# Supplementary material
Source: PubMed Central journal article supplement (PMC1952668)
Supplement: 07_049_Haase_Suppl_Table2.pdf [file 07_049_Haase_Suppl_Table2.pdf]

| <i>Replicate 1<br/>50uM zinc control</i> |          |          | <i>Replicate 1<br/>control 50uM zinc</i> |           |           | <i>Replicate 2<br/>50uM zinc control</i> |           |           |
|------------------------------------------|----------|----------|------------------------------------------|-----------|-----------|------------------------------------------|-----------|-----------|
| ID                                       | AMPCH1   | AMPCH2   | ID                                       | AMPCH1    | AMPCH2    | ID                                       | AMPCH1    | AMPCH2    |
| CY3Cy5                                   | 19110.17 | 2197.904 | CY3Cy5                                   | 8720.95   | 529.629   | CY3Cy5                                   | 12902.611 | 475.539   |
| NM_000041                                | 11319.86 | 10512.54 | NM_000041                                | 31095.227 | 35094.938 | NM_000041                                | 28436.938 | 25220.295 |
| W69211                                   | 580.897  | 702.015  | W69211                                   | 1081.357  | 821.142   | W69211                                   | 970.691   | 835.161   |
| AA449931                                 | 1019.304 | 1203.174 | AA449931                                 | 7032.393  | 7630.537  | AA449931                                 | 4746.587  | 4256.723  |
| AA877347                                 | 22955.6  | 21507.51 | AA877347                                 | 33419.883 | 47544.133 | AA877347                                 | 37536.301 | 34594.094 |
| R54049                                   | 583.509  | 162.604  | S57235                                   | 13101.218 | 13291.12  | S57235                                   | 13491.124 | 12628.643 |
| BI755551                                 | 739.093  | 502.326  | AI376272                                 | 3914.414  | 4194.492  | AI376272                                 | 3239.821  | 2609.7    |
| S57235                                   | 4957.845 | 4739.792 | BF242229                                 | 1488.445  | 1357.764  | BF242229                                 | 1307.96   | 1276.335  |
| AI376272                                 | 1479.787 | 1805.028 | X75756                                   | 42772.539 | 46815.754 | X75756                                   | 29027.385 | 33122.887 |
| BF242229                                 | 1216.193 | 1303.575 | AI754623                                 | 2867.605  | 2782.854  | AI754623                                 | 3469.139  | 2511.953  |
| X75756                                   | 2782.446 | 2627.012 | AA401326                                 | 17206.611 | 19809.156 | AA401326                                 | 11542.562 | 10627.293 |
| AI754623                                 | 2282.281 | 2145.242 | N55461                                   | 1293.313  | 1225.793  | N55461                                   | 1380.399  | 1433.549  |
| AA401326                                 | 6417.421 | 6265.77  | AA504482                                 | 7564.388  | 7873.853  | AA504482                                 | 9344.408  | 8718.051  |
| N55461                                   | 957.926  | 1667.426 | BI602175                                 | 1419.604  | 1229.085  | BI602175                                 | 983.722   | 1223.258  |
| AA504482                                 | 4149.734 | 4225.45  | NM_006003                                | 24011.635 | 30991.98  | NM_006003                                | 27187.064 | 29883.846 |
| BI602175                                 | 374.762  | 694.776  | NM_006555                                | 7516.98   | 7646.321  | NM_006555                                | 8320.518  | 9459.468  |
| NM_006003                                | 13519.7  | 12668.22 | SR5                                      | 10094.57  | 11905.024 | SR5                                      | 14189.956 | 12046.057 |
| NM_006555                                | 5238.448 | 5765.278 | SR7                                      | 8159.545  | 53736.359 | SR7                                      | 12168.618 | 47610.141 |
| SR5                                      | 7966.749 | 5838.084 | SR9                                      | 30992.264 | 6393.178  | SR9                                      | 34545.859 | 4739.017  |
| SR7                                      | 7050.715 | 35011.89 | CY3Cy5                                   | 9986.216  | 730.237   | CY3Cy5                                   | 14398.078 | 733.229   |
| SR9                                      | 27775.4  | 4540.223 | NM_006869                                | 48948.539 | 49424.152 | NM_006869                                | 22553.701 | 21487.742 |
| CY3Cy5                                   | 16942.03 | 1653.764 | NM_015364                                | 8199.634  | 13689.876 | NM_015364                                | 13307.065 | 9139.153  |
| NM_006869                                | 6814.43  | 6833.506 | NM_006611                                | 848.437   | 676.591   | NM_006611                                | 652.886   | 457.889   |
| NM_015364                                | 7004.793 | 5311.065 | NM_004963                                | 3371.861  | 3995.111  | NM_004963                                | 2604.534  | 2366.487  |
| NM_006611                                | 673.708  | 580.554  | NM_001181                                | 533.308   | 683.611   | NM_005535                                | 21381.281 | 20726.605 |
| NM_004963                                | 2103.008 | 1603.646 | NM_005535                                | 30973.199 | 39131.836 | AB037857                                 | 863.844   | 882.777   |
| NM_001181                                | 814.533  | 622.247  | AB037857                                 | 1409.465  | 1302.567  | AF218021                                 | 1425.641  | 1260.5    |
| NM_005535                                | 7156.42  | 6777.347 | AF218021                                 | 1492.991  | 1498.567  | NM_013262                                | 14978.745 | 15977.487 |
| AB037857                                 | 670.089  | 820.522  | NM_013262                                | 14108.933 | 13037.869 | NM_007185                                | 11343.1   | 11967.112 |
| AF218021                                 | 808.839  | 1031.372 | NM_007185                                | 12352.196 | 13092.659 | AF195420                                 | 1251.579  | 986.661   |
| NM_013262                                | 8331.469 | 10010.08 | NM_003221                                | 849.097   | 776.233   | NM_012278                                | 1265.817  | 1580.294  |
| NM_007185                                | 2452.019 | 2689.716 | NM_003357                                | 18573.021 | 18760.375 | AF023142                                 | 531.504   | 918.276   |
| NM_003357                                | 9110.447 | 9713.382 | AF195420                                 | 946.702   | 1228.828  | NM_014057                                | 4123.271  | 4421.145  |
| AF195420                                 | 2402.642 | 2003.717 | AK023261                                 | 5562.99   | 7719.584  | AK026849                                 | 4745.376  | 3912.494  |
| AK023261                                 | 6474.732 | 5435.138 | NM_005097                                | 1521.562  | 1775.889  | NM_018677                                | 1824.806  | 1690.286  |
| NM_005097                                | 1646.722 | 1564.209 | NM_012278                                | 1386.694  | 1408.434  | NM_002785                                | 1155.574  | 1351.55   |
| NM_012278                                | 1248.972 | 1722.599 | AF023142                                 | 848.891   | 1008.32   | NM_016582                                | 5552.953  | 4968.972  |
| AF023142                                 | 932.044  | 1151.006 | NM_014057                                | 3726.44   | 3800.017  | NM_014229                                | 1572.961  | 1415.74   |
| NM_014057                                | 4726.839 | 4438.537 | NM_001550                                | 8436.173  | 8787.708  | NM_013265                                | 10860.87  | 13985.061 |
| NM_001550                                | 2342.894 | 1949.337 | AK026849                                 | 3893.277  | 5614.355  | NM_014964                                | 2984.715  | 3140.058  |
| AK026849                                 | 860.719  | 837.519  | NM_018677                                | 1277.034  | 1223.664  | NM_014016                                | 11810.183 | 9542.362  |
| NM_018677                                | 1760.541 | 1929.266 | NM_002785                                | 1358.088  | 1379.426  | NM_013433                                | 3649.55   | 3342.31   |
| NM_002785                                | 866.831  | 972.398  | X78947                                   | 546.491   | 570.432   | NM_003794                                | 8920.235  | 7269.682  |
| X78947                                   | 515.502  | 562.155  | NM_016582                                | 8064.035  | 9957.873  | NM_019892                                | 6257.237  | 9465.086  |
| NM_016582                                | 1605.992 | 1368.421 | NM_014229                                | 1680.314  | 2073.5    | NM_016169                                | 10910.283 | 10426.777 |
| NM_014229                                | 1133.306 | 1023.777 | NM_013265                                | 19852.609 | 16030.236 | BF307652                                 | 2143.065  | 2215.76   |
| NM_013265                                | 5624.001 | 9346.805 | NM_014964                                | 4248.27   | 4887.128  | NM_005529                                | 917.796   | 831.752   |
| NM_014964                                | 2244.157 | 2044.092 | NM_014016                                | 8876.514  | 12729.609 | NM_005869                                | 10345.838 | 11270.547 |

|           |          |          |           |           |           |           |           |           |
|-----------|----------|----------|-----------|-----------|-----------|-----------|-----------|-----------|
| NM_014016 | 5563.144 | 4754.379 | NM_013433 | 3531.497  | 4399.186  | AF105067  | 3815.607  | 4145.598  |
| NM_013433 | 2709.682 | 3284.643 | NM_003794 | 8314.881  | 10371.579 | NM_018676 | 3344.328  | 3472.927  |
| NM_003794 | 4870.767 | 4878.032 | NM_019892 | 8611.747  | 5900.809  | NM_012072 | 745.401   | 930.895   |
| NM_019892 | 2360.279 | 4091.611 | NM_016169 | 7583.216  | 7197.208  | NM_006014 | 2671.073  | 3055.812  |
| NM_016169 | 4795.374 | 4975.56  | BF307652  | 2951.71   | 2934.778  | NM_002066 | 1432.83   | 1540.567  |
| BF307652  | 818.405  | 903.637  | NM_017772 | 3022.389  | 4051.913  | NM_007355 | 65832.516 | 64235.297 |
| NM_017772 | 2372.556 | 2535.01  | AF116574  | 3615.935  | 3902.875  | NM_006096 | 2585.798  | 3149.373  |
| AF116574  | 1634.816 | 2085.149 | NM_005529 | 751.569   | 925.397   | NM_012288 | 6907.263  | 5214.814  |
| NM_005529 | 810.114  | 1058.7   | NM_005869 | 8041.603  | 9061.899  | NM_005264 | 5580.886  | 5202.849  |
| NM_005869 | 8712.312 | 7758.817 | AF105067  | 3817.373  | 4091.048  | NM_020373 | 1815.767  | 1830.448  |
| AF105067  | 3467.936 | 3421.793 | NM_018676 | 4023.12   | 4274.954  | NM_000714 | 2422.786  | 2027.395  |
| NM_018676 | 3904.602 | 3622.444 | NM_012072 | 945.909   | 929.495   | NM_002556 | 4824.21   | 4825.945  |
| NM_012072 | 1042.361 | 775.004  | NM_006014 | 2075.762  | 2889.802  | NM_018089 | 8579.775  | 7079.502  |
| NM_006014 | 3414.862 | 3156.788 | NM_006280 | 51005.762 | 55739.918 | L21934    | 5890.47   | 4693.845  |
| NM_006280 | 34039.13 | 42400.85 | NM_002155 | 7225.632  | 5795.342  | AL117442  | 7860.446  | 7360.307  |
| NM_002155 | 4885.523 | 7015.623 | NM_002066 | 1940.181  | 2095.55   | NM_004695 | 1700.456  | 949.295   |
| NM_001771 | 610.791  | 512.166  | NM_007355 | 66436.117 | 69445.367 | AF299075  | 1614.821  | 1573.191  |
| NM_002066 | 827.76   | 996.979  | NM_006096 | 2167.378  | 2496.661  | NM_000340 | 753.067   | 553.214   |
| NM_007355 | 66618.3  | 48504.94 | NM_012288 | 5956.025  | 7469.24   | NM_007188 | 5466.333  | 7862.31   |
| NM_006096 | 3033.314 | 3954.289 | NM_005264 | 5409.653  | 5452.607  | NM_001214 | 7284.693  | 9221.574  |
| NM_012288 | 3939.353 | 3873.169 | NM_020373 | 2152.611  | 2309.344  | AK022409  | 1616.643  | 1194.112  |
| NM_005264 | 3133.393 | 3444.201 | NM_000714 | 2521.289  | 2779.111  | U16851    | 16823.969 | 15413.249 |
| NM_020373 | 1687.215 | 1761.621 | NM_002556 | 5151.279  | 5744.779  | NM_014341 | 10304.157 | 10049.912 |
| NM_000714 | 2256.776 | 2399.916 | NM_018089 | 6708.292  | 8812.033  | NM_020309 | 1002.941  | 1186.313  |
| NM_002556 | 4628.245 | 4851.213 | L21934    | 3840.548  | 3779.796  | NM_000341 | 1471.159  | 1293.322  |
| NM_018089 | 6042.596 | 5545.154 | AL117442  | 7515.036  | 5796.144  | AK023533  | 1187.184  | 1508.821  |
| L21934    | 3211.484 | 2879.161 | NM_004695 | 854.069   | 1124.825  | NM_012450 | 1164.33   | 1175.604  |
| AL117442  | 3992.74  | 4387.336 | AF299075  | 1703.22   | 1866.516  | NM_007071 | 12899.339 | 14474.092 |
| NM_004695 | 1328.815 | 941.655  | NM_007188 | 6157.261  | 5490.891  | NM_012135 | 883.338   | 642.199   |
| AF299075  | 1387.1   | 1606.327 | NM_001214 | 10760.817 | 12705.103 | NM_006812 | 13845.11  | 11916.303 |
| NM_000340 | 495.797  | 808.712  | AK022409  | 1678.085  | 1937.057  | AK024434  | 8131.579  | 6056.231  |
| NM_007188 | 5404.051 | 5974.793 | U16851    | 18922.207 | 19206.549 | NM_002388 | 15945.898 | 13433.184 |
| NM_001214 | 4112.757 | 4842.858 | NM_014341 | 10328.427 | 9981.68   | NM_016069 | 32212.508 | 38432.527 |
| AK022409  | 1241.334 | 1355.042 | NM_020309 | 1157.116  | 1505.761  | NM_017612 | 4778.614  | 4536.847  |
| U16851    | 20673.92 | 21706.36 | NM_000341 | 1308.27   | 1521.371  | NM_013236 | 14933.323 | 15499.175 |
| NM_014341 | 11466.75 | 11737.35 | AK023533  | 1274.628  | 1286.3    | NM_017841 | 9819.322  | 9807.978  |
| NM_020309 | 777.196  | 990.944  | NM_012450 | 2260.502  | 2458.641  | NM_001254 | 7053.86   | 5333.146  |
| NM_006446 | 459.55   | 499.933  | NM_007071 | 9592.858  | 9348.405  | NM_020412 | 18964.326 | 19536.275 |
| NM_000341 | 1952.708 | 2073.4   | NM_012135 | 1227.376  | 1116.412  | NM_003032 | 9863.463  | 9030.69   |
| AK023533  | 1321.901 | 1429.874 | NM_006812 | 13928.168 | 13764.906 | NM_017453 | 19188.305 | 14599.414 |
| NM_012450 | 878.269  | 958.456  | AK024434  | 10511.971 | 9394.177  | AF038564  | 7007.002  | 6018.35   |
| NM_007071 | 11343.18 | 12509.17 | NM_002388 | 14829.209 | 15632.826 | AB033768  | 2549.885  | 2139.882  |
| NM_012135 | 1149.114 | 867.998  | NM_016069 | 35731.008 | 42987.227 | NM_017659 | 2834.898  | 2393.379  |
| M37190    | 419.123  | 637.297  | NM_017612 | 3963.706  | 4702.388  | NM_006904 | 7002.77   | 7007.244  |
| NM_006812 | 8839.285 | 9664.197 | NM_013236 | 13428.373 | 11000.849 | NM_004217 | 17105.82  | 17531.727 |
| AK024434  | 2253.307 | 2206.132 | NM_017841 | 9087.674  | 7240.571  | NM_006347 | 32250.863 | 39245.586 |
| NM_002388 | 12564.05 | 12145.36 | NM_001254 | 5297.546  | 5870.394  | NM_020406 | 2193.553  | 2490.961  |
| NM_016069 | 18552.29 | 22810    | NM_020412 | 23451.002 | 21288.512 | NM_014685 | 16249.833 | 17747.146 |
| NM_017612 | 3423.597 | 2922.757 | NM_003032 | 9048.842  | 8623.84   | NM_001550 | 6815.325  | 4858.357  |
| NM_013236 | 11896.8  | 15189.5  | NM_017453 | 14516.728 | 17480.162 | AK026849  | 3070.661  | 1961.86   |
| NM_017841 | 6779.215 | 8686.631 | AF038564  | 5677.215  | 6506.184  | NM_018677 | 1411.708  | 1297.781  |
| NM_001254 | 6538.205 | 6094.274 | AB033768  | 1216.114  | 1494.111  | NM_002785 | 1118.721  | 732.934   |
| NM_020412 | 6039.258 | 6800.885 | NM_017659 | 2968.603  | 2693.703  | NM_000041 | 29017.426 | 26519.219 |

|           |          |          |           |           |           |           |           |           |
|-----------|----------|----------|-----------|-----------|-----------|-----------|-----------|-----------|
| NM_003032 | 3727.383 | 3832.063 | NM_006904 | 7561.04   | 7933.529  | W69211    | 872.972   | 739.614   |
| NM_017453 | 10390.42 | 8501.921 | NM_004217 | 16218.287 | 18505.254 | AA449931  | 4931.929  | 5136.031  |
| AF038564  | 5189.844 | 4682.434 | NM_006347 | 31477.09  | 32809.27  | AA877347  | 40969.34  | 38424.586 |
| AB033768  | 1531.478 | 1343.337 | NM_020406 | 2190.58   | 2316.064  | S57235    | 14184.963 | 13616.264 |
| NM_017659 | 2240.399 | 2211.694 | NM_014685 | 13697.446 | 13986.446 | AI376272  | 2844.009  | 2480.645  |
| NM_006904 | 5744.85  | 5325.205 | NM_00155C | 7365.094  | 6662.605  | BF242229  | 1226.292  | 1048.485  |
| NM_004217 | 11277.86 | 10867.52 | AK026849  | 3070.975  | 4261.643  | X75756    | 29591.764 | 32832.496 |
| NM_006347 | 22361.9  | 25651.98 | NM_018677 | 1697.362  | 1594.968  | AI754623  | 4054.041  | 2985.076  |
| NM_020406 | 3255.999 | 3082.35  | NM_002785 | 1368.648  | 1347.66   | AA401326  | 11609.294 | 11668.008 |
| NM_014685 | 11705.82 | 12599.87 | NM_000041 | 35986.297 | 41269.73  | N55461    | 1631.692  | 1828.428  |
| NM_00155C | 2634.325 | 2535.296 | W69211    | 984.674   | 1073.154  | AA504482  | 8648.3    | 8011.147  |
| AK026849  | 608.164  | 887.484  | AA449931  | 5633.24   | 6377.385  | BI602175  | 1196.527  | 960.067   |
| NM_018677 | 1239.357 | 1561.957 | AA877347  | 36794.16  | 49920.242 | NM_006003 | 27741.363 | 30217.924 |
| NM_002785 | 667.883  | 828.135  | S57235    | 12855.839 | 12477.974 | NM_006555 | 7918.748  | 9371.145  |
| NM_000041 | 10798.89 | 11962.18 | AI376272  | 3448.594  | 3447.419  | NM_016516 | 2635.12   | 3558.388  |
| AA449931  | 1246.904 | 1157.164 | BF242229  | 1280.512  | 937.434   | AF263538  | 1592.446  | 1426.203  |
| AA877347  | 26871.9  | 25071.91 | X75756    | 41220.711 | 41510.152 | NM_001771 | 542.085   | 471.758   |
| BI755551  | 510.469  | 1065.999 | AI754623  | 2523.302  | 2066.579  | NM_002066 | 1246.584  | 1048.416  |
| S57235    | 7259.77  | 8416.973 | AA401326  | 9818.052  | 10396.75  | NM_007355 | 60304.68  | 57146.836 |
| AI376272  | 2262.925 | 2026.058 | N55461    | 1313.836  | 1241.243  | NM_006096 | 2893.48   | 2406.521  |
| BF242229  | 1597.731 | 1253.633 | AA504482  | 6814.049  | 6653.806  | NM_006869 | 27888.482 | 29525.898 |
| X75756    | 3178.506 | 3262.328 | BI602175  | 984.018   | 1120.571  | NM_015364 | 12177.978 | 8742.166  |
| AI754623  | 1778.882 | 1778.511 | NM_006003 | 23672.494 | 27833.414 | NM_006611 | 536.408   | 758.802   |
| AA401326  | 5106.028 | 5144.771 | NM_006555 | 6851.589  | 7209.008  | NM_004963 | 2990.167  | 2440.182  |
| N55461    | 997.678  | 1359.792 | NM_016516 | 3176.862  | 2293.344  | NM_005535 | 23413.826 | 25324.203 |
| AA504482  | 4856.449 | 4019.522 | AF263538  | 1603.884  | 1882.863  | AB037857  | 1051.826  | 1000.954  |
| BI602175  | 791.083  | 547.146  | NM_00628C | 56245.746 | 58193.332 | AF218021  | 1225.314  | 1094.498  |
| NM_006003 | 17522.18 | 17710.51 | NM_002155 | 8385.155  | 6080.924  | NM_013262 | 14672.345 | 16494.746 |
| NM_006555 | 6623.524 | 6877.475 | NM_001771 | 832.623   | 647.317   | NM_007185 | 9539.098  | 10807.874 |
| NM_016516 | 1718.344 | 2849.392 | NM_002066 | 1685.09   | 1860.185  | NM_003221 | 557.944   | 740.91    |
| AF263538  | 1484.193 | 1291.514 | NM_007355 | 58356.684 | 57251.586 | NM_003357 | 14838.392 | 14069.732 |
| NM_001771 | 491.042  | 596.595  | NM_006096 | 2816.736  | 2439.2    | AF195420  | 1217.208  | 885.667   |
| NM_002066 | 744.718  | 625.197  | NM_006869 | 42162.227 | 50321.598 | AK023261  | 7240.985  | 7192.193  |
| NM_007355 | 69507.75 | 46326.09 | NM_015364 | 8874.773  | 13753.766 | NM_005097 | 1234.395  | 1699.552  |
| NM_006096 | 2383.243 | 3496.769 | NM_004963 | 3048.111  | 3239.286  | NM_012278 | 1031.141  | 1354.927  |
| NM_006869 | 7025.34  | 7569.157 | NM_005535 | 28313.199 | 33530.602 | AF023142  | 981.261   | 956.461   |
| NM_015364 | 7995.167 | 6697.227 | AB037857  | 1331.025  | 971.925   | NM_01610C | 941.129   | 1225.95   |
| NM_006611 | 709.347  | 555.079  | AF218021  | 1008.228  | 978.248   | NM_014057 | 4124.086  | 4881.818  |
| NM_004963 | 2142.427 | 1932.009 | NM_013262 | 13780.352 | 11872.43  | NM_020309 | 1133.082  | 837.409   |
| NM_001181 | 495.395  | 971.402  | NM_007185 | 11872.986 | 12075.226 | NM_000341 | 1776.053  | 1530.573  |
| NM_005535 | 8344.94  | 8716.05  | NM_003221 | 677.255   | 562.008   | AK023533  | 1230.104  | 1394.906  |
| AB037857  | 947.496  | 1005.389 | NM_003357 | 13392.432 | 12736.714 | NM_01245C | 1955.052  | 1533.06   |
| AF218021  | 855.117  | 933.898  | AF195420  | 752.012   | 989.219   | NM_007071 | 13273.277 | 11171.628 |
| NM_013262 | 9724.373 | 11462.09 | AK023261  | 5540.125  | 7606.874  | NM_016582 | 5369.23   | 4739.548  |
| NM_007185 | 3525.481 | 3347.484 | NM_005097 | 1134.772  | 1308.217  | NM_014229 | 1904.005  | 1654.796  |
| NM_003221 | 746.979  | 605.709  | NM_012278 | 872.924   | 1425.663  | NM_013265 | 14664.314 | 20343.236 |
| NM_003357 | 9333.079 | 9183.809 | AF023142  | 549.598   | 773.981   | NM_014964 | 3810.878  | 3940.103  |
| AF195420  | 1382.014 | 1071.88  | NM_01610C | 807.522   | 789.373   | NM_014016 | 11212.851 | 9286.214  |
| AK023261  | 5970.818 | 4950.279 | NM_014057 | 3833.617  | 3653.686  | NM_013433 | 3715.649  | 3630.675  |
| NM_005097 | 1736.348 | 1366.826 | NM_020309 | 1118.871  | 1387.03   | NM_003794 | 8474.23   | 6526.376  |
| NM_012278 | 1669.855 | 1716.199 | NM_000341 | 1531.144  | 1643.483  | NM_019892 | 5991.215  | 8722.375  |
| AF023142  | 1545.13  | 1574.325 | AK023533  | 1551.958  | 1061.914  | NM_016169 | 7907.532  | 8567.593  |
| NM_01610C | 1048.139 | 1329.308 | NM_01245C | 2169.09   | 2336.488  | BF307652  | 2187.608  | 2787.421  |

|           |          |          |           |           |           |           |           |           |
|-----------|----------|----------|-----------|-----------|-----------|-----------|-----------|-----------|
| NM_014057 | 4891.084 | 6009.436 | NM_007071 | 11393.938 | 12895.343 | NM_017772 | 3970.591  | 4643.548  |
| NM_020309 | 658.921  | 708.806  | NM_016582 | 7734.713  | 9348.463  | AF116574  | 3444.583  | 4397.436  |
| NM_000341 | 1603.697 | 1521.149 | NM_014229 | 1809.073  | 2305.504  | NM_005529 | 827.168   | 1175.79   |
| AK023533  | 1077.645 | 1223.07  | NM_013265 | 20298.443 | 17323.4   | NM_005869 | 10708.184 | 14335.738 |
| NM_012450 | 936.494  | 927.042  | NM_014964 | 5151.768  | 5545.627  | AF105067  | 4793.433  | 5258.377  |
| NM_007071 | 9998.401 | 10676.19 | NM_014016 | 8875.418  | 11127.439 | NM_018676 | 3781.646  | 4214.259  |
| NM_016582 | 1054.326 | 1167.287 | NM_013433 | 3365.832  | 3605.324  | NM_012072 | 868.487   | 1408.349  |
| NM_014229 | 1139.904 | 1158.947 | NM_003794 | 7219.724  | 8418.175  | NM_006014 | 3634.639  | 4207.086  |
| NM_013265 | 6170.671 | 9957.07  | NM_019892 | 7859.502  | 5548.739  | NM_006904 | 7638.75   | 6309.516  |
| NM_014964 | 2152.719 | 2456.835 | NM_016169 | 6989.988  | 6488.131  | NM_004217 | 15648.69  | 13245.04  |
| NM_014016 | 6955.693 | 6448.144 | BF307652  | 2459.723  | 2033.281  | NM_006347 | 31812.045 | 30832.533 |
| NM_013433 | 3663.889 | 4031.425 | NM_017772 | 3028.063  | 3307.121  | NM_020406 | 2385.398  | 2210.454  |
| NM_003794 | 6319.86  | 5780.835 | AF116574  | 3189.281  | 3181.747  | NM_014685 | 18205.539 | 15337.331 |
| NM_019892 | 3512.246 | 4936.808 | NM_005529 | 825.672   | 982.288   | NM_012288 | 6472.301  | 5581.732  |
| NM_016169 | 5480.474 | 5815.066 | NM_005869 | 8379.744  | 10464.14  | NM_005264 | 5616.568  | 6025.522  |
| BF307652  | 579.112  | 686.613  | AF105067  | 2879.034  | 3154.193  | NM_020373 | 2235.803  | 2212.854  |
| NM_017772 | 2642.348 | 2310.032 | NM_018676 | 3387.573  | 3746.059  | NM_000714 | 2701.423  | 2386.72   |
| AF116574  | 1590.878 | 1859.288 | NM_012072 | 761.663   | 788.255   | NM_002556 | 4441.55   | 4115.54   |
| NM_005529 | 837.359  | 954.911  | NM_006014 | 2569.033  | 3650.814  | NM_018089 | 6407.924  | 5633.024  |
| NM_005869 | 8884.045 | 8879.565 | NM_006904 | 6881.517  | 8866.43   | L21934    | 5298.414  | 4417.995  |
| AF105067  | 3896.018 | 3894.2   | NM_004217 | 15832.444 | 18723.141 | AL117442  | 8276.573  | 8456.534  |
| NM_018676 | 2588.539 | 2878.678 | NM_006347 | 26632.906 | 30326.188 | NM_004695 | 1691.088  | 1408.396  |
| NM_012072 | 563.179  | 694.537  | NM_020406 | 2355.453  | 1733.263  | AF299075  | 1537.967  | 1535.807  |
| NM_006014 | 2911.809 | 3086.067 | NM_014685 | 19338.025 | 18838.367 | NM_000340 | 667.767   | 962.88    |
| NM_006904 | 7435.967 | 7067.399 | NM_012288 | 5971.797  | 7069.604  | NM_007188 | 6256.093  | 9696.228  |
| NM_004217 | 9759.524 | 9730.312 | NM_005264 | 6384.156  | 5712.926  | NM_001214 | 8307.877  | 11365.158 |
| NM_006347 | 18623.66 | 18318.2  | NM_020373 | 2220.301  | 2593.115  | AK022409  | 1285.221  | 1468.697  |
| NM_020406 | 2391.234 | 2059.341 | NM_000714 | 2084.465  | 3008.975  | U16851    | 24165.697 | 30068.197 |
| NM_014685 | 9242     | 10000.93 | NM_002556 | 4852.484  | 4398.534  | NM_014341 | 14818.657 | 17746.816 |
| NM_012288 | 4626.792 | 4609.839 | NM_018089 | 5587.674  | 7992.161  | NM_006003 | 25108.092 | 20116.266 |
| NM_005264 | 3208.975 | 3905.554 | L21934    | 3621.224  | 4349.64   | NM_006555 | 7278.711  | 5386.878  |
| NM_020373 | 2366.354 | 1918.681 | AL117442  | 7239.686  | 7354.589  | NM_016516 | 3700.251  | 3435.728  |
| NM_000714 | 2619.556 | 2773.282 | NM_004695 | 991.971   | 1744.535  | AF263538  | 1603.643  | 1067.344  |
| NM_002556 | 3563.724 | 4343.113 | AF299075  | 1999.084  | 1865.529  | NM_012135 | 936.193   | 968.954   |
| NM_018089 | 5327.602 | 4439.57  | NM_000340 | 628.206   | 779.672   | M37190    | 582.676   | 733.943   |
| L21934    | 2963.162 | 2671.169 | NM_007188 | 5831.345  | 5694.83   | NM_006812 | 14079.718 | 12710.755 |
| AL117442  | 3670.678 | 3414.643 | NM_001214 | 6388.909  | 6930.645  | AK024434  | 8591.059  | 8041.927  |
| NM_004695 | 947.818  | 901.442  | AK022409  | 1230.468  | 1713.317  | NM_002388 | 14683.582 | 12980.852 |
| AF299075  | 1218.888 | 1266.664 | U16851    | 13147.757 | 16049.281 | NM_016069 | 34371.039 | 37801.148 |
| NM_000340 | 423.157  | 1138.228 | NM_014341 | 10052.709 | 11606.336 | NM_017612 | 3713.737  | 3442.226  |
| NM_007188 | 3025.395 | 4173.19  | NM_006003 | 21646.281 | 21119.104 | NM_013236 | 15369.674 | 17603.258 |
| NM_001214 | 2393.608 | 3122.715 | NM_006555 | 6921.195  | 7165.143  | NM_017841 | 10604.836 | 11369.108 |
| AK022409  | 855.821  | 1251.252 | NM_016516 | 3145.488  | 2135.386  | NM_001254 | 8623.671  | 8913.03   |
| U16851    | 15982.27 | 20741.73 | AF263538  | 1585.137  | 1863.211  | NM_020412 | 23929.059 | 32557.094 |
| NM_014341 | 8253.883 | 8432.135 | NM_012135 | 907.629   | 1147.808  | NM_003032 | 11407.047 | 13009.282 |
| NM_006003 | 12294.43 | 12085.9  | M37190    | 675.5     | 674.517   | NM_017453 | 19136.486 | 17221.348 |
| NM_006555 | 5238.556 | 5596.555 | NM_006812 | 13904.195 | 14853.556 | AF038564  | 7106.892  | 8404.81   |
| NM_016516 | 1807.152 | 2358.445 | AK024434  | 9631.884  | 10009.571 | AB033768  | 2000.751  | 2563.026  |
| AF263538  | 1595.279 | 1251.354 | NM_002388 | 16104.732 | 18983.014 | NM_017659 | 3037.145  | 3874.163  |
| NM_012135 | 540.438  | 705.616  | NM_016069 | 37190.48  | 40475.313 | AK023261  | 6808.989  | 4744.534  |
| NM_006812 | 9171.37  | 9303.022 | NM_017612 | 3604.611  | 4199.412  | NM_005097 | 1406.792  | 904.737   |
| AK024434  | 2029.106 | 2428.277 | NM_013236 | 13502.421 | 12788.684 | NM_012278 | 1474.076  | 1203.49   |
| NM_002388 | 10881.04 | 10212.46 | NM_017841 | 9596.585  | 8629.03   | AF023142  | 728.96    | 713.206   |



|           |          |          |           |           |           |           |           |           |
|-----------|----------|----------|-----------|-----------|-----------|-----------|-----------|-----------|
| NM_01606€ | 17561.91 | 18339.13 | NM_001254 | 6155.554  | 7826.02   | NM_01610C | 1231.746  | 704.433   |
| NM_017612 | 2882.602 | 2558.509 | NM_020412 | 23210.615 | 23749.309 | NM_014057 | 3862.604  | 3200.344  |
| NM_01323€ | 8811.697 | 9515.679 | NM_003032 | 8759.529  | 8795.544  | NM_00155C | 6084.838  | 4413.996  |
| NM_017841 | 4307.728 | 3908.288 | NM_017453 | 15571.75  | 18819.826 | NM_018677 | 1711.343  | 1588.537  |
| NM_001254 | 2969.422 | 2688.417 | AF038564  | 5981.763  | 7528.442  | NM_00278€ | 1092.465  | 839.769   |
| NM_020412 | 3253.615 | 4443.995 | AB033768  | 2110.98   | 2913.598  | NM_000041 | 28265.723 | 28332.352 |
| NM_003032 | 2215.099 | 2655.258 | NM_01765€ | 2393.405  | 2803.334  | W69211    | 937.829   | 881.665   |
| NM_017453 | 7268.146 | 6760.659 | AK023261  | 5840.985  | 5253.691  | AA449931  | 3953.65   | 3234.164  |
| AF038564  | 4139.002 | 4429.77  | NM_005097 | 1290.129  | 983.847   | AA877347  | 35227.652 | 35987.387 |
| AB033768  | 1133.166 | 1247.906 | NM_01227€ | 1075.436  | 961.092   | S57235    | 12724.859 | 13097.842 |
| NM_01765€ | 1713.557 | 1650.491 | AF023142  | 710.163   | 702.306   | AI376272  | 2851.364  | 3334.253  |
| AK023261  | 5455.199 | 4544.09  | NM_01610C | 619.642   | 728.082   | BF242229  | 1306.242  | 1323.035  |
| NM_005097 | 1753.292 | 1696.531 | NM_014057 | 3763.573  | 3657.245  | X75756    | 42313.883 | 50994.133 |
| NM_01227€ | 1221.455 | 1317.472 | NM_00155C | 7771.474  | 8053.597  | AI754623  | 3238.258  | 2569.927  |
| AF023142  | 886.11   | 1044.96  | AK026849  | 3137.708  | 5582.769  | AA401326  | 15577.201 | 17938.883 |
| NM_01610C | 936.448  | 937.108  | NM_018677 | 1477.665  | 1561.241  | N55461    | 1792.545  | 1688.382  |
| NM_014057 | 3449.433 | 3935.736 | NM_00278€ | 1252.107  | 1310.935  | AA504482  | 9225.808  | 9136.364  |
| NM_00155C | 2136.038 | 2162.274 | NM_000041 | 28095.309 | 30676.379 | BI602175  | 750.925   | 999.2     |
| AK026849  | 555.772  | 694.794  | W69211    | 900.283   | 846.511   | NM_00552€ | 809.094   | 573.05    |
| NM_018677 | 1233.404 | 1269.955 | AA449931  | 4353.157  | 4706.747  | NM_00586€ | 9997.766  | 8616.125  |
| NM_00278€ | 904.714  | 910.764  | AA877347  | 29968.111 | 43559.465 | AF105067  | 3990.28   | 3745.731  |
| NM_000041 | 6931.23  | 6322.257 | AI376272  | 2549.104  | 2802.006  | NM_01867€ | 3518.157  | 3422.55   |
| W69211    | 75.517   | 841.997  | BF242229  | 1168.839  | 1011.747  | NM_012072 | 869.206   | 697.186   |
| AA449931  | 893.858  | 1072.283 | X75756    | 31772.252 | 36488.086 | NM_006014 | 3323.406  | 1987.286  |
| AA877347  | 19519.76 | 18682.23 | AI754623  | 2572.085  | 2000.717  | NM_00628C | 46900.785 | 57405.859 |
| S57235    | 1771.512 | 2002.648 | AA401326  | 9639.355  | 11402.241 | NM_001771 | 1114.016  | 1081.032  |
| AI376272  | 1130.44  | 1078.744 | N55461    | 1204.613  | 1458.827  | NM_00206€ | 1425.227  | 1241.189  |
| BF242229  | 914.18   | 1022.476 | AA504482  | 8003.988  | 8006.645  | NM_00735€ | 68195.992 | 59354.223 |
| X75756    | 3007.875 | 3087.455 | BI602175  | 991.854   | 927.683   | NM_00609€ | 2742.477  | 2756.226  |
| AI754623  | 1755.739 | 2131.293 | NM_00552€ | 788.587   | 616.568   | NM_00686€ | 26705.105 | 28349.379 |
| AA401326  | 5595.311 | 5860.926 | NM_00586€ | 9679.908  | 8060.15   | NM_015364 | 11754.739 | 8547.754  |
| N55461    | 1528.296 | 1599.702 | AF105067  | 3995.809  | 2488.379  | NM_004963 | 2900.579  | 2832.907  |
| AA504482  | 3806.224 | 4009.657 | NM_01867€ | 3281.979  | 2285.125  | NM_00553€ | 24869.32  | 28000.148 |
| BI602175  | 285.898  | 608.716  | NM_012072 | 856.342   | 562.206   | AB037857  | 1160.457  | 1164.987  |
| NM_00552€ | 834.785  | 758.985  | NM_006014 | 2459.768  | 2198.356  | AF218021  | 1230.441  | 1464.1    |
| NM_00586€ | 8223.191 | 6864.854 | NM_00628C | 54482.316 | 56323.23  | NM_013262 | 15801.098 | 19824.881 |
| AF105067  | 2847.212 | 2171.784 | NM_00215€ | 7960.847  | 4562.687  | NM_00718€ | 13326.565 | 15035.998 |
| NM_01867€ | 2515.639 | 2232.62  | NM_001771 | 697.555   | 537.971   | NM_003221 | 699.524   | 802.98    |
| NM_012072 | 900.707  | 720.28   | NM_00206€ | 1626.537  | 1494.809  | NM_003357 | 14504.168 | 17117.277 |
| NM_006014 | 2538.547 | 2313     | NM_00735€ | 60210.777 | 57400.738 | AF195420  | 1496.552  | 1468.824  |
| NM_00628C | 24523.67 | 31158.08 | NM_00609€ | 2546.967  | 2558.67   | NM_00034C | 1067.011  | 512.265   |
| NM_00215€ | 3287.873 | 4907.12  | NM_00686€ | 29191.082 | 29759.699 | NM_00718€ | 4936.808  | 5605.645  |
| NM_001771 | 368.962  | 468.999  | NM_015364 | 8586.401  | 13399.575 | NM_001214 | 7294.507  | 8273.712  |
| NM_00735€ | 61449.71 | 45131.02 | NM_006611 | 676.321   | 483.108   | AK022409  | 1894.932  | 1916.736  |
| NM_00609€ | 2302.854 | 2678.279 | NM_004963 | 3529.875  | 3423.649  | U16851    | 17473.314 | 15918.564 |
| NM_00686€ | 4904.494 | 5366.085 | AB037857  | 906.072   | 929.238   | NM_014341 | 12103.795 | 10165.755 |
| NM_015364 | 3735.248 | 2639.135 | AF218021  | 1077.336  | 1018.036  | NM_02030€ | 1133.846  | 1050.86   |
| NM_004963 | 1265.103 | 1075.782 | NM_013262 | 13974.786 | 16076.751 | NM_000341 | 2067.019  | 2131.082  |
| NM_00553€ | 4330.647 | 4052.524 | NM_00718€ | 12145.799 | 13994.233 | AK023533  | 1404.882  | 1194.682  |
| AB037857  | 657.145  | 659.688  | NM_003221 | 754.332   | 836.286   | NM_01245C | 1641.135  | 1617.393  |
| AF218021  | 1063.934 | 1046.436 | NM_003357 | 15268.988 | 17599.047 | NM_007071 | 13454.863 | 12579.158 |
| NM_013262 | 9588.861 | 12416.79 | AF195420  | 884.23    | 1472.865  | NM_016582 | 5777.864  | 4232.443  |
| NM_00718€ | 3677.424 | 4058.125 | NM_00034C | 691.09    | 788.397   | NM_01422€ | 1758.024  | 1341.629  |

|           |          |          |           |           |           |           |           |           |
|-----------|----------|----------|-----------|-----------|-----------|-----------|-----------|-----------|
| NM_003357 | 8853.853 | 10310.68 | NM_007188 | 7549.156  | 5577.067  | NM_013265 | 12653.075 | 17256.25  |
| AF195420  | 1462.781 | 1122.448 | NM_001214 | 8785.762  | 7866.045  | NM_014964 | 2611.9    | 3066.682  |
| NM_000340 | 696.233  | 787.405  | AK022409  | 1789.819  | 1125.473  | NM_014016 | 10234.119 | 8742.388  |
| NM_007188 | 3668.388 | 4405.396 | U16851    | 14299.705 | 9405.994  | NM_013433 | 3686.457  | 4068.163  |
| NM_001214 | 2935.307 | 3166.938 | NM_014341 | 11295.882 | 7493.298  | AJ224867  | 847.38    | 460.774   |
| AK022409  | 781.609  | 887.497  | NM_020309 | 1322.042  | 1188.689  | NM_003794 | 9092.596  | 8746.426  |
| U16851    | 15672.19 | 15648.71 | NM_000341 | 1184.246  | 817.163   | NM_019892 | 6198.651  | 10644.124 |
| NM_014341 | 9284.32  | 9549.654 | AK023533  | 1605.445  | 1088.617  | NM_016169 | 7910.307  | 10025.629 |
| NM_020309 | 756.15   | 707.783  | NM_012450 | 1875.446  | 2128.492  | BF307652  | 2537.437  | 3237.157  |
| NM_000341 | 1333.542 | 1534.79  | NM_007071 | 13651.407 | 12047.252 | NM_017772 | 4376.773  | 5507.908  |
| AK023533  | 1012.855 | 1179.394 | NM_016582 | 5989.8    | 7591.924  | AF116574  | 3558.329  | 5355.817  |
| NM_012450 | 1069.711 | 793.755  | NM_014229 | 1943.446  | 2141.863  | NM_020412 | 23485.365 | 21895.053 |
| NM_007071 | 4822.35  | 4828.192 | NM_013265 | 21207.875 | 14718.983 | NM_003032 | 7451.423  | 7678.339  |
| NM_016582 | 686.713  | 565.767  | NM_014964 | 3963.475  | 2936.093  | NM_017453 | 19962.699 | 14829.971 |
| NM_014229 | 411.267  | 701.424  | NM_014016 | 10829.296 | 9356.055  | AF038564  | 6586.903  | 5726.111  |
| NM_013265 | 3710.042 | 5126.915 | NM_013433 | 3506.213  | 2616.344  | AB033768  | 1924.072  | 1326.015  |
| NM_014964 | 1339.155 | 1251.811 | AJ224867  | 423.229   | 453.813   | NM_017659 | 2781.421  | 2357.738  |
| NM_014016 | 2763.354 | 2355.543 | NM_003794 | 8485.833  | 6237.599  | NM_006904 | 7888.386  | 7252.04   |
| NM_013433 | 2202.97  | 2413.993 | NM_019892 | 8652.539  | 4377.142  | NM_004217 | 16598.078 | 17440.029 |
| AJ224867  | 693.997  | 553.371  | NM_016169 | 7966.613  | 7294.032  | NM_020406 | 2711.298  | 2983.659  |
| NM_003794 | 4974.869 | 5070.483 | BF307652  | 3158.433  | 3348.103  | NM_014685 | 18042.172 | 17718.52  |
| NM_019892 | 3344.576 | 4976.91  | NM_017772 | 3798.735  | 4658.357  | NM_012288 | 5944.948  | 4553.607  |
| NM_016169 | 5604.313 | 6690.392 | AF116574  | 2924.757  | 3546.526  | NM_005264 | 4939.052  | 5376.736  |
| BF307652  | 785.195  | 959.237  | NM_020412 | 33954.156 | 33826.309 | NM_020373 | 1812.248  | 1783.951  |
| NM_017772 | 3069.56  | 3291.503 | NM_003032 | 14050.587 | 12882     | NM_000714 | 2658.94   | 2372.915  |
| AF116574  | 1540.681 | 1567.654 | NM_017453 | 19555.98  | 22067.602 | NM_002556 | 4463.225  | 5104.42   |
| NM_020412 | 5742.455 | 5588.702 | AF038564  | 6023.103  | 5264.241  | NM_018089 | 8180.645  | 8309.168  |
| NM_003032 | 3076.824 | 3021.371 | AB033768  | 1346.397  | 1116.175  | L21934    | 5710.678  | 6384.535  |
| NM_017453 | 9466.809 | 7504.743 | NM_017659 | 3033.439  | 2350.338  | AL117442  | 10360.861 | 12111.438 |
| AF038564  | 4104.542 | 3485.385 | NM_006904 | 9697.038  | 10618.998 | NM_004695 | 1776.074  | 1521.151  |
| AB033768  | 1250.951 | 1031.38  | NM_004217 | 21557.693 | 23476.131 | AF299075  | 1798.82   | 2095.677  |
| NM_017659 | 2009.391 | 1811.553 | NM_020406 | 3182.573  | 2819.17   | AK026663  | 1806.795  | 1341.932  |
| NM_006904 | 7080.275 | 6369.518 | NM_014685 | 23126.221 | 24049.264 | NM_001174 | 5592.627  | 4234.133  |
| NM_004217 | 9203.872 | 10470.17 | NM_012288 | 7474.935  | 7736.333  | U69645    | 17527.539 | 25609.979 |
| NM_020406 | 1646.41  | 1904.53  | NM_005264 | 6842.933  | 6032.387  | NM_019082 | 10768.749 | 9818.29   |
| NM_014685 | 3498.238 | 3908.155 | NM_020373 | 1821.933  | 2760.26   | NM_001424 | 2091.622  | 2341.346  |
| NM_012288 | 2237.652 | 2161.138 | NM_000714 | 2557.744  | 2738.008  | AB040950  | 2080.835  | 2244.056  |
| NM_005264 | 2168.523 | 2310.076 | NM_002556 | 5016.351  | 4156.709  | NM_014003 | 8357.203  | 8044.614  |
| NM_020373 | 955.812  | 1036.689 | NM_018089 | 6435.146  | 6457.431  | NM_001356 | 1973.734  | 1927.128  |
| NM_000714 | 2031.738 | 2027.961 | L21934    | 4146.523  | 3397.328  | AB037805  | 8693.308  | 9185.083  |
| NM_002556 | 2691.053 | 3334.819 | AL117442  | 8872.831  | 7404.673  | NM_016516 | 2516.847  | 2967.331  |
| NM_018089 | 7333.72  | 6714.285 | NM_004695 | 1162.988  | 1320.735  | AF263538  | 1564.871  | 1417.985  |
| L21934    | 4560.362 | 4456.832 | AF299075  | 1936.543  | 2522.958  | M37190    | 684.343   | 601.833   |
| AL117442  | 4436.371 | 5398.883 | AK026663  | 1864.518  | 2520.874  | NM_006812 | 12952.818 | 14087.437 |
| NM_004695 | 875.965  | 1001.175 | NM_001174 | 6866.332  | 8274.763  | AK024434  | 9325.809  | 10208.742 |
| AK026663  | 1120.156 | 1085.037 | U69645    | 32317.313 | 23303.262 | NM_002388 | 15707.575 | 15942.271 |
| NM_001174 | 3767.054 | 3154.645 | NM_019082 | 13705.931 | 12311.061 | NM_016069 | 40953.172 | 46842.012 |
| U69645    | 7251.793 | 14471.51 | NM_001424 | 3064.796  | 2820.274  | NM_017612 | 3851.323  | 4557.073  |
| NM_019082 | 4652.698 | 5019.622 | AB040950  | 1748.311  | 2196.895  | NM_013236 | 16777.156 | 21371.582 |
| NM_001424 | 784.503  | 757.509  | NM_014003 | 10434.001 | 11952.712 | NM_017841 | 11460.026 | 13775.533 |
| AB040950  | 2052.376 | 2212.924 | NM_001356 | 2916.312  | 2754.729  | NM_001254 | 8440.293  | 7611.687  |
| NM_014003 | 3426.731 | 3172.249 | AB037805  | 14821.617 | 15443.468 | NM_004389 | 849.507   | 842.611   |
| NM_001356 | 895.516  | 718.473  | NM_016516 | 4647.641  | 3591.465  | NM_005928 | 5395.173  | 3609.712  |

|           |          |          |           |           |           |           |           |           |
|-----------|----------|----------|-----------|-----------|-----------|-----------|-----------|-----------|
| AB037805  | 1277.901 | 1487.321 | AF263538  | 2302.641  | 3184.963  | NM_003952 | 4017.561  | 3777.705  |
| NM_01651E | 732.669  | 1019.721 | NM_01213E | 1191.502  | 1286.522  | NM_005424 | 2682.853  | 2334.229  |
| AF263538  | 836.557  | 726.797  | M37190    | 695.381   | 729.541   | NM_00597E | 5162.756  | 4811.689  |
| NM_006812 | 8863.861 | 8741.06  | NM_006812 | 14222.011 | 11256.128 | AY007220  | 18690.953 | 19491.064 |
| AK024434  | 2352.519 | 2703.861 | AK024434  | 7862.382  | 5423.242  | NM_00443E | 3162.752  | 4145.557  |
| NM_016397 | 470.255  | 495.654  | NM_00238E | 15423.808 | 13198.207 | X89399    | 1226.233  | 2001.307  |
| NM_00238E | 12957.3  | 13915.07 | NM_01606E | 38598.035 | 30640.238 | NM_00380E | 2225.936  | 2045.51   |
| NM_01606E | 22178.41 | 29215.36 | NM_017612 | 4603.005  | 5806.792  | AK023666  | 1041.268  | 1301.378  |
| NM_017612 | 3707.577 | 4113.766 | NM_01323E | 17193.107 | 16473.982 | NM_00539E | 1443.401  | 1418.64   |
| NM_01323E | 12596.69 | 16178.72 | NM_017841 | 11423.347 | 8927.786  | NM_00511E | 322.687   | 458.943   |
| NM_017841 | 5904.651 | 6746.18  | NM_001254 | 7761.674  | 6986.207  | NM_01518E | 3035.93   | 2730.416  |
| NM_001254 | 6472.193 | 5239.45  | NM_00438E | 998.45    | 961.982   | NM_005374 | 1790.414  | 1940.093  |
| NM_00592E | 5836.084 | 5964.903 | NM_00592E | 5260.815  | 4469.52   | AF011757  | 668.406   | 839.997   |
| NM_003952 | 3026.812 | 2281.06  | NM_003952 | 4372.129  | 3264.674  | NM_003632 | 2158.516  | 2444.818  |
| NM_005424 | 865.205  | 708.067  | NM_005424 | 3889.197  | 3415.005  | NM_002194 | 2842.198  | 2882.506  |
| NM_00597E | 1274.808 | 1499.804 | NM_00597E | 6763.329  | 7194.294  | NM_00053C | 1822.915  | 1561.431  |
| AY007220  | 2150.507 | 1889.854 | AY007220  | 27555.377 | 28927.914 | AB028989  | 987.847   | 1566.164  |
| X89399    | 620.631  | 935.121  | X89399    | 3195.266  | 2169.083  | NM_01616E | 13380.919 | 17397.438 |
| NM_00380E | 1214.412 | 1043.575 | NM_00380E | 1986.171  | 2418.471  | NM_00208E | 24378.277 | 25653.928 |
| AK023666  | 795.633  | 796.655  | AK023666  | 2013      | 1968.113  | NM_01624E | 2607.625  | 1942.113  |
| NM_00539E | 856.199  | 1138.686 | NM_00539E | 3318.547  | 1838.169  | NM_00548E | 22294.34  | 29244.854 |
| NM_006573 | 1145.296 | 995.988  | NM_006573 | 1257.93   | 958.031   | NM_020482 | 4219.288  | 4373.48   |
| NM_00511E | 1141.116 | 865.83   | NM_00511E | 718.568   | 1025.936  | NM_00239E | 975.62    | 689.543   |
| NM_01518E | 2206.936 | 2468.542 | NM_01518E | 4097.677  | 3536.629  | NM_005417 | 1983.44   | 2199.208  |
| NM_005374 | 2385.262 | 2161.627 | NM_005374 | 2086.269  | 2308.371  | NM_00264E | 4167.411  | 3457.849  |
| AF011757  | 714.037  | 984.755  | AF011757  | 1106.013  | 1256.365  | AK025329  | 25887.238 | 26826.346 |
| NM_003632 | 1307.418 | 1604.403 | NM_003632 | 2634.688  | 3223.091  | NM_00125E | 3066.537  | 2242.354  |
| NM_002194 | 1454.9   | 1983.057 | NM_002194 | 3776.918  | 3910.522  | AL137679  | 5696.029  | 5265.939  |
| NM_00053C | 1012.999 | 911.299  | NM_00053C | 2373.162  | 3189.2    | NM_00178E | 20743.975 | 18795.66  |
| AB028989  | 1169.107 | 1517.524 | AB028989  | 2042.146  | 2884.731  | AB040965  | 1582.176  | 1629.068  |
| NM_01616E | 7066.327 | 5869.429 | NM_01616E | 17890.344 | 19199.533 | AK025026  | 3051.625  | 3497.955  |
| NM_00208E | 15550.32 | 16638.55 | NM_00208E | 27823.387 | 27708.6   | AK023052  | 2665.725  | 2794.231  |
| NM_01624E | 1625.801 | 1317.216 | NM_01624E | 2285.69   | 3732.618  | AB018350  | 780.446   | 876.413   |
| NM_00548E | 5972.876 | 5380.453 | NM_00548E | 23694.531 | 26202.949 | NM_00645E | 54823.82  | 49802.066 |
| NM_020482 | 2345.496 | 3122.483 | NM_020482 | 5649.803  | 4381.138  | NM_017541 | 601.439   | 785.698   |
| NM_004464 | 1440.877 | 991.285  | NM_00239E | 1236.115  | 613.82    | NM_01846C | 17970.244 | 23157.957 |
| NM_00239E | 927.512  | 979.279  | NM_005417 | 3026.899  | 2023.898  | NM_00270E | 12006.387 | 13635.259 |
| NM_005417 | 1414.031 | 2061.731 | NM_00264E | 4883.644  | 4495.822  | NM_005591 | 14374.228 | 16598.035 |
| NM_00264E | 3364.507 | 2635.369 | AK025329  | 29438.027 | 29908.986 | NM_002373 | 1464.7    | 1710.028  |
| AK025329  | 8025.168 | 7622.907 | NM_00125E | 2778.835  | 2183.458  | NM_00312E | 667.307   | 1374.816  |
| NM_00125E | 1093.021 | 1123.223 | AL137679  | 5956.803  | 5591.58   | NM_017734 | 448.417   | 421.02    |
| AL137679  | 3377.15  | 3145.941 | NM_00178E | 19540.125 | 17880.256 | NM_00254E | 2438.232  | 3238.483  |
| NM_00178E | 16972.99 | 13615.15 | AB040965  | 2000.255  | 1035.131  | NM_00668E | 62278.926 | 55230.445 |
| AB040965  | 1051.403 | 1037.403 | AK025026  | 3825.274  | 3034.574  | NM_005411 | 7276.552  | 8728.736  |
| AK025026  | 901.245  | 793.781  | AK023052  | 3570.076  | 3281.09   | NM_00485E | 8272.768  | 7030.407  |
| AK023052  | 1352.026 | 1687.478 | AB018350  | 1143.493  | 652.187   | NM_006952 | 1302.707  | 1381.634  |
| NM_00645E | 9132.27  | 9209.254 | NM_00645E | 52932.301 | 44886.723 | NM_00505E | 451.88    | 483.202   |
| NM_017541 | 1072.261 | 1166.908 | NM_017541 | 1135.898  | 869.358   | NM_00480E | 1869.513  | 1837.809  |
| NM_01846C | 15630.66 | 20034.62 | NM_01846C | 19467.238 | 13171.396 | NM_004617 | 1848.308  | 1709.866  |
| NM_00270E | 1653.089 | 1960.316 | NM_00270E | 14159.919 | 11574.065 | NM_00566E | 7770.004  | 6877.234  |
| NM_005591 | 12229.53 | 11421.59 | NM_005591 | 13636.15  | 17608.08  | NM_00674E | 20650.205 | 13205.894 |
| NM_002373 | 2151.98  | 2490.163 | NM_002373 | 2241.656  | 3521.686  | NM_012177 | 9455.011  | 8104.357  |
| NM_00312E | 603.51   | 1471.056 | NM_00312E | 1869.626  | 1766.988  | NM_00666E | 36112.898 | 37371.996 |

|           |          |          |           |           |           |           |           |           |
|-----------|----------|----------|-----------|-----------|-----------|-----------|-----------|-----------|
| NM_017734 | 767.996  | 376.88   | NM_017734 | 542.52    | 719.125   | NM_002807 | 25307.996 | 16897.979 |
| AK024251  | 474.904  | 661.123  | AK024251  | 1348.64   | 1658.468  | NM_002799 | 66644.234 | 58512.488 |
| NM_002545 | 1448.326 | 1439.346 | NM_002545 | 4309.397  | 4857.284  | NM_002790 | 48880.027 | 48901.52  |
| NM_006688 | 16283.38 | 17515.4  | NM_006688 | 64274.23  | 59874.859 | NM_018386 | 9449.017  | 9252.638  |
| NM_005411 | 1592.165 | 1533.126 | NM_005411 | 8494.44   | 8586.771  | NM_014948 | 1994.218  | 1843.935  |
| NM_004855 | 7499.36  | 7517.174 | NM_004855 | 9831.619  | 8550.787  | BF217579  | 12441.517 | 13264.569 |
| NM_006952 | 859.087  | 1411.089 | NM_006952 | 1555.441  | 1221.755  | NM_004335 | 4742.019  | 4566.006  |
| NM_005055 | 812.805  | 531.555  | NM_004808 | 2074.399  | 1315.697  | AF040965  | 10890.021 | 11064.025 |
| NM_004808 | 1864.798 | 2011.375 | NM_004617 | 2633.145  | 2819.336  | AB037840  | 4332.381  | 4426.959  |
| NM_004617 | 640.213  | 777.487  | NM_005668 | 7976.009  | 8780.985  | NM_007011 | 2044.586  | 2450.044  |
| NM_005668 | 4837.343 | 3916.786 | NM_006748 | 15931.604 | 15981.727 | Y10210    | 8522.419  | 9003.76   |
| NM_006748 | 8476.064 | 6455.204 | NM_012177 | 8173.987  | 7554.157  | AB020689  | 4612.491  | 4761.405  |
| NM_012177 | 5526.963 | 4676.478 | NM_006666 | 44574.875 | 38847.371 | AK023916  | 1280.137  | 1814.163  |
| NM_006666 | 18302.48 | 15055.71 | NM_002807 | 20299.098 | 16339.965 | NM_003203 | 5887.532  | 6478.157  |
| NM_002807 | 16212.51 | 11167.6  | NM_002799 | 66331.289 | 56936.906 | NM_002514 | 1726.685  | 2334.875  |
| NM_002799 | 77909.19 | 48960.2  | NM_002790 | 43485.766 | 35486.43  | AF177238  | 2584.494  | 1846.321  |
| NM_002790 | 32936.8  | 37309.52 | NM_018386 | 9386.56   | 6159.245  | AL096747  | 1025.293  | 859.564   |
| NM_018386 | 7417.95  | 7590.027 | NM_014948 | 1926.071  | 1467.366  | AB021641  | 645.855   | 523.181   |
| NM_014948 | 1271.912 | 1641.661 | BF217579  | 15592.542 | 11332.192 | NM_012406 | 11525.78  | 11073.399 |
| BF217579  | 3440.996 | 3459.966 | NM_004335 | 7229.143  | 6300.95   | NM_014947 | 27472.508 | 24131.088 |
| BC036820  | 491.297  | 433.181  | AF040965  | 17247.166 | 12893.324 | AL355698  | 1807.177  | 1547.568  |
| NM_004335 | 2996.265 | 2443.929 | AB037840  | 3876.574  | 2451.344  | AB033112  | 2227.347  | 2122.383  |
| AF040965  | 7665.957 | 7983.084 | NM_007011 | 3022.263  | 3086.873  | AK023243  | 2150.958  | 2146.173  |
| AB037840  | 2380.868 | 2376.275 | Y10210    | 5448.531  | 4471.672  | NM_014409 | 3577.502  | 3530.793  |
| NM_007011 | 2104.498 | 2075.73  | AB020689  | 4990.601  | 6131.841  | BE791857  | 541.566   | 590.767   |
| Y10210    | 7799.928 | 7843.966 | AK023916  | 1448.088  | 1297.79   | NM_006867 | 401.275   | 461.706   |
| AB020689  | 3594.974 | 3623.005 | NM_003203 | 7894.881  | 10261.854 | NM_001422 | 3964.614  | 2647.013  |
| AK023916  | 1363.176 | 1199.138 | NM_002514 | 1923.898  | 2089.633  | AK022358  | 5520.157  | 5041.617  |
| NM_003203 | 5684.044 | 5294.375 | AF177238  | 3696.801  | 1866.44   | NM_000977 | 29218.854 | 42930.559 |
| AF177238  | 1635.853 | 1332.099 | AL096747  | 1516.397  | 1262.465  | NM_014205 | 51995.348 | 52749.172 |
| AL096747  | 1035.541 | 941.226  | NM_012406 | 14133.313 | 10638.13  | NM_018141 | 23064.053 | 22606.123 |
| AB021641  | 290.627  | 698.145  | NM_014947 | 34603.961 | 32534.313 | NM_016504 | 48673.699 | 54798.492 |
| NM_018008 | 421.312  | 639.705  | AL355698  | 2158.122  | 2093.277  | U25752    | 64054.91  | 57462.129 |
| NM_012406 | 7176.628 | 8342.736 | AB033112  | 2312.816  | 2155.903  | X96646    | 57913.332 | 58552.953 |
| NM_014947 | 6322.747 | 6352.704 | AK023243  | 2448.917  | 1680.745  | AB032991  | 12739.841 | 10564.239 |
| AL355698  | 1366.874 | 1337.007 | NM_014409 | 3216.594  | 2746.416  | AK026985  | 6299.196  | 5588.471  |
| AB033112  | 1115.551 | 1406.685 | NM_001422 | 2820.899  | 4310.134  | AK000855  | 383.334   | 432.656   |
| AK023243  | 934.838  | 1607.409 | AK022358  | 4852.886  | 6371.116  | NM_004109 | 11174.587 | 8732      |
| NM_014409 | 2427.747 | 1543.594 | NM_000977 | 23406.855 | 19751.887 | NM_003198 | 12876.671 | 10747.709 |
| BE791857  | 727.856  | 480.559  | NM_014205 | 48522.16  | 44111.512 | AF220415  | 1697.186  | 1382.42   |
| NM_006867 | 842.152  | 714.051  | NM_018141 | 22839.516 | 19989.211 | NM_005174 | 67855.672 | 54867.742 |
| NM_001422 | 2992.707 | 2201.874 | NM_016504 | 41967.086 | 40500.031 | NM_000365 | 6164.269  | 6458.811  |
| NM_005513 | 829.275  | 133.077  | U25752    | 65952.438 | 67449.703 | AF110322  | 5276.843  | 7664.75   |
| AK022358  | 6696.539 | 5583     | X96646    | 39219.488 | 35003.074 | NM_013450 | 3613.52   | 3729.574  |
| NM_000977 | 28110.59 | 35846.81 | AB032991  | 9098.613  | 7344.542  | NM_004538 | 1962.68   | 2586.068  |
| NM_014205 | 34734.5  | 35132.98 | AK026985  | 7036.34   | 7395.448  | NM_003077 | 3672.37   | 4572.458  |
| NM_018141 | 19991.73 | 19926.36 | NM_004109 | 9479.358  | 9692.652  | NM_002105 | 4387.448  | 5497.934  |
| BE790474  | 447.148  | 410.025  | NM_003198 | 14395.441 | 12697.979 | NM_018489 | 3647.298  | 3235.88   |
| NM_016504 | 35448.75 | 37005.25 | AF220415  | 1215.784  | 1347.541  | L13203    | 4725.183  | 4759.634  |
| U25752    | 79931.23 | 51295.38 | NM_005174 | 65531.34  | 56567.203 | NM_018040 | 3641.636  | 3069.88   |
| X96646    | 38172.74 | 41524.77 | NM_000365 | 4984.566  | 4635.771  | AB042646  | 4983.603  | 5170.122  |
| AB032991  | 8988.693 | 9067.731 | AF110322  | 6264.509  | 6544.82   | NM_003431 | 4571.736  | 5167.731  |
| AK026985  | 6087.912 | 5593.229 | NM_013450 | 4646.222  | 4046.597  | M29581    | 3904.781  | 4836.597  |

|           |          |          |           |           |           |           |           |           |
|-----------|----------|----------|-----------|-----------|-----------|-----------|-----------|-----------|
| AF007153  | 822.934  | 666.708  | NM_00453E | 2457.252  | 2163.286  | AL359622  | 732.26    | 540.703   |
| NM_00410E | 5629.935 | 5333.135 | NM_003077 | 4013.83   | 3655.126  | AL050204  | 3590.596  | 2831.119  |
| NM_00319E | 7543.12  | 8010.352 | NM_00210E | 6874.02   | 5489.753  | AF085999  | 1124.896  | 1157.178  |
| AF220415  | 1019.015 | 1077.135 | NM_01848E | 2840.169  | 3515.783  | AK025316  | 2584.705  | 2239.283  |
| NM_005174 | 64375.87 | 42138.36 | L13203    | 4687.798  | 4768.046  | AK026357  | 4418.694  | 4148.168  |
| NM_00036E | 4009.928 | 3843.879 | NM_01804C | 3371.406  | 2880.61   | NM_01832E | 6537.342  | 5475.385  |
| AF110322  | 6945.393 | 6566.396 | AB042646  | 6183.872  | 5548.212  | NM_01423E | 10334.633 | 9110.234  |
| NM_01345C | 2208.587 | 2409.875 | NM_003431 | 4255.566  | 4412.127  | AK026922  | 1716.809  | 1999.615  |
| NM_00453E | 1889.208 | 2838.201 | M29581    | 4015.594  | 4251.923  | AK022645  | 1198.778  | 1177.911  |
| NM_003077 | 6216.198 | 7987.796 | AL359622  | 698.567   | 604.912   | NM_01435E | 1768.23   | 5752.945  |
| NM_00210E | 8264.851 | 10754.56 | AL050204  | 4554.793  | 4450.259  | AF070541  | 496.792   | 671.38    |
| NM_01848E | 3948.525 | 2450.115 | AF085999  | 975.277   | 1046.017  | AK022006  | 25201.59  | 26922.059 |
| L13203    | 2316.92  | 2522.866 | AK025316  | 2287.507  | 2577.377  | AF070552  | 11698.226 | 13077.771 |
| NM_01804C | 3244.67  | 2368.088 | AK026357  | 4486.33   | 5303.359  | NM_004271 | 13732.093 | 13701.036 |
| AB042646  | 2851.712 | 2870.743 | NM_01832E | 6089.47   | 7181.124  | AF129928  | 849.205   | 1263.453  |
| NM_003431 | 1366.985 | 1194.89  | NM_01423E | 10023.186 | 11975.538 | AK022282  | 851.636   | 1303.743  |
| M29581    | 1474.01  | 1510.498 | AK026922  | 1711.296  | 1929.598  | NM_01826E | 4409.239  | 5269.826  |
| AL050204  | 2686.174 | 2836.096 | AK022645  | 1235.921  | 1180.652  | NM_004867 | 21223.51  | 27261.131 |
| AK025316  | 1665.337 | 1264.056 | NM_01435E | 5246.427  | 1408.816  | AL050021  | 14999.233 | 15601.572 |
| AK026357  | 3469.832 | 2387.336 | AF070541  | 378.091   | 617.313   | AB002448  | 1729.831  | 2219.908  |
| NM_01832E | 3920.624 | 3631.467 | AK022006  | 34683.938 | 38104.508 | AF070580  | 585.354   | 889.539   |
| NM_01423E | 5873.666 | 5229.775 | AF070552  | 12883.512 | 13408.354 | NM_00383E | 3494.367  | 4146.65   |
| AK026922  | 1871.348 | 1565.824 | NM_004271 | 14321.406 | 15206.038 | AK023089  | 5039.704  | 4001.026  |
| AK022645  | 1178.735 | 1174.529 | AF129928  | 984.969   | 912.752   | AK026059  | 64065.664 | 46365.238 |
| NM_01435E | 2435.926 | 5263.197 | AK022282  | 773.968   | 1043.988  | AK026942  | 1126.407  | 846.337   |
| AF070541  | 773.854  | 1080.724 | NM_01826E | 4303.021  | 4614.45   | AK025814  | 3949.055  | 3056.961  |
| AK022006  | 9462.736 | 9473.393 | NM_004867 | 35363.281 | 24989.068 | AK000655  | 11645.628 | 12245.888 |
| AF070552  | 16406.53 | 17915.38 | AL050021  | 18242.842 | 16420.043 | AL117611  | 1198.095  | 957.619   |
| AJ270695  | 819.941  | 520.331  | AB002448  | 1722.093  | 1560.032  | NM_01793E | 4697.935  | 5152.659  |
| NM_004271 | 2395.708 | 2574.353 | AF070580  | 446.233   | 775.49    | D63134    | 1592.874  | 2032.432  |
| AF129928  | 735.266  | 668.841  | NM_00383E | 2842.244  | 3217.405  | AJ227893  | 811.379   | 897.858   |
| AF070610  | 572.825  | 940.059  | AK023089  | 5831.837  | 6038.229  | Y12018    | 63806.164 | 48804.941 |
| AK022282  | 1218.798 | 836.881  | AK026059  | 62929.422 | 49744.242 | X64990    | 614.834   | 672.809   |
| NM_01826E | 5178.767 | 5913.295 | AK026942  | 1015.69   | 1069.804  | Y10513    | 1786.355  | 1885.733  |
| NM_004867 | 21472.03 | 32478.96 | AK025814  | 3804.622  | 3135.047  | M87941    | 394.865   | 458.749   |
| AL050021  | 12626.67 | 10651.89 | AK000655  | 15349.721 | 13691.929 | M21536    | 1357.584  | 1494.436  |
| AB002448  | 1575.792 | 1299.57  | AL117611  | 1124.855  | 1030.188  | NM_01402E | 54969.355 | 48570.191 |
| NM_00383E | 2036.159 | 1845.753 | NM_01793E | 5970.73   | 6307.277  | Z83937    | 1515.029  | 1424.626  |
| AK023089  | 4752.852 | 4138.118 | D63134    | 1686.389  | 2091.486  | L08443    | 1923.089  | 1738.659  |
| AK026059  | 4450.221 | 4920.316 | AJ227893  | 769.766   | 997.29    | L38936    | 1029.15   | 1552.097  |
| AK026942  | 955.583  | 774.268  | Y12018    | 64449.711 | 53732.676 | D55643    | 1833.297  | 2293.568  |
| AK025814  | 1940.008 | 1213.638 | X64990    | 859.466   | 576.961   | AK025818  | 4982.415  | 4646.567  |
| AK000655  | 5619.189 | 6919.36  | Y10513    | 1967.152  | 1700.876  | AK023185  | 13064.378 | 9332.596  |
| AL117611  | 882.288  | 912.068  | M21536    | 966.078   | 725.225   | AK022183  | 553.324   | 484.082   |
| NM_01793E | 3975.224 | 3199.076 | NM_01402E | 52502.09  | 49484.074 | AK026345  | 2297.31   | 2314.059  |
| D63134    | 1770.004 | 1557.995 | Z83937    | 1056.022  | 983.99    | AB007971  | 1653.156  | 1602.998  |
| AJ227893  | 1232.98  | 1075.14  | L08443    | 2278.417  | 2454.016  | NM_01827E | 3886.771  | 4295.068  |
| Y12018    | 19986.32 | 28895.9  | L38936    | 1073.253  | 951.674   | AK026328  | 694.553   | 860.024   |
| X64990    | 842.531  | 782.659  | D55643    | 2360.293  | 2428.655  | AK000417  | 758.259   | 821.833   |
| Y10513    | 1740.577 | 1591.953 | AK025818  | 3160.73   | 4100.998  | AK000864  | 3671.319  | 4536.925  |
| M87941    | 1308.508 | 1037.676 | AK023185  | 7464.892  | 9896.229  | AK022414  | 2075.599  | 1775.387  |
| M21536    | 1347.833 | 1218.556 | AK026345  | 2674.11   | 2064.242  | NM_017624 | 13161.817 | 13115.844 |
| NM_01402E | 41485.69 | 40740.48 | AB007971  | 2023.807  | 1453.019  | AK000907  | 5670.763  | 6888.873  |

|            |          |          |           |           |           |           |           |           |
|------------|----------|----------|-----------|-----------|-----------|-----------|-----------|-----------|
| Z83937     | 1355.413 | 1319.502 | NM_01827E | 5302.771  | 4315.944  | AK024390  | 2160.664  | 2687.267  |
| L08443     | 1523.174 | 1391.152 | AK026328  | 1047.226  | 1042.833  | AK024968  | 1084.436  | 1293.784  |
| L38936     | 776.054  | 607.696  | AK000417  | 884.059   | 871.147   | AK024517  | 3403.005  | 3520.173  |
| D55643     | 2207.567 | 1963.058 | AK000864  | 4922.773  | 5877.317  | AK024585  | 517.152   | 622.984   |
| AK025818   | 4079.918 | 3055.194 | AK022414  | 1692.738  | 1661.154  | AK024887  | 3327.94   | 4489.722  |
| AK023185   | 8646.139 | 5443.686 | NM_017624 | 12928.639 | 11157.907 | AK025005  | 941.9     | 1210.61   |
| AK022183   | 252.21   | 675.514  | NM_01792E | 601.761   | 628.548   | AF086151  | 763.698   | 469.302   |
| AK026345   | 976.728  | 750.677  | AK000907  | 7280.972  | 6251.588  | AK095587  | 5800.012  | 4978.341  |
| AK021531   | 731.906  | 772.788  | AK024390  | 2139.862  | 1964.327  | AF086043  | 1627.52   | 1213.905  |
| AB007971   | 938.717  | 781.451  | AK024517  | 2289.628  | 2325.793  | AK024174  | 704.431   | 659.022   |
| NM_01827E  | 962.499  | 1048.051 | AK024585  | 689.12    | 556.16    | AK000038  | 2050.822  | 1849.649  |
| AK000417   | 773.63   | 672.355  | AK024887  | 3143.044  | 2775.961  | BC010084  | 1142.634  | 1055.198  |
| AK000864   | 912.434  | 930.483  | AK025005  | 633.342   | 809.636   | U10513    | 3605.331  | 4585.482  |
| AK022414   | 1399.614 | 1056.477 | AF086151  | 768.562   | 770.484   | L10151    | 1570.274  | 2173.34   |
| NM_017624  | 6445.79  | 7022.273 | AK095587  | 7017.211  | 6344.184  | AK022203  | 1279.66   | 1372.296  |
| NM_01792E  | 665.379  | 764.422  | AF086043  | 1510.69   | 1165.323  | BC032236  | 841.444   | 816.054   |
| AK000907   | 6350.302 | 5839.155 | AK024174  | 1114.562  | 567.848   | AK023037  | 2286.077  | 2394.725  |
| AK024390   | 871.686  | 1386.591 | AK000038  | 2120.448  | 1722.102  | AK055950  | 2237.277  | 2212.927  |
| AK024968   | 1174.213 | 692.902  | BC010084  | 1793.361  | 1774.944  | AL050122  | 1404.795  | 1481.452  |
| AK024517   | 1535.839 | 1508.498 | U10513    | 4802.296  | 3300.515  | AK000839  | 17343.582 | 17256.148 |
| AK024585   | 976.753  | 724.474  | L10151    | 2133.85   | 1895.095  | AF086195  | 889.395   | 992.065   |
| AK024887   | 686.604  | 808.154  | AK022203  | 1282.159  | 1292.47   | AK021963  | 1570.772  | 1441.206  |
| AK025005   | 1015.212 | 972.993  | BC032236  | 846.478   | 635.597   | AK002209  | 882.736   | 646.586   |
| AK095587   | 4775.462 | 4006.721 | AK023037  | 3343.155  | 3065.05   | NM_014354 | 2577.439  | 1618.69   |
| AF086043   | 1910.059 | 1503.327 | AK055950  | 1422.486  | 1482.18   | AL137548  | 12348.882 | 10675.86  |
| AK024174   | 827.673  | 676.579  | AL050122  | 1600.164  | 1146.748  | AK095051  | 756.251   | 958.998   |
| AK000038   | 4870.219 | 4449.333 | AK000839  | 11401.302 | 12242.159 | AF088062  | 866.346   | 1290.753  |
| BC010084   | 649.195  | 813.03   | AK021963  | 713.311   | 902.674   | AK024929  | 1189.891  | 1485.781  |
| U10513     | 1855.134 | 2174.724 | AK002209  | 1654.783  | 998.417   | NM_01777E | 681.226   | 671.726   |
| L10151     | 1006.204 | 1122.661 | NM_014354 | 2377.736  | 2027.964  | D17232    | 27444.395 | 25296.48  |
| AK022203   | 1444.572 | 1104.107 | AL137548  | 10438.141 | 9840.573  | NM_00526C | 3170.955  | 3601.632  |
| BC032236   | 1210.479 | 969.564  | AK095051  | 1446.215  | 466.023   | AF085880  | 10959.609 | 10357.257 |
| AK023037   | 2225.666 | 2224.156 | AF088062  | 1797.586  | 865.191   | NM_01615E | 677.914   | 720.826   |
| S71611     | 1052.677 | 1165.698 | AK024929  | 1689.794  | 1470.268  | AF000990  | 1131.776  | 1409.156  |
| unknown (S | 836.813  | 694.624  | NM_01777E | 1000.192  | 1649.535  | NM_016094 | 8007.378  | 10201.356 |
| AK055950   | 2620.698 | 2730.389 | D17232    | 19542.928 | 30009.361 | AK025003  | 3861.846  | 4323.448  |
| AL050122   | 1254.578 | 1226.264 | NM_00526C | 4177.244  | 3846.071  | AK023601  | 501.883   | 647.605   |
| AK000839   | 8601.771 | 5045.912 | AF085880  | 10751.381 | 10983.831 | NM_001427 | 6849.852  | 8578.773  |
| NM_014354  | 2397.686 | 1960.988 | NM_01615E | 788.707   | 627.801   | NM_01617E | 2693.845  | 2892.893  |
| AL137548   | 6166.46  | 5868.621 | AF000990  | 1574.455  | 1335.362  | M15639    | 13450.706 | 15400.238 |
| AK095051   | 599.125  | 918.714  | NM_016094 | 8220.091  | 6378.812  | AF130084  | 4691.803  | 6432.796  |
| AF088062   | 663.178  | 794.334  | AK025003  | 3608.893  | 2997.902  | AF133334  | 19778.965 | 20203.039 |
| AK024929   | 886.141  | 803.86   | NM_001427 | 5825.471  | 5854.438  | NM_01629C | 5508.506  | 7326.079  |
| NM_01777E  | 1179.561 | 1511.678 | NM_01617E | 2242.643  | 1999.954  | AK026498  | 2350.081  | 2910.803  |
| D17232     | 14750.74 | 13137.42 | M15639    | 10399.416 | 12396.169 | NM_003894 | 1746.57   | 1262.243  |
| NM_00526C  | 1573.97  | 1483.272 | AF130084  | 3610.267  | 3431.791  | AK001007  | 7388.288  | 6548.824  |
| AF085880   | 7810.927 | 7240.459 | AF133334  | 17230.506 | 14682.88  | NM_01448E | 715.355   | 709.16    |
| NM_01615E  | 853.348  | 389.492  | NM_01629C | 4771.606  | 3952.355  | AF116655  | 15956.691 | 16308.983 |
| AF000990   | 1722.427 | 1779.349 | AK026498  | 2335.653  | 2260.061  | AF086134  | 606.749   | 554.72    |
| NM_016094  | 6993.387 | 7715.234 | NM_003894 | 2671.905  | 1703.46   | AF009308  | 33809.48  | 37336.332 |
| AK025003   | 1963.255 | 1986.346 | AK001007  | 7556.788  | 5714.609  | AB032969  | 51816.305 | 51280.066 |
| NM_001427  | 6047.204 | 6684.162 | NM_01448E | 848.497   | 791.082   | Y11610    | 1120.972  | 1056.069  |
| NM_01617E  | 2771.888 | 2637.817 | AF116655  | 14297.662 | 14651.652 | AF085940  | 934.884   | 860.758   |

|           |          |          |           |           |           |           |           |           |
|-----------|----------|----------|-----------|-----------|-----------|-----------|-----------|-----------|
| M15639    | 12731.89 | 12470.9  | AF086134  | 480.591   | 738.78    | L37695    | 1218.249  | 1224.944  |
| AF130084  | 2979.011 | 3262.903 | AF009308  | 35508.852 | 38995.402 | NM_004627 | 14386.257 | 11969.682 |
| AF133334  | 11199.34 | 9290.918 | AB032969  | 55998.492 | 50082.273 | AK026523  | 3199.263  | 3389.313  |
| NM_01629C | 4483.524 | 4120.853 | Y11610    | 1247.537  | 1740.541  | AL050217  | 10150.133 | 13435.433 |
| AK026498  | 859.605  | 1528.805 | AF085940  | 1084.735  | 734.438   | L37704    | 919.68    | 1047.369  |
| NM_003894 | 1658.066 | 1388.87  | L37695    | 1529.711  | 1242.8    | NM_005162 | 2663.733  | 3276.929  |
| AF085922  | 726.196  | 495.079  | NM_004627 | 7825.198  | 16407.826 | AB007968  | 2248.764  | 2447.75   |
| AK001007  | 6381.705 | 6370.769 | AK026523  | 3431.103  | 3388.228  | NM_005664 | 32061.896 | 41561.836 |
| NM_01448E | 1205.02  | 808.869  | AL050217  | 12471.749 | 10339.121 | NM_00627C | 56700.086 | 52568.09  |
| AF116655  | 9855.209 | 8449.295 | L37704    | 930.483   | 994.203   | U50277    | 2899.651  | 3277.739  |
| AF086134  | 754.115  | 713.914  | NM_005162 | 2382.061  | 2186.261  | Z48633    | 3477.6    | 4583.616  |
| AF009308  | 26117.6  | 28062.36 | AB007968  | 2065.013  | 1962.058  | M62627    | 17472.822 | 20955.469 |
| AB032969  | 20912.73 | 18222.41 | NM_005664 | 33058.039 | 32008.678 | NM_00668E | 6380.247  | 7942.882  |
| Y11610    | 881.69   | 933.461  | NM_00627C | 43544.289 | 48904.895 | CY3Cy5    | 10471.197 | 258.378   |
| AF085940  | 983.062  | 885.76   | U50277    | 2161.089  | 2260.344  | AI889961  | 6180.54   | 6689.418  |
| L37695    | 1170.599 | 754.412  | Z48633    | 3286.897  | 2739.963  | AI360116  | 2568.094  | 2702.358  |
| NM_004627 | 13677.82 | 6111.061 | M62627    | 15003.644 | 16323.969 | AI572835  | 7481.89   | 8303.798  |
| AK026523  | 1501.425 | 1372.119 | NM_00668E | 7048.432  | 8588.747  | R20392    | 8537.33   | 9874.209  |
| AL050217  | 3363.417 | 3092.323 | CY3Cy5    | 6591.48   | 323.306   | AA486367  | 6142.965  | 4320.742  |
| L37704    | 956.043  | 613.939  | AI889961  | 4442.694  | 4554.11   | N56684    | 695.876   | 713.551   |
| NM_005162 | 2251.509 | 1997.173 | AI360116  | 2577.412  | 2219.173  | M55153    | 1977.679  | 1886.985  |
| AB007968  | 1346.376 | 1135.466 | NM_013983 | 556.158   | 808.168   | AF414120  | 1064.747  | 1037.178  |
| AL117544  | 1111.534 | 635.735  | AI572835  | 9186.173  | 10588.888 | AK097322  | 775.511   | 590.06    |
| NM_005664 | 7818.044 | 7519.031 | R20392    | 11438.587 | 11431.248 | AL136131  | 15995.588 | 11430.752 |
| NM_00627C | 19993.4  | 16978.16 | AA486367  | 6745.133  | 5374.701  | NM_033357 | 8008.865  | 8504.02   |
| U50277    | 1111.507 | 1212.952 | M55153    | 1723.432  | 1713.647  | AF335109  | 2608.903  | 2332.361  |
| Z48633    | 3893.452 | 3843.424 | AF414120  | 1116.729  | 1420.351  | NM_003263 | 927.122   | 753.276   |
| M62627    | 15764.74 | 15660.6  | AK097322  | 1036.328  | 1129.823  | U59911    | 12543.219 | 10934.853 |
| NM_00668E | 4663.136 | 4444.474 | AL136131  | 11075.414 | 19492.783 | SR2       | 71081.891 | 60471.82  |
| CY3Cy5    | 10623.41 | 685.859  | NM_033357 | 7588.893  | 7164.751  | SR4       | 30473.047 | 21405.963 |
| AI889961  | 6369.705 | 7436.125 | AF335109  | 2301.594  | 2630.63   | SR6       | 3178.353  | 2115.099  |
| AI360116  | 2861.393 | 3150.009 | U59911    | 10513.432 | 13761.583 | SR8       | 16704.752 | 34846.961 |
| NM_013983 | 248.81   | 510.425  | NM_002054 | 1199.302  | 1407.656  | SR10      | 55273.035 | 17468.271 |
| AI572835  | 1518.381 | 1943.216 | SR2       | 48344.926 | 42714.41  | CY3Cy5    | 10437.742 | 154.973   |
| R20392    | 7077.985 | 7180.754 | SR4       | 21831.752 | 21213.406 | NM_000865 | 2915.192  | 3683.44   |
| AA486367  | 5955.054 | 5503.771 | SR6       | 2499.086  | 2169.114  | NM_000867 | 1998.165  | 3175.869  |
| N56684    | 640.395  | 989.433  | SR8       | 7545.583  | 21101.846 | AF076642  | 3148.089  | 5581.875  |
| M55153    | 769.902  | 784.95   | SR10      | 35604.504 | 11852.109 | NM_00238E | 3635.941  | 4444.269  |
| AF414120  | 498.733  | 924.33   | CY3Cy5    | 5831.51   | 341.675   | NM_005314 | 2718.673  | 3351.727  |
| AK097322  | 690.529  | 655.173  | NM_000865 | 3767.583  | 3861.039  | NM_00488E | 3620.36   | 3329.417  |
| AL136131  | 9333.839 | 7066.104 | NM_000867 | 2180.682  | 1733.471  | NM_00514E | 396.591   | 826.996   |
| NM_033357 | 7492.212 | 7572.876 | AF076642  | 4376.142  | 3296.549  | NM_012152 | 14498.936 | 14835.122 |
| AF335109  | 2118.208 | 2055.322 | NM_00238E | 4674.564  | 4377.602  | AK024093  | 5138.262  | 4299.725  |
| NM_003263 | 155.548  | 614.462  | NM_005314 | 2674.867  | 2867.984  | NM_00194C | 5520.067  | 5450.797  |
| U59911    | 6663.452 | 6403.84  | NM_00488E | 3286.372  | 3774.858  | U83115    | 25767.365 | 20103.197 |
| NM_002054 | 792.73   | 860.021  | NM_00514E | 1127.895  | 472.278   | NM_001264 | 18739.85  | 18383.943 |
| SR2       | 22637.03 | 17946.23 | NM_012152 | 19257.979 | 19442.254 | NM_013364 | 18182.389 | 15725.594 |
| SR4       | 4774.264 | 3677.057 | AK024093  | 4410.627  | 5031.528  | NM_01436E | 2507.271  | 1990.166  |
| SR6       | 929.632  | 722.791  | NM_00194C | 5047.062  | 5322.967  | NM_00085C | 7019.902  | 6479.267  |
| SR8       | 4329.529 | 8812.86  | U83115    | 23540.061 | 35238.156 | NM_00467E | 1408.578  | 1589.947  |
| SR10      | 2791.205 | 975.95   | NM_001264 | 19867.266 | 21651.748 | NM_007193 | 998.244   | 444.471   |
| CY3Cy5    | 20388.06 | 1092.73  | NM_013364 | 20297.764 | 26019.803 | NM_001994 | 6762.094  | 6385.848  |
| NM_00086E | 3803.445 | 3345.222 | NM_01436E | 2279.709  | 2719.342  | J00129    | 39887.859 | 38073.922 |

|           |          |          |           |           |           |           |           |           |
|-----------|----------|----------|-----------|-----------|-----------|-----------|-----------|-----------|
| NM_000867 | 3297.092 | 3815.748 | NM_00085C | 6224.845  | 6781.591  | NM_00332C | 5483.933  | 5305.003  |
| AF076642  | 3367.493 | 4635.954 | NM_00467E | 2055.625  | 2128.406  | L10146    | 9620.123  | 6717.842  |
| NM_00238E | 4179.377 | 4190.556 | NM_00719D | 554.269   | 1090.851  | NM_00068E | 7038.764  | 7458.035  |
| NM_005314 | 2570.519 | 2898.002 | NM_001994 | 7211.134  | 6186.663  | AK025657  | 6304.759  | 10760.269 |
| NM_00488E | 4432.441 | 4688.671 | J00129    | 33753.637 | 43968.688 | AF142063  | 725.483   | 690.19    |
| NM_00514E | 596.038  | 1102.494 | NM_00332C | 3931.813  | 3993.247  | W42849    | 2062.803  | 2370.799  |
| NM_01215E | 4866.174 | 4736.05  | L10146    | 4573.294  | 8018.002  | AK022790  | 40565.25  | 30720.738 |
| AK024093  | 5855.768 | 5096.125 | NM_00068E | 6807.294  | 7483.111  | NM_004311 | 24821.035 | 20547.088 |
| NM_00194C | 4878.314 | 5645.505 | AK025657  | 10725.844 | 7186.726  | NM_005624 | 3030.207  | 2544.616  |
| U83115    | 17175.68 | 15211.18 | AF142063  | 826.855   | 889.589   | NM_00230E | 1512.826  | 1789.092  |
| NM_001264 | 9013.35  | 10075.66 | W42849    | 2058.395  | 2477.868  | AB020672  | 776.219   | 756.282   |
| NM_013364 | 4508.262 | 4743.431 | AK022790  | 34860.203 | 41750.094 | AK026958  | 658.33    | 716.563   |
| NM_01436E | 1099.893 | 1396.256 | NM_004311 | 17524.854 | 21973.08  | NM_00057E | 1055.223  | 744.96    |
| NM_00085C | 3923.569 | 3069.85  | NM_005624 | 2609.922  | 3194.524  | NM_00148C | 606.694   | 652.404   |
| NM_00467E | 1033.819 | 828.958  | NM_00230E | 1386.864  | 1502.896  | AF263462  | 3682.972  | 4578.042  |
| NM_00719D | 1339.475 | 1516.67  | AB020672  | 514.166   | 516.587   | AB040962  | 925.738   | 946.631   |
| NM_001994 | 4090.543 | 3784.577 | AK026958  | 687.456   | 895.74    | NM_00063E | 2567.518  | 2149.835  |
| J00129    | 21711.06 | 21029.77 | NM_00057E | 1477.442  | 1399.869  | AV697672  | 1157.085  | 736.192   |
| NM_00332C | 3784.953 | 4251.032 | NM_00148C | 553.053   | 546.044   | NM_00094E | 32481.336 | 41177.82  |
| L10146    | 6373.426 | 5108.692 | AF263462  | 5041.44   | 4861.122  | NM_00298E | 744.085   | 897.154   |
| NM_00068E | 5010.066 | 4821.394 | AB040962  | 1211.01   | 1168.775  | AK056773  | 5445.26   | 5641.755  |
| AK025657  | 4600.242 | 6944.567 | NM_00063E | 2267.646  | 3145.878  | NM_00218E | 16739.463 | 19138.002 |
| AF142063  | 823.885  | 1093.949 | AV697672  | 1332.555  | 2017.144  | NM_01647C | 6442.128  | 5938.133  |
| W42849    | 1753.746 | 1912.363 | NM_00094E | 30542.018 | 38977.898 | AL365408  | 41643.188 | 44750.258 |
| AK022790  | 28410.01 | 22523.59 | NM_00298E | 1186.022  | 1687.987  | AK026204  | 7477.131  | 6371.273  |
| NM_004311 | 17342.14 | 15865.03 | NM_00219C | 550.61    | 417.429   | NM_01463E | 3428.164  | 1762.15   |
| NM_005624 | 1481.423 | 1556.602 | AK056773  | 5834.103  | 5840.781  | NM_00414E | 8087.733  | 8347.559  |
| NM_00230E | 2154.309 | 1552.217 | NM_00218E | 14856.028 | 17781.324 | AK023196  | 1215.564  | 1666.453  |
| AB020672  | 1045.902 | 989.441  | NM_01647C | 6171.689  | 7121.184  | NM_01872E | 4439.707  | 4059.26   |
| AK026958  | 1068.675 | 1030.852 | AL365408  | 43047.828 | 45501.883 | AK024014  | 2488.517  | 2680.474  |
| NM_00057E | 2520.068 | 1974.354 | AK026204  | 7209.608  | 6209.344  | NM_016234 | 14749.163 | 12591.649 |
| NM_00148C | 993.535  | 844.693  | NM_01463E | 2657.47   | 2591.703  | NM_00187E | 9426.449  | 9379.485  |
| AF263462  | 2322.312 | 2525.422 | NM_00414E | 6589.05   | 8227.25   | NM_016144 | 15641.072 | 13840.74  |
| AB040962  | 1534.574 | 1151.936 | AK023196  | 1912.603  | 1494.439  | AL133099  | 8472.384  | 8835.87   |
| NM_00063E | 4170.563 | 3629.61  | NM_01872E | 3910.987  | 3861.053  | NM_01608E | 4462.179  | 4976.568  |
| AV697672  | 941.212  | 921.876  | AK024014  | 2414.994  | 2372.521  | NM_00043E | 1775.883  | 1521.42   |
| NM_00094E | 20606.67 | 26057.14 | NM_016234 | 11859.38  | 12908.005 | NM_00019C | 11848.542 | 14071.052 |
| NM_00298E | 662.297  | 728.472  | NM_00187E | 8597.867  | 8729.635  | X15667    | 8354.84   | 8878.446  |
| AK056773  | 3136.733 | 2922.802 | NM_016144 | 11763.186 | 13463.024 | NM_01751E | 7134.895  | 6763.146  |
| NM_00218E | 1681.555 | 1494.775 | AL133099  | 7236.586  | 8313.682  | NM_018661 | 1173.589  | 1007.137  |
| NM_01647C | 5435.73  | 4873.627 | NM_01608E | 3507.876  | 3498.418  | AK023078  | 14251.177 | 9865.216  |
| AL365408  | 8993.082 | 9966.932 | NM_00043E | 1985.487  | 2425.606  | NM_00223E | 61335.93  | 47028.41  |
| AK026204  | 5055.08  | 5100.054 | NM_00019C | 14313.162 | 12042.08  | NM_00224E | 44450.449 | 41928.273 |
| NM_01463E | 1747.13  | 1545.083 | X15667    | 10734.159 | 11837.488 | NM_015684 | 3578.819  | 2511.102  |
| NM_00414E | 4420.23  | 4159.17  | NM_01751E | 6337.605  | 7946.35   | NM_00394E | 31370.246 | 33970.781 |
| AK023196  | 1741.165 | 2390.751 | NM_018661 | 989.241   | 1432.068  | NM_004981 | 11036.439 | 11428.503 |
| NM_01872E | 4714.666 | 6151.777 | NM_00167E | 686.107   | 632.796   | AK096507  | 485.71    | 1123.661  |
| AK024014  | 845.916  | 848.132  | AK023078  | 8131.122  | 16424.576 | NM_016524 | 1332.634  | 1021.019  |
| NM_016234 | 13631.18 | 12370.5  | NM_00223E | 60333.93  | 50812.246 | NM_00712E | 36802.313 | 39919.109 |
| NM_00187E | 8673.801 | 8843.735 | NM_00224E | 49353.992 | 49511.824 | AL137631  | 8756.647  | 7626.117  |
| NM_016144 | 9944.731 | 9475.271 | NM_015684 | 4882.986  | 5547.128  | NM_016057 | 16602.977 | 19491.791 |
| AL133099  | 6284.771 | 6205.987 | NM_00394E | 31902.609 | 36308.676 | NM_014677 | 2789.271  | 2880.833  |
| NM_01608E | 5117.593 | 5613.296 | NM_004981 | 14027.332 | 15567.716 | NM_00685E | 1331.568  | 1248.453  |



|           |          |          |           |           |           |           |           |           |
|-----------|----------|----------|-----------|-----------|-----------|-----------|-----------|-----------|
| NM_000433 | 3263.03  | 2874.044 | NM_016524 | 1677.998  | 2381.975  | NM_015599 | 1637.788  | 861.958   |
| AF268419  | 831.042  | 605.931  | NM_007126 | 43867.422 | 46507.168 | NM_018696 | 11582.865 | 11294.237 |
| NM_00019C | 8344.392 | 11191.33 | AL137631  | 9955.411  | 11018.46  | NM_000136 | 27616.807 | 33014.219 |
| X15667    | 2934.675 | 2945.83  | NM_016057 | 17931.406 | 17302.904 | AL157456  | 1709.567  | 1744.752  |
| NM_017512 | 4236.676 | 4147.217 | NM_014677 | 3103.796  | 3694.079  | AL162056  | 2101.802  | 2256.964  |
| NM_018661 | 948.972  | 874.922  | NM_006855 | 889.823   | 1200.808  | NM_00038C | 11376.418 | 11895.982 |
| AK023078  | 5890.363 | 3701.181 | NM_015599 | 1262.531  | 1247.004  | NM_00462E | 3971.542  | 4460.714  |
| NM_002239 | 19945    | 26002.15 | NM_018696 | 13400.002 | 12940.126 | NM_014876 | 6673.125  | 6677.969  |
| NM_002249 | 7657.994 | 10270.2  | NM_000136 | 22655.453 | 21918.242 | NM_005406 | 8264.13   | 8449.579  |
| NM_015684 | 3664.942 | 3028.077 | AL157456  | 1433.167  | 1520.908  | NM_00332E | 3142.447  | 2777.075  |
| NM_003945 | 12511.54 | 14517.34 | AL162056  | 2051.531  | 1884.098  | X93921    | 3457.399  | 3170.86   |
| NM_004981 | 2656.804 | 2670.712 | NM_00038C | 12180.423 | 14313.949 | AF073482  | 6035.88   | 5302.577  |
| AK096507  | 946.248  | 929.904  | NM_00462E | 4187.125  | 5345.717  | NM_00599C | 4359.819  | 4074      |
| NM_016057 | 4750.201 | 5619.949 | NM_014876 | 6447.487  | 7551.873  | NM_016276 | 30268.152 | 35329.426 |
| NM_014677 | 3965.065 | 3709.198 | NM_005406 | 7527.325  | 7716.127  | NM_017762 | 6658.387  | 5226.663  |
| NM_006855 | 437.169  | 898.336  | NM_00332E | 5041.954  | 5033.243  | NM_001863 | 54640.59  | 54862.383 |
| NM_015599 | 2114.363 | 1385.612 | X93921    | 3387.211  | 3401.428  | NM_000921 | 9593.239  | 9545.93   |
| AB037902  | 870.256  | 954.396  | AF073482  | 5414.111  | 5641.76   | NM_00009E | 3662.781  | 3802.214  |
| NM_018696 | 4436.802 | 5086.372 | NM_00599C | 3281.353  | 3321.135  | NM_000016 | 26487.533 | 34267.578 |
| NM_000136 | 10858.08 | 12033.35 | NM_016276 | 41724.199 | 43840.27  | AK026913  | 6682.769  | 7139.66   |
| AL157456  | 933.718  | 1189.329 | NM_017762 | 4404.044  | 5837.805  | L10146    | 10412.048 | 7376.309  |
| AL162056  | 1883.668 | 2149.603 | NM_001863 | 60370.227 | 59997.699 | NM_000685 | 9152.614  | 9070.959  |
| NM_00038C | 3312.754 | 3270.346 | NM_000921 | 8772.209  | 8948.771  | AK025657  | 8025.558  | 14042.254 |
| NM_00462E | 1691.488 | 1645.142 | NM_00009E | 3481.528  | 3460.451  | AF142063  | 996.126   | 978.848   |
| AF085734  | 628.494  | 572.34   | NM_000016 | 27629.6   | 37249.594 | W42849    | 2463.996  | 2158.756  |
| NM_014876 | 5440.296 | 5744.056 | AK026913  | 7727.186  | 8291.868  | AI889961  | 6543.012  | 6844.524  |
| NM_005406 | 6278.349 | 7611.071 | AK025657  | 13678.145 | 8155.152  | AI360116  | 3320.556  | 2877.624  |
| NM_00332E | 3660.624 | 3847.936 | AF142063  | 2856.922  | 2259.756  | NM_013983 | 908.402   | 794.184   |
| X93921    | 2204.54  | 2671.715 | W42849    | 3126.034  | 2557.749  | AI572835  | 9891.248  | 9073.772  |
| AF073482  | 3001.543 | 3603.518 | AI889961  | 4829.845  | 4809.495  | R20392    | 10712.887 | 10816.229 |
| NM_00599C | 4763.453 | 4287.623 | AI360116  | 2348.848  | 2281.748  | AA486367  | 7082.761  | 5992.379  |
| NM_016276 | 5893.697 | 5310.276 | NM_013983 | 736.229   | 655.51    | N56684    | 559.945   | 687.354   |
| NM_000016 | 12836.87 | 12742.15 | AI572835  | 5975.627  | 6989.534  | M55153    | 1371.935  | 1287.081  |
| AK026913  | 4309.537 | 4415.314 | R20392    | 8834.235  | 9518.469  | AL136131  | 11116.034 | 8724.762  |
| L10146    | 10147.45 | 6946.281 | AA486367  | 7219.568  | 5546.446  | NM_033357 | 5347.25   | 4486.224  |
| NM_000685 | 9554.797 | 8995.865 | N56684    | 1258.946  | 1733.882  | AF335109  | 2309.85   | 2117.635  |
| AK025657  | 6948.73  | 9951.052 | M55153    | 1658.296  | 1464.613  | U59911    | 8310.946  | 6592.539  |
| AF142063  | 782.396  | 901.522  | AL136131  | 10603.765 | 15698.771 | SB        | 687.434   | 791.517   |
| W42849    | 1636.663 | 1519.965 | NM_033357 | 7060.67   | 7116.558  | NM_002054 | 1196.881  | 1312.45   |
| AI889961  | 4055.431 | 4616.983 | AF335109  | 1689.464  | 1857.67   | NM_004482 | 914.931   | 989.871   |
| AI360116  | 1499.724 | 1997.094 | NM_003263 | 681.933   | 851.308   | AK026204  | 7703.669  | 8178.171  |
| NM_013983 | 662.555  | 392.126  | U59911    | 10429.921 | 11220.821 | NM_014635 | 4456.515  | 3101.161  |
| AI572835  | 1183.323 | 1271.688 | NM_002054 | 1036.813  | 1166.366  | NM_004145 | 9345.319  | 9157.471  |
| R20392    | 5015.911 | 5232.424 | NM_004482 | 723.292   | 775.911   | AK023196  | 1635.082  | 2175.826  |
| AA486367  | 5144.548 | 5111.042 | AK026204  | 7447.899  | 7418.042  | NM_01872E | 4348.297  | 3854.159  |
| N56684    | 1920.59  | 2111.568 | NM_014635 | 4231.029  | 3870.679  | AK024014  | 4970.686  | 4593.332  |
| M55153    | 600.266  | 841.804  | NM_004145 | 8912.669  | 8949.791  | NM_000865 | 4402.252  | 4289.579  |
| AF414120  | 2515.456 | 2058.081 | AK023196  | 2025.182  | 1882.437  | NM_000867 | 1905.429  | 3691.869  |
| AK097322  | 950.525  | 850.46   | NM_01872E | 4101.384  | 4183.625  | AF076642  | 3519.16   | 5183.908  |
| AL136131  | 6645.126 | 4604.191 | AK024014  | 2814.943  | 3436.591  | NM_002386 | 4351.092  | 4572.515  |
| NM_033357 | 7538.785 | 7856.24  | NM_000865 | 3510.826  | 3022.925  | NM_005314 | 3214.577  | 2771.259  |
| AF335109  | 2973.783 | 2454.102 | NM_000867 | 2512.586  | 1593.188  | NM_004885 | 3853.501  | 3950.971  |
| NM_003263 | 1061.206 | 830.713  | AF076642  | 4332.326  | 3987.893  | NM_005145 | 384.314   | 1121.514  |

|           |          |          |           |           |           |           |           |           |
|-----------|----------|----------|-----------|-----------|-----------|-----------|-----------|-----------|
| U59911    | 12953.51 | 12281.92 | NM_002386 | 4135.041  | 4116.285  | NM_012152 | 15268.692 | 16267.984 |
| AK026204  | 4990.064 | 4464.61  | NM_005314 | 2563.924  | 2716.575  | AK024093  | 4881.932  | 4561.545  |
| NM_014635 | 1620.542 | 1045.557 | NM_004885 | 2813.064  | 3584.494  | NM_001940 | 4132.159  | 4186.232  |
| NM_004145 | 2756.381 | 2044.366 | NM_005145 | 1077.853  | 878.567   | U83115    | 15410.817 | 10741.453 |
| AK023196  | 1604.248 | 2129.395 | NM_012152 | 12733.459 | 14641.684 | NM_001264 | 14655.883 | 15410.258 |
| NM_018728 | 3335.076 | 3086.049 | AK024093  | 3035.276  | 3732.725  | NM_013364 | 10850.647 | 9569.532  |
| AK024014  | 722.301  | 847.338  | NM_001940 | 3901.56   | 3925.328  | NM_000850 | 6303.863  | 6280.553  |
| NM_000865 | 2322.661 | 2529.634 | U83115    | 17487.809 | 19256.973 | NM_004676 | 1317.479  | 1068.952  |
| NM_000867 | 1204.874 | 1785.384 | NM_001264 | 15063.256 | 16074.952 | NM_007193 | 1418.019  | 2075.711  |
| AF076642  | 1991.326 | 2996.838 | NM_013364 | 9902.923  | 12772.41  | NM_001994 | 5848.288  | 8176.373  |
| NM_002386 | 3056.448 | 2704.59  | NM_014368 | 1350.533  | 1936.42   | J00129    | 37711.371 | 41065.996 |
| NM_005314 | 1370.637 | 1492.183 | NM_000850 | 4870.346  | 5307.764  | NM_003320 | 5450.946  | 6216.397  |
| NM_004885 | 4883.014 | 4741.643 | NM_004676 | 1242.999  | 1518.702  | NM_016524 | 2875.375  | 3109.168  |
| NM_005145 | 508.812  | 1271.814 | NM_007193 | 516.144   | 638.282   | AL137631  | 9752.072  | 8419.618  |
| NM_012152 | 4279.901 | 4435.703 | NM_001994 | 5720.194  | 4627.891  | NM_016057 | 19198.705 | 24079.381 |
| AK024093  | 4626.413 | 4463.931 | J00129    | 28810.389 | 36659.945 | NM_014677 | 3929.333  | 3598.934  |
| NM_001940 | 4121.514 | 4506.989 | NM_003320 | 5624.563  | 5281.155  | NM_006855 | 1876.463  | 1744.763  |
| U83115    | 16084.55 | 15504.03 | NM_016524 | 1914.63   | 2247.22   | AK022790  | 47871.5   | 41004.582 |
| NM_001264 | 9063.468 | 9870.985 | NM_007126 | 44317.113 | 40626.66  | NM_004311 | 24784.729 | 23546.018 |
| NM_013364 | 3473.379 | 2981.645 | AL137631  | 11551.175 | 13312.94  | NM_005624 | 2701.004  | 2735.121  |
| NM_014368 | 3268.477 | 2924.389 | NM_016057 | 19471.139 | 17695.414 | NM_002302 | 1561.784  | 1522.053  |
| NM_004676 | 1808.862 | 1368.005 | NM_014677 | 2970.282  | 3825.251  | AB020672  | 836.829   | 708.135   |
| NM_003320 | 3293.083 | 3634.225 | NM_006855 | 1280.343  | 1359.756  | AK026958  | 677.328   | 795.438   |
| NM_016524 | 1218.026 | 781.573  | AK022790  | 31160.867 | 40702.012 | NM_000579 | 1501.502  | 1302.032  |
| NM_007126 | 9569.534 | 9042.065 | NM_004311 | 18228.26  | 23669.865 | NM_001480 | 777.781   | 663.881   |
| AL137631  | 4152.673 | 4074.758 | NM_005624 | 2613.14   | 2566.638  | AF263462  | 4231.701  | 4665.526  |
| NM_016057 | 8485.406 | 11020.54 | NM_002302 | 1446.564  | 1642.768  | AB040962  | 840.437   | 610.847   |
| NM_014677 | 3281.517 | 2473.967 | AB020672  | 670.296   | 1228.834  | NM_000639 | 1891.046  | 1283.5    |
| NM_006855 | 979.405  | 927.999  | AK026958  | 694.993   | 888.224   | AV697672  | 703.341   | 866.754   |
| AK022790  | 18162.94 | 13902.75 | NM_000579 | 1445.087  | 1611.027  | NM_000942 | 24369.4   | 28235.43  |
| NM_004311 | 9611.804 | 9849.869 | NM_001480 | 701.324   | 1145.996  | NM_002190 | 714.064   | 660.967   |
| NM_005624 | 1305.089 | 1252.391 | AF263462  | 3473.154  | 3944.302  | AK056773  | 3707.242  | 4388.329  |
| NM_002302 | 1119.905 | 1114.189 | AB040962  | 832.355   | 1104.523  | NM_002182 | 14754.291 | 18275.488 |
| AB020672  | 440.659  | 580.567  | NM_000639 | 2434.175  | 3000.561  | NM_016470 | 6084.329  | 5698.229  |
| AK026958  | 808.976  | 763.918  | AV697672  | 650.651   | 952.533   | AL365408  | 49980.516 | 48727.758 |
| NM_000579 | 1737.025 | 1140.625 | NM_000942 | 28028.645 | 28225.029 | NM_017762 | 8367.089  | 7700.855  |
| NM_001480 | 730.444  | 937.257  | NM_002982 | 493.337   | 619.891   | NM_000921 | 12659.308 | 12529.171 |
| AF263462  | 1859.566 | 1984.595 | AK056773  | 2843.428  | 2805.663  | NM_000098 | 4855.508  | 4786.709  |
| AB040962  | 1134.783 | 895.274  | NM_002182 | 9639.274  | 9778.604  | NM_000016 | 32010.699 | 40736.754 |
| NM_000639 | 4084.04  | 3164.686 | NM_016470 | 5387.944  | 6368.811  | AK026913  | 8073.499  | 9181.435  |
| AV697672  | 1384.06  | 1120.421 | AL365408  | 40207.121 | 43235.387 | NM_016234 | 16263.569 | 14751.163 |
| NM_000942 | 28634.61 | 31611.43 | NM_017762 | 4201.02   | 5319.625  | NM_001876 | 10960.25  | 10580.211 |
| NM_002982 | 1357.17  | 1549.794 | NM_001863 | 61136.668 | 52685.309 | NM_016144 | 10552.927 | 10301.771 |
| NM_016470 | 5368.219 | 4678.003 | NM_000921 | 10335.439 | 10433.144 | AL133099  | 8840.679  | 8808.218  |
| AL365408  | 10141.88 | 11251.31 | NM_000098 | 4016.42   | 4734.347  | NM_016082 | 4800.397  | 5596.528  |
| NM_017762 | 2206.503 | 2117.037 | NM_000016 | 28345.596 | 35493.891 | NM_000433 | 3160.591  | 3163.331  |
| NM_001863 | 42698.45 | 39557.18 | AK026913  | 7982.438  | 7890.021  | NM_000190 | 10532.889 | 11995.113 |
| NM_000921 | 6613.737 | 6337.313 | NM_016234 | 12240.301 | 13563.448 | X15667    | 7807.817  | 8121.532  |
| NM_000098 | 2966.088 | 3679.135 | NM_001876 | 7597.511  | 8205.417  | NM_017512 | 5843.845  | 4599.939  |
| NM_000016 | 14554.34 | 16644.14 | NM_016144 | 11439.552 | 13376.846 | AK023078  | 10747.036 | 7472.023  |
| AK026913  | 3868.407 | 4544.909 | AL133099  | 6829.422  | 6550.381  | NM_002239 | 60823.02  | 47775.332 |
| NM_016234 | 9963.976 | 9804.764 | NM_016082 | 3818.7    | 3717.378  | NM_002249 | 46623.734 | 46808.742 |
| NM_001876 | 8070.287 | 8919.699 | NM_000433 | 2516.405  | 2374.759  | NM_015684 | 4935.135  | 4403.328  |

|           |          |          |           |           |           |           |           |           |
|-----------|----------|----------|-----------|-----------|-----------|-----------|-----------|-----------|
| NM_016144 | 7695.482 | 7139.454 | NM_00019C | 14434.452 | 11712.018 | NM_00394E | 29902.775 | 35824.25  |
| AL133099  | 2887.289 | 3950.62  | X15667    | 8836.227  | 9552.161  | NM_004981 | 13268.967 | 13833.856 |
| NM_016082 | 3116.504 | 3842.568 | NM_017512 | 5773.902  | 7761.39   | AK096507  | 912.646   | 1149.685  |
| NM_000433 | 2016.726 | 2195.326 | NM_018661 | 1068.238  | 1486.742  | NM_002054 | 1136.69   | 1477.826  |
| AF268419  | 245.344  | 435.985  | AK023078  | 9144.101  | 16222.512 | NM_004482 | 1104.766  | 1234.634  |
| NM_00019C | 9863.3   | 12170.19 | NM_00223E | 60198.344 | 47959.066 | NM_01559E | 2248.076  | 1297.02   |
| X15667    | 3374.69  | 3341.22  | NM_00224E | 40479.348 | 39798.031 | AB037902  | 1023.972  | 834.203   |
| NM_017512 | 6627.092 | 5809.922 | NM_015684 | 2598.394  | 2568.371  | NM_01869E | 18531.652 | 20697.365 |
| NM_018661 | 1156.269 | 887.458  | NM_00394E | 28032.693 | 30450.074 | NM_00013E | 19739.363 | 18439.318 |
| AK023078  | 11042.62 | 7541.139 | NM_004981 | 10885.932 | 10280.19  | AL157456  | 1314.389  | 1390.691  |
| NM_00223E | 29729.08 | 31170.82 | AK096507  | 897.881   | 451.027   | AL162056  | 1534.435  | 1611.686  |
| NM_00224E | 14537.15 | 19568.21 | NM_002054 | 1535.858  | 1718.37   | NM_00038C | 9075.21   | 9501.155  |
| NM_015684 | 4929.804 | 4482.57  | NM_004482 | 980.049   | 789.007   | NM_00462E | 3328.715  | 2801.931  |
| NM_004981 | 2515.375 | 2663.993 | NM_01559E | 1365.155  | 1167.254  | NM_01487E | 4961.78   | 4880.614  |
| AK096507  | 914.274  | 890.119  | AB037902  | 487.111   | 436.01    | NM_00540E | 5672.004  | 6460.797  |
| NM_002054 | 1028.89  | 989.587  | NM_01869E | 13649.558 | 11507.661 | NM_00332E | 3963.73   | 4136.768  |
| NM_004482 | 671.24   | 685.194  | NM_00013E | 28471.617 | 26232.043 | X93921    | 2279.865  | 2299.108  |
| NM_01559E | 949.463  | 1061.339 | AL157456  | 1827.469  | 1716.143  | AF073482  | 6223.353  | 5962.567  |
| AB037902  | 656.638  | 855.516  | AL162056  | 2013.856  | 1966.055  | NM_00599C | 5240.062  | 4071.568  |
| NM_01869E | 2618.846 | 3610.413 | NM_00038C | 11796.124 | 14263.554 | NM_01627E | 53321.219 | 46629.555 |
| NM_00013E | 13299.53 | 14381.44 | NM_00462E | 3589.973  | 4261.49   | NM_00085C | 5727.339  | 3617.112  |
| AL157456  | 450.191  | 906.082  | AF085734  | 561.386   | 401.63    | NM_00467E | 1232.239  | 2468.891  |
| AL162056  | 1723.229 | 1911.489 | NM_01487E | 5014.086  | 5135.789  | NM_007193 | 759.815   | 780.629   |
| NM_00038C | 5043.922 | 4430.581 | NM_00540E | 4153.082  | 4018.696  | NM_001994 | 6424.371  | 7588.464  |
| NM_00462E | 2986.389 | 2844.323 | NM_00332E | 3458.713  | 3297.808  | J00129    | 40223.656 | 42996.578 |
| AF085734  | 861.128  | 984.126  | X93921    | 2518.957  | 2306.347  | NM_00332C | 3910.78   | 4408.786  |
| NM_006502 | 954.314  | 755.72   | AF073482  | 4746.396  | 4460.736  | AK025657  | 7873.137  | 15780.453 |
| NM_01487E | 8103.534 | 6866.771 | NM_00599C | 2677.148  | 2908.949  | AF142063  | 1272.434  | 1849.643  |
| NM_00540E | 10527.88 | 9849.448 | NM_01627E | 37897.055 | 41183.25  | W42849    | 3097.476  | 3207.522  |
| NM_00332E | 3983.438 | 3939.822 | NM_00085C | 5194.134  | 5531.952  | AI889961  | 5901.287  | 7127.08   |
| X93921    | 4243.897 | 4466.301 | NM_00467E | 1082.934  | 1375.434  | AI360116  | 1686.272  | 2189.426  |
| NM_00599C | 6517.96  | 5966.95  | NM_007193 | 696.65    | 588.417   | NM_013983 | 508.422   | 527.865   |
| NM_01627E | 7281.13  | 7596.756 | NM_001994 | 6909.362  | 6313.41   | AI572835  | 6103.531  | 5739.292  |
| NM_00085C | 4755.865 | 4065.755 | NM_00332C | 6334.677  | 6170.731  | AA486367  | 5434.675  | 3917.299  |
| NM_00467E | 770.304  | 630.845  | AF142063  | 1245.542  | 1022.344  | N56684    | 291.965   | 525.897   |
| NM_007193 | 747.365  | 849.588  | W42849    | 3151.893  | 2972.888  | M55153    | 798.412   | 926.904   |
| NM_001994 | 3046.913 | 3816.53  | AI889961  | 4452.448  | 4514.736  | AF414120  | 794.791   | 530.672   |
| J00129    | 26183.02 | 27938.28 | AI360116  | 2919.512  | 2566.545  | AK097322  | 673.071   | 550.086   |
| NM_00332C | 4003.863 | 5096.386 | NM_013983 | 487.487   | 624.287   | AL136131  | 11905.612 | 9534.701  |
| L10146    | 7063.248 | 5933.342 | AI572835  | 6413.283  | 7250.346  | NM_033357 | 5883.09   | 5972.57   |
| NM_00068E | 6470.094 | 6682.936 | N56684    | 652.511   | 849.391   | AF335109  | 2394.293  | 2096.357  |
| AK025657  | 4526.887 | 8196.359 | M55153    | 1260.825  | 1175.868  | U59911    | 12648.412 | 12142.107 |
| AF142063  | 1183.239 | 1993.465 | AL136131  | 8942.066  | 12609.197 | NM_00219C | 715.032   | 823.191   |
| W42849    | 1347.674 | 1869.306 | NM_033357 | 5948.337  | 5485.658  | AK056773  | 4936.925  | 6335.288  |
| AI889961  | 3831.653 | 4364.584 | AF335109  | 1145.584  | 1621.745  | NM_002182 | 17345.93  | 23152.303 |
| AI360116  | 2276.768 | 2575.902 | NM_003263 | 508.03    | 782.653   | NM_01647C | 7636.187  | 8157.3    |
| NM_013983 | 920.36   | 2150.022 | U59911    | 8160.271  | 9730.905  | AL365408  | 48357.188 | 50005.75  |
| AI572835  | 1411.861 | 1253.207 | NM_002982 | 623.943   | 933.146   | AK026204  | 9057.65   | 9282.829  |
| R20392    | 7839.629 | 7015.853 | AK056773  | 3513.798  | 3683.743  | NM_01463E | 5126.917  | 3199.087  |
| AA486367  | 7497.653 | 6222.175 | NM_002182 | 12669.509 | 13868.457 | NM_00414E | 10090.544 | 11911.587 |
| N56684    | 498.324  | 649.195  | NM_01647C | 6221.277  | 7584.895  | AK023196  | 2130.975  | 2885.521  |
| M55153    | 1166.185 | 748.943  | AL365408  | 41044.629 | 43867.883 | NM_01872E | 5693.158  | 5352.032  |
| AF414120  | 1119.552 | 1137.867 | AK026204  | 7273.105  | 7903.508  | AK024014  | 3378.103  | 3956.458  |

|           |          |          |           |           |           |           |           |           |
|-----------|----------|----------|-----------|-----------|-----------|-----------|-----------|-----------|
| AK097322  | 1184.527 | 771.721  | NM_014635 | 3212.849  | 2964.426  | NM_000865 | 3019.071  | 3125.738  |
| AL136131  | 12187.59 | 7469.396 | NM_004145 | 7128.699  | 6832.994  | NM_000867 | 1268.737  | 2322.405  |
| NM_033357 | 8972.397 | 8797.088 | AK023196  | 2189.935  | 1431.132  | AF076642  | 2925.903  | 4853.257  |
| AF335109  | 3554.973 | 3472.563 | NM_018728 | 3682.431  | 3456.086  | NM_002386 | 3219.869  | 3599.824  |
| NM_003263 | 1340.859 | 2322.716 | AK024014  | 2550.097  | 2600.892  | NM_005314 | 2663.247  | 2568.439  |
| U59911    | 13931.26 | 14048.98 | NM_000865 | 2721.28   | 2239.786  | NM_004885 | 3062.043  | 2931.169  |
| AK056773  | 2944.547 | 3601.49  | NM_000867 | 2296.493  | 1692.756  | NM_005145 | 297.006   | 850.436   |
| NM_002182 | 1242.234 | 1432.759 | AF076642  | 4882.229  | 3735.877  | NM_012152 | 12637.505 | 13025.379 |
| NM_016470 | 6182.399 | 5616.139 | NM_002386 | 4151.176  | 3997.939  | AK024093  | 3957.307  | 3616.109  |
| AL365408  | 6603.522 | 8067.18  | NM_005314 | 2319.692  | 2988.776  | NM_001940 | 3891.095  | 4351.788  |
| AK026204  | 4339.516 | 4554.391 | NM_004885 | 2592.514  | 2755.994  | U83115    | 19266.955 | 15033.351 |
| NM_014635 | 2943.662 | 2412.42  | NM_005145 | 628.508   | 267.016   | NM_001264 | 15125.653 | 15016.63  |
| NM_004145 | 3001.814 | 3637.847 | NM_012152 | 6266.278  | 5248.725  | NM_013364 | 11730.755 | 10464.158 |
| AK023196  | 1627.397 | 2545.757 | AK024093  | 2419.102  | 2775.99   | NM_014368 | 2085.321  | 2306.098  |
| NM_018728 | 4332.313 | 4926.93  | NM_001940 | 3097.907  | 2676.764  | NM_002239 | 63609.207 | 48935.77  |
| AK024014  | 585.36   | 854.551  | U83115    | 14811.28  | 16043.807 | NM_002249 | 45257.254 | 48182.633 |
| NM_000865 | 2277.5   | 2382.58  | NM_001264 | 14451.146 | 13558.282 | NM_015684 | 5998.716  | 5322.442  |
| NM_000867 | 1779.286 | 2274.197 | NM_013364 | 7853.76   | 10733.404 | NM_003945 | 30204.438 | 38123.84  |
| AF076642  | 2983.93  | 3561.631 | NM_014368 | 1146.749  | 1592.426  | NM_004981 | 12639.414 | 14733.64  |
| NM_002386 | 3590.668 | 3633.515 | NM_002239 | 57422.301 | 45734.797 | AK096507  | 417.657   | 1092.073  |
| NM_005314 | 3752.913 | 3662.1   | NM_002249 | 33604.012 | 34878.652 | NM_016524 | 2597.99   | 2373.874  |
| NM_004885 | 6682.648 | 6837.85  | NM_015684 | 4562.587  | 5153.495  | NM_007126 | 43149.395 | 46069.078 |
| NM_005145 | 719.049  | 1307.803 | NM_003945 | 28536.873 | 31463.301 | AL137631  | 14399.271 | 15591.727 |
| NM_012152 | 4498.547 | 5166.497 | NM_004981 | 11455.981 | 11403.073 | NM_016057 | 19910.875 | 24145.994 |
| AK024093  | 6430.951 | 5686.15  | AK096507  | 832.184   | 561.875   | NM_014677 | 3253.852  | 3564.549  |
| NM_001940 | 5461.45  | 5693.89  | NM_016524 | 1825.188  | 2145.466  | NM_006855 | 1671.672  | 1550.103  |
| U83115    | 20210.38 | 19409.05 | NM_007126 | 46821.367 | 43072.82  | AK022790  | 36873.512 | 28026.992 |
| NM_001264 | 12743.61 | 13357.83 | AL137631  | 9968.95   | 10200.021 | NM_004311 | 20377.283 | 16233.597 |
| NM_013364 | 3717.568 | 4096.276 | NM_016057 | 17609.518 | 15275.394 | NM_005624 | 2859.767  | 2853.029  |
| NM_014368 | 1485.2   | 1642.166 | NM_014677 | 2934.057  | 3224.421  | NM_002302 | 1727.299  | 2040.285  |
| NM_002239 | 20568.75 | 25373.99 | NM_006855 | 851.489   | 955.704   | AK026958  | 666.12    | 646.999   |
| NM_002249 | 9346.276 | 11540.87 | AK022790  | 30143.727 | 34981.285 | NM_000579 | 1188.946  | 1070.027  |
| NM_015684 | 3924.191 | 3104.364 | NM_004311 | 17557.563 | 22280.961 | NM_001480 | 766.569   | 538.549   |
| NM_003945 | 21110.99 | 25424.33 | NM_005624 | 2139.752  | 2269.76   | AF263462  | 3140.616  | 3480.623  |
| NM_004981 | 1579.553 | 1599.416 | NM_002302 | 1306.373  | 1476.636  | AB040962  | 594.484   | 928.48    |
| AK096507  | 406.053  | 1527.595 | AB020672  | 647.701   | 641.137   | NM_000639 | 2288.052  | 1932.642  |
| NM_016524 | 1298.63  | 1351.841 | NM_000579 | 773.484   | 616.277   | NM_000942 | 31039.211 | 39646.152 |
| NM_007126 | 15278.34 | 16315.75 | AF263462  | 2931.962  | 2777.354  | NM_005406 | 9004.687  | 10216.212 |
| AL137631  | 10364.13 | 11188.11 | AB040962  | 672.821   | 677.957   | NM_003328 | 5059.555  | 5542.659  |
| NM_016057 | 11529.73 | 16809.88 | NM_000639 | 1732.396  | 2327.232  | X93921    | 3688.184  | 3929.031  |
| NM_014677 | 3676.291 | 3572.363 | AV697672  | 523.65    | 612.73    | AF073482  | 7201.193  | 6570.881  |
| NM_006855 | 1194.124 | 1087.336 | NM_000942 | 24507.773 | 27370.971 | NM_005990 | 4823.289  | 4508.184  |
| AK022790  | 22300.22 | 16557.69 | NM_005406 | 7175.409  | 7150.495  | NM_016276 | 46305.805 | 45971.715 |
| NM_004311 | 12381.23 | 10888.06 | NM_003328 | 4516.512  | 4229.116  | NM_017762 | 7963.432  | 7685.969  |
| NM_005624 | 2018.966 | 1942.459 | X93921    | 3223.183  | 3361.685  | NM_000921 | 15009.354 | 15569.334 |
| NM_002302 | 1403.415 | 1321.417 | AF073482  | 4931.718  | 4925.219  | NM_000098 | 4586.105  | 4928.494  |
| AB020672  | 1287.364 | 899.924  | NM_005990 | 3455.412  | 3354.133  | NM_000016 | 31488.07  | 36754.199 |
| AK026958  | 958.787  | 1033.401 | NM_016276 | 46097.137 | 44064.887 | AK026913  | 8842.922  | 9753.453  |
| NM_000579 | 1988.387 | 1692.763 | NM_017762 | 5075.038  | 5214.172  | NM_016234 | 7586.194  | 7750.586  |
| NM_001480 | 1134.722 | 819.104  | NM_001863 | 62799.445 | 53632.922 | NM_001876 | 8663.353  | 8607.315  |
| AF263462  | 2736.64  | 2813.797 | NM_000921 | 9256.758  | 10400.557 | NM_016144 | 12140.217 | 12015.636 |
| AB040962  | 1037.036 | 706.158  | NM_000098 | 4097.788  | 4555.179  | AL133099  | 7006.672  | 7635.591  |
| NM_000639 | 4026.403 | 3526.341 | NM_000016 | 27160.654 | 29778.236 | NM_016082 | 4168.866  | 4865.598  |

|           |          |          |           |           |           |           |           |           |
|-----------|----------|----------|-----------|-----------|-----------|-----------|-----------|-----------|
| AV697672  | 315.991  | 824.609  | AK026913  | 5718.001  | 5995.572  | NM_000433 | 1727.624  | 1635.722  |
| NM_000942 | 19816.29 | 26457.03 | NM_016234 | 9704.054  | 10540.216 | NM_000190 | 12793.051 | 15967.864 |
| NM_005406 | 6615.332 | 7357.029 | NM_016144 | 11834.515 | 13922.243 | X15667    | 7251.635  | 10305.13  |
| NM_003328 | 2675.644 | 2868.177 | AL133099  | 5894.146  | 6039.785  | NM_014737 | 8516.957  | 9418.29   |
| X93921    | 3014.575 | 3192.225 | NM_016082 | 4258.253  | 3982.687  | NM_003488 | 8837.022  | 9423.338  |
| AF073482  | 5254.46  | 5454.118 | NM_000433 | 2048.541  | 2178.875  | NM_001454 | 61825.586 | 50236.895 |
| NM_005990 | 4006.667 | 4135.817 | NM_000190 | 10311.721 | 7899.432  | NM_006558 | 12513.64  | 16930.904 |
| NM_016276 | 3266.336 | 3282.925 | X15667    | 7915.34   | 7322.106  | Z22780    | 767.81    | 1025.866  |
| NM_017762 | 7714.336 | 7396.633 | NM_017512 | 5564.774  | 6068.873  | NM_005797 | 1725.757  | 1961.986  |
| NM_000921 | 9484.966 | 10316.03 | NM_018661 | 1012.852  | 730.407   | NM_004824 | 4091.002  | 4044.235  |
| NM_000098 | 3924.484 | 4556.156 | AK023078  | 7261.204  | 13977.181 | U83191    | 6966.645  | 8100.22   |
| NM_000016 | 20341.01 | 23063.01 | NM_014737 | 6676.863  | 5770.8    | NM_013952 | 4773.092  | 5284.922  |
| AK026913  | 4750.049 | 4896.127 | NM_003488 | 7270.502  | 6668.09   | NM_004482 | 996.835   | 1198.703  |
| NM_016234 | 12433.04 | 11740.75 | NM_001454 | 56722.703 | 50813.68  | NM_015599 | 1548.143  | 544.733   |
| NM_001876 | 9122.254 | 8367.988 | NM_006558 | 15662.236 | 10355.706 | AB037902  | 757.407   | 648.497   |
| NM_016144 | 10073.42 | 8194.143 | NM_005797 | 1580.01   | 1261.536  | NM_018696 | 14434.74  | 15607.429 |
| AL133099  | 5727.068 | 6897.232 | NM_004824 | 2969.157  | 3042.295  | NM_000136 | 23676.795 | 31253.859 |
| NM_016082 | 4693.068 | 6359.406 | M17733    | 59001.555 | 57842.066 | AL157456  | 1329.327  | 1106.67   |
| NM_000433 | 3212.01  | 3265.455 | U83191    | 5112.706  | 6414.979  | AL162056  | 1980.528  | 1785.474  |
| AF268419  | 576.425  | 468.323  | NM_013952 | 7617.758  | 10012.964 | NM_000380 | 10878.658 | 10764.078 |
| NM_000190 | 9893.226 | 13813.65 | NM_004482 | 809.029   | 735.335   | AB032958  | 2212.403  | 2128.426  |
| X15667    | 3658.902 | 3578.235 | NM_015599 | 1150.924  | 1254.895  | AK024427  | 6263.495  | 6907.403  |
| NM_017512 | 5474.926 | 6772.29  | NM_018696 | 13750.573 | 14716.012 | NM_003006 | 3622.706  | 3833.272  |
| NM_018661 | 641.487  | 953.92   | NM_000136 | 20170.943 | 15631.398 | AF272035  | 7141.446  | 7284.513  |
| AK023078  | 8752.402 | 6686.831 | AL157456  | 1335.551  | 1011.366  | AY009133  | 1565.588  | 2085.261  |
| NM_014737 | 4854.429 | 4658.156 | AL162056  | 1696.312  | 1241.229  | NM_000965 | 961.198   | 803.308   |
| NM_003488 | 7956.04  | 7666.695 | NM_000380 | 9224.843  | 9384.326  | NM_013403 | 5291.371  | 5457.397  |
| NM_001454 | 71162.02 | 37993.59 | NM_004628 | 3598.682  | 3833.91   | NM_004123 | 375.723   | 546.166   |
| NM_006558 | 6012.522 | 8636.607 | NM_014876 | 5867.76   | 6933.473  | NM_000674 | 2879.021  | 2565.103  |
| Z22780    | 811.166  | 507.092  | AB032958  | 1764.386  | 1453.141  | AB020671  | 1110.854  | 1360.156  |
| NM_005797 | 767.746  | 622.202  | AK024427  | 4906.511  | 4256.186  | NM_000206 | 25029.205 | 32274.916 |
| NM_004824 | 2099.769 | 2714.857 | NM_003006 | 2951.881  | 2899.386  | NM_018255 | 5032.15   | 5885.298  |
| U83191    | 4551.904 | 5153.273 | NM_000493 | 595.699   | 632.704   | NM_016232 | 1490.306  | 1273.345  |
| NM_013952 | 6168.201 | 5650.596 | AF272035  | 5943.055  | 5577.361  | AF178930  | 668.163   | 1026.468  |
| NM_004482 | 787.809  | 1085.298 | AY009133  | 1233.835  | 1265.502  | M74161    | 2253.348  | 2315.55   |
| AB037902  | 1019.213 | 743.583  | NM_013403 | 4660.728  | 2899.62   | NM_016542 | 8846.889  | 7695.445  |
| NM_018696 | 4618.19  | 5426.394 | NM_000674 | 2741.361  | 1947.23   | NM_000484 | 2215.27   | 2264.131  |
| NM_000136 | 13899.03 | 14573.91 | AB020671  | 668.285   | 675.018   | S40369    | 16068.546 | 15502.877 |
| AL157456  | 1286.45  | 897.951  | NM_000206 | 33423.938 | 26822.727 | NM_015831 | 10707.22  | 10794.71  |
| AL162056  | 3432.524 | 3438.082 | NM_018255 | 4724.502  | 4006.01   | AK023154  | 6668.007  | 5067.146  |
| NM_000380 | 4709.003 | 3922.367 | NM_016232 | 1447.56   | 1357.758  | NM_002510 | 1400.753  | 1421.357  |
| NM_004628 | 2687.083 | 2814.603 | AF178930  | 1160.471  | 1237.627  | NM_020386 | 416.797   | 841.894   |
| AF085734  | 843.168  | 985.58   | M74161    | 2642.715  | 2416.343  | NM_006624 | 11217.428 | 12105.538 |
| NM_014876 | 7759.99  | 8530.919 | NM_016542 | 6769.893  | 9174.293  | NM_007069 | 464.894   | 651.577   |
| AB032958  | 1147.786 | 882.107  | NM_000484 | 2463.704  | 2146.212  | AF130079  | 783.245   | 1006.96   |
| AK024427  | 7789.418 | 8246.19  | S40369    | 15248.695 | 12481.638 | NM_017667 | 3091.109  | 2334.99   |
| NM_003006 | 3091.86  | 2817.848 | NM_015831 | 9354.859  | 9607.261  | AK002211  | 5539.327  | 5795.38   |
| NM_000493 | 571.789  | 473.088  | AK023154  | 4136.488  | 4775.335  | NM_012127 | 4158.066  | 6343.282  |
| AF272035  | 6088.878 | 5084.851 | Z36820    | 2764.14   | 3047.267  | NM_014454 | 1862.246  | 2023.827  |
| AY009133  | 996.997  | 1134.15  | NM_003967 | 4352.387  | 6413.806  | NM_017489 | 8654.2    | 7558.731  |
| NM_000965 | 976.44   | 824.038  | NM_012451 | 3615.113  | 5083.87   | NM_002824 | 16619.107 | 20757.777 |
| NM_013403 | 3620.479 | 3498.33  | NM_002510 | 1343.182  | 1485.64   | NM_006835 | 25496.018 | 26913.387 |
| NM_000674 | 2228.036 | 2047.474 | NM_020386 | 635.003   | 558.41    | NM_006023 | 22163.189 | 20708.932 |

|           |          |          |           |           |           |           |           |           |
|-----------|----------|----------|-----------|-----------|-----------|-----------|-----------|-----------|
| AB020671  | 667.263  | 831.938  | NM_006624 | 8339.724  | 6089.341  | NM_014673 | 9359.419  | 12935.004 |
| NM_000206 | 21130.78 | 28226.97 | AF130079  | 703.394   | 561.842   | AB002330  | 3822.961  | 4267.998  |
| NM_018255 | 4382.583 | 4823.412 | NM_017667 | 1731.237  | 1679.406  | AL137509  | 27527.695 | 40643.348 |
| NM_016232 | 468.658  | 1297.713 | AK002211  | 4045.885  | 3407.502  | NM_006535 | 4035.369  | 4181.24   |
| AF178930  | 848.374  | 1088.995 | NM_012127 | 4576.917  | 2323.847  | NM_019887 | 16030.778 | 17824.773 |
| M74161    | 3171.229 | 2979.888 | NM_014454 | 1497.434  | 1532.279  | NM_006024 | 13000.603 | 12020.216 |
| NM_016542 | 9097.871 | 7900.692 | NM_017485 | 5075.768  | 3683.279  | NM_020191 | 7373.772  | 5950.635  |
| NM_000484 | 1778.821 | 2118.765 | NM_002824 | 20200.689 | 13130.722 | NM_017434 | 1709.518  | 2114.501  |
| S40369    | 9895.731 | 10928.57 | NM_006835 | 29632.221 | 27363.063 | NM_020405 | 492.389   | 621.04    |
| NM_015831 | 8133.475 | 7987.593 | NM_006023 | 18174.939 | 18288.609 | NM_020182 | 12850.432 | 8955.789  |
| AK023154  | 4518.305 | 4534.561 | NM_014673 | 8807.814  | 8106.432  | AL137669  | 7091.451  | 7186.476  |
| Z36820    | 1765.542 | 2393.942 | AB002330  | 2932.542  | 2304.069  | AJ275213  | 1342.57   | 1326.128  |
| NM_003967 | 6261.756 | 5986.843 | AL137509  | 27206.504 | 23203.014 | NM_004793 | 22320.117 | 22460.285 |
| NM_012451 | 2713.528 | 2638.027 | NM_006535 | 4042.376  | 2742.188  | NM_004390 | 308.593   | 890.099   |
| NM_002510 | 1743.244 | 1399.361 | NM_019887 | 14700.903 | 12414.414 | NM_014263 | 12241.978 | 13071.049 |
| NM_020385 | 482.074  | 669.665  | NM_004050 | 6519.431  | 4315.029  | NM_020361 | 1518.207  | 1432.191  |
| NM_006624 | 6092.416 | 6326.237 | NM_006024 | 10389.949 | 10186.381 | NM_015907 | 3328.428  | 2830.33   |
| AF130079  | 1127.019 | 793.14   | NM_020191 | 4372.638  | 6280.12   | AK026343  | 9147.795  | 5194.917  |
| NM_017667 | 3513.325 | 2338.709 | NM_017434 | 2065.773  | 1837.628  | NM_001912 | 1653.714  | 1510.385  |
| AK002211  | 2958.587 | 3010.479 | NM_020182 | 6294.203  | 8546.867  | NM_013267 | 3089.477  | 2880.059  |
| NM_012127 | 3407.782 | 5208.841 | AL137669  | 5295.266  | 5445.676  | NM_002454 | 3849.206  | 4096.306  |
| NM_014454 | 2011.809 | 2143.693 | AJ275213  | 1348.362  | 1741.335  | NM_001917 | 10522.842 | 10392.961 |
| NM_017485 | 6689.72  | 5946.478 | NM_004793 | 15442.131 | 11022.121 | NM_005956 | 28301.672 | 27232.209 |
| NM_002824 | 7638.685 | 10899.14 | NM_004390 | 438.475   | 175.63    | NM_003043 | 4902.604  | 5192.631  |
| NM_006835 | 22138.21 | 28549.41 | NM_014263 | 8576.776  | 6315.646  | D87077    | 1278.928  | 1508.47   |
| NM_006023 | 13365.39 | 11303.08 | NM_020361 | 1085.082  | 888.294   | NM_014305 | 978.247   | 1258.845  |
| NM_014673 | 4628.541 | 4514.61  | NM_015907 | 2125.393  | 1807.911  | L07033    | 2550.709  | 2627.92   |
| AB002330  | 3923.49  | 3719.616 | AK026343  | 4308.005  | 5476.476  | AK023934  | 1187.771  | 1522.369  |
| AL137509  | 23649.25 | 29154.02 | NM_001912 | 1354.564  | 1334.513  | AK000142  | 2185.97   | 2511.076  |
| NM_006535 | 5734.787 | 6558.728 | NM_013267 | 1791.178  | 1148.003  | NM_018943 | 5103.848  | 4949.293  |
| NM_019887 | 13311.04 | 13507.57 | NM_002454 | 2453.75   | 1967.553  | AJ292757  | 858.883   | 1025.208  |
| NM_004050 | 1894.301 | 1537.125 | NM_001917 | 9276.051  | 8258.834  | U01922    | 2461.839  | 2318.018  |
| NM_006024 | 8064.067 | 6414.763 | NM_005956 | 38412.441 | 36292.348 | NM_003995 | 2226.187  | 2348.955  |
| NM_020191 | 3427.53  | 2510.509 | NM_003043 | 5671.798  | 5897.405  | NM_004465 | 767.168   | 640.058   |
| NM_020182 | 6438.548 | 4293.799 | D87077    | 2152.798  | 2574.004  | NM_003433 | 12627.306 | 14682.992 |
| AL137669  | 2709.958 | 2899.119 | NM_014305 | 1268.983  | 1146.964  | NM_005221 | 6372.664  | 6526.379  |
| AJ275213  | 305.948  | 590.732  | L07033    | 4543.449  | 4515.464  | NM_005870 | 806.996   | 1047.4    |
| NM_004793 | 19951.57 | 20134.22 | AK000142  | 1653.117  | 1175.26   | NM_018561 | 3965.042  | 4611.04   |
| NM_004390 | 310.372  | 511.362  | NM_005993 | 10136.416 | 6999.452  | NM_001270 | 8273.748  | 8869.021  |
| NM_014263 | 9453.535 | 8611.04  | AK026341  | 5098.507  | 4017.444  | NM_001952 | 17154.734 | 15615.26  |
| NM_020361 | 1326.472 | 1061.231 | NM_018943 | 4173.744  | 3231.187  | NM_003223 | 9363.456  | 11529.455 |
| NM_015907 | 5044.056 | 4086.121 | U01922    | 830.275   | 560.172   | NM_006713 | 63916.957 | 54781.336 |
| AK026343  | 7269.563 | 3992.629 | NM_003995 | 1249.808  | 834.025   | NM_020201 | 7586.293  | 9361.291  |
| NM_001912 | 994.723  | 729.087  | NM_003433 | 15355.285 | 13692.082 | U81557    | 396.871   | 675.05    |
| NM_013267 | 2171.234 | 1997.93  | NM_005221 | 6531.138  | 6347.999  | AK023530  | 870.582   | 621.041   |
| NM_002454 | 3390.445 | 3585.707 | NM_005870 | 1161.967  | 1090.411  | NM_016015 | 16501.664 | 12601.022 |
| NM_001917 | 5766.607 | 5762.938 | NM_018561 | 4823.392  | 3815.6    | NM_012245 | 22256.84  | 17208.68  |
| NM_005956 | 9648.538 | 10340.21 | NM_001270 | 8471.895  | 5949.354  | NM_003986 | 483.973   | 580.123   |
| NM_003043 | 1967.068 | 2291.503 | NM_001952 | 12661.649 | 9122.711  | NM_001533 | 37451.828 | 45264.16  |
| D87077    | 742.615  | 1207.656 | NM_003223 | 10859.063 | 8898.02   | NM_006925 | 14548.246 | 17353.396 |
| NM_014305 | 719.194  | 914.216  | NM_006713 | 59785.543 | 50664.363 | NM_003977 | 27434.168 | 27609.777 |
| L07033    | 3119.336 | 3177.978 | NM_020201 | 11504.527 | 8579.991  | NM_005995 | 37545.609 | 42594.172 |
| AK023934  | 686.79   | 675.5    | U81557    | 802.994   | 731.215   | U28424    | 3166.665  | 3187.049  |

|           |          |          |           |           |           |           |           |           |
|-----------|----------|----------|-----------|-----------|-----------|-----------|-----------|-----------|
| AK000142  | 2394.881 | 1929.225 | AK023530  | 984.599   | 1024.781  | BF541372  | 4954.169  | 4650.08   |
| NM_005993 | 11757.66 | 11647.66 | NM_016019 | 11128.509 | 8029.273  | AF092137  | 6796.183  | 7452.076  |
| AK026341  | 6652.265 | 6437.234 | NM_012245 | 22242.395 | 20706.559 | NM_004623 | 2606.477  | 2913.305  |
| NM_018943 | 2639.879 | 2561.569 | NM_001533 | 23395.885 | 17688.295 | NM_016551 | 9272.863  | 9627.412  |
| AJ292757  | 1265.575 | 1266.495 | NM_006929 | 12471.024 | 8265.193  | AK024631  | 586.389   | 465.895   |
| NM_003999 | 961.83   | 2028.801 | NM_003977 | 29583.551 | 24992.121 | AF087977  | 1097.258  | 1380.326  |
| NM_004469 | 1369.325 | 1172.372 | NM_005998 | 33434.438 | 28019.02  | AK026949  | 1638.624  | 1427.489  |
| NM_003433 | 3113.139 | 2920.522 | U28424    | 2529.705  | 2115.102  | NM_004957 | 7771.736  | 9643.826  |
| NM_005221 | 6050.032 | 6025.992 | BF541372  | 3358.455  | 2426.031  | AL050028  | 11440.667 | 10382.583 |
| NM_005870 | 747.756  | 976.911  | AF092137  | 4390.315  | 3895.671  | NM_000371 | 955.553   | 778.839   |
| NM_018561 | 2986.042 | 3683.782 | NM_004623 | 2049.749  | 1866.16   | BE732255  | 15202.786 | 15562.532 |
| NM_001270 | 6900.362 | 6908.917 | NM_016551 | 8543.639  | 5997.06   | NM_004955 | 2419.052  | 2183.823  |
| NM_001952 | 6838.033 | 6192.206 | AK024631  | 752.683   | 580.995   | NM_003364 | 2143.329  | 2318.4    |
| NM_003223 | 6450.507 | 7248.057 | AF087977  | 1153.202  | 769.896   | NM_017803 | 1655.61   | 1298.029  |
| NM_006713 | 68716.13 | 41469.98 | AK026949  | 1200.757  | 1095.466  | NM_005994 | 6674.454  | 8499.346  |
| NM_020201 | 3742.082 | 4401.671 | NM_004957 | 7999.444  | 7720.169  | AB027508  | 10858.777 | 7803.882  |
| NM_014878 | 1123.366 | 741.699  | AL050028  | 14025.129 | 14656.033 | NM_016331 | 4737.903  | 5993.474  |
| AK023530  | 1033.523 | 1036.574 | NM_000371 | 1118.851  | 913.784   | NM_014360 | 39871.816 | 43277.98  |
| NM_016019 | 13636.1  | 12543.59 | BE732255  | 15565.02  | 18471.625 | NM_018952 | 866.035   | 911.055   |
| NM_012245 | 17680.02 | 13267.12 | NM_004955 | 2472.34   | 2941.555  | AB033053  | 4679.583  | 3998.229  |
| NM_003986 | 530.245  | 602.497  | NM_003364 | 2318.648  | 2545.709  | NM_007358 | 11648.407 | 9858.394  |
| NM_001533 | 20529.9  | 23601.21 | NM_017803 | 3724.871  | 4099.552  | NM_001571 | 3723.75   | 3059.311  |
| NM_006929 | 6830.098 | 6935.079 | NM_005994 | 11622.031 | 10463.001 | AF126749  | 1248.131  | 1237.573  |
| NM_003977 | 13358.76 | 13196.59 | AB027508  | 11330.908 | 10049.896 | NM_018108 | 4894.549  | 4837.033  |
| NM_005998 | 24395.28 | 25607.2  | NM_016331 | 8032.892  | 7539.334  | NM_003408 | 766.625   | 890.165   |
| U28424    | 4311.224 | 4900.416 | NM_014360 | 55832.051 | 49005.75  | NM_003450 | 1861.316  | 2358.066  |
| BF541372  | 2130.168 | 2263.391 | NM_018952 | 1916.432  | 1314.065  | AK021577  | 2710.654  | 2795.235  |
| AF092137  | 1087.941 | 1294.713 | AB033053  | 2449.743  | 2991.536  | AF147390  | 647.847   | 692.925   |
| NM_004623 | 1577.562 | 1984.687 | NM_007358 | 12375.315 | 9958.413  | AF085879  | 573.402   | 1175.438  |
| NM_016551 | 6353.602 | 6171.213 | NM_001571 | 3381.756  | 2992.958  | AF075019  | 2213.979  | 1993.372  |
| AK024631  | 652.595  | 668.471  | AF126749  | 813.697   | 653.543   | AF147388  | 979.237   | 972.942   |
| AF087977  | 740.5    | 943.96   | NM_018108 | 2996.54   | 3090.964  | AK021498  | 4012.191  | 4009.944  |
| AK026949  | 1418.963 | 1252.604 | NM_003450 | 1856.143  | 922.449   | AF085874  | 5360.687  | 5503.483  |
| NM_004957 | 5935.235 | 6128.602 | AK021577  | 1576.012  | 1063.36   | AF147346  | 1001.478  | 1578.652  |
| AL050028  | 6478.274 | 6529.872 | AF147390  | 487.767   | 848.123   | AK026959  | 3409.69   | 3655.065  |
| BE732255  | 13312.26 | 11066.43 | AF075019  | 1320.581  | 1333.604  | NM_019556 | 1733.14   | 2618.99   |
| NM_004955 | 2567.129 | 2949.798 | AF147388  | 858.903   | 861.872   | NM_004753 | 6111.183  | 6743.378  |
| NM_003364 | 1152.243 | 1198.351 | AK021498  | 4093.443  | 3547.427  | NM_015462 | 5618.992  | 5615.83   |
| NM_017803 | 2375.665 | 2178.208 | AF085874  | 5503.598  | 4506.209  | AK026700  | 2623.841  | 3176.352  |
| NM_005994 | 3131.427 | 4031.732 | AF147346  | 1050.395  | 925.819   | AK000127  | 560.5     | 724.282   |
| AB027508  | 4497.874 | 3631.433 | AK026959  | 3493.448  | 3271.178  | AF086242  | 1007.908  | 1002.935  |
| NM_016331 | 5327.348 | 5443.2   | NM_019556 | 3189.944  | 2303.399  | AF086370  | 847.989   | 1276.221  |
| NM_014360 | 4671.041 | 3848.721 | NM_004753 | 7354.924  | 7264.548  | AF086332  | 21310.117 | 26045.002 |
| AB033053  | 3234.327 | 2572.911 | NM_015462 | 11432.167 | 10921.9   | AF086432  | 477.648   | 729.208   |
| NM_007358 | 10648.57 | 9836.792 | AK026700  | 2701.302  | 4001.782  | AJ404614  | 20018.213 | 18053.621 |
| NM_001571 | 4129.639 | 3178.225 | AK000127  | 888.773   | 939.355   | AF086347  | 5986.776  | 6328.369  |
| AF126749  | 906.439  | 1037.99  | AF086242  | 1582.763  | 1392.55   | AF086388  | 945.409   | 1110.233  |
| NM_018108 | 4523.55  | 4012.182 | AF086370  | 1929.347  | 2402.939  | AK001043  | 4758.89   | 5178.965  |
| NM_003450 | 859.23   | 1234.71  | AF086332  | 26312.246 | 30370.455 | AK024535  | 10618.875 | 11858.702 |
| AK021577  | 1626.787 | 2401.798 | AF086432  | 743.898   | 822.43    | AL359608  | 1244.685  | 1389.679  |
| AF147390  | 445.314  | 537.304  | AJ404614  | 21387.451 | 18534.883 | NM_016498 | 35745.207 | 39963.887 |
| AF085879  | 367.453  | 372.434  | AF086347  | 7404.716  | 7061.926  | AF088025  | 622.201   | 652.848   |
| AF075019  | 2322.339 | 1891.136 | AF086388  | 2049.119  | 2468.148  | AK024286  | 357.602   | 849.27    |

|           |          |          |           |           |           |           |           |           |
|-----------|----------|----------|-----------|-----------|-----------|-----------|-----------|-----------|
| AF147388  | 856.168  | 787.363  | AF086444  | 1692.973  | 1427.246  | AF085934  | 1207.215  | 1256.846  |
| AK021498  | 1611.905 | 1225.627 | AK001043  | 9481.194  | 10556.927 | AF147423  | 1149.022  | 879.048   |
| AF085874  | 1527.165 | 1453.96  | AK024535  | 16274.163 | 16402.404 | AF075088  | 1204.155  | 769.309   |
| AF147346  | 705.218  | 733.238  | AL359608  | 1578.02   | 2148.572  | AK023971  | 43636.719 | 45616.113 |
| AK026959  | 2206.002 | 2028.182 | NM_01649€ | 32719.484 | 32569.781 | AK024738  | 2211.203  | 1942.582  |
| NM_01955€ | 1346.004 | 1599.564 | AF088025  | 828.662   | 825.35    | AL133103  | 1420.559  | 1755.039  |
| NM_00475€ | 2112.423 | 2181.054 | AK024286  | 587.643   | 834.62    | BC015321  | 1578.085  | 1600.445  |
| NM_01546€ | 6323.642 | 6655.735 | AF085934  | 1070.46   | 1220.208  | AL157450  | 1517.135  | 951.678   |
| AK026700  | 2149.079 | 1769.543 | AF147423  | 629.866   | 492.339   | AL359594  | 1887.31   | 1464.443  |
| AK000127  | 837.871  | 558.676  | AF075088  | 1005.237  | 1326.735  | AL137293  | 1913.724  | 1856.185  |
| AF086242  | 1308.551 | 748.973  | AK023971  | 35985.934 | 42705.84  | AL137458  | 1606.24   | 1976.718  |
| AF086370  | 596.393  | 949.404  | AK024738  | 2194.414  | 1739.333  | AL157490  | 19424.535 | 20928.98  |
| AF086332  | 2048.12  | 2337.176 | AL133103  | 1654.79   | 1145.5    | AL390167  | 3981.107  | 4508.138  |
| AJ404614  | 13947.51 | 12541.2  | BC015321  | 1306.6    | 1194.351  | AK023657  | 982.03    | 1092.676  |
| AF086347  | 1754.537 | 1813.462 | AL157450  | 1429.514  | 993.789   | NM_01433€ | 579.061   | 609.535   |
| AF086388  | 973.008  | 867.948  | AL359594  | 1853.865  | 1504.526  | AF086068  | 2259.586  | 1922.862  |
| AF086444  | 1033.2   | 1400.042 | AL137293  | 3341.506  | 2588.647  | AF086059  | 1314.591  | 1743.265  |
| AK001043  | 4454.415 | 4709.169 | AL137458  | 1371.06   | 1810.885  | AF086091  | 794.082   | 1140.822  |
| AK024535  | 4459.029 | 4255.3   | AL157490  | 21657.861 | 19457.813 | AF075018  | 1411.263  | 1448.455  |
| NM_01649€ | 7525.349 | 8862.698 | AL390167  | 5368.219  | 5368.34   | AK024239  | 1336.815  | 1168.483  |
| AF088025  | 746.476  | 496.977  | AK023657  | 1374.612  | 1048.704  | AK021838  | 11839.21  | 14495.939 |
| AF147423  | 657.62   | 682.128  | NM_01433€ | 721.584   | 708.986   | AK021990  | 544.34    | 932.602   |
| AF075088  | 701.353  | 468.532  | AF086068  | 1757.356  | 1425.651  | AF083118  | 1915.319  | 1908.494  |
| AK023971  | 29763.23 | 29100.31 | AF086059  | 1326.011  | 1266.597  | AF132602  | 267.419   | 587.404   |
| AK024738  | 2315.948 | 1641.021 | AF075018  | 1303.618  | 1457.465  | AK000957  | 816.726   | 418.334   |
| AL133103  | 1431.616 | 1359.216 | AK024239  | 1228.163  | 670.016   | AF089811  | 634.494   | 1023.023  |
| BC015321  | 891.483  | 1890.957 | AK021838  | 13919.345 | 15010.521 | AF147444  | 1311.063  | 1317.775  |
| AL359594  | 994.497  | 1281.277 | AK021990  | 502.694   | 853.87    | NM_01656€ | 594.41    | 492.249   |
| AL137458  | 1179.806 | 1237.918 | AF083118  | 1506.871  | 1616.878  | AK021909  | 1274.624  | 963.44    |
| AL157490  | 12348.77 | 12316.4  | AF132602  | 688.205   | 960.024   | AK022043  | 735.311   | 562.422   |
| AL390167  | 4326.944 | 4105.525 | AF089811  | 837.77    | 1178.942  | AK022168  | 945.973   | 600.402   |
| AK023657  | 954.541  | 860.578  | AF147444  | 1132.519  | 1356.124  | AK022327  | 1096.113  | 1229.944  |
| AF086068  | 1230.744 | 1275.507 | NM_01656€ | 293.916   | 827.487   | AK021959  | 1161.539  | 734.019   |
| AF086059  | 935.262  | 1187.135 | AK021909  | 474.618   | 460.124   | AK022061  | 868.792   | 230.309   |
| AF075018  | 1753.585 | 1644.794 | AK022168  | 967.939   | 1179.254  | AK022201  | 1397.127  | 1412.994  |
| AK024239  | 937.563  | 1219.116 | AK022327  | 994.783   | 1130.467  | AK022353  | 3630.106  | 4151.624  |
| AK021838  | 3227.123 | 3593.823 | AK022061  | 597.347   | 469.107   | AK026868  | 1508.81   | 1375.967  |
| AK021990  | 755.243  | 769.127  | AK022201  | 1720.892  | 1151.469  | AK022245  | 573.077   | 456.286   |
| AF083118  | 1489.769 | 1394.393 | AK022353  | 4629.398  | 3759.727  | AK022200  | 5113.969  | 5240.54   |
| AF089811  | 798.134  | 372.527  | AK026868  | 1505.154  | 1725.553  | AK026967  | 4907.123  | 4963.53   |
| AF147444  | 876.023  | 788.397  | AK022200  | 4731.005  | 3309.396  | AK024604  | 2430.049  | 2685.028  |
| NM_01656€ | 591.768  | 318.29   | AK023396  | 544.512   | 675.734   | AK023396  | 786.738   | 644.486   |
| AK021909  | 1278.931 | 1208.972 | NM_018101 | 11788.258 | 12722.854 | AF264625  | 600.707   | 526.381   |
| AK022043  | 577.434  | 654.69   | BF526704  | 1850.18   | 2185.319  | NM_018101 | 13568.753 | 12000.454 |
| AK022168  | 564.905  | 494.158  | AJ491695  | 9402.866  | 10082.97  | AF293366  | 1329.357  | 1364.178  |
| AK022327  | 889.445  | 561.614  | AF052107  | 17992.91  | 17520.668 | BF526704  | 1967.884  | 2162.297  |
| AK022061  | 330.957  | 327.25   | AK022430  | 1544.372  | 1769.317  | AJ491695  | 6771.798  | 7791.938  |
| AK022201  | 613.71   | 599.468  | AK001022  | 3187.151  | 2943.376  | AF052107  | 18861.697 | 19404.234 |
| AK022353  | 696.791  | 1072.807 | AL049351  | 7949.465  | 5693.076  | BF244825  | 994.631   | 1100.245  |
| AK026868  | 516.198  | 459.71   | AK021826  | 5529.126  | 3375.947  | AK022430  | 2111.221  | 2047.408  |
| AK022245  | 692.025  | 445.798  | AK024138  | 4481.017  | 5109.081  | AK001022  | 4188.035  | 3784.877  |
| AK026500  | 184.38   | 236.97   | Y10505    | 2193.069  | 2602.542  | AL049351  | 7203.459  | 5870.738  |
| AK022200  | 1772.507 | 1630.622 | U00946    | 16687.102 | 18844.477 | AK021826  | 5111.719  | 8592.821  |



|           |          |          |           |           |           |           |           |           |
|-----------|----------|----------|-----------|-----------|-----------|-----------|-----------|-----------|
| AK026967  | 217.108  | 230.248  | NM_005615 | 4286.195  | 5418.1    | AK024541  | 446.076   | 778.042   |
| AK023396  | 1147.981 | 649.582  | Z34290    | 1266.21   | 1437.68   | AK024138  | 4521.666  | 5264.983  |
| NM_018101 | 9135.287 | 9237.115 | AF070642  | 5691.98   | 6228.947  | Y10505    | 3305.842  | 2859.449  |
| AF293366  | 754.927  | 1099.846 | AK027125  | 3737.708  | 3325.158  | U00946    | 10346.95  | 11647.538 |
| BF526704  | 1983.988 | 1927.302 | D16918    | 1106.131  | 1232.34   | NM_005615 | 2426.618  | 2405.996  |
| AJ491695  | 2242.658 | 2309.146 | D16467    | 1969.814  | 2093.812  | Z34290    | 1054.962  | 1140.346  |
| AF052107  | 6878.575 | 6996.929 | AF090932  | 2501.114  | 3333.139  | AF070642  | 4100.694  | 3805.611  |
| AK022430  | 1002.478 | 953.043  | AF166125  | 1624.471  | 1403.752  | AK027125  | 3578.197  | 3678.884  |
| AK001022  | 2833.528 | 2392.843 | AF225425  | 3607.835  | 3968.854  | AK025311  | 494.141   | 584.678   |
| AL049351  | 1181.325 | 1700.029 | AF064848  | 18940.404 | 18593.762 | D16918    | 1276.908  | 1343.405  |
| AK021826  | 1656.905 | 2178.963 | U61089    | 8732.238  | 7138.587  | D16467    | 1971.203  | 2059.221  |
| AK024138  | 4374.947 | 4989.853 | AK001036  | 2508.128  | 3998.921  | AF090932  | 1663.032  | 1453.506  |
| Y10505    | 2891.44  | 2853.126 | AK024858  | 14510.902 | 13980.968 | AF166125  | 1508.289  | 1443.382  |
| U00946    | 9422.014 | 10288.61 | Y16697    | 2997.542  | 2165.121  | AF225425  | 2828.802  | 2578.032  |
| NM_005615 | 898.818  | 1055.382 | NM_001045 | 6412.976  | 5692.656  | AF064848  | 16051.986 | 14453.376 |
| Z34290    | 1279.119 | 779.881  | AK024554  | 1630.672  | 1156.986  | U61089    | 9258.216  | 8138.936  |
| AF070642  | 3072.977 | 3122.469 | AF068294  | 3884.551  | 3564.599  | AK001036  | 4542.674  | 2911.245  |
| AK027125  | 2469.543 | 3002.244 | AK025909  | 6351.161  | 5818.941  | AK024858  | 14531.726 | 15626.316 |
| AK025311  | 270.595  | 388.506  | AK026138  | 1912.229  | 2101.094  | Y16697    | 1139.989  | 1307.556  |
| D16918    | 1030.044 | 1504.37  | AK021434  | 9291.479  | 8519.112  | NM_001045 | 7381.09   | 6206.767  |
| D16467    | 1892.006 | 1561.879 | NM_016475 | 13925.397 | 12138.486 | AK024554  | 2120.321  | 1986.709  |
| AF090932  | 1004.09  | 1383.363 | AK000933  | 13041.99  | 12121.245 | AF068294  | 4537.846  | 4616.698  |
| AF166125  | 995.619  | 1466.427 | Y10205    | 1399.296  | 1275.318  | AK025909  | 8697.501  | 8301.551  |
| AF225425  | 1002.374 | 991.517  | NM_014626 | 1602.498  | 1688.976  | AK026138  | 2422.666  | 2200.184  |
| AF064848  | 6162.968 | 6579.94  | AK025277  | 1295.291  | 1482.108  | Z70706    | 602.623   | 772.089   |
| U61089    | 5232.169 | 5249.79  | AF086095  | 1279.36   | 1581.306  | AK021434  | 6825.359  | 8033.813  |
| AK001036  | 3491.95  | 2606.842 | NM_018352 | 1801.792  | 3595.24   | NM_016475 | 12357.438 | 14928.919 |
| AK024858  | 4123.762 | 4603.371 | AK026880  | 2527.824  | 2919.535  | AK000933  | 15769.909 | 15757.521 |
| Y16697    | 621.6    | 830.923  | AL080092  | 12973.612 | 11872.814 | Y10205    | 1053.267  | 1276.981  |
| NM_001045 | 5414.289 | 4109.258 | AF075069  | 1195.633  | 1524.331  | NM_014626 | 1522.266  | 1408.498  |
| AK024554  | 2605.168 | 1931.964 | AL137279  | 2024.704  | 1927.032  | AK025277  | 1079.193  | 1103.756  |
| AF068294  | 2623.934 | 2685.826 | AK023981  | 1449.765  | 1091.674  | AF086095  | 2054.935  | 1552.823  |
| AK025909  | 6043.036 | 6852.257 | AK025037  | 1162.125  | 838.489   | NM_018352 | 2347.912  | 1175.483  |
| AK026138  | 1633.051 | 1409.09  | AK021874  | 6594.915  | 5756.744  | AK026880  | 2800.274  | 2567.108  |
| AK021434  | 3181.746 | 3460.635 | AF086384  | 63655.309 | 57130.605 | AF086061  | 435.971   | 571.967   |
| NM_016475 | 4090.348 | 4941.947 | M77818    | 18403.119 | 14736.392 | AL080092  | 12344.476 | 10502.003 |
| AK000933  | 9514.084 | 9289.343 | AF009267  | 2374.823  | 2310.044  | AF075069  | 1147.965  | 1269.879  |
| Y10205    | 676.188  | 859.245  | AK027129  | 5620.015  | 6460.701  | AL137279  | 2267.829  | 2654.632  |
| NM_014626 | 1057.608 | 897.093  | L19367    | 610.91    | 874.77    | AK023981  | 1738.248  | 1603.943  |
| AK025277  | 607.044  | 802.613  | NM_015695 | 6472.789  | 6491.542  | AK025037  | 1229.823  | 1195.646  |
| AF086095  | 1612.694 | 1065.668 | CY3Cy5    | 9360.022  | 620.591   | AK021874  | 5793.3    | 6147.427  |
| NM_018352 | 3851.988 | 1814.117 | BG696293  | 2625.38   | 2847.453  | AF086384  | 64973.496 | 56427.93  |
| AK026880  | 2245.481 | 2632.314 | AA777410  | 1864.481  | 2765.749  | M77818    | 26503.557 | 31017.809 |
| AF086061  | 392.297  | 554.95   | BG113873  | 1813.45   | 2042.462  | AF009267  | 2145.276  | 2301.87   |
| AL080092  | 7774.836 | 8157.594 | BC013135  | 30502.271 | 35065.465 | AK027129  | 7201.732  | 7251.749  |
| AF075069  | 937.487  | 1142.937 | AI625002  | 1616.127  | 343.735   | L19367    | 602.702   | 785.331   |
| AL137279  | 1806.522 | 1840.032 | AA281652  | 2443.29   | 2028.188  | NM_015695 | 6417.147  | 6464.314  |
| AK023981  | 1277.515 | 1450.877 | U31905    | 1002.312  | 1973.483  | CY3Cy5    | 18670.609 | 515.947   |
| AK025037  | 916.86   | 844.791  | X52479    | 3173.647  | 2160.119  | BG696293  | 3852.942  | 3986.871  |
| AK021874  | 1873.496 | 1743.253 | BC013200  | 30841.096 | 38970.57  | AA777410  | 3707.204  | 2740.444  |
| AF086384  | 81229.98 | 44200.87 | AW408832  | 6056.924  | 6178.226  | BG113873  | 1971.327  | 1858.659  |
| M77818    | 14162.55 | 14892.23 | AA486364  | 20899.523 | 21940.625 | BC013135  | 42412.414 | 47095.949 |
| AF009267  | 1001.895 | 932.259  | M15476    | 38733.402 | 46302.875 | AI625002  | 1160.388  | 1887.151  |

|           |          |          |           |           |           |           |           |           |
|-----------|----------|----------|-----------|-----------|-----------|-----------|-----------|-----------|
| AK027129  | 4521.214 | 4679.535 | U57456    | 4928.034  | 4345.085  | H07899    | 1121.743  | 749.998   |
| L19367    | 306.681  | 303.765  | N70057    | 16249.189 | 17065.604 | AA281652  | 4568.809  | 4004.353  |
| NM_01569E | 3238.656 | 3025.993 | NM_006497 | 18432.451 | 20123.396 | U31905    | 1931.321  | 1925.141  |
| CY3Cy5    | 33754.08 | 3278.485 | NM_00689Z | 2734.125  | 2928.953  | X52479    | 7763.598  | 6820.967  |
| BG696293  | 744.533  | 1015.382 | SR7       | 7603.449  | 45176.48  | BC013200  | 25858.17  | 21427.459 |
| AA777410  | 392.141  | 504.481  | SR9       | 32683.938 | 5116.76   | AW408832  | 6299.292  | 5699.162  |
| BG113873  | 349.679  | 563.381  | CY3Cy5    | 7541.329  | 409.641   | AA486364  | 19188.268 | 20869.932 |
| BC013135  | 2502.317 | 2999.171 | AF254067  | 3841.777  | 4619.171  | M15476    | 43787.148 | 52720.727 |
| AA281652  | 2500.921 | 2741.399 | NM_01636Z | 4495.778  | 5114.852  | U57456    | 4380.354  | 4127.239  |
| X52479    | 2746.517 | 3669.901 | AY009090  | 1550.517  | 1759.084  | N70057    | 18901.328 | 20299.234 |
| BC013200  | 14241.72 | 14600.86 | U81380    | 1162.365  | 1149.35   | NM_006497 | 16732.566 | 18457.355 |
| AW408832  | 2031.968 | 2589.729 | NM_01650E | 952.44    | 1149.858  | NM_00689Z | 4577.382  | 6252.862  |
| AA486364  | 10044.53 | 12362.58 | NM_01229E | 5063.387  | 3045.594  | SR9       | 60517.34  | 11346.852 |
| N70057    | 9485.218 | 8861.568 | AF041038  | 1459.501  | 2494.373  | CY3Cy5    | 21696.064 | 832.82    |
| NM_006497 | 8599.116 | 7707.208 | NM_00453E | 3591.429  | 3523.935  | AF254067  | 8092.232  | 5765.786  |
| NM_00689Z | 4176.92  | 4838.411 | NM_01467Z | 1331.804  | 1877.427  | NM_01636Z | 6145.83   | 5589.481  |
| SR7       | 5576.495 | 29344.06 | AB058719  | 1335.108  | 1490.769  | AY009090  | 1822.171  | 1850.814  |
| SR9       | 25068.36 | 4092.953 | AK025935  | 3850.894  | 4414.246  | NM_00559Z | 700.235   | 445.052   |
| CY3Cy5    | 31281.89 | 2454.092 | AB032953  | 791.05    | 1206.678  | U81380    | 1469.513  | 1249.93   |
| AF254067  | 1523.185 | 1326.823 | NM_016441 | 2360.998  | 2795.505  | NM_00230Z | 1081.322  | 782.628   |
| NM_01636Z | 1115.885 | 1237.247 | NM_006334 | 3259.284  | 4132.483  | NM_01650E | 1709.474  | 1663.573  |
| AY009090  | 529.626  | 1170.577 | NM_003474 | 1977.693  | 1880.922  | NM_01229E | 5415.623  | 8104.69   |
| U81380    | 567.231  | 913.488  | NM_00462E | 4095.026  | 4843.355  | AF041038  | 2250.229  | 2193.63   |
| NM_01229E | 1273.448 | 1879.896 | NM_00130E | 1460.349  | 1247.745  | NM_00453E | 6678.819  | 5388.53   |
| AF041038  | 509.329  | 655.395  | AB046861  | 3060.706  | 3541.206  | NM_01467Z | 6617.357  | 5341.565  |
| NM_00453E | 921.825  | 1306.785 | NM_00594C | 638.538   | 743.148   | AB058719  | 1019.511  | 803.281   |
| NM_01467Z | 2508.396 | 2420.125 | AF061034  | 17923.201 | 15207.437 | AK025935  | 3319.521  | 2536.795  |
| AB058719  | 1131.51  | 894.47   | X03655    | 1386.796  | 1274.308  | AB032953  | 944.097   | 960.824   |
| AK025935  | 4498.935 | 4150.662 | NM_00583Z | 4525.528  | 4913.218  | NM_016441 | 3885.545  | 3599.176  |
| AB032953  | 1162.765 | 1605.121 | NM_00310C | 5017.205  | 5160.908  | NM_006334 | 3431.384  | 3579.051  |
| NM_016441 | 3879.9   | 2974.114 | NM_00676E | 8818.656  | 9428.62   | NM_003474 | 2797.473  | 2521.353  |
| NM_006334 | 6324.303 | 4958.055 | NM_01332Z | 12527.26  | 21490.895 | NM_00462E | 5342.96   | 5552.102  |
| NM_003474 | 2761.955 | 2968.146 | AB020627  | 2167.822  | 2637.697  | NM_00130E | 1774.258  | 1903.951  |
| NM_00462E | 3916.324 | 4007.556 | NM_00200Z | 1017.253  | 1137.397  | AB046861  | 5015.654  | 5809.284  |
| AB046861  | 3826.377 | 4175.554 | NM_005387 | 3792.899  | 4805.326  | X03655    | 1920.837  | 1921.753  |
| AB028173  | 721.322  | 587.999  | AL137938  | 7056.281  | 5624.3    | NM_00583Z | 7475.769  | 6688.522  |
| NM_00594C | 1478.077 | 1645.167 | AF228704  | 6241.714  | 7438.604  | NM_00310C | 6816.211  | 6431.358  |
| AF061034  | 6484.229 | 6442.878 | NM_00421E | 3302.582  | 4071.958  | NM_00676E | 10756.889 | 11506.931 |
| X03655    | 895.928  | 934.038  | AK022746  | 4980.605  | 5806.257  | NM_01332Z | 21510.15  | 16343.188 |
| AY007135  | 13672.3  | 14775.69 | NM_00656E | 11157.983 | 13832.053 | AB020627  | 2660.66   | 2382.882  |
| AF202889  | 3897.076 | 3380.719 | NM_00644C | 4749.245  | 4563.807  | NM_00200Z | 1440.507  | 1234.546  |
| NM_00583Z | 1987.271 | 2444.34  | NM_004847 | 13951.105 | 13143.985 | NM_005387 | 1760.609  | 1517.769  |
| NM_00310C | 2260.11  | 2424.561 | NM_00225E | 9378.384  | 11226.307 | AL137938  | 13426.083 | 14443.681 |
| NM_00676E | 2956.615 | 2765.788 | BC034483  | 1821.876  | 1574.601  | AF228704  | 11656.933 | 10057.187 |
| NM_01332Z | 3074.615 | 2422.788 | NM_00362C | 3638.578  | 4372.918  | AK022746  | 6877.904  | 5983.899  |
| NM_005387 | 2744.524 | 2773.53  | NM_01328E | 5482.964  | 7287.938  | NM_00656E | 14383.203 | 15566.988 |
| AL137938  | 5228.697 | 5788.135 | AA586375  | 1616.852  | 1638.535  | NM_00644C | 6009.793  | 6246.717  |
| AF228704  | 10251.04 | 9881.975 | BE910339  | 27212.371 | 21324.641 | NM_004847 | 13204.828 | 15364.307 |
| NM_00421E | 7591.052 | 6976.088 | U89715    | 10825.614 | 10327.507 | NM_00225E | 7986.222  | 8361.154  |
| AK022746  | 7438.421 | 5992.686 | NM_005227 | 5287.988  | 5230.942  | BC034483  | 1651.96   | 1422.506  |
| NM_00656E | 13994.55 | 13617.09 | NM_00028E | 17820.387 | 11789.713 | NM_00362C | 4793.446  | 5296.191  |
| NM_00644C | 5361.94  | 5893.512 | NM_016454 | 26572.506 | 33452.676 | NM_01328E | 11529.261 | 9927.297  |
| NM_004847 | 4019.099 | 3782.198 | NM_00346E | 3340.492  | 3756.046  | BE910339  | 36593.375 | 47370.137 |

|           |          |          |           |           |           |           |           |           |
|-----------|----------|----------|-----------|-----------|-----------|-----------|-----------|-----------|
| NM_00225E | 1171.184 | 1167.03  | NM_016433 | 1761.033  | 1913.511  | U89715    | 13500.234 | 15716.241 |
| BC034483  | 1265.428 | 981.121  | NM_00085E | 6418.301  | 5794.715  | NM_005227 | 6268.991  | 6699.398  |
| AA586375  | 1912.954 | 1520.825 | NM_00548C | 4436.716  | 4837.066  | NM_00028E | 21368.105 | 15040.303 |
| BE910339  | 15931.11 | 18097.17 | AB034694  | 1492.455  | 1518.434  | NM_016454 | 33157.668 | 41120.809 |
| U89715    | 8182.788 | 9506.768 | NM_003273 | 3341.776  | 2276.963  | NM_00346E | 4410.856  | 5034.201  |
| NM_005227 | 2517.801 | 2817.845 | AK026404  | 1991.373  | 2765.104  | NM_016433 | 3045.192  | 3047.008  |
| NM_00028E | 5712.085 | 8191.529 | NM_01794E | 5013.6    | 5977.25   | NM_00085E | 6979.98   | 9470.682  |
| NM_016454 | 12250.87 | 10357.75 | NM_000392 | 1035.847  | 777.551   | NM_00548C | 4548.579  | 5101.156  |
| NM_00346E | 2070.041 | 1726.985 | AF208536  | 1752.62   | 2938.688  | NM_003273 | 1583.873  | 1676.271  |
| NM_016433 | 1130.262 | 1502.304 | AB037848  | 1255.321  | 1554.829  | AL096777  | 423.197   | 413.118   |
| NM_00085E | 3125.031 | 3058.913 | AF082657  | 5810.063  | 5017.641  | AF208536  | 3588.119  | 2586.135  |
| NM_00548C | 830.476  | 854.142  | NM_006744 | 2126.16   | 1858.112  | AB037848  | 1765.224  | 1388.145  |
| AK026404  | 1770.94  | 1478.733 | AF297659  | 851.34    | 1202.797  | AF082657  | 5670.264  | 5180.612  |
| NM_01794E | 2852.047 | 2792.3   | NM_018231 | 5328.301  | 4988.063  | NM_006744 | 2124.438  | 2708.169  |
| AF208536  | 895.971  | 798.456  | NM_007163 | 394.188   | 727.509   | AF297659  | 1434.057  | 1165.813  |
| AB037848  | 606.529  | 554.455  | NM_000583 | 7499.704  | 7050.325  | NM_018231 | 7056.272  | 7982.396  |
| AF082657  | 5810.281 | 8078.163 | NM_004254 | 8780.326  | 7701.317  | NM_007163 | 752.041   | 629.35    |
| NM_006744 | 1771.871 | 1672.841 | NM_014914 | 6401.809  | 7851.527  | NM_000583 | 10816.214 | 10977.98  |
| AF297659  | 858.381  | 1169.601 | NM_01828E | 2576.794  | 2986.483  | NM_004254 | 13066.91  | 13965.921 |
| NM_018231 | 4476.949 | 3636.625 | AB018260  | 1099.964  | 1012.664  | NM_014914 | 9910.463  | 8530.226  |
| NM_007163 | 1145.22  | 757.717  | NM_01476E | 5288.098  | 4434.487  | NM_01828E | 3802.362  | 3718.709  |
| NM_000583 | 7891.919 | 7379.426 | NM_016121 | 3185.391  | 3720.341  | NM_01598E | 893.575   | 544.452   |
| NM_004254 | 10803.09 | 9670.335 | NM_01476E | 3184.317  | 3546.939  | NM_01476E | 5290.831  | 5146.474  |
| AB046833  | 1657.159 | 1092.54  | NM_00634E | 42206.855 | 45735.52  | NM_016627 | 11139.802 | 9227.625  |
| NM_014914 | 2915.726 | 2662.206 | AK026264  | 12074.605 | 11037.808 | NM_016121 | 1314.423  | 1235.494  |
| NM_01828E | 1792.951 | 1460.489 | AF222927  | 1473.371  | 1876.667  | AK026264  | 17240.682 | 18141.211 |
| NM_01476E | 3707.861 | 5065.418 | NM_01434E | 3755.69   | 3768.146  | AF222927  | 4451.758  | 4330.986  |
| NM_016627 | 15161.86 | 14636.41 | NM_018217 | 9865.531  | 10319.197 | NM_01434E | 4291.618  | 3676.335  |
| NM_016121 | 3043.807 | 3148.46  | AF241831  | 5517.514  | 4668.273  | NM_018217 | 13996.077 | 12462.894 |
| NM_01476E | 1946.494 | 2212.737 | NM_003033 | 4264.509  | 3899.742  | AF241831  | 5119.314  | 6116.948  |
| AF222927  | 3609.549 | 3736.191 | U96113    | 2490.15   | 3534.632  | NM_003033 | 7764.064  | 9073.948  |
| NM_01434E | 1780.887 | 1671.765 | NM_002733 | 4774.906  | 5896.692  | U96113    | 3053.03   | 3203.697  |
| NM_018217 | 2385.125 | 2178.404 | M31008    | 1724.461  | 1664.829  | NM_002733 | 10393.364 | 8735.938  |
| AF241831  | 3239.749 | 4062.055 | NM_00628E | 2887.052  | 2672.769  | M31008    | 2493.354  | 2732.067  |
| NM_003033 | 4735.914 | 5912.301 | NM_016224 | 7043.728  | 4878.833  | NM_00628E | 3928.428  | 5439.644  |
| U96113    | 2708.867 | 2845.966 | AB046861  | 3803.326  | 3331.655  | NM_016224 | 9859.775  | 14286.277 |
| NM_002733 | 7064.585 | 5933.191 | NM_00594C | 867.342   | 1036.251  | AB046861  | 5412.685  | 5047.828  |
| M31008    | 1528.819 | 1465.309 | AF061034  | 17656.176 | 18527.166 | AB028173  | 478.917   | 764.639   |
| NM_00628E | 3043.022 | 4199.974 | X03655    | 1593.3    | 1411.931  | NM_00594C | 1269.118  | 1323.055  |
| NM_014177 | 483.655  | 654.281  | BG696293  | 3190.789  | 2669.163  | AF061034  | 18281.414 | 20684.932 |
| NM_016224 | 5568.06  | 6740.921 | AA777410  | 2074.075  | 2360.149  | X03655    | 2060.239  | 1986.972  |
| AB046861  | 2270.129 | 2024.309 | BG113873  | 2068.283  | 2002.382  | BG696293  | 3829.439  | 3643.617  |
| AF061034  | 2474.186 | 2341.778 | AI625002  | 1609.363  | 455.978   | AA777410  | 2208.439  | 1736.837  |
| BG696293  | 6246.764 | 5312.243 | H07899    | 599.158   | 1269.353  | BG113873  | 3100.883  | 3315.758  |
| AA777410  | 458.953  | 587.731  | AA281652  | 2389.534  | 2573.03   | BC013135  | 25186.424 | 28609.045 |
| BG113873  | 845.458  | 1060.33  | U31905    | 1364.615  | 1528.224  | AI625002  | 714.227   | 1354.441  |
| BC013135  | 12076.63 | 11006.83 | X52479    | 3357.459  | 2765.299  | AA281652  | 1948.773  | 2173.51   |
| AI625002  | 565.99   | 1218.264 | BC013200  | 25429.605 | 29532.633 | U31905    | 2501.129  | 2733.575  |
| AA281652  | 3547.201 | 4178.555 | AW408832  | 1076.547  | 1330.372  | X52479    | 9061.192  | 9047.266  |
| U31905    | 722.687  | 592.517  | AA486364  | 18467.852 | 18785.721 | BC013200  | 48674.23  | 47491.563 |
| X52479    | 4340.023 | 5069.053 | M15476    | 36413.816 | 41861.137 | AW408832  | 6973.3    | 4839.861  |
| AA486364  | 5468.001 | 6155.985 | U57456    | 5133.211  | 4626.26   | AA486364  | 23701.617 | 32225.371 |
| M15476    | 9351.048 | 9350.831 | N70057    | 15758.274 | 15466.849 | U57456    | 4710.993  | 4831.396  |

|           |          |          |           |           |           |           |           |           |
|-----------|----------|----------|-----------|-----------|-----------|-----------|-----------|-----------|
| U57456    | 3150.074 | 3648.84  | NM_006497 | 16170.21  | 16287.094 | N70057    | 18009.91  | 19568.279 |
| N70057    | 6112.256 | 5709.84  | NM_006892 | 2571.443  | 2314.55   | NM_006497 | 20327.928 | 25630.629 |
| NM_006497 | 6319.886 | 5356.916 | AK000124  | 2014.834  | 1853.189  | NM_006892 | 4279.14   | 4555.036  |
| NM_006892 | 3416.665 | 4192.457 | NM_00448C | 2937.382  | 3414.172  | AK000124  | 3375.854  | 3975.886  |
| AK000124  | 2358.07  | 2582.424 | BC034483  | 1637.802  | 1412.49   | NM_00448C | 6088.755  | 6563.68   |
| NM_00448C | 4103.617 | 3104.949 | NM_00362C | 3430.826  | 3848.97   | BC034483  | 1797.077  | 1764.266  |
| NM_00362C | 1724.92  | 1791.069 | NM_01328E | 6051.982  | 7657.713  | NM_00362C | 5782.479  | 5357.529  |
| NM_01328E | 5372.123 | 5140.286 | AA586375  | 1614.321  | 1849.503  | NM_01328E | 8937.069  | 7204.655  |
| AA586375  | 1187.504 | 972.423  | BE910339  | 32474.783 | 37585.969 | AA586375  | 2063.781  | 2001.786  |
| BE910339  | 10230.87 | 10756.16 | U89715    | 10648.648 | 12728.422 | BE910339  | 31329.725 | 38307.168 |
| U89715    | 3123.849 | 3786.22  | AF254067  | 4202.801  | 5231.945  | U89715    | 10293.029 | 10478.628 |
| AF254067  | 2411.695 | 2167.081 | NM_016363 | 4093.274  | 4711.898  | AF254067  | 5475.805  | 4349.56   |
| NM_016363 | 1609.045 | 1649.679 | AY009090  | 1428.742  | 1904.457  | NM_016363 | 8235.716  | 8853.184  |
| AY009090  | 610.708  | 758.087  | NM_005592 | 338.369   | 393.645   | AY009090  | 840.013   | 1409.251  |
| U81380    | 655.344  | 652.162  | U81380    | 729.086   | 1044.75   | NM_005592 | 3042.835  | 2804.774  |
| NM_01650E | 769.088  | 645.712  | NM_01650E | 1546.901  | 2103.665  | NM_002303 | 3423.157  | 2843.299  |
| NM_01229E | 4414.605 | 3442.454 | AF041038  | 1408.826  | 1611.271  | NM_01650E | 3591.995  | 3532.547  |
| AF041038  | 882.74   | 1038.85  | NM_00453E | 1685.393  | 2212.153  | NM_01229E | 4751.733  | 7907.493  |
| NM_00453E | 2641.203 | 2643.661 | NM_014672 | 3116.997  | 4513.46   | AF041038  | 1992.522  | 2320.28   |
| NM_014672 | 4518.291 | 3409.036 | AB058719  | 2017.268  | 2618.314  | NM_00453E | 5823.586  | 4688.036  |
| AB058719  | 1630.467 | 1055.301 | AK025935  | 6357.57   | 6742.968  | NM_014672 | 6521.795  | 5574.386  |
| AK025935  | 4049.67  | 3650.391 | AB032953  | 732.013   | 880.042   | AK025935  | 3906.774  | 3907.393  |
| AB032953  | 787.613  | 746.759  | NM_016441 | 2364.459  | 3772.765  | AB032953  | 1025.195  | 1271.51   |
| NM_016441 | 2596.185 | 2397.329 | NM_00462E | 3780.419  | 4322.71   | NM_016441 | 4560.526  | 3896.733  |
| NM_006334 | 5530.565 | 3923.109 | NM_00717E | 23660.291 | 24185.176 | NM_006334 | 4217.318  | 4305.663  |
| NM_003474 | 2701.593 | 2439.927 | NM_00130E | 1462.769  | 682.176   | NM_003474 | 3015.865  | 3065.152  |
| NM_00462E | 2487.43  | 2460.215 | AF297659  | 609.138   | 777.359   | NM_00462E | 6838.522  | 6818.623  |
| NM_00717E | 16170.46 | 15009.26 | NM_018231 | 6006.564  | 5676.75   | NM_00717E | 37439.766 | 46449.441 |
| NM_00130E | 746.429  | 812.481  | NM_000583 | 5992.236  | 6622.316  | NM_00130E | 2421.868  | 2328.629  |
| AF297659  | 542.851  | 562.004  | NM_005833 | 4581.868  | 5762.02   | AF297659  | 1681.12   | 1985.278  |
| NM_018231 | 2476.83  | 2221.497 | NM_00310C | 5061.59   | 4694.783  | NM_018231 | 5690.306  | 5595.427  |
| NM_000583 | 4865.257 | 4868.114 | NM_013322 | 11763.805 | 17897.754 | NM_000583 | 6484.658  | 7303.578  |
| NM_004254 | 5104.72  | 5782.54  | NM_002003 | 2139.838  | 2932.26   | NM_004254 | 9534.396  | 9492.776  |
| AB046833  | 979.693  | 965.194  | NM_005387 | 3245.725  | 3360.424  | NM_005833 | 3358.365  | 2730.27   |
| AY007135  | 21484.82 | 27680.83 | AF228704  | 6986.987  | 8561.597  | NM_00310C | 2479.083  | 2399.86   |
| AF202889  | 3088.732 | 2818.813 | NM_00421E | 11844.971 | 12909.011 | NM_006344 | 579.657   | 1336.679  |
| NM_005833 | 2730.868 | 2262.49  | AK022746  | 4106.42   | 4753.313  | NM_013322 | 18400.787 | 14137.755 |
| NM_00310C | 2619.281 | 2631.487 | NM_00644C | 5084.092  | 5315.875  | AB020627  | 3525.536  | 2943.67   |
| NM_00676E | 3851.284 | 3474.751 | NM_004847 | 14294.485 | 13635.525 | NM_002003 | 1859.111  | 2125.898  |
| NM_013322 | 9086.061 | 6628.072 | NM_00225E | 6340.371  | 6892.953  | NM_005387 | 6027.118  | 5378.733  |
| AB020627  | 2245.07  | 2508.956 | AF151889  | 20903.615 | 15433.786 | NM_00684E | 622.786   | 712.289   |
| NM_002003 | 776.1    | 715.027  | U96113    | 1983.839  | 2568.75   | AL137938  | 13881.96  | 16170.194 |
| NM_005387 | 4298.958 | 4454.194 | NM_002733 | 4037.886  | 5641.834  | AF228704  | 10989.021 | 10076.035 |
| AL137938  | 7693.612 | 7831.323 | M31008    | 1282.789  | 1341.352  | AK022746  | 7991.589  | 7820.863  |
| AF228704  | 10848.49 | 10303.11 | NM_00628E | 2968.22   | 2576.086  | NM_00656E | 15968.419 | 16276.087 |
| NM_00421E | 8939.601 | 7643.707 | NM_016224 | 8137.326  | 7838.047  | NM_00644C | 7252.709  | 9066.481  |
| AK022746  | 6739.15  | 5610.456 | NM_005227 | 5203.79   | 4847.392  | NM_004847 | 19525.756 | 24899.822 |
| NM_00656E | 10858.75 | 9556.36  | NM_00346E | 3612.127  | 4276.561  | NM_00225E | 11564.435 | 11780.985 |
| NM_00644C | 4345.174 | 3926.257 | NM_016433 | 1772.01   | 1932.438  | AF151889  | 19366.979 | 33808.563 |
| NM_004847 | 3470.109 | 3611.774 | NM_00085E | 6183.485  | 5333.028  | U96113    | 3074.52   | 3724.729  |
| NM_00225E | 1346.415 | 963.682  | NM_00548C | 3841.776  | 4223.374  | NM_002733 | 7460.645  | 6286.444  |
| AF151889  | 10569.47 | 14139.45 | AB034694  | 1459.839  | 1852.633  | M31008    | 2287.886  | 2169.58   |
| U96113    | 2786.749 | 2761.465 | NM_003273 | 2187.036  | 1884.434  | NM_00628E | 3214.463  | 4225.862  |

|           |          |          |           |           |           |           |           |           |
|-----------|----------|----------|-----------|-----------|-----------|-----------|-----------|-----------|
| NM_002733 | 2623.323 | 2031.499 | AF016694  | 279.854   | 1650.346  | NM_016224 | 8225.048  | 9056.94   |
| M31008    | 704.114  | 661.455  | NM_000392 | 3133.37   | 4218.838  | NM_005227 | 5837.744  | 6091.456  |
| NM_006288 | 1326.956 | 1516.829 | AF208536  | 2021.839  | 2674.638  | NM_000286 | 11578.337 | 9854.337  |
| NM_016224 | 2192.23  | 2925.838 | AB037848  | 1414.5    | 1339.907  | NM_016454 | 19904.996 | 18126.492 |
| NM_005227 | 3004.801 | 2096.51  | AF082657  | 5901.925  | 4787.589  | NM_003469 | 9246.385  | 9544.484  |
| NM_000286 | 7239.966 | 9322.105 | NM_006744 | 1691.43   | 1816.861  | NM_016433 | 1140.428  | 1599.411  |
| NM_016454 | 10079.59 | 11195.29 | NM_006497 | 10254.229 | 9410.999  | NM_000859 | 965.555   | 1332.966  |
| NM_003469 | 1306.027 | 1496.82  | NM_006892 | 1965.604  | 2157.431  | NM_005480 | 2067.591  | 1948.121  |
| NM_016433 | 2443.504 | 2067.952 | AK000124  | 1847.942  | 1971.182  | AB034694  | 2863.097  | 2526.181  |
| NM_000859 | 5912.089 | 7080.903 | NM_004480 | 3561.242  | 4175.524  | NM_003273 | 5381.334  | 8225.71   |
| NM_005480 | 2006.8   | 1789.157 | NM_014914 | 5578.018  | 7530.418  | AK026404  | 2748.221  | 2529.355  |
| NM_003273 | 1280.335 | 3098.478 | NM_018289 | 3308.803  | 3634.649  | NM_017948 | 11755.188 | 12447.887 |
| AK026404  | 1756.126 | 1426.638 | AB018260  | 1143.848  | 1258.142  | NM_000392 | 5365.314  | 5544.583  |
| NM_017948 | 4346.481 | 3749.167 | NM_014766 | 7187.642  | 7336.964  | AF208536  | 4915.756  | 4383.404  |
| NM_000392 | 2489.054 | 2489.382 | NM_016627 | 18524.813 | 24265.027 | AB037848  | 2133.016  | 2357.462  |
| AF208536  | 1423.562 | 1430.535 | NM_006349 | 51423.926 | 56535.434 | NM_018417 | 830.466   | 1324.929  |
| AB037848  | 885.276  | 983.104  | AK026264  | 15197.571 | 18296.354 | AF082657  | 8362.063  | 9731.149  |
| AF082657  | 6701.041 | 9621.646 | NM_018217 | 9213.604  | 9866.372  | NM_006744 | 3352.209  | 3359.805  |
| NM_006744 | 1689.021 | 1377.573 | AF241831  | 5741.77   | 4311.893  | NM_006497 | 20748.91  | 25167.777 |
| NM_006497 | 4606.394 | 4891.58  | NM_003033 | 4656.238  | 3731.04   | NM_006892 | 3182.928  | 3144.363  |
| NM_006892 | 1740.461 | 2292.704 | NM_016441 | 1826.487  | 2338.338  | AK000124  | 2194.855  | 3131.268  |
|           | 3120.897 | 704.031  | NM_006334 | 3934.94   | 5545.618  | NM_004480 | 3290.513  | 2754.025  |
| AK000124  | 1427.282 | 1821.651 | NM_003474 | 1309.033  | 1632.536  | NM_014914 | 7552.335  | 6427.385  |
| NM_004480 | 799.23   | 1217.234 | NM_004625 | 2745.738  | 3089.782  | NM_004484 | 2762.985  | 3473.725  |
| NM_014914 | 3313.596 | 3544.927 | NM_007179 | 22004.475 | 26693.775 | NM_018289 | 1806.944  | 1994.795  |
| NM_004484 | 317.25   | 326.699  | NM_001306 | 1551.671  | 1609.558  | NM_014766 | 1761.198  | 1844.599  |
| NM_018289 | 1844.122 | 1751.738 | AB046861  | 3836.269  | 4090.126  | NM_016627 | 38108.59  | 43153.043 |
| AB018260  | 562.394  | 474.549  | NM_005940 | 1246.36   | 2219.083  | NM_016121 | 4427.206  | 3921.845  |
| NM_014766 | 3876.7   | 5236.379 | AF061034  | 17615.775 | 20224.109 | NM_014769 | 4647.322  | 4838.159  |
| NM_016627 | 15258.56 | 13499.25 | X03655    | 1152.446  | 1852.904  | NM_006349 | 53430.48  | 50644.18  |
| NM_016121 | 2915.721 | 3308.103 | BG696293  | 2513.088  | 2239.432  | AK026264  | 10565.468 | 10539.773 |
| NM_014769 | 1812.758 | 1591.348 | AA777410  | 5271.726  | 7234.107  | AF222927  | 6675.933  | 8265.165  |
| NM_006349 | 21505.28 | 30658.35 | BG113873  | 1687.786  | 1360.671  | NM_014345 | 5649.983  | 5341.28   |
| AK026264  | 6690.766 | 7812.176 | BC013135  | 14974.2   | 15830.466 | NM_018217 | 14146.963 | 12842.035 |
| AF222927  | 4847.261 | 5083.98  | AA281652  | 926.02    | 1140.856  | AF241831  | 6417.178  | 7623.35   |
| NM_014345 | 2370.776 | 2350.237 | U31905    | 1759.904  | 3163.866  | NM_003033 | 6333.322  | 7650.293  |
| NM_018217 | 6235.255 | 5078.05  | X52479    | 6442.629  | 6105.351  | NM_016441 | 3517.406  | 2894.729  |
| AF241831  | 4109.123 | 4527.637 | AW408832  | 6590.715  | 6097.715  | NM_006334 | 6860.598  | 7100.405  |
| NM_003033 | 5216.404 | 4886.523 | AA486364  | 19845.686 | 18502.076 | NM_003474 | 2458.085  | 2113.753  |
| NM_016441 | 2560.339 | 2005.249 | M15476    | 35876.824 | 41148.402 | NM_004625 | 4090.013  | 4530.5    |
| NM_006334 | 3118.329 | 2454.192 | U57456    | 4907.955  | 4111.762  | NM_007179 | 28170.248 | 35421.574 |
| NM_003474 | 571.473  | 442.987  | N70057    | 14199.269 | 15309.119 | NM_001306 | 1321.156  | 1385.849  |
| NM_007179 | 6387.539 | 6345.107 | AK022746  | 3651.69   | 4293.666  | AB046861  | 3722.664  | 4017.708  |
| NM_001306 | 600.2    | 611.553  | NM_006568 | 8256.87   | 10746.853 | NM_005940 | 933.665   | 2015.608  |
| AB046861  | 2141.45  | 2584.262 | NM_006440 | 4100.982  | 4372.105  | AF061034  | 9595.794  | 11590.053 |
| AB028173  | 203.905  | 428.367  | NM_004847 | 11108.989 | 11292.366 | AA777410  | 696.271   | 798.996   |
| NM_005940 | 281.634  | 565.418  | NM_002255 | 9025.834  | 10085.886 | BC013135  | 42913.664 | 43583.84  |
| AF061034  | 2685.331 | 2993.852 | BC034483  | 1824.907  | 2295.075  | AI625002  | 993.115   | 1781.631  |
| BG696293  | 708.121  | 1002.423 | NM_003620 | 3193.852  | 4202.556  | H07899    | 943.363   | 805.325   |
| AA777410  | 1015.767 | 847.368  | NM_013289 | 6218.072  | 8675.046  | AA281652  | 4010.991  | 3465.168  |
| BG113873  | 474.346  | 517.526  | AA586375  | 1491.55   | 1766.508  | U31905    | 2228.405  | 2332.175  |
| BC013135  | 6076.119 | 7581.251 | BE910339  | 32321.939 | 34734.086 | X52479    | 6923.856  | 6684.699  |
| AI625002  | 383.46   | 529.325  | AF254067  | 9322.732  | 11183.116 | BC013200  | 51137.262 | 48128.203 |

|           |          |          |           |           |           |           |           |           |
|-----------|----------|----------|-----------|-----------|-----------|-----------|-----------|-----------|
| AA281652  | 2896.873 | 2993.522 | NM_016363 | 5311.75   | 5999.583  | AW408832  | 7998.968  | 9082.592  |
| U31905    | 480.77   | 501.287  | AY009090  | 1153.959  | 1318.095  | AA486364  | 23394.369 | 31418.309 |
| AW408832  | 3404.43  | 3172.18  | U81380    | 1779.589  | 3127.23   | M15476    | 41084.766 | 51348.215 |
| AA486364  | 10923.97 | 10952.55 | NM_016509 | 881.031   | 1204.945  | U57456    | 6462.727  | 7313.956  |
| M15476    | 10964.4  | 10896.1  | NM_012296 | 5868.243  | 3083.959  | N70057    | 19617.922 | 21620.84  |
| U57456    | 3363.485 | 3323.399 | AF041038  | 1704.424  | 2742.409  | AK022746  | 6965.617  | 6162.433  |
| N70057    | 5409.368 | 5013.059 | NM_004536 | 4787.28   | 4970.875  | NM_004847 | 17410.844 | 18921.209 |
| AK022746  | 6153.299 | 5386.457 | NM_014672 | 4138.363  | 4939.235  | NM_002255 | 11218.815 | 9970.56   |
| NM_006568 | 5554.936 | 5172.787 | AB058719  | 2004.918  | 2234.153  | BC034483  | 1703.311  | 1777.968  |
| NM_006440 | 1091.596 | 1087.268 | AK025935  | 4186.659  | 4079.903  | AA586375  | 5106.755  | 5704.583  |
| NM_004847 | 2121.263 | 2054.641 | AB032953  | 615.906   | 991.32    | AF254067  | 2666.464  | 2042.27   |
| NM_002255 | 788.11   | 695.136  | AF208536  | 1635.998  | 2960.412  | NM_016363 | 3334.346  | 2551.037  |
| AF151889  | 4945.63  | 5579.125 | AB037848  | 965.994   | 1355.977  | AY009090  | 2407.043  | 2215.95   |
| BC034483  | 447.856  | 374.196  | AF082657  | 5660.438  | 5009.16   | NM_005592 | 748.376   | 548.732   |
| NM_003620 | 2204.774 | 2209.921 | NM_006744 | 1380.362  | 1621.025  | U81380    | 1228.754  | 1362.209  |
| NM_013289 | 5744.437 | 4607.534 | AF297659  | 981.591   | 1556.209  | NM_016509 | 1313.375  | 1594.354  |
| AA586375  | 629.012  | 503.282  | NM_018231 | 7921.268  | 7986      | NM_012296 | 4740.206  | 6872.355  |
| BE910339  | 8894.478 | 9555.614 | NM_007163 | 457.74    | 656.265   | AF041038  | 2491.37   | 2995.625  |
| U89715    | 2169.733 | 2874.806 | NM_000583 | 6497.587  | 6363.899  | NM_004536 | 6376.518  | 6249.429  |
| AF254067  | 1510.83  | 1472.579 | NM_003100 | 2897.412  | 3444.504  | NM_014672 | 7309.493  | 5974.309  |
| NM_016363 | 2319.826 | 1722.248 | NM_013322 | 11764.449 | 18312.223 | AB058719  | 2423.192  | 2655.697  |
| AY009090  | 428.518  | 416.618  | AB020627  | 2005.644  | 1857.154  | AK025935  | 4931.525  | 5209.76   |
| U81380    | 502.586  | 545.894  | NM_005387 | 5957.921  | 5905.937  | AB032953  | 1153.085  | 958.331   |
| NM_016509 | 1002.218 | 595.89   | AL137938  | 11985.015 | 9431.787  | AF208536  | 3530.675  | 3206.453  |
| NM_012296 | 1384.611 | 2926.301 | AF228704  | 6956.224  | 7820.737  | AB037848  | 1452.979  | 1219.765  |
| AF041038  | 970.975  | 959.958  | AF222927  | 5012.389  | 5636.125  | AF082657  | 6183.029  | 7769.504  |
| NM_004536 | 2650.683 | 2014.453 | NM_014345 | 3590.362  | 3977.725  | NM_006744 | 1834.674  | 2040.882  |
| NM_014672 | 4546.403 | 3241.824 | NM_018217 | 9440.224  | 9544.254  | AF297659  | 885.791   | 1179.252  |
| AB058719  | 1054.907 | 956.998  | AF241831  | 6035.075  | 7282.603  | NM_018231 | 5776.781  | 6305.166  |
| AK025935  | 3672.043 | 3317.06  | NM_003033 | 5358.542  | 4944.849  | NM_007163 | 349.309   | 810.438   |
| AB032953  | 638.688  | 670.13   | U96113    | 2918.665  | 3261.363  | NM_000583 | 6584.013  | 6240.108  |
| AF208536  | 1735.748 | 1525.781 | NM_002733 | 5279.928  | 7093.762  | NM_005833 | 7294.808  | 7788.805  |
| AF082657  | 4301.047 | 5746.616 | M31008    | 1645.873  | 1690.9    | NM_003100 | 8258.695  | 8991.311  |
| NM_006744 | 1114.676 | 942.536  | NM_006288 | 3651.274  | 3073.428  | NM_013322 | 20655.463 | 16868.682 |
| AF297659  | 580.283  | 418.154  | NM_016224 | 9576.94   | 8511.31   | AB020627  | 3821.599  | 4097.422  |
| NM_018231 | 1815.153 | 1964.817 | NM_016454 | 14315.427 | 17263.24  | NM_005387 | 6845.088  | 8350.451  |
| NM_000583 | 3322.517 | 3780.708 | NM_000859 | 1178.517  | 811.533   | NM_006846 | 984.718   | 1074.222  |
| NM_004254 | 5401.027 | 5447.62  | NM_005480 | 3979.946  | 4106.9    | AL137938  | 14027.927 | 15373.199 |
| AB046833  | 285.282  | 506.655  | NM_003273 | 3194.502  | 2025.91   | AF228704  | 12774.987 | 11016.147 |
| AY007135  | 14511.71 | 16781.74 | AK026404  | 2329.474  | 2925.934  | AF222927  | 6138.833  | 6393.876  |
| AF202889  | 2785.882 | 2820.059 | NM_017948 | 8087.409  | 9378.905  | NM_014345 | 5161.244  | 4747.345  |
| NM_005833 | 1890.95  | 2322.626 | NM_000392 | 2494.112  | 3261.362  | NM_018217 | 10941.25  | 9414.892  |
| NM_003100 | 1868.124 | 2206.993 | NM_000267 | 5053.018  | 5677.962  | AF241831  | 4567.557  | 6140.348  |
| NM_006768 | 5045.581 | 5163.863 | NM_016603 | 4645.868  | 6148.662  | NM_003033 | 5573.395  | 5682.81   |
| NM_013322 | 13841.54 | 10213.03 | NM_004398 | 43796.129 | 46618.57  | U96113    | 3213.941  | 3126.898  |
| AB020627  | 2409.05  | 2553.009 | NM_014966 | 9144.233  | 9115.48   | NM_002733 | 7861.084  | 6843.565  |
| NM_002003 | 1442.227 | 976.178  | NM_014962 | 3921.383  | 3631.427  | M31008    | 1666.301  | 1386.707  |
| NM_005387 | 4182.641 | 4064.301 | D87684    | 14654.269 | 16760.309 | NM_006288 | 3140.235  | 3671.102  |
| NM_006846 | 376.191  | 355.483  | NM_001586 | 1705.893  | 1855.346  | NM_016224 | 5181.889  | 5254.025  |
| AL137938  | 7780.859 | 7959.621 | NM_006317 | 2534.946  | 2961.519  | NM_005227 | 3444.465  | 3661.847  |
| AF228704  | 12250.43 | 9825.07  | NM_001219 | 10333.952 | 17799.254 | NM_000286 | 17747.795 | 12356.936 |
| NM_004215 | 7480.338 | 6746.202 | AK000124  | 3067.014  | 3072.719  | NM_016454 | 30550.416 | 40073.398 |
| AF222927  | 5152.299 | 5671.222 | NM_004480 | 2900.193  | 4214.521  | NM_003469 | 6292.894  | 6842.998  |

|           |          |          |           |           |           |           |           |           |
|-----------|----------|----------|-----------|-----------|-----------|-----------|-----------|-----------|
| NM_01434E | 3615.423 | 3540.254 | NM_014914 | 5050.554  | 5300.705  | NM_01643E | 3941.248  | 3507.331  |
| NM_018217 | 3173.904 | 3075.468 | NM_004484 | 12062.313 | 12907.425 | NM_00085E | 8139.117  | 11926.97  |
| AF241831  | 1451.489 | 2287.796 | NM_01476E | 4423.066  | 3704.343  | NM_00548C | 5773.522  | 6102.396  |
| NM_00303E | 3175.751 | 3532.662 | NM_00634E | 49300.395 | 51886.211 | AB034694  | 3311.646  | 2790.258  |
| U96113    | 2374.703 | 2924.262 | AK026264  | 15635.254 | 14783.512 | NM_00327E | 5714.913  | 8509.19   |
| NM_00273E | 2609.292 | 2514.663 | NM_00438E | 1809.765  | 2043.439  | AK026404  | 3756.329  | 3655.313  |
| M31008    | 140.442  | 688.473  | NM_00587E | 38105.082 | 45099.625 | NM_01794E | 12006.051 | 12802.254 |
| NM_00628E | 1211.573 | 1377.266 | AF039697  | 930.64    | 907.789   | NM_00039E | 6210.065  | 6035.98   |
| NM_016224 | 3140.276 | 3695.92  | AF284436  | 755.129   | 597.42    | NM_000267 | 6623.383  | 4815.927  |
| NM_005227 | 1775.815 | 2109.513 | NM_00444E | 3580.39   | 3085.864  | NM_01660E | 8058.695  | 6441.915  |
| NM_00028E | 4844.504 | 6536.531 | U39657    | 10808.268 | 12301.098 | NM_00439E | 50976.723 | 48837.793 |
| NM_016454 | 13040.45 | 13119.43 | NM_01837E | 1422.902  | 1519.363  | NM_01496E | 11145.391 | 11866.557 |
| NM_00346E | 2394.537 | 2228.545 | NM_00644E | 1544.307  | 1258.805  | NM_01496E | 3633.416  | 3949.917  |
| NM_01643E | 2617.233 | 3149.728 | BF216030  | 7847.208  | 8412.619  | D87684    | 22089.963 | 12966.82  |
| NM_00085E | 7594.32  | 10847.29 | AF131839  | 1553.261  | 1604.743  | NM_00158E | 1431.791  | 1350.084  |
| NM_00548C | 3476.019 | 3509.276 | NM_002757 | 3537.852  | 4510.159  | NM_006317 | 2080.765  | 2476.438  |
| AB034694  | 1280.755 | 1020.391 | NM_003684 | 2014.395  | 2436.18   | AK000124  | 1815.128  | 2110.927  |
| NM_00327E | 3187.228 | 5879.762 | NM_005657 | 2515.364  | 6487.283  | NM_00448C | 2230.2    | 2114.341  |
| AK026404  | 1897.947 | 1582.236 | NM_01863E | 6429.025  | 7587.487  | NM_014914 | 9496.865  | 6972.55   |
| NM_01794E | 5293.68  | 4563.058 | AF080158  | 4074.869  | 3562.471  | NM_01828E | 4824.26   | 3924.595  |
| NM_00039E | 3304.459 | 2657.975 | AB037794  | 11320.756 | 11274.243 | AB018260  | 2371.368  | 2676.345  |
| NM_000267 | 6141.825 | 5890.146 | NM_00593E | 1572.06   | 1371.003  | NM_01598E | 740.531   | 1801.949  |
| NM_01660E | 5408.705 | 5326.581 | NM_01241E | 2629.116  | 4636.687  | NM_01476E | 5711.493  | 6665.167  |
| NM_00439E | 4355.136 | 4172.829 | NM_01417E | 5779.851  | 7206.623  | NM_016627 | 39765.512 | 37153.754 |
| NM_01496E | 3323.333 | 3873.711 | NM_001251 | 23408.414 | 24638.68  | NM_016121 | 5830.88   | 5976.29   |
| NM_01496E | 2916.889 | 3908.64  | AB011112  | 7758.383  | 9293.895  | NM_01476E | 5808.224  | 6182.778  |
| D87684    | 11192.39 | 8247.398 | NM_00262E | 3743.62   | 4628.75   | NM_00634E | 59757.324 | 53607.039 |
| NM_006317 | 471.274  | 747.304  | NM_018844 | 5088.005  | 5370.564  | AK026264  | 17141.822 | 17225.703 |
| NM_00121E | 7405.776 | 4407.818 | AF279778  | 1767.941  | 2088.308  | NM_00438E | 1903.503  | 2195.811  |
| AK000124  | 1224.965 | 1685.764 | NM_015477 | 5198.734  | 6444.676  | NM_00587E | 35654.699 | 36621.512 |
| NM_00448C | 1728.044 | 1232.838 | AK023212  | 3342.742  | 4033.895  | AF039697  | 663.17    | 874.197   |
| NM_014914 | 4992.521 | 4744.907 | AL353943  | 1451.272  | 1534.042  | NM_004934 | 813.196   | 763.401   |
| NM_01828E | 2269.462 | 2318.249 | BE568801  | 1011.058  | 765.572   | AF284436  | 884.771   | 695.177   |
| AB018260  | 507.396  | 543.864  | AB002336  | 2098.188  | 834.874   | NM_00444E | 3547.679  | 4330.59   |
| NM_01476E | 4588.335 | 6134.271 | NM_01328E | 9454.103  | 7253.907  | U39657    | 13119.186 | 12498.046 |
| NM_016627 | 21656.78 | 23491.88 | NM_00608E | 64322.988 | 73521.672 | NM_01634C | 4627.159  | 5100.312  |
| NM_016121 | 2126.919 | 2411.091 | NM_00577E | 8519.743  | 4816.21   | NM_01837E | 1701.88   | 1479.931  |
| NM_01476E | 1443.072 | 1333.995 | NM_01763E | 1762.097  | 2019.404  | NM_00644E | 1353.129  | 1233.51   |
| NM_00634E | 24632.71 | 32766.51 | NM_00327C | 1324.045  | 656.702   | NM_002757 | 3843.422  | 2773.854  |
| AK026264  | 7614.197 | 7481.292 | NM_016591 | 1558.887  | 600.692   | NM_003684 | 5826.354  | 4955.536  |
| NM_00587E | 5858.679 | 6141.093 | AL157437  | 15212.84  | 11188.766 | NM_005657 | 3481.718  | 4639.099  |
| AF039697  | 1164.652 | 1060.276 | L25629    | 1107.494  | 842.494   | NM_017671 | 2075.741  | 2464.03   |
| NM_00444E | 4260.865 | 3851.061 | AJ245539  | 907.593   | 451.568   | AB040883  | 9693.906  | 7681.265  |
| U39657    | 6592.591 | 5993.764 | NM_00149C | 2250.511  | 1248.737  | NM_01863E | 10231.668 | 8896.652  |
| NM_01837E | 1072.707 | 1081.547 | NM_01774C | 7247.322  | 4850.233  | AF264628  | 815.669   | 990.941   |
| NM_00644E | 590.93   | 1001.246 | AB033052  | 3308.861  | 3305.412  | NM_00171E | 4421.828  | 4490.073  |
| BF216030  | 1925.73  | 1963.186 | NM_018227 | 4095.892  | 3160.488  | NM_00439E | 14191.544 | 19709.252 |
| NM_002757 | 4265.694 | 3667.958 | NM_00334C | 43378.672 | 41747.852 | NM_00266E | 1987.969  | 2369.138  |
| NM_003684 | 3340.328 | 3690.196 | U46752    | 1933.567  | 1833.179  | NM_006094 | 10057.997 | 10540.063 |
| NM_005657 | 1936.968 | 2251.029 | NM_002794 | 48166.461 | 48994.531 | AF080158  | 4993.954  | 6306.104  |
| NM_017671 | 1004.546 | 812.706  | BF244646  | 31357.537 | 22158.143 | AB037794  | 17421.438 | 15312.712 |
| AB040883  | 3230.923 | 3057.038 | AF275808  | 1030.993  | 1261.068  | NM_00593E | 1233.52   | 1418.138  |
| NM_01863E | 6240.627 | 6759.206 | AK024038  | 3136.415  | 2754.658  | NM_01241E | 4616.541  | 3752.549  |

|           |          |          |           |           |           |           |           |           |
|-----------|----------|----------|-----------|-----------|-----------|-----------|-----------|-----------|
| AF264628  | 968.029  | 865.552  | NM_002055 | 435.954   | 2483.691  | NM_014178 | 9533.126  | 10861.202 |
| NM_001715 | 1482.042 | 1923.876 | AF163302  | 3992.832  | 3911.329  | NM_001251 | 22994.977 | 26451.869 |
| NM_004395 | 2478.898 | 4173.517 | NM_006408 | 3223.244  | 2102.359  | NM_004789 | 574.495   | 407.575   |
| NM_002663 | 361.448  | 483.312  | NM_002419 | 6413.76   | 5189.199  | AB011112  | 8819.562  | 10231.784 |
| NM_006094 | 3192.148 | 3297.424 | NM_001989 | 10734.454 | 6899.809  | NM_018669 | 6536.039  | 6894.988  |
| AF080158  | 3072.799 | 2508.843 | NM_002653 | 6506.817  | 1833.102  | NM_002623 | 4366.934  | 4837.308  |
| AB037794  | 11712.46 | 10163.97 | NM_005604 | 2460.955  | 1739.571  | NM_018844 | 6998.904  | 6768.651  |
| NM_005935 | 1511.781 | 1884.069 | S69023    | 2395.871  | 2094.887  | AF279778  | 2296.792  | 1774.725  |
| NM_012415 | 4824.519 | 3487.87  | NM_003454 | 3255.573  | 2879.19   | NM_015477 | 5952.937  | 5548.034  |
| NM_014178 | 2530.943 | 2807.46  | NM_003418 | 27832.643 | 15063.794 | AK023212  | 4476.171  | 4097.29   |
| NM_001251 | 7739.813 | 8871.595 | NM_017908 | 6755.847  | 3822.381  | AL353943  | 3382.341  | 4325.273  |
| NM_006605 | 354.72   | 523.732  | M25077    | 6140.101  | 4537.131  | BE568801  | 2487.361  | 2417.89   |
| AB011112  | 5838.281 | 5913.489 | NM_018702 | 2486.482  | 1975.018  | AB002336  | 2228.54   | 4224.146  |
| NM_002623 | 923.226  | 1069.219 | NM_004593 | 2962.76   | 2412.992  | NM_003127 | 1613.845  | 1610.134  |
| NM_018844 | 2843.714 | 2683.751 | NM_005778 | 9332.371  | 5221.416  | NM_013286 | 13775.994 | 15733.671 |
| AF279778  | 2059.417 | 1916.675 | NM_001032 | 64223.871 | 57250.617 | NM_006082 | 65797.938 | 62429.781 |
| NM_015477 | 5589.728 | 4779.907 | AK001052  | 35031.313 | 32302.799 | NM_006633 | 7672.106  | 4155.894  |
| AK023212  | 3058.255 | 2630.04  | NM_001415 | 62058.426 | 54527.223 | NM_016262 | 2036.396  | 2602.595  |
| AL353943  | 2853.895 | 3532.766 | NM_004564 | 7134.604  | 4521.439  | AB011116  | 16519.988 | 19828.027 |
| BE568801  | 601.738  | 849.104  | NM_000968 | 63945.297 | 53123.43  | AB037858  | 6337.615  | 7307.388  |
| AB002336  | 535.742  | 1339.461 | AL355743  | 2661.355  | 1414.185  | NM_000173 | 1159.494  | 786.825   |
| NM_003127 | 930.672  | 953.151  | L77571    | 1079.568  | 1007.205  | NM_005775 | 8916.578  | 14462.836 |
| NM_013286 | 3296.007 | 3553.294 | X81896    | 1107.021  | 1009.787  | NM_017639 | 1251.741  | 1125.768  |
| NM_006082 | 65852.87 | 44252    | AF070595  | 629.834   | 820.197   | NM_003270 | 1571.292  | 1357.342  |
| NM_006633 | 3608.655 | 4538.528 | NM_002202 | 2682.919  | 1597.109  | NM_016591 | 486.646   | 1497.183  |
| NM_016262 | 556.32   | 728.55   | NM_006005 | 4060.835  | 2740.702  | AL157437  | 20837.83  | 22491.25  |
| AB011116  | 6002.159 | 6020.382 | NM_002629 | 62508.383 | 48551.207 | L25629    | 807.841   | 669.661   |
| AB037858  | 2915.948 | 2319.275 | NM_014364 | 2423.085  | 1684.484  | AJ245539  | 717.549   | 536.805   |
| NM_005775 | 3423.403 | 5137.606 | NM_001685 | 58101.262 | 50323.602 | NM_001490 | 1998.3    | 2784.323  |
| NM_003270 | 639.173  | 940.665  | NM_006067 | 35503.93  | 22497.758 | NM_017740 | 7064.408  | 7374.181  |
| NM_016591 | 785.051  | 994.518  | NM_000284 | 9149.854  | 5440.448  | AB033052  | 4741.245  | 3890.309  |
| AL157437  | 3698.322 | 4137.736 | NM_004813 | 8001.492  | 4831.059  | NM_018227 | 5933.462  | 4557.828  |
| L25629    | 665.188  | 747.195  | AK023008  | 3596.688  | 2038.33   | AF050199  | 959.957   | 1096.866  |
| AJ245539  | 906.598  | 887.451  | NM_004689 | 3121.798  | 1689.728  | NM_003340 | 43320.324 | 49246.074 |
| NM_001490 | 1427.618 | 1960.575 | NM_006026 | 10855.971 | 6188.318  | U46752    | 3683.965  | 3027.069  |
| NM_017740 | 3815.619 | 5002.665 | AB040956  | 4229.366  | 2512.126  | NM_002794 | 67115.367 | 51880.059 |
| AB033052  | 2355.269 | 2250.506 | NM_016587 | 2875.47   | 1638.576  | AK024030  | 4966.208  | 6525.828  |
| NM_018227 | 4615.63  | 3936.841 | NM_003516 | 3353.709  | 3311.117  | AF275808  | 2710.893  | 3068.336  |
| AF050199  | 883.084  | 677.247  | NM_017953 | 5225.495  | 3926.137  | AK024038  | 12164.579 | 13351.582 |
| U46752    | 1732.699 | 1174.584 | BC000124  | 4175.186  | 3972.096  | NM_002055 | 2167.285  | 2151.223  |
| NM_002794 | 30900.08 | 28907.7  | Z11773    | 1809.328  | 1071.244  | NM_005803 | 14798.909 | 8779.271  |
| BF244646  | 7863.952 | 8659.103 | NM_006914 | 2253.66   | 1276.076  | NM_015515 | 9388.498  | 7201.76   |
| AK024030  | 2229.487 | 4611.287 | NM_003446 | 61399.332 | 52169.371 | AK001579  | 20312.854 | 20257.699 |
| AF275808  | 888.514  | 1078.88  | NM_001485 | 12968.738 | 10237.033 | NM_002670 | 10380.181 | 11635.629 |
| AK024038  | 3496.723 | 3508.683 | NM_002702 | 2114.758  | 1849.129  | AF163302  | 4153.171  | 5194.691  |
| NM_005803 | 3874.85  | 4636.586 | AK021510  | 1916.876  | 1636.765  | NM_006408 | 2763.524  | 3151.166  |
| NM_015515 | 4064.188 | 3501.649 | AK022711  | 2772.008  | 3672.429  | NM_002419 | 9401.081  | 10177.551 |
| AK001579  | 7164.574 | 6701.851 | AK024310  | 1111.292  | 1766.155  | NM_001989 | 12806.854 | 12015.43  |
| NM_002670 | 3939.515 | 4011.762 | AK023039  | 3065.508  | 3111.23   | NM_002653 | 3228.042  | 6289.805  |
| AF163302  | 1222.598 | 1243.765 | AL109688  | 5137.24   | 5139.543  | NM_005604 | 2868.241  | 2459.919  |
| NM_002419 | 5301.141 | 3970.342 | AF074981  | 1212.655  | 1003.261  | S69023    | 2759.494  | 2699.607  |
| NM_001989 | 2915.295 | 2563.468 | AK025863  | 3132.915  | 1287.771  | NM_003454 | 4252.293  | 3463.12   |
| NM_002653 | 2596.585 | 2962.556 | D42044    | 3535.049  | 2303.9    | NM_003418 | 25860.516 | 36869.434 |



|           |          |          |           |           |           |           |           |           |
|-----------|----------|----------|-----------|-----------|-----------|-----------|-----------|-----------|
| NM_005604 | 910.045  | 928.358  | AK026149  | 1851.644  | 2148.668  | NM_01790E | 6745.331  | 7927.213  |
| S69023    | 2457.194 | 2479.93  | AF038185  | 7457.311  | 4855.213  | NM_00688E | 801.403   | 1701.122  |
| NM_003454 | 3717.808 | 2562.195 | AB027011  | 24932.348 | 19375.807 | M25077    | 10018.573 | 8665.84   |
| NM_00341E | 18519.97 | 30271.07 | AK025305  | 2123.924  | 2026.012  | NM_01870Z | 3227.827  | 3293.983  |
| NM_01790E | 2292.938 | 2515.583 | AL117415  | 4260.198  | 3792.787  | M62843    | 1104.943  | 932.154   |
| NM_00688E | 511.678  | 703.027  | AK023616  | 1047.134  | 912.888   | NM_00459Z | 4849.812  | 3626.937  |
| NM_01870Z | 2810.577 | 2404.036 | AK025665  | 3655.609  | 3174.093  | NM_018084 | 24705.703 | 18417.98  |
| M62843    | 610.215  | 622.07   | AK027152  | 2765.842  | 1572.099  | AF164797  | 67570.273 | 53954.781 |
| NM_00459Z | 1949.164 | 1317.556 | BC037530  | 52393.82  | 43064.613 | NM_01784C | 48392.148 | 48473.844 |
| NM_00577E | 5407.894 | 6108.578 | NM_014851 | 14800.519 | 14667.422 | AK001052  | 54119.699 | 48799.23  |
| NM_00103Z | 35527.15 | 34533.32 | AK022811  | 2271.963  | 2580.136  | NM_00141E | 64320.754 | 52746.313 |
| NM_018084 | 3177.836 | 3157.365 | AL117635  | 2348.846  | 2218.86   | NM_004564 | 10360.15  | 10731.405 |
| AF164797  | 19116.41 | 16467.8  | AK025332  | 2247.147  | 1872.729  | NM_00096E | 66859.32  | 51839.012 |
| NM_01784C | 9582.768 | 9695.001 | AB040929  | 720.04    | 850.982   | AL355743  | 3027.583  | 3130.649  |
| AK001052  | 16999.82 | 16980.39 | AB020735  | 1679.608  | 1452.212  | L77571    | 1333.419  | 987.666   |
| NM_00141E | 38237.18 | 39785.54 | AL109700  | 628.176   | 787.436   | X81896    | 1135.313  | 1063.905  |
| NM_00096E | 71717.16 | 48735.49 | D17010    | 963.282   | 568.209   | AF070595  | 1145.272  | 512.557   |
| AL355743  | 1414.565 | 1459.385 | AJ011596  | 6518.22   | 5497.737  | NM_00220Z | 3972.5    | 3934.464  |
| AF070595  | 655.431  | 571.244  | U17639    | 1764.588  | 1561.78   | NM_00600E | 4396.212  | 4663.813  |
| NM_00220Z | 4365.857 | 4686.378 | AL049215  | 52577.082 | 43561.422 | NM_00262E | 68373.438 | 51619.203 |
| NM_00600E | 3483.243 | 3602.565 | AL049254  | 1637.356  | 1095.419  | NM_014364 | 3059.893  | 3008.078  |
| NM_00262E | 49866.54 | 39953.01 | Z83954    | 1993.695  | 1278.187  | NM_00168E | 66587     | 50899.641 |
| NM_014364 | 1638.468 | 1724.829 | M74093    | 1831.315  | 1470.377  | NM_006067 | 47472.426 | 45085.641 |
| NM_00168E | 38179.8  | 39736.85 | D17207    | 5743.236  | 3136.386  | NM_000284 | 13928.426 | 11812.167 |
| NM_006067 | 22810.91 | 30289.29 | D55640    | 1871.782  | 1032.484  | NM_00481Z | 11781.287 | 11952.923 |
| NM_000284 | 4961.984 | 4701.153 | AF085822  | 2433.538  | 2377.04   | AK023008  | 4820.502  | 5804.404  |
| NM_00481Z | 5401.063 | 5216.228 | AK021551  | 3170.339  | 1795.597  | NM_00468E | 11133.495 | 10523.559 |
| AK023008  | 2270.388 | 2953.325 | AK025117  | 1432.261  | 1596.02   | NM_00602E | 50391.18  | 46251.07  |
| NM_00468E | 5576.048 | 6130.769 | AK000024  | 9275.124  | 7017.518  | BG339855  | 1411.375  | 1147.608  |
| NM_00602E | 7963.708 | 8098.289 | AK026693  | 2584.539  | 2013.973  | AB040956  | 8380.163  | 9162.387  |
| AB040956  | 2097.502 | 2893.458 | AK001128  | 1272.018  | 632.976   | NM_016587 | 3681.708  | 2939.853  |
| NM_016587 | 1217.544 | 1617.65  | AK000794  | 4422.689  | 2143.711  | NM_00351E | 4485.653  | 4133.48   |
| NM_01795Z | 2344.415 | 2557.28  | AK000950  | 2157.775  | 1511.43   | NM_01795Z | 9707.083  | 8165.039  |
| BC000124  | 1743.428 | 1788.364 | AK026812  | 1804.885  | 1684.106  | BC000124  | 6631.831  | 6047.539  |
| Z11773    | 722.068  | 1148.723 | AK000176  | 1430.526  | 1379.791  | Z11773    | 2373.826  | 3159.88   |
| NM_006914 | 642.269  | 799.644  | AK000981  | 1087.938  | 1807.18   | NM_006914 | 1981.782  | 2441.968  |
| NM_00344E | 12068.14 | 14173.73 | AK024615  | 847.222   | 792.173   | NM_00344E | 62384.531 | 55533.801 |
| NM_00148E | 2185.419 | 2030.04  | AK025325  | 9340.811  | 5797.241  | NM_00148E | 11949.451 | 12659.017 |
| NM_00270Z | 1448.738 | 1480.469 | U50531    | 3964.972  | 3594.025  | NM_00270Z | 2328.717  | 2523.218  |
| AK021510  | 621.929  | 1172.867 | NM_00531E | 14042.086 | 9766.354  | AK021510  | 2015.227  | 1907.105  |
| AK022711  | 2273.913 | 1965.423 | U85653    | 872.938   | 799.216   | AK022711  | 2776.755  | 2296.291  |
| AK024310  | 887.214  | 635.81   | L09099    | 1359.919  | 1088.707  | AK024310  | 727.639   | 932.069   |
| AK023039  | 3123.236 | 2612.761 | AL117474  | 3802.232  | 2908.628  | AK023039  | 2968.722  | 2724.761  |
| AL109688  | 1661.733 | 1427.963 | NM_005421 | 2059.51   | 1452.09   | AL109688  | 4415.987  | 4402.3    |
| AF074981  | 659.233  | 660.383  | AK024580  | 46701.922 | 39193.715 | AF074981  | 1090.051  | 1131.004  |
| AK025863  | 1861.52  | 2734.129 | AL442093  | 7986.167  | 6959.998  | AK025863  | 2932.918  | 3891.366  |
| D42044    | 2205.49  | 2326.724 | NM_01244E | 1873.611  | 1405.632  | D42044    | 5087.505  | 4713.688  |
| AK023009  | 961.71   | 1370.411 | AK000543  | 18002.154 | 13717.222 | AK023009  | 910.819   | 1314.117  |
| AK026149  | 851.084  | 591.087  | AK026683  | 6483.429  | 5161.153  | AK026149  | 1365.383  | 1274.579  |
| AF038185  | 2888.252 | 2794.156 | D16906    | 6573.714  | 4302.066  | AF038185  | 7649.971  | 8937.87   |
| AB027011  | 2289.912 | 2585.989 | AL110280  | 3038.009  | 2252.573  | AB027011  | 22009.35  | 23444.219 |
| AK025305  | 2398.886 | 2377.674 | AF086196  | 1188.157  | 877.844   | AK025305  | 3204.913  | 3622.368  |
| AF131805  | 103.872  | 370.433  | NM_00554Z | 51434.563 | 44942.617 | AF131805  | 757.204   | 2332.327  |

|           |          |          |           |           |           |           |           |           |
|-----------|----------|----------|-----------|-----------|-----------|-----------|-----------|-----------|
| AL117415  | 5309.265 | 4796.035 | X95095    | 2776.81   | 2181.875  | AL117415  | 20157.781 | 20175.398 |
| AK023616  | 711.11   | 593.208  | AB007902  | 2143.316  | 3044.762  | AK023616  | 2225.709  | 1994.345  |
| AK025665  | 4353.291 | 4191.468 | AF078528  | 27847.49  | 25018.973 | AK025665  | 4522.362  | 4060.632  |
| AK027152  | 1140.431 | 1897.914 | AF161411  | 6343.205  | 6066.73   | AL355694  | 925.102   | 1116.026  |
| AF191492  | 1093.857 | 1005.953 | NM_01989€ | 3159.273  | 3111.929  | AK027152  | 3467.959  | 5196.313  |
| BC037530  | 10073.13 | 7801.095 | J04118    | 1040.615  | 341.12    | AL049257  | 800.636   | 407.664   |
| NM_014851 | 6841.331 | 5898.941 | NM_00073€ | 14022.543 | 13859.299 | AF191492  | 1571.804  | 1449.22   |
| AK022811  | 3815.664 | 2679.312 | U31734    | 59349.547 | 50803.492 | BC037530  | 47650.68  | 43980.867 |
| AL117635  | 2710.78  | 1613.799 | AF085885  | 3965.032  | 3408.171  | NM_014851 | 13779.986 | 14167.006 |
| AK025332  | 1427.913 | 1300.873 | M24751    | 2112.015  | 2042.71   | AK022811  | 3597.362  | 3023.156  |
| AB040929  | 651.832  | 604.715  | AL049974  | 2058.138  | 2248.975  | AL117635  | 2434.645  | 2438.454  |
| AB020735  | 951.101  | 1084.131 | AK022953  | 608.593   | 899.912   | AK025332  | 1133.759  | 1307.98   |
| AJ011596  | 410.228  | 388.873  | AF009319  | 3931.959  | 3428.74   | AB040929  | 809.748   | 392.601   |
| U17639    | 774.963  | 314.191  | NM_01846€ | 11963.768 | 9871.46   | AB020735  | 1474.94   | 1205.792  |
| AL049215  | 1229.422 | 1562.963 | Z36845    | 1689.98   | 1336.899  | AJ011596  | 5768.298  | 6544.342  |
| Z83954    | 2699.811 | 2556.904 | NM_016127 | 14356.136 | 9920.715  | U17639    | 1596.344  | 1497.542  |
| M74093    | 1686.86  | 1486.572 | AF085939  | 1592.364  | 1190.11   | AL049215  | 48496.98  | 43713.773 |
| M28219    | 998.135  | 1113.652 | NM_00679€ | 28911.736 | 23791.053 | X51779    | 1527.505  | 1983.96   |
| L17326    | 611.386  | 535.103  | Z36874    | 56698.395 | 48780.547 | X81001    | 818.648   | 950.066   |
| D17207    | 1901.12  | 2000.098 | AK095477  | 2271.982  | 2458.449  | AL049254  | 1829.262  | 2401.143  |
| D55640    | 2541.75  | 2144.774 | AK023326  | 1155.693  | 975.538   | Z83954    | 6149.052  | 6861.192  |
| NM_01741€ | 810.976  | 329.007  | AK022418  | 1360.452  | 612.789   | M74093    | 4629.922  | 4695.007  |
| AF085822  | 1981.126 | 1418.396 | AL137257  | 3411.463  | 1938.979  | M28219    | 2852.958  | 2451.503  |
| AK021551  | 561.385  | 1160.39  | CY3Cy5    | 5916.294  | 244.035   | L17326    | 737.732   | 923.225   |
| AK025117  | 1511.566 | 1099.182 | AA778392  | 10602.169 | 11062.789 | D17207    | 10074.531 | 12695.51  |
| AK000024  | 1259.86  | 1190.576 | AI478178  | 3640.902  | 5277.852  | D55640    | 4689.24   | 5260.049  |
| AK026693  | 1050.829 | 1159.128 | AA101279  | 7424.28   | 10452.883 | AF085897  | 1084.953  | 1002.036  |
| AK001128  | 1112.893 | 650.24   | M19154    | 2604.149  | 3100.094  | NM_01741€ | 450.038   | 375.452   |
| AK000794  | 1152.382 | 882.592  | AA399410  | 10858.109 | 10036.896 | AF085822  | 2316.079  | 2895.184  |
| AK000176  | 799.954  | 634.145  | AA137031  | 2507.875  | 2200.841  | AK021551  | 2397.706  | 3220.146  |
| AK000831  | 2174.316 | 2010.533 | AA292226  | 5584.442  | 5064.554  | AK025117  | 1774.931  | 1741.476  |
| AK024615  | 762.87   | 683.487  | NM_00050€ | 2610.392  | 2875.245  | AK000024  | 8530.945  | 7976.752  |
| AK025054  | 843.124  | 1090.302 | J04449    | 1627.926  | 1284.421  | AK026693  | 2285.225  | 2434.776  |
| AK024556  | 425.19   | 370.337  | BC007031  | 7743.549  | 6807.162  | NM_01228€ | 1121.972  | 596.302   |
| AK024935  | 696.253  | 603.074  | AF129756  | 13291.903 | 12814.989 | AK001128  | 1037.891  | 1127.285  |
| AK025325  | 2976.686 | 3351.796 | NM_002957 | 21094.938 | 21245.979 | AK000090  | 772.549   | 866.29    |
| U50531    | 1406.157 | 2274.719 | BC036369  | 2809.592  | 2340.66   | AK000794  | 6444.575  | 6652.163  |
| NM_00531€ | 4971.308 | 6870.03  | X12492    | 14397.153 | 13336.885 | AK000950  | 8437.296  | 7651.286  |
| AL117474  | 1273.29  | 1485.137 | U93051    | 9981.322  | 8524.834  | AK026812  | 5099.744  | 4984.608  |
| NM_005421 | 726.071  | 502.34   | SR2       | 68177.5   | 68216.305 | AK000176  | 2380.412  | 2115.53   |
| AK024580  | 2899.689 | 3615.3   | SR4       | 22958.875 | 17405.547 | AK000831  | 9020.222  | 8789.604  |
| AL442093  | 3343.853 | 2719.051 | SR6       | 3729.38   | 3346.632  | AK000981  | 2319.853  | 2227.869  |
| AK024331  | 2367.921 | 1930.685 | SR8       | 14387.985 | 35815.516 | AK024615  | 563.541   | 527.428   |
| AK024452  | 1798.09  | 1588.644 | SR10      | 36981.023 | 12005.692 | AK025054  | 3209.728  | 3209.258  |
| AK021733  | 2871.217 | 2218.739 | CY3Cy5    | 7764.101  | 774.417   | AK024556  | 825.755   | 1067.045  |
| NM_01244€ | 2012.821 | 2046.216 | NM_00568€ | 2253.479  | 3293.339  | AK024935  | 2114.67   | 2399.254  |
| AK000543  | 7941.167 | 9592.583 | NM_00292€ | 1745.156  | 2264.925  | AK025325  | 8611.497  | 7926.931  |
| AK026683  | 3967.136 | 3428.883 | NM_018697 | 1880.731  | 1949.092  | U50531    | 4546.354  | 4217.31   |
| D16906    | 4928.185 | 4985.683 | AF090116  | 1331.878  | 1528.948  | NM_00531€ | 9850.628  | 10425.277 |
| AL110280  | 1070.095 | 992.479  | NM_01403€ | 65954.961 | 67291.875 | U85653    | 880.349   | 635.98    |
| NM_00554€ | 25269.52 | 32717.5  | NM_004224 | 13288.55  | 15044.771 | L09099    | 1958.144  | 1638.538  |
| X95095    | 591.009  | 804.627  | NM_000254 | 9578.672  | 12966.268 | AL117474  | 3332.121  | 3267.446  |
| AF078528  | 9743.396 | 9850.055 | Z21967    | 12112.259 | 11815.392 | NM_005421 | 2199.215  | 2232.217  |

|           |          |          |           |           |           |           |           |           |
|-----------|----------|----------|-----------|-----------|-----------|-----------|-----------|-----------|
| AF161411  | 6337.466 | 4389.144 | NM_003738 | 1019.374  | 1100.055  | AK024580  | 40710.262 | 37699.836 |
| AK000450  | 28448.69 | 28023.49 | NM_016185 | 58877.781 | 53175.121 | AL442093  | 8675.101  | 6905.25   |
| NM_018224 | 9433.16  | 8679.955 | NM_012110 | 15973.574 | 18406.4   | AK024331  | 2065.111  | 1479.722  |
| NM_019896 | 6705.271 | 5983.412 | AF052693  | 4971.469  | 5421.38   | AK024452  | 2105.595  | 1901.781  |
| NM_018566 | 8970.308 | 7845.993 | L09100    | 799.366   | 844.109   | AJ249975  | 562.396   | 977.55    |
| J04118    | 1135.721 | 1199.411 | NM_005472 | 1154.499  | 1027.406  | AK021733  | 2804.328  | 3128.5    |
| NM_000730 | 8807.169 | 8593.401 | NM_004313 | 964.208   | 1351.722  | NM_012446 | 2619.951  | 3203.479  |
| U31734    | 22127.65 | 26546.61 | NM_013435 | 434.053   | 671.326   | AK000543  | 15629.776 | 15141.723 |
| AF085885  | 1471.819 | 1775.066 | NM_000132 | 18078.418 | 17735.23  | AK026683  | 6662.148  | 6098.017  |
| M24751    | 904.45   | 740.763  | NM_001727 | 5662.678  | 4628.544  | D16906    | 6122.892  | 5857.348  |
| AL049974  | 605.807  | 865.996  | BG717460  | 3142.371  | 3510.416  | AK022335  | 1082.417  | 878.016   |
| AF009319  | 656.188  | 973.337  | NM_018086 | 22461.072 | 25319.633 | AL110280  | 2628.448  | 2262.933  |
| AL365519  | 593.855  | 770.294  | NM_004161 | 16791.836 | 18630.072 | AK024235  | 1048.199  | 579.768   |
| NM_018465 | 6973.165 | 6972.675 | NM_001295 | 1504.518  | 2543.817  | NM_017458 | 890.829   | 1459.801  |
| Z36845    | 574.162  | 706.57   | NM_005161 | 3364.111  | 2942.865  | AF086196  | 1347.412  | 1379.464  |
| NM_016127 | 9592.499 | 11497.22 | AB037749  | 943.913   | 1417.058  | NM_005542 | 49621.426 | 44968.848 |
| AF085939  | 820.729  | 751.231  | NM_020347 | 1759.471  | 1695.833  | X95095    | 4167.795  | 4272.164  |
| NM_006792 | 18237.8  | 20996.41 | NM_001462 | 3964.567  | 6100.063  | AB007902  | 1038.644  | 875.307   |
| Z36874    | 65238.27 | 42070.81 | NM_004072 | 1716.257  | 3127.003  | AF078528  | 27994.277 | 33450.07  |
| AK095477  | 4451.917 | 2689.683 | AF068286  | 1856.441  | 1620.582  | AF161411  | 8509.24   | 6845.246  |
| AK023326  | 2348.003 | 2056.303 | AB040957  | 10426.806 | 10926.211 | NM_019896 | 7375.145  | 6542.387  |
| AK022462  | 3512.489 | 3335.537 | NM_006890 | 1181.606  | 1446.426  | NM_018566 | 9050.708  | 7563.69   |
| NM_020530 | 1347.147 | 1086.149 | NM_003110 | 17437.977 | 25139.697 | J04118    | 1978.029  | 1628.383  |
| AK022418  | 2042.468 | 2010.81  | NM_003612 | 7573.609  | 8048.676  | NM_000730 | 11599.332 | 12921.864 |
| AF279777  | 821.807  | 752.215  | NM_013230 | 2641.736  | 3340.438  | U31734    | 63722.301 | 49040.52  |
| AK021748  | 1765.136 | 1584.383 | X72308    | 5040.976  | 5900.647  | AF085885  | 5160.864  | 4885.779  |
| AK021771  | 1007.208 | 576.577  | NM_005408 | 1195.605  | 1254.778  | M24751    | 2714.72   | 2591.551  |
| AL137257  | 16221.27 | 13580.83 | AB041269  | 1389.724  | 1098.061  | AL049974  | 2501.807  | 1975.705  |
| AF086503  | 1178.855 | 1003.986 | AK024908  | 5929.396  | 5836.006  | AK022953  | 1990.972  | 2214.594  |
| CY3Cy5    | 26626.65 | 1544.824 | NM_018270 | 10233.937 | 10699.834 | AF009319  | 3604.866  | 3315.892  |
| AA778392  | 2790.044 | 4306.325 | NM_000260 | 18656.746 | 18115.883 | AL365519  | 1669.191  | 1828.668  |
| AI478178  | 1006.081 | 1483.171 | NM_014160 | 8589.55   | 7186.679  | NM_018465 | 16175.39  | 15363.901 |
| AA101279  | 5522.742 | 5499.993 | AF230877  | 2985.35   | 2307.84   | Z36845    | 1815.469  | 1532.385  |
| M19154    | 1279.173 | 1706.125 | NM_017668 | 10996.612 | 9185.262  | M73792    | 1488.699  | 1695.143  |
| AA399410  | 9192.935 | 11457.54 | AB033049  | 22019.42  | 22617.707 | NM_016127 | 16927.098 | 18169.527 |
| AA137031  | 1648.958 | 1677.974 | NM_004377 | 7048.154  | 7591.313  | AF085939  | 2877.281  | 2923.421  |
| AA292226  | 1256.44  | 2083.424 | AB037815  | 18651.771 | 21390.189 | AK095477  | 5406.327  | 4222.351  |
| NM_000500 | 2057.143 | 2070.633 | NM_003645 | 11790.112 | 12551.468 | AK023326  | 2167.098  | 1363.36   |
| J04449    | 1258.603 | 1439.126 | AF263613  | 4412.808  | 8869.532  | AK022462  | 4470.657  | 4244.762  |
| BC007031  | 1063.991 | 1362.113 | NM_000097 | 4538.091  | 5301.618  | NM_020530 | 2246.946  | 2267.328  |
| AF129756  | 5036.678 | 3738.937 | NM_001509 | 3684.105  | 2951.628  | AK022418  | 3514.75   | 2863.013  |
| NM_002957 | 5304.168 | 6019.424 | AK022878  | 11516.718 | 11088.729 | AF279777  | 2247.558  | 1469.168  |
| BC036369  | 1877.971 | 2981.81  | NM_018095 | 1390.567  | 2639.63   | AK021748  | 3199.044  | 3542.463  |
| X12492    | 10056.85 | 10986.09 | AF217187  | 25257.99  | 27428.695 | AK021771  | 614.98    | 546.39    |
| U93051    | 7128.935 | 10381.51 | NM_017750 | 7112.213  | 8864.146  | AL137257  | 18485.855 | 15860.131 |
| SR2       | 26109.95 | 21716.97 | AK027122  | 10254.972 | 13805.843 | AF086503  | 853.553   | 907.053   |
| SR4       | 7882.871 | 5998.474 | AK026196  | 4687.265  | 4091.292  | CY3Cy5    | 14729.363 | 520.248   |
| SR6       | 1722.208 | 1251.575 | AL137668  | 1679.693  | 2163.486  | AA778392  | 7191.96   | 8461.38   |
| SR8       | 9386.74  | 18132.33 | AV704019  | 984.044   | 648.462   | AI478178  | 2989.245  | 2952.392  |
| SR10      | 44015.54 | 11822.23 | NM_013348 | 4679.412  | 5048.077  | AA101279  | 6544.065  | 7367.125  |
| CY3Cy5    | 16387.56 | 595.105  | NM_004977 | 10701.534 | 13098.055 | M19154    | 2740.979  | 2248.056  |
| NM_000406 | 719.659  | 789.228  | NM_012283 | 28297.326 | 33510.945 | AA399410  | 9072.144  | 9299.907  |
| NM_005682 | 1748.564 | 1377.012 | NM_004700 | 1457.801  | 1543.095  | AA137031  | 1839.728  | 1323.477  |

|           |          |          |           |           |           |           |           |           |
|-----------|----------|----------|-----------|-----------|-----------|-----------|-----------|-----------|
| NM_002926 | 1824.618 | 2292.752 | NM_004162 | 12503.393 | 15326.191 | AA292226  | 2705.339  | 3068.438  |
| NM_000233 | 485.814  | 768.245  | NM_006868 | 13469.233 | 15863.486 | NM_000500 | 8664.64   | 10371.984 |
| NM_018697 | 981.407  | 1865.326 | AB020706  | 5552.575  | 5763.465  | J04449    | 3156.741  | 2783.866  |
| AF090116  | 792.315  | 618.748  | NM_007166 | 8681.922  | 8628.798  | BC007031  | 4950.604  | 6757.887  |
| NM_014030 | 7917.165 | 9868.651 | NM_016223 | 70693.539 | 61239.09  | AF129756  | 18886.883 | 17819.592 |
| NM_004224 | 565.252  | 1044.954 | NM_002869 | 10231.087 | 10891.353 | X12492    | 22142.504 | 21466.221 |
| NM_000254 | 6686.817 | 6552.929 | NM_006755 | 6823.779  | 7758.746  | U93051    | 10844.962 | 13305.532 |
| Z21967    | 5098.558 | 6871.55  | NM_005881 | 3968.603  | 6084.069  | SR2       | 66838.625 | 61899.031 |
| NM_003738 | 931.521  | 1161.157 | L40519    | 1656.698  | 2305.124  | SR4       | 34768.82  | 29070.658 |
| NM_016185 | 25752.21 | 31191.99 | NM_004204 | 5650.905  | 4946.236  | SR6       | 5953.639  | 3589.566  |
| NM_012110 | 3652.989 | 3836.575 | AK002181  | 1913.488  | 1638.43   | SR8       | 20694.252 | 40300.027 |
| AF052693  | 1721.867 | 1745.625 | NM_001641 | 23993.521 | 25260.543 | SR10      | 62636.789 | 20773.705 |
| NM_001129 | 9355.605 | 10082.5  | BC015750  | 60923.883 | 71408.633 | CY3Cy5    | 17016.525 | 565.679   |
| NM_005472 | 1093.5   | 1427.786 | AK025769  | 7417.914  | 9207.9    | NM_005682 | 2551.178  | 2725.763  |
| NM_004313 | 636.525  | 600.251  | AW945166  | 2078.161  | 2906.136  | NM_002926 | 1661.467  | 1843.668  |
| NM_000132 | 17816.08 | 13493.02 | NM_005236 | 9651.136  | 14064.661 | NM_018697 | 1881.005  | 1713.479  |
| BG717460  | 4268.554 | 3663.98  | NM_006384 | 22676.797 | 28008.336 | NM_014030 | 50518.379 | 57011.773 |
| NM_018086 | 9411.927 | 9500.503 | NM_013257 | 3621.121  | 4910.65   | NM_004224 | 2491.34   | 2943.061  |
| NM_004161 | 13944    | 16311.87 | AB044546  | 2946.256  | 2705.633  | NM_000254 | 11107.765 | 8536.035  |
| NM_001295 | 1115.059 | 1033.489 | NM_006256 | 7126.29   | 8064.996  | Z21967    | 12257.22  | 14026.64  |
| NM_005161 | 1632.378 | 2071.281 | NM_002846 | 1771.285  | 11027.446 | NM_003738 | 1389.074  | 2817.613  |
| AB037749  | 830.519  | 770.836  | NM_002837 | 4625.258  | 4895.245  | NM_016185 | 62422.953 | 56636.926 |
| NM_020347 | 2470.656 | 2302.156 | AL133077  | 33740.023 | 42934.441 | NM_012110 | 12196.261 | 12244.237 |
| NM_001462 | 2192.12  | 1862.392 | AK025211  | 3125.611  | 6119.392  | NM_005461 | 593.089   | 1676.465  |
| NM_004072 | 791.235  | 970.896  | U06715    | 944.369   | 1046.833  | AF052693  | 3996.964  | 3843.229  |
| AF068286  | 625.343  | 892.512  | NM_013402 | 15504.003 | 11319.317 | NM_001129 | 31496.703 | 21772.336 |
| AB040957  | 6272.598 | 3756.459 | NM_002662 | 924.577   | 588.798   | L09100    | 1148.595  | 1610.344  |
| NM_006890 | 1228.955 | 955.484  | NM_000132 | 17079.547 | 15908.693 | NM_005472 | 1899.764  | 1837.749  |
| NM_003110 | 4418.463 | 3966.878 | NM_001727 | 9973.926  | 9268.873  | NM_004313 | 2156.544  | 1185.132  |
| NM_003612 | 337.531  | 558.913  | NM_004076 | 4505.37   | 4742.545  | NM_013435 | 1598.614  | 1571.63   |
| NM_013230 | 1707.035 | 1903.592 | BG717460  | 4219.72   | 5380.29   | NM_000132 | 25683.152 | 22278.24  |
| NM_005408 | 563.663  | 439.605  | AA778392  | 11111.682 | 11001.664 | NM_001727 | 5814.475  | 6021.193  |
| BC008376  | 2860.677 | 2984.024 | AI478178  | 3410.253  | 4365.072  | NM_004076 | 3185.895  | 3787.406  |
| AB041269  | 1817.115 | 2195.644 | AA101279  | 7414.182  | 8596.038  | NM_007123 | 63061.113 | 61664.07  |
| AK024908  | 8253.605 | 8128.341 | M19154    | 2548.619  | 3473.267  | BG717460  | 4409.155  | 4007.505  |
| NM_018270 | 8269.985 | 8627.686 | AA399410  | 11356.112 | 10861.471 | NM_018086 | 20904.02  | 25092.418 |
| NM_000260 | 2605.603 | 2307.266 | AA137031  | 3468.403  | 3711.357  | NM_004161 | 18209.266 | 19723.004 |
| AF230877  | 2790.088 | 2566.082 | AA292226  | 7828.231  | 7835.905  | NM_001295 | 2273.119  | 2023.534  |
| NM_017668 | 11039.19 | 7721.544 | NM_000500 | 3078.013  | 3588.054  | NM_005161 | 2128.249  | 3799.36   |
| AB033049  | 10478.67 | 9042.5   | J04449    | 2216.275  | 2969.737  | AB037749  | 845.4     | 1803.329  |
| NM_004377 | 6011.729 | 7015.231 | BC007031  | 9600.409  | 10126.245 | NM_020347 | 3333.914  | 2862.059  |
| AB037815  | 4230.922 | 4648.395 | AF129756  | 18250.541 | 24787.672 | NM_001462 | 3126.858  | 2427.018  |
| NM_003645 | 7172.412 | 9482.518 | NM_002957 | 20236.264 | 22370.998 | AB040957  | 7386.224  | 3341.172  |
| AF263613  | 5292     | 3886.218 | BC036369  | 3589.227  | 3663.496  | NM_003110 | 10474.198 | 12267.891 |
| NM_000097 | 4012.545 | 5030.747 | X12492    | 15068.271 | 14193.787 | NM_003612 | 2985.138  | 3748.124  |
| NM_001509 | 1401.422 | 1544.3   | U93051    | 7342.535  | 7294.559  | NM_013230 | 2852.449  | 3160.082  |
| AK022878  | 4492.735 | 4346.249 | NM_017540 | 2106.119  | 2350.738  | X72308    | 1064.678  | 1901.138  |
| NM_018099 | 2029.708 | 1515.494 | NM_018270 | 12668.431 | 13535.933 | NM_005408 | 652.795   | 798.133   |
| AF217187  | 15108.44 | 17421.72 | NM_000260 | 60752.785 | 60752.117 | BC008376  | 6857.526  | 5952.045  |
| NM_017750 | 2982.712 | 2983.702 | NM_014160 | 8519.693  | 8291.667  | AB041269  | 2621.247  | 1739.421  |
| AK027122  | 7903.937 | 7956.107 | NM_017668 | 11382.178 | 12593.688 | AK024908  | 10041.69  | 8500.981  |
| AK026196  | 2244.317 | 3171.573 | AB033049  | 62240.602 | 64726.895 | NM_018270 | 12436.209 | 11361.521 |
| AL137668  | 724.778  | 1067.499 | NM_005682 | 2552.778  | 2324.401  | NM_000260 | 8714.328  | 9473.396  |

|           |          |          |           |           |           |           |           |           |
|-----------|----------|----------|-----------|-----------|-----------|-----------|-----------|-----------|
| NM_004977 | 2078.656 | 2244.029 | NM_002926 | 1738.46   | 1286.922  | NM_014160 | 11022.992 | 9957.698  |
| NM_004888 | 30296.28 | 31483.08 | NM_018697 | 2534.385  | 2546.303  | AF230877  | 4363.768  | 3276.292  |
| NM_012283 | 12592.3  | 12784.72 | AF090116  | 1199.224  | 1075.417  | NM_017668 | 13198.853 | 9834.481  |
| NM_004700 | 1009.302 | 1142.549 | NM_014030 | 62465.93  | 62229.82  | AB033049  | 13153.714 | 11475.71  |
| NM_004162 | 12324.76 | 12720.65 | NM_004224 | 11912.749 | 13346.781 | NM_004377 | 8438.931  | 10788.015 |
| NM_006868 | 11128.22 | 9678.733 | NM_000254 | 11499.936 | 16488.059 | AB037815  | 15936.771 | 17868.266 |
| AB020706  | 8073.084 | 8677.026 | Z21967    | 12503.528 | 10355.268 | NM_003645 | 12465.715 | 14660.47  |
| NM_007166 | 9901.576 | 8327.155 | NM_003738 | 1070.617  | 1780.581  | NM_000097 | 4739.51   | 5126.825  |
| NM_016223 | 24673.93 | 24219.43 | NM_016185 | 64233.977 | 63572.402 | NM_001509 | 3431.455  | 3549.665  |
| NM_002869 | 12262.7  | 8683.206 | NM_012110 | 12406.365 | 16304.441 | AK022878  | 11601.787 | 11166.131 |
| NM_006755 | 8978.318 | 9190.327 | AF052693  | 3045.562  | 3550.791  | NM_018099 | 2657.992  | 2058.202  |
| NM_005881 | 6371.34  | 6846.845 | NM_001129 | 24039.418 | 37649.066 | AF217187  | 19167.834 | 19754.643 |
| NM_005794 | 383.741  | 454.143  | L09100    | 821.199   | 1150.232  | NM_017750 | 3146.224  | 2238.313  |
| L40519    | 3358.899 | 3334.322 | NM_005472 | 1165.069  | 1282.754  | AK026196  | 3418.027  | 2624.983  |
| NM_004204 | 2242.542 | 3043.788 | NM_004313 | 1242.311  | 1073.691  | AL137668  | 2113.294  | 2006.994  |
| AK002181  | 520.798  | 766.418  | NM_004162 | 22507.99  | 25057.92  | AV704019  | 935.828   | 5194.88   |
| NM_001641 | 15948.78 | 22449.45 | NM_006868 | 14968.691 | 13211.977 | NM_013348 | 516.853   | 3269.475  |
| BC015750  | 42158.76 | 43642.54 | AB020706  | 6014.409  | 5320.687  | NM_004977 | 1647.328  | 1708.212  |
| AK025769  | 3657.794 | 4064.881 | NM_007166 | 10308.838 | 9336.35   | NM_004888 | 55816.129 | 56098.016 |
| AW945166  | 1939.916 | 1736.544 | NM_002869 | 10452.809 | 14894.453 | NM_012283 | 12187.345 | 11269.221 |
| NM_005236 | 8003.644 | 7481.852 | NM_004161 | 15569.484 | 11769.318 | NM_004700 | 1339.875  | 1249.104  |
| NM_006384 | 12994.59 | 13825.71 | NM_001295 | 1626.056  | 2732.999  | NM_004162 | 13065.185 | 12597.304 |
| NM_013257 | 1892.294 | 2047.062 | NM_005161 | 3517.94   | 3365.805  | NM_006868 | 13236.241 | 11929.119 |
| AB044546  | 857.865  | 444.257  | AB037749  | 1376.783  | 1347.477  | AB020706  | 8203.432  | 6537.681  |
| NM_014225 | 52892    | 56469.06 | NM_020347 | 2676.511  | 1763.839  | NM_007166 | 10197.301 | 8771.459  |
| AF163473  | 6200.139 | 6510.046 | NM_001462 | 4440.216  | 6008.689  | NM_016223 | 32931.402 | 35570.574 |
| NM_006256 | 4675.23  | 5716.154 | NM_004072 | 1648.88   | 2381.24   | NM_002869 | 13591.852 | 10273.062 |
| NM_002846 | 2696.802 | 5735.736 | AF068286  | 1113.445  | 624.232   | NM_006755 | 14326.117 | 15706.783 |
| NM_002837 | 5875.564 | 5351.882 | AB040957  | 7947.234  | 7682.852  | NM_005881 | 7805.224  | 7592.133  |
| AL133077  | 27473.39 | 30774.19 | NM_006890 | 836.609   | 858.079   | L40519    | 2512.5    | 2196.321  |
| AK025211  | 5285.286 | 3923.235 | NM_003110 | 12703.04  | 12578.613 | NM_004204 | 4509.384  | 5123.695  |
| U06715    | 1399.482 | 1036.366 | NM_003612 | 3256.132  | 3371.618  | AK002181  | 1875.555  | 1749.554  |
| NM_013402 | 17253.84 | 18339.79 | NM_013230 | 2971.621  | 3703.683  | AK025769  | 5233.22   | 5007.646  |
| NM_002662 | 664.243  | 569.015  | X72308    | 1925.543  | 2130.583  | AW945166  | 2670.408  | 969.1     |
| NM_000132 | 16825.62 | 15727.31 | BC008376  | 6972.712  | 6630.431  | NM_005236 | 9288.771  | 6062.042  |
| NM_004076 | 2608.755 | 3625.838 | AB041269  | 1827.839  | 1638.115  | NM_006384 | 24734.506 | 19417.322 |
| BG717460  | 3192.726 | 3804.25  | AK024908  | 7247.334  | 7086.498  | NM_013257 | 4219.667  | 5238.723  |
| AI478178  | 757.823  | 1423.963 | NM_002837 | 4970.648  | 5448.568  | AB044546  | 2218.903  | 1310.666  |
| AA101279  | 6055.688 | 6008.684 | AL133077  | 28380.326 | 29325.883 | NM_014225 | 57773.602 | 49277.738 |
| M19154    | 1074.54  | 1036.885 | AK025211  | 2576.433  | 3656.233  | AF163473  | 6110.912  | 5020.229  |
| AA399410  | 9017.388 | 11421.56 | U06715    | 1166.596  | 1140.534  | NM_006256 | 6628.247  | 5706.023  |
| AA137031  | 1585.696 | 1882.481 | NM_002662 | 828.721   | 654.164   | NM_002846 | 2918.254  | 10531.813 |
| AA292226  | 1377.942 | 2022.47  | NM_004377 | 9449.769  | 10835.857 | NM_002837 | 7756.803  | 5833.606  |
| NM_000500 | 1720.994 | 1913.14  | AB037815  | 21879.209 | 25187.85  | AL133077  | 34180.121 | 38393.184 |
| J04449    | 1092.448 | 1235.208 | NM_003645 | 13656.611 | 12181.465 | AK025211  | 4323.291  | 3636.692  |
| BC007031  | 960.825  | 968.257  | AF263613  | 4643.207  | 8277.23   | U06715    | 1260.203  | 929.461   |
| AF129756  | 6828.084 | 4580.245 | NM_000097 | 6028.192  | 7350.936  | NM_013402 | 18612.99  | 19048.834 |
| NM_002957 | 7029.945 | 8203.497 | AK022878  | 16974.344 | 21911.402 | NM_002662 | 1015.173  | 962.15    |
| BC036369  | 2518.225 | 3647.541 | NM_018099 | 1846.343  | 2750.202  | NM_000132 | 26340.5   | 28400.377 |
| X12492    | 22376.5  | 24718.25 | AF217187  | 25191.561 | 23229.914 | NM_001727 | 13546.248 | 15786.282 |
| U93051    | 10555.48 | 12071.03 | NM_017750 | 4805.714  | 6584.365  | NM_004076 | 4058.89   | 7097.538  |
| NM_017540 | 1390.483 | 1537.412 | AK026196  | 4662.457  | 4222.451  | BG717460  | 5085.766  | 5098.253  |
| NM_018270 | 10052.11 | 10379.34 | AL137668  | 1457.182  | 2351.54   | AA778392  | 9638.522  | 9924.607  |

|           |          |          |           |           |           |           |           |           |
|-----------|----------|----------|-----------|-----------|-----------|-----------|-----------|-----------|
| NM_01416C | 6939.791 | 7354.176 | NM_01334E | 1449.397  | 2015.961  | AI478178  | 3854.721  | 4180.584  |
| NM_01766E | 9004.799 | 9335.734 | NM_004977 | 2523.601  | 2920.916  | AA101279  | 8465.29   | 8144.061  |
| NM_00568Z | 1165.671 | 1293.209 | NM_00488E | 50135.926 | 51270.473 | M19154    | 2941.418  | 2426.773  |
| NM_00292E | 1342.808 | 1850.421 | NM_01228Z | 25837.713 | 21101.102 | AA399410  | 12172.507 | 9800.406  |
| NM_018697 | 957.9    | 1596.078 | NM_00470C | 1210.906  | 1198.248  | AA137031  | 2937.399  | 2288.544  |
| NM_01403C | 5884.953 | 6919.528 | U93051    | 19900.801 | 17500.244 | AA292226  | 4005.931  | 3494.009  |
| NM_004224 | 637.839  | 831.091  | NM_01754C | 2599.421  | 1950.256  | NM_00050C | 2187.03   | 978.16    |
| NM_000254 | 5792.737 | 5601.7   | NM_00675E | 8575.111  | 7511.417  | J04449    | 2083.463  | 1501.843  |
| Z21967    | 4970.058 | 6133.803 | NM_005881 | 4807.221  | 5538.119  | BC007031  | 2992.16   | 2828.186  |
| NM_00373E | 1235.947 | 829.346  | L40519    | 1871.665  | 1282.573  | AF129756  | 13601.216 | 9064.506  |
| NM_01618E | 38320.52 | 46718.95 | NM_004204 | 9050.579  | 9683.098  | NM_002957 | 9700.621  | 8676.771  |
| NM_012110 | 7696.248 | 7289.436 | AK002181  | 2246.446  | 2932.957  | BC036369  | 2646.857  | 3182.1    |
| AF052693  | 3661.427 | 2613.194 | NM_001641 | 25975.082 | 20191.238 | X12492    | 21785.918 | 15178.628 |
| NM_001129 | 26424.43 | 24532.02 | BC015750  | 65234.047 | 61531.563 | U93051    | 10205.872 | 10338.469 |
| L09100    | 1289.481 | 1023.381 | AK025769  | 9075.845  | 10848.845 | NM_01754C | 2163.222  | 2121.814  |
| NM_00547Z | 1735.266 | 1288.716 | AW945166  | 2459.144  | 3305.932  | NM_01827C | 14774.015 | 18443.752 |
| NM_00431Z | 974.204  | 849.852  | NM_00523E | 10073.366 | 12973.044 | NM_00026C | 63043.418 | 59739.023 |
| NM_01343E | 715.462  | 663.143  | NM_006384 | 21567.686 | 20677.313 | NM_01416C | 10092.917 | 13086.849 |
| NM_00416Z | 10558.47 | 12590.51 | NM_013257 | 2660.461  | 2220.423  | NM_01766E | 13106.827 | 10018.62  |
| NM_00686E | 13518.48 | 13176.27 | AB044546  | 1987.42   | 1486.301  | AB033049  | 57304.938 | 55626.613 |
| AB020706  | 7586.441 | 10165.03 | NM_01422E | 50159.125 | 54521.57  | NM_00040E | 868.536   | 708.556   |
| NM_00716E | 8911.911 | 10014.94 | AF163473  | 5100.546  | 4219.914  | NM_00568Z | 2600.822  | 2572.602  |
| NM_01622Z | 28719.94 | 34491.96 | NM_00625E | 5805.132  | 4484.795  | NM_00292E | 2068.617  | 2106.008  |
| NM_00286E | 13176.32 | 13301.82 | NM_00284E | 1933.333  | 8177.709  | NM_00023Z | 628.821   | 830.901   |
| NM_01808E | 5641.241 | 6181.047 | AF052693  | 5431.29   | 5212.292  | NM_018697 | 1988.431  | 1788.725  |
| NM_004161 | 12617.17 | 15275.34 | NM_001129 | 37035.992 | 42825.766 | NM_01403C | 49883.793 | 45552.297 |
| NM_00129E | 892.63   | 798.142  | L09100    | 3184.715  | 3604.425  | NM_004224 | 1941.83   | 2298.391  |
| NM_005161 | 883.863  | 1513.525 | NM_00547Z | 4023.372  | 4343.778  | NM_000254 | 7231.018  | 2041.738  |
| AB037749  | 718.108  | 767.79   | NM_00431Z | 1208.414  | 1138.287  | Z21967    | 6963.789  | 5253.531  |
| NM_020347 | 1368.461 | 1970.825 | NM_01343E | 1566.891  | 1855.997  | NM_01618E | 57853.594 | 57554.258 |
| NM_00146Z | 2544.756 | 2089.18  | NM_00013Z | 18099.711 | 16836.895 | NM_012110 | 8417.1    | 7508.167  |
| NM_00407Z | 913.528  | 793.228  | NM_001727 | 11372.784 | 11069.231 | AF052693  | 3180.91   | 1946.131  |
| AF068286  | 651.612  | 855.601  | NM_00407E | 4412.646  | 4202.688  | NM_001129 | 31403.213 | 22205.396 |
| AB040957  | 6173.762 | 3401.091 | NM_00712Z | 48157.758 | 58783.777 | L09100    | 1060.213  | 1197.181  |
| NM_00689C | 978.444  | 1017.999 | BG717460  | 4349.311  | 4959.594  | NM_00547Z | 1419.003  | 1416.188  |
| NM_003110 | 5406.237 | 4445.429 | AA778392  | 13528.178 | 14773.206 | NM_00431Z | 1112.742  | 883.42    |
| NM_00361Z | 874.959  | 642.832  | AI478178  | 4051.945  | 4753.185  | NM_01343E | 980.999   | 706.237   |
| NM_01323C | 3084.223 | 2844.241 | AA101279  | 7522.489  | 7108.037  | NM_00416Z | 24952.826 | 34184.895 |
| NM_00540E | 347.094  | 403.023  | M19154    | 3083.958  | 2960.756  | NM_00686E | 17299.211 | 18900.721 |
| BC008376  | 4670.781 | 4533.262 | AA399410  | 12826.014 | 14035.93  | AB020706  | 7707.783  | 9012.539  |
| AB041269  | 1956.843 | 1648.527 | AA137031  | 2753.196  | 2519.033  | NM_00716E | 12428.132 | 13758.695 |
| AK024908  | 8610.813 | 7069.223 | AA292226  | 5779.54   | 5870.288  | NM_00286E | 12744.3   | 11244.698 |
| NM_002837 | 3659.054 | 4044.85  | NM_00050C | 3116.471  | 3172.334  | NM_004161 | 17394.211 | 14017.334 |
| AL133077  | 19932.34 | 23888.39 | J04449    | 1775.045  | 1247.366  | NM_00129E | 2062.135  | 1676.86   |
| AK025211  | 3415.475 | 2963.144 | BC007031  | 5822.128  | 4497.278  | NM_005161 | 2590.694  | 3209.427  |
| U06715    | 1194.232 | 1032.486 | AF129756  | 10076.831 | 10158.307 | AB037749  | 1150.91   | 728.554   |
| NM_01340Z | 14252.44 | 18659.07 | NM_002957 | 15074.485 | 12731.105 | NM_020347 | 2799.059  | 2187.903  |
| NM_00266Z | 746.862  | 685.626  | BC036369  | 3463.636  | 1886.143  | NM_00146Z | 4343.97   | 2797.225  |
| NM_004377 | 4213.584 | 5745.542 | X12492    | 15139.144 | 12143.269 | NM_00407Z | 1763.256  | 1660.933  |
| AB037815  | 3527.815 | 3839.215 | X72308    | 3780.778  | 3346.497  | AF068286  | 1131.804  | 1150.368  |
| NM_00364E | 4910.158 | 7369.327 | NM_00540E | 1109.662  | 662.924   | NM_003110 | 5207      | 3456.902  |
| AF263613  | 5253.698 | 3897.433 | BC008376  | 20751.787 | 17997.15  | NM_01323C | 2743.922  | 2186.121  |
| NM_000097 | 3855.879 | 4425.489 | AB041269  | 4667.683  | 4298.435  | X72308    | 819.63    | 451.606   |

|           |          |          |           |           |           |           |           |           |
|-----------|----------|----------|-----------|-----------|-----------|-----------|-----------|-----------|
| NM_001509 | 1223.025 | 1625.265 | AK024908  | 8552.034  | 7474.945  | BC008376  | 5879.872  | 3968.237  |
| AK022878  | 4511.305 | 3998.209 | NM_018270 | 13327.424 | 13831.638 | AB041269  | 1936.965  | 1864.05   |
| NM_018099 | 2771.969 | 1808.787 | NM_000260 | 65245.539 | 60320.613 | AK024908  | 9398.488  | 6702.924  |
| AF217187  | 16141.14 | 17908.56 | NM_014160 | 9519.017  | 10235.683 | NM_002837 | 6760.07   | 9037.905  |
| NM_017750 | 3294.122 | 2962.031 | AF230877  | 8621.318  | 8863.51   | AL133077  | 34603.051 | 48265.684 |
| AK027122  | 11645.75 | 11364.08 | NM_017668 | 10820.347 | 10216.146 | AK025211  | 4401.678  | 5409.628  |
| AK026196  | 3810.765 | 4846.693 | AB033049  | 54517.988 | 59130.148 | U06715    | 1248.497  | 1476.678  |
| AL137668  | 1764.215 | 1594.727 | NM_000400 | 641.16    | 625.377   | NM_002662 | 1287.015  | 1542.314  |
| AV704019  | 201.401  | 1041.211 | NM_005682 | 2516.563  | 3084.384  | NM_004377 | 7047.218  | 9003.264  |
| NM_013348 | 689.731  | 484.751  | NM_002920 | 2131.637  | 2020.576  | AB037815  | 17102.305 | 16445.029 |
| NM_004977 | 4327.027 | 3964.073 | NM_000233 | 749.303   | 966.498   | NM_003645 | 12772.237 | 13617.804 |
| NM_002251 | 523.437  | 379.02   | NM_018697 | 2092.64   | 1997.521  | AF263613  | 5906.022  | 4124.573  |
| NM_012283 | 15461.13 | 13369.26 | NM_014030 | 57995.004 | 52371.406 | NM_000097 | 4713.188  | 3935.356  |
| NM_004700 | 1377.644 | 1167.29  | NM_004224 | 10006.376 | 9412.094  | AK022878  | 11626.385 | 9984.222  |
| U93051    | 9128.452 | 13126.6  | NM_000254 | 8668.892  | 6626.901  | NM_018099 | 2948.986  | 2806.378  |
| NM_017540 | 1511.991 | 2058.365 | Z21967    | 10080.715 | 6409.928  | NM_017750 | 4273.169  | 5293.153  |
| NM_006755 | 5709.311 | 5137.914 | NM_003738 | 995.01    | 661.893   | AK026196  | 2657.1    | 2797.427  |
| NM_005881 | 3926.439 | 4235.897 | NM_016185 | 54219.219 | 53783.59  | AL137668  | 814.116   | 919.348   |
| L40519    | 2759.564 | 2454.886 | NM_012110 | 10261.219 | 11065.496 | NM_004977 | 2622.611  | 3430.229  |
| NM_004204 | 2132.646 | 2562.201 | NM_013348 | 3437.93   | 3538.201  | NM_004888 | 56102.141 | 53085.012 |
| AK002181  | 531.347  | 684.82   | NM_004977 | 10398.56  | 10420.936 | NM_012283 | 14746.402 | 12758.39  |
| BC015750  | 56154.61 | 44854.54 | NM_004888 | 54958.75  | 55990.598 | NM_004700 | 1380.953  | 1266.731  |
| AK025769  | 7801.729 | 7384.186 | NM_012283 | 67142.352 | 60115.805 | U93051    | 21253.043 | 30515.164 |
| AW945166  | 4073.348 | 3274.765 | NM_004700 | 2097.074  | 2049.225  | NM_017540 | 2467.029  | 2832.589  |
| NM_005230 | 12240.47 | 8751.08  | NM_004162 | 21941.031 | 21824.186 | NM_006755 | 14768.16  | 11424.715 |
| NM_006384 | 24314.06 | 26014.28 | NM_006868 | 14959.693 | 13758.729 | NM_005881 | 7005.286  | 5513.261  |
| NM_013257 | 3222.495 | 2597.981 | NM_007160 | 12344.192 | 13379.428 | L40519    | 2201.356  | 1754.308  |
| AB044546  | 1522.253 | 1469.635 | NM_004161 | 17919.311 | 13650.721 | NM_004204 | 4694.759  | 4405.965  |
| NM_006250 | 6055.57  | 4838.428 | NM_001295 | 1926.521  | 3298.135  | AK002181  | 1437.633  | 2128.088  |
| NM_002840 | 2712.569 | 5739.881 | NM_005161 | 3723.006  | 2611.994  | AK025769  | 7804.916  | 6661.296  |
| AF052693  | 2508.59  | 2633.252 | AB037749  | 829.561   | 1132.273  | AW945166  | 3337.049  | 2796.651  |
| NM_001129 | 17067.39 | 18352.7  | NM_020347 | 2592.35   | 2032.368  | NM_005230 | 9258.915  | 4831.579  |
| L09100    | 1060.485 | 1025.294 | NM_001462 | 3357.158  | 3694.874  | NM_006384 | 20754.018 | 14180.006 |
| NM_005472 | 1706.888 | 1779.776 | NM_004072 | 1601.896  | 1030.85   | NM_013257 | 1602.376  | 974.974   |
| NM_004313 | 904.586  | 858.772  | AB040957  | 6803.918  | 5890.041  | AB044546  | 1376.13   | 1072.521  |
| NM_013435 | 340.298  | 561.643  | NM_006890 | 1082.757  | 511.995   | NM_014225 | 56751.332 | 47954.09  |
| NM_000132 | 8742.533 | 7416.198 | NM_003110 | 9318.651  | 9105.858  | AF163473  | 5868.195  | 3351.783  |
| NM_001727 | 4288.854 | 5275.085 | NM_003612 | 1674.456  | 1341.928  | NM_006250 | 6633.834  | 5178.97   |
| NM_004070 | 1904.434 | 2721.788 | NM_013230 | 2366.474  | 1813.081  | NM_002840 | 3369.016  | 9136.435  |
| BG717460  | 3245.659 | 3083.65  | NM_014225 | 56721.273 | 57772.004 | AF052693  | 7645.713  | 9666.558  |
| AA778392  | 3774.441 | 4914.594 | NM_002837 | 5009.514  | 4493.924  | NM_001129 | 47371.59  | 53977.668 |
| AI478178  | 1231.811 | 1846.754 | AL133077  | 28726.867 | 26090.82  | L09100    | 3797.174  | 4697.098  |
| AA101279  | 7256.797 | 7457.838 | AK025211  | 3212.734  | 3517.911  | NM_005472 | 5493.48   | 6997.007  |
| AA399410  | 12604.35 | 11567.67 | U06715    | 1270.143  | 1230.401  | NM_013435 | 1565.828  | 2431.971  |
| AA137031  | 2376.888 | 1800.598 | NM_013402 | 20212.645 | 19273.746 | NM_000132 | 26199.146 | 27109.639 |
| AA292226  | 1734.056 | 2270.246 | NM_002662 | 832.677   | 952.851   | NM_001727 | 11280.653 | 12264.849 |
| NM_000500 | 2870.374 | 2809.051 | NM_004377 | 12218.087 | 14046.015 | NM_004070 | 4098.243  | 4913.141  |
| J04449    | 2917.521 | 2373.177 | AB037815  | 24982.488 | 27495.229 | NM_007123 | 58733.664 | 56949.785 |
| BC007031  | 1389.217 | 1295.744 | NM_003645 | 15245.46  | 18187.166 | BG717460  | 5038.979  | 3469.2    |
| AF129756  | 10682.03 | 5914.802 | AF263613  | 5113.072  | 8954.132  | AA778392  | 9004.341  | 8621.896  |
| NM_002957 | 8467.154 | 7381.22  | NM_017750 | 4778.7    | 4062.981  | AI478178  | 3903.674  | 4373.208  |
| BC036369  | 2615.357 | 2596.939 | AK026196  | 3844.531  | 2823.301  | AA101279  | 9660.16   | 10983.072 |
| X12492    | 21395.2  | 20878.78 | AL137668  | 1272.504  | 1090.248  | AA137031  | 2623.318  | 1486.318  |

|           |          |          |           |           |           |           |           |           |
|-----------|----------|----------|-----------|-----------|-----------|-----------|-----------|-----------|
| X72308    | 474.711  | 644.742  | NM_016444 | 786.492   | 874.356   | AA292226  | 1130.009  | 1596.85   |
| BC008376  | 4067.884 | 4473.034 | NM_017839 | 1438.717  | 1335.736  | NM_000500 | 3618.08   | 4332.061  |
| AB041269  | 2835.196 | 3695.924 | NM_003707 | 11661.39  | 11441.409 | J04449    | 1677.215  | 1080.984  |
| AK024908  | 7628.082 | 9077.808 | AL137718  | 4030.092  | 5049.894  | BC007031  | 1232.927  | 979.305   |
| NM_018270 | 8607.41  | 9344.337 | NM_003460 | 10877.677 | 10167.976 | AF129756  | 8529.609  | 4149.909  |
| NM_000260 | 4030.582 | 4515.589 | U94354    | 699.692   | 899.85    | NM_002957 | 6815.13   | 5250.145  |
| NM_014160 | 5188.265 | 6037.083 | NM_002904 | 32638.902 | 40252.41  | BC036369  | 2897.146  | 2431.374  |
| NM_017668 | 9779.348 | 9790.768 | NM_014189 | 13787.513 | 10479.495 | X12492    | 20003.367 | 13226.156 |
| AB033049  | 13894.81 | 14247.44 | NM_005686 | 2874.623  | 2715.023  | X72308    | 3813.453  | 5366.722  |
| NM_000406 | 334.449  | 516.559  | NM_006767 | 1995.381  | 1021.042  | NM_005408 | 910.664   | 1295.005  |
| NM_005682 | 1838.602 | 1562.27  | NM_017540 | 2495.7    | 2374.17   | BC008376  | 23370.041 | 30689.283 |
| NM_002926 | 2755.029 | 3037.681 | NM_006755 | 10959.477 | 11229.478 | X87895    | 633.082   | 1681.371  |
| NM_000233 | 729.626  | 728.734  | NM_005881 | 5894.845  | 5328.18   | AB041269  | 4945.588  | 6356.021  |
| NM_018697 | 1934.548 | 2352.567 | NM_005794 | 988.241   | 1156.712  | AK024908  | 9970.415  | 11666.145 |
| AF090116  | 579.449  | 963.194  | L40519    | 2700.379  | 2954.606  | NM_018270 | 13777.776 | 15665.463 |
| NM_014030 | 11013.61 | 11063.17 | NM_004204 | 6316.561  | 5329.747  | NM_000260 | 61733.129 | 54162.355 |
| NM_004224 | 895.61   | 1088.23  | AK002181  | 2137.492  | 999.311   | NM_014160 | 10088.307 | 9277.938  |
| NM_000254 | 11732.91 | 8584.338 | NM_001641 | 24053.48  | 13569.632 | AF230877  | 5981.745  | 5430.867  |
| Z21967    | 8960.658 | 9224.621 | BC015750  | 65149.207 | 56578     | NM_017668 | 11126.092 | 7541.271  |
| NM_003738 | 1317.658 | 862.666  | AK025769  | 7479.367  | 6529.761  | AB033049  | 59203.805 | 53720.07  |
| NM_016185 | 46803.25 | 50196.63 | AW945166  | 2580.605  | 2348.814  | NM_000406 | 499.568   | 761.259   |
| NM_012110 | 7685.605 | 7085.817 | NM_005236 | 8915.097  | 7816.1    | NM_005682 | 2748.143  | 3261.389  |
| NM_005461 | 496.547  | 422.868  | NM_006384 | 18822.586 | 14378.258 | NM_002926 | 2236.799  | 2338.31   |
| NM_013348 | 452.496  | 541.377  | NM_002589 | 8708.07   | 10044.343 | NM_000233 | 256.736   | 1603.857  |
| NM_004977 | 4621.431 | 5344.583 | AF064846  | 2449.715  | 3223.05   | NM_018697 | 1975.388  | 1456.43   |
| NM_004888 | 32407.92 | 36822.06 | AL110227  | 1589.075  | 1934.918  | NM_014030 | 13755.866 | 17079.76  |
| NM_012283 | 20042    | 23904.12 | NM_001400 | 8927.669  | 7614.769  | NM_004224 | 1604.486  | 2030.439  |
| NM_004700 | 860.177  | 951.737  | AB033281  | 5176.879  | 6025.033  | NM_000254 | 8711.581  | 4094.666  |
| NM_004162 | 11804.51 | 14299.74 | NM_002882 | 48330.691 | 55111.383 | Z21967    | 6269.096  | 4581.397  |
| NM_006868 | 8956.104 | 10004.11 | AB011161  | 2312.111  | 1402.306  | NM_016185 | 59427.152 | 45337.848 |
| AB020706  | 7905.229 | 9385.046 | NM_000827 | 1415.911  | 1764.598  | NM_012110 | 8599.323  | 6221.873  |
| NM_007166 | 10511.69 | 10908.61 | NM_002944 | 1831.886  | 1850.558  | NM_013348 | 3196.485  | 4503.482  |
| NM_016223 | 27196.22 | 37315.61 | AF327354  | 4169.56   | 3792.864  | NM_004977 | 11696.876 | 16277.178 |
| NM_002869 | 16282.11 | 14109.41 | NM_006259 | 1304.138  | 1564.969  | NM_004888 | 59634.371 | 54399.203 |
| NM_018086 | 6472.419 | 7826.083 | AB014513  | 21327.367 | 26318.496 | NM_002251 | 896.815   | 1627.532  |
| NM_004161 | 17239.4  | 17065.26 | NM_004747 | 4623.131  | 4327.6    | NM_012283 | 64774     | 58895.27  |
| NM_001295 | 1831.958 | 1196.186 | NM_002341 | 14869.176 | 20200.084 | NM_004700 | 2291.27   | 2590.539  |
| NM_005161 | 1142.143 | 1439.696 | AL137651  | 4827.494  | 3429.679  | NM_004162 | 23929.9   | 29245.92  |
| AB037749  | 965.901  | 853.849  | NM_018945 | 7501.064  | 4962.961  | NM_006868 | 16630.426 | 19799.883 |
| NM_020347 | 2961.801 | 2836.048 | NM_000818 | 4975.6    | 3508.628  | NM_007166 | 10939.704 | 10216.191 |
| NM_001462 | 4027.17  | 3258.266 | NM_006650 | 1601.563  | 1344.835  | NM_004161 | 18064.271 | 14346.604 |
| NM_004072 | 1531.671 | 1325.191 | AK024436  | 8485.373  | 6367.314  | NM_001295 | 1976.26   | 1664.122  |
| AF068286  | 872.001  | 993.05   | NM_006648 | 12807.355 | 10406.805 | NM_005161 | 2498.81   | 4434.927  |
| AB040957  | 7394.144 | 4148.442 | NM_000868 | 1894.466  | 1177.018  | AB037749  | 1010.21   | 1201.022  |
| NM_006890 | 1072.04  | 767.166  | NM_004711 | 1881.478  | 1576.52   | NM_020347 | 2915.567  | 2265.314  |
| NM_003110 | 5293.094 | 4055.08  | AF161361  | 1425.601  | 1590.879  | NM_001462 | 4157.589  | 4082.295  |
| NM_003612 | 492.23   | 548.066  | NM_006463 | 16437.508 | 16490.021 | NM_004072 | 1677.837  | 2153.729  |
| NM_013230 | 2930.073 | 2318.288 | NM_001444 | 44374.609 | 52529.168 | AF068286  | 1216.685  | 1172.266  |
| NM_013257 | 2417.652 | 2385.747 | AK027208  | 1096.226  | 1180.83   | AB040957  | 7233.466  | 2835.402  |
| AB044546  | 657.665  | 739.055  | NM_016521 | 12817.53  | 12517.783 | NM_003110 | 5586.265  | 2473.507  |
| AF163473  | 5824.015 | 6891.9   | X98494    | 15620.923 | 12431.804 | NM_013230 | 2890.599  | 1858.944  |
| NM_006256 | 5803.769 | 6726.125 | NM_001240 | 8423.34   | 7731.831  | AF163473  | 7036.149  | 8749.772  |
| NM_002846 | 2224.864 | 5800.233 | NM_002709 | 17577.586 | 15492.285 | NM_006256 | 8529.102  | 10243.671 |



|           |          |          |           |           |           |           |           |           |
|-----------|----------|----------|-----------|-----------|-----------|-----------|-----------|-----------|
| NM_002837 | 5258.245 | 5758.271 | NM_001095 | 2772.24   | 2720.376  | NM_002846 | 5147.403  | 19893.813 |
| AL133077  | 20837.62 | 24300.73 | NM_006823 | 8820.815  | 8361.994  | NM_002837 | 6567.75   | 7082.545  |
| AK025211  | 3878.973 | 3816.599 | NM_007031 | 2124.389  | 2044.144  | AK025211  | 4508.813  | 5231.67   |
| U06715    | 928.175  | 1052.384 | NM_002657 | 3599.44   | 2978.484  | U06715    | 1763.299  | 1479.939  |
| NM_013402 | 18309.37 | 24236.6  | NM_001350 | 18560.941 | 16061.598 | NM_004377 | 8178.526  | 9217.931  |
| NM_002662 | 839.213  | 1160.158 | NM_014805 | 3248.31   | 2096.69   | AB037815  | 18351.219 | 19657.594 |
| NM_004377 | 8358.599 | 8797.723 | NM_016074 | 32070.607 | 22925.803 | NM_003645 | 13270.45  | 12944.661 |
| AB037815  | 4645.963 | 4616.838 | NM_003921 | 6332.199  | 3588.747  | AF263613  | 6136.202  | 3499.367  |
| NM_003645 | 10106    | 11380.51 | NM_004208 | 25559.537 | 19841.016 | NM_000097 | 5494.694  | 6050.637  |
| AF263613  | 6941.431 | 4728.68  | NM_001843 | 5206.292  | 5472.109  | NM_018095 | 2196.878  | 2073.323  |
| NM_000097 | 4885.684 | 4884.859 | NM_013266 | 1212.308  | 1261.989  | NM_017750 | 4387.139  | 3187.38   |
| NM_001505 | 916.019  | 1451.317 | NM_000415 | 2452.939  | 3386.518  | AK026196  | 2574.07   | 1826.954  |
| AK022878  | 7543.202 | 6274.155 | NM_017768 | 8140.958  | 13009.575 | AL137668  | 1199.609  | 700.94    |
| NM_018095 | 2171.756 | 1714.241 | NM_002776 | 2986.787  | 2282.284  | NM_016444 | 1988.945  | 2695.873  |
| AF217187  | 15455.02 | 16009.54 | AK023398  | 6783.05   | 6297.032  | NM_017835 | 2051.7    | 2768.165  |
| NM_017750 | 4183.363 | 4011.645 | NM_001907 | 1064.497  | 1277.206  | AL137718  | 5360.049  | 6053.738  |
| AK027122  | 9884.087 | 9210.377 | NM_015711 | 65732.617 | 64617.773 | NM_003460 | 10411.884 | 11657.588 |
| AK026196  | 3210.628 | 4547.411 | NM_000050 | 2689.166  | 1760.524  | U94354    | 1504.367  | 1813.329  |
| AL137668  | 1212.584 | 991.937  | NM_000481 | 2378.821  | 2226.498  | NM_002904 | 32963.449 | 48806.66  |
| NM_016444 | 1174.269 | 1084.388 | AK025681  | 3988.152  | 3869.669  | NM_005686 | 2720.79   | 2987.301  |
| NM_017835 | 673.496  | 695.511  | NM_014905 | 11072.577 | 7731.569  | NM_006767 | 1654.01   | 1542.143  |
| AL137718  | 4812.102 | 4335.342 | NM_012137 | 7904.952  | 5656.033  | NM_017540 | 2486.777  | 2400.675  |
| NM_003460 | 2747.674 | 2962.948 | NM_004483 | 25779.797 | 33084.711 | NM_005881 | 6799.744  | 5348.95   |
| U94354    | 1044.98  | 922.911  | NM_001281 | 7688.251  | 8752.211  | L40519    | 2840.449  | 1201.769  |
| NM_002904 | 24832.06 | 35420    | NM_016835 | 2836.688  | 1275.35   | NM_004204 | 5470.634  | 5432.588  |
| NM_014185 | 11822.44 | 15778.9  | NM_003981 | 31790.586 | 18985.273 | AK002181  | 2667.447  | 2538.491  |
| NM_005686 | 1072.357 | 1084.689 | AB014522  | 21798.537 | 29741.23  | BC015750  | 62597.797 | 60376.23  |
| NM_006767 | 1621.303 | 2116.842 | NM_014875 | 19717.18  | 31710.836 | AK025769  | 7283.111  | 6902.972  |
| NM_017540 | 2306.571 | 2311.361 | AB033023  | 14332.505 | 21687.572 | AW945166  | 2432.387  | 851.384   |
| NM_006755 | 21161.08 | 18384.67 | BC027895  | 2408.493  | 4892.951  | NM_005236 | 10047.028 | 2942.104  |
| NM_005881 | 8438.411 | 7385.78  | NM_016525 | 7086.802  | 8393.6    | NM_006384 | 21838.508 | 7744.18   |
| NM_005794 | 417.346  | 545.825  | AF116238  | 4353.171  | 2534.738  | NM_002585 | 11066.063 | 12439.883 |
| L40519    | 3988.383 | 3142.681 | NM_006982 | 1497.921  | 965.687   | AF064846  | 3721.433  | 4133.658  |
| NM_004204 | 2660.619 | 3605.997 | AB033085  | 4366.675  | 2950.22   | AL110227  | 2368.841  | 2843.366  |
| AK002181  | 545.673  | 557.607  | AF024703  | 27001.961 | 16892.545 | NM_001400 | 8176.14   | 12626.093 |
| AF118064  | 545.499  | 368.667  | NM_016531 | 1989.619  | 739.611   | AB033281  | 6975.927  | 6721.477  |
| NM_001641 | 24308.3  | 31280.07 | NM_003593 | 21830.105 | 15475.092 | NM_002882 | 55456.965 | 54877.27  |
| BC015750  | 61085.45 | 47414.67 | NM_014383 | 63955.305 | 53624.711 | AB011161  | 2465.418  | 2251.888  |
| AK025769  | 8053.521 | 6543.956 | NM_000244 | 11580.828 | 8347.997  | NM_000827 | 1537.794  | 1702.252  |
| AW945166  | 3835.761 | 2250.868 | NM_014285 | 8086.997  | 5792.651  | NM_002944 | 1314.104  | 1708.314  |
| NM_005236 | 11238.7  | 6710.125 | AF026816  | 27935.111 | 18791.615 | AF327354  | 3934.252  | 5218.241  |
| NM_006384 | 25858.73 | 21464.97 | NM_004715 | 4581.392  | 2433.457  | NM_006255 | 1570.49   | 1095.404  |
| NM_002585 | 8992.433 | 9614.829 | NM_018553 | 4125.835  | 2184.418  | AB014513  | 13466.084 | 14498.511 |
| AF064846  | 2908.567 | 2870.249 | NM_004704 | 4914.46   | 2942.008  | NM_004747 | 3549.716  | 4036.205  |
| AL110227  | 1738.788 | 1738.487 | NM_014633 | 9081.961  | 4190.567  | AK024430  | 63798.762 | 63800.797 |
| NM_001400 | 2366.886 | 3346.232 | NM_001970 | 65033.086 | 54347.105 | NM_002341 | 20944.775 | 12658.521 |
| AB033281  | 4839.095 | 4806.036 | NM_006810 | 28084.939 | 22245.496 | AL137651  | 5005.265  | 3753.31   |
| NM_002882 | 51799.22 | 47364.78 | AL049674  | 1055.443  | 1005.221  | NM_018945 | 10599.075 | 12836.683 |
| AB011161  | 2155.18  | 1997.183 | NM_001965 | 787.375   | 1111.896  | NM_006650 | 1568.47   | 858.602   |
| NM_000827 | 1170.226 | 1202.843 | NM_004116 | 7999.695  | 9719.656  | AK024436  | 6116.38   | 5192.1    |
| AF327354  | 3522.474 | 3505.792 | AK024508  | 3843.239  | 4757.414  | NM_006648 | 7873.522  | 9331.683  |
| NM_004490 | 278.293  | 315.523  | AK027213  | 10381.515 | 14919.509 | NM_004711 | 4038.801  | 1791.443  |
| NM_006255 | 1144.619 | 1074.75  | AL096749  | 31993.342 | 34389.605 | U63542    | 787.325   | 1214.701  |

|           |          |          |           |           |           |           |           |           |
|-----------|----------|----------|-----------|-----------|-----------|-----------|-----------|-----------|
| AB014513  | 1820.858 | 1776.393 | AK023620  | 3594.694  | 2922.731  | AF161361  | 2051.083  | 2127.355  |
| NM_004747 | 1451.786 | 2197.255 | AF086189  | 18943.725 | 17427.498 | NM_006463 | 26351.621 | 27718.648 |
| AK024430  | 13380.01 | 12723.9  | AL050055  | 9315.886  | 9331.444  | NM_001444 | 53460.707 | 54012.121 |
| NM_002341 | 28645.51 | 13202.62 | NM_005009 | 27576.723 | 21632.359 | AK027208  | 2125.254  | 1988.315  |
| AL137651  | 759.911  | 1318.051 | NM_014596 | 26892.303 | 25323.662 | NM_016521 | 14515.552 | 19398.977 |
| NM_018945 | 10192.61 | 8424.924 | NM_006703 | 20041.904 | 20555.389 | X98494    | 14906.599 | 19342.521 |
| NM_000818 | 4395.606 | 4053.191 | NM_004037 | 7236.378  | 7436.802  | NM_001240 | 8945.89   | 8683.548  |
| NM_006650 | 1114.817 | 971.259  | NM_005116 | 5175.075  | 5878.901  | NM_002709 | 25893.727 | 31164.949 |
| AK024436  | 7429.439 | 8776.366 | NM_002766 | 13222.998 | 8863.419  | NM_001099 | 3394.517  | 3986.816  |
| NM_006648 | 7573.179 | 7713.929 | NM_000788 | 27445.209 | 30791.281 | NM_006823 | 8440.34   | 7849.759  |
| NM_004711 | 3566.11  | 2622.305 | AF254088  | 3406.231  | 2822.683  | NM_007031 | 2006.984  | 1605.945  |
| U63542    | 989.743  | 742.757  | NM_001420 | 2818.041  | 2201.771  | NM_002657 | 2443.614  | 3030.66   |
| AF161361  | 1757.891 | 2112.862 | NM_000248 | 2766.011  | 2681.978  | NM_004089 | 6946.06   | 5946.734  |
| NM_006463 | 15420.15 | 14529.07 | AB031046  | 4155.537  | 3830.343  | NM_001350 | 22355.809 | 13906.169 |
| NM_001444 | 53955.57 | 46171.26 | NM_002449 | 47550.742 | 42287.734 | NM_014809 | 5430.806  | 7169.822  |
| AK027208  | 2032.928 | 1512.502 | AK025388  | 4331.704  | 3364.249  | NM_016074 | 28107.277 | 19912.475 |
| NM_016521 | 14263.29 | 14709.02 | NM_006147 | 1796.071  | 1030.897  | NM_003921 | 8378.106  | 8964.237  |
| X98494    | 11316.56 | 10845.81 | AB006631  | 3168.298  | 2523.328  | NM_004208 | 28180.82  | 21847.83  |
| NM_001240 | 7003.336 | 6177.984 | AF291181  | 2047.791  | 2726.816  | NM_001843 | 4563.457  | 3240.541  |
| NM_002709 | 23707.72 | 30308.43 | NM_005741 | 9481.041  | 11253.425 | NM_013266 | 769.648   | 750.566   |
| NM_001099 | 4648.376 | 5508.826 | NM_000964 | 6956.439  | 7742.19   | NM_017768 | 5534.31   | 2261.504  |
| NM_006823 | 10509.96 | 10279.3  | NM_012185 | 846.555   | 1053.877  | NM_002776 | 3295.66   | 3915.04   |
| NM_007031 | 1386.828 | 1071.834 | BF343886  | 2601.274  | 3027.748  | AK023398  | 4369.037  | 5194.027  |
| NM_002657 | 2010.422 | 3157.954 | NM_013263 | 13753.703 | 16011.508 | NM_015711 | 65667.523 | 60026.363 |
| NM_004089 | 5586.421 | 5301.85  | AL137407  | 13836.71  | 13488.664 | NM_000050 | 1992.74   | 2369.06   |
| NM_001350 | 21373.8  | 18750.96 | NM_018178 | 4817.847  | 4632.088  | NM_000481 | 1792.614  | 2434.289  |
| NM_014809 | 5547.515 | 5711.911 | AK025204  | 1993.227  | 1891.5    | AK025681  | 5193.025  | 4643.453  |
| NM_016074 | 43160.53 | 37252.18 | AK027256  | 944.656   | 1028.92   | NM_014905 | 9558.966  | 8173.956  |
| NM_003921 | 9012.563 | 6586.988 | AL365406  | 852.964   | 1180.219  | NM_012137 | 6793.386  | 5517.15   |
| NM_004208 | 29653.76 | 34038.99 | NM_019000 | 3102.417  | 2777.685  | NM_004483 | 27742.75  | 15318.024 |
| NM_006336 | 310.044  | 347.042  | AF143330  | 3110.292  | 2940.756  | NM_001281 | 12343.523 | 10116.792 |
| NM_001843 | 1258.232 | 1279.963 | AK025178  | 11935.086 | 13299.169 | NM_016835 | 2901.674  | 4049.721  |
| NM_000419 | 1092.517 | 886.843  | AF147359  | 2692.425  | 2706.234  | AB014522  | 19072.615 | 10620.86  |
| NM_017768 | 6951.357 | 4610.26  | NM_014835 | 18752.201 | 23036.402 | NM_014875 | 15975.051 | 11310.229 |
| NM_002776 | 1225.972 | 1366.935 | AK001822  | 10424.379 | 9657.208  | BC027895  | 2879.041  | 963.133   |
| AK023398  | 5628.208 | 7469.571 | AK026969  | 8577.623  | 6963.079  | NM_016529 | 3548.114  | 1754.487  |
| NM_001907 | 2117.889 | 2001.785 | AF086287  | 4846.093  | 4111.831  | AF116238  | 3936.957  | 5723.991  |
| NM_015711 | 50162.24 | 49301.85 | AK024268  | 5354.94   | 4647.486  | NM_003069 | 935.958   | 1459.824  |
| NM_000050 | 560.48   | 469.72   | AF086295  | 2409.922  | 1715.188  | AB033085  | 6481.619  | 6454.638  |
| NM_000481 | 3003.424 | 2638.337 | AF086344  | 5832.781  | 4015.177  | AF024703  | 21885.678 | 28665.256 |
| AK025681  | 6873.107 | 5358.099 | AF086424  | 1814.166  | 2703.951  | NM_016531 | 1114.647  | 1915.49   |
| NM_014905 | 9699.892 | 10223.11 | AL110130  | 1110.659  | 1257.735  | NM_003593 | 21593.523 | 25257.359 |
| NM_012137 | 4486.132 | 4429.826 | AF052116  | 1300.702  | 1666.246  | NM_014383 | 63338.969 | 52756.074 |
| NM_004483 | 30562.24 | 29956.15 | NM_018087 | 6810.869  | 10485.806 | AF026816  | 37342.598 | 39819.449 |
| NM_001513 | 26865.17 | 33916.98 | AL360260  | 3333.741  | 3759.591  | NM_004719 | 5405.761  | 3309.811  |
| NM_001281 | 9317.666 | 8336.092 | AK023647  | 2182.442  | 2305.106  | NM_018553 | 4393.545  | 3182.892  |
| NM_016835 | 2734.889 | 3657.435 | AL137366  | 622.817   | 765.52    | NM_004704 | 6220.936  | 3788.329  |
| NM_003981 | 35198.38 | 38002.45 | BC031635  | 2365.731  | 3373.346  | NM_014633 | 9954.362  | 5503.278  |
| U26596    | 40460.31 | 46236.57 | AF085916  | 1320.981  | 1167.527  | AK024508  | 6976.028  | 4002.385  |
| AB014522  | 9378.414 | 9284.539 | AF085950  | 1073.256  | 1127.218  | AK027213  | 7125.865  | 3045.131  |
| NM_014875 | 16775.25 | 11151.94 | AL359598  | 1932.638  | 2686.187  | AL096749  | 26763.271 | 38793.906 |
| AB033023  | 16044.31 | 11689.4  | AF085980  | 1435.389  | 1211.845  | AK023620  | 2302.124  | 3142.517  |
| BC027895  | 3962.364 | 2342.722 | AF085927  | 4064.635  | 5124.702  | AF086189  | 10464.398 | 13266.384 |

|           |          |          |           |           |           |           |           |           |
|-----------|----------|----------|-----------|-----------|-----------|-----------|-----------|-----------|
| NM_016529 | 3990.686 | 3683.349 | AF085954  | 20400.879 | 28305.605 | AL050055  | 6777.693  | 9245.424  |
| AF116238  | 3848.095 | 3986.859 | AL137337  | 2795.278  | 2802.025  | NM_005009 | 18026.521 | 29134.902 |
| NM_006982 | 1498.787 | 1578.076 | AL137541  | 739.867   | 1072.459  | NM_014596 | 19523.039 | 24188.791 |
| AB033085  | 5750.844 | 4682.98  | AL161969  | 1815.938  | 1799.344  | NM_006703 | 16042.025 | 18391.682 |
| AF024703  | 11529.86 | 13901    | AL442095  | 6645.242  | 5906.068  | NM_004037 | 5230.791  | 7470.852  |
| NM_016531 | 1231.079 | 1893.893 | AL137378  | 3040.516  | 3674.854  | NM_005116 | 4274.747  | 5655.44   |
| NM_003593 | 17641.28 | 18474.42 | AL137609  | 48139.527 | 43474.156 | NM_002766 | 4761.005  | 7353.761  |
| NM_014383 | 67512.73 | 50519.61 | AL353946  | 6936.995  | 6809.01   | NM_000788 | 27110.727 | 26387.477 |
| NM_000244 | 7970.78  | 10159.64 | X69081    | 10929.343 | 9192.061  | AF254088  | 3397.795  | 3046.59   |
| NM_014285 | 8024.239 | 7999.294 | NM_005714 | 11387.242 | 9783.689  | NM_001420 | 1961.63   | 1640.971  |
| AF026816  | 28015.66 | 33327.67 | AL359931  | 7357.922  | 5302.01   | NM_000248 | 1992.908  | 1355.487  |
| NM_004719 | 6291.19  | 5830.846 | AF086052  | 1789.947  | 1902.729  | AB031046  | 1546.819  | 1786.061  |
| NM_018553 | 5139.916 | 5547.071 | AK000954  | 6540.066  | 8283.02   | NM_002449 | 38238.691 | 42256.188 |
| NM_004704 | 6916.448 | 6929.097 | AF086099  | 1903.057  | 1939.032  | AK025388  | 3358.836  | 2713.435  |
| NM_005455 | 13485.62 | 9137.61  | AK025800  | 10471.575 | 17186.275 | NM_006147 | 826.928   | 1099.044  |
| NM_014633 | 10651.57 | 8355.483 | AK022333  | 2987.83   | 3115.912  | AB006631  | 2041.772  | 2245.688  |
| NM_001970 | 72866.72 | 53296.03 | AK023294  | 1240.002  | 1131.971  | AF291181  | 1945.479  | 1151.839  |
| NM_006810 | 32658.36 | 32272.14 | AF095854  | 3800.584  | 3586.493  | NM_005741 | 7929.202  | 11477.83  |
| AL049674  | 729.207  | 715.227  | NM_014162 | 1505.239  | 1694.261  | NM_000964 | 5895.083  | 6219.585  |
| NM_001969 | 1075.306 | 812.569  | NM_014133 | 861.85    | 863.881   | BF343886  | 1925.462  | 1921.635  |
| NM_004116 | 5699.281 | 4843.391 | AF113689  | 812.785   | 699.481   | NM_013263 | 12005.821 | 10949.832 |
| AK024508  | 6838.99  | 6512.861 | AF159093  | 10687.64  | 11002.441 | AL137407  | 10995.97  | 12404.882 |
| AK027213  | 6084.075 | 4363.714 | AF113679  | 2607.783  | 3026.662  | NM_018178 | 4656.26   | 6917.792  |
| AL096749  | 6589.399 | 6838.578 | AK021997  | 8759.456  | 8539.411  | AK025204  | 1608.505  | 2350.21   |
| AK023620  | 2924.242 | 3636.818 | AK022125  | 3177.647  | 3528.951  | AK027256  | 574.638   | 1232.253  |
| AF086189  | 7466.58  | 8377.623 | AK022244  | 17308.469 | 13418.687 | AL365406  | 897.317   | 1048.428  |
| AL050055  | 5403.945 | 6142.924 | AK022381  | 13114.422 | 11379.697 | NM_019000 | 1964.378  | 3333.126  |
| NM_005009 | 18637.95 | 26324.35 | AK022012  | 2544.139  | 2514.579  | AF143330  | 2149.728  | 3122.551  |
| NM_014596 | 16989.79 | 19333.78 | AK022286  | 3829.901  | 3491.625  | AK025178  | 9345.54   | 10861.964 |
| NM_006703 | 18591    | 20632.48 | AK022613  | 11625.355 | 9499.551  | AF147359  | 1780.107  | 2080.576  |
| NM_004037 | 6724.283 | 8612.594 | AK023843  | 903.695   | 1048.968  | NM_014835 | 15003.367 | 16699.227 |
| NM_005116 | 2620.515 | 2872.154 | AL359557  | 2969.448  | 3660.734  | AK001822  | 8541.634  | 9110.695  |
| NM_002766 | 7785.518 | 11192.94 | AK027257  | 1368.221  | 1831.991  | AK026969  | 6793.883  | 6281.283  |
| NM_000788 | 27441.11 | 31822.43 | AK024582  | 1404.471  | 1137.582  | AF086287  | 3740.219  | 2685.387  |
| AF254088  | 2779.964 | 3421.799 | AK024143  | 1481.283  | 2207.256  | AF086409  | 1273.991  | 1497.18   |
| NM_001420 | 1632.287 | 1472.194 | AK022099  | 1483.932  | 1936.362  | AK024268  | 4570.804  | 6249.705  |
| NM_000248 | 1654.135 | 1446.152 | NM_014367 | 3583.181  | 3154.835  | AF086295  | 2175.684  | 2713.975  |
| AB031046  | 764.133  | 674.458  | AK024901  | 1233.446  | 822.782   | AF086344  | 3487.208  | 3579.739  |
| NM_002449 | 12137.57 | 11795.74 | NM_019073 | 1851.569  | 494.578   | AF086424  | 1429.676  | 1218.72   |
| AK025388  | 505.469  | 558.047  | NM_002365 | 2745.826  | 1796.734  | AL110130  | 1326.908  | 1174.654  |
| NM_006147 | 718.045  | 733.816  | AF161441  | 24904.814 | 21009.998 | AF052116  | 1045.418  | 1264.632  |
| AB006631  | 2072.742 | 1676.839 | AL137474  | 5236.411  | 6111.187  | NM_018087 | 6364.295  | 5929.006  |
| AF291181  | 1056.884 | 1087.327 | AL133023  | 1275.867  | 1546.726  | AL360260  | 2427.425  | 2381.016  |
| NM_005741 | 3944.225 | 4341.041 | AK021572  | 3345.396  | 4167.733  | AK023647  | 1694.332  | 2135.276  |
| NM_000964 | 2110.827 | 1776.35  | AK026757  | 2734.109  | 3009.989  | BC031635  | 1475.405  | 2058.847  |
| BF343886  | 579.621  | 787.541  | AK024007  | 6228.219  | 4976.2    | AF085916  | 1009.188  | 1494.959  |
| NM_013263 | 10017.72 | 7589.181 | AF116699  | 2089.635  | 1962.923  | AL359598  | 1580.013  | 2441.012  |
| AL137407  | 8950.004 | 5572.021 | AF119908  | 2673.148  | 3598.556  | AF085980  | 1301.893  | 1501.189  |
| AF147439  | 686.364  | 806.472  | U50539    | 1317      | 643.645   | AF085927  | 3699.714  | 5022.32   |
| AF085839  | 807.343  | 746.509  | AK000653  | 22488.535 | 23440.83  | AF085954  | 20720.109 | 26811.061 |
| NM_018178 | 4836.11  | 5410.916 | AK000908  | 3340.263  | 2407.603  | AL137337  | 2017.898  | 2455.102  |
| AK025204  | 746.735  | 766.554  | X96660    | 5167.969  | 2417.276  | AL137541  | 3617.386  | 3932.486  |
| AK027256  | 614.885  | 551.707  | AK023519  | 2818.781  | 1930.04   | AL161969  | 1635.364  | 1808.422  |

|           |          |          |           |           |           |           |           |           |
|-----------|----------|----------|-----------|-----------|-----------|-----------|-----------|-----------|
| AL365406  | 643.332  | 624.711  | Z70696    | 2877.895  | 2513.945  | AL442095  | 4355.211  | 5000.167  |
| NM_01900C | 2547.031 | 3126.327 | NM_005792 | 17730.199 | 18016.486 | AL137378  | 3262.837  | 3276.711  |
| AF143330  | 2394.78  | 2651.521 | AF048847  | 14941.591 | 13759.759 | AL137609  | 36760.906 | 38646.719 |
| AK025178  | 9516.951 | 9596.049 | AL137717  | 7483.892  | 7340.937  | AL353946  | 5459.574  | 5512.509  |
| AF147359  | 1117.735 | 1258.175 | AF035297  | 4286.633  | 5562.703  | X69081    | 8124.026  | 7668.955  |
| NM_01483E | 8752.737 | 8120.038 | NM_01403E | 5694.278  | 11092.999 | NM_005714 | 6364.224  | 10074.842 |
| AK001822  | 4386.228 | 4965.693 | S67154    | 8781.418  | 8035.894  | AL359931  | 5293.254  | 6367.575  |
| AK026969  | 5646.511 | 6861.592 | AK026181  | 19925.045 | 19233.926 | AF086052  | 1026.283  | 2020.103  |
| AF086287  | 4175.126 | 3570.85  | AK021451  | 2245.093  | 1707.99   | AK000954  | 4139.075  | 4091.408  |
| AF086356  | 756.978  | 453.323  | AK001971  | 1678.318  | 1187.615  | AF086099  | 1397.065  | 1395.929  |
| AF086409  | 1549.948 | 1070.634 | AF086468  | 3567.228  | 2943.63   | AK025800  | 13838.911 | 12890.902 |
| AK024268  | 4432.97  | 3752.864 | AK027239  | 3114.314  | 1760.429  | AK022333  | 2259.735  | 2860.376  |
| AF086295  | 2421.772 | 1707.487 | AF005082  | 29413.555 | 21943.295 | AK023294  | 1214.784  | 1519.315  |
| AF086344  | 3061.303 | 2937.539 | AL117595  | 5904.75   | 5505.78   | AF095854  | 3028.46   | 3684.471  |
| AL110130  | 1107.605 | 861.761  | AB028988  | 41454.801 | 34043.633 | NM_014162 | 897.93    | 1614.486  |
| AF052116  | 571.535  | 510.367  | AK023072  | 2416.181  | 1190.957  | AF113689  | 1049.415  | 940.284   |
| NM_018087 | 6583.68  | 4260.652 | AF086105  | 12800.913 | 9367.72   | AF159093  | 7116.821  | 8685.19   |
| AL360260  | 1557.791 | 1167.256 | AK026600  | 3240.305  | 1979.203  | AF113679  | 1425.425  | 1803.674  |
| AK023647  | 1158.781 | 760.562  | AK026733  | 2240.995  | 966.134   | AK021997  | 4886.169  | 5895.011  |
| AL137366  | 846.22   | 643.467  | AF161429  | 9844.946  | 5313.761  | AK022125  | 2075.958  | 1898.655  |
| BC031635  | 1175.115 | 1104.112 | AK021495  | 3783.293  | 2451.376  | AK022244  | 9559.908  | 14080.291 |
| AF085916  | 1226.437 | 937.967  | AF067777  | 65758.609 | 52383.539 | AK022381  | 8273.414  | 8001.449  |
| AF085950  | 421.049  | 387.781  | U17613    | 1055.268  | 993.149   | AK022012  | 1950.672  | 1565.648  |
| AL359598  | 1978.571 | 2103.854 | AK027211  | 1787.9    | 1034.353  | AK022286  | 4703.857  | 5950.689  |
| AF085980  | 2113.433 | 1525.626 | AJ299406  | 3056.579  | 2844.212  | AK022613  | 10527.953 | 11628.75  |
| AF085927  | 4499.056 | 4905.17  | Y10697    | 3473.178  | 4306.982  | AL359557  | 2252.934  | 2942.095  |
| AF085954  | 12321.88 | 14689.01 | AY007166  | 38007.637 | 44944.211 | AK027257  | 1133.759  | 1231.752  |
| AL137337  | 2045.45  | 2370.272 | NM_004937 | 7598.535  | 9537.998  | AK024582  | 885.383   | 751.039   |
| AL137541  | 1213.959 | 693.286  | L13197    | 5608.521  | 6823.818  | AK024143  | 1117.146  | 1451.904  |
| AL161969  | 1008.486 | 979.613  | AF056450  | 9553.667  | 12725.683 | NM_014367 | 4159.511  | 5193.76   |
| AL442095  | 1588.284 | 1389.045 | CY3Cy5    | 5242.587  | 436.162   | AK024901  | 1128.948  | 1804.326  |
| AL137378  | 1631.747 | 1158.599 | AI298884  | 24319.506 | 29095.873 | NM_019073 | 1646.358  | 1697.486  |
| AL137609  | 39440.88 | 40328.98 | D87845    | 2856.329  | 3313.172  | AK025835  | 260.867   | 1339.025  |
| AL353946  | 7420.313 | 7195.232 | X53279    | 557.471   | 805.019   | NM_002365 | 1812.949  | 2392.771  |
| X69081    | 8904.466 | 9000.76  | M83254    | 5064.841  | 5005.406  | AF161441  | 26376.037 | 29495.967 |
| NM_005714 | 1457.701 | 1056.285 | S56770    | 1295.137  | 1161.554  | AL137474  | 3467.437  | 2852.081  |
| AL359931  | 2850.825 | 2151.939 | AI193606  | 603.605   | 775.495   | AL133023  | 846.415   | 1069.898  |
| AF086052  | 1032.863 | 1163.831 | H58872    | 15107.448 | 17251.041 | AK021572  | 2904.494  | 3080.02   |
| AK000954  | 3812.178 | 3964.624 | J02938    | 831.449   | 604.886   | AK026757  | 1535.111  | 987.238   |
| AK021922  | 593.914  | 417.244  | J04543    | 11308.512 | 12162.92  | AF116699  | 2742.406  | 3059.735  |
| AK025800  | 12539.23 | 6735.696 | S60415    | 938.502   | 772.363   | AF119908  | 3400.216  | 2710.906  |
| AK022333  | 1460.231 | 874.779  | AA456295  | 1846.558  | 2208.744  | U50539    | 1145.993  | 1083.316  |
| AK023294  | 725.029  | 939.263  | BE733577  | 3737.871  | 4158.378  | AK000653  | 9475.767  | 9881.574  |
| NM_01780E | 611.748  | 570.685  | AI817942  | 9224.428  | 9746.893  | AK000908  | 2570.577  | 3878.454  |
| AF095854  | 1564.128 | 1318.262 | BG762340  | 1219.826  | 1174.578  | X96660    | 4386.126  | 6056.688  |
| AF288405  | 286.49   | 493.742  | NM_00545E | 2146.303  | 2488.04   | AK000993  | 916.456   | 1076.805  |
| AF159093  | 2491.448 | 3179.866 | NM_006534 | 5758.334  | 6528.856  | AK023519  | 3544.68   | 3836.725  |
| AF113679  | 595.606  | 754.636  | SR5       | 8999.469  | 9754.732  | Z70696    | 1418.846  | 1391.122  |
| AK021997  | 7286.174 | 7554.686 | SR7       | 7312.722  | 47759.004 | NM_005792 | 15466.207 | 20744.395 |
| AK022125  | 1753.23  | 1894.422 | SR9       | 29174.916 | 5701.744  | AF048847  | 14762.491 | 15352.174 |
| AK022244  | 4443.996 | 6937.681 | CY3Cy5    | 5544.398  | 471.601   | AL137717  | 5699.661  | 4799.089  |
| AK022381  | 8337.512 | 7986.01  | NM_016453 | 2050.236  | 2601.829  | AF035297  | 4590.847  | 5742.629  |
| AK022012  | 2495.433 | 2136.305 | NM_017701 | 1666.265  | 1550.339  | NM_01403E | 6750.458  | 6151.045  |

|           |          |          |           |           |           |           |           |           |
|-----------|----------|----------|-----------|-----------|-----------|-----------|-----------|-----------|
| AK022149  | 1206.241 | 767.382  | NM_014226 | 2897.001  | 2606.223  | S67154    | 6284.644  | 5628.761  |
| AK022286  | 4403.495 | 4638.896 | AF142567  | 2477.295  | 1854.626  | AK026181  | 14634.261 | 17298.113 |
| AK022411  | 142.195  | 698.681  | NM_005621 | 7357.171  | 6244.402  | AK021451  | 3134.869  | 4722.757  |
| AK022613  | 6580.071 | 5924.163 | NM_017410 | 1884.914  | 1738.31   | AK001971  | 1805.613  | 2594.063  |
| AK027257  | 471.379  | 430.259  | AY009398  | 497.754   | 575.021   | AF086468  | 3532.83   | 5755.801  |
| NM_014367 | 2916.71  | 2529.776 | X99680    | 9643.521  | 8844.423  | AK027239  | 3678.081  | 4264.574  |
| AK024901  | 700.618  | 783.925  | NM_001448 | 1408.985  | 1533.805  | AF005082  | 35973.414 | 43646.684 |
| NM_019073 | 1541.6   | 1415.594 | NM_016072 | 10182.046 | 9975.336  | AL117595  | 6009.968  | 6616.254  |
| AK025835  | 447.856  | 557.333  | AK026349  | 12001.935 | 13841.656 | AB028988  | 31575.906 | 42225.004 |
| NM_002365 | 711.416  | 1175.647 | NM_014733 | 2025.929  | 2186.27   | AK023072  | 3342.848  | 3554.208  |
| AF161441  | 28251.42 | 27845.69 | D12485    | 2054.298  | 2123.93   | AF086105  | 8949.274  | 10815.649 |
| AL137474  | 2168.644 | 1757.402 | AK023204  | 6514.756  | 7782.837  | AK026600  | 3196.84   | 3874.089  |
| AL133023  | 363.363  | 318.477  | NM_003449 | 3910.13   | 3885.169  | AF161429  | 11857.688 | 11379.879 |
| AK021572  | 1757.884 | 1460.014 | NM_002478 | 4354.128  | 4167.274  | AK021495  | 4988.323  | 4674.758  |
| AK026757  | 780.948  | 616.784  | D38163    | 743.667   | 828.251   | AF067777  | 64032.438 | 52040.078 |
| AK024007  | 6098.526 | 7546.499 | NM_004967 | 336.667   | 655.915   | AJ299406  | 2782.571  | 2665.146  |
| AF116699  | 1170.596 | 667.369  | D28449    | 18604.236 | 34596.359 | Y10697    | 2558.807  | 3248.375  |
| AF119908  | 5319.61  | 3945.661 | NM_003281 | 643.306   | 869.154   | AY007166  | 30643.451 | 33755.652 |
| U50539    | 1286.569 | 1202.967 | AA460480  | 1205.64   | 1516.508  | NM_004937 | 5965.586  | 7605.6    |
| AK000653  | 20151.84 | 19620.72 | S78774    | 6432.537  | 7309.958  | L13197    | 9554.665  | 10590.539 |
| AK000908  | 2895.654 | 2597.885 | NM_004922 | 5596.109  | 4958.962  | AF056450  | 6007.123  | 6559.613  |
| X96660    | 3114.117 | 3813.423 | NM_002871 | 1458.782  | 1498.719  | CY3Cy5    | 9861.875  | 369.184   |
| AK000993  | 1133.69  | 970.863  | NM_006987 | 1462.343  | 1431.562  | AI298884  | 26351.275 | 26996.848 |
| AK023519  | 4816.77  | 5064.916 | NM_001282 | 6465.776  | 5135.109  | D87845    | 2923.201  | 2773.587  |
| Z70696    | 1834.225 | 1426.973 | U44105    | 609.672   | 776.141   | X53279    | 815.266   | 543.242   |
| NM_005792 | 16329.82 | 17038.39 | NM_016103 | 2295.422  | 2686.093  | M83254    | 3797.889  | 4082.219  |
| AF048847  | 19396.68 | 17178.65 | AL133654  | 6521.401  | 6032.615  | S56770    | 1027.659  | 1160.876  |
| L37718    | 72243.98 | 53022.01 | AL137262  | 1621.662  | 1737.523  | AI193606  | 346.45    | 445.169   |
| AL137717  | 5888.963 | 3821.399 | NM_020437 | 2236.118  | 1899.572  | H58872    | 18715.578 | 16635.867 |
| AF035297  | 4570.473 | 3909.812 | NM_018643 | 2014.808  | 1801.884  | J02938    | 857.006   | 787.315   |
| NM_014039 | 6821.086 | 4427.693 | NM_016186 | 396.558   | 534.62    | J04543    | 13288.5   | 12349.841 |
| S67154    | 5205.414 | 5680.511 | M30142    | 2215.168  | 2060.542  | S60415    | 880.491   | 803.792   |
| AK026181  | 3375.772 | 3111.661 | NM_005018 | 1040.624  | 1103.233  | AA456295  | 1906.493  | 1733.581  |
| AK021451  | 4699.208 | 4130.912 | NM_013378 | 9291.211  | 11482.939 | BE733577  | 4101.618  | 4501.512  |
| AK001971  | 2051.186 | 1740.668 | NM_001085 | 1372.979  | 1832.684  | BG762340  | 1163.17   | 1562.802  |
| AF086468  | 4689.895 | 4548.424 | NM_006110 | 1634.164  | 2247.167  | AA009484  | 773.808   | 936.118   |
| AK027239  | 4478.958 | 4930.712 | NM_002860 | 8696.097  | 8444.951  | NM_005456 | 2084.965  | 2357.581  |
| AF005082  | 37923.28 | 40681.97 | NM_006169 | 3857.977  | 4285.602  | NM_006534 | 6092.87   | 7647.666  |
| AL117595  | 5247.621 | 5331.236 | NM_001218 | 1168.547  | 1237.592  | SR5       | 12368.247 | 13059.436 |
| AB028988  | 10306.2  | 11994.32 | NM_014183 | 1024.303  | 1285.2    | SR7       | 11046.688 | 47081.707 |
| AK023072  | 4137.382 | 3551.127 | NM_018353 | 3749.301  | 3569.873  | SR9       | 43576.34  | 7036.389  |
| AF086105  | 2867.966 | 3082.762 | NM_003560 | 28199.068 | 30694.592 | CY3Cy5    | 11336.243 | 554.171   |
| AK026600  | 3956.039 | 4077.661 | NM_014403 | 2135.285  | 1939.571  | NM_016453 | 2760.743  | 2602.293  |
| AF251189  | 788.102  | 655.283  | AL050100  | 1766.142  | 1684.671  | NM_017701 | 1585.844  | 1529.091  |
| AK026733  | 765.45   | 892.766  | NM_020139 | 2207.383  | 2468.008  | NM_014226 | 2742.091  | 2650.8    |
| AF161429  | 11386.73 | 8840.312 | AL080207  | 507.09    | 732.742   | AF142567  | 1826.848  | 2278.42   |
| AK021495  | 4068.251 | 3505.004 | NM_005688 | 487.622   | 536.4     | NM_005621 | 6874.938  | 6454.373  |
| AF067777  | 51882.76 | 39571.89 | U53531    | 887.905   | 1260.164  | NM_017410 | 1815.526  | 2112.813  |
| U17613    | 380.504  | 521.963  | NM_004925 | 25743.137 | 18358.473 | AK026349  | 13341.585 | 17263.717 |
| AK027211  | 558.559  | 614.728  | NM_003234 | 5179.308  | 10785.605 | NM_014733 | 2103.461  | 2099.903  |
| AJ299406  | 3266.924 | 3427.552 | NM_004858 | 2403.488  | 3022.696  | D12485    | 2197.764  | 2712.465  |
| AK021891  | 1730.586 | 1580.74  | AB051826  | 1210.731  | 741.944   | AK023204  | 8537.848  | 7835.835  |
| Y10697    | 1597.526 | 996.441  | AK024964  | 336.281   | 725.785   | NM_003449 | 4691.459  | 5315.111  |

|           |          |          |           |           |           |           |           |           |
|-----------|----------|----------|-----------|-----------|-----------|-----------|-----------|-----------|
| AY007166  | 19749.14 | 16655.21 | M20697    | 3183.758  | 3505.523  | NM_00247E | 4579.303  | 6106.311  |
| NM_004937 | 4176.382 | 3344.344 | NM_01504E | 3461.176  | 3673.426  | D38163    | 941.31    | 1213.689  |
| L13197    | 6105.715 | 5696.447 | NM_002014 | 17166.219 | 16131.767 | D28449    | 24046.076 | 21158.348 |
| AF056450  | 1714.925 | 1595.651 | NM_006927 | 15065.087 | 20979.152 | NM_003281 | 668.061   | 985.627   |
| CY3Cy5    | 10482.29 | 964.461  | NM_014601 | 1992.818  | 2352.727  | AA460480  | 985.664   | 1126.623  |
| X53279    | 266.666  | 401.254  | NM_017761 | 18119.189 | 23278.881 | S78774    | 8200.1    | 8205.028  |
| M83254    | 1324.713 | 1551.138 | NM_00692E | 737.051   | 1297.562  | NM_004922 | 7173.906  | 7811.83   |
| S56770    | 1006.104 | 767.859  | AF237700  | 1853.279  | 1934.818  | NM_002871 | 1327.277  | 1255.211  |
| AI193606  | 453.349  | 553.03   | D38163    | 945.235   | 987.433   | NM_006987 | 956.891   | 924.748   |
| H58872    | 13418.11 | 10677.89 | D28449    | 14743.798 | 17614.152 | NM_001282 | 6319.996  | 5332.023  |
| J02938    | 740.799  | 749.092  | NM_003281 | 782.213   | 777.695   | U44105    | 833.995   | 987.912   |
| J04543    | 9806.047 | 9552.226 | AA460480  | 1174.427  | 1292.954  | NM_016103 | 2348.833  | 2517.127  |
| S60415    | 853.473  | 781.825  | AI298884  | 24358.229 | 22176.438 | AL133654  | 8065.71   | 7239.042  |
| AA456295  | 919.363  | 917.178  | D87845    | 2932.169  | 3762.104  | AL137262  | 1864.097  | 2248.095  |
| BE733577  | 2851.596 | 3289.375 | X53279    | 760.396   | 515.191   | NM_020437 | 2547.661  | 2473.519  |
| AI817942  | 8680.645 | 10340.58 | M83254    | 4008.167  | 3963.608  | M30142    | 2063.662  | 2365.831  |
| BG762340  | 1641.077 | 1465.42  | S56770    | 969.189   | 1023.149  | NM_00501E | 1019.813  | 1341.527  |
| AA009484  | 562.66   | 713.645  | H58872    | 14340.151 | 14547.351 | NM_01337E | 9587.44   | 11329.339 |
| NM_00545E | 1644.305 | 1749.464 | J02938    | 631.685   | 616.32    | NM_00108E | 1795.631  | 1763.971  |
| NM_006534 | 4026.672 | 4153.971 | J04543    | 10107.703 | 11710.413 | NM_006110 | 2093.713  | 2596.522  |
| SR5       | 5614.381 | 5700.33  | S60415    | 740.778   | 700.271   | NM_00286C | 8948.223  | 6924.162  |
| SR7       | 6011.763 | 35423.24 | AA456295  | 1358.083  | 1740.88   | NM_00616E | 5528.906  | 4302.187  |
| SR9       | 22643.43 | 4125.364 | BE733577  | 2979.337  | 3005.845  | NM_00121E | 1239.935  | 881.052   |
| CY3Cy5    | 12823.59 | 1763.692 | AI817942  | 7985.366  | 8674.299  | NM_014183 | 1829.931  | 1193.663  |
| NM_016453 | 2210.145 | 1861.187 | BG762340  | 1083.174  | 890.6     | NM_018353 | 4250.526  | 2828.021  |
| AB018301  | 94.959   | 263.529  | AA009484  | 668.632   | 723.924   | NM_00356C | 34345.988 | 31550.594 |
| NM_017701 | 497.861  | 446.967  | NM_00545E | 1711.058  | 2187.668  | NM_014403 | 2316.665  | 2312.405  |
| NM_01422E | 990.146  | 1188.582 | NM_006534 | 5524.783  | 5312.614  | AL050100  | 1727.877  | 2113.448  |
| NM_005621 | 4181.662 | 5481.373 | M30142    | 1882.958  | 1387.649  | NM_02013E | 2008.16   | 2788.517  |
| NM_006202 | 5896.9   | 6693.229 | NM_00501E | 835.705   | 1052.249  | AL080207  | 584.803   | 747.868   |
| NM_003391 | 670.446  | 632.9    | NM_01337E | 11655.081 | 10084.031 | NM_00568E | 730.335   | 1084.365  |
| NM_01741C | 1406.082 | 1857.269 | NM_00108E | 1855.844  | 1912.096  | U53531    | 724.853   | 1060.027  |
| X99680    | 1126.391 | 1251.864 | NM_006110 | 1878.898  | 1831.885  | NM_003234 | 10251.87  | 7287.949  |
| NM_00144E | 1979.737 | 2740.703 | NM_016453 | 2502.463  | 2885.677  | NM_00485E | 3167.767  | 2996.54   |
| NM_016072 | 7723.402 | 10942.86 | NM_017701 | 1649.348  | 1381.083  | AB051826  | 1082.62   | 1117.18   |
| AK026349  | 10263.62 | 13602.45 | NM_01422E | 2622.999  | 2130.085  | AK024964  | 707.307   | 450.582   |
| NM_014733 | 1878.169 | 2284.57  | AF142567  | 1986.868  | 1649.423  | M20697    | 4354.979  | 5321.506  |
| D12485    | 1553.962 | 1826.063 | NM_005621 | 5829.861  | 4678.986  | NM_01504E | 3988.224  | 4626.326  |
| AK023204  | 6467.888 | 6778.049 | NM_006202 | 58489.031 | 55873.18  | NM_002014 | 17169.504 | 28544.152 |
| NM_00247E | 2638.247 | 3930.832 | NM_01741C | 1421.535  | 1073.118  | NM_006927 | 17803.91  | 19393.973 |
| D38163    | 654.669  | 518.239  | X99680    | 7150.927  | 6633.79   | NM_014601 | 1939.279  | 2238.353  |
| NM_004967 | 576.068  | 508.115  | NM_00144E | 1452.41   | 1513.345  | NM_017761 | 15288.364 | 20965.768 |
| D28449    | 15870.14 | 15172.05 | NM_016072 | 9242.132  | 8837.657  | NM_00692E | 572.02    | 717.672   |
| NM_003281 | 263.717  | 455.1    | AK026349  | 11843.235 | 12375.357 | AF237700  | 1471.716  | 1324.133  |
| AA460480  | 356.603  | 488.804  | NM_014733 | 1946.41   | 2008.049  | D38163    | 1140.071  | 1494.403  |
| S78774    | 1468.765 | 1418.558 | D12485    | 1904.027  | 1665.506  | NM_004967 | 733.493   | 882.476   |
| NM_004922 | 4245.049 | 5753.998 | AK023204  | 6524.77   | 7629.313  | D28449    | 26694.607 | 25346.02  |
| NM_002871 | 1813.934 | 1343.996 | NM_00344E | 3880.523  | 3784.734  | NM_003281 | 804.668   | 1390.464  |
| NM_006987 | 981.862  | 897.778  | NM_00247E | 4778.917  | 4358.577  | AA460480  | 1101.65   | 1555.082  |
| NM_001282 | 4724.645 | 4525.637 | NM_003234 | 5228.341  | 6690.5    | AI298884  | 25809.555 | 23624.93  |
| NM_01683C | 2700.177 | 2664.841 | NM_00485E | 2756.719  | 3237.826  | D87845    | 3393.534  | 2075.735  |
| U44105    | 832.501  | 741.357  | S78774    | 8089.285  | 8958.06   | M83254    | 2794.87   | 1574.921  |
| NM_016103 | 2203.951 | 2081.649 | NM_004922 | 5878.739  | 5500.668  | S56770    | 1037.271  | 741.151   |

|           |          |          |           |           |           |           |           |           |
|-----------|----------|----------|-----------|-----------|-----------|-----------|-----------|-----------|
| AL133654  | 4733.162 | 4546.077 | NM_002871 | 1382.905  | 1688.867  | H58872    | 20018.242 | 12545.739 |
| AL137262  | 993.995  | 1064.834 | NM_006987 | 1372.476  | 1388.005  | J02938    | 996.199   | 634.222   |
| NM_020437 | 1492.982 | 1599.247 | NM_001282 | 5879.909  | 4935.953  | J04543    | 14379.555 | 9901.1    |
| NM_00401C | 170.839  | 297.417  | NM_01683C | 4324.103  | 4671.469  | S60415    | 1003.008  | 914.622   |
| X87888    | 404.09   | 201.661  | U44105    | 1049.423  | 1554.185  | AA456295  | 1737.186  | 892.129   |
| NM_018643 | 933.179  | 770.006  | NM_016103 | 1984.019  | 2413.801  | BE733577  | 4481.952  | 3922.929  |
| NM_01618E | 365.423  | 445.275  | AL133654  | 5802.624  | 5112.396  | AI817942  | 10620.929 | 10409.533 |
| M30142    | 1285.18  | 1527.04  | AL137262  | 1679.913  | 1767.441  | BG762340  | 1632.795  | 1090.772  |
| NM_00501E | 728.539  | 1026.856 | NM_020437 | 1895.51   | 2036.589  | AA009484  | 748.05    | 561.441   |
| NM_01337E | 3240.53  | 4407.474 | NM_018643 | 1715.758  | 1862.008  | NM_00545E | 2324.007  | 1770.933  |
| NM_00108E | 730.855  | 1014.878 | NM_006927 | 15685.713 | 19110.863 | NM_006534 | 5261.853  | 4654.991  |
| NM_006110 | 1501.934 | 1513.345 | NM_014601 | 2046.65   | 2055.107  | NM_01618E | 773.729   | 539.46    |
| NM_00286C | 6397.441 | 5421.182 | NM_017761 | 16039.162 | 11295.812 | M30142    | 2748.057  | 3024.991  |
| NM_00616E | 2863.569 | 2741.207 | AF237700  | 1592.527  | 1532.263  | NM_00501E | 1263.115  | 1748.582  |
| NM_00121E | 887.047  | 858.049  | NM_00286C | 9492.528  | 10892.578 | NM_01337E | 14616.365 | 18511.578 |
| NM_014183 | 2126.25  | 1708.096 | NM_00616E | 5225.943  | 5203.592  | NM_00108E | 2702.197  | 2422.979  |
| AB046780  | 14168.56 | 18774.32 | NM_00121E | 1293.815  | 1638.577  | NM_006110 | 2442.904  | 2947.989  |
| NM_018353 | 2786.213 | 2004.554 | NM_014183 | 1254.968  | 1165.527  | NM_016453 | 2842.674  | 2747.123  |
| NM_016373 | 261.255  | 292.243  | NM_018353 | 3562.388  | 3260.805  | NM_017701 | 1929.814  | 1730.727  |
| NM_00356C | 29519.86 | 35288.27 | NM_016373 | 511.169   | 645.692   | NM_01422E | 2508.948  | 2664.206  |
| NM_014403 | 1618.835 | 1850.249 | NM_00356C | 26685.955 | 32479.639 | AF142567  | 2502.552  | 2891.75   |
| AL050100  | 1010.928 | 1015.752 | NM_014403 | 1916.821  | 2081.235  | NM_005621 | 9296.801  | 10786.488 |
| NM_02013E | 1555.608 | 1234.704 | AL050100  | 1734.303  | 1777.848  | NM_00620E | 59206.203 | 53799.727 |
| AL080207  | 662.054  | 459.431  | NM_02013E | 1979.307  | 1952.991  | NM_003391 | 424.082   | 636.038   |
| NM_00568E | 706.716  | 670.662  | NM_00568E | 527.375   | 674.698   | NM_01741C | 2334.985  | 2821.79   |
| NM_00074E | 2482.48  | 3945.266 | NM_00074E | 9743.082  | 9076.311  | X99680    | 8238.141  | 13860.797 |
| NM_00004E | 3303.939 | 3531.957 | NM_00004E | 2902.974  | 4274.317  | NM_00144E | 2314.132  | 2995.928  |
| U53531    | 631.392  | 627.529  | U53531    | 721.981   | 932.482   | NM_01607E | 10743.888 | 13391.978 |
| NM_00492E | 13022.12 | 25109.35 | NM_00492E | 25430.328 | 20927.035 | AK026349  | 13527.964 | 16282.233 |
| NM_003234 | 6857.892 | 4667.192 | NM_00545E | 2175.776  | 2318.721  | NM_014733 | 2120.153  | 2300.018  |
| NM_00485E | 3273.586 | 3551.206 | NM_006534 | 5918.212  | 5261.949  | D12485    | 1698.677  | 1257.331  |
| AB051826  | 633.807  | 827.18   | AB051826  | 1450.975  | 930.086   | AK023204  | 7290.995  | 4492.25   |
| AK024964  | 226.293  | 433.126  | AK024964  | 377.349   | 684.011   | NM_00344E | 4804.651  | 3021.535  |
| M20697    | 2373.764 | 2893.719 | M20697    | 3496.553  | 3635.781  | NM_00247E | 4426.759  | 3457.27   |
| NM_01504E | 2463.737 | 2747.89  | NM_01504E | 3124.124  | 3023.855  | NM_003234 | 10078.345 | 8942.552  |
| NM_002014 | 9940.141 | 15099.23 | NM_002014 | 16728.832 | 14795.415 | NM_00485E | 4302.258  | 5289.214  |
| NM_006927 | 10041.2  | 11258.77 | NM_00253E | 7490.366  | 8107.355  | NM_00492E | 6477.804  | 9367.265  |
| NM_014601 | 1160.117 | 1329.739 | AK026349  | 12880.338 | 12615.109 | NM_002871 | 2687.288  | 2795.653  |
| NM_017761 | 8776.427 | 12521.35 | NM_014733 | 2180.507  | 2004.756  | NM_006987 | 1807.288  | 2336.647  |
| NM_00692E | 550.309  | 754.896  | D12485    | 2032.319  | 1650.407  | NM_00128E | 8522.549  | 8006.042  |
| AF237700  | 561.398  | 924.769  | AK023204  | 5659.536  | 5859.901  | NM_01683C | 6398.167  | 8098.512  |
| D38163    | 412.07   | 270.101  | NM_00344E | 3824.495  | 3531.942  | U44105    | 783.286   | 1122.137  |
| NM_004967 | 408.143  | 316.659  | NM_00247E | 5101.232  | 4210.603  | NM_016103 | 3380.798  | 3990.555  |
| D28449    | 13543.52 | 9472.586 | D38163    | 1174.271  | 963.967   | AL133654  | 10130.056 | 9994.202  |
| NM_003281 | 320.148  | 341.563  | NM_004967 | 481.055   | 388.519   | AL137262  | 2319.531  | 2808.011  |
| AA460480  | 340.796  | 421.7    | D28449    | 15882.494 | 20375.441 | NM_020437 | 3094.315  | 3792.085  |
| AI298884  | 11719.92 | 14024.09 | NM_003281 | 804.179   | 775.954   | NM_018643 | 1624.314  | 1034.034  |
| D87845    | 2823.284 | 2525.069 | AA460480  | 1162.604  | 995.754   | NM_017761 | 14642.254 | 21845.148 |
| M83254    | 834.825  | 1164.38  | AI298884  | 22969.537 | 20969.439 | NM_00692E | 1340.006  | 1241.845  |
| S56770    | 410.83   | 584.073  | D87845    | 2950.146  | 3514.874  | AF237700  | 1694.015  | 1154.434  |
| AI193606  | 250.82   | 337.974  | X53279    | 557.97    | 612.163   | NM_00616E | 4137.196  | 3341.135  |
| J02938    | 363.289  | 548.499  | M83254    | 3172.676  | 4097.135  | NM_00121E | 1050.51   | 1058.911  |
| J04543    | 8828.05  | 9955.679 | S56770    | 1188.816  | 1627.04   | NM_014183 | 1932.648  | 1585.417  |

|           |          |          |           |           |           |           |           |           |
|-----------|----------|----------|-----------|-----------|-----------|-----------|-----------|-----------|
| S60415    | 573.811  | 819.513  | AI193606  | 532.191   | 529.404   | NM_018353 | 5857.045  | 4959.6    |
| AA456295  | 733.548  | 988.279  | H58872    | 14067.066 | 15778.155 | NM_016373 | 839.124   | 875.609   |
| BE733577  | 2339.296 | 2473.689 | J02938    | 537.085   | 642.288   | AL050100  | 2041.185  | 2608.59   |
| AI817942  | 7204.141 | 8141.034 | J04543    | 9246.435  | 9100.69   | NM_020139 | 2724.717  | 3361.801  |
| BG762340  | 885.845  | 1124.354 | S60415    | 717.834   | 546.54    | AL080207  | 1151.1    | 1098.603  |
| AA009484  | 368.656  | 755.413  | AA456295  | 1111.397  | 1193.688  | NM_005688 | 615.481   | 1064.393  |
| NM_005456 | 1203.469 | 1443.305 | BE733577  | 2752.518  | 2930.863  | NM_000748 | 12547.586 | 16841.209 |
| NM_006534 | 3365.061 | 3698.238 | AI817942  | 7487.507  | 8008.283  | NM_000048 | 4352.293  | 4496.247  |
| NM_016186 | 183.961  | 297.002  | AA009484  | 688.64    | 751.466   | AF104032  | 40809.313 | 42597.797 |
| M30142    | 1046.858 | 829.321  | NM_018643 | 1727.865  | 1489.034  | U53531    | 687.535   | 764.131   |
| NM_005018 | 578.859  | 515.557  | M30142    | 1676.406  | 1196.191  | NM_004925 | 18592.77  | 21600.061 |
| NM_013378 | 2374.521 | 2287.645 | NM_005018 | 1015.667  | 941.135   | NM_005456 | 2507.906  | 1504.513  |
| NM_001085 | 905.059  | 631.318  | NM_013378 | 10781.14  | 10520.961 | NM_006534 | 6461.907  | 5222.229  |
| NM_006110 | 1182.731 | 1109.399 | NM_001085 | 1336.301  | 1670.775  | AB051826  | 1061.835  | 824.424   |
| NM_016453 | 2057.778 | 2349.62  | NM_006110 | 1828.711  | 1846.427  | AK024964  | 879.314   | 1367.629  |
| AB018301  | 172.471  | 309.492  | NM_016453 | 2080.819  | 2402.299  | M20697    | 4863.435  | 7824.696  |
| NM_017701 | 466.071  | 502.83   | NM_017701 | 1584.694  | 1731.747  | NM_002538 | 12795.071 | 14585.162 |
| NM_014226 | 989.055  | 1095.877 | NM_014226 | 2174.617  | 2155.586  | NM_016585 | 16780.516 | 21011.99  |
| AF142567  | 1277.485 | 1493.315 | AF142567  | 2178.116  | 1539.86   | AK026349  | 13776.347 | 13475.694 |
| NM_006202 | 5295.558 | 6436.84  | NM_005621 | 6251.146  | 6198.661  | NM_014733 | 1982.201  | 1789.534  |
| NM_003391 | 461.645  | 499.455  | NM_006202 | 54907.262 | 50457.656 | D12485    | 1714.427  | 1721.26   |
| NM_017410 | 1448.736 | 1765.154 | NM_017410 | 1373.923  | 1122.425  | AK023204  | 7066.1    | 6064.354  |
| AY009398  | 173.705  | 263.144  | X99680    | 6254.911  | 5707.13   | NM_003449 | 4405.363  | 4237.133  |
| X99680    | 1005.287 | 1256.535 | NM_001448 | 1260.494  | 1259.176  | NM_002478 | 4884.053  | 4843.354  |
| NM_001448 | 1889.512 | 2289.741 | NM_016072 | 8925.687  | 9518.919  | D38163    | 736.472   | 658.027   |
| NM_016072 | 7459.78  | 10326.2  | NM_005688 | 551.551   | 474.03    | D28449    | 23079.977 | 11520.569 |
| AK026349  | 9982.357 | 11493.47 | NM_000748 | 13945.469 | 11892.247 | NM_003281 | 1307.422  | 686.236   |
| NM_014733 | 1408.876 | 2011.793 | NM_000048 | 3356.87   | 3683.345  | AA460480  | 788.536   | 549.593   |
| D12485    | 1221.895 | 1590.398 | AF104032  | 38050.91  | 38510.336 | AI298884  | 24889.512 | 18075.191 |
| AK023204  | 5114.154 | 5567.625 | U53531    | 710.72    | 860.68    | D87845    | 3961.475  | 2388.693  |
| NM_003449 | 2779.646 | 3150.901 | NM_004925 | 23940.477 | 13652.888 | M83254    | 3638.975  | 2914.715  |
| NM_002478 | 2165.56  | 3214.649 | NM_003234 | 6575.331  | 8665.462  | S56770    | 1203.802  | 940.445   |
| NM_003234 | 4560.237 | 2245.954 | NM_004858 | 3318.061  | 3333.565  | H58872    | 16758.85  | 10409.69  |
| NM_016179 | 791.901  | 732.427  | S78774    | 5177.969  | 5865.887  | J02938    | 785.527   | 647.853   |
| NM_004858 | 3396.799 | 2674.555 | NM_004922 | 5787.038  | 5195.7    | J04543    | 13125.862 | 10537.889 |
| S78774    | 1711.267 | 2342.985 | NM_002871 | 1783.701  | 1769.8    | S60415    | 817.5     | 695.956   |
| NM_004922 | 3909.704 | 4890.381 | BE873653  | 37467.172 | 33641.176 | AA456295  | 1446.778  | 919.042   |
| NM_002871 | 1535.867 | 1320.612 | NM_006987 | 1490.316  | 1700.727  | BE733577  | 4100.81   | 2469.51   |
| NM_006987 | 844.561  | 961.992  | NM_001282 | 5975.548  | 4711.552  | AA009484  | 499.837   | 1312.949  |
| NM_001282 | 4355.407 | 3618.546 | NM_016830 | 3603.452  | 3961.284  | NM_018643 | 1845.061  | 1810.215  |
| NM_016830 | 2367.784 | 2512.531 | U44105    | 609.596   | 732.138   | M30142    | 1730.48   | 1681.99   |
| U44105    | 664.268  | 809.694  | NM_016103 | 1886.668  | 2619.008  | NM_005018 | 1248.369  | 1353.078  |
| NM_016103 | 2028.498 | 2238.267 | AL133654  | 6108.54   | 5667.808  | NM_013378 | 9254.465  | 9531.979  |
| AL133654  | 4904.354 | 4875.721 | AL137262  | 2032.637  | 2228.774  | NM_001085 | 1869.491  | 1793.686  |
| AL137262  | 960.468  | 1189.672 | NM_020437 | 1918.557  | 2134.596  | NM_006110 | 2454.174  | 2192.452  |
| NM_020437 | 1662.538 | 1625.341 | NM_002014 | 17830.303 | 15385.275 | NM_016453 | 2740.603  | 3253.206  |
| NM_018643 | 230.644  | 441.378  | NM_002538 | 8395.292  | 8456.684  | NM_017701 | 1514.472  | 1777.606  |
| NM_006927 | 8470.735 | 6950.867 | NM_016585 | 15318.522 | 14077.794 | NM_014226 | 2344.726  | 2396.671  |
| NM_014601 | 1153.654 | 852.317  | NM_006927 | 15629.624 | 17450.541 | AF142567  | 1839.216  | 2151.626  |
| NM_017761 | 8158.828 | 9313.413 | NM_014601 | 1995.744  | 1824.602  | NM_005621 | 6851.309  | 6969.449  |
| NM_006928 | 599.617  | 615.619  | NM_017761 | 17477.813 | 13301.494 | NM_017410 | 1414.804  | 1422.306  |
| AF237700  | 956.607  | 762.372  | NM_006928 | 988.341   | 635.466   | X99680    | 5480.313  | 5236.729  |
| NM_002860 | 7521.695 | 8537.059 | AF237700  | 1677.823  | 1360.25   | NM_001448 | 1529.334  | 1373.254  |



|           |          |          |           |           |           |           |           |           |
|-----------|----------|----------|-----------|-----------|-----------|-----------|-----------|-----------|
| NM_00616E | 2890.919 | 3108.675 | NM_00286C | 9226.139  | 10716.046 | NM_01607Z | 9479.595  | 7884.435  |
| NM_00121E | 1089.416 | 892.613  | NM_00616E | 5756.323  | 5992.869  | NM_00568E | 593.83    | 538.171   |
| NM_01835Z | 2736.245 | 2298.645 | NM_00121E | 980.764   | 1494.716  | NM_00074E | 12650.105 | 14131.943 |
| NM_01637Z | 351.587  | 329.191  | NM_01418Z | 1473.709  | 1186.83   | NM_00004E | 3654.056  | 3253.615  |
| NM_00356C | 23127.25 | 27279.5  | AB046780  | 17072.029 | 17063.674 | U53531    | 701.868   | 739.553   |
| NM_01440Z | 1622.852 | 1655.191 | NM_01835Z | 3811.297  | 3642.041  | NM_00492E | 17875.754 | 29223.594 |
| AL050100  | 842.168  | 1120.942 | NM_01637Z | 426.884   | 439.896   | NM_003234 | 7953.5    | 6019.454  |
| NM_02013E | 1202.957 | 1207.294 | NM_00356C | 27884.111 | 35698.594 | NM_00485E | 2979.288  | 3231.807  |
| AL080207  | 141.926  | 249.207  | NM_01440Z | 2062.477  | 2019.845  | S78774    | 7150      | 9021.702  |
| NM_00568E | 7081.173 | 11320.72 | AL050100  | 1752.118  | 1802.391  | NM_00492Z | 5772.552  | 8943.579  |
| NM_00074E | 1524.868 | 2269.388 | NM_02013E | 1996.859  | 2241.987  | NM_002871 | 1953.431  | 2276.164  |
| NM_00004E | 2652.282 | 2600.254 | AL080207  | 561.912   | 620.203   | BE873653  | 39967.941 | 50628.383 |
| U53531    | 477.928  | 554.511  | NM_01773C | 7486.571  | 6032.292  | NM_006987 | 1840.2    | 1920.809  |
| NM_00492E | 14038.97 | 26959.72 | AB051826  | 1327.731  | 932.482   | NM_01683C | 4366.511  | 5132.578  |
| NM_00545E | 779.151  | 574.73   | AK024964  | 780.131   | 626.466   | U44105    | 943.562   | 920.858   |
| NM_006534 | 3142.792 | 2319.059 | M20697    | 3812.42   | 3814.849  | NM_01610Z | 2885.247  | 2876.89   |
| AK024964  | 399.216  | 521.339  | NM_01504E | 3599.329  | 4026.227  | AL133654  | 6837.846  | 6337.196  |
| M20697    | 3342.472 | 3655.332 | AF231022  | 30407.191 | 25686.338 | AL137262  | 1841.792  | 1806.014  |
| NM_01504E | 2813.662 | 3051.955 | NM_016327 | 4472.083  | 5276.742  | NM_020437 | 2543.132  | 2933.869  |
| NM_002014 | 11433.34 | 15533.7  | NM_00632Z | 3625.137  | 3608.2    | NM_002014 | 16781.436 | 17423.867 |
| AK026349  | 7818.742 | 6698.848 | U66702    | 61444.336 | 50493.25  | NM_00253E | 9226.402  | 8461.277  |
| NM_01473Z | 1517.337 | 1605.403 | AF216381  | 13360.769 | 14514.634 | NM_01658E | 13362.909 | 13298.035 |
| D12485    | 1190.698 | 1107.644 | L08442    | 612.376   | 781.112   | NM_006927 | 18246.105 | 24646.51  |
| AK023204  | 5717.825 | 4609.69  | AB014593  | 1854.435  | 2111.744  | NM_014601 | 1944.103  | 2666.204  |
| NM_00344E | 2585.47  | 2958.832 | AK074832  | 26543.676 | 21349.367 | NM_017761 | 14901.319 | 24378.125 |
| NM_00247E | 1983.994 | 2724.631 | NM_01626E | 49223.137 | 43517.762 | NM_00692E | 920.393   | 1124.766  |
| NM_004967 | 431.814  | 339.045  | NM_00623E | 2351.92   | 2248.53   | AF237700  | 1461.134  | 1508.592  |
| NM_003281 | 603.202  | 378.168  | NM_01425E | 917.159   | 237.309   | NM_00286C | 11071.675 | 16282.353 |
| AA460480  | 223.985  | 342.769  | AK026353  | 2045.327  | 2065.092  | NM_00616E | 5645.562  | 6950.063  |
| D87845    | 3420.992 | 3151.631 | L24123    | 6856.14   | 6521.977  | NM_00121E | 1736.557  | 1501.771  |
| X53279    | 364.423  | 349.128  | AF071111  | 1201.778  | 892.185   | NM_01418Z | 2096.892  | 1912.724  |
| M83254    | 1090.381 | 1149.488 | NM_01594Z | 7780.162  | 8388.13   | AB046780  | 20979.186 | 23832.951 |
| S56770    | 497.713  | 567.392  | NM_017907 | 9942.416  | 7942.792  | NM_01835Z | 4313.252  | 3293.911  |
| H58872    | 8425.518 | 7390.41  | NM_002044 | 9764.607  | 8878.466  | NM_00356C | 36903.902 | 40039.145 |
| J02938    | 305.457  | 441.342  | AJ272267  | 2037.569  | 2185.988  | NM_01440Z | 2957.134  | 3555.619  |
| J04543    | 10439.67 | 11087.65 | NM_00067Z | 971.77    | 913.807   | AL050100  | 1391.685  | 1693.014  |
| S60415    | 781.481  | 833.822  | NM_00267E | 3392.323  | 2835.797  | NM_02013E | 1927.03   | 3244.715  |
| AA456295  | 799.236  | 959.017  | NM_00210Z | 5911.716  | 5109      | AL080207  | 1081.756  | 1160.417  |
| BE733577  | 1979.712 | 2370.345 | NM_00666E | 4475.994  | 3933.872  | NM_01773C | 8170.564  | 8044.473  |
| BG762340  | 1400.058 | 1109.52  | NM_00027C | 13058.725 | 14516.247 | AB051826  | 930.501   | 1911.793  |
| AA009484  | 382.121  | 465.025  | U89277    | 3340.57   | 3675.457  | AK024964  | 616.513   | 860.161   |
| NM_01864Z | 540.993  | 765.53   | AK026670  | 810.657   | 1812.453  | M20697    | 3722.929  | 6345.167  |
| NM_01618E | 128.364  | 234.661  | NM_00287E | 3330.462  | 3995.536  | NM_01504E | 3680.415  | 5278.32   |
| M30142    | 1322.458 | 1254.016 | AK022332  | 3516.744  | 3404.921  | AF231022  | 21778.857 | 22437.613 |
| NM_00501E | 751.593  | 870.404  | NM_00646E | 2308.563  | 1506.471  | NM_016327 | 5104.601  | 4017.244  |
| NM_01337E | 3271.38  | 3613.574 | NM_00676E | 4629.956  | 4072.032  | NM_00632Z | 4243.383  | 4234.058  |
| NM_00108E | 1625.682 | 1133.215 | NM_001189 | 1294.077  | 1436.452  | U66702    | 64280.555 | 47654.629 |
| NM_01645Z | 2862.764 | 2507.042 | NM_00699Z | 1103.2    | 780.424   | AF216381  | 21285.414 | 16714.209 |
| NM_017701 | 325.938  | 378.337  | AL365370  | 2269.034  | 2184.62   | AB014593  | 1495.752  | 1255.841  |
| NM_01422E | 866.434  | 1174.419 | AK022204  | 880.854   | 1170.035  | AK074832  | 22122.561 | 20086.146 |
| AF142567  | 940.565  | 1143.301 | AF085912  | 848.097   | 651.224   | NM_01626E | 65771.938 | 45877.871 |
| NM_005621 | 3564.093 | 4751.663 | AK001127  | 1551.106  | 1264.604  | NM_00623E | 2633.371  | 2102.139  |
| NM_00620Z | 3808.283 | 4942.999 | U79256    | 14957.192 | 13899.972 | NM_01425E | 474.533   | 666.715   |

|           |          |          |           |           |           |           |           |           |
|-----------|----------|----------|-----------|-----------|-----------|-----------|-----------|-----------|
| NM_003391 | 299.264  | 426.344  | AL832550  | 1152.131  | 1162.346  | AK026353  | 2407.879  | 2042.382  |
| NM_01741C | 1230.516 | 1719.457 | AF131798  | 407.202   | 501.442   | L24123    | 5702.745  | 5496.206  |
| AY009398  | 328.027  | 299.937  | AF052176  | 459.968   | 655.7     | AF071111  | 1434.805  | 845.172   |
| X99680    | 789      | 1205.25  | NM_001412 | 4409.103  | 5460.289  | NM_015942 | 8248.97   | 6438.989  |
| NM_00144E | 2265.624 | 2679.034 | AF095771  | 1442.83   | 1417.118  | NM_017907 | 10400.333 | 8381.369  |
| NM_016072 | 8232.241 | 9886.218 | AF086205  | 1490.31   | 1443.385  | NM_002044 | 11749.534 | 8925.367  |
| NM_00568E | 274.881  | 256.844  | AK024169  | 880.221   | 767.416   | AJ272267  | 2298.919  | 2107.372  |
| NM_00074E | 1958.48  | 2639.271 | AF147395  | 1879.558  | 1783.333  | NM_000673 | 1441.442  | 1125.256  |
| NM_00004E | 2510.453 | 2419.146 | AF087967  | 562.992   | 367.005   | NM_00267E | 2678.758  | 2100.231  |
| U53531    | 454.648  | 631.731  | AF085985  | 803.922   | 825.507   | NM_002103 | 5884.994  | 5255.894  |
| NM_00492E | 14388.59 | 27521.25 | AK026384  | 582.596   | 375.777   | NM_00666E | 5717.663  | 6464.353  |
| NM_003234 | 7833.238 | 4586.387 | AK025217  | 635.309   | 582.234   | NM_00027C | 14300.217 | 19672.816 |
| NM_00485E | 4796.892 | 4250.778 | AF075105  | 1574.052  | 1515.694  | U89277    | 4312.135  | 3743.285  |
| S78774    | 1614.957 | 1920.722 | U03241    | 786.146   | 541.265   | AK026670  | 1732.565  | 989.525   |
| NM_004922 | 3824.313 | 5291.923 | NM_005117 | 1411.232  | 1531.698  | NM_00287E | 5392.604  | 3906.712  |
| NM_002871 | 1686.58  | 1565.575 | AJ007733  | 989.732   | 833.573   | AK022332  | 4793.586  | 4326.924  |
| BE873653  | 6560.59  | 7181.455 | AK021625  | 2961.01   | 2349.211  | NM_00646E | 2813.308  | 3341.387  |
| NM_006987 | 735.671  | 820.164  | AK021679  | 636.03    | 701.781   | NM_00676E | 6614.552  | 5908.618  |
| NM_001282 | 4276.756 | 3637.12  | AK001380  | 5347.186  | 3958.651  | NM_001189 | 1955.063  | 1671.618  |
| NM_01683C | 2836.783 | 2710.542 | AK024938  | 592.956   | 446.607   | NM_006992 | 1515.636  | 1821.574  |
| U44105    | 661.993  | 617.307  | AK025312  | 3030.677  | 2543.657  | AL365370  | 2478.11   | 2755.924  |
| NM_016103 | 1987.976 | 2115.082 | AK027205  | 989.511   | 894.178   | AK022204  | 842.84    | 660.809   |
| AL133654  | 4868.531 | 5724.563 | AK026493  | 928.332   | 725.334   | AK001127  | 1316.271  | 1064.195  |
| AL137262  | 1498.817 | 1306.789 | AK002042  | 663.443   | 747.241   | U79256    | 13809.707 | 12101.663 |
| NM_020437 | 1879.886 | 1745.998 | AL049268  | 900.563   | 679.925   | AL832550  | 1596.201  | 1467.469  |
| NM_002014 | 10100.65 | 11210.97 | AK023963  | 7646.571  | 6327.813  | AF131798  | 1323.271  | 1250.904  |
| NM_00253E | 6612.497 | 6460.325 | AK022473  | 4781.147  | 4928.06   | AK001731  | 6121.854  | 4892.041  |
| NM_01658E | 8954.548 | 10168.31 | AK023810  | 1976.553  | 1623.014  | AF052176  | 1270.4    | 1634.379  |
| NM_006927 | 13277.61 | 13064.34 | U80761    | 14676.019 | 19386.01  | NM_001412 | 5746.777  | 6061.368  |
| NM_014601 | 1403.081 | 1091.598 | U61100    | 758.163   | 504.3     | AF095771  | 1762.322  | 1811.78   |
| NM_017761 | 8390.577 | 9728.215 | NM_018582 | 585.808   | 448.857   | AF086205  | 1955.287  | 1574.413  |
| NM_00692E | 938.008  | 731.57   | M21539    | 725.421   | 869.191   | AK024169  | 1125.785  | 1687.348  |
| AF237700  | 1305.228 | 1138.393 | AK024125  | 837.244   | 686.887   | AF147395  | 2841.252  | 3445.889  |
| NM_00286C | 9108.226 | 8141.052 | AK024761  | 15521.819 | 12510.084 | AF087967  | 349.047   | 557.933   |
| NM_00616E | 3697.572 | 3281.4   | NM_01433E | 16518.971 | 14649.825 | AF085985  | 1259.375  | 1437.503  |
| NM_00121E | 1123.195 | 784.7    | AF086067  | 4837.558  | 4395.246  | AK026384  | 626.848   | 631.024   |
| NM_014183 | 1665.889 | 1549.487 | AK024967  | 6845.838  | 6509.501  | AK025217  | 954.353   | 504.492   |
| AB046780  | 15767.41 | 17524.96 | AK025102  | 2869.574  | 2379.504  | AL137342  | 3926.59   | 2761.556  |
| NM_018353 | 2653.148 | 2078.464 | AF086562  | 1440.82   | 1267.813  | AF075105  | 2269.14   | 1979.788  |
| NM_016373 | 638.305  | 537.267  | AY007113  | 1237.443  | 1394.294  | U03241    | 2968.356  | 2270.055  |
| NM_00356C | 36443.44 | 42116.53 | AF130083  | 17984.002 | 20997.893 | U62539    | 1306.242  | 1098.468  |
| NM_014403 | 1786.093 | 2150.529 | NM_00270C | 11646.156 | 8373.153  | NM_005117 | 1350.719  | 826.383   |
| AL050100  | 751.21   | 1024.404 | AB002437  | 18083.014 | 14740.604 | AJ007733  | 1143.362  | 629.797   |
| NM_02013E | 1209.451 | 1158.054 | AK023496  | 827.175   | 406.397   | AK021625  | 2924.224  | 1835.299  |
| NM_01773C | 6451.924 | 6333.878 | NM_006777 | 1633.949  | 1267.673  | AK021679  | 1143.142  | 1045.156  |
| AB051826  | 581.605  | 1331.119 | AK024969  | 6970.655  | 5739.298  | AK001380  | 6368.235  | 4042.722  |
| AK024964  | 559.091  | 353.681  | AK022250  | 847.218   | 772.999   | AK024938  | 589.328   | 865.524   |
| M20697    | 2937.792 | 4294.77  | NM_01236E | 1302.5    | 1268.929  | AK025312  | 2558.448  | 3633.914  |
| NM_01504E | 2874.05  | 2915.669 | AK025092  | 2209.323  | 2285.552  | AK026493  | 462.263   | 884.415   |
| AF231022  | 2427.123 | 3192.788 | AF130047  | 779.934   | 496.326   | AK002042  | 873.183   | 946.154   |
| NM_016327 | 4482.623 | 5447.311 | Z83944    | 1933.908  | 1693.58   | AK023963  | 10638.085 | 9867.646  |
| NM_006322 | 3785.355 | 4444.645 | AF085871  | 2960.48   | 2386.964  | AK022473  | 3760.444  | 4975.302  |
| U66702    | 9363.464 | 11890.69 | AF026564  | 1807.338  | 1524.671  | AK023810  | 2232.459  | 2109.647  |

|           |          |          |           |           |           |           |           |           |
|-----------|----------|----------|-----------|-----------|-----------|-----------|-----------|-----------|
| AF216381  | 18341.53 | 14769.66 | X97301    | 4212.927  | 2943.113  | U80761    | 9848.036  | 12510.61  |
| L08442    | 313.944  | 380.128  | NM_019063 | 48839.016 | 43412.738 | U61100    | 716.604   | 508.913   |
| AB014593  | 1923.847 | 2204.253 | NM_014336 | 2037.519  | 1767.565  | NM_018582 | 682.422   | 439.397   |
| AK074832  | 9875.345 | 9870.598 | AB002308  | 1790.674  | 1483.028  | M21539    | 830.911   | 767.97    |
| NM_014256 | 304.772  | 491.895  | NM_012143 | 8704.328  | 7297.831  | AK024761  | 18135.631 | 14479.247 |
| AK026353  | 2061.635 | 1731.58  | AF085892  | 2465.315  | 1972.586  | NM_014335 | 12240.097 | 8346.173  |
| L24123    | 3790.698 | 4082.479 | AF075114  | 8619.637  | 8572.353  | AF086067  | 5777.994  | 5325.994  |
| AF071111  | 864.859  | 881.343  | AK022218  | 62225.32  | 54020.227 | AK024967  | 6628.277  | 5627.385  |
| NM_015942 | 7298.162 | 6382.243 | NM_007112 | 7601.116  | 8452.255  | AK025102  | 2945.337  | 2563.319  |
| NM_000673 | 1047.608 | 1083.226 | S82075    | 2467.652  | 2364.498  | AF086562  | 2684.995  | 2417.109  |
| NM_002676 | 656.599  | 726.57   | Z70766    | 529.586   | 711.985   | Y11897    | 668.268   | 633.637   |
| NM_002103 | 3421.007 | 3554.23  | AK000660  | 10041.148 | 9813.022  | AY007113  | 1700.606  | 1964.532  |
| NM_006665 | 3362.092 | 2626.151 | AK026298  | 397.01    | 503.314   | AF130083  | 15900.256 | 18790.213 |
| AK026256  | 778.18   | 551.377  | NM_014711 | 4500.015  | 4526.336  | NM_002700 | 8612.864  | 11072.803 |
| NM_000270 | 12254.01 | 11052.91 | AK022015  | 1898.229  | 2485.855  | AB002437  | 25034.176 | 10748.961 |
| U89277    | 2881.896 | 2352.654 | AK002208  | 2528.646  | 1934.303  | AK023496  | 640.919   | 363.953   |
| AB046837  | 767.52   | 665.489  | D63135    | 993.69    | 782.024   | NM_006777 | 1331.732  | 1307.834  |
| AK026670  | 1824.873 | 818.549  | AB033083  | 4416.511  | 3333.422  | AK024969  | 7951.164  | 8123.354  |
| NM_002876 | 4826.118 | 3028.014 | CY3Cy5    | 4897.871  | 346.628   | AK022250  | 1390.496  | 1026.828  |
| AK022332  | 5043.772 | 4319.888 | H41522    | 1557.148  | 1304.875  | NM_012369 | 1150.78   | 797.895   |
| NM_006465 | 1910.021 | 2304.597 | AA460291  | 8911.528  | 7884.65   | AK025092  | 2039.136  | 1732.806  |
| NM_006769 | 6062.784 | 4130.793 | BI821333  | 17645.809 | 14818.971 | AF130047  | 552.063   | 585.89    |
| NM_001189 | 487.175  | 597.554  | X51841    | 42631.125 | 42465.043 | Z83944    | 1949.547  | 1612.72   |
| NM_006992 | 1040.783 | 889.893  | AF051344  | 8081.981  | 9320.538  | AF085871  | 3208.222  | 3357.128  |
| AL365370  | 2342.232 | 2422.748 | BG506100  | 13626.287 | 22737.416 | AL110141  | 66670.445 | 47925.422 |
| AL109726  | 362.288  | 272.892  | X53586    | 6211.563  | 7056.01   | NM_019063 | 44513.41  | 47459.094 |
| AL109716  | 229.484  | 192.878  | M17176    | 1238.176  | 1099.621  | NM_014336 | 1999.144  | 2820.459  |
| AF085912  | 430.485  | 291.375  | M26576    | 902.124   | 938.566   | AB002308  | 1356.778  | 2633.873  |
| AB028963  | 369.089  | 307.004  | M32972    | 5889.595  | 6023.48   | NM_003324 | 5169.389  | 5316.249  |
| AK001127  | 586.528  | 443.46   | D89854    | 1259.473  | 1629.536  | NM_012143 | 9266.524  | 5539.406  |
| U79256    | 7486.658 | 5703.489 | M13207    | 726.282   | 762.097   | AF085892  | 2747.339  | 2413.079  |
| AL832550  | 1020.519 | 989.435  | X14885    | 1005.533  | 1042.245  | AF075114  | 6931.102  | 6771.875  |
| AF131798  | 346.498  | 391.989  | M97815    | 905.691   | 1006.844  | AK022218  | 69626.133 | 49929.379 |
| AK001731  | 6212.064 | 4066.346 | SR4       | 18675.514 | 20006.168 | NM_007112 | 9174.997  | 7074.414  |
| AF143876  | 194.408  | 361.526  | SR6       | 2549.534  | 2668.504  | S82075    | 3733.232  | 3260.745  |
| NM_001412 | 4849.339 | 3117.188 | SR8       | 9219.19   | 28925.736 | Z70766    | 1101.242  | 695.22    |
| AF095771  | 1238.48  | 1054.239 | SR10      | 33529.965 | 13314.488 | AK000660  | 12684.688 | 8077.519  |
| AF086205  | 1694.99  | 1505.634 | CY3Cy5    | 4535.605  | 317.541   | AK026298  | 883.572   | 444.591   |
| AK024169  | 563.494  | 553.35   | AK025588  | 2633.395  | 2362.759  | NM_014711 | 6487.574  | 5399.208  |
| AF147395  | 1415.022 | 1233.415 | NM_003188 | 5511.923  | 5807.716  | AK022015  | 1969.775  | 2431.745  |
| AF087967  | 202.008  | 298.246  | NM_007118 | 579.653   | 542.683   | D17234    | 1004.547  | 1104.194  |
| AF085985  | 473.588  | 618.271  | U59431    | 3979.957  | 3572.984  | AK002208  | 2246.163  | 2327.343  |
| AK026384  | 869.839  | 1095.833 | U49349    | 1327.168  | 1266.856  | D63135    | 940.027   | 1626.947  |
| AK025217  | 576.58   | 661.179  | NM_020152 | 2500.125  | 3412.731  | AB033083  | 3694.292  | 4146.968  |
| AL137342  | 3713.932 | 3003.325 | NM_013404 | 1374.287  | 1522.295  | NM_017828 | 18965.998 | 15290.464 |
| AF075105  | 2492.984 | 1807.594 | NM_006157 | 426.685   | 544.331   | CY3Cy5    | 8832.531  | 294.234   |
| U40710    | 116.839  | 263.353  | NM_003966 | 899.627   | 1051.782  | H41522    | 1958.746  | 2627.12   |
| U03241    | 235.884  | 213.799  | AK024443  | 64302.832 | 67721.539 | AA460291  | 13162.917 | 16378.794 |
| NM_005117 | 858.14   | 546.774  | X06710    | 2366.167  | 3184.659  | BI821333  | 19964.201 | 26001.309 |
| AJ007733  | 1095.283 | 878.692  | AK000896  | 1735.187  | 1858.361  | X51841    | 30160.773 | 47700.219 |
| AK021625  | 2815.839 | 2646.525 | NM_020384 | 2935.548  | 4121.137  | AF051344  | 6710.144  | 7440.062  |
| AK021679  | 1035.931 | 859.409  | AK026074  | 1427.948  | 1590.049  | BG506100  | 17519.85  | 16214.79  |
| AK001380  | 3861.038 | 1812.024 | NM_003172 | 11466.144 | 11278.036 | X53586    | 6003.06   | 6602.899  |

|           |          |          |           |           |           |           |           |           |
|-----------|----------|----------|-----------|-----------|-----------|-----------|-----------|-----------|
| AK025312  | 2014.983 | 2141.136 | NM_004809 | 3370.548  | 3487.477  | M17176    | 1262.807  | 1252.423  |
| AK027205  | 605.99   | 621.812  | AA903183  | 842.979   | 633.294   | M26576    | 581.197   | 870.388   |
| AK026493  | 327.412  | 313.916  | NM_017817 | 4634.964  | 6979.865  | M32972    | 5761.74   | 7664.229  |
| AL049268  | 424.662  | 330.604  | NM_018184 | 14276.688 | 21087.125 | D11151    | 1084.111  | 1504.588  |
| AK023963  | 9193.469 | 6595.505 | AB046823  | 1484.803  | 1438.603  | D89854    | 1581.211  | 1412.751  |
| AK022473  | 1865.981 | 1543.271 | NM_004929 | 946.316   | 1041.56   | M13207    | 922.482   | 453.363   |
| AK023810  | 1212.836 | 1171.269 | NM_004662 | 749.366   | 929.238   | X14885    | 929.729   | 1300.576  |
| U80761    | 5103.086 | 5970.397 | NM_016639 | 43736.996 | 52932.383 | M97815    | 1090.176  | 1470.248  |
| U61100    | 2981.82  | 2594.941 | U61739    | 11324.855 | 11502.266 | NM_006325 | 9314.443  | 9242.211  |
| NM_018582 | 828.64   | 604.319  | AJ132089  | 1295.765  | 1426.575  | SR2       | 67754.992 | 59961.496 |
| M21539    | 868.353  | 646.175  | U92819    | 14744.938 | 14179.454 | SR4       | 28223.004 | 22580.064 |
| AF130117  | 617.068  | 697.15   | AB020626  | 1212.998  | 1472.469  | SR6       | 4292.773  | 3104.692  |
| AB007861  | 801.021  | 727.286  | NM_002036 | 9877.691  | 10718.575 | SR8       | 15280.362 | 30949.9   |
| AK024125  | 779.878  | 516.674  | NM_012400 | 720.525   | 1010.54   | SR10      | 50509.184 | 16320.665 |
| AK024761  | 15673.76 | 14708.32 | NM_005384 | 4164.257  | 3945.103  | CY3Cy5    | 9846.632  | 374.068   |
| M55536    | 5481.486 | 3214.417 | AB013103  | 743.289   | 992.888   | AK025588  | 4769.696  | 5326.76   |
| NM_014335 | 17714.51 | 14650.63 | AF019225  | 3722.929  | 4703.379  | NM_003188 | 7648.68   | 8662.293  |
| AF086067  | 6282.367 | 7111.331 | Z36803    | 10509.374 | 9701.023  | NM_007118 | 799.296   | 1039.012  |
| AK024967  | 6275.556 | 6190.034 | NM_013371 | 747.636   | 1019.932  | U59431    | 3507.546  | 4431.164  |
| AK025102  | 2343.801 | 2178.423 | NM_000707 | 7113.774  | 7844.823  | U49349    | 1527.722  | 1721.93   |
| AF086562  | 978.998  | 929.841  | AB011139  | 2497.387  | 3249.786  | NM_020152 | 3070.182  | 2986.778  |
| Y11897    | 861.8    | 658.257  | NM_006919 | 932.061   | 1097.847  | NM_013404 | 1186.205  | 1352.08   |
| AK021749  | 755.572  | 667.255  | AK022625  | 10322.039 | 10679.963 | NM_006157 | 690.134   | 1368.111  |
| AJ011980  | 204.201  | 338.05   | NM_005425 | 669.029   | 711.821   | NM_003966 | 837.356   | 796.333   |
| AY007113  | 1631.043 | 1460.862 | AK023084  | 3807.419  | 4837.315  | X06710    | 2147.054  | 2426.661  |
| AF130083  | 18820.95 | 15193.63 | BC012333  | 11815.448 | 14583.036 | AK000896  | 2172.786  | 2683.167  |
| NM_002700 | 1658.512 | 1480.635 | AF237952  | 7848.23   | 8504.558  | NM_003872 | 643.138   | 887.355   |
| AB002437  | 20127.26 | 11906.08 | AL079287  | 3648.292  | 4311.486  | NM_020384 | 4198.942  | 5246.451  |
| AK023496  | 560.555  | 503.605  | NM_014427 | 14820.286 | 17068.479 | NM_002309 | 1202.474  | 1248.54   |
| NM_006777 | 1484.853 | 1889.312 | AB046769  | 3772.879  | 4137.355  | AK026074  | 2645.052  | 2549.458  |
| AK024969  | 6195.312 | 5204.851 | NM_015922 | 11485.798 | 10851.299 | NM_003172 | 13720.344 | 13608.969 |
| AK022250  | 451.481  | 466.609  | NM_020381 | 3681.304  | 4604.325  | NM_004809 | 5069.961  | 4505.5    |
| NM_019598 | 64.273   | 66.603   | NM_002957 | 4478.35   | 4756.07   | AA903183  | 861.067   | 836.748   |
| J05063    | 655.753  | 566.688  | NM_018106 | 11081.84  | 11486.953 | NM_017817 | 6223.534  | 6531.868  |
| NM_012369 | 463.727  | 444.976  | NM_003725 | 3363.496  | 5676.165  | NM_018184 | 18100.648 | 19954.273 |
| AK025092  | 2606.775 | 2068.573 | BE899154  | 2492.714  | 2787.454  | AB046823  | 1670.813  | 2293.324  |
| AF130047  | 257.27   | 523.308  | NM_004863 | 3165.241  | 3698.705  | NM_004929 | 1793.883  | 1999.691  |
| Z83944    | 682.66   | 386.98   | AK024573  | 3185.519  | 3404.762  | NM_004662 | 1199.786  | 1238.8    |
| AF085871  | 2920.01  | 2376.167 | NM_002299 | 2919.57   | 3267.182  | NM_016639 | 49236.191 | 53680.098 |
| AF026564  | 1335.233 | 1034.912 | D79998    | 4756.483  | 5350.641  | U61739    | 11732.776 | 12765.879 |
| X97301    | 631.847  | 607.533  | AB032963  | 3799.513  | 4337.021  | AJ132089  | 1138.437  | 1482.095  |
| NM_019063 | 46783.82 | 40357.73 | NM_000385 | 1471.211  | 1492.291  | U92819    | 14545.792 | 17326.602 |
| NM_014336 | 1286.508 | 1239.408 | AF301013  | 5637.129  | 10597.64  | AB020626  | 1223.572  | 1922.41   |
| AB002308  | 2365.371 | 3132.708 | U15688    | 1927.441  | 2163.394  | NM_002036 | 8226.77   | 10630.524 |
| NM_003324 | 6224.082 | 4516.711 | NM_000483 | 5661.426  | 4725.894  | NM_012400 | 908.882   | 992.947   |
| NM_012143 | 7905.115 | 5935.35  | NM_018448 | 10006.768 | 11626.603 | AB013103  | 919.998   | 1322.597  |
| NM_017506 | 275.365  | 301.532  | NM_001659 | 17248.461 | 15081.019 | AF019225  | 4492.907  | 4753.959  |
| NM_006658 | 488.765  | 595.337  | AB020663  | 3127.803  | 3999.854  | Z36803    | 9783.337  | 12838.949 |
| AF085892  | 3208.284 | 2876.587 | AF297866  | 2787.747  | 3139.655  | NM_013371 | 945.84    | 1183.943  |
| AF075114  | 3341.058 | 2397.357 | NM_002864 | 2525.183  | 3575.83   | AB011139  | 3256.795  | 3031.341  |
| AK022218  | 57521.62 | 43171.17 | NM_003102 | 675.779   | 648.358   | NM_006919 | 1016.238  | 1080.34   |
| NM_007112 | 7571.888 | 5731.913 | NM_014305 | 4132.008  | 5027.063  | AK022625  | 8162.207  | 10120.132 |
| S82075    | 3304.687 | 2780.188 | NM_012123 | 10402.705 | 14546.207 | NM_005425 | 656.673   | 828.515   |

|           |          |          |           |           |           |           |           |           |
|-----------|----------|----------|-----------|-----------|-----------|-----------|-----------|-----------|
| Z70766    | 973.265  | 717.987  | U87972    | 6388.63   | 6217.181  | AK023084  | 3905.531  | 4844.398  |
| AK000660  | 10811.93 | 6360.26  | NM_017925 | 2955.412  | 3493.152  | BC012333  | 13789.653 | 14711.688 |
| AK026298  | 720.817  | 624.523  | NM_003171 | 4025.547  | 4675.951  | AF237952  | 9240.144  | 10425.252 |
| NM_014711 | 7274.973 | 4847.61  | NM_006437 | 13164.563 | 13348.909 | AL079287  | 5280.287  | 5954.616  |
| AK022015  | 1385.211 | 1293.645 | NM_017890 | 3747.46   | 3702.757  | NM_014427 | 16929.754 | 19652.777 |
| D17234    | 458.947  | 438.095  | AK021654  | 2242.524  | 2923.382  | AB046769  | 5826.518  | 6096.924  |
| D63135    | 695.117  | 813.766  | NM_016481 | 1526.945  | 2062.446  | NM_015922 | 12122.526 | 15058.347 |
| AB033083  | 3042.698 | 2605.364 | NM_003925 | 12544.93  | 15350.989 | NM_020381 | 5252.13   | 5907.248  |
| CY3Cy5    | 10440.14 | 605.676  | Z15114    | 6792.374  | 6844.735  | NM_002957 | 4709.824  | 5054.432  |
| H41522    | 402.834  | 521.578  | AB040812  | 23059.631 | 31519.813 | NM_018106 | 10044.219 | 11038.285 |
| AA460291  | 3936.951 | 6083.047 | NM_017625 | 688.29    | 856.067   | NM_003725 | 3978.57   | 3871.545  |
| BI821333  | 11726.07 | 16950.9  | NM_006285 | 7699.766  | 9487.025  | BE899154  | 2565.858  | 2357.57   |
| X51841    | 2511.165 | 3209.865 | NM_001348 | 3369.406  | 3424.396  | NM_004863 | 3425.518  | 3784.104  |
| AF051344  | 3292.421 | 4136.562 | NM_000215 | 7575.876  | 7257.798  | AK024573  | 3795.24   | 4311.069  |
| BG506100  | 13919.77 | 13927.75 | AK027148  | 7855.786  | 8234.048  | NM_002299 | 2448.569  | 2839.255  |
| X53586    | 4548.758 | 4627.916 | NM_005084 | 5965.611  | 5864.306  | D79998    | 4537.751  | 4984.66   |
| M17176    | 983.562  | 1207.111 | NM_007283 | 668.23    | 642.71    | AB032963  | 3715.256  | 4292.87   |
| M26576    | 664.084  | 964.209  | NM_006111 | 7853.582  | 8358.116  | NM_000385 | 1598.338  | 1862.429  |
| M32972    | 1412.896 | 1463.214 | AK026071  | 11253.592 | 11337.75  | AF301013  | 5787.581  | 4938.398  |
| D11151    | 615.924  | 448.386  | AK026074  | 1800.506  | 1832.259  | NM_000483 | 5675.593  | 6238.03   |
| D89854    | 2181.761 | 2015.202 | NM_003172 | 12435.584 | 15075.774 | NM_018448 | 11510.059 | 11978.962 |
| M13207    | 468.519  | 457.262  | NM_004809 | 4578.631  | 4426.714  | NM_001659 | 15688.408 | 20036.195 |
| X14885    | 447.256  | 702.762  | AA903183  | 723.879   | 775.357   | AB020663  | 3826.171  | 4148.744  |
| M97815    | 797.303  | 824.152  | H41522    | 1823.698  | 1647.877  | AF297866  | 2516.155  | 2738.688  |
| NM_006325 | 6134.741 | 6509.388 | AA460291  | 10173.854 | 8898.127  | NM_002864 | 3057.68   | 2800.584  |
| SR2       | 56493.02 | 47347.12 | BI821333  | 20163.586 | 18919.5   | NM_014305 | 4949.178  | 5459.603  |
| SR4       | 18891.49 | 16065.65 | X51841    | 41385.762 | 42341.75  | NM_012123 | 14485.603 | 11471.409 |
| SR6       | 2033.031 | 1703.882 | AF051344  | 7315.592  | 7332.164  | U87972    | 5580.024  | 6111.227  |
| SR10      | 18748.9  | 5533.45  | BG506100  | 13875.61  | 17874.078 | NM_017925 | 3040.433  | 3011.706  |
| CY3Cy5    | 18163.5  | 983.9    | X53586    | 6287.385  | 5912.222  | NM_003171 | 4774.595  | 4049.134  |
| AK025588  | 648.568  | 863.669  | M17176    | 925.52    | 1001.349  | NM_006437 | 13809.536 | 14339.562 |
| NM_003188 | 4928.451 | 4849.092 | M26576    | 1903.764  | 2268.798  | NM_017890 | 3267.718  | 3096.135  |
| NM_007118 | 539.763  | 601.049  | M32972    | 4825.823  | 4716.26   | AK021654  | 2354.279  | 2622.693  |
| U59431    | 307.146  | 669.749  | D89854    | 1363.292  | 1573.199  | NM_016481 | 2761.809  | 1921.533  |
| U49349    | 807.491  | 849.412  | M13207    | 1022.112  | 958.836   | NM_003925 | 12622.346 | 13689.931 |
| NM_020152 | 2435.711 | 2631.907 | M97815    | 1200.018  | 1214.134  | Z15114    | 6493.383  | 6994.718  |
| NM_013404 | 421.247  | 524.337  | NM_006325 | 6473.958  | 7389.499  | AB040812  | 27538.279 | 34000.453 |
| NM_006157 | 277.609  | 401.29   | AF085893  | 987.64    | 1121.879  | NM_017625 | 969.658   | 687.747   |
| NM_003966 | 377.171  | 490.303  | NM_003201 | 6138.861  | 7217.659  | NM_006285 | 9868.862  | 9691.459  |
| X06710    | 1930.807 | 2115.765 | AB011139  | 2762.51   | 2860.181  | NM_001348 | 3982.917  | 4876.867  |
| AK000896  | 1877.912 | 2043.918 | NM_006919 | 1131.768  | 1037.075  | NM_000215 | 7064.47   | 8591.289  |
| AV682011  | 653.882  | 545.917  | AK022625  | 14153.982 | 14515.341 | AK027148  | 9406.069  | 12382.351 |
| NM_003872 | 479.888  | 395.535  | NM_005425 | 806.813   | 676.455   | NM_005084 | 8046.184  | 10104.949 |
| NM_020384 | 3244.31  | 3283.727 | AK023084  | 4659.318  | 4614.642  | NM_007283 | 650.331   | 835.489   |
| NM_006058 | 13081.21 | 11764.11 | AK025588  | 3573.853  | 3115.913  | NM_006111 | 9340.597  | 10303.438 |
| M97496    | 7491.716 | 9460.932 | NM_003188 | 5443.24   | 6960.426  | AK026071  | 7933.851  | 9491.9    |
| NM_002309 | 560.985  | 479.831  | NM_007118 | 693.411   | 789.494   | NM_002309 | 462.441   | 690.916   |
| AK026074  | 1662.208 | 2011.583 | U59431    | 4147.315  | 4481.681  | AK026074  | 2352.812  | 2681.022  |
| NM_003172 | 4071.615 | 5601.588 | U49349    | 939.475   | 1408.822  | NM_003172 | 13578.286 | 16455.988 |
| NM_004809 | 1476.56  | 1910.676 | NM_020152 | 2399.803  | 2951.684  | NM_004809 | 4811.345  | 5595.357  |
| AA903183  | 182.961  | 415.912  | NM_013404 | 1529.498  | 1327.012  | AA903183  | 1023.452  | 1004.401  |
| NM_017817 | 3438.06  | 3244.897 | NM_006157 | 386.736   | 520.486   | H41522    | 2017.401  | 2326.108  |
| NM_018184 | 7862.244 | 8387.258 | NM_003966 | 795.911   | 994.436   | AA460291  | 10493.367 | 13331.01  |

|           |          |          |           |           |           |           |           |           |
|-----------|----------|----------|-----------|-----------|-----------|-----------|-----------|-----------|
| AB046823  | 869.272  | 1149.191 | AK024443  | 59861.223 | 62893.039 | BI821333  | 19142.459 | 27950.594 |
| NM_004929 | 926.769  | 991.016  | X06710    | 2584.542  | 2893.754  | X51841    | 29254.436 | 45334.59  |
| NM_004662 | 993.221  | 933.095  | AK000896  | 1603.052  | 1632.668  | AF051344  | 6382.563  | 7646.853  |
| NM_016639 | 6755.038 | 7281.136 | NM_003872 | 484.823   | 743.871   | BG506100  | 16723.08  | 15359.054 |
| U61739    | 2579.958 | 2816.594 | NM_020384 | 3370.125  | 3561.406  | X53586    | 5967.633  | 6160.654  |
| AJ132089  | 1114.078 | 1132.063 | NM_006058 | 13466.186 | 17118.732 | M17176    | 1212.324  | 1030.168  |
| U92819    | 10567.87 | 13431.85 | NM_006628 | 11322.224 | 11882.892 | M26576    | 677.583   | 805.162   |
| AB020626  | 511.396  | 810.122  | M97496    | 27861.578 | 32525.908 | M32972    | 4963.093  | 5179.994  |
| NM_002036 | 625.37   | 858.068  | NM_000483 | 6410.278  | 7067.181  | D11151    | 812.565   | 572.454   |
| NM_012400 | 591.312  | 509.095  | NM_018448 | 12488.03  | 18931.012 | D89854    | 1468.214  | 1519.829  |
| NM_006850 | 667.362  | 697.903  | NM_001659 | 18536.369 | 19352.533 | M13207    | 773.364   | 678.962   |
| AB013103  | 429.467  | 482.437  | AB020663  | 4080.433  | 5475.34   | M97815    | 979.415   | 1376.16   |
| AF019225  | 3084.408 | 2850.906 | AF297866  | 3193.614  | 3814.023  | NM_006325 | 9006.722  | 8167.898  |
| Z36803    | 4426.505 | 6377.59  | NM_002864 | 2707.464  | 2982.48   | AF085893  | 1071.244  | 1204.672  |
| NM_013371 | 541.292  | 773.232  | NM_017817 | 4762.608  | 5877.801  | NM_003201 | 8537.106  | 6409.826  |
| NM_000707 | 7199.723 | 7458.894 | NM_018184 | 13783.973 | 15322.552 | AB011139  | 3405.416  | 3880.399  |
| NM_003201 | 8089.796 | 7247.217 | AB046823  | 1597.654  | 1731.542  | NM_006919 | 1249.374  | 1285.888  |
| AB011139  | 3716.66  | 2990.468 | NM_004929 | 1050.084  | 1372.396  | AK022625  | 8811.243  | 11441.455 |
| NM_006919 | 784.025  | 1234.573 | NM_004662 | 748.874   | 933.39    | NM_005425 | 814.717   | 891.938   |
| AK022625  | 1231.04  | 1656.479 | NM_016639 | 49060.934 | 49386.953 | AK023084  | 3557.286  | 4156.182  |
| NM_005425 | 371.753  | 476.761  | U61739    | 12197.202 | 10942.858 | AK025588  | 3200.486  | 3974.72   |
| AK023084  | 1282.132 | 2014.094 | AJ132089  | 1071.055  | 1486.433  | NM_003188 | 7370.573  | 8110.203  |
| BC012333  | 8759.533 | 8655.188 | U92819    | 13515.139 | 12369.824 | NM_007118 | 795.007   | 955.119   |
| AF237952  | 5378.302 | 5501.486 | AB020626  | 1236.126  | 1212.769  | U59431    | 2400.046  | 2981.868  |
| AL079287  | 3627.379 | 3429.503 | NM_002036 | 11266.304 | 11081.808 | U49349    | 1550.32   | 1540.73   |
| NM_014427 | 8685.556 | 10234.24 | NM_012400 | 1034.875  | 1109.772  | NM_020152 | 2493.549  | 3257.551  |
| AB046769  | 2898.874 | 3188.591 | NM_005384 | 4372.374  | 4491.324  | NM_013404 | 946.815   | 1066.758  |
| NM_015922 | 6162.557 | 7689.433 | AB013103  | 836.588   | 931.48    | NM_006157 | 538.804   | 583.623   |
| NM_020381 | 2390.086 | 2899.393 | AF019225  | 3513.822  | 3617.629  | NM_003966 | 995.535   | 476.339   |
| NM_002957 | 2200.347 | 2460.925 | Z36803    | 11277.674 | 9778.355  | AK024443  | 68473.188 | 62783.738 |
| NM_018106 | 7607.736 | 9053.882 | NM_013371 | 720.441   | 886.807   | X06710    | 2794.479  | 2816.989  |
| NM_003725 | 3663.151 | 2984.982 | NM_000707 | 7098.083  | 6935.313  | AK000896  | 2214.749  | 2420.969  |
| BE899154  | 1466.965 | 1570.917 | AF202092  | 17503.352 | 21733.934 | AV682011  | 907.602   | 600.745   |
| NM_004863 | 3324.66  | 3095.145 | NM_000215 | 7957.793  | 8912.243  | NM_003872 | 781.48    | 770.637   |
| AK024573  | 3192.09  | 3654.607 | AK027148  | 9328.358  | 10928.983 | NM_020384 | 3845.002  | 3829.967  |
| NM_002299 | 1541.941 | 1583.081 | NM_005084 | 6595.716  | 7722.428  | NM_006058 | 20491.609 | 17359.469 |
| D79998    | 4042.789 | 4128.229 | NM_007283 | 651.229   | 595.216   | NM_006628 | 10391.191 | 10398.331 |
| AB032963  | 4129.485 | 4045.554 | NM_006111 | 9370.672  | 10215.666 | M97496    | 26603.369 | 35408.934 |
| NM_000385 | 887.011  | 684.673  | AK026071  | 11052.283 | 11801.037 | NM_000483 | 5015.122  | 3983.382  |
| AF301013  | 5213.88  | 3731.403 | BC012333  | 11964.171 | 14671.696 | NM_018448 | 12805.691 | 7844.403  |
| NM_018992 | 66766.87 | 48228.57 | AF237952  | 7557.731  | 8655.234  | NM_001659 | 15655.854 | 15465.147 |
| U15688    | 1673.371 | 1867.219 | AL079287  | 3228.668  | 4191.089  | AB020663  | 4468.972  | 3969.607  |
| NM_000483 | 2528.858 | 2700.938 | NM_014427 | 14051.514 | 14231.704 | AF297866  | 1942.775  | 1582.725  |
| NM_018448 | 13835.78 | 14592.35 | AB046769  | 3811.06   | 3678.509  | NM_002864 | 3674.78   | 3656.629  |
| NM_001659 | 8326.48  | 12856.73 | NM_015922 | 11176.019 | 10265.97  | NM_017817 | 6051.9    | 5731.637  |
| AB020663  | 3624.521 | 4004.892 | NM_020381 | 4867.052  | 5225.231  | NM_018184 | 17330.563 | 19032.629 |
| AF297866  | 2218.132 | 2574.653 | NM_002957 | 5377.481  | 5640.285  | AB046823  | 1705.13   | 1666.428  |
| NM_002864 | 1021.599 | 1463.695 | NM_018106 | 9353.804  | 9146.989  | NM_004929 | 1409.357  | 1526.236  |
| NM_003102 | 392.769  | 306.731  | NM_003725 | 2718.484  | 4372.018  | NM_004662 | 819.553   | 1188.469  |
| NM_014305 | 3845.385 | 3637.094 | BE899154  | 2283.731  | 2431.385  | NM_016639 | 47652.23  | 53039.625 |
| NM_012123 | 8428.058 | 6063.251 | NM_004863 | 2898.686  | 3000.808  | U61739    | 7699.804  | 8204.938  |
| U87972    | 1511.055 | 1856.87  | NM_002299 | 2786.596  | 2581.979  | AJ132089  | 1158.365  | 1300.73   |
| NM_017925 | 3647.789 | 4012.044 | D79998    | 4243.604  | 3613.15   | U92819    | 14000.881 | 16782.281 |

|           |          |          |           |           |           |           |           |           |
|-----------|----------|----------|-----------|-----------|-----------|-----------|-----------|-----------|
| AK022208  | 16601.4  | 16794.23 | AB032963  | 3662.348  | 3357.572  | AB020626  | 994.05    | 1292.156  |
| NM_003171 | 3182.985 | 2448.656 | NM_000385 | 1614.162  | 1569.624  | NM_002036 | 5550.484  | 7013.221  |
| NM_006437 | 12233.01 | 15661.43 | AF301013  | 3858.895  | 6423.128  | NM_012400 | 920.073   | 881.518   |
| NM_017890 | 2602.981 | 2465.39  | NM_018992 | 55612.227 | 61372.734 | NM_005384 | 4749.959  | 5107.963  |
| AK021654  | 1513.21  | 1403.475 | U15688    | 1865.834  | 2203.473  | AB013103  | 940.139   | 969.157   |
| NM_016481 | 2268.591 | 1686.325 | NM_006325 | 7173.008  | 7706.044  | AF019225  | 4913.66   | 4337.708  |
| NM_003925 | 10223.85 | 9875.917 | AF085893  | 1157.1    | 1050.857  | Z36803    | 9663.225  | 11398.835 |
| Z15114    | 3888.522 | 4165.373 | NM_003102 | 892.323   | 968.234   | NM_013371 | 851.47    | 851.002   |
| AB040812  | 25668.54 | 33405.5  | NM_014305 | 4069.983  | 4980.905  | NM_000707 | 7153.763  | 7249.113  |
| NM_017625 | 1038.615 | 783.553  | NM_012123 | 9870.405  | 11562.682 | AF202092  | 19977.029 | 19890.654 |
| NM_006285 | 11216.45 | 10603.77 | U87972    | 5280.872  | 5796.625  | NM_000215 | 7383.517  | 9521.194  |
| NM_003656 | 13958.87 | 15577.48 | NM_017925 | 2706.907  | 3005.194  | AK027148  | 9647.887  | 8873.359  |
| NM_001348 | 4773.813 | 5538.52  | AK022208  | 25681.338 | 23307.666 | NM_005084 | 8424.819  | 10338.745 |
| NM_000215 | 5184.602 | 6684.987 | NM_003171 | 3427.895  | 3397.052  | NM_007283 | 725.472   | 659.048   |
| AK027148  | 4138.292 | 4709.729 | NM_006437 | 11512.69  | 10105.81  | NM_006111 | 9194.773  | 7343.084  |
| NM_005084 | 8193.395 | 9610.29  | NM_017890 | 2648.045  | 2629.606  | AK026071  | 9017.167  | 8221.118  |
| NM_007283 | 538.197  | 702.302  | AK021654  | 2110.356  | 2078.692  | BC012333  | 13343.727 | 10728.045 |
| NM_006111 | 7748.593 | 9351.688 | Z15114    | 6029.65   | 5396.096  | AF237952  | 9986.345  | 8509.358  |
| AK026071  | 2463.151 | 3415.66  | AB040812  | 22951.32  | 23495.33  | AL079287  | 4123.783  | 3157.051  |
| NM_002309 | 379.201  | 326.176  | NM_017625 | 653.712   | 1136.456  | NM_014427 | 15565.777 | 12323.223 |
| AK026074  | 1679.191 | 1637.001 | NM_006285 | 7284.924  | 9575.644  | AB046769  | 4062.25   | 3563.315  |
| NM_003172 | 8087.732 | 8721.335 | NM_003656 | 58317.254 | 53057.426 | NM_015922 | 10902.887 | 12162.068 |
| NM_004809 | 1846.098 | 2064.775 | NM_001348 | 4133.741  | 3919.8    | NM_020381 | 3972.033  | 3971.496  |
| AA903183  | 592.252  | 434.104  | AV682011  | 303.025   | 790.627   | NM_002957 | 4765.088  | 5092.118  |
| H41522    | 355.829  | 443.482  | NM_003872 | 577.372   | 835.809   | NM_018106 | 10373.728 | 10681.208 |
| AA460291  | 4020.976 | 6152.192 | NM_020384 | 3182.422  | 3657.068  | NM_003725 | 4544.338  | 3488.541  |
| BI821333  | 11611.08 | 17868.79 | NM_006058 | 14554.899 | 20404.664 | BE899154  | 1886.756  | 2371.081  |
| X51841    | 2499.027 | 3069.525 | NM_006628 | 10585.538 | 9955.354  | NM_004863 | 3121.312  | 3499.885  |
| AF051344  | 3170.883 | 3767.878 | M97496    | 29125.785 | 29218.582 | AK024573  | 3163.119  | 4000.464  |
| BG506100  | 15986.35 | 15468.52 | AK026074  | 1640.516  | 2022.79   | NM_002299 | 2702.005  | 2846.78   |
| X53586    | 5037.12  | 5813.069 | NM_003172 | 11401.35  | 10542.12  | D79998    | 4488.582  | 4686.572  |
| M17176    | 672.592  | 751.334  | NM_004809 | 3472.915  | 3101.492  | AB032963  | 4151.775  | 4200.314  |
| M26576    | 456.586  | 471.488  | AA903183  | 572.568   | 531.316   | NM_000385 | 1354.442  | 1790.227  |
| M32972    | 1722.167 | 1785.365 | H41522    | 1484.703  | 1284.056  | AF301013  | 5874.917  | 3888.28   |
| D11151    | 499.603  | 596.237  | AA460291  | 10020.735 | 8502.018  | U15688    | 1948.829  | 2019.17   |
| D89854    | 2257.281 | 2243.191 | BI821333  | 17457.191 | 14768.005 | NM_006325 | 9681.95   | 9648.315  |
| M13207    | 492.455  | 563.52   | X51841    | 41473.539 | 34299.605 | AF085893  | 1511.405  | 820.706   |
| X14885    | 857.822  | 1065.947 | AF051344  | 5625.732  | 4918.97   | NM_003102 | 1089.07   | 711.436   |
| M97815    | 1062.835 | 1188.709 | BG506100  | 12040.448 | 15454.464 | NM_014305 | 5288.005  | 5337.085  |
| NM_006325 | 7431.391 | 9421.425 | X53586    | 5878.957  | 5543.373  | NM_012123 | 13239.045 | 7100.188  |
| AF085893  | 164.862  | 437.338  | M17176    | 944.857   | 894.046   | U87972    | 4510.25   | 3040.059  |
| NM_003201 | 6477.492 | 5434.887 | M26576    | 839.673   | 1061.226  | NM_017925 | 3130.582  | 2484.78   |
| AB011139  | 3091.953 | 2434.188 | M32972    | 4922.891  | 3976.215  | NM_003171 | 4646.19   | 3187.259  |
| NM_006919 | 458.718  | 537.436  | D89854    | 2155.748  | 2646.612  | NM_006437 | 13988.405 | 10694.384 |
| AK022625  | 1723.868 | 1286.896 | M13207    | 712.998   | 575.441   | NM_017890 | 3021.028  | 2365.711  |
| NM_005425 | 394.456  | 384.266  | X14885    | 1128.571  | 1019.87   | AK021654  | 2295.146  | 1759.506  |
| AK023084  | 1456.661 | 1514.964 | M97815    | 889.901   | 1048.082  | NM_016481 | 2804.596  | 1659.799  |
| AK025588  | 712.659  | 868.936  | AB013103  | 735.482   | 1038.476  | NM_003925 | 15023.013 | 12375.439 |
| NM_003188 | 5142.604 | 5810.842 | AF019225  | 3483.956  | 3757.169  | Z15114    | 6335.796  | 6148.518  |
| NM_007118 | 558.652  | 668.524  | Z36803    | 10739.08  | 9922.472  | AB040812  | 30346.734 | 31067.455 |
| U59431    | 453.815  | 710.386  | NM_013371 | 852.683   | 978.574   | NM_017625 | 970.109   | 465.818   |
| U49349    | 1540.424 | 2244.512 | NM_000707 | 6399.491  | 6189.741  | NM_006285 | 9552.193  | 8699.252  |
| NM_020152 | 2630.374 | 2786.753 | AF202092  | 19235.904 | 21690.186 | NM_001348 | 3559.385  | 4293.452  |

|           |          |          |           |           |           |           |           |           |
|-----------|----------|----------|-----------|-----------|-----------|-----------|-----------|-----------|
| NM_013404 | 483.786  | 548.308  | NM_003201 | 6659.043  | 7621.544  | AV682011  | 1060.132  | 1473.64   |
| AF300648  | 138.234  | 144.415  | AB011139  | 2876.742  | 3448.355  | NM_003872 | 707.375   | 1191.407  |
| NM_006157 | 475.952  | 493.886  | NM_006919 | 1129.122  | 1139.108  | NM_020384 | 4143.998  | 5040.207  |
| NM_003966 | 866.846  | 846.872  | AK022625  | 12184.27  | 12331.57  | NM_006058 | 23770.893 | 20485.598 |
| AK024443  | 56621.2  | 46941.35 | AK023084  | 3712.717  | 3299.412  | NM_006628 | 14296.205 | 16441.424 |
| X06710    | 2838.286 | 2915.402 | AK025588  | 3025.096  | 3193.607  | M97496    | 29540.238 | 37943.855 |
| AK000896  | 2314.12  | 2682.516 | NM_003188 | 5385.644  | 5895.745  | NM_002309 | 625.668   | 788.506   |
| AV682011  | 727.116  | 783.323  | U59431    | 4138.589  | 3606.42   | AK026074  | 2092.842  | 1593.397  |
| NM_003872 | 565.569  | 827.416  | U49349    | 1270.476  | 1317.792  | NM_003172 | 13164.307 | 9865.067  |
| NM_020384 | 3738.858 | 4336.553 | NM_020152 | 2505.454  | 2684.801  | NM_004809 | 4563.366  | 3869.026  |
| NM_006058 | 17878.65 | 18122.82 | NM_013404 | 1559.81   | 1515.798  | AA903183  | 667.494   | 769.774   |
| NM_006628 | 10480.23 | 12258.18 | NM_003966 | 689.519   | 783.522   | H41522    | 1701.723  | 1088.887  |
| M97496    | 2743.409 | 3776.203 | AK024443  | 62080.895 | 59493.027 | AA460291  | 8561.645  | 7902.455  |
| NM_000483 | 1517.289 | 1593.435 | X06710    | 2542.874  | 3172.336  | BI821333  | 17977.135 | 16367.931 |
| NM_018448 | 9199.81  | 8227.551 | AK000896  | 1703.836  | 2011.363  | X51841    | 24539.324 | 33821.492 |
| NM_001659 | 5372.701 | 7758.073 | D79998    | 4843.216  | 5626.143  | AF051344  | 6196.763  | 5074.22   |
| AB020663  | 4824.79  | 4035.495 | AB032963  | 4476.282  | 3981.899  | BG506100  | 16608.047 | 13331.792 |
| AF297866  | 2724.567 | 2613.703 | NM_000385 | 1280.259  | 1578.088  | X53586    | 6462.319  | 4839.901  |
| NM_002864 | 2881.113 | 3305.526 | AF301013  | 3815.183  | 6196.911  | M17176    | 1407.322  | 730.727   |
| NM_017817 | 3328.576 | 3443.935 | NM_018992 | 61165.148 | 67308.859 | M26576    | 681.782   | 703.24    |
| NM_018184 | 8159.804 | 9226.342 | U15688    | 1853.01   | 2241.842  | M32972    | 4656.046  | 4339.391  |
| AB046823  | 979.926  | 1069.562 | NM_000483 | 6176.703  | 6121.288  | D89854    | 1691.911  | 918.453   |
| NM_004929 | 632.25   | 833.924  | NM_018448 | 11157.412 | 12735.77  | M13207    | 829.282   | 374.346   |
| NM_004662 | 905.062  | 883.7    | NM_001659 | 16902.572 | 16475.693 | M97815    | 1212.049  | 881.838   |
| NM_016639 | 6265.624 | 7081.578 | AB020663  | 4089.928  | 5124.381  | AB013103  | 1295.462  | 1955.373  |
| U61739    | 2400.584 | 2859.306 | AF297866  | 2701.873  | 2906.611  | AF019225  | 4876.117  | 6122.174  |
| AJ132089  | 1363.168 | 1248.901 | NM_002864 | 2470.929  | 3125.314  | Z36803    | 7521.327  | 9806.79   |
| U92819    | 13475.15 | 16744.99 | NM_017817 | 4676.64   | 5522.69   | NM_013371 | 1142.546  | 856.913   |
| AB020626  | 935.366  | 1139.855 | NM_018184 | 12921.325 | 14148.283 | NM_000707 | 8588.347  | 10463.428 |
| NM_002036 | 867.828  | 749.826  | AB046823  | 1312.69   | 1250.492  | AF202092  | 24186.139 | 20186.479 |
| NM_012400 | 850.523  | 805.254  | NM_004929 | 989.183   | 1165.044  | NM_003201 | 9344.119  | 6646.816  |
| NM_005384 | 5032.001 | 5988.227 | NM_004662 | 874.32    | 887.121   | AB011139  | 3995.535  | 3160.359  |
| NM_006850 | 772.729  | 966.341  | NM_016639 | 51487.125 | 52722.594 | NM_006919 | 1285.886  | 1410.161  |
| AB013103  | 1081.023 | 1134.17  | U61739    | 12144.119 | 10749.007 | AK022625  | 8844.2    | 12117.063 |
| AF019225  | 5325.995 | 5325.722 | AJ132089  | 1447.052  | 1482.181  | NM_005425 | 688.004   | 847.738   |
| Z36803    | 6746.812 | 10178.81 | U92819    | 14980.506 | 12328.421 | AK023084  | 4613.561  | 5512.113  |
| NM_013371 | 740.536  | 1022.277 | AB020626  | 1199.51   | 1420.063  | AK025588  | 3343.95   | 3743.981  |
| NM_000707 | 7462.442 | 8627.91  | NM_002036 | 11519.408 | 11554.217 | NM_003188 | 7847.884  | 6542.792  |
| AF202092  | 17093.52 | 20340.94 | NM_012400 | 961.978   | 880.525   | NM_007118 | 773.341   | 684.877   |
| NM_000215 | 3838.065 | 4385.843 | NM_005384 | 4317.832  | 4014.51   | U59431    | 2447.729  | 2310.023  |
| AK027148  | 2659.314 | 2952.406 | NM_006850 | 857.279   | 831.041   | U49349    | 1712.354  | 1571.828  |
| NM_005084 | 6098.724 | 6352.529 | Z15114    | 6104.329  | 6333.495  | NM_020152 | 3275.354  | 2678.802  |
| NM_007283 | 468.317  | 468.643  | AB040812  | 22308.186 | 25663.41  | NM_013404 | 1290.758  | 1655.437  |
| NM_006111 | 7710.428 | 9003.635 | NM_017625 | 384.919   | 684.619   | NM_006157 | 643.925   | 529.774   |
| AK026071  | 2846.931 | 3667.438 | NM_006285 | 8527.3    | 8770.47   | NM_003966 | 984.797   | 562.517   |
| BC012333  | 10065.95 | 9613.845 | NM_001348 | 3680.32   | 3595.555  | AK024443  | 68887.297 | 59929.191 |
| AF237952  | 5737.181 | 6432.89  | NM_000215 | 8071.972  | 8180.663  | X06710    | 2966.724  | 2780.544  |
| AL079287  | 3777.113 | 4056.271 | AK027148  | 11026.948 | 12048.03  | AK000896  | 2155.318  | 2256.768  |
| NM_014427 | 6915.288 | 8952.343 | NM_005084 | 6107.833  | 6264.163  | D79998    | 4464.131  | 3347.89   |
| AB046769  | 3098.67  | 3736.549 | NM_007283 | 712.505   | 577.705   | AB032963  | 3655.097  | 3554.743  |
| NM_015922 | 8368.257 | 10225.9  | NM_006111 | 8035.078  | 7158.223  | NM_000385 | 1596.605  | 1358.383  |
| NM_020381 | 3262.875 | 3132.851 | AK026071  | 10523.739 | 9481.063  | AF301013  | 6522.129  | 4563.246  |
| NM_002957 | 2393.675 | 2366.915 | BC012333  | 11029.999 | 12143.332 | U15688    | 2401.419  | 1704.879  |



|           |          |          |           |           |           |           |           |           |
|-----------|----------|----------|-----------|-----------|-----------|-----------|-----------|-----------|
| NM_01810E | 8507.766 | 9334.758 | AF237952  | 7783.616  | 7870.597  | NM_00048E | 5187.822  | 4030.111  |
| NM_00372E | 3650.115 | 3030.779 | AL079287  | 3518.969  | 3616.796  | NM_01844E | 11546.278 | 6923.384  |
| BE899154  | 1907.747 | 1857.897 | NM_014427 | 15064.012 | 13351.08  | NM_00165E | 15092.92  | 16797.371 |
| NM_00486E | 4192.479 | 4275.798 | AB046769  | 4809.894  | 4453.135  | AB020663  | 4311.889  | 3497.307  |
| AK024573  | 4563.749 | 5292.016 | NM_01592E | 11750.567 | 10452.179 | AF297866  | 2737.35   | 2309.992  |
| NM_00229E | 2353.81  | 2718.898 | NM_020381 | 5396.686  | 5961.86   | NM_002864 | 3983.85   | 3409.266  |
| D79998    | 5429.946 | 5685.208 | NM_002957 | 7175.941  | 7259.875  | NM_017817 | 6537.796  | 7368.851  |
| AB032963  | 4901.363 | 5136.721 | NM_01810E | 9668.902  | 8283.693  | NM_018184 | 18498.645 | 21078.857 |
| NM_00038E | 1375.342 | 1343.416 | NM_00372E | 3043.912  | 4185.768  | AB046823  | 1530.415  | 2493.747  |
| AF301013  | 8304.442 | 5578.221 | BE899154  | 2473.175  | 3061.2    | NM_00492E | 1973.753  | 2463.855  |
| NM_01899E | 71883.89 | 46404.4  | NM_00486E | 3189.464  | 3010.531  | NM_00466E | 1185.54   | 1127.51   |
| U15688    | 3966.204 | 2688.103 | AK024573  | 3430.023  | 3246.911  | NM_01663E | 50767.789 | 49561.027 |
| NM_00632E | 5604.839 | 5576.152 | NM_00229E | 3037.958  | 3145.219  | U61739    | 10167.063 | 10619.402 |
| AF085893  | 697.681  | 486.047  | NM_00383C | 991.345   | 960.448   | AJ132089  | 1759.586  | 1410.504  |
| NM_01430E | 3844.099 | 3963.755 | NM_00084E | 1134.811  | 838.739   | U92819    | 14851.874 | 17062.674 |
| AF000416  | 574.103  | 643.289  | NM_01564E | 1211.91   | 1486.036  | AB020626  | 1406.435  | 1228.841  |
| NM_01212E | 9061.546 | 6634.971 | NM_00464C | 21458.75  | 24725.072 | NM_00203E | 7197.41   | 6860.407  |
| U87972    | 1293.718 | 1333.25  | NM_01622E | 10256.837 | 9741.496  | NM_01240C | 747.76    | 1005.838  |
| NM_01792E | 3594.285 | 4074.493 | AB037823  | 4543.057  | 4891.5    | NM_005384 | 4679.992  | 4903.029  |
| AK022208  | 17801.59 | 16325.04 | NM_01538C | 21082.959 | 21040.553 | Z15114    | 5515.209  | 6449.936  |
| NM_003171 | 3489.394 | 3048.144 | BE254485  | 2361.791  | 2566.025  | AB040812  | 27805.672 | 25740.52  |
| NM_006437 | 15984.17 | 18388.62 | NM_00273E | 835.497   | 871.787   | NM_01762E | 835.757   | 481.227   |
| NM_01789C | 2559.39  | 2839.506 | AF085893  | 1343.891  | 1155.874  | NM_00628E | 9527.09   | 7095.616  |
| AK021654  | 1709.843 | 1919.525 | NM_00310E | 621.857   | 913.178   | NM_00134E | 4322.332  | 3283.621  |
| NM_016481 | 2113.026 | 1823.871 | NM_01430E | 4503.522  | 4668.768  | NM_00021E | 7077.215  | 7037.608  |
| NM_00392E | 13140.22 | 13335.25 | NM_01212E | 9939.435  | 11742.208 | AK027148  | 11111.892 | 7717.993  |
| Z15114    | 4507.353 | 5059.348 | U87972    | 7017.962  | 6221.889  | NM_005084 | 8475.554  | 7102.041  |
| AB040812  | 30839.34 | 41256.14 | NM_01792E | 3001.687  | 3002.16   | NM_00728E | 745.175   | 396.461   |
| NM_01762E | 999.023  | 797.673  | AK022208  | 27413.348 | 26211.957 | NM_006111 | 9086.775  | 6131.466  |
| NM_00628E | 13576.05 | 13409.51 | NM_003171 | 4296.958  | 3715.735  | AK026071  | 8691.3    | 7050.844  |
| NM_00365E | 13851.6  | 14773.9  | NM_006437 | 14024.458 | 13653.621 | BC012333  | 12929.739 | 9956.992  |
| NM_00134E | 4889.081 | 5175.227 | NM_01789C | 3069.144  | 3454.961  | AF237952  | 8306.082  | 6295.351  |
| AV682011  | 609.464  | 534.804  | AK021654  | 2550.796  | 2682.757  | AL079287  | 5318.751  | 5169.487  |
| NM_00387E | 358.846  | 529.676  | NM_016481 | 1919.52   | 2412.368  | NM_014427 | 16849.111 | 16776.584 |
| NM_020384 | 2444.91  | 2626.783 | NM_00392E | 12796.103 | 14171.836 | AB046769  | 4819.391  | 5245.396  |
| NM_00605E | 12393.06 | 10481.59 | AF217974  | 5075.788  | 4805.492  | NM_01592E | 11683.672 | 12203.746 |
| NM_00662E | 8766.158 | 9440.944 | NM_00328E | 858.486   | 842.499   | NM_020381 | 6191.094  | 6057.357  |
| M97496    | 4308.43  | 5311.696 | NM_00088E | 4904.864  | 5593.613  | NM_002957 | 6541.532  | 6775.128  |
| NM_00230E | 415.137  | 346.636  | NM_00059E | 7958.135  | 9469.669  | NM_01810E | 11769.333 | 13639.465 |
| AK026074  | 1544.332 | 1587.189 | X99663    | 4065.371  | 3978.308  | NM_00372E | 4783.271  | 4654.253  |
| NM_00317E | 7964.477 | 9084.675 | NM_01655E | 4073.115  | 4394.61   | BE899154  | 2633.801  | 2818.445  |
| NM_00480E | 1564.352 | 2043.874 | NM_00356E | 4292.803  | 3738.04   | NM_00486E | 3457.202  | 4648.207  |
| AA903183  | 366.409  | 541.886  | NM_004841 | 1438.228  | 1904.286  | AK024573  | 3781.992  | 5118.779  |
| H41522    | 502.981  | 642.773  | NM_01844C | 16733.369 | 15460.639 | NM_00229E | 3259.147  | 3857.205  |
| AA460291  | 4660.229 | 6774.776 | AK025470  | 1328.524  | 1119.309  | NM_00383C | 1279.621  | 1392.6    |
| BI821333  | 9040.299 | 13225.01 | M35410    | 16464.736 | 13544.895 | NM_00084E | 924.888   | 1088.262  |
| X51841    | 2365.294 | 2961.203 | AB023227  | 1890.773  | 1567.081  | NM_01564E | 2095.021  | 1654.073  |
| AF051344  | 3612.281 | 3964.092 | NM_00577E | 23337.996 | 17951.066 | NM_00464C | 26936.012 | 27421.201 |
| BG506100  | 13148.75 | 12136.78 | AK023071  | 6257.863  | 5785.823  | NM_01622E | 11379.829 | 13632.453 |
| X53586    | 4806.805 | 5875.053 | NM_004041 | 2333.932  | 2099.578  | AB037823  | 3964.867  | 4249.098  |
| M17176    | 650.862  | 848.811  | AK022888  | 4388.31   | 3704.146  | NM_01538C | 23587.357 | 27317.779 |
| M26576    | 866.162  | 685.634  | AK024484  | 7097.517  | 7557.001  | BE254485  | 2922.266  | 3787.083  |
| M32972    | 1865.447 | 1938.366 | NM_00263E | 1101.277  | 1057.233  | NM_00273E | 855.304   | 925.101   |

|           |          |          |           |           |           |           |           |           |
|-----------|----------|----------|-----------|-----------|-----------|-----------|-----------|-----------|
| D11151    | 478.666  | 564.627  | NM_00140€ | 2003.544  | 2540.476  | AF085893  | 1263.536  | 883.513   |
| D89854    | 2241.154 | 2108.515 | NM_00229€ | 4558.683  | 4709.766  | NM_01430€ | 4766.945  | 3230.689  |
| M13207    | 571.383  | 493.101  | NM_00016€ | 3123.425  | 3595.695  | NM_01212€ | 14882.11  | 7412.121  |
| X14885    | 434.107  | 957.109  | AF305200  | 682.532   | 696.15    | U87972    | 4964.599  | 2924.343  |
| M97815    | 904.114  | 1046.89  | AL570170  | 4790.925  | 3831.694  | NM_01792€ | 3987.411  | 2643.253  |
| AB013103  | 659.169  | 759.753  | D56495    | 1370.953  | 867.612   | NM_003171 | 5838.608  | 3934.229  |
| AF019225  | 3839.93  | 3545.336 | NM_00661€ | 10734.133 | 8666.024  | NM_006437 | 17964.383 | 19020.996 |
| Z36803    | 4974.547 | 6807.875 | NM_00463€ | 15442.041 | 14261.947 | NM_01789€ | 4380.682  | 4273.41   |
| NM_013371 | 437.757  | 615.586  | NM_00537€ | 466.721   | 566.001   | AK021654  | 5350.171  | 6259.973  |
| NM_000707 | 4777.153 | 5024.803 | L40027    | 5570.964  | 4941.018  | NM_016481 | 2993.224  | 2574.323  |
| AF202092  | 16185.42 | 17259.12 | NM_00371€ | 51059.125 | 49226.883 | AF217974  | 3461.86   | 4445.438  |
| NM_003201 | 7545.862 | 5657.471 | NM_01418€ | 30846.023 | 35855.727 | NM_00328€ | 852.985   | 868.686   |
| AB011139  | 3089.776 | 2489.312 | NM_01770€ | 3049.805  | 2289.236  | NM_00088€ | 7225.096  | 7060.681  |
| NM_00691€ | 609.281  | 553.979  | AF334406  | 2157.389  | 2071.374  | NM_00059€ | 9172.51   | 7086.992  |
| AK022625  | 1869.039 | 1618.205 | NM_017444 | 8175.846  | 7833.985  | X99663    | 4669.869  | 5138.863  |
| NM_00542€ | 295.184  | 407.139  | NM_01802€ | 5722.413  | 10756.401 | NM_01655€ | 3382.853  | 3581.751  |
| AK025588  | 772.033  | 813.904  | NM_01599€ | 10877.413 | 9360.898  | AK025340  | 735.495   | 830.939   |
| NM_00318€ | 5080.706 | 5423.239 | NM_003804 | 12671.589 | 10630.563 | NM_00356€ | 3886.657  | 4996.214  |
| NM_007118 | 618.118  | 544.5    | NM_01845€ | 10809.475 | 10562.113 | NM_004841 | 2103.165  | 1920.398  |
| U59431    | 443.084  | 767.65   | NM_00470€ | 62166.074 | 64417.363 | NM_01844€ | 14835.452 | 14393.712 |
| U49349    | 1569.751 | 1473.907 | NM_016001 | 11435.699 | 11942.61  | AK025470  | 1608.938  | 1555.279  |
| NM_02015€ | 3351.671 | 3196.402 | S49432    | 2031.388  | 2058.88   | M35410    | 14780.794 | 18647.975 |
| NM_013404 | 781.006  | 829.873  | D86984    | 2401.082  | 2745.866  | AB023227  | 2474.473  | 2482.451  |
| NM_006157 | 278.182  | 356.702  | NM_01595€ | 1274.363  | 1233.32   | NM_00577€ | 25550.412 | 27338.82  |
| NM_00396€ | 796.378  | 724.187  | AK026904  | 3909.842  | 3196.821  | AK023071  | 6457.139  | 4946.803  |
| AK024443  | 58095.83 | 45390.79 | NM_00379€ | 704.306   | 742.713   | NM_004041 | 1926.766  | 1280.493  |
| X06710    | 2862.802 | 2735.511 | NM_00191€ | 2078.265  | 2754.845  | AK022888  | 4247.637  | 3332.339  |
| AK000896  | 1962.27  | 2059.221 | NM_00190€ | 8560.565  | 11170.42  | AK024484  | 8701.319  | 5446.699  |
| D79998    | 4592.606 | 4545.489 | NM_01219€ | 2688.199  | 2953.739  | NM_00263€ | 1059.359  | 624.276   |
| AB032963  | 3596.855 | 3729.216 | AB040886  | 1747.451  | 1573.773  | NM_00229€ | 3927.944  | 4197.047  |
| NM_00038€ | 989.411  | 830.079  | AB029020  | 3112      | 2972.182  | AL570170  | 4792.01   | 4770.721  |
| AF301013  | 4979.884 | 3849.079 | AK022759  | 3611.791  | 3371.572  | D56495    | 1075.341  | 1029.644  |
| NM_01899€ | 46066.21 | 42131.23 | NM_01233€ | 11783.386 | 10275.199 | NM_01458€ | 667.957   | 746.729   |
| U15688    | 1299.762 | 1098.975 | AF217798  | 4110.729  | 4065.016  | NM_00661€ | 10418.125 | 10281.104 |
| NM_00048€ | 1711.806 | 1799.235 | AF161472  | 6639.869  | 6776.482  | NM_00463€ | 12642.15  | 13330.99  |
| NM_01844€ | 10663.28 | 9379.417 | AL133642  | 23054.172 | 22299.053 | NM_00537€ | 478.661   | 727.537   |
| NM_00165€ | 6532.779 | 8727.593 | AB011154  | 2486.274  | 2201.847  | L40027    | 6111.47   | 5802.78   |
| AB020663  | 3014.135 | 3089.416 | AF124432  | 4777.579  | 3596.414  | NM_00371€ | 49455.145 | 48507.809 |
| AF297866  | 2130.899 | 2242.901 | NM_00633€ | 11369.259 | 13787.125 | NM_00706€ | 1595.881  | 1125.667  |
| NM_017817 | 5171.153 | 4323.311 | NM_01587€ | 5758.523  | 4840.667  | NM_00201€ | 1041.14   | 1171.8    |
| NM_018184 | 13127.8  | 13583.68 | NM_000377 | 6020.879  | 5696.633  | NM_01418€ | 35693.117 | 31472.938 |
| AB046823  | 1649.14  | 1576.707 | NM_00681€ | 1070.276  | 1415.959  | NM_01770€ | 2830.21   | 2675.134  |
| NM_00492€ | 1517.939 | 1609.86  | NM_01682€ | 3555.502  | 3155.561  | AF334406  | 2604.427  | 2330.679  |
| NM_00466€ | 1801.298 | 1803.707 | NM_00312€ | 3715.492  | 2838.295  | NM_017444 | 8973.526  | 8945.213  |
| NM_01663€ | 10700.03 | 10071.37 | X52360    | 3395.809  | 3102.435  | NM_01802€ | 11496.834 | 6719.847  |
| U61739    | 3996.775 | 4161.973 | NM_00263€ | 23015.164 | 21975.658 | NM_01599€ | 12717.706 | 14108.376 |
| AJ132089  | 1472.731 | 1623.52  | NM_016494 | 38880.766 | 37429.852 | NM_003804 | 9353.772  | 10684.141 |
| U92819    | 16938.13 | 21535.67 | U09410    | 5897.133  | 4399.764  | NM_01845€ | 13722.622 | 13290.867 |
| AB020626  | 1189.189 | 1027.246 | NM_02022€ | 1950.713  | 1757.172  | NM_00470€ | 66368.969 | 62258.367 |
| NM_00203€ | 974.368  | 913.957  | NM_00118€ | 4802.085  | 5446.323  | NM_016001 | 14262.547 | 10249.137 |
| NM_01240€ | 1089.193 | 741.639  | NM_00450€ | 7331.622  | 6263.242  | AL137722  | 1121.621  | 476.811   |
| NM_005384 | 4926.762 | 5480.368 | AF000560  | 9092.797  | 7324.382  | S49432    | 1424.011  | 986.801   |
| NM_00685€ | 696.577  | 465.716  | NM_01328€ | 7385.797  | 5736.024  | NM_01595€ | 1426.704  | 529.104   |

|           |          |          |           |           |           |           |           |           |
|-----------|----------|----------|-----------|-----------|-----------|-----------|-----------|-----------|
| Z15114    | 3396.522 | 3757.848 | NM_005777 | 7431.833  | 8150.625  | AK026904  | 3387.746  | 4188.104  |
| AB040812  | 23706.5  | 27736.02 | NM_012345 | 4826.539  | 3558.614  | AB002364  | 643.875   | 780.538   |
| NM_017625 | 582.516  | 379.863  | NM_005826 | 23683.734 | 20904.18  | NM_003793 | 1030.625  | 1229.734  |
| NM_006285 | 8085.617 | 6784.575 | NM_004592 | 2829.646  | 2338.891  | NM_001910 | 1728.084  | 2082.355  |
| NM_003656 | 9982.087 | 9833.265 | NM_015001 | 9460.614  | 7780.726  | NM_001909 | 9416.158  | 8765.143  |
| NM_001348 | 3395.173 | 3933.027 | NM_019027 | 1513.481  | 1396.991  | NM_012198 | 2470.929  | 2351.339  |
| NM_000215 | 3954.556 | 4403.026 | NM_016107 | 3507.025  | 3591.577  | NM_003368 | 10431.418 | 8375.279  |
| AK027148  | 3765.997 | 3556.031 | NM_002567 | 26393.32  | 23233.943 | AB040886  | 1531.123  | 1609.279  |
| NM_005084 | 6733.996 | 7354.099 | NM_001404 | 3525.219  | 2833.054  | NM_001460 | 602.117   | 804.198   |
| NM_007283 | 521.059  | 514.823  | NM_001605 | 26917.168 | 18642.27  | AB029020  | 3211.008  | 3338.52   |
| AF237952  | 8832.63  | 8365.911 | AF225422  | 14127.107 | 10924.23  | AK022759  | 5178.191  | 4284.513  |
| AL079287  | 5738.161 | 5726.684 | AB040960  | 10246.879 | 9050.933  | NM_012333 | 14709.371 | 14186.702 |
| NM_014427 | 12820.52 | 14205.46 | NM_015946 | 8517.211  | 12226.729 | AF217798  | 4052.899  | 5109.588  |
| AB046769  | 6293.295 | 6470.358 | NM_006303 | 6836.721  | 7359.879  | AF161472  | 8219.079  | 9667.956  |
| NM_015922 | 12478.12 | 15887.53 | AL080059  | 4578.859  | 3543.717  | AF124432  | 4383.369  | 5721.159  |
| NM_020381 | 5151.79  | 4883.637 | AL080219  | 4679.418  | 4380.092  | NM_006330 | 17866.412 | 13074.785 |
| NM_002957 | 4341.173 | 3999.546 | AK026709  | 743.223   | 744.815   | NM_015873 | 4522.893  | 4737.969  |
| NM_018106 | 10585.39 | 11738.24 | AK024165  | 540.891   | 683.126   | NM_000377 | 7954.303  | 7818.691  |
| NM_003725 | 5241.506 | 3805.777 | NM_003001 | 2630.23   | 2464.418  | NM_006818 | 1535.028  | 1268.638  |
| BE899154  | 2740.012 | 2668.7   | NM_001985 | 7636.46   | 5780.045  | NM_016823 | 4153.487  | 4563.582  |
| NM_004863 | 4560.984 | 4798.287 | NM_000102 | 1595.313  | 1636.027  | NM_003120 | 3723.36   | 3461.084  |
| AK024573  | 4811.85  | 5489.442 | NM_002490 | 26316.84  | 27485.045 | X52360    | 3233.027  | 3845.014  |
| NM_002299 | 2527.663 | 2292.989 | BE563532  | 2294.102  | 2043.633  | NM_002636 | 22260.641 | 22945.127 |
| NM_003830 | 899.156  | 877.214  | NM_001916 | 6928.739  | 6127.958  | NM_016494 | 43632.816 | 46360.477 |
| NM_000842 | 709.079  | 735.74   | NM_002491 | 1387.057  | 4510.266  | U09410    | 6305.307  | 6420.865  |
| NM_015642 | 1684.336 | 1595.391 | NM_015425 | 3545.687  | 2688.306  | NM_020229 | 1666.131  | 1976.53   |
| NM_004640 | 13066.82 | 13778.84 | NM_015153 | 6116.571  | 5829.409  | NM_001186 | 6134.756  | 6033.742  |
| NM_002901 | 8598.853 | 8989.338 | AB032966  | 19692.527 | 17045.02  | NM_004502 | 6084.252  | 7252.691  |
| NM_016222 | 11140.37 | 12379.61 | M26747    | 4416.376  | 3744.117  | AF000560  | 8361.157  | 9943.686  |
| AB037823  | 2484.399 | 2916.776 | NM_014820 | 6177.524  | 5783.896  | NM_013282 | 7034.271  | 7962.926  |
| NM_015380 | 23137.87 | 33319.88 | NM_005035 | 1679.986  | 1868.267  | NM_005777 | 7968.55   | 6809.157  |
| BE254485  | 2630.202 | 2681.621 | NM_019014 | 4073.332  | 3723.582  | NM_012345 | 4588.679  | 3710.672  |
| NM_002045 | 146.983  | 201.493  | NM_002097 | 25288.531 | 23336.189 | NM_005826 | 20295.186 | 20577.283 |
| NM_014305 | 5137.147 | 4841.291 | X04706    | 5586.13   | 4934.483  | NM_004592 | 3204.908  | 3671.835  |
| NM_012123 | 15850.16 | 10618.07 | NM_018039 | 1160.392  | 1384.433  | NM_015001 | 7754.235  | 9513.472  |
| U87972    | 3232.612 | 2597.685 | NM_006494 | 7837.943  | 6582.591  | NM_019027 | 1741.89   | 1767.283  |
| NM_017925 | 6173.749 | 6121.743 | X52343    | 5158.358  | 3794.907  | NM_016107 | 4536.905  | 4570.638  |
| AK022208  | 23707.98 | 24114.19 | NM_005853 | 1764.266  | 1499.814  | NM_002567 | 31437.85  | 42995.871 |
| NM_003171 | 5657.25  | 4444.344 | X99681    | 1010.417  | 1143.585  | NM_001404 | 4199.271  | 3846.775  |
| NM_006437 | 18703.97 | 24308.07 | NM_014068 | 921.442   | 850.918   | NM_001605 | 22415.959 | 25736.621 |
| NM_017890 | 4784.943 | 4900.624 | NM_017814 | 7430.66   | 6274.293  | AF225422  | 12182.291 | 12673.036 |
| AK021654  | 3238.873 | 2895.85  | AF074996  | 1242.025  | 1015.587  | AB040960  | 11873.021 | 10325.879 |
| NM_016481 | 3560.405 | 2366.721 | AF131811  | 2847.415  | 2278.939  | NM_015946 | 14478.327 | 10314.39  |
| NM_003925 | 13711.01 | 14050.69 | AF293026  | 13220.489 | 11099.967 | NM_006303 | 10912.73  | 9762.877  |
| AF217974  | 1344.881 | 1101.81  | AF236158  | 1008.101  | 1155.648  | AL080059  | 4081.019  | 5379.783  |
| NM_004948 | 285.993  | 281.927  | AF217986  | 5680.957  | 5537.652  | AL080219  | 3646.699  | 3918.898  |
| NM_003285 | 308.554  | 256.606  | AK026320  | 1755.237  | 1551.568  | AK026709  | 799.72    | 713.058   |
| NM_000888 | 3918.047 | 3873.502 | AL137530  | 3797.87   | 3144.452  | AK024165  | 565.862   | 951.323   |
| NM_000595 | 3985.758 | 1826.67  | NM_015953 | 8668.501  | 7264.589  | NM_003001 | 2940.893  | 2750.67   |
| X99663    | 2219.985 | 2203.622 | AF147310  | 787.73    | 624.467   | NM_001985 | 7754.319  | 8461.629  |
| NM_016552 | 1170.084 | 1231.585 | AK024775  | 2232.704  | 2185.256  | NM_000102 | 1096.932  | 1306.597  |
| AK025340  | 251.109  | 583.715  | AK025562  | 2114.502  | 2009.992  | NM_002490 | 30611.352 | 33170.227 |
| NM_003565 | 3310.956 | 4330.411 | AF088024  | 614.488   | 589.279   | BE563532  | 2444.271  | 2520.292  |

|           |          |          |           |           |           |           |           |           |
|-----------|----------|----------|-----------|-----------|-----------|-----------|-----------|-----------|
| NM_004114 | 1460.748 | 1107.184 | AK025887  | 1185.214  | 1320.081  | NM_001916 | 6903.037  | 7280.761  |
| NM_01844C | 14816.06 | 21387.45 | AB037719  | 2267.32   | 2364.59   | NM_002491 | 7254.763  | 1870.445  |
| M35410    | 20566.65 | 32710.78 | AK024694  | 1398.845  | 955.696   | NM_015425 | 3289.923  | 2668.672  |
| AB023227  | 2446.242 | 2188.941 | AF086229  | 527.716   | 643.401   | NM_015153 | 6225.3    | 5211.894  |
| NM_005776 | 20322.57 | 27983.62 | AK026143  | 2965.28   | 1878.74   | AB032966  | 14852.498 | 15705.435 |
| AK023071  | 5480.826 | 4903.774 | AL137578  | 644.355   | 813.038   | M26747    | 5747.291  | 5778.132  |
| NM_004041 | 1693.301 | 1566.735 | AL110252  | 1505.732  | 2415.666  | NM_01482C | 8041.935  | 6898.083  |
| AK022888  | 3527.738 | 4090.848 | AL050143  | 2211.962  | 2172.239  | NM_005035 | 2981.281  | 2839.853  |
| AK024484  | 9048.4   | 8521.766 | AL137616  | 2006.413  | 2085.33   | NM_019014 | 4944.188  | 5240.707  |
| NM_002632 | 949.963  | 934.188  | AK021752  | 1691.882  | 1502.191  | NM_002097 | 30797.197 | 33340.609 |
| NM_001953 | 20528.9  | 22017.54 | AL050012  | 1392.476  | 1408.788  | X04706    | 4216.868  | 3593.265  |
| NM_001406 | 491.418  | 564.634  | AL109706  | 14993.766 | 13597.378 | NM_018039 | 1616.29   | 1102.016  |
| NM_002292 | 1181.874 | 1140.721 | AK001118  | 859.272   | 1046.297  | NM_006494 | 7102.44   | 7387.586  |
| NM_000166 | 2886.043 | 3159.29  | AF035291  | 54287.137 | 49369.652 | X52343    | 3737.656  | 3797.122  |
| AF305200  | 798.151  | 433.65   | AK026291  | 14504.063 | 13285.487 | NM_005853 | 4463.817  | 4387.917  |
| AL570170  | 4359.958 | 4178.282 | AK021924  | 679.779   | 713.156   | X99681    | 882.984   | 1121.021  |
| D56495    | 641.69   | 407.703  | AL049285  | 1389.529  | 1183.619  | NM_01406E | 824.651   | 971.981   |
| NM_014583 | 366.747  | 433.511  | AL117520  | 839.219   | 933.455   | NM_017814 | 6022.561  | 5936.309  |
| NM_006613 | 3300.267 | 4037.465 | AL049303  | 827.178   | 754.34    | AF074996  | 912.705   | 898.352   |
| NM_00463E | 11052.88 | 10854.01 | AL080208  | 770.415   | 721.239   | AF131811  | 2944.523  | 2423.234  |
| NM_005373 | 633.238  | 629.645  | L23851    | 520.628   | 586.005   | AF293026  | 14093.688 | 12493.803 |
| L40027    | 6023.437 | 6978.832 | L35592    | 8399.857  | 6998.454  | AF236158  | 995.612   | 951.249   |
| NM_00371E | 34530.41 | 37790.95 | NM_01207E | 1568.939  | 1336.244  | AF217986  | 4918.197  | 4928.663  |
| NM_007062 | 1728.277 | 1452.443 | BC017695  | 533.082   | 536.526   | AK026320  | 1670.198  | 1608.851  |
| NM_00201C | 661.369  | 637.652  | AL360274  | 22808.85  | 19757.6   | AL137530  | 3414.245  | 3765.703  |
| NM_017444 | 9219.751 | 7314.388 | NM_01405C | 11142.039 | 9896.078  | NM_015953 | 11464.578 | 10913.705 |
| NM_01802E | 12911.08 | 5807.976 | AF085854  | 994.335   | 1138.368  | AF147310  | 386.33    | 684.818   |
| NM_01599E | 14145.09 | 12654.14 | AF074997  | 1178.064  | 1202.399  | AK024775  | 1940.336  | 1926.875  |
| NM_003804 | 3779.348 | 4293.413 | AK027027  | 1165.075  | 1160.943  | AK025562  | 2570.054  | 1946.846  |
| NM_018453 | 14920.94 | 11571.08 | NM_014911 | 1102.191  | 924.671   | AF088024  | 919.579   | 1849.88   |
| AK022937  | 112.849  | 219.688  | AF009289  | 8139.034  | 6777.239  | AK024694  | 1392.361  | 1520.579  |
| NM_00470E | 72484.2  | 48296.26 | AF040247  | 1571.667  | 1647.256  | AF086229  | 691.234   | 813.059   |
| NM_016001 | 16996.57 | 13608.02 | AF056439  | 1028.427  | 916.806   | AK026143  | 3186.738  | 2567.177  |
| NM_01610E | 9958.591 | 8751.158 | AF007835  | 1114.397  | 820.355   | AL137578  | 746.305   | 473.757   |
| S49432    | 743.512  | 533.984  | AF009303  | 4141.297  | 3164.325  | AL110252  | 2041.804  | 1292.335  |
| D86984    | 3913.198 | 3408.557 | NM_004474 | 3853.425  | 3781.536  | AL050143  | 2006.543  | 2375.702  |
| NM_01595E | 1037.801 | 577.112  | AF056449  | 914.706   | 1036.88   | AL137616  | 1605.604  | 1687.372  |
| AK026904  | 3173.216 | 3261.229 | AK001033  | 2065.559  | 1604.56   | AK021752  | 1804.598  | 1685.607  |
| AB002364  | 672.354  | 469.708  | AK021463  | 838.283   | 674.68    | AL050012  | 1548.781  | 1297.554  |
| NM_003793 | 1081.985 | 1232.427 | AK021698  | 714.493   | 698       | AL109706  | 12100.074 | 11664.165 |
| NM_00191C | 898.819  | 544.994  | AK001082  | 2670.527  | 2281.735  | AK001118  | 1431.903  | 1214.082  |
| AK023354  | 658.02   | 362.618  | AK001871  | 1036.951  | 1005.889  | AF035291  | 63227.867 | 53150.672 |
| J03210    | 407.257  | 313.551  | AK021743  | 4986.443  | 4212.86   | AK026291  | 17078.748 | 15964.694 |
| NM_00190E | 10623.35 | 8495.18  | AK026699  | 949.903   | 999.031   | AK021924  | 888.617   | 864.891   |
| NM_00336E | 12064.55 | 9300.435 | AK025589  | 4874.179  | 4630.957  | AL049285  | 1500.133  | 1323.721  |
| AB040886  | 2415.093 | 2656.217 | AK026734  | 961.266   | 654.076   | AL117520  | 824.609   | 502.283   |
| NM_00146C | 727.511  | 526.797  | NM_016633 | 33128.102 | 32354.822 | AL049303  | 749.025   | 554.24    |
| AB029020  | 4457.25  | 3873.78  | AK023250  | 6210.196  | 5371.472  | AL080208  | 1072.834  | 823.247   |
| AK022759  | 6124.014 | 4292.021 | AK024882  | 3070.162  | 3034.43   | BC017695  | 518.631   | 643.532   |
| NM_012333 | 16244.31 | 12936.85 | NM_014062 | 11408.592 | 8867.309  | AL360274  | 19079.352 | 17572.207 |
| AF217798  | 4055.624 | 4256.951 | NM_006304 | 59417.215 | 55818.668 | NM_01405C | 9357.614  | 9737.23   |
| AF161472  | 9091.646 | 7378.664 | X74804    | 1159.459  | 757.862   | AF085854  | 1040.601  | 1079.731  |
| AL133642  | 24855.9  | 29601.3  | AF293367  | 3605.81   | 2755.958  | AF074997  | 1024.925  | 824.287   |

|           |          |          |           |           |           |           |           |           |
|-----------|----------|----------|-----------|-----------|-----------|-----------|-----------|-----------|
| AB011154  | 1500.706 | 1701.255 | AF086231  | 3587.926  | 3567.068  | AK027027  | 1498.018  | 1363.32   |
| AF124432  | 5949.566 | 6859.365 | AK001494  | 2808.68   | 1773.376  | NM_014911 | 814.563   | 825.528   |
| NM_00633C | 21433.07 | 16403.72 | AL133438  | 2913.872  | 2094.852  | AF009289  | 5711.464  | 5577.804  |
| NM_015873 | 3303.227 | 3567.326 | AK022310  | 848.571   | 470.119   | AF040247  | 1824.937  | 1663.8    |
| NM_000377 | 8795.823 | 10179.83 | AK021784  | 851.703   | 890.619   | AF056439  | 866.338   | 1081.02   |
| NM_00681E | 1445.845 | 1340.736 | AF230800  | 2669.792  | 2038.601  | AF007835  | 622.697   | 1020.983  |
| NM_016823 | 5486.284 | 4903.662 | NM_01852C | 2336.953  | 1794.18   | AF009303  | 2689.479  | 3005.099  |
| NM_00312C | 2496.072 | 2194.986 | AK026647  | 922.015   | 800.74    | NM_004474 | 3394.751  | 4062.378  |
| X52360    | 1928.567 | 1958.842 | AK022152  | 1980.139  | 1265.811  | AF056449  | 769.963   | 623.758   |
| NM_00263E | 7849.669 | 6409.159 | NM_003534 | 36258.559 | 40349.313 | AK001033  | 2030.333  | 2073.486  |
| NM_016494 | 25414.11 | 25426.82 | L08437    | 3923.051  | 3625.407  | AK001781  | 570.148   | 531.501   |
| U09410    | 6618.21  | 5503.368 | AK057143  | 12385.568 | 14268.214 | AK021463  | 936.092   | 833.744   |
| NM_02022E | 836.485  | 471.7    | NM_015594 | 28053.846 | 25193.068 | AK001082  | 1582.989  | 1499.994  |
| NM_001186 | 7164.644 | 5466.295 | AF056423  | 2968.257  | 2677.829  | AK001871  | 735.623   | 783.663   |
| NM_004502 | 5761.939 | 5627.662 | X04293    | 716.852   | 528.199   | AK026699  | 1017.614  | 735.707   |
| AF000560  | 7929.204 | 8479.725 | AK026475  | 873.732   | 1130.734  | AK025589  | 6403.298  | 5414.651  |
| NM_013282 | 8296.949 | 9449.867 | K01884    | 1087.735  | 924.516   | AK026734  | 468.246   | 975.263   |
| NM_005777 | 12040.6  | 10940.2  | U00962    | 16158.258 | 14572.464 | NM_016633 | 26728.023 | 25905.986 |
| NM_01234E | 6336.719 | 5590.757 | NM_000522 | 1046.509  | 521.861   | AK023250  | 7034.7    | 6301.989  |
| U94387    | 520.162  | 476.564  | AK026130  | 25940.949 | 16686.801 | AK024882  | 3491.334  | 3925.561  |
| NM_00582E | 18366.26 | 17671.07 | NM_01248C | 6617.468  | 4522.109  | NM_014062 | 12222.341 | 12848.054 |
| NM_004592 | 5545.724 | 4202.903 | AK024144  | 11894.335 | 7737.715  | NM_006304 | 60215.238 | 51662.25  |
| NM_015001 | 8025.803 | 7267.499 | Y08959    | 1406.669  | 1134.841  | X74804    | 981.185   | 1031.608  |
| NM_019027 | 1344.059 | 1303.651 | NM_00534E | 20856.332 | 17279.768 | AF293367  | 3986.255  | 4126.59   |
| NM_016107 | 4281.254 | 3562.747 | NM_005343 | 26144.172 | 20281.73  | AF086231  | 4125.81   | 3929.649  |
| NM_002567 | 32491.45 | 34173.81 | AB032985  | 838.333   | 709.974   | AK001494  | 2312.494  | 2761.245  |
| NM_001404 | 7013.207 | 6461.692 | AF196865  | 2700.636  | 2257.287  | AL133438  | 3226.153  | 3090.652  |
| NM_00160E | 25889.15 | 35827.55 | AJ008114  | 59158.34  | 51677.449 | AK022310  | 1413.405  | 1167.365  |
| AF225422  | 12445.52 | 12544.24 | AF147432  | 3769.709  | 2649.794  | AK021784  | 875.461   | 807.615   |
| AB040960  | 16029.84 | 14058.52 | AK024690  | 807.42    | 838.274   | AF230800  | 1904.963  | 2109.273  |
| NM_01594E | 11874.4  | 8367.771 | BC005946  | 50458.105 | 48413.793 | NM_01852C | 2081.908  | 2273.506  |
| NM_006303 | 11524.24 | 9606.893 | AK021893  | 3715.334  | 3359.097  | AK026647  | 643.237   | 706.751   |
| AL080059  | 5609.8   | 5145.191 | NM_00104E | 9717.621  | 11114.811 | AK022152  | 1267.378  | 1269.572  |
| AL080219  | 2440.372 | 2937.541 | AK026497  | 3040.598  | 2750.546  | NM_003534 | 54408.516 | 41119.105 |
| AK026709  | 666.719  | 518.476  | BE958139  | 1798.526  | 1498.043  | L08437    | 5317.134  | 4106.594  |
| AK024165  | 831.111  | 670.195  | AF085359  | 950.742   | 769.281   | AK057143  | 14605.246 | 11233.538 |
| NM_003001 | 2805.429 | 2338.441 | AF086516  | 1630.668  | 1262.81   | NM_015594 | 23888.443 | 24469.188 |
| NM_00198E | 10429.58 | 9257.542 | D86978    | 9778.664  | 7621.547  | AF056423  | 2903.604  | 3224.776  |
| NM_000102 | 868.003  | 561.709  | AL080060  | 5457.731  | 5184.538  | X04293    | 945.318   | 1003.109  |
| NM_00249C | 33995.96 | 37330.61 | NM_005267 | 3717.756  | 2438.524  | AK026475  | 1168.667  | 1041.399  |
| BE563532  | 3188.064 | 3278.924 | AF086017  | 899.975   | 572.819   | K01884    | 1010.257  | 1006.802  |
| NM_00191E | 11868.55 | 14026.43 | AK024978  | 11202.345 | 10811.274 | U00962    | 14282.603 | 13216.737 |
| NM_002491 | 11408.75 | 2406.987 | U12897    | 3686.218  | 3132.646  | NM_000522 | 748.112   | 678.416   |
| NM_01542E | 5550.519 | 3946.184 | AJ227894  | 534.977   | 440.867   | AK026130  | 23012.902 | 19391.109 |
| NM_015153 | 8545.353 | 6613.583 | NM_020357 | 14672.731 | 11507.24  | NM_01248C | 3637.842  | 3808.066  |
| AB032966  | 2296.932 | 2313.387 | AK026836  | 2231.954  | 1600.188  | AK024144  | 8711.4    | 9091.796  |
| M26747    | 4320.739 | 3675.79  | T59562    | 29652.293 | 21583.238 | Y08959    | 1283.781  | 1117.343  |
| NM_01482C | 9265.444 | 6753.648 | NM_01821E | 3135.656  | 2168.544  | NM_00534E | 16857.145 | 17085.158 |
| NM_00503E | 4524.583 | 3864.551 | NM_014114 | 3172.096  | 3058.763  | NM_005343 | 25197.93  | 23523.795 |
| NM_019014 | 6306.354 | 5459.749 | U62822    | 5168.932  | 3614.17   | AB032985  | 1277.005  | 1149.83   |
| NM_002097 | 33089.13 | 36528.38 | CY3Cy5    | 6982.667  | 536.547   | AF116698  | 1085.034  | 2201.041  |
| X04706    | 1390.874 | 1092.018 | AA220921  | 5941.563  | 10172.219 | AF196865  | 3051.925  | 2539.348  |
| NM_01803E | 2147.361 | 1359.034 | N67770    | 1134.103  | 1270.999  | AJ008114  | 61587.039 | 53535.535 |

|           |          |          |           |           |           |           |           |           |
|-----------|----------|----------|-----------|-----------|-----------|-----------|-----------|-----------|
| NM_006494 | 2027.591 | 2792.274 | U90065    | 3825.645  | 4449.93   | AJ008141  | 2060.83   | 4562.596  |
| X52343    | 1265.614 | 1761.163 | AJ005898  | 3333.919  | 3781.778  | AF147432  | 4954.239  | 8123.448  |
| NM_005853 | 5043.601 | 5144.309 | X57303    | 5247.519  | 6212.436  | AK024690  | 1060.907  | 1253.03   |
| X99681    | 734.504  | 707.454  | AA463224  | 1518.45   | 1425.963  | BC005946  | 54849.34  | 44237.18  |
| NM_01406E | 712.669  | 678.211  | BG248802  | 8165.476  | 9449.599  | AK021893  | 4482.661  | 3950.026  |
| NM_017814 | 5287.209 | 5798.059 | L19605    | 1595.264  | 2043.513  | NM_00104E | 11950.192 | 9627.792  |
| AF074996  | 388.304  | 429.671  | X07979    | 14314.231 | 16597.27  | AK026497  | 3660.963  | 3171.362  |
| AF131811  | 2670.754 | 2036.734 | NM_00669E | 1794.025  | 1722.293  | BE958139  | 2082.442  | 1873.321  |
| AF293026  | 14559.05 | 10923.45 | SR5       | 3269.443  | 2617.011  | AF086516  | 1790.339  | 1704.3    |
| AF236158  | 495.963  | 574.571  | SR7       | 5201.771  | 39911.195 | D86978    | 7892.854  | 6961.442  |
| AF217986  | 2997.094 | 2718.673 | SR9       | 26406.643 | 4972.315  | AL080060  | 4312.903  | 4303.491  |
| AK026320  | 1825.231 | 1711.467 | CY3Cy5    | 5231.461  | 261.945   | NM_005267 | 3048.998  | 2879.896  |
| AL137530  | 1605.577 | 1757.537 | AK002163  | 4912.543  | 5430.226  | AF086017  | 926.844   | 1029.993  |
| NM_015953 | 9614.446 | 9395.712 | NM_002287 | 8732.888  | 11476.864 | AK024978  | 10810.77  | 9841.56   |
| U82310    | 402.281  | 408.15   | NM_012344 | 2313.942  | 2772.968  | U12897    | 4392.657  | 3527.001  |
| AF147301  | 388.744  | 364.963  | NM_01438E | 2210.716  | 2980.669  | AJ227894  | 631.275   | 514.613   |
| AF147310  | 351.955  | 403.532  | NM_001704 | 763.934   | 1190.256  | NM_020357 | 16612.271 | 13267.989 |
| AK024775  | 2204.254 | 1474.857 | AB036432  | 8825.266  | 8434.099  | AK026836  | 2590.885  | 1637.746  |
| AK025562  | 3031.113 | 1847.936 | NM_014872 | 5136.373  | 7115.24   | T59562    | 26215.535 | 22316.119 |
| AF088024  | 853.796  | 852.541  | NM_00348C | 1380.88   | 1517.529  | NM_01821E | 2047.92   | 3214.405  |
| AK025887  | 599.378  | 673.8    | NM_032951 | 2432.67   | 2867.598  | AK026368  | 722.362   | 994.292   |
| AB037719  | 3679.692 | 3314.856 | NM_000503 | 2624.003  | 2881.507  | NM_014114 | 3556.725  | 3812.043  |
| AK024694  | 1907.461 | 2894.464 | NM_012421 | 16773.012 | 22463.137 | AF147414  | 533.084   | 1397.457  |
| AF086229  | 438.758  | 403.181  | NM_000023 | 2499.426  | 2445.243  | CY3Cy5    | 15941.137 | 681.709   |
| AK026143  | 3422.665 | 2879.275 | AF022654  | 795.994   | 773.997   | AA220921  | 9189.114  | 12266.814 |
| AL137578  | 614.706  | 619.15   | NM_001143 | 887.133   | 982.144   | N67770    | 1290.696  | 1926.193  |
| AL110252  | 3641.847 | 2241.037 | AK022638  | 4721.256  | 4473.88   | AA486200  | 65671.43  | 59438.789 |
| AL050143  | 1770.963 | 1750.668 | BG698409  | 1902.485  | 1650.068  | U90065    | 4849.254  | 5376.056  |
| AL137616  | 1158.763 | 893.923  | M91368    | 806.609   | 957.785   | AJ005898  | 7477.494  | 10750.775 |
| AK021752  | 1741.323 | 1630.201 | AF224741  | 890.111   | 829.716   | X57303    | 6495.343  | 8731.899  |
| AL050012  | 1698.475 | 1384.49  | NM_006594 | 2769.632  | 2768.196  | AA463224  | 2174.504  | 2528.896  |
| AL109706  | 5219.825 | 4114.92  | NM_004177 | 2572.583  | 2116.216  | BG248802  | 11560.669 | 14002.12  |
| AK001118  | 1519.738 | 1060.964 | NM_01242E | 1732.685  | 1948.749  | L19605    | 3513.742  | 3238.414  |
| AF035291  | 25894.95 | 25736.9  | NM_004871 | 3466.286  | 3641.021  | AA876532  | 17393.301 | 19594.291 |
| AK026291  | 19313.35 | 17002.66 | NM_00569E | 9636.721  | 10545.414 | BG744224  | 19561.34  | 26587.635 |
| AK021924  | 940.969  | 981.273  | AF202146  | 10206.64  | 9812.192  | NM_00607E | 3214.922  | 3753.06   |
| AL049285  | 586.573  | 539.129  | NM_006393 | 1177.677  | 1509.225  | NM_00669E | 5573.086  | 6989.859  |
| AL080106  | 602.199  | 689.786  | NM_014923 | 1392.477  | 1095.089  | SR5       | 10583.047 | 8606.074  |
| AL117520  | 270.765  | 212.459  | NM_005477 | 3133.311  | 4065.667  | SR7       | 11497.021 | 44794.223 |
| AL049303  | 415.6    | 244.597  | NM_00264C | 1167.892  | 2389.162  | SR9       | 47717.488 | 8107.891  |
| AL050059  | 490.85   | 273.765  | M15530    | 998.862   | 919.02    | CY3Cy5    | 15924.813 | 585.349   |
| AL080208  | 1015.487 | 1022.53  | NM_001877 | 885.261   | 675.762   | AK002163  | 6032.509  | 5514.984  |
| L23851    | 226.615  | 262.113  | NM_014207 | 5176.824  | 4852.938  | NM_002287 | 14120.086 | 14251.272 |
| L35592    | 3042.259 | 2451.103 | NM_00405E | 692.291   | 586.605   | NM_012344 | 3088.58   | 3268.261  |
| NM_01207E | 2088.825 | 2028.897 | NM_001634 | 21649.09  | 15053.7   | NM_002351 | 33312.043 | 46070.027 |
| BC017695  | 579.948  | 715.264  | NM_002267 | 8598.995  | 9171.63   | NM_01438E | 3099.802  | 3600.063  |
| AL360274  | 15335.91 | 14096.59 | NM_006412 | 5681.203  | 5157.37   | NM_001704 | 1133.318  | 2247.108  |
| AK021858  | 465.038  | 673.334  | NM_003063 | 7792.683  | 10079.448 | AB036432  | 8351.788  | 11173.921 |
| NM_01405C | 10965.05 | 9646.909 | NM_014041 | 39791.965 | 56606.371 | NM_014872 | 6161.949  | 7886.55   |
| AF087995  | 283.106  | 328.941  | NM_00716E | 6577.996  | 5150.676  | NM_003643 | 1144.692  | 1810.472  |
| AF085854  | 1245.396 | 1251.722 | NM_014313 | 874.683   | 1391.882  | NM_00348C | 2156.417  | 2464.221  |
| AF074997  | 972.135  | 1016.121 | AK024966  | 1729.082  | 2005.832  | NM_00089E | 1225.754  | 1192.451  |
| AK027027  | 1354.14  | 871.568  | NM_016033 | 9748.361  | 13056.551 | NM_032951 | 7057.776  | 7544.684  |

|            |          |          |           |           |           |           |           |           |
|------------|----------|----------|-----------|-----------|-----------|-----------|-----------|-----------|
| NM_014911  | 741.242  | 748.984  | NM_017585 | 4075.239  | 3241.195  | NM_000503 | 8267.869  | 9179.845  |
| AF009289   | 1005.141 | 1070.106 | U61737    | 8075.59   | 8108.672  | AK000004  | 3286.079  | 3127.945  |
| AF040247   | 2190.252 | 1535.35  | NM_005694 | 4781.403  | 4429.304  | NM_012421 | 31953.885 | 40775.891 |
| AF056439   | 587.068  | 523.91   | NM_014865 | 10478.069 | 10017.323 | AB014601  | 1623.605  | 1938.773  |
| AF009303   | 2558.866 | 2527.548 | AL442089  | 7770.713  | 7563.264  | NM_000023 | 7965.24   | 8271.982  |
| NM_004474  | 2138.926 | 2217.021 | NM_001200 | 1836.946  | 2417.307  | NM_001143 | 1401.534  | 1720.07   |
| AF056449   | 773.126  | 663.593  | AB007964  | 1084.128  | 831.446   | NM_003282 | 489.781   | 550.395   |
| AK001033   | 2629.537 | 2678.408 | AF128541  | 6741.138  | 6532.787  | AK022638  | 9850.934  | 10213.249 |
| AK001781   | 608.704  | 457.901  | AK026305  | 3570.255  | 5041.591  | BG698409  | 2878.209  | 3653.789  |
| AK021463   | 852.595  | 868.82   | NM_002552 | 5794.317  | 6758.262  | M91368    | 1009.249  | 960.104   |
| AK001082   | 724.121  | 555.714  | NM_014321 | 5244.123  | 8318.63   | AF224741  | 887.938   | 877.254   |
| AK001871   | 827.719  | 652.307  | AK022733  | 1390.63   | 1776.823  | NM_006594 | 2202.617  | 2687.195  |
| AK021521   | 536.277  | 397.374  | AB011132  | 7133.096  | 8767.576  | NM_004177 | 2114.107  | 3542.345  |
| AK021743   | 412.667  | 429.384  | AF275798  | 22350.105 | 30668.148 | NM_012429 | 2749.195  | 2759.48   |
| AK026251   | 572.5    | 462.28   | NM_005441 | 5272.955  | 6189.713  | NM_004871 | 4929.414  | 5462.888  |
| AK026699   | 868.548  | 921.524  | NM_016079 | 10385.056 | 13249.639 | NM_005695 | 14636.217 | 15990.843 |
| AK025182   | 196.385  | 268.489  | AK023108  | 1704.565  | 2036.372  | NM_014923 | 1651.809  | 1919.011  |
| AK025589   | 6698.992 | 5816.502 | AK026409  | 8159.495  | 10549.925 | NM_005477 | 11520.866 | 14666.175 |
| AK026378   | 247.56   | 275.607  | AF097025  | 3321.964  | 4658.818  | NM_004315 | 1695.902  | 1585.408  |
| AK026734   | 518.087  | 745.115  | Y11339    | 2991.955  | 3817.472  | L09089    | 537.22    | 582.41    |
| NM_016633  | 6968.602 | 5137.387 | NM_003135 | 2215.411  | 1305.621  | NM_002640 | 11257.789 | 7461.442  |
| AF083130   | 252.431  | 275.931  | NM_012315 | 4289.517  | 4212.997  | X03084    | 578.426   | 921.397   |
| NM_014062  | 11661.77 | 11643.49 | AF022654  | 754.511   | 996.793   | M15530    | 6844.165  | 5370.829  |
| AL109720   | 324.509  | 401.288  | NM_001143 | 962.164   | 1037.213  | NM_001877 | 2153.9    | 2572.845  |
| NM_006304  | 50262.21 | 44531.09 | AK022638  | 7677.41   | 8311.133  | NM_014207 | 15300.126 | 17549.797 |
| X74804     | 703.538  | 885.278  | BG698409  | 2536.075  | 2944.516  | NM_001634 | 13958.86  | 9474.07   |
| AF293367   | 4702.227 | 4012.734 | AA220921  | 6710.65   | 10660.91  | NM_003063 | 7960.977  | 10136.477 |
| AF086231   | 6609.653 | 6571.783 | N67770    | 829.052   | 1038.903  | NM_014041 | 51239.965 | 51294.09  |
| AK001494   | 1094.1   | 1004.984 | AA486200  | 66734.609 | 58768.027 | NM_007169 | 5823.397  | 8822.85   |
| AL133438   | 4714.136 | 4259.132 | U90065    | 3585.846  | 3704.767  | NM_017585 | 10672.676 | 13544.791 |
| unknown (S | 617.46   | 432.911  | AJ005898  | 3576.868  | 4336.55   | U61737    | 34718.625 | 44984.922 |
| AK022310   | 827.566  | 868.815  | X57303    | 6048.019  | 6926.985  | X06389    | 2054.759  | 1581.911  |
| AK021784   | 624.698  | 661.629  | BG248802  | 8493.134  | 9853.901  | NM_000033 | 2224.157  | 3103      |
| AF230800   | 966.866  | 987.781  | L19605    | 2032.218  | 2075.782  | NM_012434 | 792.935   | 964.821   |
| NM_018520  | 2108.748 | 1993.321 | AA876532  | 9141.727  | 9467.841  | NM_005694 | 13982.222 | 15164.193 |
| AK026647   | 671.879  | 665.116  | BG744224  | 6668.556  | 6684.631  | AK022983  | 452.729   | 308.782   |
| AK022152   | 1118.495 | 1274.342 | NM_006079 | 1584.489  | 1578.113  | NM_014865 | 4652.315  | 4719.832  |
| NM_003534  | 53463.53 | 38578.02 | NM_006695 | 3628.592  | 3668.738  | AL442089  | 5564.021  | 6735.245  |
| L08437     | 5780.961 | 4596.889 | NM_018025 | 2892.926  | 1847.25   | AB007964  | 2729.109  | 2624.245  |
| AK024399   | 483.013  | 483.477  | NM_001707 | 18081.799 | 13360.401 | AF128541  | 7274.636  | 8743.006  |
| AF056423   | 1065.934 | 951.021  | X03084    | 503.067   | 494.567   | AK026305  | 6828.332  | 8480.547  |
| U00956     | 320.569  | 507.46   | M15530    | 6146.826  | 6887.861  | NM_002552 | 6852.92   | 7665.163  |
| X04293     | 920.258  | 842.664  | NM_001877 | 1416.716  | 1753.105  | AF275798  | 35267.867 | 42786.848 |
| AK026475   | 1190.352 | 924.097  | NM_014207 | 10017.314 | 11111.461 | NM_005441 | 16259.091 | 16257.93  |
| K01884     | 1242.975 | 1435.6   | AK002163  | 4773.668  | 5090.836  | NM_016079 | 26277.557 | 28434.535 |
| U00962     | 2977.582 | 2929.45  | NM_002287 | 9046.146  | 11126.085 | AK023108  | 3577.452  | 4597.061  |
| NM_000522  | 726.341  | 678.065  | NM_012344 | 2451.782  | 2561.248  | AK026409  | 23194.586 | 32599.611 |
| AK026130   | 10291.75 | 8639.177 | NM_002351 | 27726.344 | 28169.895 | AB030176  | 1411.852  | 1981.123  |
| NM_012480  | 1583.323 | 1523.697 | NM_014385 | 2562.97   | 2773.977  | NM_002537 | 13836.594 | 13309.717 |
| AK024144   | 7012.877 | 6236.957 | NM_014872 | 4973.72   | 6663.282  | NM_003135 | 10335.724 | 12495.856 |
| Y08959     | 1155.165 | 1037.19  | NM_003480 | 801.904   | 943.711   | NM_012315 | 7962.918  | 8333.679  |
| NM_005345  | 11212.79 | 12724.83 | NM_000503 | 1703.825  | 1631.972  | AF022654  | 629.432   | 783.763   |
| AF086047   | 471.019  | 325.241  | NM_002405 | 10142.718 | 10171.626 | AK022638  | 10084.912 | 10618.646 |

|           |          |          |           |           |           |           |           |           |
|-----------|----------|----------|-----------|-----------|-----------|-----------|-----------|-----------|
| NM_005343 | 18271.47 | 17714.6  | AK000004  | 1638.982  | 1904.439  | AA220921  | 8870.445  | 9292.278  |
| AB032985  | 1053.805 | 790.091  | AK001393  | 8721.403  | 7492.2    | N67770    | 865.465   | 1801.648  |
| AF196865  | 3275.933 | 2892.091 | NM_000023 | 6290.869  | 5135.965  | BG248802  | 12122.888 | 14020.934 |
| AJ008114  | 32583.35 | 35277.91 | NM_014861 | 1053.833  | 1231.33   | L19605    | 3404.046  | 3595.173  |
| AJ008141  | 1071.507 | 1745.589 | NM_012434 | 789.538   | 1222.93   | AA876532  | 16508.555 | 18339.885 |
| AF147432  | 2877.91  | 4194.415 | NM_005694 | 8300.936  | 9866.548  | BG744224  | 19391.713 | 24085.354 |
| AK024690  | 1648.478 | 1495.493 | M91368    | 798.315   | 917.012   | NM_006079 | 3257.996  | 3454.198  |
| BC005946  | 32786.72 | 27290.17 | AF224741  | 939.406   | 986.34    | NM_006696 | 4883.698  | 5952.66   |
| AK021893  | 2294.594 | 1619.74  | NM_006594 | 2700.839  | 2948.864  | NM_018026 | 3590.51   | 5546.9    |
| NM_00104E | 15708.2  | 9966.975 | NM_004177 | 2366.147  | 1522.608  | NM_001707 | 23732.615 | 26861.461 |
| NM_00150E | 540.954  | 306.112  | NM_012429 | 1949.323  | 1848.655  | X03084    | 394.491   | 514.741   |
| AK026497  | 3082.238 | 2451.124 | NM_004871 | 3479.544  | 3462.009  | M15530    | 6251.151  | 5976.682  |
| BE958139  | 2094.668 | 1693.797 | NM_00569E | 9395.444  | 10518.773 | AF169158  | 1646.75   | 2045.209  |
| AF085359  | 1103.271 | 918.418  | AF202146  | 9529.945  | 7601.774  | AK002163  | 6443.68   | 6055.843  |
| AF086516  | 2881.944 | 3017.634 | NM_014923 | 653.93    | 1010.848  | NM_001704 | 1075.145  | 1122.491  |
| D86978    | 8831.615 | 8842.541 | NM_005477 | 3200.396  | 3947.155  | AB036432  | 10546.875 | 11893.924 |
| AL080060  | 982.447  | 631.612  | NM_00264C | 5099.237  | 6741.037  | NM_014872 | 6326.734  | 7416.782  |
| NM_005267 | 3907.561 | 3738.344 | Y11339    | 8782.598  | 8852.743  | NM_003643 | 809.241   | 1148.668  |
| U80763    | 750.678  | 658.744  | AB030176  | 1018.513  | 1359.54   | NM_00348C | 1549.691  | 1957.832  |
| AF086017  | 959.437  | 1190.841 | NM_002537 | 10025.27  | 11339.182 | NM_032951 | 5795.823  | 6789.946  |
| AK024978  | 5928.879 | 4861.438 | NM_003139 | 6923.454  | 7455.978  | NM_000503 | 4367.186  | 5368.875  |
| U12897    | 5235.387 | 3680.656 | NM_01231E | 5750.188  | 7192.621  | NM_00240E | 16049.625 | 18115.316 |
| AJ227894  | 945.517  | 667.026  | NM_00405E | 704.176   | 592.088   | AK000004  | 2716.528  | 3553.839  |
| NM_020357 | 17099.76 | 13619.79 | NM_001634 | 19679.543 | 13948.517 | NM_012421 | 31019.906 | 32914.648 |
| AK026836  | 2835.208 | 2139.295 | NM_002267 | 9770.144  | 8220.586  | AB014601  | 1646.406  | 1508.157  |
| T59562    | 13861.02 | 11640.63 | NM_006412 | 5002.348  | 3997.529  | AK001393  | 14104.355 | 15614.446 |
| NM_01821E | 694.078  | 600.71   | NM_003063 | 7777.309  | 9959.029  | NM_000023 | 6374.252  | 6767.363  |
| AK026368  | 546.477  | 334.67   | NM_014041 | 37923.762 | 55738.477 | NM_014861 | 524.167   | 731.725   |
| NM_014114 | 3977.125 | 4360.415 | NM_00716E | 6150.673  | 3954.203  | NM_012434 | 779.07    | 855.164   |
| U62822    | 6671.917 | 2749.885 | AF178941  | 1536.963  | 1095.141  | M91368    | 980.556   | 891.341   |
| CY3Cy5    | 24108.97 | 2875.791 | U61737    | 32245.811 | 26304.646 | AF224741  | 912.998   | 1178.51   |
| AA220921  | 516.59   | 971.479  | X06389    | 919.925   | 859.558   | NM_006594 | 3117.981  | 3763.021  |
| AA486200  | 22499.27 | 24534.14 | NM_000033 | 2473.079  | 1851.207  | NM_004177 | 1947.772  | 2943.754  |
| U90065    | 1260.34  | 2034.013 | NM_00607E | 1980.613  | 2290.746  | NM_012429 | 2114.364  | 2185.513  |
| AJ005898  | 520.341  | 1007.752 | NM_00669E | 3802.23   | 4389.082  | NM_004871 | 5059.628  | 4707.201  |
| X57303    | 2152.458 | 4382.844 | NM_01802E | 3272.35   | 3271.346  | NM_00569E | 14113.105 | 15772.126 |
| AA463224  | 747.859  | 823.28   | NM_001707 | 18438.402 | 17488.133 | AF202146  | 15251.695 | 13055.793 |
| BG248802  | 859.554  | 1351.019 | NM_01486E | 9701.533  | 8961.532  | NM_006393 | 993.686   | 1557.702  |
| L19605    | 1155.337 | 1468.138 | AL442089  | 7518.351  | 8292.487  | NM_014923 | 1598.389  | 2007.992  |
| AA876532  | 6489.182 | 8059.972 | NM_00120C | 1720.123  | 2131.86   | NM_005477 | 9830.541  | 10724.427 |
| S74349    | 1567.432 | 1846.106 | AB007964  | 1139.856  | 890.239   | NM_00701E | 720.538   | 971.148   |
| X07979    | 19726.48 | 24753.46 | AF128541  | 6812.525  | 6083.82   | L09089    | 723.385   | 443.559   |
| BG744224  | 7318.071 | 9363.39  | AK026305  | 5370.995  | 5254.001  | NM_00264C | 11636.657 | 7206.685  |
| NM_00607E | 3193.309 | 3726.299 | NM_002552 | 5639.806  | 5944.493  | Y11339    | 6972.697  | 6417.744  |
| NM_00669E | 6325.829 | 7062.159 | NM_014321 | 7142.299  | 8577.62   | AB030176  | 1103.166  | 962.545   |
| SR5       | 8679.007 | 8167.253 | AF275798  | 23494.934 | 23976.273 | NM_002537 | 12751.163 | 12071.526 |
| SR7       | 10957.37 | 41887.37 | NM_005441 | 9187.218  | 8822.175  | NM_003139 | 9520.499  | 9646.645  |
| SR9       | 36580.77 | 5768.43  | NM_01607E | 12961.193 | 11776.467 | NM_01231E | 7150.698  | 7585.639  |
| CY3Cy5    | 16743.26 | 803.756  | AK023108  | 2912.139  | 2651.396  | NM_001634 | 20242.91  | 18647.59  |
| AK002163  | 1669.147 | 1907.68  | AK026409  | 23768.52  | 16457.99  | NM_002267 | 10001.165 | 9966.773  |
| NM_002287 | 6468.009 | 7042.686 | AF097025  | 12476.085 | 10140.45  | NM_014041 | 48738.027 | 53529.887 |
| NM_002351 | 9879.056 | 16178.63 | NM_00240E | 10617.629 | 12535.174 | NM_00716E | 6336.094  | 8482.286  |
| NM_01438E | 981.349  | 1422.557 | AK000004  | 2198.757  | 2296.354  | NM_014313 | 1177.707  | 1473.143  |



|           |          |          |           |           |           |           |           |           |
|-----------|----------|----------|-----------|-----------|-----------|-----------|-----------|-----------|
| AB036432  | 906.741  | 1482.614 | NM_012421 | 19277.656 | 24493.205 | AK024966  | 2412.092  | 2775.594  |
| NM_014872 | 2450.256 | 2995.695 | AB014601  | 1262.831  | 1352.651  | AF178941  | 10183.666 | 12387.444 |
| NM_003643 | 229.885  | 415.37   | AK001393  | 9744.18   | 10837.251 | NM_016033 | 14079.547 | 13531.815 |
| NM_000899 | 765.147  | 823.165  | NM_000023 | 5678.623  | 6093.691  | NM_017585 | 8495.301  | 10931.202 |
| NM_032951 | 3292.133 | 3858.918 | AF022654  | 628.429   | 731.97    | X06389    | 1886.683  | 1476.94   |
| NM_000503 | 1516.11  | 2103.955 | NM_001143 | 953.194   | 994.707   | NM_000033 | 1525.456  | 1634.198  |
| NM_002405 | 15940.92 | 21002.27 | AK022638  | 6621.462  | 6933.949  | NM_006079 | 1531.91   | 1845.346  |
| AK000004  | 2677.594 | 3147.77  | BG698409  | 2342.031  | 2393.448  | NM_006696 | 3763.656  | 4377.409  |
| NM_012421 | 29418.97 | 36552.12 | U36798    | 634.348   | 844.535   | NM_018026 | 2773.838  | 3951.88   |
| AB014601  | 2151.892 | 2200.156 | AA220921  | 6443.454  | 9389.253  | NM_001707 | 22102.408 | 25324.5   |
| NM_000023 | 3786.451 | 3851.973 | N67770    | 962.662   | 1028.702  | AK022983  | 1036.411  | 771.934   |
| AF022654  | 975.414  | 1118.345 | U90065    | 3880.844  | 3447.721  | NM_014868 | 12062.413 | 13818.232 |
| NM_001143 | 1085.041 | 1143.383 | AJ005898  | 3512.993  | 3778.536  | AL442089  | 8806.141  | 10279.339 |
| AK022638  | 10460.78 | 11043.47 | X57303    | 5404.693  | 5454.042  | AF128541  | 7811.545  | 8788.684  |
| BG698409  | 2378.429 | 2062.877 | AA463224  | 1070.163  | 1371.663  | AK026305  | 8140.221  | 7612.057  |
| AF224741  | 338.339  | 559.668  | BG248802  | 3634.439  | 3326.573  | NM_002552 | 6767.509  | 7979.754  |
| NM_006594 | 2149.415 | 2104.387 | L19605    | 1979.122  | 2278.787  | NM_014321 | 8938.704  | 8540.328  |
| NM_004177 | 708.513  | 1954.498 | AA876532  | 9685.021  | 7835.161  | AK022733  | 1808.845  | 1636.925  |
| NM_012429 | 98.301   | 513.339  | S74349    | 1238.228  | 1026.273  | AB011132  | 10812.843 | 10635.11  |
| NM_004871 | 1546.75  | 2252.481 | X07979    | 37535.992 | 30963.141 | NM_020362 | 17225.561 | 14089.164 |
| NM_005698 | 7766.922 | 9819.239 | BG744224  | 16538.146 | 13318.702 | AB040937  | 2131.727  | 2164.189  |
| AF202146  | 13782.71 | 14468.12 | NM_005477 | 8382.923  | 9933.747  | AF275798  | 33615.633 | 42395.797 |
| NM_006393 | 281.096  | 539.633  | NM_007018 | 550.207   | 665.902   | NM_005441 | 14531.323 | 13907.909 |
| NM_014923 | 1789.635 | 2272.839 | NM_004318 | 1370.387  | 1103.99   | AK023108  | 2696.721  | 1365.933  |
| NM_005477 | 4817.809 | 4777.695 | NM_002640 | 5485.416  | 9598.288  | AK026409  | 19942.926 | 22911.164 |
| NM_007018 | 1137.297 | 942.815  | M15530    | 6486.028  | 6498.931  | AF097025  | 11734.871 | 11247.296 |
| NM_004318 | 1790.193 | 1656.1   | NM_001877 | 1396.178  | 1773.925  | NM_002405 | 12947.19  | 11637.431 |
| L09089    | 656.84   | 685.062  | NM_014207 | 10026.343 | 10747.902 | AK000004  | 1831.245  | 1687.718  |
| NM_002640 | 11196.73 | 6667.643 | AK002163  | 4342.169  | 4646.8    | NM_012421 | 21960.1   | 20460.016 |
| X03084    | 1137.037 | 905.259  | NM_012344 | 2922.961  | 3100.199  | AB014601  | 1296.752  | 1457.347  |
| M15530    | 9083.605 | 9306.451 | NM_002351 | 29856.594 | 29890.791 | AK001393  | 10124.243 | 10299.828 |
| NM_001877 | 2037.171 | 2125.772 | NM_014385 | 2409.172  | 2762.091  | NM_000023 | 3573.676  | 3763.754  |
| NM_014207 | 16290.93 | 17894.31 | NM_001704 | 1222.011  | 1289.489  | AF022654  | 751.64    | 1277.963  |
| NM_001634 | 6784.228 | 12901.42 | AB036432  | 6601.773  | 5927.984  | NM_001143 | 2245.022  | 2614.224  |
| NM_002267 | 3170.799 | 4957.626 | NM_014872 | 2697.805  | 2542.366  | NM_003282 | 1062.699  | 397.947   |
| NM_006412 | 1231.876 | 1983.719 | NM_003480 | 1579.181  | 1164.255  | AK022638  | 11106.596 | 10342.454 |
| NM_003063 | 1203.438 | 1186.883 | NM_000899 | 694.088   | 693.816   | BG698409  | 2734.988  | 2761.933  |
| NM_014041 | 31099.06 | 40213.4  | NM_032951 | 4370.695  | 3639.385  | U36798    | 1679.692  | 2465.382  |
| NM_007169 | 3155.175 | 5059.458 | NM_000503 | 5422.408  | 4306.649  | AA220921  | 9215.338  | 9677.967  |
| NM_014313 | 1363.777 | 1374.663 | NM_017585 | 9389.348  | 8707.343  | N67770    | 1228.022  | 946.532   |
| AK024966  | 843.203  | 1466.85  | U61737    | 32563.6   | 36371.754 | U90065    | 4414.992  | 4316.953  |
| AF178941  | 1601.17  | 2413.9   | X06389    | 1265.466  | 1910.892  | AJ005898  | 4004.431  | 3783.149  |
| NM_016033 | 14275.8  | 13172.45 | NM_000033 | 2255.446  | 2211.854  | X57303    | 5459.171  | 6894.874  |
| NM_017585 | 4716.326 | 5526.789 | NM_014861 | 902.737   | 1113.357  | AA463224  | 2298.206  | 2273.004  |
| U61737    | 14616.5  | 18921.41 | NM_012434 | 711.543   | 799.025   | BG248802  | 11579.909 | 13240.021 |
| Y10506    | 465.615  | 285.076  | NM_005694 | 8956.696  | 9790.552  | L19605    | 3630.996  | 3588.275  |
| X06389    | 1616.904 | 1056.299 | M91368    | 833.667   | 850.27    | AA876532  | 13787.625 | 14128.632 |
| NM_000033 | 1682.422 | 1956.827 | AF224741  | 1090.431  | 1013.778  | S74349    | 1916.2    | 1653.654  |
| NM_014861 | 1282.759 | 1153.418 | NM_006594 | 3239.332  | 3102.178  | X07979    | 35443.703 | 29624.283 |
| NM_012434 | 1302.484 | 812.315  | NM_004177 | 2461.201  | 1884.111  | BG744224  | 16756.328 | 17888.844 |
| NM_003759 | 548.33   | 423.663  | NM_012429 | 2244.199  | 3110.961  | NM_005477 | 11748.492 | 8017.603  |
| NM_005694 | 15340.32 | 14911.53 | NM_004871 | 3413.805  | 3759.346  | NM_004318 | 1081.911  | 519.148   |
| NM_014868 | 5419.396 | 8948.608 | NM_005698 | 8256.061  | 7277.811  | NM_002640 | 5375.261  | 2972.27   |

|           |          |          |           |           |           |           |           |           |
|-----------|----------|----------|-----------|-----------|-----------|-----------|-----------|-----------|
| AL442089  | 682.637  | 766.442  | AF202146  | 11775.634 | 7118.363  | M15530    | 8044.368  | 9450.927  |
| NM_00120C | 1308.475 | 1386.197 | NM_006393 | 1536.8    | 1211.059  | NM_001877 | 2028.127  | 1976.911  |
| AB007964  | 897.484  | 917.215  | NM_014923 | 1375.95   | 1200.538  | NM_014207 | 13489.234 | 14128.408 |
| AF128541  | 985.42   | 1454.163 | AF275798  | 26807.773 | 31976.053 | AK002163  | 6859.188  | 5542.828  |
| AK026305  | 1995.033 | 2975.22  | NM_005441 | 11404.719 | 12438.243 | NM_012344 | 4118.584  | 3998.213  |
| NM_002552 | 7010.309 | 7771.519 | NM_016079 | 18182.5   | 21792.729 | NM_002351 | 34935.355 | 41564.473 |
| NM_014321 | 12575.22 | 11559.1  | AK023108  | 3129.016  | 3620.18   | NM_014385 | 2869.342  | 3361.939  |
| AK022733  | 2155.813 | 1788.465 | AK026409  | 18626.959 | 18343.311 | NM_001704 | 1791.676  | 1619.867  |
| AB011132  | 12517.68 | 12639.95 | AF097025  | 14514.294 | 17095.055 | AB036432  | 9511.845  | 11566.85  |
| NM_020362 | 17639.23 | 14108.25 | Y11339    | 8150.206  | 9135.094  | NM_014872 | 6776.623  | 7876.213  |
| AB040937  | 2403.944 | 2355.624 | AB030176  | 1008.257  | 1589.081  | NM_003643 | 403.471   | 1499.594  |
| AF275798  | 36343.3  | 48338.47 | NM_002537 | 10077.293 | 9594.455  | NM_00348C | 3098.156  | 3252.47   |
| NM_005441 | 19214.43 | 21228.92 | NM_003139 | 8279.794  | 7658.552  | NM_000899 | 862.069   | 1410.767  |
| NM_016079 | 25105.44 | 28858.72 | NM_012316 | 6179.629  | 7669.121  | NM_032951 | 5068.903  | 4917.667  |
| AK023108  | 2919.209 | 2715.944 | NM_004059 | 833.21    | 401.717   | NM_000503 | 5578.391  | 5973.704  |
| AK026409  | 8024.054 | 7997.469 | NM_001634 | 20585.139 | 14077.694 | NM_017585 | 8588.94   | 10150.368 |
| AF097025  | 7088.925 | 6098.539 | NM_002267 | 10471.268 | 11841.063 | U61737    | 33347.543 | 37851.531 |
| Y11339    | 7737.558 | 6665.839 | NM_006412 | 7378.714  | 7759.095  | X06389    | 1672.883  | 696.38    |
| AB030176  | 1862.669 | 1652.523 | NM_003063 | 8895.6    | 11742.982 | NM_000033 | 1995.22   | 1503.965  |
| NM_003937 | 589.52   | 587.989  | NM_007169 | 5896.248  | 4417.375  | NM_014861 | 1146.689  | 843.207   |
| NM_002537 | 11158.38 | 9463.09  | NM_014313 | 821.14    | 905.205   | NM_012434 | 1410.626  | 720.156   |
| NM_003139 | 11975.34 | 15265.56 | AK024966  | 2565.223  | 1920.78   | NM_005694 | 12848.186 | 10370.79  |
| NM_012316 | 8136.945 | 8664.209 | AF178941  | 17899.674 | 13579.467 | M91368    | 1129.543  | 907.377   |
| AF022654  | 466.357  | 655.495  | NM_016033 | 9537.742  | 8826.718  | AF224741  | 1389.754  | 1197.221  |
| NM_001143 | 370.725  | 590.076  | NM_013439 | 38475.539 | 47818.934 | NM_006594 | 3183.886  | 3209.253  |
| AK022638  | 3164.574 | 3959.465 | NM_003406 | 51390.996 | 50785.352 | NM_004177 | 3481.599  | 5165.181  |
| BG698409  | 1041.173 | 1582.471 | NM_018316 | 3223.291  | 2743.237  | NM_012429 | 3712.183  | 4506.35   |
| AA220921  | 5697.28  | 7704.831 | AB011180  | 1603.629  | 1784.495  | NM_004871 | 5311.889  | 5314.524  |
| N67770    | 610.247  | 663.965  | NM_007167 | 6728.258  | 5736.258  | NM_005698 | 13650.704 | 12187.517 |
| U90065    | 5442.152 | 4943.404 | NM_014832 | 3116.448  | 3161.324  | AF202146  | 15862.81  | 12729.465 |
| AJ005898  | 3045.246 | 3020.443 | NM_003243 | 630.207   | 397.921   | NM_006393 | 1203.731  | 999.708   |
| X57303    | 3758.768 | 6868.306 | NM_002477 | 9194.943  | 9341.988  | NM_014923 | 1567.428  | 1809.32   |
| AA463224  | 2593.809 | 2654.632 | NM_004673 | 705.334   | 986.429   | AF275798  | 33279.426 | 37756.172 |
| BG248802  | 11482.9  | 12924.52 | NM_018026 | 4140.039  | 3853.631  | NM_005441 | 14171.995 | 14182.214 |
| L19605    | 2777.646 | 2875.359 | NM_001707 | 20914.775 | 21794.086 | NM_016079 | 22639.447 | 17442.822 |
| AA876532  | 14491.45 | 16861.09 | NM_014868 | 12047.034 | 10471.227 | AK023108  | 2363.415  | 1734.453  |
| S74349    | 1979.456 | 1849.633 | AL442089  | 10076.649 | 8637.885  | AK026409  | 14499.301 | 10077.956 |
| X07979    | 20404.56 | 21611.34 | NM_00120C | 1891.873  | 3029.389  | AF097025  | 9868.303  | 7491.58   |
| BG744224  | 8109.647 | 8922.153 | AB007964  | 996.872   | 856.692   | Y11339    | 6565.411  | 5005.2    |
| NM_006079 | 3238.951 | 3474.158 | NM_002552 | 6361.108  | 5641.783  | NM_002537 | 12964.774 | 7725.946  |
| NM_006696 | 5620.737 | 6163.689 | NM_014321 | 6313.257  | 6878.722  | NM_003139 | 10495.956 | 6870.063  |
| NM_018026 | 2749.37  | 4342.746 | AK022733  | 1495.932  | 1311.772  | NM_012316 | 7948.04   | 5561.246  |
| NM_001707 | 18672.02 | 21941.59 | AB011132  | 8099.078  | 6815.813  | NM_001634 | 21349.037 | 13494.001 |
| M15530    | 2977.545 | 3182.043 | NM_020362 | 11910.797 | 12402.058 | NM_002267 | 9891.139  | 9444.114  |
| NM_001877 | 816.522  | 1317.49  | AB040937  | 1922.972  | 1322.321  | NM_006412 | 5306.739  | 7729.082  |
| NM_014207 | 11837.64 | 14574.94 | NM_000095 | 7521.061  | 6075.196  | NM_003063 | 9979.349  | 9648.056  |
| AK002163  | 6154.826 | 6374.709 | NM_004797 | 827.718   | 856.024   | NM_014041 | 34694.043 | 33409.57  |
| NM_012344 | 2719.984 | 2481.937 | NM_001338 | 7012.875  | 6204.352  | NM_007169 | 7137.248  | 10042.144 |
| NM_002351 | 26428.76 | 37053.8  | NM_003637 | 1060.451  | 1082.977  | NM_014313 | 1626.028  | 1453.312  |
| NM_014385 | 2621.287 | 2743.254 | BC035133  | 915.357   | 578.429   | AK024966  | 2502.731  | 2323.484  |
| NM_001704 | 629.451  | 665.873  | NM_004233 | 6400.823  | 8292.431  | NM_016033 | 13913.552 | 12252.468 |
| AB036432  | 4347.31  | 4904.322 | NM_001544 | 7344.328  | 7158.362  | NM_013439 | 41296.797 | 44889.348 |
| NM_014872 | 6935.589 | 6431.505 | X58531    | 1142.564  | 964.703   | NM_003406 | 53909.441 | 50031.168 |

|           |          |          |           |           |           |           |           |           |
|-----------|----------|----------|-----------|-----------|-----------|-----------|-----------|-----------|
| NM_003643 | 773.254  | 1027.754 | AB011168  | 9424.244  | 7891.102  | NM_018316 | 3152.037  | 2271.638  |
| NM_003480 | 668.628  | 699.1    | BE794262  | 4332.139  | 4489.343  | AB011180  | 969.653   | 831.883   |
| NM_000899 | 775.941  | 767.683  | NM_003212 | 16764.041 | 15894.213 | NM_007167 | 3294.759  | 2981.326  |
| NM_032951 | 2977.213 | 3382.381 | NM_006382 | 2180.719  | 2203.99   | NM_014832 | 5600.765  | 6289.541  |
| NM_000503 | 1421.653 | 1716.545 | NM_004811 | 15207.733 | 13489.13  | NM_018026 | 3512.919  | 4497.849  |
| NM_002405 | 17878.11 | 18991.57 | AK021910  | 64583.277 | 56699.238 | NM_001707 | 17488.158 | 16187.829 |
| AK000004  | 2527.366 | 2823.517 | M62402    | 2539.6    | 2802.081  | AK022983  | 508.859   | 713.41    |
| NM_012421 | 27916.92 | 30133.79 | NM_002547 | 780.176   | 684.686   | NM_014868 | 11221.496 | 12374.363 |
| AB014601  | 3012.765 | 2703.761 | NM_004748 | 3253.795  | 3286.058  | AL442089  | 5873.909  | 4660.354  |
| AK001393  | 13766.67 | 12669.85 | NM_002668 | 15134.38  | 16065.737 | NM_001200 | 3255.173  | 2360.644  |
| NM_000023 | 4011.997 | 3568.317 | NM_014316 | 47303.863 | 38040.445 | AB007964  | 1494.757  | 737.354   |
| NM_014861 | 924.009  | 946.124  | NM_004054 | 3718.503  | 3244.075  | AF128541  | 7811.619  | 6527.895  |
| NM_012434 | 901.565  | 1083.487 | NM_001138 | 6936.823  | 6084.276  | AK026305  | 10417.962 | 8779.193  |
| NM_003759 | 427.918  | 335.852  | NM_007289 | 751.294   | 638.43    | NM_002552 | 7568.3    | 9363.031  |
| NM_005694 | 14759.02 | 14962.8  | NM_004219 | 66508.781 | 63805.25  | NM_014321 | 9774.742  | 7261.223  |
| M91368    | 822.613  | 1053.846 | NM_003443 | 63506.637 | 58479.195 | AK022733  | 1774.704  | 1892.821  |
| AF224741  | 1108.16  | 1746.827 | NM_002025 | 6922.488  | 4971.9    | AB011132  | 10256.39  | 9173.927  |
| NM_006594 | 3624.54  | 4457.296 | AB015228  | 26436.426 | 10629.238 | AB040937  | 2070.445  | 2031.824  |
| NM_004177 | 2794.521 | 3986.766 | AL049685  | 3230.286  | 3972.991  | NM_000095 | 6938.824  | 8735.402  |
| NM_012429 | 3572.257 | 3364.854 | AK026800  | 7734.35   | 7447.273  | AL137493  | 1166.733  | 1028.529  |
| NM_004871 | 5035.54  | 5102.09  | NM_001442 | 1649.095  | 1702.333  | NM_004797 | 2017.368  | 1431.287  |
| AB040903  | 434.709  | 403.513  | NM_017775 | 4467.331  | 4329.02   | NM_001338 | 4594.642  | 5294.628  |
| NM_005698 | 15476.27 | 16559.37 | AK001958  | 1324.356  | 1322.554  | NM_003637 | 1171.111  | 1749.385  |
| AF202146  | 16402.94 | 15184.95 | AK025947  | 4123.742  | 3596.773  | BC035133  | 1212.951  | 1406.277  |
| NM_014923 | 1652.311 | 1906.752 | AF217973  | 6868.524  | 6784.539  | AB011168  | 3693.79   | 3600.691  |
| NM_005477 | 5208.415 | 4664.982 | NM_007033 | 15074.328 | 16041.024 | BE794262  | 2677.039  | 2575.769  |
| NM_007018 | 1012.025 | 1131.609 | AF226048  | 8794.193  | 7090.789  | NM_003212 | 10022.025 | 8421.35   |
| NM_004318 | 1766.236 | 1599.156 | NM_005573 | 6420.604  | 7073.076  | NM_006382 | 1449.784  | 1269.276  |
| L09089    | 589.269  | 612.862  | D50918    | 21902.205 | 16491.223 | NM_004811 | 19434.658 | 16718.223 |
| NM_002640 | 11800.55 | 7082.227 | U48734    | 9309.017  | 8535.648  | AK021910  | 55268.547 | 48022.75  |
| Y11339    | 6424.609 | 6644.749 | NM_006400 | 13775.923 | 17004.436 | M62402    | 4335.593  | 5044.979  |
| AB030176  | 1784.368 | 1420.731 | NM_003903 | 5125.095  | 4891.565  | NM_002547 | 1007.987  | 889.733   |
| NM_003937 | 896.274  | 790.081  | NM_017955 | 5091.377  | 4649.32   | NM_001058 | 931.957   | 1277.641  |
| NM_002537 | 13136.19 | 13187.53 | NM_016060 | 7703.613  | 6226.03   | NM_014316 | 55611.781 | 43567.242 |
| NM_003139 | 11236.5  | 14623.86 | NM_002208 | 18743.906 | 18794.668 | NM_004054 | 3058.027  | 718.552   |
| NM_012316 | 7925.324 | 8521.792 | NM_007216 | 2825.093  | 2282.377  | NM_001138 | 6119.227  | 5256.534  |
| NM_004059 | 928.932  | 802.259  | AK023518  | 1640.017  | 1099.109  | NM_003443 | 64857.023 | 53529.168 |
| NM_001634 | 18831.75 | 20404.45 | NM_000944 | 2474.322  | 2231.676  | NM_002025 | 6025.777  | 7036.394  |
| NM_002267 | 9070.489 | 9999.759 | NM_012239 | 2327.25   | 1909.818  | AB015228  | 14552.384 | 36853.383 |
| NM_006412 | 4851.456 | 7714.543 | NM_012262 | 2761.007  | 2676.047  | AL049685  | 4354.542  | 4693.247  |
| NM_003063 | 9452.81  | 7986.16  | NM_013390 | 7563.978  | 6556.827  | AK026800  | 11488.84  | 9917.938  |
| NM_014041 | 44893.33 | 45522.09 | NM_002829 | 1884.55   | 3929.253  | AF217973  | 2528.607  | 2272.296  |
| NM_007169 | 5361.449 | 8848.401 | J02783    | 21070.053 | 24392.986 | NM_007033 | 20893.936 | 23323.207 |
| NM_014313 | 1056.957 | 910.709  | NM_018137 | 615.416   | 569.046   | AF226048  | 9203.303  | 13343.679 |
| AK024966  | 1340.125 | 1609.892 | NM_006577 | 25898.146 | 29051.92  | NM_005573 | 10945.477 | 10182.398 |
| AF178941  | 1632.619 | 2171.24  | NM_004413 | 896.263   | 829.128   | NM_002208 | 27401.105 | 25035.076 |
| NM_016033 | 13955.49 | 12464.9  | NM_005317 | 1854.245  | 1499.969  | NM_007216 | 3341.338  | 3183.361  |
| NM_017585 | 4599.12  | 5328.359 | AF120493  | 1096.372  | 1163.756  | AK023518  | 1543.624  | 627.829   |
| U61737    | 12122.01 | 12792.44 | U12597    | 2866.422  | 3436.495  | NM_012239 | 2133.324  | 1871.548  |
| Y10506    | 429.794  | 290.465  | U28055    | 821.178   | 801.598   | NM_012262 | 2405.39   | 2261.623  |
| X06389    | 2104.615 | 1365.535 | AB044343  | 7744.149  | 6447.199  | NM_013390 | 8643.28   | 5586.034  |
| NM_000033 | 1480.35  | 1647.491 | NM_001285 | 573.965   | 602.145   | NM_002829 | 4848.665  | 1405.681  |
| NM_006079 | 2913.112 | 3439.537 | NM_014662 | 990.046   | 846.803   | J02783    | 36435.684 | 22650.486 |

|           |          |          |           |           |           |           |           |           |
|-----------|----------|----------|-----------|-----------|-----------|-----------|-----------|-----------|
| NM_00669E | 5979.345 | 6847.295 | NM_00517E | 8014.111  | 7084.817  | NM_01659C | 497.328   | 666.335   |
| NM_01802E | 2363.35  | 4168.134 | NM_01770Z | 8358.756  | 4480.999  | NM_00562E | 19785.576 | 20083.459 |
| NM_001707 | 17913.1  | 21092.16 | AB014516  | 7478.448  | 6345.548  | NM_00547E | 1473.302  | 1540.846  |
| AK022983  | 567.636  | 645.188  | Z83950    | 1883.648  | 1824.44   | X60152    | 4091.162  | 3805.406  |
| NM_01486E | 11821.89 | 16306.04 | AL080063  | 3020.856  | 2452.139  | NM_00231E | 3465.965  | 2409.5    |
| AL442089  | 4182.2   | 5569.649 | NM_00562E | 13787.956 | 12099.935 | AB023232  | 2516.716  | 1352.366  |
| NM_00120C | 2899.58  | 2728.286 | X15262    | 3558.506  | 2250.403  | NM_00471Z | 3030.552  | 2534.472  |
| AB007964  | 1319.483 | 1013.888 | NM_00547E | 943.732   | 946.183   | NM_00376E | 966.524   | 1346.12   |
| AF128541  | 1606.815 | 2119.583 | AB040918  | 2292.321  | 2248.059  | NM_00169E | 15889.602 | 17323.273 |
| AK026305  | 3495.303 | 4081.301 | NM_01585E | 4756.232  | 4060.333  | NM_01418E | 58037.555 | 47744.586 |
| NM_00255Z | 7558.662 | 7353.074 | X60152    | 1569.237  | 1559.38   | AK026365  | 4105.136  | 2837.151  |
| NM_014321 | 12689.37 | 9983.798 | NM_00231E | 2438.297  | 2317.947  | D86971    | 11885.158 | 8336.894  |
| AK022733  | 2071.69  | 1496.012 | AB023232  | 2871.273  | 3203.372  | NM_00307Z | 14390.199 | 15071.679 |
| AB011132  | 12106.54 | 10952.24 | AL137589  | 2190.476  | 1841.267  | NM_01404E | 1858.669  | 1850.294  |
| NM_02036Z | 17952.95 | 13328.27 | AF036943  | 572.077   | 757.985   | AF274863  | 3151.719  | 4120.951  |
| AB040937  | 1960.138 | 2113.688 | NM_00250Z | 3415.487  | 4279.736  | AF319458  | 1169.93   | 1340.001  |
| AF275798  | 37324.28 | 42884.39 | AF226732  | 7440.019  | 6327.216  | AF024697  | 4706.671  | 5056.792  |
| NM_005441 | 18647.92 | 20362.25 | NM_00631Z | 5649.986  | 5460.982  | NM_018651 | 1186.099  | 1231.526  |
| NM_01607E | 24729.3  | 22431.48 | NM_00280E | 1277.412  | 1142.209  | AF164156  | 876.341   | 692.524   |
| AK023108  | 2738.098 | 2273.357 | NM_00293E | 13146.056 | 11616.976 | NM_00561Z | 7118.958  | 4971.551  |
| AK026409  | 8869.604 | 8070.257 | NM_01583E | 29348.283 | 28332.205 | D17018    | 684.1     | 814.4     |
| AF097025  | 7249.047 | 6147.439 | NM_00471Z | 1949.467  | 1364.957  | AB046852  | 1532.318  | 1263.265  |
| NM_00240E | 15027.14 | 17049.89 | NM_00169E | 11338.353 | 8631.394  | AF086167  | 1055.568  | 966.881   |
| AK000004  | 6413.271 | 5076.208 | NM_000661 | 59025.469 | 59869.211 | AF085891  | 1157.975  | 1192.146  |
| NM_012421 | 25877.95 | 32674.54 | NM_00097Z | 72864.742 | 62576.094 | AF161414  | 4522.816  | 3093.087  |
| AB014601  | 1820.081 | 1997.007 | AF086431  | 2476.378  | 1987.463  | AF070628  | 1288.292  | 677.556   |
| AK001393  | 11444.53 | 12892.41 | AL110204  | 789.748   | 524.837   | U79293    | 686.049   | 602.5     |
| NM_00002Z | 3545.811 | 4275.57  | NM_01418E | 54948.004 | 47248.172 | NM_015434 | 3671.543  | 3170.493  |
| AF022654  | 1059.219 | 1122.724 | AK026365  | 3337.443  | 4084.87   | NM_01405E | 4126.956  | 3493.937  |
| NM_00114Z | 1100.231 | 1290.301 | S70004    | 2094.868  | 1898.181  | AF086488  | 994.431   | 707.449   |
| NM_00328Z | 589.893  | 611.72   | AF105378  | 1922.586  | 1787.888  | NM_018691 | 3690.399  | 3667.248  |
| AK022638  | 9344.431 | 11270.45 | NM_000167 | 4076.902  | 4658.562  | AK022098  | 1526.596  | 1793.739  |
| BG698409  | 1991.701 | 2164.112 | AY007125  | 2393.459  | 2128.306  | AB040933  | 1385.529  | 1250.47   |
| U36798    | 379.667  | 464.186  | AB032987  | 1754.143  | 1556.715  | AK021875  | 1635.388  | 1272.347  |
| AA220921  | 8141.937 | 9475.848 | NM_017567 | 11294.92  | 11049.665 | AK026900  | 6110.159  | 4414.512  |
| N67770    | 560.597  | 751.15   | NM_000691 | 5423.346  | 5640.809  | AK025020  | 7430.019  | 4238.119  |
| U90065    | 5320.503 | 4917.187 | Y18643    | 497.421   | 550.704   | AK024598  | 3270.719  | 2550.462  |
| AJ005898  | 3171.988 | 2789.99  | NM_00307Z | 10591.081 | 8584.393  | AF087983  | 1319.024  | 1087.163  |
| X57303    | 3639.516 | 5866.779 | NM_01404E | 953.597   | 1385.546  | NM_020234 | 5608.145  | 4495.724  |
| AA463224  | 2369.631 | 2400.316 | AF274863  | 2336.478  | 2343.523  | Z36825    | 3063.521  | 2916.613  |
| BG248802  | 11496.07 | 12574.95 | AF319458  | 860.201   | 722.108   | U30889    | 937.137   | 663.887   |
| L19605    | 2782.465 | 2445.938 | AF024697  | 4381.391  | 3702.847  | AF086157  | 2994.427  | 1271.065  |
| AA876532  | 13091.12 | 13960.52 | NM_018651 | 834.951   | 824.047   | AL109710  | 1254.848  | 914.524   |
| S74349    | 1666.252 | 1409.363 | NM_00561Z | 5533.183  | 2384.057  | AK023793  | 1964.57   | 2012.395  |
| X07979    | 17864.04 | 14939.37 | D17018    | 1061.918  | 792.901   | AK023286  | 1445.921  | 1495.446  |
| BG324670  | 685.263  | 588.363  | AB046852  | 1698.658  | 1377.84   | AL079282  | 1109.285  | 375.783   |
| BG744224  | 7852.593 | 7840.761 | AF086167  | 1006.789  | 981.9     | NM_01405E | 1331.913  | 1086.707  |
| NM_005477 | 4411.894 | 4094.277 | AF085891  | 5195.06   | 5449.632  | AK026340  | 1061.996  | 876.614   |
| NM_00701E | 1399.313 | 1172.467 | AF019618  | 1929.169  | 2247.512  | AK022686  | 5836.698  | 5654.157  |
| NM_00431E | 1721.656 | 1463.156 | AK025656  | 1949.355  | 1899.077  | AK023516  | 5669.684  | 5307.698  |
| L09089    | 561.983  | 750.185  | AF161414  | 5891.69   | 5883.95   | AK023864  | 4803.108  | 3793.091  |
| NM_00264C | 11691.77 | 7431.72  | AL110177  | 1465.853  | 1576.69   | AK023017  | 4173.385  | 3823.239  |
| X03084    | 776.025  | 683.846  | NM_00276Z | 15621.141 | 11788.109 | AK023610  | 998.191   | 938.411   |

|           |          |          |           |           |           |           |           |           |
|-----------|----------|----------|-----------|-----------|-----------|-----------|-----------|-----------|
| NM_00094  | 280.29   | 351.515  | NM_01405  | 2872.16   | 2395.444  | AK023908  | 4688.506  | 4630.506  |
| M15530    | 8853.71  | 10179.15 | NM_018691 | 1844.64   | 1548.426  | Z24724    | 7014.977  | 7357.776  |
| NM_00048  | 401.797  | 607.799  | AK001020  | 1063.968  | 604.502   | AK022712  | 7704.979  | 6650.496  |
| NM_001877 | 2169.333 | 2244.919 | AK022098  | 1553.629  | 2325.831  | AK024132  | 1315.185  | 1041.276  |
| NM_014207 | 15794.88 | 17186.58 | AK021875  | 997.691   | 1350.029  | AK021863  | 19033.58  | 14113.421 |
| AK002163  | 6019.584 | 5921.973 | AK022072  | 948.406   | 1049.992  | AK022293  | 1305.667  | 501.968   |
| NM_012344 | 2757.37  | 3187.027 | AK026900  | 8950.62   | 8522.69   | AL117439  | 1427.046  | 1203.797  |
| NM_002351 | 28643.09 | 33154.81 | AK023199  | 2498.048  | 2216.54   | AL133065  | 4472.879  | 3356.252  |
| NM_01438  | 2371.997 | 2538.71  | AK025020  | 5905.66   | 6950.04   | NM_005297 | 10724.813 | 9738.241  |
| NM_001704 | 639.678  | 674.424  | AF086009  | 1098.594  | 1061.705  | U80769    | 2058.048  | 1698.467  |
| AB036432  | 4656.878 | 5139.365 | AF086463  | 3919.268  | 4646.731  | S80491    | 1163.279  | 433.754   |
| NM_01487  | 7475.985 | 6422.624 | AF086031  | 381.763   | 922.282   | AJ011377  | 3624.455  | 2610.705  |
| NM_00364  | 455.513  | 515.514  | AK024130  | 965.803   | 1001.484  | AL137734  | 1135.363  | 1444.12   |
| NM_00348  | 356.412  | 362.208  | AL137270  | 232.998   | 889.769   | AK023784  | 764.033   | 962.461   |
| NM_00089  | 542.283  | 469.918  | AK024598  | 2234.853  | 2276.75   | AK026323  | 2701.711  | 4875.272  |
| NM_032951 | 3644.552 | 3700.943 | AF087983  | 1062.096  | 1276.406  | NM_00349  | 67198.703 | 56512.379 |
| NM_00050  | 1810.623 | 1342.612 | NM_020234 | 4436.32   | 3706.646  | AL133430  | 20699.67  | 17943.941 |
| NM_01758  | 3274.465 | 3982.835 | U70772    | 838.189   | 1125.011  | AF070633  | 37541.09  | 38788.863 |
| U61737    | 14595.38 | 16787.03 | AF086127  | 790.626   | 383.716   | S51971    | 68129.406 | 61248.73  |
| Y10506    | 446.585  | 372.962  | AF086157  | 3222.223  | 1827.119  | AF054996  | 5361.887  | 4822.279  |
| X06389    | 1774.951 | 900.398  | AL109710  | 1984.07   | 2457.143  | AF090098  | 4062.515  | 2885.615  |
| NM_00003  | 1694.582 | 1931.315 | AK021538  | 1090.818  | 1031.731  | AF146694  | 4160.918  | 3374.234  |
| NM_014861 | 1426.313 | 1228.968 | AK023793  | 4628.297  | 4431.252  | AK057104  | 3256.513  | 2899.617  |
| NM_012434 | 1318.901 | 1139.452 | AK023286  | 4066.032  | 3907.907  | AL133555  | 3194.035  | 3645.905  |
| NM_005694 | 14496.04 | 14607.45 | AK021544  | 984.883   | 911.073   | AF233648  | 1744.752  | 1478.247  |
| M91368    | 1422.818 | 1527.409 | AL079282  | 1572.414  | 3492.775  | AK021781  | 730.933   | 668.57    |
| AF224741  | 1740.812 | 1855.357 | AL122104  | 2037.169  | 2325.931  | NM_018584 | 2400.176  | 2401.001  |
| NM_006594 | 3615.919 | 3559.438 | NM_01405  | 2189.497  | 1818.328  | AY007126  | 11420.47  | 12115.34  |
| NM_004177 | 2980.045 | 4152.974 | AK026340  | 1037.893  | 920.007   | AF085951  | 5788.051  | 4461.112  |
| NM_01242  | 3583.674 | 3195.134 | AK022686  | 9221.033  | 6664.778  | AF131787  | 1197.776  | 1110.321  |
| NM_004871 | 6546.329 | 4323.532 | AK023516  | 5916.532  | 4964.3    | AF087989  | 1587.642  | 1056.275  |
| AB040903  | 356.601  | 458.414  | AK023864  | 5758.71   | 4635.141  | NM_01818  | 8212.482  | 7418.902  |
| NM_00569  | 15516.45 | 15020.62 | AK023017  | 4671.767  | 3759.316  | U80771    | 12712.685 | 9778.057  |
| AF202146  | 15773.14 | 12059.46 | AK023908  | 3936.543  | 3370.849  | NM_00618  | 1079.359  | 828.891   |
| NM_01492  | 1820.688 | 1653.695 | AK024236  | 1002.075  | 785.324   | AJ272173  | 16291.84  | 15567.211 |
| AF275798  | 35040.3  | 42248.6  | Z24724    | 8063.325  | 8122.345  | Y17180    | 64525.598 | 56797.395 |
| NM_005441 | 19167.38 | 21039.99 | AK022712  | 9231.956  | 9568.461  | NM_00564  | 4070.536  | 3999.217  |
| NM_01607  | 27094.7  | 27519.66 | AK024132  | 1627.32   | 1747.802  | AK021566  | 607.363   | 534.708   |
| AK023108  | 2941.61  | 2862.987 | AK021863  | 18810.668 | 23073.389 | NM_002037 | 4578.894  | 3340.531  |
| AK026409  | 9191.99  | 9061.459 | AK024208  | 1181.949  | 1650.125  | NM_020157 | 10032.743 | 8784.875  |
| AF097025  | 7099.955 | 6010.212 | NM_005684 | 620.103   | 838.424   | NM_01432  | 2978.274  | 2404.696  |
| Y11339    | 8328.949 | 7514.43  | AK022293  | 1517.149  | 1660.223  | AK025703  | 5733.239  | 5598.282  |
| AB030176  | 2083.61  | 1710.194 | AL117439  | 2035.714  | 1825.823  | NM_01818  | 5373.9    | 3741.775  |
| NM_003937 | 964.123  | 656.367  | AL133065  | 4043.048  | 4789.343  | AK022598  | 5668.055  | 6320.439  |
| NM_002537 | 13159.6  | 12444.62 | NM_005297 | 13417.946 | 10239.318 | AK024306  | 2047.849  | 1521.394  |
| NM_00313  | 11124.45 | 13013.04 | U80769    | 1400.088  | 1363.669  | AK025862  | 22573.516 | 19448.289 |
| NM_01231  | 8363.018 | 8275.072 | S80491    | 623.643   | 1030      | AK026495  | 2825.179  | 1824.405  |
| NM_00405  | 1150.304 | 1195.705 | AJ011377  | 2901.663  | 2055.191  | AK025052  | 3644.331  | 2713.397  |
| NM_001634 | 20836.15 | 19151.96 | AL137734  | 1417.461  | 778.576   | NM_01438  | 1986.26   | 1175.031  |
| NM_002267 | 9603.125 | 11416.09 | AK023784  | 1120.66   | 660.697   | U85044    | 2450.007  | 1708.408  |
| NM_00641  | 5271.778 | 7687.436 | AK026323  | 1990.029  | 1529.183  | BC018880  | 1111.789  | 876.919   |
| NM_00306  | 9970.312 | 8781.123 | NM_00349  | 58963.867 | 57750.375 | AF086090  | 2773.912  | 2715.75   |
| NM_014041 | 46736.15 | 52062.04 | AL133430  | 21585.627 | 22078.334 | AK002173  | 26166.574 | 21457.48  |

|           |          |          |           |           |           |           |           |           |
|-----------|----------|----------|-----------|-----------|-----------|-----------|-----------|-----------|
| NM_007169 | 5883.338 | 9565.349 | AF070633  | 41490.52  | 40426.688 | NM_017746 | 3379.587  | 2772.917  |
| NM_014313 | 1590.402 | 1068.279 | AF054996  | 13966.771 | 12775.411 | NM_020188 | 29733.215 | 26860.605 |
| AK024966  | 1115.442 | 1059.549 | AF090098  | 4883.507  | 3886.188  | M87929    | 1517.954  | 1338.731  |
| AF178941  | 1729.932 | 2357.601 | AF146694  | 4252.256  | 3539.436  | U88897    | 12275.435 | 11113.031 |
| NM_016033 | 14240.44 | 10619.79 | AK057104  | 2023.913  | 2477.552  | CY3Cy5    | 6756.447  | 218.09    |
| NM_013439 | 43975.17 | 45784.87 | AL133555  | 2546.344  | 2045.365  | BG617923  | 532.642   | 1170.843  |
| NM_003406 | 52095.41 | 49247.17 | AK024979  | 18513.887 | 17400.08  | U37448    | 4615.01   | 6249.984  |
| NM_018316 | 2640.565 | 2465.676 | AF233648  | 2313.124  | 1799.424  | BG435851  | 793.149   | 1003.482  |
| AB011180  | 811.689  | 1011.302 | AK021781  | 777.348   | 616.011   | AA927698  | 5245.69   | 5619.98   |
| NM_007167 | 6164.405 | 7922.526 | NM_018584 | 2017.019  | 1437.871  | AI498426  | 2655.862  | 3150.762  |
| NM_014832 | 8455.126 | 10168.06 | AY007126  | 12690.573 | 9242.633  | D01038    | 35334.262 | 47202.258 |
| NM_003243 | 541.748  | 565.145  | AF085951  | 6039.742  | 5809.928  | AB019205  | 3137.792  | 3778.709  |
| NM_002477 | 3143.515 | 3577.608 | AF131787  | 1442.458  | 781.906   | J05008    | 3001.366  | 3612.81   |
| NM_004673 | 325.538  | 510.938  | AF087989  | 2034.983  | 1673.017  | U11087    | 2006.005  | 2016.701  |
| NM_018026 | 2892.991 | 4294.95  | Z70715    | 1509.877  | 973.098   | D50640    | 4061.82   | 6046.009  |
| NM_001707 | 18013.44 | 21365.98 | NM_018182 | 5990.883  | 4473.396  | D43747    | 1551.219  | 1684.838  |
| AK022983  | 552.101  | 805.114  | U80771    | 7316.289  | 5276.518  | M98776    | 5239.246  | 7322.888  |
| NM_014868 | 11786.19 | 14240.66 | AJ272173  | 16062.738 | 11167.518 | X99135    | 67249.023 | 55095.719 |
| AL442089  | 4676.248 | 5033.904 | Y17180    | 61830.574 | 64246.434 | AF009744  | 3432.384  | 2324.284  |
| NM_001200 | 2824.014 | 2985.931 | NM_005649 | 4290.284  | 3488.316  | NM_172140 | 5613.639  | 6078.132  |
| AB007964  | 1088.881 | 1038.626 | AK021566  | 853.731   | 530.95    | SR6       | 4951.828  | 2579.92   |
| AF128541  | 1377.21  | 2432.66  | NM_002037 | 5301.316  | 6212.238  | SR8       | 16696.705 | 29214.891 |
| AK026305  | 3902.687 | 4097.457 | NM_020157 | 23579.389 | 22228.977 | SR10      | 57748.363 | 13019.469 |
| NM_002552 | 7234     | 7451.282 | X64991    | 1278.231  | 1468.804  | CY3Cy5    | 3400.257  | 138.767   |
| NM_014321 | 14009.09 | 10323.28 | NM_014320 | 2924.813  | 2501.703  | NM_005311 | 1785.129  | 2152.856  |
| AK022733  | 1756.72  | 1619.556 | AK025703  | 6135.852  | 4611.75   | NM_005905 | 5492.049  | 6121.35   |
| AB011132  | 11368.64 | 7957.46  | NM_018185 | 3918.118  | 3515.244  | NM_016235 | 1049.37   | 1535.071  |
| NM_020362 | 18423.42 | 12150.29 | AK022598  | 5569.859  | 5155.262  | NM_000960 | 924.888   | 1285.331  |
| AB040937  | 2567.978 | 1955.108 | AK024306  | 1479.094  | 1295.418  | AF172932  | 1544.963  | 2215.821  |
| NM_000095 | 659.016  | 689.591  | NM_018322 | 7284.451  | 6589.946  | NM_005359 | 1516.975  | 1791.88   |
| AL137493  | 571.377  | 441.632  | AK025862  | 20358.48  | 16530.432 | NM_002511 | 2674.772  | 3492.938  |
| NM_004797 | 539.622  | 599.292  | AK026495  | 1969.909  | 2296.545  | AF295378  | 6707.476  | 9651.871  |
| NM_002457 | 228.643  | 313.55   | AK025052  | 2897.103  | 2570.178  | AF320908  | 3106.706  | 4014.759  |
| NM_001338 | 1861.38  | 2704.973 | NM_014388 | 1971.943  | 1506.557  | NM_004085 | 7096.872  | 9874.029  |
| NM_003637 | 747.928  | 1065.265 | NM_002548 | 1499.745  | 1189.497  | NM_012445 | 42153.277 | 52810.559 |
| NM_004233 | 11387.27 | 8853.317 | U85044    | 1510.21   | 1175.016  | NM_018104 | 4325.857  | 5574.611  |
| NM_001544 | 10131.45 | 10909.63 | BC018880  | 1068.102  | 861.719   | NM_006080 | 1101.751  | 890.94    |
| X58531    | 693.21   | 566.332  | AF086090  | 3057.93   | 2022.622  | NM_004429 | 6526.081  | 6455.275  |
| AB011168  | 3633.177 | 3301.469 | AK002173  | 22610.967 | 18293.189 | U64564    | 2901.841  | 2104.635  |
| BE794262  | 834.496  | 1023.625 | NM_017746 | 1928.856  | 1200.546  | NM_006470 | 3182.427  | 2669.885  |
| NM_003212 | 5535.15  | 4907.168 | NM_020188 | 25909.635 | 22753.342 | NM_002855 | 8238.673  | 9376.056  |
| NM_006382 | 515.648  | 568.237  | U88897    | 10207.528 | 6645.022  | AB038463  | 1766.737  | 1774.616  |
| NM_004811 | 18080.74 | 18414.28 | CY3Cy5    | 2159.153  | 287.005   | M30262    | 2711.046  | 2420.883  |
| AK021910  | 40235.95 | 39551.14 | U37448    | 3460.03   | 3307.754  | NM_005460 | 1501.336  | 1282.957  |
| M62402    | 4518.101 | 4234.762 | BG435851  | 685.555   | 687.341   | AF160477  | 3624.828  | 2761.683  |
| NM_002547 | 510.717  | 419.648  | AA927698  | 3359.339  | 4779.888  | M12883    | 8359.08   | 4484.643  |
| NM_004748 | 1348.679 | 1462.109 | AI498426  | 988.514   | 1474.488  | BG288747  | 14230.944 | 6145.184  |
| NM_002668 | 21106.24 | 17677.4  | D01038    | 26350.762 | 32654.428 | AI524814  | 4882.423  | 5144.152  |
| NM_001058 | 516.829  | 681.357  | AB019205  | 1967.154  | 2317.973  | AB024411  | 2628.078  | 3561.449  |
| NM_014316 | 48765.63 | 44896.91 | J05008    | 2191.075  | 2697.688  | NM_002444 | 35254.598 | 50124.621 |
| NM_004054 | 1543.641 | 1420.451 | U11087    | 1051.272  | 1408.766  | NM_001104 | 1573.516  | 1779.485  |
| NM_001138 | 758.245  | 765.141  | D50640    | 3550.729  | 2783.709  | NM_002989 | 11434.163 | 12984.972 |
| NM_007289 | 773.802  | 719.85   | D43747    | 1180.216  | 1072.565  | U88898    | 12908.346 | 18588.762 |

|           |          |          |           |           |           |           |           |           |
|-----------|----------|----------|-----------|-----------|-----------|-----------|-----------|-----------|
| NM_004219 | 69662.64 | 46542.36 | M98776    | 4931.481  | 3069.467  | NM_020154 | 41264.938 | 53858.996 |
| NM_003443 | 16281.47 | 19673.87 | X99135    | 63630.992 | 59326.113 | NM_004665 | 3643.405  | 3956.339  |
| NM_002025 | 7069.458 | 10267.53 | AF009744  | 2177.893  | 2399.403  | NM_005300 | 2177.208  | 2512.471  |
| AB015228  | 14088.28 | 30945.52 | NM_172140 | 6023.376  | 4121.625  | NM_000893 | 1600.88   | 2235.317  |
| AL049685  | 5845.833 | 4451.303 | SR6       | 3624.669  | 5288.976  | NM_005091 | 878.332   | 1215.568  |
| AK026800  | 9860.189 | 8344.678 | SR8       | 13619.106 | 52863.715 | AF031167  | 3419.106  | 2745.905  |
| NM_001442 | 1874.017 | 1898.047 | SR10      | 51349.23  | 29581.096 | NM_003204 | 6247.331  | 6408.787  |
| NM_017775 | 6978.609 | 8013.575 | CY3Cy5    | 2529.603  | 218.371   | AF254069  | 1860.75   | 2039.046  |
| AK001958  | 2405.238 | 1740.845 | NM_005311 | 780.592   | 1095.333  | AL117600  | 15858.224 | 12527.083 |
| AK025947  | 6020.394 | 5826.801 | NM_005905 | 4088.028  | 4749.896  | NM_001712 | 1152.338  | 809.047   |
| AF217973  | 3410.473 | 3518.153 | NM_016235 | 847.164   | 807.964   | NM_004487 | 19937.061 | 23345.094 |
| NM_007033 | 21106.64 | 22192.81 | AF295378  | 4999.117  | 5629.16   | AB029000  | 9008.403  | 8669.217  |
| AF226048  | 8954.38  | 11949.75 | AF320908  | 2697.568  | 2494.914  | AK026965  | 18017.199 | 17815.227 |
| NM_005573 | 11726.47 | 10016.28 | NM_004085 | 7061.381  | 7620.005  | AK025859  | 7252.528  | 3713.697  |
| AV723708  | 404.809  | 583.039  | NM_012445 | 32313.264 | 34194.293 | AL117499  | 21426.043 | 15394.534 |
| NM_006400 | 18572.96 | 19165.87 | NM_018104 | 3540.185  | 3071.234  | NM_007054 | 2762.036  | 1792.683  |
| NM_003903 | 6569.398 | 6799.305 | NM_004425 | 5657.734  | 5644.388  | AB007957  | 878.343   | 492.99    |
| NM_017955 | 6808.281 | 6152.9   | U64564    | 2172.073  | 2282.371  | AK000160  | 5305.318  | 3059.442  |
| NM_016060 | 10210.17 | 9679.364 | NM_006470 | 2319.964  | 2180.746  | NM_006032 | 5592.594  | 7636.299  |
| NM_002208 | 28213.86 | 21874.89 | NM_002855 | 5912.517  | 4707.637  | NM_014788 | 4208.195  | 4398.837  |
| NM_007216 | 3369.07  | 2700.986 | M30262    | 4101.061  | 7062.454  | NM_002153 | 1201.448  | 1859.929  |
| AK023518  | 1039.756 | 832.41   | NM_005460 | 1416.865  | 1952.641  | AB040890  | 6283.859  | 8346.638  |
| NM_000944 | 2115.352 | 2041.862 | AF160477  | 4984.928  | 6843.73   | AK024233  | 1853.102  | 2564.77   |
| NM_012239 | 2687.462 | 2687.245 | M12883    | 7707.369  | 11322.683 | AK021870  | 2331.594  | 3202.488  |
| NM_012262 | 1414.932 | 2176.445 | BG288747  | 10873.123 | 19474.213 | U06680    | 1724.645  | 2018.132  |
| NM_013390 | 11882.57 | 11041.9  | AI524814  | 2505.661  | 3569.676  | NM_005123 | 1233.559  | 2013.8    |
| NM_002829 | 6916.548 | 3341.912 | AB024411  | 2615.28   | 2854.461  | NM_015584 | 15026.589 | 18623.967 |
| J02783    | 34003.36 | 39291.26 | NM_002444 | 25642.859 | 29725.092 | NM_002063 | 970.514   | 1427.083  |
| NM_018137 | 722.27   | 1098.256 | NM_001104 | 1512.095  | 1985.506  | NM_000815 | 2237.868  | 1884.044  |
| NM_006577 | 34841.79 | 39295.35 | NM_005300 | 1258.987  | 1819.718  | NM_001293 | 918.484   | 1030.43   |
| NM_004413 | 1250.133 | 950.64   | NM_000893 | 1553.407  | 1690.862  | AB023173  | 9104.849  | 10377.188 |
| NM_005317 | 846.368  | 1845.685 | NM_000698 | 32201.752 | 36169.469 | AF156548  | 5630.415  | 5321.74   |
| AF120493  | 1093.663 | 720.383  | AF031167  | 1595.342  | 2735.658  | NM_000387 | 17532.232 | 16541.836 |
| U12597    | 3950.041 | 3763.847 | NM_003204 | 4799.286  | 5693.238  | NM_004663 | 2361.429  | 1453.397  |
| U28055    | 1229.777 | 1157.095 | AF254069  | 1172.661  | 1407.925  | NM_015310 | 1376.997  | 1016.526  |
| AB044343  | 2238.919 | 2294.349 | AL117600  | 14069.287 | 12603.224 | NM_005013 | 67697.117 | 56913.387 |
| NM_001285 | 544.815  | 351.977  | NM_001712 | 893.761   | 1088.682  | AB002338  | 2346.087  | 1829.216  |
| NM_018409 | 632.766  | 560.448  | NM_004487 | 17904.891 | 12068.305 | NM_001072 | 2084.102  | 2695.727  |
| NM_014662 | 1171.79  | 1266.706 | AB029000  | 6408.298  | 3489.009  | NM_014070 | 1422.089  | 1628.602  |
| NM_005178 | 4177.818 | 2878.835 | AK026965  | 29251.623 | 44363.145 | NM_016027 | 1465.688  | 1380.102  |
| NM_017702 | 5653.178 | 10532.79 | AK025859  | 8489.885  | 15470.691 | NM_014297 | 13648.031 | 15119.701 |
| AB014516  | 4910.864 | 3962.592 | AL117499  | 23667.57  | 35783.348 | NM_018156 | 21038.264 | 26356.098 |
| Z83950    | 1898.009 | 1680.246 | NM_007054 | 2311.316  | 3788.712  | X98266    | 2329.788  | 2678.326  |
| AL080063  | 3951.728 | 3660.651 | AB007957  | 520.724   | 1040.531  | U00930    | 17385.805 | 23314.713 |
| NM_016590 | 566.134  | 573.46   | AK000160  | 5462.902  | 9041.429  | AK024958  | 1377.084  | 1627.516  |
| NM_005625 | 17527.54 | 14658.24 | NM_006032 | 5237.766  | 5112.618  | AL117552  | 2879.384  | 3029.562  |
| NM_005475 | 2088.914 | 1979.786 | NM_014788 | 2825.263  | 3187.264  | NM_002692 | 14186.655 | 15922.046 |
| AB040918  | 2062.006 | 1748.006 | NM_002153 | 959.184   | 894.779   | NM_007064 | 2518.8    | 2267.797  |
| NM_015859 | 8348.879 | 5854.708 | AB040890  | 4547.108  | 4907.735  | NM_006281 | 3411.781  | 2623.897  |
| X60152    | 2259.906 | 1695.25  | AK024233  | 1723.265  | 1648.128  | NM_002738 | 11672.969 | 10896.852 |
| NM_002316 | 597.101  | 703.14   | NM_005123 | 1399.414  | 2081.25   | U23460    | 38737.66  | 39380.563 |
| AB023232  | 4095.435 | 3573.637 | NM_015584 | 10025.246 | 13287.435 | NM_005356 | 49005.141 | 51513.012 |
| NM_017420 | 653.17   | 493.514  | NM_002063 | 826.146   | 838.874   | Z25434    | 5284.501  | 3534.995  |

|           |          |          |           |           |           |           |           |           |
|-----------|----------|----------|-----------|-----------|-----------|-----------|-----------|-----------|
| AL137589  | 2125.878 | 2796.134 | NM_006667 | 55513.746 | 49197.043 | NM_005884 | 17599.605 | 16477.441 |
| NM_002502 | 6841.692 | 4041.634 | NM_000815 | 1750.93   | 2063.781  | NM_012399 | 15118.438 | 11727.819 |
| AF226732  | 4816.879 | 5950.296 | NM_001293 | 799.957   | 829.714   | AF151638  | 3519.436  | 2880.313  |
| NM_006312 | 7666.056 | 7876.655 | AB023173  | 7625.815  | 5586.256  | U90552    | 11388.126 | 7806.638  |
| NM_002805 | 1673.104 | 1789.39  | AF156548  | 4940.691  | 2459.329  | NM_005460 | 1489.395  | 1421.275  |
| NM_016135 | 531.94   | 305.522  | NM_000387 | 26449.223 | 29892.951 | AF160477  | 2866.574  | 3738.259  |
| NM_003662 | 348.285  | 454.053  | NM_015310 | 2311.604  | 3713.386  | M12883    | 6023.875  | 7304.333  |
| NM_002939 | 19774.81 | 20064.58 | NM_016154 | 31871.633 | 51067.949 | BG288747  | 13383.658 | 12258.192 |
| NM_015836 | 40531.59 | 45940.61 | AB002338  | 2544.766  | 4121.601  | BG617923  | 756.614   | 845.987   |
| NM_004713 | 3243.849 | 2148.081 | NM_001072 | 1813.091  | 1909.5    | U37448    | 3601.385  | 4896.802  |
| NM_003769 | 1142.927 | 761.623  | NM_014070 | 1168.313  | 1322.76   | BG435851  | 239.936   | 1270.898  |
| NM_001698 | 16108.83 | 13646.71 | NM_016027 | 807.864   | 1422.456  | AA927698  | 5084.896  | 4648.521  |
| AF086431  | 1844.374 | 2400.122 | NM_014297 | 10368.678 | 12028.689 | AI498426  | 1720.704  | 2162.855  |
| NM_014188 | 28225.53 | 31471.55 | X98266    | 1659.231  | 2119.009  | D01038    | 27864.947 | 36333.617 |
| AK026365  | 4740.776 | 3923.111 | U00930    | 12265.83  | 16611.48  | AB019205  | 2354.663  | 2908.402  |
| S70004    | 762.405  | 842.676  | AK024958  | 1104.5    | 988.354   | J05008    | 3129.538  | 3604.707  |
| AF105378  | 769.176  | 717.762  | AL117552  | 1758.093  | 1724.346  | U11087    | 1415.895  | 1480.065  |
| NM_000167 | 6470.147 | 5681.419 | NM_002692 | 10370.939 | 10964.904 | D50640    | 3959.905  | 5220.318  |
| AY007125  | 3286.041 | 3999.156 | AB023190  | 26505.432 | 28597.707 | D43747    | 1359.758  | 1454.578  |
| AB032987  | 2176.157 | 1876.607 | NM_007064 | 1956.811  | 2264.037  | M98776    | 4983.181  | 5484.389  |
| NM_017567 | 10135.99 | 8477.327 | NM_006281 | 1820.905  | 3224.845  | AF009744  | 3486.497  | 2576.308  |
| NM_000691 | 3007.856 | 3351.147 | NM_002738 | 10024.991 | 10499.76  | NM_172140 | 5618.914  | 3773.851  |
| NM_000305 | 606.779  | 497.805  | U23460    | 39744.73  | 32886.348 | AK026965  | 16009.815 | 19829.324 |
| D86971    | 10874.93 | 10772.22 | NM_005356 | 39428.363 | 28985.641 | AK025859  | 7199.145  | 7580.014  |
| NM_003073 | 12607.58 | 13267.02 | Z25434    | 5285.039  | 3281.314  | AL117499  | 19986.646 | 21651.611 |
| NM_014048 | 1445.776 | 1103.479 | NM_012399 | 17808.084 | 27952.568 | NM_007054 | 2299.785  | 3133.066  |
| AF274863  | 2897.358 | 3038.474 | AF229804  | 64591.957 | 66168.023 | AB007957  | 943.346   | 1197.183  |
| AF319458  | 1212.238 | 919.011  | U90552    | 14882.358 | 26033.607 | AK000160  | 4727.922  | 5365.388  |
| AF024697  | 2235.225 | 2090.195 | NM_005460 | 651.958   | 947.663   | NM_005311 | 1585.305  | 1772.498  |
| NM_018651 | 487.6    | 367.904  | AF160477  | 2415.016  | 2552.863  | NM_005905 | 4595.386  | 5680.81   |
| AF164156  | 599.474  | 333.403  | NM_003226 | 756.67    | 2993.18   | NM_016235 | 1662.916  | 2490.933  |
| NM_005612 | 5575.285 | 3159.244 | M12883    | 4854.844  | 4561.571  | NM_000960 | 1174.289  | 2077.985  |
| AF088026  | 694.475  | 524.588  | BG288747  | 7851.864  | 10467.156 | AF172932  | 1516.486  | 1900.141  |
| D17018    | 783.125  | 423.195  | BG617923  | 1192.805  | 1219.644  | NM_005359 | 1034.166  | 1316.346  |
| AB046852  | 1649.75  | 1740.68  | U37448    | 3414.136  | 3784.426  | NM_002511 | 2715.712  | 3514.055  |
| AF086167  | 1252.878 | 1431.964 | AA927698  | 2947.829  | 4926.122  | AF295378  | 7171.196  | 7718.533  |
| AL109727  | 706.913  | 481.792  | AI498426  | 778.88    | 1385.423  | AF320908  | 3147.323  | 3762.274  |
| AF085891  | 2773.239 | 2757.466 | D01038    | 26300.357 | 24939.061 | NM_004085 | 6226.152  | 5823.068  |
| AF019618  | 2117.185 | 1974.175 | AB019205  | 2029.487  | 1865.831  | NM_012445 | 35270.281 | 38227.617 |
| AK025656  | 2986.83  | 2797.916 | J05008    | 1923.07   | 1887.569  | NM_006080 | 827.31    | 595.964   |
| AF138859  | 881.905  | 866.452  | U11087    | 1084.602  | 1177.289  | NM_004429 | 5753.981  | 4664.118  |
| AF161414  | 4934.209 | 3843.025 | D43747    | 1211.566  | 1343.813  | U64564    | 2476.283  | 1417.684  |
| AK025967  | 1746.686 | 1380.169 | M98776    | 5380.754  | 4137.647  | NM_006470 | 2842.648  | 2014.795  |
| AL110177  | 2292.837 | 1888.883 | AF009744  | 2123.69   | 2264.905  | NM_002855 | 7375.664  | 4366.092  |
| NM_002763 | 12468.06 | 15247.47 | NM_172140 | 4952.52   | 2581.521  | AB038463  | 1729.295  | 1513.891  |
| AF070628  | 1330.437 | 1168.086 | AK026965  | 15482.362 | 13813.421 | M30262    | 2080.102  | 1322.17   |
| NM_015434 | 3602.101 | 3251.999 | AK025859  | 4751.411  | 4405.842  | NM_000387 | 16734.361 | 21211.342 |
| NM_014055 | 3569.098 | 3059.388 | AL117499  | 13104.939 | 12741.049 | NM_004663 | 2063.116  | 2461.919  |
| NM_018691 | 2684.295 | 2018.154 | NM_007054 | 1840.704  | 1623.443  | NM_015310 | 1618.24   | 2238.338  |
| AK001020  | 762.908  | 539.713  | AK000160  | 3451.608  | 3624.154  | NM_016154 | 23953.576 | 29119.891 |
| AK022098  | 1559.12  | 1546.484 | NM_005311 | 816.95    | 1379.793  | NM_005013 | 63312.641 | 55599.625 |
| AB040933  | 1216.561 | 992.12   | NM_005905 | 4048.526  | 4167.07   | AB002338  | 2263.081  | 2507.662  |
| AK021875  | 1767.164 | 1494.227 | NM_016235 | 1048.55   | 1213.751  | AI524814  | 3805.428  | 4670.103  |



|           |          |          |           |           |           |           |           |           |
|-----------|----------|----------|-----------|-----------|-----------|-----------|-----------|-----------|
| AK026900  | 11869.64 | 11053.56 | NM_00096C | 770.55    | 964.951   | AB024411  | 2662.619  | 3719.62   |
| AK025020  | 9483.913 | 7791.645 | AF172932  | 944.826   | 1004.062  | NM_002444 | 33467.484 | 47815.422 |
| AF086009  | 1411.657 | 1386.759 | NM_00535E | 830.228   | 1074.707  | NM_001104 | 1657.724  | 2100.929  |
| AF086463  | 1121.245 | 1174.683 | NM_002511 | 2363.56   | 2351.262  | NM_00298E | 10267.634 | 10532.904 |
| AK024130  | 696.737  | 511.524  | AF295378  | 5712.536  | 6589.89   | U88898    | 12722.407 | 17148.713 |
| AK024598  | 3830.128 | 2731.407 | NM_00408E | 6961.71   | 7757.016  | NM_020154 | 42027.934 | 46814.91  |
| AF087983  | 1443.645 | 1335.395 | NM_01244E | 32325.748 | 36281.711 | NM_00466E | 3698.969  | 3803.166  |
| NM_020234 | 6071.478 | 5622.824 | NM_00442E | 5993.421  | 4468.43   | NM_00530C | 2507.154  | 2283.915  |
| U70772    | 650.71   | 508.635  | U64564    | 2820.397  | 2099.234  | NM_00089E | 1826.875  | 1678.366  |
| Z36825    | 689.226  | 1074.663 | NM_00647C | 3395.646  | 5649.327  | NM_00069E | 31549.053 | 34400.988 |
| U30889    | 358.488  | 449.291  | NM_00285E | 8298.696  | 15513.72  | NM_005091 | 563.28    | 632.719   |
| Z36846    | 350.382  | 408.919  | AB038463  | 1517.82   | 2578.813  | AF031167  | 2760.092  | 2168.642  |
| AF086127  | 1041.419 | 538.66   | M30262    | 3270.645  | 5036.39   | NM_003204 | 5542.558  | 3511.295  |
| AF086157  | 5090.95  | 3826.386 | NM_000387 | 16312.124 | 14338.609 | AF254069  | 1639.704  | 1237.699  |
| AL109710  | 1237.345 | 1114.522 | NM_00466E | 1609.036  | 1802.2    | AL117600  | 14884.808 | 10385.028 |
| AK023793  | 702.877  | 809.365  | NM_01531C | 1479.199  | 1514.081  | NM_00171E | 1043.093  | 904.436   |
| AK022185  | 740.393  | 709.127  | NM_016154 | 20514.775 | 21063.795 | NM_004487 | 17242.941 | 15690.039 |
| AK023286  | 688.266  | 677.956  | NM_00501E | 60401.531 | 54732.746 | AB029000  | 8558.42   | 6907.087  |
| AK021544  | 776.852  | 863.494  | AB002338  | 1523.304  | 1638.998  | Z25434    | 4610.06   | 5715.629  |
| AL079282  | 883.469  | 886.599  | AI524814  | 2651.942  | 3688.557  | NM_005884 | 15945.917 | 23607.658 |
| NM_01405E | 473.086  | 324.589  | AB024411  | 2854.492  | 2459.699  | NM_01239E | 13524.378 | 16296.184 |
| AK026340  | 852.359  | 669.089  | NM_002444 | 27694.4   | 28278.842 | AF229804  | 34305.277 | 46304.305 |
| AK022686  | 1517.629 | 1840.151 | NM_001104 | 1592.045  | 1722.78   | AF151638  | 3511.32   | 3959.09   |
| AK023516  | 8014.074 | 7006.733 | NM_00298E | 7344.935  | 9559.881  | U90552    | 9007.592  | 11922.196 |
| AK023864  | 2616.642 | 2446.688 | U88898    | 11246.519 | 9745.458  | NM_00603E | 5110.96   | 6211.395  |
| AK023017  | 3788.248 | 3566.871 | NM_020154 | 33793.531 | 32807.016 | NM_01478E | 3625.648  | 4209.006  |
| AK023908  | 2133.51  | 1807.751 | NM_00466E | 1935.09   | 3141.007  | NM_00215E | 1111.04   | 2090.351  |
| AK024236  | 1215.987 | 1139.687 | NM_00530C | 1331.179  | 1873.999  | AB040890  | 5642.827  | 7399.222  |
| Z24724    | 9238.924 | 9758.292 | NM_00089E | 1508.929  | 1867.733  | AK024233  | 1954.612  | 2604.767  |
| AK022712  | 4906.853 | 3867.943 | NM_00069E | 32148.344 | 37673.313 | AK021870  | 2202.34   | 3099.655  |
| AK024132  | 1973.011 | 2260.31  | AF031167  | 1879.075  | 3032.303  | U06680    | 1532.764  | 2615.394  |
| AK021863  | 28532.98 | 29828.4  | NM_003204 | 5124.502  | 4337.288  | NM_00512E | 1274.791  | 1655.136  |
| AK024208  | 668.196  | 581.659  | AF254069  | 1218.013  | 741.007   | NM_015584 | 14257.075 | 13137.269 |
| NM_005684 | 697.677  | 647.843  | AL117600  | 20886.488 | 24771.525 | NM_001697 | 56347.93  | 45976.371 |
| AK022293  | 1825.503 | 1170.652 | NM_00171E | 1294.696  | 2354.166  | NM_01609E | 27741.076 | 24480.334 |
| AL117439  | 1014.297 | 996.029  | NM_004487 | 25535.471 | 26433.408 | NM_00206E | 958.121   | 900.238   |
| AL133065  | 5586.899 | 5155.87  | AB029000  | 9824.051  | 14749.017 | NM_006667 | 56885.398 | 45679.063 |
| NM_005297 | 1944.696 | 1909.426 | Z25434    | 4313.007  | 4237.385  | NM_00081E | 2263.273  | 1613.832  |
| U80769    | 616.325  | 887.154  | NM_005884 | 12780.675 | 13643.032 | NM_00129E | 988.695   | 734.438   |
| S80491    | 1074.128 | 850.33   | NM_01239E | 8785.069  | 7615.027  | AB023173  | 8816.422  | 8029.246  |
| AJ011377  | 4309.331 | 3321.373 | AF229804  | 46331.063 | 44394.18  | AF156548  | 5151.65   | 4443.503  |
| AL137734  | 738.947  | 791.814  | AF151638  | 2614.841  | 3349.194  | NM_17214C | 4728.946  | 5162.777  |
| AK026323  | 2123.855 | 1445.357 | U90552    | 6752.76   | 7422.971  | NM_00107E | 2242.664  | 2532.007  |
| AL133430  | 17606.2  | 15301.64 | NM_00603E | 4595.525  | 4312.23   | NM_01407C | 1356.918  | 1582.357  |
| AF070633  | 31126.08 | 37806.43 | NM_01478E | 2575.112  | 2492.737  | NM_016027 | 1692.565  | 1351.981  |
| Y16184    | 542.015  | 617.989  | NM_00215E | 1330.351  | 1707.983  | NM_014297 | 13651.588 | 16091.068 |
| S51971    | 72100.48 | 54059.36 | AB040890  | 4263.496  | 5183.673  | NM_01815E | 20100.111 | 24731.334 |
| NM_01837C | 390.746  | 485.862  | AK024233  | 1627.025  | 1978.702  | X98266    | 2546.194  | 2782.502  |
| AF054996  | 14097.99 | 15367.81 | AK021870  | 1803.109  | 1739.248  | U00930    | 18756.348 | 23968.895 |
| AF090098  | 3737.391 | 3911.54  | U06680    | 1238.776  | 1724.641  | AK024958  | 1406.917  | 1630.626  |
| AF146694  | 4515.378 | 4262.041 | NM_00512E | 939.577   | 1047.417  | NM_01457E | 8143.761  | 6577.312  |
| AK057104  | 3484.023 | 2527.12  | NM_015584 | 12062.617 | 22939.168 | NM_00243E | 7117.745  | 5149.232  |
| AL133555  | 2437.644 | 3204.669 | NM_001697 | 44072.715 | 59974.477 | AL117552  | 2794.865  | 1868.094  |

|           |          |          |           |           |           |           |           |           |
|-----------|----------|----------|-----------|-----------|-----------|-----------|-----------|-----------|
| AK024979  | 1074.47  | 1038.594 | NM_01609E | 21396.277 | 30755.189 | NM_00269Z | 14060.56  | 11481.326 |
| AF233648  | 1222.029 | 1195.819 | AB032525  | 777.529   | 622.845   | AB023190  | 28961.051 | 18842.365 |
| AK021781  | 782.556  | 749.784  | NM_00206Z | 873.594   | 971.578   | NM_007064 | 1990.056  | 1455.147  |
| NM_018584 | 2991.293 | 2925.287 | NM_00081E | 2337.252  | 1703.172  | NM_006281 | 3108.095  | 1946.75   |
| AY007126  | 5452.905 | 6264.024 | NM_00129Z | 1306.697  | 2062.056  | NM_00273E | 12401.267 | 10564.367 |
| AF085951  | 4919.77  | 4581.729 | AB023173  | 6047.247  | 7810.323  | U23460    | 35346.094 | 40422.918 |
| AF131787  | 916.646  | 986.733  | AF156548  | 6860.01   | 5909.774  | NM_00535E | 46918.168 | 44101.027 |
| AF087989  | 1091.704 | 694.919  | NM_17214C | 3452.312  | 3630.728  | NM_00442E | 4482.689  | 6030.384  |
| Z70715    | 2046.389 | 1712.075 |           | 171.833   | 2128.159  | U64564    | 2086.13   | 2787.572  |
| NM_01818Z | 7379.854 | 5958.158 | NM_00107Z | 1597.044  | 1694.958  | NM_00647C | 2304.954  | 2968.571  |
| U80771    | 10347.52 | 7798.827 | NM_01407C | 1348.372  | 1253.537  | NM_00285E | 6435.98   | 6059.384  |
| NM_00618E | 762.431  | 506.951  | NM_01628C | 509.738   | 714.373   | AB038463  | 1606.649  | 1492.46   |
| NM_00564E | 3649.371 | 4360.989 | NM_016027 | 828.573   | 1422.289  | M30262    | 2000.55   | 2279.891  |
| AK021566  | 1198.328 | 867.195  | NM_014297 | 9698.814  | 10709.979 | NM_00546C | 1030.068  | 1114.981  |
| NM_002037 | 6438.414 | 5447.96  | NM_01815E | 17311.098 | 17567.949 | AF160477  | 3196.091  | 4194.601  |
| NM_01634E | 1247.019 | 1339.584 | X98266    | 1636.097  | 1599.885  | M12883    | 5347.016  | 5966.238  |
| NM_020157 | 2567.391 | 2606.861 | U00930    | 14877.077 | 17668.121 | BG288747  | 12437.384 | 12434.899 |
| X64991    | 896.083  | 850.876  | AK024958  | 1264.099  | 1257.256  | BG617923  | 807.607   | 689.135   |
| NM_01432C | 3585.568 | 3484.563 | NM_01457E | 6085.94   | 7080.252  | U37448    | 4020.235  | 5022.762  |
| AK025703  | 3928.674 | 4636.257 | NM_00243E | 5604.436  | 7835.185  | BG435851  | 612.556   | 863.444   |
| NM_01818E | 4527.908 | 3831.646 | AL117552  | 2003.621  | 2501.385  | AA927698  | 4612.534  | 4161.063  |
| AK022598  | 6052.177 | 6032.646 | NM_00269Z | 11300.334 | 12604.478 | AI498426  | 1781.9    | 1470.32   |
| AK024306  | 1829.113 | 1523.011 | NM_007064 | 1970.589  | 1804.512  | D01038    | 28327.104 | 26316.318 |
| NM_01832Z | 8027.81  | 6038.96  | NM_006281 | 1942.516  | 1925.638  | AB019205  | 2265.002  | 1853.5    |
| AK025862  | 19817.46 | 20368.42 | NM_00273E | 12885.349 | 15810.119 | J05008    | 2892.555  | 2007.9    |
| AK026495  | 3238.351 | 1997.014 | U23460    | 51120     | 49010.598 | U11087    | 1477.427  | 899.508   |
| AK025052  | 3086.735 | 3001.537 | NM_00535E | 59254.016 | 57141.551 | D50640    | 3252.505  | 2680.811  |
| NM_01438E | 1786.671 | 1236.475 | NM_00442E | 5643.438  | 5342.687  | D43747    | 1311.721  | 980.159   |
| U85044    | 3246.421 | 2453.677 | U64564    | 1667.503  | 1881.332  | M98776    | 4610.043  | 4823.32   |
| BC018880  | 1181.42  | 1058.483 | NM_00647C | 1742.868  | 2503.635  | X99135    | 67736.984 | 52233.352 |
| AF086090  | 2599.883 | 2843.951 | NM_00285E | 4885.016  | 6115.677  | AF009744  | 3593.905  | 2479.775  |
| AK002173  | 25635.27 | 28223.64 | AB038463  | 839.049   | 847.867   | NM_003204 | 5344.958  | 5607.805  |
| NM_01774E | 2828.519 | 2066.901 | M30262    | 1915.527  | 2120.849  | AF254069  | 1369.415  | 1742.965  |
| NM_02018E | 26850.14 | 20430.86 | NM_00546C | 628.034   | 808.442   | AL117600  | 14836.797 | 16328.478 |
| M87929    | 832.446  | 507.85   | AF160477  | 2712.228  | 2699.189  | NM_00171Z | 865.589   | 1283.57   |
| CY3Cy5    | 8450.781 | 649.592  | M12883    | 4793.613  | 4901.56   | NM_004487 | 15668.029 | 15718.888 |
| BG617923  | 743.361  | 818.804  | BG288747  | 8418.147  | 11468.512 | AB029000  | 7393.731  | 8000.96   |
| U37448    | 3889.506 | 4916.349 | U37448    | 3287.628  | 3422.659  | AK026965  | 12109.932 | 15985.984 |
| BG435851  | 460.996  | 717.556  | AA927698  | 3061.083  | 3968.496  | AK025859  | 7505.75   | 6779.727  |
| AA927698  | 4555.012 | 3980.072 | AI498426  | 1006.536  | 1569.091  | AL117499  | 19106.256 | 21027.734 |
| AI498426  | 2150.787 | 2880.494 | D01038    | 27860.717 | 30797.148 | NM_007054 | 2455.908  | 2698.279  |
| BG824773  | 323.132  | 441.161  | AB019205  | 2036.19   | 2309.953  | AB007957  | 1462.642  | 2087.989  |
| D01038    | 5222.553 | 5906.039 | J05008    | 2323.079  | 2732.041  | AK000160  | 5144.25   | 5439.846  |
| AB019205  | 2288.876 | 3092.133 | U11087    | 1230.504  | 1164.536  | NM_005311 | 1689.846  | 1886.897  |
| J05008    | 1929.782 | 2402.301 | D50640    | 3837.229  | 2105.08   | NM_00590E | 5189.59   | 5037.277  |
| U11087    | 931.341  | 1301.154 | D43747    | 1036.257  | 1028.648  | NM_01623E | 1162.666  | 1470.85   |
| D50640    | 2731.943 | 5541.866 | M98776    | 5360.478  | 2024.037  | NM_00096C | 901.45    | 1116.464  |
| D43747    | 548.525  | 831.457  | X99135    | 62696.344 | 67137.461 | AF172932  | 1424.085  | 1599.475  |
| M98776    | 4216.411 | 7588.082 | AF009744  | 3029.657  | 5283.267  | NM_00535E | 1499.068  | 876.281   |
| X99135    | 4811.061 | 6722.632 | NM_003204 | 4520.869  | 4315.714  | NM_002511 | 1717.674  | 1818.543  |
| AF009744  | 3239.968 | 3134.888 | AF254069  | 1049.732  | 1062.041  | AF295378  | 6121.682  | 3619.413  |
| NM_17214C | 4758.233 | 5086.741 | AL117600  | 10770.946 | 7022.33   | AF320908  | 2995.089  | 1799.708  |
| SR6       | 4594.65  | 3354.946 | NM_004487 | 14909.904 | 12568.323 | NM_00408E | 6521.05   | 4276.115  |

|           |          |          |           |           |           |           |           |           |
|-----------|----------|----------|-----------|-----------|-----------|-----------|-----------|-----------|
| SR8       | 14001.48 | 31225.99 | AB029000  | 5118.541  | 5056.438  | NM_012445 | 33092.594 | 28478.691 |
| SR10      | 33637.57 | 9348.702 | AK026965  | 16626.854 | 15592.111 | NM_018104 | 3499.555  | 3615.27   |
| CY3Cy5    | 4190.709 | 180.523  | AK025859  | 5139.681  | 4394.789  | NM_006080 | 1002.673  | 712.759   |
| NM_005311 | 1529.219 | 1738.959 | AL117499  | 13719.599 | 12138.298 | NM_006667 | 59160.301 | 52596.324 |
| NM_005905 | 4979.908 | 4234.436 | NM_007054 | 1681.251  | 2038.92   | AK025125  | 524.726   | 824.071   |
| NM_016235 | 705.546  | 1237.574 | AK000160  | 3187.997  | 3884.371  | NM_000815 | 2172.887  | 2380.26   |
| NM_000960 | 342.621  | 422.092  | NM_005311 | 834.481   | 1149.012  | NM_001293 | 930.332   | 723.23    |
| AF172932  | 1788.641 | 1909.667 | NM_005905 | 3650.631  | 4219.267  | AB023173  | 8643.327  | 10180.099 |
| NM_005355 | 627.383  | 573.828  | NM_016235 | 835.568   | 828.858   | AF156548  | 5301.542  | 5897.579  |
| NM_002511 | 647.206  | 719.713  | NM_000960 | 781.736   | 786.317   | NM_000387 | 14083.424 | 17991.664 |
| AF295378  | 5762.564 | 6786.691 | AF172932  | 1091.009  | 1006.222  | NM_004663 | 2382.921  | 2501.555  |
| AF320908  | 2830.177 | 3780.25  | NM_005355 | 828.51    | 1212.552  | NM_015310 | 1705.801  | 2355.854  |
| NM_004085 | 1691.64  | 2354.418 | NM_002511 | 2058.789  | 2663.28   | NM_016154 | 23936.58  | 27735.666 |
| NM_012445 | 19959.12 | 23932.17 | NM_000794 | 563.869   | 1157.44   | NM_005013 | 66661.648 | 59908.77  |
| NM_018104 | 1165.157 | 1791.068 | AF295378  | 5674.492  | 5327.105  | AB002338  | 2252.874  | 2954.767  |
| NM_006080 | 567.617  | 857.031  | AF320908  | 2570.48   | 2656.089  | AI524814  | 4734.047  | 5612.406  |
| NM_004425 | 1625.227 | 2250.44  | NM_004085 | 6798.503  | 6788.45   | AB024411  | 2869.543  | 3510.813  |
| U64564    | 1636.836 | 1681.045 | NM_012445 | 34748.207 | 25914.033 | NM_002444 | 36019.328 | 44781.707 |
| NM_006470 | 2579.144 | 2963.34  | NM_018104 | 3827.971  | 1981.305  | NM_001104 | 1635.432  | 1645.987  |
| NM_002855 | 4985.231 | 3996.598 | NM_006080 | 1028.508  | 1176.328  | NM_002989 | 10559.029 | 9046.59   |
| M30262    | 823.368  | 894.741  | NM_006667 | 57440.129 | 46519.27  | U88898    | 12754.156 | 12385.352 |
| NM_005460 | 2665.778 | 2220.095 | NM_000815 | 1478.294  | 1653.447  | NM_020154 | 39874.266 | 26731.674 |
| AF160477  | 2087.023 | 2112.444 | NM_001293 | 585.831   | 4018.761  | NM_004665 | 2870.905  | 1546.116  |
| M12883    | 3225.941 | 3592.831 | AB023173  | 6769.945  | 5977.963  | NM_005300 | 2008.244  | 983.259   |
| BG288747  | 14376.95 | 9771.246 | AF156548  | 4493.291  | 3753.467  | NM_000893 | 1354.161  | 948.027   |
| AI524814  | 4553.108 | 4635.349 | NM_000387 | 15841.57  | 14567.586 | NM_000695 | 30381.807 | 23151.057 |
| AB024411  | 1260.858 | 1478.447 | NM_004663 | 1837.665  | 1978.271  | NM_005091 | 1065.276  | 589.593   |
| NM_002444 | 31246.03 | 44413.9  | NM_015310 | 1303.865  | 1224.557  | AF031167  | 3257.964  | 1706.201  |
| Z83802    | 204.645  | 449.802  | NM_016154 | 17644.975 | 17540.768 | AB023190  | 29001.59  | 33412.625 |
| NM_001104 | 1291.333 | 1171.133 | NM_005013 | 48990.594 | 52310.203 | NM_007064 | 1986.104  | 2633.207  |
| NM_002989 | 7575.24  | 7125.992 | AB002338  | 1074.63   | 1557.912  | NM_006281 | 3392.594  | 3288.797  |
| U88898    | 13327.83 | 14307.99 | AI524814  | 2583.596  | 4077.619  | NM_002735 | 12242.606 | 14113.599 |
| NM_020154 | 35487.96 | 43303.38 | AB024411  | 2240.824  | 2969.301  | NM_005355 | 46099.691 | 51880.855 |
| NM_004665 | 3703.192 | 3174.019 | NM_002444 | 28790.045 | 29838.201 | Z25434    | 4129.81   | 5290.302  |
| NM_005300 | 2532.352 | 2357.909 | NM_001104 | 1482.854  | 1736.894  | NM_005884 | 16025.928 | 22951.74  |
| NM_000893 | 1105.846 | 1310.894 | NM_002989 | 8031.212  | 9945.15   | NM_012395 | 14287.888 | 16356.915 |
| NM_000695 | 11687.57 | 15529.72 | U88898    | 12298.686 | 11548.886 | AF229804  | 39110.664 | 47088.758 |
| NM_005091 | 857.46   | 809.697  | NM_020154 | 35977.031 | 39280.063 | AF151638  | 3508.838  | 4959.342  |
| AF031167  | 3174.04  | 2721.221 | NM_004665 | 2475.081  | 3130.697  | NM_014785 | 4247.21   | 4726.46   |
| NM_003204 | 3053.932 | 3482.224 | NM_005300 | 1631.861  | 1785.056  | NM_002153 | 1427.791  | 2014.161  |
| AF254069  | 1509.389 | 1525.943 | NM_000893 | 1300.349  | 1435.056  | AB040890  | 6239.285  | 7277.101  |
| AL117600  | 13670.64 | 16158.67 | NM_000695 | 34603.449 | 29153.818 | AK024233  | 2022.774  | 1815.064  |
| NM_001712 | 1514.353 | 1346.415 | NM_005091 | 654.325   | 471.539   | AK021870  | 2449.708  | 2447.748  |
| NM_004487 | 9441.279 | 8924.303 | AF031167  | 1674.109  | 1672.939  | U06680    | 2033.122  | 1616.547  |
| AK026965  | 2607.619 | 2778.548 | AB023190  | 31571.955 | 29789.838 | NM_005123 | 1201.397  | 814.344   |
| AK025859  | 5944.147 | 4691.653 | NM_007064 | 2077.542  | 1816.03   | NM_015584 | 14986.813 | 7626.356  |
| AL117499  | 17682.11 | 16769.03 | NM_006281 | 1520.867  | 2713.762  | NM_001697 | 54796.66  | 35798.582 |
| NM_007054 | 2373.594 | 2352.276 | NM_002735 | 9488.144  | 7500.166  | NM_016095 | 27899.387 | 15256.763 |
| AB007957  | 839.9    | 607.345  | NM_005355 | 35790.316 | 35304.738 | NM_002063 | 1086.484  | 613.078   |
| AK000160  | 4349.732 | 3655.25  | Z25434    | 4379.813  | 4144.527  | AL137479  | 1151.042  | 1958.432  |
| NM_006032 | 3184.074 | 2949.568 | NM_005884 | 12973.488 | 14241.478 | NM_004211 | 2732.898  | 3025.355  |
| NM_014785 | 3873.738 | 4065.242 | NM_012395 | 6754.779  | 5570.854  | Y10776    | 4055.289  | 4977.522  |
| NM_002153 | 1141.095 | 1228.834 | AF229804  | 48578.551 | 44843.578 | AK027241  | 4596.709  | 5606.43   |

|           |          |          |           |           |           |           |           |           |
|-----------|----------|----------|-----------|-----------|-----------|-----------|-----------|-----------|
| AB040890  | 5641.845 | 7029.32  | AF151638  | 1908.514  | 2068.52   | NM_004561 | 1239.841  | 1513.671  |
| AK024233  | 2095.332 | 2051.951 | U90552    | 7224.456  | 8640.48   | AK024812  | 6124.45   | 7384.499  |
| AK021870  | 2891.579 | 3250.894 | NM_006032 | 5405.033  | 7307.616  | M20642    | 1833.618  | 2200.483  |
| U06680    | 1929.392 | 1855.771 | NM_014788 | 4654.468  | 7989.192  | AK026412  | 3503.161  | 3857.356  |
| NM_005123 | 1471.955 | 1582.791 | NM_002153 | 1175.756  | 1542.366  | X89669    | 2165.593  | 3055.826  |
| AB032525  | 431.536  | 437.621  | AB040890  | 4416.072  | 4879.273  | NM_001072 | 2575.345  | 2742.391  |
| NM_002063 | 561.128  | 587.536  | AK024233  | 1826.59   | 1857.54   | NM_014070 | 1730.137  | 1557.193  |
| NM_006667 | 16386.79 | 21255.91 | AK021870  | 2191.739  | 2052.642  | NM_016280 | 358.102   | 504.693   |
| AK025125  | 627.41   | 768.594  | U06680    | 1562.206  | 1114.166  | NM_016027 | 1529.273  | 1026.059  |
| NM_000815 | 1979.782 | 1976.1   | NM_005123 | 964.873   | 822.767   | NM_014297 | 14373.052 | 10927.109 |
| NM_001293 | 723.153  | 712.031  | NM_015584 | 11354.507 | 12698.924 | NM_018156 | 21514.279 | 16435.592 |
| AB023173  | 8136.579 | 9112.309 | NM_001697 | 45403.777 | 50044.801 | X98266    | 2739.926  | 1440.159  |
| AF156548  | 4868.85  | 6047.444 | NM_016098 | 20013.666 | 23816.092 | U00930    | 19861.463 | 11670.269 |
| NM_000387 | 5812.132 | 6359.347 | NM_002063 | 874.789   | 675.788   | AK024958  | 1493.244  | 684.896   |
| NM_004663 | 2092.341 | 1881.69  | AL137479  | 1099.603  | 860.217   | NM_014575 | 8876.751  | 3577.428  |
| NM_015310 | 1611.094 | 1187.265 | NM_004211 | 2979.848  | 2843.22   | NM_002439 | 7286.555  | 3552.396  |
| NM_016154 | 14949.54 | 11828.5  | Y10776    | 2959.001  | 3243.324  | AL117552  | 3260.373  | 2942.143  |
| NM_005013 | 60926.8  | 50696.61 | AK027241  | 5055.966  | 2476.681  | NM_002692 | 15608.954 | 16688.65  |
| AB002338  | 2161.057 | 2008.194 | NM_004561 | 1002.932  | 1138.565  | X55525    | 1355.556  | 1328.164  |
| NM_001072 | 2121.318 | 1917.946 | AK024812  | 4183.376  | 4533.521  | AB040878  | 1439.581  | 1162.068  |
| NM_014070 | 864.977  | 642.91   | M20642    | 1872.073  | 1820.642  | S74647    | 1430.765  | 1583.944  |
| NM_016027 | 1910.066 | 1059.868 | AK026412  | 2176.228  | 2028.289  | NM_003506 | 2032.332  | 2075.729  |
| NM_014297 | 13327.19 | 12310.84 | X89669    | 2337.991  | 2216.554  | NM_018093 | 7973.964  | 8087.549  |
| NM_018156 | 8483.2   | 8612.972 | NM_001072 | 2051.263  | 2785.349  | NM_003389 | 5893.883  | 6046.36   |
| X98266    | 2612.605 | 2295.069 | NM_014070 | 1541.59   | 1929.978  | NM_000430 | 2844.495  | 3237.564  |
| U00930    | 16367.34 | 18082.62 | NM_016027 | 926.708   | 1459.217  | AB033030  | 855.235   | 1196.3    |
| AK024958  | 1677.496 | 1928.499 | NM_014297 | 10133.095 | 10791.694 | NM_016656 | 3669.031  | 2079.318  |
| AL117552  | 2833.466 | 2980.882 | NM_018156 | 19080.176 | 17662.92  | NM_015963 | 9225.752  | 10300.674 |
| NM_002692 | 12099.91 | 13825.57 | X98266    | 1667.019  | 1846.531  | AB007871  | 3081.055  | 3897.353  |
| AB023190  | 3182.976 | 3677.619 | U00930    | 14617.563 | 15981.463 | NM_017813 | 8843.381  | 10071.371 |
| NM_007064 | 1332.617 | 1330.357 | AK024958  | 1121.857  | 1376.325  | NM_003840 | 6874.248  | 6552.151  |
| NM_006281 | 3835.434 | 2755.727 | NM_014575 | 5590.978  | 6503.41   | NM_018378 | 1459.976  | 2059.204  |
| NM_002738 | 10284.21 | 13063.47 | NM_002439 | 5313.604  | 6057.256  | NM_018423 | 2376.591  | 1866.358  |
| U23460    | 5685.733 | 7243.549 | AL117552  | 1816.72   | 1861.247  | NM_001741 | 13243.451 | 11051.885 |
| NM_005356 | 43772.54 | 49244.52 | NM_002692 | 11550.518 | 8508.529  | NM_000745 | 5108.653  | 3931.415  |
| Z25434    | 1479.461 | 1671.228 | X55525    | 1193.936  | 881.104   | AF116705  | 13463.484 | 7722.002  |
| NM_005884 | 15874.29 | 22219.91 | AB040878  | 1282.872  | 1322.801  | NM_004460 | 956.124   | 548.365   |
| NM_012399 | 11697.94 | 10653.22 | S74647    | 1306.38   | 820.979   | NM_006072 | 3095.181  | 1357.918  |
| AF229804  | 7351.931 | 6347.204 | NM_003506 | 2031.664  | 1548.051  | BE794490  | 1168.985  | 905.509   |
| AF151638  | 3365.88  | 3908.574 | NM_018093 | 7685.818  | 6830.588  | NM_003561 | 5746.315  | 4245.042  |
| U90552    | 7612.52  | 7556.747 | NM_003389 | 5425.995  | 5118.349  | NM_000315 | 2095.208  | 972.29    |
| NM_005460 | 1360.531 | 1270.118 | NM_000430 | 1930.676  | 1690.846  | NM_002991 | 1338.405  | 1292.803  |
| AF160477  | 2188.71  | 2431.839 | AB033030  | 629.729   | 548.971   | NM_004071 | 6386.87   | 7775.073  |
| NM_003226 | 358.478  | 422.722  | NM_016656 | 2008.555  | 1462.165  | NM_001316 | 20459.621 | 13995.96  |
| M12883    | 3691.609 | 4122.859 | NM_015963 | 3476.096  | 2860.506  | AJ008149  | 4847.124  | 4421.59   |
| BG288747  | 12556.39 | 9753.648 | AB007871  | 5030.054  | 4834.209  | NM_001192 | 948.416   | 357.211   |
| BG617923  | 576.878  | 424.063  | NM_017813 | 7068.419  | 7700.436  | NM_002353 | 2179.437  | 1209.424  |
| U37448    | 3710.769 | 4008.977 | NM_003840 | 5327.678  | 5661.167  | NM_012153 | 3047.562  | 2652.7    |
| BG435851  | 736.753  | 758.588  | NM_018378 | 1592.976  | 1356.169  | NM_013241 | 4201.461  | 3229.972  |
| AA927698  | 3995.712 | 3680.089 | NM_018423 | 2061.132  | 2164.946  | NM_017988 | 62169.277 | 57066.34  |
| AI498426  | 1875.051 | 1933.437 | NM_001741 | 10324.917 | 9820.812  | NM_015535 | 1637.849  | 2229.472  |
| D01038    | 5092.967 | 5625.447 | NM_000745 | 3224.093  | 3346.512  | Z24725    | 6111.066  | 5030.071  |
| AB019205  | 2769.642 | 3277.741 | AF116705  | 11587.167 | 11772.109 | AF161362  | 4634.328  | 4639.855  |

|           |          |          |           |           |           |           |           |           |
|-----------|----------|----------|-----------|-----------|-----------|-----------|-----------|-----------|
| J05008    | 2232.135 | 2633.417 | NM_00446C | 1216.488  | 974.608   | AK024078  | 741.187   | 809.844   |
| U11087    | 1043.759 | 1183.567 | NM_00607Z | 2999.789  | 3288.529  | NM_01593C | 15332.086 | 11699.216 |
| D50640    | 2470.158 | 5018.124 | BE794490  | 1154.622  | 1305.803  | AB046840  | 5022.024  | 3498.157  |
| D43747    | 911.02   | 705.308  | NM_003561 | 4289.21   | 4462.931  | AF174487  | 2098.937  | 1981.946  |
| M98776    | 3462.626 | 6643.715 | NM_002991 | 669.99    | 608.805   | NM_01769C | 973.602   | 1051.883  |
| X99135    | 3078.411 | 4131.073 | NM_004071 | 5360.955  | 4746.009  | NM_005041 | 1238.78   | 567.737   |
| AK026965  | 3048.086 | 3320.758 | NM_00131C | 10941.839 | 13277.283 | NM_006407 | 16015.585 | 8504.624  |
| AK025859  | 6719.371 | 5355.063 | AJ008149  | 7357.359  | 6703.419  | NM_00737Z | 5260.867  | 2445.347  |
| AL117499  | 18656.97 | 18424.09 | NM_00235Z | 938.036   | 1050.094  | M34572    | 529.972   | 1109.843  |
| NM_007054 | 2522.015 | 2408.604 | NM_01215Z | 1993.736  | 1878.881  | NM_00626Z | 48628.871 | 48107.016 |
| AB007957  | 687.009  | 580.245  | NM_013241 | 2978.284  | 2586.748  | NM_004791 | 3980.288  | 5289.428  |
| AK000160  | 4664.38  | 4323.836 | NM_01798E | 55464.863 | 60038.66  | Z36876    | 5298.509  | 6811.043  |
| NM_005311 | 1710.149 | 1125.413 | NM_01553E | 1602.225  | 1016.891  | NM_00089Z | 1785.534  | 1687.819  |
| NM_00590E | 5100.811 | 3427.833 | Z24725    | 3965.38   | 3942.143  | X75363    | 546.942   | 529.431   |
| NM_01623E | 845.587  | 955.089  | AF161362  | 3528.761  | 2919.224  | NM_00504E | 1016.457  | 774.445   |
| NM_00096C | 381.581  | 502.475  | NM_00392E | 61310.582 | 63044.07  | NM_00187Z | 1512.517  | 1204.008  |
| AF172932  | 1403.385 | 1708.232 | M57399    | 59511.605 | 57803.324 | AB029025  | 979.196   | 742.094   |
| NM_00535E | 505.917  | 529.841  | NM_01593E | 8718.806  | 10110.954 | NM_00710C | 49016.184 | 51709.711 |
| NM_002511 | 733.035  | 789.139  | AB046840  | 2633.211  | 3697.7    | NM_002954 | 66247.898 | 57753.805 |
| AF295378  | 5563.727 | 6372.065 | AF174487  | 1810.317  | 1685.135  | NM_00394C | 1033.248  | 802.227   |
| AF320908  | 2726.309 | 3340.088 | NM_01769E | 754.443   | 520.881   | NM_01657Z | 2725.981  | 1978.627  |
| NM_00408E | 1375.851 | 1753.122 | NM_005041 | 588.421   | 928.686   | NM_000027 | 2403.844  | 1434.467  |
| NM_01244E | 18041.15 | 21017.95 | NM_006407 | 15385.4   | 10141.374 | NM_01754E | 25227.217 | 13092.604 |
| NM_018104 | 1036.965 | 1254.1   | NM_00737Z | 3197.864  | 2470.824  | AF134802  | 1946.268  | 1171.443  |
| NM_00608C | 754.363  | 631.926  | M34572    | 553.6     | 598.575   | NM_01822Z | 1423.057  | 1018.267  |
| NM_00442E | 1495.377 | 1977.916 | NM_00626Z | 33907.613 | 30156.822 | NM_00574C | 4709.798  | 3148.665  |
| U64564    | 1293.037 | 1312.769 | NM_004791 | 3682.27   | 2910.31   | NM_00430E | 20413.678 | 12204.081 |
| NM_00647C | 2257.14  | 2254.96  | Z36876    | 3612.873  | 3365.221  | AF112366  | 4072.166  | 2202.172  |
| NM_00285E | 4546.519 | 2969.135 | NM_00089Z | 1826.125  | 1998.704  | NM_004274 | 2068.114  | 1910.705  |
| AB038463  | 2211.775 | 1718.538 | NM_00187Z | 702.082   | 900.411   | AK024002  | 13380.1   | 22544.346 |
| M30262    | 657.84   | 519.674  | AB029025  | 489.226   | 1115.283  | NM_02039E | 13116.888 | 15769.643 |
| NM_000387 | 6178.484 | 6196.803 | NM_00710C | 40058.359 | 31957.725 | AB011117  | 2237.556  | 2755.091  |
| NM_00466Z | 2163.044 | 2269.784 | NM_002954 | 61390.586 | 62708.566 | AF060935  | 4562.578  | 3784.817  |
| NM_01531C | 1646.778 | 1129.305 | NM_00394C | 690.474   | 497.389   | AK026886  | 2602.209  | 2977.225  |
| NM_016154 | 16802.43 | 15457.2  | NM_01657Z | 2126.108  | 1428.804  | D83778    | 2243.802  | 3031.346  |
| NM_00501Z | 60230.93 | 50505.23 | NM_000027 | 1162.719  | 1463.112  | NM_004264 | 5520.941  | 5221.424  |
| AB002338  | 2524.943 | 2211.815 | NM_01754E | 20738.605 | 18056.385 | AK024788  | 2832.999  | 3170.987  |
| AI524814  | 4129.644 | 3686.512 | AF134802  | 1352.53   | 1096.403  | NM_00447Z | 894.145   | 1359.846  |
| AB024411  | 1180.253 | 1239.327 | NM_01822Z | 1393.38   | 1230.927  | AK022696  | 3687.722  | 2728.313  |
| NM_002444 | 30208.86 | 41418.28 | NM_00574C | 4024.222  | 3482.515  | NM_00120E | 1944.216  | 2356.117  |
| NM_001104 | 934.516  | 979.35   | NM_00430E | 16417.189 | 12773.899 | NM_00501E | 3708.144  | 4742.022  |
| NM_00298E | 7709.613 | 8113.599 | AF112366  | 3380.962  | 3862.269  | NM_01446E | 2683.74   | 2643.222  |
| U88898    | 13199.52 | 16566.41 | NM_004274 | 1788.212  | 1741.1    | NM_01485Z | 3888.116  | 3183.709  |
| NM_020154 | 35526.97 | 44033.61 | AK024002  | 15819.083 | 13492.926 | NM_000344 | 22133.146 | 24604.311 |
| NM_00466E | 3412.982 | 3306.426 | NM_02039E | 9796.643  | 7965.678  | AF248650  | 5103.983  | 5333.482  |
| NM_00530C | 2051.71  | 2324.456 | AB011117  | 1463.228  | 1059.149  | S74678    | 54182.602 | 50051.418 |
| NM_00089Z | 956.72   | 992.9    | AF060935  | 2632.151  | 1908.986  | AF248651  | 1524.31   | 1339.36   |
| NM_00069E | 9111.271 | 11014.67 | AK026886  | 1409.108  | 1026.075  | NM_00135E | 51586.383 | 43990.652 |
| NM_005091 | 722.832  | 670.897  | D83778    | 1858.355  | 1118.847  | NM_00483E | 11784.228 | 11737.354 |
| AF031167  | 3501.909 | 2465.766 | NM_004264 | 4588.966  | 3421.885  | AB037751  | 8126.356  | 6621.342  |
| NM_003204 | 3102.094 | 3083.486 | AK024788  | 1990.708  | 1841.871  | S79281    | 8321.88   | 6412.675  |
| AF254069  | 1440.138 | 1360.394 | NM_00447Z | 832.364   | 661.931   | AK025585  | 4936.845  | 3469.415  |
| AL117600  | 11492.08 | 11172.13 | AK022696  | 2151.525  | 1503.052  | NM_001414 | 15351.783 | 17516.727 |

|           |          |          |           |           |           |           |           |           |
|-----------|----------|----------|-----------|-----------|-----------|-----------|-----------|-----------|
| NM_001712 | 996.073  | 677.609  | NM_001206 | 1561.892  | 1424.303  | D16891    | 4436.274  | 4424.633  |
| NM_004487 | 8713.572 | 6569.315 | NM_005016 | 2677.476  | 2373.005  | NM_017760 | 6131.251  | 4409.182  |
| AB029000  | 6734.991 | 6254.263 | NM_014469 | 2283.588  | 1885.562  | NM_015936 | 12644.211 | 15358.451 |
| Z25434    | 2348.856 | 2318.43  | NM_014852 | 2671.271  | 1813.927  | AL109698  | 4202.894  | 4790.766  |
| NM_005884 | 16696.41 | 21913.23 | NM_000344 | 14951.242 | 13013.155 | AF217980  | 7709.846  | 9609.518  |
| NM_012399 | 12624.93 | 11087.62 | AF248650  | 3510.019  | 2248.708  | AL117461  | 2903.721  | 3099.079  |
| AF229804  | 13787    | 13538.7  | S74678    | 33215.008 | 30342.348 | NM_016499 | 1364.959  | 1178.541  |
| AF151638  | 3926.522 | 3707.479 | AF248651  | 807.002   | 899.658   | AF104921  | 39549.488 | 46071.863 |
| U90552    | 11014.21 | 11311.79 | NM_001358 | 28122.186 | 27982.826 | NM_000126 | 23915.014 | 20707.861 |
| NM_014788 | 3666.487 | 3420.743 | NM_004836 | 8598.56   | 7102.716  | AK022291  | 975.545   | 1499.001  |
| NM_002153 | 1139.374 | 960.39   | AB037751  | 4877.887  | 4079.281  | BF239974  | 3448.125  | 3272.709  |
| AB040890  | 5362.237 | 6426.174 | S79281    | 5387.942  | 3809.661  | NM_000104 | 2082.661  | 2160.672  |
| AK024233  | 1844.025 | 2367.319 | AK025585  | 2770.624  | 2480.143  | NM_005015 | 24703.557 | 25956.316 |
| AK021870  | 2576.307 | 3794.407 | NM_001414 | 7229.198  | 7810.282  | NM_004255 | 67669.859 | 54798.289 |
| U06680    | 1729.762 | 1613.555 | D16891    | 2858.51   | 3063.864  | NM_000269 | 56043.977 | 50719.609 |
| NM_017859 | 374.079  | 303.226  | NM_017760 | 3357.475  | 2948.504  | AF182288  | 5591.693  | 5735.065  |
| NM_005123 | 1205.214 | 1505.937 | NM_015936 | 7893.158  | 7431.174  | NM_004491 | 4269.242  | 2670.597  |
| NM_015584 | 13674.14 | 15131.23 | AL109698  | 2400.589  | 2427.065  | L14787    | 777.974   | 799.494   |
| NM_001697 | 57352.96 | 51608.69 | AF217980  | 6879.09   | 5363.039  | AK026810  | 6834.399  | 6973.378  |
| NM_016098 | 26047.48 | 27401.18 | AL117461  | 1481.569  | 1649.699  | NM_015629 | 14970.164 | 16233.008 |
| AB032525  | 690.438  | 415.469  | NM_016499 | 1031.069  | 881.198   | AF218032  | 12799.346 | 10149.185 |
| NM_002063 | 563.036  | 510.507  | AF104921  | 31064.57  | 24761.305 | NM_017542 | 14968.081 | 12540.051 |
| NM_006667 | 17027.11 | 19706.78 | NM_000126 | 13133.917 | 12689.15  | AK024407  | 2453.56   | 1622.883  |
| AK025125  | 539.63   | 654.512  | AK022291  | 634.934   | 1101.001  | NM_004182 | 42318.785 | 44252.586 |
| NM_000815 | 1769.398 | 1666.795 | BF239974  | 2814.204  | 2376.757  | NM_018419 | 1175.388  | 1655.706  |
| NM_001293 | 489.927  | 483.187  | NM_000104 | 1013.068  | 1014.333  | NM_014240 | 1809.836  | 2603.607  |
| AB023173  | 7656.829 | 7515.84  | NM_005015 | 15055.096 | 12612.836 | BE379399  | 2224.623  | 2943.988  |
| AF156548  | 4465.211 | 4879.176 | NM_004255 | 48091.926 | 46764.801 | NM_015877 | 3142.66   | 3901.566  |
| NM_172140 | 3927.205 | 3926.891 | NM_000269 | 47712.91  | 35458.961 | AL117598  | 3067.72   | 2902.416  |
| NM_001072 | 2187.185 | 1806.133 | AF182288  | 2066.366  | 1667.184  | AL109670  | 1861.295  | 1877.08   |
| NM_014070 | 1082.031 | 684.948  | NM_004491 | 2289.953  | 1399.388  | AF085831  | 2167.505  | 2377.785  |
| NM_016027 | 1766.229 | 1277.852 | AK026810  | 4035.699  | 3444.063  | AL832149  | 6728.671  | 7251.289  |
| NM_014297 | 11863.68 | 12911.02 | NM_015629 | 9055.792  | 5949.476  | AK022839  | 4795.27   | 6570.204  |
| NM_018156 | 8092.99  | 9658.282 | AF218032  | 6861.791  | 4265.366  | NM_018350 | 2022.196  | 3421.226  |
| X98266    | 1959.361 | 1906.492 | NM_017542 | 9723.774  | 6926.3    | AK025839  | 5850.816  | 4688.929  |
| U00930    | 15418.63 | 21351.08 | AK024407  | 1568.554  | 1136.984  | NM_003946 | 2359.586  | 3053.871  |
| AK024958  | 1824.048 | 1722.737 | NM_004182 | 28712.279 | 27941.514 | AB045292  | 5527.311  | 7931.988  |
| NM_014575 | 8189.391 | 7623.383 | NM_018419 | 771.859   | 785.562   | AK022998  | 3940.715  | 4780.125  |
| NM_002439 | 5631.463 | 4890.955 | NM_014240 | 1512.646  | 1303.521  | AK025699  | 17856.082 | 24872.025 |
| AL117552  | 3012.753 | 2948.395 | BE379399  | 1317.626  | 1005.794  | AF147316  | 919.006   | 894.167   |
| NM_002692 | 11826.08 | 12543.59 | NM_015877 | 2503.107  | 2085.984  | AF147353  | 968.833   | 1120.379  |
| AB023190  | 2670.409 | 2617.975 | AL117598  | 2009.956  | 2432.739  | NM_018024 | 11984.503 | 11283.301 |
| NM_007064 | 984.646  | 937.736  | AL109670  | 1792.981  | 1684.943  | AK027173  | 618.581   | 982.175   |
| NM_006281 | 3491.096 | 2894.348 | AF085831  | 1280.847  | 1022.401  | AK026783  | 1721.619  | 1922.478  |
| NM_002738 | 9434.725 | 10817.08 | AL832149  | 3093.23   | 2417.341  | AF088040  | 783.21    | 833.241   |
| U23460    | 6779.347 | 7087.619 | AK022839  | 2955.366  | 2737.672  | AK021814  | 3718.874  | 3595.397  |
| NM_005356 | 44774.41 | 49184.46 | NM_018350 | 1891.453  | 2067.309  | AF088035  | 3191.54   | 1762.387  |
| NM_004429 | 1584.087 | 2153.75  | AK025839  | 2648.88   | 2730.992  | AF086251  | 527.588   | 1570.945  |
| U64564    | 1502.706 | 1542.886 | NM_003946 | 1663.147  | 1724.18   | NM_018092 | 13419.529 | 20479.865 |
| NM_006470 | 2572.815 | 2248.192 | AB045292  | 4137.516  | 2441.825  | NM_005842 | 4854.773  | 6888.433  |
| NM_002855 | 4915.65  | 3132.436 | AK022998  | 2609.789  | 2128.386  | AF147419  | 2917.941  | 2337.414  |
| AB038463  | 1889.982 | 1670.167 | AK025699  | 18027.973 | 13687.384 | AK024280  | 1156.465  | 1370.441  |
| M30262    | 800.162  | 822.298  | NM_018024 | 7225.338  | 6957.773  | AF075036  | 1951.467  | 1976.763  |

|           |          |          |           |           |           |           |           |           |
|-----------|----------|----------|-----------|-----------|-----------|-----------|-----------|-----------|
| NM_00546C | 1250.357 | 1096.226 | AK026783  | 900.287   | 636.486   | NM_014797 | 4817.201  | 6569.995  |
| AF160477  | 1911.564 | 1924.047 | AK021814  | 2068.909  | 1744.515  | AK027139  | 1705.026  | 2233.381  |
| M12883    | 2908.669 | 3854.653 | AF088035  | 1854.528  | 1597.516  | AL831841  | 6329.123  | 9408.236  |
| BG288747  | 13157.98 | 11814.86 | NM_018092 | 11629.351 | 8595.673  | AL110165  | 2802.855  | 3746.83   |
| BG617923  | 599.103  | 764.771  | NM_005842 | 3215.341  | 3183.251  | AL117652  | 1664.272  | 1801.257  |
| U37448    | 3387.464 | 4369.542 | AF147419  | 2591.969  | 2205.277  | AL050168  | 3303.764  | 3865.201  |
| BG435851  | 494.302  | 609.274  | AK024280  | 1387.689  | 1239.206  | AL117447  | 699.228   | 1110.831  |
| AA927698  | 3657.802 | 3915.99  | AF075036  | 1944.721  | 1336.196  | AL122122  | 6197.959  | 7830.623  |
| AI498426  | 1881.266 | 1843.229 | NM_014797 | 5399.917  | 3931.542  | AK000122  | 14924.714 | 16235.681 |
| BG824773  | 360.234  | 352.025  | AK027139  | 547.661   | 1255.427  | AK023159  | 4557.816  | 4259.245  |
| D01038    | 4744.281 | 5064.604 | AL831841  | 6776.264  | 5703.605  | AK001091  | 5971.171  | 4801.736  |
| AB019205  | 2294.264 | 2383.089 | AL110165  | 3045.033  | 2196.675  | U80775    | 928.997   | 1206.59   |
| J05008    | 1788.025 | 1743.399 | AL117652  | 954.038   | 986.785   | AF086428  | 1025.643  | 1203.107  |
| U11087    | 939.319  | 989.094  | AL050168  | 2205.787  | 1122.11   | AK025310  | 5589.784  | 4869.598  |
| D50640    | 2400.5   | 4339.623 | AL122122  | 5470.601  | 3275.523  | AL049353  | 703.979   | 1464.098  |
| D43747    | 601.761  | 471.346  | AK000122  | 11324.251 | 7376.65   | AF009269  | 1304.991  | 926.998   |
| M98776    | 3588.905 | 5645.874 | AK023159  | 2859.707  | 2654.755  | AF009313  | 2504.186  | 1933.229  |
| X99135    | 5619.494 | 6308.481 | AK001091  | 5124.83   | 2990.516  | AF056420  | 1027.611  | 562.222   |
| AF009744  | 2872.999 | 2495.044 | AK025310  | 2603.281  | 3599.364  | AF090887  | 1782.114  | 1426.084  |
| NM_003204 | 3662.238 | 3779.466 | AL049353  | 539.586   | 408.164   | AF009279  | 1069.138  | 761.416   |
| AF254069  | 1315.599 | 1457.624 | AF009269  | 1622.394  | 1412.67   | NM_015883 | 3061.211  | 3000.085  |
| AL117600  | 12980.3  | 12053.28 | AF009313  | 3438.619  | 3097.693  | AF056429  | 1285.73   | 1326.441  |
| NM_001712 | 1239.642 | 1065.057 | AF056420  | 1105.972  | 1228.203  | AF070547  | 4243.895  | 3802.233  |
| NM_004487 | 9835.201 | 7527.555 | AF090887  | 1087.222  | 808.192   | AK001110  | 10686.943 | 8868.354  |
| AB029000  | 8242.999 | 7632.131 | NM_015883 | 1587.694  | 1477.601  | AK021801  | 682.974   | 463.93    |
| AK026965  | 3279.898 | 3828.157 | AF056429  | 483.722   | 495.423   | AK002184  | 1106.528  | 1034.926  |
| AK025859  | 5853.101 | 4374.901 | AF070547  | 3470.178  | 2943.412  | AK021652  | 1410.339  | 2030.737  |
| AL117499  | 17378.21 | 16546.26 | AK001110  | 13269.86  | 8856.888  | AK021859  | 1808.54   | 1822.395  |
| NM_007054 | 2272.315 | 2396.74  | AK002184  | 711.537   | 415.769   | AK025826  | 1507.654  | 1243.299  |
| AB007957  | 644.183  | 659.535  | AK021652  | 776.571   | 728.462   | AK026439  | 2015.73   | 981.24    |
| AK000160  | 4324.283 | 4950.409 | AK021859  | 1456.169  | 1038.257  | AK025278  | 855.155   | 1527.239  |
| NM_005311 | 1638.323 | 1404.439 | AK025826  | 1380.49   | 1184.303  | AK026466  | 897.823   | 1122.765  |
| NM_005905 | 4572.797 | 3777.193 | AK026439  | 1810.221  | 1580.264  | AY007163  | 10945.193 | 10302.568 |
| NM_016235 | 681.749  | 1248.383 | AK025278  | 979.793   | 697.116   | NM_006236 | 24958.945 | 23486.299 |
| NM_00096C | 340.933  | 510.428  | AK026466  | 714.071   | 662.99    | AK023734  | 910.265   | 1090.812  |
| AF172932  | 1593.181 | 1988.088 | AY007163  | 11718.638 | 10871.941 | D17265    | 40252.734 | 40952.113 |
| NM_005359 | 589.369  | 652.08   | NM_006236 | 34324.164 | 28920.227 | AF085827  | 1408.251  | 1084.202  |
| NM_002511 | 482.215  | 709.724  | AK023734  | 1048.688  | 1010.828  | Y08266    | 30495.629 | 25817.186 |
| NM_000794 | 282.405  | 437.357  | D17265    | 33105.426 | 28791.148 | AK002171  | 7047.449  | 4587.092  |
| AF295378  | 5395.553 | 5753.953 | AF085827  | 751.566   | 538.778   | AJ002572  | 2678.746  | 2313.174  |
| AF320908  | 2546.096 | 3394.705 | Y08266    | 39675.434 | 39933.617 | AK026897  | 9795.268  | 7426.193  |
| NM_004085 | 1300.721 | 1471.813 | AK002171  | 4695.792  | 4479.284  | AB037861  | 9760.434  | 6958.609  |
| NM_018104 | 1182.194 | 1248.663 | AJ002572  | 2228.834  | 1592.736  | AK021887  | 6313.182  | 4289.652  |
| NM_00608C | 399.339  | 371.399  | AK026897  | 7596.911  | 6260.137  | AF086180  | 11907.509 | 9279.371  |
| NM_006667 | 21466.81 | 25300.68 | AB037861  | 7219.869  | 6928.382  | AK022135  | 2180.398  | 1431.862  |
| AK025125  | 627.1    | 718.817  | AK021887  | 4764.439  | 2811.715  | AK022898  | 3206.043  | 6627.571  |
| NM_000815 | 2194.906 | 2202.587 | AF086180  | 11815.738 | 6394.323  | NM_017559 | 20266.059 | 25265.016 |
| NM_001293 | 1100.723 | 937.548  | AK022135  | 2105.196  | 865.879   | AL117592  | 580.702   | 1411.693  |
| AB023173  | 9248.356 | 8861.496 | AK022898  | 3369.583  | 1255.1    | AK024897  | 784.324   | 926.178   |
| AF156548  | 4914.268 | 5166.856 | NM_017559 | 21851.656 | 15398.19  | NM_003547 | 1605.81   | 1226.636  |
| NM_000387 | 6015.072 | 6169.455 | AL117592  | 488.213   | 434.507   | AL049980  | 4476.954  | 4184.449  |
| NM_004663 | 2110.184 | 1814.706 | NM_003547 | 2033.036  | 2160.575  | NM_006683 | 1206.586  | 1143.066  |
| NM_01531C | 1457.416 | 1081.149 | AL049980  | 3136.163  | 2620.795  | AF070529  | 832.52    | 801.194   |

|           |          |          |           |           |           |           |           |           |
|-----------|----------|----------|-----------|-----------|-----------|-----------|-----------|-----------|
| NM_016154 | 15116.57 | 14631.57 | NM_006683 | 2111.527  | 2422.326  | AK022978  | 3793.589  | 2544.354  |
| NM_005013 | 66222.16 | 48697.48 | AF070529  | 1134.474  | 820.172   | AK021447  | 6457.934  | 7147.621  |
| AB002338  | 2234.029 | 2136.667 | AK022978  | 1719.14   | 2322.422  | AK025096  | 1374.455  | 1200.951  |
| AI524814  | 4320.58  | 3869.007 | AK021447  | 7502.361  | 5829.003  | L31955    | 419.759   | 659.467   |
| AB024411  | 1290.663 | 1275.146 | AK025096  | 1551.65   | 1227.556  | AF131774  | 2657.314  | 3076.048  |
| NM_002444 | 29320.14 | 42175.98 | AF131774  | 2064.904  | 1541.312  | AK025793  | 809.307   | 1251.779  |
| NM_001104 | 1268.767 | 953.144  | AK025793  | 582.196   | 488.573   | AK000151  | 785.145   | 1020.396  |
| NM_002989 | 7716.68  | 6391.833 | AK000151  | 674.523   | 538.683   | AL389942  | 849.428   | 1398.251  |
| U88898    | 12944.08 | 14448.38 | AL389942  | 1309.086  | 909.781   | D17052    | 2768.494  | 2374.933  |
| NM_020154 | 34993.85 | 42689.17 | D17052    | 1640.947  | 1203.8    | D28378    | 66914.539 | 59121.961 |
| NM_004665 | 3454.865 | 2856.822 | D28378    | 59677.902 | 43983.266 | M64700    | 963.76    | 811.448   |
| NM_005300 | 2107.904 | 2191.612 | L41143    | 8047.189  | 6435.431  | NM_001267 | 757.179   | 410.552   |
| NM_000893 | 810.208  | 906.182  | NM_005331 | 35649.656 | 27475.656 | L41143    | 13425.139 | 7992.226  |
| NM_005091 | 417.004  | 341.654  | NM_014111 | 1341.615  | 648.483   | NM_005331 | 37332.984 | 37890.277 |
| AF031167  | 3278.765 | 1735.485 | S85075    | 662.86    | 435.413   | NM_014111 | 2003.423  | 1098.563  |
| AB023190  | 3967.266 | 3270.997 | AJ008129  | 3976.865  | 1661.864  | S85075    | 1054.958  | 1303.229  |
| NM_007064 | 1671.85  | 1322.52  | AF161451  | 14904.694 | 10673.168 | AJ008129  | 5953.814  | 7234.908  |
| NM_006281 | 3787.424 | 2916.941 | X02067    | 28744.527 | 20461.377 | AJ008158  | 816.05    | 1234.262  |
| NM_002738 | 10891.42 | 11713.25 | U92013    | 19022.672 | 14411.579 | AF161451  | 20101.502 | 27308.477 |
| U23460    | 9314.145 | 9366.427 | AK023965  | 1866.646  | 1779.687  | X02067    | 41250.875 | 47649.57  |
| NM_005356 | 52147.94 | 45077.54 | AK026211  | 1343.16   | 1165.237  | U92013    | 20294.227 | 21096.93  |
| Z25434    | 3222.305 | 2747.926 | X58968    | 2926.309  | 3142.42   | AK023965  | 2718.893  | 2564.714  |
| NM_005884 | 17589.79 | 24978.11 | U92020    | 7365.831  | 6017.267  | AK026211  | 2258.721  | 2158.415  |
| NM_012399 | 13215.26 | 13242.76 | AL117542  | 2282.244  | 1940.514  | X58968    | 2490.08   | 2558.116  |
| AF229804  | 12609.29 | 14257.92 | AL109712  | 22613.324 | 18978.404 | U92020    | 7046.728  | 5624.184  |
| AF151638  | 4002.244 | 4119.206 | X04215    | 623.523   | 518.286   | AL117542  | 923.747   | 933.249   |
| U90552    | 9641.187 | 10340.62 | NM_017782 | 2680.505  | 1882.036  | AL109712  | 18683.512 | 20526.49  |
| NM_006032 | 3088.136 | 3139.614 | NM_018149 | 4459.747  | 2862.26   | X04215    | 1545.533  | 851.618   |
| NM_014788 | 3304.64  | 3853.794 | NM_018468 | 18091.693 | 9890.233  | NM_017782 | 4152.002  | 4905.418  |
| NM_002153 | 1046.067 | 1088.206 | Z36814    | 1143.097  | 677.723   | NM_018149 | 6858.256  | 8804.325  |
| AB040890  | 5274.545 | 6087.809 | D17045    | 988.856   | 500.215   | D16944    | 1131.671  | 1474.621  |
| AK024233  | 1804.122 | 2181.831 | AK000827  | 2392.967  | 1038.37   | NM_018468 | 18744.152 | 25148.758 |
| AK021870  | 2693.623 | 3621.407 | NM_002503 | 38445.148 | 18399.768 | Z36814    | 1767.251  | 1921.125  |
| U06680    | 1794.678 | 1579.957 | NM_005319 | 8583.368  | 3838.899  | D17045    | 1761.21   | 1774.125  |
| NM_005123 | 1332.678 | 1897.391 | NM_019058 | 947.768   | 851.341   | AK000827  | 5897.572  | 5218.276  |
| NM_015584 | 14665.01 | 13451.66 | AK022351  | 1955.574  | 1674.723  | NM_002503 | 44666.574 | 42138.559 |
| NM_001697 | 54246.18 | 46718.64 | AK022059  | 774.301   | 357.029   | NM_005319 | 12661.816 | 6139.771  |
| NM_016098 | 26240.45 | 22016.71 | NM_020194 | 7226.209  | 8885.306  | NM_019058 | 959.543   | 722.435   |
| NM_002063 | 292.379  | 534.283  | AK026853  | 846.224   | 487.582   | AK022351  | 3194.361  | 1629.903  |
| AL137479  | 1330.397 | 1574.876 | AF038183  | 18041.67  | 7265.506  | S74319    | 800.13    | 253.412   |
| NM_004211 | 1543.604 | 1569.679 | NM_017882 | 3841.53   | 2580.604  | AK022059  | 1345.058  | 916.748   |
| Y10776    | 4194.81  | 4301.153 | NM_003521 | 3062.765  | 5319.263  | NM_020194 | 15271.74  | 17285.016 |
| AK027241  | 2550.533 | 2635.464 | CY3Cy5    | 6628.186  | 397.99    | AK026853  | 991.013   | 1609.32   |
| NM_006978 | 7846.881 | 6655.894 | J03571    | 18253.611 | 19416.73  | AF038183  | 28308.41  | 37220.004 |
| NM_004561 | 1888.145 | 1487.179 | X56134    | 1035.223  | 1430.047  | NM_017882 | 5442.335  | 6721.976  |
| AK024812  | 7184.429 | 8211.802 | NM_001456 | 1702.321  | 1751.039  | NM_003521 | 2999.159  | 3415.579  |
| M20642    | 1834.874 | 1767.38  | H44784    | 1015.078  | 963.887   | X56134    | 1448.88   | 2044.891  |
| AK026412  | 3531.912 | 3749.671 | BI759091  | 4011.753  | 6499.733  | NM_001456 | 1363.316  | 1288.75   |
| X89669    | 1727.063 | 2034.535 | BG685843  | 21572.602 | 24820.096 | H44784    | 1246.145  | 749.383   |
| NM_001072 | 2292.097 | 2047.525 | BI490011  | 3358.324  | 4164.346  | BI759091  | 2890.419  | 2789.202  |
| NM_016027 | 1837.933 | 1078.44  | AF035771  | 1915.827  | 2093.284  | BG685843  | 13784.819 | 13354.365 |
| NM_014297 | 13080.14 | 13360.43 | N20475    | 9968.651  | 14213.827 | BI490011  | 2135.95   | 2082.176  |
| NM_018156 | 8497.829 | 9030.361 | BI199286  | 9655.775  | 9835.9    | AF035771  | 1234.016  | 1157.295  |



|           |          |          |           |           |           |           |           |           |
|-----------|----------|----------|-----------|-----------|-----------|-----------|-----------|-----------|
| X98266    | 2212.257 | 1854.239 | AA026626  | 1819.383  | 2168.443  | BI199286  | 6826.746  | 9782.974  |
| U00930    | 17492.77 | 21541.38 | H61726    | 1187.845  | 1240.402  | AA026626  | 1309.179  | 1535.23   |
| AK024958  | 1594.543 | 1439.058 | NM_004774 | 4874.609  | 4166.021  | H61726    | 1438.513  | 1573.019  |
| NM_014575 | 8859.669 | 6752.875 | NM_005234 | 5281.113  | 3954.902  | NM_004774 | 6417.863  | 5144.455  |
| NM_002439 | 5014.076 | 4383.232 | SR1       | 67051.992 | 65519.441 | SR7       | 10200.683 | 46594.902 |
| AL117552  | 2920.611 | 2236.745 | SR3       | 49314.773 | 32303.982 | SR9       | 31453.826 | 4351.493  |
| NM_002692 | 12568.72 | 10088.73 | SR5       | 7968.798  | 5704.056  | CY3Cy5    | 9994.058  | 387.293   |
| X55525    | 467.713  | 531.086  | SR7       | 6137.509  | 34918.352 | AF212842  | 744.326   | 1985.922  |
| NM_000242 | 713.553  | 595.424  | SR9       | 23497.148 | 3076.199  | NM_018404 | 718.796   | 1534.611  |
| AB040878  | 608.491  | 357.589  | CY3Cy5    | 3158.301  | 251.507   | NM_001118 | 588.196   | 1138.734  |
| S74647    | 1468.753 | 1315.492 | AF212842  | 639.158   | 1132.792  | AL133097  | 4698.841  | 3711.417  |
| NM_003506 | 2227.591 | 1946.057 | NM_018404 | 926.699   | 994.53    | U90908    | 468.756   | 817.047   |
| NM_018093 | 7754.662 | 7107.977 | M27544    | 5053.265  | 4822.077  | NM_006458 | 4418.797  | 4066.9    |
| NM_003012 | 338.069  | 572.025  | NM_002258 | 366.635   | 732.606   | NM_014459 | 1028.74   | 426.579   |
| NM_003389 | 6536.101 | 6942.199 | NM_001118 | 1857.678  | 2398.105  | NM_004093 | 1743.616  | 1324.323  |
| NM_000430 | 2288.515 | 3628.738 | AL133097  | 8548.729  | 9348.483  | AF086122  | 7026.918  | 5743.671  |
| AB033030  | 418.673  | 427.169  | U90908    | 683.374   | 1187.431  | AK024397  | 6997.991  | 7706.254  |
| NM_016656 | 3588.313 | 2077.585 | NM_006458 | 9331.132  | 11097.605 | NM_018047 | 3652.856  | 4885.136  |
| NM_015963 | 9174.928 | 11380.14 | NM_014459 | 510.042   | 998.899   | AF317516  | 12819.232 | 12894.845 |
| AB007871  | 1091.726 | 1063.717 | NM_004093 | 1863.664  | 2920.974  | NM_002581 | 1609.168  | 2266.696  |
| NM_017813 | 8305.85  | 7704.114 | NM_001449 | 17740.395 | 20044.236 | AI417964  | 571.762   | 990.998   |
| NM_003840 | 2569.688 | 3459.604 | AF086122  | 8729.784  | 12670.654 | S78203    | 4612.097  | 8070.456  |
| NM_018378 | 1235.146 | 1097.66  | AK024397  | 10454.19  | 11596.215 | NM_016208 | 12353.563 | 20288.049 |
| NM_018423 | 1936.522 | 1489.416 | NM_018047 | 4522.68   | 4720.418  | NM_001635 | 606.48    | 624.997   |
| NM_001741 | 10466.59 | 11626.79 | NM_001288 | 589.083   | 795.478   | NM_007269 | 3791.666  | 2820.155  |
| NM_000745 | 3023.538 | 3063.893 | NM_003564 | 2499.64   | 3116.888  | AK026014  | 4174.973  | 2944.382  |
| AF116705  | 11107.99 | 10562.71 | AF317516  | 10908.18  | 12874.766 | NM_004298 | 4398.885  | 3194.12   |
| NM_004460 | 321.87   | 340.339  | AI417964  | 760.592   | 696.868   | NM_007181 | 4739.643  | 4802.489  |
| NM_006072 | 1999.519 | 1818.57  | S78203    | 3589.893  | 3814.118  | AB007857  | 1702.997  | 1485.122  |
| BE794490  | 289.92   | 281.287  | NM_016208 | 9472.378  | 7894.414  | NM_001778 | 31225.848 | 35182.758 |
| NM_003561 | 1918.863 | 1974.575 | NM_005638 | 10096.15  | 9712.658  | NM_004997 | 15208.166 | 13425.918 |
| NM_002991 | 512.535  | 459.319  | NM_007235 | 20434.115 | 19388.684 | NM_005923 | 6914.303  | 5916.267  |
| NM_004071 | 6505.056 | 6790.117 | NM_007269 | 3901.001  | 3199.189  | NM_003465 | 3076.606  | 3162.274  |
| NM_001316 | 20879.23 | 12665.43 | AK026014  | 4438.385  | 4356.867  | NM_005127 | 13022.321 | 15953.958 |
| AJ008149  | 1070.726 | 1133.388 | NM_004298 | 5462.621  | 6913.833  | NM_005567 | 3601.568  | 4349.194  |
| NM_001192 | 579.248  | 580.728  | NM_007181 | 6137.766  | 7201.561  | NM_005216 | 13162.966 | 15989.736 |
| NM_002353 | 2457.901 | 1639.979 | AB007857  | 2193.625  | 2888.075  | NM_006626 | 1621.511  | 2082.835  |
| NM_012153 | 3668.819 | 3489.887 | NM_001778 | 49415.199 | 56998.41  | NM_003965 | 2838.431  | 1833.393  |
| NM_013241 | 5718.508 | 6045.515 | NM_004997 | 19087.898 | 24409.512 | NM_004584 | 5205.625  | 5512.238  |
| NM_017988 | 29186    | 31801.46 | NM_005923 | 9020.042  | 12417.111 | X15183    | 69451.273 | 68381.594 |
| NM_015535 | 1448.332 | 2121.18  | NM_003465 | 3651.981  | 4721.743  | AK023618  | 6626.003  | 6414.23   |
| Z24725    | 6161.219 | 5950.804 | AF289028  | 942.45    | 1200.515  | NM_001492 | 860.582   | 1673.865  |
| AF161362  | 4879.512 | 5776.467 | NM_005127 | 15260.661 | 20428.104 | AB012643  | 16363.11  | 28848.52  |
| AK024078  | 919.549  | 819.19   | NM_005567 | 4938.482  | 5295.816  | AB023170  | 2048.272  | 3599.688  |
| NM_015939 | 13666.37 | 10975.89 | NM_005216 | 11672.688 | 11704.294 | NM_014153 | 12274.326 | 17506.4   |
| AB046840  | 5319.575 | 3112.155 | NM_006626 | 958.998   | 1208.802  | NM_002296 | 17195.828 | 31241.021 |
| AF174487  | 958.372  | 1011.141 | NM_003965 | 2692.076  | 5451.026  | NM_018845 | 8010.977  | 5618.648  |
| NM_017699 | 808.591  | 867.062  | NM_004584 | 5329.07   | 6662.991  | AY008372  | 749.309   | 758.694   |
| NM_005041 | 832.33   | 585.281  | AK023618  | 6770.28   | 9242.624  | NM_005505 | 1977.905  | 2357.27   |
| NM_006407 | 15568.73 | 17021.86 | NM_001492 | 683.185   | 786.319   | AK026964  | 793.196   | 842.019   |
| NM_007373 | 4223.009 | 3236.711 | AB012643  | 15362.564 | 14742.617 | NM_001134 | 2090.912  | 2100.777  |
| M34572    | 220.733  | 306.668  | AB023170  | 1619.457  | 2322.892  | NM_016016 | 9979.429  | 13182.263 |
| NM_006263 | 40844.27 | 38597.7  | NM_014153 | 11564.062 | 14562.109 | NM_020407 | 1381.906  | 1270.629  |

|           |          |          |           |           |           |           |           |           |
|-----------|----------|----------|-----------|-----------|-----------|-----------|-----------|-----------|
| NM_004791 | 758.69   | 604.066  | NM_00229€ | 19040.34  | 17860.064 | AF118274  | 7755.565  | 7662.42   |
| Z36876    | 5089.041 | 4981.823 | NM_000414 | 9685.095  | 7069.122  | NM_018344 | 2706.542  | 2584.032  |
| NM_000892 | 753.211  | 347.529  | NM_018845 | 6590.275  | 6269.459  | NM_000079 | 6945.232  | 8439.245  |
| X75363    | 631.607  | 373.939  | NM_005505 | 1597.406  | 1560.971  | NM_000083 | 2344.895  | 2063.627  |
| NM_00504€ | 573.828  | 449.559  | AK026964  | 987.078   | 950.627   | AL110245  | 3080.453  | 3714.278  |
| NM_001873 | 1568.259 | 1273.248 | NM_001134 | 2196.466  | 2015.905  | NM_005628 | 28001.516 | 30295.178 |
| AB029025  | 747.62   | 671.106  | NM_01601€ | 13358.441 | 8447.787  | NM_003951 | 836.48    | 934.584   |
| NM_00130€ | 683.896  | 672.625  | NM_020407 | 1400.47   | 1209.743  | NM_016605 | 26171.842 | 31121.719 |
| NM_00710C | 45878.75 | 50071.65 | AF118274  | 9870.928  | 9024.151  | NM_004172 | 1136.464  | 764.545   |
| NM_002954 | 72021.41 | 52869.15 | NM_018344 | 2753.851  | 2128.45   | NM_01899C | 10236.059 | 17490.613 |
| NM_00394C | 1134.152 | 1481.053 | NM_000079 | 4870.897  | 3959.223  | NM_000947 | 6208.743  | 3506.323  |
| M26880    | 654.699  | 389.002  | NM_000083 | 1601.51   | 2582.119  | AL096750  | 34903.684 | 36130.418 |
| NM_016572 | 3126.249 | 3694.412 | AL110245  | 3029.005  | 2339.973  | NM_016061 | 5461.969  | 5850.8    |
| NM_000027 | 2314.501 | 1866.205 | NM_005628 | 23257.975 | 18048.428 | NM_004153 | 3165.29   | 3839.718  |
| NM_01754€ | 18180.42 | 15759.96 | NM_016605 | 26813.98  | 22589.393 | NM_019049 | 3205.411  | 2867.747  |
| AF134802  | 2081.045 | 1884.097 | X74609    | 27897.744 | 27999.389 | NM_012413 | 531.221   | 745.529   |
| NM_018222 | 1287.964 | 1265.944 | NM_01899C | 9335.76   | 8147.205  | AF130101  | 1829.386  | 1340.638  |
| NM_00574C | 4674.955 | 6032.554 | NM_013363 | 1102.471  | 879.539   | NM_004656 | 7669.516  | 6561.66   |
| NM_00430€ | 18463.01 | 18824.57 | NM_000947 | 4734.775  | 6803.471  | NM_005576 | 1339.922  | 2052.706  |
| AF112366  | 1690.55  | 1635.465 | AL096750  | 35954.555 | 35859.453 | AF071569  | 1694.758  | 2816.488  |
| NM_004274 | 869.375  | 695.432  | NM_016061 | 4073.292  | 4817.776  | NM_002269 | 3825.435  | 4332.299  |
| AK024002  | 7091.021 | 6165.525 | NM_016062 | 36815.012 | 40725.859 | J04948    | 1431.892  | 1753.509  |
| NM_02039€ | 6544.439 | 5850     | NM_004153 | 2820.883  | 3606.381  | NM_018043 | 1105.636  | 1174.479  |
| AB011117  | 1908.374 | 1713.986 | NM_019049 | 3286.586  | 3657.349  | AK022564  | 65005.246 | 61355.73  |
| AF060935  | 3040.972 | 1891.095 | NM_012413 | 393.827   | 674.058   | NM_003564 | 2982.332  | 5325.643  |
| AK026886  | 2149.629 | 1912.98  | AF130101  | 901.378   | 1631.231  | AK023414  | 441.887   | 1144.035  |
| D83778    | 1527.791 | 1812.318 | NM_00465€ | 5148.675  | 5544.54   | NM_002581 | 1323.789  | 2436.909  |
| NM_004264 | 9168.145 | 8916.078 | NM_00557€ | 1890.114  | 1432.682  | AI417964  | 804.169   | 1177.165  |
| AK024788  | 3039.078 | 3344.092 | AF071569  | 1850.421  | 968.604   | X56134    | 1684.051  | 1325.375  |
| NM_004473 | 1111.301 | 1171.065 | NM_002269 | 2644.268  | 2660.568  | BI759091  | 2650.029  | 2607.475  |
| AK022696  | 2753.775 | 2448.006 | J04948    | 1220.958  | 1037.424  | BG685843  | 12573.45  | 13535.861 |
| NM_00120€ | 1898.021 | 2056.319 | NM_018043 | 607.75    | 489.562   | BI490011  | 2327.391  | 2458.34   |
| NM_00501€ | 2025.602 | 2573.084 | AK022564  | 44195.121 | 54045.211 | AF035771  | 1367.722  | 1345.625  |
| NM_01446€ | 1352.973 | 1517.353 | NM_003564 | 2301.82   | 2532.718  | N20475    | 9352.871  | 7813.285  |
| NM_014852 | 2965.29  | 2497.489 | AF317516  | 7769.508  | 7532.885  | BI199286  | 6864.901  | 9440.709  |
| NM_000344 | 18450.95 | 21055.91 | NM_002581 | 1277.891  | 975.057   | AA026626  | 1568.733  | 1490.627  |
| AF248650  | 4966.934 | 5331.046 | AI417964  | 735.759   | 497.307   | H61726    | 1255.43   | 1609.21   |
| S74678    | 42220.97 | 40713.22 | J03571    | 14005.557 | 11829.619 | NM_004774 | 6724.99   | 5641.004  |
| AF248651  | 1415.832 | 1125.225 | X56134    | 1570.984  | 1778.613  | NM_005234 | 4761.992  | 5110.405  |
| NM_00135€ | 42893.49 | 35725.45 | NM_00145€ | 1567.142  | 1813.022  | AL050355  | 600.408   | 1026.412  |
| NM_00483€ | 9576.088 | 9873.427 | H44784    | 1100.861  | 1073.801  | NM_00521€ | 13451.584 | 20615.916 |
| AB037751  | 8084.381 | 6587.581 | BI759091  | 3360.255  | 4501.562  | NM_00662€ | 1497.681  | 2818.715  |
| S79281    | 7126.829 | 7183.936 | BG685843  | 14404.84  | 13074.288 | NM_003965 | 3081.927  | 3203.041  |
| AK025585  | 4075.265 | 3681.304 | BI490011  | 2336.316  | 2619.256  | NM_004584 | 4819.281  | 9464.775  |
| NM_001414 | 14574.91 | 10815.75 | AF035771  | 1258.141  | 1060.448  | AF212842  | 328.875   | 1697.774  |
| D16891    | 4606.834 | 3623.602 | N20475    | 6862.471  | 8531.935  | NM_018404 | 863.862   | 710.409   |
| NM_01776C | 6205.226 | 4348.317 | BI199286  | 6942.252  | 6359.178  | M27544    | 3002.614  | 3237.142  |
| NM_01593€ | 9782.432 | 8451.37  | AA026626  | 1333.726  | 1479.167  | NM_00225€ | 502.486   | 537.381   |
| AL109698  | 4274.18  | 3438.167 | H61726    | 1805.699  | 2479.125  | NM_001118 | 750.111   | 808.725   |
| AF217980  | 1890.857 | 1912.25  | NM_004774 | 7001.593  | 14488.838 | U90908    | 1154.28   | 1187.025  |
| AL117461  | 2966.767 | 2322.773 | NM_005234 | 5468.626  | 5489.254  | NM_00645€ | 4850.722  | 4498.168  |
| NM_01649€ | 695.293  | 593.313  | NM_00521€ | 10831.379 | 18805.186 | NM_004093 | 1912.729  | 1795.141  |
| AF104921  | 37580.08 | 43590.03 | NM_00662€ | 677.93    | 1378.141  | NM_00144€ | 11408.52  | 12817.508 |

|           |          |          |           |           |           |           |           |           |
|-----------|----------|----------|-----------|-----------|-----------|-----------|-----------|-----------|
| NM_000126 | 25741.69 | 28492.18 | NM_003965 | 1575.902  | 1814.59   | AF086122  | 6386.557  | 5900.087  |
| AK022291  | 1676.881 | 1447.718 | NM_004584 | 3880.088  | 3902.323  | AK024397  | 6626.313  | 8298.086  |
| BF239974  | 2443.663 | 2672.656 | X15183    | 61116.152 | 64442.301 | NM_005022 | 1362.344  | 1293.784  |
| NM_000104 | 2227.483 | 2181.233 | AK023618  | 4417.302  | 4743.29   | NM_000083 | 1617.411  | 1860.99   |
| NM_005015 | 20982.71 | 24163.1  | AF212842  | 448.148   | 1212.019  | AL110245  | 3067.563  | 5678.186  |
| NM_004255 | 71599.2  | 51789.97 | NM_018404 | 760.824   | 740.168   | NM_005628 | 27863.449 | 44260.813 |
| NM_000269 | 30226.67 | 38145.13 | M27544    | 3745.933  | 3242.592  | NM_003951 | 1083.416  | 1654.996  |
| AF182288  | 6383.601 | 5949.448 | NM_001118 | 1183.772  | 1314.655  | S78203    | 7225.377  | 8619.144  |
| NM_004491 | 3076.139 | 2085.518 | NM_001165 | 5472.771  | 12949.429 | NM_016208 | 10602.897 | 9282.898  |
| L14787    | 577.101  | 518.853  | NM_001381 | 62655.926 | 67105.172 | NM_001635 | 692.933   | 718.738   |
| AK026810  | 6497.585 | 5932.771 | NM_006458 | 5650.887  | 5560.119  | NM_005638 | 9444.527  | 6941.485  |
| NM_015629 | 12577.4  | 13599    | NM_004093 | 1378.605  | 1872.602  | NM_007235 | 17584.389 | 12695.192 |
| AF218032  | 10754.01 | 9008.778 | NM_001449 | 11172.992 | 11515.174 | NM_007269 | 4680.222  | 3691.771  |
| NM_017542 | 14225.4  | 13139.33 | AF086122  | 5807.557  | 8731.461  | AK026014  | 3829.131  | 3441.632  |
| AK024407  | 1875.408 | 1671.028 | AK024397  | 7136.011  | 7057.314  | NM_014845 | 3914.867  | 3012.284  |
| NM_004182 | 32320.82 | 32333.81 | NM_018047 | 3582.394  | 2721.714  | NM_004298 | 4596.149  | 3561.161  |
| NM_018419 | 724.045  | 563.586  | NM_005022 | 1083.741  | 1112.335  | NM_007181 | 4782.09   | 4776.117  |
| NM_014240 | 1544.93  | 1339.019 | NM_000083 | 961.063   | 1483.614  | AB007857  | 1179.477  | 1631.344  |
| BE379399  | 1450.093 | 1829.549 | AL110245  | 2566.131  | 2493.194  | NM_001778 | 29968.26  | 36575.008 |
| NM_015877 | 845.178  | 699.35   | NM_005628 | 22606.77  | 21117.625 | NM_004997 | 9917.123  | 9626.194  |
| AL117598  | 3759.757 | 2637.747 | NM_003951 | 563.858   | 539.734   | NM_005127 | 9488.034  | 8993.28   |
| AL109670  | 538.582  | 613.543  | NM_016605 | 23775.568 | 20785.445 | NM_005567 | 2855.555  | 2983.247  |
| AF085831  | 1890.756 | 1794.521 | S78203    | 3902.651  | 4413.031  | AF071569  | 2054.53   | 4133.463  |
| AL832149  | 5994.431 | 5229.658 | NM_016208 | 11030.481 | 10173.993 | NM_002269 | 3951.279  | 6821.666  |
| AK022839  | 4419.715 | 5059.295 | NM_005638 | 9638.387  | 11921.029 | J04948    | 1713.677  | 2988.642  |
| NM_018350 | 1712.567 | 2247.763 | NM_007235 | 19348.525 | 22008.537 | NM_018043 | 996.247   | 1618.379  |
| AK025839  | 5351.829 | 4334.058 | NM_007269 | 3890.05   | 4343.191  | NM_001492 | 986.71    | 801.11    |
| NM_003946 | 2148.187 | 1962.768 | AK026014  | 4125.764  | 4967.317  | AB012643  | 15881.42  | 15699.823 |
| AB045292  | 4186.75  | 7123.368 | NM_014845 | 2892.055  | 4167.854  | AB023170  | 2120.841  | 1799.796  |
| AK022998  | 2869.784 | 3426.319 | NM_004298 | 4956.332  | 6819.074  | NM_014153 | 10905.981 | 8475.988  |
| AK025699  | 7455.212 | 8166.452 | NM_007181 | 3985.634  | 4687.683  | NM_002296 | 17574.49  | 13431.364 |
| AF147353  | 374.052  | 483.872  | AB007857  | 1445.545  | 1404.734  | NM_000414 | 8399.374  | 7636.879  |
| NM_018024 | 9324.046 | 6491.673 | NM_001778 | 33902.008 | 38451.891 | NM_018845 | 8282.902  | 6253.083  |
| AK026783  | 1098.7   | 1080.427 | NM_004997 | 13431.438 | 13472.903 | AY008372  | 712.597   | 746.398   |
| AF088040  | 447.763  | 294.047  | NM_005923 | 5649.181  | 5470.405  | NM_005505 | 2519.234  | 2166.087  |
| AK021814  | 3034.514 | 1994.908 | NM_003465 | 2662.017  | 2614.344  | AK026964  | 687.836   | 826.984   |
| AF086221  | 460.019  | 360.688  | AF289028  | 637.718   | 575.022   | NM_001134 | 1937.152  | 2159.902  |
| AF088035  | 1776.124 | 1418.44  | NM_005127 | 10464.869 | 11045.603 | NM_016016 | 9359.242  | 13772.258 |
| AF086251  | 379.236  | 760.27   | NM_005567 | 3842.577  | 3370.5    | NM_020407 | 1358.513  | 1333.752  |
| NM_018092 | 8609.105 | 13014.05 | AF071569  | 1855.193  | 1742.838  | AF118274  | 7251.104  | 7993.213  |
| NM_005842 | 3518.274 | 4186.623 | NM_002269 | 2295.691  | 2174.171  | NM_018344 | 1952.678  | 2157.295  |
| NM_003787 | 406.164  | 395.35   | J04948    | 1161.679  | 1135.813  | NM_000079 | 4717.876  | 5406.04   |
| AK024280  | 723.013  | 998.871  | NM_018043 | 716.089   | 683.845   | NM_004774 | 6367.322  | 8884.033  |
| AF075036  | 927.824  | 886.811  | AK022564  | 62871.348 | 63989.539 | NM_005234 | 5542.828  | 9909.87   |
| NM_014797 | 3677.061 | 4286.752 | NM_001492 | 839.665   | 696.924   | NM_016436 | 825.115   | 361.141   |
| AK027139  | 1321.049 | 1779.16  | AB012643  | 15130.716 | 12312.352 | NM_018990 | 10979.28  | 9704.929  |
| AL831841  | 2460.276 | 3036.898 | AB023170  | 1653.919  | 1864.28   | NM_013363 | 1256.146  | 932.274   |
| AL110165  | 461.326  | 514.142  | NM_014153 | 11905.892 | 13609.942 | NM_016061 | 4952.078  | 4605.109  |
| AL117652  | 416.095  | 525.309  | NM_002296 | 18821.34  | 17663.727 | NM_004153 | 3948.293  | 4010.913  |
| AL050168  | 842.816  | 836.118  | NM_000414 | 10839.813 | 7245.6    | NM_019049 | 3166.943  | 3182      |
| AL117447  | 397.171  | 302.323  | NM_018845 | 7319.314  | 8003.563  | NM_005447 | 935.578   | 978.139   |
| AL122122  | 2826.317 | 2885.7   | AY008372  | 627.12    | 550.007   | AF130101  | 1580.146  | 1569.487  |
| AK000122  | 5296.251 | 4998     | NM_005505 | 2096.004  | 2126.278  | NM_004656 | 6111.348  | 5937.553  |

|           |          |          |           |           |           |           |           |           |
|-----------|----------|----------|-----------|-----------|-----------|-----------|-----------|-----------|
| AK023159  | 4468.972 | 3405.08  | AK026964  | 805.819   | 1427.855  | NM_005576 | 1076.755  | 1614.216  |
| AK001091  | 1570.22  | 1050.768 | NM_001134 | 1848.128  | 2465.363  | AF086122  | 6842.677  | 10739.408 |
| U80775    | 822.846  | 515.948  | NM_016016 | 12615.048 | 9444.134  | AK024397  | 6514.678  | 12488.827 |
| AF086428  | 425.691  | 484.785  | NM_020407 | 1021.447  | 1033.865  | AF073931  | 551.29    | 846.863   |
| AK025310  | 4976.76  | 3692.065 | AF118274  | 10235.856 | 8971.086  | NM_018047 | 2808.983  | 5970.118  |
| AL049353  | 574.488  | 709.448  | NM_018344 | 2225.522  | 2023.75   | NM_005022 | 1176.188  | 1903.899  |
| NM_014896 | 703.868  | 643.632  | NM_000079 | 4783.508  | 4480.681  | NM_003564 | 2659.421  | 1479.011  |
| AF009269  | 365.471  | 390.788  | NM_004774 | 3849.518  | 4214.256  | AK023414  | 597.843   | 614.044   |
| AF009313  | 384.856  | 400.234  | NM_005234 | 5253.12   | 6560.646  | NM_002581 | 1383.799  | 1421.658  |
| AF056420  | 1280.594 | 1378.48  | X74609    | 31001.922 | 29076.992 | AI417964  | 1059.368  | 481.598   |
| AF090887  | 1210.371 | 1606.484 | NM_018990 | 9305.973  | 8371.209  | J03571    | 14087.833 | 12467.563 |
| AF009279  | 996.314  | 1212.253 | NM_013363 | 1074.679  | 1139.787  | X56134    | 1563.706  | 1501.034  |
| NM_015883 | 3119.077 | 3825.339 | NM_000947 | 6322.879  | 9215.356  | BI759091  | 2901.332  | 3146.177  |
| AF056429  | 846.332  | 1160.487 | AL096750  | 39863.68  | 40341.473 | AF035771  | 1099.695  | 1395.121  |
| AF070547  | 654.907  | 1060.265 | NM_016061 | 4563.925  | 5476.916  | N20475    | 9666.759  | 9769.062  |
| AK001110  | 3370.805 | 3671.842 | NM_004153 | 2773.852  | 3741.193  | BI199286  | 6418.438  | 9398.355  |
| AK021801  | 508.571  | 462.084  | AK024740  | 2642.052  | 4516.048  | AA026626  | 1402.048  | 1448.304  |
| AK002184  | 788.317  | 743.172  | AF078164  | 9295.047  | 10244.348 | H61726    | 1171.941  | 1361.378  |
| AK021652  | 995.534  | 1032.425 | NM_019049 | 3222.336  | 3101.695  | NM_004997 | 14846.505 | 21816.018 |
| AK026439  | 173.842  | 319.998  | AF130101  | 979.886   | 1413.462  | NM_005923 | 6372.901  | 9702.389  |
| AK026466  | 346.457  | 347.843  | NM_004656 | 5082.282  | 4275.004  | NM_003465 | 2505.971  | 5693.858  |
| AY007163  | 10790.65 | 8171.877 | NM_005576 | 1533.988  | 844.678   | AF289028  | 915.812   | 1804.498  |
| NM_006236 | 7500.675 | 7793.396 | AF086122  | 4468.791  | 3738.863  | NM_005127 | 12681.794 | 23809.068 |
| AK023734  | 665.726  | 625.022  | AK024397  | 6037.499  | 4432.789  | NM_005216 | 12448.931 | 6713.889  |
| D17265    | 42100.82 | 45561.66 | NM_018047 | 3329.698  | 2237.196  | NM_006626 | 1789.458  | 1248.98   |
| AF085827  | 1506.496 | 1808.168 | NM_005022 | 1011.707  | 1068.101  | NM_003965 | 2447.362  | 1781.684  |
| Y08266    | 14411.01 | 16649.13 | NM_003564 | 1834.132  | 2379.212  | AK023618  | 4757.019  | 3987.012  |
| AK002171  | 7434.909 | 6634.776 | AF317516  | 8586.802  | 8313.709  | AF212842  | 802.867   | 1460.917  |
| AJ002572  | 2207.97  | 2133.071 | NM_002581 | 1079.641  | 1023.28   | NM_018404 | 953.086   | 745.461   |
| AK026897  | 9650.786 | 10550    | AI417964  | 848.824   | 778.858   | M27544    | 3469.831  | 3706.755  |
| AB037861  | 9594.146 | 7613.149 | J03571    | 14310.928 | 12248.423 | NM_002258 | 404.978   | 708.545   |
| AK021887  | 5784.831 | 6750.329 | X56134    | 1630.624  | 2107.889  | NM_001118 | 1190.982  | 1163.78   |
| AF086180  | 9703.447 | 10364.44 | H44784    | 1026.87   | 1092.993  | NM_001165 | 5956.434  | 4614.178  |
| AK022135  | 573.98   | 543.356  | AI421041  | 51101.77  | 55832.242 | NM_001381 | 68778.539 | 61271.164 |
| AK022898  | 2101.466 | 4542.837 | BI759091  | 2596.555  | 4236.975  | NM_006458 | 5125.165  | 5958.892  |
| NM_017559 | 1236.446 | 2390.421 | BG685843  | 13912.4   | 12526.624 | NM_004093 | 1960.794  | 1831.792  |
| AL117592  | 443.347  | 401.873  | BI490011  | 2796.984  | 2405.728  | NM_001449 | 11572.346 | 13682.531 |
| AK024897  | 265.961  | 366.658  | AF035771  | 1465.916  | 1058.131  | NM_016016 | 9634.876  | 21516.732 |
| NM_003547 | 436.072  | 329.593  | N20475    | 6775.852  | 7613.014  | NM_020407 | 1373.398  | 2009.733  |
| AL049980  | 4859.207 | 4558.103 | BI199286  | 6522.36   | 4797.569  | AF118274  | 6356.779  | 11338.581 |
| NM_006683 | 1446.037 | 1341.733 | AA026626  | 1110.952  | 670.842   | NM_018344 | 2456.69   | 4748.875  |
| AF070529  | 906.728  | 894.472  | H61726    | 1008.746  | 527.045   | NM_000083 | 1652.936  | 752.598   |
| AK022978  | 3645.015 | 3270.066 | NM_004997 | 13107.177 | 10431.635 | AL110245  | 3033.615  | 2681.043  |
| AK021447  | 4290.809 | 5597.708 | NM_005923 | 4933.215  | 4461.17   | NM_005628 | 24810.979 | 22633.477 |
| AK025096  | 432.749  | 877.992  | NM_003465 | 2143.915  | 1644.721  | NM_003951 | 855.506   | 723.313   |
| L31955    | 208.908  | 427.629  | NM_005127 | 10961.841 | 11967.164 | S78203    | 6416.145  | 5926.26   |
| AF131774  | 2219.687 | 2452.141 | NM_005567 | 4225.699  | 3871.933  | NM_016208 | 11832.03  | 10869.417 |
| AK025793  | 672.777  | 723.648  | NM_005216 | 9135.581  | 11919.102 | NM_005638 | 11983.145 | 8909.727  |
| AK000151  | 895.851  | 703.587  | NM_006626 | 785.284   | 1410.059  | NM_007235 | 23651.404 | 19545.598 |
| AL389942  | 806.753  | 788.288  | NM_003965 | 1555.12   | 1950.07   | NM_007269 | 4298.867  | 4081.55   |
| D17052    | 3567.988 | 3342.424 | NM_004584 | 4477.012  | 4597.46   | AK026014  | 3782.438  | 3787.344  |
| D28378    | 71271.8  | 52343.17 | AK023618  | 4787.727  | 6035.364  | NM_014845 | 3361.8    | 3174.373  |
| M64700    | 441.599  | 375.143  | AF212842  | 714.174   | 2690.626  | NM_004298 | 4416.778  | 3682.561  |

|           |          |          |           |           |           |           |           |           |
|-----------|----------|----------|-----------|-----------|-----------|-----------|-----------|-----------|
| AF111846  | 405.224  | 249.393  | NM_018404 | 875.962   | 1121.189  | NM_007181 | 5176.904  | 4684.14   |
| NM_001267 | 324.051  | 349.793  | M27544    | 5030.46   | 5026.121  | AB007857  | 1398.173  | 2113.011  |
| L41143    | 13668.43 | 10846.93 | NM_001118 | 1489.781  | 1801.074  | NM_001778 | 31291.221 | 36606.852 |
| NM_005331 | 12030.23 | 11517.77 | AL133097  | 7933.692  | 8446.705  | NM_019049 | 3089.289  | 4889.617  |
| NM_014111 | 867.383  | 741.035  | NM_001165 | 4502.66   | 8086.055  | NM_005447 | 766.598   | 781.139   |
| S85075    | 602.307  | 727.684  | NM_001381 | 64031.598 | 62334.059 | NM_012413 | 828.234   | 1110.723  |
| AJ008129  | 4632.681 | 4514.389 | NM_006458 | 5719.332  | 6181.317  | AF130101  | 1502.915  | 2320.21   |
| AJ008158  | 502.348  | 628.266  | NM_004093 | 1432.75   | 1548.994  | AF071569  | 1752.246  | 1798.287  |
| AF161451  | 16933.63 | 19032.49 | NM_001449 | 9313.277  | 6767.563  | NM_002269 | 3572.279  | 3239.303  |
| X02067    | 23682.56 | 24149.62 | NM_016016 | 11483.726 | 6645.689  | J04948    | 1472.802  | 1432.083  |
| U92013    | 20894.78 | 16213.59 | NM_020407 | 888.703   | 970.124   | NM_018043 | 801.707   | 775.737   |
| AK023965  | 4160.306 | 2726.016 | AF118274  | 8167.614  | 6324.57   | AK022564  | 66885.469 | 51935.57  |
| AK026211  | 2347.005 | 2461.588 | NM_018344 | 2140.719  | 2208.643  | NM_001492 | 878.205   | 656.962   |
| X58968    | 1084.854 | 1287.58  | NM_000079 | 5133.529  | 5463.814  | AB012643  | 13097.36  | 13733.619 |
| U92020    | 2708.572 | 3417.062 | NM_000083 | 1148.697  | 1892.542  | AB023170  | 2291.16   | 2140.125  |
| AL117542  | 524.159  | 582.681  | AL110245  | 2743.015  | 2508.059  | NM_014153 | 10925.912 | 9754.794  |
| AL109712  | 4995.917 | 6402.406 | NM_005628 | 22994.188 | 24480.168 | NM_002296 | 20084.84  | 15711.46  |
| X04215    | 429.637  | 622.499  | NM_003951 | 631.671   | 856.588   | NM_000414 | 9158.23   | 9908.516  |
| NM_017782 | 4106.5   | 4570.866 | S78203    | 4557.041  | 6267.268  | NM_018845 | 8645.421  | 8999.984  |
| NM_018149 | 4854.202 | 6478.341 | NM_016208 | 11848.46  | 12659.016 | AY008372  | 610.691   | 820.37    |
| D16944    | 999.788  | 766.163  | NM_005638 | 10010.535 | 12989.159 | NM_005505 | 2400.378  | 2769.546  |
| NM_018468 | 15908.58 | 20070.93 | NM_007235 | 20104.457 | 25455.055 | AK026964  | 876.287   | 1043.115  |
| Z36814    | 2083.154 | 1923.343 | NM_007269 | 3907.326  | 4253.916  | NM_001134 | 2393.301  | 2006.689  |
| D17045    | 1877.981 | 1476.608 | AK026014  | 4037.579  | 5035.426  | NM_006695 | 2718.63   | 3643.112  |
| AK000827  | 5507.821 | 4492.486 | NM_014845 | 2905.956  | 4487.157  | NM_004815 | 4153.124  | 6862.537  |
| NM_002503 | 24480.18 | 20286.71 | NM_004298 | 4658.723  | 7947.947  | NM_004147 | 1565.549  | 2043.568  |
| NM_005319 | 11777.69 | 7588.058 | NM_007181 | 3724.056  | 3721.367  | AK000959  | 6186.35   | 11318.319 |
| NM_019058 | 665.112  | 721.457  | AB007857  | 1386.002  | 991.432   | AB046820  | 5422.797  | 4307.214  |
| AK022351  | 3623.026 | 2986.751 | NM_001778 | 30235.771 | 25456.834 | AK025922  | 886.816   | 515.978   |
| S74319    | 391.649  | 395.982  | NM_019049 | 3147.053  | 2528.769  | NM_014646 | 1677.461  | 1533.145  |
| AK022059  | 1696.187 | 1269.044 | NM_012413 | 517.07    | 489.015   | NM_006375 | 1207.071  | 911.897   |
| NM_020194 | 9742.477 | 10134.14 | AF130101  | 921.978   | 1015.801  | AF123659  | 4797.937  | 4441.037  |
| AK026853  | 367.331  | 547.433  | NM_004656 | 4885.416  | 4324.343  | X74609    | 37150.156 | 36379.691 |
| AF038183  | 19948.37 | 25872.48 | NM_005576 | 1824.789  | 1033.995  | NM_018990 | 10591.208 | 10069.862 |
| NM_017882 | 3133.237 | 4589.76  | AF071569  | 1880.633  | 1283.646  | NM_013363 | 1419.39   | 1611.972  |
| NM_003521 | 990.236  | 953.051  | NM_002269 | 2875.914  | 3441.011  | NM_000947 | 7380.448  | 6659.903  |
| CY3Cy5    | 13369.36 | 1179.22  | J04948    | 1234.789  | 1345.041  | AL096750  | 38296.234 | 51876.289 |
| J03571    | 7328.71  | 9520.67  | NM_018043 | 758.798   | 601.115   | NM_016061 | 4809.136  | 4899.416  |
| X56134    | 501.861  | 625.737  | AK022564  | 63615.602 | 60742.246 | NM_004153 | 7421.792  | 7803.937  |
| NM_001456 | 1894.531 | 1924.365 | NM_001492 | 733.595   | 1042.01   | NM_003628 | 3269.029  | 5356.935  |
| H44784    | 1133.546 | 1162.6   | AB012643  | 20068.639 | 22449.633 | NM_004648 | 838.897   | 1498.919  |
| BI759091  | 2930.439 | 3428.718 | AB023170  | 2137.47   | 2813.792  | AF029325  | 2176.295  | 4281.071  |
| BG685843  | 12392.14 | 14868.23 | NM_014153 | 12192.138 | 17443.658 | NM_001365 | 2199.132  | 1643.045  |
| BI490011  | 1444.233 | 1533.185 | NM_002296 | 20390.5   | 19573.354 | NM_000677 | 9190.142  | 7675.256  |
| AF035771  | 1029.489 | 1123.956 | NM_000414 | 11692.774 | 9217.802  | BF308728  | 1946.962  | 1736.777  |
| N20475    | 8785.682 | 6331.202 | NM_018845 | 7786.993  | 7940.798  | NM_013280 | 862.868   | 627.825   |
| BI199286  | 9996.79  | 9444.158 | AY008372  | 741.166   | 768.612   | NM_018315 | 16820.91  | 13502.854 |
| AA026626  | 774.376  | 685.471  | NM_005505 | 2191.411  | 2161.144  | AF051151  | 888.337   | 867.218   |
| H61726    | 1330.099 | 944.284  | AK026964  | 1039.222  | 1391.797  | AF142421  | 2971.215  | 2999.938  |
| NM_004774 | 6871.513 | 4064.77  | NM_001134 | 2060.431  | 1751.234  | AF257238  | 3973.143  | 3742.248  |
| NM_005234 | 3882.349 | 2819.204 | NM_006695 | 2632.521  | 2431.094  | AB037836  | 2053.398  | 2316.174  |
| SR7       | 7603.574 | 31978.02 | NM_004815 | 3692.909  | 3145.517  | NM_014247 | 1752.378  | 1628.829  |
| SR9       | 29730.08 | 3422.458 | NM_004147 | 1467.563  | 1058.593  | NM_018695 | 66192.281 | 57937.797 |

|           |          |          |           |           |           |           |           |           |
|-----------|----------|----------|-----------|-----------|-----------|-----------|-----------|-----------|
| CY3Cy5    | 5844.588 | 426.534  | AK000959  | 4168.09   | 2769.28   | NM_006343 | 1237.561  | 1078.98   |
| AF212842  | 401      | 1107.508 | AB037743  | 3524.26   | 2759.785  | NM_014786 | 1814.711  | 2246.305  |
| NM_018404 | 1404.427 | 1321.506 | AB046820  | 7307.574  | 4601.774  | NM_001423 | 969.976   | 716.018   |
| M27544    | 534.42   | 634.851  | AK025922  | 851.75    | 594.862   | NM_003955 | 896.976   | 1601.304  |
| NM_00225E | 647.215  | 575.1    | NM_01464E | 2476.758  | 1863.761  | NM_005739 | 5610.824  | 6124.958  |
| AL133097  | 3119.307 | 3068.433 | NM_00637E | 1052.951  | 1349.053  | AB023166  | 1615.209  | 1504.706  |
| NM_001165 | 7150.773 | 4185.241 | AF123659  | 4802.157  | 4125.737  | AB028966  | 10084.401 | 10339.429 |
| U90908    | 658.663  | 600.577  | X74609    | 42950.004 | 44634.238 | AF055027  | 8039.063  | 5065.066  |
| NM_00645E | 3582.626 | 3402.911 | AB002316  | 561.507   | 882.231   | U63541    | 5639.675  | 3555.014  |
| NM_004093 | 2046.591 | 1369.779 | NM_01899C | 10895.823 | 11009.055 | AB033045  | 2194.489  | 1430.566  |
| NM_00144E | 9094.588 | 7338.314 | NM_013363 | 1355.654  | 1531.163  | AF055006  | 6204.057  | 5436.087  |
| NM_003564 | 1504.748 | 990.39   | NM_000947 | 5859.735  | 8377.967  | NM_004935 | 7088.665  | 5430.386  |
| AF317516  | 12199.87 | 8968.417 | AL096750  | 39905.32  | 39395.371 | NM_006951 | 1701.46   | 1085.973  |
| NM_002581 | 484.883  | 586.097  | NM_016061 | 4398.55   | 4983.377  | NM_00189E | 7085.986  | 5949.081  |
| S78203    | 5301.797 | 6926.531 | NM_016062 | 44491.02  | 43463.09  | NM_014023 | 1627.658  | 939.7     |
| NM_01620E | 8571.868 | 9405.257 | NM_004153 | 3020.804  | 3315.695  | NM_002745 | 6500.252  | 4789.251  |
| NM_00563E | 11013.53 | 8671.189 | AK024740  | 7985.864  | 9482.512  | D26488    | 4776.151  | 2908.121  |
| NM_00723E | 19629.75 | 14823.12 | AF078164  | 8336.363  | 7028.926  | NM_001432 | 1561.732  | 1333.536  |
| NM_00726E | 4156.248 | 3788.765 | NM_00362E | 4860.108  | 4725.744  | AK002193  | 1490.985  | 1312.217  |
| AK026014  | 3639.341 | 3527.912 | AF029325  | 2474.567  | 2331.912  | AB014554  | 2166.948  | 2097.619  |
| NM_01484E | 3562.082 | 2836.916 | NM_005704 | 3364.648  | 2601.278  | AF097431  | 3528.316  | 3665.596  |
| NM_00429E | 5556.975 | 3976.677 | AF097021  | 1605.559  | 1429.205  | NM_00197E | 1508.335  | 1321.751  |
| NM_007181 | 6419.179 | 4056.814 | NM_00136E | 2081.062  | 1562.017  | NM_005897 | 1665.682  | 1481.185  |
| AB007857  | 1462.532 | 1338.482 | NM_000677 | 7777.342  | 5045.623  | NM_002579 | 547.637   | 1013.931  |
| NM_004584 | 3642.501 | 2204.513 | BF308728  | 1920.704  | 1385.1    | NM_004221 | 8728.671  | 8612.52   |
| AK023618  | 6395.167 | 4885.975 | NM_01328C | 710.843   | 833.225   | NM_004061 | 3968.733  | 2668.599  |
| AB023170  | 653.112  | 1125.979 | NM_01831E | 27512.268 | 17479.412 | NM_003019 | 1087.253  | 1405.821  |
| NM_014153 | 8190.737 | 7523.197 | AF051151  | 1194.188  | 1049.563  | AL109790  | 1294.006  | 1214.584  |
| NM_00229E | 17146.14 | 15484.6  | AF142421  | 3546.223  | 2368.97   | NM_006923 | 6239.419  | 4095.18   |
| NM_000414 | 4048.267 | 4870.69  | AF257238  | 638.033   | 485.66    | NM_00461E | 33587.5   | 35780.762 |
| NM_01884E | 11136.56 | 9527.106 | AB037836  | 2864.563  | 2186.243  | AF119889  | 14759.374 | 16125.116 |
| AY008372  | 629.624  | 862.675  | NM_014247 | 2130.875  | 2254.875  | M90657    | 1070.67   | 1195.966  |
| NM_00550E | 2235.754 | 2333.758 | NM_01869E | 62279.07  | 62188.188 | NM_00669E | 3928.047  | 2886.867  |
| AK026964  | 1087.877 | 722.866  | NM_006343 | 1673.865  | 1283.129  | AK025645  | 19902.342 | 21301.709 |
| NM_001134 | 961.837  | 704.697  | NM_01478E | 2397.893  | 3356.967  | AK023266  | 960.861   | 918.722   |
| NM_020407 | 1096.505 | 1547.465 | NM_001423 | 1788.827  | 1553.079  | NM_006814 | 13168.204 | 11003.907 |
| AF118274  | 2797.519 | 4274.375 | NM_01571E | 10442.088 | 8297.703  | NM_005067 | 9273.304  | 7548.029  |
| NM_00007E | 8126.02  | 14312.34 | NM_00395E | 1846.376  | 2476.337  | AB007899  | 1621.707  | 1194.775  |
| NM_00562E | 31157.82 | 41048.09 | NM_00573E | 7662.282  | 7416.661  | NM_002817 | 20337.514 | 15798.895 |
| X74609    | 11012.42 | 10358.66 | AB023166  | 2457.667  | 2040.623  | NM_002801 | 12609.316 | 7830.977  |
| NM_01899C | 9515.202 | 10290.46 | AB028966  | 11494.175 | 9495.769  | BE905810  | 986.961   | 778.488   |
| NM_013363 | 949.111  | 914.82   | NM_00575E | 9965.059  | 15345.438 | NM_01478C | 1529.997  | 1350.622  |
| NM_000947 | 7299.073 | 4696.549 | AF044774  | 4882.391  | 3886.467  | NM_01473C | 9991.473  | 7841.856  |
| AL096750  | 7058.378 | 7849.317 | NM_005402 | 9572.374  | 12390.55  | NM_014167 | 1319.749  | 1012.345  |
| NM_016061 | 5270.824 | 4384.043 | AF055027  | 10628.57  | 9737.266  | NM_016063 | 2785.779  | 3115.258  |
| NM_016062 | 42995.21 | 44603.34 | U63541    | 6467.177  | 8931.415  | U82987    | 4022.488  | 3701.404  |
| NM_004153 | 3416.841 | 2367.742 | AB033045  | 3035.583  | 3212.534  | NM_005732 | 2618.851  | 2952.778  |
| NM_005447 | 765.066  | 884.981  | AF055006  | 10397.019 | 10499.003 | NM_01489C | 1108.399  | 1054.507  |
| NM_012413 | 1158.459 | 2067.903 | NM_00493E | 7460.627  | 6282.396  | AK056481  | 5949.803  | 5966.995  |
| AF130101  | 2677.162 | 3595.172 | NM_006951 | 2542.175  | 2208.311  | NM_005433 | 1537.407  | 1300.446  |
| NM_00557E | 1056.721 | 4656.125 | NM_00189E | 13208.8   | 11132.522 | L35035    | 8403.766  | 7435.567  |
| AK022564  | 27707.71 | 22316.88 | NM_014023 | 2562.999  | 2336.481  | NM_007152 | 2954.718  | 5079.626  |
| NM_003564 | 1959.314 | 1912.502 | NM_00274E | 8415.375  | 9078.226  | NM_018293 | 2433.405  | 2153.948  |

|           |          |          |           |           |           |           |           |           |
|-----------|----------|----------|-----------|-----------|-----------|-----------|-----------|-----------|
| AK023414  | 577.002  | 662.588  | D26488    | 6786.623  | 6860.518  | NM_002955 | 1179.821  | 833.843   |
| AF317516  | 13570.91 | 13394.63 | NM_001432 | 2281.082  | 2206.041  | NM_001935 | 6330.641  | 6686.437  |
| NM_002581 | 1001.241 | 714.385  | AK002193  | 2200.168  | 2887.564  | AF230808  | 4181.29   | 3666.446  |
| J03571    | 6061.752 | 6510.742 | AB014554  | 3475.748  | 4080.374  | U18910    | 2138.175  | 1583.275  |
| X56134    | 927.899  | 740.514  | AF097431  | 6501.843  | 7252.094  | NM_005235 | 4743.773  | 4890.052  |
| NM_001455 | 1852.005 | 1723.58  | NM_001975 | 2714.865  | 3450.083  | AK075306  | 5971.895  | 5812.127  |
| H44784    | 1195.209 | 492.116  | NM_005897 | 1874.746  | 1991.86   | AB037820  | 720.033   | 437.35    |
| BI490011  | 2126.79  | 3157.517 | NM_002575 | 1155.534  | 947.055   | NM_002945 | 59860.543 | 54324.586 |
| AF035771  | 1432.565 | 2346.746 | NM_004221 | 5012.937  | 5563.615  | AF113008  | 2807.301  | 2513.218  |
| N20475    | 12703.14 | 16475.88 | NM_004061 | 2162.411  | 3724.58   | NM_020217 | 2616.017  | 2292.375  |
| BI199286  | 14151.65 | 30865.95 | NM_003015 | 2504.522  | 2199.695  | NM_018135 | 64400.816 | 60298.914 |
| AA026626  | 1323.657 | 2672.267 | AL109790  | 1449.334  | 1605.23   | AF205435  | 18750.473 | 14875.52  |
| H61726    | 2197.908 | 4182.059 | NM_006923 | 7050.167  | 8031.374  | AF085983  | 957.996   | 493.417   |
| NM_004774 | 8408.204 | 11385.32 | NM_004615 | 52972.43  | 43993.563 | AF052105  | 4559.764  | 4017.505  |
| NM_005234 | 4827.906 | 7504.593 | AF119889  | 20394.219 | 21840.541 | AK001204  | 8836.295  | 7621.823  |
| AL050355  | 1120.784 | 667.685  | M90657    | 1519.318  | 1772.143  | M15465    | 4982.982  | 4595.844  |
| NM_005215 | 19323.44 | 24058.23 | NM_006695 | 4588.433  | 4462.206  | J03866    | 11886.517 | 10436.18  |
| NM_006625 | 2561.796 | 3024.577 | AK025645  | 27457.391 | 28222.84  | AK022836  | 6533.358  | 5370.344  |
| NM_003965 | 4061.263 | 3079.977 | AK023266  | 853.094   | 1078.618  | NM_012343 | 13100.148 | 11021.525 |
| AF212842  | 773.021  | 1494.744 | NM_006814 | 17072.809 | 19887.35  | NM_000397 | 1628.857  | 1293.807  |
| NM_018404 | 1607.278 | 2045.716 | NM_005067 | 14231.836 | 15964.167 | NM_003075 | 3213.956  | 3629.672  |
| NM_002255 | 830.633  | 1118.188 | AB007899  | 1799.546  | 2696.003  | AL137703  | 877.233   | 574.051   |
| NM_001118 | 1036.155 | 1289.325 | NM_002817 | 24777.754 | 28339.078 | NM_001805 | 9304.81   | 7714.552  |
| NM_006455 | 5463.742 | 7260.172 | NM_002801 | 16346.361 | 24595.697 | AL117477  | 5601.305  | 5493.25   |
| NM_014455 | 1459.939 | 1217.609 | BE905810  | 1232.849  | 820.558   | NM_012107 | 5240.043  | 5327.64   |
| NM_004093 | 2911.353 | 4353.032 | NM_014780 | 1799.822  | 1915.77   | AB037760  | 2280.143  | 2081.078  |
| NM_001445 | 13697.92 | 25382.22 | NM_014730 | 13609.889 | 18968.143 | NM_015680 | 3231.154  | 3995.217  |
| NM_001387 | 430.13   | 845.146  | NM_014167 | 1541.638  | 1775.704  | M22637    | 1520.896  | 1790.134  |
| AF086122  | 8587.418 | 13676.09 | NM_016063 | 4419.732  | 6354.814  | NM_018364 | 8189.371  | 4258.742  |
| AK024397  | 2332.804 | 4776.496 | U82987    | 5618.169  | 6693.859  | NM_006775 | 1068.166  | 886.593   |
| NM_000083 | 2602.926 | 2516.165 | NM_005732 | 3984.85   | 5105.646  | AL137303  | 2681.586  | 2243.581  |
| AL110245  | 1603.416 | 2321.474 | NM_014890 | 1647.191  | 1909.322  | AL355708  | 1435.356  | 1561.783  |
| NM_005625 | 30899.04 | 43067.26 | AK056481  | 7792.495  | 7268.129  | AL161980  | 688.413   | 724.039   |
| NM_003951 | 921.708  | 870.678  | NM_005433 | 1846.435  | 2940.255  | AB002449  | 2174.403  | 2029.36   |
| NM_004172 | 566.725  | 764.402  | NM_018118 | 661.883   | 474.032   | AK001489  | 2450.387  | 2747.611  |
| S78203    | 6049.854 | 7865.548 | L35035    | 6891.573  | 5781.651  | NM_015681 | 3491.583  | 2996.844  |
| NM_001635 | 1182.56  | 1194.297 | NM_007152 | 2805.502  | 2012.454  | AF070582  | 3343.952  | 2849.211  |
| NM_004295 | 6741.879 | 6237.377 | NM_018293 | 3292.924  | 2204.397  | NM_006383 | 5345.463  | 5950.279  |
| NM_001232 | 592.224  | 1124.186 | NM_002955 | 1011.564  | 768.618   | NM_015400 | 4662.639  | 4994.027  |
| NM_007181 | 9156.021 | 14067.19 | NM_001935 | 7869.604  | 5782.48   | AL359561  | 2005.292  | 1511.453  |
| AB007857  | 2059.171 | 4006.988 | AF230808  | 5105.135  | 3829.899  | AK026464  | 1705.281  | 1517.855  |
| NM_005923 | 9620.583 | 13897.56 | U18910    | 2524.314  | 2897.903  | AK001362  | 1131.123  | 1183.399  |
| NM_003465 | 3672.667 | 6036.983 | NM_005235 | 8462.105  | 6503.666  | AK023491  | 1133.726  | 974.536   |
| AF071569  | 2200.269 | 3645.739 | AK075306  | 10373.63  | 9881.894  | AK022400  | 1769.347  | 1526.639  |
| NM_002265 | 4297.077 | 5497.488 | AB037820  | 923.199   | 1058.446  | AF052100  | 2534.434  | 3248.709  |
| J04948    | 1500.101 | 2083.13  | NM_001280 | 26494.154 | 27988.826 | AL110235  | 612.953   | 804.512   |
| NM_018043 | 1132.563 | 1369.758 | AB019572  | 62268.996 | 55805.59  | U79245    | 1094.044  | 1091.694  |
| NM_001492 | 1593.124 | 2031.328 | NM_002945 | 58406.023 | 58831.09  | AF086124  | 1317.639  | 1696.906  |
| AB012643  | 7848.694 | 9036.56  | AF113008  | 3156.288  | 2013.962  | AK024820  | 1849.325  | 1634.75   |
| NM_005505 | 3337.635 | 5314.544 | NM_020217 | 2392.639  | 2161.872  | AB033105  | 2408.171  | 2070.052  |
| AK026964  | 1802.368 | 2136.112 | NM_018135 | 59887.195 | 61721.281 | AF038192  | 1065.251  | 1184.167  |
| NM_001134 | 1679.424 | 2675.052 | AF205435  | 19581.25  | 19681.17  | AJ001865  | 1802.941  | 2148.87   |
| NM_016015 | 14654.92 | 33440.87 | AF052105  | 7310.494  | 10670.315 | AJ227875  | 726.386   | 891.777   |

|           |          |          |           |           |           |           |           |           |
|-----------|----------|----------|-----------|-----------|-----------|-----------|-----------|-----------|
| NM_018344 | 1494.484 | 1194.487 | AK001204  | 8682.181  | 6342.583  | D61704    | 17903.342 | 14687.809 |
| NM_000079 | 6503.878 | 5154.556 | M15465    | 4875.396  | 3619.766  | AJ227889  | 1550.613  | 1476.048  |
| NM_004774 | 8870.49  | 8594.263 | J03866    | 9516.404  | 7690.979  | Y12017    | 1206.245  | 905.18    |
| NM_005234 | 5180.286 | 6448.896 | AK022836  | 5049.478  | 3713.816  | X64989    | 1349.983  | 940.262   |
| NM_016436 | 968.429  | 773.695  | NM_012343 | 19208.916 | 12242.254 | Y10512    | 1240.982  | 1166.357  |
| AF007190  | 1038.405 | 806.998  | NM_000397 | 1009.488  | 955.398   | L34409    | 24611.203 | 33601.344 |
| X74609    | 14256.38 | 16191.52 | NM_003078 | 4474.287  | 3123.165  | U12210    | 5292.976  | 5004.417  |
| AB002316  | 977.235  | 820.301  | AL137703  | 1201.916  | 892.345   | Z83936    | 1041.96   | 995.254   |
| NM_004153 | 4714.8   | 6357.632 | NM_001809 | 8855.74   | 4758.753  | L08440    | 3949.599  | 5285.822  |
| AF130101  | 2129.361 | 914.321  | AL117477  | 6161.271  | 3680.826  | M73799    | 1567.402  | 1612.577  |
| NM_004656 | 10190.86 | 6781.085 | NM_012107 | 5022.896  | 3807.126  | AF086119  | 1033.674  | 1127.326  |
| NM_005576 | 997.133  | 1560.219 | AB037760  | 3608.188  | 2459.161  | NM_003782 | 3598.505  | 3873.075  |
| AF086122  | 6449.414 | 5731.769 | NM_015680 | 3276.852  | 2371.97   | AL442096  | 1528.924  | 1448.66   |
| AK024397  | 1370.256 | 2480.92  | M22637    | 2197.929  | 1284.748  | AK023299  | 810.226   | 859.109   |
| AF073931  | 566.735  | 690.23   | AB037770  | 970.017   | 703.697   | NM_018228 | 1525.496  | 1675.447  |
| NM_018047 | 2014.423 | 3115.234 | NM_018364 | 7683.811  | 6241.142  | AJ270693  | 1807.092  | 1685.943  |
| NM_005022 | 615.02   | 870.399  | NM_006778 | 1009.553  | 702.132   | NM_017790 | 3252.072  | 2532.191  |
| NM_003564 | 1551.092 | 1549.856 | NM_007022 | 3659.66   | 4338.578  | AK000861  | 1105.446  | 646.378   |
| AK023414  | 378.377  | 566.49   | AL049943  | 13797.498 | 12548.551 | AK000023  | 3845.557  | 2795.412  |
| AF317516  | 13463.61 | 11745.2  | AL137303  | 2322.782  | 2563.629  | AK000901  | 1318.611  | 1140.328  |
| NM_002581 | 632.706  | 693.056  | AL355708  | 1637.782  | 2001.253  | AK024867  | 719.034   | 739.878   |
| J03571    | 6326.368 | 5189.105 | AL161980  | 626.481   | 650.95    | AK025002  | 2481.609  | 2042.209  |
| T57791    | 959.018  | 1309.63  | AB002449  | 1398.528  | 1230.518  | AK024011  | 3064.278  | 2158.07   |
| T64134    | 316.622  | 850.492  | AK001489  | 2920.844  | 1716.736  | AL390145  | 1215.831  | 428.903   |
| N20475    | 10213.06 | 8264.598 | NM_015681 | 5391.623  | 4058.457  | NM_018340 | 3923.271  | 2415.314  |
| BI199286  | 11594.78 | 12402.59 | AF070582  | 3342.003  | 3278.129  | AF049883  | 2933.209  | 3480.644  |
| AA026626  | 763.316  | 1035.346 | NM_006383 | 8292.301  | 5741.553  | L10148    | 1504.403  | 1504.418  |
| H61726    | 1430.193 | 1635.997 | NM_015400 | 8861.087  | 7210.906  | AK026247  | 1420.996  | 880.861   |
| NM_004997 | 7690.003 | 6011.944 | AL359561  | 2153.084  | 1959.259  | AK024893  | 826.944   | 894.388   |
| NM_005923 | 6428.539 | 5580.977 | AK026464  | 2024.173  | 1437.628  | AL110175  | 761.95    | 924.473   |
| NM_003465 | 2456.35  | 2258.762 | AK001362  | 1299.782  | 1287.33   | AF288406  | 1818.243  | 2110.262  |
| AF289028  | 779.457  | 674.67   | AK023491  | 857.03    | 809.601   | AK027156  | 19767.125 | 18363.039 |
| NM_005127 | 13547.51 | 11295.14 | AK022400  | 1969.631  | 1688.724  | AL157504  | 13434.778 | 10408.727 |
| NM_005567 | 557.329  | 473.74   | AF052100  | 2444.541  | 2307.52   | AK023328  | 7822.482  | 7116.302  |
| NM_005216 | 14354.27 | 12418.58 | AL110235  | 801.012   | 397.567   | AF119879  | 28010.332 | 21930.34  |
| NM_006626 | 1438.417 | 1057.246 | U79245    | 1099.069  | 914.885   | AY007095  | 1198.166  | 1946.9    |
| NM_003965 | 2920.336 | 1265.497 | AF086124  | 2575.785  | 1390.009  | AF086244  | 4294.306  | 3831.064  |
| NM_004584 | 4897.42  | 4029.091 | AK024820  | 1687.105  | 1444.677  | AL161992  | 17504.74  | 10801.272 |
| AK023618  | 5518.526 | 3500.886 | AB033105  | 1948.541  | 1858.039  | AK023551  | 756.145   | 797.128   |
| NM_018404 | 1514.877 | 1702.284 | AF038192  | 962.678   | 996.883   | AK023910  | 2983.037  | 2674.738  |
| M27544    | 1045.726 | 2018.704 | AJ001865  | 1442.256  | 1566.923  | D16991    | 4666.745  | 3829.117  |
| NM_002258 | 650.77   | 1092.066 | D61704    | 19578.719 | 18791.115 | AK023538  | 1164.433  | 794.13    |
| NM_014459 | 1316.282 | 1679.524 | AJ227889  | 2068.619  | 1547.467  | U17620    | 1930.228  | 1446.103  |
| NM_004093 | 1990.746 | 2367.267 | Y12017    | 1259.41   | 1085.486  | AF075086  | 59996.438 | 52942.309 |
| NM_001449 | 11331.3  | 14818.91 | X64989    | 645.24    | 761.875   | X77485    | 12075.871 | 11047.842 |
| NM_001387 | 159.725  | 342.565  | Y10512    | 826.602   | 1054.809  | NM_014499 | 2932.862  | 2155.278  |
| NM_016016 | 10949.97 | 13795.21 | L34409    | 26384.266 | 24404.65  | AK021555  | 1471.574  | 1433.678  |
| NM_020407 | 595.481  | 606.052  | U12210    | 4904.713  | 3401.187  | AB046765  | 2334.711  | 2619.665  |
| AF118274  | 1541.496 | 1494.525 | Z83936    | 1392.291  | 1784.943  | AF133333  | 13089.385 | 9105.326  |
| NM_018344 | 1513.974 | 1503.728 | L08440    | 9188.608  | 8857.47   | NM_018368 | 2628.953  | 1764.961  |
| NM_000079 | 4818.452 | 4882.736 | M73799    | 2665.021  | 2839.099  | NM_004881 | 27953.158 | 23326.477 |
| NM_000083 | 1762.723 | 1113.486 | AF086119  | 1147.066  | 1483.516  | U94903    | 1197.412  | 970.974   |
| AL110245  | 1131.304 | 1377.107 | NM_003782 | 2842.166  | 1907.619  | NM_005155 | 14435.867 | 11392.73  |



|           |          |          |           |           |           |           |           |           |
|-----------|----------|----------|-----------|-----------|-----------|-----------|-----------|-----------|
| NM_00562E | 29387.59 | 26422.94 | AL353947  | 840.165   | 704.037   | U80764    | 21482.654 | 16928.357 |
| NM_003951 | 1016.009 | 645.064  | AL442096  | 1895.947  | 1866.155  | AB020684  | 12789.821 | 10695.115 |
| S78203    | 5154.207 | 4044.464 | NM_01822E | 938.333   | 727.849   | AF077036  | 51461.488 | 41642.184 |
| NM_01620E | 10587.91 | 11486.44 | AJ270693  | 1128.218  | 712.669   | NM_020421 | 3149.42   | 2467.35   |
| NM_00726E | 4385.242 | 2700.188 | NM_01779C | 2479.413  | 2360.593  | D17094    | 4693.614  | 4289.483  |
| AK026014  | 4521.146 | 3211.639 | AK000861  | 999.327   | 928.568   | L37690    | 16422.744 | 12720.097 |
| NM_01484E | 3805.35  | 3372.907 | AK000023  | 2298.313  | 1981.366  | D61707    | 1690.973  | 1140.718  |
| AB007857  | 1899.246 | 2428.356 | AK000901  | 1133.474  | 1210.134  | AK021610  | 3751.263  | 3128.373  |
| NM_00177E | 31739.05 | 38244.15 | AK024351  | 1774.657  | 1688.917  | Z36835    | 12086.729 | 9358.284  |
| NM_01904E | 3437.222 | 3217.336 | AK024867  | 1539.179  | 3075.088  | L37703    | 19838.75  | 16007.274 |
| NM_005447 | 442.352  | 482.855  | AK025002  | 4124.601  | 4167.508  | AK023767  | 4800.812  | 3608.74   |
| NM_01241E | 694.348  | 717.15   | AK024011  | 2626.395  | 1687.889  | AF084516  | 1713.38   | 1712.717  |
| AF130101  | 1632.578 | 1301.099 | AF119913  | 1673.425  | 1038.458  | AL137554  | 809.163   | 720.667   |
| NM_00465E | 9775.534 | 8416.918 | NM_01834C | 2375.638  | 2586.44   | AJ001907  | 1917.33   | 1826.121  |
| NM_00557E | 784.428  | 1427.371 | AF049883  | 3225.703  | 2350.039  | M32220    | 5649.263  | 5189.837  |
| AF071569  | 1917.633 | 2080.965 | L10148    | 2131.431  | 1641.351  | D17188    | 12368.387 | 14814.72  |
| NM_00226E | 3556.574 | 3448.303 | AK026247  | 1209.821  | 1015.695  | AJ001432  | 38779.059 | 39043.621 |
| J04948    | 1890.766 | 1382.659 | AK024893  | 768.417   | 503.684   | NM_02043E | 10344.463 | 7825.923  |
| AK022564  | 27117.54 | 21984    | AL110175  | 974.229   | 1389.916  | AF052169  | 1717.29   | 1541.239  |
| NM_00149E | 717.773  | 917.988  | AK027156  | 20540.432 | 19283.725 | CY3Cy5    | 6856.816  | 268.197   |
| AB012643  | 5960.238 | 5105.908 | AL157504  | 13860.311 | 20817.34  | BF942101  | 3363.305  | 3355.61   |
| AB023170  | 1209.268 | 1311.406 | AJ012499  | 64931.305 | 64641.508 | BI825012  | 8690.614  | 10694.764 |
| NM_01415E | 13385.18 | 11156.5  | AK024900  | 4779.728  | 3873.725  | BM051302  | 1257.813  | 1975.632  |
| NM_00229E | 23230.07 | 15282.85 | AF119879  | 27616.723 | 16360.225 | BE314182  | 7292.758  | 7414.948  |
| NM_000414 | 5466.497 | 5038.771 | Y10482    | 37618.828 | 27650.588 | AI808029  | 1406.677  | 1566.774  |
| NM_01884E | 11013.56 | 8325.279 | AY007095  | 1622.639  | 1240.401  | AI971217  | 793.672   | 1032.556  |
| AY008372  | 961.839  | 1132.496 | AF086244  | 5035.751  | 3565.832  | X03225    | 3122.71   | 4257.125  |
| NM_001134 | 1496.422 | 1507.515 | AL161992  | 13417.227 | 12512.818 | AK097395  | 5987.059  | 6338.994  |
| NM_00669E | 1314.282 | 1148.557 | AK023551  | 914.374   | 531.623   | M12783    | 2146.253  | 2575.823  |
| NM_00481E | 5268.089 | 4707.815 | AK023910  | 2936.107  | 2592.866  | AK091535  | 721.35    | 715.241   |
| NM_004147 | 820.978  | 717.096  | D16991    | 3820.717  | 3715.404  | AF085357  | 5961.37   | 9670.67   |
| AK000959  | 2416.536 | 2334.885 | AK023538  | 1326.807  | 1184.026  | NM_003841 | 7717.925  | 9202.388  |
| AB037743  | 4357.613 | 4023.638 | NM_01449E | 3004.276  | 3232.379  | AF296673  | 719.183   | 774.428   |
| AB046820  | 6049.59  | 6025.883 | AK021555  | 1731.645  | 1925.77   | NM_080824 | 793.503   | 776.561   |
| NM_01464E | 2664.125 | 2532.591 | AF133333  | 11571.309 | 9572.537  | SR2       | 61797.871 | 58570.543 |
| NM_00637E | 1604.04  | 1139.454 | NM_01836E | 2425.467  | 2756.732  | SR4       | 21167.16  | 15777.533 |
| AF123659  | 2271.117 | 1521.006 | NM_004881 | 36419.23  | 22747.217 | SR6       | 3390.485  | 2235.353  |
| AL050355  | 1200.313 | 877.833  | U94903    | 1488.918  | 1253.604  | SR8       | 11612.879 | 28955.494 |
| AF007190  | 381.895  | 770.981  | NM_00515E | 17280.484 | 10411.717 | SR10      | 41981.566 | 15872.62  |
| X74609    | 16779.53 | 19847.28 | NM_01909E | 14945.103 | 9768.978  | NM_01432E | 1686.591  | 1549.298  |
| NM_01899C | 12110.47 | 11988.03 | U80764    | 19343.26  | 16787.119 | NM_00412E | 2765.462  | 3739.94   |
| NM_01336E | 1212.772 | 1020.45  | AB020684  | 11459.444 | 8667.469  | NM_00292E | 4728.505  | 4839.452  |
| NM_000947 | 8408.103 | 4931.466 | AF077036  | 44844.609 | 40771.512 | NM_00016C | 2047.603  | 2116.443  |
| AL096750  | 7431.715 | 7870.345 | NM_020421 | 5081.244  | 3604.114  | NM_003301 | 1115.077  | 1037.911  |
| NM_016061 | 5874.743 | 4905.56  | D17094    | 4051.038  | 3199.184  | NM_00095E | 1112.677  | 1338.233  |
| NM_01606E | 49906.46 | 57092.8  | L37690    | 18812.928 | 12520.187 | U27768    | 1265.43   | 1264.482  |
| NM_00362E | 3126.823 | 2651.907 | D61707    | 1693.07   | 1548.243  | AF305550  | 5042.505  | 5049.915  |
| NM_00464E | 763.925  | 750.098  | AK021610  | 2956.638  | 2225.691  | U66582    | 8487.097  | 9565.354  |
| AF029325  | 1425.674 | 1581.085 | AF084516  | 2226.49   | 2504.802  | NM_00619E | 3395.176  | 3352.336  |
| NM_005704 | 1157.089 | 1755.26  | AJ001907  | 3235.988  | 3232.76   | NM_00381E | 676.958   | 771.108   |
| NM_00136E | 1672.118 | 1527.352 | M32220    | 7293.447  | 6194.124  | NM_00084E | 1325.978  | 1479.049  |
| NM_000677 | 9647.456 | 9187.793 | D17188    | 8773.949  | 6927.649  | NM_00467E | 2170.704  | 2309.189  |
| BF308728  | 1064.602 | 1113.732 | AF052169  | 2422.754  | 2268.189  | NM_00095C | 13411.652 | 15925.169 |

|           |          |          |           |           |           |           |           |           |
|-----------|----------|----------|-----------|-----------|-----------|-----------|-----------|-----------|
| NM_01328C | 854.216  | 700.829  | CY3Cy5    | 2623.527  | 193.963   | NM_00513C | 6773.998  | 7580.395  |
| NM_01831E | 5759.337 | 5442.833 | BF942101  | 2849.168  | 2941.069  | L10139    | 807.709   | 785.267   |
| AF051151  | 811.299  | 788.52   | BI825012  | 11724.283 | 11004.15  | NM_00003C | 65961.914 | 54428.93  |
| AF142421  | 3156.818 | 3771.852 | M21574    | 570.134   | 775.523   | NM_02047C | 3221.329  | 4945.636  |
| NM_014247 | 1546.441 | 2115.632 | BM051302  | 1675.63   | 1259.993  | AA478950  | 1802.532  | 2999.839  |
| NM_01869E | 20292.92 | 17217.8  | BE314182  | 6737.121  | 7989.556  | AB029033  | 6089.728  | 7757.539  |
| NM_00634C | 1851.439 | 1706.725 | AI808029  | 946.586   | 1078.63   | AF091034  | 4642.417  | 4717.054  |
| NM_01478E | 1512.228 | 1281.037 | X03225    | 3271.601  | 3327.635  | NM_005301 | 20250.334 | 24500.578 |
| NM_00142C | 770.564  | 750.453  | AK097395  | 7107.845  | 6864.657  | NM_01665C | 4826.338  | 5383.168  |
| NM_01571E | 2276.392 | 3287.964 | M12783    | 1881.219  | 2064.557  | AB035124  | 8613.746  | 8354.666  |
| NM_00395E | 686.456  | 925.992  | AK091535  | 578.416   | 763.044   | AF060170  | 1478.115  | 1417.628  |
| NM_00573C | 4840.303 | 5963.553 | AF085357  | 8305.891  | 5446.934  | NM_01660C | 872.864   | 1071.388  |
| AB023166  | 1984.571 | 1910.98  | NM_003841 | 17017.178 | 16450.85  | NM_00440C | 8730.453  | 10407.363 |
| AB028966  | 1698.885 | 1851.14  | AF296673  | 455.124   | 647.797   | AK023397  | 2479.198  | 2938.064  |
| NM_00575E | 9852.322 | 8046.862 | NM_080824 | 469.187   | 422.523   | NM_00172E | 2050.72   | 2189.811  |
| AF044774  | 2050.095 | 1926.587 | SR2       | 52655.203 | 60348.77  | NM_00407C | 4925.278  | 4982.452  |
| NM_00540C | 5295.17  | 4740.583 | SR4       | 14562.885 | 17039.809 | NM_00299C | 574.533   | 670.608   |
| AF055027  | 6750.842 | 7314.841 | SR6       | 2328.647  | 2355.142  | NM_00038C | 1117.254  | 1368.845  |
| U63541    | 4921.141 | 3967.318 | SR8       | 8114.847  | 25240.564 | X01394    | 30490.629 | 40102.898 |
| AB033045  | 2171.281 | 1550.988 | SR10      | 21522.502 | 8324.007  | NM_000041 | 24810.371 | 30848.281 |
| AF055006  | 7297.906 | 5902.177 | CY3Cy5    | 2555.393  | 205.645   | NM_002984 | 1798.032  | 1847.487  |
| NM_00493E | 10056.11 | 7615.786 | NM_01432C | 1487.143  | 3127.614  | AB037752  | 6605.081  | 8028.591  |
| NM_006951 | 2756.155 | 1696.648 | NM_00412C | 4366.458  | 5579.835  | AK024821  | 14479.301 | 12954.702 |
| NM_00189C | 7830.935 | 7239.874 | NM_00292E | 6928.007  | 10731.124 | AB002340  | 2615.589  | 2717.18   |
| NM_01402C | 1913.228 | 1552.379 | NM_00016C | 1997.381  | 2404.639  | NM_000224 | 2163.718  | 3339.287  |
| NM_00274E | 7552.563 | 7892.392 | NM_003301 | 975.423   | 1127.127  | NM_01847C | 13526.708 | 13484.69  |
| AB014554  | 2242.132 | 2684.566 | NM_00095E | 1407.874  | 1462.057  | NM_01436C | 6908.536  | 5062.997  |
| AF097431  | 3615.787 | 3755.066 | U27768    | 1197.138  | 1143.033  | NM_01830E | 2350.893  | 2953.597  |
| NM_00197E | 1146.869 | 1254.956 | AF305550  | 5575.7    | 5613.672  | NM_00183C | 11530.598 | 14122.172 |
| NM_005897 | 1501.539 | 1696.11  | U66582    | 7721.6    | 7150.912  | NM_017774 | 18475.314 | 18855.281 |
| NM_004221 | 12044.43 | 10504.13 | S73288    | 636.589   | 774.164   | AB037716  | 2330.943  | 2670.733  |
| NM_004061 | 4689.029 | 3071.428 | NM_00619E | 2953.876  | 3123.847  | NM_016297 | 3492.064  | 3252.655  |
| NM_00301C | 479.989  | 877.969  | NM_00381C | 868.434   | 774.039   | NM_00175C | 2938.336  | 3753.255  |
| NM_00692C | 6848.228 | 5400.875 | NM_00084C | 1342.181  | 1096.338  | BC003406  | 2973.006  | 2651.5    |
| NM_00461E | 24028.17 | 36716.53 | NM_00467E | 1958.513  | 1803.775  | AL137672  | 773.379   | 838.509   |
| AF119889  | 5279.354 | 5057.003 | NM_00095C | 22020.102 | 21394.43  | X64177    | 939.589   | 1476.313  |
| M90657    | 861.062  | 784.232  | NM_00513C | 6080.077  | 7177.904  | NM_015994 | 10500.716 | 10013.67  |
| NM_00669C | 3882.392 | 3350.098 | NM_00003C | 49701.332 | 49080.008 | NM_002241 | 379.921   | 719.378   |
| AK025645  | 15326.06 | 18944.77 | NM_02047C | 4465.055  | 4871.656  | NM_01406E | 2543.58   | 2856.886  |
| AK023266  | 1068.715 | 1156.726 | NM_006574 | 524.329   | 896.88    | NM_00169E | 6384.867  | 6877.528  |
| NM_006814 | 13279.04 | 12581.82 | AA478950  | 1811.302  | 1747.399  | NM_00224E | 3879.138  | 5372.72   |
| NM_005067 | 10221.51 | 7650.272 | AB029033  | 9443.204  | 11415.842 | NM_012281 | 1416.426  | 1819.583  |
| AB007899  | 2130.4   | 1507.863 | AF091034  | 4948.824  | 6051.162  | AK025772  | 4405.064  | 3361.207  |
| BE905810  | 1385.854 | 1830.427 | NM_005301 | 27538.283 | 36222.328 | NM_00550C | 908.156   | 1018.254  |
| NM_01478C | 1842.51  | 1792.723 | NM_004167 | 432.378   | 920.951   | NM_152747 | 1329.085  | 1363.272  |
| NM_018116 | 1008.358 | 805.349  | NM_01665C | 6297.692  | 8046.825  | NM_01741E | 1865.061  | 1734.057  |
| NM_01473C | 12282.65 | 11081.47 | AB035124  | 9572.938  | 15268.27  | NM_001667 | 23393.453 | 33321.391 |
| NM_014167 | 1745.938 | 1532.555 | AF060170  | 1410.865  | 2144.479  | AB046834  | 622.778   | 814.863   |
| NM_01606C | 3608.257 | 4011.655 | NM_01660C | 1245.709  | 1645.043  | NM_015957 | 467.804   | 477.743   |
| U82987    | 3535.901 | 4052.963 | NM_00440C | 14131.88  | 18626.512 | NM_00026C | 1286.278  | 1485.158  |
| NM_00573C | 3173.203 | 3747.521 | AK023397  | 3383.519  | 4436.572  | NM_017831 | 1747.536  | 1807.484  |
| NM_01489C | 1448.569 | 1849.243 | NM_00172E | 3005.939  | 3711.991  | AK022537  | 16753.738 | 14373.882 |
| AK056481  | 6077.869 | 7696.96  | NM_00407E | 8226.968  | 10563.493 | AF116632  | 916.398   | 951.642   |

|           |          |          |           |           |           |           |           |           |
|-----------|----------|----------|-----------|-----------|-----------|-----------|-----------|-----------|
| NM_005433 | 1973.402 | 1482.519 | NM_002996 | 1518.631  | 2027.214  | AF064597  | 1079.859  | 1299.025  |
| NM_018118 | 821.255  | 725.825  | NM_000383 | 1290.409  | 1308.984  | NM_006345 | 4996.583  | 5979.927  |
| L35035    | 9913.153 | 8148.33  | NM_004633 | 639.712   | 928.993   | NM_006875 | 3378.971  | 3003.463  |
| NM_007152 | 2473.752 | 2223.512 | X01394    | 44470.477 | 43589.648 | AL050040  | 853.355   | 1121.404  |
| NM_018293 | 2790.875 | 2009.243 | NM_000041 | 37639.328 | 34403.676 | NM_006556 | 12988.823 | 14320.651 |
| NM_002955 | 1005.382 | 1010.065 | NM_002984 | 2805.478  | 2648.845  | AL133066  | 715.327   | 539.572   |
| NM_001935 | 8133.63  | 8625.927 | AB037752  | 8125.775  | 8277.932  | AF264717  | 2396.694  | 2976.851  |
| AF230808  | 3897.253 | 3311.336 | AK024821  | 11385.676 | 13646.473 | NM_012260 | 6837.724  | 6217.582  |
| U18910    | 3393.462 | 1965.685 | AB002340  | 2501.188  | 2955.36   | NM_001141 | 4541.155  | 5275.879  |
| NM_005235 | 4660.056 | 4531.444 | NM_000224 | 2556.22   | 2437.298  | NM_000015 | 10419.815 | 15556.71  |
| S83390    | 897.396  | 625.854  | NM_014325 | 7227.339  | 8876.305  | AB028992  | 2439.161  | 1778.621  |
| AK075306  | 7871.431 | 6319.005 | NM_006414 | 5881.423  | 6085.67   | L10139    | 886.55    | 891.198   |
| AB037820  | 789.016  | 810.975  | NM_018475 | 11137.761 | 9913.05   | NM_020470 | 3552.959  | 4766.679  |
| NM_002945 | 70856.31 | 58369.34 | NM_014362 | 3986.706  | 5152.182  | NM_006574 | 504.634   | 1124.281  |
| AF113008  | 2799.811 | 2928.047 | NM_018305 | 2245.602  | 1759.676  | AA478950  | 1856.164  | 2239.779  |
| NM_020217 | 3899.794 | 3812.187 | NM_001832 | 14043.231 | 16793.531 | BF942101  | 3457.479  | 3490.156  |
| NM_018135 | 75474.45 | 60117.22 | NM_017774 | 13919.271 | 13328.438 | BI825012  | 10141.659 | 10931.146 |
| AF205435  | 24421.45 | 18044.16 | AB037716  | 2363.286  | 2318.456  | M21574    | 455.691   | 495.826   |
| AF052105  | 5463.319 | 5298.043 | NM_016297 | 3837.906  | 4993.131  | BM051302  | 1246.838  | 1862.986  |
| AK001204  | 9483.629 | 7936.391 | NM_001752 | 3805.027  | 3810.208  | BE314182  | 8053.611  | 7776.4    |
| M15465    | 2952.814 | 2943.658 | BC003406  | 2613.749  | 5609.065  | AI808029  | 1361.846  | 1407.684  |
| J03866    | 11998.2  | 10099.05 | AL137672  | 1318.759  | 1889.859  | X03225    | 2860.246  | 3872.949  |
| AK022836  | 7760.41  | 5633.25  | X64177    | 1462.743  | 2147.029  | AK097395  | 5869.214  | 6790.694  |
| NM_012343 | 7670.19  | 4998.885 | NM_015994 | 13025.01  | 19359.301 | M12783    | 1937.222  | 2611.405  |
| NM_000397 | 1954.535 | 1217.634 | NM_002235 | 801.479   | 1016.319  | NM_003841 | 8033.191  | 10238.101 |
| NM_002045 | 73163.75 | 60427.71 | NM_002241 | 723.116   | 815.259   | AF296673  | 642.335   | 793.73    |
| BF217340  | 902.423  | 954.557  | NM_014065 | 2780.323  | 3516.143  | NM_080824 | 657.021   | 758.463   |
| NM_003075 | 3148.948 | 5032.369 | NM_001695 | 5431.149  | 4948.078  | NM_018002 | 2720.04   | 2864.96   |
| AL137703  | 904.795  | 870.366  | NM_002245 | 5688.179  | 7140.135  | AB002340  | 2816.271  | 2839.79   |
| NM_001805 | 13502.11 | 12406.68 | NM_012281 | 2922.793  | 3201.138  | NM_000224 | 2378.38   | 2629.755  |
| NM_018255 | 925.181  | 954.691  | AK025772  | 4003.561  | 6321.482  | NM_014325 | 11767.529 | 10957.435 |
| AL117477  | 8973.49  | 10539.32 | NM_005505 | 1286.496  | 1173.411  | NM_006414 | 6486.494  | 7399.958  |
| NM_012107 | 7497.854 | 7558.779 | NM_152747 | 1848.012  | 1934.742  | NM_014322 | 1536.583  | 1217.919  |
| AB037760  | 2085.311 | 2316.333 | NM_017415 | 1488.992  | 1619.075  | NM_004122 | 2283.773  | 2424.538  |
| NM_015680 | 2947.364 | 2719.469 | NM_001667 | 23413.746 | 20247.045 | NM_002925 | 4062.396  | 4596.881  |
| M22637    | 345.843  | 604.149  | AB046834  | 728.44    | 812.951   | NM_000160 | 2140.316  | 2051.455  |
| NM_018364 | 8095.796 | 5475.45  | NM_000262 | 1401.109  | 1553.156  | NM_003301 | 1008.869  | 1032.045  |
| NM_007022 | 6017.374 | 4033.49  | NM_017831 | 1641.763  | 1467.749  | NM_000955 | 1291.518  | 1278.064  |
| AL049943  | 8333.46  | 7394.883 | AK022537  | 10541.465 | 12115.711 | U27768    | 1135.15   | 1344.32   |
| AL137303  | 2925.323 | 2817.748 | AF116632  | 1355.75   | 1042.832  | AF305550  | 4995.04   | 5856.517  |
| AL355708  | 1655.974 | 1376.838 | AF064597  | 1206.709  | 1127.33   | NM_006195 | 3766.129  | 3853.027  |
| AB002449  | 1735.156 | 1007.998 | NM_006345 | 5001.858  | 3716.571  | NM_003812 | 709.679   | 816.375   |
| NM_016480 | 29581.45 | 16185.41 | NM_006875 | 2253.624  | 2168.224  | NM_000845 | 1223.274  | 1096.81   |
| AK001489  | 1936.878 | 2339.051 | D87119    | 5760.267  | 6415.718  | NM_004675 | 2237.719  | 1942.328  |
| NM_015681 | 2778.791 | 2672.39  | AB037769  | 680.657   | 687.566   | NM_000950 | 14497.062 | 13821.864 |
| AF070582  | 2449.79  | 2023.023 | AL050040  | 1272.099  | 2333.812  | NM_005135 | 7026.211  | 6109.387  |
| NM_006383 | 3624.563 | 4468.523 | AF264717  | 3344.685  | 3704.903  | AK025772  | 4632.065  | 3510.692  |
| NM_015400 | 1554.079 | 2168.304 | NM_012260 | 9088.785  | 13601.176 | NM_005505 | 1200.251  | 1083.996  |
| AL359561  | 2537.96  | 2527.779 | NM_001141 | 7883.392  | 10757.748 | NM_152747 | 1920.621  | 1922.614  |
| AK026464  | 1148.031 | 1036.811 | NM_000015 | 11318.305 | 15004.138 | NM_017415 | 1714.27   | 1649.813  |
| AK001362  | 977.37   | 1378.912 | AB028992  | 2273.845  | 3067.421  | NM_001667 | 23791.471 | 25015.893 |
| AK023491  | 737.083  | 1026.696 | L10139    | 993.579   | 1205.803  | AB046834  | 576.837   | 764.245   |
| AK022400  | 1264.3   | 1216.266 | NM_020470 | 3368.445  | 4024.733  | AB029033  | 5250.844  | 6967.042  |

|           |          |          |           |           |           |           |           |           |
|-----------|----------|----------|-----------|-----------|-----------|-----------|-----------|-----------|
| AF052100  | 2451.939 | 2256.177 | NM_006574 | 540.37    | 775.202   | AF091034  | 4225.092  | 4407.216  |
| AL110235  | 717.028  | 667.125  | AA478950  | 1964.542  | 2083.577  | NM_005301 | 15847.973 | 19102.855 |
| U79245    | 1383.609 | 1426.004 | BF942101  | 2765.314  | 3636.718  | NM_016653 | 4987.609  | 5354.131  |
| AF086124  | 1035.61  | 2015.057 | BI825012  | 11587.83  | 11597.032 | NM_016602 | 822.477   | 941.433   |
| AK024820  | 1708.436 | 1694.11  | BM051302  | 1498.501  | 1091.116  | NM_004409 | 7817.265  | 9287.138  |
| AB033105  | 2537.199 | 1688.594 | BE314182  | 7546.486  | 8125.933  | AK023397  | 2290.048  | 3088.3    |
| AF038192  | 861.273  | 1033.341 | AI808029  | 1096.551  | 1092.957  | NM_001725 | 2389.937  | 2824.32   |
| AJ001865  | 1495.981 | 1083.789 | X03225    | 2643.177  | 2431.454  | NM_004079 | 4994.871  | 5252.886  |
| D61704    | 7376.391 | 4838.627 | AK097395  | 6431.88   | 5666.972  | NM_002996 | 473.485   | 758.2     |
| AJ227889  | 561.669  | 516.077  | M12783    | 1788.863  | 1524.742  | NM_000383 | 949.138   | 1080.575  |
| Y12017    | 1130.358 | 1232.133 | AK091535  | 653.487   | 539.706   | NM_004633 | 572.567   | 317.486   |
| Y10512    | 1404.635 | 1275.757 | AF085357  | 9050.127  | 5221.298  | X01394    | 33364.594 | 36089.164 |
| L34409    | 7991.157 | 9280.757 | NM_003841 | 28824.508 | 35482.977 | NM_000041 | 24728.063 | 23439.652 |
| U12210    | 5021.854 | 5636.578 | AF296673  | 1883.871  | 2837.072  | NM_002984 | 1646.959  | 1637.61   |
| Z83936    | 1067.934 | 1030.096 | NM_080824 | 638.913   | 728.135   | AB037752  | 6617.403  | 6972.617  |
| L08440    | 560.025  | 795.9    | AB032956  | 885.559   | 1213.14   | AF317425  | 3413.67   | 2783.075  |
| M73799    | 830.031  | 749.945  | NM_018002 | 2066.599  | 2668.206  | AF264717  | 2429.319  | 2556.689  |
| AF086119  | 421.467  | 509.709  | AB002340  | 2479.237  | 2611.939  | NM_012260 | 7413.718  | 6932.693  |
| NM_003782 | 3440.682 | 3601.835 | NM_000224 | 2505.313  | 2700.893  | NM_001141 | 4613.048  | 5386.678  |
| AL442096  | 873.688  | 639.075  | NM_014328 | 8453.425  | 11908.168 | NM_000018 | 9986.127  | 14140.758 |
| AK023299  | 677.908  | 600.001  | NM_006414 | 5292.517  | 6854.763  | AB028992  | 2270.097  | 1752.533  |
| AJ270693  | 1351.236 | 911.714  | NM_014322 | 943.367   | 1827.865  | NM_018479 | 10387.032 | 9706.683  |
| NM_017790 | 2228.688 | 1663.96  | NM_004122 | 2745.497  | 2555.939  | NM_014362 | 6348.521  | 4656.877  |
| AK000861  | 742.298  | 610.379  | NM_002928 | 4934.542  | 6006.298  | NM_018308 | 1831.72   | 2146.146  |
| AK025009  | 1085.872 | 446.528  | NM_000160 | 1794.569  | 1985.794  | NM_001832 | 10806.507 | 12573.367 |
| AK000023  | 4003.123 | 2636.694 | NM_003301 | 740.774   | 755.942   | NM_017774 | 19677.613 | 18600.732 |
| AK000901  | 1031.927 | 707.383  | NM_000955 | 1360.012  | 1302.628  | NM_016297 | 3217.667  | 2605.962  |
| AK024886  | 1310.515 | 1001.399 | U27768    | 1013.914  | 1209.261  | NM_001752 | 3077.318  | 3483.042  |
| AK025002  | 828.059  | 775.808  | AF305550  | 5139.029  | 5035.708  | BC003406  | 2843.405  | 2394.86   |
| AK024011  | 3751.71  | 3189.484 | U66582    | 8580.953  | 9406.3    | AL137672  | 490.385   | 872.898   |
| AL390145  | 1371.381 | 1155.014 | S73288    | 760.583   | 989.088   | X64177    | 943.486   | 1145.398  |
| AF119913  | 4066.394 | 1712.347 | NM_006198 | 3538.073  | 3619.124  | NM_015994 | 9202.785  | 7175.576  |
| NM_018340 | 3374.658 | 1967.177 | NM_003812 | 1382.398  | 1071.928  | NM_014065 | 2197.271  | 1999.796  |
| AF049883  | 2153.141 | 2274.525 | NM_000849 | 1616.596  | 1202.966  | NM_001695 | 5608.408  | 5180.292  |
| L10148    | 845.589  | 663.771  | NM_004678 | 2148.912  | 1955.16   | NM_002248 | 2719.194  | 3231.493  |
| AK026247  | 829.109  | 634.855  | NM_000950 | 18580.344 | 13446.436 | NM_012281 | 1617.368  | 1918.151  |
| AK023302  | 547.116  | 472.158  | NM_005139 | 5538.535  | 4686.342  | NM_080824 | 959.617   | 927.896   |
| AL110175  | 715.43   | 797.478  | AK025772  | 2748.693  | 5163.644  | NM_000262 | 1329.556  | 1551.688  |
| AF288406  | 1682.428 | 1268.209 | NM_005509 | 866.17    | 953.016   | NM_017831 | 1727.432  | 1894.304  |
| AK027156  | 21497.75 | 19215.54 | NM_152747 | 1336.144  | 2044.738  | AK022537  | 17111.148 | 12419.315 |
| AL157504  | 17531.08 | 12256.61 | NM_017415 | 1119.496  | 1754.694  | AF116632  | 836.135   | 886.976   |
| AK023328  | 9686.288 | 8623.556 | NM_001667 | 22068.195 | 25660.014 | AF064597  | 854.144   | 805.059   |
| AJ012499  | 73807.35 | 56787.92 | AB046834  | 782.038   | 853.567   | NM_006345 | 4661.63   | 5033.001  |
| AK024900  | 6616.746 | 5087.608 | AB029033  | 7617.548  | 8785.887  | NM_006875 | 2867.976  | 2067.27   |
| AF119879  | 7909.32  | 6454.274 | AF091034  | 3747.75   | 4956.725  | D87119    | 3082.198  | 3024.675  |
| Y10482    | 1878.593 | 1750.348 | NM_005301 | 19275.814 | 18873.957 | AL050040  | 1026.61   | 868.014   |
| AY007095  | 824.015  | 990.769  | NM_016653 | 4026.3    | 4127.374  | NM_006556 | 13047.991 | 11440.495 |
| AF086244  | 2489.19  | 1701.14  | AB035124  | 6513.988  | 7176.894  | AL133066  | 587.685   | 609.52    |
| AL161992  | 16114.95 | 8371     | AF060170  | 1027.956  | 1184.902  | NM_000849 | 1217.502  | 1198.046  |
| AK023910  | 2463.244 | 1359.993 | NM_016602 | 896.976   | 936.003   | NM_004678 | 2061.013  | 2079.225  |
| D16991    | 4309.111 | 2823.052 | NM_004409 | 9883.945  | 8531.254  | NM_000950 | 17877.297 | 18819.973 |
| U17620    | 734.406  | 410.658  | AK023397  | 2687.292  | 2766.811  | NM_005139 | 7472.226  | 7053.09   |
| X77485    | 2388.129 | 2412.571 | NM_001725 | 2593.317  | 2557.2    | L10139    | 664.315   | 924.34    |

|           |          |          |           |           |           |           |           |           |
|-----------|----------|----------|-----------|-----------|-----------|-----------|-----------|-----------|
| NM_01449E | 3624.679 | 2550.153 | NM_00407E | 6014.173  | 5908.67   | NM_02047C | 3168.608  | 3752.676  |
| AK021555  | 1976.725 | 1563.008 | NM_00299E | 969.568   | 1008.286  | AA478950  | 1505.726  | 1652.181  |
| AB046765  | 1968.349 | 1932.901 | NM_00038E | 1926.79   | 2178.816  | BF942101  | 2787.002  | 2740.475  |
| AF133333  | 14054.61 | 11579.12 | NM_00463E | 884.483   | 1485.066  | BI825012  | 8279.609  | 8295.156  |
| NM_01836E | 2895.835 | 1964.185 | X01394    | 23364.74  | 21231.271 | M21574    | 403.165   | 452.15    |
| NM_004881 | 3104.855 | 3230.814 | NM_000041 | 31801.111 | 28069.871 | BM051302  | 1192.466  | 1445.608  |
| U94903    | 738.906  | 622.388  | NM_002984 | 2190.333  | 1960.407  | BE314182  | 7360.787  | 5707.884  |
| NM_00515E | 6473.907 | 7101.746 | AF317425  | 3140.615  | 3199.068  | AI808029  | 1054.004  | 995.494   |
| NM_01909E | 17130.41 | 14489.32 | AF264717  | 2494.192  | 2018.101  | M12783    | 2092.958  | 1609.474  |
| U80764    | 16454.17 | 11607.16 | NM_01226C | 5297.875  | 6495.793  | AK091535  | 603.503   | 428.295   |
| AB020684  | 8357.398 | 5390.12  | NM_001141 | 5605.516  | 6444.776  | AF085357  | 6107.183  | 8423.434  |
| D17094    | 2969.694 | 1982.641 | NM_00001E | 9199.359  | 11219.738 | NM_003841 | 7415.815  | 8814.086  |
| L37690    | 5152.809 | 4163.749 | AB028992  | 1551.781  | 2393.181  | AF296673  | 407.877   | 408.981   |
| D61707    | 1069.141 | 798.113  | NM_01847E | 10682.947 | 15715.709 | NM_00463E | 579.796   | 422.289   |
| AK021610  | 1633.465 | 1281.101 | NM_01436E | 3928.122  | 6844.417  | X01394    | 36905.164 | 42632.25  |
| Z36835    | 15622.32 | 9318.855 | NM_01830E | 2134.208  | 2460.107  | NM_000041 | 31428.252 | 36601.891 |
| L37703    | 7704.691 | 6317.666 | NM_00183E | 12390.926 | 14384.686 | NM_002984 | 1528.797  | 1590.926  |
| AK023767  | 2862.421 | 1757.506 | NM_017774 | 12862.221 | 13493.901 | AF317425  | 4500.971  | 3406.757  |
| AF084516  | 1616.224 | 1788.207 | AB037716  | 2074.819  | 1998.183  | NM_01800E | 2746.434  | 2974.248  |
| AL137554  | 1271.157 | 835.115  | NM_016297 | 2836.15   | 2641.998  | AB002340  | 2890.554  | 2308.444  |
| AJ001907  | 1567.617 | 1440.76  | NM_00175E | 2944.072  | 2844.175  | NM_000224 | 1858.943  | 2280.878  |
| M32220    | 2323.602 | 2107.869 | BC003406  | 2304.348  | 3253.73   | NM_01432E | 10974.173 | 9804.308  |
| D17188    | 14071.29 | 10995.69 | AL137672  | 1035.258  | 1265.911  | NM_006414 | 5718.448  | 6028.718  |
| AJ001432  | 28995.97 | 29219.16 | X64177    | 1118.915  | 1091.03   | NM_01432E | 1564.149  | 1317.801  |
| NM_02043E | 14613.68 | 11524.09 | NM_015994 | 8898.659  | 9121.23   | NM_00412E | 2551.667  | 2631.533  |
| AF052169  | 1085.337 | 1018.743 | NM_01406E | 2309.115  | 2255.476  | NM_00292E | 3752.195  | 3007.001  |
| CY3Cy5    | 5972.535 | 313.67   | NM_00169E | 5333.62   | 5184.543  | NM_00016C | 1612.267  | 1530.075  |
| BF942101  | 3936.059 | 3390.234 | NM_00224E | 4231.384  | 4215.653  | NM_003301 | 908.372   | 735.387   |
| BI825012  | 3345.959 | 3395.362 | NM_012281 | 2547.389  | 3073.907  | NM_00095E | 1209.089  | 926.683   |
| M21574    | 667.321  | 565.237  | NM_080824 | 397.837   | 393.556   | U27768    | 917.589   | 895.254   |
| BM051302  | 1332.389 | 1956.156 | NM_00026E | 1194.164  | 1318.028  | AF305550  | 4540.108  | 3484.999  |
| BE314182  | 7912.982 | 7960.773 | NM_017831 | 1292.206  | 1124.497  | U66582    | 7768.813  | 7644.574  |
| AI808029  | 2231.024 | 2942.719 | AK024393  | 481.712   | 845.844   | NM_00619E | 3320.484  | 2936.419  |
| AI971217  | 768.669  | 654.717  | AK022537  | 9712.434  | 12218.775 | NM_00381E | 746.974   | 630.565   |
| X03225    | 2979.471 | 5669.688 | AF116632  | 1057.353  | 909.67    | NM_01406E | 2679.271  | 3057.475  |
| AK097395  | 5555.975 | 6185.775 | AF064597  | 1279.152  | 1170.904  | NM_00169E | 5990.176  | 5229.702  |
| M12783    | 3001.346 | 3256.3   | NM_00634E | 4999.625  | 4569.861  | NM_00224E | 2838.322  | 3453.069  |
| AK091535  | 1506.37  | 1606.499 | NM_00687E | 2110.393  | 2572.144  | NM_012281 | 1878.649  | 1933.371  |
| AF085357  | 6911.214 | 12787.02 | D87119    | 4465.827  | 3854.098  | AK025772  | 4402.789  | 3282.659  |
| NM_003841 | 719.563  | 828.039  | AL050040  | 890.566   | 798.49    | NM_00550E | 904.274   | 1104.268  |
| AF296673  | 266.096  | 372.321  | NM_00655E | 11457.912 | 9913.021  | NM_152747 | 1794.975  | 1896.833  |
| NM_080824 | 614.927  | 742.631  | AL133066  | 650.494   | 659.982   | NM_01741E | 1748.023  | 1996.347  |
| SR6       | 3043.998 | 3026.191 | NM_00084E | 1241.075  | 1175.429  | NM_001667 | 20455.205 | 22634.324 |
| SR8       | 10862.63 | 32145.9  | NM_00467E | 1518.932  | 1479.281  | AB046834  | 700.184   | 643.598   |
| SR10      | 33990.87 | 14435.12 | NM_00095C | 19716.383 | 18989.172 | AB029033  | 5518.228  | 5850.54   |
| CY3Cy5    | 5344.958 | 332.195  | NM_00513E | 6054.953  | 7331.62   | AF091034  | 4153.534  | 3478.684  |
| NM_01432E | 1932.46  | 1186.154 | L10139    | 1060.549  | 947.994   | NM_005301 | 13706.812 | 14069.115 |
| NM_00412E | 2320.651 | 2452.706 | NM_02047C | 3849.804  | 3916.322  | NM_01665E | 4032.153  | 3794.182  |
| NM_00292E | 2108.794 | 1881.614 | NM_006574 | 654.69    | 852.13    | AB035124  | 7829.686  | 5198.172  |
| NM_00016C | 2512.383 | 2581.578 | AA478950  | 2068.712  | 2214.834  | AF060170  | 1250.819  | 1023.601  |
| NM_003301 | 1437.92  | 1522.188 | BF942101  | 2653.912  | 3222.946  | NM_01660E | 865.291   | 702.698   |
| NM_00095E | 1169.636 | 1407.234 | BI825012  | 11281.955 | 9879.235  | NM_00440E | 9493.145  | 8030.26   |
| U27768    | 1244.943 | 1449.082 | BM051302  | 1558.055  | 1073.778  | AK023397  | 2314.623  | 2019.27   |

|           |          |          |           |           |           |           |           |           |
|-----------|----------|----------|-----------|-----------|-----------|-----------|-----------|-----------|
| AF305550  | 6820.271 | 7832.079 | BE314182  | 7198.983  | 7016.136  | NM_001725 | 2205.032  | 1649.86   |
| U66582    | 11594.1  | 14343.55 | AI808029  | 827.242   | 927.358   | NM_004079 | 4222.012  | 4084.895  |
| NM_00619E | 3171.935 | 3492.733 | X03225    | 3143.459  | 2300.446  | NM_002996 | 759.666   | 611.02    |
| NM_00084C | 1296.056 | 1464.972 | AK097395  | 7844.323  | 6877.636  | NM_000383 | 1011.208  | 1229.238  |
| NM_00467E | 1980     | 2150.206 | M12783    | 1789.808  | 1416.671  | NM_006875 | 3061.148  | 2723.17   |
| NM_00095C | 5569.886 | 7425.29  | AK091535  | 775.346   | 928.469   | D87119    | 3452.955  | 4527.356  |
| NM_00513C | 7431.589 | 8508.767 | AF085357  | 8168.272  | 4958.793  | AL050040  | 1428.663  | 1303.341  |
| NM_02047C | 2332.488 | 3849.275 | NM_003841 | 18949.434 | 13653.16  | AL133066  | 721.284   | 732.146   |
| NM_006574 | 382.946  | 655.052  | AF296673  | 513.589   | 510.447   | AF264717  | 1950.906  | 2719.387  |
| AA478950  | 1496.418 | 1903.441 | NM_004633 | 499.282   | 958.265   | NM_01226C | 6707.115  | 6497.593  |
| AB029033  | 1056.678 | 1126.248 | X01394    | 35282.199 | 31864.529 | NM_001141 | 4944.125  | 6055.302  |
| AF091034  | 4401.943 | 4001.008 | NM_000041 | 31092.664 | 29864.297 | NM_00001E | 10846.754 | 16586.188 |
| NM_005301 | 8037.982 | 8863.858 | NM_002984 | 2487.758  | 2200.541  | AB028992  | 2159.21   | 1722.283  |
| NM_004167 | 746.932  | 647.298  | AF317425  | 3275.03   | 3356.883  | NM_018479 | 12086.572 | 10900.323 |
| NM_016653 | 5077.906 | 7600.211 | NM_018002 | 2407.398  | 2447.568  | NM_014362 | 6313.067  | 4398.104  |
| AB035124  | 11175.01 | 12825.65 | AB002340  | 2314.085  | 2704.92   | NM_01830E | 2331.713  | 2862.882  |
| AF060170  | 1794.563 | 1832.885 | NM_000224 | 2641.532  | 2640.933  | NM_001832 | 7931.004  | 8410.503  |
| NM_016602 | 985.141  | 1005.69  | NM_01432E | 7947.53   | 8879.854  | NM_017774 | 18301.727 | 15349.784 |
| NM_00440E | 5642.504 | 6138.931 | NM_006414 | 4957.522  | 5078.021  | AB037716  | 2161.785  | 2091.778  |
| AK023397  | 2573.371 | 3137.405 | NM_014322 | 953.036   | 1779.312  | NM_016297 | 3110.915  | 2142.752  |
| NM_001725 | 1407.546 | 1726.741 | NM_004122 | 2959.525  | 2669.536  | NM_001752 | 3027.189  | 2595.258  |
| NM_004079 | 3078.18  | 3318.011 | NM_00292E | 5863.808  | 5837.532  | BC003406  | 2887.837  | 1676.097  |
| NM_000383 | 1380.803 | 1398.714 | NM_00016C | 1382.703  | 1255.387  | X64177    | 783.287   | 1045.088  |
| NM_004633 | 943.44   | 344.716  | NM_003301 | 815.319   | 652.691   | NM_015994 | 9840.845  | 8250.483  |
| X01394    | 5160.798 | 6472.889 | NM_00095E | 1496.639  | 1517.129  | NM_01847E | 22781.912 | 32431.412 |
| NM_000041 | 14413.36 | 17255.3  | U27768    | 1192.158  | 1120.178  | AF220492  | 10755.173 | 11086.471 |
| NM_002984 | 1631.119 | 1388.754 | AF305550  | 4708.423  | 4107.02   | X89671    | 3250.002  | 3054.854  |
| AB037752  | 4739.921 | 6359.352 | U66582    | 7077.747  | 7748.225  | NM_014941 | 4227.309  | 4211.24   |
| AK024821  | 13767.16 | 12993.73 | S73288    | 572.513   | 463.133   | NM_013253 | 1744.905  | 1540.302  |
| NM_000224 | 925.298  | 1188.994 | NM_00619E | 2858.058  | 2748.443  | NM_005895 | 5030.138  | 5042.372  |
| NM_01432E | 12724.66 | 13873.45 | NM_003812 | 818.129   | 893.472   | D82345    | 11800.653 | 16771.646 |
| NM_006414 | 5143.584 | 7257.328 | NM_00223E | 756.453   | 733.518   | NM_003814 | 2361.779  | 3167.812  |
| NM_018479 | 11714.9  | 10930.98 | NM_01406E | 2231.084  | 2196.261  | NM_00296E | 607.765   | 1000.428  |
| NM_014362 | 6074.912 | 4403.206 | NM_00169E | 5027.297  | 6113.719  | NM_015957 | 576.09    | 1083.079  |
| NM_01830E | 652.211  | 720.98   | NM_00224E | 3376.105  | 3674.746  | NM_000262 | 1367.357  | 1213.988  |
| NM_001832 | 2184.02  | 2559.4   | NM_012281 | 2277.579  | 1942.258  | NM_017831 | 1654.834  | 1311.229  |
| NM_017774 | 18066.23 | 27672.52 | AK025772  | 3033.326  | 5326.119  | AK022537  | 15216.17  | 8576.73   |
| AB037716  | 2900.939 | 4501.743 | NM_00550E | 892.704   | 981.683   | AF116632  | 673.878   | 676.048   |
| NM_004827 | 305.478  | 639.647  | NM_152747 | 1357.841  | 1748.85   | AF064597  | 1238.734  | 1107.534  |
| NM_016297 | 3270.595 | 2511.483 | NM_01741E | 1256.13   | 1457.006  | NM_00634E | 5049.307  | 4953.049  |
| NM_001752 | 3044.67  | 3914.477 | NM_001667 | 21990.268 | 20245.199 | NM_00325E | 18425.047 | 19114.266 |
| BC003406  | 3473.288 | 2666.054 | AB046834  | 570.531   | 753.401   | AL080128  | 4733.313  | 4839.569  |
| AL137672  | 527.452  | 604.817  | AB029033  | 8314.172  | 8344.272  | AB037787  | 6341.032  | 7627.436  |
| X64177    | 1215.464 | 1493.519 | AF091034  | 3570.938  | 4534.523  | AB033072  | 1206.02   | 1126.906  |
| NM_015994 | 10774.68 | 10487.1  | NM_005301 | 21833.418 | 20298.846 | AB040892  | 1529.587  | 1935.656  |
| NM_00223E | 122.368  | 471.91   | NM_016653 | 4199.458  | 3559.644  | NM_001822 | 1973.901  | 2395.126  |
| NM_002241 | 854.872  | 1048.878 | AB035124  | 6069.279  | 6514.811  | NM_01826E | 14534.049 | 16384.484 |
| NM_012281 | 1292.984 | 1406.063 | AF060170  | 1034.173  | 1132.84   | NM_01438E | 1660.796  | 1877.132  |
| AK025772  | 5120.758 | 3223.263 | NM_016602 | 518.114   | 899.204   | NM_018110 | 2052.882  | 2882.021  |
| NM_00550E | 1052.422 | 1496.875 | NM_00440E | 9479.775  | 6787.093  | NM_006253 | 8643.49   | 10970.672 |
| NM_152747 | 2137.965 | 2148.48  | AK023397  | 2329.346  | 2016.852  | NM_00386E | 743.567   | 700.125   |
| NM_01741E | 1551.497 | 1568.895 | NM_00172E | 1965.469  | 1791.339  | NM_018262 | 1418.321  | 1192.838  |
| NM_001667 | 12732.29 | 18842.67 | NM_00407E | 4534.348  | 4453.068  | NM_006207 | 953.759   | 1057.815  |

|           |          |          |           |           |           |           |           |           |
|-----------|----------|----------|-----------|-----------|-----------|-----------|-----------|-----------|
| AB046834  | 483.223  | 379.266  | NM_00299€ | 924.073   | 975.34    | NM_00322C | 2027.591  | 1575.624  |
| NM_000262 | 1125.505 | 1261.759 | NM_000383 | 1060.143  | 839.83    | AF009674  | 5244.58   | 4099.74   |
| NM_017831 | 1899.008 | 1597.172 | NM_006875 | 2238.998  | 2600.913  | NM_00036C | 1378.357  | 971.449   |
| AK024393  | 526.147  | 464.181  | D87119    | 4160.813  | 4172.7    | NM_000844 | 877.161   | 733.151   |
| AK022537  | 16549.88 | 14128.7  | AL050040  | 687.835   | 930.241   | NM_00551C | 7478.134  | 5349.871  |
| AF064597  | 1281.106 | 1161.207 | NM_00655€ | 10498.144 | 10117.492 | Z36817    | 824.573   | 952.35    |
| AF198444  | 139.347  | 295.541  | AF264717  | 2342.707  | 2168.89   | NM_014505 | 28636.189 | 27136.217 |
| NM_006345 | 5945.378 | 7232.182 | NM_01226C | 5111.134  | 5126.118  | NM_004209 | 7039.398  | 5761.968  |
| AL133066  | 846.087  | 1202.311 | NM_001141 | 5510.582  | 6868.411  | NM_016162 | 3610.979  | 3828.392  |
| AF264717  | 1658.936 | 2267.818 | NM_00001€ | 8681.08   | 9121.609  | AF130056  | 3546.707  | 3476.901  |
| NM_01226C | 4882.612 | 4774.529 | AB028992  | 1495.62   | 1993.007  | NM_002201 | 57194.574 | 59555.059 |
| NM_001141 | 2592.023 | 4030.708 | NM_018475 | 9596.134  | 11998.662 | AK025047  | 1774.428  | 1780.115  |
| NM_00001€ | 12017.92 | 17738.51 | NM_014362 | 3988.469  | 6952.267  | NM_006806 | 4069.879  | 4474.271  |
| AB028992  | 2694.276 | 2310.358 | NM_01830€ | 2729.878  | 2946.577  | NM_006763 | 3429.282  | 3313.308  |
| L10139    | 364.024  | 293.86   | NM_001832 | 11925.544 | 10936.95  | NM_006119 | 2635.778  | 2829.458  |
| NM_02047C | 1849.314 | 2462.198 | NM_017774 | 13295.58  | 12363.356 | NM_004465 | 1261.999  | 1545.386  |
| NM_006574 | 279.084  | 612.363  | AB037716  | 2134.562  | 2010.538  | NM_001761 | 7969.336  | 8471.281  |
| AA478950  | 1506.948 | 2109.546 | NM_004827 | 412.229   | 297.854   | BE884341  | 3362.245  | 3661.842  |
| BF942101  | 4802.7   | 5075.247 | NM_00192€ | 545.406   | 509.622   | AF231997  | 2539.104  | 3477.646  |
| BI825012  | 3273.066 | 3792.988 | NM_016297 | 2881.014  | 2381.254  | NM_00259€ | 6027.583  | 5807.136  |
| M21574    | 465.143  | 400.99   | NM_001752 | 2785.71   | 2145.877  | NM_020184 | 727.131   | 781.541   |
| BM051302  | 1661.421 | 2209.183 | BC003406  | 2004.701  | 2601.395  | NM_005815 | 2311.63   | 1981.793  |
| BE314182  | 8901.158 | 7741.522 | AL137672  | 937.404   | 840.42    | NM_001229 | 1226.807  | 1260.879  |
| AI808029  | 1790.259 | 1683.006 | X64177    | 1312.769  | 905.868   | NM_014916 | 697.135   | 433.505   |
| X03225    | 3112.135 | 3733.904 | NM_015994 | 9539.585  | 13354.307 | NM_00025C | 881.363   | 580.188   |
| AK097395  | 5358.643 | 5428.877 | NM_01847€ | 26211.516 | 25851.914 | NM_018147 | 11587.568 | 8037.275  |
| AF085357  | 6963.992 | 11845.83 | AF220492  | 7560.186  | 6768.328  | NM_018967 | 2628.204  | 2180.563  |
| AK092768  | 374.124  | 547.964  | X89671    | 2283.539  | 2843.955  | NM_00185C | 894.271   | 828.929   |
| NM_080824 | 672.709  | 732.224  | NM_014941 | 4461.881  | 3944.412  | NM_00216C | 1554.363  | 1288.392  |
| AL137698  | 279.509  | 470.19   | NM_018372 | 6481.55   | 6718.447  | NM_005675 | 2859.631  | 2560.389  |
| NM_018002 | 2785.874 | 2778.126 | NM_013253 | 1597.474  | 1700.642  | NM_00277C | 1928.196  | 2704.055  |
| AB002340  | 2393.524 | 1809.339 | NM_005895 | 5376.495  | 7121.215  | BC030636  | 2848.528  | 2931.886  |
| NM_000224 | 987.276  | 1214.285 | D82345    | 13229.648 | 13299.526 | D21064    | 547.721   | 491.324   |
| NM_01432€ | 13236.22 | 17615.59 | NM_003814 | 1769.268  | 1920.696  | NM_002812 | 5324.561  | 5315.063  |
| NM_006414 | 5302.473 | 7874.649 | NM_00296€ | 715.201   | 826.798   | NM_020365 | 3799.832  | 3741.316  |
| NM_014322 | 1850.423 | 1011.322 | NM_015957 | 429.186   | 491.484   | NM_003982 | 1525.508  | 1575.794  |
| NM_004122 | 2680.833 | 3536.664 | NM_000262 | 1431.635  | 1382.896  | NM_002079 | 8292.274  | 8247.1    |
| NM_00292€ | 1959.2   | 2444.454 | NM_017831 | 1289.973  | 1376.768  | NM_002112 | 4217.044  | 5505.237  |
| NM_00016C | 2541.354 | 2453.137 | AK022537  | 10260.512 | 11776.51  | NM_004121 | 2164.29   | 3439.102  |
| NM_003301 | 1089.749 | 1016.28  | AF116632  | 1138.955  | 768.676   | NM_001902 | 2853.871  | 2249.782  |
| NM_000955 | 992.887  | 825.753  | AF064597  | 1109.996  | 868.533   | AL137605  | 23828.094 | 23372.219 |
| U27768    | 1352.145 | 1140.316 | NM_006345 | 4911.401  | 4023.458  | NM_016261 | 1645.479  | 1392.133  |
| U66582    | 12490.82 | 12507.29 | NM_00325€ | 23558.131 | 22175.574 | NM_006519 | 1132.317  | 1162.615  |
| NM_00084€ | 1518.533 | 1412.799 | AL080128  | 5064.92   | 4219.275  | NM_012076 | 1027.231  | 718.184   |
| NM_00467€ | 1970.611 | 2196.98  | AB037787  | 6690.127  | 5554.537  | NM_007285 | 21658.609 | 16930.863 |
| NM_00095C | 5707.831 | 6873.751 | AB033072  | 858.648   | 672.876   | D14678    | 7308.581  | 5631.512  |
| AK025772  | 5166.815 | 2803.941 | AB040892  | 2209.848  | 1899.406  | NM_016221 | 3791.242  | 2637.874  |
| NM_00550€ | 1236.526 | 1162.777 | NM_001822 | 2204.312  | 2035.335  | NM_018113 | 2147.83   | 2084.45   |
| NM_152747 | 2140.01  | 1719.953 | NM_01826€ | 16431.582 | 17006.314 | NM_005187 | 1672.375  | 1613.388  |
| NM_017415 | 1352.365 | 1394.231 | AF230904  | 9748.599  | 7993.798  | U73377    | 3646.341  | 3051.156  |
| NM_001667 | 12608.42 | 16036.36 | NM_01759€ | 8735.962  | 8492.896  | NM_00219€ | 4669.814  | 4839.381  |
| AB046834  | 593.855  | 874.372  | AL157480  | 3658.14   | 3804.056  | BC005219  | 6507.278  | 5923.123  |
| AB029033  | 1318.571 | 1302.327 | NM_01438€ | 1562.293  | 1527.63   | NM_00426€ | 1636.954  | 1691.952  |

|           |          |          |           |           |           |           |           |           |
|-----------|----------|----------|-----------|-----------|-----------|-----------|-----------|-----------|
| AF091034  | 4666.306 | 4703.306 | NM_018110 | 2992.497  | 2746.177  | NM_006662 | 5797.105  | 5552.741  |
| NM_005301 | 9491.363 | 10579.93 | AF312678  | 853.314   | 963.967   | NM_004031 | 764.984   | 1024.615  |
| NM_004167 | 722.225  | 619.578  | NM_006253 | 12676.785 | 8868.786  | NM_004514 | 4987.708  | 4888.997  |
| NM_016653 | 4893.985 | 4824.366 | NM_003866 | 926.161   | 1373.537  | NM_006163 | 1349.103  | 1526.309  |
| AB035124  | 10613.9  | 8289.917 | NM_018262 | 1472.727  | 1466.228  | NM_001272 | 12092.46  | 8610.676  |
| AF060170  | 1630.773 | 1440.972 | NM_006207 | 1901.155  | 1588.432  | NM_016303 | 7594.203  | 7733.801  |
| NM_016602 | 1269.494 | 858.148  | NM_003220 | 3260.173  | 2693.727  | NM_006196 | 28592.229 | 30696.32  |
| NM_004409 | 6492.285 | 5809.937 | AF009674  | 4337.685  | 3152.507  | AV733560  | 1318.448  | 1049.889  |
| NM_000383 | 1311.15  | 1483.099 | NM_000360 | 970.453   | 831.35    | NM_004247 | 3622.725  | 3599.365  |
| NM_004633 | 1071.816 | 256.997  | NM_000844 | 1108.601  | 1063.391  | NM_017722 | 3984.524  | 3509.4    |
| X01394    | 5041.577 | 6853.957 | NM_005510 | 6156.683  | 5947.23   | AL137730  | 3678.112  | 3144.345  |
| NM_000041 | 13214.02 | 16172.98 | NM_014505 | 29182.904 | 23697.348 | NM_004500 | 38941.402 | 33625.086 |
| NM_002984 | 1214.842 | 1281.59  | NM_004209 | 5347.313  | 4628.608  | AL137681  | 2672.998  | 2086.114  |
| AF264717  | 1471.884 | 2010.747 | NM_016162 | 3555.533  | 2932.576  | AK025694  | 51246.191 | 50097.469 |
| NM_012260 | 4332.104 | 3387.083 | AF130056  | 3020.791  | 2965.518  | NM_002157 | 63466.762 | 56239.305 |
| NM_001141 | 3491.1   | 4425.648 | NM_002201 | 53597.684 | 57895.57  | NM_004095 | 13012.547 | 7150.616  |
| NM_000018 | 11365.27 | 13615.37 | AK025047  | 2395.172  | 1856.594  | NM_014365 | 755.873   | 555.383   |
| AB028992  | 2567.104 | 2494.957 | NM_006806 | 3754.99   | 4312.687  | NM_005147 | 3737.937  | 3013.98   |
| NM_018479 | 13372.39 | 17417.74 | NM_006763 | 3148.852  | 2161.362  | NM_014665 | 4179.646  | 3338.843  |
| NM_014362 | 7232.569 | 4907.434 | NM_006119 | 3204.063  | 3000.885  | AK023609  | 1851.032  | 2238.682  |
| NM_018308 | 756.25   | 729.132  | NM_004465 | 1172.423  | 1444.616  | NM_018019 | 3353.754  | 3358.881  |
| NM_001832 | 3923.652 | 6123.982 | AK026927  | 3445.628  | 2881.082  | AK027220  | 3771.503  | 2723.175  |
| NM_017774 | 16662.71 | 16118.66 | NM_014059 | 14283.853 | 17955.438 | NM_018011 | 7475.993  | 6998.993  |
| AB037716  | 2494.986 | 2593.486 | NM_001761 | 6732.072  | 5492.571  | AF132733  | 2795.172  | 2168.666  |
| NM_004827 | 265.962  | 478.674  | BE884341  | 3026.717  | 3089.246  | NM_001071 | 42890.93  | 40348.164 |
| NM_016297 | 3432.237 | 2615.132 | AF231997  | 2913.914  | 2403.985  | NM_006187 | 2007.304  | 2641.624  |
| NM_001752 | 2698.443 | 3247.505 | NM_007125 | 2783.7    | 2871.201  | NM_020354 | 10724.179 | 14917.316 |
| BC003406  | 3463.782 | 2474.815 | NM_002598 | 5712.06   | 5696.204  | AF202637  | 3833.203  | 6557.644  |
| AL137672  | 500.588  | 663.472  | NM_020184 | 910.069   | 904.927   | NM_000026 | 38964.977 | 44226.07  |
| X64177    | 987.587  | 1177.032 | NM_005815 | 1989.397  | 1771.253  | AB033016  | 17246.131 | 9941.517  |
| NM_015994 | 9702.345 | 8479.455 | NM_001229 | 1660.241  | 1569.85   | D87452    | 1915.833  | 1691.438  |
| NM_002241 | 309.81   | 398.128  | NM_014916 | 546.814   | 439.364   | AB037864  | 1577.583  | 1538.279  |
| NM_014065 | 2429.373 | 2414.913 | NM_000250 | 1069.559  | 883.539   | L26494    | 864.413   | 655.883   |
| NM_001695 | 5867.807 | 6349.94  | NM_018147 | 8684.503  | 5819.762  | BF382513  | 4216.333  | 2869.439  |
| NM_002248 | 1424.897 | 1832.054 | NM_018967 | 3823.573  | 3527.186  | AB020713  | 11385.37  | 7869.975  |
| NM_012281 | 1236.796 | 1625.687 | NM_001850 | 1172.893  | 1004.156  | AK025426  | 1231.065  | 937.322   |
| NM_080824 | 695.691  | 563.971  | NM_002160 | 1582.133  | 1484.114  | NM_016558 | 5894.762  | 4902.609  |
|           | 700.015  | 532.107  | NM_005675 | 2650.749  | 1503.733  | NM_007145 | 6524.275  | 5546.159  |
|           | 774.099  | 618.665  | NM_002770 | 2679.91   | 2019.527  | AL133112  | 1001.931  | 970.728   |
| AL137698  | 209.788  | 348.143  | BC030636  | 2983.423  | 2356.802  | AF085877  | 513.016   | 556.433   |
| NM_015957 | 651.594  | 596.976  | D21064    | 412.247   | 456.06    | AK002078  | 2484.921  | 1925.428  |
| NM_000262 | 816.795  | 1098.896 | NM_002812 | 4974.973  | 3925.593  | AF085837  | 1430.699  | 1806.868  |
| NM_017831 | 1596.646 | 1304.99  | NM_020365 | 4092.056  | 4091.422  | AK023165  | 1098.709  | 1154.681  |
| AK022537  | 16589.77 | 11581.07 | NM_003982 | 1453.913  | 1074.199  | NM_016115 | 2952.721  | 2130.461  |
| AF116632  | 649.321  | 616.636  | NM_002079 | 6844.132  | 6453.512  | NM_014950 | 3741.16   | 3055.284  |
| AF064597  | 1232.465 | 1150.241 | NM_002112 | 5377.541  | 3824.075  | AF147376  | 814.092   | 1030.757  |
| NM_006345 | 5230.485 | 5414.577 | NM_004121 | 2577.828  | 2009.364  | AK027190  | 819.353   | 866.084   |
| NM_006875 | 3865.52  | 3208.156 | AY007092  | 3275.533  | 3759.354  | AL360136  | 963.922   | 1138.647  |
| D87119    | 3095.395 | 3953.776 | NM_001902 | 2378.907  | 3638.44   | AF086259  | 1162.426  | 1129.299  |
| AB037769  | 609.573  | 607.918  | AL137605  | 37140.277 | 35040.824 | AF086328  | 1470.345  | 1328.308  |
| AL050040  | 1075.979 | 1130.328 | NM_016261 | 1379.021  | 1305.829  | AK023753  | 1641.805  | 1219.426  |
| NM_006556 | 12994.96 | 16887.98 | NM_006519 | 1237.186  | 1122.771  | AF086441  | 6934.898  | 5195.452  |
| AL133066  | 569.087  | 653.625  | NM_004607 | 56865.324 | 61430.645 | NM_014117 | 2299.755  | 2456.988  |



|          |          |          |          |           |           |           |           |           |
|----------|----------|----------|----------|-----------|-----------|-----------|-----------|-----------|
| NM_00084 | 1732.713 | 1489.801 | NM_01207 | 1193.763  | 843.68    | AF086087  | 8419.499  | 7091.956  |
| NM_00467 | 2330.514 | 2291.608 | NM_00728 | 19917.035 | 14736.317 | AK000671  | 25782.764 | 25656.857 |
| NM_00095 | 5885.449 | 5600.835 | D14678   | 8294.677  | 6428.204  | AK094020  | 789.664   | 1295.776  |
| NM_02047 | 2170.6   | 2750.188 | NM_01622 | 3226.332  | 3042.804  | AL137425  | 733.979   | 773.586   |
| NM_00657 | 337.558  | 480.414  | NM_01811 | 2287.137  | 1879.58   | AL359584  | 626.272   | 675.091   |
| AA478950 | 1446.787 | 1324.069 | NM_00518 | 1732.019  | 1246.52   | AL137285  | 684.636   | 634.345   |
| BF942101 | 3564.79  | 2798.57  | U73377   | 3555.187  | 2905.44   | AL137456  | 1523.418  | 1551.285  |
| BI825012 | 3260.306 | 3242.912 | NM_00219 | 4290.896  | 4448.994  | AL157489  | 704.747   | 669.404   |
| M21574   | 505.964  | 373.997  | BC005219 | 9179.011  | 7763.079  | AL390157  | 517.44    | 774.964   |
| BM051302 | 1670.022 | 2305.66  | NM_00426 | 2964.574  | 2688.514  | AK024874  | 707.943   | 488.949   |
| BE314182 | 8920.933 | 8110.038 | NM_00154 | 785.032   | 506.189   | AK021847  | 725.728   | 585.003   |
| AI808029 | 1562.148 | 2093.561 | NM_00666 | 9170.49   | 7698.959  | AK023086  | 3928.284  | 3943.189  |
| X03225   | 2382.099 | 3076.706 | NM_00403 | 1668.158  | 1375.927  | AF241534  | 583.672   | 778.913   |
| AK097395 | 4811.566 | 5006.094 | NM_00451 | 5784.535  | 4217.59   | NM_017621 | 8131.521  | 7522.214  |
| M12783   | 2626.144 | 3025.518 | NM_00616 | 1572.31   | 1119.214  | AK023574  | 1377.939  | 1223.505  |
| AK091535 | 1419.762 | 1140.74  | NM_00127 | 14388.751 | 9265.719  | AF131767  | 1457.297  | 1236.652  |
| AF085357 | 6540.391 | 11275.55 | NM_01630 | 8039.217  | 6660.285  | AK021907  | 1285.845  | 1195.956  |
| AK092768 | 133.672  | 219.483  | NM_00619 | 30419.068 | 25980.369 | AK022029  | 782.335   | 777.301   |
| NM_00384 | 789.598  | 887.067  | AV733560 | 949.993   | 862.217   | AK022320  | 908.181   | 751.187   |
| AF296673 | 346.082  | 541.265  | D17129   | 45786.652 | 39777.34  | AK022058  | 556.678   | 817.945   |
| NM_00463 | 967.174  | 426.654  | NM_00309 | 20439.74  | 17018.398 | NM_01828  | 721.639   | 492.066   |
| X01394   | 7130.685 | 7800.252 | NM_00424 | 4853.042  | 3531.333  | AK024381  | 305.708   | 647.549   |
| NM_00004 | 14391.68 | 14661.78 | NM_01772 | 3647.822  | 3384.354  | AK026503  | 1409.616  | 1847.331  |
| NM_00298 | 1436.527 | 1197.02  | AL137730 | 6175.449  | 4295.009  | AK026671  | 1941.15   | 2138.94   |
| AB037752 | 4409.398 | 4632.667 | NM_00450 | 33777.695 | 21864.9   | AK025522  | 16740.031 | 12511.592 |
| NM_01800 | 2401.486 | 2770.345 | NM_00327 | 11345.134 | 5518.411  | AK025464  | 51127.059 | 46576.652 |
| AB002340 | 2504.897 | 1879.209 | AL137681 | 3019.904  | 2103.51   | AL049962  | 4493.214  | 4616.389  |
| NM_00022 | 797.595  | 963.099  | AK025694 | 53040.5   | 51216.695 | NM_016941 | 1488.258  | 1349.87   |
| NM_01432 | 11273.13 | 9828.674 | NM_00215 | 57583.113 | 62013.07  | NM_02040  | 1370.955  | 1056.936  |
| NM_00641 | 4735.777 | 4591.502 | NM_00409 | 10732.902 | 6847.053  | NM_00498  | 6677.134  | 6001.881  |
| NM_01432 | 2087.1   | 1352.261 | NM_01436 | 440.442   | 490.416   | AL080151  | 1811.77   | 1578.036  |
| NM_00412 | 2912.145 | 3485.046 | NM_00514 | 3345.628  | 2578.895  | AL050085  | 563.694   | 695.835   |
| NM_00292 | 2513.07  | 2142.504 | NM_01466 | 3005.026  | 2006.869  | AK024127  | 819.945   | 792.074   |
| NM_00016 | 2744.508 | 3101.46  | AK023609 | 3347.407  | 4328.012  | AK024243  | 602.19    | 1756.919  |
| NM_00330 | 1650.605 | 1319.909 | NM_01801 | 5488.969  | 6784.301  | AK021574  | 2462.541  | 3590.67   |
| NM_00095 | 807.486  | 1131.867 | AK027220 | 5226.228  | 7468.095  | AF119911  | 9744.241  | 8233.317  |
| U27768   | 1152.984 | 1067.07  | NM_01801 | 11560.265 | 12065.63  | AF116656  | 6842.915  | 4999.293  |
| AF305550 | 6169.361 | 6306.645 | AK022132 | 462.823   | 1016.305  | NM_00105  | 3626.803  | 3208.875  |
| U66582   | 11025.83 | 12043.59 | NM_00047 | 1071.168  | 742.122   | AF132206  | 957.403   | 779.536   |
| NM_00619 | 3089.913 | 4010.401 | AF132733 | 2840.525  | 2868.549  | AJ001869  | 2238.007  | 2368.743  |
| NM_00223 | 190.619  | 295.724  | NM_00107 | 33001.984 | 31407.234 | NM_02021  | 4237.398  | 5254.335  |
| NM_01406 | 2189.25  | 1863.53  | NM_00618 | 2836.375  | 2099.572  | D17267    | 7018.75   | 7360.442  |
| NM_00169 | 5692.367 | 5081.221 | NM_02035 | 9906.153  | 8183.253  | AB040944  | 683.58    | 594.405   |
| NM_00224 | 1308.57  | 1168.402 | AF202637 | 5268.311  | 3132.803  | NM_01814  | 2106.316  | 1920.297  |
| NM_01228 | 1455.091 | 1190.37  | NM_00002 | 39875.289 | 33550.93  | AK024326  | 1705.591  | 1338.766  |
| AK025772 | 5001.584 | 2963.845 | AB033016 | 7538.753  | 3236.647  | U61088    | 434.254   | 684.788   |
| NM_00550 | 1240.996 | 1032.402 | D87452   | 2770.1    | 2593.693  | AF086467  | 1051.645  | 1141.665  |
| NM_15274 | 2240.556 | 1782.624 | AB037864 | 2567.678  | 2416.533  | AL137345  | 2448.068  | 2041.897  |
| NM_01741 | 1471.984 | 1229.543 | L26494   | 3990.819  | 3186.484  | AK000967  | 1961.27   | 1750.581  |
| NM_00166 | 12844.75 | 13309.87 | NM_00034 | 673.929   | 960.349   | AK021583  | 3174.144  | 2654.18   |
| AB046834 | 639.042  | 570.814  | BF382513 | 5119.459  | 3713.73   | AL137442  | 4244.014  | 2960.227  |
| AB029033 | 1242.061 | 1382.078 | AB020713 | 8073.006  | 4697.073  | AL049281  | 711.567   | 811.963   |
| AF091034 | 4676.962 | 4125.667 | AK025426 | 1911.34   | 1085.587  | NM_00120  | 24532.092 | 20328.195 |

|           |          |          |           |           |           |           |           |           |
|-----------|----------|----------|-----------|-----------|-----------|-----------|-----------|-----------|
| NM_005301 | 9210.491 | 9767.814 | NM_01655E | 5449.622  | 3091.598  | AL050061  | 1033.858  | 1158.751  |
| NM_004167 | 954.26   | 471.673  | NM_00714E | 6131.824  | 3261.009  | AL050206  | 1107.453  | 1041.592  |
| NM_01665E | 4756.003 | 4918.308 | AL133112  | 1316.397  | 633.897   | AK026898  | 2541.676  | 2183.868  |
| AB035124  | 10786.49 | 8188.62  | AF085855  | 1146.5    | 1325.513  | NM_006637 | 440.877   | 502.823   |
| AF060170  | 1370.529 | 1474.668 | AF085877  | 1298.895  | 1347.934  | AK022419  | 1019.672  | 1004.768  |
| NM_01660E | 980.771  | 1044.277 | AK002078  | 3991.591  | 5660.279  | NM_014624 | 925.248   | 1034.602  |
| NM_00440E | 5814.501 | 5943.248 | AF085837  | 4634.07   | 4221.315  | NM_01393E | 1063.012  | 796.245   |
| AK023397  | 2250.901 | 2822.971 | AK023165  | 1875.587  | 2194.375  | AF086145  | 914.338   | 774.819   |
| NM_00172E | 1446.084 | 1428.623 | NM_016115 | 3559.385  | 4698.076  | BC002538  | 2725.649  | 1539.324  |
| NM_00407E | 2970.667 | 3333     | NM_01495C | 4938.682  | 4433.454  | NM_01783E | 3198.443  | 1677.719  |
| NM_00038E | 1457.207 | 1899.947 | AL080180  | 1277.539  | 2288.22   | AK096584  | 6996.275  | 6050.021  |
| NM_00687E | 4291.891 | 3363.415 | X89067    | 1939.072  | 2392.717  | Z29070    | 665.318   | 621.741   |
| D87119    | 3261.932 | 3702.178 | AF147376  | 1579.244  | 1195.085  | AL078636  | 847.729   | 802.213   |
| AB037769  | 849.461  | 431.971  | AK027190  | 2115.932  | 1985.069  | S72917    | 859.779   | 559.631   |
| AL050040  | 1233.662 | 921.148  | AL360136  | 1927.818  | 2294.219  | AF076617  | 63382.219 | 52106.355 |
| NM_00655E | 13256.53 | 13226.87 | AF086259  | 2050.827  | 2171.422  | M91159    | 667.309   | 458.652   |
| AL133066  | 607.736  | 721.017  | AF086369  | 1040.383  | 1201.095  | AK025129  | 625.525   | 526.156   |
| AF264717  | 1645.292 | 2093.06  | AF086328  | 5043.653  | 6021.801  | NM_01439E | 4286.551  | 3306.362  |
| NM_01226C | 4662.652 | 3731.758 | AK024196  | 1213.564  | 1205.039  | AK023291  | 8400.623  | 6518.783  |
| NM_001141 | 3184.984 | 4137.026 | AK001099  | 1584.467  | 1315.814  | BF541820  | 737.575   | 1144.015  |
| NM_00001E | 11994.71 | 11946.42 | AK023753  | 4263.582  | 3733.891  | X07696    | 2746.64   | 3563.647  |
| AB028992  | 2928.687 | 1667.194 | AF086441  | 16393.354 | 11983.824 | AA481015  | 1481.806  | 1769.988  |
| NM_01847E | 13454.04 | 11550.26 | AK027255  | 2043.347  | 1053.783  | AI925826  | 4582.547  | 5448.996  |
| NM_01436E | 6859.221 | 4722.39  | NM_014117 | 4887.671  | 4912.339  | U04209    | 7344.388  | 6080.751  |
| NM_01830E | 968.878  | 1326.985 | AF086087  | 6183.438  | 6180.813  | M55284    | 4705.77   | 4931.92   |
| NM_00183E | 2245.722 | 3112.083 | AF075091  | 856.025   | 936.671   | AA679391  | 1583.703  | 2080.333  |
| NM_017774 | 17472.97 | 18470.95 | AK000671  | 55215.379 | 55022.742 | BG682146  | 3209.101  | 3528.714  |
| AB037716  | 2632.219 | 3146.087 | AK002016  | 937.7     | 1327.34   | NM_00506C | 2037.817  | 2659.145  |
| NM_004827 | 308.056  | 387.328  | AK094020  | 880.902   | 1031.079  | NM_005437 | 10287.395 | 12316.952 |
| NM_016297 | 3142.049 | 2533.694 | AL137425  | 2038.499  | 3042.552  | SR9       | 40654.238 | 5973.221  |
| NM_00175E | 2952.729 | 3129.685 | AL137637  | 1287.284  | 1448.947  | CY3Cy5    | 11974.74  | 419.118   |
| BC003406  | 3391.479 | 2583.358 | AL359584  | 1366.003  | 1784.599  | NM_003974 | 7497.08   | 8868.151  |
| AL137672  | 733.111  | 805.319  | AL137285  | 1434.651  | 1418.381  | NM_01433E | 18963.307 | 21765.355 |
| X64177    | 1233.957 | 1750.613 | AL137456  | 2146.844  | 2030.204  | NM_00149E | 1934.332  | 1966.882  |
| NM_015994 | 13171.25 | 19124.52 | AL157489  | 1394.658  | 824.648   | AB005216  | 1541.575  | 2011.675  |
| NM_01847E | 16426.72 | 20515.41 | AL390157  | 1274.325  | 1048.822  | AK000184  | 758.205   | 725.595   |
| AF220492  | 9858.963 | 10118.37 | AK021649  | 1278.972  | 834.389   | AF055020  | 4555.819  | 5942.735  |
| X89671    | 3103.353 | 2761.123 | AF088007  | 1465.117  | 457.587   | NM_00698E | 4611.437  | 5467.993  |
| NM_014941 | 3894.667 | 4482.445 | AK024874  | 1016.22   | 1269.434  | AF272043  | 10950.128 | 12749.669 |
| NM_01837E | 7694.639 | 7398.923 | AF086071  | 1362.562  | 1480.602  | NM_002587 | 7576.256  | 9083.429  |
| NM_01325E | 1771.186 | 1610.953 | AK021847  | 909.583   | 1752.229  | NM_00223E | 3031.809  | 3289.631  |
| NM_00589E | 6813.478 | 5910.77  | AK026035  | 533.389   | 710.76    | NM_00486E | 1014.395  | 1045.977  |
| D82345    | 13176.7  | 15511.57 | AK023086  | 6060.068  | 7690.946  | NM_002414 | 68663.367 | 60067.148 |
| NM_003814 | 2757.344 | 2834.47  | AF241534  | 1387.113  | 1765.39   | AL133580  | 20412.986 | 19696.498 |
| NM_00296E | 493.898  | 558.191  | NM_017621 | 9597.575  | 8782.44   | NM_01466E | 13590.07  | 16905.088 |
| NM_00026E | 715.62   | 1389.651 | AK023574  | 806.896   | 1129.565  | NM_01333E | 21031.59  | 29844.412 |
| NM_017831 | 1565.261 | 1880.182 | AF131767  | 1861.318  | 1265.857  | NM_00233E | 2742.683  | 3904.449  |
| AK024393  | 472.34   | 299.198  | AK021907  | 1976.66   | 2622.914  | NM_00340C | 13665.697 | 14454.993 |
| AK022537  | 16431.13 | 11407.57 | AK022029  | 2055.253  | 2381.573  | NM_00670E | 2668.31   | 3060.986  |
| AF116632  | 549.962  | 734.136  | AK022167  | 729.067   | 601.108   | NM_01443E | 664.791   | 857.43    |
| AF064597  | 1290.913 | 1479.847 | AK022320  | 1261.959  | 1100.167  | NM_00558E | 1490.069  | 1926.314  |
| AF198444  | 246.863  | 368.5    | AK022058  | 1195.281  | 836.842   | NM_01226E | 7886.576  | 8235.721  |
| NM_00634E | 5796.593 | 9546.466 | AK022196  | 339.962   | 523.405   | NM_00455E | 3226.652  | 3579.028  |

|           |          |          |           |           |           |           |           |           |
|-----------|----------|----------|-----------|-----------|-----------|-----------|-----------|-----------|
| NM_00325E | 9168.912 | 10403.14 | AK024381  | 1105.849  | 1251.31   | X56692    | 5465.677  | 6801.445  |
| AL080128  | 3343.194 | 3460.084 | AK026503  | 2002.222  | 1725.549  | NM_01427E | 4486.846  | 3437.425  |
| AB037787  | 4545.909 | 4918.142 | AK026671  | 3641.678  | 3921.124  | NM_000734 | 12055.743 | 12471.408 |
| AB033072  | 1111.655 | 1182.271 | AK025522  | 13914.908 | 16335.035 | X82693    | 14478.302 | 16192.181 |
| AB040892  | 824.852  | 1011.911 | AK025464  | 46750.344 | 56609.297 | NM_00717E | 18276.832 | 25063.457 |
| NM_00182Z | 2030.936 | 2162.745 | AL049962  | 2815.854  | 2407.178  | NM_00272Z | 3350.197  | 3362.135  |
| AB002360  | 331.024  | 404.449  | NM_016941 | 1695.11   | 1455.804  | NM_014904 | 1351.477  | 1403.654  |
| NM_01826E | 6920.395 | 6189.98  | NM_02040E | 1170.02   | 1445.373  | AL137576  | 10662.772 | 12147.707 |
| AF230904  | 9361.867 | 9354.351 | NM_00498E | 16866.018 | 11435.831 | NM_01835E | 5489.628  | 6196.386  |
| NM_01759E | 9773.55  | 8017.683 | AL050085  | 1809.197  | 1514.253  | NM_00651E | 18565.383 | 16390.014 |
| AL157480  | 2829.12  | 2558.828 | AK001308  | 1718.331  | 1951.197  | NM_00305E | 2870.248  | 3792.784  |
| NM_01438E | 2102.313 | 1850.783 | AK024127  | 1395.447  | 1692.704  | NM_00507E | 977.525   | 1093.928  |
| NM_018110 | 2037.147 | 2908.921 | AK024243  | 809.82    | 366.155   | NM_014824 | 2244.511  | 2235.238  |
| AF312678  | 1131.295 | 1064.097 | AK021574  | 3794.455  | 3660.195  | NM_014504 | 2968.428  | 2975.885  |
| NM_00625Z | 10034.9  | 14477.34 | AF119911  | 10527.538 | 9454.269  | AF161407  | 13306.778 | 15788.974 |
| NM_00386E | 2393.565 | 1513.742 | AF116656  | 4511.541  | 4691.433  | NM_01473E | 4639.36   | 5139.589  |
| NM_01826Z | 2373.918 | 2132.691 | NM_00105C | 3117.422  | 2825.674  | NM_01808C | 6361.844  | 7099.893  |
| NM_006207 | 553.487  | 842.854  | AF132206  | 1062.901  | 1123.123  | AF174605  | 7249.514  | 7487.987  |
| NM_00322C | 1916.908 | 1812.499 | AJ001869  | 6906.28   | 6014.355  | NM_01445Z | 17796.209 | 20132.176 |
| AF009674  | 3273.506 | 4386.616 | NM_00529E | 1274.207  | 1409.054  | NM_00571Z | 2577.868  | 2847.319  |
| NM_00036C | 1820.174 | 1585.16  | NM_02021Z | 5992.903  | 3901.572  | AK023553  | 3241.842  | 2564.024  |
| NM_000844 | 528.775  | 624.107  | D17267    | 9088.68   | 7416.218  | NM_01673Z | 4239.937  | 4514.256  |
| NM_00551C | 8378.559 | 8917.848 | AF200341  | 399.746   | 618.17    | AF181994  | 2407.956  | 2349.057  |
| Z36817    | 925.512  | 1361.937 | AJ238214  | 515.99    | 908.698   | NM_01896Z | 1541.562  | 1737.956  |
| NM_01450E | 19851.37 | 28372.79 | AB040944  | 1979.411  | 1461.136  | AF125100  | 2175.706  | 2301.705  |
| NM_00420E | 6946.325 | 8994.747 | NM_01814E | 3675.448  | 2758.477  | AF130728  | 1498.958  | 1432.336  |
| NM_01616Z | 5537     | 5482.556 | AK024326  | 1222.978  | 1117.059  | NM_00128E | 21323.369 | 23872.035 |
| AF130056  | 4591.439 | 3985.614 | U61088    | 818.229   | 748       | NM_001131 | 25286.164 | 29683.059 |
| NM_002201 | 22578.69 | 21437.29 | AF086467  | 1627.962  | 1518.669  | AA481015  | 1836.292  | 1470.689  |
| AK025047  | 588.672  | 508.909  | AL137345  | 2319.742  | 2555.137  | AI925826  | 5086.598  | 5598.642  |
| NM_00680E | 5609.872 | 4718.83  | AK000967  | 2254.445  | 1874.613  | Z15108    | 761.701   | 1045.164  |
| NM_00676Z | 2997.599 | 2122.4   | AK021583  | 3420.572  | 2778.843  | M55284    | 4916.087  | 4738.946  |
| NM_006119 | 2962.072 | 2481.743 | AL137442  | 3757.591  | 2574.645  | AA679391  | 1482.562  | 1718.661  |
| NM_00446E | 1654.136 | 1201.311 | NM_00120E | 31200.957 | 24929.668 | BG682146  | 3382.429  | 3266.901  |
| AK026927  | 3483.118 | 3053.026 | AL050061  | 3515.781  | 2892.98   | AA884709  | 2399.064  | 2449.708  |
| NM_01405E | 19595.67 | 11936.66 | AL050206  | 1897.551  | 2492.225  | NM_00506C | 2649.938  | 2707.457  |
| NM_001761 | 7461.362 | 5546.605 | AK026898  | 3127.191  | 2308.565  | NM_01427E | 3764.997  | 2693.113  |
| BE884341  | 3317.745 | 4239.878 | NM_006637 | 566.981   | 678.427   | NM_000734 | 11410.679 | 11928.627 |
| AF231997  | 2563.61  | 4186.836 | AK022419  | 587.947   | 508.075   | NM_012331 | 2209.662  | 2653.685  |
| NM_00712E | 3144.904 | 4456.695 | AJ251832  | 492.068   | 643.132   | NM_006644 | 10150.002 | 9261.962  |
| NM_00259E | 8296.812 | 8537.211 | NM_014624 | 949.863   | 664.096   | NM_00658Z | 88065.508 | 5687.716  |
| NM_020184 | 881.204  | 1014.242 | NM_01393E | 1327.566  | 1225.807  | NM_003974 | 9347.288  | 9787.14   |
| NM_00581E | 3186.39  | 2292.833 | AF086145  | 818.592   | 987.222   | NM_00606E | 1437.84   | 2132.186  |
| NM_01491E | 532.514  | 726.026  | BC002538  | 1495.977  | 1731.437  | NM_01433E | 24195.408 | 24588.252 |
| NM_00025C | 978.917  | 1117.081 | AK022355  | 452.501   | 609.807   | NM_00149E | 1049.92   | 995.802   |
| NM_018147 | 10286.64 | 10492.31 | NM_01783E | 2727.859  | 3549.177  | NM_00228E | 1387.145  | 1456.172  |
| NM_018967 | 1616.4   | 1685.286 | AK096584  | 21435.393 | 18303.609 | NM_00441E | 10422.49  | 6020.616  |
| NM_00185C | 838.547  | 618.648  | Z29070    | 583.913   | 447.663   | AB005216  | 1535.531  | 1624.915  |
| NM_00216C | 771.412  | 890.094  | AL078636  | 1423.869  | 1314.877  | NM_00032E | 11560.499 | 12946.132 |
| NM_00567E | 3440.928 | 5981.709 | AK022382  | 700.425   | 572.232   | AF015041  | 1319.265  | 1306.468  |
| NM_00558E | 358.116  | 347.154  | M91159    | 711.237   | 608.504   | NM_00236Z | 698.191   | 1319.593  |
| NM_00277C | 2966.832 | 3208.274 | NM_01439Z | 7937.786  | 6240.358  | AF055020  | 5366.025  | 6759.461  |
| BC030636  | 4695.25  | 3620.009 | AK023291  | 6954.256  | 5716.348  | NM_00698E | 4553.996  | 5905.934  |

|           |          |          |           |           |           |           |           |           |
|-----------|----------|----------|-----------|-----------|-----------|-----------|-----------|-----------|
| D21064    | 872.61   | 680.3    | BF541820  | 1113.239  | 894.458   | AF272043  | 10843.286 | 11486.916 |
| NM_002812 | 6015.288 | 4782.188 | CY3Cy5    | 3953.382  | 308.321   | NM_002238 | 2784.208  | 2901.637  |
| NM_020365 | 4507.815 | 3879.587 | AI925826  | 5083.943  | 6287.055  | NM_004868 | 2224.281  | 1919.61   |
| NM_003982 | 1835.057 | 1449.579 | U04209    | 3915.26   | 4659.073  | NM_004669 | 2147.484  | 2401.812  |
| NM_002079 | 8165.35  | 5695.887 | M55284    | 3076.052  | 4225.629  | NM_007028 | 14605.527 | 13098.491 |
| NM_002112 | 3018.872 | 5669.271 | AA679391  | 1371.101  | 1809.404  | AF131781  | 10185.996 | 6500.047  |
| NM_004121 | 1548.049 | 1300.181 | BG682146  | 3284.305  | 3527.685  | NM_015865 | 772.057   | 903.666   |
| AY007092  | 4065.807 | 2855.998 | NM_005060 | 1803.265  | 1671.166  | NM_003055 | 6168.813  | 7005.446  |
| NM_001902 | 3807.374 | 1880.241 | NM_005437 | 7196.498  | 5943.682  | NM_005075 | 871.817   | 592.361   |
| AL137605  | 2991.373 | 2891.975 | SR5       | 7242.291  | 6826.737  | NM_006841 | 674.173   | 734.142   |
| NM_016261 | 1643.946 | 1351.348 | SR7       | 6124.105  | 41499.711 | NM_002414 | 69664.773 | 63090.809 |
| NM_012076 | 1297.13  | 1115.52  | SR9       | 22897.617 | 3618.426  | NM_000355 | 1355.556  | 1602.735  |
| NM_007285 | 20623.69 | 17425.26 | CY3Cy5    | 3490.273  | 296.333   | AL133580  | 22236.697 | 17580.764 |
| D14678    | 6929.186 | 5910.12  | NM_003974 | 7185.439  | 7833.022  | NM_014666 | 13961.32  | 13449.968 |
| NM_016221 | 4498.108 | 3867.141 | NM_006065 | 435.127   | 1097.795  | NM_005451 | 1953.662  | 2293.946  |
| NM_018113 | 2603.51  | 3062.944 | NM_014339 | 25361.928 | 28615.119 | NM_007172 | 7701.954  | 7548.933  |
| NM_005187 | 2744.871 | 3815.722 | AB005216  | 1164.252  | 1226.46   | NM_006152 | 4258.354  | 4288.807  |
| U73377    | 2828.719 | 4204.002 | NM_000325 | 8152.054  | 8199.686  | NM_013333 | 21025.428 | 23135.887 |
| NM_002199 | 5372.488 | 5163.077 | AF055020  | 6610.189  | 7140.013  | NM_002333 | 2751.969  | 2915.744  |
| BC005219  | 8614.824 | 8235.59  | NM_006986 | 3531.443  | 3175.978  | NM_003400 | 14757.542 | 13765.472 |
| NM_004268 | 2003.324 | 2216.832 | AF272043  | 8383.338  | 6728.95   | NM_006705 | 3271.756  | 3855.581  |
| NM_001546 | 442.719  | 559.824  | NM_002587 | 10240.652 | 7444.355  | NM_014439 | 696.888   | 1097.522  |
| NM_006662 | 2321.689 | 2178.41  | NM_002238 | 1887.812  | 1403.923  | NM_005582 | 892.351   | 966.015   |
| NM_004031 | 1211.537 | 972.187  | NM_004868 | 1197.159  | 1375.406  | NM_014600 | 2177.865  | 2116.463  |
| NM_004514 | 6092.28  | 5523.594 | NM_007028 | 9381.079  | 8546.404  | AF181994  | 3030.09   | 3044.635  |
| NM_006163 | 1858.91  | 1474.176 | AF130728  | 5443.325  | 9101.299  | NM_018962 | 1434.36   | 1536.06   |
| NM_001272 | 9465.318 | 4577.338 | NM_002414 | 58272.922 | 57027.5   | AF125100  | 2756.495  | 2987.464  |
| NM_016303 | 8228.669 | 5883.22  | NM_005451 | 2355.659  | 2710.603  | NM_006114 | 12764.385 | 11265.818 |
| NM_006196 | 25006.9  | 20671.69 | NM_007172 | 6083.141  | 6987.333  | X82693    | 11061.313 | 12268.746 |
| AV733560  | 2290.316 | 2275.016 | NM_013333 | 16171.602 | 13669.67  | NM_007176 | 21797.799 | 25859.986 |
| D17129    | 43432.38 | 44688.99 | NM_002333 | 2511.236  | 2991.789  | NM_002722 | 3016.488  | 3153.022  |
| NM_003091 | 24885.34 | 17983.48 | NM_003400 | 9651.429  | 11473.804 | AF317058  | 1098.844  | 1530.39   |
| NM_004247 | 5039.543 | 3620.277 | NM_006705 | 2938.397  | 2764.489  | NM_006028 | 722.911   | 870.162   |
| NM_017722 | 5449.196 | 4042.61  | NM_014439 | 765.715   | 495.478   | NM_014904 | 1602.255  | 1467.407  |
| AL137730  | 3953.954 | 2506.714 | NM_005582 | 1033.478  | 1174.007  | NM_018358 | 4984.323  | 5451.063  |
| NM_004500 | 40199.15 | 38304    | NM_012266 | 4181.9    | 2926.633  | NM_013356 | 588.177   | 646.633   |
| NM_003276 | 12664.65 | 7196.198 | NM_004559 | 2400.249  | 1769.288  | AK022417  | 1975.701  | 2239.687  |
| AK025694  | 22004.62 | 20402.12 | X56692    | 5543.014  | 3148.946  | U50534    | 694.057   | 746.609   |
| NM_002157 | 63382.95 | 53252.32 | NM_014278 | 2742.534  | 3568.961  | NM_014824 | 3041.622  | 3377.295  |
| NM_004095 | 14789.34 | 12154.54 | NM_000734 | 11374.861 | 9782.629  | NM_014504 | 3309.286  | 2827.363  |
| NM_014365 | 979.921  | 822.81   | X82693    | 13913.853 | 10759.107 | AF212247  | 4685.544  | 5967.677  |
| NM_005147 | 6675.969 | 10960.75 | AF317058  | 995.406   | 943.6     | AF161407  | 12104.461 | 15865.845 |
| NM_014665 | 2868.92  | 4105.152 | NM_014904 | 704.345   | 411.582   | NM_014738 | 4612.678  | 5905.785  |
| AK023609  | 2304.665 | 2883.085 | AL137576  | 7499.374  | 4202.271  | NM_018080 | 6489.245  | 6890.89   |
| NM_018019 | 4281.391 | 4398.537 | NM_018358 | 4237.677  | 2949.046  | AF174605  | 5681.77   | 5647.384  |
| AK027220  | 4627.495 | 3775.227 | AF131781  | 5308.105  | 6703.286  | NM_014453 | 18251.051 | 18282.602 |
| NM_018011 | 8191.667 | 8870.592 | NM_006516 | 14056.461 | 12652.094 | NM_005713 | 2681.936  | 2639.642  |
| NM_000476 | 772.27   | 371.077  | NM_015865 | 1062.817  | 1308.303  | AK023553  | 3147.365  | 2686.32   |
| AF132733  | 4259.91  | 3056.803 | NM_003055 | 7788.964  | 7157.351  | AF272043  | 9464.603  | 8776.842  |
| NM_001071 | 44306.29 | 38264.22 | NM_005075 | 671.752   | 968.541   | NM_002238 | 2388.946  | 2309.916  |
| NM_006187 | 2452.185 | 2309.945 | NM_014824 | 3227.139  | 2202.314  | NM_004868 | 1050.837  | 1075.271  |
| NM_020354 | 12030.01 | 8970.692 | NM_014504 | 1982.466  | 1754.005  | NM_004669 | 1588.906  | 1702.215  |
| AB033016  | 16768.55 | 8864.176 | NM_014408 | 14251.547 | 9710.12   | NM_007028 | 12484.576 | 11586.058 |

|           |          |          |           |           |           |           |           |           |
|-----------|----------|----------|-----------|-----------|-----------|-----------|-----------|-----------|
| D87452    | 2217.479 | 2595.696 | NM_014741 | 3973.149  | 2866.248  | AF130728  | 1394.915  | 1279.25   |
| AB037864  | 1635.565 | 1728.597 | AF212247  | 4725.199  | 2755.106  | NM_004987 | 14447.816 | 16021.146 |
| BF382513  | 2639.372 | 2247.673 | AF161407  | 13286.312 | 6601.003  | NM_001289 | 23012.98  | 21753.668 |
| AB020713  | 12505.09 | 9961.445 | NM_014738 | 4542.202  | 2573.378  | NM_001131 | 24339.41  | 23472.053 |
| AK025426  | 1289.196 | 1130.981 | NM_018080 | 7292.983  | 5520.842  | X07696    | 3048.36   | 3597.675  |
| NM_016558 | 7819.137 | 7071.617 | AF174605  | 5504.565  | 4945.397  | AA481015  | 1426.143  | 1349.653  |
| NM_007145 | 7596.816 | 7878.587 | NM_014453 | 18852.053 | 11463.885 | AI925826  | 4325.533  | 4886.71   |
| AL133112  | 1566.587 | 1734.447 | NM_005713 | 1646.395  | 1031.805  | U04209    | 6823.207  | 5080.796  |
| AF085855  | 459.15   | 363.989  | AK023553  | 1695.452  | 1448.288  | AI393201  | 5236.236  | 7182.931  |
| AF085877  | 693.87   | 610.322  | NM_014600 | 1030.925  | 504.212   | M34664    | 68499.531 | 64663.859 |
| AK002078  | 3256.433 | 2585.188 | NM_016733 | 2017.529  | 1546.141  | Z15108    | 1110.013  | 1085.298  |
| AF085837  | 1054.938 | 1141.096 | AF181994  | 2353.988  | 2124.039  | AA001218  | 755.377   | 1203.678  |
| AK023165  | 1450.799 | 1107.923 | NM_018962 | 1320.517  | 1294.555  | AA679391  | 1250.973  | 1387.754  |
| AK023857  | 539.269  | 342.246  | AF125100  | 2578.986  | 2870.919  | BG682146  | 3230.687  | 2762.642  |
| NM_016115 | 3492.182 | 2546.257 | AF130728  | 1697.407  | 2787.761  | AA884709  | 1077.628  | 618.917   |
| NM_014950 | 4730.345 | 3088.12  | NM_001289 | 25228.441 | 19497.926 | NM_012266 | 6700.057  | 6265.099  |
| AL080180  | 207.044  | 511.361  | M54894    | 393.745   | 960.724   | NM_004559 | 2978.13   | 3307.028  |
| AF147376  | 1145.267 | 820.345  | AA481015  | 1402.253  | 1433.419  | X56692    | 5412.4    | 7767.566  |
| AK027190  | 711.27   | 476.974  | AI925826  | 5723.799  | 4548.958  | NM_014278 | 3905.553  | 2693.926  |
| AL360136  | 736.577  | 733.535  | U04209    | 6515.387  | 6674.148  | NM_000734 | 12646.907 | 12298.271 |
| AF086259  | 638.803  | 835.082  | M55284    | 3570.067  | 4784.757  | NM_012331 | 2296.653  | 2130.072  |
| AF086369  | 507.954  | 648.434  | AA679391  | 1389.366  | 1543.776  | NM_006644 | 10607.541 | 9070.163  |
| AF086328  | 584.823  | 669.951  | BG682146  | 1364.295  | 1865.856  | NM_006583 | 88747.063 | 5031.761  |
| AF086427  | 1027.827 | 1142.728 | NM_005060 | 1977.272  | 1521.886  | NM_003974 | 9577.601  | 10283.559 |
| AK024196  | 386.894  | 579.964  | NM_005437 | 4849.088  | 4529.05   | NM_014339 | 21324.094 | 25859.051 |
| AK023753  | 794.64   | 580.993  | AK022417  | 1908.147  | 2243.779  | NM_001495 | 1027.758  | 1075.617  |
| AF086441  | 1053.254 | 890.834  | U50534    | 616.159   | 1402.343  | NM_002288 | 1216.17   | 1925.617  |
| AK027255  | 322.875  | 418.994  | NM_014278 | 3451.474  | 6874.35   | AB005216  | 1758.878  | 1860.177  |
| NM_014117 | 675.419  | 714.329  | NM_000734 | 16044.734 | 15969.363 | NM_000325 | 11129.129 | 11646.922 |
| AF086087  | 6942.429 | 6093.366 | NM_006644 | 10456.822 | 8172.391  | AK000184  | 1094.827  | 996.778   |
| AK000671  | 6985.594 | 7359.76  | NM_006583 | 72126.477 | 7424.412  | AF055020  | 4551.631  | 4749.657  |
| AK002016  | 403.933  | 558.348  | NM_014339 | 32666.807 | 32602.824 | NM_006986 | 4345.185  | 5956.964  |
| AL137425  | 1031.629 | 888.316  | NM_001495 | 2139.976  | 2781.208  | NM_014904 | 900.03    | 1062.795  |
| AL137637  | 896.97   | 300.568  | NM_002288 | 2053.49   | 1947.75   | AL137576  | 8513.992  | 9076.922  |
| AL359584  | 1169.295 | 956.973  | NM_000325 | 6115.854  | 8036.719  | NM_018358 | 6277.83   | 8127.338  |
| AL137456  | 1945.258 | 2346.314 | AF015041  | 1492.437  | 1926.316  | NM_013356 | 760.85    | 407.236   |
| AL157489  | 859.183  | 1224.708 | NM_002363 | 514.211   | 765.769   | AF131781  | 10322.6   | 6705.718  |
| AL390157  | 1114.393 | 1483.062 | AF055020  | 6163.975  | 7093.776  | NM_006516 | 18689.107 | 14923.958 |
| AK021649  | 453.028  | 574.287  | NM_006986 | 2897.462  | 3711.481  | NM_015865 | 906.365   | 1052.099  |
| AF088007  | 347.77   | 555.452  | AF272043  | 7033.558  | 7124.168  | NM_003055 | 6305.664  | 6575.124  |
| AK024874  | 712.371  | 527.812  | NM_002587 | 9250.178  | 7791.492  | NM_005075 | 1031.334  | 942.646   |
| AK021847  | 1201.921 | 812.379  | NM_002238 | 1357.868  | 1394.298  | NM_006841 | 704.608   | 794.964   |
| AK026035  | 343.066  | 324.299  | NM_004868 | 936.459   | 1816.067  | NM_002414 | 69823.383 | 62320.988 |
| AK023086  | 3391.656 | 3324.705 | NM_004669 | 698.535   | 1369.648  | NM_000355 | 1197.085  | 1471.746  |
| NM_017621 | 5224.081 | 5314.417 | NM_007028 | 5803.305  | 6225.077  | NM_005451 | 2365.642  | 2350.806  |
| AK023574  | 1711.503 | 1485.321 | AF131781  | 5372.853  | 6548.403  | NM_007172 | 7131.15   | 7789.319  |
| AF131767  | 675.201  | 507.921  | NM_015865 | 1427.755  | 1713.566  | NM_006152 | 4307.772  | 3657.281  |
| AK021907  | 1579.707 | 981.601  | NM_003055 | 10728.983 | 8470.077  | NM_013333 | 20188.445 | 19845.211 |
| AK022029  | 818.972  | 565.676  | NM_005075 | 421.984   | 471.776   | NM_002333 | 2506.659  | 2832.142  |
| AK022167  | 465.008  | 639.109  | NM_006841 | 1011.634  | 979.983   | NM_003400 | 15458.342 | 13622.414 |
| AK022320  | 1191.306 | 1746.377 | NM_002414 | 65376.465 | 51208.117 | NM_006705 | 2224.346  | 2644.722  |
| AK022058  | 396.679  | 723.037  | NM_000355 | 1900.939  | 2035.791  | NM_014439 | 945.985   | 851.585   |
| AK022196  | 437.476  | 440.924  | NM_005451 | 23904.15  | 7654.065  | NM_005582 | 1134.345  | 780.195   |

|           |          |          |           |           |           |           |           |           |
|-----------|----------|----------|-----------|-----------|-----------|-----------|-----------|-----------|
| AK022350  | 318.605  | 361.404  | NM_007172 | 6254.566  | 5200.981  | AF174605  | 6136.645  | 5083.498  |
| NM_01828C | 737.65   | 381.911  | NM_006152 | 3291.249  | 2787.223  | NM_014453 | 18717.438 | 20164.131 |
| AK024381  | 386.46   | 375.933  | NM_013333 | 10580.687 | 6130.276  | NM_005713 | 2675.435  | 2954.882  |
| AK026503  | 1465.336 | 1066.922 | NM_002333 | 2552.168  | 2512.565  | AK023553  | 2961.037  | 2431.166  |
| AK026671  | 1296.421 | 1201.842 | NM_00340C | 5068.19   | 8054.375  | NM_01460C | 1089.498  | 971.59    |
| AK025522  | 19241.24 | 14589.52 | NM_00670E | 3285.901  | 3723.335  | NM_018962 | 1058.832  | 1204.167  |
| AK025464  | 27017.43 | 31456.08 | NM_01443E | 830.644   | 2111.432  | AF125100  | 3191.902  | 3192.296  |
| AL049962  | 4568.694 | 3958.322 | NM_005582 | 984.124   | 1303.824  | NM_006114 | 15977.742 | 15057.637 |
| NM_016941 | 2675.851 | 2777.57  | NM_01226E | 2809.667  | 3085.927  | X82693    | 12624.85  | 13800.316 |
| NM_02040E | 2081.951 | 1191.851 | NM_00455E | 957.901   | 831.141   | NM_00717E | 22602.846 | 32826.793 |
| NM_00498E | 4331.165 | 3449.005 | X56692    | 4084.619  | 3918.896  | NM_002722 | 3587.496  | 4411.087  |
| AL080151  | 1999.269 | 2063.416 | NM_01447E | 14691.717 | 18814.641 | AF317058  | 1094.28   | 1443.549  |
| AK001308  | 427.881  | 296.962  | NM_01460C | 1293.087  | 1610.941  | NM_00602E | 1183.819  | 1141.382  |
| AK024127  | 705.499  | 549.452  | AF181994  | 2330.656  | 2328.466  | NM_012297 | 13591.272 | 11581.596 |
| AK024243  | 555.063  | 338.268  | NM_018962 | 1485.025  | 1109.926  | AB007925  | 40875.789 | 42804.785 |
| AK021574  | 897.404  | 1011.57  | AF125100  | 2258.549  | 2033.222  | NM_01818C | 1194.077  | 709.149   |
| AF119911  | 12706.66 | 13813.74 | NM_006114 | 11392.396 | 8562.556  | NM_000361 | 11105.742 | 11583.462 |
| AF116656  | 6550.347 | 5524.521 | X82693    | 14669.343 | 9077.8    | NM_00247E | 42732.277 | 48304.574 |
| NM_00105C | 2534.015 | 2503.199 | NM_00717E | 26588.424 | 16967.488 | NM_00383E | 4448.737  | 5201.867  |
| AF132206  | 1675.071 | 1633.079 | M22538    | 21281.699 | 21853     | NM_017987 | 1359.925  | 1559.275  |
| AJ001869  | 1181.6   | 908.481  | NM_014904 | 654.034   | 460.361   | AK022417  | 2001.737  | 1894.57   |
| AJ002969  | 868.08   | 849.549  | AL137576  | 2726.794  | 1910.65   | U50534    | 634.902   | 888.441   |
| NM_020213 | 5447.332 | 6093.545 | NM_01835E | 3226.54   | 2300.617  | NM_014824 | 3186.822  | 3135.822  |
| D17267    | 10448.25 | 7861.113 | AK022417  | 1762.3    | 2016.533  | NM_014504 | 2610.423  | 2860.893  |
| AF200341  | 572.138  | 309.931  | U50534    | 982.859   | 1310.092  | NM_01440E | 16636.822 | 16488.627 |
| AJ238214  | 764.192  | 640.097  | NM_014824 | 3062.871  | 1792.589  | NM_014741 | 5865.215  | 5732.962  |
| AB040944  | 1340.888 | 1410.756 | AK000782  | 464.377   | 3647.618  | AF212247  | 6020.978  | 6259.386  |
| NM_01814E | 3797.374 | 5886.857 | NM_014504 | 722.561   | 644.984   | AF161407  | 12590.771 | 12811.379 |
| AK024326  | 1980.653 | 2363.631 | NM_01440E | 4440.789  | 2201.94   | NM_01473E | 5770.563  | 5165.968  |
| U61088    | 745.298  | 997.67   | NM_014741 | 1990.447  | 764.281   | NM_01808C | 7946.682  | 6712.059  |
| AK024538  | 1221.813 | 1727.265 | AF212247  | 1517.962  | 702.538   | NM_007115 | 1746.256  | 1274.222  |
| AF086467  | 2421.611 | 3487.849 | AF161407  | 7885.631  | 3930.37   | NM_00461E | 1371.11   | 1360.105  |
| AL137345  | 2950.685 | 3219.313 | NM_01473E | 1362.411  | 1373.473  | NM_00436C | 1421.739  | 1490.637  |
| AK000967  | 2590.15  | 2059.08  | NM_01640E | 1085.326  | 2575.858  | NM_017692 | 6213.999  | 6078.079  |
| AK021583  | 3980.45  | 4478.806 | NM_01808C | 5050.246  | 8457.591  | NM_00397E | 4357.539  | 5750.194  |
| AL137442  | 3469.694 | 2630.821 | AF174605  | 1122.033  | 1328.983  | NM_000812 | 1922.516  | 2299.155  |
| NM_00120E | 17296.68 | 14294.76 | NM_014453 | 9479.375  | 4119.223  | AK024747  | 27825.836 | 24135.668 |
| AL050061  | 645.98   | 622.293  | NM_005713 | 2885.418  | 1639.554  | NM_00639C | 4674.861  | 4265.776  |
| AL050206  | 1098.099 | 727.88   | AK023553  | 417.355   | 454.636   | NM_00358C | 6448.758  | 6577.903  |
| AK026898  | 2542.783 | 2665.272 | AF272043  | 8024.567  | 7262.742  | NM_00650E | 3393.915  | 3181.073  |
| NM_006637 | 506.143  | 451.882  | NM_00223E | 1780.448  | 2194.427  | NM_00323E | 3734.111  | 4131.452  |
| AK022419  | 854.021  | 705.382  | NM_00486E | 751.281   | 911.103   | AB042562  | 3165.832  | 2333.131  |
| AJ251832  | 761.501  | 629.362  | NM_00466E | 1268.814  | 1065.163  | NM_01600E | 7726.192  | 8803.751  |
| NM_014624 | 1240.412 | 760.747  | NM_00702E | 10037.639 | 5559.045  | NM_00237E | 1948.392  | 2086.638  |
| NM_01393E | 1530.133 | 1161.982 | AF130728  | 1121.857  | 996.669   | NM_00372E | 4219.263  | 4315.854  |
| AF086145  | 1628.375 | 882.569  | NM_004987 | 14986.683 | 13329.616 | NM_017431 | 547.141   | 595.298   |
| Z70709    | 406.554  | 368.336  | NM_00128E | 26605.15  | 30764.572 | NM_006097 | 8021.925  | 6914.234  |
| BC002538  | 2947.52  | 2135.164 | NM_001131 | 35164.52  | 52317.508 | NM_006113 | 3417.642  | 3543.242  |
| NM_01783E | 5054.599 | 2236.957 | X07696    | 1722.407  | 607.286   | NM_015313 | 24345.063 | 17398.441 |
| AK096584  | 3460.876 | 1828.108 | AI925826  | 2616.251  | 1212.218  | AK022287  | 12461.705 | 10888.118 |
| Z29070    | 1115.572 | 908.143  | U04209    | 985.372   | 434.71    | NM_015897 | 3262.828  | 2735.732  |
| AL078636  | 1140.904 | 1466.925 | AI393201  | 2068.091  | 1297.606  | NM_00543E | 6555.958  | 5921.33   |
| AK022382  | 748.216  | 1270.953 | M34664    | 61332.234 | 63185.387 | AF177473  | 18410.303 | 17671.061 |

|           |          |          |           |           |           |           |           |           |
|-----------|----------|----------|-----------|-----------|-----------|-----------|-----------|-----------|
| AF147362  | 505.613  | 641.682  | Z15108    | 1213.53   | 1317.982  | NM_000546 | 5009.937  | 5493.437  |
| AF147365  | 747.739  | 711.025  | M55284    | 1385.17   | 955.029   | AB023223  | 1079.646  | 1278.657  |
| S72917    | 958.348  | 1405.129 | AA679391  | 500.467   | 442.069   | AB018257  | 5255.322  | 5124.512  |
| AF076617  | 61007.25 | 50335.57 | NM_012266 | 4433.235  | 4681.641  | NM_007282 | 7020.061  | 7423.365  |
| M91159    | 532.72   | 548.229  | NM_004555 | 2355.274  | 2554.122  | NM_017610 | 1614.124  | 1695.486  |
| NM_014392 | 2523.007 | 2793.386 | X56692    | 4858.315  | 3401.539  | AL122070  | 897.895   | 879.731   |
| AK023291  | 8028.601 | 6676.503 | NM_014278 | 2431.015  | 3480.123  | AK025133  | 11103.795 | 14187.058 |
| BF541820  | 332.009  | 529.904  | NM_005838 | 1003.161  | 1808.38   | AB020704  | 2434.808  | 2415.902  |
| CY3Cy5    | 8084.352 | 534.247  | NM_000734 | 11056.482 | 12837.896 | NM_004087 | 8121.043  | 4011.785  |
| M54894    | 343.432  | 368.25   | NM_012331 | 1676.958  | 998.41    | NM_018700 | 1079.506  | 1771.306  |
| X07696    | 1547.597 | 2004.252 | NM_006644 | 3275.109  | 1178.323  | NM_000119 | 3520.854  | 3922.84   |
| AA481015  | 1963.109 | 2016.794 | NM_006583 | 51168.309 | 727.358   | NM_001065 | 9458.271  | 8368.484  |
| AI925826  | 2247.026 | 2810.522 | NM_003974 | 1879.161  | 416.119   | AK027100  | 2122.825  | 1910.151  |
| U04209    | 8125.716 | 5450.534 | NM_014335 | 14250.903 | 4006.394  | AY010111  | 954.085   | 494.788   |
| M55284    | 4627.657 | 5379.38  | NM_004416 | 1703.751  | 1742.306  | NM_003622 | 2424.149  | 1227.938  |
| AA679391  | 1498.172 | 1587.378 | NM_000628 | 1431.399  | 721.922   | NM_001774 | 3132.713  | 2725.108  |
| BG682146  | 3710.302 | 3725.618 | NM_000325 | 3087.034  | 4782.218  | AK021645  | 1776.851  | 1711.61   |
| AA884709  | 383.644  | 579.048  | AF055020  | 3014.536  | 1908.341  | NM_013339 | 3863.093  | 4205.345  |
| NM_005060 | 1947.128 | 2221.564 | NM_006986 | 1205.929  | 1084.465  | NM_001491 | 2365.851  | 2008.88   |
| NM_005437 | 10299.74 | 13567.99 | NM_014904 | 993.731   | 990.535   | AK026541  | 2439.17   | 3144.474  |
| SR9       | 33219.55 | 4628.633 | AL137576  | 8243.457  | 6633.424  | NM_005899 | 16614.205 | 13814.224 |
| CY3Cy5    | 6806.347 | 328.463  | NM_018358 | 5368.955  | 6758.188  | D42055    | 13325     | 11406.082 |
| NM_003974 | 11071.16 | 14286.02 | NM_016321 | 397.535   | 386.8     | AL137349  | 2929.505  | 2417.849  |
| NM_006065 | 464.862  | 445.02   | AF131781  | 6857.657  | 18304.424 | NM_003339 | 1314.288  | 906.62    |
| NM_014339 | 12579.42 | 15372.88 | NM_006516 | 15299.151 | 22604.561 | NM_016476 | 52763.57  | 46992.328 |
| NM_001495 | 332.47   | 408.268  | NM_015865 | 564.445   | 402.443   | NM_015902 | 2650.676  | 1953.074  |
| NM_002288 | 1406.611 | 1784.145 | NM_003055 | 6567.389  | 3951.083  | NM_020155 | 4765.903  | 4723.697  |
| NM_004416 | 14031.12 | 8510.61  | NM_002414 | 49982.316 | 26367.996 | BE874471  | 9267.767  | 8377.567  |
| NM_000628 | 10220.06 | 11921.77 | NM_000355 | 889.655   | 593.518   | NM_006121 | 5388.155  | 5423.619  |
| AB005216  | 1661.607 | 2414.758 | AL133580  | 3502.255  | 2259.275  | AK023520  | 9159.242  | 6788.789  |
| NM_002363 | 979.974  | 1385.998 | NM_014666 | 2508.408  | 807.8     | NM_004693 | 1010.44   | 878.39    |
| AF055020  | 2725.958 | 3606.999 | NM_005451 | 391.628   | 376.443   | NM_007211 | 9433.798  | 7209.688  |
| NM_006986 | 5952.715 | 8486.259 | NM_007172 | 1355.975  | 576.605   | AB011152  | 2287.198  | 2187.073  |
| AF272043  | 13182.76 | 17078.98 | NM_006152 | 1765.226  | 1025.658  | NM_014956 | 10810.137 | 9189.026  |
| NM_002587 | 1651.737 | 2380.638 | NM_013333 | 4181.946  | 2167.753  | AB014592  | 1249.453  | 1412.151  |
| NM_002238 | 3222.725 | 3636.466 | NM_002333 | 981.308   | 849.238   | NM_016952 | 1761.651  | 2126.919  |
| NM_004868 | 820.245  | 873.192  | NM_003400 | 2473.722  | 1978.821  | NM_001654 | 4881.639  | 4021.51   |
| NM_007028 | 16019.23 | 17606.33 | NM_006705 | 1298.066  | 762.619   | NM_014519 | 3307.16   | 3248.394  |
| AF130728  | 1476.949 | 1445.171 | AF174605  | 4416.622  | 4268.339  | NM_002517 | 204.065   | 746.817   |
| NM_001289 | 26278.13 | 28707.01 | NM_014453 | 19142.484 | 10346.914 | NM_007147 | 10630.521 | 12155.832 |
| NM_001131 | 2490.942 | 3354.496 | NM_005713 | 2092.846  | 1700.388  | X65463    | 4155.616  | 4471.448  |
| NM_002414 | 61797.38 | 55082.64 | AK023553  | 2211.215  | 2867.622  | AK024418  | 2040.935  | 2053.112  |
| NM_000355 | 723.632  | 1067.535 | NM_014600 | 1011.498  | 577.513   | NM_003367 | 6607.198  | 5886.272  |
| AL133580  | 23545.82 | 23557    | NM_016733 | 2211.075  | 2907.958  | NM_005194 | 18337.32  | 14170.521 |
| NM_014666 | 12986.39 | 16166.86 | NM_007176 | 8408.351  | 6066.01   | AB002296  | 2375.568  | 2506.176  |
| NM_005451 | 2574.656 | 3523.59  | NM_002722 | 740.318   | 470.72    | NM_014315 | 6608.24   | 5505.551  |
| NM_007172 | 6924.855 | 8555.559 | M22538    | 10590.306 | 6693.483  | NM_012087 | 3528.672  | 2877.046  |
| NM_006152 | 3655.461 | 4312.721 | NM_012297 | 15318.746 | 9583.271  | AF165520  | 1580.176  | 1667.616  |
| NM_013333 | 19852.72 | 26563.49 | AB007925  | 38144.52  | 23325.049 | AK026072  | 1241.126  | 822.372   |
| NM_002333 | 1293.374 | 1815.591 | NM_018180 | 965.287   | 451.981   | NM_004289 | 831.881   | 822.87    |
| NM_006705 | 1556.071 | 1632.254 | NM_000361 | 8794.652  | 6592.891  | NM_015679 | 6889.965  | 6588.57   |
| NM_012266 | 8951.871 | 9963.849 | NM_002475 | 59392.293 | 58761.102 | AF299118  | 64976.277 | 59343.203 |
| NM_004555 | 3578.575 | 4498.607 | NM_003836 | 7066.125  | 4592.64   | AK025353  | 19515.408 | 18417.273 |

|           |          |          |           |           |           |           |           |           |
|-----------|----------|----------|-----------|-----------|-----------|-----------|-----------|-----------|
| X56692    | 4020.475 | 5489.764 | NM_018203 | 1398.33   | 1497.301  | AK056896  | 29704.027 | 32966.098 |
| AK024467  | 303.739  | 456.485  | AK022417  | 2383.615  | 3741.632  | AK022763  | 25584.643 | 27558.242 |
| NM_014476 | 683.058  | 803.558  | NM_014504 | 1027.096  | 765.292   | AF288207  | 38711.516 | 36662.742 |
| NM_014278 | 5235.535 | 3502.323 | NM_014408 | 6731.387  | 3194.772  | NM_001001 | 60884.727 | 54557.199 |
| NM_000734 | 13100.53 | 12886    | NM_014741 | 2011.351  | 617.051   | NM_005715 | 4753.706  | 5099.05   |
| NM_012331 | 1492.259 | 1498.908 | AF212247  | 1534.1    | 860.284   | AK026992  | 4047.268  | 4081.182  |
| NM_006644 | 12494.56 | 12215.77 | AF161407  | 7461.961  | 3427.425  | NM_004541 | 37038.73  | 39560.969 |
| NM_006583 | 87929.56 | 3288.947 | NM_014738 | 2179.733  | 1502.688  | NM_006830 | 55670.004 | 40741.613 |
| X82693    | 5433.169 | 5846.44  | NM_016406 | 6484.299  | 6553.735  | AK026414  | 15311.713 | 11637.471 |
| NM_007176 | 22708.1  | 37132.37 | NM_018080 | 4206.694  | 4715.079  | D17297    | 1504.667  | 670.977   |
| NM_002722 | 3393.877 | 3743.958 | NM_007115 | 1217.062  | 1020.188  | NM_002626 | 47976.691 | 42880.273 |
| AF317058  | 1249.74  | 1777.016 | NM_004616 | 1028.69   | 895.902   | NM_018436 | 22899.176 | 15045.088 |
| AK025965  | 900.467  | 440.588  | NM_004360 | 972.835   | 326.128   | AF157115  | 6195.5    | 6032.498  |
| AF016693  | 570.286  | 617.844  | NM_018173 | 753.403   | 1688.589  | AJ223353  | 7325.271  | 8195.353  |
| NM_006028 | 692.129  | 773.129  | NM_000812 | 1473.196  | 2506.335  | NM_012241 | 6542.087  | 7720.374  |
| NM_014904 | 1220.495 | 1786.454 | AK024747  | 22810.633 | 37577.051 | AF250288  | 1037.167  | 1069.868  |
| AL137576  | 11409.9  | 13168.11 | NM_006390 | 2557.185  | 3487.338  | NM_001806 | 9619.183  | 7947.097  |
| NM_018358 | 5644.008 | 6022.354 | NM_003580 | 1804.66   | 2353.353  | AB040941  | 3757.791  | 3520.475  |
| NM_013356 | 626.552  | 676.461  | NM_006506 | 1003.797  | 1408.977  | AL137241  | 1122.944  | 997.79    |
| AF131781  | 16483.84 | 10500.29 | NM_002378 | 929.881   | 520.845   | AB037742  | 2866.851  | 2335.31   |
| NM_006516 | 18253.12 | 15529.18 | NM_017431 | 1399.322  | 405.617   | AF272375  | 1623.207  | 1190.453  |
| NM_015865 | 742.675  | 592.256  | NM_006097 | 5497.85   | 5201.227  | AK025078  | 952.916   | 1277.15   |
| NM_003055 | 3489.577 | 3302.754 | NM_015313 | 5696.935  | 3737.9    | AK023754  | 978.687   | 1155.655  |
| NM_005075 | 1038.33  | 1347.446 | AK022287  | 3892.417  | 4208.845  | AK024737  | 2288.893  | 2612.527  |
| NM_006841 | 825.715  | 961.029  | NM_015897 | 1231.126  | 1214.868  | AB007890  | 8769.712  | 5467.712  |
| NM_014824 | 2882.374 | 3776.759 | NM_005436 | 6794.068  | 4672.514  | AL359605  | 2602.004  | 1733.67   |
| NM_014504 | 3942.387 | 3463.406 | AF177473  | 24470.5   | 18445.711 | AB020633  | 4976.348  | 3849.552  |
| NM_014408 | 18827.5  | 21757.64 | NM_000546 | 6071.342  | 8369.369  | AK025445  | 12676.464 | 10479.753 |
| NM_014741 | 6347.303 | 8684.728 | AB018257  | 5531.608  | 9145.627  | AL357200  | 1844.711  | 2046.147  |
| AF212247  | 5643.141 | 7267.331 | AK001059  | 2679.325  | 5381.57   | NM_017727 | 17552.117 | 17048.359 |
| AF161407  | 7086.669 | 8483.028 | NM_007282 | 8741.296  | 14047.617 | NM_018319 | 5554.216  | 5695.239  |
| NM_014738 | 6085.134 | 6664.795 | NM_017770 | 627.71    | 1130.386  | AK021714  | 1801.75   | 2090.21   |
| NM_018080 | 4343.734 | 4616.952 | NM_017610 | 723.339   | 1101.5    | NM_020314 | 9355.519  | 8082.259  |
| AF174605  | 8964.355 | 8818.713 | AL122070  | 737.042   | 1216.911  | AK022972  | 6943.218  | 5912.717  |
| NM_014453 | 16529.18 | 19570.47 | AK025133  | 6715.569  | 4403.527  | AK025996  | 1688.607  | 1742.121  |
| NM_005713 | 2606.361 | 2694.933 | NM_004087 | 784.335   | 1463.819  | AF088015  | 1846.216  | 925.316   |
| AK023553  | 3737.397 | 2994.911 | NM_001065 | 3911.526  | 1929.923  | AF086168  | 1061.118  | 949.705   |
| NM_014600 | 748.633  | 838.177  | AK027100  | 3017.404  | 1863.635  | AF007132  | 1113.474  | 1108.487  |
| NM_016733 | 3563.106 | 2851.852 | NM_003622 | 2306.755  | 2804.557  | AK026711  | 1843.905  | 1553.5    |
| AF181994  | 3236.611 | 2913.751 | NM_001774 | 4304.806  | 2794.019  | NM_017864 | 6072.191  | 4139.246  |
| NM_018962 | 649.101  | 586.024  | AK021645  | 1271.241  | 1625.23   | NM_004869 | 6585.275  | 4869.893  |
| AF125100  | 3763     | 4131.421 | NM_001491 | 3737.496  | 7639.515  | AF136408  | 1543.429  | 1161.114  |
| NM_006114 | 15531.6  | 13668.31 | NM_002642 | 800.036   | 1554.958  | AJ011602  | 1275.68   | 670.4     |
| AF130728  | 1252.777 | 1329.542 | AK026541  | 3735.66   | 5701.648  | AJ002787  | 3124.931  | 3493.145  |
| NM_001131 | 2719.501 | 3695.186 | NM_005899 | 32422.379 | 46253.652 | Z70764    | 1904.975  | 2023.851  |
| X07696    | 1759.119 | 1923.076 | D42055    | 13397.923 | 24561.482 | M32443    | 2125.931  | 2172.019  |
| AA481015  | 1830.564 | 1752.625 | AL137349  | 3375.507  | 5940.011  | D16908    | 944.063   | 811.453   |
| AI925826  | 2134.105 | 2213.886 | NM_003339 | 779.17    | 2074.65   | D16477    | 1449.381  | 1203.577  |
| U04209    | 6932.97  | 4427.266 | NM_016476 | 34397.844 | 53095.445 | AK024759  | 2002.134  | 1537.991  |
| Z15108    | 789.596  | 1094.143 | NM_015902 | 1329.236  | 1411.802  | AK026808  | 3103.694  | 3856.415  |
| M55284    | 4259.146 | 4330.744 | NM_020155 | 1903.723  | 2025.954  | AK000063  | 1174.601  | 629.978   |
| AA001218  | 316.406  | 654.999  | AK023520  | 1406.301  | 1584.117  | AK000949  | 1818.685  | 1357.043  |
| AA679391  | 1437.043 | 1277.073 | NM_014956 | 5212.77   | 3467.24   | AK027068  | 969.902   | 706.052   |



|           |          |          |           |           |           |           |           |           |
|-----------|----------|----------|-----------|-----------|-----------|-----------|-----------|-----------|
| BG682146  | 3603.61  | 3917.617 | NM_001654 | 1383.261  | 1388.159  | AK000974  | 2169.151  | 1685.199  |
| AA884709  | 952.738  | 1291.767 | NM_014519 | 2468.405  | 1219.482  | AK025051  | 1345.494  | 1244.513  |
| NM_005060 | 2073.064 | 1872.954 | NM_007147 | 12475.882 | 12373.381 | AK024553  | 21567.801 | 18888.803 |
| NM_005437 | 10365.92 | 12764.67 | NM_003367 | 7575.008  | 11499.506 | AL157449  | 16029.369 | 17778.352 |
| AK022417  | 1143.262 | 1000.626 | NM_005194 | 24762.801 | 40419.949 | AL117582  | 1212.265  | 1011.243  |
| U50534    | 834.185  | 855.394  | AB002296  | 2830.649  | 4672.513  | AK025525  | 1040.903  | 1147.457  |
| NM_014278 | 5329.014 | 3549.277 | NM_014315 | 8012.485  | 10234.011 | AF090916  | 646.368   | 441.815   |
| NM_012331 | 1723.563 | 2551.254 | NM_012087 | 1821.611  | 1781.288  | AK026860  | 5239.129  | 4338.333  |
| NM_006644 | 11228.89 | 11217.56 | AF165520  | 834.394   | 996.656   | AK024211  | 1906.124  | 1542.812  |
| NM_006583 | 85891.83 | 4082.894 | NM_004289 | 850.693   | 473.646   | NM_014896 | 2187.593  | 2517.474  |
| NM_003974 | 10805.54 | 12369.94 | AK025353  | 4140.299  | 3788.548  | AK023435  | 3483.383  | 2121.93   |
| NM_006065 | 769.944  | 662.837  | AK056896  | 7070.96   | 4063.895  | AF086035  | 7999.314  | 9513.643  |
| NM_014339 | 13886.65 | 16586.56 | NM_000976 | 55080.828 | 15277.768 | AK022159  | 6198.495  | 6912.997  |
| NM_001495 | 407.678  | 511.632  | NM_001000 | 61073.469 | 57328.055 | U25750    | 10924.035 | 9944.657  |
| NM_002288 | 1366.479 | 1729.095 | AF288207  | 10477.488 | 6464.049  | AK026744  | 1177.302  | 418.063   |
| NM_004416 | 13882.54 | 8730.346 | NM_001001 | 56454.145 | 58109.387 | NM_005234 | 6171.424  | 4316.977  |
| NM_000325 | 12136.8  | 13917.99 | NM_005715 | 6393.215  | 4544.2    | BC023536  | 2059.27   | 1606.801  |
| AF015041  | 1154.425 | 1144.101 | AK026992  | 5274.504  | 6712.773  | NM_001803 | 6048.768  | 5105.994  |
| NM_002363 | 707.935  | 756.078  | X81895    | 1662.843  | 1900.07   | NM_006233 | 22402.139 | 18048.049 |
| AK000184  | 592.084  | 543.563  | NM_004541 | 44020.734 | 33546.891 | AK021889  | 1034.445  | 1157.054  |
| AF055020  | 2301.332 | 3049.224 | NM_006830 | 63773.172 | 64593.555 | AK023736  | 3251.168  | 3752.253  |
| NM_006986 | 5687.366 | 8174.469 | AK026414  | 14328.318 | 14747.397 | AK000992  | 1427.731  | 951.982   |
| AF272043  | 12898.3  | 14606.83 | D17297    | 835.261   | 1126.356  | L23544    | 22619.984 | 20809.951 |
| NM_002587 | 1890.74  | 1964.14  | NM_004074 | 44624.57  | 45128.813 | NM_019020 | 6676.708  | 5840.619  |
| NM_002238 | 3394.186 | 3069.75  | NM_002626 | 45376.316 | 49144.43  | NM_016474 | 2711.114  | 1585.908  |
| NM_004868 | 703.682  | 688.688  | NM_018436 | 22533.928 | 33566.906 | NM_000910 | 3019.454  | 2433.457  |
| NM_004669 | 2151.374 | 2207.578 | AF157115  | 2466.3    | 2715.109  | AF086001  | 41840.57  | 49581.004 |
| NM_007028 | 17096.42 | 14354.25 | AJ223353  | 2454.141  | 2913.644  | AL117560  | 33510.141 | 32034.896 |
| NM_015865 | 846.484  | 739.06   | NM_012241 | 2097.823  | 2678.826  | M24749    | 8642.23   | 7340.564  |
| NM_003055 | 3975.865 | 4901.642 | AL080201  | 5356.869  | 3528.66   | NM_005831 | 66818.055 | 59805.023 |
| NM_005075 | 763.655  | 1273.511 | NM_001806 | 1220.451  | 327.744   | NM_005850 | 68619.117 | 61232.633 |
| NM_006841 | 849.985  | 1024.887 | AB040941  | 2153.422  | 1104.3    | AF009317  | 7401.111  | 5863.023  |
| NM_000355 | 655.451  | 893.544  | AF272375  | 481.598   | 641.479   | AK026583  | 6009.796  | 3508.792  |
| AL133580  | 23723.07 | 22949.12 | AK025078  | 1479.235  | 1916.953  | AF218031  | 7817.534  | 5897.114  |
| NM_014666 | 13741.57 | 16524.39 | AK023754  | 1932.081  | 1896.684  | AF210650  | 2773.478  | 1662.231  |
| NM_005451 | 2442.38  | 3201.709 | AK021689  | 1978.113  | 1473.338  | NM_018356 | 6428.084  | 4629.007  |
| NM_006152 | 3917.104 | 5133.131 | AK024737  | 2562.737  | 4975.155  | AF085896  | 1641.031  | 1493.261  |
| NM_013333 | 23717.48 | 38560.09 | AB007890  | 10502.818 | 14287.848 | X74613    | 32672.887 | 37141.555 |
| NM_002333 | 1040.378 | 1232.351 | AF070591  | 858.152   | 1200.521  | AF075080  | 17350.043 | 16470.889 |
| NM_003400 | 15788.03 | 15072.2  | AF286160  | 8159.882  | 8289.806  | AL390183  | 1219.752  | 885.403   |
| NM_006705 | 1114.67  | 1114.389 | AF275800  | 3977.578  | 6914.746  | Y13897    | 2169.318  | 1898.56   |
| NM_012266 | 9166.942 | 7915.081 | AL359605  | 2460.52   | 3782.055  | AK001857  | 1220.51   | 1252.271  |
| NM_004559 | 3684.69  | 3306.377 | AB020633  | 4035.648  | 6558      | AL133577  | 3257.844  | 2792.966  |
| X56692    | 4204.698 | 4076.839 | AK025445  | 10409.726 | 13536.645 | AK025378  | 1402.935  | 1279.737  |
| AK024467  | 704.05   | 615.165  | AL357200  | 2388.821  | 3036.853  | NM_000479 | 3836.084  | 2864.841  |
| NM_014476 | 810.679  | 437.648  | NM_017727 | 5495.04   | 9226.424  | AF038199  | 2971.756  | 1753.611  |
| NM_014600 | 792.087  | 856.893  | NM_018319 | 2902.06   | 3597.895  | CY3Cy5    | 7617.515  | 152.543   |
| NM_016733 | 3478.093 | 3199.011 | AK025996  | 831.331   | 758.388   | BE908993  | 2592.632  | 2966.039  |
| AF181994  | 2978.341 | 3260.111 | AK026702  | 357.633   | 1219.451  | AB012701  | 1674.334  | 2062.213  |
| NM_018962 | 834.852  | 1151.42  | AF086168  | 1649.943  | 1690.822  | M61156    | 2604.005  | 2887.51   |
| AF125100  | 3973.319 | 5004.259 | AF007132  | 1770.609  | 2444.781  | R44005    | 1428.859  | 2140.619  |
| NM_006114 | 13855.06 | 13934.69 | AK026711  | 1805.976  | 3945.314  | AI942392  | 4050.118  | 4798.833  |
| NM_007176 | 21976.48 | 37316.5  | NM_017864 | 7359.83   | 15909.421 | M55040    | 931.798   | 1109.007  |

|           |          |          |           |           |           |           |           |           |
|-----------|----------|----------|-----------|-----------|-----------|-----------|-----------|-----------|
| NM_002722 | 2835.692 | 3368.091 | NM_004865 | 7619.155  | 13588.19  | AW009739  | 738.106   | 999.178   |
| M22538    | 37012.47 | 48251.69 | AF136408  | 937.583   | 1625.486  | BC036805  | 8645.232  | 10970.573 |
| NM_014904 | 1211.083 | 1546.345 | AL110203  | 545.607   | 1129.169  | Z74615    | 19463.697 | 24979.498 |
| AL137576  | 11755.85 | 11713.49 | AJ011602  | 873.17    | 1644.227  | X03884    | 50699.82  | 51268.301 |
| NM_01835E | 5632.739 | 4702.627 | AJ002787  | 4498.265  | 6766.225  | U36759    | 801.145   | 1356.827  |
| NM_016321 | 555.478  | 402.064  | Z70764    | 1472.645  | 2292.821  | X91625    | 6325.955  | 7625.212  |
| NM_01335E | 712.287  | 679.034  | AL049252  | 1758.204  | 883.217   | AF090901  | 733.206   | 842.712   |
| NM_00506C | 7969.104 | 10451.28 | Z83948    | 1403.621  | 960.228   | AF004231  | 410.634   | 627.13    |
| NM_005437 | 10076.78 | 10435.28 | AK024759  | 693.481   | 1239.077  | AF001862  | 15640.189 | 17475.475 |
| AK022417  | 962.915  | 1020.622 | AK022309  | 1449.758  | 3339.97   | SR2       | 73152.164 | 46818.379 |
| U50534    | 910.91   | 704.63   | AK000063  | 1156.497  | 2354.384  | SR4       | 26632.152 | 8678.164  |
| NM_014824 | 3259.954 | 3937.449 | AK000949  | 1022.454  | 1782.082  | SR6       | 5773.252  | 3877.125  |
| NM_014504 | 3248.078 | 3030.139 | AK024553  | 21678.633 | 7686.766  | SR8       | 15812.116 | 46909.668 |
| NM_01440E | 18273.23 | 20186.43 | AF143879  | 8506.514  | 7967.935  | SR10      | 60327.754 | 27786.225 |
| NM_014741 | 6667.648 | 8528.329 | AK024621  | 23660.512 | 24825.188 | CY3Cy5    | 7158.666  | 191.685   |
| AF212247  | 5876.481 | 7004.69  | AL157449  | 16141.838 | 16645.668 | NM_00412E | 320.607   | 598.416   |
| AF161407  | 6803.793 | 8629.552 | AL117582  | 859.108   | 718.773   | U87460    | 11368.712 | 11609.831 |
| NM_01473E | 6212.526 | 5878.742 | AK025525  | 1689.275  | 2320.046  | NM_003617 | 721.469   | 661.414   |
| NM_01640E | 5164.074 | 3570.999 | NM_018233 | 17426.836 | 27013.369 | NM_001841 | 1850.432  | 1483.036  |
| NM_01808C | 4018.448 | 3806.641 | AV740891  | 2527.758  | 4850.524  | NM_002054 | 3032.9    | 3452.869  |
| AF174605  | 6593.71  | 6864.699 | AF143329  | 675.103   | 1755.18   | AF300649  | 2687.557  | 3022.559  |
| NM_014453 | 14988.19 | 13424.83 | AF090916  | 1090.514  | 1842.658  | NM_00412E | 932.802   | 1282.587  |
| NM_005713 | 2823.938 | 2179.857 | AK026860  | 1259.956  | 623.854   | NM_000823 | 2733.331  | 3414.235  |
| AK023553  | 4003.14  | 2405.971 | NM_01489E | 474.431   | 461.572   | NM_004414 | 4753.6    | 6101.121  |
| AF272043  | 13088.96 | 15020.18 | AK023435  | 1385.178  | 1673.709  | NM_003317 | 6835.54   | 9744.197  |
| NM_002587 | 1734.15  | 1866.083 | AF086035  | 9430.231  | 11480.697 | NM_001139 | 3166.822  | 4809.519  |
| NM_00223E | 2963.795 | 3780.988 | AK022159  | 5240.748  | 5284.406  | NM_00460E | 26538.674 | 35999.77  |
| NM_00486E | 734.53   | 904.481  | AK023691  | 8047.436  | 9980.908  | NM_003772 | 1933.188  | 3137.903  |
| NM_00466E | 2155.795 | 2144.35  | AK023502  | 818.85    | 1431.043  | NM_001541 | 2340.052  | 3079.625  |
| NM_00702E | 16036.95 | 14845.78 | AK026744  | 694.89    | 1146.198  | NM_00541E | 2156.417  | 2169.15   |
| AF130728  | 1403.145 | 1383.411 | AK002105  | 841.83    | 1309.698  | NM_00467C | 1114.247  | 970.187   |
| NM_00128E | 27245.64 | 38296.17 | NM_005234 | 9014.032  | 13294.876 | L09081    | 3471.613  | 4484.285  |
| NM_001131 | 2219.163 | 3020.762 | BC023536  | 1770.646  | 3046.654  | NM_016113 | 4369.151  | 4026.565  |
| X07696    | 1615.234 | 1458.458 | NM_001803 | 6364.043  | 10491.972 | NM_014222 | 3579.609  | 2110.881  |
| AA481015  | 1837.116 | 1662.643 | NM_006233 | 19622.322 | 24157.242 | NM_00050E | 5196.588  | 7490.687  |
| AI925826  | 1881.41  | 1884.163 | AK021889  | 827.046   | 897.141   | NM_004542 | 1155.15   | 2216.419  |
| U04209    | 6937.227 | 3757.648 | NM_01902C | 686.978   | 250.379   | X06182    | 2717.352  | 4191.271  |
| AI393201  | 4246.317 | 5635.796 | NM_016474 | 547.126   | 510.534   | BF217496  | 5959.564  | 6826.584  |
| M34664    | 63984.97 | 59799.61 | AL117560  | 30892.711 | 38313.461 | NM_004762 | 11610.035 | 15210.526 |
| Z15108    | 733.772  | 858.041  | M24749    | 5719.77   | 9400.197  | NM_006641 | 51522.902 | 52352.43  |
| M55284    | 4122.957 | 4133.145 | NM_000554 | 51711.008 | 59821.625 | NM_000634 | 8217.609  | 10488.178 |
| AA679391  | 1175.199 | 914.1    | AF009317  | 8777.828  | 12221.175 | NM_01467E | 43321.066 | 40186.555 |
| BG682146  | 4103.84  | 3110.055 | AK026583  | 6116.578  | 9434.578  | AB040969  | 3864.351  | 4287.881  |
| AA884709  | 663.703  | 339.667  | AF218031  | 8740.253  | 11495.928 | NM_003467 | 28034.742 | 27299.064 |
| NM_01226E | 8584.736 | 9592.72  | AF210650  | 2578.719  | 5613.244  | NM_01493E | 3112.281  | 3965.95   |
| NM_00455E | 4219.78  | 5088.284 | NM_01835E | 6175.748  | 13045.535 | NM_003943 | 2347.677  | 3017.93   |
| X56692    | 5459.579 | 9036.226 | AF085896  | 1163.27   | 2734.613  | NM_019052 | 13235.284 | 16501.729 |
| AK024467  | 476.408  | 467.867  | X74613    | 55132.074 | 58632.34  | NM_003202 | 25609.371 | 30845.475 |
| NM_01447E | 619.181  | 580.746  | AF075080  | 26026.674 | 32167.172 | AF119902  | 883.649   | 1220.782  |
| NM_01427E | 4933.337 | 3288.479 | AL390183  | 702.222   | 711.352   | NM_02052E | 3904.721  | 5699.741  |
| NM_000734 | 13419.64 | 13266.9  | AK025378  | 795.88    | 605.673   | NM_00389C | 3512.09   | 4517.397  |
| NM_012331 | 1726.2   | 2290.055 | NM_00047E | 1765.092  | 937.464   | BF127978  | 3077.908  | 3406.806  |
| NM_006644 | 10850.29 | 11098.17 | AF038199  | 1340.614  | 1539.537  | AF110801  | 2233.254  | 2143.741  |

|           |          |          |           |           |           |           |           |           |
|-----------|----------|----------|-----------|-----------|-----------|-----------|-----------|-----------|
| NM_006583 | 90420.43 | 3610.813 | CY3Cy5    | 2426.428  | 191.546   | NM_016579 | 17218.211 | 17510.133 |
| NM_003974 | 9507.615 | 11494.48 | BE908993  | 1803.933  | 2238.022  | AK022565  | 10431.241 | 8327.006  |
| NM_006065 | 746.568  | 600.005  | R44005    | 1600.147  | 1858.855  | AK023151  | 2962.545  | 1751.12   |
| NM_014339 | 10888.41 | 13407.83 | AI942392  | 2775.872  | 3783.649  | AB033076  | 1796.218  | 586.425   |
| NM_002288 | 1201.066 | 1822.527 | M55040    | 584.432   | 768.344   | AK022876  | 3242.893  | 5588.407  |
| NM_004416 | 14137.85 | 7145.278 | AW009739  | 816.744   | 725.122   | AF134894  | 1731.123  | 3055.008  |
| NM_000628 | 9982.409 | 10570.02 | BC036805  | 7097.889  | 4417.138  | NM_003938 | 7160.88   | 10648.872 |
| AB005216  | 1320.794 | 1903.521 | Z74615    | 22341.336 | 17810.717 | NM_014827 | 26234.313 | 36777.453 |
| NM_000325 | 13283.58 | 14368.8  | X03884    | 41678.039 | 26950.234 | NM_001441 | 1827.577  | 2086.334  |
| AF015041  | 1143.788 | 1033.566 | U36759    | 527.652   | 335.912   | NM_018324 | 1214.902  | 1270.572  |
| NM_002363 | 661.168  | 610.936  | X91625    | 3622.329  | 1959.167  | AF064255  | 25431.09  | 27936.908 |
| AK000184  | 702.395  | 385.901  | AF004231  | 590.396   | 947.082   | U08853    | 5179.738  | 5778.216  |
| AF055020  | 2573.537 | 2494.611 | AF001862  | 12302.299 | 8251.484  | NM_004261 | 27085.217 | 40633.219 |
| NM_006986 | 6674.624 | 8884.696 | SR6       | 3033.282  | 3819.698  | NM_016006 | 2890.257  | 2850.071  |
| NM_014904 | 1047.553 | 1413.516 | SR8       | 11273.277 | 38834.703 | NM_016245 | 9010.604  | 10198.364 |
| AL137576  | 10901.7  | 11138.91 | SR10      | 27248.619 | 4425.198  | AF005632  | 2884.662  | 3704.038  |
| NM_018358 | 5164.408 | 5810.045 | CY3Cy5    | 1193.217  | 107.855   | NM_000903 | 3394.691  | 4090.738  |
| NM_016321 | 621.121  | 739.951  | U87460    | 7816.317  | 7015.279  | NM_004493 | 21362.307 | 26202.551 |
| NM_013356 | 446.304  | 363.718  | NM_003617 | 536.63    | 705.671   | AF309489  | 483.571   | 1011.636  |
| AF131781  | 15613.09 | 9537.492 | AF300649  | 3501.895  | 3364.361  | NM_004047 | 28346.895 | 35709.074 |
| NM_006516 | 18463.73 | 15438.46 | NM_004125 | 1335.503  | 1132.428  | AF287303  | 612.735   | 773.009   |
| NM_015865 | 557.995  | 566.877  | NM_000823 | 3709.587  | 3271.407  | NM_004823 | 2602.455  | 3189.34   |
| NM_003055 | 3141.664 | 3593.717 | NM_004414 | 3793.835  | 3461.041  | Y17179    | 69501.945 | 59525.582 |
| NM_005075 | 1147.576 | 1036.819 | NM_003317 | 7779.541  | 5669.373  | AF239613  | 1660.3    | 1720.264  |
| NM_006841 | 726.284  | 846.953  | NM_001139 | 2373.816  | 1923.954  | AK026840  | 4577.779  | 2649.105  |
| NM_002414 | 62368.16 | 51984.7  | NM_004609 | 30964.598 | 17425.316 | NM_000288 | 3008.375  | 1056.634  |
| NM_000355 | 703.892  | 702.145  | NM_003772 | 1734.912  | 1011.993  | AK026317  | 20020.102 | 28962.43  |
| AL133580  | 24349.94 | 22188.75 | NM_001541 | 2600.427  | 2036.12   | X82207    | 28525.695 | 43287.414 |
| NM_014666 | 13477.17 | 15518.36 | NM_005416 | 1517.571  | 1314.073  | NM_015044 | 2079.897  | 3138.858  |
| NM_005451 | 2709.603 | 3313.701 | NM_004670 | 593.087   | 1177.737  | NM_002867 | 780.542   | 1442.517  |
| NM_007172 | 6892.875 | 6971.147 | L09081    | 6626.544  | 11407.403 | NM_000520 | 6039.93   | 5377.552  |
| NM_006152 | 3579.03  | 3730.235 | NM_000218 | 68758.039 | 61687.074 | NM_000289 | 2120.671  | 1945.423  |
| NM_013333 | 20637.64 | 22846.8  | NM_000509 | 4196.218  | 3320.63   | NM_001500 | 6410.873  | 6258.289  |
| NM_002333 | 1036.275 | 1175.822 | NM_004542 | 755.787   | 1117.174  | NM_020379 | 461.801   | 689.831   |
| NM_003400 | 16187.54 | 14253.58 | X06182    | 1553.635  | 736.946   | AL110127  | 3108.783  | 2890.547  |
| NM_006705 | 1178.513 | 1171.868 | BF217496  | 7182.864  | 7976.402  | AK001997  | 567.298   | 682.359   |
| AL050107  | 462.483  | 822.77   | NM_004762 | 10628.323 | 8512.664  | NM_002528 | 4657.994  | 4851.55   |
| NM_014453 | 16316.94 | 16078.52 | NM_006641 | 37196.156 | 33816.863 | D38438    | 2418.797  | 2523.312  |
| NM_005713 | 2943.302 | 2613.458 | NM_000634 | 8023.719  | 7713.55   | AV714945  | 1040.615  | 1511.057  |
| AK023553  | 3759.934 | 2431.626 | NM_014679 | 41735.855 | 41213.41  | AF089897  | 489.548   | 620.537   |
| NM_014600 | 1064.484 | 1180.611 | AB040969  | 2437.353  | 3203.684  | AF007872  | 5328.894  | 6167.027  |
| NM_016733 | 3470.775 | 2959.16  | NM_003467 | 21195.223 | 21500.682 | M30938    | 15700.554 | 14348.431 |
| AF181994  | 3019.961 | 3027.265 | NM_014936 | 2319.049  | 2579.956  | NM_015148 | 2732.591  | 3018.975  |
| NM_018962 | 913.845  | 924.232  | NM_003943 | 2090.925  | 1895.502  | NM_004714 | 2859.208  | 2953.594  |
| AF125100  | 3767.48  | 3863.054 | NM_019052 | 9652.083  | 9769.778  | NM_005401 | 1324.865  | 1340.513  |
| NM_006114 | 14603.11 | 15682.83 | NM_003202 | 17386.031 | 13917.314 | NM_002497 | 26601.789 | 20352.377 |
| X82693    | 6171.52  | 7583.64  | AF119902  | 696.123   | 720.16    | AB025194  | 8868.875  | 6394.01   |
| NM_007176 | 23791.31 | 37602.47 | NM_020525 | 4913.684  | 3408.018  | NM_006239 | 1476.744  | 480.733   |
| NM_002722 | 3311.162 | 3604.927 | NM_003890 | 3989.231  | 2929.304  | BC020863  | 2103.967  | 1570.457  |
| AF317058  | 1181.133 | 1318.02  | BF127978  | 2941.043  | 2714.905  | NM_017897 | 6409.078  | 10728.72  |
| NM_006028 | 684.533  | 914.49   | AF110801  | 1377.36   | 3166.741  | NM_004265 | 31860.207 | 51306.355 |
| AB007925  | 10080.9  | 10620.4  | NM_016579 | 17421.545 | 14687.553 | NM_002572 | 8541.839  | 12140.648 |
| NM_000361 | 14731.04 | 15002.57 | AB018297  | 1291.817  | 1095.419  | NM_000509 | 4461.117  | 3410.376  |

|           |          |          |           |           |           |           |           |           |
|-----------|----------|----------|-----------|-----------|-----------|-----------|-----------|-----------|
| NM_002475 | 34618.55 | 39079.72 | AK022565  | 6711.807  | 4234.313  | NM_004542 | 983.871   | 1298.406  |
| NM_003836 | 2501.431 | 2244.879 | AK023151  | 2475.794  | 1996.827  | X06182    | 1960.844  | 2209.075  |
| NM_017987 | 1199.717 | 1093.546 | AB033076  | 1601.217  | 1007.956  | BE908993  | 2387.705  | 2751.642  |
| NM_018203 | 1152.948 | 1142.345 | AK022876  | 2088.395  | 1664.53   | AB012701  | 1279.577  | 1620.659  |
| AK022417  | 1070.376 | 1079.356 | AF134894  | 1067.695  | 1190.698  | M61156    | 2600.51   | 2809.572  |
| U50534    | 861.424  | 813.214  | NM_003938 | 4889.481  | 3508.825  | R44005    | 1352.759  | 1415.446  |
| NM_014824 | 3331.104 | 4831.362 | NM_014827 | 16500.875 | 6810.716  | AI942392  | 4620.393  | 4603.714  |
| AK000782  | 425.64   | 365.581  | NM_001441 | 1606.693  | 1988.651  | M55040    | 991.317   | 1047.021  |
| NM_014504 | 3687.107 | 3333.046 | NM_018324 | 1377.624  | 1387.317  | AW009739  | 642.157   | 1081.728  |
| NM_014408 | 18123.28 | 17875.45 | AF064255  | 27478.646 | 23956.402 | BC036805  | 7540.212  | 9948.35   |
| NM_014741 | 6264.521 | 7111.092 | NM_016368 | 50178.547 | 52477.215 | Z74615    | 18671.191 | 21205.932 |
| AF212247  | 6011.83  | 6494.374 | U08853    | 3427.901  | 4489.432  | X03884    | 53538.855 | 51667.328 |
| AF161407  | 7036.603 | 6834.495 | NM_004261 | 37892.195 | 22377.041 | U36759    | 732.735   | 758.276   |
| NM_014738 | 6732.323 | 5383.357 | NM_016006 | 2388.064  | 2298.605  | X91625    | 6898.891  | 6122.775  |
| NM_018080 | 5498.815 | 5998.841 | NM_016245 | 7924.612  | 7870.681  | AF090901  | 656.158   | 631.975   |
| NM_007115 | 1722.485 | 1357.751 | AF005632  | 3237.731  | 2689.907  | AF004231  | 392.883   | 472.062   |
| NM_004616 | 1041.381 | 1007.304 | NM_000903 | 2721.571  | 2291.534  | AF001862  | 15100.148 | 13444.245 |
| NM_004360 | 312.513  | 494.412  | NM_004493 | 17689.494 | 12020.43  | NM_016044 | 3541.386  | 7375.226  |
| NM_017692 | 5472.45  | 4662.251 | AF309489  | 813.033   | 722.953   | AK023151  | 2148.683  | 1584.677  |
| NM_003975 | 4125.756 | 4640.496 | NM_004047 | 23330.494 | 13078.276 | AB033076  | 1641.065  | 1564.972  |
| NM_004834 | 11419.96 | 13435.52 | NM_004823 | 2170.473  | 1794.264  | AK022876  | 2695.569  | 2942.875  |
| NM_018173 | 485.675  | 430.666  | Y17179    | 62790.469 | 57625.121 | AF134894  | 1319.864  | 1124.671  |
| NM_000812 | 1899.61  | 1835.611 | NM_000891 | 936.436   | 1247.169  | NM_003938 | 5733.349  | 5787.826  |
| AK024747  | 24518.31 | 22669.63 | AF239613  | 1610.342  | 2329.885  | NM_014827 | 22451.396 | 20210.498 |
| NM_006390 | 5719.379 | 5279.218 | AK026840  | 4221.568  | 7104.215  | NM_004126 | 272.901   | 580.76    |
| NM_003580 | 5582.385 | 5887.392 | NM_000288 | 3025.307  | 5018.902  | U87460    | 10412.438 | 11627.494 |
| NM_006506 | 3594.848 | 4412.466 | AK026317  | 15468.86  | 20638.357 | NM_003617 | 679.281   | 1022.752  |
| NM_003235 | 1321.256 | 1614.592 | NM_015044 | 1514.983  | 1335.469  | NM_001841 | 2176.484  | 1953.03   |
| AB042562  | 3693.841 | 2766.715 | NM_002867 | 402.608   | 143.498   | NM_002054 | 3385.541  | 3385.161  |
| NM_016009 | 8953.948 | 9397.383 | NM_000520 | 3877.148  | 4324.832  | AF300649  | 2694.665  | 3002.547  |
| NM_002378 | 633.942  | 757.973  | NM_000289 | 1874.989  | 1838.537  | NM_004125 | 879.609   | 1205.23   |
| NM_003726 | 4056.705 | 4756.877 | NM_001500 | 4202.183  | 4727.675  | NM_000823 | 3435.558  | 3677.985  |
| NM_006097 | 4548.321 | 4157.515 | AL110127  | 2392.258  | 2786.728  | NM_004414 | 4958.084  | 5358.427  |
| NM_006113 | 3342.031 | 2711.197 | NM_002528 | 3532.723  | 3319.676  | NM_003317 | 6637.185  | 8055.446  |
| NM_015313 | 29751.67 | 22810.28 | D38438    | 3398.888  | 3176.751  | NM_001139 | 3394.05   | 3243.263  |
| AK022287  | 16194.26 | 11864.12 | AV714945  | 840.944   | 777.212   | NM_004609 | 25863.178 | 29020.293 |
| NM_015897 | 4753.511 | 5063.638 | AF007872  | 3345.362  | 2782.75   | NM_003772 | 2044.175  | 2890.914  |
| NM_005436 | 4172.248 | 3215.628 | M30938    | 8072.017  | 3222.223  | NM_001541 | 2653.442  | 2538.748  |
| AF177473  | 3328.426 | 3669.035 | NM_015148 | 1646.949  | 1292.234  | NM_005416 | 1816.193  | 1310.282  |
| NM_000546 | 4599.338 | 5223.654 | NM_004714 | 2309.209  | 2908.376  | L09081    | 5294.198  | 3948.042  |
| AB023223  | 999.904  | 887.549  | NM_005401 | 1012.367  | 955.307   | NM_016113 | 4532.634  | 7987.535  |
| AB018257  | 5472.613 | 5057.92  | NM_002497 | 30439.955 | 48958.227 | NM_014222 | 4408.512  | 6394.341  |
| NM_002708 | 32150.71 | 37027.6  | AB025194  | 11814.734 | 19242.762 | AK026840  | 3470.039  | 2140.275  |
| AK001059  | 2294.167 | 1690.958 | NM_006239 | 1744.211  | 3098.748  | NM_000288 | 3188.647  | 2588.675  |
| NM_007282 | 8575.955 | 8132.377 | BC020863  | 581.315   | 1030.912  | AK026317  | 13103.756 | 14431.347 |
| NM_017610 | 1857.075 | 2161.327 | NM_004265 | 37592.598 | 32061.143 | X82207    | 22713.381 | 25124.951 |
| AL122070  | 574.052  | 884.246  | NM_002572 | 5473.33   | 2303.513  | NM_015044 | 1440.167  | 1772.298  |
| AK025133  | 7839.572 | 12317.44 | NM_000509 | 4806.444  | 2696.966  | NM_002867 | 579.736   | 814.84    |
| AB020704  | 2470.16  | 2055.333 | BE908993  | 4142.672  | 2927.452  | BF217496  | 4901.594  | 5666.9    |
| NM_020197 | 635.199  | 512.448  | AB012701  | 1844.823  | 1284.445  | NM_004762 | 11548.907 | 15899.995 |
| NM_004087 | 10140.37 | 4368.357 | M61156    | 2807.077  | 2467.983  | NM_006641 | 48957.918 | 53478.477 |
| NM_018700 | 712.527  | 1625.8   | R44005    | 1785.171  | 1929.435  | NM_000634 | 8039.258  | 9015.857  |
| NM_000119 | 2867.295 | 2626.937 | AI942392  | 2865.842  | 2852.689  | NM_014679 | 41687.094 | 41418.102 |

|           |          |          |           |           |           |           |           |           |
|-----------|----------|----------|-----------|-----------|-----------|-----------|-----------|-----------|
| NM_001065 | 9646.144 | 7502.919 | M55040    | 459.429   | 673.074   | AB040969  | 3652.72   | 4521.734  |
| AK027100  | 2829.75  | 1673.168 | AW009739  | 786.002   | 657.845   | NM_003467 | 30166.449 | 30936.594 |
| AY010111  | 969.741  | 545.64   | BC036805  | 7061.146  | 4408.248  | NM_014936 | 3450.145  | 4118.251  |
| NM_003622 | 3084.158 | 2148.538 | Z74615    | 19988.574 | 8521.55   | NM_003943 | 2418.157  | 3060.41   |
| NM_001774 | 2903.138 | 2438.074 | X03884    | 47347.961 | 35759.395 | NM_019052 | 13856.542 | 16956.656 |
| NM_005023 | 632.004  | 434.656  | U36759    | 532.587   | 579.661   | NM_003202 | 27035.436 | 27531.551 |
| AK021645  | 1684.464 | 1636.696 | X91625    | 7413.798  | 10363.355 | AF119902  | 1372.864  | 1251.275  |
| NM_013339 | 3894.767 | 4286.386 | AF090901  | 466.282   | 1525.022  | NM_020525 | 4338.633  | 5511.403  |
| NM_001491 | 1523.871 | 1323.958 | AF004231  | 1177.723  | 2199.296  | NM_003890 | 4064.876  | 3575.488  |
| NM_002642 | 709.989  | 1000.192 | AF001862  | 21199.377 | 23366.32  | BF127978  | 2869.114  | 1493.89   |
| AK026541  | 2582.396 | 3401.196 | NM_058197 | 122.101   | 1729.373  | AF110801  | 2819.989  | 891.173   |
| NM_005899 | 7400.925 | 5779.407 | NM_016044 | 3400.213  | 5009.538  | AB018297  | 1544.667  | 3221.971  |
| D42055    | 13617.8  | 12727.09 | AK023151  | 1839.676  | 2167.702  | AK022565  | 12493.982 | 17633.381 |
| AL137349  | 3009.069 | 3048.98  | AB033076  | 1385.781  | 1395.621  | NM_006239 | 1364.441  | 1346.722  |
| NM_003339 | 1482.909 | 1018.841 | AK022876  | 2787.336  | 3813.802  | BC020863  | 590.47    | 587.904   |
| NM_016476 | 51312.61 | 47676.36 | AF134894  | 998.714   | 1051.681  | NM_017897 | 6293.408  | 6026.056  |
| NM_015902 | 2638.04  | 2002.676 | NM_003938 | 6762.778  | 4696.569  | NM_004265 | 26042.75  | 38931.727 |
| NM_020155 | 5444.712 | 4786.757 | NM_014827 | 19757.881 | 15599.252 | NM_002572 | 7045.341  | 7645.701  |
| BE874471  | 10633.2  | 9285.401 | U87460    | 8553.859  | 7292.027  | NM_001441 | 1891.577  | 2135.644  |
| NM_006121 | 6685.377 | 6343.51  | NM_003617 | 1193.807  | 1631.314  | NM_018324 | 1220.395  | 1696.795  |
| AK023520  | 10181.42 | 7035.843 | NM_001841 | 1071.943  | 890.692   | AF064255  | 26631.42  | 31595.326 |
| NM_004693 | 562.865  | 614.674  | NM_002054 | 3532.606  | 2912.842  | NM_016368 | 39620.473 | 46688.941 |
| NM_007211 | 7878.917 | 5614.577 | AF300649  | 3339.756  | 2355.206  | U08853    | 5402.29   | 6430.39   |
| AB011152  | 2054.382 | 2247.083 | NM_004125 | 1099.787  | 857.067   | NM_004261 | 29105.014 | 45276.746 |
| NM_014956 | 13318.31 | 8595.706 | NM_000823 | 3053.852  | 1790.165  | NM_016006 | 2903.109  | 3030.799  |
| AB014592  | 925.916  | 807.858  | NM_004414 | 4601.638  | 3990.2    | NM_016245 | 8900.354  | 10490.096 |
| NM_016952 | 1293.918 | 1310.222 | NM_003317 | 10633.606 | 10067.63  | AF005632  | 2613.105  | 2892.35   |
| NM_001654 | 5545.433 | 7345.585 | NM_001139 | 4637.238  | 6465.528  | NM_000903 | 3315.09   | 3667.006  |
| NM_014519 | 3603.942 | 3350.861 | NM_004609 | 41179.285 | 49109.406 | NM_004493 | 23242.377 | 22783.004 |
| NM_007147 | 3546.541 | 2969.158 | NM_003772 | 3003.348  | 6526.997  | NM_004047 | 28565.07  | 31952.551 |
| X65463    | 4985.379 | 4696.95  | NM_001541 | 5503.28   | 8165.224  | AF287303  | 898.007   | 639.973   |
| AK024418  | 826.721  | 848.105  | NM_005416 | 3009.562  | 5613.049  | NM_004823 | 2391.417  | 2212.807  |
| NM_003367 | 9322.272 | 9041.065 | NM_004670 | 640.907   | 1224.056  | Y17179    | 65039.031 | 50885.418 |
| NM_005194 | 24785    | 21131.62 | L09081    | 5954.349  | 8442.811  | AF239613  | 1572.436  | 3036.987  |
| AB002296  | 2422.277 | 3084.347 | NM_016113 | 6271.66   | 8179.335  | NM_016044 | 2729.996  | 4108.393  |
| NM_014315 | 7619.908 | 8107.915 | NM_014222 | 4019.347  | 4747.456  | NM_000520 | 6629.875  | 6071.856  |
| NM_012087 | 3800.094 | 4847.98  | AK026840  | 1978.256  | 2816.826  | NM_000289 | 2657.28   | 2400.07   |
| AF165520  | 2341.452 | 3195.37  | NM_000288 | 1265.471  | 1963.806  | NM_001500 | 6892.915  | 6569.568  |
| AK026072  | 1274.109 | 1015.446 | AK026317  | 13346.235 | 15994.603 | NM_004388 | 4703.773  | 5531.47   |
| NM_004289 | 1183.185 | 1064.074 | X82207    | 28630.975 | 30277.096 | NM_020379 | 359.67    | 1117.443  |
| NM_015679 | 7126.633 | 6545.384 | NM_015044 | 1625.18   | 1405.475  | AL110127  | 3023.203  | 3327.164  |
| AF299118  | 51135.51 | 45271.65 | NM_002867 | 664.856   | 773.945   | NM_002528 | 5139.667  | 5866.504  |
| AK025353  | 22325.47 | 20875.6  | BF217496  | 9941.236  | 11809.16  | D38438    | 2805.658  | 2967.23   |
| AK056896  | 33287.23 | 33699.66 | NM_004762 | 15122.234 | 14298.041 | AV714945  | 1269.215  | 1430.606  |
| AK022763  | 27283.01 | 25566.5  | NM_006641 | 59443.066 | 52095.551 | AF007872  | 5855.063  | 6062.783  |
| AF288207  | 33427.12 | 31898.55 | NM_000634 | 10584.914 | 9856.152  | M30938    | 16915.176 | 11805.475 |
| NM_001001 | 62204.21 | 51037.54 | NM_014679 | 49573.449 | 35271.539 | NM_015148 | 2780.004  | 2470.571  |
| NM_005715 | 3673.453 | 3781.984 | AB040969  | 4409.601  | 4008.818  | NM_004714 | 2846.688  | 2018.17   |
| AK026992  | 5412.351 | 4455.287 | NM_003467 | 30667.777 | 30247.453 | NM_002497 | 30471.545 | 40523.59  |
| X81895    | 819.561  | 613.508  | NM_014936 | 3200.064  | 3624.632  | NM_005416 | 1764.873  | 2333.188  |
| AL137343  | 988.365  | 610.732  | NM_003943 | 2613.164  | 2733.713  | NM_004670 | 398.353   | 557.413   |
| NM_004541 | 38568.27 | 48179.2  | NM_019052 | 13215.257 | 18731.023 | L09081    | 3522.192  | 4057.063  |
| NM_006830 | 51488.28 | 46786.13 | NM_003202 | 17027.139 | 24060.305 | NM_000218 | 69693.438 | 55150.871 |

|           |          |          |           |           |           |           |           |           |
|-----------|----------|----------|-----------|-----------|-----------|-----------|-----------|-----------|
| AK026414  | 16751.18 | 15494.4  | AF119902  | 958.526   | 1553.724  | NM_016113 | 3701.714  | 3490.307  |
| D17297    | 1026.056 | 1099.641 | NM_020525 | 6953.362  | 10218.515 | NM_014222 | 2810.979  | 3319.323  |
| NM_004074 | 61257.28 | 53245.26 | X62468    | 773.776   | 1233.439  | NM_000509 | 4366.335  | 4082.319  |
| NM_002626 | 45311.61 | 44744.33 | NM_00389C | 6153.667  | 9711.105  | X06182    | 1865.374  | 2029.443  |
| NM_018436 | 25879.64 | 28917.1  | BF127978  | 5689.171  | 7691.267  | BE908993  | 2313.711  | 2857.506  |
| AF157115  | 6368.313 | 7558.69  | AF110801  | 2322.401  | 5216.4    | AB012701  | 1301.827  | 1784.426  |
| AJ223353  | 8619.013 | 9312.058 | AB018297  | 1521.46   | 2430.973  | M61156    | 2498.627  | 2721.092  |
| NM_012241 | 7550.258 | 6503.355 | AK022565  | 9560.989  | 9815.585  | R44005    | 1496.765  | 1375.567  |
| AF250288  | 587.16   | 439.377  | AB025194  | 6992.39   | 7746.872  | AI942392  | 4800.486  | 4117.608  |
| NM_018486 | 1678.086 | 2160.649 | NM_006239 | 1420.494  | 2184.791  | M55040    | 913.443   | 892.633   |
| NM_005324 | 29391.92 | 28832.94 | BC020863  | 3705.427  | 7173.031  | AW009739  | 783.214   | 1077.293  |
| AL080201  | 23081.03 | 19470.95 | NM_017897 | 4935.716  | 7814.981  | BC036805  | 7991.43   | 8627.676  |
| NM_001806 | 11317.2  | 8365.311 | NM_004265 | 40569.469 | 37027.477 | Z74615    | 19720.654 | 19395.057 |
| AB040941  | 3030.624 | 2349.697 | NM_002572 | 7508.019  | 7760.355  | X03884    | 54322.031 | 47273.492 |
| AL137241  | 1356.869 | 1076.65  | NM_001441 | 2482.983  | 3645.008  | U36759    | 661.255   | 597.139   |
| AB037742  | 3186.229 | 1709.057 | NM_018324 | 1976.432  | 3015.661  | X91625    | 6442.688  | 3223.574  |
| AF272375  | 1603.775 | 2042.348 | AF064255  | 40381.441 | 37448.801 | AF001862  | 15797.664 | 26213.818 |
| AK025078  | 1632.462 | 2021.353 | NM_016368 | 55354.371 | 55397.543 | NM_00389C | 3131.916  | 3183.669  |
| AK021689  | 486.519  | 452.557  | U08853    | 4248.897  | 4216.518  | BF127978  | 3503.016  | 3245.939  |
| AK024737  | 4187.484 | 5082.146 | NM_004261 | 44389.898 | 29146.857 | AF110801  | 2144.266  | 1867.243  |
| AB007890  | 6796.092 | 4717.597 | NM_016006 | 2659.596  | 3291.682  | NM_016579 | 17958.961 | 16724.918 |
| AF070591  | 682.671  | 741.041  | NM_016245 | 9372.462  | 9194.953  | AB018297  | 1450.416  | 1473.529  |
| AF286160  | 10504.18 | 9688.393 | AF005632  | 4080.518  | 3138.343  | AK022565  | 9061.365  | 8433.611  |
| NM_020411 | 551.332  | 431.825  | NM_000903 | 3892.188  | 5253.911  | AK023151  | 2214.919  | 2862.713  |
| AF275800  | 3635.447 | 3443.743 | NM_004493 | 22162.764 | 27721.703 | AB033076  | 1536.184  | 1317.784  |
| AL359605  | 1963.899 | 1779.742 | AF309489  | 747.509   | 1536.902  | AK022876  | 2708.575  | 2948.575  |
| AB020633  | 5805.929 | 5551.05  | NM_004047 | 29293.682 | 38691.195 | AF134894  | 1234.104  | 1701.033  |
| AK025445  | 14021.75 | 14361.95 | AF287303  | 675.479   | 1346.906  | NM_003936 | 5444.627  | 5760.435  |
| AL357200  | 1605.319 | 2091.1   | NM_004823 | 3256.82   | 5693.352  | NM_014827 | 21976.336 | 21081.398 |
| NM_017727 | 18404.38 | 14536.78 | Y17179    | 60568.328 | 62341.371 | U87460    | 10860.036 | 12260.511 |
| NM_018319 | 5590.112 | 4829.705 | NM_000891 | 1091.961  | 2026.677  | NM_001841 | 1863.219  | 1844.225  |
| AL359559  | 1482.704 | 877.817  | AF239613  | 1888.058  | 1558.899  | NM_002054 | 3598.871  | 3268.6    |
| AY008301  | 683.431  | 730.294  | NM_016044 | 2820.625  | 3728.894  | AF300649  | 2587.246  | 2885.136  |
| AK024063  | 397.636  | 444.701  | NM_00150C | 4552.8    | 5086.346  | NM_004125 | 894.544   | 933.669   |
| AK021714  | 2294.403 | 2512.42  | NM_004388 | 4732.066  | 6183.793  | NM_000823 | 3942.838  | 3895.751  |
| NM_020314 | 8983.837 | 7837.661 | NM_020379 | 942.145   | 1006.649  | NM_004414 | 5777.774  | 5040.86   |
| AK022972  | 6593.452 | 4219.701 | AL110127  | 2571.341  | 3452.091  | NM_003317 | 6757.714  | 5678.75   |
| AK025996  | 1981.923 | 1756.581 | AK001997  | 436.412   | 713.48    | NM_001139 | 3709.577  | 2164.127  |
| AF088015  | 2226.721 | 1571.117 | NM_002528 | 4893.53   | 3598.945  | NM_004609 | 24078.344 | 7751.543  |
| AK026702  | 947.476  | 662.148  | D38438    | 4997.039  | 7282.551  | NM_001541 | 2614.225  | 4506.491  |
| AF086168  | 1026.218 | 943.357  | AV714945  | 1289.42   | 1853.42   | NM_004823 | 1965.761  | 1915.394  |
| AF007132  | 1386.051 | 1160.204 | NM_015148 | 2509.767  | 4128.236  | Y17179    | 68793.867 | 52148.184 |
| AK026711  | 2309.504 | 1869.186 | NM_004714 | 2703.523  | 4112.85   | NM_000891 | 860.21    | 587.748   |
| NM_017864 | 6913.523 | 5606.478 | NM_005401 | 689.405   | 1259.015  | AF239613  | 1219.537  | 1679.52   |
| NM_004869 | 7108.576 | 5653.905 | NM_017677 | 307.448   | 1033.489  | AK026840  | 4400.945  | 3670.562  |
| AF136408  | 1467.383 | 1268.088 | NM_002497 | 20997.566 | 29029.715 | NM_000288 | 3417.464  | 2719.351  |
| AL110203  | 541.161  | 686.011  | NM_005416 | 1056.409  | 1299.246  | AK026317  | 13382.596 | 13998.706 |
| AJ011595  | 550.704  | 590.971  | L09081    | 2442.773  | 2277.986  | X82207    | 22308.852 | 24945.475 |
| AJ011602  | 724.67   | 950.597  | NM_014222 | 2373.526  | 2828.827  | NM_015044 | 1551.481  | 1948.163  |
| AJ002787  | 1241.274 | 1095.796 | NM_004542 | 1008.418  | 1255.054  | NM_002867 | 593.687   | 776.373   |
| Z70764    | 1655.219 | 1311.319 | X06182    | 2330.762  | 2969.709  | BF217496  | 4240.535  | 4904.762  |
| AL049252  | 513.552  | 552.062  | BE908993  | 2606.445  | 3118.278  | NM_004762 | 11114.793 | 15238.333 |
| M25785    | 1678.399 | 1668.244 | AB012701  | 2324.154  | 2298.47   | NM_006641 | 45774.586 | 48059.402 |

|           |          |          |           |           |           |           |           |           |
|-----------|----------|----------|-----------|-----------|-----------|-----------|-----------|-----------|
| M32443    | 1100.833 | 929.63   | M61156    | 3365.85   | 3056.233  | NM_000634 | 8515.748  | 8793.94   |
| D16477    | 1082.318 | 1350.746 | R44005    | 1770.053  | 1544.473  | NM_014679 | 43028.211 | 35793.797 |
| AK024759  | 1047.372 | 727.94   | AI942392  | 4412.421  | 5564.992  | AB040969  | 4182.787  | 4200.738  |
| AK026808  | 966.22   | 683.072  | M55040    | 947.713   | 1544.035  | NM_003467 | 30878.549 | 28759.463 |
| AK000792  | 290.875  | 442.548  | AW009739  | 885.835   | 1215.267  | NM_014936 | 3396.198  | 3342.885  |
| AK000949  | 1647.268 | 1731.202 | Z74615    | 40946.984 | 52002.43  | NM_003943 | 2515.1    | 2542.49   |
| AK027068  | 675.018  | 762.585  | X03884    | 47281.48  | 58140.973 | NM_019052 | 13484.837 | 12260.031 |
| AK000974  | 1955.454 | 1412.854 | U36759    | 870.374   | 1021.931  | NM_003202 | 27334.688 | 17509.299 |
| AK025051  | 1314.845 | 786.506  | X91625    | 6420.952  | 9861.174  | AF119902  | 1093.903  | 266.551   |
| AK024553  | 2701.157 | 2083.312 | AF090901  | 524.227   | 1232.566  | NM_015148 | 1678.064  | 1584.055  |
| AF143879  | 7278.938 | 6942.713 | AF004231  | 823.955   | 1087.951  | NM_004714 | 1582.542  | 1627.92   |
| AK024621  | 30333.94 | 31873.37 | NM_00389C | 3006.13   | 4180.097  | NM_005401 | 313.212   | 479.452   |
| AL157449  | 15177.44 | 17387.03 | BF127978  | 3668.816  | 4565.066  | NM_002497 | 26333.775 | 16766.762 |
| AL117582  | 2068.928 | 1414.126 | AF110801  | 2108.382  | 3243.806  | AB025194  | 8443.357  | 8127.421  |
| AK025525  | 861.73   | 1408.43  | AB018297  | 806.341   | 942.336   | NM_006239 | 1170.313  | 1247.047  |
| NM_018233 | 6491.825 | 5706.282 | AK022565  | 2863.588  | 2926.479  | NM_017897 | 5467.672  | 5516.531  |
| AV740891  | 837.091  | 983.1    | AK023151  | 1266.933  | 1675.274  | NM_004265 | 26448.467 | 38692.492 |
| AF090916  | 544.379  | 557.378  | AK022876  | 1731.45   | 1382.481  | NM_002572 | 6805.965  | 7764.502  |
| AK026860  | 7356.576 | 6599.375 | AF134894  | 894.272   | 624.904   | NM_001441 | 1669.181  | 2786.36   |
| AK024211  | 994.439  | 414.355  | NM_003938 | 5346.179  | 3101.525  | NM_018324 | 1148.638  | 1406.958  |
| NM_01489E | 2256.486 | 1924.083 | NM_014827 | 20054.887 | 14680.53  | AF064255  | 22200.949 | 25744.141 |
| AK023435  | 3511.944 | 1080.367 | NM_00412E | 383.282   | 1607.087  | NM_01636E | 40165.902 | 42559.199 |
| AF086035  | 12712.56 | 11565.87 | U87460    | 13107.049 | 13916.642 | U08853    | 5308.3    | 5768.933  |
| AK022159  | 7433.071 | 7040.438 | NM_003617 | 890.723   | 584.618   | NM_004261 | 30702.746 | 42115.473 |
| D16905    | 452.684  | 733.311  | NM_001841 | 1788.411  | 2528.061  | NM_01600E | 2867.333  | 2893.345  |
| AJ012491  | 662.468  | 669.133  | NM_002054 | 4364.541  | 5714.129  | NM_016245 | 8965.933  | 9211.825  |
| AF007136  | 1371.401 | 1029.045 | AF300649  | 3324.345  | 3723.393  | AF005632  | 2835.712  | 3135.706  |
| U25750    | 4307.446 | 3605.617 | NM_00412E | 1118.484  | 1363.78   | NM_000903 | 3343.182  | 3025.23   |
| AK023691  | 11777.33 | 10762.15 | NM_000823 | 5701.304  | 8069.523  | NM_004493 | 23071.352 | 17084.566 |
| AK023502  | 541.128  | 499.639  | NM_004414 | 6715.667  | 10929.902 | AF309489  | 1265.585  | 407.747   |
| AK026744  | 1095.201 | 860.745  | NM_003317 | 12326.764 | 16503.545 | NM_004047 | 28506.383 | 10226.688 |
| AK002105  | 493.182  | 583.6    | NM_001139 | 4434.933  | 6654.359  | NM_006773 | 2774.06   | 2108.954  |
| NM_005234 | 4962.591 | 5528.928 | NM_004609 | 42935.84  | 49745.621 | AK024439  | 12407.398 | 8808.854  |
| BC023536  | 1717.891 | 1895.27  | NM_003772 | 2101.303  | 3465.729  | X89676    | 1431.099  | 1465.312  |
| NM_001803 | 7540.371 | 7562.278 | NM_004823 | 1259.713  | 1485.653  | NM_012444 | 505.47    | 905.909   |
| NM_006233 | 22609.42 | 30315.72 | Y17179    | 64960.207 | 60507.285 | Z32684    | 3145.803  | 2744.344  |
| AK021889  | 1289.862 | 1262.297 | NM_000891 | 477.638   | 661.203   | NM_016512 | 1250.648  | 1060.683  |
| AK000992  | 1310.548 | 1086.089 | AF239613  | 963.718   | 1017.903  | NM_01748E | 7113.742  | 8456.741  |
| L23544    | 10847.38 | 9822.025 | AK026840  | 2115.247  | 2127.731  | AY009400  | 636.672   | 725.904   |
| NM_01902C | 6837.147 | 5705.115 | NM_00028E | 1408.188  | 1681.31   | NM_005069 | 1343.199  | 1519.961  |
| NM_016474 | 2710.161 | 1259.766 | AK026317  | 10243.729 | 8077.34   | NM_016044 | 3095.482  | 4058      |
| NM_00091C | 3238.758 | 2675.737 | X82207    | 25467.779 | 16918.473 | NM_00052C | 6533.2    | 6052.639  |
| AF086001  | 18339.41 | 18224.59 | NM_015044 | 957.882   | 695.749   | NM_000289 | 2819.879  | 2056.019  |
| AL117560  | 31738.47 | 32709.93 | NM_002867 | 583.165   | 855.497   | NM_00150C | 6456.264  | 7213.063  |
| M24749    | 9756.818 | 8339.557 | BF217496  | 6971.807  | 4689.044  | NM_00438E | 5260.664  | 5282.687  |
| NM_005831 | 64334.54 | 49459.63 | NM_004762 | 11395.566 | 6086.135  | NM_020379 | 605.907   | 799.855   |
| NM_00585C | 37566.06 | 34522.71 | NM_006641 | 60977.594 | 48090.41  | AL110127  | 3042.977  | 2944.388  |
| NM_000554 | 49526.61 | 46183.03 | NM_000634 | 13151.962 | 17763.357 | AK001997  | 572.138   | 711.831   |
| AF009317  | 6028.417 | 5833.232 | NM_014679 | 52680.352 | 52316.863 | NM_00252E | 5911.369  | 5142.612  |
| AK026583  | 6937.426 | 5131.386 | AB040969  | 2491.805  | 3955.6    | D38438    | 3361.914  | 2705.549  |
| AF218031  | 8895.661 | 9394.108 | NM_003467 | 24603.744 | 30233.023 | AV714945  | 1376.38   | 879.649   |
| AF210650  | 3852.125 | 2860.187 | NM_014936 | 2534.903  | 3440.045  | AF089897  | 404.799   | 482.224   |
| NM_01835E | 10378.95 | 7945.949 | NM_003943 | 3253.659  | 5493.433  | AF007872  | 6141.964  | 2630.08   |

|           |          |          |           |           |           |           |           |           |
|-----------|----------|----------|-----------|-----------|-----------|-----------|-----------|-----------|
| AF085896  | 1849.354 | 1585.298 | NM_019052 | 14884.353 | 26180.357 | M30938    | 16855.033 | 3130.925  |
| X74613    | 6545.646 | 6893.984 | NM_003202 | 28612.479 | 43454.445 | NM_017586 | 11542.104 | 10241.137 |
| AF075080  | 3397.95  | 3853.488 | AF119902  | 1129.228  | 1709.069  | NM_004148 | 3784.379  | 3573.616  |
| AL390183  | 991.898  | 770.086  | NM_020525 | 5624.742  | 6457.735  | X03168    | 1853.015  | 1673.054  |
| Y13897    | 1300.578 | 846.613  | NM_015148 | 790.205   | 545.818   | NM_005168 | 3627.289  | 3081.28   |
| AK001857  | 1875.606 | 1048.371 | NM_004714 | 1673.587  | 1642.606  | NM_017801 | 11018.762 | 8881.694  |
| AK021525  | 675.451  | 1093.436 | NM_002497 | 12704.536 | 11975.438 | NM_007348 | 7128.728  | 5948.841  |
| AL133577  | 2754.684 | 2153.666 | AB025194  | 8189.271  | 6324.37   | NM_016953 | 547.625   | 474.339   |
| NM_000479 | 1993.123 | 1515.26  | NM_006239 | 1043.125  | 996.597   | U65473    | 5964.265  | 6660.934  |
| AF038199  | 2839.272 | 1504.377 | BC020863  | 305.335   | 301.743   | D63481    | 12487.659 | 11831.883 |
| CY3Cy5    | 6241.469 | 277.448  | NM_017897 | 2748.983  | 2746.131  | AY009951  | 13355.749 | 18557.953 |
| BE908993  | 3733.308 | 3948.503 | NM_004265 | 26622.199 | 13075.618 | AL157424  | 1677.535  | 1994.094  |
| AB012701  | 1260.812 | 1455.088 | NM_002572 | 4702.635  | 3356.253  | AK024422  | 530.501   | 725.576   |
| M61156    | 2076.698 | 2209.515 | NM_001441 | 1492.174  | 1214.149  | NM_002673 | 794.612   | 1663.38   |
| R44005    | 1373.177 | 1772.653 | NM_018324 | 854.315   | 514.975   | NM_003876 | 6892.516  | 6737.483  |
| AI942392  | 5672.719 | 6121.768 | AF064255  | 31602.127 | 16020.039 | AJ276310  | 523.294   | 787.419   |
| M55040    | 823.058  | 882.05   | U08853    | 6403.347  | 12189.941 | NM_012295 | 5463.313  | 6176.073  |
| AW009739  | 882.868  | 1117.003 | NM_004261 | 41975.355 | 31322.17  | NM_015910 | 1732.2    | 1396.312  |
| BC036805  | 6566.879 | 6736.306 | NM_016006 | 2609.132  | 5184.7    | NM_000222 | 368.935   | 427.611   |
| Z74615    | 2341.437 | 2742.291 | NM_016245 | 8002.31   | 13381.917 | AL133666  | 2182.112  | 1794.226  |
| X03884    | 47460.65 | 50055.4  | AF005632  | 5060.697  | 7344.21   | NM_000663 | 3227.254  | 3246.59   |
| U36759    | 681.718  | 566.598  | NM_000903 | 4452.255  | 7259.445  | NM_004710 | 5553.537  | 5775.257  |
| X91625    | 7347.387 | 4891.07  | NM_004493 | 22143.293 | 26560.23  | NM_004396 | 20201.32  | 17627.412 |
| AF090901  | 788.16   | 609.512  | AF309489  | 919.398   | 1753.999  | NM_017999 | 5175.583  | 4025.51   |
| AF001862  | 12766.2  | 13405.33 | NM_006773 | 1246.425  | 1692.267  | NM_015989 | 40474.121 | 23506.762 |
| NM_058197 | 493.279  | 375.41   | AK024439  | 7278.115  | 6871.977  | NM_001043 | 2690.652  | 975.014   |
| SR6       | 3906.566 | 3014.921 | X89676    | 910.766   | 826.466   | NM_004779 | 9285.58   | 8336.764  |
| SR8       | 15148.31 | 37168.47 | Z32684    | 1686.556  | 1866.611  | NM_019071 | 5343.612  | 3816.792  |
| SR10      | 45444.71 | 19283.68 | NM_016512 | 994.148   | 1008.535  | NM_014399 | 5539.345  | 5789.297  |
| CY3Cy5    | 4857.384 | 294.242  | NM_017488 | 3484.935  | 3062.701  | NM_005470 | 4430.649  | 4375.234  |
| U87460    | 13493.52 | 15330.59 | AY009400  | 607.285   | 723.616   | NM_004225 | 13273.188 | 12407.924 |
| NM_003617 | 851.069  | 968.367  | NM_005069 | 997.982   | 595.348   | NM_003862 | 2150.096  | 2027.539  |
| NM_001841 | 2291.682 | 2618.756 | NM_016044 | 1965.636  | 1139.046  | NM_002873 | 5525.104  | 4185.539  |
| NM_002054 | 2796.63  | 3508.327 | NM_000520 | 3118.042  | 2354.468  | NM_015571 | 9399.835  | 7520.619  |
| AF300649  | 1600.287 | 1935.284 | NM_000289 | 2008.169  | 1017.706  | NM_004701 | 17148.691 | 14950.851 |
| NM_004125 | 738.927  | 664.54   | NM_001500 | 3979.064  | 2538.479  | AK025554  | 3055.315  | 2173.911  |
| NM_000823 | 1469.617 | 1486.296 | NM_020379 | 1443.403  | 2135.975  | BI824151  | 9028.825  | 10270.437 |
| NM_004414 | 4798.929 | 4421.483 | AL110127  | 3164.217  | 5581.92   | AK021791  | 9391.468  | 7980.744  |
| NM_003317 | 3827.5   | 3788.844 | AK001997  | 521.563   | 1839.95   | NM_004052 | 28511.078 | 28391.229 |
| NM_001139 | 2595.066 | 2352.493 | NM_002528 | 5455.451  | 8608.114  | NM_004394 | 9751.305  | 10453.832 |
| NM_004609 | 3103.482 | 3083.291 | D38438    | 5230.091  | 8577.193  | NM_005727 | 21005.613 | 21836.408 |
| NM_003772 | 2656.098 | 2326.049 | AV714945  | 1020.681  | 1906.413  | AK027242  | 3002.585  | 3068.121  |
| NM_001541 | 826.392  | 674.372  | AF089897  | 311.799   | 709.836   | NM_001279 | 18703.135 | 18063.77  |
| NM_005416 | 1411.258 | 1237.331 | M30938    | 8539.56   | 2634.008  | NM_005010 | 2467.099  | 1835.065  |
| NM_004670 | 726.58   | 644.726  | NM_017586 | 11194.032 | 8431.021  | NM_019055 | 3238.415  | 2411.35   |
| L09081    | 488.32   | 536.15   | NM_004148 | 3035.474  | 2261.101  | NM_020199 | 2971.625  | 1593.315  |
| NM_016113 | 2675.437 | 3110.815 | X03168    | 1201.734  | 1207.115  | U96136    | 970.203   | 433.976   |
| NM_014222 | 2879.413 | 3991.766 | NM_005168 | 1852.02   | 1869.806  | NM_005941 | 370.898   | 440.055   |
| NM_000509 | 5522.087 | 5871.114 | NM_017801 | 7578.434  | 7792.5    | NM_015884 | 714.431   | 459.058   |
| NM_004542 | 1194.453 | 1593.823 | NM_007348 | 2976.817  | 3572.052  | AF201380  | 3181.204  | 3871.135  |
| BF217496  | 2719.762 | 2787.005 | NM_016953 | 641.988   | 618.013   | NM_012392 | 10164.141 | 10991.895 |
| NM_004762 | 11718.39 | 15722.22 | U65473    | 5956.002  | 4206.604  | NM_014833 | 18517.541 | 16234.802 |
| NM_006641 | 28440.76 | 39840.92 | D63481    | 14542.892 | 10304.701 | NM_003876 | 13537.099 | 13244.775 |



|           |          |          |           |           |           |           |           |           |
|-----------|----------|----------|-----------|-----------|-----------|-----------|-----------|-----------|
| NM_000634 | 7515.862 | 8827.606 | AY009951  | 11105.175 | 5523.385  | NM_004832 | 960.17    | 987.348   |
| NM_014679 | 30761.86 | 32710.7  | AL157424  | 899.636   | 932.028   | NM_005957 | 1095.129  | 1276.565  |
| AB040969  | 4208.203 | 4661.304 | NM_003876 | 3100.735  | 2369.384  | AK024374  | 2331.983  | 2223.672  |
| NM_003467 | 31065.99 | 37065.59 | NM_015910 | 1108.114  | 1437.118  | NM_007101 | 968.006   | 981.551   |
| NM_014936 | 3883.603 | 3789.339 | NM_000222 | 654.892   | 1202.43   | NM_018234 | 615.616   | 578.588   |
| NM_003943 | 2037.893 | 1750.274 | AL133666  | 3319.212  | 5827.373  | AB033062  | 1809.924  | 1711.698  |
| NM_019052 | 13671.81 | 14925.86 | NM_003604 | 371.322   | 1004.581  | NM_016437 | 32733.498 | 30139.943 |
| NM_003202 | 23911.19 | 23837.82 | NM_000663 | 1700.981  | 2268.48   | NM_002720 | 17378.203 | 16529.346 |
| AF119902  | 618.219  | 720.802  | NM_004710 | 6063.202  | 7238.979  | AK024716  | 17981.936 | 14910.243 |
| NM_020525 | 1595.166 | 1286.25  | NM_004396 | 21351.924 | 23708.152 | X67155    | 3603.921  | 2835.972  |
| NM_003890 | 1286.508 | 1614.806 | NM_017999 | 5119.947  | 6221.443  | NM_020380 | 10177.944 | 8602.838  |
| BF127978  | 777.823  | 742.37   | NM_001043 | 1668.999  | 639.688   | AL137519  | 771.043   | 651.848   |
| AF110801  | 2044.381 | 1612.382 | NM_004779 | 7102.378  | 6232.208  | NM_002890 | 40770.879 | 31309.662 |
| NM_016579 | 10444.74 | 11113.48 | NM_019071 | 2731.704  | 2481.846  | NM_001330 | 51019.207 | 35395.699 |
| AK022565  | 9656.184 | 11474.23 | NM_014399 | 4416.066  | 3466.249  | NM_015927 | 1162.427  | 812.547   |
| AK023151  | 2972.202 | 3551.194 | AF113685  | 725.464   | 1477.984  | NM_005122 | 902.232   | 799.479   |
| AB033076  | 1335.152 | 1300.743 | NM_005470 | 2525.583  | 2718.16   | NM_014552 | 3654.009  | 3251.241  |
| AK022876  | 2975.8   | 2194.596 | AF142570  | 595.525   | 653.573   | NM_003072 | 10646.234 | 10112.842 |
| NM_001441 | 1816.495 | 1920.295 | NM_004225 | 10216.72  | 8732.653  | NM_001913 | 2466.515  | 2636.025  |
| NM_018324 | 1058.28  | 1226.445 | NM_003862 | 1093.807  | 1051.753  | AK025594  | 800.806   | 1164.298  |
| AF064255  | 14031.97 | 17996.55 | NM_002873 | 2487.418  | 2171.75   | AB040931  | 5146.979  | 5003.729  |
| NM_016368 | 15423.35 | 20472.6  | NM_015571 | 4254.947  | 3411.338  | NM_003599 | 1792.024  | 1504.812  |
| U08853    | 6052.84  | 7002.73  | NM_004701 | 7974.564  | 6320.11   | NM_015911 | 1714.538  | 1619.171  |
| NM_004261 | 27089.16 | 46476.98 | AK025554  | 689.644   | 720.866   | BC011826  | 8877.099  | 7453.42   |
| NM_016006 | 2744.721 | 3300.67  | BI824151  | 5446.841  | 2910.056  | NM_017647 | 7008.144  | 6452.565  |
| NM_016245 | 8698.307 | 9146.245 | AK021791  | 4571.186  | 3071.232  | NM_012091 | 3297.52   | 3055.973  |
| AF005632  | 1295.989 | 1131.845 | NM_004052 | 17672.48  | 7987.622  | NM_012321 | 5555.046  | 4905.23   |
| NM_000903 | 3199.728 | 3209.416 | NM_005727 | 45441.203 | 57597.301 | D13642    | 5482.5    | 5270.203  |
| NM_004493 | 21898.93 | 21384.84 | AK027242  | 3029.502  | 5116.204  | NM_004741 | 11715.408 | 8403.874  |
| AF309489  | 544.703  | 279.222  | NM_001279 | 21067.094 | 22331.234 | NM_018032 | 6852.763  | 7065.61   |
| NM_004047 | 27118.41 | 28178.69 | NM_005010 | 2295.44   | 3460.523  | NM_003675 | 12045.829 | 11199.378 |
| AF287303  | 886.127  | 606.707  | U96136    | 442.086   | 305.906   | NM_017518 | 4076.718  | 3618.536  |
| NM_004823 | 1709.148 | 1599.002 | NM_005941 | 2420.554  | 5455.184  | NM_004117 | 4257.854  | 4188.254  |
| Y17179    | 73071.4  | 53188.02 | AF201380  | 2526.448  | 2531.792  | NM_016594 | 7355.479  | 7250.723  |
| NM_000891 | 720.975  | 661.291  | NM_003619 | 786.295   | 1502.987  | NM_030752 | 12324.44  | 8292.188  |
| AF239613  | 1410.238 | 1735.433 | NM_012392 | 7264.365  | 5390.149  | D26068    | 31835.814 | 27635.309 |
| AK026840  | 4516.173 | 2839.1   | NM_014833 | 15315.885 | 13372.354 | NM_018559 | 10866.518 | 8186.473  |
| NM_000288 | 3333.907 | 2359.546 | NM_000045 | 975.288   | 646.365   | NM_017593 | 4280.198  | 3571.186  |
| AK026317  | 8634.753 | 5643.49  | NM_003878 | 7523.449  | 4784.756  | NM_004282 | 16996.221 | 10473.181 |
| NM_002867 | 519.734  | 759.925  | NM_004832 | 563.891   | 609.461   | AK025695  | 2919.957  | 2924.055  |
| NM_000520 | 7609.994 | 7003.937 | NM_005957 | 729.187   | 711.837   | AK025442  | 8827.298  | 6843.309  |
| NM_000289 | 1393.417 | 1344.099 | NM_007101 | 672.528   | 454.142   | AL050041  | 1252.884  | 1039.72   |
| NM_001500 | 6772.799 | 8259.846 | NM_002720 | 14473.882 | 23988.049 | NM_002451 | 2001.052  | 1763.852  |
| NM_004388 | 6029.458 | 7157.736 | NM_020380 | 8424.243  | 14639.931 | NM_013411 | 1558.514  | 1357.023  |
| NM_020379 | 797.134  | 760.703  | AL137519  | 701.674   | 927.488   | NM_020200 | 799.226   | 700.59    |
| AL110127  | 2921.297 | 2964.176 | NM_001330 | 43478.633 | 13250.661 | NM_000156 | 831.601   | 408.542   |
| AK001997  | 623.803  | 775.031  | NM_015927 | 886.045   | 478.588   | NM_000180 | 8957.372  | 7305.569  |
| NM_002528 | 5303.449 | 4504.542 | NM_005122 | 660.359   | 656.618   | NM_000858 | 8439.952  | 8967.598  |
| D38438    | 1487.525 | 1069.113 | NM_014552 | 2672.086  | 1910.975  | AF254087  | 2149.702  | 1976.264  |
| AV714945  | 940.391  | 604.506  | NM_003072 | 8104.452  | 8042.892  | NM_017715 | 1722.307  | 1596.302  |
| AF089897  | 828.485  | 493.982  | NM_001913 | 2152.781  | 1810.26   | AL117607  | 2418.585  | 2275.995  |
| AF007872  | 7214.438 | 5663.729 | AK025594  | 655.284   | 615.991   | AB037774  | 3503.329  | 3541.072  |
| M30938    | 15540.43 | 8327.371 | AB040931  | 3397.969  | 2683.379  | NM_005438 | 771.17    | 762.396   |

|           |          |          |           |           |          |           |           |           |
|-----------|----------|----------|-----------|-----------|----------|-----------|-----------|-----------|
| NM_01514E | 2403.633 | 1917.899 | NM_00359E | 1016.728  | 918.151  | AK024361  | 2053.211  | 2160.429  |
| NM_004714 | 2478.693 | 2115.278 | NM_015911 | 1132.091  | 926.671  | NM_00435C | 2271.448  | 2501.693  |
| NM_005401 | 505.468  | 1067.144 | BC011826  | 4270.313  | 2844.775 | NM_018044 | 6178.696  | 5712.173  |
| NM_002497 | 24968.46 | 20444.42 | NM_017647 | 6295.708  | 4068.751 | NM_004503 | 927.737   | 345.016   |
| AB025194  | 6340.412 | 5604.457 | NM_012091 | 1678.566  | 1287.82  | NM_001717 | 186.434   | 507.11    |
| NM_00623E | 708.27   | 553.326  | NM_012321 | 2968.062  | 2466.511 | AF274347  | 6251.222  | 4200.565  |
| BC020863  | 379.304  | 280.971  | D13642    | 1721.844  | 1088.085 | AK001144  | 508.859   | 374.949   |
| NM_017897 | 8184.847 | 8571.467 | NM_004741 | 6238.034  | 2935.995 | NM_01855E | 4480.584  | 3006.768  |
| NM_00426E | 23624.98 | 36676.7  | NM_01803E | 4061.004  | 2179.163 | AK023525  | 4683.035  | 3571.948  |
| NM_00257E | 7265.094 | 7844.575 | NM_01751E | 2744.189  | 5000.598 | AF085829  | 1624.708  | 1387.711  |
| NM_00050E | 5955.952 | 6121.867 | NM_01759E | 2639.723  | 788.836  | AF075029  | 866.596   | 600.044   |
| NM_00454E | 1548.168 | 1640.959 | NM_00428E | 11910.038 | 6514.584 | AK021903  | 3641.592  | 3461.88   |
| X06182    | 2244.581 | 2587.088 | AK025695  | 1224.412  | 1055.806 | AL390143  | 4365.332  | 4299.556  |
| AB012701  | 983.407  | 1228.759 | AK025442  | 4616.624  | 4923.472 | AL162075  | 1708.335  | 1443.953  |
| M61156    | 1832.168 | 1997.661 | AL050041  | 520.15    | 586.066  | AK021595  | 1815.286  | 1962.858  |
| R44005    | 1429.37  | 1401.706 | NM_002451 | 1618.329  | 1560.129 | AK021648  | 1190.485  | 1132.43   |
| AI942392  | 5386.505 | 4280.421 | NM_013411 | 1032.436  | 875.988  | AF147358  | 12045.966 | 12277.003 |
| M55040    | 1010.957 | 514.283  | NM_02020C | 353.684   | 459.455  | AL110290  | 524.337   | 375.628   |
| AW009739  | 835.727  | 752.876  | NM_00018C | 9262.397  | 6739.368 | NM_01841C | 6715.788  | 6927.666  |
| BC036805  | 6831.792 | 6158.246 | NM_00085E | 7503.54   | 4852.423 | AF147404  | 526.488   | 612.139   |
| Z74615    | 2167.885 | 2217.694 | AF254087  | 897.85    | 585.904  | AF086355  | 1175.521  | 638.961   |
| X03884    | 47685.14 | 43159.7  | NM_01771E | 954.023   | 617.147  | AF086403  | 700.21    | 618.595   |
| U36759    | 434.671  | 732.756  | AL117607  | 1419.937  | 726.981  | AF086314  | 837.78    | 1119.055  |
| X91625    | 8081.004 | 8610.377 | AB037774  | 1389.507  | 729.457  | NM_016364 | 803.56    | 730.949   |
| AF090901  | 641.155  | 485.832  | NM_00543E | 539.168   | 282.373  | AF086419  | 2537.618  | 2930.349  |
| AF001862  | 13813.39 | 16857.69 | AK024361  | 1570.153  | 1165.832 | AF086461  | 935.66    | 976.989   |
| NM_058197 | 325.83   | 535.591  | NM_00435C | 2399.346  | 4185.609 | AF131795  | 512.441   | 572.761   |
| NM_016044 | 3235.939 | 3332.199 | NM_018044 | 6079.487  | 9882.147 | AL833296  | 3174.872  | 2338.231  |
| AK023151  | 2889.438 | 3437.825 | NM_00450E | 856.266   | 1489.016 | AL110240  | 5317.363  | 4170.7    |
| AB033076  | 1558.776 | 2291.426 | AF274347  | 5439.355  | 1683.491 | NM_01537E | 682.907   | 606.553   |
| AK022876  | 3831.377 | 3796.668 | NM_01855E | 4009.036  | 1847.41  | AF085919  | 530.812   | 329.633   |
| AF134894  | 1773.325 | 2104.598 | AK023525  | 2439.052  | 1838.315 | AF085933  | 1149.411  | 785.829   |
| NM_00393E | 5271.563 | 6535.552 | AF085829  | 1440.138  | 845.47   | AF147431  | 949.586   | 845.902   |
| NM_00412E | 597.444  | 788.028  | AF075029  | 617.415   | 535.1    | AK026422  | 7080.694  | 7522.251  |
| U87460    | 12878.09 | 12126.85 | AK021903  | 4176.597  | 3641.387 | AF085938  | 1919.741  | 1554.036  |
| NM_003617 | 579.552  | 687.606  | AL390143  | 3847.38   | 3143.401 | AK022264  | 1287.818  | 1212.961  |
| NM_001841 | 1828.48  | 1425.734 | AL162075  | 935.008   | 1130.789 | AL137331  | 1262.683  | 1256.843  |
| NM_002054 | 2691.969 | 2114.821 | AK021595  | 957.948   | 874.605  | AL162040  | 4812.411  | 4142.72   |
| AF300649  | 1827.869 | 1009.12  | AK021648  | 1051.7    | 824.891  | AL442084  | 964.97    | 896.267   |
| NM_00412E | 642.49   | 668.459  | AF147358  | 12644.092 | 8840.654 | AL137371  | 11680.229 | 11395.958 |
| NM_00082E | 1439.083 | 1030.72  | NM_01841C | 2895.084  | 2981.132 | AL137596  | 4825.544  | 4645.333  |
| NM_004414 | 4378.121 | 3477.504 | AF086314  | 452.556   | 291.95   | AL353942  | 18233.125 | 16534.502 |
| NM_003317 | 4005.723 | 4200.396 | NM_016364 | 567.505   | 231.508  | Z38010    | 8023.555  | 8242.552  |
| NM_001139 | 2840.496 | 3969.948 | AF086419  | 2434.707  | 896.624  | AK024713  | 1188.191  | 694.121   |
| NM_00460E | 2651.76  | 3543.233 | AF086461  | 410.447   | 113.831  | AF086114  | 692.446   | 664.715   |
| NM_00377E | 2807.812 | 3396.885 | AL833296  | 2356.002  | 1775.555 | AK024204  | 639.894   | 852.098   |
| NM_001541 | 341.743  | 397.197  | AL110240  | 4141.04   | 2207.498 | AK023737  | 3014.257  | 1841.735  |
| NM_00541E | 1508.556 | 1619.347 | NM_01537E | 497.632   | 479.375  | NM_00660E | 4935.291  | 3779.984  |
| NM_00467C | 886.392  | 808.12   | AF085933  | 703.493   | 360.43   | NM_01411E | 633.558   | 497.619   |
| L09081    | 808.843  | 1182.976 | AF147431  | 371.18    | 391.419  | AK023643  | 558.734   | 430.117   |
| NM_00021E | 77510.94 | 58755.73 | AK026422  | 8287.552  | 5384.946 | NM_014157 | 1648.909  | 1761.251  |
| NM_016113 | 2055.106 | 1903.852 | AF085938  | 906.238   | 824.766  | AF090933  | 557.855   | 681.929   |
| NM_01422E | 3047.003 | 3081.225 | AK022264  | 892.437   | 1122.65  | AF111851  | 3299.4    | 3195.349  |

|           |          |          |           |           |          |           |           |           |
|-----------|----------|----------|-----------|-----------|----------|-----------|-----------|-----------|
| AK026840  | 5500.239 | 5771.753 | AL137331  | 831.41    | 806.284  | AF152529  | 646.829   | 440.23    |
| NM_00028E | 4161.431 | 4289.479 | AL162040  | 3317.12   | 2240.977 | AL360200  | 894.864   | 1045.001  |
| AK026317  | 10328.09 | 11148.47 | AL442084  | 428.469   | 454.959  | AK021992  | 643.917   | 611.534   |
| X82207    | 7554.731 | 10853.47 | AL137371  | 5929.585  | 3801.841 | AK022102  | 651.986   | 592.373   |
| NM_015044 | 1599.27  | 2348.754 | AL137596  | 1785.418  | 1249.891 | AK022235  | 1140.946  | 980.532   |
| NM_002867 | 869.716  | 1080.195 | AL353942  | 10160.446 | 5726.25  | AK022378  | 3502.444  | 3444.551  |
| BF217496  | 2823.813 | 3381.07  | Z38010    | 11623.657 | 6145.039 | AK022009  | 397.8     | 562.63    |
| NM_004762 | 10488.53 | 13523.4  | AK024713  | 579.382   | 352.92   | AK022274  | 485.462   | 648.866   |
| NM_006641 | 26863.61 | 30670.63 | AK023737  | 1358.662  | 1059.871 | AK022401  | 562.616   | 552.74    |
| NM_000634 | 7222.806 | 5861.88  | NM_006609 | 3381.045  | 2758.157 | AK027174  | 480.963   | 483.77    |
| NM_014679 | 28172.91 | 18533.9  | AK023643  | 741.29    | 993.385  | AL110173  | 740.905   | 784.152   |
| AB040969  | 3620.208 | 2596.39  | AL390159  | 263.778   | 581.797  | AK027254  | 1197.926  | 1092.042  |
| NM_003467 | 30371.82 | 23051.28 | NM_014157 | 805.463   | 845.924  | AK021772  | 1557.814  | 1020.437  |
| NM_014936 | 3565.724 | 2354.441 | AF111851  | 4242.97   | 3601.129 | AK026297  | 1031.234  | 448.083   |
| NM_003943 | 2200.631 | 2018.651 | AL360200  | 734.119   | 591.357  | AK054831  | 14263.04  | 11301.693 |
| NM_019052 | 13296.49 | 15385.89 | AK022378  | 1320.627  | 779.65   | AK021770  | 1100.673  | 1027.366  |
| NM_003202 | 24625.07 | 27487.11 | AL110173  | 717.005   | 370.635  | AK027248  | 1550.122  | 1429.653  |
| AF119902  | 705.852  | 1068.356 | AK027254  | 1147.2    | 598.918  | AK022804  | 12710.361 | 9913.001  |
| NM_02052E | 1559.146 | 1807.496 | AK021772  | 1389.946  | 712.2    | AF009263  | 2148.786  | 2408.562  |
| NM_00389C | 1251.88  | 1407.003 | AK026297  | 434.05    | 571.549  | AF009283  | 660.968   | 719.87    |
| BF127978  | 998.251  | 1021.629 | AK054831  | 15314.635 | 9555.496 | AF086329  | 2708.404  | 3059.9    |
| AF110801  | 2631.674 | 2772.398 | AK021770  | 1124.859  | 894.239  | AK025799  | 657.241   | 857.942   |
| NM_016579 | 9936.887 | 9699.061 | AK027248  | 1018.906  | 1160.328 | AK022857  | 906.343   | 647.513   |
| AB018297  | 2151.535 | 1884.514 | AK022804  | 6998.299  | 5190.712 | AL110206  | 1550.187  | 1784.11   |
| AK022565  | 9644.722 | 10192.51 | AF009263  | 2597.892  | 2303.356 | NM_004821 | 1153.245  | 1022.837  |
| AB025194  | 7483.47  | 8944.723 | AF009283  | 304.163   | 517.376  | AK024292  | 1139.303  | 771.087   |
| NM_006239 | 874.716  | 1075.836 | AF086329  | 3281.432  | 2633.364 | AK026263  | 2034.017  | 1681.538  |
| BC020863  | 679.519  | 803.558  | AK025799  | 671.974   | 495.858  | U50526    | 754.43    | 438.654   |
| NM_017897 | 7216.786 | 7051.674 | AK022857  | 651.43    | 498.16   | S75105    | 3974.792  | 2918.747  |
| NM_00426E | 25203.73 | 43040.15 | AK026263  | 1601.906  | 2159.805 | AF056455  | 5212.996  | 5183.201  |
| NM_002572 | 6986.163 | 8143.771 | U50526    | 651.441   | 576.995  | NM_01851C | 1402.063  | 1212.282  |
| NM_001441 | 1736.018 | 2001.208 | S75105    | 2608.919  | 1969.047 | U50537    | 632.847   | 488.213   |
| NM_018324 | 871.76   | 1028.023 | AF056455  | 4826.869  | 3458.668 | AK024988  | 915.235   | 654.748   |
| AF064255  | 12889.8  | 12730.14 | NM_01851C | 1098.969  | 858.418  | AF026943  | 2131.247  | 1883.436  |
| NM_01636E | 14748.87 | 14410.01 | AK024988  | 517.253   | 492.706  | L77582    | 806.632   | 644.818   |
| U08853    | 5795.755 | 4286.308 | AF026943  | 869.416   | 1372.207 | NM_02044E | 1535.148  | 1110.482  |
| NM_004261 | 23093.37 | 31283.42 | L77582    | 418.256   | 637.009  | NM_005419 | 2398.788  | 2108.962  |
| NM_01600E | 2490.071 | 1981.917 | NM_02044E | 1088.016  | 860.478  | NM_003479 | 38741.695 | 30257.545 |
| NM_01624E | 8705.415 | 6124.819 | NM_005419 | 1252.069  | 1016.129 | AK022078  | 245.803   | 472.322   |
| AF005632  | 1324.863 | 1153.261 | NM_003479 | 23936.754 | 13105.73 | AF130108  | 796.559   | 619.884   |
| NM_000903 | 3176.583 | 3410.227 | AK022078  | 346.412   | 580.607  | NM_020224 | 6352.392  | 5591.371  |
| NM_004493 | 21778.37 | 25225.02 | NM_020224 | 4500.708  | 2380.061 | U17617    | 1221.899  | 1436.487  |
| NM_004047 | 31119.8  | 42138.31 | U17617    | 2282.045  | 1404.834 | AK022952  | 10343.631 | 8715.786  |
| AF287303  | 551.249  | 873.031  | AK022952  | 5355.676  | 2367.295 | BF218888  | 1273.547  | 987.367   |
| NM_004823 | 2102.235 | 2858.934 | BF218888  | 935.56    | 683.042  | AF086401  | 4536.292  | 3728.245  |
| AB013889  | 293.843  | 915.741  | AF086401  | 2668.047  | 2201.257 | L23869    | 1788.386  | 1353.795  |
| Y17179    | 74053.13 | 55773.23 | L23869    | 1042.126  | 622.798  | Z21853    | 3187.76   | 2500.12   |
| NM_000891 | 447.274  | 379.996  | Z21853    | 1889.434  | 1359.552 | U80770    | 841.435   | 715.628   |
| AF239613  | 1389.074 | 1085.777 | U80770    | 1967.857  | 1777.674 | AB075846  | 620.73    | 622.548   |
| NM_058197 | 305.472  | 461.737  | NM_018342 | 624.029   | 973.891  | NM_018342 | 1008.6    | 989.162   |
| NM_016044 | 3878.158 | 5530.803 | BC020260  | 1520.806  | 1293.376 | BC020260  | 1819.807  | 1388.237  |
| NM_00052C | 7390.951 | 8461.238 | D17156    | 4200.88   | 3579.934 | D17156    | 7748.109  | 5480.596  |
| NM_00028E | 1798.388 | 1216.874 | L04461    | 625.814   | 581.595  | L04461    | 1258.498  | 588.948   |

|           |          |          |           |           |           |           |           |           |
|-----------|----------|----------|-----------|-----------|-----------|-----------|-----------|-----------|
| NM_00150C | 6572.006 | 5922.103 | AK026938  | 14782.255 | 9319.96   | AK026938  | 13510.542 | 11000.482 |
| NM_00438E | 5890.328 | 4197.935 | AK024373  | 7851.508  | 5665.012  | AK024373  | 11296.834 | 10291.096 |
| NM_02037E | 690.111  | 521.829  | AK022343  | 4735.508  | 3057.82   | AK022343  | 5187.196  | 4602.92   |
| AL110127  | 3192.091 | 1890.672 | AK026400  | 1076.382  | 624.748   | AK026400  | 1338.029  | 1189.92   |
| AK001997  | 901.978  | 695.349  | U92989    | 7304.266  | 3997.959  | U92989    | 9914.594  | 8447.167  |
| NM_00252E | 6020.128 | 5601.085 | AF075102  | 1397.39   | 898.19    | AF075102  | 1848.284  | 1957.567  |
| D38438    | 1750.488 | 1840.121 | NM_018463 | 7728.068  | 4151.702  | NM_018463 | 6319.242  | 6263.604  |
| AV714945  | 900.409  | 1023.633 | X74956    | 21796.385 | 10745.122 | X74956    | 19159.086 | 17669.848 |
| AF089897  | 835.395  | 697.355  | AF132197  | 4486.785  | 2538.813  | AF132197  | 7804.755  | 6286.208  |
| AF007872  | 8072.059 | 8865.623 | AK025546  | 686.843   | 426.572   | AK025546  | 1222.499  | 1091.234  |
| M30938    | 16046.71 | 12372.57 | AL137487  | 952.751   | 729.074   | AL137487  | 2184.049  | 2100.073  |
| NM_01514E | 2677.67  | 3189.478 | AK024120  | 1278.062  | 1053.41   | AK023800  | 926.357   | 985.476   |
| NM_004714 | 2854.29  | 3529.489 | CY3Cy5    | 3404.702  | 410.886   | AK024120  | 1459.016  | 1668.749  |
| NM_005401 | 393.44   | 995.771  | W96179    | 2594.555  | 2702.723  | CY3Cy5    | 8670.84   | 304.581   |
| NM_017677 | 495.923  | 535.824  | AW247841  | 3864.896  | 3528.299  | W96179    | 3597.818  | 3665.31   |
| NM_002497 | 25080.76 | 21054.9  | BG568198  | 567.384   | 451.457   | AW247841  | 6022.729  | 6446.63   |
| NM_00541E | 1352.828 | 1956.295 | M76559    | 3341.274  | 3024.375  | M76559    | 3207.414  | 4575.423  |
| NM_00467C | 804.077  | 903.47   | U11058    | 380.792   | 504.171   | AI222585  | 830.953   | 804.964   |
| L09081    | 618.455  | 659.791  | AI222585  | 733.652   | 801.603   | AA398427  | 2965.012  | 2874.457  |
| NM_00021E | 72644.93 | 60611.79 | AA411678  | 11449.755 | 26775.445 | H20856    | 3295.411  | 2411.515  |
| NM_016113 | 2633.178 | 3285.022 | AA862813  | 23661.863 | 28244.34  | NM_00475E | 3957.027  | 3627.888  |
| NM_014222 | 3036.088 | 3861.91  | AA398427  | 2532.854  | 3766.851  | SR5       | 6609.347  | 6259.145  |
| L14819    | 285.04   | 545.731  | T55728    | 6541.8    | 8509.271  | SR7       | 7111.547  | 46673.797 |
| NM_00050E | 4925.825 | 4375.157 | H20856    | 1878.308  | 2314.52   | SR9       | 26870.32  | 3863.331  |
| NM_004542 | 1149.057 | 1243.299 | N62586    | 4971.422  | 6874.279  | CY3Cy5    | 9861.561  | 354.08    |
| X06182    | 2050.827 | 1442.305 | AA242743  | 6139.921  | 9514.849  | NM_016382 | 2145.547  | 1126.845  |
| BE908993  | 3301.222 | 2042.74  | NM_00475E | 2557.966  | 7537.03   | AK023117  | 2714.96   | 3760.772  |
| AB012701  | 848.687  | 752.544  | NM_005163 | 6139.362  | 7859.168  | AL122046  | 1939.406  | 1435.9    |
| M61156    | 1834.45  | 1660.573 | SR5       | 6247.68   | 6237.147  | NM_00085E | 2012.882  | 3998.243  |
| R44005    | 1628.92  | 1527.734 | SR7       | 4847.303  | 41691.586 | NM_00553E | 7693.56   | 6509.148  |
| AI942392  | 5858.945 | 6149.046 | SR9       | 18864.48  | 4200.299  | NM_005077 | 2037.072  | 1796.812  |
| M55040    | 587.709  | 510.23   | CY3Cy5    | 4530.349  | 516.002   | NM_004423 | 5214.315  | 5687.487  |
| AW009739  | 679.023  | 792.965  | NM_016382 | 750.905   | 1298.374  | NM_00199C | 1429.329  | 1368.94   |
| BC036805  | 7010.138 | 7674.187 | AK023117  | 2528.655  | 1670.13   | NM_002141 | 780.971   | 829.643   |
| Z74615    | 1997.413 | 2442.185 | AL122046  | 1128.7    | 975.248   | NM_00377E | 5540.795  | 7368.072  |
| X03884    | 59885.02 | 52102.88 | NM_00085E | 2788.563  | 2257.12   | NM_00709E | 318.999   | 478.358   |
| U36759    | 1026.57  | 1117.869 | NM_00553E | 6077.552  | 6261.915  | NM_012464 | 331.109   | 723.884   |
| X91625    | 6855.961 | 5657.482 | NM_005077 | 1840.059  | 1625.449  | NM_00612E | 1340.128  | 1808.479  |
| AF090901  | 761.866  | 542.047  | NM_004423 | 5837.723  | 5331.901  | NM_000582 | 1839.051  | 2441.344  |
| AF004231  | 360.528  | 276.736  | NM_00199C | 1294.183  | 1515.237  | NM_004684 | 538.244   | 582.508   |
| AF001862  | 17191.91 | 26073.16 | NM_002141 | 885.597   | 910.06    | BF338709  | 524.176   | 701.416   |
| NM_00389C | 1592.716 | 2367.626 | NM_003311 | 3353.765  | 4160.052  | AF204171  | 502.546   | 572.806   |
| BF127978  | 875.445  | 1012.679 | NM_00377E | 4644.84   | 4573.166  | AF100756  | 8584.428  | 8516.212  |
| AF110801  | 2389.149 | 2481.468 | NM_00709E | 422.622   | 597.945   | NM_00682E | 3926.838  | 4392.537  |
| NM_01657E | 11603.14 | 13641.39 | NM_01571E | 849.561   | 1499.33   | NM_004862 | 618.623   | 749.45    |
| AB018297  | 2085.188 | 2397.652 | NM_012464 | 342.616   | 416.727   | NM_001661 | 852.414   | 894.402   |
| AK022565  | 9767.076 | 11159.71 | NM_00612E | 1527.406  | 1824.27   | NM_014563 | 1852.981  | 1620.5    |
| AK023151  | 2527.165 | 2856.186 | BF338709  | 429.948   | 859.15    | NM_02015C | 4447.962  | 4020.538  |
| AB033076  | 1150.601 | 1813.948 | AF204171  | 590.79    | 544.228   | NM_00715C | 4505.069  | 3471.361  |
| AK022876  | 3151.159 | 2771.492 | M18182    | 2966.019  | 7539.592  | NM_006831 | 4080.978  | 3420.853  |
| AF134894  | 1669.22  | 1232.47  | AF100756  | 5585.01   | 4722.567  | AL162044  | 6881.937  | 6466.748  |
| NM_00393E | 4914.328 | 4449.516 | NM_00682E | 3140.55   | 2654.366  | AK024004  | 1895.532  | 2031.526  |
| NM_014827 | 21855.71 | 13948.64 | NM_004862 | 676.021   | 652.544   | AF026929  | 1027.827  | 1512.287  |

|           |          |          |           |           |           |           |           |           |
|-----------|----------|----------|-----------|-----------|-----------|-----------|-----------|-----------|
| U87460    | 13142.44 | 12602.65 | NM_001661 | 734.697   | 819.891   | NM_016734 | 681.412   | 659.811   |
| NM_003617 | 749.142  | 785.884  | NM_014563 | 1447.985  | 1185.052  | Y08147    | 1983.922  | 2158.606  |
| NM_001841 | 2153.917 | 2394.47  | NM_02015C | 3952.265  | 4056.084  | D00174    | 2997.386  | 3327.178  |
| NM_002054 | 2374.679 | 1843.295 | NM_00715C | 3488.884  | 3738.454  | AB000520  | 828.164   | 1074.031  |
| AF300649  | 1264.689 | 1138.47  | NM_006831 | 2730.032  | 2722.397  | NM_006907 | 594.105   | 547.601   |
| NM_004125 | 744.496  | 670.034  | AL162044  | 5210.776  | 5219.823  | NM_002686 | 656.892   | 656.612   |
| NM_000823 | 1287.319 | 1621.571 | AK024004  | 1433.13   | 2089.492  | NM_006267 | 1914.944  | 1589.144  |
| NM_004414 | 5607.893 | 7348.706 | AK022365  | 484.691   | 648.181   | NM_002661 | 7234.702  | 6640.857  |
| NM_003317 | 3525.357 | 4122.508 | BE892273  | 41201.598 | 44986.289 | NM_001263 | 541.641   | 441.66    |
| NM_001139 | 3020.706 | 2671.663 | AF026929  | 523.162   | 496.032   | AK023982  | 1118.758  | 968.528   |
| NM_004609 | 1707.642 | 2445.534 | NM_016734 | 491.798   | 640.224   | NM_018466 | 2378.349  | 1951.399  |
| NM_003772 | 2770.677 | 3046.921 | AF035803  | 257.516   | 210.655   | Y11312    | 1701.236  | 1493.213  |
| NM_004823 | 1968.802 | 2490.394 | Y08147    | 2911.106  | 2898.31   | AB014533  | 3730.819  | 4258.555  |
| Y17179    | 70829.24 | 51495.84 | D00174    | 6467.872  | 7230.534  | M11427    | 616.372   | 536.893   |
| NM_000891 | 569.642  | 815.925  | AB000520  | 1165.593  | 1111.377  | NM_014509 | 746.867   | 798.101   |
| AF239613  | 1424.683 | 2002.065 | NM_006907 | 583.129   | 466.255   | U26662    | 522.952   | 294.841   |
| AK026840  | 4860.231 | 4832.422 | NM_002686 | 453.558   | 538.596   | NM_020372 | 2389.736  | 2715.224  |
| NM_000288 | 3658.434 | 3236.186 | NM_006267 | 1441.09   | 928.663   | NM_002635 | 54471.406 | 50546.211 |
| AK026317  | 9513.81  | 6766.082 | NM_002661 | 6260.899  | 4851.559  | NM_004979 | 1005.332  | 717.847   |
| X82207    | 6868.492 | 7228.679 | AK023982  | 938.129   | 897.211   | NM_016077 | 3419.243  | 3451.175  |
| NM_015044 | 1448.236 | 1284.302 | NM_018466 | 1435.524  | 1674.209  | NM_015537 | 3627.725  | 3028.957  |
| NM_002867 | 598.896  | 515.73   | Y11312    | 1916.176  | 1979.596  | NM_01652C | 22793.293 | 19135.98  |
| BF217496  | 2747.577 | 2951.267 | AB014533  | 4447.399  | 4241.233  | AB018353  | 3470.521  | 3685.731  |
| NM_004762 | 11130.65 | 13622.08 | M11427    | 622.799   | 1198.405  | NM_007036 | 5629.186  | 3482.455  |
| NM_006641 | 29513.2  | 37167.99 | NM_000744 | 954.23    | 1372.316  | NM_002617 | 3373.895  | 2978.672  |
| NM_000634 | 7312.415 | 6991.309 | NM_003039 | 1550.204  | 1784.153  | NM_003313 | 9406.116  | 8536.002  |
| NM_014679 | 27683.24 | 16505.43 | NM_014509 | 785.132   | 1604.536  | AF090907  | 2291.044  | 2400.212  |
| AB040969  | 3341.483 | 2901.645 | U26662    | 456.395   | 833.303   | AK024476  | 4209.638  | 3767.846  |
| NM_003467 | 29272.85 | 27195.28 | NM_020372 | 4196.184  | 4588.059  | X74794    | 7367.07   | 5736.933  |
| NM_014936 | 4567.312 | 5663.131 | NM_004979 | 781.502   | 921.28    | AL050298  | 3424.129  | 2383.771  |
| NM_003943 | 1671.757 | 1899.947 | NM_016077 | 3123.008  | 2602.616  | NM_002915 | 1398.802  | 1371.595  |
| NM_019052 | 12260.98 | 13416.57 | NM_015537 | 2037.919  | 1697.179  | NM_006736 | 3663      | 5226.789  |
| NM_003202 | 21844.68 | 17266.98 | NM_01652C | 12594.238 | 7475.047  | NM_00364C | 2117.903  | 2112.433  |
| AF119902  | 785.169  | 793.861  | AB018353  | 3151.845  | 2006.008  | NM_014444 | 4572.476  | 5202.326  |
| NM_020525 | 1559.814 | 1673.573 | NM_007036 | 4065.39   | 2791.758  | NM_012248 | 6933.927  | 7091.417  |
| NM_015148 | 2600.032 | 3079.721 | NM_002617 | 2877.882  | 2704.966  | NM_01497C | 3906.814  | 3371.337  |
| NM_004714 | 2865.088 | 3777.846 | NM_003313 | 9297.899  | 7764.03   | NM_014393 | 5134.774  | 4722.797  |
| NM_005401 | 754.118  | 981.959  | AF090907  | 2410.298  | 1972.404  | NM_004223 | 12503.15  | 11042.363 |
| NM_017677 | 206.614  | 446.808  | AK024476  | 4447.979  | 3990.905  | NM_006813 | 466.092   | 521.605   |
| NM_002497 | 27772.9  | 26660.01 | X74794    | 6164.442  | 6009.977  | NM_001355 | 10577.088 | 10156.518 |
| AB025194  | 7074.018 | 8487.943 | AL050298  | 2292.144  | 2477.063  | U63336    | 740.604   | 673.405   |
| NM_006239 | 676.408  | 776.48   | NM_007079 | 27184.217 | 28738.145 | NM_004684 | 626.597   | 481.626   |
| BC020863  | 607.477  | 453.442  | M20696    | 2373.594  | 2260.015  | BF338709  | 574.888   | 521.757   |
| NM_017897 | 6856.76  | 4743.578 | NM_002915 | 772.584   | 1184.167  | AF204171  | 597.734   | 510.585   |
| NM_004265 | 22136.31 | 30286.57 | NM_006736 | 2856.589  | 3946.761  | M18182    | 159.022   | 376.055   |
| NM_002572 | 6366.087 | 5318.32  | NM_012248 | 5911.112  | 8182.185  | W96179    | 3223.48   | 2934.086  |
| NM_001441 | 1886.714 | 1614.529 | NM_014393 | 3687.563  | 5338.843  | AW247841  | 5669.531  | 5195.883  |
| NM_018324 | 986.89   | 1045.648 | NM_004223 | 9852.325  | 10694.221 | BG568198  | 610.22    | 351.008   |
| AF064255  | 15900.15 | 18752.94 | NM_006813 | 488.979   | 451.017   | M76559    | 3230.269  | 3135.461  |
| NM_016368 | 15330.41 | 14021.2  | NM_001355 | 8319.887  | 9229.939  | AI222585  | 810.517   | 1033.829  |
| U08853    | 6355.665 | 6329.072 | NM_001216 | 485.473   | 337.999   | AA411678  | 12683.823 | 14166.017 |
| NM_004261 | 25430.22 | 39508.22 | U63336    | 500.537   | 866.714   | T55728    | 7983.56   | 7116.82   |
| NM_016245 | 9208.621 | 8689.594 | BF338709  | 347.05    | 356.595   | H20856    | 2473.781  | 1759.937  |

|           |          |          |           |           |           |           |           |           |
|-----------|----------|----------|-----------|-----------|-----------|-----------|-----------|-----------|
| AF005632  | 709.586  | 677.017  | AF204171  | 415.182   | 271.678   | N62586    | 4782.709  | 4410.03   |
| NM_000903 | 3159.866 | 2570.406 | W96179    | 2653.717  | 2500.45   | AA242743  | 4090.803  | 3878.293  |
| NM_004493 | 23154.85 | 25130.85 | AW247841  | 4229.098  | 4296.985  | NM_004758 | 3906.589  | 2206.182  |
| NM_004047 | 29222.38 | 32175.34 | BG568198  | 642.475   | 400.819   | NM_005163 | 6668.685  | 6413.016  |
| AF287303  | 950.764  | 1749.602 | M76559    | 3982.415  | 3268.037  | NM_015361 | 8021.137  | 8375.912  |
| NM_006773 | 3878.443 | 4116.624 | U11058    | 368.019   | 210.315   | NM_004310 | 10077.817 | 12159.093 |
| AK024439  | 13650.5  | 16410.47 | AI222585  | 759.538   | 856.751   | AF035803  | 562.666   | 414.848   |
| X89676    | 1143.579 | 1263.719 | AA411678  | 9183.104  | 10455.41  | Y08147    | 2285.299  | 2245.754  |
| NM_012444 | 439.07   | 936.332  | AA862813  | 22873.139 | 25683.361 | D00174    | 4302.348  | 3721.57   |
| Z32684    | 3063.446 | 3442.412 | AA398427  | 2097.726  | 2520.097  | AB000520  | 746.306   | 667.794   |
| NM_016512 | 898.164  | 1038.573 | T55728    | 7210.238  | 9084.671  | NM_016382 | 2020.19   | 827.618   |
| NM_017488 | 6000.552 | 7537.542 | H20856    | 2047.25   | 2293.199  | AK023117  | 2605.686  | 3227.477  |
| AY009400  | 589.365  | 725.465  | N62586    | 4703.323  | 5926.48   | AL122046  | 1543.149  | 1217.106  |
| NM_005068 | 725.551  | 615.604  | AA242743  | 5900.338  | 6057.488  | NM_000855 | 2308.858  | 2360.667  |
| NM_016044 | 3185.123 | 3490.834 | NM_004758 | 2159.519  | 5335.318  | NM_005536 | 9118.79   | 8110.983  |
| NM_000520 | 7238.121 | 7763.478 | NM_005163 | 5377.304  | 5175.292  | NM_005077 | 2169.705  | 3065.265  |
| NM_000288 | 2118.477 | 1657.4   | NM_015361 | 10300.417 | 9289.377  | NM_003311 | 2920.216  | 2811.898  |
| NM_001500 | 8538.308 | 8905.294 | NM_004310 | 9784.589  | 7749.353  | NM_003776 | 4639.744  | 5392.298  |
| NM_004388 | 5536.501 | 3508.381 | Y08147    | 2448.973  | 1628.676  | NM_015719 | 788.067   | 1101.173  |
| NM_020379 | 677.691  | 764.467  | D00174    | 6203.82   | 4747.709  | NM_006129 | 1415.424  | 1416.977  |
| NM_002528 | 6265.097 | 5927.158 | AB000520  | 1044.888  | 447.397   | NM_000582 | 1221.36   | 1158.848  |
| D38438    | 1396.018 | 1313.768 | NM_016382 | 874.705   | 1483.697  | NM_005593 | 790.338   | 592.749   |
| AV714945  | 911.688  | 903.972  | AK023117  | 2990.783  | 2348.449  | NM_004979 | 556.173   | 570.652   |
| AF089897  | 683.129  | 508.138  | AL122046  | 1400.68   | 1498.085  | NM_016077 | 3687.457  | 2845.37   |
| AF007872  | 9126.924 | 10986.46 | NM_000855 | 2400.778  | 2379.384  | AF100756  | 8423.065  | 6735.629  |
| M30938    | 21557.56 | 20894.64 | NM_005536 | 5997.885  | 9222.682  | NM_006825 | 4301.232  | 4304.853  |
| NM_017588 | 5197.512 | 6358.603 | NM_005077 | 2192.745  | 2111.229  | NM_004862 | 601.149   | 680.645   |
| NM_004148 | 4711.042 | 5974.976 | NM_004423 | 6230.568  | 6350.384  | NM_001661 | 1024.565  | 1133.785  |
| X03168    | 1528.542 | 1510.557 | NM_001990 | 1356.763  | 1501.617  | NM_014563 | 1980.075  | 2406.624  |
| NM_005168 | 1582.577 | 2133.269 | NM_002141 | 1316.517  | 1476.136  | NM_020150 | 4758.515  | 5651.384  |
| NM_017801 | 8944.237 | 9487.494 | NM_003311 | 3327.378  | 3313.66   | NM_007150 | 5411.164  | 4188.323  |
| NM_007348 | 5730.766 | 6017.209 | NM_003776 | 4793.898  | 4326.272  | NM_006831 | 4683.948  | 4708.691  |
| NM_016953 | 380.617  | 524.653  | NM_015719 | 677.723   | 936.607   | AL162044  | 6581.01   | 5226.231  |
| U65473    | 2337.673 | 2837.977 | NM_006129 | 1328.714  | 1456.058  | AK024004  | 1478.44   | 1442.248  |
| D63481    | 4463.058 | 4736.508 | NM_000582 | 2028.243  | 2175.313  | AK022365  | 537.178   | 634.623   |
| AY009951  | 13839.78 | 16856.62 | NM_005593 | 1217.756  | 967.968   | BE892273  | 35781.16  | 36160.781 |
| AL157424  | 1808.575 | 1942.463 | NM_004979 | 476.489   | 451.857   | AF026929  | 675.972   | 510.76    |
| AK024422  | 576.976  | 447.643  | NM_016077 | 3158.27   | 2114.162  | NM_016734 | 443.982   | 557.724   |
| NM_002673 | 518      | 1839.28  | AF100756  | 6978.595  | 7936.961  | NM_014393 | 5011.234  | 4609.007  |
| NM_003876 | 6946.818 | 7287.168 | NM_006825 | 3642.611  | 3297.929  | NM_004223 | 13532.037 | 13861.912 |
| AJ276310  | 678.212  | 694.834  | NM_004862 | 490.568   | 479.531   | NM_006813 | 619.524   | 508.242   |
| NM_012295 | 4843.238 | 3776.057 | NM_001661 | 683.895   | 931.059   | NM_001355 | 10742.396 | 10361.34  |
| NM_015910 | 1036.97  | 1132.668 | NM_014563 | 1613.128  | 1629.446  | NM_001216 | 298.277   | 605.215   |
| NM_000222 | 260.277  | 408.268  | NM_020150 | 4137.766  | 4325.952  | U63336    | 819.656   | 666.772   |
| AL133666  | 1817.261 | 1680.123 | NM_007150 | 3456.178  | 4161.887  | NM_006907 | 799.644   | 1412.014  |
| NM_000663 | 3086.121 | 2162.594 | NM_006831 | 3035.766  | 3074.536  | NM_002686 | 759.059   | 836.579   |
| NM_004710 | 4903.506 | 5481.16  | AL162044  | 5267.021  | 5146.094  | NM_006267 | 1698.272  | 1647.677  |
| NM_004396 | 13872.22 | 11234.43 | AK024004  | 1410.348  | 1558.23   | NM_002661 | 8657.875  | 8424.64   |
| NM_017999 | 6542.058 | 8739.522 | BE892273  | 39487.551 | 32763.768 | NM_001263 | 492.262   | 530.789   |
| NM_015988 | 19789.49 | 21790.12 | NM_016734 | 415.26    | 363.88    | AK023982  | 1418.899  | 1244.178  |
| NM_001043 | 2954.759 | 3232.186 | NM_014393 | 3302.736  | 3545.999  | NM_018466 | 2955.581  | 2663.708  |
| NM_004779 | 12806.85 | 13497.48 | NM_004223 | 10074.909 | 9054.282  | Y11312    | 2098.062  | 1733.999  |
| NM_019071 | 4544.98  | 4331.364 | NM_006813 | 498.177   | 294.603   | AB014533  | 4407.435  | 4567.086  |

|           |          |          |           |           |           |           |           |           |
|-----------|----------|----------|-----------|-----------|-----------|-----------|-----------|-----------|
| NM_01439  | 5508.711 | 7814.922 | NM_00135  | 8438.311  | 7438.49   | M11427    | 500.737   | 345.292   |
| AF113685  | 364.026  | 636.112  | NM_00121  | 490.706   | 316.312   | NM_000744 | 728.246   | 769.324   |
| NM_00547  | 3323.93  | 4606.431 | NM_006907 | 775.194   | 782.525   | NM_00303  | 1138.08   | 915.34    |
| AF142570  | 271.821  | 465.743  | NM_00268  | 553.382   | 534.902   | NM_01450  | 773.83    | 627.383   |
| NM_00422  | 13747.85 | 15284.23 | NM_006267 | 1714.236  | 1489.141  | U26662    | 492.166   | 390.339   |
| NM_00386  | 2784.893 | 2907.32  | NM_002661 | 6692.032  | 6609.366  | NM_02037  | 864.852   | 1005.971  |
| NM_00287  | 4886.067 | 3409.295 | NM_00126  | 345.107   | 340.074   | NM_00263  | 52884.723 | 48394.859 |
| NM_015571 | 10905.01 | 10079.36 | AK023982  | 896.436   | 1108.363  | NM_00475  | 4771.658  | 3332.273  |
| AK025554  | 2649.825 | 1809.078 | NM_01846  | 1447.084  | 2208.052  | NM_00516  | 8327.818  | 8930.03   |
| BI824151  | 6782.412 | 9985.23  | Y11312    | 1825.452  | 2068.452  | NM_015361 | 11336.544 | 13266.934 |
| AK021791  | 11323.25 | 9389.716 | AB014533  | 4104.975  | 4304.525  | NM_00431  | 11177.317 | 15930.511 |
| NM_00405  | 27279.62 | 20029.48 | M11427    | 531.24    | 533.214   | NM_015537 | 4591.188  | 5822.32   |
| NM_004394 | 8729.509 | 9669.709 | NM_000744 | 812.249   | 889.567   | NM_01652  | 24345.893 | 24008.17  |
| NM_005727 | 3073.947 | 4528.931 | NM_00303  | 1067.49   | 1105.345  | AB018353  | 4104.468  | 5881.145  |
| AK027242  | 2646.332 | 2524.523 | NM_01450  | 566.32    | 488.867   | NM_00703  | 7953.149  | 8350.364  |
| NM_00127  | 14856.66 | 11979.68 | NM_02037  | 3380.337  | 3273.95   | NM_002617 | 4959.069  | 5878.445  |
| NM_00501  | 1619.098 | 2070.748 | NM_00263  | 40796.18  | 45320.207 | AF090907  | 3364.728  | 5042.315  |
| NM_01905  | 2496.381 | 3017.837 | NM_00475  | 1786.828  | 2846.935  | AK024476  | 5767.131  | 7169.708  |
| NM_02019  | 4534.253 | 3567.302 | NM_00516  | 4926.044  | 3635.667  | X74794    | 6529.297  | 7523.018  |
| U96136    | 938.07   | 1002.404 | NM_015361 | 10228.794 | 8813.31   | AL050298  | 3250.029  | 3189.562  |
| NM_00277  | 262.559  | 438.103  | NM_00431  | 10497.241 | 7226.141  | NM_00707  | 33712.203 | 49921.34  |
| NM_005941 | 249.266  | 459.681  | NM_015537 | 3826.34   | 3584.399  | M20696    | 3833.083  | 4401.882  |
| NM_015884 | 619.331  | 954.513  | NM_01652  | 23092.379 | 29983.883 | NM_00291  | 1106.361  | 1129.514  |
| AF201380  | 4136.427 | 5686.47  | AB018353  | 3968.645  | 3423.195  | NM_00673  | 3272.113  | 2856.359  |
| NM_01239  | 10500.75 | 11909.33 | NM_00703  | 4440.078  | 3664.738  | NM_00364  | 1939.463  | 1763.562  |
| NM_01483  | 16404.92 | 13407.77 | NM_002617 | 2529.314  | 2737.235  | NM_014444 | 4849.946  | 4817.534  |
| NM_00483  | 621.583  | 532.205  | NM_00331  | 9691.365  | 8522.707  | NM_01224  | 6933.442  | 7434.256  |
| NM_005957 | 1212.959 | 1411.326 | AF090907  | 2412.26   | 2319.302  | NM_01497  | 3893.964  | 4059.843  |
| AK024374  | 2043.174 | 2118.395 | AK024476  | 4565.977  | 5344.306  | NM_01571  | 953.673   | 1343.23   |
| NM_007101 | 775.539  | 778.128  | X74794    | 6462.83   | 7591.002  | NM_012464 | 506.08    | 523.151   |
| NM_018234 | 716.39   | 287.737  | AL050298  | 2317.623  | 2967.86   | NM_00612  | 1696.475  | 1767.664  |
| AB033062  | 1355.372 | 1450.289 | NM_00707  | 32205.291 | 34295.648 | NM_00058  | 1746.124  | 2074.07   |
| NM_016437 | 21689.8  | 21414.18 | M20696    | 3085.392  | 2977.209  | NM_00559  | 1308.775  | 1653.373  |
| NM_00272  | 19083.23 | 14641.05 | NM_00291  | 818.779   | 1263.48   | NM_004684 | 1157.109  | 1059.108  |
| AK024716  | 16312.28 | 10410.6  | NM_00673  | 2220.582  | 2934.517  | BF338709  | 591.214   | 781.205   |
| X67155    | 3102.96  | 1956.006 | NM_00364  | 1401.183  | 1703.088  | AF204171  | 672.799   | 716.745   |
| NM_02038  | 12728.3  | 11516.92 | NM_014444 | 3620.919  | 4421.98   | W96179    | 4582.431  | 5300.221  |
| AL137519  | 875.004  | 709.756  | NM_01224  | 5230.547  | 6111.773  | BG568198  | 937.165   | 993.072   |
| NM_00289  | 42930.36 | 42202.56 | NM_01497  | 2726.414  | 3364.119  | M76559    | 5500.395  | 8276.734  |
| NM_00133  | 17685.86 | 17565.53 | NM_01571  | 669.487   | 1147.177  | U03884    | 540.029   | 116.498   |
| NM_00512  | 1251.617 | 1061.993 | NM_012464 | 326.284   | 273.296   | AI222585  | 808.948   | 1075.163  |
| AL133055  | 319.293  | 480.774  | NM_00612  | 1491.182  | 1118.004  | AA411678  | 12915.435 | 16257.679 |
| NM_01455  | 2272.998 | 2824.542 | NM_00058  | 1957.638  | 1659.939  | AA862813  | 31746.35  | 35731.383 |
| NM_00307  | 11884.23 | 15548.55 | NM_00559  | 1156.626  | 1009.125  | AA398427  | 3094.54   | 3594.158  |
| NM_00191  | 2798.631 | 4338.347 | NM_004684 | 370.279   | 522.911   | T55728    | 8909.681  | 9571.955  |
| AK025594  | 889.225  | 1103.174 | BF338709  | 511.151   | 660.449   | H20856    | 2917.997  | 2701.852  |
| AB040931  | 4996.792 | 5174.238 | M18182    | 323.85    | 359.635   | N62586    | 5968.015  | 6520.881  |
| NM_00359  | 2055.604 | 1848.832 | W96179    | 2753.728  | 3372.162  | AA242743  | 4674.329  | 5176.26   |
| NM_015911 | 1756.959 | 1483.359 | AW247841  | 4666.112  | 5350.845  | AK022365  | 544.311   | 426.477   |
| BC011826  | 8463.871 | 6692.846 | BG568198  | 628.028   | 481.571   | BE892273  | 42033.262 | 38168.254 |
| NM_017647 | 8432.227 | 6911.185 | M76559    | 3185.933  | 3202.715  | AF026929  | 538.096   | 751.632   |
| NM_012091 | 3687.095 | 2349.833 | AI222585  | 811.617   | 619.969   | NM_016734 | 688.264   | 639.168   |
| NM_012321 | 6745.897 | 5496.257 | AA411678  | 8102.555  | 8585.005  | AF035803  | 382.824   | 698.549   |

|           |          |          |           |           |           |           |           |           |
|-----------|----------|----------|-----------|-----------|-----------|-----------|-----------|-----------|
| D13642    | 5568.505 | 6181.205 | AA862813  | 21966.994 | 22211.201 | Y08147    | 2697.078  | 2983.61   |
| NM_004741 | 9105.906 | 7075.788 | AA398427  | 2055.219  | 2096.312  | D00174    | 6377.134  | 6553.479  |
| NM_018032 | 6874.509 | 3866.489 | T55728    | 5890.669  | 6685.123  | AB000520  | 971.451   | 1108.649  |
| NM_003675 | 10974.72 | 9048.508 | H20856    | 1897.378  | 2729.543  | NM_016382 | 2082.041  | 1370.647  |
| NM_017518 | 4502.339 | 3090.87  | N62586    | 4279.869  | 6913.369  | AK023117  | 3141.611  | 4604.421  |
| NM_004117 | 3946.096 | 2154.313 | AA242743  | 4767.37   | 5348.319  | AL122046  | 2043.337  | 1846.743  |
| NM_016594 | 7063.905 | 4016.933 | AK022365  | 318.3     | 276.94    | NM_000855 | 2550.732  | 3605.631  |
| NM_030752 | 10570.59 | 8102.65  | BE892273  | 35433.367 | 26087.799 | NM_005536 | 8853.827  | 8881.046  |
| D26068    | 33235.32 | 39398.29 | AF026929  | 464.926   | 332.112   | NM_005077 | 2024.491  | 2344.191  |
| NM_018559 | 9256.141 | 9276.849 | NM_016734 | 712.182   | 666.253   | NM_004423 | 5532.222  | 6383.468  |
| NM_017593 | 5281.468 | 6132.859 | Y08147    | 3112.958  | 2764.695  | NM_001990 | 1833.913  | 2069.286  |
| NM_004282 | 17319.58 | 16442.73 | D00174    | 7423.135  | 6805.805  | NM_002141 | 800.985   | 986.572   |
| AK025695  | 4188.393 | 5524.81  | AB000520  | 1084.17   | 622.398   | NM_003311 | 2646.473  | 3641.538  |
| AK025442  | 12405.7  | 11535.79 | NM_016382 | 818.486   | 1815.315  | NM_003776 | 5667.461  | 7818.421  |
| AL050041  | 1550.527 | 1578.428 | AK023117  | 3172.992  | 2915.406  | NM_000744 | 553.9     | 677.802   |
| NM_002451 | 3677.327 | 4449.826 | AL122046  | 1221.815  | 1474.284  | NM_003039 | 1054.592  | 1104.595  |
| NM_013411 | 2133.556 | 2430.121 | NM_000855 | 3125.773  | 3826.388  | NM_014509 | 451.084   | 848.329   |
| AB007956  | 643.316  | 399.562  | NM_005536 | 6314.868  | 8919.162  | U26662    | 496.394   | 296.422   |
| NM_020200 | 918.104  | 805.4    | NM_005077 | 1941.631  | 2120.066  | NM_020372 | 3020.059  | 2985.19   |
| NM_000156 | 849.37   | 717.383  | NM_004423 | 6621.404  | 7596.359  | NM_002635 | 51832.664 | 44129.512 |
| NM_000180 | 8980.205 | 5629.662 | NM_001990 | 1230.899  | 1381.93   | NM_004979 | 799.516   | 750.052   |
| NM_000855 | 11590.51 | 8201.587 | NM_002141 | 1126.34   | 1126.369  | NM_016077 | 3609.848  | 3525.136  |
| AF254087  | 2270.748 | 2475.275 | NM_003311 | 4083.775  | 7381.388  | AF100756  | 9041.812  | 8099.514  |
| NM_017715 | 1250.061 | 1045.837 | NM_003776 | 4066.252  | 4119.549  | NM_006825 | 4694.021  | 5286.312  |
| AL117607  | 1490.848 | 1176.259 | NM_000744 | 544.18    | 439.608   | NM_004862 | 787.099   | 635.426   |
| AB037774  | 3425.527 | 3025.73  | NM_003039 | 1142.269  | 859.292   | NM_001661 | 1044.378  | 1074.55   |
| NM_005438 | 623.879  | 879.979  | NM_014509 | 583.032   | 391.419   | NM_014563 | 1535.57   | 1528.127  |
| AK024361  | 3315.068 | 3993.031 | NM_020372 | 3545.918  | 2362.291  | NM_020150 | 5327.001  | 5038.286  |
| NM_004350 | 2382.693 | 2020.833 | NM_002635 | 43093.898 | 47297.598 | NM_007150 | 4265.571  | 4270.568  |
| NM_018044 | 8373.861 | 6975.452 | NM_004979 | 658.963   | 602.98    | NM_006831 | 4001.574  | 3267.7    |
| NM_004503 | 681.217  | 738.278  | NM_016077 | 3340.475  | 2698.946  | AL162044  | 6103.06   | 6096.727  |
| NM_001717 | 798.21   | 258.344  | AF100756  | 7093.248  | 9483.663  | AK024004  | 1808.787  | 1848.109  |
| AF274347  | 1027.759 | 1014.832 | NM_006825 | 4117.38   | 4504.453  | NM_006736 | 3118.448  | 2799.23   |
| NM_018555 | 2213.793 | 1463.251 | NM_004862 | 775.966   | 900.372   | NM_003640 | 2085.661  | 1578.853  |
| AK023525  | 4275.645 | 4813.815 | NM_001661 | 675.792   | 872.892   | NM_014444 | 3972.536  | 4137.647  |
| AF085829  | 1164.647 | 1564.052 | NM_014563 | 1621.937  | 1580.183  | NM_012248 | 6840.605  | 6284.167  |
| AF075029  | 684.682  | 733.69   | NM_020150 | 4426.286  | 4332.178  | NM_014970 | 4485.057  | 3884.241  |
| AK021903  | 2086.292 | 2243.052 | NM_007150 | 3369.709  | 3519.282  | NM_014393 | 5446.06   | 4758.689  |
| AL390143  | 3739.424 | 4554.734 | NM_006831 | 2974.602  | 3419.254  | NM_004223 | 13683.635 | 13514.287 |
| AL162075  | 2261.807 | 2241.275 | AL162044  | 5089.792  | 5781.94   | NM_006813 | 527.528   | 645.75    |
| AK021595  | 2170.49  | 1469.542 | AK024004  | 1287.454  | 1393.266  | NM_001355 | 10766.46  | 9156.335  |
| AK021648  | 999.754  | 689.454  | NM_006736 | 2042.084  | 1670.697  | NM_001216 | 323.952   | 453.698   |
| AF147358  | 10626.04 | 8913.719 | NM_003640 | 1265.41   | 1233.715  | U63336    | 763.645   | 739.64    |
| AL110290  | 632.667  | 269.403  | NM_014444 | 3588.497  | 2993.663  | NM_006907 | 1260.013  | 2023.675  |
| NM_018410 | 10046.83 | 6891.085 | NM_012248 | 5762.882  | 4920.542  | NM_002686 | 1030.061  | 2113.896  |
| AF147404  | 482.869  | 728.839  | NM_014970 | 3399.086  | 3739.966  | NM_006267 | 1524.022  | 1665.142  |
| AF086314  | 1511.1   | 936.907  | NM_014393 | 4073.771  | 4652.735  | NM_002661 | 8093.797  | 7915.864  |
| AF086419  | 1098.201 | 779.683  | NM_004223 | 12892.828 | 13102.806 | NM_001263 | 803.877   | 964.748   |
| AF086461  | 1159.45  | 1056.664 | NM_006813 | 592.363   | 597.142   | AK023982  | 1158.533  | 1183.426  |
| AF131795  | 559.225  | 589.776  | NM_001355 | 9444.043  | 9876.171  | NM_018466 | 2385.762  | 2872.916  |
| AL833296  | 2195.382 | 2302.49  | NM_001216 | 497.196   | 334.901   | Y11312    | 1835.201  | 1457.169  |
| AL110240  | 6636.814 | 9142.176 | U63336    | 573.998   | 785.826   | AB014533  | 2379.139  | 2900.523  |
| AF075081  | 374.025  | 457.153  | NM_006907 | 1063.91   | 915.025   | AK022097  | 2553.631  | 2503.676  |



|           |          |          |           |           |           |           |           |           |
|-----------|----------|----------|-----------|-----------|-----------|-----------|-----------|-----------|
| NM_015372 | 400.706  | 466.448  | NM_002686 | 624.968   | 726.447   | NM_002166 | 20201.629 | 19169.709 |
| AF085919  | 433.459  | 502.147  | NM_006267 | 1705.488  | 1212.938  | NM_004660 | 8562.365  | 8299.527  |
| AF085933  | 872.676  | 1125.654 | NM_002661 | 7152.204  | 9488.59   | NM_006165 | 2405.745  | 2547.692  |
| AF147431  | 886.57   | 907.248  | NM_001263 | 314.405   | 496.367   | NM_016011 | 10084.367 | 9321.209  |
| AK026422  | 4505.843 | 6465.883 | AK023982  | 1109.433  | 1381.112  | AL035307  | 3637.812  | 3495.079  |
| AF085938  | 1745.587 | 1613.338 | NM_018466 | 1773.234  | 2578.962  | AK023772  | 655.081   | 740.344   |
| AK022264  | 1438.684 | 1481.521 | Y11312    | 1684.371  | 1799.201  | NM_012234 | 4602.793  | 3988.657  |
| AL137331  | 941.856  | 964.062  | AB014533  | 4235.498  | 3965.056  | NM_015361 | 11728.767 | 10279.314 |
| AL162040  | 3722.292 | 2769.262 | M11427    | 530.062   | 452.897   | NM_004310 | 9909.557  | 11804.158 |
| AL442084  | 985.113  | 622.446  | AK022097  | 2218.157  | 1632.481  | NM_015537 | 4799.826  | 4696.732  |
| AL137371  | 9572.942 | 7759.922 | NM_002166 | 14710.379 | 10216.132 | AB018353  | 3282.924  | 4878.961  |
| AL137596  | 4625.966 | 4418.286 | NM_004660 | 8000.828  | 6886.004  | NM_007036 | 6368.622  | 4814.513  |
| AL353942  | 10916.08 | 12363.71 | NM_006165 | 2723.517  | 1978.267  | NM_002617 | 3440.065  | 3818.58   |
| Z38010    | 1988.097 | 1180.555 | NM_016011 | 12546.744 | 11885.765 | NM_003313 | 9350.03   | 13564.322 |
| AK024713  | 1084.391 | 913.832  | AL035307  | 4506.5    | 7458.432  | X74794    | 7603.974  | 6208.893  |
| AK024204  | 562.316  | 667.81   | AK023772  | 590.56    | 423.058   | AL050298  | 3323.795  | 3047.632  |
| AK023737  | 3592.609 | 2494.774 | NM_012234 | 4142.981  | 3854.908  | NM_007079 | 23515.654 | 25733.115 |
| NM_006609 | 4237.274 | 3411.877 | NM_015361 | 14589.542 | 19880.605 | M20696    | 3613.594  | 3513.04   |
| NM_014118 | 508.704  | 426.073  | NM_004310 | 10583.881 | 9366.886  | NM_002915 | 1059.699  | 1179.682  |
| AK023643  | 349.517  | 428.238  | NM_015537 | 5192.965  | 5729.631  | NM_005203 | 706.229   | 317.764   |
| AL390159  | 328.841  | 379.965  | NM_016520 | 22385.621 | 31720.393 | NM_006566 | 3155.504  | 1295.406  |
| AF095853  | 422.837  | 545.133  | AB018353  | 3642.663  | 3259.774  | AK026154  | 7622.416  | 6936.894  |
| NM_014157 | 1938.337 | 2192.868 | NM_007036 | 4957.394  | 4357.349  | AL117546  | 12472.062 | 11681.266 |
| AF090933  | 287.896  | 388.354  | NM_002617 | 2756.845  | 3961.707  | AK027073  | 793.915   | 913.284   |
| AF111851  | 1298.673 | 1518.688 | NM_003313 | 10132.137 | 9700.902  | NM_000384 | 899.563   | 795.758   |
| AF152529  | 556.507  | 463.638  | AF090907  | 2502.094  | 2978.488  | AB018325  | 3269.47   | 3577.887  |
| AL360200  | 818.574  | 765.696  | AK024476  | 4493.148  | 4751.807  | AL157482  | 3116.241  | 2926.173  |
| AK021992  | 690.523  | 852.425  | X74794    | 6508.651  | 7182.547  | NM_003603 | 537.769   | 403.194   |
| AK022102  | 483.281  | 466.693  | AL050298  | 2307.798  | 2868.042  | NM_005428 | 7151.292  | 7445.146  |
| AK022235  | 1016.342 | 798.338  | NM_007079 | 29810.295 | 25610.564 | NM_017974 | 1286.2    | 1799.749  |
| AK022378  | 3496.118 | 4181.636 | M20696    | 2904.263  | 2829.578  | NM_003979 | 582.36    | 730.866   |
| AK022009  | 378.854  | 762.099  | NM_002915 | 713.226   | 996.633   | X14677    | 2204.597  | 2747.469  |
| AK022274  | 672.594  | 242.427  | NM_006566 | 1800.775  | 1891.681  | U17077    | 1571.383  | 1957.081  |
| AK022401  | 481.21   | 375.277  | AK026154  | 6304.253  | 4436.335  | NM_000915 | 2806.04   | 3373.996  |
| AK027174  | 553.616  | 609.135  | AL117546  | 20645.66  | 14915.851 | NM_002344 | 502.992   | 473.089   |
| AK025833  | 238.066  | 468.83   | AK027073  | 846.51    | 452.873   | AK024475  | 1372.283  | 2496.895  |
| NM_017597 | 507.664  | 556.676  | NM_000384 | 650.483   | 495.977   | NM_019846 | 2032.204  | 2078.111  |
| AK054831  | 2108.915 | 1748.787 | AB018325  | 3759.534  | 2876.577  | NM_014433 | 865.544   | 986.746   |
| AK021770  | 1660.13  | 1599.548 | AL157482  | 4276.929  | 3998.767  | NM_002062 | 5089.259  | 4430.701  |
| AK027248  | 2331.322 | 2898.948 | NM_003603 | 476.667   | 695.61    | NM_014394 | 44846.316 | 41406.891 |
| AK022804  | 16417.72 | 17644.85 | NM_005428 | 9717.624  | 19577.771 | NM_005243 | 13454.312 | 10146.776 |
| AF009263  | 1636.516 | 1680.012 | NM_017974 | 1327.653  | 1164.512  | NM_006218 | 1060.427  | 949.512   |
| AF009283  | 1118.235 | 902.204  | NM_003979 | 678.313   | 918.801   | NM_018140 | 4251.367  | 3898.512  |
| AF086329  | 1306.672 | 1004.453 | X14677    | 2650.162  | 2790.474  | NM_016948 | 3086.955  | 2313.293  |
| AK025799  | 579.086  | 437.107  | NM_005863 | 5740.321  | 10187.013 | NM_000142 | 1424.171  | 1673.555  |
| AK022857  | 453.911  | 708.521  | U17077    | 2533.432  | 2920.918  | AF272372  | 24827.996 | 22408.068 |
| AL110206  | 977.744  | 1185.696 | NM_000915 | 2649.073  | 3045.402  | AK097045  | 2525.998  | 3029.51   |
| NM_004821 | 347.975  | 280.373  | AK024475  | 1590.334  | 1098.838  | AF161356  | 61130.02  | 60408.719 |
| AK024292  | 1235.405 | 768.297  | AB026542  | 12466.687 | 12987.139 | AB014548  | 4572.189  | 6087.971  |
| AK026263  | 1160.641 | 1018.24  | NM_019846 | 3751.766  | 3280.571  | NM_018256 | 5911.12   | 3590.299  |
| U50526    | 888.606  | 847.635  | NM_014433 | 1058.064  | 860.394   | AK025150  | 714.936   | 428.182   |
| S75105    | 4266.866 | 4393.542 | NM_002062 | 7968.756  | 6162.621  | AK024611  | 12738.492 | 12312.015 |
| AF056455  | 1981.148 | 2001.209 | NM_014394 | 47689.844 | 36753.637 | BC010420  | 6140.586  | 5346.615  |

|           |          |          |           |           |           |           |           |           |
|-----------|----------|----------|-----------|-----------|-----------|-----------|-----------|-----------|
| NM_01851C | 1818.599 | 1797.107 | NM_005243 | 11214.811 | 9885.683  | NM_01228C | 16110.13  | 15868.095 |
| U50537    | 592.253  | 679.025  | NM_00621E | 1778.723  | 1330.847  | NM_018172 | 4793.912  | 4841.008  |
| AK024988  | 1492.216 | 1302.66  | NM_01814C | 3543.158  | 3090.364  | U03886    | 735.51    | 701.669   |
| AF026943  | 2598.494 | 2083.798 | NM_01694E | 1791.407  | 1832.713  | AK022040  | 987.112   | 1111.902  |
| L77582    | 786.759  | 660.051  | NM_000142 | 1582.872  | 973.503   | AK022722  | 1178.953  | 1009.149  |
| NM_02044E | 1545.44  | 1455.358 | AF272372  | 18967.537 | 15520.802 | NM_003591 | 15719.261 | 17443.945 |
| NM_00541E | 2382.09  | 1680.095 | AK097045  | 2803.646  | 2214.416  | AL080111  | 13254.629 | 16956.408 |
| L31956    | 902.763  | 168.838  | AF161356  | 53057.738 | 67493.492 | NM_014642 | 3289.187  | 3462.591  |
| NM_00347E | 35225.33 | 34564.74 | AB014548  | 5390.826  | 4864.116  | NM_00382E | 2859.531  | 1939.729  |
| AK022078  | 526.773  | 394.89   | NM_01825E | 4289.242  | 5549.984  | AL110168  | 2465.526  | 1947.232  |
| AF075101  | 694.821  | 985.113  | AK025150  | 890.857   | 703.882   | NM_014522 | 430.248   | 637.242   |
| AF130108  | 1149.168 | 887.324  | AK024611  | 10936.514 | 10625.241 | NM_002831 | 6943.642  | 5011.249  |
| NM_020224 | 6181.632 | 5884.335 | BC010420  | 4422.04   | 5641.271  | AL833409  | 3083.126  | 2826.412  |
| U17617    | 910.241  | 533.65   | NM_01228C | 19525.463 | 19630.52  | NM_01596E | 1007.256  | 962.383   |
| NM_01410C | 207.962  | 358.136  | NM_018172 | 4764.266  | 4382.126  | NM_016147 | 5333.832  | 4364.845  |
| AK022952  | 11259.4  | 13057.48 | U03886    | 919.654   | 937.669   | NM_002833 | 2062.27   | 2257.059  |
| BF218888  | 945.128  | 1017.133 | AK022040  | 1215.977  | 1531.609  | NM_016592 | 1158.964  | 1476.973  |
| AK021604  | 137.333  | 390.655  | AK022722  | 1291.879  | 1355.102  | NM_01832E | 9959.208  | 14168.138 |
| AF086401  | 5094.667 | 5798.586 | NM_003591 | 17249.461 | 36337.402 | NM_00186E | 570.076   | 589.644   |
| L23869    | 1909.552 | 2129.045 | AL080111  | 16447.771 | 16706.967 | NM_014773 | 519.053   | 287.648   |
| Z21853    | 3631.825 | 4849.943 | NM_00355C | 8327.604  | 9199.98   | NM_00560E | 7775.292  | 8733.736  |
| U80770    | 905.11   | 747.008  | NM_014642 | 3548.664  | 3360.157  | AF134707  | 1103.888  | 1092.564  |
| AB075846  | 613.82   | 598.833  | NM_00382E | 2045.198  | 1239.963  | BE730629  | 801.788   | 666.867   |
| NM_018342 | 1329.729 | 1336.22  | AL110168  | 3144.219  | 2656.754  | AK027167  | 1662.928  | 2204.996  |
| BC020260  | 1245.422 | 967.732  | NM_014522 | 351.795   | 497.632   | AK025265  | 3039.932  | 3310.349  |
| D17156    | 6981.821 | 5924.605 | NM_002831 | 5012.814  | 4474.286  | NM_01327E | 410.158   | 891.738   |
| L04461    | 858.467  | 699.034  | AL833409  | 3983.643  | 2809.371  | NM_018652 | 12700.931 | 12061.831 |
| AK026938  | 11695.68 | 10828.56 | NM_01596E | 784.511   | 575.872   | AB011166  | 4001.233  | 2325.845  |
| AK024373  | 9713.342 | 7319.446 | NM_016147 | 4875.229  | 4192.188  | AK024460  | 5368.731  | 3743.903  |
| AK022343  | 3424.909 | 1852.635 | NM_002833 | 1988.712  | 1493.155  | NM_00660E | 3325.763  | 3291.263  |
| AK026400  | 1063.586 | 1061.678 | NM_016592 | 1139.112  | 995.955   | S78570    | 780.693   | 446.263   |
| U92989    | 8378.661 | 6991.351 | NM_01832E | 7060.863  | 6872.106  | NM_006442 | 26845.994 | 22396.453 |
| AF075102  | 1590.799 | 1277.238 | NM_00186E | 438.503   | 304.511   | NM_003902 | 8090.303  | 7149.97   |
| NM_018463 | 2876.796 | 2536.534 | NM_00093C | 1122.137  | 1982.409  | NM_016427 | 7933.894  | 7317.734  |
| X74956    | 8183.527 | 10887.95 | NM_014773 | 454.468   | 392.904   | NM_00670E | 693.679   | 230.296   |
| AF132197  | 6470.648 | 6649.57  | NM_00560E | 9347.599  | 6703.7    | U80741    | 3449.789  | 3144.174  |
| AK025546  | 981.1    | 760.475  | AF134707  | 1335.818  | 1360.08   | NM_014497 | 1683.025  | 1412.582  |
| AF278761  | 262.828  | 507.66   | BE730629  | 1006.669  | 1056.787  | AL133598  | 7253.065  | 7631.106  |
| AL137487  | 1410.31  | 1810.641 | AK027167  | 2389.831  | 3322.93   | NM_00554E | 648.985   | 1002.412  |
| AK023800  | 1045.241 | 1056.214 | AK025265  | 3653.308  | 3321.456  | NM_015511 | 3581.113  | 4711.112  |
| AK024120  | 1173.674 | 1486.493 | NM_01327E | 886.628   | 544.653   | NM_00662E | 3754.988  | 2865.798  |
| CY3Cy5    | 9461.373 | 879.862  | NM_018652 | 15372.998 | 14681.343 | NM_004891 | 22047.586 | 15986.966 |
| W96179    | 4852.227 | 5481.953 | AB011166  | 2456.198  | 3600.13   | NM_00393E | 442.61    | 587.424   |
| AW247841  | 5883.95  | 6400.052 | AK024460  | 3951.69   | 4125.31   | NM_00287E | 540.208   | 661.495   |
| BG568198  | 378.021  | 494      | NM_00660E | 4705.444  | 3576.856  | AF075068  | 36160.523 | 27126.148 |
| M76559    | 4186.511 | 4884.978 | S78570    | 605.919   | 354.402   | AK024366  | 750.981   | 540.36    |
| U03884    | 261.165  | 189.316  | NM_006442 | 22483.322 | 18432.467 | AK025913  | 1159.159  | 731.245   |
| U11058    | 446.913  | 230.693  | NM_003902 | 7946.958  | 6456.701  | AK021930  | 450.049   | 494.929   |
| AI222585  | 588.784  | 532.474  | NM_00509E | 215.167   | 389.335   | NM_018354 | 1172.862  | 1183.293  |
| AA411678  | 11141.05 | 8847.352 | NM_016427 | 9274.805  | 9248.817  | X78938    | 695.274   | 470.088   |
| AA862813  | 44318.14 | 41093.72 | NM_00670E | 743.979   | 570.616   | AK022379  | 1352.553  | 685.169   |
| AA398427  | 2780.263 | 2290.237 | U80741    | 3239.031  | 3421.886  | AK025231  | 9499.116  | 7757.78   |
| T55728    | 9759.77  | 7774.444 | NM_014497 | 1319.888  | 1460.705  | AK001115  | 1470.414  | 992.819   |

|           |          |          |           |           |           |           |           |           |
|-----------|----------|----------|-----------|-----------|-----------|-----------|-----------|-----------|
| H20856    | 3322.822 | 2495.354 | AL133598  | 6066.792  | 6254.443  | NM_014096 | 2190.016  | 2001.707  |
| N62586    | 6932.456 | 6704.482 | NM_015511 | 3913.411  | 2607.509  | AL133050  | 924.591   | 446.264   |
| AA242743  | 3459.216 | 3068.601 | NM_006625 | 2830.041  | 2649.113  | AK023343  | 1355.512  | 1853.735  |
| SR5       | 6144.269 | 4970.084 | NM_004891 | 14760.419 | 13933.662 | AK022421  | 1116.062  | 820.449   |
| SR7       | 6554.817 | 37382.69 | AF086538  | 648.774   | 652.527   | AK023292  | 1008.839  | 707.429   |
| SR9       | 24838.57 | 3568.604 | NM_003935 | 407.995   | 298.914   | AF085881  | 3755.2    | 2904.732  |
| CY3Cy5    | 7969.84  | 705.118  | NM_002875 | 477.339   | 579.322   | AK022737  | 10242.493 | 7412.927  |
| NM_016382 | 1942.959 | 971.435  | AF075068  | 19145.346 | 14624.498 | NM_003472 | 40034.77  | 29277.773 |
| AK023117  | 3009.842 | 4860.482 | AK024366  | 436.201   | 217.939   | U92980    | 2750.282  | 2316.395  |
| AL122046  | 1953.567 | 2019.527 | AK022171  | 645.588   | 437.096   | AF133658  | 610.701   | 546.204   |
| AF119914  | 198.437  | 299.54   | NM_018354 | 984.3     | 961.433   | AB048287  | 4984.225  | 4329.372  |
| NM_000855 | 988.997  | 1209.923 | X78938    | 1192.528  | 1365.969  | Y11159    | 1100.325  | 898.434   |
| NM_005536 | 8647.842 | 6411.474 | AK022379  | 949.391   | 873.431   | AB020648  | 3363.596  | 3120.973  |
| NM_005077 | 548.013  | 749.396  | AK025231  | 17668.164 | 18016.479 | AK025798  | 13186.044 | 10187.643 |
| NM_004423 | 2903.688 | 2822.844 | AK001439  | 432.982   | 409.44    | AF086173  | 671.639   | 285.928   |
| NM_001990 | 1613.818 | 955.048  | AK001115  | 1971.065  | 2841.361  | AK025164  | 840.772   | 481.23    |
| NM_002141 | 571.054  | 340.736  | NM_014095 | 3003.304  | 2697.182  | NM_018366 | 4532.929  | 3701.205  |
| NM_003311 | 2710.954 | 2484.774 | AL133050  | 1115.661  | 1137.799  | AB040290  | 1221.112  | 997.624   |
| NM_003776 | 5875.825 | 7519.906 | AK027233  | 1013.161  | 791.083   | NM_019845 | 5975.521  | 5728.873  |
| NM_007095 | 420.326  | 460.071  | AK023343  | 370.628   | 363.215   | AL359056  | 687.697   | 341.448   |
| NM_015719 | 974.11   | 1259.732 | AK023292  | 392.934   | 432.176   | AF124367  | 897.854   | 947.472   |
| NM_012464 | 368.99   | 360.61   | AK022452  | 570.814   | 1648.951  | AK000798  | 380.25    | 622.117   |
| NM_006129 | 1713.728 | 1817.105 | AK023781  | 561.392   | 584.562   | AK025615  | 4425.023  | 3586.945  |
| NM_005593 | 712.891  | 697.856  | AF085881  | 2908.598  | 2251.704  | AK023803  | 559.015   | 544.387   |
| NM_004684 | 556.159  | 534.909  | AK022737  | 7898.978  | 7116.914  | AK026947  | 21534.715 | 17292.814 |
| BF338709  | 298.757  | 314.738  | NM_003472 | 34147.273 | 22788.279 | U84526    | 10978.84  | 5637.748  |
| AF204171  | 600.11   | 469.176  | U92980    | 2528.158  | 1372.844  | L23401    | 1787.724  | 1701.853  |
| AF100756  | 9647.321 | 11630.75 | AF133658  | 780.18    | 655.512   | NM_018090 | 57290.836 | 44277.992 |
| NM_006825 | 2787.412 | 3772.49  | AB048287  | 7473.355  | 5738.863  | AK022728  | 19225.553 | 17777.541 |
| NM_004862 | 581.261  | 718.517  | Y11159    | 1549.322  | 1055.044  | AL109678  | 1120.023  | 928.437   |
| NM_001661 | 953.965  | 655.288  | AB020648  | 2727.154  | 3161.231  | AL137524  | 1129.612  | 987.963   |
| NM_014563 | 1490.268 | 1201.345 | AK025798  | 14567.741 | 12406.35  | AF218008  | 3637.788  | 3087.436  |
| NM_020150 | 3705.199 | 3268.138 | NM_018366 | 4058.149  | 3656.871  | M22404    | 11738.105 | 10138.98  |
| NM_007150 | 4372.602 | 2904.579 | AB040290  | 792.077   | 830.553   | AF052115  | 1152.718  | 821.791   |
| NM_006831 | 4397.298 | 2918.886 | NM_019845 | 7071.086  | 7196.964  | NM_014019 | 16989.063 | 11165.943 |
| AL162044  | 7272.831 | 6108.975 | AL359056  | 255.586   | 614.567   | Z70711    | 514.488   | 580.006   |
| AK024004  | 2036.753 | 2020.514 | AK021497  | 695.543   | 736.743   | AF116653  | 880.045   | 643.602   |
| AK022365  | 562.16   | 408.699  | AF124367  | 644.955   | 841.423   | NM_012365 | 840.195   | 792.862   |
| BE892273  | 5728.389 | 7300.14  | AK000798  | 346.232   | 587.538   | AK025323  | 670.45    | 590.748   |
| AF026929  | 604.602  | 336.275  | AK025615  | 4336.734  | 3925.143  | NM_013326 | 3054.833  | 3401.02   |
| NM_016734 | 426.423  | 501.261  | AK023803  | 559.7     | 537.04    | BC037322  | 1394.285  | 1099.181  |
| AF035803  | 431.647  | 564.83   | AK025168  | 356.907   | 251.736   | Y12022    | 1734.975  | 1972.75   |
| Y08147    | 1212.386 | 1151.431 | AK026947  | 18217.824 | 12750.325 | AF026944  | 3899.856  | 2886.337  |
| D00174    | 1661.574 | 1863.812 | U84526    | 8102.077  | 8529.113  | AK021493  | 3246.893  | 2743.894  |
| AB000520  | 849.078  | 1272.206 | L23401    | 2259.987  | 1240.007  | NM_006161 | 4438.513  | 3498.689  |
| NM_006907 | 1464.442 | 1628.276 | NM_018090 | 55689.461 | 46642.047 | NM_006204 | 395.354   | 387.456   |
| NM_002686 | 877.604  | 799.116  | AK022728  | 27237.09  | 23016.707 | NM_012155 | 4837.46   | 3683.177  |
| NM_006267 | 1946.466 | 1947.356 | AL109678  | 1401.406  | 931.556   | AF144700  | 1575.109  | 1197.136  |
| NM_002661 | 7896.363 | 8687.498 | AL137524  | 1309.586  | 1202.265  | NM_004105 | 7165.566  | 5410.516  |
| NM_001263 | 251.645  | 379.551  | AF218008  | 4092.708  | 2654.836  | AB046825  | 2603.609  | 1919.736  |
| AK023982  | 1221.252 | 986.549  | M22404    | 16546.146 | 13661.581 | X64975    | 806.816   | 708.925   |
| NM_018466 | 3157.483 | 2270.657 | AF052115  | 1080.977  | 843.714   | AF071509  | 323.391   | 454.757   |
| Y11312    | 1755.983 | 996.016  | Z70711    | 933.442   | 844.837   | AL050297  | 3537.045  | 3838.923  |

|           |          |          |           |           |           |           |           |           |
|-----------|----------|----------|-----------|-----------|-----------|-----------|-----------|-----------|
| AB014533  | 1196.505 | 1262.456 | NM_01236E | 1212.135  | 1140.262  | AK026966  | 2604.126  | 1364.83   |
| NM_000744 | 568.641  | 794.264  | AK025323  | 609.125   | 614.115   | AF147398  | 860.351   | 612.967   |
| NM_00303E | 1038.408 | 1289.553 | NM_01332E | 5008.506  | 4428.716  | AJ009817  | 682.029   | 260.217   |
| NM_01450E | 491.356  | 656.147  | BC037322  | 1094.922  | 1826.87   | AK025268  | 1819.796  | 1353.408  |
| NM_02037E | 465.995  | 693.888  | Y12022    | 636.591   | 981.262   | AL833005  | 3257.033  | 2827.768  |
| NM_00497E | 700.773  | 501.003  | AK001375  | 1161.906  | 1069.536  | L43366    | 1695.371  | 1693.171  |
| NM_016077 | 3913.531 | 4567.904 | NM_019597 | 4533.667  | 4552.06   | AK026124  | 4711.722  | 6058.672  |
| NM_015537 | 1547.68  | 1629.793 | AL137559  | 526.782   | 620.32    | NM_01550E | 5228.662  | 4447.154  |
| NM_01652C | 19814.09 | 19066.55 | AF026944  | 2677.084  | 2571.963  | AL110157  | 3237.934  | 4208.685  |
| AB018353  | 3647.05  | 4733.186 | AK021493  | 2617.441  | 2285.93   | U84508    | 1312.933  | 1020.639  |
| NM_00703E | 6171.344 | 6009.596 | NM_006161 | 6233.358  | 5217.29   | NM_01779E | 2777.098  | 2280.372  |
| NM_002617 | 3369.792 | 3246.625 | NM_00619E | 495.125   | 365.731   | NM_012131 | 2450.423  | 2466.556  |
| NM_00331E | 4497.333 | 5522.695 | NM_006204 | 410.055   | 394.721   | S41540    | 1484.503  | 882.184   |
| AF090907  | 2200.909 | 1802.646 | NM_01215E | 4800.538  | 4470.027  | CY3Cy5    | 1664.851  | 79.759    |
| AK024476  | 3188.284 | 2224.644 | AF144700  | 1809.898  | 1164.868  | AI417481  | 503.744   | 515.892   |
| X74794    | 7199.406 | 5144.806 | NM_00410E | 8285.313  | 5992.371  | BI906766  | 571.104   | 649.148   |
| AL050298  | 3401.677 | 1941.984 | AB046825  | 2740.623  | 2220.148  | U60519    | 1040.758  | 1110.755  |
| NM_00707E | 10259.74 | 9189.047 | X64975    | 1413.913  | 1253.923  | AA282906  | 756.07    | 938.577   |
| M20696    | 3229.08  | 2750.043 | AF064876  | 301.506   | 279.697   | L02870    | 1533.516  | 2046.611  |
| NM_00291E | 1649.216 | 1213.416 | AF071509  | 413.379   | 333.364   | BG755482  | 4230.53   | 6216.992  |
| NM_00673E | 3531.532 | 4147.12  | AL050297  | 5733.423  | 3436.408  | AI480307  | 4900.516  | 5550.471  |
| NM_00364C | 2273.472 | 2331.606 | AF185573  | 397.841   | 438.945   | X51420    | 1178.65   | 1269.765  |
| NM_014444 | 5342.805 | 4672.869 | AJ009817  | 372.639   | 267.03    | X51757    | 3026.388  | 4668.249  |
| NM_01224E | 7942.22  | 8736.622 | AK025268  | 1644.677  | 1495.13   | L24038    | 1437.031  | 1219.776  |
| NM_01439E | 4828.379 | 4965.916 | AL833005  | 3389.368  | 3160.479  | NM_00618E | 517.836   | 412.083   |
| NM_00422E | 12913.08 | 14015.78 | L43366    | 1916.687  | 1828.789  | NM_002751 | 1012.571  | 1103.708  |
| NM_00135E | 11713.37 | 11177.45 | AK026124  | 5389.5    | 4414.195  | M55593    | 746.639   | 1183.168  |
| NM_00121E | 475.273  | 730.053  | NM_01550E | 1911.118  | 3481.371  | NM_078467 | 2473.949  | 3175.09   |
| U63336    | 811.914  | 819.292  | AL110157  | 2917.956  | 1761.408  | SR2       | 57087.516 | 50008.801 |
| NM_004684 | 673.077  | 640.015  | NM_00231E | 5712.619  | 5145.473  | SR4       | 17177.023 | 11747.762 |
| BF338709  | 588.648  | 614.419  | L38712    | 8291.62   | 7684.158  | SR6       | 2956.594  | 1948.952  |
| AF204171  | 545.66   | 438.212  | U84508    | 1321.319  | 1249.31   | CY3Cy5    | 2948.352  | 116.063   |
| W96179    | 4276.386 | 4196.112 | NM_01779E | 5183.396  | 3840.965  | NM_01684E | 3040.698  | 3197.442  |
| AW247841  | 4919.053 | 3937.362 | NM_012131 | 2391.297  | 1807.155  | NM_000514 | 1559.224  | 1503.512  |
| BG568198  | 569.972  | 371.181  | S41540    | 1459.33   | 2061.932  | AL137432  | 1887.929  | 2194.904  |
| M76559    | 3052.243 | 2377.026 | CY3Cy5    | 1337.816  | 184.783   | NM_000957 | 1007.832  | 1166.581  |
| U03884    | 212.798  | 195.853  | AI417481  | 410.768   | 451.265   | NM_01904E | 3919.201  | 4380.49   |
| U11058    | 509.473  | 327.491  | BI906766  | 666.757   | 541.628   | NM_00324C | 1726.103  | 3373.558  |
| AI222585  | 780.962  | 667.19   | U60519    | 1254.691  | 1625.088  | NM_016564 | 12227.725 | 17274.727 |
| AA411678  | 11732.34 | 14321.48 | AA282906  | 1927.642  | 2089.036  | AF279656  | 734.107   | 1028.921  |
| T55728    | 8842.707 | 8131.661 | L02870    | 3511.456  | 4431.627  | AK021660  | 996.192   | 1067.576  |
| H20856    | 3021.932 | 2582.642 | BG755482  | 5174.961  | 5736.918  | AB007933  | 8734.472  | 9847.094  |
| N62586    | 6013.727 | 5172.518 | AI480307  | 5217.871  | 4574.016  | NM_00670E | 3983.013  | 4162.981  |
| AA242743  | 3228.448 | 2831.852 | X51420    | 1067.109  | 1658.851  | NM_00139E | 1759.422  | 1347.807  |
| NM_00475E | 6019.878 | 2819.358 | X51757    | 4757.106  | 3071.678  | NM_014474 | 1387.884  | 1360.609  |
| NM_00516E | 9402.512 | 9503.987 | L24038    | 1403.465  | 1512.691  | NM_01624E | 498.582   | 605.96    |
| NM_015361 | 6547.182 | 7525.917 | NM_05305E | 1028.734  | 1067.613  | NM_006181 | 923.376   | 904.59    |
| NM_00431C | 10434.24 | 15434.63 | NM_00618E | 837.26    | 1862.466  | NM_00379E | 16437.818 | 14658.3   |
| M16006    | 161.532  | 193.706  | NM_002751 | 2051.632  | 2747.106  | NM_00297E | 2290.308  | 2554.661  |
| AF035803  | 431.523  | 550.68   | M55593    | 1757.34   | 1494.814  | NM_00443E | 17323.02  | 18087.137 |
| Y08147    | 1507.689 | 2093.903 | NM_078467 | 4329.77   | 4423.238  | NM_00658C | 2101.602  | 2263.43   |
| D00174    | 1073.177 | 1449.602 | SR2       | 42838.699 | 36256.566 | NM_00130E | 1070.591  | 1066.099  |
| AB000520  | 554.332  | 943.721  | SR4       | 13759.189 | 9964.919  | NM_00508E | 858.988   | 898.16    |

|           |          |          |           |           |           |           |           |           |
|-----------|----------|----------|-----------|-----------|-----------|-----------|-----------|-----------|
| NM_016382 | 2064.485 | 736.712  | SR6       | 2227.803  | 1528.928  | D17028    | 25400.615 | 32913.609 |
| AK023117  | 2539.563 | 2989.79  | SR8       | 6839.896  | 14684.54  | NM_013442 | 27139.756 | 30041.277 |
| AL122046  | 1145.64  | 790.503  | SR10      | 25168.006 | 6641.102  | BG611243  | 2259.235  | 2911.97   |
| AF119914  | 187.771  | 239.352  | CY3Cy5    | 731.301   | 121.982   | AK023221  | 4642.146  | 4118.328  |
| NM_000855 | 1088.489 | 1032.784 | NM_016848 | 4093.922  | 4289.8    | NM_003664 | 2694.398  | 1551.097  |
| NM_005536 | 8958.883 | 6709.124 | NM_000514 | 3140.088  | 3035.614  | NM_002426 | 1831.969  | 1649.011  |
| NM_002141 | 517.903  | 657.725  | AL137432  | 2099.596  | 1828.541  | AK027182  | 782.472   | 669.181   |
| NM_001804 | 434.949  | 675.682  | NM_000957 | 2584.363  | 2303.804  | J03651    | 2270.456  | 2290.205  |
| NM_003311 | 2576.687 | 2446.145 | NM_019043 | 4952.57   | 4217.945  | U61738    | 2438.255  | 2752.258  |
| NM_003776 | 6233.919 | 8955.892 | NM_003240 | 3188.127  | 3041.588  | AJ132087  | 902.984   | 824.843   |
| NM_007098 | 239.536  | 438.351  | NM_016564 | 24732.313 | 23118.557 | U92818    | 441.706   | 640.647   |
| NM_015719 | 824.276  | 1259.696 | NM_000796 | 334.687   | 375.391   | NM_000442 | 5376.355  | 4802.704  |
| NM_012464 | 209.317  | 274.855  | AF279656  | 913.121   | 932.76    | NM_002934 | 1404.17   | 1564.571  |
| NM_006129 | 1680.938 | 1923.042 | AB007933  | 29816.602 | 28119.184 | AK023011  | 5820.991  | 5766.389  |
| NM_000582 | 1055.043 | 1196.591 | NM_006702 | 5747.18   | 6203.667  | NM_016816 | 1289.194  | 855.434   |
| NM_005593 | 748.509  | 1152.6   | NM_001396 | 5556.647  | 5953.909  | L17325    | 1191.968  | 1534.074  |
| NM_004979 | 682.214  | 316.402  | NM_014474 | 1652.376  | 1835.18   | NM_017716 | 1075.911  | 1127.309  |
| NM_016077 | 2789.787 | 3004.7   | NM_016249 | 894.194   | 1099.532  | M58603    | 8819.675  | 8046.876  |
| AF100756  | 8528.636 | 6560.035 | NM_006181 | 943.631   | 992.316   | NM_003639 | 2844.597  | 2395.66   |
| NM_006825 | 2733.622 | 3019.696 | NM_003796 | 14743.606 | 15978.185 | NM_001549 | 450.818   | 257.313   |
| NM_004862 | 906.543  | 495.825  | NM_002973 | 2035.516  | 2597.997  | NM_000115 | 3314.674  | 3234.688  |
| NM_007150 | 6225.961 | 6107.379 | NM_004436 | 18072.971 | 13458.734 | AF308801  | 4148.61   | 4291.76   |
| NM_006831 | 6076.916 | 6363.403 | NM_006580 | 3480.375  | 2423.353  | NM_007318 | 30553.984 | 30892.246 |
| AL162044  | 7622.398 | 8076.694 | NM_001305 | 2137.71   | 1654.443  | NM_014874 | 1671.987  | 1518.64   |
| AK024004  | 2115.808 | 2100.306 | NM_005082 | 566.199   | 412.839   | NM_005765 | 19139.91  | 21716.992 |
| AK022365  | 580.997  | 745.762  | D17028    | 25100.336 | 17824.443 | NM_002762 | 638.725   | 745.355   |
| BE892273  | 4775.735 | 6243.145 | NM_013442 | 20825.859 | 14933.039 | NM_006324 | 15674.16  | 14343.914 |
| NM_016734 | 1782.768 | 1707.406 | BG611243  | 2323.233  | 1082.943  | NM_005469 | 8442.56   | 9885.601  |
| NM_014393 | 3992.957 | 4501.868 | AK023221  | 3226.152  | 3741.038  | NM_016361 | 1905.865  | 2051.489  |
| NM_004223 | 11961.1  | 14410.74 | NM_003664 | 2093.207  | 3255.555  | NM_003708 | 23059.586 | 23198.326 |
| NM_006813 | 247.564  | 292.229  | NM_002426 | 1585.116  | 1377.646  | NM_014349 | 4642.151  | 4910.923  |
| NM_001355 | 11672.28 | 13521.43 | AK027182  | 925.025   | 978.399   | AB040895  | 544.749   | 571.425   |
| NM_001216 | 299.822  | 482.423  | J03651    | 3051.898  | 3463.211  | NM_018210 | 3078.201  | 3220.269  |
| U63336    | 563.88   | 520.781  | U61738    | 4458.954  | 3955.119  | NM_001096 | 3121.567  | 4152.889  |
| NM_006907 | 906.95   | 1005.055 | AJ132087  | 602.4     | 748.652   | NM_016014 | 5361.008  | 6369.437  |
| NM_002686 | 649.71   | 506.505  | U92818    | 648.241   | 940.089   | NM_017581 | 2150.828  | 2606.701  |
| NM_006267 | 1668.178 | 1335.132 | NM_000442 | 4745.946  | 5291.272  | AA488804  | 10405.337 | 9682.469  |
| NM_002661 | 7957.857 | 5884.027 | NM_002934 | 1791.817  | 1787.662  | NM_006539 | 538.509   | 561.146   |
| NM_001263 | 507.185  | 206.38   | AK023011  | 17041.031 | 18895.17  | NM_001684 | 1330.197  | 1600.707  |
| AK023982  | 1184.083 | 1136.46  | NM_016816 | 1785.914  | 2520.538  | NM_016318 | 5875.425  | 6302.957  |
| AB014533  | 1458.378 | 1976.402 | L17325    | 1273.676  | 1570.649  | NM_013309 | 724.359   | 804.251   |
| M11427    | 68.662   | 486.908  | NM_017716 | 1219.14   | 1328.008  | NM_019891 | 1226.362  | 1255.564  |
| NM_000744 | 408.001  | 496.375  | M58603    | 8625.462  | 7730.662  | AF038186  | 4144.843  | 3127.216  |
| NM_003039 | 1156.668 | 1122.765 | NM_003639 | 2459.022  | 2056.444  | NM_016277 | 4823.3    | 4762.595  |
| NM_014509 | 746.14   | 619.336  | NM_001549 | 396.292   | 655.657   | NM_007247 | 4592.211  | 6415.47   |
| U26662    | 348.72   | 352.465  | NM_000115 | 3179.097  | 2649.838  | NM_006554 | 5205.479  | 7344.841  |
| NM_020372 | 523.631  | 864.843  | AF308801  | 5685.348  | 4661.292  | X99962    | 12022.559 | 13393.177 |
| NM_002635 | 48573.61 | 52289.25 | NM_007318 | 54164.945 | 58408.195 | AL050114  | 676.54    | 471.991   |
| NM_004758 | 4622.612 | 2206.438 | NM_014874 | 1348.905  | 973.944   | AK021492  | 2118.675  | 1612.505  |
| NM_005163 | 8470.952 | 9230.53  | NM_005765 | 15436.813 | 13113.449 | AK023794  | 4042.94   | 4595.23   |
| NM_015361 | 5428.032 | 5557.823 | NM_006324 | 9428.274  | 7836.196  | NM_019885 | 2778.09   | 2631.822  |
| NM_004310 | 8670.374 | 9299.027 | NM_005469 | 7211.975  | 6995.016  | AB033103  | 1473.406  | 1810.715  |
| NM_015537 | 1301.303 | 1147.184 | NM_016361 | 2196.98   | 1575.823  | NM_002907 | 2928.59   | 2016.944  |

|           |          |          |           |           |           |           |           |           |
|-----------|----------|----------|-----------|-----------|-----------|-----------|-----------|-----------|
| NM_01652C | 18064.54 | 11935.5  | NM_00370E | 42294.492 | 45802.949 | AK024098  | 629.082   | 836.889   |
| AB018353  | 3270.816 | 3187.8   | NM_01434E | 5564.667  | 6832.086  | AK001116  | 790.007   | 1615.995  |
| NM_00703E | 6119.392 | 3543.927 | AB040895  | 669.807   | 573.237   | AK022371  | 3433.578  | 3468.896  |
| NM_002617 | 3535.622 | 2783.795 | NM_01821C | 2876.335  | 3519.46   | D42045    | 3370.609  | 2965.146  |
| NM_00331E | 5048.298 | 6101.475 | NM_00109E | 5733.426  | 4852.522  | AB007953  | 1881.849  | 1756.592  |
| AF090907  | 2701.155 | 3024.122 | NM_016014 | 4089.236  | 3651.351  | NM_01400E | 3593.031  | 3002.203  |
| X74794    | 3869.491 | 4457.11  | NM_018327 | 901.794   | 1116.584  | NM_004197 | 3212.916  | 2781.73   |
| AL050298  | 3987.937 | 3325.755 | AA488804  | 9427.972  | 13283.04  | NM_00407E | 1215.669  | 962.604   |
| NM_00707E | 11841.73 | 13728.92 | NM_00653E | 519.313   | 884.721   | NM_00127E | 4828.5    | 4078.434  |
| M20696    | 4037.786 | 3544.804 | NM_001684 | 1713.121  | 1199.926  | NM_01910E | 1805.641  | 1417.562  |
| NM_00291E | 1818.873 | 1352.985 | NM_01631E | 10637.742 | 8551.857  | NM_000294 | 4658.252  | 4071.495  |
| NM_00673E | 3867.928 | 5037.738 | NM_01330E | 1081.385  | 693.79    | AJ272212  | 1130.711  | 1755.823  |
| NM_00364C | 2209.586 | 2526.423 | NM_019891 | 1200.149  | 832.699   | NM_00162E | 12722.926 | 14098.43  |
| NM_014444 | 5470.899 | 5838.047 | AF038186  | 3250.562  | 3290.953  | NM_005677 | 1152.745  | 1888.961  |
| NM_01224E | 8374.646 | 8123.952 | NM_016277 | 4119.928  | 4095.642  | AF229803  | 545.473   | 880.104   |
| NM_01497C | 4642.167 | 4948.934 | NM_007247 | 4662.068  | 3896.138  | AF151810  | 1879.272  | 5382.33   |
| NM_00709E | 236.162  | 414.126  | NM_006554 | 4292.475  | 3329.373  | NM_00213C | 21173.32  | 44143.641 |
| NM_01571E | 705.534  | 1023.015 | X99962    | 9581.031  | 8047.388  | NM_00130E | 783.918   | 964.302   |
| NM_012464 | 525.306  | 623.784  | AL050114  | 423.669   | 469.681   | NM_00508E | 1003.535  | 852.566   |
| NM_00612E | 1700.171 | 1657.652 | AK021492  | 1920.991  | 2041.303  | D17028    | 23480.48  | 21701.734 |
| NM_00058E | 1053.493 | 1031.653 | AK023794  | 10550.939 | 11609.729 | NM_01344E | 29600.436 | 27028.129 |
| NM_00559E | 576.856  | 513.613  | NM_01988E | 2480.028  | 2752.567  | BG611243  | 2054.281  | 2267.799  |
| AJ224741  | 181.171  | 179.29   | AB033103  | 1318.767  | 1631.678  | AI417481  | 341.976   | 358.658   |
| NM_004684 | 400.215  | 357.626  | NM_002907 | 2015.554  | 3406.901  | BI906766  | 2299.317  | 2873.429  |
| BF338709  | 417.948  | 314.32   | AK024098  | 993.231   | 1125.384  | U60519    | 1345.295  | 1235.628  |
| AF204171  | 442.622  | 383.934  | AK001116  | 542.203   | 754.121   | AA282906  | 1135.399  | 1386.627  |
| W96179    | 4331.589 | 2979.74  | AK022371  | 3515.909  | 4818.657  | L02870    | 1824.574  | 1649.385  |
| AW247841  | 5985.239 | 4289.667 | NM_01400E | 3509.042  | 3109.744  | BG755482  | 3358.902  | 3814.419  |
| BG568198  | 557.171  | 388.207  | NM_004197 | 5224.125  | 4191.037  | AI480307  | 4702.82   | 4890.406  |
| M76559    | 5416.249 | 5375.021 | NM_00407E | 1471.197  | 1459.397  | X51420    | 1152.794  | 1196.01   |
| AF043473  | 749.558  | 715.463  | NM_00127E | 3866.336  | 4084.378  | X51757    | 3263.014  | 4361.485  |
| U11058    | 356.067  | 466.317  | NM_01910E | 1817.89   | 1677.768  | L24038    | 1624.081  | 1304.757  |
| AI222585  | 833.591  | 882.149  | NM_000294 | 4330.61   | 4161.93   | NM_05305E | 302.225   | 751.917   |
| AA398427  | 2656.881 | 3134.111 | AJ272212  | 1419.598  | 1374.903  | NM_00618E | 506.542   | 426.472   |
| T55728    | 9213.574 | 8189.952 | NM_00162E | 18773.559 | 18845.063 | NM_002751 | 1341.21   | 1239.339  |
| H20856    | 3124.043 | 2442.968 | NM_005677 | 2340.662  | 1727.901  | M55593    | 1025.354  | 1157.972  |
| N62586    | 5999.96  | 5333.562 | AF229803  | 722.799   | 738.402   | AK001883  | 15850.602 | 16911.072 |
| AA242743  | 3393.953 | 3201.928 | AF151810  | 1753.188  | 647.386   | NM_01462E | 5450.805  | 6117.7    |
| AK022365  | 585.196  | 374.961  | NM_00213C | 26850.482 | 15100.919 | NM_00731E | 50122.613 | 47681.074 |
| BE892273  | 4947.295 | 6594.244 | NM_00130E | 1738.714  | 1647.443  | NM_014874 | 1605.533  | 1544.376  |
| AF026929  | 556.744  | 452.667  | NM_00508E | 801.973   | 728.387   | NM_00576E | 21120.99  | 17892.824 |
| NM_016734 | 584.504  | 398.171  | D17028    | 25347.725 | 29907.914 | NM_00276E | 720.565   | 587.221   |
| AF035803  | 451.701  | 344.674  | NM_01344E | 24264.945 | 29203.447 | NM_006324 | 13924.613 | 10200.173 |
| Y08147    | 1404.946 | 902.122  | BG611243  | 2295.805  | 2087.234  | NM_01684E | 3474.645  | 3916.686  |
| D00174    | 1476.243 | 999.422  | AI417481  | 458.477   | 372.31    | NM_000514 | 1713.427  | 2033.078  |
| AB000520  | 866.818  | 773.471  | BI906766  | 567.9     | 670.607   | AL137432  | 2080.327  | 2529.134  |
| NM_01638E | 2113.466 | 739.381  | U60519    | 1340.002  | 1502.777  | NM_000957 | 1131.496  | 1193.348  |
| AK023117  | 2732.563 | 3626.945 | AA282906  | 1899.926  | 1877.012  | NM_01904E | 4175.512  | 4683.178  |
| AL122046  | 1715.04  | 1422.108 | L02870    | 3114.942  | 4371.603  | NM_00324C | 1421.98   | 1207.574  |
| AF119914  | 190.403  | 342.947  | D28235    | 544.981   | 815.914   | NM_016564 | 13724.738 | 14349.116 |
| NM_00085E | 996.48   | 1381.285 | X51757    | 3677.132  | 2453.157  | AF279656  | 554.877   | 755.576   |
| NM_014817 | 277.148  | 320.792  | L24038    | 1213.367  | 1247.92   | AK021660  | 324.537   | 290.213   |
| NM_00553E | 8648.09  | 6222.978 | NM_05305E | 452.935   | 439.294   | AB007933  | 12839.424 | 13904.001 |

|           |          |          |           |           |           |           |           |           |
|-----------|----------|----------|-----------|-----------|-----------|-----------|-----------|-----------|
| NM_005077 | 1010.697 | 1625.431 | NM_006186 | 648.143   | 514.953   | NM_006702 | 5604.313  | 5308.852  |
| NM_004423 | 3908.832 | 5252.567 | NM_002751 | 2492.264  | 2150.249  | NM_001396 | 1961.956  | 1631.213  |
| NM_001990 | 1717.454 | 1912.583 | M55593    | 1508.988  | 1364.805  | NM_014474 | 1246.2    | 1440.383  |
| NM_002141 | 612.936  | 686.587  | NM_078467 | 3713.544  | 3262.789  | NM_016249 | 921.84    | 590.375   |
| NM_001804 | 397.092  | 398.862  | AK001883  | 17836.199 | 14023.813 | NM_002973 | 2273.394  | 3805.125  |
| NM_003311 | 2972.932 | 3224.118 | NM_014629 | 4392.928  | 2599.584  | NM_004436 | 18365.668 | 19126.322 |
| NM_003776 | 6604.079 | 8272.287 | NM_007318 | 49789.355 | 59415.297 | NM_006580 | 2907.243  | 2514.649  |
| NM_000744 | 370.313  | 629.368  | NM_014874 | 1349.129  | 1131.6    | NM_019891 | 952.99    | 1406.121  |
| NM_003039 | 1334.38  | 1363.805 | NM_005765 | 16226.091 | 20437.998 | AF038186  | 4177.644  | 3316.86   |
| NM_014509 | 741.864  | 1189.537 | NM_002762 | 935.06    | 726.055   | NM_016277 | 4777.854  | 3839.549  |
| U26662    | 455.257  | 322.487  | NM_006324 | 9615.681  | 13383.623 | NM_007247 | 4012.84   | 4237.696  |
| NM_020372 | 408.795  | 600.211  | NM_016848 | 3952.384  | 4586.005  | NM_006554 | 5288.095  | 5251.933  |
| NM_002635 | 49349.02 | 43976.67 | NM_000514 | 2166.095  | 2253.897  | X99962    | 9763.146  | 8264.612  |
| NM_004979 | 719.866  | 378.422  | AL137432  | 1954.013  | 1499.786  | AK023221  | 3258.457  | 3215.062  |
| J04755    | 328.148  | 138.986  | NM_016564 | 31166.635 | 36900.914 | NM_003664 | 2727.001  | 2879.691  |
| NM_005623 | 125.608  | 390.817  | AF279656  | 646.461   | 669.855   | NM_002426 | 2450.21   | 3522.276  |
| NM_016077 | 4170.958 | 3414.151 | AK021660  | 372.747   | 289.773   | AK027182  | 745.74    | 822.857   |
| AB029010  | 191.573  | 264.365  | AB007933  | 30043.105 | 29282.219 | J03651    | 2392.634  | 2080.899  |
| NM_006364 | 279.682  | 289.302  | NM_006702 | 5846.553  | 6310.239  | U61738    | 1762.64   | 1803.572  |
| AF100756  | 10382.52 | 9498.83  | NM_001396 | 5063.772  | 4771.381  | AJ132087  | 769.992   | 763.301   |
| NM_006825 | 3835.431 | 4868.964 | NM_014474 | 2016.516  | 1613.781  | U92818    | 577.086   | 512.656   |
| NM_004862 | 710.785  | 673.287  | NM_016249 | 1109.447  | 1052.753  | NM_000442 | 4930.428  | 3954.404  |
| NM_001661 | 1157.394 | 1157.594 | NM_006181 | 918.222   | 873.246   | NM_002934 | 1738.905  | 1364.965  |
| NM_014563 | 2203.099 | 2377.249 | NM_003796 | 12968.294 | 13423.596 | AK023011  | 8042.656  | 7716.251  |
| NM_020150 | 4947.673 | 6320.695 | NM_002973 | 2286.754  | 2458.99   | NM_016816 | 2046.371  | 1453.621  |
| NM_007150 | 6219.458 | 5745.662 | NM_004436 | 16588.455 | 11698.65  | L17325    | 1356.72   | 1160.767  |
| NM_006831 | 4589.62  | 3939.686 | NM_006580 | 3324.094  | 2336.394  | NM_017716 | 1518.365  | 1365.009  |
| AL162044  | 7051.86  | 7479.591 | NM_019891 | 1148.649  | 1022.614  | M58603    | 8860.308  | 11358.254 |
| AK024004  | 1906.388 | 1926.107 | AF038186  | 3408.957  | 5094.022  | NM_003639 | 2765.024  | 2942.889  |
| NM_006736 | 3628.065 | 3779.538 | NM_016277 | 3984.361  | 4866.622  | NM_000115 | 3227.015  | 3068.544  |
| NM_003640 | 2340.773 | 2018.062 | NM_007247 | 5423.182  | 5962.75   | AF308801  | 4959.19   | 4324.507  |
| NM_014444 | 5726.209 | 6013.088 | NM_006554 | 4525.784  | 5346.961  | AJ272212  | 1104.713  | 1211.917  |
| NM_012248 | 8210.284 | 7832.367 | X99962    | 8580.383  | 10633.313 | NM_001626 | 15268.63  | 14919.437 |
| NM_014970 | 4542.71  | 3856.784 | AK023221  | 3242.051  | 3688.601  | NM_005677 | 1612.105  | 1509.23   |
| NM_014393 | 5145.349 | 4477.283 | NM_003664 | 1729.574  | 2325.523  | AF229803  | 463.143   | 433.474   |
| NM_004223 | 13090.02 | 10317.99 | NM_002426 | 1686.845  | 1931.78   | AF151810  | 764.361   | 1377.626  |
| NM_006813 | 361.297  | 458.991  | AK027182  | 556.275   | 626.651   | NM_002130 | 18055.264 | 28733.871 |
| NM_001355 | 12914.35 | 9211.356 | U61738    | 3483.807  | 3891.563  | NM_005469 | 7384.608  | 7583.528  |
| NM_001216 | 590.668  | 739.555  | AJ132087  | 966.446   | 1444.835  | NM_016361 | 1930.868  | 2035.609  |
| U63336    | 851.605  | 698.364  | U92818    | 700.164   | 734.427   | NM_003708 | 29769.115 | 35366.566 |
| NM_006907 | 1172.992 | 1003.624 | NM_000442 | 6198.119  | 11826.928 | NM_014349 | 5369.715  | 6073.88   |
| NM_002686 | 798.403  | 1194.355 | NM_002934 | 2066.665  | 2054.539  | AB040895  | 463.103   | 742.325   |
| NM_006267 | 2189.226 | 2409.791 | AK023011  | 18789.283 | 21096.572 | NM_018210 | 2902.535  | 3465.207  |
| AK023982  | 1635.49  | 1545.254 | NM_016816 | 1478.222  | 2304.933  | NM_001096 | 5156.896  | 5971.491  |
| NM_018466 | 4377.601 | 3841.948 | L17325    | 1058.792  | 1116.087  | NM_016014 | 6056.657  | 5980.617  |
| AB014533  | 1675.641 | 2023.224 | NM_017716 | 1364.054  | 1187.366  | NM_018327 | 422.977   | 498.528   |
| AK022097  | 1426.79  | 1412.203 | M58603    | 8103.022  | 8727.615  | NM_017581 | 2488.554  | 2886.934  |
| NM_002166 | 20477.8  | 22567.31 | NM_003639 | 2541.784  | 2925.078  | AA488804  | 12882.399 | 9807.543  |
| NM_004660 | 10031.8  | 9487.481 | NM_001549 | 344.998   | 471.426   | NM_006539 | 659.86    | 570.998   |
| NM_006165 | 1699.703 | 2217.041 | NM_000115 | 2924.083  | 2857.814  | NM_001684 | 1512.131  | 1843.46   |
| NM_016011 | 4203.39  | 4110.998 | AF308801  | 4916.497  | 4699.426  | AB028977  | 293.852   | 480.281   |
| AL035307  | 3366.25  | 3507.205 | AJ272212  | 1481.001  | 1448.719  | NM_016318 | 6348.627  | 7742.28   |
| AK023772  | 955.799  | 540.235  | NM_001626 | 17552.523 | 16936.545 | NM_013309 | 1069.722  | 1404.337  |

|           |          |          |           |           |           |           |           |           |
|-----------|----------|----------|-----------|-----------|-----------|-----------|-----------|-----------|
| NM_012234 | 4852.85  | 3936.828 | NM_005677 | 1693.907  | 1764.331  | NM_078467 | 2830.854  | 2914.875  |
| NM_015361 | 6125.612 | 4590.563 | AF229803  | 600.167   | 353.219   | AK001883  | 13898.489 | 11618.029 |
| NM_004310 | 10023.78 | 8090.209 | AF151810  | 1797.303  | 887.076   | NM_014629 | 4577.112  | 4748.615  |
| NM_015537 | 1182.274 | 951.502  | NM_002130 | 28122.305 | 21753.115 | AL050114  | 510.635   | 543.45    |
| NM_016520 | 20160.11 | 15401.75 | NM_005469 | 7052.515  | 7421.764  | AK021492  | 2459.14   | 2531.322  |
| AB018353  | 4770.204 | 5044.496 | NM_016361 | 2133.06   | 1833.487  | AK023794  | 5545.323  | 5962.938  |
| NM_002617 | 3925.363 | 3454.419 | NM_003708 | 36656.801 | 36247.18  | NM_019885 | 3265.337  | 3371.72   |
| NM_003313 | 6034.075 | 8392.672 | NM_014349 | 5868.112  | 6349.614  | AB033103  | 1311.279  | 1334.203  |
| AF090907  | 2741.148 | 3622.193 | AB040895  | 527.403   | 558.345   | NM_002907 | 3676.136  | 2371.115  |
| NM_007079 | 12681.73 | 14673.26 | NM_018210 | 2351.195  | 1944.638  | AK024098  | 632.134   | 773.172   |
| M20696    | 4113.013 | 4134.333 | NM_001096 | 3844.77   | 3272.665  | AK022371  | 4401.429  | 4170.356  |
| NM_002915 | 1389.877 | 1180.685 | NM_016014 | 6001.817  | 6022.601  | D42045    | 3745.848  | 3441.366  |
| AK026015  | 226.431  | 448.424  | NM_018327 | 789.902   | 1263.898  | AB007953  | 2558.746  | 1914.733  |
| NM_005203 | 184.255  | 206.337  | NM_017581 | 2784.143  | 2120.378  | NM_014002 | 4437.775  | 3577.143  |
| NM_006566 | 3698.335 | 1703.773 | AA488804  | 7838.85   | 10173.682 | NM_004197 | 4480.177  | 4027.919  |
| AK026154  | 4074.434 | 4706.064 | NM_006539 | 467.902   | 626.923   | NM_004073 | 1085.182  | 975.075   |
| AL117546  | 7774.496 | 8007.331 | NM_001684 | 1836.911  | 1341.041  | NM_001278 | 5386.241  | 6628.342  |
| AK027073  | 574.855  | 615.171  | NM_000808 | 379.566   | 454.238   | NM_019105 | 2328.316  | 4223.913  |
| NM_000384 | 910.721  | 696.036  | NM_016318 | 11385.921 | 13640.465 | NM_000294 | 4989.977  | 4074.908  |
| AL157482  | 1842.052 | 1170.89  | NM_013309 | 1122.372  | 804.662   | NM_016249 | 780.391   | 822.689   |
| NM_003603 | 477.705  | 377.13   | NM_078467 | 3472.398  | 3635.909  | NM_006181 | 888.176   | 1145.64   |
| NM_005428 | 6656.082 | 5636.9   | AK001883  | 16239.369 | 16146.971 | NM_003796 | 17204.475 | 16616.082 |
| NM_017974 | 1316.505 | 1112.703 | NM_014629 | 4430.876  | 3601.353  | NM_002973 | 2269.596  | 3467.776  |
| NM_003979 | 338.536  | 342.374  | AL050114  | 510.11    | 730.93    | NM_004436 | 16119.194 | 20175.115 |
| X14677    | 481.653  | 416.165  | AK021492  | 2124.205  | 1995.703  | NM_006580 | 2056.511  | 2636.746  |
| NM_005863 | 3432.206 | 2870.705 | AK023794  | 12301.825 | 13782.207 | NM_001305 | 749.593   | 857.032   |
| U17077    | 916.934  | 1012.997 | NM_019885 | 2783.945  | 2505.948  | NM_005082 | 717.456   | 857.132   |
| NM_000915 | 2865.435 | 3417.778 | AB033103  | 1602.479  | 1752.847  | D17028    | 22292.691 | 28928.322 |
| NM_002344 | 470.856  | 551.352  | NM_002907 | 2262.698  | 3300.634  | NM_013442 | 26616.227 | 31711.01  |
| AK024475  | 1166.645 | 2088.852 | AK024098  | 1089.721  | 1377.262  | BG611243  | 1805.969  | 2686.57   |
| AJ278865  | 621.007  | 605.71   | AK001116  | 557.243   | 729.77    | AI417481  | 2342.037  | 4518.07   |
| NM_014433 | 676.291  | 545.316  | AK022371  | 5005.256  | 10327.789 | BI906766  | 2090.672  | 2132.301  |
| NM_002062 | 3214.834 | 3404.722 | D42045    | 3509.553  | 4338.083  | U60519    | 1335.708  | 1263.235  |
| NM_014394 | 31680.97 | 31160.1  | AB007953  | 1485.585  | 2403.976  | AA282906  | 841.311   | 1025.25   |
| NM_005243 | 13661.5  | 15303.89 | NM_014002 | 3797.207  | 3540.939  | L02870    | 1987.033  | 1959.695  |
| NM_006218 | 2211.081 | 2987.825 | NM_004197 | 5957.085  | 5153.312  | BG755482  | 3650.937  | 3409.287  |
| NM_018140 | 4225.468 | 4835.699 | NM_004073 | 1569.811  | 2084.41   | AI480307  | 5799.398  | 5473.427  |
| NM_016948 | 3778.842 | 3058.51  | NM_001278 | 3522.282  | 4339.92   | X51420    | 1223.117  | 1403.364  |
| NM_000142 | 1857.654 | 2402.337 | NM_019105 | 2011.973  | 2321.01   | D28235    | 1386.097  | 1171.142  |
| AF272372  | 21579.46 | 21939.58 | NM_000294 | 4221.583  | 4176.656  | X51757    | 3658.101  | 5240.529  |
| AK097045  | 3095.869 | 3185.347 | NM_016249 | 1142.558  | 1112.726  | L24038    | 1644.421  | 1256.123  |
| AB014548  | 5132.671 | 4988.563 | NM_006181 | 708.146   | 739.766   | NM_053056 | 583.093   | 645.718   |
| NM_018256 | 5186.201 | 2235.412 | NM_003796 | 12808.149 | 12920.426 | NM_006186 | 370.417   | 628.977   |
| AK025150  | 498.018  | 364.217  | NM_002973 | 2049.146  | 2901.975  | NM_002751 | 981.414   | 1595.806  |
| AK024611  | 10540.41 | 7124.746 | NM_004436 | 16102.318 | 14829.386 | M55593    | 1102.39   | 743.254   |
| BC010420  | 6778.532 | 3721.204 | NM_006580 | 3171.4    | 3495.532  | NM_017716 | 1648.288  | 2058.958  |
| NM_012280 | 10939.48 | 8522.483 | NM_001305 | 1731.585  | 1825.323  | M58603    | 9744.239  | 12642.273 |
| NM_018172 | 4591.04  | 4172.792 | NM_005082 | 642.36    | 672.209   | NM_003639 | 2904.463  | 3985.9    |
| U03886    | 323.828  | 411.83   | D17028    | 23144.176 | 24213.336 | NM_001549 | 612.121   | 609.147   |
| AK022040  | 2209.067 | 1998.864 | NM_013442 | 22534.805 | 22551.727 | NM_000115 | 3977.562  | 4458.941  |
| AK022722  | 1397.552 | 1168.643 | BG611243  | 2050.902  | 1780.192  | AF308801  | 4749.961  | 7209.006  |
| NM_003591 | 12749.44 | 12624.92 | BI906766  | 568.162   | 534.157   | NM_007318 | 55647.906 | 49954.969 |
| AL080111  | 8535.317 | 12478.23 | U60519    | 1227.972  | 1372.537  | NM_014874 | 1595.416  | 2049.841  |



|           |          |          |           |           |           |           |           |           |
|-----------|----------|----------|-----------|-----------|-----------|-----------|-----------|-----------|
| NM_003550 | 2165.008 | 2825.41  | AA282906  | 1596.39   | 1027.49   | NM_005765 | 22696.014 | 27909.99  |
| NM_014642 | 3874.491 | 4433.965 | L02870    | 2415.68   | 2220.506  | NM_002762 | 643.352   | 1021.125  |
| AB037821  | 352.867  | 336.306  | BG755482  | 5308.561  | 5314.305  | NM_006324 | 17811.383 | 20546.109 |
| NM_003829 | 2815.372 | 2122.772 | AI480307  | 6398.099  | 7083.58   | NM_016848 | 3745.534  | 5076.074  |
| AL110168  | 1589.727 | 1031.132 | D28235    | 370.497   | 491.637   | NM_000514 | 1798.6    | 2384.744  |
| NM_014522 | 406.462  | 495.456  | X51757    | 5036.051  | 3833.051  | AL137432  | 1572.334  | 2268.067  |
| NM_002831 | 6114.504 | 6190.738 | L24038    | 1168.876  | 1447.331  | NM_000957 | 1115.796  | 1337.41   |
| AL833409  | 877.125  | 1157.644 | NM_053056 | 569.181   | 583.896   | NM_019043 | 4849.489  | 5305.741  |
| NM_015966 | 842.196  | 826.145  | NM_006186 | 650.166   | 708.262   | NM_003240 | 1361.112  | 1807.518  |
| NM_016147 | 5437.844 | 5165.936 | NM_002751 | 2456.327  | 2655.02   | NM_016564 | 15243.693 | 17403.949 |
| NM_002833 | 1908.978 | 2689.979 | M55593    | 1375.068  | 1282.478  | AF279656  | 579.922   | 642.931   |
| NM_016592 | 692.179  | 629.82   | NM_017716 | 1512.192  | 2003.814  | AK021660  | 499.564   | 930.684   |
| NM_018326 | 8216.522 | 5569.986 | M58603    | 8582.389  | 7780.011  | AB007933  | 11197.777 | 12745.319 |
| NM_001868 | 419.042  | 353.915  | NM_003639 | 2676.249  | 2034.298  | NM_006702 | 6551.426  | 5029.514  |
| NM_014773 | 709.94   | 353.583  | NM_001549 | 480.789   | 932.655   | NM_001396 | 2443.37   | 1500.039  |
| NM_005606 | 6085.451 | 5616.604 | NM_000115 | 2756.939  | 2624.062  | NM_006539 | 537.645   | 820.483   |
| AF134707  | 1545.085 | 1324.15  | AF308801  | 4459.098  | 4974.435  | NM_001684 | 1399.346  | 2155.067  |
| NM_001223 | 327.3    | 667.88   | NM_007318 | 54289.262 | 58740.781 | NM_016318 | 5474.312  | 7137.168  |
| BE730629  | 365.71   | 797.413  | NM_014874 | 1561.483  | 1842.223  | NM_013309 | 674.605   | 1037.188  |
| AK027167  | 1172.349 | 1261.182 | NM_005765 | 15468.279 | 15784.577 | NM_019891 | 1004.572  | 1298.99   |
| AK025265  | 2761.696 | 2953.841 | NM_002762 | 762.409   | 724.059   | AF038186  | 3708.317  | 3989.168  |
| NM_013279 | 489.922  | 1001.082 | NM_006324 | 9425.13   | 10914.192 | NM_016277 | 4925.573  | 5684.016  |
| NM_018652 | 4441.942 | 4588.212 | NM_016848 | 4895.186  | 4529.317  | NM_007247 | 4185.288  | 5441.619  |
| AB011166  | 5652.771 | 2956.88  | NM_000514 | 2815.663  | 2359.598  | NM_006554 | 6515.99   | 8304.155  |
| AK024460  | 5549.899 | 4467.235 | AL137432  | 2040.715  | 1440.031  | X99962    | 14089.362 | 15230.303 |
| NM_006606 | 2889.62  | 3008.862 | NM_000957 | 2242.528  | 1794.943  | AK023221  | 5276.254  | 6792.866  |
| S78570    | 510.434  | 416.219  | NM_019043 | 4926.69   | 3131.84   | NM_003664 | 3246.37   | 3365.475  |
| AK022814  | 148.717  | 173.781  | AF279656  | 1091.242  | 1013.074  | NM_002426 | 2032.705  | 2352.71   |
| NM_006442 | 17170.12 | 10315.61 | AK021660  | 456.834   | 390.731   | AK027182  | 1049.581  | 1215.169  |
| NM_003902 | 5571.307 | 3638.589 | AB007933  | 29448.42  | 38126.008 | J03651    | 2390.834  | 3822.044  |
| NM_016427 | 4222.468 | 3692.78  | NM_006702 | 5132.289  | 6702.86   | U61738    | 2438.342  | 3747.645  |
| NM_006468 | 40.323   | 148.189  | NM_001396 | 4859.539  | 4765.97   | AJ132087  | 988.769   | 1083.524  |
| NM_006706 | 847.756  | 489.817  | NM_014474 | 1988.663  | 1611.732  | U92818    | 771.46    | 900.978   |
| U80741    | 3853.895 | 3857.531 | NM_006539 | 517.751   | 453.45    | NM_000442 | 6483.52   | 5912.938  |
| NM_014497 | 1678.424 | 1171.925 | NM_001684 | 1909.289  | 1291.061  | NM_002934 | 1983.978  | 2183.134  |
| AL133598  | 7983.97  | 7140.498 | NM_000808 | 381.953   | 416.72    | AK023011  | 8647.606  | 9361.741  |
| NM_015511 | 3515.366 | 4549.106 | NM_016318 | 10061.263 | 9247.501  | NM_016816 | 2815.813  | 2647.533  |
| NM_006625 | 4204.358 | 3749.251 | NM_013309 | 958.365   | 688.91    | NM_014002 | 4153.29   | 4059.421  |
| NM_004891 | 19911.98 | 14237.41 | NM_019891 | 1122.135  | 690.035   | NM_004197 | 4089.239  | 4090.69   |
| AF086538  | 450.7    | 317.874  | AF038186  | 2679.526  | 2288.805  | NM_004073 | 1090.116  | 1072.578  |
| NM_003935 | 405.587  | 387.112  | NM_016277 | 4050.704  | 4338.907  | NM_001278 | 4743.653  | 4335.183  |
| NM_002879 | 651.729  | 766.657  | NM_007247 | 4240.301  | 4581.616  | NM_019105 | 1959.014  | 2007.513  |
| NM_004641 | 79.473   | 413.405  | NM_006554 | 3692.148  | 3313.845  | NM_000294 | 4577.54   | 5141.821  |
| NM_003206 | 576.023  | 399.564  | X99962    | 9211.978  | 8551.556  | AJ272212  | 1391.33   | 1436.708  |
| AF075068  | 17086.14 | 13783.89 | AK023221  | 3639.49   | 3038.455  | NM_001626 | 15906.604 | 17287.893 |
| AK025785  | 159.146  | 356.225  | NM_003664 | 2668.018  | 3253.292  | NM_005677 | 1705.118  | 2145.981  |
| NM_000738 | 495.415  | 626.707  | NM_002426 | 1957.528  | 1904.862  | AF151810  | 993.022   | 1679.338  |
| AF086474  | 770.771  | 1094.69  | AK027182  | 555.707   | 610.868   | NM_002130 | 19731.986 | 39469.883 |
| AF086529  | 536.556  | 491.921  | J03651    | 3337.961  | 3401.492  | NM_005469 | 8342.438  | 10896.027 |
| AF086023  | 1593.56  | 1268.54  | U61738    | 4839.941  | 4693.021  | NM_016361 | 2424.091  | 2733.294  |
| AK024366  | 559.347  | 572.497  | AJ132087  | 681.549   | 839.549   | NM_003708 | 25775.119 | 30866.73  |
| AK022171  | 259.001  | 336.059  | U92818    | 842.106   | 847.398   | NM_014349 | 6034.712  | 7527.515  |
| NM_018354 | 1316.585 | 1461.117 | NM_000442 | 5058.063  | 5748.95   | AB040895  | 716.661   | 1080.379  |

|           |          |          |           |           |           |           |           |           |
|-----------|----------|----------|-----------|-----------|-----------|-----------|-----------|-----------|
| U84517    | 620.795  | 528.79   | NM_002934 | 2081.472  | 2141.515  | NM_004820 | 1506.299  | 1734.264  |
| AK022379  | 1074.102 | 1166.016 | AK023011  | 17883.322 | 17538.799 | NM_018210 | 4183.267  | 7169.416  |
| AK025231  | 3001.357 | 4052.397 | NM_016816 | 1538.625  | 2000.643  | NM_001096 | 7200.055  | 12814.441 |
| AK025338  | 689.877  | 1241.615 | L17325    | 1737.341  | 1536.374  | NM_016014 | 7393.876  | 11243.304 |
| AK023296  | 205.916  | 218.329  | NM_014002 | 4073.92   | 3072.022  | NM_000196 | 895.684   | 2013.738  |
| AK001439  | 339.568  | 579.589  | NM_004197 | 6782.46   | 5517.554  | NM_017581 | 3301.811  | 3434.823  |
| AK001115  | 668.262  | 639.971  | NM_004073 | 1601.406  | 1841.108  | L29496    | 542.882   | 594.92    |
| AL133050  | 580.579  | 443.557  | NM_001278 | 4576.342  | 5261.591  | NM_000928 | 336.151   | 520.084   |
| AK027233  | 268.052  | 474.018  | NM_019105 | 1967.206  | 1906.788  | NM_007002 | 13492.253 | 10626.256 |
| AK023343  | 431.736  | 386.431  | NM_000294 | 4361.557  | 4826.969  | NM_003255 | 4451.186  | 4816.447  |
| AK000246  | 30.939   | 167.39   | AJ272212  | 1578.019  | 1569.996  | NM_014155 | 2920.053  | 2556.216  |
| AK023292  | 317.996  | 497.146  | NM_001626 | 24132.018 | 23264.33  | AK026331  | 7433.456  | 8024.419  |
| AK023948  | 548.387  | 403.897  | NM_005677 | 1728.018  | 1610.691  | M30773    | 3159.567  | 3128.957  |
| AK022452  | 598.025  | 742.791  | AF151810  | 1556.99   | 770.538   | NM_016338 | 7622.743  | 11363.953 |
| AF085881  | 3974.49  | 4489.959 | NM_002130 | 25516.523 | 13711.863 | AF113699  | 10666.931 | 10219.421 |
| AK022737  | 9130.771 | 11227.26 | NM_005469 | 6130.649  | 4571.24   | AL050114  | 851.394   | 950.592   |
| NM_003472 | 39421.35 | 48057.88 | NM_016361 | 2619.27   | 2353.071  | AK021492  | 3187.23   | 2676.702  |
| U92980    | 2937.328 | 3002.821 | NM_003708 | 43654.953 | 34361.719 | AK023794  | 4152.082  | 4972.098  |
| AF133658  | 456.715  | 487.057  | NM_014349 | 6290.501  | 6155.946  | NM_019885 | 4101.848  | 4256.175  |
| AB048287  | 1547.493 | 1704.9   | AB040895  | 676.234   | 716.701   | NM_005328 | 733.443   | 584.502   |
| Y11159    | 867.145  | 719.951  | NM_018210 | 3556.812  | 3568.168  | AB033103  | 1385.988  | 1750.68   |
| AB020648  | 3545.936 | 3987.514 | NM_001096 | 6270.617  | 6421.197  | NM_002907 | 4286.247  | 3093.594  |
| AK025798  | 15102.67 | 13032.05 | NM_016014 | 7095.792  | 9729.321  | AK024098  | 929.71    | 1485.83   |
| AF086173  | 387.928  | 225.969  | NM_018327 | 772.537   | 1295.418  | AK001116  | 396.755   | 621.328   |
| AK025164  | 735.924  | 458.955  | NM_017581 | 2666.954  | 2090.809  | AK022371  | 4920.373  | 4657.249  |
| NM_018366 | 3788.746 | 3576.742 | AA488804  | 9230.023  | 10164.837 | D42045    | 6044.413  | 5484.771  |
| AB040290  | 1084.257 | 817.773  | L29496    | 505.766   | 348.698   | NM_017820 | 656.837   | 587.266   |
| NM_019848 | 3805.183 | 4003.262 | NM_000928 | 408.044   | 302.612   | NM_001849 | 1216.448  | 933.804   |
| AL359056  | 730.191  | 772.512  | NM_007002 | 10604.492 | 9576.126  | NM_003734 | 5435.776  | 5153.527  |
| AK021497  | 652.339  | 652.549  | NM_012121 | 1322.779  | 1335.336  | NM_014935 | 4988.573  | 4925.678  |
| AF124367  | 767.674  | 1086.489 | NM_003255 | 4476.296  | 4338.491  | X99660    | 7570.435  | 7742.736  |
| AK000798  | 365.113  | 450.658  | NM_014155 | 2676.713  | 3231.036  | X03635    | 1802.652  | 1785.218  |
| AK025615  | 4535.745 | 3583.732 | AK026331  | 15153.344 | 16556.883 | X97671    | 761.301   | 802.023   |
| AK026947  | 2558.802 | 3097.679 | M30773    | 2262.702  | 3035.595  | NM_004351 | 1742.181  | 2104.135  |
| U84526    | 13848.44 | 13514.82 | NM_016338 | 10815.602 | 8621.037  | NM_004236 | 10180.89  | 9199.916  |
| L23401    | 510.508  | 716.723  | AF113699  | 17444.609 | 16829.424 | NM_020533 | 5791.775  | 6029.242  |
| NM_018090 | 10648.13 | 14442.62 | AK001883  | 16640.941 | 14624.532 | NM_001894 | 5999.956  | 5696.051  |
| AK022728  | 9981.953 | 12191.45 | NM_014629 | 5068.774  | 3572.331  | NM_000614 | 950.009   | 776.502   |
| AL109678  | 1331.981 | 1764.83  | AL050114  | 516.42    | 800.228   | AK022884  | 1437.493  | 1115.442  |
| AL137524  | 559.65   | 645.259  | AK021492  | 2869.517  | 2865.032  | AF305072  | 550.155   | 522.116   |
| AF218008  | 3204.808 | 3513.659 | AK023794  | 15824.811 | 15445.01  | NM_006620 | 11427.562 | 7337.56   |
| M22404    | 1636.397 | 1571.284 | NM_019885 | 3365.155  | 3002.823  | NM_001397 | 1725.113  | 2149.075  |
| AF052115  | 885.833  | 689.404  | AB033103  | 1945.822  | 2245.543  | NM_005543 | 866.596   | 997.484   |
| NM_014019 | 6033.994 | 5781.426 | NM_002907 | 2352.921  | 3679.574  | Y08770    | 679.727   | 759.233   |
| Z70711    | 571.5    | 207.661  | AK024098  | 1467.589  | 1425.391  | NM_004772 | 4981.419  | 2579.629  |
| AF116653  | 584.591  | 484.475  | AK001116  | 591.421   | 674.735   | NM_003714 | 4275.984  | 3796.638  |
| AK025323  | 715.796  | 836.265  | AK022371  | 3236.086  | 4002.175  | AF024540  | 1922.278  | 1002.746  |
| NM_013326 | 1837.23  | 1803.531 | D42045    | 3632.351  | 3872.925  | NM_002189 | 1443.54   | 1289.22   |
| BC037322  | 1876.785 | 1183.448 | AB007953  | 1749.999  | 2591.254  | U42977    | 5462.825  | 4028.999  |
| Y12022    | 1983.002 | 2026.562 | NM_017820 | 1821.491  | 1370.578  | NM_002881 | 7888.268  | 6678.734  |
| AK001375  | 1893.771 | 2593.291 | NM_001849 | 1732.876  | 1569.643  | NM_003666 | 1619.266  | 1326.438  |
| AL137559  | 1950.403 | 2436.999 | NM_003734 | 10191.62  | 8256.405  | NM_003288 | 3740.083  | 3752.543  |
| AF026944  | 3366.604 | 3254.091 | NM_014935 | 11359.974 | 10702.657 | NM_018242 | 410.187   | 429.942   |

|           |          |          |           |           |           |           |           |           |
|-----------|----------|----------|-----------|-----------|-----------|-----------|-----------|-----------|
| AK021493  | 3483.377 | 3739.287 | X99660    | 12967.287 | 11742.618 | M83822    | 3495.526  | 2356.755  |
| NM_006161 | 1325.41  | 991.138  | X03635    | 3450.289  | 3727.632  | NM_018434 | 9127.229  | 12683.726 |
| NM_006192 | 523.027  | 366.37   | NM_004351 | 4416.851  | 3379.802  | NM_003914 | 2216.027  | 1284.459  |
| NM_006204 | 619.871  | 647.947  | NM_004236 | 8204.453  | 8256.621  | NM_020423 | 2021.282  | 1675.717  |
| NM_012155 | 5281.051 | 6513.978 | AB011093  | 4963.48   | 4760.755  | AK021437  | 881.743   | 900.183   |
| AF144700  | 2212.524 | 2146.706 | NM_020533 | 8399.193  | 8153.112  | NM_003831 | 4218.318  | 3861.763  |
| NM_002595 | 218.371  | 325.843  | NM_001894 | 6949.534  | 6181.91   | NM_001755 | 402.377   | 597.988   |
| NM_004105 | 5958.738 | 7066.48  | NM_000614 | 782.324   | 879.393   | AB007965  | 3839.216  | 4295.375  |
| AB046825  | 3117.124 | 4665.281 | AK022884  | 1524.903  | 1911.194  | NM_017645 | 1442.432  | 1265.716  |
| X64975    | 321.132  | 324.494  | AF305072  | 713.487   | 1201.714  | NM_000066 | 393.124   | 522.297   |
| AF064876  | 255.972  | 324.782  | NM_006620 | 8561.52   | 17936.037 | NM_001196 | 13347.313 | 13105.099 |
| AL050297  | 2116.521 | 4072.166 | NM_001397 | 1421.068  | 1251.735  | NM_016005 | 1500.397  | 1430.933  |
| AK026966  | 2696.849 | 1821.265 | NM_005543 | 965.835   | 782.444   | NM_017744 | 858.405   | 620.639   |
| AF147398  | 410.142  | 424.152  | Y08770    | 766.137   | 793.999   | NM_001924 | 3884.901  | 3027.85   |
| AF185573  | 426.334  | 325.519  | NM_004772 | 5179.59   | 6032.082  | NM_017705 | 3032.116  | 2592.865  |
| AJ009817  | 373.934  | 403.718  | NM_003714 | 5736.81   | 8749.022  | NM_001796 | 981.107   | 430.586   |
| AK025268  | 1731.387 | 1722.619 | NM_004004 | 542.385   | 779.576   | AL133566  | 849.589   | 710.217   |
| AL833005  | 3744.123 | 3064.637 | AF024540  | 1645.098  | 990.67    | M36118    | 2830.836  | 2276.684  |
| L43366    | 1381.72  | 1705.984 | NM_002185 | 1606.947  | 1316.663  | NM_003395 | 4847.702  | 4583.577  |
| AK026124  | 3949.977 | 5430.651 | U42977    | 3919.303  | 4083.319  | NM_002630 | 1043.019  | 600.71    |
| NM_015505 | 5717.673 | 4296.229 | NM_002881 | 6661.725  | 6696.139  | AJ295149  | 17948.307 | 16611.078 |
| AL110157  | 3498.787 | 4353.922 | NM_003666 | 3249.138  | 2814.021  | NM_013435 | 5616.69   | 4612.3    |
| L38712    | 4147.517 | 4897.844 | NM_003285 | 3740.457  | 3267.859  | NM_014685 | 4538.988  | 3944.917  |
| U84508    | 679.182  | 631.407  | NM_018242 | 497.361   | 505.837   | AB037784  | 952.83    | 901.214   |
| NM_017793 | 5207.691 | 6009.912 | M83822    | 2918.013  | 3218.829  | AL359623  | 2031.388  | 1479.513  |
| NM_012131 | 2504.64  | 3484.521 | NM_018434 | 11063.96  | 7095.461  | AK026920  | 2638.828  | 2077.187  |
| S41540    | 1384.608 | 1050.335 | NM_003914 | 1147.762  | 1875.025  | AL137255  | 1268.973  | 1072.001  |
| CY3Cy5    | 2015.82  | 157.422  | NM_020423 | 1166.868  | 1573.605  | NM_003370 | 8347.123  | 8441.888  |
| AI417481  | 459.674  | 354.462  | AK021437  | 1757.462  | 1448.454  | AB037715  | 1552.457  | 1071.509  |
| BI906766  | 758.783  | 893.669  | NM_003831 | 3717.917  | 3508.356  | AF250924  | 7106.526  | 3802.37   |
| U60519    | 1584.911 | 1397.577 | NM_001755 | 575.044   | 377.121   | D86979    | 1946.518  | 1462.158  |
| AA282906  | 716.391  | 619.573  | AB007965  | 7456.778  | 5956.69   | NM_018212 | 321.999   | 254.412   |
| L02870    | 856.147  | 819.054  | NM_017645 | 963.189   | 715.963   | AB023230  | 387.238   | 322.595   |
| BG755482  | 6096.73  | 5787.248 | NM_000066 | 793.494   | 573.546   | AK022889  | 6943.461  | 6678.701  |
| AI480307  | 5125.299 | 4312.592 | NM_001196 | 14161.73  | 11430.871 | X52357    | 27384.385 | 24086.023 |
| X51420    | 1164.457 | 1160.754 | NM_016005 | 1669.103  | 1850.559  | AF211891  | 1408.267  | 1568.447  |
| X51757    | 3195.054 | 2820.865 | NM_017744 | 1127.486  | 857.587   | NM_005641 | 2584.213  | 2062.493  |
| L24038    | 1662.511 | 1587.455 | NM_001924 | 3337.503  | 3881.477  | NM_001665 | 1543.428  | 1482.621  |
| NM_053055 | 405.49   | 275.887  | NM_017705 | 3061.49   | 3888.119  | AK025362  | 1121.328  | 1021.146  |
| NM_006185 | 675.544  | 629.013  | NM_001796 | 3859.269  | 4085.854  | AK021776  | 4443.674  | 3257.157  |
| NM_002751 | 1156.737 | 1975.553 | AB040880  | 813.091   | 1099.516  | AK026042  | 1261.999  | 1250.417  |
| SR2       | 53381.12 | 37320.37 | NM_009587 | 7814.97   | 8354.343  | NM_014233 | 11912.376 | 10791.214 |
| SR4       | 12638.49 | 7067.337 | AL133566  | 833.841   | 669.827   | NM_002137 | 57872.898 | 53916.141 |
| SR6       | 1967.442 | 946.61   | M36118    | 5076.301  | 4250.831  | NM_002911 | 1704.913  | 1399.962  |
| SR8       | 6757.992 | 10558.31 | NM_003395 | 12346.899 | 10735.895 | U94386    | 1183.68   | 649.29    |
| SR10      | 25123.15 | 5335.034 | NM_002630 | 708.158   | 884.214   | NM_016000 | 5353.031  | 4445.232  |
| CY3Cy5    | 1243.016 | 130.427  | AJ295149  | 40883.859 | 33993.887 | NM_006372 | 4627.349  | 4143.361  |
| NM_016845 | 1976.123 | 2007.64  | NM_013435 | 5864.609  | 6263.713  | NM_014150 | 1791.296  | 1334.558  |
| NM_000514 | 1807.129 | 1567.063 | NM_014685 | 6200.765  | 4940.992  | NM_006805 | 12481.145 | 10895.341 |
| AL137432  | 1678.679 | 1846.168 | AB037784  | 474.7     | 594.004   | AF132027  | 6403.449  | 5309.899  |
| NM_000957 | 408.422  | 709.464  | AL359623  | 1651.57   | 1348.107  | NM_004681 | 15952.565 | 8167.208  |
| NM_019043 | 4228.174 | 4567.879 | AK026920  | 2877.741  | 2630.417  | AB033096  | 10017.724 | 5072.236  |
| NM_003240 | 654.751  | 616.661  | AL137255  | 2130.366  | 1840.55   | NM_014885 | 5697.524  | 565.066   |

|           |          |          |           |           |           |           |           |           |
|-----------|----------|----------|-----------|-----------|-----------|-----------|-----------|-----------|
| NM_016564 | 3800.521 | 4268.859 | NM_00337C | 9073.829  | 8481.668  | AF070625  | 1559.592  | 1443.62   |
| AF279656  | 408.808  | 330.322  | AB037715  | 2929.398  | 3149.775  | AL365512  | 2763.02   | 2706.103  |
| AK021660  | 229.441  | 245.112  | AF250924  | 9401.957  | 10044.803 | AK001740  | 3763.338  | 3813.995  |
| AB007933  | 3132.411 | 2113.754 | D86979    | 2969.769  | 2855.265  | AF131793  | 1089.737  | 982.725   |
| NM_006702 | 5612.489 | 3982.398 | AB023230  | 747.204   | 957.214   | NM_00591E | 19522.836 | 15176.272 |
| NM_00139E | 1347.136 | 715.903  | AF018081  | 24773.238 | 27280.752 | NM_005333 | 21825.66  | 18310.531 |
| NM_014474 | 1236.22  | 1200.566 | NM_020202 | 13589.91  | 20413.504 | NM_000767 | 338.549   | 243.161   |
| NM_01624E | 539.451  | 687.768  | AK022889  | 6824.699  | 4594.198  | AK026161  | 2848.46   | 2513.84   |
| NM_00379E | 19293.36 | 27811.03 | X52357    | 38232.359 | 28878.002 | NM_004553 | 27443.469 | 23863.791 |
| NM_00443E | 16853.96 | 20271.46 | AF211891  | 1573.637  | 1034.786  | D63484    | 2568.645  | 1725.891  |
| NM_00658C | 1894.644 | 1400.114 | NM_005641 | 2324.769  | 1975.898  | AK026745  | 5932.147  | 4096.897  |
| NM_00130E | 991.09   | 944.44   | NM_00166E | 1353.838  | 1331.089  | AL157440  | 3538.333  | 2320.969  |
| NM_005082 | 915.428  | 884.606  | AK025362  | 1142.987  | 1338.952  | NM_016423 | 6080.016  | 5609.339  |
| D17028    | 23409.17 | 19443.47 | AK021776  | 4172.926  | 4363.981  | AB040975  | 1652.069  | 1767.039  |
| NM_013442 | 26176.18 | 19332.56 | AK026042  | 1345.989  | 1322.974  | NM_005119 | 7554.146  | 5363.418  |
| BG611243  | 2064.192 | 2057.97  | NM_014233 | 16221.877 | 13110.203 | NM_00316E | 23790.246 | 22792.395 |
| AK023221  | 3901.573 | 3843.604 | NM_002137 | 53555.82  | 46991.629 | AK055844  | 1293.498  | 1062.803  |
| NM_003664 | 2292.168 | 1778.767 | NM_002911 | 1743.83   | 1391.237  | NM_01828E | 10619.168 | 6233.092  |
| NM_00242E | 1498.564 | 1318.266 | U94386    | 589.239   | 653.574   | NM_00314E | 5077.552  | 4818.56   |
| AK027182  | 712.612  | 692.697  | NM_01600C | 11210.134 | 9567.43   | X52342    | 2360.199  | 1209.091  |
| J03651    | 2284.815 | 2445.524 | NM_006372 | 5137.988  | 3401.068  | AB014526  | 982.067   | 959.839   |
| U61738    | 637.49   | 906.936  | NM_01415C | 2022.85   | 1832.064  | NM_01853E | 987.974   | 690.026   |
| AJ132087  | 1065.456 | 903.85   | NM_00680E | 21843.256 | 17369.631 | NM_01334E | 1351.551  | 1031.636  |
| U92818    | 507.225  | 626.326  | AF132027  | 19868.094 | 16764.26  | AF131784  | 1580.275  | 578.137   |
| NM_000442 | 4752.746 | 4013.073 | NM_004681 | 12579.194 | 12762.381 | NM_017851 | 3428.144  | 2724.223  |
| NM_002934 | 1339.827 | 1088.544 | AB033096  | 8385.977  | 8007.288  | NM_01608E | 17792.611 | 16730.619 |
| AK023011  | 4474.707 | 2919.589 | NM_01488E | 1318.279  | 5566.754  | AK025768  | 3366.668  | 3066.985  |
| NM_01681E | 1899.044 | 1046     | NM_00444E | 10671.883 | 12723.308 | AL117502  | 2739.861  | 2362.457  |
| L17325    | 999.079  | 1101.147 | AF070625  | 2850.656  | 2184.229  | AK001846  | 868.069   | 809.565   |
| NM_01771E | 1291.888 | 852.447  | AL365512  | 2657.877  | 2356.494  | AL117454  | 2225.805  | 3123.343  |
| M58603    | 9919.793 | 8030.536 | AK001740  | 6669.087  | 6066.675  | AF272890  | 1873.922  | 2547.377  |
| NM_00363E | 3609.516 | 5194.4   | AF131793  | 1210.323  | 1251.228  | U00684    | 396.722   | 803.24    |
| AF308801  | 5061.402 | 6837.143 | NM_00591E | 21723.563 | 31919.553 | NM_01645E | 17049.541 | 25953.248 |
| NM_00731E | 17485.54 | 19760.71 | J02625    | 9045.972  | 8775.625  | AF086227  | 454.32    | 610.224   |
| NM_014874 | 2718.748 | 2134.022 | Y17175    | 57706.586 | 67024.453 | AK026246  | 1290.658  | 773.94    |
| NM_00576E | 15010.49 | 9535.623 | NM_00454E | 24621.186 | 21468.295 | AF070524  | 570.214   | 590.593   |
| NM_002762 | 274.036  | 183.231  | NM_005333 | 19400.887 | 18515.865 | AF035281  | 2086.675  | 1712.421  |
| NM_006324 | 12426.55 | 9095.146 | AK026161  | 2330.155  | 1869.391  | AK026304  | 967.492   | 902.412   |
| NM_00546E | 7356.691 | 8679.972 | NM_004553 | 23278.59  | 21801.119 | AL133446  | 1139.467  | 888.538   |
| NM_016361 | 2027.407 | 2627.019 | D63484    | 1760.267  | 1854.157  | NM_006553 | 565.395   | 327.203   |
| NM_00370E | 4028.012 | 4672.209 | AK026745  | 4528.193  | 3839.354  | AK024689  | 545.486   | 533.653   |
| NM_01434E | 5628.626 | 5475.086 | AL157440  | 2771.932  | 3019.168  | BC035667  | 826.119   | 649.839   |
| AB040895  | 607.733  | 733.258  | NM_016423 | 8016.676  | 6311.641  | AL049277  | 974.009   | 684.888   |
| NM_01821C | 3639.436 | 4276.291 | AB040975  | 1818.693  | 1614.741  | AL080104  | 364.804   | 476.092   |
| NM_00109E | 7871.573 | 10301.83 | NM_005119 | 8626.36   | 7257.971  | AL117571  | 1392.038  | 1697.186  |
| NM_016014 | 6034.881 | 5546.296 | NM_00316E | 20438.883 | 24281.123 | AK091573  | 1263.766  | 1690.528  |
| NM_018327 | 163.702  | 113.778  | AK055844  | 1155.001  | 938.384   | AF131814  | 2122.451  | 2763.583  |
| NM_017581 | 1653.98  | 1726.283 | NM_01828E | 8740.724  | 13678.195 | AL359600  | 2345.224  | 3413.708  |
| AA488804  | 10558.99 | 6349.299 | NM_00314E | 7417.821  | 5128.479  | BC028617  | 482.61    | 590.63    |
| NM_00653E | 464.977  | 474.874  | X52342    | 1172.428  | 1467.505  | AL117653  | 675.058   | 423.736   |
| NM_001684 | 1345.26  | 2049.284 | NM_003131 | 13625.428 | 15621.808 | AF087999  | 886.412   | 1705.941  |
| NM_00080E | 293.141  | 579.283  | NM_00523E | 4428.989  | 4515.198  | NM_00374C | 2263.629  | 1874.201  |
| NM_019891 | 998.103  | 1609.365 | AB014526  | 943.594   | 742.586   | AL050078  | 1216.096  | 725.066   |

|           |          |          |           |           |           |           |           |           |
|-----------|----------|----------|-----------|-----------|-----------|-----------|-----------|-----------|
| AF038186  | 3679.337 | 3094.02  | NM_018538 | 1179.714  | 1517.192  | AK022933  | 514.575   | 493.806   |
| NM_016277 | 3533.682 | 2324.807 | NM_013346 | 1308.726  | 964.92    | NM_014276 | 1676.88   | 1469.992  |
| NM_007247 | 3616.518 | 3139.539 | AF131784  | 717.741   | 1292.604  | AF056438  | 927.329   | 897.901   |
| NM_006554 | 7005.911 | 5037.608 | NM_017851 | 3523.225  | 2939.989  | AF003737  | 10905.94  | 9168.673  |
| X99962    | 12241.61 | 8920.968 | AK026182  | 58756.023 | 59516.406 | AF009296  | 1225.547  | 1097.128  |
| AK025587  | 313.446  | 374.577  | AK025603  | 3159.553  | 2336.208  | AK001011  | 2363.083  | 2063.705  |
| AL050114  | 847.259  | 675.72   | NM_016085 | 21095.393 | 14896.03  | AK021457  | 756.317   | 677.051   |
| AK021492  | 2374.986 | 1957.319 | AK025768  | 3177.927  | 2504.885  | AK021690  | 643.277   | 625.696   |
| AK023794  | 1175.435 | 1201.784 | AL117502  | 2823.726  | 2716.787  | AK021740  | 434.795   | 751.231   |
| NM_019885 | 3378.177 | 3215.214 | AK001846  | 1525.217  | 974.307   | AK026238  | 963.72    | 997.704   |
| NM_005328 | 175.961  | 277.828  | AK024637  | 347.807   | 317.837   | AK026694  | 406.356   | 580.15    |
| AB033103  | 1151.586 | 1436.786 | AK024108  | 472.187   | 334.255   | AK026731  | 1501.032  | 1296.138  |
| NM_002907 | 4355.486 | 2890.039 | NM_013345 | 372.52    | 303.515   | NM_004192 | 2695.815  | 2328.441  |
| AK024098  | 555.869  | 791.337  | AL117454  | 18785.955 | 16214.611 | AK024160  | 1163.613  | 1019.145  |
| AK001116  | 230.321  | 297.669  | AF272890  | 1946.381  | 2270.48   | AK025077  | 1435.056  | 991.769   |
| AK022371  | 2781.266 | 2274.461 | U00684    | 1580.215  | 2599.803  | NM_006417 | 4093.754  | 3011.139  |
| D42045    | 3761.325 | 3031.225 | NM_016455 | 25515.654 | 20017.84  | L43350    | 640.809   | 543.616   |
| AB007953  | 2732.805 | 1387.7   | AF086227  | 1842.794  | 1843.965  | NM_020317 | 4972.662  | 5327.896  |
| NM_014002 | 3113.14  | 3293.623 | AK026304  | 656.389   | 504.617   | AL080234  | 3228.101  | 2236.734  |
| NM_004197 | 2362.356 | 1582.201 | AL133446  | 3893.627  | 3934.301  | AK027025  | 515.744   | 333.388   |
| NM_004073 | 1167.615 | 814.948  | AF147406  | 574.746   | 381.772   | AK025105  | 448.81    | 542.615   |
| NM_001278 | 5875.889 | 7032.489 | NM_006553 | 273.033   | 207.126   | AF212220  | 4506.661  | 2954.813  |
| NM_019105 | 1803.551 | 2443.484 | U56251    | 1264.133  | 1709.034  | AL137709  | 1572.992  | 2202.144  |
| NM_000294 | 6234.055 | 11021.97 | AK024689  | 741.939   | 728.952   | AK023277  | 3548.24   | 2026.66   |
| AJ272212  | 992.646  | 1673.611 | BC035667  | 705.061   | 938.87    | AK000425  | 2466.213  | 2275.135  |
| NM_001626 | 5562.103 | 7241.433 | AL049277  | 2615.088  | 2003.854  | Z27200    | 1396.991  | 1438.438  |
| NM_005677 | 1108.264 | 1057.657 | AL117506  | 498.321   | 587.753   | AF070571  | 5999.789  | 3267.949  |
| AF229803  | 394.472  | 396.087  | AL050043  | 684.311   | 631.931   | AK023554  | 1175.444  | 880.445   |
| AF151810  | 876.572  | 1626.458 | AL080205  | 398.798   | 692.739   | NM_003513 | 17622.301 | 4699.353  |
| NM_002130 | 17546.6  | 19679.09 | AL117571  | 1694.88   | 1691.254  | AL079294  | 404.148   | 510.067   |
| NM_001305 | 808.365  | 1121.437 | L22263    | 517.297   | 353.586   | AK024844  | 918.183   | 832.442   |
| NM_005082 | 1013.373 | 1532.102 | AK091573  | 964.768   | 908.235   | AL049437  | 1164.265  | 905.043   |
| D17028    | 24317.84 | 22976.63 | AF131814  | 2089.535  | 2586.582  | AF161427  | 30562.219 | 25037.488 |
| NM_013442 | 27529.33 | 25243.3  | AL359600  | 2873.686  | 2711.121  | AK021715  | 9272.326  | 7334.162  |
| BG611243  | 2127.124 | 2335.715 | AL360144  | 1418.411  | 1315.32   | AK000315  | 10299.542 | 7161.147  |
| AI417481  | 418.28   | 315.614  | BC028617  | 753.433   | 536.221   | AK023248  | 1164.217  | 937.431   |
| BI906766  | 876.658  | 963.549  | AL050078  | 1517.124  | 1466.901  | NM_012404 | 21933.541 | 14760.835 |
| U60519    | 1673.959 | 1495.657 | AK021616  | 325.848   | 334.459   | AF251190  | 869.128   | 791.659   |
| AA282906  | 482.604  | 429.461  | NM_014275 | 5305.997  | 4843.136  | AF130075  | 1092.978  | 1178.326  |
| L02870    | 848.056  | 601.493  | AF035303  | 549.024   | 657.432   | NM_005444 | 5416.783  | 6198.399  |
| BG755482  | 6237.287 | 5516.565 | AF056438  | 1556.41   | 1485.342  | V00589    | 6699.734  | 8750.872  |
| AI480307  | 5409.988 | 4494.967 | AF003737  | 31488.525 | 29561.521 | AK000451  | 517.146   | 1165.536  |
| X51420    | 1340.792 | 927.797  | AF009296  | 999.42    | 965.33    | AL390163  | 943.677   | 1236.271  |
| X51757    | 2807.536 | 2665.829 | AK001011  | 6213.535  | 5335.639  | NM_018572 | 1133.951  | 1609.935  |
| L24038    | 1139.848 | 715.453  | AK021457  | 464.738   | 525.097   | AK024838  | 713.883   | 698.342   |
| NM_006186 | 474.715  | 418.331  | AK021690  | 1309.327  | 1728.413  | AK000175  | 2434.473  | 1958.934  |
| NM_002751 | 1339.099 | 1614.422 | AK001078  | 657.784   | 3485.919  | AL137736  | 1350.799  | 1373.982  |
| M55593    | 1633.222 | 2544.416 | AK001840  | 1133.321  | 1193.644  | AK021897  | 8070.903  | 5787.103  |
| NM_078467 | 2094.855 | 2378.067 | AK021486  | 718.329   | 1012.5    | AK001051  | 1272.782  | 774.626   |
| NM_014629 | 4354.893 | 3086.364 | AK021740  | 706.464   | 591.086   | NM_018317 | 1586.671  | 1141.672  |
| NM_007318 | 23006.82 | 24715.16 | AK025148  | 575.488   | 573.543   | AF086051  | 1100.792  | 920.95    |
| NM_014874 | 2081.001 | 2294.541 | AK026238  | 695.216   | 737.63    | AK024356  | 921.354   | 792.609   |
| NM_005765 | 17608.39 | 14954.45 | AK026694  | 891.191   | 704.379   | AL365410  | 5350.404  | 4664.979  |

|           |          |          |            |           |           |           |           |           |
|-----------|----------|----------|------------|-----------|-----------|-----------|-----------|-----------|
| NM_002762 | 371.748  | 423.096  | AK025564   | 1399.871  | 1844.528  | D17082    | 15739.835 | 12233.906 |
| NM_006324 | 13211.15 | 10735.85 | AK026286   | 1589.248  | 2369.954  | D17252    | 52540.699 | 36956.965 |
| NM_016848 | 2278.312 | 2234.84  | AK026731   | 1476.681  | 1078.185  | D16476    | 408.737   | 323.106   |
| NM_000514 | 1999.521 | 2622.129 | NM_004192  | 3020.887  | 2517.282  | NM_003673 | 823.43    | 640.834   |
| AL137432  | 1692.289 | 2630.526 | AK024160   | 1589.943  | 1819.724  | Z36823    | 1345.269  | 1735.313  |
| NM_000957 | 377.974  | 820.838  | AK025077   | 773.058   | 1087.457  | AF147387  | 671.522   | 1024.413  |
| NM_019043 | 4225.919 | 5086.989 | NM_006417  | 5734.39   | 5772.472  | NM_012081 | 1623.514  | 1835.671  |
| NM_003240 | 862.276  | 448.832  | L43350     | 802.419   | 713.953   | AL137463  | 467.99    | 870.45    |
| NM_016564 | 3844.837 | 3919.412 | NM_020317  | 6616.439  | 5664.511  | AF085909  | 2721.362  | 3116.986  |
| AF279656  | 335.864  | 188.65   | AL080234   | 4777.8    | 5546.7    | AF090888  | 990.711   | 692.51    |
| AB007933  | 2588.125 | 2175.271 | AK027025   | 1212.805  | 1224.975  | AK027193  | 762.68    | 911.219   |
| NM_006702 | 5333.534 | 4058.525 | AF212220   | 4556.852  | 3747.978  | AF086471  | 8474.354  | 6668.71   |
| NM_001396 | 1622.959 | 1669.445 | unknown (S | 417.871   | 2988.636  | NM_018455 | 13626.25  | 12017.92  |
| NM_014474 | 1670.887 | 2960.145 | AK025010   | 482.13    | 452.702   | AF113018  | 739.057   | 520.863   |
| NM_016249 | 956.088  | 1238.197 | AK022082   | 327.977   | 227.99    | AK021996  | 1132.321  | 1727.623  |
| NM_006181 | 1028.757 | 1251.642 | AL137470   | 2621.775  | 3963.278  | AL049337  | 824.912   | 907.887   |
| NM_003796 | 14977.53 | 13452.26 | AL137709   | 2450.02   | 2361.288  | CY3Cy5    | 7568.393  | 352.733   |
| NM_002973 | 2740.964 | 2707.203 | AK023277   | 2430.195  | 3550.555  | U13697    | 840.171   | 1210.814  |
| NM_004436 | 13962.84 | 11179.32 | AK000425   | 2888.045  | 2822.12   | U04270    | 4936.362  | 6521.417  |
| NM_006580 | 1810.299 | 1034.186 | Z27200     | 1344.866  | 1484.774  | Z34820    | 3160.417  | 4787.074  |
| NM_019891 | 1137.231 | 1437.217 | AF070571   | 4136.331  | 4922.51   | BG181154  | 1593.015  | 1725.541  |
| AF038186  | 3594.323 | 3659.025 | AK023554   | 896.205   | 1060.618  | AA843679  | 4776.415  | 4135.333  |
| NM_016277 | 3912.569 | 3407.994 | NM_003513  | 10373.112 | 8815.125  | H68922    | 869.3     | 1276.553  |
| NM_007247 | 4038.71  | 4744.635 | AK024844   | 750.612   | 667.981   | NM_004957 | 2598.317  | 3891.931  |
| NM_006554 | 7446.043 | 6758.942 | AL049437   | 898.757   | 1190.206  | SR5       | 8495.161  | 9039.524  |
| X99962    | 12532.65 | 10015.52 | AF161427   | 56459.566 | 59038.844 | SR7       | 7558.659  | 50236.02  |
| AK023221  | 3842.225 | 3838.659 | AK021715   | 8104.937  | 6821.426  | SR9       | 28648.213 | 4740.865  |
| NM_003664 | 2575.284 | 1917.56  | AK000315   | 10905.387 | 9174.407  | CY3Cy5    | 6770.209  | 285.632   |
| NM_002426 | 1321.906 | 1582.701 | NM_012404  | 17080.721 | 14537.958 | NM_004380 | 12170.313 | 16122.676 |
| AK027182  | 589.782  | 889.645  | AF251190   | 741.852   | 571.663   | AY007378  | 3204.168  | 4731.695  |
| J03651    | 2384.977 | 2500.368 | AF130075   | 7324.732  | 6859.077  | NM_000114 | 1029.569  | 1254.745  |
| U61738    | 706.702  | 830.751  | NM_005444  | 8388.445  | 14149.984 | NM_005156 | 4588.95   | 5252.663  |
| AJ132087  | 782.545  | 619.318  | V00589     | 44296.547 | 49071.895 | NM_015193 | 614.412   | 951.683   |
| U92818    | 460.229  | 261.162  | AL109959   | 668.453   | 954.912   | X98834    | 4115.845  | 6428.799  |
| NM_000442 | 4808.099 | 3363.478 | AK024838   | 710.085   | 450.583   | NM_007035 | 8485.796  | 10431.716 |
| NM_002934 | 1227.76  | 1054.526 | AK000175   | 4637.783  | 4381.574  | AB019562  | 1068.58   | 1436.327  |
| AK023011  | 4263.59  | 3152.934 | AL137736   | 4021.573  | 4057.462  | AK022847  | 3030.938  | 3901.61   |
| NM_016816 | 2053.512 | 1420.763 | AK021897   | 6355.573  | 5803.045  | NM_020203 | 893.728   | 998.347   |
| L17325    | 2608.699 | 2842.437 | AK001051   | 1523.845  | 1245.722  | L40992    | 399.101   | 720.778   |
| NM_003639 | 3834.989 | 5254.782 | NM_018317  | 1810.017  | 1332.054  | U20582    | 4654.233  | 5150.626  |
| NM_001549 | 649.268  | 369.878  | AF086051   | 833.939   | 961.423   | NM_002079 | 8039.498  | 7405.438  |
| NM_000115 | 2935.773 | 2222.891 | AK024356   | 1105.802  | 870.752   | NM_006808 | 24980.961 | 23018.219 |
| AF308801  | 3760.366 | 3151.186 | AL049370   | 1142.212  | 978.703   | NM_006634 | 11775.2   | 9058.029  |
| AJ272212  | 1022.646 | 1491.843 | AL365410   | 4958.914  | 3811.804  | AL122120  | 2905.181  | 2176.767  |
| NM_001626 | 5705.544 | 6732.893 | D17082     | 15505.314 | 11800.609 | NM_014684 | 1573.156  | 1365.704  |
| NM_005677 | 938.133  | 1197.187 | D17252     | 43677.094 | 44941.551 | AK027247  | 949.344   | 1065.399  |
| AF229803  | 606.337  | 456.807  | D16476     | 347.934   | 272.975   | NM_002480 | 6623.193  | 6385.428  |
| AF151810  | 931.38   | 2025.947 | NM_003673  | 2560.704  | 1394.869  | NM_017571 | 8249.385  | 5256.563  |
| NM_002130 | 19134.04 | 23729.67 | Z36823     | 6237.518  | 7155.372  | AB007946  | 717.293   | 1132.002  |
| NM_005469 | 7123.654 | 7681.502 | AF147387   | 2774.385  | 2633.025  | L03169    | 842.901   | 1106.634  |
| NM_016361 | 2127.957 | 2644.624 | NM_012081  | 1612.38   | 2145.041  | M81349    | 451.406   | 614.665   |
| NM_003708 | 4663.316 | 5427.009 | AF085909   | 20675.451 | 23500.625 | NM_001928 | 5167.327  | 8485.097  |
| NM_014349 | 5775.93  | 5766.418 | AF090888   | 942.533   | 478.537   | NM_006399 | 729.51    | 1033.339  |

|           |          |          |           |           |           |           |           |           |
|-----------|----------|----------|-----------|-----------|-----------|-----------|-----------|-----------|
| AB040895  | 602.604  | 984.548  | AK027193  | 1679.253  | 1681.951  | NM_018965 | 573.657   | 973.166   |
| NM_004820 | 565.055  | 614.063  | AF086471  | 8825.776  | 9487.312  | NM_000185 | 2792.083  | 3439.493  |
| NM_018210 | 3921.043 | 4786.038 | NM_018455 | 11915.019 | 13499.952 | Y00816    | 861.447   | 1116.315  |
| NM_001096 | 7800.225 | 8158.048 | AF113018  | 1040.537  | 1230.068  | NM_004512 | 4835.575  | 6003.939  |
| NM_016014 | 5282.229 | 3768.392 | AK021996  | 1807.41   | 1994.876  | NM_001055 | 17174.775 | 33554.926 |
| NM_000195 | 219.282  | 184.169  | AL049337  | 4152.619  | 5016.046  | NM_015875 | 435.899   | 844.594   |
| NM_017581 | 1574.619 | 1887.501 | CY3Cy5    | 1846.912  | 208.982   | NM_002271 | 41277.586 | 31823.49  |
| AA488804  | 13906.45 | 15390.49 | U04270    | 7811.075  | 16115.787 | NM_018361 | 4429.222  | 2902.467  |
| NM_006535 | 547.376  | 1244.26  | Z34820    | 434.86    | 1014.32   | NM_016467 | 15565.588 | 11357.181 |
| NM_001684 | 2418.991 | 6033.525 | L02840    | 463.002   | 1281.053  | NM_007253 | 2764.813  | 2233.682  |
| NM_016315 | 3342.782 | 3960.868 | AA629719  | 62601.813 | 74644.359 | NM_019106 | 1135.857  | 1883.658  |
| NM_013305 | 559.72   | 489.727  | BG181154  | 1171.225  | 1813.789  | L08436    | 710.97    | 828.454   |
| NM_078467 | 2572.223 | 2346.347 | SR5       | 1754.203  | 1021.536  | NM_014170 | 5229.259  | 6117.778  |
| AK001883  | 11602.95 | 5593.833 | SR7       | 3765.815  | 20220.717 | AF116652  | 33059.824 | 49510.887 |
| NM_014625 | 5094.823 | 4312.994 | SR9       | 14642.763 | 2180.248  | NM_000835 | 685.476   | 1063.899  |
| AK025587  | 598.881  | 572.07   | CY3Cy5    | 2183.493  | 196.74    | AK000271  | 599.063   | 624.499   |
| AL050114  | 942.282  | 937.04   | NM_004119 | 820.213   | 1848.033  | NM_014145 | 1078.594  | 1061.969  |
| AK021492  | 2479.776 | 2088.211 | AY007378  | 3809.868  | 8117.016  | NM_018835 | 3698.158  | 4143.731  |
| AK023794  | 2214.696 | 2036.415 | D26070    | 945.442   | 2816.564  | NM_003401 | 2480.634  | 1837.273  |
| NM_019885 | 3982.391 | 4466.66  | NM_001642 | 6637.846  | 19653.662 | AL137724  | 3806.931  | 2632.363  |
| NM_005325 | 864.541  | 851.708  | NM_001542 | 699.207   | 1463.825  | NM_004755 | 5853.233  | 2201.934  |
| AB033103  | 1657.416 | 1868.1   | X98834    | 1644.444  | 565.404   | NM_006231 | 1446.734  | 1222.695  |
| NM_002907 | 4658.613 | 2209.81  | NM_007035 | 3088.888  | 1507.647  | AK023471  | 1886.164  | 1041.088  |
| AK024098  | 785.041  | 816.839  | AK022847  | 1210.788  | 773.642   | AF044578  | 2106.437  | 2000.04   |
| AK023920  | 30.817   | 1414.037 | NM_020203 | 928.194   | 754.679   | NM_001945 | 4386.333  | 3500.175  |
| AK022371  | 3749.404 | 3034.697 | U20582    | 2320.164  | 2392.676  | NM_001067 | 15526.096 | 16776.02  |
| D42045    | 4596.106 | 3515.648 | NM_002075 | 4903.276  | 5363.967  | NM_005335 | 22656.244 | 29092.643 |
| AB007953  | 2694.941 | 2264.559 | NM_000325 | 1094.825  | 1869.677  | J04474    | 7875.197  | 9385.432  |
| NM_014002 | 4065.103 | 5408.634 | NM_013395 | 4641.16   | 8189.829  | NM_003761 | 1887.616  | 2403.073  |
| NM_004197 | 3305.092 | 4581.912 | NM_002410 | 942.569   | 1109.575  | NM_004726 | 270.782   | 970.999   |
| NM_004073 | 1937.276 | 3175.057 | AL122120  | 2032.615  | 2593.498  | NM_014011 | 1533.937  | 2022.403  |
| NM_001275 | 6088.597 | 7451.07  | NM_014684 | 1092.873  | 1345.009  | AK025994  | 2124.874  | 2672.318  |
| NM_019105 | 2078.752 | 2245.582 | NM_001925 | 2905.455  | 1110.401  | L29306    | 648.302   | 907.148   |
| NM_000294 | 4091.919 | 3546.103 | NM_000185 | 2355.165  | 1840.898  | NM_013985 | 2832.813  | 3725.058  |
| NM_016245 | 410.858  | 662.252  | Y00816    | 604.052   | 522.501   | NM_001735 | 1076.574  | 1686.235  |
| NM_006181 | 966.69   | 956.335  | NM_004512 | 2797.158  | 2895.57   | NM_020203 | 777.948   | 835.044   |
| NM_003795 | 13218.7  | 9546.117 | NM_001055 | 16015.499 | 11081.908 | U20582    | 4413.733  | 2857.073  |
| NM_002973 | 2824.084 | 2883.878 | NM_019106 | 1225.583  | 396.799   | NM_000337 | 1032.34   | 380.891   |
| NM_004435 | 16570.28 | 14234.8  | L08436    | 581.317   | 377.527   | NM_002075 | 7501.326  | 5897.725  |
| NM_006580 | 2028.612 | 1897.824 | NM_000555 | 2680.302  | 1131.717  | AI660957  | 1974.644  | 3950.111  |
| NM_001305 | 814.087  | 870.095  | NM_014170 | 1734.1    | 1087.485  | U13697    | 1049.146  | 823.392   |
| NM_005082 | 1003.729 | 1133.809 | AF116652  | 34971.191 | 22245.574 | U04270    | 4141.517  | 3030.255  |
| D17028    | 26477.98 | 26358.81 | NM_014145 | 703.123   | 756.874   | AA629719  | 63930.965 | 66296.258 |
| NM_013442 | 28959.93 | 26388.98 | NM_018835 | 2566.205  | 1602.503  | BG676364  | 3046.917  | 3359.847  |
| BG611243  | 2142.974 | 2590.024 | NM_003401 | 1458.801  | 1619.231  | H68922    | 1328.646  | 2548.094  |
| AI417481  | 490.598  | 395.81   | AL137724  | 3093.037  | 1473.052  | NM_004957 | 2469.523  | 3338.81   |
| BI906766  | 664.352  | 717.102  | NM_004755 | 2727.349  | 3929.479  | NM_005252 | 1104.516  | 1741.182  |
| U60519    | 1400.247 | 1414.492 | NM_002913 | 2247.2    | 1868.255  | AF090906  | 819.27    | 1144.11   |
| AA282906  | 584.138  | 720.797  | AK022797  | 905.805   | 531.881   | AB023219  | 2835.674  | 3933.465  |
| L02870    | 661.229  | 571.348  | NM_007370 | 1588.484  | 1012.129  | NM_001925 | 4756.269  | 4855.609  |
| BG755482  | 5968.453 | 4509.933 | AK023471  | 1345.262  | 1146.306  | NM_006395 | 727.785   | 315.523   |
| AI480307  | 5100.916 | 3614.465 | AF044578  | 1625.778  | 821.91    | NM_018965 | 605.994   | 546.094   |
| X51420    | 1383.748 | 865.811  | NM_001945 | 1889.896  | 936.354   | NM_000185 | 2785.863  | 1410.644  |

|           |          |          |           |           |           |           |           |           |
|-----------|----------|----------|-----------|-----------|-----------|-----------|-----------|-----------|
| X51757    | 3157.708 | 5176.184 | NM_001067 | 5277.208  | 3145.92   | Y00816    | 1150.76   | 878.473   |
| L24038    | 1844.273 | 1626.949 | NM_014034 | 2750.511  | 1809.24   | NM_004512 | 3546.495  | 5834.063  |
| NM_053056 | 654.051  | 1063.782 | NM_005335 | 4853.482  | 2557.403  | NM_004380 | 11739.886 | 6649.784  |
| NM_002751 | 1313.889 | 1745.509 | J04474    | 856.625   | 565.702   | AY007378  | 3569.356  | 3129.394  |
| M55593    | 982.822  | 825.07   | NM_003761 | 967.324   | 647.889   | D26070    | 1606.494  | 1347.323  |
| NM_017716 | 1376.968 | 1634.043 | AK025994  | 1264.057  | 988.59    | NM_001642 | 7576.799  | 8548.9    |
| M58603    | 10505.72 | 9180.188 | NM_001738 | 913.472   | 1253.261  | NM_001542 | 602.718   | 1119.308  |
| NM_003639 | 3091.358 | 2837.934 | NM_020203 | 735.58    | 669.04    | NM_017459 | 1056.238  | 1730.283  |
| NM_001549 | 649.476  | 313.407  | U20582    | 2460.3    | 2024.083  | NM_005156 | 4586.11   | 5516.291  |
| NM_000115 | 2928.876 | 2520.368 | NM_002079 | 4659.372  | 3774.871  | NM_015193 | 337.737   | 917.725   |
| AF308801  | 4576.728 | 5089.524 | U13697    | 665.48    | 628.712   | X98834    | 3423.169  | 4392.172  |
| NM_007318 | 22845.09 | 23743.85 | U04270    | 5816.074  | 3345.552  | NM_007035 | 7931.979  | 8294.884  |
| NM_014874 | 2104.362 | 2068.167 | AA629719  | 55926.777 | 40796.688 | AB019562  | 1662.336  | 1794.593  |
| NM_005765 | 17558.78 | 14785.2  | AA927528  | 1518.065  | 1308.816  | AF036364  | 2022.332  | 2648.529  |
| NM_002762 | 462.148  | 462.199  | X02152    | 52838.98  | 59436.684 | AK022847  | 2991.088  | 3099.538  |
| NM_006324 | 14262.62 | 10932.56 | AA843679  | 2886.131  | 3566.515  | NM_006808 | 25498.016 | 19808.285 |
| NM_016848 | 2135.353 | 2137.305 | NM_004957 | 1091.838  | 1054.974  | NM_006634 | 12122.787 | 8827.796  |
| NM_000514 | 1748.017 | 2050.236 | NM_005252 | 670.047   | 750.955   | NM_016465 | 1702.155  | 1818.337  |
| AL137432  | 1807.295 | 3367.974 | AF090906  | 1829.53   | 1410.776  | NM_000328 | 1138.007  | 1410.584  |
| NM_000957 | 269.574  | 778.083  | AB023219  | 2052.126  | 1900.01   | NM_013399 | 4383.106  | 6676.999  |
| NM_019043 | 4405.346 | 3931.123 | NM_001928 | 5647.991  | 3110.87   | NM_002410 | 1086.49   | 1898.64   |
| NM_003240 | 539.883  | 415.832  | NM_006399 | 444.773   | 402.841   | AL122120  | 2973.62   | 3471.573  |
| NM_016564 | 3448.793 | 3736.996 | NM_000185 | 2960.199  | 2352.281  | NM_014684 | 1557.555  | 1677.84   |
| NM_000796 | 468.534  | 643.959  | NM_004512 | 3086.26   | 2303.523  | AK027247  | 1258.919  | 1044.748  |
| AB007933  | 4353.314 | 6449.173 | NM_004380 | 8865.588  | 5519.975  | NM_002480 | 7207.355  | 7428.832  |
| NM_014474 | 1311.536 | 2216.146 | AY007378  | 2339.239  | 1287.058  | NM_017571 | 8047.126  | 5083.691  |
| NM_006539 | 544.853  | 465.375  | NM_001642 | 4860.601  | 3979.065  | AB007946  | 796.38    | 858.963   |
| NM_001684 | 1395.605 | 2153.421 | NM_000501 | 12742.788 | 7497.64   | L03169    | 1102.148  | 1321.913  |
| NM_000808 | 152.808  | 542.345  | NM_000114 | 601.968   | 445.033   | NM_014011 | 1483.509  | 1421.674  |
| NM_016318 | 3745.892 | 4505.653 | NM_005156 | 1200.111  | 923.303   | AK025994  | 2101.612  | 2446.355  |
| NM_013309 | 591.099  | 808.901  | X98834    | 2174.56   | 1757.151  | L29306    | 757.625   | 875.678   |
| NM_019891 | 1087.307 | 1268.066 | NM_007035 | 4233.789  | 4125.665  | NM_013989 | 2352.086  | 1584.413  |
| AF038186  | 3570.776 | 3528.661 | AB019562  | 669.499   | 589.98    | NM_001738 | 1197.186  | 618.281   |
| NM_016277 | 4520.776 | 4307.987 | AF036364  | 1408.887  | 1918.869  | NM_001055 | 14912.828 | 7956.806  |
| NM_007247 | 4348.43  | 4844.339 | AK022847  | 1648.618  | 1755.358  | NM_015878 | 1024.644  | 365.166   |
| NM_006554 | 8808.176 | 8216.091 | NM_006808 | 17492.211 | 9300.801  | NM_018361 | 4404.078  | 2812.793  |
| X99962    | 13658.51 | 10893.55 | NM_006634 | 7948.78   | 5192.629  | NM_019893 | 599.321   | 821.857   |
| AK023221  | 4040.64  | 4142.197 | NM_016465 | 1323.875  | 1361.76   | AB040966  | 6109.877  | 5843.909  |
| NM_003664 | 2212.693 | 1645.144 | NM_000328 | 623.594   | 402.206   | NM_020132 | 1430.053  | 2094.2    |
| NM_002426 | 1611.084 | 1285.414 | NM_013399 | 2899.494  | 1757.905  | NM_016467 | 15413.426 | 16266.754 |
| AK027182  | 715.099  | 1004.302 | NM_002480 | 1807.691  | 1383.332  | NM_007253 | 3110.456  | 3538.364  |
| J03651    | 2211.904 | 2408.319 | NM_017571 | 2204.564  | 1121.872  | NM_019106 | 916.56    | 2163.235  |
| U61738    | 754.672  | 633.962  | L03169    | 621.432   | 592.444   | L08436    | 769.146   | 1089.686  |
| AJ132087  | 813.128  | 433.048  | NM_014011 | 1295.164  | 1530.574  | NM_000558 | 2874.294  | 3659.353  |
| NM_000442 | 5233.47  | 3794.729 | AK025994  | 1688.102  | 1722.573  | NM_004198 | 639.221   | 859.736   |
| NM_002934 | 1616.96  | 1609.078 | L29306    | 607.416   | 481.082   | NM_014170 | 4911.404  | 4658.696  |
| AK023011  | 7427.818 | 12477.88 | NM_013989 | 2400.517  | 2556.611  | AF116652  | 41669.43  | 51496.086 |
| L17325    | 1446.151 | 1834.855 | NM_001738 | 911.129   | 817.547   | NM_000835 | 912.872   | 1057.284  |
| NM_014002 | 3980.436 | 4008.944 | NM_001055 | 16189.742 | 11473.963 | NM_004957 | 2357.751  | 3405.128  |
| NM_004197 | 2788.76  | 2541.544 | NM_002271 | 28669.609 | 18655.506 | AF090906  | 942.132   | 571.033   |
| NM_004073 | 1312.769 | 1137.556 | NM_018361 | 2679.688  | 3277.054  | AB023219  | 2248.985  | 1525.692  |
| NM_001278 | 5594.917 | 5063.769 | NM_019893 | 650.268   | 582.761   | NM_014148 | 762.052   | 287.654   |
| NM_019105 | 1716.985 | 1453.494 | AB040966  | 3217.784  | 3320.921  | NM_018835 | 3655.663  | 2220.511  |



|           |          |          |           |           |           |           |           |           |
|-----------|----------|----------|-----------|-----------|-----------|-----------|-----------|-----------|
| NM_000294 | 4221.978 | 4378.255 | NM_020132 | 721.772   | 671.343   | NM_003401 | 2517.85   | 1226.732  |
| AJ272212  | 1153.542 | 1700.469 | NM_016467 | 6082.277  | 5801.843  | NM_002913 | 3850.472  | 4293.682  |
| NM_001626 | 6080.872 | 7219.163 | NM_007253 | 1309.908  | 1060.204  | AK022797  | 1284.096  | 1056.013  |
| NM_005677 | 1084.014 | 1305.012 | NM_019106 | 543.336   | 344.029   | NM_007370 | 5040.546  | 5656.612  |
| AF229803  | 446.667  | 734.702  | NM_000558 | 3427.662  | 2747.638  | NM_006231 | 1235.977  | 1722.202  |
| AF151810  | 1047.255 | 2476.281 | NM_014170 | 2937.446  | 3232.273  | AK023471  | 1975.405  | 1943.898  |
| NM_002130 | 20729.43 | 32314.52 | AF116652  | 20964.982 | 23836.313 | AF044578  | 2154.697  | 2606.515  |
| NM_005469 | 7965.448 | 8865.945 | NM_004957 | 1926.456  | 2383.114  | NM_001948 | 4409.968  | 3819.173  |
| NM_016361 | 1794.368 | 2265.396 | NM_005252 | 868.469   | 1055.443  | NM_014034 | 8220.378  | 8912.56   |
| NM_003708 | 4558.807 | 4996.235 | AF090906  | 865.064   | 873.534   | NM_005335 | 24776.24  | 25223.521 |
| NM_014349 | 6403.516 | 6114.932 | AB023219  | 2095.432  | 1668.182  | J04474    | 8292.416  | 8702.899  |
| AB040895  | 573.107  | 799.61   | NM_014148 | 707.166   | 581.356   | NM_003761 | 2064.992  | 2656.21   |
| NM_018210 | 3707.166 | 3237.489 | NM_018835 | 3013.986  | 2257.384  | AF036364  | 2174.081  | 3296.029  |
| NM_001096 | 8018.46  | 6151.58  | NM_003401 | 1428.606  | 2020.177  | AK022847  | 2575.053  | 1492.761  |
| NM_016014 | 5271.958 | 3125.686 | AL137724  | 3191.897  | 1935.182  | NM_020203 | 745.518   | 285.101   |
| AA488804  | 14784.31 | 12929.92 | NM_004758 | 2719.476  | 5385.69   | U20582    | 4441.384  | 2763.353  |
| L29496    | 648.28   | 727.961  | NM_002913 | 1658.597  | 1517.457  | AI660957  | 685.102   | 880.772   |
| NM_007002 | 14128.58 | 11067.28 | AK022797  | 930.497   | 760.733   | U13697    | 829.21    | 1124.959  |
| NM_012121 | 512.935  | 688.094  | NM_007370 | 3935.356  | 3766.485  | X75308    | 891.093   | 1532.427  |
| NM_003255 | 5342.963 | 4610.229 | NM_006231 | 731.998   | 467.48    | U04270    | 4954.863  | 6619.329  |
| NM_014155 | 3470.649 | 3610.86  | NM_001948 | 842.687   | 811.234   | AA927528  | 3277.777  | 3323.032  |
| AK026331  | 6374.065 | 8587.502 | NM_001067 | 2574.247  | 2710.309  | BG181154  | 1502.99   | 1484.802  |
| M30773    | 2524.065 | 2899.727 | NM_014034 | 4399.641  | 4460.416  | AA843679  | 4843.185  | 4097.358  |
| NM_016338 | 6899.495 | 10342.34 | NM_005335 | 14219.023 | 13736.521 | H68922    | 857.081   | 1232.529  |
| AF113699  | 8201.991 | 5925.455 | J04474    | 4311.004  | 4656.965  | NM_001928 | 4542.876  | 3029.174  |
| AK001883  | 12447.4  | 8226.839 | NM_003761 | 1796.984  | 3065.477  | NM_006399 | 765.515   | 265.48    |
| NM_014629 | 5684.554 | 5777.962 | NM_004726 | 786.781   | 4014.223  | NM_000185 | 2571.584  | 2051.968  |
| AK025587  | 423.449  | 590.372  | NM_015193 | 641.894   | 652.715   | Y00816    | 661.097   | 865.228   |
| AL050114  | 886.464  | 1168.895 | X98834    | 2877.123  | 3024.95   | NM_004512 | 3491.984  | 4165.989  |
| AK021492  | 2752.92  | 3034.538 | NM_007035 | 4851.988  | 5893.685  | NM_004380 | 12168.643 | 12049.566 |
| AK023794  | 1871.055 | 1840.521 | AB019562  | 764.502   | 853.738   | NM_004119 | 833.085   | 929.029   |
| NM_019885 | 5402.657 | 9280.184 | AF036364  | 1301.898  | 1615.172  | AY007378  | 4202.017  | 5112.166  |
| NM_005328 | 281.73   | 347.091  | AK022847  | 1782.988  | 1827.216  | D26070    | 1617.41   | 1847.86   |
| AB033103  | 1615.04  | 1370.738 | NM_020203 | 672.406   | 687.963   | NM_001642 | 7498.706  | 8543.573  |
| NM_002907 | 4357.106 | 1728.345 | U20582    | 2470.715  | 2650.783  | NM_001542 | 917.379   | 810.535   |
| AK024098  | 1079.784 | 1215.867 | NM_002079 | 4563.615  | 4329.753  | NM_017459 | 728.641   | 1171.016  |
| NM_001849 | 570.276  | 647.911  | U04270    | 4500.513  | 2928.333  | NM_000501 | 9546.539  | 14601.083 |
| NM_003734 | 3192.703 | 3163.857 | AA629719  | 56446.664 | 61305.656 | NM_000114 | 1117.881  | 1513.895  |
| NM_014935 | 1789.683 | 2002.88  | AA927528  | 1527.655  | 1487.983  | NM_005156 | 4571.446  | 5177.583  |
| X99660    | 3607.618 | 4790.681 | X02152    | 62555.859 | 71167.5   | NM_000835 | 777.631   | 174.333   |
| X03635    | 1298.893 | 1606.995 | BG676364  | 1712.726  | 1810.285  | AK000271  | 877.815   | 125.029   |
| X97671    | 426.004  | 683.011  | BG181154  | 1064.275  | 1009.357  | NM_006808 | 27798.281 | 28347.693 |
| NM_004351 | 1100.169 | 1785.955 | AA843679  | 9203.587  | 26617.881 | NM_006634 | 12094.973 | 12224.943 |
| NM_004236 | 10899.51 | 11156.79 | NM_017571 | 5246.129  | 5318.45   | NM_016465 | 2442.607  | 3075.827  |
| AB011093  | 9086.975 | 9054.407 | L03169    | 695.442   | 807.12    | NM_000328 | 1172.418  | 1234.809  |
| NM_002462 | 308.951  | 519.934  | NM_001928 | 6283.019  | 3948.078  | NM_013399 | 4386.336  | 6449.928  |
| NM_005618 | 354.181  | 562.131  | NM_006399 | 539.079   | 517.146   | NM_002410 | 661.379   | 945.197   |
| NM_020533 | 7132.093 | 9550.028 | NM_000185 | 2918.226  | 2615.707  | AL122120  | 2950.295  | 3486.819  |
| NM_001894 | 5919.148 | 6139.302 | Y00816    | 567.348   | 470.119   | NM_014684 | 1641.691  | 2549.965  |
| NM_000614 | 765.662  | 761.109  | NM_004512 | 3917.042  | 3966.547  | AK027247  | 1868.112  | 3373.961  |
| AK022884  | 1960.574 | 2701.941 | NM_004380 | 7889.226  | 7761.33   | NM_002480 | 7433.851  | 9314.479  |
| NM_006620 | 10553.31 | 4308.85  | AY007378  | 1467.567  | 1372.726  | NM_014034 | 8620.27   | 15709.913 |
| NM_001397 | 1281.145 | 1004.26  | D26070    | 876.329   | 651.065   | NM_014011 | 1759.807  | 962.021   |

|           |          |          |           |           |           |           |           |           |
|-----------|----------|----------|-----------|-----------|-----------|-----------|-----------|-----------|
| Y08770    | 729.437  | 517.209  | NM_001642 | 1393.007  | 1489.596  | AK025994  | 2223.329  | 1650.057  |
| NM_004772 | 5549.741 | 5147.167 | NM_000501 | 19476.078 | 19188.635 | L29306    | 641.98    | 411.084   |
| AF024540  | 2052.667 | 1060.054 | NM_000114 | 1591.495  | 2328.136  | NM_013989 | 2647.169  | 2150.103  |
| NM_002189 | 1436.594 | 1269.767 | NM_005156 | 4181.484  | 8334.648  | NM_001738 | 1427.098  | 1149.425  |
| U42977    | 5111.221 | 3850.661 | NM_000558 | 4422.7    | 4136.666  | NM_001055 | 15636.524 | 16796.26  |
| NM_002881 | 7059.943 | 6226.916 | NM_014170 | 3163.552  | 3894.505  | NM_015878 | 845.562   | 941.058   |
| NM_003666 | 1053.987 | 1072.749 | AF116652  | 48339.492 | 44437.879 | NM_002271 | 46730.891 | 48915.438 |
| NM_003288 | 3787.049 | 5307.475 | NM_000835 | 610.649   | 840.646   | NM_018361 | 5108.118  | 4137.137  |
| NM_018242 | 341.482  | 509.148  | NM_006808 | 13823.9   | 11598.262 | NM_019893 | 659.836   | 1064.646  |
| M83822    | 5273.228 | 6049.085 | NM_006634 | 4576.062  | 3844.607  | AB040966  | 6336.361  | 6244.963  |
| NM_018434 | 11347.44 | 23327.98 | NM_016465 | 1038.643  | 1113.673  | NM_020132 | 1462.817  | 2152.73   |
| NM_003914 | 2621.807 | 1668.617 | NM_000328 | 653.566   | 412.658   | NM_016467 | 15915.121 | 16751.49  |
| NM_020423 | 2127.782 | 1637.952 | NM_013399 | 4178.283  | 3728.882  | NM_007253 | 3613.253  | 5216.791  |
| AK021437  | 807.736  | 627.53   | NM_002410 | 679.875   | 517.754   | NM_019106 | 1008.973  | 2930.52   |
| NM_003831 | 5005.521 | 4480.933 | AL122120  | 1959.257  | 1388.328  | L08436    | 583.465   | 1074.709  |
| NM_001759 | 405.612  | 559.342  | NM_014684 | 1056.939  | 931.696   | NM_018371 | 21803.469 | 8874.794  |
| AB007965  | 4096.96  | 4940.271 | AK027247  | 1336.76   | 2042.869  | NM_014390 | 9550.5    | 5643.846  |
| NM_017649 | 1589.674 | 1424.167 | NM_002480 | 4887.859  | 6293.898  | NM_018143 | 856.638   | 460.678   |
| NM_001196 | 14182.69 | 15598.43 | NM_014034 | 6332.267  | 7568.772  | X78924    | 9469.334  | 6261.661  |
| NM_016008 | 1831.698 | 1448.989 | NM_005335 | 17535.646 | 19761.658 | NM_013250 | 1139.573  | 834.196   |
| NM_017744 | 713.83   | 719.693  | J04474    | 5389.8    | 7114.938  | AF090906  | 806.515   | 949.109   |
| NM_001924 | 3855.576 | 2695.417 | NM_003761 | 2141.088  | 2722.566  | AB023219  | 2487.548  | 2051.777  |
| NM_017705 | 2793.786 | 1775.311 | NM_004726 | 476.302   | 668.143   | NM_014148 | 1122.352  | 888.841   |
| NM_001796 | 563.688  | 400.535  | NM_014011 | 1323.088  | 1591.146  | NM_018835 | 4122.039  | 4388.663  |
| NM_009587 | 3990.139 | 5655.907 | AK025994  | 1879.297  | 2124.544  | NM_003401 | 2901.467  | 2733.301  |
| AL133566  | 688.402  | 609.145  | L29306    | 575.932   | 569.288   | AL137724  | 3998.309  | 5350.224  |
| M36118    | 544.811  | 692.348  | NM_013989 | 2635.32   | 2295.722  | NM_004758 | 7057.54   | 4203.635  |
| NM_003399 | 2930.968 | 3085.866 | NM_001738 | 990.362   | 976.619   | NM_002913 | 3975.82   | 4450.324  |
| NM_001097 | 360.631  | 478.614  | NM_001055 | 19628.787 | 17146.029 | AK022797  | 1511.184  | 1386.443  |
| NM_002630 | 847.582  | 592.359  | NM_015878 | 606.309   | 577.125   | NM_007370 | 5577.283  | 5869.266  |
| AJ295149  | 9840.352 | 11360.36 | NM_002271 | 26862.58  | 29466.82  | NM_006231 | 1356.753  | 1987.625  |
| NM_013438 | 5150.487 | 5928.804 | NM_018361 | 1873.527  | 2762.639  | AK023471  | 2233.869  | 2291.598  |
| NM_005099 | 198.22   | 90.265   | NM_019893 | 704.583   | 1539.487  | AF044578  | 2733.574  | 2950.701  |
| NM_014688 | 5465.941 | 5307.581 | AB040966  | 2789.818  | 3121.782  | NM_001948 | 4189.625  | 4151.806  |
| AB037784  | 814.733  | 596.224  | NM_020132 | 2218.352  | 2105.049  | NM_001067 | 16682.34  | 16194.12  |
| AL359623  | 2485.102 | 2370.362 | NM_016467 | 10026.517 | 12220.328 | NM_003573 | 4501.05   | 2008.386  |
| AK026920  | 2509.754 | 1928.74  | NM_007253 | 3016.018  | 2309.436  | NM_000296 | 3868.9    | 1989.431  |
| AL137255  | 1367.031 | 1223.688 | NM_019106 | 1381.573  | 949.786   | NM_017422 | 6338.015  | 3563.677  |
| NM_003370 | 7761.175 | 6965.368 | L08436    | 734.116   | 834.151   | NM_005879 | 1474.104  | 1177.431  |
| AB037715  | 1551.588 | 796.656  | NM_005607 | 2693.896  | 3033.74   | NM_004112 | 2339.092  | 3250.6    |
| AF250924  | 5843.042 | 2590.151 | NM_006761 | 47577.965 | 55952.441 | AK025592  | 7854.392  | 13503.119 |
| D86979    | 2333.033 | 1402.609 | NM_014897 | 1723.716  | 1839.928  | NM_004635 | 8695.957  | 10318.008 |
| NM_018212 | 414.385  | 224.601  | NM_003453 | 6275.298  | 6014.416  | AK023023  | 8802.531  | 11232.886 |
| AF018081  | 7423.475 | 8273.945 | NM_018371 | 20216.164 | 18009.932 | NM_015993 | 3741.117  | 5893.89   |
| NM_020202 | 20831.27 | 34131.08 | NM_014390 | 8763.868  | 8404.492  | NM_002659 | 1238.248  | 1425.563  |
| AK022889  | 6603.292 | 7636.511 | X78924    | 11346.306 | 10193.376 | Z36776    | 2654.538  | 2950.052  |
| X52357    | 18119.97 | 17880.47 | NM_013250 | 716.954   | 774.377   | AB029015  | 2370.56   | 2473.977  |
| AF211891  | 1363.24  | 1338.651 | AF090906  | 905.627   | 760.393   | NM_003287 | 1009.625  | 293.021   |
| NM_005641 | 3499.801 | 3436.93  | AB023219  | 2290.581  | 2480.255  | NM_012325 | 16066.318 | 7138.412  |
| NM_001668 | 1303.936 | 1379.821 | NM_014148 | 739.541   | 875.382   | NM_014434 | 1629.8    | 1207.89   |
| AK025362  | 1600.392 | 1440.612 | NM_018835 | 3231.439  | 4362.284  | NM_019607 | 4168.6    | 2310.331  |
| AK021776  | 5336.985 | 5183.992 | NM_003401 | 1559.7    | 4856.668  | U79260    | 10007.557 | 4684.998  |
| AK026042  | 2119.717 | 4454.79  | AL137724  | 2850.553  | 3178.852  | NM_001895 | 9753.389  | 6381.835  |

|           |          |          |           |           |           |           |           |           |
|-----------|----------|----------|-----------|-----------|-----------|-----------|-----------|-----------|
| NM_014233 | 10857.07 | 15461.64 | NM_00475E | 2501.353  | 5864.41   | NM_006447 | 2452.997  | 2076.637  |
| NM_002137 | 71114.01 | 48930.4  | NM_00737C | 4910.229  | 5307.568  | AF119851  | 632.478   | 783.017   |
| NM_002911 | 2170.531 | 2466.273 | NM_006231 | 1005.325  | 1458.146  | NM_014129 | 4887.221  | 5063.714  |
| U94386    | 847.413  | 708.469  | AK023471  | 1417.196  | 1910.558  | D87455    | 2727.391  | 3063.744  |
| NM_01600C | 3624.856 | 2637.938 | AF044578  | 1979.304  | 1998.169  | AF080577  | 1594.331  | 1651.496  |
| NM_006372 | 4425.862 | 3844.806 | NM_00194E | 2889.34   | 3302.652  | L22005    | 6891.082  | 7949.823  |
| NM_01415C | 1742.21  | 1328.532 | NM_001067 | 10659.067 | 11649.511 | NM_012291 | 13599.097 | 16096.899 |
| NM_00680E | 11363.02 | 8457.89  | AB028984  | 428.208   | 747.251   | NM_01336E | 2070.508  | 2978.175  |
| AF132027  | 7397.593 | 6103.25  | NM_005602 | 1384.903  | 1639.043  | NM_003807 | 7389.841  | 7714.421  |
| NM_004681 | 14014.39 | 6789.725 | NM_003573 | 5231.381  | 5586.077  | NM_00435E | 4671.747  | 5898.421  |
| AB033096  | 9061.899 | 4507.823 | NM_00029E | 4233.816  | 4041.309  | NM_00179C | 3418.373  | 3183.044  |
| NM_01488E | 6780.82  | 755.21   | NM_012302 | 562.921   | 480.051   | NM_018243 | 4850.837  | 3877.926  |
| L31408    | 9564.769 | 4370.765 | NM_017422 | 7579.714  | 6261.028  | NM_014939 | 2481.269  | 2061.33   |
| NM_00154E | 10607.09 | 8952.325 | NM_00587E | 1016.324  | 1299.331  | Y17866    | 913.819   | 1048.991  |
| AF070625  | 1446.843 | 1612.143 | AF147790  | 1005.935  | 931.944   | AK024247  | 732.635   | 1067.325  |
| AL365512  | 2793.536 | 3378.584 | NM_004112 | 3769.337  | 3720.735  | NM_00300E | 7286.951  | 4179.503  |
| AK001740  | 3145.563 | 3246.099 | AK025592  | 3219.044  | 3656.213  | NM_00441E | 2898.805  | 1535.293  |
| AF131793  | 993.747  | 1190.612 | NM_00463E | 6014.862  | 5407.399  | NM_000917 | 11242.09  | 6640.307  |
| NM_00591E | 21853.66 | 18901.52 | AK023023  | 7319.716  | 6372.59   | NM_00538E | 18638.582 | 10664.146 |
| J02625    | 9412.437 | 8996.089 | NM_015993 | 2680.573  | 3077.757  | NM_01444E | 25690.467 | 14607.853 |
| Y17175    | 81144.29 | 55862.01 | Z36776    | 1269.924  | 906.668   | AL832826  | 1595.651  | 1131.928  |
| NM_00454E | 22277.31 | 28623.81 | AB029015  | 1488.067  | 1225.746  | NM_016123 | 1973.676  | 1489.036  |
| NM_005333 | 20621.47 | 23286.41 | NM_00243C | 407.559   | 556.015   | AB048365  | 1364.107  | 1033.002  |
| AK026161  | 3946.484 | 5357.718 | NM_00615C | 1978.068  | 3110.615  | NM_000391 | 4004.945  | 3794.799  |
| NM_004553 | 34291.43 | 38729.69 | NM_02034E | 1421.615  | 1883.723  | AF229179  | 859.329   | 703.734   |
| D63484    | 2633.897 | 2857.385 | NM_003287 | 859.333   | 1092.113  | NM_014771 | 9005.846  | 11166.215 |
| AK026745  | 6659.763 | 4742.982 | NM_01232E | 13126.202 | 15810.232 | NM_00227E | 3296.949  | 3869.595  |
| AL157440  | 3964.149 | 2894.887 | NM_014434 | 1561.262  | 1807.912  | AB032945  | 940.926   | 1209.927  |
| NM_016423 | 8299.587 | 7135.781 | NM_019607 | 3470.594  | 3613.063  | AK025215  | 11215.421 | 12100.096 |
| AB040975  | 1738.555 | 1680.804 | U79260    | 6608.161  | 7140.397  | BF569160  | 736.651   | 825.876   |
| NM_00316E | 22731.96 | 14256.73 | NM_00189E | 7034.39   | 8529.014  | AK024625  | 635.781   | 1117.375  |
| AK055844  | 1470.911 | 1157.36  | NM_006447 | 1909.397  | 2094.639  | NM_018131 | 10251.405 | 7990.623  |
| NM_01828E | 12000.73 | 5567.65  | AF119851  | 628.761   | 608.642   | NM_01763E | 7013.616  | 6600.446  |
| NM_00314E | 6863.407 | 6491.808 | NM_01412E | 3608.794  | 4877.914  | NM_01246E | 649.463   | 737.642   |
| X52342    | 1172.26  | 623.154  | D87455    | 2414.276  | 2689.703  | D70836    | 37106.734 | 15872.878 |
| NM_003131 | 16285.76 | 10663.02 | AF080577  | 1174.01   | 1502.463  | D16878    | 1234.839  | 523.257   |
| AB014526  | 809.097  | 957.834  | L22005    | 6404.161  | 5485.625  | NM_014943 | 2259.908  | 1521.415  |
| NM_01853E | 870.656  | 901.585  | NM_012291 | 6294.796  | 4399.777  | AK024392  | 3392.868  | 2424.012  |
| NM_01334E | 1190.757 | 1024.594 | NM_01336E | 1326.051  | 1508.505  | NM_01326C | 1335.625  | 557.627   |
| AF131784  | 1534.627 | 751.095  | NM_003807 | 5422.578  | 4658.523  | NM_01830C | 1769.488  | 1354.72   |
| NM_017851 | 3066.679 | 3370.305 | NM_00435E | 2105.343  | 1799.746  | NM_00487E | 1898.03   | 1869.492  |
| AK026182  | 27231.73 | 26763.5  | NM_00179C | 1611.734  | 1742.687  | NM_018254 | 5320.703  | 4682.759  |
| AK025603  | 3484.168 | 3763.809 | NM_018243 | 3375.154  | 2009.576  | NM_01774E | 1847.555  | 2661.084  |
| NM_01608E | 15628.4  | 20463.84 | NM_01493E | 1473.111  | 882.79    | NM_018433 | 3597.631  | 3102.879  |
| AK025768  | 3045.658 | 3813.749 | Y17866    | 1425.151  | 1318.173  | NM_000937 | 1280.498  | 1168.772  |
| AL117502  | 3503.587 | 6208.404 | AK024247  | 1003.652  | 723.624   | AB028451  | 571.295   | 804.501   |
| AK001846  | 1059.185 | 1169.018 | NM_002842 | 2088.844  | 2613.932  | AK024810  | 18078.924 | 18445.236 |
| AK024637  | 443.238  | 526.695  | NM_01212E | 571.744   | 510.069   | AK022615  | 31618.939 | 37964.098 |
| AK024108  | 640.635  | 469.504  | NM_00441E | 2187.098  | 3465.024  | NM_004043 | 7114.07   | 7354.575  |
| AL110293  | 303.487  | 299.72   | NM_000917 | 12648.996 | 12758.582 | BM458096  | 16733.693 | 15444.761 |
| NM_01645E | 14988.67 | 11582.66 | NM_00538E | 15034.8   | 13797.571 | NM_00562E | 11511.049 | 11161.108 |
| AF086227  | 731.249  | 507.446  | NM_01444E | 21379.754 | 18664.207 | D29958    | 19590.553 | 15410.546 |
| AK026246  | 1477.359 | 737.63   | AL832826  | 1260.452  | 1034.094  | NM_015971 | 11386.56  | 10071.957 |

|           |          |          |           |           |           |           |           |           |
|-----------|----------|----------|-----------|-----------|-----------|-----------|-----------|-----------|
| AF070524  | 267.171  | 311.598  | NM_016123 | 1816.552  | 1462.946  | D17257    | 62725.293 | 57144.797 |
| AF035281  | 2422.44  | 2673.761 | AB048365  | 1122.527  | 1130.57   | AK000724  | 3806.009  | 1939.305  |
| AK026304  | 1327.429 | 1981.718 | NM_000391 | 3106.724  | 3748.296  | NM_003720 | 14308.298 | 6350.444  |
| AL133446  | 382.992  | 493.021  | AF229179  | 598.503   | 466.22    | AF097159  | 1295.513  | 749.604   |
| NM_006553 | 418.047  | 508.105  | NM_014771 | 5851.562  | 5227.965  | NM_004807 | 1651.781  | 1175.681  |
| U56251    | 1497.129 | 1396.05  | NM_002275 | 2796.466  | 2474.613  | AF219140  | 789.005   | 621.996   |
| AK024689  | 414.996  | 596.53   | AK025215  | 6033.812  | 4083.442  | J03569    | 49692.785 | 35116.313 |
| BC035667  | 578.178  | 554.356  | BF569160  | 739.346   | 688.357   | NM_003115 | 5759.943  | 4106.023  |
| AL049277  | 954.318  | 1078.245 | NM_014834 | 1066.106  | 907.887   | NM_000687 | 14564.793 | 11802.901 |
| AL049988  | 412.606  | 428.537  | NM_017636 | 6435.804  | 4825.54   | NM_000446 | 967.71    | 725.744   |
| AL117506  | 211.854  | 454.503  | M27877    | 22736.139 | 24593.73  | NM_018200 | 1910.602  | 1931.169  |
| AL049302  | 306.274  | 511.232  | D70836    | 42430.84  | 37803.359 | NM_014838 | 4337.908  | 3694.151  |
| AL050043  | 457.1    | 627.805  | D16878    | 994.301   | 1424.4    | NM_007212 | 3554.665  | 3958.072  |
| AL117571  | 1113.086 | 1506.115 | NM_014943 | 2432.215  | 3041.789  | AF005067  | 2312.807  | 3283.781  |
| AK091573  | 1414.231 | 1856.529 | AK024392  | 2983.9    | 2915.619  | NM_005710 | 8664.484  | 9026.685  |
| AL359600  | 1945.867 | 2343.751 | NM_013260 | 1253.333  | 1022.721  | AF252284  | 1724.14   | 1654.123  |
| BC028617  | 475.957  | 290.604  | NM_018300 | 1056.355  | 1228.809  | NM_014930 | 1641.381  | 1299.761  |
| AL117653  | 518.273  | 281.402  | NM_004875 | 1929.505  | 1479.828  | NM_001530 | 4810.154  | 4320.89   |
| AF087999  | 1248.25  | 808.858  | NM_018254 | 7471.004  | 5864.617  | U80232    | 10634.251 | 10584.454 |
| NM_003740 | 2424.649 | 1377.214 | NM_017745 | 1557.971  | 1318.573  | AK025788  | 2139.357  | 1213.175  |
| AL050078  | 602.02   | 820.033  | NM_018433 | 1970.303  | 2207.795  | AF086164  | 1453.028  | 743.894   |
| AK022933  | 291.933  | 464.503  | NM_000937 | 1020.328  | 795.624   | AK025577  | 1186.703  | 863.247   |
| NM_014276 | 987.93   | 1010.733 | AK024810  | 5087.958  | 3610.812  | AK000216  | 1812.489  | 1135.875  |
| AF056438  | 667.131  | 826.566  | AK022615  | 18802.104 | 16411.563 | AK023440  | 1004.695  | 673.829   |
| AF003737  | 1695.672 | 1667.769 | NM_004043 | 4325.644  | 3327.793  | AB033041  | 20558.613 | 12491.522 |
| AF009296  | 1107.093 | 986.727  | BM458096  | 10384     | 7855.56   | NM_014894 | 53999.723 | 49428     |
| AK001011  | 1982.039 | 1630.057 | D17257    | 49856.051 | 36350.805 | AY007155  | 5661.376  | 6780.222  |
| AK021457  | 694.867  | 808.12   | AK023309  | 489.088   | 1019.867  | AK027160  | 2879.894  | 2279.717  |
| AK021690  | 625.409  | 703.325  | AK000724  | 3626.1    | 4134.914  | AL359211  | 927.513   | 1741.997  |
| AK026238  | 931.351  | 645.556  | NM_003720 | 8346.889  | 10608.349 | AF070526  | 953.137   | 869.76    |
| AK025564  | 441.054  | 260.39   | AF097159  | 1132.477  | 1334.568  | U79264    | 1958.655  | 2067.085  |
| AK026286  | 379.53   | 387.385  | NM_004807 | 1450.589  | 1517.7    | NM_015690 | 9116.342  | 10406.517 |
| AK026731  | 653.061  | 835.754  | J03569    | 46762.285 | 40550.816 | AF070530  | 19712.805 | 16185.706 |
| NM_004192 | 3106.975 | 3522.097 | NM_003115 | 4009.64   | 3875.74   | AF086487  | 338.474   | 497.078   |
| AK024160  | 1107.145 | 1444.507 | NM_000687 | 10647.298 | 10588.613 | NM_006420 | 1241.145  | 1244.259  |
| AK025077  | 1392.06  | 973.315  | NM_000446 | 391.052   | 606.512   | AF131855  | 1344.353  | 930.083   |
| NM_006417 | 4374.449 | 3679.964 | NM_018200 | 1270.793  | 1183.587  | AF086046  | 1796.603  | 1802.717  |
| L43350    | 809.097  | 847.982  | NM_014838 | 2636.781  | 2686.108  | AK024962  | 1377.566  | 765.82    |
| NM_020317 | 7548.231 | 6597.568 | NM_007212 | 1128.49   | 781.329   | AK025135  | 6749.711  | 2131.154  |
| AL080234  | 5617.192 | 4257.504 | AF005067  | 1984.525  | 1814.434  | NM_017926 | 2422.858  | 1508.127  |
| AK027025  | 410.062  | 495.973  | NM_005710 | 5509.442  | 4239.821  | AY007145  | 2888.932  | 1599.617  |
| AK025105  | 598.141  | 789.682  | AF086526  | 1192.671  | 1876.993  | D38549    | 1909.365  | 1850.362  |
| AK021675  | 465.75   | 707.221  | AK025788  | 3662.909  | 3592.946  | AK024780  | 1455.07   | 886.614   |
| AF212220  | 6147.065 | 4977.921 | AF086164  | 1459.058  | 1583.748  | AF085947  | 735.576   | 627.615   |
| AK025010  | 282.487  | 272.072  | AK025577  | 1348.953  | 1322.527  | AF086000  | 702.481   | 446.835   |
| AL137709  | 1617.292 | 1142.671 | AK000216  | 1342.946  | 1792.861  | AL359591  | 945.545   | 439.987   |
| AK023277  | 3055.196 | 1031.857 | AK023440  | 793.379   | 865.61    | U10510    | 5696.907  | 5476.488  |
| AK000425  | 1876.569 | 1611.345 | AB033041  | 12588.245 | 11084.124 | Z36842    | 1074.862  | 983.881   |
| Z27200    | 1131.942 | 1386.224 | NM_014894 | 53803.754 | 52396.938 | AF086137  | 788.141   | 1048.358  |
| AF070571  | 7073.735 | 5082.505 | AY007155  | 4797.225  | 3743.656  | AF086155  | 695.802   | 1019.709  |
| AK023554  | 1150.026 | 964.325  | AK027160  | 1470.326  | 1060.119  | NM_014150 | 4779.706  | 1593.415  |
| NM_003513 | 19994.09 | 6545.598 | AL359211  | 885.762   | 768.561   | AK021795  | 862.708   | 419.819   |
| AL079294  | 385.195  | 344.865  | AF070526  | 812.104   | 941.469   | AL162042  | 2380.971  | 2414.484  |

|           |          |          |            |           |           |           |           |           |
|-----------|----------|----------|------------|-----------|-----------|-----------|-----------|-----------|
| AK024844  | 989.985  | 992.06   | U79264     | 1961.059  | 2076.686  | AK026131  | 907.157   | 824.569   |
| AL049437  | 1546.474 | 1233.678 | NM_015695  | 10685.084 | 10846.09  | AK023312  | 1340.454  | 937.726   |
| AF161427  | 12103.31 | 15870.93 | AK023619   | 950.839   | 1429.013  | AL133570  | 1252.763  | 656.435   |
| AK021715  | 10147.81 | 11226.84 | AF070530   | 12293.91  | 12391.27  | AK026496  | 348.457   | 484.879   |
| AK000315  | 11599.2  | 12248.68 | AK024962   | 1333.859  | 2002.431  | AK021462  | 688.938   | 743.498   |
| AK023248  | 1461.197 | 1490.112 | AK025135   | 4459.544  | 8476.179  | AK022678  | 1603.832  | 1513.437  |
| NM_012404 | 22383.44 | 25356.46 | NM_017926  | 2313.358  | 3140.316  | AK023473  | 470.352   | 587.734   |
| AF251190  | 726.688  | 963.617  | AY007145   | 4383.208  | 5612.553  | AK023835  | 2198.621  | 2309.127  |
| AF130075  | 1991.793 | 2424.593 | D38549     | 3005.666  | 3531.502  | AK023012  | 944.282   | 1106.08   |
| NM_005444 | 5521.927 | 6141.298 | AK024780   | 1367.251  | 1258.655  | AK023906  | 2777.861  | 2675.118  |
| V00589    | 7418.966 | 14605.56 | AF085947   | 699.777   | 579.383   | AK024234  | 558.649   | 834.402   |
| AL390163  | 1891.494 | 1834.005 | AL359591   | 546.762   | 512.818   | NM_012405 | 2851.619  | 2968.789  |
| NM_018572 | 1450.142 | 1434.209 | U10510     | 6875.046  | 7632.164  | AL050205  | 6311.542  | 2919.536  |
| NM_005315 | 239.648  | 347.435  | AF086155   | 658.58    | 189.886   | NM_005691 | 1321.807  | 977.132   |
| AK024838  | 792.544  | 355.27   | AF116677   | 399.178   | 960.192   | AF086156  | 564.407   | 504.057   |
| AK000175  | 2374.681 | 1286.8   | AK022010   | 564.325   | 543.069   | AK023814  | 763.983   | 696.978   |
| AL137736  | 1740.105 | 1020.355 | NM_014155  | 3928.482  | 3400.896  | AF130063  | 676.584   | 632.743   |
| AK021897  | 7841.752 | 7783.002 | AK021795   | 863.194   | 1149.916  | AF086528  | 953.702   | 678.614   |
| AK001051  | 1599.705 | 1451.891 | AL162042   | 3345.443  | 5248.993  | AF251187  | 998.363   | 542.09    |
| NM_018317 | 1271.936 | 1572.158 | AK026131   | 1231.536  | 1327.279  | NM_006543 | 1092.63   | 1131.164  |
| AF086051  | 1392.181 | 1070.734 | AK023312   | 1228.933  | 977.864   | AK024171  | 435.72    | 695.028   |
| AK024356  | 674.74   | 979.972  | AL133570   | 672.275   | 688.64    | AK023018  | 1724.168  | 1831.815  |
| AL365410  | 5843.458 | 8043.208 | AK021462   | 898.826   | 923.282   | AK022672  | 1902.004  | 1485.32   |
| D17082    | 20061.65 | 21716.47 | AK023392   | 995.149   | 1730.029  | AK023870  | 1017.938  | 920.051   |
| D17252    | 49015.93 | 40260.07 | AK021943   | 1085.842  | 2852.177  | AK021599  | 1834.23   | 1816.011  |
| D16476    | 443.613  | 268.55   | AK022678   | 1241.137  | 3451.856  | BC030975  | 672.224   | 442.408   |
| NM_003673 | 1054.463 | 1090.039 | AK023835   | 1556.502  | 1977.159  | AK024263  | 1343.473  | 635.665   |
| AF086456  | 498.742  | 619.894  | AK023012   | 1196.305  | 972.212   | NM_016613 | 2862.045  | 1653.755  |
| Z36823    | 4934.101 | 6612.869 | AK023906   | 2084.368  | 1657.155  | AF086414  | 1088.073  | 497.817   |
| AF147387  | 738      | 1008.516 | AK024234   | 668.176   | 614.886   | AJ012490  | 4136.487  | 3267.353  |
| NM_012081 | 1705.399 | 1609.125 | NM_012405  | 3361.323  | 4241.944  | U84516    | 13236.254 | 8434.332  |
| AL137463  | 356.424  | 422.143  | AL050205   | 4359.729  | 6522.055  | AL049270  | 1230.468  | 812.815   |
| AF085909  | 3818.542 | 3780.903 | AK023947   | 428.247   | 714.101   | U88834    | 7445.481  | 5363.756  |
| AF090888  | 653.349  | 386.818  | NM_005691  | 1283.564  | 1528.669  | BC025324  | 1021.345  | 778.296   |
| AK027193  | 650.983  | 495.259  | AF086156   | 897.091   | 981.207   | NM_006087 | 64238.75  | 55494.613 |
| AF086471  | 7478.824 | 3574.651 | AK023814   | 897.759   | 685.304   | NM_003533 | 1780.693  | 2098.006  |
| NM_018455 | 12843.87 | 5802.496 | AF130063   | 574.132   | 394.881   | AK023726  | 3760.142  | 3863.078  |
| AF113018  | 552.159  | 302.197  | AF086528   | 797.693   | 571.188   | AK024906  | 926.891   | 786.952   |
| AK021996  | 1142.629 | 825.708  | AL162043   | 466.73    | 751.148   | AF131836  | 2018.937  | 2185.876  |
| AL049337  | 653.637  | 517.51   | AF251187   | 705.878   | 866.841   | AF275804  | 20903.539 | 20962.029 |
| CY3Cy5    | 4115.996 | 332.016  | NM_006543  | 891.992   | 1076.122  | AL137488  | 1244.811  | 918.865   |
| AI660957  | 409.836  | 673.472  | AK024171   | 806.664   | 1647.651  | AL049447  | 50928.504 | 51148.781 |
| U13697    | 1044.147 | 1200.838 | unknown (S | 1584.286  | 1600.442  | NM_020527 | 2722.475  | 2537.228  |
| U04270    | 2208.634 | 4342.854 | AK023018   | 1820.13   | 1646.956  | AB020637  | 6153.621  | 8594.765  |
| AA629719  | 71490.92 | 66191.18 | AK022672   | 1423.783  | 1490.775  | NM_005286 | 3734.75   | 3473.867  |
| BG181154  | 1734.286 | 1812.742 | AK023870   | 1155.895  | 1299.041  | AK024365  | 2541.646  | 2852.744  |
| AA843679  | 4908.129 | 4799.892 | AK021599   | 1723.605  | 1959.141  | AJ251759  | 1185.932  | 1203.253  |
| H68922    | 693.931  | 727.611  | AK024263   | 786.569   | 1673.071  | AK024371  | 1028.816  | 1283.176  |
| NM_004957 | 2757.313 | 3709.71  | NM_016613  | 2876.438  | 4045.81   | NM_005454 | 654.764   | 796.608   |
| SR5       | 6186.533 | 5556.482 | AF086414   | 3653.449  | 5379.419  | AB019569  | 64452.852 | 56949.137 |
| SR7       | 6100.496 | 36788.22 | AJ012490   | 6667.347  | 6164.198  | NM_001889 | 13828.992 | 10576.423 |
| SR9       | 25444.69 | 4210.063 | U84516     | 15512.639 | 15013.266 | X89668    | 22596.016 | 18157.326 |
| CY3Cy5    | 3240.471 | 196.629  | AL049270   | 1532.818  | 1410.773  | NM_004455 | 4907.531  | 3322.802  |

|           |          |          |           |           |           |           |           |           |
|-----------|----------|----------|-----------|-----------|-----------|-----------|-----------|-----------|
| NM_00438C | 10666.52 | 11820.57 | U88834    | 9039.612  | 11094.004 | NM_006901 | 1299.958  | 1000.256  |
| AY007378  | 3627.974 | 4176.513 | NM_003533 | 1537.99   | 1524.361  | NM_01853C | 7810.037  | 4404.459  |
| D26070    | 1488.162 | 1472.869 | AK023726  | 5937.343  | 6062.004  | AJ003145  | 564.902   | 785.186   |
| NM_001642 | 6981.789 | 8740.262 | AK024906  | 1313.779  | 949.295   | AK022855  | 12988.117 | 10452.011 |
| NM_001542 | 706.978  | 1066.655 | AF131836  | 1945.769  | 2150.479  | AK023816  | 1002.627  | 866.797   |
| NM_003392 | 223.654  | 455.37   | AF275804  | 20121.521 | 22666.279 | AL050102  | 1266.39   | 1217.113  |
| NM_017459 | 214.172  | 489.905  | AL137488  | 1696.663  | 1978.675  | AF305686  | 3027.569  | 7029.674  |
| NM_000114 | 505.69   | 708.351  | AL049447  | 47443.336 | 53144.02  | AF085832  | 1175.145  | 1036.145  |
| NM_005156 | 4513.807 | 6697.27  | NM_020527 | 2592.655  | 2904.355  | AK025981  | 2452.729  | 2445.104  |
| NM_015193 | 435.986  | 696.937  | AB020637  | 6753.491  | 4966.619  | AF113212  | 786.519   | 414.99    |
| X98834    | 3781.071 | 4964.069 | NM_005286 | 5020.375  | 5515.115  | AF086266  | 1150.687  | 807.081   |
| NM_007035 | 8527.691 | 8625.524 | AK024365  | 3818.858  | 3160.542  | AF086252  | 1637.654  | 1513.317  |
| AB019562  | 1066.625 | 1312.486 | AJ251759  | 1368.231  | 923.626   | AK026703  | 1093.183  | 788.703   |
| AF036364  | 2203.915 | 2124.064 | AK024371  | 2524.449  | 2281.902  | NM_017866 | 10946.708 | 8864.403  |
| AK022847  | 2815.71  | 3284.302 | NM_005454 | 2516.79   | 1911.328  | AJ131244  | 948.75    | 708.342   |
| NM_020203 | 669.169  | 790.507  | NM_001889 | 11888.895 | 17919.689 | NM_003536 | 1616.974  | 1057.871  |
| L40992    | 458.403  | 761.902  | NM_004999 | 720.844   | 886.703   | AF116707  | 2597      | 2701.092  |
| U20582    | 4579.58  | 4596.313 | X89668    | 27267.709 | 33880.352 | U90910    | 4093.951  | 4250.006  |
| NM_002079 | 7603.33  | 6354.494 | NM_004458 | 4694.432  | 7198.323  | CY3Cy5    | 3792.472  | 147.473   |
| NM_006808 | 23005.75 | 30867.32 | NM_006901 | 1479.871  | 2059.557  | AA143087  | 6166.29   | 6390.722  |
| NM_006634 | 11481.38 | 12215.11 | NM_01853C | 12026.723 | 14061.244 | U25804    | 4018.203  | 2875.73   |
| NM_016465 | 2120.511 | 3177.584 | AJ003145  | 1409.598  | 1805.077  | BI870965  | 3464.848  | 3114.361  |
| NM_000328 | 1112.632 | 1507.833 | AL050102  | 931.318   | 1013.375  | NM_001903 | 8363.759  | 10854.282 |
| NM_013399 | 3669.843 | 6061.353 | AF305686  | 3669.799  | 2131.384  | BI835536  | 13413.711 | 12400.833 |
| NM_00241C | 531.036  | 699.537  | AF085832  | 971.206   | 1205.363  | BF205051  | 2030.509  | 2549.157  |
| AL122120  | 3696.723 | 3391.53  | AK025981  | 2245.83   | 2227.958  | X02761    | 1258.463  | 1553.966  |
| NM_014684 | 1592.836 | 2345.412 | AF086266  | 798.611   | 905.774   | M91463    | 997.087   | 1031.535  |
| AK027247  | 1176.129 | 1311.163 | AF086252  | 1903.902  | 2410.78   | J03060    | 3028.664  | 3672.965  |
| NM_00248C | 7585.766 | 10398.46 | AK026703  | 797.093   | 1054.145  | X54156    | 773.409   | 961.559   |
| NM_017571 | 8534.069 | 6914.095 | NM_017866 | 8067.204  | 9416.003  | NM_003743 | 1489.201  | 1473.027  |
| AB007946  | 663.434  | 1050.598 | AJ131244  | 695.198   | 826.249   | AA829383  | 4813.413  | 5562.13   |
| L03169    | 1223.713 | 1447.791 | NM_003536 | 1248.655  | 1331.234  | AF012434  | 10293.87  | 11236.063 |
| M81349    | 327.502  | 482.129  | AF116707  | 3353.596  | 2985.041  | NM_033334 | 382.616   | 596.722   |
| NM_001928 | 3826.135 | 8008.616 | U90910    | 7255.299  | 7218.453  | SR2       | 67439.992 | 63374.328 |
| NM_006399 | 784.837  | 960.847  | CY3Cy5    | 1593.63   | 387.699   | SR4       | 20959.453 | 20553.443 |
| NM_018965 | 518.25   | 402.973  | AA143087  | 4563.968  | 5557.269  | SR6       | 3314.343  | 2642.985  |
| NM_000185 | 1676.691 | 1821.513 | U25804    | 1847.408  | 3152.025  | SR8       | 11788.673 | 30343.645 |
| Y00816    | 821.462  | 956.724  | BI870965  | 2588.218  | 2806.383  | SR10      | 40667.07  | 12716.136 |
| NM_004512 | 1949.263 | 1926.553 | NM_001903 | 7112.827  | 10352.019 | CY3Cy5    | 3876.485  | 161.172   |
| NM_001055 | 9360.346 | 10532.59 | BI835536  | 7861.268  | 11451.196 | NM_005902 | 881.634   | 1333.986  |
| NM_018361 | 4845.7   | 3498.041 | BF205051  | 2176.962  | 2638.386  | NM_00285C | 55395.25  | 61697.551 |
| NM_019893 | 822.755  | 896.961  | X02761    | 1366.436  | 1474.008  | NM_004302 | 542.519   | 792.57    |
| AB040966  | 6908.451 | 8375.815 | M91463    | 672.456   | 1384.005  | NM_005903 | 2042.771  | 1676.26   |
| NM_020132 | 1337.358 | 1748.617 | J03060    | 2418.795  | 2742.037  | NM_000861 | 888.221   | 772.855   |
| NM_016467 | 16092.42 | 17275.87 | NM_003743 | 3416.776  | 3873.579  | AB037734  | 869.098   | 1262.366  |
| NM_007253 | 1201.042 | 1601.34  | AA829383  | 3076.493  | 2367.285  | U77493    | 436.768   | 820.712   |
| NM_019106 | 893.814  | 2268.27  | AF012434  | 7117.586  | 6485.942  | NM_019062 | 344.05    | 840.476   |
| L08436    | 604.352  | 890.13   | SR2       | 46457.543 | 26167.588 | NM_003873 | 468.238   | 559.635   |
| NM_000558 | 806.033  | 1861.453 | SR4       | 10625.188 | 7880.353  | NM_000263 | 1389.672  | 1606.141  |
| NM_004198 | 230.987  | 441.467  | SR6       | 1917.586  | 1444.175  | AB001451  | 607.683   | 743.579   |
| NM_01417C | 4911.431 | 4835.386 | SR8       | 6500.42   | 13061.023 | NM_017583 | 1958.045  | 3414.895  |
| AF116652  | 5378.326 | 6658.998 | SR10      | 22541.457 | 6267.623  | Y16132    | 7740.322  | 9846.238  |
| NM_000835 | 595.113  | 769.156  | CY3Cy5    | 1147.932  | 152.697   | NM_016593 | 660.66    | 1336.619  |

|           |          |          |           |           |           |           |           |           |
|-----------|----------|----------|-----------|-----------|-----------|-----------|-----------|-----------|
| AK000271  | 998.568  | 418.525  | NM_005902 | 959.356   | 828.97    | NM_002521 | 548.55    | 1045.182  |
| NM_01414E | 360.69   | 467.228  | NM_00285C | 55955.254 | 68163.234 | NM_001150 | 618.334   | 752.146   |
| NM_01883E | 4157.465 | 5159.238 | NM_004302 | 463.736   | 612.488   | NM_00285E | 1057.162  | 2010.437  |
| NM_003401 | 3317.741 | 3745.01  | NM_005903 | 1238.08   | 1600.373  | NM_00322E | 794.378   | 1050.308  |
| NM_00475E | 7247.792 | 2800.08  | NM_000861 | 1224.243  | 1841.43   | NM_00009E | 1813.13   | 2173.12   |
| NM_002913 | 3760.732 | 4749.414 | AB037734  | 597.999   | 903.143   | AA418251  | 937.292   | 1667.6    |
| AK022797  | 1570.477 | 1611.703 | U77493    | 574.414   | 589.751   | NM_01904E | 998.367   | 1186.796  |
| NM_00737C | 6062.845 | 7476.435 | NM_019062 | 1184.171  | 1835.052  | NM_00638C | 3758.222  | 3630.573  |
| NM_006231 | 1456.495 | 2026.034 | NM_003873 | 292.402   | 443.34    | AB020710  | 2058.243  | 1909.583  |
| AK023471  | 2124.866 | 1937.615 | NM_000263 | 657.701   | 431.86    | NM_016174 | 3630.902  | 4346.365  |
| AF044578  | 2271.56  | 2598.841 | AF073519  | 5659.435  | 3776.663  | NM_020377 | 587.615   | 662.16    |
| NM_00194E | 4548.768 | 3792.056 | AB001451  | 361.571   | 433.663   | U88896    | 1833.546  | 1848.808  |
| NM_001067 | 15163.44 | 18735.13 | NM_017583 | 2165.258  | 1454.214  | NM_005724 | 8042.498  | 9868.812  |
| NM_014034 | 7951.528 | 10387.99 | Y16132    | 8439.984  | 6495.19   | X58794    | 1116.957  | 1035.35   |
| NM_00533E | 20537.11 | 26232.95 | NM_002521 | 632.869   | 318.322   | NM_00173E | 2447.383  | 2885.785  |
| J04474    | 8990.27  | 9614.737 | NM_001150 | 765.321   | 556.828   | NM_00234E | 540.352   | 813.302   |
| NM_003761 | 1189.966 | 1011.224 | NM_00285E | 1147.737  | 569.626   | NM_00508C | 16334.048 | 19875.797 |
| NM_00472E | 220.63   | 455.404  | NM_00322E | 597.086   | 600.306   | NM_004887 | 9265.488  | 10735.511 |
| NM_014011 | 1991.627 | 2027.231 | NM_00009E | 1236.651  | 1141.944  | NM_006404 | 1319.736  | 1400.499  |
| AK025994  | 1705.696 | 1645.655 | AA418251  | 917.317   | 792.156   | NM_00298E | 596.315   | 927.064   |
| L29306    | 668.713  | 588.356  | NM_01904E | 776.384   | 1141.409  | M15330    | 989.881   | 1393.29   |
| NM_01398E | 1825.796 | 1774.137 | NM_00638C | 3182.772  | 5062.161  | NM_01439E | 3275.881  | 3943.273  |
| NM_00173E | 1321.393 | 1253.538 | AB020710  | 1522.484  | 2811.341  | AK027201  | 2171.333  | 2634.232  |
| NM_020203 | 894.929  | 965.51   | NM_016174 | 4461.833  | 4934.95   | NM_00048E | 5699.963  | 5472.552  |
| L40992    | 609.874  | 608.682  | NM_020377 | 488.651   | 532.406   | X98507    | 2583.588  | 2737.186  |
| U20582    | 4209.224 | 4344.781 | U88896    | 1113.468  | 1255.475  | NM_01603C | 40397.426 | 48848.84  |
| NM_000337 | 333.44   | 349.693  | NM_005724 | 6081.478  | 6290.98   | NM_01466E | 9928.787  | 12395.472 |
| NM_00207E | 7058.309 | 7463.675 | X58794    | 1046.27   | 1439.305  | NM_005652 | 5196.148  | 5190.916  |
| U13697    | 944.246  | 996.86   | NM_00173E | 2664.243  | 6473.234  | AK02668E  | 633.846   | 918.898   |
| U04270    | 2260.606 | 4979.854 | NM_00234E | 1273.609  | 3881.437  | AL133064  | 3118.188  | 3920.911  |
| AA629719  | 69361.7  | 61975.57 | NM_00508C | 10873.443 | 14044.938 | NM_006227 | 4032.842  | 5482.474  |
| BG181154  | 1415.423 | 1197.171 | NM_004887 | 3796.459  | 3544.436  | NM_00290E | 5704.741  | 6461.706  |
| AA843679  | 4762.337 | 4123.703 | NM_006404 | 450.432   | 343.975   | NM_01902E | 7936.974  | 8080.765  |
| H68922    | 706.321  | 634.049  | NM_01479E | 411.519   | 476.713   | NM_000431 | 3496.873  | 4301.509  |
| NM_004957 | 2996.244 | 3415.186 | NM_00298E | 778.685   | 882.857   | NM_013421 | 707.027   | 864.573   |
| NM_005252 | 595.51   | 821.528  | M15330    | 527.281   | 852.197   | AB033118  | 4892.884  | 9650.855  |
| AF090906  | 668.712  | 422.519  | NM_01439E | 2523.475  | 2025.169  | NM_01960E | 3495.299  | 3725.73   |
| AB023219  | 2952.168 | 2319.104 | AK027201  | 1865.213  | 1536.499  | NM_00169C | 9599.019  | 9383.344  |
| NM_00192E | 3165.145 | 4746.287 | NM_00048E | 4853.097  | 3625.176  | AF034374  | 6819.548  | 7773.192  |
| NM_00639E | 777.197  | 693.871  | X98507    | 1959.682  | 1671.005  | NM_01611E | 10791.898 | 7701.806  |
| NM_01896E | 389.884  | 616.921  | NM_01603C | 37662.879 | 24689.283 | NM_001683 | 10799.275 | 11820.376 |
| NM_00018E | 1400.667 | 1562.036 | NM_01466E | 5917.422  | 4415.841  | NM_01440E | 1930.635  | 2805.06   |
| Y00816    | 847.781  | 1077.051 | NM_005652 | 4891.419  | 4850.017  | NM_00081E | 812.947   | 1685.087  |
| NM_004512 | 1678.522 | 2218.542 | AK02668E  | 478.597   | 640.422   | NM_01492E | 1051.42   | 1259.616  |
| NM_00293C | 86.124   | 172.026  | AL133064  | 1882.333  | 2453.125  | AK025130  | 4640.027  | 5675.438  |
| NM_00438C | 11389.7  | 12721.93 | NM_006227 | 3159.627  | 2652.366  | NM_01787E | 1814.413  | 2610.458  |
| AY007378  | 3756.298 | 4044.353 | NM_00290E | 3253.467  | 3368.984  | AK023232  | 2365.411  | 2887.289  |
| D26070    | 1372.224 | 1426.695 | NM_00070C | 38734.52  | 40281.871 | NM_000271 | 6471.105  | 7006.183  |
| NM_001642 | 6915.445 | 8423.604 | NM_01902E | 6113.009  | 7018.397  | AB018268  | 5279.567  | 5517.408  |
| NM_001542 | 678.364  | 960.897  | NM_000431 | 3376.861  | 3636.478  | Z70701    | 10118.117 | 11350.947 |
| NM_000501 | 2719.233 | 3030.509 | NM_013421 | 1012.461  | 1419.468  | AB040972  | 3378.448  | 4002.118  |
| NM_000114 | 412.527  | 589.003  | AB033118  | 5578.231  | 4462.086  | BE260997  | 740.276   | 542.013   |
| NM_00515E | 3935.548 | 5200.813 | NM_01960E | 2513.967  | 3479.183  | NM_01868E | 14053.969 | 10771.006 |

|           |          |          |           |           |           |           |           |           |
|-----------|----------|----------|-----------|-----------|-----------|-----------|-----------|-----------|
| NM_015193 | 314.389  | 435.948  | NM_00169C | 6117.414  | 7698.131  | NM_017676 | 1922.968  | 1903.168  |
| X98834    | 3484.403 | 4678.01  | AF034374  | 6598.495  | 7926.229  | AK021764  | 927.259   | 815.395   |
| NM_00703E | 7558.822 | 6731.606 | NM_016118 | 4915.862  | 5541.723  | NM_005431 | 2267.73   | 2699.557  |
| AB019562  | 1160.709 | 1119.103 | NM_018674 | 14120.709 | 14691.409 | AB036063  | 2357.74   | 2398.747  |
| AF036364  | 2186.053 | 1848.408 | NM_001683 | 14458.053 | 11994.761 | NM_002894 | 9009.617  | 7095.864  |
| AK022847  | 2585.409 | 2130.857 | NM_001682 | 1421.955  | 1000.753  | NM_004629 | 10460.618 | 10504.991 |
| AK000271  | 1028.562 | 335.642  | NM_01440E | 2067.66   | 2020.121  | NM_00426C | 8174.496  | 8641.249  |
| NM_006634 | 11902.87 | 13546.62 | NM_00081E | 683.165   | 783.36    | NM_006251 | 6010.626  | 6123.689  |
| NM_01646E | 2368.325 | 4058.109 | NM_01492E | 1165.279  | 1246.346  | NM_004103 | 6838.173  | 8030.769  |
| NM_00032E | 1124.864 | 1733.735 | AK025130  | 3529.706  | 2900.215  | NM_002314 | 7085.336  | 7326.426  |
| NM_01339E | 3810.101 | 5985.147 | NM_01787E | 1620.79   | 1262.669  | NM_001744 | 6061.428  | 7502.844  |
| NM_00241C | 542.861  | 584.415  | AK023232  | 2149.198  | 1728.412  | NM_00629E | 2148.171  | 3305.388  |
| AL122120  | 3158.242 | 2709.072 | NM_000271 | 5998.734  | 4354.289  | Z25433    | 4452.495  | 4674.678  |
| NM_014684 | 1498.549 | 1446.874 | NM_01820E | 3521.679  | 2363.239  | NM_005922 | 4411.837  | 4304.351  |
| AK027247  | 877.941  | 995.819  | NM_006184 | 16629.531 | 11582.416 | NM_01863E | 4944.041  | 5823.385  |
| NM_00248C | 6678.071 | 6843.515 | AB018268  | 4979.454  | 5683.83   | NM_000382 | 3416.318  | 3503.273  |
| NM_017571 | 7537.03  | 4678.139 | Z70701    | 7901.089  | 7593.103  | NM_001150 | 396.729   | 673.728   |
| AB007946  | 489.64   | 618.882  | AB040972  | 2915.271  | 3084.912  | NM_00285E | 1199.119  | 1827.371  |
| L03169    | 1040.697 | 923.224  | AF148505  | 2268.899  | 2350.705  | NM_00322E | 918.275   | 987.514   |
| M81349    | 400.156  | 361.716  | BE260997  | 1463.938  | 1487.974  | NM_00009E | 1665.677  | 1744.812  |
| NM_014011 | 1974.225 | 1313.059 | NM_01868E | 10294.352 | 17077.098 | AA418251  | 790.319   | 1102.779  |
| AK025994  | 1356.539 | 929.995  | NM_01767E | 1184.406  | 1924.322  | AA143087  | 5271.772  | 5288.522  |
| L29306    | 717.954  | 568.11   | AK021764  | 388.414   | 834.506   | U25804    | 3692.223  | 2665.503  |
| NM_01398E | 1860.733 | 2217.975 | NM_005431 | 2036.312  | 2662.534  | BI870965  | 3218.949  | 3216.595  |
| NM_00173E | 1303.424 | 1589.453 | AB036063  | 2202.075  | 2893.341  | NM_001903 | 8481.504  | 11249.677 |
| NM_00227C | 476.915  | 404.837  | NM_002894 | 6074.903  | 7872.959  | BI835536  | 13972.97  | 11568.622 |
| NM_00105E | 9719.409 | 13553.11 | NM_00462E | 6664.989  | 8200.177  | BF205051  | 2260.768  | 2540.193  |
| NM_01587E | 771.553  | 1161.314 | NM_00426C | 7241.021  | 8454.842  | X02761    | 1031.386  | 1359.354  |
| NM_018361 | 5512.427 | 4214.511 | AL050067  | 901.823   | 854.287   | M91463    | 853.288   | 978.151   |
| NM_019893 | 950.805  | 1047.338 | NM_004972 | 4284.175  | 3877.227  | J03060    | 3538.698  | 3272.955  |
| AB040966  | 6838.955 | 7809.415 | NM_006251 | 3445.214  | 3309.742  | X54156    | 681.701   | 956.85    |
| NM_020132 | 1338.555 | 1787.377 | NM_004103 | 6123.765  | 5968.607  | NM_003743 | 1504.785  | 1592.165  |
| NM_016467 | 15677.73 | 16037.24 | NM_002314 | 4119.632  | 4179.975  | AA829383  | 5077.108  | 5814.514  |
| NM_007253 | 1093.068 | 1296.301 | NM_001744 | 4566.683  | 3677.57   | AF012434  | 10719.082 | 11246.812 |
| NM_01910E | 937.69   | 1683.446 | NM_00629E | 1655.073  | 1496.347  | NM_033334 | 363.743   | 583.031   |
| L08436    | 582.239  | 960.924  | Z25433    | 2966.935  | 3092.294  | AB037791  | 1351.228  | 1648.518  |
| NM_00055E | 661.207  | 1291.224 | NM_005922 | 2422.521  | 2558.344  | NM_018124 | 7947.653  | 7096.072  |
| NM_00419E | 188.388  | 543.491  | NM_01863E | 4592.494  | 3022.71   | NM_00048E | 4587.862  | 3980.368  |
| NM_01417C | 4617.385 | 4144.13  | AL137593  | 11554.145 | 9943.516  | X98507    | 2167.334  | 2629.594  |
| AF116652  | 5500.865 | 5241.87  | NM_00391E | 2315.273  | 1921.249  | NM_01603C | 36616.02  | 46292.172 |
| NM_00083E | 727.059  | 557.346  | NM_000382 | 3049.535  | 5994.773  | NM_01466E | 8820.087  | 10259.804 |
| NM_004957 | 2286.798 | 1803.429 | NM_001150 | 650.429   | 818.555   | NM_005652 | 4257.228  | 4138.046  |
| NM_005252 | 1003.693 | 731.274  | NM_00285E | 874.859   | 858.22    | AK026686  | 490.814   | 752.879   |
| AF090906  | 623.883  | 670.362  | AA143087  | 6251.493  | 6623.737  | NM_005902 | 1005.435  | 1424.46   |
| AB023219  | 3238.747 | 3279.963 | U25804    | 2225.469  | 4438.195  | NM_00285C | 54449.621 | 60723.629 |
| NM_01414E | 491.262  | 415.664  | BI870965  | 3236.854  | 4446.078  | NM_004302 | 800.408   | 962.042   |
| NM_01883E | 4550.281 | 5404.279 | NM_001903 | 6891.452  | 7154.644  | NM_005903 | 1946.307  | 1596.265  |
| NM_003401 | 2828.905 | 2041.907 | BI835536  | 9386.25   | 12109.516 | NM_000861 | 826.081   | 708.041   |
| AL137724  | 2984.444 | 4658.423 | BF205051  | 2491.573  | 2846.037  | AB037734  | 738.172   | 984.985   |
| NM_00475E | 8686.993 | 3171.583 | X02761    | 1384.093  | 1391.578  | U77493    | 464.839   | 869.143   |
| NM_002913 | 4669.688 | 5925.387 | M91463    | 676.214   | 632.015   | NM_003873 | 653.121   | 341.977   |
| AK022797  | 1897.891 | 1802.772 | U88317    | 2258.183  | 3005.295  | NM_000263 | 999.854   | 1198.392  |
| NM_00737C | 6191.919 | 7331.506 | J03060    | 2504.976  | 1960.657  | AF073519  | 7625.564  | 7824.858  |



|           |          |          |           |           |           |           |           |           |
|-----------|----------|----------|-----------|-----------|-----------|-----------|-----------|-----------|
| NM_006231 | 1193.36  | 2106.032 | X54156    | 360.389   | 440.084   | AB001451  | 507.589   | 690.62    |
| AK023471  | 2148.747 | 1947.956 | NM_003743 | 1223.427  | 950.671   | NM_017583 | 2237.168  | 2857.475  |
| AF044578  | 1942.543 | 1705.849 | AA829383  | 3497.589  | 3196.728  | Y16132    | 8809.894  | 9383.052  |
| NM_001948 | 3947.944 | 3119.647 | AF012434  | 6869.965  | 6140.3    | NM_016593 | 723.615   | 975.118   |
| NM_001067 | 15207.72 | 12846.92 | AB037791  | 1186.953  | 780.978   | NM_002521 | 707.138   | 796.932   |
| NM_014034 | 7365.373 | 7636.273 | NM_018124 | 4995.189  | 4491.411  | NM_017875 | 1533.373  | 2277.799  |
| NM_005335 | 19223.34 | 16630.39 | NM_000485 | 3892.489  | 4375.085  | AK023232  | 2568.948  | 2733.663  |
| J04474    | 7883.717 | 7467.33  | X98507    | 2032.844  | 2447.57   | NM_000271 | 6259.084  | 7339.094  |
| NM_003761 | 898.625  | 623.268  | NM_005652 | 3237.185  | 5462.989  | NM_018209 | 5345.943  | 6536.433  |
| X98834    | 3221.894 | 2506.802 | AK026686  | 771.545   | 1287.083  | NM_006184 | 16803.457 | 21490.621 |
| NM_007035 | 7637.824 | 5331.211 | NM_005902 | 843.853   | 686.708   | AB018268  | 4921.506  | 4900.936  |
| AB019562  | 1174.34  | 1079.058 | NM_002850 | 51243.25  | 68548.055 | NM_019045 | 1161.796  | 1311.132  |
| AF036364  | 2163.054 | 2367.132 | NM_004302 | 500.896   | 621.937   | NM_006380 | 3623.994  | 3070.27   |
| AK022847  | 2887.298 | 3113.908 | NM_005903 | 1058.039  | 1307.099  | AB020710  | 1922.25   | 1592.527  |
| NM_020203 | 823.069  | 976.315  | NM_000861 | 617.055   | 725.157   | NM_016174 | 3898.225  | 4662.084  |
| L40992    | 669.415  | 834.517  | AB037734  | 482.298   | 559.243   | NM_020377 | 686.101   | 829.625   |
| U20582    | 4763.259 | 5445.557 | U77493    | 627.167   | 380.545   | U88896    | 1979.439  | 1927.933  |
| NM_002079 | 7511.936 | 7455.131 | NM_019062 | 725.746   | 441.311   | NM_005724 | 8364.094  | 8735.174  |
| U13697    | 1049.685 | 1396.366 | NM_003873 | 567.247   | 352.708   | X58794    | 1128.516  | 1122.566  |
| U04270    | 2341.644 | 4889.707 | NM_000263 | 1056.942  | 1027.265  | NM_001735 | 2311.765  | 2698.354  |
| BG181154  | 1494.439 | 947.21   | AF073519  | 5505.371  | 3943.377  | NM_002349 | 663.857   | 754.256   |
| AA843679  | 4195.105 | 2646.892 | NM_017583 | 2033.666  | 1441.46   | NM_005080 | 16826.127 | 20256.449 |
| H68922    | 572.632  | 378.585  | Y16132    | 8016.462  | 6398.956  | NM_004887 | 9502.003  | 10849.905 |
| NM_017571 | 6133.433 | 2014.332 | NM_002521 | 642.808   | 402.757   | NM_006404 | 906.575   | 898.221   |
| AB007946  | 692.374  | 323.361  | NM_017875 | 1398.273  | 1113.797  | NM_014795 | 744.806   | 872.987   |
| L03169    | 1182.51  | 1280.569 | AK023232  | 1851.971  | 2044.33   | NM_002986 | 896.232   | 903.6     |
| M81349    | 510.158  | 491.661  | NM_019045 | 1009.03   | 1529.334  | M15330    | 1237.007  | 1759.23   |
| NM_001928 | 4715.99  | 8681.993 | NM_006380 | 2627.911  | 3894.904  | NM_014396 | 3405.387  | 3146.814  |
| NM_006399 | 821.364  | 1143.201 | AB020710  | 1274.233  | 1810.812  | AK027201  | 2510.122  | 2348.709  |
| NM_018965 | 442.651  | 594.252  | NM_016174 | 5043.709  | 5312.077  | Z25433    | 3883.879  | 3868.013  |
| NM_000185 | 1780.95  | 2218.268 | NM_020377 | 668.946   | 987.676   | NM_005922 | 3587.386  | 3860.096  |
| Y00816    | 1177.117 | 1245.324 | U88896    | 1020.233  | 947.455   | NM_018638 | 4604.083  | 6177.126  |
| NM_004512 | 1417.53  | 1992.775 | AF116702  | 41888.664 | 33929.492 | AL137593  | 12170.867 | 15460.483 |
| NM_004380 | 13219.71 | 17820.46 | NM_005724 | 4369.678  | 3220.824  | NM_003915 | 2554.569  | 2564.041  |
| AY007378  | 3681.491 | 4436.919 | X58794    | 884.643   | 791.008   | NM_000382 | 2929.494  | 2968.49   |
| D26070    | 1715.469 | 1139.206 | NM_001735 | 1872.646  | 1671.447  | AL133064  | 3566.188  | 3753.085  |
| NM_001642 | 6927.017 | 7035.52  | NM_002349 | 548.247   | 602.025   | NM_006227 | 3368.221  | 4615.312  |
| NM_000501 | 2816.189 | 2844.108 | NM_005080 | 12679.274 | 11283.834 | NM_002905 | 5889.453  | 6564.354  |
| NM_000114 | 446.726  | 319.074  | NM_004887 | 7922.528  | 6178.09   | NM_000700 | 44619.613 | 51527.965 |
| NM_005156 | 3930.473 | 3687.137 | NM_006404 | 518.357   | 468.353   | NM_019028 | 7547.311  | 7986.338  |
| NM_000558 | 690.556  | 881.074  | NM_002986 | 787.619   | 635.628   | NM_000431 | 4110.926  | 5046.461  |
| NM_014170 | 4387.273 | 3416.021 | M15330    | 897.504   | 913.133   | NM_013421 | 830.969   | 844.806   |
| AF116652  | 7115.699 | 8342.968 | NM_014396 | 2336.099  | 1536.767  | AB033118  | 5411.424  | 8675.423  |
| NM_000835 | 644.515  | 832.756  | AK027201  | 2114.666  | 1651.701  | NM_019606 | 3992.47   | 4046.222  |
| AK000271  | 1292.959 | 606.591  | Z25433    | 2549.52   | 3645.87   | NM_001690 | 10116.583 | 9819.938  |
| NM_001149 | 431.209  | 462.924  | AL133064  | 2463.847  | 4030.105  | AF034374  | 7069.992  | 7371.595  |
| NM_006808 | 31202.65 | 38590.9  | NM_000700 | 38185.051 | 45343.363 | NM_016118 | 10879.496 | 7590.024  |
| NM_006634 | 12728.09 | 12721.33 | NM_019028 | 9701.084  | 12469.068 | NM_018674 | 9399.932  | 10424.933 |
| NM_016465 | 2414.39  | 2877.969 | NM_000431 | 2729.663  | 3142.161  | NM_001683 | 15674.25  | 17648.746 |
| NM_000328 | 992.739  | 1247.632 | NM_013421 | 1195.8    | 1027.954  | NM_001682 | 1728.553  | 2334.851  |
| NM_013399 | 3697.817 | 4584.119 | NM_012474 | 7118.344  | 7689.796  | NM_014405 | 1848.971  | 2697.663  |
| NM_002410 | 657.917  | 387.388  | AB033118  | 4398.057  | 2535.458  | NM_000816 | 1211.596  | 1067.396  |
| AL122120  | 2824.09  | 2033.377 | NM_019606 | 2572.987  | 2828.993  | NM_014928 | 1074.694  | 1234.49   |

|           |          |          |           |           |           |           |           |           |
|-----------|----------|----------|-----------|-----------|-----------|-----------|-----------|-----------|
| NM_014684 | 1549.042 | 1272.676 | NM_00169C | 6284.762  | 5973.446  | AK025130  | 5007.816  | 5488.85   |
| AK027247  | 1153.367 | 803.216  | AF034374  | 7003.325  | 6617.474  | NM_033334 | 411.947   | 851.413   |
| NM_00248C | 6830.764 | 5546.672 | NM_016118 | 6036.227  | 5580.997  | AB037791  | 1557.961  | 1339.29   |
| NM_014034 | 7128.894 | 4018.875 | NM_018674 | 15358.687 | 15170.398 | NM_018124 | 7670.286  | 6558.065  |
| NM_005335 | 20205.22 | 14058.01 | NM_001683 | 15081.533 | 11434.685 | Z70701    | 9071.938  | 9665.553  |
| J04474    | 7951.95  | 7119.136 | NM_001682 | 1836.928  | 1036.814  | AB040972  | 2859.052  | 3205.888  |
| NM_003761 | 1298.961 | 933.285  | NM_014405 | 1950.697  | 1870.25   | AF148505  | 2953.111  | 3435.515  |
| NM_004726 | 778.031  | 714.724  | NM_000816 | 936.129   | 987.222   | BE260997  | 880.61    | 725.473   |
| NM_014011 | 2400.44  | 2420.465 | NM_014928 | 1134.524  | 962.134   | NM_018686 | 13928.514 | 12241.58  |
| AK025994  | 2111.13  | 2370.311 | AK025130  | 3491.468  | 2754.098  | NM_017676 | 2157.228  | 2023.489  |
| L29306    | 660.084  | 852.324  | Z70701    | 10645.559 | 13413.654 | AK021764  | 974.517   | 761.715   |
| NM_013989 | 2108.794 | 2153.199 | AF148505  | 2372.285  | 2555.117  | NM_005431 | 2389.305  | 2190.902  |
| NM_001738 | 1603.534 | 1835.161 | BE260997  | 474.262   | 678.199   | AB036063  | 2822.945  | 2658.682  |
| NM_00227C | 375.258  | 406.554  | NM_018686 | 8341.991  | 12457.61  | NM_002894 | 9615.135  | 7490.952  |
| NM_001055 | 12086.94 | 17973.24 | NM_017676 | 1129.378  | 1502.399  | NM_004629 | 10902.244 | 10516.881 |
| NM_015878 | 941.581  | 1111.833 | AK021764  | 381.709   | 372.139   | NM_00426C | 9155.429  | 9250.16   |
| NM_002271 | 39065.44 | 45947.62 | NM_005431 | 1868.83   | 1793.995  | AL050067  | 1057.956  | 1107.606  |
| NM_018361 | 5686.92  | 4344.263 | AB036063  | 2103.779  | 2191.685  | NM_004972 | 5098.596  | 5060.696  |
| NM_019893 | 1192.648 | 949.634  | NM_002894 | 5867.53   | 5922.399  | NM_006251 | 5832.519  | 5858.672  |
| AB040966  | 6946.403 | 6681.074 | NM_004629 | 7450.726  | 8108.385  | NM_004103 | 6344.755  | 7621.948  |
| NM_020132 | 1138.139 | 1440.707 | NM_00426C | 7284.201  | 5881.537  | NM_002314 | 7137.723  | 6530.131  |
| NM_016467 | 15323.26 | 10893.62 | AL050067  | 1336.796  | 1035.944  | NM_001744 | 6210.62   | 6894.962  |
| NM_007253 | 1144.128 | 1040.884 | NM_004972 | 4736.769  | 3947.771  | NM_006296 | 2192.549  | 3099.8    |
| NM_019106 | 784.362  | 1247.207 | NM_006251 | 4061.77   | 3416.336  | AF073519  | 7104.816  | 7026.631  |
| L08436    | 760.645  | 508.555  | NM_004103 | 5209.68   | 4094.722  | AB001451  | 578.285   | 747.38    |
| NM_005607 | 3985.303 | 2466.58  | NM_002314 | 4084.191  | 4251.965  | NM_017583 | 2158.309  | 3251.776  |
| NM_006761 | 46507.69 | 33723    | NM_001744 | 4873.357  | 3443.272  | Y16132    | 7649.685  | 8759.898  |
| NM_014897 | 2291.359 | 1850.61  | NM_006296 | 1827.868  | 1794.564  | NM_016593 | 696.76    | 775.391   |
| NM_003453 | 7507.435 | 5686.056 | AF073519  | 5452.974  | 5186.525  | NM_002521 | 881.4     | 839.316   |
| NM_018371 | 18944.29 | 24768.34 | NM_002521 | 565.086   | 823.075   | NM_001150 | 720.646   | 521.523   |
| NM_01439C | 11004.76 | 14699.52 | NM_001150 | 690.512   | 850.04    | NM_002856 | 1039.806  | 1417.431  |
| NM_018143 | 713.849  | 883.227  | NM_002856 | 1107.254  | 1118.875  | NM_003225 | 753.871   | 949.237   |
| X78924    | 5617.746 | 5699.885 | NM_003225 | 756.241   | 687.315   | NM_000096 | 1563.51   | 1958.757  |
| NM_01325C | 938.783  | 1086.387 | NM_000096 | 1142.029  | 1351.586  | AA418251  | 830.482   | 1222.784  |
| AF090906  | 735.852  | 719.204  | AA418251  | 879.125   | 657.482   | AA143087  | 4910.697  | 5448.385  |
| AB023219  | 3582.471 | 3691.355 | AA143087  | 6850.748  | 7168.037  | U25804    | 3803.909  | 2410.393  |
| NM_014148 | 583.449  | 578.41   | U25804    | 1804.097  | 2865.746  | BI870965  | 3063.153  | 3173.378  |
| NM_018835 | 4984.486 | 6668.001 | BI870965  | 2319.468  | 1918.117  | NM_001903 | 8198.574  | 9675.459  |
| NM_003401 | 3369.207 | 2126.051 | NM_001903 | 7180.446  | 5134.753  | BI835536  | 13269.626 | 10831.357 |
| AL137724  | 3502.957 | 4795.231 | BI835536  | 8424.563  | 8028.217  | BF205051  | 2184.012  | 1950.841  |
| NM_004758 | 9495.672 | 3330.802 | BF205051  | 2362.611  | 2012.787  | X02761    | 1052.413  | 1053.303  |
| NM_002913 | 5266.079 | 5133.318 | X02761    | 1476.966  | 1272.396  | M91463    | 998.396   | 943.045   |
| AK022797  | 1845.589 | 1366.771 | M91463    | 945.773   | 738.753   | J03060    | 3061.998  | 3044.435  |
| NM_00737C | 6266.632 | 6282.779 | J03060    | 2570.952  | 2062.719  | X54156    | 573.228   | 900.917   |
| NM_006231 | 1439.494 | 1898.853 | X54156    | 1208.776  | 657.705   | NM_003743 | 1405.716  | 1596.695  |
| AK023471  | 2154.325 | 1599.815 | NM_003743 | 1106.095  | 556.705   | AA829383  | 5368.719  | 5490.037  |
| AF044578  | 2023.565 | 1485.747 | AA829383  | 3710.637  | 3216.536  | AF012434  | 10440.881 | 9524.17   |
| NM_001948 | 4221.575 | 2665.222 | AF012434  | 6967.96   | 5495.296  | NM_006404 | 742.888   | 749.911   |
| NM_001067 | 14606.25 | 9227.485 | NM_006404 | 408.202   | 519.303   | NM_014795 | 777.138   | 967.432   |
| NM_005602 | 743.198  | 473.148  | NM_014795 | 378.653   | 353.811   | NM_002986 | 1175.725  | 1263.705  |
| NM_003573 | 4005.018 | 3913.905 | NM_014396 | 2232.769  | 2257.486  | M15330    | 1004.507  | 1382.298  |
| NM_000296 | 3463.155 | 3620.502 | AK027201  | 1287.118  | 1399.886  | NM_014396 | 3372.09   | 2912.094  |
| NM_012302 | 452.876  | 522.773  | NM_000485 | 5566.625  | 6033.061  | AK027201  | 1740.464  | 2148.27   |

|           |          |          |           |           |           |           |           |           |
|-----------|----------|----------|-----------|-----------|-----------|-----------|-----------|-----------|
| NM_017422 | 1561.481 | 1862.454 | X98507    | 1834.236  | 2023.656  | NM_000489 | 4940.714  | 4139.167  |
| NM_006149 | 256.473  | 677.076  | NM_016030 | 47367.332 | 42284.145 | X98507    | 2054.834  | 2329.829  |
| NM_005879 | 1932.035 | 2087.039 | NM_014669 | 6313.785  | 6976.777  | NM_016030 | 32844.617 | 35192.012 |
| AF147790  | 1043.617 | 1520.887 | NM_005652 | 4073.306  | 4755.854  | NM_014669 | 7541.587  | 7416.993  |
| NM_018969 | 398.379  | 528.143  | AK026686  | 317.709   | 532.343   | NM_005652 | 4433.395  | 4127.887  |
| NM_004112 | 1413.676 | 1639.988 | NM_005902 | 772.574   | 666.101   | AK026686  | 735.862   | 584.989   |
| AK025592  | 4932.847 | 5552.51  | NM_002850 | 52031.504 | 61449.039 | NM_005902 | 932.127   | 1298.424  |
| NM_004635 | 8896.627 | 10071.65 | NM_004302 | 453.092   | 548.642   | NM_002850 | 58053.609 | 59574.18  |
| AK023023  | 7264.454 | 6793.134 | NM_005903 | 1361.421  | 1420.98   | NM_004302 | 738.354   | 933.408   |
| NM_015993 | 1733.557 | 2133.608 | NM_000861 | 563.617   | 720.894   | NM_005903 | 1954.088  | 1525.749  |
| NM_002659 | 1116.755 | 865.532  | AB037734  | 749.559   | 632.441   | NM_000861 | 1005.351  | 620.975   |
| Z36776    | 1517.156 | 1316.238 | U77493    | 444.522   | 355.457   | AB037734  | 1547.087  | 1254.955  |
| AB029015  | 2437.797 | 2390.374 | NM_019062 | 366.16    | 331.803   | U77493    | 765.987   | 493.434   |
| NM_002067 | 6576.548 | 4995.603 | NM_003873 | 460.602   | 415.779   | NM_019062 | 420.638   | 480.11    |
| NM_002430 | 531.942  | 344.871  | NM_000263 | 657.101   | 426.314   | NM_003873 | 415.207   | 406.757   |
| NM_006150 | 1457.518 | 597.591  | NM_001683 | 15767.581 | 15179.829 | NM_001682 | 2021.92   | 2775.044  |
| NM_020345 | 1844.748 | 1335.118 | NM_001682 | 1254.199  | 927.527   | NM_014405 | 1947.488  | 3227.849  |
| NM_003287 | 1491.427 | 919.323  | NM_014405 | 1971.847  | 1730.165  | NM_000816 | 972.22    | 1307.829  |
| NM_012325 | 16160.71 | 14069.94 | NM_000816 | 859.951   | 1206.396  | NM_014928 | 1219.377  | 1059.792  |
| NM_014434 | 1953.273 | 2076.531 | NM_014928 | 992.244   | 989.664   | AK025130  | 4723.826  | 5366.537  |
| NM_019607 | 5440.137 | 4993.909 | AK025130  | 2465.508  | 2986.042  | NM_017875 | 1704.446  | 1987.413  |
| U79260    | 11589.14 | 10881.28 | NM_017875 | 1188.883  | 1193.526  | AK023232  | 2247.882  | 2574.839  |
| NM_001895 | 9502.396 | 11939.06 | AK023232  | 2454.831  | 2974.991  | NM_000271 | 6689.209  | 5952.51   |
| NM_006447 | 3423.372 | 3457.859 | NM_000271 | 7192.788  | 7448.089  | NM_018209 | 4753.074  | 5157.243  |
| AF119851  | 562.205  | 653.92   | NM_018209 | 3549.225  | 3988.438  | NM_006184 | 17735.357 | 23223.852 |
| NM_014129 | 5010.788 | 6480.897 | NM_006184 | 17234.994 | 15783.397 | AB018268  | 5123.655  | 5552.984  |
| D87455    | 2506.106 | 2477.695 | AB018268  | 6791.375  | 7384.782  | NM_019045 | 1467.591  | 1115.39   |
| AF080577  | 2641.571 | 2444.881 | NM_019045 | 819.113   | 1053.109  | NM_006380 | 4041.953  | 3417.481  |
| L22005    | 5623.547 | 8852.582 | NM_006380 | 2606.697  | 2283.559  | AB020710  | 2016.188  | 1558.201  |
| NM_012291 | 13617.24 | 15705.65 | AB020710  | 1550.709  | 1440.875  | NM_016174 | 3756.945  | 4187.916  |
| NM_013368 | 2119.862 | 2376.284 | NM_016174 | 5087.333  | 4395.257  | NM_020377 | 754.615   | 521.907   |
| NM_003807 | 2067.399 | 1508.994 | NM_020377 | 703.816   | 627.701   | U88896    | 1890.677  | 1683.883  |
| NM_004358 | 5184.515 | 5437.429 | U88896    | 1757.359  | 1404.277  | AF116702  | 58282.363 | 54966.137 |
| NM_001790 | 3454.083 | 2874.865 | AF116702  | 45949.309 | 31241.43  | NM_005724 | 8527.928  | 8767.406  |
| NM_018243 | 3933.914 | 3511.009 | NM_005724 | 6639.643  | 5155.531  | X58794    | 1092.738  | 1155.504  |
| NM_014939 | 2775.838 | 2130.908 | X58794    | 987.21    | 1000.461  | NM_001735 | 2474.639  | 2473.873  |
| Y17866    | 994.25   | 634.08   | NM_001735 | 1439.416  | 1103.161  | NM_002349 | 716.177   | 672.89    |
| AK024247  | 804.605  | 586.919  | NM_002349 | 612.636   | 570.834   | NM_005080 | 16846.818 | 19055.965 |
| NM_003005 | 5665.045 | 2392.399 | NM_005080 | 12327.507 | 11330.368 | NM_004887 | 8968.462  | 8082.251  |
| NM_002842 | 914.43   | 520.57   | NM_004887 | 4836.77   | 3370.656  | NM_006251 | 6397.05   | 8612.676  |
| NM_012126 | 348.616  | 454.835  | NM_004972 | 3866.494  | 4371.977  | NM_004103 | 6632.215  | 10171.558 |
| NM_004418 | 3456.33  | 2274.396 | NM_006251 | 3522.831  | 3718.777  | NM_002314 | 6920.035  | 8627.034  |
| NM_000917 | 10977.61 | 11855.63 | NM_004103 | 5734.055  | 5310.666  | NM_001744 | 5796.843  | 6116.551  |
| NM_005389 | 17976.7  | 20737.54 | NM_002314 | 4132.276  | 4504.449  | NM_006296 | 2138.262  | 2943.929  |
| NM_014445 | 24350.07 | 30064.54 | NM_001744 | 4339.896  | 4219.392  | Z25433    | 3841.932  | 3953.681  |
| AL832826  | 1572.659 | 2139.758 | NM_006296 | 1685.37   | 1962.687  | NM_005922 | 4033.517  | 4311.392  |
| NM_016123 | 2499.226 | 2508.672 | Z25433    | 2839.799  | 3628.773  | NM_018638 | 4717.44   | 6102.024  |
| AB048365  | 1586.849 | 1905.517 | NM_005922 | 2166.261  | 2531.509  | AL137593  | 11499.355 | 11955.569 |
| NM_000391 | 4132.987 | 5207.677 | NM_018638 | 4202.728  | 3966.271  | NM_003915 | 2235.119  | 2400.973  |
| AF229179  | 674.526  | 854.35   | AL137593  | 12769.008 | 14693.167 | NM_000382 | 3362.585  | 3072.935  |
| NM_014771 | 7087.209 | 7571.886 | NM_003915 | 2155.699  | 2082.011  | AL133064  | 3448.498  | 4162.403  |
| NM_002275 | 1123.899 | 781.71   | NM_000382 | 2419.802  | 2770.171  | NM_006227 | 4057.952  | 5461.843  |
| AK025215  | 11630.11 | 11339.24 | AL133064  | 2501.468  | 2978.826  | NM_002905 | 6200.645  | 6078.943  |

|           |          |          |           |           |           |           |           |           |
|-----------|----------|----------|-----------|-----------|-----------|-----------|-----------|-----------|
| NM_018131 | 8679.413 | 5185.649 | NM_006227 | 3500.195  | 2851.161  | NM_000700 | 46131.465 | 49195.445 |
| NM_014834 | 413.576  | 375.171  | NM_002905 | 4812.234  | 4869.87   | NM_019028 | 7770.215  | 7459.986  |
| NM_017636 | 3825.891 | 3508.515 | NM_019028 | 9784.326  | 9533.461  | NM_000431 | 3693.258  | 4816.3    |
| NM_012468 | 534.878  | 439.049  | NM_000431 | 3124.382  | 2494.389  | NM_013421 | 771.226   | 1060.906  |
| M27877    | 11762.74 | 5982.754 | NM_013421 | 901.16    | 959.63    | NM_012474 | 13433.118 | 12274.14  |
| D70836    | 29215.71 | 17960.79 | NM_012474 | 9082.937  | 8480.405  | AB033118  | 5020.27   | 8712.307  |
| D16878    | 1521.114 | 1014.014 | AB033118  | 5370.27   | 3244.114  | NM_019606 | 4105.308  | 3244.428  |
| NM_014943 | 1341.896 | 1478.924 | NM_019606 | 2294.598  | 2331.146  | NM_001690 | 9711.07   | 9155.641  |
| AK024392  | 4309.789 | 5291.439 | NM_001690 | 4888.671  | 3733.646  | AF034374  | 6469.579  | 6003.238  |
| NM_013260 | 1079.907 | 860.997  | AF034374  | 6816.994  | 6293.678  | NM_016118 | 11136.732 | 7738.548  |
| NM_018300 | 2227.035 | 1916.729 | NM_016118 | 6218.604  | 5947.034  | NM_018674 | 9204.012  | 9223.365  |
| NM_004875 | 2542.635 | 3105.553 | NM_018674 | 14022.566 | 12360.965 | NM_000068 | 1559.155  | 1983.253  |
| NM_018254 | 3193.738 | 3495.751 | NM_000068 | 1223.471  | 1001.83   | AB033046  | 13117.371 | 18353.367 |
| NM_017745 | 1888.984 | 2732.623 | AB033046  | 8012.112  | 8083.71   | NM_015918 | 10389.468 | 16211.223 |
| NM_018433 | 4926.825 | 5069.937 | NM_015918 | 8406.116  | 7787.467  | AB029041  | 12212.116 | 14821.365 |
| NM_000937 | 1218.375 | 1911.567 | AK023228  | 566.119   | 706.689   | AK026642  | 12606.997 | 13691.264 |
| AB028451  | 705.523  | 762.581  | AB029041  | 13602.07  | 13938.575 | AL359063  | 1808.003  | 2218.252  |
| AK024810  | 17931.59 | 17161.45 | AK026642  | 9548.536  | 8877.553  | AL079292  | 4475.807  | 4368.709  |
| AK022615  | 29222.61 | 27869.06 | AL359063  | 1249.866  | 1497.781  | X89667    | 1597.924  | 1738.714  |
| NM_004043 | 4481.627 | 4730.139 | AL079292  | 2604.608  | 3212.079  | AB037791  | 1516.516  | 1236.313  |
| BM458096  | 13954.07 | 10643.96 | X89667    | 2024.262  | 2346.753  | NM_018124 | 8199.604  | 7108.674  |
| NM_005626 | 12144.33 | 8757.938 | AB037791  | 1390.804  | 1143.511  | Z70701    | 10408.202 | 10571.26  |
| D29958    | 17587.31 | 14814.27 | Z70701    | 11037.781 | 8994.006  | AB040972  | 2898.718  | 3068.48   |
| NM_015971 | 12286.52 | 7356.42  | AB040972  | 4331.199  | 4001.477  | AF148505  | 3445.381  | 3387.214  |
| D17257    | 54770.02 | 47227.23 | BE260997  | 692.376   | 702.241   | BE260997  | 893.122   | 786.565   |
| AK000724  | 3752.356 | 2531.258 | NM_018686 | 7148.948  | 9317.811  | NM_018686 | 14612.785 | 11598.607 |
| NM_003720 | 11583.81 | 8226.696 | NM_017676 | 1474.862  | 1633.107  | NM_017676 | 2324.682  | 2393.254  |
| AF097159  | 1463.816 | 1494.188 | AK021764  | 496.142   | 608.129   | AK021764  | 992.661   | 626.527   |
| NM_004807 | 2596.95  | 3030.266 | NM_005431 | 2332.865  | 2037.607  | NM_005431 | 2889.586  | 2180.194  |
| AF219140  | 369.013  | 569.87   | AB036063  | 2258.709  | 2155.119  | AB036063  | 2540.389  | 2294.396  |
| J03569    | 29025.82 | 31325.91 | NM_002894 | 5622.509  | 5250.792  | NM_002894 | 10172.024 | 7766.229  |
| NM_003115 | 6648.877 | 5417.07  | NM_004629 | 7605.378  | 6214.827  | NM_004629 | 11569.636 | 9027.837  |
| NM_000687 | 18213.84 | 17918.87 | NM_004260 | 7379.427  | 6613.124  | NM_004260 | 8216.622  | 7136.494  |
| NM_000446 | 472.601  | 317.537  | AL050067  | 1293.259  | 886.37    | AL050067  | 1102.91   | 908.774   |
| NM_018200 | 1811.304 | 2461.663 | AK024732  | 794.838   | 1035.811  | NM_015564 | 2060.073  | 5050.017  |
| NM_014838 | 5268.996 | 4375.992 | J05158    | 588.317   | 616.27    | AF160476  | 811.224   | 1362.544  |
| NM_007212 | 3263.573 | 3438.732 | NM_015564 | 1263.734  | 1311.168  | L22650    | 1015.879  | 996.965   |
| AF005067  | 2816.055 | 2506.399 | AF160476  | 671.905   | 1045.619  | AB014520  | 4426.541  | 4747.308  |
| NM_005710 | 6476.864 | 5576.966 | L22650    | 1268.084  | 2917.174  | AF161420  | 1466.426  | 1653.345  |
| AF252284  | 1652.457 | 1282.752 | AB014520  | 6765.856  | 7074.204  | NM_004907 | 1312.095  | 1251.981  |
| NM_014930 | 1342.956 | 699.561  | AF161420  | 1280.582  | 1098.664  | NM_002891 | 699.483   | 622.801   |
| NM_001530 | 3538.534 | 3207.664 | NM_004907 | 1744.662  | 2086.472  | NM_001775 | 683.117   | 597.353   |
| U80232    | 5033.459 | 4517.214 | NM_002891 | 1021.587  | 1316.749  | X04526    | 15657.913 | 12401.565 |
| AF086526  | 1379.466 | 566.74   | NM_001775 | 638.422   | 444.799   | D26067    | 5608.29   | 5115.078  |
| AK025788  | 1973.33  | 949.833  | BE083789  | 404.108   | 420.425   | AF227924  | 2870.058  | 2813.486  |
| AF086164  | 1473.157 | 932.132  | D26067    | 4113.193  | 4472.598  | NM_005716 | 11809.346 | 11855.162 |
| AK025577  | 1002.089 | 1033.317 | AF227924  | 1967.396  | 2058.578  | NM_006183 | 2305.409  | 1994.257  |
| AK000216  | 1663.706 | 1641.82  | NM_005716 | 17335.529 | 13694.136 | NM_016087 | 816.654   | 678.902   |
| AK023440  | 806.787  | 745.065  | NM_006183 | 1423.318  | 2174.042  | S59184    | 2308.363  | 2570.325  |
| AB033041  | 15752.99 | 16681.9  | S59184    | 2122.731  | 1346.682  | NM_006661 | 1864.273  | 1476.54   |
| NM_014894 | 10667.96 | 12505.19 | NM_005130 | 386.685   | 402.493   | NM_005746 | 15721.418 | 14436.538 |
| AY007155  | 5170.898 | 5785.425 | NM_006661 | 2404.54   | 2304.893  | NM_004588 | 976.194   | 1143.48   |
| AK027160  | 2829.811 | 2229.61  | NM_005746 | 11600.106 | 10518.868 | U16126    | 863.482   | 879.459   |

|           |          |          |           |           |           |           |           |           |
|-----------|----------|----------|-----------|-----------|-----------|-----------|-----------|-----------|
| AL359211  | 1014.517 | 1040.782 | NM_00458E | 978.235   | 820.249   | NM_002172 | 13710.703 | 13404.796 |
| U79264    | 1388.251 | 1398.969 | U16126    | 838.872   | 745.047   | NM_002614 | 800.182   | 715.404   |
| NM_01569E | 2812.493 | 2760.642 | NM_002172 | 15375.746 | 11111.101 | NM_005655 | 3288.017  | 3243.325  |
| AK023619  | 420.282  | 201.108  | NM_002614 | 505.14    | 556.099   | NM_007314 | 4785.509  | 4501.388  |
| AF070530  | 22195.59 | 16734.12 | NM_005655 | 2098.907  | 2115.806  | NM_016073 | 3539.936  | 2393.853  |
| NM_00642C | 1402.644 | 1062.289 | AJ008144  | 288.837   | 397.61    | NM_00660C | 19026.094 | 17453.502 |
| AF131855  | 990.182  | 558.995  | NM_007314 | 2976.488  | 3864.916  | AF297709  | 2021.774  | 1947.706  |
| AF086046  | 1966.167 | 1297.839 | NM_016073 | 2486.466  | 3936.369  | L77564    | 1240.68   | 1245.486  |
| AK024962  | 838.501  | 631.314  | NM_00660C | 14610.354 | 13699.159 | NM_015384 | 2417.451  | 1935.244  |
| AK025135  | 5794.41  | 1755.21  | AF297709  | 1505.376  | 1766.48   | AK023327  | 1351.218  | 1282.462  |
| NM_01792E | 2451.519 | 1757.112 | L77564    | 957.115   | 960.743   | AB046858  | 1961.239  | 1625.975  |
| AY007145  | 1074.44  | 872.688  | NM_015384 | 1847.779  | 1986.887  | D50914    | 3005.936  | 2577.199  |
| D38549    | 1114.247 | 1424.236 | AK023327  | 1393.518  | 1326.113  | BE878692  | 1035.737  | 769.669   |
| AK024780  | 1203.346 | 1230.743 | AB046858  | 1281.096  | 1244.878  | NM_002007 | 944.315   | 645.781   |
| AF085947  | 359.245  | 531.247  | D50914    | 2823.615  | 2153.779  | NM_01589E | 1830.765  | 1059.047  |
| AF086000  | 384.773  | 411.859  | BE878692  | 796.887   | 1024.537  | NM_00230E | 49360.004 | 28379.67  |
| AL359591  | 1041.868 | 573.853  | NM_002007 | 672.677   | 654.021   | AK025439  | 3526.839  | 3005.564  |
| AK022389  | 258.29   | 397.191  | NM_01589E | 1508.205  | 4105.722  | NM_001737 | 1382.955  | 1609.877  |
| AK022123  | 512.96   | 528.471  | NM_00230E | 27638.219 | 43126.938 | Z36784    | 890.351   | 825.949   |
| AK024184  | 678.195  | 477.476  | AK025439  | 2675.816  | 2510.86   | NM_01662E | 10723.527 | 9890.862  |
| U10510    | 3810.022 | 4027.132 | NM_001737 | 1954.762  | 1402.819  | NM_007213 | 4070.881  | 3033.496  |
| Z36842    | 964.222  | 708.127  | Z36784    | 804.96    | 692.579   | NM_019064 | 1440.545  | 826.518   |
| AF086155  | 723.479  | 669.193  | NM_01662E | 8901.728  | 6821.661  | NM_000094 | 2358.9    | 2193.068  |
| AK022010  | 310.508  | 328.067  | NM_007213 | 2483.637  | 2277.579  | AJ295148  | 1364.195  | 1538.642  |
| NM_01415E | 5089.501 | 2108.652 | NM_019064 | 983.415   | 487.017   | AF176701  | 752.371   | 618.093   |
| AK021795  | 460.948  | 364.102  | NM_000094 | 2955.955  | 1944.589  | NM_016302 | 5025.924  | 4323.617  |
| AL162042  | 684.384  | 731.237  | AJ295148  | 898.758   | 1025.141  | NM_00415E | 22779.197 | 15536.697 |
| AK023312  | 1202.461 | 1141.662 | AF176701  | 292.05    | 380.888   | AK021866  | 910.322   | 669.331   |
| AL133570  | 1217.263 | 1242.036 | NM_016302 | 3475.086  | 3787.787  | NM_00324E | 5748.502  | 6028.491  |
| AK022678  | 1657.719 | 1887.859 | NM_00415E | 15251.976 | 26572.559 | M21897    | 887.252   | 969.038   |
| AK023473  | 402.665  | 325.996  | AK021866  | 506.473   | 549.422   | AF301463  | 1409.616  | 1389.279  |
| AK023835  | 1784.21  | 1754.776 | NM_00324E | 4238.347  | 3950.755  | NM_015984 | 9554.571  | 6044.66   |
| AK023012  | 682.308  | 475.395  | M21897    | 702.316   | 550.64    | AK025969  | 2080.804  | 1196.484  |
| AK023906  | 2257.249 | 1603.941 | AF301463  | 1086.47   | 1111.663  | NM_006894 | 799.237   | 701.046   |
| AK024234  | 492.834  | 409.887  | NM_015984 | 4709.712  | 4806.011  | AK023031  | 2516.816  | 1996.012  |
| NM_01240E | 2654.225 | 2858.975 | AK025969  | 1091.111  | 1224.869  | NM_005717 | 47055.355 | 39370.516 |
| AL050205  | 6620.503 | 4264.079 | NM_006894 | 1249.622  | 1134.139  | NM_01209C | 5550.849  | 3711.575  |
| AK023947  | 401.876  | 589.797  | AK023031  | 1840.308  | 2001.422  | BE793385  | 912.853   | 1315.364  |
| NM_005691 | 1810.946 | 1794.29  | NM_005717 | 44412.07  | 35414.934 | AF177292  | 590.703   | 328.155   |
| AF086156  | 633.891  | 750.995  | NM_01209C | 4352.42   | 4084.848  | NM_00308E | 5445.947  | 4635.422  |
| AK023814  | 670.575  | 686.608  | BE793385  | 981.258   | 1286.879  | AF043290  | 588.706   | 611.654   |
| AF130063  | 724.018  | 774.161  | AF177292  | 419.395   | 493.53    | NM_004082 | 4789.183  | 4459.857  |
| AF086528  | 977.834  | 978.505  | NM_00308E | 4796.893  | 4123.627  | NM_01439E | 4996.362  | 4427.119  |
| AL162043  | 644.101  | 757.117  | AF043290  | 649.445   | 468.042   | NM_005934 | 8956.575  | 8501.242  |
| NM_006543 | 1281.781 | 1541.205 | NM_004082 | 3442.299  | 1887.545  | NM_00712E | 5152.264  | 8655.904  |
| AK024171  | 469.83   | 433.254  | NM_01439E | 4305.276  | 3673.755  | AY004253  | 5402.638  | 6065.167  |
| AK023018  | 1630.447 | 1616.518 | NM_005934 | 10059.194 | 5778.897  | Z46967    | 621.623   | 624.778   |
| AK022672  | 2162.362 | 1299.523 | NM_00712E | 3737.439  | 2381.269  | NM_00214E | 1233.852  | 791.121   |
| AK023870  | 632.111  | 386.92   | AY004253  | 4293.687  | 3000.098  | AL137449  | 2131.455  | 1905.946  |
| AK021599  | 1744.847 | 1384.038 | NM_00214E | 1058.055  | 1256.671  | U88153    | 1579.913  | 1262.005  |
| AK024263  | 1639.573 | 1232.404 | AL137449  | 1990.165  | 2065.676  | X03910    | 13414.011 | 10263.171 |
| NM_016613 | 3277.325 | 1359.846 | U88153    | 1734.642  | 1734.614  | NM_01842E | 6261.468  | 4719.789  |
| AF086414  | 829.212  | 220.59   | X03910    | 14158.45  | 14203.047 | NM_006924 | 18287.096 | 13480.255 |

|           |          |          |           |           |           |           |           |           |
|-----------|----------|----------|-----------|-----------|-----------|-----------|-----------|-----------|
| AJ012490  | 2940.634 | 3365.526 | NM_00505E | 308.28    | 630.82    | NM_016024 | 9057.604  | 6144.477  |
| U84516    | 10075.96 | 9478.716 | NM_006924 | 14545.078 | 14877.438 | NM_018107 | 5077.406  | 3850.419  |
| AL049270  | 1250.155 | 1337.356 | NM_016024 | 6908.663  | 5351.969  | NM_012279 | 1747.229  | 1386.427  |
| U88834    | 2243.625 | 2024.58  | NM_018107 | 3584.504  | 3956.94   | NM_018387 | 9186.457  | 5793.595  |
| BC025324  | 651.548  | 772.046  | NM_012279 | 1389.786  | 1753.416  | BF310673  | 2128.679  | 1791.062  |
| NM_006087 | 66802.09 | 57711.82 | NM_018387 | 8244.567  | 6565.477  | R97012    | 24699.469 | 20462.6   |
| NM_003533 | 1589.016 | 1656.433 | BF310673  | 1532.622  | 1158.876  | U77700    | 8374.343  | 6069.918  |
| AK023726  | 2791.574 | 3776.631 | R97012    | 17577.063 | 15190.063 | NM_006567 | 8236.682  | 6144.931  |
| AK024906  | 656.928  | 573.498  | U77700    | 6541.628  | 5091.934  | AF038554  | 21610.381 | 16129.289 |
| AF131836  | 2497.014 | 2140.446 | NM_006567 | 5108.766  | 4375.485  | AF264621  | 4323.727  | 3132.942  |
| AF275804  | 20256.15 | 22912.93 | AF038554  | 16442.84  | 13179.067 | NM_005875 | 20979.619 | 17459.178 |
| AL137488  | 654.3    | 653.944  | AF264621  | 2765.845  | 1826.885  | NM_004184 | 3118.434  | 3299.317  |
| AL049447  | 48854.45 | 48007.41 | NM_005875 | 13695.594 | 10333.741 | AK075087  | 729.169   | 710.514   |
| NM_020527 | 2419.335 | 2179.931 | NM_004184 | 3185.151  | 2111.255  | AK026571  | 3030.088  | 2992.511  |
| AB020637  | 5581.618 | 7125.672 | AK075087  | 526.05    | 693.511   | AK024673  | 4833.893  | 5058.872  |
| NM_00528E | 2208.163 | 1696.43  | AK026571  | 2772.786  | 2267.315  | AF070618  | 1061.652  | 962.257   |
| AK024365  | 870.779  | 1086.271 | AK024673  | 3086.694  | 3017.083  | AF131748  | 3893.935  | 3654.672  |
| AJ251759  | 1122.552 | 898.077  | AF070618  | 769.782   | 903.193   | NM_000456 | 2758.855  | 2181.825  |
| AK024371  | 505.128  | 500.586  | AF131748  | 3164.318  | 3071.612  | NM_002496 | 9018.049  | 8463.883  |
| AB019569  | 22770.58 | 18710.68 | NM_000456 | 1632.892  | 2061.597  | NM_016243 | 3412.004  | 3028.974  |
| NM_00188E | 16636.56 | 12636.87 | AF190122  | 559.999   | 499.958   | NM_014402 | 58409.016 | 48859.027 |
| NM_00499E | 733.26   | 397.434  | NM_002496 | 7562.459  | 6685.695  | NM_004649 | 6149.497  | 4589.909  |
| X89668    | 9007.719 | 4725.681 | NM_016243 | 3124.431  | 2634.876  | NM_006540 | 3504.775  | 2676.316  |
| NM_00445E | 5705.809 | 4167.928 | X53943    | 766.582   | 809.748   | NM_017766 | 1419.497  | 763.301   |
| NM_006901 | 1184.434 | 953.21   | NM_014402 | 46735.473 | 51837.445 | NM_002811 | 17029.773 | 9651.149  |
| NM_01853C | 5038.969 | 4130.376 | NM_006540 | 2933.808  | 2890.87   | NM_020310 | 2228.663  | 1726.134  |
| AJ003145  | 870.486  | 752.562  | NM_017766 | 1679.594  | 1294.038  | AK024444  | 528.139   | 518.298   |
| AK022855  | 7358.402 | 7212.385 | NM_002811 | 10813.287 | 8410.933  | NM_005802 | 4448.208  | 3314.393  |
| AK023816  | 736.459  | 1481.056 | NM_020310 | 1638.672  | 1477.962  | AB002331  | 4857.763  | 4036.216  |
| AL050102  | 1517.099 | 1026.453 | NM_005802 | 4135.356  | 3386.201  | NM_002504 | 2452.078  | 2168.325  |
| AF305686  | 2309.32  | 3617.967 | AB002331  | 3730.282  | 2571.297  | AB046775  | 1582.444  | 876.668   |
| AF085832  | 1021.03  | 833.657  | NM_002504 | 2054.279  | 1609.711  | X74862    | 1362.217  | 940.531   |
| AK025981  | 2883.106 | 2686.071 | AB046775  | 1020.765  | 1017.514  | X65663    | 5317.074  | 3230.141  |
| AF086266  | 1619.241 | 1561.504 | X74862    | 838.286   | 734.905   | NM_003185 | 2556.327  | 2318.905  |
| AF086252  | 1674.593 | 1258.191 | X65663    | 3108.156  | 2401.447  | NM_004456 | 8795.482  | 7459.975  |
| AK026703  | 404.774  | 599.732  | NM_003185 | 1892.904  | 1018.278  | NM_004284 | 8019.765  | 7215.701  |
| NM_01759E | 237.036  | 265.347  | NM_004456 | 6701.843  | 4574.893  | NM_012243 | 1797.255  | 1818.253  |
| NM_01786E | 11134.96 | 8067.658 | NM_004284 | 6212.518  | 4788.994  | AK025743  | 904.061   | 1221.168  |
| AJ131244  | 648.73   | 629.602  | NM_012243 | 1494.261  | 846.945   | AL137466  | 547.338   | 555.922   |
| NM_00353E | 1488.67  | 925.483  | AK025743  | 1032.759  | 884.166   | AL122040  | 526.257   | 590.331   |
| AF116707  | 1846.296 | 2385.901 | AK023768  | 1066.424  | 1124.569  | AK023974  | 3141.355  | 2281.055  |
| U90910    | 1041.629 | 911.544  | NM_01472E | 841.116   | 725.188   | AK023768  | 1443.728  | 1079.313  |
| CY3Cy5    | 3520.798 | 174.018  | AF147335  | 653.724   | 744.218   | NM_01472E | 938.68    | 877.112   |
| AA143087  | 2639.898 | 4019.842 | AK000711  | 901.485   | 577.235   | AF147335  | 694.102   | 597.522   |
| U25804    | 5127.278 | 3839.598 | BI768072  | 509.781   | 570.192   | BI768072  | 1125.76   | 609.467   |
| BI870965  | 2980.327 | 3854.475 | AK022216  | 4418.624  | 3932.279  | AK022216  | 2854.55   | 2313.797  |
| NM_001903 | 8259.604 | 12427.19 | AK025812  | 3155.828  | 2936.561  | AK025812  | 1905.954  | 1629.571  |
| BI835536  | 16778.32 | 16385.56 | AK021459  | 322.799   | 457.308   | AK021459  | 698.843   | 286.03    |
| BF205051  | 2009.266 | 2275.055 | U00960    | 1354.159  | 1646.779  | U00960    | 1804.031  | 1056.153  |
| X02761    | 416.732  | 495.138  | AK022262  | 1327.059  | 1266.841  | AK022262  | 720.957   | 568.39    |
| M91463    | 880.848  | 775.314  | AF088039  | 52535.285 | 59893.48  | AF088039  | 54781.414 | 49077.836 |
| U88317    | 476.52   | 414.111  | AF143888  | 252.063   | 329.967   | AF143888  | 548.185   | 120.58    |
| J03060    | 2781.542 | 2099.973 | AF086220  | 1243.521  | 1064.166  | AF086220  | 979.663   | 845.027   |

|           |          |          |           |           |           |           |           |           |
|-----------|----------|----------|-----------|-----------|-----------|-----------|-----------|-----------|
| X54156    | 659.931  | 590.921  | AK023941  | 1834.639  | 1299.292  | AK023941  | 1495.211  | 1214.987  |
| NM_003743 | 1505.422 | 1758.025 | AF086265  | 439.583   | 355.949   | AL390083  | 4481.749  | 3729.314  |
| AA829383  | 5371.848 | 4271.981 | AL390083  | 5845.959  | 4092.024  | AB020702  | 1141.423  | 1003.515  |
| AF012434  | 12256.63 | 9818.398 | AL050227  | 1019.095  | 543.15    | AL050227  | 618.237   | 1077.231  |
| NM_033334 | 890.932  | 1183.743 | AF085905  | 991.104   | 827.479   | AF085905  | 1498.874  | 1109.059  |
| SB        | 591.182  | 1340.145 | NM_013355 | 581.78    | 482.597   | NM_013355 | 418.889   | 678.159   |
| SR2       | 57364.59 | 44598.5  | AK001008  | 1063.506  | 1062.663  | NM_003847 | 7423.504  | 6101.793  |
| SR4       | 18973.6  | 10899.9  | NM_007197 | 1141.789  | 1311.78   | AK021973  | 1015.832  | 794.903   |
| SR6       | 3356.777 | 3337.622 | AK021973  | 2484.713  | 2310.323  | AL117638  | 716.883   | 56.551    |
| SR8       | 11415.98 | 29992.63 | AL110155  | 659.96    | 275.78    | AL050165  | 52900.266 | 47374.887 |
| SR10      | 40896.45 | 16437.93 | AL050165  | 52704.273 | 52780.93  | AL117445  | 1021.88   | 850.777   |
| CY3Cy5    | 5230.534 | 345.275  | AL117445  | 1467.052  | 1036.959  | AL122113  | 8147.376  | 6345.648  |
| NM_005902 | 1147.321 | 1923.16  | AL122113  | 9206.926  | 8672.661  | AK024415  | 2160.071  | 1992.834  |
| NM_002850 | 53360.91 | 56045.37 | AK024415  | 3075.804  | 2436.761  | AL049365  | 5739.359  | 5064.421  |
| NM_004302 | 739.022  | 1140.247 | AL049365  | 4173.047  | 4362.95   | AB007877  | 902.016   | 853.265   |
| NM_005903 | 2263.089 | 1877.462 | AB007877  | 666.313   | 418.673   | AK025132  | 684.046   | 781.138   |
| NM_000861 | 987.567  | 860.133  | AK025132  | 908.497   | 619.675   | AK025157  | 1361.122  | 1371.717  |
| AB037734  | 986.598  | 1120.131 | AK025157  | 1310.081  | 973.572   | NM_020215 | 979.297   | 1044.643  |
| U77493    | 517.811  | 666.174  | NM_020215 | 945.102   | 643.984   | AK022001  | 2532.599  | 2020.462  |
| NM_000263 | 804.552  | 1059.365 | AK022001  | 2085.715  | 1781.63   | AK022633  | 735.788   | 896.169   |
| AF073519  | 7742.819 | 9792.074 | AK022633  | 1022.411  | 470.1     | AK027199  | 1032.626  | 664.491   |
| AB001451  | 633.559  | 485.394  | AK027199  | 838.18    | 494.755   | AK000079  | 2889.618  | 2469.855  |
| NM_017583 | 2291.631 | 3700.488 | AK000079  | 2231.995  | 1474.637  | AJ227874  | 1467.677  | 1363.481  |
| Y16132    | 4551     | 6359.851 | AL137361  | 659.444   | 779.18    | AF009268  | 619.708   | 443.678   |
| NM_016593 | 590.353  | 549.57   | AJ227874  | 1732.029  | 1606.691  | AF009312  | 684.89    | 575.648   |
| NM_002521 | 453.116  | 712.958  | AF009268  | 471.022   | 668.974   | AF056428  | 4344.29   | 3657.841  |
| NM_002856 | 942.406  | 1737.08  | AF056418  | 2029.196  | 2382.838  | AF069136  | 837.629   | 620.663   |
| NM_003225 | 1144.245 | 1461.633 | AF127772  | 1286.779  | 1146.213  | AK021594  | 690.517   | 448.759   |
| NM_000096 | 2934.699 | 3546.694 | AF009276  | 842.52    | 931.145   | AK021635  | 1847.209  | 1516.77   |
| AA418251  | 1098.608 | 2078.171 | AF056428  | 7690.795  | 7264.309  | AK021856  | 1221.345  | 803.634   |
| NM_019045 | 1418.484 | 1842.299 | AF069136  | 659.152   | 743.853   | AK025276  | 1920.586  | 1804.941  |
| NM_006380 | 4162.613 | 4055.191 | AK001995  | 438.287   | 662.726   | AK026457  | 918.124   | 987.768   |
| AB020710  | 2137.546 | 1719.828 | AK021594  | 720.486   | 729.762   | AJ008131  | 14550.602 | 16996.223 |
| Z83801    | 433.781  | 489.365  | AK001151  | 512.107   | 270.279   | NM_006272 | 756.344   | 907.284   |
| NM_016174 | 2600.552 | 3662.791 | AK021635  | 1568.412  | 1598.809  | AK024303  | 864.168   | 797.248   |
| NM_020377 | 343.856  | 637.887  | AK021856  | 1578.831  | 1698.115  | AL160131  | 8135.376  | 8284.415  |
| U88896    | 2004.224 | 2363.321 | AK025276  | 2508.648  | 1643.748  | AF086045  | 4202.02   | 5526.61   |
| NM_005724 | 7746.111 | 9389.954 | AK026457  | 1469.166  | 972.503   | AK027028  | 2340.337  | 2012.607  |
| X58794    | 944.717  | 1112.292 | AJ008131  | 20285.027 | 19219.641 | AK026916  | 4725.164  | 3706.079  |
| NM_001735 | 2224.722 | 2514.821 | AF086338  | 498.817   | 406.652   | AK026914  | 1667.204  | 1674.967  |
| NM_002349 | 486.979  | 451.926  | AK024303  | 779.286   | 1734.56   | Y13808    | 495.641   | 518.623   |
| NM_005080 | 15964.33 | 14356.67 | AL160131  | 9127.02   | 6564.762  | Y11166    | 1977.535  | 1551.896  |
| NM_004887 | 7234.145 | 4777.958 | AF086045  | 3041.506  | 2800.423  | AK023515  | 1816.135  | 1415.107  |
| NM_006404 | 764.204  | 790.749  | AK027028  | 1315.115  | 1718.874  | AL137623  | 11418.464 | 10141.841 |
| NM_014795 | 1038.426 | 908.696  | AK027069  | 376.804   | 487.328   | AK026485  | 705.507   | 586.181   |
| NM_002986 | 431.714  | 421.85   | AK026916  | 3246.853  | 3827.942  | NM_003546 | 3102.799  | 2170.561  |
| M15330    | 945.575  | 973.889  | AK026914  | 2220.847  | 2555.953  | AF118077  | 2651.216  | 2792.245  |
| NM_014396 | 3462.951 | 4929.546 | Y13808    | 526.18    | 625.781   | AL137625  | 912.939   | 1080.872  |
| AK027201  | 1209.863 | 949.317  | Y11166    | 1391.813  | 1408.166  | AK025750  | 1816.402  | 2158.455  |
| NM_000489 | 3669.82  | 2862.788 | AK023515  | 1631.796  | 1401.879  | AK025783  | 1274.369  | 1307.706  |
| X98507    | 2093.69  | 2776.617 | AL137623  | 14320.275 | 10395.164 | AF113675  | 801.212   | 605.782   |
| NM_016030 | 6211.128 | 8013.174 | AK026485  | 607.616   | 480.329   | AK024514  | 662.558   | 441.592   |
| NM_014669 | 7849.087 | 13017.81 | NM_003546 | 1476.562  | 2267.196  | NM_020119 | 6198.053  | 4010.103  |

|           |          |          |           |           |           |           |           |           |
|-----------|----------|----------|-----------|-----------|-----------|-----------|-----------|-----------|
| NM_005652 | 4680.312 | 6476.666 | AF118077  | 1562.607  | 1901.411  | AL049417  | 5982.81   | 4154.963  |
| AK026686  | 759.704  | 1035.999 | AL137625  | 862.422   | 1663.722  | AK023507  | 664.673   | 659.506   |
| AL133064  | 3859.77  | 4532.157 | AK025750  | 1986.839  | 4851.183  | NM_005169 | 2033.734  | 1985.055  |
| NM_006227 | 3628.554 | 6513.448 | BF031253  | 771.205   | 887.164   | AL109818  | 890.197   | 449.185   |
| NM_002905 | 5779.652 | 6813.316 | AK025783  | 1462.585  | 1368.004  | NM_017929 | 1107.46   | 465.707   |
| NM_019028 | 5070.074 | 7766.295 | AF113675  | 865.137   | 1363.577  | NM_018472 | 963.592   | 762.127   |
| NM_000431 | 4455.57  | 6303.07  | AK024514  | 507.303   | 761.482   | AJ008128  | 16606.391 | 15798.908 |
| NM_013421 | 627.109  | 786.391  | NM_020119 | 4101.356  | 6797.711  | AL449243  | 9548.02   | 7283.956  |
| AB033118  | 4460.497 | 9011.594 | AL049417  | 6090.471  | 8921.211  | M12211    | 1229.375  | 842.058   |
| NM_019606 | 4202.997 | 4960.112 | NM_005169 | 5002.765  | 5073.859  | AK026449  | 6462.134  | 8774.995  |
| NM_001690 | 10013.9  | 10137    | AL109818  | 614.675   | 519.077   | NM_014027 | 4076.469  | 4303.825  |
| AF034374  | 4516.025 | 3638.511 | S97393    | 664.757   | 575.778   | NM_020467 | 4455.906  | 5726.172  |
| NM_018674 | 1592.883 | 1196.808 | BE698533  | 303.085   | 491.902   | AF116621  | 3882.245  | 4401.594  |
| NM_001683 | 12784.16 | 14690.42 | NM_017929 | 772.391   | 739.676   | AF086554  | 1684.106  | 1605.241  |
| NM_001682 | 1883.829 | 2786.18  | NM_018472 | 1365.237  | 890.909   | AL390136  | 9924.781  | 8366.382  |
| NM_014405 | 1660.093 | 2121.21  | AF085923  | 267.68    | 452.446   | AF086398  | 53553.113 | 44373.402 |
| NM_000816 | 905.922  | 695.054  | AJ008128  | 27046.07  | 16070.976 | AK024545  | 919.962   | 604.594   |
| NM_014928 | 1306.745 | 2040.163 | AL449243  | 6599.396  | 4548.664  | AK023444  | 733.485   | 605.615   |
| AK025130  | 1272.946 | 1286.178 | M12211    | 1649.662  | 1402.582  | AK025953  | 1022.552  | 1013.393  |
| NM_017875 | 1848.154 | 2683.361 | AK026449  | 12194.323 | 11500.438 | NM_003180 | 1930.204  | 1440.81   |
| AK023232  | 2117.888 | 3147.47  | NM_014027 | 2472.671  | 2571.257  | AF086406  | 13561.887 | 10835.057 |
| NM_000271 | 5544.563 | 6070.559 | NM_020467 | 3556.345  | 5826.717  | D17216    | 3592.521  | 2554.914  |
| NM_018209 | 6494.763 | 8893.067 | AF116621  | 3651.295  | 7183.445  | AL137581  | 1728.903  | 1178.033  |
| AB018268  | 3360.686 | 4413.849 | AF086554  | 1709.59   | 1951.894  | AK024942  | 1619.107  | 1313.557  |
| Z70701    | 6722.267 | 6752.828 | AL390136  | 12671.96  | 12812.452 | AJ227873  | 18751.033 | 13394.792 |
| AB040972  | 2094.728 | 2547.815 | AK023156  | 632.756   | 873.329   | AK022886  | 4897.673  | 3805.514  |
| BE260997  | 597.322  | 677.12   | AF086398  | 52054.52  | 54127.617 | AK024665  | 11458.945 | 8062.903  |
| NM_018686 | 15193.89 | 13099.79 | AK024545  | 884.411   | 1083.491  | AF147363  | 748.92    | 542.411   |
| NM_017676 | 2816.875 | 2947.282 | NM_003180 | 2344.155  | 3447.399  | AJ227880  | 1003.754  | 835.346   |
| AK021764  | 1193.346 | 1048.354 | AF086406  | 13373.748 | 12751.577 | AK000691  | 1197.55   | 1208.619  |
| NM_005431 | 2701.853 | 2517.806 | D17216    | 4184.172  | 3827.584  | AK001448  | 1853.769  | 1470.75   |
| AB036063  | 2468.322 | 2526.513 | AL137581  | 1729.319  | 1542.751  | AK026890  | 473.141   | 596.046   |
| NM_002894 | 9550.002 | 8145.134 | AK024942  | 1813.185  | 1590.56   | AL049321  | 3939.576  | 2961.611  |
| NM_004629 | 11118.79 | 7753.737 | AJ227873  | 19747.311 | 17919.67  | CY3Cy5    | 3499.849  | 183.056   |
| AL050067  | 813.474  | 411.158  | AK022886  | 4819.967  | 4075.51   | W74254    | 12716.559 | 22165.881 |
| NM_004972 | 4391.928 | 4259.737 | AK024665  | 9308.601  | 8821.86   | M58603    | 5045.889  | 6191.21   |
| NM_006251 | 7295.468 | 8146.277 | AF147363  | 916.21    | 600.435   | AA443286  | 681.103   | 543.953   |
| NM_004103 | 5193.465 | 6203.958 | AJ227880  | 788.024   | 658.884   | AB003334  | 6421.009  | 6244.281  |
| NM_006296 | 1760.624 | 2127.157 | AK000691  | 1363.018  | 1036.622  | AA490737  | 769.971   | 795.754   |
| Z25433    | 4510.519 | 5020.923 | AK001448  | 1563.422  | 1454.932  | AI878886  | 15504.02  | 17972.676 |
| NM_005922 | 4397.806 | 5279.963 | AK026890  | 596.184   | 477.512   | BG697179  | 7229.174  | 7561.312  |
| NM_018638 | 3622.688 | 5725.96  | AL049321  | 2938.207  | 2512.826  | NM_002136 | 42398.574 | 44676.715 |
| AL137593  | 6491.559 | 8611.613 | CY3Cy5    | 1387.096  | 248.526   | BM012504  | 4007.337  | 4436.385  |
| NM_000382 | 3371.974 | 4167.79  | W74254    | 16429.033 | 8464.777  | AA664145  | 1496.822  | 1670.231  |
| NM_001150 | 255.075  | 382.044  | M58603    | 5533.62   | 3991.947  | X72308    | 7857.977  | 9373.784  |
| NM_002856 | 877.278  | 1567.851 | AA443286  | 828.844   | 531.588   | R48168    | 11084.868 | 13799.861 |
| NM_003225 | 1250.851 | 1207.969 | AB003334  | 8260.22   | 6758.467  | NM_003942 | 1563.296  | 2340.679  |
| NM_000096 | 2405.844 | 2752.396 | AW276315  | 748.642   | 759.626   | NM_004452 | 805.703   | 1255.483  |
| AA418251  | 1056.021 | 1729.886 | AA490737  | 756.783   | 691.364   | SR9       | 20101.26  | 3556.155  |
| AA143087  | 2480.826 | 3317.06  | AI878886  | 17152.262 | 14137.051 | CY3Cy5    | 3216.709  | 170.488   |
| U25804    | 4227.735 | 3551.154 | BG697179  | 8471.76   | 8386.235  | NM_000418 | 390.277   | 860.223   |
| BI870965  | 2846.8   | 2836.926 | NM_002136 | 46711.914 | 33446.738 | NM_013246 | 370.64    | 378.939   |
| NM_001903 | 8861.296 | 11415.74 | BM012504  | 4913.104  | 4546.024  | NM_000591 | 1431.901  | 1631.629  |



|           |          |          |           |           |           |           |           |           |
|-----------|----------|----------|-----------|-----------|-----------|-----------|-----------|-----------|
| BI835536  | 16569.9  | 16057.58 | AA664145  | 1425.774  | 1394.786  | NM_000565 | 782.043   | 935.178   |
| BF205051  | 2044.17  | 2313.014 | X72308    | 10227.675 | 11314.077 | NM_002019 | 1230.313  | 1587.761  |
| X02761    | 524.835  | 424.314  | T70999    | 780.2     | 1344.759  | AF253318  | 704.212   | 825.24    |
| M91463    | 816.407  | 640.47   | T50790    | 906.433   | 1324.064  | NM_017767 | 4896.868  | 5668.124  |
| J03060    | 2949.966 | 3020.62  | R48168    | 10230.442 | 13340.229 | AK024848  | 5992.204  | 7576.003  |
| X54156    | 525.885  | 511.724  | NM_003942 | 1491.066  | 2165.278  | NM_004852 | 1373.093  | 1547.161  |
| NM_003743 | 1620.489 | 2150.716 | SR5       | 5330.551  | 6129.673  | U06699    | 4000.787  | 5571.812  |
| AA829383  | 4807.643 | 3648.314 | SR7       | 4627.53   | 35946.566 | AK024396  | 1292.848  | 1846.368  |
| AF012434  | 11792.16 | 6889.176 | SR9       | 17581.709 | 3828.312  | U58514    | 1574.032  | 1812.347  |
| NM_033334 | 322.773  | 738.603  | NM_000591 | 1330.929  | 1352.079  | NM_000544 | 1897.971  | 2198.209  |
| AB037791  | 1986.151 | 3213.892 | NM_000565 | 840.275   | 716.514   | NM_001044 | 286.49    | 491.811   |
| NM_018124 | 9264.432 | 11550.07 | NM_002019 | 2000.041  | 1484.543  | NM_004644 | 838.053   | 818.695   |
| NM_000489 | 3851.78  | 2844.875 | AF253318  | 991.969   | 1159.964  | AV681967  | 1710.936  | 2234.895  |
| X98507    | 2038.706 | 2350.462 | NM_017767 | 5966.517  | 6053.543  | NM_018250 | 1926.839  | 1933.648  |
| NM_016030 | 9500.011 | 11574.23 | AK024848  | 5408.299  | 7097.983  | NM_016553 | 5469.657  | 5477.877  |
| NM_014669 | 8349.87  | 11825.42 | NM_004852 | 1579.689  | 1518.146  | AB023136  | 603.978   | 503.093   |
| NM_005652 | 4790.206 | 5194.696 | NM_000543 | 1235.62   | 1562.763  | NM_003795 | 23621.016 | 25642.057 |
| AK026686  | 567.013  | 785.045  | U06699    | 4093.339  | 4627.857  | NM_014232 | 4526.157  | 4245.516  |
| NM_005902 | 1146.577 | 1430.519 | AJ290954  | 9979.033  | 18506.66  | NM_005701 | 1546.987  | 1114.561  |
| NM_002850 | 49106.53 | 51575.72 | AK025451  | 1765.634  | 1796.401  | NM_006819 | 36684.848 | 40275.887 |
| NM_005302 | 258.253  | 221.053  | NM_002783 | 1393.285  | 1664.391  | NM_014744 | 2387.314  | 2035.354  |
| NM_004302 | 773.172  | 1303.295 | NM_001047 | 3616.348  | 37242.762 | AF146759  | 977.504   | 1272.58   |
| NM_005903 | 2207.73  | 1541.407 | AK024396  | 1593.822  | 2622.841  | AB032993  | 4937.011  | 5230.22   |
| NM_000861 | 995.651  | 653.872  | NM_000544 | 1770.409  | 1543.239  | NM_000854 | 4073.893  | 4831.684  |
| AB037734  | 1032.195 | 841.258  | NM_004644 | 510.995   | 639.264   | NM_007295 | 2850.908  | 2581.136  |
| U77493    | 393.7    | 786.925  | AV681967  | 1435.841  | 1209.387  | NM_003651 | 8156.936  | 11608.381 |
| NM_003873 | 460.055  | 891.592  | NM_018250 | 1921.667  | 1626.353  | NM_003262 | 1987.798  | 1805.52   |
| NM_000263 | 900.995  | 607.236  | NM_016553 | 5762.256  | 5776.8    | NM_020125 | 559.947   | 604.68    |
| AF073519  | 6712.389 | 8698.332 | AB023136  | 720.468   | 815.089   | AK022832  | 2360.01   | 2623.766  |
| AB001451  | 732.542  | 742.282  | NM_003795 | 22120.635 | 21708.652 | NM_014641 | 2247.681  | 2553.73   |
| NM_017583 | 2054.799 | 3181.44  | NM_014232 | 4660.782  | 4429.961  | NM_004462 | 9949.604  | 10969.884 |
| Y16132    | 4513.108 | 8259.179 | NM_005701 | 1431.421  | 1753.117  | AB020664  | 2314.919  | 2726.189  |
| NM_016593 | 819.062  | 1191.265 | NM_006819 | 38880.773 | 37505.617 | NM_006640 | 17051.166 | 18941.549 |
| NM_002521 | 703.656  | 784.583  | NM_014744 | 2166.603  | 2929.255  | NM_000343 | 609.166   | 1102.557  |
| NM_017875 | 1423.816 | 2280.549 | AF146759  | 1119.794  | 1351.902  | NM_012336 | 11960.697 | 27897.275 |
| AK023232  | 1954.146 | 2330.293 | AB032993  | 5318.351  | 6971.925  | NM_016354 | 992.136   | 1337.913  |
| NM_000271 | 5782.049 | 5700.891 | NM_000854 | 2979.231  | 3720.991  | NM_018155 | 3375.842  | 3064.863  |
| NM_018209 | 6310.215 | 8756.65  | AL117423  | 3850.585  | 4385.509  | AL050358  | 828.26    | 1259.555  |
| NM_006184 | 17733.35 | 25987.29 | NM_002084 | 1780.172  | 2319.252  | NM_004731 | 1233.916  | 641.3     |
| AB018268  | 2932.923 | 3968.729 | NM_007295 | 2927.08   | 3431.935  | AB023139  | 3090.725  | 3974.786  |
| NM_019045 | 1461.219 | 1682.798 | NM_003262 | 2003.589  | 1927.315  | NM_017885 | 2987.799  | 3454.293  |
| NM_006380 | 4015.327 | 3552.846 | NM_020125 | 404.531   | 380.491   | D80004    | 966.997   | 1287.777  |
| AB020710  | 1770.405 | 1697.879 | AK022832  | 2005.721  | 1756.509  | NM_000946 | 5922.414  | 5459.821  |
| Z83801    | 218.738  | 364.78   | NM_014641 | 2610.508  | 2336.959  | NM_016070 | 1678.414  | 1762.793  |
| NM_016174 | 2362.58  | 3254.725 | NM_004462 | 11329.285 | 8974.467  | NM_016390 | 1252.949  | 1667.079  |
| NM_020377 | 486.915  | 468.987  | AB020664  | 2254.082  | 2201.646  | NM_016101 | 4541.932  | 4429.954  |
| U88896    | 1750.417 | 1578.284 | NM_006640 | 16043.076 | 19236.541 | NM_005859 | 23359.363 | 23393.518 |
| NM_005724 | 8054.801 | 7301.575 | NM_019112 | 2642.052  | 3074.395  | NM_020313 | 839.053   | 1031.66   |
| X58794    | 799.683  | 1192.216 | NM_012336 | 7969.645  | 10047.28  | NM_014628 | 6290.62   | 8227.303  |
| NM_001735 | 2244.188 | 1842.875 | NM_016354 | 1262.066  | 1642.572  | AK025630  | 1523.65   | 1711.886  |
| NM_002349 | 747.367  | 1104.798 | NM_003038 | 1365.668  | 2272.409  | AL365404  | 12744.535 | 16426.203 |
| NM_004887 | 7021.145 | 5397.839 | NM_018155 | 4379.433  | 5363.141  | AK022907  | 3399.24   | 4479.092  |
| NM_006404 | 568.442  | 493.663  | AL050358  | 1875.424  | 2311.754  | NM_014793 | 2192.602  | 3352.188  |

|           |          |          |           |           |           |           |           |           |
|-----------|----------|----------|-----------|-----------|-----------|-----------|-----------|-----------|
| NM_01479E | 677.185  | 829.876  | NM_004731 | 764.826   | 1791.453  | NM_00424E | 1267.003  | 1788.35   |
| NM_00298E | 474.705  | 921.225  | AB023139  | 3173.684  | 2674.826  | AK024504  | 1739.543  | 2134.475  |
| M15330    | 1086.555 | 1395.911 | NM_01788E | 2474.494  | 2098.433  | AF039023  | 1918.29   | 1967.238  |
| NM_01439E | 3515.472 | 4898.806 | D80004    | 807.425   | 712.29    | NM_005511 | 3018.489  | 3409.77   |
| AK027201  | 1921.3   | 3243.053 | NM_00094E | 5815.389  | 4997.057  | NM_01469E | 10074.649 | 11732.044 |
| Z25433    | 3895.994 | 4623.087 | NM_01607C | 1854.7    | 1632.561  | NM_01847E | 3912.349  | 4449.563  |
| NM_00592E | 4394.166 | 3881.693 | NM_01639C | 1697.408  | 1573.356  | X52005    | 10568.102 | 15670.071 |
| NM_01863E | 3725.12  | 5765.041 | NM_016101 | 5817.523  | 6368.278  | NM_001047 | 615.193   | 774.479   |
| AL137593  | 8607.866 | 11582.03 | NM_00585E | 36979.383 | 42356.621 | AK024396  | 1298.997  | 2026.206  |
| NM_00391E | 2922.944 | 3253.991 | NM_02031E | 1398.651  | 3159.538  | U58514    | 1472.124  | 1742.782  |
| NM_00038E | 3335.808 | 3432.93  | NM_01462E | 5451.252  | 7025.826  | M58603    | 4284.915  | 4711.988  |
| AL133064  | 3449.364 | 4377.354 | AK025630  | 1538.684  | 2674.339  | AA443286  | 679.115   | 368.794   |
| NM_006227 | 3019.985 | 4688.274 | AL365404  | 14403.774 | 16312.637 | AB003334  | 7549.287  | 6749.622  |
| NM_00290E | 4866.14  | 6167.477 | AK022907  | 3924.024  | 4127.685  | AA490737  | 1190.12   | 907.97    |
| NM_00070C | 41806.81 | 50605.41 | NM_01479E | 2757.473  | 2802.633  | AI878886  | 17396.633 | 18875.891 |
| NM_01902E | 5483.895 | 6298.667 | NM_00424E | 1944.227  | 2111.575  | BG697179  | 8215.602  | 8943.365  |
| NM_000431 | 4214.988 | 4739.732 | NM_003241 | 1319.961  | 1504.962  | NM_00213E | 44956.188 | 48363.063 |
| NM_013421 | 494.843  | 630.26   | NM_00268E | 2969.753  | 3710.751  | BM012504  | 4156.083  | 4963.748  |
| AB033118  | 4618.046 | 5779.017 | AK024504  | 1850.79   | 2044.806  | AA664145  | 1171.437  | 1436.171  |
| NM_01960E | 4445.542 | 4657.661 | AF039023  | 1699.831  | 1770.597  | X72308    | 6799.267  | 8130.246  |
| NM_00169C | 10165.22 | 6676.053 | NM_005511 | 3232.715  | 2947.202  | T70999    | 553.269   | 852.433   |
| AF034374  | 4897.624 | 3400.491 | NM_01469E | 11526.656 | 10971.016 | T50790    | 906.765   | 922.899   |
| NM_018674 | 1600.248 | 1390.893 | NM_01847E | 4333.977  | 4784.69   | NM_00394E | 1935.292  | 2739.032  |
| NM_00168E | 12080.56 | 12992.36 | X52005    | 12493.518 | 9406.956  | NM_00445E | 575.498   | 1043.687  |
| NM_00168E | 1780.844 | 2527.06  | NM_001047 | 718.33    | 369.57    | AB040954  | 2383.226  | 2190.104  |
| NM_01440E | 1969.267 | 2409.861 | AK024396  | 974.639   | 1100.393  | NM_002081 | 847.535   | 1100.02   |
| NM_00081E | 859.51   | 1101.845 | U58514    | 1210.96   | 1136.4    | NM_002084 | 1933.663  | 1883.003  |
| NM_01492E | 743.877  | 935.344  | M58603    | 6471.089  | 5073.26   | D16892    | 15418.248 | 17352.998 |
| AK025130  | 2726.04  | 4653.12  | AA443286  | 896.658   | 565.374   | NM_00475C | 1404.349  | 2317.8    |
| NM_033334 | 282.631  | 476.715  | AB003334  | 8863.435  | 7048.089  | NM_00729E | 2728.186  | 2484.894  |
| AB037791  | 1635.882 | 2296.639 | AW276315  | 793.1     | 800.196   | NM_01324E | 475.768   | 421.132   |
| NM_018124 | 9114.981 | 8302.286 | AA490737  | 1338.244  | 1106.49   | NM_000591 | 1396.973  | 1430.844  |
| Z70701    | 7080.734 | 6678.947 | AI878886  | 19357.912 | 17684.861 | NM_00056E | 997.401   | 950.69    |
| AB040972  | 2355.841 | 2623.772 | BG697179  | 8819.911  | 9770.258  | NM_00201E | 1620.183  | 2072.804  |
| AF148505  | 2598.38  | 3094.047 | NM_00213E | 46533.383 | 41197.512 | AF253318  | 713.693   | 542.969   |
| BE260997  | 628.843  | 662.844  | BM012504  | 5591.392  | 5552.756  | NM_017767 | 4251.301  | 4727.35   |
| NM_01868E | 15396.22 | 10300.75 | AA664145  | 1334.689  | 1104.557  | AK024848  | 5180.221  | 5612.613  |
| NM_01767E | 2261.914 | 1930.555 | X72308    | 10233.31  | 11685.349 | NM_00485E | 1211.304  | 1166.605  |
| AK021764  | 911.126  | 612.432  | T70999    | 906.96    | 1048.615  | NM_00054E | 1205.024  | 1300.97   |
| NM_005431 | 2420.47  | 1405.798 | T50790    | 919.438   | 1213.856  | U06699    | 3130.241  | 3960.96   |
| AB036063  | 2831.842 | 2575.813 | R48168    | 10778.743 | 13746.254 | AJ290954  | 10043.669 | 11866.099 |
| NM_002894 | 9142.084 | 5100.71  | NM_00394E | 1861.922  | 2069.142  | AK025451  | 1917.908  | 1935.523  |
| NM_00462E | 11354.86 | 7218.458 | NM_00445E | 966.198   | 1133.983  | NM_00278E | 1107.8    | 1294.926  |
| NM_00426C | 7712.199 | 9525.568 | AB040954  | 2949.877  | 2664.38   | NM_016354 | 1017.726  | 1364.722  |
| AL050067  | 582.756  | 461.821  | NM_002081 | 1345.258  | 1303.356  | NM_00303E | 1495.647  | 1636.099  |
| NM_00497E | 4147.849 | 4091.524 | NM_002084 | 1695.143  | 1504.708  | NM_01815E | 3101.414  | 3213.63   |
| NM_006251 | 6929.292 | 7129.653 | D16892    | 14509.197 | 10872.847 | AL050358  | 1002.863  | 1135.089  |
| NM_00410E | 5227.163 | 7113.128 | NM_00475C | 1548.416  | 1179.58   | NM_004731 | 1140.688  | 810.009   |
| NM_002314 | 8178.647 | 9684.108 | NM_00729E | 2459.077  | 2026.775  | NM_000544 | 1763.491  | 1595.232  |
| NM_001744 | 6118.274 | 8875.356 | NM_00041E | 431.835   | 282.762   | NM_004644 | 927.957   | 682.687   |
| NM_00629E | 1916.186 | 3373.39  | NM_000591 | 1466.5    | 1645.255  | AV681967  | 1647.312  | 1841.005  |
| AF073519  | 6831.978 | 7140.886 | NM_00056E | 1014.107  | 809.198   | NM_01825C | 2089.467  | 1855.203  |
| AB001451  | 618.376  | 544.386  | NM_00201E | 1689.106  | 1632.404  | NM_01655E | 5859.734  | 4952.204  |

|           |          |          |           |           |           |           |           |           |
|-----------|----------|----------|-----------|-----------|-----------|-----------|-----------|-----------|
| NM_017583 | 2044.384 | 2881.86  | AF253318  | 1234.374  | 1414.208  | AB023136  | 577.15    | 619.762   |
| Y16132    | 4826.848 | 6965.611 | NM_017767 | 6222.919  | 6738.717  | NM_003795 | 24854.268 | 23402.846 |
| NM_016593 | 637.746  | 870.07   | AK024848  | 5423.823  | 6874.254  | NM_014232 | 4653.547  | 4966.561  |
| NM_002521 | 680.169  | 906.26   | NM_004852 | 1423.733  | 1158.524  | NM_005701 | 1501.286  | 1155.658  |
| NM_001150 | 205.044  | 304.164  | NM_000543 | 1041.625  | 1131.441  | NM_006819 | 34324.418 | 39915.02  |
| NM_002856 | 893.905  | 1403.135 | U06699    | 6431.955  | 8254.304  | NM_014744 | 2517.931  | 1836.062  |
| NM_003225 | 1106.741 | 1077.011 | AJ290954  | 10536.134 | 11277.884 | AF146759  | 784.78    | 698.419   |
| NM_000096 | 2324.663 | 2504.071 | AK025451  | 1889.541  | 1731.766  | AB032993  | 4748.542  | 3491.449  |
| AA418251  | 1086.056 | 1271.089 | NM_002783 | 1417.544  | 1476.734  | NM_000854 | 3730.822  | 3215.031  |
| AA143087  | 2711.112 | 2742.565 | NM_016354 | 980.966   | 781.582   | AL117423  | 3515.173  | 3768.473  |
| U25804    | 4062.252 | 2401.636 | NM_003038 | 1062.268  | 1238.456  | NM_002685 | 2883.951  | 3139.999  |
| BI870965  | 2581.259 | 1669.512 | NM_018155 | 3232.261  | 2867.631  | AK024504  | 1667.663  | 2036.767  |
| NM_001903 | 8226.412 | 5199.891 | AL050358  | 1568.649  | 1352.524  | AF039023  | 1937.373  | 2609.853  |
| BI835536  | 16364.62 | 12403.74 | NM_004731 | 940.628   | 1181.19   | NM_005511 | 2886.202  | 3667.358  |
| BF205051  | 1873.159 | 1022.858 | NM_000544 | 2109.185  | 1937.178  | NM_014698 | 9988.918  | 11164.109 |
| X02761    | 645.348  | 305.649  | NM_004644 | 681.774   | 883.667   | NM_018475 | 4204.386  | 4557.272  |
| M91463    | 804.209  | 828.543  | AV681967  | 1645.628  | 1718.15   | NM_003262 | 1554.41   | 1694.485  |
| J03060    | 2557.813 | 1847.759 | NM_018250 | 1774.664  | 1575.049  | AK022832  | 2500.184  | 2291.893  |
| X54156    | 553.078  | 656.181  | NM_016553 | 5503.748  | 5907.823  | NM_014641 | 2175.438  | 2318.185  |
| NM_003743 | 1483.311 | 1720.55  | AB023136  | 790.308   | 852.039   | NM_004462 | 10651.218 | 12208.627 |
| AA829383  | 6016.246 | 7556.695 | NM_003795 | 24074.502 | 28954.947 | AB020664  | 2075.25   | 2251.529  |
| AF012434  | 13420.57 | 16013.03 | NM_014232 | 4398.423  | 4878.982  | NM_006640 | 14917.459 | 14507.406 |
| NM_006404 | 523.897  | 887.851  | NM_005701 | 1266.683  | 1973.455  | NM_000343 | 402.051   | 833.216   |
| NM_014795 | 953.085  | 890.923  | NM_006819 | 42696.594 | 41841.082 | NM_019112 | 2569.978  | 2410.197  |
| NM_002986 | 762.954  | 721.486  | NM_014744 | 2264.112  | 2534.378  | NM_012336 | 9696.458  | 8087.436  |
| M15330    | 1043.628 | 1595.999 | AF146759  | 880.649   | 1107.768  | NM_003942 | 1935.75   | 2266.252  |
| NM_014396 | 3368.766 | 4052.077 | AB032993  | 4631.81   | 3801.371  | NM_004452 | 859.852   | 935.622   |
| AK027201  | 1852.815 | 1992.595 | NM_000854 | 4087.012  | 5996.797  | AB040954  | 2517.519  | 2305.25   |
| NM_000489 | 3953.996 | 2935.541 | AL117423  | 3777.897  | 3183.64   | NM_002081 | 802.667   | 1037.615  |
| X98507    | 1921.502 | 2367.037 | NM_002685 | 3105.323  | 2742.33   | AB023139  | 2627.532  | 2674.802  |
| NM_016030 | 10014.97 | 11412.46 | AK024504  | 1178.529  | 1131.929  | NM_017885 | 3747.963  | 2998.535  |
| NM_014669 | 8764.286 | 12256.2  | AF039023  | 1690.935  | 1571.487  | D80004    | 969.57    | 1116.361  |
| NM_005652 | 4936.837 | 4975.719 | NM_005511 | 2771.294  | 2152.524  | NM_000946 | 6052.067  | 4656.219  |
| AK026686  | 512.708  | 617.755  | NM_014698 | 9389.995  | 8159.737  | NM_016070 | 1604.631  | 1649.958  |
| NM_005902 | 952.992  | 977.302  | NM_018475 | 3868.708  | 3786.433  | NM_016390 | 1546.643  | 1847.046  |
| NM_002850 | 43707.51 | 27974.54 | NM_003262 | 2147.28   | 2223.903  | NM_016101 | 4512.919  | 4461.201  |
| NM_005302 | 181.956  | 209.789  | NM_020125 | 451.09    | 443.016   | NM_005859 | 27715.025 | 27377.783 |
| NM_004302 | 525.574  | 503.211  | AK022832  | 2478.262  | 2031.487  | NM_020313 | 958.542   | 829.136   |
| NM_005903 | 2078.95  | 1062.646 | NM_014641 | 2572.208  | 3252.421  | NM_014628 | 5655.576  | 6224.879  |
| NM_000861 | 1303.422 | 1635.271 | NM_004462 | 10726.278 | 11414.239 | AK025630  | 1336.846  | 1258.219  |
| NM_000024 | 240.539  | 511.045  | AB020664  | 2336.348  | 2241.696  | AL365404  | 12000.227 | 11947.735 |
| AB037734  | 1020.882 | 564.163  | NM_006640 | 14635.77  | 14111.226 | AK022907  | 3251.949  | 3302.668  |
| U77493    | 477.348  | 762.505  | NM_000343 | 495.615   | 391.706   | NM_014793 | 2547.418  | 2739.526  |
| NM_019062 | 161.656  | 317.678  | NM_019112 | 2321.929  | 2075.558  | NM_004245 | 991.723   | 967.649   |
| NM_003873 | 451.015  | 619.859  | NM_012336 | 9820.032  | 10254.509 | NM_003241 | 951.251   | 1140.258  |
| NM_014253 | 139.925  | 275.331  | NM_020246 | 1380.331  | 1201.728  | NM_000543 | 1121.186  | 1595.563  |
| NM_000263 | 1073.024 | 1465.565 | NM_003942 | 1929.816  | 1826.625  | U06699    | 4047.572  | 4762.432  |
| NM_001683 | 13462.91 | 13956.7  | NM_004452 | 678.857   | 808.144   | AJ290954  | 9976.306  | 11863.045 |
| NM_001682 | 1836.144 | 2240.586 | AB040954  | 2652.001  | 2198.168  | AK025451  | 2028.412  | 2072.33   |
| NM_014405 | 2092.005 | 2664.84  | NM_002081 | 972.544   | 696.348   | NM_002783 | 1304.136  | 1604.31   |
| NM_000816 | 1053.733 | 1274.048 | AB023139  | 2977.211  | 2253.01   | X52005    | 11928.454 | 16034.169 |
| NM_014928 | 1028.626 | 1214.716 | NM_017885 | 2710.73   | 2582.094  | NM_001047 | 523.386   | 470.94    |
| AK025130  | 4401.864 | 5368.84  | D80004    | 1344.109  | 1472.115  | AK024396  | 1286.84   | 1347.388  |

|           |          |          |           |           |           |           |           |           |
|-----------|----------|----------|-----------|-----------|-----------|-----------|-----------|-----------|
| NM_017875 | 1627.636 | 2171.911 | NM_016070 | 1569.927  | 1806.347  | U58514    | 1590.341  | 1774.491  |
| AK023232  | 2376.757 | 2636.605 | NM_016390 | 1537.08   | 1748.551  | W74254    | 14407.267 | 18788.365 |
| NM_000271 | 5741.878 | 5053.327 | NM_016101 | 5440.116  | 6226.057  | M58603    | 5226.409  | 5505.745  |
| NM_018209 | 6527.984 | 7846.44  | NM_005859 | 47008.398 | 66379.602 | AA443286  | 624.962   | 597.123   |
| NM_006184 | 18199.5  | 26262.09 | NM_020313 | 870.192   | 1321.294  | AB003334  | 7397.521  | 6769.232  |
| AB018268  | 3015.307 | 3517.589 | NM_014628 | 5442.19   | 6265.689  | AW276315  | 787.235   | 813.298   |
| NM_019045 | 1336.123 | 1378.812 | AK025630  | 1134.923  | 1488.803  | AA490737  | 843.367   | 849.419   |
| NM_006380 | 3897.363 | 2283.961 | AL365404  | 12707.787 | 11827.854 | AI878886  | 16416.102 | 17652.455 |
| AB020710  | 1918.358 | 970.228  | AK022907  | 4530.975  | 4206.099  | BG697179  | 7000.508  | 7292.309  |
| Z83801    | 330.812  | 357.301  | NM_014793 | 3447.708  | 2829.912  | NM_002136 | 39971.012 | 40227.965 |
| NM_016174 | 2263.401 | 1608.176 | NM_004245 | 1789.435  | 1232.481  | BM012504  | 3817.26   | 3353.701  |
| NM_020377 | 454.681  | 317.893  | NM_003241 | 1374.243  | 1312.006  | AA664145  | 956.475   | 1288.147  |
| U88896    | 2852.947 | 3522.505 | NM_000543 | 1038.284  | 1103.785  | X72308    | 8125.219  | 7489.096  |
| AF116702  | 61689.34 | 54570.19 | U06699    | 4203.443  | 3915.705  | T70999    | 498.439   | 344.143   |
| NM_005724 | 7708.019 | 4725.236 | AJ290954  | 10232.642 | 8970.276  | T50790    | 924.31    | 772.753   |
| X58794    | 1016.738 | 1040.318 | AK025451  | 2002.922  | 1462.95   | R48168    | 11695.537 | 10708.41  |
| NM_001735 | 2660.333 | 2983.974 | NM_002783 | 1410.795  | 1355.854  | AB032993  | 4682.266  | 3851.946  |
| NM_002349 | 605.534  | 620.289  | X52005    | 13921.662 | 10562.615 | NM_000854 | 3390.391  | 3626.149  |
| NM_005080 | 18661.97 | 28342.91 | NM_001047 | 431.673   | 576.314   | AL117423  | 3580.74   | 4112.882  |
| NM_004887 | 7686.297 | 9977.372 | AK024396  | 1255.998  | 1073.277  | NM_002084 | 2157.426  | 1630.354  |
| NM_004972 | 4757.13  | 3744.831 | U58514    | 1344.722  | 2455.87   | D16892    | 15876.731 | 14137.104 |
| NM_006251 | 6490.516 | 6025.759 | AA443286  | 1127.693  | 632.618   | NM_004750 | 1598.612  | 1863.859  |
| NM_004103 | 5991.424 | 6270.301 | AB003334  | 9835.426  | 16202.5   | NM_007295 | 3296.535  | 1891.88   |
| NM_002314 | 8534.083 | 10419.74 | AW276315  | 692.35    | 608.31    | NM_003651 | 8241.905  | 9634.62   |
| NM_001744 | 6527.684 | 8359.984 | AA490737  | 921.833   | 804.329   | NM_013246 | 681.186   | 654.31    |
| NM_006296 | 1993.829 | 2445.503 | AI878886  | 18351.063 | 17050.209 | NM_000591 | 1502.364  | 1423.3    |
| Z25433    | 4434.471 | 4666.602 | BG697179  | 8163.411  | 8806.894  | NM_000565 | 878.165   | 785.161   |
| NM_005922 | 4730.107 | 4493.775 | NM_002136 | 43428.691 | 27955.928 | NM_002019 | 1356.801  | 1373.363  |
| NM_018638 | 4128.975 | 5099.005 | BM012504  | 4703.615  | 4261.656  | AF253318  | 463.479   | 616.78    |
| AL137593  | 8632.6   | 11365.78 | AA664145  | 1297.265  | 1207.51   | NM_017767 | 4661.477  | 4095.722  |
| NM_003915 | 2881.249 | 3598.007 | X72308    | 11957.996 | 10469.002 | AK024848  | 5798.085  | 5244.661  |
| NM_000382 | 2890.423 | 3115.822 | T70999    | 699.957   | 812.374   | NM_004852 | 1409.37   | 1145.387  |
| AL133064  | 3844.07  | 3911.001 | T50790    | 1083.651  | 832.702   | NM_000343 | 592.09    | 872.482   |
| NM_006227 | 3060.501 | 3576.672 | R48168    | 11467.876 | 12392.041 | NM_019112 | 2513.556  | 2975.125  |
| NM_002905 | 5263.008 | 3808.973 | AB032993  | 4458.569  | 3964.014  | NM_012336 | 11280.446 | 11226.331 |
| NM_000700 | 40314.82 | 32498.62 | NM_000854 | 3337.403  | 2720.731  | NM_020161 | 524.311   | 602.137   |
| NM_019028 | 5834.243 | 6603.659 | AL117423  | 3769.596  | 3322.961  | NM_020246 | 1385.62   | 1612.965  |
| NM_000431 | 3894.858 | 3145.916 | NM_002084 | 1962.917  | 1836.284  | NM_016354 | 991.077   | 1080.785  |
| NM_013421 | 1055.993 | 1345.481 | D16892    | 16472.857 | 10848.714 | NM_003038 | 2150.929  | 1251.644  |
| NM_012474 | 15197.55 | 15861.85 | NM_004750 | 1892.832  | 1640.955  | NM_018155 | 4577.25   | 3962.715  |
| AB033118  | 4867.718 | 5667.072 | NM_007295 | 3486.352  | 3135.647  | AL050358  | 1181.726  | 1383.735  |
| NM_019606 | 4624.774 | 4182.093 | NM_000418 | 523.556   | 268.497   | NM_004731 | 1151.506  | 654.297   |
| NM_001690 | 10855.02 | 8907.968 | NM_013246 | 486.966   | 464.893   | NM_000544 | 2052.639  | 1887.274  |
| AF034374  | 5209.168 | 5489.998 | NM_000591 | 1281.258  | 1810.51   | NM_004644 | 845.764   | 865.063   |
| NM_016118 | 12190.57 | 10457.54 | NM_000565 | 926.825   | 1046.865  | AV681967  | 1797.58   | 1943.727  |
| NM_018674 | 1579.719 | 1843.617 | NM_002019 | 1675.777  | 1379.828  | NM_018250 | 1867.121  | 1723.26   |
| NM_000068 | 715.119  | 434.066  | AF253318  | 1361.005  | 1182.586  | NM_016553 | 5559.575  | 5005.251  |
| AB033046  | 12422.37 | 11214.43 | NM_017767 | 6533.273  | 5057.353  | AB023136  | 576.407   | 524.463   |
| NM_015918 | 11549.38 | 12063.93 | AK024848  | 5322.202  | 5137.931  | NM_003795 | 24673.754 | 18196.998 |
| AK023228  | 356.684  | 394.242  | NM_004852 | 1435.394  | 1307.566  | NM_014232 | 4401.147  | 3881.299  |
| NM_013249 | 602.463  | 736.71   | NM_003633 | 481.425   | 359.888   | NM_005701 | 1385.001  | 1249.763  |
| AB029041  | 2763.024 | 2904.267 | NM_000343 | 507.053   | 578.399   | NM_006819 | 34945.242 | 33731.152 |
| AK026642  | 12582.3  | 16410.97 | NM_019112 | 2122.23   | 1748.367  | NM_014744 | 2584.931  | 1576.054  |

|           |          |          |           |           |           |           |           |           |
|-----------|----------|----------|-----------|-----------|-----------|-----------|-----------|-----------|
| AL359063  | 2781.009 | 2927.334 | NM_012336 | 10433.719 | 9663.055  | AF146759  | 529.057   | 724.032   |
| AL079292  | 4876.654 | 4874.74  | NM_020161 | 777.711   | 711.828   | AL365404  | 14066.964 | 15958.429 |
| X89667    | 948.831  | 1079.176 | NM_020246 | 1456.55   | 1441.311  | AK022907  | 4019.9    | 4737.802  |
| AB037791  | 1933.148 | 2398.19  | NM_016354 | 1238.921  | 1025.136  | NM_014793 | 2632.959  | 2978.912  |
| NM_018124 | 9835.279 | 8004.366 | NM_003038 | 1449.968  | 2038.112  | NM_004245 | 1329.663  | 1286.832  |
| Z70701    | 7602.313 | 4685.381 | NM_018155 | 4985.379  | 5684.706  | NM_003241 | 646.886   | 942.959   |
| AB040972  | 2109.346 | 1750.901 | AL050358  | 1654.203  | 1552.895  | NM_002685 | 3189.475  | 2732.106  |
| AF148505  | 2840.549 | 1911.669 | NM_004731 | 834.1     | 1152.031  | AK024504  | 1668.014  | 1609.352  |
| NM_018686 | 14976.44 | 6452.044 | NM_000544 | 2314.491  | 2497.499  | AF039023  | 1970.328  | 2152.794  |
| NM_017676 | 2925.617 | 2763.476 | NM_001044 | 554.385   | 545.449   | NM_005511 | 3593.475  | 3685.898  |
| AK021764  | 1435.835 | 1672.581 | NM_004644 | 709.213   | 885.218   | NM_014696 | 13030.331 | 12721.641 |
| NM_005431 | 2614.423 | 1338.634 | AV681967  | 1351.751  | 1553.615  | NM_018475 | 4375.223  | 4531.673  |
| AB036063  | 2869.674 | 2289.071 | NM_018250 | 1999.524  | 1905.556  | NM_003262 | 2655.45   | 1972.306  |
| NM_002894 | 11303.36 | 8421.509 | NM_016553 | 5592.876  | 7082.202  | NM_020125 | 422.232   | 526.918   |
| NM_004629 | 13041.99 | 11070.09 | AB023136  | 773.339   | 877.824   | AK022832  | 2947.525  | 3780.181  |
| NM_004260 | 7725.978 | 8739.841 | NM_003795 | 21517.314 | 21627.818 | NM_014641 | 2483.11   | 1993.994  |
| AL050067  | 606.443  | 548.035  | NM_014232 | 4215.209  | 4404.306  | NM_004462 | 10510.044 | 9053.712  |
| NM_015564 | 2871.954 | 2687.514 | NM_005701 | 1098.103  | 1870.082  | AB020664  | 2253.795  | 1909.701  |
| AF160476  | 607.942  | 716.078  | NM_006819 | 43613.328 | 32682.658 | NM_006640 | 15521.025 | 15020.844 |
| L22650    | 1134.401 | 1450.339 | NM_014744 | 2270.811  | 2207.667  | NM_000857 | 1201.192  | 1118.163  |
| AB014520  | 1317.287 | 1390.92  | AF146759  | 973.508   | 1292.831  | L20688    | 54681.816 | 54183.961 |
| AF161420  | 1441.979 | 2378.982 | AL365404  | 13098.897 | 13196.122 | X69111    | 18104.43  | 15531.836 |
| NM_004907 | 1371.804 | 1269.198 | AK022907  | 3701.484  | 3484.905  | AF252283  | 571.869   | 402.219   |
| NM_001775 | 662.907  | 869.405  | NM_014793 | 3130.494  | 2178.132  | AB037799  | 2909.349  | 2687.302  |
| BE083789  | 470.758  | 458.251  | NM_004245 | 1887.665  | 1653.102  | AB007950  | 6467.845  | 6962.129  |
| X04526    | 17670    | 19352.81 | NM_003241 | 1228.872  | 1185.093  | AL133111  | 353.425   | 732.733   |
| D26067    | 6942.223 | 5384.017 | NM_002685 | 3263.675  | 3499.683  | AK025593  | 1343.191  | 1024.389  |
| AF227924  | 2652.129 | 1793.627 | AK024504  | 1669.929  | 1654.633  | AB018304  | 1482.621  | 1296.799  |
| NM_005716 | 6607.933 | 4941.098 | AF039023  | 2508.807  | 2435.415  | NM_007061 | 9924.869  | 10199.584 |
| NM_006183 | 2551.706 | 1259.759 | NM_005511 | 3927.956  | 4208.023  | AB040954  | 2744.545  | 2392.295  |
| NM_016087 | 755.015  | 808.006  | NM_014696 | 14136.677 | 14030.14  | NM_002081 | 1007.352  | 1125.069  |
| S59184    | 1866.801 | 1379.992 | NM_018475 | 4580.375  | 4666.947  | AB023139  | 2513.814  | 2784.57   |
| NM_005130 | 125.993  | 599.903  | NM_003262 | 2538.6    | 2696.766  | NM_017885 | 3105.338  | 2712.107  |
| NM_006661 | 1656.756 | 1440.324 | NM_020125 | 560.156   | 556.285   | D80004    | 1256.156  | 1563.268  |
| NM_005746 | 16682.16 | 15829.66 | AK022832  | 2379.057  | 2347.975  | NM_000946 | 5785.035  | 4557.528  |
| NM_004588 | 986.917  | 813.352  | NM_014641 | 2434.867  | 3006.898  | NM_016070 | 1754.964  | 1578.044  |
| U16126    | 570.342  | 511.492  | NM_004462 | 10574.674 | 10072.681 | NM_016390 | 1573.587  | 1377.311  |
| NM_004572 | 648.835  | 280.046  | AB020664  | 2217.436  | 1492.748  | NM_016101 | 4573.266  | 4563.163  |
| NM_002172 | 5821.584 | 5978.147 | NM_006640 | 15197.86  | 13259.098 | NM_005859 | 29241.877 | 25735.818 |
| NM_002614 | 730.043  | 469.142  | NM_000857 | 1289.766  | 1225.432  | NM_020313 | 882.355   | 761.247   |
| NM_005655 | 4719.813 | 2940.931 | L20688    | 52023.902 | 41143.844 | NM_014628 | 5918.551  | 5899.499  |
| AJ008144  | 193.799  | 302.148  | X69111    | 13772.037 | 13533.504 | AK025630  | 1529.32   | 1468.276  |
| NM_007314 | 5452.708 | 5115.764 | AF252283  | 413.244   | 373.87    | NM_005761 | 1560.803  | 1484.623  |
| NM_016073 | 3830.965 | 3279.211 | AB037799  | 2855.821  | 2524.387  | NM_014718 | 2532.911  | 2891.988  |
| NM_006600 | 23094.1  | 27992.36 | AB007950  | 11368.342 | 9852.186  | NM_000632 | 905.376   | 1092.061  |
| AF297709  | 2689.568 | 2861.971 | AL133111  | 553.713   | 620.143   | AB002298  | 770.697   | 574.009   |
| L77564    | 1139.903 | 1414.585 | AK025593  | 2749.985  | 3578.422  | AK024488  | 9420.434  | 7340.386  |
| NM_015384 | 3773.621 | 2628.126 | AB018304  | 2095.767  | 3736.571  | AK023249  | 29085.998 | 25706.17  |
| AK023327  | 1565.649 | 1827.833 | NM_007061 | 21276.051 | 40176.359 | NM_017442 | 5660.151  | 4687.284  |
| AB046858  | 2423.229 | 2368.283 | AB040954  | 2749.961  | 2939.159  | NM_000743 | 2570.962  | 2133.036  |
| D50914    | 4102.927 | 5086.787 | NM_002081 | 1273.439  | 1316.635  | NM_007218 | 2477.8    | 2304.356  |
| BE878692  | 1322.854 | 1892.876 | AB023139  | 3311.076  | 3210.399  | Z25436    | 2599.749  | 2733.127  |
| NM_002007 | 895.717  | 614.071  | NM_017885 | 3340.157  | 3288.384  | NM_005275 | 5132.32   | 5095.936  |

|           |          |          |           |           |           |           |           |           |
|-----------|----------|----------|-----------|-----------|-----------|-----------|-----------|-----------|
| NM_01589€ | 2039.526 | 1174.316 | D80004    | 1116.304  | 1237.422  | NM_00200€ | 7677.58   | 9399.434  |
| NM_00230€ | 52250.16 | 17316.46 | NM_00094€ | 4875.824  | 4976.066  | NM_012324 | 2725.521  | 2402.687  |
| AK025439  | 3497.014 | 3253.809 | NM_01607€ | 1672.485  | 1815.886  | AK000039  | 798.899   | 837.581   |
| NM_001737 | 861.834  | 680.61   | NM_01639€ | 1875.288  | 1738.747  | AL137352  | 901.816   | 929.126   |
| Z36784    | 827.773  | 512.213  | NM_01610€ | 5647.175  | 5523.734  | NM_01474€ | 1152.26   | 786.447   |
| NM_01662€ | 11999.9  | 11665.98 | NM_00585€ | 41579.738 | 32419.4   | NM_00448€ | 3058.915  | 3303.685  |
| NM_019064 | 1374.43  | 430.415  | NM_02031€ | 1135.524  | 1223.771  | BF240063  | 543.867   | 390.477   |
| NM_000094 | 1251.171 | 871.669  | NM_01462€ | 5416.715  | 4962.29   | AF172264  | 2538.927  | 2181.889  |
| AJ295148  | 2019.12  | 1075.534 | AK025630  | 1617      | 1583.27   | Y08267    | 1670.534  | 1582.669  |
| AF176701  | 546.902  | 609.802  | NM_00576€ | 1778.272  | 1828.624  | U80756    | 19688.68  | 17273.68  |
| NM_01630€ | 5663.849 | 5814.455 | NM_01471€ | 2228.959  | 1679.047  | NM_01816€ | 1588.183  | 1614.917  |
| NM_00415€ | 25599.15 | 23960.25 | AB028953  | 503.781   | 517.824   | NM_00524€ | 1287.723  | 861.807   |
| AK021866  | 1012.116 | 1061.702 | NM_00063€ | 692.047   | 709.749   | NM_00481€ | 5607.576  | 7212.472  |
| NM_00324€ | 6951.742 | 10614.26 | AB002298  | 620.688   | 887.578   | AL117629  | 4503.045  | 3465.351  |
| M21897    | 508.379  | 852.391  | AK024488  | 8021.316  | 7022.531  | NM_00259€ | 1803.514  | 2099.619  |
| AF301463  | 1711.585 | 1740.155 | AK023249  | 36633.863 | 29611.273 | NM_01572€ | 1643.467  | 1243.994  |
| NM_015984 | 10054.12 | 9198.801 | NM_01744€ | 7659.495  | 9869.893  | AF174604  | 1921.481  | 1596.675  |
| AK022471  | 527.99   | 507.344  | NM_00074€ | 2143.5    | 2739.805  | AB002379  | 3600.209  | 3660.308  |
| AK025969  | 2118.744 | 1263.839 | NM_00721€ | 2390.113  | 2569.112  | AF113223  | 2062.807  | 2097.889  |
| NM_006894 | 251.743  | 238.02   | Z25436    | 3374.739  | 3417.102  | AB046851  | 2336.24   | 2580.036  |
| AK023031  | 2035.686 | 1867.12  | NM_00527€ | 6150.634  | 6030.957  | NM_018174 | 1018.149  | 766.068   |
| NM_005717 | 30521.56 | 19873.08 | NM_003844 | 13499.858 | 11890.598 | NM_01454€ | 2262.012  | 2509.788  |
| NM_01209€ | 4778.44  | 3083.927 | NM_00200€ | 15567.839 | 13660.998 | NM_004437 | 1753.616  | 1606.785  |
| BE793385  | 1545.005 | 1919.472 | NM_012324 | 3940.151  | 4105.182  | AK025875  | 847.894   | 1226.357  |
| NM_00308€ | 5999.677 | 6349.729 | AK000039  | 983.645   | 824.714   | BC014152  | 54183.852 | 51466.164 |
| AF043290  | 489.527  | 385.48   | AL137352  | 1315.764  | 1307.853  | AB037779  | 25518.539 | 21523.32  |
| NM_00408€ | 3866.041 | 3061.783 | NM_01474€ | 988.542   | 1033.505  | NM_00065€ | 19856.461 | 9091.112  |
| NM_01439€ | 4444.265 | 2844.96  | NM_00448€ | 3588.316  | 4050.802  | NM_00039€ | 879.436   | 730.215   |
| NM_005934 | 2807.703 | 3261.452 | BF240063  | 620.469   | 507.409   | NM_00088€ | 1891.735  | 1314.938  |
| NM_00712€ | 4783.521 | 3821.402 | BI461699  | 986.875   | 1385.969  | NM_00385€ | 12404.657 | 11491.118 |
| AY004253  | 2576.125 | 1860.438 | AK090409  | 788.449   | 809.444   | NM_00023€ | 1953.086  | 1552.992  |
| Z46967    | 627.644  | 699.533  | AF172264  | 2506.082  | 2343.658  | NM_00290€ | 20720.211 | 22542.316 |
| NM_00269€ | 363.213  | 523.478  | Y08267    | 1483.195  | 1620.716  | NM_01233€ | 3221.549  | 2786.769  |
| AF069138  | 406.776  | 345.187  | U80756    | 17587.34  | 11475.881 | NM_005787 | 16053.377 | 15961.455 |
| NM_00214€ | 1838.652 | 1947.345 | NM_01816€ | 1771.359  | 1827.145  | NM_00214€ | 2820.631  | 2976.677  |
| AL137449  | 2630.14  | 2706.251 | NM_00524€ | 1749.268  | 1926.43   | AF284421  | 8882.381  | 8780.126  |
| U88153    | 1855.743 | 2377.409 | NM_00481€ | 9184.859  | 5005.103  | NM_00604€ | 5113.573  | 3353.925  |
| X03910    | 14258.27 | 14542.02 | AL117629  | 5069.208  | 5127.012  | NM_00636€ | 34549.449 | 25225.945 |
| NM_01842€ | 6041.856 | 4757.648 | NM_00259€ | 2470.828  | 3251.203  | NM_00396€ | 6708.152  | 5740.146  |
| NM_00505€ | 402.077  | 444.862  | NM_01572€ | 1622.386  | 1536.961  | NM_00278€ | 7086.278  | 4990.442  |
| NM_006924 | 17524.13 | 12161.59 | AF174604  | 2520.181  | 3051.292  | NM_00334€ | 8175.664  | 8053.14   |
| NM_016024 | 9221.466 | 5270.538 | AB002379  | 3261.76   | 2663.562  | NM_00278€ | 38473.645 | 28372.918 |
| NM_018107 | 4832.364 | 2422.446 | AF113223  | 1677.851  | 1707.848  | AL080137  | 472.365   | 516.832   |
| NM_01227€ | 1775.881 | 1468.35  | AB046851  | 2502.978  | 2293.196  | NM_01767€ | 1030.721  | 1029.576  |
| NM_018387 | 7056.673 | 3245.279 | NM_018174 | 1084.383  | 2167.559  | NM_017704 | 2577.809  | 2268.36   |
| BF310673  | 2102.39  | 1327.047 | NM_01454€ | 2681.509  | 2597.263  | BC006359  | 1296.312  | 955.544   |
| R97012    | 24226.45 | 40180.56 | NM_004437 | 1692.455  | 1368.474  | AK026127  | 2017.961  | 1514.958  |
| U77700    | 7300.255 | 3844.751 | AK025875  | 1478.661  | 799.537   | BC016062  | 16674.461 | 13836.959 |
| NM_006567 | 7160.683 | 5218.992 | BC014152  | 59903.645 | 50871.926 | NM_002814 | 2766.592  | 3099.137  |
| AF038554  | 20141.27 | 8379.898 | NM_00022€ | 559.384   | 415.595   | NM_01225€ | 2239.219  | 2746.006  |
| AF264621  | 3925.91  | 2307.443 | AB037779  | 33707.887 | 24174.264 | NM_00628€ | 8863.518  | 6501.724  |
| NM_00587€ | 21687.6  | 20530.73 | NM_00065€ | 12711.817 | 18844.322 | NM_00569€ | 630.295   | 1047.021  |
| NM_004184 | 5000.486 | 7436.339 | NM_00039€ | 731.865   | 823.261   | X97303    | 13489.598 | 10672.736 |

|           |          |          |           |           |           |           |           |           |
|-----------|----------|----------|-----------|-----------|-----------|-----------|-----------|-----------|
| AK026571  | 1913.74  | 1004.905 | NM_000889 | 1409.597  | 1847.889  | NM_017530 | 1522.006  | 1426.595  |
| AK024673  | 5539.703 | 3956.261 | NM_003859 | 11829.637 | 12415.941 | AB029030  | 1065.473  | 778.896   |
| AF070618  | 950.286  | 698.093  | NM_000236 | 1513.185  | 1435.79   | AL360183  | 1648.556  | 1362.68   |
| AF131748  | 5006.56  | 6364.828 | NM_002903 | 28352.018 | 20818.846 | AK027046  | 1480.846  | 1503.837  |
| NM_000456 | 3962.474 | 3588.603 | NM_012339 | 3733.279  | 2496.104  | NM_003113 | 3944.217  | 2470.266  |
| AF190122  | 699.165  | 761.666  | NM_005787 | 18369.803 | 14466.855 | NM_016578 | 2810.781  | 2192.9    |
| NM_002496 | 12996.42 | 13366.75 | NM_002143 | 3430.477  | 4354.788  | NM_015832 | 8526.652  | 8748.057  |
| NM_016243 | 3584.321 | 3979.278 | NM_006360 | 19915.928 | 30966.041 | NM_014319 | 1758.889  | 2042.162  |
| X53943    | 688.439  | 574.517  | NM_003968 | 7886.313  | 18309.172 | AB019566  | 64650.219 | 70473.984 |
| NM_014402 | 66901.38 | 49654.06 | NM_002786 | 6041.607  | 8187.796  | NM_000981 | 58528.844 | 63574.816 |
| NM_004649 | 7809.066 | 7952.921 | NM_003343 | 10642.754 | 10567.322 | NM_002047 | 21081.008 | 15839.051 |
| NM_006540 | 3698.082 | 2933.099 | NM_002789 | 38769.727 | 39102.063 | NM_001031 | 65041.438 | 70332.898 |
| NM_017766 | 1495.166 | 1233.138 | AL080137  | 736.538   | 791.611   | NM_007208 | 12540.959 | 9498.612  |
| NM_002811 | 16760.99 | 8867.453 | NM_017679 | 1433.82   | 1485.443  | NM_000999 | 64995.191 | 69281.094 |
| NM_020310 | 2558.134 | 1355.623 | NM_017704 | 2489.452  | 2768.313  | NM_000985 | 12471.832 | 10607.146 |
| AK024444  | 522.105  | 381.073  | BC006359  | 1533.992  | 1547.796  | BF130622  | 11073.067 | 8601.849  |
| NM_005802 | 4324.856 | 1683.472 | AK026127  | 2216.894  | 2335.938  | BU165106  | 1335.451  | 1474.936  |
| AB002331  | 5435.197 | 3303.184 | BC016062  | 17776.381 | 16469.098 | AF038202  | 1427.564  | 1702.943  |
| NM_002504 | 3298.111 | 5797.485 | NM_002814 | 3158.138  | 2234.313  | AB040925  | 1000.174  | 876.508   |
| AB046775  | 1762.443 | 542.181  | NM_012250 | 3095.753  | 2084.659  | BC008837  | 994.532   | 919.925   |
| X74862    | 1007.451 | 791.584  | NM_006283 | 8175.404  | 7863.046  | NM_001861 | 950.804   | 702.014   |
| X65663    | 3875.214 | 1044.952 | X97303    | 11436.373 | 8564.039  | AK025558  | 5162.442  | 4573.952  |
| NM_003185 | 2873.319 | 1928.356 | NM_017530 | 2757.521  | 2238.422  | AK024355  | 1269.295  | 1304.499  |
| NM_004456 | 10550.73 | 9816.458 | AL360183  | 1745.384  | 2337.229  | NM_001864 | 35185.668 | 25747.283 |
| NM_004284 | 8279.862 | 8867.594 | AK027046  | 2434.695  | 5279.564  | NM_003477 | 10242.731 | 7884.259  |
| NM_012243 | 1928.198 | 1265.193 | NM_003113 | 4621.059  | 9395.644  | NM_002654 | 45175.594 | 34532.871 |
| AK025743  | 285.913  | 193.235  | NM_016578 | 3665.539  | 5086.446  | NM_020382 | 3694.839  | 3019.04   |
| AL137466  | 190.824  | 354.827  | NM_015832 | 11170.474 | 10128.928 | NM_007192 | 8351.529  | 6409.313  |
| AL122040  | 262.235  | 374.3    | NM_014319 | 1876.793  | 2872.866  | AB002337  | 6923.342  | 6555.648  |
| AK023974  | 3379.422 | 2736.565 | AB019566  | 53497.25  | 58193.699 | NM_014933 | 3614      | 3838.341  |
| AK023768  | 1983.845 | 1604.644 | NM_000981 | 60737.754 | 70086.445 | NM_003076 | 17564.332 | 16442.133 |
| NM_014729 | 1667.281 | 2185.522 | NM_002047 | 24615.629 | 22427.877 | NM_006385 | 1523.523  | 1153.369  |
| AF147335  | 358.513  | 552.107  | NM_001031 | 61436.676 | 70154.367 | NM_003456 | 2078.764  | 1431.051  |
| AK000711  | 1724.429 | 1389.428 | NM_007208 | 12654.341 | 12293.812 | NM_002585 | 3105.618  | 1897.36   |
| BI768072  | 773.927  | 603.718  | NM_000999 | 65279.512 | 69779.133 | AB029016  | 1809.372  | 1211.173  |
| AK022216  | 1330.059 | 1094.499 | NM_000985 | 13284.72  | 8049.378  | AL049390  | 1361.206  | 1230.62   |
| AK025812  | 480.755  | 481.76   | BF130622  | 9604.023  | 7380.114  | AK000584  | 5503.186  | 5899.002  |
| AK021459  | 749.67   | 468.474  | BU165106  | 1494.881  | 1347.006  | AJ297363  | 1076.458  | 880.368   |
| U00960    | 1950.283 | 784.263  | AF038202  | 1780.914  | 1189.882  | AK026379  | 3061.722  | 2513.514  |
| AK022262  | 241.492  | 435.787  | AL360198  | 8358.411  | 9191.758  | AK022965  | 1708.54   | 1335.455  |
| AF088039  | 11488.97 | 8557.184 | AB040925  | 811.566   | 828.245   | AK024278  | 4389.274  | 5268.086  |
| AF143888  | 328.972  | 240.761  | BC008837  | 731.496   | 424.942   | AB056722  | 4582.901  | 4846.531  |
| AF086220  | 960.555  | 1028.097 | AK025558  | 6213.181  | 6564.855  | NM_013242 | 7863.609  | 6039.888  |
| AK023941  | 792.718  | 542.77   | AK024355  | 1495.911  | 2062.065  | NM_012066 | 10214.393 | 9108.783  |
| AL390083  | 2018.762 | 791.489  | NM_001864 | 37374.766 | 47514.156 | AF052168  | 6225.983  | 6058.764  |
| AB020702  | 1094.73  | 857.16   | NM_003477 | 9519.331  | 10367.334 | NM_014650 | 1101.273  | 1131.111  |
| AL050227  | 744.11   | 1161.41  | NM_002654 | 42724.848 | 37906.059 | AK022632  | 2118.923  | 1991.478  |
| AF085905  | 2007.834 | 1515.368 | NM_020382 | 3578.016  | 3407.983  | AK021554  | 1881.888  | 2552.294  |
| NM_013355 | 145.522  | 219.686  | NM_007192 | 8691.848  | 13408.496 | AF070620  | 571.73    | 787.259   |
| AK001008  | 231.918  | 229.805  | AB002337  | 9065.847  | 9926.856  | NM_020235 | 2805.058  | 2407.852  |
| NM_003847 | 1723.566 | 2163.636 | NM_014933 | 4503.833  | 5460.023  | AL109681  | 468.971   | 520.609   |
| AK021973  | 1011.266 | 1196.906 | NM_003076 | 16998.555 | 18951.494 | AL162039  | 4675.569  | 2635.152  |
| AL110155  | 1389.744 | 179.189  | NM_006385 | 1738.229  | 1981.601  | AK024896  | 1549.765  | 1730.534  |

|           |          |          |           |           |           |           |           |           |
|-----------|----------|----------|-----------|-----------|-----------|-----------|-----------|-----------|
| AL117638  | 473.99   | 186.822  | NM_00345€ | 3662.989  | 3258.17   | AK095125  | 812.001   | 784.501   |
| AL050165  | 6169.78  | 5685.997 | NM_00258€ | 3452.9    | 2817.255  | AK024059  | 2660.735  | 2601.553  |
| AL117445  | 663.307  | 615.672  | AB029016  | 1815.327  | 1434.063  | AB007928  | 2095.799  | 1298.22   |
| AL122113  | 5953.714 | 4525.629 | AL049390  | 1009.032  | 666.344   | AK023645  | 1241.78   | 862.545   |
| AK024415  | 1654.925 | 1984.032 | AK000584  | 3906.022  | 3003.196  | D83543    | 1000.249  | 723.403   |
| AL049365  | 5223.707 | 3702.004 | AJ297363  | 884.915   | 834.819   | NM_01693€ | 3220.59   | 3083.754  |
| AB007877  | 563.758  | 585.547  | AK026379  | 2381.841  | 1852.683  | AJ001861  | 2171.184  | 1649.353  |
| AK025132  | 857.998  | 891.84   | AK022965  | 2738.479  | 3346.319  | X64981    | 1475.674  | 2312.958  |
| AK025157  | 1308.425 | 911.358  | AK024278  | 5046.378  | 3833.855  | X75692    | 3238.826  | 2065.802  |
| NM_02021€ | 1103.639 | 900.237  | AB056722  | 4675.191  | 3669.897  | Y10511    | 8464.077  | 7812.953  |
| AK022001  | 2108.097 | 899.467  | NM_01324€ | 7034.54   | 7029.068  | M26147    | 4583.748  | 4039.78   |
| AK022633  | 768.873  | 652.081  | NM_01206€ | 11277.058 | 9712.969  | AF018254  | 913.12    | 767.539   |
| AK027199  | 1007.482 | 710.495  | AF052168  | 7776.853  | 6290.225  | NM_01624€ | 1221.942  | 887.755   |
| AK000079  | 3160.169 | 3697.845 | AK022632  | 2285.469  | 2525.932  | AK026459  | 532.533   | 404.721   |
| AJ227874  | 1440.699 | 661.563  | AK021554  | 2087.349  | 2056.796  | AK026416  | 11155.286 | 8610.88   |
| AF009268  | 410.049  | 353.6    | NM_02023€ | 2981.427  | 3548.967  | AK025797  | 792.796   | 802.452   |
| AF009312  | 291.263  | 432.787  | AK000532  | 489.694   | 218.165   | AK000019  | 881.728   | 673.562   |
| AF056418  | 230.09   | 376.801  | AL109681  | 703.429   | 658.661   | AK024947  | 817.749   | 986.519   |
| AF127772  | 324.034  | 376.135  | AL162039  | 6539.667  | 12409.466 | NM_01750€ | 1257.133  | 1111.055  |
| AF009276  | 397.278  | 834.04   | AK024896  | 1960.439  | 2111.91   | AK024606  | 3128.92   | 3546.045  |
| AF056428  | 1365.446 | 1197.863 | AK095125  | 577.247   | 636.296   | NM_016417 | 12088.656 | 11612.045 |
| AF069136  | 739.173  | 662.18   | AK024059  | 2314.077  | 2165.135  | NM_01910€ | 1752.432  | 1414.313  |
| AK001995  | 762.244  | 491.398  | AB007928  | 2121.486  | 2201.971  | AL080118  | 5344.102  | 3824.74   |
| AK021594  | 429.342  | 300.177  | AK023645  | 956.473   | 992.49    | AL049378  | 3994.071  | 3743.767  |
| AK001151  | 149.738  | 402.477  | D83543    | 1157.737  | 1925.532  | L09086    | 717.109   | 866.575   |
| AK021635  | 2267.561 | 2157.322 | NM_01693€ | 4244.342  | 6349.539  | AK021505  | 959.511   | 837.706   |
| AK021856  | 467.838  | 233.547  | AJ001861  | 1813.336  | 1675.956  | AK021598  | 4580.47   | 4132.362  |
| AK025276  | 828.839  | 364.931  | NM_00518€ | 448.589   | 397.972   | AJ012498  | 524.252   | 425.245   |
| AK026457  | 166.373  | 512.814  | X64981    | 1654.791  | 1130.965  | NM_00597€ | 9922.313  | 11603.667 |
| AK026825  | 198.591  | 338.56   | X75692    | 3806.182  | 3780.206  | X04547    | 2620.343  | 1770.024  |
| AJ008131  | 3422.774 | 2557.99  | Y10511    | 9312.278  | 10518.573 | AK025823  | 1712.487  | 2081.047  |
| NM_00627€ | 692.99   | 408.948  | M26147    | 4861.137  | 3697.652  | AK026691  | 857.732   | 1008.408  |
| AK024303  | 1087.857 | 892.988  | NM_01624€ | 1631.946  | 1246.24   | AL359941  | 2633.178  | 2640.037  |
| AL160131  | 8248.664 | 10918.31 | AK026459  | 2315.558  | 6502.487  | U52076    | 810.273   | 794.78    |
| AF086045  | 4269.852 | 6135.177 | AK026416  | 13607.653 | 11047.325 | AF035278  | 1778.195  | 1399.763  |
| AK027028  | 2727.004 | 2625.598 | AK000019  | 674.203   | 911.872   | AL050202  | 859.795   | 703.467   |
| AK027069  | 405.703  | 323.824  | AK000645  | 747.337   | 875.81    | U32999    | 8388.681  | 8641.095  |
| AK026916  | 5858.874 | 5960.695 | AK024947  | 1377.659  | 1221.543  | U66052    | 4469.823  | 4612.632  |
| AK026914  | 1116.575 | 1663.958 | NM_01750€ | 771.907   | 688.725   | AK024156  | 785.444   | 1123.129  |
| Y13808    | 483.456  | 550.675  | AK024606  | 3296.294  | 2733.972  | AF086288  | 1646.152  | 1061.992  |
| Y11166    | 2581.414 | 2409.787 | NM_016417 | 15653.271 | 12774.055 | NM_016944 | 574.753   | 467.115   |
| AK023515  | 1713.928 | 1377.226 | NM_01910€ | 1730.206  | 1903.625  | AK023109  | 1667.207  | 1261.489  |
| AL137623  | 2782.349 | 2741.056 | AL080118  | 5057.952  | 4090.955  | NM_00529€ | 16064.686 | 10863.95  |
| AK026485  | 508.381  | 679.402  | AL049378  | 3485.192  | 2837.417  | AF133332  | 5140.416  | 4184.278  |
| NM_00354€ | 3426.929 | 1576.825 | L09086    | 1229.894  | 1136.291  | NM_00108€ | 7920.54   | 9263.642  |
| AF118077  | 2913.548 | 1686.318 | AK021505  | 1402.04   | 950.242   | BC015991  | 13330.265 | 13563.667 |
| AK025750  | 2563.718 | 1517.423 | NM_00597€ | 11861.341 | 8087.502  | U46214    | 2369.203  | 2000.998  |
| AK025783  | 1679.842 | 1621.313 | X04547    | 2128.685  | 1589.032  | NM_00031€ | 8071.052  | 7477.792  |
| AF113675  | 609.053  | 675.121  | AK025823  | 2682.989  | 1708.031  | AF161343  | 4591.162  | 4873.63   |
| AK024514  | 998.421  | 1038.97  | AK026691  | 853.487   | 691.647   | NM_00476€ | 7061.897  | 6939.068  |
| NM_02011€ | 8846.578 | 6606.31  | AL359941  | 2469.068  | 1709.526  | AK022246  | 1723.195  | 1003.286  |
| AL049417  | 6480.462 | 5612.757 | AF035278  | 1462.548  | 1013.275  | X75684    | 921.383   | 694.024   |
| AK023507  | 653.718  | 724.757  | AL050202  | 523.032   | 577.905   | D17200    | 334.079   | 484.313   |



|           |          |          |           |           |           |           |           |           |
|-----------|----------|----------|-----------|-----------|-----------|-----------|-----------|-----------|
| NM_005166 | 593.81   | 858.805  | U32999    | 11009.479 | 8878.135  | AF113701  | 5971.914  | 4491.962  |
| AL109818  | 798.819  | 679.265  | U66052    | 6526.035  | 6355.543  | Y11158    | 1890.843  | 1536.846  |
| BE698533  | 398.463  | 352.5    | AK024156  | 1342.016  | 1261.878  | NM_006771 | 11631.1   | 10179.407 |
| NM_017929 | 684.748  | 432.713  | AF086288  | 1562.878  | 1950.81   | L37702    | 10286.267 | 7998.944  |
| NM_018472 | 576.146  | 360.155  | NM_016944 | 616.177   | 495.362   | AK022812  | 3154.125  | 2440.377  |
| AJ008128  | 3505.945 | 1606.746 | AK023109  | 1759.582  | 1909.335  | U79301    | 2740.884  | 2591.371  |
| AL449243  | 11143.79 | 8575.348 | NM_005293 | 19801.357 | 18441.211 | AK022260  | 4621.269  | 3825.542  |
| AK026449  | 1238.973 | 685.93   | AF133332  | 6186.604  | 4722.753  | M32219    | 8505.882  | 6778.691  |
| NM_014027 | 4380.482 | 2496.61  | NM_001088 | 6588.822  | 5590.682  | BC018868  | 1118.658  | 737.213   |
| NM_020467 | 3966.958 | 2439.136 | BC015991  | 11710.333 | 10515.31  | AF086174  | 663.43    | 525.163   |
| AF116621  | 5696.284 | 3689.419 | U94902    | 490.43    | 356.786   | AF007128  | 9451.636  | 6772.763  |
| AF086554  | 2392.961 | 1654.142 | U46214    | 2446.284  | 2196.56   | CY3Cy5    | 2935.16   | 165.385   |
| AL390136  | 5557.82  | 5704.097 | NM_000310 | 9120.202  | 7274.053  | AI351740  | 6461.282  | 4151.128  |
| AK023156  | 444.661  | 392.758  | AF161343  | 4256.375  | 3762.451  | AA444051  | 737.936   | 759.635   |
| AF086398  | 20094.04 | 22565.03 | NM_004765 | 7146.333  | 5358.338  | NM_007164 | 1312.708  | 1128.359  |
| AK024545  | 1022.236 | 1000.619 | AK022246  | 1337.608  | 1009.266  | BE783826  | 8326.443  | 10064.44  |
| AK023444  | 703.193  | 796.182  | X75684    | 798.879   | 891.188   | X04827    | 1362.222  | 1112.816  |
| AK025953  | 1376.971 | 1686.126 | AF113701  | 5170.049  | 5438.586  | H07088    | 933.185   | 956.007   |
| NM_003180 | 1556.541 | 1823.484 | Y11158    | 1653.993  | 1343.486  | BC008428  | 199.988   | 409.094   |
| AF086406  | 15587.95 | 16292.64 | NM_006771 | 14944.278 | 13570.162 | BC020596  | 1461.804  | 2025.447  |
| D17216    | 8419.571 | 5866.044 | L37702    | 13149.014 | 14118.947 | AF116606  | 53890.492 | 56141.336 |
| AL137581  | 2858.842 | 2266.359 | AK022812  | 4036.609  | 3304.646  | X98922    | 3603.096  | 5152.411  |
| AK024942  | 1203.208 | 991.181  | U79301    | 3730.748  | 3585.062  | AK098435  | 2417.804  | 3871.229  |
| AJ227873  | 11080.72 | 4904.092 | AK022260  | 5347.573  | 4807.869  | AK092872  | 1709.402  | 3702.875  |
| AK022886  | 4959.84  | 4320.295 | M32219    | 9064.531  | 8921.727  | M16801    | 605.621   | 959.781   |
| AK024665  | 17447.29 | 27095.44 | BC018868  | 823.569   | 553.806   | NM_145904 | 19854.475 | 30810.564 |
| AF147363  | 974.964  | 612.939  | CY3Cy5    | 2160.968  | 188.065   | NM_021969 | 317.025   | 657.545   |
| AJ227880  | 1008.589 | 630.905  | AI351740  | 5625.545  | 9339.642  | SR10      | 29229.043 | 10551.73  |
| AK000691  | 787.708  | 494.379  | AA444051  | 531.097   | 746.168   | NM_002090 | 259.879   | 334.315   |
| AK001448  | 1549.418 | 625.751  | NM_007164 | 3124.698  | 2963.488  | NM_004485 | 2981.617  | 1759.323  |
| AK026890  | 480.42   | 465.483  | BE783826  | 17022.191 | 16338.559 | NM_012419 | 693.735   | 641.862   |
| AL049321  | 5322.059 | 4867.257 | X04827    | 1188.872  | 1407.299  | NM_013296 | 6849.337  | 7006.204  |
| CY3Cy5    | 5480.129 | 288.767  | H07088    | 782.461   | 923.902   | AL117478  | 667.198   | 797.137   |
| W74254    | 16193.1  | 32866.51 | AI004656  | 519.849   | 359.805   | NM_005307 | 669.308   | 695.891   |
| M58603    | 9068.149 | 9871.808 | BC020596  | 1411.71   | 1350.79   | NM_005958 | 1579.634  | 1894.602  |
| AB003334  | 12695.18 | 17932.74 | AF116606  | 46529.895 | 48060.742 | NM_013436 | 1055.223  | 1412.244  |
| AW276315  | 728.352  | 788.256  | X98922    | 3447.202  | 3413.022  | AF225426  | 875.419   | 796.941   |
| AA490737  | 1048.406 | 814.673  | AK098435  | 7095.439  | 12289.994 | NM_005208 | 2793.892  | 2944.372  |
| AI878886  | 17078.36 | 16089.87 | AK092872  | 3092.306  | 3110.533  | NM_000421 | 1012.877  | 1433.426  |
| BG697179  | 9676.88  | 7628.317 | AF230496  | 403.978   | 703.011   | AK025687  | 1432.802  | 2660.676  |
| NM_002136 | 44720.92 | 42135.68 | M16801    | 497.095   | 639.755   | AF218941  | 2497.834  | 4133.731  |
| BM012504  | 2529.595 | 1981.266 | NM_145904 | 19481.252 | 23498.135 | AL137264  | 1106.929  | 2353.569  |
| AA664145  | 1395.262 | 1763.156 | SR4       | 12499.415 | 11959.365 | NM_002226 | 467.46    | 1026.139  |
| X72308    | 4668.575 | 3649.837 | SR6       | 2224.49   | 1938.576  | X84370    | 4976.488  | 10581.845 |
| T70999    | 665.322  | 594.17   | SR8       | 7306.652  | 22480.885 | NM_004039 | 1182.584  | 2183.149  |
| R48168    | 14851.06 | 13166.98 | SR10      | 27799.482 | 12774.038 | AB014558  | 1016.934  | 1287.581  |
| NM_003942 | 2889.535 | 2944.607 | CY3Cy5    | 2200.623  | 177.713   | NM_000118 | 2786.292  | 3681.089  |
| NM_004452 | 855.061  | 1047.13  | NM_002418 | 635.326   | 813.902   | AK026248  | 930.74    | 1023.203  |
| SR9       | 22481.65 | 2837.617 | NM_004485 | 1974.127  | 3585.224  | NM_004578 | 1765.1    | 1126.88   |
| CY3Cy5    | 3722.936 | 140.367  | NM_012419 | 608.143   | 838.985   | NM_000647 | 509.723   | 416.782   |
| NM_000418 | 624.204  | 1212.267 | NM_013296 | 5912.441  | 5964.599  | AB046793  | 699.831   | 692.719   |
| NM_013246 | 996.133  | 750.563  | AL117478  | 755.15    | 724.667   | NM_017604 | 1724.544  | 1672.91   |
| NM_000591 | 2414.197 | 3223.356 | NM_005307 | 1073.114  | 1091.961  | NM_017738 | 4295.91   | 4173.485  |

|           |          |          |           |           |           |           |           |           |
|-----------|----------|----------|-----------|-----------|-----------|-----------|-----------|-----------|
| NM_000565 | 702.868  | 608.97   | NM_005958 | 1698.424  | 1235.235  | NM_016557 | 1456.338  | 1691.005  |
| NM_002019 | 1616.802 | 1517.61  | NM_013436 | 1483.596  | 1498.902  | NM_000623 | 2350.872  | 2238.11   |
| NM_017767 | 3378.839 | 2719.829 | AF225426  | 589.538   | 827.548   | AF161348  | 6887.888  | 36521.676 |
| AK024848  | 7001.375 | 7081.271 | NM_005208 | 5862.48   | 5443.938  | NM_018467 | 5383.385  | 5411.054  |
| NM_004852 | 1945.794 | 1975.681 | NM_000421 | 983.063   | 1051.22   | NM_006068 | 639.716   | 571.237   |
| NM_000543 | 2390.897 | 2557.913 | AK025687  | 12568.248 | 14037.008 | NM_002704 | 47.338    | 394.784   |
| U06699    | 3265.457 | 3252.154 | AF218941  | 4487.059  | 5036.53   | U16752    | 280.481   | 454.493   |
| AK024396  | 1034.609 | 1507.903 | AL137264  | 10024.702 | 9554.923  | NM_002038 | 8474.437  | 9662.086  |
| U58514    | 1453.969 | 1678.905 | X84370    | 7382.229  | 7481.146  | NM_005729 | 5375.927  | 7518.648  |
| NM_000544 | 2163.641 | 2942.049 | AB014558  | 962.714   | 1239.045  | NM_015493 | 793.829   | 1693.003  |
| NM_001044 | 427.92   | 560.898  | NM_006287 | 601.999   | 782.9     | NM_003747 | 1294.174  | 1936.656  |
| NM_004644 | 991.279  | 944.081  | NM_000118 | 2035.072  | 2815.442  | AB037744  | 1258.907  | 1784.932  |
| AV681967  | 2540.208 | 3045.052 | NM_000913 | 667.335   | 707.711   | AF141901  | 324.994   | 937.415   |
| NM_018250 | 2273.418 | 2595.062 | NM_001298 | 58216.504 | 58838.668 | NM_007008 | 685.095   | 2068.3    |
| NM_016553 | 9321.493 | 10882.21 | BG325046  | 2678.331  | 2659.452  | AL109708  | 595.67    | 1075.378  |
| AB023136  | 749.197  | 834.993  | AK026248  | 873.063   | 1292.159  | AF099740  | 1244.237  | 1094.566  |
| NM_003795 | 31233.74 | 26288.3  | NM_004578 | 1737.116  | 3657.255  | NM_006117 | 17035.391 | 14701.889 |
| NM_014232 | 6365.844 | 5020.429 | NM_000647 | 767.338   | 1849.439  | NM_002225 | 2118.158  | 1952.852  |
| NM_005701 | 2669.067 | 1676.165 | AB046793  | 695.721   | 537.896   | NM_006229 | 631.169   | 746.264   |
| NM_006819 | 27911.62 | 24084.26 | NM_017604 | 1334.297  | 1416.839  | NM_015415 | 19211.9   | 17026.209 |
| NM_014744 | 2452.722 | 2322.97  | NM_017738 | 6129.501  | 5738.479  | NM_004897 | 2134.41   | 2252.297  |
| AF146759  | 363.969  | 436.571  | NM_016557 | 1261.988  | 1579.301  | NM_002555 | 1294.49   | 1069.19   |
| AB032993  | 6406.32  | 4449.612 | NM_000623 | 2359.229  | 2381.805  | AF225418  | 844.289   | 1084.365  |
| NM_000854 | 5608.343 | 5189.149 | AF161348  | 1624.742  | 1616.382  | NM_000309 | 1145.623  | 914.961   |
| AL117423  | 5357.347 | 6488.418 | NM_018467 | 6626.813  | 7467.033  | NM_004528 | 16916.5   | 16774.051 |
| NM_002084 | 2946.228 | 3141.176 | NM_006068 | 995.565   | 844.65    | NM_018394 | 772.211   | 409.545   |
| NM_004750 | 1529.136 | 2586.159 | U16752    | 716.626   | 594.099   | NM_002450 | 8260.439  | 12881.338 |
| NM_007295 | 4753.586 | 3960.735 | NM_002038 | 7638.544  | 9395.836  | NM_001686 | 678.887   | 1209.082  |
| NM_003651 | 11552.85 | 14311.33 | NM_005729 | 7520.561  | 8301.205  | NM_004978 | 402.799   | 534.64    |
| NM_003262 | 2795.338 | 3106.899 | NM_015493 | 977.181   | 1021.601  | NM_000705 | 723.613   | 983.123   |
| NM_020125 | 475.39   | 733.085  | NM_003747 | 1726.068  | 1705.327  | NM_002243 | 264.363   | 655.129   |
| AK022832  | 3250.631 | 4566.249 | AB037744  | 1655.525  | 1837.086  | NM_016577 | 302.938   | 1019.882  |
| NM_014641 | 4051.266 | 2533.782 | AF141901  | 1506.35   | 1451.329  | AK023107  | 6361.479  | 10420.173 |
| AB020664  | 2731.233 | 2725.429 | NM_007008 | 1064.087  | 1103.077  | NM_006854 | 7014.223  | 11308.667 |
| NM_006640 | 20956.86 | 19051.11 | AL109708  | 859.579   | 785.963   | NM_004580 | 4198.55   | 5800.557  |
| NM_000343 | 1150.989 | 1056.464 | L29143    | 655.146   | 696.42    | NM_020387 | 10462.543 | 14340.462 |
| NM_019112 | 2463.764 | 2721.101 | AF234532  | 1302.222  | 1353.066  | NM_007246 | 1427.963  | 1782.2    |
| NM_012336 | 17922.7  | 15754.55 | AF099740  | 1340.719  | 1431.497  | AF150735  | 5146.555  | 5018.511  |
| NM_020246 | 2079.655 | 3018.432 | NM_006117 | 21244.506 | 43323.145 | NM_018183 | 1933.048  | 1549.192  |
| NM_000084 | 3241.583 | 2674.35  | NM_002225 | 3085.522  | 3973.457  | NM_012382 | 2834.259  | 2978.751  |
| NM_016354 | 1129.144 | 1323.87  | NM_006229 | 636.053   | 998.277   | BF038366  | 846.205   | 672.383   |
| NM_003038 | 3738.107 | 3635.712 | NM_015415 | 18886.115 | 21737.965 | NM_012304 | 668.159   | 908.946   |
| NM_018155 | 6160.241 | 6696.807 | NM_004897 | 2708.368  | 2873.705  | NM_016440 | 13355.858 | 16240.543 |
| NM_004731 | 1601.167 | 1188.216 | NM_002555 | 1767.439  | 1868.898  | NM_007194 | 3458.75   | 3854.19   |
| AB023139  | 3822.858 | 5678.699 | AF225418  | 1063.316  | 800.433   | NM_000314 | 5416.211  | 6707.85   |
| NM_017885 | 5417.96  | 7096.659 | NM_000309 | 1055.163  | 904.814   | S74620    | 978.824   | 1509.732  |
| D80004    | 1421.687 | 1847.374 | NM_004528 | 14959.664 | 15327.729 | AF305239  | 918.422   | 1304.808  |
| NM_000946 | 8214.939 | 7711.824 | AK026381  | 16089.183 | 13817.93  | NM_002827 | 2757.129  | 3269.79   |
| NM_016070 | 1893.841 | 1828.039 | NM_002450 | 11594.704 | 6803.236  | NM_001946 | 656.464   | 1121.014  |
| NM_016101 | 5194.241 | 4252.553 | NM_001686 | 810.523   | 862.314   | BF035425  | 1515.045  | 2362.82   |
| NM_005859 | 5979.864 | 4314.516 | NM_004978 | 370.626   | 706.249   | NM_001608 | 485.17    | 432.813   |
| NM_014628 | 7159.97  | 7905.185 | NM_000705 | 782.007   | 678.521   | NM_000159 | 24967.977 | 23102.59  |
| AK025630  | 1918.425 | 1618.383 | NM_004231 | 55251.922 | 54792.969 | NM_014638 | 1733.258  | 1902.414  |

|           |          |          |           |           |           |           |           |           |
|-----------|----------|----------|-----------|-----------|-----------|-----------|-----------|-----------|
| AL365404  | 12069.8  | 12164.3  | NM_016577 | 640.714   | 502.984   | NM_006287 | 355.848   | 334.931   |
| AK022907  | 3663.872 | 5060.093 | AK023107  | 7570.554  | 6499.014  | NM_000118 | 2716.131  | 1672.659  |
| NM_014793 | 1440.299 | 1951.027 | NM_006854 | 9554.4    | 9425.024  | NM_000913 | 602.206   | 478.405   |
| NM_004245 | 909.15   | 898.8    | NM_004580 | 5125.479  | 5436.711  | NM_001295 | 36201.328 | 54900.398 |
| NM_003241 | 954.402  | 2163.87  | NM_007246 | 1858.326  | 2327.184  | BG325046  | 2127.947  | 2276.673  |
| NM_002685 | 3794.979 | 5331.561 | AF150735  | 4713.3    | 5109.195  | AI351740  | 5928.875  | 4523.602  |
| AK024504  | 2456.773 | 3617.328 | NM_018183 | 1124.796  | 2069.058  | AA444051  | 551.511   | 638.399   |
| AF039023  | 4024.825 | 5770.146 | NM_012382 | 4023.015  | 3204.341  | NM_007164 | 1662.234  | 1886.459  |
| NM_005511 | 4074.337 | 7242.561 | BF038366  | 769.968   | 700.133   | BE783826  | 13286.37  | 15637.212 |
| NM_014695 | 3092.966 | 4854.413 | NM_002452 | 18051.967 | 14409.364 | X04827    | 1369.732  | 1038.935  |
| NM_018475 | 7585.825 | 11319.18 | NM_012304 | 923.775   | 821.689   | H07088    | 798.257   | 800.229   |
| AK024396  | 1331.916 | 1789.607 | NM_016440 | 15912.734 | 14184.309 | AI004656  | 336.145   | 678.215   |
| U58514    | 1858.342 | 2337.98  | NM_007194 | 3044.563  | 3347.961  | BC020596  | 1059.829  | 1417.67   |
| M58603    | 10256.81 | 9464.968 | NM_000314 | 6474.637  | 5196.122  | AF116606  | 54664.586 | 57213.586 |
| AB003334  | 10228.73 | 7848.326 | AB002369  | 1294.92   | 1560.241  | X98922    | 3379.071  | 4732.769  |
| AW276315  | 876.156  | 492.935  | S74620    | 3522.883  | 3940.086  | AK098435  | 3996.278  | 4626.38   |
| AA490737  | 1122.514 | 753.284  | AF305239  | 1252.971  | 1030.733  | AK092872  | 2055.059  | 2673.681  |
| AI878886  | 17825.85 | 14948.49 | NM_002827 | 6035.879  | 5050.592  | AF230496  | 418.321   | 714.82    |
| BM012504  | 2665.092 | 2441.51  | NM_001946 | 891.121   | 832.514   | M16801    | 838.306   | 1004.985  |
| AA664145  | 1550.83  | 2216.657 | BF035425  | 22070.076 | 20477.326 | NM_145904 | 18413.473 | 19733.492 |
| X72308    | 5149.894 | 4915.399 | NM_014635 | 1559.26   | 1818.394  | NM_021969 | 1161.058  | 2068.088  |
| T50790    | 1007.22  | 1043.336 | NM_006287 | 591.635   | 620.193   | NM_013334 | 3099.385  | 2895.508  |
| R48168    | 18295.03 | 21925.98 | NM_000118 | 2068.567  | 2722.565  | AB037744  | 1428.505  | 1179.527  |
| NM_003942 | 3455.693 | 4956.244 | NM_000913 | 666.552   | 682.256   | AF141901  | 879.836   | 641.994   |
| NM_004452 | 1087.399 | 1485.054 | NM_001295 | 54757.918 | 46961.652 | NM_007005 | 747.654   | 805.941   |
| NM_002081 | 1106.654 | 1775.236 | BG325046  | 2552.719  | 2285.824  | AL109708  | 831.301   | 749.359   |
| D16892    | 21691.56 | 27784.61 | AI351740  | 5078.425  | 8800.285  | L29143    | 451.316   | 386.642   |
| NM_004750 | 1504.231 | 2412.35  | AA444051  | 747.559   | 654.218   | AF234532  | 902.412   | 970.573   |
| NM_007295 | 4527.898 | 4521.749 | NM_007164 | 2781.827  | 2627.891  | NM_002415 | 329.3     | 674.211   |
| NM_000415 | 506.484  | 736.7    | BE783826  | 17901.518 | 17602.406 | NM_002090 | 116.824   | 463.497   |
| NM_013246 | 721.777  | 378.785  | X04827    | 1323.407  | 1567.449  | NM_004485 | 2821.283  | 1875.05   |
| NM_000591 | 1435.258 | 1018.196 | H07088    | 792.777   | 619.533   | NM_012415 | 536.373   | 555.591   |
| NM_017767 | 3867.459 | 4020.701 | AI004656  | 628.899   | 458.954   | NM_013296 | 6344.188  | 7190.402  |
| AK024848  | 7786.78  | 8981.516 | BC020596  | 1728.162  | 1373.51   | AL117478  | 663.047   | 713.309   |
| NM_004852 | 2151.662 | 2954.852 | AF116606  | 52390.438 | 48871.953 | NM_005307 | 809.851   | 805.518   |
| NM_003633 | 541.952  | 1284.494 | X98922    | 3906.944  | 3474.136  | NM_005955 | 1324.002  | 1786.458  |
| NM_000543 | 2394.429 | 3670.009 | AK098435  | 5233.482  | 4680.647  | NM_013436 | 1124.624  | 1594.993  |
| U06699    | 3615.988 | 5589.127 | AK092872  | 3151.158  | 2997.391  | AF225426  | 580.971   | 656.532   |
| AJ290954  | 16267.39 | 20466.33 | AF230496  | 537.11    | 658.233   | NM_005205 | 4165.191  | 4085.097  |
| NM_002783 | 1472.991 | 1889.529 | M16801    | 545.346   | 807.385   | NM_000421 | 835.219   | 969.526   |
| NM_000084 | 3053.661 | 2990.854 | NM_145904 | 18663.125 | 16622.908 | AK025687  | 4919.438  | 6134.403  |
| NM_016354 | 1318.652 | 1678.227 | NM_021965 | 564.14    | 711.949   | AF218941  | 3252.361  | 3243.172  |
| NM_003035 | 4398.73  | 4505.638 | NM_013334 | 6814.819  | 5843.006  | AL137264  | 5575.466  | 6312.607  |
| NM_018155 | 5160.64  | 5872.786 | AB037744  | 1748.078  | 1410.398  | NM_002226 | 144.687   | 600.317   |
| NM_004731 | 1642.207 | 1074.438 | AF141901  | 981.78    | 805.447   | X84370    | 5081.69   | 5929.013  |
| NM_000544 | 2426.719 | 2463.956 | NM_007005 | 1009.382  | 872.953   | NM_004035 | 1068.649  | 1072.798  |
| NM_001044 | 692.848  | 399.076  | AL109708  | 874.848   | 780.079   | AB014558  | 1064.325  | 841.234   |
| NM_004644 | 1063.074 | 672.574  | L29143    | 560.08    | 704.215   | NM_016577 | 436.217   | 639.783   |
| AV681967  | 2432.959 | 2162.574 | AF234532  | 1136.389  | 1433.507  | AK023107  | 6141.231  | 5839.455  |
| NM_018250 | 2142.286 | 1716.334 | NM_002415 | 506.213   | 552.414   | NM_006854 | 6537.295  | 5904.585  |
| NM_016553 | 8172.484 | 6176.094 | NM_004485 | 1987.441  | 2873.68   | NM_004580 | 4635.583  | 4289.293  |
| AB023136  | 812.103  | 808.433  | NM_012415 | 582.767   | 904.975   | NM_020387 | 24932.203 | 23566.58  |
| NM_003795 | 32743.84 | 29728.69 | NM_013296 | 6344.401  | 5514.473  | NM_007246 | 1494.097  | 1313.896  |

|           |          |          |           |           |           |           |           |           |
|-----------|----------|----------|-----------|-----------|-----------|-----------|-----------|-----------|
| NM_014232 | 6539.232 | 6033.9   | AL117478  | 717.952   | 514.454   | AK026248  | 939.886   | 950.3     |
| NM_005701 | 2895.307 | 2140.653 | NM_005307 | 1034.161  | 1032.649  | NM_004578 | 1500.607  | 1203.488  |
| NM_001231 | 522.835  | 1120.78  | NM_005958 | 1631.64   | 1318.36   | NM_000647 | 336.512   | 491.129   |
| NM_006819 | 31675.16 | 38444.74 | NM_013436 | 1224.522  | 815.261   | AB046793  | 480.455   | 633.173   |
| NM_014744 | 3216.886 | 3420.023 | AF225426  | 632.341   | 811.173   | NM_017604 | 1400.651  | 1564.752  |
| AF146759  | 715.608  | 1237.348 | NM_005208 | 7079.277  | 7044.623  | NM_017738 | 2912.129  | 3528.934  |
| AB032993  | 7582.956 | 7683.169 | NM_000421 | 867.604   | 847.418   | NM_016557 | 1331.985  | 1223.976  |
| NM_000854 | 6730.418 | 8623.981 | AK025687  | 14847.597 | 17163.961 | NM_000623 | 2216.01   | 2354.119  |
| NM_001901 | 584.354  | 639.274  | AF218941  | 4093.833  | 4446.973  | NM_018301 | 248.986   | 460.991   |
| AL117423  | 5121.045 | 6509.655 | AL137264  | 9927.161  | 9198.361  | AF161348  | 1861.693  | 2020.777  |
| NM_002685 | 3846.387 | 4889.251 | NM_002226 | 584.582   | 422.619   | NM_018467 | 7010.242  | 5830.688  |
| AK024504  | 2057.155 | 3142.163 | X84370    | 8475.685  | 8268.652  | NM_006068 | 741.403   | 751.517   |
| AF039023  | 3166.833 | 3693.929 | NM_004039 | 1237.883  | 1490.554  | U16752    | 396.148   | 324.279   |
| NM_005511 | 4060.283 | 4400.644 | AB014558  | 891.311   | 1318.174  | NM_002038 | 9113.395  | 6497.811  |
| NM_014698 | 2994.933 | 3681.179 | NM_016577 | 615.332   | 317.762   | NM_005729 | 5718.905  | 5052.693  |
| NM_018475 | 7415.282 | 7594.133 | AK023107  | 7640.718  | 6035.413  | NM_015493 | 926.822   | 908.419   |
| NM_003262 | 2429.337 | 2132.827 | NM_006854 | 9100.1    | 8063.74   | NM_003747 | 1631.048  | 1529.931  |
| AK022832  | 2522.883 | 1887.862 | NM_004580 | 4648.033  | 5421.519  | NM_002827 | 4370.589  | 3695.97   |
| NM_014641 | 3770.675 | 2174.818 | NM_020387 | 44730.195 | 61605.141 | NM_001946 | 711.651   | 664.842   |
| NM_004462 | 15034.81 | 12108.71 | NM_007246 | 1519.705  | 2120.75   | BF035425  | 7413.562  | 5794.722  |
| AB020664  | 3185.468 | 4424.392 | AK026248  | 1545.413  | 2205.333  | NM_000159 | 49667.754 | 46457.805 |
| NM_006640 | 23026.53 | 33795.15 | NM_004578 | 1273.101  | 1824.852  | NM_014638 | 1248.668  | 1184.81   |
| NM_000343 | 971.185  | 1408.471 | AB046793  | 606.51    | 311.129   | AF099740  | 1456.031  | 1440.73   |
| NM_019112 | 2574.708 | 3174.108 | NM_017604 | 1463.839  | 1180.368  | NM_006117 | 16076.623 | 16380.568 |
| NM_012336 | 17746.86 | 15405.78 | NM_017738 | 6184.729  | 4770.319  | NM_002225 | 2164.527  | 2502.509  |
| NM_020161 | 490.957  | 595.099  | NM_016557 | 1504.53   | 1174.243  | NM_006229 | 567.758   | 573.861   |
| NM_020246 | 1658.813 | 2072.425 | NM_000623 | 2558.922  | 2184.327  | NM_015415 | 19953.371 | 17856.805 |
| NM_003942 | 2806.219 | 3224.108 | AF161348  | 1566.122  | 1339.243  | NM_004897 | 2377.099  | 2689.128  |
| NM_004452 | 741.465  | 1095.547 | NM_018467 | 7838.646  | 7721.725  | NM_002555 | 1353.576  | 1255.35   |
| AB040954  | 3663.599 | 3297.934 | NM_006068 | 1227.683  | 1296.793  | AF225418  | 629.408   | 1147.07   |
| NM_002081 | 993.503  | 1208.702 | NM_002704 | 304.23    | 388.533   | NM_000309 | 1225.368  | 1385.729  |
| AB023139  | 4070.595 | 3289.861 | U16752    | 493.588   | 487.568   | NM_004528 | 19210.717 | 21986.457 |
| NM_017885 | 4979.461 | 3916.993 | NM_002038 | 8433.499  | 11428.952 | AK026381  | 11481.447 | 11664.969 |
| D80004    | 1185.858 | 1001.629 | NM_005729 | 7870.762  | 9198.031  | NM_002450 | 8368.226  | 10767.206 |
| NM_000946 | 6794.43  | 4640.301 | NM_015493 | 1245.663  | 2165.943  | NM_001686 | 902.054   | 651.566   |
| NM_016070 | 1766.817 | 1492.908 | NM_003747 | 2219.437  | 2358.982  | NM_000705 | 638.094   | 474.607   |
| NM_016390 | 2213.493 | 1860.255 | NM_002827 | 5602.405  | 4183.304  | NM_004231 | 51558.445 | 44075.664 |
| NM_016101 | 5974.037 | 5225.915 | NM_001946 | 814.965   | 743.19    | NM_145904 | 17462.193 | 15169.303 |
| NM_005859 | 6801.95  | 6311.603 | BF035425  | 17404.666 | 18300.152 | NM_013334 | 4043.84   | 3849.844  |
| NM_020313 | 1007.083 | 1229.329 | NM_000159 | 49928.023 | 57788.719 | AF150735  | 4974.165  | 5540.961  |
| NM_014628 | 8286.904 | 11211.4  | NM_014638 | 1433.044  | 1671.68   | NM_018183 | 1602.931  | 1347.915  |
| AK025630  | 2198.505 | 2836.245 | AF099740  | 1354.359  | 1325.05   | NM_012382 | 3098.618  | 3289.336  |
| AL365404  | 12812.6  | 15458.24 | NM_006117 | 15166.593 | 18729.564 | BF038366  | 857.865   | 883.801   |
| AK022907  | 3606.571 | 4986.461 | NM_002225 | 2466.359  | 1747.695  | NM_002452 | 17106.131 | 17275.754 |
| NM_014793 | 1282.442 | 2171.024 | NM_006229 | 603.713   | 638.357   | NM_012304 | 683.065   | 404.068   |
| NM_004245 | 462.943  | 689.813  | NM_015415 | 19660.904 | 16914.908 | NM_016440 | 15062.601 | 11941.784 |
| NM_000543 | 2058.081 | 2378.704 | NM_004897 | 2737.756  | 2252.412  | NM_007194 | 3664.865  | 5006.6    |
| U06699    | 2517.073 | 3240.282 | NM_002555 | 1846.235  | 1223.276  | NM_000314 | 5791.769  | 6348.296  |
| AJ290954  | 14431.69 | 18480.82 | AF225418  | 1107.37   | 867.953   | AB002369  | 1215.839  | 1173.814  |
| AK025451  | 3003.735 | 3045.901 | NM_000309 | 778.148   | 798.916   | S74620    | 1501.223  | 1443.713  |
| NM_002783 | 1038.404 | 1131.354 | NM_004528 | 17981.783 | 18902.139 | AF305239  | 1155.688  | 1019.248  |
| X52005    | 20246.4  | 18312.81 | AK026381  | 20018.668 | 19937.008 | AL137264  | 6456.287  | 6443.465  |
| AK024396  | 963.532  | 1085.052 | NM_002450 | 12742.334 | 10092.743 | NM_002226 | 379.051   | 528.066   |

|           |          |          |           |           |           |           |           |           |
|-----------|----------|----------|-----------|-----------|-----------|-----------|-----------|-----------|
| U58514    | 1607.958 | 1084.805 | NM_001686 | 904.294   | 810.526   | X84370    | 5735.614  | 5721.154  |
| W74254    | 14385.81 | 14207.74 | NM_000705 | 869.423   | 1061.495  | NM_004039 | 1149.69   | 1150.545  |
| M58603    | 7704.479 | 5107.488 | NM_004231 | 53936.793 | 63339.801 | AB014558  | 1017.121  | 825.123   |
| AB003334  | 9903.884 | 7243.895 | NM_145904 | 19533.082 | 16947.09  | NM_006287 | 377.541   | 459.122   |
| AW276315  | 1037.237 | 1042.678 | NM_013334 | 5499.406  | 5262.124  | NM_000118 | 2738.861  | 2198.835  |
| BM012504  | 3061.532 | 3308.332 | AF150735  | 4703.382  | 4416.434  | NM_000913 | 557.337   | 562.913   |
| AA664145  | 1653.21  | 2859.663 | NM_018183 | 979.636   | 1600.025  | NM_001296 | 33537.082 | 54120.172 |
| X72308    | 4914.185 | 5154.752 | NM_012382 | 3802.793  | 3300.462  | BG325046  | 2033.182  | 2402.58   |
| T70999    | 570.297  | 686.679  | BF038366  | 977.836   | 1039.474  | AI351740  | 5958.733  | 4408.06   |
| T50790    | 681.892  | 634.899  | NM_002452 | 25800.42  | 43114.766 | AA444051  | 580.747   | 970.688   |
| R48168    | 16397.97 | 13939.9  | NM_012304 | 671.26    | 800.449   | NM_007164 | 1237.612  | 1631.893  |
| AB032993  | 7224.388 | 5300.144 | NM_016440 | 17468.973 | 18377.801 | BE783826  | 11460.02  | 17146.258 |
| NM_000854 | 5706.933 | 5180.93  | NM_007194 | 3511.53   | 4102.424  | X04827    | 1455.427  | 1008.176  |
| NM_001901 | 672.767  | 412.642  | NM_000314 | 7302.043  | 6762.147  | H07088    | 909.334   | 648.702   |
| AL117423  | 7926.438 | 10962.7  | AB002369  | 1319.961  | 1745.762  | AI004656  | 482.858   | 387.694   |
| NM_002084 | 2730.21  | 2137.666 | S74620    | 3179.464  | 3243.839  | BC020596  | 1259.328  | 1326.506  |
| D16892    | 19829.43 | 13542.42 | AF305239  | 1315.122  | 1010.485  | AF116606  | 54922.621 | 43551.609 |
| NM_004750 | 1160.246 | 1273.609 | AL137264  | 9992.248  | 9150.139  | X98922    | 3194.146  | 3167.739  |
| NM_007295 | 3104.169 | 1994.674 | NM_002226 | 543.646   | 431.066   | AK098435  | 4253.128  | 4126.687  |
| NM_003651 | 11174.99 | 10117.5  | X84370    | 7318.354  | 7258.793  | AK092872  | 2411.922  | 2801.292  |
| NM_000418 | 587.101  | 622.116  | NM_004039 | 1251.883  | 1485.79   | AF230496  | 503.862   | 359.486   |
| NM_013246 | 743.59   | 503.749  | AB014558  | 800.99    | 1273.022  | M16801    | 494.801   | 451.669   |
| NM_002019 | 2615.683 | 3244.478 | NM_006287 | 582.245   | 475.478   | NM_002038 | 8895.349  | 5264.564  |
| NM_017767 | 4415.063 | 5685.313 | NM_000118 | 1948.456  | 2445.78   | NM_005729 | 5874.09   | 5281.12   |
| AK024848  | 8469.451 | 9988.608 | NM_000913 | 574.036   | 415.077   | NM_015493 | 972.708   | 986.293   |
| NM_004852 | 2284.619 | 2627.333 | NM_001296 | 52188.879 | 36325.566 | NM_003747 | 1399.739  | 1310.911  |
| NM_003633 | 403.465  | 722.683  | BG325046  | 2318.74   | 1670.884  | AB037744  | 1479.14   | 1357.955  |
| NM_000343 | 779.753  | 902.135  | AI351740  | 5003.121  | 6790.621  | AF141901  | 812.139   | 893.582   |
| NM_019112 | 2054.802 | 2574.498 | AA444051  | 716.324   | 677.121   | NM_007008 | 790.946   | 1063.506  |
| NM_012336 | 19128.12 | 19050.78 | NM_007164 | 2714.553  | 2232.074  | AL109708  | 702.226   | 871.62    |
| NM_020246 | 1676.786 | 1806.407 | BE783826  | 16590.322 | 15140.786 | AF234532  | 842.049   | 689.551   |
| NM_000084 | 2534.768 | 1732.479 | X04827    | 1264.823  | 1442.946  | NM_002418 | 456.017   | 398.278   |
| NM_016354 | 936.185  | 940.943  | H07088    | 898.456   | 864.236   | NM_004485 | 2941.36   | 1856.785  |
| NM_003038 | 3189.732 | 1821.505 | AI004656  | 553.502   | 543.677   | NM_012419 | 554.806   | 569.589   |
| NM_018155 | 3798.78  | 2313.124 | BC020596  | 1242.193  | 1336.236  | NM_013296 | 6322.776  | 6152.053  |
| NM_004731 | 1275.197 | 837.924  | AF116606  | 54599.031 | 53999.672 | AL117478  | 627.843   | 548.193   |
| NM_000544 | 2152.773 | 1595.735 | X98922    | 4414.347  | 4451.031  | NM_005307 | 835.095   | 789.942   |
| NM_004644 | 1216.243 | 911.275  | AK098435  | 6200.152  | 5519.909  | NM_005958 | 1315.264  | 1385.655  |
| NM_005701 | 3831.544 | 4558.588 | AK092872  | 3058.123  | 3110.741  | NM_013436 | 978.864   | 1305.166  |
| NM_001231 | 152.918  | 778.167  | AF230496  | 710.136   | 892.632   | AF225426  | 565.353   | 395.562   |
| AF146759  | 573.648  | 579.927  | M16801    | 535.038   | 395.579   | NM_005208 | 3706.909  | 3962.441  |
| AL365404  | 12939.84 | 12982.15 | NM_002038 | 7269.804  | 10770.935 | NM_000421 | 844.839   | 765.948   |
| AK022907  | 2897.112 | 3799.202 | NM_005729 | 6631.108  | 7856.187  | AK025687  | 6592.648  | 6534.222  |
| NM_014793 | 1333.742 | 1941.859 | NM_015493 | 856.282   | 1301.268  | AF218941  | 3670.836  | 2924.932  |
| NM_004245 | 948.974  | 936.547  | NM_003747 | 1411.728  | 2080.241  | NM_004978 | 324.694   | 309.566   |
| NM_002685 | 3708.596 | 3481.23  | AB037744  | 1284.589  | 1565.739  | NM_000705 | 591.468   | 450.158   |
| AK024504  | 1768.082 | 1535.086 | AF141901  | 879.956   | 916.358   | NM_004231 | 51883.426 | 39752.039 |
| AF039023  | 2673.392 | 1970.086 | NM_007008 | 1023.934  | 698.953   | NM_016577 | 460.759   | 603.427   |
| NM_005511 | 3438.848 | 2545.876 | AL109708  | 826.067   | 693.333   | AK023107  | 6247.888  | 6216.684  |
| NM_014698 | 3010.653 | 2534.199 | AF234532  | 997.244   | 764.43    | NM_006854 | 7364.917  | 7609.91   |
| NM_018475 | 6045.184 | 4572.941 | NM_004485 | 1906.006  | 2703.109  | NM_004580 | 4658.022  | 3977.354  |
| NM_003262 | 2622.017 | 1757.28  | NM_012419 | 530.954   | 544.158   | NM_020387 | 25028.947 | 24366.016 |
| NM_020125 | 476.459  | 505.148  | NM_013296 | 6535.557  | 6390.096  | NM_007246 | 1352.175  | 1436.459  |

|           |          |          |           |           |           |           |           |           |
|-----------|----------|----------|-----------|-----------|-----------|-----------|-----------|-----------|
| AK022832  | 2755.778 | 2466.136 | AL117478  | 786.575   | 803.289   | AK026248  | 977.219   | 1087.944  |
| NM_014641 | 4276.493 | 3468.498 | NM_005307 | 1115.281  | 1179.834  | NM_004578 | 1629.781  | 1242.021  |
| NM_004462 | 16802.68 | 16433.59 | NM_005958 | 1383.806  | 1651.364  | NM_000647 | 347.983   | 625.094   |
| AB020664  | 3681.215 | 4221.535 | NM_013436 | 1581.779  | 1330.494  | AB046793  | 385.869   | 762.173   |
| NM_006640 | 22522.89 | 31398.61 | AF225426  | 641.417   | 847.717   | NM_017604 | 1614.042  | 1530.983  |
| NM_000857 | 1632.364 | 1613.067 | NM_005208 | 7387.351  | 7500.657  | NM_017738 | 3135.33   | 3036.496  |
| L20688    | 65524.26 | 47060.83 | NM_000421 | 1062.492  | 1087.671  | NM_016557 | 1411.536  | 1959.516  |
| X69111    | 25798.53 | 20449.63 | AK025687  | 13813.818 | 13807.149 | NM_000623 | 2152.653  | 1876.98   |
| AF252283  | 917.201  | 943.09   | AF218941  | 4136.045  | 4084.448  | AF161348  | 1584.679  | 1257.717  |
| AB037799  | 2159.169 | 2390.392 | NM_004978 | 437.193   | 682.574   | NM_018467 | 5965.659  | 4973.852  |
| AB007950  | 2877.305 | 3768.232 | AF004711  | 550.71    | 1098.002  | NM_006068 | 749.529   | 785.377   |
| AL133111  | 574.399  | 666.281  | NM_000705 | 657.89    | 867.401   | NM_016440 | 17262.129 | 13192.389 |
| AK025593  | 3353.885 | 2213.994 | NM_004231 | 53979.727 | 55820.484 | NM_007194 | 2982.16   | 2340.175  |
| AB018304  | 1573.902 | 1242.205 | NM_002243 | 651.393   | 821.073   | NM_000314 | 3954.226  | 3530.291  |
| NM_007061 | 4032.397 | 4081.594 | NM_016577 | 559.687   | 489.039   | AB002369  | 1289.042  | 1163.188  |
| AB040954  | 3057.952 | 2178.497 | AK023107  | 7499.094  | 5705.523  | S74620    | 1928.897  | 1930.172  |
| NM_002081 | 940.816  | 1027.408 | NM_006854 | 8297.743  | 5880.075  | AF305239  | 1015.323  | 1033.031  |
| AB023139  | 3933.366 | 3124.676 | NM_004580 | 3648.225  | 3636.365  | NM_002827 | 4372.149  | 3825.504  |
| NM_017885 | 5718.479 | 4193.199 | NM_020387 | 30110.578 | 24152.045 | NM_001946 | 716.782   | 798.705   |
| D80004    | 1499.334 | 1474.022 | NM_007246 | 1535.939  | 1360.692  | BF035425  | 8816.282  | 7714.339  |
| X63966    | 336.853  | 618.529  | AK026248  | 1066.233  | 1210.014  | NM_000159 | 56510.258 | 52041.191 |
| NM_000946 | 9066.807 | 9498.444 | NM_004578 | 1216.133  | 1726.054  | NM_014638 | 1364.938  | 1588.735  |
| NM_016070 | 2614.681 | 2224.105 | AB046793  | 771.485   | 605.222   | AF099740  | 1229.131  | 1418.967  |
| NM_016390 | 2785.109 | 2390.44  | NM_017604 | 1557.302  | 1360.417  | NM_006117 | 16448.744 | 14876.278 |
| NM_016101 | 6301.54  | 6320.525 | NM_017738 | 7162.439  | 6927.637  | NM_002225 | 2236.244  | 3372.849  |
| NM_005859 | 7499.167 | 8972.442 | NM_016557 | 1844.664  | 2595.087  | NM_006229 | 478.871   | 721.346   |
| NM_020313 | 866.773  | 1124.17  | NM_000623 | 3252.513  | 2919.525  | NM_015415 | 20828.768 | 18831.83  |
| NM_014628 | 8143.301 | 14404.97 | AF161348  | 1686.843  | 1535.826  | NM_004897 | 2232.466  | 3004.379  |
| AK025630  | 2255.279 | 2670.938 | NM_018467 | 8536.29   | 10227.618 | NM_002555 | 2032.663  | 2695.107  |
| NM_005761 | 3888.007 | 3160.259 | NM_006068 | 1477.445  | 1252.894  | AF225418  | 809.562   | 1069.431  |
| NM_014718 | 3286.475 | 3453.8   | U16752    | 530.992   | 514.608   | NM_000309 | 1029.944  | 1091.875  |
| AB028953  | 976.517  | 1554.633 | NM_016440 | 15003.621 | 13968.29  | AK026381  | 12534.969 | 13252.582 |
| NM_000632 | 1489.061 | 1309.443 | NM_007194 | 3333.159  | 4987.249  | NM_002450 | 8959.545  | 9926.945  |
| AB002298  | 736.076  | 603.146  | NM_000314 | 6762.626  | 6998.333  | NM_001686 | 828.552   | 637.305   |
| AK024488  | 9564.025 | 8575.028 | AB002369  | 1364.172  | 1402.855  | NM_014723 | 2261.868  | 2477.273  |
| AK023249  | 42791.43 | 40295.18 | S74620    | 2279.027  | 2479.25   | AB011106  | 2078.572  | 1544.833  |
| NM_007360 | 576.943  | 570.329  | AF305239  | 1168.856  | 1118.586  | D26362    | 2732.025  | 2197.498  |
| NM_017442 | 6198.063 | 5001.959 | NM_002827 | 5864.981  | 5509.182  | NM_013452 | 1327.686  | 1255.31   |
| NM_000743 | 3055.011 | 1925.444 | NM_001946 | 738.385   | 850.518   | AL133073  | 322.499   | 437.698   |
| NM_007218 | 2641.767 | 2093.72  | BF035425  | 14517.021 | 12462.74  | AY009402  | 1390.517  | 1586.173  |
| Z25436    | 2090.96  | 1784.686 | NM_000159 | 51937.953 | 51690.828 | NM_018451 | 1435.887  | 1104.737  |
| NM_005275 | 6692.009 | 5316.751 | NM_014638 | 1568.438  | 1494.226  | NM_012443 | 619.335   | 624.146   |
| NM_003844 | 2741.933 | 2436.488 | AF099740  | 1271.954  | 1212.865  | NM_007009 | 397.9     | 573.647   |
| NM_002005 | 9735.261 | 12936.42 | NM_006117 | 16786.867 | 16923.914 | NM_002584 | 3553.967  | 3286.479  |
| NM_012324 | 3154.181 | 3862.255 | NM_002225 | 2613.933  | 2069.02   | NM_013334 | 3549.04   | 4419.691  |
| AK000039  | 1775.029 | 1654.139 | NM_006229 | 832.669   | 1095.379  | AF150735  | 5858.215  | 6594.603  |
| NM_014749 | 1688.221 | 1636.147 | NM_015415 | 22234.154 | 21654.359 | NM_018183 | 1847.538  | 1375.988  |
| NM_004489 | 4456.605 | 4706.689 | NM_004897 | 3405.893  | 3959.937  | NM_002452 | 16915.986 | 16992.117 |
| BF240063  | 688.033  | 616.961  | NM_002555 | 1736.268  | 1863.939  | NM_012304 | 474.723   | 379.988   |
| BI461699  | 1561.452 | 2436.4   | AF225418  | 1505.704  | 1099.37   | AF245505  | 1249.202  | 806.448   |
| AK090409  | 1341.858 | 2088.425 | NM_000309 | 1124.428  | 1129.191  | AB037776  | 834.054   | 873.484   |
| AF172264  | 5435.203 | 7134.502 | NM_004528 | 19058.617 | 24139.238 | AF196976  | 3028.429  | 2421.608  |
| Y08267    | 1960.199 | 1976.562 | AK026381  | 23064.662 | 23481.998 | AL050379  | 1013.168  | 690.648   |

|           |          |          |           |           |           |           |           |           |
|-----------|----------|----------|-----------|-----------|-----------|-----------|-----------|-----------|
| U80756    | 22261.98 | 24992.57 | NM_00245C | 13893.657 | 9956.667  | NM_003161 | 1896.065  | 2157.495  |
| NM_018161 | 2235.734 | 2117.656 | NM_00168E | 822.161   | 933.772   | NM_01449E | 436.897   | 485.371   |
| NM_00524E | 1517.244 | 1248.826 | NM_01472C | 2923.095  | 1630.956  | NM_01621E | 15886.56  | 15700.049 |
| NM_00481C | 5865.423 | 9611.668 | AB011106  | 1855.87   | 1423.609  | AK026919  | 1497.029  | 925.23    |
| AL117629  | 5510.672 | 4522.716 | D26362    | 2936.459  | 2618.711  | NM_001501 | 4224.036  | 5053.369  |
| NM_00259E | 1985.721 | 1721.253 | NM_01345Z | 2312.999  | 2601.921  | NM_00617E | 30814.117 | 33489.238 |
| NM_01572E | 2138.57  | 1589.953 | AY009402  | 1943.668  | 2211.333  | AL137459  | 1537.541  | 2244.732  |
| AB002379  | 1440.543 | 1917.456 | NM_018451 | 1216.083  | 859.474   | AB037812  | 327.183   | 381.882   |
| AF113223  | 2983.998 | 1814.515 | NM_01244C | 588.845   | 809.231   | AB007932  | 1451.173  | 1307.659  |
| AB046851  | 2759.249 | 3179.586 | NM_00700E | 570.214   | 501.929   | NM_00397E | 734.142   | 1320.125  |
| NM_00574E | 26626.63 | 19759.33 | NM_00258A | 3288.827  | 2765.341  | NM_002561 | 3875.142  | 4594.82   |
| NM_01985E | 11302.29 | 11904.53 | NM_01333A | 5508.407  | 3914.965  | NM_00080E | 487.737   | 534.101   |
| NM_01817A | 3106.419 | 2669.156 | AF150735  | 5447.676  | 6149.774  | NM_01859C | 8124.111  | 8416.226  |
| NM_01454E | 3526.505 | 4473.604 | NM_01818C | 1609.298  | 2418.973  | NM_00317E | 1274.598  | 1093.132  |
| NM_004437 | 3208.281 | 3550.783 | NM_01238Z | 4585.963  | 5120.666  | NM_012437 | 6632.744  | 6536.321  |
| AK025875  | 2219.425 | 3619.708 | BF038366  | 963.326   | 1056.09   | AF090944  | 847.757   | 786.721   |
| BC014152  | 44283.31 | 48155.54 | NM_00245Z | 21246.023 | 22581.271 | NM_002607 | 411.551   | 486.764   |
| NM_01241E | 728.074  | 590.596  | NM_01230A | 806.364   | 1048.937  | AF116712  | 421.963   | 397.393   |
| AB037779  | 9057.407 | 9199.653 | AF245505  | 1097.6    | 751.604   | AF116626  | 3050.078  | 2580.183  |
| NM_00065E | 34577.26 | 31189.14 | AB037776  | 779.463   | 588.952   | NM_00176C | 17465.912 | 15294.828 |
| NM_00039C | 1022.735 | 1576.092 | AF196976  | 4219.205  | 3284.248  | NM_002527 | 803.424   | 828.955   |
| NM_00088E | 3280.669 | 2839.4   | AL050379  | 1219.148  | 1113.336  | NM_00589C | 2373.286  | 2692.306  |
| NM_00385E | 20491.56 | 17638.3  | NM_003161 | 2424.158  | 2150.776  | AF149785  | 3158.924  | 3369.931  |
| NM_00023E | 2522.377 | 2743.353 | NM_01449E | 422.099   | 508.574   | NM_01206E | 5143.113  | 7187.939  |
| NM_00290C | 8700.577 | 12386.75 | NM_01621E | 19634.664 | 19039.059 | NM_00406A | 6604.102  | 6270.046  |
| NM_01233E | 3095.094 | 4152.896 | AK026919  | 981.095   | 1370.375  | NM_00125E | 6349.609  | 6490.975  |
| NM_005787 | 17691.36 | 19047    | NM_001501 | 5734.179  | 5002.427  | NM_02020E | 631.318   | 914.274   |
| NM_00214C | 2535.411 | 2645.682 | NM_00617E | 35929.652 | 27110.986 | NM_001191 | 2789.935  | 3394.229  |
| AF284421  | 1387.348 | 1171.058 | AL137459  | 2259.868  | 1674.226  | U15174    | 463.889   | 435.95    |
| NM_00604E | 5714.512 | 2674.103 | AB007932  | 1570.04   | 1539.481  | NM_01434A | 495.82    | 590.61    |
| NM_00636C | 20415.62 | 12399.19 | AF219257  | 31332.055 | 30210.119 | AB040917  | 708.026   | 529.112   |
| NM_00396E | 7827.803 | 6566.104 | NM_00397E | 1341.437  | 825.181   | AL110261  | 4973.415  | 4515.132  |
| NM_00278E | 9544.7   | 5220.25  | NM_002561 | 6386.479  | 6796.318  | AK021786  | 873.763   | 805.803   |
| NM_00281C | 13280.07 | 12183    | NM_00620E | 466.196   | 778.78    | NM_00593Z | 1067.005  | 873.173   |
| NM_00334C | 10555.09 | 8794.34  | NM_00080E | 465.534   | 396.759   | NM_00427E | 8171.458  | 5975.694  |
| NM_00278E | 59658.44 | 45309.6  | AL359933  | 13135.641 | 15737.95  | NM_00190E | 1071.02   | 1354.767  |
| AL080137  | 882.22   | 1703.833 | NM_00130Z | 701.277   | 679.206   | NM_00028E | 9591.727  | 8797.037  |
| NM_01767E | 1979.746 | 2536.314 | M17783    | 6116.967  | 6816.448  | AV702690  | 1278.387  | 1163.207  |
| AF155103  | 921.595  | 1105.89  | NM_01859C | 9680.563  | 10255.396 | AL117452  | 5172.09   | 4387.81   |
| NM_01770A | 3983.283 | 4385.819 | NM_00317E | 2215.017  | 2222.907  | NM_01223C | 1618.989  | 1813.78   |
| BC006359  | 2778.672 | 2835.216 | NM_012437 | 9064.608  | 7462.532  | NM_01403E | 6696.117  | 9358.12   |
| AK026127  | 3453.669 | 3467.53  | AF090944  | 762.422   | 731.883   | NM_002061 | 4744.026  | 4476.969  |
| BC016062  | 25481.78 | 31572.65 | NM_002607 | 943.838   | 358.684   | AF169974  | 3320.337  | 3757.35   |
| NM_00281A | 5042.863 | 7689.54  | AF116626  | 2663.095  | 3101.661  | NM_00452Z | 697.375   | 696.575   |
| NM_01225C | 3801.294 | 7323.161 | NM_00176C | 18331.064 | 17537.516 | NM_00573C | 2319.342  | 1901.477  |
| NM_00628C | 13725.29 | 13955.61 | NM_002527 | 913.58    | 937.762   | NM_01813E | 2477.433  | 2659.521  |
| NM_002701 | 816.1    | 1250.236 | NM_00589C | 2479.165  | 1759.297  | NM_01961E | 4012.088  | 3407.498  |
| NM_00569C | 1215.23  | 1838.416 | NM_00706E | 31124.221 | 27040.043 | AF183411  | 1240.02   | 1044.186  |
| X97303    | 20339.2  | 19472.76 | AF149785  | 4413.855  | 3821.701  | BF244591  | 879.16    | 585.017   |
| L32162    | 532.194  | 662.52   | NM_01206E | 7374.823  | 5722.592  | NM_00588E | 6021.535  | 6247.381  |
| NM_01753C | 471.731  | 1003.366 | NM_00406A | 7107.009  | 5820.923  | U63785    | 898.09    | 828.098   |
| AL360183  | 2051.926 | 1831.334 | NM_00125E | 4778.051  | 4642.988  | NM_00596E | 1115.535  | 840.218   |
| AK027046  | 2011.632 | 1626.461 | NM_01470A | 5140.052  | 5096.991  | NM_00315E | 2206.63   | 1926.694  |

|           |          |          |           |           |           |           |           |           |
|-----------|----------|----------|-----------|-----------|-----------|-----------|-----------|-----------|
| NM_003113 | 5180.004 | 2897.041 | NM_020205 | 766.415   | 561.18    | NM_003108 | 871.506   | 721.837   |
| NM_016578 | 3250.38  | 2856.365 | NM_001191 | 4271.906  | 3500.453  | NM_013310 | 5173.59   | 3514.797  |
| NM_003822 | 572.476  | 505.365  | U15174    | 716.312   | 914.053   | BC004958  | 2738.449  | 1805.117  |
| NM_015832 | 10235.38 | 9071.095 | NM_013342 | 3357.618  | 5951.779  | NM_005762 | 6788.37   | 6223.593  |
| NM_001326 | 4470.959 | 4565.993 | NM_014344 | 2057.652  | 1791.226  | NM_006473 | 997.956   | 995.954   |
| NM_014319 | 2134.871 | 2279.497 | AB040917  | 1103.355  | 1233.128  | NM_014643 | 625.147   | 601.85    |
| NM_017923 | 804.253  | 756.638  | AL110261  | 10365.799 | 11586.049 | NM_005653 | 1089.958  | 874.835   |
| NM_002047 | 32743.83 | 28069.84 | AA203539  | 687.613   | 574.138   | NM_014553 | 1276.412  | 1296.987  |
| NM_000999 | 73054.84 | 52427.47 | AK021786  | 1462.523  | 1283.057  | NM_003440 | 883.508   | 909.681   |
| NM_000985 | 22241.68 | 28544.75 | NM_005932 | 841.453   | 408.665   | NM_004698 | 4323.967  | 4401.301  |
| BF130622  | 18706.76 | 29841.97 | AF241254  | 529.238   | 276.08    | U41387    | 7932.153  | 4591.1    |
| BU165106  | 2123.943 | 2082.863 | NM_004279 | 7583.569  | 8519.604  | NM_004516 | 9033      | 8993.154  |
| AF038202  | 3153.063 | 3710.806 | NM_001908 | 1828.404  | 1595.577  | NM_006513 | 1668.757  | 1407.987  |
| AL360198  | 1503.453 | 1681.025 | NM_000285 | 8162.227  | 6937.326  | NM_003685 | 14133.271 | 11808.592 |
| AB040925  | 1673.05  | 1756.844 | NM_005911 | 20288.969 | 16848.791 | NM_002486 | 450.464   | 435.331   |
| BC008837  | 1409.332 | 1081.728 | AV702690  | 1241.7    | 1179.899  | NM_001540 | 2024.899  | 1488.387  |
| NM_001861 | 1575.268 | 1285.313 | AL117452  | 4269.745  | 4848.534  | NM_012111 | 11460.421 | 8816.652  |
| AK025558  | 5727.948 | 4652.188 | NM_012230 | 1724.533  | 1194.545  | NM_004470 | 9953.552  | 5881.086  |
| AK024355  | 1293.681 | 1060.409 | NM_014038 | 8596.092  | 8140.542  | NM_001418 | 7403.604  | 5925.241  |
| NM_001864 | 16250.12 | 9210.871 | NM_002061 | 4221.735  | 5402.654  | NM_003756 | 25690.543 | 15880.114 |
| NM_003477 | 13030.86 | 8693.401 | AF169974  | 3467.132  | 3502.52   | AL049680  | 2589.362  | 2116.971  |
| NM_002654 | 53214.81 | 39774.25 | NM_004522 | 804.41    | 901.936   | AL133660  | 381.698   | 487.273   |
| NM_015478 | 898.066  | 604.431  | NM_019619 | 4951.346  | 4910.766  | AK001595  | 2263.002  | 1202.763  |
| NM_020382 | 4904.734 | 4752.246 | AF183411  | 1591.584  | 1616.686  | NM_018015 | 2707.838  | 1785.492  |
| NM_007192 | 12794.18 | 10210.9  | BF244591  | 1107.993  | 1312.13   | NM_003715 | 4626.149  | 4245.48   |
| AB002337  | 12516.57 | 17248.17 | NM_005886 | 11067.513 | 10136.868 | M94065    | 1573.546  | 1179.976  |
| NM_014933 | 5521.118 | 5810.416 | U63785    | 1146.733  | 1282.589  | BF036874  | 1362.092  | 1062.687  |
| NM_003076 | 26878.24 | 24679.94 | NM_005966 | 1636.072  | 1649.64   | AF182419  | 2615.271  | 2281.252  |
| NM_006385 | 2967.693 | 2541.228 | NM_003156 | 3113.485  | 3831.587  | NM_007016 | 2464.048  | 2395.333  |
| NM_003456 | 2966.412 | 3169.27  | NM_003108 | 674.898   | 437.889   | NM_002703 | 5508.079  | 5654.4    |
| NM_002585 | 3365.992 | 2573.638 | NM_013310 | 5061.071  | 2743.648  | NM_005375 | 6095.53   | 10029.744 |
| AB029016  | 2819.289 | 3107.226 | BC004958  | 2707.534  | 1977.385  | NM_005985 | 2924.731  | 3399.112  |
| AK000445  | 461.598  | 655.685  | NM_005762 | 8073.346  | 6854.745  | NM_015906 | 3780.599  | 4072.595  |
| AL049390  | 869.758  | 832.341  | NM_006473 | 1033.862  | 1280.461  | AK023759  | 957.051   | 1090.145  |
| AK000584  | 8273.108 | 9808.061 | NM_014643 | 886.254   | 705.701   | AB033111  | 1142.397  | 972.503   |
| AF075040  | 1498.171 | 1517.318 | NM_005653 | 1587.143  | 1340.771  | AJ276316  | 1191.712  | 888.836   |
| AJ297363  | 1061.767 | 1286.23  | NM_014553 | 1240.386  | 1011.333  | AF229246  | 6358.423  | 4487.364  |
| AK026379  | 3328.337 | 3354.493 | NM_003440 | 1126.708  | 773.18    | S64709    | 3072.92   | 2639.253  |
| AF075002  | 446.029  | 532.14   | NM_004698 | 5034.466  | 3614.653  | NM_018488 | 585.88    | 403.101   |
| AK022965  | 5013.936 | 2822.959 | U41387    | 9563.882  | 8692.996  | X56465    | 579.229   | 408.748   |
| AK024278  | 4890.726 | 4361.767 | NM_004516 | 9576.106  | 9239.608  | NM_003071 | 8864.845  | 4999.835  |
| NM_018022 | 1247.25  | 942.909  | NM_006513 | 1898.671  | 1922.587  | AK021494  | 1792.051  | 1233.079  |
| AB056722  | 1066.6   | 716.38   | NM_003685 | 17993.707 | 18287.141 | AK022117  | 379.323   | 341.847   |
| NM_013242 | 11039.74 | 7106.508 | NM_012111 | 15539.984 | 14895.953 | AF075023  | 885.305   | 602.459   |
| NM_012066 | 10774.73 | 11040.61 | NM_004470 | 13402.844 | 14030.6   | AL360160  | 18267.088 | 13702.683 |
| AF052168  | 3477.042 | 3944.664 | NM_001418 | 10001.318 | 10004.931 | AK001092  | 33527.133 | 31499.457 |
| AK022632  | 4312.638 | 4330.821 | NM_003756 | 29195.746 | 26963.184 | NM_014144 | 1028.566  | 856.971   |
| AK021554  | 615.422  | 816.297  | AL049680  | 2975.083  | 2665.524  | AF147345  | 801.518   | 673.622   |
| NM_020235 | 4031.116 | 3565.783 | AK001595  | 1561.435  | 1282.539  | AF147373  | 2120.745  | 1969.106  |
| AL109681  | 444.802  | 821.73   | NM_018015 | 2235.427  | 1597.498  | AK026209  | 680.606   | 753.285   |
| AL162039  | 8598.658 | 5945.986 | NM_003715 | 6403.229  | 9879.298  | AF086253  | 1079.955  | 1931.47   |
| AK024896  | 3004.179 | 2961.634 | M94065    | 1350.843  | 1539.446  | AF086434  | 898.482   | 991.752   |
| AL353952  | 993.765  | 1151.767 | BF036874  | 1523.859  | 1408.183  | AK022063  | 2905.027  | 2427.385  |



|           |          |          |           |           |           |           |          |           |
|-----------|----------|----------|-----------|-----------|-----------|-----------|----------|-----------|
| AK021912  | 729.295  | 803.261  | AF182419  | 2648.777  | 2410.435  | AF086345  | 2173.304 | 1448.546  |
| AK095125  | 1037.669 | 1121.715 | NM_007016 | 3026.983  | 2731.372  | AF086464  | 743.136  | 440.861   |
| AK024059  | 4885.767 | 4330.42  | NM_002703 | 5569.853  | 4412.774  | AL049278  | 2125.691 | 1333.906  |
| AK023663  | 1179.531 | 1446.399 | NM_005375 | 10459.812 | 5020.832  | AL117519  | 432.266  | 314.519   |
| AB007928  | 4777.242 | 5596.637 | NM_005985 | 4656.403  | 4066.838  | NM_005060 | 1334.265 | 805.656   |
| AK023645  | 1500.18  | 1469.873 | NM_015906 | 5915.852  | 6601.196  | AF085935  | 737.64   | 557.859   |
| NM_016930 | 4065.374 | 3638.368 | AK023759  | 1698.685  | 1600.161  | AL035369  | 2121.674 | 1873.457  |
| AJ001861  | 1765.836 | 1235.407 | AJ276316  | 1958.354  | 1859.76   | AF075097  | 1815.99  | 1550.646  |
| NM_005186 | 525.423  | 606.269  | AF229246  | 11905.064 | 12416.666 | AK022801  | 1525.996 | 1299.098  |
| X75692    | 2013.754 | 1640.008 | S64709    | 4416.97   | 4272.11   | AL133075  | 6034.593 | 6429.412  |
| X64988    | 711.848  | 1029.181 | NM_018485 | 1324.373  | 1336.188  | AL137692  | 309.735  | 302.031   |
| Y10511    | 7827.013 | 7833.335 | X56465    | 1283.339  | 1141.385  | AL137630  | 1974.657 | 2032.294  |
| M26147    | 5219.192 | 5751.731 | NM_003071 | 12265.714 | 16374.563 | AK055236  | 455.412  | 414.051   |
| AF018254  | 1421.649 | 1257.173 | AK021494  | 2723.766  | 1125.778  | AL137277  | 6239.986 | 6527.867  |
| NM_016240 | 1863.557 | 1853.648 | AF075023  | 1044.391  | 848.916   | AF086395  | 6075.477 | 4764.226  |
| AK025238  | 556.829  | 667.96   | AL360160  | 20506.887 | 17426.168 | AF086049  | 1595.581 | 1154.577  |
| AK021836  | 907.675  | 983.538  | AK001092  | 32948.055 | 28296.943 | AF114263  | 1034.723 | 632.968   |
| AK026416  | 1313.153 | 630.024  | NM_014144 | 1107.514  | 1101.876  | AK026142  | 2106.765 | 1381.115  |
| AK025797  | 1000.858 | 786.07   | AF147345  | 972.43    | 927.059   | AF161369  | 2184.545 | 2279.256  |
| AK000019  | 661.533  | 487.276  | AF147373  | 2604.724  | 1919.45   | AK027176  | 7452.241 | 5929.321  |
| AK000645  | 667.845  | 1141.141 | AF086303  | 1234.081  | 1280      | AF073328  | 436.841  | 402.244   |
| AK024947  | 1522.599 | 1254.305 | AF086434  | 2689.194  | 2783.301  | AF211968  | 327.132  | 268.871   |
| NM_017503 | 1613.614 | 1734.986 | AF086345  | 3995.422  | 3632.869  | Y12019    | 2261.07  | 2088.087  |
| AK024606  | 1384.025 | 1529.685 | AF086464  | 871.726   | 878.827   | AL137326  | 212.471  | 392.97    |
| AK023907  | 852.116  | 618.508  | AL049278  | 2531.875  | 2657.293  | AK021898  | 1323.324 | 1333.212  |
| NM_016417 | 16753.54 | 16783.28 | AL117519  | 572.752   | 471.515   | AK022024  | 2059.632 | 2138.26   |
| NM_019105 | 3286.68  | 2747.736 | NM_013315 | 297.489   | 647.201   | AK022163  | 455.698  | 492.658   |
| AL080118  | 7162.529 | 5039.316 | AK025063  | 383.003   | 322.698   | AK022341  | 630.881  | 938.076   |
| AL049378  | 3325.277 | 2597.079 | NM_005060 | 1367.572  | 636.705   | AK026861  | 429.846  | 489.006   |
| L09086    | 786.725  | 644.399  | AF085935  | 745.715   | 667.264   | AK021642  | 2534.889 | 1987.021  |
| AK021505  | 384.598  | 595.891  | AL035369  | 2732.455  | 2315.052  | AK022455  | 751.078  | 355.065   |
| U00951    | 1606.294 | 1854.773 | AF075097  | 2691.537  | 2584.004  | AK021987  | 775.924  | 560.135   |
| AK021598  | 4409.603 | 4368.078 | AK022801  | 1419.218  | 1316.655  | AK026905  | 2814.36  | 2289.865  |
| AJ012498  | 833.792  | 926.261  | AL133075  | 7188.613  | 5552.361  | NM_000134 | 507.818  | 325.565   |
| NM_005973 | 9120.217 | 11285.89 | AL137630  | 2382.655  | 1696.853  | NM_006635 | 4328.438 | 2718.979  |
| X04547    | 3812.619 | 3996.47  | AL137277  | 7980.174  | 6155.365  | X14675    | 1206.619 | 961.189   |
| AK025823  | 2647.798 | 3926.875 | AL137447  | 582.556   | 630.63    | AF071170  | 531.864  | 601.71    |
| AK026691  | 1561.604 | 1536.549 | AL157467  | 727.287   | 897.133   | AF075075  | 861.185  | 635.106   |
| AL359941  | 1562.708 | 1171.378 | BC023609  | 1703.124  | 1749.507  | NM_018304 | 6181.123 | 5148.654  |
| U52076    | 1346.626 | 839.546  | AK025100  | 743.091   | 507.805   | AK024457  | 3323.851 | 2354.876  |
| AF035278  | 1167.609 | 971.862  | AF086395  | 7861.736  | 8166.377  | AK026894  | 926.859  | 738.681   |
| AL050202  | 527.328  | 458.771  | AF086049  | 3081.364  | 2903.73   | AK026372  | 641.964  | 648.514   |
| U32999    | 6543.865 | 6090.155 | AF114263  | 1863.293  | 1917.459  | AL109684  | 540.881  | 383.535   |
| U66052    | 1346.622 | 1530.143 | AK026142  | 2763.044  | 3190.072  | NM_014186 | 7134.352 | 4585.73   |
| AK024156  | 1804.075 | 1774.071 | AK027176  | 7703.716  | 2831.539  | AF056442  | 937.699  | 777.99    |
| AF086288  | 2201.661 | 1766.447 | AF073328  | 407.428   | 150.71    | AK024752  | 27090.74 | 20237.191 |
| AF119866  | 848.394  | 1934.353 | AF129266  | 460.869   | 295.562   | BG117194  | 1456.26  | 1392.667  |
| NM_005293 | 4974.811 | 3358.637 | Y12019    | 3206.456  | 2326.533  | AF131859  | 4195.199 | 3193.495  |
| AF133332  | 7654.877 | 6541.421 | AF147418  | 445.993   | 474.323   | AK023632  | 435.184  | 463.429   |
| AK022805  | 917.604  | 642.511  | AK021898  | 1652.589  | 1573.324  | AF086118  | 4269.319 | 3399.343  |
| NM_001085 | 1838.612 | 1781.712 | AK022024  | 2200.77   | 2115.353  | NM_014135 | 1539.985 | 1283.67   |
| BC015991  | 20183.18 | 18038.48 | AK022301  | 1214.938  | 1166.185  | AK025044  | 1048.364 | 1020.36   |
| U94902    | 1054.918 | 1082.608 | AK021948  | 1617.9    | 1765.028  | U48697    | 895.179  | 456.754   |

|           |          |          |           |           |           |           |           |           |
|-----------|----------|----------|-----------|-----------|-----------|-----------|-----------|-----------|
| U46214    | 1016.255 | 955.249  | AK022054  | 781.735   | 788.804   | AF230317  | 259.394   | 488.821   |
| NM_00031C | 12178.72 | 12207.8  | AK022341  | 880.368   | 1056.773  | AK023806  | 1213.417  | 1264.899  |
| AF161343  | 5017.302 | 4144.59  | AK021642  | 6543.588  | 5947.961  | Y16696    | 13104.675 | 10275.601 |
| NM_00476E | 10307.9  | 9484.987 | AK022455  | 928.127   | 796.687   | AK026094  | 2164.257  | 1599.785  |
| AK022246  | 1527.737 | 1128.177 | AK021987  | 2342.523  | 2273.007  | AF161344  | 4421.582  | 4475.016  |
| X75684    | 1762.915 | 1014.297 | AK026905  | 5274.684  | 6474.229  | AF086027  | 1217.414  | 811.261   |
| AF113701  | 8454.02  | 6218.13  | AK023449  | 763.668   | 745.536   | NM_001207 | 60233.078 | 42940.016 |
| Y11158    | 2272.562 | 2407.878 | AK026704  | 931.582   | 1779.361  | AK022199  | 1459.833  | 1136.63   |
| NM_006771 | 12865.09 | 11360.68 | NM_000134 | 748.188   | 1256.266  | NM_003524 | 5944.166  | 3548.868  |
| L37702    | 6669.673 | 6700.607 | AF071170  | 759.527   | 295.568   | AK021438  | 502.671   | 571.164   |
| AK022260  | 3685.649 | 2874.52  | AF075075  | 763.44    | 682.131   | NM_005913 | 539.182   | 557.053   |
| M32219    | 13785.71 | 11240.52 | NM_018304 | 7758.414  | 6870.736  | S39891    | 835.027   | 984.103   |
| BC018868  | 1107.726 | 835.179  | AK024457  | 6617.377  | 7059.877  | R17536    | 443.594   | 459.114   |
| AF086174  | 874.49   | 624.076  | AL389977  | 415.428   | 493.372   | AK021624  | 821.854   | 767.28    |
| AF007128  | 13909.46 | 8783.54  | AK026894  | 1348.193  | 1473.228  | AF278605  | 12579.735 | 7062.33   |
| CY3Cy5    | 3400.513 | 230.343  | AK026372  | 1135.251  | 1065.468  | NM_006497 | 9724.5    | 9856.599  |
| AI351740  | 11615.57 | 5323.365 | AK024752  | 28046.742 | 14576.049 | AK022329  | 376.841   | 432.884   |
| AA444051  | 686.821  | 508.16   | BG117194  | 1771.222  | 1351.052  | AL133599  | 1098.226  | 923.937   |
| NM_007164 | 790.672  | 579.281  | AK024181  | 980.833   | 703.717   | NM_016472 | 2392.379  | 2235.963  |
| BE783826  | 3553.081 | 3956.723 | AF131859  | 4149.662  | 4425.813  | AF086064  | 419.114   | 475.527   |
| X04827    | 1722.797 | 1161.176 | AK023632  | 515.804   | 1082.52   | AK023042  | 2143.569  | 1637.461  |
| H07088    | 1163.419 | 1412.778 | AF086118  | 4793.801  | 6188.168  | AF086501  | 247.067   | 420.469   |
| AI004656  | 356.209  | 659.718  | NM_01413E | 1482.436  | 1725.582  | NM_01655C | 3685.252  | 3148.322  |
| BC020596  | 1338.966 | 1618.969 | AK025044  | 1786.291  | 1412.644  | AK024813  | 6767.214  | 4745.235  |
| X98922    | 4374.736 | 4028.794 | AK023690  | 1002.914  | 1073.614  | AJ227909  | 7194.139  | 7234.487  |
| AK098435  | 5804.703 | 5093.26  | AF230317  | 599.143   | 839.965   | AK021880  | 899.759   | 783.989   |
| AK092872  | 2979.175 | 2835.425 | AK023806  | 2798.998  | 2833.897  | AK024107  | 437.711   | 238.513   |
| AF230496  | 378.645  | 427.198  | AF088068  | 607.032   | 798.971   | CY3Cy5    | 7651.144  | 903.869   |
| M16801    | 514.745  | 523.646  | Y16696    | 21194.574 | 23730.021 | BG698522  | 2756.582  | 2402.11   |
| NM_145904 | 32244.23 | 42542.85 | AK026094  | 3241.499  | 3939.659  | L15189    | 1600.461  | 1159.747  |
| NM_02196E | 420.905  | 675.205  | AF161344  | 9063.729  | 11021.667 | AB023420  | 10985.678 | 7540.194  |
| SR6       | 2004.67  | 824.75   | AF086027  | 1553.919  | 1558.371  | BI822179  | 921.84    | 857.708   |
| SR8       | 7024.429 | 7441.712 | NM_001207 | 61912.25  | 69378.039 | AF022912  | 5528.716  | 4721.175  |
| SR10      | 23236.94 | 2662.162 | NM_003524 | 6590.697  | 2196.629  | AA477428  | 21922.537 | 26460.205 |
| CY3Cy5    | 1577.171 | 95.057   | AK021438  | 511.963   | 326.629   | AA156342  | 1445.211  | 1759.944  |
| NM_00448E | 3351.604 | 1654.291 | NM_005913 | 622.492   | 510.38    | R45594    | 15798.694 | 21319.238 |
| NM_01241E | 809.648  | 466.491  | S39891    | 1514.622  | 895.1     | H46425    | 613.665   | 1055.572  |
| NM_01329E | 8579.25  | 7592.099 | AK021624  | 933.227   | 699.797   | AI355949  | 570.229   | 1027.295  |
| AL117478  | 639.601  | 763.073  | AF278605  | 9499.646  | 10960.246 | AA278152  | 15018.594 | 18532.166 |
| NM_005307 | 652.204  | 593.995  | NM_006497 | 13849.227 | 12244.861 | H75530    | 2137.891  | 2695.843  |
| NM_00595E | 1920.523 | 2070.752 | AK022329  | 627.245   | 453.573   | NM_00417E | 3439.791  | 4132.819  |
| NM_000421 | 1140.787 | 949.18   | AL133599  | 2065.486  | 1818.291  | SR5       | 6115.018  | 5575.68   |
| AK025687  | 2772.429 | 3065.408 | AK022380  | 442.898   | 652.71    | SR7       | 6957.469  | 43661.328 |
| AF218941  | 3601.334 | 3286.029 | NM_016472 | 3854.929  | 3672.473  | SR9       | 25781.285 | 3562.81   |
| AL137264  | 2258.728 | 2248.75  | AF086064  | 804.814   | 694.511   | CY3Cy5    | 5744.684  | 388.393   |
| NM_00222E | 444.677  | 525.273  | AK023042  | 4035.117  | 4360.807  | NM_00131E | 3960.661  | 5056.148  |
| X84370    | 5973.266 | 11231.15 | AF086501  | 466.647   | 636.563   | AF286095  | 1701.814  | 1463.312  |
| NM_00403E | 2363.706 | 2623.6   | AK026429  | 867.517   | 962.143   | NM_00087E | 871.347   | 1036.507  |
| AB014558  | 2141.416 | 1078.69  | NM_01655C | 5452.692  | 6232.632  | NM_00425E | 27739.938 | 22866.744 |
| NM_000118 | 2924.038 | 948.254  | AK024813  | 8790.816  | 10042.663 | NM_001981 | 3758.291  | 3197.05   |
| NM_00129E | 35835.3  | 29712.41 | AJ227909  | 19070.604 | 21394.359 | NM_014654 | 2382.372  | 3070.274  |
| BG325046  | 2534.838 | 2482.429 | AK021880  | 1110.451  | 1110.231  | NM_00158E | 26370.004 | 55775.816 |
| AK026248  | 945.615  | 1252.27  | AK024107  | 643.84    | 785.162   | AK026108  | 2983.333  | 4454.365  |

|           |          |          |           |           |           |           |           |           |
|-----------|----------|----------|-----------|-----------|-----------|-----------|-----------|-----------|
| NM_00457E | 2093.092 | 1324.146 | CY3Cy5    | 3578.899  | 267.992   | NM_00637E | 2026.777  | 2983.205  |
| AB046793  | 495.178  | 625.224  | BG698522  | 9872.577  | 21660.756 | BF571428  | 1799.244  | 2535.262  |
| NM_017604 | 1669.922 | 1801.742 | L15189    | 1299.069  | 1687.32   | AB037723  | 2454.477  | 3340.695  |
| NM_01773E | 6233.102 | 5835.452 | AB023420  | 10701.325 | 12619.803 | NM_00624E | 6020.292  | 7272.205  |
| NM_016557 | 2090.476 | 2068.4   | BI822179  | 1182.794  | 2142.236  | NM_00431E | 303.828   | 800.618   |
| NM_00062E | 2837.551 | 2810.422 | AF022912  | 5688.678  | 5473.406  | NM_01692E | 4254.309  | 6189.044  |
| NM_00606E | 725.021  | 474.747  | AA477428  | 19388.404 | 17937.34  | NM_01232E | 901.981   | 1354.319  |
| NM_00203E | 16499.33 | 10784.95 | AA156342  | 1531.579  | 1052.26   | NM_01394E | 836.154   | 990.884   |
| NM_00572E | 8518.829 | 12997.59 | R45594    | 15579.854 | 12790.426 | NM_00163E | 6781.035  | 12760.433 |
| NM_01549E | 1250.427 | 1330.183 | H46425    | 949.49    | 772.116   | AF182404  | 2836.932  | 3050.683  |
| NM_003747 | 1607.754 | 1286.578 | AI355949  | 445.956   | 457.111   | NM_000804 | 780.401   | 778.819   |
| AB037744  | 1929.601 | 809.129  | AA278152  | 13327.517 | 17348.285 | NM_00655E | 4602.701  | 3130.734  |
| AF141901  | 789.418  | 373.836  | H75530    | 2373.577  | 2523.833  | NM_00244E | 740.674   | 918.603   |
| NM_00700E | 764.886  | 487.701  | NM_00417E | 3365.759  | 3235.694  | NM_01780E | 574.824   | 745.225   |
| AL109708  | 963.956  | 306.807  | NM_00454E | 27304.211 | 21500.584 | AK023202  | 2757.782  | 2261.591  |
| AF234532  | 622.333  | 1061.307 | SR1       | 65561.195 | 67812.57  | D63877    | 3501.441  | 2796.191  |
| AF099740  | 1209.474 | 2025.1   | SR3       | 44497.148 | 34346.945 | AF131760  | 1065.64   | 1077.488  |
| NM_006117 | 20423.98 | 23928.99 | SR5       | 6204.541  | 5410.426  | NM_01869E | 1896.433  | 1973.359  |
| NM_00222E | 2294.43  | 2375.721 | SR7       | 5359.198  | 33257.203 | NM_006461 | 3935.933  | 4684.008  |
| NM_00622E | 508.979  | 671.244  | SR9       | 18747.361 | 3315.585  | NM_018201 | 2570.897  | 3136.876  |
| NM_01541E | 24856.65 | 24163.66 | CY3Cy5    | 2966.859  | 206.447   | NM_01443E | 602.797   | 691.563   |
| NM_004897 | 3064.947 | 4520.595 | NM_00131E | 5251.756  | 6046.74   | NM_003764 | 4682.26   | 5917.456  |
| NM_00255E | 1209.934 | 1477.123 | AF286095  | 2275.837  | 2609.474  | NM_00482E | 290.504   | 988.591   |
| AF225418  | 931.564  | 1593.597 | NM_00087E | 993.264   | 1137.481  | NM_00679E | 22923.912 | 24526.955 |
| NM_00030E | 1604.362 | 1352.46  | S66407    | 1803.907  | 1788.188  | NM_00153E | 1871.223  | 2852.561  |
| NM_00245C | 9209.769 | 10732.52 | NM_001981 | 3306.548  | 3202.577  | X97261    | 9346.219  | 14488.479 |
| NM_00168E | 1076.798 | 1285.981 | NM_014654 | 860.807   | 444.454   | D87666    | 64491.555 | 69501.156 |
| NM_00497E | 532.476  | 548.22   | NM_00158E | 30768.877 | 22823.547 | AF149304  | 1028.863  | 1294.192  |
| NM_00070E | 773.18   | 748.396  | AK026108  | 4429.446  | 3871.36   | NM_01209E | 6051.013  | 4622.365  |
| AK023107  | 5681.932 | 3987.341 | NM_00637E | 1862.293  | 1617.819  | X73079    | 18769.219 | 12989.83  |
| NM_006854 | 7286.464 | 3969.06  | BF571428  | 3102.421  | 2121.157  | NM_019091 | 1370.884  | 971.575   |
| NM_00458C | 4407.633 | 1764.928 | AB037723  | 3937.076  | 2933.143  | AF264781  | 760.789   | 504.073   |
| NM_020387 | 18303.19 | 10296.07 | NM_00624E | 5400.578  | 5417.183  | NM_00245E | 659.692   | 610.771   |
| NM_00724E | 2632.909 | 3660.392 | NM_00431E | 571.647   | 461.148   | AK024215  | 4225.79   | 4421.414  |
| AF113125  | 440.927  | 755.294  | U58096    | 25015.533 | 18521.607 | AB044661  | 4895.981  | 5021.27   |
| AF150735  | 5168.798 | 4676.267 | NM_01692E | 5371.479  | 4950.966  | NM_00060E | 6834.477  | 9436.62   |
| NM_01818E | 2712.517 | 1711.752 | NM_01232E | 1367.985  | 1478.866  | NM_016124 | 3514.867  | 5015.339  |
| NM_01238E | 3937.956 | 3272.568 | NM_01394E | 1034.367  | 977.063   | NM_01907E | 343.03    | 722.756   |
| BF038366  | 1185.374 | 1032.448 | NM_00163E | 8209.243  | 5793.199  | U53530    | 2709.34   | 3804.683  |
| NM_01644C | 13853.47 | 12054.54 | H39560    | 930.44    | 884.58    | NM_00659E | 2447.349  | 5371.602  |
| NM_007194 | 3895.893 | 2837.824 | AF182404  | 2405.791  | 3990.271  | NM_01594E | 1535.743  | 2280.673  |
| NM_000314 | 6861.341 | 7469.385 | NM_000804 | 879.963   | 779.57    | NM_00304E | 737.928   | 1156.311  |
| S74620    | 1287.813 | 1157.976 | NM_00655E | 4655.249  | 5384.638  | NM_00479C | 404.351   | 345.735   |
| AF305239  | 1226.644 | 847.518  | NM_014521 | 632.924   | 884.005   | NM_00221E | 10800.063 | 13191.293 |
| NM_002827 | 2970.289 | 1930.966 | NM_00244E | 1323.331  | 1443.699  | NM_00282E | 2938.194  | 1993.097  |
| NM_00194E | 777.209  | 372.793  | NM_01780E | 959.171   | 993.081   | AF159141  | 3072.745  | 2041.359  |
| BF035425  | 1128.784 | 604.171  | AK023202  | 3093.062  | 2910.633  | NM_01645E | 13416.64  | 11701.519 |
| NM_00015E | 9783.759 | 6183.742 | AF131760  | 1162.463  | 1016.179  | AK022233  | 3228.889  | 4836.631  |
| NM_01463E | 2113.194 | 3705.582 | NM_01869E | 1767.249  | 1225.832  | AK026410  | 9547.332  | 12580.799 |
| NM_000118 | 3719.795 | 3296.023 | NM_006461 | 3221.586  | 2670.061  | AF113208  | 9394.298  | 10499.892 |
| NM_00091E | 516.049  | 528.47   | NM_018201 | 2372.233  | 1810.349  | NM_00615E | 4906.519  | 6767.469  |
| NM_00129E | 41075.61 | 49306.09 | NM_01443E | 567.948   | 494.406   | NM_012164 | 3489.794  | 5019.781  |
| BG325046  | 2529.322 | 2647.783 | NM_01488C | 670.225   | 486.158   | AK026010  | 832.421   | 1758.78   |

|           |          |          |           |           |           |           |           |           |
|-----------|----------|----------|-----------|-----------|-----------|-----------|-----------|-----------|
| AI351740  | 13567.81 | 6528.368 | NM_003764 | 3883.216  | 2864.199  | NM_004721 | 531.965   | 1343.36   |
| AA444051  | 822.318  | 651.919  | NM_004829 | 723.769   | 648.224   | AB011156  | 1582.08   | 2756.287  |
| NM_007164 | 980.796  | 737.141  | NM_006793 | 20065.035 | 24395.639 | NM_018079 | 1588.353  | 2594.908  |
| BE783826  | 4522.463 | 4611.482 | NM_001538 | 3955.152  | 3621.208  | NM_004760 | 18375.785 | 22311.992 |
| X04827    | 2121.193 | 1116.043 | X97261    | 9240.149  | 9301.991  | NM_006752 | 4314.577  | 5898.333  |
| H07088    | 1505.933 | 1329.445 | NM_001468 | 2343.348  | 2222.962  | NM_004428 | 297.639   | 1068.821  |
| AI004656  | 518.675  | 526.728  | NM_005410 | 350.878   | 1345.154  | NM_006809 | 4870.685  | 5971.902  |
| BC020596  | 1691.964 | 1500.212 | AF149304  | 646.059   | 1026.669  | NM_013943 | 792.782   | 663.417   |
| AF116606  | 71831.48 | 51639.63 | NM_012095 | 7058.966  | 9995.742  | NM_001639 | 5738.377  | 6114.083  |
| X98922    | 4141.332 | 4685.596 | NM_016438 | 510.527   | 645.301   | H39560    | 637.543   | 885.524   |
| AK098435  | 6289.318 | 7786.458 | X73079    | 16813.879 | 18309.027 | BG698522  | 3939.939  | 3888.322  |
| AK092872  | 3062.352 | 3263.913 | NM_019091 | 1438.406  | 2045.826  | AA152346  | 552.341   | 1299.942  |
| AF230496  | 504.24   | 381.45   | AF264781  | 1013.93   | 1372.517  | L15189    | 1891.352  | 1881.958  |
| M16801    | 597.64   | 239.984  | NM_002456 | 566.833   | 615.212   | AB023420  | 12036.853 | 15989.291 |
| NM_145904 | 27107.18 | 19240.9  | AK024215  | 3680.731  | 3453.259  | R45594    | 17284.225 | 23776.795 |
| NM_013334 | 3941.081 | 7692.823 | AB044661  | 4283.435  | 4045.287  | H46425    | 596.974   | 1054.105  |
| AB037744  | 2094.585 | 1910.51  | NM_000606 | 10231.17  | 7701.779  | H75530    | 1932.131  | 3087.638  |
| AF141901  | 1105.581 | 1058.731 | NM_016124 | 3785.778  | 3508.182  | NM_004176 | 3665.54   | 4773.029  |
| NM_007008 | 1262.617 | 1335.618 | NM_019079 | 387.815   | 431.202   | NM_004548 | 26286.719 | 35373.781 |
| AL109708  | 1026.051 | 925.051  | U53530    | 1913.662  | 1801.957  | AK000554  | 2848.923  | 3040.435  |
| L29143    | 488.012  | 346.534  | NM_006598 | 3158.978  | 2765.468  | NM_006472 | 1015.088  | 1302.966  |
| AF234532  | 566.112  | 614.496  | NM_015948 | 2291.121  | 2791.577  | NM_001538 | 1647.989  | 1842.988  |
| NM_002418 | 551.259  | 414.015  | NM_003054 | 3703.183  | 3791.432  | X97261    | 8000.24   | 8264.545  |
| NM_004485 | 3519.375 | 1933.493 | NM_003042 | 2104.522  | 3136.892  | NM_001468 | 1896.001  | 1473.297  |
| NM_012419 | 716.592  | 454.091  | NM_002219 | 9394.177  | 10328.491 | D87666    | 56266.875 | 55449.367 |
| NM_013296 | 9139.814 | 7918.531 | NM_002826 | 3173.035  | 3899.562  | NM_001981 | 4093.994  | 4722.331  |
| AL117478  | 638.223  | 584.211  | AF159141  | 4853.09   | 4402.839  | NM_014654 | 540.219   | 771.746   |
| NM_005307 | 763.131  | 629.061  | NM_002420 | 1008.68   | 1324.953  | NM_001585 | 21674.365 | 25824     |
| NM_005958 | 2045.95  | 2085.476 | NM_016458 | 18956.514 | 17669.939 | AB037723  | 2293.667  | 3384.151  |
| NM_013436 | 1142.346 | 1404.746 | AK022233  | 2374.413  | 2522.905  | NM_006246 | 6340.217  | 6552.5    |
| AF225426  | 716.184  | 1166.612 | AK026410  | 12238.115 | 8996.365  | NM_012323 | 1083.314  | 1023.289  |
| NM_005208 | 5134.598 | 5132.25  | NM_014637 | 3391.693  | 3132.715  | NM_000111 | 1302.788  | 699.708   |
| NM_000421 | 924.22   | 975.815  | NM_013379 | 14730.733 | 12919.347 | NM_015948 | 1828.051  | 1663.241  |
| AK025687  | 3174.122 | 2919.041 | AF113208  | 9793.825  | 8656.612  | NM_003054 | 4478.611  | 3398.099  |
| AF218941  | 3631.83  | 2832.375 | NM_006153 | 6051.434  | 4783.956  | NM_003042 | 1048.217  | 944.475   |
| AL137264  | 2014.708 | 1430.892 | NM_012164 | 3914.705  | 3179.482  | NM_002219 | 10716.516 | 9894.765  |
| NM_002226 | 632.814  | 148.517  | AB011156  | 764.082   | 992.352   | NM_002445 | 1006.949  | 1375.667  |
| X84370    | 4451.214 | 3416.462 | NM_006752 | 4442.735  | 6136.685  | NM_017809 | 717.186   | 1183.334  |
| NM_004039 | 1906.328 | 965.77   | NM_004428 | 530.917   | 268.993   | AK023202  | 3514.106  | 3359.992  |
| AB014558  | 3274.871 | 4242.847 | NM_006809 | 4787.003  | 4473.062  | D63877    | 4588.401  | 4168.881  |
| NM_016577 | 247.897  | 753.155  | NM_018199 | 488.713   | 710.324   | AF131760  | 1216.072  | 1266.695  |
| AK023107  | 6850.805 | 8797.896 | NM_013943 | 1356.214  | 1587.325  | NM_018698 | 1687.928  | 2138.681  |
| NM_006854 | 8382.527 | 8636.643 | NM_001639 | 8028.561  | 5315.685  | NM_006461 | 3808.893  | 4417.135  |
| NM_004580 | 5561.254 | 4726.665 | H39560    | 442.699   | 495.601   | NM_018201 | 2553.59   | 3059.676  |
| NM_020387 | 19171.52 | 18355.47 | BG698522  | 8424.818  | 8328.504  | NM_014438 | 662.109   | 1171.196  |
| NM_007246 | 1979.203 | 1909.791 | AA152346  | 678.124   | 321.486   | NM_003764 | 4976.483  | 4466.451  |
| AK026248  | 1159.36  | 1131.989 | L15189    | 1698.1    | 1853.681  | NM_006793 | 25049.09  | 26083.096 |
| NM_004578 | 2322.759 | 1575.234 | AB023420  | 10811.933 | 7366.848  | NM_018079 | 1173.88   | 745.885   |
| NM_000647 | 403.715  | 456.505  | BI822179  | 1044.973  | 656.994   | NM_004760 | 16197.367 | 13434.396 |
| AB046793  | 592.62   | 623.636  | AF022912  | 5361.508  | 4067.172  | NM_006752 | 3807.925  | 3773.338  |
| NM_017604 | 1746.858 | 1812.092 | AA477428  | 22189.701 | 20781.377 | NM_006809 | 4160.273  | 4045.833  |
| NM_017738 | 5922.498 | 5196.497 | AA156342  | 1585.075  | 1032.378  | AF149304  | 504.335   | 478.725   |
| NM_016557 | 2210.982 | 2059.154 | R45594    | 16353.794 | 13700.02  | X73079    | 21386.85  | 29769.932 |

|           |          |          |           |           |           |           |           |           |
|-----------|----------|----------|-----------|-----------|-----------|-----------|-----------|-----------|
| NM_000623 | 2802.5   | 2559.634 | H46425    | 1148.872  | 786.547   | NM_019091 | 1528.654  | 1367.361  |
| AF161348  | 2216.351 | 2031.511 | AI355949  | 542.424   | 870.351   | AF264781  | 1145.419  | 1205.602  |
| NM_018467 | 8688.638 | 6964.883 | AA278152  | 13574.607 | 17471.604 | NM_002456 | 541.251   | 529.161   |
| NM_00606E | 510.936  | 753.49   | H75530    | 2022.338  | 1975.37   | AK024215  | 4674.866  | 3947.969  |
| NM_00203E | 13400.84 | 4402.42  | AK000554  | 3516.142  | 3966.76   | NM_00060E | 8069.042  | 9554.027  |
| NM_00572E | 6428.923 | 4008.159 | NM_00647E | 1305.335  | 1506.181  | NM_00417E | 2810.638  | 2186.206  |
| NM_01549E | 1570.049 | 2449.689 | NM_00153E | 3604.721  | 3327.256  | NM_00454E | 23077.459 | 19915.242 |
| NM_003747 | 2350.455 | 3244.382 | X97261    | 9526.949  | 9142.016  | AK000554  | 2659.589  | 2026.679  |
| NM_002827 | 3820.708 | 3604.542 | NM_00146E | 2049.855  | 2628.911  | NM_00647E | 1112.291  | 1089.097  |
| NM_00194E | 1015.843 | 992.021  | D87666    | 55548.371 | 65149.371 | NM_00282E | 3174.874  | 3043.67   |
| BF035425  | 1377.249 | 1294.838 | NM_00131E | 5437.529  | 4819.943  | AF159141  | 3608.695  | 4971.912  |
| NM_00015E | 9866.327 | 10762.65 | AF286095  | 2366.136  | 2113.825  | AK022233  | 2348.817  | 3177.298  |
| NM_01463E | 1627.531 | 1571.172 | NM_00087E | 1186.239  | 985.013   | NM_01337E | 14000.637 | 12895.045 |
| AF099740  | 1329.975 | 1343.655 | S66407    | 1762.789  | 1276.153  | NM_00615E | 5083.758  | 6314.527  |
| NM_006117 | 19950.33 | 18696.79 | NM_00425E | 51199.367 | 38707.441 | NM_012164 | 3952.533  | 5683.378  |
| NM_00222E | 2572.517 | 2738.504 | NM_001981 | 3388.73   | 3394.968  | AB011156  | 687.419   | 1350.343  |
| NM_00622E | 543.682  | 703.801  | NM_014654 | 840.536   | 503.171   | NM_00624E | 5410.656  | 4069.647  |
| NM_01541E | 23200.06 | 16727.53 | NM_00158E | 36137.691 | 29025.078 | U58096    | 21007.018 | 21688.336 |
| NM_004897 | 2491.96  | 2288.285 | AK026108  | 5684.799  | 5506.108  | NM_01692E | 3805.161  | 3429.898  |
| NM_00255E | 1241.343 | 1117.838 | NM_00637E | 2329.883  | 2735.976  | NM_01232E | 736.724   | 941.305   |
| AF225418  | 928.316  | 1152.451 | BF571428  | 3487.219  | 3446.804  | NM_01819E | 324.373   | 310.882   |
| NM_00030E | 1436.192 | 1119.583 | AB037723  | 4717.6    | 4772.611  | AA477428  | 24123.912 | 21158.342 |
| NM_00452E | 20002.91 | 17183.4  | NM_00624E | 5678.014  | 5464.71   | AA156342  | 1283.797  | 1569.289  |
| AK026381  | 5129.127 | 6521.913 | NM_00431E | 535.435   | 615.537   | R45594    | 16805.326 | 16983.678 |
| NM_00245C | 8776.22  | 8031.637 | U58096    | 24597.959 | 18250.516 | H46425    | 729.598   | 888.362   |
| NM_00168E | 1026.138 | 898.87   | NM_01692E | 5447.204  | 4713.26   | AI355949  | 1032.684  | 1854.243  |
| NM_00497E | 501.574  | 310.701  | NM_01232E | 1147.349  | 1405.052  | AA278152  | 15428.308 | 16742.756 |
| NM_00070E | 819.913  | 335.312  | NM_01594E | 2609.287  | 2581.117  | H75530    | 2174.28   | 2415.966  |
| NM_004231 | 44189.5  | 42241.97 | NM_003054 | 4043.258  | 4042.763  | NM_003764 | 4093.667  | 2894.2    |
| NM_145904 | 32466.76 | 36023.59 | NM_00304E | 1409.858  | 1379.74   | NM_00679E | 21301.969 | 17174.738 |
| NM_013334 | 2850.876 | 2741.332 | NM_00479C | 572.628   | 493.281   | NM_00153E | 1661.657  | 2130.463  |
| AF150735  | 5313.354 | 4540.254 | NM_00221E | 9475.399  | 10604.598 | X97261    | 9832.325  | 12347.028 |
| NM_01818E | 2867.761 | 1602.498 | AF182404  | 2546.997  | 3165.629  | NM_00425E | 24866.678 | 18424.094 |
| NM_01238E | 4032.115 | 3562.591 | NM_00655E | 5203.899  | 4679.435  | NM_001981 | 3609.66   | 3158.106  |
| BF038366  | 1235.443 | 959.525  | NM_014521 | 925.541   | 610.117   | NM_014654 | 633.182   | 576.573   |
| NM_00245E | 16061.65 | 15115.74 | NM_00244E | 1434.399  | 1054.82   | NM_00158E | 21586.289 | 21263.232 |
| NM_01644C | 12857.53 | 6735.07  | NM_01780E | 886.691   | 852.575   | AK026108  | 2983.272  | 2886.758  |
| NM_007194 | 3530.875 | 1471.009 | AK023202  | 3473.718  | 2667.297  | NM_00637E | 1755.522  | 2042.188  |
| NM_000314 | 6829.785 | 5038.722 | D63877    | 3612.435  | 3875.006  | BF571428  | 2092.324  | 2472.059  |
| AB002369  | 1916.682 | 2226.732 | AF131760  | 1354.378  | 1138.352  | AB037723  | 2405.609  | 2334.713  |
| S74620    | 1923.702 | 2420.427 | NM_01869E | 1470.556  | 1460.25   | NM_00060E | 7809.44   | 7940.448  |
| AF305239  | 1342.279 | 1726.671 | NM_006461 | 3511.38   | 3409.347  | NM_016124 | 4085.054  | 4626.133  |
| AL137264  | 2658.89  | 3379.863 | NM_018201 | 3421.521  | 3438.633  | NM_01594E | 1965.665  | 2153.443  |
| NM_00222E | 505.243  | 749.411  | NM_01443E | 1473.843  | 1678.37   | NM_00244E | 896.167   | 893.894   |
| X84370    | 5324.595 | 7283.624 | NM_01488C | 1064.223  | 1040.368  | NM_01780E | 582.365   | 540.199   |
| NM_00403E | 2353.817 | 2255.229 | NM_003764 | 5084.656  | 4467.428  | AK023202  | 3510.669  | 2511.086  |
| AB014558  | 2151.715 | 1663.303 | NM_00482E | 853.333   | 947.176   | D63877    | 4529.406  | 3415.022  |
| NM_000118 | 3361.404 | 2505.177 | NM_00679E | 21581.113 | 25180.033 | AF131760  | 1305.084  | 1107.953  |
| NM_00091E | 567.437  | 463.177  | NM_01807E | 1000.115  | 1716.086  | NM_01869E | 1598.828  | 1362.921  |
| NM_00129E | 40146.54 | 48158.16 | NM_00476C | 17264.131 | 17829.625 | NM_006461 | 3770.24   | 3197.389  |
| BG325046  | 2524.71  | 2642.505 | NM_00675E | 4208.163  | 3914.696  | NM_018201 | 2765.642  | 2439.592  |
| AI351740  | 13882.77 | 6145.842 | NM_00442E | 521.236   | 404.9     | NM_01443E | 745.786   | 681.196   |
| AA444051  | 795.699  | 630.768  | NM_00680E | 4496.357  | 5952.565  | NM_00615E | 4757.785  | 3907.981  |

|           |          |          |           |           |           |           |           |           |
|-----------|----------|----------|-----------|-----------|-----------|-----------|-----------|-----------|
| NM_007164 | 674.611  | 677.989  | AF149304  | 753.007   | 659.351   | NM_012164 | 3923.065  | 4620.224  |
| BE783826  | 3900.859 | 4793.532 | NM_012095 | 6996.146  | 6783.858  | AB011156  | 555.365   | 1140      |
| H07088    | 1306.199 | 1243.912 | NM_016438 | 536.251   | 407.536   | NM_018079 | 1344.349  | 1011.171  |
| AI004656  | 598.927  | 361.199  | X73079    | 19745.428 | 18211.303 | NM_004760 | 17811.787 | 17464.41  |
| BC020596  | 1159.632 | 932.668  | NM_019091 | 1544.957  | 1430.664  | X73079    | 21927.346 | 17473.221 |
| AF116606  | 67535.34 | 29549.02 | AF264781  | 1084.344  | 1341.907  | NM_019091 | 1537.563  | 1146.934  |
| X98922    | 3582.629 | 1631.087 | NM_002456 | 539.485   | 594.036   | AF264781  | 1631.755  | 2042.838  |
| AK098435  | 6410.722 | 4521.858 | AK024215  | 4230.571  | 4351.659  | NM_002456 | 839.758   | 544.75    |
| AK092872  | 3402.011 | 3041.423 | AB044661  | 5065.053  | 5462.302  | AK024215  | 5211.022  | 3827.292  |
| AF230496  | 519.703  | 499.7    | NM_000606 | 13498.121 | 12914.773 | AB044661  | 6288.528  | 4358.855  |
| M16801    | 1052.444 | 1466.079 | NM_016124 | 4135.964  | 4042.287  | NM_015376 | 1377.686  | 1077.062  |
| NM_002038 | 17079.16 | 10578.93 | NM_019079 | 680.425   | 742.709   | NM_001176 | 993.325   | 769.165   |
| NM_005729 | 7534.497 | 7042.352 | U53530    | 2902.903  | 3434.993  | NM_013341 | 642.83    | 958.835   |
| NM_015493 | 1398.858 | 1937.437 | NM_004176 | 3681.45   | 4063.711  | NM_016536 | 822.774   | 1465.707  |
| NM_003747 | 1834.632 | 1873.094 | NM_004548 | 28593.617 | 20968.078 | NM_004066 | 293.869   | 1257.109  |
| AB037744  | 1839.385 | 2005.588 | AK000554  | 3230.309  | 3196.823  | NM_004941 | 5475.771  | 4513.757  |
| AF141901  | 1093.314 | 1114.046 | NM_006472 | 1445.869  | 1318.662  | AF151831  | 3547.664  | 3887.689  |
| NM_007008 | 1023.093 | 1252.08  | NM_002826 | 3294.877  | 3048.187  | AB011121  | 553.069   | 560.107   |
| AL109708  | 1123.356 | 907.16   | AF159141  | 4229.744  | 3085.063  | AF083255  | 6321.963  | 5696.697  |
| AF234532  | 574.017  | 413.115  | NM_002420 | 449.896   | 397.008   | AK022605  | 887.599   | 1323.191  |
| NM_002418 | 466.226  | 534.811  | NM_016458 | 20929.502 | 17667.111 | AK000554  | 3051.162  | 3688.116  |
| NM_013296 | 8864.933 | 8373.365 | AK022233  | 2322.071  | 2686.378  | NM_006472 | 1038.857  | 1746.461  |
| AL117478  | 763.583  | 601.615  | AK026410  | 15354.02  | 16491.783 | NM_002826 | 2879.931  | 2816.18   |
| NM_005307 | 678.889  | 436.873  | NM_014637 | 3821.384  | 4652.695  | AF159141  | 3778.903  | 3321.516  |
| NM_005958 | 1661.181 | 1146.448 | NM_013379 | 17656.795 | 17533.988 | NM_016458 | 20235.883 | 16474.008 |
| NM_013436 | 1168.997 | 869.848  | AF113208  | 11005.964 | 11904.182 | AK022233  | 2488.197  | 2573.116  |
| AF225426  | 751.415  | 123.596  | NM_006153 | 6491.15   | 6502.805  | AK026410  | 9900.638  | 8705.669  |
| NM_005208 | 4293.526 | 2143.72  | NM_012164 | 4285.528  | 3967.662  | NM_014637 | 4314.175  | 3197.938  |
| NM_000421 | 1014.05  | 583.556  | AK026010  | 423.42    | 670.581   | NM_013379 | 16384.822 | 13646.486 |
| AK025687  | 3374.32  | 3167.101 | AB011156  | 1216.083  | 1355.484  | AF113208  | 10759.653 | 7968.568  |
| AF218941  | 3255.402 | 2322.056 | NM_006246 | 5807.033  | 6313.487  | BC012757  | 1082      | 866.629   |
| NM_004978 | 544.545  | 704.894  | NM_004316 | 552.739   | 702.453   | M96686    | 321.616   | 735.663   |
| NM_000705 | 827.391  | 875.4    | U58096    | 24137.344 | 21925.098 | NM_004062 | 2447.449  | 3124.794  |
| NM_004231 | 40998.23 | 44857.84 | NM_016929 | 5373.452  | 5497.614  | NM_005883 | 437.569   | 1583.674  |
| NM_016577 | 320.244  | 662.864  | NM_012323 | 1160.605  | 1533.354  | NM_004449 | 1051.42   | 1776.391  |
| AK023107  | 6929.034 | 8744.515 | NM_013943 | 1020.758  | 922.002   | NM_014591 | 2761.491  | 3112.255  |
| NM_006854 | 8146.652 | 9128.669 | NM_001639 | 7323.376  | 3807.826  | NM_014592 | 439.477   | 663.28    |
| NM_004580 | 5861.771 | 4539.618 | BG698522  | 7993.81   | 8075.955  | NM_001945 | 2699.638  | 2034.461  |
| NM_020387 | 19625.37 | 17991.15 | AA152346  | 634.855   | 318.438   | NM_020039 | 2286.756  | 2255.225  |
| NM_007246 | 1934.477 | 1495.937 | L15189    | 1556.231  | 1602.915  | NM_006653 | 1446.034  | 1624.074  |
| AK026248  | 1223.125 | 1190.864 | AB023420  | 11031.471 | 11291.882 | NM_014442 | 1961.717  | 1696.419  |
| NM_004578 | 2366.866 | 1673.202 | BI822179  | 1078.601  | 1010.568  | AB011167  | 1400.645  | 1345.782  |
| NM_000647 | 1419.699 | 1963.759 | AF022912  | 5906.667  | 5665.385  | NM_005409 | 819.743   | 971.503   |
| AB046793  | 588.1    | 893.948  | AA477428  | 24094.627 | 26191.012 | NM_000208 | 2514.772  | 2301.904  |
| NM_017604 | 1865.742 | 1616.04  | AA156342  | 1428.742  | 1320.209  | NM_002188 | 29959.123 | 25496.188 |
| NM_017738 | 5432.856 | 4144.182 | R45594    | 17262.768 | 16695.463 | AK027119  | 11559.328 | 9619.588  |
| NM_016557 | 1931.149 | 1306.645 | H46425    | 1192.761  | 792.935   | AB037727  | 20831.459 | 17129.221 |
| NM_000623 | 2174.312 | 1364.169 | NM_003764 | 4760.813  | 6590.774  | NM_005426 | 2868.069  | 1998.215  |
| AF161348  | 2102.519 | 758.299  | NM_004829 | 761.909   | 751.195   | NM_004763 | 1539.479  | 1132.271  |
| NM_018467 | 7863.845 | 4769.006 | NM_006793 | 19882.41  | 23644.434 | NM_014063 | 7167.374  | 6540.8    |
| NM_006068 | 657.104  | 1258.982 | NM_001538 | 3736.802  | 2931.474  | D86964    | 6539.697  | 5646.155  |
| AF305239  | 1413.823 | 1595.857 | X97261    | 9201.804  | 7415.9    | AL049801  | 4560.885  | 3355.002  |
| NM_002827 | 4769.893 | 5086.121 | NM_001468 | 1906.929  | 1798.583  | NM_016395 | 12399.298 | 6955.898  |

|           |          |          |           |           |           |           |           |           |
|-----------|----------|----------|-----------|-----------|-----------|-----------|-----------|-----------|
| NM_00194E | 1564.914 | 1952.194 | D87666    | 58221.164 | 64135.871 | NM_00315Z | 919.553   | 1026.76   |
| BF035425  | 1289.472 | 1549.581 | NM_00131E | 5339.577  | 4309.42   | NM_014727 | 1594.666  | 1422.661  |
| NM_00015E | 11460.12 | 11367.14 | AF286095  | 2495.289  | 2770.84   | NM_00634Z | 4786.958  | 4121.19   |
| NM_01463E | 1738.562 | 1739.407 | NM_00087E | 1370.72   | 966.373   | NM_01639E | 3942.076  | 3909.895  |
| AF099740  | 1616.491 | 1580.882 | S66407    | 1674.711  | 1719.975  | NM_00568E | 2131.652  | 3779.514  |
| NM_006117 | 20034.07 | 15084.17 | NM_00425E | 58882.773 | 47305.059 | NM_00555Z | 15546.006 | 18879.545 |
| NM_00222E | 2734.992 | 2341.123 | NM_001981 | 3787.442  | 4498.479  | NM_006717 | 3765.088  | 2793.907  |
| NM_00622E | 529.832  | 757.855  | NM_014654 | 3163.287  | 4296.618  | AL109786  | 1353.365  | 1532.561  |
| NM_01541E | 23064.15 | 16277.5  | NM_00158E | 38368.84  | 33661.035 | AK026479  | 3113.919  | 2106.318  |
| NM_004897 | 2202.686 | 2057.285 | AK026108  | 6131.222  | 6123.498  | AK022860  | 3997.873  | 3125.385  |
| NM_00255E | 1309.016 | 717.042  | NM_00060E | 10624.978 | 9670.681  | X60188    | 23428.785 | 19913.699 |
| AF225418  | 811.339  | 910.338  | NM_016124 | 5239.746  | 4199.004  | NM_005977 | 2988.559  | 2320.744  |
| NM_00030E | 1257.906 | 456.427  | NM_01907E | 494.913   | 479.617   | NM_00626E | 29104.742 | 24599.443 |
| NM_00452E | 18651.9  | 7482.518 | U53530    | 2222.961  | 2230.421  | NM_00312E | 591.121   | 588.686   |
| AK026381  | 6952.307 | 15199.85 | NM_00659E | 3323.158  | 2382.54   | NM_00605E | 1338.649  | 1370.063  |
| NM_00245C | 13393.42 | 22954.88 | NM_01594E | 2429.483  | 2208.912  | NM_000347 | 2153.915  | 1852.332  |
| NM_00168E | 1543.102 | 2024.794 | NM_003054 | 3734.29   | 3202.965  | M13452    | 1210.566  | 1219.706  |
| AY009402  | 1093.115 | 1261.412 | NM_00304Z | 1309.393  | 888.412   | AF082075  | 458.719   | 357.933   |
| NM_018451 | 2137.246 | 1712.088 | NM_00479C | 533.45    | 418.271   | NM_016114 | 2773.243  | 1971.286  |
| NM_01244Z | 1543.737 | 2121.672 | NM_00221E | 8915.277  | 8224.035  | AY007114  | 1631.059  | 1231.675  |
| NM_00700E | 769.593  | 1080.697 | AF182404  | 2296.534  | 2372.129  | AF086604  | 941.886   | 424.068   |
| AF150735  | 5131.327 | 3007.524 | NM_00655E | 4728.853  | 5450.702  | AB000895  | 1261.624  | 865.819   |
| NM_01818Z | 2866.895 | 843.368  | NM_014521 | 752.315   | 1215.234  | X80031    | 1339.322  | 1039.074  |
| NM_01238Z | 3989.287 | 1631.207 | NM_00244E | 1337.884  | 1349.485  | AK022178  | 1167.21   | 998.114   |
| BF038366  | 1003.677 | 555.883  | NM_01780E | 897.89    | 1124.444  | NM_006011 | 431.066   | 309.808   |
| NM_00245Z | 21197.03 | 34632.05 | AK023202  | 3287.467  | 2993.834  | NM_015601 | 820.659   | 558.648   |
| NM_012304 | 786.81   | 1380.562 | D63877    | 3671.69   | 4286.406  | NM_00178C | 11168.623 | 14250.27  |
| AF196976  | 3119.956 | 3390.645 | AF131760  | 1290.531  | 1520.257  | AJ277442  | 1094.9    | 2015.321  |
| NM_01449E | 529.499  | 846.537  | NM_01869E | 1830.451  | 1893.055  | NM_00456E | 6220.143  | 5794.595  |
| NM_01621E | 11052.94 | 15187.29 | NM_006461 | 3561.219  | 3746.272  | AF089088  | 1065.048  | 1050.616  |
| AK026919  | 2305.554 | 1604.453 | NM_00615Z | 6766.62   | 6116.573  | L07557    | 5852.381  | 3198.257  |
| AF219257  | 6094.971 | 7046.892 | NM_012164 | 4504.785  | 3812.679  | NM_00279E | 53953.199 | 35779.621 |
| NM_00397E | 626.003  | 1073.541 | AK026010  | 514.798   | 375.177   | D78514    | 7303.06   | 5005.83   |
| NM_002561 | 4296.378 | 3285.491 | NM_004721 | 329.644   | 274.512   | AK021665  | 559.51    | 503.901   |
| NM_00610Z | 18050.2  | 13993.79 | AB011156  | 1062.618  | 938.857   | NM_01336E | 906.447   | 644.734   |
| NM_00620E | 810.657  | 348.287  | NM_01807E | 905.706   | 1429.907  | NM_002787 | 39237.844 | 25159.512 |
| AL359933  | 9425.804 | 3042.458 | NM_00476C | 16870.246 | 15604.716 | U95006    | 16091.412 | 11181.53  |
| NM_00130Z | 789.297  | 581.255  | NM_00675Z | 4435.234  | 3393.886  | NM_003347 | 6349.188  | 4600.957  |
| M17783    | 6574.835 | 5814.661 | NM_00442E | 608.247   | 204.091   | AF273051  | 1062.471  | 1076.545  |
| NM_01859C | 13968.97 | 21122.95 | NM_00680E | 4282.778  | 4111.598  | NM_01451E | 5937.393  | 5297.388  |
| NM_00317E | 1583.987 | 3291.168 | AF149304  | 718.396   | 605.15    | AK021868  | 2022.861  | 1537.534  |
| NM_012437 | 7415.729 | 13945.52 | NM_01209E | 6991.897  | 9186.669  | AK000643  | 58161.578 | 62813.68  |
| AF116626  | 4253.366 | 4545.812 | NM_01643E | 432.698   | 693.752   | NM_018421 | 6239.135  | 4291.537  |
| NM_00176C | 24945.12 | 30970.03 | AF264781  | 1039.917  | 1384.141  | AB014574  | 43795.09  | 39220.16  |
| NM_002527 | 942.385  | 1198.491 | NM_01537E | 1244.157  | 1656.464  | NM_020127 | 1505.311  | 1670.139  |
| NM_00589C | 3076.415 | 4768.587 | NM_00117E | 992.111   | 1187.191  | NM_01562Z | 7735.72   | 6057.948  |
| NM_00125E | 8629.757 | 10058.43 | NM_013341 | 737.531   | 776.14    | AB045116  | 958.876   | 713.083   |
| NM_014704 | 2581.454 | 3006.971 | NM_01653E | 1091.88   | 1199.283  | L49054    | 597.167   | 458.652   |
| NM_02020E | 488.647  | 600.599  | NM_00406E | 535.356   | 406.919   | NM_00167E | 735.937   | 775.458   |
| NM_001227 | 2126.049 | 1972.33  | NM_004941 | 6494.21   | 4074.681  | NM_00342Z | 1600.005  | 976.716   |
| NM_001191 | 2015.448 | 1947.227 | AF151831  | 3608.77   | 3681.064  | NM_001451 | 1681.651  | 1295.338  |
| NM_01334Z | 3634.028 | 1492.403 | AB011121  | 480.24    | 701.134   | NM_01477E | 1144.141  | 856.832   |
| NM_014344 | 1299.137 | 896.136  | AF083255  | 6118      | 6185.396  | NM_00294Z | 3783.044  | 3326.311  |

|           |          |          |           |           |           |           |           |           |
|-----------|----------|----------|-----------|-----------|-----------|-----------|-----------|-----------|
| AB040917  | 943.838  | 1269.629 | AK022605  | 1065.148  | 657.579   | AL133649  | 1130.917  | 1056.404  |
| AL110261  | 3493.416 | 5922.646 | AK000554  | 2677.176  | 2797.412  | AB018303  | 453.806   | 464.177   |
| AA203539  | 660.83   | 949.372  | NM_006472 | 1491.381  | 1741.556  | NM_006454 | 4255.86   | 3894.542  |
| AK021786  | 1237.068 | 1964.936 | NM_002826 | 3293.815  | 3655.772  | NM_015846 | 5349.031  | 3317.675  |
| NM_005932 | 1535.844 | 2168.786 | NM_002420 | 719.105   | 750.908   | NM_015972 | 10177.01  | 6828.571  |
| NM_004279 | 12416.52 | 12051.23 | NM_016458 | 19980.396 | 24089.621 | NM_016132 | 2727.153  | 2459.303  |
| NM_004851 | 419.131  | 725.39   | AK022233  | 2588.6    | 2659.877  | NM_018006 | 2954.835  | 1983.813  |
| NM_001908 | 2299.01  | 2432.86  | AK026410  | 15294.269 | 15664.066 | NM_016090 | 2627.449  | 1847.972  |
| NM_000285 | 14388.31 | 14397.44 | NM_014637 | 3895.7    | 4193.676  | NM_001013 | 51111.168 | 42703.246 |
| AV702690  | 1345.353 | 1081.578 | AF113208  | 10138.601 | 11161.123 | AK024040  | 4443.933  | 3745.581  |
| AL117452  | 7193.028 | 6666.021 | AF019382  | 1341.063  | 1159.673  | NM_005061 | 4894.4    | 3585.083  |
| NM_012230 | 2531.598 | 2788.426 | BC012757  | 1185.715  | 1289.742  | NM_000997 | 59686.016 | 61879.875 |
| NM_014038 | 8528.158 | 9442.421 | M96686    | 532.6     | 866.566   | AF182417  | 40731.813 | 27392.018 |
| NM_002061 | 7647.427 | 6764.24  | NM_004062 | 2569.467  | 2624.524  | AL137354  | 18194.953 | 10561.01  |
| AF169974  | 3234.272 | 2345.729 | NM_005883 | 1096.302  | 800.727   | NM_001023 | 60129.281 | 60015.785 |
| NM_004522 | 1096.374 | 738.53   | NM_004449 | 970.155   | 969.833   | AK021571  | 6741.92   | 5320.356  |
| NM_005733 | 3548.492 | 2102.018 | NM_014591 | 2676.675  | 2014.797  | AF052149  | 4591.326  | 3749.196  |
| NM_018138 | 2836.589 | 2029.926 | NM_014592 | 731.843   | 760.039   | AK025586  | 828.348   | 600.241   |
| NM_019619 | 4633.602 | 1487.74  | NM_001945 | 2550.083  | 2814.302  | AL137512  | 473.395   | 466.848   |
| AF183411  | 1779.318 | 816.919  | NM_020039 | 3003.995  | 2296.724  | NM_005036 | 552.344   | 469.244   |
| BF244591  | 657.212  | 195.867  | NM_006653 | 1812.813  | 1418.862  | NM_002541 | 1410.856  | 1101.885  |
| NM_005886 | 8151.279 | 12035.75 | NM_014442 | 5132.201  | 4464.511  | NM_000056 | 4550.999  | 2741.573  |
| U63785    | 1984.087 | 3666.847 | AB002313  | 1070.866  | 1026.344  | NM_016311 | 27262.469 | 16049.98  |
| NM_005966 | 2303.356 | 4695.461 | AB011167  | 1719.424  | 1519.329  | NM_000290 | 2503.886  | 1952.761  |
| NM_003156 | 5513.492 | 11820.5  | NM_005409 | 1815.445  | 1658.134  | NM_016538 | 3610.066  | 2570.957  |
| NM_003108 | 1562.82  | 2598.082 | NM_000208 | 4282.968  | 4695.87   | AK023275  | 8437.799  | 5267.185  |
| NM_013310 | 6441.707 | 7710.14  | NM_002188 | 45199.863 | 42159.473 | AJ223352  | 5792.308  | 3723.895  |
| BC004958  | 3870.209 | 4390.711 | AK027119  | 13366.071 | 14254.772 | NM_012238 | 2042.532  | 1711.558  |
| NM_005762 | 13748.4  | 21719.77 | AB037727  | 34935.512 | 39724.652 | NM_016539 | 12489.641 | 4441.913  |
| NM_006473 | 2401.673 | 2829.339 | NM_005426 | 3471.931  | 3915.297  | NM_006807 | 25290.434 | 17926.953 |
| NM_014643 | 881.082  | 1346.18  | NM_004763 | 1645.941  | 1678.124  | L16464    | 555.665   | 630.539   |
| NM_005653 | 1720.047 | 2356.752 | NM_014063 | 8881.883  | 8708.846  | NM_006532 | 2560.12   | 4084.488  |
| NM_014553 | 1591.626 | 1494.419 | D86964    | 6177.723  | 6825.56   | U07132    | 3589.086  | 3012.829  |
| NM_003440 | 1047.609 | 1399.959 | AL049801  | 4294.727  | 4786.77   | NM_003436 | 607.824   | 448.45    |
| NM_004698 | 5454.704 | 5674.444 | NM_014727 | 3395.877  | 3044.882  | AL035301  | 1211.397  | 1288.757  |
| U41387    | 14431.19 | 7933.284 | BE885010  | 632.894   | 752.816   | NM_017687 | 1098.729  | 1388.573  |
| NM_004516 | 9751.776 | 8060.982 | NM_006342 | 6643.317  | 5680.18   | NM_017975 | 3054.803  | 1288.323  |
| NM_006513 | 1886.444 | 1460.997 | NM_016396 | 6162.204  | 7097.216  | AK025036  | 1121.476  | 1088.679  |
| NM_003685 | 14828.16 | 9954.032 | NM_005689 | 1991.586  | 2560.715  | AK024843  | 10885.648 | 7339.695  |
| NM_002486 | 959.973  | 509.479  | NM_005552 | 21215.578 | 16780.18  | AF074994  | 604.97    | 407.818   |
| NM_006295 | 5447.052 | 3553.748 | NM_006717 | 3512.932  | 3175.831  | NM_017670 | 4648.27   | 4226.714  |
| NM_001540 | 3234.076 | 1138.967 | AL109786  | 2031.359  | 1354.376  | AF286598  | 648.77    | 489.87    |
| NM_012111 | 10966.19 | 5483.452 | AK026479  | 2894.224  | 2642.243  | AK021468  | 914.524   | 436.498   |
| NM_004470 | 12399.61 | 7563.189 | AK022860  | 3802.973  | 3481.398  | NM_004366 | 5440.44   | 3888.975  |
| NM_001418 | 13345.96 | 18229.18 | X60188    | 34974.219 | 31412.047 | AK026168  | 1183.168  | 908.908   |
| NM_003756 | 37736.42 | 49090.71 | NM_005977 | 3316.02   | 2675.802  | AJ296152  | 7819.892  | 5857.859  |
| AL049680  | 6120.394 | 12958.58 | NM_002747 | 563.296   | 755.77    | AK001067  | 1425.114  | 1436.211  |
| AL133660  | 344.5    | 728.185  | NM_006265 | 28900.844 | 21255.156 | AK027088  | 10226.358 | 7429.341  |
| AK001595  | 3888.672 | 3918.178 | NM_003126 | 833.803   | 997.874   | AB037721  | 3852.458  | 3860.772  |
| NM_018015 | 4512.074 | 5066.83  | NM_006059 | 1654.417  | 1512.068  | AK027120  | 842.765   | 849.126   |
| NM_003715 | 7044.845 | 8592.685 | NM_000347 | 5928.07   | 5890.707  | AB029001  | 958.552   | 1019.763  |
| M94065    | 1987.815 | 2370.843 | M13452    | 2793.375  | 1801.806  | AB006624  | 4358.853  | 3553.132  |
| BF036874  | 1832.731 | 3112.459 | AF082075  | 984.309   | 1307.802  | AL109717  | 589.743   | 854.794   |



|           |          |          |           |           |           |           |           |           |
|-----------|----------|----------|-----------|-----------|-----------|-----------|-----------|-----------|
| BE888487  | 519.127  | 547.29   | NM_016114 | 2821.416  | 3471.203  | AK025473  | 974.077   | 906.528   |
| AF182419  | 3061.607 | 3513.181 | AY007114  | 1821.794  | 2152.816  | AF146693  | 897.772   | 1060.082  |
| NM_004293 | 1210.09  | 833.534  | AF086604  | 834.095   | 1078.356  | AF271070  | 12070.735 | 7153.184  |
| NM_007016 | 3598.073 | 3176.401 | X80031    | 1663.711  | 1658.756  | NM_014903 | 724.205   | 628.481   |
| NM_002703 | 6009.92  | 4892.207 | AK022178  | 1930.194  | 1827.654  | AK055959  | 842.101   | 774.598   |
| NM_005375 | 6905.771 | 11384.07 | NM_006011 | 804.395   | 971.823   | AF052141  | 445.564   | 262.061   |
| NM_005985 | 1350.001 | 2439.295 | L00635    | 1243.95   | 1015.82   | AK021705  | 4109.109  | 2467.313  |
| NM_015906 | 3514.024 | 2528.405 | NM_015601 | 882.639   | 1162.08   | NM_016141 | 12513.729 | 9710.979  |
| AK023759  | 899.198  | 351.64   | NM_001780 | 12894.568 | 12549.519 | AL109702  | 1373.025  | 824.852   |
| L25270    | 5916.721 | 4121.812 | AJ277442  | 1013.423  | 852.75    | AK025624  | 7587.927  | 5767.201  |
| AB033111  | 884.404  | 341.336  | NM_004565 | 5740.868  | 6234.74   | AK026684  | 1506.227  | 1075.326  |
| AJ276316  | 1633.54  | 690.45   | AF089088  | 1356.721  | 1183.246  | AL110125  | 3802.53   | 2807.452  |
| AF229246  | 2679.02  | 2538.497 | L07557    | 5683.939  | 6144.877  | AK022764  | 1414.31   | 1429.255  |
| S64709    | 5505.094 | 8799.188 | NM_002796 | 48079.164 | 42757.336 | AJ011600  | 1086.7    | 1024.142  |
| NM_018485 | 922.278  | 1204.098 | D78514    | 7035.119  | 5531.626  | AJ002785  | 692.154   | 676.234   |
| X56465    | 1268.821 | 2985.14  | AK021665  | 585.045   | 767.486   | Z70716    | 492.525   | 551.599   |
| AK021494  | 1642.789 | 2451.688 | NM_013366 | 976.779   | 796.484   | AL049251  | 496.627   | 518.108   |
| AK022117  | 699.488  | 1023.727 | NM_002787 | 37351.5   | 43473.273 | Z83945    | 938.592   | 873.138   |
| AF075023  | 573.551  | 642.513  | U95006    | 10020.228 | 12161.968 | L32606    | 403.252   | 325.337   |
| AL360160  | 4222.794 | 6417.584 | NM_003347 | 6264.577  | 7681.76   | L05148    | 7898.917  | 10867.764 |
| AB040926  | 424.892  | 573.138  | AF273051  | 1190.253  | 1408.401  | AK091125  | 664.883   | 820.597   |
| AK001092  | 6807.267 | 8013.728 | NM_014516 | 11571.805 | 11808.941 | D16474    | 4083.839  | 3130.978  |
| NM_014144 | 1621.584 | 1697.489 | AK021868  | 1805.718  | 2930.532  | AL080072  | 705.954   | 762.748   |
| AF147345  | 1034.806 | 645.37   | NM_015623 | 8495.861  | 9047.172  | AK024898  | 417.228   | 460.717   |
| AF147373  | 735.368  | 569.256  | AB045116  | 1964.304  | 1252.217  | AL049280  | 1314.304  | 1031.001  |
| AK026209  | 515.764  | 534.487  | L49054    | 940.725   | 669.807   | AK025212  | 5909.581  | 5248.594  |
| AF086253  | 1116.136 | 1021.591 | NM_001675 | 1415.291  | 1256.029  | AL157503  | 3865.005  | 2510.672  |
| AF086434  | 900.185  | 689.295  | NM_003422 | 2044.026  | 2724.036  | AK000053  | 753.934   | 471.439   |
| AK022063  | 1239.513 | 557.266  | NM_001451 | 2351.898  | 2315.044  | AK000786  | 1401.76   | 1172.45   |
| AF086345  | 1235.625 | 329.345  | NM_014775 | 1649.377  | 1389.372  | AK000935  | 853.931   | 622.163   |
| AL049278  | 4098.644 | 5641.788 | NM_002943 | 5411.357  | 5532.435  | AK021458  | 1731.245  | 1576.487  |
| AL117519  | 986.139  | 2072.233 | AL133649  | 1449.067  | 1093.221  | NM_017674 | 1989.061  | 1609.109  |
| NM_005060 | 1914.283 | 2430.529 | AB018303  | 931.601   | 879.283   | AK000811  | 496.515   | 321.028   |
| AF085935  | 1060.066 | 1273.661 | NM_006454 | 5741.454  | 3304.475  | AK000966  | 928.97    | 671.862   |
| AL035369  | 3145.827 | 3753.089 | NM_015846 | 7187.897  | 6754.222  | AK024525  | 1553.988  | 1342.671  |
| AF075097  | 401.868  | 772.068  | NM_015972 | 9605.672  | 8864.411  | AK024909  | 799.007   | 912.292   |
| AK022801  | 3059.95  | 2968.287 | NM_016132 | 3664.318  | 3913.578  | AK001880  | 7237.37   | 5718.144  |
| AL133075  | 5071.663 | 6103.047 | NM_005061 | 3892.73   | 3698.129  | AF156166  | 3907.215  | 2765.156  |
| AL137630  | 2701.247 | 2798.15  | AF182417  | 42031.027 | 42238.523 | NM_014373 | 2641.277  | 1781.659  |
| AK055236  | 535.265  | 414.264  | AL137354  | 17040.021 | 15118.279 | NM_014206 | 31074.328 | 16092.178 |
| AL137277  | 1597.644 | 1679.078 | NM_001023 | 56123.949 | 62237.652 | NM_001651 | 3080.359  | 2794.751  |
| AL137447  | 884.143  | 1214.912 | AK021571  | 4545.326  | 3385.45   | L32786    | 1713.507  | 1197.016  |
| AL157467  | 616.283  | 521.203  | AF052149  | 6536.533  | 6234.537  | AK002023  | 2873.508  | 1859.103  |
| BC023609  | 995.575  | 1063.178 | AK025586  | 1178.899  | 1082.008  | NM_016464 | 608.826   | 498.521   |
| AF086395  | 5755.462 | 1635.711 | AL137512  | 1165.554  | 1315.76   | L40402    | 1107.067  | 743.415   |
| AF086049  | 762.644  | 342.382  | NM_005036 | 624.608   | 661.8     | AK022422  | 554.431   | 715.099   |
| AF114263  | 1502.084 | 1844.059 | NM_002541 | 1492.105  | 1547.244  | AK023485  | 579.587   | 434.252   |
| AF086073  | 447.551  | 717.155  | NM_000056 | 3953.895  | 3935.193  | AK022474  | 16711.367 | 12339.978 |
| AK026142  | 4834.036 | 8879.18  | NM_016311 | 26151.406 | 25390.379 | AK022392  | 5528.839  | 4143.091  |
| AF161369  | 680.032  | 1069.723 | NM_001867 | 56463.199 | 55972.508 | AL117451  | 601.789   | 743.738   |
| AK027176  | 1716.174 | 2502.464 | NM_002300 | 58056.73  | 65338.145 | AK025949  | 1759.075  | 1185.775  |
| AF073328  | 646.633  | 773.693  | NM_000290 | 5586.741  | 5389.951  | Y10259    | 3561.956  | 2297.195  |
| AF129266  | 512.502  | 714.533  | NM_016535 | 4380.612  | 4037.487  | AK021725  | 2061.66   | 1504.953  |

|           |          |          |           |           |           |           |           |           |
|-----------|----------|----------|-----------|-----------|-----------|-----------|-----------|-----------|
| AF211968  | 629.551  | 649.424  | AK023275  | 7607.144  | 7439.835  | NM_002406 | 4029.281  | 2781.549  |
| Y12019    | 771.168  | 998.075  | AJ223352  | 5596.746  | 6028.303  | AK024282  | 1406.767  | 1025.956  |
| AK021898  | 865.81   | 897.627  | NM_012236 | 3053.001  | 3849.704  | AF085838  | 7558.33   | 3407.29   |
| AK022024  | 2433.16  | 2262.703 | NM_006807 | 28960.178 | 27189.988 | NM_018277 | 825.964   | 788.629   |
| AK022301  | 1297.748 | 1764.683 | NM_000326 | 900.259   | 641.347   | AF014455  | 645.396   | 609.62    |
| AK021948  | 2142.656 | 2841.157 | L16464    | 902.926   | 1318.102  | AF086335  | 2787.485  | 1827.817  |
| AK021642  | 1256.013 | 492.614  | NM_006532 | 4468.974  | 3731.479  | AB011118  | 10437.26  | 7411.931  |
| AK021987  | 354.774  | 650.584  | U07132    | 4967.997  | 4648.768  | S66666    | 1390.411  | 1337.243  |
| AK026905  | 2739.449 | 4112.243 | NM_003436 | 711.834   | 390.838   | AK021476  | 1378.394  | 1450.753  |
| AK026704  | 472.981  | 681.74   | AL035301  | 1920.235  | 1460.127  | NM_018630 | 6380.604  | 3743.773  |
| NM_000134 | 500.696  | 920.619  | NM_017687 | 1577.654  | 1477.498  | AF086175  | 1097.488  | 860.29    |
| NM_006636 | 6487.079 | 6060.402 | NM_017975 | 2486.145  | 4296.686  | AK002196  | 853.658   | 931.004   |
| X14675    | 1219.414 | 1738.402 | AK025036  | 1955.706  | 1688.847  | NM_004576 | 1181.96   | 1092.878  |
| AF071170  | 1066.961 | 1383.061 | AK024843  | 12632.665 | 11088.601 | AF040097  | 771.206   | 867.955   |
| AF161364  | 442.987  | 576.565  | AF074994  | 679.522   | 843.658   | NM_020436 | 681.306   | 763.557   |
| AF075075  | 1281.542 | 1993.154 | NM_017670 | 5836.451  | 4748.355  | AK024182  | 905.684   | 1178.066  |
| AK025259  | 512.623  | 392.204  | AF286598  | 935.589   | 933.998   | NM_006913 | 10034.946 | 7713.953  |
| NM_005453 | 248.524  | 427.226  | AK021468  | 836.007   | 974.821   | NM_000496 | 10403.23  | 7530.638  |
| NM_018304 | 9116.379 | 6154.608 | BC033020  | 911.344   | 870.629   | AL049955  | 14903.027 | 25687.646 |
| AK024457  | 1338.619 | 1419.367 | NM_004366 | 10089.402 | 9729.77   | AF155654  | 9441.063  | 8303.678  |
| AK026894  | 797.086  | 1442.706 | AK026168  | 1788.995  | 1916.778  | AF088044  | 389.875   | 637.889   |
| AL109684  | 732.501  | 1004.349 | AJ296152  | 8419.794  | 10227.407 | AK000028  | 3484.832  | 2730.522  |
| NM_014186 | 11108.72 | 13935.66 | AK001067  | 2445.474  | 2726.48   | NM_013320 | 50361.785 | 31523.07  |
| AF056442  | 620.424  | 764.17   | AK027088  | 10436.592 | 11526.611 | AJ245902  | 778.118   | 702.4     |
| AK024752  | 33320.23 | 39542.74 | AB037721  | 6900.239  | 6095.29   | AF009316  | 489.502   | 313.495   |
| BG117194  | 3019.014 | 4725.132 | AB029001  | 1380.854  | 1386.666  | AF087987  | 836.236   | 579.596   |
| AF131859  | 8953.055 | 7526.508 | AB006624  | 6976.039  | 8478.335  | H09474    | 1368.974  | 1279.213  |
| AK023632  | 443.519  | 641.035  | AL109717  | 1567.593  | 1533.008  | AB002368  | 8388.553  | 8067.552  |
| AF086118  | 5329.11  | 4796.477 | AK025473  | 1095.011  | 963.641   | AL360263  | 55793.527 | 50812.898 |
| NM_014136 | 3431.205 | 1983.348 | AF146693  | 1650.521  | 1524.618  | Z36780    | 1535.402  | 1932.713  |
| AK023806  | 677.406  | 487.339  | AF271070  | 10854.122 | 10711.402 | AK022403  | 1284.236  | 1575.621  |
| AF088068  | 597.113  | 414.057  | AK055959  | 1219.25   | 885.607   | AK022955  | 9633.729  | 6906.777  |
| Y16696    | 16062.42 | 7303.791 | AK021705  | 3676.389  | 6809.019  | AF131741  | 383.001   | 216.805   |
| AK026094  | 3128.184 | 1156.187 | NM_016141 | 18808.611 | 19953.455 | AK021760  | 918.06    | 733.883   |
| AF161344  | 3292.755 | 3503.991 | AL109702  | 1582.485  | 1914.392  | BC035855  | 1268.688  | 809.71    |
| AF086027  | 1528.897 | 2129.904 | AK025624  | 8842.115  | 8932.403  | AL137408  | 6166.708  | 4866.927  |
| AK022154  | 482.325  | 911.413  | AK026684  | 1872.75   | 1981.67   | AF054995  | 1270.319  | 988.89    |
| AK022199  | 2136.467 | 3442.144 | AL110125  | 7403.124  | 6134.058  | AL080176  | 3223.924  | 2138.125  |
| NM_006211 | 663.062  | 1399.262 | AK022764  | 1834.287  | 1853.176  | AK023627  | 3012.595  | 1984.266  |
| NM_003524 | 8210.587 | 10178.49 | X89744    | 468.317   | 336.093   | CY3Cy5    | 5034.588  | 293.911   |
| AK021438  | 1184.487 | 1704.292 | AJ011600  | 3451.441  | 3873.181  | BI759406  | 2134.638  | 3265.043  |
| NM_005913 | 512.781  | 703.985  | AJ002785  | 1872.667  | 1553.033  | R76099    | 803.475   | 1357.158  |
| AK022315  | 585.882  | 613.07   | Z70716    | 1200.154  | 1346.815  | S74445    | 332.602   | 848.022   |
| S39891    | 1292.791 | 1633.524 | AL049251  | 1414.052  | 1358.283  | BI763360  | 893.724   | 1436.259  |
| AK021624  | 914.718  | 641.038  | Z83945    | 2213.223  | 2084.653  | D25538    | 1739.287  | 2442.698  |
| AF278605  | 15326.96 | 7472.692 | L32606    | 978.118   | 781.087   | NM_000360 | 4823.123  | 6741.014  |
| NM_006497 | 3405.15  | 3030.09  | L05148    | 7295.177  | 8036.472  | X03635    | 1244.875  | 1408.057  |
| AL133599  | 698.572  | 580.397  | AK091125  | 970.46    | 1279.136  | AF353674  | 7747.197  | 7075.22   |
| AK022380  | 561.11   | 361.886  | D16904    | 520.847   | 402.047   | BC002645  | 3226.846  | 2740.411  |
| NM_016472 | 2923.109 | 2694.119 | D16474    | 10093.708 | 8033.916  | NM_021138 | 1696.296  | 1436.248  |
| AK023042  | 3671.592 | 2481.238 | AL080072  | 1428.116  | 850.699   | BC002792  | 796.6     | 1037.454  |
| NM_016550 | 6113.791 | 5567.541 | AK024898  | 1263.091  | 955.107   | NM_021005 | 957.263   | 1383.012  |
| AK024813  | 9824.054 | 11259.43 | AL049280  | 2885.93   | 2742.005  | SB        | 931.559   | 574.814   |

|           |          |          |           |           |           |           |           |           |
|-----------|----------|----------|-----------|-----------|-----------|-----------|-----------|-----------|
| L19365    | 446.427  | 670.205  | AK025212  | 9409.599  | 8547.55   | SR2       | 57691.883 | 44443.043 |
| AK024107  | 761.823  | 1254.674 | AB021925  | 354.215   | 280.128   | SR4       | 17469.955 | 12197.418 |
| CY3Cy5    | 1370.685 | 146.033  | AL157503  | 4431.077  | 4367.996  | SR6       | 2739.981  | 1681.829  |
| BG698522  | 660.956  | 509.421  | AK000053  | 815.058   | 775.807   | SR8       | 9270.848  | 20047.627 |
| AA152346  | 370.798  | 609.229  | AK000786  | 2053.163  | 1691.523  | SR10      | 31694.609 | 7475.057  |
| L15189    | 1514.339 | 1856.579 | AK000935  | 812.579   | 1155.369  | CY3Cy5    | 4000.853  | 251.825   |
| AB023420  | 10338.59 | 12691.62 | AK021458  | 3722.445  | 3198.516  | NM_003834 | 2433.884  | 5376.651  |
| BI822179  | 622.172  | 1232.88  | NM_017674 | 4633.824  | 4320.608  | NM_005959 | 3420.704  | 3991.094  |
| AF022912  | 5511.85  | 6107.524 | AK000811  | 517.76    | 722.625   | NM_003381 | 1123.589  | 1623.699  |
| AA477428  | 20069.88 | 25322.35 | AK000966  | 846.341   | 805.206   | NM_005756 | 920.846   | 1314.619  |
| AA156342  | 1439.519 | 1547.028 | AK024525  | 4634.2    | 4825.585  | NM_003702 | 11418.075 | 12117.011 |
| R45594    | 13676.14 | 19884.66 | AK024909  | 1355.11   | 1162.067  | NM_000369 | 595.925   | 911.568   |
| AI355949  | 545.529  | 584.184  | AK024544  | 2502.769  | 2210.814  | NM_016351 | 1160.742  | 1442.452  |
| AA278152  | 16736.94 | 17091.38 | AK001880  | 8533.855  | 8554.218  | NM_004405 | 2243.224  | 2365.345  |
| H75530    | 2187.282 | 2758.591 | AF156166  | 5401.283  | 6546.386  | NM_001988 | 5246.758  | 6306.973  |
| NM_004176 | 3872.474 | 4384.688 | NM_014373 | 3296.538  | 3581.375  | NM_006060 | 2034.28   | 2907.164  |
| SR7       | 5214.361 | 30117.27 | NM_014206 | 31323.48  | 24477.256 | NM_005667 | 2649.963  | 3218.277  |
| SR9       | 20009.57 | 3012.809 | NM_001651 | 9426.358  | 9573.755  | NM_000060 | 648.508   | 390.853   |
| CY3Cy5    | 2033.576 | 184.585  | L32786    | 2677.558  | 2835.372  | L09080    | 1185.973  | 1273.213  |
| NM_001315 | 2817.39  | 1923.98  | U03239    | 611.241   | 838.952   | NM_007326 | 2617.974  | 2819.611  |
| AF286095  | 1113.252 | 826.731  | AL355720  | 831.268   | 912.574   | NM_001886 | 3952.764  | 3161.704  |
| S66407    | 845.403  | 699.017  | AK002023  | 5696.415  | 5992.961  | NM_005622 | 636.24    | 965.743   |
| NM_016523 | 463.873  | 396.679  | AF150156  | 701.128   | 875.575   | NM_018058 | 7608.018  | 5919.818  |
| NM_004258 | 2168.173 | 2947.086 | NM_016464 | 932.399   | 906.388   | NM_004548 | 10895.688 | 17147.059 |
| NM_001981 | 3265.645 | 3726.652 | L40402    | 2339.594  | 2047.521  | X69079    | 16501.932 | 18284.146 |
| NM_014654 | 315.155  | 735.224  | AF086216  | 529.52    | 334.402   | AF091033  | 558.325   | 1098.378  |
| NM_001585 | 1072.141 | 1473.394 | AK022422  | 730.54    | 537.88    | AB037732  | 1411.426  | 1902.899  |
| AK026108  | 1631.586 | 2180.445 | AK023485  | 425.019   | 443.332   | NM_001837 | 544.306   | 686.025   |
| NM_006379 | 1915.903 | 2972.466 | AK022474  | 15787.852 | 14547.864 | M27487    | 501.85    | 831.834   |
| BF571428  | 1567.111 | 1841.872 | AK022392  | 7296.353  | 5829.33   | NM_003811 | 2795.884  | 3355.167  |
| AB037723  | 715.575  | 1059.286 | AL117451  | 971.77    | 644.497   | NM_002981 | 5123.131  | 4166.327  |
| NM_006246 | 5385.147 | 5689.29  | AK025949  | 2409.667  | 2525.277  | NM_001244 | 836.747   | 895.95    |
| U58096    | 19232.01 | 18667.19 | Y10259    | 3056.008  | 3937.577  | NM_012275 | 331.007   | 500.141   |
| NM_012323 | 779.262  | 346.146  | AK021725  | 3852.245  | 3255.507  | NM_006137 | 5609.395  | 4397.199  |
| NM_018199 | 201.953  | 698.232  | NM_002408 | 4790.691  | 5076.349  | NM_016139 | 47189.188 | 42026.27  |
| NM_013943 | 594.581  | 873.81   | AK024282  | 1416.314  | 1340.078  | AL117468  | 7735.468  | 6568.182  |
| NM_001639 | 6632.922 | 9915.368 | AF085838  | 3560.215  | 7556.251  | NM_019613 | 8881.805  | 6380.569  |
| AF182404  | 2712.221 | 1953.228 | NM_018277 | 1542.564  | 1743.235  | NM_005382 | 616.102   | 886.6     |
| NM_006555 | 4297.466 | 3231.297 | AF014455  | 595.124   | 815.667   | AK027086  | 5114.466  | 5278.682  |
| NM_014521 | 445.342  | 289.073  | AF086335  | 3564.637  | 4229.815  | AB032997  | 1013.191  | 924.258   |
| NM_002445 | 632.518  | 1050.741 | AB011118  | 19526.488 | 17952.48  | AL096857  | 2794.772  | 2701.193  |
| NM_017809 | 549.703  | 784.546  | S66666    | 880.519   | 817.559   | AF073770  | 3296.744  | 4962.938  |
| AK023202  | 3452.963 | 3162.56  | AK021476  | 3359.464  | 3229.777  | AL359401  | 5505.17   | 13122.341 |
| D63877    | 4041.18  | 3910.818 | NM_018630 | 4611.507  | 6491.662  | NM_012213 | 2020.391  | 3982.341  |
| AF131760  | 1206.372 | 1627.047 | AF086175  | 4153.217  | 6147.998  | NM_016573 | 2967.128  | 5572.768  |
| NM_018698 | 1574.782 | 2025.168 | AK002196  | 1632.886  | 1387.669  | NM_001303 | 7453.489  | 7558.517  |
| NM_006461 | 3923.073 | 4843.804 | NM_004576 | 1890.6    | 2134.548  | M21304    | 514.491   | 897.413   |
| NM_018201 | 2748.559 | 2961.917 | AF040097  | 1720.283  | 1786.633  | NM_001979 | 5438.861  | 10994.196 |
| NM_014438 | 764.841  | 889.411  | NM_020436 | 608.511   | 655.394   | AB040896  | 1369.85   | 1817.031  |
| NM_003764 | 4859.405 | 4703.319 | AK024182  | 964.275   | 946.825   | NM_003636 | 14234.429 | 13690.922 |
| NM_006793 | 21810.06 | 18982.93 | NM_006913 | 10118.041 | 11041.583 | NM_002234 | 860.512   | 944.241   |
| NM_001538 | 1048.424 | 1366.44  | NM_000495 | 13927.651 | 9240.262  | NM_000701 | 2241.871  | 2452.688  |
| X97261    | 10714.84 | 11886.39 | AL049955  | 21405.295 | 16930.141 | AB022696  | 2479.992  | 3095.014  |

|           |          |          |           |           |           |           |           |           |
|-----------|----------|----------|-----------|-----------|-----------|-----------|-----------|-----------|
| NM_00146E | 1982.838 | 1884.969 | AF155654  | 12830.961 | 15639.912 | AF137372  | 5475.039  | 4925.054  |
| D87666    | 59528.61 | 49238.3  | AF088044  | 654.736   | 1154.097  | AF220417  | 1755.575  | 1828.442  |
| AF149304  | 423.867  | 371.681  | AK000028  | 4402.719  | 4381.224  | D83782    | 4317.842  | 4543.785  |
| NM_01209E | 5119.62  | 3516.615 | NM_01332C | 46619.77  | 50641.898 | NM_00207E | 2390.715  | 1991.639  |
| X73079    | 15022.11 | 15810.48 | AJ245902  | 637.768   | 788.901   | NM_000287 | 2122.369  | 2505.436  |
| NM_019091 | 1508.245 | 1404.283 | AL050039  | 810.836   | 990.715   | NM_00165E | 1720.866  | 1700.61   |
| AF264781  | 1445.695 | 1223.021 | AF009316  | 583.458   | 489.936   | NM_002611 | 1796.04   | 3342.681  |
| NM_00245E | 844.446  | 936.816  | AF087987  | 696.58    | 857.2     | NM_017417 | 715.693   | 766.857   |
| AK024215  | 4062.711 | 4755.581 | AK021723  | 384.069   | 442.417   | AL133602  | 641.969   | 1122.245  |
| AB044661  | 5340.248 | 6110.573 | H09474    | 2584.206  | 1942.06   | AF037219  | 6110.658  | 5495.127  |
| NM_00060E | 3812.044 | 4902.371 | AB002368  | 9324.947  | 9732.689  | AK026075  | 1364.389  | 2018.854  |
| NM_016124 | 3503.773 | 4984.991 | AL360263  | 53638.691 | 52529.863 | NM_000251 | 3243.072  | 2663.704  |
| U53530    | 2092.599 | 2672.13  | Z36780    | 1989.95   | 2642.676  | NM_00603E | 2585.996  | 2882.28   |
| NM_00659E | 2915.259 | 4443.052 | AK022403  | 1535.642  | 1654.941  | AB011133  | 3641.447  | 3165.52   |
| NM_01594E | 1696.823 | 1374.552 | AK022955  | 7729.089  | 8579.795  | NM_01757E | 32282.576 | 22648.168 |
| NM_003054 | 2429.404 | 2817.564 | AF131741  | 465.632   | 329.428   | NM_018444 | 2446.665  | 2305.291  |
| NM_00304E | 367.826  | 466.531  | AK021760  | 753.927   | 570.306   | NM_00025E | 1690.423  | 1837.322  |
| NM_00221E | 9581.958 | 9268.838 | BC035855  | 2699.521  | 1951.717  | NM_006947 | 11183.66  | 10453.719 |
| NM_00282E | 2257.98  | 1350.146 | AL137408  | 12597.688 | 9411.931  | NM_017917 | 3648.248  | 2237.258  |
| AF159141  | 2497.423 | 3057.505 | AF054995  | 1475.949  | 1216.495  | NM_00409C | 5930.644  | 5089.358  |
| NM_00242C | 260.823  | 425.327  | AL080176  | 3742.521  | 2068.24   | NM_014634 | 6552.002  | 6520.99   |
| NM_01645E | 3807.151 | 4580.18  | AK023627  | 2638.917  | 2530.946  | NM_00191E | 3159.958  | 3529.212  |
| AK022233  | 2419.647 | 3723.097 | CY3Cy5    | 2145.956  | 206.982   | BC031485  | 1661.722  | 1755.687  |
| AL137713  | 201.721  | 442.146  | BI759406  | 2263.099  | 2556.712  | NM_00409E | 9645.834  | 9162.038  |
| AK026410  | 5227.091 | 7050.715 | R76099    | 524.981   | 663.349   | X15624    | 1896.352  | 1925.598  |
| NM_014637 | 4090.156 | 4438.487 | S74445    | 569.601   | 612.859   | NM_01805E | 8269.25   | 12000.118 |
| NM_01337E | 12295.97 | 16360.74 | BI763360  | 1105.061  | 1480.005  | NM_00454E | 9752.907  | 24740.432 |
| AF113208  | 7643.017 | 8623.573 | D25538    | 1039.261  | 1982.869  | X69079    | 16780.863 | 19600.807 |
| NM_00615E | 3873.629 | 5314.013 | NM_00036C | 4816.477  | 5259.029  | BI759406  | 2056.036  | 2355.997  |
| NM_012164 | 3286.852 | 4565.724 | X03635    | 2174.418  | 2739.803  | R76099    | 680.212   | 865.858   |
| AB011156  | 549.976  | 764.574  | AF353674  | 6975.052  | 6302.662  | S74445    | 401.965   | 717.139   |
| NM_01807E | 1554.832 | 887.672  | BC002645  | 3268.86   | 2957.733  | BI763360  | 701.476   | 875.044   |
| NM_00476C | 13870.02 | 13521.16 | NM_021138 | 2554.189  | 3385.019  | D25538    | 1797.493  | 1713.873  |
| NM_00675E | 3878.039 | 4268.679 | BC002792  | 912.916   | 1102.226  | NM_00036C | 5399.813  | 6360.315  |
| NM_00442E | 245.924  | 553.213  | NM_02100E | 1455.485  | 1138.697  | NM_00184E | 623.971   | 457.963   |
| NM_00680E | 3615.707 | 3940.281 | SB        | 656.12    | 254.43    | X03635    | 1155.688  | 1304.862  |
| NM_01394E | 541.949  | 499.122  | SR2       | 45330.691 | 32251.18  | X03348    | 1468.965  | 1256.074  |
| NM_00163E | 6268.666 | 10791.21 | SR4       | 11650.313 | 8667.334  | AF353674  | 8818.584  | 6888.171  |
| BG698522  | 777.746  | 1097.404 | SR6       | 1923.103  | 1431.807  | BC002645  | 3675.679  | 2990.991  |
| AA152346  | 481.869  | 528.646  | SR8       | 6070.272  | 14949.219 | NM_021138 | 1907.117  | 2013.739  |
| L15189    | 1867.102 | 1861.045 | SR10      | 22631.98  | 7175.138  | BC002792  | 958.938   | 1109.839  |
| AB023420  | 11140.22 | 11926.64 | CY3Cy5    | 1708.006  | 168.057   | NM_02100E | 1138.048  | 1407.951  |
| BI822179  | 866.926  | 934.655  | X07203    | 454.406   | 677.917   | SB        | 799.924   | 668.112   |
| AF022912  | 6061.527 | 6424.483 | AB040104  | 483.309   | 637.654   | NM_00152E | 710.087   | 790.367   |
| AA477428  | 23187.77 | 28656.77 | NM_003834 | 2458.651  | 2298.199  | NM_01742E | 2397.17   | 2036.914  |
| AA156342  | 1615.496 | 2021.457 | NM_00595E | 3293.777  | 3379.785  | NM_00538E | 604.116   | 1490.902  |
| R45594    | 15191.23 | 20540.84 | NM_003381 | 1387.926  | 1319.195  | AK027086  | 4991.386  | 8503.83   |
| AI355949  | 582.784  | 770.548  | NM_00575E | 807.956   | 985.228   | AB032997  | 1034.297  | 2008.687  |
| AA278152  | 15910.04 | 13588.97 | NM_00370E | 9298.614  | 9923.724  | AL096857  | 2524.028  | 2780.704  |
| H75530    | 2127.332 | 2414.54  | NM_00036E | 758.027   | 878.294   | X07203    | 452.557   | 450.558   |
| NM_00417E | 3810.694 | 3851.362 | NM_016351 | 1218.287  | 1174.963  | NM_003834 | 2156.241  | 2853.983  |
| NM_00454E | 18155.89 | 18910.25 | NM_00440E | 2570.532  | 3296.848  | NM_00595E | 3273.688  | 3607.113  |
| AK000554  | 3174.526 | 2995.353 | NM_00606C | 3387.948  | 2297.971  | NM_003381 | 1015.384  | 1209.439  |

|           |          |          |           |           |           |           |          |           |
|-----------|----------|----------|-----------|-----------|-----------|-----------|----------|-----------|
| NM_006472 | 907.731  | 659.734  | NM_005667 | 2613.246  | 3143.684  | NM_005756 | 789.18   | 929.202   |
| NM_00153E | 837.582  | 563.606  | NM_00630E | 566.263   | 633.476   | NM_00440E | 2323.136 | 2204.722  |
| X97261    | 8854.598 | 6334.332 | NM_00006C | 506.161   | 1058.109  | NM_00198E | 5891.827 | 5604.796  |
| NM_00146E | 1677.181 | 1326.151 | L09080    | 3102.749  | 2633.573  | NM_00606C | 2443.771 | 2999.97   |
| D87666    | 62857.66 | 59320.29 | NM_00732E | 5179.89   | 4101.83   | NM_005667 | 3109.143 | 3153.769  |
| NM_00131E | 4007.616 | 5646.981 | NM_00188E | 4081.726  | 3809.482  | NM_00006C | 718.076  | 259.875   |
| AF286095  | 1348.131 | 1797.099 | NM_005622 | 804.879   | 697.516   | L09080    | 1044.349 | 1426.478  |
| NM_00087E | 341.375  | 544.801  | NM_01805E | 8194.369  | 8506.288  | NM_00732E | 2059.167 | 2168.347  |
| S66407    | 765.51   | 894.22   | NM_00454E | 11941.409 | 5674.932  | NM_00188E | 4231.462 | 3674.564  |
| NM_00425E | 1956.634 | 3187.065 | X69079    | 20055.463 | 16169.151 | D83782    | 4415.174 | 7649.06   |
| NM_001981 | 3603     | 4051.688 | AF091033  | 1502.708  | 1514.823  | NM_00207E | 2431.12  | 3333.102  |
| NM_014654 | 403.54   | 784.89   | NM_001122 | 12218.168 | 16242.098 | NM_000287 | 1966.331 | 2878.395  |
| NM_00158E | 1405.95  | 1646.613 | NM_004591 | 1741.693  | 1991.651  | NM_00165E | 1768.182 | 2221.289  |
| AK026108  | 1862.861 | 2212.876 | AL133027  | 1153.638  | 1566.905  | AF091033  | 532.938  | 739.772   |
| NM_00637E | 2107.811 | 2722.333 | AB037732  | 1345.943  | 2233.915  | NM_001122 | 7252.604 | 9383.239  |
| BF571428  | 1404.593 | 1463.009 | NM_005767 | 394.403   | 613.952   | NM_004591 | 835.76   | 1012.311  |
| AB037723  | 794.33   | 789.511  | NM_001837 | 522.597   | 629.937   | AL133027  | 1375.664 | 981.09    |
| NM_00624E | 5076.872 | 4633.476 | M27487    | 938.619   | 2331.657  | AB037732  | 1348.316 | 1268.108  |
| U58096    | 18131.81 | 16068.38 | NM_002164 | 1218.132  | 1151.397  | NM_001837 | 674.648  | 393.927   |
| NM_01692E | 3194.018 | 2857.494 | NM_003811 | 3456.227  | 3995.677  | M27487    | 722.426  | 555.493   |
| NM_01594E | 1317.792 | 780.958  | NM_002981 | 4531.678  | 4821.002  | NM_002164 | 1116.445 | 819.924   |
| NM_003054 | 2157.298 | 1979.324 | NM_001244 | 1077.984  | 1032.831  | NM_003811 | 3050.506 | 3153.85   |
| NM_00221E | 10343.29 | 11861.05 | NM_006137 | 4133.721  | 4739.01   | NM_002981 | 5386.756 | 4482.684  |
| AF182404  | 2680.362 | 2995.74  | NM_01613E | 42285.609 | 29478.156 | NM_001244 | 766.943  | 765.133   |
| NM_00655E | 5301.368 | 6234.816 | AL117468  | 7450.981  | 7039.296  | NM_006137 | 5528.12  | 3964.279  |
| NM_014521 | 436.507  | 666.035  | NM_019613 | 6639.019  | 8276.954  | NM_01613E | 44534.27 | 34810.895 |
| NM_00244E | 856.357  | 1067.085 | NM_00538E | 783.151   | 603.902   | AL117468  | 7505.713 | 6577.238  |
| NM_01780E | 555.089  | 786.833  | AK027086  | 4365.79   | 3793.564  | NM_00191E | 4047.292 | 6684.824  |
| AK023202  | 3964.102 | 4110.827 | AB032997  | 968.525   | 787.631   | BC031485  | 2092.44  | 3057.354  |
| D63877    | 4283.42  | 3386.078 | AL096857  | 2943.997  | 2349.567  | NM_00409E | 8534.402 | 9767.436  |
| AF131760  | 16577.44 | 41627.46 | AF073770  | 3292.465  | 4436.779  | X15624    | 1868.728 | 2455.352  |
| NM_01869E | 1734.448 | 1757.227 | AL359401  | 6410.619  | 5846.598  | AF073770  | 3450.713 | 4726.347  |
| NM_006461 | 4668.333 | 5415.609 | NM_012213 | 2305.737  | 1994.353  | AL359401  | 6278.521 | 9272.201  |
| NM_018201 | 2507.29  | 2994.655 | NM_016573 | 3155.478  | 2701.334  | NM_012213 | 1793.228 | 2487.392  |
| NM_01443E | 659.765  | 552.251  | NM_001303 | 6280.347  | 6874.174  | NM_016573 | 2602.489 | 2717.639  |
| NM_003764 | 4695.911 | 4139.802 | M21304    | 748.996   | 727.356   | NM_001303 | 7048.413 | 6852.812  |
| NM_006793 | 20298.99 | 15871.42 | NM_00197E | 6023.425  | 5674.892  | M21304    | 634.858  | 708.738   |
| NM_01807E | 1025.028 | 312.853  | AB040896  | 1112.361  | 1695.753  | NM_00197E | 4773.921 | 5511.134  |
| NM_00476C | 12460.21 | 7288.708 | NM_00363E | 12203.183 | 15040.984 | AB040896  | 1423.666 | 1338.235  |
| NM_006752 | 3748.532 | 3581.054 | NM_002234 | 2602.595  | 2435.876  | NM_00363E | 14342.66 | 13325.72  |
| NM_00442E | 268.516  | 761.987  | NM_000701 | 1987.653  | 2554.525  | NM_002234 | 823.472  | 942.638   |
| NM_00680E | 3936.199 | 4498.122 | AB022696  | 6038.102  | 5570.335  | NM_000701 | 2501.098 | 2549.353  |
| AF149304  | 585.906  | 756.544  | AF137372  | 5384.304  | 4737.726  | AB022696  | 2718.181 | 2434.671  |
| NM_01209E | 6339.784 | 8461.229 | AF220417  | 1498.977  | 1123.953  | NM_001523 | 645.201  | 989.254   |
| NM_01643E | 490.122  | 597.721  | D83782    | 5470.73   | 3826.661  | NM_017423 | 2500.715 | 2435.026  |
| X73079    | 18864.14 | 23416.09 | NM_00207E | 2686.213  | 2049.828  | Z70705    | 562.535  | 623.346   |
| NM_019091 | 1701.265 | 1530.881 | NM_000287 | 2238.833  | 1604.536  | NM_002611 | 1537.024 | 1809.859  |
| AF264781  | 1618.183 | 836.68   | NM_00165E | 1730.377  | 1370.307  | NM_017417 | 630.334  | 578.018   |
| NM_016142 | 19823.69 | 42233.93 | Z70705    | 834.604   | 748.666   | AL133602  | 933.166  | 926.984   |
| NM_00245E | 833.871  | 701.801  | NM_002611 | 1894.525  | 2056.623  | AF037219  | 5719.96  | 4251.004  |
| AK024215  | 4114.982 | 3673     | NM_017417 | 947.255   | 913.981   | AK026075  | 1325.615 | 1518.556  |
| AB044661  | 4959.576 | 4577.69  | AL133602  | 1912.029  | 2127.771  | NM_000251 | 3109.519 | 2382.176  |
| NM_00060E | 3495.667 | 3602.921 | AF037219  | 3836.892  | 5784.322  | NM_00603E | 2630.479 | 2692.983  |

|           |          |          |           |           |           |           |           |           |
|-----------|----------|----------|-----------|-----------|-----------|-----------|-----------|-----------|
| NM_016124 | 3641.625 | 3452.395 | AK026075  | 1866.352  | 1437.199  | AB011133  | 3328.202  | 3148.597  |
| NM_019079 | 383.802  | 340.04   | NM_000251 | 2224.431  | 4225.105  | NM_017572 | 33442.113 | 24942.17  |
| U53530    | 2189.814 | 1840.117 | AB011133  | 2626.595  | 3256.121  | NM_018444 | 2229.462  | 1808.724  |
| NM_006598 | 2610.155 | 3134.071 | NM_017572 | 31902.723 | 28835.246 | NM_000252 | 1729.489  | 1609.493  |
| NM_004176 | 3049.484 | 1777.436 | NM_018444 | 2517.619  | 2426.979  | NM_006947 | 9461.154  | 7755.062  |
| NM_004548 | 17545.55 | 11270.08 | NM_000252 | 1663.73   | 1683.47   | NM_017917 | 3373.456  | 2053.093  |
| AK000554  | 3502.591 | 3827.152 | NM_006947 | 10923.399 | 9002.396  | NM_000060 | 593.528   | 653.854   |
| NM_006472 | 927.244  | 1042.667 | NM_017917 | 2466.147  | 3101.335  | L09080    | 1382.258  | 1675.807  |
| NM_002826 | 3152.367 | 3298.805 | NM_004090 | 4846.165  | 4487.822  | NM_007326 | 3137.716  | 3577.356  |
| AF159141  | 3306.282 | 4218.46  | NM_014634 | 8178.946  | 6690.78   | NM_001886 | 4192.292  | 5234.18   |
| NM_002420 | 315.937  | 314.651  | NM_001919 | 5547.793  | 5147.126  | NM_005622 | 697.21    | 1156.597  |
| NM_016458 | 3595.023 | 3979.65  | BC031485  | 2167.874  | 1884.687  | NM_018058 | 8017.987  | 8463.27   |
| AK022233  | 2274.725 | 2641.645 | NM_004092 | 7077.563  | 7350.168  | NM_004548 | 7700.064  | 10992.897 |
| AK026410  | 6026.399 | 6176.861 | X15624    | 1821.76   | 1244.285  | X69079    | 13870.82  | 13289.201 |
| NM_014637 | 3907.721 | 4597.315 | NM_004467 | 404.237   | 540.66    | BI759406  | 1842.452  | 1731.388  |
| NM_013379 | 13121.57 | 15217.09 | NM_005622 | 795.899   | 729.771   | R76099    | 572.664   | 676.371   |
| AF113208  | 7525.318 | 6623.617 | NM_018058 | 5861.503  | 7705.516  | BI763360  | 713.65    | 522.8     |
| NM_006153 | 3858.869 | 4358.164 | NM_004548 | 11088.765 | 6597.314  | D25538    | 1930.612  | 1093.722  |
| NM_012164 | 2990.888 | 3277.706 | X69079    | 25338.793 | 21488.328 | NM_000360 | 4805.989  | 4823.238  |
| AB011156  | 548.286  | 586.197  | BI759406  | 2479.967  | 2662.473  | X03635    | 1218.498  | 1306.292  |
| NM_006246 | 4270.977 | 2484.567 | R76099    | 488.253   | 701.098   | BC011847  | 60281.324 | 71133.078 |
| U58096    | 18615.02 | 17812.87 | BI763360  | 1284.427  | 1520.196  | X03348    | 1544.434  | 1567.614  |
| NM_016929 | 4060.072 | 4279.05  | X03635    | 2171.893  | 2301.509  | AF353674  | 7728.717  | 6874.147  |
| NM_012323 | 797.57   | 694.742  | BC011847  | 52002.074 | 67672.125 | BC002645  | 3216.665  | 2548.928  |
| NM_018199 | 478.767  | 662.414  | X03348    | 1669.401  | 1664.461  | NM_021138 | 1599.342  | 1317.13   |
| NM_013943 | 625.449  | 758.382  | AF353674  | 7362.411  | 7072.496  | BC002792  | 1072.448  | 900.692   |
| NM_001639 | 7725.851 | 13825.51 | BC002645  | 4163.226  | 3956.763  | NM_002981 | 5018.528  | 4847.798  |
| BG698522  | 700.977  | 980.703  | NM_021138 | 2543.209  | 2104.086  | NM_001244 | 951.315   | 1519.153  |
| AA152346  | 418.667  | 484.639  | BC002792  | 1092.073  | 1187.567  | NM_006137 | 5443.28   | 5310.562  |
| L15189    | 1902.413 | 1395.416 | NM_021005 | 1724.683  | 811.187   | NM_016139 | 46302.453 | 44790.559 |
| AB023420  | 11250.65 | 10297.34 | NM_001523 | 809.19    | 601.495   | AL117468  | 7612.456  | 8297.501  |
| BI822179  | 822.241  | 1010.324 | NM_017423 | 1514.83   | 1557.256  | NM_019613 | 9039.831  | 7557.785  |
| AF022912  | 5645.304 | 5054.792 | NM_019613 | 6355.958  | 10382.618 | NM_005382 | 498.641   | 700.539   |
| AA477428  | 21019.95 | 18818.76 | NM_005382 | 740.969   | 693.589   | AK027086  | 4865.917  | 5428.133  |
| AA156342  | 1493.916 | 1526.697 | AK027086  | 3979.361  | 4909.957  | AB032997  | 941.428   | 973.061   |
| R45594    | 14274.11 | 16305.9  | AB032997  | 920.442   | 1063.699  | AL096857  | 2749.631  | 2595.199  |
| AI355949  | 526.022  | 589.695  | AL096857  | 2456.88   | 2637.165  | NM_003834 | 1929.7    | 1640.738  |
| AA278152  | 15074.61 | 10884.56 | X07203    | 579.381   | 715.204   | NM_005959 | 3384.237  | 3161.963  |
| H75530    | 1959.703 | 1975.104 | AB040104  | 387.255   | 651.437   | NM_003381 | 1011.095  | 838.222   |
| NM_003764 | 4566.933 | 1987.248 | NM_003834 | 3335.648  | 3419.343  | NM_005756 | 867.37    | 777.899   |
| NM_006793 | 22735.01 | 18547.29 | NM_005959 | 3731.77   | 4200.894  | NM_003702 | 12355.418 | 9993      |
| NM_001538 | 1072.644 | 1506.606 | NM_003381 | 1432.849  | 1559.23   | NM_000369 | 773.054   | 703.159   |
| X97261    | 11976.49 | 15402.64 | NM_000369 | 751.554   | 900.632   | NM_004405 | 2304.371  | 1858.182  |
| NM_001468 | 2110.587 | 2103.161 | NM_016351 | 1500.883  | 1682.133  | NM_001988 | 5507.89   | 5477.701  |
| D87666    | 62567.39 | 52175.03 | NM_004405 | 3479.309  | 3300.458  | NM_006060 | 2226.126  | 2118.113  |
| NM_001315 | 4214.896 | 5915.683 | NM_001988 | 9745.166  | 7244.697  | NM_005667 | 2826.205  | 2878.401  |
| AF286095  | 1346.982 | 1551.035 | NM_006060 | 3837.402  | 2206.646  | NM_002234 | 1105.164  | 1281.967  |
| NM_000878 | 336.795  | 376.564  | NM_005667 | 3295.293  | 3506.24   | NM_000701 | 2454.157  | 2917.447  |
| S66407    | 705.388  | 771.409  | NM_006308 | 542.35    | 444.215   | AB022696  | 3794.39   | 5017.709  |
| NM_004258 | 2018.047 | 2028.352 | NM_000060 | 609.966   | 727.243   | AF137372  | 5769.004  | 7500.436  |
| NM_001981 | 3760.252 | 3478.778 | L09080    | 2724.543  | 2054.375  | AF220417  | 1570.367  | 2127.151  |
| NM_014654 | 373.01   | 816.825  | NM_007326 | 4624.793  | 4206.989  | D83782    | 4469.043  | 5606.341  |
| NM_001585 | 1474.568 | 1336.398 | NM_001886 | 3577.209  | 2857.624  | NM_002078 | 2123.552  | 2007.177  |

|           |          |          |           |           |           |           |           |           |
|-----------|----------|----------|-----------|-----------|-----------|-----------|-----------|-----------|
| AK026108  | 1427.256 | 1810.847 | AF137372  | 5145.606  | 6178.618  | NM_000287 | 2062.836  | 1987.748  |
| NM_006379 | 2000.417 | 1986.763 | AF220417  | 1230.312  | 1415.37   | NM_001656 | 1631.373  | 1572.784  |
| BF571428  | 1205.36  | 1337.868 | D83782    | 5780.44   | 7390.065  | NM_001122 | 6766.081  | 7301.938  |
| AB037723  | 670.36   | 669.73   | NM_002078 | 2446.573  | 2165.714  | NM_004591 | 676.734   | 455.266   |
| NM_000606 | 3199.873 | 1659.187 | NM_000287 | 2224.336  | 1719.152  | AL133027  | 1133.276  | 893.904   |
| NM_016124 | 3188.749 | 2057.048 | NM_001656 | 1505.811  | 1820.568  | AB037732  | 1271.825  | 1327.008  |
| U53530    | 1943.735 | 2232.365 | AF091033  | 833.604   | 918.537   | NM_001837 | 583.278   | 694.914   |
| NM_006598 | 2826.031 | 4179.465 | NM_001122 | 11606.645 | 14776.267 | BC016029  | 877.544   | 750.848   |
| NM_015948 | 1600.995 | 1702.061 | NM_004591 | 2021.635  | 2153.313  | M27487    | 2435.9    | 3651.984  |
| NM_003054 | 2514.912 | 3072.464 | AL133027  | 1281.38   | 1503.026  | NM_002286 | 37463.223 | 28149.225 |
| NM_002219 | 10269.3  | 10571.75 | AB037732  | 1411.38   | 1475.557  | NM_002164 | 795.402   | 586.904   |
| AF182404  | 3185.057 | 3145.126 | NM_001837 | 568.009   | 669.649   | NM_003811 | 2805.421  | 2511.561  |
| NM_006555 | 5166.257 | 5746.519 | M27487    | 1127.693  | 1173.4    | AB011133  | 3616.404  | 4417.531  |
| NM_014521 | 425.537  | 568.046  | NM_003811 | 3343.783  | 3501.235  | NM_017572 | 32903.652 | 36387.848 |
| NM_002445 | 829.121  | 1010.255 | NM_002981 | 5230.606  | 5119.155  | NM_018444 | 2341.297  | 3218.612  |
| NM_017809 | 547.188  | 596.801  | NM_001244 | 1089.088  | 1029.102  | NM_000252 | 1621.371  | 1993.159  |
| AK023202  | 3912.568 | 3034.71  | NM_006137 | 4044.803  | 3355.369  | NM_006947 | 11650.661 | 11085.571 |
| D63877    | 4085.213 | 3537.887 | NM_016139 | 42410.695 | 29170.65  | NM_017917 | 3677.083  | 2546.089  |
| AF131760  | 1241.387 | 1375.823 | AL117468  | 6450.959  | 3987.432  | NM_004090 | 6124.409  | 7101.07   |
| NM_018698 | 1507.492 | 1397.004 | NM_004090 | 4803.495  | 4648.188  | NM_014634 | 6749.882  | 9192.387  |
| NM_006461 | 4030.761 | 4253.529 | NM_014634 | 7973.902  | 6704.851  | NM_001919 | 3853.354  | 5493.8    |
| NM_018201 | 2472.16  | 2223.846 | NM_001919 | 6644.229  | 7513.317  | BC031485  | 1153.097  | 1215.116  |
| NM_014438 | 592.196  | 572.131  | BC031485  | 1906.476  | 1712.479  | NM_004092 | 8669.012  | 8272.065  |
| NM_006153 | 3109.393 | 1747.118 | NM_004092 | 7104.488  | 8582.131  | X15624    | 1837.437  | 1483.041  |
| NM_012164 | 2818.15  | 1813.162 | X15624    | 1833.886  | 1801.202  | AF073770  | 3397.809  | 2734.28   |
| AK026010  | 438.852  | 323.051  | AF073770  | 3624.119  | 4183.312  | AL359401  | 5688.715  | 6334.653  |
| NM_004721 | 409.403  | 453.651  | AL359401  | 6450.546  | 5672.937  | NM_012213 | 1951.96   | 1598.711  |
| AB011156  | 690.56   | 945.813  | NM_012213 | 2489.546  | 1999.534  | NM_016573 | 2579.55   | 2307.978  |
| NM_018079 | 1442.902 | 1168.649 | NM_016573 | 3629.252  | 3952.864  | NM_001303 | 7387.377  | 6552.876  |
| NM_004760 | 16100.82 | 16702.01 | NM_001303 | 7109.291  | 8251.63   | M21304    | 562.889   | 365.622   |
| NM_006752 | 4765.59  | 5767.389 | NM_001979 | 6324.12   | 5867.798  | NM_001979 | 5766.807  | 5272.334  |
| NM_004428 | 224.866  | 954.118  | AB040896  | 1288.888  | 1483.209  | AB040896  | 1478.4    | 1234.451  |
| NM_006809 | 4064.338 | 4174.413 | AF084645  | 473.563   | 621.873   | NM_001107 | 5636.493  | 5639.443  |
| AF149304  | 672.186  | 866.302  | NM_003636 | 12011.875 | 11804.732 | AF084645  | 592.858   | 398.971   |
| NM_012095 | 7144.155 | 7808.528 | NM_002234 | 2052.004  | 2118.427  | AF151851  | 4170.225  | 3447.971  |
| X73079    | 17480.76 | 21220.63 | NM_000701 | 2139.038  | 2247.529  | NM_003636 | 13690.15  | 11329.222 |
| NM_019091 | 1571.582 | 1433.344 | AB022696  | 5893.998  | 5139.214  | AF040723  | 8803.074  | 20049.859 |
| AF264781  | 1652.314 | 1203.678 | NM_001523 | 934.815   | 774.264   | NM_015527 | 5555.808  | 8612.811  |
| NM_002456 | 930.689  | 518.078  | NM_017423 | 1577.219  | 2304.394  | X89675    | 1144.643  | 1619.01   |
| AK024215  | 3942.074 | 3094.976 | Z70705    | 778.153   | 709       | NM_012189 | 707.914   | 682.049   |
| AB044661  | 4754.748 | 3596.232 | NM_002611 | 1819.645  | 1648.651  | NM_005798 | 9979.187  | 10915.952 |
| NM_015376 | 1441.942 | 678.599  | NM_017417 | 1155.103  | 1479.644  | NM_004216 | 3093.745  | 3057.377  |
| NM_001176 | 1223.28  | 694.835  | AL133602  | 1692.235  | 1535.526  | NM_016289 | 16867.277 | 18864.998 |
| NM_013341 | 751.429  | 461.236  | AF037219  | 3990.844  | 4475.943  | NM_001464 | 1163.964  | 1128.306  |
| NM_016536 | 755.314  | 897.109  | AK026075  | 1648.813  | 1392.543  | NM_002051 | 3550.004  | 3510.92   |
| NM_004066 | 446.42   | 711.86   | NM_000251 | 2699.085  | 2512.078  | NM_001523 | 747.796   | 763.723   |
| NM_004941 | 4317.044 | 3539.18  | NM_006038 | 3534.115  | 3439.845  | NM_017423 | 2220.836  | 1862.476  |
| AF151831  | 4090.126 | 3714.501 | AB011133  | 2935.801  | 2786.038  | Z70705    | 721.886   | 559.289   |
| AB011121  | 546.996  | 675.704  | NM_017572 | 30828.742 | 25497.24  | NM_002611 | 1534.903  | 1493.245  |
| AF083255  | 6962.785 | 7059.542 | NM_018444 | 2812.816  | 2136.11   | NM_017417 | 717.176   | 433.84    |
| AK022605  | 858.311  | 1335.219 | NM_000252 | 1716.651  | 1467.235  | AL133602  | 1077.829  | 1012.94   |
| AK000554  | 3534.658 | 4662.996 | NM_006947 | 10334.684 | 9209.854  | AF037219  | 5492.014  | 3278.017  |
| NM_006472 | 1083.954 | 726.25   | NM_017917 | 2146.154  | 2131.48   | AK026075  | 1280.606  | 1470.319  |

|           |          |          |           |           |           |           |           |           |
|-----------|----------|----------|-----------|-----------|-----------|-----------|-----------|-----------|
| NM_002826 | 3321.633 | 3572.415 | NM_00006C | 772.876   | 996.245   | NM_000251 | 3116.085  | 2091.632  |
| AF159141  | 3707.748 | 4637.52  | L09080    | 2405.23   | 2635.576  | NM_00603E | 2785.299  | 2298.244  |
| NM_01645E | 4092.544 | 3629.734 | NM_00732E | 5176.205  | 4221.53   | U87223    | 2370.321  | 4092.622  |
| AK022233  | 2513.496 | 2716.471 | AK023080  | 497.048   | 419.717   | NM_000093 | 676.519   | 1084.311  |
| AL137713  | 242.053  | 275.36   | NM_00188E | 3674.895  | 4864.87   | NM_00177E | 3694.659  | 4944.686  |
| AK026410  | 5562.243 | 5182.696 | NM_004467 | 398.844   | 505.356   | AB033059  | 829.984   | 941.056   |
| NM_014637 | 3909.496 | 3869.646 | NM_005622 | 883.635   | 871.992   | NM_016484 | 5088.423  | 3950.575  |
| NM_01337E | 13732.26 | 13891.92 | NM_01805E | 5731.547  | 7637.881  | NM_014452 | 1548.581  | 2132.458  |
| AF113208  | 7610.361 | 5809.689 | NM_00454E | 13009.102 | 9268.824  | AF023130  | 406.184   | 655.283   |
| BC012757  | 987.664  | 519.879  | X69079    | 22865.703 | 20212.166 | AK021536  | 5871.761  | 2618.221  |
| M96686    | 767.016  | 508.266  | BI759406  | 3063.37   | 3246.334  | NM_00260C | 484.394   | 423.446   |
| NM_004062 | 1762.044 | 1461.916 | R76099    | 705.982   | 790.569   | NM_00364E | 13034.722 | 12152.056 |
| NM_005883 | 493.434  | 376.203  | S74445    | 738.142   | 729.745   | NM_006663 | 1161.549  | 947.545   |
| NM_00444E | 964.886  | 1051.59  | BI763360  | 1432.301  | 1296.034  | NM_006092 | 827.444   | 865.854   |
| NM_014591 | 2892.413 | 3590.884 | D25538    | 1287.2    | 1607.468  | NM_00393E | 770.317   | 721.379   |
| NM_00194E | 2690.275 | 2296.375 | NM_00036C | 5723.512  | 5241.392  | NM_012424 | 931.484   | 754.542   |
| NM_02003E | 1859.592 | 2378.861 | NM_00184E | 545.904   | 371.516   | NM_00244E | 1515.719  | 1571.339  |
| NM_006653 | 1395.207 | 2191.315 | X03635    | 2162.606  | 1666.876  | NM_000863 | 1393.044  | 838.07    |
| NM_014442 | 433.083  | 423.394  | BC011847  | 61413.711 | 71929.492 | NM_006651 | 2270.96   | 2186.645  |
| AB011167  | 1967.947 | 2198.15  | X03348    | 1572.681  | 1543.98   | NM_00533E | 8621.953  | 7182.971  |
| NM_00020E | 1061.09  | 1074.887 | AF353674  | 7048.436  | 5613.209  | NM_00141E | 11642.16  | 8934.152  |
| NM_00218E | 8114.707 | 8604.718 | BC002645  | 3742.449  | 3342.279  | AF119817  | 9812.265  | 8282.441  |
| AK027119  | 5775.826 | 4680.369 | NM_021138 | 2707.063  | 2334.708  | AL035306  | 2101.574  | 1590.847  |
| AB037727  | 3342.343 | 2834.618 | BC002792  | 1004.535  | 678.777   | NM_00132E | 17418.506 | 23208.883 |
| NM_00542E | 2678.781 | 2760.44  | NM_006137 | 3676.081  | 3571.506  | NM_00574E | 3523.711  | 5000.133  |
| NM_004763 | 1614.613 | 1594.474 | NM_01613E | 42093.605 | 30865.541 | NM_00423C | 2531.763  | 2877.525  |
| NM_014063 | 7024.759 | 6407.866 | AL117468  | 7533.175  | 7504.632  | NM_014503 | 1003.595  | 852.212   |
| D86964    | 7216.13  | 6335.114 | NM_019613 | 6107.531  | 9951.271  | NM_01465E | 1450.666  | 1738.805  |
| AL049801  | 6257.918 | 5229.805 | NM_005382 | 970.57    | 856.343   | NM_00439E | 4047.003  | 4650.857  |
| NM_01639E | 13756.67 | 9046.222 | AK027086  | 4464.623  | 4431.361  | NM_006337 | 5879.32   | 7262.978  |
| NM_003152 | 1023.389 | 922.314  | AB032997  | 1001.363  | 898.666   | NM_01406C | 5000.104  | 3598.937  |
| NM_014727 | 811.404  | 750.964  | AL096857  | 2531.065  | 3020.862  | NM_00474E | 7722.328  | 6390.643  |
| NM_006342 | 4451.648 | 3902.334 | X07203    | 485.67    | 700.809   | BQ446064  | 1993.597  | 1775.723  |
| NM_01639E | 3356.59  | 2408.923 | AB040104  | 636.901   | 418.77    | AF302502  | 9118.646  | 6655.74   |
| NM_00568E | 2411.856 | 1915.775 | NM_003834 | 3481.628  | 3522.151  | AF274571  | 1590.48   | 1378.068  |
| NM_005552 | 7527.334 | 8984.448 | NM_00595E | 3914.969  | 3199.394  | NM_00544E | 2164.703  | 1293.41   |
| NM_006717 | 4434.195 | 4348.254 | NM_003381 | 1718.494  | 1569.908  | NM_00387E | 1977.862  | 1661.796  |
| AL109786  | 1631.683 | 2562.54  | NM_00575E | 875.054   | 869.841   | NM_016052 | 6602.089  | 3427.376  |
| AK026479  | 3034.646 | 2999.789 | NM_003702 | 10819.488 | 10704.75  | NM_00671E | 1118.403  | 898.518   |
| AK022860  | 3722.913 | 3813.861 | NM_00036E | 837.236   | 763.256   | NM_005427 | 791.548   | 638.825   |
| X60188    | 14460.94 | 15517.13 | NM_016351 | 1481.411  | 1322.749  | NM_016312 | 874.028   | 499.973   |
| NM_005977 | 2883.782 | 2843.233 | NM_00440E | 3078.078  | 2872.066  | AF234887  | 732.367   | 1013.048  |
| NM_002747 | 516.837  | 333.813  | NM_00198E | 8390.4    | 5231.455  | NM_00177E | 1514.81   | 1198.873  |
| NM_00626E | 25234.66 | 29100.18 | NM_00606C | 3570.109  | 1830.491  | NM_001903 | 7408.265  | 7356.947  |
| NM_00312E | 658.925  | 490.625  | NM_005667 | 2880.291  | 3063.551  | NM_005857 | 4628.217  | 4693.716  |
| NM_00605E | 1282.845 | 1374.226 | NM_00630E | 608.228   | 290.235   | NM_00042E | 1494.116  | 2011.309  |
| NM_000347 | 544.528  | 668.529  | NM_000701 | 2085.767  | 2232.823  | AK027037  | 1011.546  | 1028.875  |
| M13452    | 475.333  | 775.394  | AB022696  | 6188.611  | 5664.249  | NM_00387E | 9322.297  | 6853.66   |
| AF082075  | 436.566  | 298.902  | AF137372  | 5222.422  | 6082.854  | AF191687  | 3913.843  | 2918.198  |
| NM_016114 | 2508.801 | 1918.621 | AF220417  | 1667.942  | 1471.324  | NM_000274 | 9714.567  | 8136.426  |
| AY007114  | 2251.893 | 1551.308 | D83782    | 5799.833  | 5451.879  | NM_00017C | 1303.575  | 888.579   |
| AF086604  | 808.868  | 514.368  | NM_00207E | 2614.353  | 2007.761  | NM_000281 | 12585.845 | 9519.2    |
| AB000895  | 1313.206 | 918.415  | NM_000287 | 2380.9    | 2386.648  | AK001295  | 561.109   | 246.134   |



|           |          |          |           |           |           |           |           |           |
|-----------|----------|----------|-----------|-----------|-----------|-----------|-----------|-----------|
| X80031    | 1429.191 | 750.86   | NM_001656 | 1829.441  | 2096.506  | NM_006031 | 3123.116  | 2579.353  |
| AK022178  | 1015.819 | 804.875  | AF091033  | 647.749   | 884.149   | NM_002715 | 6549.979  | 5799.958  |
| L00635    | 620.385  | 444.586  | NM_001122 | 13365.54  | 12840.751 | NM_001020 | 62605.922 | 68818.07  |
| NM_015601 | 1039.371 | 707.707  | NM_004591 | 2275.988  | 2157.468  | AB020660  | 2633.866  | 2077.061  |
| NM_001780 | 10486.28 | 9670.098 | AL133027  | 1370.155  | 1652.755  | NM_006659 | 14028.638 | 10578.346 |
| AJ277442  | 790.757  | 1043.652 | AB037732  | 1520.607  | 1688.148  | NM_018051 | 1446.265  | 1007.905  |
| NM_004569 | 6867.998 | 5685.643 | NM_005767 | 603.905   | 510.71    | NM_015371 | 2228.631  | 1390.235  |
| AF089088  | 1134.799 | 1510.949 | NM_001837 | 660.082   | 660.207   | AB040915  | 1566.721  | 1052.477  |
| L07557    | 5698.774 | 5077.084 | BC016029  | 862.588   | 863.283   | AF147791  | 552.676   | 651.876   |
| NM_002796 | 45666.75 | 45655.39 | M27487    | 815.98    | 603.941   | NM_006481 | 3388.618  | 5309.946  |
| D78514    | 7373.235 | 6423.045 | NM_002286 | 53603.445 | 48018.129 | AB011115  | 1432.986  | 4037.281  |
| AK021665  | 735.225  | 831.68   | NM_002164 | 961.266   | 972.499   | NM_003910 | 25255.203 | 27146.488 |
| NM_013366 | 888.452  | 1142.732 | NM_003811 | 3167.644  | 3265.245  | AB007913  | 939.767   | 968.129   |
| NM_002787 | 35166.16 | 32749.5  | NM_018444 | 2294.918  | 2189.405  | NM_006696 | 4220.036  | 5001.952  |
| NM_003347 | 3478.718 | 3419.914 | NM_000252 | 1592.923  | 1540.918  | NM_004599 | 6241.882  | 7004.582  |
| AF273051  | 1309.197 | 1518.202 | NM_006947 | 9700.474  | 9969.667  | NM_006037 | 8696.407  | 9459.622  |
| NM_014516 | 630.945  | 796.33   | NM_017917 | 2178.578  | 3444.403  | NM_015871 | 5588.123  | 6877.104  |
| AK021868  | 1866.917 | 1644.225 | NM_004090 | 4804.383  | 4681.699  | NM_019037 | 3444.271  | 3196.215  |
| AK000643  | 24456.22 | 25249.02 | NM_014634 | 9476.846  | 8402.423  | NM_015891 | 5028.021  | 3190.848  |
| NM_018421 | 5179.415 | 5134.246 | NM_001919 | 7754.761  | 8308.767  | NM_006802 | 812.306   | 690.982   |
| NM_020127 | 1719.629 | 1709.253 | BC031485  | 2292.565  | 2144.797  | NM_005066 | 24164.02  | 20216.477 |
| NM_015623 | 6961.7   | 8152.264 | NM_004092 | 7561.783  | 10011.67  | NM_003089 | 7410.705  | 5203.841  |
| L49054    | 608.358  | 478.247  | X15624    | 1941.943  | 2099.053  | NM_003753 | 16035.111 | 10257.995 |
| NM_001675 | 785.392  | 732.161  | AF073770  | 3181.276  | 3744.623  | NM_006223 | 524.688   | 464.21    |
| NM_003422 | 1721.18  | 698.787  | AL359401  | 6648.666  | 4726.487  | NM_017590 | 2192.265  | 1444.301  |
| NM_001451 | 1886.523 | 926.076  | NM_012213 | 2754.437  | 2202.857  | AB011145  | 4734.979  | 2942.807  |
| NM_014779 | 982.485  | 1101.7   | NM_016573 | 3584.464  | 2998.374  | NM_003750 | 13964.114 | 7297.464  |
| NM_002943 | 2176.108 | 1988.684 | NM_001303 | 8471.907  | 10144.295 | M92422    | 2912.073  | 1677.809  |
| AL133649  | 1397.366 | 1472.201 | M21304    | 935.938   | 836.971   | NM_017868 | 1496.803  | 1098.232  |
| AB018303  | 759.827  | 827.272  | NM_001979 | 6385.24   | 5508.603  | AK021888  | 1128.212  | 1186.979  |
| NM_006454 | 3363.918 | 5034.195 | AB040896  | 1607.715  | 1526.97   | AK022848  | 2354.344  | 2731.433  |
| NM_015846 | 4773.671 | 5661.389 | AF084645  | 428.315   | 618.096   | AL049957  | 1086.558  | 927.735   |
| NM_015972 | 10066.49 | 9002.405 | AF151851  | 5741.98   | 5217.616  | NM_018159 | 15485.54  | 16097.758 |
| NM_018006 | 3886.226 | 2919.085 | NM_003636 | 11773.975 | 10034.744 | NM_000819 | 5354.069  | 5665.677  |
| NM_016090 | 2987.677 | 2234.607 | X89675    | 1683.798  | 1963.307  | NM_002513 | 3872.99   | 4088.853  |
| NM_001013 | 46791.59 | 48115.18 | NM_012189 | 697.474   | 842.401   | NM_017424 | 4713.051  | 5914.797  |
| AK024040  | 4541.824 | 4436.12  | NM_005798 | 7997.15   | 10165.872 | NM_001522 | 8012.769  | 7501.048  |
| NM_005061 | 4803.071 | 4203.593 | NM_004216 | 2773.875  | 2605.523  | NM_000883 | 7830.478  | 6160.833  |
| AF182417  | 39688.07 | 34377.88 | NM_016289 | 30673.705 | 28496.48  | AF254086  | 1708.497  | 1515.083  |
| AL137354  | 17676.05 | 14669.97 | NM_001464 | 738.265   | 1161.372  | AL390142  | 906.255   | 843.934   |
| NM_001023 | 58758.01 | 58541.36 | NM_002051 | 3914.582  | 3208.335  | NM_006565 | 3019.66   | 2382.886  |
| AK021571  | 6652.617 | 5003.217 | NM_001523 | 1034.753  | 929.229   | AB007930  | 5058.169  | 3714.149  |
| AF052149  | 4490.009 | 3579.464 | NM_017423 | 1907.016  | 2738.412  | AJ005273  | 3746.857  | 3464.919  |
| AK025586  | 854.108  | 352.954  | NM_002611 | 1973.577  | 1733.536  | AK021892  | 2548.283  | 2203.717  |
| NM_005036 | 857.672  | 503.025  | NM_017417 | 998.414   | 891.894   | NM_003437 | 1508.491  | 1219.595  |
| NM_002541 | 1705.176 | 1887.565 | AL133602  | 2096.333  | 1657.767  | NM_018337 | 5735.42   | 4757.472  |
| NM_000056 | 4898.512 | 4242.413 | AF037219  | 4671.659  | 5454.076  | AA193295  | 11010.039 | 6078.758  |
| NM_016311 | 29236.59 | 26403.89 | AK026075  | 2004.25   | 1386.529  | NM_018045 | 4868.396  | 3603.234  |
| NM_001867 | 59213.46 | 52202.1  | NM_000251 | 2820.999  | 3273.951  | NM_014803 | 2259.798  | 1942.507  |
| NM_002300 | 60344.77 | 55722.16 | NM_006038 | 3605.041  | 3100.652  | AK024956  | 291.341   | 511.138   |
| NM_000290 | 2116.161 | 2377.089 | NM_001779 | 4262.068  | 4507.65   | AF147386  | 1454.011  | 1297.218  |
| NM_016538 | 3355.601 | 3400.904 | AB033059  | 839.485   | 1117.021  | AF273052  | 6391.29   | 6853.651  |
| AK023275  | 7769.396 | 6561.515 | NM_016484 | 3859.504  | 4921.469  | NM_017943 | 9068.893  | 7788.326  |

|           |          |          |           |           |           |           |           |           |
|-----------|----------|----------|-----------|-----------|-----------|-----------|-----------|-----------|
| AJ223352  | 4609.205 | 4759.286 | AK026114  | 642.01    | 649.898   | AK025682  | 904.767   | 1350.834  |
| NM_01223E | 2020.177 | 2281.468 | NM_01445Z | 1430.871  | 1572.799  | NM_01335Z | 596.237   | 523.379   |
| NM_01653E | 10532.55 | 5482.448 | NM_01468Z | 590.772   | 538.41    | NM_01647E | 7154.478  | 5349.329  |
| NM_006807 | 19177.73 | 18386.72 | AK021536  | 8135.404  | 9189.084  | AL389986  | 8761.468  | 6552.757  |
| L16464    | 551.638  | 501.87   | U31285    | 712.588   | 732.1     | AF088052  | 1221.02   | 895.818   |
| NM_00653Z | 868.458  | 986.621  | NM_00260C | 848.062   | 780.89    | AL389941  | 847.715   | 567.023   |
| U07132    | 2366.693 | 1988.175 | NM_00364E | 13482.457 | 9414.572  | AB037756  | 1308.199  | 1253.959  |
| NM_00343E | 639.62   | 650.546  | NM_00609Z | 1150.726  | 1061.758  | AK001853  | 3389.056  | 2606.068  |
| AL035301  | 1123.039 | 2388.875 | NM_00393E | 944.972   | 933.74    | AK025071  | 684.925   | 775.479   |
| NM_017687 | 1133.701 | 908.709  | NM_01242Z | 1098.478  | 1166.261  | NM_01537C | 1674.863  | 1633.125  |
| NM_01797E | 2813.688 | 695.032  | NM_00244E | 3136.026  | 2242.615  | AF085917  | 863.231   | 1252.204  |
| AK025036  | 907.544  | 596.915  | NM_00086Z | 1480.869  | 1303.865  | AF085989  | 790.849   | 689.452   |
| AK024843  | 8937.217 | 8073.031 | NM_006651 | 3774.413  | 2948.663  | AL360139  | 55853.539 | 51442.953 |
| AF074994  | 548.164  | 529.024  | NM_00533E | 6708.416  | 6705.927  | AF075110  | 13756.97  | 11077.685 |
| NM_01767C | 4609.717 | 5195.809 | NM_00141E | 9656.249  | 8866.723  | AL137323  | 767.925   | 678.786   |
| AF286598  | 551.972  | 754.331  | AF119817  | 20139.035 | 15948.756 | AL137494  | 3508.476  | 3396.68   |
| AK021468  | 882.953  | 1077.96  | AL035306  | 2065.644  | 1844.629  | AL162037  | 4497.525  | 5478.407  |
| BC033020  | 872.215  | 1063.964 | NM_00574E | 3334.67   | 3041.772  | AL390150  | 886.014   | 1140.122  |
| NM_00436E | 3728.284 | 3066.821 | NM_00423C | 4003.663  | 3899.256  | NM_002761 | 566.3     | 218.506   |
| AK026168  | 1214.655 | 1520.393 | NM_01450Z | 822.862   | 1231.974  | AF086063  | 736.049   | 580.837   |
| AJ296152  | 7434.319 | 6577.842 | NM_01465E | 2371.402  | 1902.483  | AF086098  | 1183.953  | 948.976   |
| AK001067  | 1667.344 | 1679.175 | NM_00439E | 4293.479  | 4508.576  | AF086076  | 650.278   | 646.752   |
| AK027088  | 10694.49 | 9348.903 | NM_006337 | 6156.434  | 6641.383  | AL833393  | 3089.006  | 1834.308  |
| AB037721  | 966.647  | 1166.558 | NM_004507 | 3588.094  | 4899.069  | AF088005  | 1380.602  | 795.433   |
| AK027120  | 575.879  | 576.668  | NM_00271C | 12162.711 | 13958.285 | AF086096  | 5760.144  | 4727.846  |
| AB029001  | 1150.677 | 1239.355 | NM_01406C | 3679.434  | 6246.745  | AL390132  | 624.137   | 406.379   |
| AB006624  | 4103.963 | 3408.793 | NM_00474E | 6585.032  | 7620.934  | NM_01793Z | 2023.863  | 1695.962  |
| AK025473  | 855.596  | 917.737  | BQ446064  | 1746.224  | 1792.517  | NM_01781E | 9751.231  | 5584.175  |
| AF146693  | 646.161  | 723.108  | AF302502  | 7462.644  | 8324.341  | AK024653  | 13594.188 | 11315.103 |
| AF271070  | 10729.54 | 7860.125 | AF274571  | 1843.115  | 1800.949  | AF103907  | 928.087   | 536.1     |
| NM_01490Z | 494.825  | 630.507  | NM_00544E | 2151.769  | 2394.012  | AF094508  | 381.336   | 441.959   |
| AK055959  | 744.864  | 683.529  | NM_00387E | 1914.337  | 2312.173  | AF161351  | 845.501   | 716.738   |
| AF052141  | 705.601  | 452.172  | NM_01605Z | 5738.068  | 5087.667  | AF111782  | 1349.268  | 1293.415  |
| AK021705  | 5288.5   | 5282.621 | NM_00671E | 1476.643  | 771.96    | AF151530  | 789.994   | 901.761   |
| NM_016141 | 8453.955 | 6608.483 | NM_005427 | 938.761   | 801.82    | AK021991  | 603.761   | 462.72    |
| AL109702  | 1137.589 | 663.888  | NM_01631Z | 664.692   | 643.489   | AK022093  | 3116.604  | 3179.978  |
| AK025624  | 7214.109 | 3835.815 | AF234887  | 981.494   | 495.239   | AK022272  | 556.22    | 478.309   |
| AK026684  | 1427.421 | 1216.697 | NM_00177E | 1320.443  | 1136.732  | AK027155  | 1743.123  | 1741.857  |
| AL110125  | 947.715  | 989.273  | NM_00179Z | 501.717   | 424.612   | AK024528  | 5983.725  | 4333.826  |
| AK022764  | 1381.559 | 1590.504 | NM_00190Z | 7877.99   | 5237.236  | AK000016  | 547.834   | 368.905   |
| X89744    | 345.014  | 209.724  | NM_005857 | 3482.738  | 4478.628  | AK023367  | 1582.306  | 812.901   |
| AJ002785  | 556.28   | 729.819  | NM_00042E | 1445.181  | 1999.891  | AL080209  | 1700.589  | 1573.81   |
| Z70716    | 277.577  | 494.662  | AK027037  | 2083.143  | 5745.691  | NM_01625E | 1857.612  | 1945.367  |
| AL049251  | 636.853  | 644.495  | NM_00387E | 7039.959  | 10347.781 | NM_01431E | 2080.627  | 1726.295  |
| L05148    | 7792.108 | 7298.267 | AF191687  | 3000.305  | 3410.795  | AK056674  | 1478.304  | 968.194   |
| AK091125  | 358.177  | 511.311  | NM_00304E | 375.507   | 668.797   | AK022042  | 749.111   | 427.779   |
| D16474    | 1026.327 | 1010.448 | NM_00027Z | 7903.871  | 6498.91   | AL117588  | 427.102   | 378.997   |
| AL080072  | 547.963  | 353.155  | NM_00017C | 2427.158  | 2077.155  | BE895529  | 2694.968  | 2361.845  |
| AK024898  | 990.149  | 1506.404 | NM_000281 | 11456.527 | 8823.596  | AK000964  | 560.798   | 639.75    |
| AL049280  | 998.264  | 1343.351 | AK001295  | 638.296   | 1789.848  | AL117536  | 1832.043  | 1573.78   |
| AK025212  | 2633.279 | 2353.014 | NM_006031 | 2937.797  | 3344.061  | NM_017751 | 6871.413  | 6350.189  |
| AL157503  | 3624.22  | 3203.352 | NM_00271E | 6998.545  | 5447.786  | NM_003771 | 1302.201  | 1066.074  |
| AK000053  | 766.082  | 866.264  | NM_00102C | 52095.863 | 65685.844 | NM_01786C | 563.399   | 826.035   |

|           |          |          |           |           |           |           |           |           |
|-----------|----------|----------|-----------|-----------|-----------|-----------|-----------|-----------|
| AK000786  | 699.031  | 678.922  | AB020660  | 3012.669  | 2689.302  | X91195    | 45713.246 | 46245.801 |
| AK000935  | 771.637  | 600.169  | NM_006659 | 22885.713 | 18426.549 | AF086190  | 526.935   | 918.652   |
| AK021458  | 969.804  | 1542.558 | NM_018051 | 1374.185  | 1300.557  | AL050035  | 2317.725  | 2543.027  |
| NM_017674 | 638.103  | 480.737  | NM_015371 | 5034.982  | 4211.805  | AK024449  | 705.739   | 678.789   |
| AK000966  | 743.711  | 590.9    | AB040915  | 1868.188  | 1994.811  | AF279780  | 36430.297 | 29250.594 |
| AK024525  | 402.426  | 272.766  | AF147791  | 751.224   | 470.716   | AK022510  | 2298.729  | 1881.839  |
| AK024909  | 416.972  | 514.325  | NM_006481 | 2186.63   | 2681.648  | AJ131609  | 1398.713  | 1243.568  |
| AK001880  | 6008.808 | 10625.47 | AB011115  | 1453.435  | 2053.111  | BC019280  | 2409.031  | 2252.343  |
| AF156166  | 1698.352 | 1252.829 | NM_003910 | 34379.281 | 65227.539 | AF086498  | 656.105   | 478.274   |
| NM_014373 | 2287.827 | 1489.282 | AB007913  | 1673.84   | 2498.864  | AK000687  | 610.681   | 287.737   |
| NM_014206 | 24327.2  | 8313.429 | NM_006696 | 4055.282  | 4927.897  | AF079567  | 2141.075  | 1090.001  |
| NM_001651 | 965.806  | 1045.866 | NM_004599 | 7017.902  | 6328.143  | AK022177  | 959.168   | 859.599   |
| L32786    | 1224.695 | 877.107  | NM_006037 | 8587.276  | 7295.349  | AK023852  | 763.091   | 690.313   |
| AK002023  | 1165.53  | 1027.904 | NM_015871 | 5471.847  | 6708.827  | AF086466  | 1309.587  | 1323.243  |
| NM_016464 | 700.267  | 604.679  | NM_019037 | 5228.757  | 4027.579  | AB007962  | 2528.623  | 1987.803  |
| AK023485  | 428.062  | 463.631  | NM_015891 | 4090.606  | 3030.266  | AF005081  | 1061.657  | 829.34    |
| AK022474  | 17982.99 | 16232.84 | NM_006802 | 1216.41   | 1016.932  | AK026438  | 543.373   | 659.935   |
| AK022392  | 3304.716 | 3244.301 | AB037778  | 1441.952  | 1060.502  | AK021546  | 825.38    | 516.57    |
| AL117451  | 648.73   | 606.936  | NM_005066 | 23929.02  | 15199.594 | AL050186  | 20576.02  | 19895.082 |
| AK025949  | 1591.283 | 2757.226 | NM_003089 | 7401.775  | 6330.785  | AK021918  | 3626.247  | 4076.435  |
| Y10259    | 3895.41  | 5001.704 | NM_003753 | 13356.766 | 12517.833 | AK021669  | 2214.55   | 3036.512  |
| AK021725  | 2292.006 | 2126.249 | NM_006223 | 495.5     | 505.575   | AL080113  | 30253.848 | 26203.381 |
| NM_002408 | 3353.031 | 1423.349 | NM_017590 | 2020.504  | 1849.553  | AL050083  | 1150.935  | 1810.114  |
| AK024282  | 1540.777 | 835.961  | AB011145  | 4402.731  | 3873.153  | AK022766  | 408.501   | 491.177   |
| AF085838  | 10763.23 | 3931.229 | NM_003750 | 14435.286 | 9918.74   | AL049422  | 6773.297  | 5236.094  |
| NM_018277 | 639.337  | 484.984  | M92422    | 2252.621  | 2447.894  | AK023526  | 2327.924  | 2092.435  |
| AF014455  | 988.542  | 821.963  | NM_017868 | 1400.148  | 895.721   | BE266129  | 624.837   | 617.822   |
| AF086335  | 657.37   | 627.954  | AK021888  | 1414.312  | 1860.452  | AK025602  | 9582.067  | 8740.61   |
| AB011118  | 5078.438 | 5057.448 | AK022848  | 3258.774  | 5031.855  | AK026309  | 3829.55   | 2699.585  |
| S66666    | 610.734  | 760.592  | AL049957  | 917.762   | 1753.119  | AL137486  | 1888.662  | 1576.901  |
| AK021476  | 911.445  | 1347.837 | NM_018159 | 20407.477 | 23057.244 | AL110162  | 741.955   | 792.433   |
| NM_018630 | 6670.782 | 4407.753 | NM_000819 | 5717.083  | 6829.573  | AK022681  | 9628.487  | 8176.474  |
| AF086175  | 1102.95  | 913.573  | NM_002513 | 3603.084  | 3859.156  | CY3Cy5    | 3118.247  | 249.767   |
| AK002196  | 907.915  | 810.183  | NM_017424 | 3818.177  | 5406.334  | Y18483    | 394.381   | 666.73    |
| NM_004576 | 576.727  | 538.135  | NM_001522 | 8550.586  | 9322.448  | AI299075  | 595.604   | 418.592   |
| AF040097  | 886.168  | 725.977  | NM_000883 | 5994.947  | 8480.897  | M59979    | 494.371   | 490.271   |
| NM_020436 | 850.849  | 955.369  | AF254086  | 1938.712  | 1610.77   | AB011098  | 971.486   | 1088.824  |
| AK024182  | 1074.197 | 1253.257 | AL390142  | 1312.79   | 1153.726  | AA609759  | 1336.347  | 1545.427  |
| NM_006913 | 7767.349 | 7603.122 | NM_006565 | 3086.746  | 2169.55   | AA029418  | 5809.832  | 5522.924  |
| NM_000499 | 7267.853 | 5983.628 | AB007930  | 5065.002  | 4020.141  | L20815    | 7015.012  | 6908.93   |
| AK000028  | 4216.432 | 7040.423 | X76978    | 601.215   | 212.757   | AI364483  | 8541.053  | 7678.582  |
| NM_013320 | 45594.38 | 18920.01 | AJ005273  | 4519.532  | 4743.521  | AA456001  | 6196.086  | 5111.539  |
| AJ245902  | 652.726  | 399.905  | AK021892  | 2892.881  | 2043.048  | AA451686  | 4604.994  | 4562.324  |
| AF009316  | 433.561  | 563.941  | NM_003121 | 278.977   | 555.66    | NM_003822 | 746.467   | 691.391   |
| BE816678  | 501.161  | 356.073  | NM_003437 | 2093.711  | 1801.409  | NM_004412 | 5540.93   | 5184.285  |
| AF087987  | 811.443  | 628.89   | NM_018337 | 8860.088  | 5441.783  | SR5       | 5895.566  | 4982.509  |
| H09474    | 540.704  | 599.199  | AA193295  | 9661.028  | 7857.837  | SR7       | 5148.541  | 26816.164 |
| AB002368  | 8965.712 | 9705.987 | NM_018045 | 5933.768  | 5242.743  | SR9       | 17432.852 | 2373.928  |
| AL360263  | 51745.35 | 47158.45 | NM_014803 | 1943.201  | 2672.827  | CY3Cy5    | 3631.825  | 204.015   |
| Z36780    | 1595.756 | 1835.622 | AK024956  | 879.168   | 954.059   | NM_019555 | 1730.872  | 2135.224  |
| AK022403  | 1085.494 | 1133.543 | AF147386  | 2180.307  | 2602.099  | NM_012096 | 6232.098  | 5873.989  |
| AK022955  | 11844.05 | 9399.433 | AF273052  | 7267.644  | 6778.22   | L12052    | 3763.116  | 4661.984  |
| AF131741  | 437.65   | 266.347  | NM_017943 | 7312.867  | 9660.929  | AB028976  | 2606.566  | 2572.786  |

|           |          |          |           |           |           |           |           |           |
|-----------|----------|----------|-----------|-----------|-----------|-----------|-----------|-----------|
| AK021760  | 761.51   | 713.129  | AF147383  | 1185.365  | 1225.203  | AK026337  | 522.408   | 437.338   |
| BC035855  | 576.081  | 540.072  | AK025682  | 1648.797  | 1495.036  | NM_015869 | 513.542   | 423.832   |
| AL137408  | 1641.742 | 1783.115 | NM_013352 | 803.116   | 1171.802  | AB031038  | 526.653   | 549.302   |
| AF054995  | 1438.662 | 1272.633 | NM_016478 | 10542.674 | 10613.853 | NM_004626 | 382.161   | 251.733   |
| AL080176  | 3144.986 | 3004.319 | AL389986  | 7677.034  | 8833.215  | NM_001899 | 634.028   | 481.372   |
| AK023627  | 3027.388 | 2348.535 | AF088052  | 1746.725  | 999.794   | NM_004305 | 21886.055 | 21385.703 |
| CY3Cy5    | 1830.776 | 155.599  | AF086342  | 640.424   | 96.501    | NM_006089 | 5665.012  | 5176.462  |
| BI759406  | 1945.072 | 957.842  | AF086310  | 556.04    | 548.083   | NM_003144 | 22864.133 | 18457.01  |
| R76099    | 712.168  | 556.161  | AL389941  | 944.588   | 879.431   | NM_000908 | 623.462   | 393.778   |
| S74445    | 415.338  | 866.498  | AB037756  | 2027.62   | 1610.3    | AB011102  | 4615.876  | 3499.286  |
| BI763360  | 480.145  | 815.762  | AK001853  | 4082.276  | 2899.19   | NM_002969 | 1180.844  | 1018.76   |
| D25538    | 2778.281 | 3748.29  | AK025071  | 1045.753  | 470.024   | NM_004620 | 1121.858  | 953.512   |
| NM_000360 | 4419.911 | 9081.833 | AF075082  | 492.936   | 813.342   | AF087940  | 1005.266  | 1253.541  |
| D49950    | 272.288  | 686.05   | NM_015370 | 3177.043  | 4465.689  | AJ277587  | 813.504   | 927.368   |
| NM_001849 | 367.021  | 693.178  | AF085917  | 1179.312  | 1567.301  | D87432    | 2514.156  | 2631.656  |
| X03635    | 417.677  | 1106.167 | AF085989  | 816.845   | 930.914   | AK023749  | 436.719   | 641.33    |
| BC011847  | 54087.09 | 55489.04 | AL360139  | 51714.027 | 53523.141 | NM_002337 | 3734.263  | 4236.827  |
| X03348    | 1551.681 | 2612.377 | AF075110  | 11613.682 | 13636.686 | NM_013245 | 1456.362  | 1906.762  |
| AF353674  | 7840.583 | 6719.304 | AK022157  | 235.045   | 461.56    | NM_006423 | 18136.172 | 17719.91  |
| BC002645  | 3374.225 | 2767.411 | AL137323  | 1256.643  | 1291.036  | NM_004766 | 2616.35   | 2827.774  |
| NM_021138 | 1177.861 | 975.865  | AL137494  | 3743.634  | 3300.353  | NM_005819 | 5669.544  | 7095.954  |
| BC002792  | 1370.459 | 3036.053 | AL162037  | 4260.285  | 4004.548  | AK024722  | 609.474   | 890.457   |
| NM_021005 | 1349.823 | 4442.329 | AL390150  | 961.666   | 976.578   | AK025520  | 2673.929  | 1591.259  |
| SB        | 713.363  | 1936.723 | NM_002761 | 555.64    | 370.199   | NM_004892 | 7275.198  | 5778.619  |
| SR6       | 1865.712 | 785.604  | AF086063  | 975.558   | 900.557   | NM_014597 | 11419.503 | 9916.541  |
| SR8       | 7223.548 | 8891.448 | AF086098  | 1797.809  | 1729.29   | NM_017896 | 9148.157  | 6426.492  |
| SR10      | 28413.12 | 6066.751 | AF086076  | 848.383   | 767.236   | AB002374  | 3694.933  | 2668.188  |
| CY3Cy5    | 4116.668 | 240.806  | AL833393  | 2543.936  | 2929.257  | U17327    | 1665.255  | 1087.012  |
| NM_003834 | 1409.217 | 1256.065 | AF088005  | 2081.465  | 1565.089  | M87790    | 8521.991  | 8490.365  |
| NM_005959 | 5024.382 | 5830.36  | AF086096  | 6486.948  | 5682.569  | NM_001768 | 2903.148  | 3055.749  |
| NM_003381 | 1027.092 | 1699.046 | AL390132  | 732.634   | 776.56    | NM_000029 | 2998.728  | 2424.785  |
| NM_005756 | 1039.624 | 1514.632 | NM_017933 | 5933.849  | 4944.206  | NM_000715 | 679.227   | 1538.984  |
| NM_003702 | 14866.39 | 19104.95 | NM_017819 | 8788.508  | 5785.458  | AF035802  | 1537.839  | 1270.168  |
| NM_000369 | 654.997  | 1518.267 | AK024653  | 30922.49  | 30616.832 | Y08145    | 524.342   | 581.151   |
| NM_016351 | 1189.028 | 2278.108 | AF103907  | 1506.237  | 1879.01   | M26123    | 418.686   | 606.744   |
| NM_004405 | 1928.837 | 3199.868 | AF094508  | 865.364   | 790.743   | NM_001838 | 819.296   | 868.078   |
| NM_001988 | 2798.646 | 6254.039 | AF161351  | 1259.614  | 1312.9    | NM_000790 | 312.735   | 357.56    |
| NM_006060 | 2511.331 | 4772.392 | AF257098  | 586.96    | 470.538   | NM_002660 | 3282.189  | 3862.723  |
| NM_005667 | 3619.235 | 3514.291 | AF111782  | 3385.777  | 3535.963  | NM_015900 | 523.972   | 525.067   |
| NM_006308 | 511.704  | 360.673  | AF151530  | 1402.476  | 1707.098  | NM_003706 | 640.62    | 601.874   |
| NM_000060 | 567.459  | 352.638  | AK022093  | 7527.938  | 7168.246  | AL122071  | 780.506   | 754.504   |
| NM_009589 | 239.105  | 492.301  | AK022376  | 922.745   | 729.573   | AB033054  | 8704.345  | 8773.893  |
| L09080    | 639.673  | 376.106  | AK022005  | 745.87    | 589.972   | NM_016122 | 1149.398  | 618.154   |
| NM_007326 | 591.155  | 615.167  | AK022272  | 1930.697  | 1441.584  | AF153330  | 1113.789  | 1155.285  |
| NM_001886 | 4256.851 | 4918.639 | AK027155  | 6091.906  | 4888.563  | NM_001652 | 762.343   | 702.775   |
| NM_005622 | 571.633  | 602.381  | AF221846  | 786.86    | 469.863   | BF540935  | 1004.885  | 1206.184  |
| NM_018058 | 7529.039 | 6118.575 | AF264626  | 458.546   | 837.386   | NM_004466 | 394.183   | 349.536   |
| X69079    | 13114.95 | 27972.58 | AK027219  | 552.402   | 397.985   | NM_007081 | 1962.571  | 1749.647  |
| NM_001122 | 2792.407 | 2248.463 | AK024528  | 8346.956  | 6783.068  | AB032964  | 2433.605  | 2594.75   |
| AL133027  | 1245.226 | 1126.13  | AK000016  | 1267.159  | 1518.245  | BE733605  | 2846.234  | 2953.659  |
| AB037732  | 1504.842 | 2009.945 | AK023367  | 1466.008  | 1526.784  | NM_003334 | 13379.924 | 13113.127 |
| NM_005767 | 689.327  | 1042.303 | AL080209  | 1723.731  | 1991.155  | NM_002693 | 4499.085  | 3966.603  |
| NM_001837 | 630.663  | 1067.763 | AL137431  | 936.719   | 957.994   | NM_003671 | 831.987   | 797.405   |

|           |          |          |           |           |           |           |           |           |
|-----------|----------|----------|-----------|-----------|-----------|-----------|-----------|-----------|
| NM_001839 | 61682.52 | 59761.09 | NM_016255 | 1782.207  | 1906.644  | M20695    | 1116.36   | 915.954   |
| BC016029  | 1096.941 | 1756.536 | NM_014318 | 2049.832  | 2141.75   | AK026000  | 3650.519  | 3237.981  |
| M27487    | 417.177  | 928.849  | AK021962  | 460.212   | 407.566   | NM_017833 | 778.92    | 699.822   |
| NM_002286 | 32092.92 | 43571.9  | AK056674  | 1457.579  | 1543.316  | NM_006675 | 4553.173  | 4103.716  |
| NM_002164 | 735.62   | 750.032  | AK022856  | 657.614   | 400.272   | NM_003022 | 5358.313  | 4197.354  |
| NM_003811 | 3209.346 | 3500.548 | AK022042  | 746.875   | 911.162   | NM_004873 | 3406.657  | 3310.537  |
| NM_002981 | 5556.318 | 6551.521 | AL117588  | 861.518   | 841.303   | NM_019842 | 717.553   | 938.116   |
| NM_001244 | 369.814  | 675.015  | NM_017708 | 653.958   | 1427.156  | NM_002951 | 11929.078 | 13981.516 |
| NM_012275 | 305.186  | 357.412  | BE895529  | 3354.183  | 3567.698  | NM_002317 | 861.904   | 893.49    |
| NM_006137 | 7475.813 | 3178.317 | AK000964  | 673.602   | 589.85    | NM_000320 | 2334.585  | 3183.086  |
| NM_016139 | 56654.57 | 53910.92 | AL117536  | 2040.525  | 2197.527  | NM_017921 | 229.567   | 246.624   |
| AL117468  | 5636.333 | 5693.213 | NM_017751 | 8002.029  | 8484.228  | NM_003136 | 8301.504  | 7127.728  |
| NM_019613 | 10413.68 | 5634.807 | NM_003771 | 2235.74   | 2937.473  | NM_004620 | 721.35    | 953.626   |
| NM_005382 | 592.218  | 454.865  | NM_017860 | 2485.847  | 6565.986  | AF087940  | 1550.016  | 2000.6    |
| AK027086  | 5946.084 | 5398.346 | X91195    | 45117.258 | 45654.715 | AJ277587  | 719.818   | 649.899   |
| AB032997  | 1026.893 | 1123.698 | AF086190  | 1478.097  | 1859.153  | D87432    | 814.818   | 894.365   |
| AF073770  | 3394.923 | 2363.144 | NM_006143 | 956.174   | 1026.64   | AI565117  | 48836.637 | 51367.215 |
| AL359401  | 4039.691 | 5125.576 | AL050035  | 3879.849  | 3412.972  | AI299075  | 460.355   | 542.985   |
| NM_012213 | 1206.402 | 1508.443 | AK024449  | 1161.544  | 1432.115  | M59979    | 274.762   | 276.226   |
| NM_016573 | 2267.087 | 1732.937 | AL357201  | 578.143   | 444.159   | AB011098  | 797.413   | 743.295   |
| NM_001303 | 8416.73  | 6524.893 | AF279780  | 33950.777 | 23934.09  | AA609759  | 968.665   | 1149.158  |
| M21304    | 615.142  | 807.448  | AK022510  | 2568.65   | 2077.627  | AA029418  | 4027.668  | 3814.045  |
| NM_001979 | 5622.956 | 10668.19 | AK023878  | 1096.843  | 1514.924  | L20815    | 4276.071  | 4073.779  |
| AB040896  | 2113.718 | 3039.598 | AK021851  | 1743.455  | 2025.918  | AI364483  | 7714.546  | 7092.908  |
| NM_001107 | 7562.208 | 9763.841 | L37717    | 576.597   | 495.729   | AA456001  | 6623.237  | 5768.368  |
| AF084645  | 449.822  | 911.435  | AJ131609  | 2052.099  | 1783.911  | AA451686  | 4635.346  | 4715.163  |
| AF151851  | 3987.366 | 5509.554 | BC019280  | 4553.515  | 3680.054  | NM_003822 | 993.488   | 1509.337  |
| NM_003471 | 141.484  | 339.508  | AF086498  | 776.248   | 859.671   | NM_004412 | 5611.854  | 5385.957  |
| NM_000701 | 2129.03  | 1802.643 | AK000687  | 555.096   | 570.518   | NM_002050 | 1297.668  | 1219.148  |
| AB022696  | 619.031  | 663.803  | L77565    | 461.61    | 451.532   | NM_007097 | 6791.061  | 6617.838  |
| NM_002233 | 255.895  | 1132.173 | AF079567  | 1808.198  | 1165.452  | NM_000029 | 3331.415  | 4540.321  |
| AF137372  | 4651.419 | 3374.208 | AK022177  | 1159.143  | 1375.921  | NM_000715 | 216.258   | 456.117   |
| AF220417  | 2877.018 | 1823.869 | AK023852  | 852.17    | 719.59    | AF035802  | 1077.829  | 1495.411  |
| D83782    | 2802.036 | 3258.47  | AF086466  | 2552.781  | 2568.127  | Y08145    | 464.241   | 666.794   |
| NM_002078 | 2642.848 | 2737.49  | AB007962  | 3872.673  | 3347.434  | M26123    | 299.766   | 406.802   |
| NM_000287 | 2176.488 | 4745.116 | AF005081  | 1476.287  | 1765.794  | NM_001838 | 660.701   | 715.281   |
| Z70705    | 652.015  | 479.175  | AK026438  | 962.885   | 734.72    | NM_019555 | 1505.833  | 1607.866  |
| NM_002611 | 1667.664 | 1487.636 | AL050186  | 20676.236 | 27893.906 | NM_012096 | 5811.54   | 4708.023  |
| AL133602  | 520.541  | 725.179  | AK021918  | 4210.472  | 4317.014  | NM_003905 | 18312.035 | 12837.371 |
| AF037219  | 7150.779 | 8666.036 | AK021669  | 3874.637  | 4102.063  | L12052    | 3312.774  | 3671.937  |
| AK026075  | 1590.516 | 3355.589 | AL080113  | 30312.289 | 26415.053 | AB028976  | 2066.677  | 2072.824  |
| NM_000251 | 4002.298 | 4537.599 | AL050083  | 1818.154  | 1744.135  | AK026337  | 462.063   | 464.87    |
| NM_006038 | 2467.427 | 2212.583 | AK022766  | 680.327   | 530.02    | NM_015869 | 383.288   | 290.216   |
| NM_002485 | 419.376  | 120.55   | AL049422  | 5465.798  | 5490.388  | AB031038  | 505.337   | 341.943   |
| AB011133  | 3770.729 | 2660.827 | AL133089  | 1505.463  | 1199.636  | NM_004626 | 395.374   | 395.204   |
| NM_017572 | 30135.91 | 19818.05 | AK023526  | 2506.448  | 2231.679  | NM_001899 | 561.188   | 418.028   |
| NM_018444 | 1763.458 | 1440.365 | BE266129  | 1153.572  | 897.367   | NM_004305 | 21595.324 | 22408.121 |
| NM_000252 | 1716.429 | 2069.682 | AK025602  | 9687.106  | 7477.151  | NM_006089 | 5302.322  | 4428.595  |
| NM_006947 | 10258.28 | 8299.134 | AK026309  | 4950.005  | 4974.512  | NM_005992 | 1075.344  | 1420.939  |
| NM_017917 | 3728.324 | 1913.232 | AL137486  | 4344.529  | 3365.32   | NM_003144 | 23766.447 | 23387.58  |
| NM_004090 | 4929.499 | 3139.116 | AL110162  | 1330.159  | 1400.999  | NM_000908 | 569.438   | 546.839   |
| NM_014634 | 5445.122 | 3986.65  | AF119880  | 810.208   | 71.556    | AB011102  | 5059.566  | 4221.674  |
| NM_001919 | 624.203  | 601.599  | AK022681  | 9308.254  | 11104.835 | D63480    | 1722.929  | 1391.871  |

|           |          |          |           |           |           |           |           |           |
|-----------|----------|----------|-----------|-----------|-----------|-----------|-----------|-----------|
| BC031485  | 1752.166 | 3284.405 | CY3Cy5    | 2046.701  | 237.35    | NM_002969 | 1442.365  | 1684.024  |
| NM_004092 | 11011.49 | 17609.34 | Y18483    | 380.969   | 302.383   | AK023749  | 375.323   | 403.966   |
| NM_004467 | 198.486  | 292.988  | AI565117  | 46809.574 | 43984.68  | NM_002337 | 2916.281  | 2802.188  |
| NM_005622 | 570.235  | 707.313  | AI299075  | 598.745   | 455.765   | NM_013245 | 1256.953  | 1489.972  |
| NM_018058 | 6499.318 | 4771.227 | M59979    | 561.545   | 498.747   | NM_006423 | 15990.639 | 14436.081 |
| NM_004548 | 11338.92 | 14363.74 | AB011098  | 805.859   | 529.017   | NM_004766 | 1812.59   | 1720.899  |
| X69079    | 8786.349 | 6495.145 | AA609759  | 1226.611  | 902.417   | NM_005819 | 4547.562  | 4368.244  |
| BI759406  | 2478.428 | 1676.674 | AA029418  | 7298.058  | 8436.989  | AK024722  | 631.927   | 629.511   |
| R76099    | 889.358  | 1184.637 | L20815    | 5004.328  | 3889.871  | AK025520  | 2640.295  | 1379.178  |
| S74445    | 669.001  | 911.865  | AI364483  | 10039.719 | 7457.683  | NM_004892 | 6978.565  | 5843.673  |
| BI763360  | 639.809  | 885.742  | AA456001  | 8665.028  | 7475.354  | NM_014597 | 10134.73  | 8257.832  |
| D49950    | 469.245  | 428.178  | AA451686  | 7204.001  | 13329.939 | NM_017896 | 6374.222  | 5179.541  |
| NM_001849 | 371.219  | 330.869  | AA934644  | 328.011   | 689.854   | AB002374  | 3005.12   | 2360.68   |
| X03635    | 470.995  | 454.896  | NM_003822 | 897.545   | 876.626   | U17327    | 1060.193  | 1174.611  |
| BC011847  | 62251.57 | 54759.36 | NM_004412 | 5298.323  | 6709.732  | M87790    | 10185.137 | 11597.88  |
| X03348    | 1425.471 | 2318.803 | SR5       | 5579.128  | 4961.08   | NM_001768 | 2922.467  | 3272.535  |
| BC002645  | 3537.075 | 2088.619 | SR7       | 4616.483  | 28079.785 | NM_002951 | 13676.684 | 20231.975 |
| NM_021138 | 1609.536 | 1315.196 | SR9       | 16673.605 | 2222.101  | NM_002317 | 532.933   | 780.511   |
| BC002792  | 954.936  | 1115.083 | NM_019555 | 1811.202  | 1583.019  | NM_000320 | 1810.176  | 3134.138  |
| NM_021005 | 898.064  | 819.551  | NM_012096 | 6099.81   | 4436.846  | NM_003136 | 6140.404  | 5853.612  |
| SB        | 598.223  | 568.708  | NM_003905 | 14391.542 | 13811.407 | NM_013328 | 13022.701 | 14167.772 |
| NM_001523 | 669.088  | 1139.63  | L12052    | 4635.565  | 3412.684  | NM_000790 | 395.601   | 336.132   |
| NM_017423 | 3452.366 | 6278.836 | AB028976  | 2692.165  | 2194.436  | NM_002660 | 2487.284  | 2546.599  |
| NM_019613 | 10261.45 | 5735.822 | NM_015869 | 590.776   | 380.477   | NM_015900 | 498.99    | 473.543   |
| NM_005382 | 610.94   | 610.51   | AB031038  | 537.432   | 241.621   | NM_003706 | 690.817   | 572.639   |
| AK027086  | 5906.121 | 5577.357 | NM_004626 | 348.992   | 300.869   | AL122071  | 683.44    | 789.86    |
| AB032997  | 1223.804 | 870.695  | NM_001899 | 411.964   | 499.697   | AB033054  | 8303.819  | 11090.125 |
| AL096857  | 2320.855 | 1754.465 | NM_004305 | 31774.949 | 25545.773 | NM_016122 | 1173.859  | 982.261   |
| AB040104  | 225.331  | 700.993  | NM_006089 | 7008.339  | 11360.374 | NM_016583 | 894.803   | 1208.841  |
| NM_003834 | 1938.739 | 2795.957 | NM_003144 | 30972.68  | 29393.998 | AF153330  | 1120.33   | 1312.463  |
| NM_005959 | 5644.439 | 8413.763 | NM_000908 | 689.751   | 862.08    | NM_001652 | 367.72    | 572.806   |
| NM_003381 | 1124.202 | 1722.466 | AB011102  | 5015.503  | 7573.987  | NM_003822 | 613.951   | 885.317   |
| NM_005756 | 925.849  | 794.239  | D63480    | 1615.263  | 1965.316  | NM_004412 | 2389.73   | 2776.163  |
| NM_003702 | 13316.6  | 10293.45 | NM_002969 | 1660.063  | 1937.756  | NM_002050 | 1075.577  | 1260.535  |
| NM_000369 | 683.635  | 417.365  | NM_004620 | 1180.214  | 1333.491  | NM_007097 | 5141.257  | 6877.061  |
| NM_016351 | 1066.183 | 1091.357 | AF087940  | 2558.267  | 5024.053  | D87446    | 2646.967  | 2928.295  |
| NM_004405 | 2616.339 | 4963.953 | AJ277587  | 1030.097  | 709.103   | BF540935  | 1519.962  | 1475.719  |
| NM_006060 | 1915.661 | 1930.671 | D87432    | 3017.181  | 1787.861  | NM_004466 | 430.461   | 364.757   |
| NM_005667 | 3715.214 | 3740.611 | AK023749  | 535.952   | 402.361   | NM_007081 | 2149.094  | 1784.493  |
| NM_006308 | 344.272  | 452.371  | NM_002337 | 3478.76   | 2840.763  | AB032964  | 3091.003  | 2763.928  |
| NM_000060 | 548.499  | 291.8    | NM_013245 | 1890.188  | 824.502   | BE733605  | 3447.241  | 3132.164  |
| L09080    | 771.376  | 662.115  | NM_006423 | 16974.447 | 11655.189 | NM_003334 | 15818.039 | 15727.328 |
| NM_007326 | 730.675  | 1322.509 | NM_004766 | 2469.696  | 1773.244  | NM_002693 | 4752.083  | 4148.331  |
| AK023080  | 225.531  | 1102.053 | NM_005819 | 5149.508  | 4203.875  | NM_003671 | 996.316   | 912.656   |
| NM_001886 | 5874.857 | 11377.09 | AK024722  | 683.846   | 464.379   | M20695    | 1225.927  | 1486.002  |
| AF137372  | 4710.572 | 4787.235 | AK025520  | 2161.896  | 1702.941  | AK026000  | 3765.377  | 3967.815  |
| AF220417  | 2781.989 | 2357.726 | NM_004892 | 6478.534  | 6362.252  | NM_017833 | 753.5     | 721.541   |
| D83782    | 2496.878 | 2748.419 | NM_014597 | 9626.921  | 7791.318  | NM_006675 | 4353.07   | 6406.631  |
| NM_002078 | 2448.563 | 1734.791 | NM_017896 | 7013.17   | 5272.309  | NM_003022 | 5634.68   | 5478.998  |
| NM_000287 | 1683.362 | 1406.591 | AB002374  | 3383.348  | 2974.288  | NM_004873 | 3657.367  | 3756.347  |
| NM_001656 | 1841.876 | 1401.696 | U17327    | 1426.319  | 1472.39   | NM_019842 | 943.095   | 973.478   |
| AF091033  | 374.698  | 792.8    | M87790    | 13386.252 | 12877.63  | NM_003144 | 18185.908 | 20998.99  |
| NM_001122 | 3948.5   | 5902.119 | NM_001768 | 3306.903  | 3208.618  | NM_000908 | 457.492   | 572.892   |

|           |          |          |           |           |           |           |           |           |
|-----------|----------|----------|-----------|-----------|-----------|-----------|-----------|-----------|
| NM_004591 | 472.362  | 978.904  | NM_000029 | 5257.892  | 8138.762  | AB011102  | 4911.856  | 3836.876  |
| NM_006274 | 297.259  | 609.51   | NM_000715 | 418.708   | 544.586   | D63480    | 1416.422  | 1539.526  |
| AL133027  | 1478.802 | 1067.659 | AF035802  | 1868.606  | 2083.239  | NM_002969 | 1532.067  | 1880.753  |
| NM_005767 | 579.705  | 428.465  | Y08145    | 928.205   | 879.569   | NM_004620 | 775.867   | 781.346   |
| NM_001837 | 697.51   | 490.351  | M26123    | 398.684   | 389.438   | AF087940  | 1221.58   | 1007.504  |
| M27487    | 391.665  | 478.718  | NM_001838 | 872.91    | 391.369   | AJ277587  | 594.104   | 578.741   |
| NM_002286 | 28156.4  | 21412.48 | NM_013328 | 18752.717 | 15201.015 | D87432    | 2130.418  | 2019.087  |
| NM_002164 | 742.919  | 936.611  | NM_000790 | 338.904   | 462.517   | Y18483    | 281.598   | 284.024   |
| NM_003811 | 2598.491 | 2370.807 | NM_002660 | 4147.272  | 2971.429  | AI565117  | 48617.328 | 46382.113 |
| NM_002981 | 5223.972 | 2894.537 | NM_015900 | 526.507   | 443.654   | AI299075  | 415.295   | 393.975   |
| NM_001244 | 394.336  | 641.136  | NM_003706 | 436.362   | 639.146   | M59979    | 295.762   | 433.586   |
| NM_012275 | 377.35   | 352.83   | AL122071  | 860.066   | 922.929   | AB011098  | 690.172   | 835.764   |
| AL117468  | 8292.051 | 16531.21 | AB033054  | 11703.51  | 11835.854 | AA609759  | 852.651   | 986.127   |
| NM_004090 | 5556.584 | 5100.459 | NM_016122 | 1057.471  | 1268.568  | AA029418  | 3817.029  | 5207.378  |
| NM_014634 | 5131.543 | 4165.11  | AF153330  | 1951.977  | 2745.102  | L20815    | 4333.306  | 5688.492  |
| NM_001919 | 675.748  | 667.28   | NM_001652 | 366.818   | 505.751   | AI364483  | 7634.237  | 12244.717 |
| BC031485  | 1539.622 | 1486.667 | D87446    | 4371.239  | 3757.457  | AA456001  | 6821.936  | 7958.326  |
| NM_004092 | 7976.435 | 6722.576 | BF540935  | 1388.875  | 1313.798  | AA451686  | 4616.648  | 5136.422  |
| X15624    | 1544.309 | 1140.142 | NM_004466 | 353.663   | 308.3     | AA934644  | 320.412   | 326.995   |
| AF073770  | 3949.7   | 4012.42  | NM_007081 | 3104.178  | 2379.199  | M87790    | 9311.371  | 9858.555  |
| AL359401  | 5779.52  | 10932.65 | AB032964  | 3053.271  | 3134.334  | NM_001768 | 2351.304  | 2935.1    |
| NM_012213 | 1975.727 | 3629.762 | BE733605  | 2579.313  | 2434.02   | NM_000029 | 6119.134  | 6915.031  |
| NM_016573 | 3401.031 | 5357.073 | NM_003334 | 18155.863 | 15395.379 | NM_000715 | 329.29    | 417.13    |
| NM_001303 | 7232.674 | 5391.104 | NM_002693 | 5427.774  | 4858.697  | AF035802  | 1190.038  | 1259.446  |
| M21304    | 549.096  | 192.374  | NM_003671 | 883.303   | 842.076   | Y08145    | 634.256   | 515.254   |
| NM_001979 | 5439.471 | 5800.627 | M20695    | 1331.423  | 1089.69   | M26123    | 350.921   | 311.939   |
| AB040896  | 1939.847 | 1908.703 | AK026000  | 3945.307  | 4171.053  | NM_001838 | 666.165   | 664.758   |
| AF084645  | 801.473  | 1877.237 | NM_017833 | 839.853   | 1277.586  | NM_019555 | 1466.001  | 1213.92   |
| AF151851  | 3209.962 | 1778.075 | NM_006675 | 4304.37   | 4208.884  | NM_012096 | 6162.345  | 4150.653  |
| NM_005176 | 316.579  | 624.278  | NM_003022 | 4974.175  | 4879.501  | NM_003905 | 18025.164 | 12447.198 |
| NM_003636 | 15087.48 | 12495.37 | NM_004873 | 3932.917  | 4089.265  | L12052    | 3441.079  | 4123.334  |
| NM_000701 | 2556.65  | 1811.639 | NM_019842 | 1010.358  | 1091.778  | AB028976  | 2115.628  | 1890.79   |
| AB022696  | 811.329  | 1567.911 | NM_002951 | 16977.338 | 22371.141 | NM_015869 | 494.285   | 554.328   |
| NM_014379 | 346.062  | 722.795  | NM_002317 | 858.401   | 957.236   | AB031038  | 3005.758  | 11972.807 |
| NM_021005 | 765.467  | 1076.328 | NM_000320 | 4142.726  | 3838.361  | NM_004626 | 599.195   | 2489.308  |
| SB        | 458.632  | 532.71   | NM_003136 | 7644.975  | 6793.951  | NM_001899 | 407.129   | 364.383   |
| NM_001523 | 684.149  | 525.864  | NM_004620 | 1277.476  | 1736.786  | NM_004305 | 23206.041 | 26627.391 |
| NM_017423 | 2290.982 | 1247.659 | AF087940  | 1883.324  | 1693.161  | NM_006089 | 5820.102  | 5433.914  |
| Z70705    | 826.071  | 821.701  | AJ277587  | 1102.228  | 1438.919  | AB033054  | 6688.496  | 8882.728  |
| NM_002611 | 2690.226 | 3657.632 | D87432    | 3223.064  | 3431.733  | NM_016122 | 828.645   | 761.712   |
| NM_017417 | 410.566  | 518.032  | AI565117  | 48947.355 | 50654.906 | AF153330  | 1000.076  | 1312.97   |
| AL133602  | 470.667  | 422.018  | AI299075  | 465.282   | 461.661   | NM_001652 | 268.444   | 216.878   |
| AF037219  | 5562.481 | 2767.398 | AB011098  | 919.432   | 772.83    | AK023749  | 425.391   | 351.121   |
| AK026075  | 2520.807 | 6494.012 | AA609759  | 1095.755  | 1078.452  | NM_002337 | 2961.9    | 2887.968  |
| NM_000251 | 5915.74  | 9343.749 | AA029418  | 6389.783  | 4149.216  | NM_013245 | 1190.866  | 1690.067  |
| NM_006038 | 2706.556 | 1618.182 | L20815    | 5310.107  | 4932.353  | NM_006423 | 16563.184 | 15886.026 |
| AB011133  | 3731.954 | 2211.935 | AI364483  | 11689.765 | 10924.134 | NM_004766 | 2221.327  | 2459.198  |
| NM_017572 | 34235.06 | 19074.47 | AA456001  | 8660.813  | 7602.737  | NM_005819 | 4919.569  | 5533.906  |
| NM_018444 | 1937.334 | 1742.011 | AA451686  | 5728.944  | 4818.606  | AK024722  | 618.5     | 945.021   |
| NM_000252 | 1643.235 | 2787.848 | NM_003822 | 1246.038  | 2108.101  | AK025520  | 2769.834  | 2158.949  |
| NM_006947 | 14245.91 | 26930.49 | NM_004412 | 5452.306  | 7298.701  | NM_004892 | 7057.582  | 7099.39   |
| NM_017917 | 5780.675 | 7095.694 | NM_002050 | 1550.726  | 1173.334  | NM_014597 | 10579.291 | 9305.13   |
| L09080    | 686.988  | 501.956  | NM_007097 | 5849.183  | 3831.992  | NM_017896 | 7299.566  | 5305.608  |

|           |          |          |           |           |           |           |           |           |
|-----------|----------|----------|-----------|-----------|-----------|-----------|-----------|-----------|
| NM_00732€ | 690.4    | 495.908  | NM_00002€ | 4764.649  | 4465.154  | AB002374  | 2901.001  | 2543.918  |
| NM_00188€ | 3742.168 | 2699.191 | NM_00071€ | 430.987   | 485.949   | U17327    | 1136.636  | 1119.859  |
| NM_00562€ | 783.414  | 1222.561 | AF035802  | 1769.347  | 1288.526  | NM_01783€ | 488.977   | 448.928   |
| NM_01805€ | 8967.278 | 10896.6  | Y08145    | 844.386   | 771.013   | NM_00667€ | 3259.069  | 3871.438  |
| NM_00454€ | 14578.82 | 35520.13 | NM_00183€ | 896.403   | 611.276   | NM_00302€ | 5197.931  | 5412.722  |
| X69079    | 10788.86 | 9972.229 | NM_01955€ | 1805.83   | 1816.676  | NM_00487€ | 3151.5    | 3635.246  |
| BI759406  | 1827.526 | 612.722  | NM_01209€ | 5027.15   | 4455.468  | NM_01984€ | 947.128   | 900.28    |
| R76099    | 846.498  | 469.951  | NM_00390€ | 14344.877 | 14469.918 | NM_002951 | 14238.979 | 15888.333 |
| S74445    | 514.295  | 590.461  | L12052    | 4742.2    | 4063.684  | NM_002317 | 1133.121  | 1209.697  |
| BI763360  | 783.243  | 1604.64  | AB028976  | 3180.343  | 5479.098  | NM_00032€ | 2306.917  | 2793.178  |
| D25538    | 3117.467 | 6069.615 | AK026337  | 539.024   | 479.027   | NM_00313€ | 7827.304  | 5538.014  |
| NM_00036€ | 4917.068 | 4150.928 | NM_01586€ | 449.219   | 414.733   | NM_01332€ | 14266.729 | 11756.261 |
| X03635    | 609.806  | 303.084  | AB031038  | 395.89    | 672.866   | NM_00079€ | 364.566   | 291.921   |
| BC011847  | 57835.98 | 44976.72 | NM_00462€ | 368.426   | 493.972   | NM_00266€ | 2921.393  | 2915.574  |
| X03348    | 1657.5   | 1578.247 | NM_00189€ | 366.653   | 490.184   | NM_01590€ | 601.629   | 482.13    |
| AF353674  | 7404.709 | 5013.002 | NM_00430€ | 34611.09  | 35134.938 | NM_00370€ | 668.349   | 637.502   |
| BC002645  | 4408.995 | 4846.049 | NM_00608€ | 6535.741  | 9137.745  | AL122071  | 770.894   | 952.753   |
| NM_021138 | 2326.234 | 3986.59  | NM_003144 | 28797.295 | 32744.682 | NM_01491€ | 26301.775 | 30394.584 |
| BC002792  | 1542.539 | 3981.383 | NM_00090€ | 606.815   | 798.325   | NM_012341 | 4163.295  | 3851.417  |
| NM_002981 | 4570.678 | 3584.761 | AB011102  | 4621.948  | 6716.841  | NM_00325€ | 14748.815 | 14819.155 |
| NM_001244 | 477.773  | 446.812  | D63480    | 1443.154  | 1630.436  | D87450    | 3233.311  | 3330.169  |
| NM_006137 | 7537.655 | 4074.547 | NM_00296€ | 1419.7    | 1165.171  | NM_017797 | 10778.332 | 12669.285 |
| NM_01613€ | 44772.58 | 30894.45 | NM_002337 | 3263.718  | 2812.609  | AK021919  | 351.162   | 359.473   |
| AL117468  | 5664.387 | 3678.497 | NM_01324€ | 2235.849  | 1013.179  | AF000562  | 3183.957  | 3117.832  |
| NM_01961€ | 10319.69 | 4461.059 | NM_00642€ | 17625.998 | 14154.597 | AK025713  | 3692.525  | 2444.895  |
| NM_00538€ | 853.208  | 839.508  | NM_00476€ | 2562.69   | 2120.64   | NM_01810€ | 816.206   | 516.433   |
| AK027086  | 8346.204 | 11728.36 | NM_00581€ | 6193.6    | 5630.7    | NM_00205€ | 1170.89   | 1105.833  |
| AB032997  | 1442.574 | 1857.012 | AK024722  | 670.958   | 872.787   | NM_007097 | 5938.434  | 5457.375  |
| AL096857  | 2956.288 | 2894.175 | AK025520  | 2620.069  | 2057.435  | D87446    | 2888.529  | 2554.373  |
| X07203    | 264.137  | 352.589  | NM_00489€ | 6880.806  | 8267.074  | BF540935  | 1256.753  | 985.385   |
| NM_003834 | 2285.105 | 4264.12  | NM_014597 | 10498.396 | 9440.891  | NM_00446€ | 508.377   | 365.174   |
| NM_00595€ | 4619.231 | 3307.601 | NM_01789€ | 8397.092  | 7293.068  | NM_007081 | 2415.037  | 1886.17   |
| NM_003381 | 773.611  | 499.1    | AB002374  | 3495.686  | 3335.312  | NM_00037€ | 203.334   | 213.469   |
| NM_00575€ | 699.925  | 520.399  | U17327    | 1346.616  | 1420.133  | AB032964  | 3127.234  | 3175.536  |
| NM_00036€ | 704.748  | 387.581  | M87790    | 12816.09  | 10937.993 | BE733605  | 3343.023  | 3445.264  |
| NM_016351 | 1063.942 | 972.82   | NM_00176€ | 3142.295  | 2516.239  | NM_003334 | 18224.055 | 18077.023 |
| NM_00440€ | 1884.611 | 1445.558 | NM_002951 | 24028.961 | 48427.801 | NM_00269€ | 5360.102  | 5102.717  |
| NM_00198€ | 2998.233 | 3169.019 | NM_002317 | 882.271   | 1822.609  | NM_003671 | 981.029   | 1037.956  |
| NM_00606€ | 2598.698 | 5426.796 | NM_00032€ | 3568.059  | 2297.725  | M20695    | 1138.059  | 1082.141  |
| NM_005667 | 4544.295 | 9891.648 | NM_00313€ | 7677.299  | 8603.058  | AK026000  | 3426.486  | 3655.074  |
| NM_00630€ | 459.249  | 1286.937 | NM_01332€ | 15931.288 | 13274.919 | NM_005814 | 990.605   | 1093.794  |
| NM_000701 | 2273.147 | 1699.502 | NM_00266€ | 4141.142  | 3175.984  | NM_01627€ | 466.317   | 570.435   |
| AB022696  | 780.794  | 621.785  | NM_01590€ | 523.011   | 595.016   | NM_000211 | 6837.749  | 7672.945  |
| AF137372  | 5110.742 | 3995.39  | NM_00370€ | 560.811   | 997.097   | AB037830  | 1022.605  | 875.01    |
| AF220417  | 2778.091 | 1980.07  | AL122071  | 950.53    | 754.828   | NM_01568€ | 2793.214  | 3043.303  |
| D83782    | 3421.397 | 5987.89  | NM_01612€ | 1046.254  | 1823.563  | NM_004357 | 12797.89  | 17120.793 |
| NM_00207€ | 3080.585 | 3581.592 | AF153330  | 1279.338  | 1297.468  | X03324    | 3266.661  | 3502.93   |
| NM_000287 | 1720.267 | 2097.244 | NM_00165€ | 201.003   | 528.771   | AF130988  | 623.797   | 792.386   |
| NM_00165€ | 1717.642 | 1433.789 | NM_00382€ | 1039.416  | 1133.57   | NM_014934 | 487.522   | 343.047   |
| AF091033  | 493.431  | 405.26   | NM_00441€ | 5677.942  | 6326.907  | NM_01538€ | 390.948   | 257.204   |
| NM_001122 | 3896.274 | 6537.246 | NM_00205€ | 1393.796  | 1225.209  | NM_00369€ | 4202.878  | 2742.583  |
| NM_004591 | 689.537  | 1444.373 | NM_007097 | 6990.741  | 6029.572  | NM_00087€ | 3590.314  | 3458.608  |
| AL133027  | 1218.755 | 611.426  | D87446    | 4037.889  | 3298.098  | NM_014214 | 2301.7    | 2278.384  |



|           |          |          |           |           |           |           |           |           |
|-----------|----------|----------|-----------|-----------|-----------|-----------|-----------|-----------|
| AB037732  | 1302.083 | 1706.698 | BF540935  | 1275.951  | 1003.645  | NM_000856 | 359.705   | 499.56    |
| NM_005767 | 806.955  | 656.736  | NM_004466 | 455.807   | 388.316   | NM_005232 | 305.555   | 585.397   |
| NM_001837 | 642.074  | 473.927  | NM_007081 | 2836.907  | 2717.313  | NM_002752 | 2472.051  | 2457.048  |
| NM_001839 | 57706.09 | 46293.95 | AB032964  | 3253.277  | 3802.956  | NM_013281 | 607.508   | 632.279   |
| BC016029  | 947.073  | 799.872  | BE733605  | 3027.716  | 3922.382  | Y11306    | 1017.746  | 599.507   |
| M27487    | 533.344  | 937.294  | NM_003334 | 21364.563 | 18534.674 | NM_016112 | 456.243   | 314.18    |
| NM_002286 | 37530.26 | 54224.57 | NM_002693 | 5955.797  | 6889.682  | X85106    | 1213.119  | 1388.613  |
| NM_002164 | 1355.358 | 2883.151 | NM_003671 | 1146.868  | 1153.344  | NM_003931 | 1913.026  | 1625.135  |
| NM_003811 | 3536.826 | 7962.863 | M20695    | 1413.852  | 1050.425  | NM_006681 | 249.03    | 319.668   |
| AB011133  | 4102.854 | 3656.393 | AK026000  | 4090.329  | 4288.444  | AF250226  | 13184.403 | 11673.414 |
| NM_017572 | 30873.42 | 16238.36 | NM_006675 | 4523.433  | 4706.816  | AL157475  | 3530.095  | 4348.772  |
| NM_018444 | 2096.062 | 1692.712 | NM_003022 | 5369.919  | 6227.504  | NM_006069 | 13953.941 | 17513.607 |
| NM_000252 | 1379.896 | 1358.743 | NM_004873 | 3642.573  | 3666.094  | NM_006534 | 3038.326  | 3825.465  |
| NM_006947 | 10553.46 | 7919.406 | NM_019842 | 879.418   | 949.424   | NM_017601 | 1597.696  | 1576.165  |
| NM_017917 | 3579.668 | 1377.167 | NM_003144 | 28846.979 | 24445.227 | AF110265  | 7869.221  | 7857.054  |
| NM_004090 | 5625.522 | 4483.571 | NM_000908 | 469.864   | 493.881   | AF272371  | 49157.816 | 58239.305 |
| NM_014634 | 5866.852 | 3546.187 | AB011102  | 4920.38   | 6386.923  | AK021848  | 1559.19   | 1654.784  |
| NM_001919 | 1080.459 | 799.912  | D63480    | 1302.45   | 1418.587  | NM_003704 | 1371.396  | 1378.453  |
| BC031485  | 2242.552 | 3653.919 | NM_002969 | 1338.589  | 1289.321  | AK023140  | 773.185   | 666.057   |
| NM_004092 | 8989.855 | 7097.914 | NM_004620 | 983.047   | 965.493   | AF084362  | 517.703   | 506.915   |
| X15624    | 1691.722 | 1478.234 | AF087940  | 1887.759  | 2106.244  | NM_001553 | 963.158   | 962.698   |
| AF073770  | 4305.217 | 3927.585 | AJ277587  | 770.637   | 772.965   | NM_014173 | 12160.954 | 12664.876 |
| AL359401  | 6403.405 | 13008.73 | D87432    | 3139.247  | 3078.811  | NM_001731 | 12288.081 | 9322.794  |
| NM_012213 | 1559.87  | 1894.245 | AI565117  | 47527.5   | 59195.734 | AL137506  | 612.433   | 523.076   |
| NM_016573 | 2342.565 | 1404.649 | AI299075  | 629.2     | 747.419   | AK022961  | 2178.581  | 2091.409  |
| NM_001303 | 7122.958 | 4590.392 | M59979    | 487.499   | 498.465   | NM_007375 | 4594.764  | 4406.235  |
| M21304    | 672.661  | 575.64   | AB011098  | 1232.817  | 1118.871  | NM_014371 | 3731.079  | 3115.079  |
| NM_001979 | 5152.501 | 3836.49  | AA609759  | 1332.963  | 1464.106  | AF290512  | 1819.962  | 1641.394  |
| AB040896  | 1571.959 | 1101.47  | AA029418  | 7115.166  | 4216.685  | NM_006716 | 6417.186  | 5708.296  |
| NM_001107 | 7202.688 | 4868.269 | L20815    | 4984.614  | 3898.319  | AB002323  | 3192.947  | 2861.376  |
| AF151851  | 4585.803 | 9264.022 | AI364483  | 8108.629  | 5764.036  | AK022241  | 5769.745  | 6063.423  |
| NM_005176 | 672.141  | 1297.298 | AA456001  | 8381.056  | 7802.216  | AK022587  | 3128.552  | 3250.313  |
| AF040723  | 1358.338 | 1326.913 | AA451686  | 5116.189  | 4765.399  | NM_005723 | 1369.186  | 1480.573  |
| NM_015527 | 5505.088 | 4721.909 | M87790    | 10283.05  | 7462.701  | NM_020185 | 3405.329  | 3657.614  |
| X89675    | 409.331  | 393.567  | NM_001768 | 3450.754  | 2830.184  | NM_002832 | 26953.508 | 26848.023 |
| NM_012189 | 411.293  | 283.495  | NM_000029 | 4273.228  | 3600.363  | NM_017732 | 5003.566  | 5633.741  |
| NM_005798 | 8868.96  | 5766.146 | AF035802  | 1748.433  | 1555.422  | NM_002851 | 2103.439  | 2204.262  |
| NM_004216 | 2822.977 | 1949.589 | Y08145    | 1023.949  | 796.611   | NM_005339 | 14795.577 | 11888.162 |
| NM_016289 | 11681.56 | 6563.009 | M26123    | 490.221   | 404.83    | NM_001906 | 4013.652  | 3124.999  |
| NM_001464 | 1154.424 | 789.322  | NM_001838 | 844.04    | 652.87    | NM_004142 | 463.794   | 401.365   |
| NM_002051 | 4251.607 | 5084.339 | NM_019555 | 1674.876  | 1808.314  | AF108138  | 2398.84   | 2045.511  |
| NM_001523 | 884.104  | 936.269  | NM_012096 | 6176.279  | 6120.61   | BF340302  | 2011.01   | 1876.907  |
| NM_017423 | 2400.296 | 865.295  | NM_003905 | 15624.292 | 21606.018 | AK024210  | 1068.888  | 770.234   |
| Z70705    | 856.756  | 674.248  | L12052    | 4461.246  | 3584.226  | NM_002276 | 1350.479  | 1137.026  |
| NM_002611 | 3154.105 | 4773.939 | AB028976  | 3759.688  | 5574.681  | AL133087  | 1605.991  | 1461.337  |
| NM_017417 | 344.975  | 351.017  | AK026337  | 740.788   | 868.499   | NM_018010 | 1604.812  | 1616.244  |
| AF037219  | 5605.809 | 2955.011 | NM_015869 | 656.744   | 567.486   | NM_002274 | 6638.567  | 7604.613  |
| AK026075  | 1404.174 | 1423.38  | NM_004626 | 404.414   | 503.752   | AL080200  | 329.854   | 219.672   |
| NM_000251 | 3489.365 | 2197.61  | NM_001899 | 463.308   | 930.601   | BF337874  | 1686.614  | 1731.97   |
| U87223    | 946.068  | 727.355  | NM_004305 | 23672.787 | 20738.656 | NM_003475 | 9572.821  | 11539.482 |
| NM_000093 | 556.799  | 358.904  | NM_006089 | 5724.812  | 6719.912  | NM_000243 | 3435.98   | 3805.443  |
| NM_001779 | 3262.496 | 2174.524 | AB033054  | 12361.434 | 10227.67  | NM_012256 | 8415.488  | 10016.467 |
| AB033059  | 556.573  | 557.519  | NM_016122 | 947.04    | 1288.343  | NM_006006 | 295.707   | 318.992   |

|           |          |          |           |           |           |           |           |           |
|-----------|----------|----------|-----------|-----------|-----------|-----------|-----------|-----------|
| NM_016484 | 5523.561 | 3695.932 | AF153330  | 1407.993  | 1233.433  | NM_016325 | 2056.162  | 2776.931  |
| NM_014452 | 1653.789 | 1309.456 | AK023749  | 352.785   | 408.522   | NM_001604 | 1435.966  | 1139.652  |
| AK021536  | 10738.27 | 9203.854 | NM_002337 | 3859.933  | 4986.036  | NM_017656 | 1446.873  | 1546.465  |
| U31285    | 477.335  | 429.188  | NM_013245 | 2163.324  | 1344.981  | X16282    | 6534.794  | 7035.288  |
| NM_002600 | 442.209  | 521.04   | NM_006423 | 22680.119 | 25208.803 | AK022519  | 228.497   | 342.465   |
| NM_003646 | 16087.29 | 26877.84 | NM_004766 | 2975.147  | 2842.376  | NM_014415 | 2592.817  | 2069.901  |
| NM_006663 | 2081.874 | 3438.757 | NM_005819 | 7172.62   | 7631.654  | S75264    | 6939.069  | 5525.076  |
| NM_006092 | 1105.442 | 641.426  | AK024722  | 857.917   | 915.043   | AF027513  | 1158.257  | 862.029   |
| NM_003939 | 800.107  | 700.337  | AK025520  | 3248.021  | 2274.235  | NM_001379 | 2254.664  | 1938.095  |
| NM_012424 | 1113.311 | 735.948  | NM_004892 | 7286.417  | 8399.265  | NM_018664 | 2850.41   | 4261.734  |
| NM_002446 | 976.206  | 900.164  | NM_014597 | 10673.053 | 10221.872 | NM_005034 | 975.248   | 655.063   |
| NM_000863 | 1035.214 | 1125.692 | NM_017896 | 7943.455  | 6417.418  | NM_003926 | 5194.33   | 3375.211  |
| NM_006651 | 2963.945 | 5098.732 | AB002374  | 3063.595  | 2934.757  | AF085356  | 662.889   | 761.162   |
| NM_005336 | 10609.13 | 17042.05 | U17327    | 1135.29   | 900.221   | NM_016047 | 23282.979 | 19373.305 |
| AF119817  | 6166.284 | 13911.36 | NM_017833 | 696.807   | 1011.287  | NM_001499 | 5782.79   | 5656.809  |
| AL035306  | 3643.785 | 6363.063 | NM_006675 | 4193.469  | 3724.47   | NM_014763 | 9619.885  | 7574.951  |
| NM_001328 | 8426.697 | 8399.224 | NM_003022 | 6663.522  | 7800.772  | AK026261  | 279.756   | 387.663   |
| NM_005749 | 3460.183 | 2523.458 | NM_004873 | 3669.799  | 2893.118  | AF086534  | 534.863   | 707.784   |
| NM_004230 | 1120.814 | 877.578  | NM_019842 | 960.021   | 993.318   | AF070617  | 2276.656  | 819.883   |
| NM_014503 | 1073.131 | 646.382  | NM_002951 | 14533.988 | 15268.531 | NM_014918 | 3976.844  | 3600.065  |
| NM_014659 | 1294.26  | 1052.015 | NM_002317 | 605.685   | 691.08    | NM_003654 | 318.151   | 487.642   |
| NM_004399 | 4472.233 | 3302.62  | NM_000320 | 3259.618  | 2017.864  | NM_000152 | 4937.04   | 5228.067  |
| NM_006337 | 5829.16  | 4164.418 | NM_003136 | 8229.452  | 8496.844  | D17222    | 8389.099  | 9433.693  |
| NM_004507 | 4688.884 | 1779.992 | NM_013328 | 16067.016 | 15578.055 | NM_000154 | 1731.755  | 1751.737  |
| NM_002710 | 14016.59 | 8696.383 | NM_002660 | 4547.054  | 5099.792  | NM_006213 | 311.34    | 296.088   |
| NM_014060 | 6557.127 | 4853.039 | NM_015900 | 933.67    | 1031.086  | NM_003549 | 374.808   | 477.06    |
| NM_004749 | 6362.333 | 4234.577 | NM_003706 | 823.654   | 1196.347  | NM_000671 | 3089.254  | 2483.989  |
| BQ446064  | 2052.074 | 1772.768 | AL122071  | 889.484   | 544.888   | NM_006297 | 7481.703  | 6674.746  |
| AF302502  | 8583.099 | 5570.832 | NM_014913 | 41374.371 | 49752.746 | AF318366  | 3752.962  | 3956.978  |
| AF274571  | 2377.699 | 3930.91  | NM_012341 | 4548.162  | 5013.374  | AF182423  | 1518.745  | 728.976   |
| NM_005449 | 1766.012 | 1044.866 | NM_003256 | 15818.712 | 14941.728 | D26018    | 3709.036  | 2432.246  |
| NM_003879 | 2452.713 | 2276.765 | D87450    | 4199.645  | 3961.19   | AB037863  | 639.305   | 745.665   |
| NM_016052 | 5972.858 | 2350.032 | NM_017797 | 12858.97  | 10615.316 | BC000363  | 968.705   | 901.353   |
| NM_006718 | 1120.769 | 1265.638 | AF000562  | 3153.037  | 3752.293  | NM_007237 | 2348.722  | 2062.962  |
| NM_005427 | 944.797  | 849.036  | AK025713  | 3447.969  | 3986.65   | NM_004608 | 839.419   | 741.117   |
| NM_016312 | 1046.883 | 1906.084 | NM_018100 | 714.659   | 1078.485  | NM_018257 | 3578.043  | 2867.951  |
| NM_001792 | 149.971  | 940.272  | NM_002050 | 1602.16   | 1247.325  | NM_005919 | 2429.537  | 1911.612  |
| NM_001903 | 12068.54 | 27109.06 | NM_007097 | 7458.96   | 5730.959  | AF085931  | 1913.805  | 2635.959  |
| NM_005857 | 3907.48  | 3044.757 | D87446    | 4188.508  | 4398.303  | AF086112  | 412.204   | 610.41    |
| NM_002429 | 404.62   | 197.235  | BF540935  | 1492.119  | 1759.517  | AL137254  | 1288.279  | 1349.51   |
| NM_000429 | 1264.828 | 853.916  | NM_004466 | 851.404   | 2117.795  | AK026359  | 733.079   | 880.016   |
| AK027037  | 924.924  | 726.015  | NM_007081 | 3080.002  | 5123.691  | AF085884  | 1272.375  | 1242      |
| NM_003875 | 10904.34 | 7703.547 | AB032964  | 3483.851  | 4076.787  | S81522    | 3161.801  | 2794.949  |
| AF191687  | 1852.521 | 1236.39  | BE733605  | 3573.516  | 4310.813  | AF075070  | 289.931   | 215.853   |
| NM_003046 | 649.353  | 391.245  | NM_003334 | 26988.303 | 24310.639 | S94541    | 590.806   | 537.371   |
| NM_000274 | 9248.276 | 6193.406 | NM_002693 | 6456.829  | 6969.166  | AK024228  | 1459.488  | 1437.942  |
| NM_000170 | 1161.021 | 1396.722 | NM_003671 | 1192.279  | 1229.434  | NM_016647 | 1326.674  | 1393.837  |
| NM_000281 | 11267.83 | 8197.844 | M20695    | 1330.528  | 946.427   | AK024695  | 1299.123  | 1144.064  |
| AK001295  | 508.885  | 549.626  | AK026000  | 3370.254  | 1959.716  | NM_018659 | 363.724   | 630.84    |
| NM_006031 | 3287.482 | 1584.828 | NM_005814 | 1512.481  | 2917.557  | AF038174  | 2593.865  | 2615.995  |
| NM_002715 | 5691.559 | 4648.762 | NM_016279 | 873.911   | 1640.929  | NM_013243 | 422.434   | 299.001   |
| NM_001020 | 66568.23 | 56414.94 | NM_000211 | 9716.656  | 19471.867 | AF070632  | 323.081   | 394.68    |
| AB020660  | 4080.022 | 6075.375 | AB037830  | 1400.657  | 3521.212  | AF161359  | 1790.696  | 1465.58   |

|           |          |          |           |           |           |           |           |           |
|-----------|----------|----------|-----------|-----------|-----------|-----------|-----------|-----------|
| NM_006659 | 8855.603 | 19271.64 | NM_015685 | 3960.965  | 8177.833  | AL365520  | 1525.924  | 1361.189  |
| NM_015371 | 1868.148 | 2901.687 | X03324    | 4033.225  | 8263.846  | AL359338  | 556.526   | 447.585   |
| AB040915  | 2606.675 | 4079.12  | AF130988  | 893.298   | 1771.077  | AK023623  | 1337.514  | 1031.019  |
| AF147791  | 374.301  | 788.529  | NM_014934 | 837.616   | 1656.01   | AK021539  | 4623.29   | 5392.301  |
| NM_006481 | 1974.017 | 1383.618 | NM_003690 | 5654.624  | 11164.021 | AK021819  | 438.398   | 344.154   |
| AB011115  | 940.448  | 650.317  | NM_000876 | 6488.803  | 8612.974  | AK026738  | 1178.056  | 1617.741  |
| NM_003910 | 20874.87 | 11445.06 | NM_014214 | 4724.586  | 6401.63   | AK025011  | 827.676   | 908.341   |
| NM_006696 | 4375.357 | 3019.549 | NM_000856 | 828.084   | 1047.143  | AL157491  | 934.822   | 942.681   |
| NM_004599 | 7170.801 | 5856.274 | NM_005232 | 1222.475  | 852.224   | NM_005266 | 1512.612  | 1323.958  |
| NM_006037 | 7082.562 | 5171.174 | NM_002752 | 4070.004  | 6259.526  | AF087965  | 357.447   | 446.234   |
| NM_015871 | 4554.885 | 4353.308 | NM_013281 | 1125.165  | 2214.007  | AF085998  | 1031.772  | 855.604   |
| NM_019037 | 3268.759 | 2838.507 | Y11306    | 1281.697  | 1588.221  | X68742    | 391.271   | 303.568   |
| NM_015891 | 4816.588 | 2563.562 | NM_016112 | 502.151   | 767.627   | AB007977  | 4206.459  | 4736.422  |
| NM_006802 | 870.74   | 435.707  | X85106    | 1911.261  | 2084.617  | NM_014221 | 4535.795  | 3685.269  |
| NM_005066 | 19576.21 | 17894.48 | NM_003931 | 2288.436  | 2899.748  | U58663    | 271.668   | 271.333   |
| NM_003089 | 6755.799 | 3060.43  | NM_012479 | 20976.904 | 17246.18  | U84515    | 1213.318  | 1245.919  |
| NM_003753 | 14826.01 | 7690.244 | AF250226  | 13109.361 | 9728.399  | AF086143  | 4999.647  | 3819.475  |
| NM_006223 | 739.436  | 527.778  | AL157475  | 2552.694  | 3133.635  | AK022239  | 292.884   | 277.382   |
| NM_017590 | 2864.423 | 3852.962 | NM_006069 | 17267.633 | 15326.616 | AK022364  | 451.509   | 462.844   |
| AB011145  | 7667.438 | 11826.05 | NM_006534 | 3336.341  | 3104.112  | AK024674  | 443.72    | 576.051   |
| M92422    | 4565.295 | 6572.477 | NM_017601 | 1442.725  | 1166.752  | AK024244  | 2147.596  | 2027.462  |
| NM_017868 | 1760.777 | 3225.071 | AF110265  | 8795.415  | 6702.088  | AK023812  | 356.975   | 529.568   |
| AK021888  | 1041.823 | 691.115  | AK021848  | 1557.099  | 1896.629  | AL390084  | 1120.36   | 1301.084  |
| AK022848  | 1217.619 | 684.075  | NM_003704 | 1656.003  | 2260.529  | AK023565  | 445.167   | 695.899   |
| AL049957  | 1193.061 | 690.99   | AK023140  | 1451.468  | 1956.072  | NM_003835 | 1381.927  | 1218.341  |
| NM_018159 | 6994.7   | 6148.761 | AF084362  | 1137.925  | 1435.156  | AK000245  | 677.667   | 855.089   |
| NM_000819 | 5088.094 | 3168.406 | NM_001553 | 2200.353  | 2653.85   | AF118072  | 783.461   | 693.524   |
| NM_002513 | 2874.232 | 1912.734 | NM_014173 | 24337.221 | 26653.277 | AK023724  | 259.978   | 332.882   |
| NM_017424 | 6271.249 | 4064.151 | NM_001731 | 20536.404 | 36147.543 | AK026195  | 279.989   | 135.952   |
| NM_001522 | 6051.475 | 4335.922 | AL137506  | 1576.479  | 2612.838  | AK022420  | 1657.256  | 1505.422  |
| NM_000883 | 7221.827 | 2842.795 | AK022961  | 4377.035  | 7665.932  | AK023254  | 480.333   | 363.354   |
| AF254086  | 1542.241 | 1579.018 | NM_007375 | 8786.878  | 15828.873 | AK023945  | 12052.988 | 9956.46   |
| AL390142  | 807.79   | 516.23   | NM_014371 | 6240.489  | 13227.325 | AK022446  | 496.618   | 448.572   |
| NM_006565 | 3834.117 | 2188.073 | AF290512  | 4571.439  | 7328.819  | AK023773  | 620.752   | 519.655   |
| AB007930  | 5154.773 | 4608.949 | NM_006716 | 11135.122 | 18129.523 | AF116709  | 840.475   | 980.727   |
| AJ005273  | 3261.946 | 1804.198 | AB002323  | 4889.069  | 8615.145  | AK025533  | 1292.758  | 1399.956  |
| AK021892  | 2148.879 | 1545.78  | AK022241  | 10061.351 | 12953.21  | AK026499  | 363.651   | 409.578   |
| NM_017637 | 394.749  | 610.182  | AK022587  | 5536.593  | 8409.025  | AK021911  | 6440.36   | 8269.601  |
| NM_003121 | 576.846  | 959.896  | NM_005506 | 3776.816  | 5585.542  | D17225    | 1200.617  | 2624.626  |
| NM_003437 | 1649.592 | 2833.269 | NM_020185 | 3198.658  | 3841.702  | AF147430  | 344.353   | 628.809   |
| AA193295  | 15792.16 | 19417.27 | NM_002832 | 32451.447 | 19022.18  | U35875    | 10506.356 | 11161.252 |
| NM_018045 | 6508.794 | 10210.31 | NM_017732 | 3948.183  | 2812.42   | AK021857  | 13830.965 | 12871.834 |
| NM_014803 | 2511.606 | 1371.396 | NM_002851 | 1640.825  | 1235.587  | AK022257  | 1301.109  | 1364.631  |
| AK024956  | 344.379  | 77.804   | NM_005339 | 13983.629 | 8865.084  | BE887356  | 25691.871 | 21547.609 |
| AF147386  | 549.441  | 439.018  | NM_001906 | 3013.056  | 2447.942  | X84369    | 881.983   | 920.382   |
| AF273052  | 6400.083 | 5462.633 | NM_004142 | 575.873   | 682.405   | AK023329  | 6598.989  | 6791.59   |
| NM_017943 | 9409.187 | 5522.139 | AF108138  | 2858.544  | 3626.991  | AK021773  | 1708.118  | 1591.662  |
| AK025682  | 687.013  | 654.996  | BF340302  | 2762.106  | 3542.798  | AK027074  | 1708.379  | 1194.41   |
| NM_013352 | 633.665  | 363.591  | AK024210  | 1646.103  | 2304.43   | AL365456  | 488.396   | 428.879   |
| NM_016478 | 4875.775 | 2587.292 | NM_002276 | 2228.223  | 3133.741  | NM_018036 | 585.668   | 566.663   |
| AL389986  | 8656.95  | 4879.607 | AL133087  | 3028.89   | 4545.341  | AK025048  | 312.285   | 381.828   |
| AF088052  | 1192.326 | 1262.745 | NM_018010 | 2556.022  | 3236.614  | U84522    | 3027.828  | 3615.1    |
| AF086342  | 337.725  | 438.815  | NM_002274 | 9442.78   | 10303.404 | AK021694  | 1346.631  | 1395.466  |

|           |          |          |           |           |           |            |           |           |
|-----------|----------|----------|-----------|-----------|-----------|------------|-----------|-----------|
| AF086387  | 818.764  | 1128.134 | AL080200  | 670.691   | 1128.138  | AF086013   | 569.731   | 805.859   |
| AF086443  | 464.028  | 1009.241 | BF337874  | 3178.438  | 4826.232  | U84505     | 2336.143  | 2584.458  |
| AB037756  | 2371.004 | 4037.019 | NM_003475 | 19445.031 | 21623.9   | X81005     | 1479.135  | 1871.999  |
| AK001853  | 4834.095 | 7425.688 | NM_012256 | 8381.939  | 5685.505  | NM_012352  | 838.859   | 646.424   |
| AK025071  | 808.205  | 2467.055 | NM_006006 | 393.375   | 416.696   | AL049430   | 1682.508  | 1490.789  |
| NM_01537C | 617.254  | 550.025  | NM_016325 | 1866.315  | 1434.153  | AK021461   | 339.845   | 260.799   |
| AF085917  | 644.396  | 888.39   | NM_001604 | 1579.097  | 1035.3    | AB015349   | 399.762   | 380.766   |
| AF085989  | 696.182  | 594.944  | NM_017656 | 1464.564  | 1149.279  | AL079274   | 11761.239 | 12612.069 |
| AL360139  | 18755.46 | 12819.85 | X16282    | 7880.784  | 5164.803  | AL137398   | 941.305   | 844.807   |
| AF075110  | 14982.52 | 7979.555 | NM_014415 | 2792.907  | 1921.29   | Y12021     | 1961.18   | 3692.29   |
| AL137323  | 679.952  | 449.238  | S75264    | 8501.744  | 6225.893  | BC016172   | 1177.941  | 2760.355  |
| AL137494  | 3552.741 | 2854.793 | AF027513  | 1190.517  | 1228.636  | AF127771   | 1396.425  | 2671.941  |
| AL162037  | 4342.372 | 3109.532 | NM_001375 | 2435.754  | 2206.586  | NM_01330C  | 14320.696 | 13344.754 |
| AL390150  | 1152.939 | 852.657  | NM_018664 | 5075.01   | 2543.679  | AK026039   | 6061.839  | 6403.436  |
| NM_002761 | 416.606  | 316.377  | NM_005034 | 954.485   | 1090.066  | AF108756   | 10019.742 | 9890.075  |
| AF086063  | 691.821  | 282.704  | NM_003926 | 7916.839  | 8076.595  | NM_004075  | 3939.499  | 5642.843  |
| AF086098  | 929.203  | 564.225  | AF085356  | 876.43    | 846.997   | NM_001887  | 3545.018  | 5217.922  |
| AF086076  | 966.928  | 1303.667 | NM_016047 | 24748.814 | 23262.539 | NM_006533  | 2777.563  | 3404.861  |
| AL833393  | 4965.547 | 4506.415 | NM_001495 | 5522.459  | 5212.163  | AK026747   | 5187.588  | 7579.226  |
| AF088005  | 958.084  | 2219.415 | BF030165  | 8809.415  | 8539.484  | AL110150   | 3503.134  | 4759.741  |
| AL390132  | 867.506  | 1315.688 | NM_016732 | 15724.935 | 11528.054 | NM_001996  | 6507.277  | 7688.14   |
| NM_017933 | 460.297  | 728.354  | AF086534  | 592.472   | 632.985   | X87825     | 3559.207  | 4768.824  |
| NM_017815 | 12952.8  | 14388.45 | AF070617  | 858.058   | 2090.653  | D17215     | 4195.136  | 4037.918  |
| AK024653  | 3364.483 | 2819.208 | NM_014918 | 5517.482  | 3503.162  | BE781513   | 742.642   | 571       |
| AF103907  | 566.279  | 503.821  | NM_000152 | 4998.582  | 4185.238  | NM_015714  | 14565.252 | 15336.941 |
| AF161351  | 703.516  | 600.728  | D17222    | 9748.943  | 6967.537  | AK075564   | 909.737   | 845.997   |
| AF151530  | 500.445  | 363.838  | NM_000154 | 2689.612  | 1745.878  | AK026219   | 1224.511  | 1099.521  |
| AK021991  | 470.023  | 457.149  | NM_003545 | 442.32    | 382.456   | D28446     | 882.032   | 941.785   |
| AK022093  | 638.035  | 720.592  | NM_000671 | 2958.459  | 3468.225  | AK024756   | 3008.435  | 2316.762  |
| AK022376  | 424.51   | 348.47   | NM_006297 | 12135.506 | 10108.563 | NM_017911  | 2011.084  | 1877.986  |
| AK022272  | 442.399  | 380.201  | X85325    | 52912.113 | 42201.582 | AJ224168   | 2323.22   | 2682.563  |
| AK027155  | 1096.984 | 681.529  | AF318366  | 4110.798  | 3988.254  | S69873     | 1048.558  | 1136.848  |
| AF221846  | 288.064  | 286.979  | AF182423  | 1259.364  | 3011.679  | NM_018497  | 634.616   | 534.447   |
| AF264626  | 457.196  | 737.848  | D26018    | 3781.552  | 5018.385  | AK023584   | 549.963   | 495.753   |
| AK023757  | 143.985  | 499.865  | AB037863  | 750.846   | 733.86    | NM_003774  | 515.037   | 363.079   |
| AK024528  | 2587.113 | 3326.528 | BC000363  | 661.883   | 695.92    | D87466     | 5527.453  | 5781.851  |
| AL049311  | 499.194  | 296.023  | NM_007237 | 2159.581  | 2280.697  | CY3Cy5     | 1496.867  | 130.33    |
| AK023367  | 1385.862 | 923.592  | AF085931  | 2334.626  | 1876.814  | AA608568   | 7684.713  | 6168.204  |
| AL080209  | 2112.804 | 1536.184 | AF086112  | 318.71    | 280.697   | BG831301   | 17950.369 | 18284.332 |
| NM_016255 | 1699.011 | 1008.113 | AL137254  | 1314.286  | 893.9     | AA478647   | 6369.949  | 6565.048  |
| NM_014318 | 1669.638 | 1286.874 | AK026359  | 1042.304  | 888.008   | ID 2623896 | 1137.134  | 1032.434  |
| AK021962  | 286.139  | 405.367  | AF085884  | 1268.392  | 1124.197  | ID 2602214 | 2062.312  | 2248.079  |
| AK056674  | 1635.878 | 2470.381 | S81522    | 3242.64   | 2538.175  | ID 2071279 | 7713.884  | 6034.399  |
| AK022042  | 803.128  | 1321.789 | AF075070  | 303.177   | 297.039   | L10709     | 5148.096  | 7391.846  |
| AL117588  | 798.923  | 1008.193 | S94541    | 959.601   | 995.811   | N35489     | 591.929   | 519.417   |
| AK021569  | 222.997  | 399.095  | L36587    | 19770.434 | 18557.686 | AI928195   | 704.756   | 658.181   |
| NM_017705 | 468.551  | 293.625  | AK024228  | 1950.805  | 1888.261  | AA458922   | 1554.995  | 2008.737  |
| BE895529  | 1697.648 | 1308.406 | NM_016647 | 2454.791  | 2165.494  | NM_145655  | 1133.466  | 1017.903  |
| AK000964  | 684.125  | 535.366  | AK024695  | 1246.026  | 1444.673  | NM_021957  | 298.626   | 418.361   |
| AL117536  | 2787.531 | 2181.979 | AF038174  | 3213.303  | 3626.194  | SR2        | 51477.676 | 24240.807 |
| NM_017751 | 6357.018 | 4881.794 | NM_013243 | 436.662   | 528.721   | SR4        | 11271.969 | 6051.829  |
| NM_003771 | 833.705  | 566.707  | AF070632  | 399.314   | 290.067   | SR6        | 2236.524  | 909.103   |
| NM_01786C | 485.884  | 391.765  | AF161359  | 1928.015  | 1548.452  | SR8        | 7574.11   | 14185.193 |

|           |          |          |           |           |           |           |           |           |
|-----------|----------|----------|-----------|-----------|-----------|-----------|-----------|-----------|
| X91195    | 37898.65 | 29914.21 | AK026202  | 346.885   | 243.116   | SR10      | 25972.885 | 5995.191  |
| AF086190  | 465.33   | 418.613  | AK021539  | 3874.293  | 2334.841  | CY3Cy5    | 1460.975  | 124.787   |
| NM_006143 | 221.441  | 340.765  | AK021819  | 564.32    | 338.524   | NM_017729 | 1101.235  | 955.223   |
| AL050035  | 1403.708 | 936.205  | AK026738  | 1635.541  | 1528.71   | NM_005259 | 2046.867  | 1935.922  |
| AK024449  | 489.456  | 527.84   | AK025011  | 584.624   | 672.784   | NM_002840 | 630.318   | 508.813   |
| AL357201  | 387.284  | 386.778  | AL157491  | 720.624   | 743.386   | NM_006174 | 700.788   | 746.442   |
| AF279780  | 32487.7  | 21630.73 | NM_005266 | 1600.085  | 1002.824  | NM_015850 | 2652.477  | 3768.671  |
| AK022510  | 2018.417 | 1246.127 | AF087965  | 518.227   | 524.653   | NM_004864 | 366.426   | 312.033   |
| L37717    | 295.167  | 587.122  | AF085998  | 1169.664  | 904.862   | NM_002838 | 9167.817  | 13701.113 |
| AJ131609  | 1493.064 | 2125.048 | AK024681  | 690.256   | 447.064   | NM_014686 | 50654.082 | 52138.703 |
| BC019280  | 3231.871 | 6134.91  | X68742    | 274.228   | 567.253   | BF528358  | 1259.296  | 957.277   |
| AK000687  | 778.876  | 1149.114 | AF085990  | 362.428   | 332.57    | NM_016339 | 631.689   | 733.072   |
| L77565    | 368.186  | 665.781  | NM_014907 | 16375.251 | 15881.382 | NM_002487 | 5124.374  | 5840.466  |
| AF079567  | 2576.239 | 2738.424 | AB007977  | 6790.254  | 6250.405  | NM_013340 | 306.533   | 534.642   |
| AK022177  | 1314.548 | 1396.759 | NM_014221 | 4865.731  | 4888.968  | NM_005462 | 588.697   | 401.761   |
| AK023852  | 857.176  | 643.342  | U84515    | 1334.188  | 1579.528  | NM_012319 | 2156.989  | 1714.191  |
| AF086466  | 652.74   | 474.382  | AK022364  | 346.16    | 293.243   | NM_006510 | 4978.464  | 5370.257  |
| AB007962  | 1273.337 | 1117.971 | AK024674  | 458.461   | 147.334   | NM_003141 | 1511.675  | 1339.541  |
| AF005081  | 989.691  | 712.023  | AK024244  | 1973.298  | 1408.351  | NM_020245 | 1432.036  | 1183.171  |
| AK026438  | 584.429  | 631.319  | AK023812  | 603.301   | 420.447   | NM_007175 | 885.131   | 814.705   |
| AK021546  | 766.098  | 419.639  | AL390084  | 1138.275  | 996.661   | AB046381  | 784.876   | 454.201   |
| AL050186  | 19392.52 | 9634.449 | AK023565  | 443.195   | 496.653   | AJ011497  | 1206.478  | 1063.49   |
| AK021918  | 3900.785 | 3284.892 | AK021479  | 810.903   | 657.429   | NM_000336 | 803.003   | 1132.004  |
| AK021669  | 2077.159 | 2223.374 | NM_003835 | 1275.422  | 1274.339  | AF215923  | 4833.34   | 4905.087  |
| AL080113  | 25847.76 | 10846.59 | AK000245  | 1371.87   | 989.056   | U66621    | 5664.03   | 7048.777  |
| AL050083  | 919.213  | 853.244  | AF118072  | 941.51    | 423.912   | NM_005720 | 12670.999 | 10601.951 |
| AK022766  | 498.408  | 461.736  | AK024112  | 356.806   | 233.905   | AB040936  | 592.318   | 395.161   |
| AL049422  | 6877.325 | 3880.443 | AF085900  | 12162.763 | 8221.563  | U61736    | 395.117   | 519.035   |
| AK023526  | 1707.972 | 1771.224 | AK022420  | 1122.559  | 1125.923  | AJ132086  | 700.524   | 944.773   |
| BE266129  | 689.926  | 404.365  | AK023254  | 587.571   | 704.087   | U92816    | 6766.364  | 9937.425  |
| X66227    | 254.955  | 348.737  | AK023945  | 11528.581 | 10273.08  | BC011987  | 6668.274  | 5813.674  |
| AK025602  | 13584.27 | 14039.33 | AK022446  | 618.281   | 467.03    | NM_004106 | 887.642   | 880.091   |
| AK026309  | 5700.078 | 7124.591 | AK023352  | 714.522   | 829.475   | NM_003485 | 2487.703  | 2534.938  |
| AL110162  | 1013.771 | 1528.521 | AK023773  | 1019.166  | 969.955   | NM_005038 | 9517.121  | 7066.489  |
| AK022681  | 16215.5  | 15158.71 | AF116709  | 809.993   | 962.195   | M95923    | 567.768   | 518.508   |
| CY3Cy5    | 6320.225 | 397.49   | AK025533  | 1150.312  | 1163.784  | NM_002415 | 61892.273 | 59222.082 |
| Y18483    | 733.943  | 1129.08  | AK021911  | 7319.051  | 5382.268  | NM_006332 | 8532.996  | 6428.883  |
| M59979    | 553.796  | 777.173  | D17225    | 1742.208  | 747.49    | NM_000916 | 998.912   | 721.036   |
| AB011098  | 1173.847 | 1048.744 | AF147430  | 377.454   | 261.944   | NM_018663 | 1770.084  | 1809.47   |
| AA609759  | 1037.012 | 795.776  | AK025766  | 4035.198  | 3156.909  | NM_145904 | 4884.478  | 4113.535  |
| AA029418  | 1881.618 | 2217.722 | U35875    | 17612.422 | 13281.958 | NM_006796 | 8444.205  | 5544.943  |
| L20815    | 2592.155 | 2072.868 | AK021857  | 19849.127 | 12967.926 | NM_000706 | 753.26    | 725.775   |
| AI364483  | 1488.78  | 1214.549 | AK022257  | 1657.949  | 1193.051  | NM_015941 | 3215.16   | 2481.43   |
| AA456001  | 3294.594 | 4180.671 | BE887356  | 31793.975 | 21085.439 | NM_003655 | 4882.942  | 5230.848  |
| BI818232  | 89.985   | 278.719  | X84369    | 711.688   | 851.81    | AK025111  | 516.487   | 451.606   |
| AA451686  | 7171.664 | 7357.505 | AK023329  | 7830.951  | 6938.477  | NM_001732 | 922.008   | 905.753   |
| SR5       | 6198.945 | 5225.365 | AK021773  | 1744.51   | 1517.619  | NM_018690 | 3647.402  | 3544.668  |
| SR7       | 6601.412 | 33564.08 | AK027074  | 1803.903  | 1254.182  | NM_000860 | 3352.184  | 3529.233  |
| SR9       | 23017.89 | 2756.446 | AL365456  | 1096.172  | 1161.12   | AB037798  | 1904.336  | 1938.427  |
| CY3Cy5    | 4395.312 | 259.572  | NM_018038 | 915.639   | 1437.527  | NM_000780 | 520.811   | 429.276   |
| NM_019555 | 1887.472 | 2100.871 | AK025048  | 478.586   | 476.511   | AF272663  | 5013.915  | 6245.29   |
| NM_012096 | 9125.103 | 11488.75 | U84522    | 3149.699  | 2800.013  | NM_012190 | 1261.227  | 1490.719  |
| AB028976  | 2274.494 | 2094.755 | AK021694  | 1473.769  | 944.281   | AB033015  | 463.505   | 527.5     |

|           |          |          |            |           |           |            |           |           |
|-----------|----------|----------|------------|-----------|-----------|------------|-----------|-----------|
| NM_01586  | 548.276  | 309.65   | AF086013   | 510.529   | 508.662   | AF277719   | 764.191   | 1155.247  |
| AB031038  | 591.154  | 495.726  | U84505     | 2562.089  | 2331.813  | NM_000791  | 2331.934  | 2569.954  |
| NM_00462  | 476.738  | 348.794  | X81005     | 1716.008  | 1133.596  | NM_003681  | 1419.292  | 1695.782  |
| NM_00189  | 848.312  | 426.933  | AL049265   | 2174.471  | 1948.333  | NM_00480   | 7110.426  | 7077.094  |
| NM_00430  | 6568.429 | 8929.9   | AL137635   | 583.636   | 387.271   | AB037738   | 308.589   | 322.543   |
| NM_00608  | 9480.129 | 7429.353 | AL049430   | 1705.424  | 1256.499  | NM_014954  | 11637.919 | 13257.292 |
| NM_003144 | 27078.29 | 25682.92 | AK021461   | 577.761   | 541.019   | NM_000807  | 523.258   | 631.703   |
| NM_00090  | 894.835  | 923.464  | AB015349   | 385.83    | 369.069   | NM_01490   | 1155.86   | 987.547   |
| AB011102  | 7948.993 | 4728.504 | AL079274   | 11858.405 | 9391.992  | X91148     | 518.823   | 500.966   |
| NM_00296  | 1441.817 | 1697.68  | S46403     | 560.989   | 500.358   | NM_01570   | 7039.297  | 4115.599  |
| NM_00462  | 1127.122 | 1118.85  | AL137398   | 1527.268  | 2245.38   | NM_019087  | 1559.344  | 1319.477  |
| AF087940  | 1091.472 | 902.401  | Y12021     | 1158.087  | 1256.774  | NM_01632   | 561.445   | 550.617   |
| AJ277587  | 1042.831 | 1105.666 | NM_01330   | 12730.01  | 12974.829 | NM_004277  | 237.704   | 549.742   |
| D87432    | 3274.368 | 3949.121 | AK026039   | 6292.991  | 5631.996  | NM_00507   | 673.68    | 611.445   |
| AK023749  | 541.837  | 769.687  | AF108756   | 10328.437 | 9270.422  | AF308802   | 1342.527  | 1256.084  |
| NM_002337 | 6565.607 | 8137.388 | NM_00407   | 5621.175  | 4825.297  | S76984     | 8338.276  | 7224.406  |
| NM_00476  | 4588.775 | 4675.045 | NM_001887  | 5881.802  | 5257.034  | NM_01449   | 47041.664 | 54520.227 |
| NM_00581  | 3641.121 | 4460.207 | NM_00653   | 2282.034  | 1928.165  | NM_014081  | 652.089   | 454.77    |
| AK024722  | 823.109  | 813.344  | AK026747   | 7138.837  | 5805.987  | NM_005651  | 554.126   | 626.017   |
| AK025520  | 3431.468 | 1917.815 | AL110150   | 4760.268  | 4188.893  | NM_00719   | 1720.521  | 2289.641  |
| NM_00489  | 9885.606 | 5767.773 | NM_00199   | 6908.283  | 5462.581  | AK023337   | 1794.603  | 2310.07   |
| NM_014597 | 12978.58 | 8781.309 | X87825     | 3468.412  | 3211.168  | NM_01327   | 10108.632 | 12946.465 |
| NM_01789  | 10758.43 | 8077.13  | AK001285   | 17445.516 | 13890.064 | AB037842   | 903.223   | 695.917   |
| AB002374  | 5134.334 | 4285.989 | D17215     | 3773.128  | 3316.962  | U92074     | 840.666   | 639.41    |
| U17327    | 1825.659 | 1505.352 | BE781513   | 714.536   | 541.818   | NM_019011  | 2598.607  | 2802.234  |
| M87790    | 6083.676 | 5977.78  | NM_015714  | 20283.271 | 13943.425 | AF459094   | 4260.1    | 5919.219  |
| NM_00176  | 3283.319 | 3083.142 | AK075564   | 872.525   | 1009.712  | NM_003157  | 1848.614  | 1593.281  |
| NM_00002  | 3443.768 | 3126.938 | AK026219   | 1866.45   | 1665.035  | NM_00493   | 1172.695  | 1049.389  |
| NM_00071  | 488.7    | 450.176  | D28446     | 1338.263  | 1150.215  | NM_015981  | 576.878   | 742.047   |
| AF035802  | 1222.06  | 1146.524 | AK024756   | 2286.391  | 2175.108  | NM_00045   | 2007.21   | 1761.241  |
| NM_00183  | 941.48   | 1341.285 | NM_017911  | 2298.254  | 1916.414  | NM_014791  | 8126.201  | 8009.413  |
| NM_01332  | 21497.85 | 23521.58 | AJ224168   | 1977.366  | 2410.817  | NM_00331   | 6007.493  | 3420.041  |
| NM_00079  | 447.667  | 570.902  | S69873     | 982.837   | 960.378   | NM_00436   | 3360.35   | 2808.907  |
| NM_00266  | 5501.187 | 7444.479 | AF147325   | 58735.203 | 60485.66  | NM_00018   | 6648.465  | 6731.976  |
| NM_01590  | 365.882  | 467.677  | NM_01442   | 1768.227  | 1721.896  | AK023384   | 1539.991  | 1875.143  |
| NM_00370  | 861.203  | 671.016  | AK023584   | 689.804   | 691.383   | NM_01602   | 11796.514 | 9895.275  |
| AL122071  | 849.007  | 867.214  | NM_003774  | 743.086   | 655.248   | AB046381   | 744.892   | 612.956   |
| AB033054  | 12514.93 | 13231.29 | BG831301   | 21747.424 | 9614.064  | AJ011497   | 1151.291  | 1337.917  |
| NM_01612  | 1476.444 | 883.656  | M14764     | 415.984   | 257.134   | NM_00301   | 327.201   | 375.742   |
| AF153330  | 1433.885 | 1445.412 | AA478647   | 8141.063  | 6740.841  | NM_00033   | 634.156   | 907.457   |
| D87446    | 4316.619 | 5422.741 | AW058501   | 299.759   | 604.004   | W61100     | 26790.016 | 32486.449 |
| BF540935  | 344.819  | 380.803  | ID 2623896 | 1340.613  | 1340.141  | AA608568   | 8044.075  | 8005.48   |
| NM_00446  | 816.466  | 506.732  | ID 2602214 | 3212.687  | 2560.244  | BG831301   | 18164.85  | 20774.627 |
| NM_007081 | 3293.271 | 3267.219 | ID 2071279 | 8846.44   | 8209.849  | M14764     | 359.846   | 1236.474  |
| AB032964  | 4312.206 | 3655.096 | L10709     | 9390.601  | 7636.889  | AA478647   | 7541.196  | 16079.694 |
| BE733605  | 3801.54  | 2367.862 | N35489     | 696.916   | 739.386   | ID 2623896 | 1235.817  | 1031.92   |
| NM_003334 | 11359.11 | 8643.842 | AI928195   | 954.758   | 1093.411  | ID 2602214 | 2029.142  | 2350.925  |
| NM_00269  | 9792.802 | 7281.722 | AA482489   | 410.128   | 291.679   | ID 2071279 | 8276.349  | 6955.448  |
| NM_003671 | 1316.286 | 1187.101 | AA458922   | 3040.437  | 2696.188  | L10709     | 5066.12   | 7732.195  |
| M20695    | 1683.566 | 1792.57  | NM_14565   | 2486.242  | 3428.063  | N35489     | 581.196   | 630.778   |
| AK026000  | 4766.013 | 4063.177 | NM_021957  | 647.198   | 757.859   | AA458922   | 1517.993  | 1592.883  |
| NM_01783  | 862.391  | 604.605  | SR2        | 53596.809 | 59818.684 | NM_14565   | 1104.069  | 906.851   |
| NM_00667  | 5690.004 | 5523.044 | SR4        | 15351.808 | 13480.199 | NM_021957  | 363.458   | 138.208   |

|           |          |          |           |           |           |           |           |           |
|-----------|----------|----------|-----------|-----------|-----------|-----------|-----------|-----------|
| NM_003022 | 9713.219 | 7137.386 | SR6       | 2756.702  | 3890.982  | NM_001719 | 6213.066  | 6526.73   |
| NM_004873 | 6137.417 | 5673.424 | SR8       | 8214.08   | 24114.125 | AL080062  | 1521.103  | 1181.349  |
| NM_019842 | 1183.11  | 1848.272 | SR10      | 28570.611 | 9930.807  | NM_145904 | 5976.412  | 5771.518  |
| NM_002951 | 21489    | 26239.84 | CY3Cy5    | 1609.852  | 328.955   | NM_006796 | 8526.659  | 7683.286  |
| NM_002317 | 923.98   | 932.154  | NM_017729 | 1545.295  | 1144.151  | NM_000706 | 602.213   | 774.113   |
| NM_000320 | 2401.115 | 4048.544 | NM_002840 | 609.117   | 327.66    | NM_015941 | 2910.427  | 2045.53   |
| NM_017921 | 622.805  | 910.616  | NM_006174 | 706.343   | 449.684   | NM_003655 | 4891.671  | 5004.343  |
| NM_003136 | 14597.74 | 17886.81 | NM_015850 | 4132.292  | 2790.339  | NM_014837 | 3305.987  | 3265.145  |
| NM_004620 | 1114.688 | 1412.687 | NM_002838 | 15401.289 | 8472.385  | NM_017729 | 1199.334  | 1038.998  |
| AF087940  | 1502.08  | 2065.634 | NM_014686 | 51919.453 | 55407.219 | NM_005259 | 2284.917  | 3142.287  |
| AJ277587  | 1484.792 | 1947.852 | BF528358  | 1422.775  | 4161.313  | NM_002840 | 511.85    | 587.408   |
| D87432    | 3723.167 | 4371.979 | NM_016339 | 830.59    | 940.453   | NM_006174 | 714.485   | 901.086   |
| Y18483    | 460.173  | 556.336  | NM_002487 | 7303.207  | 7923.043  | NM_015850 | 2329.596  | 4447.711  |
| AI565117  | 59178.2  | 49831.44 | NM_013340 | 517.807   | 707.553   | NM_002838 | 9188.239  | 11524.031 |
| AI299075  | 484.809  | 312.239  | NM_005462 | 1074.574  | 1104.45   | NM_014686 | 51440.438 | 54578.828 |
| M59979    | 540.348  | 502.895  | NM_012319 | 2577.925  | 3337.083  | BF528358  | 1300.204  | 893.59    |
| AB011098  | 1551.155 | 963.275  | AK026235  | 364.501   | 631.188   | NM_016339 | 651.686   | 620.508   |
| AA609759  | 1402.562 | 1113.038 | NM_006510 | 10376.161 | 11832.127 | NM_002487 | 5135.597  | 5223.544  |
| AA029418  | 2472.771 | 2746.297 | NM_003141 | 2711.731  | 3031.107  | NM_013340 | 428.038   | 472.246   |
| L20815    | 3208.633 | 3164.854 | NM_020245 | 3105.546  | 3188.134  | NM_005462 | 557.967   | 500.504   |
| AI364483  | 1958.969 | 1711.83  | NM_007175 | 1460.397  | 2140.223  | NM_012319 | 1876.821  | 1370.539  |
| AA456001  | 4188.767 | 4879.072 | AB046381  | 1061.19   | 1219.704  | NM_006510 | 6169.675  | 6454.106  |
| AA451686  | 7707.531 | 7246.971 | AJ011497  | 1849.799  | 2147.321  | NM_003141 | 2009.667  | 1998.942  |
| AA934644  | 392.298  | 486.476  | NM_000336 | 1305.71   | 1234.377  | NM_020245 | 2092.783  | 1922.039  |
| NM_003822 | 598.756  | 877.79   | AF215923  | 5749.416  | 3814.713  | NM_007175 | 860.834   | 1085.917  |
| NM_004412 | 11118.25 | 10828.53 | U66621    | 7175.019  | 3860.934  | X91148    | 472.475   | 530.698   |
| NM_002050 | 768.553  | 1861.118 | NM_005720 | 14648.71  | 10191.787 | NM_015700 | 6459.641  | 4715.439  |
| NM_007097 | 10756.66 | 15787.99 | AB040936  | 417.809   | 199.33    | NM_019087 | 1321.483  | 1322.602  |
| NM_000029 | 3885.68  | 3997.52  | U61736    | 675.325   | 438.269   | NM_016322 | 520.997   | 501.437   |
| NM_000715 | 547.611  | 622.383  | AJ132086  | 1064.778  | 915.795   | NM_004277 | 304.804   | 485.681   |
| AF035802  | 1347.878 | 1576.167 | U92816    | 10399.633 | 8192.837  | NM_005072 | 767.781   | 870.637   |
| Y08145    | 557.112  | 532.724  | BC011987  | 5878.457  | 11850.474 | AF215923  | 4587.351  | 5819.934  |
| M26123    | 617.598  | 535.027  | NM_004106 | 951.778   | 2013.699  | U66621    | 6337.616  | 8405.707  |
| NM_001838 | 1057.114 | 1141.827 | NM_003485 | 3227.082  | 3178.875  | NM_005720 | 11874.327 | 12064.469 |
| NM_019555 | 1525.623 | 1349.426 | NM_005038 | 9678.049  | 13692.841 | AB040936  | 300.19    | 451.038   |
| NM_012096 | 7651.264 | 4409.688 | M95923    | 957.51    | 875.644   | U61736    | 395.954   | 554.613   |
| NM_003905 | 26225.12 | 13739.02 | NM_002415 | 56364.359 | 64152.012 | AJ132086  | 851.969   | 872.607   |
| L12052    | 5441.411 | 4977.02  | NM_006332 | 9706.157  | 18762.068 | U92816    | 7064.853  | 12701.808 |
| AB028976  | 2296.684 | 1375.167 | NM_000916 | 2871.664  | 3406.023  | BC011987  | 6432.981  | 4717.633  |
| NM_015869 | 697.896  | 591.394  | NM_018663 | 4057.5    | 3282.316  | NM_004106 | 890.534   | 609.234   |
| AB031038  | 795.544  | 1442.778 | NM_145904 | 7976.766  | 8696.463  | NM_003485 | 2287.004  | 2159.898  |
| NM_004626 | 490.506  | 787.707  | NM_006796 | 11488.11  | 14050.212 | NM_005038 | 8116.602  | 6004.88   |
| NM_001899 | 915.022  | 640.11   | NM_000706 | 1044.974  | 1138.27   | M95923    | 548.822   | 476.137   |
| NM_004305 | 6050.385 | 7295.671 | NM_015941 | 3062.873  | 4402.249  | NM_002415 | 54865.891 | 56891.316 |
| NM_006089 | 9659.808 | 6858.592 | NM_003655 | 7063.838  | 6520.905  | NM_006332 | 9078.022  | 5352.474  |
| AF072506  | 383.921  | 564.843  | AK025111  | 991.52    | 174.084   | NM_000916 | 1616.09   | 1379.677  |
| NM_005992 | 111.258  | 455.322  | NM_001732 | 1536.247  | 1073.982  | NM_018663 | 1820.534  | 2267.111  |
| NM_003144 | 37525.99 | 50932.96 | NM_018690 | 4262.258  | 2735.302  | NM_014791 | 8520.754  | 8027.025  |
| NM_000908 | 971.442  | 1211.228 | NM_000860 | 4435.46   | 2603.175  | NM_003318 | 6709.355  | 4774.115  |
| AB011102  | 10241.4  | 7400.467 | AB037798  | 2310.499  | 1640.018  | NM_004362 | 2875.125  | 2451.648  |
| D63480    | 2483.439 | 2454.709 | NM_000780 | 766.96    | 494.455   | NM_000182 | 7232.02   | 8433.323  |
| NM_002969 | 1711.602 | 2369.535 | AF272663  | 8928.249  | 6261.931  | AK023384  | 1722.741  | 2508.156  |
| M81768    | 334.76   | 231.268  | NM_012190 | 1623.717  | 1283.329  | NM_016026 | 11993.359 | 13122.146 |

|           |          |          |            |           |           |           |           |           |
|-----------|----------|----------|------------|-----------|-----------|-----------|-----------|-----------|
| AK023749  | 534.401  | 458.874  | AB033015   | 314.05    | 280.603   | AK025111  | 638.66    | 705.217   |
| NM_002337 | 5445.818 | 4063.609 | AF277719   | 737.423   | 870.402   | NM_001732 | 942.146   | 798.784   |
| NM_013245 | 1704.306 | 2120.819 | NM_000791  | 2511.523  | 2172.318  | NM_018690 | 3501.039  | 4398.571  |
| NM_006423 | 19359.6  | 13465.82 | NM_003681  | 2226.547  | 1795.788  | NM_000860 | 3285.543  | 4415.514  |
| NM_004766 | 3880.659 | 3521.497 | NM_004800  | 9055.772  | 9258.914  | AB037798  | 1914.948  | 1800.211  |
| NM_005819 | 3706.294 | 3692.261 | AB037738   | 366.006   | 627.904   | NM_000780 | 544.403   | 700.939   |
| AK024722  | 988.114  | 816.339  | NM_014954  | 22006.064 | 23125.111 | AF272663  | 4706.111  | 5747.861  |
| AK025520  | 4230.097 | 2523.537 | NM_000807  | 735.285   | 889.034   | NM_012190 | 1262.199  | 1346.833  |
| NM_004892 | 11187.36 | 10407.64 | NM_014909  | 3514.715  | 3767.194  | AB033015  | 315.793   | 430.973   |
| AB002374  | 5604.425 | 5033.415 | X91148     | 920.947   | 1557.053  | AF277719  | 660.55    | 827.976   |
| U17327    | 2276.926 | 2306.667 | NM_015700  | 8704.262  | 14483.299 | NM_000791 | 2282.164  | 2297.344  |
| M87790    | 5446.382 | 6517.918 | NM_019087  | 1912.604  | 2419.724  | NM_003681 | 1025.587  | 1657.064  |
| NM_001768 | 3840.443 | 5619.938 | NM_016322  | 726.901   | 816.088   | NM_004800 | 7268.829  | 6582.239  |
| NM_002951 | 22843.34 | 28819.25 | NM_005072  | 980.896   | 1083.761  | NM_014954 | 10661.778 | 10855.369 |
| NM_002317 | 966.416  | 1386.807 | AF308802   | 2991.499  | 3648.181  | NM_000807 | 477.18    | 665.123   |
| NM_000320 | 3047.13  | 7520.624 | S76984     | 8315.601  | 5195.847  | NM_014909 | 1521.551  | 1557.261  |
| NM_017921 | 467.092  | 672.293  | NM_014495  | 52965.23  | 52166.629 | NM_145659 | 1309.463  | 955.263   |
| NM_003136 | 13660.53 | 9506.824 | NM_014081  | 670.702   | 521.614   | NM_021957 | 369.414   | 253.533   |
| NM_013328 | 19787.43 | 14794.69 | NM_005651  | 706.138   | 603.367   | NM_001719 | 6791.887  | 9234.495  |
| NM_000790 | 508.021  | 359.241  | NM_007195  | 2048.462  | 1781.108  | AL080062  | 1737.643  | 1522.345  |
| NM_002660 | 4655.311 | 4164.421 | AK023337   | 2821.85   | 2322.024  | AF308802  | 1394.338  | 1391.169  |
| NM_003706 | 853.65   | 857.572  | NM_013275  | 15479.725 | 13292.331 | S76984    | 8380.86   | 8210.058  |
| AL122071  | 1365.513 | 1531.881 | AB037842   | 1061.027  | 798.771   | NM_014495 | 49731.422 | 52555.598 |
| AB033054  | 13347.1  | 13815.25 | U92074     | 675.582   | 462.515   | NM_014081 | 518.85    | 668.944   |
| NM_016122 | 1704.203 | 963.925  | NM_019011  | 3575.191  | 3341.448  | NM_005651 | 627.473   | 754.248   |
| NM_016583 | 408.892  | 533.484  | AF459094   | 5186.775  | 5507.705  | NM_007195 | 1418.654  | 1676.505  |
| AF153330  | 1691.266 | 1851.296 | NM_003157  | 2093.186  | 2029.332  | AK023337  | 2142.235  | 2254.577  |
| NM_001652 | 388.132  | 494.338  | NM_004938  | 1552.828  | 1724.038  | NM_013275 | 10331.656 | 10222.742 |
| NM_003822 | 526.579  | 714.059  | NM_014326  | 625.57    | 758.701   | AB037842  | 871.881   | 875.631   |
| NM_004412 | 12404.13 | 14894.55 | NM_004448  | 580.464   | 689.035   | U92074    | 725.575   | 603.376   |
| NM_002050 | 789.759  | 1066.213 | NM_015981  | 1683.588  | 1974.55   | NM_019011 | 2822.425  | 2628.729  |
| NM_007097 | 10412.9  | 10721.44 | NM_000455  | 3640.526  | 4221.222  | AF459094  | 3641.166  | 3032.623  |
| D87446    | 4056.329 | 3860.665 | NM_014791  | 13025.376 | 15634.256 | NM_003157 | 1141.386  | 1340.481  |
| NM_004466 | 706.961  | 323.609  | NM_003318  | 8795.82   | 10506.911 | NM_004938 | 1474.743  | 1804.237  |
| NM_007081 | 3282.933 | 2352.161 | NM_004362  | 5384.09   | 6220.208  | NM_014326 | 548.751   | 326.177   |
| AB032964  | 4413.336 | 4134.167 | NM_000182  | 12740.207 | 15378.286 | NM_004448 | 499.755   | 358.527   |
| BE733605  | 4667.648 | 3758.436 | AK023384   | 2589.003  | 2007.062  | NM_015981 | 785.89    | 883.552   |
| NM_003334 | 16296.44 | 16538.2  | NM_016026  | 16873.148 | 17629.67  | NM_000455 | 2777.433  | 2586.966  |
| NM_002693 | 13435.95 | 14969.32 | AB046381   | 764.429   | 479.701   | NM_012319 | 1776.717  | 1453.61   |
| M20695    | 1661.934 | 1895.575 | AJ011497   | 1738.449  | 1337.582  | AK026235  | 429.406   | 186.114   |
| AK026000  | 4893.959 | 3675.823 | NM_003018  | 354.887   | 499.407   | NM_006510 | 5871.48   | 6077.662  |
| NM_017833 | 728.777  | 576.822  | NM_000336  | 947.526   | 546.995   | NM_003141 | 1833.759  | 1896.416  |
| NM_006675 | 5843.351 | 4308.943 | W61100     | 39978.539 | 32042.928 | NM_020245 | 1761.763  | 1825.082  |
| NM_003022 | 11994.49 | 8611.575 | AA608568   | 9485.486  | 9095.783  | NM_007175 | 1086.97   | 1073.019  |
| NM_004873 | 7751.597 | 6843.023 | BG831301   | 23093.15  | 17601.904 | AB046381  | 590.672   | 703.369   |
| NM_019842 | 1844.59  | 1362.314 | M14764     | 515.625   | 427.385   | AJ011497  | 1151.507  | 1188.682  |
| NM_003144 | 32772.47 | 33368.33 | AA478647   | 8264.36   | 7761.262  | NM_003018 | 345.058   | 426.235   |
| NM_000908 | 1105.767 | 1531.745 | AW058501   | 359.66    | 529.158   | NM_000336 | 494.991   | 1010.896  |
| AB011102  | 11260.57 | 8628.65  | ID 2623896 | 1116.012  | 1247.279  | W61100    | 29146.402 | 33576.035 |
| D63480    | 2740.284 | 2745.527 | ID 2602214 | 3608.9    | 3394.521  | AA608568  | 7665.683  | 8110.889  |
| NM_002969 | 1597.876 | 1766.283 | ID 2071279 | 8856.043  | 8881.925  | BG831301  | 18218.109 | 21739.693 |
| NM_004620 | 913.886  | 855.99   | L10709     | 8894.299  | 6201.267  | AA478647  | 5896.437  | 6243.276  |
| AF087940  | 1090.443 | 655.405  | N35489     | 824.94    | 853.968   | AW058501  | 315.537   | 235.883   |



|           |          |          |           |           |           |            |           |           |
|-----------|----------|----------|-----------|-----------|-----------|------------|-----------|-----------|
| AJ277587  | 988.892  | 705.548  | AI928195  | 886.324   | 1477.758  | ID 2623896 | 1092.835  | 1045.499  |
| D87432    | 3051.521 | 2933.635 | AA458922  | 3440.069  | 2759.813  | ID 2602214 | 1951.455  | 2346.194  |
| AI565117  | 65785.02 | 49891.19 | NM_145659 | 2073.748  | 2475.688  | ID 2071279 | 7287.5    | 5565.649  |
| AI299075  | 555.927  | 551.149  | NM_021957 | 461.455   | 901.7     | L10709     | 4609.331  | 5518.139  |
| M59979    | 1119.667 | 805.391  | NM_001719 | 9659.587  | 10227.975 | N35489     | 611.864   | 543.381   |
| AB011098  | 2293.923 | 2170.373 | AL080062  | 2063.956  | 2105.582  | AI928195   | 753.864   | 586.88    |
| AA609759  | 1845.217 | 2830.604 | NM_145904 | 7149.209  | 7728.438  | AA458922   | 1843.258  | 2065.942  |
| AA029418  | 3656.682 | 5649.447 | NM_006796 | 10939.681 | 14538.746 | M95923     | 536.796   | 483.296   |
| L20815    | 3493.849 | 4454.888 | NM_000706 | 1165.384  | 1213.51   | NM_002415  | 56685.508 | 58052.109 |
| AI364483  | 3147.234 | 1639.262 | NM_015941 | 2774.43   | 2989.658  | NM_006332  | 9208.282  | 6257.498  |
| AA456001  | 3723.798 | 3132.918 | NM_003655 | 7170.82   | 4462.22   | NM_000916  | 1455.402  | 1456.092  |
| BI818232  | 659.757  | 401.418  | NM_014837 | 4302.088  | 3376.776  | NM_018663  | 2192.843  | 2910.485  |
| AA451686  | 8830.306 | 7773.805 | NM_017729 | 1145.428  | 1306.567  | NM_145904  | 5427.259  | 6157.853  |
| AA934644  | 424.694  | 395.542  | NM_005259 | 4082.834  | 3145.521  | NM_006796  | 8946.606  | 8720.979  |
| M87790    | 9025.497 | 13944.88 | NM_002840 | 633.644   | 665.572   | NM_000706  | 705.65    | 892.432   |
| NM_001768 | 4582.048 | 6755.861 | NM_006174 | 834.718   | 959.815   | NM_015941  | 2876.195  | 3872.441  |
| NM_000029 | 4002.613 | 4809.629 | NM_015850 | 6201.407  | 7740.576  | NM_003655  | 4309.467  | 6251.277  |
| NM_000715 | 633.408  | 692.818  | NM_004864 | 370.001   | 422.709   | NM_014837  | 3406.056  | 3560.631  |
| AF035802  | 1594.275 | 2013.463 | NM_002838 | 15613.843 | 8738.681  | NM_017729  | 1024.415  | 1199.225  |
| Y08145    | 609.6    | 452.057  | NM_014686 | 54099.402 | 56718.359 | NM_005259  | 1898.213  | 2602.643  |
| M26123    | 762.421  | 946.796  | BF528358  | 1030.976  | 2521.436  | NM_002840  | 542.533   | 449.664   |
| NM_001838 | 1425.607 | 1423.9   | NM_016339 | 1031.034  | 2011.079  | NM_006174  | 686.988   | 649.444   |
| NM_019555 | 2428.984 | 2810.276 | NM_002487 | 8317.178  | 9222.052  | NM_015850  | 2663.744  | 4181.013  |
| NM_012096 | 11319.51 | 8968.384 | NM_005462 | 1273.109  | 1053.767  | NM_002838  | 9310.483  | 12345.62  |
| NM_003905 | 34959.57 | 26371.91 | NM_012319 | 2618.845  | 3535.171  | NM_014686  | 50708.246 | 48282.637 |
| L12052    | 7773.935 | 10984.84 | NM_006510 | 11809.992 | 13579.04  | BF528358   | 1197.426  | 724.243   |
| AB028976  | 3502.174 | 4159.12  | NM_003141 | 2996.448  | 3266.89   | NM_016339  | 664.03    | 551.504   |
| NM_015869 | 672.844  | 631.218  | NM_020245 | 3943.561  | 5683.407  | NM_002487  | 4986.468  | 5239.957  |
| AB031038  | 978.106  | 917.935  | NM_007175 | 1463.455  | 1438.613  | NM_005462  | 767.89    | 658.837   |
| NM_004626 | 730.97   | 584.478  | NM_019087 | 2402.572  | 4410.836  | NM_014954  | 13545.721 | 17123.723 |
| NM_001899 | 1194.526 | 816.443  | NM_016322 | 620.688   | 520.647   | NM_000807  | 666.876   | 525.111   |
| NM_004305 | 7797.638 | 9918.764 | NM_005072 | 814.03    | 670.942   | NM_014909  | 1881.439  | 2451.39   |
| NM_006089 | 12093.87 | 9173.439 | AF215923  | 5985.242  | 5308.886  | X91148     | 479.657   | 794.62    |
| AB033054  | 17237.68 | 25603.77 | U66621    | 9253.354  | 8067.022  | NM_015700  | 7154.459  | 6618.273  |
| NM_016122 | 2282.859 | 2542.212 | NM_005720 | 15311.14  | 15852.291 | NM_019087  | 1692.844  | 2058.84   |
| NM_016583 | 354.27   | 600.685  | AB040936  | 588.547   | 563.325   | NM_016322  | 569.555   | 654.807   |
| AF153330  | 2083.61  | 3389.646 | U61736    | 571.206   | 555.731   | NM_004277  | 274.101   | 399.466   |
| NM_001652 | 728.993  | 874.549  | AJ132086  | 783.841   | 1133.188  | AF215923   | 4244.403  | 5038.04   |
| M81768    | 518.259  | 428.259  | U92816    | 10972.874 | 9766.745  | U66621     | 5775.971  | 8566.692  |
| AK023749  | 1026.168 | 1089.194 | BC011987  | 5084.024  | 11004.813 | NM_005720  | 12248.617 | 11645.373 |
| NM_002337 | 8836.588 | 12144.16 | NM_004106 | 821.987   | 1308.246  | AB040936   | 416.568   | 393.46    |
| NM_013245 | 3095.285 | 5880.652 | NM_003485 | 3575.164  | 4539.811  | U61736     | 356.292   | 661.376   |
| NM_006423 | 31595.86 | 43027.47 | NM_005038 | 11131.685 | 17206.568 | AJ132086   | 750.732   | 972.581   |
| NM_004766 | 4996.952 | 5594.879 | M95923    | 1085.952  | 882.484   | U92816     | 6491.354  | 7792.193  |
| NM_005819 | 4734.645 | 7660.076 | NM_002415 | 59053.93  | 62152.867 | BC011987   | 6254.439  | 3038.705  |
| AK024722  | 1037.955 | 1358.741 | NM_006332 | 9743.686  | 14476.897 | NM_004106  | 736.388   | 562.881   |
| AK025520  | 4653.08  | 3255.926 | NM_000916 | 2712.972  | 3023.563  | NM_003485  | 2071.941  | 1704.495  |
| NM_004892 | 15430.22 | 15651.84 | NM_018663 | 4000.046  | 2307.505  | NM_005038  | 9761.316  | 6503.877  |
| NM_014597 | 22725.57 | 28658.81 | NM_000182 | 10138.356 | 6609.163  | NM_003157  | 1444.347  | 1888.207  |
| NM_017896 | 19327.27 | 22576.43 | AK023384  | 2381.528  | 1506.106  | NM_004938  | 1265.86   | 973.621   |
| AB002374  | 8682.822 | 10999.61 | NM_016026 | 14326.106 | 12510.08  | NM_014326  | 614.038   | 296.858   |
| U17327    | 3828.694 | 4819.636 | AK025111  | 637.181   | 583.242   | NM_004448  | 491.068   | 262.2     |
| NM_017833 | 1448.609 | 981.417  | NM_001732 | 1454.491  | 1388.417  | NM_015981  | 993.817   | 793.595   |

|           |          |          |            |           |           |           |           |           |
|-----------|----------|----------|------------|-----------|-----------|-----------|-----------|-----------|
| NM_006675 | 8315.197 | 10184.05 | NM_018690  | 5030.067  | 4638.012  | NM_000455 | 3003.742  | 3085.318  |
| NM_003022 | 13735.04 | 14082.28 | NM_000860  | 5741.422  | 5168.664  | NM_014791 | 8900.04   | 8369.43   |
| NM_004873 | 8687.909 | 10289.67 | AB037798   | 1988.406  | 2149.85   | NM_003318 | 7529.683  | 5625.109  |
| NM_019842 | 1628.004 | 2081.621 | NM_000780  | 533.428   | 494.351   | NM_004362 | 3140.392  | 3419.538  |
| NM_002951 | 21523.34 | 22324.44 | AF272663   | 9918.903  | 7992.554  | NM_000182 | 7129.548  | 10126.891 |
| NM_002317 | 1604.592 | 1278.931 | NM_012190  | 1518.437  | 1583.741  | AK023384  | 1742.142  | 2115.676  |
| NM_000320 | 3168.861 | 5569.583 | AB033015   | 471.141   | 495.281   | NM_016026 | 12134.753 | 11977.834 |
| NM_017921 | 530.261  | 874.36   | AF277719   | 825.482   | 884.548   | AK025111  | 505.883   | 509.939   |
| NM_003136 | 18480.69 | 18798.45 | NM_000791  | 3179.541  | 3351.82   | NM_001732 | 929.344   | 908.399   |
| NM_000790 | 806.923  | 732.837  | NM_003681  | 2863.68   | 2662.407  | NM_018690 | 3657.215  | 3936.403  |
| NM_002660 | 7269.551 | 9410.392 | NM_004800  | 10907.225 | 11518.992 | NM_000860 | 3329.501  | 4213.684  |
| NM_015900 | 572.356  | 929.964  | NM_014954  | 25293.271 | 26169.174 | AB037798  | 1610.34   | 1712.571  |
| NM_003706 | 988.123  | 1199.392 | NM_000807  | 789.726   | 827.967   | NM_000780 | 448.145   | 498.186   |
| NM_005218 | 480.858  | 334.639  | NM_014909  | 2928.367  | 3169.222  | NM_000791 | 2132.786  | 1718.372  |
| AL122071  | 1197.854 | 1482.492 | NM_145659  | 2177.882  | 2182.384  | NM_003681 | 1214.988  | 1495.158  |
| NM_014913 | 53745.84 | 49926.2  | NM_021957  | 896.181   | 1842.279  | NM_004800 | 7260.031  | 6550.768  |
| NM_005864 | 1090.521 | 1246.15  | NM_001719  | 7535.391  | 5542.996  | NM_004952 | 2915.494  | 2884.462  |
| NM_012341 | 9165.721 | 9548.049 | AL080062   | 1762.575  | 1292.2    | AY007239  | 350.653   | 296.018   |
| NM_003256 | 27933.2  | 35477.62 | AF308802   | 2079.326  | 1576.914  | NM_020414 | 4098.468  | 3842.698  |
| D87450    | 6938.946 | 8193.533 | S76984     | 9194.813  | 8299.071  | AB037730  | 3164.864  | 2385.229  |
| NM_017797 | 19700.04 | 20423.72 | NM_014495  | 53104.828 | 55131.973 | NM_001357 | 8402.662  | 7697.14   |
| AK021919  | 863.89   | 663.602  | NM_014081  | 831.526   | 585.353   | NM_003893 | 2966.909  | 2436.494  |
| AF000562  | 5490.843 | 4881.065 | NM_005651  | 914.029   | 702.452   | AB037816  | 1011.71   | 1089.916  |
| AK025713  | 7928.061 | 6546.612 | NM_007195  | 2100.906  | 2466.471  | NM_014380 | 39383.457 | 43882.414 |
| NM_018100 | 2198.382 | 1542.75  | AK023337   | 3944.607  | 3767.396  | NM_014265 | 573.467   | 408.64    |
| NM_002050 | 1097.439 | 1485.173 | NM_013275  | 19881.49  | 24876.982 | NM_001719 | 7126.838  | 7851.883  |
| NM_007097 | 13880.19 | 17624.88 | AB037842   | 1037.994  | 1324.465  | AL080062  | 1736.15   | 1787.6    |
| NM_004466 | 837.688  | 567.632  | NM_019011  | 3628.855  | 4572.5    | AF308802  | 1548.54   | 1471.175  |
| NM_007081 | 4915.175 | 4209.939 | AF459094   | 6178.673  | 7267.883  | S76984    | 8219.988  | 6935.659  |
| AB032964  | 4848.039 | 4194.203 | NM_003157  | 2664.832  | 2590.824  | NM_014495 | 49590.246 | 53979.504 |
| BE733605  | 4625.005 | 3315.854 | NM_004938  | 1281.867  | 1684.86   | NM_014081 | 702.538   | 648.594   |
| NM_003334 | 14401.34 | 10668.21 | NM_014326  | 785.213   | 661.399   | NM_005651 | 534.877   | 552.503   |
| NM_002693 | 11837.69 | 8127.134 | NM_004448  | 617.306   | 468.255   | NM_007195 | 1793.44   | 2075.178  |
| NM_003671 | 1964.24  | 1479.21  | NM_015981  | 1502.603  | 1448.731  | AK023337  | 1862.596  | 2332.638  |
| M20695    | 1575.054 | 1286.494 | NM_000455  | 4413.866  | 4972.188  | NM_013275 | 9260.711  | 7233.217  |
| AK026000  | 5338.658 | 4139.021 | NM_012319  | 2503.25   | 3009.435  | AB037842  | 813.055   | 517.166   |
| NM_005814 | 809.519  | 652.505  | NM_006510  | 8550.899  | 5669.687  | U92074    | 532.502   | 512.163   |
| NM_016279 | 636.322  | 810.604  | NM_003141  | 2016.757  | 1359.19   | NM_019011 | 2999.277  | 2894.065  |
| NM_000211 | 11007.29 | 11098.1  | NM_020245  | 2541.204  | 1663.838  | AF459094  | 4386.383  | 3367.569  |
| AB037830  | 1684.417 | 1564.213 | NM_007175  | 1223.193  | 1251.265  | NM_002544 | 438.726   | 459.427   |
| NM_015685 | 1923.065 | 1812.946 | AB046381   | 752.245   | 793.487   | AB011542  | 994.683   | 1137.231  |
| NM_004357 | 9382.759 | 11409.93 | AJ011497   | 1788.963  | 1385.283  | NM_001853 | 1314.943  | 1331.082  |
| X03324    | 5387.016 | 5026.27  | NM_003018  | 495.479   | 480.323   | U41737    | 476.186   | 587.673   |
| AF130988  | 652.302  | 598.342  | NM_000336  | 1077.927  | 861.927   | NM_005799 | 582.826   | 564.656   |
| NM_014934 | 1556.874 | 593.099  | W61100     | 45545.965 | 48020.586 | X99661    | 601.211   | 628.396   |
| NM_015385 | 574.222  | 449.121  | AA608568   | 12921.946 | 23787.688 | NM_005927 | 2291.487  | 1924.314  |
| NM_003690 | 10969.43 | 6358.319 | BG831301   | 29384.959 | 24809.354 | AB028983  | 1832.235  | 2078.176  |
| NM_000876 | 4640.39  | 4774.265 | M14764     | 559.897   | 717.489   | AB037800  | 1235.007  | 1625.823  |
| NM_014214 | 5415.952 | 5196.731 | AA478647   | 8736.124  | 9492.641  | AK026377  | 2075.812  | 1790.058  |
| NM_000856 | 681.286  | 718.395  | ID 2623896 | 1235.992  | 1751.911  | NM_018660 | 3020.58   | 4303.429  |
| NM_005232 | 543.057  | 827.879  | ID 2602214 | 4543.079  | 5048.967  | NM_003394 | 2788.64   | 4098.236  |
| NM_002752 | 4489.735 | 4593.084 | ID 2071279 | 9146.179  | 9235.17   | NM_014636 | 1101.496  | 732.063   |
| NM_013281 | 940.109  | 428.731  | L10709     | 9777.987  | 7678.184  | NM_006747 | 1361.837  | 1351.472  |

|           |          |          |           |           |           |           |           |           |
|-----------|----------|----------|-----------|-----------|-----------|-----------|-----------|-----------|
| Y11306    | 1542.782 | 1591.861 | N35489    | 643.432   | 848.478   | NM_007086 | 2929.793  | 2312.311  |
| NM_016112 | 700.749  | 509.477  | AI928195  | 1052.671  | 1282.885  | NM_003870 | 7152.828  | 7034.04   |
| X85106    | 1441.313 | 1415.935 | AA458922  | 3488.957  | 2476.244  | AK024507  | 488.468   | 690.49    |
| NM_003931 | 2526.338 | 1599.317 | M95923    | 774.641   | 601.878   | NM_001243 | 3569.192  | 3068.321  |
| NM_006681 | 94.055   | 371.221  | NM_002415 | 55161.949 | 39969.289 | AK025997  | 376.377   | 512.132   |
| NM_012479 | 27207.47 | 13533.28 | NM_006332 | 7958.241  | 5095.962  | NM_005546 | 1712.885  | 2201.703  |
| AF250226  | 18379.04 | 12012.28 | NM_000916 | 1836.445  | 1411.36   | NM_014887 | 3262.269  | 3071.451  |
| NM_003217 | 53184.22 | 34023.57 | NM_018663 | 3922.141  | 1828.557  | NM_002590 | 740.845   | 576.909   |
| AL157475  | 6643.226 | 6469.028 | NM_145904 | 7452.72   | 5594.714  | NM_018556 | 9295.033  | 8145.652  |
| NM_006069 | 4755.527 | 5667.609 | NM_006796 | 10028.526 | 8044.236  | NM_005824 | 1176.099  | 509.566   |
| NM_006534 | 3752.68  | 4508.339 | NM_000706 | 761.281   | 951.755   | AF052211  | 3113.122  | 3015.352  |
| NM_017601 | 2595.31  | 2972.992 | NM_015941 | 3130.761  | 3739.135  | NM_005600 | 2881.919  | 2204.239  |
| AF110265  | 15187.41 | 16430.66 | NM_003655 | 7881.368  | 6185.33   | NM_005967 | 1922.021  | 1611.397  |
| AF272371  | 56081.21 | 44905.65 | NM_014837 | 4865.123  | 5292.469  | AB014566  | 1949.665  | 1734.63   |
| AK021848  | 2029.568 | 1483.797 | NM_017729 | 1171.418  | 1419.886  | NM_015678 | 615.57    | 323.272   |
| NM_003704 | 2523.459 | 2034.291 | NM_005259 | 4586.478  | 3670.923  | NM_014223 | 1473.47   | 1324.872  |
| AK023140  | 862.715  | 779.37   | NM_002840 | 781.711   | 990.994   | NM_016194 | 1919.859  | 1858.829  |
| AF084362  | 976.746  | 741.019  | NM_006174 | 990.562   | 1130.265  | AL050385  | 1344.558  | 1308.175  |
| NM_001553 | 290.888  | 419.201  | NM_015850 | 4985.684  | 3969.962  | NM_007027 | 3157.823  | 2177.392  |
| NM_014173 | 28415.15 | 31861.59 | NM_002838 | 16407.359 | 11060.884 | NM_000633 | 17072.414 | 16305.662 |
| NM_001731 | 29760.11 | 26515.06 | AK027377  | 282.042   | 162.267   | AB037855  | 881.573   | 1052.219  |
| AL137506  | 1581.671 | 1924.502 | NM_014686 | 55024.309 | 55910.484 | AK024524  | 5775.021  | 5286.778  |
| AK022961  | 5054.777 | 4032.047 | BF528358  | 1014.45   | 2214.947  | NM_000562 | 1452.624  | 1481.223  |
| NM_007375 | 9474.954 | 8009.473 | NM_016339 | 916.284   | 1428.913  | NM_020353 | 503.781   | 236.394   |
| NM_014371 | 8895.77  | 7387.424 | NM_002487 | 8278.51   | 10067.196 | NM_019011 | 8871.098  | 9342.066  |
| AF290512  | 756.211  | 921.351  | NM_013340 | 643.62    | 838.638   | NM_004879 | 2974.828  | 2869.192  |
| NM_006716 | 10729.34 | 6440.875 | NM_005462 | 1016.947  | 902.966   | AB020694  | 3553.222  | 2994.927  |
| AB002323  | 5418.722 | 3477.891 | NM_014954 | 15971.294 | 7735.521  | NM_016071 | 13564.919 | 12357.764 |
| AK022241  | 8290.246 | 5896.824 | NM_000807 | 823.824   | 464.664   | AL050131  | 758.249   | 583.224   |
| AK022587  | 6484.234 | 5099.425 | NM_014909 | 2331.942  | 1381.49   | NM_004475 | 4316.633  | 3447.151  |
| NM_005506 | 2709.41  | 1982.922 | X91148    | 598.451   | 845.8     | NM_001627 | 2450.169  | 2084.245  |
| NM_005723 | 1993.88  | 1448.196 | NM_015700 | 7078.693  | 7866.33   | NM_001226 | 3463.759  | 2485.896  |
| AL137404  | 24563.83 | 20699.9  | NM_019087 | 1951.186  | 1503.488  | NM_001336 | 389.948   | 402.91    |
| NM_017732 | 7386.04  | 8701.823 | NM_016322 | 714.211   | 748.679   | AB050716  | 954.59    | 720.52    |
| NM_002851 | 2201.445 | 1998.846 | NM_005072 | 1014.586  | 1811.058  | X77690    | 1200.353  | 1176.573  |
| NM_002071 | 521.159  | 316.736  | AF215923  | 6440.489  | 6496.568  | NM_005658 | 1062.651  | 663.802   |
| NM_005339 | 15349.01 | 10430.65 | U66621    | 11248.908 | 9629.787  | NM_002422 | 681.184   | 649.702   |
| NM_001906 | 7726.303 | 7599.33  | NM_005720 | 16553.865 | 18673.318 | NM_006690 | 1514.768  | 1362.622  |
| NM_004142 | 745.204  | 410.919  | AB040936  | 543.14    | 362.154   | AF218022  | 2072.587  | 2273.815  |
| AF108138  | 3295.062 | 2389.32  | U61736    | 495.712   | 571.379   | NM_003348 | 3201.598  | 2321.219  |
| NM_004347 | 600.531  | 559.398  | AJ132086  | 1043.723  | 1145.994  | AL137663  | 612.212   | 798.928   |
| BF340302  | 742.875  | 640.436  | U92816    | 11630.021 | 11078.279 | AB006198  | 9520.901  | 10178.747 |
| AK024210  | 1023.404 | 686.074  | BC011987  | 4804.619  | 12258.402 | U72518    | 3366.769  | 3206.038  |
| NM_002276 | 809.562  | 612.875  | NM_004106 | 747.134   | 1266.996  | AF264765  | 493.544   | 326.118   |
| AL133087  | 1675.296 | 1296.224 | NM_003485 | 3361.774  | 3626.018  | NM_015322 | 1935.051  | 2437.559  |
| NM_018010 | 2754.445 | 2638.128 | NM_005038 | 12499.099 | 23650.01  | NM_016607 | 2865.134  | 2637.89   |
| NM_002274 | 2081.706 | 2389.789 | NM_003157 | 2282.128  | 1356.11   | NM_003275 | 563.463   | 539.137   |
| AL080200  | 774.514  | 657.142  | NM_004938 | 1634.943  | 2826.588  | NM_000268 | 13814.549 | 12176.582 |
| BF337874  | 1287.326 | 1448.422 | NM_014326 | 1335.838  | 1560.128  | M30493    | 14956.209 | 13564.516 |
| NM_003475 | 5297.275 | 5548.631 | NM_015981 | 1581.149  | 811.572   | AJ008160  | 661.529   | 530.214   |
| NM_000243 | 3813.628 | 4048.957 | NM_000455 | 3181.432  | 1994.755  | NM_004343 | 21096.965 | 17420.053 |
| NM_004383 | 16348.17 | 22302.32 | NM_014791 | 12308.591 | 10503.864 | X52355    | 4291.762  | 3322.549  |
| NM_012256 | 3887.488 | 5088.899 | NM_003318 | 8119.693  | 7347.179  | NM_006963 | 8659.715  | 10523.483 |

|           |          |          |           |           |           |           |           |           |
|-----------|----------|----------|-----------|-----------|-----------|-----------|-----------|-----------|
| NM_006006 | 396.635  | 381.619  | NM_004362 | 4521.297  | 3677.81   | NM_000307 | 346.311   | 433.137   |
| NM_016325 | 2220.533 | 2418.745 | NM_000182 | 11946.368 | 10076.221 | U66561    | 4477.603  | 4414.474  |
| NM_001604 | 2132.405 | 1365.09  | AK023384  | 2882.596  | 2548.478  | NM_000306 | 1626.992  | 1521.413  |
| NM_017656 | 2146.139 | 1729.227 | NM_016026 | 15084.067 | 18448.467 | NM_002200 | 1868.628  | 1665.29   |
| X16282    | 8214.248 | 7113.472 | AK025111  | 766.577   | 929.989   | AF017433  | 1820.731  | 1979.152  |
| AK022519  | 497.009  | 208.879  | NM_001732 | 1759.752  | 1709.119  | AF130111  | 3913.449  | 5081.509  |
| NM_014415 | 4901.766 | 3508.228 | NM_018690 | 6008.741  | 5147.301  | NM_016307 | 2371.877  | 2878.02   |
| S75264    | 8800.112 | 6634.36  | NM_000860 | 5879.93   | 5220.539  | AB028449  | 3212.057  | 4184.326  |
| AF027513  | 2087.203 | 1328.094 | AB037798  | 2395.636  | 2206.203  | NM_004697 | 3755.114  | 4751.237  |
| NM_001379 | 5251.685 | 3491.976 | NM_000780 | 499.123   | 884.719   | AF131776  | 3733.406  | 3403.994  |
| NM_018664 | 4366.256 | 5308.948 | AF272663  | 11461.498 | 9934.841  | NM_020528 | 3473.159  | 3055.126  |
| NM_005034 | 1299.019 | 1056.673 | NM_012190 | 1602.045  | 1604.012  | NM_007040 | 25599.916 | 20950.547 |
| NM_003926 | 4221.806 | 3782.982 | AF277719  | 895.237   | 1119.68   | NM_014483 | 6151.833  | 5512.876  |
| AF085356  | 972.866  | 779.371  | NM_000791 | 3413.516  | 4465.774  | AK024249  | 1449.858  | 1496.092  |
| NM_016047 | 37311.46 | 31017.73 | NM_003681 | 2567.681  | 2355.445  | AF239156  | 6878.298  | 6545.843  |
| NM_001499 | 8701.888 | 10991.08 | NM_004800 | 10112.148 | 10852.085 | NM_020390 | 2521.843  | 1666.132  |
| BF030165  | 15713.36 | 22807.57 | AB037738  | 462.117   | 518.282   | NM_003321 | 17565.879 | 15385.934 |
| NM_016732 | 18706.89 | 26631.83 | AF147429  | 3751.667  | 6987.627  | U18937    | 6458.521  | 5046.6    |
| NM_014763 | 14769.72 | 16294.14 | NM_001357 | 8821.823  | 4915.791  | U01925    | 640.214   | 455.068   |
| AF086534  | 600.254  | 596.346  | NM_003893 | 3578.415  | 2771.844  | AJ420488  | 53094.59  | 56274.363 |
| AF070617  | 3584.947 | 1164.343 | AB037816  | 1296.697  | 1157.773  | AF268872  | 1373.38   | 1107.041  |
| NM_014918 | 7104.43  | 7756.331 | NM_014380 | 50003.711 | 30575.002 | AK022180  | 20902.23  | 12542.818 |
| NM_003654 | 214.935  | 458.541  | NM_001719 | 9444.88   | 11914.14  | AK001384  | 1277.38   | 1095.732  |
| NM_000152 | 4908.189 | 4027.622 | AL080062  | 1887.876  | 2394.733  | AK025437  | 2711.915  | 2633.735  |
| D17222    | 19363.83 | 16416.24 | AF308802  | 1891.212  | 2525.944  | AK074164  | 590.645   | 683.476   |
| NM_000154 | 2819.601 | 3022.37  | S76984    | 11230.794 | 10654.832 | NM_004168 | 7349.643  | 6984.337  |
| NM_006213 | 597.791  | 398.361  | NM_014495 | 50220.621 | 54938.574 | AF161353  | 9143.156  | 7548.653  |
| NM_003549 | 969.438  | 1096.137 | NM_014081 | 800.087   | 1014.977  | NM_000764 | 851.785   | 534.83    |
| NM_000671 | 4673.053 | 3127.147 | NM_005651 | 1012.645  | 755.709   | NM_004146 | 19008.371 | 19814.375 |
| NM_006297 | 4654.625 | 5057.607 | NM_007195 | 2167.677  | 2546.739  | NM_003002 | 14300.501 | 19154.502 |
| X85325    | 52931.49 | 46075.46 | AK023337  | 4450.218  | 3870.046  | D42047    | 1763.972  | 2344.216  |
| AF318366  | 4419.885 | 4879.083 | NM_013275 | 20257.15  | 17694.242 | AB009282  | 17336.943 | 19122.764 |
| AF182423  | 2743.562 | 1834.774 | AB037842  | 1202.955  | 1206.029  | NM_005004 | 29702.051 | 22277.59  |
| D26018    | 5008.844 | 3208.557 | U92074    | 810.085   | 704.914   | NM_003670 | 3871.998  | 3156.277  |
| NM_017643 | 503.411  | 340.272  | NM_019011 | 3836.426  | 3586.251  | NM_014639 | 3723.011  | 3794.837  |
| AB037863  | 434.259  | 556.787  | AF459094  | 6404.024  | 7331.061  | NM_006392 | 3075.786  | 2605.723  |
| BC000363  | 1275.408 | 1407.77  | NM_005927 | 3159.34   | 2362.643  | NM_014717 | 1598.646  | 1159.196  |
| NM_005919 | 3462.382 | 5240.71  | AB028983  | 2909.675  | 2288.552  | NM_017922 | 3284.979  | 2906.438  |
| AF085931  | 2105.12  | 2973.184 | AB037800  | 1934.086  | 1503.405  | NM_017916 | 15512.106 | 13537.351 |
| AF086112  | 601.144  | 632.476  | AK026377  | 2137.481  | 1898.597  | NM_001805 | 4744.049  | 5675.36   |
| AL137254  | 1165.64  | 1090.875 | NM_018660 | 5064.336  | 3297.222  | AK022360  | 1945.04   | 1709.137  |
| AK026359  | 1044.874 | 910.866  | NM_003394 | 5108.115  | 5039.816  | AK095694  | 1211.843  | 915.702   |
| AF085884  | 751.816  | 681.413  | NM_014636 | 1149.244  | 657.056   | X52341    | 47472.516 | 28195.32  |
| S81522    | 6187.097 | 6414.239 | NM_006747 | 1650.33   | 1697.022  | NM_003082 | 5405.235  | 4466.469  |
| S94541    | 1055.385 | 829.575  | NM_007086 | 2730.249  | 3855.639  | AL133632  | 2104.702  | 1523.14   |
| L36587    | 23699.31 | 29580.31 | NM_003870 | 8928.07   | 9253.63   | AK024551  | 1158.818  | 2267.148  |
| AK024228  | 1696.295 | 1457.454 | AK024507  | 983.925   | 1015.773  | AL833249  | 1968.467  | 3365.032  |
| NM_016647 | 1474.271 | 2738.486 | NM_001243 | 4209.048  | 4441.124  | NM_018374 | 2800.16   | 3210.705  |
| AK024695  | 1180.505 | 1239.933 | AK025997  | 392.91    | 713.03    | AF131852  | 408.866   | 329.816   |
| NM_018659 | 705.334  | 569.322  | NM_005546 | 3156.723  | 3168.886  | AK021894  | 2085.695  | 2413.185  |
| AF038174  | 3490.064 | 2521.657 | NM_014887 | 4668.227  | 5062.798  | NM_020424 | 4133.8    | 4037.229  |
| NM_013243 | 370.187  | 595.924  | NM_002590 | 613.574   | 814.811   | AF438313  | 540.745   | 808.927   |
| AF070632  | 781.279  | 856.779  | NM_018556 | 15395.088 | 18214.574 | NM_017815 | 482.31    | 502.703   |

|           |          |          |           |           |           |           |           |           |
|-----------|----------|----------|-----------|-----------|-----------|-----------|-----------|-----------|
| AK023623  | 969.38   | 1422.949 | NM_005824 | 1392.848  | 2497.93   | AF147341  | 664.783   | 1109.779  |
| AK026202  | 433.693  | 635.069  | AF052211  | 7839.024  | 11401.837 | AB033009  | 17161.373 | 17701.445 |
| AK021539  | 4204.515 | 5082.197 | AB014566  | 1958.761  | 1214.196  | AL137761  | 2776.655  | 2756.898  |
| AK021819  | 784.016  | 697.39   | NM_014223 | 1912.774  | 1855.688  | AK022086  | 475.881   | 736.303   |
| AK026738  | 1299.504 | 1145.723 | NM_016194 | 2107.842  | 2098.783  | AF147320  | 1425.037  | 1202.027  |
| AK025011  | 815.526  | 740.213  | AL050385  | 1399.377  | 1281.821  | AK027024  | 689.402   | 666.407   |
| AL157491  | 1018.212 | 924.431  | NM_007027 | 3373.895  | 3397.053  | AK022339  | 1337.105  | 1187.142  |
| NM_005266 | 1121.542 | 1132.041 | NM_000633 | 29558.914 | 24397.965 | AK022138  | 1472.354  | 1757.005  |
| AF085998  | 1481.384 | 1121.694 | AB037855  | 1185.432  | 1067.88   | AF143880  | 506.71    | 637.433   |
| AK024681  | 669.022  | 670.533  | AK024524  | 7934.573  | 7496.946  | NM_017636 | 8492.8    | 6982.368  |
| NM_014907 | 19015.34 | 20758.09 | NM_000562 | 2371.685  | 2642.439  | AL133052  | 1684.681  | 1058.021  |
| AB007977  | 661.47   | 777.931  | NM_020353 | 431.337   | 459.991   | AB037824  | 2459.184  | 2061.164  |
| NM_014221 | 6821.434 | 5180.09  | NM_019011 | 14409.473 | 13079.42  | AF361494  | 884.739   | 679.26    |
| U84515    | 737.957  | 1001.304 | NM_004879 | 3644.344  | 4160.776  | AK022810  | 1007.937  | 1364.404  |
| AF086106  | 941.264  | 845.855  | AB020694  | 4780.624  | 5993.503  | AK023122  | 358.526   | 690.764   |
| AF086143  | 2630.124 | 4222.893 | NM_016071 | 18905.723 | 19410.684 | AF147408  | 2075.057  | 2192.893  |
| AK022239  | 495.958  | 917.458  | AL050131  | 1169.843  | 1336.722  | AK027222  | 3160.626  | 3400.086  |
| AK022364  | 661.995  | 577.598  | NM_004475 | 8473.813  | 7933.554  | AF085868  | 443.186   | 306.593   |
| AK024244  | 1505.821 | 1577.101 | NM_001627 | 2854.653  | 3708.743  | AL049275  | 402.648   | 410.937   |
| AK023812  | 299.115  | 314.912  | NM_001226 | 5322.799  | 8163.227  | AK054767  | 593.65    | 630.435   |
| AL390084  | 814.142  | 960.32   | NM_002422 | 1313.296  | 509.759   | AL049301  | 972.924   | 1032.995  |
| AK021479  | 697.098  | 628.907  | NM_006690 | 2562.775  | 2008.626  | AL050042  | 1751.049  | 1797.716  |
| NM_003835 | 933.323  | 751.067  | AF218022  | 2928.192  | 3290.749  | AL117570  | 362.695   | 447.139   |
| AK000245  | 534.379  | 668.158  | NM_003348 | 3648.756  | 3733.08   | NM_018469 | 1499.138  | 1840.932  |
| AF118072  | 642.887  | 1010.544 | AL137663  | 916.852   | 672.609   | NM_014867 | 2136.254  | 2305.664  |
| AK023724  | 534.566  | 545.391  | AB006198  | 14951.323 | 11174.668 | AL359932  | 612.069   | 496.823   |
| AK024112  | 779.501  | 545.542  | U72518    | 4412.446  | 3719.279  | AB037850  | 4045.802  | 3022.059  |
| AF085900  | 3316.244 | 2938.611 | AF264765  | 773.706   | 771.779   | AK002197  | 1964.393  | 1928.062  |
| AK022420  | 1585.447 | 1008.035 | NM_015322 | 3941.074  | 2754.197  | AF087996  | 1496.87   | 1397.177  |
| AK023254  | 748.796  | 654.205  | NM_016607 | 5225.222  | 4627.541  | AK021710  | 2019.425  | 1824.082  |
| AK023945  | 17481.37 | 17869.56 | NM_003275 | 1209.581  | 784.954   | AB025286  | 2124.717  | 3543.806  |
| AK023352  | 412.452  | 529.178  | NM_000268 | 29064.406 | 27251.775 | AF009286  | 853.559   | 917.919   |
| AF116709  | 1347.968 | 1813.289 | M30493    | 26832.531 | 23876.533 | NM_015880 | 407.499   | 455.007   |
| AK025533  | 1461.484 | 2025.581 | AJ008160  | 822.406   | 831.63    | AF056437  | 948.615   | 861.642   |
| AK026499  | 232.326  | 975.722  | NM_004343 | 41267.199 | 45125.98  | AB032364  | 517.051   | 480.737   |
| AK021911  | 8139.679 | 8810.135 | X52355    | 8773.077  | 13898.936 | AF009295  | 543.518   | 342.723   |
| D17225    | 2727.602 | 5370.642 | NM_002200 | 1868.107  | 657.354   | NM_005029 | 1534.142  | 1922.134  |
| AF147430  | 280.69   | 478.867  | AF017433  | 1687.628  | 477.693   | AF056447  | 1924.631  | 1876.787  |
| AK025766  | 6072.617 | 5779.494 | AF130111  | 3549.588  | 1278.859  | AK001010  | 796.275   | 1014.917  |
| U35875    | 4829.806 | 5669.309 | NM_016307 | 3359.82   | 2766.582  | NM_018076 | 746.629   | 924.354   |
| AK021857  | 11319.84 | 12948.82 | AB028449  | 3690.447  | 2865.86   | AK021442  | 1987.339  | 2230.04   |
| AK022257  | 1929.299 | 2189.029 | NM_004697 | 4128.967  | 3658.405  | AK001076  | 869.765   | 1104.293  |
| BE887356  | 7797.3   | 7213.439 | AF131776  | 6299.986  | 6552.058  | AK001820  | 512.327   | 669.78    |
| X84369    | 1012.815 | 1269.82  | NM_020528 | 4475.462  | 4130.48   | AK021482  | 4831.713  | 5337.292  |
| AK001074  | 922.713  | 581.003  | NM_007040 | 35812.703 | 32423.592 | AK021730  | 578.963   | 554.262   |
| AK023329  | 8522.315 | 9789.774 | NM_014483 | 6895.309  | 5925.44   | AK025126  | 811.781   | 933.46    |
| AK025181  | 495.527  | 581.211  | AK024249  | 2462.165  | 1946.766  | AK025317  | 5545.238  | 5383.402  |
| AK021773  | 2547.439 | 2872.1   | AF239156  | 10025.93  | 7562.781  | AK026119  | 620.427   | 452.474   |
| AK027074  | 2693.373 | 3009.1   | NM_020390 | 2203.638  | 2430.768  | AK026725  | 1620.499  | 1687.429  |
| AL365456  | 816.691  | 953.496  | NM_003321 | 26444.139 | 21852.826 | NM_005523 | 1137.557  | 1613.947  |
| NM_018036 | 779.966  | 905.679  | U18937    | 8696.216  | 6649.539  | AL109674  | 581.705   | 964.548   |
| AK025048  | 1011.038 | 1453.657 | U01925    | 827.022   | 884.91    | AK024512  | 6813.168  | 5720.586  |
| U84522    | 1385.583 | 1868.74  | AJ420488  | 54822.051 | 60272.297 | AK023454  | 1733.38   | 1350.964  |

|            |          |          |           |           |           |           |           |           |
|------------|----------|----------|-----------|-----------|-----------|-----------|-----------|-----------|
| AK021694   | 2011.927 | 2105.449 | AF268872  | 1797.358  | 1979.35   | L23207    | 792.183   | 688.31    |
| AF086013   | 699.64   | 938.95   | AK022180  | 35359.402 | 29201.121 | NM_018062 | 2052.489  | 1278.446  |
| U84505     | 1339.327 | 1663.265 | NM_004146 | 14827.678 | 3358.548  | NM_007128 | 10323.643 | 10401.049 |
| X81005     | 2442.491 | 2693.351 | NM_003002 | 9508.745  | 2083.724  | NM_007160 | 528.305   | 736.51    |
| AL049265   | 3942.196 | 3232.078 | D42047    | 1515.345  | 1201.762  | NM_018627 | 496.128   | 817.68    |
| AK022225   | 359.496  | 287.447  | AB009282  | 20774.563 | 14378.954 | NM_015377 | 657.428   | 496.858   |
| NM_012352  | 187.791  | 415.673  | NM_005004 | 31044.207 | 33669.883 | AL137531  | 1152.151  | 1024.735  |
| AL137635   | 516.052  | 778.769  | NM_003670 | 3347.464  | 4263.958  | AK022210  | 355.474   | 371.355   |
| AL049430   | 714.119  | 738.612  | NM_014639 | 5080.778  | 4099.92   | AL080085  | 5788.457  | 4477.033  |
| AK021461   | 626.495  | 784.723  | NM_006392 | 3131.222  | 2735.422  | AF086519  | 614.457   | 1167.649  |
| AB015349   | 875.228  | 904.646  | NM_014717 | 2006.946  | 1747.172  | AF055012  | 1971.794  | 2535.344  |
| AL079274   | 2587.626 | 3565.119 | NM_017922 | 4686.451  | 3568.509  | AK022307  | 2554.45   | 2695.115  |
| S46403     | 729.488  | 774.156  | NM_002823 | 56467.219 | 60914.039 | NM_005172 | 2283.873  | 2707.856  |
| AL137398   | 1133.587 | 1035.836 | NM_017916 | 23658.754 | 22311.117 | AK025192  | 8457.058  | 8322.609  |
| Y12021     | 790.266  | 838.471  | NM_001805 | 13069.512 | 8490.57   | NM_012403 | 2193.643  | 1715.147  |
| AF127771   | 1057.743 | 984.958  | AK022360  | 2718.372  | 2752.078  | AK022611  | 7543.05   | 7017.203  |
| Z83949     | 545.449  | 580.969  | AK095694  | 1452.031  | 2051.302  | NM_006158 | 9678.642  | 9326.414  |
| NM_013300  | 18220.85 | 24515.06 | X52341    | 57223.199 | 60577.492 | NM_006346 | 1697.857  | 1580.669  |
| AK026039   | 8759.303 | 11977.53 | NM_003082 | 8808.798  | 8241.079  | AK025240  | 2480.735  | 2088.223  |
| AF108756   | 10258.12 | 14310.34 | AL133632  | 3408.639  | 5722.717  | NM_017633 | 10089.484 | 10916.09  |
| NM_004075  | 5787.015 | 6737.057 | NM_020424 | 4476.431  | 2326.545  | AF086186  | 10387.013 | 9283.789  |
| NM_001887  | 9901.27  | 8817.083 | AB033009  | 22554.619 | 14998.828 | NM_017802 | 2618.35   | 2478.325  |
| NM_006533  | 1532.679 | 1419.46  | AL137761  | 3355.591  | 3016.787  | AK023667  | 942.127   | 918.656   |
| AK026747   | 12163.74 | 13948.7  | AK022086  | 829.531   | 888.322   | AJ008137  | 9633.693  | 9451.772  |
| AL110150   | 1117.366 | 1153.888 | AF147320  | 2265.813  | 2685.312  | AF085841  | 966.988   | 978.281   |
| NM_001998  | 5517.339 | 5999.997 | AK027024  | 998.594   | 911.609   | AL049232  | 407.919   | 278.077   |
| X87825     | 1610.921 | 1551.384 | AK022339  | 1541.049  | 1511.449  | U92026    | 800.022   | 1091.841  |
| AK001285   | 26204.04 | 25075.44 | AK022138  | 1747.486  | 1753.745  | AF086234  | 22402.775 | 15037.774 |
| D17215     | 6096.922 | 4323.277 | AF086191  | 9717.811  | 7768.049  | AK023680  | 5051.716  | 4871.505  |
| BE781513   | 766.988  | 884.299  | AF143880  | 696.013   | 722.425   | AF009324  | 3557.851  | 2714.812  |
| NM_015714  | 3506.571 | 5324.837 | NM_017638 | 10830.831 | 10654.486 | AF019226  | 1172.829  | 1299.192  |
| AK075564   | 1198.91  | 1622.568 | AL133052  | 2512.88   | 2878.379  | AK022112  | 454.278   | 617.253   |
| AK026219   | 2479.127 | 2427.83  | AB037824  | 3753.143  | 3978.15   | AL137480  | 13823.282 | 14045.563 |
| D28446     | 865.946  | 819.936  | AF361494  | 1150.195  | 1069.994  | AK022182  | 644.608   | 597.908   |
| AK024756   | 4623.036 | 5537.196 | AK022810  | 3163.228  | 2653.218  | D16473    | 2127.933  | 1779      |
| NM_017911  | 3988.419 | 4358.085 | AF054994  | 397.501   | 236.821   | AB028968  | 1635.156  | 1472.37   |
| AJ224168   | 3983.676 | 3781.303 | AL049301  | 1433.013  | 1604.794  | AK001202  | 917.734   | 986.173   |
| S69873     | 1670.174 | 1684.624 | AL050042  | 2944.178  | 2832.339  | AF195764  | 50088.648 | 48896.594 |
| AF147325   | 67932.49 | 51771.43 | AL117570  | 533.399   | 382.796   | AF055029  | 814.027   | 1000.82   |
| NM_014428  | 3422.323 | 3148.759 | NM_018465 | 2234.306  | 1795.994  | S82164    | 1179.266  | 1433.218  |
| NM_018497  | 726.561  | 747.724  | NM_014867 | 3628.211  | 3263.471  | AK024394  | 2235.157  | 2256.477  |
| AK023584   | 897.103  | 1125.942 | AL359932  | 1017.256  | 959.406   | AF147374  | 1671.645  | 1663.405  |
| NM_003774  | 792.333  | 909.804  | AB037850  | 7608.822  | 6179.232  | AF130091  | 850.529   | 638.974   |
| D87466     | 6400.626 | 8894.662 | AK002197  | 3792.227  | 4267.706  | L43338    | 10822.181 | 10196.497 |
| CY3Cy5     | 2840.084 | 183.02   | AF087996  | 4750.181  | 3625.13   | AJ227866  | 14528.396 | 12052.137 |
| AA608568   | 12913.06 | 13038.12 | AK021710  | 3204.473  | 3059.743  | AF458223  | 4948.474  | 3268.58   |
| BG831301   | 10713.28 | 18485.77 | AF056437  | 1216.786  | 843.666   | AK026822  | 1542.641  | 1013.841  |
| M14764     | 318.258  | 522.418  | AB032364  | 524.302   | 429.309   | AK022838  | 8292.551  | 8718.361  |
| AA478647   | 9557.348 | 9095.166 | AF009295  | 537.483   | 340.555   | NM_003509 | 654.095   | 525.015   |
| ID 2623896 | 1309.668 | 1343.837 | NM_005025 | 1714.06   | 1480.193  | CY3Cy5    | 5166.731  | 316.308   |
| ID 2602214 | 1814.693 | 1870.124 | AF056447  | 2147.794  | 1863.032  | AA700390  | 4125.249  | 4193.584  |
| ID 2071279 | 8993.511 | 5120.854 | AK001010  | 1963.788  | 1140.66   | AA436163  | 775.276   | 1375.429  |
| L10709     | 4267.911 | 4736.58  | NM_018076 | 1530.259  | 1970.637  | BI907981  | 698.277   | 728.853   |

|           |          |          |           |           |           |           |           |           |
|-----------|----------|----------|-----------|-----------|-----------|-----------|-----------|-----------|
| N35489    | 870.685  | 708.324  | AK021442  | 2692.002  | 2682.642  | BI603841  | 1941.21   | 1741.709  |
| AI928195  | 906.658  | 363.27   | AK001076  | 1114.844  | 1175.77   | Y08136    | 566.231   | 380.304   |
| AA458922  | 2462.324 | 4153.658 | AK001820  | 670.051   | 714.683   | AA156863  | 3913.081  | 3332.605  |
| NM_14565E | 1472.779 | 921.462  | AK021482  | 8300.184  | 8157.321  | BI915199  | 3012.545  | 2639.374  |
| SR10      | 34390.27 | 14665.98 | AK021730  | 1052.663  | 914.89    | BI830442  | 267.143   | 702.572   |
| CY3Cy5    | 2867.921 | 252.77   | AK025126  | 458.518   | 455.939   | AI218732  | 2348.425  | 3793.799  |
| NM_01772E | 1801.519 | 2023.69  | AK025317  | 13371.789 | 9490.639  | NM_00410E | 1832.17   | 2194.48   |
| NM_00525E | 1030.486 | 1420.435 | AK026119  | 1052.109  | 1083.086  | SR5       | 5802.955  | 5217.852  |
| NM_00284C | 471.49   | 1188.24  | AK026725  | 3311.513  | 3089.937  | SR7       | 5031.323  | 49151.211 |
| NM_006174 | 844.141  | 1080.628 | AJ008118  | 59647.52  | 59332.652 | SR9       | 18607.922 | 3184.526  |
| NM_01585C | 1917.322 | 3696.951 | AL109674  | 851.24    | 473.847   | CY3Cy5    | 5395.774  | 511.077   |
| NM_00283E | 10683.21 | 13172.15 | AK024512  | 8721.028  | 6691.75   | NM_01804E | 4464.104  | 5327.988  |
| NM_01468E | 31851.84 | 26739.87 | AK023454  | 2761.199  | 2106.979  | NM_00516C | 6762.765  | 8252.34   |
| BF528358  | 1829.189 | 975.569  | L23207    | 1525.366  | 951.123   | NM_00059E | 299.199   | 342.268   |
| NM_01633E | 1037.013 | 496.069  | NM_01806E | 1492.463  | 1985.591  | X78817    | 8689.922  | 8940.018  |
| NM_002487 | 6209.253 | 4446.311 | NM_00712E | 13065.937 | 8476.758  | AB023135  | 553.019   | 523.131   |
| NM_01231E | 2785.423 | 1865.276 | NM_00716C | 598.094   | 558.706   | AY009401  | 452.285   | 390.869   |
| AK026235  | 807.324  | 769.73   | NM_018627 | 1011.017  | 831.951   | AF294628  | 1067.529  | 1256.379  |
| NM_00651C | 5250.69  | 4223.089 | NM_015377 | 1150.02   | 1144.662  | AK026960  | 612.607   | 703.416   |
| NM_02024E | 2341.825 | 3064.558 | AL137531  | 1823.307  | 1509.674  | NM_00244E | 2390.634  | 3513.768  |
| NM_00717E | 2249.069 | 2743.124 | AL080085  | 6776.521  | 6996.612  | AF053952  | 6911.527  | 9792.469  |
| NM_00301E | 291.676  | 851.99   | AF086519  | 1038.2    | 877.046   | BF184738  | 416.133   | 458.536   |
| NM_00033E | 1230.397 | 2834.468 | AF055012  | 2594.893  | 1805.364  | NM_014044 | 3120.496  | 3466.022  |
| W61100    | 8096.615 | 11209.1  | AK022307  | 5056.285  | 3852.245  | NM_00090C | 820.338   | 962.721   |
| AF215923  | 9804.032 | 18177.97 | NM_00517E | 4327.115  | 3698.79   | AK023684  | 5306.153  | 7975.562  |
| U66621    | 9970.571 | 17932.96 | AK025192  | 14137.198 | 9533.488  | NM_00023E | 1985.157  | 2993.24   |
| NM_00572C | 25300.51 | 28764.49 | NM_01240E | 3082.331  | 2578.328  | NM_015057 | 552.135   | 527.087   |
| AB040936  | 536.349  | 764.772  | AK022611  | 8232.26   | 8451.867  | AF303398  | 4762.217  | 5043.824  |
| AJ132086  | 902.037  | 756.529  | NM_00615E | 17481.234 | 13889.646 | NM_01481C | 1940.921  | 1145.121  |
| U92816    | 4926.098 | 4059.077 | NM_00634E | 2626.253  | 2538.463  | NM_00473E | 2669.593  | 2192.677  |
| BC011987  | 9026.464 | 4710.918 | AK025240  | 3260.688  | 4305.587  | NM_007357 | 3491.542  | 4080.469  |
| NM_00410E | 959.259  | 621.713  | NM_005377 | 519.382   | 368.408   | NM_00376E | 3968.583  | 5225.491  |
| NM_00348E | 2336.682 | 1711.531 | NM_01763E | 14184.661 | 10875.182 | AK023448  | 1420.446  | 1059.589  |
| NM_00503E | 13857.53 | 6543.614 | AF086186  | 19249.801 | 19106.09  | Y18213    | 2166.388  | 2718.402  |
| M95923    | 346.669  | 309.268  | NM_01780E | 4488.295  | 2988.71   | NM_00328E | 2461.838  | 3266.116  |
| NM_00241E | 72099.66 | 65048.62 | AF155194  | 417.456   | 656.223   | NM_001311 | 3081.923  | 3796.339  |
| NM_00633E | 11005.39 | 6887.468 | AK023667  | 1297.952  | 1500.203  | NM_01779E | 7511.583  | 7479.969  |
| NM_01866E | 3314.752 | 5889.373 | AJ008137  | 20216.764 | 17880.654 | NM_01241C | 1119.665  | 1872.948  |
| NM_145904 | 17306.12 | 22392.3  | AF085841  | 1301.747  | 1412.899  | NM_001111 | 5653.161  | 10862.077 |
| NM_00679E | 13762.32 | 14993.22 | AL049232  | 469.318   | 535.814   | NM_001611 | 821.888   | 942.486   |
| NM_00070E | 1269.523 | 1566.627 | U92026    | 1404.831  | 1344.687  | AB018310  | 2738.903  | 2838.606  |
| NM_015941 | 8305.91  | 9174.55  | AF086234  | 28480.338 | 21204.619 | NM_02013E | 481.256   | 708.927   |
| NM_00365E | 9452.517 | 13197.12 | AK023680  | 6656.709  | 4863.156  | NM_01537E | 12556.413 | 12639.44  |
| NM_014837 | 4611.275 | 6068.418 | AF009324  | 3841.602  | 3586.946  | NM_00487E | 382.327   | 516.326   |
| AK025111  | 817.868  | 1071.133 | AF019226  | 1461.219  | 1187.874  | NM_00074E | 925.882   | 1062.253  |
| NM_00173E | 1112.499 | 1421.436 | AK022112  | 626.92    | 631.319   | NM_00235E | 8247.698  | 8936.463  |
| NM_01869C | 2171.828 | 2871.738 | AL137480  | 18163.834 | 12489.868 | AK026608  | 3211.385  | 3153.165  |
| NM_00086C | 4284.532 | 5178.383 | AK022182  | 619.566   | 608.612   | AB046836  | 732.727   | 690.804   |
| AB037798  | 2797.861 | 3871.802 | D16473    | 1994.296  | 1924.744  | AJ224166  | 1247.37   | 809.68    |
| NM_00078C | 554.192  | 368.481  | AB028968  | 1939.305  | 1995.214  | AK026098  | 3370.541  | 2973.116  |
| AF272663  | 2438.437 | 2552.044 | AK001202  | 879.406   | 837.47    | NM_012381 | 2158.366  | 1918.618  |
| NM_01219C | 2245.523 | 2234.727 | AF195764  | 50403.277 | 53835.965 | M20702    | 1724.491  | 2135.019  |
| AF277719  | 957.042  | 703.117  | AF055029  | 1465.729  | 1292.286  | NM_006397 | 14248.95  | 11233.784 |

|            |          |          |           |           |           |           |           |           |
|------------|----------|----------|-----------|-----------|-----------|-----------|-----------|-----------|
| NM_000791  | 3852.198 | 2926.978 | S82164    | 2290.738  | 2238.969  | D83776    | 1520.1    | 1910.938  |
| NM_003681  | 2390.945 | 1969.825 | AK024394  | 2507.911  | 2566.761  | AK026362  | 2953.944  | 2712.322  |
| NM_00480C  | 8844.554 | 5723.929 | AF147374  | 1860.371  | 1709.713  | NM_00496E | 1939.96   | 2553.285  |
| NM_014954  | 6012.394 | 10383.55 | AF130091  | 594.86    | 853.718   | NM_00590E | 1707.373  | 2148.095  |
| NM_000807  | 828.548  | 999.667  | L43338    | 22789.705 | 19394.865 | NM_00478E | 3308.77   | 3655.53   |
| NM_01490E  | 949.852  | 1681.545 | AJ227866  | 30907.881 | 26328.338 | AK024079  | 665.569   | 953.308   |
| X91148     | 992.276  | 1563.945 | AF458223  | 5898.432  | 5327.851  | NM_00242E | 1580.745  | 1851.27   |
| NM_01570C  | 15835.24 | 14956.34 | AK026822  | 1620.676  | 1109.774  | NM_014674 | 3484.121  | 3710.331  |
| NM_019087  | 2813.708 | 3108.172 | AK022838  | 13764.219 | 13235.458 | NM_018271 | 584.417   | 928.559   |
| NM_01632Z  | 970.38   | 1128.287 | NM_00350E | 816.714   | 740.719   | NM_000547 | 340.202   | 843.172   |
| NM_004277  | 653.736  | 1201.421 | CY3Cy5    | 6122.071  | 536.323   | NM_01465Z | 805.289   | 998.5     |
| NM_00507Z  | 1497.029 | 1843.714 | AA700390  | 6842.002  | 8029.289  | AL133020  | 4230.208  | 5049.205  |
| AF308802   | 1900.687 | 2479.279 | AA436163  | 1838.634  | 1771.802  | NM_014044 | 2837.342  | 2598.449  |
| S76984     | 12898.73 | 11081.63 | BI907981  | 990.508   | 1421.662  | NM_00090C | 694.012   | 736.057   |
| NM_01449E  | 27469.32 | 27771.46 | BI603841  | 3035.624  | 3563.249  | AK023684  | 4761.545  | 3756.008  |
| NM_014081  | 596.146  | 671.272  | M19888    | 1003.109  | 1201.54   | NM_00023Z | 1722.785  | 1577.335  |
| NM_005651  | 807.444  | 895.508  | Y08136    | 854.392   | 700.201   | AA700390  | 4251.908  | 3754.326  |
| NM_00719E  | 2003.159 | 1954.337 | AA156863  | 5232.25   | 5843.001  | AA436163  | 747.078   | 1589.743  |
| AK023337   | 1116.932 | 1018.997 | BI915199  | 3465.122  | 4811.992  | BI907981  | 602.669   | 492.411   |
| NM_01327E  | 11671.56 | 9835.828 | R82957    | 63962.422 | 68947.102 | BI603841  | 1702.629  | 2371.19   |
| AB037842   | 1063.392 | 769.462  | BI830442  | 2267.127  | 3152.057  | AA156863  | 4436.907  | 5676.783  |
| U92074     | 1078.036 | 584.824  | AI218732  | 2694.289  | 2858.603  | BI915199  | 3040.082  | 2806.406  |
| NM_019011  | 3393.472 | 2634.347 | NM_00410Z | 2484.908  | 2338.325  | BI830442  | 442.229   | 388.028   |
| AF459094   | 6004.847 | 3424.765 | SR5       | 7172.3    | 5506.959  | AI218732  | 2216.416  | 2569.475  |
| NM_003157  | 1460.768 | 1171.711 | SR7       | 5846.849  | 29402.111 | NM_00410Z | 1744.238  | 1942.794  |
| NM_00493E  | 1417.802 | 1003.198 | SR9       | 19689.654 | 2228.085  | NM_004544 | 5706.841  | 5542.62   |
| NM_01432E  | 448.535  | 554.663  | CY3Cy5    | 4944.021  | 362.599   | NM_01889C | 21262.076 | 22909.688 |
| NM_00045E  | 4950.111 | 7652.846 | NM_01804E | 7357.56   | 7262.887  | NM_00265Z | 309.797   | 254.966   |
| NM_014791  | 17530.85 | 17905.51 | AJ133439  | 545.003   | 538.515   | NM_001311 | 2493.823  | 2508.067  |
| NM_00331E  | 14056.17 | 12072.75 | NM_00516C | 12443.654 | 8217.424  | NM_01779E | 6775.909  | 5441.293  |
| NM_00436Z  | 4915.085 | 5434.134 | NM_00059E | 299.905   | 581.011   | NM_01241C | 738.709   | 678.585   |
| NM_00018Z  | 15008.46 | 26093.57 | X78817    | 14292.117 | 12627.93  | NM_001111 | 4507.622  | 4744.462  |
| AK023384   | 2642.602 | 5365.927 | AB023135  | 1278.782  | 1110.061  | NM_01804E | 4639.552  | 4179.545  |
| NM_01602E  | 22692.09 | 24821.27 | AY009401  | 780.489   | 964.188   | NM_00516C | 6988.753  | 5335.031  |
| AB046381   | 1224.37  | 1174.577 | AF294628  | 1584.616  | 1362.356  | NM_00059E | 460.205   | 751.141   |
| AJ011497   | 611.035  | 702.679  | AK026960  | 887.331   | 823.02    | X78817    | 7957.253  | 26130.27  |
| NM_00301E  | 382.86   | 494.066  | NM_001991 | 1376.835  | 1879.472  | AB023135  | 832.628   | 1482.607  |
| NM_00033E  | 710.228  | 1515.752 | NM_00019Z | 3353.327  | 3027.033  | AY009401  | 493.299   | 582.348   |
| W61100     | 6742.297 | 8810.843 | BC014586  | 539.369   | 702.062   | AK026960  | 766.503   | 767.314   |
| AA608568   | 11344.51 | 10419.08 | NM_00244E | 3403.951  | 2774.859  | NM_001991 | 1156.328  | 1108.352  |
| BG831301   | 10637.18 | 11856.73 | AF053952  | 16617.953 | 16442.75  | NM_00019Z | 1476.887  | 2019.431  |
| AA478647   | 8662.482 | 6666.827 | NM_00321Z | 5910.03   | 5501.946  | BC014586  | 478.266   | 790.08    |
| ID 2623896 | 1325.064 | 986.844  | BF184738  | 519.278   | 621.969   | NM_00244E | 2463.726  | 2587.551  |
| ID 2602214 | 2006.989 | 1640.8   | NM_014044 | 3565.679  | 3140.479  | AF053952  | 6145.63   | 5851.665  |
| ID 2071279 | 8971.634 | 3897.318 | NM_00090C | 1467.918  | 1054.538  | NM_00321Z | 5625.039  | 6099.023  |
| L10709     | 5192.585 | 7929.943 | AK023684  | 6512.267  | 6516.235  | BF184738  | 492.342   | 539.925   |
| N35489     | 1053.86  | 560.926  | NM_00023Z | 2891.215  | 2355.88   | NM_015057 | 612.17    | 615.485   |
| AA458922   | 3293.963 | 5811.459 | NM_015057 | 916.939   | 959.321   | AF303398  | 3828.199  | 3862.641  |
| NM_14565E  | 2521.489 | 2769.795 | AF303398  | 8602.91   | 8380.554  | NM_01481C | 1933.749  | 1148.171  |
| NM_021957  | 665.691  | 685.607  | NM_01481C | 2787.494  | 2757.483  | NM_00473E | 2700.535  | 2270.501  |
| NM_00171E  | 9405.42  | 11738.28 | NM_00473E | 3034.173  | 4122.723  | NM_007357 | 3494.77   | 4249.294  |
| AL080062   | 2743.488 | 2996.443 | NM_007357 | 5778.122  | 5812.977  | NM_00376Z | 3745.838  | 5606.355  |
| NM_145904  | 14207.31 | 14637.38 | AK023448  | 1816.575  | 1580.658  | AK023448  | 1683.469  | 1445.899  |



|           |          |          |           |           |           |           |           |           |
|-----------|----------|----------|-----------|-----------|-----------|-----------|-----------|-----------|
| NM_00679E | 9473.262 | 9225.671 | Y18213    | 2833.757  | 2663.313  | Y18213    | 2491.63   | 2306.936  |
| NM_00070E | 911.831  | 847.631  | NM_00328E | 2875.342  | 2701.024  | NM_00328E | 2525.341  | 2521.945  |
| NM_015941 | 6250.364 | 4771.594 | AF249898  | 8502.92   | 8245.455  | AF249898  | 6810.688  | 7400.481  |
| NM_00365E | 9200.857 | 15265.95 | M69181    | 11762.569 | 10634.05  | M69181    | 5861.662  | 6203.357  |
| NM_014837 | 4286.457 | 4053.953 | AK027224  | 322.198   | 935.356   | AK027224  | 767.487   | 424.433   |
| NM_01772E | 1868.37  | 1371.902 | NM_001311 | 4517.717  | 2956.925  | L09078    | 338.957   | 722.195   |
| NM_00525E | 926.592  | 846.227  | NM_01779E | 9293.791  | 7484.1    | NM_00242E | 1356.919  | 1308.018  |
| NM_00284C | 539.974  | 425.133  | NM_01241C | 1800.039  | 1348.925  | NM_014674 | 3370.229  | 4025.868  |
| NM_006174 | 929.535  | 494.355  | NM_001111 | 8186.62   | 5106.462  | NM_018271 | 570.087   | 651.935   |
| NM_01585C | 1529.016 | 2484.822 | NM_00502E | 9815.144  | 12596.118 | NM_000547 | 343.69    | 529.175   |
| NM_004864 | 399.563  | 339.805  | NM_001611 | 1634.543  | 1528.716  | NM_01465E | 849.353   | 683.856   |
| NM_00283E | 10134.61 | 9606.688 | AB018310  | 5355.136  | 5179.859  | AL133020  | 3635.483  | 3435.198  |
| NM_01468E | 32463.84 | 22341.07 | NM_02013E | 663.182   | 761.978   | NM_001611 | 989.068   | 1117.603  |
| BF528358  | 2120.998 | 778.336  | NM_00074E | 1148.875  | 1469.918  | AB018310  | 2369.626  | 2919.504  |
| NM_01633E | 1491.406 | 1038.092 | NM_00235E | 9739.917  | 9869.146  | NM_02013E | 521.732   | 949.773   |
| NM_01334C | 740.655  | 931.241  | AK026608  | 3271.382  | 4327.477  | NM_01537E | 13760.173 | 15546.692 |
| NM_00546E | 609.526  | 647.54   | AB046836  | 1979.242  | 3952.247  | NM_00487E | 417.137   | 620.761   |
| NM_01231E | 4907.949 | 5713.606 | AJ224166  | 1714.249  | 1676.326  | NM_00074E | 909.39    | 1116.009  |
| AK026235  | 801.67   | 995.866  | AK026098  | 5201.671  | 7096.542  | NM_00235E | 8104.314  | 11380.24  |
| NM_00651C | 7061.437 | 9623.506 | NM_012381 | 2577.725  | 3526.116  | AK026608  | 3366.257  | 3633.503  |
| NM_003141 | 2489.519 | 2608.478 | M20702    | 2011.107  | 2198.223  | NM_00410E | 1254.272  | 1181.661  |
| NM_02024E | 2826.911 | 3556.069 | NM_006397 | 23634.457 | 24642.033 | NM_004544 | 4326.847  | 3852.071  |
| NM_00717E | 1756.97  | 1796.078 | D83776    | 2119.667  | 2320.571  | NM_01889C | 16783.514 | 13249.28  |
| X91148    | 988.075  | 672.039  | NM_00408E | 2971.038  | 3385.188  | NM_016204 | 619.301   | 343.498   |
| NM_01570C | 10594.42 | 7082.271 | NM_00013E | 3277.313  | 3694.779  | AB046836  | 895.816   | 590.103   |
| NM_019087 | 1998.648 | 1706.812 | NM_00590E | 2314.102  | 2651.527  | AJ224166  | 1125.883  | 2230.196  |
| NM_01632E | 761.658  | 538.427  | NM_00478E | 4104.04   | 4267.516  | AK026098  | 3308.823  | 3626.202  |
| NM_004277 | 404.259  | 558.01   | AK024079  | 946.876   | 792.306   | NM_012381 | 2298.957  | 2177.521  |
| NM_00507E | 1211.146 | 1110.173 | NM_00242E | 1947.835  | 2100.268  | M20702    | 1957.165  | 2145.794  |
| AF215923  | 8586.227 | 7274.921 | NM_014674 | 5116.155  | 4317.282  | NM_006397 | 14998.318 | 15048.878 |
| U66621    | 7669.072 | 7155.159 | NM_018271 | 1444.168  | 1334.611  | D83776    | 1678.371  | 1814.301  |
| NM_00572C | 23230.01 | 12349.59 | NM_000547 | 1082.656  | 997.236   | NM_00408E | 2037.265  | 2307.69   |
| AB040936  | 484.469  | 352.33   | NM_01465E | 1023.542  | 801.859   | NM_00013E | 3070.29   | 3613.973  |
| AB023161  | 358.363  | 781.702  | AL133020  | 5948.536  | 4431.993  | NM_01816E | 965.481   | 1276.265  |
| AJ132086  | 1264.109 | 897.425  | NM_014044 | 4363.887  | 4436.135  | AK02636E  | 3016.304  | 3169.007  |
| U92816    | 6696.02  | 5811.345 | NM_00090C | 1373.109  | 1680.245  | NM_00478E | 3185.168  | 4675.696  |
| BC011987  | 10796.38 | 5503.895 | AK023684  | 6442.048  | 8990.527  | AK024079  | 754.656   | 920.617   |
| NM_00410E | 1862.094 | 1753.036 | NM_00023E | 3117.922  | 3496.268  | NM_00019E | 1705.431  | 1807.17   |
| NM_00348E | 3750.053 | 3667.054 | AA700390  | 6545.52   | 5344.956  | BC01458E  | 451.267   | 481.763   |
| NM_00503E | 20758.31 | 16065.32 | AA436163  | 1385.398  | 1242.295  | NM_00244E | 2211.348  | 2103.409  |
| M95923    | 906.286  | 1355.972 | BI907981  | 1143.132  | 1171.771  | AF05395E  | 8162.606  | 6250.363  |
| NM_00241E | 71457.71 | 70066.87 | BI603841  | 3711.563  | 3384.262  | NM_00321E | 4549.363  | 3275.871  |
| NM_00633E | 12946.43 | 7815.255 | M19888    | 1266.825  | 1537.734  | NM_014044 | 2914.498  | 2031.599  |
| NM_00091E | 1150.832 | 1143.419 | Y08136    | 695.432   | 646.333   | NM_00090C | 731.373   | 548.526   |
| NM_01866E | 3627.317 | 5541.433 | AI21873E  | 3411.822  | 4076.898  | AK023684  | 5104.664  | 3481.012  |
| NM_014791 | 14434.37 | 9249.826 | NM_00410E | 2609.521  | 2487.829  | NM_00023E | 1643.823  | 1509.039  |
| NM_00331E | 8856.313 | 4799.095 | NM_004544 | 6479.692  | 6207.72   | AA700390  | 4553.768  | 4353.017  |
| NM_00436E | 3042.272 | 2151.7   | NM_01889C | 25599.328 | 21647.617 | Y18474    | 351.952   | 320.304   |
| NM_00018E | 12649.09 | 9776.437 | NM_016204 | 1147.24   | 745.678   | AA436163  | 659.651   | 1150.3    |
| AK023384  | 2120.396 | 2203.988 | NM_001311 | 5395.016  | 4703.811  | BI907981  | 580.517   | 698.45    |
| NM_01602E | 21500.56 | 11507.92 | NM_01779E | 10412.296 | 9874.751  | BI603841  | 1626.567  | 2131.369  |
| AK025111  | 595.901  | 402.086  | NM_01241C | 1944.163  | 1653.188  | M19888    | 335.427   | 329.95    |
| NM_00173E | 1247.068 | 830.62   | NM_001111 | 9219.265  | 7149.448  | Y08136    | 476.227   | 573.087   |

|            |          |          |           |           |           |           |           |           |
|------------|----------|----------|-----------|-----------|-----------|-----------|-----------|-----------|
| NM_01869C  | 3392.419 | 2528.649 | NM_01804C | 6770.874  | 5326.521  | AA156863  | 4113.752  | 4506.423  |
| NM_00086C  | 4519.321 | 3741.282 | NM_00516C | 13241.969 | 9165.078  | BI915199  | 3114.944  | 3332.978  |
| AB037798   | 2196.786 | 1827.824 | NM_00059C | 429.73    | 491.89    | BI830442  | 376.909   | 643.394   |
| NM_00078C  | 337.767  | 664.659  | X78817    | 16892.352 | 17252.002 | AI218732  | 2441.073  | 2496.417  |
| AF272663   | 3224.652 | 3433.26  | AB023135  | 1297.978  | 1754.408  | AF249898  | 6455.734  | 5359.026  |
| NM_01219C  | 3387.11  | 3422.221 | AY009401  | 879.043   | 1247.288  | M69181    | 6252.629  | 5456.021  |
| AB033015   | 542.26   | 613.924  | NM_001991 | 1577.937  | 1842.88   | AK027224  | 477.289   | 299.186   |
| AF277719   | 1679.811 | 1954.93  | NM_000193 | 3789.66   | 3688.219  | NM_002652 | 262.113   | 526.099   |
| NM_000791  | 5823.194 | 7024.742 | BC014586  | 713.949   | 709.293   | NM_001311 | 2931      | 1915.827  |
| AB037738   | 706.05   | 1050.992 | NM_00244E | 3568.135  | 3043.106  | NM_01779E | 7456.666  | 5748.37   |
| S82769     | 807.051  | 742.943  | AF053952  | 18848.428 | 19662.566 | NM_01241C | 1016.966  | 726.427   |
| NM_004677  | 326.349  | 886.212  | NM_003213 | 6765.954  | 6713.852  | NM_001111 | 5469.95   | 5691.049  |
| NM_014954  | 5196.698 | 7234.079 | BF184738  | 827.654   | 680.038   | NM_01804C | 5152.104  | 6298.338  |
| NM_000807  | 1170.461 | 1570.634 | NM_015057 | 822.35    | 851.493   | NM_00516C | 7766.468  | 7506.939  |
| NM_01490C  | 1027.765 | 1569.234 | AF303398  | 10551.204 | 13291.851 | X78817    | 7888.945  | 10588.765 |
| NM_14565C  | 1781.659 | 1192.264 | NM_01481C | 2420.414  | 2910.417  | AB023135  | 831.337   | 787.974   |
| NM_021957  | 306.371  | 396.615  | NM_003763 | 7929.258  | 8532.479  | AY009401  | 554.45    | 721.004   |
| NM_00171C  | 7075.058 | 7812.987 | AK023448  | 1716.242  | 1874.445  | AF294628  | 946.764   | 1485.35   |
| AL080062   | 1949.381 | 1463.698 | Y18213    | 2837.536  | 2740.063  | AK026960  | 778.821   | 815.813   |
| AF308802   | 1914.47  | 2037.104 | NM_003283 | 3116.303  | 3350.222  | NM_001991 | 1235.589  | 1368.35   |
| S76984     | 15353.74 | 9578.74  | AF249898  | 8851.258  | 8470.251  | NM_000742 | 873.364   | 783.838   |
| NM_01449E  | 35160.57 | 31129.21 | M69181    | 12634.261 | 13719.007 | NM_00235E | 6889.615  | 5013.189  |
| NM_014081  | 819.395  | 748.576  | AK027224  | 370.561   | 982.431   | AK026608  | 2730.643  | 2070.936  |
| NM_00719E  | 3106.508 | 3547.14  | NM_00242E | 3056.154  | 4631.56   | NM_015057 | 803.792   | 628.179   |
| AK023337   | 1870.693 | 2552.443 | NM_014674 | 5873.251  | 5357.157  | AF303398  | 4940.937  | 6451.703  |
| NM_01327E  | 19778.71 | 20694.99 | NM_018271 | 1180.375  | 1140.434  | NM_01481C | 2047.919  | 1424.418  |
| AB037842   | 2004.714 | 1923.199 | NM_000547 | 806.971   | 406.849   | NM_00473E | 3034.618  | 3144.424  |
| AF459094   | 9663.241 | 10570.9  | NM_014652 | 1590.466  | 3489.175  | NM_007357 | 3580.076  | 4352.406  |
| NM_003157  | 2725.19  | 4580.691 | AL133020  | 7976.785  | 14024.483 | NM_003763 | 3594.688  | 5137.611  |
| NM_00493E  | 2561.327 | 3897.504 | BU565263  | 58134.469 | 62634.445 | AK023448  | 1653.938  | 1522.274  |
| NM_01432E  | 855.593  | 1249.194 | NM_00502E | 8896.235  | 9010.329  | Y18213    | 2550.524  | 2363.044  |
| NM_015981  | 464.579  | 600.307  | NM_001611 | 3586.149  | 5761.701  | NM_003283 | 3017.25   | 2404.697  |
| NM_00045E  | 4201.248 | 5245.214 | NM_020133 | 1451.291  | 1577.897  | NM_018163 | 1403.833  | 1274.911  |
| NM_01231C  | 3841.358 | 3517.111 | NM_01537E | 21087.275 | 20556.076 | AK026362  | 3215.501  | 2799.848  |
| AK026235   | 745.577  | 558.956  | NM_00487E | 937.208   | 1137.19   | NM_00496E | 1999.23   | 1923.617  |
| NM_00651C  | 6808.942 | 7781.493 | BF028822  | 1678.648  | 2415.137  | NM_00590E | 1792.684  | 1733.143  |
| NM_003141  | 2611.716 | 2522.269 | NM_005502 | 577.263   | 2862.381  | NM_00478E | 2838.202  | 2539.281  |
| NM_02024E  | 2772.015 | 3582.497 | NM_00635E | 5690.467  | 6655.228  | AK024079  | 672.623   | 734.647   |
| NM_00717E  | 2113.303 | 2111.454 | NM_00235E | 10907.013 | 10497.675 | NM_00242E | 1670.081  | 1492.624  |
| AB046381   | 1356.57  | 1227.662 | AK026608  | 3512.396  | 3507.942  | NM_014674 | 3386.449  | 2237.691  |
| AJ011497   | 720.459  | 838.437  | NM_004102 | 2806.396  | 3094.35   | NM_018271 | 897.621   | 666.45    |
| NM_00301E  | 652.62   | 742.989  | NM_004544 | 6906.888  | 7240.314  | NM_000547 | 399.849   | 621.9     |
| NM_00033C  | 1095.074 | 2422.022 | NM_01889C | 27685.887 | 28475.346 | NM_014652 | 890.007   | 638.029   |
| AW058501   | 443.454  | 511.327  | NM_016204 | 1016.099  | 1059.325  | AL133020  | 4106.81   | 3727.51   |
| ID 2623896 | 2649.434 | 2803.24  | AB046836  | 1521.475  | 1337.029  | NM_00502E | 5664.061  | 9881.299  |
| ID 2602214 | 3799.838 | 5990.83  | NM_01781E | 9172.452  | 7972.749  | NM_001611 | 1025.259  | 1252.023  |
| ID 2071279 | 16505.04 | 17104.43 | AJ224166  | 1644.417  | 1520.653  | AB018310  | 2583.046  | 3775.792  |
| L10709     | 7697.186 | 19291.79 | AK026098  | 4514.573  | 4984.384  | NM_020133 | 524.629   | 641.618   |
| N35489     | 1955.845 | 2895.214 | NM_012381 | 2578.381  | 3459.369  | NM_01537E | 14511.498 | 14391.012 |
| AI928195   | 1369.917 | 1206.534 | M20702    | 2265.181  | 2483.672  | NM_00487E | 535.219   | 438.301   |
| AA458922   | 2428.358 | 3775.633 | NM_00408E | 3590.45   | 4222.882  | AB037832  | 604.1     | 265.027   |
| M95923     | 582.166  | 747.855  | NM_00013E | 3541.17   | 3922.813  | NM_014347 | 4829.608  | 4129.338  |
| NM_00241E  | 64083.11 | 50885.64 | NM_018163 | 1626.562  | 1753.261  | NM_00129E | 8116.554  | 6628.452  |

|           |          |          |           |           |           |           |           |           |
|-----------|----------|----------|-----------|-----------|-----------|-----------|-----------|-----------|
| NM_006332 | 14783.53 | 10707.79 | AK026362  | 5354.524  | 9244.634  | NM_004344 | 9891.491  | 8527.462  |
| NM_000916 | 1002.431 | 1134.242 | NM_004968 | 3032.233  | 3585.549  | NM_000757 | 943.128   | 1244.143  |
| NM_018663 | 3234.884 | 7249.12  | NM_005908 | 2495.683  | 3260.204  | AB046786  | 571.6     | 433.408   |
| NM_145904 | 17917.17 | 24362.06 | NM_004785 | 4369.527  | 3034.636  | NM_016620 | 20201.465 | 15859.885 |
| NM_006796 | 14172.46 | 15781.81 | AK024079  | 994.305   | 597.74    | NM_018890 | 19201.969 | 12735.513 |
| NM_000706 | 1499.934 | 2120.748 | NM_000193 | 3526.116  | 3512.963  | NM_016204 | 538.646   | 534.853   |
| NM_015941 | 9402.429 | 9515.692 | BC014586  | 860.564   | 904.29    | AB046836  | 876.65    | 1055.261  |
| NM_005259 | 2002.639 | 2386.501 | NM_002448 | 3715.729  | 3052.809  | AJ224166  | 1303.201  | 2478.839  |
| NM_015850 | 2922.406 | 6404.575 | AF053952  | 17786.906 | 19898.07  | AK026098  | 3985.708  | 4484.488  |
| NM_002838 | 17639.98 | 21980.85 | NM_003213 | 6390.476  | 7285.896  | NM_012381 | 2650.225  | 2820.936  |
| NM_014686 | 49974.77 | 47680.31 | BF184738  | 844.206   | 745.359   | M20702    | 2034.986  | 2264.927  |
| BF528358  | 3607.988 | 2113.701 | NM_014044 | 3755.475  | 3998.319  | NM_006397 | 16075.146 | 14969.619 |
| NM_016339 | 1873.127 | 1588.487 | NM_000900 | 1401.374  | 1562.573  | D83776    | 1715.395  | 1852.979  |
| NM_002487 | 11183.53 | 11649.95 | AK023684  | 6690.364  | 8810.579  | NM_004088 | 2187.961  | 2213.134  |
| NM_013340 | 672.278  | 453.724  | NM_000232 | 2922.006  | 2771.424  | NM_000138 | 3480.881  | 3148.052  |
| NM_005462 | 529.643  | 553.276  | AA700390  | 6438.385  | 6019.578  | BC032460  | 3320.228  | 3101.996  |
| S82769    | 637.075  | 786.824  | M19888    | 601.002   | 541.876   | NM_014071 | 1516.946  | 1148.111  |
| NM_004677 | 760.357  | 805.235  | Y08136    | 624.026   | 683.779   | AK024404  | 818.996   | 778.234   |
| NM_014954 | 7857.878 | 11845.7  | AA156863  | 5604.069  | 6797.886  | NM_006329 | 637.329   | 691.49    |
| NM_000807 | 1372.063 | 1981.427 | BI915199  | 3814.771  | 4579.303  | NM_005166 | 1088.627  | 807.805   |
| NM_014909 | 1471.989 | 2185.775 | R82957    | 58841.105 | 59811.805 | NM_000213 | 9696.595  | 8911.507  |
| X91148    | 1310.576 | 1370.543 | BI830442  | 857.551   | 1099.317  | BE906107  | 9812.107  | 7872.725  |
| NM_015700 | 11192.04 | 9947.124 | AI218732  | 2521.373  | 2383.2    | NM_015516 | 4189.746  | 4659.162  |
| NM_019087 | 3053.526 | 4100.511 | AF249898  | 9744.044  | 9688.75   | AB033065  | 669.538   | 903.75    |
| NM_016322 | 706.435  | 1189.86  | M69181    | 14026.47  | 18118.752 | NM_004857 | 4102.417  | 5386.978  |
| NM_004277 | 686.799  | 1128.503 | AK027224  | 725.753   | 1402.193  | NM_003253 | 782.747   | 2682.633  |
| AF215923  | 11665.11 | 14565.47 | NM_002652 | 486.705   | 887.559   | NM_013285 | 4937.207  | 6542.627  |
| U66621    | 10867.43 | 15481.7  | NM_001311 | 4172.593  | 3729.238  | NM_002872 | 9802.191  | 12720.563 |
| NM_005720 | 32284.79 | 36384.99 | NM_017798 | 10862.164 | 9532.801  | NM_000490 | 953.882   | 942.639   |
| AB040936  | 723.441  | 842.366  | NM_012410 | 2205.719  | 1899.836  | NM_004839 | 2021.284  | 2427.933  |
| AB023161  | 724.194  | 396.793  | NM_001111 | 9051.179  | 7006.016  | NM_012193 | 1076.268  | 904.007   |
| U61736    | 1310.469 | 681.475  | NM_018049 | 7066.913  | 5863.648  | NM_003405 | 8756.996  | 7149.145  |
| AJ132086  | 1933.118 | 2838.861 | AJ133439  | 594.156   | 537.055   | NM_004720 | 6712.591  | 5207.536  |
| U92816    | 9083.854 | 10617.28 | X78817    | 19107.959 | 19249.754 | NM_001057 | 1999.929  | 1486.116  |
| BC011987  | 11962.15 | 7866.25  | AB023135  | 1354.08   | 1534.322  | AF272381  | 4176.575  | 3405.553  |
| NM_004106 | 1666.767 | 1703.354 | AY009401  | 963.261   | 888.802   | NM_004524 | 1319.639  | 1011.381  |
| NM_003485 | 4243.198 | 5915.914 | AF294628  | 1912.328  | 1504.957  | NM_006315 | 2414.77   | 1981.923  |
| NM_005038 | 23821.23 | 20900.11 | AK026960  | 1730.637  | 2071.758  | NM_018401 | 901.859   | 529.326   |
| NM_003157 | 2079.806 | 2909.619 | NM_001991 | 1650.036  | 1330.523  | NM_005163 | 3100.553  | 2577.764  |
| NM_004938 | 2380.114 | 2279.768 | NM_000742 | 1130.993  | 1704.459  | NM_007273 | 20836.664 | 13531.959 |
| NM_014326 | 758.593  | 672.443  | NM_002355 | 10718.638 | 11183.793 | BE894943  | 915.922   | 572.772   |
| NM_004448 | 656.258  | 501.826  | AK026608  | 4227.916  | 4891.2    | NM_016422 | 2466.257  | 2841.96   |
| NM_015981 | 996.665  | 999.426  | NM_014810 | 2570.01   | 2183.244  | NM_017878 | 1781.996  | 1105.311  |
| NM_000455 | 4486.721 | 5426.408 | NM_004738 | 3965.356  | 4657      | NM_004494 | 48618.434 | 47448.961 |
| NM_014791 | 15603.87 | 12873.99 | NM_007357 | 6655.186  | 5931.627  | AL049687  | 1059.325  | 1142.342  |
| NM_003318 | 12252.73 | 8066.668 | NM_003763 | 7870.298  | 6931.248  | NM_005643 | 7260.29   | 8774.799  |
| NM_004362 | 4074.094 | 4113.971 | AK023448  | 2076.597  | 1711.773  | NM_003592 | 2794.618  | 3694.183  |
| NM_000182 | 14418.26 | 15859.52 | Y18213    | 2611.282  | 1973.373  | NM_014953 | 3232.48   | 2969.76   |
| AK023384  | 2980.909 | 3604.676 | NM_003283 | 3485.18   | 2427.449  | AF179995  | 1749.013  | 7951.037  |
| NM_016026 | 22220.14 | 16876.96 | NM_018163 | 1773.832  | 1588.609  | NM_016195 | 3766.148  | 1301.921  |
| AK025111  | 1362.614 | 1434.514 | AK026362  | 4000.006  | 5313.701  | NM_004523 | 3568.086  | 3315.237  |
| NM_001732 | 1346.492 | 1584.241 | NM_004968 | 4021.999  | 6108.042  | NM_004404 | 7525.482  | 8216.384  |
| NM_018690 | 4625.361 | 4458.417 | NM_005908 | 2696.465  | 3104.144  | NM_002960 | 2871.622  | 3568.947  |

|           |          |          |           |           |           |           |           |           |
|-----------|----------|----------|-----------|-----------|-----------|-----------|-----------|-----------|
| NM_00086C | 5525.798 | 8144.458 | NM_00478E | 4611.29   | 4088.841  | NM_00679C | 1842.063  | 1760.481  |
| AB037798  | 3990.726 | 5126.648 | AK024079  | 1046.524  | 1033.923  | AL117522  | 4814.366  | 4515.743  |
| NM_00078C | 886.46   | 715.917  | NM_00242E | 2156.6    | 2816.349  | NM_00657Z | 8946.301  | 6032.477  |
| AF272663  | 3872.662 | 4790.715 | NM_014674 | 5659.474  | 5631.845  | NM_019061 | 3041.241  | 1933.131  |
| NM_01219C | 3753.849 | 4655.008 | NM_01465Z | 765.855   | 1208.55   | AB033007  | 2243.885  | 1667.816  |
| AB033015  | 602.235  | 721.576  | AL133020  | 6526.215  | 7510.597  | NM_003781 | 362.041   | 273.273   |
| AF277719  | 1573.15  | 2089.141 | AB018310  | 6500.224  | 5614.608  | NM_001304 | 613.841   | 419.826   |
| NM_000791 | 7007.421 | 9929.759 | NM_02013Z | 823.103   | 756.149   | NM_00313C | 1567.88   | 998.203   |
| NM_003681 | 4594.765 | 6948.185 | NM_01537E | 21599.689 | 15973.761 | NM_00471E | 9989.379  | 12727.146 |
| NM_00480C | 14195.63 | 13737.79 | NM_00487E | 1716.031  | 1595.241  | D29810    | 1894.413  | 2480.196  |
| AB037738  | 329.169  | 447.317  | NM_001777 | 47187.438 | 49115.59  | NM_00012E | 1156.6    | 1920.568  |
| NM_00495Z | 4282.614 | 4142.911 | U79457    | 11199.035 | 11358.575 | AB002384  | 1846.02   | 5268.241  |
| AY007239  | 1424.163 | 1062.224 | AB037832  | 1040.733  | 1089.147  | NM_018437 | 732.017   | 990.762   |
| NM_020414 | 6991.958 | 6728.985 | NM_014347 | 5772.463  | 5187.672  | NM_00042Z | 645.212   | 543.384   |
| AB037730  | 6111.538 | 5553.892 | NM_00129E | 14038.362 | 12285.335 | AK023164  | 1635.921  | 1871.516  |
| AF147429  | 1359.173 | 1470.572 | NM_004344 | 16413.383 | 16028.37  | NM_00537E | 870.133   | 675.359   |
| NM_001357 | 13125.61 | 9923.15  | AF085972  | 551.397   | 611.138   | AK027121  | 8991.521  | 6699.241  |
| NM_00389Z | 5722.691 | 4952.695 | NM_000757 | 2129.336  | 2624.918  | NM_01743Z | 878.276   | 735.121   |
| AB037816  | 1504.458 | 1574.057 | AB046786  | 1434.392  | 1652.175  | AL117661  | 3404.865  | 2912.319  |
| NM_01438C | 43407.66 | 44417.52 | NM_01662C | 24460.863 | 24042.229 | X64643    | 1735.979  | 1580.96   |
| NM_01426E | 401.032  | 389.027  | NM_01889C | 25506.725 | 26246.209 | NM_00538C | 6834.849  | 5820.282  |
| NM_00171E | 6960.72  | 5490.585 | NM_016204 | 1150.913  | 894.416   | NM_00526E | 587.083   | 349.275   |
| AL080062  | 1891.973 | 1462.803 | AB046836  | 3800.383  | 5791.001  | D70835    | 39361.277 | 30184.371 |
| AF308802  | 2315.365 | 1558.485 | AK026098  | 4183.883  | 4880.555  | NM_002697 | 1663.227  | 1322.192  |
| S76984    | 14501.97 | 8060.177 | NM_012381 | 2615.065  | 3514.754  | NM_00151E | 7250.192  | 4366.146  |
| NM_01449E | 40775.7  | 29751.63 | M20702    | 2523.312  | 2622.043  | NM_00341Z | 6443.989  | 3782.788  |
| NM_014081 | 1035.835 | 769.87   | NM_006397 | 28473.188 | 22559.98  | NM_01833E | 904.419   | 599.903   |
| NM_005651 | 1268.886 | 1332.061 | D83776    | 2528.783  | 2429.659  | AK022668  | 2017.994  | 1830.143  |
| NM_00719E | 2962.692 | 3758.814 | NM_00408E | 3363.169  | 3180.816  | AW975132  | 1478.267  | 942.298   |
| AK023337  | 2048.833 | 3305.12  | NM_00013E | 3550.187  | 2836.159  | NM_006051 | 3540.002  | 3046.302  |
| NM_01327E | 20201.39 | 28125    | AB011541  | 768.341   | 530.311   | NM_018427 | 3294.014  | 1847.088  |
| AB037842  | 2103.723 | 2742.966 | BC032460  | 5447.895  | 6075.386  | NM_01466Z | 953.261   | 952.82    |
| U92074    | 1506.585 | 1978.868 | NM_014071 | 2502.231  | 2643.041  | AF007217  | 1034.319  | 750.942   |
| NM_019011 | 5010.118 | 6857.497 | AK024404  | 1577.636  | 1524.763  | AB037753  | 3122.75   | 3382.667  |
| AF459094  | 7161.656 | 7800.892 | NM_00632E | 1367.09   | 1403.031  | NM_004674 | 2977.995  | 3160.069  |
| AB011542  | 1753.464 | 1295.563 | AB032369  | 1246.195  | 2033.052  | AB037801  | 3136.149  | 3623.016  |
| NM_00185Z | 1754.762 | 1438.316 | NM_00516E | 1620.573  | 2016.737  | AL080159  | 8669.432  | 9117.808  |
| NM_00579E | 889.848  | 856.905  | NM_00021Z | 52219.039 | 56565.184 | NM_01782Z | 22447.436 | 24621.393 |
| X99661    | 1073.687 | 948.204  | BE906107  | 22849.256 | 21980.6   | U55185    | 1056.015  | 915.949   |
| NM_005927 | 4122.515 | 3049.838 | NM_01551E | 7384.106  | 5585.519  | U30828    | 7647.364  | 5888      |
| AB028983  | 1962.639 | 853.423  | AB033065  | 964.394   | 682.57    | AF085886  | 41348.762 | 37198.035 |
| AB037800  | 1064.326 | 884.883  | NM_005211 | 541.113   | 859.135   | AK023828  | 2575.582  | 2266.223  |
| AK026377  | 2238.546 | 1999.311 | NM_004857 | 10013.642 | 9810.228  | AL080223  | 2525.723  | 2741.792  |
| NM_01866C | 3886.716 | 5004.94  | NM_01210E | 635.683   | 748.466   | AK001630  | 6514.971  | 8498.567  |
| NM_003394 | 1243.405 | 734.017  | NM_00049C | 1876.554  | 2532.443  | NM_01461Z | 9601.549  | 9187.247  |
| NM_01463E | 1444.294 | 533.679  | NM_00483E | 3974.958  | 2472.688  | AF079098  | 989.367   | 1135.462  |
| NM_006747 | 2757.052 | 1488.454 | NM_01219Z | 3087.607  | 2330.31   | AK021815  | 772.197   | 518.391   |
| NM_00708E | 4420.955 | 1490.293 | NM_00340E | 16392.385 | 11349.85  | NM_00154Z | 620.884   | 678.839   |
| NM_00387C | 9884.626 | 4671.354 | NM_00472C | 6673.528  | 5570.678  | NM_016641 | 6057.66   | 3541.421  |
| NM_00124Z | 7840.343 | 5099.119 | NM_001057 | 2038.416  | 1911.416  | AB018010  | 684.554   | 483.444   |
| NM_00554E | 3244.502 | 5441.141 | NM_005561 | 10805.197 | 11776.355 | NM_01461C | 9606.076  | 8451.704  |
| NM_00029E | 731.123  | 628.732  | AF272381  | 8156.471  | 8113.627  | NM_00068E | 670.393   | 384.374   |
| S51112    | 447.38   | 613.215  | NM_004524 | 2377.499  | 2458.224  | NM_006621 | 3890.581  | 3423.914  |

|           |          |          |           |           |           |           |           |           |
|-----------|----------|----------|-----------|-----------|-----------|-----------|-----------|-----------|
| NM_014887 | 5880.526 | 8591.885 | NM_006315 | 3508.452  | 3573.944  | BF347398  | 1413.078  | 1642.95   |
| NM_00259C | 868.55   | 1181.212 | NM_018401 | 1230.109  | 1437.072  | AK026762  | 2525.93   | 2414.254  |
| NM_01855E | 13183.39 | 13078.66 | NM_005163 | 4017.348  | 5108.5    | NM_004412 | 982.935   | 1282.704  |
| NM_005824 | 1662.671 | 837.496  | NM_007273 | 30096.836 | 34452.746 | L48516    | 2546.601  | 2372.017  |
| AF052211  | 6196.304 | 5256.077 | BE894943  | 2194.317  | 2291.74   | NM_01664E | 7953.223  | 6193.956  |
| NM_00560C | 4327.087 | 3287.904 | NM_016422 | 2388.488  | 2074.02   | AF083930  | 1979.037  | 1937.586  |
| NM_005967 | 1445.926 | 1267.317 | NM_01787E | 6409.603  | 5444.987  | AB040907  | 261.826   | 749.125   |
| NM_01331E | 312.398  | 364.78   | NM_004494 | 57643.305 | 61460.727 | NM_00342E | 770.017   | 991.71    |
| AB014566  | 3018.748 | 3529.367 | AL049687  | 1557.925  | 1384.72   | NM_014862 | 1068.36   | 951.99    |
| NM_01567E | 636.951  | 439.762  | NM_005643 | 12699.01  | 11361.019 | AK027159  | 1408.976  | 1317.856  |
| AK025950  | 568.71   | 277.391  | NM_003592 | 3997.839  | 3066.988  | AF075112  | 580.509   | 793.599   |
| NM_014223 | 1798.838 | 1587.385 | NM_014953 | 4414.822  | 3006.998  | AK001796  | 598.772   | 462.816   |
| NM_016194 | 3561.231 | 2979.648 | AF179995  | 2644.619  | 1931.503  | AF086152  | 4981.034  | 4413.218  |
| AL050385  | 2489.048 | 2069.837 | NM_004523 | 4509.173  | 4729.811  | U78519    | 1860.848  | 1676.795  |
| NM_007027 | 6774.449 | 6035.125 | NM_004404 | 11108.937 | 9816.938  | AK026872  | 1197.601  | 882.662   |
| NM_000633 | 8114.402 | 6424.709 | NM_00296C | 10268.244 | 6961.691  | AL157505  | 419.113   | 305.221   |
| AB037855  | 1624.667 | 1722.091 | NM_00679C | 3471.696  | 2810.088  | NM_00719C | 3053.182  | 2440.466  |
| AK024524  | 7313.28  | 4488.642 | AL117522  | 12261.861 | 7680.095  | AF043897  | 962.302   | 1093.56   |
| NM_000562 | 709.172  | 400.616  | NM_006572 | 11390.738 | 15092.119 | U79246    | 1376.88   | 1601.606  |
| NM_020353 | 923.078  | 95.379   | NM_019061 | 2349.07   | 3790.725  | AF052140  | 549.179   | 685.751   |
| AB020694  | 6253.598 | 5695.074 | AB033007  | 3713.5    | 4329.077  | NM_01883E | 703.188   | 829.415   |
| NM_016071 | 19362.76 | 18028.51 | NM_003781 | 303.674   | 554.313   | AF007147  | 986.535   | 926.505   |
| AL050131  | 1017.024 | 841.562  | NM_001304 | 967.152   | 716.654   | AF052127  | 2465.973  | 2537.628  |
| NM_00447E | 6316.442 | 8731.169 | NM_00313C | 1254.408  | 1324.62   | AK024261  | 593.944   | 486.801   |
| NM_001627 | 5800.902 | 6411.27  | NM_00471E | 27927.055 | 19553.268 | AF052150  | 449.662   | 415.524   |
| NM_00122E | 6380.237 | 7474.946 | D29810    | 3555.058  | 2845.763  | AF086481  | 591.478   | 471.885   |
| AB050716  | 1336.799 | 1351.448 | NM_00012E | 3082.762  | 2389.867  | AL355689  | 437.049   | 291.125   |
| X77690    | 1717.18  | 1923.424 | AB002384  | 3503.8    | 3338.749  | AK024885  | 2410.327  | 2470.66   |
| NM_00653E | 705.425  | 582.451  | AK023164  | 2571.935  | 2608.323  | AK022441  | 1066.983  | 1073.32   |
| NM_00565E | 1591.25  | 1811.795 | NM_00537E | 1680.352  | 1475.738  | AK026208  | 3224.171  | 3187.677  |
| NM_002422 | 820.998  | 835.25   | AK027121  | 10285.113 | 10568.418 | NM_016947 | 29240.711 | 22280.031 |
| NM_00669C | 658.383  | 1139.491 | NM_017433 | 3929.353  | 2789.433  | AY007136  | 731.836   | 677.758   |
| NM_00615E | 231.183  | 294.08   | AL117661  | 5777.517  | 4436.406  | AL359940  | 1454.753  | 1784.665  |
| AF218022  | 3137.039 | 2933.188 | X64643    | 2766.065  | 2121.699  | AF085961  | 414.552   | 363.795   |
| NM_00334E | 3496.64  | 2712.214 | NM_00538C | 9547.04   | 6458.595  | AK024925  | 6024.777  | 5220.292  |
| AL137663  | 667.375  | 505.752  | NM_00526E | 616.947   | 497.058   | AL049460  | 3011.724  | 2226.394  |
| AB006198  | 11455.7  | 8725.258 | D70835    | 59224.359 | 55000.52  | AK022396  | 835.111   | 799.994   |
| U72518    | 4867.324 | 3100.983 | NM_002697 | 2691.937  | 3969.726  | AF075113  | 637.395   | 728.267   |
| NM_015322 | 4058.473 | 4125.61  | NM_01833E | 773.513   | 1065.026  | AF086037  | 325.749   | 417.677   |
| NM_016607 | 4455.498 | 3977.739 | AK022668  | 4025.993  | 4503.371  | AK022892  | 3622.54   | 2052.571  |
| NM_00327E | 663.078  | 1223.237 | AW975132  | 3255.678  | 2573.464  | Z36807    | 15417.945 | 14870.367 |
| NM_00026E | 6586.24  | 9269.976 | NM_006051 | 9461.201  | 6495.881  | U20896    | 597.81    | 470.606   |
| M30493    | 11114.88 | 15070.2  | NM_018427 | 5479.041  | 4716.892  | U52836    | 548.305   | 373.772   |
| AJ008160  | 920.815  | 1065.643 | NM_014663 | 1949.611  | 1404.646  | NM_01793E | 1649.92   | 1066.193  |
| NM_004343 | 29035.77 | 44169.34 | AF007217  | 1642.811  | 857.172   | AK021837  | 1036.554  | 873.149   |
| X52355    | 5435.353 | 5900.214 | AB037753  | 4616.909  | 3332.125  | AK002088  | 6928.558  | 7233.033  |
| NM_006963 | 13152.03 | 18532.83 | NM_004674 | 3526.842  | 2680.097  | X98206    | 792.159   | 946.696   |
| NM_000307 | 313.972  | 493.36   | AB037801  | 4840.107  | 3506.825  | AK000106  | 2079.852  | 2096.147  |
| U66561    | 5590.174 | 6249.886 | AL080159  | 20305.623 | 15427.79  | AK022370  | 1366.503  | 1074.206  |
| NM_00030E | 1043.302 | 1264.904 | NM_017823 | 26077.02  | 19566.061 | AK026765  | 508.704   | 1048.252  |
| AB028449  | 4924.444 | 6096.474 | U55185    | 1218.729  | 764.021   | AL117530  | 981.775   | 1079.02   |
| NM_004697 | 5952.77  | 6709.351 | U30828    | 9410.525  | 5891.832  | AK025016  | 731.409   | 598.906   |
| U94384    | 1216.044 | 999.593  | AF085886  | 57781.762 | 34450.008 | AL080191  | 2091.347  | 1707.065  |

|           |          |          |           |           |           |           |           |           |
|-----------|----------|----------|-----------|-----------|-----------|-----------|-----------|-----------|
| AF131776  | 4017.777 | 2780.596 | AK023828  | 6660.92   | 4334.081  | AK021639  | 666.262   | 468.805   |
| NM_02052E | 6473.426 | 3365.245 | AL080223  | 4221.188  | 2914.992  | AK023189  | 1025.515  | 733.587   |
| NM_00704C | 20860.62 | 12451.84 | AK001630  | 12227.567 | 9260.141  | AF306347  | 717.626   | 534.535   |
| NM_014483 | 8889.63  | 5224.542 | NM_014612 | 20346.043 | 17492.182 | AK001164  | 1422.8    | 1903.311  |
| AK024249  | 1834.399 | 1279.314 | AF079098  | 998.335   | 1211.298  | AK022619  | 505.699   | 577.348   |
| AF239156  | 7063.464 | 4321.973 | NM_001543 | 1108.839  | 1266.327  | AK023464  | 1473.669  | 1553.992  |
| U18937    | 15413.97 | 19999.31 | NM_016641 | 9638.598  | 9513.408  | AK022963  | 511.005   | 498.623   |
| U01925    | 1357.286 | 1758.759 | AB018010  | 1341.375  | 1246.374  | AK023563  | 235.174   | 883.022   |
| AJ420488  | 65693.8  | 57240.46 | NM_01461C | 15544.702 | 11307.369 | AK023905  | 1308.718  | 1525.211  |
| AF268872  | 4008.931 | 4735.686 | NM_00068E | 668.99    | 611.5     | AK024231  | 1804.668  | 2291.272  |
| AK022180  | 9740.63  | 11459.45 | NM_006621 | 5553.443  | 4409.38   | NM_01694C | 2574.036  | 2683.637  |
| AK001384  | 1739.188 | 2097.655 | BF347398  | 5242.511  | 4298.588  | AK025757  | 3580.145  | 4156.367  |
| AK025437  | 5099.52  | 6877.437 | AK026762  | 3661.973  | 3140.334  | Y16713    | 705.99    | 675.669   |
| AF052152  | 515.844  | 592.101  | NM_004412 | 1771.895  | 608.201   | L07394    | 5714.175  | 5971.029  |
| AK074164  | 880.268  | 861.082  | L48516    | 3033.392  | 2031.444  | AK056133  | 1149.018  | 1116.461  |
| NM_00416E | 12691.31 | 11203.71 | NM_01664E | 9536.086  | 6746.521  | NM_01784E | 9934.056  | 6491.863  |
| AF161353  | 13939.23 | 12779.67 | AF083930  | 2395.889  | 1385.548  | AF130080  | 848.346   | 867.226   |
| AB009282  | 22266.26 | 27182.71 | NM_00342E | 1702.743  | 1034      | AK026006  | 891.522   | 703.69    |
| NM_01463E | 4115.298 | 3201.603 | NM_014862 | 1398.815  | 904.648   | NM_01908E | 5112.153  | 3793.57   |
| NM_006392 | 4090.053 | 2840.15  | AK027159  | 1336.769  | 936.257   | AF147440  | 878.944   | 938.378   |
| NM_014717 | 1779.072 | 1156.483 | AF075112  | 661.56    | 654.715   | AL122072  | 2391.003  | 1259.203  |
| NM_017922 | 4088.688 | 2443.678 | AK001796  | 629.105   | 659.032   | AK026221  | 453.666   | 233.151   |
| NM_002823 | 66791.88 | 52472.16 | AF086152  | 12143.207 | 9111.032  | Y13870    | 831.241   | 686.013   |
| NM_01791E | 16963.22 | 8999.666 | U78519    | 2417.583  | 2697.166  | AK026403  | 1630.872  | 1454.11   |
| AK095694  | 2207.729 | 2301.462 | AK026872  | 2395.107  | 2351.323  | AF086361  | 319.069   | 531.619   |
| X52341    | 47857.93 | 47256.01 | AL157505  | 1013.029  | 802.124   | AK022980  | 496.938   | 653.897   |
| NM_003082 | 11802.83 | 11617.99 | NM_00719C | 5190.396  | 4376.816  | AL359058  | 1409.37   | 1127.922  |
| AL133632  | 6786.29  | 6289.379 | AF043897  | 1231.221  | 947.347   | AK022439  | 733.749   | 818.371   |
| NM_018374 | 3963.082 | 4351.367 | U79246    | 2012.273  | 1119.505  | AK026237  | 1529.982  | 1699.002  |
| AF131852  | 441.718  | 750.193  | AF052140  | 431.961   | 210.787   | AK023687  | 625.786   | 620.138   |
| AK021894  | 2492.684 | 3413.307 | NM_01883E | 1600.634  | 879.507   | NM_017632 | 2351.517  | 2111.319  |
| NM_020424 | 7028.485 | 9429.632 | AF007147  | 1633.477  | 1809.585  | AK026655  | 1705.489  | 1600.939  |
| AB033009  | 20351.3  | 21996.48 | AF052127  | 4574.742  | 3095.158  | AF129926  | 1115.451  | 914.375   |
| AL137761  | 4833.859 | 4616.982 | AK024261  | 540.612   | 456.391   | AK025822  | 1753.995  | 1361.777  |
| AK022086  | 866.363  | 1440.363 | AF052150  | 921.376   | 560.505   | AL360140  | 575.191   | 436.657   |
| AF147320  | 1075.269 | 835.051  | AK024885  | 2831.843  | 1803.5    | AL390128  | 1650.474  | 1189.056  |
| AK027024  | 1181.496 | 1013.905 | AK022441  | 1466.916  | 1266.293  | AK001044  | 841.966   | 316.525   |
| AK022339  | 1697.453 | 1180.963 | AK026208  | 4680.647  | 3937.036  | AL157429  | 5248.4    | 4124.556  |
| AK022138  | 1154.594 | 1097.885 | NM_016947 | 42590.621 | 36427.402 | NM_012071 | 20796.084 | 15617.56  |
| AF086191  | 953.369  | 1091.462 | AY007136  | 749.283   | 1142.062  | AF055018  | 4376.265  | 4135.269  |
| AF143880  | 677.302  | 640.628  | AF085961  | 1153.336  | 1426.495  | AF070599  | 1099.035  | 840.842   |
| NM_01763E | 10623.33 | 4817.107 | AK024925  | 13876.724 | 12003.399 | NM_00545C | 1314.386  | 1294.881  |
| AB037824  | 4182.355 | 4326.097 | AL049460  | 7726.722  | 7767.936  | AK023600  | 576.448   | 598.619   |
| AF361494  | 928.88   | 955.7    | AK022396  | 2423.343  | 2954.225  | NM_00552E | 646.911   | 544.902   |
| AK022810  | 1190.211 | 2849.769 | AK022892  | 7754.078  | 3810.169  | NM_00528E | 1525.165  | 1570.105  |
| AK023122  | 627.288  | 653.075  | Z36807    | 28243.59  | 11865.442 | AK001918  | 739.095   | 673.527   |
| AF147408  | 2587.457 | 2551.135 | U20896    | 591.313   | 181.849   | NM_01863E | 21157.287 | 18517.387 |
| AK027222  | 2100.123 | 1944.262 | U52836    | 710.039   | 478.259   | AF086048  | 2840.829  | 2170.663  |
| AF054994  | 156.619  | 487.23   | NM_01793E | 1629.816  | 1190.163  | L15616    | 3737.589  | 3193.9    |
| AF085868  | 638.933  | 738.148  | AK021837  | 2163.026  | 1315.468  | AB019565  | 6919.14   | 6624.891  |
| AK054767  | 659.201  | 858.896  | AK002088  | 15395.737 | 14173.304 | D16914    | 51149     | 63715.195 |
| AL050042  | 1630.474 | 1687.426 | X98206    | 596.258   | 996.228   | AA084879  | 770.876   | 947.517   |
| NM_01846E | 1367.749 | 1311.264 | AK000106  | 2188.371  | 2407.414  | NM_000833 | 1859.308  | 1842.176  |

|           |          |          |           |           |           |            |           |           |
|-----------|----------|----------|-----------|-----------|-----------|------------|-----------|-----------|
| NM_014867 | 2473.64  | 1731.701 | AK022370  | 1524.207  | 1524.648  | NM_000283  | 3532.465  | 2966.882  |
| AB037850  | 4286.481 | 2351.784 | AK026765  | 1604.054  | 1444.995  | NM_012460  | 2013.58   | 1835.065  |
| AK021710  | 3575.296 | 3669.379 | AL080191  | 4788.708  | 5208.368  | NM_012118  | 2862.274  | 2330.433  |
| BC033114  | 278.648  | 454.196  | AK021639  | 537.299   | 617.939   | AK024092   | 2293.833  | 940.108   |
| AL137446  | 496.105  | 959.38   | AK023189  | 1495.766  | 2123.129  | AK026285   | 1131.484  | 401.701   |
| AB025286  | 532.184  | 459.417  | AF306347  | 933.819   | 570.816   | AK002044   | 2188.89   | 1492.087  |
| AF009286  | 607.548  | 946.169  | AK001164  | 1925.775  | 569.678   | AK022206   | 533.096   | 552.229   |
| AF056437  | 831.736  | 1038.134 | AK023464  | 3999.805  | 2285.955  | U90904     | 5840.738  | 4638.894  |
| AB032364  | 885.926  | 859.59   | AK024157  | 504.288   | 343.16    | AF088053   | 3599.319  | 2524.403  |
| NM_018076 | 752.442  | 655.062  | AK023905  | 3203.602  | 1724.035  | AL133662   | 841.12    | 1334.528  |
| AK021442  | 1605.599 | 1517.906 | AK024231  | 3612.048  | 2778.004  | NM_002565  | 796.976   | 634.777   |
| AK001076  | 1103.337 | 965.045  | NM_016940 | 3243.128  | 3291.987  | U90903     | 975.273   | 1005.658  |
| AK001820  | 572.688  | 327.268  | AK025757  | 5544.363  | 6446.756  | AF278760   | 1425.932  | 1357.19   |
| AK021482  | 1395.625 | 917.571  | Y16713    | 915.116   | 1492.615  | X58061     | 518.516   | 367.587   |
| AK025317  | 2931.742 | 2168.868 | L07394    | 12901.619 | 11618.767 | AB032954   | 2234.818  | 2390.133  |
| AJ008118  | 46348.6  | 42068.02 | AK056133  | 1733.412  | 1337.032  | NM_006003  | 21994.713 | 19197.762 |
| AK000939  | 690.063  | 408.737  | NM_017845 | 12809.089 | 16398.479 | AL110197   | 3621.799  | 3296.854  |
| NM_005523 | 470.167  | 366.732  | AF130080  | 982.272   | 837.335   | AF085995   | 933.596   | 765.074   |
| AK024512  | 10524.16 | 11120.97 | AK026006  | 1383.472  | 1226.662  | CY3Cy5     | 1845.305  | 181.887   |
| AK023454  | 2179.188 | 2683.122 | NM_019089 | 12282.858 | 10691.259 | AA029300   | 2806.387  | 2301.874  |
| L23207    | 553.179  | 572.155  | AL122072  | 5459.291  | 7164.383  | BG708842   | 28720.885 | 27700.174 |
| NM_018062 | 2983.344 | 2122.461 | Y13870    | 911.452   | 1575.349  | M19723     | 50211.773 | 58395.367 |
| NM_007128 | 9952.078 | 10896.73 | AK026403  | 2034.89   | 1678.456  | X06256     | 2630.553  | 2503.726  |
| NM_007160 | 1637.082 | 1378.017 | AK022980  | 1535.531  | 1777.397  | AA709271   | 456.422   | 1028.231  |
| NM_018627 | 809.822  | 1288.107 | AK026237  | 2411.563  | 1566.334  | M34057     | 555.388   | 1197.48   |
| AL137531  | 855.105  | 625.017  | AK023687  | 1188.047  | 765.526   | ID 1984668 | 5586.03   | 3262.389  |
| AL080085  | 7273.991 | 2953.29  | NM_017632 | 3497.878  | 4485.342  | ID 1832579 | 2127.879  | 2749.622  |
| AF086519  | 530.073  | 640.664  | AK026655  | 1695.761  | 1639.343  | H-430185 N | 1448.859  | 1685.894  |
| AF055012  | 3224.281 | 3332.356 | NM_005279 | 672.51    | 716.634   | D16583     | 1177.304  | 1133.726  |
| AK022307  | 2769.323 | 3447.416 | AF129926  | 2431.95   | 1941.807  | AA481547   | 16390.031 | 11474.794 |
| U00950    | 346.875  | 637.127  | AK025822  | 2281.014  | 2809.691  | AA831880   | 533.665   | 512.218   |
| AF085997  | 198.865  | 524.165  | AL360140  | 606.75    | 721.02    | T64880     | 1820.169  | 1393.601  |
| NM_005172 | 1054.99  | 1229.423 | AF201937  | 52298.883 | 44524.855 | NM_020967  | 1281.891  | 1032.64   |
| AK025192  | 1049.679 | 1222.576 | AL390128  | 4000.053  | 3789.158  | SR2        | 54778.078 | 32402.375 |
| NM_012403 | 1332.308 | 1700.907 | AF055018  | 10375.555 | 9855.078  | SR4        | 16146.457 | 7727.019  |
| AK023251  | 429.954  | 408.423  | AF070599  | 1957.675  | 1471.208  | SR6        | 2314.994  | 1155.682  |
| AK022611  | 10610.65 | 9016.276 | NM_005450 | 2632.629  | 1449.207  | SR8        | 9253.311  | 13783.217 |
| NM_006158 | 2421.842 | 2442.442 | NM_005525 | 707.491   | 1921.437  | SR10       | 31216.746 | 5789.774  |
| NM_006346 | 2248.221 | 3158.183 | AF086048  | 4211.369  | 3259.51   | CY3Cy5     | 1957.316  | 116.201   |
| AK025240  | 2491.715 | 1837.389 | L15616    | 3858.717  | 2468.827  | NM_005027  | 862.835   | 867.137   |
| NM_017633 | 9134.685 | 7781.984 | AB019565  | 7825.565  | 4554.031  | NM_004612  | 1274.668  | 983.225   |
| AF086186  | 1125.115 | 755.541  | D16914    | 64055.555 | 66288.516 | NM_005608  | 16195.694 | 11664.438 |
| NM_017802 | 2275.076 | 1953.68  | AA084879  | 1749.498  | 1844.708  | NM_001106  | 2280.498  | 1890.444  |
| AK023667  | 1305.929 | 938.024  | NM_000833 | 4193.903  | 5127.04   | NM_015583  | 1447.135  | 2267.051  |
| AJ008137  | 2840.244 | 1599.049 | NM_000283 | 8556.546  | 9168.122  | NM_018490  | 1023.097  | 1945.837  |
| AF085841  | 732.131  | 378.633  | NM_012460 | 3088.375  | 2660.002  | NM_004778  | 1521.922  | 3300.487  |
| U92026    | 866.334  | 1186.714 | NM_012118 | 4969.967  | 4469.996  | NM_006245  | 3964.277  | 6958.238  |
| AF086234  | 33369.81 | 37220.78 | AK001133  | 743.198   | 918.18    | NM_012258  | 545.388   | 1095.469  |
| AK023680  | 7892.917 | 6996.095 | AK024092  | 3327.963  | 3866.841  | AK022349   | 4082.891  | 3420.314  |
| AF009324  | 6803.52  | 6694.422 | AK022206  | 1228.973  | 625.133   | NM_005750  | 506.558   | 538.995   |
| AF019226  | 1572.843 | 1849.876 | U90903    | 1500.723  | 3014.534  | NM_004973  | 5175.882  | 3405.717  |
| AL137480  | 15984.06 | 19900.18 | AF278760  | 5229.72   | 7872.339  | NM_001890  | 587.426   | 269.515   |
| AK022182  | 780.792  | 782.705  | AB032954  | 4116.506  | 3079.329  | NM_001286  | 2765.973  | 2156.19   |

|           |          |          |            |           |           |           |           |           |
|-----------|----------|----------|------------|-----------|-----------|-----------|-----------|-----------|
| D16473    | 4730.746 | 4823.147 | NM_006003  | 29025.111 | 17766.977 | NM_014648 | 1139.975  | 530.13    |
| AB028968  | 4299.203 | 4336.142 | AL110197   | 4832.898  | 2916.106  | NM_000951 | 2919.714  | 2089.033  |
| AK001202  | 1065.615 | 1100.895 | AF085995   | 1051.705  | 830.826   | AK000158  | 2691.712  | 3221.978  |
| AF195764  | 36416.31 | 34676.58 | CY3Cy5     | 1218.301  | 186.918   | NM_005769 | 750.466   | 495.55    |
| AF055029  | 1274.545 | 1506.691 | AA029300   | 2532.615  | 2928.068  | AK024500  | 6109.313  | 8144.927  |
| S82164    | 263.654  | 526.51   | BG708842   | 44101.387 | 36827.773 | NM_002564 | 2330.357  | 3572.505  |
| AK024394  | 2836.036 | 2565.182 | M19723     | 58376.727 | 64452.578 | NM_000963 | 2580.484  | 3276.134  |
| AF147374  | 2720.736 | 1704.676 | X06256     | 2912.784  | 3695.144  | NM_013308 | 2601.486  | 3384.004  |
| AF130091  | 1311.337 | 648.831  | AA709271   | 612.477   | 674.208   | AF027302  | 3352.612  | 4653.658  |
| L43338    | 2240.543 | 1276.104 | M34057     | 1325.589  | 1109.944  | NM_002852 | 2199.503  | 4495.651  |
| AJ227866  | 4490.465 | 2146.317 | ID 1984668 | 1772.598  | 6315.959  | NM_001817 | 2198.065  | 3161.715  |
| AF458223  | 7327.752 | 3280.082 | ID 1832579 | 2233.47   | 2668.031  | AF063611  | 805.478   | 1183.9    |
| AK026822  | 2157.608 | 1371.597 | H-430185 N | 1888.85   | 1731.843  | NM_006039 | 516.438   | 581.579   |
| AK022838  | 8219.459 | 4261.685 | D16583     | 3733.864  | 2014.824  | NM_002089 | 396.763   | 563.032   |
| NM_003509 | 599.697  | 250.863  | H44051     | 679.73    | 600.269   | NM_014656 | 2788.838  | 2220.731  |
| CY3Cy5    | 7874.394 | 1136.4   | AA481547   | 14858.606 | 10311.725 | NM_002076 | 3870.743  | 2870.675  |
| AA700390  | 6753.404 | 12145.81 | AA831880   | 903.928   | 711.891   | X05299    | 5171.684  | 3419.052  |
| Y18474    | 361.874  | 1108.136 | T64880     | 2171.875  | 1830.3    | BM468475  | 1045.252  | 840.413   |
| BI907981  | 586.058  | 318.497  | NM_020967  | 1006.388  | 935.445   | NM_000318 | 4833.106  | 3808.761  |
| BI603841  | 625.894  | 602.357  | NM_001071  | 46757.027 | 38233.594 | NM_002060 | 2371.155  | 2203.58   |
| Y08136    | 684.795  | 350.683  | SR2        | 51061.098 | 36785.637 | AK001230  | 1629.46   | 1326.512  |
| AA156863  | 4493.438 | 4476.973 | SR4        | 14005.468 | 9296.577  | NM_014680 | 4860.076  | 3620.716  |
| BI915199  | 4034.02  | 3627.208 | SR6        | 2311.739  | 1503.231  | NM_006224 | 39510.266 | 28096.439 |
| AI218732  | 2823.018 | 2510.246 | SR8        | 7966.683  | 16134.883 | AL137300  | 3422.678  | 3372.169  |
| NM_004102 | 1675.78  | 1973.713 | SR10       | 27452.078 | 6948.782  | NM_000229 | 2686.596  | 2843.939  |
| NM_004544 | 6419.664 | 5629.305 | CY3Cy5     | 989.226   | 164.589   | NM_003129 | 15409.029 | 27396.398 |
| SR7       | 4918.444 | 23917.99 | NM_005027  | 1311.114  | 1111.148  | NM_001956 | 1920.074  | 2734.678  |
| SR9       | 19724.01 | 3010.852 | NM_004612  | 1547.896  | 1568.616  | AB033064  | 1677.887  | 3164.891  |
| CY3Cy5    | 2526.313 | 325.043  | NM_005608  | 17428.938 | 16440.523 | AK022317  | 4610.804  | 8080.927  |
| NM_018049 | 8940.997 | 16968.33 | NM_001106  | 2023.723  | 2486.837  | NM_003124 | 3305.523  | 4643.854  |
| NM_014395 | 532.504  | 770.761  | NM_015583  | 2633.937  | 2549.127  | NM_005031 | 4053.491  | 4507.712  |
| X78817    | 4011.88  | 3467.408 | NM_018490  | 2612.576  | 3979.859  | AB040920  | 1373.148  | 900.707   |
| AB023135  | 618.039  | 412.218  | NM_004822  | 1105.474  | 930.436   | NM_000720 | 877.945   | 770.281   |
| AF294628  | 979.185  | 1122.712 | AK022349   | 5182.939  | 3782.081  | NM_004842 | 2288.707  | 1922.624  |
| AK026960  | 840.446  | 794.359  | NM_005750  | 1001.701  | 835.981   | AK024639  | 2642.032  | 2283.815  |
| NM_000193 | 594.654  | 757.685  | NM_004973  | 5606.492  | 5672.233  | NM_015720 | 2817.15   | 2445.962  |
| BC014586  | 544.457  | 696.183  | NM_007245  | 9284.054  | 7929.042  | AB007915  | 1118.071  | 1163.635  |
| NM_002448 | 2167.946 | 2228.542 | NM_001890  | 672.588   | 925.175   | AB033070  | 513.42    | 619.313   |
| AF053952  | 2370.385 | 1932.856 | NM_001286  | 3573.498  | 3250.43   | NM_018229 | 2269.387  | 1762.744  |
| NM_014044 | 3822.188 | 3011.714 | NM_014648  | 851.231   | 868.39    | AY009127  | 15269.034 | 10765.811 |
| NM_000900 | 839.892  | 760.13   | NM_005073  | 630.563   | 671.491   | NM_014869 | 964.205   | 902.483   |
| AK023684  | 5653.651 | 4614.637 | NM_000951  | 3344.557  | 3521.605  | NM_006708 | 20975.49  | 16256.987 |
| NM_000232 | 1946.227 | 2013.983 | X52599     | 641.526   | 521.534   | AB037835  | 1402.174  | 952.284   |
| NM_015057 | 945.049  | 1647.023 | AK000158   | 5742.469  | 5512.903  | NM_000157 | 3664.456  | 5494.878  |
| AF303398  | 1613.38  | 4185.643 | NM_005769  | 843.011   | 605.286   | NM_000712 | 13976.921 | 21148.953 |
| NM_004738 | 3547.096 | 2186.961 | AK024500   | 13565.573 | 12687.269 | NM_018088 | 873.888   | 1747.298  |
| NM_007357 | 2941.083 | 2998.214 | NM_002564  | 6594.718  | 7504.879  | AB011164  | 3836.824  | 4145.375  |
| NM_003763 | 4139.573 | 4463.471 | AF027302   | 4502.037  | 5750.692  | M24750    | 1836.354  | 1950.452  |
| AK023448  | 1568.139 | 1308.833 | NM_002852  | 3539.052  | 3362.348  | NM_005965 | 978.951   | 812.878   |
| Y18213    | 2770.405 | 2549.212 | NM_001817  | 4453.378  | 3552.635  | NM_002740 | 2651.071  | 2536.386  |
| NM_003283 | 2846.68  | 2491.48  | AF063611   | 1087.933  | 860.859   | AL117482  | 3284.394  | 2910.341  |
| AF249898  | 8782.094 | 7373.09  | NM_006039  | 731.808   | 520.54    | NM_006549 | 20092.18  | 18263.385 |
| M69181    | 3415.101 | 3243.093 | NM_002089  | 567.296   | 563.054   | AB018324  | 9002.7    | 8155.478  |



|           |          |          |           |           |           |            |           |           |
|-----------|----------|----------|-----------|-----------|-----------|------------|-----------|-----------|
| AK027224  | 780.102  | 457.27   | NM_014656 | 6311.419  | 6308.783  | NM_002742  | 41744.039 | 35193.887 |
| NM_002652 | 372.256  | 428.624  | NM_002076 | 5009.644  | 4212.935  | Z25431     | 3122.467  | 2025.876  |
| NM_001311 | 4635.575 | 4392.305 | X05299    | 5390.437  | 4137.396  | NM_005627  | 4289.472  | 2846.494  |
| NM_017798 | 7581.96  | 6261.231 | BM468475  | 1283.03   | 952.323   | M64497     | 788.856   | 1261.461  |
| NM_012410 | 650.698  | 722.475  | NM_000318 | 6209.963  | 4722.564  | NM_003356  | 2154.661  | 1574.393  |
| NM_001111 | 4628.447 | 5842.601 | NM_002060 | 10335.8   | 7857.308  | NM_014648  | 714.989   | 722.811   |
| NM_004152 | 590.619  | 1437.374 | AK001230  | 2417.955  | 2471.958  | NM_005073  | 458.212   | 427.187   |
| NM_001611 | 1338.814 | 3455.63  | NM_014680 | 6473.664  | 3954.114  | NM_000951  | 2893.651  | 2346.135  |
| NM_020133 | 535.296  | 425.624  | NM_006224 | 60053.516 | 52293.203 | AA029300   | 2647.733  | 3415.816  |
| NM_015379 | 15677.03 | 10679.06 | NM_000229 | 3616.749  | 3678.757  | BG708842   | 23353.547 | 44843.688 |
| NM_004878 | 370.554  | 419.191  | NM_006995 | 20127.539 | 22193.912 | M19723     | 48764.344 | 65827.914 |
| AF144638  | 3908.486 | 4188.954 | NM_001956 | 4617.792  | 6650.466  | X06256     | 2545.111  | 3222.033  |
| NM_000742 | 736.311  | 835.935  | AB033064  | 3398.613  | 4515.998  | M34057     | 575.831   | 669.997   |
| NM_002355 | 9662.583 | 6035.684 | AK022317  | 8598.855  | 11840.573 | ID 1984668 | 5248.147  | 2268.206  |
| AK026608  | 3143.569 | 2745.425 | NM_004531 | 10592.872 | 13607.194 | ID 1832579 | 1960.757  | 2014.758  |
| AB046836  | 821.81   | 2475.614 | AL133581  | 3778.348  | 2521.724  | H-430185 N | 1656.923  | 1307.586  |
| NM_017816 | 8121.524 | 7735.662 | NM_002558 | 994.697   | 870.936   | D16583     | 1053.77   | 1031.17   |
| AJ224166  | 1771.52  | 2807.641 | NM_005031 | 6836.819  | 6529.451  | AA481547   | 15873.933 | 12536.533 |
| AK026098  | 6360.293 | 13025.04 | AB040920  | 989.54    | 921.826   | AA831880   | 676.721   | 721.811   |
| M20702    | 2106.291 | 1583.753 | NM_000720 | 1323.271  | 1401.277  | T64880     | 1682.49   | 1295.603  |
| NM_006397 | 15120.1  | 7448.264 | NM_004842 | 2357.38   | 1977.132  | NM_020967  | 1167.529  | 808.903   |
| D83776    | 1825.566 | 1464.048 | AK024639  | 3132.57   | 2575.394  | NM_001071  | 45577.066 | 27097.287 |
| NM_004088 | 1951.682 | 2020.54  | NM_015720 | 8277.785  | 7880.421  | AB028990   | 1228.411  | 865.319   |
| NM_002180 | 1703.818 | 1512.201 | AB007915  | 1370.639  | 984.404   | X05299     | 4792.939  | 3300.254  |
| NM_000138 | 3755.531 | 3396.906 | AB033070  | 929.665   | 920.277   | BM468475   | 941.804   | 1128.96   |
| NM_018163 | 1281.184 | 1278.555 | NM_018229 | 2696.018  | 2164.485  | NM_000318  | 4446.971  | 4667.151  |
| AK026362  | 2824.356 | 2445.568 | NM_006325 | 8674.15   | 7720.358  | NM_002060  | 3081.609  | 4547.142  |
| NM_004968 | 2282.849 | 3001.567 | AY009127  | 14786.527 | 15520.746 | AK001230   | 1738.584  | 1965.777  |
| NM_005908 | 2017.92  | 1774.252 | NM_014869 | 1526.979  | 1129.672  | NM_014680  | 4976.253  | 5826.96   |
| NM_004785 | 3356.579 | 3344.495 | AB037835  | 1430.404  | 1751.292  | NM_005027  | 929.837   | 1345.855  |
| AK024079  | 787.57   | 965.151  | NM_007205 | 489.056   | 487.181   | NM_004612  | 1373.221  | 1754.963  |
| NM_002428 | 2154.851 | 2469.494 | NM_014846 | 5119.776  | 4794.068  | NM_005608  | 17225.527 | 19543.531 |
| NM_014674 | 3474.515 | 3968.16  | AB011164  | 5143.481  | 4917.872  | NM_001106  | 2414.922  | 2510.655  |
| NM_018271 | 477.029  | 625.347  | M24750    | 1866.371  | 1613.495  | NM_015583  | 1740.197  | 2928.482  |
| NM_000547 | 314.016  | 707.306  | NM_005965 | 1710.82   | 1460.482  | NM_018490  | 729.253   | 936.84    |
| NM_014652 | 1236.112 | 893.61   | NM_002740 | 2792.542  | 1714.029  | NM_004778  | 629.331   | 610.197   |
| AL133020  | 4155.548 | 3983.354 | AL117482  | 3898.121  | 3587.4    | NM_006245  | 3872.859  | 3988.069  |
| NM_014044 | 5944.279 | 10394.14 | NM_006549 | 44936.156 | 31956.27  | NM_005103  | 634.443   | 242.916   |
| NM_000900 | 1244.35  | 2458.963 | AB018324  | 9388.762  | 8322.558  | NM_004822  | 514.104   | 618.747   |
| AK023684  | 7463.678 | 9014.758 | NM_002742 | 58558.633 | 64407.48  | AK022349   | 3751.511  | 3965.983  |
| NM_000232 | 2338.131 | 3525.725 | Z25431    | 3457.284  | 3173.803  | NM_005750  | 503.209   | 579.254   |
| J05070    | 192.687  | 615.731  | NM_005627 | 3612.704  | 5291.829  | NM_004973  | 4847.21   | 3225.078  |
| AA700390  | 8719.064 | 16668.79 | M64497    | 1623.846  | 730.009   | NM_007245  | 8140.127  | 5940.161  |
| AA436163  | 727.647  | 685.835  | NM_007274 | 18044.152 | 13178.429 | NM_001890  | 696.571   | 460.566   |
| BI907981  | 572.411  | 514.519  | NM_003356 | 6799.103  | 5493.097  | NM_001286  | 2796.053  | 2640.84   |
| BI603841  | 660.172  | 663.585  | AF238315  | 477.075   | 539.733   | AB007915   | 1105.805  | 1231.805  |
| Y08136    | 533.475  | 461.469  | NM_014648 | 1106.009  | 1832.798  | AB033070   | 747.715   | 781.05    |
| AA156863  | 4567.245 | 3722.335 | NM_019604 | 552.736   | 975.548   | NM_018229  | 1866.944  | 2493.365  |
| BI915199  | 3580.134 | 2959.317 | NM_005073 | 478.752   | 673.154   | NM_006325  | 6298.759  | 8775.132  |
| R82957    | 51197.15 | 33031.13 | M19723    | 56481.227 | 65728.867 | AY009127   | 13849.849 | 12852.2   |
| AI218732  | 2803.192 | 2457.126 | X06256    | 3487.856  | 4009.774  | NM_014869  | 1043.741  | 1282.47   |
| NM_004102 | 1857.005 | 1794.763 | AA709271  | 751.375   | 627.948   | AK000158   | 2418.705  | 3761.841  |
| NM_004544 | 6429.52  | 5127.551 | M34057    | 1285.458  | 959.509   | NM_005769  | 616.485   | 1233.721  |

|           |          |          |            |           |           |           |           |           |
|-----------|----------|----------|------------|-----------|-----------|-----------|-----------|-----------|
| NM_01889C | 21354.9  | 15758.03 | ID 1984668 | 1811.376  | 5421.051  | AK024500  | 6214.847  | 13787.311 |
| NM_002652 | 449.478  | 780.596  | ID 1832579 | 2086.88   | 1854.459  | NM_002564 | 2718.926  | 4208.323  |
| NM_001311 | 8125.985 | 17180.94 | H-430185 N | 1929.959  | 1670.534  | NM_000963 | 3096.29   | 2755.113  |
| NM_01779E | 11735.71 | 19924.83 | D16583     | 3392.123  | 1993.965  | NM_01330E | 1955.964  | 1566.799  |
| NM_000354 | 364.442  | 754.022  | H44051     | 772.655   | 625.149   | AF027302  | 3189.515  | 2981.707  |
| NM_01241C | 1325.981 | 2477.852 | AA481547   | 17402.773 | 15065.042 | NM_002852 | 1797.469  | 2195.708  |
| NM_001111 | 7077.506 | 13607.89 | AA831880   | 1127.953  | 1388.948  | NM_001817 | 2540.521  | 2606.343  |
| NM_01804E | 10857.74 | 20298.03 | T64880     | 2461.323  | 1929.561  | AF063611  | 762.998   | 986.531   |
| NM_00516C | 10483.39 | 6641.501 | NM_020967  | 1143.823  | 1049.866  | NM_00603E | 565.959   | 703.425   |
| X78817    | 4587.376 | 4898.659 | NM_001071  | 46734.188 | 36744.496 | NM_01465E | 2698.904  | 2461.891  |
| AB023135  | 406.981  | 406.888  | AB028990   | 1381.758  | 1250.374  | NM_00207E | 4255.979  | 3372.996  |
| AY009401  | 361.288  | 450.872  | AK002089   | 562.541   | 660.402   | Z25431    | 2737.327  | 2049.32   |
| AF294628  | 899.452  | 951.644  | NM_00031E  | 6717.474  | 8578.86   | NM_005627 | 3907.452  | 3235.313  |
| AK026960  | 662.877  | 681.182  | NM_004612  | 1740.802  | 1898.531  | M64497    | 837.107   | 1561.298  |
| NM_001991 | 1210.556 | 860.615  | NM_00560E  | 18226.135 | 16470.045 | NM_007274 | 10016.875 | 15579.613 |
| NM_000193 | 551.355  | 740.376  | NM_00110E  | 2235.001  | 2457.786  | NM_00335E | 2754.542  | 2942.659  |
| BC014586  | 530.86   | 640.755  | NM_015583  | 2559.54   | 2181.045  | NM_006224 | 42168.16  | 47073.066 |
| NM_00244E | 2402.646 | 2466.734 | NM_01849C  | 2708.558  | 2266.177  | AL137300  | 3437.774  | 4564.534  |
| AF053952  | 2199.479 | 2130.501 | NM_00477E  | 1058.408  | 834.866   | NM_00022E | 2666.458  | 3915.191  |
| NM_003213 | 6741.229 | 4949.27  | NM_00624E  | 5071.017  | 4160.548  | NM_00699E | 23355.592 | 26576.863 |
| NM_015057 | 729.186  | 540.966  | NM_005103  | 478.506   | 671.439   | NM_00312E | 14716.826 | 25939.549 |
| AF303398  | 1295.016 | 1063.742 | NM_004822  | 1381.761  | 1601.653  | NM_00195E | 2204.058  | 2833.542  |
| NM_01481C | 2645.814 | 1414.765 | AK022349   | 5701.76   | 3992.435  | AB033064  | 1518.048  | 2720.599  |
| NM_00473E | 3844.523 | 2860.939 | NM_00575C  | 1349.583  | 995.413   | AK022317  | 4846.972  | 8833.646  |
| NM_007357 | 3191.757 | 3659.77  | NM_004973  | 5553.839  | 5031.1    | NM_00688E | 57192.383 | 67267.664 |
| NM_003763 | 4434.74  | 4632.994 | NM_00724E  | 10077.167 | 7961.491  | NM_004531 | 11529.836 | 9110.226  |
| AK023448  | 2153.583 | 1326.91  | NM_00189C  | 911.343   | 859.852   | AL133581  | 2118.572  | 2629.288  |
| Y18213    | 3050.39  | 1943.915 | NM_00128E  | 3280.261  | 2628.663  | NM_00255E | 538.941   | 782.948   |
| NM_003283 | 3218.23  | 2639.161 | AB007915   | 1230.1    | 1780.361  | NM_005031 | 4445.088  | 4740.318  |
| AF249898  | 9384.202 | 6819.978 | AB033070   | 1161.642  | 2474.301  | AB040920  | 1101.765  | 681.653   |
| M69181    | 3289.462 | 2983.001 | NM_01822E  | 2717.446  | 3769.417  | NM_00072C | 845.609   | 825.409   |
| AK027224  | 759.59   | 455.068  | NM_00632E  | 7742.939  | 10854.461 | NM_004842 | 2313.05   | 1883.869  |
| L09078    | 261.578  | 469.163  | AY009127   | 13921.017 | 23761.082 | AK024639  | 2377.17   | 2006.769  |
| NM_00242E | 3752.847 | 8950.45  | NM_01486E  | 1851.397  | 2483.328  | NM_01572C | 2611.844  | 2610.032  |
| NM_014674 | 5693.655 | 13299.47 | AK000158   | 7129.037  | 6589.196  | NM_020967 | 1074.987  | 690.063   |
| NM_018271 | 881.302  | 1589.053 | NM_00576E  | 1304.485  | 1106.696  | AB028990  | 1248.283  | 1125.562  |
| NM_000547 | 573.981  | 1221.01  | AK024500   | 14085.998 | 12448.771 | NM_00670E | 23763.244 | 21191     |
| NM_014652 | 1350.079 | 1786.657 | NM_002564  | 8015.667  | 7416.168  | AB037835  | 1631.3    | 1606.313  |
| AL133020  | 4958.347 | 5704.626 | NM_000963  | 2055.616  | 2743.975  | NM_01622E | 1512.538  | 1303.309  |
| NM_004152 | 645.787  | 1330.278 | NM_01330E  | 4038.173  | 5381.824  | NM_000157 | 3787.442  | 4278.553  |
| NM_001611 | 913.151  | 854.806  | AF027302   | 3915.831  | 4060.253  | NM_000712 | 14902.519 | 18451.518 |
| AB018310  | 1791.43  | 2274.283 | NM_002852  | 4379.531  | 4176.584  | NM_01808E | 6767.008  | 5723.488  |
| NM_020133 | 700.539  | 607.755  | NM_001817  | 4916.828  | 4046.732  | AK023035  | 3750.38   | 3006.756  |
| NM_01537E | 16166.21 | 11299.85 | AF063611   | 1160.314  | 924.97    | NM_01484E | 4163.993  | 5260.139  |
| NM_00487E | 447.018  | 587.557  | NM_00603E  | 1164.467  | 773.154   | AB011164  | 3737.647  | 3638.938  |
| AF144638  | 4011.002 | 3727.116 | NM_00208E  | 698.339   | 601.98    | M24750    | 2101.093  | 2228.769  |
| NM_005502 | 355.36   | 408.657  | NM_01465E  | 6544.511  | 5707.032  | NM_00596E | 1303.486  | 1424.901  |
| NM_000742 | 909.064  | 724.067  | NM_00207E  | 5160.932  | 3721.831  | NM_00274C | 2612.653  | 2327.236  |
| NM_00235E | 10340.56 | 6499.484 | Z25431     | 3008.577  | 3890.348  | AL117482  | 3134.651  | 3166.507  |
| AK026608  | 3551.609 | 2752.357 | NM_005627  | 3167.422  | 7124.504  | NM_00654E | 17230.258 | 14516.316 |
| NM_004102 | 1971.315 | 5489.417 | M64497     | 1793.101  | 1212.167  | AB018324  | 8673.595  | 7346.647  |
| NM_004544 | 11315.59 | 18280.17 | NM_007274  | 18790.174 | 15864.785 | NM_002742 | 31737.115 | 27773.816 |
| AB046836  | 847.687  | 1800.833 | NM_00335E  | 7183.875  | 7060.075  | NM_00575C | 623.276   | 440.125   |

|           |          |          |           |           |           |            |           |           |
|-----------|----------|----------|-----------|-----------|-----------|------------|-----------|-----------|
| NM_01781E | 6888.396 | 3839.855 | AF238315  | 555.718   | 465.798   | NM_00724E  | 8667      | 8208.229  |
| AJ224166  | 1260.535 | 838.289  | NM_006224 | 58512.043 | 63151.637 | NM_00189C  | 667.424   | 1022.117  |
| AK026098  | 3834.405 | 3449.127 | AL137300  | 6024.712  | 5907.649  | NM_00128E  | 2809.411  | 3097.83   |
| NM_012381 | 2093.856 | 1771.338 | NM_00022E | 4277.418  | 3985.86   | NM_01464E  | 1198.178  | 1250.968  |
| M20702    | 1749.427 | 1894.476 | NM_00699E | 21150.369 | 20419.703 | NM_00507E  | 523.082   | 737.036   |
| NM_006397 | 14766.03 | 7980.08  | NM_00312E | 21824.205 | 18231.682 | NM_000951  | 3375.486  | 2931.555  |
| D83776    | 2451.292 | 2653.41  | NM_00195E | 5711.937  | 5492.681  | X52599     | 470.941   | 842.506   |
| NM_00408E | 1977.486 | 2042.106 | AB033064  | 3488.148  | 3239.285  | AA029300   | 2636.129  | 2909.448  |
| NM_00218C | 1856.65  | 1444.549 | AK022317  | 7199.855  | 6473.532  | BG708842   | 22932.887 | 26099.537 |
| NM_00013E | 3982.76  | 3517.975 | NM_01839E | 10966.191 | 9530.53   | M19723     | 47927.332 | 55714.031 |
| NM_01816E | 1244.715 | 1428.449 | NM_003124 | 7626.76   | 6662.416  | M34057     | 746.165   | 844.023   |
| AK026362  | 3009.803 | 1988.967 | NM_00688E | 60567.84  | 66312.258 | ID 1984668 | 5260.543  | 1924.353  |
| NM_00496E | 2795.104 | 3220.737 | NM_004531 | 10505.527 | 15476.722 | ID 1832579 | 1936.558  | 1827.707  |
| NM_00590E | 1973.942 | 2191.212 | AL133581  | 4057.794  | 2904.314  | H-430185 N | 1531.938  | 1535.52   |
| NM_00478E | 3439.866 | 3646.996 | NM_00255E | 1511.578  | 1675.949  | D16583     | 1257.002  | 1310.64   |
| AK024079  | 647.049  | 982.422  | NM_005031 | 8230.893  | 7800.396  | AA481547   | 17019.041 | 12863.089 |
| NM_00019E | 815.132  | 2674.949 | AB040920  | 1100.004  | 1261.611  | AA831880   | 633.421   | 451.689   |
| BC014586  | 907.617  | 1906.799 | NM_00072C | 1462.964  | 1128.293  | T64880     | 1600.115  | 1440.232  |
| NM_00244E | 3036.253 | 5706.471 | NM_00484E | 2634.938  | 2785.457  | NM_00603E  | 519.095   | 579.12    |
| AF053952  | 2219.239 | 3490.149 | AK024639  | 3381.433  | 2632.331  | NM_01465E  | 3024.457  | 3393.409  |
| NM_014044 | 4452.45  | 4407.827 | NM_01572C | 9731.226  | 10781.865 | NM_00207E  | 4040.324  | 4099.215  |
| NM_00090C | 939.216  | 1563.376 | NM_020967 | 1011.59   | 1065.161  | X05299     | 5082.323  | 4207.263  |
| AA700390  | 4827.52  | 4206.7   | AB028990  | 1523.113  | 1473.646  | BM468475   | 863.948   | 1347.953  |
| AA436163  | 570.44   | 698.39   | NM_00670E | 26031.76  | 25450.547 | NM_00031E  | 4656.447  | 5436.916  |
| BI907981  | 510.453  | 350.171  | AB037835  | 1712.645  | 1631.36   | NM_00206C  | 3699.663  | 5175.191  |
| BI603841  | 521.909  | 390.834  | NM_01622E | 1542.884  | 1737.624  | AK001230   | 1680.432  | 1955.866  |
| Y08136    | 438.219  | 436.084  | NM_000157 | 6018.758  | 6153.362  | NM_01468C  | 4972.036  | 5145.975  |
| AA156863  | 4475.964 | 3591.608 | NM_00071E | 18256.76  | 15639.194 | NM_005027  | 1017.52   | 1240.675  |
| BI915199  | 3570.418 | 2891.659 | NM_01808E | 1467.382  | 1600.331  | NM_00461E  | 1230.556  | 1526.266  |
| R82957    | 49820.48 | 33413.78 | BC013695  | 13562.304 | 9344.177  | NM_00560E  | 17404.596 | 15789.279 |
| AI218732  | 2629.938 | 2247.361 | NM_00720E | 493.749   | 435.693   | NM_00110E  | 2588.303  | 2459.147  |
| AF249898  | 14216.47 | 23059.33 | AK023035  | 5280.924  | 6142.674  | NM_01558E  | 1668.358  | 2150.043  |
| M69181    | 5174.578 | 8963.5   | NM_01484E | 4919.127  | 5218.674  | NM_01849C  | 798.662   | 1064.499  |
| AK027224  | 1199.423 | 1100.457 | AB011164  | 5244.929  | 5626.608  | NM_00477E  | 609.717   | 589.168   |
| NM_001311 | 5398.271 | 5831.099 | M24750    | 1891.989  | 1877.984  | NM_00624E  | 4312.868  | 5701.098  |
| NM_01779E | 11007.18 | 16558.35 | NM_00596E | 2090.931  | 1736.338  | NM_00482E  | 749.124   | 571.808   |
| NM_01241C | 932.94   | 385.788  | NM_00274C | 3457.86   | 3040.294  | AK022349   | 3821.094  | 3670.477  |
| NM_001111 | 4075.588 | 3935.383 | AL117482  | 4146.713  | 3369.124  | NM_005031  | 4211.803  | 4251.851  |
| NM_01804E | 6147.35  | 5147.504 | NM_00654E | 46723.48  | 33201.445 | AB040920   | 1006.252  | 710.867   |
| NM_00516C | 9711.263 | 5748.284 | AB018324  | 9381.795  | 7307.151  | NM_00072C  | 895.142   | 751.432   |
| X78817    | 3792.687 | 3673.993 | NM_00274E | 58970.379 | 47338.75  | NM_00484E  | 1926.791  | 1691.984  |
| AF294628  | 795.808  | 1070.474 | NM_00575C | 987.163   | 916.578   | AK024639   | 2346.898  | 1891.285  |
| AK026960  | 755.971  | 611.886  | NM_00724E | 9430.621  | 8616.439  | NM_01572C  | 2936.702  | 4033.8    |
| NM_001991 | 1361.989 | 959.819  | NM_00189C | 928.852   | 949.217   | AB007915   | 1040.333  | 1453.072  |
| NM_00550E | 548.523  | 1211.667 | NM_00128E | 2964.974  | 3403.387  | AB033070   | 621.226   | 1219.907  |
| NM_00074E | 1147.179 | 1582.52  | NM_01464E | 863.752   | 1161.19   | NM_01822E  | 2010.686  | 2652.666  |
| NM_00235E | 12633.83 | 12481.39 | NM_00507E | 527.656   | 512.429   | NM_00632E  | 6408.103  | 6992.238  |
| AK026608  | 3915.574 | 3657.985 | NM_000951 | 3869.135  | 4867.939  | AY009127   | 14919.854 | 14175.035 |
| NM_015057 | 794.327  | 664.763  | X52599    | 1293.044  | 1468.752  | NM_01486E  | 1197.157  | 1622.539  |
| AF303398  | 1111.492 | 1045.02  | AA029300  | 3057.333  | 3425.008  | AK000158   | 2510.22   | 3486.368  |
| NM_01481C | 2473.337 | 1053.865 | BG708842  | 56456.949 | 66996.68  | AK024500   | 6448.455  | 9253.807  |
| NM_00473E | 3393.328 | 2764.915 | M19723    | 55004.25  | 62583.93  | NM_002564  | 1766.693  | 2094.095  |
| NM_007357 | 3135.901 | 3480.462 | X06256    | 3492.371  | 3139.859  | NM_00096E  | 2544.882  | 2474.771  |

|           |          |          |            |           |           |           |           |           |
|-----------|----------|----------|------------|-----------|-----------|-----------|-----------|-----------|
| NM_003763 | 4298.896 | 4097.841 | AA709271   | 707.935   | 704.804   | NM_01330E | 2339.072  | 2414.99   |
| AK023448  | 1750.978 | 1419.357 | M34057     | 1571.368  | 1323.288  | AF027302  | 3495.874  | 3451.332  |
| Y18213    | 2616.838 | 2146.736 | ID 1984668 | 1793.183  | 6303.713  | NM_002852 | 1944.849  | 2246.806  |
| NM_003283 | 2915.806 | 2907.03  | ID 1832579 | 2531.175  | 2342.656  | NM_001817 | 2592.954  | 2517.264  |
| NM_018163 | 2285.789 | 5050.549 | H-430185 N | 2084.646  | 1814.23   | AF063611  | 794.756   | 915.974   |
| AK026362  | 5163.335 | 7497.483 | D16583     | 3268.938  | 2351.258  | NM_005965 | 1109.649  | 846.071   |
| NM_00496E | 3319.125 | 6365.502 | H44051     | 674.107   | 582.194   | NM_00274C | 2447.346  | 2334.983  |
| NM_00590E | 2653.375 | 3729.008 | AA481547   | 18075.801 | 13946.585 | AL117482  | 3237.946  | 2831.528  |
| NM_00478E | 4227.455 | 5532.001 | AA831880   | 1227.292  | 1097.283  | NM_00654E | 18832.826 | 17449.584 |
| AK024079  | 910.571  | 1430.483 | NM_00603E  | 961.183   | 697.624   | AB018324  | 7830.132  | 6243.771  |
| NM_00242E | 2522.815 | 3632.055 | NM_00208E  | 525.73    | 639.687   | NM_002742 | 46624.102 | 54318.363 |
| NM_014674 | 4877.044 | 10007.6  | NM_01465E  | 8938.185  | 9670.196  | Z25431    | 2878.869  | 2880.524  |
| NM_018271 | 690.834  | 2191.798 | NM_00207E  | 4597.449  | 4479.712  | NM_005627 | 4067.558  | 3888.098  |
| NM_014652 | 1449.937 | 655.903  | X05299     | 5381.873  | 5325.96   | M64497    | 910.995   | 2038.524  |
| AL133020  | 4068.391 | 3242.665 | BM468475   | 960.595   | 1199.432  | NM_007274 | 10424.162 | 13616.11  |
| NM_001611 | 1025.93  | 882.198  | NM_00031E  | 6246.575  | 5872.399  | NM_00335E | 2467.252  | 3607.977  |
| AB018310  | 1788.465 | 2111.794 | NM_00206C  | 7365.481  | 7611.336  | AF238315  | 530.778   | 772.613   |
| NM_020133 | 708.003  | 512.496  | AK001230   | 1982.34   | 2566.351  | NM_00022E | 2520.809  | 3509.24   |
| NM_01537E | 15346.56 | 10332.78 | NM_01468C  | 7414.346  | 6419.45   | NM_01839E | 9605.177  | 12319.725 |
| NM_00487E | 476.363  | 624.809  | NM_005027  | 1659.524  | 1575.9    | NM_003124 | 3187.859  | 3692.456  |
| AF144638  | 4461.029 | 5055.858 | NM_004612  | 2060.137  | 1675.707  | NM_00688E | 57715.504 | 58455.965 |
| U79457    | 16261.47 | 25023.73 | NM_00560E  | 18701.537 | 13774.701 | NM_004531 | 12337.011 | 8433.796  |
| AB037832  | 724.098  | 1190.765 | NM_00110E  | 2161.57   | 2490.556  | NM_00255E | 604.864   | 583.643   |
| NM_014347 | 4949.806 | 8707.022 | NM_015583  | 2831.406  | 2110.279  | NM_00358E | 795.688   | 807.085   |
| NM_00129E | 11765.33 | 16311.29 | NM_01849C  | 2899.999  | 3009.927  | NM_000922 | 3271.203  | 3477.018  |
| NM_004344 | 15579.24 | 21994.91 | NM_00477E  | 1002.679  | 1076.329  | NM_013232 | 4517.541  | 3807.931  |
| AF085972  | 740.917  | 1652.471 | NM_00624E  | 5363.153  | 5004.505  | NM_000362 | 604.899   | 437.215   |
| NM_000757 | 1266.865 | 3723.372 | NM_005103  | 667.564   | 1690.073  | NM_01442E | 2262.756  | 1837.149  |
| AB046786  | 255.517  | 1113.944 | NM_004822  | 1108.766  | 1306.986  | AK000770  | 961.314   | 1248.167  |
| NM_01889C | 20166.25 | 9938.561 | AK022349   | 4570.039  | 2781.346  | NM_00237C | 24510.416 | 24499.486 |
| AB046836  | 627.028  | 616.205  | NM_005031  | 7052.617  | 7264.162  | NM_01567C | 3228.66   | 4193.082  |
| AJ224166  | 1258.884 | 949.384  | AB040920   | 824.425   | 1331.991  | NM_01470E | 1242.756  | 1337.079  |
| AK026098  | 4201.689 | 3139.997 | NM_00072C  | 1216.992  | 1304.607  | AB028990  | 1210.218  | 1167.427  |
| NM_012381 | 2335.886 | 1688.804 | NM_004842  | 2034.363  | 2318.366  | NM_00670E | 23413.271 | 20908.277 |
| M20702    | 1982.546 | 2050.767 | AK024639   | 2768.387  | 2521.034  | AB037835  | 1663.71   | 1649.628  |
| NM_006397 | 14693.54 | 7447.265 | NM_01572C  | 5275.449  | 5583.84   | AK023035  | 5083.221  | 4555.569  |
| D83776    | 1574.012 | 2014.389 | NM_01822E  | 2807.964  | 3053.71   | NM_01484E | 4708.672  | 4739.833  |
| NM_00408E | 2122.404 | 2165.432 | NM_00632E  | 7010.734  | 8109.796  | M24750    | 2067.326  | 1976.604  |
| NM_00218C | 1770.796 | 1567.71  | AY009127   | 12996.539 | 20292.186 | AB046776  | 514.288   | 400.585   |
| NM_00013E | 3755.338 | 3594.552 | NM_01486E  | 1532.508  | 1919.812  | NM_002687 | 11446.602 | 8731.975  |
| BC032460  | 5944.9   | 9167.236 | AK000158   | 6216.996  | 5348      | NM_000627 | 1120.933  | 849.725   |
| NM_014071 | 1988.263 | 4557.785 | NM_00576E  | 930.175   | 1001.251  | NM_00003E | 1259.406  | 745.695   |
| AK024404  | 1183.125 | 2968.289 | AK024500   | 14125.539 | 12607.487 | NM_00082E | 991.598   | 755.17    |
| NM_00632E | 1079.691 | 1623.707 | NM_002564  | 8753.882  | 8063.4    | NM_004334 | 949.579   | 888.652   |
| NM_00516E | 1925.462 | 3817.084 | NM_000963  | 2170.05   | 3404.042  | NM_00388E | 2838.866  | 3458.239  |
| NM_01551E | 2533.918 | 2352.153 | NM_01330E  | 3846.958  | 5656.087  | NM_005843 | 1791.695  | 2064.854  |
| AB033065  | 846.968  | 851.96   | AF027302   | 3867.687  | 3632.803  | NM_003854 | 1395.126  | 2942.591  |
| NM_004857 | 828.514  | 623.502  | NM_002852  | 3645.241  | 2723.456  | NM_01798C | 5076.808  | 4330.175  |
| NM_01210E | 552.926  | 429.145  | NM_001817  | 4588.414  | 3345.995  | NM_001252 | 1379.658  | 2281.937  |
| NM_003253 | 596.731  | 588.172  | NM_00596E  | 1672.866  | 1743.331  | AF053712  | 852.12    | 831.245   |
| NM_01328E | 4606.942 | 2808.565 | NM_00274C  | 2624.84   | 2509.955  | NM_003947 | 1236.052  | 1782.964  |
| NM_002872 | 9918.833 | 6770.535 | AL117482   | 3843.151  | 3084.701  | NM_00093E | 51435.02  | 58272.941 |
| NM_00049C | 591.78   | 433.232  | NM_00654E  | 47623.102 | 37713.645 | NM_006514 | 1867.333  | 2273.088  |

|           |          |          |           |           |           |           |           |           |
|-----------|----------|----------|-----------|-----------|-----------|-----------|-----------|-----------|
| AJ225028  | 454.802  | 191.546  | AB018324  | 9607.08   | 9173.499  | AF065164  | 2253.478  | 2235.149  |
| NM_004839 | 1189.424 | 1154.996 | Z25431    | 2714.113  | 3742.191  | AB028991  | 3125.855  | 2541.071  |
| NM_012193 | 636.676  | 673.228  | NM_005627 | 2921.277  | 6029.267  | AF263547  | 9232.767  | 6682.302  |
| NM_003405 | 10818.41 | 6385.375 | M64497    | 1805.717  | 1016.197  | AJ008143  | 4277.584  | 3761.538  |
| NM_004720 | 8590.951 | 4814.294 | NM_007274 | 9451.864  | 9249.5    | NM_007144 | 3730.461  | 2516.75   |
| NM_001057 | 2065.198 | 1528.406 | AF238315  | 638.79    | 929.332   | NM_004424 | 4413.338  | 3750.708  |
| NM_005561 | 9005.668 | 10002.83 | NM_006224 | 61363.336 | 58000.023 | AL133117  | 2983.724  | 2636.847  |
| AF272381  | 2338.879 | 4182.919 | AL137300  | 5692.816  | 4669      | AB033040  | 1281.747  | 1608.324  |
| NM_004524 | 1301.187 | 2727.328 | NM_000229 | 4188.609  | 4097.183  | AF070586  | 2493.541  | 2743.439  |
| NM_006315 | 4167.76  | 6127.911 | NM_006995 | 24459.066 | 21212.955 | NM_014412 | 1431.143  | 1461.429  |
| NM_018401 | 1334.251 | 1671.891 | NM_003129 | 20972.328 | 19531.992 | NM_013303 | 3610.001  | 2903.168  |
| NM_005163 | 8251.865 | 9990.115 | NM_001956 | 6193.129  | 6882.047  | NM_012227 | 3955.262  | 5910.124  |
| NM_007273 | 33996.92 | 42340.3  | AB033064  | 3669.752  | 3930.032  | NM_006101 | 8850.788  | 13399.842 |
| BE894943  | 293.897  | 779.986  | AK022317  | 8007.116  | 7488.657  | NM_001237 | 10062.919 | 12208.521 |
| NM_016422 | 1801.981 | 2240.533 | NM_018396 | 11537.762 | 11195.083 | NM_002507 | 1573.643  | 1607.425  |
| NM_017878 | 658.432  | 297.547  | NM_003124 | 7737.494  | 6688.156  | NM_015962 | 2344.945  | 1978.288  |
| NM_004494 | 43055.38 | 34348.77 | NM_006886 | 55096.535 | 56042.246 | NM_016078 | 3466.073  | 4192.93   |
| AL049687  | 1211.394 | 839.438  | NM_004531 | 10318.12  | 13913.073 | NM_003798 | 1221.026  | 733.199   |
| NM_005643 | 7887.509 | 5156.837 | AL133581  | 3957.984  | 2767.292  | NM_004401 | 3157.886  | 3045.332  |
| NM_003592 | 1881.182 | 1870.117 | NM_002558 | 916.681   | 1100.456  | NM_001849 | 1980.082  | 1938.947  |
| NM_014953 | 2336.352 | 1025.083 | NM_003586 | 1575.753  | 1345.976  | AF255910  | 727.174   | 548.306   |
| AF179995  | 1315.548 | 1723.754 | NM_000922 | 3921.291  | 3634.757  | NM_016146 | 6541.719  | 5352.183  |
| NM_016195 | 2988.521 | 641.787  | NM_013232 | 8122.659  | 9011.767  | AK024343  | 2727.713  | 1950.086  |
| NM_004523 | 3511.396 | 2484.448 | NM_014429 | 2111.842  | 1777.199  | NM_001936 | 457.654   | 277.38    |
| NM_004404 | 8609.438 | 5711.545 | AK000770  | 814.686   | 1236.904  | NM_002569 | 601.447   | 524.759   |
| NM_002960 | 1174.421 | 1021.915 | NM_002370 | 24549.123 | 29656.207 | D42084    | 4850.31   | 3516.733  |
| NM_006790 | 993.83   | 828.072  | NM_015670 | 3127.879  | 3692.132  | NM_014693 | 850.134   | 835.69    |
| AL117522  | 1996.291 | 2191.625 | NM_014709 | 1460.41   | 1441.501  | AB007896  | 1178.272  | 740.768   |
| NM_006572 | 16391.98 | 15998.7  | NM_006708 | 27329.217 | 26334.398 | AB007916  | 8082.016  | 8211.044  |
| NM_004784 | 360.847  | 583.524  | AB037835  | 1911.154  | 2014.128  | NM_002874 | 637.214   | 876.268   |
| NM_019061 | 5412.789 | 7044.933 | NM_016228 | 2019.51   | 2085.67   | AF049140  | 4508.471  | 8965.073  |
| AB033007  | 3710.758 | 6864.311 | NM_000157 | 6288.765  | 6535.793  | AL136794  | 3126.594  | 2336.484  |
| NM_003781 | 344.638  | 1304.047 | NM_000712 | 19016.629 | 19320.877 | BC035601  | 32551.588 | 32135.723 |
| NM_003130 | 1054.908 | 713.795  | NM_018088 | 1451.014  | 1382.175  | NM_001458 | 1179.036  | 1461.146  |
| NM_004716 | 5772.296 | 5098.063 | BC013695  | 14546.893 | 11760.516 | NM_020388 | 3633.063  | 3774.53   |
| D29810    | 2396.863 | 1929.751 | NM_007205 | 555.08    | 268.895   | AB046829  | 1660.84   | 1300.774  |
| AB002384  | 1870.137 | 983.214  | AK023035  | 5360.901  | 5578.58   | NM_016445 | 437.361   | 686.668   |
| NM_018437 | 709.61   | 598.102  | NM_014846 | 5423.043  | 5202.592  | NM_003379 | 13008.021 | 11162.981 |
| NM_000422 | 544.024  | 306.682  | AB011164  | 4998.68   | 4264.063  | NM_004521 | 11407.163 | 6727.102  |
| AK023164  | 2591.186 | 1834.485 | M24750    | 2181.275  | 2376.325  | AF229162  | 2102.92   | 1395.477  |
| AK027121  | 9879.286 | 4673.593 | AB046776  | 1342.789  | 1495.7    | U02309    | 41548.824 | 37507.141 |
| AL117661  | 4216.021 | 3212.457 | NM_002687 | 21980.412 | 37695.742 | NM_005257 | 9494.782  | 8260.567  |
| X64643    | 1975.957 | 1121.438 | NM_000627 | 2649.537  | 2691.029  | AF011573  | 5167.483  | 5176.021  |
| NM_005380 | 8892.463 | 7105.682 | NM_000825 | 1093.146  | 1420.111  | NM_002145 | 2598.931  | 2258.836  |
| AF060169  | 363.638  | 599.444  | NM_004334 | 494.39    | 607.831   | NM_004831 | 1375.028  | 1534.716  |
| NM_005269 | 555.987  | 1142.923 | NM_003886 | 2740.309  | 3596.1    | NM_014213 | 5510.915  | 4335.816  |
| D70835    | 49592.04 | 55128.82 | NM_003854 | 606.145   | 792.278   | NM_000168 | 2421.411  | 2010.841  |
| NM_002697 | 1562.721 | 1814.61  | NM_017980 | 4524.611  | 5311.487  | AF294629  | 2113.239  | 2326.058  |
| NM_001518 | 11590.57 | 16586.8  | NM_001252 | 2265.88   | 1961.739  | NM_000545 | 4107.098  | 4823.702  |
| NM_003412 | 1639.488 | 4476.744 | AF053712  | 2361.332  | 2054.32   | NM_002136 | 48179.957 | 47549.07  |
| NM_018336 | 1575.082 | 3974.227 | NM_003947 | 1321.151  | 1372.164  | AK025571  | 823.444   | 1081.138  |
| NM_006051 | 2776.382 | 2070.474 | NM_002821 | 26424.387 | 24916.281 | NM_014463 | 40599.09  | 35748.328 |
| NM_018427 | 3374.139 | 2144.248 | M96652    | 39969.781 | 61978.219 | NM_005520 | 17991.385 | 15068.913 |

|           |          |          |           |           |           |           |           |           |
|-----------|----------|----------|-----------|-----------|-----------|-----------|-----------|-----------|
| NM_014663 | 1527.14  | 1150.092 | L41690    | 2639.219  | 3284.566  | AK023265  | 1487.022  | 1587.385  |
| AF007217  | 1061.939 | 447.938  | NM_018059 | 1958.118  | 1531.099  | NM_018723 | 692.733   | 606.605   |
| AB037753  | 3582.089 | 2769.798 | NM_002170 | 315.182   | 266.698   | AB029009  | 2379.282  | 2586.831  |
| NM_004674 | 2497.766 | 1485.015 | NM_000939 | 57614.645 | 63965.563 | AF112207  | 2429.28   | 1987.955  |
| AB037801  | 4314.822 | 2448.042 | NM_005183 | 748.511   | 627.782   | NM_005594 | 19060.645 | 15422.43  |
| AL080159  | 6905.112 | 4470.914 | NM_006514 | 4723.284  | 4270.677  | NM_004461 | 49325.563 | 54994.457 |
| NM_017823 | 23946.39 | 13770.82 | AF065164  | 5368.924  | 4264.139  | NM_018473 | 13273.132 | 9219.135  |
| U55185    | 1309.076 | 759.47   | AB028991  | 4378.854  | 4633.723  | BF106121  | 1241.757  | 1333.313  |
| U30828    | 4750.907 | 3805.883 | AF263547  | 8668.171  | 11360.478 | AK022590  | 887.635   | 870.878   |
| AF085886  | 46446.81 | 34552.97 | AJ008143  | 15181.164 | 26319.305 | AK023719  | 3301.489  | 2968.251  |
| AK023828  | 1053.847 | 931.481  | NM_007144 | 4036.766  | 6040.856  | AK025590  | 816.927   | 1350.38   |
| AL080223  | 4876.308 | 12579.41 | NM_004424 | 3803.419  | 3932.541  | AY007149  | 3049.851  | 2630.762  |
| AK001630  | 7229.156 | 12562.3  | AL133117  | 2957.796  | 3458.248  | M12078    | 705.44    | 722.593   |
| NM_014612 | 6735.63  | 10047.49 | AB033040  | 1401.186  | 1619.67   | NM_004550 | 9307.674  | 7002.704  |
| AF079098  | 1373.636 | 3061.841 | AF070586  | 1414.327  | 1645.57   | NM_000785 | 1343.697  | 1321.654  |
| AK021815  | 694.721  | 1079.325 | NM_014412 | 1390.011  | 1568.671  | NM_004110 | 5503.888  | 5273.992  |
| NM_001543 | 1435.034 | 3862.422 | NM_012227 | 5228.479  | 5084.984  | NM_013387 | 46257.516 | 37488.633 |
| AB018010  | 713.333  | 430.257  | NM_006101 | 7429.955  | 11029.347 | NM_005262 | 4813.808  | 4575.252  |
| NM_014610 | 12955.08 | 5738.744 | NM_001237 | 10906.947 | 10605.184 | NM_005757 | 1615.856  | 1802.453  |
| NM_000689 | 580.174  | 299.704  | NM_002507 | 2200.198  | 2435.198  | NM_020128 | 1663.435  | 943.922   |
| NM_006621 | 5028     | 3978.316 | NM_015962 | 3203.842  | 4013.451  | NM_005068 | 2023.98   | 1829.605  |
| BF347398  | 485.855  | 311.472  | NM_016145 | 1068.508  | 2504.653  | NM_018223 | 2791.173  | 2804.248  |
| AK026762  | 2080.681 | 1709.161 | NM_016078 | 10034.279 | 8648.41   | NM_006693 | 14421.968 | 13624.231 |
| NM_004412 | 880.121  | 779.795  | NM_003798 | 1207.33   | 1508.867  | NM_001722 | 2098.665  | 1427.04   |
| L48516    | 2480.088 | 1485.308 | NM_004401 | 3434.881  | 2451.535  | AB046802  | 630.341   | 332.059   |
| NM_016648 | 7727.748 | 3757.438 | NM_001849 | 13594.484 | 9757.368  | NM_003297 | 1300.407  | 1202.853  |
| AF083930  | 2113.469 | 1725.956 | AF255910  | 1496.077  | 1409.597  | X74861    | 452.047   | 614.83    |
| NM_003428 | 754.774  | 977.302  | NM_016146 | 6631.959  | 5667.935  | NM_018269 | 6568.272  | 5357.445  |
| AK027159  | 1429.571 | 1221.726 | AK024343  | 3189.407  | 2804.676  | AK024633  | 3903.677  | 3644.343  |
| AK025360  | 363.777  | 836.528  | NM_001936 | 860.271   | 1095.11   | NM_001453 | 4494.324  | 4645.762  |
| AF075112  | 1010.191 | 1495.224 | NM_002569 | 1487.352  | 2778.005  | NM_012075 | 1021.88   | 776.215   |
| AK001796  | 946.868  | 1991.784 | D42084    | 5218.281  | 7512.193  | AB004851  | 545.009   | 523.203   |
| AF086152  | 548.325  | 1016.129 | NM_014693 | 973.817   | 977.35    | AK023911  | 1580.96   | 1632.751  |
| U78519    | 4433.502 | 6900.483 | AB007896  | 1410.242  | 1659.459  | NM_001283 | 4223.186  | 1989.597  |
| AK026872  | 1074.625 | 2244.915 | AF049140  | 3477.265  | 4150.431  | AL110237  | 682.712   | 779.436   |
| NM_007190 | 2846.985 | 2192.631 | AL136794  | 3021.187  | 3099.172  | D87470    | 2053.789  | 2236.573  |
| AF043897  | 1274.594 | 1455.832 | BC035601  | 49322.039 | 58531.676 | AF147307  | 8870.777  | 5713.847  |
| U79246    | 823.237  | 658.159  | NM_001458 | 3091.157  | 2806.223  | AK001829  | 1966.663  | 2767.769  |
| AF007147  | 620.416  | 313.572  | NM_020388 | 9294.571  | 8501.271  | NM_016525 | 3436.747  | 2896.133  |
| AF052127  | 1410.289 | 1057.596 | AB046829  | 2468.135  | 2333.419  | AK024931  | 5113.229  | 4889.373  |
| AF086481  | 498.121  | 431.123  | NM_016445 | 950.047   | 980.535   | AL109715  | 922.16    | 768.363   |
| AK024885  | 1867.458 | 1613.372 | NM_003379 | 36568.984 | 25714.65  | AF086181  | 629.439   | 975.123   |
| AK022441  | 543.289  | 1507.239 | NM_004521 | 9944.585  | 9199.214  | AK021540  | 1062.784  | 979.542   |
| AK022158  | 240.435  | 1001.709 | AF229162  | 2050.526  | 1464.065  | D86985    | 815.498   | 484.373   |
| AK026208  | 6150.959 | 13380.74 | U02309    | 50022.211 | 39693.371 | AK022258  | 1101.721  | 945.144   |
| AF085961  | 590.403  | 405.454  | NM_005257 | 14217.816 | 10259.992 | AF131799  | 594.828   | 351.573   |
| AK024925  | 1593.537 | 1704.94  | AF011573  | 8531.564  | 6444.305  | AK000455  | 2240.226  | 1576.447  |
| AL049460  | 1035.878 | 801.088  | NM_002145 | 5068.303  | 4949.874  | NM_005230 | 873.542   | 1057.771  |
| AK022396  | 626.759  | 544.818  | NM_004831 | 1578.128  | 1450.507  | AL365407  | 624.583   | 470.936   |
| AF075113  | 947.341  | 640.033  | NM_014213 | 4986.836  | 5791.543  | AK000840  | 2624.374  | 2469.115  |
| AF086037  | 341.104  | 378.693  | AF294629  | 1707.572  | 1667.725  | AL162073  | 1197.608  | 1091.704  |
| AK022892  | 1180.417 | 763.541  | NM_000545 | 1752.924  | 1645.756  | AJ006835  | 3462.179  | 3621.781  |
| Z36807    | 4888.135 | 3461.034 | AK025571  | 2194.987  | 1886.883  | AF085890  | 533.132   | 357.135   |

|           |          |          |           |           |           |           |           |           |
|-----------|----------|----------|-----------|-----------|-----------|-----------|-----------|-----------|
| U20896    | 724.278  | 543.538  | NM_014463 | 43812.859 | 37396.738 | AL110138  | 455.852   | 576.713   |
| NM_01793E | 1727.845 | 1190.594 | NM_00552C | 22692.314 | 17698.551 | AL050153  | 567.402   | 551.135   |
| AK023189  | 1258.656 | 760.983  | AK023265  | 3433.793  | 2936.674  | AL122039  | 575.049   | 498.03    |
| AF306347  | 597.619  | 335.047  | NM_018723 | 892.092   | 710.029   | AF070577  | 3643.182  | 3061.036  |
| AK001164  | 1124.91  | 1193.775 | AB029009  | 2307.744  | 2212.644  | AL157484  | 3092.332  | 2743.32   |
| AK022963  | 401.835  | 449.963  | AF112207  | 3191.964  | 2746.287  | AK024850  | 1165.475  | 1223.568  |
| AK024231  | 815.575  | 844.856  | NM_005594 | 45069.895 | 34597.375 | Y09836    | 1074.839  | 781.617   |
| NM_01694C | 2248.623 | 2255.229 | NM_004461 | 56778.191 | 61340.461 | AL137597  | 3671.318  | 2673.036  |
| AK025757  | 3608.361 | 2924.874 | NM_018473 | 13265.322 | 11765.544 | AK022144  | 2138.751  | 1684.965  |
| Y16713    | 505.105  | 517.904  | BF106121  | 1203.277  | 888.569   | AF086044  | 483.876   | 470.124   |
| L07394    | 2252.045 | 1516.964 | AK022590  | 1708.548  | 1236.491  | NM_01492E | 472.821   | 471.117   |
| AK056133  | 1204.198 | 804.23   | AK023719  | 5123.656  | 4604.333  | AF131790  | 529.111   | 626.582   |
| NM_01784E | 10867.03 | 5654.356 | AK025590  | 1516.409  | 1431.288  | AJ011378  | 472.948   | 533.964   |
| AF130080  | 694.036  | 853.984  | AY007149  | 3665.181  | 5925.671  | AF009266  | 715.121   | 650.056   |
| AK026006  | 986.491  | 844.864  | M12078    | 545.071   | 762.516   | AF060168  | 1260.125  | 1089.586  |
| NM_01908E | 900.086  | 980.037  | NM_00078E | 701.982   | 1419.318  | AF009275  | 793.494   | 593.024   |
| AF147440  | 384.292  | 493.194  | NM_00411C | 4223.378  | 4442.35   | AF015251  | 457.755   | 563.61    |
| AL122072  | 2099.156 | 2470.021 | NM_005262 | 13115.176 | 11607.057 | AF056426  | 1034      | 1034.466  |
| AK026221  | 318.717  | 424.31   | NM_005757 | 1846.742  | 1914.423  | NM_01832E | 748.392   | 708.545   |
| Y13870    | 652.248  | 797.093  | NM_016483 | 584.632   | 393.11    | AK001150  | 2247.957  | 1496.624  |
| AK026403  | 1331.879 | 1249.24  | NM_02012E | 1597.427  | 1337.35   | AK021633  | 998.383   | 797.702   |
| AL359058  | 902.938  | 712.272  | NM_00506E | 6028.447  | 5490.005  | AK025659  | 1145.536  | 1198.327  |
| AK022439  | 455.275  | 406.386  | NM_018223 | 3446.384  | 3394.027  | AK026788  | 859.591   | 841.043   |
| AK026237  | 1209.009 | 1183.017 | NM_006693 | 16120.451 | 12424.12  | AK025272  | 929.431   | 745.565   |
| AK023687  | 586.363  | 262.081  | NM_001722 | 3253.36   | 3052.55   | AK026824  | 547.173   | 558.55    |
| NM_017632 | 2128.444 | 2076.769 | AB046802  | 4685.403  | 4008.423  | AJ008130  | 18556.023 | 13791.771 |
| AK026655  | 1661.024 | 1369.515 | NM_003297 | 1753.368  | 1571.34   | AF086502  | 1299.881  | 1266.059  |
| AF129926  | 1322.768 | 1444.473 | X74861    | 859.56    | 1021.805  | L39924    | 1921.004  | 1478.125  |
| AK025822  | 2848.381 | 2044.073 | NM_01826E | 7355.311  | 4118.518  | U52054    | 6704.415  | 3859.823  |
| AF201937  | 25048.15 | 18570.26 | AK024633  | 4006.289  | 2474.88   | AK023325  | 1045.875  | 1023.664  |
| AL390128  | 1525.522 | 1431.204 | NM_001453 | 5716.304  | 3274.517  | NM_01798E | 1274.089  | 1118.028  |
| AL157429  | 844.048  | 680.603  | NM_01207E | 1467.384  | 1405.304  | AK025866  | 2327.783  | 1605.744  |
| NM_012071 | 25081.94 | 18463.72 | AB004851  | 816.265   | 1035.164  | AF088058  | 6839.914  | 6206.706  |
| AF055018  | 1894.643 | 1755.975 | AK023911  | 6928.698  | 5722.63   | NM_000513 | 1958.528  | 1368.532  |
| AF070599  | 487.983  | 407.53   | AL110237  | 713.648   | 866.57    | Y11165    | 1405.31   | 1037.138  |
| NM_00552E | 666.788  | 340.357  | D87470    | 1913.316  | 2604.86   | BC028422  | 861.717   | 775.521   |
| NM_00528E | 390.169  | 436.824  | AF147307  | 8249.052  | 11419.175 | NM_00354E | 645.847   | 426.422   |
| AK001918  | 590.103  | 446.939  | AK001829  | 2521.416  | 1695.014  | AK024413  | 858.984   | 920.216   |
| NM_01863E | 13289.39 | 9074.585 | AK024931  | 19287.068 | 16025.375 | AK022247  | 1388.252  | 2329.358  |
| AF086048  | 3409.133 | 2949.571 | AL109715  | 850.308   | 965.396   | AK001453  | 4066.791  | 2201.839  |
| L15616    | 3150.404 | 2799.1   | AF086181  | 1046.338  | 895.759   | AB007972  | 1733.999  | 1196.557  |
| AB019565  | 8420.089 | 6119.365 | AK021540  | 602.763   | 594.555   | AL390144  | 15247.579 | 13380.098 |
| D16914    | 60876.25 | 51738.75 | D86985    | 534.571   | 633.463   | AK024017  | 1019.978  | 676.253   |
| AA084879  | 1135.538 | 1244.885 | AK022258  | 1247.777  | 1479.466  | X56196    | 609.11    | 744.974   |
| NM_000833 | 1129.234 | 886.712  | AF088043  | 454.767   | 579.131   | D17220    | 7663.525  | 5361.599  |
| NM_000283 | 2622.47  | 2943.538 | AF131799  | 836.707   | 656.679   | D28363    | 55836.742 | 43566.41  |
| NM_01246C | 1183.186 | 1416.264 | AK000455  | 2477.625  | 2158.569  | AB011171  | 800.296   | 528.094   |
| NM_012118 | 2146.948 | 2029.467 | NM_00523C | 1103.318  | 747.978   | NM_005322 | 3282.603  | 1987.021  |
| AK024092  | 2233.047 | 1476.713 | AL365407  | 1164.974  | 1144.514  | AK024465  | 921.069   | 636.161   |
| AK002044  | 2631.042 | 2777.472 | AK000840  | 8840.597  | 7048.901  | AK021478  | 3484.503  | 3383.328  |
| U90904    | 7723.886 | 4718.129 | AL162073  | 2332.784  | 1916.348  | AF131782  | 972.529   | 956.731   |
| AF088053  | 2989.367 | 1819.973 | AJ006835  | 3818.104  | 4749.36   | NM_01421C | 2881.686  | 3278.075  |
| AL133662  | 1032.023 | 720.893  | AF085890  | 846.781   | 1077.003  | AK021603  | 896.102   | 901.348   |

|            |          |          |           |           |           |           |           |           |
|------------|----------|----------|-----------|-----------|-----------|-----------|-----------|-----------|
| NM_002565  | 599.649  | 303.262  | AL110138  | 1744.835  | 1314.479  | AL110136  | 2587.407  | 2448.62   |
| U90903     | 897.571  | 627.257  | AL122039  | 976.005   | 899.081   | AK026469  | 2282.388  | 2557.265  |
| AB032954   | 1786.236 | 1618.197 | AF070577  | 12871.511 | 10890.523 | D16935    | 4041.713  | 3809.753  |
| NM_006003  | 21876.95 | 14608.02 | AL157484  | 13326.585 | 11246.798 | U92019    | 615.742   | 531.399   |
| AL110197   | 3614.367 | 2865.429 | AK024850  | 1004.798  | 1345.886  | U52835    | 1835.608  | 876.37    |
| AF085995   | 1204.056 | 611.755  | Y09836    | 2035.087  | 4350.832  | NM_000756 | 2164.874  | 1123.153  |
| CY3Cy5     | 639.564  | 167.467  | AL137597  | 4544.337  | 5255.43   | AK022148  | 712.079   | 256.872   |
| AA029300   | 2195.145 | 2241.898 | AK022144  | 2584.919  | 2766.045  | Z36811    | 54564.195 | 52785.516 |
| BG708842   | 4958.777 | 5632.474 | AF086044  | 551.702   | 501.744   | NM_018950 | 11028.22  | 4706.39   |
| M19723     | 22892.87 | 24718.65 | AF131790  | 863.983   | 426.838   | K03200    | 5539.914  | 3624.152  |
| X06256     | 1949.064 | 1737.724 | AJ011378  | 1330.552  | 1215.198  | U17629    | 2710.118  | 1512.871  |
| ID 1984668 | 4933.539 | 1707.863 | AF009266  | 620.999   | 589.474   | NM_020428 | 3269.493  | 2512.491  |
| ID 1832579 | 1622.49  | 1603.716 | AF009310  | 986.624   | 856.187   | U79265    | 1531.111  | 1029.552  |
| H-430185 N | 1143.638 | 1150.356 | AF060168  | 1622.844  | 1900.697  | AK022868  | 5073.962  | 2399.762  |
| D16583     | 589.553  | 841.662  | AK001096  | 616.446   | 712.713   | NM_003530 | 618.904   | 449.681   |
| AA481547   | 12876.28 | 10771.7  | NM_018325 | 1427.994  | 1692.295  | AJ227871  | 1389.11   | 865.958   |
| T64880     | 1256.464 | 1240.994 | AK021565  | 352.411   | 256.04    | AK025344  | 2158.286  | 1417.23   |
| NM_020967  | 1080.03  | 881.175  | AK021778  | 730.603   | 740.781   | D28589    | 31821.76  | 17329.527 |
| SR4        | 13429.88 | 9984.774 | AK001150  | 4864.355  | 4201.5    | AF301223  | 679.447   | 590.281   |
| SR6        | 2122.218 | 2266.307 | AK002123  | 758.359   | 602.864   | NM_017867 | 38825.77  | 20053.656 |
| CY3Cy5     | 1768.178 | 237.462  | AK021633  | 2503.76   | 2731.732  | U92820    | 4165.705  | 3569.398  |
| NM_005027  | 717.568  | 499.062  | AK025659  | 2818.852  | 2141.273  | NM_017937 | 1712.347  | 1813.515  |
| NM_004612  | 844.539  | 1318.839 | AK026788  | 2270.602  | 2556.067  | AL360266  | 2714.82   | 2329.975  |
| NM_005608  | 14045.63 | 13566.5  | AK025272  | 1155.918  | 1219.852  | AL160132  | 17567.496 | 19301.305 |
| NM_001106  | 1994.767 | 847.387  | AK026824  | 885.882   | 984.822   | NM_019557 | 4386.528  | 4181.135  |
| NM_015583  | 1027.105 | 1403.591 | AJ008130  | 28319.434 | 21611.02  | CY3Cy5    | 3777.96   | 179.829   |
| NM_004778  | 431.96   | 318.172  | NM_003665 | 600.782   | 558.233   | AA150828  | 801.972   | 1131.384  |
| NM_006245  | 4066.349 | 3712.151 | AF086502  | 2592.872  | 2137.504  | H64379    | 5406.058  | 15658.445 |
| NM_005103  | 212.25   | 136.576  | L39924    | 1419.753  | 1395.661  | BE208258  | 58845.246 | 65316.59  |
| NM_004822  | 380.084  | 373.048  | U52054    | 8245.409  | 9649.907  | T72202    | 753.665   | 686.926   |
| AK022349   | 3007.594 | 3001.97  | D17226    | 806.072   | 1282.945  | BI831922  | 1846.335  | 1814.182  |
| NM_004973  | 4170.376 | 3299.209 | AK023325  | 2329.288  | 4498.168  | M69238    | 930.195   | 806.736   |
| NM_007245  | 6361.52  | 4832.244 | NM_017985 | 3069.846  | 4374.762  | AA599158  | 6858.806  | 5609.263  |
| NM_001890  | 462.918  | 555.195  | NM_000513 | 1861.802  | 2439.864  | SR5       | 6100.284  | 3406.196  |
| NM_001286  | 2550.827 | 3252.95  | Y11165    | 3407.667  | 3318.864  | SR7       | 5262.394  | 20456.115 |
| NM_014648  | 1376.02  | 1954.785 | AL137445  | 905.397   | 929.286   | SR9       | 12853.945 | 1195.091  |
| NM_000951  | 3560.311 | 4519.38  | BC028422  | 904.183   | 897.817   | CY3Cy5    | 3150.625  | 165.577   |
| AK000158   | 752.408  | 959.446  | NM_003545 | 819.396   | 791.822   | NM_005261 | 652.473   | 771.172   |
| AK024500   | 3220.467 | 4128.58  | AK024413  | 1580.25   | 1801.893  | NM_001560 | 332.098   | 677.276   |
| NM_002564  | 976.33   | 1022.215 | AL137752  | 409.23    | 357.193   | NM_001783 | 10745.135 | 12279.755 |
| NM_000963  | 2159.617 | 1785.114 | AK022247  | 1736.079  | 1413.547  | J03171    | 3575.615  | 3992.086  |
| NM_013308  | 1856.499 | 1704.556 | AK001453  | 5623.547  | 5087.194  | NM_005856 | 423.554   | 593.784   |
| AF027302   | 3148.865 | 2806.837 | AB007972  | 4260.96   | 6428.131  | NM_005312 | 1295.471  | 2760.093  |
| NM_002852  | 1734.695 | 1733.844 | AL390144  | 31465.131 | 40215.016 | NM_001711 | 761.973   | 1128.358  |
| NM_001817  | 1721.618 | 2098.247 | D28363    | 55956.648 | 59719.926 | NM_004210 | 9812.203  | 10032.925 |
| AF063611   | 952.454  | 890.135  | AB011171  | 2266.114  | 2144.04   | NM_020140 | 1722.652  | 1877.036  |
| NM_006039  | 444.539  | 599.402  | AF090099  | 656.407   | 908.056   | NM_001496 | 4490.905  | 3268.591  |
| NM_014656  | 1278.043 | 961.515  | AF189251  | 753.45    | 801.606   | U65404    | 1208.224  | 1066.621  |
| NM_002076  | 3164.767 | 2852.356 | NM_005322 | 6472.905  | 6688.963  | NM_002500 | 714.667   | 451.396   |
| X05299     | 5565.797 | 5196.112 | AK024465  | 2026.469  | 2014.521  | AK026232  | 5770.426  | 4390.961  |
| BM468475   | 1147.89  | 2429.241 | AK021478  | 8184.054  | 7456.001  | NM_014892 | 12625.18  | 10810.777 |
| NM_002060  | 925.943  | 1961.346 | AF131782  | 2227.625  | 2237.892  | AK023827  | 3338.334  | 2559.798  |
| AK001230   | 1494.338 | 2273.072 | NM_014210 | 4097.487  | 3207.354  | NM_001117 | 630.586   | 341.325   |



|            |          |          |           |           |           |           |           |           |
|------------|----------|----------|-----------|-----------|-----------|-----------|-----------|-----------|
| NM_01468C  | 4686.049 | 8425.985 | AK021603  | 4280.225  | 4022.541  | NM_000231 | 1170.85   | 477.062   |
| NM_006224  | 14864.55 | 14608.48 | AL110136  | 3571.95   | 3137.906  | L07517    | 2618.735  | 1498.707  |
| AL137300   | 2404.424 | 2642.227 | AK002203  | 895.385   | 680.376   | AK022451  | 1264.561  | 836.79    |
| NM_000229  | 2666.83  | 2953.992 | AK026469  | 6211.758  | 5981.864  | NM_014359 | 61131.492 | 66571.227 |
| NM_003129  | 13265.03 | 14207.19 | D16935    | 3940.22   | 3581.027  | BM918441  | 1408.985  | 1184.09   |
| NM_001956  | 675.009  | 699.536  | U92019    | 1301.469  | 1475.331  | NM_001045 | 5528.322  | 7941.843  |
| AB033064   | 1119.511 | 1723.728 | U52835    | 2469.683  | 2526.85   | NM_005697 | 6063.029  | 6605.358  |
| AK022317   | 2927.977 | 3105.005 | NM_000756 | 2379.703  | 2973.373  | NM_003099 | 5860.201  | 7044.327  |
| NM_018396  | 7977.273 | 7328.194 | AK022148  | 1354.277  | 1945.231  | NM_004781 | 1350.989  | 1818.942  |
| NM_003124  | 1810.801 | 2110.173 | Z36811    | 55121.234 | 65323.488 | NM_018303 | 2640.197  | 3645.292  |
| NM_004531  | 9479.224 | 5900.919 | K03200    | 7779.449  | 8249.055  | NM_014758 | 4047.555  | 6275.987  |
| NM_002558  | 566.448  | 643.971  | U17629    | 3305.563  | 3877.778  | NM_005124 | 2630.168  | 3223.928  |
| NM_005031  | 3724.018 | 4214.574 | NM_020428 | 6157.949  | 6007.862  | AK000947  | 2213.487  | 2473.598  |
| AB040920   | 658.529  | 535.286  | U79265    | 2414.954  | 1833.061  | L08240    | 1410.264  | 1502.801  |
| NM_000720  | 372.902  | 396.438  | AK022868  | 5822.035  | 5611.441  | NM_017952 | 842.148   | 504.763   |
| NM_004842  | 1938.792 | 1366.801 | NM_003530 | 718.278   | 977.9     | NM_002940 | 1318.623  | 477.127   |
| AK024639   | 2757.187 | 1794.123 | AJ227871  | 1824.199  | 2078.785  | NM_016081 | 8016.032  | 7479.09   |
| AB007915   | 1144.61  | 1697.304 | AK025344  | 3202.877  | 3296.483  | NM_006389 | 3187.555  | 3225.149  |
| AB033070   | 500.748  | 1658.389 | D28589    | 33861.434 | 35596.609 | M30818    | 449.368   | 395.975   |
| NM_006325  | 6718.093 | 12592.56 | AF301223  | 935.327   | 975.904   | NM_003329 | 58952.41  | 46088.348 |
| AY009127   | 18679.38 | 28571.24 | NM_017867 | 37554.367 | 28203.15  | NM_003299 | 36672.508 | 23207.211 |
| NM_014869  | 698.734  | 2387.846 | U92820    | 6329.17   | 4756.634  | NM_014330 | 15701.024 | 10769.729 |
| NM_006708  | 16554.85 | 11897.26 | NM_017937 | 2747.618  | 2511.48   | NM_007034 | 874.448   | 692.919   |
| AB037835   | 987.265  | 869.096  | AL360266  | 3390.798  | 2656.442  | NM_007214 | 6465.379  | 7172.09   |
| NM_000157  | 2255.975 | 2475.577 | AL160132  | 36313.531 | 30543.258 | NM_000311 | 6994.583  | 8679.13   |
| NM_000712  | 10657.98 | 9633.922 | NM_019557 | 4868.49   | 5543.229  | NM_017909 | 2817.391  | 2709.327  |
| NM_018088  | 488.503  | 422.145  | CY3Cy5    | 1745.857  | 180.364   | NM_006335 | 10518.499 | 9797.366  |
| BC013695   | 8923.557 | 9282.75  | AA150828  | 953.296   | 818.894   | NM_000786 | 612.162   | 532.042   |
| NM_014846  | 1898.263 | 1938.72  | H64379    | 3976.168  | 3152.097  | NM_017731 | 834.822   | 1148.524  |
| M24750     | 1948.795 | 1433.677 | BE208258  | 57564.422 | 66204.734 | AB040891  | 2671.867  | 3065.217  |
| NM_005965  | 783.791  | 633.461  | T72202    | 617.032   | 655.754   | AB037780  | 798.976   | 1110.813  |
| NM_002740  | 1837.502 | 1954.85  | BI831922  | 2184.031  | 1541.393  | NM_005845 | 8627.861  | 6852.25   |
| AL117482   | 2359.523 | 2678.976 | M69238    | 1132.489  | 1026.022  | NM_016209 | 6369.115  | 4804.184  |
| NM_006549  | 4614.618 | 3829.215 | AA599158  | 5774.577  | 6770.918  | AK075415  | 480.04    | 609.693   |
| AB018324   | 6966.889 | 4335.515 | SR3       | 36706.145 | 24188.072 | NM_018964 | 3673.383  | 3180.073  |
| NM_002742  | 4143.666 | 3774.203 | SR5       | 5060.503  | 4992.389  | NM_000080 | 1263.717  | 855.66    |
| Z25431     | 2969.271 | 2797.028 | SR7       | 3712.216  | 32925.801 | NM_001829 | 2395.504  | 1576.107  |
| NM_005627  | 6090.868 | 6184.988 | SR9       | 13474.974 | 2787.424  | AF283645  | 3081.5    | 2116.739  |
| NM_007274  | 12960.05 | 33399.64 | CY3Cy5    | 2414.025  | 637.441   | NM_016575 | 1656.78   | 1695.687  |
| NM_003356  | 720.381  | 1142.991 | NM_005261 | 421.986   | 408.537   | NM_003897 | 2616.833  | 2822.868  |
| AF238315   | 506.205  | 721.849  | NM_001560 | 362.062   | 258.876   | NM_014165 | 11047.075 | 12430.933 |
| NM_014648  | 1123.648 | 913.213  | NM_001783 | 9699.808  | 7355.815  | AL442085  | 3242.525  | 3937.555  |
| NM_005073  | 484.817  | 432.069  | J03171    | 3250.385  | 2964.941  | NM_013313 | 5387.172  | 7111.934  |
| NM_000951  | 2432.43  | 1874.85  | NM_004323 | 10922.182 | 12371.577 | NM_002553 | 2373.963  | 2976.565  |
| AA029300   | 2256.38  | 1716.148 | NM_005312 | 1802.92   | 939.401   | AJ404615  | 2879.619  | 3129.901  |
| BG708842   | 4964.177 | 5269.096 | NM_001711 | 705.26    | 761.998   | NM_016053 | 12413.344 | 11052.068 |
| M19723     | 20363.69 | 17848.77 | NM_004210 | 7938.326  | 6491.082  | AB007869  | 1966.349  | 1746.514  |
| X06256     | 1915.705 | 1884.111 | NM_020140 | 1448.719  | 1450.766  | AB046844  | 1171.888  | 1098.481  |
| ID 1984668 | 4945.842 | 1326.468 | NM_001962 | 472.843   | 522.034   | NM_000302 | 1190.976  | 898.286   |
| ID 1832579 | 1556.221 | 1186.443 | NM_002500 | 774.06    | 1019.683  | NM_013235 | 20919.422 | 16123.554 |
| H-430185 N | 1241.978 | 1212.32  | AK026232  | 4801.06   | 6799.167  | NM_016015 | 10453.148 | 8108.691  |
| D16583     | 546.231  | 658.627  | NM_014892 | 12489.162 | 11416.25  | NM_020120 | 1371.502  | 964.987   |
| AA481547   | 12674.5  | 8094.183 | AK023827  | 3280.71   | 3134.895  | AK022900  | 1735.388  | 1130.674  |

|           |          |          |           |           |           |           |           |           |
|-----------|----------|----------|-----------|-----------|-----------|-----------|-----------|-----------|
| T64880    | 1189.395 | 1028.141 | NM_001117 | 495.396   | 486.133   | NM_002266 | 32544.594 | 19475.514 |
| NM_020967 | 1265.342 | 1146.555 | NM_000231 | 527.387   | 1471.599  | NM_014400 | 5283.6    | 3954.726  |
| AB028990  | 1354.867 | 2789.964 | L07517    | 2238.123  | 2853.486  | AL157492  | 1334.792  | 981.079   |
| AK002089  | 368.18   | 326.985  | AK022451  | 1236.085  | 1363.344  | AL353957  | 2414.182  | 2071.193  |
| X05299    | 5015.959 | 4733.843 | NM_014359 | 67309.68  | 69564.297 | NM_000231 | 1080.699  | 632.871   |
| BM468475  | 857.801  | 866.37   | BM918441  | 999.977   | 1292.443  | L07517    | 2678.688  | 2695.199  |
| NM_000318 | 4197.503 | 4269.978 | NM_018557 | 292.495   | 652.519   | AK022451  | 1119.467  | 1384.669  |
| NM_002060 | 634.963  | 662.811  | NM_001045 | 6014.681  | 5728.548  | AA150828  | 745.483   | 1279.466  |
| AK001230  | 1103.963 | 920.071  | NM_005697 | 5020.802  | 3673.688  | T72202    | 657.95    | 548.037   |
| NM_014680 | 3270.705 | 3007.709 | NM_003099 | 5411.869  | 4132.754  | BI831922  | 1388.264  | 1599.854  |
| NM_005027 | 665.211  | 557.616  | NM_004781 | 1586.444  | 1471.623  | M69238    | 950.275   | 830.179   |
| NM_004612 | 982.71   | 865.575  | NM_018303 | 2198.713  | 1984.545  | AA664180  | 561.592   | 461.839   |
| NM_005608 | 13727.2  | 11256.2  | NM_014758 | 3411.316  | 2882.092  | NM_002711 | 1721.045  | 795.102   |
| NM_001106 | 2052.271 | 1197.813 | NM_005124 | 2185.602  | 2143.433  | AK026092  | 3087.272  | 2468.473  |
| NM_015583 | 1055.355 | 1035.794 | AK000947  | 1503.042  | 1494.611  | AK001175  | 1115.339  | 829.917   |
| NM_004778 | 353.542  | 237.677  | L08240    | 1451.396  | 1222.987  | NM_003329 | 58437.789 | 62093.156 |
| NM_006245 | 3900.955 | 3052.432 | NM_017952 | 812.684   | 540.956   | NM_003299 | 38447.578 | 35167.828 |
| NM_005103 | 303.715  | 182.865  | NM_016081 | 8813.721  | 7655.404  | NM_007034 | 689.825   | 709.739   |
| NM_004822 | 354.634  | 350.605  | NM_006389 | 3630.286  | 3578.3    | NM_005261 | 526.535   | 586.691   |
| AK022349  | 3146.816 | 2466.077 | M30818    | 333.656   | 458.829   | NM_001560 | 652.979   | 615.427   |
| NM_007245 | 9723.854 | 23963.33 | NM_000163 | 454.307   | 436.964   | NM_005312 | 1491.499  | 1642.509  |
| NM_001890 | 629.459  | 1193.431 | NM_003329 | 53106.031 | 55461.734 | NM_001711 | 834.543   | 801.091   |
| NM_001286 | 2998.06  | 4838.299 | NM_003299 | 35720.512 | 27663.252 | NM_004210 | 9848.129  | 8524.799  |
| AB007915  | 927.071  | 1561.251 | NM_014330 | 14422.386 | 17841.439 | NM_020140 | 1815.255  | 1795.776  |
| AB033070  | 588.463  | 576.569  | NM_007034 | 802.979   | 984.816   | NM_002500 | 842.806   | 436.065   |
| NM_018229 | 1594.297 | 1957.585 | NM_007214 | 6472.211  | 6280.722  | AK026232  | 6326.295  | 3490.021  |
| NM_006325 | 4057.578 | 3911.581 | NM_000311 | 8246.382  | 6878.592  | NM_014892 | 12953.852 | 8790.859  |
| AY009127  | 12816.46 | 10892.24 | NM_017909 | 2536.419  | 2201.034  | AK023827  | 3239.813  | 2656.967  |
| NM_014869 | 569.409  | 937.225  | NM_006335 | 8613.862  | 7497.458  | NM_001117 | 779.526   | 456.397   |
| AK000158  | 751.076  | 1055.991 | NM_000786 | 311.22    | 254.238   | NM_001829 | 2727.184  | 2667.328  |
| AK024500  | 3467.82  | 3875.353 | NM_017731 | 689.781   | 474.388   | NM_007256 | 619.474   | 933.195   |
| NM_002564 | 842.622  | 773.652  | AB040891  | 2511.036  | 2065.644  | AF283645  | 3396.807  | 3351.888  |
| NM_000963 | 2133.241 | 1460.135 | AB037780  | 969.423   | 773.32    | NM_016575 | 2048.653  | 2635.421  |
| NM_013308 | 1738.898 | 1313.998 | NM_016209 | 9198.713  | 10080.646 | NM_018557 | 619.982   | 422.76    |
| AF027302  | 2997.027 | 2690.011 | AK075415  | 558.238   | 535.725   | NM_001045 | 7524.588  | 8544.78   |
| NM_002852 | 1553.258 | 1404.048 | AK025616  | 520.572   | 683.116   | NM_005697 | 7105.42   | 9576.449  |
| NM_001817 | 1728.9   | 1487.255 | NM_018964 | 3770.673  | 3712.079  | NM_004781 | 1580.09   | 1947.57   |
| AF063611  | 907.563  | 896.819  | NM_000080 | 826.893   | 1091.178  | NM_018303 | 2389.279  | 1931.155  |
| NM_006039 | 424.636  | 451.66   | NM_001829 | 1791.445  | 2022.857  | NM_014758 | 3957.974  | 3500.186  |
| NM_002089 | 387.206  | 475.303  | NM_007256 | 645.616   | 731.303   | NM_005124 | 2143.155  | 2143.605  |
| M28983    | 376.582  | 573.434  | AF283645  | 2999.651  | 3530.991  | AK000947  | 2162.14   | 1861.625  |
| NM_014656 | 1825.553 | 3080.461 | NM_016575 | 2031.055  | 2668.563  | L08240    | 1698.601  | 1346.662  |
| NM_002076 | 4453.848 | 6106.708 | NM_003897 | 2042.198  | 1581.44   | NM_017952 | 918.65    | 798.402   |
| Z25431    | 2539.482 | 2579.557 | NM_014165 | 9672.941  | 9747.609  | NM_002940 | 2696.264  | 1296.382  |
| NM_005627 | 4218.153 | 2735.201 | AL442085  | 2801.559  | 2214.431  | NM_016081 | 7657.797  | 5374.509  |
| M64497    | 687.565  | 1385.177 | NM_013313 | 2455.39   | 2087.878  | NM_006389 | 4004.718  | 2622.359  |
| NM_007274 | 7855.211 | 8569.533 | NM_014736 | 9275.854  | 7575.841  | NM_000163 | 601.038   | 385.313   |
| NM_003356 | 625.552  | 635.355  | AK023886  | 1016.403  | 873.114   | AB023216  | 512.723   | 790.44    |
| AF238315  | 276.012  | 339.121  | NM_002553 | 1618.956  | 1289.766  | NM_002266 | 35071.719 | 31914.5   |
| NM_006224 | 15313.45 | 12474.41 | AJ404615  | 2678.746  | 2418.502  | NM_014400 | 5587.067  | 6613.292  |
| AL137300  | 2561.796 | 2586.177 | AB007869  | 2466.592  | 2324.753  | AL157492  | 1066.795  | 1425.233  |
| NM_000229 | 2321.146 | 2510.635 | AB046844  | 1103.72   | 1024.582  | AL353957  | 2800.285  | 2621.898  |
| NM_006995 | 18728.17 | 18620.7  | NM_000302 | 1173.483  | 1359.211  | NM_007214 | 6506.939  | 5606.988  |

|            |          |          |           |           |           |           |           |           |
|------------|----------|----------|-----------|-----------|-----------|-----------|-----------|-----------|
| NM_00312€  | 13480.2  | 14849.71 | NM_01323€ | 20701.676 | 19350.76  | NM_000311 | 7368.853  | 8231.99   |
| NM_00195€  | 882.195  | 742.241  | NM_01601€ | 8651.104  | 8435.068  | NM_01790€ | 2890.529  | 2434.489  |
| AB033064   | 1118.949 | 1576.233 | AK022900  | 1167.3    | 866.214   | NM_00633€ | 10437.478 | 10828.916 |
| AK022317   | 3071.786 | 3009.835 | AB023216  | 450.181   | 332.023   | NM_00078€ | 442.091   | 548.499   |
| NM_01839€  | 7951.012 | 5546.139 | NM_00226€ | 28760.379 | 29204.871 | NM_017731 | 1962.4    | 2922.698  |
| NM_003124  | 1902.566 | 1885.284 | NM_01440€ | 4736.756  | 6484.385  | AB040891  | 2857.45   | 1992.426  |
| NM_00688€  | 60127.04 | 47135.91 | AL157492  | 1338.593  | 3660.048  | AB037780  | 944.818   | 1127.45   |
| NM_004531  | 9499.148 | 5153.97  | AL353957  | 2260.033  | 2579.205  | NM_00584€ | 13662.916 | 10017.619 |
| AL133581   | 1585.626 | 1612.612 | NM_000231 | 665.948   | 1462.11   | NM_01620€ | 11084.969 | 7083.735  |
| NM_00255€  | 486.231  | 501.983  | L07517    | 2526.106  | 2554.486  | AK075415  | 829.527   | 639.653   |
| NM_005031  | 3549.649 | 4144.915 | AK022451  | 914.605   | 514.373   | NM_018964 | 3804.955  | 2697.198  |
| AB040920   | 1059.125 | 2024.149 | BM918441  | 663.518   | 544.079   | NM_00008€ | 1321.131  | 961.779   |
| NM_00484€  | 3397.332 | 6249.818 | AA150828  | 947.105   | 466.941   | NM_002711 | 948.635   | 796.884   |
| AK024639   | 4482.036 | 6431.526 | AI859208  | 427.577   | 350.372   | AK026092  | 3375.384  | 4438.877  |
| NM_020967  | 1162.006 | 1371.803 | H64379    | 4314.318  | 3414.579  | AK001175  | 1143.549  | 1278.943  |
| NM_001071  | 31437.12 | 21473.27 | T72202    | 721.65    | 863.817   | NM_003897 | 3245.805  | 3301.502  |
| AB028990   | 1199.555 | 1053.128 | BI831922  | 1991.1    | 1419.074  | NM_01416€ | 11251.438 | 10802.205 |
| NM_00670€  | 16239.18 | 9746.47  | M69238    | 1177.111  | 857.531   | AL442085  | 3097.909  | 3321.62   |
| AB037835   | 968.187  | 770.051  | AA664180  | 547.671   | 356.638   | NM_01331€ | 4703.955  | 4681.943  |
| NM_01622€  | 1098.555 | 982.505  | BE294756  | 334.782   | 274.272   | NM_01473€ | 10333.302 | 9749.153  |
| NM_000157  | 2867.875 | 2581.831 | NM_002711 | 1050.961  | 1630.156  | AK023886  | 1258.64   | 964.412   |
| NM_00071€  | 10545.85 | 8010.62  | AK026092  | 3101.451  | 3395.759  | NM_00255€ | 2684.8    | 2236.13   |
| NM_01808€  | 503.886  | 460.799  | AK001175  | 875.763   | 1241.537  | AJ404615  | 3014.474  | 2428.122  |
| AK023035   | 4385.575 | 2988.436 | NM_00332€ | 55690.023 | 53871.914 | NM_01605€ | 21710.465 | 16182.071 |
| NM_01484€  | 3714.923 | 3063.625 | NM_00329€ | 31031.785 | 22434.971 | AB007869  | 2203.665  | 1461.004  |
| AB011164   | 2948.703 | 1908.361 | NM_007034 | 497.592   | 533.137   | AB046844  | 1374.441  | 1083.157  |
| M24750     | 2124.513 | 1489.808 | NM_00156€ | 368.356   | 284.33    | NM_00030€ | 1725.575  | 1044.744  |
| NM_00596€  | 840.515  | 988.561  | NM_00178€ | 9607.369  | 7113.876  | NM_01323€ | 23571.809 | 14780.112 |
| NM_00274€  | 2845.796 | 4531.372 | J03171    | 3567.566  | 2360.32   | NM_01601€ | 10766.267 | 7091.81   |
| NM_00654€  | 8080.892 | 17517.17 | NM_00231€ | 281.473   | 219.088   | AK022900  | 1222.081  | 899.89    |
| AB018324   | 10149.89 | 17739.7  | NM_00531€ | 1569.218  | 1258.902  | NM_00196€ | 444.756   | 1056.125  |
| NM_00274€  | 5396.313 | 9657.773 | NM_001711 | 712.469   | 789.846   | NM_00250€ | 1008.641  | 1419.954  |
| NM_00575€  | 339.435  | 380.794  | NM_00421€ | 9034.712  | 8477.818  | AK026232  | 8207.177  | 9858.989  |
| NM_00497€  | 4129.319 | 3215.802 | NM_02014€ | 1681.339  | 1806.209  | NM_01489€ | 17622.297 | 25680.32  |
| NM_00724€  | 6104.531 | 6731.398 | NM_00196€ | 327.201   | 288.833   | AK023827  | 4233.092  | 7057.984  |
| NM_00189€  | 442.791  | 327.59   | NM_00250€ | 769.427   | 1030.404  | NM_001117 | 816.539   | 1163.896  |
| NM_00128€  | 2303.224 | 2357.583 | AK026232  | 4870.916  | 7119.846  | NM_000231 | 1832.309  | 1389.791  |
| NM_01464€  | 936.829  | 840.387  | NM_01489€ | 12568.322 | 15205.629 | L07517    | 3791.016  | 4526.738  |
| NM_00507€  | 401.868  | 404.654  | AK023827  | 2830.785  | 3667.754  | AK022451  | 1556.61   | 2329.329  |
| NM_000951  | 2330.706 | 1639.079 | NM_001117 | 538.951   | 918.214   | BM918441  | 1237.367  | 1608.434  |
| AA029300   | 2114.766 | 1566.963 | NM_00182€ | 2315.105  | 1996.253  | AA150828  | 822.135   | 967.316   |
| BG708842   | 5049.026 | 4563.797 | NM_00725€ | 520.872   | 324.887   | AI859208  | 407.803   | 485.341   |
| M19723     | 19314.51 | 15834.98 | AF283645  | 2661.367  | 2410.717  | H64379    | 4869.807  | 4965.302  |
| ID 1984668 | 5103.853 | 773.699  | NM_01657€ | 2017.642  | 1748.352  | T72202    | 722.84    | 582.413   |
| ID 1832579 | 1934.464 | 1072.044 | NM_018557 | 355.308   | 321.174   | BI831922  | 1976.094  | 1946.388  |
| H-430185 N | 1464.847 | 1136.207 | NM_00104€ | 6236.216  | 4667.058  | M69238    | 991.104   | 982.136   |
| D16583     | 422.07   | 693.63   | NM_005697 | 5898.698  | 4069.147  | AA664180  | 713.22    | 778.898   |
| AA481547   | 22801.66 | 42087    | NM_00309€ | 5551.017  | 3665.399  | NM_016081 | 11667.898 | 18501.143 |
| T64880     | 1895.498 | 3515.511 | NM_004781 | 1578.954  | 1510.181  | NM_00638€ | 4647.897  | 6937.29   |
| NM_00603€  | 449.523  | 659.509  | NM_01830€ | 2175.553  | 2268.287  | M30818    | 596.022   | 842.306   |
| NM_01465€  | 1400.664 | 1325.25  | NM_01475€ | 3673.003  | 3800.946  | NM_00575€ | 300.97    | 625.527   |
| NM_00207€  | 2539.506 | 2333.33  | AL133047  | 390.3     | 358.006   | NM_00332€ | 60517.191 | 62806.965 |
| X05299     | 4826.865 | 4362.688 | NM_005124 | 2316.867  | 2528.73   | NM_00329€ | 50792.281 | 52743.488 |

|           |          |          |           |           |           |           |           |           |
|-----------|----------|----------|-----------|-----------|-----------|-----------|-----------|-----------|
| BM468475  | 654.196  | 753.291  | AK000947  | 2061.395  | 1977.577  | NM_007034 | 866.368   | 1217.42   |
| NM_00031E | 3778.847 | 3854.896 | L08240    | 1429.373  | 1684.196  | NM_005261 | 899.46    | 1293.307  |
| NM_00206C | 568.835  | 683.971  | NM_01795Z | 707.856   | 1059.757  | NM_00156C | 885.563   | 1106.118  |
| AK001230  | 1245.4   | 973.946  | NM_00294C | 1512.142  | 2393.599  | NM_00178Z | 12191.655 | 18545.338 |
| NM_01468C | 3308.917 | 2685.676 | NM_016081 | 7942.344  | 7325.481  | J03171    | 3823.582  | 5394.91   |
| NM_005027 | 699.047  | 615.124  | NM_00638E | 3382.541  | 3711.683  | NM_00585E | 436.394   | 1126.726  |
| NM_00461Z | 1058.153 | 984.9    | M30818    | 458.402   | 396.326   | NM_00231C | 460.5     | 471.653   |
| NM_00560E | 13986.36 | 10215.87 | NM_00016Z | 509.686   | 626.673   | NM_00531Z | 1876.367  | 3091.168  |
| NM_001106 | 1913.754 | 930.212  | AB023216  | 590.047   | 443.708   | NM_001711 | 1566.678  | 1708.066  |
| NM_01558Z | 1045.655 | 883.663  | NM_00226E | 27759.625 | 19635.811 | NM_02014C | 2117.207  | 3217.056  |
| NM_00477E | 416.36   | 200.909  | NM_01440C | 4961.021  | 3572.308  | AK075415  | 686.283   | 910.532   |
| NM_00624E | 4287.563 | 2777.04  | AL157492  | 1227.329  | 871.699   | NM_018964 | 5055.694  | 7375.641  |
| NM_00510Z | 661.95   | 672.555  | AL353957  | 2552.783  | 1959.297  | NM_00008C | 1427.513  | 1993.97   |
| NM_00482Z | 608.891  | 1354.438 | NM_007214 | 5896.692  | 4928.671  | NM_00182Z | 2517.293  | 3122.087  |
| AK022349  | 4710.83  | 6771.7   | NM_000311 | 7469.764  | 5384.095  | NM_00725E | 555.706   | 817.906   |
| NM_005031 | 3921.164 | 4910.141 | NM_01790E | 2672.974  | 1922.782  | NM_00033Z | 307.102   | 869.022   |
| AB040920  | 672.968  | 598.677  | NM_00633E | 8731.062  | 7578.675  | AF283645  | 3733.006  | 4923.787  |
| NM_00072C | 379.25   | 294.149  | NM_00078E | 456.3     | 336.072   | NM_01657E | 2347.524  | 2981.657  |
| NM_00484Z | 2036.328 | 1838.029 | NM_00251E | 288.802   | 359.905   | NM_018557 | 606.444   | 725.535   |
| AK024639  | 2466.021 | 2310.929 | NM_017731 | 608.415   | 670.085   | NM_00104E | 6628.214  | 10805.53  |
| AB007915  | 1031.402 | 1518.206 | AB040891  | 2382.356  | 2655.505  | NM_005697 | 6732.17   | 11303.688 |
| AB033070  | 397.111  | 447.949  | AB037780  | 1092.008  | 980.087   | NM_00309E | 5799.402  | 9701.564  |
| NM_01822E | 1674.986 | 1709.217 | NM_00584E | 10441.761 | 10597.884 | NM_004781 | 2161.68   | 3306.801  |
| NM_00632E | 4004.247 | 4095.365 | NM_01620E | 9333.217  | 10110.591 | NM_01830Z | 3094.633  | 4584.298  |
| AY009127  | 12440.6  | 9584.023 | AK075415  | 414.454   | 610.205   | NM_01475E | 5232.688  | 6831.295  |
| NM_01486E | 531.59   | 668.725  | NM_018964 | 4266.617  | 4827.387  | AL133047  | 961.493   | 1476.295  |
| NM_00392E | 322.697  | 278.94   | NM_00008C | 1484.156  | 3604.898  | AK000947  | 2838.293  | 3856.373  |
| AK000158  | 607.922  | 781.304  | NM_002711 | 1277.585  | 1227.353  | L08240    | 2201.545  | 2944.402  |
| AK024500  | 3450.863 | 3550.012 | AK026092  | 3378.624  | 2659.168  | NM_00294C | 3519.958  | 3297.513  |
| NM_002564 | 1059.411 | 844.418  | AK001175  | 861.437   | 900.777   | AB046844  | 1276.169  | 1721.894  |
| NM_00096Z | 2167.942 | 1365.21  | NM_003897 | 2330.445  | 1778.868  | NM_00030Z | 1468.045  | 1726.099  |
| NM_01330E | 2290.305 | 2214.277 | NM_01416E | 9335.68   | 8734.479  | NM_01323E | 24663.863 | 24886.584 |
| NM_00285Z | 2993.451 | 5974.833 | AL442085  | 3123.512  | 2335.108  | NM_01601E | 11268.791 | 10802.814 |
| NM_001817 | 2245.9   | 4096.47  | NM_01331Z | 3966.098  | 3912.958  | NM_02012C | 1422.455  | 1554.117  |
| AF063611  | 1403.493 | 1718.322 | NM_01473E | 10200.898 | 10809.73  | AK022900  | 1204.584  | 1273.3    |
| NM_00596E | 879.198  | 769.157  | AK023886  | 1128.625  | 1180.222  | AB023216  | 592.313   | 744.817   |
| NM_00274C | 1982.702 | 1920.373 | NM_00255Z | 2279.987  | 2289.013  | NM_00226E | 34753.379 | 28670.256 |
| AL117482  | 2220.156 | 2480.629 | AJ404615  | 2579.632  | 2457.674  | NM_01440C | 5440.798  | 5785.915  |
| NM_00654E | 5846.032 | 6006.162 | NM_01605Z | 16903.451 | 16433.514 | AL157492  | 1253.741  | 1269.47   |
| AB018324  | 7194.634 | 6334.625 | AB007869  | 2068.821  | 1867.699  | AL353957  | 2359.342  | 2483.183  |
| NM_00274Z | 4384.519 | 4484.434 | AB046844  | 989.899   | 1144.753  | NM_007214 | 5791.84   | 5528.13   |
| Z25431    | 2552.188 | 2322.291 | NM_00030Z | 1154.305  | 1504.418  | NM_000311 | 8036.087  | 10840.177 |
| NM_005627 | 4210.563 | 2556.232 | NM_01323E | 21755.967 | 24681.826 | NM_01790E | 3247.05   | 3644.685  |
| M64497    | 668.134  | 1614.521 | NM_01601E | 8918.591  | 10978.022 | NM_00633E | 11400.61  | 13150.558 |
| NM_007274 | 7718.46  | 8683.572 | AK022900  | 1126.767  | 1151.593  | NM_017731 | 1521.135  | 2715.755  |
| NM_00335E | 587.511  | 638.247  | NM_00196Z | 381.155   | 302.194   | NM_000351 | 740.672   | 1220.92   |
| NM_006224 | 14737.12 | 11965.3  | NM_00250C | 645.209   | 616.203   | AB040891  | 3448.319  | 4446.238  |
| AL137300  | 2398.397 | 2015.314 | AK026232  | 4928.611  | 4727.998  | AB037780  | 1104.294  | 2387.881  |
| NM_00022E | 2422.743 | 2182.41  | NM_01489Z | 13027.67  | 10164.16  | NM_01620E | 15021.256 | 19145.324 |
| NM_00699E | 17541.1  | 13489.98 | AK023827  | 3524.677  | 2576.257  | NM_00202E | 412.486   | 345.328   |
| NM_00312E | 13515.7  | 13103.48 | NM_001117 | 537.516   | 572.007   | AK002114  | 6076.208  | 5257.085  |
| NM_00195E | 841.663  | 506.628  | NM_000231 | 601.454   | 1389.248  | AL390184  | 770.708   | 1052.896  |
| AB033064  | 1121.813 | 1074.872 | L07517    | 2116.956  | 2034.854  | NM_01869E | 511.517   | 568.537   |

|           |          |          |           |           |           |           |           |           |
|-----------|----------|----------|-----------|-----------|-----------|-----------|-----------|-----------|
| AK022317  | 3727.817 | 3339.768 | AK022451  | 962.295   | 784.353   | NM_01804E | 568.393   | 312.423   |
| NM_01839E | 9694.35  | 9055.983 | NM_01435E | 58629.523 | 63499.77  | AK026318  | 1367.976  | 1615.13   |
| NM_003124 | 2493.917 | 5864.678 | BM918441  | 832.657   | 978.725   | AF291673  | 1300.095  | 1367.018  |
| NM_004531 | 17253.4  | 23340.7  | AA150828  | 959.147   | 999.122   | NM_00436E | 11650.278 | 9243.476  |
| AL133581  | 2463.131 | 5235.458 | AI859208  | 483.846   | 367.825   | NM_01635E | 4997.378  | 3938.452  |
| NM_00255E | 539.851  | 1384.906 | H64379    | 4369.733  | 4113.019  | AJ296290  | 3309.2    | 3080.048  |
| NM_00358E | 563.326  | 748.637  | T72202    | 604.159   | 709.877   | AK026092  | 3472.27   | 2725.446  |
| NM_00092E | 3269.077 | 3852.901 | BI831922  | 1976.692  | 1632.217  | AK001175  | 1098.801  | 1048.962  |
| NM_01323E | 1909.578 | 1906.114 | M69238    | 1159.482  | 1064.325  | NM_003897 | 3182.052  | 3338.487  |
| NM_00036E | 499.052  | 403.752  | AA664180  | 533.482   | 659.097   | NM_01416E | 11361.852 | 18986.814 |
| NM_01442E | 1937.182 | 1331.559 | NM_016081 | 9223.589  | 6935.173  | NM_01331E | 5270.669  | 6052.873  |
| AK000770  | 557.422  | 448.089  | NM_00638E | 3359.653  | 2998.108  | NM_01473E | 12648.887 | 13556.98  |
| NM_00237C | 19284.23 | 16196.12 | M30818    | 288.841   | 242.868   | AK023886  | 1668.25   | 1249.245  |
| NM_01567C | 3652.519 | 4155.875 | NM_00016E | 414.897   | 492.572   | NM_00255E | 2688.478  | 2439.269  |
| NM_01470E | 1007.948 | 1132.499 | NM_00332E | 55542.254 | 45341.422 | AJ404615  | 3804.479  | 4023.771  |
| AB028990  | 1077.867 | 1106.933 | NM_00329E | 31067.717 | 18659.531 | AB007869  | 2544.517  | 3497.722  |
| NM_00670E | 16088.24 | 9896.864 | NM_01433C | 14496.771 | 13335.568 | M64108    | 1809.028  | 1858.032  |
| AB037835  | 1110.618 | 799.877  | NM_007034 | 612.364   | 456.34    | Y17867    | 2353.362  | 3010.156  |
| NM_01622E | 1070.41  | 930.952  | NM_005261 | 377.118   | 475.327   | M92642    | 685.26    | 1006.7    |
| NM_000157 | 2882.76  | 2396.894 | NM_00156C | 472.889   | 305.256   | NM_018071 | 2558.791  | 2585.103  |
| NM_00071E | 10625.39 | 5019.465 | NM_00178E | 9841.592  | 9256.727  | NM_00433E | 2952.92   | 3518.755  |
| NM_01808E | 456.152  | 261.683  | J03171    | 2964.972  | 2921.09   | M31520    | 58214.344 | 62682.59  |
| BC013695  | 10755.22 | 10248.58 | NM_00531E | 1609.393  | 998.3     | NM_00202C | 10527.854 | 10076.281 |
| NM_00720E | 341.334  | 347.618  | NM_001711 | 735.629   | 893.442   | AL050137  | 1225.477  | 717.131   |
| NM_01484E | 6745.56  | 14346.92 | NM_00421C | 9116.854  | 10010.491 | AK024423  | 2081.041  | 1870.633  |
| AB011164  | 5103.269 | 8794.763 | NM_02014C | 1431.269  | 2111.285  | NM_00504E | 26049.166 | 20643.484 |
| M24750    | 2781.558 | 4623.567 | AK075415  | 431.702   | 528.923   | NM_00597E | 7632.282  | 7592.017  |
| NM_002687 | 8886.729 | 7548.726 | NM_018964 | 4512.472  | 3251.764  | NM_00628E | 5485.367  | 3784.652  |
| NM_000627 | 818.654  | 1053.51  | NM_00008C | 907.178   | 817.643   | NM_020321 | 705.676   | 863.838   |
| NM_00003E | 945.057  | 544.577  | NM_00182E | 2116.822  | 1567.93   | NM_01592C | 13261.05  | 15422.581 |
| NM_00082E | 717.819  | 669.011  | NM_00725E | 457.311   | 322.465   | AB011113  | 2279.718  | 2690.973  |
| NM_00196E | 262.084  | 290.949  | AF283645  | 3158.049  | 2690.177  | NM_004115 | 1332.013  | 1862.91   |
| NM_004334 | 270.415  | 284.277  | NM_01657E | 2208.206  | 1963.515  | NM_018287 | 994.751   | 1588.731  |
| NM_00388E | 1546.932 | 1243.18  | NM_018557 | 243.41    | 359.385   | NM_00195E | 1678.992  | 1820.007  |
| NM_00584E | 1683.891 | 1327.552 | NM_00104E | 2507.573  | 2168.485  | AF016004  | 1984.968  | 2304.139  |
| NM_003854 | 472.995  | 444.843  | NM_005697 | 5534.721  | 5381.042  | NM_003567 | 2141.242  | 1721.649  |
| NM_01798C | 5572.253 | 2920.565 | NM_00309E | 4925.576  | 3804.181  | NM_00731E | 2089.249  | 904.253   |
| NM_00125E | 1023.141 | 1209.811 | NM_004781 | 1728.305  | 1513.392  | L20686    | 2456.009  | 2199.879  |
| AF053712  | 409.715  | 335.69   | NM_01830E | 1867.535  | 2315.058  | NM_000304 | 2011.901  | 1312.898  |
| NM_003947 | 353.56   | 229.989  | NM_01475E | 3551.896  | 3720.037  | AK023362  | 804.145   | 581.691   |
| NM_002821 | 12230.34 | 9538.617 | AL133047  | 385.655   | 359.666   | S72604    | 20801.348 | 20887.369 |
| M96652    | 768.631  | 418.914  | NM_005124 | 2361.94   | 3122.753  | NM_017984 | 447.097   | 558.087   |
| L41690    | 1922.535 | 1674.329 | AK000947  | 1980.262  | 2229.944  | NM_00246C | 383.558   | 608.989   |
| NM_01805E | 1371.396 | 2470.412 | L08240    | 1518.301  | 1848.069  | NM_00267E | 2176.799  | 2106.333  |
| NM_006514 | 925.394  | 2532.316 | NM_00294C | 1435.479  | 2944.511  | NM_01243E | 20399.973 | 18222.938 |
| AF065164  | 821.177  | 1920.088 | AB046844  | 1233.831  | 1065.712  | NM_005007 | 9698.084  | 7240.221  |
| AB028991  | 2946.828 | 2622.307 | NM_00030E | 1160.848  | 1486.699  | AK024996  | 3089.954  | 2544.129  |
| AF263547  | 9334.359 | 6407.485 | NM_01323E | 19332.084 | 15636.227 | NM_004417 | 936.858   | 751.661   |
| AJ008143  | 1248.634 | 1358.251 | NM_01601E | 9931.567  | 7312.048  | NM_01229C | 5552.512  | 4598.232  |
| NM_007144 | 3137.001 | 3001.346 | NM_02012C | 1185.97   | 1106.681  | NM_002431 | 4687.74   | 4701.824  |
| NM_00509E | 319.851  | 263.892  | AK022900  | 1374.008  | 784.5     | NM_001827 | 53873.52  | 47239.016 |
| NM_004424 | 2050.194 | 2030.15  | AB023216  | 425.677   | 212.672   | NM_02046E | 3727.869  | 2560.464  |
| AL133117  | 2752.68  | 2823.855 | NM_00226E | 29926.105 | 21449.275 | AL079280  | 681.563   | 559.714   |

|           |          |          |           |           |           |           |           |           |
|-----------|----------|----------|-----------|-----------|-----------|-----------|-----------|-----------|
| AB033040  | 1409.18  | 1126.762 | NM_01440C | 4835.502  | 4241.662  | NM_002853 | 4190.665  | 3756.398  |
| AF070586  | 955.497  | 825.196  | AL157492  | 1140.292  | 997.497   | NM_003174 | 1435.502  | 1396.004  |
| NM_014412 | 1186.365 | 1082.643 | AL353957  | 2377.79   | 2106.771  | NM_012307 | 9597.382  | 11474.416 |
| NM_013303 | 3178.486 | 2175.222 | NM_007214 | 5490.562  | 5127.147  | NM_002540 | 1867.441  | 2297.008  |
| NM_012227 | 3538.288 | 2796.234 | NM_000311 | 7110.234  | 6183.89   | NM_006371 | 1631.727  | 1707.518  |
| NM_006101 | 6364.591 | 3264.901 | NM_017909 | 2402.428  | 2655.813  | NM_018834 | 825.849   | 803.44    |
| NM_001237 | 8179.455 | 4640.281 | NM_006335 | 7940.869  | 8222.48   | AK026882  | 1787.542  | 2022.477  |
| NM_002507 | 978.463  | 710.85   | NM_000786 | 447.45    | 421.781   | NM_004574 | 1125.362  | 1331.587  |
| NM_015962 | 2074.1   | 1159.197 | NM_017731 | 648.135   | 569.845   | NM_004848 | 1403.437  | 1227.178  |
| NM_016145 | 1531.205 | 570.749  | AB040891  | 2312.592  | 3485.15   | NM_001944 | 769.985   | 791.16    |
| NM_016078 | 1441     | 839.493  | AB037780  | 1256.835  | 1122.77   | NM_014813 | 1554.263  | 1119.765  |
| NM_003798 | 907.735  | 425.161  | NM_016209 | 9563.418  | 11431.623 | AF014459  | 2981.713  | 2752.217  |
| AF255910  | 357.068  | 917.352  | AK002114  | 5412.491  | 5090.131  | AK024601  | 5751.545  | 6856.912  |
| NM_016146 | 7463.384 | 9142.879 | AL390184  | 627.432   | 567.62    | S68069    | 8023.894  | 6740.527  |
| AK024343  | 2808.278 | 2003.43  | NM_018699 | 430.889   | 322.604   | AB011095  | 1551.055  | 1662.178  |
| NM_002569 | 443.282  | 941.372  | NM_018048 | 404.435   | 527.755   | NM_001503 | 1287.314  | 1207.364  |
| D42084    | 5187.06  | 4095.124 | AK026318  | 1286.63   | 810.632   | NM_006302 | 2605.941  | 2631.083  |
| NM_001734 | 377.011  | 377.945  | AF291673  | 981.659   | 781.698   | AJ224875  | 5231.292  | 5033.373  |
| NM_014693 | 706.599  | 546.333  | NM_004365 | 10071.694 | 8508.72   | NM_002149 | 3053.83   | 2998.338  |
| AB007896  | 1040.705 | 947.743  | NM_016355 | 4517.519  | 4139.831  | AF043324  | 5450.791  | 5839.795  |
| AB007916  | 6184.957 | 5936.789 | AJ296290  | 3780.335  | 2374.428  | AK024172  | 1273.492  | 1295.531  |
| NM_002874 | 1060.499 | 910.839  | AK026092  | 3616.254  | 2450.063  | NM_014814 | 9671.283  | 7365.286  |
| AF049140  | 3071.366 | 1839.61  | AK001175  | 976.909   | 846.798   | NM_002797 | 17466.639 | 14113.952 |
| AL136794  | 1708.363 | 1489.769 | NM_003897 | 2607.895  | 2710.719  | AK024318  | 2119.58   | 1655.564  |
| BC035601  | 11360.09 | 7985.447 | NM_014165 | 9304.981  | 9833.104  | NM_016129 | 6937.95   | 6202.039  |
| NM_001458 | 589.183  | 346.718  | AL442085  | 3664.476  | 3234.552  | NM_002809 | 12649.394 | 10450.922 |
| NM_020388 | 2222.91  | 1684.662 | NM_013313 | 3900.422  | 4075.144  | NM_017912 | 8351.802  | 9055.627  |
| NM_004202 | 6814.212 | 4994.688 | NM_014736 | 10291.043 | 10220.643 | NM_000423 | 5345.929  | 5168.399  |
| AB046829  | 2140.06  | 3210.057 | AK023886  | 1290.284  | 1574.331  | AB046838  | 3035.245  | 2756.801  |
| NM_016445 | 405.771  | 768.363  | NM_002553 | 2010.983  | 2434.624  | AK026339  | 725.75    | 717.796   |
| NM_004521 | 17681.01 | 24041.64 | AJ404615  | 2611.427  | 3401.971  | X98411    | 3362.656  | 4666.455  |
| AF229162  | 2947.326 | 4823.033 | AB007869  | 2812.685  | 2871.329  | NM_014865 | 6035.409  | 5738.233  |
| U02309    | 26961.57 | 39528.06 | M64108    | 1852.589  | 1480.136  | AB032977  | 6312.749  | 5420.437  |
| NM_005257 | 8361.271 | 10329.59 | Y17867    | 1520.578  | 1363.414  | AK001725  | 1307.518  | 1204.667  |
| AF011573  | 3389.358 | 3105.838 | M92642    | 685.766   | 692.08    | NM_003036 | 1641.132  | 1592.79   |
| NM_002145 | 2630.128 | 2618.069 | NM_018071 | 2330.197  | 2081.154  | NM_020529 | 5082.213  | 3282.251  |
| NM_004831 | 1423.593 | 1413.638 | NM_004333 | 2180.836  | 1605.001  | NM_020395 | 3160.403  | 3563.947  |
| NM_014213 | 6179.675 | 5495.667 | M31520    | 53874.527 | 62409.727 | NM_003425 | 1798.358  | 1933.141  |
| NM_000168 | 1714.058 | 1535.277 | NM_002020 | 7217.662  | 5079.453  | NM_013388 | 7249.59   | 7035.51   |
| AF294629  | 1522.877 | 1633.481 | AL050137  | 679.086   | 819.579   | AF038951  | 11564.997 | 9325.502  |
| NM_000545 | 1065.976 | 1759.746 | AK024423  | 2053.584  | 1919.57   | NM_006492 | 581.321   | 691.357   |
| NM_002136 | 37676.2  | 34278.16 | NM_005043 | 22591.258 | 17940.816 | AK021811  | 1927.341  | 2055.786  |
| NM_014463 | 27402.99 | 14889.52 | NM_005979 | 8761.095  | 7652.492  | NM_003428 | 1992.386  | 2596.135  |
| NM_005520 | 15377.02 | 12420.98 | NM_006282 | 4754.491  | 5244.614  | AF055030  | 1243.219  | 1549.87   |
| AK023265  | 1018.533 | 1156.393 | NM_020321 | 814.786   | 924.064   | AK000589  | 1718.211  | 1151.457  |
| AB029009  | 1545.382 | 641.825  | NM_015920 | 14125.971 | 11514.055 | X53281    | 7663.309  | 6568.929  |
| AF112207  | 2113.241 | 1294.795 | AB011113  | 1539.872  | 1554.841  | BC012782  | 1584.358  | 1376.207  |
| BF106121  | 1502.076 | 3015.908 | NM_004115 | 1292.282  | 1046.637  | AF132026  | 48003.613 | 32029.744 |
| AK022590  | 1513.074 | 1811.929 | NM_018287 | 906.578   | 688.463   | AL050353  | 2060.83   | 1808.865  |
| AK023719  | 2468.591 | 2320.959 | NM_001955 | 1355.778  | 1480.899  | NM_003184 | 887.269   | 899.46    |
| AK025590  | 524.361  | 467.748  | AF016004  | 1579.464  | 2484.66   | AB037788  | 5479.686  | 3879.415  |
| AY007149  | 2991.502 | 2291.715 | NM_003567 | 1820.097  | 1896.134  | NM_004587 | 4763.031  | 4085.835  |
| M12078    | 456.505  | 441.611  | NM_007315 | 1833.213  | 1683.785  | AF161401  | 10646.046 | 7964.4    |

|           |          |          |           |           |           |           |           |           |
|-----------|----------|----------|-----------|-----------|-----------|-----------|-----------|-----------|
| NM_00455C | 7665.405 | 5654.924 | L20686    | 2023.556  | 2424.667  | NM_00099C | 10303.472 | 7984.221  |
| NM_00078E | 942.312  | 1132.845 | NM_000304 | 1247.312  | 2197.028  | NM_01474C | 4281.208  | 2605.779  |
| NM_004110 | 3272.165 | 2839.995 | AK023362  | 490.915   | 737.594   | NM_01595E | 9343.623  | 6491.174  |
| NM_013387 | 37078.54 | 31404.5  | S72604    | 19165.756 | 14691.045 | AF075008  | 2557.255  | 1767.108  |
| NM_00526Z | 2870.579 | 2519.259 | NM_00267E | 2111.566  | 1766.581  | NM_006504 | 3016.651  | 2898.845  |
| NM_005757 | 1400.203 | 1150.76  | NM_01243Z | 14808.543 | 13534.289 | AF070538  | 1101.911  | 1317.123  |
| NM_01648Z | 455.766  | 417.05   | NM_005007 | 6311.667  | 8076.652  | AL137430  | 628.631   | 528.04    |
| NM_02012E | 1049.302 | 688.637  | AK024996  | 4820.35   | 3976.701  | NM_00069E | 8560.207  | 7368.266  |
| NM_00506E | 747.567  | 615.137  | NM_004417 | 546.392   | 609.785   | NM_00248E | 22640.504 | 17851.801 |
| NM_01822Z | 2663.258 | 1415.052 | NM_01229C | 4906.889  | 4822.259  | NM_00400Z | 9210.511  | 8100.271  |
| NM_00669Z | 11807.31 | 4858.326 | NM_002431 | 4539.769  | 2078.481  | NM_00018E | 2109.212  | 1720.109  |
| NM_00172Z | 2586.373 | 1268.76  | NM_001827 | 55617.688 | 47299.633 | BF244401  | 2890.982  | 2593.474  |
| NM_003297 | 1310.961 | 1759.293 | NM_02046E | 3604.214  | 3772.687  | NM_00471E | 27973.854 | 18536.604 |
| X74861    | 410.296  | 1239.544 | AL079280  | 588.58    | 498.676   | AL359585  | 3088.065  | 2411.584  |
| NM_01826E | 7624.852 | 13919.29 | NM_00285Z | 3089.527  | 3696.73   | AB046850  | 2500.64   | 1819.518  |
| AK024633  | 6599.978 | 11493.49 | NM_003174 | 1481.003  | 1181.65   | NM_014801 | 2257.071  | 1881.225  |
| NM_00145Z | 4670.938 | 6780.822 | NM_012307 | 8731.425  | 7105.023  | NM_00364Z | 10974.55  | 6546.053  |
| NM_01207E | 607.589  | 643.137  | NM_00254C | 1632.394  | 1524.734  | AB027013  | 3157.945  | 3574.855  |
| AB004851  | 358.297  | 349.227  | NM_006371 | 1193.774  | 1114.258  | BC032686  | 865.615   | 818.095   |
| AK023911  | 602.018  | 433.226  | NM_018834 | 781.607   | 862.991   | BF185480  | 3014.241  | 2736.994  |
| NM_00128Z | 3428.868 | 2520.818 | AK026882  | 1115.969  | 1140.659  | NM_00212E | 24118.492 | 17691.324 |
| AL110237  | 378.038  | 591.046  | NM_004574 | 710.026   | 657.869   | NM_00710E | 782.016   | 883.465   |
| D87470    | 2024.51  | 1756.416 | NM_00484E | 817.691   | 836.655   | NM_01781C | 1752.681  | 1577.486  |
| AF147307  | 7692.434 | 4795.377 | NM_001944 | 399.379   | 605.527   | NM_003181 | 61249.535 | 63484.965 |
| AK001829  | 1451.557 | 2719.918 | NM_01481Z | 1097.646  | 1701.333  | NM_004451 | 1707.253  | 1416.736  |
| NM_01652E | 2825.85  | 2947.544 | AF014459  | 2575.139  | 3290.685  | NM_004364 | 476.629   | 710.65    |
| AK024931  | 3922.161 | 3194.185 | AK024601  | 6896.787  | 14689.232 | AK023505  | 3378.92   | 3732.941  |
| AL109715  | 493.739  | 410.973  | S68069    | 9669.931  | 28798.639 | AB037851  | 6609.554  | 7711.693  |
| AK021540  | 269.997  | 167.97   | AB011095  | 1860.261  | 4407.789  | AL050389  | 6575.595  | 6565.278  |
| AK022258  | 1380.981 | 1813.838 | NM_00150Z | 1624.257  | 3480.892  | AK025855  | 1431.344  | 1020.154  |
| AK000930  | 507.675  | 915.647  | NM_00630Z | 2929.733  | 6993.199  | AK024684  | 1653.8    | 1592.756  |
| AF131799  | 751.943  | 1177.506 | AJ224875  | 7570.31   | 15934.944 | NM_01494E | 13747.311 | 13357.655 |
| AK000455  | 2887.716 | 5095.745 | NM_00214E | 3637.743  | 7466.116  | AK001546  | 1256.777  | 1218.378  |
| NM_00523C | 973.422  | 2950.385 | AF043324  | 3712.371  | 6116.023  | NM_006537 | 5289.75   | 5676.927  |
| AL365407  | 480.634  | 399.465  | AK024172  | 1636.687  | 3221.931  | AF007155  | 9579.983  | 8851.739  |
| AL162073  | 908.018  | 829.068  | NM_014814 | 9105.898  | 16248.647 | AK023055  | 830.41    | 529.043   |
| AJ006835  | 4137.284 | 3517.046 | NM_002797 | 18088.719 | 25506.033 | AL049282  | 6251.578  | 5006.614  |
| AF085890  | 512.405  | 518.511  | AK024318  | 2779.261  | 4128.717  | AK021443  | 4211.33   | 2778.825  |
| AL110138  | 236.912  | 332.911  | NM_01612E | 8417.454  | 10428.39  | AF070569  | 989.865   | 1084.703  |
| AL122039  | 481.637  | 337.64   | NM_00280E | 13674.514 | 19323.371 | NM_02023Z | 3179.34   | 3411.228  |
| AF070577  | 966.354  | 398.089  | NM_01791Z | 8889.266  | 11879.354 | AF143873  | 642.201   | 603.022   |
| AL157484  | 952.97   | 507.432  | NM_00042Z | 3862.195  | 3628.722  | AL355732  | 2459.536  | 2832.791  |
| AK024850  | 807.034  | 558.515  | AB046838  | 2024.389  | 2034.04   | NM_01796E | 2673.296  | 2096.218  |
| Y09836    | 1405.37  | 3111.376 | X98411    | 3166.825  | 2749.35   | AF143327  | 1175.504  | 1187.409  |
| AK022144  | 3033.448 | 5087.655 | AF116658  | 3746.129  | 4809.332  | AL049991  | 684.678   | 792.656   |
| AF086044  | 681.358  | 1241.745 | NM_01486E | 4680.724  | 5536.946  | AL049990  | 1051.182  | 934.785   |
| NM_01492E | 946.28   | 1786.734 | AB032977  | 5665.879  | 6348.857  | AF131843  | 1381.675  | 1199.533  |
| AF131790  | 557.01   | 1043.962 | AK001725  | 1135.061  | 1476.054  | AK026653  | 1441.963  | 1291.262  |
| AF009266  | 676.435  | 832.386  | NM_00303E | 1365.093  | 1428.167  | NM_020231 | 1394.342  | 1169.262  |
| AF060168  | 1167.57  | 989.928  | NM_02052E | 3035.188  | 6032.997  | AL133118  | 3923.306  | 4324.596  |
| AF009275  | 349.642  | 496.364  | NM_02039E | 4112.419  | 9098.176  | AK023571  | 2002.488  | 2457.043  |
| AF015251  | 596.127  | 463.071  | NM_00342E | 1912.43   | 3904.818  | AF131783  | 544.251   | 300.921   |
| NM_01832E | 451.041  | 510.893  | NM_01338E | 6745.647  | 14253.706 | NM_00170Z | 4652.127  | 5134.056  |

|           |          |          |           |           |           |           |           |           |
|-----------|----------|----------|-----------|-----------|-----------|-----------|-----------|-----------|
| AK001150  | 794.487  | 726.871  | AF038951  | 16754.166 | 29555.863 | AK026657  | 1701.001  | 1991.627  |
| AK002123  | 319.882  | 224.907  | NM_006492 | 770.332   | 1479.761  | AL833558  | 554.365   | 518.466   |
| AK021633  | 555.39   | 361.669  | AK021811  | 2974.027  | 3884.026  | NM_01805C | 422.945   | 521.804   |
| AK025659  | 1505.735 | 4206.735 | NM_00342E | 3087.044  | 3895.458  | AF087991  | 15816.215 | 13959.271 |
| AK025272  | 1285.483 | 2552.559 | AF055030  | 2520.891  | 1991.907  | Y12839    | 1270.107  | 1001.473  |
| AK026824  | 848.163  | 1068.826 | AK000589  | 2818.52   | 4442.93   | AJ001876  | 700.76    | 761.643   |
| AJ008130  | 6738.046 | 6173.442 | X53281    | 8988.732  | 18935.236 | AJ227884  | 1314.922  | 1528.123  |
| L39924    | 1275.781 | 1143.903 | BC012782  | 2764.388  | 4787.016  | X64986    | 7571.423  | 8902.976  |
| U52054    | 6278.813 | 5032.679 | AF132026  | 54167.992 | 65258.125 | Y10510    | 527.061   | 580.035   |
| AK023325  | 810.466  | 1061.451 | AL050353  | 3226.344  | 7220.583  | L38282    | 2412.583  | 2472.028  |
| NM_01798E | 672.061  | 844.08   | AB037788  | 6629.407  | 8330.997  | NM_01805E | 3541.038  | 3206.237  |
| AK025866  | 2125.864 | 2203.401 | NM_004587 | 4101.701  | 2322.829  | NM_01900E | 2560.774  | 2091.201  |
| AF088058  | 5738.505 | 6777.745 | NM_00097E | 53658.02  | 67170.758 | M20838    | 980.229   | 793.754   |
| NM_000513 | 1472.961 | 1758.245 | AF147412  | 13806.253 | 12485.18  | AK022738  | 916.015   | 723.275   |
| Y11165    | 623.271  | 529.557  | AK024570  | 13424.51  | 16441.213 | AK024252  | 503.108   | 871.197   |
| AL137445  | 233.439  | 857.999  | AF161401  | 9723.482  | 11442.728 | AK002095  | 1129.826  | 1452.179  |
| BC028422  | 1064.495 | 2261.126 | NM_00099C | 9252.385  | 10040.257 | AK000821  | 5475.319  | 4467.218  |
| AK024413  | 451.006  | 608.513  | NM_01474C | 3444.646  | 4407.766  | AK024526  | 9115.633  | 8219.783  |
| AK022247  | 430.282  | 331.914  | NM_01595E | 6752.32   | 7462.98   | AK000848  | 933.842   | 895.166   |
| AK001453  | 4015.64  | 3096.606 | AF075008  | 1908.26   | 2402.881  | AK023307  | 450.481   | 647.176   |
| AB007972  | 727.919  | 662.756  | NM_006504 | 2320.779  | 2363.365  | NM_01761E | 2323.665  | 2220.183  |
| AL390144  | 11610.21 | 12691.69 | AF070538  | 794.989   | 456.191   | NM_01784E | 772.212   | 501.476   |
| X56196    | 740.357  | 691.032  | AL137430  | 641.269   | 506.367   | AK024315  | 9303.09   | 7779.733  |
| D17220    | 6921.533 | 6829.509 | NM_00069E | 7746.5    | 6391.247  | AK024945  | 1965.623  | 1481.937  |
| D28363    | 47615.24 | 48898.71 | NM_00248E | 21384.371 | 15070.655 | AK024579  | 3104.669  | 2512.102  |
| AB011171  | 361.449  | 193.141  | NM_004003 | 6308.166  | 4419.245  | S75708    | 12231.824 | 11969.331 |
| NM_005322 | 1559.491 | 1055.266 | NM_00018E | 1522.183  | 947.122   | U79291    | 10022.404 | 9825.085  |
| AK024465  | 309.658  | 286.459  | BF244401  | 1653.5    | 782.271   | D17172    | 17341.668 | 20229.955 |
| AK021478  | 3775.803 | 5377.146 | NM_00471E | 19363.719 | 13083.05  | AJ227859  | 1468.084  | 1685.69   |
| AF131782  | 955.914  | 1680.979 | AL359585  | 3106.575  | 2174.977  | NM_018544 | 833.283   | 947.085   |
| NM_01421C | 4556.619 | 9216.978 | AB046850  | 2561.723  | 2010.325  | AK022670  | 411.01    | 376.982   |
| AL110136  | 2747.361 | 4260.692 | NM_014801 | 3132.815  | 2658.207  | L10141    | 407.655   | 572.258   |
| AK026469  | 331.162  | 228.007  | NM_003642 | 8505.277  | 12505.581 | AB020699  | 5089.579  | 5351.117  |
| D16935    | 4179.482 | 3982.666 | AB027013  | 3622.76   | 5157.4    | AF086269  | 2030.987  | 1732.667  |
| U92019    | 383.381  | 274.343  | BC032686  | 531.887   | 716.801   | U90437    | 10944.456 | 8438.171  |
| U52835    | 1124.535 | 950.82   | BF185480  | 2542.363  | 2059.055  | S71604    | 398.971   | 425.951   |
| NM_00075E | 1404.747 | 1429.005 | NM_00212E | 14073.539 | 16484.275 | AK000842  | 9738.388  | 7845.486  |
| Z36811    | 56105.59 | 43700.51 | NM_00710E | 362.074   | 672.702   | AK023386  | 8627.39   | 5826.39   |
| NM_01895C | 10318.06 | 5555.672 | NM_003074 | 4730.163  | 4950.82   | NM_007053 | 20138.475 | 17848.605 |
| K03200    | 6684.704 | 5491.926 | AL360195  | 1925.57   | 3276.124  | AK022153  | 1570.838  | 1432.542  |
| U17629    | 2555.869 | 2275.336 | U14383    | 680.163   | 1009.431  | AK022789  | 1091.951  | 570.052   |
| NM_02042E | 2381.59  | 2371.956 | NM_01781C | 2474.032  | 3610.936  | AK023756  | 694.395   | 431.724   |
| U79265    | 1424.675 | 1107.053 | NM_003181 | 57029.539 | 67429.109 | NM_001126 | 6327.212  | 6242.6    |
| AK022868  | 4673.495 | 2993.301 | NM_004451 | 1565.969  | 2484.673  | AK023673  | 4246.431  | 5547.046  |
| NM_00353C | 380.801  | 255.897  | NM_004364 | 1008.191  | 700.858   | NM_018252 | 3404.844  | 4142.298  |
| AJ227871  | 1400.445 | 623.232  | NM_014951 | 247.492   | 185.076   | NM_01800C | 54033.492 | 53081.699 |
| AK025344  | 2944.193 | 3125.832 | AK023505  | 3245.774  | 2346.1    | AF164963  | 899.449   | 1220.168  |
| D28589    | 32817    | 30386.65 | AB037851  | 5237.962  | 3675.47   | AF124366  | 28844.76  | 30955.223 |
| AF301223  | 739.428  | 1968.591 | AL050389  | 5210.497  | 3870.037  | AF130112  | 1230.875  | 1229.592  |
| U92820    | 7213.823 | 13566.58 | AK025855  | 951.143   | 1028.317  | NM_000551 | 5015.912  | 4900.833  |
| NM_017937 | 2219.034 | 5457.133 | AK024684  | 1302.212  | 1189.717  | AL365518  | 1842.985  | 1559.514  |
| AL360266  | 4299.673 | 7652.135 | NM_01494E | 8728.645  | 7735.617  | AF086257  | 2900.324  | 2912.062  |
| AL160132  | 7108.713 | 10096.86 | AK001546  | 925.658   | 638.422   | AF075056  | 680.606   | 781.982   |



|           |          |          |           |           |           |           |           |           |
|-----------|----------|----------|-----------|-----------|-----------|-----------|-----------|-----------|
| NM_019557 | 6026.006 | 8219.604 | NM_006537 | 4894.672  | 4191.574  | AC119751  | 571.214   | 625.334   |
| CY3Cy5    | 5023.038 | 306.229  | AF007155  | 7445.614  | 7362.594  | U00928    | 935.445   | 1093.467  |
| AA150828  | 1028.659 | 1233.742 | AK023055  | 561.707   | 435.854   | NM_019056 | 5008.749  | 5122.002  |
| AI859208  | 820.849  | 717.122  | AL049282  | 4316.285  | 4031.566  | AF279783  | 3617.138  | 3078.904  |
| T72202    | 1115.068 | 1491.486 | AK021443  | 3089.926  | 4787.889  | AF182422  | 11962.225 | 9482.018  |
| AA599158  | 9795.345 | 10738.86 | AF070569  | 693.643   | 917.119   | NM_016943 | 707.073   | 495.324   |
| NM_002711 | 3563.466 | 2915.733 | NM_020233 | 2602.81   | 2590.93   | AF070602  | 1024.911  | 921.463   |
| SR5       | 7288.722 | 8015.775 | AF143873  | 510.555   | 573.899   | BE393290  | 1702.206  | 1334.498  |
| SR7       | 8560.356 | 51141.95 | AL355732  | 2611.567  | 2413.513  | NM_017622 | 2053.597  | 1373.433  |
| SR9       | 26491.07 | 4492.553 | NM_017966 | 1863.965  | 1745.237  | AF133331  | 8079.846  | 5731.906  |
| CY3Cy5    | 7484.099 | 601.393  | AF143327  | 1259.247  | 1228.067  | AK022289  | 1149.413  | 738.671   |
| NM_005261 | 721.927  | 839.158  | AL137535  | 510.385   | 574.54    | L34408    | 597.213   | 373.982   |
| NM_001783 | 11627.83 | 12806.57 | AL049991  | 440.577   | 543.763   | AF161403  | 10715.379 | 5512.963  |
| J03171    | 5814.219 | 5381.637 | AL049990  | 1144.601  | 1891.568  | NM_020183 | 6297.708  | 10719.132 |
| NM_004323 | 14614.23 | 12973.32 | AF131843  | 1620.415  | 2535.784  | NM_018029 | 1062.409  | 1540.093  |
| NM_005312 | 1934.025 | 3994.357 | AK026653  | 1879.91   | 2963.335  | AL389954  | 845.871   | 1511.651  |
| NM_001711 | 1170.296 | 1272.48  | NM_020231 | 1680.913  | 3121.411  | NM_019852 | 2079.885  | 3756.35   |
| NM_004210 | 12261.69 | 15102.59 | AL133118  | 3239.398  | 2858.24   | NM_006118 | 7917.18   | 7806.73   |
| U65404    | 1001.791 | 1136.261 | AK023571  | 1421.418  | 1186.35   | AK026225  | 36404.586 | 49321.23  |
| AK026232  | 10760.32 | 11753.91 | NM_001702 | 3440.621  | 3332.117  | AL050032  | 3946.432  | 6215.858  |
| NM_014892 | 17549.1  | 21921.12 | AK026657  | 1721.477  | 1290.99   | AF009304  | 1049.916  | 1625.45   |
| NM_000231 | 2212.157 | 1330.008 | NM_018050 | 293.296   | 144.621   | AF086177  | 11391.722 | 14531.781 |
| L07517    | 4688.59  | 6215.569 | AF087991  | 11174.303 | 9118.041  | NM_018949 | 2071.044  | 2958.568  |
| NM_018557 | 1123.188 | 1577.332 | Y12839    | 733.415   | 734.782   | AK021593  | 527.117   | 795.594   |
| NM_001045 | 4716.02  | 5272.028 | X64979    | 265.202   | 314.893   | Z36847    | 341.733   | 592.689   |
| NM_005697 | 6470.275 | 7774.853 | AJ001876  | 623.839   | 651.926   | D17187    | 2212.85   | 2402.683  |
| NM_003099 | 8540.05  | 9962.414 | AJ227884  | 1330.711  | 1421.68   | AJ243672  | 1576.843  | 2377.162  |
| NM_004781 | 3132.202 | 3403.036 | X64986    | 8364.951  | 7231.578  | AL122087  | 1000.535  | 1112.453  |
| NM_018303 | 4080.848 | 3561.792 | Y10510    | 414.544   | 393.812   | D17169    | 54855.297 | 50504.063 |
| NM_014758 | 4346.044 | 4280.685 | L38282    | 2712.681  | 2635.653  | NM_017924 | 9609.88   | 11398.588 |
| AL133047  | 711.769  | 810.215  | NM_018056 | 2983.079  | 2649.828  | S81578    | 871.182   | 458.153   |
| NM_005124 | 4088.634 | 4130.415 | NM_019008 | 1987.858  | 2051.185  | NM_017546 | 7285.668  | 5873.5    |
| AK000947  | 3578.933 | 4332.964 | M20838    | 953.15    | 1137.229  | AJ001889  | 678.054   | 514.492   |
| L08240    | 1925.217 | 2272.469 | AK022738  | 822.468   | 1266.606  | AF086210  | 410.03    | 265.243   |
| NM_017952 | 1349.517 | 1345.025 | AK024252  | 736.561   | 620.78    | AL137400  | 2714.652  | 1130.154  |
| NM_002940 | 3570.809 | 2658.426 | AK002095  | 1099.37   | 1057.878  | NM_006511 | 1575.416  | 792.571   |
| NM_016081 | 9690.963 | 12107.29 | AK000821  | 3749.982  | 3663.249  | AF007142  | 2889.608  | 1859.457  |
| NM_006389 | 10078.54 | 10677.5  | AK024526  | 8474.058  | 6040.346  | AF119853  | 3032.951  | 1763.856  |
| M30818    | 783.545  | 939.388  | AK000848  | 816.77    | 759.742   | CY3Cy5    | 1660.901  | 133.284   |
| NM_000163 | 870.012  | 1243.461 | AK023307  | 441.763   | 504.574   | AI248827  | 3465.725  | 2809.462  |
| NM_014330 | 12168.9  | 13688.64 | NM_017618 | 2076.004  | 1718.605  | R45026    | 2045.982  | 1433.135  |
| NM_007214 | 10801.35 | 14037.76 | NM_017848 | 414.464   | 466.597   | AI970239  | 3292.621  | 1979.371  |
| NM_000311 | 11849.34 | 13054.18 | AK024315  | 6382.48   | 6115.593  | AA496452  | 3341.822  | 4855.402  |
| NM_017909 | 5262.936 | 4269.204 | AK024945  | 1771.689  | 1742.217  | X67594    | 1169.183  | 2784.09   |
| NM_006335 | 16758.41 | 12854.83 | AK024579  | 3118.515  | 3487.648  | BC008837  | 448.48    | 822.665   |
| NM_000786 | 793.234  | 878.964  | S75708    | 7701.526  | 6596.277  | NM_015869 | 476.984   | 872.142   |
| NM_002519 | 949.556  | 669.825  | U79291    | 7933.631  | 6793.144  | NM_001631 | 554.237   | 508.976   |
| NM_017731 | 1099.489 | 1642.956 | D17172    | 14387.179 | 10418.103 | AB000734  | 1178.957  | 939.887   |
| AB040891  | 3711.367 | 4747.886 | AJ227859  | 1212.163  | 1021.236  | NM_005987 | 59144.32  | 64681.367 |
| NM_016209 | 17125.37 | 19093.35 | NM_018544 | 480.377   | 510.573   | X87838    | 2499.177  | 2137.267  |
| AK075415  | 600.699  | 914.185  | AB020699  | 4416.721  | 2928.918  | NM_033199 | 2489.795  | 1928.312  |
| NM_018964 | 3481.784 | 4316.938 | AF086269  | 1549.095  | 1594.054  | NM_015001 | 1757.717  | 1742.713  |
| NM_000080 | 1228.878 | 1664.469 | U90437    | 7890.87   | 6924.635  | SR2       | 50863.441 | 25983.486 |

|           |          |          |           |           |           |           |           |           |
|-----------|----------|----------|-----------|-----------|-----------|-----------|-----------|-----------|
| NM_001825 | 4337.502 | 5598.847 | AK000842  | 10800.676 | 10662.026 | SR4       | 12147.316 | 6015.911  |
| AF283645  | 6198.603 | 7910.392 | AK023386  | 6651.492  | 6493.14   | SR6       | 2003.538  | 900.436   |
| NM_016575 | 557.038  | 1244.878 | NM_007053 | 19007.084 | 18856.877 | SR8       | 7773.133  | 10489.119 |
| NM_003897 | 6010.443 | 5470.666 | AK022153  | 1351.79   | 1544.764  | SR10      | 27444.051 | 4532.54   |
| NM_014165 | 14050.96 | 13913.27 | AK022789  | 750.528   | 766.017   | CY3Cy5    | 720.676   | 118.537   |
| AL442085  | 4541.847 | 4257.375 | AK023756  | 710.076   | 1011.648  | X00094    | 1441.661  | 1207.233  |
| NM_013313 | 6493.374 | 7361.043 | NM_001126 | 5109.672  | 4444.818  | NM_003775 | 784.344   | 765.481   |
| NM_014736 | 18093.2  | 19176.21 | AK023673  | 3887.782  | 3502.265  | NM_002082 | 4161.157  | 3224.045  |
| AK023886  | 2237.564 | 2032.645 | NM_018252 | 2820.632  | 2391.591  | AF155657  | 13481.278 | 7622.855  |
| AB007869  | 2057.222 | 2910.272 | NM_018000 | 48116.879 | 34500.797 | NM_006056 | 1465.709  | 1184.632  |
| AB046844  | 1373.778 | 2274.742 | AF164963  | 717.547   | 625.989   | AF045229  | 8797.073  | 6816.678  |
| NM_000302 | 2736.631 | 2310.583 | AF124366  | 19193.807 | 15979.398 | NM_000228 | 248.866   | 438.727   |
| NM_013235 | 29263.36 | 34165.73 | NM_000551 | 3569.123  | 2407.877  | NM_000830 | 865.828   | 965.833   |
| NM_016015 | 13192.66 | 14218.84 | AL365518  | 1208.596  | 876.427   | AF148950  | 397.135   | 609.381   |
| NM_020120 | 2023.765 | 2143.638 | AF086257  | 2222.901  | 1743.604  | NM_001155 | 7777.176  | 5217.056  |
| AK022900  | 1616.58  | 2530.275 | AF075056  | 590.859   | 445.397   | M62896    | 8672.393  | 7404.666  |
| AB023216  | 1151.447 | 1793.674 | U00928    | 782.589   | 731.229   | NM_017736 | 1485.615  | 1610.147  |
| NM_002266 | 41700.45 | 51583.57 | NM_019056 | 3670.327  | 3817.923  | NM_000390 | 758.439   | 1310      |
| NM_014400 | 7829.338 | 9808.262 | AF279783  | 2094.708  | 2091.868  | NM_001498 | 30291.375 | 21099.021 |
| AL157492  | 1631.642 | 2477.948 | AF182422  | 8460.014  | 8717.257  | AF263523  | 1625.767  | 1347.491  |
| AL353957  | 4678.633 | 6716.159 | AF070602  | 883.305   | 727.7     | L08441    | 8256.111  | 6467.436  |
| NM_000231 | 3049.552 | 2421.005 | BE393290  | 1106.887  | 1376.778  | AA641953  | 2252.082  | 1453.643  |
| L07517    | 4449.307 | 3999.592 | NM_017622 | 1563.102  | 1526.464  | AL137764  | 8319.464  | 6113.744  |
| AA150828  | 766.018  | 961.333  | AF133331  | 6689.969  | 6326.97   | NM_001660 | 13008.225 | 7715.724  |
| H90764    | 466.68   | 560.165  | AK022289  | 876.277   | 1193.059  | NM_000710 | 456.964   | 254.685   |
| AI859208  | 783.777  | 950.997  | L34408    | 558.679   | 533.701   | NM_000752 | 1094.723  | 805.043   |
| H64379    | 5127.199 | 6129.938 | AF161403  | 9930.271  | 11494.698 | AB040945  | 321.147   | 329.861   |
| T72202    | 1214.854 | 1455.877 | NM_020183 | 4197.385  | 4178.773  | NM_002018 | 5471.791  | 3566.113  |
| BI831922  | 2696.422 | 3367.941 | NM_018025 | 853.74    | 798.622   | AF161383  | 5474.364  | 4616.951  |
| M69238    | 1441.238 | 1744.724 | AL389954  | 509.846   | 375.599   | U72882    | 7026.299  | 6573.015  |
| NM_002711 | 3474.341 | 2916.302 | NM_019852 | 1627.967  | 1285.423  | NM_014337 | 8801.866  | 7247.858  |
| AK026092  | 3446.281 | 4602.545 | NM_006118 | 3227.102  | 4940.913  | NM_007161 | 10026.036 | 8506.447  |
| AK001175  | 1360.555 | 2109.99  | AK026225  | 19489.402 | 17269.018 | NM_014387 | 17214.367 | 16369.014 |
| NM_003298 | 30155.79 | 32347.65 | AL050032  | 2339.314  | 1853.406  | NM_003641 | 3429.296  | 3319.751  |
| NM_007034 | 1038.154 | 1175.757 | AF009304  | 563.808   | 362.223   | NM_012463 | 1790.428  | 1963.391  |
| NM_005261 | 876.178  | 809.936  | AF086177  | 5694.568  | 4897.347  | L29140    | 16402.725 | 13337.821 |
| NM_001783 | 11998.69 | 15496.74 | NM_018945 | 1632.132  | 1560.685  | AK026448  | 3488.185  | 4223.172  |
| J03171    | 6454.797 | 6718.71  | D17187    | 1578.558  | 1394.558  | AK057418  | 2635.083  | 2114.553  |
| NM_005312 | 1942.795 | 4813.983 | AJ243672  | 1073.267  | 1661.446  | NM_007260 | 1613.232  | 1618.249  |
| NM_001711 | 1141.483 | 1228.424 | AL122087  | 611.664   | 830.882   | AF148646  | 4313.827  | 3657.286  |
| NM_004210 | 11890.64 | 14655.89 | D17169    | 34842.203 | 34456.98  | AL110218  | 879.122   | 691.309   |
| NM_020140 | 2345.048 | 2923.525 | NM_017924 | 8094.846  | 7420.235  | AB023201  | 2398.707  | 1625.467  |
| AK026232  | 11502.84 | 12906.44 | S81578    | 539.786   | 659.531   | NM_000072 | 506.212   | 393.834   |
| NM_001117 | 1236.789 | 1158.825 | NM_017546 | 4945.337  | 4608.763  | NM_000697 | 1449.335  | 1144.767  |
| AF283645  | 5781.811 | 6021.937 | AL137400  | 1455.851  | 2275.816  | NM_000017 | 5477.783  | 3555.22   |
| NM_016575 | 796.428  | 1052.759 | NM_006511 | 791.293   | 823.968   | NM_000237 | 544.938   | 445.126   |
| NM_018557 | 741.183  | 731.451  | AF007142  | 2553.933  | 2497.233  | NM_018346 | 5033.576  | 3969.188  |
| NM_001045 | 3781.016 | 3941.972 | AF119853  | 3105.933  | 3473.067  | AL122054  | 1887.161  | 1398.175  |
| NM_005697 | 7130.373 | 7914.09  | CY3Cy5    | 2128.684  | 197.353   | AB011182  | 1409.418  | 968.759   |
| NM_003098 | 8209.211 | 10351.42 | BG386057  | 397.546   | 422.649   | AB023151  | 511.557   | 502.722   |
| NM_004781 | 3145.514 | 3724.121 | AI970239  | 2879.912  | 3803.34   | NM_000140 | 5604.987  | 4874.248  |
| NM_018303 | 4601.359 | 4765.308 | AA496452  | 3976.277  | 4103.436  | NM_005125 | 2578.381  | 2622.108  |
| NM_014758 | 4722.815 | 6439.146 | X67594    | 2123.497  | 1813.434  | NM_020038 | 363.19    | 522.81    |

|           |          |          |           |           |           |           |           |           |
|-----------|----------|----------|-----------|-----------|-----------|-----------|-----------|-----------|
| AL133047  | 797.098  | 1063.353 | BC008837  | 403.71    | 571.11    | NM_015926 | 5289.856  | 5532.146  |
| NM_005124 | 4167.502 | 4786.995 | NM_015869 | 670.147   | 545.186   | X03757    | 3427.317  | 3295.827  |
| AK000947  | 3421.975 | 4073.47  | NM_001631 | 800.001   | 787.052   | NM_005136 | 411.199   | 540.218   |
| L08240    | 2151.873 | 2323.84  | AB000734  | 1744.94   | 1716.582  | AK094513  | 553.19    | 537.515   |
| NM_017952 | 1260.034 | 1499.345 | NM_005987 | 54075.203 | 66532.391 | NM_001183 | 9038.833  | 7688.894  |
| NM_002940 | 3120.761 | 2260.107 | X87838    | 2776.016  | 2816.277  | NM_000890 | 693.168   | 985.401   |
| NM_016081 | 9148.648 | 11283.71 | NM_033199 | 2911.126  | 2424.467  | NM_004976 | 15594.194 | 11768.512 |
| NM_006389 | 9991.171 | 11530.03 | NM_015001 | 1928.564  | 2010.502  | AK021597  | 1477.033  | 1151.172  |
| M30818    | 855.234  | 1232.862 | SR2       | 49599.617 | 43116.117 | NM_005737 | 29279.621 | 18895.592 |
| NM_000163 | 675.831  | 1053.993 | SR4       | 13250.386 | 11287.664 | NM_006803 | 1439.776  | 1653.833  |
| NM_005755 | 854.443  | 2903.696 | SR6       | 2179.256  | 1792.933  | NM_002533 | 1810.968  | 1264.526  |
| AB023216  | 1156.251 | 1030.598 | SR8       | 7269.151  | 19510.904 | AF235022  | 492.932   | 514.319   |
| NM_002266 | 42601.43 | 45210.27 | SR10      | 26449.619 | 9117.189  | AF182814  | 2780.615  | 1752.181  |
| NM_014400 | 8728.687 | 11302.6  | CY3Cy5    | 2844.404  | 126.951   | NM_005329 | 517.64    | 484.426   |
| AL157492  | 2166.084 | 2321.411 | X00094    | 849.986   | 986.886   | NM_000107 | 4215.494  | 3587.105  |
| AL353957  | 4951.507 | 5333.062 | NM_003775 | 1877.429  | 3281.389  | AL157445  | 1163.433  | 1502.611  |
| NM_007214 | 10370.9  | 9701.427 | NM_002082 | 7319.125  | 10083.062 | NM_001517 | 6140.67   | 5521.246  |
| NM_000311 | 11158.49 | 12265.82 | NM_002922 | 354.094   | 819.48    | NM_005053 | 2274.653  | 2300.218  |
| NM_017909 | 6024.427 | 5277.041 | AF155657  | 14174.852 | 13229.769 | D86974    | 3349.06   | 3804.737  |
| NM_006335 | 16566.25 | 16899.78 | NM_006056 | 2250.209  | 2093.006  | NM_018283 | 3009.542  | 2354.642  |
| NM_002519 | 706.86   | 727.669  | AF045229  | 10156.892 | 9245.387  | NM_001983 | 1583.978  | 2408.824  |
| NM_017731 | 1372.78  | 1609.503 | NM_001840 | 6353.142  | 6312.04   | NM_004993 | 579.203   | 787.212   |
| AB040891  | 3569.678 | 4227.469 | AK025099  | 4051.353  | 3275.738  | M29551    | 9373.357  | 8108.011  |
| AB037780  | 720.068  | 1513.796 | NM_016099 | 20245.938 | 17716.773 | AB023148  | 398.931   | 765.971   |
| NM_005845 | 17895.98 | 19379.32 | NM_000394 | 478.361   | 491.154   | NM_002929 | 1230.653  | 1887.673  |
| NM_016209 | 17170.53 | 20292.18 | NM_000228 | 520.485   | 649.038   | BC028375  | 1857.904  | 2226.327  |
| AK025616  | 567.609  | 791.526  | NM_000830 | 1263.637  | 1341.898  | AB026436  | 3111.598  | 3173.497  |
| NM_018964 | 3256.066 | 4911.221 | AF148950  | 930.341   | 639.087   | NM_016029 | 7986.713  | 7295.814  |
| NM_000080 | 1167.981 | 1592.778 | NM_001155 | 7367.411  | 9072.474  | AK024562  | 1004.199  | 1063.837  |
| NM_002711 | 3837.659 | 3019.872 | M62896    | 11708.288 | 10486.353 | NM_014066 | 1231.837  | 1095.978  |
| AK026092  | 3903.949 | 4838.569 | NM_017736 | 2355.735  | 2087.336  | NM_004573 | 1591.499  | 1138.997  |
| AK001175  | 1665.971 | 1609.443 | NM_000390 | 2000.564  | 1057.22   | NM_001498 | 30600.473 | 19888.975 |
| NM_003897 | 5966.022 | 4800.504 | NM_001498 | 45873.98  | 39048.922 | AF263523  | 1378.375  | 1044.556  |
| NM_014165 | 18286.59 | 23608.56 | AF263523  | 1720.832  | 2221.724  | L08441    | 7590.514  | 6986.078  |
| AL442085  | 5029.021 | 6444.203 | L08441    | 11308.202 | 10542.814 | AA641953  | 2291.181  | 2310.652  |
| NM_013313 | 6486.274 | 7091.139 | AA641953  | 3377.964  | 3029.247  | AI248827  | 4070.812  | 8280.376  |
| NM_014736 | 15895.49 | 19669.6  | AL137764  | 9961.856  | 8477.912  | R45026    | 2429.546  | 2782.581  |
| AK023886  | 2175.515 | 1990.271 | NM_001660 | 11429.945 | 14197.384 | BG386057  | 373.504   | 573.384   |
| NM_002553 | 3561.913 | 4239.892 | NM_000710 | 751.415   | 617.144   | AI970239  | 3647.999  | 2104.675  |
| AJ404615  | 5464.579 | 5882.16  | NM_000752 | 1492.928  | 1983.046  | AA496452  | 3223.993  | 3322.277  |
| NM_016053 | 28668.53 | 32756.17 | AB040945  | 527.262   | 608.31    | X67594    | 1171.244  | 1200.322  |
| AB007869  | 2494.005 | 3761.111 | NM_002018 | 6790.811  | 6637.536  | AF363393  | 865.3     | 1161.205  |
| AB046844  | 1335.602 | 2686.279 | NM_006018 | 441.869   | 594.873   | NM_015869 | 1151.026  | 792.087   |
| NM_000302 | 3046.208 | 3583.445 | AF161383  | 7400.252  | 6620.186  | NM_001631 | 878.421   | 981.16    |
| NM_013235 | 33844.79 | 51705.42 | NM_000410 | 9591.095  | 9483.541  | AB000734  | 962.047   | 1160.589  |
| AK022900  | 2322.059 | 5104.961 | AF224266  | 2148.585  | 2119.128  | X87838    | 2705.218  | 2706.519  |
| AK026232  | 11534.47 | 9373.908 | U72882    | 11766.153 | 11945.496 | NM_033199 | 2610.324  | 2826.827  |
| NM_014892 | 21484.96 | 25927.6  | NM_014337 | 7857.127  | 8705.955  | NM_015001 | 1826.341  | 2017.109  |
| AK023827  | 4052.459 | 5080.714 | NM_007161 | 11521.095 | 10728.716 | NM_000169 | 3523.924  | 2530.315  |
| NM_001117 | 1292.099 | 1110.118 | NM_014387 | 23540.445 | 15235.948 | AK057418  | 2825.174  | 1808.086  |
| NM_000231 | 2633.083 | 1056.845 | NM_003641 | 5297.684  | 4464.324  | L37199    | 924.108   | 1034.921  |
| L07517    | 4355.698 | 3789.023 | NM_012463 | 2595.686  | 2366.993  | NM_007260 | 1646.751  | 1322.62   |
| AA150828  | 1585.22  | 1574.559 | L29140    | 21035.189 | 18806.764 | AF148646  | 4528.195  | 3463.812  |

|           |          |          |           |           |           |           |           |           |
|-----------|----------|----------|-----------|-----------|-----------|-----------|-----------|-----------|
| AI859208  | 1055.737 | 1083.4   | AK026448  | 5988.987  | 3696.119  | AL110218  | 717.19    | 916.884   |
| H64379    | 4673.748 | 4243.159 | AK057418  | 3001.02   | 3101.411  | AB023201  | 2627.01   | 3161.804  |
| T72202    | 1214.889 | 1497.724 | L37199    | 385.115   | 670.942   | X00094    | 891.582   | 814.877   |
| BI831922  | 2829.228 | 3283.704 | NM_00726C | 2239.236  | 2521.863  | NM_003775 | 942.926   | 742.104   |
| M69238    | 1832.224 | 1646.653 | AF148646  | 6277.329  | 6126.529  | NM_002082 | 4993.195  | 4306.768  |
| BE294756  | 4074.983 | 2059.917 | AL110218  | 1338.291  | 1461.894  | AF155657  | 14493.919 | 13085.288 |
| NM_016081 | 10127.47 | 10497.22 | AB023201  | 2761.646  | 3110.544  | NM_006056 | 1693.43   | 1840.898  |
| NM_006389 | 11259.79 | 9656.067 | NM_000072 | 641.818   | 584.858   | NM_017736 | 1624.881  | 1858.732  |
| M30818    | 805.783  | 396.363  | NM_000697 | 2077.195  | 1839.233  | NM_00039C | 701.37    | 1322.835  |
| NM_000163 | 778.682  | 465.738  | NM_000017 | 7474.421  | 7070.075  | AK021597  | 1221.829  | 861.89    |
| NM_003299 | 34943.04 | 27732.67 | NM_000237 | 765.179   | 776.017   | NM_005737 | 30515.326 | 22054.854 |
| NM_007034 | 1177.757 | 1074.654 | NM_018346 | 6429.265  | 6333.91   | NM_000014 | 262.15    | 470.816   |
| NM_005261 | 1031.438 | 784.506  | AL122054  | 2925.398  | 6195.786  | NM_006803 | 1763.301  | 1899.645  |
| NM_001783 | 13278.8  | 11981.29 | AB011182  | 1797.789  | 1782.609  | NM_002533 | 1665.82   | 1451.07   |
| J03171    | 5947.166 | 4959.901 | AB023151  | 596.71    | 848.916   | AF235022  | 637.73    | 581.075   |
| NM_005312 | 2213.983 | 3417.902 | NM_00014C | 6601.273  | 6477.773  | AL137764  | 8874.489  | 8306.908  |
| NM_001711 | 707.064  | 473.894  | NM_005125 | 4240.003  | 3583.93   | NM_00166C | 13213.477 | 9624.861  |
| NM_00421C | 14394.35 | 14491.29 | NM_020038 | 866.431   | 687.701   | NM_00071C | 503.5     | 557.755   |
| NM_02014C | 2777.443 | 3857.488 | NM_016246 | 2119.723  | 2233.396  | NM_000752 | 1240.425  | 1099.264  |
| AK075415  | 741.333  | 1237.186 | NM_015926 | 8398.392  | 7513.815  | AB040945  | 489.878   | 414.972   |
| AK025616  | 552.101  | 764.644  | X03757    | 6072.231  | 5847.46   | NM_002018 | 5581.813  | 5082.571  |
| NM_018964 | 3864.587 | 5615.122 | NM_005136 | 601.692   | 547.111   | U72882    | 8943.668  | 8663.962  |
| NM_00008C | 1449.006 | 1820.639 | AK094513  | 732.395   | 646.479   | NM_014387 | 23527.945 | 61624.277 |
| NM_000339 | 319.777  | 682.848  | NM_001183 | 9021.801  | 10747.775 | NM_003641 | 4676.543  | 11175.023 |
| AF283645  | 6203.027 | 6735.417 | NM_00089C | 1524.579  | 1517.918  | NM_012463 | 2243.09   | 3344.389  |
| NM_016575 | 981.806  | 1500.567 | NM_004976 | 15289.657 | 17715.047 | L29140    | 17919.225 | 15391.379 |
| NM_018557 | 1067.22  | 1121.579 | AK021597  | 1431.652  | 1411.331  | AK026448  | 3845.786  | 3886.436  |
| NM_001045 | 5654.476 | 6136.716 | NM_005737 | 36232.551 | 38661.254 | AB026436  | 3751.293  | 4176.899  |
| NM_005697 | 8187.6   | 9095.729 | NM_006803 | 2621.71   | 2579.692  | NM_016029 | 8549.955  | 8758.569  |
| NM_003099 | 9243.473 | 9969.095 | NM_002533 | 1903.53   | 2115.022  | AK024562  | 1169.957  | 1425.428  |
| NM_004781 | 3030.949 | 2248.77  | AF235022  | 737.918   | 794.762   | NM_014066 | 1221.632  | 1318.254  |
| NM_018303 | 3788.818 | 3149.412 | AF182814  | 3471.541  | 3619.721  | NM_004573 | 1415.031  | 1359.603  |
| NM_014758 | 5164.161 | 4321.642 | NM_005329 | 809.553   | 733.696   | NM_000072 | 585.276   | 411.047   |
| AL133047  | 629.704  | 713.624  | NM_000107 | 4375.208  | 5136.908  | NM_000697 | 986.457   | 1231.973  |
| NM_005124 | 4268.997 | 4059.126 | AL157445  | 2025.283  | 1654.897  | NM_000017 | 5965.163  | 4693.589  |
| AK000947  | 4036.367 | 4117.961 | NM_001517 | 10577.783 | 7796.011  | NM_000237 | 582.537   | 756.046   |
| L08240    | 2062.093 | 1865.125 | NM_005053 | 3767.702  | 3367.394  | NM_018346 | 6454.669  | 6075.159  |
| NM_017952 | 1520.994 | 1349.477 | D86974    | 4123.985  | 3893.291  | AL122054  | 1890.699  | 1973.854  |
| NM_00294C | 3578.183 | 2105.044 | NM_018283 | 3822.656  | 3760.633  | NM_015926 | 6947.179  | 8317.152  |
| AB046844  | 1431.424 | 2680.016 | NM_001983 | 2885.683  | 2127.442  | X03757    | 4667.626  | 7613.434  |
| NM_000302 | 3214.245 | 3334.709 | NM_004993 | 650.238   | 718.927   | AK094513  | 878.93    | 1455.059  |
| NM_013235 | 33695.59 | 40799.97 | M29551    | 11851.755 | 13588.296 | NM_001183 | 10159.934 | 10600.678 |
| NM_016015 | 19214.13 | 21342.39 | AB023148  | 835.344   | 763.548   | NM_00089C | 899.878   | 952.313   |
| NM_02012C | 3112.246 | 3358.592 | NM_002929 | 1320.968  | 1304.703  | NM_004976 | 16193.422 | 10429.573 |
| AK022900  | 2147.403 | 3251.611 | BC028375  | 2480.866  | 2535.488  | NM_033199 | 2060.403  | 2262.362  |
| NM_001125 | 689.94   | 541.053  | AB026436  | 3963.251  | 4109.987  | NM_015001 | 1802.319  | 2132.489  |
| AB023216  | 1357.606 | 1888.902 | NM_016029 | 10459.544 | 8700.772  | NM_000169 | 3835.468  | 3738.968  |
| NM_002266 | 48520.05 | 52176.89 | AK024562  | 1653.775  | 2026.399  | BE799167  | 359.473   | 1524.977  |
| NM_01440C | 10419.75 | 13447.03 | NM_014066 | 1641.251  | 1504.787  | AF182814  | 3653.283  | 2336.192  |
| AL157492  | 3286.248 | 4340.508 | NM_004573 | 2189.698  | 2153.558  | NM_005329 | 668.752   | 675.516   |
| AL353957  | 5997.871 | 6419.28  | NM_001498 | 25306.5   | 20183.484 | NM_005053 | 2962.452  | 6821.805  |
| NM_007214 | 11320.55 | 11160.15 | AF263523  | 1447.802  | 1603.396  | NM_001983 | 1898.422  | 2825.743  |
| NM_000311 | 13407.92 | 14987.62 | L08441    | 11928.922 | 9309.003  | Y12337    | 1131.091  | 1579.075  |

|           |          |          |           |           |           |           |           |           |
|-----------|----------|----------|-----------|-----------|-----------|-----------|-----------|-----------|
| NM_01790  | 5940.652 | 4671.273 | AA641953  | 2989.572  | 2106.504  | M29551    | 12790.442 | 14097.241 |
| NM_00633  | 17882.81 | 14824.18 | AI248827  | 4942.753  | 4155.77   | AB023148  | 702.043   | 705.653   |
| NM_00078  | 893.404  | 667.384  | R45026    | 3028.441  | 3116.227  | NM_00292  | 1366.891  | 1116.234  |
| NM_00251  | 658.015  | 423.474  | AI970239  | 3505.739  | 4401.766  | BC028375  | 2179.133  | 1450.393  |
| NM_017731 | 1333.691 | 1190.346 | AA496452  | 4153.066  | 3862.365  | AF148950  | 517.568   | 684.793   |
| AB040891  | 3822.482 | 3262.655 | X67594    | 2570.976  | 2243.752  | NM_001155 | 9202.022  | 17187.809 |
| AB037780  | 508.146  | 862.743  | BC008837  | 435.797   | 387.578   | M62896    | 8634.164  | 12990.879 |
| NM_00584  | 19667.05 | 16746.68 | NM_01586  | 557.466   | 610.122   | NM_01773  | 1528.896  | 2041.837  |
| NM_01620  | 17118.09 | 12922.58 | NM_001631 | 780.715   | 946.047   | NM_00039  | 867.813   | 1512.647  |
| NM_00202  | 773.304  | 681.114  | AB000734  | 1928.106  | 1686.546  | NM_00031  | 366.519   | 459.413   |
| AK002114  | 8308.545 | 7022.919 | NM_005987 | 57075.02  | 67114.039 | NM_00149  | 29133.963 | 21251.691 |
| NM_01804  | 736.159  | 790.461  | X87838    | 3096.761  | 2678.397  | AF263523  | 1353.71   | 1216.58   |
| AK026318  | 2495.789 | 2936.099 | NM_03319  | 3112.779  | 2326.099  | L08441    | 8223.021  | 7767.917  |
| AF291673  | 1549.72  | 1329.367 | NM_015001 | 1994.039  | 1757.675  | AA641953  | 2409.102  | 1834.311  |
| NM_00436  | 16260.72 | 14488.38 | NM_00016  | 5060.956  | 5158.636  | AI248827  | 3857.456  | 4314.165  |
| NM_01635  | 9220.778 | 8025.042 | AK057418  | 2766.615  | 2600.252  | X67594    | 1477.601  | 2334.209  |
| AJ296290  | 6072.889 | 7498.011 | L37199    | 388.569   | 586.884   | BC008837  | 510.494   | 698.744   |
| AK026092  | 4473.022 | 5835.259 | NM_00726  | 1755.487  | 1813.332  | NM_001631 | 653.305   | 558.699   |
| AK001175  | 1999.7   | 2212.965 | AF148646  | 4484.462  | 4692.399  | AB000734  | 1218.852  | 1110.824  |
| NM_003897 | 7266.146 | 5372.616 | AL110218  | 999.583   | 983.919   | NM_005987 | 57849.73  | 63175.816 |
| NM_01416  | 17577.49 | 14601.99 | AB023201  | 2736.036  | 2473.598  | X87838    | 2774.519  | 1958.177  |
| AL442085  | 4908.559 | 4583.12  | X00094    | 738.018   | 1046.533  | NM_007161 | 10544.468 | 10748.293 |
| NM_01331  | 7496.055 | 8069.458 | NM_00377  | 1959.71   | 3095.268  | NM_014387 | 17758.295 | 28246.703 |
| NM_01473  | 22327.7  | 24526.64 | NM_00208  | 7646.105  | 7557.387  | NM_003641 | 4085.646  | 6435.2    |
| AK023886  | 2649.196 | 2516.906 | AF155657  | 15426.658 | 14776.557 | NM_01246  | 1973.853  | 3081.839  |
| NM_00255  | 3502.183 | 3762.089 | NM_00605  | 2968.292  | 2808.323  | L29140    | 16015.943 | 16875.422 |
| AJ404615  | 6525.843 | 5694.917 | AF045229  | 10911.351 | 10256.448 | AK026448  | 3565.455  | 4197.009  |
| NM_01605  | 30756.42 | 30319.62 | NM_00184  | 6893.701  | 7605.543  | AK057418  | 2597.718  | 1960.825  |
| AB007869  | 2143.908 | 2185.386 | AK025099  | 3580.537  | 3460.002  | L37199    | 459.226   | 471.389   |
| M64108    | 875.082  | 741.957  | NM_01609  | 22181.543 | 20051.395 | NM_00726  | 1759.511  | 1611.808  |
| M92642    | 673.022  | 600.207  | NM_00039  | 462.87    | 406.24    | AF148646  | 4814.632  | 3728.674  |
| NM_018071 | 2754.824 | 2556.812 | NM_00022  | 441.474   | 559.951   | AL110218  | 817.736   | 744.991   |
| NM_00433  | 5042.667 | 5287.243 | NM_00083  | 1387.63   | 1257.651  | AB023201  | 2367.889  | 2221.68   |
| NM_00202  | 3131.562 | 4151.471 | NM_00520  | 405.142   | 379.042   | X00094    | 1060.092  | 1205.36   |
| AL050137  | 731.902  | 836.497  | AF148950  | 748.298   | 842.297   | NM_00377  | 879.576   | 1998.373  |
| AK024423  | 2886.316 | 2471.128 | NM_001155 | 7801.341  | 8932.657  | NM_00208  | 5724.363  | 10303.777 |
| NM_00504  | 10282.78 | 11971.5  | M62896    | 13257.683 | 13449.558 | NM_00292  | 360.462   | 1035.822  |
| NM_00597  | 5622.87  | 6486.396 | NM_01773  | 2366.043  | 2249.89   | AF155657  | 16407.217 | 16207.155 |
| NM_00628  | 11805.89 | 8813.953 | NM_00039  | 1766.536  | 1137.078  | NM_00605  | 2094.764  | 1890.403  |
| NM_020321 | 2056.822 | 1556.29  | AK021597  | 1283.39   | 1128.903  | AF045229  | 10938.573 | 8621.947  |
| NM_00082  | 662.004  | 667.649  | NM_005737 | 26837.396 | 24937.576 | NM_00184  | 6818.146  | 5064.985  |
| NM_01592  | 18941.54 | 16871.65 | NM_00680  | 2246.282  | 2177.609  | AK025099  | 2954.378  | 2602.261  |
| AB011113  | 1740.935 | 1314.315 | NM_00253  | 1696.078  | 1584.61   | NM_01609  | 19333.334 | 11522.279 |
| NM_004115 | 1298.535 | 779.663  | AF235022  | 768.36    | 859.359   | NM_00022  | 312.447   | 367.272   |
| NM_018287 | 1287.489 | 1086.417 | AL137764  | 11370.907 | 10066.372 | NM_00083  | 912.544   | 977.026   |
| NM_00195  | 1452.368 | 931.798  | NM_00166  | 12124.013 | 14851.828 | NM_01865  | 8429.455  | 11439.008 |
| AF016004  | 2004.415 | 3069.012 | NM_00071  | 577.107   | 755.806   | NM_00513  | 667.224   | 1039.174  |
| NM_003567 | 1320.868 | 1055.886 | NM_00075  | 1767.456  | 1921.565  | AK094513  | 876.581   | 1528.544  |
| NM_00731  | 2947.995 | 1785.109 | AB040945  | 651.877   | 537.994   | NM_001183 | 11699.408 | 14183.967 |
| L20686    | 1445.584 | 1286.452 | NM_00201  | 8578.504  | 7881.375  | NM_00089  | 952.138   | 1703.665  |
| NM_00030  | 3442.855 | 2299.413 | NM_00601  | 370.227   | 777.571   | NM_00497  | 16888.197 | 18367.938 |
| S72604    | 14120.07 | 14118.54 | AF161383  | 6736.766  | 7441.452  | AK021597  | 1361.985  | 1823.795  |
| NM_00267  | 3537.651 | 3380.979 | NM_00041  | 9395.925  | 10921.256 | NM_005737 | 32220.6   | 30212.326 |

|           |          |          |           |           |           |           |           |           |
|-----------|----------|----------|-----------|-----------|-----------|-----------|-----------|-----------|
| NM_012432 | 12053.65 | 12937.73 | AF224266  | 2303.865  | 2568.785  | NM_000014 | 430.359   | 579.379   |
| NM_005007 | 7579.914 | 6064.501 | U72882    | 11302.249 | 11407.988 | NM_006803 | 1743.673  | 1792.437  |
| NM_004417 | 2081.078 | 1491.954 | NM_014337 | 8645.078  | 8119.004  | NM_002533 | 1761.568  | 1710.057  |
| NM_012290 | 10586.96 | 11261.02 | NM_007161 | 12871.124 | 12065.304 | AF235022  | 688.85    | 512.041   |
| NM_002431 | 7445.885 | 9980.383 | NM_014387 | 24873.979 | 17827.715 | AL137764  | 10652.168 | 9533.494  |
| NM_001827 | 62534.68 | 57760.63 | NM_003641 | 5550.282  | 5628.224  | NM_001660 | 14768.243 | 11049.209 |
| NM_020466 | 3187.058 | 2945.938 | NM_012463 | 2560.236  | 2770.824  | NM_000710 | 520.317   | 586.609   |
| AL079280  | 809.227  | 610.075  | L29140    | 26093.453 | 26440.432 | NM_000752 | 1488.345  | 1553.525  |
| NM_002853 | 6764.445 | 4858.937 | AK026448  | 6395.384  | 4439.426  | AB040945  | 570.678   | 634.32    |
| NM_003174 | 1512.592 | 986.358  | AB026436  | 3388.318  | 3273.115  | NM_002018 | 7218.951  | 5960.564  |
| NM_012307 | 5696.034 | 4591.143 | NM_016029 | 9006.894  | 7753.222  | NM_006018 | 405.277   | 353.112   |
| NM_002540 | 3475.574 | 3003.479 | AK024562  | 1482.396  | 1487.743  | AF161383  | 6812.154  | 5266.214  |
| NM_006371 | 2845.56  | 2156.07  | NM_014066 | 1364.984  | 1312.238  | NM_000410 | 10693.367 | 8239.325  |
| NM_018834 | 1713.382 | 1116.901 | NM_004573 | 2147.794  | 1834.489  | AF224266  | 1427.212  | 1242.605  |
| AK026882  | 1387.411 | 1283.99  | NM_000072 | 935.422   | 871.24    | U72882    | 7938.767  | 5375.454  |
| NM_004574 | 879.254  | 756.924  | NM_000697 | 2571.279  | 2365.756  | NM_014337 | 7545.548  | 4912.244  |
| NM_004848 | 1765.821 | 1604.57  | NM_000017 | 7877.684  | 7622.163  | Y12337    | 1140.372  | 2232.281  |
| NM_001944 | 797.163  | 609.003  | NM_000237 | 665.037   | 725.176   | M29551    | 14133.528 | 18668.68  |
| NM_014813 | 683.62   | 795.632  | NM_018346 | 6846.622  | 6587.844  | AB023148  | 947.552   | 1405.739  |
| AF014459  | 2051.696 | 2062.73  | AL122054  | 2400.06   | 2352.91   | NM_002929 | 1587.829  | 2112.391  |
| AK024601  | 8322.325 | 8529.628 | AB011182  | 1653.043  | 1746.541  | BC028375  | 2638.272  | 4004.49   |
| S68069    | 11992.99 | 7159.532 | AB023151  | 830.847   | 1109.282  | AB026436  | 4429.938  | 4963.261  |
| AB011095  | 1374.929 | 977.144  | NM_000140 | 7234.945  | 7514.289  | NM_016029 | 11465.454 | 12261.431 |
| NM_001503 | 1567.634 | 1326.538 | NM_005125 | 4195.977  | 3693.771  | AK024562  | 1649.951  | 2328.165  |
| NM_006302 | 4702.902 | 3847.622 | NM_020038 | 866.676   | 837.2     | NM_014066 | 1524.722  | 2304.312  |
| AJ224875  | 8158.165 | 8681.362 | NM_016246 | 1993.776  | 2048.438  | NM_004573 | 1822.061  | 2828.173  |
| NM_002149 | 7308.316 | 8269.828 | NM_015926 | 9237.474  | 8322.322  | NM_000072 | 737.49    | 1098.783  |
| AF043324  | 11343.82 | 9491.509 | X03757    | 5769.707  | 5016.735  | NM_000697 | 2205.571  | 3159.999  |
| AK024172  | 2247.805 | 1695.101 | NM_018658 | 10892.288 | 9829.936  | NM_000017 | 9876.728  | 13643.669 |
| NM_014814 | 17527.95 | 10378.76 | NM_005136 | 761.531   | 842.426   | NM_000237 | 768.095   | 1537.269  |
| NM_002797 | 27256.7  | 20635.54 | AK094513  | 1093.4    | 1063.231  | NM_018346 | 8351.538  | 9298.714  |
| AK024318  | 4846.601 | 3455.253 | NM_001183 | 9673.153  | 12920.329 | AL122054  | 2406.958  | 3519.513  |
| NM_016129 | 12522.37 | 10850.97 | NM_000890 | 2162.238  | 2016.171  | AB011182  | 1867.597  | 2214.655  |
| NM_002809 | 20404.08 | 17278.06 | NM_004976 | 16377.679 | 21391.719 | AB023151  | 613.135   | 739.609   |
| NM_017912 | 2451.905 | 1687.825 | NM_033199 | 2475.394  | 1858.171  | NM_000140 | 7891.418  | 7845.524  |
| NM_000423 | 7049.4   | 6292.48  | NM_015001 | 1636.539  | 1305.123  | NM_005125 | 3191.225  | 3299.954  |
| AB046838  | 5636.172 | 4677.702 | NM_000169 | 4459.188  | 4425.645  | NM_020038 | 602.294   | 660.849   |
| AK026339  | 969.63   | 849.481  | AF182814  | 3751.437  | 3458.319  | NM_016246 | 1712.759  | 1786.043  |
| X98411    | 6816.384 | 5324.232 | NM_005329 | 1005.426  | 1207.782  | NM_015926 | 6988.597  | 6212.318  |
| AF116658  | 8047.954 | 6507.381 | NM_000107 | 4032.868  | 5580.146  | X03757    | 4067.654  | 3580.338  |
| NM_014865 | 8045.621 | 8909.291 | AL157445  | 2153.393  | 2031.453  | NM_020248 | 18245.24  | 25382.736 |
| AB032977  | 5488.932 | 5178.234 | NM_001517 | 10992.943 | 9971.924  | X89670    | 942.93    | 1584.286  |
| AK001725  | 2467.243 | 2767.511 | NM_005053 | 4035.781  | 3841.998  | NM_001726 | 712.863   | 693.652   |
| NM_003036 | 1711.288 | 3316.357 | D86974    | 4281.258  | 4119.369  | NM_004053 | 3840.766  | 5019.266  |
| NM_020529 | 8948.954 | 6962.161 | NM_018283 | 3610.341  | 3463.635  | NM_014420 | 439.138   | 614.148   |
| NM_020395 | 4134.934 | 3844.362 | NM_001983 | 3074.162  | 2054.244  | NM_001489 | 2746.872  | 2912.489  |
| NM_003425 | 1617.789 | 907.719  | Y12337    | 1642.914  | 1601.904  | M20259    | 564.619   | 752.099   |
| NM_013388 | 12453.85 | 10229.35 | M29551    | 14360.17  | 17583.549 | NM_020374 | 4326.331  | 3520.996  |
| AF038951  | 17437.59 | 13214.5  | AB023148  | 1023.547  | 999.528   | NM_014922 | 1494.644  | 2316.235  |
| AK021811  | 2598.495 | 4012.86  | NM_002929 | 1632.356  | 1873.681  | NM_000169 | 5970.158  | 7772.895  |
| NM_003428 | 2255.018 | 2864.063 | BC028375  | 2689.757  | 3232.014  | BE799167  | 313.284   | 818.507   |
| AF055030  | 2283.773 | 3202.804 | AF148950  | 678.709   | 686.87    | AF182814  | 5066.837  | 7281.078  |
| AK000589  | 2982.684 | 1870.444 | NM_001155 | 6607.838  | 6844.607  | NM_005329 | 1053.964  | 1701.012  |

|           |          |          |           |           |           |           |           |           |
|-----------|----------|----------|-----------|-----------|-----------|-----------|-----------|-----------|
| X53281    | 3337.109 | 2920.188 | M62896    | 9776.577  | 9368.596  | NM_000107 | 6096.629  | 8696.026  |
| BC012782  | 2948.682 | 3493.566 | NM_017736 | 2059.466  | 1855.63   | AL157445  | 2337.645  | 3977.601  |
| AF132026  | 62925.93 | 55856.27 | NM_000390 | 2238.225  | 2275.639  | NM_001517 | 11594.817 | 14404.78  |
| AL050353  | 5025.996 | 4265.593 | NM_000313 | 354.804   | 544.619   | NM_005053 | 3523.451  | 4661.139  |
| AB037788  | 16910.2  | 13657.33 | NM_001498 | 36727.574 | 33031.504 | D86974    | 3453.65   | 3993.793  |
| NM_004587 | 6040.292 | 3172.762 | AF263523  | 1696.946  | 2018.815  | NM_018283 | 4925.027  | 5042.141  |
| NM_000975 | 66118.18 | 60724.94 | L08441    | 12707.945 | 9939.913  | NM_001983 | 2462.383  | 4684.484  |
| AF147412  | 9570.435 | 7416.72  | AA641953  | 2927.965  | 2406.588  | NM_004993 | 703.597   | 916.102   |
| AK024570  | 23769.05 | 20788.37 | AI248827  | 5496.216  | 8773.567  | NM_001793 | 15416.746 | 11967.401 |
| AF161401  | 18059.29 | 16081.67 | R45026    | 4660.163  | 8315.404  | NM_001943 | 2813.395  | 2511.938  |
| NM_000990 | 19408.57 | 18129.27 | BI768063  | 299.389   | 746.036   | NM_004927 | 6738.252  | 5222.93   |
| NM_014740 | 13671.98 | 12953.14 | BG386057  | 2741.396  | 2430.908  | AB040928  | 469.844   | 538.998   |
| NM_015956 | 18395.57 | 18898.25 | AI970239  | 3635.128  | 4437.137  | NM_001459 | 2184.683  | 2957.767  |
| AF075008  | 4477.896 | 2560.09  | AA496452  | 3974.03   | 3488.938  | NM_015513 | 7923.745  | 9054.031  |
| NM_006504 | 4134.976 | 2569.473 | X67594    | 2190.906  | 1960.804  | NM_006219 | 5181.971  | 6158.592  |
| AF070538  | 1037.566 | 897.435  | BC008837  | 458.683   | 414.118   | NM_004443 | 3534.717  | 4357.422  |
| AL137430  | 1174.94  | 828.44   | NM_001631 | 1062.582  | 986.16    | NM_001932 | 364.096   | 699.004   |
| NM_000696 | 14445.55 | 10940.9  | AB000734  | 2223.851  | 2126.217  | NM_017412 | 1336.4    | 2232.174  |
| NM_002488 | 34744.66 | 28825.41 | NM_005987 | 53568.109 | 70410.172 | NM_005544 | 543.51    | 694.336   |
| NM_004003 | 3879.319 | 2920.902 | X87838    | 3470      | 3819.854  | NM_002964 | 19151.057 | 22458.986 |
| NM_000188 | 3890.229 | 2800.472 | NM_007161 | 10242.743 | 8780.288  | NM_003215 | 526.212   | 693.382   |
| BF244401  | 1680.634 | 1541.96  | NM_014387 | 20420.797 | 12609.729 | NM_016447 | 1115.297  | 2306.363  |
| NM_004718 | 40155.33 | 28863.88 | NM_003641 | 4131.806  | 3306.478  | NM_015626 | 7779.222  | 10406.223 |
| AL359585  | 4447.452 | 2740.18  | NM_012463 | 1897.779  | 1569.899  | NM_004899 | 4551.952  | 6323.682  |
| AB046850  | 3529.899 | 1989.051 | L29140    | 17595.09  | 16866.656 | AB006628  | 13563.863 | 19360.125 |
| NM_014801 | 1264.502 | 934.026  | AK026448  | 5408.73   | 3235.056  | AF272036  | 14164.658 | 14373.292 |
| NM_003642 | 14606.13 | 6335.376 | AK057418  | 3159.708  | 3157.54   | AF231023  | 6205.523  | 6957.51   |
| BF185480  | 3845.692 | 2636.536 | L37199    | 443.856   | 536.497   | NM_005148 | 4023.016  | 4953.984  |
| NM_002128 | 27791.79 | 17160.3  | NM_007260 | 1963.757  | 2128.92   | NM_004746 | 1074.552  | 1698.271  |
| NM_003074 | 4354.953 | 2714.758 | AF148646  | 5166.016  | 5959.965  | AF146019  | 10313.871 | 11165.764 |
| AL360195  | 1301.04  | 1036.715 | AL110218  | 1200.416  | 1078.94   | Z36782    | 8028.756  | 7550.462  |
| U14383    | 849.466  | 752.759  | AB023201  | 2699.193  | 3453.886  | M70435    | 693.674   | 966.579   |
| NM_017810 | 4127.297 | 4215.438 | X00094    | 937.978   | 1453.782  | NM_003490 | 17778.877 | 24390.609 |
| NM_003181 | 50687.48 | 50744.47 | NM_003775 | 1444.637  | 1949.846  | AF210651  | 796.707   | 555.15    |
| NM_004451 | 3156.853 | 3859.176 | NM_002082 | 9295.927  | 10061.372 | AF090942  | 716.741   | 564.803   |
| NM_004364 | 460.88   | 1498.973 | NM_002922 | 1695.132  | 1506.882  | AF508940  | 2395.684  | 1345.67   |
| NM_014951 | 354.533  | 967.495  | AF155657  | 15608.648 | 14187.19  | NM_020237 | 924.452   | 661.065   |
| AK023505  | 2931.485 | 3007.297 | NM_006056 | 2588.341  | 2702.57   | AF130051  | 684.329   | 469.079   |
| AB037851  | 6786.687 | 7559.929 | AF045229  | 9996.991  | 9257.949  | M25753    | 19362.559 | 11542.587 |
| AL050389  | 6775.41  | 5538.849 | NM_001840 | 6022.087  | 6371.925  | NM_003883 | 3127.832  | 2320.471  |
| AK025855  | 2195.275 | 1328.212 | AK025099  | 3513.249  | 3009.522  | NM_014929 | 2598.488  | 1627.068  |
| AK024684  | 1850.951 | 1272.173 | NM_016099 | 21494.357 | 22170.391 | NM_004203 | 8894.872  | 5331.582  |
| NM_014945 | 14276.63 | 13126.96 | NM_000394 | 485.043   | 643.872   | NM_001951 | 1939.219  | 1406.19   |
| AK001546  | 1560.451 | 1113.341 | NM_000228 | 545.039   | 669.859   | NM_002391 | 2289.789  | 1423.022  |
| NM_006537 | 7479.165 | 6143.609 | NM_000830 | 1481.149  | 1576.969  | NM_003674 | 31073.842 | 32020.908 |
| AF007155  | 12553.62 | 10969.57 | NM_018658 | 6274.994  | 6407.459  | NM_001197 | 2687.769  | 3728.548  |
| AL049282  | 7085.565 | 4449.209 | NM_005136 | 529.007   | 543.986   | NM_006682 | 1021.498  | 1809.111  |
| AK021443  | 7491.733 | 3069.038 | AK094513  | 607.654   | 634.239   | NM_006410 | 435.069   | 955.199   |
| AF070569  | 998.961  | 1089.02  | NM_001183 | 7485.105  | 9902.854  | NM_014977 | 47020.941 | 56717.531 |
| NM_020233 | 3364.587 | 3092.838 | NM_000890 | 1513.547  | 1257.881  | AK026325  | 2320.753  | 3427.029  |
| AL355732  | 3259.355 | 2790.002 | NM_004976 | 13233.186 | 14088.15  | U83857    | 907.656   | 1121.331  |
| NM_017966 | 3761.684 | 2675.407 | AK021597  | 1207.176  | 1358.241  | NM_001230 | 2475.559  | 2790.798  |
| AF143327  | 1549.608 | 1163.895 | NM_005737 | 31306.664 | 33855.777 | AK025662  | 3584.872  | 4055.508  |

|           |          |          |           |           |           |           |           |           |
|-----------|----------|----------|-----------|-----------|-----------|-----------|-----------|-----------|
| AL137535  | 571.022  | 524.708  | NM_006803 | 2283.393  | 2676.752  | NM_000201 | 2134.644  | 2866.708  |
| AL049990  | 1691.496 | 1508.338 | NM_002533 | 1823.709  | 1597.739  | AB011539  | 964.087   | 1530.347  |
| AF131843  | 1578.736 | 1117.856 | AF235022  | 733.343   | 713.366   | U37028    | 1550.11   | 2304.569  |
| AK026653  | 2260.901 | 2118.957 | AL137764  | 12085.755 | 12825.379 | AB014597  | 2792.004  | 3831.724  |
| NM_020231 | 2113.813 | 1732.217 | NM_001660 | 12993.388 | 22165.932 | S81361    | 354.065   | 403.014   |
| AL133118  | 2491.119 | 1862.527 | NM_000752 | 1665.182  | 1907.623  | AK024313  | 4144.073  | 2162.979  |
| AK023571  | 874.764  | 775.883  | NM_002018 | 8324.34   | 8780.81   | NM_003891 | 2319.241  | 1372.385  |
| AF052148  | 877.097  | 1009.622 | NM_006018 | 458.502   | 443.16    | AL359575  | 361.161   | 246.219   |
| AF131783  | 752.694  | 844.128  | AF161383  | 6723.591  | 6478.289  | NM_002022 | 406.12    | 223.717   |
| NM_001702 | 4390.446 | 5685.263 | NM_000410 | 9703.157  | 11541.774 | NM_015524 | 5410.854  | 1776.143  |
| AK026657  | 3479.563 | 4339.391 | AF224266  | 2515.393  | 2461.357  | NM_001673 | 6491.927  | 5054.954  |
| AL833558  | 561.64   | 892.358  | U72882    | 10528.454 | 12267.574 | AK023167  | 513.754   | 315.154   |
| NM_018050 | 721.097  | 906.907  | NM_014337 | 8154.03   | 9713.814  | NM_016510 | 3276.217  | 2400.994  |
| AF087991  | 23725.2  | 23434.3  | NM_003384 | 12279.777 | 11703.503 | NM_014270 | 1761.355  | 1718.146  |
| AJ227884  | 567.97   | 674.947  | Y12337    | 1132.462  | 914.55    | NM_000071 | 2689.214  | 2461.811  |
| X64986    | 1315.62  | 1007.507 | M29551    | 9894.17   | 9882.138  | NM_006843 | 1733.968  | 1774.071  |
| Y10510    | 643.671  | 489.221  | AB023148  | 583.295   | 848.185   | NM_004321 | 2182.5    | 2822.913  |
| L38282    | 1429.455 | 1124.585 | NM_002929 | 1541.178  | 1594.557  | AF311212  | 5149.678  | 5207.337  |
| NM_018050 | 6341.26  | 5083.142 | BC028375  | 2248.396  | 2255.602  | NM_006915 | 1993.137  | 1992.738  |
| NM_019008 | 3461.428 | 2687.085 | AB026436  | 3689.714  | 4261.931  | NM_006035 | 1456.941  | 1670.053  |
| M20838    | 890.022  | 989.851  | NM_016029 | 8878.603  | 7361.542  | NM_006086 | 7959.399  | 6679.339  |
| AK022738  | 1738.919 | 1258.985 | AK024562  | 1852.616  | 1894.172  | NM_004520 | 8179.195  | 5558.222  |
| AK024252  | 1209.567 | 1758.236 | NM_014066 | 1467.87   | 1483.463  | AK027118  | 11125.065 | 8936.01   |
| AK002095  | 870.424  | 1314.535 | NM_004573 | 2461.808  | 3493.74   | AK022882  | 14256.831 | 13727.409 |
| AL080182  | 826.3    | 682.02   | NM_000072 | 951.079   | 875.956   | NM_006105 | 2713.779  | 3910.898  |
| AK000821  | 6245.222 | 5021.532 | NM_000697 | 2711.265  | 3466.652  | NM_005981 | 550.045   | 809.25    |
| AK024526  | 3690.808 | 3493.598 | AL122054  | 2605.475  | 2567.574  | NM_000474 | 372.423   | 518.348   |
| AK023307  | 453.988  | 634.269  | AB011182  | 1600.46   | 1488.414  | NM_016264 | 1096.194  | 761.588   |
| NM_017618 | 1131.95  | 1023.002 | AB023151  | 536.684   | 612.327   | NM_006079 | 14061.484 | 5623.734  |
| NM_017848 | 603.978  | 765.372  | NM_000140 | 7723.237  | 8189.604  | AB037837  | 1332.275  | 960.506   |
| AK024315  | 11339.01 | 10673.09 | NM_005125 | 4179.693  | 4553.497  | NM_014595 | 6065.072  | 2915.767  |
| AK024579  | 1658.958 | 1872.754 | NM_020038 | 1074.624  | 1155.998  | NM_014789 | 908.827   | 487.349   |
| S75708    | 6150.866 | 5261.048 | NM_016246 | 2268.893  | 2313.885  | AB046784  | 1256.879  | 611.591   |
| U79291    | 11829.91 | 10996.9  | NM_015926 | 10764.856 | 10707.965 | X52402    | 1737.089  | 808.315   |
| D17172    | 18643.75 | 28684.48 | X03757    | 6458.281  | 6677.906  | AL133663  | 848.155   | 384.643   |
| AJ227859  | 1543.025 | 1882.831 | NM_002902 | 8776.092  | 11230.433 | NM_004992 | 1197.576  | 721.476   |
| AK022670  | 666.231  | 980.737  | NM_020248 | 14624.973 | 12499.614 | NM_014462 | 2117.311  | 1374.467  |
| AB020699  | 6292.586 | 7732.416 | X89670    | 875.734   | 829.567   | NM_014156 | 50501.215 | 40481.586 |
| AF086269  | 1753.277 | 1748.277 | NM_004053 | 4602.314  | 8852.545  | NM_003137 | 5969.408  | 3388.479  |
| U90437    | 13433.76 | 13080.22 | NM_001489 | 1897.892  | 1813.087  | NM_006938 | 36400.184 | 22896.186 |
| S71604    | 662.682  | 910.372  | M20259    | 472.922   | 350.88    | NM_004515 | 665.368   | 569.501   |
| AK000842  | 9991.491 | 11698.87 | NM_020374 | 2572.582  | 3831.324  | NM_020158 | 2835.09   | 2162.97   |
| AK023386  | 7506.485 | 7095.281 | NM_014922 | 1696.468  | 1841.021  | AF176085  | 2417.248  | 1673.091  |
| NM_007053 | 23680.65 | 30164.63 | NM_000169 | 6052.372  | 5452.728  | NM_006985 | 10748.343 | 7585.613  |
| AK022789  | 871.1    | 536.044  | NM_005329 | 1808.142  | 1724.402  | AF265228  | 2447.146  | 1957.659  |
| AK023756  | 1144.735 | 1028.578 | NM_000107 | 4331.398  | 5446.016  | NM_003757 | 34525.801 | 22166.455 |
| NM_001126 | 6792.875 | 6589.795 | AL157445  | 2048.771  | 1949.193  | AK025561  | 4610.529  | 3006.164  |
| AK023673  | 5718.269 | 5864.515 | NM_001517 | 11100.067 | 9016.916  | NM_018602 | 21701.881 | 12400.503 |
| NM_018252 | 6595.22  | 7619.958 | NM_005053 | 4138.142  | 4115.526  | NM_004096 | 3942.5    | 3296.269  |
| NM_018000 | 14573.78 | 17536.16 | D86974    | 4686.912  | 4563.416  | NM_017629 | 5588.37   | 3643.823  |
| AF164963  | 647.371  | 968.481  | NM_018283 | 4108.675  | 4092.119  | AL049681  | 1315.828  | 1267.931  |
| AF124366  | 26877.99 | 33229.71 | NM_001983 | 2851.393  | 2331.148  | NM_006584 | 702.057   | 778.281   |
| AF130112  | 1609.69  | 1783.176 | NM_004993 | 672.15    | 678.744   | AF052181  | 2455.273  | 4372.862  |



|           |          |          |           |           |           |           |           |           |
|-----------|----------|----------|-----------|-----------|-----------|-----------|-----------|-----------|
| NM_000551 | 6946.711 | 9809.423 | NM_001793 | 15922.601 | 27114.414 | AL050074  | 4002.442  | 2908.985  |
| AL365518  | 2202.375 | 2441.778 | NM_001943 | 3054.881  | 2548.495  | AK026436  | 668.777   | 389.444   |
| AF086257  | 3996.47  | 3898.973 | NM_004927 | 6026.905  | 5569.646  | NM_018061 | 1959.684  | 900.428   |
| AC119751  | 887.706  | 725.135  | AB040928  | 590.805   | 665.615   | AK023059  | 759.644   | 419.28    |
| U00928    | 737.745  | 1064.616 | NM_001459 | 2414.897  | 1418.904  | NM_003551 | 2183.387  | 971.489   |
| NM_019056 | 6156.136 | 5622.829 | NM_015513 | 8140.875  | 7210.664  | AF305210  | 302.874   | 250.07    |
| AF279783  | 2932.775 | 2917.795 | NM_006219 | 4259.53   | 3865.251  | AK021900  | 2169.831  | 997.899   |
| AF182422  | 15738.99 | 15520.17 | NM_004443 | 4096.167  | 3411.91   | NM_002764 | 8676.391  | 4178.78   |
| AF070602  | 876.957  | 880.457  | NM_017412 | 1915.846  | 1362.723  | NM_015455 | 36076.191 | 19693.193 |
| BE393290  | 2450.218 | 2627.364 | NM_005544 | 578.864   | 497.47    | AF024702  | 9234.188  | 6079.117  |
| NM_017622 | 3120.576 | 3296.534 | NM_002964 | 21059.826 | 23484.424 | NM_001964 | 2178.697  | 1572.235  |
| AF133331  | 11349.53 | 10296.61 | NM_016447 | 1288.489  | 1269.291  | NM_005962 | 5595.923  | 3386.619  |
| AK022289  | 1526.84  | 1637.637 | NM_004899 | 3895.254  | 4219.435  | X74864    | 2863.947  | 2073.693  |
| AF161403  | 1594.091 | 1894.556 | AB006628  | 14269.099 | 13413.998 | AK026804  | 3243.057  | 2841.635  |
| NM_020183 | 5888.139 | 5313.802 | AF272036  | 9630.202  | 10023.961 | NM_016170 | 6909.286  | 6619.133  |
| NM_018029 | 1192.915 | 1504.616 | AF231023  | 3840.856  | 4769.837  | NM_006166 | 3002.573  | 1984.447  |
| AL389954  | 1185.449 | 1515.288 | NM_005148 | 2944.688  | 2763.495  | S72620    | 29071.209 | 16632.387 |
| NM_019852 | 2672.526 | 2570.599 | NM_004746 | 1067.983  | 1175.219  | NM_005263 | 8616.169  | 6189.731  |
| NM_006118 | 9080.517 | 4151.108 | AF146019  | 8506.259  | 8924.036  | AB033022  | 2961.364  | 2203.514  |
| AK026225  | 36059.98 | 40184.48 | Z36782    | 5875.545  | 6048.151  | AF147397  | 1103.3    | 1212.295  |
| AL050032  | 1612.423 | 1828.831 | M70435    | 717.035   | 676.057   | AK027158  | 781.961   | 606.724   |
| AF009304  | 1414.919 | 1725.396 | NM_003490 | 19808.662 | 21004.945 | AF085836  | 1286.701  | 650.755   |
| AF086177  | 14929.05 | 15921.99 | AF210651  | 931.898   | 886.874   | AL049449  | 728.563   | 526.36    |
| NM_018949 | 827.976  | 1252.834 | AF090942  | 955.251   | 661.566   | AL359654  | 469.445   | 247.489   |
| D17187    | 3114.241 | 2724.942 | AF508940  | 1913.019  | 2153.39   | AK024224  | 4491.495  | 1297.362  |
| AJ243672  | 1177.153 | 1081.513 | NM_020237 | 986.977   | 969.425   | NM_015362 | 12652.619 | 4317.512  |
| AL122087  | 1073.62  | 1258.05  | AF130051  | 607.144   | 558.501   | AF147344  | 562.293   | 556.066   |
| D17169    | 53866.3  | 45289.32 | M25753    | 16540.518 | 15132.13  | AF147371  | 701.721   | 509.125   |
| NM_017924 | 10702.98 | 12238.45 | NM_003883 | 4005.383  | 3624.533  | NM_018982 | 4480.575  | 3497.861  |
| NM_017546 | 8869.351 | 9432.913 | NM_014929 | 2910.342  | 2561.071  | AF086254  | 3766.227  | 3968.392  |
| AL137400  | 3607.004 | 1679.146 | NM_004203 | 10696.484 | 8872.374  | AF086261  | 842.046   | 1040.284  |
| NM_006511 | 1371.276 | 1456.649 | NM_001951 | 2283.454  | 1965.425  | AF086367  | 1538.728  | 1176.16   |
| AF007142  | 2800.003 | 2905.209 | NM_002391 | 2639.091  | 2281.563  | AF086437  | 1001.146  | 579.791   |
| AF119853  | 2362.812 | 2233.514 | NM_003674 | 39217.629 | 39436.094 | AK025088  | 4231.66   | 2823.473  |
| CY3Cy5    | 2922.725 | 157.563  | NM_001197 | 2898.507  | 2938.378  | U79295    | 756.282   | 537.02    |
| AI248827  | 6864.955 | 6913.122 | NM_006410 | 965.163   | 476.512   | AK002107  | 427.022   | 427.568   |
| R45026    | 1639.568 | 1692.949 | NM_014977 | 46713.055 | 54340.285 | NM_003596 | 2186.715  | 2264.727  |
| AI970239  | 3465.683 | 2082.758 | AK026325  | 2178.429  | 2310.04   | NM_018838 | 5967.247  | 3408.59   |
| AA496452  | 5510.324 | 6982.346 | U83857    | 1004.511  | 1147.862  | AF075083  | 403.065   | 228.89    |
| X67594    | 1050.35  | 1289.827 | NM_001230 | 1915.261  | 1803.079  | AK021454  | 1816.368  | 847.619   |
| NM_001631 | 670.585  | 1037.792 | AK025662  | 2720.59   | 2811.308  | AK022069  | 1251.78   | 971.898   |
| AB000734  | 862.061  | 917.884  | NM_000201 | 1852.744  | 1935.546  | AF085944  | 852.045   | 293.586   |
| NM_005987 | 67766.93 | 59648.03 | AB011539  | 1458.138  | 1018.643  | AL133038  | 995.455   | 289.602   |
| X87838    | 3849.112 | 3842.417 | U37028    | 1958.965  | 1910.777  | AL137414  | 1081.693  | 365.258   |
| NM_033199 | 2032.235 | 1937.344 | AB014597  | 2351.511  | 2849.393  | AL359574  | 1468.906  | 902.789   |
| NM_015001 | 2398.427 | 2059.728 | S81361    | 470.58    | 627.278   | AL133569  | 4224.04   | 2756.927  |
| SR2       | 49005.9  | 30901.6  | AK024313  | 4909.569  | 4086.267  | AL137435  | 471.102   | 574.714   |
| SR4       | 13524.03 | 7704.246 | NM_003891 | 1806.553  | 1494.458  | AL157463  | 752.697   | 1000.583  |
| SR6       | 1858.823 | 1111.782 | AL359575  | 671.635   | 463.429   | AL359604  | 543.309   | 479.843   |
| SR8       | 8378.516 | 19434.89 | NM_002022 | 514.703   | 817.632   | AK027189  | 1664.262  | 1313.163  |
| SR10      | 24898.59 | 4512.09  | NM_015524 | 3280.723  | 5453.709  | AF088014  | 313.436   | 486.757   |
| CY3Cy5    | 1337.543 | 120.944  | NM_001673 | 8022.806  | 5048.383  | AL109719  | 1043.678  | 898.762   |
| X00094    | 935.582  | 596.072  | AK023167  | 386.543   | 996.859   | AF086093  | 1002.017  | 1042.49   |

|           |          |          |           |           |           |           |           |           |
|-----------|----------|----------|-----------|-----------|-----------|-----------|-----------|-----------|
| NM_003775 | 329.883  | 484.119  | NM_016510 | 3496.127  | 3222.039  | U92022    | 816.559   | 761.152   |
| NM_002082 | 1791.794 | 1708.026 | NM_014270 | 2350.74   | 2703.94   | NM_003650 | 13531.021 | 9377.298  |
| AF155657  | 15944.07 | 17942.96 | NM_000071 | 2732.183  | 2267.019  | AK022119  | 2827.101  | 2158.411  |
| NM_006050 | 1327.927 | 1393.543 | NM_004321 | 2649.476  | 2768.097  | NM_016644 | 1225.051  | 988.424   |
| AF045229  | 11979.21 | 13977.68 | AF311212  | 6141.337  | 5764.885  | AF085842  | 370.889   | 358.488   |
| NM_001840 | 8127.875 | 9298.526 | NM_006915 | 1812.085  | 2484.308  | AK026750  | 1952.438  | 1019.822  |
| AK025099  | 3933.692 | 5855.623 | NM_006035 | 1701.099  | 1694.446  | AF072164  | 1553.626  | 600.529   |
| NM_016090 | 9354.728 | 10970.64 | NM_006080 | 10111.853 | 8597.627  | NM_018610 | 477.225   | 315.203   |
| NM_000394 | 395.932  | 543.123  | NM_004520 | 8263.37   | 8967.93   | AF083122  | 342.727   | 256.741   |
| NM_000830 | 1417.313 | 2434.39  | AK027118  | 10063.284 | 10623.677 | AF232216  | 491.738   | 255.191   |
| AF148950  | 266.903  | 982.702  | AK022882  | 14329.274 | 15010.809 | NM_017773 | 2648.391  | 944.489   |
| NM_001155 | 10895.42 | 10166.13 | NM_006105 | 3313.087  | 3402.732  | AK021885  | 290.905   | 162.904   |
| M62896    | 3409.993 | 3529.874 | NM_005981 | 655.797   | 828.599   | AK022296  | 590.65    | 506.217   |
| NM_017730 | 2092.156 | 1611.875 | NM_000474 | 341.112   | 295.929   | AK021940  | 1020.639  | 919.577   |
| NM_000390 | 858.71   | 1640.398 | NM_016264 | 1035.741  | 747.957   | AK022189  | 629.785   | 636.73    |
| NM_001490 | 8665.397 | 7788.073 | NM_006070 | 11340.779 | 9995.763  | AK022338  | 523.039   | 696.406   |
| AF263523  | 1642.329 | 1322.983 | AB037837  | 1702.895  | 1666.318  | AK026856  | 849.845   | 1258.759  |
| L08441    | 12303.67 | 8929.578 | NM_014590 | 6272.062  | 5477.908  | AL162033  | 2020.896  | 2028.134  |
| AA641953  | 2826.723 | 2538.024 | NM_014780 | 1223.672  | 871.458   | NM_005001 | 21707.75  | 6547.642  |
| AL137764  | 7851.505 | 10750.14 | AB046784  | 1509.18   | 1386.497  | AK024175  | 4848.199  | 2116.015  |
| NM_001660 | 16582.76 | 15815.42 | X52402    | 2950.37   | 2805.559  | NM_000510 | 1849.852  | 562.455   |
| NM_000710 | 623.06   | 475.236  | AL133663  | 1332.495  | 956.631   | BE067520  | 1111.135  | 318.879   |
| NM_000752 | 2473.361 | 1694.529 | NM_004992 | 1455.647  | 1308.581  | NM_017787 | 3726.096  | 3676.007  |
| AB040945  | 633.51   | 670.418  | NM_014462 | 2254.351  | 2012.917  | NM_020315 | 8033.322  | 4070.824  |
| NM_002010 | 3987.356 | 6029.07  | NM_014150 | 49507.23  | 60189.953 | AK001910  | 1136.989  | 898.57    |
| NM_002377 | 528.948  | 727.069  | NM_003137 | 5384.75   | 5530.823  | AK023892  | 471.299   | 387.18    |
| NM_006010 | 548.508  | 720.567  | NM_006930 | 37114.465 | 33707.641 | AF124368  | 812.497   | 1015.264  |
| AF161383  | 12798.9  | 13054.59 | AF265228  | 1924.224  | 2230.126  | AF265210  | 1581.398  | 1348.105  |
| NM_003494 | 474.221  | 471.096  | NM_003757 | 32568.258 | 28746.482 | AK024241  | 1449.161  | 1403.132  |
| NM_000410 | 9231.036 | 11257.66 | AK025561  | 3928.071  | 4061.053  | AK025061  | 1325.395  | 1034.247  |
| U72882    | 3164.395 | 3192.182 | NM_018602 | 28702.418 | 29123.689 | AF088067  | 5651.518  | 2777.496  |
| NM_014337 | 7157.109 | 7728.209 | NM_004090 | 4944.125  | 3776.427  | AK022213  | 237.356   | 286.979   |
| NM_007161 | 7737.027 | 8985.578 | NM_017620 | 6749.073  | 6152.223  | Y10509    | 1041.512  | 3225.243  |
| NM_014387 | 17896.63 | 31260.44 | AL049681  | 1764.793  | 1608.398  | AK024389  | 7673.969  | 16375.53  |
| NM_003641 | 2285.892 | 3918.85  | NM_006584 | 829.82    | 801.421   | AK026793  | 1453.325  | 2604.038  |
| L29140    | 6303.353 | 6808.237 | AF052181  | 2764.848  | 2825.791  | NM_001672 | 542.113   | 946.468   |
| AK026448  | 3498.174 | 5120.197 | AL050074  | 5464.476  | 5823.001  | AJ276253  | 21121.494 | 28759.045 |
| AK057418  | 4687.831 | 3323.859 | AK026436  | 834.993   | 650.561   | AF147314  | 810.033   | 1158.676  |
| NM_007260 | 3454.492 | 2800.891 | NM_018061 | 1733.876  | 2071.712  | NM_018980 | 2331.012  | 3514.207  |
| AF148646  | 6434.356 | 4325.257 | AK023059  | 925.546   | 472.716   | AF086201  | 1542.078  | 1945.915  |
| AL110218  | 1156.007 | 706.878  | NM_003551 | 2008.934  | 2134.194  | AK024712  | 1091.061  | 877.121   |
| AB023201  | 2332.166 | 1715.245 | AK021900  | 2487.254  | 1943.498  | U48696    | 1221.03   | 1571.119  |
| NM_000072 | 1051.017 | 1155.04  | NM_002764 | 10101.565 | 9176.398  | AF230316  | 5750.79   | 4012.45   |
| NM_000697 | 1334.666 | 2092.305 | NM_015450 | 29811.551 | 26799.305 | K00629    | 386.047   | 321.011   |
| NM_000017 | 5788.125 | 7010.713 | AF024702  | 14169.346 | 14108.668 | AK024515  | 4690.366  | 4836.169  |
| NM_000237 | 736.702  | 766.06   | NM_001964 | 1686.876  | 2645.053  | AF085862  | 3946.722  | 4211.301  |
| NM_018340 | 7874.702 | 8376.808 | NM_005962 | 4486.479  | 4840.369  | NM_017990 | 1583.207  | 1681.994  |
| AB011182  | 1943.702 | 2828.48  | NM_016170 | 8956.433  | 8220.722  | AL049271  | 43843.039 | 31262.264 |
| AB023151  | 649.145  | 1085.391 | NM_006160 | 2703.377  | 2377.881  | AK023079  | 26276.4   | 18129.527 |
| NM_000140 | 7217.521 | 9238.372 | S72620    | 33984.391 | 30376.143 | NM_019600 | 1941.357  | 1557.81   |
| NM_005120 | 3173.37  | 4529.953 | NM_016831 | 675.148   | 680.025   | AK026198  | 2171.512  | 1858.222  |
| NM_016240 | 827.111  | 986.302  | S73501    | 587.269   | 523.129   | AF183570  | 638.139   | 739.425   |
| NM_015920 | 1755.809 | 1839.821 | NM_005263 | 11300.489 | 11861.647 | NM_005497 | 18426.293 | 13603.93  |

|           |          |          |           |           |           |           |           |           |
|-----------|----------|----------|-----------|-----------|-----------|-----------|-----------|-----------|
| X03757    | 3185.182 | 2902.527 | AB033022  | 4661.551  | 4432.507  | NM_005912 | 1476.846  | 2507.971  |
| NM_01865E | 1261.889 | 1352.319 | AF147397  | 1025.609  | 1351.984  | NM_00590E | 32877.578 | 58331.98  |
| NM_00513E | 874.256  | 766.871  | AK027158  | 932.354   | 1309.357  | AK021879  | 305.812   | 683.484   |
| AK094513  | 576.583  | 659.608  | AK002187  | 801.241   | 1188.766  | AK055991  | 1529.482  | 2595.848  |
| NM_00089C | 499.527  | 1001.775 | AF085836  | 1877.733  | 1967.477  | AF113697  | 652.985   | 1198.785  |
| NM_00497E | 20781.11 | 18924.1  | AL049449  | 1273.844  | 1256.99   | AK022326  | 1728.247  | 1814.385  |
| AK021597  | 1447.028 | 1209.097 | AF147347  | 420.439   | 570.06    | AF085991  | 1147.046  | 1047.926  |
| NM_005737 | 34594.76 | 23447.44 | AL359654  | 1466.463  | 998.588   | NM_00568E | 1442.435  | 985.789   |
| NM_00680E | 1601.385 | 1234.612 | AK024224  | 4883.427  | 10239.134 | NM_020427 | 13624.314 | 9078.358  |
| NM_00253E | 1798.046 | 1442.013 | NM_01536E | 14200.782 | 14268.355 | AF085920  | 946.982   | 1274.17   |
| AF235022  | 951.854  | 580.522  | AF147344  | 1031.841  | 823.337   | AK023173  | 10100.574 | 11151.762 |
| AF182814  | 5742.153 | 5766.686 | AF147371  | 995.801   | 964.573   | AK025225  | 350.263   | 645.778   |
| NM_00532E | 608.833  | 1106.092 | AK023745  | 608.571   | 774.624   | U79275    | 5210.212  | 3836.822  |
| NM_000107 | 6005.041 | 8462.715 | NM_01898E | 4555.858  | 5079.622  | AJ227908  | 595.054   | 679.534   |
| AL157445  | 988.721  | 1519.908 | AF086254  | 4474.837  | 4758.699  | AF007193  | 777.698   | 754.279   |
| NM_001517 | 3189.594 | 5507.622 | AF086261  | 1011.987  | 802.294   | AK022367  | 1317.337  | 1241.704  |
| NM_00505E | 628.391  | 643.971  | AF086367  | 1697.365  | 1597.981  | BC028589  | 1742.585  | 1551.734  |
| D86974    | 3454.406 | 3304.474 | AF086437  | 1257.284  | 1388.802  | CY3Cy5    | 1140.188  | 144.539   |
| NM_01828E | 4024.205 | 3802.665 | AK025088  | 4476.716  | 4948.969  | K02765    | 732.711   | 721.239   |
| NM_00198E | 2602.426 | 3846.101 | U79295    | 1194.283  | 1444.098  | M65134    | 937.095   | 461.047   |
| NM_00499E | 708.617  | 625.775  | NM_00359E | 3397.839  | 3570.169  | BG539651  | 918.18    | 820.506   |
| M29551    | 5038.855 | 5527.558 | NM_01883E | 6288.501  | 9413.146  | N52646    | 10305.804 | 7601.099  |
| NM_00292E | 2028.661 | 2776.022 | AF075083  | 582.166   | 955.373   | AW160671  | 50081.637 | 25239.088 |
| BC028375  | 2190.562 | 2519.67  | AK021454  | 2476.177  | 3318.6    | BI870529  | 18749.992 | 8015.434  |
| AB026436  | 3947.448 | 3034.328 | AK022069  | 1991.276  | 2554.218  | AA702698  | 588.905   | 444.269   |
| NM_01602E | 9803.117 | 8298.692 | AL137457  | 1534.183  | 1854.361  | AI681514  | 470.016   | 340.45    |
| AK024562  | 1178.42  | 1074.767 | AF075092  | 404.101   | 859.307   | NM_00130C | 3332.007  | 1165.33   |
| NM_01406E | 1875.505 | 1749.047 | AF085944  | 1498.177  | 1723.516  | BG748827  | 2697.7    | 1840.825  |
| NM_00457E | 1286.719 | 1311.064 | AL133038  | 1549.041  | 2137.889  | AA952897  | 1641.437  | 896.7     |
| NM_00031E | 641.276  | 1252.834 | AL137414  | 1903.099  | 2367.878  | BG760342  | 3615.578  | 2924.501  |
| NM_00149E | 10598.11 | 17073.38 | AL359574  | 2559.752  | 3157.844  | AA703141  | 1827.179  | 1481.005  |
| AF263523  | 2203.579 | 3200.166 | AL133569  | 7412.826  | 10216.461 | AI122630  | 7108.814  | 6732.032  |
| L08441    | 15028.74 | 24782.56 | AL137435  | 697.418   | 731.98    | NM_00210E | 22994.039 | 46075.242 |
| AA641953  | 3432.013 | 6870.136 | AL157463  | 532.706   | 1104.302  | NM_00337E | 5622.928  | 5503.473  |
| AI248827  | 7785.994 | 10742.78 | AL359604  | 886.163   | 790.538   | SR1       | 55627.574 | 58375.008 |
| R45026    | 1951.895 | 2523.799 | AF088014  | 755.552   | 682.737   | SR3       | 45781.43  | 25108.637 |
| BI768063  | 472.993  | 521.168  | AL109719  | 1186.743  | 968.004   | SR5       | 5237.973  | 3772.346  |
| BG386057  | 1226.995 | 1216.289 | AF086093  | 1115.879  | 1506.351  | SR7       | 5377.154  | 29608.793 |
| AI970239  | 3461.34  | 2008.139 | U92022    | 1235.106  | 977.194   | SR9       | 17801.648 | 2216.509  |
| AA496452  | 5205.743 | 5723.871 | NM_00365C | 16634.572 | 15904.116 | CY3Cy5    | 2089.536  | 244.246   |
| X67594    | 1189.186 | 1267.31  | AK022119  | 5732.491  | 6007.95   | NM_01242E | 4473.004  | 3627.713  |
| BC008837  | 748.123  | 1040.568 | NM_016644 | 1406.953  | 1613.237  | NM_01326E | 325.624   | 244.014   |
| NM_001631 | 440.83   | 618.739  | AF085842  | 765.545   | 876.964   | NM_00172E | 3448.048  | 2880.968  |
| AB000734  | 730.8    | 755.788  | AK023882  | 550.812   | 480.495   | NM_00556E | 5679.231  | 3746.025  |
| NM_005987 | 65167.42 | 57821.74 | AK026750  | 1368.151  | 1239.461  | NM_003824 | 4291.377  | 3430.547  |
| X87838    | 3411     | 3901.554 | AF072164  | 1726.797  | 1416.965  | NM_00068E | 585.498   | 492.542   |
| NM_03319E | 1862.344 | 1998.081 | NM_01861C | 514.896   | 571.858   | NM_01245E | 1497.957  | 708.982   |
| NM_015001 | 2141.251 | 2107.041 | AK025234  | 548.473   | 431.526   | AF229166  | 519.371   | 557.467   |
| NM_00016E | 4033.148 | 2602.927 | AF083122  | 988.701   | 878.009   | NM_005137 | 1908.058  | 1053.224  |
| AF148646  | 8610.696 | 12826.16 | AF232216  | 1348.398  | 1505.446  | NM_006764 | 1042.55   | 740.672   |
| AL110218  | 1353.226 | 1961.676 | NM_01777E | 5216.94   | 5707.213  | NM_00138E | 455.421   | 579.867   |
| AB023201  | 2259.224 | 3436.018 | AK021885  | 858.623   | 1032.694  | NM_00116E | 907.43    | 524.56    |
| X00094    | 976.028  | 1044.309 | AK022018  | 469.617   | 533.001   | NM_00587E | 955.715   | 886.872   |

|           |          |          |           |           |           |           |           |           |
|-----------|----------|----------|-----------|-----------|-----------|-----------|-----------|-----------|
| NM_003775 | 366.33   | 758.966  | AK022161  | 695.308   | 1146.528  | AF308602  | 3122.225  | 2540.981  |
| NM_002082 | 1881.363 | 1955.807 | AK022296  | 1102.516  | 1206.585  | AB011089  | 1178.319  | 1381.47   |
| AF155657  | 16464.12 | 19556.05 | AK021940  | 3701.155  | 9845.597  | AF007192  | 314.045   | 583.808   |
| NM_006056 | 1074.789 | 1043.682 | AK022052  | 105.842   | 863.918   | NM_001276 | 5841.333  | 4561.604  |
| AF045229  | 11539.92 | 9939.906 | AK026856  | 1864.613  | 2643.199  | NM_016157 | 452.154   | 424.5     |
| NM_001840 | 7776.051 | 6801.151 | AL162033  | 4390.9    | 5357.471  | NM_014915 | 15562.683 | 16516.275 |
| AK025099  | 4049.279 | 3511.395 | AL162010  | 632.166   | 542.383   | NM_012286 | 1265.583  | 1523.185  |
| NM_016095 | 8964.297 | 7337.159 | AK026893  | 661.319   | 746.172   | NM_002195 | 5730.625  | 4749.731  |
| NM_000394 | 537.281  | 686.258  | AK026761  | 975.915   | 885.285   | D84294    | 2220.184  | 2324.042  |
| NM_000830 | 1277.055 | 1598.804 | NM_005001 | 21956.592 | 20201.596 | M31659    | 988.894   | 676.221   |
| NM_001155 | 9932.896 | 6650.824 | AK024175  | 4193.036  | 3900.14   | NM_003056 | 3739.558  | 2925.619  |
| M62896    | 3454.108 | 3043.236 | NM_000510 | 1197.415  | 1100.448  | NM_016226 | 13756.061 | 7691.674  |
| NM_017736 | 2072.841 | 1476.53  | NM_017787 | 2888.789  | 2572.294  | AK024311  | 580.982   | 850.894   |
| NM_000390 | 1260.07  | 1851.501 | NM_020315 | 9209.684  | 11416.582 | AF052155  | 5477.272  | 3916.938  |
| AL137764  | 7761.5   | 15864.18 | AK001910  | 2435.268  | 2769.968  | NM_005085 | 1179.139  | 780.909   |
| NM_001660 | 16448.9  | 18452.66 | AK023892  | 838.268   | 1150.937  | AF060902  | 1078.331  | 667.772   |
| NM_000710 | 512.257  | 753.736  | AF124368  | 1816.306  | 2601.984  | AF121858  | 3862.935  | 2422.688  |
| NM_000752 | 2463.352 | 2547.55  | AF265210  | 3022.981  | 3919.749  | NM_013437 | 3852.243  | 2244.682  |
| AB040945  | 508.783  | 464.724  | AK024241  | 1510.253  | 2190.196  | NM_017681 | 544.82    | 364.602   |
| NM_002018 | 4193.56  | 5579.169 | AK025061  | 2428.094  | 2994.094  | X57655    | 5238.487  | 3071.929  |
| NM_006018 | 533.01   | 623.05   | AF088067  | 6866.401  | 6055.256  | AK025966  | 1536.794  | 557.749   |
| AF161383  | 10794.01 | 9067.209 | AK022213  | 515.398   | 483.781   | NM_018725 | 440.47    | 426.012   |
| NM_003494 | 359.161  | 324.081  | AF056441  | 1847.279  | 1552.565  | NM_003081 | 13681.976 | 9424.068  |
| NM_000410 | 9716.644 | 10820.89 | AK024142  | 1196.861  | 1624.21   | NM_016495 | 6793.184  | 4642.105  |
| U72882    | 2711.277 | 2487.839 | Y10509    | 1043.452  | 1367.868  | D50402    | 13171.688 | 11151.477 |
| NM_014337 | 6117.988 | 5316.323 | AK024389  | 6654.009  | 6239.191  | M73547    | 5951.87   | 7756.366  |
| NM_007161 | 6398.122 | 5827.484 | AK026793  | 1871.164  | 1888.895  | NM_003687 | 860.556   | 864.235   |
| NM_014387 | 14847.14 | 18904.57 | NM_001672 | 772.127   | 641.671   | NM_004134 | 3776.241  | 2919.977  |
| NM_003641 | 2841.958 | 5641.562 | AJ276253  | 21664.051 | 20150.902 | NM_005955 | 1867.246  | 1745.019  |
| NM_012463 | 1822.505 | 1999.715 | AF147314  | 966.444   | 766.392   | NM_004048 | 684.816   | 741.793   |
| L29140    | 5294.28  | 3844.274 | NM_018980 | 3817.645  | 3264.929  | NM_001179 | 216.468   | 254.431   |
| AK026448  | 3845.548 | 4421.473 | AF086201  | 1765.685  | 1448.845  | NM_017765 | 8863.95   | 6657.272  |
| AB026436  | 4758.085 | 6407.449 | AK024712  | 994.238   | 1371.231  | NM_000428 | 521.712   | 363.625   |
| NM_016029 | 13076.71 | 19864.3  | U48696    | 1524.243  | 2290.454  | AB040967  | 717.645   | 621.714   |
| NM_004573 | 1628.103 | 2938.149 | AF230316  | 6912.881  | 6720.945  | NM_014721 | 732.283   | 407.833   |
| NM_000072 | 1308.161 | 1892.014 | AK024515  | 5838.66   | 4752.233  | AK026352  | 369.759   | 273.201   |
| NM_000697 | 1755.126 | 2746.732 | AF085862  | 5890.202  | 5157.629  | AL137705  | 1603.329  | 854.184   |
| NM_000017 | 6343.355 | 9636.156 | NM_017998 | 2609.134  | 1771.905  | NM_014848 | 290.84    | 478.484   |
| NM_000237 | 923.13   | 776.302  | AL049271  | 44179.102 | 41173.945 | BF217766  | 711.761   | 892.984   |
| NM_018346 | 8272.582 | 7884.99  | AK023079  | 31256.531 | 28658.643 | NM_000184 | 1182.561  | 1365.575  |
| AL122054  | 3066.946 | 2696.311 | NM_019609 | 2982.179  | 3000.705  | NM_016180 | 409.587   | 458.379   |
| AB011182  | 1683.437 | 1578.633 | AK026198  | 5178.441  | 4584.421  | NM_000112 | 556.287   | 570.249   |
| AB023151  | 581.411  | 476.372  | AF183570  | 1166.311  | 498.525   | NM_005827 | 5942.156  | 6832.46   |
| NM_000140 | 6051.592 | 4851.509 | NM_005497 | 14268.035 | 12920.178 | NM_003053 | 2056.929  | 2144.297  |
| NM_005125 | 2798.961 | 2512.792 | AK024048  | 4700.137  | 6052.521  | NM_003044 | 382.996   | 556.486   |
| NM_016246 | 931.36   | 1143.213 | AB033093  | 7247.988  | 11308.397 | NM_006672 | 3470.616  | 4016.52   |
| NM_015926 | 1679.71  | 1936.255 | NM_005912 | 875.063   | 992.661   | AB007875  | 595.702   | 891.662   |
| X03757    | 3115.075 | 2572.126 | NM_005909 | 26547.984 | 23000.908 | NM_014796 | 4259.196  | 2627.177  |
| NM_018658 | 1153.184 | 1289.622 | AK055991  | 1404.297  | 1162.973  | AL050288  | 19691.424 | 9911.203  |
| NM_001183 | 13920.74 | 12260.46 | AF113697  | 913.738   | 896.544   | NM_005040 | 2750.171  | 1558.901  |
| NM_004976 | 18339.4  | 11792.44 | AK022326  | 2406.789  | 2379.177  | NM_016391 | 6693.887  | 3239.174  |
| NM_033199 | 2403.194 | 3639.13  | AF085991  | 1506.306  | 1605.838  | AF075033  | 3658.785  | 1607.171  |
| NM_015001 | 2985.754 | 3453.403 | NM_005683 | 1740.823  | 2051.039  | D50911    | 7530.307  | 2603.693  |

|           |          |          |           |           |           |           |           |           |
|-----------|----------|----------|-----------|-----------|-----------|-----------|-----------|-----------|
| BE799167  | 489.534  | 541.568  | NM_020427 | 13332.862 | 14417.823 | AB011104  | 962.37    | 576.023   |
| AF182814  | 6351.032 | 6959.891 | AK025225  | 688.292   | 440.824   | AK024069  | 3344.192  | 2043.261  |
| NM_005329 | 771.477  | 919.278  | U79275    | 7392.254  | 6919.013  | NM_004582 | 16721.842 | 11083.353 |
| NM_000107 | 5055.993 | 4373.107 | AJ227908  | 776.522   | 917.231   | NM_015640 | 9790.942  | 8461.181  |
| AL157445  | 805.467  | 797.191  | AF007193  | 1128.407  | 1319.114  | AF233450  | 668.982   | 878.209   |
| NM_001517 | 2889.193 | 3276.563 | AK022367  | 1694.234  | 1689.701  | NM_016233 | 842.04    | 904.092   |
| NM_005053 | 568.353  | 490.11   | BC028589  | 2442.602  | 2396.718  | NM_000821 | 11919.715 | 19618.773 |
| D86974    | 3656.857 | 3494.079 | CY3Cy5    | 4216.902  | 317.948   | NM_003145 | 21665.527 | 17700.832 |
| NM_018283 | 4092.664 | 3226.186 | K02765    | 1757.366  | 2029.735  | NM_001632 | 1131.704  | 1358.374  |
| NM_001983 | 2558.512 | 3629.374 | M65134    | 671.908   | 816.884   | NM_012264 | 1377.177  | 1151.073  |
| M29551    | 4672.367 | 4183.077 | BG539651  | 1973.199  | 2384.879  | AF311312  | 1877.151  | 1466.8    |
| AB023148  | 803.873  | 791.804  | N52646    | 24312.668 | 27655.645 | NM_014915 | 13426.971 | 14816.57  |
| NM_002929 | 1152.178 | 839.502  | AA702698  | 2445.173  | 4276.327  | NM_012286 | 1235.282  | 1300.253  |
| BC028375  | 1885.713 | 1606.012 | AI681514  | 1360.791  | 3245.5    | NM_002195 | 5366.831  | 3608.637  |
| NM_001155 | 12007.52 | 11445.64 | NM_001300 | 4286.643  | 5761.324  | D84294    | 1989.624  | 1384.903  |
| NM_000313 | 656.967  | 747.488  | BG748827  | 5021.304  | 4373.202  | X59770    | 287.76    | 138.264   |
| NM_001498 | 10141.15 | 12717.78 | AA703141  | 2202.289  | 1564.78   | K02765    | 867.096   | 509.129   |
| AF263523  | 1911.393 | 2046.498 | SR9       | 16518.764 | 1653.387  | BG539651  | 740.733   | 469.45    |
| L08441    | 15019.47 | 14583.18 | CY3Cy5    | 2303.259  | 169.385   | N52646    | 9123.788  | 4008.909  |
| AA641953  | 3125.6   | 2842.771 | NM_012428 | 7641.299  | 11816.517 | AW160671  | 43558.832 | 13028.575 |
| AI248827  | 7548.723 | 6318.888 | NM_013269 | 753.652   | 2213.326  | BI870529  | 14205.199 | 3534.62   |
| R45026    | 1657.934 | 1322.07  | NM_001728 | 4717.04   | 4133.918  | AA702698  | 445.083   | 238.41    |
| AI970239  | 3022.757 | 1623.338 | NM_005565 | 8137.034  | 7435.516  | AI681514  | 348.71    | 190.37    |
| AA496452  | 4791.278 | 4753.544 | NM_003824 | 7136.594  | 7195.657  | NM_001300 | 3079.241  | 1445.154  |
| X67594    | 971.923  | 998.353  | NM_000686 | 1687.669  | 1903.302  | BG748827  | 3221.229  | 2648.543  |
| AB000734  | 679.87   | 605.512  | NM_012452 | 3638.871  | 4998.175  | AA952897  | 1489.333  | 1149.309  |
| NM_005987 | 59990.13 | 43946.74 | AF229166  | 1266.724  | 1509.994  | BG760342  | 4119.214  | 4285.057  |
| X87838    | 3596.478 | 2531.075 | NM_005137 | 3981.001  | 3642.634  | AA703141  | 1794.671  | 1497.326  |
| NM_007161 | 9224.093 | 12036.08 | NM_006764 | 3015.649  | 3106.886  | AI122630  | 7608.855  | 7596.975  |
| NM_014387 | 21658.67 | 37068.79 | NM_001386 | 2300.582  | 2725.285  | NM_002103 | 20388.508 | 18637.592 |
| NM_003641 | 2291.362 | 3414.605 | NM_001163 | 1867.529  | 2658.99   | NM_003379 | 6116.258  | 5926.435  |
| AK057418  | 4565.593 | 2839.461 | NM_005878 | 2809.152  | 3234.611  | NM_006589 | 4433.178  | 4193.123  |
| L37199    | 703.106  | 466.035  | NM_012286 | 1847.265  | 2393.529  | NM_004134 | 2974.492  | 2021.308  |
| NM_007260 | 4051.593 | 3380.698 | NM_002195 | 10692.335 | 21731.891 | NM_005955 | 1722.59   | 1706.427  |
| AF148646  | 8160.385 | 5715.741 | D84294    | 2728.151  | 1818.381  | NM_004048 | 625.629   | 553.798   |
| AL110218  | 1357.938 | 1019.965 | M31659    | 1906.361  | 3608.459  | NM_012428 | 3884.448  | 2791.622  |
| AB023201  | 2463.755 | 1914.556 | NM_003056 | 4923.976  | 6205.632  | NM_001728 | 3174.758  | 1404.601  |
| X00094    | 820.135  | 540.574  | NM_016226 | 15406.386 | 22456.902 | NM_005565 | 4798.519  | 1801.825  |
| NM_003775 | 322.66   | 410.458  | AK024311  | 1004.286  | 1027.115  | NM_003824 | 3999.314  | 1362.182  |
| NM_002082 | 2068.517 | 1574.046 | AF052155  | 8285.35   | 9067.168  | NM_012452 | 1601.138  | 614.167   |
| NM_002922 | 206.293  | 504.662  | NM_005085 | 2056.526  | 2530.506  | AF229166  | 478.885   | 406.111   |
| AF155657  | 18995.44 | 18848.59 | AF060902  | 2334.65   | 2493.112  | NM_005137 | 2427.75   | 1229.838  |
| NM_006056 | 1256.979 | 1385.983 | AF121858  | 8541.288  | 7931.283  | NM_006764 | 1673.703  | 928.18    |
| AF045229  | 13422.37 | 12214.56 | NM_013437 | 5786.757  | 5999.081  | NM_001386 | 704.773   | 898.514   |
| NM_001840 | 8213.975 | 7564.471 | NM_017681 | 1198.113  | 1521.342  | NM_001163 | 1531.9    | 970.768   |
| AK025099  | 4437.909 | 4395.994 | X57655    | 11474.091 | 7061.885  | NM_005878 | 1203.55   | 1275.009  |
| NM_016099 | 11102.42 | 14684.11 | AK025966  | 3181.771  | 3077.301  | AF308602  | 3102.296  | 3554.429  |
| NM_000228 | 1048.333 | 959.138  | NM_018725 | 749.502   | 759.825   | AB011089  | 1281.257  | 1458.812  |
| NM_000830 | 1216.114 | 1751.602 | NM_003081 | 25894.732 | 20535.371 | AF007192  | 382.913   | 664.952   |
| NM_014587 | 438.529  | 770.468  | NM_016495 | 8420.556  | 7883.37   | NM_001276 | 5470.996  | 4282.551  |
| NM_018658 | 1214.355 | 1438.011 | NM_004048 | 879.005   | 693.339   | NM_016157 | 284.558   | 377.729   |
| NM_005136 | 560.245  | 482.418  | NM_017765 | 16278.305 | 17589.623 | NM_000112 | 434.252   | 447.042   |
| AK094513  | 831.032  | 725.21   | NM_000428 | 682.915   | 788.935   | NM_005827 | 5299.328  | 5450.007  |

|           |          |          |           |           |           |           |           |           |
|-----------|----------|----------|-----------|-----------|-----------|-----------|-----------|-----------|
| NM_001183 | 18367.05 | 18887.01 | AB040967  | 1347.089  | 910.368   | NM_003053 | 2341.046  | 1800.461  |
| NM_004976 | 22878.03 | 15970.42 | NM_003578 | 545.012   | 609.769   | NM_003044 | 617.641   | 709.898   |
| AK021597  | 1491.367 | 1085.488 | NM_014721 | 1122.184  | 1029.964  | NM_006672 | 4209.063  | 3784.284  |
| NM_005737 | 38178.66 | 25412.07 | AK026352  | 960.192   | 1995.007  | M31659    | 838.898   | 680.391   |
| NM_006803 | 1803.739 | 1462.022 | AL137705  | 2792.143  | 3122.098  | NM_003056 | 3636.667  | 2452.82   |
| NM_002533 | 1908.51  | 1401.285 | U41898    | 735.457   | 948.149   | NM_016226 | 13206.47  | 4989.928  |
| AF235022  | 798.616  | 381.124  | AF169257  | 1049.708  | 1684.774  | AK024311  | 495.65    | 261.456   |
| AL137764  | 7334.296 | 6209.982 | NM_014848 | 693.43    | 375.572   | AF052155  | 5175.08   | 1890.257  |
| NM_001660 | 16381.22 | 10973.69 | BF217766  | 928.662   | 330.346   | NM_005085 | 976.01    | 505.915   |
| NM_000710 | 715.967  | 509.133  | NM_000112 | 771.241   | 414.216   | AF060902  | 1346.231  | 551.659   |
| NM_000752 | 2113.083 | 1475.024 | NM_005827 | 9900.722  | 4007.449  | AF121858  | 3855.291  | 1578.718  |
| AB040945  | 716.19   | 399.63   | NM_003053 | 4401.376  | 3017.348  | NM_013437 | 3410.491  | 1785.732  |
| NM_002018 | 4418.354 | 4403.15  | NM_003044 | 1592.657  | 1452.588  | NM_017681 | 796.965   | 632.689   |
| NM_006018 | 420.28   | 404.795  | NM_006672 | 6246.079  | 5529.332  | X57655    | 6048.792  | 5781.032  |
| AF161383  | 13214.45 | 11406.35 | AB007875  | 1649.678  | 2108.775  | AK025966  | 2080.875  | 1896.333  |
| NM_000410 | 11888.19 | 14467.07 | NM_014796 | 5410.541  | 6256.221  | NM_018725 | 588.824   | 677.725   |
| U72882    | 2897.532 | 2034.787 | NM_005040 | 6516.227  | 8414.571  | NM_003081 | 15522.216 | 15311.328 |
| NM_014337 | 6394.076 | 6808.074 | NM_016391 | 15424.49  | 25803.533 | NM_016495 | 7609.936  | 6346.932  |
| Y12337    | 293.596  | 424.192  | M80783    | 640.63    | 792.964   | D50402    | 13776.389 | 14387.214 |
| M29551    | 5946.796 | 5353.916 | AF075033  | 5756.949  | 6171.424  | M73547    | 5739.677  | 6069.832  |
| AB023148  | 809.951  | 675.269  | AB011104  | 1410.723  | 1701.805  | NM_003687 | 594.826   | 708.922   |
| NM_002929 | 1714.997 | 1024.804 | AK024069  | 5160.18   | 7771.896  | NM_003145 | 22045.025 | 15061.423 |
| BC028375  | 2505.445 | 2137.657 | NM_004582 | 24578.359 | 26561.707 | NM_001632 | 1205.769  | 916.228   |
| AB026436  | 4515.287 | 3249.549 | NM_015640 | 12545.42  | 10052.69  | NM_012264 | 1260.61   | 991.831   |
| NM_016029 | 11749.34 | 9272.97  | AF233450  | 1060.922  | 638.885   | AF311312  | 1753.371  | 1354.234  |
| AK024562  | 1420.972 | 1322.544 | NM_016233 | 1529.173  | 782.799   | NM_017765 | 8849.078  | 3269.951  |
| NM_014066 | 2220.283 | 1714.36  | NM_000821 | 21085.143 | 11778.109 | NM_000428 | 341.781   | 172.334   |
| NM_004573 | 1339.31  | 1409.189 | NM_003145 | 27712.232 | 17588.508 | AB040967  | 497.615   | 270.653   |
| NM_000072 | 887.963  | 676.01   | NM_001632 | 1405.537  | 1358.298  | NM_014721 | 601.343   | 387.137   |
| NM_000697 | 1600.428 | 1922.967 | NM_012264 | 1705.684  | 1428.263  | AK026352  | 465.696   | 450.889   |
| NM_000017 | 6444.53  | 6334.576 | AF311312  | 2312.904  | 2473.167  | AL137705  | 2319.992  | 2311.354  |
| NM_000237 | 784.153  | 705.121  | NM_014915 | 26233.99  | 21490.852 | U41898    | 378.679   | 634.671   |
| NM_018346 | 9235.783 | 7962.911 | NM_012286 | 2156.321  | 2558.965  | NM_014848 | 442.833   | 444.117   |
| AL122054  | 2840.301 | 2344.476 | NM_002195 | 8625.557  | 9380.905  | BF217766  | 726.848   | 584.641   |
| AB011182  | 1822.724 | 1421.58  | D84294    | 2902.309  | 2935.729  | NM_000184 | 1062.695  | 1270.361  |
| AB023151  | 740.862  | 689.66   | BG539651  | 2108.674  | 2334.42   | NM_016180 | 377.584   | 340.239   |
| NM_000140 | 6946.873 | 5698.27  | N52646    | 21803.426 | 19122.781 | NM_002103 | 21925.184 | 17287.766 |
| NM_005125 | 2828.276 | 2973.061 | AW160671  | 61060.527 | 58030.609 | NM_003379 | 5716.767  | 4857.447  |
| NM_016246 | 882.716  | 747.169  | BI870529  | 22590.512 | 27273.92  | NM_006589 | 4365.767  | 3554.546  |
| NM_015926 | 1765.283 | 1582.055 | AI681514  | 1124.848  | 2006.261  | AB007875  | 717.318   | 539.559   |
| X03757    | 3079.792 | 2909.714 | NM_001300 | 5336.682  | 10015.14  | NM_014796 | 3868.256  | 1149.216  |
| X89670    | 441.068  | 750.5    | BG760342  | 5792.089  | 3877.541  | AL050288  | 20143.209 | 12839.993 |
| NM_001726 | 463.027  | 606.94   | AA703141  | 2286.495  | 1513.676  | NM_005040 | 2856.75   | 2922.625  |
| NM_004053 | 4484.541 | 3900.848 | AI122630  | 9304.771  | 7464.16   | NM_016391 | 7985.955  | 4509.761  |
| NM_001489 | 3274.619 | 3128.97  | NM_002103 | 35892.824 | 22189.551 | AF075033  | 5143.537  | 2163.858  |
| NM_020374 | 4922.44  | 3538.043 | NM_003379 | 7328.536  | 4770.189  | D50911    | 10696.709 | 7132.567  |
| NM_014922 | 640.259  | 824.352  | NM_006589 | 5984.922  | 3945.782  | AB011104  | 1336.942  | 1286.773  |
| NM_000169 | 4658.182 | 4035.655 | NM_004134 | 3622.769  | 4211.745  | AK024069  | 3989.415  | 3391.894  |
| AF182814  | 6041.66  | 5392.54  | NM_005955 | 4091.221  | 4529.286  | NM_004582 | 19364.984 | 15485.722 |
| NM_005329 | 961.666  | 1004.556 | NM_004048 | 1038.832  | 1629.632  | NM_015640 | 10763.393 | 10796.272 |
| NM_000107 | 4884.585 | 4088.289 | BE548044  | 554.62    | 1218.699  | AF233450  | 651.481   | 1029.362  |
| AL157445  | 751.308  | 995.694  | NM_012428 | 6166.394  | 7001.792  | NM_016233 | 933.209   | 838.727   |
| NM_001517 | 3117.813 | 3780.542 | NM_013269 | 550.156   | 834.863   | NM_000821 | 11173.255 | 10204.542 |

|           |          |          |           |           |           |           |           |           |
|-----------|----------|----------|-----------|-----------|-----------|-----------|-----------|-----------|
| NM_005053 | 606.254  | 749.894  | NM_001728 | 5011.719  | 4468.323  | AF308602  | 3471.846  | 2673.021  |
| D86974    | 3982.624 | 3183.479 | NM_005565 | 8604.239  | 7348.929  | AB011089  | 1375.035  | 1317.336  |
| NM_018283 | 5083.992 | 2873.537 | NM_003824 | 7317.631  | 7977.944  | AF007192  | 320.37    | 404.131   |
| NM_001983 | 2662.406 | 3056.65  | NM_000686 | 1434.892  | 1697.153  | NM_001276 | 5063.985  | 3290.061  |
| NM_004993 | 781.004  | 734.253  | NM_012452 | 2892.215  | 3417.241  | NM_016157 | 521.507   | 401.792   |
| NM_001793 | 4911.061 | 5640.402 | AF229166  | 1643.319  | 3428.584  | NM_014915 | 15822.269 | 9420.507  |
| NM_001943 | 3360.555 | 3297.083 | NM_001386 | 2084.668  | 2225.69   | NM_012286 | 1395.143  | 552.502   |
| NM_004927 | 8234.297 | 6732.305 | NM_001163 | 1768.853  | 1475.875  | NM_002195 | 4955.132  | 1581.723  |
| AB040928  | 534.954  | 579.472  | NM_005878 | 2371.018  | 2024.362  | D84294    | 1963.118  | 752.194   |
| NM_001459 | 1821.121 | 2752.806 | AF308602  | 3772.361  | 2615.514  | X59770    | 303.838   | 237.232   |
| NM_015513 | 2928.635 | 3008.168 | AB011089  | 1998.825  | 1398.17   | K02765    | 829.459   | 1186.601  |
| NM_006219 | 6393.412 | 7719.243 | AF007192  | 692.767   | 531.545   | BG539651  | 1457.113  | 1888.819  |
| NM_004443 | 1015.838 | 886.842  | NM_001276 | 5858.338  | 5302.85   | N52646    | 11709.584 | 18321.129 |
| NM_017412 | 1284.235 | 1734.57  | NM_016157 | 1342.979  | 1011.796  | AW160671  | 53597.105 | 30186.766 |
| NM_005544 | 730.895  | 468.387  | NM_000112 | 942.801   | 999.789   | BI870529  | 19480.455 | 6600.631  |
| NM_002964 | 1047.656 | 1125.436 | NM_005827 | 11041.177 | 9336.786  | AA702698  | 780.375   | 552.668   |
| AF311862  | 5698.202 | 4977.938 | NM_003053 | 5236.561  | 7308.15   | AI681514  | 695.384   | 670.241   |
| NM_003215 | 588.104  | 450.871  | NM_003044 | 1441.976  | 1763.123  | NM_001300 | 3462.995  | 3553.658  |
| NM_016447 | 1194.825 | 1730.003 | NM_006672 | 10938.917 | 10599.775 | BG748827  | 3128.366  | 3748.605  |
| NM_015626 | 7829.844 | 6986.659 | M31659    | 1262.935  | 1837.534  | AA952897  | 1821.521  | 1622.561  |
| NM_004899 | 4173.355 | 4237.148 | NM_003056 | 5271.146  | 5104.841  | BG760342  | 4267.07   | 5527.298  |
| AB006628  | 3011.845 | 2389.35  | NM_016226 | 15474.947 | 20058.877 | AA703141  | 1951.727  | 1527.39   |
| AF272036  | 11086    | 6790.71  | AK024311  | 1024.109  | 780.404   | AI122630  | 7669.47   | 7179.882  |
| AF231023  | 5831.097 | 4544.677 | AF052155  | 9257.901  | 8243.869  | NM_003081 | 16844.703 | 14055.245 |
| NM_005148 | 4560.344 | 4968.91  | NM_005085 | 2498.145  | 2282.919  | NM_016495 | 7759.687  | 4780.968  |
| NM_004746 | 1233.87  | 941.104  | AF060902  | 2388.898  | 2026.387  | D50402    | 15551.329 | 11561.953 |
| AF146019  | 11251.41 | 9342.462 | AF121858  | 8470.313  | 7621.243  | M73547    | 6050.796  | 5217.896  |
| Z36782    | 8055.865 | 5857.527 | NM_017681 | 1460.654  | 2601.562  | NM_003687 | 905.336   | 951.802   |
| M70435    | 1631.588 | 1300.443 | X57655    | 11938.072 | 5952.984  | NM_004134 | 3605.236  | 1598.743  |
| NM_003490 | 6272.397 | 6080.128 | AK025966  | 3053.012  | 2381.309  | NM_005955 | 1968.146  | 739.757   |
| AF210651  | 1721.758 | 1422.716 | NM_018725 | 678.64    | 690.292   | NM_004048 | 690.496   | 499.488   |
| AF090942  | 1567.763 | 1107.259 | NM_003081 | 25776.67  | 17638.473 | BE548044  | 707.931   | 749.955   |
| AF508940  | 3186.326 | 2539.298 | NM_016495 | 7823.195  | 7820.717  | AF028832  | 942.169   | 1134.53   |
| NM_005429 | 531.777  | 538.084  | D50402    | 22952.566 | 15765.472 | NM_006017 | 872.597   | 845.636   |
| NM_020237 | 1858.813 | 1993.645 | M73547    | 10232.53  | 5644.021  | NM_012428 | 6220.333  | 10167.319 |
| AF130051  | 1152.228 | 1247.159 | NM_003687 | 1712.704  | 1406.048  | NM_013269 | 566.581   | 694.176   |
| M25753    | 13887.52 | 11909.62 | NM_003145 | 41119.574 | 51610.867 | NM_001728 | 5293.907  | 10583.688 |
| NM_003883 | 5326.898 | 5136.462 | NM_001632 | 1549.581  | 1921.254  | NM_005565 | 5875.134  | 5550.016  |
| NM_014929 | 3612.245 | 3139.493 | NM_012264 | 1860.376  | 1756.645  | NM_003824 | 4525.197  | 2267.714  |
| NM_004203 | 8278.033 | 7206.057 | AF311312  | 2200.241  | 2664.889  | NM_000686 | 537.329   | 421.018   |
| NM_001951 | 3894.059 | 3691.972 | NM_017765 | 18126.186 | 17483.602 | NM_012452 | 1859.77   | 1651.258  |
| NM_002391 | 3106.076 | 2464.958 | NM_000428 | 870.934   | 606.22    | AF229166  | 795.039   | 855.057   |
| NM_007066 | 6037.205 | 4520.29  | AB040967  | 1432.626  | 975.481   | NM_005137 | 2689.935  | 2945.449  |
| NM_003674 | 9230.576 | 7715.831 | NM_014721 | 1613.167  | 780.006   | NM_006764 | 1577.428  | 1577.21   |
| NM_001197 | 2901.454 | 2680.345 | AK026352  | 1225.198  | 1636.268  | NM_001386 | 783.561   | 1048.121  |
| NM_006682 | 751.449  | 770.611  | AL137705  | 2853.2    | 2570.228  | NM_001163 | 1374.565  | 1442.369  |
| NM_014977 | 7343.654 | 7564.3   | U41898    | 779.338   | 502.409   | NM_005878 | 1347.857  | 1239.589  |
| AK026325  | 2200.415 | 2710.276 | BF217766  | 965.918   | 895.487   | NM_014848 | 461.086   | 429.276   |
| U83857    | 1521.59  | 1279.679 | NM_000184 | 1569.285  | 1276.457  | BF217766  | 880.154   | 844.07    |
| NM_001230 | 2317.377 | 1957.271 | NM_016180 | 863.95    | 822.659   | NM_000184 | 1474.238  | 1274.396  |
| AK025662  | 3647.827 | 2497.846 | NM_002103 | 35096.164 | 32543.535 | NM_016180 | 384.568   | 270.554   |
| NM_000201 | 2189.499 | 1377.525 | NM_003379 | 7548.627  | 8407.925  | NM_000112 | 473.486   | 333.493   |
| AB011539  | 534.152  | 426.472  | NM_006589 | 5586.63   | 4708.489  | NM_005827 | 6373.621  | 4759.598  |

|           |          |          |           |           |           |           |           |           |
|-----------|----------|----------|-----------|-----------|-----------|-----------|-----------|-----------|
| AB014597  | 3299.605 | 3700.184 | AB007875  | 2487.922  | 2940.356  | NM_006672 | 4193.94   | 10203.017 |
| S81361    | 557.45   | 843.372  | NM_014796 | 5614.554  | 5520.545  | NM_000336 | 665.624   | 998.06    |
| AK024313  | 5824.94  | 6984.149 | AL050288  | 26424.4   | 23658.934 | M31659    | 1495.409  | 2289.9    |
| NM_003891 | 2137.033 | 2786.72  | NM_005040 | 4629.61   | 3178.357  | NM_016226 | 17027.555 | 18855.547 |
| AL359575  | 964.306  | 965.836  | NM_016391 | 12613.989 | 13697.324 | AK024311  | 773.05    | 1332.858  |
| NM_002022 | 807.484  | 509.036  | AF075033  | 5767.706  | 4874.068  | AF052155  | 6933.509  | 3773.969  |
| NM_015524 | 9254.063 | 5264.007 | D50911    | 10503.522 | 8886.663  | NM_005085 | 1173.588  | 849.562   |
| NM_001673 | 10790.61 | 15003.02 | AB011104  | 1196.154  | 1061.534  | AF060902  | 1337.937  | 1343.268  |
| AK023167  | 967.179  | 505.11   | AK024069  | 5211.005  | 4176.844  | AF121858  | 4432.064  | 4387.736  |
| NM_016510 | 2436.362 | 3304.732 | NM_004582 | 19766.111 | 15446.384 | NM_013437 | 4271.547  | 4764.109  |
| NM_014270 | 2446.118 | 2748.323 | NM_015640 | 12157.288 | 9028.335  | NM_017681 | 974.74    | 862.543   |
| NM_000071 | 3009.559 | 3701.758 | AF233450  | 944.065   | 624.607   | X57655    | 6469.08   | 8631.876  |
| NM_006843 | 819.761  | 981.639  | NM_016233 | 1748.65   | 1367.517  | AK025966  | 2051.316  | 1788.016  |
| NM_004321 | 1440.281 | 1142.85  | NM_000821 | 21849.232 | 16553.965 | NM_018725 | 492.794   | 521.503   |
| AF311212  | 6960.032 | 6512.442 | AF308602  | 4975.729  | 7138.809  | AK024069  | 4235.04   | 3773.623  |
| NM_006086 | 3961.26  | 3249.435 | AB011089  | 2190.31   | 2311.785  | NM_004582 | 19053.211 | 12958.683 |
| NM_004520 | 10874.2  | 9588.075 | AF007192  | 662.498   | 701.802   | NM_015640 | 10907.168 | 7323.178  |
| AK027118  | 14144.13 | 11006.69 | NM_001276 | 5305.631  | 5874.805  | AF233450  | 659.322   | 1025.754  |
| AK022882  | 21226.53 | 17710.19 | NM_016157 | 1274.234  | 1164.704  | NM_016233 | 1156.24   | 924.23    |
| NM_006105 | 2983.808 | 3588.386 | NM_014915 | 23758.693 | 18311.607 | NM_000821 | 15821.798 | 8921.627  |
| NM_005981 | 1045.988 | 872.404  | NM_012286 | 1831.374  | 1918.047  | NM_001632 | 1393.389  | 3623.792  |
| NM_000474 | 932.99   | 1450     | NM_002195 | 8054.346  | 8674.296  | NM_012264 | 1573.211  | 5577.435  |
| NM_016264 | 1224.553 | 2215.851 | D84294    | 2851.312  | 2221.335  | AF311312  | 2926.561  | 4434.375  |
| NM_006079 | 22110.96 | 23734.96 | K02765    | 1739.81   | 1768.586  | NM_017765 | 12416.822 | 26735.08  |
| AB037837  | 2709.525 | 2040.54  | M65134    | 550.196   | 613.732   | NM_000428 | 698.668   | 1406.248  |
| NM_014595 | 3950.163 | 2162.724 | BG539651  | 2351.736  | 1848.244  | AB040967  | 1194.146  | 933.157   |
| NM_014789 | 1598.563 | 1752.438 | N52646    | 20679.973 | 16215.801 | NM_014721 | 1270.123  | 888.053   |
| AB046784  | 2953.13  | 2920.587 | AW160671  | 56941.668 | 54327.086 | AK026352  | 537.716   | 1214.183  |
| X52402    | 991.101  | 1339.006 | BI870529  | 21022.295 | 20313.752 | AL137705  | 2281.497  | 3112.577  |
| AL133663  | 1838.085 | 1918.787 | AA702698  | 1123.021  | 969.468   | NM_007262 | 24803.637 | 21469.215 |
| NM_004992 | 1917.36  | 2459.156 | AI681514  | 1321.904  | 1567.11   | NM_014783 | 8023.659  | 7349.26   |
| NM_014462 | 4146.431 | 4696.032 | NM_001300 | 3935.298  | 3700.916  | NM_014053 | 3695.121  | 4359.865  |
| NM_014156 | 39936.01 | 44677.07 | BG748827  | 4889.319  | 2756.073  | NM_002571 | 1195.093  | 1385.909  |
| NM_003137 | 8886.584 | 9453.734 | AA952897  | 2070.189  | 2071.914  | NM_004939 | 3197.602  | 3342.412  |
| NM_006938 | 40179.84 | 43244.24 | BG760342  | 5436.985  | 3524.34   | NM_001425 | 8900.99   | 6437.464  |
| NM_004515 | 839.226  | 461.943  | AA703141  | 2116.547  | 1552.751  | NM_015710 | 1040.81   | 504.77    |
| NM_020158 | 3431.078 | 3394.082 | AI122630  | 9678.617  | 7715.797  | NM_014158 | 6547.265  | 10805.591 |
| AF176085  | 3407.567 | 3239.587 | NM_003081 | 27695.674 | 24847.643 | NM_014675 | 1969.694  | 5142.434  |
| NM_006985 | 14701.84 | 13469.39 | NM_016495 | 8433.988  | 12972.216 | NM_006589 | 4590.565  | 13134.513 |
| AK025561  | 6594.311 | 6742.992 | D50402    | 25152.738 | 27110.916 | NM_002191 | 582.972   | 416.952   |
| NM_018602 | 4113.399 | 3873.954 | M73547    | 9671.583  | 8169.801  | AB007875  | 1422.597  | 3205.073  |
| NM_004096 | 6535.612 | 8620.475 | NM_003687 | 1975.798  | 2128.7    | NM_014796 | 4592.36   | 2056.665  |
| NM_017629 | 8468.621 | 9626.499 | NM_004134 | 3370.164  | 3701.921  | AL050288  | 22540.615 | 15821.362 |
| AL049681  | 2653.756 | 2862.145 | NM_005955 | 4286.613  | 4503.607  | NM_005040 | 3006.668  | 3910.712  |
| NM_006584 | 1393.697 | 1691.765 | NM_004048 | 1104.431  | 1154.722  | NM_016391 | 10221.036 | 8893.379  |
| AF052181  | 4247.426 | 4749.826 | NM_012428 | 5594.979  | 5311.318  | M80783    | 385.669   | 436.714   |
| AL050074  | 2373.406 | 2421.836 | NM_013269 | 468.134   | 707.05    | AF075033  | 6281.324  | 5458.833  |
| AK026436  | 1187.895 | 1629.262 | NM_001728 | 4812.748  | 3644.465  | D50911    | 11225.576 | 9452.342  |
| NM_018061 | 3367.275 | 2005.886 | NM_005565 | 8124.592  | 7618.281  | AB011104  | 1226.203  | 1026.644  |
| AK023059  | 1428.185 | 645.757  | NM_003824 | 7264.21   | 5585.849  | NM_001078 | 939.104   | 1210.083  |
| NM_003551 | 4524.925 | 3816.735 | NM_000686 | 1346.755  | 1340.09   | NM_000552 | 7228.962  | 12811.648 |
| AK021900  | 2390.513 | 3013.847 | NM_012452 | 3084.943  | 3483.634  | NM_003809 | 675.568   | 1127.12   |
| NM_002764 | 13075.84 | 13496.74 | AF229166  | 1392.096  | 1437.149  | AK000860  | 3075.322  | 4397.55   |



|           |          |          |           |           |           |           |           |           |
|-----------|----------|----------|-----------|-----------|-----------|-----------|-----------|-----------|
| NM_019857 | 594.436  | 831.141  | NM_005137 | 4209.184  | 3079.22   | NM_014961 | 1073.489  | 1350.466  |
| NM_015455 | 48550.48 | 48130.59 | NM_006764 | 1603.103  | 1872.923  | NM_020145 | 2006.887  | 4918.034  |
| AF024702  | 2061.156 | 2632.228 | NM_001386 | 2214.99   | 2055.028  | AK021529  | 2487.487  | 6578.157  |
| NM_001964 | 3126.297 | 1603.251 | NM_001163 | 1664.221  | 1631.287  | AB037845  | 5236.985  | 9902.597  |
| NM_005962 | 7719.203 | 6800.11  | NM_005878 | 2338.709  | 1982.125  | NM_005980 | 1260.181  | 3726.886  |
| X74864    | 1064.475 | 1103.752 | NM_020346 | 594.398   | 1090.324  | NM_016190 | 54215.816 | 60917.285 |
| AK026804  | 3594.478 | 3256.694 | AF169257  | 872.386   | 1667.57   | NM_012383 | 13307.789 | 22159.85  |
| NM_016170 | 2468.76  | 3162.941 | NM_014848 | 883.444   | 1756.332  | AJ271684  | 1234.255  | 2441.137  |
| NM_002114 | 847.859  | 938.607  | BF217766  | 1783.752  | 2390.134  | AF255342  | 5958.661  | 7364.133  |
| NM_006166 | 4091.635 | 3503.725 | NM_000184 | 3165.755  | 3536.701  | NM_003300 | 3318.995  | 1553.85   |
| S72620    | 30685.29 | 31915.77 | NM_016180 | 612.009   | 1045.052  | AK026682  | 1695.53   | 1061.943  |
| S73501    | 540.76   | 424.686  | NM_000112 | 691.026   | 949.61    | NM_017720 | 61731.141 | 58592.301 |
| NM_005263 | 9706.547 | 8810.182 | NM_005827 | 10384.187 | 8156.36   | NM_004655 | 1891.336  | 2209.53   |
| AB033022  | 3361.183 | 3999.359 | NM_003053 | 5109.432  | 7501.536  | NM_003942 | 2000.652  | 1990.6    |
| AF147397  | 795.5    | 820.355  | NM_003044 | 1285.793  | 1487.078  | NM_006471 | 50171.082 | 34409.094 |
| AK027158  | 542.244  | 715.417  | NM_006672 | 9308.271  | 9848.971  | NM_004165 | 2259.205  | 1514.602  |
| AF085836  | 806.409  | 897.139  | M31659    | 1199.814  | 1321.787  | NM_000368 | 1661.815  | 1625.618  |
| AL049449  | 744.486  | 495.828  | NM_003056 | 4986.273  | 4508.48   | NM_016586 | 2208.485  | 2769.369  |
| AF147347  | 600.611  | 657.541  | NM_016226 | 14412.041 | 17575.244 | NM_004140 | 938.667   | 1630.903  |
| AL359654  | 624.209  | 639.517  | AK024311  | 1244.807  | 803.308   | NM_002866 | 8060.871  | 15199.675 |
| AK024224  | 8134.947 | 5218.362 | AF052155  | 9261.345  | 7557.2    | AK023847  | 1630.551  | 2960.022  |
| NM_015362 | 18728.74 | 19809.46 | NM_005085 | 2321.579  | 1866.477  | NM_003860 | 2097.716  | 4155.145  |
| AF147344  | 1051.414 | 1271.667 | AF060902  | 2466.486  | 1804.771  | NM_005414 | 865.134   | 1201.292  |
| AF147371  | 1299.057 | 1178.492 | AF121858  | 8757.855  | 6750.472  | NM_004468 | 8070.17   | 9733.924  |
| AK023745  | 1789.008 | 1886.104 | NM_013437 | 5960.293  | 5155.104  | NM_016031 | 7443      | 16746.332 |
| NM_018982 | 7664.492 | 8350.066 | NM_017681 | 1115.677  | 1520.774  | NM_004804 | 2573.05   | 7488.878  |
| AF086254  | 4813.798 | 5299.579 | X57655    | 11680.021 | 5410.662  | M92439    | 8253.478  | 18290.494 |
| AF086261  | 534.391  | 484.565  | AK025966  | 3283.11   | 2685.313  | AL117665  | 4821.708  | 10603.098 |
| AF086367  | 2030.827 | 1260.31  | NM_018725 | 776.161   | 753.79    | AF263541  | 2391.55   | 8416.53   |
| U79295    | 773.475  | 719.208  | AK024069  | 5558.755  | 6800.369  | BE873030  | 1659.989  | 2882.086  |
| AK002107  | 631.653  | 727.057  | NM_004582 | 24867.846 | 28063.379 | NM_002440 | 686.493   | 958.458   |
| NM_003596 | 1451.509 | 1184.581 | NM_015640 | 13632.725 | 17746.398 | NM_003625 | 583.396   | 389.375   |
| NM_018838 | 6101.093 | 5578.189 | AF233450  | 1246.289  | 1393.164  | BC006990  | 8223.427  | 5919.043  |
| AK021454  | 2313.765 | 2451.936 | NM_016233 | 1697.547  | 2144.63   | NM_002277 | 1297.063  | 1276.173  |
| AF075092  | 1160.999 | 1409.157 | NM_000821 | 26124.361 | 27054.574 | NM_019114 | 1896.19   | 2007.929  |
| AL133038  | 1324.069 | 1506.238 | AF311312  | 2606.127  | 3642.142  | M33552    | 8366.645  | 7273.667  |
| AL137414  | 1960.035 | 1905.585 | NM_005313 | 29321.848 | 22154.709 | AJ252060  | 2244.727  | 2162.99   |
| AL359574  | 1395.105 | 1603.755 | NM_017765 | 19337.51  | 15493.76  | NM_006403 | 4307.918  | 5073.969  |
| AL133569  | 2165.854 | 2779.674 | NM_000428 | 727.877   | 637.556   | NM_018977 | 609.524   | 762.789   |
| AL137435  | 581.549  | 847.362  | AB040967  | 1481.358  | 1095.367  | AJ001402  | 840.916   | 971.153   |
| AL157463  | 530.682  | 774.889  | NM_014721 | 1133.651  | 1050.412  | NM_000235 | 7438.587  | 11256.813 |
| AL359604  | 638.386  | 710.012  | AK026352  | 1115.368  | 1727.512  | NM_015879 | 764.005   | 1905.542  |
| AK027189  | 2316.258 | 1361.733 | AL137705  | 2849.617  | 2565.697  | AF068236  | 40864.168 | 53676.133 |
| AF088014  | 520.97   | 595.756  | U41898    | 815.761   | 537.505   | L25628    | 985.171   | 1331.616  |
| U92022    | 2371.371 | 2344.502 | NM_007262 | 26821.967 | 29527.934 | M37033    | 13133.648 | 18601.977 |
| NM_016644 | 1768.747 | 1622.83  | NM_014783 | 8862.277  | 9917.662  | NM_007171 | 6566.425  | 7635.508  |
| AK026750  | 431.019  | 480.792  | NM_014053 | 4902.3    | 5560.941  | NM_004278 | 1407.36   | 4864.71   |
| AF072164  | 1403.437 | 1584.489 | NM_002571 | 2524.448  | 2559.095  | NM_005632 | 1330.591  | 2928.944  |
| NM_018610 | 407.391  | 794.302  | NM_004939 | 5005.976  | 3821.791  | AK021499  | 944.96    | 2066.805  |
| NM_017773 | 2764.334 | 3374.082 | NM_001425 | 10568.038 | 11099.155 | AK000336  | 3385.721  | 8045.021  |
| AK021885  | 959.223  | 962.579  | NM_014675 | 4384.216  | 7010.501  | AB007948  | 1744.904  | 3788.046  |
| AK022018  | 731.989  | 592.885  | AB007875  | 2042.819  | 1575.036  | AB033066  | 1676.298  | 1952.347  |
| AK022161  | 1052.59  | 1077.214 | NM_018261 | 2317.885  | 1866.816  | AF126028  | 2549.853  | 1001.147  |

|           |          |          |           |           |           |           |           |           |
|-----------|----------|----------|-----------|-----------|-----------|-----------|-----------|-----------|
| AK022296  | 763.953  | 928.477  | NM_01479€ | 5676.498  | 5554.027  | NM_00701€ | 16152.004 | 7367.107  |
| AK021940  | 1315.083 | 1509.13  | NM_00504€ | 4790.879  | 3654.81   | NM_00707€ | 496.438   | 441.941   |
| AK022052  | 935.522  | 830.93   | NM_016391 | 13126.26  | 10815.666 | NM_01604€ | 1532.848  | 1221.905  |
| AK022189  | 814.585  | 1058.796 | AF075033  | 6219.978  | 5437.736  | NM_01764€ | 697.73    | 926.279   |
| AK026856  | 1171.875 | 1630.747 | D50911    | 12635.991 | 10653.797 | NM_017721 | 2121.366  | 2228.567  |
| NM_005001 | 28066.54 | 34056.23 | AB011104  | 1512.942  | 1436.835  | NM_01908€ | 5396.263  | 5455.581  |
| AK024175  | 5182.155 | 5983.139 | NM_00107€ | 1261.271  | 2274.101  | AB002373  | 1927.609  | 2066.468  |
| NM_00051€ | 970.515  | 1380.668 | NM_00055€ | 5754.458  | 6831.088  | NM_01635€ | 12955.246 | 16545.967 |
| NM_017787 | 2453.386 | 3207.263 | NM_00380€ | 764.109   | 882.706   | AK024167  | 5603.573  | 7125.287  |
| M20839    | 822.783  | 545.162  | AK000860  | 3874.456  | 3477.813  | NM_00502€ | 1630.705  | 1771.089  |
| NM_02031€ | 12062.1  | 11186.57 | NM_014961 | 972.143   | 981.911   | NM_018014 | 3431.346  | 9897.215  |
| AK023892  | 353.113  | 427.811  | NM_02014€ | 2537.991  | 2310.09   | NM_00235€ | 11678.93  | 18501.566 |
| AF265210  | 1884.833 | 1415.716 | AK021529  | 3309.576  | 3239.971  | AF230809  | 2201.059  | 3150.324  |
| AK024241  | 800.48   | 574.38   | AB037845  | 4560.124  | 4039.198  | NM_017894 | 41670     | 47247.34  |
| AK025061  | 646.852  | 431.905  | NM_00598€ | 1471.037  | 1156.952  | NM_00650€ | 1782.664  | 3234.129  |
| AF088067  | 3939.102 | 6430.805 | NM_01619€ | 58609.344 | 59095.453 | AK025447  | 1590.696  | 5103.014  |
| AF056441  | 861.507  | 1390.553 | AL137579  | 11064.28  | 8501.155  | NM_002624 | 44117.52  | 52817.055 |
| AK024389  | 4118.705 | 4822.291 | NM_01238€ | 15093.38  | 12257.805 | AF006199  | 1549.48   | 4992.729  |
| AK026793  | 1197.584 | 1229.134 | AJ271684  | 1534.642  | 1400.423  | NM_004554 | 3975.434  | 9814.801  |
| NM_00167€ | 439.144  | 531.111  | AF255342  | 8394.39   | 6803.418  | NM_018119 | 2517.18   | 6389.623  |
| AJ276253  | 14303.44 | 11452.15 | NM_00330€ | 8756.387  | 7389.876  | NM_01457€ | 862.826   | 714.644   |
| NM_01898€ | 387.108  | 720.857  | AK026682  | 2799.111  | 4449.111  | AL162035  | 789.082   | 328.475   |
| AF086201  | 1705.989 | 1936.609 | NM_00465€ | 2115.329  | 2098.87   | NM_00669€ | 739.265   | 493.076   |
| U48696    | 1099.422 | 1197.233 | NM_00394€ | 2497.552  | 2413.06   | NM_003084 | 3466.39   | 2112.805  |
| AF230316  | 6284.423 | 7177.967 | NM_006471 | 54863.863 | 43648.098 | NM_00258€ | 5699.557  | 4133.235  |
| L32136    | 482.352  | 491.387  | NM_00416€ | 3188.726  | 1693.462  | NM_00100€ | 56581.516 | 54175.801 |
| K00629    | 860.125  | 598.873  | NM_00036€ | 2970.023  | 2887.802  | D17289    | 4011.682  | 4262.631  |
| AK024515  | 1604.154 | 1349.518 | NM_01658€ | 3773.252  | 3397.37   | NM_00294€ | 13269.747 | 11770.921 |
| AF085862  | 2950.369 | 2968.529 | NM_00414€ | 958.599   | 967.091   | NM_01423€ | 5134.101  | 4678.722  |
| NM_01799€ | 1979.808 | 1916.321 | NM_00286€ | 14505.26  | 15496.778 | NM_01774€ | 5446.53   | 6617.691  |
| AL049271  | 41513.14 | 32137.58 | NM_00386€ | 3136.046  | 3408.096  | NM_014901 | 10378.753 | 13972.789 |
| AK023079  | 31959.53 | 23425.97 | NM_005414 | 2208.426  | 2718.68   | AK000005  | 2201.435  | 2643.582  |
| NM_01960€ | 2202.859 | 1644.453 | NM_00446€ | 11222.852 | 11109.978 | AF086790  | 1812.685  | 2209.522  |
| AK026198  | 757.716  | 721.279  | NM_016031 | 8059.431  | 7695.429  | U28480    | 996.048   | 1114.93   |
| AF183570  | 481.267  | 789.293  | NM_004804 | 2683.76   | 2861.196  | NM_00010€ | 16077.667 | 24136.354 |
| NM_005497 | 1948.512 | 2343.293 | M92439    | 10328.74  | 9454.856  | NM_01812€ | 4087.658  | 11081.618 |
| AK024048  | 7187.589 | 6996.231 | AL117665  | 4427.356  | 3697.337  | NM_016931 | 11064.818 | 26201.68  |
| AB033093  | 4431.583 | 5212.591 | AF263541  | 3674.917  | 2726.045  | NM_00016€ | 3628.198  | 5701.503  |
| NM_00591€ | 1138.178 | 921.513  | NM_00126€ | 8799.063  | 8458.997  | NM_00442€ | 394.257   | 214.645   |
| NM_00590€ | 15224.74 | 17134.94 | BE873030  | 2903.294  | 2476.969  | AK027067  | 698.785   | 332.925   |
| AK055991  | 1741.876 | 1433.155 | NM_00244€ | 2367.102  | 2202.033  | NM_016287 | 10443.189 | 7448.692  |
| AF113697  | 819.872  | 521.049  | NM_00362€ | 2043.705  | 2088.445  | NM_003864 | 8790.968  | 5136.378  |
| NM_00568€ | 1924.917 | 1572.54  | BC006990  | 11905.384 | 13161.107 | NM_006824 | 22950.447 | 14720.925 |
| NM_020427 | 13533.15 | 19489.3  | NM_002277 | 3963.987  | 3695.968  | NM_002107 | 1016.291  | 800.411   |
| AF085920  | 945.914  | 893.34   | NM_019114 | 3299.057  | 3634.374  | NM_002694 | 11320.031 | 10709.472 |
| AK023173  | 3189.627 | 2797.832 | M33552    | 15379.597 | 15977.729 | NM_004454 | 1700.325  | 1734.829  |
| U79275    | 842.859  | 637.664  | AJ252060  | 2690.15   | 2199.193  | NM_00096€ | 449.729   | 609.787   |
| AK022367  | 1097.74  | 516.21   | NM_00640€ | 5487.681  | 4983.749  | NM_01248€ | 2701.956  | 1876.248  |
| BC028589  | 2855.971 | 2362.09  | NM_018977 | 1015.903  | 1180.838  | AF217227  | 840.982   | 983.733   |
| CY3Cy5    | 4052.829 | 377.148  | AJ001402  | 2138.597  | 1544.595  | AK024141  | 1196.385  | 1360.332  |
| BG539651  | 546.324  | 375.315  | NM_00454€ | 579.202   | 508.77    | U13706    | 869.448   | 990.286   |
| N52646    | 5571.896 | 4466.651 | NM_00023€ | 5370.173  | 8304.894  | NM_00281€ | 15278.957 | 13188.182 |
| AW160671  | 53142.2  | 42831.35 | NM_01587€ | 892.057   | 1004.198  | NM_00119€ | 381.758   | 522.537   |

|           |          |          |           |           |           |           |           |           |
|-----------|----------|----------|-----------|-----------|-----------|-----------|-----------|-----------|
| BI870529  | 22644.95 | 17783.88 | AF068236  | 45785.359 | 45270.969 | AK022745  | 4647.156  | 4659.229  |
| AA702698  | 1041.325 | 934.855  | L25628    | 1071.741  | 1470.251  | AL049450  | 5231.987  | 4086.184  |
| AI681514  | 382.04   | 316.663  | M37033    | 16324.892 | 15284.41  | NM_005086 | 48153.047 | 59211.293 |
| NM_00130C | 4275.195 | 4577.713 | NM_007171 | 6349.521  | 5897.245  | NM_007236 | 4085.64   | 8962.337  |
| BG748827  | 5099.953 | 5153.106 | NM_004278 | 2138.531  | 1709.312  | AL049340  | 1028.329  | 2664.184  |
| AA952897  | 2420.254 | 1633.788 | NM_005632 | 1238.105  | 1093.247  | NM_017606 | 2597.955  | 10282.76  |
| BG760342  | 4329.036 | 4611.684 | AK021499  | 1053.941  | 1028.299  | AK024644  | 8361.547  | 17124.896 |
| AA703141  | 2284.233 | 1942.373 | AK000336  | 3088.149  | 2955.492  | AB019573  | 1024.903  | 1013.59   |
| AI122630  | 7155.01  | 4486.771 | NM_002795 | 49622.777 | 42654.707 | AF064254  | 804.373   | 615.227   |
| NM_002103 | 8612.762 | 5200.899 | NM_006292 | 7516.548  | 8207.953  | AL137360  | 3411.254  | 3964.575  |
| NM_003379 | 5772.946 | 3617.525 | AB007948  | 2011.741  | 2283.901  | AK000819  | 358.891   | 689.831   |
| SR1       | 62926.76 | 51412.52 | AB033066  | 2095.251  | 956.977   | AF201941  | 2668.787  | 2478.313  |
| SR3       | 30639.94 | 13206.73 | AF126028  | 3772.693  | 3718.198  | AF026941  | 867.905   | 1077.852  |
| SR5       | 4026.529 | 1964.963 | NM_007019 | 19060.072 | 22030.74  | NM_00707C | 3592.892  | 3165.007  |
| SR7       | 5348.684 | 17195.4  | NM_007075 | 819.397   | 884.353   | AL133019  | 3104.101  | 3416.917  |
| SR9       | 17444.65 | 1713.209 | NM_016042 | 2053.299  | 2646.901  | NM_014895 | 1275.118  | 1242.343  |
| CY3Cy5    | 1438.659 | 179.831  | NM_01764C | 1594.956  | 1345.425  | AK024883  | 5231.06   | 4710.574  |
| NM_012428 | 5085.221 | 5361.275 | NM_017721 | 3194.481  | 4765.322  | AF217989  | 2404.744  | 2855.602  |
| NM_005565 | 6131.201 | 5010.595 | NM_019088 | 7660.217  | 10407.135 | NM_017654 | 2310.414  | 2147.157  |
| NM_003824 | 4417.557 | 3544.437 | AB002373  | 2691.421  | 2985.911  | L77561    | 412.174   | 959.542   |
| NM_000686 | 383.507  | 260.024  | NM_01635C | 35143.082 | 23334.246 | AL109696  | 917.195   | 1775.628  |
| NM_012452 | 1010.388 | 795.905  | AK024167  | 10025.256 | 6204.521  | AK022190  | 805.726   | 1818.205  |
| AF229166  | 883.855  | 1038.356 | AK025308  | 581.935   | 590.806   | AJ011593  | 2438.533  | 5334.712  |
| NM_005137 | 1372.76  | 1650.295 | NM_005026 | 2169.788  | 1681.229  | AJ227907  | 679.421   | 1017.102  |
| NM_006764 | 1198.829 | 819.372  | AF213356  | 963.389   | 1170.143  | X89743    | 788.692   | 1281.311  |
| NM_001163 | 1417.302 | 1495.848 | BC035716  | 2217.689  | 2762.242  | U17621    | 599.757   | 825.454   |
| NM_005878 | 353.004  | 458.557  | NM_018014 | 4909.155  | 4550.33   | AL049239  | 1911.753  | 2472.552  |
| AF308602  | 4031.222 | 3672.163 | NM_002355 | 15886.808 | 18450.234 | NM_013288 | 1231.954  | 1399.959  |
| AB011089  | 988.232  | 797.852  | AF230809  | 2859.62   | 3003.723  | M60721    | 2155.655  | 1734.065  |
| AF007192  | 400.721  | 284.506  | NM_017894 | 47759.82  | 47300.117 | L39061    | 3474.446  | 2795.688  |
| NM_001276 | 5658.448 | 3082.924 | NM_006505 | 1447.379  | 2250.367  | AF071508  | 1257.926  | 1572.695  |
| NM_014915 | 19201.53 | 9778.684 | AK025447  | 2123.602  | 1942.744  | L07265    | 13603.673 | 14215.565 |
| NM_012286 | 1135.581 | 594.665  | NM_002624 | 47794.883 | 46336.703 | D16472    | 2135.197  | 2439.383  |
| NM_002195 | 5853.478 | 3437.729 | AF006199  | 1643.036  | 1726.903  | AK022467  | 326.783   | 581.852   |
| D84294    | 2678.33  | 1520.791 | NM_004554 | 8283.778  | 6685.373  | AL157459  | 2596.038  | 4433.156  |
| M31659    | 1443.91  | 1306.908 | NM_018119 | 3403.485  | 2795.673  | AL157421  | 480.458   | 684.175   |
| NM_003056 | 4155.123 | 6704.041 | NM_014576 | 1553.652  | 1901.874  | AL353954  | 1407.98   | 1735.545  |
| NM_016226 | 20099.57 | 18031.71 | AL162035  | 1012.356  | 729.815   | NM_01763C | 565.461   | 414.934   |
| AK024311  | 717.126  | 1235.79  | NM_006692 | 1886.658  | 1555.251  | AK000778  | 1293.192  | 1610.782  |
| AF052155  | 9800.322 | 6515.454 | NM_003084 | 4929.954  | 4107.38   | AK000932  | 1022.309  | 2027.46   |
| NM_005085 | 918.362  | 744.88   | NM_002582 | 8563.102  | 7783.917  | AL133573  | 5419.736  | 6700.819  |
| AF060902  | 1331.634 | 1232.506 | NM_001005 | 59723.93  | 59136.746 | AK000115  | 641.704   | 1743.144  |
| AF121858  | 2223.572 | 1929.266 | D17289    | 5175.936  | 4021.563  | NM_017959 | 548.845   | 698.179   |
| NM_013437 | 4133.076 | 4074.397 | NM_002945 | 18180.111 | 13307.624 | AK000958  | 719.697   | 661.458   |
| NM_017681 | 1024.561 | 658.558  | NM_01423C | 7467.894  | 4371.242  | AK024523  | 996.645   | 866.071   |
| X57655    | 6184.979 | 6496.025 | NM_017748 | 9292.666  | 10069.334 | AK024600  | 646.99    | 621.631   |
| AK025966  | 2011.413 | 1217.751 | AK025374  | 2113.352  | 2427.042  | AK024543  | 1548.242  | 1665.043  |
| NM_018725 | 1086.918 | 1628.952 | NM_014901 | 13570.748 | 14243.05  | AK024624  | 6988.208  | 5870.778  |
| NM_003081 | 5219.818 | 4824.85  | AK000005  | 3157.276  | 3484.014  | AF086473  | 550.963   | 496.438   |
| NM_016495 | 8473.845 | 4170.898 | AF086790  | 2597.448  | 2578.626  | D87682    | 1041.478  | 1228.269  |
| D50402    | 2537.463 | 1536.381 | U28480    | 1564.326  | 1727.594  | AF321617  | 4325.111  | 6391.178  |
| M73547    | 5934.64  | 5360.506 | NM_000108 | 14548.082 | 19165.688 | AV710479  | 464.596   | 640.139   |
| NM_003687 | 310.315  | 270.922  | NM_018128 | 4122.872  | 4766.886  | NM_00695C | 652.873   | 583.627   |

|           |          |          |           |           |           |           |           |           |
|-----------|----------|----------|-----------|-----------|-----------|-----------|-----------|-----------|
| NM_004134 | 3362.277 | 1590.681 | NM_016931 | 14670.359 | 13379.404 | NM_000682 | 472.563   | 519.307   |
| NM_005955 | 1331.341 | 580.689  | NM_004373 | 56361.852 | 45990.945 | AF086208  | 2074.064  | 2439.017  |
| NM_004048 | 1303.209 | 496.733  | NM_005566 | 57509.586 | 60254.016 | AK023335  | 1242.874  | 1344.733  |
| NM_001179 | 505.295  | 1220.499 | NM_000162 | 6307.61   | 4954.023  | AK023187  | 654.517   | 761.877   |
| NM_017765 | 3413.766 | 5540.845 | AK027067  | 997.541   | 854.644   | AK022231  | 270.562   | 236.222   |
| NM_000428 | 631.598  | 793.621  | NM_016287 | 14502.956 | 10588.149 | NM_019033 | 350.869   | 530.669   |
| AB040967  | 800.06   | 1119.805 | NM_003864 | 9755.165  | 10394.008 | AL133101  | 1728.583  | 1903.614  |
| NM_014721 | 1222.398 | 1190.786 | NM_006824 | 24775.885 | 22378.85  | AK024602  | 20604.82  | 22964.605 |
| AK026352  | 538.547  | 543.02   | NM_002107 | 1279.847  | 1270.527  | NM_018507 | 398.961   | 360.8     |
| AL137705  | 1823.906 | 1272.928 | NM_002694 | 15543.726 | 15121.292 | NM_000485 | 7425.099  | 8048.691  |
| NM_014848 | 333.305  | 314.993  | NM_004454 | 3277.719  | 5586.792  | NM_018542 | 1248.74   | 1568.718  |
| BF217766  | 960.104  | 658.015  | NM_000966 | 915.899   | 807.53    | AK025503  | 1686.78   | 3782.992  |
| NM_000184 | 1250.489 | 761.131  | NM_012482 | 3288.582  | 2812.569  | AF130073  | 1827.796  | 3095.632  |
| NM_000112 | 593.335  | 450.558  | AF217227  | 1513.118  | 1315.676  | AK024225  | 15516.837 | 21730.535 |
| NM_005827 | 3965.074 | 3390.799 | AK024141  | 3768.782  | 3218.793  | AF086334  | 951.636   | 1386.666  |
| NM_003053 | 1292.417 | 770.344  | U13706    | 1086.379  | 644.474   | AL137602  | 1357.701  | 2958.01   |
| NM_006672 | 909.336  | 533.104  | NM_002813 | 25752.66  | 24856.408 | NM_003696 | 666.15    | 1473.42   |
| AB007875  | 1001.008 | 1431.049 | AK022745  | 5322.453  | 5750.576  | AF075035  | 20049.498 | 15043.478 |
| NM_014796 | 6441.736 | 8102.915 | AL049450  | 7091.977  | 7500.369  | AL110180  | 3786.964  | 4011.369  |
| NM_001147 | 281.609  | 260.938  | NM_005086 | 56714.945 | 52474.527 | BC024924  | 5091.728  | 5361.395  |
| AL050288  | 25848.38 | 22755.49 | NM_007238 | 4530.249  | 3926.484  | NM_017906 | 7762.576  | 6848.395  |
| NM_005040 | 3529.74  | 5186.148 | AL049340  | 914.397   | 1199.918  | AL110286  | 3912.05   | 3735.423  |
| NM_016391 | 7537.192 | 6357.638 | NM_017606 | 3076.74   | 2174.568  | AF086374  | 367.075   | 388.471   |
| M80783    | 614.426  | 544.941  | AK024644  | 10767.478 | 7965.321  | AL162066  | 8845.239  | 9847.407  |
| AF075033  | 9070.38  | 8616.603 | AB019573  | 770.291   | 680.217   | NM_016096 | 25975.648 | 19121.264 |
| D50911    | 12539.23 | 6758.276 | U68494    | 1154.369  | 859.902   | U79290    | 1399.756  | 1568.626  |
| AB011104  | 1335.175 | 834.151  | AF064254  | 1191.021  | 1088.858  | X98114    | 379.978   | 350.768   |
| AK024069  | 3908.302 | 2086.433 | AK021524  | 607.301   | 421.295   | NM_014040 | 5039.617  | 5118.245  |
| NM_004582 | 17139.28 | 9149.622 | AL137360  | 6031.343  | 5152.703  | AK000799  | 7301.793  | 6680.779  |
| NM_015640 | 9128.07  | 5339.847 | AF143331  | 1701.924  | 1713.976  | NM_015582 | 6811.404  | 5656.211  |
| AF233450  | 629.729  | 535.344  | AK000819  | 1530.635  | 1582.461  | AK027091  | 2104.715  | 1936.004  |
| NM_016233 | 585.382  | 374.605  | AF201941  | 4135.103  | 3649.486  | NM_001526 | 1947.426  | 2302.458  |
| NM_000821 | 3989.683 | 2615.932 | AF026941  | 1323.464  | 1649.745  | U31738    | 1223.278  | 1733.934  |
| NM_003145 | 18139.68 | 10016.12 | NM_007070 | 4158.705  | 4793.558  | AF179890  | 5086.453  | 7517.892  |
| NM_001632 | 1171.211 | 936.22   | AL133019  | 4686.239  | 4440.494  | AK023536  | 9031.307  | 9734.654  |
| NM_012264 | 1639.235 | 987.516  | NM_014895 | 2212.883  | 1930.938  | AK026561  | 1492.191  | 1419.042  |
| AF311312  | 2179.174 | 1201.164 | AK024883  | 6526.945  | 7547.848  | AK021568  | 8508.779  | 10066.813 |
| NM_014915 | 24989.54 | 30911.12 | AF217989  | 4207.818  | 4241.166  | Z36838    | 468.349   | 472.161   |
| NM_012286 | 1031.305 | 1526.335 | NM_017654 | 1584.804  | 2524.713  | AF088054  | 452.59    | 459.683   |
| NM_002195 | 7431.878 | 7090.232 | L77561    | 383.199   | 449.274   | AK023881  | 2863.774  | 3289.773  |
| D84294    | 2984.152 | 3339.314 | AL109696  | 1003.83   | 1212.791  | AK027114  | 57749.801 | 59802.043 |
| K02765    | 675.321  | 660.971  | AK022190  | 1166.661  | 1423.999  | NM_016296 | 1612.826  | 1490.236  |
| M65134    | 284.509  | 378.281  | AJ011593  | 2601.468  | 3317.015  | AK002146  | 511.551   | 792.447   |
| BG539651  | 613.7    | 447.674  | AJ227907  | 521.84    | 290.81    | NM_003159 | 728.756   | 898.421   |
| N52646    | 6859.587 | 7088.31  | X89743    | 783.965   | 951.115   | NM_015492 | 3362.94   | 4679.625  |
| AW160671  | 53600.97 | 46329.37 | U17621    | 703.56    | 766.399   | NM_006933 | 306.288   | 252.32    |
| BI870529  | 21428.58 | 13864.6  | AL049239  | 4905.975  | 3476.017  | AF132204  | 1095.541  | 1290.501  |
| AA702698  | 911.021  | 563.117  | NM_013288 | 1476.255  | 1470.976  | AK022874  | 4755.692  | 4343.771  |
| AI681514  | 410.922  | 341.225  | M60721    | 2057.752  | 2377.452  | CY3Cy5    | 1619.258  | 117.56    |
| NM_001300 | 3566.46  | 1697.474 | L39061    | 4316.841  | 3860.139  | BI912037  | 792.465   | 736.724   |
| BG748827  | 4504.721 | 3902.046 | AF071508  | 4230.217  | 5989.95   | AA454646  | 703.505   | 534.183   |
| AA952897  | 2474.819 | 1365.609 | L07265    | 38827.273 | 41192.676 | U18087    | 15183.902 | 8023.667  |
| BG760342  | 4006.801 | 3122.178 | D16472    | 6598.168  | 6175.15   | U66349    | 1295.461  | 363.683   |

|           |          |          |           |           |           |           |           |           |
|-----------|----------|----------|-----------|-----------|-----------|-----------|-----------|-----------|
| AA703141  | 2158.284 | 1304.431 | AK022467  | 617.265   | 305.767   | AA057156  | 870.658   | 401.629   |
| AI122630  | 6384.472 | 3856.362 | AL157459  | 4222.717  | 3463.374  | AF166327  | 15910.667 | 7674.129  |
| NM_002103 | 7688.626 | 4837.492 | AL157421  | 675.549   | 534.435   | AF260739  | 566.217   | 350.128   |
| NM_003379 | 5474.849 | 3163.826 | AB020654  | 490.485   | 519.099   | AF531423  | 2882.494  | 1787.871  |
| NM_006589 | 3836.185 | 2604.153 | AL353954  | 1256.514  | 1176.88   | X76555    | 687.221   | 477.418   |
| NM_004134 | 4235.042 | 4093.485 | NM_017630 | 1252.435  | 1248.678  | NM_005432 | 1164.918  | 648.113   |
| NM_005955 | 1653.195 | 1440.329 | AK000778  | 1942.037  | 2023.698  | L10386    | 2297.767  | 1571.855  |
| NM_004048 | 2122.821 | 4797.325 | AL133573  | 10707.113 | 7789.196  | AF061812  | 1752.786  | 1270.816  |
| NM_012428 | 5236.441 | 4021.399 | AK000115  | 620.324   | 511.441   | NM_012469 | 4606.561  | 4584.174  |
| NM_013269 | 620.473  | 419.82   | NM_017959 | 325.444   | 645.319   | NM_134260 | 7517.276  | 6224.4    |
| NM_001728 | 7587.728 | 6700.71  | AK000958  | 1342.273  | 1101.911  | SR2       | 51719.633 | 34073.676 |
| NM_005565 | 6287.05  | 4919.478 | AK024523  | 1409.247  | 1251.758  | SR4       | 14638.1   | 8765.185  |
| NM_003824 | 4540.636 | 3358.911 | AK024600  | 1151.107  | 1304.83   | SR6       | 2264.189  | 1435.286  |
| NM_012452 | 775.181  | 881.207  | AK024543  | 2788.545  | 2159.412  | SR8       | 7712.369  | 15478.801 |
| AF229166  | 720.465  | 673.865  | AK024624  | 17790.475 | 12361.807 | SR10      | 27341.457 | 6127.69   |
| NM_005137 | 1614.292 | 1559.033 | AK025090  | 1375.659  | 1134.514  | CY3Cy5    | 2647.846  | 218.348   |
| NM_006764 | 1114.015 | 893.733  | NM_014152 | 629.258   | 853.368   | AL080157  | 1504.453  | 1701.512  |
| NM_001163 | 1134.255 | 640.19   | AF086473  | 1124.639  | 1238.501  | NM_005308 | 1560.416  | 1249.003  |
| NM_005878 | 239.535  | 149.68   | D87682    | 1544.182  | 1034.546  | NM_007227 | 522.304   | 224.47    |
| AF308602  | 3882.405 | 2522.167 | AF321617  | 8164.524  | 10828.536 | NM_007023 | 770.599   | 229.224   |
| AB011089  | 760.222  | 454.159  | AF223389  | 1418.718  | 1331.109  | NM_005873 | 3899.162  | 1860.408  |
| AF007192  | 386.047  | 314.994  | AV710479  | 817.783   | 906.298   | NM_004624 | 1019.337  | 415.741   |
| NM_001276 | 5146.509 | 2563.224 | NM_006950 | 1094.767  | 1864.542  | NM_003865 | 1032.974  | 517.504   |
| NM_000112 | 609.64   | 579.144  | NM_000682 | 1011.233  | 660.193   | AB015330  | 2451.395  | 1709.368  |
| NM_005827 | 4316.555 | 6276.43  | AF086208  | 3011.706  | 3418.138  | NM_001455 | 2511.62   | 1937.751  |
| NM_003053 | 1474.055 | 1371.172 | AK023335  | 2915.321  | 2018.249  | L09071    | 488.413   | 267.169   |
| NM_006672 | 1271.808 | 1606.199 | AK023187  | 1264.999  | 916.521   | NM_003322 | 1086.172  | 1157.997  |
| NM_000338 | 180.546  | 430.648  | AK022231  | 779.01    | 284.891   | NM_006363 | 4336.441  | 3463.048  |
| M31659    | 1337.993 | 1075.366 | NM_019033 | 882.145   | 808.521   | NM_020415 | 1943.021  | 1637.042  |
| NM_016226 | 18209.79 | 10415.2  | AL133101  | 2513.413  | 1547.009  | AL049667  | 4057.651  | 1716.574  |
| AK024311  | 774.404  | 746.313  | AF143875  | 606.279   | 478.478   | BF205683  | 1392.099  | 618.268   |
| AF052155  | 8810.044 | 5493.591 | AK024602  | 44204.789 | 49247.973 | NM_001548 | 602.256   | 159.637   |
| NM_005085 | 770.008  | 359.114  | NM_018507 | 1093.462  | 1646.868  | NM_000758 | 2633.145  | 1674.572  |
| AF060902  | 965.023  | 729.383  | NM_000485 | 14299.908 | 16422.012 | NM_002990 | 2596.413  | 2068.507  |
| AF121858  | 1872.715 | 1469.271 | NM_018542 | 2839.633  | 4284.295  | NM_002432 | 1285.757  | 561.813   |
| NM_013437 | 6138.995 | 8889.324 | AK025503  | 3166.244  | 3701.992  | AB033037  | 1119.161  | 887.353   |
| NM_017681 | 1181.087 | 820.987  | AF130073  | 3402.095  | 4962.511  | L40400    | 2579.977  | 2551.166  |
| X57655    | 5643.469 | 5044.689 | AK024225  | 28814.766 | 28615.459 | AK025688  | 1808.835  | 1855.796  |
| AK025966  | 2162.894 | 1146.394 | AF086334  | 2422.241  | 2773.478  | NM_001195 | 366.347   | 291.354   |
| NM_018725 | 446.192  | 325.28   | AL137602  | 842.639   | 1075.554  | NM_014448 | 634.412   | 952.542   |
| NM_003081 | 5165.891 | 2601.793 | NM_003696 | 753.009   | 904.034   | NM_020166 | 2542.901  | 2506.497  |
| NM_016495 | 7195.722 | 2503.193 | U00949    | 645.28    | 669.364   | S56138    | 449.213   | 413.285   |
| D50402    | 2806.589 | 1244.33  | BC024924  | 7248.884  | 8270.053  | AK023860  | 849.288   | 497.322   |
| M73547    | 5531.069 | 3786.129 | NM_017906 | 12774.803 | 14147.966 | NM_004905 | 8466.665  | 3607.363  |
| NM_003687 | 331.366  | 191.94   | AL110286  | 6478.497  | 6279.108  | AF217971  | 1876.226  | 1216.457  |
| NM_020121 | 1105.37  | 1337.742 | AF086374  | 631.544   | 630.313   | AF245517  | 855.606   | 508.656   |
| NM_003145 | 24481.55 | 37759.24 | AL162066  | 29834.248 | 21134.561 | NM_004982 | 609.817   | 417.032   |
| NM_001632 | 1684.035 | 1644.716 | NM_016096 | 34390.137 | 23311.51  | AK026180  | 798.736   | 743.511   |
| NM_012264 | 2245.196 | 3455.804 | U79290    | 2495.559  | 2049.658  | NM_005817 | 3931.969  | 4559.116  |
| AF311312  | 2276.295 | 1923.378 | X98114    | 662.451   | 451.057   | NM_003916 | 3976.914  | 3546.728  |
| NM_001179 | 508.618  | 370.062  | NM_014040 | 8068.667  | 7912.22   | NM_002870 | 10016.624 | 15000.178 |
| NM_017765 | 2478.169 | 2072.119 | AK000799  | 12752.487 | 11208.511 | AF135422  | 1616.351  | 1484.608  |
| NM_000428 | 544.226  | 415.694  | NM_015582 | 12007.539 | 16351.068 | AF070587  | 5900.773  | 15011.61  |

|           |          |          |           |           |           |           |           |           |
|-----------|----------|----------|-----------|-----------|-----------|-----------|-----------|-----------|
| AB040967  | 873.454  | 870.609  | AK027091  | 3141.49   | 4709.617  | BE250526  | 526.5     | 2310.503  |
| NM_014721 | 1084.197 | 642.394  | NM_001526 | 3823.295  | 4887.084  | NM_012222 | 2835.15   | 2260.763  |
| AK026352  | 455.822  | 403.221  | U31738    | 2464.722  | 3380.018  | NM_005002 | 2593.605  | 1293.262  |
| AL137705  | 1698.441 | 858.44   | AF179890  | 7940.034  | 11654.002 | NM_006596 | 2955.874  | 2145.46   |
| AF169257  | 212.451  | 121.49   | AK023536  | 15184.849 | 21854.666 | AK023214  | 4882.449  | 2675.826  |
| NM_014848 | 285      | 149.873  | AK026561  | 4769.332  | 7485.18   | NM_001469 | 6941.323  | 3853.251  |
| BF217766  | 1087.806 | 364.15   | AK021568  | 17322.955 | 24788.586 | NM_003600 | 2727.692  | 1848.527  |
| NM_000184 | 1064.216 | 435.46   | Z36838    | 2524.595  | 3851.314  | NM_017490 | 2441.151  | 1957.434  |
| NM_002103 | 9175.165 | 7644.99  | AK023881  | 6021.722  | 8840.027  | AK026727  | 1024.974  | 853.082   |
| NM_003379 | 6131.208 | 5133.036 | AK027114  | 63353.707 | 63337.855 | NM_002830 | 862.154   | 624.95    |
| NM_006589 | 4951.768 | 5847.629 | NM_016298 | 3984.913  | 4637.178  | NM_006247 | 5331.473  | 4267.601  |
| AB007875  | 749.71   | 946.544  | AK002146  | 1773.63   | 2451.622  | AB032983  | 828.213   | 1014.086  |
| NM_014796 | 4314.243 | 2270.493 | NM_003159 | 2365.39   | 2764.64   | NM_018281 | 3373.253  | 3434.426  |
| AL050288  | 21866.98 | 9262.297 | NM_015492 | 10836.892 | 8684.361  | NM_004457 | 4614.916  | 4709.476  |
| NM_005040 | 2921.66  | 1884.125 | NM_006933 | 1320.465  | 858.336   | NM_014049 | 2314.519  | 2392.361  |
| NM_016391 | 6792.706 | 3001.817 | AF132204  | 4054.621  | 2325.754  | BC036375  | 12471.133 | 9832.483  |
| M80783    | 494.446  | 209.212  | AK022874  | 6788.902  | 2530.343  | U66349    | 1234.511  | 591.493   |
| AF075033  | 7979.759 | 2646.538 | CY3Cy5    | 2068.089  | 600.114   | AA057156  | 972.958   | 725.131   |
| D50911    | 13181.96 | 3585.35  | BI912037  | 1051.087  | 771.236   | AF260739  | 415.104   | 331.984   |
| AB011104  | 1784.919 | 947.761  | AA454646  | 588.226   | 557.174   | AF531423  | 2576.56   | 1799.786  |
| AK024069  | 4932.453 | 1773.316 | U18087    | 46045.621 | 35357.359 | X76555    | 539.384   | 492.813   |
| NM_004582 | 19522.27 | 6694.435 | U66349    | 1431.723  | 1456.363  | NM_005432 | 1112.138  | 693.076   |
| NM_015640 | 10869.48 | 4983.75  | AA057156  | 1702.82   | 1888.374  | L10386    | 2536.476  | 2329.566  |
| AF233450  | 727.099  | 520.7    | AF166327  | 16962.459 | 17719.793 | AF061812  | 1590.569  | 1882.935  |
| NM_016233 | 809.507  | 257.377  | AF260739  | 1741.309  | 1515.084  | AL136756  | 623.691   | 797.566   |
| NM_000821 | 5843.021 | 2547.432 | AF531423  | 2890.785  | 2764.416  | NM_012469 | 4442.112  | 4678.45   |
| AF308602  | 3999.768 | 3446.387 | X76555    | 1117.224  | 1013.148  | NM_134260 | 7468.517  | 6037.09   |
| AB011089  | 955.014  | 895.771  | NM_005432 | 2149.694  | 1895.289  | AK025688  | 1608.046  | 1666.62   |
| AF007192  | 519.525  | 602.003  | L10386    | 3938.067  | 3444.278  | Z36819    | 46359.75  | 36103.914 |
| NM_001276 | 9996.548 | 21454.76 | AF061812  | 8273.883  | 6081.604  | NM_001195 | 768.078   | 814.091   |
| NM_014915 | 19314.87 | 11627.51 | AL136756  | 1746.387  | 1769.602  | NM_007227 | 748.359   | 341.178   |
| NM_012286 | 1091.315 | 660.513  | NM_012469 | 10883.347 | 9381.794  | NM_004624 | 1141.005  | 902.042   |
| NM_002195 | 5536.469 | 2373.364 | NM_134260 | 9582.604  | 6704.484  | NM_003865 | 925.825   | 347.408   |
| D84294    | 2374.105 | 1062.039 | SR2       | 51320.617 | 41500.961 | AB015330  | 2174.927  | 2006.838  |
| K02765    | 326.965  | 219.242  | SR4       | 14737.334 | 11780.148 | NM_001455 | 2616.078  | 2173.311  |
| BG539651  | 475.734  | 180.255  | SR6       | 3166.182  | 2763.404  | L09071    | 406.766   | 746.814   |
| N52646    | 5310.774 | 1857.523 | SR8       | 7720.511  | 19100.346 | NM_003322 | 1004.19   | 1389.227  |
| AW160671  | 56994.34 | 24362.2  | SR10      | 26934.225 | 7167.543  | AK026180  | 689.606   | 556.999   |
| BI870529  | 24343.83 | 15945.99 | CY3Cy5    | 1641.149  | 159.097   | NM_013365 | 2190.556  | 2360.772  |
| AA702698  | 1280.138 | 1053.867 | AL080157  | 2992.669  | 2377.022  | NM_005817 | 3603.03   | 3562.13   |
| AI681514  | 548.971  | 676.232  | NM_005308 | 1987.251  | 1590.918  | NM_003916 | 3580.691  | 1992.734  |
| NM_001300 | 5277.316 | 6935.991 | NM_007227 | 604.502   | 449.63    | AL049667  | 4006.242  | 2254.614  |
| BG748827  | 7496.934 | 17117.75 | NM_007023 | 780.904   | 783.354   | NM_000334 | 1266.932  | 1090.935  |
| AA952897  | 3934.172 | 4820.437 | NM_005873 | 6087.873  | 5011.574  | NM_020400 | 1233.752  | 845.96    |
| NM_003081 | 8643.935 | 9717.57  | NM_004624 | 1992.964  | 2052.173  | NM_001504 | 874.975   | 502.792   |
| NM_016495 | 10510.43 | 6419.067 | NM_003865 | 1688.019  | 1660.377  | D50926    | 1874.582  | 1064.677  |
| D50402    | 3169.609 | 2803.655 | AB015330  | 7471.247  | 6980.744  | BF205683  | 1140.276  | 871.134   |
| M73547    | 6876.819 | 6438.406 | NM_001455 | 3726.915  | 3144.243  | NM_001548 | 599.618   | 267.741   |
| NM_003687 | 445.864  | 340.681  | L09071    | 772.836   | 571.997   | NM_000758 | 3023.87   | 2839.328  |
| NM_004134 | 3555.328 | 1656.052 | NM_003322 | 1849.787  | 1687.897  | NM_002990 | 3561.426  | 4510.494  |
| NM_005955 | 1174.722 | 535.289  | BC036375  | 16958.057 | 15599.095 | NM_002432 | 1515.674  | 966.984   |
| NM_004048 | 925.51   | 333.171  | NM_006363 | 4279.666  | 4525.075  | AB033037  | 1004.36   | 912.343   |
| NM_012428 | 4948.229 | 3164.348 | NM_020415 | 3297.054  | 2601.699  | L40400    | 3219.921  | 5251.694  |

|           |          |          |           |           |           |           |           |           |
|-----------|----------|----------|-----------|-----------|-----------|-----------|-----------|-----------|
| NM_01326€ | 733.566  | 631.762  | AL049667  | 4810.161  | 4236.561  | NM_006247 | 4205.284  | 4002.916  |
| NM_00172€ | 8517.015 | 10759.23 | NM_000334 | 2995.486  | 2310.062  | AB032983  | 1039.872  | 1297.725  |
| NM_00556€ | 8678.913 | 15639.2  | NM_02040€ | 1780.888  | 1740.548  | NM_018281 | 3287.604  | 3911.474  |
| NM_003824 | 7066.926 | 13487.3  | NM_001504 | 1905.894  | 1512.577  | NM_004457 | 3817.127  | 3443.076  |
| NM_00068€ | 613.695  | 922.202  | D50926    | 2373.002  | 2977.652  | NM_01404€ | 2287.484  | 1603.223  |
| NM_001163 | 1604.884 | 2981.855 | BF205683  | 4074.047  | 4125.189  | NM_00431€ | 4783.766  | 4177.497  |
| NM_00587€ | 373.031  | 939.194  | NM_00156€ | 413.617   | 375.179   | NM_02016€ | 2637.688  | 2078.221  |
| NM_02034€ | 382.856  | 643.265  | NM_00154€ | 974.984   | 2590.597  | AK023860  | 1008.416  | 848.029   |
| AF169257  | 430.482  | 267.268  | NM_00075€ | 4263.25   | 5908.935  | NM_000031 | 2921.609  | 2323.173  |
| NM_01484€ | 590.108  | 566.272  | M17017    | 607.74    | 602.592   | NM_00208€ | 21388.137 | 12567.611 |
| BF217766  | 1128.047 | 1154.188 | NM_00299€ | 4969.364  | 3046.853  | NM_01628€ | 6503.787  | 5155.346  |
| NM_000184 | 1585.261 | 1624.647 | NM_00243€ | 2364.626  | 2228.799  | NM_001567 | 765.164   | 734.689   |
| NM_01618€ | 376.319  | 249.411  | AB033037  | 1363.03   | 1180.332  | NM_00490€ | 8159.722  | 5447.058  |
| NM_000112 | 530.469  | 401.621  | L40400    | 5069.852  | 4689.872  | AF217971  | 1968.383  | 1822.896  |
| NM_005827 | 4606.249 | 4289.201 | AK025688  | 3141.687  | 3403.89   | NM_00192€ | 394.23    | 529.032   |
| NM_00305€ | 1530.945 | 841.742  | Z36819    | 52778.719 | 50475.871 | AF245517  | 879.159   | 1044.341  |
| NM_003044 | 357.048  | 272.928  | NM_00119€ | 413.09    | 509.401   | NM_00498€ | 506.468   | 515.162   |
| NM_00667€ | 1545.056 | 892.754  | NM_01444€ | 2336.8    | 2160.056  | AF286370  | 238.429   | 485.254   |
| M31659    | 1312.411 | 976.214  | NM_00431€ | 5407.448  | 7300.994  | NM_000217 | 368.057   | 223.746   |
| NM_00305€ | 4268.527 | 5662.427 | NM_02016€ | 3537.849  | 3453.508  | NM_01246€ | 4373.645  | 4125.495  |
| NM_01622€ | 19773.11 | 11578.14 | S56138    | 463.123   | 546.068   | NM_13426€ | 5683.739  | 5013.355  |
| AK024311  | 757.88   | 926.038  | AK023860  | 2371.041  | 2019.64   | NM_00147€ | 14099.678 | 10885.373 |
| AF052155  | 11337.16 | 6593.71  | NM_000031 | 3377.686  | 2880.42   | AF135422  | 2038.437  | 1620.895  |
| AF060902  | 1699.759 | 2634.082 | NM_00208€ | 23920.955 | 19827.309 | NM_00447€ | 5954.047  | 4445.756  |
| AF121858  | 2644.362 | 3955.809 | AK026061  | 1131.336  | 1236.319  | NM_00261€ | 1629.681  | 880.975   |
| NM_013437 | 5707.861 | 9068.171 | NM_01628€ | 8900.301  | 8960.185  | AF070587  | 4122.904  | 2315.352  |
| NM_017681 | 1312.113 | 1550.383 | NM_001567 | 1516.991  | 1378.208  | BE250526  | 479.099   | 339.203   |
| X57655    | 8851.724 | 24330.23 | NM_00490€ | 9703.979  | 10988.63  | NM_01681€ | 1225.346  | 631.07    |
| AK025966  | 2796.146 | 4653.334 | AF217971  | 4945.763  | 5205.795  | NM_01222€ | 2523.944  | 2266.982  |
| NM_01444€ | 399.494  | 572.241  | NM_00192€ | 723.279   | 1144.135  | NM_00500€ | 2565.391  | 1919.148  |
| NM_01872€ | 1009.57  | 1970.736 | AF245517  | 1298.52   | 1202.53   | NM_00659€ | 2877.713  | 3129.173  |
| AK024069  | 5466.085 | 3863.19  | NM_00498€ | 1665.831  | 1412.027  | AK023214  | 5396.881  | 4395.162  |
| NM_00458€ | 24777.72 | 22304.87 | AF286370  | 878.867   | 1042.751  | NM_00146€ | 9145.087  | 8588.572  |
| NM_01564€ | 13316.56 | 12536.51 | NM_000217 | 532.288   | 481.022   | NM_00360€ | 2648.891  | 2984.522  |
| AF233450  | 1152.539 | 1571.37  | AK026180  | 1186.696  | 1409.65   | NM_01749€ | 3138.978  | 2865.504  |
| NM_01623€ | 794.797  | 736.431  | NM_01336€ | 3719.881  | 3582.846  | AK026727  | 963.754   | 1031.504  |
| NM_000821 | 5440.003 | 3551.6   | NM_005817 | 5332.107  | 5432.082  | NM_00283€ | 712.567   | 948.805   |
| NM_00314€ | 22076.51 | 23330.3  | NM_00391€ | 4631.667  | 4857.99   | L09071    | 376.25    | 629.497   |
| NM_00163€ | 1765.606 | 2264.234 | NM_00287€ | 26072.977 | 17066.867 | NM_00332€ | 1298.277  | 1455.764  |
| NM_012264 | 1986.674 | 1304.309 | NM_00147€ | 41949.773 | 34530.477 | BC036375  | 12219.819 | 8755.695  |
| AF311312  | 2318.469 | 1655.173 | AF135422  | 2727.997  | 1987.833  | BI912037  | 730.161   | 549.343   |
| NM_001179 | 458.821  | 250.248  | NM_00447€ | 17727.631 | 13732.092 | AA454646  | 644.874   | 551.502   |
| NM_01776€ | 2995.81  | 2196.927 | NM_00261€ | 1395.056  | 1021.321  | U18087    | 14987.091 | 8971.035  |
| NM_00042€ | 575.474  | 558.353  | AF070587  | 5485.257  | 3994.24   | U66349    | 1287.675  | 593.401   |
| AB040967  | 1002.574 | 897.891  | BE250526  | 797.843   | 680.675   | AA057156  | 1039.629  | 892.591   |
| NM_014721 | 1830.988 | 2366.565 | NM_01681€ | 1706.54   | 1741.875  | AF166327  | 16845.119 | 13421.256 |
| AK026352  | 914.966  | 1747.076 | NM_01222€ | 6271.749  | 5887.66   | AF260739  | 615.88    | 573.015   |
| AL137705  | 2408.912 | 4079.029 | NM_00500€ | 2912.542  | 3356.984  | AF531423  | 2579.293  | 2208.429  |
| U41898    | 475.601  | 678.664  | NM_00659€ | 3719.197  | 4105.284  | X76555    | 650.202   | 680.455   |
| NM_00726€ | 34619.6  | 28858.68 | AK023214  | 8273.764  | 8573.676  | NM_00543€ | 1127.629  | 881.273   |
| NM_01478€ | 11018.56 | 8542.383 | NM_00146€ | 9168.973  | 8873.292  | L10386    | 2760.94   | 3414.184  |
| NM_01405€ | 4190.486 | 3923.207 | NM_00360€ | 8970.666  | 7476.722  | AF061812  | 1683.482  | 1910.198  |
| NM_002571 | 976.283  | 702.736  | NM_01749€ | 4384.334  | 4081.39   | AL136756  | 741.764   | 1458.702  |

|           |          |          |           |           |           |           |           |           |
|-----------|----------|----------|-----------|-----------|-----------|-----------|-----------|-----------|
| NM_00493  | 3634.482 | 4842.984 | AK026727  | 1714.788  | 2542.167  | NM_00299  | 2987.438  | 3502.04   |
| NM_00142  | 15779.3  | 16700.52 | NM_00283  | 685.28    | 664.633   | NM_00243  | 1484.784  | 1051.316  |
| NM_01571  | 1139.541 | 808.228  | NM_00624  | 5635.927  | 5080.188  | AB033037  | 1056.732  | 907.359   |
| NM_01415  | 4343.569 | 3117.455 | AB032983  | 2369.793  | 1976.675  | L40400    | 3074.3    | 3260.858  |
| AK021591  | 3313.827 | 3298.031 | NM_018281 | 5248.955  | 4714.018  | AK025688  | 1761.362  | 1722.431  |
| NM_01467  | 2010.913 | 1289.895 | NM_004457 | 6079.57   | 4719.646  | NM_01444  | 850.049   | 737.591   |
| NM_00658  | 4325.047 | 3471.698 | NM_01404  | 3091.193  | 2565.455  | AL080157  | 1599.493  | 1548.737  |
| AB007875  | 862.328  | 786.909  | BC036375  | 15317.721 | 12803.452 | NM_00530  | 1763.704  | 1066.904  |
| NM_01479  | 5131.504 | 2813.9   | U18087    | 51606.324 | 51965.875 | NM_007227 | 467.577   | 502.827   |
| NM_00504  | 4561.805 | 8243.585 | U66349    | 1456.318  | 1629.349  | NM_00702  | 508.26    | 377.898   |
| NM_016391 | 9540.816 | 14200.35 | AA057156  | 1600.426  | 1519.079  | NM_00587  | 4238.441  | 3898.53   |
| M80783    | 954.688  | 1737.551 | AF166327  | 18348.406 | 16981.889 | NM_004624 | 1319.752  | 1123.166  |
| AF075033  | 10528.65 | 14446.2  | AF260739  | 1771.687  | 1505.754  | NM_00386  | 1031.254  | 1155.415  |
| D50911    | 17217.17 | 24065.27 | AF531423  | 3109.542  | 2700.666  | AB015330  | 2489.824  | 2857.698  |
| AB011104  | 2028.482 | 3887.099 | X76555    | 1202.938  | 1195.281  | NM_00145  | 2808.23   | 2830.345  |
| NM_00055  | 7750.225 | 8971.336 | NM_00543  | 2198.763  | 1779.193  | NM_00498  | 729.158   | 785.638   |
| NM_00380  | 834.005  | 1147.016 | L10386    | 3933.766  | 3462.495  | NM_001694 | 46929.211 | 49190.594 |
| AK000860  | 1323.501 | 1328.905 | AF061812  | 8117.11   | 5765.015  | AF286370  | 687.314   | 348.216   |
| NM_014961 | 889.916  | 1038.9   | AL136756  | 1746.28   | 1471.294  | NM_000217 | 255.8     | 311.405   |
| NM_02014  | 2559.778 | 3860.481 | NM_01246  | 10578.617 | 8938.884  | AK026180  | 804.019   | 796.104   |
| AK021529  | 2047.309 | 2145.649 | NM_13426  | 8862.975  | 7158.313  | NM_005817 | 3734.669  | 4363.31   |
| AB037845  | 6590.574 | 5693.44  | AK025688  | 2239.803  | 1980.951  | NM_00391  | 3851.188  | 2824.819  |
| NM_00598  | 1028.108 | 907.647  | Z36819    | 51363.113 | 47864.867 | NM_00287  | 15455.031 | 13585.524 |
| NM_01619  | 4524.578 | 5750.443 | NM_001195 | 384.177   | 469.459   | NM_00636  | 4555.116  | 3325.958  |
| AL137579  | 2477.587 | 2781.428 | NM_01444  | 972.447   | 703.399   | NM_02041  | 2008.352  | 1507.27   |
| NM_01238  | 11262.71 | 6577.907 | NM_007227 | 643.371   | 570.017   | AL049667  | 4538.183  | 3259.1    |
| AF255342  | 446.077  | 456.009  | NM_00702  | 502.453   | 549.883   | NM_000334 | 1223.746  | 1297.124  |
| NM_00330  | 2649.321 | 2406.58  | NM_00587  | 5506.222  | 4504.837  | NM_02040  | 1329.651  | 949.484   |
| AK026682  | 2418.024 | 1708.709 | NM_004624 | 1946.222  | 1716.147  | NM_001504 | 804.053   | 1158.524  |
| NM_00465  | 2376.425 | 3853.816 | NM_014461 | 892.924   | 1294.691  | D50926    | 2113.031  | 1780.31   |
| NM_00394  | 3032.089 | 4885.795 | NM_00386  | 1126.22   | 1357.716  | BF205683  | 1074.499  | 1096.693  |
| NM_00416  | 3367.754 | 4651.506 | AB015330  | 7834.567  | 6555.914  | NM_00154  | 534.163   | 486.267   |
| NM_00036  | 3213.346 | 4754.856 | NM_00145  | 3552.372  | 3225.709  | NM_00075  | 3229.319  | 3903.445  |
| NM_01658  | 3825.426 | 6633.483 | L09071    | 632.395   | 432.97    | NM_00360  | 3793.573  | 3542.43   |
| BE535363  | 352.069  | 391.944  | NM_00332  | 1870.82   | 1697.95   | NM_01749  | 2723.703  | 3780.194  |
| NM_00414  | 1251.427 | 1551.863 | AK026180  | 1200.054  | 1332.257  | NM_00271  | 1100.93   | 1266.655  |
| NM_00286  | 2372.498 | 2493.057 | NM_005817 | 3230.951  | 3288.684  | AK026727  | 1048.662  | 1309.159  |
| NM_00386  | 805.416  | 1253.187 | NM_00391  | 3519.926  | 4026.508  | NM_00283  | 736.186   | 668.337   |
| NM_005414 | 1093.581 | 1128.908 | NM_00287  | 9810.947  | 7925.334  | NM_006247 | 4933.141  | 4846.941  |
| NM_00446  | 2434.427 | 4044.384 | AL049667  | 5585.457  | 5585.19   | AB032983  | 992.599   | 1361.876  |
| NM_016031 | 7177.709 | 11329.14 | NM_000334 | 3823.789  | 4160.578  | NM_018281 | 3716.961  | 4723.688  |
| NM_004804 | 5888.514 | 6493.663 | NM_02040  | 1999.447  | 2064.305  | NM_004457 | 4031.737  | 4129.965  |
| M92439    | 6950.809 | 8336.046 | NM_001504 | 2155.989  | 1929.167  | NM_01404  | 2453.481  | 2509.297  |
| AL117665  | 5847.28  | 7191.803 | D50926    | 2350.028  | 2938.395  | NM_00431  | 5214.09   | 5245.602  |
| AF263541  | 3050.345 | 5286.117 | BF205683  | 4077.181  | 3687.121  | NM_02016  | 2850.782  | 2725.678  |
| AK027169  | 528.751  | 667.515  | NM_00156  | 653.098   | 482.999   | S56138    | 475.39    | 313.741   |
| NM_00126  | 9268.837 | 10323.32 | NM_00154  | 663.06    | 1104.007  | AK023860  | 969.341   | 1033.832  |
| BE873030  | 393.338  | 310.638  | NM_00075  | 4040.215  | 4802.085  | NM_000031 | 3130.392  | 3520.304  |
| NM_00244  | 697.904  | 317.273  | NM_00299  | 5822.898  | 3495.865  | NM_00208  | 24633.801 | 17235.932 |
| NM_00362  | 343.603  | 311.017  | NM_00243  | 1859.215  | 2325.357  | NM_01628  | 7084.733  | 5124.167  |
| BC006990  | 11098.72 | 13607.6  | AB033037  | 1453.467  | 1287.52   | NM_001567 | 901.321   | 1204.602  |
| NM_019114 | 2928.608 | 3246.207 | L40400    | 4728.523  | 3854.274  | NM_00490  | 9080.23   | 7359.936  |
| M33552    | 5189.046 | 5501.313 | NM_006247 | 5112.691  | 5431.511  | AF217971  | 2015.333  | 2444.699  |



|           |          |          |           |           |           |           |           |           |
|-----------|----------|----------|-----------|-----------|-----------|-----------|-----------|-----------|
| NM_006403 | 6537.914 | 11127.98 | AB032983  | 1818.188  | 1254.724  | NM_001925 | 333.218   | 651.935   |
| NM_018977 | 1038.588 | 1457.737 | NM_004457 | 5021.151  | 4683.445  | AF245517  | 1029.717  | 1131.174  |
| AJ001402  | 342.767  | 441.3    | NM_014049 | 2278.269  | 2454.897  | X78926    | 2218.111  | 1898.492  |
| NM_004540 | 526.12   | 899.33   | NM_004315 | 5788.251  | 7116.212  | AJ278110  | 656.453   | 974.468   |
| NM_000235 | 11801.13 | 10528.63 | NM_000031 | 3913.462  | 3747.722  | NM_014237 | 1206.57   | 1563.813  |
| NM_015879 | 897.932  | 1057.878 | NM_002085 | 26030.051 | 25535.701 | NM_020396 | 486.451   | 535.994   |
| AF068236  | 2771.434 | 2789.205 | AK026061  | 1302.429  | 1525.514  | AF029900  | 2598.016  | 2802.223  |
| L25628    | 791.137  | 752.041  | NM_016286 | 9044.333  | 9008.382  | NM_003325 | 8079.577  | 9011.545  |
| M37033    | 13489.06 | 17503.89 | NM_001567 | 1416.051  | 1311.916  | NM_016178 | 1861.509  | 1924.915  |
| NM_007171 | 7417.256 | 9529.02  | NM_004905 | 9648.053  | 10932.348 | AK022639  | 939.597   | 790.072   |
| NM_004278 | 2507.516 | 3572.529 | AF217971  | 5749.521  | 5380.219  | D31766    | 7188.409  | 7125.914  |
| NM_005632 | 2225.657 | 3164.393 | NM_001925 | 937.472   | 2638.081  | NM_006547 | 1322.892  | 1128.647  |
| AK021499  | 1056.236 | 1237.005 | AF245517  | 1401.092  | 1125.63   | NM_001478 | 19987.615 | 20424.332 |
| AK000336  | 3891.633 | 4527.515 | NM_001694 | 53805.453 | 66851.945 | AF135422  | 1819.629  | 2008.483  |
| NM_002795 | 47732.67 | 54336.14 | NM_000217 | 602.449   | 887.514   | NM_004479 | 6781.589  | 6379.462  |
| NM_006292 | 8786.873 | 8738.8   | NM_012469 | 10497.418 | 10069.318 | NM_002610 | 1665.783  | 1342.758  |
| AB007948  | 2491.478 | 3202.997 | NM_134260 | 6756.76   | 5135.592  | AF070587  | 4380.112  | 3162.721  |
| AB033066  | 1286.911 | 1060.504 | NM_001478 | 12649.632 | 13810.929 | BE250526  | 416.212   | 697.673   |
| AF126028  | 3124.128 | 2834.118 | NM_004479 | 21609.303 | 18083.158 | NM_016819 | 1294.559  | 1128.254  |
| NM_007019 | 23942.08 | 20756.45 | NM_002610 | 2046.44   | 1776.62   | NM_012222 | 2949.271  | 3806.314  |
| NM_007075 | 673.413  | 890.09   | AF070587  | 5956.857  | 4591.606  | NM_005002 | 3229.503  | 3168.508  |
| NM_016042 | 2404.871 | 2860     | BE250526  | 818.323   | 629.561   | NM_006596 | 3378.258  | 3921.615  |
| NM_017640 | 1100.537 | 1087.641 | NM_016819 | 1877.283  | 2022.948  | AK023214  | 5779.907  | 6258.163  |
| NM_017721 | 2637.271 | 1507.023 | NM_012222 | 6705.738  | 6392.026  | NM_001469 | 10477.482 | 16366.387 |
| NM_019088 | 6346.59  | 4415.196 | NM_005002 | 3310.421  | 3292.02   | BC036368  | 374.01    | 406.748   |
| AB002373  | 3871.945 | 2529.23  | NM_006596 | 3890.836  | 2570.637  | NM_001851 | 2871.667  | 2869.428  |
| NM_016350 | 2248.922 | 2752.052 | AK023214  | 8156.3    | 6445.069  | S67789    | 463.029   | 388.246   |
| AK024167  | 9503.85  | 20502.11 | NM_001469 | 9521.051  | 8923.347  | AK022689  | 4250.079  | 3913.005  |
| AK025308  | 597.281  | 1015.669 | NM_003600 | 9935.503  | 8556.93   | NM_016227 | 1097.542  | 998.218   |
| NM_005026 | 2173.755 | 2652.597 | NM_017490 | 4612.061  | 3269.568  | NM_004195 | 10210.523 | 10884.979 |
| AF213356  | 368.98   | 688.688  | NM_002718 | 1793.52   | 1583.168  | NM_004705 | 2837.585  | 3793.267  |
| BC035716  | 2207.859 | 2031.032 | AK026727  | 1942.828  | 1688.542  | NM_020190 | 6303.481  | 6629.133  |
| NM_018014 | 4944.791 | 8640.905 | NM_002830 | 725.953   | 620.8     | AK024003  | 485.472   | 613.577   |
| NM_002359 | 12375.55 | 12113.77 | BI912037  | 1611.914  | 1883.507  | NM_014357 | 1991.068  | 2675.896  |
| AF230809  | 1695.919 | 2237.738 | AA454646  | 974.421   | 927.056   | NM_004067 | 1131.693  | 1888.193  |
| NM_017894 | 4079.927 | 5964.888 | U18087    | 49439.992 | 40063.059 | NM_000121 | 5912.78   | 9513.284  |
| NM_006509 | 2533.598 | 2209.992 | U66349    | 1490.021  | 1737.708  | NM_002091 | 2611.415  | 3558.483  |
| AK025447  | 2051.176 | 3556.156 | AA057156  | 1773.521  | 1755.635  | AB033092  | 2848.138  | 3595.593  |
| NM_002624 | 4126.942 | 6666.739 | U19487    | 351.842   | 493.556   | NM_003023 | 1158.605  | 960.839   |
| AF006199  | 2068.813 | 2929.747 | AF166327  | 17511.453 | 16247.411 | BC035030  | 2342.695  | 3097.63   |
| NM_004554 | 1287.08  | 2411.104 | AF260739  | 1635.398  | 1749.871  | NM_005340 | 51156.742 | 39361.324 |
| NM_018119 | 2731.054 | 5213.994 | AF531423  | 3029.263  | 2981.242  | NM_016201 | 982.995   | 959.58    |
| NM_014576 | 863.798  | 1008.021 | X76555    | 1076.05   | 851.81    | NM_017977 | 2252.005  | 2266.168  |
| AL162035  | 1052.975 | 1088.068 | NM_005432 | 2120.93   | 1507.616  | AF147727  | 1424.895  | 2037.044  |
| NM_006692 | 273.473  | 244.099  | L10386    | 3567.285  | 3473.516  | NM_006751 | 4060.557  | 11242.995 |
| NM_003084 | 4829.928 | 3975.717 | AF061812  | 7945.43   | 5867.074  | AB037834  | 2690.79   | 2606.269  |
| NM_002582 | 5021.271 | 4396.948 | AL136756  | 1533.859  | 885.778   | NM_003569 | 1701.69   | 4064.483  |
| NM_001009 | 56866.62 | 54828.22 | NM_002990 | 4616.689  | 3398.684  | NM_014052 | 13177.748 | 12252.247 |
| D17289    | 7031.785 | 9402.285 | NM_002432 | 1948.023  | 1865.927  | AF202635  | 764.619   | 1021.601  |
| NM_002949 | 17332.39 | 20628.37 | NM_001195 | 485.809   | 447.606   | NM_014125 | 508.06    | 666.612   |
| NM_014230 | 6727.482 | 7591.35  | NM_014448 | 3400.728  | 5742.82   | NM_017904 | 661.611   | 785.626   |
| NM_017748 | 8061.223 | 8915.063 | AL080157  | 3860.749  | 4151.939  | NM_013367 | 3522.564  | 3209.354  |
| AK025374  | 3463.058 | 4907.423 | NM_005308 | 2664.435  | 2430.457  | NM_000321 | 6744.6    | 5074.355  |

|           |          |          |           |           |           |           |           |           |
|-----------|----------|----------|-----------|-----------|-----------|-----------|-----------|-----------|
| NM_014901 | 19418.97 | 24989.42 | NM_000911 | 364.562   | 301.405   | NM_004336 | 8911.615  | 8711.216  |
| AK000005  | 3886.685 | 6407.824 | NM_007227 | 629.027   | 745.049   | NM_015949 | 2003.716  | 2683.297  |
| AF086790  | 405.543  | 624.45   | NM_007023 | 484.253   | 573.341   | NM_013979 | 3844.365  | 3048.361  |
| U28480    | 1011.428 | 1814.373 | NM_005873 | 5627.015  | 3998.989  | NM_003790 | 932.626   | 900.756   |
| NM_000108 | 19669.62 | 17975.4  | NM_004624 | 1909.838  | 1701.774  | NM_000494 | 1369.069  | 1255.868  |
| NM_018128 | 6229.26  | 7388.037 | NM_003865 | 1450.968  | 1648.92   | NM_016023 | 1766.66   | 1419.705  |
| NM_016931 | 4317.998 | 7966.213 | AB015330  | 7522.01   | 5757.8    | NM_003722 | 4282.098  | 3608.129  |
| NM_000162 | 1509.973 | 1726.022 | NM_001455 | 3722.318  | 2755.872  | NM_014430 | 695.697   | 537.583   |
| AK027067  | 1209.568 | 1439.139 | NM_004982 | 1273.834  | 1230.345  | NM_000495 | 557.332   | 495.388   |
| NM_016287 | 12282.82 | 12005.03 | NM_001694 | 53550.836 | 64150.18  | AF085883  | 2946.455  | 3335.952  |
| NM_003864 | 12321.87 | 11316.05 | AF286370  | 823.957   | 799.863   | NM_016571 | 709.56    | 1139.816  |
| NM_006824 | 23286.26 | 25863.09 | NM_000217 | 737.166   | 785.553   | NM_003688 | 525.306   | 577.188   |
| NM_002107 | 1157.104 | 1171.868 | NM_013365 | 3540.179  | 4311.766  | NM_016446 | 2368.515  | 4579.663  |
| NM_002694 | 9574.437 | 7944.809 | NM_005817 | 5680.236  | 6476.399  | NM_002516 | 601.1     | 376.697   |
| NM_004454 | 2607.888 | 2872.752 | NM_003916 | 4737.667  | 6213.059  | NM_001870 | 743.269   | 871.747   |
| NM_000966 | 758.802  | 912.124  | NM_002870 | 38951.641 | 37299.695 | AJ271216  | 1536.143  | 1712.678  |
| NM_012482 | 3498.757 | 3975.549 | NM_006363 | 4891.645  | 5666.629  | U23028    | 2948.926  | 3209.085  |
| AF217227  | 1447.877 | 2422.473 | NM_020415 | 3896.397  | 3280.338  | AK022680  | 1806.966  | 1438.991  |
| AK024141  | 684.84   | 777.643  | AL049667  | 5604.018  | 6026.763  | NM_018946 | 6599.218  | 6883.325  |
| U13706    | 374.898  | 413.972  | NM_000334 | 3693.696  | 3859.914  | NM_016359 | 9386.584  | 7657.545  |
| NM_002813 | 13161.26 | 14491.57 | NM_020400 | 1903.718  | 1961.795  | NM_004156 | 4416.683  | 6173.649  |
| NM_001198 | 621.547  | 1042.487 | NM_001504 | 2166.786  | 1650.737  | AK000561  | 797.939   | 907.012   |
| AK022745  | 12028.5  | 13096.64 | D50926    | 2286.957  | 2546.563  | AB051449  | 11397.078 | 11086.855 |
| AL049450  | 8321.874 | 11749.37 | BF205683  | 3950.984  | 3805.29   | BC009187  | 5618.105  | 4657.493  |
| AK023481  | 638.274  | 799.349  | NM_001565 | 469.215   | 553.588   | AL133617  | 564.009   | 818.2     |
| NM_005086 | 5799.649 | 7830.406 | NM_001548 | 573.296   | 1237.176  | NM_016485 | 7891.805  | 7928.608  |
| NM_007238 | 4732.38  | 6808.965 | NM_000758 | 5638.992  | 5113.828  | NM_002615 | 401.556   | 1020.956  |
| AL049340  | 1267.315 | 1807.693 | M17017    | 712.239   | 512.88    | AF090894  | 381.684   | 611.638   |
| AK024644  | 8997.012 | 14168.59 | NM_003600 | 10125.179 | 9460.237  | NM_006167 | 2470.158  | 2914.321  |
| AB019573  | 1102.788 | 1679.791 | NM_017490 | 4521.485  | 3452.879  | NM_016357 | 3137.896  | 3296.319  |
| U68494    | 1240.937 | 2763.61  | NM_002718 | 1887.021  | 1598.254  | NM_014500 | 7091.364  | 7785.939  |
| AF064254  | 1295.127 | 1790.803 | AK026727  | 1815.807  | 2125.427  | NM_020149 | 1216.75   | 1396.696  |
| AL137360  | 4218.627 | 6550.53  | NM_002830 | 603.391   | 804.768   | NM_006237 | 1347.502  | 1818.539  |
| AK000819  | 231.97   | 685.909  | NM_006247 | 6897.527  | 12759.758 | NM_001271 | 3860.06   | 2476.875  |
| AF201941  | 4763.835 | 5343.873 | AB032983  | 2199.271  | 1816.771  | NM_003683 | 2011.943  | 2515.453  |
| AF143878  | 283.004  | 545.609  | NM_018281 | 6090.421  | 6584.815  | AF039019  | 3444.805  | 3276.311  |
| AF026941  | 1568.534 | 2513.65  | NM_004457 | 5834.1    | 6141.25   | NM_012255 | 4344.999  | 4745.539  |
| NM_007070 | 6804.932 | 6915.861 | NM_014049 | 3545.889  | 3679.166  | NM_018196 | 1599.095  | 1857.091  |
| AL133019  | 6046.177 | 8261.485 | NM_005396 | 563.339   | 619.997   | NM_004818 | 5407.607  | 6537.032  |
| AK026192  | 473.47   | 581.671  | NM_004315 | 8696.221  | 22654.191 | J04205    | 8531.208  | 9283.851  |
| NM_014895 | 1420.028 | 1184.451 | NM_020166 | 4728.165  | 4347.513  | D38491    | 5985.081  | 2928.961  |
| AK024883  | 6717.95  | 5625.522 | S56138    | 527.911   | 410.347   | AK026835  | 2381.765  | 2342.125  |
| AF217989  | 1897.104 | 2743.525 | AK023860  | 2783.284  | 3086.218  | NM_002819 | 14151.188 | 13981.291 |
| NM_017654 | 5383.048 | 4738.87  | NM_000031 | 3966.029  | 4276.539  | NM_013264 | 4390.533  | 3628.506  |
| AK000776  | 318.325  | 815.492  | NM_002085 | 26249.098 | 24104.465 | NM_003315 | 8815.238  | 9334.345  |
| L77561    | 616.674  | 1106.958 | AK026061  | 1719.726  | 1439.235  | NM_005570 | 7486.273  | 8035.141  |
| AL109696  | 1156.208 | 1681.475 | NM_016286 | 8646.941  | 8974.13   | NM_000086 | 4631.83   | 4329.034  |
| AK022190  | 698.36   | 772.459  | NM_001567 | 1656.624  | 1525.371  | NM_003752 | 2523.663  | 2891.549  |
| AJ011593  | 2387.373 | 2530.945 | NM_004905 | 9619.939  | 9579.767  | NM_016491 | 12683.735 | 20317.389 |
| AJ227907  | 283.054  | 366.171  | AF217971  | 5515.477  | 4951.478  | NM_006429 | 26920.344 | 32599.889 |
| X89743    | 869.922  | 1134.741 | NM_001925 | 722.014   | 1045.209  | NM_003307 | 2929.456  | 2658.985  |
| AJ011599  | 217.587  | 529.007  | AF245517  | 1446.806  | 1441.665  | AF070565  | 401.152   | 423.854   |
| AJ002784  | 445.61   | 563.978  | X78926    | 3451.181  | 3158.952  | AK021644  | 1349.741  | 1118.389  |

|           |          |          |           |           |           |           |           |           |
|-----------|----------|----------|-----------|-----------|-----------|-----------|-----------|-----------|
| U17621    | 1202.218 | 1446.44  | AJ278110  | 1118.734  | 1217.025  | NM_002064 | 1486.899  | 1495.389  |
| AL049239  | 1601.324 | 2337.181 | NM_014237 | 3067.266  | 2173.548  | NM_015523 | 10224.31  | 8892.493  |
| NM_01328E | 1690.53  | 2622.339 | NM_02039E | 784.329   | 1028.959  | NM_01596C | 6479.832  | 6685.663  |
| M60721    | 4756.659 | 5538.425 | AF029900  | 5640.572  | 6939.681  | NM_00608E | 4395.69   | 3647.565  |
| L39061    | 5640.039 | 6514.453 | NM_00332E | 10731.873 | 14743.051 | NM_000907 | 7903.328  | 7308.776  |
| AF071508  | 753.707  | 1019.09  | NM_01617E | 2341.736  | 3499.84   | AF254085  | 3981.386  | 6062.758  |
| L07265    | 4837.09  | 6454.641 | AK022639  | 2335.206  | 2726.525  | AK023541  | 340.552   | 865.838   |
| L19369    | 204.603  | 563.765  | D31766    | 9136.333  | 12565.862 | NM_001987 | 739.919   | 1418.286  |
| AK022467  | 721.798  | 985.63   | NM_006547 | 1816.955  | 1475.799  | AJ251845  | 1194.625  | 1285.979  |
| AL157459  | 3833.271 | 7067.856 | NM_00147E | 52920.977 | 61741.293 | AK000435  | 1044.891  | 1093.627  |
| NM_00425E | 375.185  | 546.128  | NM_002612 | 325.044   | 557.44    | AK000569  | 2197.527  | 2321.437  |
| AL157421  | 152.789  | 617.779  | AF135422  | 3366.933  | 2817.923  | NM_00604E | 2956.035  | 2575.29   |
| AB020654  | 437.56   | 506.157  | NM_00447E | 17767.736 | 17781.82  | NM_017661 | 4013.386  | 2911.488  |
| AL353954  | 945.253  | 703.201  | NM_00261C | 2025.069  | 2047.677  | BC016698  | 13128.337 | 12485.087 |
| NM_01763C | 768.815  | 1225.906 | AF070587  | 6036.788  | 4194.169  | NM_007374 | 4532.531  | 10614.034 |
| AK000778  | 1645.129 | 1855.354 | BE250526  | 770.211   | 857.758   | AK027185  | 1497.126  | 1117.193  |
| AK000932  | 637.996  | 802.591  | NM_01681E | 2144.476  | 2302.811  | AK025576  | 1010.792  | 1025.307  |
| AL133573  | 1451.294 | 2347.521 | NM_012222 | 7206.979  | 6982.505  | AF147385  | 634.513   | 659.174   |
| AK000115  | 539.569  | 857.278  | NM_005002 | 3640.984  | 3299.447  | BC034819  | 3515.133  | 4411.685  |
| NM_01795E | 560.569  | 910.829  | NM_00659E | 4617.138  | 4080.785  | AF147313  | 6759.636  | 7865.018  |
| AK000958  | 1100.679 | 1215.468 | AK023214  | 9565.615  | 8054.73   | AF147382  | 21930.264 | 25160.799 |
| AK024523  | 1084.001 | 1383.666 | NM_00146E | 10921.981 | 9249.705  | AK001957  | 4775.086  | 4467.764  |
| AK024600  | 253.756  | 661.902  | BC036368  | 1409.708  | 1745.297  | AK000850  | 629.768   | 733.964   |
| AK024543  | 1383.215 | 1795.282 | NM_001851 | 4575.763  | 5039.727  | AK021833  | 1761.481  | 2307.928  |
| AK024624  | 1835.719 | 2166.226 | S67789    | 1508.84   | 1556.996  | AF143867  | 1348.873  | 1809.504  |
| AK025090  | 479.268  | 622.021  | AK022689  | 4841.786  | 5426.486  | AK025889  | 4588.759  | 11486.191 |
| NM_014152 | 464.559  | 640.244  | NM_016227 | 1576.545  | 1596.052  | NM_01471E | 2325.031  | 4353.485  |
| NM_01860E | 427.382  | 450.324  | NM_00419E | 21776.406 | 24118.732 | AF086386  | 1480.923  | 1594.334  |
| AF086473  | 868.624  | 863.342  | NM_00470E | 5485.128  | 3848.934  | AF086457  | 906.286   | 761.253   |
| D87682    | 1557.592 | 1573.302 | NM_02019C | 15884.431 | 15143.172 | AK025469  | 1459.363  | 1259.126  |
| AF321617  | 4780.435 | 5802.239 | AK024003  | 872.994   | 1078.405  | NM_02023E | 6010.24   | 6174.091  |
| M85205    | 587.724  | 763.605  | NM_014357 | 5609.397  | 5180.034  | AK024187  | 606.347   | 856.074   |
| AF223389  | 580.795  | 1024.077 | NM_004067 | 2086.777  | 2217.101  | AF075079  | 319.507   | 466.527   |
| AV710479  | 789.765  | 1185.952 | NM_000121 | 12417.745 | 10274.954 | AK022479  | 501.864   | 677.645   |
| NM_00695C | 1653.393 | 1937.231 | NM_002091 | 11080.865 | 9235.631  | AK023572  | 505.48    | 634.99    |
| NM_000682 | 499.088  | 929.423  | AB033092  | 4532.692  | 4384.613  | AF086004  | 5499.165  | 4665.5    |
| AK025141  | 764.273  | 1238.245 | M89957    | 447.079   | 334.461   | AF085930  | 527.433   | 748.378   |
| AF086208  | 2880.549 | 3517.853 | NM_003023 | 1658.409  | 1759.167  | AF086006  | 220.497   | 853.621   |
| AK023335  | 1288.788 | 1435.905 | BC035030  | 8523.271  | 7920.967  | AL137318  | 1370.046  | 1862.769  |
| AK023187  | 615.29   | 773.92   | NM_00534C | 54699.395 | 53532.164 | AL137482  | 675.418   | 853.83    |
| AK022231  | 479.627  | 636.139  | NM_016201 | 4282.431  | 4679.214  | AL162011  | 11202.854 | 13318.46  |
| NM_019033 | 329.903  | 578.607  | NM_000864 | 2435.391  | 2638.886  | AL390177  | 457.125   | 567.77    |
| AL133101  | 2475.472 | 3883.052 | NM_017977 | 3670.656  | 3585.898  | AK056111  | 765.605   | 886.828   |
| AF143875  | 351.567  | 948.253  | AF147727  | 1846.555  | 1363.992  | AL162055  | 392.685   | 789.856   |
| AK024602  | 1370.716 | 1749.857 | NM_006751 | 4149.955  | 4111.476  | Y13807    | 1040.377  | 1338.647  |
| NM_018507 | 1121.072 | 1279.885 | AB037834  | 3657.793  | 2443.384  | AK023038  | 985.117   | 1556.575  |
| NM_00048E | 13567.48 | 16397.34 | NM_00356E | 1795.347  | 1798.719  | AK026206  | 1099.628  | 1475.787  |
| NM_018542 | 572.955  | 452.636  | NM_014052 | 17052.535 | 16527.918 | AF086074  | 846.102   | 443.154   |
| AK025503  | 1198.773 | 943.04   | NM_002777 | 718.128   | 759.722   | AK023964  | 2543.184  | 2243.328  |
| AF130073  | 1518.247 | 988.037  | AF202635  | 914.627   | 988.404   | AF086084  | 868.745   | 1183.319  |
| AK024225  | 20902.53 | 16659.45 | NM_01412E | 958.925   | 782.845   | AK000156  | 327.536   | 318.047   |
| AF086334  | 1308.067 | 842.699  | NM_017904 | 1506.242  | 1508.568  | AL050184  | 952.48    | 1029.631  |
| AL137602  | 390.339  | 365.947  | NM_013367 | 3852.989  | 4501.499  | AK027112  | 2827.766  | 2314.989  |

|           |          |          |           |           |           |           |           |           |
|-----------|----------|----------|-----------|-----------|-----------|-----------|-----------|-----------|
| AF075035  | 571.632  | 532.272  | NM_000321 | 7006.735  | 7842.947  | AL049314  | 2711.614  | 2933.975  |
| AL110180  | 3907.535 | 2766.288 | NM_006341 | 19188.227 | 15253.402 | AF093016  | 9733.465  | 9838.04   |
| BC024924  | 5284.646 | 2691.657 | NM_001709 | 3941.428  | 3868.329  | -         | 453.729   | 545.617   |
| NM_017906 | 6908.161 | 3544.097 | NM_006191 | 4675.562  | 4276.026  | AF090925  | 436.978   | 507.649   |
| AL110286  | 4101.54  | 4082.132 | NM_001800 | 6629.709  | 8410.381  | NM_014163 | 3284.956  | 3972.44   |
| AF086374  | 1344.122 | 1352.33  | NM_004336 | 9597.461  | 9549.285  | AK021974  | 1200.17   | 1352.041  |
| AL162066  | 3302.836 | 3770.31  | NM_015949 | 2817.833  | 2142.06   | AK022068  | 653.599   | 901.528   |
| NM_016096 | 26737.31 | 28431.39 | NM_013979 | 4680.741  | 5452.816  | AK022229  | 813.507   | 941.068   |
| U79290    | 1778.949 | 2314.231 | NM_003790 | 4285.459  | 4146.241  | AK022362  | 2624.944  | 2413.809  |
| X98114    | 476.046  | 413.862  | NM_000494 | 4337.795  | 4698.147  | AK022004  | 3894.525  | 2869.329  |
| AK024197  | 530.176  | 511.435  | NM_016023 | 1670.801  | 2171.882  | AK022390  | 845.66    | 1153.391  |
| NM_014040 | 7008.064 | 7852.871 | NM_003722 | 14324.989 | 15511.193 | AK027134  | 476.328   | 608.543   |
| AK000799  | 10196    | 10719.7  | NM_014430 | 671.286   | 1204.195  | AK024168  | 388.559   | 307.036   |
| NM_015582 | 8398.962 | 6666.315 | NM_000495 | 671.769   | 718.583   | AK021793  | 1328.692  | 1502.189  |
| AK027091  | 4295.555 | 3263.478 | AF085883  | 3194.729  | 3282.693  | AK022255  | 1449.157  | 2243.312  |
| NM_001526 | 509.937  | 462.582  | NM_016571 | 2056.331  | 1800.293  | AF161360  | 1040.182  | 1008.471  |
| U31738    | 2273.344 | 2145.421 | NM_003688 | 618.809   | 742.895   | AK021720  | 889.127   | 1052.186  |
| AF179890  | 8925.429 | 7063.032 | NM_016446 | 3502.477  | 3133.453  | NM_016497 | 34736.176 | 22615.641 |
| AK023536  | 9297.195 | 6822.221 | NM_002516 | 1591.673  | 1759.848  | AK000617  | 436.529   | 295.418   |
| AK021568  | 8321.566 | 5211.896 | AK023237  | 354.9     | 209.006   | AF009261  | 814.296   | 751.574   |
| AF088054  | 377.794  | 390.152  | NM_001870 | 1783.227  | 1686.275  | AL080082  | 800.088   | 1058.148  |
| AK023881  | 2743.764 | 2734.933 | AJ271216  | 2140.382  | 1689.196  | AK021623  | 1022.216  | 995.316   |
| AK027114  | 19405.71 | 14589.54 | U23028    | 4194.666  | 4307.248  | AK023733  | 424.011   | 661.603   |
| NM_016296 | 1715.618 | 1471.165 | NM_000817 | 6716.007  | 7444.74   | AF119901  | 2395.476  | 2885.717  |
| AK002146  | 540.993  | 421.131  | AF113132  | 43064.34  | 33637.828 | AK001936  | 1343.66   | 1784.596  |
| NM_003159 | 595.982  | 446.587  | NM_006571 | 9807.735  | 9083.13   | NM_003770 | 33354.816 | 39461.836 |
| NM_015492 | 1841.617 | 2704.65  | NM_001875 | 418.117   | 325.983   | AK001395  | 3734.722  | 3941.819  |
| NM_006933 | 412.628  | 618.945  | AK022680  | 1334.717  | 1148.55   | S57803    | 5544.839  | 5215.951  |
| AK022874  | 4653.315 | 3995.617 | NM_018946 | 7931.132  | 8548.8    | AF131822  | 4518.422  | 9043.548  |
| CY3Cy5    | 1067.079 | 144.787  | NM_016359 | 10886.916 | 12542.694 | AK023131  | 1133.77   | 1285.469  |
| BI912037  | 729.07   | 493.255  | NM_004156 | 7477.341  | 5553.005  | U61096    | 460.579   | 572.87    |
| AA454646  | 877.431  | 662.251  | AK000561  | 798.257   | 869.194   | AF085865  | 3908.707  | 4715.839  |
| U18087    | 2064.765 | 1546.35  | BC009187  | 7604.905  | 8707.052  | X78261    | 399.994   | 430.139   |
| U66349    | 1732.741 | 791.068  | AL133617  | 929.18    | 746.141   | AK025521  | 2732.244  | 3525.039  |
| AA057156  | 1183.927 | 909.071  | NM_016485 | 8844.325  | 10601.484 | NM_001053 | 25951.641 | 25003.865 |
| AF166327  | 14399.76 | 7400.939 | NM_002615 | 1120.494  | 1455.764  | Z70694    | 1835.505  | 2240.898  |
| AF260739  | 462.352  | 258.602  | AF090894  | 801.255   | 695.537   | L77602    | 584.551   | 464.057   |
| AF531423  | 2299.343 | 1369.085 | NM_006237 | 2494.764  | 1501.601  | NM_015421 | 10010.306 | 10409.709 |
| X76555    | 739.167  | 694.598  | NM_001271 | 4683.771  | 5088.737  | AF086081  | 4072.094  | 4314.207  |
| NM_005432 | 832.285  | 514.557  | NM_003683 | 4492.599  | 7423.03   | NM_018111 | 651.615   | 903.883   |
| L10386    | 3237.633 | 1600.583 | AF039019  | 4363.262  | 4461.505  | L23867    | 549.202   | 623.046   |
| AF061812  | 722.441  | 509.245  | NM_012255 | 5522.543  | 4030.05   | AB020968  | 478.532   | 429.665   |
| AL136756  | 568.252  | 458.911  | NM_018196 | 1790.543  | 1374.019  | AL138690  | 1671.034  | 1946.213  |
| NM_012469 | 5047.536 | 6063.861 | NM_004818 | 7263.81   | 5459.855  | AK000394  | 577.495   | 972.382   |
| SR6       | 3789.965 | 3828.591 | J04205    | 11287.563 | 8125.878  | NM_013941 | 1365.267  | 1410.037  |
| SR8       | 14212.93 | 44980.07 | D38491    | 5565.967  | 3154.75   | AF074989  | 972.895   | 1171.09   |
| SR10      | 49546.08 | 23044.01 | AK026835  | 3046.518  | 2445.502  | AK001107  | 659.754   | 1094.409  |
| CY3Cy5    | 6542.42  | 928.547  | NM_002819 | 15406.762 | 15430.405 | AF147393  | 569.079   | 548.513   |
| AL080157  | 824.089  | 634.39   | NM_013264 | 3713.395  | 5857.315  | AK022368  | 347.473   | 315.716   |
| NM_005306 | 2008.54  | 1088.175 | NM_003315 | 10521.193 | 8916.66   | AL080112  | 1855.425  | 2733.123  |
| NM_007227 | 569.385  | 369.539  | NM_000086 | 7944.404  | 9335.592  | AL137325  | 722.66    | 518.612   |
| NM_007023 | 366.647  | 253.967  | NM_003752 | 3699.142  | 2838.697  | AF147361  | 1285.344  | 1069.912  |
| NM_005873 | 3814.776 | 2934.479 | NM_003932 | 14588.797 | 13435.81  | AL133086  | 1098.741  | 932.586   |

|           |          |          |           |           |           |           |           |           |
|-----------|----------|----------|-----------|-----------|-----------|-----------|-----------|-----------|
| NM_004624 | 1290.246 | 998.418  | NM_016491 | 13041.564 | 12204.771 | NM_012151 | 25247.105 | 27729.822 |
| NM_003865 | 861.839  | 581.133  | NM_006429 | 34354.008 | 24757.369 | AF087994  | 2083.657  | 2323.243  |
| AB015330  | 939.863  | 892.844  | NM_015960 | 9254.761  | 9803.759  | AJ227912  | 2085.932  | 1652.02   |
| NM_001455 | 2326.55  | 1733.244 | NM_006085 | 4863.906  | 4825.916  | NM_018195 | 2672.766  | 2265.73   |
| L09071    | 414.169  | 262.128  | NM_000907 | 7075.533  | 7578.254  | AK025532  | 2759.406  | 2499.259  |
| NM_003322 | 1736.134 | 3187.496 | AF254085  | 3969.595  | 3284.718  | NM_003522 | 1253.448  | 1003.1    |
| NM_006363 | 4518.504 | 2308.144 | AK023541  | 341.783   | 398.153   | BF217847  | 714.129   | 1026.686  |
| NM_020415 | 1937.126 | 1212.049 | NM_001987 | 1460.438  | 899.412   | NM_005320 | 4073.156  | 1159.295  |
| AL049667  | 4066.87  | 3161.515 | AF244088  | 2772.376  | 2351.188  | CY3Cy5    | 4216.896  | 157.386   |
| NM_000334 | 827.597  | 548.608  | NM_007136 | 1319.354  | 1291.741  | BI830936  | 997.623   | 1639.703  |
| NM_020400 | 1723.77  | 878.528  | AJ251845  | 902.637   | 940.087   | U79292    | 4927.754  | 5813.655  |
| NM_001504 | 600.823  | 215.523  | AK000435  | 2807.843  | 2408.441  | AA947915  | 1009.578  | 680.768   |
| D50926    | 2262.897 | 1189.7   | AK000569  | 6325.084  | 5271.337  | BI830753  | 522.837   | 724.061   |
| BF205683  | 455.804  | 492.47   | NM_006045 | 3399.51   | 2873.06   | X68314    | 1785.971  | 2279.86   |
| NM_001548 | 558.702  | 203.531  | NM_017661 | 4209.066  | 3949.762  | X71973    | 26313.063 | 31866.217 |
| NM_000758 | 3836.308 | 2901.646 | BC016698  | 12519.717 | 17347.008 | T49651    | 15258.952 | 19174.795 |
| NM_002990 | 2860.613 | 1870.548 | NM_007374 | 10694.309 | 4023.997  | N51014    | 2139.929  | 2422.976  |
| NM_002432 | 1215.972 | 313.941  | AF147382  | 54739.32  | 53319.77  | BE392471  | 18301.705 | 25254.254 |
| AB033037  | 1319.111 | 1238.177 | AK001957  | 6643.863  | 6908.165  | AI802950  | 1689.561  | 2166.862  |
| L40400    | 5849.524 | 7263.064 | AK000850  | 1380.268  | 1072.76   | AA682423  | 538.203   | 520.678   |
| AK025688  | 3143.319 | 5930.713 | AK021833  | 2630.275  | 2785.062  | AL043686  | 6313.338  | 8200.836  |
| NM_001195 | 570.843  | 939.507  | AF143867  | 2416.319  | 2349.33   | AA490172  | 967.457   | 1332.945  |
| NM_014448 | 782.631  | 1433.949 | AK025889  | 5876.909  | 5936.094  | AA775212  | 6110.2    | 6366.516  |
| NM_004315 | 4886.728 | 3483.391 | NM_014715 | 3411.478  | 2853.249  | NM_000945 | 3001.765  | 3153.24   |
| NM_020166 | 2429.988 | 1586.62  | AF086448  | 2853.104  | 3146.748  | SR5       | 8576.42   | 8452.354  |
| AK023860  | 876.168  | 642.765  | AB019391  | 1156.708  | 1318.245  | SR7       | 7738.219  | 49592.863 |
| NM_000031 | 2955.304 | 2249.587 | AF086386  | 2446.208  | 3283.019  | SR9       | 23110.205 | 3633.218  |
| NM_002085 | 27157.05 | 11085.53 | AF086413  | 474.498   | 409.63    | CY3Cy5    | 3950.429  | 208.756   |
| NM_016286 | 8827.404 | 5073.124 | AF086457  | 1330.281  | 1567.1    | NM_003371 | 10016.241 | 8955.607  |
| NM_001567 | 1089.815 | 782.664  | AK025469  | 1405.597  | 1790.479  | AK023114  | 4596.926  | 4415.286  |
| NM_004905 | 8384.255 | 4576.481 | NM_020235 | 7658.839  | 7151.449  | NM_003678 | 4892.593  | 4451.154  |
| AF217971  | 1448.159 | 1001.981 | AF070581  | 1432.247  | 1371.578  | NM_012301 | 689.166   | 857.012   |
| NM_001925 | 460.101  | 379.374  | AK024187  | 1203.067  | 1363.187  | NM_005631 | 977.981   | 1743.793  |
| AF245517  | 911.028  | 612.478  | AF086006  | 754.738   | 824.854   | NM_014419 | 3829.047  | 4100.016  |
| NM_004982 | 323.327  | 185.775  | AL137318  | 1423.505  | 1624.157  | NM_014938 | 2755.172  | 3800.686  |
| NM_000217 | 516.358  | 834.325  | AL137482  | 972.74    | 909.895   | AF049460  | 826.779   | 528.67    |
| AK026180  | 1195.988 | 1288.75  | AL162011  | 11849.671 | 9910.899  | AK026066  | 1269.485  | 1693.735  |
| NM_005817 | 9610.271 | 11097.03 | AL390177  | 785.11    | 862.49    | NM_005244 | 2698.979  | 2645.115  |
| NM_003916 | 7172.182 | 8096.193 | AL137678  | 572.532   | 498.035   | NM_005270 | 690.202   | 872.629   |
| NM_002870 | 6356.298 | 7732.483 | AK056111  | 1301.337  | 1069.656  | NM_014815 | 2721.031  | 2923.781  |
| NM_001478 | 4259.132 | 3325.422 | AL162055  | 824.883   | 598.795   | NM_007221 | 7842.816  | 8517.48   |
| AF135422  | 1870.55  | 1372.476 | Y13807    | 1300.405  | 1078.023  | X54163    | 20873.73  | 22020.051 |
| NM_004479 | 1214.625 | 693.505  | AK022053  | 690.032   | 545.115   | AK025395  | 828.761   | 815.567   |
| NM_002610 | 2225.725 | 1080.486 | AK023038  | 2186.214  | 2416.119  | NM_000388 | 961.222   | 976.489   |
| AF070587  | 4310.015 | 2513.38  | AK026206  | 2792.309  | 3717.459  | X58377    | 466.304   | 335.333   |
| NM_016819 | 1384.909 | 768.169  | AF086074  | 5981.34   | 13958.151 | NM_002469 | 696.86    | 660.271   |
| NM_012222 | 2161.031 | 2609.735 | AK023964  | 4126.188  | 8487.374  | NM_014668 | 1063.394  | 1105.009  |
| NM_005002 | 2737.761 | 1496.493 | AF086084  | 1150.176  | 1266.821  | NM_004722 | 2829.197  | 3145.369  |
| NM_006596 | 3311.934 | 2252.636 | AK000156  | 430.164   | 367.945   | NM_014425 | 1003.109  | 950.14    |
| AK023214  | 6024.68  | 3706.259 | AL050184  | 1516.133  | 1915.813  | NM_012133 | 3335.396  | 2428.915  |
| NM_001469 | 11583.97 | 6229.045 | AF085853  | 547.321   | 561.437   | NM_017954 | 1692.612  | 1524.556  |
| NM_003600 | 1300.279 | 553.409  | NM_014163 | 11468.295 | 9445.666  | NM_006612 | 1382.813  | 1135.38   |
| NM_017490 | 2608.563 | 1007.111 | AK021659  | 690.208   | 501.254   | NM_016451 | 3131.177  | 2461.086  |

|           |          |          |           |           |           |           |           |           |
|-----------|----------|----------|-----------|-----------|-----------|-----------|-----------|-----------|
| AK026727  | 1122.213 | 1664.135 | NM_014137 | 992.741   | 1123.257  | NM_007351 | 19863.924 | 12289.162 |
| NM_00283C | 1808.798 | 2041.349 | AK021974  | 1828.984  | 1400.718  | AK026266  | 10456.222 | 7087.081  |
| NM_006247 | 10296.46 | 13129.39 | AK022068  | 1051.461  | 885.319   | NM_007124 | 4792.396  | 2895.038  |
| AB032983  | 1228.353 | 4186.564 | AK022229  | 1889.917  | 1708.43   | NM_003176 | 3159.325  | 2281.841  |
| NM_018281 | 6174.88  | 9352.54  | AK022362  | 4591.927  | 4516.917  | NM_000723 | 1183.036  | 723.329   |
| NM_004457 | 8690.313 | 11007.16 | AK022004  | 5477.26   | 5120.179  | AL096751  | 5944.371  | 4851.363  |
| NM_014049 | 5171.823 | 6469.657 | AK022136  | 410.399   | 267.736   | NM_000364 | 704.489   | 914.196   |
| NM_005396 | 419.312  | 864.891  | AK022390  | 2167.836  | 1976.341  | AF026920  | 5542.208  | 6883.726  |
| BC036375  | 13479.55 | 5154.398 | AK027134  | 1237.985  | 1338.264  | NM_004931 | 3688.039  | 3956.863  |
| BI912037  | 668.031  | 447.137  | AK024168  | 2843.527  | 3409.802  | NM_000607 | 13614.292 | 15667.406 |
| AA454646  | 936.13   | 615.647  | AF264622  | 1790.244  | 1938.045  | NM_002575 | 2077.425  | 2618.701  |
| U18087    | 2276.433 | 1758.818 | AK027203  | 645.171   | 734.269   | NM_004244 | 3612.271  | 3447.318  |
| U66349    | 1506.815 | 784.001  | AK021793  | 4142.486  | 4928.231  | AK001500  | 1339.193  | 1394.111  |
| AA057156  | 1020.519 | 912.991  | AK022255  | 5591.887  | 7194.428  | NM_020129 | 1861.615  | 987.126   |
| AF166327  | 14389.82 | 6222.003 | AK023730  | 647.403   | 526.576   | Y16521    | 3886.142  | 3340.123  |
| AF531423  | 2027.914 | 806.68   | AF009261  | 815.193   | 846.055   | AL050371  | 3161.679  | 2832.387  |
| X76555    | 633.971  | 324.495  | AF086264  | 458.138   | 357.642   | NM_002651 | 3331.625  | 2444.196  |
| NM_005432 | 1003.051 | 339.552  | AB037792  | 2237.52   | 3537.648  | NM_002413 | 3608.873  | 2369.083  |
| L10386    | 4451.264 | 4800.103 | AK022480  | 1079.991  | 1266.193  | NM_017577 | 457.602   | 461.46    |
| AF061812  | 1180.738 | 2431.506 | AK024158  | 1172.274  | 1582.148  | NM_001647 | 1769.512  | 1417.57   |
| AL136756  | 1011.785 | 1711.877 | AL080082  | 1093.19   | 1076.265  | NM_018158 | 2679.432  | 2322.992  |
| NM_012469 | 8137.879 | 13175.73 | AK021623  | 1673.851  | 1650.915  | NM_016301 | 8754.773  | 5884.557  |
| NM_13426C | 16598.84 | 25638.14 | AK023733  | 526.831   | 569.563   | AK021975  | 651.191   | 635.81    |
| NM_016383 | 188.404  | 649.231  | U79242    | 1191.192  | 1527.034  | AB032952  | 20239.6   | 17425.285 |
| AK025688  | 1723.691 | 1059.136 | AF056452  | 916.429   | 540.911   | NM_002522 | 10911.107 | 9882.789  |
| Z36819    | 49062.86 | 22824.52 | AK001936  | 2027.454  | 1419.232  | NM_002978 | 1828.652  | 998.951   |
| NM_014448 | 473.946  | 358.662  | NM_00377C | 56877.375 | 52605.828 | AB040879  | 951.002   | 1207.205  |
| AL080157  | 896.365  | 564.157  | AK001395  | 4211.693  | 4378.9    | AL049935  | 12727.408 | 12217.169 |
| NM_005308 | 1974.083 | 1000.693 | S57803    | 10628.903 | 10825.782 | AB033043  | 6566.898  | 6840.614  |
| NM_007227 | 484.607  | 392.786  | AK023131  | 3481.795  | 3364.697  | NM_014999 | 5762.407  | 4608.105  |
| NM_007023 | 393.655  | 276.169  | AJ276248  | 447.881   | 640.107   | AK025220  | 2604.865  | 2472.883  |
| NM_005873 | 3698.994 | 2358.264 | U61096    | 783.108   | 1016.675  | NM_016308 | 13416.55  | 10396.415 |
| NM_004624 | 1274.024 | 691.014  | AF085865  | 5819.664  | 6979.587  | D42046    | 3658.774  | 3508.496  |
| NM_003865 | 873.073  | 265.151  | X78261    | 833.058   | 1166.386  | NM_001033 | 12840.991 | 8337.926  |
| AB015330  | 1296.428 | 793.365  | AK025521  | 5733.874  | 5813.312  | NM_004526 | 20052.52  | 11712.175 |
| NM_001455 | 3140.9   | 2999.646 | NM_001053 | 54256.434 | 67727.18  | NM_002526 | 6844.095  | 4993.432  |
| L09071    | 480.258  | 1113.614 | Z70694    | 12713.992 | 19327.113 | NM_020135 | 5003.523  | 4248.25   |
| NM_003322 | 1424.561 | 3484.211 | L77602    | 1980.395  | 2816.168  | NM_018518 | 5226.09   | 3614.306  |
| AK026180  | 647.339  | 380.835  | NM_015421 | 11629.431 | 17043.58  | AK023149  | 2205.239  | 1627.201  |
| NM_013365 | 2792.675 | 1952.228 | AF086081  | 4437.13   | 5656.694  | AK023168  | 2483.038  | 2458.438  |
| NM_005817 | 4402.318 | 2950.818 | NM_018634 | 643.187   | 564.896   | NM_006646 | 1042.574  | 1104.964  |
| NM_003916 | 3031.732 | 1637.874 | NM_018111 | 1478.383  | 1288.328  | NM_004742 | 1278.622  | 956.943   |
| NM_00287C | 3694.758 | 2514.266 | AK022175  | 824.217   | 1103.299  | NM_014753 | 2824.125  | 2276.064  |
| NM_006363 | 4150.338 | 2084.809 | L23867    | 1810.812  | 2529.829  | NM_006585 | 31612.703 | 22311.457 |
| NM_020415 | 1720.868 | 1208.637 | AB020968  | 1396.494  | 1543.89   | NM_014331 | 3952.678  | 2785.365  |
| AL049667  | 3743.935 | 2455.489 | AL138690  | 2447.001  | 1336.806  | NM_006795 | 8924.731  | 7328.872  |
| NM_000334 | 890.012  | 376.195  | AK000394  | 1355.301  | 934.399   | AF070568  | 2820.089  | 2067.053  |
| NM_02040C | 1437.942 | 683.896  | NM_013941 | 1561.29   | 1076.328  | NM_00024C | 3453.044  | 2707.184  |
| NM_001504 | 559.608  | 219.632  | AF074989  | 1608.157  | 1267.301  | AK055733  | 9848.816  | 6711.348  |
| D50926    | 2240.82  | 624.007  | AK001107  | 1415.99   | 833.817   | AF298880  | 4745.005  | 1988.32   |
| BF205683  | 600.549  | 309.461  | AF147393  | 993.027   | 749.676   | AK025395  | 744.659   | 848.524   |
| NM_001565 | 345.291  | 227.336  | AK022368  | 241.324   | 273.963   | NM_000388 | 631.57    | 540.567   |
| NM_001548 | 812.351  | 467.295  | AL080112  | 2482.798  | 2390.554  | X58377    | 365.863   | 234.277   |

|           |          |          |           |           |           |           |           |           |
|-----------|----------|----------|-----------|-----------|-----------|-----------|-----------|-----------|
| NM_00075E | 8204.503 | 9353.736 | AL137325  | 715.092   | 654.495   | BI830936  | 809.605   | 865.998   |
| M17017    | 211.408  | 848.855  | AF147361  | 2215.865  | 2526.126  | U79292    | 3435.775  | 3803.472  |
| NM_00299C | 6399.615 | 11032.6  | AL133086  | 2386.762  | 2181.39   | AA947915  | 714.725   | 522.946   |
| NM_00243Z | 1776.78  | 1500.1   | NM_012151 | 39446.168 | 31462.648 | BI830753  | 466.509   | 465.963   |
| AB033037  | 1726.193 | 2910.864 | AF087994  | 2622.686  | 3348.191  | X68314    | 1817.328  | 1130.273  |
| L40400    | 5116.806 | 7791.354 | AJ227912  | 2494.779  | 3775.475  | X71973    | 24185.59  | 15137.052 |
| NM_006247 | 4567.33  | 2346.329 | NM_01819E | 4226.03   | 6040.418  | T49651    | 12208.672 | 9389.17   |
| AB032983  | 719.221  | 490.522  | AK025532  | 10846.415 | 18534.361 | AI802950  | 1379.999  | 959.372   |
| NM_018281 | 2627.891 | 2022.903 | AK021789  | 884.555   | 1649.645  | AA682423  | 314.684   | 228.639   |
| NM_004457 | 4014.12  | 2218.109 | NM_00352Z | 1580.958  | 2082.174  | AL043686  | 5138.885  | 4837.06   |
| NM_01404E | 2438.232 | 1342.912 | BF217847  | 2002.248  | 2176.567  | AA490172  | 664.823   | 587.648   |
| NM_00431E | 4826.224 | 2953.372 | NM_00532C | 5475.494  | 4073.137  | AA775212  | 4391.227  | 3289.351  |
| NM_02016E | 2557.004 | 1549.731 | CY3Cy5    | 1475.126  | 207.986   | NM_00094E | 2254.798  | 1376.079  |
| AK023860  | 1021.295 | 477.716  | BI830936  | 607.162   | 528.072   | NM_002574 | 67257.727 | 53525.758 |
| NM_000031 | 2834.539 | 2029.196 | U79292    | 2177.717  | 2042.917  | AB011174  | 2299.441  | 1650.202  |
| NM_00208E | 26598.6  | 10251.94 | AA947915  | 378.161   | 647.227   | AB043635  | 393.589   | 301.943   |
| NM_01628E | 8015.366 | 3563.649 | BI830753  | 371.999   | 272.704   | NM_000607 | 12102.839 | 13711.963 |
| NM_001567 | 783.064  | 326.231  | X68314    | 1287.162  | 1228.239  | AF090409  | 269.929   | 262.681   |
| NM_00490E | 8548.938 | 2755.889 | X71973    | 15370.302 | 13506.315 | NM_00257E | 1633.12   | 1961.77   |
| AF217971  | 1651.79  | 1279.86  | T49651    | 9998.634  | 7245.824  | NM_004244 | 2763.602  | 2587.823  |
| NM_00192E | 814.773  | 908.317  | N51014    | 1104.668  | 949.42    | NM_003371 | 8977.377  | 9535.422  |
| AF245517  | 1484.771 | 1783.288 | BE392471  | 9607.924  | 8044.818  | AK023114  | 3853.275  | 3533.108  |
| NM_00498Z | 567.494  | 701.39   | AI802950  | 723.551   | 768.93    | NM_00367E | 4285.751  | 3006.297  |
| NM_001694 | 59761.88 | 57346.43 | AL043686  | 3930.412  | 3377.381  | NM_012301 | 618.201   | 464.487   |
| AF286370  | 474.344  | 811.515  | AA490172  | 480.958   | 522.56    | NM_005631 | 1124.458  | 1259.063  |
| NM_000217 | 416.582  | 935.807  | AA775212  | 3255.143  | 3462.092  | NM_01441E | 3018.567  | 2295.65   |
| NM_01246E | 4010.968 | 2106.807 | NM_00094E | 1524.101  | 2076.453  | NM_01493E | 2468.791  | 2500.212  |
| NM_13426C | 7353.841 | 2747.531 | SR5       | 4482.237  | 4362.208  | AF049460  | 431.369   | 395.162   |
| NM_00147E | 4611.6   | 2938.336 | SR7       | 3793.444  | 30898.076 | AK026066  | 1349.105  | 1267.034  |
| AF135422  | 2075.221 | 1208.628 | SR9       | 13432.172 | 2733.907  | NM_005244 | 2340.43   | 2733.32   |
| NM_00447E | 952.436  | 695.822  | CY3Cy5    | 2628.916  | 271.591   | NM_00544Z | 2957.367  | 3311.073  |
| NM_00261C | 2014.117 | 962.9    | NM_003371 | 5182.65   | 4577.977  | NM_007221 | 6995.751  | 9622.726  |
| AF070587  | 4230.905 | 1917.832 | AK023114  | 2861.26   | 2462.779  | X54163    | 17145.711 | 18055.111 |
| BE250526  | 431.073  | 230.498  | NM_00367E | 2969.878  | 3286.395  | NM_00297E | 1978.365  | 1625.395  |
| NM_01681E | 1242.048 | 347.885  | NM_012301 | 375.23    | 330.141   | NM_01466E | 1302.978  | 1274.199  |
| NM_01222Z | 2070.45  | 2037.846 | NM_005631 | 1063.75   | 497.765   | NM_00472Z | 2986.064  | 2691.399  |
| NM_00500Z | 4946.263 | 6039.51  | NM_01441E | 1870.904  | 1536.406  | NM_01442E | 1477.042  | 1303.028  |
| NM_00659E | 6746.928 | 8557.464 | NM_01493E | 1878.587  | 1408.622  | NM_01213Z | 3261.746  | 2297.5    |
| AK023214  | 12174.5  | 16533.43 | AF049460  | 343.302   | 562.88    | NM_017954 | 1804.995  | 1435.063  |
| NM_00146E | 19029.83 | 28596.3  | AK026066  | 992.882   | 979.009   | NM_00661Z | 1294.288  | 760.202   |
| NM_00360C | 2365.583 | 3858.244 | NM_005244 | 1770.816  | 1813.527  | NM_016451 | 3356.854  | 3035.33   |
| NM_01749C | 4770.051 | 7489.967 | NM_00527C | 507.506   | 506.988   | NM_007351 | 19294.869 | 14572.559 |
| NM_00271E | 1937.926 | 3975.29  | NM_01481E | 1629.584  | 1709.622  | AK026266  | 9623.363  | 9368.706  |
| AK026727  | 1557.239 | 2325.367 | NM_00544Z | 1826.176  | 2124.205  | NM_007124 | 4913.976  | 6678.42   |
| NM_00283C | 1317.269 | 1517.146 | NM_007221 | 4384.074  | 4515.677  | NM_00317E | 3516.979  | 5711.133  |
| NM_00332Z | 844.618  | 596.205  | X54163    | 11012.745 | 11974.892 | NM_00072Z | 1331.808  | 1185.65   |
| BC036375  | 13362.2  | 4978.614 | AK025395  | 465.353   | 590.989   | NM_000364 | 699.328   | 967.844   |
| BI912037  | 702.725  | 359.51   | NM_00038E | 536.11    | 702.953   | NM_00679E | 12309.613 | 12407.943 |
| AA454646  | 732.324  | 427.001  | NM_00246E | 319.819   | 513.157   | AF070568  | 2924.994  | 3092.813  |
| U18087    | 2624.629 | 1186.442 | NM_01466E | 632.475   | 592.42    | NM_000277 | 356.295   | 518.22    |
| U66349    | 2151.928 | 2148.91  | NM_00472Z | 1879.915  | 1673.837  | NM_00024C | 3801.76   | 3649.187  |
| AA057156  | 1672.595 | 3054.782 | NM_01442E | 809.453   | 891.457   | AK055733  | 10703.349 | 10219.314 |
| U19487    | 317.965  | 784.219  | NM_01213Z | 2222.803  | 2258.899  | AF298880  | 5424.285  | 5467.839  |

|           |          |          |           |           |           |           |           |           |
|-----------|----------|----------|-----------|-----------|-----------|-----------|-----------|-----------|
| AF166327  | 25663.72 | 34425.53 | NM_017954 | 1123.725  | 1388.666  | AK001500  | 1438.752  | 1641.509  |
| AF260739  | 579.39   | 946.381  | NM_006612 | 973.109   | 517.153   | NM_006774 | 481.266   | 495.502   |
| AF531423  | 4026.083 | 6115.482 | NM_016451 | 2415.967  | 2057.86   | NM_020129 | 1915.3    | 969.698   |
| X76555    | 1003.142 | 2468.816 | NM_007351 | 10564.474 | 10161.478 | Y16521    | 3909.212  | 3201.347  |
| NM_005432 | 1613.522 | 1894.976 | AK026266  | 5970.661  | 5349.994  | AL050371  | 3350.109  | 3136.32   |
| L10386    | 6445.196 | 6558.525 | NM_007124 | 3331.439  | 3210.297  | NM_002651 | 3495.577  | 3049.28   |
| AF061812  | 1171.588 | 3045.483 | NM_003176 | 2649.274  | 2746.673  | NM_002413 | 3991.074  | 4142.45   |
| AL136756  | 924.265  | 1107.269 | NM_000723 | 1192.016  | 1124.844  | NM_017577 | 591.206   | 704.726   |
| AB033037  | 790.416  | 385.215  | AL096751  | 3263.635  | 3920.953  | NM_001647 | 2069.259  | 4204.484  |
| L40400    | 2777.718 | 1390.597 | NM_000364 | 496.586   | 535.227   | NM_018158 | 2691.539  | 3048.445  |
| AK025688  | 1666.787 | 960.479  | AF026920  | 3110.568  | 2738.574  | NM_016301 | 8534.346  | 8752.093  |
| NM_014448 | 409.778  | 263.336  | NM_004931 | 2383.319  | 2732.798  | AK021975  | 774.578   | 820.13    |
| AL080157  | 833.967  | 451.776  | NM_000607 | 9290.531  | 9520.805  | AB032952  | 23102.873 | 39412.602 |
| NM_005308 | 2032.845 | 1750.938 | NM_002575 | 1572.442  | 1900.094  | NM_000945 | 2709.442  | 2294.771  |
| NM_000911 | 349.985  | 502.148  | NM_004244 | 2549.114  | 3416.837  | NM_002574 | 67577.227 | 63376.387 |
| NM_007227 | 876.156  | 1258.872 | AK001500  | 972.673   | 827.81    | AB011174  | 2266.365  | 2343.786  |
| NM_007023 | 544.252  | 1116.911 | NM_006774 | 320.845   | 422.468   | AB043635  | 532.016   | 769.03    |
| NM_005873 | 7568.611 | 10199.96 | NM_020129 | 615.597   | 1369.104  | AB040879  | 1142.13   | 1109.039  |
| NM_004624 | 2148.058 | 3635.37  | Y16521    | 2525.869  | 2343.716  | AL049935  | 12999.827 | 10252.629 |
| NM_014461 | 278.102  | 855.803  | AL050371  | 2150.669  | 1891.814  | AB033043  | 7242.461  | 7048.046  |
| NM_003865 | 1710.86  | 1810.593 | NM_002651 | 2128.152  | 1936.03   | NM_014999 | 5394.293  | 3814.394  |
| AB015330  | 1937.993 | 4573.79  | NM_002413 | 2238.273  | 2157.575  | AK025220  | 3090.81   | 2540.27   |
| NM_001455 | 3623.734 | 4568.341 | NM_017577 | 367.945   | 319.467   | NM_016308 | 13375.325 | 8887.359  |
| NM_004982 | 667.621  | 1421.398 | NM_001647 | 1429.037  | 1433.297  | D42046    | 3782.758  | 3549.81   |
| NM_001694 | 53190.04 | 51966.16 | NM_018158 | 1962.715  | 2141.015  | NM_001033 | 12669.455 | 8775.981  |
| AK026180  | 562.596  | 272.448  | NM_016301 | 4985.356  | 7426.677  | NM_004526 | 21585.006 | 20648.078 |
| NM_005817 | 4080.173 | 2877.252 | AK021975  | 458.317   | 773.442   | NM_002526 | 6420.919  | 7653.502  |
| NM_003916 | 3183.969 | 1452.473 | AB032952  | 12381.128 | 13961.349 | NM_020135 | 5452.169  | 7601.337  |
| NM_002870 | 4259.531 | 2259.775 | NM_002522 | 5163.021  | 4979.068  | NM_018518 | 5378.18   | 7673.133  |
| NM_006363 | 4800.988 | 1826.853 | NM_002978 | 1718.804  | 2469.339  | AK023149  | 2332.934  | 4248.999  |
| NM_020415 | 3114.163 | 4337.16  | AB040879  | 638.865   | 502.279   | AK023168  | 2907.932  | 4174.748  |
| NM_014879 | 384.49   | 687.422  | AL049935  | 11777.688 | 6872.757  | NM_006646 | 1097.205  | 1490.658  |
| AL049667  | 7809.8   | 9047.919 | AB033043  | 3659.947  | 3520.909  | NM_004742 | 1401.313  | 1975.706  |
| NM_000334 | 1456.736 | 2488.46  | NM_014999 | 4369.914  | 3880.718  | NM_014753 | 3383.571  | 7026.553  |
| NM_020400 | 2893.075 | 4266.013 | AK025220  | 2448.462  | 1903.852  | NM_006585 | 35760.914 | 52920.434 |
| NM_001504 | 1104.468 | 1794.858 | NM_016308 | 8351.837  | 9258.581  | NM_014331 | 4235.049  | 7519.082  |
| D50926    | 5104     | 6081.54  | D42046    | 2644.985  | 2481.754  | NM_005270 | 803.832   | 1192.257  |
| BF205683  | 1270.762 | 1569.046 | NM_001033 | 7168.538  | 8170.464  | NM_014815 | 2218.84   | 2149.12   |
| NM_001565 | 534.557  | 1347.602 | NM_004526 | 10015.919 | 13258.056 | NM_005443 | 3541.645  | 2754.248  |
| NM_001548 | 1199.992 | 898.656  | NM_002526 | 4053.494  | 3704.919  | NM_007221 | 7103.171  | 6062.213  |
| NM_000758 | 10083.87 | 11915.17 | NM_020135 | 3851.051  | 2953.479  | X54163    | 17212.295 | 17214.146 |
| M17017    | 347.644  | 618.993  | NM_018518 | 3466.524  | 3697.585  | AK025395  | 586.644   | 645.881   |
| NM_003600 | 2226.993 | 5145.904 | AK023149  | 1824.431  | 2002.62   | NM_000388 | 763.165   | 580.594   |
| NM_017490 | 4479.708 | 9150.985 | AK023168  | 2295.551  | 2987.656  | X58377    | 436.743   | 310.303   |
| NM_002718 | 1791.375 | 5309.354 | NM_006646 | 891.978   | 820.321   | NM_002469 | 446.375   | 340.558   |
| AK026727  | 1024.759 | 660.642  | NM_004742 | 834.637   | 871.142   | U79292    | 4223.093  | 3772.196  |
| NM_002830 | 937.128  | 322.42   | NM_014753 | 2255.785  | 2191.002  | AA947915  | 740.4     | 369.088   |
| NM_006247 | 4719.298 | 2396.216 | NM_006585 | 17471.523 | 17875.16  | X68314    | 1247.841  | 1191.821  |
| AB032983  | 531.059  | 663.392  | NM_014331 | 2979.016  | 3174.734  | X71973    | 20600.529 | 20776.508 |
| NM_018281 | 3099.896 | 2083.628 | NM_006795 | 7679.366  | 8838.091  | T49651    | 12512.99  | 16917.889 |
| NM_004457 | 4048.292 | 2551.146 | AF070568  | 1760.227  | 2252.865  | N51014    | 1407.907  | 2559.631  |
| NM_014049 | 2742.694 | 1438.701 | NM_000240 | 2837.394  | 3320.25   | BE392471  | 15663.344 | 36506.648 |
| NM_004315 | 5231.547 | 2852.829 | AK055733  | 6313.417  | 9091.432  | AI802950  | 1118.059  | 1732.481  |



|           |          |          |           |           |           |           |           |           |
|-----------|----------|----------|-----------|-----------|-----------|-----------|-----------|-----------|
| NM_020166 | 2696.957 | 1342.22  | AF298880  | 3939.906  | 4678.334  | AA682423  | 441.484   | 614.882   |
| S56138    | 970.34   | 1034.565 | AK025395  | 471.169   | 349.158   | AL043686  | 5584.271  | 10174.52  |
| AK023860  | 1721.811 | 2182.536 | NM_00038E | 548.163   | 530.421   | AA490172  | 781.031   | 1443.119  |
| NM_000031 | 6844.444 | 9955.436 | NM_00246E | 297.005   | 168.304   | AA775212  | 5020.167  | 6477.545  |
| NM_01628E | 18431.46 | 24317.7  | BI830936  | 512.022   | 403.826   | NM_000723 | 1688.954  | 1802.341  |
| NM_001567 | 1607.972 | 4001.846 | U79292    | 2376.56   | 2200.196  | AL096751  | 6326.454  | 5338.594  |
| NM_00490E | 17147.8  | 16979.47 | AA947915  | 265.523   | 327.153   | NM_000364 | 625.041   | 588.036   |
| AF217971  | 3163.075 | 4618.381 | BI830753  | 299.989   | 223.152   | AF026920  | 4828.336  | 4631.419  |
| NM_00192E | 848.672  | 1399.304 | X68314    | 1126.988  | 1183.578  | NM_004931 | 3706.977  | 4036.214  |
| AF245517  | 1914.96  | 2714.433 | X71973    | 13917.41  | 13726.744 | NM_000607 | 14628.655 | 15568.134 |
| X78926    | 5089.549 | 9699.568 | T49651    | 8802.055  | 7065.208  | NM_00257E | 1759.638  | 1743.747  |
| AJ278110  | 1712.589 | 3853.221 | N51014    | 1139.231  | 1003.154  | NM_004244 | 2777.692  | 2302.482  |
| NM_014237 | 676.728  | 1412.296 | BE392471  | 11144.702 | 9238.171  | NM_003371 | 9843.075  | 8031.292  |
| NM_02039E | 480.974  | 1011.872 | AI802950  | 1039.71   | 989.761   | AK023114  | 3715.69   | 2991.468  |
| AF029900  | 1126.292 | 2235.676 | AI741278  | 269.058   | 87.226    | NM_00367E | 3968.999  | 3212.021  |
| NM_00332E | 10337.43 | 7523.729 | AA682423  | 372.062   | 307.234   | NM_012301 | 545.485   | 853.296   |
| NM_01617E | 2764.913 | 1407.291 | AL043686  | 3868.036  | 3323.479  | NM_005631 | 878.323   | 2293.689  |
| AK022639  | 602.852  | 324.068  | AA490172  | 398.851   | 421.266   | NM_01441E | 2618.43   | 3705.121  |
| D31766    | 7052.578 | 3113.363 | AA775212  | 3110.667  | 3079.759  | NM_01493E | 2708.769  | 3318.644  |
| NM_006547 | 1219.171 | 587.132  | NM_00094E | 1382.561  | 1918.711  | AF049460  | 739.528   | 527.235   |
| NM_00147E | 5745.101 | 3281.049 | NM_002574 | 50195.684 | 55401.176 | AK026066  | 1289.046  | 1601.125  |
| AF135422  | 4100.882 | 5357.084 | AB011174  | 1431.303  | 2019.152  | NM_005244 | 2453.322  | 2496.906  |
| NM_00447E | 1960.415 | 2840.022 | AB043635  | 464.105   | 309.261   | NM_01815E | 3432.275  | 3482.417  |
| AF070587  | 8643.735 | 8671.313 | NM_000607 | 8797.662  | 8195.746  | NM_016301 | 9690.163  | 8468.8    |
| BE250526  | 691.098  | 1116.038 | NM_00257E | 1589.344  | 1274.464  | AK021975  | 806.308   | 1043.07   |
| NM_01681E | 1771.91  | 2915.731 | NM_004244 | 1754.507  | 1602.603  | AB032952  | 20367.359 | 23107.654 |
| NM_01222E | 3633.822 | 7538.392 | NM_003371 | 5215.723  | 4202.149  | NM_00252E | 11241.417 | 12017.635 |
| NM_00500E | 5401.165 | 7455.723 | AK023114  | 2602.227  | 2392.735  | NM_00297E | 2003.463  | 1743.649  |
| NM_00659E | 6956.658 | 9438.299 | NM_00367E | 2278.098  | 2606.528  | NM_01466E | 1052.806  | 957.722   |
| AK023214  | 11486.63 | 15376.65 | NM_012301 | 374.347   | 349.087   | NM_00472E | 3007.749  | 2916.032  |
| NM_00146E | 19147.98 | 28014.96 | NM_005631 | 828.816   | 488.409   | NM_01442E | 1064.784  | 1016.582  |
| BC036368  | 417.783  | 855.462  | NM_01441E | 1877.29   | 1934.145  | NM_01213E | 3387.333  | 2709.026  |
| NM_001851 | 4016.316 | 6699.717 | NM_01493E | 1782.476  | 1851.597  | NM_017954 | 1763.882  | 1957.256  |
| S67789    | 1011.283 | 1969.729 | AF049460  | 351.608   | 675.705   | NM_00661E | 1239.053  | 1235.273  |
| AK022689  | 3941.156 | 6191.199 | AK026066  | 730.294   | 740.984   | NM_016451 | 2777.542  | 3078.681  |
| NM_016227 | 1336.898 | 2728.572 | NM_005244 | 1641.369  | 1781.434  | NM_007351 | 19138.549 | 16208.203 |
| NM_00419E | 1863.478 | 4996.17  | NM_01481E | 1518.02   | 1663.38   | AK026266  | 10035.719 | 9322.308  |
| NM_00470E | 2742.41  | 2940.447 | NM_00544E | 1880.783  | 2567.597  | NM_007124 | 4692.029  | 3865.44   |
| NM_02019E | 1330.776 | 774.651  | NM_007221 | 4347.591  | 5333.332  | NM_00317E | 3460.606  | 2940.384  |
| AK024003  | 355.207  | 187.275  | X54163    | 12737.313 | 15885.438 | AK023168  | 3865.425  | 3964.358  |
| NM_014357 | 825.799  | 429.068  | NM_00297E | 1356.764  | 1279.13   | NM_00664E | 1134.061  | 1745.373  |
| NM_004067 | 622.413  | 449.144  | NM_01466E | 632.588   | 599.848   | NM_00474E | 1560.931  | 1625.73   |
| NM_000121 | 2944.797 | 1434.869 | NM_00472E | 2181.812  | 1598.933  | NM_01475E | 3236.586  | 3189.393  |
| AB033092  | 3270.359 | 2437.42  | NM_01442E | 783.787   | 873.558   | NM_00658E | 34443.594 | 32011.389 |
| M89957    | 632.19   | 681.358  | NM_01213E | 1926.426  | 2253.298  | NM_014331 | 4526.268  | 5432.433  |
| NM_00302E | 1612.76  | 1747.706 | NM_017954 | 857.258   | 987.515   | NM_00679E | 13330.928 | 16710.787 |
| BC035030  | 1880.369 | 7340.987 | NM_00661E | 695.85    | 685.761   | AF070568  | 3414.45   | 3392.123  |
| NM_016201 | 690.101  | 824.033  | NM_016451 | 1791.783  | 2161.213  | NM_00024E | 3578.698  | 3214.178  |
| NM_000864 | 5148.946 | 6855.351 | NM_007351 | 10631.457 | 12245.898 | AK055733  | 10686.248 | 8593.146  |
| NM_017977 | 3533.31  | 4832.195 | AK026266  | 6556.873  | 7344.212  | AF298880  | 5287.387  | 5235.313  |
| AF147727  | 2055.506 | 2904.6   | NM_007124 | 2575.012  | 2541.984  | AK001500  | 1644.026  | 1009.409  |
| NM_006751 | 6234.352 | 7867.185 | NM_00317E | 2066.483  | 2454.531  | NM_006774 | 653.927   | 630.499   |
| AB037834  | 3669.377 | 6170.368 | NM_00072E | 1047.461  | 1160.005  | NM_02012E | 1876.219  | 1112.267  |

|           |          |          |           |           |           |           |           |           |
|-----------|----------|----------|-----------|-----------|-----------|-----------|-----------|-----------|
| NM_00356  | 1855.563 | 2593.354 | AL096751  | 2997.861  | 3240.075  | Y16521    | 4126.734  | 3843.806  |
| NM_013344 | 651.246  | 710.719  | NM_000364 | 556.702   | 743.457   | AL050371  | 3114.778  | 3605.07   |
| NM_014052 | 12937.71 | 14373.73 | AF026920  | 3572.457  | 4012.164  | NM_002651 | 3062.405  | 3242.479  |
| NM_002777 | 1158.514 | 1448.16  | NM_004931 | 2590.997  | 3267.636  | NM_002413 | 4702.16   | 4054.328  |
| AF202635  | 1151.548 | 1788.925 | NM_006795 | 7968.147  | 8399.527  | NM_017577 | 770.548   | 721.05    |
| NM_014125 | 672.082  | 1140.945 | AF070568  | 2409.13   | 2536.323  | NM_001647 | 2348.624  | 2295.513  |
| NM_017904 | 729.199  | 1390.446 | NM_000240 | 2643.255  | 2088.557  | NM_006228 | 1137.171  | 908.461   |
| NM_013367 | 7458.598 | 9927.562 | AK055733  | 6907.919  | 6369.158  | NM_003768 | 5872.408  | 6063.813  |
| NM_000321 | 6869.794 | 2515.859 | AF298880  | 4061.09   | 3252.495  | NM_018393 | 1783.248  | 2102.425  |
| NM_006341 | 11208.12 | 4348.443 | AK001500  | 1038.154  | 915.439   | BF032535  | 2980.205  | 2582.821  |
| NM_001709 | 3453.769 | 1156.873 | NM_006774 | 320.767   | 343.137   | NM_018332 | 4568.417  | 3945.394  |
| NM_006191 | 2040.311 | 1356.785 | NM_020129 | 755.868   | 1330.945  | NM_005096 | 9764.541  | 8810.206  |
| NM_004336 | 15055.49 | 10806.63 | Y16521    | 2263.123  | 1870.778  | NM_006760 | 1160.057  | 1404.275  |
| NM_015949 | 5506.115 | 6089.08  | AL050371  | 1992.166  | 2139.369  | NM_012289 | 6328.807  | 5427.618  |
| NM_013979 | 7871.834 | 8599.13  | NM_002651 | 2125.866  | 2067.217  | AB037775  | 1728.543  | 1767.256  |
| NM_003790 | 1138.945 | 1649.314 | NM_002413 | 2639.085  | 2730.067  | L27560    | 1423.934  | 1381.427  |
| NM_000494 | 4282.33  | 5787.334 | NM_017577 | 451.6     | 559.149   | AB011174  | 2039.404  | 1513.013  |
| NM_003722 | 1357.194 | 1986.275 | NM_001647 | 1258.548  | 1194.625  | AB043635  | 590.242   | 568.571   |
| NM_014430 | 1888.772 | 1990.384 | NM_018158 | 1692.036  | 1903.334  | AB040879  | 1319.43   | 1120.297  |
| NM_000495 | 852.147  | 1448.07  | NM_016301 | 4667.396  | 7342.925  | AL049935  | 13025.336 | 11931.549 |
| AF085883  | 6421.075 | 6941.098 | AK021975  | 432.603   | 539.765   | AB033043  | 7326.818  | 8342.681  |
| NM_016571 | 900.539  | 1079.769 | AB032952  | 11462.853 | 12974.655 | NM_014999 | 5463.633  | 5200.796  |
| NM_003688 | 1049.853 | 1532.285 | NM_002522 | 6064.292  | 7916.464  | AK025220  | 3239.078  | 3580.327  |
| NM_016446 | 1904.469 | 3832.078 | NM_000945 | 1923.365  | 2137.357  | NM_016308 | 14665.305 | 12804.39  |
| NM_002516 | 599.034  | 895.404  | NM_002574 | 51678.453 | 56294.938 | D42046    | 5369.766  | 7898.241  |
| AK023237  | 511.88   | 704.698  | AB011174  | 1485.464  | 1772.168  | NM_001033 | 13309.305 | 11297.891 |
| NM_001870 | 369.21   | 543.273  | AB043635  | 425.071   | 326.663   | NM_004526 | 22755.787 | 20119.736 |
| AJ271216  | 2445.751 | 1814.306 | AB040879  | 728.955   | 555.241   | NM_002526 | 8037.712  | 9483.333  |
| U23028    | 3720.486 | 1946.908 | AL049935  | 10905.087 | 6581.265  | NM_020135 | 6354.589  | 6296.357  |
| AK022680  | 2956.117 | 3017.81  | AB033043  | 4190.926  | 4062.959  | NM_018518 | 5965.039  | 5483.51   |
| NM_018946 | 14411.72 | 15945.95 | NM_014999 | 4061.824  | 3768.694  | AK023149  | 2979.947  | 3225.328  |
| NM_016359 | 21887.26 | 21550.69 | AK025220  | 2217.42   | 1598.662  | NM_006438 | 1293.98   | 1518.271  |
| NM_004156 | 8739.396 | 14652.88 | NM_016308 | 7382.593  | 8401.714  | NM_004598 | 339.392   | 285.455   |
| AK000561  | 1249.746 | 1234.981 | D42046    | 2758.603  | 2736.852  | AK024697  | 2900.561  | 3465.344  |
| BC009187  | 15211.82 | 14967.75 | NM_001033 | 6947.875  | 9066.606  | NM_006460 | 2684.737  | 2885.913  |
| AL133617  | 1414.025 | 2192.887 | NM_004526 | 10907.611 | 14345.604 | L34156    | 627.932   | 719.447   |
| NM_016485 | 15320.74 | 16222.94 | NM_002526 | 4471.457  | 5116.415  | NM_003749 | 1797.831  | 1897.825  |
| NM_002615 | 477.565  | 1002.015 | NM_020135 | 3942.42   | 4775.593  | NM_003557 | 6696.91   | 6926.058  |
| AF090894  | 386.399  | 618.968  | NM_018518 | 3035.035  | 3127.592  | NM_001257 | 19402.896 | 17098.689 |
| NM_006167 | 2795.279 | 2026.647 | AK023149  | 1821.586  | 1993.908  | D85245    | 6481.837  | 6247.521  |
| NM_016357 | 3780.996 | 2080.039 | AK023168  | 1951.128  | 2760.834  | NM_000943 | 835.726   | 802.721   |
| NM_014500 | 7679.121 | 4002.864 | NM_006646 | 823.938   | 683.246   | NM_004658 | 3244.464  | 2963.904  |
| NM_020149 | 947.357  | 277.145  | NM_004742 | 830.168   | 815.227   | NM_001250 | 4571.57   | 3653.246  |
| NM_006237 | 1147.749 | 688.37   | NM_014753 | 2203.878  | 1861.501  | AF298812  | 1828.22   | 1322.691  |
| NM_001271 | 4303.674 | 1725.929 | NM_006585 | 19733.705 | 22371.67  | NM_004969 | 1954.097  | 1965.275  |
| NM_003683 | 2257.707 | 2482.965 | NM_014331 | 3208.106  | 3660.41   | AJ249900  | 637.858   | 613.835   |
| NM_004818 | 8899.232 | 9270.995 | NM_005270 | 536.453   | 778.423   | AK022581  | 5428.125  | 4822.68   |
| J04205    | 17605.17 | 12757.68 | NM_014815 | 1501.523  | 1443.217  | NM_018054 | 1918.707  | 2509.149  |
| D38491    | 8250.511 | 4023.38  | NM_005443 | 1958.131  | 2590.34   | NM_000958 | 7247.637  | 7215.156  |
| AK026835  | 5578.233 | 6606.282 | NM_007221 | 4607.335  | 4403.295  | NM_001401 | 1468.207  | 1852.813  |
| NM_002819 | 29820.64 | 36392.51 | X54163    | 11584.351 | 10962.583 | NM_013271 | 10213.528 | 11411.363 |
| NM_013264 | 10410.58 | 6941.421 | AK025395  | 392.585   | 413.357   | NM_004157 | 1959.813  | 1532.083  |
| NM_003315 | 13853.31 | 10664.81 | NM_000388 | 385.229   | 419.471   | NM_000684 | 1559.052  | 1551.23   |

|           |          |          |           |           |           |           |           |           |
|-----------|----------|----------|-----------|-----------|-----------|-----------|-----------|-----------|
| NM_000086 | 8130.529 | 6974.433 | X58377    | 239.22    | 296.171   | NM_015913 | 16862.625 | 13586.319 |
| NM_003752 | 5438.028 | 6936.902 | NM_002465 | 330.46    | 270.167   | NM_005157 | 6913.008  | 7770.008  |
| NM_003932 | 25756.73 | 34165.64 | BI830936  | 536.43    | 536.305   | NM_007354 | 1054.861  | 891.098   |
| NM_016491 | 24648.58 | 34370.02 | U79292    | 2262.798  | 2488.922  | U67037    | 1207.079  | 1335.06   |
| NM_006429 | 43426.56 | 54078.19 | AA947915  | 255.09    | 695.5     | NM_004960 | 15376.976 | 14118.228 |
| NM_003307 | 3264.604 | 2805.176 | BI830753  | 330.443   | 194.971   | AF272370  | 13727.07  | 15132.154 |
| AK021644  | 1334.249 | 668.929  | X68314    | 962.894   | 1048.769  | AF130050  | 4163.335  | 3598.782  |
| NM_015944 | 755.804  | 449.537  | X71973    | 13819.706 | 16337.102 | NM_012197 | 8215.626  | 6254.917  |
| NM_002064 | 1812.59  | 1061.803 | T49651    | 8968.756  | 9101.925  | AK024016  | 5014.488  | 4589.365  |
| NM_015523 | 14057.98 | 8423.003 | N51014    | 908.61    | 824.336   | NM_003581 | 4071.5    | 3660.362  |
| L27943    | 498.772  | 532.09   | BE392471  | 11058.837 | 9169.054  | NM_002888 | 400.543   | 310.906   |
| NM_006085 | 5997.054 | 5169.06  | AI802950  | 979.29    | 963.846   | NM_012407 | 1653.776  | 1503.036  |
| NM_000907 | 12373.38 | 11049.33 | AA682423  | 302.953   | 242.979   | AF302505  | 2176.321  | 1932.043  |
| AF254085  | 6213.483 | 5835.482 | AL043686  | 3454.326  | 3332.111  | NM_007186 | 3166.913  | 2178.221  |
| AK023541  | 702.998  | 553.419  | AA490172  | 511.553   | 786.484   | NM_007044 | 4327.199  | 3384.158  |
| NM_001987 | 1474.744 | 2437.893 | AA775212  | 3101.894  | 3516.547  | AF294326  | 8036.483  | 6882.048  |
| AF244088  | 1539.594 | 3277.173 | NM_000723 | 1194.356  | 937.293   | NM_014678 | 2838.487  | 3574.187  |
| NM_007136 | 1703.232 | 2065.769 | AL096751  | 3421.801  | 2886.684  | NM_016097 | 13013.354 | 22204.316 |
| AK025434  | 942.745  | 1153.665 | NM_000364 | 469.983   | 493.966   | AB035301  | 634.876   | 656.379   |
| AJ251845  | 1033.993 | 1133.314 | AF026920  | 3252.486  | 3134.026  | AB046800  | 3661.221  | 3505.333  |
| AK000435  | 1480.1   | 2157.432 | NM_004931 | 2120.843  | 2063.914  | NM_002162 | 11239.303 | 10775.794 |
| AK000569  | 1438.71  | 1505.122 | NM_000607 | 9883.155  | 7803.676  | NM_015458 | 2287.024  | 2486.611  |
| NM_006049 | 3982.106 | 2744.295 | NM_002575 | 1529.466  | 1281.864  | D13540    | 8946.802  | 7419.98   |
| NM_017661 | 5180.297 | 4471.484 | NM_004244 | 1736.662  | 1341.322  | NM_016570 | 10638.481 | 9465.576  |
| BC016698  | 26441.42 | 24321.63 | NM_003371 | 4923.442  | 3406.256  | AF209198  | 3162.776  | 3172.93   |
| NM_007374 | 8148.229 | 29259.3  | AK023114  | 2548.256  | 2696.575  | M69012    | 52193.734 | 51117.363 |
| AK027185  | 1898.011 | 1366.643 | NM_003678 | 2275.598  | 2736.109  | NM_006936 | 17246.545 | 19658.631 |
| AK025576  | 937.157  | 595.266  | NM_012301 | 337.393   | 350.476   | NM_001327 | 15646.595 | 14238.637 |
| AF147385  | 578.848  | 551.029  | NM_005631 | 1043.663  | 620.995   | NM_000063 | 874.12    | 939.737   |
| AL442086  | 3732.604 | 2743.979 | NM_014419 | 2058.371  | 2019.198  | NM_018389 | 1762.546  | 1506.088  |
| BC034819  | 2278.932 | 4278.033 | NM_014938 | 1798.092  | 1905.315  | AB033026  | 714.326   | 676.112   |
| AF147313  | 988.879  | 1134.95  | AF049460  | 271.779   | 672.394   | AF104914  | 14627.804 | 23317.92  |
| AK001957  | 9746.219 | 8629.946 | AK026066  | 871.028   | 1104.017  | NM_014716 | 10476.958 | 11071.502 |
| AK000850  | 393.054  | 560.297  | NM_005244 | 1772.015  | 2071.537  | AB002354  | 679.138   | 696.165   |
| AK021833  | 3820.069 | 4151.243 | NM_018158 | 2573.506  | 2016.563  | AK023845  | 2123.047  | 2315.039  |
| AF143867  | 1180.951 | 1357.387 | NM_016301 | 5568.361  | 7006.179  | NM_002638 | 5918.374  | 6912.014  |
| AK025889  | 8303.999 | 7082.523 | AK021975  | 436.758   | 448.373   | NM_016487 | 1567.366  | 1752.017  |
| NM_014715 | 2497.262 | 3238.877 | AB032952  | 11453.269 | 9325.668  | NM_005808 | 13162.862 | 13590.344 |
| AF088056  | 321.439  | 641.477  | NM_002522 | 6087.32   | 5381.119  | NM_006401 | 35826.016 | 34366.758 |
| AF086448  | 3900.943 | 5385.723 | NM_002978 | 1376.43   | 1561.648  | AF269249  | 1303.061  | 1305.024  |
| AB019391  | 425.844  | 638.046  | NM_014668 | 760.136   | 771.683   | D31763    | 3481.389  | 3100.35   |
| AF086386  | 3008.394 | 4709.485 | NM_004722 | 2429.604  | 1857.521  | NM_018169 | 8408.749  | 5717.326  |
| AF086413  | 548.682  | 478.944  | NM_014425 | 806.488   | 860.321   | AK021452  | 1416.84   | 3326.744  |
| AF086457  | 937.276  | 663.412  | NM_012133 | 1770.072  | 2448.618  | NM_004506 | 4476.881  | 4160.424  |
| AK025469  | 1602.323 | 833.899  | NM_017954 | 989.682   | 1658.709  | S74529    | 49508.082 | 44606.953 |
| NM_020239 | 7687.996 | 8407.084 | NM_006612 | 700.036   | 939.165   | NM_005933 | 641.035   | 567.521   |
| AF070581  | 385.117  | 682.226  | NM_016451 | 1894.182  | 2368.805  | NM_001421 | 574.518   | 603.784   |
| AK024187  | 892.541  | 1790.879 | NM_007351 | 10092.201 | 11526.804 | M73837    | 1992.28   | 2514.246  |
| AF075079  | 525.043  | 555.795  | AK026266  | 5975.516  | 6287.421  | U69127    | 21619.328 | 21805.111 |
| AK022479  | 643.672  | 457.524  | NM_007124 | 2568.109  | 3323.071  | NM_005839 | 13810.16  | 10622.673 |
| AK023572  | 475.902  | 487.848  | NM_003176 | 2236.823  | 2363.33   | AK023379  | 4795.72   | 4769.035  |
| AF086004  | 3992.18  | 3786.201 | AK023168  | 2847.015  | 2924.165  | NM_006076 | 1283.959  | 1370.649  |
| AF147433  | 911.037  | 1037.483 | NM_006646 | 1057.578  | 968.321   | AK021904  | 7279.629  | 6833.037  |

|           |          |          |           |           |           |           |           |           |
|-----------|----------|----------|-----------|-----------|-----------|-----------|-----------|-----------|
| AF085978  | 418.133  | 659.285  | NM_004742 | 809.334   | 569.138   | -         | 1105.424  | 1346.822  |
| AF085930  | 999.732  | 1028.26  | NM_014753 | 2517.585  | 1805.265  | NM_018292 | 691.166   | 658.161   |
| AF086006  | 836.32   | 735.876  | NM_006585 | 23396.152 | 20393.939 | AL049705  | 9397.931  | 9584.881  |
| AL137318  | 2182.532 | 3098.388 | NM_014331 | 3095.63   | 2669.966  | AK022294  | 2139.434  | 2361.807  |
| AL137482  | 1137.961 | 1250.131 | NM_006795 | 9933.641  | 9204.965  | AF086507  | 1482.433  | 1500.66   |
| AL162011  | 19189.58 | 16963.57 | AF070568  | 2057.608  | 1546.188  | U79289    | 1508.521  | 1356.275  |
| AL390177  | 445.058  | 697.27   | NM_000240 | 2484.747  | 2086.455  | NM_014025 | 5349.592  | 4047.486  |
| AL137678  | 455.923  | 545.929  | AK055733  | 6752.433  | 6198.847  | NM_000402 | 1832.769  | 1751.973  |
| AK056111  | 784.301  | 885.405  | AF298880  | 3477.02   | 3190.474  | NM_000690 | 2003.317  | 1968.753  |
| AL162055  | 552.846  | 752.231  | AK001500  | 1162.058  | 1091.659  | NM_000155 | 8796.163  | 8530.509  |
| Y13807    | 1691.409 | 2747.783 | NM_006774 | 338.42    | 607.505   | AK024489  | 1101.483  | 861.642   |
| AK022053  | 418.189  | 730.258  | NM_020125 | 648.233   | 1668.192  | NM_000181 | 4073.606  | 3881.227  |
| AK023038  | 353.959  | 397.089  | Y16521    | 2536.98   | 3090.446  | NM_014121 | 1267.844  | 1017.214  |
| AK026206  | 831.929  | 1305.841 | AL050371  | 1823.146  | 2146.338  | NM_006730 | 1498.913  | 1120.198  |
| AF086074  | 1424.356 | 744.737  | NM_002651 | 2271.504  | 2090.17   | NM_005644 | 7604.619  | 5692.402  |
| AK023964  | 5540.999 | 5383.866 | NM_002413 | 2677.011  | 3002.792  | NM_018442 | 3534.434  | 3264.806  |
| AF086084  | 1210.108 | 1730.979 | NM_017577 | 313.044   | 451.115   | AF182416  | 7718.064  | 6635.885  |
| AK000156  | 558.481  | 975.364  | NM_001647 | 1389.648  | 1715.539  | NM_005995 | 21130.24  | 18292.99  |
| AL050184  | 1228.332 | 1453.599 | NM_006225 | 641.93    | 515.989   | NM_006015 | 1799.164  | 1947.136  |
| AF085853  | 400.597  | 644.707  | NM_003765 | 4614.194  | 3922.373  | NM_004634 | 3523.496  | 4323.983  |
| AK027112  | 6123.306 | 6279.219 | NM_018393 | 1203.282  | 878.561   | NM_002017 | 5772.805  | 7669.398  |
| AL049314  | 3649.644 | 3995.967 | BF032535  | 1741.249  | 1604.089  | NM_002155 | 821.027   | 973.866   |
| AF093016  | 12515.73 | 11425.92 | NM_018332 | 2626.872  | 2357.533  | U13223    | 10599.577 | 10282.39  |
| AF161345  | 377.051  | 308.933  | NM_005095 | 5613.58   | 6271.206  | NM_016270 | 2232.982  | 2290.765  |
| -         | 746.131  | 888.858  | NM_006760 | 837.69    | 660.997   | AK001357  | 760.858   | 669.204   |
| AF090925  | 1505.153 | 1719.091 | NM_012285 | 3637.865  | 2959.268  | NM_015721 | 3169.427  | 2954.85   |
| AF100637  | 411.154  | 380.885  | AB037775  | 1135.109  | 770.523   | AF086298  | 1101.55   | 1126.566  |
| NM_014163 | 1462.837 | 1643.319 | L27560    | 972.777   | 821.741   | AK027238  | 925.333   | 1084.208  |
| AK021659  | 354.726  | 1044.125 | AB011174  | 1390.805  | 1512.589  | AK000032  | 566.851   | 513.235   |
| NM_014137 | 614.882  | 533.382  | AB043635  | 365.031   | 249.352   | AK025758  | 482.625   | 607.97    |
| AK021974  | 2270.302 | 2569.975 | AB040879  | 848.678   | 531.81    | S94540    | 21445.518 | 19971.559 |
| AK022068  | 1450.613 | 1737.171 | AL049935  | 10382.733 | 7447.347  | U79297    | 1387.72   | 1536.11   |
| AK022229  | 1473.807 | 1861.828 | AB033043  | 4763.038  | 5343.227  | AK002164  | 1444.751  | 1277.137  |
| AK022362  | 4724.042 | 4855.646 | NM_014995 | 3723.595  | 4111.087  | AF052122  | 10186.933 | 9955.87   |
| AK022004  | 6032.004 | 5692.533 | AK025220  | 2104.872  | 2372.773  | NM_001310 | 2849.278  | 2981.77   |
| AK022136  | 380.354  | 686.081  | NM_016305 | 7497.057  | 8633.278  | AK026924  | 3867.127  | 4248.001  |
| AK022390  | 989.823  | 1637.91  | D42046    | 2577.835  | 2923.4    | AL122047  | 7931.068  | 9178.721  |
| AK027134  | 805.095  | 1287.774 | NM_001033 | 6864.314  | 9209.461  | AF052091  | 2085.806  | 2603.794  |
| AK024168  | 586.255  | 972.035  | NM_004525 | 9977.167  | 13249.393 | AK024447  | 64421.629 | 66802.898 |
| AF222857  | 353.521  | 535.007  | NM_002525 | 5476.798  | 6267.727  | AF086458  | 4033.38   | 5079.813  |
| AF264622  | 382.812  | 637.793  | NM_020135 | 4121.233  | 4511.58   | AF086548  | 2857.551  | 3278.984  |
| AK021793  | 1169.6   | 1977.227 | NM_018515 | 3713.566  | 4397.734  | AK024350  | 669.82    | 945.659   |
| AK022255  | 702.741  | 900.095  | AK023149  | 1945.5    | 2079.594  | AK023717  | 1499.717  | 1903.651  |
| AK023730  | 567.251  | 612.105  | NM_006435 | 810.422   | 942.566   | AK023727  | 1452.483  | 1363.606  |
| AF161360  | 1546.341 | 1932.428 | NM_001845 | 269.13    | 153.329   | AK025271  | 668.533   | 632.192   |
| AK021720  | 1613.327 | 1558.869 | AK024697  | 2400.557  | 1539.154  | AF086204  | 6064.199  | 5005.161  |
| NM_016497 | 52741.11 | 28313.69 | NM_006460 | 1836.032  | 1889.839  | NM_007021 | 1353.085  | 1067.034  |
| AK000617  | 986.26   | 1060.442 | L34156    | 415.736   | 429.21    | AK022076  | 465.843   | 409.045   |
| AF009261  | 1369.04  | 1762.947 | NM_003745 | 1248.195  | 1105.367  | AK023065  | 395.236   | 450.481   |
| AF086264  | 384.433  | 504.862  | NM_003557 | 5060.528  | 3624.772  | AK021570  | 1272.729  | 1233.867  |
| AB037792  | 3170.458 | 4588.996 | NM_001257 | 11388.625 | 8512.76   | AL360204  | 792.525   | 671.58    |
| AK022480  | 179.945  | 610.06   | NM_001795 | 234.663   | 159.014   | AK000103  | 2656.67   | 2564.868  |
| AK024158  | 264.682  | 612.129  | D85245    | 4483.797  | 3593.797  | AF085959  | 647.53    | 795.9     |

|           |          |          |           |           |           |           |           |           |
|-----------|----------|----------|-----------|-----------|-----------|-----------|-----------|-----------|
| AL080082  | 1033.759 | 1509.495 | NM_000943 | 477.843   | 715.01    | AK023104  | 880.564   | 875.712   |
| AK021623  | 2280.36  | 3934.58  | NM_004658 | 2211.916  | 2192.321  | AK026923  | 3188.058  | 3856.466  |
| AK023733  | 804.066  | 1028.83  | NM_001250 | 3683.662  | 3311.296  | AK021691  | 23102.063 | 24265.213 |
| U79242    | 731.033  | 1210.687 | AF298812  | 985.057   | 1086.924  | AK023595  | 1348.389  | 1155.122  |
| AF056452  | 326.506  | 352.572  | NM_004969 | 1435.466  | 1515.231  | AK000141  | 7259.679  | 7901.6    |
| AF119901  | 5328.54  | 5557.813 | AJ249900  | 520.621   | 627.68    | AL137758  | 2976.301  | 2933.884  |
| AK001936  | 2253.227 | 3205.358 | AK022581  | 3560.161  | 3849.324  | AK023865  | 679.976   | 530.432   |
| NM_003770 | 1594.745 | 2003.096 | NM_018054 | 1424.713  | 1219.084  | AK025786  | 1334.835  | 1308.347  |
| AK001395  | 8512.811 | 9108.921 | NM_000958 | 4377.217  | 5051.014  | AK024188  | 1872.723  | 2489.414  |
| S57803    | 7178.118 | 6242.15  | NM_001401 | 818.711   | 773.469   | AK024379  | 686.464   | 937.713   |
| AF131822  | 1380.841 | 2156.641 | NM_013271 | 6131.886  | 6480.1    | AK026820  | 490.859   | 660.005   |
| AK023131  | 1179.925 | 1346.344 | NM_004157 | 1071.11   | 1364.811  | AK001716  | 5065.025  | 5001.211  |
| AJ276248  | 449.948  | 690.408  | NM_000684 | 888.092   | 964.628   | AK026821  | 1362.618  | 1374.876  |
| AL360138  | 375.862  | 350.537  | NM_015913 | 8925.594  | 12276.484 | AK026280  | 1250.416  | 975.672   |
| U61096    | 636.611  | 1016.727 | NM_005157 | 4868.653  | 4222.649  | AF113017  | 4538.983  | 5217.868  |
| AF085865  | 7682.727 | 10018.11 | NM_007354 | 445.391   | 387.5     | AL080232  | 5834.427  | 6133.128  |
| X78261    | 193.41   | 834.946  | U67037    | 494.889   | 420.435   | AK001120  | 7581.678  | 8059.084  |
| AK025521  | 4227.647 | 7918.517 | NM_004960 | 7891.438  | 6548.464  | AK022416  | 1013.839  | 1304.259  |
| NM_001053 | 20060.79 | 28024.8  | AF272370  | 8792.338  | 8290.154  | AK023224  | 4060.64   | 6831.282  |
| Z70694    | 1760.72  | 3476.634 | AF130050  | 3045.013  | 2916.913  | AK022442  | 1101.21   | 1328.117  |
| NM_015421 | 19127.97 | 20611.02 | AK023045  | 373.943   | 343.143   | AK023336  | 1423.837  | 2246.784  |
| AF086081  | 7691.018 | 8744.638 | NM_012197 | 5524.243  | 5528.55   | AK023771  | 624.037   | 1414.14   |
| NM_018634 | 743.34   | 1030.428 | AK024016  | 3213.849  | 3300.191  | AK026873  | 3931.614  | 4013.018  |
| NM_018111 | 913.884  | 1743.879 | NM_003581 | 2726.869  | 2232.59   | AK026394  | 5498.939  | 5879.074  |
| AK022175  | 241.563  | 561.389  | NM_012407 | 940.593   | 866.014   | NM_005448 | 1154.9    | 1181.884  |
| L23867    | 789.758  | 1059.261 | AF302505  | 1604.299  | 1584.142  | AK025943  | 35070.391 | 34097.875 |
| AB020968  | 804.079  | 902.54   | NM_007186 | 2175.82   | 1945.557  | BG106479  | 1156.045  | 1650.794  |
| AL138690  | 2997.492 | 3669.238 | NM_007044 | 2653.49   | 3220.693  | AF130069  | 15382.552 | 19542.232 |
| AK000394  | 572.264  | 889.184  | AF294326  | 4606.617  | 5848.718  | AL109669  | 3933.348  | 4473.427  |
| NM_013941 | 2462.198 | 2922.922 | NM_014678 | 1733.013  | 1516.391  | AB037766  | 1779.571  | 1497.983  |
| AF074989  | 1567.666 | 2253.135 | NM_012317 | 50725.449 | 57922.93  | AK026995  | 816.69    | 651.956   |
| AK001107  | 744.734  | 935.489  | NM_017853 | 3512.983  | 3592.493  | AL133091  | 995.98    | 1166.873  |
| AF147393  | 679.678  | 935.057  | NM_016097 | 6823.403  | 7778.126  | BF842915  | 514.542   | 599.392   |
| AK022368  | 671.078  | 911.279  | AB035301  | 515.977   | 415.031   | X82545    | 6832.107  | 8265.788  |
| AL080112  | 3318.577 | 4329.184 | AB046800  | 2473.616  | 2619.593  | AK024632  | 7450.88   | 8197.079  |
| AK022299  | 518.131  | 519.023  | NM_002162 | 7651.414  | 7941.575  | NM_018474 | 7199.138  | 7648.969  |
| AL137325  | 1086.203 | 1290.194 | NM_015458 | 1451.447  | 1489.794  | AK024937  | 2439.105  | 3730.465  |
| AF147361  | 1608.392 | 1773.207 | D13540    | 5501.058  | 5768.591  | AK022094  | 4444.569  | 6749.953  |
| AL133086  | 1720.947 | 2135.812 | NM_016570 | 6682.497  | 6837.647  | AK026695  | 1465.792  | 3045.257  |
| NM_012151 | 33576.46 | 50154.17 | AF209198  | 2649.253  | 1977.462  | AK022220  | 1830.424  | 3672.494  |
| AF087994  | 4891.482 | 5575.344 | M69012    | 36300.34  | 28041.125 | AL137539  | 709.756   | 842.022   |
| AJ227912  | 3110.042 | 4017.623 | NM_006936 | 12866.365 | 8107.499  | U84520    | 3915.487  | 5694.773  |
| NM_018195 | 4876.373 | 6033.751 | NM_001327 | 9322.435  | 8315.354  | Z11853    | 855.411   | 706.657   |
| AK025532  | 5454.492 | 5861.406 | NM_003652 | 292.422   | 217.267   | AL133616  | 6686.64   | 10522.041 |
| AK021789  | 788.526  | 1113.697 | NM_000063 | 651.937   | 507.963   | AK023391  | 439.793   | 645.6     |
| AF086383  | 482.232  | 906.816  | NM_018389 | 1076.364  | 1121.877  | AK026382  | 3058.521  | 4158.387  |
| NM_003522 | 1541.573 | 2384.55  | AB033026  | 438.034   | 320.129   | AK091169  | 3120.152  | 3644.559  |
| BF217847  | 1192.158 | 1495.268 | AF104914  | 12870.55  | 9616.177  | NM_014745 | 44612.145 | 42485.094 |
| NM_005320 | 5341.741 | 1877.261 | NM_014716 | 7002.908  | 6611.572  | AF086026  | 9515.939  | 9170.76   |
| CY3Cy5    | 5827.274 | 277.802  | AK023845  | 1325.01   | 1689.596  | AL133011  | 1068.197  | 945.372   |
| BI830936  | 1012.626 | 1577.758 | NM_002638 | 4354.807  | 4943.838  | NM_016300 | 2121.839  | 2049.622  |
| U79292    | 1225.693 | 1489.001 | NM_016487 | 1289.455  | 1499.48   | NM_015607 | 26470.01  | 27410.707 |
| AA947915  | 928.638  | 464.474  | NM_005808 | 8522.834  | 9769.844  | AK026955  | 2418.378  | 1534.304  |

|           |          |          |           |           |           |             |           |           |
|-----------|----------|----------|-----------|-----------|-----------|-------------|-----------|-----------|
| BI830753  | 752.398  | 1028.932 | NM_006401 | 20158.48  | 25109.922 | AL110202    | 27843.752 | 23470.402 |
| X68314    | 1936.648 | 1697.719 | AF269249  | 887.774   | 886.697   | AK021980    | 1361.384  | 1202.681  |
| X71973    | 34891.85 | 40030.37 | D31763    | 2909.472  | 1892.948  | S46402      | 1401.944  | 1396.502  |
| T49651    | 16237.3  | 21539.27 | NM_018165 | 5352.023  | 6076.764  | AF075048    | 776.253   | 684.688   |
| N51014    | 2430.729 | 2692.731 | AK021452  | 2212.133  | 814.233   | Z83940      | 1140.044  | 1407.72   |
| BE392471  | 19476.65 | 23298.66 | NM_004506 | 1480.158  | 1647.479  | NM_005800   | 2920.495  | 3607.157  |
| AI802950  | 1444.355 | 1452.18  | S74529    | 31834.611 | 23175.688 | AF019617    | 11833.708 | 14778.939 |
| AI741278  | 230.584  | 552.944  | NM_005933 | 423.984   | 369.34    | AL137305    | 7543.157  | 7937.8    |
| AA682423  | 158.997  | 350.815  | NM_001421 | 327.215   | 185.494   | NM_005290   | 717.119   | 1720.818  |
| AL043686  | 4242.499 | 6401.835 | M73837    | 2509.036  | 1224.831  | AK025802    | 1127.266  | 1514.763  |
| AA490172  | 500.253  | 575.388  | U69127    | 13435.694 | 16365.98  | AF085973    | 1376.451  | 2192.375  |
| AA775212  | 6084.508 | 7263.183 | NM_005835 | 7691.072  | 5996.309  | NM_018013   | 4289.958  | 5647.482  |
| NM_000945 | 2966.914 | 2675.938 | AK023379  | 2837.164  | 2760.621  | AK022517    | 2679.567  | 2932.229  |
| SR5       | 7261.029 | 6511.9   | NM_006076 | 806.833   | 775.296   | NM_000329   | 18796.623 | 22528.709 |
| SR7       | 7318.367 | 46303.53 | AK021904  | 4277.605  | 4426.274  | NM_001182   | 10619.221 | 13102.926 |
| SR9       | 26294.6  | 4613.25  | -         | 827.565   | 901.925   | NM_000333   | 3458.743  | 4193.406  |
| CY3Cy5    | 5692.042 | 280.338  | NM_018292 | 458.537   | 421.697   | NM_000172   | 7256.696  | 8236.546  |
| NM_003371 | 933.276  | 903.171  | AL049705  | 6131.084  | 7469.011  | NM_002297   | 6358.275  | 6744.389  |
| NM_001164 | 1302.697 | 1046.951 | AK022294  | 1256.653  | 1058.338  | AB040968    | 13273.86  | 14493.141 |
| AK023114  | 4990.204 | 5167.035 | AF086507  | 775.792   | 799.277   | X85323      | 1379.847  | 1294.272  |
| NM_003678 | 7494.045 | 6573.245 | U79289    | 889.317   | 617.593   | U17615      | 2978.666  | 2901.945  |
| NM_005631 | 1287.495 | 2493.307 | NM_014028 | 3369.625  | 3716.546  | NM_005303   | 3473.337  | 4356.135  |
| NM_014419 | 1335.295 | 1682.315 | NM_000402 | 1441.292  | 1196.717  | NM_016126   | 12427.123 | 10641.386 |
| NM_014938 | 3529.081 | 3944.949 | NM_004273 | 377.357   | 129.444   | U84119      | 1918.615  | 1688.135  |
| AF049460  | 1248.44  | 1006.328 | NM_000690 | 1084.994  | 1017.572  | NM_003608   | 4885.267  | 4666.885  |
| AK026066  | 1534.369 | 1649.475 | NM_000155 | 5716.802  | 4737.53   | AF302079    | 16962.416 | 17032.086 |
| NM_005244 | 964.09   | 864.012  | AK024489  | 669.53    | 1170.567  | AJ224167    | 692.869   | 837.999   |
| AF054589  | 235.695  | 549.08   | NM_000181 | 2937.195  | 2503.554  | NM_002550   | 556.337   | 831.574   |
| NM_005270 | 1026.643 | 990.093  | NM_014121 | 704.944   | 726.712   | NM_000692   | 1490.21   | 1316.985  |
| NM_014815 | 3196.381 | 3387.281 | NM_006730 | 618.444   | 793.408   | AF086062    | 1512.608  | 1405.816  |
| NM_007221 | 7686.105 | 8785.132 | NM_005644 | 4281.91   | 4472.357  | AF000268    | 1948.638  | 905.682   |
| X54163    | 19249.11 | 21074.28 | NM_018442 | 1813.97   | 1795.91   | L47668      | 46074.496 | 54848.188 |
| AK025395  | 815.261  | 936.677  | AF182416  | 4432.005  | 4829.005  | NM_017920   | 7116.323  | 9263.104  |
| NM_000388 | 1104.554 | 1094.002 | NM_005995 | 12082.386 | 13743.637 | AK025345    | 1130.094  | 1538.841  |
| X58377    | 667.802  | 485.174  | NM_006015 | 1037.55   | 784.282   | D25274      | 11145.126 | 5252.181  |
| NM_002469 | 504.114  | 782.349  | NM_004634 | 1930.705  | 2264.817  | CY3Cy5      | 3701.551  | 193.039   |
| NM_014668 | 623.943  | 587.928  | NM_002017 | 4316.171  | 4221.078  | D50373      | 734.248   | 1887.652  |
| NM_004722 | 1977.994 | 2139.193 | NM_017523 | 6884.212  | 7546.849  | AA488757    | 4772.917  | 9423.473  |
| NM_014425 | 1145.679 | 1146.527 | NM_002382 | 17935.375 | 16966.35  | AA205399    | 1378.354  | 1789.692  |
| NM_012133 | 4474.526 | 4363.684 | NM_002158 | 438.998   | 599.719   | AI394286    | 697.855   | 1872.995  |
| NM_017954 | 1145.085 | 1650.51  | U13223    | 8884.206  | 9176.885  | H07071      | 465.236   | 1546.689  |
| NM_006612 | 1826.671 | 1926.734 | NM_016270 | 1898.517  | 1946.439  | M25322      | 5579.879  | 6197.64   |
| NM_016451 | 4814.27  | 5459.645 | AK001357  | 392.715   | 205.517   | H-L 27586 I | 4014.73   | 8513.851  |
| NM_007351 | 20750.91 | 19373.14 | NM_015721 | 2208.623  | 1667.211  | ID 214180   | 485.418   | 1202.382  |
| AK026266  | 12179.53 | 10188.79 | AF086298  | 868.767   | 698.723   | ID 1867426  | 2953.778  | 3195.111  |
| NM_007124 | 6897.44  | 5850.546 | AK027238  | 653.519   | 629.072   | ID 396450   | 640.968   | 612.026   |
| NM_003176 | 5662.712 | 4745.366 | AK000032  | 413.45    | 300.97    | W99328      | 1023.273  | 1147.608  |
| NM_000723 | 1798.799 | 1851.994 | AK025758  | 401.876   | 272.639   | AI434176    | 1429.155  | 1187.857  |
| AL096751  | 5183.353 | 3961.755 | AL360201  | 308.651   | 115.743   | H08563      | 497.419   | 231.719   |
| NM_000364 | 1268.29  | 1074.482 | S94540    | 12190.399 | 10730.938 | BE735403    | 851.616   | 599.769   |
| AF026920  | 3407.671 | 3789.768 | U79297    | 1190.925  | 603.587   | NM_022552   | 5703.177  | 3311.726  |
| NM_004931 | 3238.131 | 4166.358 | AK002164  | 639.248   | 554.918   | NM_014389   | 5309.787  | 4658.364  |
| NM_000607 | 7794.498 | 9418.301 | AF052122  | 5795.604  | 6425.286  | SR2         | 57395.18  | 34108.785 |

|           |          |          |           |           |           |           |           |           |
|-----------|----------|----------|-----------|-----------|-----------|-----------|-----------|-----------|
| AB011099  | 293.284  | 454.037  | NM_001310 | 1719.731  | 1654.548  | SR4       | 15858.575 | 9211.295  |
| AF035799  | 62.335   | 1187.412 | AK026924  | 2716.614  | 2404.038  | SR6       | 2454.864  | 1109.127  |
| AF090409  | 548.288  | 357.439  | AL122047  | 3699.954  | 3980.115  | SR8       | 8451.479  | 13816.761 |
| NM_002575 | 2018.651 | 2575.076 | AF052091  | 1222.252  | 1555.804  | SR10      | 31786.965 | 5806.474  |
| NM_004244 | 2858.607 | 2974.422 | AK024447  | 48004.852 | 40348.035 | CY3Cy5    | 1222.081  | 85.595    |
| AK001500  | 1198.45  | 1129.647 | AF052145  | 668.306   | 852.149   | AK025175  | 1365.619  | 619.716   |
| NM_006774 | 736.369  | 414.899  | AF086458  | 3631.851  | 3158.936  | NM_005811 | 4661.208  | 9082.848  |
| NM_020129 | 2391.01  | 1243.966 | AF086548  | 2277.777  | 2476.414  | NM_005764 | 664.002   | 1316.026  |
| Y16521    | 2956.983 | 3091.302 | AK024350  | 578.902   | 442.956   | NM_016362 | 877.347   | 1654.654  |
| NM_003167 | 450.695  | 744.155  | AK023717  | 1293.961  | 1115.941  | NM_002836 | 5504.715  | 11631.922 |
| AL050371  | 4016.167 | 4461.744 | AK023727  | 881.818   | 893.163   | NM_020167 | 1191.429  | 2264.044  |
| NM_002651 | 4271.449 | 3879.868 | AK025271  | 456.359   | 253.873   | AL049963  | 25524.988 | 46248.641 |
| NM_002413 | 2211.5   | 1600.095 | AF086204  | 3225.368  | 2307.988  | NM_016058 | 49587.383 | 54275.227 |
| NM_017577 | 816.73   | 589.212  | NM_007021 | 572.577   | 447.617   | NM_014005 | 995.662   | 1411.249  |
| NM_001757 | 264.345  | 349.118  | AK026283  | 317.873   | 248.111   | NM_004636 | 993.305   | 1715.743  |
| NM_001647 | 511.329  | 839.157  | AK022076  | 274.042   | 188.961   | AK022603  | 561.293   | 425.383   |
| NM_018158 | 3925.662 | 3261.393 | AK021570  | 832.215   | 824.135   | NM_004896 | 4536.033  | 3324.981  |
| NM_016301 | 10235.99 | 9123.584 | AL360204  | 347.897   | 377.519   | NM_003976 | 339.018   | 306.354   |
| AK021975  | 778.308  | 937.941  | AK000103  | 1494.161  | 1428.834  | NM_017688 | 1892.008  | 1159.868  |
| AB032952  | 9071.264 | 10398.94 | AF085959  | 499.021   | 563.002   | AK025612  | 3803.801  | 2630.547  |
| NM_002522 | 963.154  | 1272.703 | AK023104  | 594.076   | 469.31    | NM_012268 | 1136.349  | 885.555   |
| NM_018607 | 632.201  | 470.522  | AK022181  | 212.226   | 205.74    | NM_012203 | 722.682   | 631.367   |
| NM_002978 | 1413.02  | 980.892  | AK026923  | 2032.245  | 2527.292  | NM_004736 | 4754.271  | 3430.597  |
| AB040879  | 721.677  | 788.725  | AK021691  | 14861.424 | 17848.957 | NM_006459 | 4404.397  | 3601.484  |
| AL049935  | 13245.37 | 13978.78 | AK023595  | 1097.823  | 1302.952  | NM_003827 | 12965.273 | 13382.137 |
| AB033043  | 4351.719 | 4879.357 | AK000141  | 4315.686  | 3861.15   | NM_004583 | 1700.365  | 1184.177  |
| NM_014998 | 7139.138 | 7444.245 | AL137758  | 2020.428  | 1822.926  | NM_001103 | 721.174   | 1357.786  |
| AK025220  | 4923.238 | 4959.184 | AK023865  | 300.533   | 139.445   | AF228710  | 11726.477 | 20893.934 |
| NM_016308 | 21591.5  | 19411.22 | AK025786  | 627.799   | 622.776   | NM_018399 | 893.246   | 1550.201  |
| D42046    | 4739.478 | 5329.685 | AK024188  | 1215.97   | 1100.049  | AY007131  | 28357.154 | 53854.766 |
| NM_001033 | 19263.89 | 17268.5  | AK024379  | 440.889   | 232.984   | NM_001144 | 5744.604  | 13730.918 |
| NM_004526 | 28124.94 | 24922.33 | AK026820  | 413.585   | 265.991   | AK023766  | 6166.211  | 9883.266  |
| NM_002526 | 1575.164 | 2019.548 | AK001716  | 2048.86   | 2023.608  | NM_001897 | 1252.847  | 2374.757  |
| NM_020135 | 6981.174 | 9004.616 | AK026821  | 942.943   | 809.972   | NM_003853 | 1103.795  | 1975.073  |
| NM_018518 | 7153.004 | 6736.116 | AK026280  | 840.553   | 1034.273  | AB033109  | 1848.899  | 1721.913  |
| AK023149  | 3549.66  | 3450.122 | AF113017  | 3109.767  | 3905.255  | NM_002053 | 13186.031 | 20358.627 |
| AK023168  | 3614.534 | 3541.468 | AL080232  | 2619.985  | 2707.333  | NM_006889 | 1026.289  | 1217.815  |
| NM_006646 | 1309.993 | 1781.829 | AK001120  | 4615.756  | 5257.967  | NM_002438 | 1286.991  | 1195.056  |
| NM_004742 | 1166.97  | 1159.905 | AK022416  | 635.261   | 821.655   | NM_014589 | 899.531   | 746.401   |
| NM_014753 | 3543.244 | 4062.796 | AK023224  | 2991.808  | 2970.455  | NM_000759 | 794.667   | 720.673   |
| NM_006585 | 35273.7  | 36937.99 | AK023731  | 2080.865  | 1400.723  | AK023334  | 1068.979  | 643.393   |
| NM_014331 | 7638.917 | 7070.68  | AK022442  | 838.86    | 1079.303  | NM_002563 | 13455.579 | 8494.886  |
| NM_006795 | 11766.93 | 12585.58 | AK023336  | 1028.684  | 1193.867  | NM_002437 | 1702.928  | 915.308   |
| AF070568  | 4041.719 | 3416.564 | AK023771  | 415.854   | 504.602   | D79991    | 3348.882  | 2259.664  |
| NM_000240 | 2332.293 | 2655.707 | AK026873  | 2944.124  | 3079.769  | AK022425  | 461.163   | 338.819   |
| AK055733  | 13244.52 | 14245.67 | AK026394  | 3652.367  | 3521.025  | NM_000054 | 4134.09   | 3425.286  |
| AF298880  | 4900.917 | 4755.765 | NM_005448 | 795.526   | 497.783   | NM_014713 | 9655.799  | 7832.269  |
| AK025395  | 1116.119 | 1619.759 | AK025943  | 19069.074 | 16762.182 | NM_001812 | 2185.68   | 940.422   |
| NM_000388 | 1671.651 | 1600.914 | BG106479  | 770.076   | 666.608   | NM_014785 | 1032.025  | 793.044   |
| X58377    | 474.746  | 329.003  | AF130069  | 8865.01   | 6301.034  | NM_006033 | 3549.764  | 3323.119  |
| NM_002469 | 575.255  | 638.132  | AL109669  | 2197.668  | 1765.986  | NM_004837 | 10007.252 | 8446.457  |
| BI830936  | 961.311  | 997.907  | AB037766  | 1051.176  | 695.816   | NM_000370 | 1744.392  | 3436.402  |
| U79292    | 1209.972 | 1306.027 | AK026995  | 487.374   | 428.798   | BE865893  | 4197.124  | 7411.5    |

|           |          |          |           |           |           |             |           |           |
|-----------|----------|----------|-----------|-----------|-----------|-------------|-----------|-----------|
| AA947915  | 971.718  | 496.636  | AL133091  | 640.743   | 726.244   | AY005822    | 1696.21   | 3598.788  |
| BI830753  | 464.855  | 777.745  | BF842915  | 366.179   | 354.296   | AF289022    | 3288.637  | 6996.037  |
| X68314    | 2044.398 | 1798.669 | X82545    | 4022.156  | 3140.717  | AB002326    | 485.755   | 1085.115  |
| X71973    | 37705.2  | 37971.97 | AK024632  | 4066.834  | 3959.824  | M17252      | 362.412   | 782.018   |
| T49651    | 14208.06 | 15701.57 | NM_018474 | 4011.907  | 4004.657  | NM_016025   | 12022.619 | 16091.85  |
| N51014    | 2379.443 | 1990.087 | AK024937  | 1387.329  | 1732.454  | NM_013319   | 2810.203  | 3153.782  |
| BE392471  | 20723.8  | 23532.56 | D17178    | 1034.351  | 1228.167  | NM_000746   | 2614.884  | 3892.294  |
| AI802950  | 1379.284 | 1618.109 | AK022094  | 3117.783  | 3096.321  | NM_000722   | 1097.527  | 1387.996  |
| AA682423  | 450.396  | 468.945  | AK026695  | 906.863   | 1096.028  | NM_006030   | 952.228   | 669.559   |
| AL043686  | 3960.413 | 4545.007 | AK022220  | 490.41    | 604.667   | NM_020410   | 5804.382  | 3818.62   |
| AA490172  | 519.802  | 670.816  | AL137539  | 333.184   | 462.353   | AF000143    | 13036.8   | 11233.609 |
| AA775212  | 5522.407 | 6699.652 | U84520    | 2279.611  | 2063.622  | NM_014211   | 510.364   | 474.171   |
| NM_000945 | 2638.719 | 2214.043 | AL133616  | 6092.723  | 3656.051  | NM_000814   | 2413.726  | 1684.559  |
| AB011174  | 2642.774 | 2408.123 | AK026382  | 2870.36   | 1431.553  | NM_000453   | 1855.674  | 1326.811  |
| AB043635  | 607.593  | 875.336  | AK091169  | 2075.774  | 2005.959  | J03077      | 18856.16  | 15954.486 |
| NM_000607 | 10241.27 | 16351.76 | NM_014745 | 21689.371 | 17143.238 | J03048      | 6531.379  | 6219.728  |
| AB011099  | 481.431  | 338.064  | AF086026  | 6994.359  | 5403.471  | AL157469    | 1610.395  | 1179.848  |
| NM_002575 | 2004.985 | 2453.614 | AL133011  | 501.069   | 580.632   | NM_002868   | 2582.979  | 3313.268  |
| NM_004244 | 4122.631 | 4801.178 | NM_016300 | 1453.439  | 1199.786  | AK024100    | 2533.907  | 4853.34   |
| NM_003371 | 1358.681 | 1524.474 | NM_015607 | 15263.518 | 12227.518 | NM_005135   | 722.346   | 648.793   |
| AK023114  | 5239.207 | 5744.419 | AK026955  | 1163.956  | 1412.353  | NM_000317   | 14196.081 | 15519.131 |
| NM_003678 | 7850.805 | 7554.162 | AL110202  | 15780.441 | 15966.154 | NM_018376   | 6760.481  | 5313.849  |
| NM_014271 | 231.748  | 358.045  | AK021980  | 666.98    | 781.255   | NM_017615   | 1242.805  | 1505.151  |
| NM_005631 | 1301.291 | 2266.224 | S46402    | 833.96    | 796.421   | NM_017438   | 4189.772  | 7549.692  |
| NM_014419 | 959.432  | 798.77   | AF075048  | 423.971   | 469.98    | NM_020195   | 12827.837 | 19078.174 |
| NM_014938 | 3680.333 | 4551.155 | Z83940    | 641.568   | 940.062   | AK023824    | 3619.091  | 10573.966 |
| AF049460  | 729.634  | 577.143  | NM_005800 | 1800.176  | 1870.76   | AL133069    | 4789.127  | 9213.389  |
| NM_000441 | 427.882  | 390.048  | AF019617  | 6620.625  | 6408.136  | AL117574    | 864.977   | 1036.341  |
| AF054589  | 329.177  | 543.216  | AL137305  | 3949.735  | 5262.782  | AK026055    | 6955.328  | 9135.146  |
| NM_014815 | 3163.812 | 3558.215 | NM_005290 | 439.751   | 300.428   | AK024126    | 1223.637  | 1483.352  |
| NM_005443 | 4245.728 | 3772.45  | AK025802  | 483.708   | 498.214   | NM_001516   | 4345.378  | 4522.652  |
| NM_007221 | 7315.827 | 8496.03  | AF085973  | 467.382   | 388.391   | NM_002744   | 3862.165  | 1767.033  |
| X54163    | 17513.77 | 16789.65 | NM_018013 | 2886.894  | 3519.142  | NM_015917   | 12584.914 | 7732.209  |
| NM_018607 | 555.494  | 559.817  | AK022517  | 1686.433  | 1348.213  | NM_020397   | 852.346   | 841.84    |
| NM_002978 | 1499.238 | 1052.475 | NM_000329 | 14819.227 | 13195.082 | NM_000061   | 1206.499  | 820.094   |
| S83549    | 317.921  | 371.771  | NM_001182 | 5039.716  | 4337.239  | AB046859    | 8801.019  | 7064.325  |
| NM_014668 | 999.597  | 989.643  | NM_000333 | 1637.216  | 1749.253  | NM_005109   | 9759.348  | 6839.643  |
| NM_004722 | 2168.39  | 2485.672 | NM_000172 | 4384.992  | 3469.6    | AK023573    | 2591.214  | 2089.663  |
| NM_014425 | 1496.77  | 1739.49  | NM_002297 | 3988.466  | 3310.478  | NM_002730   | 7751.94   | 5146.99   |
| NM_012133 | 5110.225 | 5458.987 | AB040968  | 7932.642  | 5797.443  | NM_004828   | 1428.14   | 1274.282  |
| NM_017954 | 1157.312 | 1162.721 | X85323    | 664.104   | 600.676   | AB011540    | 17362.67  | 15877.422 |
| NM_006612 | 1441.047 | 1519.361 | U17615    | 1472.11   | 1127.959  | NM_000040   | 4020.968  | 4341.293  |
| NM_016451 | 4779.588 | 4799.409 | NM_005303 | 1830.413  | 1640.236  | NM_004631   | 3016.167  | 2171.664  |
| NM_007351 | 18431.06 | 17897.05 | NM_016126 | 7878.043  | 7478.606  | NM_004736   | 3934.164  | 3299.752  |
| NM_000723 | 1676.426 | 1595.812 | U84119    | 940.358   | 1066.57   | D50373      | 1008.133  | 2163.348  |
| AL096751  | 5181.617 | 4119.706 | NM_003608 | 2982.551  | 2812.767  | AA488757    | 4040.165  | 7756.101  |
| NM_000364 | 1151.777 | 933.865  | AF302079  | 10386.028 | 10708.634 | AA205399    | 1044.104  | 1086.153  |
| AF026920  | 3977.68  | 4051.017 | AJ224167  | 323.535   | 342.253   | H07071      | 719.384   | 573.235   |
| NM_004931 | 3573.387 | 3427.713 | NM_002550 | 285.791   | 354.299   | M25322      | 3940.082  | 3143.598  |
| NM_006795 | 14749.55 | 18960.69 | NM_000692 | 800.818   | 1000.447  | H-L 27586 I | 3512.677  | 2448.253  |
| AF070568  | 5912.164 | 4981.589 | AF086062  | 809.54    | 1144.05   | ID 214180   | 633.145   | 245.96    |
| NM_000277 | 685.678  | 544.286  | L47668    | 21523.781 | 19471.453 | ID 1867426  | 3128.018  | 1601.77   |
| NM_000240 | 2821.745 | 2215.363 | NM_017920 | 3920.002  | 4189.198  | W99328      | 984.737   | 640.828   |



|           |          |          |             |           |           |           |           |           |
|-----------|----------|----------|-------------|-----------|-----------|-----------|-----------|-----------|
| AK055733  | 14050.98 | 14153.07 | AK025345    | 859.873   | 770.572   | AI434176  | 1150.378  | 678.525   |
| AF298880  | 5218.085 | 5052.678 | D25274      | 5525.935  | 6728.612  | H08563    | 776.392   | 546.775   |
| AK001500  | 1940.848 | 2154.028 | CY3Cy5      | 1402.031  | 141.254   | BE735403  | 816.202   | 771.433   |
| NM_006774 | 919.812  | 932.299  | D50373      | 803.122   | 861.842   | NM_022552 | 5852.258  | 3897.434  |
| NM_020129 | 2533.808 | 1521.823 | AA488757    | 3033.557  | 3289.185  | NM_014389 | 6117.772  | 5575.411  |
| Y16521    | 3074.058 | 3295.118 | AA205399    | 989.099   | 2573.824  | AF116659  | 1614.279  | 1257.548  |
| NM_003167 | 135.174  | 353.231  | AI394286    | 1.554     | 1532.767  | D79991    | 3453.004  | 2476.168  |
| AL050371  | 3715.655 | 4102.603 | H07071      | 478.532   | 691.099   | AK022425  | 432.407   | 653.775   |
| NM_002651 | 4184.909 | 4105.968 | M25322      | 2653.657  | 3995.459  | NM_000054 | 4158.105  | 3782.998  |
| NM_002413 | 2273.904 | 1949.983 | H-L 27586 I | 2704.599  | 3043.55   | NM_001812 | 2810.891  | 2928.44   |
| NM_017577 | 889.873  | 660.537  | ID 214180   | 508.844   | 440.538   | NM_014785 | 1165.057  | 2363.883  |
| NM_018158 | 3431.535 | 3733.663 | ID 1867426  | 3776.094  | 3142.769  | AK025175  | 891.021   | 1116.139  |
| NM_016301 | 10118.52 | 8720.492 | ID 396450   | 372.524   | 291.041   | NM_005811 | 4590.808  | 6129.109  |
| AK021975  | 659.299  | 730.851  | W99328      | 849.547   | 971.848   | NM_005764 | 1236.105  | 1033.128  |
| AB032952  | 8483.895 | 8795.875 | AI434176    | 1100.659  | 1179.43   | NM_016362 | 1053.127  | 1078.719  |
| NM_002522 | 1027.293 | 1238.594 | H08563      | 842.866   | 951.069   | NM_004214 | 13087.303 | 8684.1    |
| NM_000945 | 3512.033 | 3900.313 | BE735403    | 1614.847  | 3139.412  | NM_004329 | 7730.171  | 4206.088  |
| AB011174  | 2709.551 | 2617.654 | NM_022552   | 7439.132  | 10808.614 | NM_002836 | 3547.919  | 2455.683  |
| AB043635  | 836.139  | 1133.834 | SR4         | 14025.178 | 13410.354 | NM_020167 | 789.031   | 545.478   |
| AB040879  | 629.426  | 864.714  | SR6         | 2431.925  | 1758.866  | AL049963  | 21464.828 | 12267.455 |
| AL049935  | 16299.49 | 19250.64 | SR8         | 7552.121  | 21082.318 | NM_016058 | 45644.027 | 18889.133 |
| AB033043  | 5307.723 | 6200.844 | SR10        | 27492.617 | 8558.71   | NM_014005 | 1152.648  | 995.223   |
| NM_014999 | 7230.99  | 8484.281 | CY3Cy5      | 1576.042  | 113.275   | NM_004636 | 840.372   | 908.604   |
| AK025220  | 4586.807 | 5447.986 | AK025175    | 523.015   | 518.259   | NM_004896 | 3998.284  | 2322.364  |
| NM_016308 | 19150.62 | 14699.48 | NM_005811   | 3666.894  | 3387.365  | NM_003976 | 657.904   | 493.406   |
| D42046    | 4442.344 | 4097.604 | NM_005764   | 638.921   | 675.886   | NM_017688 | 2311.39   | 1765.871  |
| NM_001033 | 18055.38 | 15694.12 | NM_016362   | 680.094   | 829.204   | AK025612  | 4285.044  | 3697.724  |
| NM_004526 | 27388.26 | 22362.83 | NM_004214   | 9269.53   | 9042.62   | NM_012268 | 1362.669  | 1037.916  |
| NM_002526 | 1620.004 | 1542.346 | NM_004329   | 8822.901  | 7495.055  | NM_012203 | 867.124   | 704.245   |
| NM_020135 | 7417.116 | 9405.136 | NM_002836   | 3909.518  | 3497.738  | AL157469  | 1258.191  | 669.028   |
| NM_018518 | 6509.525 | 6420.004 | NM_020167   | 1167.06   | 926.081   | NM_002868 | 2867.879  | 2320.109  |
| AK023168  | 3780.914 | 3943.885 | AL049963    | 17525.584 | 18626.537 | AK024100  | 3152.368  | 5532.438  |
| NM_006646 | 1181.319 | 1468.841 | NM_016058   | 30056.834 | 36937.273 | NM_005135 | 996.402   | 782.99    |
| NM_004742 | 1132.572 | 1194.985 | NM_014005   | 1528.652  | 1461.879  | NM_003827 | 10933.963 | 7044.311  |
| NM_014753 | 3329.203 | 3410.086 | NM_004636   | 1245.268  | 609.284   | NM_004583 | 697.169   | 377.537   |
| NM_006585 | 34473.02 | 35551.04 | AK022603    | 419.521   | 521.43    | NM_001103 | 622.298   | 359.948   |
| NM_014331 | 7183.844 | 7171     | NM_004896   | 3389.709  | 4210.804  | AF228710  | 8231.198  | 4059.958  |
| AF054589  | 822.071  | 638.858  | NM_003976   | 705.572   | 1071.376  | NM_018399 | 773.663   | 453.119   |
| NM_014815 | 2924.058 | 2913.301 | NM_017688   | 2388.732  | 2470.782  | AY007131  | 24522.635 | 19364.93  |
| NM_005443 | 5332.687 | 3816.771 | AK025612    | 4728.771  | 5152.897  | U61735    | 3031.013  | 2034.563  |
| NM_007221 | 8036.47  | 8814.28  | NM_012203   | 936.725   | 1224.677  | NM_001144 | 4592.134  | 3421.781  |
| X54163    | 20850.52 | 21008.64 | NM_004736   | 5261.401  | 6148.858  | AK023766  | 5170.206  | 3112.37   |
| AK025395  | 1174.01  | 1271.274 | NM_006455   | 6707.775  | 6944.931  | NM_001897 | 1210.263  | 1068.102  |
| NM_000388 | 1550.44  | 1133.048 | NM_003827   | 9767.353  | 8087.224  | NM_003853 | 1070.204  | 1053.976  |
| X58377    | 612.032  | 451.492  | NM_004583   | 601.23    | 720.877   | AB033109  | 1389.993  | 1251.863  |
| NM_002469 | 708.049  | 866.243  | NM_001103   | 697.416   | 668.156   | NM_002053 | 12398.76  | 9923.306  |
| BI830936  | 1105.376 | 1009.89  | AF228710    | 9708.579  | 9630.35   | NM_006889 | 959.848   | 936.907   |
| U79292    | 1070.199 | 1110.057 | NM_018399   | 645.154   | 512.164   | NM_002438 | 1319.121  | 994.093   |
| AA947915  | 1062.874 | 380.455  | AY007131    | 23739.006 | 19810.781 | NM_014589 | 1049.298  | 1037.191  |
| BI830753  | 623.487  | 648.531  | U61735      | 3064.487  | 2907.931  | NM_000759 | 1444.646  | 1523.854  |
| X68314    | 1586.271 | 1409.296 | NM_001144   | 5528.071  | 3882.693  | AK023334  | 1266.196  | 1252.49   |
| X71973    | 32988.72 | 32296.67 | AK023766    | 4503.523  | 3807.1    | NM_002563 | 14178.14  | 11646.854 |
| T49651    | 14746.63 | 16337.21 | NM_001897   | 863.148   | 1359.39   | NM_002437 | 2197.16   | 1776.127  |

|           |          |          |           |           |           |           |           |           |
|-----------|----------|----------|-----------|-----------|-----------|-----------|-----------|-----------|
| N51014    | 2071.832 | 1943.174 | NM_003853 | 1133.583  | 852.206   | AK023573  | 2675.893  | 2970.941  |
| BE392471  | 18406.91 | 19175.44 | AB033109  | 1582.539  | 1522.93   | NM_002730 | 7851.933  | 6540.693  |
| AI802950  | 1152.015 | 1160.136 | NM_002053 | 12695.063 | 10694.705 | NM_004828 | 1262.345  | 984.161   |
| AL043686  | 3731.564 | 4192.076 | NM_006888 | 986.381   | 1041.683  | AB011540  | 17570.951 | 10913.476 |
| AA490172  | 440.828  | 581.535  | NM_002438 | 1314.894  | 1273.226  | NM_000040 | 3919.328  | 3209.553  |
| AA775212  | 5230.142 | 5462.251 | NM_014588 | 1401.969  | 1416.911  | NM_004631 | 3346.147  | 1383.848  |
| NM_000723 | 1922.425 | 1704.854 | NM_000758 | 1275.503  | 1330.557  | NM_006033 | 3874.696  | 2184.497  |
| AL096751  | 5025.086 | 3807.603 | AK023334  | 1326.218  | 1186.678  | NM_004837 | 8559.074  | 4591.335  |
| NM_000364 | 975.57   | 787.332  | NM_002563 | 12892.031 | 14235.901 | NM_000370 | 1551.766  | 1038.694  |
| AF026920  | 3600.65  | 3740.507 | NM_002437 | 1895.555  | 1654.115  | BE865893  | 3081.467  | 2600.128  |
| NM_004931 | 3580.329 | 3595.684 | D79991    | 3262.382  | 3254.792  | NM_003123 | 50855.844 | 36490.746 |
| NM_000607 | 10275.38 | 11722.14 | NM_000054 | 7514.556  | 7262.916  | AY005822  | 1714.685  | 1655.214  |
| AB011099  | 516.127  | 337.79   | NM_014713 | 11244.579 | 10777.649 | NM_018128 | 12482.979 | 11421.412 |
| AF090409  | 625.436  | 491.99   | NM_001812 | 2180.769  | 2181.481  | AF289022  | 2712.182  | 2034.836  |
| NM_002575 | 2426.909 | 2922.309 | NM_014785 | 1238.337  | 970.71    | AB002326  | 490.159   | 260.532   |
| NM_004244 | 4238.648 | 4786.299 | NM_006033 | 3399.48   | 3078.239  | NM_016025 | 12005.674 | 10259.543 |
| NM_003371 | 955.626  | 1342.344 | NM_004837 | 6489.359  | 6692.33   | NM_013318 | 2528.868  | 2014.087  |
| NM_001164 | 244.691  | 445.921  | NM_000370 | 1181.126  | 1030.866  | NM_000746 | 2063.674  | 1555.957  |
| AK023114  | 5588.484 | 5314.896 | BE865893  | 4127.672  | 3714.625  | NM_000722 | 915.239   | 1003.702  |
| NM_003678 | 7563.539 | 6366.047 | NM_003123 | 48323.914 | 45607.824 | NM_006030 | 1093.266  | 1132.885  |
| NM_005631 | 958.476  | 2147.874 | AY005822  | 1446.661  | 1624.825  | NM_020410 | 5991.334  | 4865.487  |
| NM_014418 | 874.976  | 816.968  | NM_018128 | 14246.85  | 13148.879 | AF000143  | 18331.777 | 17730.031 |
| NM_014938 | 3670.771 | 3976.673 | AF289022  | 2656.466  | 2436.56   | NM_014211 | 576.48    | 715.222   |
| AF049460  | 891.12   | 623.514  | M17252    | 309.871   | 264.497   | NM_000814 | 2934.847  | 3471.473  |
| NM_000441 | 736.98   | 789.948  | NM_016025 | 11524.527 | 10410.309 | NM_000453 | 2031.829  | 1993.248  |
| AK026066  | 1308.729 | 1230.49  | NM_013318 | 2513.864  | 2637.8    | NM_022552 | 3830.652  | 4131.474  |
| NM_005244 | 593.83   | 696.137  | NM_000746 | 2039.535  | 1689.735  | NM_014388 | 5264.321  | 5967.284  |
| NM_018158 | 3521.497 | 2555.79  | NM_000722 | 1148.683  | 1186.743  | NM_001718 | 496.017   | 363.575   |
| NM_016301 | 10637.45 | 7211.14  | NM_006030 | 1166.44   | 1128.57   | AF116659  | 1883.49   | 876.839   |
| AK021975  | 904.68   | 870.337  | NM_020410 | 5571.985  | 5805.524  | NM_000317 | 17061.578 | 9368.81   |
| AB032952  | 8512.851 | 8521.762 | AF000143  | 19915.584 | 19336.604 | NM_018376 | 6144.694  | 3680.451  |
| NM_002522 | 1429.665 | 1045.483 | NM_014211 | 623.115   | 658.4     | NM_017615 | 663.517   | 744.981   |
| NM_018607 | 529.081  | 370.316  | NM_000814 | 2418.665  | 2635.313  | NM_017438 | 3671.827  | 3018.151  |
| NM_002978 | 1491.921 | 1419.157 | NM_000453 | 1779.622  | 2001      | U59209    | 2812.038  | 2713.214  |
| S83549    | 220.549  | 377.652  | J03077    | 17026.797 | 19397.451 | NM_020195 | 9541.105  | 4548.121  |
| NM_014668 | 919.88   | 886.669  | J03048    | 8897.982  | 7619.033  | AK023824  | 2486.577  | 2654.91   |
| NM_004722 | 2226.852 | 2797.112 | AL157469  | 1076.288  | 982.553   | AL133069  | 3728.475  | 3340.044  |
| NM_014425 | 1581.902 | 1730.437 | NM_002868 | 3324.29   | 3659.57   | AL117574  | 730.792   | 804.852   |
| NM_012133 | 4658.432 | 4473.218 | AK024100  | 6019.813  | 2813.517  | AK026055  | 6957.932  | 5206.692  |
| NM_017954 | 1349.512 | 1327.362 | NM_005135 | 751.983   | 713.013   | AK024126  | 1034.179  | 897.673   |
| NM_006612 | 1232.385 | 1628.054 | NM_000317 | 13653.538 | 12811.65  | NM_001516 | 4401.084  | 3611.388  |
| NM_016451 | 4875.931 | 5217.76  | NM_018376 | 3981.532  | 4325.899  | NM_002744 | 4418.028  | 3984.376  |
| NM_007351 | 18422.95 | 16322.8  | NM_017615 | 604.086   | 377.197   | NM_015917 | 14224.479 | 11508.103 |
| AK026266  | 10850.19 | 8339.651 | NM_017438 | 3062.44   | 2423.651  | NM_020397 | 951.938   | 1220.084  |
| NM_007124 | 5612.864 | 4524.64  | U59209    | 2298.209  | 2012.463  | NM_000061 | 1296.007  | 1063.853  |
| NM_003176 | 4313.708 | 3559.295 | NM_020195 | 5602.005  | 8194.746  | AB046859  | 9825.498  | 10518.477 |
| AK023168  | 4000.55  | 3228.657 | AK023824  | 3911.657  | 2311.465  | NM_005108 | 9923.695  | 8580.067  |
| NM_006646 | 1125.202 | 1115.112 | AL133069  | 3693.514  | 4361.408  | NM_003976 | 641.44    | 820.104   |
| NM_004742 | 1033.911 | 977.961  | AL117574  | 592.088   | 1080.042  | NM_012268 | 1295.582  | 1446.177  |
| NM_014753 | 3563.271 | 3757.218 | AK026055  | 6571.794  | 7323.026  | NM_012203 | 806.36    | 739.136   |
| NM_006585 | 36148.74 | 38007.68 | AK024126  | 1047.73   | 835.648   | NM_004736 | 5438.877  | 3822.211  |
| NM_014331 | 7656.398 | 8023.662 | NM_001516 | 4109.754  | 3789.466  | NM_006458 | 5787.956  | 4350.235  |
| NM_006795 | 13220.53 | 13657.6  | NM_002744 | 3868.927  | 4420.36   | D50373    | 742.388   | 782.431   |

|           |          |          |             |           |           |             |           |           |
|-----------|----------|----------|-------------|-----------|-----------|-------------|-----------|-----------|
| AF070568  | 6672.665 | 6267.242 | NM_015917   | 11519.124 | 12283.641 | AA488757    | 3081.992  | 2550.381  |
| NM_000277 | 618.914  | 453.829  | NM_020397   | 1155.683  | 927.838   | AA205399    | 796.432   | 344.357   |
| NM_000240 | 3105.953 | 3593.996 | NM_000061   | 1124.17   | 1273.145  | H07071      | 642.613   | 497.514   |
| AK055733  | 16058.08 | 17769.87 | AB046859    | 9560.232  | 9877.558  | M25322      | 3746.3    | 1760.479  |
| AF298880  | 5268.03  | 5243.25  | NM_005109   | 9415.301  | 10788.178 | H-L 27586 I | 3101.327  | 2764.078  |
| AK001500  | 1717.248 | 1942.728 | AK023573    | 1778.173  | 1887.167  | ID 214180   | 575.515   | 551.06    |
| NM_006774 | 872.248  | 657.42   | NM_002730   | 6600.778  | 7027.698  | ID 1867426  | 3551.067  | 3033.526  |
| NM_020129 | 2510.06  | 1249.062 | NM_004828   | 1677.299  | 1565.567  | W99328      | 804.743   | 957.376   |
| Y16521    | 3075.91  | 3428.733 | AB011540    | 25231.973 | 27283.436 | AI434176    | 1133.01   | 848.641   |
| AL050371  | 3937.526 | 3793.278 | NM_004736   | 3860.87   | 3731.8    | H08563      | 773.019   | 852.685   |
| NM_002651 | 3686.956 | 3578.752 | NM_006895   | 295.198   | 437.792   | BE735403    | 888.597   | 1011.713  |
| NM_002413 | 2275.303 | 1493.985 | NM_006459   | 4394.132  | 4442.651  | NM_002438   | 1019.975  | 1351.437  |
| NM_017577 | 924.922  | 481.323  | D50373      | 761.746   | 757.915   | NM_014589   | 1497.406  | 2443.497  |
| NM_006228 | 1214.125 | 869.321  | AA488757    | 3191.766  | 3136.231  | NM_000759   | 1272.575  | 1693.33   |
| NM_003768 | 6101.655 | 5798.276 | AA205399    | 439.674   | 745.55    | AK023334    | 1379.126  | 1512.444  |
| NM_018393 | 2095.979 | 1921.007 | H07071      | 576.434   | 637.994   | NM_002563   | 16045.342 | 17518.922 |
| BF032535  | 2056.615 | 1364.64  | M25322      | 2740.882  | 5199.265  | NM_000054   | 5466.599  | 4720.276  |
| NM_018332 | 5301.084 | 4939.282 | H-L 27586 I | 2823.88   | 3136.117  | NM_014713   | 10747.03  | 7962.045  |
| NM_005096 | 15269.7  | 12207.07 | ID 214180   | 518.815   | 635.435   | NM_001812   | 2465.787  | 1251.695  |
| NM_006760 | 1527.75  | 1258.874 | ID 1867426  | 3977.375  | 4411.86   | NM_014785   | 1862.019  | 1272.754  |
| NM_012289 | 8869.614 | 7288.778 | W99328      | 852.506   | 761.266   | NM_005811   | 4469.27   | 3242.575  |
| AB037775  | 1008.458 | 1366.498 | AI434176    | 1065.761  | 1042.686  | NM_005764   | 657.559   | 795.618   |
| L27560    | 966.259  | 1157.983 | H08563      | 1032.354  | 725.858   | NM_016362   | 626.304   | 556.301   |
| AB011174  | 3398.169 | 2809.492 | BE735403    | 1275.405  | 1409.578  | NM_004214   | 12273.866 | 9257.824  |
| AB043635  | 775.289  | 1086.139 | NM_022552   | 6259.188  | 4810.811  | NM_004329   | 8523.355  | 8405.982  |
| AB040879  | 746.081  | 1076.644 | NM_014389   | 10317.701 | 17919.795 | NM_002836   | 4393.836  | 4011.904  |
| AL049935  | 15458.73 | 18224.48 | NM_001718   | 838.98    | 1460.62   | NM_020167   | 958.737   | 760.554   |
| AB033043  | 5417.411 | 6933.59  | AF116659    | 2362.153  | 2612.712  | AL049963    | 22900.457 | 17455.998 |
| NM_014999 | 7873.595 | 8520.994 | D79991      | 2555.639  | 2339.71   | NM_016058   | 49196.504 | 29474.834 |
| AK025220  | 4442.704 | 4815.155 | AK022425    | 444.088   | 281.116   | NM_014005   | 1183.883  | 1195.532  |
| NM_016308 | 18728.26 | 14364.23 | NM_000054   | 4131.548  | 3679.178  | NM_004636   | 1172.98   | 1628.337  |
| D42046    | 4000.77  | 3960.679 | NM_014713   | 8709.379  | 7307.062  | NM_004896   | 4889.997  | 3628.625  |
| NM_001033 | 16904.54 | 14313.63 | NM_001812   | 1452.881  | 1408.133  | NM_006030   | 1222.828  | 1433.137  |
| NM_004526 | 25378.84 | 19117.96 | NM_014785   | 890.138   | 776.447   | NM_020410   | 6109.204  | 7623.422  |
| NM_002526 | 1558.178 | 1302.349 | AK025175    | 600.142   | 461.79    | AF000143    | 19556.104 | 21952.377 |
| NM_020135 | 6930.626 | 6944.374 | NM_005811   | 5140.365  | 8284.061  | NM_014211   | 676.4     | 754.206   |
| NM_018518 | 6467.103 | 5413.296 | NM_005764   | 799.962   | 916.139   | AL157469    | 1253.602  | 1185.585  |
| AK023149  | 3481.361 | 2916.74  | NM_016362   | 820.212   | 1154.736  | NM_002868   | 3105.498  | 3661.995  |
| NM_006438 | 1201.701 | 1039.28  | NM_004214   | 11399.397 | 16646.662 | AK024100    | 2540.501  | 4997.631  |
| NM_001845 | 463.893  | 402.515  | NM_004329   | 13380.589 | 22016.465 | NM_005135   | 888.019   | 593.685   |
| AK024697  | 3783.021 | 4612.775 | NM_002836   | 4310.721  | 4484.345  | NM_003827   | 11437.684 | 9972.912  |
| NM_006460 | 4213.396 | 3802.263 | NM_020167   | 1036.811  | 1081.68   | NM_004583   | 881.959   | 512.792   |
| L34156    | 862.054  | 1089.383 | AL049963    | 19139.887 | 20747.914 | NM_001103   | 700.626   | 733.138   |
| NM_003749 | 2003.995 | 1885.075 | NM_016058   | 32869.313 | 41408.168 | AF228710    | 9403.465  | 9712.12   |
| NM_003557 | 4064.001 | 3866.98  | NM_014005   | 1793.106  | 1387.143  | NM_018399   | 699.62    | 556.893   |
| NM_001257 | 5977.807 | 5121.745 | NM_004896   | 3225.291  | 4197.394  | AY007131    | 27423.43  | 27237.309 |
| NM_001795 | 585.879  | 585.892  | NM_003976   | 1207.506  | 1300.215  | U61735      | 3308.683  | 3321.97   |
| D85245    | 2452.985 | 2574.023 | NM_017688   | 2466.537  | 2832.32   | NM_001144   | 5180.268  | 5364.893  |
| NM_000943 | 1353.186 | 1311.66  | AK025612    | 5595.691  | 6535.622  | AK023766    | 5612.275  | 4084.184  |
| NM_004658 | 4263.381 | 4075.323 | NM_012268   | 2567.032  | 2757.525  | NM_001897   | 1165.626  | 1008.491  |
| NM_001250 | 1405.869 | 1463.448 | NM_012203   | 1113.547  | 1156.365  | NM_003853   | 1089.086  | 1422.666  |
| AF298812  | 790.442  | 791.974  | J03077      | 16670.568 | 16413.287 | AB033109    | 2201.289  | 1869.146  |
| NM_004969 | 3353.922 | 3466.708 | J03048      | 7202.212  | 5888.91   | NM_002053   | 15716.729 | 15071.489 |

|           |          |          |           |           |           |           |           |           |
|-----------|----------|----------|-----------|-----------|-----------|-----------|-----------|-----------|
| AJ249900  | 688.834  | 853.551  | AL157469  | 871.453   | 919.877   | NM_006889 | 843.414   | 1079.253  |
| AK022581  | 5733.576 | 6241.798 | NM_002868 | 2640.318  | 2839.221  | NM_002744 | 3669.123  | 3787.871  |
| NM_018054 | 3655.617 | 3746.093 | AK024100  | 5051.971  | 1878.097  | NM_015917 | 13639.346 | 14542.092 |
| NM_000958 | 9124.133 | 8948.722 | NM_005135 | 617.827   | 586.591   | NM_020397 | 1155.601  | 789.876   |
| NM_001401 | 1766.391 | 1290.042 | NM_003827 | 9207.575  | 8844.585  | NM_005109 | 8563.256  | 8253.711  |
| NM_013271 | 605.148  | 423.727  | NM_004583 | 529.887   | 561.013   | NM_004828 | 1677.458  | 1427.378  |
| NM_004157 | 1948.511 | 1321.156 | NM_001103 | 815.102   | 796.143   | AB011540  | 22705.34  | 21158.939 |
| NM_000684 | 1602.252 | 1545.88  | AF228710  | 10833.782 | 12004.727 | NM_000040 | 5646.901  | 4959.105  |
| NM_015913 | 21409.82 | 13913.67 | NM_018399 | 526.398   | 754.288   | NM_004631 | 3034.643  | 2298.945  |
| NM_005157 | 6843.65  | 6809.423 | AY007131  | 30263.559 | 29781.318 | NM_006033 | 3294.197  | 3415.106  |
| NM_007354 | 393.514  | 610.624  | U61735    | 2980.451  | 2870.526  | NM_004837 | 8381.121  | 6746.133  |
| U67037    | 893.513  | 972.716  | NM_001144 | 5351.038  | 4215.643  | NM_000370 | 1676.261  | 1446.218  |
| NM_004960 | 18659.03 | 19979.67 | AK023766  | 4413.315  | 4671.23   | BE865893  | 3797.525  | 4440.693  |
| AF272370  | 7509.522 | 9071.108 | NM_001897 | 851.94    | 1150.505  | NM_003123 | 58403.25  | 52398.113 |
| AF130050  | 6782.645 | 5380.978 | NM_003853 | 1353.489  | 1044.455  | AY005822  | 1900.034  | 1694.236  |
| AK023045  | 374.252  | 408.611  | AB033109  | 1491.891  | 1727.922  | NM_018129 | 15837.153 | 14812.807 |
| NM_012197 | 9869.295 | 9209.056 | NM_002053 | 15989.093 | 14119.717 | AF289022  | 2927.734  | 2632.434  |
| AK024016  | 6191.079 | 6537.177 | NM_006889 | 951.211   | 1011.891  | AB002326  | 495.61    | 678.354   |
| NM_003581 | 5156.972 | 5779.44  | NM_002438 | 1244.159  | 1441.861  | M17252    | 405.474   | 516.22    |
| NM_002888 | 628.228  | 562.697  | NM_014589 | 1685.778  | 1918.173  | NM_016025 | 12865.827 | 12703.399 |
| NM_012407 | 1981.964 | 2275.416 | NM_000759 | 1448.71   | 1726.41   | NM_013319 | 2984.55   | 2818.596  |
| AF302505  | 2088.872 | 2787.204 | AK023334  | 1305.773  | 1737.882  | NM_000746 | 2254.746  | 2150.684  |
| NM_007186 | 2873.299 | 2309.571 | NM_002563 | 14413.94  | 16159.448 | NM_000722 | 1073.656  | 1306.224  |
| NM_007044 | 6306.314 | 6126.687 | NM_002437 | 2222.377  | 1720.021  | NM_018655 | 2599.302  | 2447.538  |
| AF294326  | 10813.71 | 9853.954 | AK023573  | 2412.239  | 2180.385  | NM_006550 | 1964.072  | 1726.976  |
| NM_014678 | 2633.768 | 2957.732 | NM_002730 | 5841.328  | 6206.199  | NM_005773 | 3097.114  | 3349.353  |
| NM_012317 | 60986.53 | 54388.1  | NM_004828 | 1181.129  | 1306.12   | AB032971  | 423.932   | 346.988   |
| NM_017853 | 7440.144 | 6154.084 | AB011540  | 15898.423 | 14907.953 | NM_002482 | 1490.291  | 783.974   |
| NM_016097 | 12601.61 | 9708.136 | NM_000040 | 3766.671  | 4131.229  | NM_001718 | 534.997   | 393.001   |
| AB035301  | 588.161  | 503.651  | NM_004631 | 2406.25   | 2960.998  | AF116659  | 1548.972  | 1033.757  |
| AB046800  | 731.75   | 834.185  | NM_006033 | 3202.861  | 3267.78   | NM_000317 | 19830.49  | 17384.678 |
| NM_002162 | 13096.84 | 15368.71 | NM_004837 | 6170.912  | 7123.383  | NM_018376 | 6951.794  | 5148.05   |
| NM_015458 | 1683.72  | 1061.489 | NM_000370 | 1402.22   | 1612.447  | NM_017615 | 599.071   | 955.829   |
| D13540    | 7432.061 | 6493.249 | BE865893  | 5083.385  | 5116.04   | NM_017438 | 4153.33   | 3931.58   |
| NM_016570 | 13789.45 | 11637.03 | NM_003123 | 52915.387 | 52231.621 | U59209    | 3316.479  | 3083.306  |
| AF209198  | 4731.84  | 4529.442 | AY005822  | 1803.333  | 2163.64   | NM_020195 | 11032.319 | 7297.176  |
| L09247    | 325.478  | 430.019  | NM_018129 | 17569.57  | 17072.086 | AK023824  | 3247.393  | 4519.511  |
| M69012    | 14954.66 | 15714.03 | AF289022  | 2873.978  | 2696.512  | AL133069  | 4507.814  | 4259.326  |
| NM_016347 | 558.114  | 663.866  | AB002326  | 489.493   | 411.25    | AL117574  | 822.432   | 901.34    |
| NM_006936 | 19323.35 | 27368.36 | M17252    | 450.719   | 456.974   | AK026055  | 8012.554  | 7988.723  |
| NM_001327 | 19506.12 | 21309.08 | NM_016025 | 12152.157 | 11517.957 | AK024126  | 1137.421  | 1164.826  |
| NM_006983 | 292.049  | 212.921  | NM_013319 | 2527.858  | 2787.142  | NM_001516 | 4813.376  | 4720.645  |
| AF321182  | 476.018  | 659.201  | NM_000746 | 2397.821  | 1937.549  | NM_019086 | 2362.902  | 2403.674  |
| AB037722  | 628.84   | 650.225  | NM_000722 | 1198.984  | 1365.907  | NM_006670 | 3296.377  | 2990.449  |
| NM_003652 | 382.018  | 410.789  | NM_006030 | 1205.838  | 1244.234  | NM_012425 | 7620.483  | 6161.773  |
| NM_000063 | 385.472  | 435.9    | NM_020410 | 6135.5    | 6019.847  | NM_000081 | 518.643   | 812.306   |
| NM_018389 | 2162.542 | 2563.368 | AF000143  | 23335.469 | 23833.504 | NM_018558 | 975.369   | 1106.433  |
| AB033026  | 473.247  | 664.295  | NM_014211 | 709.79    | 826.379   | NM_001974 | 3913.372  | 3194.115  |
| NM_014716 | 16165.08 | 15621.27 | NM_000814 | 2717.074  | 3131.478  | NM_013957 | 770.414   | 1051.011  |
| AB002354  | 1017.647 | 1284.29  | NM_000453 | 2002.338  | 2043.69   | NM_002468 | 7263.045  | 6028.756  |
| AK023845  | 2461.565 | 1867.958 | NM_022552 | 4711.032  | 3227.514  | NM_003028 | 1803.107  | 1966.531  |
| NM_002638 | 1460.464 | 1474.502 | NM_014389 | 4951.128  | 4356.319  | NM_001566 | 1079.838  | 1101.969  |
| NM_016487 | 978.065  | 846.204  | NM_001718 | 354.418   | 474.786   | NM_016541 | 1259.071  | 1163.903  |

|           |          |          |             |           |           |           |           |           |
|-----------|----------|----------|-------------|-----------|-----------|-----------|-----------|-----------|
| NM_00580E | 11375.48 | 11305.67 | AF116659    | 1703.508  | 1662.356  | NM_01854E | 6526.594  | 7454.501  |
| NM_006401 | 35287.38 | 46696.81 | NM_000317   | 14902.332 | 15393.014 | NM_013401 | 1268.17   | 1663.509  |
| AF269249  | 1918.258 | 1893.831 | NM_01837E   | 4708.519  | 5880.345  | NM_01823E | 4208.442  | 4089.078  |
| D31763    | 4248.453 | 2790.169 | NM_01761E   | 666.63    | 663.154   | NM_00685E | 11176.461 | 12238.11  |
| NM_01816E | 11255.01 | 8647.9   | NM_01743E   | 3185.685  | 2950.486  | NM_00140E | 7834.721  | 8189.078  |
| AK021452  | 1642.523 | 3955.336 | U59209      | 2588.546  | 2477.788  | NM_00388C | 1141.125  | 961.111   |
| NM_00450E | 6625.663 | 6160.384 | NM_02019E   | 6832.008  | 9408.858  | AF131778  | 1850.297  | 1554.491  |
| S74529    | 36417.76 | 39375.16 | AK023824    | 4251.307  | 2864.759  | NM_00156E | 2928.272  | 2387.911  |
| NM_00593E | 1566.811 | 1454.375 | AL133069    | 4171.042  | 4496.796  | NM_01327E | 2060.061  | 1841.342  |
| NM_00559E | 401.723  | 450.573  | AL117574    | 654.808   | 838.096   | NM_003487 | 10328.21  | 4401.833  |
| NM_001421 | 1071.337 | 1195.444 | AK026055    | 7081.864  | 8977.9    | NM_006887 | 14034.211 | 9526.651  |
| M73837    | 2841.236 | 4383.096 | AK024126    | 897.534   | 917.872   | NM_006477 | 1345.181  | 1390.919  |
| NM_00583E | 15287.24 | 11138.49 | NM_00151E   | 4537.041  | 3817.702  | NM_00106E | 1825.092  | 2180.142  |
| AK023379  | 5775.347 | 5028.513 | NM_002744   | 4495.951  | 4764.013  | NM_01817C | 3147.595  | 2943.848  |
| NM_00607E | 1233.234 | 1320.694 | NM_015917   | 12698.358 | 13896.56  | NM_003867 | 1187.976  | 1058.818  |
| AK021904  | 10406.26 | 10025.72 | NM_020397   | 1166.673  | 1231.5    | AK022588  | 449.05    | 664.144   |
| -         | 1541.297 | 1396.658 | NM_000061   | 1293.216  | 1376.413  | AL162062  | 968.447   | 1086.488  |
| NM_01829E | 1106.668 | 1371.697 | AB046859    | 13238.802 | 12324.422 | NM_00317E | 9357.393  | 8001.259  |
| AL049705  | 11544.37 | 12173.52 | NM_00510E   | 10668.619 | 11417.773 | NM_00503C | 15224.324 | 13429.523 |
| AK022294  | 1590.157 | 1224.577 | NM_00397E   | 482.038   | 354.792   | NM_017584 | 3692.868  | 3977.913  |
| AF086507  | 1700.406 | 1339.237 | NM_01768E   | 2131.591  | 3338.955  | NM_02035E | 3754.216  | 4030.121  |
| U79289    | 860.307  | 773.664  | AK025612    | 3852.032  | 3638.32   | AB014541  | 19499.582 | 19941.66  |
| NM_01402E | 5828.706 | 4678.612 | NM_01226E   | 1477.812  | 1340.886  | NM_00258E | 7967.201  | 7477.074  |
| NM_00040E | 4629.175 | 4432.877 | NM_01220E   | 758.638   | 871.219   | NM_00657C | 15881.836 | 16877.832 |
| NM_00069C | 2536.789 | 2036.034 | NM_00473E   | 4299.022  | 4264.113  | NM_02034E | 1248.04   | 1411.235  |
| NM_00015E | 5509.514 | 5552.584 | NM_00645E   | 5536.829  | 5524.586  | NM_006034 | 11175.692 | 11488.689 |
| AK024489  | 1935.955 | 1453.685 | D50373      | 995.691   | 917.248   | AB040943  | 891.852   | 887.043   |
| NM_000181 | 6789.366 | 5689.626 | AA488757    | 4722.369  | 4652.164  | NM_005201 | 9608.114  | 9437.438  |
| NM_000667 | 567.997  | 468.719  | AA205399    | 486.859   | 855.537   | NM_00009E | 630.1     | 760.6     |
| NM_014121 | 1148.612 | 1320.18  | H07071      | 721.172   | 842.984   | AF174600  | 8115.485  | 5765.145  |
| NM_00673C | 1862.355 | 1675.224 | M25322      | 3144.92   | 4619.063  | AK001003  | 1654.848  | 1469.191  |
| NM_005644 | 10177.05 | 9917.979 | H-L 27586 I | 2919.39   | 2676.894  | NM_00280C | 19932.592 | 15325.823 |
| NM_01844E | 3656.409 | 4479.776 | ID 214180   | 564.964   | 631.77    | NM_018384 | 18873.545 | 19077.893 |
| AF182416  | 9820.563 | 9175.805 | ID 1867426  | 4024.629  | 4016.009  | NM_00187E | 751.562   | 832.41    |
| NM_00599E | 18499.22 | 16555.56 | W99328      | 1156.959  | 849.865   | AF282617  | 8948.088  | 7959.91   |
| NM_00601E | 2159.783 | 2633.85  | AI434176    | 1064.096  | 1209.779  | NM_005877 | 12800.01  | 13005.539 |
| NM_004634 | 3547.975 | 3392.093 | H08563      | 1224.295  | 1047.318  | NM_00333E | 6263.186  | 5869.945  |
| NM_002017 | 7579.021 | 7783.487 | BE735403    | 1538.455  | 1257.828  | NM_01339E | 1816.728  | 1702.782  |
| NM_01752E | 14746.03 | 13234.27 | NM_00243E   | 925.743   | 779.491   | NM_01775E | 2013.561  | 2186.188  |
| NM_00238E | 10425.13 | 12702.73 | NM_01458E   | 983.687   | 853.42    | D26069    | 10530.749 | 10828.604 |
| NM_00215E | 740.082  | 895.142  | NM_00075E   | 998.239   | 1143.825  | BF107577  | 19269.311 | 20451.934 |
| U13223    | 6847.981 | 5444.462 | AK023334    | 918.801   | 936.225   | NM_005837 | 12758.017 | 11158.619 |
| NM_01627C | 1176.435 | 1001.748 | NM_00256E   | 10861.988 | 10966.233 | NM_01662E | 8003.922  | 5175.011  |
| AK001357  | 751.297  | 547.837  | NM_002437   | 1606.365  | 1251.223  | NM_01749E | 1872.505  | 1768.27   |
| NM_015721 | 3472.542 | 2745.612 | D79991      | 2896.37   | 2712.055  | NM_00613E | 9929.926  | 8834.778  |
| AF086298  | 1200.355 | 1302.698 | NM_000054   | 5408.64   | 4360.601  | AF237772  | 3367.375  | 4061.545  |
| AK027238  | 1136.917 | 929.236  | NM_01471E   | 9844.232  | 8765.964  | AK025934  | 2117.13   | 1646.794  |
| AK000032  | 552.057  | 450.813  | NM_00181E   | 1620.516  | 1712.808  | AJ008154  | 1504.175  | 1150.902  |
| AK025758  | 953.599  | 644.072  | NM_01478E   | 926.104   | 859.35    | NM_00685E | 5164.565  | 4248.186  |
| S94540    | 1734.303 | 1904.87  | NM_005811   | 5163.728  | 5277.585  | X52350    | 59168.836 | 57900.652 |
| U79297    | 1671.06  | 3009.431 | NM_005764   | 1084.067  | 1048.858  | AF071554  | 1896.531  | 1781.87   |
| AK002164  | 993.324  | 1391.351 | NM_01636E   | 747.803   | 1235.015  | U90919    | 4466.22   | 4289.227  |
| AF052122  | 2966.783 | 3702.846 | NM_004214   | 10033.388 | 10428.545 | NM_006177 | 1101.716  | 1334.596  |

|           |          |          |           |           |           |           |           |           |
|-----------|----------|----------|-----------|-----------|-----------|-----------|-----------|-----------|
| NM_00131C | 3117.092 | 3667.444 | NM_00432E | 10230.304 | 9079.373  | AL137286  | 6904.527  | 6443.457  |
| AK026924  | 1249.834 | 1512.091 | NM_00283E | 4342.032  | 4530.761  | NM_01635E | 6874.637  | 7042.105  |
| AL122047  | 7635.567 | 6961.801 | NM_020167 | 1271.838  | 1034.647  | NM_01627E | 15812.015 | 20304.475 |
| AF052091  | 736.389  | 711.116  | AL049963  | 18746.969 | 18316.715 | NM_02041E | 3347.748  | 4865.004  |
| AK024447  | 44618.07 | 48530.98 | NM_01605E | 32362.389 | 39251.203 | NM_01329E | 4812.798  | 4537.141  |
| AF052145  | 549.693  | 229.967  | NM_01400E | 2025.829  | 1821.559  | AF315592  | 4523.658  | 4955.203  |
| AF086458  | 4853.498 | 6124.572 | NM_00463E | 1366.402  | 976.211   | AF095844  | 2867.758  | 2950.227  |
| AF086548  | 1078.698 | 1080.006 | NM_00489E | 3504.112  | 3797.838  | NM_01583E | 2010.796  | 2866.556  |
| AK024350  | 620.46   | 807.511  | NM_00603C | 925.123   | 696.599   | NM_00098E | 58907.156 | 57838.664 |
| AK023717  | 952.211  | 1680.475 | NM_02041C | 4592.716  | 3254.694  | AK026760  | 15457.146 | 17105.732 |
| AK023727  | 757.038  | 895.819  | AF000143  | 14859.271 | 12424.129 | NM_01477E | 2938.094  | 2808.699  |
| AK025271  | 763.824  | 654.766  | NM_014211 | 518.74    | 310.097   | AK025248  | 4102.851  | 2470.684  |
| AF086204  | 1611.372 | 1627.056 | NM_000814 | 1841.658  | 2106.308  | NM_00453E | 18187.047 | 14134.077 |
| NM_007021 | 969.372  | 837.154  | NM_00045E | 1792.659  | 1886.347  | NM_00642E | 16703.525 | 14362.598 |
| AK026283  | 692.904  | 700.34   | J03077    | 17144.539 | 17989.586 | NM_00428C | 23840.156 | 16381.57  |
| AK022076  | 456.183  | 699.55   | J03048    | 8334.499  | 6329.48   | AF110399  | 1348.962  | 1233.275  |
| AK023065  | 355.916  | 513.628  | AL157469  | 1065.287  | 967.353   | AK027094  | 4780.402  | 3791.366  |
| NM_01767E | 308.741  | 506.749  | NM_00286E | 2945.805  | 3052.586  | AL359596  | 1283.535  | 1085.952  |
| AK021570  | 1324.65  | 1364.245 | AK024100  | 6029.615  | 2495.756  | U79249    | 842.734   | 707.29    |
| AL360204  | 937.963  | 785.308  | NM_00513E | 767.222   | 799.948   | AK022114  | 951.791   | 1174.803  |
| AK000103  | 1030.069 | 894.729  | NM_003827 | 9222.041  | 9306.302  | AL133585  | 1933.79   | 1899.898  |
| AK026294  | 566.342  | 607.644  | NM_00458E | 644.775   | 680.829   | NM_002631 | 15160.913 | 17087.018 |
| AF085959  | 1303.572 | 1269.412 | NM_001103 | 806.278   | 845.247   | NM_00077E | 973.365   | 781.526   |
| AF075107  | 167.788  | 368.707  | AF228710  | 12166.59  | 11465.052 | AB032981  | 780.337   | 734.68    |
| AK023104  | 1105.703 | 1286.669 | NM_01839E | 667.161   | 583.081   | BF217864  | 9753.032  | 11087.906 |
| AK022181  | 466.193  | 614.097  | AY007131  | 34151.512 | 28960.1   | BC017044  | 969.34    | 1149.838  |
| AK026923  | 2364.495 | 1549.312 | U61735    | 3447.193  | 3198.533  | AV758498  | 2759.036  | 3914.273  |
| AK021691  | 12547.27 | 11693.38 | NM_001144 | 6024.505  | 4408.708  | NM_02019E | 3451.23   | 3806.411  |
| AK023595  | 502.157  | 538.419  | AK023766  | 4132.445  | 4386.882  | AB002299  | 302.921   | 770.969   |
| AK000141  | 6987.03  | 5915.877 | NM_001897 | 991.557   | 1281.369  | AK024113  | 1406.67   | 1009.49   |
| AL137758  | 3248.328 | 2828.617 | NM_00385E | 1620.065  | 1161.547  | NM_018657 | 1835.761  | 1583.411  |
| AK023865  | 47.235   | 329.219  | AB033109  | 1377.278  | 1611.457  | L40410    | 21534.736 | 19120.869 |
| AK025786  | 1585.681 | 1362.286 | NM_00205E | 15764.989 | 14708.567 | NM_00705E | 2233.405  | 2139.721  |
| AK024188  | 1867.728 | 1806.614 | NM_00688E | 1051.593  | 1116.718  | NM_01665E | 2762.617  | 2495.677  |
| AK024379  | 1043.235 | 910.512  | NM_002744 | 3045.483  | 2458.075  | NM_01631C | 11836.895 | 11874.795 |
| AK026820  | 1127.652 | 1010.469 | NM_015917 | 9658.355  | 7520.572  | AK021562  | 894.831   | 1124.622  |
| AK001716  | 2871.582 | 2916.354 | NM_020397 | 1082.231  | 652.317   | BC006560  | 1306.166  | 1137.791  |
| AF113683  | 431.509  | 568.264  | NM_000061 | 1151.489  | 1439.232  | NM_00629E | 706.839   | 1133.622  |
| AK026821  | 493.845  | 466.359  | AB046859  | 8870.786  | 8037.726  | AF060938  | 38749.297 | 37751.031 |
| AK026280  | 912.799  | 642.779  | NM_00510E | 8829.452  | 9970.616  | NM_00197E | 5831.933  | 5356.027  |
| AF113017  | 1409.183 | 1432.932 | AK023573  | 3330.996  | 3244.008  | NM_01446E | 4927.278  | 4574.532  |
| AL080232  | 1067.885 | 1196.898 | NM_00273C | 6577.974  | 6479.262  | AL050015  | 1859.437  | 1183.58   |
| AK001120  | 1573.947 | 1689.738 | NM_00482E | 1425.233  | 1337.507  | AY007117  | 6053.724  | 5025.32   |
| AK022416  | 1303.368 | 956.034  | AB011540  | 20957.004 | 18676.355 | AF039698  | 3976.944  | 4051.181  |
| AK023224  | 2948.289 | 3164.108 | NM_00004C | 5112.8    | 5214.908  | AK025419  | 3089.162  | 3770.207  |
| AK022442  | 1121.037 | 1099.636 | NM_004631 | 3259.922  | 3857.321  | NM_01325E | 9926.595  | 14111.888 |
| AK023336  | 684.493  | 744.693  | NM_00603E | 4172.72   | 4406.264  | NM_01837E | 6256.811  | 9506.98   |
| AK023771  | 206.685  | 485.824  | NM_004837 | 7547.136  | 8614.61   | NM_00491E | 492.054   | 520.01    |
| AK026873  | 5778.682 | 5683.389 | NM_00037C | 1573.877  | 1810.814  | AK026838  | 1858.695  | 2562.819  |
| AK026394  | 6237.361 | 6270.948 | BE865893  | 5951.828  | 5582.424  | AK022443  | 2468.047  | 2704.767  |
| NM_00544E | 826.941  | 623.128  | NM_00312E | 58411.742 | 59593.25  | AK023371  | 3372.974  | 4127.78   |
| AB000464  | 316.443  | 260.951  | AY005822  | 2380.697  | 2200.59   | AF086187  | 4139.629  | 4003.945  |
| AK025943  | 35069.15 | 37932.16 | NM_01812E | 23255.428 | 20631.451 | AF305836  | 53683.043 | 55310.945 |

|           |          |          |           |           |           |           |           |           |
|-----------|----------|----------|-----------|-----------|-----------|-----------|-----------|-----------|
| BG106479  | 2002.651 | 1985.584 | AF289022  | 2756.827  | 3032.431  | AL109784  | 523.326   | 674.197   |
| AF130069  | 5313.333 | 5501.603 | AB002326  | 470.538   | 607.206   | AL137383  | 456.551   | 529.648   |
| AL109669  | 5409.285 | 5414.589 | M17252    | 371.469   | 612.13    | AL035295  | 2580.979  | 2980.922  |
| AB037766  | 1441.333 | 1162.901 | NM_016025 | 13503.287 | 13255.354 | NM_018302 | 7301.389  | 6593.359  |
| AK026995  | 1337.933 | 1261.208 | NM_013319 | 2848.735  | 3090.95   | AK027252  | 3069.025  | 3553.407  |
| AL133091  | 1026.084 | 1282.808 | NM_000746 | 2169.439  | 2074.88   | AF165527  | 2744.49   | 2864.613  |
| BF842915  | 727.541  | 705.6    | NM_000722 | 1488.353  | 1390.454  | NM_014092 | 1026.668  | 1072.902  |
| AF086212  | 253.975  | 402.921  | NM_016116 | 609.611   | 390.927   | AL110133  | 6089.315  | 5422.988  |
| X82545    | 4745.828 | 6735.617 | NM_018655 | 1776.239  | 1588.921  | AL050053  | 670.93    | 646.869   |
| AK024632  | 2888.893 | 3435.662 | NM_005663 | 1993.367  | 1822.052  | AK000529  | 7000.637  | 6234.465  |
| NM_018474 | 3526.36  | 3586.462 | X89960    | 579.156   | 477.987   | AK027243  | 1845.589  | 2809.843  |
| AK024937  | 2738.661 | 2711.448 | NM_006550 | 1279.508  | 1342.715  | AF147415  | 1233.791  | 1472.612  |
| D17178    | 2710.43  | 2350.223 | NM_005773 | 2646.77   | 3267.207  | AK098474  | 564.19    | 954.084   |
| AK022094  | 2907.87  | 3553.794 | NM_017644 | 3851.508  | 4084.616  | AL117475  | 1803.106  | 2164.698  |
| AK026695  | 1424.426 | 1835.173 | NM_002482 | 946.502   | 1266.915  | AL049300  | 806.012   | 568.684   |
| AK022220  | 534.094  | 521.382  | AF116659  | 2257.167  | 1529.75   | NM_017535 | 3599.705  | 4130.093  |
| AL137539  | 442.7    | 635.231  | NM_000317 | 18396.43  | 16720.215 | NM_003887 | 1298.943  | 1529.998  |
| U84520    | 1598.412 | 1334.232 | NM_018376 | 4695.218  | 6212.348  | NM_004267 | 14364.666 | 18350.945 |
| AL133616  | 5946.43  | 9176.632 | NM_017615 | 733.368   | 684.026   | AL357212  | 622.676   | 792.396   |
| AK023391  | 513.518  | 742.079  | NM_017438 | 3748.466  | 3178.176  | AK026687  | 2354.746  | 2641.419  |
| AK026382  | 2716.551 | 3788.031 | U59209    | 3397.562  | 2366.195  | AL117444  | 1490.413  | 1492.931  |
| AK091169  | 4747.204 | 5719.175 | NM_020195 | 7897.232  | 10574.461 | NM_017994 | 10885.217 | 11699.972 |
| NM_014745 | 10520.61 | 12403.9  | AK023824  | 4542.264  | 3295.411  | AK021693  | 2557.114  | 2249.762  |
| AF086026  | 6569.225 | 7406.77  | AL133069  | 4423.87   | 4740.678  | AB023177  | 758.415   | 1194.8    |
| NM_016300 | 2736.212 | 3019.19  | AL117574  | 743.347   | 864.864   | Y11609    | 1863.494  | 1884.715  |
| NM_015607 | 24025.61 | 28674.96 | AK026055  | 8512.971  | 10023.879 | AJ278482  | 481.772   | 425.394   |
| AK026955  | 2845.415 | 2212.938 | AK024126  | 1097.499  | 1205.047  | NM_012122 | 13139.719 | 11359.11  |
| AL110202  | 32956.19 | 33661.11 | NM_001516 | 4869.402  | 4528.431  | AF009285  | 12281.933 | 13480.395 |
| AK021980  | 1411.122 | 1398.569 | NM_019086 | 1886.953  | 1511.949  | AF009294  | 5177.018  | 7495.879  |
| S46402    | 1565.031 | 1692.054 | NM_006670 | 2311.726  | 2351.7    | NM_001524 | 1505.974  | 1406.245  |
| AF075048  | 681.997  | 509.075  | NM_012425 | 4993.339  | 4523.046  | AK000998  | 777.177   | 1081.311  |
| Z83940    | 1764.694 | 1910.729 | NM_005816 | 1527.877  | 1252.8    | AK001225  | 538.292   | 886.327   |
| NM_005800 | 3750.826 | 3327.21  | NM_002750 | 6776.124  | 6687.522  | AK021684  | 2427.658  | 3866.039  |
| AF019617  | 3021.42  | 3091.918 | AK024134  | 5909.178  | 5115.462  | AK001060  | 695.458   | 905.913   |
| AL137305  | 9506.868 | 7915.475 | NM_003014 | 1311.238  | 1043.55   | AK001819  | 335.305   | 666.088   |
| NM_005290 | 1678.538 | 2054.056 | NM_018558 | 885.662   | 756.396   | AK021480  | 1066.507  | 1075.608  |
| AK025802  | 1570.662 | 1515.255 | NM_001974 | 3377.551  | 3685.687  | AK025112  | 1841.654  | 2356.269  |
| AF085973  | 813.842  | 943.863  | NM_013957 | 831.352   | 1018.053  | AK026079  | 500.05    | 921.922   |
| NM_018013 | 1920.338 | 2708.53  | NM_002468 | 6334.774  | 6600.948  | AK025173  | 5062.46   | 6457.858  |
| AK022517  | 3015.953 | 1879.248 | NM_003028 | 1699.245  | 1554.138  | AK025430  | 1590.397  | 1781.625  |
| NM_000329 | 19463.08 | 23054.4  | NM_001566 | 945.821   | 717.642   | AK026722  | 631.48    | 977.057   |
| NM_001182 | 3501.07  | 3128.578 | NM_016541 | 2166.444  | 2068.582  | AF117338  | 5467.442  | 5227.4    |
| NM_000333 | 3586.835 | 3694.229 | NM_018548 | 6664.018  | 5902.817  | AK025567  | 3711.632  | 3137.733  |
| NM_000172 | 3749.005 | 3516.383 | NM_013401 | 1728.633  | 1065.145  | NM_019102 | 776.589   | 848.609   |
| NM_002297 | 1828.566 | 1477.271 | NM_018238 | 4118.921  | 3396.89   | U56857    | 7091.337  | 7620.942  |
| AB040968  | 4242.834 | 3895.066 | NM_006858 | 14669.478 | 13256.985 | AF086421  | 1517.942  | 1781.756  |
| X85323    | 887.226  | 558.36   | NM_001405 | 8801.629  | 7912.59   | AK001612  | 1036.339  | 981.416   |
| U17615    | 1938.052 | 1902.64  | NM_003880 | 1505.02   | 1435.107  | AF161522  | 7470.659  | 8768.392  |
| NM_005303 | 707.692  | 734.504  | NM_005468 | 446.924   | 380.788   | AF086028  | 9573.065  | 16587.682 |
| NM_016126 | 15152.94 | 16871.58 | AF131778  | 2110.733  | 2154.923  | U46119    | 422.791   | 787.4     |
| U84119    | 1963.412 | 1582.184 | NM_001562 | 2735.989  | 2401.998  | AK025365  | 1961.101  | 1950.467  |
| NM_003608 | 6480.934 | 7266.047 | NM_013278 | 2106.337  | 2090.156  | AK023445  | 973.831   | 995.316   |
| AF302079  | 16951.89 | 18272.72 | NM_003487 | 6830.347  | 5105.467  | AK023489  | 1501.968  | 1805.799  |

|             |          |          |           |           |           |           |           |           |
|-------------|----------|----------|-----------|-----------|-----------|-----------|-----------|-----------|
| AJ224167    | 720.42   | 620.296  | NM_006887 | 9224.02   | 8713.964  | AK021561  | 4792.8    | 6333.817  |
| NM_00255C   | 663.374  | 658.471  | NM_006477 | 1334.159  | 1086.331  | AK025222  | 273.551   | 598.026   |
| NM_000692   | 1972.352 | 1915.147 | NM_00288C | 4506.505  | 4896.304  | NM_003531 | 3581.044  | 2581.18   |
| AF086062    | 1391.765 | 1273.104 | NM_00067E | 7037.39   | 6445.831  | NM_01779C | 1181.17   | 765.917   |
| AF000268    | 1392.851 | 2277.827 | NM_00106E | 1405.316  | 1407.718  | NM_00351C | 992.738   | 628.75    |
| L47668      | 10156.3  | 15048.21 | NM_004657 | 2409.957  | 2456.755  | NM_018534 | 1148.269  | 1435.716  |
| NM_01792C   | 3243.114 | 3825.644 | NM_01817C | 2204.237  | 1913.868  | AB037847  | 2588.937  | 4411.673  |
| AK025345    | 1179.348 | 1675.511 | NM_003867 | 1078.218  | 1266.539  | NM_00517C | 2201.746  | 3866.735  |
| D25274      | 12389.12 | 10174.26 | AK022588  | 346.357   | 393.835   | S96437    | 1386.702  | 2777.452  |
| CY3Cy5      | 2421     | 204.632  | AL162062  | 1005.33   | 846.247   | NM_01517E | 2020.04   | 3245.337  |
| D50373      | 667.828  | 687.152  | NM_003173 | 7323.373  | 8398.598  | AL353939  | 970.203   | 1318.316  |
| AA488757    | 624.769  | 677.249  | NM_00503C | 12388.864 | 11800.233 | AL117573  | 4550.594  | 5283.513  |
| AA205399    | 663.885  | 297.884  | NM_017584 | 3605.683  | 3243.461  | AL080186  | 1606.246  | 2194.307  |
| M25322      | 3401.093 | 773.985  | NM_02035E | 3615.467  | 3428.149  | NM_00530E | 50332.777 | 53029.578 |
| AA436187    | 861.057  | 990.579  | AB014541  | 16846.877 | 15027.917 | NM_00164E | 20218.584 | 24351.035 |
| H-L 27586 I | 4540.486 | 3127.193 | NM_002583 | 7200.825  | 6952.577  | AL137327  | 3896.777  | 5175.75   |
| AI434176    | 1812.859 | 1406.531 | NM_00657C | 15053.121 | 13823.871 | AF358454  | 5052.394  | 7872.987  |
| BE735403    | 765.197  | 655.781  | NM_02034E | 1501.523  | 1312.329  | AK026090  | 1861.886  | 2123.428  |
| NM_022552   | 4862.698 | 3108.74  | NM_006034 | 12536.948 | 12001.725 | AF070637  | 706.522   | 2430.938  |
| NM_01438E   | 3830.964 | 3480.157 | AB040943  | 778.807   | 1557.37   | AL137634  | 2166.292  | 2526.958  |
| SR8         | 8678.975 | 14431.32 | NM_005201 | 11775.608 | 10455.204 | AK024863  | 6518.805  | 7905.323  |
| SR10        | 27937.1  | 5407.081 | NM_000092 | 773.765   | 768.264   | AJ008135  | 54824.969 | 47876.289 |
| CY3Cy5      | 1654.225 | 74.078   | AF174600  | 6513.485  | 5474.754  | AK026908  | 7477.989  | 7282.061  |
| AK025175    | 255.729  | 305.178  | AK001003  | 1258.563  | 795.094   | U92025    | 564.881   | 475.683   |
| NM_005811   | 2404.797 | 2115.811 | NM_00280C | 13184.933 | 12282.46  | AB046766  | 963.653   | 685.5     |
| NM_016362   | 523.742  | 395.061  | NM_018384 | 15144.608 | 12670.787 | AF009323  | 989.793   | 766.467   |
| NM_004214   | 11043.62 | 8535.749 | AF282617  | 6730.19   | 6522.662  | U52829    | 1277.202  | 1031.289  |
| NM_00432E   | 4804.79  | 4563.905 | AF157323  | 2574.011  | 2549.504  | AK001526  | 6505.337  | 6709.772  |
| NM_00283E   | 3793.414 | 3606.766 | NM_00602E | 430.977   | 561.653   | NM_00051E | 451.593   | 696.77    |
| AL049963    | 20227.12 | 13345.49 | NM_005877 | 11623.467 | 9636.992  | AF086183  | 878.979   | 1252.027  |
| NM_01605E   | 45712.85 | 27664.22 | NM_00333E | 7077.047  | 6310.795  | AK000525  | 1712.569  | 2292.428  |
| AK022603    | 305.541  | 268.088  | NM_01339E | 1371.41   | 1582.177  | AL137434  | 2065.802  | 3228.224  |
| NM_00489E   | 4560.652 | 2824.32  | NM_017752 | 1618.87   | 1360.926  | Z36795    | 2497.35   | 3058.794  |
| NM_00397E   | 339.934  | 357.086  | D26069    | 9434.793  | 8351.173  | AL080216  | 2174.116  | 3152.654  |
| NM_01768E   | 2609.321 | 2231.348 | BF107577  | 19813.215 | 17648.516 | NM_019897 | 299.857   | 630.412   |
| AK025612    | 3531.898 | 3106.622 | NM_005837 | 11092.325 | 10665.007 | AF038188  | 12455.911 | 13457.974 |
| NM_00473E   | 5370.1   | 5225.275 | NM_01662E | 6675.824  | 6405.316  | AJ227888  | 705.644   | 993.191   |
| NM_00645E   | 3921.015 | 3154.767 | NM_017493 | 2217.824  | 1650.958  | D17046    | 1368.52   | 1685.744  |
| NM_003827   | 13283.44 | 18977.1  | NM_00613E | 8213.993  | 12637.443 | NM_01764E | 9191.628  | 12045.612 |
| NM_004583   | 788.395  | 895.346  | AF237772  | 3932.779  | 3552.141  | AJ227864  | 774.455   | 885.527   |
| NM_001103   | 620.691  | 654.409  | AK025934  | 1983.581  | 2851.992  | AF157562  | 4180.434  | 6085.45   |
| AF228710    | 2976.963 | 3017.731 | AJ008154  | 1360.05   | 1399.986  | AK021958  | 8669.923  | 12809.735 |
| NM_01839E   | 628.589  | 574.779  | NM_00685E | 3992.694  | 3792.354  | M31164    | 1491.644  | 1838.446  |
| AY007131    | 10710.44 | 13699.94 | X52350    | 55938.324 | 52390.355 | AF113674  | 16767.24  | 15479.918 |
| U61735      | 3501.107 | 3017.191 | AF071554  | 1567.422  | 1287.894  | NM_003511 | 757.712   | 1808.715  |
| NM_001144   | 4266.295 | 6210.74  | U90919    | 3853.755  | 7262.667  | CY3Cy5    | 4049.152  | 171.007   |
| AK023766    | 6754.55  | 4900.565 | NM_006177 | 1331.191  | 1445.88   | H97792    | 1314.805  | 958.47    |
| NM_001897   | 974.881  | 787.686  | AL137286  | 6042.261  | 5626.362  | L33404    | 449.866   | 688.253   |
| NM_003853   | 674.94   | 443.555  | NM_01635E | 5691.468  | 5273.802  | M13509    | 682.008   | 808.887   |
| AB033109    | 1581.5   | 1132.401 | NM_01627E | 14454.227 | 12953.366 | X04076    | 1952.014  | 3003.585  |
| NM_002053   | 1547.773 | 1042.267 | NM_02041E | 4517.754  | 4220.037  | W95082    | 1488.65   | 1598.358  |
| NM_00688E   | 867.717  | 1203.055 | NM_013293 | 5726.872  | 5823.005  | AA485362  | 1458.666  | 1311.34   |
| NM_00243E   | 570.063  | 556.781  | AF315592  | 4440.533  | 4616.82   | BI772354  | 3275.446  | 3207.356  |



|           |          |          |           |           |           |           |           |           |
|-----------|----------|----------|-----------|-----------|-----------|-----------|-----------|-----------|
| NM_014589 | 863.046  | 785.138  | AF095844  | 1466.483  | 2426.457  | AA733033  | 2893.876  | 2634.772  |
| NM_000759 | 445.585  | 814.126  | NM_015833 | 2322.318  | 2072.85   | AA583574  | 1279.017  | 1151.935  |
| AK023334  | 996.576  | 908.953  | NM_000986 | 50882.242 | 55411.586 | AI690184  | 18855.551 | 15355.308 |
| NM_002563 | 14023.04 | 11860.28 | AK026760  | 17021.252 | 13508.867 | AA927490  | 1650.329  | 1122.663  |
| NM_002437 | 1116.386 | 1206.766 | NM_014772 | 2552.295  | 2467.51   | NM_001824 | 54095.004 | 51041.836 |
| D79991    | 3463.091 | 4454.872 | AK025248  | 2580.446  | 3057.83   | SR5       | 6879.89   | 4875.328  |
| AK022425  | 533.991  | 464.314  | NM_004539 | 14238.013 | 15858.978 | SR7       | 6166.352  | 29810.486 |
| NM_000054 | 1127.324 | 976.43   | NM_006428 | 14729.244 | 14890.089 | SR9       | 21249.861 | 1919.887  |
| NM_014713 | 8312.693 | 7486.711 | NM_004280 | 18967.613 | 22880.057 | CY3Cy5    | 3615.234  | 237.008   |
| NM_001812 | 2263.64  | 872.492  | AF110399  | 1521.357  | 1537.947  | NM_017818 | 3057.612  | 2276.723  |
| NM_014785 | 718.589  | 833.292  | AK027094  | 3889.196  | 5030.341  | NM_001767 | 4385.354  | 3651.405  |
| NM_006033 | 683.242  | 692.429  | AL359596  | 1351.906  | 918.804   | AF028823  | 4878.98   | 3389.148  |
| NM_004837 | 7958.208 | 7373.775 | U79249    | 561.51    | 522.267   | NM_004295 | 16711     | 15446.491 |
| NM_000370 | 1506.042 | 1437.001 | AK022114  | 1024.911  | 687.352   | NM_002087 | 4355.735  | 6647.533  |
| BE865893  | 1028.078 | 996.13   | AL133585  | 1195.167  | 1235.182  | NM_014585 | 1909.446  | 2941.429  |
| NM_003123 | 13622.42 | 14010.75 | NM_002631 | 12897.37  | 10935.068 | AF200815  | 449.863   | 1010.513  |
| AY005822  | 796.825  | 568.772  | NM_000775 | 893.081   | 654.568   | NM_013441 | 2868.317  | 2535.419  |
| NM_018129 | 4957.404 | 4334.065 | BF217864  | 9146.484  | 8834.387  | NM_014421 | 802.129   | 657.549   |
| AF289022  | 3415.273 | 3480.497 | NM_005917 | 25186.734 | 18439.566 | M60499    | 1600.806  | 1046.233  |
| AB002326  | 708.084  | 237.158  | NM_007052 | 436.696   | 675.019   | NM_003833 | 8565.021  | 8450.905  |
| M17252    | 717.227  | 110.933  | BC017044  | 894.384   | 957.747   | AK000868  | 3951.786  | 2157.15   |
| NM_016025 | 13632.04 | 11793.36 | AV758498  | 2154.144  | 3605.73   | NM_001233 | 2671.573  | 1524.523  |
| NM_013319 | 3157.849 | 2664.623 | NM_020196 | 3096.473  | 3270.629  | NM_001234 | 1001.803  | 683.843   |
| NM_000746 | 1741.027 | 1323.866 | AK024113  | 773.39    | 987.052   | BF679789  | 998.751   | 666.178   |
| NM_000722 | 508.777  | 394.88   | NM_018657 | 1197.903  | 1157.002  | AB007859  | 903.449   | 758.612   |
| NM_006030 | 1184.961 | 679.881  | L40410    | 15992.946 | 16009.203 | NM_006754 | 792.793   | 591.768   |
| NM_020410 | 5830.819 | 5261.975 | NM_007055 | 2066.333  | 2253.973  | NM_001127 | 4522.864  | 4865.698  |
| AF000143  | 2056.742 | 1586.078 | NM_016652 | 2018.785  | 2109.199  | NM_012430 | 2768.518  | 2504.864  |
| NM_000814 | 1810.37  | 1671.623 | NM_016310 | 11386.151 | 11573.914 | NM_003917 | 14693.926 | 16107.545 |
| NM_000453 | 1405.307 | 1421.709 | AK021562  | 862.067   | 978.109   | NM_007077 | 1407.539  | 2500.311  |
| J03077    | 26809.4  | 32127.9  | BC006560  | 1167.755  | 1617.931  | NM_020164 | 5490.947  | 6300.884  |
| J03048    | 4394.022 | 5839.883 | NM_006298 | 1065.493  | 845.455   | AK023521  | 4968.836  | 4757.813  |
| AL157469  | 1350.411 | 1842.639 | AF060938  | 42605.133 | 35059.414 | NM_014267 | 24295.35  | 17871.705 |
| NM_002868 | 2904.064 | 4294.294 | NM_001973 | 5959.76   | 6634.737  | NM_001481 | 814.075   | 574.49    |
| AK024100  | 1738.235 | 6035.228 | NM_014468 | 4305.019  | 5299.519  | U30872    | 1415.058  | 956.726   |
| NM_005135 | 975.968  | 1009.266 | AL050015  | 1811.632  | 2033.988  | AF111783  | 605.055   | 363.855   |
| NM_000317 | 14679.57 | 10965.67 | AY007117  | 4979.172  | 4179.092  | NM_020469 | 3731.673  | 2975.567  |
| NM_018376 | 7337.711 | 6059.757 | AF039698  | 3245.05   | 2263.891  | NM_014734 | 1758.661  | 1379.333  |
| NM_017615 | 775.776  | 861.718  | AB046828  | 4245.287  | 2598.084  | NM_002289 | 503.106   | 489.665   |
| NM_017438 | 4711.029 | 4476.667 | AF144487  | 1199.855  | 1242.01   | AK026408  | 1526.184  | 1089.499  |
| U59209    | 4349.104 | 4469.42  | AL137532  | 2087.836  | 2391.115  | NM_005025 | 936.122   | 924.928   |
| NM_020195 | 15593.74 | 9161.618 | AK025419  | 2798.604  | 3441.001  | NM_001056 | 905.371   | 1087.598  |
| AK023824  | 1714.981 | 2870.865 | NM_017413 | 453.877   | 323.819   | AY026461  | 2587.088  | 2355.022  |
| AL133069  | 5125.947 | 5371.274 | NM_013259 | 9167.701  | 9568.029  | AK025708  | 2858.71   | 2478.062  |
| AL117574  | 1018.692 | 693.705  | NM_018375 | 6788.023  | 5857.359  | NM_000405 | 910.407   | 862.102   |
| AK026055  | 9267.899 | 7785.866 | NM_004913 | 573.986   | 325.968   | NM_006405 | 8893.197  | 9223.207  |
| AK024126  | 1484.547 | 1478.103 | AK026838  | 2177.74   | 2131.447  | AJ245946  | 426.061   | 432.357   |
| NM_001516 | 4694.441 | 4120.417 | AK022443  | 2665.343  | 2823.454  | NM_006749 | 882.482   | 816.615   |
| NM_002744 | 2739.125 | 2045.698 | AK023371  | 4046.831  | 3742.027  | AL137619  | 1095.344  | 1227.991  |
| NM_015917 | 12876.9  | 10337.44 | AF086187  | 3002.855  | 3852.834  | NM_004300 | 12257.275 | 6943.35   |
| NM_020397 | 1096.71  | 894.885  | AF305836  | 53435.969 | 49802.422 | AK001913  | 4392.155  | 4217.091  |
| NM_000061 | 1397.311 | 1275.545 | AL109784  | 608.674   | 539.273   | NM_017737 | 813.45    | 1175.458  |
| AB046859  | 2929.228 | 2439.41  | AL137383  | 564.057   | 630.352   | NM_004292 | 1567.657  | 1385.753  |

|             |          |          |           |           |           |           |           |           |
|-------------|----------|----------|-----------|-----------|-----------|-----------|-----------|-----------|
| NM_005109   | 8957.618 | 7525.334 | AL035295  | 4043.801  | 4658.84   | NM_015484 | 5104.85   | 4441.632  |
| AK023573    | 3685.666 | 3749.747 | NM_018302 | 6371.64   | 7665.382  | NM_018046 | 2187.449  | 1919.562  |
| NM_002730   | 7916.794 | 7159.161 | AK027252  | 3408.634  | 3741.768  | NM_013316 | 1762.789  | 2301.311  |
| NM_004828   | 1870.36  | 1646.851 | AF165527  | 3771.989  | 3670.998  | M20701    | 8764.32   | 11662.461 |
| AB011540    | 895.585  | 1244.328 | NM_014092 | 1408.234  | 1076.482  | NM_002912 | 1445.193  | 1883.74   |
| NM_000040   | 911.257  | 863.615  | AL110133  | 6538.709  | 4967.857  | NM_006739 | 2491.279  | 3938.042  |
| NM_004631   | 3774.06  | 3392.396 | AL050053  | 457.956   | 510.116   | NM_013274 | 3423.746  | 3914.877  |
| NM_003296   | 714.539  | 756.383  | AK000529  | 5118.894  | 4474.844  | AL050187  | 1077.779  | 1234.172  |
| NM_004736   | 4659.272 | 5812.65  | AK027243  | 1799.672  | 1349.54   | NM_012387 | 12577.485 | 12447.521 |
| NM_006895   | 586.017  | 625.643  | AF147415  | 1242.053  | 1343.786  | NM_014735 | 1111.38   | 1040.772  |
| NM_006459   | 4063.331 | 4408.433 | AL049273  | 265.737   | 195.815   | NM_004252 | 14945.855 | 14116.657 |
| D50373      | 724.456  | 809.297  | AK098474  | 554.404   | 395.432   | AF172929  | 13004.197 | 9047.961  |
| AA488757    | 917.696  | 1010.13  | AL117475  | 1857.78   | 1596.265  | NM_006398 | 9939.214  | 9991.99   |
| AA205399    | 821.795  | 276.401  | NM_017535 | 15613.828 | 19805.406 | AK025655  | 2432.827  | 2175.344  |
| M25322      | 3216.495 | 695.128  | NM_003887 | 1892.404  | 2457.84   | NM_004056 | 2075.378  | 1415.79   |
| H-L 27586 I | 4107.596 | 3784.274 | NM_004267 | 16051.033 | 13999.997 | AK000868  | 3556.327  | 2948.696  |
| ID 214180   | 667.006  | 482.759  | AL357212  | 639.184   | 814.117   | NM_001233 | 2620.685  | 1486.316  |
| ID 1867426  | 2307.142 | 2328.406 | AK026687  | 2540.498  | 3415.113  | NM_001234 | 1061.713  | 758.536   |
| W99328      | 629.082  | 719.708  | AL117444  | 1914.294  | 2127.237  | BF679789  | 1359.898  | 1235.63   |
| AI434176    | 1619.602 | 1336.203 | NM_017994 | 11391.181 | 12685.554 | H97792    | 1445.381  | 1078.783  |
| BE735403    | 809.471  | 820.511  | AK021693  | 2760.026  | 2910.705  | L33404    | 466.326   | 595.504   |
| NM_022552   | 4761.708 | 4012.013 | AB023177  | 691.407   | 956.241   | M13509    | 743.19    | 749.549   |
| NM_014389   | 3877.526 | 3708.659 | Y11609    | 1993.191  | 1548.118  | X04076    | 1965.519  | 2793.948  |
| NM_001718   | 627.014  | 690.949  | NM_012122 | 10208.586 | 8526.472  | W95082    | 1438.627  | 1658.052  |
| AF116659    | 1386.057 | 1569.748 | AF009285  | 10235.027 | 9053.094  | AA485362  | 1184.346  | 972.808   |
| D79991      | 3586.783 | 4326.923 | NM_012125 | 3745.519  | 3075.87   | AJ222801  | 2501.551  | 2871.429  |
| AK022425    | 413.668  | 496.788  | AF056435  | 904.169   | 1167.73   | W72207    | 1588.949  | 2148.683  |
| NM_000054   | 1184.807 | 1120.741 | AB032363  | 725.963   | 672.388   | BI772354  | 3357.196  | 2970.022  |
| NM_014713   | 8232.239 | 10116.87 | AF009294  | 4936.24   | 4201.993  | AA733033  | 2810.5    | 2388.7    |
| NM_001812   | 1787.96  | 1315.023 | NM_001524 | 951.477   | 847.59    | AA583574  | 1537.328  | 1304.517  |
| NM_014785   | 757.863  | 1129.923 | AK000998  | 547.837   | 649.196   | AI690184  | 20306.541 | 17703.414 |
| NM_005811   | 2534.067 | 2140.928 | AK001225  | 621.957   | 568.632   | AA927490  | 1558.8    | 1316.963  |
| NM_005764   | 409.397  | 432.865  | AK021435  | 457.154   | 384.862   | NM_001824 | 52411.773 | 55738.207 |
| NM_016362   | 347.044  | 522.242  | AK021684  | 4684.546  | 4840.819  | NM_005052 | 10476.717 | 9762.892  |
| NM_004214   | 10451.13 | 9942.636 | AK001060  | 738.844   | 1022.953  | NM_014734 | 1373.302  | 1568.819  |
| NM_004329   | 4832.786 | 6548.976 | AK021480  | 1135.541  | 1280.864  | AK026408  | 1780.869  | 1415.275  |
| NM_002836   | 3340.668 | 3499.023 | AK021726  | 592.107   | 917.999   | NM_005025 | 974.271   | 1098.439  |
| NM_020167   | 309.573  | 273.813  | AK025112  | 1987.165  | 2056.86   | M74782    | 403.581   | 418.744   |
| AL049963    | 18779.52 | 14192.33 | AK026079  | 619.784   | 659.294   | NM_017818 | 4233.785  | 3105.783  |
| NM_016058   | 42894.12 | 25726.13 | AK026675  | 603.606   | 861.777   | NM_020433 | 689.731   | 382.652   |
| NM_014005   | 442.34   | 331.776  | AK025173  | 7732.216  | 7601.598  | NM_001767 | 4608.897  | 4309.282  |
| NM_004636   | 409.24   | 664.094  | AK025430  | 1790.482  | 2099.851  | AF028823  | 5429.068  | 5019.975  |
| AK022603    | 271.049  | 397.912  | AK026269  | 641.242   | 801.948   | NM_004295 | 16895.613 | 16007.598 |
| NM_004896   | 4073.988 | 2945.806 | AK026722  | 828.557   | 822.664   | NM_002087 | 4076.12   | 3958.019  |
| NM_003976   | 237.593  | 436.322  | AF117338  | 4057.511  | 3459.382  | AB023154  | 549.578   | 347.024   |
| NM_017688   | 2383.821 | 2762.265 | AK025567  | 3152.217  | 2369.591  | NM_001714 | 328.653   | 270.173   |
| AK025612    | 3518.544 | 3135.046 | NM_019102 | 652.7     | 409.141   | NM_014585 | 2177.216  | 2084.857  |
| NM_012268   | 560.757  | 610.04   | U56857    | 5785.017  | 4260.38   | AF200815  | 593.045   | 659.813   |
| NM_012203   | 1025.998 | 1004.627 | L43349    | 1031.833  | 959.314   | NM_013441 | 2512.741  | 2046.413  |
| J03077      | 23644.82 | 28661.39 | AF086421  | 1225.912  | 1601.954  | NM_014421 | 597.606   | 614.87    |
| AL157469    | 1192.279 | 1362.641 | AK001612  | 804.904   | 833.308   | M60499    | 1305.713  | 960.486   |
| NM_002868   | 2334.243 | 4656.12  | AF161522  | 6572.625  | 7645.67   | NM_003615 | 396.021   | 394.878   |
| AK024100    | 1733.68  | 6700.882 | AF086028  | 12861.174 | 13148.505 | NM_004300 | 12944.024 | 7735.987  |

|           |          |          |           |           |           |           |           |           |
|-----------|----------|----------|-----------|-----------|-----------|-----------|-----------|-----------|
| NM_005135 | 667.274  | 846.147  | U46119    | 422.272   | 433.411   | NM_000052 | 211.058   | 568.145   |
| NM_003827 | 12220.33 | 15092.64 | AK025365  | 1589.142  | 1657.734  | AB007859  | 963.382   | 985.667   |
| NM_004583 | 895.592  | 986.205  | AK023489  | 1115.798  | 1202.214  | NM_006754 | 429.782   | 284.93    |
| NM_018395 | 717.357  | 729.36   | AK021561  | 6580.521  | 6490.193  | NM_001127 | 2624.316  | 2378.849  |
| AY007131  | 10447.71 | 14813.96 | AL050145  | 392.204   | 464.109   | NM_012430 | 3299.884  | 2404.499  |
| U61735    | 3152.804 | 2855.947 | AK025222  | 598.78    | 504.311   | NM_003917 | 12644.521 | 12309.156 |
| NM_001144 | 4509.44  | 5738.58  | NM_003531 | 2380.439  | 2605.709  | NM_007077 | 1321.617  | 1400.719  |
| AK023766  | 6265.299 | 4634.84  | NM_017795 | 980.547   | 745.916   | NM_002956 | 1721.517  | 1767.249  |
| NM_003853 | 573.504  | 488.042  | NM_003510 | 776.553   | 710.52    | AB018739  | 998.927   | 947.082   |
| AB033109  | 1462.776 | 1483.683 | AL137403  | 2389.357  | 2546.753  | NM_006750 | 18830.799 | 14815.211 |
| NM_002053 | 1747.07  | 1422.583 | AL049348  | 1055.64   | 871.345   | NM_020164 | 4451.123  | 3049.35   |
| NM_002435 | 675.094  | 661.268  | NM_018534 | 1269.75   | 1367.831  | AK023521  | 4313.757  | 3184.498  |
| NM_014585 | 741.953  | 904.267  | AB037847  | 2710.122  | 2276.115  | NM_014267 | 23047.57  | 16088.346 |
| NM_000755 | 507.302  | 450.862  | NM_005170 | 2788.448  | 3116.563  | NM_001481 | 507.417   | 336.988   |
| AK023334  | 778.17   | 904.463  | S96437    | 1888.329  | 1967.531  | U30872    | 1021.051  | 942.199   |
| NM_002563 | 13415.4  | 13779.9  | NM_015175 | 1741.894  | 1767.398  | AF111783  | 311.418   | 350.053   |
| NM_002437 | 1133.968 | 1149.432 | AL353939  | 1320.462  | 1558.275  | NM_002635 | 1082.01   | 651.696   |
| AK023573  | 3047.033 | 2923.248 | AL117573  | 3922.498  | 5352.921  | NM_006395 | 11025.141 | 13391.157 |
| NM_004825 | 1754.511 | 1380.263 | AL080186  | 1036.966  | 1479.468  | AK025655  | 2536.496  | 2343.667  |
| AB011540  | 1105.737 | 1564.29  | NM_005305 | 51137.273 | 52407.391 | NM_001362 | 483.245   | 373.563   |
| NM_000040 | 1007.085 | 1182.971 | NM_001645 | 26439.725 | 25841.145 | NM_004055 | 2110.985  | 1524.739  |
| NM_004631 | 3702.238 | 3183.198 | AL137327  | 4167.983  | 5731.979  | NM_001055 | 858.188   | 975.265   |
| NM_006033 | 1076.198 | 1269.025 | AF358454  | 4757.989  | 4324.099  | AY026461  | 3022.031  | 2725.459  |
| NM_004837 | 8706.048 | 9297.237 | AK026090  | 2373.793  | 2534.474  | AK025708  | 4053.502  | 3021.624  |
| BE865893  | 1149.193 | 1041.899 | AF070637  | 660.014   | 884.451   | NM_000405 | 953.465   | 1227.031  |
| NM_003123 | 14252.81 | 19666.05 | AL137634  | 1159.736  | 1273.226  | NM_005564 | 46419.605 | 36391.836 |
| AY005822  | 744.077  | 598.212  | AK024863  | 7120.06   | 10201.31  | NM_004505 | 3405.5    | 3343.458  |
| NM_018125 | 5936.082 | 5097.067 | AJ008135  | 57306.691 | 58610.508 | NM_006405 | 7302.304  | 5932.788  |
| AF289022  | 3841.314 | 3187.048 | AK026908  | 8852.728  | 10746.588 | NM_006745 | 901.17    | 1047.095  |
| AB002326  | 708.666  | 265.748  | AL050068  | 667.588   | 391.1     | AL137619  | 1237.8    | 1032.263  |
| M17252    | 448.46   | 409.651  | U92025    | 389.054   | 385.031   | NM_001824 | 55098.039 | 61594.031 |
| NM_016025 | 13289.92 | 13089.72 | AB046766  | 844.564   | 727.467   | NM_005052 | 11551.319 | 11640.858 |
| NM_013315 | 3171.05  | 3412.078 | AF009323  | 816.269   | 777.888   | AF319476  | 2106.283  | 1803.083  |
| NM_000745 | 1782.905 | 2229.056 | U52829    | 611.639   | 592.935   | AK001913  | 5047.771  | 5083.42   |
| NM_000722 | 534.298  | 483.475  | Z25437    | 719.358   | 1702.903  | NM_017737 | 891.569   | 1169.858  |
| NM_006030 | 744.407  | 982.474  | AK001526  | 4920.702  | 4912      | NM_004292 | 1647.122  | 1506.159  |
| NM_020410 | 5735.737 | 6453.995 | AF086183  | 1235.805  | 1099.396  | NM_015484 | 5897.803  | 5040.083  |
| AF000143  | 1687.657 | 1802.155 | AK000525  | 1651.205  | 1869.4    | NM_018045 | 2021.589  | 1872.876  |
| NM_000814 | 1741.343 | 2007.969 | AL137434  | 1587.443  | 1654.755  | NM_013315 | 2024.287  | 1759.811  |
| NM_000453 | 1477.052 | 1456.641 | Z36795    | 2638.496  | 2978.697  | M20701    | 9481.424  | 8297.583  |
| NM_022552 | 5352.781 | 3626.844 | AL080216  | 2119.664  | 2224.875  | NM_002912 | 1266.013  | 1043.294  |
| NM_014385 | 3969.566 | 4185.375 | AF038188  | 13791.917 | 14012.977 | NM_013284 | 3082.387  | 2870.877  |
| NM_001715 | 614.957  | 580.077  | AJ227888  | 716.735   | 998.563   | NM_006735 | 2294.831  | 2692.892  |
| AF116659  | 1232.058 | 1353.421 | D17046    | 1394.447  | 1494.28   | NM_013274 | 4170.613  | 4330.697  |
| NM_000317 | 16809.73 | 17192.99 | NM_017645 | 11923.174 | 12600.834 | AL050187  | 1012.108  | 965.416   |
| NM_018375 | 7245.484 | 6330.403 | AJ227864  | 821.216   | 629.213   | NM_012387 | 12762.64  | 10339.773 |
| NM_017615 | 644.721  | 749.752  | AF157562  | 4004.443  | 4577.898  | NM_014735 | 1234.404  | 953.882   |
| NM_017435 | 5499.573 | 5107.841 | AK021958  | 9813.521  | 9065.584  | NM_004252 | 15967.882 | 15318.702 |
| U59209    | 5020.664 | 4654.704 | M31164    | 1770.289  | 1662.099  | AF172929  | 13877.047 | 10503.083 |
| NM_020195 | 15220.53 | 9530.499 | AF113674  | 15097.727 | 17995.82  | M60499    | 1181.276  | 859.636   |
| AK023824  | 2553.623 | 2889.247 | NM_003511 | 769.777   | 2817.563  | NM_001614 | 59297.328 | 60617.027 |
| AL133069  | 4120.619 | 3595.679 | CY3Cy5    | 5213.288  | 432.964   | NM_000365 | 488.392   | 518.049   |
| AL117574  | 1098.441 | 842.214  | H97792    | 1907.444  | 2381.026  | NM_003833 | 9647.709  | 10333.219 |

|             |          |          |           |           |           |           |           |           |
|-------------|----------|----------|-----------|-----------|-----------|-----------|-----------|-----------|
| AK026055    | 9059.328 | 9860.411 | L33404    | 580.18    | 844.26    | AK000868  | 4085.008  | 3050.961  |
| AK024126    | 1666.353 | 1969.905 | M13509    | 1281.565  | 2138.201  | NM_001233 | 2757.214  | 1896.243  |
| NM_001516   | 5204.559 | 5249.332 | X04076    | 2768.358  | 2223.224  | NM_001234 | 1125.599  | 980.26    |
| NM_002744   | 3020.106 | 2783.577 | W95082    | 1640.901  | 1727.915  | BF679789  | 1345.036  | 1848.904  |
| NM_015917   | 14137.9  | 13649.02 | AA485362  | 1389.957  | 1515.004  | H97792    | 1553.316  | 1096.464  |
| NM_020397   | 1061.723 | 1297.986 | AJ222801  | 3579.275  | 3421.636  | L33404    | 472.566   | 452.842   |
| NM_000061   | 1350.233 | 1055.648 | W72207    | 2928.324  | 1664.66   | M13509    | 625.552   | 687.333   |
| AB046859    | 3260.325 | 2569.828 | BI772354  | 4240.221  | 5131.492  | X04076    | 2175.502  | 2534.713  |
| NM_005109   | 9254.467 | 7948.052 | AA733033  | 2895.063  | 2780.062  | W95082    | 1593.795  | 1167.746  |
| NM_013372   | 508.867  | 218.031  | AA583574  | 1675.065  | 1729.243  | AA485362  | 1143.954  | 826.939   |
| NM_003976   | 433.297  | 472.781  | AI690184  | 32749.73  | 25544.611 | AJ222801  | 2408.973  | 2863.322  |
| NM_017688   | 2721.33  | 2283.783 | AA927490  | 1520.717  | 1536.061  | W72207    | 1952.759  | 2202.074  |
| AK025612    | 3808.72  | 3654.892 | NM_001824 | 52466.137 | 61892.188 | BI772354  | 3716.722  | 3215.309  |
| NM_004736   | 4400.021 | 4829.226 | SR5       | 10975.686 | 13061.608 | AA733033  | 2836.204  | 2442.176  |
| NM_006459   | 4613.521 | 6244.301 | SR7       | 9448.123  | 61448.07  | AA583574  | 1550.491  | 1317.211  |
| D50373      | 530.554  | 546.295  | SR9       | 28582.748 | 4855.604  | AI690184  | 20258.9   | 16761.678 |
| AA488757    | 656.578  | 766.706  | CY3Cy5    | 7301.941  | 345.856   | AA927490  | 1685.387  | 1154.507  |
| M25322      | 3002.07  | 686.895  | NM_017818 | 3953.444  | 5210.628  | NM_001481 | 637.16    | 792.559   |
| H-L 27586 I | 4311.741 | 4384.669 | NM_020433 | 556.855   | 682.549   | U30872    | 1097.529  | 1561.398  |
| ID 214180   | 667.63   | 790.122  | NM_001767 | 5535.603  | 4774.942  | AF111783  | 649.309   | 703.323   |
| ID 1867426  | 2553.075 | 2004.63  | AF028823  | 6651.23   | 7181.485  | NM_020469 | 3949.746  | 4538.931  |
| ID 396450   | 801.526  | 600.448  | NM_004295 | 24254.641 | 22700.676 | NM_002639 | 1104.977  | 1124.526  |
| W99328      | 692.716  | 820.445  | NM_002087 | 4987.672  | 4200.436  | NM_014734 | 1680.045  | 1578.193  |
| AI434176    | 1558.817 | 1223.382 | AB023154  | 478.875   | 462.952   | NM_002289 | 572.785   | 446.102   |
| BE735403    | 1047.784 | 532.068  | NM_001714 | 390.381   | 568.595   | AK026408  | 1605.805  | 1386.735  |
| NM_002438   | 908.658  | 856.599  | NM_014585 | 2479.756  | 2299.606  | NM_005025 | 1053.82   | 1500.652  |
| NM_014589   | 847.225  | 895.299  | AF200815  | 1023.482  | 884.877   | NM_006307 | 415.699   | 470.003   |
| NM_000759   | 721.866  | 736.069  | NM_013441 | 4549.231  | 3576.755  | NM_017818 | 3865.339  | 2909.341  |
| AK023334    | 1026.258 | 1128.813 | NM_014421 | 1141.07   | 956.322   | NM_020433 | 711.258   | 451.037   |
| AK022425    | 490.837  | 637.841  | M60499    | 1499.012  | 1739.6    | NM_001767 | 4813.289  | 4680.992  |
| NM_000054   | 1199.262 | 1340.05  | NM_003833 | 15035.895 | 11248.213 | AF028823  | 5877.878  | 5129.244  |
| NM_014713   | 7890.378 | 9143.078 | AK000868  | 5047.491  | 2475.809  | NM_004295 | 16650.701 | 15437.023 |
| NM_001812   | 1775.284 | 1161.25  | NM_001233 | 2968.196  | 1711.771  | NM_002087 | 4150.047  | 4501.067  |
| NM_014785   | 809.543  | 755.426  | NM_001234 | 2178.046  | 1505.782  | AB023154  | 365.887   | 403.109   |
| NM_005811   | 2203.413 | 1644.563 | BF679789  | 2833.907  | 2824.69   | NM_001714 | 428.616   | 247.536   |
| NM_005764   | 403.407  | 262.724  | AB007859  | 1349.651  | 1451.786  | NM_014585 | 2272.913  | 2211.194  |
| NM_016362   | 423.572  | 392.905  | NM_006754 | 556.754   | 560.938   | AF200815  | 700.886   | 660.614   |
| NM_004214   | 10722.86 | 11500    | NM_001127 | 3081.928  | 3528.609  | NM_013441 | 2903.21   | 1969.119  |
| NM_004329   | 4773.735 | 5466.526 | NM_012430 | 2788.279  | 3273.976  | NM_014421 | 683.588   | 522.471   |
| NM_002836   | 3699.223 | 4420.702 | NM_003917 | 18790.918 | 18442.098 | NM_000324 | 205.589   | 1531.459  |
| NM_020167   | 444.664  | 477.569  | NM_007077 | 1917.617  | 1909.92   | AL137619  | 1709.457  | 1822.437  |
| NM_016058   | 47296.8  | 30150.53 | NM_002956 | 2267.799  | 2049.059  | NM_004300 | 13718.143 | 7118.816  |
| NM_014005   | 514.695  | 343.619  | AB018739  | 1031.222  | 962.859   | AB007859  | 990.392   | 965.864   |
| NM_004636   | 386.341  | 938.237  | NM_006750 | 19346.518 | 17285.883 | NM_006754 | 547.624   | 410.658   |
| AK022603    | 256.27   | 308.171  | NM_020164 | 4407.882  | 3898.048  | NM_001127 | 2969.13   | 2875.86   |
| NM_004896   | 4007.046 | 2879.13  | AK023521  | 4933.506  | 4073.904  | NM_012430 | 3132.186  | 2783.79   |
| NM_006030   | 814.356  | 801.09   | NM_014267 | 23654.309 | 24356.039 | NM_003917 | 13984.775 | 14595.467 |
| NM_020410   | 6905.931 | 9573.809 | NM_001481 | 733.895   | 577.238   | NM_007077 | 1470.059  | 1304.988  |
| AF000143    | 1902.556 | 2350.719 | U30872    | 1193.057  | 1312.152  | NM_002956 | 2077.944  | 1828.741  |
| NM_014211   | 398.082  | 380.646  | AF111783  | 540.256   | 460.32    | AB018739  | 921.496   | 913.793   |
| J03077      | 25107.18 | 36243.48 | NM_020469 | 5193.686  | 5257.096  | NM_006750 | 21284.758 | 16128.543 |
| J03048      | 4278.731 | 5060.895 | NM_014734 | 2387.865  | 1484.521  | NM_020164 | 4898.013  | 2904.5    |
| AL157469    | 1218.326 | 1182.452 | AK026408  | 2063.219  | 1401.908  | AK023521  | 4655.866  | 3285.83   |

|           |          |          |           |           |           |           |           |           |
|-----------|----------|----------|-----------|-----------|-----------|-----------|-----------|-----------|
| NM_00286E | 2630.225 | 4073.501 | NM_00502E | 1475.145  | 762.349   | NM_014267 | 24776.16  | 14610.493 |
| AK024100  | 1931.285 | 5574.152 | NM_006307 | 369.077   | 153.43    | AF172929  | 14542.132 | 13393.84  |
| NM_001103 | 377.369  | 711.71   | NM_00105E | 1485.92   | 3262.801  | NM_00639E | 12478.539 | 14832.269 |
| AF228710  | 2914.983 | 2505.051 | AY026461  | 2880.98   | 3164.828  | AK025655  | 2674.596  | 2369.722  |
| NM_01839E | 740.374  | 897.651  | AK025708  | 3959.995  | 5806.354  | NM_00136E | 368.447   | 438.802   |
| AY007131  | 11241.93 | 16655.35 | NM_00040E | 897.085   | 1105.309  | NM_00405E | 2325.343  | 1516.998  |
| U61735    | 4168.648 | 4609.257 | NM_005564 | 53601.801 | 51651.824 | NM_00105E | 1194.596  | 1064.551  |
| NM_001144 | 5032.42  | 8926.306 | NM_00450E | 4144.459  | 4085.463  | AY026461  | 3046.478  | 2650.37   |
| NM_001897 | 1022.377 | 870.673  | NM_00640E | 12368.01  | 12253.418 | AK025708  | 4130.184  | 3311.493  |
| NM_00385E | 437.612  | 629.717  | AJ245946  | 508.964   | 513.789   | NM_00040E | 935.983   | 1086.873  |
| AB033109  | 2279.785 | 3486.609 | NM_00674E | 1353.598  | 1358.097  | NM_005564 | 45858.555 | 34953.105 |
| NM_00688E | 871.748  | 947.2    | AL137619  | 2858.98   | 2529.212  | NM_00450E | 3531.3    | 3341.962  |
| NM_002744 | 2975.148 | 3400.326 | NM_00430C | 9847.089  | 5305.058  | NM_00640E | 10718.188 | 8447.354  |
| NM_015917 | 14350.5  | 17679.97 | AF319476  | 2334.17   | 4781.075  | AJ245946  | 450.56    | 425.233   |
| NM_020397 | 933.536  | 1120.306 | AK001913  | 4921.34   | 5606.155  | NM_01491C | 5759.732  | 11147.886 |
| NM_000061 | 1416.839 | 1155.782 | NM_017737 | 1170.228  | 1027.359  | AB029031  | 5271.154  | 7380.367  |
| AK023573  | 3194.206 | 2903.575 | NM_00429E | 1748.734  | 1674.078  | NM_001294 | 5975.691  | 6470.102  |
| NM_00273C | 7590.623 | 6946.813 | NM_015484 | 5630.066  | 5849.755  | NM_014241 | 7339.197  | 8201.222  |
| NM_00482E | 1871.189 | 1467.062 | NM_01804E | 2002.816  | 1856.629  | AF302786  | 3628.066  | 2934.567  |
| AB011540  | 819.235  | 943.544  | NM_01331E | 2673.821  | 2783.197  | AL122083  | 2883.194  | 3024.649  |
| NM_00004C | 896.89   | 772.821  | M20701    | 14348.847 | 14530.098 | NM_00505E | 13871.067 | 23182.783 |
| NM_004631 | 4299.051 | 3109.76  | NM_00291E | 1565.77   | 1539.062  | AF319476  | 1838.133  | 1577.639  |
| NM_004837 | 8126.44  | 7165.123 | NM_013284 | 3769.352  | 4416.317  | AK001913  | 5515.073  | 5584.248  |
| NM_00037C | 1441.424 | 1535.263 | NM_00673E | 3364.817  | 2508.227  | NM_017737 | 1127.965  | 1298.306  |
| BE865893  | 1206.852 | 1267.123 | NM_013274 | 4593.666  | 4403.206  | NM_00429E | 2025.3    | 2091.18   |
| NM_00312E | 13887.09 | 17066.14 | AL050187  | 998.758   | 1113.775  | NM_015484 | 6449.868  | 5775.114  |
| AY005822  | 1295.586 | 1500.745 | NM_012387 | 14688.076 | 16870.551 | NM_01804E | 2687.487  | 1941.977  |
| NM_01812E | 6680.332 | 8370.76  | NM_01473E | 2341.37   | 4207.991  | NM_01331E | 2138.313  | 2451.662  |
| AF289022  | 4194.57  | 4857.431 | NM_00425E | 21259.529 | 24312.586 | M20701    | 12234.13  | 11642.447 |
| AB002326  | 742.558  | 374.401  | AF172929  | 12985.412 | 12375.113 | NM_00291E | 1311.131  | 1450.007  |
| M17252    | 539.834  | 462.082  | NM_00639E | 14019.986 | 10815.856 | NM_013284 | 3961.704  | 3365.753  |
| NM_01602E | 14286.62 | 15056.17 | AK025655  | 2857.958  | 2452.889  | NM_00673E | 2669.689  | 2925.099  |
| NM_01331E | 3201.812 | 3676.585 | NM_00405E | 1860.98   | 897.143   | NM_013274 | 4961.673  | 4510.453  |
| NM_00072E | 707.613  | 546.566  | NM_00383E | 12048.845 | 17784.6   | AL157500  | 321.813   | 720.479   |
| NM_01611E | 575.637  | 422.548  | AK000868  | 4127.023  | 4196.833  | AK024955  | 28893.982 | 40417.828 |
| NM_00092E | 449.725  | 288.519  | NM_00123E | 2487.909  | 3012.567  | NM_01658C | 2205.605  | 3569.788  |
| NM_01865E | 2591.944 | 1982.112 | NM_001234 | 961.825   | 1208.267  | AF169693  | 976.603   | 2093.094  |
| NM_00566E | 2609.804 | 2884.798 | BF679789  | 2008.884  | 2553.284  | L23206    | 5319.509  | 13711.428 |
| NM_00577E | 4268.092 | 3435.039 | H97792    | 1828.063  | 1932.871  | NM_01219E | 8183.003  | 10110.397 |
| NM_017644 | 5410.255 | 5434.534 | L33404    | 457.814   | 514.244   | NM_00629E | 3224.845  | 3739.644  |
| AB032971  | 205.494  | 356.933  | M13509    | 1139.578  | 1222.088  | NM_00722E | 5074.593  | 4588.919  |
| NM_00248E | 2214.18  | 1331.361 | X04076    | 3196.854  | 2626.12   | AB011105  | 2267.913  | 2117.49   |
| NM_00171E | 617.543  | 795.158  | W95082    | 1732.564  | 1791.686  | NM_00221E | 745.133   | 641.273   |
| AF116659  | 1329.647 | 1287.666 | AA485362  | 1951.177  | 1479.561  | NM_01897C | 465.134   | 374.986   |
| NM_000317 | 17029.24 | 12153.56 | AJ222801  | 4002.735  | 3533.927  | NM_004814 | 12033.346 | 10387.307 |
| NM_01837E | 7209.287 | 5307.89  | W72207    | 3333.524  | 2175.248  | D86976    | 17103.85  | 15684.211 |
| NM_01761E | 857.671  | 737.918  | BI772354  | 3786.272  | 4765.199  | AF307080  | 379.111   | 514.301   |
| NM_01743E | 6477.574 | 7529.968 | AA733033  | 3518.064  | 3296.762  | NM_004057 | 2197.911  | 2040.326  |
| U59209    | 5640.207 | 5937.519 | AA583574  | 1868.077  | 1878.072  | NM_018971 | 606.129   | 853.35    |
| NM_02019E | 19056.54 | 15528.52 | AI690184  | 49388.211 | 62356.164 | K03175    | 905.096   | 988.138   |
| AK023824  | 2071.635 | 3750.431 | AA927490  | 1524.978  | 1588.154  | NM_00326E | 777.092   | 653.866   |
| AL133069  | 4989.463 | 5553.009 | NM_001824 | 59919.922 | 65463.852 | NM_00301E | 697.248   | 761.536   |
| AL117574  | 1109.522 | 895.857  | NM_00505E | 15023.941 | 6197.284  | NM_003711 | 2329.97   | 2048.572  |

|           |          |          |           |           |           |           |           |           |
|-----------|----------|----------|-----------|-----------|-----------|-----------|-----------|-----------|
| AK026055  | 10329.38 | 11662.74 | BF038439  | 685.053   | 300.65    | NM_006496 | 11958.101 | 9174.269  |
| AK024126  | 1754.63  | 1963.566 | NM_014734 | 1723.157  | 2005.734  | NM_000828 | 456.013   | 532.474   |
| NM_001516 | 5257.929 | 5981.537 | NM_002289 | 483.884   | 753.669   | NM_004826 | 1163.942  | 960.791   |
| NM_019086 | 648.094  | 710.365  | AK026408  | 1690.27   | 2341.227  | NM_013314 | 510.323   | 400.886   |
| NM_006670 | 6385.626 | 5078.411 | NM_005025 | 1373.969  | 1377.381  | NM_002072 | 2742.033  | 3011.245  |
| NM_012425 | 8824.022 | 7701.759 | NM_006307 | 437.719   | 533.291   | NM_003182 | 704.641   | 580.135   |
| NM_005816 | 1886.262 | 1616.485 | M74782    | 460.148   | 529.061   | BE904126  | 21399.691 | 24615.436 |
| NM_002750 | 5891.25  | 4827.609 | NM_017818 | 3345.854  | 3627.953  | AF272380  | 36010.281 | 37499.145 |
| AK024134  | 1844.059 | 2052.081 | NM_020433 | 664.762   | 548.26    | NM_004431 | 8251.981  | 11336.491 |
| NM_003014 | 483.987  | 712.36   | NM_001767 | 5441.907  | 4739.965  | NM_002012 | 2036.738  | 2707.531  |
| NM_018558 | 1440.702 | 2163.136 | AF028823  | 6774.689  | 6826.198  | NM_002070 | 50580.762 | 60414.41  |
| NM_001974 | 6014.365 | 8495.43  | NM_004295 | 30727.264 | 26127.986 | AF227969  | 4045.871  | 5576.744  |
| NM_003028 | 1916.531 | 1867.61  | NM_002087 | 5600.856  | 5214.439  | AF116657  | 854.618   | 792.651   |
| NM_001566 | 1284.608 | 2088.642 | AB023154  | 554.779   | 418.53    | NM_004102 | 642.932   | 446.271   |
| NM_018548 | 6732.592 | 9439.207 | NM_001714 | 358.926   | 602.153   | NM_003944 | 31511.416 | 27869.578 |
| NM_013401 | 807.007  | 1677.069 | NM_014585 | 2718.92   | 2765.152  | NM_016120 | 56440.82  | 57618.188 |
| NM_018238 | 1451.726 | 1781.363 | AF200815  | 976.493   | 1307.437  | NM_002893 | 948.595   | 579.852   |
| NM_006858 | 3952.162 | 4417.633 | NM_013441 | 4772.182  | 4237.479  | NM_002393 | 4268.874  | 4079.469  |
| NM_001405 | 1925.273 | 2266.185 | NM_014421 | 1151.385  | 895.782   | NM_002669 | 11183.527 | 9226.419  |
| NM_003880 | 735.496  | 470.245  | M60499    | 1239.587  | 931.758   | AB014600  | 3685.734  | 3655.716  |
| NM_005468 | 453.39   | 401.753  | NM_001614 | 60464.316 | 65459.551 | NM_018312 | 3688.979  | 3262.075  |
| AF131778  | 442.929  | 586.542  | NM_004300 | 10349.196 | 15591.071 | X98259    | 1183.822  | 972.926   |
| NM_001562 | 3133.466 | 2963.305 | AB007859  | 1178.048  | 1258.163  | NM_014792 | 400.053   | 205.864   |
| NM_013278 | 628.513  | 738.298  | NM_006754 | 486.416   | 647.419   | U05255    | 685.396   | 733.198   |
| NM_003487 | 9243.477 | 4930.319 | NM_001127 | 3098.424  | 3286.876  | X98260    | 5427.001  | 4235.977  |
| NM_006887 | 15420.54 | 12611.77 | NM_012430 | 3270.427  | 3667.959  | NM_007217 | 14182.195 | 11204.899 |
| NM_006477 | 859.088  | 922.713  | NM_003917 | 21713.844 | 20537.986 | NM_014777 | 7394.141  | 7332.662  |
| NM_002880 | 5684.813 | 5129.999 | NM_007077 | 2049.667  | 1981.493  | NM_001102 | 8125.572  | 7751.506  |
| NM_000678 | 1570.14  | 1440.484 | NM_002956 | 2726.878  | 2589.194  | NM_003803 | 965.906   | 1020.051  |
| NM_004657 | 540.117  | 536.617  | AB018739  | 1273.062  | 1196.304  | NM_002818 | 58647.246 | 52956.203 |
| NM_003173 | 8014.398 | 6909.042 | NM_006750 | 24253.646 | 23903.797 | NM_001937 | 4656.305  | 4194.234  |
| NM_005030 | 13379.98 | 13648.27 | NM_020164 | 5816.732  | 5232.154  | AK024778  | 1307.021  | 1103.929  |
| NM_017584 | 3630.383 | 4009.889 | AK023521  | 5096.237  | 5118.801  | AK021608  | 2739.204  | 3411.991  |
| NM_020359 | 4508.589 | 4867.559 | NM_014267 | 23221.629 | 20782.068 | NM_004297 | 962.947   | 1084.334  |
| AB014541  | 10464.08 | 13934.71 | NM_001481 | 740.471   | 366.26    | NM_006044 | 9974.188  | 12313.918 |
| NM_002583 | 5528.403 | 4279.746 | U30872    | 1187.119  | 1121.969  | AK025498  | 4080.152  | 4622.065  |
| NM_006570 | 11053.1  | 12652.04 | AF111783  | 514.493   | 363.532   | NM_001395 | 6962.826  | 10150.424 |
| NM_020348 | 1853.481 | 1890.857 | NM_020469 | 4428.45   | 2393.693  | NM_002068 | 13726.332 | 22336.168 |
| NM_006034 | 5047.04  | 5454.85  | NM_002639 | 1104.379  | 608.211   | NM_019854 | 493.425   | 525.758   |
| AB040943  | 600.696  | 230.415  | NM_006398 | 14011.136 | 15481.305 | NM_013338 | 3493.53   | 3057.645  |
| NM_005201 | 1622.084 | 1488.891 | AK025655  | 2486.698  | 3115.745  | NM_014671 | 5964.47   | 4857.097  |
| NM_000092 | 623.886  | 593.68   | NM_001362 | 662.376   | 511.77    | NM_001814 | 9994.005  | 10303.573 |
| AF174600  | 10501.34 | 9554.409 | NM_004056 | 2061.096  | 2459.336  | NM_005656 | 2327.87   | 2172.549  |
| AK001003  | 1410.276 | 1828.846 | NM_001056 | 1052.204  | 1173.854  | NM_006012 | 9437.993  | 7756.439  |
| NM_002800 | 17044.1  | 12657.41 | AY026461  | 3172.579  | 3268.336  | NM_002151 | 1652.37   | 2099.907  |
| NM_018384 | 14090.96 | 10589.01 | AK025708  | 3305.313  | 4325.018  | NM_014889 | 2733.74   | 2443.324  |
| NM_001872 | 219.46   | 229.643  | NM_000405 | 1142.428  | 1375.498  | AF173935  | 2884.432  | 1878.517  |
| NM_006025 | 529.463  | 629.909  | NM_005564 | 56621.895 | 59292.352 | AK025322  | 8448.167  | 9601.895  |
| NM_013396 | 2310.924 | 2175.365 | NM_004508 | 4917.466  | 4963.861  | NM_017887 | 8794.167  | 6875.376  |
| NM_017752 | 1865.728 | 1804.724 | NM_006405 | 17287.912 | 17941.717 | NM_000526 | 914.492   | 924.085   |
| D26069    | 10240.62 | 9735.779 | AJ245946  | 555.727   | 346.107   | AF007152  | 2422.801  | 1748.337  |
| BF107577  | 2532.271 | 2450.979 | NM_006749 | 1124.469  | 914.434   | NM_017575 | 1148.604  | 812.009   |
| NM_005837 | 10954.67 | 10657.24 | AL137619  | 2881.037  | 1633.239  | NM_005310 | 1119.657  | 1040.904  |

|           |          |          |           |           |           |           |           |           |
|-----------|----------|----------|-----------|-----------|-----------|-----------|-----------|-----------|
| NM_016625 | 6482.14  | 4922.654 | NM_001824 | 57862.867 | 64112.77  | NM_014423 | 9015.898  | 6960.17   |
| NM_017493 | 1718.901 | 1934.369 | NM_002964 | 568.065   | 434.495   | NM_018083 | 1342.416  | 1914.221  |
| NM_006136 | 7537.327 | 5977.459 | NM_005052 | 13925.728 | 13115.226 | AL110188  | 9200.357  | 10459.597 |
| AF237772  | 3329.948 | 3271.808 | BF038439  | 472.208   | 602.295   | D70834    | 29185.674 | 31922.102 |
| AK025934  | 1717.002 | 1310.862 | AF319476  | 1890.013  | 2506.784  | NM_000970 | 63670.227 | 69496.328 |
| AJ008154  | 1105.457 | 1028.008 | AK001913  | 4796.342  | 4983.953  | NM_033286 | 590.66    | 929.057   |
| NM_006856 | 4952.485 | 4719.017 | NM_017737 | 1173.601  | 814.988   | AK000102  | 1589.703  | 1864.162  |
| X52350    | 55259.51 | 53898.15 | NM_004292 | 1876.175  | 1786.102  | AB040916  | 2763.272  | 2689.239  |
| AF071554  | 588.517  | 694.193  | NM_015484 | 5632.999  | 6061.965  | NM_005587 | 2185.347  | 2033.474  |
| AF315592  | 4465.546 | 3799.592 | NM_018046 | 1986.387  | 2446.56   | AF038362  | 2297.29   | 1524.381  |
| AF095844  | 2785.338 | 1669.694 | NM_013316 | 2976.252  | 3318.888  | NM_005195 | 14645.041 | 13200.894 |
| NM_015833 | 2200.38  | 2569.82  | M20701    | 16643.18  | 14831.133 | NM_005481 | 2830.236  | 2240.114  |
| NM_000986 | 64952.5  | 54695.65 | NM_002912 | 1534.594  | 2102.146  | NM_004715 | 5713.396  | 4979.566  |
| AK026760  | 3702.461 | 3122.631 | NM_013284 | 4009.083  | 4250.363  | L40392    | 2819.916  | 2217.479  |
| NM_014772 | 2572.771 | 2141.276 | NM_006739 | 1564.892  | 1100.57   | BF541482  | 515.69    | 447.817   |
| AK025248  | 3885.569 | 2257.595 | NM_013274 | 4840.691  | 3697.838  | NM_001007 | 57517.672 | 62904.363 |
| NM_004539 | 12834.11 | 10264.22 | AL050187  | 1013.928  | 863.83    | NM_003017 | 7870.616  | 5730.326  |
| NM_006428 | 9654.136 | 8310.343 | NM_012387 | 14260.321 | 9446.346  | NM_020366 | 3872.845  | 3237.917  |
| NM_004280 | 19877.56 | 12554.68 | NM_014735 | 1456.345  | 835.375   | AF086497  | 1508.494  | 1496.018  |
| AF110399  | 1359.079 | 960.093  | NM_004252 | 19239.527 | 10375.85  | NM_020141 | 7116.294  | 8838.134  |
| AK027094  | 5423.637 | 3719.214 | AF172929  | 11833.121 | 7389.879  | NM_006482 | 1190.822  | 1797.39   |
| AL359596  | 1422.784 | 1893.427 | M60499    | 1219.208  | 1279.546  | NM_003635 | 2167.813  | 2887.482  |
| U79249    | 934.713  | 1034.658 | NM_000366 | 584.912   | 586.278   | NM_000662 | 4002.25   | 3531.474  |
| AK022114  | 1121.917 | 1260.195 | NM_003833 | 11320.324 | 11893.411 | NM_000292 | 2332.895  | 2313.635  |
| AL133585  | 1996.027 | 1873.069 | AK000868  | 4181.538  | 3559.207  | NM_003689 | 54832.906 | 50524.063 |
| NM_005917 | 27672.64 | 31921.77 | NM_001233 | 2112.003  | 2433.678  | NM_016173 | 1044.146  | 1477.616  |
| NM_007052 | 787.213  | 494.376  | NM_001234 | 1128.62   | 1068.526  | NM_002875 | 7448.075  | 7703.876  |
| NM_018657 | 2061.608 | 1852.9   | BF679789  | 1877.27   | 2412.693  | NM_004427 | 9920.137  | 10594.268 |
| L40410    | 19951.91 | 15097.87 | H97792    | 2204.786  | 3667.264  | U90549    | 6973.129  | 6299.742  |
| NM_007055 | 2828.569 | 2434.863 | L33404    | 683.714   | 839.586   | NM_013240 | 9652.371  | 8456.839  |
| NM_016652 | 4462.725 | 3184.417 | M13509    | 1251.163  | 1231.026  | NM_015874 | 24558.918 | 15528.443 |
| NM_016310 | 10577    | 10013.86 | X04076    | 3100.091  | 2420.159  | NM_004965 | 54576.844 | 49632.121 |
| AK021562  | 972.536  | 899.823  | W95082    | 2353.209  | 4628.174  | AF312393  | 30364.688 | 26788.9   |
| BC006560  | 510.181  | 383.379  | AA485362  | 2091.9    | 1683.616  | AF272898  | 5895.43   | 5002.864  |
| NM_006296 | 740.868  | 945.355  | AJ222801  | 4105.087  | 3465.488  | AB037817  | 714.389   | 881.757   |
| AF060938  | 17383.83 | 16131.6  | W72207    | 2978.702  | 1893.577  | AB032951  | 6577.965  | 6500.828  |
| NM_001973 | 2794.996 | 2329.182 | BI772354  | 3294.682  | 3343.361  | NM_003417 | 1211.509  | 1144.957  |
| NM_014466 | 5267.684 | 5505.785 | AA733033  | 2828.433  | 2252.84   | NM_005149 | 9793.026  | 8921.104  |
| AL050015  | 1773.696 | 2186.688 | AA583574  | 1519.054  | 991.203   | AK024073  | 871.587   | 980.052   |
| AY007117  | 7310.883 | 9226.178 | AI690184  | 34461.98  | 19535.961 | AK022223  | 536.628   | 533.474   |
| AF039698  | 3070.422 | 4056.551 | AA927490  | 1329.702  | 767.226   | NM_005887 | 5584.261  | 5589.588  |
| AB046828  | 2700.602 | 3694.82  | NM_001481 | 537.972   | 629.357   | AK024921  | 717.734   | 1239.041  |
| AL137532  | 2457.129 | 1631.207 | U30872    | 1110.478  | 1231.037  | AK026103  | 3717.066  | 5463.805  |
| AK074298  | 455.422  | 391.824  | AF111783  | 506.653   | 438.106   | NM_016353 | 18046.23  | 39084.645 |
| NM_017413 | 614.865  | 322.088  | NM_002639 | 927.971   | 1331.393  | AK022567  | 2071.791  | 2126.055  |
| NM_018375 | 2407.284 | 3090.386 | NM_014734 | 1950.952  | 1941.44   | S77357    | 839.766   | 674.966   |
| AK023371  | 1255.277 | 1237.04  | NM_002289 | 524.674   | 497.888   | AK023450  | 876.619   | 1163.833  |
| AF086187  | 6425.646 | 4876.129 | AK026408  | 1342.27   | 1518.935  | AL080280  | 4800.984  | 4941.253  |
| AF305836  | 10391.62 | 14534.74 | NM_005025 | 1340.004  | 974.35    | AB028947  | 1203.677  | 1225.312  |
| AL137383  | 267.318  | 300.811  | NM_006307 | 481.378   | 483.46    | AF035314  | 1152.713  | 1025.572  |
| AL035295  | 1363.408 | 1504.222 | M74782    | 861.129   | 887.318   | NM_018036 | 1175.658  | 1219.884  |
| NM_018302 | 5833.521 | 6437.499 | NM_017818 | 3506.177  | 4350.573  | AF052087  | 1335.759  | 1364.175  |
| AK027252  | 1503.774 | 1419.983 | NM_020433 | 736.022   | 870.076   | AF007143  | 1182.343  | 1444.011  |

|           |          |          |           |           |           |           |           |           |
|-----------|----------|----------|-----------|-----------|-----------|-----------|-----------|-----------|
| AF165527  | 1796.156 | 2020.947 | NM_001767 | 6379.644  | 5784.677  | AF147417  | 686.434   | 702.436   |
| NM_014092 | 1160.209 | 1926.573 | AF028823  | 8693.406  | 14310.682 | AK023656  | 972.21    | 866.806   |
| AL110133  | 1774.052 | 2186.091 | NM_004295 | 36025.02  | 30101.117 | AF086511  | 1626.842  | 1550.542  |
| AL050053  | 427.028  | 572.337  | NM_002087 | 5551.133  | 4760.098  | AK022989  | 2267.953  | 3198.266  |
| AK000529  | 6883.263 | 6293.068 | AB023154  | 436.376   | 175.327   | AK001604  | 4362.476  | 4335.696  |
| AK027243  | 1714.656 | 2171.296 | NM_001714 | 553.809   | 415.885   | AK021619  | 826.236   | 828.432   |
| AL117539  | 573.041  | 464.554  | NM_014585 | 3048.079  | 1745.032  | AK025872  | 549.692   | 785.629   |
| NM_003887 | 696.192  | 551.992  | AF200815  | 851.966   | 498.175   | AF131762  | 29657.494 | 26423.758 |
| NM_004267 | 1718.086 | 3177.499 | NM_013441 | 4679.037  | 2080.149  | AY007089  | 2277.261  | 4498.432  |
| AL357212  | 407.443  | 434.622  | NM_014421 | 1256.272  | 462.779   | AK021816  | 8728.203  | 23347.898 |
| AK026687  | 2370.939 | 2653.326 | NM_006745 | 1074.327  | 1507.187  | AK024018  | 662.119   | 988.537   |
| AL117444  | 1304.938 | 1670.399 | NM_004694 | 488.144   | 768.763   | D43770    | 12192.293 | 13288.434 |
| NM_017994 | 8783.516 | 10453.08 | AL137619  | 2329.603  | 2530.021  | AF085960  | 635.535   | 749.872   |
| AK021693  | 1953.152 | 1924.693 | NM_004300 | 10523.753 | 12513.149 | AK021519  | 2063.59   | 1830.041  |
| AB023177  | 807.941  | 869.805  | AB007859  | 1684.079  | 1997.779  | NM_014254 | 4964.765  | 5222.032  |
| Y11609    | 748.676  | 773.726  | NM_006754 | 544.287   | 821.239   | AF086036  | 631.985   | 1045.794  |
| NM_012122 | 7470.385 | 6479.547 | NM_001127 | 3594.307  | 3877.209  | AF086010  | 639.897   | 785.475   |
| AF009285  | 1934.345 | 1650.261 | NM_012430 | 3264.218  | 3776.902  | U09197    | 2882.504  | 2622.629  |
| NM_012125 | 2048.898 | 1869.477 | NM_003917 | 15990.757 | 15550.831 | U50529    | 534.54    | 499.479   |
| AB032363  | 430.581  | 405.65   | NM_007077 | 2143.076  | 1864.274  | Z36800    | 608.209   | 725.166   |
| AF009294  | 2524.242 | 2232.581 | NM_002956 | 2578.912  | 1753.3    | U15553    | 4186.461  | 3986.719  |
| AK021684  | 1107.851 | 1661.958 | AB018739  | 1033.105  | 574.959   | U52831    | 599.336   | 753.819   |
| AK001060  | 554.62   | 386.554  | NM_006750 | 20947.178 | 12655.169 | Z36829    | 829.312   | 642.322   |
| AK021480  | 749.699  | 619.833  | NM_020164 | 4729.643  | 2282.622  | AK024734  | 6663.056  | 6099.668  |
| AK025112  | 631.895  | 607.508  | AK023521  | 5007.271  | 2055.249  | NM_017741 | 2051.27   | 1824.974  |
| AK025173  | 1151.647 | 1310.818 | NM_014267 | 22239.447 | 11845.788 | AK000144  | 1520.413  | 2542.256  |
| AK025430  | 440.579  | 478.767  | AL050187  | 1283.244  | 1433.063  | AK022275  | 708.083   | 687.387   |
| AF117338  | 1742.721 | 1985.34  | NM_007127 | 415.371   | 358.467   | AK000942  | 1072.359  | 1434.583  |
| AK025567  | 1746.649 | 1946.72  | NM_012387 | 14253.491 | 16040.54  | NM_016345 | 506.812   | 824.509   |
| NM_019102 | 937.362  | 1014.583 | NM_014735 | 1808.857  | 1740.404  | AL117533  | 4023.514  | 5827.441  |
| U56857    | 867.095  | 769.026  | NM_004252 | 20441.65  | 20870.748 | AK026036  | 1362.03   | 1310.127  |
| L43349    | 1202.799 | 1040.176 | AF172929  | 12797.731 | 16201.075 | AK023422  | 1952.903  | 2307.405  |
| BE905682  | 589.325  | 473.28   | NM_006395 | 14258.531 | 15001.637 | AK022796  | 2346.571  | 2676.285  |
| AF086421  | 1562.84  | 2106.379 | AK025655  | 2855.299  | 3063.03   | AK095193  | 1359.805  | 1723.231  |
| AK001612  | 1273.589 | 1177.594 | NM_001362 | 618.558   | 419.529   | AK025081  | 1318.094  | 1318.384  |
| AF161522  | 8595.053 | 6959.594 | NM_004056 | 2002.057  | 2095.822  | AL122088  | 2003.983  | 1665.838  |
| AF086028  | 624.992  | 598.428  | NM_001056 | 1281.167  | 1182.467  | AF119912  | 474.287   | 597.827   |
| U46119    | 591.054  | 444.533  | AY026461  | 4039.346  | 4764.788  | AL137518  | 1343.077  | 1622.484  |
| AK025365  | 1867.345 | 1884.05  | AK025708  | 4265.138  | 5215.483  | AK022556  | 411.672   | 755.802   |
| AK023445  | 382.067  | 385.872  | NM_000405 | 1510.322  | 1417.567  | AK023437  | 2615.147  | 3862.605  |
| AK023489  | 328.522  | 527.604  | NM_005564 | 52781.953 | 37530.238 | AK024147  | 490.387   | 775.306   |
| AK021561  | 459.289  | 598.239  | NM_004505 | 4880.054  | 3011.483  | AK022897  | 1672.123  | 1756.558  |
| AL050145  | 432.229  | 444.878  | NM_006405 | 18273.482 | 10902.408 | AK023898  | 5649.414  | 6266.836  |
| AK025222  | 455.362  | 483.282  | AJ245946  | 586.492   | 393.333   | NM_019040 | 8484.985  | 11924.686 |
| NM_003531 | 2830.52  | 2438.747 | NM_002390 | 6017.609  | 7454.287  | NM_005975 | 2509.684  | 3276.555  |
| L08434    | 199.905  | 446.802  | NM_006142 | 1819.24   | 1995.67   | Y16711    | 1017.334  | 1816.902  |
| NM_017795 | 944.474  | 832.075  | NM_014910 | 9087.964  | 9100.612  | AJ272179  | 2611.793  | 3391.956  |
| NM_003510 | 566.842  | 307.018  | AK001064  | 4020.663  | 4312.374  | AJ007015  | 5020.813  | 3017.104  |
| NM_018534 | 339.81   | 505.874  | AB029031  | 6254.726  | 7127.566  | AL049317  | 1894.625  | 2307.782  |
| AB037847  | 2410.218 | 3215.488 | NM_001294 | 5877.398  | 6470.817  | AL050090  | 1223.383  | 1591.601  |
| NM_005170 | 3044.632 | 4221.983 | NM_014241 | 8649.065  | 9656.065  | AF086309  | 1582.272  | 1657.863  |
| S96437    | 989.612  | 1455.06  | AF302786  | 3639.752  | 4333.984  | AF238870  | 960.259   | 1231.659  |
| NM_015176 | 1567.404 | 1551.493 | AL122083  | 4446.093  | 5642.588  | AK026279  | 4293.094  | 5621.702  |



|           |          |          |           |           |           |           |           |           |
|-----------|----------|----------|-----------|-----------|-----------|-----------|-----------|-----------|
| AL080186  | 506.886  | 415.835  | NM_005052 | 16488.877 | 14198.445 | AF130094  | 8298.06   | 9534.397  |
| NM_005306 | 1415.923 | 1326.045 | BF038439  | 802.363   | 777.536   | AK026673  | 2708.665  | 2988.821  |
| NM_001646 | 990.841  | 895.961  | AF319476  | 1927.764  | 2718.344  | NM_005452 | 4942.141  | 4170.119  |
| AL137327  | 3657.813 | 3862.282 | NM_005538 | 673.871   | 1602.413  | AF170935  | 13533.682 | 14513.001 |
| AF358454  | 4564.351 | 6646.9   | AK001913  | 8382.889  | 16186.245 | AK025218  | 958.309   | 1051.483  |
| AK026090  | 1113.395 | 1446.457 | NM_017737 | 1613.705  | 1316.364  | AJ227899  | 1829.198  | 2216.82   |
| AF070637  | 381.247  | 301.799  | NM_004292 | 2637.932  | 2649.38   | AL359607  | 874.13    | 1192.79   |
| AL137634  | 1155.849 | 1545.728 | NM_015484 | 7218.635  | 6687.462  | AF161371  | 9740.709  | 9728.674  |
| AK024863  | 6285.168 | 7110.081 | NM_018046 | 2846.633  | 5653.423  | AK022464  | 903.742   | 871.75    |
| AJ008135  | 3909.867 | 4425.882 | NM_013316 | 3452.5    | 3376.852  | AF086230  | 1270.885  | 1129.205  |
| AK026908  | 4385.055 | 6178.429 | M20701    | 21852.221 | 16158.555 | AK023408  | 6181.063  | 5111.695  |
| D17110    | 357.92   | 474.871  | NM_002912 | 1468.359  | 1321.739  | U84509    | 3739.223  | 4829.736  |
| U92025    | 439.149  | 464.072  | NM_013284 | 3928.698  | 2565.875  | AK002036  | 5870.862  | 5766.49   |
| AB046766  | 790.621  | 857.222  | NM_006739 | 3313.986  | 1492.943  | U84512    | 706.94    | 594.399   |
| AF009323  | 379.123  | 472.864  | NM_013274 | 5913.416  | 3802.735  | AK025775  | 5388.8    | 5189.513  |
| AK001526  | 4861.804 | 4673.926 | AL157500  | 1197.325  | 1371.34   | AB046791  | 1410.765  | 1615.482  |
| AF086183  | 96.178   | 173.265  | AK024955  | 30842.926 | 31315.586 | AF043469  | 1033.93   | 2657.815  |
| AK000525  | 2456.869 | 2187.008 | NM_016580 | 2871.317  | 3570.258  | AL109671  | 1083.813  | 1217.791  |
| AL137434  | 1079.503 | 852.995  | AF169693  | 1484.844  | 1435.892  | NM_012375 | 463.297   | 528.552   |
| AL080216  | 1794.703 | 2016.578 | L23206    | 6611.898  | 6444.823  | AK022008  | 1235.984  | 1708.198  |
| AF038188  | 1869.372 | 2756.094 | NM_012192 | 7924.708  | 9307.632  | NM_018186 | 2386.125  | 3974.486  |
| AJ227888  | 686.142  | 663.304  | NM_006293 | 3777.042  | 3578.719  | AL080188  | 3492.757  | 4487.14   |
| D17046    | 841.242  | 949.196  | NM_007229 | 5594.976  | 5673.658  | T99941    | 3809.281  | 3727.792  |
| NM_017645 | 6318.014 | 6254.677 | AB011105  | 2734.566  | 2503.683  | AF113678  | 1355.103  | 1536.422  |
| AJ227864  | 937.788  | 1023.935 | NM_002213 | 801.897   | 982.602   | AL137313  | 53225.551 | 53994.254 |
| AF157562  | 3900.284 | 5541.322 | NM_018970 | 1316.568  | 1524.051  | Z83951    | 474.995   | 567.49    |
| AK021958  | 11499.98 | 14124.56 | NM_004814 | 11766.629 | 11865.038 | AL833529  | 408.678   | 409.232   |
| M31164    | 2385.438 | 2413.074 | D86976    | 18961.549 | 14169.119 | AB002363  | 6157.333  | 7580.041  |
| AF113674  | 16980.07 | 19201.21 | AF307080  | 688.269   | 502.662   | NM_005284 | 2214.1    | 3412.153  |
| NM_003511 | 943.734  | 1879.739 | NM_004057 | 4005.902  | 4395.02   | AF086351  | 2584.339  | 3289.73   |
| CY3Cy5    | 3141.243 | 186.367  | NM_018971 | 1233.953  | 899.576   | D83199    | 21117.084 | 22097.057 |
| H97792    | 1518.091 | 1086.299 | K03175    | 1364.513  | 1293.524  | AK025957  | 443.103   | 440.39    |
| X04076    | 3058.61  | 2929.693 | NM_003265 | 693.667   | 975.609   | Y16708    | 908.424   | 1266.363  |
| W95082    | 2395.101 | 1672.224 | NM_003015 | 1120.077  | 1345.216  | AL157453  | 3300.319  | 3687.618  |
| AA485362  | 1180.922 | 784.894  | NM_003711 | 2208.744  | 2069.52   | NM_019096 | 8440.426  | 12234.658 |
| AJ222801  | 1743.756 | 1347.395 | NM_006496 | 11647.378 | 10219.6   | AK022212  | 44702.484 | 46312.996 |
| W72207    | 1512.672 | 1422.034 | NM_004826 | 2048.661  | 842.934   | X64974    | 4683.293  | 6304.084  |
| BI772354  | 3603.49  | 2713.977 | NM_002072 | 4486.27   | 1635.735  | NM_000834 | 8039.5    | 11308.864 |
| AA733033  | 4201.691 | 3784.892 | BE904126  | 31462.408 | 31595.697 | NM_006485 | 45026.625 | 40530.184 |
| AA583574  | 1569.41  | 1541.252 | AF272380  | 34840.07  | 34919.652 | NM_012459 | 3522.884  | 3858.499  |
| AI690184  | 2965.436 | 3938.773 | NM_004431 | 11873.068 | 13387.695 | NM_012360 | 437.566   | 614.737   |
| AA927490  | 2380.609 | 1787.883 | NM_002012 | 2194.374  | 2573.219  | AL137268  | 3727      | 5015.01   |
| NM_001824 | 7071.059 | 7878.07  | NM_002070 | 47865.426 | 46754.027 | AK001130  | 583.265   | 1139.729  |
| NM_002964 | 440.694  | 607.7    | AF227969  | 4520.121  | 5186.587  | AK022398  | 670.668   | 781       |
| SR7       | 5527.843 | 18439.91 | AF116657  | 761.23    | 992.574   | AK024109  | 4331.474  | 3858.089  |
| SR9       | 19762.86 | 1724.747 | NM_004102 | 741.042   | 1307.951  | AF088048  | 1594.892  | 1782.259  |
| CY3Cy5    | 1759.64  | 136.17   | NM_003944 | 41595.082 | 35327.336 | AK001143  | 2944.036  | 2663.189  |
| NM_017818 | 3649.622 | 2149.735 | NM_016120 | 61172.543 | 62711.48  | AK001701  | 4359.522  | 4055.227  |
| NM_001767 | 4704.193 | 4680.721 | NM_002893 | 1720.482  | 1977.759  | AB007978  | 545.074   | 665.862   |
| AF028823  | 4616.674 | 4046.478 | NM_002393 | 11373.615 | 11483.438 | AF217970  | 1000.661  | 1083.961  |
| NM_004295 | 4164.746 | 3603.094 | NM_002669 | 10459.128 | 11452.351 | AF086297  | 1304.139  | 1387.5    |
| NM_002087 | 5341.698 | 5040.22  | AB014600  | 5333.601  | 5188.497  | AK025455  | 3775.467  | 3530.774  |
| AB023154  | 318.374  | 562.834  | NM_018312 | 4369.243  | 4318.794  | AK026799  | 3333.812  | 3139.19   |

|           |          |          |           |           |           |            |           |           |
|-----------|----------|----------|-----------|-----------|-----------|------------|-----------|-----------|
| NM_001714 | 682.623  | 280.126  | X98259    | 1724.125  | 1910.538  | NM_01486C  | 1113.733  | 1087.146  |
| NM_01458E | 2145.9   | 1688.74  | NM_01479Z | 396.446   | 586.312   | AK022549   | 1876.812  | 2017.881  |
| AF200815  | 736.471  | 634.6    | U05255    | 1176.924  | 962.288   | NM_018157  | 1152.301  | 1050.43   |
| NM_013441 | 1503.205 | 1785.123 | X98260    | 6242.07   | 3941.225  | Z70714     | 3728.07   | 3593.303  |
| NM_014421 | 576.212  | 376.398  | NM_007217 | 12875.19  | 13456.757 | AK021640   | 7638.419  | 8313.474  |
| M60499    | 2012.217 | 1971.732 | NM_014777 | 10153.292 | 8053.338  | NM_01656E  | 52593.555 | 49285.254 |
| NM_00383Z | 5811.209 | 6108.903 | NM_001102 | 7806.05   | 5293.129  | CY3Cy5     | 2077.458  | 137.511   |
| AK000868  | 4635.191 | 4002.119 | NM_00380Z | 1840.063  | 1247.991  | BF310427   | 1051.719  | 804.943   |
| NM_00123Z | 3549.475 | 3184.705 | NM_00281E | 54245.895 | 37441.965 | AA045192   | 724.322   | 723.124   |
| NM_001234 | 828.639  | 551.715  | NM_001937 | 6952.683  | 4388.812  | M92642     | 539.639   | 619.881   |
| BF679789  | 915.341  | 428.617  | AK024778  | 2396.185  | 3517.925  | AA464532   | 366.51    | 560.996   |
| AB007859  | 1075.935 | 1158.5   | AK021608  | 2846.337  | 3555.273  | H-U 44385  | 12183.875 | 9623.393  |
| NM_006754 | 913.058  | 478.659  | NM_004297 | 1470.811  | 1731.498  | ID 1654970 | 4490.615  | 4184.538  |
| NM_001127 | 3285.378 | 3044.406 | NM_006044 | 9560.743  | 16681.75  | ID 2531132 | 5950.091  | 4898.06   |
| NM_01243C | 3361.194 | 2421.43  | AK025498  | 3762.379  | 5075.619  | BF125928   | 13990.591 | 8852.293  |
| NM_003917 | 5280.32  | 5136.04  | NM_00139E | 10700.114 | 13697.114 | AA489017   | 4811.395  | 3881      |
| NM_007077 | 849.368  | 888.948  | NM_00206E | 18015.809 | 15851.035 | NM_01224E  | 11090.705 | 6742.381  |
| NM_00295E | 1923.261 | 1877.438 | NM_019854 | 408.709   | 397.578   | SR2        | 53197.758 | 33781.688 |
| AB018739  | 1807.242 | 3672.134 | NM_01333E | 3257.79   | 3546.096  | SR4        | 16601.658 | 8101.121  |
| NM_00675C | 19284.66 | 16501.56 | NM_014671 | 6708.489  | 6505.935  | SR6        | 2791.582  | 1235.861  |
| NM_020164 | 5334.334 | 3498.08  | NM_001814 | 11411.985 | 9933.023  | SR8        | 9142.166  | 15322.872 |
| AK023521  | 5510.27  | 4171.935 | NM_01843E | 536.084   | 603.927   | SR10       | 32232.754 | 6589.878  |
| NM_014267 | 22469.5  | 16921.17 | NM_00565E | 2334.909  | 2296.759  | CY3Cy5     | 3467.647  | 135.025   |
| NM_001481 | 719.851  | 833.596  | NM_00601Z | 8770.558  | 10240.33  | NM_01745C  | 1630.467  | 1271.864  |
| U30872    | 1520.926 | 1790.76  | NM_002151 | 2785.861  | 2688.574  | NM_00202Z  | 776.359   | 937.042   |
| AF111783  | 709.516  | 456.985  | NM_01488E | 3209.827  | 3476.398  | NM_00283E  | 700.383   | 574.473   |
| NM_02046E | 2446.478 | 2604.923 | AF173935  | 2318.632  | 3322.844  | AF190500   | 517.322   | 252.713   |
| NM_014734 | 2101.951 | 2353.53  | AK025322  | 14969.291 | 13801.235 | NM_00161E  | 458.202   | 632.568   |
| NM_00228E | 471.555  | 472.715  | NM_017887 | 7378.054  | 8002.115  | NM_00527Z  | 11480.193 | 12124.801 |
| AK026408  | 2296.406 | 2543.033 | NM_00052E | 1913.856  | 1523.791  | NM_000524  | 472.624   | 748.318   |
| NM_00502E | 1082.371 | 1499.079 | AF007152  | 2109.094  | 2409.418  | NM_00657E  | 1120.001  | 1067.242  |
| NM_00105E | 1343.373 | 1441.343 | NM_01757E | 812.357   | 848.989   | NM_01864E  | 656.591   | 711.374   |
| AY026461  | 2661.778 | 2190.664 | AL122100  | 1431.671  | 1129.783  | AB035266   | 2337.228  | 1708.131  |
| AK025708  | 4065.166 | 2798.81  | NM_00531C | 1665.079  | 1387.754  | NM_003744  | 1795.712  | 1684.187  |
| NM_00040E | 590.67   | 504.473  | NM_01442Z | 11295.323 | 23067.129 | NM_00637E  | 11030.13  | 7514.624  |
| NM_005564 | 12007.49 | 10244.72 | NM_01808Z | 1520.172  | 1738.033  | NM_01813Z  | 2530.922  | 1550.087  |
| NM_00450E | 4309.479 | 5233.302 | AL110188  | 11261.975 | 13283.299 | NM_003061  | 1727.684  | 1509.39   |
| NM_00640E | 2837.672 | 2823.97  | D70834    | 33307.531 | 30806.762 | NM_018207  | 2026.804  | 1851.919  |
| AJ245946  | 389.077  | 347.636  | NM_00097C | 53353.582 | 64178.156 | NM_00034E  | 5176.874  | 3620.798  |
| NM_00674E | 1145.776 | 1167.348 | NM_03328E | 662.312   | 841.28    | NM_006531  | 1238.597  | 921.773   |
| NM_004694 | 1168.246 | 1154.609 | AK000102  | 1766.813  | 1855.388  | AB029021   | 4226.313  | 3724.55   |
| AL137619  | 658.07   | 551.282  | AB040916  | 2993.887  | 3252.443  | Z36789     | 3023.671  | 2656.876  |
| NM_00430C | 15692.29 | 11101.72 | NM_005587 | 2261.557  | 2064.662  | J02874     | 879.846   | 2263.232  |
| NM_00005Z | 251.794  | 318.107  | AF038362  | 3152.061  | 3484.721  | AF070525   | 8287.496  | 5149.443  |
| AF319476  | 1927.396 | 1712.903 | NM_00519E | 13761.36  | 15126.798 | NM_001177  | 3387.253  | 4768.89   |
| NM_00553E | 686.862  | 662.951  | NM_005481 | 2613.523  | 2523.965  | NM_014447  | 1520.13   | 1005.552  |
| AK001913  | 6361.231 | 7676.514 | NM_00471E | 6622.143  | 7316.213  | NM_006691  | 1036.695  | 837.178   |
| NM_017737 | 982.212  | 1338.704 | L40392    | 2454.004  | 2247.385  | NM_00150E  | 605.848   | 689.456   |
| NM_00429Z | 2095.135 | 2209.701 | NM_001007 | 57460.621 | 63885.633 | NM_00371C  | 1845.639  | 2688.469  |
| NM_015484 | 5641.641 | 4745.653 | NM_003017 | 5135.511  | 4257.739  | Z83805     | 515.62    | 816.06    |
| NM_01804E | 2505.805 | 1805.788 | NM_02036E | 3590.753  | 2545.816  | NM_003614  | 810.692   | 973.946   |
| NM_01331E | 970.599  | 1226.643 | AF086497  | 1470.823  | 2057.561  | NM_014257  | 3408.151  | 3432.244  |
| M20701    | 3906.138 | 3725.813 | NM_020141 | 8984.049  | 9741.826  | NM_001140  | 301.483   | 474.808   |

|           |          |          |           |           |           |           |           |           |
|-----------|----------|----------|-----------|-----------|-----------|-----------|-----------|-----------|
| NM_002912 | 1517.57  | 1423.658 | NM_006482 | 1216.728  | 1440.712  | NM_004843 | 2116.198  | 1616.033  |
| NM_013284 | 3739.004 | 3653.983 | NM_003779 | 488.973   | 854.436   | AK022845  | 1169.001  | 1159.542  |
| NM_006739 | 3173.9   | 3822.681 | NM_003635 | 2921.843  | 3052.268  | NM_003004 | 496.429   | 643.432   |
| NM_013274 | 4918.812 | 4696.182 | NM_000662 | 3271.695  | 4411.94   | S77835    | 525.812   | 700.359   |
| AL050187  | 1200.909 | 1149.792 | NM_000292 | 2316.996  | 2135.52   | NM_002985 | 627.808   | 634.758   |
| NM_012387 | 14502.47 | 13468.49 | NM_003689 | 49615.078 | 57448.254 | AB018347  | 4096.037  | 3281.792  |
| NM_014735 | 1262.133 | 1382.68  | NM_016173 | 3132.67   | 3331.027  | NM_003284 | 929.356   | 578.561   |
| NM_004252 | 18200.92 | 21044.63 | NM_002875 | 7757.068  | 9222.659  | NM_018152 | 724.038   | 566.516   |
| AF172929  | 18826.61 | 16270.02 | NM_004427 | 12376.253 | 10227.938 | NM_012461 | 5136.517  | 3044.771  |
| NM_006398 | 7774.257 | 8620.104 | U90549    | 7420.287  | 7981.409  | AK001379  | 2216.338  | 3290.801  |
| AK025655  | 3432.193 | 2802.509 | NM_013240 | 9516.982  | 9175.438  | NM_007072 | 1252.13   | 941.899   |
| NM_004056 | 3449.951 | 2377.588 | NM_015874 | 24144.07  | 17300.318 | NM_012320 | 2146.66   | 1930.534  |
| NM_003833 | 6154.02  | 8074.018 | NM_004965 | 55103.059 | 62542.855 | NM_018208 | 2534.393  | 2284.999  |
| AK000868  | 4537.469 | 3613.854 | AF312393  | 42459.641 | 28191.889 | NM_015929 | 4207.313  | 3432.723  |
| NM_001233 | 3233.527 | 3302.581 | AF272898  | 3548.157  | 3655.948  | U90653    | 4439.459  | 3840.606  |
| NM_001234 | 935.286  | 901.608  | AB037817  | 868.887   | 605.25    | NM_000178 | 1093.705  | 1928.549  |
| BF679789  | 949.218  | 742.448  | AB032951  | 4539.503  | 3065.363  | NM_000275 | 940.477   | 813.664   |
| H97792    | 1362.527 | 1369.73  | NM_003417 | 1504.422  | 2331.934  | AK000037  | 968.631   | 929.865   |
| L33404    | 339.315  | 420.194  | NM_005149 | 14148.146 | 9501.454  | NM_014760 | 2989.769  | 2637.988  |
| X04076    | 2456.955 | 3182.542 | AK022223  | 718.359   | 739.19    | NM_018398 | 2902.772  | 4087.081  |
| W95082    | 2011.465 | 2037.412 | NM_005887 | 4371.736  | 7065.637  | NM_002560 | 5394.11   | 4981.353  |
| AA485362  | 1083.97  | 1148.224 | AK024921  | 1359.262  | 1530.977  | NM_014404 | 1127.411  | 1958.362  |
| AJ222801  | 1705.919 | 2078.285 | AK026103  | 2983.651  | 3363.073  | NM_018713 | 704.437   | 519.722   |
| W72207    | 1706.396 | 1997.646 | NM_016353 | 24655.451 | 22623.678 | NM_015947 | 5060.599  | 4943.093  |
| BI772354  | 3523.228 | 2896.261 | AK022567  | 2264.268  | 1788.993  | NM_002042 | 5631.411  | 5101.197  |
| AA733033  | 4091.662 | 4322.951 | S77357    | 1008.745  | 815.685   | AB028944  | 674.084   | 710.048   |
| AA583574  | 1698.256 | 1427.106 | AK023450  | 1884.746  | 2847.391  | AJ006268  | 1209.69   | 1356.255  |
| AI690184  | 3138.636 | 3615.178 | AL080280  | 7937.724  | 7818.044  | M74089    | 6059.722  | 4251.4    |
| AA927490  | 2076.281 | 1659.264 | AB028947  | 2465.45   | 3005.677  | AF190864  | 4578.427  | 4044.835  |
| NM_001824 | 6280.605 | 6761.285 | AF035314  | 1407.089  | 1392.572  | NM_002779 | 2756.266  | 2218.051  |
| NM_002964 | 462.907  | 471.091  | NM_018036 | 1305.807  | 1206.918  | L40397    | 16597.766 | 15712.27  |
| NM_005052 | 13233.69 | 14893.04 | AF052087  | 1439.582  | 1324.026  | NM_020198 | 7702.577  | 4968.467  |
| NM_014734 | 1625.234 | 1924.839 | AF007143  | 2349.688  | 1970.186  | AA098879  | 587.941   | 928.292   |
| NM_002289 | 518.562  | 514.795  | AF147417  | 703.716   | 1078.554  | NM_000025 | 12314.142 | 10246.343 |
| AK026408  | 1870.681 | 1860.612 | AK023656  | 1244.03   | 857.618   | D38521    | 2187.247  | 1686.861  |
| NM_005025 | 1057.384 | 1311.477 | AF086511  | 1618.476  | 3165.594  | NM_000403 | 4743.618  | 3606.136  |
| NM_006307 | 430.641  | 696.834  | AK022989  | 5459.572  | 3800.438  | NM_018127 | 12652.583 | 13760.225 |
| NM_017818 | 4511.486 | 4801.82  | AK001604  | 5491.562  | 3069.993  | AB020677  | 3072.787  | 3769.663  |
| NM_020433 | 213.745  | 715.323  | AK021619  | 992.726   | 1286.182  | AB033097  | 1819.796  | 2789.648  |
| NM_001767 | 4456.046 | 6099.893 | AK025872  | 626.112   | 713.856   | AJ223948  | 4094.006  | 4849.845  |
| AF028823  | 3959.029 | 4691.918 | AF131762  | 24245.006 | 28959.721 | NM_016218 | 1186.501  | 1243.07   |
| NM_004295 | 4039.492 | 4483.295 | AY007089  | 1805.879  | 2273.989  | AK022947  | 2204.375  | 2383.729  |
| NM_002087 | 5854.084 | 5661.636 | AK021816  | 10659.401 | 11976.953 | AL050029  | 1958.709  | 1973.157  |
| AB023154  | 325.073  | 538.672  | D43770    | 12587.275 | 13979.157 | AL049966  | 700.668   | 928.337   |
| NM_001714 | 845.009  | 547.225  | AF085960  | 777.272   | 801.97    | NM_005204 | 3283.742  | 2966.046  |
| NM_014585 | 2221.165 | 2469.772 | AK021519  | 2323.722  | 2965.501  | NM_016203 | 1595.1    | 2007.94   |
| AF200815  | 630.278  | 906.249  | NM_014254 | 5359.774  | 5405.659  | NM_002759 | 4493.531  | 2773.087  |
| NM_014564 | 234.172  | 301.568  | AF086036  | 971.431   | 1136.979  | NM_007271 | 2256.098  | 1745.278  |
| NM_013441 | 1600.235 | 1914.155 | AF086010  | 874.811   | 695.096   | BE392143  | 4010.144  | 3156.736  |
| M60499    | 1897.888 | 1412.123 | U09197    | 3291.814  | 3207.292  | NM_005813 | 1778.924  | 903.979   |
| NM_003615 | 490.099  | 429.75   | U66050    | 583.295   | 576.279   | AB037718  | 3246.299  | 1972.392  |
| NM_004300 | 14506.61 | 9916.842 | Z36800    | 1021.383  | 626.887   | AL389994  | 1308.58   | 1079.766  |
| AB007859  | 1586.645 | 2389.789 | U15553    | 4479.762  | 4374.146  | NM_003909 | 4999.639  | 4017.761  |

|           |          |          |           |           |           |            |           |           |
|-----------|----------|----------|-----------|-----------|-----------|------------|-----------|-----------|
| NM_006754 | 899.43   | 541.574  | U52831    | 684.036   | 463.304   | NM_001277  | 4788.712  | 3807.091  |
| NM_001127 | 3440.713 | 3654.244 | U78628    | 481.807   | 1849.445  | NM_003659  | 6458.273  | 5438.005  |
| NM_012430 | 3850.748 | 3565.54  | Z36829    | 1796.172  | 3831.601  | AB029021   | 6481.144  | 4864.45   |
| NM_003917 | 4659.368 | 4685.318 | AK024734  | 5196.011  | 3433.209  | NM_002101  | 36290.07  | 24752.414 |
| NM_007077 | 845.733  | 926.65   | NM_017741 | 2282.84   | 1280.337  | NM_005423  | 498.068   | 330.315   |
| NM_002956 | 2094.947 | 2100.037 | AK000144  | 1503.888  | 1912.199  | Z36789     | 2660.527  | 2194.179  |
| AB018739  | 1279.625 | 1320.975 | AK022275  | 534.14    | 867.55    | J02874     | 1027.103  | 829.084   |
| NM_006750 | 19067.3  | 18612.82 | AK000942  | 1170.821  | 1677.378  | BF310427   | 1225.087  | 1261.784  |
| NM_020164 | 5511.168 | 5490.726 | NM_016345 | 529.471   | 520.623   | AA045192   | 821.585   | 1083.571  |
| AK023521  | 5272     | 4658.806 | AL117533  | 9000.64   | 10911.874 | H45617     | 160.875   | 675.038   |
| NM_014267 | 21968.24 | 18959.94 | AK026036  | 1688.313  | 1923.094  | M92642     | 457.357   | 840.303   |
| NM_001481 | 720.535  | 783.674  | AK023422  | 3148.271  | 3442.365  | AA464532   | 625.037   | 699.295   |
| U30872    | 1752.597 | 1699.479 | AK022796  | 2742.425  | 2439.031  | H-U 44385  | 11215.593 | 13028.635 |
| AF111783  | 591.038  | 619.82   | AK095193  | 2250.906  | 2013.857  | ID 1654970 | 4747.426  | 5883.394  |
| NM_002639 | 1271.969 | 1002.552 | AK025081  | 2281.534  | 2342.218  | ID 2531132 | 5370.813  | 5998.033  |
| NM_006398 | 7892.691 | 7943.694 | AL122088  | 2280.525  | 2230.362  | ID 4365538 | 168.565   | 665.407   |
| AK025655  | 3420.806 | 2876.603 | AF116633  | 917.713   | 363.354   | AA485665   | 481.323   | 413.961   |
| NM_004056 | 3176.953 | 2052.757 | AF119912  | 937.697   | 953.733   | BF125928   | 14709.134 | 12505.548 |
| NM_001056 | 1379.332 | 913.813  | AL137518  | 2265.256  | 2252.253  | BG571026   | 1449.378  | 1221.838  |
| AY026461  | 2643.098 | 2722.523 | AK023437  | 3500.565  | 2368.749  | AA489017   | 4989.277  | 3191.77   |
| AK025708  | 4022.312 | 3265.829 | AK024147  | 961.018   | 2789.911  | NM_012245  | 11405.455 | 6458.648  |
| NM_000405 | 463.638  | 501.192  | AK022897  | 1287.116  | 2475.632  | NM_133263  | 1391.687  | 878.723   |
| NM_005564 | 11970.45 | 12953.68 | AK023556  | 602.819   | 4075.456  | NM_003284  | 962.134   | 591.964   |
| NM_004508 | 3677.503 | 3904.579 | AK023898  | 7986.15   | 5665.119  | NM_018152  | 628.976   | 507.738   |
| NM_006405 | 3106.237 | 3289.281 | NM_019040 | 11263.441 | 12859.349 | NM_000319  | 3889.8    | 3180.489  |
| AJ245946  | 363.746  | 407.002  | NM_005978 | 2723.863  | 3163.767  | NM_012461  | 4462.763  | 3771.246  |
| NM_006749 | 803.959  | 1190.997 | Y16711    | 1141.981  | 1558.293  | AK001379   | 1698.72   | 1530.754  |
| NM_004694 | 519.217  | 462.425  | AJ272179  | 2725.249  | 4194.46   | NM_001616  | 579.341   | 1072.52   |
| AL137619  | 591.477  | 557.167  | AJ007015  | 3658.042  | 5186.41   | NM_005904  | 414.577   | 636.158   |
| NM_001824 | 7901.004 | 8127.237 | AL049317  | 2150.988  | 2697.08   | NM_005273  | 10553.283 | 13315.985 |
| NM_002964 | 342.395  | 579.773  | AL050090  | 1592.464  | 2030.452  | AB035266   | 2340.74   | 1700.926  |
| NM_005052 | 12748.86 | 14355.37 | AF086309  | 1710.272  | 1749.191  | NM_003744  | 2419.289  | 2254.355  |
| AF319476  | 2077.97  | 1611.223 | AF238870  | 1729.239  | 1747.508  | NM_018132  | 2411.716  | 1511.908  |
| AK001913  | 6214.19  | 6408.417 | AK026279  | 5211.278  | 5030.476  | NM_003061  | 1535.732  | 1046.408  |
| NM_017737 | 1193.251 | 1446.958 | AF130094  | 12887.31  | 13138.259 | NM_018207  | 1878.083  | 1322.532  |
| NM_004292 | 2166.005 | 1873.304 | AK026673  | 3079.873  | 2806.63   | NM_000345  | 4085.75   | 3135.511  |
| NM_015484 | 6173.918 | 5250.836 | NM_005452 | 4712.573  | 7938.756  | NM_001862  | 45998.867 | 35548.051 |
| NM_018046 | 2840.525 | 2184.023 | AF170935  | 15114.562 | 18024.777 | NM_006531  | 1347.461  | 1039.823  |
| NM_013316 | 906.383  | 964.731  | AK025218  | 1437.494  | 1218.486  | M74089     | 5257.47   | 3384.975  |
| M20701    | 3704.602 | 3939.962 | AJ227899  | 2446.341  | 1392.197  | AF190864   | 4873.354  | 4903.522  |
| NM_002912 | 1544.494 | 1328.343 | AL359607  | 1620.329  | 1728.991  | NM_002779  | 3029.362  | 2717.197  |
| NM_013284 | 3786.934 | 4114.436 | AF161371  | 10954     | 12605.126 | L40397     | 15923.601 | 14785.952 |
| NM_006739 | 2911.07  | 4029.067 | AK022464  | 1971.848  | 1327.068  | NM_020198  | 7432.124  | 6250.866  |
| NM_013274 | 4842.577 | 5303.283 | AF086230  | 1933.702  | 1608.206  | AA098879   | 732.27    | 620.449   |
| AL050187  | 1079.892 | 1128.602 | AK023408  | 6187.429  | 5104.805  | NM_002356  | 1239.79   | 1946.956  |
| NM_012387 | 12095.23 | 10762.06 | U84509    | 4905.696  | 5498.97   | NM_006691  | 1160.448  | 1943.612  |
| NM_014735 | 1174.014 | 1410.767 | AK002036  | 5291.351  | 6400.666  | NM_001505  | 568.2     | 791.618   |
| NM_004252 | 18182.26 | 20532.75 | U84512    | 890.321   | 1046.098  | NM_003710  | 1724.354  | 2566.092  |
| AF172929  | 19183.27 | 15719.01 | AK025775  | 5287.972  | 6378.399  | NM_014257  | 3329.529  | 3825.479  |
| NM_012465 | 1074.736 | 1135.128 | AB046791  | 2079.483  | 2525.234  | NM_004843  | 2206.596  | 1619.055  |
| NM_000366 | 559.659  | 548.717  | AF043469  | 3071.194  | 1457.325  | AK022845   | 1150.597  | 933.175   |
| NM_003833 | 6165.907 | 6371.077 | AL109671  | 1658.861  | 2150.059  | S77835     | 571.818   | 483.221   |
| AK000868  | 4411.704 | 3527.418 | AK022008  | 2282.668  | 2118.377  | NM_002985  | 586.797   | 365.57    |

|           |          |          |            |           |           |           |           |           |
|-----------|----------|----------|------------|-----------|-----------|-----------|-----------|-----------|
| NM_001233 | 3244     | 3243.369 | NM_018186  | 3513.974  | 3207.082  | AB018347  | 3782.247  | 2965.482  |
| NM_001234 | 799.535  | 840.067  | AJ132194   | 404.613   | 602.347   | AB033073  | 1022.327  | 887.186   |
| BF679789  | 978.785  | 671.559  | AL080188   | 4681.171  | 4751.843  | NM_005813 | 1446.325  | 1039.329  |
| H97792    | 1163.998 | 918.709  | T99941     | 6414.149  | 7325.369  | AB037718  | 4502.375  | 3917.458  |
| X04076    | 2563.636 | 3068.583 | AF113678   | 2586.606  | 2568.144  | AL389994  | 895.122   | 994.858   |
| W95082    | 1945.297 | 2064.978 | AL137313   | 53891.832 | 58477.605 | NM_003909 | 4329.93   | 3915.686  |
| AA485362  | 1050.875 | 1089.312 | AL833529   | 377.487   | 508.351   | NM_001277 | 6455.817  | 6191.73   |
| AJ222801  | 1694.429 | 1890.414 | AB002363   | 7935.229  | 4922.96   | NM_003659 | 6100.522  | 5635.492  |
| W72207    | 1177.949 | 2286.167 | NM_005284  | 4309.63   | 4254.167  | NM_007072 | 1670.122  | 1845.474  |
| BI772354  | 3625.044 | 4167.944 | AF086351   | 3144.427  | 2281.564  | NM_012320 | 2438.986  | 2640.269  |
| AA733033  | 3974.977 | 4372.883 | D83199     | 23046.076 | 17154     | NM_015929 | 4700.143  | 5286.309  |
| AA583574  | 1340.632 | 1382.719 | AK025957   | 670.877   | 238.858   | U90653    | 4876.434  | 5561.277  |
| AI690184  | 2128.658 | 2219.739 | Y16708     | 1286.075  | 1077.755  | NM_000196 | 740.486   | 653.244   |
| AA927490  | 2015.349 | 1828.675 | AL157453   | 4388.401  | 3627.697  | NM_018339 | 6465.965  | 7594.077  |
| NM_001481 | 739.767  | 718.648  | NM_019098  | 11855.148 | 14332.65  | NM_006745 | 38736.465 | 51980.414 |
| U30872    | 1750.235 | 1449.088 | AK022212   | 48647.215 | 53456.164 | NM_000275 | 991.344   | 1997.19   |
| AF111783  | 650.461  | 571.229  | X64974     | 5918.741  | 7517.399  | AK000037  | 1593.058  | 1341.138  |
| NM_002639 | 1239.387 | 1056.251 | NM_000834  | 11726.003 | 14404.034 | NM_014760 | 3331.925  | 3311.42   |
| NM_014734 | 1873.551 | 1570.952 | NM_006485  | 51925.234 | 57566.27  | NM_018398 | 1448.065  | 1639.712  |
| NM_002289 | 455.832  | 446.182  | NM_012459  | 3653.078  | 4951.25   | NM_014404 | 989.303   | 1263.857  |
| AK026408  | 2106.324 | 1632.077 | NM_012360  | 773.45    | 910.376   | NM_015947 | 4057.108  | 2989.423  |
| NM_005025 | 1153.138 | 1355.549 | AL137268   | 4941.958  | 5430.937  | NM_002042 | 2762.799  | 1957.832  |
| NM_006307 | 194.932  | 442.997  | AK001130   | 918.167   | 817.125   | AB028944  | 584.729   | 629.654   |
| NM_017818 | 3788.577 | 3044.28  | AK022398   | 1223.796  | 872.409   | AJ006268  | 1096.061  | 1077.669  |
| AF028823  | 4821.902 | 4715.521 | AK024109   | 5337.818  | 5350.832  | NM_012245 | 12469.478 | 8420.635  |
| NM_004295 | 4011.459 | 4389.765 | AF088048   | 1643.683  | 2249.236  | NM_133263 | 1077.171  | 1205.542  |
| NM_002087 | 5419.087 | 5924.505 | AK001143   | 3645.334  | 2996.653  | NM_000025 | 13775.101 | 14966.412 |
| AB023154  | 205.998  | 616.244  | AK001701   | 4951.596  | 3878.96   | D38521    | 2448.837  | 2511.973  |
| NM_001714 | 428.283  | 417.783  | AK022205   | 756.44    | 828.242   | NM_000403 | 4730.146  | 4698.955  |
| NM_014585 | 2019.224 | 2395.69  | AB007978   | 854.289   | 996.8     | NM_018127 | 12793.421 | 12944.086 |
| AF200815  | 545.872  | 716.752  | AF217970   | 1223.359  | 1328.692  | AB020677  | 2648.837  | 3008.129  |
| NM_013441 | 1769.669 | 1738.759 | AF086297   | 1837.443  | 1879.728  | AB033097  | 1811.895  | 2457.207  |
| NM_006749 | 1110.618 | 1650.369 | AK025455   | 3856.643  | 3141.77   | NM_000135 | 1328.661  | 1780.352  |
| NM_004694 | 915.534  | 839.314  | AK026799   | 5194.045  | 2808.323  | AJ223948  | 5105.334  | 7386.103  |
| AL137619  | 636.959  | 539.727  | AK022549   | 1775.047  | 1413.375  | NM_016218 | 1455.133  | 1394.795  |
| NM_003615 | 502.145  | 390.646  | NM_018157  | 1455.208  | 1451.492  | AK022947  | 2293.625  | 2241.117  |
| NM_004300 | 16006.48 | 10175.4  | Z70714     | 4791.359  | 2923.82   | AL050029  | 2559.248  | 2677.743  |
| NM_006754 | 728.1    | 588.936  | AK021640   | 12133.52  | 8047.606  | AL049966  | 792.915   | 617.064   |
| NM_001127 | 3586.975 | 3957.979 | NM_016565  | 53880.875 | 55121.141 | NM_016203 | 1491.222  | 1839.537  |
| NM_012430 | 3322.382 | 2616.74  | CY3Cy5     | 6489.396  | 379.249   | NM_002759 | 4050.246  | 2113.468  |
| NM_003917 | 4829.005 | 4855.438 | BF310427   | 2557.849  | 3297.367  | NM_007271 | 2113.825  | 1786.941  |
| NM_007077 | 753.98   | 1074.013 | N94424     | 680.368   | 502.703   | NM_006255 | 5997.266  | 4639.226  |
| NM_002956 | 1746.886 | 2327.408 | AA045192   | 1048.941  | 539.801   | BE392143  | 4129.977  | 3716.552  |
| AB018739  | 1245.795 | 1212.209 | H45617     | 465.027   | 187.554   | NM_018132 | 2564.197  | 1459.616  |
| NM_006750 | 17845.56 | 17070.88 | M92642     | 1752.083  | 1137.523  | NM_003061 | 1364.154  | 1402.112  |
| NM_020164 | 4852.327 | 4113.252 | AA464532   | 438.564   | 211.64    | NM_018207 | 1834.686  | 1539.298  |
| AK023521  | 5510.039 | 5112.359 | H-U 44385  | 13414.07  | 10410.486 | NM_000345 | 8956.386  | 8075.784  |
| NM_014267 | 22258.26 | 18121.5  | ID 1654970 | 6598.22   | 4764.814  | NM_001862 | 48689.762 | 54049.082 |
| AL050187  | 1122.789 | 1423.029 | ID 2531132 | 8804.778  | 13876.887 | NM_006531 | 1681.481  | 1653.215  |
| NM_012387 | 15093.94 | 15372.38 | ID 4365538 | 689.404   | 719.807   | AB029021  | 7949.331  | 8845.265  |
| NM_014735 | 1318.909 | 1764.421 | BF125928   | 14656.678 | 13098.509 | NM_002101 | 42103.688 | 31689.713 |
| NM_004252 | 19960.36 | 27088.86 | BG571026   | 1573.776  | 1588.452  | NM_005423 | 651.059   | 1130.946  |
| AF172929  | 20490.28 | 18088.63 | AA489017   | 4911.962  | 3905.653  | Z36789    | 3455.973  | 4055.632  |

|           |          |          |           |           |           |           |           |           |
|-----------|----------|----------|-----------|-----------|-----------|-----------|-----------|-----------|
| NM_00639E | 8607.235 | 9112.794 | NM_01224E | 17383.986 | 17183.57  | J02874    | 965.859   | 1066.028  |
| L11285    | 483.384  | 524.892  | NM_13326E | 1815.917  | 1649.081  | BF310427  | 888.442   | 1241.552  |
| AK025655  | 3465.74  | 3265.823 | SR2       | 53901.578 | 52408.484 | N94424    | 402.746   | 524.265   |
| NM_00405E | 3475.563 | 2250.4   | SR4       | 15576.73  | 17243.727 | AA045192  | 704.144   | 536.211   |
| NM_00105E | 1416.005 | 2139.855 | SR10      | 31372.221 | 12392.807 | AI521645  | 1169.6    | 1738.806  |
| AY026461  | 2674.641 | 2975.724 | CY3Cy5    | 2186.646  | 177.335   | H45617    | 1370.692  | 3965.372  |
| AK025708  | 4078.172 | 3926.927 | NM_01745C | 2613.626  | 4866.026  | M92642    | 871.907   | 999.498   |
| NM_005564 | 11909.77 | 12322.84 | NM_00202E | 1715.776  | 2099.534  | AA464532  | 326.9     | 452.452   |
| NM_00450E | 3633.303 | 4571.544 | NM_00283E | 1156.341  | 890.702   | H-U 44385 | 13223.554 | 10056.182 |
| NM_00640E | 3311.421 | 3781.019 | AF190500  | 518.759   | 287.499   | BF125928  | 15691.474 | 11350.092 |
| AJ245946  | 365.119  | 394.634  | NM_00161E | 553.214   | 236.575   | BG571026  | 1113.208  | 803.924   |
| NM_00239C | 7258.164 | 8476.607 | NM_00527E | 16861.352 | 10657.817 | AA489017  | 5164.963  | 3695.117  |
| NM_00614E | 1128.924 | 849.809  | NM_000524 | 558.798   | 404.061   | AK022845  | 1047.58   | 1204.442  |
| NM_01491C | 2766.029 | 3034.315 | NM_00657E | 2211.865  | 2008.93   | NM_003004 | 561.851   | 498.606   |
| AK001064  | 4467.534 | 4484.101 | NM_01864E | 687.232   | 511.156   | S77835    | 378.584   | 442.994   |
| AB029031  | 7815.858 | 8627.569 | AB035266  | 6599.057  | 5631.5    | NM_00298E | 451.003   | 584.31    |
| NM_001294 | 7206.335 | 7953.671 | NM_003744 | 3296.286  | 2411.989  | AB018347  | 5236.552  | 5747.102  |
| NM_014241 | 7843.51  | 8962.493 | NM_00637E | 16081.854 | 10148.143 | AB033073  | 2136.549  | 2360.365  |
| AF302786  | 4760.268 | 4251.144 | NM_01813E | 2249.572  | 3283.757  | NM_003284 | 1068.181  | 1380.55   |
| AL122083  | 2816.327 | 2413.72  | NM_003061 | 1771.938  | 1706.943  | NM_01815E | 733.338   | 729.397   |
| NM_00505E | 14680.65 | 13801.6  | NM_018207 | 3142.163  | 2712.976  | NM_00031E | 4011.462  | 4311.658  |
| AF319476  | 2027.431 | 2416.988 | NM_006531 | 3234.216  | 3828.849  | NM_003257 | 2218.214  | 2589.119  |
| AK001913  | 6732.15  | 7552.988 | AB029021  | 11454.882 | 14454.967 | AK001379  | 2135.382  | 2040.414  |
| NM_017737 | 1141.171 | 1299.327 | NM_00542E | 758.247   | 742.356   | NM_01745C | 1814.131  | 1755.693  |
| NM_00429E | 2463.909 | 2426.457 | Z36789    | 3999.241  | 5153.146  | NM_00202E | 1421.56   | 1786.713  |
| NM_015484 | 5245.713 | 5476.056 | J02874    | 2110.992  | 2272.767  | NM_00283E | 528.532   | 796.108   |
| NM_01804E | 2645.793 | 2586.175 | AF070525  | 19098.379 | 30367.162 | NM_00161E | 605.292   | 1108.691  |
| NM_01331E | 1004.339 | 1441.693 | NM_001177 | 8937.583  | 7459.569  | NM_005904 | 428.374   | 614.343   |
| M20701    | 4402.486 | 4795.897 | NM_014447 | 1355.978  | 1174.389  | NM_000524 | 731.789   | 744.475   |
| NM_00291E | 1655.985 | 1307.206 | NM_006691 | 1405.122  | 630.967   | NM_00657E | 1293.366  | 891.772   |
| NM_013284 | 4121.331 | 3999.869 | NM_00150E | 729.487   | 353.021   | NM_01864E | 779.719   | 790.131   |
| NM_00673E | 3653.657 | 4454.399 | NM_00371C | 2759.885  | 1352.499  | AB035266  | 1966.226  | 1243.828  |
| NM_013274 | 6164.831 | 5495.402 | Z83805    | 887.724   | 753.019   | NM_003744 | 2647.024  | 2104.092  |
| AL157500  | 489.047  | 517.516  | NM_00466E | 1076.667  | 934.116   | NM_00637E | 13795.813 | 11074.271 |
| AK024955  | 5175.569 | 5596.894 | NM_003614 | 2049.674  | 1652.435  | NM_014404 | 1378.566  | 1016.684  |
| AF169693  | 618.86   | 493.211  | NM_014257 | 7105.405  | 5174.818  | NM_01871E | 648.066   | 676.672   |
| L23206    | 1953.636 | 2630.053 | NM_00484E | 2311.692  | 2054.34   | NM_015947 | 5147.896  | 4627.812  |
| NM_01219E | 9778.323 | 8831.501 | AK022845  | 1610.702  | 1187.276  | NM_00204E | 11515.758 | 11047.679 |
| NM_00629E | 4285.245 | 4664.42  | NM_003004 | 417.265   | 506.194   | AB028944  | 706.054   | 1008.332  |
| NM_00722E | 3881.835 | 4680.522 | S77835    | 542.864   | 931.844   | AJ006268  | 1728.264  | 3124.373  |
| AB011105  | 843.021  | 804.649  | NM_003284 | 2435.544  | 2501.647  | AF190864  | 5419.189  | 8606.847  |
| NM_00221E | 679.942  | 428.989  | NM_01815E | 894.677   | 1344.276  | NM_00277E | 3685.479  | 4708.425  |
| NM_004814 | 10628.92 | 9369.351 | NM_012461 | 5653.914  | 10112.299 | L40397    | 17973.783 | 22214.75  |
| AF307080  | 374.649  | 858.402  | AK001379  | 2233.248  | 2698.799  | NM_02019E | 8208.364  | 7346.771  |
| NM_004057 | 431.697  | 798.236  | NM_00707E | 3648.203  | 6211.506  | AF070525  | 7423.642  | 7635.292  |
| NM_018971 | 547.148  | 1081.597 | NM_01232C | 4062.057  | 4532.831  | NM_001177 | 4654.497  | 7113.732  |
| K03175    | 626.853  | 813.903  | NM_00019E | 813.697   | 539.826   | NM_014447 | 1740.647  | 1916.849  |
| NM_00326E | 850.581  | 674.745  | NM_01833E | 6773.831  | 5443.449  | NM_00235E | 104.762   | 455.762   |
| NM_003711 | 2504.774 | 2152.914 | NM_00674E | 42500.727 | 31645.189 | NM_006691 | 939.581   | 1380.254  |
| NM_00649E | 12768.85 | 10146.2  | NM_00027E | 1180.582  | 1241.873  | NM_00466E | 1699.503  | 1453.996  |
| NM_00082E | 403.258  | 396.319  | AK000037  | 1369.186  | 1143.03   | NM_014257 | 2459.789  | 1739.907  |
| NM_00482E | 509.445  | 511.948  | NM_01476C | 3441.625  | 2464.727  | NM_001140 | 526.125   | 411.898   |
| NM_013314 | 465.412  | 695.4    | NM_01839E | 9808.676  | 8742.827  | NM_00484E | 2211.382  | 1794.438  |

|           |          |          |            |           |           |           |           |           |
|-----------|----------|----------|------------|-----------|-----------|-----------|-----------|-----------|
| NM_002072 | 3398.213 | 4939.795 | NM_002560  | 15525.639 | 12923.113 | NM_005204 | 3425.656  | 2907.672  |
| NM_003182 | 531.519  | 581.892  | NM_014404  | 2887.758  | 2667.186  | NM_016203 | 1537.963  | 1885.603  |
| BE904126  | 4291.371 | 4486.114 | NM_018713  | 984.143   | 1085.865  | NM_002759 | 3962.622  | 2820.747  |
| AF272380  | 11141.25 | 10129.28 | NM_015947  | 6298.384  | 7079.974  | NM_007271 | 1906.073  | 2219.773  |
| NM_004431 | 1020.695 | 1261.748 | NM_002042  | 34690.426 | 31094.164 | NM_006255 | 6446.876  | 8311.509  |
| NM_002012 | 2187.299 | 2253.888 | AB028944   | 932.337   | 897.388   | AB037718  | 4672.337  | 7786.017  |
| NM_002070 | 41463.62 | 44365.1  | AJ006268   | 1222.476  | 1356.518  | AL389994  | 1400.004  | 1622.69   |
| AF227969  | 5062.494 | 6186.836 | M74089     | 6797.645  | 8399.58   | NM_003909 | 4975.077  | 5792.421  |
| AF116657  | 579.418  | 551.378  | NM_002779  | 4714.274  | 6744.794  | NM_001277 | 6140.135  | 7169.149  |
| NM_004102 | 485.965  | 358.144  | L40397     | 27181.686 | 35024.93  | NM_003659 | 6661.601  | 6831.993  |
| NM_003944 | 3615.797 | 3851.127 | NM_020199  | 12742.918 | 16017.514 | NM_007072 | 1953.157  | 2437.311  |
| NM_002893 | 1639.738 | 1629.77  | AA098879   | 984.817   | 1030.394  | NM_012320 | 2533.135  | 3094.773  |
| NM_002393 | 3253.025 | 3076.706 | NM_000403  | 6487.602  | 2743.214  | NM_018209 | 3889.339  | 5294.92   |
| AB014600  | 1887.836 | 2465.613 | NM_018127  | 12621.043 | 8689.095  | NM_000196 | 602.932   | 823.898   |
| NM_018312 | 3866.967 | 6153.077 | AB020677   | 6108.014  | 4024.605  | NM_006745 | 33937.32  | 26063.428 |
| X98259    | 1094.701 | 1120.615 | AB033097   | 3573.709  | 2449.91   | AK000037  | 1377.53   | 561.021   |
| NM_014792 | 454.087  | 304.203  | NM_000135  | 1549.23   | 1217.363  | NM_014760 | 3287.788  | 2304.697  |
| X98260    | 4510.937 | 4384.094 | AJ223948   | 4914.097  | 5391.283  | NM_018399 | 826.084   | 784.659   |
| NM_007217 | 17823.6  | 14465.21 | NM_016219  | 1038.695  | 1008.256  | NM_002560 | 5868.455  | 5104.495  |
| NM_014777 | 3438.573 | 3177.7   | AK022947   | 1915.559  | 1537.563  | NM_000787 | 680.187   | 577.995   |
| NM_001102 | 10831.48 | 9054.946 | AL050029   | 2231.724  | 1870.854  | U57962    | 3060.732  | 4266.868  |
| NM_002819 | 58554.01 | 57112.15 | AL049966   | 518.047   | 554.056   | NM_016176 | 8082.749  | 7726.948  |
| NM_001937 | 788.781  | 672.645  | NM_005204  | 3692.174  | 3108.723  | NM_017895 | 5628.125  | 6024      |
| AK024778  | 1518.886 | 1416.751 | NM_016203  | 2293.786  | 2172.741  | NM_004610 | 1750.565  | 3292.569  |
| AK021608  | 4350.769 | 3737.852 | NM_002759  | 3441.957  | 4115.823  | NM_001612 | 2583.222  | 3859.356  |
| NM_006044 | 8263.469 | 6457.181 | NM_007271  | 2051.6    | 2395.568  | AK027002  | 2335.187  | 3551.753  |
| AK025498  | 3856.26  | 3671.313 | NM_006255  | 5821.68   | 6007.697  | AB025254  | 2081.708  | 3013.847  |
| NM_001395 | 612.452  | 808.573  | BE392143   | 5426.822  | 6198.834  | NM_004081 | 1454.264  | 2428.683  |
| NM_002069 | 12045.24 | 16322.32 | AL389994   | 1995.826  | 4057.739  | NM_000025 | 11498.386 | 14312.622 |
| NM_013339 | 4733.144 | 4146.281 | NM_003909  | 6572.95   | 9722.473  | D38521    | 2756.793  | 2701.604  |
| NM_014671 | 2836.049 | 3259.827 | NM_001277  | 9644.783  | 13976.698 | NM_018127 | 13013.614 | 13519.842 |
| NM_005656 | 1989.407 | 1897.572 | NM_003659  | 7568.613  | 9462.545  | AB020677  | 2349.236  | 2449.706  |
| NM_006012 | 17197.86 | 17976.36 | Z36789     | 2448.723  | 1004.378  | AB033097  | 1562.522  | 1599.02   |
| NM_002151 | 1143.866 | 1565.668 | J02874     | 2581.351  | 1303.208  | NM_000135 | 1455.357  | 1036.088  |
| NM_014889 | 3403.809 | 5253.027 | BF310427   | 2175.799  | 1229.374  | AJ223948  | 4534.5    | 3331.526  |
| AF173935  | 3333.738 | 2056.022 | N94424     | 740.803   | 492.163   | NM_016219 | 1466.492  | 858.954   |
| AK025322  | 2229.517 | 2439.614 | AA045192   | 1671.134  | 1056.213  | AK022947  | 2518.82   | 2066.517  |
| NM_017887 | 11447.73 | 7980.263 | H45617     | 534.878   | 381.151   | AL050029  | 2277.985  | 1893.5    |
| AF007152  | 3339.785 | 2156.512 | M92642     | 1743.679  | 1608.745  | AL049966  | 677.229   | 341.67    |
| NM_017575 | 1585.207 | 1086.371 | H-U 44385  | 14340.808 | 11231.73  | NM_004063 | 412.69    | 421.217   |
| NM_014423 | 10748.39 | 8882.372 | ID 1654970 | 6956.712  | 4908.369  | AB040976  | 5656.446  | 7678.126  |
| NM_018083 | 1799.566 | 2056.344 | ID 2531132 | 6867.633  | 5768.84   | NM_007361 | 766.9     | 190.628   |
| AL110188  | 4361.905 | 4114.16  | ID 4365538 | 566.185   | 677.852   | NM_018641 | 4139.496  | 6423.653  |
| D70834    | 17338.35 | 17543.95 | BF125928   | 16025.333 | 15961.481 | U49089    | 1119.419  | 2010.001  |
| NM_000970 | 63046.31 | 59679.53 | BG571026   | 1630.642  | 1210.689  | NM_002221 | 2697.181  | 5500.243  |
| NM_033289 | 820.024  | 715.069  | AA489017   | 5418.53   | 4671.137  | NM_002371 | 1877.371  | 5796.099  |
| AK000102  | 1842.913 | 1566.809 |            | 911.354   | 1423.043  | NM_002562 | 793.089   | 1405.157  |
| AB040916  | 2901.293 | 3444.059 | NM_000319  | 4013.739  | 4594.456  | AK024502  | 4065.226  | 4712.835  |
| NM_005587 | 2370.671 | 2697.621 | NM_012461  | 4234.584  | 2685.851  | NM_001124 | 1253.159  | 2289.405  |
| AF038362  | 2182.006 | 1211.979 | AK001379   | 1669.576  | 1046.39   | NM_004586 | 3417.82   | 4594.681  |
| NM_005195 | 2943.546 | 2499.319 | NM_017450  | 1775.267  | 1278.718  | NM_004844 | 5785.644  | 10055.498 |
| NM_005481 | 2643.167 | 3003.123 | NM_002023  | 1600.91   | 1209.165  | NM_004180 | 4686.613  | 4513.959  |
| NM_004715 | 4375.678 | 4598.205 | NM_002839  | 1405.243  | 1291.277  | NM_004786 | 38206.941 | 34465.531 |

|           |          |          |           |           |           |           |           |           |
|-----------|----------|----------|-----------|-----------|-----------|-----------|-----------|-----------|
| L40392    | 3343.435 | 2559.103 | AF190500  | 807.484   | 733.974   | AF302109  | 1094.099  | 1133.918  |
| BF541482  | 524.831  | 430.076  | NM_001616 | 620.403   | 552.904   | AL117485  | 5091.211  | 4493.436  |
| NM_020366 | 5159.791 | 4446.396 | NM_005273 | 16803.957 | 13269.86  | NM_003505 | 806.514   | 722.271   |
| AF086497  | 2096.135 | 1749.173 | NM_000524 | 580.016   | 547.147   | NM_007191 | 867.875   | 541.135   |
| NM_020141 | 6223.545 | 5560.339 | NM_006576 | 2475.687  | 2388.361  | NM_000840 | 613.262   | 498.026   |
| NM_006482 | 997.716  | 1148.18  | NM_018645 | 670.027   | 646.112   | AF034102  | 31471.055 | 26410.557 |
| NM_003779 | 502.675  | 466.272  | AB035266  | 6234.845  | 6364.322  | AJ008142  | 15130.7   | 16527.648 |
| NM_003635 | 2206.771 | 3038.396 | NM_003744 | 3126.449  | 2494.176  | AL035289  | 411.566   | 573.104   |
| NM_000662 | 5039.914 | 3753.047 | NM_006378 | 15821.32  | 12582.892 | NM_001343 | 4140.747  | 7165.395  |
| NM_000292 | 1809.055 | 1800.487 | NM_018207 | 3186.927  | 4379.958  | NM_018461 | 4628.919  | 6463.021  |
| NM_003689 | 16660.43 | 14422.92 | NM_000345 | 23649.779 | 27552.904 | AF235023  | 9469.718  | 9289.268  |
| NM_016173 | 1064.703 | 1373.279 | NM_001862 | 56555.398 | 56698.965 | NM_006910 | 4745.866  | 6170.843  |
| NM_002875 | 7063.396 | 7397.005 | NM_006531 | 2738.117  | 2924.435  | AF162667  | 2967.102  | 3939.32   |
| NM_004427 | 6672.413 | 10129.1  | M74089    | 6782.775  | 13064.803 | AF303378  | 5914.189  | 4643.114  |
| U90549    | 10069.87 | 12440.46 | AF190864  | 11024.031 | 18988.623 | NM_016037 | 16994.805 | 9698.802  |
| NM_013240 | 15079.43 | 25820.34 | NM_002779 | 4756.516  | 4709.143  | NM_000043 | 8992.562  | 6925.013  |
| NM_015874 | 25719.14 | 24412.22 | L40397    | 19473.416 | 10556.627 | NM_015965 | 649.45    | 396.912   |
| NM_004965 | 45168.37 | 44892.38 | NM_020198 | 11317.477 | 5949.27   | NM_000417 | 4003.722  | 3161.427  |
| AF312393  | 7734.588 | 7094.52  | AA098879  | 781.479   | 524.582   | NM_020356 | 462.463   | 200.764   |
| AF272898  | 3445.629 | 2959.43  | AF070525  | 12529.355 | 8200.985  | NM_018235 | 27036.484 | 22920.596 |
| AB032951  | 2589.255 | 2012.494 | NM_001177 | 6354.223  | 2769.872  | NM_012104 | 10402.02  | 11661.099 |
| NM_003417 | 1422.221 | 1050.173 | NM_014447 | 1620.193  | 1326.598  | NM_006144 | 34475.52  | 27057.084 |
| NM_005149 | 7109.915 | 5039.036 | NM_002356 | 423.821   | 254.974   | AL136549  | 10702.638 | 17443.082 |
| AK024073  | 980.713  | 907.454  | NM_006691 | 1613.419  | 1240.565  | NM_012168 | 1225.933  | 2328.919  |
| AK022223  | 731.695  | 928.287  | NM_001505 | 973.62    | 826.105   | NM_007038 | 1419.5    | 1642.367  |
| NM_005887 | 5726.457 | 5013.616 | NM_003710 | 2933.088  | 2209.945  | AF311324  | 9189.59   | 9154.012  |
| AK024921  | 674.29   | 960.213  | Z83805    | 871.038   | 819.415   | AF124433  | 1184.751  | 1079.725  |
| AK026103  | 3376.431 | 3672.314 | NM_004666 | 1163.409  | 1194.728  | AK001647  | 874.316   | 1155.104  |
| NM_016353 | 3087.339 | 4654.337 | NM_003614 | 1859.841  | 1652.147  | AF036144  | 379.187   | 314.545   |
| AK022567  | 1625.797 | 1618.407 | NM_014257 | 7194.726  | 5708.54   | NM_005032 | 1414.156  | 1243.319  |
| S77357    | 1004.712 | 1086.906 | NM_001140 | 520.545   | 746.15    | NM_004160 | 6381.809  | 4987.908  |
| AK023450  | 900.164  | 1029.923 | NM_004843 | 2542.635  | 2243.011  | AL109677  | 1790.697  | 1418.938  |
| AL080280  | 742.873  | 584.396  | AK022845  | 1459.237  | 1366.549  | NM_003941 | 24828.846 | 20526.078 |
| AB028947  | 791.821  | 656.142  | S77835    | 661.06    | 897.39    | AF177909  | 801.704   | 595.827   |
| AF035314  | 1338.024 | 1675.887 | NM_002985 | 798.503   | 1339.949  | NM_002664 | 1443.03   | 1308.724  |
| NM_018036 | 1619.673 | 2915.62  | AB018347  | 10152.33  | 11944.966 | AB018271  | 1636.684  | 1159.798  |
| AF052087  | 2309.988 | 4101.278 | AB033073  | 4674.497  | 5277.164  | AL137665  | 2694.101  | 2056.091  |
| AF007143  | 713.405  | 832.539  | NM_005813 | 2549.887  | 5226.609  | NM_016434 | 1073.581  | 944.121   |
| AF147417  | 402.792  | 412.12   | AB037718  | 8614.347  | 18008.385 | U36561    | 59580.32  | 73871.375 |
| AK023656  | 1053.978 | 997.178  | AL389994  | 1315.164  | 1753.849  | NM_005634 | 2086.648  | 1881.569  |
| AK022989  | 751.275  | 737.065  | NM_003909 | 4635.906  | 2199.131  | NM_017757 | 3059.069  | 3202.419  |
| AK001604  | 3140.565 | 2981.166 | NM_001277 | 8944.259  | 5484.805  | NM_002146 | 15478.467 | 18034.879 |
| AK021619  | 789.696  | 1056.892 | NM_003659 | 6583.281  | 4657.984  | AB007892  | 1639.857  | 1983.735  |
| AK025872  | 586.443  | 500.32   | NM_007072 | 2150.862  | 1699.281  | AB037748  | 1252.851  | 1646.996  |
| AF131762  | 29458.02 | 20775.53 | NM_012320 | 3731.51   | 2452.203  | AB002306  | 2630.971  | 4042.065  |
| AY007089  | 2742.076 | 3818.63  | NM_018208 | 3801      | 2399.091  | NM_001300 | 5019.354  | 5167.212  |
| AK021816  | 458.777  | 605.036  | NM_015929 | 4696.458  | 4775.231  | NM_012472 | 1058.506  | 1062.85   |
| AK024018  | 332.412  | 491.495  | U90653    | 4609.94   | 4067.501  | NM_018187 | 7502.412  | 11838.383 |
| D43770    | 11517.56 | 12515.41 | NM_000196 | 730.761   | 556.525   | NM_018282 | 11530.229 | 12444.011 |
| AF085960  | 822.744  | 775.498  | NM_018339 | 6740.446  | 6670.062  | BC019932  | 1923.921  | 2293.835  |
| AF087976  | 254.8    | 484.434  | NM_006745 | 43269.551 | 38974.875 | AF114818  | 3104.173  | 2414.472  |
| AK021519  | 2180.824 | 1550.31  | NM_000275 | 984.809   | 1201.557  | AK025106  | 2066.169  | 2041.013  |
| NM_014254 | 4180.222 | 4106.664 | AK000037  | 1592.16   | 1255.87   | NM_020144 | 2157.597  | 1763.718  |



|           |          |          |            |           |           |           |           |           |
|-----------|----------|----------|------------|-----------|-----------|-----------|-----------|-----------|
| AF086010  | 460.116  | 666.933  | NM_014760  | 3035.169  | 3012.931  | NM_003103 | 5706.41   | 4202.326  |
| U09197    | 4119.987 | 4035.903 | NM_018398  | 1851.459  | 2159.216  | NM_015340 | 5364.866  | 3499.856  |
| U50529    | 437.036  | 599.707  | NM_002560  | 23060.574 | 21226.143 | NM_006451 | 4907.43   | 3265.273  |
| U66050    | 355.741  | 574.151  | NM_014404  | 2888.377  | 3157.118  | NM_002094 | 3155.747  | 1928.801  |
| Z36800    | 340.047  | 727.661  | NM_018713  | 981.825   | 1052.251  | NM_002937 | 1890.616  | 1534.879  |
| U15553    | 1429.406 | 1126.177 | NM_015947  | 6396.702  | 8137.658  | NM_003191 | 5074.924  | 2998.363  |
| AK024734  | 5706.83  | 4214.718 | NM_002042  | 31524.289 | 32521.514 | AL137476  | 3896.236  | 4296.989  |
| NM_017741 | 1663.159 | 1332.107 | AB028944   | 1118.116  | 1105.29   | AF052174  | 2464.266  | 2922.392  |
| AL049332  | 476.175  | 556.901  | AJ006268   | 1179.206  | 1478.865  | AF070590  | 787.8     | 1001.185  |
| AK000144  | 1875.427 | 2102.862 | NM_012245  | 24671.887 | 37855.793 | NM_000761 | 40045.91  | 44806.734 |
| AK022275  | 585.892  | 555.087  |            | 1288.054  | 911.265   | NM_020142 | 2153.974  | 2595.72   |
| AK000942  | 1586.376 | 3134.856 | NM_000025  | 21333.113 | 15237.937 | NM_000774 | 3669.528  | 5548.08   |
| NM_016345 | 521.921  | 713.879  | D38521     | 2820.177  | 2299.044  | NM_006943 | 6783.733  | 4493.553  |
| AK026036  | 1617.989 | 1805.331 | NM_000403  | 7265.582  | 6283.49   | NM_006741 | 3531.918  | 2981.664  |
| AK023422  | 351.095  | 457.147  | NM_018127  | 14211.929 | 12893.593 | NM_014166 | 9667.855  | 6471.57   |
| AK022796  | 1606.657 | 1527.589 | AB020677   | 7152.367  | 5501.445  | AL117606  | 5121.224  | 4240.68   |
| AK095193  | 472.984  | 648.64   | AB033097   | 3812.129  | 3132.871  | NM_012330 | 1864.228  | 1283.574  |
| AL122088  | 3263.693 | 1770.679 | NM_000135  | 1743.764  | 1717.714  | AF294278  | 1231.555  | 887.865   |
| AF116633  | 292.589  | 400.007  | AJ223948   | 5110.097  | 5812.426  | NM_018211 | 2662.157  | 1904.515  |
| AF119912  | 542.624  | 526.634  | NM_016218  | 1112.202  | 1251.656  | NM_014520 | 3003.575  | 2047.087  |
| AL137518  | 497.065  | 310.243  | AK022947   | 2505.286  | 2690.966  | NM_002616 | 4101.426  | 3544.121  |
| AK023134  | 188.844  | 392.276  | AL050029   | 2413.673  | 1977.922  | AK025712  | 9872.473  | 6734.518  |
| AK022556  | 574.837  | 609.042  | AL049966   | 607.271   | 617.096   | AK026375  | 3285.593  | 4529.555  |
| AK023437  | 867.847  | 930.344  | NM_005204  | 4182.296  | 4633.735  | NM_014710 | 587.29    | 986.779   |
| AK023822  | 368.114  | 534.968  | NM_016203  | 2155.499  | 1874.724  | U85992    | 1249.02   | 1444.371  |
| AK024147  | 331.241  | 612.359  | NM_002755  | 3418.146  | 4256.571  | AL110152  | 546.006   | 733.936   |
| AK022897  | 1739.173 | 1461.754 | NM_007271  | 2409.675  | 2762.123  | AF131745  | 3449.741  | 4803.923  |
| AK023898  | 1478.352 | 1440.203 | NM_006255  | 6594.403  | 7612.642  | AL117565  | 3444.043  | 3540.33   |
| NM_019040 | 8437.127 | 9736.284 | BE392143   | 4795.06   | 5931.804  | AF147305  | 564.728   | 935.691   |
| NM_005978 | 1497.235 | 1715.737 | NM_018132  | 3365.984  | 10378.252 | AF143882  | 1073.379  | 1008.625  |
| Y16711    | 1827.667 | 3019.493 | NM_018207  | 2855.577  | 2670.414  | AF086176  | 438.211   | 722.264   |
| AJ272179  | 4323.481 | 5208.785 | NM_000345  | 16949.207 | 8006.304  | AF086232  | 686.777   | 385.773   |
| AJ007015  | 4846.773 | 3320.47  | NM_001862  | 46177.176 | 25395.174 | NM_017742 | 1335.48   | 1188.852  |
| AL049317  | 3197.465 | 3719.06  | NM_006531  | 3614.752  | 1800.044  | NM_005108 | 1115.678  | 1204.554  |
| AL050090  | 2273.042 | 2814.245 | AB029021   | 13512.316 | 9173.53   | AK022292  | 2287.834  | 2464.046  |
| AF086309  | 1631.863 | 1851.987 | NM_002101  | 36147.43  | 27019.281 | AB051436  | 3392.903  | 2534.393  |
| AK026279  | 4740.855 | 4832.772 | NM_005423  | 543.611   | 590.405   | AK026482  | 5977.329  | 4952.875  |
| AF130094  | 4910.439 | 4282.268 | Z36789     | 3000.207  | 2325.279  | AL137473  | 3389.403  | 2399.919  |
| AK026673  | 2767.749 | 2718.176 | J02874     | 2784.137  | 2618.288  | AJ001873  | 1767.047  | 1429.714  |
| NM_005452 | 5105.956 | 4888.9   | BF310427   | 2252.321  | 2591.873  | AB026054  | 407.783   | 446.286   |
| AF170935  | 14182.62 | 15693.51 | N94424     | 804.621   | 759.756   | AK022604  | 2738.418  | 5439.75   |
| AK025218  | 1010.249 | 1168.589 | AA045192   | 1483.497  | 1344.9    | U66048    | 948.307   | 1471.191  |
| AJ227899  | 1574.009 | 1568.784 | H45617     | 598.931   | 336.913   | AK023401  | 4058.89   | 3846.868  |
| AF161371  | 11617.23 | 15161.77 | M92642     | 2042.281  | 1816.88   | AK001865  | 862.032   | 1118.835  |
| AK022464  | 529.367  | 652.706  | AA464532   | 567.167   | 468.76    | AK024035  | 13902.357 | 14994.407 |
| AF086230  | 879.623  | 675.645  | H-U 44385  | 15439.474 | 11779.975 | AL049331  | 374.18    | 747.35    |
| AK023408  | 7929.163 | 5651.789 | ID 1654970 | 7598.707  | 5885.254  | AL117663  | 895.612   | 684.912   |
| U84509    | 729.688  | 1305.097 | ID 2531132 | 6464.047  | 7439.689  | NM_014293 | 1513.039  | 1516.06   |
| AL110201  | 348.617  | 512.932  | ID 4365538 | 775.511   | 754.439   | AK024432  | 2395.029  | 1835.528  |
| AK002036  | 6266.668 | 6891.604 | AA485665   | 465.051   | 455.642   | AL137513  | 853.749   | 886.562   |
| U84512    | 461.851  | 724.064  | BF125928   | 16356.121 | 16701.543 | AF088001  | 925.919   | 703.017   |
| AK025775  | 5165.749 | 6237.35  | BG571026   | 1584.001  | 1556.977  | NM_018067 | 5350.908  | 4802.497  |
| AB046791  | 1306.011 | 1869.32  | AA489017   | 5206.849  | 5012.833  | NM_018956 | 11627.639 | 9109.094  |

|            |          |          |           |           |           |           |           |           |
|------------|----------|----------|-----------|-----------|-----------|-----------|-----------|-----------|
| AF043469   | 1033.065 | 3238.721 | AK022845  | 2305.126  | 4167.782  | NM_014787 | 2594.687  | 2209.568  |
| AL109671   | 728.911  | 722.266  | NM_003004 | 737.963   | 1591.579  | AL122109  | 739.408   | 650.608   |
| NM_012375  | 465.182  | 271.695  | S77835    | 337.103   | 133.333   | AF074988  | 1903.918  | 1377.523  |
| AK022008   | 1695.842 | 1407.279 | NM_002985 | 416.551   | 365.875   | AK024946  | 1659.189  | 748.833   |
| NM_018186  | 3619.27  | 4452.298 | AB018347  | 9432.151  | 6036.907  | AK001432  | 895.387   | 1189.752  |
| AL080188   | 4655.549 | 4849.259 | AB033073  | 5169.151  | 3020.187  | AL133568  | 6292.538  | 7194.461  |
| T99941     | 1448.394 | 1052.572 | NM_003284 | 3019.399  | 1862.623  | AF009265  | 2237.961  | 2918.151  |
| AF113678   | 762.009  | 481.731  | NM_018152 | 982.728   | 763.17    | AF009309  | 1566.673  | 1777.116  |
| AL137313   | 1671.231 | 1384.607 | NM_000319 | 4164.037  | 3827.686  | NM_002360 | 2204.361  | 2472.646  |
| Z83951     | 770.6    | 715.219  | NM_003257 | 234.931   | 384.947   | AF009322  | 815.929   | 712.461   |
| AL833529   | 421.264  | 428.553  | NM_012461 | 4919.679  | 5245.349  | AF056425  | 1060.825  | 1336.075  |
| AB002363   | 8968.85  | 8284.935 | AK001379  | 2010.822  | 2080.918  | AF090893  | 616.888   | 521.466   |
| NM_005284  | 627.764  | 522.588  | NM_017450 | 2012.121  | 2018.309  | AK001945  | 931.881   | 1063.042  |
| AF086351   | 3320.095 | 3223.961 | NM_002023 | 1805.093  | 1328.774  | AK021541  | 797.024   | 703.41    |
| D83199     | 22131.47 | 24262.93 | NM_002839 | 1202.793  | 1386.664  | AK021630  | 564.843   | 679.556   |
| AK025957   | 2416.808 | 2670.619 | AF190500  | 835.062   | 788.44    | AK021831  | 898.321   | 954.029   |
| Y16708     | 623.324  | 821.305  | NM_001616 | 567.432   | 601.909   | AK025650  | 1654.439  | 1566.456  |
| AL157453   | 5225.438 | 6504.08  | NM_005904 | 501.409   | 377.482   | AK026401  | 817.645   | 908.946   |
| X64974     | 8279.028 | 9852.631 | NM_005273 | 18359.727 | 14592.256 | AK026773  | 519.424   | 444.129   |
| NM_000834  | 13911.99 | 18657.02 | NM_000524 | 606.043   | 665.249   | AF086158  | 7497.806  | 7979.621  |
| NM_006485  | 1696.153 | 2161.857 | NM_006576 | 2013.977  | 1832.052  | AF086050  | 4962.92   | 6820.361  |
| NM_012459  | 4258.111 | 4696.632 | NM_018645 | 821.095   | 638.775   | AF147375  | 1330.523  | 1520.057  |
| NM_012360  | 654.608  | 874.709  | AB035266  | 6033.792  | 5880.587  | X51524    | 6158.283  | 6679.355  |
| AL137268   | 3211.836 | 4844.731 | NM_003744 | 3453.275  | 3290.187  | AK025759  | 2755.98   | 3343.276  |
| AK022398   | 324.27   | 340.982  | NM_006378 | 15967.302 | 14046.543 | AK024105  | 640.709   | 539.08    |
| AK024109   | 2179.869 | 2020.12  | NM_014404 | 4570.989  | 8872.036  | AJ238556  | 782.225   | 440.738   |
| AF088048   | 3187.938 | 2646.07  | NM_018713 | 1475.043  | 3092.988  | AK021516  | 2057.726  | 2395.449  |
| AK001143   | 2923.395 | 2539.468 | NM_015947 | 5599.851  | 3554.322  | Z70699    | 375.352   | 490.133   |
| AK001701   | 4676.878 | 3700.871 | NM_002042 | 28979.262 | 17939.018 | AL049919  | 698.947   | 594.902   |
| AB007978   | 700.722  | 329.364  | AB028944  | 837.46    | 847.543   | AK022276  | 870.457   | 855.12    |
| AF217970   | 1292.414 | 980.738  | AJ006268  | 1088.013  | 971.607   | AK026881  | 498.346   | 355.654   |
| AF086297   | 983.752  | 932.916  | M74089    | 6193.711  | 5228.197  | AL133653  | 280.688   | 346.723   |
| AK025455   | 3474.142 | 2878.354 | AF190864  | 7663.029  | 5120.083  | AK023774  | 974.179   | 833.526   |
| AK026799   | 1983.411 | 1485.496 | NM_002779 | 5152.732  | 4556.794  | AL049377  | 870.861   | 618.163   |
| NM_014860  | 1159.251 | 767.899  | L40397    | 24819.027 | 21543.164 | NM_003544 | 53017.652 | 55302.012 |
| AK022549   | 2189.639 | 2341.192 | NM_020198 | 13743.45  | 11673.277 | U17640    | 490.989   | 435.732   |
| NM_018157  | 1354.005 | 1086.498 | AA098879  | 958.619   | 920.164   | AK001187  | 1865.179  | 2358.517  |
| Z70714     | 5745.247 | 5522.679 | AF070525  | 12395.563 | 11981.027 | NM_003529 | 8772.726  | 7647.976  |
| AK021640   | 919.481  | 820.187  | NM_001177 | 6869.069  | 3060.666  | AF056436  | 2489.43   | 2205.741  |
| NM_016565  | 28064.56 | 29446.47 | NM_014447 | 1610.743  | 1501.995  | AB023191  | 1204.431  | 892.228   |
| CY3Cy5     | 1201.021 | 86.465   | NM_002356 | 458.385   | 391.674   | AK027212  | 5554.905  | 4064.168  |
| BF310427   | 1129.175 | 869.179  | NM_006691 | 1325.318  | 1301.082  | X56197    | 986.128   | 574.451   |
| N94424     | 406.783  | 711.674  | NM_001505 | 922.955   | 1046.6    | NM_005199 | 2988.112  | 2475.965  |
| AA045192   | 330.076  | 375.752  | NM_003710 | 3025.409  | 2484.964  | U90905    | 910.015   | 806.529   |
| AI521645   | 264.895  | 284.84   | Z83805    | 1068.16   | 1009.062  | AF161422  | 2882.049  | 2389.622  |
| H45617     | 227.805  | 679.345  | NM_004666 | 1000.127  | 1189.815  | AL137384  | 1936.248  | 736.47    |
| AA464532   | 337.281  | 408.813  | NM_003614 | 1774.726  | 1741.397  | AF070619  | 1111.694  | 763.541   |
| H-U 44385  | 11005.55 | 10657.85 | NM_014257 | 7134.211  | 6838.416  | NM_020153 | 852.109   | 1705.072  |
| ID 1654970 | 4590.491 | 5911.617 | NM_001140 | 526.542   | 774.789   | NM_005321 | 3789.775  | 2644.142  |
| ID 2531132 | 7001.73  | 7507.705 | NM_004843 | 2512.724  | 2654.106  | AF073520  | 1804.156  | 1382.719  |
| AA485665   | 336.04   | 205.479  | NM_005204 | 5672.578  | 11963.771 | NM_014015 | 5570.885  | 5260.251  |
| BF125928   | 17091.82 | 19389.11 | NM_016203 | 2734.227  | 4573.358  | AK026839  | 643.125   | 782.074   |
| BG571026   | 1237.683 | 1438.945 | NM_002759 | 3326.113  | 2104.49   | AJ008123  | 2862.901  | 2115.625  |

|           |          |          |           |           |           |           |           |           |
|-----------|----------|----------|-----------|-----------|-----------|-----------|-----------|-----------|
| AA489017  | 6392.348 | 8933.817 | NM_007271 | 2193.208  | 1794.292  | AJ008156  | 1238.544  | 1040.977  |
| NM_012245 | 13108.87 | 15837.02 | NM_006255 | 5376.132  | 4549.211  | AF161437  | 4003.214  | 2392.135  |
| NM_133263 | 1855.22  | 2887.184 | BE392143  | 4815.242  | 3716.077  | AK001039  | 2738.191  | 2347.102  |
| SR2       | 51493.93 | 65572.3  | NM_005813 | 1970.898  | 1609.334  | AK026465  | 872.162   | 923.295   |
| SR4       | 19976.29 | 29066.94 | AB037718  | 7130.814  | 6013.535  | AK024321  | 517.994   | 548.413   |
| SR6       | 3186.782 | 3676.82  | AL389994  | 1401.146  | 1573.199  | U52834    | 739.078   | 429.488   |
| SR10      | 37473.1  | 20485.38 | NM_003905 | 5660.935  | 4587.919  | NM_003532 | 650.089   | 280.396   |
| CY3Cy5    | 6123.32  | 641.991  | NM_001277 | 12105.427 | 12115.584 | NM_017869 | 5329.063  | 2912.273  |
| NM_017450 | 1109.159 | 765.695  | NM_003655 | 8343.688  | 8869.107  | AF075100  | 621.809   | 546.76    |
| NM_002023 | 435.433  | 473.677  | NM_007072 | 2745.675  | 3282.651  | AF203447  | 6630.029  | 4030.32   |
| NM_002839 | 269.295  | 243.835  | NM_012320 | 4088.214  | 2626.228  | NM_018502 | 1519.146  | 1053.975  |
| NM_001616 | 423.731  | 554.808  | NM_018208 | 4313.208  | 3106.706  | AL080066  | 9542.249  | 5837.51   |
| NM_005904 | 278.865  | 306      | NM_015925 | 5243.05   | 5792.699  | AJ227870  | 1103.067  | 828.416   |
| NM_005273 | 10909.23 | 10541.77 | U90653    | 5029.174  | 5810.015  | AL137620  | 1305.831  | 859.818   |
| NM_000524 | 404.632  | 349.551  | NM_000196 | 693.601   | 766.688   | NM_005294 | 1355.772  | 1040.361  |
| NM_006576 | 963.809  | 731.857  | NM_018335 | 7607.302  | 8826.954  | AK026879  | 616.405   | 282.536   |
| NM_018645 | 773.515  | 748.523  | NM_006745 | 45833.531 | 50576.191 | AK024362  | 790.18    | 719.239   |
| AB035266  | 1052.422 | 723.674  | NM_000275 | 1223.215  | 1408.811  | AF118068  | 2754.108  | 2265.287  |
| NM_003744 | 1756.442 | 1812.793 | AK000037  | 1600.766  | 1901.607  | NM_004164 | 675.86    | 454.583   |
| NM_006378 | 10182.79 | 9701.116 | NM_014760 | 3294.234  | 3841.874  | NM_019018 | 3254.001  | 2723.829  |
| NM_018132 | 3008.546 | 1833.243 | NM_018398 | 1852.599  | 2694.4    | CY3Cy5    | 5604.669  | 205.994   |
| NM_003061 | 1325.339 | 1340.029 | NM_002560 | 17303.768 | 18771.494 | BE790116  | 875.472   | 1793.063  |
| NM_018207 | 1258.306 | 1544.355 | NM_000787 | 1037.717  | 2463.866  | AI922341  | 2263.079  | 2510.051  |
| NM_000345 | 994.906  | 1086.062 | U57962    | 5526.436  | 7542.627  | M12824    | 2796.521  | 3232.7    |
| NM_001862 | 48710.78 | 65012.68 | NM_016176 | 6853.409  | 4537.041  | W60100    | 7378.065  | 3716.867  |
| NM_006531 | 1010.072 | 1810.238 | NM_005574 | 1139.307  | 811.01    | M24898    | 1134.196  | 1293.133  |
| AB029021  | 2102.042 | 3978.879 | NM_017895 | 6354.057  | 4558.569  | U72508    | 826.987   | 856.278   |
| NM_005423 | 569.043  | 1012.906 | NM_004610 | 3926.97   | 3627.966  | AA457153  | 3306.78   | 3261.658  |
| J02874    | 1125.912 | 1685.885 | NM_001612 | 2276.309  | 2208.689  | AA283122  | 2257.856  | 1687.492  |
| AF070525  | 7107.782 | 5621.408 | AK027002  | 3264.552  | 2780.734  | AA868504  | 3171.438  | 2345.462  |
| NM_001177 | 2351.126 | 3868.951 | AB025254  | 3956.527  | 3753.905  | AA877845  | 6197.726  | 5927.786  |
| NM_014447 | 1365.595 | 1292.221 | NM_004081 | 3118.147  | 3291.567  | AA664241  | 34421.172 | 34457.734 |
| NM_006691 | 708.656  | 503.642  | NM_000025 | 24877.963 | 18926.771 | NM_000588 | 18018.137 | 19965.012 |
| NM_003710 | 1134.513 | 1120.974 | D38521    | 4004.475  | 7184.168  | CY3Cy5    | 9307.666  | 4064.791  |
| NM_004666 | 918.88   | 551.02   | NM_000403 | 9478.014  | 8078.93   | NM_005810 | 6042.558  | 8324.915  |
| NM_003614 | 290.809  | 175.343  | NM_018127 | 14205.244 | 15007.894 | M28170    | 5516.68   | 4961.814  |
| NM_014257 | 653.343  | 626.395  | AB020677  | 7751.117  | 8168.749  | AK026223  | 1865.636  | 2268.366  |
| NM_004843 | 1575.857 | 1003.31  | AB033097  | 3354.458  | 3040.207  | NM_000874 | 9894.528  | 5776.244  |
| AK022845  | 621.092  | 722.585  | NM_000135 | 2055.711  | 2118.004  | NM_005854 | 1245.415  | 1050.653  |
| NM_003004 | 298.241  | 120.769  | AJ223948  | 5208.258  | 5663.576  | AB007863  | 23056.025 | 23030.811 |
| S77835    | 518.109  | 643.168  | NM_016218 | 1483.441  | 2015.119  | AK024456  | 6409.594  | 7323.796  |
| NM_002985 | 461.694  | 377.504  | AK022947  | 2455.959  | 2728.215  | NM_017789 | 1136.347  | 1200.411  |
| AB018347  | 2304.879 | 3025.429 | AL050029  | 2560.756  | 2298.273  | D31887    | 4464.986  | 5632.54   |
| AB033073  | 468.748  | 543.183  | AL049966  | 513.507   | 631.434   | NM_002313 | 3356.361  | 4532.292  |
| NM_003284 | 460.851  | 1029.372 | NM_004063 | 853.21    | 1360.315  | NM_004459 | 2395.374  | 2358.362  |
| NM_018152 | 536.048  | 719.237  | AB040976  | 10739.895 | 4123.186  | NM_005503 | 1591.667  | 2112.24   |
| NM_003257 | 417.622  | 594.915  | NM_007361 | 394.512   | 705.188   | NM_001502 | 1972.494  | 2484.401  |
| AK001379  | 2825.967 | 4431.214 | NM_018641 | 5659.938  | 3645.631  | BF002026  | 4023.046  | 7069.282  |
| NM_007072 | 825.936  | 1168.606 | U49089    | 1355.316  | 1001.001  | NM_004171 | 1378.142  | 1264.951  |
| NM_012320 | 1750.155 | 1566.686 | NM_002221 | 3985.462  | 3152.594  | NM_014037 | 8283.466  | 7651.531  |
| NM_018208 | 1988.816 | 2176.397 | NM_002371 | 3043.964  | 1803.661  | NM_004866 | 20129.373 | 21897.736 |
| NM_015925 | 3747.131 | 2679.36  | NM_002562 | 887.907   | 971.142   | NM_018688 | 3278.471  | 3997.563  |
| U90653    | 2817.361 | 2371.012 | AK024502  | 4830.917  | 4662.485  | AK056652  | 7756.492  | 12125.924 |

|            |          |          |           |           |           |           |           |           |
|------------|----------|----------|-----------|-----------|-----------|-----------|-----------|-----------|
| NM_000196  | 511.385  | 474.98   | NM_001124 | 1916.779  | 1645.893  | AL137438  | 834.124   | 1470.668  |
| NM_018339  | 5276.146 | 3585.52  | NM_004586 | 4566.843  | 4190.902  | NM_017957 | 4748.349  | 6322.943  |
| NM_006745  | 30424.19 | 20506    | NM_004844 | 6937.926  | 6750.279  | NM_003024 | 2724.595  | 4097.487  |
| NM_000275  | 720.732  | 656.266  | NM_013447 | 1010.375  | 995.244   | NM_013248 | 7461.7    | 11349.415 |
| AK000037   | 613.981  | 295.429  | NM_000051 | 6394.426  | 5512.406  | NM_000034 | 65946.164 | 72303.672 |
| NM_014760  | 2196.635 | 1202.141 | NM_005709 | 967.996   | 742.868   | AK022230  | 7202.926  | 9546.557  |
| NM_018398  | 1541.784 | 1176.39  | NM_004180 | 4593.116  | 5251.188  | AK022147  | 15931.411 | 19908.719 |
| NM_002560  | 1515.369 | 1032.28  | NM_004786 | 38897.66  | 37682.309 | L25664    | 4856.104  | 7333.631  |
| NM_014404  | 688.944  | 486.194  | AF302109  | 1632.675  | 1631.82   | NM_014940 | 4764.72   | 4747.626  |
| NM_018713  | 332.813  | 183.322  | AL117485  | 12610.902 | 11164.705 | NM_005783 | 1359.042  | 1379.839  |
| NM_015947  | 3882.157 | 1967.93  | NM_003505 | 900.216   | 704.725   | NM_016356 | 6519.532  | 7535.74   |
| AB028944   | 643.148  | 478.947  | NM_007191 | 1987.863  | 1492.406  | NM_006406 | 8839.668  | 10221.841 |
| AJ006268   | 1458.527 | 2419.475 | AL109667  | 1630.717  | 1628.044  | NM_016649 | 4256.74   | 4084.847  |
| M74089     | 5800.574 | 9732.609 | NM_000840 | 1151.657  | 1825.436  | AK090536  | 21847.707 | 18015.885 |
| AF190864   | 6104.943 | 9186.987 | NM_001094 | 885.293   | 504.506   | D63477    | 1315.394  | 1346.648  |
| NM_002779  | 2848.747 | 4096.757 | AF034102  | 26572.961 | 18364.045 | NM_020243 | 30900.641 | 36835.688 |
| NM_020198  | 7749.822 | 14008.53 | AJ008142  | 24837.213 | 15460.008 | NM_014051 | 15185.661 | 14367.578 |
| AA098879   | 625.54   | 1381.733 | AL035289  | 429.315   | 560.578   | AK025398  | 3572.862  | 3479.288  |
| AY007096   | 32.016   | 139.067  | NM_001343 | 3696.526  | 3608.464  | AK023056  | 2385.471  | 2204.197  |
| NM_000025  | 5592.21  | 6924.174 | NM_007275 | 13992.254 | 11812.771 | NM_017888 | 3699.467  | 4594.642  |
| D38521     | 2554.586 | 2838.343 | NM_019025 | 48786.668 | 40541.422 | NM_004915 | 7241.073  | 11688.741 |
| NM_000403  | 3472.426 | 2746.549 | NM_018461 | 7051.608  | 5637.612  | AK022207  | 1215.581  | 1569.334  |
| NM_018127  | 9390.127 | 7012.269 | AF235023  | 8558.358  | 8549.686  | AV708752  | 3970.733  | 5393.181  |
| AB020677   | 1508.355 | 1270.848 | NM_006910 | 5524.617  | 5006.174  | NM_006517 | 663.055   | 966.147   |
| AB033097   | 845.608  | 683.841  | AF162667  | 3334.089  | 3210.017  | AK026680  | 6517.213  | 7891.72   |
| NM_000135  | 997.452  | 666.696  | AB046847  | 6087.891  | 5178.46   | NM_012436 | 58741.863 | 62477.609 |
| AJ223948   | 3788.274 | 2531.621 | NM_000447 | 3344.351  | 2944.781  | AK001299  | 23661.162 | 32736.688 |
| NM_016218  | 1081.995 | 954.129  | NM_006354 | 6282.529  | 5299.692  | AB014559  | 12845.63  | 15940.54  |
| AK022947   | 2446.298 | 1409.091 | AF303378  | 8879.157  | 8123.005  | NM_016489 | 10387.63  | 10326.012 |
| AL050029   | 2046.82  | 1476.418 | NM_016037 | 12933.104 | 18596.686 | NM_005033 | 10596.828 | 10163.584 |
| AL049966   | 468.579  | 269.584  | NM_000043 | 7855.552  | 8868.428  | NM_015932 | 65951.727 | 67873.727 |
| NM_005204  | 2801.578 | 1546.786 | NM_016140 | 707.897   | 523.392   | NM_017949 | 1787.07   | 1628.338  |
| NM_016203  | 1197.771 | 1001.952 | NM_015965 | 508.489   | 705.834   | AK022169  | 1312.961  | 1486.793  |
| NM_002759  | 2995.692 | 1182.126 | NM_000417 | 3809.928  | 4218.734  | AF015592  | 5556.444  | 5091.918  |
| NM_007271  | 1329.806 | 947.643  | NM_020356 | 1763.566  | 1332.999  | AK026795  | 3514.432  | 3448.651  |
| NM_006255  | 4135.896 | 2332.149 | NM_018235 | 37782.563 | 27431.723 | NM_016617 | 14474.229 | 15673.697 |
| BE392143   | 3969.817 | 3179.053 | NM_012104 | 18540.707 | 13494.517 | NM_002027 | 11919.261 | 13129.49  |
| AB037718   | 2576.643 | 4669.523 | NM_006144 | 27669.26  | 30658.809 | AL162078  | 2762.701  | 3361.764  |
| AL389994   | 1421.797 | 1939.36  | NM_012168 | 2842.863  | 2439.119  | NM_000919 | 1210.434  | 1229.52   |
| NM_001277  | 3375.162 | 4689.314 | NM_007038 | 3787.221  | 3771.571  | NM_014043 | 10607.964 | 7890.651  |
| NM_003659  | 8234.345 | 14311.31 | AF311324  | 7753.68   | 8896.449  | NM_014622 | 1440.014  | 1458.053  |
| AB029021   | 1364.189 | 2442.521 | AF124433  | 1247.064  | 1077.722  | NM_014056 | 37117.344 | 32315.762 |
| NM_002101  | 34839.11 | 36864.23 | AK001647  | 684.472   | 442.716   | D31885    | 37268.633 | 31847.826 |
| NM_005423  | 518.613  | 565.747  | NM_001461 | 505.464   | 853.019   | BE743838  | 9112.917  | 8351.031  |
| Z36789     | 4256.482 | 5875.632 | AF061556  | 1739.037  | 2015.135  | AF273046  | 2377.515  | 2573.456  |
| J02874     | 924.051  | 746.467  | AL162049  | 2023.367  | 1515.239  | NM_001081 | 3176.57   | 3181.367  |
| BF310427   | 1057.067 | 1360.004 | NM_005032 | 1419.081  | 1457.741  | NM_002483 | 2688.249  | 2955.968  |
| N94424     | 258.401  | 429.972  | NM_004160 | 8902.176  | 8880.313  | BF002026  | 3042.095  | 4025.044  |
| H45617     | 261.883  | 643.161  | AL109677  | 1762.941  | 1786.18   | BE790116  | 1082.897  | 1924.714  |
| M92642     | 255.343  | 445.111  | NM_003941 | 47552.188 | 43841.652 | AI922341  | 2011.965  | 1836.38   |
| AA464532   | 296.487  | 404.61   | AF177909  | 1890.881  | 1924.584  | M12824    | 3597.084  | 4091.894  |
| H-U 44385  | 9511.018 | 8059.355 | NM_002664 | 2248.695  | 2083.074  | W60100    | 7090.177  | 4253.51   |
| ID 1654970 | 3885.629 | 4433.603 | AB018271  | 1611.422  | 1965.6    | M24898    | 920.274   | 1028.482  |

|            |          |          |           |           |           |           |           |           |
|------------|----------|----------|-----------|-----------|-----------|-----------|-----------|-----------|
| ID 2531132 | 5959.859 | 5465.224 | AL137665  | 5377.184  | 5183.111  | U72508    | 683.235   | 819.819   |
| ID 4365538 | 231.225  | 151.535  | NM_016434 | 2301.51   | 2405.815  | AA457153  | 3427.426  | 3191.911  |
| AA485665   | 311.612  | 42.267   | U36561    | 48967.449 | 66292.773 | AA283122  | 1894.713  | 2006.607  |
| BF125928   | 12246.85 | 9146.755 | NM_005634 | 2415.787  | 1430.615  | AA868504  | 2437.634  | 2109.291  |
| BG571026   | 867.108  | 770.877  | NM_017757 | 4060.359  | 2824.514  | AK026281  | 2133.63   | 1723.761  |
| AA489017   | 5421.288 | 5356.571 | NM_002146 | 29604.566 | 19623.178 | NM_006406 | 7308.102  | 5744.441  |
| NM_012245  | 9737.395 | 5414.362 | AB007892  | 1908.631  | 2325.368  | AF216292  | 21230.148 | 26554.768 |
| NM_003284  | 403.104  | 768.223  | AB002306  | 3064.872  | 3801.86   | NM_000952 | 515.434   | 593.994   |
| NM_018152  | 531.054  | 482.146  | NM_001300 | 4836.717  | 8229.896  | NM_005894 | 719.85    | 858.091   |
| NM_000319  | 5119.141 | 6486.791 | NM_018187 | 9700.634  | 14754.087 | NM_014584 | 10966.142 | 11509.819 |
| NM_003257  | 326.421  | 516.255  | NM_003016 | 31709.225 | 30978.045 | NM_005810 | 6648.652  | 7443.437  |
| NM_012461  | 4482.89  | 5404.77  | NM_005463 | 33286.012 | 32390.547 | M28170    | 5591.998  | 4610.104  |
| AK001379   | 1627.307 | 1564.455 | NM_001325 | 3117.864  | 3202      | AK026223  | 1467.849  | 1486.706  |
| NM_002023  | 706.764  | 783.482  | NM_018282 | 24169.428 | 16671.721 | NM_000874 | 9229.867  | 4947.4    |
| NM_001616  | 432.806  | 481.19   | BC019932  | 3310.945  | 3077.712  | NM_005854 | 702.041   | 673.573   |
| NM_005904  | 288.67   | 411.292  | AF114818  | 4637.549  | 5053.359  | AB007863  | 24175.898 | 23562.105 |
| NM_005273  | 9115.151 | 10390.82 | AK025106  | 3042.092  | 3597.012  | AK024456  | 5939.421  | 5624.271  |
| NM_000524  | 418.047  | 489.844  | NM_020144 | 3025.45   | 3653.831  | NM_017789 | 726.586   | 1463.4    |
| NM_006576  | 903.124  | 778.861  | NM_003908 | 52179.789 | 61502.961 | AF284223  | 2103.874  | 1216.726  |
| NM_018645  | 643.194  | 939.463  | BE893142  | 2328.921  | 2616.127  | AF176012  | 965.598   | 830.599   |
| AB035266   | 961.41   | 594.513  | NM_003103 | 6326.604  | 5626.193  | NM_005971 | 4524.69   | 5219.987  |
| NM_003744  | 1473.363 | 1443.436 | NM_015340 | 6033.705  | 5973.695  | NM_017435 | 1556.825  | 2496.402  |
| NM_006378  | 8864.517 | 7700.503 | NM_006451 | 4318.013  | 4309.734  | NM_013386 | 4045.733  | 5144.634  |
| NM_018132  | 2329.678 | 1640.107 | NM_002094 | 3036.16   | 3189.963  | NM_004171 | 1503.191  | 1483.287  |
| NM_003061  | 1065.831 | 713.253  | NM_002937 | 1612.494  | 2003.221  | NM_014037 | 8961.236  | 8932.042  |
| NM_018207  | 1033.124 | 704.154  | NM_003191 | 5887.188  | 5980.812  | NM_004866 | 20635.885 | 20625.555 |
| NM_000345  | 670.024  | 381.99   | AL137476  | 11308.848 | 8676.39   | NM_018688 | 3559.07   | 3460.354  |
| M74089     | 4471.126 | 6472.28  | AF052174  | 2702.43   | 1946.515  | AK056652  | 6826.151  | 7637.181  |
| AF190864   | 4408.71  | 5661.152 | AF070590  | 1124.657  | 721.715   | AL137438  | 1223.556  | 919.634   |
| NM_002779  | 2312.092 | 3140.136 | NM_000761 | 36600.449 | 43556.203 | NM_017957 | 3949.565  | 4598.105  |
| NM_020198  | 5224.251 | 5498.972 | NM_000774 | 5327.643  | 4284.539  | NM_003024 | 2189.745  | 2664.488  |
| AA098879   | 453.552  | 544.018  | NM_017781 | 47610.609 | 48745.785 | L25664    | 2995.368  | 2957.127  |
| NM_001177  | 2665.082 | 5378.056 | NM_006004 | 52068.285 | 66797.219 | NM_014940 | 3939.186  | 2409.22   |
| NM_014447  | 1319.814 | 1382.321 | NM_004894 | 34494.582 | 34157.297 | NM_005783 | 767.255   | 693.358   |
| NM_002356  | 189.719  | 105.488  | AB028960  | 990.731   | 917.506   | NM_006900 | 2747.262  | 2432.024  |
| NM_006691  | 610.314  | 583.457  | NM_005648 | 49263.512 | 50409.539 | AJ289111  | 15069.835 | 8324.018  |
| NM_001505  | 365.269  | 357.804  | NM_006943 | 11482.524 | 23362.539 | NM_016356 | 10308.227 | 7815.476  |
| NM_003710  | 1236.006 | 2068.124 | NM_006741 | 12545.821 | 13853.975 | NM_014043 | 12653.456 | 11298.283 |
| NM_004666  | 962.804  | 977.434  | NM_014166 | 10515.759 | 10385.76  | NM_014622 | 1798.075  | 2017.862  |
| NM_003614  | 298.126  | 348.549  | AL117606  | 9173.763  | 9665.721  | AB011114  | 57213.301 | 58837.699 |
| NM_014257  | 618.161  | 584.136  | NM_012330 | 2226.376  | 2894.959  | D11466    | 24697.055 | 31106.059 |
| NM_004843  | 1309.69  | 1215.208 | AF294278  | 6081.673  | 6369.473  | NM_014056 | 34515.172 | 38802.387 |
| AK022845   | 551.938  | 435.42   | NM_018211 | 5268.774  | 4421.804  | D31885    | 34120.207 | 37586.699 |
| NM_003004  | 365.728  | 181.805  | NM_014520 | 4979.63   | 4882.109  | NM_016649 | 4398.032  | 4069.615  |
| S77835     | 416.078  | 288.271  | NM_002616 | 4046.983  | 6147.981  | AK090536  | 22651.02  | 18107.068 |
| NM_002985  | 495.91   | 204.595  | AK025712  | 12282.939 | 12670.41  | D63477    | 1359.191  | 1309.035  |
| AB018347   | 1864.011 | 1012.715 | AK026375  | 4229.444  | 2856.089  | NM_020243 | 31396.232 | 33868.375 |
| AB033073   | 368.798  | 154.935  | NM_014710 | 1233.219  | 1039.068  | NM_014051 | 15230.219 | 13177.242 |
| NM_005813  | 1476.312 | 1582.583 | U85992    | 1292.033  | 1328.83   | AK025398  | 3121.84   | 3249.607  |
| AB037718   | 1958.113 | 2086.12  | NM_004795 | 742.008   | 1012.786  | NM_017888 | 3228.082  | 3179.441  |
| AL389994   | 1285.855 | 1907.384 | AF131745  | 4039.061  | 4763.92   | NM_004915 | 6037.437  | 6492.729  |
| NM_001277  | 2615.223 | 2622.154 | AF147305  | 888.198   | 829.948   | AK022207  | 964.596   | 1122.477  |
| NM_003659  | 4658.968 | 4416.589 | AK022109  | 4009.304  | 3893.179  | AV708752  | 3843.082  | 3813.428  |

|           |          |          |           |           |           |           |           |           |
|-----------|----------|----------|-----------|-----------|-----------|-----------|-----------|-----------|
| NM_007072 | 1084.775 | 1052.725 | AK022103  | 1534.576  | 1520.201  | AF119885  | 2670.004  | 2314.642  |
| NM_012320 | 1733.613 | 1643.75  | NM_007030 | 722.53    | 783.028   | NM_004996 | 4110.158  | 3715.946  |
| NM_018208 | 2341.587 | 2752.941 | AK022111  | 605.234   | 483.06    | NM_000588 | 17406.5   | 19807     |
| NM_015928 | 4582.118 | 4817.068 | AK021527  | 700.951   | 768.256   | AK026281  | 1657.703  | 2046.003  |
| U90653    | 3188.354 | 2933.042 | AF143882  | 1783.97   | 3831.676  | AK026680  | 6957.586  | 8447.068  |
| NM_000196 | 511.666  | 648.571  | U00953    | 848.973   | 1812.754  | NM_012436 | 65117.059 | 68290.469 |
| NM_018338 | 5460.99  | 3848.455 | AF086176  | 1673.127  | 2225.452  | AK001299  | 28491.57  | 33078.141 |
| NM_006745 | 30774.02 | 24427.2  | NM_017742 | 1558.661  | 2031.024  | AB014559  | 17697.674 | 16640.723 |
| NM_000275 | 793.727  | 878.405  | NM_005108 | 3349.509  | 3617.956  | NM_016488 | 11298.85  | 10663.71  |
| AK000037  | 665.388  | 663.927  | AK022292  | 10029.768 | 10645.275 | NM_005033 | 10556.582 | 10832.852 |
| NM_014760 | 2344.705 | 1780.127 | AB051436  | 4210.705  | 3745.28   | NM_015932 | 63431.164 | 68473.391 |
| NM_018398 | 655.919  | 559.686  | AK026482  | 32144.963 | 29494.688 | NM_017948 | 1378.463  | 1420.763  |
| NM_002560 | 2289.847 | 1811.193 | AL137473  | 4033.158  | 4477.438  | AK026795  | 3393.828  | 3410.213  |
| NM_014404 | 830.607  | 418.816  | AJ001873  | 8322.541  | 8692.487  | NM_016617 | 15467.603 | 18102.436 |
| NM_015947 | 3427.99  | 1995.723 | AB026054  | 738.611   | 482.991   | NM_002027 | 12179.561 | 13510.573 |
| AB028944  | 437.75   | 301.449  | AK022604  | 2505.323  | 2316.914  | AL162078  | 3548.179  | 3402.827  |
| AJ006268  | 939.733  | 578.121  | U66048    | 1685.537  | 1672.55   | NM_000918 | 1396.413  | 1342.054  |
| NM_012245 | 10265.85 | 9133.022 | AL080095  | 389.903   | 615.542   | NM_013382 | 13946.809 | 13250.174 |
| NM_133263 | 1083.619 | 1352.645 | AK023401  | 8693.781  | 11007.36  | AB002314  | 1336.707  | 1151.395  |
| NM_000025 | 5977.587 | 7074.411 | AK001865  | 1105.681  | 1566.147  | NM_005503 | 2055.726  | 2900.208  |
| D38521    | 2413.033 | 2458.475 | AK024035  | 24436.924 | 22881.734 | NM_001502 | 1980.719  | 2865.955  |
| NM_000403 | 3236.043 | 3039.689 | AL049331  | 473.323   | 439.28    | NM_005721 | 1777.68   | 1392.277  |
| NM_018127 | 9368.132 | 7688.048 | AL050079  | 3467.686  | 3113.946  | AF284223  | 2125.476  | 2127.102  |
| AB020677  | 1658.439 | 1283.352 | AL080233  | 4752.366  | 4089.208  | AF176012  | 713.425   | 1206.395  |
| AB033097  | 677.423  | 769.313  | AL117591  | 1479.183  | 1734.935  | BE743838  | 9390.871  | 9379.162  |
| NM_000135 | 1071.232 | 856.175  | AL050132  | 496.609   | 1043.679  | AF273046  | 3070.763  | 2893.405  |
| AJ223948  | 3836.252 | 2980.935 | AL110230  | 580.183   | 1049.707  | NM_001081 | 3085.344  | 2938.17   |
| NM_016218 | 1220.442 | 976.709  | AL117663  | 5781.928  | 10806.411 | NM_002483 | 2869.795  | 2791.775  |
| AK022947  | 2236.726 | 1699.245 | NM_014293 | 7332.001  | 7999.28   | BF002026  | 3371.388  | 3438.487  |
| AL050029  | 1914.204 | 1581.331 | AK024432  | 3870.246  | 4482.974  | BE790116  | 1332.464  | 1915.657  |
| AL049966  | 564.483  | 273.503  | AL137513  | 1708.977  | 1662.79   | AI922341  | 2222.07   | 2233.57   |
| NM_005204 | 2689.302 | 1858.617 | AF088001  | 894.99    | 1405.939  | M12824    | 3782.265  | 4520.259  |
| NM_016203 | 1160.651 | 920.465  | NM_018067 | 9008.606  | 9815.411  | W60100    | 6701.086  | 3860.135  |
| NM_002758 | 2756.192 | 1235.91  | NM_018956 | 33972.012 | 30124.174 | M24898    | 930.162   | 1427.437  |
| NM_007271 | 1372.234 | 750.868  | NM_014787 | 2946.204  | 2927.797  | U72508    | 968.995   | 1529.818  |
| NM_006255 | 3924.291 | 2427.89  | AL122109  | 1470.37   | 1235.148  | AA457153  | 3639.515  | 4292.562  |
| BE392143  | 3163.948 | 1819.661 | AF074988  | 2263.211  | 2423.86   | AA283122  | 2478.112  | 2102.7    |
| NM_018132 | 2436.254 | 2371.941 | AK024946  | 1133.811  | 2033.723  | AA868504  | 3169.491  | 1702.583  |
| NM_003061 | 1155.972 | 1433.103 | AK001432  | 2597.751  | 2631.224  | AA877845  | 6317.274  | 4807.395  |
| NM_018207 | 1266.719 | 1457.838 | AL133568  | 5758.81   | 6227.634  | AA664241  | 47702.867 | 41374.047 |
| NM_000345 | 853.753  | 764.555  | AF009265  | 2763.061  | 2945.821  | AI016456  | 1739.666  | 1766.938  |
| NM_001862 | 33876.46 | 34722.03 | AF009309  | 6306.895  | 7378.366  | NM_014940 | 4648.243  | 3336.579  |
| NM_006531 | 720.082  | 858.797  | AF054830  | 257.933   | 558.35    | NM_005783 | 987.872   | 935.802   |
| AB029021  | 1319.146 | 1626.413 | NM_002360 | 3929.228  | 4777.042  | NM_006900 | 1866.614  | 2205.339  |
| NM_002101 | 28736.54 | 24306.76 | AF009322  | 836.818   | 1028.01   | AJ289111  | 14565.632 | 11434.578 |
| NM_005423 | 440.145  | 470.584  | AF056425  | 2972.137  | 2965.618  | NM_016356 | 4270.977  | 4898.625  |
| Z36789    | 4163.61  | 4315.449 | AF090893  | 928.648   | 1311.873  | NM_006406 | 7800.922  | 7461.177  |
| J02874    | 715.619  | 739.887  | NM_018033 | 12073.672 | 11073.999 | AF216292  | 23955.221 | 28887.668 |
| BF310427  | 1064.344 | 688.099  | AK001945  | 2144.586  | 2211.655  | NM_005894 | 663.415   | 880.407   |
| AI521645  | 53.688   | 119.433  | AK021541  | 466.971   | 943.973   | NM_014584 | 12607.374 | 10885.587 |
| H45617    | 154.797  | 355.48   | AK021766  | 625.436   | 868.357   | NM_005810 | 7312.763  | 8076.068  |
| AA464532  | 310.196  | 353.82   | AK001147  | 842.529   | 521.241   | M28170    | 6083.562  | 5087.152  |
| H-U 44385 | 8634.845 | 6042.922 | AK021630  | 1588.628  | 1766.356  | NM_001555 | 559.932   | 669.955   |

|            |          |          |           |           |           |           |           |           |
|------------|----------|----------|-----------|-----------|-----------|-----------|-----------|-----------|
| ID 1654970 | 3401.63  | 3289.052 | AK021831  | 1432.332  | 2295.354  | AK026223  | 1238.918  | 1295.427  |
| ID 2531132 | 4582.389 | 3471.406 | AK025650  | 4572.941  | 4934.528  | NM_000874 | 9423.086  | 4864.963  |
| BF125928   | 11757.13 | 6677.795 | AK026401  | 2613.583  | 2987.848  | NM_005854 | 899.882   | 1681.273  |
| BG571026   | 691.004  | 474.712  | AK026773  | 2466.774  | 2486.475  | AB007863  | 30087.768 | 51541.395 |
| AA489017   | 4027.882 | 2456.253 | AK025893  | 666.103   | 621.941   | AK024456  | 6966.161  | 8791.167  |
| AK022845   | 564.933  | 1371.422 | U73530    | 701.063   | 709.687   | NM_017789 | 722.483   | 629.181   |
| NM_003004  | 275.863  | 388.776  | AF086158  | 6040.085  | 6278.311  | D31887    | 4429.727  | 3323.273  |
| S77835     | 415.746  | 737.392  | AF086050  | 5820.855  | 6846.977  | NM_002313 | 3529.588  | 3395.034  |
| NM_002985  | 376.366  | 639.94   | AF147375  | 2710.125  | 2603.489  | NM_004459 | 2969.419  | 2837.805  |
| AB018347   | 2078.459 | 2283.627 | X51524    | 17166.479 | 24087.387 | NM_004915 | 5615.425  | 7795.838  |
| AB033073   | 248.28   | 274.59   | AK025759  | 3340.844  | 3929.194  | AK022207  | 1174.217  | 1302.563  |
| NM_003284  | 382.558  | 670.356  | AK024105  | 735.476   | 934.816   | AV708752  | 3010.994  | 3712.297  |
| NM_000319  | 4732.648 | 5012.983 | AJ238556  | 473.311   | 1058.268  | AF119885  | 2500.469  | 3122.047  |
| NM_003257  | 267.334  | 227.616  | AK021516  | 7187.703  | 6328.929  | NM_004996 | 3662.512  | 4190.872  |
| NM_012461  | 4384.091 | 3630.428 | Z70699    | 1083.155  | 1163.482  | NM_005971 | 4184.721  | 5255.703  |
| AK001379   | 1474.762 | 1156.496 | AL049919  | 312.196   | 452.001   | NM_017435 | 1780.101  | 2491.261  |
| NM_017450  | 1369.264 | 1089.912 | NM_006895 | 2724.313  | 3179.558  | NM_013386 | 3815.764  | 3495.958  |
| NM_002023  | 627.669  | 460.467  | AK023429  | 1002.122  | 1167.779  | NM_006517 | 581.969   | 880.165   |
| NM_001616  | 313.192  | 367.234  | AK022276  | 1327.384  | 1838.414  | NM_004171 | 1647.234  | 1724.342  |
| NM_005904  | 212.815  | 313.977  | AK026881  | 623.115   | 782.837   | NM_014037 | 9714.65   | 10848.31  |
| NM_005273  | 8624.44  | 6362.769 | AL133653  | 672.339   | 786.31    | NM_004866 | 19550.787 | 19529.125 |
| NM_000524  | 430.673  | 306.811  | AK023774  | 1337.219  | 2160.263  | NM_018685 | 3366.351  | 2776.164  |
| NM_006576  | 854.83   | 489.289  | AL049377  | 1448.753  | 1560.381  | AK056652  | 6112.666  | 5716.561  |
| NM_018645  | 721.728  | 592.288  | NM_003544 | 52197.469 | 59859.383 | AL137438  | 1211.367  | 910.048   |
| AB035266   | 902.642  | 262.755  | U17640    | 751.627   | 794.257   | NM_017957 | 4736.7    | 5970.589  |
| NM_003744  | 1490.367 | 1021.2   | AK001187  | 3462.378  | 3422.665  | NM_003024 | 2216.229  | 2361.147  |
| NM_006375  | 7678.034 | 5250.521 | NM_003525 | 25157.885 | 35652.992 | NM_013245 | 6475.795  | 3672.348  |
| NM_014404  | 706.45   | 1013.719 | AF086284  | 314.941   | 1356.747  | AK022147  | 14554.173 | 9507.213  |
| NM_015947  | 4839.022 | 5565.718 | AF056436  | 5703.223  | 10685.557 | L25664    | 3635      | 3018.051  |
| NM_002042  | 328.254  | 379.475  | AB023191  | 1316.859  | 1693.458  | NM_002027 | 13270.483 | 12335.171 |
| AB028944   | 527.405  | 1031.75  | AK027212  | 7102.971  | 8238.173  | AL162078  | 2773.911  | 2662.425  |
| AJ006268   | 939.792  | 1315.607 | X56197    | 1242.04   | 1388.028  | NM_000919 | 1343.874  | 1595.649  |
| M74089     | 4161.658 | 4609.395 | NM_005195 | 14078.535 | 14677.629 | NM_013382 | 10579.356 | 14173.563 |
| AF190864   | 4266.322 | 4504.676 | U90905    | 1853.421  | 1881.301  | AB002314  | 943.983   | 1850.184  |
| NM_002775  | 2070.037 | 2480.058 | AF161422  | 3190.681  | 3223.977  | NM_014043 | 13074.039 | 12750.022 |
| L40397     | 12066.21 | 13587.66 | AL137384  | 1892.013  | 1203.705  | NM_014622 | 1622.857  | 1774.558  |
| NM_020195  | 4442.841 | 4123.635 | AF070619  | 2302.315  | 2666.42   | AB011114  | 62547.676 | 58479.133 |
| AA098879   | 458.023  | 395.946  | NM_020153 | 3712.856  | 2853.8    | D11466    | 24300.248 | 24109.418 |
| AF070525   | 7376.405 | 6103.208 | NM_005321 | 6594.068  | 7008.746  | NM_014056 | 34113.23  | 33874.211 |
| NM_001177  | 2205.639 | 3457.201 | AF073520  | 3387.001  | 3982.13   | D31885    | 35549.816 | 38098.367 |
| NM_014447  | 1075.073 | 974.148  | AF143885  | 585.244   | 1198.87   | NM_016649 | 4358.097  | 4514.783  |
| NM_006691  | 697.518  | 567.039  | NM_014015 | 12182.207 | 11071.51  | AK090536  | 23500.137 | 23025.516 |
| NM_001505  | 337.068  | 302.528  | AK026839  | 1833.073  | 2291.433  | D63477    | 1321.494  | 1359.077  |
| NM_003710  | 1219.233 | 1245.715 | Z34278    | 353.516   | 656.415   | NM_020243 | 26474.576 | 26030.242 |
| Z83805     | 313.771  | 284.03   | AK024973  | 477.387   | 724.103   | NM_014051 | 15591.524 | 11578.082 |
| NM_004666  | 786.706  | 773.688  | AJ008123  | 7346.375  | 6828.249  | AK025398  | 2166.474  | 1640.584  |
| NM_014257  | 635.915  | 446.417  | AJ008156  | 1578.896  | 1979.201  | AK023056  | 1534.931  | 1170.938  |
| NM_001140  | 340.735  | 256.02   | AF147321  | 668.356   | 631.69    | NM_001120 | 56996.715 | 37501.441 |
| NM_004843  | 1322.414 | 990.995  | AF161437  | 4155.832  | 5698.399  | NM_017885 | 2529.373  | 1871.787  |
| NM_005204  | 3322.528 | 4050.744 | AK001039  | 5087.82   | 4115.39   | NM_003150 | 6094.304  | 6382.249  |
| NM_016203  | 1323.579 | 2355.536 | AK026465  | 1911.361  | 1612.485  | NM_014784 | 3451.576  | 4393.695  |
| NM_002755  | 3199.478 | 2909.128 | AK024321  | 946.008   | 937.913   | AK026383  | 4217.554  | 6169.365  |
| NM_007271  | 1797.031 | 1999.638 | U52834    | 1379.229  | 1643.542  | AK023821  | 1162.117  | 1415.804  |

|           |          |          |           |           |           |           |           |           |
|-----------|----------|----------|-----------|-----------|-----------|-----------|-----------|-----------|
| NM_00625E | 4479.581 | 5612.473 | NM_00353Z | 758.909   | 913.538   | AB014594  | 5148.674  | 7407.115  |
| BE392143  | 3905.146 | 4123.099 | NM_01786E | 11133.566 | 11340.885 | M94547    | 2010.006  | 2217.509  |
| NM_00581Z | 1451.005 | 1206.887 | AF075100  | 857.817   | 1032.741  | NM_005087 | 8656.93   | 11215.465 |
| AB037718  | 1931.038 | 1862.688 | AF203447  | 15553.708 | 15471.742 | NM_01209E | 1697.205  | 1908.544  |
| AL389994  | 1357.927 | 1545.017 | NM_01850Z | 3496.134  | 3366.309  | NM_01809E | 5267.196  | 3878.29   |
| NM_00390E | 4231.287 | 4710.704 | AL080066  | 9530.008  | 13807.657 | AB023164  | 4331.431  | 4608.866  |
| NM_001277 | 2233.514 | 2236.976 | AJ227870  | 1227.789  | 2151.333  | AK026281  | 2476.053  | 2793.054  |
| NM_00365E | 4256.381 | 3615.448 | AL137620  | 1104.37   | 1869.665  | AK026680  | 7830.034  | 12080.436 |
| NM_00707Z | 830.978  | 779.806  | NM_005294 | 5403.33   | 5033.046  | NM_01243E | 59064.82  | 66380.43  |
| NM_01232C | 1580.38  | 1220.136 | AK026879  | 463.864   | 867.004   | AK001299  | 29764.699 | 30283.275 |
| NM_01820E | 2212.496 | 2087.625 | AF085826  | 1268.884  | 1242.539  | AB014559  | 18342.02  | 17132.283 |
| NM_01592E | 3503.796 | 2907.749 | AK024362  | 1124.787  | 1057.112  | NM_01648E | 10497.242 | 6998.986  |
| U90653    | 3362.498 | 2518.057 | AF118068  | 3785.581  | 3398.959  | NM_00503Z | 9705.184  | 7797.428  |
| NM_00019E | 494.354  | 373.584  | NM_004164 | 583.523   | 611.842   | AF015592  | 5601.888  | 4115.806  |
| NM_01833E | 5359.972 | 3624.395 | NM_01901E | 3472.974  | 4386.728  | AK026795  | 3669.938  | 2758.902  |
| NM_00674E | 29482.31 | 21099.14 | M87931    | 1001.212  | 1348.672  | NM_01639E | 5247.194  | 3609.395  |
| NM_00027E | 854.659  | 598.935  | CY3Cy5    | 1611.762  | 219.034   | NM_016617 | 14532.354 | 9567.543  |
| AK000037  | 650.083  | 441.452  | BE790116  | 751.431   | 465.109   | NM_00233E | 8215.985  | 7979.77   |
| NM_01476C | 2243.827 | 1573.011 | AI922341  | 1025.898  | 943.255   | AL117666  | 1097.211  | 1441.982  |
| NM_01839E | 642.462  | 525.89   | M12824    | 2415.719  | 1361.878  | Y17865    | 1744.523  | 1995.126  |
| NM_00256C | 2097.932 | 1774.998 | W60100    | 2743.951  | 3111.083  | NM_00582E | 20561.814 | 21905.209 |
| NM_000787 | 743.344  | 935.151  | M24898    | 358.037   | 400.194   | NM_00275E | 4663.127  | 5566.66   |
| U57962    | 1703.141 | 2879.197 | AA457153  | 1851.241  | 1678.399  | U79299    | 540.068   | 709.592   |
| NM_01617E | 9476.807 | 11344.73 | AA283122  | 788.357   | 782.991   | AJ000414  | 722.81    | 898.007   |
| NM_01789E | 3398.316 | 2904.709 | AA868504  | 1303.917  | 1849.755  | AK025674  | 11150.132 | 12643.979 |
| NM_00461C | 806.541  | 1176.565 | AA877845  | 3305.34   | 3408.883  | AF007194  | 8424.57   | 7490.762  |
| NM_00161Z | 2195.291 | 2511.442 | AA664241  | 18899.689 | 18693.045 | NM_01906E | 2001.375  | 2428.675  |
| AK027002  | 1180.158 | 1527.593 | NM_00058E | 11198.252 | 10243.65  | NM_004761 | 4551.844  | 5804.578  |
| AB025254  | 1484.509 | 1587.598 | SR1       | 69458.336 | 74013.359 | Z25424    | 4515.275  | 7836.884  |
| NM_004081 | 391.09   | 399.089  | SR3       | 32166.207 | 26338.676 | U79458    | 9236.604  | 14438.74  |
| NM_00002E | 5309.092 | 4879.359 | SR5       | 4851.005  | 4500.1    | NM_002961 | 8799.778  | 4259.237  |
| D38521    | 2272.715 | 1789.107 | SR7       | 3654.728  | 31116.629 | NM_01829E | 1228.578  | 1074.837  |
| NM_00040Z | 3294.095 | 2281.536 | SR9       | 14508.075 | 2751.155  | NM_00067E | 3265.922  | 2928.14   |
| NM_018127 | 8898.212 | 5928.416 | CY3Cy5    | 2643.776  | 185.478   | NM_004127 | 62722.711 | 67894.266 |
| AB020677  | 1698.408 | 1064.856 | NM_00581C | 2930.235  | 2529.292  | NM_013324 | 6491.651  | 7446.244  |
| AB033097  | 755.944  | 674.538  | M28170    | 2439.504  | 1941.18   | AL133022  | 2085.976  | 1473.237  |
| NM_00013E | 1167.582 | 779.99   | AK026223  | 538.061   | 517.828   | NM_00395Z | 4445.976  | 4270.232  |
| AJ223948  | 3560.307 | 2444.747 | NM_000874 | 4282.813  | 3533.662  | NM_006301 | 1112.231  | 1001.274  |
| NM_01621E | 1360.216 | 847.498  | AB007863  | 11291.23  | 6477.937  | AL049925  | 3520.997  | 3643.599  |
| AK022947  | 2254.826 | 1859.504 | AK024456  | 3238.164  | 2702.521  | X72887    | 1655.916  | 1711.016  |
| AL050029  | 2018.119 | 1588.977 | D31887    | 2417.182  | 2469.018  | NM_00452E | 2102.995  | 1947.543  |
| AL049966  | 502.342  | 394.932  | NM_00231Z | 2203.742  | 1678.268  | NM_000127 | 2800.822  | 3462.993  |
| AB040976  | 1328.426 | 2859     | NM_00445E | 1087.766  | 831.727   | Y10483    | 18006.779 | 16507.9   |
| NM_007361 | 885.915  | 177.734  | NM_00550Z | 1083.169  | 765.525   | NM_006784 | 1898.912  | 1820.87   |
| NM_018641 | 3900.886 | 5664.069 | NM_00150Z | 1387.873  | 1388.606  | NM_01787E | 4526.321  | 4265.519  |
| U49089    | 564.685  | 1145.308 | NM_005721 | 938.591   | 969.786   | NM_001087 | 52435.262 | 56701.27  |
| NM_002221 | 1381.366 | 1698.554 | AF284223  | 696.154   | 1130.701  | NM_00182E | 876.527   | 1319.301  |
| NM_002371 | 1209.727 | 2565.285 | BE743838  | 4982.776  | 6445.497  | AK025352  | 1280.433  | 2156.569  |
| NM_00256Z | 1311.214 | 1450.23  | AF273046  | 2273.472  | 2411.97   | NM_003721 | 9545.775  | 12209.372 |
| AK024502  | 4154.534 | 4685.517 | NM_001081 | 2114.674  | 2337.957  | NM_004724 | 3537.882  | 3234.895  |
| NM_001124 | 933.002  | 1429.881 | NM_00248Z | 1855.624  | 2362.779  | NM_001431 | 10369.015 | 9765.54   |
| NM_00458E | 2902.389 | 2864.335 | BF002026  | 1981.115  | 2590.542  | NM_000381 | 918.993   | 894.077   |
| NM_004844 | 3782.727 | 4340.61  | NM_004171 | 643.042   | 445.678   | NM_000427 | 3418.875  | 5760.318  |



|           |          |          |           |           |           |           |           |           |
|-----------|----------|----------|-----------|-----------|-----------|-----------|-----------|-----------|
| NM_013447 | 520.255  | 642.198  | NM_014037 | 3806.817  | 3391.843  | NM_014924 | 2031.018  | 4209.625  |
| NM_000051 | 2438.269 | 1488.769 | NM_004866 | 11275.275 | 8893.457  | NM_006946 | 1181.264  | 2109.227  |
| NM_004180 | 4103.605 | 2831.448 | NM_018688 | 2232.71   | 1808.068  | NM_000174 | 60063.035 | 64114.414 |
| NM_004786 | 25770.59 | 17339.5  | AK056652  | 4963.361  | 4146.006  | NM_002508 | 3542.754  | 2631.218  |
| AF302109  | 931.651  | 828.537  | AL137438  | 550.001   | 587.95    | NM_014343 | 4856.32   | 3790.987  |
| AL117485  | 2697.29  | 2065.304 | NM_017957 | 1764.238  | 1370.647  | D25303    | 915.459   | 1117.039  |
| NM_003505 | 543.003  | 587.958  | NM_003024 | 1357.378  | 793.171   | AB043007  | 36095.016 | 25234.078 |
| NM_007191 | 506.492  | 372.841  | NM_013248 | 3184.308  | 2834.568  | NM_004861 | 2074.377  | 1712.891  |
| NM_000840 | 393.659  | 127.246  | NM_000034 | 55627.695 | 68939.125 | NM_016161 | 812.988   | 659.408   |
| NM_004476 | 225.623  | 206.483  | AK022230  | 6871.713  | 7438.992  | AF022913  | 4759.015  | 3293.756  |
| AF034102  | 25831.6  | 26269.43 | AK022147  | 6162.208  | 8264.046  | NM_000028 | 2757.262  | 1498.885  |
| AJ008142  | 3703.406 | 5051.948 | L25664    | 1697.268  | 1694.135  | NM_001382 | 9306.88   | 7609.589  |
| AL035289  | 536.9    | 590.484  | NM_014940 | 1974.333  | 1777.44   | M93718    | 9005.886  | 10002.576 |
| NM_001343 | 3293.398 | 3349.783 | NM_005783 | 432.077   | 384.19    | NM_005386 | 1363.799  | 813.111   |
| NM_007275 | 6469.818 | 6045.74  | NM_006900 | 1265.575  | 1215.788  | AK023807  | 14833.037 | 10152.22  |
| NM_019025 | 5052.727 | 6358.907 | AJ289111  | 6565.334  | 9921.905  | NM_018188 | 10203.949 | 7077.68   |
| NM_018461 | 2773.365 | 3388.705 | NM_016356 | 4808.971  | 5247.993  | AK024273  | 2725.82   | 1910.495  |
| AF235023  | 6379.807 | 5519.955 | NM_006406 | 4179.519  | 5879.219  | X59417    | 53490.242 | 27881.404 |
| NM_006910 | 3132.85  | 4198.633 | AF216292  | 15684.119 | 15621.104 | NM_005659 | 44177.348 | 39247.773 |
| AF162667  | 2507.146 | 3060.495 | NM_005894 | 485.604   | 391.342   | D28476    | 9322.639  | 7801.1    |
| AB046847  | 3012.212 | 2723.976 | NM_014584 | 6995.916  | 10746.743 | NM_016263 | 4667.782  | 4354.104  |
| NM_000447 | 715.211  | 668.093  | NM_016649 | 3018.205  | 2688.207  | NM_003335 | 34936.875 | 26793.912 |
| NM_006354 | 4134.312 | 4093.206 | AK090536  | 11718.345 | 12602.637 | AB002376  | 6322.073  | 4353.624  |
| AF303378  | 3506.747 | 2459.315 | D63477    | 743.228   | 720.244   | NM_016631 | 1939.836  | 2150.267  |
| NM_016037 | 12211.09 | 5821.98  | NM_020243 | 20803.453 | 16341.625 | AK022730  | 2569.673  | 2535.148  |
| NM_000043 | 7079.531 | 4316.648 | NM_014051 | 8927.13   | 10783.975 | NM_002256 | 20611.008 | 14567.586 |
| NM_015965 | 698.533  | 629.145  | AK025398  | 1807.566  | 1701.578  | AF064839  | 50385.172 | 37496.289 |
| NM_000417 | 3211.464 | 2385.826 | AK023056  | 875.723   | 974.23    | NM_005439 | 12733.854 | 7143.692  |
| NM_018235 | 8047.525 | 9025.213 | NM_017888 | 1542.121  | 1586.321  | AB037810  | 6338.757  | 3023.933  |
| NM_002424 | 405.439  | 316.425  | NM_004915 | 3845.071  | 2596.82   | NM_000376 | 3625.212  | 3031.988  |
| NM_012104 | 613.424  | 588.135  | AK022207  | 630.74    | 626.461   | NM_000475 | 9734.178  | 8400.146  |
| NM_006144 | 25007.22 | 18979.06 | AV708752  | 2481.544  | 2364.975  | M61872    | 16713.178 | 15957.445 |
| AL136549  | 8129.011 | 11140.71 | AF119885  | 853.113   | 894.52    | AK027089  | 1014.12   | 1345.516  |
| NM_012168 | 454.674  | 887.659  | NM_004996 | 2650.528  | 2893.777  | X59845    | 1501.97   | 1511.989  |
| NM_007038 | 469.032  | 325.934  | NM_005971 | 3394.731  | 4465.133  | NM_006284 | 24314.16  | 23873.688 |
| AF311324  | 7511.142 | 6086.77  | NM_017435 | 1010.017  | 1332.971  | U18909    | 2295.879  | 2239.803  |
| AF124433  | 757.955  | 840.019  | NM_013386 | 2176.108  | 3203.099  | NM_003489 | 3638.021  | 3039.643  |
| AK001647  | 531.651  | 470.141  | NM_006517 | 411.766   | 1481.451  | NM_016589 | 16685.875 | 15147.116 |
| NM_001461 | 420.216  | 271.194  | AK026680  | 4544.776  | 3610.933  | NM_003597 | 974.412   | 877.938   |
| AF061556  | 1178.641 | 1125.472 | NM_012436 | 44803.652 | 36931.773 | NM_002568 | 46186.316 | 41446.859 |
| AL162049  | 1333.39  | 1487.936 | AK001299  | 16258.708 | 12869.017 | NM_006561 | 7107.677  | 8947.183  |
| AF036144  | 365.93   | 368.958  | AB014559  | 7673.271  | 6607.967  | NM_017521 | 2156.005  | 2623.166  |
| NM_005032 | 1150.114 | 833.538  | NM_016489 | 6733.263  | 5791.78   | NM_001383 | 10660.715 | 8385.151  |
| NM_004160 | 4821.441 | 3724.948 | NM_005033 | 6544.385  | 5746.68   | NM_005008 | 15981.538 | 13634.81  |
| AL109677  | 1124.43  | 823.023  | NM_015932 | 51994.645 | 52375.609 | NM_016304 | 27172.367 | 23090.541 |
| NM_003941 | 9217.403 | 9284.132 | NM_017949 | 802.559   | 678.302   | NM_006013 | 19293.127 | 23313.82  |
| AF177909  | 383.482  | 321.748  | AK022169  | 779.592   | 703.211   | NM_014046 | 15251.691 | 8587.332  |
| NM_002664 | 1227.525 | 985.742  | AF015592  | 2668.178  | 2753.656  | L34071    | 5396.945  | 3164.588  |
| AB018271  | 1119.007 | 863.802  | AK026795  | 1773.621  | 1933.527  | AK025201  | 12142.564 | 11795.369 |
| AL137665  | 1986.602 | 1491.79  | NM_016617 | 8533.521  | 8218.576  | AK021927  | 930.486   | 1091.443  |
| NM_016434 | 822.216  | 373.511  | NM_002027 | 5499.77   | 6152.944  | AK022995  | 3707.825  | 4156.976  |
| U36561    | 55629.01 | 63991.86 | AL162078  | 1664.364  | 1874.727  | AL109703  | 621.816   | 476.715   |
| NM_005634 | 1791.922 | 3042.28  | NM_000919 | 498.169   | 568.44    | NM_006066 | 19284.916 | 19899.588 |

|           |          |          |           |           |           |           |           |           |
|-----------|----------|----------|-----------|-----------|-----------|-----------|-----------|-----------|
| NM_017757 | 3525.682 | 3599.287 | NM_013382 | 8184.129  | 7204.054  | AV718258  | 1146.698  | 1190.178  |
| NM_002146 | 1178.158 | 1462.427 | AB002314  | 666.676   | 1013.655  | NM_005165 | 7254.938  | 9188.379  |
| AB007892  | 1643.769 | 2660.413 | NM_014622 | 954.927   | 1316.214  | NM_005138 | 48563.855 | 48853.754 |
| AB037748  | 1179.757 | 1598.145 | AB011114  | 46474.703 | 57234.906 | NM_002115 | 43579.824 | 41820.953 |
| AB002306  | 2504.085 | 3256.446 | D11466    | 14911.043 | 21696.744 | AK023162  | 3385.498  | 2794.41   |
| NM_001300 | 3771.092 | 3520.719 | NM_014056 | 15548.729 | 22464.174 | NM_006396 | 10381.743 | 13274.568 |
| NM_012472 | 948.431  | 961.978  | D31885    | 22597.84  | 34391.93  | NM_018649 | 5508.01   | 7172.982  |
| NM_018187 | 6756.317 | 7026.485 | BE743838  | 6006.55   | 5220.906  | NM_018263 | 908.833   | 1317.639  |
| NM_003016 | 18664.03 | 20222.78 | AF273046  | 1758.782  | 1392.676  | NM_013449 | 3544.155  | 4071.024  |
| NM_005463 | 2625.528 | 3396.145 | NM_001081 | 2069.209  | 1695.421  | NM_004537 | 1489.14   | 1285.282  |
| NM_001325 | 1916.314 | 2134.173 | NM_002483 | 1511.307  | 1437.431  | AL390134  | 8238.408  | 9318.755  |
| NM_018282 | 5415.453 | 4035.485 | BF002026  | 1718.625  | 1508.123  | NM_020226 | 4452.158  | 4336.417  |
| BC019932  | 901.826  | 931.269  | BE790116  | 804.916   | 423.952   | NM_017865 | 5305.814  | 5782.309  |
| AF114818  | 1933.229 | 2030.738 | AI922341  | 880.059   | 556.19    | NM_003427 | 3879.451  | 4645.156  |
| AK025106  | 1960.109 | 2226.239 | M12824    | 2302.179  | 1525.487  | NM_005920 | 2585.819  | 3719.448  |
| NM_020144 | 2009.247 | 1595.115 | W60100    | 2495.472  | 3346.52   | Y09321    | 1172.659  | 1687.079  |
| NM_003908 | 36137.54 | 24172.38 | M24898    | 395.16    | 427.213   | AK001499  | 7914.599  | 3556.389  |
| BE893142  | 1665.222 | 1358.235 | AA457153  | 1853.578  | 1683.516  | AK023568  | 777.133   | 833.915   |
| NM_003103 | 4030.146 | 3513.012 | AA283122  | 906.09    | 1181.607  | AK026852  | 3217.322  | 2345.539  |
| NM_015340 | 3891.689 | 3045.781 | AA868504  | 1384.124  | 1760.946  | AK021629  | 2865.77   | 1858.776  |
| NM_006451 | 3583.826 | 2741.262 | AA877845  | 3525.615  | 3429.417  | AL110257  | 61470.805 | 56873.352 |
| NM_002094 | 2026.69  | 1500.469 | AA664241  | 24510.166 | 20508.457 | AB013384  | 3122.762  | 2568.847  |
| NM_002937 | 1304.806 | 1003.748 | AI016456  | 462.27    | 517.359   | AK024824  | 1819.558  | 1536.898  |
| NM_003191 | 3152.096 | 2340.378 | AK026281  | 1218.491  | 2245.586  | AK024270  | 3515.147  | 2614.964  |
| AL137476  | 1114.398 | 1448.258 | NM_006406 | 4351.026  | 4733.77   | AK025569  | 8872.604  | 5126.427  |
| AF052174  | 2078.864 | 2471.139 | AF216292  | 16195.556 | 9669.704  | AK023060  | 2347.96   | 1128.073  |
| AF070590  | 719.808  | 1048.749 | NM_014584 | 8127.936  | 8566.798  | NM_014870 | 1365.067  | 1160.14   |
| NM_000761 | 10933.09 | 13973.24 | NM_005810 | 3222.734  | 2462.244  | AF052146  | 58643.73  | 39615.855 |
| NM_020142 | 1006.432 | 1402.958 | M28170    | 2487.844  | 1794.003  | NM_004870 | 11444.595 | 7560.745  |
| NM_000774 | 1682.629 | 2037.91  | AK026223  | 692.249   | 463.995   | AF143872  | 16638.424 | 13994.874 |
| NM_017781 | 1686.036 | 2041.293 | NM_000874 | 4177.01   | 3469      | AK025686  | 3340.584  | 3475.163  |
| NM_006004 | 47749.36 | 43971.21 | NM_005854 | 438.269   | 275.572   | AF143326  | 3442.306  | 3229.708  |
| NM_004894 | 22415.37 | 18486.04 | AB007863  | 13087.603 | 10441.871 | AL049229  | 4805.71   | 2955.104  |
| AB028960  | 471.294  | 384.898  | AK024456  | 3205.83   | 3398.709  | NM_018306 | 50372.828 | 43184.445 |
| NM_005648 | 35691.41 | 27695.21 | NM_017789 | 358.17    | 555.349   | AK026146  | 7124.505  | 3890.778  |
| NM_006943 | 5061.072 | 4561.799 | D31887    | 2645.744  | 2369.61   | AL389937  | 6696.958  | 4463.247  |
| NM_006741 | 1265.633 | 1092.149 | NM_002313 | 2512.979  | 1972.326  | AK022628  | 63175.871 | 57482.477 |
| NM_014166 | 7394.748 | 5962.122 | NM_004459 | 1386.673  | 1453.898  | AK021737  | 11088.113 | 9669.875  |
| AL117606  | 4100.296 | 3344.946 | NM_005503 | 1476.677  | 1278.569  | AL357454  | 1158.289  | 1056.807  |
| NM_012330 | 1609.998 | 1437.611 | NM_001502 | 1512.791  | 2407.147  | AK026295  | 14165.86  | 12137.453 |
| AF294278  | 763.422  | 545.946  | NM_005721 | 1154.227  | 1749.777  | AK022346  | 1006.956  | 626.413   |
| NM_018211 | 1582.495 | 1458.254 | AF284223  | 982.685   | 1545.307  | AK025007  | 4164.133  | 2868.231  |
| NM_014520 | 1793.166 | 1383.797 | AF176012  | 737.863   | 1965.424  | NM_016486 | 6861.02   | 6500.248  |
| NM_002616 | 3514.926 | 2444.91  | NM_005971 | 3204.404  | 2756.001  | AL117601  | 1054.334  | 678.902   |
| AK025712  | 9696.981 | 6991.372 | NM_017435 | 641.66    | 633.411   | AK026490  | 59881.148 | 46067.465 |
| AK026375  | 3443.357 | 4110.004 | NM_013386 | 2303.496  | 2035.397  | AJ227861  | 4245.35   | 2778.408  |
| NM_014710 | 521.918  | 868.505  | NM_004171 | 591.949   | 507.925   | AJ001020  | 1128.11   | 610.382   |
| U85992    | 1366.278 | 1611.749 | NM_014037 | 3896.982  | 3081.087  | AJ001875  | 3728.966  | 2299.074  |
| AL110152  | 368.191  | 575.911  | NM_004866 | 10547.508 | 7627.573  | X64985    | 1045.044  | 701.044   |
| AF131745  | 2369.395 | 3596.68  | NM_018688 | 1926.901  | 1276.615  | Y10507    | 820.744   | 500.778   |
| AL117565  | 1813.804 | 1840.756 | AK056652  | 4214.851  | 3038.629  | L13433    | 2430.445  | 1367.569  |
| AF147305  | 557.147  | 469.477  | AL137438  | 528.958   | 576.138   | NM_007220 | 1610.201  | 869.539   |
| AK022103  | 259.825  | 357.606  | NM_017957 | 2220.072  | 2220.3    | NM_017777 | 3691.845  | 1998.513  |

|           |          |          |           |           |           |           |           |           |
|-----------|----------|----------|-----------|-----------|-----------|-----------|-----------|-----------|
| NM_00703C | 461.775  | 403.016  | NM_003024 | 1241.195  | 1308.544  | AL109722  | 729.481   | 497.206   |
| AF143882  | 868.633  | 847.05   | NM_01324E | 3626.942  | 3987.727  | AK021989  | 771.225   | 994.485   |
| U00953    | 190.813  | 373.411  | NM_000034 | 60743.699 | 74383.695 | AK022298  | 5613.574  | 3525.074  |
| AF086232  | 372.966  | 448.642  | AK022230  | 4506.754  | 4802.937  | AJ277441  | 41550.34  | 44583.734 |
| NM_01774Z | 994.479  | 834.616  | AK022147  | 6579.284  | 9923.138  | NM_006057 | 1386.503  | 1060.563  |
| NM_00510E | 978.526  | 1091.11  | L25664    | 2202.215  | 2424.515  | AK024242  | 20340.795 | 12772.813 |
| AK022292  | 1470.722 | 1593.987 | NM_01494C | 2116.908  | 2568.919  | AK024559  | 1283.118  | 1095.174  |
| AK024173  | 516.551  | 132.285  | NM_00578Z | 481.151   | 645.954   | AK024851  | 944.984   | 731.148   |
| AB051436  | 2103.96  | 1752.37  | NM_00690C | 1790.9    | 2449.447  | AK024577  | 1370.675  | 1583.394  |
| AK026482  | 1070.717 | 1335.437 | AJ289111  | 7314.649  | 13331.581 | AL359943  | 72450.992 | 64472.016 |
| AL137473  | 2820.263 | 2247.286 | NM_01635E | 6332.775  | 8763.695  | NM_000534 | 5494.726  | 7584.139  |
| AB026054  | 224.584  | 452.866  | NM_01404Z | 7185.874  | 7492.926  | NM_00536E | 2810.894  | 3372.665  |
| AK022604  | 1773.658 | 1876.921 | NM_01462Z | 1050.961  | 1038.731  | L10140    | 1355.981  | 1908.05   |
| U66048    | 817.957  | 1113.895 | AB011114  | 41854.875 | 29506.957 | AL133447  | 3349.723  | 4302.877  |
| AK023401  | 760.051  | 736.307  | D11466    | 14312.467 | 13649.033 | AB037853  | 31685.357 | 41709.023 |
| AK001865  | 805.829  | 640.657  | NM_01405E | 21457.453 | 19981.066 | D28450    | 65994.703 | 69109.391 |
| AK024035  | 4588.287 | 4809.177 | D31885    | 20347.764 | 19862.441 | AK056222  | 3915.893  | 4290.176  |
| AL049331  | 381.73   | 276.156  | NM_01664E | 2791.283  | 2562.836  | AK002028  | 48046.004 | 38448.238 |
| AL050079  | 217.562  | 236.101  | AK090536  | 11378.31  | 11311.277 | AL050127  | 2693.998  | 2699.429  |
| AL117591  | 1052.177 | 844.84   | D63477    | 721.392   | 610.065   | AK024805  | 12209.056 | 13721.432 |
| AL050132  | 272.846  | 268.281  | NM_02024Z | 19494.592 | 15151.372 | AK001423  | 3459.77   | 2954.651  |
| AL110230  | 119.487  | 321.173  | NM_014051 | 7676.256  | 7926.968  | AK024090  | 24293.545 | 40432.531 |
| NM_01429Z | 263.999  | 374.477  | AK025398  | 1887.022  | 1793.435  | AL133574  | 2114.786  | 3280.91   |
| AK024432  | 1199.91  | 1229.027 | AK023056  | 951.466   | 1085.49   | AK021936  | 3298.175  | 4893.678  |
| AL137513  | 566.127  | 596.972  | NM_00112C | 34687.016 | 32838.137 | AF147339  | 30921.48  | 39559.824 |
| AF088001  | 579.465  | 426.558  | NM_01788E | 1981.129  | 2260.628  | AL390181  | 53418.66  | 53870.527 |
| NM_018067 | 5215.851 | 4734.572 | NM_00491E | 4495.202  | 4081.704  | NM_017914 | 28559.961 | 37158.578 |
| NM_01895E | 6738.542 | 6623.302 | AK022207  | 789.265   | 1079.894  | NM_00635C | 1773.566  | 2256.778  |
| NM_014787 | 1531.545 | 1167.335 | AV708752  | 3232.14   | 4497.566  | AK024953  | 17140.447 | 15552.963 |
| AL122109  | 483.056  | 443.44   | AF119885  | 2139.042  | 3268.959  | AK024276  | 7420.527  | 7496.832  |
| AF074988  | 1049.079 | 861.185  | NM_00075C | 461.652   | 673.79    | S83374    | 4617.637  | 5281.968  |
| AK024946  | 1047.338 | 749.437  | NM_00499E | 2841.298  | 3983.992  | AL161979  | 1420.041  | 1886.802  |
| AK001432  | 383.072  | 537.727  | NM_00058E | 12153.264 | 10637.603 | AK025784  | 42272.945 | 39613.531 |
| AL133568  | 5646.215 | 5477.322 | AK026281  | 1206.66   | 1065.793  | U07199    | 5187.068  | 4573.205  |
| AF009265  | 1757.168 | 2665.134 | U23862    | 325.596   | 205.86    | AK023713  | 1710.137  | 1661.285  |
| AF009309  | 282.279  | 252.841  | AK026680  | 4770.945  | 4147.159  | X81445    | 1176.38   | 1075.518  |
| NM_00236C | 749.1    | 1388.224 | NM_01243E | 47247.504 | 37768.148 | U95091    | 2070.323  | 1843.952  |
| AF009322  | 550.077  | 573.176  | AK001299  | 18266.246 | 12921.231 | NM_01790C | 41349.07  | 35733.832 |
| AF056425  | 385.205  | 510.092  | AB014559  | 8443.431  | 6648.495  | S50182    | 1789.368  | 1495.032  |
| AF090893  | 293.582  | 331.464  | NM_01648E | 6171.089  | 5251.453  | AL360145  | 1582.275  | 1737.399  |
| NM_01803Z | 604.423  | 669.14   | NM_00503Z | 6090.997  | 5762.885  | Y12016    | 2301.734  | 1867.595  |
| AK001945  | 274.19   | 284.464  | NM_01593Z | 51633.848 | 67458.313 | NM_00117E | 3321.449  | 4523.609  |
| AK021766  | 335.193  | 403.248  | NM_01794E | 797.749   | 805.667   | AK023696  | 7582.267  | 10653.164 |
| AK021630  | 547.435  | 318.788  | AK022169  | 962.191   | 945.043   | AF116613  | 524.465   | 769.937   |
| AK021831  | 569.498  | 711.473  | AF015592  | 2460.002  | 3040.183  | NM_000704 | 2997.816  | 4474.93   |
| AK025650  | 437.845  | 349.504  | AK026795  | 1820.019  | 2068.577  | NM_015987 | 2269.214  | 2164.469  |
| AK026401  | 376.62   | 260.463  | NM_01639E | 3435.878  | 3835.239  | NM_01960E | 3717.893  | 3817.918  |
| AK026773  | 274.532  | 192.639  | NM_016617 | 8632.275  | 9008.161  | NM_01536E | 993.767   | 1590.145  |
| AK026452  | 233.51   | 289.933  | NM_002027 | 6800.076  | 9277.082  | Z49090    | 6149.177  | 6543.338  |
| U73530    | 604.006  | 767.032  | AL162078  | 1923.179  | 2933.728  | X75685    | 2837.732  | 2556.671  |
| AF086158  | 6987.949 | 6802.964 | NM_00091E | 884.837   | 1090.972  | AK021592  | 8310.819  | 8287.551  |
| AF086050  | 4701.167 | 5143.804 | NM_01338Z | 11158.62  | 15840.391 | AK025467  | 3980.658  | 4000.542  |
| AF147375  | 683.92   | 533.466  | AB002314  | 999.936   | 993.312   | AK026593  | 19870.811 | 26626.391 |

|           |          |          |           |           |           |           |           |           |
|-----------|----------|----------|-----------|-----------|-----------|-----------|-----------|-----------|
| X51524    | 1078.315 | 1340.365 | NM_005503 | 1335.124  | 1041.353  | L37700    | 1773.584  | 1287.101  |
| AK025759  | 2550.451 | 3409.931 | NM_001502 | 1393.857  | 1122.779  | NM_017665 | 5822.89   | 3799.21   |
| AK024105  | 487.26   | 400.211  | NM_005721 | 979.652   | 715.536   | AB007966  | 473.372   | 657.076   |
| AJ238556  | 388.53   | 422.766  | AF284223  | 1184.665  | 1073.934  | AK024819  | 945.984   | 798.555   |
| AK021516  | 184.057  | 127.855  | AF176012  | 503.956   | 661.251   | AF052106  | 3428.282  | 3313.366  |
| Z70699    | 437.212  | 557.853  | BE743838  | 4943.015  | 4571.492  | AK000441  | 1770.639  | 1307.129  |
| AL049919  | 239.549  | 326.984  | AF273046  | 1661.968  | 1247.219  | AK022391  | 2086.792  | 2415.283  |
| NM_006895 | 325.541  | 585.274  | NM_001081 | 1925.329  | 1574.538  | NM_016125 | 1415.849  | 1194.118  |
| AK023429  | 409.181  | 273.279  | NM_002483 | 1590.068  | 1324.129  | AA700005  | 3232.067  | 1883.598  |
| AK022276  | 546.606  | 467.204  | BF002026  | 1480.517  | 1250.244  | AA292025  | 2768.127  | 2086.932  |
| AK026881  | 317.194  | 284.494  | BE790116  | 888.851   | 380.762   | AA437226  | 1565.043  | 1785.412  |
| AL133653  | 281.235  | 274.07   | AI922341  | 1077.715  | 1129.754  | R36143    | 470.455   | 993.608   |
| AK023774  | 1308.242 | 825.343  | M12824    | 2335.769  | 2017.443  | XM_056359 | 592.411   | 682.785   |
| U17640    | 138.541  | 303.845  | W60100    | 2552.319  | 3860.273  | D10353/NM | 5640.505  | 6409.182  |
| AK001187  | 1238.894 | 1853.068 | M24898    | 393.589   | 496.571   | M15042    | 6149.747  | 7035.812  |
| NM_003525 | 2914.207 | 3559.282 | U72508    | 344.342   | 409.145   | AK056843  | 1488.949  | 2038.821  |
| AF086284  | 297.61   | 360.732  | AA457153  | 1956.443  | 2144.029  | U49928    | 11105.154 | 14809.359 |
| AF056436  | 1653.13  | 2351.872 | AA283122  | 1144.501  | 1494.585  | AK096645  | 25462.539 | 29211.24  |
| AB023191  | 893.647  | 1256.411 | AA868504  | 1451.362  | 2324.864  | AK092859  | 1327.373  | 1555.729  |
| AK027212  | 5499.943 | 6213.812 | AA877845  | 3906.33   | 5800.202  | NM_019884 | 7150.484  | 7389.782  |
| X56197    | 1010.387 | 1660.796 | AA664241  | 29422.291 | 29788.9   | SR2       | 63910.797 | 59724.711 |
| NM_005195 | 475.105  | 755.199  | AI016456  | 659.526   | 803.043   | SR4       | 21465.025 | 17762.914 |
| U90905    | 626.998  | 1109.367 | NM_014940 | 2139.139  | 2129.237  | SR6       | 4642.777  | 3229.39   |
| AF161422  | 2076.637 | 2109.174 | NM_006900 | 1150.934  | 831.802   | SR8       | 11487.372 | 24881.822 |
| AL137384  | 1150.513 | 669.843  | AJ289111  | 6414.689  | 7307.771  | SR10      | 41395.109 | 9363.177  |
| AF070619  | 710.721  | 925.333  | NM_016355 | 3730.152  | 3488.91   | CY3Cy5    | 4332.659  | 153.545   |
| NM_020153 | 536.5    | 2153.871 | NM_006405 | 4413.077  | 4740.264  | NM_005385 | 6673.619  | 4520.646  |
| NM_005321 | 1933.391 | 2534.966 | AF216292  | 14701.013 | 8665.65   | NM_007232 | 23819.01  | 21181.943 |
| AF073520  | 1059.311 | 1466.657 | NM_005894 | 462.641   | 400.858   | NM_003027 | 848.359   | 1226.671  |
| NM_014015 | 3226.483 | 4415.625 | NM_014584 | 7174.606  | 6117.568  | NM_002717 | 9841.977  | 8128.791  |
| AK026839  | 326.442  | 343.486  | NM_005810 | 3361.761  | 3069.857  | NM_014485 | 376.127   | 797.633   |
| AK024973  | 292.694  | 467.266  | M28170    | 3074.374  | 2740.986  | NM_003025 | 12301.341 | 17587.609 |
| AJ008123  | 1302.295 | 1488.142 | AK026223  | 675.533   | 633.483   | NM_004305 | 40532.637 | 47083.555 |
| AJ008156  | 1056.934 | 1063.622 | NM_000874 | 3682.65   | 3843.961  | NM_006785 | 1670.089  | 2375.409  |
| AF147321  | 504.771  | 386.292  | NM_005854 | 486.027   | 429.479   | NM_006205 | 3295.854  | 4125.13   |
| AF161437  | 2698.133 | 2108.898 | AB007863  | 12784.613 | 11653.865 | NM_004034 | 4075.14   | 4463.911  |
| AK026465  | 602.1    | 984.114  | AK024456  | 3511.736  | 4705.688  | NM_000130 | 5161.292  | 6330.931  |
| AK024321  | 133.993  | 321.412  | NM_017785 | 590.759   | 787.692   | AI492087  | 2246.81   | 2071.218  |
| U52834    | 455.415  | 936.939  | NM_002313 | 2583.194  | 2501.994  | NM_004193 | 2924.142  | 5292.078  |
| M34428    | 297.897  | 491.354  | NM_004455 | 1406.546  | 1487.447  | NM_002803 | 19624.453 | 26912.582 |
| NM_003532 | 422.751  | 504.545  | NM_004915 | 4570.09   | 2805.341  | AB033102  | 14437.306 | 7952.49   |
| NM_017865 | 4525.55  | 4905.415 | AK022207  | 617.785   | 829.559   | NM_014774 | 6409.767  | 4832.403  |
| AF075100  | 575.791  | 853.611  | AV708752  | 2794.372  | 2177.268  | NM_014143 | 11254.407 | 10850.703 |
| AF203447  | 6552.88  | 6475.024 | AF119885  | 1746.28   | 1552.222  | M55646    | 15183.657 | 13609.713 |
| NM_018502 | 1266.23  | 1437.685 | NM_000750 | 452.214   | 350.99    | NM_006112 | 26186.16  | 23387.963 |
| AL080066  | 8029.243 | 7488.145 | NM_004995 | 3333.393  | 2933.127  | M12807    | 734.862   | 1325.653  |
| AJ227870  | 757.841  | 1372.927 | NM_005971 | 3020.344  | 2583.429  | NM_012095 | 4405.723  | 4332.084  |
| AL137620  | 768.482  | 978.24   | NM_017435 | 1177.563  | 980.558   | NM_018684 | 20605.824 | 20306.02  |
| NM_005294 | 649.496  | 518.236  | NM_013385 | 2285.775  | 2210.278  | NM_017983 | 1735.766  | 1369.518  |
| AK026879  | 261.919  | 420.195  | NM_004171 | 675.335   | 703.823   | AF116909  | 1582.308  | 1693.703  |
| AF085826  | 958.727  | 1224.908 | NM_014037 | 4232.276  | 3936.149  | BE906724  | 985.435   | 1465.827  |
| AK024362  | 736.828  | 1396.563 | NM_004865 | 10026.281 | 9552.924  | NM_002283 | 6518.181  | 7620.193  |
| AF118068  | 2807.738 | 2931.301 | NM_017957 | 2242.906  | 2286.147  | AJ276095  | 14090.519 | 12134.394 |

|           |          |          |           |           |           |           |           |           |
|-----------|----------|----------|-----------|-----------|-----------|-----------|-----------|-----------|
| NM_004164 | 558.761  | 555.862  | NM_003024 | 1483.592  | 1703.344  | NM_004819 | 3939.237  | 3794.797  |
| NM_019018 | 3045.755 | 2681.791 | NM_013248 | 4143.987  | 5679.914  | NM_007184 | 2890.719  | 2457.368  |
| M87931    | 713.914  | 833.013  | AK022230  | 4147.456  | 5821.843  | AF231916  | 2513.12   | 4034.488  |
| CY3Cy5    | 7877.987 | 803.201  | AK022147  | 8544.111  | 13643.566 | NM_003501 | 5832.605  | 8419.575  |
| BE790116  | 564.292  | 1241.235 | L25664    | 2783.197  | 3392.927  | NM_014631 | 937.212   | 590.548   |
| AI922341  | 1226.906 | 965.76   | NM_002027 | 8215.215  | 8195.66   | NM_001089 | 3235.065  | 3384.035  |
| M12824    | 3515.142 | 3799.786 | AL162078  | 1801.481  | 1658.186  | NM_000120 | 2650.366  | 3707.828  |
| W60100    | 9312.078 | 6014.495 | NM_000919 | 831.379   | 654.841   | AF172327  | 48868.289 | 42924.02  |
| U72508    | 937.606  | 963.202  | NM_013382 | 9278.381  | 5974.795  | NM_001676 | 4749.21   | 6309.648  |
| AA457153  | 4497.979 | 4526.251 | AB002314  | 964.582   | 786.881   | NM_000220 | 536.779   | 694.853   |
| AA283122  | 824.882  | 638.147  | NM_014043 | 7329.558  | 7737.72   | NM_001679 | 27067.244 | 27983.496 |
| AA868504  | 6080.529 | 4274.185 | NM_014622 | 1008.95   | 765.188   | NM_004046 | 68724.469 | 68756.07  |
| AA877845  | 9194.078 | 9094.753 | AB011114  | 44736.727 | 31986.502 | NM_004983 | 842.705   | 1128.727  |
| AA664241  | 15588.02 | 15958.6  | D11466    | 14022.536 | 12873.614 | U09384    | 565.355   | 1043.765  |
| NM_000588 | 21366.39 | 20648.51 | NM_014056 | 19342.361 | 15359.713 | NM_006860 | 10962.05  | 10593.869 |
| SR5       | 7939.479 | 7194.433 | D31885    | 19159.1   | 17697.02  | NM_004283 | 1672.047  | 1797.538  |
| SR7       | 8227.468 | 46183.05 | NM_016649 | 2592.564  | 2214.697  | NM_004163 | 13133.178 | 11531.672 |
| SR9       | 28485.42 | 4736.859 | AK090536  | 9712.17   | 11484.583 | AK026308  | 2703.944  | 2902.079  |
| CY3Cy5    | 4874.659 | 292.268  | D63477    | 581.667   | 770.562   | NM_013337 | 2269.998  | 2400.01   |
| NM_005810 | 2386.798 | 2213.261 | NM_020243 | 18849.627 | 16947.99  | NM_006899 | 11070.366 | 17845.068 |
| AK026223  | 1397.78  | 1460.565 | NM_014051 | 7862.56   | 9715.258  | NM_012200 | 4352.716  | 7450.359  |
| NM_000874 | 12770.59 | 7300.052 | AK025398  | 1718.21   | 2159.219  | AL591715  | 1035.291  | 392.838   |
| AB007863  | 1041.588 | 1011.791 | AK023056  | 1244.761  | 1709.446  | NM_018042 | 2747.991  | 2561.272  |
| AK024456  | 6549.354 | 6330.41  | NM_017888 | 2126.53   | 2373.333  | BE741525  | 1617.56   | 1718.301  |
| D31887    | 4612.518 | 5618.14  | NM_003150 | 4604.605  | 3598.786  | BF030555  | 25539.84  | 25174.754 |
| NM_002313 | 4227.025 | 4323.625 | NM_014784 | 2836.317  | 2585.008  | NM_012433 | 16300.689 | 13331.902 |
| NM_004459 | 2956.422 | 2823.125 | AK026383  | 2919.852  | 2299.114  | NM_005605 | 6122.015  | 6034.902  |
| NM_005503 | 2534.761 | 2994.015 | AK023821  | 731.518   | 735.894   | NM_002576 | 2954.105  | 3669.599  |
| NM_001502 | 1219.857 | 966.041  | AB014594  | 4522.086  | 3842.73   | NM_003582 | 5130.538  | 4390.529  |
| NM_005721 | 1729.023 | 1437.775 | M94547    | 1262.04   | 1198.209  | AF057354  | 1065.05   | 1163.323  |
| AF284223  | 1865.965 | 1890.703 | NM_005087 | 6062.168  | 5095.159  | M14200    | 67238.359 | 60800.262 |
| NM_002483 | 3160.548 | 2977.874 | NM_012098 | 1181.994  | 848.615   | NM_000282 | 5407.893  | 5767.023  |
| BF002026  | 2081.723 | 1973.317 | NM_018095 | 2408.53   | 2426.565  | NM_000532 | 30782.857 | 26273.363 |
| NM_014037 | 1277.475 | 1290.118 | AB023164  | 2711.317  | 2140.863  | NM_016341 | 1295.694  | 1162.523  |
| NM_004866 | 18943.65 | 14900.97 | AK026281  | 1264.023  | 1119.534  | AA437226  | 1326.249  | 1732.62   |
| NM_018688 | 4239.942 | 4116.089 | AK026680  | 4780.116  | 3700.897  | XM_056359 | 969.159   | 639.038   |
| AK056652  | 7147.921 | 9013.903 | NM_012436 | 52056.336 | 60011.418 | D10353/NM | 6374.265  | 5573.639  |
| AL137438  | 1237.03  | 1057.992 | AK001299  | 20990.289 | 18251.947 | M15042    | 6048.018  | 5627.953  |
| NM_017957 | 1168.246 | 1244.963 | AB014559  | 11600.243 | 10432.476 | AK056843  | 1374.653  | 1748.743  |
| NM_003024 | 2380.893 | 2428.622 | NM_016489 | 6148.135  | 6594.979  | U49928    | 11630.662 | 11035.941 |
| NM_013248 | 9291.876 | 9656.221 | NM_005033 | 5744.848  | 7086.718  | AK096645  | 27406.451 | 25344.926 |
| NM_000034 | 70838.58 | 71464.7  | NM_015932 | 53795.461 | 70195.242 | AK092859  | 1016.704  | 1400.019  |
| AK022230  | 7325.636 | 5849.287 | NM_017949 | 1073.777  | 1381.203  | NM_019884 | 7694.794  | 8020.079  |
| AK022147  | 11589.87 | 7999.688 | AK022169  | 937.376   | 1594.793  | NM_018291 | 6565.895  | 6104.886  |
| L25664    | 1347.567 | 1322.398 | AF015592  | 3073.927  | 5332.752  | NM_005530 | 7743.034  | 7201.16   |
| NM_014940 | 5522.112 | 3203.259 | AK026795  | 2179.345  | 3271.366  | NM_018653 | 1005.756  | 466.075   |
| NM_005783 | 916.641  | 765.348  | NM_016617 | 10272.53  | 14201.157 | NM_005388 | 6797.818  | 4735.733  |
| NM_006900 | 814.279  | 719.238  | NM_002338 | 4508.703  | 4241.764  | NM_007232 | 27784.01  | 22040.939 |
| AJ289111  | 15204.48 | 10937.07 | AL117666  | 658.682   | 710.444   | NM_003027 | 932.353   | 1197.624  |
| NM_016356 | 721.633  | 1134.525 | Y17865    | 967.348   | 572.815   | NM_003025 | 12978.372 | 12649.772 |
| NM_014584 | 15520.67 | 12453.93 | NM_005825 | 12283.077 | 10407.742 | NM_020179 | 11451.767 | 12102.394 |
| NM_016649 | 5369.397 | 5761.097 | NM_002756 | 3280.374  | 2478.799  | NM_004306 | 45663.762 | 43293.113 |
| AK090536  | 22380.53 | 15881.84 | AJ000414  | 395.478   | 214.419   | NM_001153 | 348.775   | 762.601   |

|           |          |          |           |           |           |           |           |           |
|-----------|----------|----------|-----------|-----------|-----------|-----------|-----------|-----------|
| D63477    | 2049.035 | 1665.355 | AK025674  | 7041.013  | 5911.2    | NM_006786 | 1558.383  | 2000.791  |
| NM_014051 | 16499.82 | 14899.28 | AF007194  | 3942.095  | 3772.048  | NM_006205 | 3042.022  | 2684.998  |
| AK025398  | 4172.268 | 3469.417 | NM_019065 | 1447.96   | 1028.172  | NM_006860 | 10434.767 | 9051.367  |
| AK027082  | 1187.886 | 1004.626 | NM_004761 | 2599.749  | 2386.997  | NM_005505 | 6550.197  | 10890.847 |
| AK023056  | 2589.725 | 2298.384 | Z25424    | 2383.526  | 2074.672  | NM_018485 | 854.276   | 2299.773  |
| NM_017885 | 3008.583 | 2989.371 | U79458    | 5140.745  | 5520.771  | NM_016565 | 1423.544  | 1473.765  |
| NM_004915 | 3898.536 | 6769.041 | NM_014920 | 492.951   | 406.262   | AB033102  | 16367.852 | 13997.252 |
| AK022207  | 1077.701 | 796.456  | NM_002961 | 2728.068  | 5311.598  | NM_014774 | 7080.833  | 5333.445  |
| AV708752  | 4056.995 | 4732.833 | NM_018295 | 845.171   | 871.046   | M55646    | 19595.744 | 19209.338 |
| AF119885  | 3035.398 | 3461.255 | NM_000675 | 2538.014  | 2523.301  | NM_006112 | 28709.32  | 30045.627 |
| NM_004995 | 4613.297 | 5669.841 | AF064770  | 572.406   | 677.973   | M12807    | 1767.231  | 1925.219  |
| NM_005971 | 5821.553 | 6199.689 | NM_005765 | 746.122   | 799.202   | NM_001765 | 12241.461 | 6845.22   |
| NM_013385 | 4462.134 | 4779.733 | NM_004127 | 40744.828 | 57218.965 | NM_003361 | 2011.244  | 2134.97   |
| AK026680  | 5810.458 | 5218.595 | NM_013324 | 4055.65   | 5911.804  | NM_012095 | 4747.157  | 3572.817  |
| NM_012435 | 9034.729 | 7763.626 | AL133022  | 851.664   | 1136.042  | NM_018684 | 20624.598 | 19480.688 |
| AB014559  | 2322.923 | 2504.8   | NM_003953 | 3666.213  | 3672.435  | NM_017983 | 1508.938  | 1289.085  |
| NM_016485 | 9998.331 | 9104.657 | NM_006301 | 824.584   | 764.413   | AK022654  | 28147.418 | 43961.91  |
| NM_005033 | 14009.96 | 12434.24 | AL049925  | 2134.347  | 1960.451  | BC002905  | 7030.596  | 9410.074  |
| NM_015932 | 71403.55 | 66720.73 | X72887    | 1270.042  | 971.786   | NM_018091 | 13650.69  | 13786.476 |
| NM_017945 | 2195.393 | 2053.006 | NM_004525 | 1306.428  | 1462.33   | NM_001108 | 15177.744 | 10644.914 |
| AK022169  | 800.5    | 949.713  | NM_000127 | 2093.784  | 1458.056  | NM_001637 | 1074.164  | 2123.29   |
| AF015592  | 6647.575 | 5693.433 | Y10483    | 10436.438 | 8666.611  | NM_016630 | 18459.246 | 14763.055 |
| AK026795  | 3773.856 | 3468.007 | NM_006784 | 829.586   | 655.954   | NM_014291 | 7727.497  | 7754.386  |
| NM_016617 | 17935.44 | 16901.8  | NM_017875 | 2928.551  | 2235.714  | NM_001085 | 3993.535  | 3643.884  |
| NM_002027 | 12304.05 | 13460.86 | NM_001087 | 35378.402 | 28687.666 | NM_000120 | 2913.022  | 3391.603  |
| AL162078  | 2322.239 | 1918.569 | NM_001825 | 491.415   | 544.468   | AF172327  | 50515.066 | 50577.297 |
| NM_000915 | 1584.982 | 1830.46  | AK025352  | 548.95    | 642.989   | NM_001675 | 5203.831  | 6008.06   |
| NM_013382 | 3336.15  | 4026.473 | NM_003721 | 5055.531  | 4729.223  | NM_000220 | 1808.452  | 2747.499  |
| AB002314  | 981.514  | 1130.587 | NM_004724 | 1977.511  | 2138.732  | NM_004515 | 1695.045  | 2159.413  |
| NM_014622 | 1735.472 | 1991.333 | NM_001431 | 6351.532  | 6236.313  | NM_001675 | 30901.236 | 26979.99  |
| AB011114  | 64800.18 | 54526.91 | NM_000381 | 547.041   | 436.518   | NM_004045 | 68844.867 | 64532.07  |
| D11466    | 22837.74 | 23164.05 | NM_000427 | 1675.094  | 1972.604  | NM_004983 | 840.873   | 1003.761  |
| NM_014055 | 29496.26 | 24240.92 | NM_014924 | 1146.112  | 1272.518  | U09384    | 908.236   | 1164.013  |
| D31885    | 27353.71 | 22543.74 | NM_006945 | 691.462   | 1000.872  | NM_001724 | 4150.463  | 3881.515  |
| BE743838  | 10888.56 | 7276.502 | NM_000174 | 44813.867 | 58796.184 | NM_000150 | 3122.174  | 4031.81   |
| AF273046  | 1804.027 | 1134.231 | NM_002505 | 1578.401  | 2785.588  | AB023152  | 1680.609  | 2344.641  |
| NM_001081 | 4647.036 | 3248.498 | NM_014343 | 3723.517  | 5038.758  | NM_006212 | 3637.825  | 4241.312  |
| NM_002483 | 2913.078 | 2408.014 | D25303    | 739.288   | 878.198   | AK022872  | 4922.635  | 4100.377  |
| BF002026  | 2189.933 | 2106.99  | AB043007  | 24452.879 | 17615.592 | AK024272  | 10308.922 | 9095.087  |
| BE790116  | 489.422  | 1159.34  | NM_004861 | 1424.952  | 1038.825  | NM_016381 | 2598.717  | 2318.582  |
| AI922341  | 1121.297 | 1122.725 | NM_016161 | 478.104   | 371.142   | AL591715  | 930.022   | 1033.495  |
| M12824    | 3750.627 | 3976.993 | AF022913  | 2791.567  | 2663.238  | NM_018042 | 3335.614  | 3768.348  |
| W60100    | 9009.043 | 5299.437 | NM_000025 | 1804.551  | 1853.856  | BE741525  | 1926.157  | 2200.574  |
| U72508    | 937.975  | 658.769  | NM_001382 | 6395.472  | 5994.1    | BF030555  | 28275.049 | 28902.861 |
| AA457153  | 4117.204 | 4295.827 | M93718    | 9140.516  | 5823.999  | NM_012433 | 16573.229 | 14662.001 |
| AA868504  | 5739.363 | 4362.029 | NM_005385 | 911.123   | 737.149   | NM_005605 | 7027.195  | 6073.05   |
| AA877845  | 7649.687 | 8177.831 | AK023807  | 9492.063  | 7778.505  | NM_002575 | 3363.375  | 3686.116  |
| AA664241  | 16718.05 | 19454.09 | NM_018185 | 6709.076  | 5775.256  | NM_003582 | 5608.603  | 4824.418  |
| NM_006405 | 12004.36 | 8157.463 | AK024273  | 1918.163  | 1438.758  | NM_006205 | 3265.951  | 2412.026  |
| AF216292  | 19584.86 | 20703.06 | X59417    | 31589.238 | 28093.662 | NM_004183 | 838.603   | 1214.085  |
| NM_005894 | 915.996  | 856.779  | NM_005655 | 34058.242 | 27708.293 | AI492087  | 2861.416  | 4142.097  |
| NM_014584 | 18051.9  | 14953.27 | D28476    | 6360.139  | 5873.52   | R72122    | 4698.74   | 3576.233  |
| NM_005810 | 2433.016 | 2617.017 | NM_016263 | 3000.033  | 2760.613  | Z35309    | 1713.844  | 1596.038  |

|           |          |          |           |           |           |           |           |           |
|-----------|----------|----------|-----------|-----------|-----------|-----------|-----------|-----------|
| AK026223  | 1282.437 | 1340.663 | NM_003335 | 19159.188 | 20104.723 | AA292025  | 1476.197  | 1632.611  |
| NM_000874 | 11380.46 | 6403.584 | AB002376  | 3639.68   | 3172.304  | AA437226  | 1871.597  | 2673.538  |
| AB007863  | 1131.472 | 1219.888 | NM_005558 | 2007.845  | 2042.884  | R36143    | 336.578   | 809.146   |
| AK024456  | 5854.049 | 6190.31  | NM_016631 | 906.313   | 1289.784  | XM_056359 | 777.385   | 1144.897  |
| NM_017788 | 537.526  | 584.733  | AK022730  | 1623.343  | 1723.927  | D10353/NM | 8194.232  | 11935.5   |
| D31887    | 4748.886 | 6254.049 | NM_005438 | 9326.719  | 11915.784 | M15042    | 6916.591  | 10828.581 |
| NM_002313 | 3502.179 | 4274.949 | AB037810  | 3967.371  | 4449.197  | AK056843  | 1985.09   | 2455.585  |
| NM_004458 | 2877.223 | 2846.539 | NM_000376 | 2468.117  | 2104.065  | U49928    | 12645.063 | 11686.993 |
| NM_005503 | 2347.098 | 3233.273 | NM_000475 | 4463.484  | 3746.846  | AK096645  | 29575.682 | 26382.221 |
| NM_001502 | 1447.391 | 1789.922 | M61872    | 11067.873 | 8168.598  | AK092859  | 1188.235  | 1313.203  |
| NM_005721 | 1350.049 | 1122.95  | AK027089  | 549.211   | 409.89    | NM_017983 | 1965.454  | 1218.017  |
| AF284223  | 1696.836 | 1144.066 | X59845    | 718.028   | 841.431   | AF116909  | 2390.395  | 1738.481  |
| AF176012  | 861.421  | 548.679  | NM_006284 | 12898.896 | 12137.854 | BE906724  | 1358.627  | 945.643   |
| NM_005971 | 5003.99  | 4541.412 | U18909    | 1648.608  | 1261.084  | NM_002283 | 7085.001  | 7683.549  |
| NM_017435 | 1802.39  | 2009.466 | NM_003488 | 2118.708  | 2045.239  | AJ276095  | 14973.205 | 13833.041 |
| NM_013386 | 4111.374 | 4274.546 | NM_016588 | 8863.017  | 7871.725  | NM_004819 | 4470.952  | 5220.932  |
| NM_014037 | 1352.122 | 1337.533 | NM_003597 | 448.54    | 472.767   | NM_007184 | 3313.07   | 3800.464  |
| NM_004866 | 21395.48 | 22453.87 | NM_002568 | 28187.771 | 22448.174 | NM_005291 | 29863.299 | 33006.836 |
| NM_018688 | 3718.597 | 4737.151 | NM_006561 | 4999.701  | 3460.791  | AF253316  | 642.556   | 974.714   |
| AK056652  | 6588.757 | 9374.057 | NM_017521 | 924.721   | 876.241   | NM_002923 | 2885.301  | 3159.413  |
| AL137438  | 1050.615 | 937.05   | AK025200  | 5018.797  | 3808.008  | NM_006794 | 926.013   | 1080.915  |
| NM_017957 | 1288.991 | 1189.397 | NM_001383 | 5908.531  | 6087.571  | NM_018653 | 675.409   | 1314.363  |
| NM_003024 | 2487.101 | 2410.116 | NM_005008 | 9445.294  | 13399.219 | NM_005388 | 7890.648  | 9656.901  |
| NM_013248 | 8391.996 | 8109.945 | NM_014046 | 10738.094 | 14486.313 | NM_007232 | 36889.402 | 46495.469 |
| NM_000034 | 70867.7  | 70612.16 | L34071    | 4424.078  | 4775.318  | NM_003027 | 1224.194  | 2150.998  |
| AK022230  | 5288.128 | 5451.989 | AK025201  | 6466.196  | 5884.912  | NM_002717 | 10465.31  | 8638.204  |
| AK022147  | 10850.71 | 8330.425 | AK022995  | 2364.637  | 1921.099  | NM_003025 | 15307.96  | 13609.824 |
| L25664    | 1089.057 | 1401.518 | NM_006066 | 11815.972 | 9257.187  | U09384    | 1704.293  | 1069.429  |
| NM_014940 | 5023.044 | 3765.188 | NM_005165 | 5356.062  | 3643.083  | NM_006860 | 11620.436 | 9297.099  |
| NM_005783 | 1077.529 | 946.36   | NM_005138 | 30157.344 | 20345.83  | NM_004794 | 17461.514 | 11507.312 |
| AJ289111  | 11122.93 | 6240.473 | NM_002115 | 22217.363 | 21011.676 | NM_004283 | 1266.642  | 1240.514  |
| NM_016356 | 460.862  | 847.445  | AK023162  | 2182.333  | 1514.243  | NM_004163 | 12249.908 | 9220.653  |
| NM_014043 | 15158.04 | 12921.52 | NM_006396 | 6861.951  | 5277.581  | AK026308  | 1751.62   | 2839.916  |
| NM_014622 | 1824.046 | 1703.962 | NM_018648 | 2390.691  | 2461.358  | NM_002803 | 20095.609 | 24747.457 |
| AB011114  | 60377.87 | 55345.26 | NM_018263 | 278.439   | 535.056   | NM_005508 | 6963.471  | 7328.382  |
| D11466    | 26104.05 | 30647.98 | NM_013448 | 1307.432  | 1213.418  | NM_006788 | 1528.109  | 1696.807  |
| NM_014056 | 34957.98 | 41133.35 | NM_004537 | 740.59    | 730.41    | AK025039  | 324.856   | 816.784   |
| D31885    | 30212.43 | 31903.42 | AL390134  | 6456.728  | 5061.772  | NM_016568 | 1691.031  | 2641.178  |
| NM_016648 | 5281.921 | 5338.598 | NM_020226 | 2892.829  | 3056.699  | AB033102  | 18763.297 | 21596.93  |
| AK090536  | 25871.88 | 20858.09 | NM_017865 | 2209.545  | 3762.316  | NM_014774 | 7892.071  | 7740.487  |
| D63477    | 2765.044 | 2268.631 | NM_003427 | 2625.656  | 6317.109  | NM_014143 | 14236.268 | 13522.11  |
| NM_020243 | 28127.13 | 40094.95 | NM_005920 | 1556.981  | 2028.495  | M55646    | 17628.502 | 16077.311 |
| NM_014051 | 17785.38 | 15820.1  | Y09321    | 684.533   | 1037.593  | NM_006112 | 27704.189 | 26469.709 |
| AK023056  | 2374.45  | 2100.163 | AK001499  | 3182.323  | 3563.954  | BE741525  | 1668.991  | 1265.406  |
| NM_017888 | 3300.94  | 3432.682 | AK026852  | 1800.975  | 1500.559  | NM_005605 | 6317.605  | 4584.77   |
| NM_004915 | 3717.581 | 6778.279 | AK021629  | 1448.851  | 1689.368  | NM_002576 | 3974.697  | 3266.912  |
| AK022207  | 1081.654 | 927.097  | AB013384  | 1883.796  | 1518.807  | NM_003582 | 5220.223  | 3506.19   |
| AV708752  | 3649.354 | 3331.043 | AK024824  | 1293.46   | 1025.726  | AF057354  | 1653.703  | 972.684   |
| AF119885  | 2658.954 | 2271.283 | AK024270  | 2806.564  | 2605.84   | AF169351  | 9219.081  | 8445.921  |
| NM_004996 | 4113.252 | 4561.569 | AK025569  | 4933.35   | 4673.898  | M14200    | 65849.992 | 50189.84  |
| NM_000588 | 19893.45 | 20527.19 | AK023060  | 1306.52   | 1211.541  | NM_000282 | 5464.034  | 4605.25   |
| AK026281  | 767.601  | 673.837  | NM_014870 | 786.908   | 850.171   | NM_000532 | 30982.783 | 46993.871 |
| AK026680  | 6001.989 | 7637.573 | AK021917  | 492.223   | 513.347   | NM_003501 | 7604.442  | 11652.446 |

|           |          |          |           |           |           |           |           |           |
|-----------|----------|----------|-----------|-----------|-----------|-----------|-----------|-----------|
| NM_012436 | 10910.45 | 13209.45 | AF052146  | 36057.203 | 30902.473 | AK022654  | 31889.99  | 37995.461 |
| AK001299  | 16169.8  | 21115.48 | NM_00487C | 6480.412  | 6176.562  | BC002905  | 7834.862  | 9284.063  |
| AB014559  | 2834.654 | 3051.909 | AF143872  | 9751.065  | 10210.755 | NM_018091 | 14637.529 | 15199.61  |
| NM_01648E | 9213.87  | 9215.271 | AK025686  | 2028.615  | 1632.064  | NM_001108 | 16024.315 | 12056.575 |
| NM_01794E | 1959.177 | 1966.958 | AF143326  | 2735.547  | 2939.364  | NM_001637 | 790.918   | 1358.073  |
| AK022169  | 1342.45  | 1351.969 | AL049229  | 3549.595  | 4226.734  | NM_01663C | 21364.775 | 25185.996 |
| AF015592  | 7068.525 | 6026.385 | NM_01830E | 44521.402 | 48009.422 | NM_014291 | 9066.821  | 11877.315 |
| AK026795  | 3614.187 | 3565.484 | AK023152  | 3780.145  | 5017.604  | NM_014631 | 1046.43   | 951.415   |
| AL162078  | 2589.844 | 2252.258 | AK000155  | 2996.07   | 3398.902  | NM_00108E | 3932.19   | 4250.217  |
| NM_00091E | 1372.649 | 1520.277 | AL389937  | 4674.657  | 5476.869  | NM_00012C | 2906.475  | 3294.79   |
| NM_01338E | 3578.177 | 3331.814 | AK022628  | 45940.766 | 35815.781 | AF172327  | 52228.141 | 49629.922 |
| AB002314  | 884.247  | 706.926  | AK021737  | 5291.297  | 5033.784  | NM_00167E | 5053.574  | 5345.016  |
| NM_00550E | 2446.337 | 3189.639 | AL357454  | 422.291   | 631.657   | AB018338  | 21606.82  | 15826.336 |
| NM_00150E | 1278.166 | 1197.838 | AK026295  | 11773.241 | 9329.277  | D80010    | 3975.327  | 2713.531  |
| NM_005721 | 1716.542 | 1525.146 | AK022346  | 459.965   | 425.215   | NM_00492E | 1385.308  | 1087.912  |
| AF284223  | 2148.769 | 1980.044 | AK025007  | 3713.92   | 3635.57   | NM_003971 | 1856.156  | 1192.092  |
| AF176012  | 1373.088 | 1247.271 | AK026490  | 35026.074 | 27166.695 | AK026973  | 1848.58   | 1134.649  |
| BE743838  | 11402.4  | 10815.7  | AJ227861  | 2225.122  | 2008.492  | NM_00582E | 1232.802  | 1276.039  |
| AF273046  | 2164.392 | 1744.764 | AJ001875  | 1971.002  | 1847.858  | U81002    | 9509.395  | 7149.653  |
| NM_001081 | 5024.427 | 4482.76  | X64985    | 582.456   | 582.187   | NM_01629E | 20521.381 | 14462.89  |
| NM_00248E | 2794.725 | 2473.385 | L77562    | 1021.2    | 780.403   | NM_01418E | 15274.754 | 11954.153 |
| BF002026  | 2740.016 | 2444.533 | L13433    | 1777.136  | 2596.527  | L38517    | 3915.068  | 3372.743  |
| BE790116  | 559.308  | 999.634  | NM_017771 | 2457.594  | 3075.013  | NM_018291 | 9138.404  | 11299.943 |
| AI922341  | 1010.604 | 874.476  | AL109722  | 475.455   | 771.1     | NM_00553C | 9473.53   | 15183.698 |
| M12824    | 3347.379 | 3534.827 | AK021989  | 576.782   | 495.379   | NM_00689E | 14408.426 | 24449.51  |
| W60100    | 8337.528 | 4656.542 | AK022298  | 3288.641  | 3066.76   | NM_01220C | 5297.713  | 6961.392  |
| AA457153  | 3838.958 | 3500.864 | AJ277441  | 22110.629 | 20464.055 | NM_001724 | 4487.269  | 4686.525  |
| AA868504  | 5100.719 | 3310.357 | NM_006057 | 755.784   | 730.423   | NM_00015C | 3525.159  | 4845.363  |
| AA877845  | 7284.865 | 8595.654 | AK024242  | 8274.486  | 8402.411  | AB023152  | 1928.356  | 2725.615  |
| AA664241  | 14336.83 | 14499.54 | AK024559  | 808.949   | 1043.408  | NM_00621E | 4568.884  | 6624.976  |
| NM_01494C | 5246.179 | 2528.843 | AK024851  | 738.395   | 780.241   | AK022872  | 6304.438  | 6128.265  |
| NM_00578E | 1084.675 | 917.076  | AK024577  | 603.947   | 1123.309  | AK024272  | 12747.031 | 14272.975 |
| AK000851  | 678.526  | 594.812  | AK024995  | 357.222   | 418.305   | NM_016381 | 2815.476  | 3497.643  |
| NM_00690C | 603.617  | 679.579  | AL359943  | 45563.504 | 40849.93  | AL591715  | 710.747   | 1055.064  |
| AJ289111  | 15668.73 | 11048.91 | NM_000534 | 2179.151  | 2953.506  | NM_01804E | 3026.76   | 2596.785  |
| NM_01635E | 747.14   | 844.218  | NM_00536E | 1707.751  | 1342.053  | NM_014944 | 8162.809  | 5909.976  |
| NM_00640E | 14142.32 | 12309.28 | L10140    | 650.766   | 741.653   | AF200348  | 5182.016  | 4756.897  |
| AF216292  | 19203.96 | 26393.18 | AL133447  | 2016.839  | 1745.763  | Y11710    | 753.516   | 747.786   |
| NM_005894 | 926.147  | 1101.098 | AB037853  | 19756.109 | 18908.742 | J03756    | 984.432   | 1199.152  |
| NM_014584 | 16367.6  | 13684.63 | D28450    | 54932.418 | 60265.125 | NM_00265C | 2562.805  | 2379.446  |
| NM_00581C | 1742.694 | 1713.937 | AK056222  | 2113.025  | 2156.803  | AK024071  | 2569.103  | 2112.386  |
| AK026223  | 1124.835 | 1074.457 | AK002028  | 31990.721 | 32462.627 | AF056490  | 2144.12   | 1620.79   |
| NM_000874 | 9957.533 | 5869.012 | AL050127  | 1873.544  | 2428.141  | NM_00553E | 1241.612  | 1467.179  |
| AB007863  | 835.704  | 863.417  | AK024805  | 7383.344  | 10827.717 | NM_005541 | 1752.441  | 2289.87   |
| AK024456  | 5821.719 | 5695.378 | AK001423  | 2286.979  | 3502.025  | AB002319  | 2473.512  | 3708.027  |
| D31887    | 4649.043 | 4812.648 | AK024090  | 14531.355 | 11572.242 | AF039942  | 5342.203  | 8783.36   |
| NM_00618C | 1960.894 | 1093.575 | AL133574  | 1445.477  | 1036.819  | NM_018654 | 699.276   | 1680.024  |
| NM_00231E | 2906.846 | 3760.912 | AK021936  | 1504.853  | 1816.224  | AB046863  | 15846.238 | 21568.309 |
| NM_00445E | 2785.22  | 2957.436 | AF147339  | 24047.209 | 20255.188 | M62403    | 12414.526 | 15683.458 |
| NM_00491E | 3691.1   | 6182.222 | AL390181  | 29027.711 | 23202.271 | NM_01788E | 4282.542  | 5341.668  |
| AK022207  | 1094.947 | 1208.539 | NM_017914 | 19375.977 | 13427.068 | AK025131  | 4065.601  | 5173.036  |
| AV708752  | 5245.018 | 5324.916 | AK024953  | 7044.874  | 8645.083  | NM_000754 | 27965.109 | 31310.795 |
| AF119885  | 3956.845 | 4104.694 | AK024276  | 3228.945  | 2789.521  | NM_01461E | 1113.227  | 1471.276  |



|          |          |          |          |           |           |          |           |           |
|----------|----------|----------|----------|-----------|-----------|----------|-----------|-----------|
| NM_00499 | 6155.099 | 7798.548 | S83374   | 2653.813  | 2039.294  | NM_00562 | 12367.31  | 13708.011 |
| NM_00597 | 4197.862 | 4641.383 | AK02578  | 22551.572 | 22800.545 | J04621   | 1384.47   | 1741.333  |
| NM_01743 | 1926.122 | 2208.88  | U07199   | 3051.333  | 3022.127  | NM_00071 | 3683.418  | 3775.44   |
| NM_01338 | 4426.133 | 4059.393 | AK02371  | 1142.636  | 1292.611  | NM_00016 | 7728.154  | 7013.774  |
| NM_01403 | 865.122  | 878.685  | X81445   | 904.513   | 837.989   | NM_00263 | 32185.951 | 16485.021 |
| NM_00486 | 17082.93 | 17334.08 | U95091   | 1564.661  | 1806.873  | NM_01774 | 3984.318  | 2897.511  |
| NM_01868 | 3318.676 | 3406.492 | NM_01790 | 24466.279 | 22747.295 | NM_00197 | 910.508   | 684.487   |
| AK05665  | 6365.158 | 8461.328 | S50182   | 1110.592  | 1735.471  | NM_00144 | 2150.525  | 846.725   |
| AL13743  | 1033.483 | 853.012  | AL36014  | 1133.532  | 1275.532  | AK02445  | 941.188   | 462.771   |
| NM_01795 | 1131.563 | 1336.788 | Y12016   | 1238.285  | 1572.502  | NM_00711 | 11266.431 | 8422.749  |
| NM_00302 | 2229.958 | 2144.79  | NM_00117 | 2235.069  | 1619.236  | NM_00204 | 1198.035  | 771.362   |
| NM_01324 | 8453.876 | 9184.328 | AK02369  | 4065.009  | 3511.454  | NM_00470 | 2161.939  | 1075.608  |
| NM_00003 | 71394.73 | 66930.34 | NM_00070 | 1369.22   | 1327.056  | NM_00710 | 4623.636  | 2713.349  |
| AK02223  | 5451.948 | 5873.797 | NM_01598 | 828.909   | 817.549   | AK02340  | 2928.974  | 2434.79   |
| AK02214  | 12136.66 | 9129.385 | NM_01960 | 1907.214  | 1985.231  | NM_01323 | 2831.079  | 2321.307  |
| L25664   | 1594.579 | 1743.436 | NM_01536 | 557.756   | 310.8     | NM_00178 | 4260.096  | 4228.723  |
| NM_00202 | 12167.62 | 10408.25 | Z49090   | 4867.392  | 3658.468  | NM_00265 | 2316.86   | 4566.417  |
| AL16207  | 2924.306 | 2227.566 | AK02159  | 5758.173  | 4479.989  | AB02895  | 13915.363 | 15868.638 |
| NM_00091 | 1558.469 | 1752.871 | AK02546  | 2533.064  | 2305.01   | U66879   | 13475.025 | 16149.169 |
| NM_01338 | 3712.939 | 3986.39  | AK02659  | 8787.05   | 10145.358 | NM_01602 | 7813.389  | 10044.888 |
| AB00231  | 671.65   | 1075.523 | L37700   | 1050.318  | 1234.992  | NM_00487 | 5101.422  | 4585.637  |
| NM_01404 | 15515.7  | 14248.96 | NM_01766 | 3067.097  | 3238.063  | NM_01420 | 2347.985  | 2673.006  |
| NM_01462 | 1764.378 | 1822.664 | AK02481  | 583.697   | 433.357   | S70385   | 10999.253 | 16223.21  |
| D11466   | 24046.58 | 25550.63 | AF05210  | 2710.299  | 2831.908  | M34671   | 13486.18  | 14165.065 |
| NM_01405 | 30318.01 | 33252.2  | AK00044  | 861.885   | 1461.453  | NM_00194 | 1398.408  | 1608.149  |
| D31885   | 26886.37 | 30402.19 | AK02239  | 1511.068  | 2390.044  | NM_01850 | 12285.067 | 13084.402 |
| NM_01664 | 4343.419 | 3775.617 | NM_01612 | 961.016   | 1354.833  | NM_00408 | 9836.724  | 9485.464  |
| AK09053  | 22059.3  | 16924.27 | CY3Cy5   | 2624.439  | 173.266   | AL05019  | 1339.572  | 571.273   |
| D63477   | 2274.189 | 2232.144 | R72122   | 3148.79   | 2380.477  | AF17670  | 2546.44   | 1740.527  |
| NM_02024 | 26475.2  | 30615.72 | Z35309   | 1638.819  | 1354.137  | NM_01448 | 1108.183  | 719.833   |
| NM_01405 | 16344.2  | 13427.65 | AA70000  | 1194.096  | 1754.99   | NM_00108 | 3239.32   | 2036.311  |
| AK02539  | 3776.854 | 4254.798 | AA29202  | 1208.623  | 1295.184  | NM_01467 | 3095.478  | 2013.569  |
| AK02305  | 2520.454 | 2202.85  | AA43722  | 2437.042  | 1560.852  | NM_01904 | 10392.576 | 6578.909  |
| NM_01788 | 3695.257 | 3645.908 | R36143   | 1140.214  | 1454.024  | NM_00104 | 4182.975  | 2499.63   |
| NM_00315 | 6932.763 | 7777.114 | AK05684  | 2066.504  | 2047.928  | AF27969  | 4737.352  | 3801.39   |
| NM_01478 | 3364.576 | 3498.275 | U49928   | 12524.282 | 11876.346 | NM_01984 | 2503.776  | 1970.145  |
| AK02638  | 3265.504 | 3587.719 | AK09664  | 23639.6   | 24104.338 | AB03299  | 52275.281 | 49237.211 |
| AK02382  | 1919.082 | 1851.775 | SR6      | 2900.244  | 2353.486  | AB04088  | 7849.459  | 6177.916  |
| AB01459  | 4889.027 | 6321.771 | SR8      | 8916.982  | 24361.563 | AY00712  | 1824.666  | 2251.241  |
| M94547   | 2832.228 | 2272.379 | SR10     | 43435.383 | 22084.748 | NM_00337 | 25651.934 | 19610.885 |
| NM_00508 | 8379.045 | 8657.238 | CY3Cy5   | 3925.132  | 276.568   | NM_00731 | 11519.157 | 11986.468 |
| NM_01209 | 1179.005 | 1294.454 | NM_00529 | 21568.875 | 16294.141 | AB03782  | 1878.796  | 760.958   |
| AB02316  | 3444.795 | 3852.735 | NM_00292 | 1757.847  | 2007.566  | AK02146  | 2518.252  | 3204.165  |
| AK02668  | 5949.938 | 6467.98  | NM_00679 | 652.028   | 722.675   | Z36796   | 68785.398 | 67661.281 |
| NM_01243 | 7890.984 | 7970.965 | NM_01865 | 596.767   | 724.74    | NM_00644 | 19726.621 | 19415.932 |
| AK00129  | 14401.6  | 19685.97 | NM_00538 | 5784.779  | 5906.349  | NM_00495 | 850.952   | 625.511   |
| AB01455  | 2588.206 | 3209.568 | NM_00723 | 39442.684 | 56725.711 | AK02602  | 47311.531 | 31255.33  |
| NM_01648 | 9987.185 | 9845.782 | NM_00302 | 1674.679  | 2056.311  | NM_00319 | 2315.736  | 1278.917  |
| NM_00503 | 13438.17 | 12968    | NM_01625 | 437.978   | 1378.477  | NM_00293 | 11920.673 | 8071.64   |
| NM_01593 | 71303.55 | 68067.28 | NM_00302 | 16935.174 | 16026.97  | AK02365  | 9998.934  | 6696.736  |
| NM_01794 | 2176.789 | 2529.768 | NM_02017 | 16950.615 | 26044.336 | AF09903  | 2361.17   | 1273.313  |
| AF01592  | 7125.804 | 5252.485 | NM_00620 | 2708.664  | 3332.661  | NM_00307 | 3018.193  | 2424.74   |
| AK02679  | 3841.352 | 3416.552 | NM_00403 | 4447.275  | 4497.366  | AL12210  | 4630.521  | 2470.04   |

|           |          |          |           |           |           |           |           |           |
|-----------|----------|----------|-----------|-----------|-----------|-----------|-----------|-----------|
| NM_016617 | 17162.98 | 17277.48 | NM_00013C | 8045.732  | 7261.449  | NM_00478C | 1189.893  | 732.917   |
| NM_00233E | 2804.007 | 1806.206 | AF193756  | 1410.312  | 1189.589  | NM_01621E | 6239.644  | 3480.659  |
| AL117666  | 925.112  | 807.482  | AI492087  | 2252.434  | 2580.838  | AK001649  | 1920.742  | 689.002   |
| NM_00582E | 22739.46 | 23245.32 | NM_00419E | 2101.384  | 1818.489  | NM_01663E | 14012.085 | 9832.025  |
| NM_00275E | 5928.838 | 6497.008 | NM_00280E | 12473.542 | 12222.953 | AB018274  | 11503.264 | 7768.894  |
| U79299    | 729.012  | 926.781  | NM_00550E | 4974.934  | 4427.148  | NM_005871 | 13784.85  | 7033.45   |
| AK025674  | 2539.902 | 2768.029 | NM_00678E | 897.852   | 926.83    | NM_00704E | 4774.251  | 2654.609  |
| AF007194  | 3773.591 | 2910.218 | NM_01656E | 1234.726  | 1276.9    | NM_01633E | 15431.056 | 7555.15   |
| NM_01906E | 2316.343 | 1922.031 | AB033102  | 18212.039 | 16393.627 | BE875028  | 4938.028  | 3129.493  |
| NM_004761 | 5384.599 | 4786.538 | NM_014774 | 6226.554  | 8314.522  | AK000511  | 6667.789  | 4411.223  |
| Z25424    | 5934.402 | 4632.477 | NM_01414E | 14469.187 | 21964.41  | AF121255  | 3117.576  | 2562.27   |
| U79458    | 14604.72 | 14495.13 | NM_006112 | 24852.809 | 25969.361 | NM_005494 | 7706.223  | 6351.134  |
| NM_01492C | 774.534  | 968.517  | M12807    | 917.201   | 951.484   | NM_01794E | 1842.191  | 1242.584  |
| NM_002961 | 11936.29 | 5179.656 | NM_00176E | 7638.918  | 18197.061 | NM_00495E | 6588.987  | 6169.643  |
| NM_01829E | 1569.901 | 1589.558 | NM_003361 | 2668.155  | 4089.543  | NM_01219E | 2763.213  | 2483.336  |
| NM_00067E | 1268.986 | 1883.029 | NM_018684 | 18836.072 | 19902.063 | AL049682  | 1415.498  | 1809.715  |
| AF064770  | 994.98   | 1469.573 | NM_01798E | 1319.107  | 1907.911  | NM_00552E | 7338.421  | 6672.304  |
| NM_004127 | 21035.79 | 26972.2  | AF116909  | 1491.035  | 1983.649  | AK022842  | 1837.348  | 2949.377  |
| NM_013324 | 9039.634 | 9743.021 | BE906724  | 1452.106  | 1346.553  | NM_00700E | 32800.762 | 43090.602 |
| AL133022  | 1912.833 | 1833.14  | NM_00228E | 9894.893  | 8887.087  | AL137346  | 529.208   | 1048.505  |
| NM_00395E | 4851.328 | 6420.632 | AJ276095  | 16275.177 | 16836.912 | NM_01775E | 37209.398 | 40580.34  |
| NM_006301 | 680.143  | 1057.534 | NM_00481E | 4327.576  | 4334.662  | NM_00579E | 11287.961 | 12794.666 |
| AL049925  | 3704.636 | 3416.767 | NM_007184 | 3304.858  | 3854.457  | NM_004901 | 3191.903  | 3890.884  |
| X72887    | 891.019  | 859.839  | AF231916  | 2261.31   | 2153.639  | U77088    | 1490.149  | 1971.35   |
| NM_00452E | 3100.51  | 2631.523 | NM_003501 | 4973.273  | 4487.478  | NM_006721 | 15564.658 | 9387.966  |
| NM_000127 | 2549.652 | 2922.726 | AK022654  | 22702.17  | 18637.334 | NM_01628E | 7872.988  | 4725.545  |
| Y10483    | 11944.74 | 11289.05 | BC002905  | 6010.725  | 5691.588  | NM_00276E | 8493.854  | 5052.478  |
| NM_006784 | 2137.399 | 2538.841 | NM_018091 | 9992.229  | 13050.508 | NM_00190E | 2899.127  | 1787.376  |
| NM_01787E | 5852.147 | 5344.184 | NM_00110E | 6192.83   | 11526.736 | AF292100  | 5045.02   | 3314.008  |
| NM_001087 | 10090.66 | 10979.14 | NM_01663C | 13009.684 | 15143.818 | NM_003434 | 61294.117 | 50816.266 |
| NM_00182E | 1155.563 | 892.431  | NM_014291 | 7762.371  | 7314.739  | NM_005654 | 951.932   | 452.494   |
| AK025352  | 1686.621 | 1326.042 | NM_014631 | 550.585   | 721.973   | AF024698  | 64870.004 | 61021.906 |
| NM_003721 | 6483.948 | 7255.733 | NM_00108E | 4949.432  | 5282.131  | BE904617  | 23462.605 | 21688.965 |
| NM_004724 | 4487.575 | 3936.297 | NM_00012C | 3300.178  | 2872.013  | AK024495  | 1182.084  | 1006.781  |
| NM_001431 | 10533.88 | 11612.91 | AF172327  | 42108.273 | 43774.109 | AF024694  | 3710.979  | 2861.781  |
| NM_000381 | 875.13   | 563.868  | NM_00167E | 5306.366  | 5340.736  | AF091081  | 13747.357 | 7277.327  |
| NM_000427 | 4359.177 | 4432.589 | NM_00167E | 27705.15  | 28266.525 | AK001758  | 6297.129  | 3881.26   |
| NM_014924 | 1962.139 | 2401.155 | NM_00404E | 66304.734 | 69947.898 | U90842    | 1267.544  | 820.207   |
| NM_00694E | 2003.249 | 2402.074 | NM_00498E | 1726.292  | 1496.573  | AF086325  | 2552.183  | 2180.304  |
| NM_000174 | 8137.782 | 12284.3  | U09384    | 934.827   | 858.628   | NM_00492E | 1087.518  | 938.262   |
| NM_00250E | 3254.991 | 2402.803 | NM_00686C | 11325.699 | 10021.755 | AF147401  | 1937.337  | 960.601   |
| NM_01434E | 6090.086 | 5799.394 | NM_004794 | 14217.441 | 18417.996 | AJ001904  | 1042.652  | 830.271   |
| D25303    | 893.15   | 933.533  | NM_00428E | 1691.355  | 1495.85   | AF075022  | 2055.997  | 1554.86   |
| AB043007  | 32500.26 | 42603.52 | NM_00416E | 18613.684 | 19657.537 | AF075060  | 4475.869  | 2353.42   |
| NM_004861 | 675.095  | 661.697  | AK026308  | 2295.633  | 2222.476  | AF147436  | 1446.967  | 1505.704  |
| NM_016161 | 827.175  | 976.553  | NM_013337 | 2753.63   | 2623.015  | AK021441  | 2209.082  | 2654.95   |
| AF022913  | 5269.269 | 4245.189 | NM_00689E | 8643.653  | 7897.193  | AK026018  | 1212.809  | 1069.174  |
| NM_00002E | 2790.281 | 2411.122 | NM_01220C | 3154.968  | 2897.517  | AF085846  | 4830.571  | 4807.288  |
| NM_00138E | 5424.169 | 6313.737 | NM_001724 | 2779.799  | 2781.461  | AK023901  | 10437.781 | 10555.475 |
| M93718    | 6045.909 | 9180.144 | NM_00015C | 2459.601  | 2264.644  | AL109705  | 1834.67   | 2078.443  |
| NM_00538E | 1164.763 | 823.904  | AB023152  | 1054.594  | 1233.256  | AF147392  | 949.354   | 1108.883  |
| AK023807  | 15118.44 | 14453.03 | NM_00621E | 3447.06   | 2813.179  | AF088057  | 8906.389  | 10241.373 |
| NM_01818E | 6918.064 | 7460.804 | AK022872  | 3380.109  | 3901.12   | AF086255  | 20330.08  | 19622.713 |

|           |          |          |           |           |           |           |           |           |
|-----------|----------|----------|-----------|-----------|-----------|-----------|-----------|-----------|
| AK024273  | 2741.697 | 2845.275 | AK024272  | 8545.753  | 8999.215  | AK022660  | 1404.929  | 1290.689  |
| D28476    | 9898.168 | 11351.36 | NM_016381 | 2065.355  | 2050.396  | AF088051  | 2184.546  | 2379.035  |
| NM_016263 | 4150.709 | 4904.75  | AL591715  | 884.288   | 1140.018  | AK023883  | 634.629   | 790.392   |
| NM_003335 | 3277.767 | 3013.159 | NM_018042 | 3483.847  | 3716.019  | AF086366  | 1344.21   | 1112.948  |
| AB002376  | 5310.833 | 5709.77  | BE741525  | 1436.812  | 1567.592  | AF086360  | 7285.042  | 5938.457  |
| NM_018249 | 968.382  | 926.936  | BF030555  | 27766.486 | 24848.436 | AF086436  | 1605.75   | 683.484   |
| NM_005555 | 2457.522 | 2705.281 | NM_012433 | 14820.44  | 11870.816 | AF087993  | 6317.674  | 4138.305  |
| NM_016631 | 1777.645 | 1963.9   | NM_005605 | 6336.833  | 6090.889  | AF035282  | 2129.48   | 1921.752  |
| AB015617  | 6469.788 | 8836.607 | NM_002576 | 2763.007  | 2616.047  | AK021966  | 5405.379  | 5240.039  |
| AK022730  | 4296.664 | 4100.047 | NM_003582 | 4104.442  | 4539.719  | AB018292  | 9021.854  | 8506.837  |
| AB037810  | 5088.371 | 4517.629 | AF057354  | 996.333   | 992.823   | AF085971  | 1741.169  | 1142.123  |
| NM_000376 | 1062.345 | 880.146  | AF169351  | 8029.626  | 8110.938  | AF147302  | 2512.528  | 1582.926  |
| NM_000475 | 7305.926 | 6903.119 | M14200    | 56820.727 | 60905.848 | AF085929  | 2302.093  | 1595.453  |
| M61872    | 13809.58 | 13112.37 | NM_000282 | 5785.457  | 5938.462  | AK001126  | 4482.259  | 3058.928  |
| AK027089  | 635.272  | 1116.412 | NM_000532 | 24190.535 | 27925.914 | AF085976  | 8167.819  | 4782.768  |
| X59845    | 1165.612 | 982.344  | NM_016341 | 1489.809  | 1811.172  | AF075104  | 7637.192  | 5424.591  |
| NM_006284 | 27244.73 | 29850.36 | NM_004034 | 3173.471  | 2893.138  | AL133025  | 1127.41   | 888.701   |
| U18909    | 2606.269 | 2669.255 | NM_000130 | 5481.873  | 4574.736  | AL137402  | 15342.507 | 10804.133 |
| NM_003489 | 4204.083 | 4117.99  | AI492087  | 1905.809  | 1720.314  | AL137617  | 3433.257  | 2599.119  |
| NM_016589 | 18727.03 | 17935.97 | R72122    | 3517.506  | 2965.119  | AL359568  | 34528.598 | 24019.658 |
| NM_002568 | 45000.82 | 51616.77 | Z35309    | 2061.613  | 2325.141  | AL133564  | 10532.183 | 8486.879  |
| NM_006561 | 6669.581 | 10047.58 | AA292025  | 1462.225  | 1369.728  | AL137428  | 1849.83   | 1538.037  |
| NM_017521 | 1779.118 | 1465.186 | AA437226  | 2358.433  | 1655.237  | AL157462  | 1678.187  | 1733.118  |
| NM_006743 | 961.604  | 611.327  | R36143    | 730.376   | 964.747   | AL359602  | 11716.613 | 12966.301 |
| AK025200  | 2442.024 | 3655.001 | XM_056359 | 884.294   | 503.108   | NM_018190 | 54434.648 | 54243.699 |
| NM_001383 | 13207.69 | 15686.16 | D10353/NM | 7916.731  | 6777.726  | AF086054  | 1861.592  | 1849.799  |
| NM_001029 | 71780.44 | 59840.9  | M15042    | 5396.699  | 4989.369  | AF086089  | 793.579   | 1005.221  |
| NM_005008 | 25461.59 | 29020.78 | AK056843  | 2506.696  | 3165.612  | AK022259  | 68201.102 | 64724.004 |
| L34071    | 7773.585 | 8211.814 | U49928    | 10885.979 | 9840.069  | AK022461  | 1504.302  | 1364.011  |
| AK025201  | 7902.623 | 7145.728 | AK096645  | 21366.361 | 20797.887 | NM_016010 | 6970.723  | 6645.929  |
| AK022995  | 3468.882 | 3233.463 | AK092859  | 1138.498  | 1081.67   | AF070647  | 45570.691 | 29057.242 |
| NM_006066 | 16063.51 | 14730.97 | NM_019884 | 6437.595  | 5637.128  | AF116649  | 1246.233  | 1032.537  |
| NM_005165 | 14405.14 | 17939.32 | NM_018291 | 6743.795  | 6951.238  | AF174394  | 3027.231  | 2287.966  |
| NM_005138 | 17458.42 | 21687.73 | NM_005530 | 7781.364  | 8392.347  | AK021876  | 13587.377 | 11165.868 |
| NM_002115 | 2974.916 | 3303.372 | AF116909  | 1308.521  | 1277.737  | AK022017  | 1803.763  | 1079.129  |
| AK023162  | 3078.185 | 3649.062 | BE906724  | 1103.594  | 801.163   | AK022160  | 4062.908  | 2645.417  |
| NM_006396 | 11186.24 | 13659.19 | NM_002283 | 6384.048  | 4497.404  | AK022295  | 1251.478  | 900.358   |
| NM_018649 | 3718.373 | 2787.229 | AJ276095  | 10962.775 | 10651.019 | AK021935  | 3089.892  | 2060.99   |
| NM_013449 | 1588.237 | 1381.058 | NM_004819 | 3963.569  | 6215.716  | AK022187  | 13147.323 | 15413.36  |
| NM_004537 | 1245.167 | 969.919  | NM_007184 | 2447.1    | 2676.967  | AK022337  | 1909.082  | 2273.768  |
| AL390134  | 9623.072 | 14791.62 | NM_005291 | 28538.83  | 24145.311 | AK026847  | 2218.442  | 2194.856  |
| NM_020226 | 4593.73  | 5081.14  | AF253316  | 641.466   | 701.336   | AK023048  | 1509.453  | 1942.858  |
| NM_017865 | 8679.685 | 7431.22  | NM_002923 | 2128.66   | 2165.256  | AL359560  | 1204.591  | 1735.595  |
| NM_003427 | 2350.14  | 2817.559 | NM_006794 | 937.187   | 1111.764  | AK026891  | 3148.249  | 3827.543  |
| NM_005920 | 1652.009 | 2161.687 | NM_018653 | 720.981   | 783.279   | AK025573  | 1225.233  | 1763.362  |
| Y09321    | 1274.098 | 1368.162 | NM_005388 | 5884.117  | 6299.73   | AK024595  | 1046.742  | 1504.812  |
| AK001499  | 6847.297 | 4662.367 | NM_007232 | 33720.758 | 29385.666 | AL137562  | 6302.121  | 5087.374  |
| AK026852  | 2800.079 | 2427.627 | NM_003027 | 1028.895  | 829.765   | M90355    | 63402.078 | 56389.965 |
| AK021629  | 3426.985 | 2837.024 | NM_003025 | 11834.876 | 10627.281 | AK022495  | 5547.187  | 5474.603  |
| AL110257  | 70187.64 | 63864.66 | NM_020179 | 11522.883 | 11892.321 | AK021632  | 1003.487  | 910.839   |
| AB013384  | 3446.518 | 3468.352 | NM_004306 | 41147.449 | 40274.336 | AK023143  | 727.875   | 760.863   |
| AK024270  | 4224.474 | 3848.706 | NM_006786 | 1892.331  | 1406.194  | AK026373  | 21660.158 | 19394.416 |
| AK025569  | 8430.921 | 9046.6   | NM_006205 | 2847.145  | 2984.057  | AK021581  | 9202.35   | 6240.876  |

|           |          |          |           |           |           |           |           |           |
|-----------|----------|----------|-----------|-----------|-----------|-----------|-----------|-----------|
| AK023060  | 1960.286 | 2010.43  | NM_00686C | 8739.416  | 6974.023  | AK021744  | 2158.198  | 1874.661  |
| NM_01487C | 2231.453 | 2231.251 | NM_004794 | 11378.226 | 13280.527 | NM_01843C | 28981.699 | 25260.33  |
| AK021917  | 1020.045 | 849.097  | NM_004283 | 1167.691  | 1041.896  | AL110200  | 1955.774  | 1592.544  |
| AF052146  | 18442.78 | 20541.95 | NM_004163 | 11806.716 | 11039.959 | AL133640  | 3724.006  | 4521.208  |
| NM_00487C | 10932.96 | 11814.29 | AK026308  | 2068.601  | 3194.176  | AJ012502  | 13104.357 | 9864.235  |
| AF143872  | 3208.845 | 2865.408 | NM_013337 | 2140.455  | 1700.661  | AK021722  | 1740.093  | 1011.148  |
| AK025686  | 2247.65  | 2698.408 | NM_004193 | 2380.402  | 2138.865  | AF147445  | 2587.728  | 2163.484  |
| AL049229  | 6433.753 | 5479.152 | NM_002803 | 13803.932 | 13711.711 | Y10508    | 11573.336 | 9563.665  |
| NM_01830C | 2938.002 | 3393.676 | NM_005508 | 5176.262  | 4559.511  | NM_005182 | 61922.934 | 53461.48  |
| AK026146  | 1699.241 | 1647.439 | NM_006788 | 1128.525  | 1342.351  | D17074    | 1595.17   | 1332.178  |
| AK023152  | 4800.403 | 4941.149 | NM_016568 | 1086.61   | 1112.893  | AF039944  | 8034.786  | 7506.781  |
| AK000155  | 4754.894 | 6368.081 | AB033102  | 16489.449 | 14334.771 | AJ276252  | 1236.562  | 1003.254  |
| AL389937  | 3028.691 | 3263.31  | NM_014774 | 6007.985  | 5563.141  | AK021716  | 6620.365  | 6900.877  |
| AK022628  | 53979.29 | 53394.92 | M55646    | 21637.402 | 24180.141 | AK025035  | 14209.499 | 12058.388 |
| AK021737  | 6170.089 | 6246.335 | NM_006112 | 23379.379 | 23182.707 | AK002085  | 11035.959 | 11163.372 |
| AK026295  | 17182.33 | 17767.59 | NM_000879 | 1015.426  | 707.789   | AL133618  | 5679.5    | 6064.72   |
| AK022346  | 1043.061 | 1149.35  | M12807    | 1285.324  | 1030.424  | AF230314  | 929.757   | 704.971   |
| AK025007  | 6503.814 | 5489.975 | NM_001765 | 5805.153  | 11285.425 | AK001086  | 1175.417  | 1236.137  |
| NM_01648C | 6729.382 | 9218.554 | NM_003361 | 2093.221  | 1887.629  | AJ131610  | 6590.546  | 7024.73   |
| AK026490  | 54154.07 | 52060.42 | NM_012099 | 3980.354  | 4220.447  | AF119872  | 12852.424 | 14674.007 |
| AJ227861  | 2229.924 | 2099.753 | NM_018684 | 18666.334 | 17424.357 | X99687    | 880.216   | 669.868   |
| AJ001875  | 1126.327 | 1269.595 | NM_017983 | 1325.552  | 1697.908  | AI275123  | 288.874   | 1042.694  |
| L13433    | 842.431  | 1423.799 | AF057354  | 981.848   | 774.69    | AK023255  | 61718.758 | 55801.797 |
| NM_00722C | 2360.935 | 2615.277 | AF169351  | 6697.959  | 5671.041  | NM_002622 | 53006.031 | 43059.645 |
| NM_017777 | 3775.196 | 4846.601 | M14200    | 53528.504 | 51355.059 | AK024185  | 2007.163  | 1851.324  |
| AL109722  | 1011.691 | 1202.987 | NM_000282 | 3926.024  | 3632.112  | NM_015417 | 1199.893  | 1294.838  |
| AK022298  | 6621.629 | 6248.672 | NM_000532 | 20711.539 | 20786.619 | AK026101  | 9787.252  | 6706.152  |
| AJ277441  | 8792.795 | 9251.56  | NM_016341 | 1101.434  | 1270.108  | AK022194  | 38910.352 | 30576.096 |
| AK024242  | 22071.05 | 22307.49 | AF231916  | 2893.785  | 2846.664  | AF085963  | 2088.494  | 1823.015  |
| AK024559  | 1432.386 | 1607.172 | NM_003501 | 5577.542  | 5702.988  | AF131851  | 663.187   | 679.25    |
| AL359943  | 69743.05 | 59470.49 | AK022654  | 27811.189 | 21546.854 | AK021436  | 1744.706  | 1845.137  |
| NM_000534 | 6035.969 | 5293.384 | BC002905  | 6831.789  | 5537.191  | U58664    | 1799.595  | 1695.312  |
| NM_005365 | 2821.907 | 4259.029 | NM_018091 | 9838.218  | 11464.271 | AL137569  | 4912.499  | 3846.649  |
| AL133447  | 3931.73  | 5075.932 | NM_001108 | 6340.016  | 12121.849 | AK021920  | 4646.672  | 3571.611  |
| AB037853  | 8338.195 | 10417.46 | NM_01663C | 12925.21  | 13654.844 | AL049415  | 2015.24   | 1719.467  |
| D28450    | 78555.01 | 59528.15 | NM_014291 | 8542.781  | 7643.583  | AK022375  | 1923.646  | 1489.699  |
| AK056222  | 3445.394 | 3614.027 | NM_014631 | 1289.402  | 1202.822  | NM_003378 | 59579.629 | 54947.512 |
| AK002028  | 45768.52 | 47311.09 | NM_001089 | 5102.167  | 3975.129  | AL110194  | 15471.179 | 12052.182 |
| AL050127  | 1802.645 | 1669.089 | NM_00012C | 2949.791  | 2580.786  | AF138860  | 4242.885  | 4002.368  |
| AK024805  | 9312.363 | 12207.94 | AF172327  | 40086.512 | 39620.668 | NM_006687 | 3342.479  | 3102.387  |
| AK001423  | 2718.751 | 2485.788 | NM_00167E | 5406.775  | 4731.693  | NM_013301 | 826.166   | 925.112   |
| AK024090  | 22156.2  | 23101.29 | NM_00022C | 1239.432  | 2629.049  | NM_017673 | 2081.698  | 2262.97   |
| AK021936  | 3513.568 | 3063.207 | NM_004519 | 1064.685  | 1869.831  | AB046857  | 1927.211  | 2392.879  |
| AF147339  | 6532.546 | 8020.079 | NM_001679 | 27527.816 | 30220.363 | AK024408  | 19740.078 | 27713.191 |
| AL390181  | 50402.04 | 51578.54 | NM_00404E | 66302.711 | 71011.055 | AF270490  | 1206.637  | 1804.531  |
| NM_017914 | 17684.59 | 24159.27 | NM_004983 | 1741.22   | 1455.366  | AJ227905  | 3933.248  | 4833.546  |
| NM_00635C | 650.906  | 907.67   | U09384    | 910.547   | 839.729   | AF086307  | 25730.191 | 24991.4   |
| AK024953  | 19412.48 | 15931.31 | NM_019884 | 5645.843  | 4222.66   | L19364    | 4894.832  | 4601.209  |
| AK024276  | 1908.638 | 2156.676 | NM_018291 | 5543.366  | 4912.958  | NM_00539C | 3147.043  | 2975.184  |
| S83374    | 1816.237 | 1798.192 | NM_00553C | 6076.891  | 5871.593  | CY3Cy5    | 4778.215  | 202.657   |
| AK025784  | 38483.68 | 41639.3  | NM_006899 | 9137.208  | 8711.558  | L07738    | 703.911   | 542.15    |
| U07199    | 6865.559 | 7728.555 | NM_01220C | 3798.495  | 3852.146  | Z48054    | 2423.464  | 2249.121  |
| AK023713  | 2451.023 | 2626.974 | NM_001724 | 2970.114  | 3187.651  | H90415    | 3274.869  | 2678.807  |

|           |          |          |           |           |           |           |           |           |
|-----------|----------|----------|-----------|-----------|-----------|-----------|-----------|-----------|
| X81445    | 738.186  | 999.881  | NM_00015C | 3446.636  | 3439.792  | AA676470  | 11142.021 | 9580.502  |
| U95091    | 2553.652 | 2227.191 | AB023152  | 1125.077  | 1129.118  | M38258    | 812.268   | 657.009   |
| NM_01790C | 34727.6  | 40831.29 | NM_006212 | 3812.654  | 3048.711  | AA457155  | 14222.4   | 11650.874 |
| S50182    | 1434.068 | 1155.976 | AK022872  | 3645.088  | 3402.67   | BM014365  | 1147.707  | 1102.358  |
| AL360145  | 1002.036 | 1128.832 | AK024272  | 7869.172  | 7906.457  | H91842    | 698.722   | 515.42    |
| Y12016    | 1949.164 | 1619.146 | NM_016381 | 2276.617  | 2239.343  | U78045    | 867.717   | 805.979   |
| NM_001178 | 2893.63  | 3374.067 | NM_018042 | 3148.885  | 3403.233  | AA878561  | 57533.977 | 58266.953 |
| AK023696  | 8105.131 | 7752.13  | BE741525  | 2443.824  | 3598.912  | BF688309  | 427.871   | 296.678   |
| AF116613  | 640.651  | 718.543  | BF030555  | 30085.771 | 42242.836 | AI538525  | 1088.607  | 996.362   |
| NM_000704 | 3371.274 | 3652.511 | NM_012433 | 15306.05  | 13986.792 | NM_000941 | 1446.753  | 1601.95   |
| NM_015987 | 2847.931 | 2554.974 | NM_005605 | 7305.866  | 8226.867  | SR1       | 61233.152 | 60890.848 |
| AK025205  | 640.976  | 675.442  | NM_020179 | 9499.794  | 6982.938  | SR3       | 57053.25  | 38857.563 |
| NM_019605 | 6491.965 | 6140.348 | NM_004306 | 34563.32  | 26266.795 | SR5       | 8440.817  | 6857.136  |
| NM_015369 | 1728.649 | 2061.318 | NM_006786 | 1496.446  | 960.668   | SR7       | 7002.477  | 44599.363 |
| Z49090    | 2334.382 | 2576.734 | NM_006205 | 2496.27   | 2583.188  | SR9       | 22297.396 | 2809.508  |
| AK021592  | 1722.083 | 2181.551 | NM_004034 | 3290.681  | 3374.781  | CY3Cy5    | 3914.131  | 120.629   |
| AK025467  | 4228.4   | 4747.002 | NM_00013C | 6274.674  | 4794.863  | U62858    | 1119.25   | 1853.331  |
| AK026593  | 23691.09 | 23346.78 | AI492087  | 1879.88   | 1842.699  | NM_001781 | 3771.284  | 2936.923  |
| NM_017665 | 6009.694 | 5339.263 | R72122    | 3549.086  | 3490.475  | NM_014432 | 2181.182  | 1576.5    |
| AF052106  | 3136.87  | 4100.59  | Z35309    | 2088.727  | 1735.005  | NM_001558 | 1245.118  | 2212.994  |
| AK000441  | 2289.775 | 1589.012 | X04571    | 479.829   | 351.949   | NM_006953 | 343.266   | 457.324   |
| AK022391  | 1869.949 | 2702.781 | AA700005  | 677.425   | 906.072   | NM_00253C | 495.065   | 707.134   |
| NM_016125 | 2186.136 | 2037.992 | AA292025  | 1456.383  | 1467.363  | U96173    | 1881.216  | 1824.272  |
| CY3Cy5    | 3833.344 | 111.042  | AA437226  | 2552.196  | 1663.809  | NM_018941 | 1555.048  | 1245.784  |
| R72122    | 4818.056 | 3273.749 | R36143    | 710.862   | 1010.413  | NM_020241 | 1160.143  | 1128.256  |
| Z35309    | 1507.912 | 928.95   | XM_056359 | 690.239   | 856.98    | BE730585  | 630.539   | 467.015   |
| X04571    | 903.451  | 894.733  | D10353/NM | 7951.078  | 7183.589  | NM_00198C | 1523.042  | 1350.345  |
| AA700005  | 1124     | 932.966  | M15042    | 6285.252  | 5847.191  | NM_005954 | 588.704   | 433.446   |
| AA292025  | 1279.872 | 1162.656 | AK056843  | 2182.111  | 2476.356  | NM_012471 | 351.704   | 494.792   |
| AA437226  | 1921.305 | 2343.256 | U49928    | 14388.698 | 15362.25  | NM_001321 | 3343.265  | 3532.501  |
| D10353/NM | 1816.463 | 904.076  | AK092859  | 1647.788  | 1617.054  | AB018264  | 2841.37   | 3229.915  |
| M15042    | 5831.471 | 4893.406 | M12807    | 756.795   | 484.248   | NM_006911 | 1380.815  | 1237.882  |
| AK056843  | 585.586  | 396.516  | NM_001765 | 4489.447  | 7034.431  | U92544    | 1324.461  | 1287.097  |
| U49928    | 7409.894 | 6680.458 | NM_003361 | 1683.308  | 1416.219  | NM_019644 | 452.727   | 437.285   |
| AK096645  | 23902.18 | 21253.24 | NM_012099 | 3440.094  | 3181.011  | NM_006791 | 1947.697  | 2388.18   |
| AK092859  | 1031.335 | 1006.822 | NM_018684 | 15149.07  | 12093.97  | AJ278348  | 16423.248 | 13665.28  |
| NM_019884 | 7483.03  | 8912.673 | NM_017983 | 1082.447  | 1939.686  | AI285199  | 983.74    | 726.181   |
| SR4       | 19551.19 | 13362.18 | AF116909  | 1491.965  | 1461.962  | AK023106  | 2022.558  | 1705.36   |
| SR6       | 3058.867 | 1835.939 | BE906724  | 1275.121  | 840.376   | NM_01673C | 31220.355 | 31810.227 |
| SR8       | 10540.46 | 17508.96 | NM_002283 | 7794.755  | 5298.414  | AL035297  | 1573.584  | 1330.092  |
| SR10      | 40936.51 | 11006.03 | AJ276095  | 13172.835 | 11683.087 | NM_004408 | 2385.506  | 1754.554  |
| CY3Cy5    | 7226.316 | 276.844  | NM_004819 | 3970.066  | 3937.65   | AJ131244  | 1661.651  | 1707.369  |
| NM_005291 | 1310.912 | 1277.001 | NM_007184 | 2707.024  | 3028.988  | NM_002532 | 4283.27   | 3255.64   |
| NM_005855 | 528.33   | 512.413  | NM_005291 | 29413.443 | 24826.428 | NM_012388 | 5468.127  | 4171.021  |
| NM_002923 | 2582.334 | 2114.497 | AF253316  | 609.503   | 1028.479  | NM_016651 | 637.103   | 492.495   |
| NM_018653 | 742.526  | 655.775  | NM_002923 | 2239.309  | 2440.848  | NM_001671 | 1349.375  | 952.703   |
| NM_005388 | 4634.294 | 3940.539 | NM_006794 | 988.365   | 956.494   | NM_019843 | 2886.229  | 2820.027  |
| NM_007232 | 4847.151 | 4347.469 | NM_018653 | 913.663   | 978.256   | NM_016192 | 4122.919  | 3779.455  |
| NM_003027 | 800.553  | 944.11   | NM_005388 | 6313.223  | 7945.428  | BE878426  | 54802.707 | 55365.777 |
| NM_002717 | 10020.85 | 5969.582 | NM_007232 | 40461.012 | 37022.547 | NM_001745 | 17145.781 | 14557.233 |
| NM_014486 | 608.089  | 557.913  | NM_003027 | 1151.391  | 942.717   | NM_003825 | 6841.619  | 8008.294  |
| NM_003025 | 7493.482 | 5913.006 | NM_016257 | 793.478   | 1097.409  | AK025006  | 16111.846 | 11941.398 |
| NM_020179 | 11549.09 | 11696.68 | NM_002717 | 7670.265  | 12300.688 | AF218014  | 7697.208  | 8569.686  |

|           |          |          |           |           |           |           |           |           |
|-----------|----------|----------|-----------|-----------|-----------|-----------|-----------|-----------|
| NM_004306 | 29005.34 | 33494.5  | NM_003025 | 15537.107 | 14670.432 | NM_006678 | 2571.972  | 3062.662  |
| NM_001153 | 992.795  | 753.502  | NM_001679 | 22173.951 | 17121.174 | AY007729  | 24679.652 | 23790.73  |
| NM_006205 | 5041.701 | 4990.006 | NM_004046 | 66337.773 | 64517.293 | NM_014424 | 717.182   | 570.221   |
| NM_004034 | 2780.961 | 2703.838 | NM_004983 | 1092.655  | 721.806   | AF159092  | 1651.512  | 1514.176  |
| NM_000130 | 1476.424 | 1373.271 | U09384    | 824.286   | 551.129   | BC007318  | 9198.26   | 7540.37   |
| AI492087  | 3750.293 | 4618.829 | NM_006860 | 9456.614  | 6810.58   | M36693    | 2585.575  | 2227.38   |
| NM_004193 | 2928.011 | 3078.595 | NM_004794 | 13317.703 | 15326.555 | NM_016292 | 6312.091  | 6152.351  |
| NM_002803 | 16857.39 | 12961.02 | NM_004283 | 1529.155  | 1172.125  | NM_002601 | 7073.673  | 5276.921  |
| NM_005508 | 7265.892 | 6412.314 | NM_004163 | 14140.17  | 14092.89  | NM_005898 | 12565.251 | 13995.25  |
| NM_018485 | 428.573  | 445.465  | AK026308  | 2049.557  | 2384.628  | NM_002889 | 35943.348 | 37627.641 |
| NM_006788 | 1163.33  | 946.431  | NM_013337 | 2573.822  | 2230.357  | AF078866  | 5880.891  | 4306.597  |
| AK025039  | 476.132  | 522.342  | NM_004193 | 2549.91   | 2473.685  | BF311880  | 7478.929  | 8501.077  |
| NM_016568 | 1074.811 | 1111.068 | NM_002803 | 15659.176 | 15696.974 | NM_016075 | 635.115   | 733.345   |
| AB033102  | 5401.907 | 4627.844 | NM_005508 | 5724.978  | 5578.791  | NM_001360 | 22191.881 | 21153.156 |
| NM_014774 | 5990.074 | 4719.785 | NM_006788 | 1560.013  | 2979.464  | AK026656  | 4413.087  | 4354.995  |
| NM_014143 | 11558.84 | 7711.764 | AK025039  | 700.935   | 929.934   | AJ276207  | 11447.279 | 9905.397  |
| M55646    | 1374.353 | 1167.667 | NM_016568 | 1560.024  | 1916.61   | AB011131  | 9456.07   | 9811.896  |
| NM_006112 | 19983.66 | 15452.07 | AB033102  | 21976.797 | 21025.529 | NM_000751 | 5053.452  | 4849.493  |
| M12807    | 671.666  | 550.016  | NM_014774 | 6778.39   | 8162.012  | NM_014849 | 5055.853  | 4321.517  |
| NM_001765 | 8976.115 | 3897.013 | NM_014143 | 12613.839 | 14343.715 | NM_001042 | 5168.38   | 4525.892  |
| NM_003361 | 527.341  | 620.233  | M55646    | 26964.541 | 29806.893 | NM_012229 | 3796.806  | 3201.577  |
| NM_012099 | 2643.395 | 1878.78  | NM_006112 | 26581.092 | 24484.551 | NM_005071 | 517.67    | 810.498   |
| NM_018684 | 13507.78 | 12938.6  | BE741525  | 1130.932  | 1197.345  | AB023147  | 3699.057  | 3225.94   |
| NM_017983 | 3201.343 | 2572.562 | BF030555  | 20424.699 | 15770.971 | NM_016615 | 4554.639  | 3847.144  |
| AF116909  | 2912.522 | 2604.552 | NM_012433 | 12064.362 | 7923.635  | NM_005630 | 1483.635  | 988.322   |
| NM_002283 | 1017.002 | 1183.396 | NM_005605 | 5441      | 4223.929  | NM_001046 | 635.251   | 714.011   |
| AJ276095  | 17626.47 | 15599.22 | NM_002576 | 2658.087  | 1875.11   | NM_012201 | 4222.243  | 5218.296  |
| NM_004819 | 3477.449 | 4636.236 | NM_003582 | 3679.786  | 3417.764  | AB046774  | 1292.493  | 1301.093  |
| NM_007184 | 4277.018 | 4447.89  | AF057354  | 1157.122  | 971.794   | AK022385  | 17630.709 | 16510.639 |
| AF231916  | 704.156  | 710.73   | AF169351  | 8510.689  | 7470.464  | NM_002775 | 551.67    | 1097.991  |
| NM_003501 | 4990.254 | 4636.838 | M14200    | 57226.711 | 54894.125 | AK024584  | 7249.298  | 2897.893  |
| AK022654  | 1944.008 | 2263.017 | NM_000282 | 4687.464  | 4640.175  | NM_003504 | 11652.372 | 8020.416  |
| BC002905  | 5913.79  | 5322.274 | NM_000532 | 23505.676 | 24176.559 | NM_013298 | 4702.899  | 3659.368  |
| NM_018091 | 9953.84  | 8533.915 | NM_016341 | 1200.061  | 1610.695  | NM_007267 | 2484.058  | 2454.26   |
| NM_001108 | 13859.12 | 7126.685 | AF231916  | 1612.888  | 1942.991  | AK022830  | 433.933   | 868.576   |
| NM_016630 | 15230.98 | 13053.4  | NM_003501 | 6365.146  | 6429.468  | Z36816    | 3022.232  | 2586.999  |
| NM_014291 | 5426.996 | 5051.214 | AK022654  | 26773.811 | 25369.357 | NM_005865 | 4785.025  | 4915.289  |
| NM_014631 | 985.053  | 771.885  | BC002905  | 7230.22   | 7710.206  | NM_006413 | 14455.248 | 10040.146 |
| NM_001089 | 978.293  | 694.034  | NM_018091 | 13590.311 | 22926.002 | NM_017684 | 1066.168  | 905.255   |
| NM_000120 | 1709.007 | 2217.692 | NM_001108 | 8000.785  | 17784.512 | AK025542  | 3212.116  | 3067.397  |
| AF172327  | 33417.5  | 28423.13 | NM_001637 | 731.913   | 1026.152  | AF207547  | 944.939   | 822.046   |
| NM_001676 | 1778.022 | 1669.816 | NM_016630 | 15941.972 | 18577.635 | NM_002768 | 6256.036  | 5964.42   |
| NM_000220 | 469.492  | 385.656  | NM_014291 | 10199.168 | 10663.529 | NM_003691 | 4228.468  | 4213.168  |
| NM_001679 | 19587.02 | 16583.72 | NM_014631 | 938.899   | 1190.549  | NM_002950 | 19630.367 | 20266.613 |
| U09384    | 1721.756 | 2293.001 | NM_001089 | 5298.463  | 6000.267  | NM_002318 | 2135.12   | 2031.334  |
| NM_006860 | 7638.632 | 7850.57  | NM_000120 | 3716.755  | 3267.325  | NM_001433 | 787.557   | 734.859   |
| NM_004794 | 18267.76 | 13696.89 | AF172327  | 46205.703 | 45693.527 | NM_003134 | 57484.691 | 52908.691 |
| NM_004283 | 2328.962 | 2759.028 | NM_001676 | 5739.955  | 5697.363  | NM_004314 | 3523.232  | 3604.108  |
| NM_004163 | 3928.411 | 3350.5   | AB018338  | 18902.717 | 14673.507 | NM_018247 | 8788.231  | 6185.078  |
| AK026308  | 1251.309 | 1656.08  | D80010    | 2614.28   | 2210.358  | NM_017979 | 5193.636  | 4649.689  |
| NM_013337 | 2704.407 | 3687.163 | NM_004923 | 991.01    | 810.608   | NM_006791 | 1865.075  | 3033.126  |
| NM_006899 | 14795.67 | 15197.22 | NM_003971 | 1414.527  | 1065.485  | AJ278348  | 15384.688 | 13625.805 |
| NM_012200 | 5404.74  | 4164.02  | AK026973  | 755.303   | 960.18    | AI285199  | 1059.709  | 997.353   |

|           |          |          |           |           |           |           |           |           |
|-----------|----------|----------|-----------|-----------|-----------|-----------|-----------|-----------|
| NM_001724 | 4655.467 | 3231.904 | NM_005822 | 1019.546  | 1726.356  | L07738    | 747.295   | 492.696   |
| NM_000150 | 1300.352 | 1229.259 | U81002    | 6302.545  | 6277.183  | Z48054    | 2454.251  | 2052.836  |
| AB023152  | 3010.417 | 2386.322 | NM_016295 | 14990.307 | 15692.197 | H90415    | 3245.767  | 2208.965  |
| NM_006212 | 2109.044 | 1961.837 | NM_014185 | 13430.667 | 12959.678 | AA676470  | 11789.7   | 9142.356  |
| AK022872  | 5375.899 | 3217.667 | L38517    | 4288.926  | 4379.027  | M38258    | 695.319   | 825.295   |
| AK024272  | 9450.645 | 7263.053 | NM_018291 | 6891.035  | 8174.3    | AA457155  | 8849.129  | 9533.705  |
| NM_016381 | 2988.2   | 2087.655 | NM_005530 | 6942.143  | 7687.675  | BM014365  | 916.29    | 774.901   |
| NM_018042 | 2031.213 | 1728.76  | NM_006895 | 9792.36   | 10111.651 | U78045    | 877.583   | 778.733   |
| BE741525  | 1712.19  | 1297.234 | NM_012200 | 3812.613  | 4596.477  | AA878561  | 56074.125 | 59057.047 |
| BF030555  | 3272.6   | 3078.981 | NM_001724 | 2911.321  | 3854.858  | BF688309  | 512.211   | 525.444   |
| NM_012433 | 12744.76 | 10725.1  | NM_000150 | 3872.606  | 3449.985  | AI538525  | 849.977   | 722.566   |
| NM_002576 | 4911.702 | 8394.204 | AB023152  | 1424.357  | 1416.338  | NM_000623 | 452.584   | 445.535   |
| NM_003582 | 6077.899 | 7841.232 | NM_006212 | 4423.161  | 4265.3    | NM_000941 | 1377.479  | 1388.231  |
| AF057354  | 1987.276 | 1940.515 | AK022872  | 3809.12   | 5040.698  | AF222980  | 1018.971  | 910.448   |
| AF169351  | 4608.013 | 4845.62  | AK024272  | 10261.002 | 11078.063 | AK026758  | 2991.582  | 3018.208  |
| M14200    | 62323.3  | 55146.39 | NM_016381 | 2910.281  | 2901.901  | NM_014424 | 673.451   | 907.395   |
| NM_000282 | 4694.881 | 5327.645 | AL591715  | 1037.604  | 1652.128  | AF159092  | 1946.643  | 2085.813  |
| NM_000532 | 26725.2  | 31329.69 | NM_018042 | 4324.742  | 4626.842  | BC007318  | 10363.538 | 9375.179  |
| NM_016341 | 1749.745 | 1939.832 | NM_014944 | 8126.868  | 5410.838  | M36693    | 2886.611  | 2586.13   |
| NM_004034 | 2309.95  | 1661.457 | AF200348  | 4258.329  | 2727.427  | NM_016292 | 5034.093  | 6398.174  |
| NM_000130 | 1149.495 | 1120.038 | NM_002650 | 1976.739  | 1707.992  | NM_002601 | 7437.004  | 5959.868  |
| AI492087  | 2528.021 | 2036.8   | NM_003260 | 19718.213 | 19115.096 | U62858    | 1099.127  | 1177.362  |
| R72122    | 5233.907 | 4805.504 | AK024071  | 2037.369  | 1729.535  | NM_001781 | 3626.923  | 3045.872  |
| Z35309    | 1362.709 | 1105.509 | AF056490  | 1991.938  | 2595.418  | NM_014432 | 2052.511  | 1338.658  |
| X04571    | 706.327  | 708.524  | NM_005535 | 1485.045  | 1463.309  | NM_001555 | 1277.025  | 1943.904  |
| AA700005  | 687.706  | 529.175  | NM_005541 | 2277.799  | 3273.714  | NM_006953 | 1339.735  | 1288.724  |
| AA292025  | 1307.55  | 960.279  | AB002319  | 3122.984  | 4947.308  | U96173    | 1554.859  | 1503.771  |
| AA437226  | 1927.019 | 2033.698 | AF039942  | 4942.169  | 6419.183  | NM_018941 | 1524.002  | 1417.18   |
| XM_056359 | 621.521  | 489.761  | NM_004421 | 2693.711  | 2539.385  | NM_020241 | 973.661   | 925.112   |
| D10353/NM | 2057.572 | 1372.147 | AB046863  | 14961.75  | 14616.732 | NM_001980 | 1452.416  | 1568.083  |
| M15042    | 7913.188 | 6299.274 | M62403    | 12166.931 | 12625.105 | NM_005954 | 389.926   | 489.263   |
| AK056843  | 1025.652 | 1037.33  | NM_017883 | 3670.493  | 4183.752  | NM_012471 | 907.892   | 548.782   |
| U49928    | 10781.65 | 16440.37 | AK025131  | 4639.625  | 4670.797  | NM_001321 | 2681.825  | 2492.636  |
| AK096645  | 27670.37 | 46478.18 | NM_000754 | 25192.172 | 27749.936 | AB018264  | 3133.735  | 3163.417  |
| AK092859  | 1449.18  | 2763.771 | NM_014615 | 1408.598  | 1697.402  | NM_006911 | 1497.934  | 1098.236  |
| NM_019884 | 8274.396 | 8977.516 | NM_005625 | 12924.387 | 15169.675 | U92544    | 1560.994  | 1498.013  |
| NM_018291 | 5265.493 | 4885.471 | J04621    | 1870.24   | 2851.162  | NM_012225 | 3922.225  | 4472.511  |
| NM_005530 | 8861.036 | 7560.268 | NM_000715 | 4401.979  | 5760.686  | NM_005071 | 630.706   | 795.524   |
| AF116909  | 2267.844 | 1565.83  | NM_000161 | 8397.063  | 14735.226 | AB023147  | 3701.701  | 4036.861  |
| NM_002283 | 724.391  | 1070.493 | NM_002634 | 21794.1   | 18770.311 | NM_016615 | 5543.872  | 5324.78   |
| AJ276095  | 15649.22 | 11575.36 | NM_017745 | 2720.924  | 2285.201  | NM_005630 | 1204.939  | 1079.225  |
| NM_004815 | 3544.955 | 4187.4   | NM_001972 | 620.496   | 640.51    | NM_001046 | 466.116   | 844.469   |
| NM_007184 | 4479.572 | 3699.336 | NM_001445 | 890.584   | 1059.185  | AK023106  | 1770.834  | 1580.057  |
| NM_005291 | 1174.111 | 1326.881 | NM_002006 | 24073.139 | 22068.178 | NM_016730 | 28821.846 | 24533.207 |
| NM_002923 | 2552.171 | 2062.024 | NM_007111 | 10958.211 | 8330.053  | AL035297  | 2009.02   | 1374.111  |
| NM_018653 | 557.02   | 611.012  | NM_002045 | 1027.602  | 1215.49   | NM_004405 | 2493.04   | 2136.11   |
| NM_005385 | 4912.103 | 4533.807 | NM_004702 | 1747.143  | 2535.599  | AJ131244  | 2005.227  | 1228.48   |
| NM_007232 | 4568.496 | 4895.429 | NM_007105 | 3647.868  | 3992.305  | NM_002532 | 4738.804  | 4786.075  |
| NM_003027 | 946.365  | 1443.717 | AK023404  | 4604.673  | 6374.977  | NM_012385 | 6012.807  | 5110.156  |
| NM_016257 | 902.729  | 985.164  | NM_013235 | 2906.345  | 5272.223  | NM_016651 | 671.962   | 1129.578  |
| NM_012114 | 688.098  | 723.375  | NM_001785 | 3903.468  | 4058.668  | NM_001671 | 1206.584  | 1333.425  |
| NM_014486 | 730.357  | 1033.289 | NM_016004 | 6238.813  | 6826.15   | NM_019843 | 2589.729  | 2885.202  |
| NM_003025 | 11632.68 | 18444.37 | NM_002655 | 2078.956  | 1583.137  | NM_016192 | 4039.555  | 4580.511  |

|           |          |          |           |           |           |           |           |           |
|-----------|----------|----------|-----------|-----------|-----------|-----------|-----------|-----------|
| U52051    | 556.486  | 483.893  | AB028955  | 13082.33  | 12081.939 | BE878426  | 55724.441 | 56038.367 |
| NM_020179 | 12629.46 | 14317.37 | U66879    | 15616.638 | 21359.188 | NM_001745 | 18530.576 | 16470.508 |
| NM_004306 | 30390.9  | 35203.51 | NM_016022 | 7204.81   | 6635.116  | NM_003825 | 7611.467  | 8259.734  |
| NM_006786 | 1940.846 | 1898.12  | NM_004874 | 3195.693  | 3868.885  | AK025006  | 17952.408 | 14217.3   |
| NM_006205 | 4624.322 | 4353.296 | NM_014204 | 1915.099  | 1669.889  | AF218014  | 8054.6    | 9369.719  |
| NM_006860 | 6819.07  | 5814.696 | S70385    | 12478.781 | 9308.575  | NM_006678 | 2519.068  | 2647.816  |
| NM_004794 | 16725.61 | 12321.66 | M34671    | 10884.287 | 13074.844 | AY007729  | 25500.533 | 29098.973 |
| NM_004283 | 1868.522 | 1917.432 | NM_001941 | 731.79    | 1362.595  | NM_001433 | 551.509   | 558.056   |
| NM_004163 | 3855.042 | 3439.264 | NM_018509 | 11911.654 | 11835.156 | NM_003134 | 55161.152 | 53842.641 |
| AK026308  | 966.448  | 949.735  | NM_004086 | 10030.612 | 9550.8    | NM_004314 | 3693.009  | 3382.051  |
| NM_013337 | 2365.803 | 3056.515 | AL050199  | 1247.212  | 960.753   | NM_018247 | 9498.64   | 6487.964  |
| NM_004193 | 2836.134 | 3081.828 | AF176706  | 2822.08   | 2538.41   | NM_017979 | 6278.134  | 6816.34   |
| NM_002803 | 18416.19 | 18818.76 | NM_014484 | 785.57    | 606.238   | NM_005896 | 13644.717 | 12142.698 |
| NM_005508 | 6672.225 | 6952.817 | NM_001086 | 2869.895  | 2880.364  | NM_002889 | 42037.438 | 33005.867 |
| NM_006788 | 1337.974 | 1086.97  | NM_014670 | 3157.699  | 3547.392  | AF078866  | 6383.215  | 4465.142  |
| AK025039  | 300.961  | 442.362  | NM_019048 | 7857.017  | 9469.935  | BF311880  | 8194.65   | 6720.377  |
| NM_016568 | 1435.073 | 1335.589 | NM_001040 | 3534.217  | 3689.138  | NM_016075 | 798.422   | 943.466   |
| AB033102  | 7842.355 | 9311.227 | AF279698  | 4595.12   | 4553.592  | NM_001360 | 22302.744 | 26698.436 |
| M55646    | 2456.545 | 2853.982 | NM_019849 | 2828.87   | 2987.898  | AK026656  | 5158.192  | 4735.549  |
| NM_006112 | 27751    | 48583.64 | AB032996  | 35185.738 | 34565.488 | AJ276207  | 11898.388 | 10837.425 |
| NM_000879 | 703.54   | 985.261  | AB040881  | 6281.027  | 7111.647  | AB011131  | 9504.059  | 11105.206 |
| M12807    | 789.431  | 920.783  | AY007121  | 1785.12   | 1769.486  | NM_000749 | 465.102   | 333.311   |
| NM_001765 | 10762.55 | 5181.778 | NM_003372 | 16355.602 | 20584.18  | NM_000751 | 5367.137  | 5264.943  |
| NM_003361 | 604.509  | 580.14   | NM_007317 | 9525.709  | 9854.268  | NM_014849 | 5893.465  | 5659.969  |
| NM_012099 | 2439.281 | 1853.342 | AB037826  | 581.07    | 1653.16   | NM_001042 | 6267.847  | 6454.62   |
| NM_018684 | 12742.75 | 11926.66 | AK021466  | 3090.461  | 3778.407  | NM_000623 | 556.503   | 607.051   |
| NM_017983 | 2759.092 | 1601.138 | NM_006443 | 22934.564 | 19387.361 | NM_000941 | 1549.519  | 1667.521  |
| AF057354  | 1633.675 | 1354.903 | NM_004959 | 498.352   | 500.743   | AF222980  | 1136.387  | 1095.573  |
| AF169351  | 4667.439 | 3896.234 | AK026022  | 37628.016 | 31829.385 | AK026758  | 3568.39   | 3907.44   |
| M14200    | 58931.38 | 55040.56 | NM_003199 | 1894.217  | 1455.569  | NM_012201 | 4204.318  | 4258.456  |
| NM_000282 | 4636.855 | 4251.813 | NM_002938 | 9184.663  | 6176.379  | AB046774  | 1447.518  | 950.412   |
| NM_000532 | 26178.31 | 24210.98 | AK023652  | 8558.249  | 7268.272  | AK022385  | 21631.014 | 17975.596 |
| NM_016341 | 1798.991 | 1574.327 | AF099032  | 1298.81   | 1832.35   | NM_002775 | 660.488   | 847.145   |
| AF231916  | 755.794  | 681.907  | NM_003070 | 3273.898  | 2430.352  | AK024584  | 8117.244  | 4523.691  |
| NM_003501 | 5129.017 | 5570.374 | AL122101  | 4488.282  | 4116.563  | NM_003504 | 12823.797 | 11157.151 |
| AK022654  | 2208.462 | 2805.153 | NM_004780 | 956.335   | 1051.015  | NM_013298 | 4672.072  | 4030.123  |
| BC002905  | 6103.365 | 6918.027 | NM_016216 | 5046.892  | 4820.855  | NM_007267 | 2953.655  | 3256.106  |
| NM_018091 | 11431.95 | 12521.19 | AK001649  | 1216.998  | 1130.893  | AK022830  | 443.754   | 932.799   |
| NM_001108 | 15434.32 | 9070.897 | NM_016638 | 13177.373 | 11365.037 | Z36816    | 3472.182  | 3155.138  |
| NM_001637 | 606.215  | 603.88   | AB018274  | 10287.022 | 9989.966  | NM_005865 | 5333.589  | 5196.454  |
| NM_016630 | 16526.87 | 18813.48 | NM_005871 | 11452.14  | 10379.337 | NM_006413 | 14590.349 | 10153.615 |
| NM_014291 | 7021.284 | 10820.97 | NM_007042 | 3635.337  | 3385.365  | NM_017684 | 1092.833  | 1021.023  |
| NM_014631 | 1333.994 | 1675.959 | NM_016333 | 12727.12  | 10965.109 | AK025542  | 3065.734  | 3201.07   |
| NM_000120 | 2714.606 | 5233.855 | BE875028  | 4049.421  | 3809.116  | AF207547  | 1038.949  | 1020.119  |
| NM_000220 | 778.42   | 944.216  | AK000511  | 5343.141  | 5765.423  | NM_002768 | 6601.693  | 7222.025  |
| NM_001679 | 22105.65 | 19898.11 | AF121255  | 3137.271  | 3528.625  | NM_003691 | 4917.664  | 5589.023  |
| U09384    | 973.455  | 790.561  | NM_005494 | 5626.507  | 4718.495  | NM_002950 | 22414.527 | 22761.984 |
| NM_019884 | 7142.427 | 8793.547 | NM_017946 | 1680.441  | 2005.883  | NM_002318 | 2652.042  | 2898.438  |
| NM_018291 | 4640.926 | 3433.445 | NM_004953 | 5128.725  | 5944.912  | NM_005954 | 637.34    | 933.612   |
| NM_005530 | 8359.4   | 8691.788 | AL049682  | 1934.682  | 2009.616  | NM_012471 | 427.158   | 711.239   |
| NM_006899 | 14092.77 | 11564.54 | NM_005528 | 8483.923  | 7994.138  | NM_001321 | 4339.424  | 4354.566  |
| NM_012200 | 5754.849 | 5377.363 | AK022842  | 1630.829  | 1078.143  | AB018264  | 3363.166  | 3465.731  |
| NM_001724 | 5473.582 | 4180.498 | NM_007006 | 21152.225 | 17549.291 | NM_006911 | 1266.786  | 1040.702  |



|           |          |          |           |           |           |           |           |           |
|-----------|----------|----------|-----------|-----------|-----------|-----------|-----------|-----------|
| NM_000150 | 1518.356 | 1717.995 | NM_017756 | 28493.08  | 20531.023 | U92544    | 1491.13   | 2087.917  |
| AB023152  | 3352.999 | 2958.041 | NM_005793 | 6747.675  | 5679.421  | NM_019644 | 365.244   | 279.487   |
| NM_006212 | 2573.418 | 3183.327 | NM_004901 | 2168.802  | 1609.196  | NM_006791 | 1888.305  | 2338.993  |
| AK022872  | 6901.216 | 5429.647 | U77088    | 905.979   | 774.811   | AJ278348  | 17385.896 | 14320.488 |
| AK024272  | 12375.37 | 13338.85 | NM_006721 | 11915.521 | 12239.066 | AI285199  | 1356.894  | 1300.186  |
| NM_016381 | 4187.932 | 4621.939 | NM_016282 | 6093.123  | 6597.558  | L07738    | 848.55    | 574.439   |
| AL591715  | 783.665  | 1022.293 | NM_002765 | 6150.253  | 7212.415  | Z48054    | 2646.134  | 2140.959  |
| NM_018035 | 846.637  | 789.363  | NM_001905 | 2274.991  | 2403.262  | H90415    | 3393.694  | 2710.421  |
| NM_018042 | 3893.197 | 4775.467 | AF292100  | 4176.56   | 3912.467  | AA676470  | 13651.257 | 13619.156 |
| BF030555  | 3850.223 | 5676.772 | NM_003434 | 54045.492 | 52123.73  | M38258    | 571.553   | 814.599   |
| NM_012433 | 13631.91 | 17531.52 | AF024698  | 60936.633 | 61413.082 | AA457155  | 11725.095 | 11720.235 |
| NM_002576 | 4022.136 | 4802.755 | BE904617  | 16705.504 | 16598.674 | BM014365  | 988.15    | 1171.665  |
| NM_003582 | 5163.073 | 4106.816 | AK024495  | 1037.061  | 632.16    | H91842    | 920.147   | 843.255   |
| NM_020179 | 10960.89 | 11008.32 | AF024694  | 3079.451  | 2553.146  | U78045    | 1073.02   | 1534.707  |
| NM_004306 | 29662.2  | 38225.26 | AF091081  | 9192.153  | 9230.199  | AA878561  | 55991.23  | 57581.758 |
| NM_006786 | 1810.484 | 1434.356 | AK001758  | 5408.831  | 4802.586  | BF688309  | 696.781   | 443.812   |
| NM_006205 | 4527.914 | 4516.195 | U90842    | 832.384   | 823.203   | AI538525  | 1138.217  | 1393.407  |
| NM_004034 | 2155.834 | 2046.546 | AF086325  | 3611.683  | 4264.116  | NM_003825 | 8762.742  | 11380.064 |
| NM_000130 | 1398.727 | 1310.944 | NM_004928 | 1320.277  | 1781.343  | AK025006  | 19570.17  | 16791.891 |
| NM_004183 | 622.879  | 907.64   | AF147401  | 1296.418  | 973.029   | AF218014  | 9192.777  | 10555.296 |
| AI492087  | 3271.993 | 4029.921 | AJ001904  | 1198.76   | 987.386   | NM_006678 | 3439.917  | 3320.869  |
| R72122    | 7953.012 | 8644.523 | AF075022  | 1455.581  | 1117.564  | AY007729  | 30572.045 | 31796.613 |
| Z35309    | 2112.176 | 2293.696 | AF075060  | 2863.052  | 2858.889  | NM_014424 | 783.002   | 850.853   |
| X04571    | 815.054  | 1062.093 | AF147436  | 924.331   | 833.194   | AF159092  | 1702.763  | 1721.173  |
| AA700005  | 1160.614 | 1275.907 | AK021441  | 1440.743  | 1581.834  | BC007318  | 10400.494 | 8155.625  |
| AA292025  | 1547.644 | 1898.295 | AK026018  | 805.024   | 515.494   | M36693    | 2877.458  | 2655.565  |
| AA437226  | 2403.208 | 3436.573 | AF085846  | 3296.758  | 3706.825  | NM_016292 | 7683.236  | 7624.086  |
| R36143    | 419.734  | 601.751  | AK023901  | 10891.563 | 10103.314 | NM_002601 | 7861.606  | 7067.885  |
| XM_056359 | 831.128  | 716.336  | AL109705  | 1406.315  | 1359.833  | U62858    | 1290.079  | 1673.603  |
| D10353/NM | 2168.134 | 2121.265 | AF147392  | 640.28    | 977.941   | NM_001781 | 4315.113  | 4011.938  |
| AK056843  | 669.339  | 928.655  | AF088057  | 7748.906  | 9085.506  | AF035121  | 609.071   | 324.309   |
| AK092859  | 1322.278 | 1645.625 | AF086255  | 20154.131 | 16546.51  | NM_014432 | 2096.201  | 2195.519  |
| M12807    | 713.54   | 802.717  | AK022660  | 515.808   | 692.351   | NM_001558 | 1220.37   | 1813.931  |
| NM_001765 | 9925.38  | 4872.593 | AF088051  | 2524.154  | 2123.174  | NM_006953 | 325.476   | 533.24    |
| NM_003361 | 613.192  | 673.001  | AF086366  | 957.164   | 713.906   | NM_002530 | 649.785   | 604.037   |
| NM_012099 | 2070.879 | 1733.976 | AF086360  | 4951.449  | 4783.188  | U96173    | 2031.374  | 1741.498  |
| NM_018684 | 12466.28 | 11110.65 | AF086436  | 534.007   | 886.396   | NM_018941 | 1633.359  | 1874.532  |
| NM_017983 | 2847.497 | 1747.154 | AF087993  | 5802.26   | 9366.447  | NM_020241 | 896.356   | 952.248   |
| AF116909  | 2409.252 | 1875.993 | AF035282  | 1764.211  | 1795.61   | BE730585  | 557.069   | 942.816   |
| NM_002283 | 865.185  | 1872.932 | AK021966  | 5502.093  | 6194.733  | NM_001980 | 1603.28   | 2125.835  |
| AJ276095  | 21168.4  | 26520.61 | AB018292  | 16494.055 | 22750.682 | NM_000749 | 417.031   | 465.404   |
| NM_004819 | 4392.593 | 6875.593 | AF085971  | 1234.594  | 996.44    | NM_000751 | 5747.528  | 6261.137  |
| NM_007184 | 5860.286 | 7047.243 | AF147302  | 2143.028  | 1740.345  | NM_014849 | 6829.88   | 6897.374  |
| NM_005291 | 1176.753 | 1888.493 | AF085929  | 1583.057  | 1547.225  | NM_001042 | 6564.561  | 6634.986  |
| AF253316  | 977.299  | 884.666  | AK001126  | 3020.841  | 2567.281  | NM_012229 | 4374.944  | 3856.252  |
| NM_005855 | 427.263  | 633.08   | AF085976  | 5861.104  | 5518.38   | NM_005071 | 664.153   | 692.613   |
| NM_002923 | 2696.553 | 2621.838 | AF075104  | 7065.727  | 6079.207  | AB023147  | 3438.166  | 3966.865  |
| NM_006794 | 420.747  | 506.818  | AL133025  | 961.321   | 838.891   | NM_016615 | 6204.892  | 5301.132  |
| NM_018653 | 717.393  | 806      | AL137402  | 14822.256 | 16688.232 | NM_005630 | 1364.932  | 1321.895  |
| NM_005388 | 5909.835 | 6224.063 | AL137617  | 3608.449  | 2733.666  | NM_001046 | 827.386   | 1051.376  |
| NM_007232 | 4236.432 | 4919.181 | AL359568  | 27901.184 | 23736.881 | AK023106  | 2271.866  | 2529.579  |
| NM_003027 | 1210.805 | 1848.591 | AL133564  | 9559.019  | 8540.449  | NM_016730 | 34445.648 | 36487.676 |
| NM_016257 | 1426.667 | 1413.749 | AL137428  | 1457.872  | 1614.055  | AL035297  | 2070.896  | 2349.72   |

|           |          |          |           |           |           |           |           |           |
|-----------|----------|----------|-----------|-----------|-----------|-----------|-----------|-----------|
| NM_012114 | 719.374  | 805.515  | AL157462  | 1015.042  | 1125.657  | NM_00440E | 2599.317  | 2792.289  |
| NM_01448E | 1409.415 | 2173.196 | AL359602  | 8781.434  | 7811.077  | AJ131244  | 2006.139  | 2334.993  |
| NM_00302E | 9999.941 | 15010.07 | NM_01819C | 47124.68  | 41015.734 | NM_00253Z | 5096.679  | 4994.512  |
| NM_00167E | 20295.91 | 18708.84 | AF086054  | 962.083   | 1017.722  | NM_01238E | 5419.998  | 5729.297  |
| NM_00404E | 67727.62 | 60546.23 | AK022259  | 48152.102 | 49490.031 | NM_016651 | 777.844   | 627.961   |
| NM_00498Z | 246.188  | 1079.496 | AK022461  | 921.207   | 1037.89   | NM_001671 | 1220.792  | 1250.66   |
| U09384    | 751.26   | 1093.662 | NM_01601C | 5563.333  | 5979.186  | NM_01984Z | 2693.769  | 3068.736  |
| NM_00686C | 6947.6   | 6415.263 | AF070647  | 29156.01  | 23882.105 | NM_01619Z | 5212.077  | 4965.476  |
| NM_004794 | 18603.44 | 17695.5  | AF116649  | 746.409   | 602.839   | BE878426  | 50511.02  | 54040.977 |
| NM_00428Z | 2281.028 | 3512.213 | AF174394  | 2489.277  | 2202.436  | NM_00174E | 20212.031 | 18346.939 |
| NM_00416Z | 5209.771 | 6734.001 | AF083121  | 639.475   | 669.159   | AK025542  | 5190.903  | 6133.52   |
| AK026308  | 962.379  | 1410.636 | AK025924  | 1030.093  | 1006.276  | AF207547  | 850.931   | 1066.492  |
| NM_013337 | 2806.635 | 4191.48  | AK021876  | 10835.736 | 9502.328  | NM_00276E | 8018.132  | 8529.644  |
| NM_00419Z | 2887.386 | 4786.996 | AK022017  | 1327.971  | 980.622   | NM_003691 | 5095.07   | 5830.653  |
| NM_00280Z | 17469.87 | 17374.96 | AK022160  | 3231.587  | 2763.899  | NM_00295C | 23432.104 | 22481.146 |
| NM_00550E | 7281.745 | 7109.665 | AK022295  | 1080.976  | 1317.958  | NM_00231E | 3008.957  | 3203.939  |
| NM_01848E | 752.276  | 525.791  | AK021935  | 2715.395  | 2560.55   | NM_00143Z | 755.198   | 664.847   |
| NM_00678E | 1528.059 | 1305.652 | AK022187  | 10730.23  | 9555.461  | NM_003134 | 58178.617 | 50030.781 |
| AK025039  | 814.17   | 539.391  | AK022337  | 1580.801  | 1504.554  | NM_004314 | 4496.063  | 3867.646  |
| NM_01656E | 1461.82  | 1342.425 | AK026847  | 805.63    | 1025.35   | NM_018247 | 9727.142  | 6944.215  |
| AB033102  | 6346.235 | 6275.115 | AK023048  | 707.943   | 653.326   | NM_01797E | 7896.4    | 9671.062  |
| NM_014774 | 7391.523 | 7774.369 | AL359560  | 606.978   | 623.74    | NM_00589E | 15550.563 | 18465.725 |
| M55646    | 2723.649 | 3133.055 | AK026891  | 2212.585  | 2360.618  | NM_00288E | 48874.852 | 49931.387 |
| NM_006112 | 29603.14 | 49316.45 | AK025573  | 1054.303  | 949.927   | AF078866  | 7496.812  | 7344.92   |
| BE741525  | 1909.187 | 1828.16  | AK024595  | 1139.993  | 1404.582  | BF311880  | 9595.6    | 12368.122 |
| BF030555  | 3767.42  | 3898.542 | AL137562  | 4119.55   | 3699.124  | NM_01607E | 1028.142  | 1347.674  |
| NM_01243Z | 12256.26 | 10120.36 | M90355    | 55582.621 | 50428.531 | NM_00136C | 25692.801 | 28869.436 |
| NM_00560E | 3775.614 | 3303.97  | AK022495  | 4490.43   | 4048.589  | AK026656  | 4509.027  | 4896.421  |
| NM_00257E | 3718.467 | 4388.102 | AK021632  | 620.873   | 698.392   | AJ276207  | 12665.506 | 13538.098 |
| NM_00358Z | 4714.688 | 3856.063 | AK026373  | 22189.203 | 31317.469 | AB011131  | 9224.292  | 12921.277 |
| AF057354  | 1560.167 | 1425.279 | AK021581  | 5427.619  | 5342.739  | AF164794  | 12702.758 | 16461.359 |
| AF169351  | 4473.462 | 5044.135 | AK021744  | 1261.664  | 1510.737  | NM_00117Z | 2150.034  | 2576.222  |
| NM_00028Z | 5981.119 | 8197.232 | NM_01843C | 20800.268 | 22634.348 | AB020656  | 2579.202  | 2547.597  |
| NM_00053Z | 32976.06 | 44264.25 | AL110200  | 1259.899  | 1782.199  | AK023648  | 3291.59   | 4001.894  |
| NM_016341 | 1805.81  | 1781.542 | AK022308  | 783.669   | 1002.518  | NM_00041Z | 1575.999  | 1818.162  |
| AF231916  | 1142.658 | 705.754  | AL133640  | 2432.208  | 3400.263  | AF077033  | 5404.454  | 3980.19   |
| NM_003501 | 5286.692 | 5439.675 | AJ012502  | 8176.872  | 8899.646  | D50406    | 761.352   | 712.828   |
| AK022654  | 1925.06  | 2424.151 | AK021722  | 649.014   | 1414.402  | NM_01778E | 499.6     | 422.757   |
| BC002905  | 6897.703 | 5557.96  | NM_000681 | 702.07    | 663.034   | NM_004991 | 730.783   | 753.362   |
| NM_018091 | 11659.26 | 10239.85 | AF147445  | 1747.439  | 2088.079  | AF222980  | 1649.254  | 1618.751  |
| NM_001108 | 14815.17 | 7430.224 | Y10508    | 8510.377  | 7748.894  | AK026758  | 3955.256  | 4833.974  |
| NM_001637 | 541.564  | 494.846  | NM_00518Z | 56307.859 | 53512.32  | NM_012201 | 5256.975  | 6852.862  |
| NM_01663C | 16203.38 | 14883.4  | D17074    | 1238.126  | 1460.27   | AB046774  | 1406.808  | 2044.631  |
| NM_014291 | 6007.009 | 6662.498 | AF039944  | 7021.203  | 6037.031  | AK022385  | 24191.885 | 27133.203 |
| NM_014631 | 840.906  | 811.632  | AJ276252  | 1048.893  | 1076.18   | NM_00277E | 747.302   | 1100.829  |
| NM_00108E | 976.747  | 1162.236 | AK021716  | 5132.195  | 4504.963  | AK024584  | 9346.197  | 4898.845  |
| NM_00012C | 2366.819 | 3492.234 | AK025035  | 10003.118 | 8652.606  | NM_003504 | 13551.856 | 13105.566 |
| AF172327  | 45178.95 | 50657.17 | AK002085  | 8231.301  | 6962.314  | NM_01329E | 5146.858  | 5217.355  |
| NM_00167E | 2416.068 | 3608.048 | AL133618  | 4213.333  | 4238.859  | NM_007267 | 3257.272  | 3827.366  |
| AB018338  | 2620.977 | 2265.474 | AF230314  | 787.788   | 791.287   | AK022830  | 307.874   | 983.668   |
| D80010    | 4963.823 | 4080.364 | AK001086  | 1360.027  | 1249.73   | Z36816    | 3830.142  | 4263.539  |
| NM_00492Z | 1344.837 | 1122.251 | AJ131610  | 5514.687  | 5694.917  | NM_00586E | 5449.852  | 6438.747  |
| NM_003971 | 2085.646 | 1476.534 | S50207    | 543.841   | 1082.159  | NM_00641Z | 16007.274 | 14005.796 |

|           |          |          |           |           |           |           |           |           |
|-----------|----------|----------|-----------|-----------|-----------|-----------|-----------|-----------|
| AK026973  | 2110.93  | 1192.227 | AF119872  | 9575.59   | 10516.868 | NM_017684 | 1263.058  | 1562.155  |
| NM_005822 | 952.709  | 721.723  | AK023255  | 60723.273 | 58945.84  | AL049689  | 934.709   | 1451.373  |
| U81002    | 10294.09 | 9028.027 | AK024185  | 1483.344  | 1814.959  | NM_000216 | 1359.441  | 1889.185  |
| NM_016298 | 15431.49 | 12663.07 | NM_015417 | 863.683   | 1082.165  | AF135960  | 1264.404  | 1253.338  |
| L38517    | 1218.278 | 1323.3   | AK026101  | 8009.693  | 5999.861  | NM_014216 | 20804.572 | 23042.643 |
| NM_018291 | 7084.669 | 7953.014 | AK022194  | 27050.885 | 19927.559 | NM_003010 | 3125.879  | 2533.834  |
| NM_005530 | 10273.98 | 13117.7  | AF085963  | 1629.657  | 1168.422  | NM_006871 | 868.954   | 854.821   |
| NM_006898 | 15424.92 | 15148.5  | AF131851  | 707.503   | 404.651   | NM_019074 | 2626.053  | 2622.728  |
| NM_012200 | 5610.525 | 4767.178 | AK021436  | 1596.328  | 1842.23   | NM_018494 | 37233.762 | 35052.996 |
| NM_001724 | 4695.368 | 2968.709 | U58664    | 1047.876  | 1020.648  | AK000006  | 696.044   | 720.948   |
| NM_000150 | 1339.134 | 1204.72  | AL137569  | 1795.09   | 2148.226  | NM_001115 | 1839.017  | 1788.986  |
| AB023152  | 3067.736 | 1994.255 | AK021920  | 2963.516  | 2646.82   | NM_014921 | 1695.485  | 1701.779  |
| NM_006212 | 2150.437 | 2279.126 | AL049415  | 1162.601  | 1091.831  | NM_016581 | 52622.359 | 54550.641 |
| AK022872  | 5867.02  | 3661.73  | AK022375  | 1312.835  | 1391.167  | NM_013255 | 2563.149  | 2485.379  |
| AK024272  | 10487.38 | 7808.283 | NM_003378 | 47815.355 | 37901.898 | NM_007183 | 588.651   | 758.396   |
| NM_016381 | 3462.579 | 2859.499 | AL110194  | 14306.603 | 22336.002 | AJ238243  | 11213.447 | 10972.863 |
| AL591715  | 782.358  | 438.099  | AF138860  | 3140.505  | 2682.201  | J05046    | 13620.786 | 18806.047 |
| NM_018042 | 3403.587 | 3838.854 | NM_006687 | 2744.471  | 2406.751  | NM_012318 | 4154.855  | 4659.221  |
| NM_014944 | 4831.091 | 5562.89  | NM_017673 | 1659.249  | 1786.375  | NM_002751 | 4025.261  | 4798.729  |
| AF200348  | 4559.389 | 4430.547 | AB046857  | 1106.927  | 1029.439  | NM_004291 | 1435.681  | 1456.526  |
| Y11710    | 540.91   | 411.801  | AK024408  | 13941.552 | 14025.864 | NM_003816 | 7180.675  | 6524.651  |
| J03756    | 714.646  | 694.141  | L19364    | 3454.548  | 4983.736  | AK022635  | 545.11    | 786.505   |
| NM_002650 | 2914.95  | 2946.48  | NM_005390 | 2919.056  | 2876.524  | NM_004912 | 4160.167  | 4439.937  |
| NM_003260 | 1276.769 | 1859.722 | CY3Cy5    | 4460.767  | 457.544   | U79304    | 14744.685 | 16206.463 |
| AK024071  | 2432.301 | 2337.158 | L07738    | 893.627   | 1022.352  | NM_016267 | 2683.29   | 2915.414  |
| AF056490  | 2529.146 | 2831.052 | Z48054    | 2706.518  | 2640.933  | NM_004671 | 4176.786  | 5553.063  |
| NM_005538 | 2281.696 | 3361.104 | H90415    | 3497.419  | 3691.527  | NM_005180 | 7440.624  | 9259.986  |
| BF341504  | 674.343  | 1066.596 | AA676470  | 18643.41  | 18506.961 | NM_006526 | 5091.684  | 5276.098  |
| NM_005541 | 1547.199 | 1818.776 | M38258    | 1016.389  | 713.717   | NM_007045 | 2418.58   | 2963.317  |
| AB002319  | 1694.067 | 1827.642 | AA457155  | 24541.984 | 20042.285 | NM_003627 | 4352.954  | 3872.988  |
| AF039942  | 7013.824 | 6625.109 | BM014365  | 993.72    | 1092.439  | NM_012145 | 31410.354 | 25284.201 |
| NM_004421 | 1921.392 | 2431.408 | H91842    | 523.814   | 645.185   | AF305779  | 1002.628  | 962.256   |
| AB046863  | 1874.624 | 2177.921 | U78045    | 1501.79   | 1547.941  | AF225416  | 15079.909 | 10664.6   |
| M62403    | 1451.709 | 1194.277 | AA878561  | 52768.219 | 61799.27  | NM_016231 | 3816.354  | 3614.626  |
| NM_017883 | 2662.694 | 2421.357 | BF688309  | 570.267   | 702.06    | NM_002093 | 7578.274  | 5041.202  |
| AK025131  | 3284.214 | 3655.436 | AI538525  | 1108.319  | 1236.883  | AB042555  | 13827.992 | 15533.229 |
| NM_000754 | 19414.86 | 14914.76 | NM_000941 | 1876.597  | 1481.854  | NM_001729 | 495.379   | 680.388   |
| NM_014619 | 958.789  | 738.839  | SR1       | 56244.801 | 62263.887 | NM_017763 | 1263.512  | 1290.361  |
| NM_005629 | 1209.992 | 1441.191 | SR3       | 47647.289 | 24073.963 | NM_013975 | 4922.474  | 4406.533  |
| J04621    | 1311.256 | 1239.509 | SR5       | 7074.229  | 5694.013  | NM_003843 | 5293.341  | 6044.436  |
| NM_000718 | 4798.846 | 5873.33  | SR7       | 5859.941  | 34823.027 | NM_012216 | 2224.212  | 2794.641  |
| NM_000161 | 7522.299 | 9293.886 | SR9       | 18519.342 | 2263.198  | NM_005338 | 535.41    | 344.333   |
| NM_002634 | 32584.59 | 31791.28 | CY3Cy5    | 2174.552  | 163.921   | X73502    | 1920.908  | 2231.716  |
| NM_017749 | 3929.59  | 3220.988 | U62858    | 1994.279  | 1885.11   | NM_020445 | 54252.535 | 57025.82  |
| NM_001972 | 938.174  | 837.89   | NM_001781 | 3387.194  | 6246.177  | NM_016376 | 13416.501 | 14732.322 |
| NM_001445 | 1780.484 | 974.931  | AF035121  | 507.683   | 226.699   | AB046848  | 4275.553  | 4687.411  |
| AK024455  | 1318.306 | 2013.696 | NM_014432 | 2291.867  | 2281.355  | AL133057  | 6059.594  | 7213.397  |
| NM_002006 | 26324.37 | 23773.05 | NM_001558 | 2532.803  | 1369.114  | U04845    | 7252.082  | 8242.639  |
| NM_007111 | 10403.13 | 11326.5  | NM_002530 | 576.445   | 443.585   | NM_018103 | 6008.562  | 7200.473  |
| NM_002048 | 1250.993 | 1488.853 | U96173    | 1795.957  | 1735.627  | AK026302  | 11254.158 | 13594.885 |
| NM_004702 | 3540.386 | 3682.549 | NM_018941 | 1907.731  | 1817.2    | NM_012214 | 10017.631 | 13409.707 |
| AK023404  | 1291.55  | 1456.06  | NM_020241 | 1359.118  | 1115.682  | AF049656  | 23503.094 | 24887.381 |
| NM_013238 | 2643.375 | 3079.261 | BE730585  | 729.913   | 746.19    | NM_000312 | 1382.89   | 1643.336  |

|           |          |          |           |           |           |           |           |           |
|-----------|----------|----------|-----------|-----------|-----------|-----------|-----------|-----------|
| NM_00178C | 4156.405 | 3927.017 | NM_00198C | 1782.296  | 1635.007  | NM_00396C | 1159.146  | 886.77    |
| NM_016004 | 7580.517 | 6879.563 | NM_005954 | 664.69    | 673.768   | AC009729  | 630.045   | 562.491   |
| NM_00265E | 2071.092 | 2120.302 | NM_012471 | 786.237   | 656.669   | NM_01659E | 6022.659  | 5658.152  |
| AB028955  | 1991.195 | 1969.997 | NM_001321 | 5609.787  | 4806.924  | BE874867  | 44932.688 | 46517.348 |
| U66879    | 6997.197 | 9078.998 | AB018264  | 4960.197  | 4058.226  | AL136719  | 6228.502  | 5316.813  |
| NM_016022 | 6361.346 | 10616.02 | NM_006911 | 1422.358  | 924.105   | NM_01410E | 15565.268 | 12574.479 |
| NM_004874 | 4723.943 | 4205.635 | U92544    | 2389.676  | 1593.1    | NM_01216C | 2376.841  | 1718.271  |
| NM_014204 | 1979.805 | 2160.723 | NM_019644 | 403.922   | 732.566   | NM_006357 | 58641.406 | 59043.621 |
| S70385    | 6547.608 | 9373.121 | NM_006791 | 2714.696  | 1468.365  | NM_01424E | 60597.168 | 58131.879 |
| M34671    | 10966.78 | 8676.058 | AJ278348  | 15371.092 | 12682.222 | AK027070  | 1435.81   | 1564.832  |
| NM_01850E | 10712.04 | 13810.61 | NM_015872 | 736.585   | 415.496   | NM_003341 | 11246.877 | 8936.941  |
| NM_00408E | 9366.366 | 13464.38 | AI285199  | 2396.44   | 1617.068  | NM_01778E | 1196.294  | 1170.7    |
| AL050199  | 1787.997 | 1455.571 | AK023106  | 2689      | 3076.422  | NM_00624E | 4253.668  | 4114.233  |
| NM_007352 | 679.554  | 343.844  | NM_01673C | 38141.832 | 37594.832 | NM_01831E | 1961.55   | 1861.124  |
| AF176706  | 2184.483 | 2207.138 | AL035297  | 2322.78   | 2335.333  | AB020640  | 2633.516  | 3359.815  |
| NM_014484 | 2079.285 | 1949.254 | NM_00440E | 2975.45   | 3298.339  | D29954    | 13627.823 | 16000.629 |
| NM_00108E | 1415.162 | 1307.952 | AJ131244  | 1997.675  | 2548.544  | AF007131  | 4526.054  | 6656.052  |
| NM_01467C | 1454.537 | 1198.9   | NM_002532 | 4087.585  | 5298.056  | NM_00683E | 2494.414  | 2891.583  |
| NM_00104C | 7244.121 | 8951.86  | NM_01238E | 6324.176  | 6496.062  | NM_000223 | 1223.228  | 1509.556  |
| NM_01984E | 1421.244 | 1740.916 | NM_016651 | 918.094   | 777.805   | NM_005851 | 2414.327  | 2331.182  |
| AB032996  | 9784.366 | 12948.65 | NM_001671 | 1137.05   | 871.082   | AF119256  | 1932.36   | 2067.401  |
| AB040881  | 6488.827 | 6415.472 | NM_019843 | 3444.928  | 2539.355  | X74497    | 874.025   | 1256.546  |
| AY007121  | 2051.58  | 2186.824 | NM_016192 | 5566.561  | 3910.697  | NM_01221C | 1624.725  | 1971.048  |
| NM_007317 | 9256.304 | 8620.469 | BE878426  | 53496.863 | 57957.023 | U10072    | 2696.46   | 2358.324  |
| AB037826  | 1472.059 | 415.96   | NM_00174E | 16483.648 | 16645.162 | AF222749  | 19641.705 | 23508.832 |
| AK021466  | 2656.384 | 2253.966 | NM_00382E | 8191.334  | 10294.356 | NM_00341C | 4717.742  | 5109.994  |
| NM_00155E | 764.075  | 670.141  | AK025006  | 14344.364 | 17588.01  | NM_00714E | 4838.859  | 3500.285  |
| NM_00495E | 951.935  | 878.535  | AF218014  | 9859.068  | 8490.813  | NM_00222E | 1064.963  | 1058.039  |
| AK026022  | 33312.98 | 30544.15 | NM_00667E | 4352.499  | 3397.835  | S69027    | 5136.197  | 5818.8    |
| NM_00319E | 1957.373 | 1898.791 | AY007729  | 41011.004 | 22758.883 | NM_012119 | 2673.342  | 2637.119  |
| NM_00293E | 8766.941 | 8703.047 | NM_014424 | 1130.85   | 667.455   | X99631    | 23570.336 | 21256.951 |
| AK023652  | 1597.13  | 1413.633 | AF159092  | 2448.335  | 2170.659  | NM_00173C | 2752.083  | 2576.575  |
| AF099032  | 2692.29  | 1957.798 | BC007318  | 9823.543  | 7364.116  | AK026290  | 620.695   | 515.801   |
| NM_00307C | 2950.81  | 3680.217 | M36693    | 3124.454  | 2675.98   | AB014589  | 3463.775  | 2844.668  |
| AL122101  | 1454.422 | 1481.687 | NM_016292 | 10118.65  | 5558.761  | AF248649  | 996.184   | 1056.387  |
| NM_00478C | 1464.389 | 2019.432 | NM_002601 | 6797.6    | 3999.987  | U37146    | 15372.03  | 18009.693 |
| NM_01621E | 8292.089 | 9949.995 | NM_00589E | 16955.707 | 15909.623 | NM_01208E | 4280.53   | 4908.375  |
| AB018274  | 12885.06 | 19907.06 | NM_00288E | 49584.824 | 55926.07  | NM_000991 | 53426.309 | 56464.516 |
| NM_005871 | 14432.32 | 10910.84 | AF078866  | 5233.127  | 6928.874  | NM_016034 | 20803.398 | 40869.988 |
| NM_007042 | 6082.615 | 5231.785 | BF311880  | 12435.271 | 12498.588 | X69150    | 53336.41  | 54385.938 |
| NM_016333 | 16266.28 | 11578.95 | NM_01607E | 1033.406  | 747.979   | NM_00102E | 57284.711 | 61645.336 |
| BE875028  | 4686.392 | 4120.982 | NM_00136C | 25154.498 | 17106.732 | NM_016067 | 46970.965 | 38762.91  |
| AF121255  | 4082.206 | 4645.812 | AK026656  | 8354.947  | 7027.575  | NM_01828E | 8114.173  | 10163.907 |
| NM_005494 | 8147.479 | 11451.17 | AJ276207  | 10963.161 | 10457.74  | AK022393  | 5956.552  | 6817.403  |
| NM_01794E | 2168.429 | 1769.686 | AB011131  | 12736.936 | 10633.085 | AK026654  | 778.356   | 1360.436  |
| NM_004953 | 5561.834 | 5265.195 | NM_000751 | 8713.716  | 7301.748  | AB020643  | 616.658   | 800.459   |
| AL049682  | 1651.766 | 1834.993 | NM_01484E | 5971.927  | 6649.842  | AK025496  | 4989.02   | 5868.994  |
| NM_00552E | 6814.343 | 7733.42  | NM_001042 | 6089.918  | 6314.689  | NM_00520E | 59374.91  | 60291.871 |
| AK022842  | 1347.19  | 1840.325 | NM_01222E | 3767.194  | 2693.753  | NM_00196E | 852.808   | 805.666   |
| NM_00700E | 26190.98 | 28596.99 | NM_005071 | 873.822   | 405.302   | NM_01613E | 2370.965  | 1930.512  |
| AL137346  | 678.94   | 528.146  | AB023147  | 3938.666  | 3337.875  | Z36833    | 59808.902 | 57391.711 |
| NM_01775E | 2290.34  | 1808.507 | NM_01661E | 7413.764  | 5090.308  | AW963246  | 411.51    | 431.568   |
| NM_005793 | 14522.47 | 12054.24 | NM_00563C | 1386.253  | 930.411   | NM_01435E | 2650.263  | 2743.863  |

|           |          |          |           |           |           |           |           |           |
|-----------|----------|----------|-----------|-----------|-----------|-----------|-----------|-----------|
| NM_004901 | 3007.035 | 2660.592 | NM_012201 | 4682.467  | 5323.701  | M21191    | 21189.992 | 23744.406 |
| U77088    | 1464.396 | 1768.195 | AB046774  | 1218.083  | 1845.785  | AF072810  | 2138.36   | 2126.361  |
| NM_006721 | 19042.46 | 16441.61 | AK022385  | 18131.777 | 20432.271 | L19778    | 1018.618  | 1056.525  |
| NM_016282 | 8515.153 | 6550.757 | NM_002775 | 946.956   | 696.386   | AF174482  | 4378.501  | 5565.756  |
| NM_002765 | 11651.2  | 15233.92 | AK024584  | 7223.352  | 5093.224  | NM_003525 | 739.287   | 1035.622  |
| NM_001905 | 4592.417 | 5946.671 | NM_003504 | 10278.492 | 11665.35  | NM_017769 | 1009.787  | 1037.09   |
| NM_018181 | 2511.966 | 2174.187 | NM_013295 | 4351.196  | 4981.899  | D85131    | 17283.383 | 21893.436 |
| X68880    | 745.924  | 470.112  | NM_007267 | 3214.708  | 3657.495  | D30612    | 3453.687  | 3466.517  |
| NM_005654 | 554.617  | 828.139  | AK022830  | 776.037   | 379.738   | NM_002163 | 490.12    | 871.334   |
| AF024698  | 64371.21 | 55107.51 | Z36816    | 3037.909  | 2763.113  | U52097    | 12996.072 | 14439.422 |
| BE904617  | 2145.548 | 2298.973 | NM_005865 | 7141.425  | 5498.785  | NM_003416 | 2600.589  | 3630.913  |
| AK024495  | 1033.452 | 1743.764 | NM_006413 | 10990.001 | 13192.047 | NM_017594 | 1030.28   | 1302.054  |
| AF024694  | 1845.209 | 2301.377 | NM_017684 | 940.792   | 963.071   | AK027237  | 1068.853  | 807.366   |
| AF091081  | 12660.62 | 11256.14 | AK025542  | 5011.133  | 5713.21   | AK027104  | 1830.832  | 1385.923  |
| AK001758  | 6763.22  | 5409.149 | AF207547  | 773.891   | 683.124   | AL133090  | 34816.402 | 25665.768 |
| AF086325  | 889.04   | 804.641  | NM_002765 | 7968.257  | 6609.741  | AF085867  | 6455.913  | 5954.748  |
| NM_004925 | 1115.435 | 1168.267 | NM_003691 | 4340.143  | 4072.812  | AF086510  | 5531.96   | 5200.055  |
| AF147401  | 855.231  | 717.144  | NM_002950 | 20448.682 | 16782.545 | Z36779    | 3551.881  | 3770.183  |
| AF075022  | 725.741  | 674.691  | NM_002315 | 3123.517  | 2253.06   | NM_018422 | 539.499   | 427.426   |
| AF075060  | 3591.463 | 2455.728 | NM_001433 | 701.527   | 687.758   | NM_002816 | 2669.862  | 3064.657  |
| AK021441  | 2611.129 | 2254.167 | NM_003134 | 53266.918 | 49574.813 | NM_017513 | 630.38    | 1359.253  |
| AK026018  | 1204.855 | 1144.084 | NM_004314 | 4218.943  | 3181.257  | NM_017822 | 9046.909  | 9044.565  |
| AF085846  | 5658.174 | 6477.105 | NM_018247 | 6894.123  | 6691.038  | AK026844  | 3544.643  | 5010.844  |
| AK023901  | 1859.533 | 1875.635 | NM_017975 | 7358.385  | 5506.114  | AK026735  | 3472.943  | 3704.528  |
| AF086255  | 6987.573 | 6097.325 | NM_019644 | 568.725   | 533.101   | AL110104  | 24084.049 | 27168.938 |
| AK022660  | 1279.671 | 882.934  | NM_006791 | 3527.769  | 2340.314  | AF240633  | 1254.053  | 1661.103  |
| AK023883  | 691.995  | 567.746  | AJ278348  | 14190.117 | 19105.658 | AK027056  | 3201.411  | 3850.074  |
| AF086366  | 519.72   | 419.89   | NM_015872 | 504.346   | 499.767   | AK024294  | 1829.744  | 1731.757  |
| AF086360  | 1075.178 | 1123.043 | AI285199  | 1301.582  | 1470.717  | AL110126  | 2472.761  | 2324.275  |
| AF086436  | 857.611  | 704.211  | L07738    | 853.349   | 571.346   | AF052172  | 15097.773 | 19149.254 |
| AF087993  | 5739.83  | 4364.96  | Z48054    | 2243.648  | 2065.969  | AB014573  | 5198.612  | 5983.724  |
| AF035282  | 1329.491 | 1375.605 | H90415    | 3105.523  | 2843.299  | AK091109  | 43127.965 | 37155.203 |
| AK021966  | 5035.285 | 5509.316 | AA676470  | 15011.487 | 11947.849 | AF032897  | 733.891   | 700.055   |
| AB018292  | 1817.722 | 1861.149 | M38258    | 651.165   | 669.186   | NM_014967 | 4521.565  | 3791.282  |
| AF075032  | 421.749  | 462.193  | AA457155  | 17485.459 | 13663.899 | AK022915  | 8232.338  | 6743.78   |
| AF085971  | 1339.726 | 1024.445 | BM014365  | 1027.562  | 1162.711  | AK021736  | 463.557   | 155.045   |
| AF147302  | 1041.702 | 743.969  | U78045    | 1291.79   | 1163.871  | AF131834  | 1060.456  | 879.817   |
| AF085929  | 1077.722 | 940.397  | AA878561  | 52825.113 | 60953.301 | AL355711  | 2162.848  | 1432.563  |
| AK001126  | 1418.554 | 1319.783 | BF688309  | 564.058   | 493.197   | AK025851  | 2382.102  | 1822.522  |
| AF085976  | 6270.215 | 6705.133 | AI538525  | 892.664   | 662.495   | AJ011409  | 20110.586 | 12232.924 |
| AF075104  | 2045.649 | 2324.375 | NM_000941 | 1544.501  | 868.965   | AJ227906  | 1828.131  | 1247.455  |
| AK021724  | 290.593  | 549.211  | AF222980  | 1002.51   | 1137.22   | AJ011598  | 741.1     | 604.194   |
| AL133025  | 1193.338 | 1225.225 | AK026758  | 4012.627  | 2268.884  | AJ001906  | 455.292   | 833.729   |
| AL137402  | 13566.42 | 14772.85 | NM_014424 | 808.077   | 1022.04   | U17633    | 853.2     | 1035.529  |
| AL137617  | 1396.191 | 1433.678 | AF159092  | 2055.83   | 2246.873  | AF283776  | 7402.844  | 6604.922  |
| AL359568  | 26341.89 | 34725.86 | BC007318  | 10202.368 | 12152.88  | L10123    | 29382.047 | 30632.33  |
| AL133564  | 805.715  | 1064.887 | M36693    | 2932.871  | 3574.918  | D16877    | 2898.302  | 3003.511  |
| AL137428  | 1753.771 | 2043.453 | NM_016292 | 9441.078  | 8986.414  | AL049992  | 564.256   | 555.96    |
| AL157462  | 1345.804 | 1662.255 | NM_002601 | 6715.17   | 6503.771  | AL109781  | 2504.019  | 2307.606  |
| AL359602  | 1057.471 | 1055.515 | U62858    | 1669.846  | 1237.549  | AK021712  | 551.855   | 189.841   |
| NM_018190 | 54164.85 | 52974.44 | NM_001781 | 3121.299  | 4301.94   | AK021895  | 3788.853  | 3719.068  |
| AF086054  | 1191.235 | 1303.667 | NM_014432 | 1977.571  | 1947.444  | AK000036  | 7467.74   | 6075.043  |
| AK022259  | 22478.72 | 25895.48 | NM_001555 | 2117.508  | 848.185   | AK000769  | 740.205   | 658.209   |

|           |          |          |           |           |           |           |           |           |
|-----------|----------|----------|-----------|-----------|-----------|-----------|-----------|-----------|
| AK022461  | 817.446  | 831.381  | NM_00253C | 653.138   | 696.54    | AK000924  | 948.057   | 628.22    |
| NM_01601C | 6953.668 | 5815.632 | U96173    | 2206.519  | 3329.513  | AK022252  | 603.782   | 434.699   |
| AK023783  | 741.972  | 495.805  | NM_018941 | 2006.636  | 1732.918  | AK000114  | 2691.094  | 2245.469  |
| AF070647  | 33375.09 | 31003.86 | NM_020241 | 1228.192  | 1163.778  | AK000952  | 5070.197  | 4255.195  |
| AF116649  | 356.458  | 412.835  | BE730585  | 672.741   | 672.884   | AK024520  | 6571.765  | 4532.451  |
| AF174394  | 971.329  | 1065.182 | NM_00198C | 1804.835  | 1475.154  | AK024592  | 1366.845  | 1188.471  |
| AF083121  | 833.218  | 812.465  | NM_005954 | 679.961   | 519.808   | AK024904  | 2351.44   | 2100.04   |
| AF144054  | 612.463  | 545.401  | NM_012471 | 566.876   | 425.321   | AK025030  | 1749.826  | 1803.439  |
| AK021876  | 6785.811 | 6306.481 | NM_001321 | 3870.515  | 2462.688  | AK024542  | 4390.041  | 4590.814  |
| AK022017  | 917.972  | 1086.285 | AB018264  | 4725.624  | 2509.22   | AK024915  | 389.3     | 787.313   |
| AK022160  | 879.679  | 705.883  | NM_006911 | 1017.769  | 667.915   | AK025064  | 415.769   | 579.296   |
| AK022295  | 1081.669 | 798.375  | U92544    | 2256.104  | 2073.096  | AB050477  | 4757.189  | 4625.899  |
| AK021935  | 2596.839 | 2233.657 | NM_012229 | 4030.71   | 3923.125  | AK000152  | 892.533   | 709.783   |
| AK022187  | 564.438  | 647.353  | NM_005071 | 908.371   | 958.578   | AK024300  | 1516.056  | 1324.88   |
| AK022337  | 964.522  | 986.491  | NM_016615 | 5149.914  | 6062.76   | L09092    | 890.427   | 1134.183  |
| AK026847  | 1302.102 | 1099.851 | NM_00563C | 1418.886  | 1507.02   | NM_012132 | 1814.063  | 1558.414  |
| AK023048  | 829.658  | 917.921  | NM_001046 | 568.6     | 439.293   | NM_012129 | 1359.174  | 1183.951  |
| AL359560  | 385.06   | 636.059  | AK023106  | 1810.99   | 1818.676  | AK024881  | 694.511   | 730.7     |
| AK026891  | 1305.545 | 1630.128 | NM_01673C | 34241.48  | 29366.637 | AK025716  | 1227.748  | 1067.461  |
| AK025573  | 549.201  | 830.109  | AL035297  | 2085.91   | 1794.303  | AF086202  | 19659.936 | 14663.065 |
| AL137562  | 6109.574 | 5222.694 | NM_004408 | 2501.071  | 2246.526  | AK022352  | 499.502   | 480.296   |
| M90355    | 66857.01 | 53099.59 | AJ131244  | 1592.183  | 2047.311  | AK023270  | 2100.849  | 1819.204  |
| AK022495  | 6968.355 | 6675.646 | NM_002532 | 3745.018  | 4254.116  | AF085979  | 29844.672 | 30882.879 |
| AK021632  | 961.673  | 970.889  | NM_012388 | 6597.057  | 6290.728  | NM_014702 | 664.07    | 586.141   |
| AK026373  | 25208.47 | 32712.46 | NM_016651 | 980.436   | 732.902   | AK001937  | 56267.883 | 58733.477 |
| AK021581  | 15750.11 | 11086.19 | NM_001671 | 1443.233  | 1138.192  | AL365517  | 1474.407  | 2185.71   |
| AK021744  | 1130.763 | 1014.23  | NM_019843 | 3466.255  | 2859.354  | AK021988  | 10344.29  | 13584.82  |
| NM_01843C | 14712.33 | 14486.82 | NM_016192 | 5672.13   | 4710.526  | AF086494  | 34764.211 | 39594.844 |
| AL110200  | 297.993  | 505.443  | BE878426  | 51628.742 | 56230.48  | BI769977  | 1629.397  | 1811.719  |
| AL133640  | 3074.963 | 2989.502 | NM_001745 | 15578.447 | 13774.88  | AL137567  | 1279.025  | 2280.337  |
| AJ012502  | 12607.24 | 10892.98 | NM_003825 | 7521.299  | 7370.677  | AK024913  | 3387.318  | 5120.412  |
| AK021722  | 2304.75  | 1028.108 | AK025006  | 12378.763 | 13095.128 | AB007961  | 3583.087  | 5141.593  |
| NM_000681 | 463.292  | 611.537  | AF218014  | 12983.651 | 6561.201  | NM_005547 | 2581.68   | 3484.93   |
| AF147445  | 1702.107 | 1318.211 | NM_006678 | 5255.472  | 3387.808  | AF119862  | 17671.734 | 14640.425 |
| Y10508    | 4342.371 | 4560.876 | AY007729  | 41246.801 | 28466.721 | U17628    | 2462.315  | 1825.76   |
| NM_005182 | 58945.22 | 53047.19 | NM_001433 | 541.243   | 951.411   | AF119867  | 3975.237  | 3839.226  |
| D17074    | 2625.367 | 3399.864 | NM_018247 | 6755.678  | 13348.975 | AL357205  | 11215.296 | 13145.495 |
| AF039944  | 8117.867 | 8027.496 | NM_017979 | 5969.126  | 6946.676  | AF124819  | 796.723   | 1091.452  |
| AJ276252  | 1658.848 | 1207.548 | NM_005898 | 15392.571 | 12228.066 | D17091    | 2892.299  | 2848.424  |
| AK021716  | 3404.486 | 3052.183 | NM_002889 | 51611.105 | 50696.395 | AL133074  | 2218.165  | 2171.248  |
| AK025035  | 12832.6  | 14181.36 | AF078866  | 5409.251  | 5907.728  | AF086318  | 9428.819  | 10436.78  |
| AK002085  | 11385.91 | 10676.06 | BF311880  | 14835.615 | 13450.28  | AF088012  | 1263.966  | 1336.211  |
| AL133618  | 1148.688 | 1013.964 | NM_016075 | 1151.569  | 947.196   | NM_018121 | 1859.875  | 1485.971  |
| AK001086  | 750      | 745.106  | NM_00136C | 32400.354 | 35949.453 | NM_014191 | 652.769   | 865.352   |
| AJ131610  | 5371.345 | 4918.062 | AK026656  | 8736.991  | 7411.319  | AK026708  | 5274.356  | 6541.787  |
| S50207    | 748.47   | 288.737  | AJ276207  | 11410.738 | 13082.037 | NM_017903 | 5889.084  | 6691.728  |
| AF119872  | 9292.33  | 10829.7  | AB011131  | 12582.263 | 10764.651 | NM_018074 | 2046.023  | 2540.79   |
| X99687    | 496.915  | 604.411  | NM_000751 | 6425.363  | 4819.963  | NM_000909 | 4283.014  | 4963.514  |
| AK023255  | 66324.45 | 58549.36 | NM_014849 | 7081.392  | 5472.147  | U31737    | 976.689   | 1011.679  |
| NM_002622 | 40082.98 | 44253.27 | NM_001042 | 5847.378  | 4021.44   | AK024828  | 2321.14   | 1839.499  |
| AK024185  | 1078.075 | 1159.114 | NM_000941 | 1717.541  | 1737.74   | AF009315  | 1878.093  | 1921.04   |
| NM_015417 | 987.013  | 920.932  | AF222980  | 1088.439  | 1227.777  | NM_019013 | 1828.6    | 1731.202  |
| AK026101  | 4295.877 | 4310.289 | AK026758  | 3368.441  | 3838.052  | NM_006783 | 991.233   | 759.207   |

|           |          |          |           |           |           |           |           |           |
|-----------|----------|----------|-----------|-----------|-----------|-----------|-----------|-----------|
| AK022194  | 8598.31  | 8152.541 | NM_012201 | 5049.203  | 4766.668  | L37711    | 992.296   | 692.949   |
| AF085963  | 800.434  | 948.674  | AB046774  | 1248.729  | 1604.365  | S70313    | 14885.9   | 23330.555 |
| AF131851  | 321.43   | 536.838  | AK022385  | 25243.904 | 23866.787 | AK021607  | 3409.172  | 6027.376  |
| AF085937  | 1046.986 | 1322.649 | NM_002775 | 1167.404  | 1438.609  | AK025860  | 1475.485  | 1945.889  |
| AL137569  | 1278.16  | 1205.761 | AK024584  | 10170.932 | 16136.008 | L09268    | 586.589   | 485.261   |
| AK021920  | 3364.128 | 3263.407 | NM_003504 | 14002.921 | 30278.268 | NM_020186 | 8156.488  | 8513.698  |
| AL049415  | 757.781  | 825.07   | NM_013298 | 4295.295  | 4816.888  | AK022424  | 377.618   | 604.594   |
| AK022375  | 1854.553 | 1474.067 | NM_007267 | 3192.661  | 3370.647  | AF090947  | 2568.799  | 1869.642  |
| NM_003378 | 7786.99  | 8477.168 | AK022830  | 825.679   | 727.916   | AJ272196  | 16003.406 | 15692.499 |
| AL110194  | 14209.79 | 14080.27 | Z36816    | 3542.354  | 3392.66   | AV756662  | 1348.924  | 870.118   |
| AF138860  | 1423.875 | 1459.745 | NM_005865 | 8196.156  | 7778.223  | CY3Cy5    | 4234.498  | 159.697   |
| NM_006687 | 2283.988 | 1825.79  | NM_006413 | 12640.558 | 16463.111 | L35251    | 3336.122  | 1883.682  |
| NM_013301 | 711.501  | 745.528  | NM_017684 | 1158.495  | 1230.737  | BE910395  | 1439.99   | 510.108   |
| NM_017673 | 1140.738 | 981.565  | AK025542  | 6110.042  | 5781.773  | N46828    | 1534.004  | 932.994   |
| AB046857  | 1487.778 | 1877.981 | AF207547  | 855.421   | 579.694   | BI908302  | 11039.081 | 16998.979 |
| AK024408  | 2323.917 | 2218.79  | NM_002768 | 8296.321  | 6165.942  | AA460969  | 5566.076  | 7325.726  |
| AF086307  | 17402.79 | 19742.95 | NM_003691 | 5324.388  | 3879.142  | BG695859  | 1045.677  | 1952.866  |
| L19364    | 3983.414 | 4045.344 | NM_002950 | 21958.158 | 16064.624 | M85079    | 2170.518  | 3941.329  |
| NM_005390 | 1206.271 | 2020.54  | NM_002318 | 3973.942  | 3386.975  | AA457671  | 10311.989 | 4484.713  |
| CY3Cy5    | 5832.454 | 243.144  | NM_005954 | 524.948   | 921.007   | X07437    | 2714.991  | 902.091   |
| L07738    | 651.837  | 688.005  | NM_012471 | 783.552   | 935.695   | NM_000641 | 1456.847  | 613.279   |
| Z48054    | 3976.568 | 4618.888 | NM_001321 | 5193.111  | 6311.624  | AE006466  | 2920.76   | 1097.061  |
| H90415    | 3981.225 | 3656.381 | AB018264  | 4613.341  | 5448.09   | BC008737  | 41219.805 | 18231.035 |
| AA676470  | 5469.735 | 5367.155 | NM_006911 | 4082.344  | 5652.066  | BC011655  | 5903.004  | 3995.68   |
| M38258    | 912.298  | 912.314  | U92544    | 2103.402  | 2665.672  | BC002396  | 4830.598  | 2550.87   |
| AA457155  | 2550.409 | 2668.377 | NM_019644 | 400.841   | 631.019   | NM_022095 | 1489.815  | 789.146   |
| BM014365  | 1352.149 | 1167.285 | NM_006791 | 3474.353  | 2204.097  | SR2       | 59980.633 | 39961.758 |
| H91842    | 618.515  | 484.764  | AJ278348  | 15086.16  | 17246.213 | SR4       | 18927.521 | 6676.724  |
| AA878561  | 66656.79 | 58016.87 | NM_015872 | 567.497   | 607.269   | SR6       | 3427.976  | 1143.571  |
| AI538525  | 1013.152 | 828.613  | AI285199  | 1988.902  | 2935.844  | SR8       | 11479.269 | 11979.674 |
| NM_000941 | 2134.977 | 1777.994 | L07738    | 802.674   | 923.959   | SR10      | 35969.758 | 5148.807  |
| SR5       | 6556.281 | 3440.512 | Z48054    | 2056.003  | 2557.496  | CY3Cy5    | 3253.584  | 139.76    |
| SR7       | 7087.563 | 29560.59 | H90415    | 3863.097  | 4073.587  | NM_020370 | 1441.875  | 823.747   |
| SR9       | 24790.68 | 2996.688 | AA676470  | 17988.357 | 16299.863 | NM_004767 | 732.5     | 648.035   |
| CY3Cy5    | 4001.751 | 143.599  | M38258    | 917.924   | 949.889   | BF310159  | 9184.379  | 4531.654  |
| U62858    | 630.748  | 1324.744 | AA457155  | 21050.76  | 18977.719 | NM_018986 | 2708.389  | 4837.285  |
| NM_001781 | 6239.556 | 4157.867 | BM014365  | 855.026   | 887.321   | AB044934  | 939.305   | 1707.664  |
| AF035121  | 459.522  | 560.541  | H91842    | 449.891   | 563.486   | U27655    | 2425.872  | 4009.254  |
| NM_014432 | 2448.863 | 2198.327 | U78045    | 1341.35   | 1133.78   | NM_003360 | 2221.502  | 3077.484  |
| NM_001558 | 920.382  | 1759.808 | AA878561  | 49368.566 | 58946.352 | Z21965    | 11143.749 | 4676.252  |
| NM_006953 | 380.765  | 461.12   | BF688309  | 748.428   | 363.782   | NM_012427 | 5944.015  | 2151.434  |
| NM_002530 | 203.733  | 522.693  | AI538525  | 1190.694  | 758.679   | AF131857  | 9161.349  | 3194.756  |
| U96173    | 2217.99  | 2847.468 | NM_003825 | 7797.742  | 11800.842 | NM_000852 | 28235.322 | 13182.038 |
| NM_018941 | 1747.034 | 1516.385 | AK025006  | 13525.524 | 21794.869 | AW797282  | 553.29    | 338.411   |
| NM_001980 | 1852.669 | 2150.682 | AF218014  | 12910.464 | 13134.483 | NM_002402 | 464.791   | 344.756   |
| NM_005954 | 539.94   | 380.001  | NM_006678 | 4931.734  | 4872.616  | L09070    | 1621.239  | 1570.499  |
| NM_012471 | 1078.375 | 1165.373 | AY007729  | 38032.426 | 32485.723 | AL133037  | 2238.079  | 945.005   |
| NM_001321 | 1701.443 | 1226.714 | NM_014424 | 1005.284  | 867.228   | NM_020350 | 5950.794  | 1965.574  |
| AB018264  | 723.836  | 460.451  | AF159092  | 2144.296  | 1759.636  | NM_000350 | 915.883   | 536.532   |
| NM_006911 | 2215.4   | 1400.521 | BC007318  | 9949.261  | 10537.613 | X91103    | 3490.318  | 1502.537  |
| U92544    | 861.381  | 334.439  | M36693    | 3162.246  | 3228.62   | AA419164  | 1867.1    | 1095.735  |
| NM_006791 | 1784.362 | 2850.493 | NM_016292 | 11352.14  | 10307.168 | AL117235  | 893.207   | 604.196   |
| AJ278348  | 17139.22 | 11718.06 | NM_002601 | 7807.836  | 6580.763  | NM_014822 | 2984.055  | 2108.579  |

|           |          |          |           |           |           |           |           |           |
|-----------|----------|----------|-----------|-----------|-----------|-----------|-----------|-----------|
| AK023106  | 2898.547 | 3060.216 | U62858    | 1861.873  | 1514.222  | NM_005296 | 1670.406  | 964.35    |
| NM_01673C | 1174.268 | 1653.221 | NM_001781 | 3620.455  | 5766.103  | AB014538  | 1650.389  | 3583.478  |
| AL035297  | 1996.509 | 2096.202 | AF035121  | 415.18    | 412.103   | NM_006209 | 1029.087  | 1787.672  |
| NM_00440E | 2619.847 | 2072.836 | NM_01443Z | 2051.531  | 2149.9    | AK025118  | 5883.657  | 11915.863 |
| AJ131244  | 2128.863 | 1982.729 | NM_00155E | 2486.419  | 1523.589  | NM_000727 | 1386.741  | 1792.085  |
| NM_00253Z | 3982.766 | 4148.905 | NM_00253C | 614.28    | 811.253   | NM_00538E | 5536.405  | 3003.31   |
| NM_01238E | 3018.27  | 1953.701 | U96173    | 1922.749  | 1946.804  | NM_01898E | 2348.293  | 783.264   |
| NM_016651 | 431.905  | 395.167  | NM_018941 | 2097.721  | 1441.622  | NM_006074 | 14409.085 | 7399.724  |
| NM_001671 | 1262.323 | 1170.116 | NM_020241 | 1228.717  | 997.78    | AF208232  | 12278.145 | 6530.495  |
| NM_01984Z | 2112.178 | 2382.14  | BE730585  | 806.451   | 598.2     | NM_00298E | 4029.056  | 2313.531  |
| NM_01619Z | 6588.012 | 5925.501 | NM_00198C | 2144.829  | 1052.494  | NM_00418E | 771.449   | 855.678   |
| BE878426  | 56857.2  | 51770.92 | NM_00074E | 662.12    | 602.783   | NM_01625E | 7423.375  | 6963.05   |
| NM_00174E | 20261.48 | 15984.63 | NM_000751 | 6921.203  | 7896.6    | NM_01464C | 1766.206  | 2168.158  |
| NM_00382E | 8364.751 | 8415.65  | NM_01484E | 7969.561  | 9655.646  | Y10518    | 18103.111 | 8443.156  |
| AK025006  | 18396.13 | 14637.66 | NM_00104Z | 7368.196  | 8591.063  | AF155135  | 10539.049 | 4292.437  |
| AF218014  | 8144.446 | 11212.43 | NM_01222E | 3903.531  | 3886.157  | NM_01479C | 1432.79   | 452.209   |
| NM_00667E | 748.293  | 349.483  | NM_005071 | 1010.65   | 1352.648  | NM_003571 | 4144.328  | 1700.117  |
| AY007729  | 9126.664 | 8399.804 | AB023147  | 4541.458  | 3922.227  | AB032965  | 19768.037 | 11162.137 |
| NM_014424 | 753.577  | 332.248  | NM_01661E | 8417.563  | 8102.854  | AF133424  | 2370.031  | 1558.611  |
| AF159092  | 1285.574 | 1145.401 | NM_00563C | 1473.628  | 1375.79   | NM_00500Z | 23772.451 | 18139.213 |
| BC007318  | 9464.196 | 7100.94  | NM_00104E | 1040.09   | 704.307   | AF084560  | 4378.286  | 3099.762  |
| M36693    | 4024.212 | 2743.769 | AK023106  | 2132.125  | 1690.529  | NM_00003Z | 3509.037  | 7246.587  |
| NM_01629Z | 7548.482 | 6225.531 | NM_01673C | 39337.012 | 35518.426 | NM_00208Z | 2250.465  | 4125.041  |
| NM_002601 | 8170.773 | 5129.7   | AL035297  | 2354.9    | 1789.137  | NM_00203E | 6959.812  | 14654.233 |
| NM_00589E | 12699.97 | 16797.7  | NM_00440E | 2245.306  | 2856.096  | NM_01490C | 1319.825  | 2795.784  |
| NM_00288E | 2658.954 | 2956.353 | AJ131244  | 1847.778  | 2161.574  | BF342908  | 1686.849  | 2752.275  |
| AF078866  | 11752.17 | 10432.98 | NM_00253Z | 4265.885  | 4271.956  | AF118073  | 701.172   | 1572.517  |
| BF311880  | 377.657  | 306.671  | NM_01238E | 7567.989  | 7021.323  | AK023510  | 5301.232  | 3274.2    |
| NM_01607E | 1281.716 | 1153.412 | NM_016651 | 921.286   | 783.462   | NM_00434E | 1466.86   | 1000.801  |
| NM_00136C | 25160.53 | 26725.62 | NM_001671 | 1887.538  | 2816.002  | NM_00070Z | 35725.578 | 16823.588 |
| AK026656  | 814.666  | 648.565  | NM_01984Z | 3112.77   | 2967.198  | X71490    | 8578.353  | 5170.941  |
| AJ276207  | 12448.92 | 9848.158 | NM_01619Z | 5536.939  | 4661.974  | AF257081  | 888.203   | 801.01    |
| AB011131  | 8573.854 | 7478.943 | BE878426  | 50835.551 | 57065.918 | NM_00223Z | 918.662   | 1134.845  |
| NM_000751 | 2314.74  | 2531.88  | NM_00174E | 15812.679 | 12969.339 | Y19240    | 5480.563  | 2027.766  |
| NM_01484E | 7381.165 | 5923.494 | AK025542  | 6222.653  | 7775.403  | AF091029  | 3851.588  | 1686.519  |
| NM_00104Z | 6140.232 | 7750.089 | AF207547  | 1188.425  | 1192.039  | X97074    | 10130.464 | 4669.23   |
| NM_01222E | 3447.81  | 3308.967 | NM_00231E | 4478.757  | 4805.487  | NM_00413E | 4706.024  | 3940.298  |
| NM_005071 | 550.536  | 378.186  | NM_00143Z | 1012.483  | 1080.183  | NM_01344Z | 2542.201  | 4665.78   |
| AB023147  | 2949.954 | 3019.148 | NM_003134 | 55392.785 | 57691.75  | NM_00046E | 3545.594  | 5813.637  |
| NM_00563C | 1936.283 | 1302.99  | NM_004314 | 5314.783  | 9087.188  | AF116685  | 745.367   | 1019.001  |
| NM_00104E | 1168.908 | 840.35   | NM_018247 | 7837.881  | 11209.791 | NM_00012Z | 9492.789  | 14999.976 |
| NM_012201 | 5612.791 | 6300.184 | NM_01797E | 8573.417  | 7269.388  | AL137501  | 1328.865  | 1022.687  |
| AB046774  | 2369.622 | 1957.472 | NM_00589E | 15369.505 | 12675.103 | BE858979  | 930.997   | 555.12    |
| AK022385  | 14342.6  | 10909.93 | NM_00288E | 51716.215 | 46147.227 | NM_00012Z | 3765.862  | 1688.519  |
| NM_00277E | 624.87   | 739.947  | AF078866  | 5248.289  | 5720.82   | NM_00702E | 3675.881  | 4122.318  |
| AK024584  | 7229.425 | 3310.679 | BF311880  | 17758.871 | 15395.139 | M37712    | 17427.771 | 9010.637  |
| NM_003504 | 12362.5  | 8747.501 | NM_01607E | 1008.629  | 963.551   | NM_014384 | 4657.27   | 2415.567  |
| NM_01329E | 5731.432 | 4266.334 | NM_00136C | 30227.645 | 22476.064 | NM_00257Z | 9740.754  | 7387.125  |
| NM_007267 | 4149.177 | 3922.552 | AK026656  | 8842.854  | 7495.898  | AL133037  | 1788.854  | 1488.774  |
| AK022830  | 632.793  | 813.14   | AJ276207  | 10940.286 | 9328.388  | NM_02035C | 5814.423  | 3273.35   |
| Z36816    | 6668.021 | 6060.886 | AB011131  | 12799.306 | 8365.871  | X91103    | 4997.075  | 4790.52   |
| NM_00586E | 2844.329 | 3038.345 | AF164794  | 12473.859 | 16009.598 | AA419164  | 1645.36   | 2770.207  |
| NM_00641Z | 15939.54 | 14932.62 | NM_00117Z | 2084.028  | 3053.874  | BE910395  | 1388.186  | 2630.533  |



|           |          |          |           |           |           |           |           |           |
|-----------|----------|----------|-----------|-----------|-----------|-----------|-----------|-----------|
| NM_017684 | 2399.856 | 1815.644 | AF077033  | 4423.722  | 6343.604  | N46828    | 1445.323  | 3083.336  |
| AK025542  | 377.499  | 747.018  | D50406    | 946.283   | 948.805   | BI908302  | 7863.14   | 12406.694 |
| AF207547  | 573.786  | 828.461  | NM_004991 | 1245.048  | 1339.354  | AA460969  | 4816.861  | 6434.477  |
| NM_002768 | 6469.134 | 9631.514 | AF222980  | 1277.932  | 1753.571  | BG695859  | 993.723   | 875.394   |
| NM_003691 | 5664.784 | 7378.758 | AK026758  | 4676.497  | 3613.034  | M85079    | 1682.686  | 1187.658  |
| NM_002950 | 21369.12 | 30762.24 | NM_012201 | 5323.567  | 4404.848  | AA457671  | 11786.837 | 7241.127  |
| NM_002318 | 1168.709 | 1092.651 | AB046774  | 1721.296  | 1539.809  | X07437    | 2298.052  | 1505.765  |
| NM_001433 | 964.356  | 616.202  | AK022385  | 23513.906 | 25432     | NM_000641 | 1764.135  | 1406.148  |
| NM_003134 | 63744.16 | 52034.6  | NM_002775 | 1014.733  | 791.358   | AE006466  | 2574.44   | 2718.073  |
| NM_004314 | 4819.042 | 3939.434 | AK024584  | 7533.511  | 5289.117  | BC008737  | 40723.965 | 33802.938 |
| NM_018247 | 10140.6  | 5531.087 | NM_003504 | 12042.372 | 13881.032 | BC011655  | 6851.682  | 11221.852 |
| NM_017979 | 5001.948 | 3892.782 | NM_013298 | 4847.17   | 5105.689  | AF112219  | 27954.24  | 11648.203 |
| NM_006791 | 2450.846 | 4546.957 | NM_007267 | 3828.664  | 3982.538  | NM_014640 | 1433.432  | 1303.864  |
| AJ278348  | 11605.49 | 10557.13 | AK022830  | 735.988   | 607.794   | Y10518    | 33875.301 | 32772.574 |
| L07738    | 687.033  | 313.064  | Z36816    | 3545.37   | 4574.329  | NM_014790 | 1093.923  | 905.758   |
| Z48054    | 4231.048 | 3843.127 | NM_005865 | 8476.554  | 6860.679  | NM_003571 | 4925.708  | 6022.495  |
| H90415    | 3860.773 | 2677.328 | NM_006413 | 12447.246 | 13413.184 | AB032965  | 23117.883 | 38817.211 |
| AA676470  | 5228.185 | 4424.733 | NM_017684 | 1184.287  | 1125.418  | NM_020370 | 1783.781  | 2351.231  |
| M38258    | 695.133  | 1135.778 | NM_000216 | 1022.845  | 1109.385  | NM_004767 | 1118.214  | 1849.695  |
| AA457155  | 2976.39  | 3338.434 | NM_014216 | 8564.313  | 9674.921  | BF310159  | 10760.063 | 15840.312 |
| BM014365  | 1476.563 | 1174.335 | NM_003010 | 1569.562  | 2045.76   | NM_018986 | 2510.191  | 1593.045  |
| H91842    | 814.131  | 682.837  | NM_006871 | 882.709   | 1169.746  | AB044934  | 658.844   | 304.348   |
| U78045    | 428.332  | 551.906  | NM_019074 | 4171.932  | 4285.943  | U27655    | 1877.534  | 1036.834  |
| AA878561  | 64418.01 | 58819.77 | NM_018494 | 17417.963 | 19187.707 | NM_003360 | 2513.464  | 1867.209  |
| AI538525  | 1194.841 | 1009.593 | AK000006  | 672.104   | 874.109   | Z21965    | 8336.628  | 6903.743  |
| NM_000623 | 402.654  | 502.048  | NM_001115 | 1439.278  | 1410.31   | NM_000852 | 32327.576 | 22828.996 |
| NM_000941 | 2335.824 | 1968.904 | NM_014921 | 1529.019  | 1145.937  | NM_016106 | 6758.728  | 5007.963  |
| AF222980  | 1202.908 | 747.842  | NM_016581 | 52843.762 | 52631.613 | NM_014570 | 7074.984  | 5284.482  |
| AK026758  | 4508.024 | 3490.616 | NM_013255 | 1990.019  | 2206.769  | NM_014747 | 4986.294  | 3672.844  |
| NM_014424 | 714.665  | 492.175  | NM_007183 | 686.469   | 519.736   | Y19240    | 5162.277  | 4703.369  |
| AF159092  | 1502.264 | 1805.498 | AJ238243  | 9016.67   | 11779.636 | AF091029  | 4513.132  | 3427.519  |
| BC007318  | 9864.107 | 8995.782 | J05046    | 23493.018 | 23087.768 | X97074    | 15574.698 | 14268.448 |
| M36693    | 4857.615 | 5717.462 | NM_012318 | 3070.928  | 2958.497  | AL117235  | 1164.758  | 1086.985  |
| NM_016292 | 7925.254 | 7629.791 | NM_002751 | 6024.278  | 5735.606  | NM_014822 | 3948.075  | 4406.562  |
| NM_002601 | 9446.726 | 6617.991 | NM_004291 | 1739.355  | 1903.643  | NM_005296 | 2105.587  | 2305.22   |
| U62858    | 682.095  | 1044.521 | NM_003816 | 6449.563  | 8086.861  | NM_001337 | 995.262   | 695.378   |
| NM_001781 | 5332.069 | 3653.461 | AK022635  | 660.976   | 403.985   | NM_003611 | 1965.026  | 1366.354  |
| AF035121  | 245.05   | 595.364  | NM_004912 | 3348.577  | 3640.613  | AB014538  | 1598.757  | 1290.091  |
| NM_014432 | 2818.169 | 2488.293 | U79304    | 21198.691 | 18197.146 | NM_006209 | 657.764   | 1156.31   |
| NM_001558 | 913.787  | 1726.397 | NM_016267 | 5446.768  | 4724.994  | AK025118  | 6463.724  | 7256.958  |
| NM_006953 | 488.914  | 343.6    | NM_004671 | 7410.637  | 7166.124  | NM_000727 | 873.235   | 782.301   |
| U96173    | 1732.13  | 2078.103 | NM_005180 | 10030.725 | 11001.707 | NM_005385 | 6049.15   | 6331.198  |
| NM_018941 | 1786.915 | 1265.313 | NM_006526 | 2589.146  | 3918.75   | NM_018985 | 2631.639  | 3537.218  |
| NM_001980 | 1685.721 | 1253.24  | NM_007045 | 2027.024  | 1975.789  | AF203032  | 2468.405  | 788.562   |
| NM_012471 | 743.891  | 686.27   | NM_003627 | 3966.718  | 4558.094  | AF070670  | 4972.777  | 4207.165  |
| NM_001321 | 1465.766 | 1140.409 | NM_012145 | 26456.441 | 24384.672 | NM_016156 | 5799.039  | 5772.829  |
| AB018264  | 603.868  | 626.784  | AF305779  | 1257.117  | 1182.979  | NM_016528 | 2512.756  | 2036.548  |
| NM_006911 | 1971.432 | 1433.115 | AF225416  | 9626.776  | 14920.039 | NM_015974 | 5159.328  | 5932.904  |
| U92544    | 883.349  | 546.641  | NM_016231 | 3640.534  | 2888.621  | NM_014384 | 4907.144  | 6090.833  |
| NM_012229 | 3453.857 | 4104.5   | NM_002093 | 6382.977  | 6143.716  | NM_002573 | 10165.534 | 8295.502  |
| AB023147  | 3199.128 | 3891.695 | AB042555  | 14787.404 | 12745.612 | AF133424  | 2671.992  | 2080.936  |
| NM_005630 | 2360.474 | 1640.529 | NM_013975 | 4148.813  | 4355.052  | NM_005003 | 24965.91  | 19296.078 |
| AK023106  | 2533.941 | 3555.304 | NM_003843 | 3739.862  | 3802.383  | AF084560  | 4678.89   | 4944.932  |

|           |          |          |           |           |           |           |           |           |
|-----------|----------|----------|-----------|-----------|-----------|-----------|-----------|-----------|
| NM_01673C | 1033.892 | 971.235  | NM_01221E | 1817.191  | 1626.777  | NM_01571E | 559.32    | 413.752   |
| AL035297  | 2044.25  | 2150.439 | X73502    | 2192.106  | 2326.212  | NM_00003Z | 3161.937  | 3291.987  |
| NM_00440E | 2479.573 | 2259.305 | NM_02044E | 29056.238 | 31043.891 | NM_00208Z | 1692.623  | 1864.048  |
| AJ131244  | 2005.987 | 2153.475 | NM_01637E | 14368.369 | 13177.597 | NM_00203E | 7332.089  | 6665.594  |
| NM_00253Z | 4418.692 | 3960.628 | AB046848  | 7882.117  | 6668.319  | NM_01490C | 961.184   | 1396.768  |
| NM_01238E | 3449.101 | 2111.737 | AL133057  | 6747.166  | 6384.712  | BF342908  | 1024.617  | 1782.231  |
| NM_016651 | 566.599  | 565.833  | U04845    | 8264.723  | 7328.326  | AF118073  | 1537.096  | 1886.663  |
| NM_001671 | 1228.866 | 1253.356 | NM_01810Z | 5399.581  | 6719.579  | AK023510  | 6243.768  | 7211.794  |
| NM_01984Z | 2327.944 | 2548.348 | AK026302  | 10629.808 | 13909.645 | NM_00434E | 2267.828  | 3350.868  |
| NM_01619Z | 5796.822 | 5555.6   | NM_012214 | 11341.574 | 9621.645  | X71490    | 9050.573  | 14263.113 |
| BE878426  | 55773.05 | 51842.03 | AF049656  | 23696.029 | 27963.221 | AF257081  | 935.474   | 785.047   |
| NM_00174E | 18828.12 | 14703.57 | NM_00031Z | 1838.894  | 2732.487  | NM_00168E | 38327.258 | 8688.828  |
| NM_00382E | 7742.626 | 6846.008 | NM_00396Z | 1384.27   | 1380.955  | NM_00021E | 368.255   | 187.093   |
| AK025006  | 20377.48 | 17009.76 | AC009729  | 606.25    | 710.634   | NM_00223Z | 1102.934  | 597.999   |
| AF218014  | 6717.199 | 6419.564 | NM_01659E | 6498.885  | 5581.663  | NM_02209E | 1435.95   | 1146.732  |
| AY007729  | 9172.986 | 7251.347 | BE874867  | 48794.211 | 46476.586 | AF112219  | 31260.613 | 45826.379 |
| NM_00143Z | 702.605  | 751.7    | AL136719  | 5002.005  | 6075.163  | NM_000521 | 788.224   | 1147.22   |
| NM_003134 | 62005.3  | 53982.86 | NM_01410E | 9995.328  | 11600.248 | NM_00413E | 5004.824  | 5889.833  |
| NM_004314 | 6023.656 | 6020.772 | NM_01216C | 2170.809  | 1553.693  | NM_00020Z | 1787.684  | 2775.278  |
| NM_018247 | 10742.1  | 7344.955 | NM_006357 | 34916.621 | 34775.559 | NM_01344Z | 2604.074  | 4400.42   |
| NM_01797E | 4661.713 | 5850.311 | NM_01424E | 42212.359 | 39090.066 | NM_00092E | 16386.211 | 21821.014 |
| NM_00589E | 12697.55 | 15360.82 | AK027070  | 1551.443  | 1697.177  | NM_00046E | 2974.395  | 3528.304  |
| NM_00288E | 3796.259 | 3996.669 | NM_003341 | 12166.529 | 28380.076 | NM_00012Z | 8649.637  | 8280.473  |
| AF078866  | 13725.73 | 13505.34 | NM_01778E | 1187.031  | 1382.465  | AL137501  | 1099.191  | 1589.072  |
| BF311880  | 271.057  | 576.109  | NM_00624E | 5350.382  | 4896.901  | NM_00671Z | 57257.332 | 32789.645 |
| NM_01607E | 1050.653 | 1422.422 | NM_01831E | 1167.252  | 1262.342  | NM_00624C | 1206.293  | 505.729   |
| NM_00136C | 24665.17 | 27413.78 | AB020640  | 3226.451  | 3128.089  | NM_00702E | 4578.872  | 1704.654  |
| AK026656  | 550.474  | 608.175  | D29954    | 13243.149 | 12943.538 | M37712    | 17604.391 | 3732.568  |
| AJ276207  | 12507.27 | 12041.64 | AF007131  | 6607.977  | 4071.383  | NM_00264E | 1005.067  | 252.436   |
| AB011131  | 8160.545 | 7630.813 | NM_00683E | 3165.685  | 2615.841  | AW797282  | 898.601   | 888.882   |
| NM_000751 | 1939.023 | 1468.698 | NM_00022Z | 1562.723  | 1472.172  | NM_00240Z | 646.744   | 713.616   |
| NM_01484E | 5732.815 | 3902.597 | NM_005851 | 1590.014  | 1337.613  | L09070    | 2344.616  | 3250.48   |
| NM_00104Z | 5689.068 | 4563.258 | AF119256  | 1403.083  | 962.071   | NM_00006Z | 20689.766 | 30693.299 |
| NM_000941 | 2289.025 | 3000.785 | X74497    | 1352.692  | 1588.974  | AL133037  | 2662.63   | 3027.636  |
| AF222980  | 1165.329 | 773.989  | NM_01221C | 1925.894  | 2148.219  | NM_02035C | 6563.779  | 5234.337  |
| AK026758  | 4369.589 | 4825.834 | U10072    | 1742.515  | 1692.119  | AA419164  | 2210.073  | 4052.174  |
| NM_012201 | 5596.957 | 7626.413 | AF222749  | 27113.48  | 29264.422 | L35251    | 3977.663  | 6218.591  |
| AB046774  | 2557.167 | 2148.222 | NM_00341C | 4025.126  | 5306.634  | BE910395  | 1640.809  | 2665.513  |
| AK022385  | 16229.5  | 16950.21 | NM_00714E | 3860.53   | 4261.538  | N46828    | 1100.546  | 1353.475  |
| NM_00277E | 366.701  | 797.599  | NM_00222E | 542.534   | 726.862   | BI908302  | 6384.69   | 4992.345  |
| AK024584  | 8093.51  | 3593.392 | S69027    | 5909.247  | 5335.71   | AA460969  | 5683.557  | 3715.42   |
| NM_003504 | 13571.39 | 9559.28  | NM_012119 | 2100.848  | 2193.396  | BG695859  | 812.243   | 1183.203  |
| NM_01329E | 5423.568 | 4523.492 | X99631    | 25239.801 | 20381.014 | NM_000641 | 2324.017  | 1424.639  |
| NM_007267 | 4177.372 | 4443.372 | NM_00173C | 2853.829  | 2770.759  | AE006466  | 2999.496  | 1070.747  |
| AK022830  | 425.789  | 1001.55  | AK026290  | 497.291   | 394.932   | BC008737  | 40180.191 | 12649.548 |
| Z36816    | 5898.94  | 5701.062 | AB014589  | 2513.761  | 3154.619  | BC011655  | 6391.055  | 3273.389  |
| NM_00586E | 2614.973 | 2236.396 | AF248649  | 1273.559  | 1167.852  | BC002396  | 5313.305  | 1269.669  |
| NM_00641Z | 15906.4  | 10232.18 | U37146    | 18179.254 | 18648.637 | AF208232  | 13350.427 | 14690.952 |
| NM_017684 | 2888.334 | 3423.595 | NM_01208E | 4572.826  | 4701.179  | NM_00298E | 5736.117  | 6087.722  |
| NM_00276E | 6821.552 | 9164.73  | NM_000991 | 52155.477 | 57199.176 | NM_00418E | 2118.261  | 2743.042  |
| NM_003691 | 5561.974 | 5046.327 | NM_016034 | 21857.875 | 13033.521 | NM_01625E | 8321.634  | 12580.229 |
| NM_00295C | 19072.67 | 17878.77 | X69150    | 53672.117 | 58270.555 | AB014542  | 7144.927  | 8904.932  |
| NM_00231E | 802.788  | 660.485  | NM_00102E | 53848.402 | 61556.746 | NM_01464C | 2357.842  | 3720.56   |

|           |          |          |           |           |           |           |           |           |
|-----------|----------|----------|-----------|-----------|-----------|-----------|-----------|-----------|
| NM_005954 | 441.229  | 421.56   | NM_016067 | 15692.912 | 17338.926 | Y10518    | 34012.902 | 49175.773 |
| NM_012471 | 1203.319 | 1143.9   | NM_018285 | 8311.794  | 6695.433  | AF155135  | 12209.247 | 17515.828 |
| NM_001321 | 1751.972 | 1756.142 | AK022393  | 2268.558  | 1622.843  | NM_014790 | 1282.765  | 1966.977  |
| AB018264  | 792.215  | 764.069  | AK026654  | 1303.215  | 1933.781  | NM_003571 | 4920.964  | 7571.951  |
| NM_006911 | 1980.99  | 1885.244 | AB020643  | 816.637   | 1021.18   | AB032965  | 16426.738 | 27567.113 |
| U92544    | 698.593  | 900.681  | AK025245  | 577.331   | 852.477   | NM_020370 | 1881.604  | 3206.143  |
| NM_006791 | 2493.682 | 5146.825 | AK025496  | 6807.539  | 8253.208  | NM_004767 | 718.909   | 1413.865  |
| AJ278348  | 18099.05 | 16846.92 | NM_005205 | 59220.883 | 63236.008 | BF310159  | 10971.963 | 7441.154  |
| L07738    | 583.382  | 538.122  | NM_001966 | 970.325   | 1704.653  | NM_018986 | 2272.033  | 2054.537  |
| Z48054    | 3907.474 | 3592.095 | NM_016138 | 3257.707  | 4251.65   | NM_003360 | 2003.438  | 1051.329  |
| H90415    | 3840.484 | 3323.29  | Z36833    | 48303.949 | 57784.359 | Z21965    | 10797.769 | 5383.411  |
| AA676470  | 6065.501 | 4258.257 | NM_014355 | 2263.891  | 2093.248  | NM_012427 | 1401.09   | 837.164   |
| AA430512  | 1309.847 | 700.02   | M21191    | 29538.18  | 24289.098 | AF131857  | 11869.414 | 4507.288  |
| M38258    | 1051.646 | 875.905  | AF072810  | 1422.815  | 1241.402  | NM_000852 | 31793.723 | 13521.93  |
| AA457155  | 2227.318 | 2516.198 | L19778    | 1033.172  | 873.284   | NM_000399 | 3272.257  | 1725.355  |
| BM014365  | 1401.53  | 1115.12  | AF174482  | 5656.221  | 5518.13   | AF257081  | 1272.229  | 1338.341  |
| H91842    | 432.819  | 418.031  | NM_003528 | 1517.805  | 1142.426  | NM_001688 | 37519.766 | 36656.457 |
| AA878561  | 62010.91 | 61001.45 | NM_017769 | 1033.434  | 963.351   | NM_003631 | 1181.475  | 1840.332  |
| AI538525  | 1049.658 | 712.28   | D85131    | 17248.92  | 12786.914 | NM_000219 | 380.301   | 1161.988  |
| NM_003825 | 9081.297 | 11626.02 | NM_004956 | 647.482   | 566.41    | NM_002232 | 1084.33   | 2154.579  |
| AK025006  | 20535.38 | 19461.6  | D30612    | 3027.725  | 2519.835  | NM_016106 | 7448.231  | 8476.998  |
| AF218014  | 7256.514 | 8153.339 | NM_002163 | 450.61    | 663.167   | NM_014570 | 7779.95   | 10933.465 |
| NM_006678 | 432.655  | 390.742  | U52097    | 18438.297 | 13293.15  | NM_014747 | 5914.749  | 7781.799  |
| AY007729  | 9848.545 | 11645.94 | NM_003416 | 2189.616  | 1970.999  | Y19240    | 6230.229  | 7797.847  |
| NM_014424 | 696.731  | 658.528  | AL079289  | 1379.97   | 2025.416  | AF091029  | 3902.574  | 4460.684  |
| AF159092  | 1475.508 | 2083.506 | NM_018484 | 397.698   | 1133.125  | X97074    | 12042.364 | 14157.035 |
| BC007318  | 10074.49 | 10790.05 | NM_017594 | 1023.368  | 1467.905  | AL117235  | 977.424   | 1265.776  |
| M36693    | 4109.095 | 3603.322 | AK027237  | 1108.16   | 1344.689  | NM_014822 | 3779.983  | 4184.245  |
| NM_016292 | 6964.344 | 7903.146 | AF075017  | 727.479   | 1109.056  | NM_005296 | 1719.911  | 1116.137  |
| NM_002601 | 8053.652 | 5950.145 | AK027104  | 2417.719  | 2489.641  | NM_001337 | 1277.91   | 851.134   |
| U62858    | 518.205  | 1178.543 | AL133090  | 14398.414 | 16681.818 | NM_003611 | 2173.815  | 1556.649  |
| NM_001781 | 6087.836 | 3789.262 | AF085867  | 4945.817  | 6096.227  | AB014538  | 1762.456  | 2172.55   |
| AF035121  | 409.022  | 807.307  | AK026158  | 773.526   | 656.292   | AK025118  | 6027.481  | 2811.64   |
| NM_014432 | 2685.426 | 1979.202 | AF086510  | 2985.461  | 2901.816  | NM_000727 | 901.586   | 432.457   |
| NM_001558 | 756      | 1328.414 | Z36779    | 3403.596  | 2956.868  | NM_002621 | 574.301   | 235.745   |
| U96173    | 1940.629 | 1533.555 | NM_002816 | 1200.127  | 1604.351  | NM_005385 | 4594.889  | 2249.268  |
| NM_018941 | 1572.556 | 1249.289 | NM_017822 | 6178.231  | 5374.373  | NM_018985 | 4735.164  | 3775.231  |
| BE730585  | 1140.944 | 887.629  | AK026844  | 4393.503  | 3739.063  | NM_006074 | 13152.275 | 5059.375  |
| NM_001980 | 1714.589 | 1431.325 | AK026735  | 4680.241  | 3476.556  | NM_006712 | 53930.293 | 57776.836 |
| NM_000749 | 937.182  | 828.648  | AL110104  | 34513.063 | 24926.693 | NM_006240 | 1521.377  | 2551.169  |
| NM_000751 | 2705.485 | 4033.173 | AF240633  | 1811.227  | 1661.525  | NM_007026 | 5044.799  | 8739.701  |
| NM_014849 | 5982.042 | 5286.633 | AK027056  | 4069.513  | 3240.581  | NM_016528 | 2838.959  | 3666.313  |
| NM_001042 | 5790.53  | 6165.529 | AK024294  | 1849.267  | 1766.361  | NM_015974 | 4421.454  | 5149.318  |
| NM_012229 | 3826.458 | 4543.343 | AL110126  | 2166.479  | 1977.259  | NM_014384 | 5419.083  | 7689.974  |
| NM_005071 | 615.66   | 629.578  | AF052172  | 22013.391 | 18297.264 | NM_002573 | 10417.834 | 8801.712  |
| AB023147  | 2824.358 | 4316.905 | AB014573  | 8804.586  | 6748.993  | AF133424  | 2120.419  | 1930.242  |
| NM_005630 | 1253.098 | 1286.967 | AK091109  | 31861.014 | 43563.695 | NM_005003 | 25767.119 | 26367.24  |
| AK023106  | 2221.918 | 2208.005 | AF032897  | 622.216   | 1137.889  | AF084560  | 4104.9    | 3394.84   |
| NM_016730 | 1110.698 | 1047.266 | NM_014967 | 3565.544  | 5603.85   | NM_015715 | 469.004   | 918.121   |
| AL035297  | 1884.56  | 2948.835 | AK022915  | 5023.528  | 9139.208  | NM_000032 | 3356.801  | 3069.509  |
| NM_004408 | 2058.345 | 1819.042 | AK021736  | 915.126   | 1140.453  | NM_002083 | 2057.973  | 1632.036  |
| AJ131244  | 2031.986 | 1781.297 | AF131834  | 1001.658  | 1452.636  | NM_002035 | 6553.105  | 3849.793  |
| NM_002532 | 4475.24  | 3929.185 | AL355711  | 1612.445  | 2160.413  | NM_014900 | 738.963   | 531.884   |

|           |          |          |           |           |           |           |           |           |
|-----------|----------|----------|-----------|-----------|-----------|-----------|-----------|-----------|
| NM_01238E | 3354.138 | 2061.607 | AK025851  | 2431.328  | 2241.257  | BF342908  | 900.092   | 499.706   |
| NM_016651 | 611.167  | 649.2    | AJ011409  | 13141.396 | 12449.813 | AF118073  | 750.494   | 462.007   |
| NM_001671 | 1071.815 | 1008.605 | AJ227906  | 1996.957  | 1812.652  | AK023510  | 6211.446  | 3146.189  |
| NM_019843 | 2161.597 | 2288.701 | AJ011598  | 512.229   | 753.211   | NM_004345 | 1763.929  | 1347.757  |
| NM_016192 | 6041.854 | 5271.405 | U17633    | 811.335   | 768.79    | NM_000702 | 39135.625 | 19960.459 |
| BE878426  | 55121.57 | 51990.93 | L10404    | 967.167   | 979.82    | NM_014273 | 16004.304 | 22005.598 |
| NM_001745 | 19296.61 | 13486.73 | AF283776  | 6381.747  | 7575.737  | AF039442  | 1570.169  | 2124.849  |
| AK025542  | 1008.307 | 676.037  | L10123    | 32681.826 | 28083.084 | NM_004680 | 915.22    | 1574.797  |
| AF207547  | 1229.765 | 1480.176 | AF071507  | 584.162   | 316.277   | AF104260  | 601.78    | 989.615   |
| NM_00276E | 6523.716 | 10341.71 | D16877    | 3526.965  | 3261.758  | NM_006071 | 2255.571  | 3421.417  |
| NM_003691 | 5843.669 | 6698.167 | L19363    | 546.679   | 223.312   | NM_012236 | 7790.186  | 7196.644  |
| NM_002950 | 21367.32 | 26895.88 | AL109781  | 4338.495  | 2741.013  | AF112219  | 30642.813 | 24312.951 |
| NM_00231E | 936.563  | 888.161  | AK021895  | 3269.979  | 4491.266  | NM_000521 | 767.153   | 502.711   |
| NM_001433 | 705.207  | 797.003  | AK000036  | 6514.331  | 7855.422  | NM_004135 | 5282.37   | 3823.572  |
| NM_003134 | 61177.43 | 51683.07 | AK000769  | 918.203   | 1212.802  | NM_013443 | 2627.291  | 2545.24   |
| NM_004314 | 4269.823 | 4714.623 | AK000924  | 745.157   | 729.245   | NM_000925 | 15622.446 | 8220.06   |
| NM_018247 | 9607.853 | 5765.822 | AK022252  | 611.654   | 623.236   | NM_000465 | 2794.832  | 1692.609  |
| NM_017979 | 4235.625 | 4457.164 | AK000114  | 2518.465  | 2465.75   | NM_000123 | 7531.725  | 4940.813  |
| NM_00589E | 11708.61 | 14072.31 | AK000952  | 7428.821  | 7305.487  | AL137501  | 1102.996  | 874.903   |
| NM_00288E | 2771.369 | 3068.547 | AK024520  | 4657.379  | 4512.988  | BE858979  | 754.824   | 496.8     |
| AF078866  | 13162.31 | 13173.08 | AK024592  | 3173.354  | 2830.844  | NM_000122 | 4436.491  | 2250.206  |
| NM_01607E | 1004.185 | 983.816  | AK024904  | 2653.276  | 2417.341  | U87223    | 724.644   | 983.064   |
| NM_001360 | 24722.05 | 22062.86 | AK025030  | 1903.557  | 1957.079  | X91348    | 13532.71  | 17834.789 |
| AK026656  | 754.445  | 685.131  | AK024542  | 4574.6    | 4177.189  | Z36505    | 3992.604  | 5758.376  |
| AJ276207  | 13689.36 | 10043.83 | AK024915  | 577.336   | 533.436   | NM_001854 | 1379.731  | 1913.303  |
| AB011131  | 8571.217 | 7257.898 | AB050477  | 3823.071  | 5676.948  | NM_017913 | 2936.691  | 3179.689  |
| AB020656  | 3584.685 | 4905.955 | AK000152  | 458.241   | 1129.055  | NM_002755 | 16135.652 | 16305.068 |
| NM_000412 | 1599.272 | 1678.057 | AK024300  | 1290.887  | 1463.524  | AK024799  | 15152.729 | 18740.127 |
| AF077033  | 2750.727 | 1968.933 | L09092    | 924.781   | 1327.143  | NM_000924 | 6547.839  | 8585.149  |
| NM_01778E | 557.926  | 818.198  | NM_012132 | 1643.475  | 1972.67   | NM_003330 | 16280.876 | 17370.99  |
| NM_004991 | 607.555  | 591.208  | NM_01212E | 1143.221  | 1223.953  | NM_002481 | 606.498   | 658.393   |
| AF222980  | 1269.911 | 932.634  | AK024881  | 559.214   | 474.546   | NM_003647 | 1306.198  | 1014.696  |
| AK026758  | 4293.563 | 5324.225 | AK025716  | 976.941   | 1289.616  | NM_001699 | 15191.43  | 12715.127 |
| NM_012201 | 5674.203 | 8324.632 | AF086202  | 15821.202 | 17565.615 | AK023019  | 1372.591  | 886.595   |
| AB046774  | 2779.08  | 2666.158 | AK022352  | 577.532   | 318.849   | NM_147171 | 4929.616  | 1972.894  |
| AK022385  | 16799.79 | 15472.63 | AK023270  | 3048.001  | 2915.587  | AF238083  | 3792.848  | 3508.966  |
| NM_00277E | 517.874  | 685.668  | AF085979  | 25670.115 | 23253.621 | NM_002962 | 1159.298  | 564.361   |
| AK024584  | 7323.099 | 3395.199 | AK023112  | 1616.402  | 1552.326  | NM_01638E | 4434.229  | 1491.442  |
| NM_003504 | 12834.57 | 9618.462 | NM_01780E | 34607.957 | 25997.549 | AB046783  | 3522.1    | 1800.836  |
| NM_01329E | 4982.285 | 3780.993 | NM_014702 | 467.724   | 1105.336  | NM_000845 | 1404.474  | 864.906   |
| NM_007267 | 4084.981 | 4155.992 | AK001937  | 52320.555 | 49978.801 | NM_004604 | 39075.895 | 26854.117 |
| AK022830  | 825.399  | 715.665  | AL365517  | 1012.004  | 1844.286  | NM_014965 | 2394.53   | 1652.434  |
| Z36816    | 5837.484 | 6182.922 | AK021988  | 8360.95   | 9429.085  | NM_004882 | 10190.6   | 5144.827  |
| NM_00586E | 2351.283 | 2005.204 | AF086494  | 25655.76  | 26045.781 | AL390148  | 10732.944 | 7915.182  |
| NM_006413 | 15967.64 | 13497.01 | BI769977  | 981.613   | 1223.419  | AK024055  | 1934.474  | 1099.105  |
| NM_017684 | 2244.419 | 1593.035 | AL137567  | 1556.808  | 1290.102  | U10485    | 1063.931  | 1416.833  |
| NM_00021E | 524.392  | 964.597  | AK024913  | 2505.293  | 2316.954  | AK025326  | 6405.578  | 7893.7    |
| NM_002203 | 313.049  | 597.372  | AB007961  | 2797.742  | 3376.534  | NM_01337E | 1553.152  | 1734.898  |
| AF135960  | 1111.538 | 946.701  | NM_005547 | 2163.035  | 2351.464  | NM_017964 | 1801.255  | 1785.901  |
| NM_01421E | 6333.678 | 8150.184 | U00942    | 384.065   | 753.031   | NM_01642E | 3174.967  | 2478.567  |
| NM_003010 | 3026.315 | 3166.429 | AF119862  | 14707.092 | 15423.5   | NM_004083 | 10729.835 | 8760.426  |
| NM_006871 | 516.235  | 753.919  | U17628    | 1908.822  | 2010.839  | NM_01603E | 8266.043  | 8504.633  |
| AK000006  | 742.733  | 867.793  | AF119867  | 6622.665  | 6943.701  | NM_001184 | 4982.744  | 4417.744  |

|           |          |          |           |           |           |           |           |           |
|-----------|----------|----------|-----------|-----------|-----------|-----------|-----------|-----------|
| NM_001115 | 677.228  | 491.23   | AL357205  | 10049.643 | 16967.816 | NM_015530 | 12182.334 | 13217.727 |
| NM_014921 | 825.652  | 1447.58  | AF124819  | 686.199   | 883.664   | NM_016238 | 7176.553  | 6175.597  |
| NM_007183 | 488.285  | 873.234  | D17091    | 2156.733  | 2479.463  | NM_001758 | 957.305   | 789.872   |
| AJ238243  | 11115.07 | 8997.805 | AL133074  | 2299.896  | 2428.386  | BE546276  | 1064.998  | 1237.1    |
| J05046    | 1776.815 | 2232.296 | AF086318  | 11448.299 | 10262.229 | NM_004725 | 25573.395 | 14313.463 |
| NM_012318 | 3972.862 | 3957.844 | AF088012  | 1252.953  | 1095.241  | NM_015997 | 3384.385  | 2355.807  |
| NM_002751 | 1317.969 | 902.049  | NM_018121 | 1223.926  | 1519.561  | NM_001167 | 3802.631  | 3272.018  |
| NM_003816 | 3860.01  | 3067.283 | NM_014191 | 808.963   | 1663.332  | NM_012115 | 3936.011  | 2566.285  |
| NM_004671 | 4919.217 | 3970.91  | AK026708  | 4306.512  | 6765.494  | NM_004933 | 10387.141 | 7134.4    |
| NM_007015 | 1355.271 | 1353.598 | NM_017903 | 5851.605  | 7753.938  | M96577    | 13332.501 | 7250.41   |
| NM_005180 | 12924.38 | 17731.02 | NM_018074 | 2080.603  | 2503.101  | NM_013258 | 3783.143  | 3425.13   |
| NM_006526 | 7583.809 | 8122.292 | AK024828  | 1548.096  | 2029.817  | NM_003842 | 4203.821  | 3046.048  |
| NM_007045 | 3197.76  | 3887.548 | AF009315  | 1924.023  | 2379.759  | NM_016184 | 3534.235  | 2497.261  |
| NM_003627 | 4750.197 | 5457.605 | NM_019013 | 1203.272  | 1161.831  | L11238    | 17244.385 | 26218.219 |
| NM_012145 | 29306.61 | 40802.41 | NM_006783 | 773.157   | 893.356   | AK025684  | 1236.001  | 876.262   |
| AF305779  | 2364.234 | 3244.782 | L37711    | 600.584   | 743.66    | NM_012205 | 2769.963  | 1274.699  |
| NM_016231 | 5920.425 | 6407.055 | S70313    | 16155.377 | 29416.275 | K02046    | 5240.044  | 3440.09   |
| NM_002093 | 4553.667 | 3803.814 | AK021607  | 2624.523  | 3856.078  | AL110151  | 13965.815 | 14074.84  |
| AB042555  | 1181.12  | 1154.232 | AK025860  | 1696.607  | 1632.8    | NM_003293 | 316.828   | 571.047   |
| NM_013975 | 5536.816 | 6376.235 | L09268    | 700.78    | 768.482   | NM_004995 | 4434.855  | 6426.42   |
| NM_003843 | 2297.195 | 2136.028 | NM_020186 | 9356.276  | 10426.696 | NM_000386 | 9428.906  | 12258.883 |
| NM_012216 | 977.528  | 1443.652 | AK022424  | 356.425   | 537.575   | NM_007231 | 883.643   | 929.25    |
| X73502    | 1884.118 | 2030.169 | AF090947  | 4105.361  | 4117.983  | NM_001190 | 5689.669  | 6727.204  |
| NM_020445 | 3178.964 | 2915.119 | NM_005047 | 2534.765  | 3446.702  | NM_005271 | 15491.158 | 17233.16  |
| AL133057  | 4512.48  | 6532.684 | AJ272196  | 12794.146 | 11918.055 | NM_015654 | 10883.37  | 9427.381  |
| NM_018103 | 5669.113 | 6715.754 | AF116662  | 789.912   | 684.419   | NM_012244 | 3420.78   | 3193.459  |
| AK026302  | 12352.55 | 16465.16 | X58162    | 8314.098  | 10062.013 | NM_004341 | 1755.158  | 1521.854  |
| NM_012214 | 8598.897 | 13886.21 | AK022825  | 1206.724  | 1467.158  | AB082521  | 4935.25   | 3972.912  |
| AF049656  | 5804.231 | 7090.55  | CY3Cy5    | 2635.989  | 199.098   | AL050182  | 1032.404  | 819.254   |
| NM_003963 | 687.885  | 480.192  | L35251    | 3489.084  | 2864.509  | NM_020040 | 1658.308  | 1359.726  |
| AC009729  | 620.708  | 394.708  | BE910395  | 1529.469  | 1297.095  | NM_002374 | 720.669   | 873.8     |
| NM_016598 | 6294.854 | 8133.532 | N46828    | 2678.585  | 2049.6    | AK026940  | 3739.027  | 2853.726  |
| BE874867  | 6497.176 | 7866.925 | BI908302  | 16372.539 | 14156.848 | AF155117  | 4642.72   | 3603.422  |
| AL136719  | 4242.941 | 3357.111 | AA460969  | 4353.53   | 4126.397  | AB014527  | 1263.314  | 1333.811  |
| NM_014109 | 12613.71 | 10019.9  | BG695859  | 1079.06   | 811.748   | NM_004411 | 3086.67   | 2626.218  |
| NM_012160 | 2609.645 | 2116.32  | M85079    | 5800.25   | 4123.283  | NM_015938 | 8433.038  | 4508.923  |
| NM_006357 | 17576.38 | 21939.73 | X07437    | 4673.442  | 4776.749  | NM_000740 | 1427.578  | 620.338   |
| NM_014248 | 53695.59 | 55811.43 | NM_000641 | 2287.04   | 2132.458  | NM_017843 | 2883.303  | 3350.984  |
| AK027070  | 1461.214 | 1477.996 | AE006466  | 5660.473  | 5747.12   | AK025985  | 3714.158  | 7940.467  |
| AF129533  | 254.194  | 494.099  | BC008737  | 52903.52  | 46488.91  | NM_013256 | 2499.423  | 2726.493  |
| NM_003341 | 7603.173 | 5017.728 | BC011655  | 8774.574  | 5530.096  | NM_004143 | 1135.825  | 1516.857  |
| NM_017785 | 1974.949 | 1690.129 | BC002396  | 5302.224  | 5706.899  | X66087    | 1291.521  | 1234.493  |
| NM_006249 | 2212.982 | 2293.969 | NM_022095 | 1388.441  | 1516.833  | NM_016328 | 4869.66   | 6088.519  |
| AB020640  | 1005.726 | 1182.696 | SR2       | 55973.395 | 56122.984 | NM_017544 | 15450.85  | 18229.611 |
| D29954    | 10288.89 | 10695.68 | SR4       | 18193.43  | 17332.367 | NM_003153 | 1513.009  | 1814.14   |
| AF119256  | 1759.279 | 2590.436 | SR6       | 2762.149  | 2516.96   | NM_016285 | 2194.272  | 2321.061  |
| X74497    | 630.577  | 711.551  | SR8       | 9838.008  | 26691.053 | NM_014707 | 2373.019  | 1430.959  |
| NM_012210 | 1643.816 | 1995.566 | SR10      | 34248.953 | 12404.946 | AF025771  | 2031.557  | 1876.093  |
| U10072    | 1693.406 | 1688.551 | CY3Cy5    | 5264.538  | 410.872   | NM_018215 | 1863.158  | 1786.755  |
| AF222749  | 4966.023 | 5871.19  | NM_020370 | 1105.457  | 1337.049  | AB033110  | 622.628   | 362.985   |
| NM_003410 | 2457.67  | 2052.656 | NM_004767 | 945.368   | 925.713   | NM_005083 | 8755.271  | 6329.885  |
| NM_007146 | 3265.91  | 2698     | BF310159  | 8690.889  | 8097.659  | NM_007187 | 15544.015 | 10732.665 |
| NM_002229 | 826.062  | 671.461  | NM_000316 | 509.292   | 441.286   | NM_001828 | 766.992   | 690.728   |

|           |          |          |           |           |           |           |           |           |
|-----------|----------|----------|-----------|-----------|-----------|-----------|-----------|-----------|
| S69027    | 2007.452 | 1730.053 | NM_01898€ | 1809.183  | 1861.235  | NM_01898€ | 17219.012 | 20653.41  |
| NM_012119 | 1957.819 | 2204.064 | U27655    | 2978.332  | 2559.44   | NM_00309€ | 14432.813 | 12570.831 |
| X99631    | 15097.48 | 14659.95 | NM_012427 | 6450.527  | 6355.789  | NM_00727€ | 5485.668  | 3906.887  |
| NM_00173C | 3267.919 | 2664.543 | AF131857  | 7877.802  | 7832      | BE390833  | 26419.086 | 20078.965 |
| AK026290  | 760.188  | 602.865  | NM_00085€ | 27185.674 | 23831.17  | NM_00473C | 13533.343 | 11023.17  |
| AB014589  | 3510.922 | 2861.469 | NM_00039€ | 883.701   | 937.571   | NM_000801 | 4524.093  | 4694.318  |
| AF248649  | 577.728  | 768.544  | AW797282  | 781.452   | 802.03    | NM_006115 | 19285.152 | 31401.691 |
| U37146    | 6747.348 | 7723.948 | NM_00240€ | 594.544   | 505.313   | NM_005801 | 5628.86   | 3442.409  |
| NM_01208€ | 3973.966 | 5776.463 | L09070    | 2233.038  | 2330.654  | NM_01819€ | 4571.967  | 2721.144  |
| NM_016034 | 12231.88 | 20132.36 | NM_00006€ | 14020.924 | 15714.166 | NM_00153€ | 26623.475 | 18881.818 |
| X69150    | 51798.27 | 47915.91 | NM_00959C | 8009.144  | 8254.252  | NM_012267 | 1019.96   | 469.819   |
| NM_01828€ | 10064.81 | 12796.99 | AL133037  | 1567.754  | 2535.17   | AK027232  | 10955.152 | 12081.378 |
| AK022393  | 8108.246 | 13502.73 | NM_02035C | 4974.211  | 5845.878  | NM_012204 | 535.115   | 976.023   |
| AK026654  | 1204.366 | 1783.938 | NM_00035C | 2375.88   | 2733.406  | NM_00361€ | 1117.348  | 1467.631  |
| AB020643  | 986.196  | 1025.173 | AA419164  | 1431.863  | 1629.795  | NM_00002€ | 49683.793 | 54371.402 |
| AK025496  | 4457.56  | 5288.914 | AL117235  | 666.092   | 748.479   | NM_01657€ | 9444.473  | 8788.675  |
| NM_00520€ | 42560.04 | 44940.06 | NM_01482€ | 3561.771  | 3293.853  | NM_00421€ | 1537.003  | 1871.849  |
| NM_00196€ | 822.648  | 512.936  | NM_00529€ | 2215.093  | 2208.578  | NM_00192€ | 48402.828 | 44308.066 |
| NM_01613€ | 3197.049 | 3007.496 | NM_001337 | 731.787   | 749.078   | NM_00090€ | 1731.711  | 1743.795  |
| Z36833    | 66083.74 | 60869.95 | NM_003611 | 2832.222  | 2576.431  | NM_00048C | 7954.291  | 7193.649  |
| NM_01435€ | 2368.495 | 2153.272 | AB014538  | 2142.369  | 1983.37   | AF254084  | 43555.34  | 31168.723 |
| M21191    | 43447.07 | 43299.4  | NM_00620€ | 899.754   | 684.553   | AK022976  | 2595.859  | 2962.55   |
| AF072810  | 2315.058 | 2143.522 | AK025118  | 5797.167  | 5317.588  | AB048791  | 7896.267  | 14191.847 |
| L19778    | 710.904  | 794.244  | NM_000727 | 1693.873  | 1559.312  | NM_003107 | 16152.25  | 29702.064 |
| AF174482  | 2055.669 | 2273.684 | NM_002621 | 534.125   | 416.555   | NM_006874 | 5837.421  | 3084.229  |
| Y08836    | 556.98   | 319.989  | NM_00538€ | 10585.974 | 9765.683  | AB046777  | 4396.5    | 3520.716  |
| NM_01776€ | 927.593  | 682.044  | NM_01898€ | 3002.211  | 1962.742  | AJ251844  | 2220.302  | 1499.674  |
| D85131    | 23008.5  | 33157.67 | NM_006074 | 25382.238 | 21975.182 | D16815    | 3050.059  | 3334.505  |
| D30612    | 4021.535 | 4201.534 | AF208232  | 15244.124 | 13117.217 | NM_00188C | 4244.662  | 3517.471  |
| NM_00216€ | 477.277  | 432.736  | NM_00298€ | 7700.288  | 7380.349  | AB028943  | 1882.537  | 1086.177  |
| U52097    | 5400.075 | 5502.316 | NM_00418€ | 1517.495  | 1191.254  | NM_006194 | 1848.753  | 1471.126  |
| NM_00341€ | 2830.634 | 3987.215 | NM_01625€ | 8384.51   | 6429.246  | AF042838  | 1652.443  | 2561.049  |
| AL079289  | 447.108  | 598.254  | AF203032  | 4099.009  | 4105.967  | AL137511  | 565.535   | 1152.407  |
| NM_017594 | 1727.253 | 1878.945 | AB014542  | 10486.145 | 8233.751  | AF075031  | 335.37    | 1161.393  |
| AK027237  | 1396.026 | 1775.641 | NM_01464C | 2059.738  | 1767.802  | AF075062  | 5235.224  | 5667.415  |
| AF075017  | 540.422  | 506.794  | Y10518    | 52239.863 | 51842.969 | NM_00418€ | 764.623   | 975.288   |
| AK027104  | 1937.72  | 2024.92  | AF155135  | 19846.695 | 31923.564 | AF147381  | 9258.687  | 9564.952  |
| AL133090  | 27882.94 | 30132.36 | NM_01479C | 1519.958  | 1709.228  | AB002452  | 389.084   | 925.501   |
| AF085867  | 11083.61 | 10072.64 | AB032965  | 19759.934 | 19105.834 | AK027101  | 9388.97   | 9817.624  |
| AK026158  | 443.303  | 764.421  | AF133424  | 4457.988  | 3610.53   | AF088075  | 1621.042  | 1417.975  |
| AF086510  | 6452.286 | 4687.86  | NM_00500€ | 26653.443 | 21278.494 | AK026376  | 4694.569  | 5860.468  |
| Z36779    | 1537.456 | 1706.876 | AF084560  | 8754.749  | 7183.651  | AF088061  | 3015.748  | 3521.458  |
| NM_01842€ | 682.309  | 669.686  | NM_01571€ | 913.527   | 851.632   | AF086286  | 2606.164  | 1858.976  |
| NM_00281€ | 5278.174 | 3328.284 | NM_00003€ | 5650.141  | 4882.471  | AF086376  | 1914.666  | 1726.629  |
| NM_01782€ | 8981.665 | 8309.837 | NM_00208€ | 4180.432  | 3626.991  | AF086410  | 1379.975  | 2044.435  |
| AK026844  | 1195.944 | 1215.043 | NM_00203€ | 7537.42   | 6973.931  | AF086455  | 1017.439  | 571.195   |
| AK026735  | 1246.196 | 1242.914 | NM_01490C | 1730.1    | 1470.401  | AK022997  | 11704.091 | 8036.762  |
| AL110104  | 10626.15 | 10572.04 | BF342908  | 2749.877  | 2494.639  | NM_014811 | 598.594   | 1647.966  |
| AK027056  | 1453.478 | 2182.44  | AF118073  | 827.104   | 734.459   | AF147426  | 2262.478  | 2769.672  |
| AK024294  | 1792.466 | 1931.419 | AK023510  | 6762.497  | 5880.932  | BC019667  | 2642.843  | 5143.746  |
| AL110126  | 3263.924 | 3184.543 | NM_00434€ | 2775.311  | 2689.165  | AK026026  | 2834.657  | 3892.432  |
| AF052172  | 2153.096 | 2408.954 | NM_00070€ | 38919.797 | 30600.494 | AF085941  | 16715.746 | 17076.148 |
| AB014573  | 2956.315 | 2836.795 | X71490    | 13768.022 | 14616.768 | Z69892    | 7055.443  | 8614.294  |

|           |          |          |           |           |           |           |           |           |
|-----------|----------|----------|-----------|-----------|-----------|-----------|-----------|-----------|
| AK025418  | 750.527  | 1251.911 | AF257081  | 2522.711  | 2267.44   | AF087961  | 715.918   | 682.833   |
| AK091109  | 18726.68 | 21443.77 | NM_001688 | 30483.396 | 29739.859 | AL137309  | 2640.68   | 2590.553  |
| AF032897  | 547.191  | 604.096  | NM_003631 | 706.001   | 626.011   | AL137475  | 1005.204  | 1037.509  |
| NM_014967 | 3085.817 | 3146.735 | NM_000219 | 812.82    | 851.586   | AL161956  | 4635.394  | 5460.202  |
| AK022915  | 10640.36 | 8993.931 | NM_002232 | 1223.131  | 842.219   | AL390176  | 3669.427  | 3401.296  |
| AK021736  | 623.861  | 481.986  | NM_016106 | 5540.838  | 7014.812  | AL137356  | 1183.018  | 1120.95   |
| AF131834  | 573.848  | 1012.064 | NM_014570 | 6824.285  | 7537.831  | AL137547  | 1122.866  | 987.726   |
| AL355711  | 1517.642 | 1876.329 | NM_014747 | 8174.923  | 13051.564 | AK021994  | 1464.972  | 1458.817  |
| AK025851  | 1185.571 | 1578.85  | Y19240    | 6582.336  | 7168.625  | Z70763    | 935.176   | 574.349   |
| AJ011409  | 21038.39 | 22981.97 | X97074    | 9649.808  | 8701.726  | AK023802  | 10719.169 | 9778.948  |
| U17633    | 526.38   | 653.264  | NM_004135 | 3380.085  | 2668.687  | AF086103  | 927.088   | 814.39    |
| L10404    | 985.184  | 1404.902 | NM_000203 | 385.58    | 612.902   | AL080135  | 954.326   | 953.398   |
| AF283776  | 8985.981 | 8510.146 | NM_013443 | 2599.93   | 1885.371  | AK023158  | 1723.685  | 1284.794  |
| L10123    | 12097.31 | 13227.9  | NM_000925 | 12803.909 | 13012.378 | AK000580  | 655.663   | 1228.356  |
| D16877    | 1950.766 | 1884.285 | NM_000465 | 2420.833  | 2938.286  | AF085852  | 3206.144  | 6758.31   |
| AL049992  | 399.887  | 332.872  | NM_000123 | 7714.458  | 9549.086  | AK023952  | 1746.526  | 2526.648  |
| AL109781  | 1104.727 | 1276.48  | AL137501  | 1256.661  | 1081.099  | AK000787  | 804.037   | 1228.51   |
| AK021712  | 529.602  | 362.556  | BE858979  | 1138.352  | 885.28    | AF090885  | 20328.473 | 27072.584 |
| AK000036  | 8601.896 | 9244.814 | NM_000122 | 3409.882  | 3054.942  | AF161342  | 448.672   | 895.484   |
| AK000769  | 675.246  | 679.183  | NM_006712 | 62009.344 | 70730.133 | NM_016646 | 390.086   | 816.404   |
| AK022252  | 526.893  | 557.624  | NM_006240 | 2903.243  | 2677.274  | NM_014082 | 1963.41   | 2268.747  |
| AK000114  | 2508.138 | 2751.539 | NM_007026 | 5809.476  | 5199.548  | AF100636  | 455.075   | 977.349   |
| AK000952  | 1099.247 | 1238.902 | M37712    | 23048.174 | 28319.777 | AK022197  | 912.458   | 1396.958  |
| AK024520  | 5548.615 | 4772.539 | NM_002648 | 963.837   | 842.326   | AK021970  | 406.591   | 1404.502  |
| AK024904  | 2319.933 | 2840.018 | AF070670  | 7994.814  | 7613.609  | AK022066  | 46112.27  | 44954.988 |
| AK025030  | 808.614  | 493.145  | NM_016156 | 6270.63   | 6191.641  | AK022224  | 1344.488  | 1392.462  |
| AK024542  | 1837.966 | 1617.378 | NM_016528 | 2180.905  | 2431.666  | AK022359  | 928.607   | 866.007   |
| AB050477  | 4965.841 | 5052.479 | NM_015974 | 4438.179  | 4401.842  | AK022000  | 939.813   | 991.866   |
| AK000152  | 848.356  | 842.448  | NM_014384 | 5152.998  | 5986.563  | AK022129  | 1634.109  | 1926.203  |
| AK024300  | 596.266  | 1061.912 | NM_002573 | 7702.943  | 7900.622  | AK022263  | 2164.867  | 2512.938  |
| L09092    | 917.341  | 993.41   | AL133037  | 1413.971  | 1552.879  | AK022384  | 1298.2    | 1235.985  |
| NM_012132 | 3657.278 | 3824.638 | NM_020350 | 4157.199  | 4091.917  | AK022404  | 680.252   | 1167.113  |
| NM_012129 | 1474.332 | 1642.96  | NM_000350 | 2702.38   | 1970.766  | AK000257  | 1056.986  | 1741.928  |
| AK024881  | 591.447  | 713.586  | X91103    | 8560.3    | 6230.769  | NM_006160 | 4730.6    | 8354.376  |
| AK025716  | 1428.478 | 1364.753 | AA419164  | 1440.809  | 1310.055  | NM_000529 | 457.451   | 1318.872  |
| AF086202  | 19891.14 | 21862.4  | BE910395  | 1475.516  | 1228.997  | AL110159  | 1197.124  | 2418.303  |
| AF085979  | 23693.99 | 32677.73 | N46828    | 2736.208  | 2516.522  | AF009259  | 809.487   | 1763.02   |
| AK023112  | 1879.581 | 1917.432 | BI908302  | 19755.984 | 17728.861 | AF009260  | 871.005   | 1558.786  |
| NM_017806 | 15266.1  | 25811.27 | AA460969  | 4608.281  | 4779.962  | NM_003079 | 5283.259  | 9153.89   |
| NM_014702 | 873.941  | 590.955  | BG695859  | 1187.986  | 1247.089  | NM_017902 | 4048.866  | 6288.509  |
| AK001937  | 6231.571 | 10596.77 | M85079    | 4068.105  | 3628.004  | AK021981  | 862.504   | 1065.397  |
| AL365517  | 734.618  | 839.22   | AA457671  | 14698.788 | 12521.682 | NM_017726 | 1754.796  | 3793.61   |
| AK021988  | 6387.207 | 7566.443 | X07437    | 7394.85   | 10800.583 | AK026716  | 1042.422  | 2112.408  |
| AF086494  | 28664.16 | 37697.27 | NM_000641 | 1814.788  | 2143.43   | AL049325  | 5255.538  | 11084.907 |
| BI769977  | 1374.729 | 1586.022 | AE006466  | 6466.239  | 6312.932  | AK024154  | 7280.213  | 10241.618 |
| AL137567  | 1519.765 | 1726.486 | BC008737  | 58985.41  | 56851.418 | AF086341  | 1397.246  | 2236.513  |
| AK024913  | 2693.917 | 5168.13  | BC011655  | 8478.251  | 6085.363  | AK024164  | 24702.574 | 38078.266 |
| AB007961  | 883.097  | 1383.537 | BC002396  | 5574.606  | 6149.328  | AF052130  | 13735.93  | 16332.25  |
| NM_005547 | 1242.515 | 1897.605 | NM_022095 | 1460.436  | 1769.354  | AF130090  | 22210.688 | 25474.629 |
| AF119862  | 17109.5  | 19764.02 | NM_000521 | 1231.186  | 1215.075  | AL096727  | 1605.437  | 2252.943  |
| U17628    | 1938.082 | 2106.563 | NM_014640 | 1735.232  | 1265.081  | AL080110  | 12026.421 | 13973.824 |
| AF119867  | 1826.689 | 1992.53  | Y10518    | 49676.316 | 42319.66  | NM_020425 | 1627.351  | 2806.511  |
| AL357205  | 9764.629 | 11159.25 | AF155135  | 14468.802 | 12609.842 | AK024076  | 2513.863  | 2871.845  |

|           |          |          |           |           |           |           |           |           |
|-----------|----------|----------|-----------|-----------|-----------|-----------|-----------|-----------|
| AF124819  | 3922.992 | 6641.332 | NM_01479C | 1455.251  | 1269.918  | M87940    | 1772.484  | 1645.199  |
| D17091    | 3546.798 | 3331.123 | NM_003571 | 9729.79   | 7889.749  | L77588    | 1412.111  | 2029.49   |
| AL133074  | 2987.078 | 3024.071 | NM_02037C | 1274.332  | 1336.262  | AF086304  | 20075.193 | 34151.656 |
| AF086318  | 998.313  | 1349.69  | NM_004767 | 1397.777  | 1170.872  | AB032976  | 2057.237  | 3137.777  |
| AF088012  | 1481.677 | 1504.429 | BF310159  | 10527.257 | 10311.67  | AF301222  | 24343.238 | 16437.439 |
| NM_018121 | 2677.639 | 1752.553 | NM_00031E | 640.335   | 932.916   | AJ131606  | 674.022   | 1051.717  |
| NM_014191 | 471.459  | 823.396  | NM_01898E | 2158.448  | 2108.481  | NM_00073Z | 62004.328 | 68765.711 |
| AK026708  | 3879.403 | 5872.327 | AB044934  | 425.468   | 349.141   | AF130044  | 1383.736  | 2938.595  |
| NM_01790Z | 6674.135 | 6671.923 | U27655    | 3212.542  | 3131.22   | AF116709  | 520.401   | 1194.698  |
| NM_018074 | 3489.717 | 4517.785 | NM_00336C | 2486.546  | 2677.11   | AF087980  | 2726.36   | 6299.242  |
| NM_00090E | 6052.517 | 9135.224 | Z21965    | 42820.555 | 40046.398 | NM_01393E | 937.251   | 596.388   |
| U31737    | 754.833  | 1054.007 | NM_012427 | 1052.222  | 1603.149  | AB038651  | 4570.535  | 6910.115  |
| AK024828  | 3354.137 | 3585.979 | AF131857  | 8728.706  | 10942.188 | X84838    | 985.577   | 1246.811  |
| AF009315  | 2944.184 | 2981.533 | NM_00085Z | 30190.094 | 29579.279 | NM_01394C | 510.122   | 678.103   |
| NM_01901Z | 2855.11  | 4062.909 | NM_00039E | 937.311   | 1175.673  | AL117643  | 1654.323  | 1201.564  |
| NM_00678Z | 864.218  | 748.746  | AW797282  | 1010.395  | 1053.92   | AF069135  | 2127.051  | 1320.346  |
| L37711    | 1182.714 | 752.929  | NM_00240Z | 567.273   | 515.975   | AK026524  | 1066.915  | 998.876   |
| S70313    | 5266.352 | 7796.39  | L09070    | 2584.833  | 1926.029  | AB011157  | 8917.833  | 5799.134  |
| AK021607  | 4072.325 | 4181.29  | NM_00006Z | 15292.896 | 17640.719 | U17632    | 1235.083  | 1117.461  |
| AK025860  | 1112.257 | 1704.348 | NM_00959C | 7111.724  | 8579.876  | AK026764  | 4474.423  | 3114.988  |
| L09268    | 511.986  | 610.686  | NM_01610E | 5282.271  | 5610.023  | AF113700  | 3916.715  | 4319.724  |
| NM_02018E | 9373.788 | 10125.1  | NM_01457C | 6001.574  | 4991.968  | AF086223  | 1036.396  | 526.659   |
| AK022424  | 584.067  | 526.702  | NM_014747 | 7641.385  | 11693.551 | AK024986  | 949.14    | 469.489   |
| AJ272196  | 15397.23 | 21732.78 | Y19240    | 5824.898  | 6218.833  | AK026730  | 1555.983  | 368.05    |
| X58162    | 648.689  | 698.565  | AF091029  | 10136.063 | 9799.24   | AK024739  | 2769.208  | 1984.73   |
| AK022825  | 662.952  | 604.552  | X97074    | 35855.246 | 27299.414 | AK098681  | 1960.133  | 3302.877  |
| CY3Cy5    | 3523.233 | 168.056  | AL117235  | 846.807   | 913.133   | AK026772  | 1054.826  | 2595.261  |
| L35251    | 3162.564 | 3836.699 | NM_01482Z | 4022.973  | 4234.703  | NM_01426C | 17269.969 | 29193.398 |
| BE910395  | 960.262  | 1237.176 | NM_00529E | 2507.813  | 2748.329  | AK026458  | 1729.466  | 2869.891  |
| N46828    | 776.458  | 848.846  | NM_001337 | 599.747   | 605.279   | AK022266  | 937.792   | 1330.895  |
| BI908302  | 3107.87  | 3692.362 | NM_003611 | 4250.282  | 4558.333  | CY3Cy5    | 16508.367 | 2238.108  |
| AA460969  | 4542.728 | 5479.981 | AB014538  | 2266.733  | 2826.242  | M74220    | 694.107   | 1089.621  |
| BG695859  | 626.462  | 1065.504 | NM_00620E | 1216.71   | 1697.288  | M23254    | 832.206   | 1205.924  |
| M85079    | 1107.788 | 1396.587 | AK025118  | 6373.275  | 7391.654  | BE618539  | 932.717   | 1098.608  |
| AA457671  | 9986.105 | 14878.52 | NM_000727 | 1904.332  | 2316.49   | R28062    | 3616.72   | 3446.029  |
| X07437    | 689.313  | 739.985  | NM_002621 | 717.347   | 681.858   | AI627464  | 781.495   | 660.777   |
| NM_000641 | 1493.881 | 1418.518 | NM_00538E | 11969.149 | 12836.67  | BI756258  | 4948.278  | 4187.534  |
| AE006466  | 2693.923 | 1990.664 | NM_01898E | 3360.3    | 3076.061  | AI342225  | 66420.063 | 69282.258 |
| BC008737  | 28608.76 | 30961.49 | NM_006074 | 38488.375 | 31922.902 | AA634103  | 66689.102 | 71572.602 |
| BC011655  | 4784.728 | 8070.348 | AF208232  | 16777.402 | 14573.495 | J04599    | 816.524   | 751.335   |
| BC002396  | 3634.061 | 3692.166 | NM_00298E | 10227.458 | 10392.943 | AF110020  | 1161.12   | 894.073   |
| NM_02209E | 2272.624 | 1778.886 | NM_00418E | 2031.748  | 1757.468  | AA608557  | 10245.772 | 6286.448  |
| SR2       | 46750.61 | 32008.41 | NM_01625E | 8834.21   | 7170.064  | AL050095  | 6902.475  | 6004.354  |
| SR4       | 13824.67 | 8889.439 | AB014542  | 6602.894  | 7176.436  | NM_00049E | 787.932   | 669.631   |
| SR6       | 2210.253 | 1190.023 | AF070670  | 7762.964  | 5449.384  | NM_000664 | 1914.094  | 1331.684  |
| SR8       | 7512.866 | 13228.6  | NM_01615E | 5860.352  | 4452.818  | SR5       | 11342.564 | 8681.683  |
| SR10      | 25084.52 | 6091.637 | NM_01652E | 1958.19   | 2027.415  | SR9       | 30232.047 | 4455.366  |
| CY3Cy5    | 2252.75  | 140.625  | NM_015974 | 4749.674  | 4097.285  | CY3Cy5    | 7158.449  | 275.658   |
| NM_02037C | 1312.982 | 941.914  | NM_014384 | 5998.954  | 7008.147  | NM_01480E | 3597.393  | 3001.694  |
| NM_004767 | 396.316  | 703.937  | NM_00257Z | 8620.694  | 10529.904 | AB006627  | 1025.373  | 758.877   |
| BF310159  | 7730.043 | 8703.66  | AF133424  | 4128.191  | 3835.146  | NM_00041E | 8938.079  | 6950.969  |
| NM_01898E | 2923.544 | 3090.213 | NM_00500Z | 30533.26  | 29660.781 | NM_00296E | 2908.808  | 1268.557  |
| AB044934  | 699.928  | 619.632  | AF084560  | 12884.787 | 20990.705 | AB007883  | 1794.733  | 1491.837  |



|           |          |          |           |           |           |           |           |           |
|-----------|----------|----------|-----------|-----------|-----------|-----------|-----------|-----------|
| U27655    | 1273.241 | 1007.594 | NM_015715 | 896.792   | 1113.329  | AK093780  | 14205.171 | 10043.396 |
| NM_00336C | 1573.157 | 1667.693 | NM_000032 | 5549.474  | 5727.85   | NM_007037 | 27250.57  | 18016.029 |
| Z21965    | 3773.553 | 3778.873 | NM_002083 | 4577.729  | 4678.63   | NM_005492 | 2813.828  | 1718.912  |
| NM_012427 | 670.59   | 716.795  | NM_002035 | 9088.755  | 8948.243  | AF038196  | 3926.166  | 3427.787  |
| AF131857  | 10827.61 | 9822.363 | NM_01490C | 1568.254  | 1737.2    | NM_004859 | 14627.003 | 10793.438 |
| NM_000852 | 34009.5  | 36324.34 | BF342908  | 1340.548  | 1541.942  | NM_016352 | 1946.682  | 1521.335  |
| NM_000399 | 532.36   | 392.55   | AF118073  | 899.424   | 1120.301  | NM_005014 | 1063.381  | 778.308   |
| AW797282  | 587.231  | 792.341  | AK023510  | 7531.506  | 7954.635  | NM_00007C | 3162.318  | 2654.627  |
| NM_002402 | 562.271  | 698.368  | NM_004345 | 2868.568  | 3453.294  | NM_001202 | 2200.701  | 2213.571  |
| L09070    | 1474.275 | 1348.65  | X71490    | 16379.355 | 17151.504 | U34249    | 851.098   | 1241.415  |
| NM_000062 | 19444.11 | 16956.97 | AF257081  | 3321.554  | 3267.246  | NM_003289 | 60654.32  | 60145.488 |
| NM_00959C | 4975.639 | 5329.744 | NM_001688 | 31383.92  | 34214.512 | AI200114  | 1259.309  | 850.773   |
| AL133037  | 1597.706 | 1221.691 | NM_003631 | 710.695   | 1071.279  | NM_006323 | 17336.906 | 10599.867 |
| NM_02035C | 5376.285 | 2954.14  | NM_000219 | 1112.44   | 1371.848  | NM_016466 | 5213.209  | 3088.588  |
| NM_00035C | 422.434  | 437.179  | NM_002232 | 1449.541  | 1024.683  | NM_001493 | 11348.736 | 8942.263  |
| X91103    | 727.177  | 775.945  | NM_022095 | 1054.843  | 988.665   | NM_014841 | 922.551   | 1086.535  |
| AA419164  | 1370.547 | 1454.684 | AF112219  | 31321.26  | 46487.805 | NM_014426 | 16545.287 | 15623.525 |
| AL117235  | 681.188  | 646.183  | NM_004135 | 4210.068  | 4263.631  | NM_006816 | 39015.508 | 30130.57  |
| NM_014822 | 3097.799 | 2875.53  | NM_000203 | 738.604   | 1004.694  | NM_000258 | 25195.994 | 16241.124 |
| NM_005296 | 1519.744 | 1552.473 | NM_013443 | 3063.774  | 2384.49   | AB033055  | 10082.512 | 7395.07   |
| NM_001337 | 604.127  | 626.975  | NM_000925 | 14892.214 | 17424.559 | AF311287  | 5663.266  | 3548.083  |
| NM_003611 | 1528.219 | 1534.163 | NM_000465 | 2963.064  | 3656.492  | NM_003098 | 2081.037  | 1347.899  |
| AB014538  | 912.359  | 1103.44  | NM_000123 | 8408.604  | 10704.791 | NM_014781 | 5591.254  | 3171.971  |
| AK025118  | 4949.461 | 5990.23  | AL137501  | 1310.43   | 1619.71   | BU629989  | 1098.678  | 734.562   |
| NM_000727 | 644.479  | 831.376  | BE858979  | 1217.828  | 1185.354  | X87896    | 974.847   | 889.611   |
| NM_002621 | 562.617  | 377.846  | NM_006712 | 55354.07  | 66817.93  | M88310    | 2077.826  | 2009.106  |
| NM_005385 | 3649.276 | 3623.683 | NM_00624C | 3164.192  | 3409.906  | NM_000042 | 1867.135  | 2276.678  |
| NM_018985 | 1953.935 | 1970.533 | NM_007026 | 8365.728  | 10839.582 | AF035787  | 1381.923  | 1639.26   |
| NM_006074 | 11664.07 | 10048.74 | M37712    | 19254.307 | 13273.592 | NM_016335 | 933.082   | 738.685   |
| AF208232  | 10282.19 | 10042.55 | NM_002648 | 943.979   | 1043.267  | NM_003165 | 5506.271  | 4172.314  |
| NM_002988 | 1270.41  | 1227.277 | AW797282  | 750.251   | 646.775   | NM_003906 | 8770.277  | 6351.894  |
| NM_004186 | 460.652  | 534.585  | NM_002402 | 402.839   | 383.539   | AL359590  | 54571.027 | 41700.047 |
| NM_016258 | 5170.289 | 6595.935 | L09070    | 2416.879  | 1737.257  | NM_002861 | 8872.655  | 9288.642  |
| AF203032  | 1433.505 | 1328.073 | NM_000062 | 15764.468 | 16975.316 | NM_00308C | 5151.088  | 4883.107  |
| AB014542  | 2843.302 | 2009.083 | NM_00959C | 7387.6    | 8565.94   | NM_013268 | 1387.594  | 748.804   |
| NM_01464C | 1645.162 | 1805.67  | AL133037  | 1930.036  | 2740.736  | NM_002645 | 3236.822  | 2793.902  |
| Y10518    | 3008.521 | 3106.187 | NM_02035C | 4566.427  | 4487.542  | AB033027  | 2674.263  | 2148.573  |
| AF155135  | 7209.742 | 7073.527 | NM_00035C | 3207.902  | 2645.987  | AK021805  | 13819.935 | 11544.014 |
| NM_01479C | 919.584  | 918.017  | X91103    | 8509.967  | 7339.768  | AB014550  | 4823.418  | 3076.697  |
| NM_003571 | 1960.119 | 1712.409 | AA419164  | 1720.607  | 1729.151  | AF320294  | 5029.962  | 4068.498  |
| AB032965  | 4580.633 | 4242.983 | L35251    | 3751.929  | 3673.789  | AF320293  | 577.305   | 549.27    |
| AF133424  | 724.302  | 800.462  | BE910395  | 1861.602  | 1943.022  | AF161436  | 6975.287  | 4841.501  |
| NM_005003 | 20366.98 | 23706.45 | N46828    | 2739.466  | 2901.191  | NM_020402 | 3699.38   | 2609.003  |
| AF084560  | 2278.202 | 3137.995 | BI908302  | 16626.402 | 15293.916 | NM_004299 | 2578.345  | 2479.331  |
| NM_015715 | 293.854  | 436.165  | AA460969  | 5318.028  | 5006.249  | NM_001171 | 1690.718  | 2074.249  |
| NM_000032 | 1757.893 | 1779.4   | BG695859  | 1351.193  | 1199.273  | NM_00225C | 6372.147  | 5403.723  |
| NM_002083 | 1000.578 | 1043.762 | M85079    | 5350.569  | 4068.347  | NM_006478 | 3223.085  | 3085.082  |
| NM_002035 | 6449.436 | 6878.652 | AA457671  | 15945.055 | 14377.462 | AF132734  | 23259.721 | 15194.694 |
| NM_01490C | 557.616  | 606.82   | X07437    | 6331.162  | 6348.88   | NM_018379 | 2378.848  | 2039.883  |
| BF342908  | 170.218  | 286.44   | NM_000641 | 1833.824  | 2211.935  | NM_016403 | 33062.66  | 21423.873 |
| AF118073  | 776.698  | 853.397  | AE006466  | 6057.569  | 6120.669  | NM_015603 | 2570.33   | 1711.2    |
| AK023510  | 4660.565 | 4461.451 | BC008737  | 53266.555 | 61219.473 | NM_001921 | 13339.178 | 11313.938 |
| NM_004345 | 972.645  | 1104.455 | BC011655  | 8468.378  | 5796.322  | NM_00623C | 13896.35  | 16614.074 |

|           |          |          |           |           |           |           |           |           |
|-----------|----------|----------|-----------|-----------|-----------|-----------|-----------|-----------|
| X71490    | 6053.456 | 6387.841 | BC002396  | 5762.859  | 5298.419  | NM_014696 | 5837.308  | 5735.889  |
| AF257081  | 398.141  | 374.512  | AF208232  | 13564.453 | 9840.564  | NM_013406 | 19614.301 | 17277.131 |
| NM_001686 | 24718.43 | 21008.31 | NM_002986 | 7625.164  | 6261.89   | AK026257  | 4994.758  | 4871.302  |
| NM_003631 | 819.901  | 689.82   | NM_004186 | 2213.663  | 2031.573  | AK023836  | 10036.209 | 8613.599  |
| NM_002232 | 775.213  | 831.662  | NM_016256 | 8267.294  | 5298.319  | NM_018106 | 4853.944  | 3338.132  |
| NM_016106 | 4894.741 | 3560.473 | AF203032  | 4187.216  | 4099.827  | AJ299442  | 7762.46   | 6155.317  |
| NM_014576 | 5053.69  | 3623.566 | AB014542  | 9486.285  | 9247.288  | NM_000126 | 3912.388  | 2972.902  |
| NM_014747 | 3682.795 | 2708.083 | NM_014646 | 2170.542  | 2408.899  | NM_003762 | 9184.715  | 9807.06   |
| Y19240    | 4417.03  | 4270.087 | Y10518    | 50800.742 | 52840.879 | NM_018446 | 7219.4    | 7581.95   |
| AF091029  | 1299.412 | 1277.499 | AF155135  | 15202.679 | 12701.691 | NM_000187 | 1869.683  | 2451.732  |
| X97074    | 2328.743 | 2636.393 | NM_014796 | 1658.023  | 1615.735  | NM_014465 | 2308.149  | 2753.351  |
| NM_004135 | 4313.593 | 5241.263 | NM_003571 | 10397.119 | 8881.479  | D87292    | 1882.815  | 1690.539  |
| NM_000203 | 413.824  | 349.225  | AB032965  | 50063.512 | 47058.078 | NM_005496 | 2536.287  | 2483.419  |
| NM_013443 | 1664.69  | 1988.584 | NM_020376 | 1724.209  | 1634.96   | NM_001202 | 2392.28   | 1386.056  |
| NM_000925 | 12252.51 | 9407.441 | NM_004767 | 1424.945  | 1570.967  | NM_003286 | 38871.828 | 30088.955 |
| NM_000465 | 2165.405 | 2436.433 | BF310159  | 10135.191 | 10311.706 | M23254    | 997.924   | 1311.019  |
| NM_000123 | 6069.032 | 6172.624 | NM_018986 | 2116.024  | 2223.074  | BE618539  | 914.61    | 1272.375  |
| AL137501  | 926.379  | 900.214  | AB044934  | 552.736   | 513.721   | R28062    | 3549.441  | 3404.088  |
| NM_006712 | 30115.21 | 29148.01 | U27655    | 3131.392  | 2943.04   | AI627464  | 1195.191  | 1805.895  |
| NM_006246 | 612.993  | 566.393  | NM_003366 | 2334.894  | 2430.734  | BI756258  | 4736.977  | 4680.684  |
| NM_007026 | 2593.487 | 3397.446 | Z21965    | 37694.418 | 33658.086 | J04599    | 842.811   | 1025.727  |
| M37712    | 12802.96 | 7176.209 | NM_012427 | 1031.475  | 1037.421  | AF110020  | 1084.932  | 712.024   |
| NM_002646 | 500.317  | 573.806  | NM_000852 | 28715.496 | 26334.854 | AA608557  | 8740.035  | 6314.705  |
| AF070670  | 2965.17  | 2855.425 | NM_000396 | 890.293   | 1041.385  | AL050095  | 5804.393  | 6179.375  |
| NM_016156 | 3824.875 | 4127.58  | AF257081  | 1944.878  | 2082.159  | NM_000496 | 806.226   | 1332.047  |
| NM_016526 | 1881.195 | 1524.52  | NM_001686 | 24631.18  | 19631.02  | NM_000664 | 1708.569  | 1837.139  |
| NM_015974 | 2726.024 | 3064.78  | NM_003631 | 574.482   | 486.916   | AF075085  | 66488.633 | 70265.68  |
| NM_014384 | 4119.633 | 4638.895 | NM_000216 | 660.153   | 767.1     | NM_005892 | 3301.162  | 2447.148  |
| NM_002573 | 9627.197 | 7985.361 | NM_002232 | 1157.946  | 610.937   | NM_000042 | 2749.574  | 1957.682  |
| AL133037  | 1590.525 | 1301.179 | NM_016106 | 5287.059  | 7542.62   | AF035787  | 1273.987  | 845.605   |
| NM_020356 | 5333.331 | 3525.627 | NM_014576 | 8102.803  | 12138.161 | NM_014806 | 2824.731  | 2957.577  |
| NM_000356 | 373.207  | 610.84   | NM_014747 | 7228.557  | 9217.836  | AB006627  | 538.526   | 994.151   |
| X91103    | 718.114  | 1004.737 | Y19240    | 5824.672  | 6645.095  | NM_000416 | 8115.307  | 7485.223  |
| AA419164  | 1464.716 | 1515.337 | AF091029  | 11344.254 | 10818.655 | NM_003382 | 574.474   | 1513.83   |
| L35251    | 3112.072 | 2573.6   | X97074    | 37896.457 | 28536.438 | NM_002965 | 3528.464  | 2799.011  |
| BE910395  | 969.893  | 1079.576 | AL117235  | 943.887   | 899.162   | AB007883  | 3483.296  | 2394.78   |
| N46828    | 731.766  | 757.531  | NM_014822 | 4489.885  | 6066.097  | AK093780  | 12003.75  | 7783.107  |
| BI908302  | 2966.364 | 2529.59  | NM_005296 | 2250.954  | 2490.013  | AY009397  | 66587.75  | 67639.047 |
| AA460969  | 3820.326 | 4010.487 | NM_001337 | 657.936   | 838.193   | NM_007037 | 20459.186 | 12254.271 |
| BG695859  | 593.454  | 713.75   | NM_003611 | 3900.383  | 4406.864  | NM_005492 | 3045.259  | 3824.038  |
| M85079    | 1005.359 | 1056.525 | AB014538  | 2637.975  | 2629.396  | AF038196  | 3964.579  | 7599.653  |
| AA457671  | 9200.219 | 9627.872 | NM_006206 | 734.246   | 1082.139  | NM_004856 | 13283.058 | 18156.033 |
| X07437    | 548.203  | 545.352  | AK025118  | 5930.406  | 6692.843  | NM_016352 | 1531.751  | 1088.409  |
| NM_000641 | 1412.945 | 1026.886 | NM_000727 | 1730.48   | 1564.795  | NM_005014 | 1276.223  | 1164.003  |
| AE006466  | 2702.913 | 1911.798 | NM_002621 | 581.439   | 450.093   | NM_006944 | 975.034   | 765.093   |
| BC008737  | 27717.82 | 25380.14 | NM_018986 | 3171.358  | 2659.114  | NM_000076 | 3049.027  | 2974.528  |
| BC011655  | 4591.279 | 7467.89  | NM_006074 | 28619.971 | 23067.605 | NM_002256 | 7589.775  | 4446.78   |
| BC002396  | 3290.39  | 3312.701 | NM_006712 | 58038.266 | 61874.883 | NM_006323 | 13960.084 | 10158.743 |
| NM_022095 | 2165.343 | 1571.364 | NM_006246 | 2907.207  | 2416.943  | NM_016466 | 3903.999  | 3735.933  |
| AF112219  | 19624.6  | 16364    | NM_007026 | 5812.497  | 4376.315  | NM_001493 | 11407.57  | 11732.727 |
| NM_014646 | 1786.298 | 1768.37  | M37712    | 17829.578 | 11545.562 | NM_014841 | 974.52    | 686.433   |
| Y10518    | 2996.143 | 3427.07  | NM_002646 | 1025.563  | 785.247   | NM_014426 | 14281.928 | 11162.048 |
| AF155135  | 6655.782 | 8075.235 | AF070670  | 9543.597  | 7572.389  | NM_006816 | 40412.164 | 23685.588 |

|           |          |          |           |           |           |           |           |           |
|-----------|----------|----------|-----------|-----------|-----------|-----------|-----------|-----------|
| NM_01479C | 996.837  | 977.732  | NM_01615E | 6774.454  | 5549.065  | AK026518  | 57770.234 | 45774.398 |
| NM_003571 | 1669.861 | 1882.472 | NM_01652E | 2410.583  | 2316.806  | NM_00025E | 21239.723 | 13714.39  |
| AB032965  | 3919.097 | 4174.278 | NM_015974 | 4832.956  | 4253.011  | AB033055  | 8067.021  | 9309.914  |
| NM_02037C | 1348.412 | 1010.292 | NM_014384 | 6030.609  | 5694.362  | AF311287  | 4557.985  | 5649.35   |
| NM_004767 | 468.656  | 540.842  | NM_002573 | 9858.825  | 8887.202  | NM_00309E | 1750.216  | 1918.028  |
| BF310159  | 7420.664 | 6341.787 | AF133424  | 4833.729  | 4425.729  | NM_014781 | 5256.344  | 4167.032  |
| NM_01898E | 2936.745 | 2802.337 | NM_005003 | 30600.641 | 30539.65  | BU629989  | 1270.734  | 1127.644  |
| AB044934  | 565.433  | 506.848  | AF084560  | 8920.698  | 7844.435  | X87896    | 1336.84   | 1314.112  |
| U27655    | 1082.667 | 695.934  | NM_01571E | 768.932   | 839.16    | M88310    | 2818.571  | 2666.239  |
| NM_00336C | 1515.573 | 1138.348 | NM_000032 | 6819.897  | 6429.086  | NM_01844E | 7600.797  | 5623.637  |
| Z21965    | 3214.59  | 3317.597 | NM_002083 | 4208.884  | 4303.118  | NM_000187 | 710.383   | 728.654   |
| NM_012427 | 614.47   | 573.061  | NM_00203E | 8250.505  | 8268.343  | NM_01446E | 1817.96   | 1416.473  |
| AF131857  | 10469.85 | 7720.945 | NM_01490C | 1608.964  | 1495.851  | D87292    | 2318.087  | 1337.35   |
| NM_000852 | 32627.46 | 31634.3  | BF342908  | 2825.045  | 2843.426  | NM_00549E | 1534.884  | 1360.725  |
| NM_00039E | 660.39   | 522.565  | AF118073  | 878.247   | 1132.567  | NM_01633E | 1131.974  | 903.444   |
| AW797282  | 657.454  | 664.324  | AK023510  | 7466.728  | 6909.499  | NM_00316E | 4734.047  | 3593.681  |
| NM_002402 | 552.356  | 477.598  | NM_00434E | 2855.364  | 2808.83   | NM_00390E | 9008.801  | 7906.406  |
| L09070    | 1596.837 | 1502.709 | NM_000702 | 41336.398 | 43508.176 | AL359590  | 47963.855 | 57697.398 |
| NM_000062 | 19787.12 | 16881.95 | X71490    | 13911.64  | 13647.377 | NM_002861 | 10782.221 | 9861.682  |
| NM_00959C | 5479.939 | 5310.197 | NM_014273 | 18995.688 | 15088.688 | NM_00308C | 5617.277  | 3733.112  |
| NM_01610E | 5434.434 | 4277.541 | AF039442  | 1501.625  | 1236.594  | NM_01326E | 1184.267  | 568.221   |
| NM_01457C | 5318.121 | 4729.278 | NM_00468C | 1268.71   | 1142.121  | NM_00264E | 2964.507  | 1492.603  |
| NM_014747 | 4259.119 | 3725.606 | AF104260  | 594.05    | 447.979   | AB033027  | 2548.883  | 2841.657  |
| Y19240    | 4598.559 | 4639.658 | NM_005671 | 2777.562  | 6416.113  | AF320293  | 2178.544  | 3678.668  |
| AF091029  | 1173.863 | 1217.62  | NM_01740E | 4854.791  | 5511.403  | AF161436  | 7336.911  | 7178.648  |
| X97074    | 2488.625 | 2943.898 | NM_01962E | 6835.772  | 6877.867  | NM_020402 | 4396.685  | 3942.84   |
| AL117235  | 614.192  | 484.197  | NM_00672E | 4856.348  | 5128.173  | NM_00429E | 2611.33   | 3221.273  |
| NM_014822 | 2853.823 | 2417.5   | NM_006071 | 1749.53   | 1878.874  | NM_001171 | 1701.044  | 1813.086  |
| NM_00529E | 1495.502 | 1199.247 | NM_01223E | 12000.685 | 12373.438 | NM_00049E | 727.026   | 571.619   |
| NM_001337 | 468.454  | 510.426  | AF112219  | 30214.775 | 28661.625 | NM_000664 | 1845.424  | 1556.946  |
| NM_003611 | 1320.91  | 1332.283 | NM_000521 | 797.082   | 1145.884  | AF075085  | 64097.516 | 57515.141 |
| AB014538  | 784.339  | 907.443  | NM_00413E | 4182.15   | 3621.607  | NM_005892 | 1957.248  | 1520.439  |
| AK025118  | 4304.673 | 3763.434 | NM_000203 | 859.424   | 1178.649  | NM_00647E | 3416.067  | 2732.505  |
| NM_000727 | 626.756  | 531.132  | NM_013443 | 3535.76   | 3076.249  | AF132734  | 21292.9   | 13703.915 |
| NM_002621 | 445.672  | 243.752  | NM_00092E | 14252.033 | 16943.379 | NM_01837E | 2500.035  | 1825.105  |
| NM_00538E | 3564.478 | 3032.214 | NM_00046E | 2941.793  | 3446.338  | NM_016403 | 32051.623 | 21835.361 |
| NM_01898E | 1818.665 | 1902.961 | NM_000123 | 8243.071  | 11501.568 | NM_015603 | 2809.846  | 2598.045  |
| NM_006074 | 11255.9  | 9927.263 | AL137501  | 1361.208  | 1998.449  | NM_001921 | 11853.396 | 7000.12   |
| AF208232  | 10269.47 | 10398.98 | BE858979  | 937.367   | 1453.311  | NM_00623C | 12043.626 | 9729.965  |
| NM_00298E | 1061.466 | 1035.676 | NM_000122 | 3324.521  | 4459.775  | NM_01469E | 8073.929  | 5660.329  |
| NM_00418E | 524.413  | 500.993  | U87223    | 1033.747  | 803.557   | NM_01340C | 17519.01  | 9287.08   |
| NM_01625E | 5434.52  | 6771.939 | X91348    | 24891.09  | 18506.227 | AK026257  | 4455.327  | 2806.083  |
| AF203032  | 1623.243 | 1481.217 | Z36505    | 4140.063  | 2424.102  | AK023836  | 9859.479  | 7936.429  |
| AB014542  | 2744.823 | 2319.675 | NM_001854 | 3175.012  | 2125.941  | NM_00012E | 4380.7    | 3916.387  |
| AF070670  | 3189.117 | 3182.43  | NM_017913 | 2804.175  | 4751.182  | NM_003762 | 10356.278 | 10962.824 |
| NM_01615E | 3811.946 | 4783.209 | NM_00275E | 17620.643 | 29255.428 | NM_00485E | 8821.021  | 6569.153  |
| NM_01652E | 2115.858 | 2015.424 | NM_000924 | 8069.126  | 6944.977  | NM_005014 | 1185.751  | 872.834   |
| NM_015974 | 3404.522 | 3774.643 | NM_00333C | 13966.852 | 17726.619 | NM_00007C | 2425.088  | 1846.956  |
| NM_014384 | 4167.889 | 5104.83  | NM_002481 | 1380.098  | 1219.262  | NM_001202 | 1804.992  | 1493.276  |
| NM_002573 | 9433.686 | 9606.591 | NM_003647 | 2114.143  | 2527.532  | NM_00328E | 50264.328 | 40491.195 |
| AF133424  | 897.002  | 775.107  | NM_00169E | 48521.66  | 45518.25  | AI200114  | 684.236   | 811.778   |
| NM_005003 | 19390.55 | 21579.94 | AB006589  | 699.758   | 692.382   | M23254    | 922.262   | 1137.073  |
| AF084560  | 1948.802 | 2609.422 | NM_018351 | 1481.208  | 1388.615  | BE618539  | 1449.023  | 1050.738  |

|           |          |          |           |           |           |           |           |           |
|-----------|----------|----------|-----------|-----------|-----------|-----------|-----------|-----------|
| NM_015715 | 263.418  | 296.396  | AK023019  | 1319.08   | 921.702   | R28062    | 4228.798  | 2609.478  |
| NM_000032 | 1663.512 | 1790.231 | NM_147171 | 6635.327  | 9042.851  | AI627464  | 1153.664  | 574.582   |
| NM_002083 | 1118.698 | 782.112  | AF238083  | 14263.197 | 13746.473 | BI756258  | 5418.88   | 4173.002  |
| NM_002035 | 6326.101 | 5303.002 | NM_002962 | 721.064   | 1473.575  | AF110020  | 1262.215  | 1392.323  |
| NM_014900 | 661.02   | 601.978  | NM_016388 | 3677.305  | 5071.79   | AA608557  | 9960.029  | 7652.484  |
| AF118073  | 774.796  | 910.627  | AB046783  | 4323.129  | 4324.652  | AL050095  | 6704.938  | 7046.243  |
| AK023510  | 4760.587 | 4232.464 | NM_000845 | 1567.151  | 1743.176  | NM_003098 | 1882.855  | 1493.564  |
| NM_004345 | 826.725  | 756.223  | NM_014965 | 4030.47   | 4208.124  | NM_014781 | 5290.358  | 2678.154  |
| NM_000702 | 25652.5  | 25850.8  | NM_004882 | 19541.064 | 21906.527 | BU629989  | 835.498   | 696.907   |
| X71490    | 6109.615 | 6440.775 | AL390148  | 13727.528 | 16313.297 | X87896    | 1233.381  | 786.566   |
| AF257081  | 555.866  | 445.219  | AK024055  | 1153.356  | 1674.668  | M88310    | 2738.73   | 2076.608  |
| NM_001688 | 26398.47 | 19195.76 | U10485    | 1044.347  | 848.385   | NM_000042 | 2530.938  | 1967.579  |
| NM_003631 | 897.082  | 967.374  | AK025326  | 19760.381 | 12651.462 | AF035787  | 1288.934  | 1154.707  |
| NM_000219 | 277.635  | 279.612  | NM_013376 | 1573.827  | 1321.969  | NM_014808 | 2889.978  | 2539.809  |
| NM_002232 | 1127.792 | 962.419  | NM_017964 | 1698.453  | 1228.347  | AB006627  | 1319.758  | 1032.818  |
| NM_022095 | 2100.15  | 1770.939 | NM_016428 | 3463.467  | 3101.026  | NM_000416 | 8600.778  | 5801.405  |
| AF112219  | 20247.91 | 20811.68 | NM_016039 | 18320.205 | 14459.261 | NM_002965 | 3299.414  | 1419.753  |
| NM_004135 | 4350.679 | 4389.943 | NM_015530 | 11816.61  | 12960.212 | AB007883  | 3759.427  | 2525.032  |
| NM_000203 | 662.231  | 437.556  | NM_016238 | 5392.307  | 7847.854  | NM_005492 | 2128.134  | 2040.094  |
| NM_013443 | 1464.293 | 1951.054 | NM_001758 | 1082.705  | 1185.436  | AF038196  | 4136.861  | 5232.752  |
| NM_000925 | 11505.96 | 8133.744 | BE546276  | 1257.072  | 1208.265  | AF320294  | 2484.693  | 2161.238  |
| NM_000465 | 2248.3   | 2035.279 | NM_004725 | 19301.447 | 19339.861 | AF161436  | 6725.936  | 4445.398  |
| NM_000123 | 5985.479 | 5112.159 | NM_015997 | 5737.161  | 6367.071  | NM_020402 | 3218.535  | 1752.079  |
| AL137501  | 1003.67  | 1039.431 | NM_001167 | 9126.567  | 8805.549  | NM_004299 | 2993.987  | 2147.167  |
| NM_000122 | 3170.878 | 3024.67  | NM_012115 | 6119.776  | 6484.619  | NM_001171 | 950.586   | 688.533   |
| NM_006712 | 33363.56 | 29368.88 | NM_004933 | 26735.537 | 31741.051 | NM_002250 | 9941.278  | 12255.211 |
| NM_006240 | 379.937  | 483.731  | M96577    | 14449.922 | 20250.582 | NM_006323 | 17536.551 | 15277.735 |
| NM_007026 | 2704.146 | 3481.844 | NM_013258 | 15337.732 | 16753.795 | NM_016466 | 5029.593  | 2917.373  |
| M37712    | 13664.46 | 8520.713 | NM_003842 | 3863.89   | 4607.63   | NM_001493 | 13946.869 | 7940.987  |
| NM_002648 | 482.547  | 581.276  | L11238    | 12406.846 | 13039.514 | AK026518  | 66178.242 | 66087.938 |
| AW797282  | 695.646  | 658.137  | AK025684  | 1437.576  | 1709.28   | NM_000258 | 28112.416 | 26916.498 |
| NM_002402 | 612.554  | 603.418  | NM_012205 | 3406.041  | 3957.388  | AB033055  | 12520.136 | 12846.548 |
| L09070    | 1338.714 | 1246.046 | K02046    | 3064.076  | 4506.688  | AF311287  | 7335.596  | 6410.999  |
| NM_000062 | 20164.52 | 20042.31 | AL110151  | 10464.549 | 10810.096 | AJ299442  | 7466.095  | 4569.003  |
| NM_009590 | 4851.396 | 4927.87  | NM_004995 | 5687.845  | 4588.766  | NM_000129 | 3520.106  | 1953.644  |
| AL133037  | 1507.889 | 1058.824 | NM_007231 | 1950.302  | 2294.749  | NM_003762 | 13597.343 | 19363.24  |
| NM_020350 | 5297.019 | 3238.935 | NM_001190 | 6335.413  | 7126.304  | NM_018446 | 7846.533  | 14492.45  |
| NM_000350 | 354.245  | 441.947  | NM_005271 | 13212.271 | 19756.686 | NM_000187 | 1551.783  | 1872.355  |
| X91103    | 917.287  | 918.935  | NM_015654 | 9507.464  | 10446.602 | NM_014465 | 2558.428  | 2725.692  |
| AA419164  | 1195.112 | 1216.223 | NM_012244 | 3508.614  | 3095.353  | D87292    | 2434.811  | 2345.06   |
| L35251    | 3244.677 | 2588.901 | NM_004341 | 1513.696  | 1808.802  | NM_005498 | 3268.39   | 5146.557  |
| BE910395  | 1005.581 | 918.54   | AB082521  | 8880.903  | 8442.14   | NM_016335 | 3569.183  | 4593.926  |
| N46828    | 858.041  | 661.296  | AL050182  | 2055.671  | 2387.671  | NM_003165 | 9283.577  | 8390.614  |
| BI908302  | 3232.326 | 2126.758 | NM_020040 | 1930.069  | 2506.094  | NM_003906 | 28829.035 | 22345.57  |
| AA460969  | 3982.712 | 3649.319 | NM_002374 | 2263.91   | 2433.532  | AL359590  | 56446.801 | 42255.496 |
| BG695859  | 742.524  | 825.182  | AK026940  | 4128.288  | 3571.065  | NM_003080 | 7885.269  | 10800.973 |
| M85079    | 786.848  | 757.025  | AF155117  | 5724.225  | 4746.311  | NM_002645 | 3524.312  | 4952.909  |
| AA457671  | 9002.998 | 9211.669 | AB014527  | 1073.09   | 1131.308  | AB033027  | 3467.945  | 6715.089  |
| X07437    | 679.307  | 610.344  | NM_004411 | 2322.419  | 2673.503  | AK021805  | 21344.752 | 33438.805 |
| NM_000641 | 1421.003 | 1049.706 | NM_015938 | 7505.449  | 7005.114  | AB014550  | 5384.795  | 6199.529  |
| AE006466  | 2628.029 | 1758.423 | NM_000740 | 584.827   | 622.848   | NM_006826 | 31978.584 | 17282.938 |
| BC008737  | 28614.67 | 26669.42 | NM_017843 | 2773.758  | 1676.303  | AB007973  | 16527.307 | 9864.917  |
| BC011655  | 4907.804 | 7951.174 | AK025985  | 6866.688  | 13000.503 | M96843    | 9963.268  | 11144.84  |

|           |          |          |           |           |           |           |           |           |
|-----------|----------|----------|-----------|-----------|-----------|-----------|-----------|-----------|
| BC002396  | 3633.266 | 3891.395 | NM_013256 | 2337.137  | 1965.387  | NM_017791 | 1867.809  | 2695.268  |
| AF208232  | 10349.17 | 10691.46 | NM_004143 | 1722.696  | 1210.409  | NM_005882 | 16397.432 | 23260.48  |
| NM_002988 | 1410.583 | 1469.255 | X66087    | 930.976   | 630.312   | BC012304  | 14158.573 | 15674.78  |
| NM_004186 | 520.99   | 552.683  | NM_016328 | 9732.328  | 7143.818  | AB046815  | 6230.067  | 5953.686  |
| NM_016258 | 5606.979 | 6982.875 | NM_017544 | 21418.504 | 17310.475 | AF075085  | 66365.055 | 65593.383 |
| AF203032  | 1130.326 | 980.454  | NM_003153 | 2150.751  | 1769.553  | NM_005892 | 3711.076  | 3909.437  |
| AB014542  | 2949.292 | 2157.044 | NM_014707 | 1823.064  | 2888.482  | NM_006478 | 4500.235  | 8058.996  |
| NM_014640 | 1537.982 | 1658.105 | AF025771  | 2609.101  | 2539.677  | AF132734  | 31668.07  | 51352.883 |
| Y10518    | 3107.688 | 3734.787 | NM_018215 | 898.516   | 1170.997  | NM_018379 | 3980.939  | 4334.283  |
| AF155135  | 6640.926 | 8014.98  | AB033110  | 1527.208  | 2386.898  | NM_016403 | 41295.305 | 31806.543 |
| NM_014790 | 1016.979 | 914.839  | NM_005083 | 32098.217 | 26327.529 | NM_015603 | 3287.552  | 3735.108  |
| NM_003571 | 1882.502 | 1813.623 | NM_007187 | 17976.926 | 14782.368 | NM_018109 | 6150.407  | 8528.595  |
| AB032965  | 4253.493 | 3960.417 | NM_018983 | 15370.15  | 15768.61  | NM_005076 | 10856.635 | 6635.427  |
| NM_020370 | 1344.067 | 641.996  | NM_003096 | 12240.274 | 16192.534 | AF253321  | 3204.585  | 3193.306  |
| NM_004767 | 474.581  | 306.539  | NM_007279 | 5624.521  | 6225.893  | U80735    | 7665.375  | 10511.266 |
| BF310159  | 6793.19  | 4841.12  | BE390833  | 22489.721 | 20911.125 | NM_017850 | 5215.369  | 6514.248  |
| NM_018986 | 2527.023 | 2500.718 | NM_004730 | 11990.565 | 11944.485 | NM_016522 | 1672.974  | 2059.395  |
| AB044934  | 543.146  | 362.364  | NM_000801 | 4298.242  | 4693.844  | NM_002224 | 5107.997  | 6917.126  |
| U27655    | 1049.62  | 761.304  | NM_006115 | 18208.924 | 18271.449 | X07979    | 56190     | 59230     |
| NM_003360 | 1630.853 | 1375.616 | NM_005801 | 4390.411  | 4288.497  | NM_003874 | 1869.625  | 2581.308  |
| Z21965    | 3504.355 | 3292.911 | NM_018198 | 3370.63   | 3054.386  | NM_000082 | 3552.47   | 3609.023  |
| NM_012427 | 620.85   | 524.363  | NM_001539 | 21578.586 | 21543.109 | L13857    | 2423.177  | 2908.873  |
| NM_000852 | 33510.6  | 34174.65 | AK027232  | 17697.717 | 17700.258 | NM_018098 | 12309.925 | 14008.244 |
| NM_000399 | 724.321  | 477.416  | NM_012204 | 512.015   | 504.582   | AF286164  | 2821.332  | 4409.409  |
| AF257081  | 454.844  | 401.914  | AK091117  | 440.755   | 476.005   | AF146277  | 11758.167 | 11850.213 |
| NM_001688 | 26018.76 | 22582.92 | NM_003613 | 1058.891  | 853.842   | NM_002559 | 1092.617  | 869.211   |
| NM_003631 | 940.758  | 784.026  | NM_000022 | 50592.656 | 37140.215 | M37191    | 17167.592 | 16993.543 |
| NM_002232 | 835.764  | 695.238  | NM_004213 | 1873.483  | 1717.841  | NM_005242 | 2107.011  | 2165.612  |
| NM_016106 | 5479.693 | 3969.664 | NM_001929 | 52720.258 | 57545.355 | NM_001114 | 3030.56   | 4287.919  |
| NM_014570 | 5294.359 | 4018.973 | NM_000906 | 2048.286  | 2458.274  | U44954    | 1551.321  | 2390.509  |
| NM_014747 | 3921.578 | 3410.438 | NM_000480 | 8865.738  | 10733.993 | X82240    | 3929.981  | 2252.021  |
| Y19240    | 4806.534 | 4697.255 | AF254084  | 42593.824 | 38495.371 | NM_013995 | 12242.869 | 16086.998 |
| AF091029  | 1399.681 | 1510.707 | AK022648  | 601.842   | 577.366   | NM_004455 | 1149.632  | 2067.845  |
| X97074    | 2493.944 | 3011.899 | AK022976  | 1907.706  | 1671.374  | NM_006010 | 27573.303 | 26275.857 |
| AL117235  | 556.272  | 534.355  | AB048791  | 9396.586  | 12033.033 | K03191    | 3978.063  | 5718.537  |
| NM_014822 | 2852.937 | 1965.897 | NM_003107 | 17231.934 | 15748.548 | NM_005079 | 29025.582 | 50807.469 |
| NM_005296 | 1526.596 | 1028.534 | NM_006874 | 5362.617  | 4907.791  | NM_005192 | 61554.84  | 57391.844 |
| NM_001337 | 549.798  | 307.415  | AB046777  | 4618.926  | 5010.699  | NM_004585 | 3889.358  | 4572.072  |
| NM_003611 | 1462.478 | 1095.807 | AJ251844  | 4043.715  | 3425.503  | NM_015032 | 7565.33   | 6026.092  |
| AB014538  | 764.893  | 696.899  | D16815    | 2067.729  | 2749.578  | AK022956  | 7343.551  | 9298.051  |
| AK025118  | 4652.909 | 4307.239 | NM_001880 | 3668.207  | 4264.308  | AK023121  | 2091.278  | 2483.092  |
| NM_000727 | 565.739  | 522.819  | AB028943  | 1136.175  | 1244.962  | NM_014104 | 53786.469 | 55747.246 |
| NM_002621 | 497.088  | 351.573  | NM_006194 | 1396.581  | 1404.845  | NM_002392 | 3859.218  | 4407.037  |
| NM_018985 | 2186.514 | 2120.152 | AK001603  | 5351.721  | 4792.685  | NM_002749 | 59532.668 | 63423.715 |
| NM_006074 | 11607.05 | 12981.16 | U71601    | 2093.746  | 2278.525  | NM_018216 | 12651.033 | 16421.641 |
| NM_006712 | 36788.5  | 40897.1  | AF042838  | 1476.759  | 1360.052  | NM_003390 | 4558.753  | 6408.422  |
| NM_006240 | 814.193  | 820.284  | AL137511  | 661.77    | 552.232   | AL137747  | 6322.255  | 4737.41   |
| NM_007026 | 3036.757 | 4353.139 | AF075031  | 1637.917  | 856.879   | NM_018338 | 1311.778  | 2052.402  |
| M37712    | 13700.27 | 9007.187 | AF075062  | 11255.142 | 8113.477  | NM_018214 | 3357.562  | 3791.54   |
| NM_002648 | 445.897  | 579.637  | NM_004188 | 1134.422  | 1070.535  | AL133644  | 16821.938 | 19505.434 |
| AF070670  | 3068.481 | 3276.508 | AF147381  | 9330.722  | 8093.569  | NM_002706 | 4624.205  | 6262.875  |
| NM_016156 | 4342.572 | 4962.632 | AB002452  | 1182.434  | 1415.708  | NM_019023 | 66823.18  | 67150.773 |
| NM_016528 | 2510.172 | 2448.437 | AK027101  | 23180.047 | 21409.123 | NM_004420 | 2170.048  | 4471.213  |

|           |          |          |           |           |           |           |           |           |
|-----------|----------|----------|-----------|-----------|-----------|-----------|-----------|-----------|
| NM_015974 | 3819.577 | 3707.126 | AF010236  | 1441.05   | 1589.9    | NM_002970 | 1831.907  | 3118.926  |
| NM_014384 | 4661.959 | 5765.332 | AK024358  | 791.14    | 531.176   | NM_005499 | 28367.18  | 31034.465 |
| NM_002573 | 10058.01 | 9197.905 | AF088075  | 1639.859  | 1551.789  | NM_013270 | 1155.211  | 1290.963  |
| AF133424  | 857.189  | 712.351  | AK026376  | 4958.594  | 4851.292  | NM_015387 | 14213.587 | 18577.75  |
| NM_005003 | 20170.01 | 20687.38 | AF088061  | 3136.218  | 3555.723  | NM_001733 | 6921.425  | 8301.321  |
| AF084560  | 2061.923 | 2136.339 | AF086425  | 807.459   | 721.817   | NM_005065 | 2410.8    | 3652.078  |
| NM_000032 | 1770.868 | 1559.365 | AF086286  | 3131.087  | 2954.002  | NM_017825 | 29778.861 | 23980.658 |
| NM_002083 | 1624.445 | 1111.63  | AF086376  | 2752.18   | 2959.576  | NM_014035 | 6908.454  | 7213.977  |
| NM_002035 | 6210.97  | 5957.911 | AF086410  | 1062.152  | 1136.508  | NM_020122 | 29601.303 | 32455.688 |
| NM_014900 | 590.271  | 572.424  | AF086455  | 613.269   | 876.63    | NM_013432 | 14700.848 | 14640.068 |
| BF342908  | 265.203  | 247.373  | AK022997  | 9125.747  | 9653.915  | NM_002298 | 66963.344 | 63618.137 |
| AF118073  | 774.021  | 848.67   | NM_017617 | 2688.532  | 2684.245  | AK027130  | 2053.048  | 2445.274  |
| AK023510  | 4919.424 | 4056.435 | AF131830  | 1657.372  | 1890.836  | NM_005479 | 38450.086 | 45449.453 |
| NM_004345 | 1025.182 | 894.117  | NM_014811 | 842.379   | 1303.257  | NM_005730 | 60173.582 | 62527.27  |
| X71490    | 6814.604 | 7735.812 | AF147426  | 1822.915  | 1767.711  | NM_005392 | 3864.563  | 5426.812  |
| NM_014273 | 9342.683 | 18493.4  | BC019667  | 23848.898 | 16899.563 | AL133572  | 10209.725 | 13099.352 |
| AF039442  | 1479.174 | 2504.056 | AK026026  | 7988.627  | 5746.574  | AK022500  | 4937.098  | 5204.182  |
| NM_004680 | 863.826  | 1065.219 | AF085941  | 15760.423 | 14398.589 | BC021298  | 2050.659  | 2880.59   |
| AF104260  | 435.203  | 567.016  | Z69892    | 5587.436  | 6166.481  | U52096    | 11748.563 | 14187.477 |
| NM_005671 | 4793.127 | 2294.941 | AK023590  | 1058.197  | 1120.931  | AB013897  | 3141.177  | 4075.338  |
| NM_017409 | 4117.226 | 3667.522 | AF087961  | 1575.979  | 1041.335  | NM_005526 | 46509.695 | 54326.039 |
| NM_019625 | 1149.122 | 1380.374 | AL137309  | 2635.963  | 2380.485  | AK001669  | 4614.136  | 5862.738  |
| NM_006729 | 3496.243 | 3225.855 | AL137475  | 1383.932  | 1766.654  | NM_006195 | 1821.604  | 1886.413  |
| NM_006071 | 763.312  | 624.312  | AL161956  | 6009.976  | 6034.099  | NM_006190 | 26222.117 | 33069.07  |
| NM_012236 | 4254.327 | 4110.349 | AL390176  | 3314.319  | 3655.844  | NM_006368 | 10549.673 | 14710.375 |
| AF112219  | 21619.73 | 19385.31 | AL137356  | 1788.017  | 1400.034  | NM_004133 | 843.481   | 1393.997  |
| NM_000521 | 757.81   | 809.709  | AL137547  | 1820.003  | 1508.339  | NM_001618 | 10964.157 | 10122.775 |
| NM_004135 | 4365.186 | 3802.905 | AK021994  | 1711.246  | 1521.78   | BC000401  | 26247.545 | 28389     |
| NM_000203 | 628.214  | 340.808  | Z70763    | 1066.797  | 825.098   | NM_006425 | 9331.378  | 7934.955  |
| NM_013443 | 1641.603 | 2135.696 | AK023802  | 6868.586  | 8003.153  | BF344046  | 2053.341  | 1863.907  |
| NM_000925 | 12762.71 | 8846.178 | AF088064  | 681.277   | 550.58    | AF432218  | 22334.135 | 26209.914 |
| NM_000465 | 2407.695 | 2426.617 | AF086103  | 807.511   | 763.166   | NM_004286 | 6363.026  | 6956.42   |
| NM_000123 | 6175.797 | 5870.098 | AL080135  | 799.867   | 867.822   | AK025082  | 6441.528  | 12135.208 |
| AL137501  | 1104.671 | 944.28   | AK023158  | 1740.424  | 1855.904  | AF086535  | 1724.552  | 2515.098  |
| U87223    | 459.198  | 862.921  | AF085852  | 3849.21   | 5508.451  | AB040901  | 1749.998  | 2440.924  |
| X91348    | 3193.432 | 5212.737 | AK023952  | 1871.227  | 1977.442  | AL137406  | 9360.833  | 12777.077 |
| Z36505    | 3769.556 | 6153.186 | AK000787  | 2794.305  | 1750.427  | NM_012253 | 13197.364 | 15752.407 |
| NM_001854 | 523.97   | 565.391  | AF090885  | 16023.914 | 13640.171 | NM_006876 | 4417.288  | 4472.25   |
| NM_017913 | 2362.412 | 2137.201 | AF161342  | 812.728   | 720.17    | NM_000293 | 2937.208  | 4254.256  |
| NM_002755 | 9936.369 | 7674.458 | NM_016646 | 1168.378  | 1082.336  | NM_003748 | 2353.164  | 3383.445  |
| AK024799  | 973.78   | 1014.841 | NM_014082 | 3102.328  | 3333.765  | NM_012269 | 869.292   | 832.361   |
| NM_000924 | 4317.953 | 5360.261 | AF100636  | 635.542   | 698.583   | AF153821  | 2684.666  | 2634.078  |
| NM_003330 | 12755.46 | 11203.96 | AF161366  | 607.134   | 728.68    | NM_013370 | 4535.632  | 5620.021  |
| NM_002481 | 441.706  | 417.924  | AK022197  | 3535.024  | 2787.072  | NM_001374 | 681.545   | 1043.201  |
| NM_003647 | 1451.261 | 1416.572 | AF090940  | 419.25    | 517.881   | NM_003310 | 14545.479 | 20983.287 |
| NM_001699 | 1786.568 | 1768.857 | AK021970  | 1018.622  | 1417.993  | AK024461  | 4692.402  | 5548.195  |
| AB006589  | 481.048  | 344.661  | AK022066  | 60817.652 | 66395.836 | AK025485  | 1718.787  | 1497.35   |
| NM_018351 | 505.846  | 484.204  | AK022224  | 2194.528  | 2165.445  | NM_017635 | 5892.373  | 3887.011  |
| AK023019  | 718.378  | 808.722  | AK022359  | 1322.157  | 1358.898  | X62534    | 4580.669  | 3504.235  |
| NM_147171 | 3559.802 | 1725.981 | AK022000  | 1699.873  | 1546.872  | AF027147  | 41348.102 | 37751.199 |
| AF238083  | 636.981  | 1098.895 | AK022129  | 1800.753  | 1956.293  | M62399    | 10838.933 | 10582.118 |
| NM_002962 | 790.309  | 512.704  | AK022263  | 1877.828  | 2101.425  | U71600    | 4162.383  | 4630.758  |
| NM_016388 | 3839.345 | 2196.976 | AK027097  | 591.875   | 772.111   | NM_004472 | 2339.541  | 4672.813  |

|           |          |          |           |           |           |           |           |           |
|-----------|----------|----------|-----------|-----------|-----------|-----------|-----------|-----------|
| AB046783  | 3447.871 | 2927.306 | AK027198  | 868.862   | 874.765   | AB037862  | 3381.302  | 3831.349  |
| NM_000845 | 527.862  | 514.19   | AK000257  | 1246.092  | 1176.245  | AF086285  | 912.513   | 1080.942  |
| NM_014965 | 1583.509 | 1631.076 | NM_006160 | 12680.471 | 11748.451 | AK023887  | 2109.876  | 2781.938  |
| NM_004882 | 6874.002 | 5374.774 | NM_000525 | 1406.787  | 1049.74   | AF088022  | 19667.291 | 20503.186 |
| AL390148  | 6693.072 | 7364.9   | AF009259  | 1209.276  | 1182.363  | AK026537  | 4474.215  | 4907.878  |
| AK024055  | 1085.714 | 1168.52  | AF009260  | 2054.452  | 1703.851  | NM_015485 | 4881.933  | 5334.108  |
| U10485    | 1582.735 | 2308.527 | NM_003075 | 3248.809  | 3336.782  | NM_002666 | 17748.217 | 21560.344 |
| AK025326  | 828.836  | 1339.25  | NM_017902 | 4943.741  | 5233.309  | AF202145  | 6682.62   | 11773.929 |
| NM_013376 | 1412.288 | 2032.632 | AK021981  | 684.45    | 818.224   | AK026155  | 3973.265  | 5115.189  |
| NM_017964 | 1421.968 | 1919.776 | AL359567  | 988.702   | 979.078   | NM_018052 | 56204.57  | 50706.723 |
| NM_016272 | 478.945  | 517.591  | NM_017726 | 934.047   | 966.838   | AF143322  | 830.401   | 934.843   |
| NM_016428 | 2185.63  | 1965.718 | AK026716  | 927.754   | 1341.663  | AK022386  | 9931.358  | 9250.523  |
| NM_004083 | 9487.778 | 7258.81  | AL049325  | 1998.69   | 2072.589  | NM_002767 | 8495.146  | 7171.704  |
| NM_016039 | 6506.889 | 6327.042 | AK024154  | 11969.405 | 11888.325 | AF131846  | 29362.709 | 29300.186 |
| NM_001184 | 4224.982 | 3837.971 | AF086341  | 1680.507  | 1371.811  | AF088069  | 7411.733  | 6358.982  |
| NM_015530 | 8623.307 | 8217.636 | AK026672  | 1917.584  | 2017.522  | AF086551  | 1665.664  | 1883.044  |
| NM_016238 | 4904.14  | 3607.068 | S83282    | 61022.723 | 67882.172 | NM_013393 | 10648.316 | 11042.686 |
| NM_001758 | 593.402  | 462.867  | AK024164  | 45227.172 | 42814.066 | AK025072  | 4421.375  | 5030.313  |
| BE546276  | 726.981  | 381.765  | AF052130  | 11818.56  | 16772.787 | AK022410  | 1120.228  | 1547.075  |
| NM_004725 | 16125.79 | 9861.295 | AF130090  | 20495.771 | 19518.652 | L10378    | 26345.232 | 27467.705 |
| NM_015997 | 2670.523 | 2090.86  | AL096727  | 2446.689  | 2432.559  | AK022179  | 1525.656  | 1512.251  |
| NM_001167 | 1758.503 | 1775.151 | AL080110  | 11957.502 | 12872.914 | AK022173  | 650.792   | 1368.449  |
| NM_012115 | 2753.134 | 2051.487 | NM_020425 | 2295.685  | 2984.874  | AJ227860  | 3246.637  | 5262.788  |
| NM_004933 | 4716.678 | 4160.122 | AK024076  | 3841.556  | 4683.428  | AL157448  | 1785.603  | 2482.817  |
| M96577    | 11580.48 | 9266.555 | M87940    | 2661.628  | 2849.941  | AF026942  | 6080.583  | 6891.596  |
| NM_013258 | 1106.505 | 960.904  | L77588    | 3520.636  | 3793.611  | AJ276429  | 3059.64   | 3878.096  |
| NM_003842 | 4065.94  | 3689.357 | AF086304  | 19798.135 | 21458.41  | AL117657  | 1504.503  | 2441.603  |
| L11238    | 10477.43 | 9729.345 | AB032976  | 1806.88   | 2255.195  | AK023589  | 1580.658  | 2599.259  |
| AK025684  | 1227.441 | 1109.3   | AF301222  | 29591.473 | 49765.379 | AK021590  | 4111.088  | 5475.875  |
| NM_012205 | 1340.999 | 1130.581 | AF215981  | 2571.033  | 2087.221  | AB002441  | 1007.932  | 1702.964  |
| K02046    | 5905.517 | 4865.879 | NM_000732 | 53339.066 | 56371.027 | AK023998  | 5238.638  | 4442.283  |
| AL110151  | 11536.99 | 17884.31 | AF087980  | 1909.552  | 2043.268  | Z11802    | 2169.995  | 1704.105  |
| NM_003293 | 434.578  | 925.694  | NM_013935 | 863.883   | 896.905   | U84507    | 1725.459  | 1288.29   |
| NM_004995 | 4235.514 | 5857.069 | AB038651  | 6253.789  | 3298.231  | AK000872  | 3171.9    | 3486.141  |
| NM_000386 | 5498.521 | 6905.351 | AL359603  | 1554.745  | 1546.971  | AK027147  | 24045.473 | 21581.668 |
| NM_007231 | 929.83   | 750.004  | X84838    | 826.986   | 895.066   | AK026084  | 1673.499  | 2339.08   |
| NM_001190 | 3557.823 | 4202.401 | NM_013940 | 882.47    | 870.606   | AK022415  | 45976.871 | 52864.813 |
| NM_005271 | 9937.512 | 9771.309 | AL117643  | 2547.483  | 1719.175  | AL137368  | 2928.388  | 3545.909  |
| NM_015654 | 6939.432 | 6779.958 | AF069135  | 11709.155 | 10763.75  | AK021932  | 2962.419  | 3318.541  |
| NM_012244 | 2243.503 | 2001.37  | AK026524  | 1619.702  | 1500.833  | AK026787  | 7503.167  | 8881.082  |
| NM_004341 | 1509.027 | 1153.457 | AB011157  | 8035.966  | 14450.246 | AK023542  | 2513.891  | 3457.954  |
| AB082521  | 3416.721 | 2788.231 | U17632    | 942.742   | 1378.79   | AK000203  | 1844.725  | 1976.02   |
| AK026806  | 157.764  | 300.368  | AK026764  | 1958.149  | 3378.299  | AK021845  | 11915.714 | 13611.076 |
| AL050182  | 686.204  | 518.801  | AF113700  | 3529.108  | 4385.533  | NM_018592 | 6139.479  | 7709.9    |
| NM_020040 | 1254.333 | 1446.472 | NM_017835 | 17125.912 | 22488.85  | NM_018503 | 47081.648 | 49837.973 |
| AK026940  | 2564.053 | 2505.467 | NM_018347 | 2601.893  | 3127.558  | NM_016449 | 34663.531 | 41811.27  |
| AF155117  | 2580.243 | 2686.302 | AK024986  | 751.765   | 710.68    | AL049670  | 14974.21  | 10420.247 |
| AB014527  | 880.794  | 901.149  | AK026730  | 1460.726  | 1550.985  | NM_018512 | 16398.947 | 19978.07  |
| NM_004411 | 2546.276 | 2357.255 | AK024739  | 2304.645  | 3241.567  | AK022620  | 1303.978  | 4297.502  |
| NM_015938 | 6969.329 | 7648.534 | AK026772  | 530.403   | 380.627   | AK022412  | 9246.34   | 8768.776  |
| NM_000740 | 754.37   | 550.931  | NM_014260 | 9001.324  | 10448.421 | AK023073  | 11309.84  | 9933.162  |
| NM_017843 | 2668.512 | 3485.047 | AK026458  | 709.642   | 862.408   | AK023922  | 868.081   | 1349.285  |
| AK025985  | 795.943  | 2225.858 | CY3Cy5    | 1950.47   | 261.589   | AK022438  | 2401.541  | 2157.6    |

|           |          |          |           |           |           |           |           |           |
|-----------|----------|----------|-----------|-----------|-----------|-----------|-----------|-----------|
| NM_013256 | 2161.962 | 4075.516 | M23254    | 412.925   | 374.886   | AK023764  | 1729.769  | 2397.677  |
| NM_004143 | 1039.311 | 1954.945 | BE618539  | 707.198   | 676.436   | AK024082  | 1213.032  | 1615.058  |
| X66087    | 1979.18  | 3271.387 | R28062    | 2228.636  | 2370.483  | AK025062  | 4079.707  | 4997.715  |
| NM_016328 | 2334.979 | 4474.515 | BI756258  | 2808.488  | 2186.126  | Z27405    | 46716.016 | 49528.285 |
| NM_017544 | 7095.123 | 11468.38 | AF110020  | 605.045   | 626.267   | AK023412  | 2869.777  | 3119.413  |
| NM_003153 | 1552.98  | 1995.524 | AA608557  | 4848.145  | 4508.749  | NM_014617 | 74625.516 | 63904.57  |
| NM_016285 | 1540.07  | 1390.987 | AL050095  | 3571.22   | 3138.282  | AK074682  | 10008.703 | 12958.12  |
| NM_014707 | 1678.659 | 1186.529 | NM_000498 | 385.47    | 403.64    | X74605    | 2282.57   | 2361.495  |
| AF025771  | 1448.261 | 1387.493 | NM_000664 | 990.744   | 993.27    | AK024513  | 2047.458  | 2274.598  |
| NM_018215 | 1677.653 | 1501.242 | SR7       | 3560.075  | 36541.766 | BC036692  | 1879.619  | 2062.195  |
| AB033110  | 380.382  | 492.559  | SR9       | 12592.462 | 3217.432  | AJ009640  | 4833.822  | 5535.467  |
| NM_005083 | 2220.578 | 1271.675 | CY3Cy5    | 3948.884  | 748.933   | Y11163    | 2874.362  | 2643.777  |
| NM_007187 | 9870.994 | 6946.48  | NM_014808 | 1146.114  | 1396.357  | AF147340  | 1149.936  | 1825.477  |
| NM_001828 | 518.578  | 297.148  | NM_000416 | 4121.216  | 4870.531  | AF035308  | 17131.764 | 25248.848 |
| NM_018983 | 12867.53 | 11751.54 | NM_002965 | 1033.632  | 1957.982  | NM_014054 | 6560.074  | 5306.313  |
| NM_003096 | 11425.16 | 7726.891 | AB007883  | 1320.264  | 1198.542  | AK022228  | 3961.949  | 3134.261  |
| NM_007279 | 3732.894 | 4231.482 | AK093780  | 5629.824  | 5389.173  | AF086480  | 4924.767  | 5828.979  |
| BE390833  | 18966.09 | 16842.94 | NM_007037 | 12257.925 | 10623.19  | AK022122  | 1673.668  | 1623.769  |
| NM_004730 | 8593.928 | 7352.563 | NM_005492 | 1050.503  | 1141.109  | AK000806  | 68770.477 | 62798.168 |
| NM_000801 | 3451.253 | 2842.012 | AF038196  | 4332.529  | 4395.123  | NM_016471 | 13118.598 | 16437.418 |
| NM_006115 | 7546.753 | 9330.028 | NM_004855 | 6310.583  | 5286.61   | NM_001145 | 3180.312  | 3126.524  |
| NM_005801 | 5057.032 | 4364.569 | NM_016352 | 679.701   | 586.522   | NM_005364 | 23208.109 | 26396.219 |
| NM_018198 | 3855.758 | 4594.78  | NM_005014 | 636.574   | 766.934   | AK023482  | 9303.128  | 11199.917 |
| NM_001539 | 17237.95 | 19311.07 | NM_006944 | 303.828   | 579.086   | AK022798  | 1631.794  | 2249.017  |
| NM_012267 | 662.12   | 662.154  | NM_000070 | 2624.498  | 2941.669  | AL157423  | 1087.219  | 1289.325  |
| AK027232  | 5982.547 | 11215.41 | NM_001202 | 1248.933  | 1766.199  | AK023115  | 1851.372  | 1683.682  |
| NM_012204 | 869.136  | 1698.374 | U34249    | 690.927   | 1684.745  | AK023176  | 2573.996  | 2719.267  |
| NM_004342 | 582.889  | 839.052  | NM_003288 | 42671.672 | 46750.793 | AL161991  | 36093.184 | 38992.086 |
| NM_003613 | 889.425  | 1363.785 | NM_006323 | 7249.383  | 6730.927  | D17032    | 49612.539 | 52625.426 |
| NM_016616 | 181.36   | 430.248  | NM_016466 | 2067.449  | 2157.505  | AL137292  | 1984.201  | 1921.378  |
| NM_000022 | 37622.48 | 47363.59 | NM_001493 | 5737.602  | 6955.284  | NM_017941 | 4647.914  | 4129.047  |
| NM_016576 | 10400.09 | 11760.49 | NM_014841 | 639.771   | 503.696   | AF301016  | 2260.109  | 2138.841  |
| NM_004213 | 1358.281 | 1278.612 | NM_014426 | 8447.017  | 6107.774  | AF118079  | 71298.234 | 62774.762 |
| NM_000906 | 1900.866 | 1776.788 | NM_006816 | 16758.994 | 14925.94  | AF277572  | 1049.92   | 1206.327  |
| NM_000480 | 5337.327 | 4946.154 | NM_000258 | 11178.175 | 9623.856  | AL365413  | 4478.392  | 5068.13   |
| AF254084  | 29401.14 | 23918.03 | AB033055  | 5782.059  | 5118.966  | NM_005258 | 12141.192 | 14634.956 |
| AK022976  | 1174.811 | 891.705  | AF311287  | 3445.184  | 2929.568  | NM_000440 | 7860.837  | 9141.707  |
| AB048791  | 4309.047 | 3402.142 | NM_003098 | 1110.522  | 954.121   | NM_001297 | 10363.487 | 13239.836 |
| NM_003107 | 10645.36 | 11776.23 | NM_014781 | 2482.112  | 2717.84   | NM_004403 | 20896.41  | 27123.973 |
| NM_006874 | 3168.932 | 2232.788 | BU629989  | 626.058   | 672.198   | X64993    | 3491.225  | 3998.123  |
| AB046777  | 3685.416 | 2960.533 | X87896    | 598.403   | 756.6     | NM_004434 | 26436.895 | 36028.352 |
| AJ251844  | 1670.106 | 1353.473 | M88310    | 1490.251  | 1609.422  | NM_006269 | 1364.493  | 1981.516  |
| D16815    | 2234.631 | 1860.632 | NM_000042 | 1369.719  | 1846.506  | NM_016230 | 9148.725  | 6146.435  |
| NM_001880 | 2872.95  | 2965.747 | AF035787  | 764.124   | 966.29    | NM_001083 | 1851.455  | 3015.168  |
| AB028943  | 1067.787 | 977.15   | NM_016335 | 905.937   | 777.963   | AK023966  | 12138.563 | 13199.702 |
| NM_006194 | 962.051  | 1134.916 | NM_003165 | 3642.742  | 2917.709  | AK025702  | 5993.191  | 7191.744  |
| AK001603  | 1436.708 | 1650.589 | NM_003906 | 6372.105  | 5243.156  | NM_018958 | 1777.563  | 2001.607  |
| U71601    | 2001.224 | 2226.64  | AL359590  | 22552.33  | 21613.393 | NM_002367 | 1273.832  | 1410.632  |
| AF042838  | 1378.537 | 2173.316 | NM_002861 | 5296.032  | 5220.294  | AK022038  | 4375.31   | 5698.346  |
| AL137511  | 434.389  | 941.102  | NM_003080 | 3358.984  | 2837.544  | L31901    | 1031.081  | 1323.609  |
| X91221    | 323.803  | 475.802  | NM_002645 | 1484.512  | 1334.713  | AK025119  | 3138.202  | 2350.844  |
| AF075031  | 362.491  | 711.055  | AB033027  | 1446.207  | 1312.454  | AJ224170  | 991.75    | 891.198   |
| AK022085  | 285.838  | 582.674  | AK021805  | 7698.633  | 6731.896  | AF085866  | 8011.019  | 8175.667  |



|           |          |          |           |           |           |             |           |           |
|-----------|----------|----------|-----------|-----------|-----------|-------------|-----------|-----------|
| AF075062  | 2658.447 | 5014.532 | AB014550  | 2356.583  | 2426.221  | NM_006106   | 904.868   | 930.767   |
| NM_00418E | 754.847  | 1219.784 | AF320294  | 2184.284  | 2271.144  | CY3Cy5      | 3972.584  | 141.731   |
| AF147381  | 8534.025 | 14434.84 | AF161436  | 3619.921  | 4033.844  | AA397813    | 68150.406 | 64484.348 |
| AB002452  | 410.612  | 672.189  | NM_020402 | 1860.164  | 2200.16   | W47350      | 3771.117  | 2224.105  |
| AF010236  | 647.643  | 493.071  | NM_00429E | 1607.543  | 1419.435  | AI160964    | 625.681   | 958.311   |
| AK024358  | 290.86   | 382.374  | NM_001171 | 953.956   | 1042.675  | W68291      | 7799.186  | 7870.189  |
| AF088075  | 1004.108 | 666.313  | NM_00225C | 4824.517  | 5553.417  | N64384      | 1917.497  | 2300.035  |
| AK026376  | 3172.568 | 3016.348 | S81591    | 584.73    | 576.327   | H-X 53655 I | 1232.964  | 830.234   |
| AF088061  | 2313.896 | 2273.127 | NM_00647E | 2081.901  | 2022.524  | H-U 05770 I | 9046.321  | 6967.592  |
| AF086286  | 1970.829 | 1632.403 | AF132734  | 10850.865 | 11836.618 | H-M 65199   | 7844.075  | 6841.137  |
| AF086376  | 1123.362 | 902.253  | NM_01837E | 1730.085  | 1290.461  | H-M 32315   | 1106.402  | 1448.363  |
| AF086410  | 752.076  | 574.273  | NM_016403 | 18085.68  | 14846.123 | H-V00536M   | 2184.916  | 1743.449  |
| AF086455  | 691.802  | 458.489  | NM_001921 | 6134.309  | 6306.593  | H-D85429M   | 46808.688 | 40522.004 |
| AK022997  | 7994.815 | 7488.353 | NM_00623C | 7857.998  | 5778.884  | BF439832    | 2132.901  | 1567.248  |
| NM_017617 | 2059.625 | 2249.687 | NM_01469E | 3855.327  | 3519.413  | BG819162    | 1183.018  | 967.906   |
| AF131830  | 1029.163 | 929.552  | NM_01340C | 8475.67   | 9112.371  | NM_017532   | 4173.497  | 4437.589  |
| AF147426  | 1612.67  | 2890.842 | AK026257  | 2644.732  | 2072.916  | SR2         | 68461.664 | 65836.703 |
| BC019667  | 942.503  | 2212.625 | AK023836  | 5003.611  | 3883.217  | SR4         | 27653.678 | 23296.887 |
| AK026026  | 1193.687 | 1718.509 | NM_01810E | 3317.459  | 2601.479  | SR6         | 4477.545  | 2737.927  |
| AF085941  | 14725.5  | 25304.79 | AJ299442  | 3759.816  | 4057.186  | SR8         | 14206.45  | 31891.912 |
| Z69892    | 5712.741 | 9466.16  | NM_00012E | 2124.185  | 2137.568  | SR10        | 50018.32  | 13743.812 |
| AK023590  | 546.121  | 1015.248 | NM_00376E | 5994.952  | 7009.926  | CY3Cy5      | 4705.759  | 145.174   |
| AL137309  | 1853.673 | 2725.372 | NM_01844E | 4368.807  | 5440.213  | NM_004447   | 8866.226  | 6751.907  |
| AL137475  | 847.468  | 966.714  | NM_000187 | 772.689   | 1266.997  | NM_012116   | 2075.718  | 2199.906  |
| AL161956  | 3708.417 | 4068.037 | NM_01446E | 984.525   | 1285.318  | NM_00095E   | 1284.65   | 1092.147  |
| AL390176  | 2641.515 | 2839.417 | D87292    | 868.581   | 1444.318  | NM_002442   | 5654.28   | 5464.847  |
| AL137356  | 504.392  | 459.682  | NM_00549E | 2122.934  | 2842.894  | AB033091    | 7948.647  | 4397.617  |
| AL137547  | 489.239  | 331.695  | NM_001202 | 1290.811  | 1414.124  | NM_004557   | 3699.011  | 3952.406  |
| AK021994  | 915.205  | 678.177  | U34249    | 389.759   | 320.218   | NM_014757   | 27846.658 | 37450.074 |
| Z70763    | 601.721  | 480.989  | NM_00328E | 28723.307 | 23696.791 | NM_017893   | 1054.18   | 1408.256  |
| AK023802  | 4285.688 | 3768.071 | BE618539  | 602.626   | 519.466   | NM_001584   | 4261.914  | 3876.157  |
| AF086103  | 487.376  | 362.928  | R28062    | 1952.609  | 1844.96   | NM_01225E   | 56578.191 | 50799.188 |
| AL080135  | 680.186  | 599.018  | BI756258  | 3085.292  | 2501.224  | AF272357    | 2200.815  | 1778.678  |
| AK023158  | 1263.996 | 1186.177 | AF110020  | 494.257   | 751.202   | NM_016372   | 35351.949 | 33988.027 |
| AK000580  | 319.064  | 386.315  | AA608557  | 4433.806  | 4628.95   | AB020705    | 4661.957  | 3208.901  |
| AF085852  | 2429.115 | 2565.175 | AL050095  | 3577.893  | 4436.596  | NM_014333   | 1936.324  | 1581.188  |
| AK023952  | 978.673  | 1775.2   | NM_00049E | 581.221   | 759.074   | NM_00298C   | 1903.925  | 3243.233  |
| AK000787  | 434.79   | 679.877  | NM_000664 | 943.926   | 1147.21   | NM_01588E   | 830.319   | 1336.493  |
| AF090885  | 15165.74 | 25315.98 | AF075085  | 48352.883 | 58027.406 | NM_007102   | 66124.078 | 65049.117 |
| AF161342  | 439.513  | 817.515  | NM_005892 | 1912.129  | 3710.651  | BG491613    | 25966.352 | 23539.447 |
| NM_014082 | 1188.517 | 1944.509 | NM_000042 | 1056.747  | 1161.141  | NM_004251   | 7690.798  | 7979.903  |
| AF100636  | 278.652  | 622.781  | AF035787  | 686.779   | 815.639   | NM_012484   | 19960.686 | 15427.28  |
| AK022197  | 977.182  | 1784.87  | NM_01480E | 1611.68   | 1605.359  | AL096732    | 1462.294  | 1881.748  |
| AK022066  | 13818.65 | 14659.65 | AB006627  | 334.17    | 375.508   | NM_003462   | 25375.584 | 21049.967 |
| AK022224  | 1239.1   | 1494.028 | NM_00041E | 3991.025  | 4509.689  | NM_006093   | 6020.174  | 4317.066  |
| AK022359  | 784.164  | 715.388  | NM_00296E | 764.411   | 1615.586  | NM_00013E   | 1121.119  | 1547.137  |
| AK022000  | 649.681  | 371.973  | AB007883  | 1468.049  | 1104.643  | NM_006664   | 5296.981  | 8338.558  |
| AK022129  | 552.13   | 469.006  | AK093780  | 5758      | 5502.609  | NM_00272E   | 1453.531  | 945.254   |
| AK022263  | 881.717  | 919.373  | AY009397  | 50500.586 | 57352.973 | NM_00045C   | 1065.474  | 648.704   |
| AK027097  | 406.634  | 295.482  | NM_007037 | 12475.256 | 12898.867 | NM_00044E   | 732.008   | 496.084   |
| AK027198  | 247.016  | 374.354  | NM_005492 | 1155.479  | 1633.912  | NM_004513   | 8843.789  | 7695.561  |
| AK000257  | 1168.193 | 1839.484 | AF038196  | 4058.636  | 5119.662  | NM_00170E   | 44667.488 | 42386.684 |
| NM_00616C | 1303.086 | 2113.898 | NM_00485E | 7927.139  | 8697.338  | NM_01773E   | 4495.415  | 3713.701  |

|           |          |          |           |           |           |           |           |           |
|-----------|----------|----------|-----------|-----------|-----------|-----------|-----------|-----------|
| AL110159  | 363.518  | 561.212  | NM_016352 | 1058.792  | 957.791   | AB033044  | 5883.418  | 6792.881  |
| AF009259  | 323.291  | 699.377  | NM_005014 | 673.738   | 884.321   | AB014564  | 1748.945  | 2528.238  |
| AF009260  | 912.576  | 1427.49  | NM_006944 | 505.34    | 1033.697  | NM_020230 | 9279.727  | 8651.246  |
| NM_003079 | 4030.346 | 5988.534 | NM_000070 | 2915.105  | 3660.993  | NM_006762 | 59843.266 | 59041.219 |
| NM_017902 | 3092.79  | 4184.922 | NM_002250 | 4039.93   | 4654.991  | NM_006352 | 2544.51   | 2868.124  |
| AK021981  | 529.555  | 401.705  | S81591    | 410.241   | 565.804   | NM_016430 | 2125.357  | 1916.425  |
| AL359567  | 926.273  | 639.981  | NM_006323 | 8017.019  | 6101.604  | NM_003742 | 4636.407  | 4532.803  |
| NM_017726 | 520.005  | 614.911  | NM_016466 | 1977.055  | 1987.647  | BE382905  | 3212.265  | 3056.236  |
| AK026716  | 568.294  | 645.667  | NM_001493 | 4776.353  | 4980.588  | NM_002152 | 9247.274  | 7558.383  |
| AL049325  | 1594.584 | 1791.865 | NM_014426 | 8220.898  | 5937.413  | AK022558  | 5939.219  | 7515.696  |
| AK024154  | 1278.693 | 2408.172 | NM_006816 | 20432.699 | 18037.178 | AK023787  | 2699.85   | 3240.02   |
| AF086341  | 995.23   | 1719.1   | AK026518  | 40080.508 | 29916.721 | NM_002133 | 2186.65   | 1944.228  |
| AK026672  | 1672.776 | 2221.036 | NM_000258 | 12447.152 | 13109.714 | NM_015697 | 5414.147  | 3353.6    |
| S83282    | 57216.23 | 60783.32 | AB033055  | 6184.495  | 6549.841  | AF086489  | 1278.903  | 485.739   |
| AK024164  | 12550.94 | 23161.99 | AF311287  | 3806.777  | 3860.867  | NM_032943 | 4967.005  | 4866.965  |
| AF052130  | 10377.1  | 18889.05 | NM_003098 | 1193.454  | 1557.054  | NM_007177 | 11565.229 | 10814.471 |
| AF130090  | 15882.75 | 28971.28 | NM_014781 | 2083.821  | 3172.08   | NM_000809 | 788.706   | 628.988   |
| AL096727  | 1484.047 | 2701.194 | BU629989  | 1298.757  | 1685.985  | AL359592  | 1006.328  | 758.661   |
| AL080110  | 9977.968 | 17062.11 | X87896    | 689.026   | 871.307   | NM_006078 | 10013.058 | 9186.603  |
| NM_020425 | 2534.103 | 4443.422 | M88310    | 1620.8    | 2398.987  | NM_000824 | 3980.619  | 2882.058  |
| AK024076  | 2588.864 | 3865.64  | NM_018446 | 4730.152  | 4454.147  | NM_000482 | 1603.858  | 1838.56   |
| M87940    | 1205.801 | 1281.466 | NM_000187 | 521.388   | 569.824   | NM_016274 | 20547.307 | 20337.26  |
| L77588    | 737.108  | 822.622  | NM_014465 | 1197.947  | 993.348   | NM_014946 | 2071.236  | 1898.602  |
| AF086304  | 14313.71 | 15267.87 | D87292    | 970.226   | 1085.651  | NM_014251 | 7399.287  | 7995.883  |
| AB032976  | 1203.041 | 1191.447 | NM_005498 | 1255.459  | 1175.046  | AK022750  | 7338.093  | 7005.331  |
| AF301222  | 17686.25 | 17353.53 | NM_016335 | 1145.467  | 1225.338  | NM_001091 | 1147.19   | 1287.317  |
| AF215981  | 568      | 631.447  | NM_003165 | 3655.933  | 3290.058  | AK023915  | 9654.876  | 8454.905  |
| NM_000732 | 56968.13 | 52982.15 | NM_003906 | 8806.015  | 7716.176  | AB051453  | 3023.222  | 2882.08   |
| AF130044  | 414.927  | 417.391  | AL359590  | 21383.641 | 20296.035 | AK026842  | 2460.645  | 1862.003  |
| AF116709  | 369.572  | 399.008  | NM_002861 | 4711.844  | 3830.204  | NM_002395 | 1637.101  | 1731.864  |
| AF087980  | 1943.823 | 2668.392 | NM_003080 | 3342.144  | 2554.949  | AB023203  | 3372.851  | 3583.746  |
| AF075111  | 3675.544 | 8429.49  | NM_002645 | 1684.808  | 1701.833  | NM_004259 | 3149.899  | 2412.719  |
| NM_013939 | 500.9    | 1283.066 | AB033027  | 1600.101  | 1750.659  | NM_016271 | 7352.432  | 5956.343  |
| AB038651  | 2769.262 | 8676.289 | AK021805  | 8446.637  | 9364.859  | NM_016619 | 4683.844  | 4024.379  |
| AL359603  | 2195.59  | 2945.169 | AB014550  | 2303.41   | 2406.698  | NM_014481 | 3829.901  | 2596.605  |
| X84838    | 885.13   | 1676.186 | AF320294  | 2611.039  | 3177.815  | U22172    | 2904.332  | 2729.205  |
| NM_013940 | 541.673  | 813.174  | AF161436  | 3736.296  | 5454.249  | AB032960  | 3077.924  | 2880.176  |
| AL117643  | 1842.623 | 4263.778 | NM_020402 | 2217.092  | 3681.284  | NM_014264 | 15005.884 | 11350.484 |
| AF069135  | 344.56   | 515.276  | NM_004299 | 1835.077  | 2110.841  | AF020089  | 2240.836  | 1770.975  |
| AK026524  | 942.674  | 2048.846 | NM_001171 | 1164.498  | 1880.351  | NM_006257 | 6973.564  | 5881.883  |
| AB011157  | 8084.209 | 7604.393 | NM_000498 | 622.786   | 511.551   | NM_016281 | 12956.97  | 8080.325  |
| U17632    | 490.493  | 603.769  | NM_000664 | 1133.208  | 1094.665  | NM_004734 | 24419.869 | 21913.924 |
| AK026764  | 3165.388 | 1955.646 | AF075085  | 48615.984 | 42523.25  | AK024793  | 2487.708  | 2180.405  |
| AF113700  | 2955.726 | 2864.198 | NM_005892 | 1491.813  | 1570.742  | AF208291  | 1147.031  | 1370.774  |
| NM_017835 | 13535.83 | 12554.3  | NM_006478 | 2110.508  | 1866.613  | L10284    | 65275.023 | 63363.008 |
| NM_018347 | 1788.93  | 1563.902 | AF132734  | 11230.68  | 9889.213  | NM_000276 | 1934.118  | 2383.8    |
| AF086223  | 270.042  | 210.867  | NM_018379 | 1589.469  | 1155.194  | NM_000019 | 68282.719 | 71482.211 |
| AK024986  | 644.879  | 444.072  | NM_016403 | 16752.439 | 13126.771 | AK023701  | 1657.855  | 1473.452  |
| AK026730  | 1200.318 | 1056.713 | NM_015603 | 1186.824  | 861.704   | NM_015886 | 944.085   | 973.715   |
| AK024739  | 1901.815 | 1601.941 | NM_001921 | 5542.373  | 4393.355  | NM_004262 | 981.547   | 421.135   |
| AK098681  | 367.372  | 330.531  | NM_006230 | 7726.708  | 5000.898  | NM_007102 | 68022.32  | 65126.531 |
| AK026772  | 472.092  | 633.535  | NM_014699 | 4753.566  | 3919.005  | BG491613  | 27080.514 | 21620.963 |
| NM_014260 | 11950.61 | 11720.92 | NM_013400 | 8661.944  | 8454.744  | AA397813  | 65214.273 | 60986.141 |

|           |          |          |           |           |           |             |           |           |
|-----------|----------|----------|-----------|-----------|-----------|-------------|-----------|-----------|
| AK026458  | 982.478  | 982.792  | AK026257  | 2504.343  | 2057.132  | W47350      | 3659.896  | 2815.437  |
| AK022266  | 269.005  | 461.643  | AK023836  | 5185.634  | 5018.296  | AI160964    | 688.043   | 612.144   |
| CY3Cy5    | 8407.182 | 481.572  | NM_018109 | 2810.655  | 2973.716  | W68291      | 9204.546  | 8557.059  |
| M74220    | 665.169  | 821.376  | AJ299442  | 3831.313  | 5228.157  | N64384      | 2030.401  | 2090.502  |
| M23254    | 721.498  | 1266.901 | NM_000129 | 2736.05   | 3647.071  | H-X 53655 I | 1269.348  | 1108.228  |
| R28062    | 4222.403 | 3745.666 | NM_003762 | 7262.831  | 11708.63  | H-U 05770 I | 10051.565 | 8668.187  |
| AI627464  | 1988.971 | 2030.239 | NM_004859 | 6793.459  | 6006.559  | H-M 65199   | 9338.453  | 7890.644  |
| BI756258  | 5433.881 | 7125.208 | NM_016352 | 547.097   | 416.157   | H-M 32315   | 1382.059  | 972.844   |
| J04599    | 395.105  | 662.015  | NM_005014 | 740.734   | 580.916   | H-V00536M   | 1822.8    | 1380.726  |
| AA608557  | 13702.21 | 12522.48 | NM_000070 | 1779.42   | 1649.653  | H-D85429M   | 45611.949 | 39541.875 |
| AL050095  | 3422.692 | 3092.209 | NM_001202 | 1455.304  | 1249.991  | BF439832    | 2256.652  | 1679.901  |
| NM_000499 | 568.114  | 581.467  | NM_003289 | 32276.846 | 23779.455 | BG819162    | 1174.687  | 1165.539  |
| NM_000664 | 1810.012 | 2047.717 | AI200114  | 336.324   | 299.363   | NM_017532   | 5628.073  | 5921.967  |
| SR1       | 73330.65 | 61833.13 | M23254    | 551.311   | 423.018   | M38449      | 11700.615 | 11454.899 |
| SR3       | 34948.85 | 26453.46 | BE618539  | 701.398   | 616.874   | AB033044    | 4754.77   | 4033.415  |
| SR5       | 6334.449 | 4922.899 | R28062    | 1966.702  | 1617.401  | AB014564    | 1714.023  | 1553.63   |
| SR7       | 6353.993 | 32601.41 | AI627464  | 374.51    | 289.255   | NM_020230   | 7819.485  | 5977.542  |
| SR9       | 27534.75 | 3759.981 | BI756258  | 3045.513  | 2539.566  | NM_006762   | 57406.188 | 57033.906 |
| CY3Cy5    | 6516.061 | 312.551  | AI342225  | 49336.734 | 53722.75  | NM_006352   | 2393.639  | 2066.97   |
| NM_014809 | 2898.431 | 2812.001 | AA634103  | 57388.781 | 75949.672 | NM_016430   | 1719.194  | 1617.756  |
| AB006627  | 603.333  | 674.487  | AF110020  | 757.658   | 997.177   | NM_004447   | 8876.51   | 6989.634  |
| NM_000419 | 8726.742 | 7832.703 | AA608557  | 5151.431  | 6723.792  | NM_001204   | 2185.341  | 2117.861  |
| NM_002965 | 3314.367 | 1696.976 | AL050095  | 4929.454  | 6187.122  | BF131321    | 1042.122  | 1206.751  |
| NM_003839 | 354.509  | 735.972  | NM_003099 | 1279.995  | 1141.625  | NM_012116   | 2175.306  | 2220.665  |
| NM_006391 | 681.015  | 495.781  | NM_014781 | 2542.445  | 2936.68   | NM_000020   | 3045.42   | 3014.123  |
| AK093780  | 15492.46 | 14296.16 | BU629989  | 596.714   | 738.275   | NM_002442   | 5335.208  | 4224.402  |
| AY009397  | 9478.256 | 9722.313 | X87896    | 579.541   | 859       | AB033091    | 8490.81   | 4638.859  |
| NM_007037 | 1757.571 | 1887.702 | M88310    | 1495.982  | 1547.915  | NM_004557   | 6459.021  | 5329.46   |
| AF038196  | 3634.875 | 5281.685 | NM_000042 | 1107.891  | 1002.682  | NM_014757   | 25227.842 | 21701.791 |
| NM_004859 | 4978.338 | 7195.508 | AF035787  | 579.02    | 466.731   | NM_017893   | 1140.556  | 1168.722  |
| NM_005014 | 1235.031 | 1115.542 | NM_014809 | 1080.724  | 1056.683  | NM_001584   | 5017.563  | 5033.758  |
| NM_006944 | 596.606  | 574.914  | NM_000419 | 3660.891  | 3518.407  | NM_012259   | 47564.949 | 53597.695 |
| NM_000070 | 636.195  | 731.149  | NM_002965 | 674.26    | 1492.167  | AF272357    | 2541.645  | 3368.425  |
| NM_001202 | 2253.432 | 1549.098 | AB007883  | 1332.778  | 1192.745  | NM_016372   | 35229.41  | 41557.145 |
| U34249    | 854.874  | 540.139  | NM_005492 | 1827.014  | 2767.755  | AB020705    | 5014.972  | 3908.208  |
| NM_003289 | 15647    | 19014.09 | AF038196  | 2683.282  | 3579.262  | NM_014333   | 2225.713  | 1825.861  |
| NM_006323 | 17056.9  | 14652.49 | AF320294  | 1870.376  | 1731.205  | NM_002980   | 1658.518  | 1829.952  |
| NM_016466 | 6036.747 | 6135.576 | AF320293  | 347.38    | 357.522   | U53532      | 3438.691  | 3746.567  |
| NM_001493 | 10533.58 | 9003.398 | AF161436  | 3903.164  | 3480.689  | NM_001740   | 590.425   | 815.662   |
| NM_003719 | 503.412  | 630.974  | NM_020402 | 1698.725  | 1828.33   | NM_012484   | 18378.305 | 17483.201 |
| NM_014841 | 1318.468 | 1553.586 | NM_004299 | 1897.88   | 1619.115  | AB006423    | 664.075   | 1019.971  |
| NM_014429 | 17011.34 | 21219.12 | NM_001171 | 884.337   | 872.511   | NM_005719   | 64412.676 | 60592.73  |
| NM_006819 | 21596.09 | 27680.08 | NM_002250 | 4643.675  | 4141.039  | NM_006664   | 5193.591  | 4862.878  |
| AK026518  | 57770.77 | 59107.94 | NM_006323 | 6125.115  | 6020.222  | NM_002419   | 883.762   | 840.657   |
| NM_000259 | 20769.39 | 16956.74 | NM_016466 | 1760.156  | 1899.2    | NM_002729   | 1365.801  | 1273.741  |
| AB033055  | 10133.37 | 9060.901 | NM_001493 | 4802.776  | 5990.986  | NM_000450   | 1264.518  | 1276.708  |
| AF311287  | 5134.402 | 4915.742 | NM_014841 | 418.855   | 599.293   | NM_000449   | 873.007   | 976.443   |
| NM_003099 | 2454.98  | 2867.791 | NM_000259 | 10574.09  | 13916.638 | NM_004513   | 8562.015  | 8878.785  |
| NM_014781 | 6233.318 | 5287.792 | AB033055  | 6295.359  | 7905.487  | NM_001709   | 45381.102 | 48417.516 |
| BU629989  | 1356.911 | 1132.684 | AF311287  | 4793.199  | 5783.612  | NM_017735   | 4204.081  | 3746.675  |
| X87896    | 968.694  | 1105.451 | AJ299442  | 4071.965  | 4822.333  | AF208291    | 1218.046  | 1188.865  |
| M88310    | 2532.083 | 2269.868 | NM_000129 | 2026.646  | 1848.351  | L10284      | 59611.207 | 59061.508 |
| NM_000042 | 1556.405 | 1534.724 | NM_003762 | 7166.565  | 6140.104  | NM_000276   | 1781.212  | 1439.725  |

|           |          |          |           |           |           |           |           |           |
|-----------|----------|----------|-----------|-----------|-----------|-----------|-----------|-----------|
| AF035787  | 1410.09  | 1151.99  | NM_01844€ | 4414.149  | 3023.575  | NM_00001€ | 60657     | 60121.734 |
| NM_005024 | 449.367  | 1133.689 | NM_000187 | 414.658   | 221.652   | NM_003742 | 4046.625  | 5461.618  |
| NM_003403 | 844.627  | 872.316  | NM_01446€ | 1056.595  | 835.814   | NM_005094 | 4729.357  | 6651.683  |
| NM_00316€ | 3870.614 | 5798.939 | D87292    | 785.902   | 654.142   | BE382905  | 936.219   | 752.499   |
| NM_00390€ | 3716.292 | 4079.24  | NM_00549€ | 1298.924  | 1205.619  | NM_002152 | 8713.19   | 9149.049  |
| AL359590  | 29881.86 | 31266.6  | NM_01633€ | 1261.362  | 1078.787  | NM_001701 | 784.11    | 701.04    |
| NM_002861 | 7598.458 | 10061.89 | NM_00316€ | 3989.137  | 3276.31   | AK022558  | 5348.245  | 6637.232  |
| NM_00308€ | 2769.68  | 2985.124 | NM_00390€ | 9202.021  | 7755.64   | NM_00647€ | 66103.859 | 66894.297 |
| NM_01326€ | 1723.306 | 1004.592 | AL359590  | 26365.318 | 26916.348 | AK023787  | 2733.463  | 3106.269  |
| NM_00264€ | 2872.645 | 2964.71  | NM_002861 | 6199.403  | 6298.168  | NM_002133 | 2182.733  | 2297.188  |
| AB033027  | 1387.858 | 1400.143 | NM_00308€ | 3424.006  | 3339.282  | AF086489  | 925.011   | 699.849   |
| AK021805  | 6193.805 | 6445.254 | NM_01326€ | 297.859   | 971.817   | NM_007177 | 12377.734 | 12149.325 |
| AB014550  | 4052.852 | 4323.35  | NM_00264€ | 1584.8    | 2188.593  | AL359592  | 1210.941  | 1342.074  |
| AF320294  | 647.263  | 1010.441 | AB033027  | 1513.507  | 2032.299  | NM_00607€ | 11214.291 | 12846.685 |
| AF320293  | 295.121  | 461.022  | AK021805  | 9633.999  | 12965.288 | NM_000824 | 4151.852  | 3496.112  |
| AF161436  | 4703.785 | 4899.956 | AB014550  | 2432.623  | 3687.749  | NM_017532 | 3714.097  | 3423.923  |
| NM_020402 | 1448.25  | 1555.537 | NM_00682€ | 16443.34  | 16378.669 | M38449    | 11359.412 | 10295.067 |
| NM_00429€ | 2417.058 | 3169.174 | AB007973  | 3343.51   | 3077.561  | NM_001091 | 1272.319  | 1449.186  |
| NM_00225€ | 7151.127 | 5669.02  | NM_00299€ | 491.521   | 343.392   | AK023915  | 10843.609 | 11546.585 |
| S81591    | 985.017  | 945.569  | M96843    | 4021.26   | 4799.347  | AB051453  | 2915.319  | 3146.082  |
| NM_003304 | 483.715  | 784.761  | NM_017791 | 1107.422  | 878.865   | AK026842  | 2699.778  | 2477.455  |
| AB023156  | 487.784  | 703.399  | NM_005882 | 6861.398  | 6680.566  | NM_00239€ | 1364.005  | 1591.706  |
| NM_00647€ | 3102.033 | 3632.422 | BC012304  | 4971.62   | 4737.458  | AB023203  | 3627.418  | 3210.23   |
| AF132734  | 22777.64 | 24789.7  | AB046815  | 2419.42   | 1940.576  | NM_014963 | 4232.785  | 5043.293  |
| NM_01837€ | 2047.584 | 2194.949 | AF075085  | 43515.797 | 30847.707 | NM_00425€ | 3129.143  | 4038.973  |
| NM_016403 | 23449.18 | 23442.77 | NM_005892 | 1375.692  | 1430.444  | NM_016271 | 7367.413  | 6208.679  |
| NM_015603 | 2189.159 | 2057.254 | NM_00647€ | 1872.975  | 1428.118  | NM_01661€ | 3818.418  | 2964.608  |
| NM_001921 | 11552.44 | 12982.84 | AF132734  | 10838.168 | 10167.479 | NM_014481 | 3059.72   | 3030.252  |
| NM_00623€ | 13419.65 | 18279.93 | NM_01837€ | 1509.594  | 1179.583  | U22172    | 2917.287  | 2613.768  |
| NM_01469€ | 1975.698 | 1760.295 | NM_016403 | 15545.633 | 12747.205 | AB032960  | 3558.981  | 3660.298  |
| NM_01340€ | 16513.46 | 14866.98 | NM_015603 | 1200.334  | 1144.713  | NM_014264 | 16680.502 | 17987.658 |
| AK026257  | 5055.145 | 5167.483 | NM_001921 | 4247.199  | 4351.416  | AF020089  | 3263.381  | 4170.106  |
| AK023836  | 3602.136 | 3055.379 | NM_00623€ | 7385.115  | 6062.481  | NM_006257 | 8564.832  | 10118.025 |
| NM_01810€ | 5320.026 | 5915.234 | NM_01469€ | 5189.625  | 6665.454  | NM_016281 | 14574.017 | 13287.069 |
| AJ299442  | 7066.014 | 7320.851 | NM_01340€ | 9454.845  | 12278.283 | NM_004734 | 23618.938 | 27390.764 |
| AB040897  | 562.88   | 1057.275 | AK026257  | 2616.909  | 3068.567  | AK024793  | 3180.747  | 2838.07   |
| NM_00012€ | 2309.282 | 1549.536 | AK023836  | 5556.841  | 7594.423  | NM_01225€ | 30116.994 | 28487.297 |
| NM_003762 | 12086.22 | 13811.11 | NM_01810€ | 2886.083  | 3910.047  | AF272357  | 1906.36   | 1570.429  |
| NM_01844€ | 7360.842 | 7642.61  | NM_00507€ | 6125.603  | 5892.981  | NM_016372 | 31393.896 | 27865.211 |
| NM_000187 | 432.422  | 874.812  | AF253321  | 914.216   | 754.746   | AB020705  | 4160.95   | 2994.23   |
| NM_01446€ | 1766.533 | 2019.022 | U80735    | 3108.049  | 3118.904  | NM_014333 | 2250.947  | 1739.494  |
| D87292    | 2180.461 | 1705.811 | NM_01785€ | 2270.538  | 2281.762  | NM_007102 | 63593.371 | 61619.398 |
| NM_00549€ | 1444.308 | 1723.053 | NM_016522 | 817.222   | 625.855   | BG491613  | 25243.787 | 23014.287 |
| NM_001202 | 2703.098 | 2136.233 | NM_002224 | 2166.158  | 1628.809  | AA397813  | 63622.945 | 62191.453 |
| U34249    | 697.624  | 928.306  | X07979    | 25646.35  | 17340.598 | W47350    | 4032.615  | 4468.944  |
| NM_00328€ | 10117.17 | 10980.45 | NM_003874 | 1484.886  | 877.994   | AI160964  | 638.941   | 878.901   |
| M74220    | 863.836  | 808.523  | NM_000082 | 1512.781  | 1282.368  | W68291    | 9694.239  | 8657.822  |
| M23254    | 786.36   | 1248.044 | L13857    | 1151.412  | 715.445   | N64384    | 2020.879  | 2068.232  |
| BE618539  | 745.738  | 698.307  | NM_01809€ | 4783.681  | 4395.589  | H-X 53655 | 1618.567  | 1155.928  |
| R28062    | 4224.042 | 3308.421 | AF286164  | 1040.831  | 699.353   | H-U 05770 | 9732.243  | 9714.955  |
| AI627464  | 1525.308 | 1346.599 | AF146277  | 5531.153  | 4920.989  | H-M 65199 | 12284.3   | 15623.877 |
| BI756258  | 4682.938 | 5815.717 | AF055033  | 11565.816 | 11258.173 | H-M 32315 | 1708.406  | 2355.534  |
| J04599    | 643.771  | 466.736  | NM_01770€ | 893.85    | 873.605   | H-V00536M | 2293.818  | 3086.052  |

|           |          |          |           |           |           |           |           |           |
|-----------|----------|----------|-----------|-----------|-----------|-----------|-----------|-----------|
| AA608557  | 13625.15 | 11500.13 | M37191    | 7214.157  | 8241.716  | H-D85429M | 48316.547 | 53668.477 |
| AL050095  | 2792.185 | 2704.681 | NM_005242 | 556.624   | 726.897   | BF439832  | 2133.469  | 2579.201  |
| NM_00049E | 499.217  | 617.164  | NM_00302C | 695.189   | 869.469   | BG819162  | 1288.482  | 1242.163  |
| NM_000664 | 1697.219 | 1423.913 | NM_001114 | 1224.719  | 1894.154  | NM_00272E | 1387.5    | 997.968   |
| AF075085  | 59261.44 | 54245.23 | X82240    | 2032.823  | 2359.885  | NM_00045C | 1126.507  | 849.357   |
| NM_005892 | 2207.094 | 2132.614 | NM_01399E | 5801.589  | 6029.778  | NM_00044E | 984.512   | 514.613   |
| NM_000042 | 2720.566 | 3134.082 | NM_00601C | 14277.507 | 13296.401 | NM_004513 | 8204.676  | 7303.821  |
| AF035787  | 1934.706 | 1544.844 | K03191    | 1988.032  | 1624.103  | NM_00170E | 42461.867 | 43397.793 |
| NM_003403 | 1012.252 | 842.539  | NM_00507E | 12508.564 | 11802.58  | AB014564  | 1334.816  | 1494.036  |
| NM_01480E | 3121.414 | 3125.06  | NM_005192 | 24940.074 | 22563.305 | NM_02023C | 8174.836  | 6867.836  |
| AB006627  | 678.797  | 698.642  | NM_00458E | 1610.479  | 1387.992  | NM_006762 | 57919.355 | 57067.211 |
| NM_00041E | 9420.739 | 8537.682 | NM_015032 | 2486.83   | 1489.108  | NM_006352 | 1892.148  | 2033.76   |
| NM_003382 | 405.231  | 377.02   | AK022956  | 3076.796  | 2537.077  | NM_01643C | 1542.541  | 1792.689  |
| NM_00296E | 3151.27  | 1613.386 | AK023121  | 773.869   | 562.057   | NM_004447 | 8996.856  | 7430.738  |
| AK093780  | 13588.93 | 12527.2  | NM_014104 | 19163.146 | 14916.698 | NM_001204 | 2240.451  | 2999.598  |
| AY009397  | 8644.776 | 9020.206 | NM_002392 | 1463.788  | 1206.104  | NM_012116 | 2371.325  | 2694.557  |
| NM_007037 | 2594.302 | 2519.163 | NM_00274E | 32992.273 | 37255.359 | NM_00002C | 3468.409  | 4080.201  |
| AF038196  | 5226.391 | 7674.692 | NM_01821E | 4336.968  | 3871.26   | NM_002442 | 7149.942  | 8399.008  |
| NM_00485E | 4477.917 | 4942.166 | NM_00339C | 1823.424  | 1538.085  | AB033091  | 9214.886  | 8173.052  |
| NM_005014 | 1198.87  | 1282.53  | AL137747  | 2679.856  | 1989.776  | NM_004557 | 6368.619  | 7118.861  |
| NM_006944 | 844.495  | 539.597  | NM_01475E | 3194.743  | 5087.787  | NM_014757 | 27444.088 | 26906.748 |
| NM_004407 | 800.189  | 807.182  | AF077188  | 7333.684  | 8662.591  | NM_017893 | 896.206   | 1362.915  |
| NM_00007C | 1225.407 | 1173.678 | NM_01244E | 5920.894  | 5895.729  | NM_001584 | 5324.043  | 4864.79   |
| NM_00225C | 9349.158 | 7492.461 | NM_01833E | 649.071   | 849.857   | NM_00080E | 854.689   | 569.426   |
| S81591    | 1289.86  | 1445.743 | NM_01868E | 38333.277 | 45449.719 | NM_000824 | 5423.916  | 4867.47   |
| NM_003304 | 1241.8   | 1238.411 | NM_006984 | 2313.345  | 2935.191  | NM_005953 | 37188.949 | 44737     |
| U02632    | 498.732  | 535.219  | NM_018214 | 1425.979  | 1736.496  | AB006423  | 588.254   | 771.857   |
| AB023156  | 541.224  | 789.487  | AL133644  | 5319.228  | 4828.915  | AJ132084  | 545.638   | 1114.525  |
| NM_006323 | 18803.13 | 19020.73 | NM_00270E | 2209.014  | 2262.361  | NM_00571E | 64921.855 | 60497.953 |
| NM_01646E | 6658.771 | 5044.123 | NM_019023 | 38391.551 | 38509.629 | NM_014264 | 14705.436 | 12519.624 |
| NM_001493 | 9878.734 | 7438.085 | NM_00442C | 1124.602  | 635.807   | AF020089  | 1531.993  | 2002.662  |
| NM_014841 | 1155.969 | 1224.949 | NM_00297C | 830.382   | 813.91    | NM_006257 | 7533.03   | 7740.374  |
| NM_01442E | 16484.66 | 20461.5  | NM_00549E | 9177.965  | 7898.841  | NM_016281 | 14622.41  | 13083.38  |
| NM_00681E | 22592.51 | 24502.73 | NM_015387 | 5898.46   | 5903.739  | AK024793  | 4082.981  | 5059.141  |
| AB033055  | 9016.869 | 8145.094 | NM_001733 | 2134.941  | 1811.197  | AF208291  | 1683.236  | 1896.016  |
| AF311287  | 5496.272 | 4736.591 | NM_00506E | 550.169   | 463.699   | NM_004877 | 59853.453 | 57577.336 |
| NM_00309E | 2317.206 | 2468.258 | NM_01782E | 10499.443 | 11547.286 | NM_005094 | 4728.895  | 4705.879  |
| NM_014781 | 5913.483 | 4311.152 | NM_01403E | 2521.352  | 3313.355  | BE382905  | 1119.13   | 1082.054  |
| BU629989  | 1502.306 | 1095.798 | NM_013432 | 6980.288  | 6933.235  | NM_002152 | 9390.423  | 9976.442  |
| X87896    | 1029.5   | 844.169  | AB020716  | 732.982   | 754.351   | NM_001701 | 951.857   | 461.263   |
| M88310    | 3428.173 | 3783.719 | NM_00229E | 57551.422 | 64972.984 | AK022558  | 5947.459  | 6189.736  |
| NM_01844E | 10578.12 | 10762.92 | AK027130  | 982.325   | 1324.089  | NM_00647E | 68401.477 | 65365.828 |
| NM_000187 | 1040.766 | 1099.809 | NM_00547E | 14810.42  | 21155.883 | AK023787  | 3696.57   | 4309.993  |
| NM_01446E | 2854.625 | 3163.827 | NM_00573C | 40883.383 | 45540.254 | NM_007177 | 12751.743 | 13835.341 |
| D87292    | 1815.356 | 1948.03  | NM_005392 | 1950.305  | 1419.175  | NM_000737 | 983.017   | 1148.181  |
| NM_00549E | 1240.792 | 1781.609 | AL133572  | 4718.385  | 4125.606  | NM_00504E | 1127.565  | 987.149   |
| NM_01633E | 585.495  | 908.359  | AK022500  | 1905.764  | 1773.265  | AK026129  | 3368.241  | 3915.207  |
| NM_00316E | 4303.719 | 6476.355 | BC021298  | 598.589   | 862.507   | NM_001743 | 52997.375 | 57504.172 |
| NM_00390E | 4126.605 | 3959.657 | U52096    | 4562.527  | 4160.335  | AK024200  | 1209.802  | 1140.506  |
| AL359590  | 28773.05 | 31048.63 | AB013897  | 1381.669  | 1198.438  | NM_003713 | 13814.426 | 18469.748 |
| NM_002861 | 8017.821 | 11758.06 | NM_00552E | 19631.49  | 12721.958 | M38449    | 12142.716 | 10036.551 |
| NM_00308C | 3250.433 | 3532.354 | AK001669  | 1639.305  | 1130.448  | AK023915  | 11102.965 | 13204.721 |
| NM_004042 | 717.467  | 692.587  | NM_00619E | 380.221   | 349.384   | AB051453  | 3114.58   | 3913.483  |

|           |          |          |           |           |           |           |           |           |
|-----------|----------|----------|-----------|-----------|-----------|-----------|-----------|-----------|
| NM_01326E | 1870.639 | 799.389  | NM_00619C | 8976.749  | 7274.014  | AK026842  | 2904.841  | 3092.501  |
| NM_00264E | 3410.046 | 3134.275 | NM_00636E | 3470.471  | 2741.569  | NM_00239E | 2218.396  | 2361.682  |
| AB033027  | 1450.509 | 1432.433 | NM_00161E | 4287.55   | 3838.211  | NM_01496E | 5245.533  | 5582.954  |
| AK021805  | 5295.022 | 5896.912 | NM_00642E | 4032.849  | 4455.313  | NM_00425E | 4350.355  | 6117.559  |
| AB014550  | 3822.093 | 3948.002 | BF344046  | 1177.716  | 1311.559  | NM_016271 | 10413.355 | 11827.946 |
| AF320294  | 710.639  | 882.999  | AF432218  | 10206.8   | 12395.071 | NM_01661E | 5260.374  | 5528.941  |
| AF320293  | 442.775  | 590.046  | NM_00428E | 3169.317  | 4008.105  | NM_014481 | 4453.745  | 4360.941  |
| AF161436  | 4789.573 | 5432.97  | AK025082  | 2549.126  | 2406.515  | U22172    | 3490.508  | 4063.715  |
| NM_02040E | 1618.727 | 1691.465 | AF086535  | 776.954   | 528.676   | AB032960  | 4433.599  | 4857.093  |
| NM_00429E | 2444.505 | 3278.311 | AB040901  | 762.209   | 649.42    | NM_015991 | 664.849   | 658.96    |
| NM_001171 | 1327.705 | 1556.592 | AL137406  | 3867.066  | 3053.981  | NM_012417 | 4771.398  | 5728.806  |
| NM_000664 | 2351.931 | 2672.55  | NM_01225E | 4741.25   | 3471.208  | NM_00254E | 1578.216  | 1670.239  |
| AF075085  | 60871.66 | 53600.26 | NM_00687E | 1539.069  | 1566.625  | NM_00296E | 653.222   | 781.303   |
| NM_00589E | 2312.647 | 2281.807 | NM_00029E | 932.134   | 699.274   | BF246606  | 700.889   | 774.368   |
| NM_00647E | 3491.605 | 5160.497 | NM_00374E | 770.619   | 670.147   | NM_01428E | 2073.251  | 1485.361  |
| AF132734  | 26445.36 | 30293.23 | AF153821  | 955.04    | 625.374   | NM_00234E | 1371.922  | 1200.647  |
| NM_01837E | 2281.469 | 2599.974 | NM_01337C | 1505.291  | 1741.5    | D13631    | 24507.576 | 26362.629 |
| NM_01640E | 24139.27 | 24960.51 | NM_001374 | 615.576   | 675.37    | NM_00371E | 6009.455  | 6424.313  |
| NM_01560E | 2083.006 | 1731.24  | NM_00331C | 4799.896  | 4501.027  | NM_002184 | 2979.781  | 3255.896  |
| NM_001921 | 11979.3  | 11186.57 | AK024461  | 1948.507  | 1924.671  | NM_01488E | 5310.494  | 6981.439  |
| NM_00623C | 12892.67 | 19389.95 | NM_01763E | 2373.522  | 2162.862  | NM_01780E | 12419.254 | 14238.678 |
| NM_01469E | 2191.116 | 2076.781 | X62534    | 1549.304  | 2108.806  | U56387    | 1548.706  | 2765.648  |
| NM_01340C | 19729.78 | 18784.13 | AF027147  | 22820.531 | 20335.85  | NM_003657 | 2227.262  | 1534.003  |
| AK026257  | 5839.257 | 5993.916 | M62399    | 4204.695  | 5318.164  | NM_00058E | 2692.272  | 3375.547  |
| AK023836  | 4328.198 | 4084.593 | NM_002357 | 597.657   | 954.728   | AL049296  | 7358.269  | 8658.577  |
| NM_01810E | 5333.694 | 5476.691 | U71600    | 2024.641  | 2632.298  | NM_014471 | 16963.039 | 19716.025 |
| AJ299442  | 7264.618 | 7902.308 | NM_00447E | 1386.971  | 1306.819  | NM_004397 | 1595.086  | 1560.153  |
| AB040897  | 738.35   | 684.524  | AB037862  | 1675.945  | 2354.189  | NM_00318E | 11784.545 | 14935.338 |
| NM_00012E | 2477.281 | 2184.103 | AK023887  | 636.591   | 609.54    | NM_02023E | 7379.334  | 5368.544  |
| NM_00376E | 16570.8  | 22025.4  | AF088022  | 7738.645  | 4647.017  | D49356    | 1384.005  | 1217.874  |
| NM_00485E | 4851.87  | 4966.669 | AK026537  | 1664.366  | 1437.949  | NM_01857E | 4074.119  | 5071.89   |
| NM_005014 | 1512.412 | 1242.705 | NM_01548E | 3608.477  | 2559.844  | NM_006201 | 7068.096  | 9023.209  |
| NM_006944 | 688.822  | 762.944  | NM_00266E | 5469.58   | 5664.654  | NM_007110 | 3970.456  | 3750.101  |
| NM_004407 | 770.996  | 756.182  | AF202145  | 3387.078  | 2376.043  | U50383    | 15102.42  | 16917.998 |
| NM_00007C | 1140.938 | 1196.276 | AK026155  | 1347.619  | 1184.369  | AK025085  | 10888.387 | 10808.476 |
| NM_00120E | 3176.176 | 3252.049 | NM_01805E | 25248.779 | 22001.711 | NM_00629C | 19233.416 | 15999.331 |
| AB037804  | 700.638  | 564.303  | AF143322  | 358.641   | 514.538   | AK022290  | 1303.13   | 1205.621  |
| U34249    | 826.217  | 791.853  | AK022386  | 4581.19   | 4389.183  | NM_00368C | 58694.793 | 59914.523 |
| NM_00328E | 7339.537 | 6999.406 | NM_002767 | 5797.259  | 6833.403  | AF118124  | 12381.814 | 16605.725 |
| M74220    | 529.833  | 825.986  | AF131846  | 12229.866 | 15401.629 | NM_00484E | 18083.023 | 21774.994 |
| M23254    | 699.974  | 939.236  | AF088069  | 3888.392  | 4501.446  | AL137527  | 14587.584 | 17717.395 |
| R28062    | 4133.331 | 3287.365 | AF086551  | 786.057   | 1040.71   | J04974    | 26365.596 | 30184.965 |
| AI627464  | 1453.974 | 1592.365 | NM_01339E | 4459.304  | 7070.471  | NM_00705E | 12608.381 | 10277.021 |
| BI756258  | 4925.837 | 5820.759 | AK025072  | 1576.114  | 1699.717  | NM_00152E | 3959.775  | 3334.28   |
| AI342225  | 6373.565 | 7115.197 | L10378    | 9559.272  | 7776.821  | NM_007014 | 2505.754  | 1926.868  |
| AA634103  | 69215.02 | 60441.43 | AJ227860  | 1613.638  | 997.03    | AL096740  | 1473.771  | 1584.306  |
| J04599    | 776.853  | 749.683  | AF026942  | 1870.647  | 1459.31   | AF191545  | 5349.822  | 5328.651  |
| AF110020  | 499.941  | 476.112  | AJ276429  | 1042.218  | 777.409   | NM_014554 | 4156.524  | 4789.25   |
| AA608557  | 11237.96 | 9922.219 | AL117657  | 788.472   | 382.569   | AK023968  | 5858.517  | 5037.77   |
| AL050095  | 4306.945 | 5698.103 | AK023589  | 928.311   | 588.075   | NM_00465E | 1951.143  | 2435.311  |
| NM_00309E | 2865.575 | 2773.994 | AK021590  | 1526.581  | 1480.432  | AK025425  | 52951.406 | 55293.512 |
| NM_014781 | 6795.178 | 5225.985 | AK023998  | 1809.064  | 1892.577  | AK025974  | 30357.52  | 33278.699 |
| BU629989  | 1431.206 | 1307.78  | U84507    | 745.505   | 628.189   | NM_005781 | 7565.487  | 9942.416  |

|           |          |          |           |           |           |           |           |           |
|-----------|----------|----------|-----------|-----------|-----------|-----------|-----------|-----------|
| X87896    | 1074.568 | 1266.629 | AK000872  | 1478.673  | 2488.777  | BC036740  | 21376.502 | 25633.518 |
| M88310    | 3450.888 | 3520.798 | AK027147  | 9010.961  | 12703.076 | NM_001747 | 30901.221 | 31324.404 |
| D16856    | 887.404  | 868.041  | AK026084  | 560.599   | 366.756   | NM_001148 | 23364.762 | 40287.129 |
| NM_000042 | 2783.911 | 2824.718 | AK022415  | 18276.877 | 11286.594 | AF242522  | 13364.053 | 16601.697 |
| AF035787  | 1861.656 | 1405.67  | AL137368  | 1142.254  | 575.245   | AJ008152  | 5211.765  | 5785.777  |
| NM_003403 | 1066.59  | 1024.568 | AK021932  | 967.668   | 649.001   | NM_004024 | 8226.269  | 7130.874  |
| NM_014808 | 2895.001 | 2892.981 | AK026787  | 3044.043  | 2217.28   | X52345    | 28237.061 | 28602.443 |
| AB006627  | 832.029  | 592.046  | AK023542  | 663.107   | 512.051   | NM_006965 | 8212.112  | 7248.238  |
| NM_000416 | 9320.102 | 8637.11  | AK000203  | 812.136   | 568.713   | AF027142  | 61590.84  | 56784.082 |
| NM_002965 | 3315.712 | 1874.47  | AK021845  | 3991.515  | 2662.864  | S67970    | 844.915   | 1115.203  |
| AK093780  | 13226.32 | 11585.15 | NM_018592 | 1971.04   | 1519.259  | AF221520  | 2893.536  | 2903.04   |
| AY009397  | 12116.53 | 11225.25 | NM_018503 | 13710.893 | 9989.078  | NM_006941 | 28817.955 | 35129.996 |
| NM_007037 | 2690.411 | 2403.839 | NM_016449 | 11395.416 | 10420.63  | NM_005360 | 2265.623  | 2702.523  |
| AF320294  | 843.319  | 723.905  | AL049670  | 4371.278  | 4987.459  | NM_004349 | 8380.81   | 11381.041 |
| AF320293  | 749.532  | 773.967  | NM_018512 | 4681.834  | 3805.976  | NM_002092 | 22065.293 | 23722.965 |
| AF161436  | 5672.025 | 5088.048 | AK022412  | 3992.374  | 4255.712  | NM_018077 | 5031.261  | 4691.789  |
| NM_020402 | 1403.827 | 1598.066 | AK023073  | 5326.891  | 5359.607  | NM_016839 | 28767.248 | 31976.146 |
| NM_004299 | 2537.54  | 3618.427 | AK022438  | 1332.166  | 1635.616  | NM_005968 | 64452.297 | 61041.758 |
| NM_002250 | 8418.479 | 6984.804 | AK023316  | 479.665   | 590.429   | AK021416  | 4331.169  | 5467.484  |
| S81591    | 1179.244 | 1105.853 | AK023764  | 824.534   | 1258.296  | NM_018471 | 21222.527 | 21962.102 |
| AB023156  | 545.631  | 627.207  | AK024082  | 620.761   | 977.939   | NM_003819 | 6613.094  | 9653.883  |
| NM_006323 | 17542.78 | 17416.03 | AK025062  | 2237.558  | 1799.944  | NM_006560 | 8123.146  | 10238.921 |
| NM_016466 | 6188.645 | 4891.466 | Z27405    | 14983.924 | 10695.738 | NM_016183 | 5566.208  | 5209.768  |
| NM_001493 | 11186.89 | 9692.174 | AK023412  | 1216.033  | 967.999   | NM_004872 | 8359.643  | 7254.109  |
| NM_014841 | 924.221  | 1090.78  | NM_014617 | 34174.84  | 24996.984 | NM_001958 | 61654.219 | 59468.516 |
| NM_014426 | 16641.38 | 21265.79 | AK074682  | 2027.154  | 1835.661  | NM_004757 | 8368.888  | 8173.977  |
| NM_006816 | 21592.81 | 24157.96 | X74605    | 801.839   | 566.748   | NM_015904 | 15724.847 | 14992.913 |
| AK026518  | 40276.87 | 30214.6  | AK024513  | 735.383   | 576.732   | NM_001960 | 62898.309 | 59286.348 |
| NM_000258 | 14181.7  | 13338.88 | BC036692  | 718.16    | 735.744   | NM_018122 | 6949.341  | 7444.071  |
| AJ299442  | 7256.283 | 6944.027 | AJ009640  | 1796.285  | 1211.771  | AF035318  | 1966.881  | 1892.91   |
| AB040897  | 800.082  | 783.479  | Y11163    | 794.189   | 840.47    | NM_015456 | 11777.437 | 10518.593 |
| NM_000129 | 2595.344 | 1909.067 | AF147340  | 400.393   | 359.705   | AK025056  | 2423.057  | 2171.617  |
| NM_003762 | 15684.98 | 15442.68 | AF035308  | 5145.791  | 5243.032  | AF140710  | 9398.285  | 8913.102  |
| NM_018446 | 9089.958 | 8574.145 | NM_014054 | 3404.375  | 3239.477  | NM_012088 | 25506.725 | 20910.104 |
| NM_000187 | 685.938  | 1024.387 | AK022228  | 1998.923  | 2956.426  | NM_017947 | 1460.264  | 1671.313  |
| NM_014465 | 2233.252 | 2085.706 | AF086480  | 2561.86   | 3407.569  | NM_002494 | 7503.438  | 8917.8    |
| D87292    | 1752.949 | 1588.109 | AK022122  | 860.876   | 1733.212  | M58510    | 16255.752 | 13988.841 |
| NM_005498 | 1112.027 | 1343.027 | AK000806  | 35572.48  | 25057.121 | NM_000782 | 1750.859  | 1747.51   |
| NM_016335 | 304.666  | 681.473  | NM_016471 | 5976.503  | 5318.918  | BE396003  | 2718.652  | 2516.514  |
| NM_003165 | 4281.203 | 6990.053 | NM_001145 | 1360.493  | 957.008   | AK023300  | 3963.575  | 3929.648  |
| NM_003906 | 4000.923 | 3793.438 | NM_005364 | 7219.322  | 5634.339  | NM_018082 | 2767.823  | 2539.223  |
| AL359590  | 32203.42 | 35517.32 | AK023482  | 3845.507  | 3188.632  | NM_003904 | 8906.688  | 13057.702 |
| NM_002861 | 5490.861 | 6963.792 | AK022798  | 701.154   | 551.868   | NM_006234 | 44740.566 | 49760.031 |
| NM_003080 | 3087.221 | 3880.639 | AL157423  | 576.162   | 508.164   | AB028987  | 10355.627 | 10457.14  |
| NM_004042 | 608.554  | 754.563  | AK023115  | 496.029   | 703.239   | NM_003594 | 2862.752  | 2435.959  |
| NM_013268 | 1893.066 | 1023.604 | AK023176  | 1080.211  | 1370.395  | NM_005521 | 10207.702 | 9657.284  |
| NM_002645 | 3530.123 | 4165.925 | AL161991  | 13380.256 | 15171.689 | AF164438  | 15563.206 | 16832.844 |
| AK021805  | 7724.428 | 9946.361 | D17032    | 22245.146 | 21052.867 | AK022284  | 4827.058  | 4880.325  |
| AB014550  | 5020.358 | 5675.167 | AL137292  | 506.518   | 530.245   | AF060937  | 983.915   | 464.273   |
| NM_006826 | 26933.11 | 25741.82 | NM_017941 | 2326.417  | 2466.714  | AB040893  | 3810.907  | 4869.785  |
| AB007973  | 13300.72 | 13994.77 | AF301016  | 1055.965  | 1240.053  | AK025844  | 1193.04   | 1609.749  |
| NM_002999 | 404.501  | 1086.358 | BE900527  | 1515.681  | 1603.662  | AL137727  | 4776.401  | 4395.481  |
| M96843    | 5116.743 | 3917.466 | AF118079  | 44461.746 | 48602.465 | L17327    | 2828.859  | 1806.544  |

|           |          |          |           |           |           |           |           |           |
|-----------|----------|----------|-----------|-----------|-----------|-----------|-----------|-----------|
| NM_017791 | 1085.872 | 1153.185 | AF277572  | 704.387   | 1170.785  | AF074986  | 1790.603  | 1978.088  |
| NM_005882 | 14526.32 | 13349.67 | AL365413  | 2486.063  | 3070.183  | AF075004  | 942.878   | 853.49    |
| BC012304  | 11359.9  | 9633.332 | NM_005258 | 6779.58   | 8493.351  | AL049240  | 4083.576  | 4043.15   |
| AB046815  | 5420.301 | 4612.108 | NM_000440 | 3171.736  | 2778.131  | U80773    | 2263.928  | 2413.347  |
| AF075085  | 59903.79 | 53605.05 | NM_001297 | 3672.967  | 3130.884  | AK021745  | 1758.198  | 2496.018  |
| NM_005892 | 1947.475 | 2130.009 | NM_004403 | 9656.134  | 7420.487  | L38937    | 7421.989  | 9064.464  |
| NM_006478 | 3423.466 | 4936.625 | X64993    | 1426.578  | 1171.948  | U90907    | 3545.348  | 3346.802  |
| AF132734  | 23949.26 | 26096.51 | NM_004434 | 10819.389 | 10482.197 | AK024327  | 2385.482  | 2215.048  |
| NM_018379 | 2418.273 | 2659.406 | NM_016230 | 2977.138  | 3555.081  | AK021700  | 1087.269  | 1428.352  |
| NM_016403 | 22488.07 | 23709.36 | NM_001083 | 694.393   | 487.542   | AK024395  | 1044.346  | 865.964   |
| NM_015603 | 2010.102 | 1764.385 | AK023966  | 6051.742  | 4095.502  | AK000801  | 8844.445  | 9345.852  |
| NM_001921 | 11672.06 | 12515.85 | AK025702  | 2793.772  | 2490.697  | D85433    | 10929.497 | 15000.02  |
| NM_006230 | 15537.05 | 24251.66 | NM_018958 | 659.598   | 855.914   | AF086184  | 24408.063 | 26507.563 |
| NM_014699 | 2849.687 | 3008.142 | NM_002367 | 319.757   | 465.614   | NM_018275 | 8180.691  | 9495.978  |
| NM_013400 | 20948.79 | 20180.13 | AK022038  | 2489.144  | 1826.115  | AL049266  | 13171.619 | 11047.546 |
| AK026257  | 2884.765 | 3163.515 | AK025119  | 830.937   | 1010.058  | AK021560  | 1009.339  | 960.8     |
| NM_005076 | 1381.961 | 1348.131 | AJ224170  | 567.126   | 934.474   | AF088045  | 2039.074  | 2352.373  |
| AF253321  | 820.089  | 828.068  | AF085866  | 4192.132  | 6226.731  | AF007149  | 1879.835  | 1807.683  |
| U80735    | 4439.055 | 4814.199 | CY3Cy5    | 2886.215  | 407.158   | NM_014705 | 781.178   | 1015.139  |
| NM_017850 | 4281.454 | 3959.442 | AA397813  | 60809.977 | 58018.676 | AK001469  | 5079.786  | 5353.226  |
| NM_016522 | 967.35   | 820.05   | W47350    | 1812.466  | 1897.827  | AK021627  | 3123.568  | 2794.032  |
| NM_002224 | 5481.552 | 4369.55  | W68291    | 4557.401  | 4501.696  | AF085859  | 3248.386  | 3152.971  |
| X07979    | 13104.67 | 11205.6  | N64384    | 981.037   | 826.274   | AF085888  | 616.645   | 805.413   |
| NM_003874 | 2380.827 | 2964.885 | H-X 53655 | 1310.293  | 1145.763  | AK026307  | 1483.196  | 1235.761  |
| NM_000082 | 2956.075 | 2428.196 | H-U 05770 | 6546.434  | 5071.104  | AL049975  | 1700.225  | 1610.854  |
| L13857    | 1724.177 | 1758.212 | H-M 65199 | 3234.83   | 2673.753  | AL080067  | 1457.585  | 2051.736  |
| NM_018098 | 9553.687 | 8338.451 | H-M 32315 | 1032.635  | 997.614   | AL117464  | 7381.108  | 8358.215  |
| AF286164  | 1106.062 | 1313.706 | H-V00536M | 1421.861  | 1243.384  | AL080160  | 1842.579  | 2577.221  |
| AF146277  | 5394.115 | 4981.486 | BG819162  | 1080.218  | 823.837   | L23849    | 1138.083  | 1108.091  |
| NM_002559 | 849.526  | 732.018  | NM_017532 | 4591.725  | 3652.44   | AL157477  | 5223.914  | 6364.84   |
| NM_017700 | 2513.513 | 1990.579 | SR2       | 52457.113 | 49799.777 | AB002318  | 2967.191  | 2635.452  |
| M37191    | 8078.695 | 6465.767 | SR4       | 15496.276 | 14205.337 | AL357535  | 3870.45   | 3428.142  |
| NM_005242 | 1300.58  | 1291.668 | SR6       | 2763.926  | 2616.792  | AL049951  | 3616.552  | 4605.51   |
| NM_003020 | 1239.102 | 1354.679 | SR8       | 9688.319  | 29799.133 | AK024963  | 1286.906  | 890.547   |
| NM_003404 | 55181.45 | 49307.25 | SR10      | 35079.82  | 14559.097 | AK023725  | 5646.345  | 4013.611  |
| X82240    | 3721.542 | 2971.203 | CY3Cy5    | 3764.167  | 414.079   | AK022936  | 9683.548  | 8270.208  |
| NM_013995 | 11725.6  | 9774.798 | NM_004447 | 5301.061  | 4264.671  | AK024385  | 4752.151  | 5928.332  |
| NM_004455 | 709.42   | 648.667  | NM_001204 | 1667.713  | 1672.563  | NM_017709 | 4522.521  | 3882.128  |
| NM_006010 | 28257.57 | 30045.19 | BF131321  | 1066.127  | 1279.595  | AF049615  | 1839.806  | 1591.928  |
| K03191    | 4411.867 | 4740.603 | NM_012116 | 1324.027  | 957.44    | NM_014358 | 46925.738 | 48536.211 |
| NM_005079 | 30209.89 | 32843.92 | NM_000020 | 1170.563  | 1003.12   | AF009282  | 11101.882 | 12126.693 |
| NM_005192 | 39825.94 | 38174.64 | NM_002442 | 3567.599  | 3499.234  | AF024704  | 16372.389 | 16542.201 |
| NM_004585 | 3434.211 | 3086.562 | AB033091  | 3653.843  | 3510.55   | AF056431  | 1712.327  | 1595.192  |
| NM_015032 | 4745.096 | 2875.473 | NM_004557 | 3124.188  | 2044.599  | NM_016412 | 1588.177  | 1630.448  |
| AK022956  | 6024.171 | 7001.264 | NM_014757 | 17028.373 | 14845.382 | AF009293  | 1955.57   | 1950.457  |
| AK023121  | 1671.404 | 2046.769 | NM_012259 | 37941.742 | 34572.859 | NM_004158 | 65790.18  | 59726.629 |
| NM_014104 | 7514.925 | 10924.29 | AF272357  | 1838.814  | 1639.504  | AF056444  | 12879.447 | 13065.481 |
| NM_002392 | 2854.5   | 2743.724 | NM_016372 | 24366.393 | 21365.928 | AK000989  | 5089.933  | 4686.94   |
| NM_002749 | 12265.67 | 12407.18 | AB020705  | 2348.162  | 3169.665  | AK002210  | 10075.37  | 10383.103 |
| NM_018216 | 8969.689 | 6939.468 | NM_014333 | 1222.991  | 1406.119  | AK021677  | 1582.894  | 1984.706  |
| NM_003390 | 3181.693 | 3529.293 | NM_002980 | 1433.228  | 1535.685  | AK001057  | 1686.021  | 2028.354  |
| AL137747  | 1175.115 | 1183.816 | NM_004262 | 505.392   | 1049.255  | AK001808  | 440.74    | 684.132   |
| NM_014755 | 7545.009 | 4734.102 | BG491613  | 19411.813 | 25472.305 | AK021471  | 1529.069  | 1948.694  |



|           |          |          |           |           |           |           |           |           |
|-----------|----------|----------|-----------|-----------|-----------|-----------|-----------|-----------|
| AF077188  | 18072.05 | 17374.47 | NM_004251 | 4388.147  | 4664.976  | AK021709  | 1506.865  | 1537.379  |
| NM_012446 | 12575.36 | 13853.16 | BF337921  | 1620.815  | 1285.69   | AK025109  | 5664.52   | 5858.68   |
| NM_018338 | 838.846  | 777.213  | U53532    | 2468.288  | 1742.997  | AK026057  | 4117.704  | 3962.928  |
| NM_018685 | 43170.21 | 45299.68 | NM_012484 | 8981.803  | 9949.35   | AK026713  | 1028.915  | 1332.513  |
| AF231919  | 2540.93  | 2975.165 | NM_005719 | 56784.246 | 60212.098 | AJ008117  | 22995.932 | 21042.16  |
| NM_018214 | 2484.594 | 3414.938 | NM_003462 | 5302.462  | 5226.678  | AJ008147  | 46562.137 | 44473.336 |
| AL133644  | 5785.514 | 5335.897 | NM_006093 | 3199.781  | 3246.403  | AK024369  | 2856.733  | 2877.12   |
| NM_002706 | 3309.884 | 3139.243 | NM_000450 | 630.927   | 853.845   | AL049244  | 1071.22   | 901.638   |
| NM_019023 | 9382.575 | 12155.05 | NM_000448 | 751.254   | 395.594   | L43345    | 2744.206  | 2270.243  |
| NM_004420 | 1714.574 | 2973.269 | NM_004513 | 4639.532  | 4999.464  | AF180297  | 8636.567  | 6969.767  |
| NM_002970 | 1395.496 | 1835.453 | NM_001708 | 31703.848 | 32428.004 | AK023245  | 2971.891  | 2987.962  |
| NM_005499 | 22050.24 | 15472.41 | NM_017735 | 2815.845  | 3348.06   | AF147303  | 940.068   | 1074.796  |
| NM_015387 | 13452.14 | 13203.59 | AB033044  | 3389.234  | 3010.927  | S56365    | 64880.281 | 62202.465 |
| NM_001733 | 1177.739 | 1323.911 | AB014564  | 1085.655  | 975.392   | AF186017  | 812.303   | 683.583   |
| NM_005065 | 2410.775 | 2846.432 | NM_020230 | 6611.37   | 9038.191  | AK023607  | 1774.954  | 1787.803  |
| NM_017825 | 18884.13 | 17197.81 | NM_006762 | 55279.836 | 59581.656 | AL049997  | 22522.926 | 21953.125 |
| NM_014035 | 4392.871 | 4040.612 | NM_016430 | 1080.368  | 1713.366  | AK024118  | 2049.344  | 2170.511  |
| NM_020122 | 21859.22 | 22359.17 | NM_003742 | 3541.579  | 3392.111  | X89657    | 1427.971  | 1414.357  |
| NM_013432 | 10538.28 | 10541.36 | NM_005094 | 3702.255  | 3076.213  | AK024509  | 3976.792  | 4543.621  |
| AB020716  | 1188.425 | 1860.385 | NM_002152 | 3375.176  | 3069.194  | AL050185  | 600.546   | 643.83    |
| NM_002298 | 68299.59 | 59212.61 | AK022558  | 3650.763  | 3322.777  | NM_017847 | 6035.898  | 5495.044  |
| AK027130  | 2490.437 | 3704.334 | AK023787  | 1723.149  | 1121.863  | AL049675  | 3775.052  | 3663.518  |
| NM_005479 | 28863.93 | 41740.23 | NM_002133 | 747.746   | 924.125   | AL050151  | 1112.236  | 1127.968  |
| NM_005730 | 19023.9  | 27857.91 | NM_015697 | 2491.841  | 3277.534  | NM_003537 | 29005.098 | 20191.691 |
| NM_005392 | 2293.411 | 2668.288 | AF086489  | 583.446   | 966.587   | AF056419  | 40495.523 | 38421.82  |
| AL133572  | 8015.781 | 6594.291 | AB018258  | 468.271   | 839.529   | AF074983  | 2041.168  | 2053.224  |
| AK022500  | 2786.821 | 2904.541 | AL359592  | 1197.163  | 1251.364  | AK021862  | 1095.018  | 1137.491  |
| BC021298  | 1904.6   | 1685.555 | NM_006078 | 5759.107  | 6119.981  | AK024177  | 3029.139  | 2648.467  |
| U52096    | 4125.041 | 3711.091 | NM_000824 | 2741.346  | 3302.106  | AK024827  | 16603.941 | 15490.157 |
| AB013897  | 1687.498 | 1435.047 | NM_000482 | 868.153   | 650.698   | K01564    | 2684.385  | 1943.88   |
| NM_005526 | 23793.49 | 33924.36 | NM_005953 | 34436.535 | 37224.355 | AB023175  | 28637.91  | 28520.523 |
| AK001669  | 730.93   | 609.601  | NM_016274 | 14479.615 | 16863.1   | AL359563  | 3315.385  | 3182.619  |
| NM_006195 | 1412.44  | 1001.584 | NM_014946 | 1087.308  | 1355.668  | NM_005304 | 1394.729  | 1069.262  |
| NM_006190 | 21227.21 | 18771    | NM_014251 | 1068.595  | 1283.207  | NM_014477 | 2904.969  | 3966.077  |
| NM_006368 | 8869.238 | 8869.287 | AK022750  | 4317.481  | 5025.393  | AL109791  | 571.232   | 922.893   |
| NM_001618 | 2486.864 | 2138.994 | NM_001091 | 1001.288  | 866.863   | AF086478  | 10748.877 | 9209.987  |
| BC000401  | 21950.1  | 25923.77 | AB051453  | 1891.328  | 1443.583  | AF086022  | 1238.495  | 1055.255  |
| NM_006425 | 9461.334 | 8985.242 | AK026842  | 1332.845  | 1350.635  | AK021514  | 65054.453 | 67508.664 |
| BF344046  | 1197.185 | 1189.684 | AB023203  | 1805.12   | 2179.598  | AJ008134  | 7032.488  | 8443.092  |
| AF432218  | 19585.17 | 29716.84 | NM_004255 | 1808.729  | 1529.053  | S71486    | 4568.433  | 5501.403  |
| NM_004286 | 5551.521 | 7097.278 | NM_016271 | 3717.043  | 3887.625  | L33808    | 31358.477 | 36882.563 |
| AK025082  | 2025.187 | 1648.797 | NM_016619 | 2880.511  | 3102.07   | D31886    | 7912.535  | 5428.124  |
| AF086535  | 1547.407 | 1247.253 | NM_014481 | 2429.011  | 2818.527  | U92024    | 1493.78   | 1136.1    |
| AB040901  | 1491.318 | 1547.476 | NM_014264 | 10869.148 | 11297.944 | AK023330  | 8284.722  | 7422.461  |
| AL137406  | 6907.417 | 7495.245 | AF020089  | 2175.832  | 1794.979  | AF075071  | 3587.684  | 3161.51   |
| NM_012253 | 6842.372 | 6487.725 | NM_006257 | 5618.039  | 5000.792  | AF001892  | 1180.156  | 1014.28   |
| NM_006876 | 3874.79  | 3206.675 | NM_016281 | 8317.025  | 7763.614  | X93500    | 3433.922  | 3198.197  |
| NM_000293 | 2917.824 | 2993.445 | NM_004734 | 15902.748 | 15547.027 | U79271    | 2784.247  | 3681.967  |
| NM_003748 | 2114.671 | 2456.381 | AK024793  | 1976.491  | 2348.703  | NM_019888 | 1392.34   | 1574.856  |
| NM_012269 | 650.785  | 674.172  | AF208291  | 956.534   | 1024.613  | AK024609  | 10592.699 | 9634.639  |
| AF153821  | 999.744  | 982.023  | NM_004877 | 53914.219 | 60315.313 | AK023660  | 1135.13   | 1139.535  |
| NM_013370 | 2036.108 | 2193.23  | L10284    | 56888.223 | 60684.227 | NM_018120 | 22760.678 | 22976.768 |
| NM_001374 | 1031.893 | 774.704  | NM_000276 | 1410.385  | 1724.183  | AK026874  | 2554.444  | 2376.609  |

|           |          |          |           |           |           |           |           |           |
|-----------|----------|----------|-----------|-----------|-----------|-----------|-----------|-----------|
| NM_00331C | 9148.787 | 9346.762 | NM_000019 | 67197.898 | 67903.852 | AK024178  | 1036.637  | 1428.839  |
| AK024461  | 3127.843 | 3235.149 | AK023701  | 1009.259  | 1269.07   | D17217    | 3389.254  | 5516.792  |
| NM_017635 | 5523.279 | 5467.439 | NM_015886 | 688.644   | 691.112   | AF088033  | 4426.53   | 5734.244  |
| X62534    | 3330.817 | 3149.908 | NM_007102 | 19783.477 | 19567.637 | NM_020422 | 5703.353  | 6340.704  |
| AF027147  | 19370.45 | 19714.15 | BG491613  | 13444.14  | 14073.682 | AJ227897  | 695.1     | 1008.299  |
| NM_002357 | 1239.59  | 1349.688 | W47350    | 1562.685  | 2193.653  | AK023628  | 747.286   | 1598.715  |
| U71600    | 3769.696 | 3857.114 | W68291    | 5424.824  | 5501.808  | AY007156  | 3585.196  | 3564.89   |
| NM_004472 | 1365.443 | 2774.124 | N64384    | 1130.003  | 939.938   | AF086408  | 64409.988 | 60721.125 |
| AB037862  | 2504.795 | 3280.049 | H-M 65199 | 7666.97   | 8080.498  | AK023979  | 6015.33   | 6883.217  |
| AF086285  | 984.303  | 671.497  | H-M 32315 | 1191.829  | 1275.68   | CY3Cy5    | 16225.259 | 761.154   |
| AK023887  | 584.917  | 559.133  | H-V00536M | 1237.517  | 1435.846  | U13738    | 4462.014  | 4193.876  |
| AF088022  | 9721.157 | 8832.836 | BF439832  | 1568.028  | 1788.037  | H94487    | 2680.742  | 2553.513  |
| AK026537  | 4321.932 | 3330.721 | BG819162  | 877.746   | 808.828   | BG681747  | 32441.113 | 31977.951 |
| NM_015485 | 5290.15  | 5280.521 | NM_017532 | 2772.293  | 3103.925  | H63077    | 54178.934 | 30375.805 |
| AF085992  | 642.77   | 488.595  | M38449    | 7375.779  | 9194.821  | AA679352  | 30346.91  | 18134.963 |
| NM_002666 | 12604.35 | 10751.46 | AK025495  | 589.748   | 678.451   | X04503    | 4557.312  | 1970.048  |
| AF202145  | 4831.982 | 5764.502 | AB033044  | 4323.671  | 3631.015  | D45917    | 3021.037  | 1495.183  |
| AK026155  | 2718.798 | 2271.263 | AB014564  | 1008.388  | 667.092   | X52001    | 3985.345  | 3053.424  |
| NM_018052 | 4874.844 | 6482.952 | NM_006762 | 27128.137 | 26481.461 | BI823872  | 30239.168 | 20571.613 |
| AF143322  | 1190.535 | 1688.736 | NM_006352 | 1449.435  | 1159.241  | AA430552  | 5392.693  | 4147.72   |
| AK022386  | 2935.936 | 3078.728 | NM_01643C | 763.069   | 1019.536  | R45054    | 4118.611  | 4767.158  |
| NM_002767 | 14546.76 | 14247.43 | NM_001204 | 1614.617  | 1336.551  | NM_00062C | 1344.649  | 1525.21   |
| AF088069  | 7236.078 | 6053.339 | BF131321  | 795.531   | 948.667   | AF312769  | 4472.026  | 4234.112  |
| AF086551  | 1318.284 | 1235.752 | NM_012116 | 1402.836  | 1657.23   | AB020668  | 1212.151  | 1435.759  |
| AF263545  | 643.919  | 671.623  | NM_00002C | 1329.529  | 1475.931  | AF309553  | 9407.066  | 6073.033  |
| NM_013393 | 9924.388 | 11163.93 | NM_002442 | 4995.475  | 5555.312  | NM_003605 | 3782.353  | 2595.906  |
| AK025072  | 4128.809 | 2960.02  | AB033091  | 6409.589  | 9305.974  | NM_006139 | 12940.229 | 14347.637 |
| L10378    | 18983.11 | 14817.9  | NM_004557 | 2899.897  | 2829.163  | NM_018961 | 6299.386  | 5813.556  |
| AK022179  | 1193.587 | 874.726  | NM_001584 | 3561.226  | 3803.417  | NM_006896 | 5258.37   | 4824.652  |
| AK022173  | 807.857  | 778.958  | NM_012255 | 27043.83  | 30722.723 | NM_002975 | 5088.579  | 3556.022  |
| AJ227860  | 2121.127 | 2502.41  | AF272357  | 1540.279  | 1805.029  | AF204173  | 1349.346  | 1351.422  |
| AL157448  | 1356.929 | 1178.205 | NM_016372 | 13863.936 | 15480.484 | J03260    | 2966.744  | 2147.943  |
| AF026942  | 2668.36  | 2230.307 | AB020705  | 2720.102  | 4178.852  | AB014514  | 4214.984  | 3676.493  |
| AL117657  | 1429.901 | 1835.886 | NM_014333 | 1388.335  | 1900.79   | NM_002865 | 7869.818  | 5580.097  |
| AK023589  | 1762.154 | 1794.394 | NM_00298C | 969.799   | 1270.658  | NM_003566 | 2559.719  | 1527.413  |
| AK021590  | 830.584  | 600.574  | NM_000482 | 1397.512  | 988.654   | NM_004249 | 1693.25   | 1376.244  |
| AB002441  | 755.878  | 989.039  | AK022750  | 1544.778  | 1860.101  | NM_003731 | 21430.625 | 26283.68  |
| AK023998  | 4397.708 | 2971.676 | NM_004251 | 1818.868  | 3145.909  | NM_005446 | 8732.864  | 8938.903  |
| AK021643  | 888.938  | 1140.6   | BF337921  | 1110.832  | 1325.166  | NM_013292 | 7077.566  | 6057.74   |
| Z11802    | 546.522  | 360.603  | U53532    | 2712.963  | 3385.203  | NM_002387 | 4395.916  | 3917.396  |
| U84507    | 1115.357 | 1178.178 | NM_012484 | 11095.406 | 17267.25  | NM_000069 | 1911.939  | 1938.814  |
| AK000872  | 3019.835 | 3149.937 | AL096732  | 735.718   | 986.905   | L08902    | 1727.357  | 618.511   |
| AK027147  | 7717.348 | 7815.78  | NM_005719 | 61487.957 | 59917.266 | J02639    | 4265.343  | 2569.896  |
| AK026084  | 1167.903 | 899.502  | NM_003462 | 19756.602 | 21565.346 | NM_007263 | 16651.484 | 10213.563 |
| AK022415  | 2900.647 | 2373.363 | NM_006093 | 3848.837  | 3968.388  | AF206020  | 2286.513  | 1199.193  |
| AL137368  | 2397.176 | 2646.723 | NM_000139 | 919.67    | 770.568   | NM_01441C | 1654.831  | 876.092   |
| AK021932  | 1765.849 | 2086.286 | NM_006664 | 3378.021  | 3423.433  | AF305835  | 1090.99   | 935.151   |
| AK026787  | 1495.299 | 1557.057 | NM_002416 | 521.932   | 638.828   | NM_00215C | 7917.583  | 6502.671  |
| AK023542  | 1326.963 | 1937.41  | NM_002728 | 1207.962  | 1232.339  | NM_004595 | 21797.199 | 16800.924 |
| AK000203  | 1140.858 | 1077.595 | NM_00045C | 769.324   | 1087.99   | NM_020178 | 1291.255  | 1061.202  |
| AK021845  | 1389.184 | 1225.916 | NM_004513 | 5442.38   | 6690.264  | NM_002264 | 3139.563  | 2659.408  |
| NM_018592 | 3751.573 | 3512.41  | NM_001708 | 32147.289 | 37084.988 | NM_014754 | 27749.564 | 25195.754 |
| NM_018503 | 3436.874 | 3140.242 | NM_017735 | 2567.865  | 3527.065  | D49387    | 1987.073  | 2163.843  |

|           |          |          |           |           |           |           |           |           |
|-----------|----------|----------|-----------|-----------|-----------|-----------|-----------|-----------|
| NM_01644  | 5121.917 | 5188.06  | AF208291  | 1238.62   | 782.751   | AF050146  | 6531.447  | 5585.685  |
| AL049670  | 10853.7  | 6176.608 | L10284    | 48145.816 | 60772.457 | NM_000116 | 6081.532  | 8943.284  |
| NM_018512 | 1190.621 | 1002.067 | NM_00027  | 1614.494  | 1424.545  | NM_00669  | 13732.955 | 21324.576 |
| AK022412  | 9269.314 | 9825.392 | NM_00001  | 42294.055 | 41693.531 | NM_006804 | 21622.656 | 27489.23  |
| AK023073  | 981.174  | 1170.299 | AK023701  | 814.382   | 861.306   | NM_01596  | 17554.621 | 19853.99  |
| AK023922  | 2020.513 | 1889.415 | NM_003742 | 1051.991  | 1549.507  | AJ278917  | 17802.025 | 13521.225 |
| AK022438  | 1966.878 | 2188.545 | NM_005094 | 3673.851  | 3698.173  | AF016495  | 1895.372  | 945.372   |
| AK023764  | 1590.157 | 1693.399 | BE382905  | 818.048   | 1140.159  | AK025641  | 47317.777 | 39631.406 |
| AK024082  | 927.455  | 626.991  | NM_002152 | 4212.011  | 5739.234  | AK025886  | 2455.143  | 1633.361  |
| NM_00394  | 812.231  | 597.561  | NM_00647  | 60154.852 | 59486.066 | NM_00305  | 1193.844  | 612.987   |
| AK025062  | 4073.719 | 3637.647 | AK023787  | 2427.19   | 2213.894  | NM_00172  | 2720.304  | 2698.59   |
| Z27405    | 2397.234 | 2813.06  | NM_002133 | 1922.678  | 2049.54   | NM_01839  | 10552.212 | 8327.868  |
| AK023412  | 1727.134 | 1743.669 | NM_015697 | 2515.184  | 4126.931  | AB037724  | 9242.803  | 8143.503  |
| NM_014617 | 56444.66 | 48322.47 | AF086489  | 556.347   | 976.633   | AK025086  | 2494.513  | 2352.999  |
| AK074682  | 8287.187 | 8307.774 | NM_032943 | 3531.155  | 3577.646  | AK026151  | 7387.51   | 5284.208  |
| AK024513  | 1114.448 | 1304.251 | NM_007177 | 7776.376  | 8005.803  | NM_01414  | 5728.883  | 4376.277  |
| BC036692  | 809.59   | 807.188  | NM_00080  | 424.006   | 758.705   | NM_00291  | 10854.494 | 6823.34   |
| AJ009640  | 4386.354 | 3586.616 | AL359592  | 849.205   | 846.124   | M20700    | 12150.707 | 10757.412 |
| Y11163    | 2815.174 | 2717.465 | NM_00607  | 7244.131  | 7983.854  | NM_001034 | 33079.641 | 37295.844 |
| AF086391  | 542.818  | 714.456  | NM_000824 | 2620.239  | 3878.112  | NM_00268  | 4169.094  | 5954.623  |
| AF147340  | 1031.501 | 1282.378 | NM_017532 | 4870.722  | 4220.88   | NM_01768  | 5212.703  | 5628.066  |
| AF035308  | 946.247  | 1071.977 | M38449    | 5908.149  | 6447.313  | AL096734  | 1687.815  | 1352.924  |
| NM_014054 | 6751.94  | 7702.793 | NM_001091 | 690.71    | 842.453   | AK000800  | 3489.751  | 5432.339  |
| AK022228  | 3881.291 | 3286.433 | AK023915  | 3462.773  | 4046.819  | BC006287  | 7788.372  | 7662.057  |
| AF086480  | 1769.652 | 1501.68  | AB051453  | 2576.277  | 2229.621  | AB023198  | 7123.152  | 6372.165  |
| AK022122  | 1351.501 | 1111.403 | NM_014963 | 3051.651  | 2824.509  | AF304163  | 34213.391 | 34997.461 |
| AK000806  | 5955.634 | 4806.528 | NM_00425  | 2986.52   | 2341.942  | NM_005231 | 8188.831  | 8778.779  |
| NM_016471 | 10339.77 | 10644.12 | NM_016271 | 5982.149  | 5882.839  | AF064729  | 5422.452  | 4343.34   |
| Z11852    | 449.856  | 876.89   | NM_01661  | 3255.24   | 3589.904  | NM_005412 | 33124.77  | 25979.379 |
| NM_001145 | 2170.829 | 2220.708 | NM_014481 | 2317.596  | 2539.702  | NM_012113 | 3143.586  | 2774.453  |
| NM_005364 | 2897.338 | 2629.039 | U22172    | 1661.437  | 1292.274  | NM_00272  | 1479.655  | 1213.761  |
| AK023482  | 7107.08  | 6404.16  | AB032960  | 2233.969  | 2627.905  | NM_01437  | 23036.275 | 23320.91  |
| AK022798  | 1348.787 | 1080.053 | NM_014264 | 10888.229 | 10938.93  | NM_017812 | 27454.09  | 24064.254 |
| AL157423  | 753.792  | 747.513  | AF020089  | 2446.831  | 1834.116  | AF204173  | 1103.965  | 844.186   |
| AK023115  | 1774.674 | 1260.627 | NM_006257 | 5405.472  | 5316.856  | J03260    | 3447.506  | 3208.637  |
| AK023176  | 2569.751 | 2353.672 | NM_016281 | 4849.345  | 5904.261  | U13738    | 4229.038  | 3247.084  |
| AL161991  | 22101.12 | 19198.24 | NM_004734 | 18127.832 | 19000.404 | AF068236  | 63380.316 | 58113.215 |
| D17032    | 36122.6  | 41234.24 | AK024793  | 2741.016  | 3298.479  | H94487    | 3021.89   | 2674.589  |
| AL137292  | 253.827  | 884.175  | NM_01225  | 42328.059 | 40828.289 | BG681747  | 31407.24  | 47546.285 |
| NM_017941 | 2396.011 | 3129.507 | NM_016372 | 20900.725 | 21180.15  | H63077    | 55670.875 | 57032.648 |
| AF301016  | 1283.601 | 1113.05  | AB020705  | 2304.844  | 2962.45   | AA679352  | 31322.568 | 32091.768 |
| BE900527  | 2062.516 | 2117.744 | NM_014333 | 1148.858  | 1243.491  | AA437291  | 880.257   | 1254.45   |
| AF118079  | 57074.84 | 48647.42 | NM_00298  | 1355.21   | 1594.963  | X04503    | 4133.544  | 3404.388  |
| AL365413  | 1396.19  | 1502.178 | NM_01588  | 1156.915  | 1396.806  | D45917    | 3007.831  | 2677.54   |
| NM_00525  | 1795.053 | 2593.939 | NM_004262 | 1030.783  | 1295.386  | X52001    | 4357.042  | 4971.97   |
| NM_00044  | 6798.734 | 5677.064 | NM_007102 | 51600.898 | 59253.828 | BI823872  | 32106.83  | 37402.637 |
| NM_001297 | 6656.896 | 5586.339 | BG491613  | 19454.629 | 29281.045 | AA430552  | 5511.722  | 5824.072  |
| NM_004403 | 22256.92 | 25800.06 | W47350    | 2853.678  | 2341.914  | X66142    | 7258.719  | 6729.121  |
| X64993    | 3432.127 | 2979.166 | AI160964  | 641.191   | 535.708   | R45054    | 4104.666  | 3966.678  |
| NM_004434 | 21165.94 | 22703.87 | W68291    | 8051.723  | 11488.292 | NM_00062  | 1208.903  | 877.598   |
| NM_00626  | 975.101  | 1114.606 | N64384    | 1328.815  | 1356.824  | NM_00090  | 13122.806 | 12507.323 |
| NM_01623  | 7220.356 | 4777.243 | H-X 53655 | 1155.49   | 654.856   | AL117398  | 6056.621  | 5329.931  |
| NM_001083 | 935.996  | 810.413  | H-U 05770 | 5258.27   | 4765.921  | AY007158  | 68747.625 | 68042.977 |

|           |          |          |           |           |           |           |           |           |
|-----------|----------|----------|-----------|-----------|-----------|-----------|-----------|-----------|
| AK023966  | 7838.52  | 8382.067 | H-M 65199 | 6061.702  | 4634.486  | M58050    | 8463.187  | 10563.643 |
| AK025702  | 4204.996 | 3614.882 | H-M 32315 | 1609.366  | 2030.678  | NM_007263 | 15678.309 | 14597.45  |
| NM_01895E | 630.628  | 798.663  | H-V00536M | 1243.494  | 2359.335  | AF206020  | 3057.455  | 2385.815  |
| NM_002367 | 799.191  | 778.487  | H-D85429M | 35750.992 | 38122.75  | NM_014410 | 2089.704  | 1519.854  |
| AK022038  | 1417.76  | 1606.641 | BF439832  | 2454.895  | 2285.672  | AF305835  | 991.481   | 449.904   |
| AK025119  | 2432.647 | 1778.306 | BG819162  | 1417.871  | 1375.706  | AF312769  | 4300.756  | 3893.911  |
| NM_00636E | 611.779  | 526.434  | NM_00272E | 998.606   | 1105.031  | AB020668  | 1559.27   | 1440.214  |
| AJ224170  | 2208.531 | 1817.102 | NM_00044E | 725.428   | 829.746   | NM_006203 | 29853.678 | 26765.984 |
| AF085866  | 6046.725 | 5525.001 | NM_004513 | 4195.4    | 5331.413  | AF309553  | 10310.175 | 9010.212  |
| NM_00610E | 911.693  | 1015.08  | NM_00170E | 26993.465 | 29472.971 | NM_00360E | 3845.003  | 3522.564  |
| CY3Cy5    | 3020.83  | 128.33   | NM_01773E | 2228.996  | 3046.388  | NM_00613E | 14035.336 | 15840.219 |
| AA397813  | 63487.43 | 52436.2  | AB033044  | 3269.1    | 3469.443  | NM_003993 | 4909.808  | 4455.509  |
| W47350    | 2651.568 | 1789.03  | AB014564  | 1156.811  | 1331.195  | NM_018961 | 7353.599  | 8311.03   |
| AI160964  | 519.186  | 676.556  | NM_020230 | 5673.093  | 7830.479  | NM_00558E | 4635.423  | 4775.491  |
| W68291    | 9894.628 | 10145.83 | NM_006762 | 45739.969 | 58013.188 | NM_012242 | 855.203   | 801.354   |
| N64384    | 463.268  | 747.663  | NM_006352 | 1938.947  | 2352.392  | NM_00689E | 5041.947  | 3243.7    |
| H-X 53655 | 637.625  | 644.706  | NM_016430 | 952.612   | 1991.688  | NM_001130 | 69219.578 | 67223.758 |
| H-U 05770 | 10330.01 | 12307.51 | BF131321  | 1002.187  | 1203.622  | NM_00297E | 5746.331  | 4708.597  |
| H-M 65199 | 3597.004 | 3738.232 | NM_01211E | 2111.274  | 3228.621  | AK023511  | 12867.537 | 9527.949  |
| H-M 32315 | 1028.942 | 850.953  | NM_000020 | 2125.537  | 2282.038  | NM_01455E | 6817.771  | 5572.316  |
| H-V00536M | 1787.519 | 1909.3   | AB033091  | 3970.133  | 4939.373  | NM_00161E | 69035.805 | 71812.531 |
| H-D85429M | 42449.7  | 49145.2  | NM_004557 | 2812.384  | 2491.184  | AK02588E  | 2035.284  | 2245.201  |
| BF439832  | 1984.59  | 2030.855 | NM_014757 | 16832.85  | 18521.744 | NM_00305E | 1258.768  | 838.155   |
| BG819162  | 611.145  | 618.173  | NM_017893 | 1810.186  | 2235.894  | AB014514  | 3682.547  | 3489.109  |
| NM_017532 | 1600.421 | 1791.326 | NM_001584 | 4389.997  | 5813.777  | NM_00286E | 6826.201  | 6212.604  |
| SR2       | 63347.63 | 49116.91 | NM_00080E | 292.485   | 882.91    | NM_00356E | 2233.646  | 1519.516  |
| SR8       | 10595.43 | 22157.85 | AL359592  | 1000.932  | 1440.785  | NM_00715E | 39040.863 | 37362.641 |
| SR10      | 36457.8  | 8952.818 | NM_00607E | 6444.023  | 6748.843  | NM_003731 | 17676.957 | 17800.52  |
| CY3Cy5    | 2610.454 | 136.754  | NM_000824 | 2405.253  | 3237.237  | NM_00544E | 6253.478  | 5146.606  |
| NM_004447 | 7421.654 | 5176.302 | NM_000482 | 1125.839  | 1281.268  | NM_013292 | 4629.352  | 4097.191  |
| NM_001204 | 847.459  | 1081.744 | NM_005953 | 30826.072 | 33978.77  | NM_002387 | 4601.341  | 3089.754  |
| NM_01211E | 1318.378 | 1429.273 | NM_016274 | 14323.365 | 16468.572 | NM_00006E | 1406.628  | 1202.778  |
| NM_000020 | 1132.486 | 1588.097 | NM_01494E | 1138.724  | 1119.282  | AB023217  | 1442.506  | 1125.707  |
| NM_002442 | 6048.025 | 6341.128 | NM_014251 | 2000.307  | 2509.708  | L08902    | 1174.918  | 750.631   |
| NM_004557 | 1837.6   | 1815.539 | AK022750  | 4295.043  | 5272.439  | J02639    | 3682.188  | 3165.872  |
| NM_014757 | 14380.72 | 14157.86 | U53532    | 3091.139  | 3333.93   | NM_005231 | 6681.161  | 7630.425  |
| NM_017893 | 380.346  | 746.494  | NM_012484 | 13384.114 | 24827.127 | AF064729  | 4859.913  | 4038.932  |
| NM_001584 | 4495.839 | 4375.856 | AL096732  | 1353.347  | 1330.76   | NM_005412 | 29668.713 | 22132.734 |
| NM_01225E | 6472.811 | 7272.116 | AB006423  | 726.296   | 632.777   | NM_012113 | 3090.254  | 2929.786  |
| AF272357  | 2370.686 | 2472.869 | AJ132084  | 527.663   | 785.306   | NM_002150 | 7475.744  | 5459.162  |
| NM_016372 | 7589.894 | 7619.798 | NM_006093 | 4587.155  | 5814.937  | NM_00459E | 18785.939 | 15011.316 |
| AB020705  | 4740.371 | 3614.845 | NM_00013E | 1866.927  | 2275.394  | NM_02017E | 1219.12   | 1326.575  |
| NM_014333 | 1551.192 | 1382.074 | NM_006664 | 6275.794  | 9331.971  | NM_002264 | 2782.862  | 2487.479  |
| NM_004262 | 718.639  | 395.574  | NM_00241E | 1515.594  | 2390.151  | NM_014754 | 23601.438 | 23481.066 |
| NM_007102 | 12939.82 | 14645.63 | NM_014264 | 10994.25  | 11208.324 | D49387    | 1196.683  | 1231.011  |
| BG491613  | 22675.37 | 23151.48 | NM_006257 | 5001.628  | 6525.794  | AF050146  | 5352.902  | 5316.686  |
| U53532    | 3856.02  | 3705.978 | NM_016281 | 8320.209  | 9116.614  | NM_00011E | 4924.339  | 7383.9    |
| NM_00013E | 532.776  | 641.107  | NM_004734 | 15165.714 | 15913.723 | NM_00669E | 12025.495 | 12900.528 |
| NM_006664 | 1778.007 | 2021.6   | AK024793  | 2107.87   | 2503.877  | NM_006804 | 17899.844 | 16882.965 |
| NM_00272E | 849.613  | 497.764  | AF208291  | 1227.373  | 1348.094  | NM_01596E | 15065.48  | 13244.274 |
| NM_000450 | 1052.501 | 689.706  | L10284    | 56314.035 | 56393.184 | NM_003051 | 5015.312  | 4657.774  |
| NM_004513 | 5612.599 | 5821.24  | NM_00027E | 1612.77   | 1811.912  | NM_145342 | 7701.218  | 6465.695  |
| NM_00170E | 46798.7  | 57055.77 | NM_003742 | 3510.908  | 3944.813  | AJ278917  | 16280.2   | 12404.276 |

|           |          |          |           |           |           |           |           |           |
|-----------|----------|----------|-----------|-----------|-----------|-----------|-----------|-----------|
| NM_017735 | 3563.207 | 4069.608 | NM_002335 | 968.902   | 947.727   | AK025641  | 39589.098 | 34260.41  |
| AB033044  | 2009.38  | 2105.26  | BE382905  | 1286.254  | 1604.381  | NM_000620 | 949.183   | 940.201   |
| NM_020230 | 8563.786 | 8668.655 | NM_002152 | 6412.862  | 6971.099  | NM_000905 | 12912.6   | 12742.748 |
| NM_006762 | 35651.69 | 50368.35 | AK022558  | 4720.009  | 4633.678  | AL117398  | 6333.67   | 5394.765  |
| NM_006352 | 2380.14  | 3643.881 | NM_006476 | 61187.887 | 58469.582 | AY007158  | 60396.637 | 57064.664 |
| NM_016430 | 1264.055 | 1686.988 | AK023787  | 2551.671  | 1902.333  | NM_001720 | 2390.598  | 2377.084  |
| NM_003742 | 3250.093 | 3344.574 | NM_002133 | 2156.684  | 2352.381  | NM_018390 | 9799.219  | 9955.908  |
| NM_005094 | 4004.939 | 4174.007 | NM_015697 | 3287.908  | 5202.301  | AB037724  | 9057.689  | 7512.166  |
| BE382905  | 721.912  | 640.514  | AF086489  | 978.278   | 959.049   | AK025086  | 2574.128  | 2393.617  |
| NM_015697 | 4186.987 | 3053.551 | NM_032943 | 4917.095  | 6748.578  | AK026151  | 7517.25   | 6946.624  |
| AF086489  | 1018.047 | 763.881  | NM_007177 | 14958.732 | 18192.797 | NM_014140 | 6151.248  | 4887.612  |
| NM_032943 | 4376.836 | 4378.625 | NM_000737 | 2241.955  | 1951.735  | NM_002916 | 10038.641 | 8979.318  |
| NM_007177 | 4658.882 | 5597.521 | AL079273  | 2191.323  | 2033.387  | M20700    | 11192.659 | 11611.462 |
| NM_000824 | 5090.061 | 5755.197 | AK026129  | 2116.627  | 2065.942  | NM_001034 | 31127.885 | 33883.848 |
| NM_000482 | 4328.787 | 3854.872 | AK024200  | 1287.465  | 1136.329  | NM_002689 | 3840.851  | 4063.22   |
| NM_016274 | 14670.68 | 18922.47 | NM_003713 | 8232.979  | 7110.345  | NM_017686 | 4411.285  | 3520.896  |
| NM_014946 | 1024.972 | 1172.174 | M38449    | 7362.827  | 8352.466  | AL096734  | 1179.359  | 1173.751  |
| NM_014251 | 896.507  | 1203.643 | AK025495  | 820.082   | 974.178   | AK000800  | 3911.615  | 4375.494  |
| AK022750  | 3634.896 | 4146.484 | NM_001091 | 1302.204  | 1334.022  | NM_018154 | 7990.882  | 6285.705  |
| NM_001091 | 711.901  | 554.939  | AK023915  | 7925.302  | 7409.25   | BC006287  | 8078.65   | 5753.738  |
| AK023915  | 4098.506 | 3697.252 | AB051453  | 2474.137  | 2222.997  | AB023198  | 6395.798  | 5599.938  |
| AB051453  | 2581.379 | 2931.078 | AK026842  | 1983.428  | 2145.01   | AF304163  | 32590.779 | 26612.549 |
| AK026842  | 2645.988 | 2041.774 | NM_002395 | 1658.116  | 1601.529  | NM_006896 | 4790.435  | 4031.093  |
| AB023203  | 4160.728 | 2673.039 | AB023203  | 2412.064  | 2766.953  | NM_001130 | 63963.75  | 60560.492 |
| NM_004259 | 2293.906 | 2449.603 | NM_014963 | 2938.947  | 3167.35   | NM_002975 | 5469.812  | 4910.622  |
| NM_016271 | 3744.146 | 4357.321 | NM_004259 | 3279.976  | 2453.79   | AK023511  | 11591.63  | 9693.563  |
| NM_016619 | 4541.287 | 4106.75  | NM_016271 | 6869.026  | 6907.66   | NM_014556 | 5740.371  | 5411.312  |
| NM_014481 | 4150.729 | 3811.97  | NM_016619 | 3550.792  | 3630.243  | NM_001615 | 64317.926 | 60728.723 |
| U22172    | 918.361  | 838.486  | NM_014481 | 2968.089  | 3436.095  | NM_002725 | 1532.605  | 902.245   |
| AB032960  | 3575.583 | 3313.326 | U22172    | 4030.407  | 3365.854  | NM_014375 | 21305.676 | 20177.896 |
| NM_014264 | 12365.17 | 10577.84 | AB032960  | 3344.613  | 4529.102  | NM_017812 | 24386.191 | 20486.693 |
| AF020089  | 1397.132 | 1970.438 | NM_017675 | 1027.295  | 638.262   | AF204173  | 1080.078  | 868.986   |
| NM_006257 | 9719.393 | 12567.92 | NM_002350 | 1571.21   | 1566.367  | J03260    | 2992.993  | 2415.456  |
| AK024793  | 1982.296 | 2096.302 | NM_012417 | 3330.492  | 3247.933  | U13738    | 3930.627  | 2915.406  |
| AF208291  | 1615.529 | 749.691  | BF246606  | 1139.254  | 976.171   | AF068236  | 64945.359 | 55550.883 |
| NM_000276 | 1072.029 | 1659.374 | NM_014289 | 774.663   | 1131.457  | H94487    | 2259.476  | 2449.833  |
| NM_000019 | 24940.57 | 28813    | NM_002342 | 891.397   | 892.335   | BG681747  | 30444.572 | 48157.703 |
| AK023701  | 1158.436 | 1217.209 | D13631    | 15665.711 | 18450.313 | H63077    | 55390.078 | 54134.953 |
| NM_015886 | 810.079  | 802.367  | NM_003712 | 4496.899  | 4055.527  | AA679352  | 29782.15  | 32493.705 |
| NM_020358 | 637.327  | 750.239  | NM_002184 | 2647.309  | 2262.035  | AA437291  | 734.774   | 983.283   |
| NM_007102 | 13485.53 | 13039.48 | NM_014883 | 3647.107  | 4236.333  | X04503    | 4175.131  | 3593.122  |
| BG491613  | 20761.35 | 19029.16 | NM_017805 | 7328.273  | 9042.796  | D45917    | 3218.363  | 3096.095  |
| W47350    | 2361.439 | 2030.644 | M86841    | 1902.303  | 1865.729  | X52001    | 4161.964  | 4527.412  |
| W68291    | 8295.736 | 7786.963 | U56387    | 1889.451  | 1681.497  | BI823872  | 29907.531 | 29386.717 |
| H-X 53655 | 475.936  | 442.066  | AJ012370  | 567.908   | 788.32    | AA430552  | 3580.388  | 3347.45   |
| H-U 05770 | 8361.661 | 7581.225 | NM_003657 | 1750.713  | 1499.48   | X66142    | 7462.396  | 8131.932  |
| H-M 65199 | 3270.837 | 3242.104 | NM_014471 | 37516.039 | 41050.813 | NM_005913 | 620.259   | 694.816   |
| H-M 32315 | 1147.278 | 1259.44  | NM_004397 | 1757.366  | 1685.811  | R45054    | 4225.369  | 4012.063  |
| H-V00536M | 1990.735 | 2246.976 | NM_003189 | 9575.669  | 8831.192  | NM_002387 | 4907.401  | 4381.118  |
| BG819162  | 1663.03  | 1503.92  | NM_020238 | 4069.009  | 3749.745  | NM_000069 | 1787.448  | 1378.307  |
| NM_017532 | 1923.292 | 2082.517 | D49356    | 990.92    | 722.919   | AB023217  | 1498.711  | 1119.606  |
| M38449    | 12537.51 | 13144.96 | NM_018579 | 2472.629  | 2286.54   | L08902    | 1308.891  | 789.377   |
| AB014564  | 2177.953 | 3015.863 | NM_006201 | 4385.216  | 3653.474  | J02639    | 3147.571  | 2697.47   |

|           |          |          |           |           |           |           |           |           |
|-----------|----------|----------|-----------|-----------|-----------|-----------|-----------|-----------|
| NM_02023C | 7031.978 | 6514.226 | NM_00125E | 13692.17  | 12376.329 | M58050    | 7701.586  | 7080.76   |
| NM_00676E | 32238.37 | 34544.66 | U50383    | 12774.475 | 11002.735 | NM_00726E | 14203.391 | 13082.21  |
| NM_00635E | 2049.743 | 2256.714 | AK025085  | 8406.438  | 7310.854  | AF206020  | 2133.108  | 2157.243  |
| NM_01643C | 883.383  | 1225.632 | NM_016317 | 679.382   | 883.97    | NM_01441C | 1413.656  | 872.007   |
| NM_001204 | 1429.127 | 970.821  | NM_00629C | 12285.188 | 21327.379 | AF305835  | 1080.479  | 528.112   |
| NM_012116 | 1034.872 | 1275.651 | AK022290  | 906.796   | 885.961   | AF312769  | 4391.018  | 3814.137  |
| NM_00002C | 1096.465 | 1280.168 | NM_00368C | 43853.273 | 45071.043 | AB020668  | 850.257   | 1188.804  |
| NM_00244E | 5287.448 | 4887.317 | AF118124  | 7900.168  | 7651.153  | NM_00620E | 6006.775  | 7059.521  |
| AB033091  | 5193.575 | 4118.75  | NM_00484E | 10970.773 | 13483.799 | AF309553  | 10420.235 | 9353.97   |
| NM_004557 | 1747.42  | 2046.705 | AL137527  | 10018.739 | 9365.209  | NM_00360E | 4008.155  | 4418.286  |
| NM_001584 | 5382.485 | 5602.829 | J04974    | 22044.598 | 18187.592 | NM_00613E | 13765.918 | 21259.08  |
| NM_01225E | 5996.518 | 6546.162 | NM_00705E | 10239.646 | 7609.37   | NM_00010C | 49837.289 | 52995.563 |
| AF272357  | 2296.205 | 2115.952 | NM_00039E | 550.248   | 530.432   | NM_00190C | 68645.188 | 66474.727 |
| NM_01637E | 7910.578 | 8963.287 | NM_007014 | 1835.292  | 2593.131  | NM_00399E | 4722.262  | 5627.875  |
| AB020705  | 4764.008 | 3453.612 | AL096740  | 1132.169  | 1216.358  | NM_018961 | 6817.216  | 10203.407 |
| NM_01433E | 1722.271 | 1566.743 | AF191545  | 3508.1    | 3765.83   | NM_00558E | 5761.07   | 8684.784  |
| NM_00298C | 1269.947 | 1455.179 | NM_014554 | 3177.065  | 3703.245  | NM_01224E | 784.32    | 1090.299  |
| NM_016274 | 12231.98 | 13120.05 | AK023968  | 3674.78   | 2970.486  | NM_003051 | 5621.435  | 5920.554  |
| NM_01494E | 907.676  | 617.235  | NM_00465E | 1315.785  | 1039.517  | NM_14534E | 7648.042  | 7820.175  |
| NM_014251 | 761.025  | 706.708  | AB040948  | 1495.047  | 1443.922  | AJ278917  | 16824.127 | 13791.744 |
| AK022750  | 2761.273 | 2420.606 | NM_00035E | 815.759   | 944.057   | AK025641  | 50067.051 | 39776.977 |
| AB006423  | 460.825  | 494.702  | AK025425  | 37508.219 | 33866.176 | AK025886  | 2132.012  | 1597.759  |
| NM_00571E | 69834.31 | 60557.15 | AK025974  | 26719.184 | 29521.395 | NM_00305E | 1097.698  | 1047.639  |
| NM_00609E | 4595.111 | 4665.828 | NM_01653E | 5568.531  | 6225.376  | AB014514  | 2978.072  | 4114.805  |
| NM_00013E | 457.01   | 789.852  | NM_005781 | 5831.152  | 4944.741  | NM_00286E | 7296.285  | 8233.838  |
| NM_006664 | 1904.963 | 1962.498 | BC036740  | 15735.189 | 14754.332 | NM_00356E | 2810.814  | 3002.054  |
| NM_00272E | 812.755  | 804.185  | NM_001747 | 18888.947 | 18554.674 | NM_00424E | 1172.054  | 1501.127  |
| NM_00045C | 984.022  | 666.154  | NM_00114E | 18176.867 | 13871.858 | NM_00715E | 34856.535 | 43057.422 |
| NM_00451E | 4573.28  | 3903.34  | AF242522  | 10869.614 | 9224.581  | NM_003731 | 23444.213 | 33929.605 |
| NM_01773E | 3027.71  | 2366.209 | AJ008152  | 6413.539  | 6037.299  | NM_00544E | 9282.668  | 11420.81  |
| L10284    | 52564.45 | 52690.22 | NM_004024 | 6136.869  | 3915.188  | NM_01329E | 6693.071  | 7597.405  |
| NM_00027E | 950.24   | 1031.54  | X52345    | 17877.316 | 12888.838 | AK000800  | 3521.039  | 3830.49   |
| NM_00001E | 23634.26 | 22626.81 | NM_00696E | 6150.23   | 4689.907  | NM_018154 | 8881.888  | 6503.549  |
| AK023701  | 970.434  | 920.523  | AF027142  | 58410.523 | 54462.156 | NM_00535E | 687.163   | 744.247   |
| NM_00374E | 3387.305 | 3743.368 | S67970    | 1233.379  | 1244.086  | BC006287  | 7570.659  | 6164.092  |
| NM_005094 | 3395.007 | 4500.292 | AF221520  | 3125.318  | 2653.563  | AB023198  | 6354.002  | 5335.714  |
| BE382905  | 710.344  | 741.196  | NM_006941 | 41304.313 | 37214.645 | AF304163  | 29733.693 | 20502.719 |
| NM_00215E | 4055.734 | 4094.998 | AB037852  | 899.093   | 747.374   | NM_005231 | 7138.653  | 6109.452  |
| NM_001701 | 555.673  | 564.237  | NM_00536C | 1483.436  | 1340.134  | AF064729  | 5684.585  | 2968.895  |
| AK022558  | 5213.486 | 4997.278 | NM_00209E | 14794.215 | 14050.46  | NM_00541E | 29137.066 | 20555.674 |
| AK023787  | 1781.015 | 2228.006 | NM_018077 | 2946.098  | 2607.869  | NM_012113 | 3617.045  | 3711.03   |
| NM_00213E | 1121.846 | 1014.338 | NM_01683E | 24603.85  | 17731.652 | NM_00215C | 4182.142  | 4301.847  |
| NM_015697 | 4186.424 | 3218.084 | NM_00596E | 61629.832 | 60186.355 | NM_00459E | 20633.152 | 18609.596 |
| AF086489  | 892.06   | 987.702  | AK021416  | 4072.035  | 6526.111  | NM_02017E | 1783.826  | 1711.516  |
| NM_03294E | 4666.085 | 4746.983 | NM_018471 | 15781.368 | 16308.02  | NM_002264 | 2995.194  | 4194.838  |
| NM_007177 | 4832.378 | 5044.749 | NM_00381E | 6281.63   | 4646.789  | NM_014754 | 25914.764 | 33986.992 |
| NM_00080E | 467.217  | 541.873  | NM_00656C | 7270.674  | 6653.971  | D49387    | 1606.586  | 1844.273  |
| AL359592  | 538.987  | 450.774  | NM_01618E | 4273.791  | 4186.995  | AF050146  | 6116.944  | 8193.678  |
| NM_00607E | 6588.508 | 7437.067 | NM_00487E | 6028.658  | 5313.515  | NM_000116 | 6809.318  | 10594.703 |
| NM_01753E | 2123.127 | 2371.724 | NM_00195E | 54197.164 | 46429.938 | NM_00669E | 14959.196 | 19686.492 |
| M38449    | 10432.78 | 9892.163 | NM_004757 | 5218.889  | 5316.256  | NM_006804 | 17564.67  | 23529.832 |
| NM_001091 | 556.546  | 581.193  | NM_015904 | 9736.767  | 8765.527  | NM_01596E | 15430.808 | 18847.67  |
| AK023915  | 4214.465 | 4447.487 | NM_00196C | 61696.414 | 56790.805 | NM_004517 | 4994.239  | 8030.493  |

|           |          |          |           |           |           |           |           |           |
|-----------|----------|----------|-----------|-----------|-----------|-----------|-----------|-----------|
| AB051453  | 2519.865 | 3586.421 | NM_018122 | 4289.988  | 3972.391  | AI017418  | 1301.381  | 1237.6    |
| AK026842  | 2507.591 | 2451.917 | AF035318  | 1836.447  | 1244.46   | NM_000679 | 3532.372  | 3022.967  |
| NM_002395 | 455.723  | 909.714  | NM_015456 | 8110.476  | 5636.775  | AF218006  | 53185.555 | 52514.914 |
| AB023203  | 3621.972 | 3058.541 | AK025056  | 1373.548  | 1440.756  | AK026935  | 24330.389 | 19205.906 |
| NM_004259 | 2723.402 | 2823.517 | AF140710  | 5684.743  | 5506.024  | NM_020162 | 8377.949  | 6611.138  |
| NM_016271 | 4045.719 | 4227.173 | NM_012088 | 15910.646 | 12431.32  | AK027124  | 62168.813 | 59699.605 |
| NM_016619 | 4741.011 | 4610.456 | NM_017947 | 1430.64   | 964.624   | M31212    | 62132.195 | 59812.793 |
| NM_014481 | 4135.781 | 4613.919 | NM_002494 | 8913.266  | 7904.965  | AL117398  | 6186.561  | 6851.22   |
| U22172    | 928.722  | 903.889  | NM_000782 | 1175.031  | 975.789   | AY007158  | 56926.473 | 55799.012 |
| AB032960  | 3807.517 | 3926.036 | BE396003  | 2008.148  | 1579.277  | NM_018390 | 11576.2   | 10579.027 |
| NM_014264 | 13245.37 | 11654.95 | AK023300  | 3201.725  | 2991.807  | AB037724  | 8118.776  | 10778.227 |
| AF020089  | 1146.936 | 1418.339 | NM_018082 | 2018.912  | 1773.462  | AK025086  | 3037.531  | 4079.242  |
| NM_006257 | 9417.728 | 8766.064 | NM_003904 | 7609.198  | 5051.194  | AK026151  | 5700.052  | 6677.09   |
| NM_016281 | 8680.649 | 6081.578 | NM_006234 | 36115.148 | 32570.328 | NM_014140 | 6886.092  | 6371.611  |
| AK024793  | 2589.883 | 2559.989 | AK026387  | 757.971   | 776.768   | NM_002916 | 12469.236 | 14063.152 |
| NM_012259 | 6639.008 | 8536.775 | AB028987  | 7329.271  | 7119.346  | M20700    | 11728.427 | 12981.284 |
| AF272357  | 2226.788 | 2102.951 | NM_003594 | 2042.648  | 2074.393  | NM_001034 | 31498.893 | 34710.543 |
| NM_016372 | 6319.663 | 6258.046 | NM_005521 | 6494.27   | 5877.128  | NM_002689 | 4614.868  | 4646.343  |
| AB020705  | 3912.182 | 2195.121 | AF164438  | 12933.974 | 11599.106 | NM_017686 | 4448.382  | 4230.077  |
| NM_014333 | 1249.289 | 1001.401 | AK022284  | 4071.397  | 3038.738  | AL096734  | 1230.854  | 1422.187  |
| NM_002980 | 1243.803 | 1274.318 | AF060937  | 652.316   | 557.374   | NM_016645 | 10611.939 | 10597.57  |
| NM_015886 | 664.563  | 717.009  | AB040893  | 3844.608  | 2546.646  | L14723    | 14298.742 | 15021.077 |
| NM_004262 | 522.654  | 497.754  | AK025844  | 1406.79   | 1230.328  | AK024462  | 25497.955 | 23427.543 |
| NM_007102 | 13694.19 | 15872.86 | AL137727  | 2895.833  | 2267.125  | NM_019601 | 1419.102  | 879.694   |
| BG491613  | 21422.29 | 22633.66 | L17327    | 1102.894  | 1404.59   | NM_002206 | 3461.765  | 3630.582  |
| AA397813  | 65967.39 | 50703.12 | AF074986  | 1085.261  | 1175.03   | NM_007074 | 2138.759  | 1536.25   |
| W47350    | 2630.579 | 1804.063 | AF075004  | 381.203   | 465.907   | NM_003815 | 7472.382  | 8544.31   |
| W68291    | 8673.734 | 9224.58  | AL049240  | 2413.582  | 2276.896  | NM_001430 | 3289.748  | 3457.863  |
| N64384    | 490.326  | 683.267  | U80773    | 1757.223  | 1509.333  | AB010098  | 1418.408  | 950.817   |
| H-X 53655 | 591.525  | 647.187  | AK021745  | 2469.562  | 3440.303  | U17989    | 2125.556  | 2615.182  |
| H-U 05770 | 8256.511 | 8205.639 | L38937    | 7571.834  | 5826.35   | U62325    | 1209.693  | 1895.519  |
| H-M 65199 | 3147.927 | 3238.094 | U90907    | 2673.002  | 2295.206  | AL137595  | 1073.504  | 1509.796  |
| H-M 32315 | 898.307  | 838.116  | AK024327  | 2428.241  | 1742.247  | NM_018028 | 1518.459  | 2155.726  |
| H-V00536M | 1883.438 | 1554.109 | AK024395  | 585.688   | 321.12    | AF249267  | 52813.145 | 60011.215 |
| H-D85429M | 40297.43 | 43507.41 | AK000801  | 6540.482  | 5550.677  | NM_004113 | 1078.273  | 1441.985  |
| BG819162  | 749.491  | 443.884  | D85433    | 7283.74   | 6271.804  | X84939    | 6777.285  | 7628.237  |
| NM_002728 | 1489.822 | 1360.137 | AF086184  | 18388.346 | 17766.934 | NM_018320 | 21847.551 | 27131.855 |
| NM_000450 | 1044.137 | 623.823  | NM_018275 | 10046.345 | 14316.259 | NM_002069 | 4389.085  | 4663.487  |
| NM_004513 | 4546.195 | 3464.248 | AL049266  | 7163.329  | 7457.368  | NM_016056 | 22756.115 | 27906.984 |
| NM_001708 | 37588.23 | 39322.05 | AK021560  | 616.48    | 664.707   | AF188492  | 1046.662  | 895.137   |
| NM_017735 | 2659.498 | 2423.202 | AF088045  | 1683.226  | 1283.876  | M65066    | 21254.598 | 20433.117 |
| AB033044  | 1636.894 | 1936.061 | AF007149  | 1485.948  | 1377.777  | NM_016951 | 2876.668  | 3521.694  |
| AB014564  | 1027.319 | 1796.073 | NM_014705 | 408.02    | 752.732   | NM_013251 | 2004.699  | 1790.936  |
| NM_020230 | 7337.783 | 7080.55  | AK001469  | 3457.124  | 3336.506  | NM_006099 | 4822.094  | 5258.532  |
| NM_006762 | 34028.52 | 42631.96 | AK021627  | 1721.61   | 1373.616  | AF272379  | 5804.266  | 5385.985  |
| NM_006352 | 2122.995 | 2425.939 | AF085859  | 1893.381  | 1617.128  | NM_012326 | 2633.131  | 2634.753  |
| NM_016430 | 1152.501 | 1264.989 | AK026307  | 954.79    | 823.703   | NM_003085 | 43179.879 | 40309.773 |
| NM_004447 | 8361.812 | 7871.956 | AL049975  | 1607.257  | 1170.273  | NM_016084 | 25078.434 | 30558.912 |
| NM_001204 | 783.044  | 1029.479 | AL080067  | 1118.53   | 861.195   | AF095289  | 51703.707 | 56450.578 |
| NM_012116 | 1618.378 | 1716.798 | AL117464  | 6306.919  | 4949.548  | NM_005537 | 8048.727  | 10943.782 |
| NM_000020 | 1086.609 | 1223.077 | AL080160  | 1658.972  | 1744.701  | NM_015935 | 9695.843  | 9895.771  |
| NM_002442 | 6079.936 | 5468.956 | L23849    | 529.072   | 764.923   | AF182412  | 2082.837  | 1670.609  |
| AB033091  | 4894.249 | 3202.727 | AL157477  | 3993.587  | 3877.83   | AK027200  | 2404.551  | 2897.949  |

|           |          |          |           |           |           |           |           |           |
|-----------|----------|----------|-----------|-----------|-----------|-----------|-----------|-----------|
| NM_004557 | 1887.734 | 2028.385 | AB002318  | 2587.701  | 1339.808  | S78372    | 979.678   | 1223.19   |
| NM_014757 | 15231.73 | 15420.38 | AL357535  | 3229.654  | 2184.226  | U03106    | 2141.436  | 4486.296  |
| NM_000809 | 1303.866 | 1130.753 | AL049951  | 3007.47   | 2789.675  | NM_000075 | 26301.398 | 30803.678 |
| NM_006078 | 6728.16  | 7368.586 | AK024963  | 989.243   | 1365.872  | NM_006845 | 15755.117 | 18383.957 |
| NM_000824 | 3977.711 | 3365.379 | AK023725  | 3055.983  | 3065.231  | NM_014885 | 1564.865  | 1612.218  |
| NM_000482 | 539.667  | 622.875  | AK022936  | 6615.399  | 6446.425  | M73239    | 623.076   | 826.916   |
| NM_016274 | 13039.76 | 16369.31 | AK024385  | 5206.8    | 4621.197  | NM_004945 | 8548.502  | 11400.27  |
| NM_014946 | 1040.929 | 1338.946 | NM_017705 | 2618.661  | 2189.505  | NM_020242 | 6103.15   | 6874.114  |
| NM_014251 | 899.538  | 922.44   | AF049615  | 903.324   | 771.264   | NM_001788 | 44081.059 | 41755.344 |
| AK022750  | 3050.372 | 3058.883 | NM_014358 | 30815.633 | 25334.721 | NM_007178 | 64073.461 | 64529.414 |
| AB006423  | 425.205  | 599.284  | AF009282  | 6851.72   | 6673.617  | NM_017682 | 820.432   | 868.495   |
| NM_005719 | 71279.28 | 60384.3  | AF024704  | 11133.996 | 8177.269  | NM_002209 | 20229.428 | 21628.475 |
| NM_006093 | 4574.624 | 5047.984 | AF056431  | 1526.179  | 1423.866  | NM_002291 | 1360.988  | 1736.694  |
| NM_000139 | 584.138  | 719.427  | NM_016412 | 1605.569  | 1270.648  | AL137477  | 11861.336 | 11813.555 |
| NM_006664 | 2171.828 | 2341.698 | AF009293  | 1536.908  | 1195.585  | AF284580  | 1688.949  | 1755.864  |
| NM_014264 | 16159.12 | 16640.48 | NM_004158 | 69999.93  | 63050.133 | AK024961  | 5691.542  | 4451.205  |
| AF020089  | 935.552  | 1263.522 | AF056444  | 9836.553  | 7040.47   | NM_016068 | 9249.759  | 7917.885  |
| NM_006257 | 9182.92  | 9817.879 | AK000989  | 3494.104  | 3027.315  | NM_014256 | 2730.272  | 3137.267  |
| NM_016281 | 8631.499 | 6352.803 | AK002210  | 7614.723  | 6235.758  | NM_015967 | 3829.962  | 6427.427  |
| NM_004734 | 16623.64 | 16928.23 | AK021677  | 1533.654  | 1698.637  | NM_012237 | 1525.907  | 1273.74   |
| AK024793  | 1762.704 | 1849.383 | AK001057  | 1369.858  | 1724.809  | NM_003595 | 1276.81   | 1482.266  |
| NM_000276 | 1163.389 | 1587.23  | AK001808  | 928.526   | 895.536   | NM_006610 | 9666.504  | 10638.659 |
| NM_000019 | 25575.81 | 30645.58 | AK021471  | 1725.084  | 1815.961  | NM_001333 | 3708.212  | 3930.582  |
| AK023701  | 1122.367 | 1079.637 | AK021709  | 1395.083  | 1400.579  | NM_003791 | 8113.638  | 9178.883  |
| NM_003742 | 3186.492 | 4163.512 | AK025109  | 5001.54   | 4503.067  | NM_018017 | 4042.142  | 5245.19   |
| NM_005094 | 3779.204 | 4987.161 | AK026057  | 2339.019  | 2323.851  | AK001296  | 10960.685 | 12937.003 |
| BE382905  | 680.535  | 1046.384 | AK026267  | 1391.619  | 1647.529  | AK000173  | 973.998   | 1997.924  |
| NM_002152 | 4583.579 | 4745.96  | AK026713  | 1168.198  | 1151.081  | NM_018365 | 4414.414  | 3864.334  |
| NM_001701 | 598.256  | 469.01   | AJ008117  | 15256.919 | 10850.498 | NM_006586 | 30109.035 | 32702.977 |
| AK022558  | 4918.764 | 5810.213 | AJ008147  | 34392.453 | 23553.389 | AJ272180  | 4909.524  | 4430.907  |
| AK023787  | 1719.664 | 2762.667 | AK024369  | 2340.512  | 1505.551  | AK025709  | 2592.421  | 2604.494  |
| AF086489  | 1049.479 | 1057.198 | AL049244  | 575.824   | 829.678   | NM_019016 | 15494.286 | 15746.409 |
| NM_000737 | 1447.086 | 1948.45  | L43345    | 1936.616  | 1676.876  | NM_012261 | 15606.671 | 13863.261 |
| NM_005045 | 760.758  | 583.04   | AF180297  | 7436.145  | 6017.018  | NM_015556 | 9069.022  | 7793.831  |
| AK026129  | 1025.916 | 987.727  | AK023245  | 2711.849  | 1966.578  | NM_018416 | 4290.558  | 4213.423  |
| M38449    | 13138.89 | 14427.97 | AF147303  | 1147.521  | 1405.281  | NM_004606 | 8025.628  | 6404.307  |
| NM_001091 | 700.749  | 801.671  | S56365    | 62919.668 | 58558.152 | D70833    | 68686.703 | 62708.383 |
| AK023915  | 4610.153 | 4246.313 | AK023607  | 1603.187  | 1194.686  | NM_016621 | 4135.518  | 4621.537  |
| AB051453  | 3051.639 | 3833.077 | AL049997  | 14397.981 | 13536.409 | AK022643  | 858.475   | 1193.021  |
| AK026842  | 2831.85  | 2524.95  | AK024118  | 1251.852  | 1181.477  | AB046808  | 4672.276  | 6248.874  |
| NM_002395 | 632.851  | 789.365  | X89657    | 879.901   | 1215.712  | AF015313  | 1050.597  | 1067.493  |
| NM_004259 | 2929.114 | 4281.072 | AK024509  | 3892.554  | 2969.547  | NM_006466 | 2479.142  | 2912.858  |
| NM_016271 | 4748.345 | 5200.13  | AL050185  | 1045.418  | 1072.23   | NM_005681 | 4404.525  | 4327.547  |
| NM_016619 | 5444.312 | 5867.371 | NM_017847 | 4028.835  | 3439.749  | NM_015156 | 6630.347  | 7878.131  |
| NM_014481 | 4742.923 | 4517.223 | AL049675  | 2700.106  | 1655.903  | NM_012384 | 5395.125  | 6115.696  |
| U22172    | 1074.947 | 1007.97  | AL050151  | 998.466   | 897.068   | NM_004653 | 5991.436  | 7466.925  |
| AB032960  | 4441.05  | 3782.075 | NM_003537 | 18466.465 | 21394.109 | AF233453  | 3598.41   | 3956.376  |
| NM_015991 | 722.952  | 646.695  | AF056419  | 31670.238 | 27513.328 | D87454    | 14233.072 | 16224.847 |
| NM_002350 | 1417.562 | 1259.174 | AF074983  | 1787.937  | 1552.488  | NM_007020 | 3705.787  | 4550.363  |
| NM_012417 | 3758.196 | 4637.826 | AK021862  | 889.202   | 1046.92   | NM_000713 | 11504.319 | 11396.356 |
| BF246606  | 311.944  | 514.214  | AK024177  | 2044.056  | 1865.128  | NM_016055 | 4983.376  | 4624.15   |
| NM_014289 | 1047.528 | 599.235  | AK024827  | 10800.337 | 9735.827  | NM_013291 | 13607.615 | 11502.339 |
| NM_002342 | 907.129  | 943.653  | K01564    | 1546.616  | 1464.899  | NM_002936 | 20231.277 | 18892.055 |



|           |          |          |           |           |           |           |           |           |
|-----------|----------|----------|-----------|-----------|-----------|-----------|-----------|-----------|
| D13631    | 16305.8  | 14205.73 | AB023175  | 21687.996 | 19661.586 | NM_014161 | 5141.429  | 4401.904  |
| NM_014883 | 4931.919 | 4465.894 | AL359563  | 2221.805  | 1856.591  | BF312817  | 4221.855  | 4055.271  |
| NM_017805 | 6604.934 | 4144.552 | NM_005304 | 989.115   | 957.967   | AF086491  | 6177.404  | 6348.852  |
| M86841    | 1546.71  | 1363.805 | NM_014477 | 3022.454  | 2783.827  | NM_014856 | 1567.602  | 1841.738  |
| U56387    | 991.689  | 1495.363 | AF086478  | 5641.579  | 6460.54   | NM_003492 | 3341.137  | 4328.634  |
| NM_003657 | 2513.986 | 2186.66  | AF086022  | 559.055   | 456.701   | NM_003780 | 49361.418 | 52353.066 |
| AL049296  | 8370.727 | 6851.428 | AK021514  | 62654.121 | 58299.559 | NM_000199 | 25967.748 | 23891.945 |
| NM_014471 | 1696.338 | 1795.556 | AJ008134  | 5593.182  | 5883.504  | NM_003778 | 69216.531 | 64452.102 |
| NM_004397 | 1442.591 | 1258.762 | S71486    | 2754.31   | 2833.688  | AK023263  | 4819.922  | 5977.787  |
| NM_003189 | 14670.88 | 15098.1  | L33808    | 32592.533 | 27610.6   | NM_004622 | 4116.675  | 3967.991  |
| NM_018579 | 4003.264 | 4126.565 | D31886    | 4363.339  | 3330.829  | AK021445  | 1578.83   | 2301.598  |
| NM_006201 | 5461.955 | 5827.56  | AK023330  | 6447.326  | 4689.274  | NM_017934 | 5144.379  | 6274.016  |
| NM_007110 | 3451.101 | 2385.532 | AF075071  | 3748.986  | 2891.325  | NM_014168 | 40828.828 | 48110.52  |
| U50383    | 14243.4  | 12868    | AF001892  | 931.545   | 723.813   | AF211971  | 6902.662  | 5666.322  |
| AK025085  | 12380.03 | 11392.68 | X93500    | 2271.428  | 1893.484  | NM_002931 | 4135.265  | 4964.644  |
| NM_006290 | 17067.66 | 11685.54 | U79271    | 2311.884  | 1823.908  | NM_013448 | 55319.512 | 54362.695 |
| AK022290  | 1334.302 | 995.513  | NM_019888 | 1384.813  | 968.605   | X65232    | 51260.418 | 55471.527 |
| AF118124  | 9540.233 | 9252.96  | AK024609  | 8174.484  | 6407.984  | U12767    | 949.723   | 1035.246  |
| NM_004849 | 11970.95 | 9375.86  | AK023660  | 996.695   | 1045.087  | U17630    | 1431.684  | 1086.651  |
| AL137527  | 10653.3  | 9847.086 | NM_018120 | 16993.256 | 14137.071 | M33782    | 1393.024  | 1421.482  |
| AK024186  | 378.001  | 530.118  | AK026874  | 2416.133  | 2580.174  | NM_017755 | 15735.929 | 13337.839 |
| J04974    | 965.203  | 1103.209 | AK024178  | 832.703   | 781.89    | NM_015696 | 963.061   | 913.398   |
| NM_007058 | 13766.26 | 15910.62 | D17217    | 3119.944  | 2963.378  | AK022551  | 4102.536  | 5170.231  |
| NM_001528 | 749.399  | 895.22   | AF088033  | 3853.52   | 3372.441  | AF085968  | 2536.958  | 2649.518  |
| AL096740  | 1288.861 | 1229.928 | NM_020422 | 4071.576  | 3830.56   | AK023665  | 1277.146  | 1585.92   |
| AF191545  | 5141.501 | 4325.771 | AJ227897  | 797.37    | 647.371   | AB011136  | 2565.239  | 2687.244  |
| NM_004652 | 1783.078 | 1432.089 | AY007156  | 2773.591  | 2479.548  | AF085898  | 8390.401  | 9077.694  |
| AK025425  | 38330.52 | 39296.52 | AF086408  | 56088.719 | 49437.117 | AK021552  | 511.162   | 671.276   |
| AK025974  | 4343.575 | 4179.769 | AK023979  | 5076.739  | 5346.383  | AL442094  | 1031.054  | 1050.894  |
| NM_005781 | 2284.055 | 2383.238 | CY3Cy5    | 14495.979 | 2827.883  | AL161960  | 1754.898  | 2763.611  |
| BC036740  | 8214.135 | 7996.986 | U13738    | 3028.255  | 4158.653  | AL049964  | 1692.609  | 2047.562  |
| NM_001747 | 28363.01 | 29387.11 | AF068236  | 55232.113 | 58729.168 | AK023269  | 2389.027  | 2877.653  |
| NM_001148 | 20224.19 | 27485.48 | H63077    | 47693.762 | 46005.75  | AF070564  | 5076.366  | 6021.615  |
| AF242522  | 11218.54 | 10946.68 | AA679352  | 26640.891 | 23337.033 | AK021439  | 22102.137 | 26023.715 |
| AJ008152  | 900.159  | 1015.418 | AA437291  | 934.537   | 793.49    | AF052099  | 3856.51   | 4041.865  |
| NM_004024 | 4160.972 | 5445.215 | X04503    | 4341.955  | 3778.354  | AL110111  | 4884.001  | 5503.073  |
| NM_006965 | 7125.63  | 8699.681 | D45917    | 2351.911  | 2741.778  | AF070543  | 2852.385  | 3294.559  |
| S67970    | 620.487  | 524.604  | X52001    | 12169.572 | 11052.589 | AF086525  | 722.775   | 917.193   |
| AF221520  | 4261.79  | 4678.153 | BI823872  | 22503.268 | 19540.535 | AF086509  | 736.484   | 652.461   |
| AB037852  | 746.68   | 863.745  | AA430552  | 5848.707  | 9130.527  | NM_014778 | 8771.668  | 8010.457  |
| NM_004349 | 4725.294 | 8145.892 | X66142    | 5296.263  | 4753.901  | AK001171  | 24888.787 | 24477.861 |
| NM_002092 | 15449.65 | 15340.26 | NM_005913 | 914.949   | 737.008   | AK026273  | 13134.009 | 15869.402 |
| NM_018077 | 3484.1   | 3117.332 | R45054    | 4915.718  | 6552.789  | NM_020250 | 26349.408 | 29694.061 |
| NM_016839 | 5889.929 | 7232.127 | NM_000620 | 1494.458  | 2704.366  | AF055007  | 1429.243  | 1376.644  |
| NM_005968 | 18674.71 | 21684.9  | NM_000905 | 11403.74  | 9838.481  | NM_012337 | 2215.38   | 2405.809  |
| AK021416  | 3133.87  | 2777.657 | SR5       | 9430.027  | 7816.704  | AL389879  | 16644.016 | 14390.141 |
| NM_018471 | 15206.18 | 13553.21 | SR7       | 6752.626  | 35714.715 | AK022869  | 4589.946  | 4534.336  |
| NM_003819 | 5841.577 | 8565.896 | SR9       | 23751.289 | 2879.397  | NM_016111 | 24091.867 | 32516.148 |
| NM_006560 | 7490.738 | 8753.214 | CY3Cy5    | 7147.563  | 586.263   | AF085958  | 68419.711 | 67092.961 |
| NM_016183 | 3529.856 | 3054.818 | AF312769  | 2885.902  | 3853.998  | AF086021  | 6838.101  | 7587.174  |
| NM_004872 | 7618.197 | 7239.89  | AB020668  | 1369.92   | 1439.009  | AK024472  | 3560.403  | 3470.662  |
| NM_001958 | 2849.82  | 3200.181 | NM_006203 | 21439.578 | 25016.447 | AF087981  | 421.2     | 728.987   |
| NM_004757 | 5913.575 | 5982.777 | NM_013261 | 653.568   | 742.978   | NM_017976 | 4200.46   | 6977.959  |

|           |          |          |           |           |           |           |           |           |
|-----------|----------|----------|-----------|-----------|-----------|-----------|-----------|-----------|
| NM_015904 | 12118.89 | 10182.03 | AF309553  | 7034.15   | 7275.443  | U06700    | 2145.968  | 2077.55   |
| NM_001960 | 60859.95 | 51541.69 | NM_003605 | 3122.575  | 3361.108  | U63828    | 3687.476  | 4539.359  |
| NM_018122 | 5064.904 | 5014.448 | NM_006139 | 11934.561 | 9061.13   | Z36794    | 1627.159  | 2217.953  |
| AF035318  | 2293.643 | 2883.192 | NM_003993 | 3552.13   | 3847.267  | Z36828    | 17978.537 | 22222.123 |
| NM_015456 | 9357.993 | 10214.35 | NM_018961 | 5785.932  | 4764.147  | AF086121  | 30310.791 | 27188.066 |
| NM_012088 | 19512.27 | 15289.53 | NM_005586 | 4926.047  | 6886.486  | AF086140  | 2255.91   | 2175.406  |
| NM_017947 | 1469.175 | 1519.461 | NM_012242 | 804.812   | 930.675   | AK026915  | 2839.92   | 3669.006  |
| NM_002494 | 5880.174 | 5690.958 | NM_006896 | 3295.764  | 3967.063  | AL110259  | 1590.69   | 2387.585  |
| M58510    | 6831.987 | 5814.973 | NM_001130 | 65876.008 | 73298.094 | AB033100  | 31481.93  | 29963.697 |
| NM_000782 | 472.746  | 347.856  | NM_002975 | 6545.217  | 8464.67   | AL390138  | 2883.046  | 3446.121  |
| BE396003  | 3053.329 | 2879.958 | AK023511  | 9011.455  | 8815.834  | AL137290  | 9700.591  | 9785.632  |
| AK023300  | 851.022  | 665.813  | NM_002725 | 1802.965  | 2133.368  | AK024180  | 967.651   | 1291.042  |
| NM_018082 | 960.679  | 1148.405 | NM_014375 | 20536.086 | 15163.281 | AK023458  | 2030.338  | 2091.635  |
| NM_003904 | 5732.354 | 8305.91  | NM_017812 | 18823.93  | 15144.507 | AK021606  | 1449.406  | 1341.296  |
| NM_006234 | 32114.72 | 37479.04 | AF204173  | 839.659   | 781.157   | NM_014124 | 52169.383 | 45994.129 |
| AB028987  | 5631.115 | 4800.406 | J03260    | 2658.211  | 1987.983  | AF119888  | 1715.766  | 1630.744  |
| NM_003594 | 2804.362 | 2284.601 | AB014514  | 3159.18   | 3397.853  | AK001551  | 4460.532  | 5564.521  |
| NM_005521 | 5420.49  | 5012.974 | NM_002865 | 5310.174  | 6230.729  | AK001825  | 3119.488  | 2792.548  |
| AF164438  | 1124.4   | 1062.301 | NM_003566 | 2054.775  | 1379.784  | AK024714  | 1287.359  | 1538.617  |
| AK022284  | 717.093  | 532.627  | NM_004249 | 515.62    | 756.905   | AK022363  | 2277.752  | 1988.545  |
| AF060937  | 1352.591 | 1211.294 | NM_003731 | 15121.442 | 13800.738 | AK022485  | 1103.375  | 1351.54   |
| AB040893  | 2667.818 | 2937.668 | NM_005446 | 6491.86   | 5230.446  | AK023395  | 3898.384  | 4938.159  |
| AL137727  | 7001.717 | 6299.085 | NM_013292 | 5393.59   | 5418.907  | AK023818  | 6877.932  | 6248.712  |
| L17327    | 3024.509 | 1491.236 | NM_002387 | 4274.471  | 3520.584  | AK024139  | 655.193   | 1141.41   |
| AL049240  | 3262.001 | 2542.668 | NM_000069 | 1910.616  | 1483.378  | AK023895  | 1775.287  | 1890.666  |
| U80773    | 2293.281 | 2370.062 | AB023217  | 965.669   | 1435.011  | AK024206  | 11896.543 | 10698.417 |
| AK021745  | 1835.728 | 1837.148 | L08902    | 1068.876  | 906.676   | NM_006262 | 4947.625  | 5625.418  |
| L38937    | 5327.679 | 5057.401 | J02639    | 2239.6    | 2014.639  | AK026598  | 4511.99   | 4060.416  |
| U90907    | 5988.427 | 4543.964 | NM_007263 | 12629.061 | 10577.479 | AK023602  | 2410.458  | 2633.138  |
| AK024327  | 2578.037 | 2226.09  | AF206020  | 2527.148  | 1807.475  | NM_018097 | 62389.965 | 53458.652 |
| AK024395  | 564.473  | 490.441  | NM_014410 | 1750.804  | 1346.674  | AF130043  | 1173.509  | 1093.464  |
| AK000801  | 7602.198 | 6874.739 | NM_002150 | 5222.875  | 5903.396  | Y11167    | 2611.033  | 3251.372  |
| D85433    | 7809.732 | 7818.049 | NM_004595 | 11901.403 | 18635.211 | AK026813  | 1554.147  | 1679.006  |
| AF086184  | 2889.423 | 2892.465 | NM_020178 | 754.796   | 799.617   | AK027225  | 1354.594  | 1988.596  |
| NM_018275 | 1066.101 | 1335.917 | NM_002264 | 2781.954  | 2548.079  | AK023083  | 4537.214  | 5710.56   |
| AL049266  | 8848.715 | 7518.804 | NM_014754 | 22610.35  | 22127.174 | AF130093  | 937.446   | 1485.599  |
| AF007149  | 2829.232 | 3116.179 | D49387    | 1219.831  | 1121.281  | AF116622  | 1352.928  | 1323.142  |
| NM_014705 | 628.463  | 546.567  | AF050146  | 6170.411  | 5702.126  | NM_005325 | 921.561   | 1238.448  |
| AK001469  | 5506.776 | 4932.855 | NM_000116 | 5507.139  | 3575.681  | AF217967  | 1719.197  | 2766.062  |
| AK021627  | 2697.304 | 2716.18  | NM_006698 | 10576.263 | 10187.833 | NM_018150 | 16727.281 | 16216.707 |
| NM_019596 | 549.976  | 754.405  | NM_006804 | 18567.535 | 16992.031 | NM_017918 | 23995.717 | 23372.838 |
| AF085859  | 1216.526 | 1519.23  | NM_015969 | 11800.434 | 11605.775 | NM_017855 | 66392.93  | 59497.766 |
| AF085888  | 1597.392 | 1444.523 | NM_003051 | 7043.238  | 10592.298 | AB007954  | 4001.111  | 5031.607  |
| L23849    | 740.992  | 884.903  | NM_145342 | 6996.791  | 7109.302  | AK026494  | 6359.274  | 7423.328  |
| AL157477  | 3693.086 | 3377.611 | AJ278917  | 20932.412 | 19728.461 | AK022067  | 969.724   | 1602.878  |
| AB002318  | 1431.055 | 1429.313 | AK025886  | 2280.049  | 1447.341  | AK023508  | 2232.075  | 2693.925  |
| AL049951  | 4188.741 | 3836.651 | NM_003058 | 934.387   | 677.947   | AK025840  | 5705.173  | 4837.741  |
| AK024963  | 1023.576 | 729.113  | NM_001720 | 1389.318  | 1631.209  | BC024009  | 3583.664  | 4535.491  |
| AK023725  | 4300.401 | 3522.115 | NM_018390 | 8496.401  | 11774.316 | AF128543  | 4477.828  | 5523.078  |
| AK022936  | 9397.71  | 9024.109 | AB037724  | 7904.978  | 6762.018  | AK022071  | 1348.89   | 1835      |
| AK024385  | 2147.514 | 1966.116 | AK025086  | 2413.006  | 2572.367  | NM_004189 | 2446.45   | 3287.887  |
| NM_017709 | 3907.244 | 2860.315 | AK026151  | 6961.229  | 7391.744  | U84510    | 11282.553 | 13083.505 |
| AF049615  | 601.148  | 839.739  | NM_014140 | 3954.757  | 5101.336  | S83198    | 23254.748 | 23588.953 |

|           |          |          |           |           |           |             |           |           |
|-----------|----------|----------|-----------|-----------|-----------|-------------|-----------|-----------|
| NM_01435E | 40136.54 | 45252.53 | NM_00291E | 6752.735  | 8465.358  | AF052119    | 30135.793 | 36582.914 |
| AF024704  | 3041.608 | 3425.724 | M20700    | 8388.1    | 8157.126  | X94290      | 3708.61   | 4318.909  |
| AF056431  | 1502.956 | 1463.705 | NM_001034 | 24411.178 | 44721.027 | AK026685    | 39727.559 | 43241.941 |
| NM_016412 | 586.278  | 928.514  | NM_00268E | 3555.426  | 5922.196  | AF090927    | 47491.559 | 51200.898 |
| AF009293  | 1694.561 | 1747.957 | NM_01768E | 2684.226  | 2878.218  | AL137642    | 2254.898  | 2510.597  |
| NM_00415E | 40114.31 | 39670.73 | AL096734  | 962.332   | 986.759   | AL133619    | 12447.178 | 13455.165 |
| AK002210  | 1532.267 | 1768.664 | AK000800  | 3417.68   | 4815.195  | AK025902    | 6142.462  | 6818.051  |
| AK021677  | 1176.289 | 1175.552 | NM_018154 | 5523.199  | 7268.417  | AL353949    | 686.945   | 741.113   |
| AK001057  | 1314.826 | 1202.241 | NM_00535E | 401.034   | 700.86    | NM_005181   | 3509.849  | 3648.831  |
| AK021471  | 1184.087 | 931.827  | BC006287  | 5626.218  | 7071.32   | AF026945    | 1031.245  | 1039.26   |
| AK025109  | 2608.941 | 2196.629 | AB023198  | 5300.088  | 5416.894  | AF143676    | 9064.813  | 9051.189  |
| AJ008117  | 5213.579 | 5770.15  | NM_005231 | 6735.843  | 5904.727  | U66044      | 13606.201 | 14029.62  |
| AJ008147  | 12401.41 | 10765.9  | AF064729  | 4101.71   | 3764.125  | NM_005247   | 55055.258 | 54106.574 |
| AK024369  | 2041.11  | 2327.862 | NM_005412 | 19236.855 | 18827.945 | NM_005283   | 2441.458  | 2927.039  |
| L43345    | 4038.753 | 3085.178 | NM_012113 | 2980.24   | 2560.714  | AL122089    | 5315.57   | 6820.618  |
| AF180297  | 5314.893 | 4231.221 | NM_00272E | 1168.066  | 1627.398  | AA203665    | 6179.341  | 7321.963  |
| AK023245  | 2870.95  | 2815.616 | NM_01437E | 18757.098 | 23992.975 | U95646      | 1879.873  | 2318.161  |
| AF186017  | 1372.253 | 827.413  | NM_017812 | 20045.322 | 27105.395 | Y16705      | 3223.428  | 3779.651  |
| AL049997  | 17395.05 | 15513.29 | AF204173  | 962.475   | 1336.346  | AF279775    | 7263.746  | 7821.967  |
| AK024118  | 1327.744 | 1164.697 | J03260    | 3239.973  | 3598.021  | NM_00234E   | 2398.907  | 3258.648  |
| X89657    | 1321.333 | 1026.4   | U13738    | 2894.425  | 3487.351  | U57971      | 2953.607  | 3960.135  |
| AK024509  | 1318.256 | 1320.7   | AF068236  | 58654.418 | 59935.891 | X89673      | 1556.786  | 1681.535  |
| NM_017847 | 5788.42  | 4510.554 | H94487    | 2012.165  | 2760.423  | AK024593    | 3481.441  | 3390.449  |
| AL049675  | 2073.204 | 2145.61  | BG681747  | 41844.289 | 27953.395 | Z83934      | 2716.021  | 2165.707  |
| AL050151  | 1846.821 | 1709.13  | H63077    | 45345.32  | 41279.578 | NM_01835E   | 12206.925 | 9474.507  |
| NM_003537 | 9387.585 | 6556.72  | AA679352  | 24979.113 | 22436.865 | AK022020    | 3504.882  | 3194.02   |
| AF056419  | 11512.82 | 9957.693 | X52001    | 3646.288  | 3881.155  | U17634      | 860.193   | 950.993   |
| AF074983  | 2093.801 | 1754.398 | AA430552  | 8526.052  | 15720.908 | AK000263    | 20559.775 | 23449.281 |
| AK021862  | 908.791  | 1074.345 | X66142    | 6741.443  | 6214.111  | Y13895      | 1030.707  | 1039.964  |
| AK021952  | 1354.456 | 681.15   | R45054    | 3662.582  | 3227.6    | NM_017447   | 3552.185  | 4081.277  |
| AL359563  | 2123.358 | 1622.055 | NM_00062C | 858.003   | 913.566   | AL049452    | 1557.832  | 1625.684  |
| AF085984  | 948.832  | 827.718  | AL117398  | 5033.792  | 4038.423  | NM_016622   | 4032.321  | 4087.046  |
| AF086478  | 8350.163 | 6367.715 | AY007158  | 60499.16  | 60869.785 | AK026976    | 3101.671  | 3291.352  |
| AK021514  | 70934.2  | 50352.43 | M58050    | 7500.875  | 9043.174  | AF070559    | 10323.76  | 9818.383  |
| AJ008134  | 851.59   | 757.041  | NM_007263 | 12673.746 | 13472.398 | D42043      | 16621.109 | 15168.321 |
| S71486    | 3017.03  | 2974.122 | AF206020  | 2138.57   | 2827.341  | CY3Cy5      | 2913.5    | 215.901   |
| L33808    | 9722.794 | 10489.52 | NM_01441C | 1626.122  | 1959.088  | BG744154    | 28185.684 | 15828.976 |
| D31886    | 6071.69  | 5776.91  | AF305835  | 708.389   | 846.373   | Z11694      | 4173.69   | 2281.424  |
| AK023330  | 4693.64  | 5886.256 | AF312769  | 3673.717  | 3957.816  | Z26317      | 2958.736  | 1878.711  |
| AF075071  | 1439.651 | 1520.445 | AB020668  | 1474.723  | 1762.234  | X16983      | 14020.008 | 14608.568 |
| AL080213  | 735.256  | 607.086  | NM_006203 | 25986.029 | 23824.469 | X56160      | 2234.791  | 2295.139  |
| AF001892  | 1327.087 | 1039.616 | NM_013261 | 1025.54   | 660.511   | BG679991    | 1560.241  | 859.056   |
| U79271    | 1960.19  | 1448.205 | AF309553  | 7034.657  | 7338.504  | H-Y 00097 I | 11181.542 | 4713.765  |
| NM_01988E | 1114.534 | 1124.25  | NM_003993 | 4972.987  | 8768.568  | H-M 59964   | 1098.131  | 424.312   |
| AK024609  | 5896.427 | 6932.245 | NM_018961 | 6994.704  | 6621.636  | H-Y 00711 I | 64316.688 | 64593.109 |
| NM_01812C | 6941.024 | 7046.962 | NM_00558E | 4579.271  | 4977.238  | H-X 16707 I | 1638.713  | 688.765   |
| AK026874  | 1360.047 | 946.369  | NM_012242 | 1551.779  | 1582.322  | AL038354    | 42792.887 | 21860.643 |
| AK024178  | 671.334  | 591.66   | NM_00689E | 3251.787  | 3465.617  | R14607      | 1142.226  | 732.656   |
| D17217    | 3135.367 | 3610.251 | NM_00297E | 5184.229  | 4398.46   | NM_02197E   | 4467.657  | 3886.058  |
| AF088033  | 932.442  | 1427.79  | AK023511  | 9593.65   | 7957.365  | SR2         | 60900.371 | 40499.898 |
| NM_020422 | 5959.241 | 6412.076 | NM_01455E | 5987.039  | 6355.427  | SR4         | 19455.055 | 6113.352  |
| AJ227897  | 539.713  | 546.268  | NM_00161E | 62471.875 | 64319.984 | SR6         | 3806.6    | 2486.005  |
| AY007156  | 2788.049 | 2417.649 | AK025886  | 2337.345  | 2167.926  | SR8         | 13799.344 | 35577.754 |

|           |          |          |           |           |           |           |           |           |
|-----------|----------|----------|-----------|-----------|-----------|-----------|-----------|-----------|
| AF086408  | 61040.27 | 51817.52 | NM_00305E | 886.544   | 722.304   | SR10      | 45962.531 | 14036.687 |
| AK023979  | 5108.294 | 4730.541 | AB014514  | 3762.335  | 3670.669  | CY3Cy5    | 1738.967  | 136.767   |
| CY3Cy5    | 12591.03 | 738.425  | NM_00286E | 4920.659  | 5703.916  | NM_001284 | 48417.449 | 33475.02  |
| U13738    | 4886.676 | 4370.765 | NM_00356E | 2285.222  | 1607.73   | NM_003242 | 10286.592 | 8407.199  |
| AF068236  | 2128.021 | 2201.507 | NM_00424E | 882.99    | 768.967   | U31099    | 631.726   | 495.533   |
| BG681747  | 23710.57 | 41473.63 | NM_00715E | 35875.074 | 34928.496 | NM_001105 | 3529.143  | 2044.767  |
| H63077    | 47769.75 | 52527.27 | NM_003731 | 21807.865 | 33088.816 | NM_00558E | 1628.39   | 811.247   |
| AA679352  | 28572.72 | 34345.09 | NM_00544E | 7816.486  | 7364.773  | NM_00207E | 1784.232  | 1177.406  |
| X04503    | 1641.384 | 1445.312 | NM_01329E | 5371.348  | 4837.828  | Y08756    | 5458.199  | 3989.897  |
| D45917    | 1537.389 | 1201.563 | NM_002387 | 4383.869  | 3091.249  | NM_00556E | 27903.889 | 21464.443 |
| X66142    | 3716.746 | 3892.443 | AB023217  | 1412.271  | 1177.822  | AY007090  | 970.305   | 339.653   |
| SR7       | 9168.487 | 45462    | L08902    | 1041.815  | 961.552   | NM_00643E | 1670.09   | 434.37    |
| SR9       | 31030.67 | 4803.918 | J02639    | 2508.334  | 2149.875  | NM_00510E | 1775.053  | 734.341   |
| CY3Cy5    | 17999.78 | 1923.866 | NM_005231 | 6265.047  | 6311.208  | NM_00451E | 856.458   | 555.136   |
| NM_00620E | 463.945  | 830.691  | AF064729  | 3780.286  | 4088.259  | NM_006501 | 1503.276  | 1523.067  |
| AF309553  | 13021.69 | 10322.6  | NM_00541E | 18758.672 | 26642.314 | NM_00271E | 15393.869 | 15990.252 |
| NM_00360E | 3616.354 | 3755.141 | NM_01211E | 2301.081  | 2447.109  | AB035356  | 1019.102  | 1580.094  |
| NM_00613E | 10401.88 | 13875.22 | NM_00215E | 7201.564  | 5802.854  | AV752086  | 1953.644  | 1759.789  |
| NM_00010E | 42375.4  | 50130    | NM_00459E | 13986.147 | 21950.422 | NM_01610E | 5709.171  | 5171.193  |
| NM_00558E | 1410.608 | 2012.82  | NM_02017E | 1009.811  | 1236.931  | NM_00437E | 4183.011  | 1616.926  |
| NM_00297E | 2428.871 | 2096.891 | NM_002264 | 2501.781  | 2694.131  | NM_00027E | 982.829   | 303.935   |
| NM_01437E | 1983.58  | 2288.486 | NM_014754 | 23053.934 | 19869.385 | NM_00560E | 28347.584 | 42931.965 |
| NM_01781E | 18790.02 | 19415.27 | D49387    | 1162.812  | 1109.832  | NM_001061 | 1248.33   | 1746.233  |
| AB014514  | 3123.256 | 3228.896 | AF050146  | 6119.193  | 5756.686  | AB011100  | 3020.146  | 2287.104  |
| NM_00286E | 6273.079 | 6419.7   | NM_00011E | 5853.607  | 3818.595  | U61741    | 1297.217  | 628.732   |
| NM_00356E | 2335.305 | 1634.598 | NM_00669E | 11325.077 | 12051.545 | NM_01240E | 7541.833  | 4484.964  |
| NM_00424E | 957.711  | 935.429  | NM_006804 | 23332.646 | 28695.354 | M76676    | 3067.281  | 1935.349  |
| NM_003731 | 18482.69 | 20872.87 | NM_01596E | 12529.945 | 13974.358 | AL137690  | 660.873   | 455.353   |
| NM_00544E | 6513.628 | 6325.378 | NM_003051 | 6593.465  | 6549.426  | Z83804    | 2946.708  | 1474.555  |
| NM_01329E | 4635.449 | 4618.906 | NM_14534E | 7073.752  | 6056.613  | NM_00438E | 1466.714  | 648.433   |
| NM_002387 | 4656.703 | 4639.028 | AJ278917  | 22812.385 | 17690.398 | U67784    | 1213.712  | 683.157   |
| NM_00006E | 1203.356 | 909.837  | AK025641  | 45346.949 | 38195.297 | NM_00736E | 2284.715  | 1847.287  |
| NM_00726E | 20850.88 | 22918.47 | NM_00062E | 723.381   | 951.936   | NM_00059E | 2038.09   | 1468.048  |
| NM_00215E | 3146.456 | 3747.321 | NM_00090E | 10809.225 | 9446.945  | NM_016584 | 12558.497 | 8840.335  |
| NM_00459E | 18547    | 20488.26 | AL117398  | 4924.407  | 5095.566  | NM_00181E | 1863.547  | 2006.335  |
| NM_02017E | 1119.161 | 1454.858 | AB037724  | 8947.533  | 6723.58   | NM_000064 | 9186.733  | 10939.472 |
| NM_002264 | 3565.505 | 3470.036 | AK025086  | 2697.447  | 2293.944  | NM_00672E | 7391.067  | 9891.898  |
| NM_014754 | 21856.55 | 24058.01 | AK026151  | 8653.285  | 7057.094  | NM_00332E | 2324.791  | 2335.412  |
| D49387    | 581.891  | 749.014  | NM_01414E | 4216.26   | 4534.554  | NM_00456E | 63177.988 | 59919.758 |
| AF050146  | 1610.242 | 1842.767 | NM_00291E | 7624.642  | 8812.584  | NM_00020E | 4115.753  | 2631.028  |
| NM_00011E | 4656.391 | 7274.333 | M20700    | 9129.237  | 8667.724  | NM_00549E | 23832.32  | 5112.262  |
| NM_00669E | 12228.64 | 12016.33 | NM_001034 | 20634.686 | 25875.605 | NM_01660E | 1157.247  | 1045.424  |
| NM_006804 | 11091.68 | 10898.12 | NM_00268E | 3116.864  | 3392.372  | NM_004817 | 2260.837  | 4086.073  |
| NM_01596E | 10034.02 | 10204.99 | NM_01768E | 3210.865  | 3954.268  | NM_01897E | 28841.75  | 54400.547 |
| NM_003051 | 1368.408 | 1341.638 | AL096734  | 1015.477  | 1320.222  | AB023215  | 13500.363 | 20808.566 |
| NM_14534E | 3741.831 | 4191.578 | AK000800  | 3072.685  | 2965.435  | NM_01807E | 3570.518  | 2803.402  |
| AJ278917  | 982.202  | 1313.609 | NM_018154 | 5374.698  | 5715.387  | AL137529  | 4826.007  | 3513.138  |
| AK025641  | 6940.147 | 8322.541 | NM_00535E | 452.702   | 967.524   | NM_01233E | 1590.808  | 923.102   |
| AK025886  | 1748.836 | 2621.658 | BC006287  | 5527.911  | 5320.31   | AK026648  | 2091.209  | 1304.587  |
| NM_00305E | 1221.429 | 1253.521 | AB023198  | 4817.418  | 4026.998  | NM_000497 | 1722.319  | 1107.891  |
| NM_01839E | 17219.04 | 14301.96 | AF304163  | 23028.906 | 18789.438 | NM_017421 | 1620.912  | 1294.925  |
| AB037724  | 7217.367 | 7646.722 | NM_00689E | 3137.798  | 3714.973  | AK025977  | 20990.105 | 11296.496 |
| AK025086  | 2013.74  | 2382.953 | NM_00113E | 60375.91  | 61807.523 | AK023130  | 10228.047 | 4449.447  |

|           |          |          |           |           |           |             |           |           |
|-----------|----------|----------|-----------|-----------|-----------|-------------|-----------|-----------|
| AK026151  | 2539.952 | 3123.66  | NM_002975 | 5061.116  | 6021.164  | NM_000273   | 775.217   | 622.492   |
| NM_014140 | 5819.703 | 5277.19  | AK023511  | 8459.183  | 9933.408  | NM_002899   | 10630.242 | 6382.673  |
| NM_002916 | 10481.11 | 8952.987 | NM_014556 | 5573.278  | 5557.793  | NM_000486   | 789.409   | 656.043   |
| M20700    | 10934.65 | 10686.98 | NM_002725 | 2049.882  | 2467.691  | BE876237    | 1231.58   | 979.054   |
| NM_001034 | 29791.14 | 25776.31 | NM_014375 | 25600.299 | 26092.49  | NM_005397   | 1762.567  | 2727.672  |
| NM_002689 | 4289.142 | 3935.402 | NM_017812 | 20958.75  | 20736.33  | NM_000806   | 8045.804  | 9649.658  |
| NM_017686 | 3444.733 | 3052.517 | AF204173  | 712.535   | 877.173   | NM_006320   | 3715.147  | 4065.438  |
| AK000800  | 3234.527 | 4048.322 | J03260    | 3036.805  | 2356.18   | AB014511    | 6827.75   | 5075.274  |
| NM_018154 | 9103.038 | 8525.264 | U13738    | 2850.165  | 2271.463  | NM_014252   | 14378.657 | 10820.735 |
| NM_005358 | 603.67   | 729.809  | AF068236  | 62341.73  | 60803.926 | NM_006822   | 2566.529  | 4545.978  |
| BC006287  | 7776.418 | 6328.428 | H94487    | 2300.381  | 2207.561  | NM_012142   | 13855.306 | 18656.201 |
| AB023198  | 7371.711 | 6649.246 | BG681747  | 44681.414 | 25049.063 | NM_016429   | 4573.411  | 6776.32   |
| AF304163  | 37409.27 | 42967    | H63077    | 48958.152 | 42960.215 | NM_018264   | 2394.162  | 1420.841  |
| NM_005231 | 6587.815 | 7292.431 | AA679352  | 27927.543 | 23311.195 | NM_014580   | 844.409   | 798.646   |
| AF064729  | 2062.89  | 2643.551 | AA437291  | 680.926   | 840.625   | AB028998    | 836.886   | 747.105   |
| NM_005412 | 28194.7  | 25109    | X04503    | 6399.086  | 6896.742  | NM_000153   | 846.538   | 764.249   |
| NM_002725 | 876.504  | 758.287  | D45917    | 2869.612  | 3225.065  | NM_002033   | 2894.337  | 2317.649  |
| NM_014375 | 2164.377 | 3069.471 | X52001    | 3908.877  | 3468.292  | NM_004111   | 3172.835  | 1734.847  |
| NM_017812 | 18845.45 | 20637.79 | BI823872  | 22504.061 | 17043.248 | AF085966    | 6253.891  | 2713.741  |
| AF204173  | 1060.382 | 1078.967 | AA430552  | 5435.36   | 4970.134  | NM_005316   | 4962.775  | 1987.738  |
| J03260    | 915.978  | 1370.24  | X66142    | 5439.367  | 3590.882  | NM_016316   | 3884.325  | 1775.841  |
| U13738    | 4881.28  | 5506.707 | R45054    | 3415.918  | 2591.041  | NM_003369   | 8479.627  | 3811.412  |
| AF068236  | 2571.603 | 3135.81  | NM_002387 | 3509.219  | 3304.055  | NM_000057   | 4217.271  | 1485.925  |
| H63077    | 45752.4  | 50331.13 | NM_000069 | 1460.01   | 1265.393  | NM_018343   | 6977.656  | 3740.559  |
| AA679352  | 26810    | 34399.16 | AB023217  | 934.305   | 1571.048  | AK095793    | 1038.927  | 681.446   |
| AA437291  | 670.612  | 567.971  | L08902    | 1299.72   | 1182.55   | NM_003177   | 6372.721  | 3251.647  |
| X04503    | 1588.442 | 1452.267 | M58050    | 8073.825  | 7320.971  | NM_017719   | 2404.344  | 2186.82   |
| D45917    | 1072.848 | 1138.435 | NM_007263 | 12995.249 | 11718.639 | AF064078    | 983.96    | 987.77    |
| X52001    | 2555.727 | 2852.99  | AF206020  | 2845.809  | 2762.734  | AL049688    | 2512.289  | 2770.205  |
| AA430552  | 1572.875 | 686.205  | NM_014410 | 1717.774  | 1628.71   | NM_002737   | 6631.199  | 5393.16   |
| X66142    | 3869.661 | 4462.88  | AF305835  | 550.606   | 382.657   | NM_001353   | 4810.822  | 7757.65   |
| R45054    | 1465.095 | 1639.553 | AF312769  | 3631.613  | 3455.39   | NM_006214   | 3429.511  | 3523.56   |
| NM_000620 | 1403.187 | 1636.099 | AB020668  | 1624.668  | 1417.909  | AJ010228    | 10957.791 | 16027.718 |
| AY007158  | 10020.45 | 14542.82 | NM_006203 | 26511.648 | 23248.361 | NM_005198   | 6225.916  | 10083.446 |
| M58050    | 8767.438 | 10356.79 | AF309553  | 6993.41   | 7320.827  | NM_006848   | 64342.637 | 66101.859 |
| NM_007263 | 22651.22 | 24944.81 | NM_003605 | 3110.525  | 3686.865  | NM_005603   | 39061.926 | 33948.211 |
| AF305835  | 607.859  | 623.047  | NM_006139 | 11772.094 | 11945.006 | NM_001061   | 684.092   | 876.281   |
| AF309553  | 12722.42 | 10317.77 | NM_000100 | 44937.695 | 32237.893 | BG744154    | 30480.365 | 17449.324 |
| NM_003605 | 3833.807 | 3706.598 | NM_001900 | 63462.965 | 65591.141 | Z11694      | 7867.131  | 4992.545  |
| NM_006139 | 10792.72 | 12969.34 | NM_003993 | 3795.34   | 3599.854  | Z26317      | 3295.937  | 1489.405  |
| NM_003993 | 5313.348 | 4184.8   | NM_018961 | 5653.029  | 3794.806  | X16983      | 16388.148 | 14543.091 |
| NM_018961 | 4483.188 | 6088.651 | NM_005586 | 4022.544  | 3234.04   | X56160      | 2555.395  | 1331.237  |
| NM_005586 | 1674.462 | 2189.546 | NM_012242 | 975.372   | 452.581   | BG679991    | 1879.917  | 513.393   |
| NM_006896 | 3544.631 | 3122.406 | NM_003051 | 5432.991  | 6400.083  | H-Y 00097 I | 10886.401 | 4266.499  |
| NM_002975 | 2804.615 | 2508.598 | NM_145342 | 7318.192  | 7502.898  | H-Y 00711 I | 64692.859 | 58470.258 |
| AK023511  | 11087.01 | 10536.51 | AJ278917  | 23686.502 | 33741.637 | H-X 16707 I | 1572.622  | 792.445   |
| NM_014556 | 4339.37  | 4261.52  | AF016495  | 1134.107  | 2277.575  | AL038354    | 43756.969 | 31360.148 |
| NM_001615 | 78410.2  | 61742.7  | AK025641  | 46683.469 | 49627.113 | R14607      | 2283.663  | 2070.294  |
| AK025886  | 1824.842 | 2949.009 | NM_001038 | 398.553   | 504.815   | NM_021976   | 4935.286  | 8011.181  |
| NM_003058 | 1193.832 | 887.458  | AK025886  | 2643.919  | 2185.571  | NM_005718   | 14290.437 | 20991.943 |
| NM_002865 | 6041.874 | 6398.35  | NM_003058 | 789.636   | 823.948   | NM_005496   | 24288.242 | 12402.146 |
| NM_003566 | 2354.777 | 1582.79  | AB014514  | 3312.159  | 3485.652  | NM_016608   | 1274.515  | 1883.437  |
| NM_004249 | 932.6    | 891.181  | NM_002865 | 4839.808  | 5553.586  | NM_002858   | 9604.868  | 7673.795  |

|           |          |          |           |           |           |           |           |           |
|-----------|----------|----------|-----------|-----------|-----------|-----------|-----------|-----------|
| NM_00715E | 29603.83 | 27631.44 | NM_00356E | 1976.063  | 1707.178  | NM_004817 | 1707.095  | 1684.217  |
| NM_003731 | 17063.7  | 15338.13 | NM_00715E | 31329.26  | 24308.275 | NM_01897E | 22589.867 | 23175.678 |
| NM_00544E | 5992.462 | 5108.003 | NM_003731 | 16478.254 | 12378.788 | AB023215  | 14122.147 | 14785.482 |
| NM_01329E | 5666.568 | 5419.511 | NM_00544E | 6414.204  | 4524.662  | NM_001284 | 50776.742 | 40515.25  |
| NM_002387 | 4946.55  | 4273.044 | NM_01329E | 5302.621  | 3774.188  | NM_00324E | 12618.277 | 14251.312 |
| NM_00006E | 876.235  | 729.974  | AK000800  | 2551.524  | 2732.703  | U31099    | 2311.574  | 2731.342  |
| AB023217  | 1844.782 | 1828.861 | NM_018154 | 5337.72   | 6970.522  | NM_001105 | 3762.782  | 3559.973  |
| J02639    | 2339.085 | 2356.016 | NM_00535E | 862.325   | 1132.721  | NM_00558E | 1772.134  | 1187.769  |
| NM_005231 | 6858.267 | 7499.018 | BC006287  | 5400.475  | 8628.376  | NM_00207E | 2771.932  | 1697.18   |
| AF064729  | 2378.563 | 2818.126 | AB023198  | 4959.155  | 6233.35   | Y08756    | 6812.341  | 4305.222  |
| NM_00541E | 29954.13 | 30700.16 | AF304163  | 23334.492 | 25879.211 | NM_00556E | 25896.033 | 12023.285 |
| NM_01211E | 3186.744 | 3176.668 | NM_005231 | 6941.133  | 6987.77   | AY007090  | 718.868   | 535.878   |
| NM_00215C | 1620.742 | 1950.814 | AF064729  | 4035.458  | 4620.611  | NM_00643E | 508.753   | 363.872   |
| NM_00459E | 16331.25 | 13858.31 | NM_00541E | 19873.152 | 23390.217 | NM_00510E | 1935.062  | 969.824   |
| NM_02017E | 1380.613 | 1120.675 | NM_01211E | 2749.782  | 2557.25   | NM_00451E | 1518.169  | 1422.311  |
| NM_014754 | 21091.59 | 22789.49 | NM_00215C | 9428.423  | 8209.495  | NM_00271E | 14396.093 | 21360.668 |
| D49387    | 582.639  | 696.473  | NM_00459E | 13889.43  | 14759.034 | AB035356  | 1047.007  | 1754.516  |
| AF050146  | 1152.371 | 1459.587 | NM_02017E | 789.053   | 772.465   | AV752086  | 1706.693  | 2377.316  |
| NM_00011E | 4333.948 | 7660.726 | NM_002264 | 2447.34   | 2721.029  | NM_01610E | 6666.433  | 13102.82  |
| NM_00669E | 11525.49 | 10648.43 | NM_014754 | 29506.404 | 39203.824 | NM_00437E | 6906.564  | 9158.111  |
| NM_006804 | 11111.93 | 12106    | D49387    | 1476.685  | 1367.273  | NM_00027E | 1674.056  | 2973.737  |
| NM_01596E | 11120.43 | 11838.61 | AF050146  | 7274.863  | 6398.074  | NM_01425E | 10704.874 | 10101.31  |
| NM_003051 | 1871.71  | 1814.973 | NM_00011E | 6342.468  | 4087.726  | NM_00166E | 19545.508 | 22576.156 |
| NM_14534E | 3998.062 | 4929.313 | NM_00669E | 11317.626 | 10893.73  | NM_016131 | 13075.938 | 11459.771 |
| AJ278917  | 899.873  | 1108.642 | NM_006804 | 22013.107 | 19337.68  | NM_00682E | 2695.136  | 3295.904  |
| AK025641  | 7824.092 | 8924.197 | NM_01596E | 11874.344 | 9451.638  | NM_01214E | 12188.952 | 11393.732 |
| NM_00062C | 728.284  | 828.244  | NM_004517 | 5816.12   | 2826.516  | NM_01642E | 3513.129  | 3428.57   |
| NM_00090E | 7690.165 | 8070.647 | AI017418  | 674.003   | 1014.08   | AB011100  | 3169.667  | 3331.362  |
| AL117398  | 5062.313 | 4726.042 | NM_00067E | 4372.836  | 5376.675  | U61741    | 1215.774  | 1442.942  |
| AY007158  | 20232.41 | 23757.94 | AF218006  | 54600.945 | 55829.527 | NM_01240E | 7987.79   | 10178.335 |
| NM_01839C | 16459.79 | 14021.44 | AK026935  | 25317.396 | 25200.395 | M76676    | 3793.05   | 4757.258  |
| AB037724  | 6797.026 | 6908.682 | NM_02016E | 6687.189  | 6998.548  | NM_003857 | 661.677   | 860.553   |
| AK025086  | 2082.689 | 2210.367 | AK027124  | 53632.684 | 56369.863 | AL137690  | 861.424   | 1009.221  |
| AK026151  | 2479.29  | 2192.17  | AB037813  | 1103.83   | 1275.343  | Z83804    | 3669.994  | 4462.578  |
| NM_01414C | 5558.769 | 4965.993 | M31212    | 58277.051 | 64720.43  | NM_00438E | 1707.461  | 2060.344  |
| NM_00291E | 10796.86 | 10595.18 | AL117398  | 4882.54   | 4711.16   | U67784    | 1098.684  | 1010.297  |
| M20700    | 9947.897 | 9992.972 | AY007158  | 59918.098 | 59641.512 | NM_00736E | 2048.578  | 1167.113  |
| NM_001034 | 27963.63 | 25413.16 | NM_00172C | 3830.817  | 3239.421  | NM_00059E | 915.22    | 586.717   |
| NM_00268E | 4453.963 | 4744.621 | NM_01839C | 9594.828  | 10468.146 | NM_016584 | 12407.556 | 7086.765  |
| NM_01768E | 3361.011 | 3200.759 | AB037724  | 9957.615  | 8905.657  | NM_000064 | 9439.637  | 14985.805 |
| AL096734  | 1308.935 | 1352.674 | AK025086  | 3172.394  | 3471.222  | NM_00672E | 8082.82   | 14011.933 |
| AK000800  | 3166.953 | 3630.086 | AK026151  | 9782.147  | 10287.811 | NM_00332E | 2211.184  | 3482.042  |
| NM_018154 | 9522.198 | 8463.55  | NM_01414C | 4442.437  | 6162.816  | NM_00456E | 63757.867 | 66755.617 |
| NM_00535E | 830.322  | 946.577  | NM_00291E | 7794.012  | 9938.791  | NM_00020E | 3793.949  | 6332.042  |
| BC006287  | 6796.918 | 5824.839 | M20700    | 9765.03   | 9894.954  | Z25427    | 5271.75   | 5687.995  |
| AB023198  | 7968.866 | 7821.014 | NM_001034 | 21393.426 | 29071.498 | NM_00467E | 13733.802 | 13328.624 |
| AF304163  | 39957.18 | 44836.59 | NM_00268E | 3292.186  | 3254.224  | NM_00135E | 5031.204  | 5297.607  |
| NM_00689E | 3406.165 | 2468.635 | NM_01768E | 3135.839  | 3430.519  | NM_006214 | 2703.125  | 3111.576  |
| NM_001130 | 36682.96 | 44258.97 | AL096734  | 901.017   | 879.832   | AJ010228  | 8063.834  | 9362.89   |
| NM_00297E | 2639.314 | 2490.303 | NM_01664E | 8678.179  | 7900.958  | NM_00519E | 4975.128  | 7443.709  |
| AK023511  | 10461.61 | 9106.125 | L14723    | 12544.593 | 12685.591 | NM_01807E | 3989.508  | 3660.512  |
| NM_01455E | 6287.372 | 6776.863 | AK024462  | 30967.158 | 28119.684 | AL137529  | 5174.013  | 6724.801  |
| NM_01781E | 17711.98 | 19427.58 | NM_005711 | 690.22    | 1029.073  | NM_01233E | 1336.784  | 1941.367  |

|           |          |          |           |           |           |             |           |           |
|-----------|----------|----------|-----------|-----------|-----------|-------------|-----------|-----------|
| AF204173  | 1238.435 | 1348.668 | NM_019601 | 1217.587  | 1156.491  | AK026648    | 2492.713  | 2791.365  |
| J03260    | 951.216  | 1161.896 | NM_002206 | 1745.57   | 2074.256  | NM_000497   | 1770.105  | 1959.985  |
| U13738    | 5014.004 | 5416.949 | NM_007074 | 2372.257  | 2519.309  | NM_017421   | 1823.541  | 2721.188  |
| AF068236  | 2108.291 | 2727.132 | NM_006614 | 2219.066  | 2656.783  | AK025977    | 22558.443 | 29309.33  |
| BG681747  | 24931.08 | 39393.65 | NM_002230 | 1501.364  | 2919.156  | AK023130    | 11391.894 | 15207.262 |
| H63077    | 47291.87 | 50013.47 | NM_003815 | 10440.863 | 13220.621 | NM_000273   | 1148.497  | 1404.415  |
| AA679352  | 27786.96 | 30084.66 | NM_001430 | 2861.486  | 2644.138  | NM_002899   | 11317.772 | 8361.035  |
| AA437291  | 667.649  | 810.98   | AB010098  | 1693.837  | 1747.317  | NM_005397   | 2082.641  | 4108.4    |
| X04503    | 1895.005 | 1689.357 | U17989    | 2741.802  | 2431.537  | NM_000806   | 10241.362 | 16037.506 |
| D45917    | 1221.762 | 1431.967 | U62325    | 1405.147  | 1349.658  | NM_006320   | 3672.211  | 5091.854  |
| X52001    | 3013.393 | 3435.331 | AL137595  | 970.876   | 871.069   | AB014511    | 8085.548  | 11535.202 |
| AA430552  | 1769.832 | 833.198  | NM_018028 | 2808.408  | 2751.904  | NM_021976   | 4116.708  | 4639.11   |
| X66142    | 3530.004 | 3810.371 | AF249267  | 60548.273 | 59848.551 | NM_005718   | 11676.829 | 11570.12  |
| R45054    | 3758.306 | 4777.447 | NM_004113 | 979.637   | 1121.794  | NM_018264   | 2410.745  | 2192.551  |
| NM_002387 | 4526.513 | 4050.471 | X84939    | 6277.529  | 6383.021  | NM_014580   | 1045.648  | 1121.361  |
| NM_000069 | 741.038  | 539.143  | NM_018320 | 42620.512 | 41278.004 | AB028998    | 790.364   | 667.409   |
| AB023217  | 2136.199 | 1680.564 | NM_002069 | 4361.352  | 5011.197  | NM_000153   | 1069.448  | 1263.543  |
| L08902    | 1879.413 | 1179.803 | NM_016056 | 26527.932 | 28941.939 | NM_002033   | 3410.217  | 3429.379  |
| M58050    | 8563.658 | 10974.85 | AF188492  | 1153.419  | 2417.709  | AK091794    | 857.382   | 1119.965  |
| AF305835  | 618.439  | 603.763  | M65066    | 18870.488 | 27222.141 | NM_004111   | 3218.524  | 4818.387  |
| AB020668  | 752.416  | 692.312  | NM_016951 | 2194.719  | 2412.72   | AF085966    | 7767.349  | 10582.494 |
| AF309553  | 14283.18 | 11808.34 | NM_013251 | 2017.319  | 2647.882  | NM_005316   | 4966.144  | 6272.952  |
| NM_003605 | 4039.885 | 4002.857 | NM_006099 | 3786.279  | 3829.101  | NM_016316   | 4294.567  | 3637.125  |
| NM_003993 | 6064.183 | 5809.375 | AF272379  | 4762.434  | 4168.912  | NM_003369   | 10362.042 | 6369.611  |
| NM_018961 | 5268.516 | 8744.547 | NM_012326 | 2287.327  | 2462.469  | NM_000057   | 4357.422  | 2091.971  |
| NM_005586 | 2045.727 | 2705.626 | NM_003085 | 46792.93  | 45541.949 | NM_003177   | 7407.935  | 8684.699  |
| NM_003051 | 1868.907 | 1914.223 | NM_016084 | 20883.424 | 21336.746 | NM_017719   | 2649.37   | 3953.543  |
| NM_145342 | 4098.988 | 4782.459 | AF095289  | 39881.676 | 48746.199 | AF064078    | 1039.312  | 2007.796  |
| AJ278917  | 1043.512 | 1008.842 | NM_005537 | 8252.387  | 16618.281 | AL049688    | 2385.886  | 3817.483  |
| AK025886  | 2033.84  | 2693.474 | AC003962  | 702.255   | 1583.459  | NM_002737   | 8913.095  | 12286.659 |
| NM_003058 | 1268.594 | 1294.455 | NM_019003 | 6086.702  | 9122.496  | NM_002719   | 14016.099 | 16160.779 |
| AB014514  | 2886.602 | 3436.027 | NM_015935 | 8793.333  | 8082.93   | AB035356    | 893.502   | 1471.984  |
| NM_002865 | 5658.546 | 6288.438 | AF182412  | 1842.079  | 1808.616  | AV752086    | 1657.258  | 2505.556  |
| NM_003566 | 2235.442 | 1518.978 | AK027200  | 2466.19   | 1626.86   | NM_016102   | 8541.849  | 11214.798 |
| NM_007159 | 34817.48 | 34374.32 | S78372    | 828.831   | 766.536   | NM_004376   | 5708.25   | 4592.996  |
| NM_003731 | 20256.82 | 20537.89 | U03106    | 5531.454  | 6638.912  | NM_000272   | 1860.222  | 2844.352  |
| NM_005446 | 7010.007 | 5765.589 | NM_000075 | 29942.32  | 47075.891 | NM_006848   | 64461.375 | 68078.813 |
| NM_013292 | 6032.893 | 5221.404 | NM_006845 | 26862.152 | 38873.641 | NM_005603   | 37727.867 | 35653.406 |
| AK000800  | 2850.065 | 3469.229 | NM_014885 | 1207.463  | 1797.37   | BG744154    | 31874.957 | 24507.219 |
| NM_018154 | 9270.2   | 8228.189 | M73239    | 792.85    | 818.14    | Z11694      | 7217.916  | 7349.977  |
| NM_005358 | 463.758  | 535.247  | NM_004945 | 8654.124  | 8222.357  | Z26317      | 3395.792  | 3728.968  |
| BC006287  | 6876.436 | 5487.941 | NM_020242 | 4555.878  | 6525.266  | X16983      | 16897.107 | 23921.176 |
| AB023198  | 8140.417 | 6552.364 | NM_001788 | 36673.801 | 40084.039 | X56160      | 2929.963  | 2169.829  |
| NM_005412 | 30523.4  | 33159.24 | NM_007178 | 55206.82  | 61658.668 | BG679991    | 1788.872  | 904.236   |
| NM_012113 | 3402.639 | 4188.643 | NM_017682 | 983.517   | 1744.416  | H-Y 00097 I | 12615.059 | 6620.731  |
| NM_002150 | 2028.033 | 2012.915 | NM_002209 | 21277.676 | 30671.676 | AL038354    | 42709.055 | 45246.934 |
| NM_004595 | 15571.95 | 14257.12 | NM_002291 | 1833.126  | 1572.912  | R14607      | 1083.073  | 1253.761  |
| NM_020178 | 907.091  | 1259.857 | AL137477  | 12513.188 | 13052.694 | W84867      | 701.18    | 1116.618  |
| NM_002264 | 3463.151 | 4139.701 | AF284580  | 1394.422  | 1566.037  | NM_000064   | 10025.587 | 13082.226 |
| NM_014754 | 21670.96 | 24003.99 | AK024961  | 4181.364  | 4255.364  | NM_006725   | 8431.917  | 10683.459 |
| D49387    | 518.631  | 936.095  | NM_016068 | 7267.585  | 6725.476  | NM_003326   | 1581.343  | 2068.354  |
| AF050146  | 1335.203 | 1644.74  | NM_014256 | 2389.65   | 2803.286  | NM_005496   | 23951.648 | 12410.995 |
| NM_000116 | 4691.468 | 8408.437 | NM_015967 | 3750.98   | 2891.561  | NM_002858   | 10680.084 | 7835.759  |

|           |          |          |           |           |           |           |           |           |
|-----------|----------|----------|-----------|-----------|-----------|-----------|-----------|-----------|
| NM_00669E | 13010.69 | 13720.91 | NM_012237 | 860.323   | 882.249   | NM_004817 | 1997.003  | 1976.333  |
| NM_006804 | 11141.92 | 11420.74 | NM_00359E | 1018.401  | 1344.791  | NM_01897E | 25603.43  | 25602.299 |
| NM_01596E | 10738.33 | 10021.01 | NM_00240E | 9114.472  | 9324.282  | AB023215  | 12463.931 | 12113.104 |
| NM_004517 | 2185.496 | 4191.3   | NM_004994 | 31058.447 | 30576.574 | NM_001284 | 53334.34  | 41593.262 |
| NM_00067E | 2022.925 | 1496.816 | NM_00661C | 17031.416 | 13835.724 | NM_003242 | 11368.567 | 13150.417 |
| AF218006  | 6581.391 | 7995.335 | NM_00133E | 2797.124  | 4538.05   | U31099    | 896.838   | 751.448   |
| AK026935  | 3001.24  | 2980.514 | NM_003791 | 10881.381 | 16288.428 | NM_001105 | 4715.329  | 3500.996  |
| NM_020162 | 9549.229 | 10405.19 | NM_018017 | 11760.238 | 12049.517 | NM_00558E | 1430.768  | 1332.894  |
| AK027124  | 12107.23 | 13706.49 | AK001296  | 14836.358 | 15073.332 | NM_00207E | 3364.617  | 2515.973  |
| AB037813  | 753.214  | 1002.883 | AK000173  | 1522.69   | 1532.869  | Y08756    | 10363.167 | 7604.889  |
| M31212    | 40597.08 | 39986.26 | NM_01836E | 2794.208  | 3894.033  | NM_00510E | 2330.299  | 3042.909  |
| AL117398  | 4921.661 | 5187.576 | NM_00658E | 30725.752 | 24416.248 | NM_00451E | 1014.659  | 1481.536  |
| AY007158  | 18812.19 | 19350.96 | AJ272180  | 1875.263  | 2010.216  | NM_006501 | 1621.839  | 2478.251  |
| NM_01839C | 16596.28 | 14101.71 | AK025709  | 2373.771  | 2260.904  | NM_005397 | 1489.456  | 2561.29   |
| AB037724  | 6889.067 | 6732.445 | NM_01901E | 19706.678 | 17594.396 | NM_00080E | 10447.035 | 13406.791 |
| AK025086  | 2245.041 | 2213.843 | NM_012261 | 11955.009 | 9889.714  | NM_00632C | 3240.167  | 3193.026  |
| AK026151  | 2703.236 | 2259.718 | NM_01555E | 7264.357  | 6920.971  | AB014511  | 5280.084  | 5242.83   |
| NM_01414C | 5556.701 | 4458.027 | NM_01841E | 2994.711  | 2746.808  | NM_01425E | 10954.114 | 10228.436 |
| NM_00291E | 10379.7  | 9083.047 | NM_00460E | 6266.354  | 5358.216  | NM_00166E | 20534.824 | 22345.684 |
| M20700    | 10799.14 | 10919.29 | D70833    | 65257.227 | 64421.777 | NM_016131 | 12946.203 | 11679.199 |
| NM_001034 | 29562.75 | 23990.22 | NM_016621 | 2987.024  | 3207.981  | NM_00682E | 2631.192  | 3666.089  |
| NM_00268E | 4631.129 | 4426.893 | AK022643  | 521.636   | 412.383   | NM_01214E | 13543.352 | 11772.415 |
| NM_01768E | 3231.897 | 2660.736 | AB046808  | 4072.971  | 3007.09   | NM_01642E | 3558.041  | 3571.003  |
| AL096734  | 1190.307 | 1164.179 | AK026265  | 2068.997  | 1601.988  | AB011100  | 3407.819  | 3037.165  |
| NM_01664E | 8222.876 | 8076.879 | AK027179  | 1190.56   | 1163.133  | U61741    | 1404.165  | 1343.42   |
| L14723    | 2677.898 | 2943.383 | AF015313  | 646.987   | 733.564   | NM_01240E | 8094.798  | 7429.658  |
| AK024462  | 3124.723 | 3392.413 | NM_00646E | 2414.463  | 1766.6    | M76676    | 4867.908  | 4330.558  |
| NM_005711 | 1301.918 | 948.06   | NM_005681 | 4117.195  | 3448.647  | NM_003857 | 2116.561  | 2573.068  |
| NM_019601 | 1798.936 | 1343.654 | NM_01515E | 6436.752  | 6309.916  | AL137690  | 979.696   | 780.271   |
| NM_00220E | 2322.41  | 2152.834 | NM_012384 | 4875.151  | 4803.528  | Z83804    | 3814.691  | 1642.568  |
| NM_007074 | 1446.226 | 1141.322 | NM_00465E | 6149.099  | 5693.284  | NM_00438E | 2773.04   | 1846.955  |
| NM_00381E | 2910.116 | 3498.592 | AF233453  | 2973.245  | 3340.703  | NM_00059E | 1453.173  | 2658.436  |
| NM_00143C | 1546.754 | 2458.609 | D87454    | 13956.867 | 14168.105 | NM_016584 | 14890.413 | 23538.631 |
| AB010098  | 1653.252 | 1107.336 | NM_00702C | 4362.979  | 4393.556  | NM_00181E | 2288.116  | 3745.877  |
| U17989    | 2196.493 | 2099.528 | NM_00071E | 10475.281 | 10360.381 | AK095793  | 1321.751  | 1268.58   |
| U62325    | 920.792  | 1243.177 | NM_01605E | 4940.143  | 5095.118  | NM_003177 | 6435.771  | 5748.982  |
| AL137595  | 769.255  | 987.766  | NM_013291 | 10212.144 | 10163.311 | NM_01771E | 2390.079  | 2499.38   |
| NM_01802E | 2119.453 | 2606.713 | NM_00293E | 16243.645 | 14287.736 | AF064078  | 943.346   | 1237.272  |
| AF249267  | 8914.107 | 10038.02 | NM_014161 | 3562.047  | 2716.961  | AL049688  | 2440.468  | 2400.902  |
| NM_004113 | 714.313  | 810.916  | BF312817  | 5344.772  | 4439.808  | NM_002737 | 6805.624  | 7021.877  |
| X84939    | 3240.238 | 2672.585 | AF086491  | 7998.517  | 7813.792  | Z25427    | 5985.396  | 6367.414  |
| NM_01832C | 5369.67  | 4770.833 | NM_01485E | 1563.767  | 1573.934  | NM_00467E | 16388.131 | 16962.229 |
| NM_00206E | 4871.696 | 4084.029 | NM_00349E | 2533.136  | 2922.403  | NM_00135E | 5940.749  | 7256.677  |
| M65066    | 16421.65 | 14099.1  | NM_00378C | 42883.383 | 38850.621 | NM_006214 | 3411.584  | 4608.017  |
| NM_016951 | 2772.123 | 2578.774 | NM_00019E | 22480.117 | 16381.158 | AJ010228  | 9037.317  | 11398.25  |
| NM_013251 | 722.071  | 889.76   | NM_00377E | 64785.953 | 65331.828 | NM_00519E | 5897.022  | 10148.79  |
| NM_00609E | 3979.53  | 3524.981 | AK023263  | 5762.523  | 6505.729  | NM_01807E | 4321.42   | 4655.509  |
| AF272379  | 2632.723 | 2180.418 | NM_00462E | 3622.129  | 5173.326  | AL137529  | 5488.659  | 5235.659  |
| NM_01232E | 2503.484 | 3291.459 | AK021445  | 2878.184  | 3514.283  | NM_01233E | 1674.428  | 1374.865  |
| NM_00308E | 2714.827 | 3039.177 | NM_017934 | 9508.072  | 9170.057  | AK026648  | 2944.887  | 2313.106  |
| NM_016084 | 27758.12 | 26515.71 | NM_01416E | 59279.527 | 59496.934 | NM_000497 | 3005.225  | 3847      |
| AF095289  | 43041.47 | 40868.32 | AF211971  | 6159.941  | 5851.371  | NM_017421 | 2724.536  | 2320.603  |
| NM_005537 | 8712.848 | 7209.935 | NM_002931 | 4502.927  | 4314.183  | AK025977  | 27250.865 | 18851.094 |



|           |          |          |           |           |           |           |           |           |
|-----------|----------|----------|-----------|-----------|-----------|-----------|-----------|-----------|
| NM_019003 | 5697.712 | 4389.264 | NM_013448 | 51399.316 | 53950.023 | AK023130  | 11874.876 | 6377.881  |
| NM_015935 | 4860.492 | 4128.176 | X65232    | 50577.637 | 39146.027 | NM_000273 | 1623.016  | 1239.819  |
| AF182412  | 1652.891 | 1788.791 | U12767    | 852.7     | 618.08    | BE876237  | 1835.526  | 2574.643  |
| AK027200  | 1428.764 | 2183.138 | U17630    | 1810.686  | 2341.531  | NM_014750 | 13222.181 | 12536.983 |
| S78372    | 931.17   | 883.723  | M33782    | 2224.878  | 2524.181  | NM_015912 | 1887.951  | 1587.673  |
| U03106    | 1808.754 | 2504.146 | NM_002196 | 655.007   | 642.536   | NM_000460 | 1354.542  | 1650.392  |
| NM_000075 | 26368.77 | 23210.18 | NM_017755 | 13408.233 | 9417.174  | AB002339  | 1626.515  | 1772.764  |
| NM_006845 | 11108.07 | 11542.08 | NM_015696 | 826.345   | 1133.183  | NM_005104 | 15660.923 | 15577.564 |
| NM_014885 | 1907.639 | 1402.689 | AK022551  | 3828.773  | 3022.317  | NM_006888 | 39919.27  | 33759.023 |
| M73239    | 1024.214 | 749.681  | AF085968  | 2621.36   | 2085.104  | AL137423  | 8291.638  | 9609.135  |
| NM_004945 | 8968.731 | 8280.979 | AK023665  | 705.615   | 1234.924  | AB018322  | 3242.391  | 4390.534  |
| NM_020242 | 6726.648 | 4744.914 | AB011136  | 2601.076  | 2316.8    | NM_007068 | 33621.137 | 42326.535 |
| NM_001788 | 32818.68 | 26147.98 | AF085898  | 8394.572  | 6721.232  | NM_005718 | 12731.155 | 15856.105 |
| NM_002209 | 18382.66 | 17064.62 | AL442094  | 897.22    | 652.712   | NM_018264 | 2312.18   | 2668.4    |
| NM_002291 | 1192.212 | 842.091  | AL161960  | 2854.515  | 2221.305  | NM_014580 | 1219.661  | 1325.645  |
| AL137477  | 7679.693 | 8191.682 | AL049964  | 1982.658  | 2511.743  | AB028998  | 1001.51   | 1094.773  |
| AF284580  | 1794.698 | 1680.097 | AK023269  | 3531.586  | 4989.642  | NM_000153 | 1670.075  | 1475.432  |
| AK024961  | 4587.055 | 4089.686 | AF070564  | 8912.265  | 14209.241 | NM_002033 | 3877.283  | 3632.233  |
| NM_016068 | 6837.853 | 6929.459 | AK021439  | 35284.164 | 38573.586 | AK091794  | 1367.977  | 1762.819  |
| NM_014256 | 1017.068 | 876.056  | AF052099  | 4191.818  | 4639.907  | NM_004111 | 4210.811  | 3688.854  |
| NM_015967 | 2915.563 | 4064.374 | AL110111  | 4314.42   | 4055.25   | AF085966  | 6762.148  | 4702.061  |
| NM_012237 | 1667.925 | 1330.859 | AF070543  | 2023.166  | 2033.042  | NM_005316 | 5702.016  | 2679.038  |
| NM_003595 | 1508.889 | 1849.344 | AF086525  | 849.797   | 938.946   | NM_016316 | 4174.201  | 3345.175  |
| NM_002409 | 1010.421 | 1146.553 | AF086509  | 898.028   | 953.773   | NM_003369 | 10286.353 | 4066.606  |
| NM_004994 | 36955.46 | 40307.34 | NM_014778 | 7573.088  | 6608.675  | NM_018343 | 9101.281  | 8120.582  |
| NM_006610 | 2842.038 | 2897.075 | AK001171  | 27006.566 | 20881.313 | X15880    | 60067.59  | 65858.242 |
| NM_017626 | 193.38   | 745.998  | AK026273  | 18541.426 | 17975.814 | AL137461  | 600.167   | 1201.863  |
| NM_001333 | 3793.756 | 2990.914 | NM_020250 | 23236.912 | 24657.203 | AF114264  | 2869.775  | 2021.184  |
| NM_003791 | 8350.396 | 7498.156 | AF055007  | 849.861   | 901.607   | NM_017514 | 780.484   | 1280.372  |
| NM_018017 | 3991.232 | 3542.002 | NM_012337 | 1869.06   | 2541.878  | NM_018972 | 3693.797  | 4504.116  |
| AK001296  | 7761.199 | 6928.926 | AL389879  | 19632.787 | 18738.846 | AB037828  | 2008.46   | 2020.058  |
| AK000173  | 1412.13  | 1223.966 | AK022869  | 5567.722  | 3988.65   | AB023210  | 1610.562  | 1728.213  |
| NM_018365 | 5005.14  | 2878.845 | NM_016111 | 26019.285 | 19482.645 | AB037786  | 2578.674  | 3225.663  |
| NM_006586 | 4113.712 | 3185.18  | AF085958  | 76918.703 | 64356.363 | NM_003648 | 10456.188 | 14324.767 |
| AJ272180  | 3417.24  | 2564.105 | AF086021  | 6487.137  | 5602.885  | AB037735  | 1123.624  | 1278.667  |
| AK025709  | 2647.671 | 2381.121 | AL117655  | 744.33    | 689.739   | AK002177  | 1989.728  | 2058.452  |
| NM_019016 | 5861.858 | 4646.43  | AK024472  | 4524.083  | 6046.153  | AK024429  | 3422.631  | 3435.321  |
| NM_012261 | 15278.36 | 13962.09 | AF087981  | 849.866   | 1192.473  | NM_003496 | 58376.824 | 58865.547 |
| NM_015556 | 12437.39 | 11305.15 | NM_017976 | 6680.55   | 6221.325  | AB000509  | 6412.368  | 5609.055  |
| NM_018416 | 2869.789 | 2784.531 | U06700    | 2313.665  | 2827.273  | AB018314  | 2994.644  | 2354.214  |
| NM_004606 | 7279.605 | 6799.121 | U63828    | 4954.499  | 4547.725  | NM_004378 | 1563.712  | 1310.108  |
| NM_016621 | 2354.379 | 2249.113 | Z36794    | 1515.186  | 2270.39   | AJ238899  | 2239.956  | 1600.141  |
| AK022643  | 1828.642 | 3942.952 | Z36828    | 17139.191 | 18372.082 | NM_018037 | 1611.905  | 1787.082  |
| AB046808  | 4258.915 | 4959.843 | AF086121  | 24799.676 | 20635.748 | NM_001110 | 6854.523  | 6080.692  |
| AK026265  | 1988.417 | 1758.157 | AF086140  | 2215.066  | 2031.565  | NM_003222 | 1420.104  | 1288.846  |
| AF015313  | 798.016  | 819.278  | AK026915  | 3164.121  | 3816.039  | NM_000841 | 7412.697  | 4454.782  |
| NM_006466 | 2652.483 | 2542.865 | AL110259  | 1678.582  | 1996.418  | NM_001245 | 3417.857  | 1718.205  |
| NM_005681 | 4081.974 | 2938.187 | AB033100  | 27794.301 | 27718.145 | NM_003672 | 17341.699 | 16606.223 |
| NM_015156 | 6433.884 | 6248.544 | AL390138  | 3951.972  | 4030.308  | NM_002574 | 59374.855 | 65082.801 |
| NM_012384 | 3865.734 | 3318.564 | AL137290  | 8916.064  | 8756.917  | AJ008139  | 6589.979  | 6748.229  |
| NM_004653 | 7827.967 | 6441.768 | AK023458  | 1446.417  | 1267.409  | NM_004326 | 4591.404  | 4507.474  |
| AF233453  | 3319.036 | 2520.762 | NM_014124 | 51578.281 | 40091.828 | NM_000882 | 925.308   | 1119.145  |
| D87454    | 16880.3  | 14980.26 | AF119888  | 1788.8    | 1643.409  | NM_004577 | 8988.919  | 8005.231  |

|           |          |          |           |           |           |           |           |           |
|-----------|----------|----------|-----------|-----------|-----------|-----------|-----------|-----------|
| NM_00702C | 6828.33  | 6595.435 | AK001551  | 3988.227  | 3701.956  | NM_015507 | 596.816   | 1002.94   |
| NM_000713 | 6796.93  | 4651.301 | AK001825  | 2621.927  | 2377.812  | AF007157  | 21488.563 | 31512.117 |
| NM_01605E | 1652.77  | 990.68   | AK024714  | 983.197   | 1274.853  | D38553    | 9460.333  | 11343.769 |
| NM_013291 | 17438.95 | 14774.26 | AK022363  | 1604.311  | 2028.983  | NM_00617C | 7490.147  | 9106.914  |
| NM_00293E | 17664.74 | 17417.37 | AK022485  | 944.116   | 1083.632  | NM_01429E | 7421.824  | 7612.913  |
| NM_014161 | 7056.721 | 5829.94  | AK023395  | 7554.971  | 7441.377  | AK001581  | 6904.028  | 5775.684  |
| BF312817  | 2977.965 | 2951.935 | AK023818  | 5576.023  | 5233.803  | NM_005862 | 5405.603  | 3971.636  |
| AF086491  | 917.674  | 915.312  | AK024139  | 979.723   | 688.185   | NM_00054E | 5350.417  | 5143.47   |
| NM_01485E | 1696.097 | 1927.887 | AK023895  | 1570.069  | 1187.234  | AK022541  | 15972.002 | 10209.562 |
| NM_003492 | 2984.823 | 2516.156 | AK024206  | 11275.133 | 10212.336 | AB002297  | 5975.416  | 5767.33   |
| NM_00378C | 7473.528 | 8845.742 | NM_006262 | 5844.547  | 9253.505  | NM_014077 | 10205.874 | 8266.08   |
| NM_002711 | 930.746  | 1080.646 | AK026598  | 3495.584  | 4110.382  | NM_018412 | 2237.931  | 1444.796  |
| NM_00019E | 12093.45 | 13204.77 | AK023602  | 2149.067  | 2689.064  | NM_01232E | 6435.402  | 7006.798  |
| NM_00377E | 25361.54 | 25280.85 | NM_018097 | 49763.52  | 49649.734 | M14087    | 33254.324 | 16337.305 |
| NM_001041 | 552.833  | 483.033  | AF130043  | 802.467   | 851.304   | NM_00088E | 10062.35  | 8058.092  |
| AK023263  | 4768.659 | 4333.404 | Y11167    | 2268.815  | 2297.897  | M59040    | 1697.376  | 996.352   |
| NM_004622 | 4337.6   | 3396.951 | AK026813  | 1497.579  | 1152.019  | NM_017582 | 24866.457 | 26156.426 |
| AK021445  | 837.607  | 856.904  | AK027225  | 1122.449  | 1039.031  | NM_01523E | 4236.072  | 5201.295  |
| NM_017934 | 6051.949 | 4413.906 | AK023083  | 3466.863  | 3092.024  | AK026962  | 2572.435  | 3591.127  |
| NM_01416E | 22006.23 | 15701.83 | AF116622  | 884.928   | 830.84    | NM_00679E | 558.492   | 434.143   |
| AF211971  | 3782.909 | 1908.567 | NM_00532E | 838.74    | 874.16    | X04366    | 3931.626  | 3515.872  |
| NM_002931 | 3325.256 | 3684.058 | AF217967  | 1754.901  | 1557.127  | NM_00050E | 53470.445 | 52269.371 |
| NM_01344E | 6374.883 | 5013.937 | NM_01815C | 11417.029 | 13569.693 | NM_01865E | 825.022   | 766.828   |
| X65232    | 16144.05 | 15278.49 | NM_01791E | 15961.739 | 17901.234 | NM_00066E | 4775.517  | 5789.819  |
| U17630    | 772.78   | 627.995  | NM_01785E | 56869.902 | 53101.484 | NM_003481 | 5972.448  | 5015.984  |
| M33782    | 1949.629 | 2189.446 | AB007954  | 3150.325  | 2825.286  | AB046814  | 2183.564  | 1346.309  |
| NM_01775E | 10357.56 | 11344.6  | AK026494  | 4331.229  | 2948.57   | NM_01777E | 642.825   | 428.636   |
| AK022551  | 3843.272 | 5245.105 | AK022067  | 947.349   | 655.964   | AK025523  | 792.333   | 727.436   |
| AB011136  | 1719.236 | 2300.562 | AK023508  | 1624.409  | 1411.295  | NM_00705E | 14944.994 | 8729.895  |
| AF085898  | 4326.805 | 4358.007 | AK025840  | 3491.571  | 2790.771  | NM_00687C | 29456.119 | 22369.982 |
| AL049964  | 2000.304 | 2044.389 | BC024009  | 5487.461  | 6712.461  | NM_00735E | 11711.298 | 7966.997  |
| AK023269  | 2134.874 | 1487.107 | AF128543  | 10952.616 | 12537.568 | L13283    | 854.585   | 853.158   |
| AF070564  | 850.028  | 859.652  | AK022071  | 940.045   | 734.062   | AF303888  | 14381.073 | 7727.683  |
| AK021439  | 9881.742 | 8415.662 | NM_00418E | 2102.034  | 2248.203  | AF176646  | 362.808   | 350.258   |
| AF052099  | 2712.159 | 2632.914 | U84510    | 11543.165 | 11617.276 | NM_007084 | 2232.531  | 3146.815  |
| AL110111  | 871.302  | 871.547  | S83198    | 24681.232 | 26601.107 | M97191    | 32819.805 | 41312.188 |
| AF070543  | 1800.148 | 1938.252 | AF052119  | 29996.994 | 27228.629 | AK023015  | 22609.268 | 20732.813 |
| AF086525  | 1141.084 | 1176.707 | X94290    | 3936.62   | 3951.17   | NM_003457 | 19823.348 | 18948.586 |
| AF086509  | 2117.821 | 1648.565 | AK026685  | 35262.402 | 31672.457 | NM_012391 | 3077.022  | 2957.571  |
| AK001171  | 14199.26 | 14762.13 | AF090927  | 41290.164 | 37583.852 | NM_005254 | 4584.449  | 6127.647  |
| AK026273  | 1238.809 | 1253.744 | AL137642  | 1993.32   | 1805.944  | NM_005611 | 1583.982  | 2069.751  |
| NM_02025C | 14420.16 | 13132.72 | AL133619  | 10965.298 | 8839.161  | AF141655  | 2253.073  | 2877.141  |
| AF055007  | 683.804  | 839.398  | AK025902  | 4901.348  | 5520.086  | NM_00734E | 1863.243  | 1826.862  |
| NM_012337 | 2190.002 | 1902.519 | AL353949  | 642.921   | 645.428   | NM_00483C | 1236.545  | 1580.861  |
| AL389879  | 1017.2   | 1023.383 | NM_005181 | 1867.864  | 2787.218  | AF132362  | 61608.836 | 67682.156 |
| AK022869  | 4497.007 | 3257.609 | AF026945  | 864.826   | 693.706   | NM_007007 | 11884.813 | 13615.192 |
| NM_016111 | 3387.252 | 4277.711 | AF143676  | 6130.053  | 5952.014  | NM_00638E | 1623.817  | 2123.466  |
| AF085958  | 21821.32 | 23774.07 | U66044    | 12793.853 | 11961.635 | NM_00655E | 28761.334 | 28881.699 |
| AF086021  | 3815.42  | 3831.73  | NM_005247 | 47024.105 | 47996.641 | NM_004501 | 43212.332 | 39833.148 |
| AF085982  | 453.117  | 610.744  | NM_005283 | 2256.711  | 2195.691  | NM_00496E | 23766.947 | 18451.09  |
| AL117655  | 754.617  | 1001.076 | AL122089  | 4331.178  | 2855.081  | NM_00670C | 2312.715  | 2377.322  |
| AK024472  | 5050.029 | 3985.153 | AA203665  | 5468.113  | 4005.532  | NM_00644E | 16605.238 | 15539.797 |
| AF087981  | 2418.488 | 2771.446 | U95646    | 1202.744  | 1066.116  | NM_01210E | 13199.192 | 10974.851 |

|           |          |          |             |           |           |           |           |           |
|-----------|----------|----------|-------------|-----------|-----------|-----------|-----------|-----------|
| NM_017976 | 4710.384 | 5915.222 | Y16705      | 2820.583  | 2168.85   | AF019633  | 4442.467  | 3703.732  |
| U06700    | 1950.003 | 1618.728 | AF279775    | 7733.05   | 6445.641  | AB002361  | 7338.359  | 6796.886  |
| U63828    | 1083.206 | 1795.703 | NM_001821   | 9867.291  | 11058.129 | NM_018060 | 10492.039 | 7052.85   |
| AF086140  | 1907.517 | 1464.913 | NM_005647   | 1941.876  | 1628.812  | NM_014239 | 7099.052  | 4430.824  |
| AK026915  | 1355.565 | 1147.889 | X64978      | 16939.303 | 16500.27  | NM_017662 | 6135.555  | 2933.154  |
| AB033100  | 28885.19 | 29492.93 | NM_000912   | 47061.18  | 52383.332 | U88837    | 2420.801  | 1157.072  |
| AL390138  | 792.229  | 795.127  | NM_002345   | 1906.741  | 2111.36   | NM_017446 | 39631.918 | 16291.978 |
| AL137290  | 2426.067 | 2377.131 | U57971      | 3056.045  | 2919.535  | AK001478  | 4686.135  | 9024.512  |
| AK024180  | 1072.791 | 1346.143 | X89673      | 1674.116  | 1794.934  | AK025697  | 10425.813 | 12184.824 |
| AK021606  | 627.915  | 828.856  | AK024593    | 2978.693  | 2680.89   | AK021734  | 1217.848  | 1476.726  |
| NM_014124 | 5206.109 | 4556.141 | Z83934      | 1719.946  | 2121.865  | BF245026  | 722.237   | 896.179   |
| AK001551  | 786.948  | 1110.773 | NM_018355   | 7384.391  | 8464.978  | D00265    | 51111.082 | 45388.086 |
| AK001825  | 3327.047 | 1877.679 | AK022020    | 2738.963  | 2532.113  | NM_000779 | 1372.451  | 2221.909  |
| AK024714  | 1102.406 | 1093.185 | AK000263    | 16168.461 | 16537.146 | NM_004552 | 55956.91  | 55965.211 |
| AK022363  | 952.815  | 649.395  | Y13895      | 1029.688  | 813.827   | NM_000143 | 4409.974  | 4528.329  |
| AK022485  | 1025.026 | 1207.552 | NM_017447   | 2918.542  | 2682.543  | AF317889  | 1177.358  | 1066.506  |
| AK023395  | 1263.11  | 1152.536 | AL049452    | 1206.823  | 1114.146  | NM_006294 | 64336.641 | 66032.414 |
| AK023895  | 1235.106 | 1719.15  | NM_016622   | 3417.152  | 2566.731  | AL137294  | 5049.064  | 5891.787  |
| AK024206  | 4313.862 | 4810.512 | AK026976    | 1833.108  | 2054.843  | NM_003743 | 2429.624  | 3157.467  |
| NM_006262 | 1740.108 | 2610.458 | AF070559    | 6514.023  | 5604.928  | AB037797  | 1253.418  | 1705.337  |
| AK026598  | 3240.132 | 3912.556 | D42043      | 9835.24   | 6652.445  | NM_001520 | 2665.011  | 2857.969  |
| AK023602  | 3832.813 | 2440.968 | CY3Cy5      | 2024.136  | 362.741   | AL050367  | 1716.56   | 1136.789  |
| NM_018097 | 53677.79 | 45982.64 | BG744154    | 22993.486 | 19959.031 | NM_017870 | 1081.867  | 1810.639  |
| AF130043  | 1027.293 | 1129.942 | Z11694      | 9088.755  | 7498.749  | AL133633  | 3797.852  | 4700.458  |
| Y11167    | 2426.171 | 2924.566 | BF983177    | 869.454   | 677.917   | NM_012252 | 541.457   | 797.426   |
| AK026813  | 870.598  | 1021.696 | Z26317      | 2799.847  | 2153.398  | AK026817  | 2319.077  | 1758.641  |
| AK027225  | 928.509  | 961.49   | X16983      | 31366.75  | 19055.926 | AL157442  | 25448.057 | 21266.941 |
| AK023083  | 3905.547 | 4068.5   | X56160      | 3707.627  | 3047.886  | AB011148  | 3497.272  | 2232.005  |
| AF130093  | 582.983  | 761.52   | BG679991    | 1453.542  | 1905.785  | AL389938  | 34078.93  | 19790.783 |
| AF116622  | 734.395  | 985.496  | H-Y 00097 I | 9761.951  | 9654.161  | NM_001949 | 46687.363 | 24511.123 |
| AF217967  | 1007.116 | 1770.833 | H-Y 00711 I | 57156.828 | 62835.254 | NM_003507 | 1388.824  | 1629.367  |
| NM_018150 | 10150.19 | 10365.54 | H-X 16707 I | 2652.463  | 2104.565  | AK026591  | 1513.257  | 2407.832  |
| NM_017855 | 64415.66 | 49986.95 | AL038354    | 43352.848 | 36280.773 | AK001889  | 3031.309  | 3771.791  |
| AB007954  | 1755.216 | 1833.76  | R14607      | 891.95    | 709.445   | AK025726  | 2894.05   | 2766.345  |
| AK026494  | 1468.907 | 1471.69  | NM_021976   | 3259.008  | 3830.142  | AJ227869  | 3634.283  | 3898.851  |
| AK023508  | 613.805  | 828.866  | SR2         | 56399.738 | 61307.273 | AK026189  | 669.992   | 920.156   |
| AK025840  | 4894.824 | 4284.85  | SR4         | 18071.234 | 24989.289 | AK026790  | 624.432   | 693.14    |
| BC024009  | 642.012  | 850.035  | SR6         | 2546.771  | 2911.388  | AL117613  | 8522.412  | 8695.804  |
| AF128543  | 1214.148 | 1433.539 | SR8         | 9853.701  | 25920.295 | AL137753  | 7143.677  | 7074.364  |
| AK022071  | 751.078  | 1074.819 | SR10        | 33660.84  | 12267.854 | AK021785  | 823.218   | 897.708   |
| U84510    | 2132.46  | 1569.392 | CY3Cy5      | 3367.049  | 259.652   | AL110262  | 17751.674 | 35935.539 |
| S83198    | 7114.765 | 6856.096 | NM_001284   | 39856.832 | 33768.938 | AK025627  | 19768.309 | 27585.059 |
| AF052119  | 17170.66 | 20397.4  | NM_003242   | 15361.836 | 9421.896  | AF216077  | 4243.946  | 5299.184  |
| X94290    | 2728.398 | 2778.079 | NM_002845   | 812.702   | 601.114   | AF086238  | 932.959   | 994.698   |
| AK026685  | 3810.859 | 3989.037 | U31099      | 1269.093  | 1298.526  | AK021612  | 12794.489 | 20401.807 |
| AF090927  | 6103.396 | 7252.678 | NM_001105   | 4688.341  | 4117.956  | AK002025  | 57751.922 | 53165.234 |
| AL137642  | 1404.232 | 1918.032 | NM_005585   | 1457.409  | 1160.487  | AK026299  | 2946.891  | 2087.693  |
| AL133619  | 7199.969 | 9191.14  | NM_002075   | 4350.566  | 3459.953  | NM_017794 | 2045.726  | 1330.682  |
| AK025902  | 4536.389 | 4335.201 | Y08756      | 10554.305 | 10013.444 | AK025170  | 2107.367  | 1565.257  |
| NM_005181 | 1508.067 | 1523.765 | NM_005563   | 23252.563 | 23463.146 | AB033031  | 1847.651  | 2247.841  |
| AF026945  | 899.193  | 905.163  | AY007090    | 1105.474  | 1037.382  | AF085872  | 10847.717 | 11298.72  |
| U66044    | 1296.137 | 1435.484 | NM_006435   | 846.72    | 784.742   | AK022538  | 12701.628 | 12305.993 |
| NM_005247 | 3428.609 | 3485.059 | NM_005102   | 1473.83   | 1545.562  | AL360257  | 1896.732  | 1755.462  |

|             |          |          |           |           |           |           |           |           |
|-------------|----------|----------|-----------|-----------|-----------|-----------|-----------|-----------|
| AL122089    | 3429.506 | 5553.613 | NM_004518 | 2036.791  | 2004.615  | AK022342  | 1249.485  | 1639.39   |
| AA203665    | 1565.537 | 1517.35  | NM_006501 | 1491.373  | 1291.552  | AF147420  | 1477.519  | 1912.252  |
| U95646      | 1213.535 | 1263.517 | NM_002719 | 10050.141 | 12738.438 | AL049312  | 2505.491  | 2920.492  |
| Y16705      | 789.692  | 971.543  | AB035356  | 692.063   | 639.605   | AL050072  | 5502.169  | 5998.856  |
| AF279775    | 1767.876 | 1431.961 | NM_016102 | 2101.123  | 2436.316  | AL117590  | 1021.948  | 1190.408  |
| NM_001821   | 4800.948 | 5031.679 | NM_004376 | 3239.52   | 4291.517  | AL049357  | 5315.803  | 9699.01   |
| NM_005647   | 1151.609 | 1679.542 | NM_000272 | 1529.421  | 1883.741  | AK027180  | 3529.068  | 4065.838  |
| X64978      | 11547.25 | 12028.71 | NM_005603 | 9876.169  | 9435.475  | AK026802  | 720.133   | 845.669   |
| NM_000912   | 15560.18 | 16261.17 | AB011100  | 3633.829  | 4083.979  | NM_004544 | 18508.293 | 23707.307 |
| NM_002345   | 1406.69  | 1322.714 | U61741    | 1292.604  | 1244.009  | AL133080  | 3281.402  | 4898.375  |
| U57971      | 750.458  | 644.604  | NM_012402 | 8033.284  | 7166.012  | NM_017792 | 6310.706  | 7134.766  |
| X89673      | 1047.75  | 862.294  | M76676    | 4378.538  | 3499.914  | AK025213  | 9052.973  | 5954.899  |
| AK024593    | 812.879  | 632.55   | NM_003857 | 619.176   | 992.304   | NM_014949 | 3538.745  | 2761.771  |
| Z83934      | 2112.229 | 1910.31  | AL137690  | 932.621   | 887.362   | AL080221  | 2018.9    | 1177.963  |
| NM_018358   | 10599.84 | 7512.96  | Z83804    | 2840.471  | 2478.801  | AL137370  | 1520.657  | 1791.518  |
| AK022020    | 3282.918 | 2339.367 | NM_004386 | 2168.662  | 2404.107  | AF009262  | 17185.016 | 19511.854 |
| U17634      | 673.124  | 840.062  | U67784    | 1508.459  | 1577.556  | AF009306  | 652.6     | 1040.566  |
| AK000263    | 9258.165 | 10638    | NM_007366 | 2050.472  | 1893.011  | AF050198  | 2383.845  | 2763.131  |
| Y13895      | 713.386  | 707.155  | NM_000592 | 1115.929  | 1252.149  | AK024346  | 2186.536  | 3226.244  |
| NM_017447   | 3928.558 | 4546.981 | NM_016584 | 16095.58  | 14888.354 | AF056422  | 1415.19   | 1745.933  |
| AL049452    | 1142.692 | 1169.272 | NM_001815 | 2166.298  | 1890.283  | AF090892  | 957.804   | 1254.219  |
| NM_016622   | 3607.93  | 3157.733 | NM_000064 | 7790.585  | 6452.614  | AK001089  | 1672.473  | 2631.528  |
| AK026976    | 2207.764 | 2462.282 | NM_006725 | 4724.509  | 5993.684  | AK001919  | 1323.653  | 1826.413  |
| AF070559    | 15048.79 | 11563.21 | NM_003326 | 1493.903  | 1785.352  | AK021535  | 1347.988  | 2057.707  |
| D42043      | 6766.669 | 5284.698 | NM_004568 | 46230.906 | 57230.367 | AK021753  | 3154.165  | 3401.138  |
| BG744154    | 24511.79 | 26094.62 | NM_000202 | 2017.37   | 3575.154  | AK001139  | 2380.661  | 3238.771  |
| Z11694      | 3336.922 | 4317.214 | NM_005496 | 14854.246 | 20391.412 | AK002090  | 1670.377  | 1568.29   |
| Z26317      | 3300.311 | 3245.872 | NM_004817 | 1710.424  | 1323.37   | AK021822  | 1154.061  | 1309.089  |
| X16983      | 5495.034 | 16918.55 | NM_018975 | 20683.961 | 23167.789 | AK025246  | 6261.997  | 6348.052  |
| BG679991    | 1862.772 | 1391.986 | AB023215  | 4650.603  | 5845.662  | AK025847  | 2895.549  | 2551.005  |
| H-Y 00711 I | 68909.57 | 71572.69 | NM_018073 | 4379.591  | 5827.664  | AK026442  | 685.93    | 345.97    |
| AL038354    | 30881.1  | 24725.39 | AL137529  | 5222.48   | 4720.818  | NM_014174 | 40393.492 | 44698.082 |
| NM_021976   | 3765.166 | 2011.348 | NM_012332 | 1986.192  | 1888.766  | AF147337  | 4715.124  | 5973.031  |
| SR2         | 53710.08 | 29441.53 | AK026648  | 1720.62   | 1395.547  | AK025203  | 57993.523 | 56158.992 |
| SR4         | 17357.77 | 7865.558 | NM_000497 | 1749.115  | 1797.078  | AK026981  | 4473.824  | 5165.795  |
| SR6         | 2812.08  | 925.051  | NM_017421 | 2275.447  | 1539.863  | NM_006394 | 405.78    | 959.444   |
| SR8         | 9360.826 | 11413.74 | AK025977  | 26656.195 | 27220.521 | AK023819  | 855.718   | 1097.107  |
| SR10        | 32314.8  | 5491.805 | AK023130  | 9142.932  | 9835.563  | AL359558  | 698.507   | 1233.59   |
| CY3Cy5      | 2375.399 | 60.881   | NM_000273 | 1444.955  | 1421.816  | AL133656  | 2497.53   | 4883.263  |
| NM_003242   | 2768.392 | 3982.345 | NM_002899 | 14999.721 | 13813.11  | AK022236  | 8322.385  | 10718.245 |
| U31099      | 586.271  | 907.996  | NM_000486 | 1212.338  | 1208.673  | AK000073  | 1850.811  | 2317.724  |
| NM_001105   | 2143.392 | 1960.398 | BE876237  | 1493.61   | 1257.735  | AK000618  | 837.347   | 1021.411  |
| NM_005585   | 1880.014 | 2414.145 | NM_005397 | 1591.693  | 1495.785  | AK024773  | 922.206   | 746.127   |
| NM_002075   | 518.571  | 566.975  | NM_000806 | 1165.04   | 1494.125  | AL390180  | 898.778   | 928.283   |
| Y08756      | 482.89   | 610.056  | NM_006320 | 2223.823  | 2550.529  | X60484    | 1245.152  | 1216.809  |
| NM_005102   | 1752.558 | 1571.034 | AB014511  | 4277.643  | 4865.608  | AF055019  | 1804.573  | 2245.759  |
| NM_004518   | 533.547  | 633.617  | NM_014252 | 7061.767  | 9086.959  | NM_003525 | 11704.075 | 9005.874  |
| NM_006501   | 1228.039 | 1122.603 | NM_001662 | 14713.67  | 12794.438 | AK000229  | 1324.737  | 1386.504  |
| NM_002719   | 13973.25 | 9221.93  | NM_016131 | 10738.446 | 10980.647 | AF056432  | 6577.734  | 6610.307  |
| AB035356    | 851.042  | 611.468  | NM_006822 | 2569.712  | 2464.74   | AK001987  | 35458.563 | 40428.078 |
| AV752086    | 747.802  | 508.623  | NM_012142 | 10203.25  | 13316.815 | NM_013332 | 3485.254  | 4112.955  |
| NM_016102   | 1481.065 | 1066.146 | NM_016429 | 2822.73   | 3693.127  | X56199    | 3400.9    | 6782.674  |
| NM_004376   | 5737.921 | 2316.928 | NM_018264 | 1934.377  | 1787.135  | NM_005193 | 4264.168  | 7715.072  |

|           |          |          |             |           |           |           |           |           |
|-----------|----------|----------|-------------|-----------|-----------|-----------|-----------|-----------|
| NM_000272 | 1576.453 | 961.473  | NM_014580   | 1560.343  | 1548.458  | AL162006  | 1668.061  | 2620.9    |
| NM_005603 | 7109.141 | 4395.378 | AB028998    | 886.205   | 638.613   | NM_017971 | 31637.137 | 42439.543 |
| NM_012402 | 6971.602 | 8679.301 | NM_000153   | 1197.795  | 973.207   | AF090097  | 1573.118  | 2104.531  |
| M76676    | 2760.65  | 3197.131 | NM_002033   | 2783.022  | 3059.185  | AF054998  | 637.194   | 1350.087  |
| NM_003857 | 541.19   | 448.003  | AK091794    | 804.419   | 775.837   | AF116620  | 19019.357 | 16000.216 |
| AL137690  | 851.648  | 1180.739 | NM_004111   | 3704.598  | 3526.606  | AF293335  | 36643.125 | 40181.195 |
| Z83804    | 3318.9   | 3334.912 | AF085966    | 5471.692  | 5586.432  | AL080065  | 1252.092  | 1415.795  |
| NM_004386 | 1018.183 | 1729.186 | NM_005316   | 4736.748  | 4200.03   | AK024431  | 13628.42  | 18159.039 |
| NM_007366 | 1246.345 | 1292.885 | NM_016316   | 5038.129  | 4473.964  | AF116635  | 729.741   | 1178.905  |
| NM_000592 | 1662.221 | 1813.665 | NM_003369   | 11786.929 | 11427.022 | X96644    | 9301.936  | 12279.266 |
| NM_016584 | 1721.888 | 2030.189 | NM_000057   | 3149.658  | 4034.097  | Z34281    | 29860.289 | 46296.609 |
| NM_001815 | 770.385  | 858.775  | NM_018343   | 6988.637  | 5396.02   | NM_018678 | 55050.043 | 60981.773 |
| NM_000064 | 2955.944 | 2776.331 | AK095793    | 1624.386  | 1542.978  | AJ008122  | 37081.922 | 41851.461 |
| NM_006725 | 5510.364 | 3758.745 | NM_003177   | 4059.844  | 4958.791  | NM_006220 | 1257.26   | 905.753   |
| NM_003326 | 1766.207 | 1010.72  | NM_017719   | 2020.987  | 2546.938  | AK022667  | 50450.488 | 42804.535 |
| NM_004568 | 41604.04 | 28987.31 | AL049688    | 1372.099  | 1479.4    | AK026667  | 1085.118  | 922.351   |
| NM_000202 | 2684.325 | 1569.749 | NM_002737   | 5349.472  | 4096.434  | AF113211  | 1283.564  | 1690.984  |
| NM_005496 | 20325.45 | 6195.27  | Z25427      | 3174.178  | 3387.716  | AL117568  | 4200.176  | 5764.403  |
| NM_004817 | 1182.233 | 1296.632 | NM_004672   | 10476.989 | 12325.25  | NM_000843 | 1094.38   | 1222.761  |
| NM_018975 | 18774.07 | 12908.07 | NM_001353   | 3458.31   | 3882.823  | S71805    | 1682.053  | 2333.577  |
| AB023215  | 4693.327 | 3161.615 | NM_006214   | 3305.913  | 2924.499  | NM_018391 | 2197.508  | 2544.523  |
| AL137529  | 5020.372 | 5673.416 | AJ010228    | 4219.831  | 5746.943  | U90917    | 1042.832  | 1394.345  |
| NM_000497 | 1631.304 | 2296.281 | NM_005198   | 3820.3    | 4633.614  | AK022140  | 5238.79   | 7500.604  |
| NM_017421 | 3014.774 | 4257.338 | NM_005603   | 46535.602 | 40264.203 | AK023372  | 27321.201 | 48002.391 |
| AK025977  | 17080.02 | 19242.83 | NM_001061   | 875.455   | 699.917   | AF086527  | 832.386   | 1436.929  |
| AK023130  | 12143.83 | 12421.95 | BG744154    | 22619.273 | 25337.303 | U21072    | 2809.908  | 4064.092  |
| NM_000273 | 604.764  | 882.152  | Z11694      | 8335.742  | 9459.002  | AK024377  | 974.21    | 1573.201  |
| NM_002899 | 4080.453 | 5593.82  | BF983177    | 744.977   | 942.677   | U38438    | 801.446   | 1177.923  |
| NM_000486 | 910.924  | 1088.781 | Z26317      | 2980.971  | 2578.135  | AK023557  | 3695.743  | 2856.463  |
| BE876237  | 1504.022 | 1404.943 | X16983      | 31607.186 | 22865.016 | AK027107  | 1111.644  | 993.521   |
| NM_005397 | 1240.924 | 1945.238 | X56160      | 3592.921  | 4092.345  | AB040887  | 5035.273  | 5821.685  |
| NM_000806 | 745.874  | 530.545  | BG679991    | 1521.627  | 3171.241  | AK025196  | 2975.38   | 3847.55   |
| NM_006320 | 4122.339 | 2547.28  | H-Y 00097 I | 9773.61   | 10250.585 | AJ227879  | 957.763   | 1391.16   |
| AB014511  | 5706.825 | 2938.709 | H-Y 00711 I | 57848.277 | 63852.848 | AK024800  | 1143.903  | 1811.847  |
| NM_014252 | 9294.526 | 4602.156 | H-X 16707 I | 1370.328  | 1598.118  | AK000401  | 3045.778  | 3445.771  |
| NM_001662 | 16038.1  | 11396.87 | AL038354    | 38273.418 | 38401.891 | AF305068  | 2056.292  | 1642.052  |
| NM_016131 | 9819.103 | 4978.12  | NM_021976   | 3071.733  | 3133.122  | D17231    | 56483.945 | 56270.145 |
| NM_006822 | 1658.495 | 1778.534 | NM_005718   | 9808.148  | 15905.364 | AF531295  | 2508.381  | 2111.308  |
| NM_012142 | 10623.19 | 6285.985 | NM_005496   | 15409.996 | 18919.832 | CY3Cy5    | 11392.405 | 599.795   |
| NM_016429 | 3982.29  | 2714.22  | NM_002858   | 7137.178  | 10141.65  | BF974315  | 7018.539  | 9872.839  |
| NM_018264 | 2122.14  | 2414.786 | NM_004817   | 2152.545  | 1726.604  | T74985    | 1538.194  | 1452.863  |
| NM_002033 | 3247.939 | 4015.683 | NM_018975   | 24380.545 | 23485.021 | AI652705  | 7691.002  | 6728.16   |
| AK091794  | 634.641  | 766.183  | AB023215    | 16218.843 | 15779.759 | AA973397  | 904.529   | 695.494   |
| NM_004111 | 1792.682 | 1479.239 | NM_001284   | 43230.285 | 46945.84  | AA569974  | 1042.712  | 818.634   |
| AF085966  | 5542.674 | 5977.506 | NM_003242   | 18120.635 | 12766.549 | AA446028  | 868.259   | 936.784   |
| NM_005316 | 4150.345 | 5421.164 | NM_002849   | 826.021   | 947.374   | M80583    | 2794.282  | 1918.627  |
| NM_016316 | 3427.111 | 3967.877 | U31099      | 1176.007  | 1290.545  | AW009565  | 9655.819  | 9996.052  |
| NM_003369 | 6586.033 | 6969.596 | NM_001105   | 5709.266  | 5861.87   | AI570478  | 2793.587  | 2621.149  |
| NM_000057 | 5054.106 | 4462.524 | NM_005585   | 1616.417  | 2653.381  | X07767    | 13455.45  | 14115.616 |
| NM_018343 | 7278.317 | 7506.893 | NM_002075   | 4453.778  | 5045.389  | X65293    | 2515.913  | 2010.84   |
| AK095793  | 817.302  | 585.202  | Y08756      | 13113.821 | 11877.422 | AF252284  | 4538.55   | 4563.717  |
| NM_003177 | 5165.84  | 4007.249 | NM_005563   | 21966.719 | 20889.396 | BU727558  | 1702.095  | 1526.069  |
| NM_017719 | 1978.078 | 1764.665 | AY007090    | 688.415   | 963.943   | SR5       | 14498.173 | 11335.438 |

|             |          |          |           |           |           |           |           |           |
|-------------|----------|----------|-----------|-----------|-----------|-----------|-----------|-----------|
| AL049688    | 1784.692 | 946.539  | NM_005102 | 1398.343  | 1802.511  | SR7       | 10607.618 | 49444.973 |
| NM_002737   | 4471.059 | 2699.886 | NM_006501 | 946.204   | 989.404   | SR9       | 34983.766 | 6713.986  |
| Z25427      | 3319.299 | 2102.205 | NM_002719 | 9005.108  | 12954.886 | CY3Cy5    | 10841.454 | 398.425   |
| NM_004672   | 11726.32 | 6128.284 | AV752086  | 692.508   | 483.434   | NM_016511 | 23582.859 | 23515.379 |
| NM_001353   | 2827.95  | 1183.751 | NM_016102 | 1398.107  | 1787.981  | NM_003559 | 4869.667  | 5314.909  |
| NM_006214   | 2562.097 | 1683.415 | NM_004376 | 2915.196  | 4808.223  | NM_002185 | 3063.802  | 1695.066  |
| AJ010228    | 5090.634 | 2611.541 | NM_000272 | 1691.088  | 2094.245  | M55337    | 1658.756  | 2110.668  |
| NM_005198   | 3957.507 | 3313.762 | NM_014252 | 8297.536  | 10139.394 | NM_013229 | 2577.05   | 2971.238  |
| NM_006061   | 265.09   | 678.594  | NM_001662 | 18819.686 | 14683.333 | NM_016533 | 67807.5   | 70597.078 |
| Z11694      | 4781.614 | 5523.331 | NM_016131 | 10669.92  | 10083.773 | NM_014751 | 14694.207 | 17208.34  |
| Z26317      | 3207.741 | 3848.741 | NM_006822 | 3073.586  | 2748.678  | NM_002347 | 37134.859 | 46175.156 |
| X16983      | 5564.502 | 17643.95 | NM_012142 | 10295.957 | 11158.897 | AB046807  | 4107.472  | 4585.266  |
| X56160      | 539.326  | 753.4    | NM_016429 | 2598.011  | 2761.768  | NM_003508 | 2410.991  | 886.023   |
| BG679991    | 2116.088 | 1296.719 | AB011100  | 2899.059  | 2798.446  | M30629    | 9252.524  | 8328.142  |
| H-Y 00097 I | 13456.83 | 12816.3  | U61741    | 1322.913  | 1617.51   | AF193873  | 4037.618  | 3380.873  |
| AL038354    | 30924.76 | 24893.82 | NM_012402 | 8245.186  | 8198.588  | NM_002628 | 2611.924  | 3023.884  |
| NM_021976   | 3733.406 | 1877.466 | M76676    | 5085.46   | 5131.993  | AA190729  | 5491.519  | 5211.282  |
| NM_005718   | 10335.94 | 6178.505 | NM_003857 | 913.93    | 810.845   | NM_004170 | 3070.947  | 2753.839  |
| NM_005496   | 19615.39 | 13878.44 | AL137690  | 810.095   | 848.755   | M33197    | 67713.68  | 72856.766 |
| NM_002858   | 8593.588 | 8289.712 | Z83804    | 2719.012  | 2778.764  | NM_015717 | 2488.358  | 2723.653  |
| NM_004817   | 1208.534 | 1973.9   | NM_004386 | 2044.967  | 1772.466  | NM_015925 | 1653.758  | 1540.713  |
| NM_018975   | 16699.04 | 25366.11 | U67784    | 1230.12   | 1737.354  | NM_003665 | 2260.627  | 2346.473  |
| NM_001284   | 28299.03 | 35354.3  | NM_007366 | 1504.657  | 1583.52   | AF220217  | 2190.441  | 2218.344  |
| NM_003242   | 1797.372 | 2693.949 | NM_000592 | 623.102   | 1176.464  | NM_013323 | 23481.4   | 26702.988 |
| U31099      | 645.882  | 842.411  | NM_016584 | 2715.939  | 3547.067  | NM_014937 | 1486.486  | 2132.223  |
| NM_001105   | 2622.467 | 2439.922 | NM_000064 | 1731.221  | 1888.519  | M33197    | 7918.671  | 7214.975  |
| NM_005585   | 1728.611 | 1987.755 | NM_006725 | 3994.114  | 3516.963  | NM_000853 | 6236.943  | 6343.804  |
| NM_002075   | 407.795  | 672.927  | NM_003326 | 956.769   | 1163.13   | NM_000846 | 526.695   | 1091.581  |
| Y08756      | 400.637  | 502.546  | NM_004568 | 42971.98  | 41455.465 | AF016903  | 43446.34  | 53152.145 |
| NM_006439   | 422.256  | 281.608  | NM_000202 | 1756.754  | 1947.433  | NM_015675 | 10641.857 | 15075.192 |
| NM_005102   | 1872.613 | 1274.78  | Z25427    | 5156.8    | 4172.6    | AK022267  | 1586.563  | 1258.369  |
| NM_004518   | 523.767  | 361.385  | NM_004672 | 12466.57  | 11297.074 | M33197    | 67720.57  | 69962.82  |
| NM_006501   | 1254.891 | 880.027  | NM_001353 | 5470.139  | 4636.063  | U90878    | 1402.042  | 1355.068  |
| NM_002719   | 12326.15 | 5799.605 | NM_006214 | 2910.809  | 2965.528  | NM_006597 | 58994.965 | 60617.941 |
| AB035356    | 811.371  | 348.842  | AJ010228  | 7908.631  | 7701.601  | NM_012483 | 20958.525 | 25914.043 |
| AV752086    | 907.401  | 436.717  | NM_005198 | 6970.375  | 9005.976  | NM_003498 | 7636.792  | 9690.553  |
| NM_016102   | 1532.962 | 1170.299 | NM_018073 | 3293.307  | 3406.893  | AB023420  | 20120.92  | 20827.242 |
| NM_004376   | 5490.959 | 2721.283 | AL137529  | 5151.818  | 5847.34   | NM_007342 | 9209.104  | 9919.58   |
| NM_000272   | 1465.33  | 1134.59  | NM_012332 | 2050.04   | 2014.803  | NM_005672 | 1274.38   | 1118.509  |
| NM_014252   | 8485.537 | 8606.602 | AK026648  | 2322.303  | 2458.757  | D25217    | 3546.064  | 3394.327  |
| NM_016131   | 9108.353 | 11745.01 | NM_000497 | 2987.682  | 4523.855  | NM_006351 | 14350.337 | 11334.255 |
| NM_006822   | 1317.808 | 2481.349 | NM_017421 | 2681.728  | 2049.841  | M33197    | 67899.836 | 67406.023 |
| NM_012142   | 9565.007 | 9785.522 | AK025977  | 21134.891 | 22069.904 | NM_004683 | 8684.713  | 9426.061  |
| NM_016429   | 3046.503 | 3485.707 | AK023130  | 9223.581  | 8392.469  | AK023226  | 4049.322  | 4681.915  |
| AB011100    | 2643.897 | 3123.227 | NM_000273 | 1573.427  | 1600.755  | AK025263  | 1599.771  | 1851.422  |
| U61741      | 951.18   | 1007.789 | NM_002899 | 4751.232  | 5335.479  | M33197    | 67894.641 | 64000.465 |
| NM_012402   | 6589.074 | 8881.331 | NM_000486 | 474.754   | 944.703   | NM_001467 | 2067.01   | 2075.316  |
| M76676      | 3448.226 | 3557.516 | BE876237  | 798.901   | 1189.644  | NM_018066 | 49752.328 | 53201.516 |
| NM_003857   | 680.908  | 518.582  | NM_005397 | 1277.911  | 1179.916  | NM_006931 | 17321.285 | 20586.164 |
| AL137690    | 891.872  | 957.26   | NM_006320 | 1946.632  | 2146.892  | NM_020344 | 12407.031 | 12536.03  |
| Z83804      | 3237.711 | 2621.619 | AB014511  | 3934.953  | 4350.829  | AF119868  | 969.834   | 1320.345  |
| NM_004386   | 1107.945 | 1041.386 | NM_021976 | 3362.723  | 2341.948  | NM_005050 | 7196.583  | 6900.307  |
| U67784      | 852.558  | 856.348  | NM_005718 | 10030.843 | 8572.477  | NM_018976 | 20262.621 | 16719.668 |

|           |          |          |             |           |           |           |           |           |
|-----------|----------|----------|-------------|-----------|-----------|-----------|-----------|-----------|
| NM_007366 | 1612.515 | 1346.018 | NM_018264   | 1987.386  | 1854.054  | NM_003355 | 8125.634  | 11282.62  |
| NM_000592 | 1018.22  | 818.385  | NM_014580   | 1113.839  | 1252.953  | NM_005074 | 2756.141  | 3421.591  |
| NM_016584 | 2196.383 | 1810.35  | AB028998    | 641.34    | 749.624   | NM_013272 | 839.192   | 961.956   |
| NM_001815 | 667.567  | 358.222  | NM_000153   | 1361.148  | 940.719   | NM_002593 | 1044.312  | 1141.998  |
| NM_000064 | 2577.873 | 1427.266 | NM_002033   | 3313.797  | 3215.641  | NM_004555 | 7553.368  | 8731.616  |
| NM_006725 | 3915.402 | 2519.244 | AK091794    | 1134.047  | 1076.187  | AL079296  | 1552.067  | 1845.744  |
| NM_003326 | 1623.87  | 753.355  | NM_004111   | 2964.506  | 2909.338  | NM_014770 | 4437.121  | 5209.1    |
| NM_004565 | 40192.77 | 25386.12 | AF085966    | 4907.268  | 4578.248  | AB037737  | 1000.772  | 1499.088  |
| NM_000202 | 2874.951 | 2070.505 | NM_005316   | 4286.108  | 4081.663  | M33197    | 66876.523 | 62345.871 |
| Z25427    | 3532.132 | 4879.059 | NM_016316   | 3327.717  | 3327.244  | AK023103  | 6569.577  | 8086.128  |
| NM_001353 | 2700.465 | 2719.01  | NM_003365   | 6372.27   | 7253.489  | NM_017855 | 8808.761  | 6846.169  |
| NM_006214 | 2339.082 | 3613.382 | NM_000057   | 2736.828  | 4055.731  | NM_019055 | 58985.594 | 59818.461 |
| AJ010228  | 4917.078 | 5020.556 | NM_018343   | 5837.582  | 5272.108  | NM_013347 | 1383.965  | 1239.124  |
| NM_005195 | 3441.651 | 4780.039 | NM_003177   | 3283.189  | 4038.219  | D80008    | 5501.812  | 3875.411  |
| NM_018073 | 3360.707 | 3819.2   | NM_017715   | 1774.855  | 1976.044  | X56789    | 2222.612  | 2831.842  |
| AL137529  | 4887.365 | 5109.497 | AL049688    | 1214.032  | 1065.694  | NM_000935 | 2435.913  | 1002.649  |
| NM_012332 | 496.366  | 594.971  | NM_002737   | 5075.827  | 3788.736  | NM_000355 | 24186.311 | 21916.449 |
| AK026648  | 2719.567 | 3213.766 | NM_002715   | 10664.471 | 9360.252  | NM_006395 | 2497.66   | 1672.375  |
| NM_000497 | 1673.387 | 1703.68  | AB035356    | 729.343   | 587.519   | NM_014306 | 12626.697 | 9955.391  |
| NM_017421 | 2360.192 | 2999.92  | AV752086    | 1832.241  | 1486.745  | NM_001084 | 4508.536  | 4098.501  |
| AK025977  | 16079.5  | 17228.84 | NM_016102   | 8866.983  | 8069.438  | NM_018622 | 11925.088 | 10599.897 |
| AK023130  | 12452.71 | 10887.33 | NM_004376   | 4104.65   | 5172.764  | M33197    | 67990.719 | 61475.375 |
| NM_000273 | 783.482  | 727.235  | NM_000272   | 1598.742  | 1302.482  | NM_005867 | 12756.218 | 12440.338 |
| NM_002895 | 4493.343 | 4375.005 | NM_006845   | 57060.211 | 64513.402 | AK026031  | 21666.869 | 26663.49  |
| NM_000486 | 678.948  | 619.6    | NM_005603   | 50504.922 | 53163.797 | NM_016465 | 43538.242 | 55841.441 |
| BE876237  | 1449.366 | 930.352  | NM_001061   | 942.325   | 1282.284  | NM_002625 | 2924.727  | 3252.308  |
| NM_005397 | 1007.31  | 772.273  | BG744154    | 23655.131 | 24179.189 | M23575    | 1482.127  | 1689.825  |
| NM_000806 | 718.394  | 274.55   | Z11694      | 8872.474  | 8072.349  | AA190729  | 8613.217  | 8028.114  |
| NM_006320 | 3560.07  | 2030.946 | BF983177    | 847.895   | 743.075   | BF974315  | 7952.793  | 10531.299 |
| AB014511  | 5126.671 | 3446.632 | Z26317      | 2968.016  | 1825.135  | T74985    | 1919.699  | 1897.497  |
| NM_021976 | 4524.332 | 4916.496 | X16983      | 28896.912 | 16039.576 | AI652705  | 9380.543  | 8600.113  |
| NM_005715 | 12340.79 | 15602.14 | X56160      | 3257.446  | 2579.007  | AA973397  | 653.413   | 830.433   |
| NM_018264 | 2261.661 | 2862.336 | BG679991    | 1014.007  | 1252.722  | AA923615  | 822.087   | 1271.917  |
| NM_014580 | 693.899  | 822.701  | H-Y 00097 I | 7864.703  | 8794.921  | AA446028  | 1179.757  | 1177.224  |
| AB028998  | 1551.329 | 1716.692 | H-Y 00711 I | 57583.293 | 62997.895 | M80583    | 3893.528  | 3860.706  |
| AK025389  | 325.572  | 510.589  | H-X 16707 I | 873.645   | 992.455   | AI570478  | 2521.284  | 2139.529  |
| NM_000153 | 1061.248 | 1257.017 | AL038354    | 32125.553 | 27347.029 | X07767    | 10996.886 | 8590.644  |
| NM_002033 | 3466.228 | 3777.989 | NM_000064   | 10024.222 | 8466.838  | X65293    | 839.537   | 852.522   |
| AK091794  | 523.782  | 644.162  | NM_006725   | 8370.597  | 6601.028  | AF252284  | 4231.97   | 3656.023  |
| NM_004111 | 2066.488 | 1303.873 | NM_003326   | 2058.363  | 2270.351  | BU727558  | 1928.301  | 1507.509  |
| AF085966  | 5888.156 | 5678.235 | NM_004565   | 52303.727 | 50692.492 | M33197    | 25207.979 | 25081.26  |
| NM_005316 | 4740.358 | 4653.756 | NM_000202   | 2373.905  | 2220.911  | AL050139  | 12855.565 | 14925.88  |
| NM_016316 | 4548.245 | 4011.21  | NM_005496   | 16110.424 | 18951.23  | U90878    | 2838.642  | 2000.275  |
| NM_003365 | 7373.255 | 5615.527 | NM_016605   | 1350.823  | 1835.065  | NM_012483 | 19554.031 | 17803.688 |
| NM_000057 | 5003.58  | 3244.691 | NM_002855   | 7447.28   | 10531.861 | NM_003495 | 9638.655  | 9957.282  |
| NM_018343 | 6874.411 | 5204.104 | NM_004817   | 1919.073  | 1700.223  | AB023420  | 23174.34  | 21121.893 |
| AK095793  | 778.551  | 405.638  | NM_018975   | 25095.068 | 22334.744 | NM_016511 | 25863.17  | 25860.305 |
| NM_003177 | 4487.436 | 2386.596 | AB023215    | 16663.439 | 15441.292 | NM_003555 | 4978.033  | 4910.166  |
| NM_017715 | 1483.136 | 899.838  | NM_001284   | 45208.906 | 43597.039 | NM_002185 | 2832.079  | 2186.129  |
| AL049688  | 1311.25  | 591.726  | NM_003242   | 18109.975 | 11514.169 | M55337    | 3420.457  | 2667.803  |
| NM_002737 | 4278.671 | 2625.14  | NM_002845   | 696.024   | 670.054   | NM_013225 | 2604.338  | 2084.357  |
| NM_002715 | 13655.25 | 14415.31 | U31099      | 1105.614  | 1354.973  | NM_016533 | 64779.676 | 60532.035 |
| AB035356  | 714.661  | 846.49   | NM_001105   | 4905.335  | 3902.935  | NM_014751 | 11237.561 | 10809.481 |

|             |          |          |           |           |           |           |           |           |
|-------------|----------|----------|-----------|-----------|-----------|-----------|-----------|-----------|
| AV752086    | 903.469  | 1212.331 | NM_005585 | 1394.762  | 1289.921  | NM_002347 | 33033.352 | 31130.359 |
| NM_016102   | 1686.018 | 2426.495 | NM_002075 | 2194.478  | 2047.257  | AB046807  | 3158.054  | 2770.981  |
| NM_004376   | 5688.317 | 5472.292 | Y08756    | 1535.592  | 1166.133  | M33197    | 67951.211 | 66586.016 |
| NM_000272   | 1677.242 | 2071.091 | NM_005563 | 18072.742 | 17872.492 | NM_014623 | 14162.104 | 13502.784 |
| NM_006061   | 401.977  | 425.24   | NM_005102 | 1708.169  | 1528.189  | NM_007244 | 22041.758 | 22380.477 |
| NM_006848   | 67429.08 | 58248.06 | NM_006501 | 1045.237  | 603.481   | M30629    | 10307.408 | 11619.119 |
| NM_005603   | 8402.352 | 10684.86 | NM_005397 | 1720.374  | 1159.86   | M33197    | 68074.961 | 65952.961 |
| BG744154    | 26803.77 | 27018.49 | NM_000806 | 12524.489 | 10113.215 | NM_018976 | 22424.422 | 19001.764 |
| Z11694      | 6244.538 | 6361.422 | NM_006320 | 2448.672  | 2912.095  | NM_003355 | 8662.158  | 12650.912 |
| Z26317      | 3503.136 | 3979.756 | AB014511  | 4784.098  | 5085.03   | NM_005074 | 2566.366  | 2771.987  |
| X16983      | 6764.066 | 16792.28 | NM_014252 | 8666.549  | 10939.732 | NM_013272 | 846.57    | 1154.075  |
| X56160      | 556.042  | 571.415  | NM_001662 | 17797.662 | 17430.496 | NM_004170 | 3550.452  | 3156.824  |
| BG679991    | 1755.57  | 930.449  | NM_016131 | 11842.919 | 12675.323 | NM_018057 | 4593.897  | 5936.877  |
| H-Y 00097 I | 13021.64 | 8952.267 | NM_006822 | 3562.214  | 2576.717  | M33197    | 67646.211 | 73341.898 |
| H-M 59964   | 364.961  | 388.816  | NM_012142 | 11498.776 | 13270.82  | NM_015717 | 3075.388  | 3135.034  |
| H-Y 00711 I | 65588.16 | 56722.46 | NM_016429 | 3026.832  | 2861.322  | NM_015925 | 1852.464  | 1740.693  |
| H-X 16707 I | 892.868  | 716.05   | AB011100  | 2980.909  | 3073.393  | NM_003665 | 2721.257  | 3421.273  |
| AL038354    | 26026.79 | 16281.72 | U61741    | 1195.194  | 1281.478  | AF220217  | 3368.534  | 2472.772  |
| NM_000064   | 2450.787 | 2795.721 | NM_012402 | 8575.154  | 5555.16   | NM_013323 | 21786.805 | 23774.066 |
| NM_006725   | 4755.723 | 5582.614 | M76676    | 4692.762  | 3557.794  | NM_017426 | 8450.371  | 8032.764  |
| NM_003326   | 1502.857 | 1766.959 | NM_003857 | 982.828   | 797.416   | M33197    | 5372.251  | 5117.437  |
| NM_004568   | 44995.73 | 48357.36 | AL137690  | 1018.515  | 592.246   | NM_000853 | 5006.533  | 5113.189  |
| NM_000202   | 3334.508 | 3514.259 | Z83804    | 2649.623  | 2037.549  | AF016903  | 46797.41  | 49260.293 |
| NM_005496   | 22262.8  | 14363.53 | NM_004386 | 807.986   | 1002.707  | NM_015675 | 10352.008 | 10215.361 |
| NM_002858   | 9978.282 | 9177.657 | U67784    | 843.218   | 892.141   | AK022267  | 1644.157  | 1575.146  |
| AB023215    | 4667.386 | 5017.752 | NM_007366 | 1175.324  | 1207.825  | AF031136  | 67759.406 | 70729.789 |
| NM_001284   | 39875.37 | 46065.68 | NM_000592 | 668.586   | 1022.966  | NM_015983 | 3683.34   | 2326.337  |
| NM_003242   | 3055.185 | 4764.018 | NM_016584 | 4278.891  | 4292.062  | NM_018622 | 14077.101 | 11678.957 |
| NM_002849   | 416.986  | 545.36   | NM_001815 | 794.621   | 715.054   | M33197    | 67786.336 | 71061.656 |
| U31099      | 854.374  | 953.127  | AK095793  | 5502.642  | 4950.692  | NM_005867 | 15659.329 | 17068.324 |
| NM_001105   | 2741.661 | 2404.142 | NM_003177 | 4020.465  | 3902.641  | AK026031  | 20585.982 | 25059.145 |
| NM_005585   | 2165.56  | 1444.534 | NM_017719 | 2225.462  | 3041.929  | NM_016468 | 46439.285 | 45696.406 |
| NM_002075   | 379.104  | 502.192  | AF064078  | 1493.358  | 1893.472  | NM_007342 | 10152.709 | 13491.988 |
| NM_005563   | 21824.72 | 12674.73 | AL049688  | 2498.422  | 3185.938  | NM_005672 | 1669.801  | 1560.483  |
| NM_005102   | 1574.837 | 926.217  | NM_002737 | 7618.333  | 7617.148  | D25217    | 4031.794  | 3991.976  |
| NM_006501   | 1106.628 | 695.437  | Z25427    | 5735.306  | 7736.976  | NM_006351 | 14843.84  | 14418.059 |
| NM_005397   | 976.843  | 1711.993 | NM_004672 | 16912.484 | 24472.385 | M33197    | 67956.633 | 66904.867 |
| NM_000806   | 726.975  | 872.28   | NM_001353 | 7684.307  | 9548.756  | NM_004683 | 9200.781  | 7942.22   |
| NM_006320   | 3839.01  | 4431.322 | NM_006214 | 3653.565  | 3481.068  | AK023226  | 3703.545  | 4310.904  |
| AB014511    | 6046.133 | 6358.758 | AJ010228  | 9825.385  | 9169.447  | AK025263  | 1610.844  | 1651.986  |
| NM_014252   | 10406.07 | 9296.347 | NM_005198 | 7318.839  | 6624.898  | M33197    | 67811.914 | 68128.266 |
| NM_001662   | 18673.03 | 26362.51 | NM_018073 | 3994.708  | 4220.76   | NM_001467 | 1742.721  | 2374.953  |
| NM_016131   | 11297.19 | 13852.63 | AL137529  | 5967.267  | 5132.539  | NM_018066 | 54626.051 | 57052.094 |
| NM_006822   | 2126.756 | 3624.971 | NM_012332 | 2220.903  | 1550.995  | NM_006931 | 14373.776 | 15114.056 |
| NM_012142   | 12032.55 | 10981.37 | AK026648  | 1666.918  | 1185.973  | NM_020344 | 12750.325 | 12770.033 |
| NM_016429   | 4071.557 | 5001.002 | NM_000497 | 1894.03   | 1731.829  | AF119868  | 1387.294  | 1293.938  |
| AB011100    | 3043.187 | 3579.035 | NM_017421 | 2593.512  | 1443.762  | NM_005050 | 7206.557  | 9270.577  |
| U61741      | 1410.207 | 1922.838 | AK025977  | 27282.525 | 22844.693 | AF252284  | 3954.174  | 3754.269  |
| NM_012402   | 7667.3   | 9697.595 | AK023130  | 8116.338  | 8304.768  | BU727558  | 1463.206  | 1051.715  |
| M76676      | 3807.683 | 3479.971 | NM_000273 | 1339.741  | 980.544   | M33197    | 24217.002 | 26313.979 |
| NM_003857   | 677.415  | 587.837  | NM_002899 | 10858.639 | 9014.977  | AL050139  | 8439.87   | 9530.824  |
| AL137690    | 851.349  | 825.305  | NM_000486 | 811.334   | 1203.779  | NM_002593 | 1399.438  | 1825.545  |
| Z83804      | 3395.559 | 2279.288 | BE876237  | 1580.044  | 1785.394  | NM_004558 | 11124.173 | 14545.443 |



|           |          |          |           |           |           |           |           |           |
|-----------|----------|----------|-----------|-----------|-----------|-----------|-----------|-----------|
| NM_004386 | 1313.643 | 850.502  | NM_014750 | 9365.109  | 10536.776 | AL079296  | 3044.88   | 2671.13   |
| U67784    | 899.757  | 563.695  | NM_015912 | 1568.957  | 1769.397  | NM_014770 | 5895.88   | 5218.822  |
| NM_007366 | 1214.049 | 720.006  | NM_000460 | 1610.141  | 1766.341  | M33197    | 68888.563 | 61128.934 |
| NM_000592 | 773.95   | 351.844  | AB002339  | 1776.316  | 2177.162  | AK023103  | 5692.657  | 8145.228  |
| NM_016584 | 1877.467 | 1065.988 | NM_005104 | 17031.908 | 15712.369 | NM_017858 | 9117.474  | 8490.611  |
| NM_001815 | 878.378  | 282.986  | NM_006888 | 36723.336 | 49386.488 | NM_019059 | 61077.27  | 58862.801 |
| AK095793  | 697.635  | 364.851  | AL137423  | 7032.304  | 10731.044 | NM_013347 | 939.061   | 1005.07   |
| NM_003177 | 4956.621 | 4970.975 | AB018322  | 3072.137  | 3549.065  | D80008    | 4982.92   | 4470.983  |
| NM_017719 | 1798.146 | 2352.184 | NM_007068 | 47262.559 | 53747.086 | X56789    | 2461.599  | 2414.728  |
| AF064078  | 552.923  | 635.413  | NM_005718 | 12689.988 | 10642.124 | NM_000935 | 1011.901  | 1397.9    |
| AL049688  | 1502.58  | 1709.58  | NM_018264 | 2515.87   | 2551.477  | NM_000359 | 28813.553 | 29856.877 |
| NM_002737 | 4818.171 | 5585.503 | NM_014580 | 2662.853  | 3860.359  | NM_006395 | 2725.348  | 2978.785  |
| NM_004672 | 15193.82 | 15199.21 | AB028998  | 961.099   | 653.974   | NM_014306 | 14933.925 | 15261.14  |
| NM_001353 | 3750.664 | 4084.421 | NM_000153 | 1636.256  | 1114.868  | NM_001084 | 6010.298  | 6755.408  |
| NM_006214 | 3021.733 | 4457.099 | NM_002033 | 3197.549  | 3059.577  | M33197    | 68009.227 | 68108.883 |
| AJ010228  | 6757.542 | 6827.533 | NM_004111 | 3087.371  | 3255.937  | NM_014623 | 13665.967 | 12429.506 |
| NM_005198 | 4149.201 | 5258.463 | AF085966  | 5559.73   | 5597.505  | NM_007244 | 14922.366 | 13894.515 |
| NM_018073 | 4232.092 | 4816.864 | NM_005316 | 4365.383  | 4249.9    | M30629    | 11829.686 | 8508.704  |
| AL137529  | 5707.028 | 5986.494 | NM_016316 | 3846.583  | 3842.18   | BE539299  | 3339.732  | 1574.987  |
| NM_012332 | 643.7    | 752.39   | NM_003369 | 10645.912 | 9869.075  | AF193873  | 4895.152  | 3368.391  |
| AK026648  | 3241.908 | 3136.874 | NM_000057 | 3311.876  | 3862.267  | NM_002628 | 2724.17   | 2251.565  |
| NM_000497 | 1855.616 | 1699.429 | NM_018343 | 6875.912  | 5857.864  | M23575    | 1041.859  | 1148.893  |
| NM_017421 | 2744.52  | 2902.472 | X15880    | 63040.031 | 70349.367 | AA190729  | 7292.956  | 5414.005  |
| AK025977  | 17604.4  | 15645.29 | AF114264  | 3606.977  | 4229.333  | BF974315  | 6582.524  | 8812.667  |
| AK023130  | 13380.54 | 8760.313 | NM_017514 | 844.882   | 937.385   | T74985    | 1983.107  | 2508.135  |
| NM_000273 | 672.437  | 395.912  | NM_018972 | 3608.136  | 4208.417  | AI652705  | 9229.13   | 9691.635  |
| NM_002899 | 3556.111 | 2251.021 | AB037828  | 1628.532  | 1839.815  | AA973397  | 966.828   | 697.703   |
| NM_000486 | 575.469  | 257.953  | AB023210  | 1711.347  | 1900.517  | AA923615  | 839.207   | 1114.408  |
| BE876237  | 975.677  | 800.671  | AB037786  | 3664.511  | 3729.756  | AA446028  | 923.537   | 1778.652  |
| NM_014750 | 11555.45 | 9902.971 | NM_003648 | 13742.748 | 12218.319 | M80583    | 2446.189  | 1596.628  |
| NM_015912 | 976.445  | 932.456  | AB037735  | 1532.776  | 1388.886  | AI570478  | 2902.825  | 2719.537  |
| NM_000460 | 688.816  | 1047.44  | AK002177  | 3655.588  | 3578.034  | X07767    | 13127.982 | 12524.235 |
| AB002339  | 1032.566 | 1052.093 | AK024429  | 4683.109  | 4071.74   | X65293    | 1192.799  | 1620.276  |
| NM_005104 | 14109.13 | 19193.63 | NM_003496 | 59836.539 | 65994.516 | AF016903  | 26273.199 | 19446.791 |
| AL137423  | 8330.104 | 8760.191 | AB000509  | 6090.358  | 5543.553  | NM_015675 | 6077.692  | 4079.132  |
| AB018322  | 2926.053 | 3314.343 | AB018314  | 2407.571  | 2487.469  | AK022267  | 1073.4    | 711.361   |
| NM_007068 | 1899.294 | 2224.656 | NM_004378 | 1174.968  | 1037.565  | NM_016040 | 6657.821  | 5714.203  |
| NM_005718 | 12695.95 | 15455.68 | AJ238899  | 2313.594  | 2142.81   | M33197    | 67776.398 | 72156.906 |
| NM_018264 | 2392.282 | 2568.697 | NM_018037 | 2839.17   | 1646.598  | AF031136  | 62561.941 | 57994.113 |
| NM_014580 | 716.644  | 787.499  | NM_001110 | 6045.443  | 6082.193  | U90878    | 1978.043  | 2146.485  |
| AB028998  | 1354.96  | 1711.556 | NM_003222 | 2351.854  | 2189.646  | NM_006597 | 60975.102 | 59601.695 |
| NM_000153 | 898.38   | 1523.673 | NM_000841 | 8849.62   | 8245.101  | NM_012483 | 23009.057 | 22456.352 |
| NM_002033 | 3316.594 | 3363.687 | NM_016563 | 1653.56   | 1116.611  | NM_003498 | 9127.915  | 9510.836  |
| AK091794  | 765.045  | 715.867  | NM_001245 | 2320.995  | 2625.899  | AB023420  | 22140.98  | 24489.814 |
| NM_004111 | 1811.111 | 958.029  | NM_003672 | 19932.822 | 23061.127 | NM_016511 | 29324.98  | 25748.592 |
| AF085966  | 5964.51  | 4880.36  | NM_002574 | 62745.32  | 67304.68  | NM_003559 | 5308.542  | 5405.083  |
| NM_005316 | 4125.184 | 3059.667 | AJ008139  | 7481.125  | 6586.796  | NM_002185 | 2608.551  | 1502.675  |
| NM_016316 | 3365.176 | 2003.874 | NM_004326 | 5874.559  | 4975.438  | M55337    | 1481.459  | 1821.489  |
| NM_003369 | 6410.417 | 3202.837 | NM_000882 | 1212.256  | 1427.595  | M33197    | 68055.828 | 66855.188 |
| NM_000057 | 4058.109 | 1909.654 | NM_004577 | 7041.328  | 7156.985  | NM_013229 | 2790.938  | 2470.707  |
| NM_018343 | 5869.379 | 4075.353 | NM_015507 | 598.257   | 819.157   | NM_016533 | 67617     | 70466.906 |
| X15880    | 5536.472 | 5742.614 | AF007157  | 30958.809 | 27077.486 | NM_014751 | 16730.506 | 18439.883 |
| AF114264  | 1763.023 | 657.215  | D38553    | 8077.167  | 9849.823  | NM_002347 | 38599.441 | 46622.813 |

|           |          |          |           |           |           |           |           |           |
|-----------|----------|----------|-----------|-----------|-----------|-----------|-----------|-----------|
| NM_017514 | 684.141  | 698.633  | NM_00617C | 9670.861  | 7388.714  | AB046807  | 3481.176  | 4183.42   |
| AB018261  | 659.769  | 369.665  | NM_01429E | 8895.97   | 6010.99   | NM_01806E | 35981.145 | 29451.094 |
| NM_018972 | 4176.121 | 3414.32  | AK001581  | 6606.03   | 6991.405  | NM_006931 | 12934.529 | 10725.279 |
| AB037828  | 1051.457 | 1310.154 | NM_005862 | 5919.236  | 5458.188  | NM_020344 | 13171.547 | 10383.698 |
| AB023210  | 2662.96  | 3094.137 | NM_00054E | 7301.075  | 5727.096  | AF119868  | 1461.465  | 1075.351  |
| AB037786  | 1654.177 | 1971.303 | AK022541  | 11194.016 | 12160.479 | NM_00505C | 8668.321  | 7874.503  |
| NM_00364E | 10064.53 | 12802.62 | AB002297  | 5766.245  | 6367.976  | M33197    | 64742.988 | 62357.32  |
| AB037735  | 861.719  | 1031.262 | NM_00502C | 39662.93  | 37590.52  | NM_01897E | 24105.379 | 22303.012 |
| AK002177  | 1373.902 | 1369.251 | NM_00380E | 1866.778  | 1717.489  | NM_00335E | 9046.854  | 12667.051 |
| AK024429  | 3351.454 | 4663.153 | NM_014077 | 7556.273  | 8396.743  | NM_005074 | 2631.885  | 3094.7    |
| NM_00349E | 6443.122 | 8173.569 | NM_018412 | 1575.679  | 2016.402  | NM_013272 | 759.762   | 1445.022  |
| AB000509  | 8004.83  | 8172.714 | NM_01232E | 6805.911  | 7994.36   | NM_018057 | 3152.17   | 4271.989  |
| AB018314  | 2612.753 | 3559.71  | M14087    | 21554.002 | 41450.266 | M33197    | 67933.445 | 69187.531 |
| NM_00437E | 814.746  | 855.221  | M59040    | 2325.465  | 2936.212  | NM_015717 | 2893.998  | 2812.619  |
| AJ238899  | 1231.952 | 1211.234 | NM_017582 | 19235.012 | 18309.742 | NM_01592E | 2005.112  | 1550.262  |
| NM_018037 | 1395.347 | 1525.832 | NM_01523E | 4155.498  | 3318.124  | NM_00366E | 2396.99   | 2882.178  |
| NM_001110 | 6201.692 | 6458.186 | AK026962  | 2974.527  | 2198.703  | AF220217  | 1844.363  | 2367.277  |
| NM_003222 | 1329.738 | 1353.376 | NM_00679E | 745.564   | 820.227   | NM_013323 | 24367.529 | 26531.51  |
| NM_000841 | 1175.608 | 854.12   | X04366    | 3957.092  | 3566.502  | NM_01742E | 8162.408  | 8878.205  |
| NM_00124E | 2379.283 | 1721.586 | NM_00050E | 54681.57  | 53857.305 | M33197    | 7171.787  | 7158.97   |
| NM_003672 | 968.761  | 963.449  | NM_00066E | 2764.631  | 2819.224  | NM_000853 | 7411.066  | 7123.141  |
| NM_002574 | 64496.45 | 60392.51 | NM_003481 | 4969.871  | 5859.246  | NM_00084E | 1898.111  | 2210.289  |
| AJ008139  | 3816.067 | 3816.925 | AB046814  | 1819.731  | 2374.57   | NM_00682C | 910.511   | 1663.53   |
| NM_00432E | 2926.334 | 4367.286 | NM_01777E | 894.235   | 1323.383  | M33197    | 67865.945 | 70368.5   |
| NM_000882 | 1183.623 | 1165.478 | NM_00705E | 12143.528 | 17642.373 | NM_00093E | 1016.359  | 901.922   |
| NM_004577 | 9367.755 | 8484.485 | NM_00687C | 31429.996 | 36428.273 | NM_00035E | 17762     | 13737.932 |
| AF007157  | 10016.64 | 12715.34 | NM_00735E | 12074.805 | 16849.172 | NM_00639E | 2097.502  | 1532.682  |
| D38553    | 10708.39 | 10283.61 | L13283    | 1116.237  | 2134.01   | NM_01430E | 15034.7   | 11511.891 |
| NM_00617C | 5682.339 | 8280.563 | NM_013327 | 852.888   | 1376.374  | NM_001084 | 5536.741  | 5027.574  |
| NM_01429E | 9279.402 | 11833.79 | AF176646  | 986.94    | 3908.915  | NM_015983 | 8212.641  | 8555.721  |
| AK001581  | 6682.272 | 5902.29  | NM_007084 | 2938.715  | 2620.329  | NM_018622 | 15022.717 | 15205.585 |
| NM_005862 | 4113.187 | 3579.418 | M97191    | 39036.957 | 30858.76  | M33197    | 67974.789 | 68138.102 |
| NM_00054E | 3966.953 | 4894.267 | AK023015  | 17550.133 | 16969.455 | NM_005867 | 16577.242 | 16625.465 |
| AK022541  | 16687.69 | 14627.39 | NM_003457 | 28794.992 | 32929.336 | AK026031  | 24322.994 | 30044.76  |
| AB002297  | 8111.761 | 10689.37 | NM_012391 | 3553.256  | 3528.192  | NM_01646E | 45461.406 | 47602.523 |
| NM_00502C | 5541.763 | 6972.165 | NM_005254 | 5502.92   | 5219.444  | NM_007342 | 8350.828  | 10117.974 |
| NM_014077 | 14518.26 | 14865.95 | NM_005611 | 1651.663  | 1613.177  | NM_005672 | 1388.305  | 1701.846  |
| NM_018412 | 1754.028 | 1558.445 | AF141655  | 3270.471  | 2432.209  | D25217    | 3923.17   | 4478.469  |
| NM_01232E | 3897.084 | 3930.681 | NM_00734E | 1425.585  | 1572.178  | NM_006351 | 14058.686 | 13218.044 |
| M14087    | 40041.36 | 24125.74 | NM_00483C | 1971.975  | 2847.406  | NM_004683 | 11054.199 | 9086.259  |
| NM_00088E | 5117.627 | 7205.623 | AF132362  | 59087.199 | 64359.957 | AK023226  | 4051.94   | 3645.145  |
| NM_017582 | 18638.03 | 18963.94 | NM_007007 | 15738.138 | 12324.453 | AK025263  | 1719.958  | 2234.017  |
| NM_01523E | 4081.698 | 3804.08  | NM_00638E | 2927.472  | 4498.514  | NM_001467 | 1998.928  | 2036.471  |
| AK026962  | 1573.142 | 2183.285 | NM_00655E | 31911.27  | 32214.4   | NM_00468E | 27095.824 | 16308.755 |
| NM_00679E | 963.701  | 596.315  | NM_004501 | 48065.617 | 41144.082 | AB037725  | 2625.021  | 1702.851  |
| X04366    | 3832.897 | 5464.547 | NM_01210E | 18254.9   | 19340.535 | M33197    | 61630.895 | 61641.375 |
| NM_00050E | 10380.45 | 12666.36 | AF019633  | 4910.852  | 6298.611  | NM_01771E | 4864.48   | 5287.049  |
| NM_01865E | 631.799  | 915.535  | AB002361  | 13225.973 | 18345.521 | NM_00486C | 7246.859  | 6851.233  |
| NM_00066E | 3264.525 | 3885.597 | NM_01806C | 9607.07   | 18216.268 | AF217190  | 21605.852 | 15316.136 |
| NM_004332 | 854.105  | 254.685  | NM_01423E | 6066.853  | 8492.989  | AB028981  | 35579.441 | 33743.289 |
| AB046814  | 3356.114 | 2059.306 | NM_017662 | 5645.184  | 5598.917  | NM_00680C | 8144.839  | 8379.622  |
| NM_01777E | 1426.165 | 1119.938 | AK001478  | 4331.261  | 2683.803  | NM_00247E | 1702.683  | 1925.366  |
| NM_017664 | 6380.51  | 7571.959 | AK025697  | 8982.898  | 7448.05   | NM_00272E | 11767.337 | 12497.923 |

|           |          |          |           |           |           |           |           |           |
|-----------|----------|----------|-----------|-----------|-----------|-----------|-----------|-----------|
| AK025523  | 704.836  | 806.92   | AK021734  | 1520.46   | 1673.229  | M33197    | 26606.342 | 25880.471 |
| NM_007059 | 13930.95 | 8525.759 | AF075028  | 711.364   | 1042.286  | AL050139  | 12641.591 | 13570.362 |
| NM_006870 | 23389.32 | 28485.85 | BF245026  | 885.85    | 957.243   | NM_002593 | 1313.108  | 1124.932  |
| NM_007359 | 8270.438 | 7191.151 | D00265    | 42880.988 | 44030.402 | NM_004558 | 7037.932  | 7015.436  |
| L13283    | 835.48   | 804.591  | NM_000779 | 726.023   | 819.985   | AL079296  | 1664.541  | 1591.693  |
| AF303888  | 14286.96 | 7677.332 | NM_004552 | 52546.363 | 47675.363 | AK023103  | 6108.203  | 6450.87   |
| NM_000077 | 881.079  | 452.546  | NM_000143 | 4313.815  | 4246.091  | NM_017858 | 8706.799  | 7602.181  |
| NM_007084 | 1028.777 | 966.831  | AF317889  | 861.216   | 1102.366  | NM_019059 | 64473.262 | 63005.313 |
| M97191    | 8493.473 | 11225.06 | NM_006294 | 58934.121 | 60844.305 | NM_013347 | 1149.112  | 1344.456  |
| AK023015  | 21539.59 | 28306.02 | AL137294  | 4922.596  | 5122.318  | D80008    | 5400.008  | 6219.147  |
| NM_003457 | 13385.78 | 16335.38 | NM_003743 | 3681.74   | 4248.834  | AK001069  | 67402.195 | 66583.086 |
| NM_012391 | 1842.318 | 1886.453 | AB037797  | 1022.938  | 1328.68   | NM_004132 | 6240.749  | 6360.646  |
| NM_005254 | 5008.783 | 6826.416 | NM_001520 | 2836.169  | 4184.148  | NM_014844 | 6784.758  | 7296.864  |
| NM_005611 | 2073.865 | 2916.577 | AL050367  | 1579.056  | 2279.397  | M33197    | 61846.473 | 60813.996 |
| AF141655  | 996.507  | 1620.654 | NM_017870 | 2259.321  | 2384.441  | NM_018492 | 17511.139 | 13282.12  |
| NM_007345 | 2213.202 | 1954.398 | AL133633  | 3627.797  | 4560.631  | NM_001346 | 5611.023  | 5799.754  |
| NM_004830 | 1397.106 | 2430.546 | AK026817  | 2145.311  | 3722.167  | NM_003149 | 3779.279  | 3461.395  |
| NM_007007 | 11171.03 | 16404.28 | AL157442  | 29958.721 | 28771.324 | NM_003377 | 27934.27  | 25798.252 |
| NM_006386 | 876.224  | 979.667  | AB011148  | 4589.726  | 4031.836  | NM_002220 | 10783.305 | 9905.777  |
| NM_006559 | 21712.24 | 29109.6  | AL389938  | 46996.645 | 32995.609 | AB033034  | 7828.595  | 7592.517  |
| NM_004501 | 29244.03 | 44452.55 | NM_001949 | 36752.223 | 26901.398 | D38169    | 6194.532  | 6075.079  |
| NM_004966 | 21354.24 | 28386.04 | NM_003507 | 1272.572  | 1319.532  | AJ293294  | 5842.873  | 7017.084  |
| NM_006700 | 2363.077 | 3062.85  | AK026591  | 1683.802  | 1608.426  | NM_018171 | 4502.574  | 3303.607  |
| NM_006445 | 18773.62 | 26583.68 | AK001889  | 3628.353  | 3300.797  | NM_002447 | 18673.33  | 16165.438 |
| NM_012109 | 7778.832 | 7959.779 | AK025726  | 3452.366  | 3909.831  | NM_014145 | 26934.014 | 29692.578 |
| AF019633  | 4185.823 | 3236.371 | AJ227869  | 4240.892  | 3993.621  | NM_002223 | 7941.827  | 8261.857  |
| AB002361  | 974.516  | 846.638  | AK026189  | 590.322   | 786.441   | NM_005490 | 28108.34  | 31221.633 |
| NM_018060 | 10114.98 | 6744.449 | AK026790  | 781.614   | 728.971   | NM_003151 | 10030.808 | 9835.794  |
| NM_014239 | 8047.282 | 5247.268 | AL117613  | 12282.525 | 12959.678 | NM_006811 | 13876.845 | 15654.735 |
| NM_017662 | 4242.389 | 2642.016 | AL137753  | 6454.803  | 7173.704  | NM_005601 | 7386.235  | 7645.11   |
| U88837    | 1955.332 | 1089.471 | AK021785  | 719.625   | 1184.372  | NM_016151 | 33212.496 | 36247.012 |
| NM_017446 | 29098.03 | 18147.31 | AL110262  | 18556.107 | 15552.645 | NM_004324 | 6359.916  | 4229.104  |
| AK001478  | 3034.752 | 6029.646 | AK025627  | 37157.711 | 41211.621 | NM_005614 | 39000.211 | 39171.383 |
| AK025697  | 9140.234 | 8563.976 | AF216077  | 9811.951  | 9458.918  | Z29572    | 800.178   | 735.504   |
| AK021734  | 345.11   | 522.923  | AF086238  | 1452.825  | 2521.063  | AK026270  | 2272.898  | 3947.728  |
| AF075028  | 412.499  | 567.826  | AK021612  | 19914.381 | 23009.301 | NM_004556 | 5317.155  | 5302.859  |
| BF245026  | 704.281  | 390.197  | AF088031  | 1777.127  | 1946.341  | D90075    | 1332.966  | 1267.679  |
| D00265    | 44126.31 | 43481.73 | AK002025  | 54351.023 | 54517.086 | M33197    | 67373.531 | 65034.047 |
| NM_000779 | 488.521  | 565.466  | AK026299  | 2679.896  | 1816.295  | NM_014857 | 1708.92   | 1196.954  |
| NM_004552 | 44179.67 | 52951.88 | NM_017794 | 1723.079  | 1105.578  | AK023827  | 3062.323  | 2588.621  |
| NM_000143 | 2984.221 | 3898.263 | AK025170  | 2294.154  | 1707.241  | AK021702  | 9908.141  | 6944.294  |
| AF317889  | 995.898  | 1246.135 | AB033031  | 1818.171  | 1966.406  | NM_003885 | 5745.426  | 5618.984  |
| AL137294  | 4097.674 | 4133.144 | AF085872  | 16030.596 | 14012.751 | NM_003936 | 6253.451  | 6285.732  |
| NM_003743 | 1687.941 | 2097.363 | AK022538  | 19729.174 | 20156.246 | M33197    | 56275.18  | 54779.984 |
| AB037797  | 1347.536 | 1474.885 | AL360257  | 2013.512  | 2385.217  | NM_002688 | 3050.277  | 2619.522  |
| NM_001520 | 4352.042 | 4867.757 | AK022342  | 1318.26   | 1364.479  | NM_020369 | 1734.187  | 1371.253  |
| AL050367  | 1127.341 | 1212.159 | AF147420  | 2364.214  | 2599.435  | NM_004415 | 7082.905  | 6933.095  |
| NM_017870 | 350.661  | 751.34   | AL049312  | 3783.554  | 3733.986  | NM_007278 | 30558.211 | 23471.961 |
| AL133633  | 4912.072 | 4822.6   | AL050072  | 7910.593  | 7216.568  | NM_004723 | 9924.109  | 9047.679  |
| AK026817  | 1139.324 | 687.298  | AL117590  | 1213.926  | 1387.473  | M33197    | 62603.836 | 63006.113 |
| AL157442  | 12346.24 | 12126.14 | AL049357  | 9817.817  | 7406.361  | NM_018413 | 45271.027 | 35802.879 |
| AB011148  | 1457.015 | 1175.99  | AL050129  | 489.367   | 391.609   | AB018299  | 55081.605 | 49857.09  |
| AL389938  | 4308.283 | 2569.693 | AL110223  | 726.185   | 639.434   | NM_005245 | 16372.174 | 14621.519 |

|           |          |          |           |           |           |           |           |           |
|-----------|----------|----------|-----------|-----------|-----------|-----------|-----------|-----------|
| NM_00194  | 47214.03 | 32417.02 | AL117659  | 771.307   | 628.219   | M33197    | 67856.164 | 67476.242 |
| NM_003507 | 1535.708 | 1886.292 | AK027180  | 3841.175  | 3737.719  | NM_01621  | 24346.469 | 22152.93  |
| AK026591  | 1775.665 | 1805.361 | AK026802  | 759.89    | 605.772   | NM_004751 | 2780.02   | 2466.442  |
| AK001889  | 2243.476 | 3379.865 | NM_004544 | 16356.554 | 16426.818 | AK025605  | 8852.945  | 8016.601  |
| AK025726  | 2423.363 | 2438.754 | AF086041  | 1155.628  | 1358.129  | NM_00378  | 1764.674  | 1640.446  |
| AJ227869  | 4126.758 | 3914.699 | Y15167    | 1992.408  | 2177.405  | NM_00700  | 8939.411  | 9094.547  |
| AK026189  | 773.826  | 676.711  | AL133080  | 3232.262  | 2655.13   | M23161    | 12022.266 | 10012.379 |
| AK026790  | 700.251  | 788.63   | NM_01779  | 6517.391  | 5737.125  | NM_00610  | 1162.015  | 1311.854  |
| AL117613  | 4977.802 | 5864.328 | AK025213  | 8195.725  | 7602.581  | NM_003197 | 18513.65  | 10843.264 |
| AL137753  | 6158.97  | 6475.486 | NM_01494  | 3295.006  | 2326.68   | AF176705  | 10842.381 | 8590.866  |
| AL110262  | 11701.31 | 12172.76 | AL080221  | 1343.676  | 964.137   | D29012    | 42082.492 | 38632.297 |
| AK025627  | 4060.45  | 5061.433 | AL137370  | 1254.119  | 1185.681  | NM_017414 | 8708.59   | 5918.646  |
| U00945    | 440.019  | 567.003  | AF009262  | 15796.374 | 14787.09  | NM_01217  | 43071.098 | 38188.797 |
| AF216077  | 999.044  | 1441.473 | AF009306  | 1086.219  | 1109.525  | NM_00279  | 18105.887 | 18231.787 |
| AF086238  | 431.731  | 585.348  | AF050198  | 1934.371  | 2443.531  | NM_00478  | 7262.276  | 5476.958  |
| AK021612  | 1824.312 | 2172.325 | AK024346  | 2409.417  | 2299.281  | M33197    | 67963.031 | 67191.016 |
| AF088031  | 1089.04  | 1117.361 | AF090892  | 1193.826  | 1162.635  | AL442083  | 7445.496  | 7305.939  |
| AK002025  | 54440.38 | 51529    | AK001089  | 1959.511  | 1981.638  | D63487    | 8075.95   | 8015.074  |
| AK026299  | 3110.363 | 2440.494 | AK001919  | 1021.312  | 1413.865  | AK097791  | 11370.487 | 12791.541 |
| NM_017794 | 1682.286 | 1015.241 | AK021535  | 1155.391  | 1425.457  | NM_020367 | 1339.489  | 1247.474  |
| AK025170  | 933.987  | 490.883  | AK021753  | 5153.447  | 4462.107  | AK022705  | 6442.994  | 5245.829  |
| AB033031  | 2673.292 | 3146.097 | AK001139  | 6734.26   | 4178.385  | NM_016404 | 14782.723 | 15507.786 |
| AF085872  | 734.969  | 884.06   | AK002090  | 1306.271  | 1549.088  | L03426    | 9569.585  | 9853.993  |
| AK022538  | 1072.255 | 1246.709 | AK021618  | 638.294   | 599.012   | M33197    | 60965.117 | 63528.961 |
| AK022342  | 786.512  | 645.021  | AK021822  | 1224.657  | 1149.796  | NM_02016  | 5670.6    | 5267.349  |
| AL049312  | 1275.79  | 1644.173 | AK025246  | 9357.964  | 9217.158  | NM_00660  | 2490.115  | 2256.559  |
| AL117590  | 620.786  | 735.934  | AK025847  | 3866.719  | 3781.746  | NM_000457 | 3158.703  | 2815.779  |
| AL049357  | 844.464  | 1089.18  | AK026442  | 514.335   | 780.48    | M34356    | 4887.403  | 5285.173  |
| AL110223  | 676.29   | 831.242  | NM_014174 | 31016.643 | 24586.791 | AJ133115  | 8575.793  | 9920.904  |
| AL117659  | 423.994  | 632.14   | AF147337  | 4631.797  | 3410.34   | AF042831  | 892.604   | 692.943   |
| AK027180  | 2140.293 | 2492.654 | AK025203  | 56765.414 | 56175.766 | X51630    | 16905.4   | 16271.122 |
| AK026802  | 406.507  | 534.977  | AK026981  | 5041.058  | 4385.563  | NM_00505  | 5657.108  | 6202.195  |
| NM_004544 | 18122.53 | 18702.37 | NM_006394 | 590.265   | 552.244   | NM_00196  | 1465.354  | 1662.693  |
| AF086041  | 838.237  | 730.287  | AK023819  | 1285.933  | 1039.097  | AF208502  | 25926.225 | 19861.865 |
| Y15167    | 1814.978 | 1964.841 | AF075067  | 507.658   | 953.07    | M33197    | 62001.297 | 59862.727 |
| AL133080  | 3740.749 | 4115.621 | AL133656  | 4750.529  | 5298.784  | AF264750  | 42435.012 | 26015.695 |
| NM_01779  | 6212.411 | 5076.601 | AL050037  | 18948.193 | 25188.752 | NM_00698  | 4163.732  | 3010.371  |
| AK025213  | 9378.763 | 7435.674 | NM_001417 | 39959.305 | 32714.404 | AK023904  | 7090.931  | 5541.68   |
| NM_01494  | 4396.886 | 3107.055 | AK022236  | 7003.767  | 6646.976  | NM_01795  | 11262.242 | 8901.551  |
| AL080221  | 2056.704 | 1109.66  | AK000073  | 1322.534  | 1366.331  | NM_01649  | 6136.717  | 4679.125  |
| AL137370  | 1350.266 | 1945.585 | AK000618  | 1333.445  | 1290.588  | NM_01430  | 8978.046  | 6555.042  |
| AF009262  | 15963.24 | 22288.78 | AK024773  | 1296.193  | 1349.95   | M33197    | 62281.023 | 58126.926 |
| AF009306  | 631.839  | 963.82   | AL390180  | 1550.593  | 1533.982  | NM_004094 | 5294.204  | 3966.696  |
| AF050198  | 1917.144 | 2095.846 | AK025154  | 479.197   | 1087.433  | NM_02023  | 8334.858  | 4396.947  |
| AK024346  | 2230.979 | 2687.617 | X60484    | 1089.495  | 906.989   | AK027059  | 18661.631 | 14940.093 |
| AF056422  | 626.116  | 819.508  | AF055019  | 1898.664  | 1331.942  | AF151109  | 23161.781 | 16281.432 |
| AF090892  | 1174.919 | 1050.039 | NM_00352  | 9749.2    | 9357.38   | NM_015414 | 67981.68  | 67137.102 |
| AK001089  | 439.486  | 557.082  | AK000229  | 1175.683  | 1715.96   | L34070    | 12536.798 | 9571.926  |
| AK001919  | 1033.938 | 1338.205 | AF056432  | 5178.285  | 8479.416  | AF038182  | 2977.647  | 2868.865  |
| AK021535  | 870.407  | 1164.275 | AK001987  | 36659.672 | 31651.289 | NM_01647  | 12509.947 | 12820.411 |
| AK021753  | 548.074  | 773.871  | NM_01333  | 2520.086  | 3354.02   | AF086472  | 2458.77   | 2508.574  |
| AK002090  | 935.442  | 1396.439 | X56199    | 4887.224  | 4140.891  | M33197    | 1585.854  | 1401.861  |
| AK021618  | 362.152  | 376.823  | NM_00519  | 5588.461  | 5465.231  | NM_00186  | 67189.586 | 71129.063 |

|            |          |          |           |           |           |           |           |           |
|------------|----------|----------|-----------|-----------|-----------|-----------|-----------|-----------|
| AK021822   | 665.544  | 720.529  | AL162006  | 882.719   | 1081.828  | NM_006441 | 16675.479 | 16185.97  |
| AK025246   | 2238.172 | 1997.459 | NM_017971 | 42267.93  | 41968.316 | NM_001918 | 5118.668  | 5169.102  |
| AK025847   | 745.196  | 726.426  | AF090097  | 1712.156  | 1524.161  | NM_018245 | 10333.267 | 12236.743 |
| AK026442   | 532.39   | 315.85   | AF054998  | 757.673   | 881.225   | M33197    | 68229.852 | 62372.543 |
| AK000944   | 591.107  | 654.44   | AF116620  | 12616.831 | 13845.802 | AF252390  | 1661.481  | 1956.049  |
| NM_014174  | 32000.69 | 44930.3  | AF293335  | 54538.125 | 53387.266 | NM_012117 | 15517.005 | 14392.906 |
| AF147337   | 3046.077 | 4187.012 | AL080065  | 1523.162  | 1259.725  | D17130    | 68136.406 | 62936.77  |
| AK025203   | 11947.33 | 16698.93 | AK024431  | 18139.658 | 14747.296 | X76302    | 17116.824 | 17055.516 |
| AK026981   | 994.129  | 1595.415 | AF116635  | 601.649   | 890.865   | AK026276  | 2167.16   | 2128.84   |
| AL359558   | 229.089  | 533.167  | X96644    | 10389.559 | 7756.607  | M33197    | 68075.148 | 63599.535 |
| AL133656   | 7351.586 | 5171.643 | Z34281    | 40211.238 | 33272.641 | X52354    | 4191.519  | 3686.568  |
| AL050037   | 15452.32 | 16751.77 | NM_018678 | 58768.082 | 63493.438 | NM_005413 | 1968.922  | 1563.081  |
| NM_001417  | 32045.35 | 37872.6  | AJ008122  | 46313.668 | 42102.141 | NM_002315 | 5812.315  | 4704.759  |
| unknown (S | 746.941  | 676.25   | NM_006220 | 1389.382  | 1001.685  | AK024191  | 2727.837  | 2795.009  |
| AK022236   | 6215.776 | 6057.629 | AK022667  | 45353.391 | 34187.922 | AV693985  | 1174.703  | 674.343   |
| AK000073   | 564.789  | 862.733  | AK026667  | 931.141   | 763.769   | D83781    | 5262.916  | 5114.581  |
| AK000618   | 592.164  | 684.163  | AF113211  | 1334.18   | 1052.805  | AF075013  | 1305.304  | 1125.911  |
| AK024773   | 497.303  | 732.095  | AL117568  | 2777.454  | 2089.667  | AF085825  | 924.275   | 1239.439  |
| AL390180   | 625.277  | 812.756  | NM_000843 | 934.37    | 660.611   | AL832699  | 5048.322  | 4883.003  |
| X60484     | 981.838  | 572.963  | S71805    | 2118.221  | 2148.081  | NM_012191 | 1942.571  | 2122.309  |
| AF055019   | 1445.006 | 1745.261 | NM_018391 | 1835.285  | 1712.133  | AK000757  | 14739.338 | 15796.804 |
| NM_003525  | 9714.948 | 12429.98 | U90917    | 969.993   | 895.852   | AL359577  | 3276.089  | 3636.19   |
| AK000229   | 815.898  | 810.037  | AK022140  | 4686.675  | 3430.021  | NM_018139 | 4558.863  | 4340.413  |
| AF056432   | 5934.377 | 5581.452 | AK023372  | 37641.441 | 25635.609 | NM_014805 | 6454.351  | 8861.554  |
| AK001987   | 6308.589 | 6935.928 | AF086527  | 902.25    | 711.373   | AF052120  | 3492.925  | 4087.714  |
| NM_013332  | 4522.944 | 3527.383 | U21072    | 2360.46   | 1906.452  | NM_014871 | 3735.777  | 5043.642  |
| X56199     | 935.918  | 842.275  | AK024377  | 859.18    | 1175.656  | AK026754  | 1723.932  | 1532.56   |
| NM_005193  | 3022.861 | 3179.672 | AK023557  | 2436.818  | 2811.382  | M33197    | 63680.031 | 61664.852 |
| AL162006   | 872.204  | 1031.366 | AK027107  | 1322.64   | 1112.753  | AL137552  | 3121.02   | 3836.084  |
| NM_017971  | 3707.741 | 4173.63  | U17625    | 802.827   | 632.007   | AK025794  | 10465.728 | 10352.477 |
| AF090097   | 889.975  | 951.545  | AB040887  | 5645.539  | 5848.152  | NM_003541 | 1208.42   | 1895.13   |
| AF054998   | 1499.676 | 2005.461 | AK025196  | 8322.44   | 5851.077  | AF131835  | 1510.197  | 1500.349  |
| AF116620   | 16493.51 | 14204.9  | AJ227879  | 818.987   | 431.412   | AK024522  | 2698.634  | 3558.48   |
| AF293335   | 9355.88  | 13026.55 | AK024800  | 1693.094  | 1338.54   | NM_007198 | 13777.922 | 16628.246 |
| AL080065   | 461.783  | 1539.096 | AK000401  | 2704.943  | 2184.436  | NM_014958 | 1354.07   | 1319.563  |
| AK024431   | 10661.75 | 15326.26 | AF305068  | 1876.586  | 1742.741  | M33197    | 67539.625 | 71614.969 |
| AF116635   | 736.736  | 750.404  | D17231    | 48595.23  | 46784.301 | AK023220  | 3871.868  | 3532.752  |
| X96644     | 5783.7   | 10170.46 | AF531295  | 2950.21   | 2166.011  | AK024566  | 1408.457  | 1064.394  |
| Z34281     | 12713.32 | 13334.27 | CY3Cy5    | 1688.594  | 157.751   | M33197    | 67902.156 | 70500.961 |
| NM_018678  | 2457.65  | 2614.025 | BF974315  | 4685.737  | 1868.572  | AK024981  | 46759.34  | 42740.309 |
| AJ008122   | 8139.293 | 9138.511 | T74985    | 656.639   | 419.76    | AK027246  | 3754.402  | 3668.766  |
| NM_006220  | 643.977  | 503.256  | AI652705  | 2835.237  | 2333.625  | U80766    | 9502.733  | 10417.004 |
| AK022667   | 38773.86 | 38008.08 | M80583    | 746.971   | 1219.105  | AK001638  | 3238.675  | 4255.848  |
| AK026667   | 724.101  | 574.299  | AW009565  | 4305.276  | 3490.166  | AF161386  | 13209.814 | 20886.699 |
| AF113211   | 237.699  | 417.864  | AI570478  | 1399.001  | 973.051   | AK025454  | 7267.386  | 10199.868 |
| AL117568   | 4040.031 | 3781.468 | X07767    | 5514.868  | 5245.233  | M33197    | 68053.258 | 65184.285 |
| S71805     | 2202.452 | 3488.803 | X65293    | 480.393   | 479.066   | X05826    | 17994.75  | 19857.297 |
| NM_018391  | 2450.844 | 2232.109 | AF252284  | 2070.163  | 1922.932  | Y11608    | 1233.744  | 1552.613  |
| U90917     | 846.396  | 805.848  | BU727558  | 800.178   | 810.412   | AJ001872  | 4810.716  | 5570.621  |
| AK022140   | 1230.765 | 1473.666 | SR1       | 63280.461 | 64947.816 | AJ227882  | 1033.354  | 896.467   |
| AK023372   | 4489.129 | 5207.146 | SR3       | 33843.383 | 23463.217 | M33197    | 67584.469 | 77946.133 |
| AF086527   | 1060.448 | 1209.605 | SR5       | 5300.333  | 5078.266  | L33811    | 980.925   | 1239.221  |
| U21072     | 1198.115 | 1907.085 | SR7       | 4152.129  | 30801.578 | L77559    | 984.105   | 1446.957  |

|           |          |          |           |           |           |            |           |           |
|-----------|----------|----------|-----------|-----------|-----------|------------|-----------|-----------|
| AK024377  | 815.008  | 1140.196 | SR9       | 15339.377 | 3013.385  | NM_00559E  | 3122.839  | 3092.656  |
| U38438    | 2335.135 | 2549.412 | CY3Cy5    | 3733.438  | 342.491   | Y10515     | 2260.719  | 2104.371  |
| AK025621  | 1658.932 | 2283.396 | NM_016511 | 8417.693  | 5364.237  | M87942     | 1193.447  | 1891.992  |
| AK023557  | 3677.406 | 3638.683 | NM_00355E | 1910.438  | 1427.14   | AK023636   | 19034.904 | 23502.402 |
| AK027107  | 269.812  | 566.954  | NM_00218E | 762.758   | 720.664   | D25272     | 4574.211  | 5276.425  |
| U17625    | 608.007  | 930.148  | M55337    | 545.612   | 414.782   | M33197     | 68001.164 | 67940.945 |
| AB040887  | 5954.264 | 4989.228 | NM_01322E | 1066.255  | 812.42    | NM_02016E  | 4255.679  | 4800.905  |
| AK025196  | 1006.363 | 1444.397 | NM_01653E | 47669.723 | 34383.699 | AB037771   | 1960.639  | 1401.316  |
| AJ227879  | 1247.052 | 1629.342 | NM_014751 | 5176.973  | 4556.678  | AK025931   | 64885.289 | 58103.441 |
| AK024800  | 1017.513 | 1309.411 | NM_002347 | 18698.17  | 13950.922 | M33197     | 3784.52   | 2818.87   |
| AK000401  | 2802.694 | 3234.543 | AB046807  | 1744.245  | 1532.497  | AK021972   | 1637      | 1536.925  |
| AF305068  | 805.489  | 1000.825 | M33197    | 60889.105 | 65908.133 | M33197     | 65101.773 | 61710.074 |
| D17231    | 55925.13 | 52451.21 | NM_01462E | 5004.361  | 4944.011  | AK001083   | 3962.734  | 4016.71   |
| AF531295  | 905.38   | 945.141  | NM_007244 | 7009.063  | 6049.771  | AK000185   | 2566.283  | 2594.324  |
| CY3Cy5    | 9257.842 | 312.023  | M30629    | 4988.511  | 4961.779  | NM_01796E  | 1626.218  | 2218.578  |
| BF974315  | 5711.898 | 8486.801 | AF193873  | 1864.154  | 1753.336  | AK027227   | 960.898   | 1611.168  |
| T74985    | 1007.944 | 1064.965 | NM_00262E | 1461.104  | 1844.411  | NM_01638E  | 787.952   | 1532.82   |
| AI652705  | 3165.035 | 2326.887 | M23575    | 859.958   | 1055.682  | NM_017834  | 1591.926  | 2819.532  |
| AA446028  | 890.631  | 851.316  | AA190729  | 3013.332  | 3962.087  | AK000865   | 2611.159  | 2690.415  |
| M80583    | 2414.341 | 1056.595 | NM_00417E | 703.865   | 554.96    | M33197     | 68075.984 | 66220.109 |
| AW009565  | 8001.667 | 8374.247 | NM_018057 | 1395.811  | 770.105   | AK024779   | 2532.791  | 3025.472  |
| AI570478  | 2685.709 | 3266.12  | M33197    | 59044.363 | 64663.57  | AK024940   | 1628.736  | 2043.119  |
| X07767    | 11152.49 | 9795.353 | NM_015717 | 857.821   | 559.549   | AK024406   | 2673.052  | 3274.821  |
| AF252284  | 2985.771 | 2253.986 | NM_01592E | 603.166   | 568.481   | AK024568   | 22332.92  | 29766.352 |
| SR5       | 7135.503 | 4673.895 | NM_00366E | 1181.731  | 888.961   | NM_018381  | 2359.185  | 2179.865  |
| SR7       | 7793.05  | 40104.15 | AF220217  | 875.462   | 733.437   | AK022769   | 1520.518  | 1351.301  |
| SR9       | 26841.39 | 3543.466 | NM_01332E | 8630.715  | 6036.337  | M33197     | 68098.797 | 64688.801 |
| CY3Cy5    | 9375.519 | 464.37   | M33197    | 3025.377  | 2566.932  | AK026277   | 28881.17  | 35536.121 |
| NM_016511 | 975.623  | 1301.328 | NM_00085E | 2713.442  | 2401.654  | U10509     | 5098.297  | 6344.591  |
| NM_00355E | 2179.49  | 2247.193 | AF016903  | 20450.773 | 16078.093 | NM_00716E  | 49835.176 | 49681.355 |
| NM_00218E | 1684.97  | 1053.64  | NM_01567E | 3797.971  | 3101.111  | NM_01401E  | 16120.521 | 14117.293 |
| NM_01322E | 2027.124 | 1810.615 | AK022267  | 611.266   | 564.207   | AF085956   | 9849.533  | 10141.229 |
| NM_01653E | 16828.34 | 24278.09 | NM_01604E | 2790.171  | 1796.147  | NM_01911E  | 4165.953  | 4174.452  |
| NM_014751 | 752.128  | 1438.059 | M33197    | 58598.012 | 63203.699 | AF147318   | 2157.842  | 2253.361  |
| NM_002347 | 13233.53 | 16409.2  | AF031136  | 45209.863 | 31450.223 | unknown (E | 2472.957  | 2915.165  |
| AB046807  | 2580.931 | 2512.109 | U90878    | 785.732   | 547.6     | M33197     | 65006.336 | 66005.547 |
| NM_007244 | 3015.213 | 2419.034 | NM_006597 | 32223.764 | 26790.158 | AL137556   | 4197.216  | 4920.956  |
| M30629    | 4089.039 | 3685.45  | NM_01248E | 12007.465 | 11466.576 | NM_01469E  | 12399.195 | 15635.026 |
| NM_00262E | 1002.147 | 867.122  | NM_00349E | 4746.522  | 5098.25   | AL359055   | 4455.367  | 5911.31   |
| M23575    | 1067.642 | 948.844  | AB023420  | 11795.687 | 12421.686 | NM_01490E  | 9122.142  | 8283.821  |
| AA190729  | 6768.267 | 5277.989 | NM_00734E | 5213.808  | 6527.301  | AF086125   | 3242.329  | 2919.176  |
| M33197    | 66517.58 | 60635.25 | NM_00567E | 540.74    | 435.182   | AL079279   | 1565.129  | 1209.57   |
| NM_015717 | 880.93   | 1114.15  | D25217    | 1818.994  | 882.26    | AK023547   | 1954.952  | 1853.726  |
| AF220217  | 1715.353 | 1609.527 | NM_006351 | 6753.597  | 3814.48   | U67847     | 3685.06   | 3865.882  |
| NM_01332E | 6473.715 | 5641.826 | M33197    | 60160.863 | 54825.496 | AK021933   | 1148.799  | 1163.428  |
| NM_014937 | 781.516  | 1253.534 | NM_00468E | 3557.918  | 3239.832  | AL137321   | 11535.64  | 11641.558 |
| M33197    | 4777.339 | 4585.715 | AK023226  | 1983.362  | 1607.307  | M33197     | 64309.418 | 61321.816 |
| NM_00085E | 1748.332 | 1956.3   | AK025263  | 753.841   | 726.494   | AK024207   | 8898.337  | 9298.753  |
| AF016903  | 4347.912 | 4640.177 | M33197    | 63457.891 | 61578.758 | AK021843   | 2357.013  | 3031.79   |
| NM_01567E | 2143.464 | 1940.913 | NM_001467 | 499.762   | 496.817   | AF075025   | 3911.118  | 4649.574  |
| AK022267  | 964.948  | 810.24   | NM_01806E | 22375.018 | 19474.859 | AF116623   | 1070.482  | 1306.787  |
| AF031136  | 4460.292 | 3378.607 | NM_006931 | 7127.734  | 5863.982  | AF088008   | 3211.104  | 3619.78   |
| U90878    | 1492.671 | 1532.786 | NM_020344 | 6930.801  | 6116.564  | AK023528   | 1516.616  | 1908.749  |

|           |          |          |           |           |           |           |           |           |
|-----------|----------|----------|-----------|-----------|-----------|-----------|-----------|-----------|
| NM_006597 | 40489.19 | 51745.73 | AF119868  | 544.905   | 546.636   | AK023043  | 4106.742  | 3990.428  |
| NM_012483 | 2523.064 | 2594.761 | NM_005050 | 3714.073  | 3223.339  | M33197    | 64626.754 | 62832.254 |
| NM_003498 | 5298.386 | 6473.161 | NM_018976 | 8069.794  | 10176.406 | AF147349  | 24109.852 | 28287.047 |
| AB023420  | 15820.68 | 15962.49 | NM_003355 | 5881.218  | 4543.537  | AL050346  | 30055.191 | 39101.5   |
| NM_007342 | 7240.826 | 6944.65  | NM_005074 | 1374.581  | 1803.086  | AK001520  | 10851.53  | 15154.912 |
| NM_005672 | 1176.436 | 1017.488 | NM_013272 | 436.312   | 654.919   | AK021731  | 1267.697  | 1665.121  |
| D25217    | 3488.086 | 3320.823 | NM_002593 | 706.14    | 1544.693  | D90070    | 20815.354 | 21472.6   |
| NM_006351 | 11147.99 | 9637.424 | NM_004558 | 4228.909  | 8692.303  | Y12235    | 3739.488  | 2803.926  |
| M33197    | 67606.54 | 65168.07 | AL079296  | 951.348   | 1827.302  | AF132601  | 1080.841  | 1276.936  |
| AK023226  | 3344.991 | 2949.723 | NM_014770 | 2270.664  | 4192.069  | M33197    | 65924.664 | 65181.594 |
| AK025263  | 776.671  | 1359.514 | M33197    | 62979.953 | 65683.719 | AF086179  | 4358.46   | 3596.457  |
| M33197    | 68858.88 | 62418.26 | AK023103  | 3515.878  | 2961.552  | AK025807  | 7379.185  | 8738.344  |
| NM_018066 | 6663.099 | 7584.275 | NM_017858 | 3480.074  | 4767.929  | M33197    | 63931.941 | 62240.188 |
| NM_006931 | 8918.681 | 8449.055 | NM_019059 | 44781.301 | 31310.326 | AK025266  | 8979.953  | 7558      |
| NM_020344 | 4079.357 | 4073.61  | D80008    | 2370.324  | 2310.521  | AK001843  | 7619.541  | 7191.009  |
| AF119868  | 797.424  | 1199.779 | X56789    | 1171.608  | 1254.352  | AK000548  | 63747.809 | 58060.051 |
| NM_018976 | 20748.31 | 14644.25 | AK001069  | 38932.512 | 26752.057 | NM_003920 | 31384.986 | 31044.75  |
| NM_003355 | 8199.16  | 12686.96 | M33197    | 63434.605 | 66507.688 | NM_004787 | 23263.76  | 24928.189 |
| NM_005074 | 1311.105 | 1176.419 | NM_000359 | 12116.549 | 8034.242  | AF087984  | 9775.621  | 10532.669 |
| NM_004558 | 2281.706 | 2147.249 | NM_006395 | 1123.252  | 1061.203  | AF009302  | 2381.927  | 3112.992  |
| AL079296  | 1024.315 | 1159.899 | NM_014306 | 5738.685  | 4999.897  | M33197    | 63715.957 | 64780.66  |
| NM_014770 | 2426.006 | 2112.504 | NM_001084 | 2736.849  | 2626.614  | AK022273  | 7345.277  | 6807.365  |
| M33197    | 67349.9  | 67839.62 | NM_018622 | 5158.207  | 5269.265  | NM_015882 | 1500.303  | 1857.328  |
| AK023103  | 4976.851 | 6255.068 | M33197    | 67139.977 | 65537.25  | AK027161  | 1148.914  | 1200.753  |
| NM_017858 | 7161.325 | 5465.155 | NM_005867 | 7023.557  | 7320.795  | AK024271  | 3549.214  | 3336.903  |
| NM_019059 | 35215.18 | 48588.5  | AK026031  | 13601.863 | 10586.348 | AK021650  | 8006.197  | 10916.729 |
| NM_013347 | 1165.55  | 1115.363 | NM_016468 | 27093.479 | 21636.582 | AL050210  | 4728.193  | 7330.48   |
| D80008    | 4290.865 | 3904.634 | BE539299  | 931.793   | 1868.739  | L37699    | 3785.705  | 4797.993  |
| AK001069  | 11213.72 | 8760.791 | AF193873  | 2160.174  | 3735.96   | M33197    | 67262.492 | 69783.758 |
| M33197    | 66810.5  | 74723.07 | NM_002628 | 1341.927  | 2217.441  | AL050173  | 3488.997  | 4129.125  |
| NM_000359 | 3934.974 | 3033.1   | M23575    | 777.19    | 1422.87   | D80002    | 2955.977  | 3854.292  |
| NM_006395 | 1253.836 | 1020.98  | AA190729  | 4750.395  | 12566.464 | U17637    | 8778.162  | 14427.943 |
| NM_014306 | 10600.49 | 8624.042 | BF974315  | 7387.663  | 10434.76  | AF207831  | 2841.903  | 3497.713  |
| NM_001084 | 3963.39  | 4049.357 | T74985    | 964.515   | 2549.061  | AK023174  | 1515.415  | 1514.159  |
| NM_005867 | 14581.98 | 14916.62 | AI652705  | 3606.719  | 5302.438  | NM_003548 | 1445.668  | 2357.71   |
| AK026031  | 9270.111 | 11703.07 | AA446028  | 480.709   | 688.782   | M33197    | 63107.254 | 62624.023 |
| NM_016468 | 30373.03 | 43845.65 | M80583    | 780.76    | 1467.193  | NM_018272 | 11770.424 | 13301.54  |
| BE539299  | 750.079  | 784.751  | AW009565  | 4630.094  | 4009.286  | CY3Cy5    | 7489.905  | 203.114   |
| AF193873  | 1126.892 | 1008.866 | AI570478  | 1405.052  | 995.99    | R19938    | 16002.681 | 16073.691 |
| NM_002628 | 1264.486 | 988.099  | X07767    | 4767.333  | 4003.606  | N94487    | 13014.24  | 16777.57  |
| AA190729  | 6191.831 | 5085.876 | AF252284  | 2044.663  | 2129.569  | AI886795  | 8191.27   | 8560.819  |
| T74985    | 1324.754 | 1603.339 | BU727558  | 779.814   | 667.645   | D10495    | 1203.174  | 1339.742  |
| AI652705  | 3754.522 | 3129.019 | M33197    | 11844.466 | 11812.272 | BF344679  | 2113.121  | 2143.224  |
| AA446028  | 995.508  | 1044.172 | AL050139  | 7226.857  | 7400.629  | M36634    | 1734.963  | 1628.023  |
| M80583    | 2629.108 | 938.503  | U90878    | 966.712   | 1903.193  | M14156    | 6929.185  | 8420.094  |
| AW009565  | 7788.81  | 7763.409 | NM_006597 | 55433.223 | 59344.965 | U87939    | 1662.339  | 1857.089  |
| AI570478  | 2712.558 | 3059.203 | NM_012483 | 12017.289 | 16634.527 | U86961    | 1943.749  | 2309.606  |
| X07767    | 10110.63 | 7513.068 | NM_003498 | 6278.097  | 11058.039 | NM_005191 | 682.233   | 1163.638  |
| AF252284  | 2927.847 | 2329.038 | AB023420  | 15663.965 | 27051.035 | AK094237  | 5511.927  | 5577.836  |
| M33197    | 19078.81 | 17943.49 | NM_016511 | 16120.343 | 29417.426 | L07592    | 1715.26   | 1517.879  |
| AL050139  | 8135.345 | 10112.5  | NM_003559 | 3467.694  | 7644.296  | NM_006981 | 2192.581  | 2317.527  |
| U90878    | 1758.043 | 1593.619 | NM_002185 | 1046.895  | 3529.472  | SR2       | 67736.734 | 62487.484 |
| NM_006597 | 38530.45 | 49676.93 | M55337    | 1228.945  | 1563.653  | SR4       | 29260.838 | 23731.01  |

|           |          |          |           |           |           |           |           |           |
|-----------|----------|----------|-----------|-----------|-----------|-----------|-----------|-----------|
| NM_012483 | 2659.289 | 2967.55  | NM_016533 | 51769.582 | 38445.328 | SR6       | 5100.125  | 3482.641  |
| NM_00349E | 4546.543 | 4504.25  | NM_014751 | 7046.744  | 5716.424  | SR8       | 15548.604 | 37635.973 |
| NM_016511 | 1550.582 | 1991.189 | NM_002347 | 22698.146 | 14767.636 | SR10      | 53132.27  | 16754.793 |
| NM_00355E | 2620.784 | 2691.624 | AB046807  | 1634.549  | 1492.381  | CY3Cy5    | 9000.59   | 488.659   |
| NM_00218E | 2071.89  | 1000.917 | NM_00350E | 919.017   | 967.491   | M33197    | 64369.609 | 62067.906 |
| M33197    | 70727.53 | 62064.82 | M33197    | 64047.004 | 68727     | NM_00736E | 2490.865  | 2770.601  |
| NM_01322E | 1884.51  | 1773.819 | NM_014623 | 6319.525  | 6266.001  | NM_01477E | 3531.435  | 3852.033  |
| NM_016533 | 22444.89 | 22817.41 | NM_007244 | 10039.885 | 8150.345  | NM_00648C | 39838.902 | 40248.414 |
| AB046807  | 2649.343 | 2484.874 | M30629    | 6764.312  | 6080.327  | NM_007223 | 61861.176 | 59683.027 |
| M33197    | 66862.18 | 62025.7  | NM_01897E | 12902.255 | 26341.313 | NM_00014E | 1346.084  | 1546.827  |
| NM_014623 | 11673.7  | 12167.66 | NM_00335E | 10108.466 | 10904.862 | AF030107  | 2170.252  | 1982.825  |
| NM_007244 | 3117.809 | 2762.586 | NM_005074 | 1561.713  | 2814.402  | NM_000871 | 1486.664  | 1099.435  |
| M30629    | 5103.36  | 5003.583 | NM_013272 | 665.755   | 418.005   | M33197    | 67667.75  | 67021.523 |
| M33197    | 67530.59 | 67280.38 | NM_018057 | 2029.035  | 3826.237  | NM_01896E | 1922.583  | 1861.719  |
| NM_01897E | 21672.31 | 17887.5  | M33197    | 64631.141 | 75755.609 | AF086924  | 62503.203 | 61777.063 |
| NM_00335E | 7830.675 | 12220.01 | NM_015717 | 1994.573  | 3449.994  | NM_000264 | 1625.478  | 1883.912  |
| NM_005074 | 895.716  | 1033.287 | NM_01592E | 986.65    | 1779.368  | AB058740  | 15855.464 | 18544.232 |
| NM_015717 | 953.228  | 1062.504 | NM_00366E | 1754.21   | 3632.528  | NM_00338E | 879.369   | 1429.754  |
| NM_01592E | 870.605  | 1277.543 | AF220217  | 1374.607  | 2458.769  | NM_00188E | 1327.17   | 1398.247  |
| NM_00366E | 1011.66  | 1024.466 | NM_013323 | 16316.69  | 27734.178 | M33197    | 67462.156 | 68742.797 |
| AF220217  | 1894.512 | 2018.943 | NM_01742E | 4465.169  | 5147.545  | NM_001154 | 23666.59  | 22009.096 |
| NM_013323 | 7434.356 | 6584.162 | M33197    | 2593.21   | 2396.33   | NM_00181E | 2075.991  | 2277.172  |
| NM_014937 | 1141.14  | 1456.14  | NM_000853 | 3313.951  | 2604.623  | NM_01693E | 1124.802  | 1494.227  |
| NM_01742E | 8879.797 | 7871.655 | AF016903  | 28963.574 | 24227.85  | NM_001993 | 1660.699  | 1807.265  |
| M33197    | 4494.781 | 3477.02  | NM_01567E | 5042.819  | 4095.396  | BF575833  | 1502.438  | 1094.756  |
| NM_000853 | 2976.192 | 2530.247 | AK022267  | 637.293   | 837.794   | NM_00017E | 9777.697  | 18063.66  |
| AF016903  | 5377.37  | 5526.359 | NM_01604C | 3258.983  | 2416.409  | NM_01572E | 17642.549 | 21016.848 |
| NM_01567E | 2142.601 | 2067.367 | AF031136  | 54668.906 | 50531.07  | R61452    | 2768.398  | 2689.019  |
| AK022267  | 899.135  | 1258.717 | NM_018622 | 11560.66  | 20335.076 | NM_01245E | 10457.769 | 9205.218  |
| NM_01604C | 5267.038 | 6723.715 | M33197    | 64887.711 | 66664.984 | NM_00280E | 16776.26  | 14379.274 |
| AF031136  | 5911.458 | 5947.028 | NM_005867 | 9684.333  | 13782.666 | M33197    | 67288.742 | 66745.508 |
| NM_015983 | 2093.358 | 2025.074 | AK026031  | 13015.016 | 11234.178 | NM_00171E | 1895.365  | 1717.618  |
| NM_018622 | 10913.02 | 9332.098 | NM_01646E | 37949.656 | 31857.344 | NM_006564 | 7611.891  | 7611.102  |
| M33197    | 66875.27 | 71756.34 | NM_007342 | 5936.163  | 9540.223  | NM_004802 | 3026.419  | 3274.353  |
| NM_005867 | 15058.6  | 14904.99 | NM_005672 | 762.677   | 758.383   | M33197    | 67416.594 | 71111.203 |
| AK026031  | 10166.67 | 12494.58 | D25217    | 3028.527  | 4519.979  | NM_000074 | 14224.883 | 14245.232 |
| NM_01646E | 29946.25 | 40079.44 | NM_006351 | 10368.378 | 13694.615 | BF434335  | 42642.195 | 49693.883 |
| NM_007342 | 8144.842 | 9170.135 | M33197    | 63672.422 | 66845.352 | M57627    | 1103.104  | 896.216   |
| NM_005672 | 1809.109 | 1510.028 | NM_004683 | 6511.073  | 9008.391  | NM_002993 | 2171.124  | 3193.917  |
| NM_006351 | 10913.68 | 10676.64 | AK023226  | 2301.976  | 3398.73   | AK026946  | 2359.007  | 2913.406  |
| M33197    | 66704.2  | 70658.4  | AK025263  | 728.758   | 500.333   | M33197    | 61595.723 | 62174.32  |
| NM_004683 | 1089.794 | 1100.889 | M33197    | 63781.855 | 63416.41  | NM_003192 | 6596.107  | 7095.729  |
| AK023226  | 3238.403 | 2788.113 | NM_001467 | 1106.866  | 942.857   | NM_01844E | 7962.568  | 8004.104  |
| AK025263  | 958.417  | 1037.568 | NM_01806E | 33688.934 | 32480.109 | AF086129  | 1853.405  | 2605.199  |
| M33197    | 67155.05 | 67209.74 | NM_006931 | 6846.493  | 5363.711  | NM_01445E | 8741.803  | 10279.095 |
| NM_01806E | 7033.785 | 8320.529 | NM_020344 | 7933.256  | 7183.704  | AF235049  | 6089.147  | 7467.929  |
| NM_006931 | 8564.165 | 8951.968 | AF119868  | 580.531   | 1157.266  | NM_005164 | 913.805   | 801.011   |
| NM_020344 | 4647.605 | 5262.296 | AF252284  | 3097.883  | 6670.978  | NM_00199E | 2693.944  | 4247.947  |
| AF119868  | 1302.84  | 1332.926 | BU727558  | 1017.833  | 1851.898  | NM_000183 | 16609.055 | 20464.521 |
| AF252284  | 2690.658 | 2249.384 | M33197    | 11837.447 | 12216.429 | AY004175  | 3437.323  | 3825.101  |
| M33197    | 19047.33 | 18107.15 | AL050139  | 10326.944 | 14525.007 | M33197    | 65773.18  | 63450.41  |
| AL050139  | 7606.729 | 8994.67  | NM_002593 | 564.503   | 608.948   | NM_012327 | 5082.143  | 3376.467  |
| NM_00455E | 2643.681 | 2955.172 | NM_00455E | 6261.094  | 9250.317  | NM_000904 | 8119.852  | 7041.853  |



|           |          |          |           |           |           |           |           |           |
|-----------|----------|----------|-----------|-----------|-----------|-----------|-----------|-----------|
| AL079296  | 990.803  | 1238.509 | AL079296  | 1262.636  | 1494.409  | NM_01604E | 12008.475 | 8892.563  |
| NM_01477C | 2318.817 | 2194.314 | NM_01477C | 2552.249  | 2324.129  | NM_00037E | 12659.189 | 12855.881 |
| M33197    | 66963.74 | 70004.59 | AB037737  | 904.744   | 1138.296  | NM_00026E | 557.504   | 642.742   |
| AK023103  | 5086.117 | 5990.02  | M33197    | 65633.578 | 66258.578 | NM_01884E | 11406.584 | 11979.907 |
| NM_01785E | 7239.705 | 5442.627 | AK023103  | 4365.069  | 5970.297  | AJ000096  | 1071.174  | 1303.226  |
| NM_01905E | 46259.31 | 55734.21 | NM_01785E | 3867.706  | 5892.501  | M16796    | 972.987   | 845.69    |
| NM_013347 | 1351.922 | 1028.38  | NM_01905E | 53102.32  | 49225.305 | AF279890  | 3686.923  | 5396.399  |
| D80008    | 5346.214 | 4183.489 | NM_013347 | 661.274   | 1210.626  | NM_00223E | 4180.75   | 4802.511  |
| X56789    | 1487.258 | 1570.89  | D80008    | 2281.206  | 2624.1    | NM_01206E | 4825.817  | 4514.381  |
| NM_00035E | 4395.863 | 4175.967 | X56789    | 1577.594  | 1696.682  | NM_00168E | 66969.625 | 65189.75  |
| NM_00639E | 1681.125 | 1637.269 | AK001069  | 55450.332 | 60961.52  | NM_016601 | 2045.582  | 2486.317  |
| NM_01430E | 10780.31 | 11124.62 | M33197    | 61069.258 | 62763.5   | NM_01790E | 19749.57  | 21829.561 |
| NM_001084 | 4277.978 | 4833.804 | NM_00035E | 15691.203 | 9656.735  | NM_00681E | 42443.188 | 53168.984 |
| M33197    | 66731.13 | 68419.06 | NM_00639E | 1133.823  | 907.197   | NM_00166E | 7712.614  | 10790.181 |
| NM_01462E | 11229.84 | 10256.34 | NM_01430E | 6564.879  | 5229.953  | NM_00421E | 23911.254 | 27392.68  |
| NM_007244 | 2766.597 | 2500.646 | NM_001084 | 3405.347  | 2606.007  | NM_01653C | 14566.833 | 18629.404 |
| M30629    | 4562.241 | 4390.253 | NM_01817E | 2850.799  | 604.315   | NM_014804 | 2867.615  | 4065.755  |
| BE539299  | 1218.068 | 991.666  | NM_00350E | 2286.759  | 1154.11   | L40520    | 5442.578  | 5001.204  |
| AF193873  | 1014.228 | 956.362  | M33197    | 64949.555 | 82477.453 | NM_00263E | 20837.58  | 24385.213 |
| NM_00262E | 1174.941 | 1159.963 | NM_01462E | 11565.852 | 20385.406 | M33197    | 65491.215 | 62913.027 |
| M23575    | 711.511  | 748.642  | NM_007244 | 9322.138  | 16998.211 | NM_00287E | 11877.764 | 11922     |
| AA190729  | 6225.783 | 5594.317 | M30629    | 7783.373  | 12762.845 | NM_00241E | 843.832   | 904.611   |
| BF974315  | 5783.473 | 10668.39 | BE539299  | 686.555   | 1168.275  | NM_01772E | 3980.838  | 4148.837  |
| T74985    | 1877.362 | 3464.062 | AF193873  | 2688.256  | 3941.316  | AK022922  | 4252.95   | 3217.783  |
| AI652705  | 4317.582 | 3320.43  | NM_00262E | 1876.216  | 3492.556  | NM_00646E | 9162.045  | 9053.657  |
| AA446028  | 1186.74  | 1121.581 | M23575    | 898.113   | 1729.149  | NM_00040C | 36782.867 | 59281.055 |
| M80583    | 2593.688 | 932.329  | AA190729  | 4526.791  | 5616.113  | M33197    | 63503.688 | 60696.5   |
| AI570478  | 2833.491 | 3393.709 | BF974315  | 7367.002  | 6438.82   | NM_00261E | 7605.308  | 5864.159  |
| X07767    | 10759.99 | 10231.08 | T74985    | 804.441   | 1024.018  | NM_00441E | 9104.238  | 9656.035  |
| AF016903  | 3779.263 | 3186.232 | AI652705  | 4210.854  | 4629.85   | U47635    | 12606.429 | 12287.682 |
| NM_01567E | 1878.912 | 1694.054 | M80583    | 791.303   | 1403.373  | NM_01865C | 3034.29   | 3529.071  |
| AK022267  | 1508.802 | 1305.923 | AW009565  | 3734.944  | 3593.047  | AK026945  | 36913.039 | 28207.615 |
| AF031136  | 4216.141 | 3585.772 | AI570478  | 1306.392  | 1146.493  | NM_01436E | 1647.547  | 2406.601  |
| U90878    | 1920.455 | 2245.336 | X07767    | 5436.148  | 4600.127  | M33197    | 62455.941 | 64527.473 |
| NM_006597 | 40791.88 | 51729    | X65293    | 562.767   | 561.119   | NM_00139E | 40128.016 | 55131.797 |
| NM_01248E | 2823.501 | 3006.393 | AF016903  | 23880.779 | 42553.816 | AB050049  | 8947.148  | 10497.573 |
| NM_00349E | 4927.401 | 5143.641 | NM_01567E | 3969.501  | 8157.161  | J05125    | 1400.168  | 1749.544  |
| AB023420  | 15873.64 | 16450.99 | AK022267  | 891.66    | 1892.985  | NM_00199E | 1038.6    | 1197.388  |
| NM_007264 | 3506.712 | 3930.546 | NM_01604C | 5197.261  | 8432.856  | NM_00017E | 8308.904  | 15780.112 |
| NM_016511 | 2560.47  | 2986.849 | U90878    | 1500.195  | 2071.014  | NM_01572E | 19428.66  | 25317.221 |
| NM_00355E | 3031.083 | 3215.036 | NM_006597 | 59967.047 | 65919.109 | R61452    | 2789.904  | 2522.616  |
| NM_00218E | 2027.541 | 1023.718 | NM_01248E | 14282.26  | 14639.709 | R19938    | 19529.068 | 14646.735 |
| M33197    | 68199.77 | 61258.23 | NM_00349E | 6584.961  | 9237.089  | AI886795  | 9264.282  | 10855.452 |
| NM_01322E | 2302.731 | 2076.141 | AB023420  | 17077.771 | 30967.477 | D10495    | 2015.502  | 1876.101  |
| NM_01653E | 25272.21 | 34393.98 | NM_016511 | 18336.67  | 20392.514 | BF344679  | 3172.027  | 3273.861  |
| NM_014751 | 1215.25  | 1201.256 | NM_00355E | 4045.722  | 6219.102  | M36634    | 2207.18   | 2204.783  |
| NM_002347 | 14872.4  | 18323.12 | NM_00218E | 1017.102  | 1821.842  | M14156    | 11054.627 | 12851.335 |
| AB046807  | 2862.041 | 2929.172 | M55337    | 1289.94   | 1756.544  | U87939    | 1876.38   | 2142.528  |
| NM_01806E | 4986.562 | 5479.551 | NM_01322E | 1104.414  | 966.597   | U86961    | 2144.213  | 2127.368  |
| NM_006931 | 9037.924 | 8496.769 | NM_01653E | 53217.742 | 43150.398 | NM_005191 | 909.584   | 1094.682  |
| NM_020344 | 4436.425 | 4906.119 | NM_014751 | 9029.051  | 9037.777  | AK094237  | 5112.68   | 5676.689  |
| AF119868  | 1427.977 | 1491.357 | NM_002347 | 22878.201 | 18180.148 | L07592    | 1406.04   | 1506.804  |
| M33197    | 66943.38 | 68190.38 | AB046807  | 1987.867  | 2097.038  | NM_006981 | 2462.091  | 2390.42   |

|           |          |          |           |           |           |           |           |           |
|-----------|----------|----------|-----------|-----------|-----------|-----------|-----------|-----------|
| NM_018976 | 21123.31 | 18235.71 | NM_018066 | 25352.859 | 40443.047 | M33197    | 67618.18  | 68336.664 |
| NM_003355 | 7954.402 | 13803.44 | NM_006931 | 10054.415 | 16852.727 | AK027244  | 2149.572  | 2500.46   |
| NM_005074 | 1257.212 | 1157.569 | NM_020344 | 10114.018 | 16047.025 | NM_018449 | 7695.526  | 6319.496  |
| M33197    | 67190.98 | 70193.26 | AF119868  | 875.163   | 1497.559  | AF086129  | 1888.261  | 2228.351  |
| NM_015717 | 1222.413 | 1032.989 | M33197    | 60539.398 | 65269.645 | NM_014458 | 9686.268  | 11569.087 |
| NM_015925 | 712.99   | 875.785  | NM_018976 | 15704.454 | 42586.832 | AF235049  | 15921.365 | 15261.365 |
| NM_003665 | 988.689  | 1404.3   | NM_003355 | 11391.617 | 16151.408 | NM_007369 | 2066.625  | 2652.797  |
| AF220217  | 2036.629 | 2132.935 | NM_005074 | 2348.3    | 4612.495  | NM_014776 | 3991.779  | 4584.247  |
| NM_013323 | 7895.52  | 7553.345 | NM_013272 | 777.943   | 658.525   | NM_006480 | 54580.617 | 59639.898 |
| NM_014937 | 2065.655 | 2782.251 | NM_018057 | 3571.403  | 5210.422  | NM_007223 | 63419.008 | 61982.441 |
| NM_017426 | 9871.013 | 10295.65 | M33197    | 62780.359 | 68510.383 | NM_000145 | 2161.544  | 1997.369  |
| M33197    | 7414.23  | 5701.908 | NM_015717 | 2064.419  | 3080.67   | AF030107  | 2503.477  | 2833.131  |
| NM_000853 | 3373.761 | 3544.57  | NM_015925 | 1250.311  | 1680.746  | NM_000871 | 1800.03   | 2003.332  |
| NM_000359 | 3415.699 | 2726.503 | NM_003665 | 1672.26   | 1677.569  | M33197    | 65239.234 | 62967.148 |
| NM_006395 | 1527.627 | 1611.294 | AF220217  | 1074.128  | 959.43    | NM_018968 | 2071.24   | 1993.839  |
| NM_014306 | 11498.07 | 12618.92 | NM_013323 | 13788.996 | 10903.934 | AF086924  | 63575.949 | 60832.078 |
| NM_001084 | 4117.71  | 4478.496 | NM_017426 | 5440.049  | 7824.922  | NM_000264 | 1223.357  | 1950.265  |
| NM_015983 | 2465.815 | 2871.766 | M33197    | 2760.45   | 3757.94   | AB058740  | 16857.756 | 18514.398 |
| NM_018622 | 11959.25 | 13128.6  | NM_000853 | 4391.265  | 6780.874  | NM_003385 | 877.467   | 1267.243  |
| M33197    | 67583.04 | 65045.34 | M33197    | 61506.836 | 63636.105 | NM_001888 | 1461.455  | 1622.776  |
| NM_005867 | 15532.57 | 17256.31 | NM_000359 | 9909.739  | 6867.499  | NM_004392 | 807.755   | 1067.412  |
| AK026031  | 10952.92 | 13751.16 | NM_006395 | 1327.431  | 1408.13   | M33197    | 65349.223 | 68056.891 |
| NM_007342 | 8236.394 | 9352.854 | NM_014306 | 10573.548 | 13133.692 | NM_001154 | 23220.391 | 22859.258 |
| NM_005672 | 1532.529 | 1725.817 | NM_001084 | 4564.246  | 7102.092  | NM_001819 | 2182.651  | 2513.198  |
| D25217    | 3462.425 | 3753.751 | NM_015983 | 5849.654  | 7636.993  | NM_016938 | 1030.713  | 1279.253  |
| NM_006351 | 11779.67 | 10581.31 | NM_018622 | 11575.271 | 15090.666 | NM_006815 | 42368.211 | 53996.813 |
| M33197    | 67080.41 | 62380.57 | M33197    | 66185.383 | 66441.828 | NM_001663 | 7594.335  | 9349.245  |
| NM_004683 | 1345.313 | 1427.47  | NM_005867 | 13537.864 | 19756.471 | NM_004218 | 23655.588 | 27128.977 |
| AK023226  | 2894.306 | 3124.469 | AK026031  | 22043.475 | 22946.914 | NM_016530 | 16128.502 | 17978.727 |
| M33197    | 67758.88 | 62928.15 | NM_016468 | 46142.094 | 43237.32  | NM_014804 | 2928.814  | 3071.076  |
| AB037725  | 2412.824 | 1995.717 | NM_007342 | 7411.005  | 12080.403 | NM_012455 | 11973.954 | 11092.416 |
| M33197    | 60953.55 | 61571.11 | NM_005672 | 796.627   | 1119.012  | NM_002806 | 18659.561 | 17398.613 |
| NM_017718 | 4187.314 | 3990.135 | D25217    | 2922.542  | 4738.54   | M33197    | 66087.641 | 68272.164 |
| NM_004860 | 6067.831 | 5979.758 | NM_006351 | 8953.969  | 12393.004 | NM_001716 | 2319.174  | 2912.418  |
| AF217190  | 17121.53 | 12471.21 | M33197    | 62893.766 | 64014.023 | NM_002030 | 1012.86   | 1167.394  |
| AB028981  | 16503.36 | 20910.15 | NM_004683 | 5779.519  | 4765.963  | NM_006073 | 991.283   | 1098.677  |
| NM_006800 | 3049.435 | 2718.742 | AK023226  | 1639.346  | 1245.604  | NM_004951 | 835.154   | 1139.237  |
| NM_002729 | 9972.426 | 9531.112 | AK025263  | 1206.141  | 1031.587  | NM_006564 | 10660.548 | 12191.904 |
| M33197    | 21397.69 | 19945.49 | M33197    | 63046.039 | 66389.328 | NM_004802 | 3803.257  | 3598.067  |
| NM_004558 | 2623.125 | 3122.778 | NM_001467 | 1837.414  | 1982.563  | M33197    | 64404.984 | 63088.578 |
| AL079296  | 1069.821 | 1344.09  | NM_004688 | 9603.38   | 8694.001  | NM_002983 | 780.869   | 784.532   |
| NM_014770 | 2225.459 | 2408.633 | AB037725  | 1011.607  | 643.413   | NM_000074 | 12594.195 | 18170.449 |
| AB037737  | 1482.483 | 2581.357 | M33197    | 59157.59  | 44470.789 | BF434335  | 47699.816 | 52011.938 |
| M33197    | 67196.98 | 70559.34 | NM_017718 | 2191.906  | 2038.05   | M57627    | 962.636   | 1031.893  |
| AK023103  | 5154.231 | 6294.405 | NM_004860 | 3630.581  | 3372.138  | NM_002993 | 2408.409  | 3221.805  |
| NM_017858 | 7962.257 | 6365.686 | AF217190  | 10867.733 | 6678.223  | AK026946  | 2353.644  | 2909.733  |
| NM_019059 | 47501.48 | 53548.59 | AB028981  | 40772.25  | 26146.896 | M33197    | 64452.328 | 66266.867 |
| NM_013347 | 1507.403 | 1369.139 | NM_006800 | 3895.499  | 3034.144  | NM_003192 | 7346.553  | 7841.627  |
| D80008    | 4947.721 | 3982.675 | NM_002476 | 945.965   | 2250.136  | NM_014369 | 1880.647  | 2564.199  |
| X56789    | 1559.291 | 1822.922 | NM_002729 | 6932.995  | 8184.03   | M33197    | 64954.746 | 66746.617 |
| AK001069  | 12062.02 | 9109.662 | M33197    | 17770.055 | 13423.208 | NM_001398 | 42741.059 | 50594.699 |
| NM_004132 | 1012.514 | 839.813  | AL050139  | 12270.447 | 16161.527 | AB050049  | 9351.524  | 8687.422  |
| NM_014844 | 1238.743 | 1345.728 | NM_004558 | 9693.972  | 13221.125 | J05125    | 1684.768  | 1584.414  |

|           |          |          |           |           |           |           |           |           |
|-----------|----------|----------|-----------|-----------|-----------|-----------|-----------|-----------|
| M33197    | 62609.2  | 57255.56 | AL079296  | 1054.832  | 1557.442  | NM_005164 | 922.139   | 1083.767  |
| NM_018492 | 14574.34 | 11142.66 | NM_01477C | 3140.832  | 2660.904  | NM_001995 | 3335.781  | 4470.943  |
| NM_00134E | 1372.631 | 1027.119 | AB037737  | 376.067   | 795.247   | NM_000183 | 18088.129 | 18452.039 |
| NM_00314E | 1303.281 | 1336.566 | AK023103  | 3030.373  | 2176.335  | AY004175  | 4827.229  | 5944.771  |
| NM_003377 | 14643.12 | 12254.72 | NM_01785E | 3168.375  | 3234.131  | M33197    | 65465.996 | 63838.355 |
| NM_00222C | 5105.01  | 5374.389 | NM_01905E | 48540.82  | 38239.352 | NM_012327 | 5729.391  | 6091.773  |
| AB033034  | 7608.009 | 7181.491 | D80008    | 2526.587  | 2857.408  | NM_000904 | 10180.457 | 9714.457  |
| D38169    | 2555.301 | 2779.631 | X56789    | 1791.292  | 1742.928  | NM_01604E | 12790.962 | 12536.563 |
| AJ293294  | 3489.858 | 4922.646 | AK001069  | 59223.063 | 54543.406 | NM_00037E | 13477.125 | 15904.872 |
| NM_018171 | 2983.208 | 2611.128 | NM_004132 | 2483.586  | 1953.612  | NM_00026E | 923.286   | 1198.664  |
| NM_002447 | 8119.492 | 6668.729 | NM_014844 | 2981.817  | 2117.682  | NM_01884E | 9440.688  | 9659.669  |
| NM_01414E | 14723.1  | 16201.07 | M33197    | 62360.777 | 62291.543 | AJ000096  | 943.345   | 1393.109  |
| NM_002223 | 1707.176 | 1214.745 | NM_018492 | 6205.489  | 6758.623  | AF279890  | 5063.975  | 5842.778  |
| NM_00549C | 12481.66 | 13410.45 | NM_00134E | 2656.487  | 2039.879  | NM_00223E | 4834.314  | 6047.937  |
| NM_003151 | 8469.698 | 8983.242 | NM_00314E | 1833.138  | 1280.925  | NM_01206E | 5749.59   | 5650.506  |
| NM_006811 | 12599.81 | 14240.29 | NM_003377 | 12988.939 | 9291.334  | NM_00168E | 65749.188 | 64431.613 |
| NM_005601 | 3191.688 | 3410.172 | NM_00222C | 6832.869  | 5714.973  | NM_016601 | 1938.731  | 1828.3    |
| NM_016151 | 6281.977 | 7234.627 | AB033034  | 4371.011  | 3105.128  | NM_01790E | 21091.432 | 22575.156 |
| NM_004324 | 4425.676 | 3020.742 | D38169    | 4183.386  | 3327.846  | NM_006981 | 2288.184  | 2682.412  |
| NM_005614 | 27673.59 | 27320.09 | AJ293294  | 3373.679  | 2483.157  | M33197    | 63518.551 | 59834.945 |
| AK026270  | 2086.967 | 2331.853 | NM_018171 | 1621.494  | 1636.841  | AK027244  | 3002.594  | 2045.988  |
| NM_00455E | 3270.109 | 3455.579 | NM_002447 | 8676.935  | 8189.202  | L40520    | 7282.091  | 6346.467  |
| D90075    | 958.814  | 1238.602 | NM_01414E | 14105.02  | 10392.107 | NM_002633 | 22922.305 | 27677.729 |
| AK021702  | 5145.383 | 3693.036 | NM_002223 | 3667.062  | 3149.827  | M33197    | 66043.609 | 64174.371 |
| NM_00388E | 6114.291 | 6968.216 | M33197    | 57392.574 | 61469.273 | NM_00287E | 14065.281 | 14815.527 |
| AL161977  | 1299.652 | 1448.678 | NM_00549C | 9212.975  | 8086.934  | NM_002412 | 965.151   | 987.372   |
| NM_00393E | 6790.292 | 6978.983 | NM_003151 | 6073.013  | 7675.628  | NM_017723 | 4151.266  | 3860.442  |
| M33197    | 63279.86 | 62234.61 | NM_006811 | 6957.672  | 6504.785  | AK022922  | 3966.597  | 3416.899  |
| NM_00268E | 2349.327 | 2757.504 | NM_005601 | 3959.143  | 3824.904  | NM_006462 | 9280.105  | 8958.155  |
| NM_02036E | 1715.604 | 2056.528 | NM_016151 | 26734.322 | 27324.393 | NM_00040C | 38743.816 | 58765.668 |
| NM_00441E | 2340.043 | 2269.525 | NM_004324 | 2205.706  | 2431.2    | M33197    | 61842.648 | 61743.406 |
| NM_00727E | 37701.68 | 44397.83 | NM_005614 | 18782.346 | 15369.642 | NM_002613 | 7677.109  | 6888.065  |
| NM_004723 | 9285.202 | 10018.14 | AK026270  | 1632.047  | 847.53    | NM_00441E | 10945.012 | 12030.438 |
| M33197    | 64661.17 | 63077.05 | NM_00455E | 2407.083  | 1747.156  | U47635    | 12869.5   | 12342.515 |
| NM_00524E | 9957.928 | 10272.81 | M33197    | 58032.98  | 56209.871 | NM_01865C | 3197.355  | 3642.433  |
| M33197    | 67387.48 | 61976.95 | AK023827  | 1327.538  | 724.962   | AK026945  | 36965.094 | 28108.877 |
| NM_01621E | 14876.09 | 13984.28 | AK021702  | 3524.93   | 4106.133  | NM_00188E | 1746.514  | 1894.895  |
| NM_004751 | 2407.459 | 2383.384 | NM_00388E | 2643.25   | 2111.61   | M33197    | 67127.445 | 67441.188 |
| AK025605  | 7654.392 | 7573.83  | NM_00393E | 2397.266  | 2730.009  | NM_001154 | 25703.521 | 17572.846 |
| NM_003783 | 1892.154 | 1680.998 | M33197    | 60362.75  | 65715.664 | NM_00181E | 2832.215  | 1774.944  |
| NM_00700C | 4747.249 | 5255.686 | NM_00268E | 1414.851  | 1159.308  | NM_01693E | 1171.164  | 1171.9    |
| NM_00610C | 952.634  | 1187.276 | NM_02036E | 1632.108  | 1361.049  | NM_001993 | 1492.802  | 1552.812  |
| NM_003197 | 16066.8  | 12589.64 | NM_00441E | 6264.255  | 6477.493  | NM_00017E | 10883.818 | 21474.947 |
| AF176705  | 11498.25 | 10624.72 | NM_00727E | 21820.367 | 15878.222 | NM_01572E | 19332.479 | 22009.756 |
| NM_017414 | 8267.032 | 6128.052 | NM_00521E | 26997.053 | 17249.328 | R61452    | 2299.481  | 2295.797  |
| NM_01217E | 31857.32 | 42187    | NM_004723 | 5114.762  | 6048.363  | R19938    | 20486.535 | 18113.916 |
| NM_00478E | 4104.603 | 4161.833 | M33197    | 57515.641 | 66242.008 | N94487    | 15367.158 | 16377.605 |
| M33197    | 67328.06 | 68268.48 | NM_018413 | 19837.936 | 28508.605 | AI886795  | 10587.789 | 11767.312 |
| AL442083  | 5637.834 | 5798.408 | AB018299  | 22018.135 | 22330.662 | D10495    | 1888.565  | 2229.96   |
| D63487    | 5651.115 | 6504.837 | NM_00524E | 10656.191 | 10894.091 | BF344679  | 2741.588  | 2960.694  |
| AK097791  | 5376.709 | 5978.744 | M33197    | 56273.535 | 57427.289 | M36634    | 1759.827  | 2152.764  |
| AK022705  | 4747.508 | 4685.324 | NM_01621E | 9111.407  | 6417.348  | M14156    | 9816.156  | 11776.437 |
| NM_016404 | 9468.005 | 9893.429 | NM_004751 | 1142.216  | 688.532   | U87939    | 1564.465  | 1995.755  |

|           |          |          |           |           |           |           |           |           |
|-----------|----------|----------|-----------|-----------|-----------|-----------|-----------|-----------|
| L03426    | 6064.891 | 6780.649 | AK025605  | 4772.383  | 3828.138  | U86961    | 2270.264  | 2139.05   |
| NM_020163 | 2341.277 | 2366.297 | NM_00700C | 3750.026  | 2807.607  | NM_005191 | 597.165   | 1081.414  |
| NM_000457 | 1453.546 | 1225.913 | M23161    | 6225.78   | 3984.502  | AK094237  | 5180.131  | 5031.644  |
| M34356    | 3621.776 | 4511.504 | NM_003197 | 8101.936  | 7382.055  | L07592    | 1491.562  | 1584.942  |
| AJ133115  | 7719.7   | 8102.237 | AF176705  | 6690.844  | 4682.871  | BF434335  | 51498.922 | 56822.547 |
| X51630    | 15918.27 | 13691.97 | D29012    | 22064.545 | 17412.275 | M57627    | 1180.568  | 1257.291  |
| NM_00505E | 4184.405 | 4023.161 | NM_017414 | 2934.571  | 4534.551  | NM_002993 | 2526.773  | 2978.693  |
| NM_00196E | 844.704  | 1070.257 | NM_01217E | 22669.775 | 18401.658 | AK026946  | 2686.039  | 1914.278  |
| AF208502  | 20248.72 | 21146.28 | NM_002793 | 7052.959  | 6778.749  | M33197    | 64676.199 | 59232.203 |
| M33197    | 60672.62 | 61685.45 | NM_00478E | 3041.959  | 2731.716  | NM_003192 | 6888.894  | 4489.396  |
| NM_00698C | 5103.024 | 4550.634 | M33197    | 59646.352 | 65137.711 | NM_01844E | 7905.52   | 5545.721  |
| AK023904  | 2648.945 | 3615.573 | AL442083  | 4075.077  | 3851.786  | AF086129  | 1928.981  | 2050.641  |
| NM_01649E | 5769.136 | 5987.435 | D63487    | 3941.154  | 3848.89   | NM_01445E | 9074.05   | 10821.556 |
| NM_01430E | 10596.29 | 10471.4  | AK097791  | 6569.853  | 5608.129  | AF235049  | 6006.743  | 6051.801  |
| M33197    | 60999.13 | 60080.45 | NM_020367 | 517.218   | 629.593   | M33197    | 67602.945 | 66508.5   |
| NM_004094 | 4400.992 | 4787.674 | AK022705  | 2664.538  | 3995.805  | NM_00736E | 3263.204  | 3561.052  |
| NM_02023E | 6592.143 | 4838.786 | NM_016404 | 7797.482  | 9237.564  | NM_01477E | 4993.96   | 5492.507  |
| AK027059  | 21979.08 | 22972.88 | L03426    | 4666.319  | 5960.032  | NM_00648C | 49131.328 | 49225.145 |
| AF151109  | 25852.6  | 26026.92 | M33197    | 55686.563 | 64293.617 | NM_007223 | 64553.035 | 60826.828 |
| L34070    | 6979.146 | 7606.995 | NM_020163 | 2314.154  | 2592.785  | NM_00014E | 1865.403  | 1788.934  |
| AF038182  | 2308.153 | 2026.239 | NM_000457 | 1275.435  | 835.288   | AF030107  | 2207.797  | 2270.648  |
| NM_01647E | 10065.13 | 9374.892 | M34356    | 2959.336  | 1823.76   | NM_000871 | 1503.123  | 1347.678  |
| AF086472  | 1947.685 | 1956.545 | AJ133115  | 4385.388  | 3184.042  | M33197    | 67551.008 | 65441.398 |
| NM_00186E | 64148.13 | 74541.81 | X51630    | 6546.276  | 5218.847  | NM_01896E | 2094.363  | 2241.567  |
| NM_006441 | 12533.61 | 12952.3  | NM_00505E | 2996.645  | 2328.008  | AF086924  | 67416.016 | 69321.547 |
| NM_00191E | 5334.132 | 4728.666 | NM_00196E | 730.945   | 451.092   | NM_000264 | 1914.981  | 2256.067  |
| NM_01824E | 3781.23  | 3921.434 | AF208502  | 15950.524 | 9112.617  | AB058740  | 14184.644 | 16615.209 |
| M33197    | 67604.72 | 65220.4  | M33197    | 58782.008 | 60108.156 | NM_00338E | 1153.23   | 1584.68   |
| X76302    | 13701.06 | 14507.84 | AF264750  | 22651.412 | 15721.277 | AF279890  | 5430.502  | 6735.031  |
| AK026276  | 2300.66  | 1630.57  | NM_00698C | 1975.47   | 1822.403  | NM_00223E | 4230.47   | 5795.611  |
| M33197    | 65690.02 | 62581.06 | AK023904  | 4530.525  | 3835.577  | NM_01206E | 3041.259  | 2725.629  |
| X52354    | 4946.09  | 5500.902 | NM_01795E | 6194.252  | 5294.467  | NM_00168E | 64893.578 | 52423.66  |
| NM_005413 | 1029.18  | 788.521  | NM_01649E | 2588.067  | 2584.232  | NM_016601 | 2051.075  | 1175.335  |
| NM_00231E | 2111.933 | 2081.174 | NM_01430E | 4320.888  | 4737.666  | NM_01790E | 19793.961 | 10346.104 |
| AK024191  | 2183.954 | 2428.342 | M33197    | 57250.266 | 51597.73  | M33197    | 66220.219 | 62345.535 |
| AV693985  | 826.274  | 565.71   | NM_004094 | 2250.006  | 2606.773  | NM_00681E | 41273.625 | 28381.641 |
| D83781    | 3208.383 | 3457.471 | NM_02023E | 3489.831  | 3404.331  | NM_001663 | 7390.355  | 6836.285  |
| AL832699  | 3954.443 | 3159.099 | AK027059  | 10645.728 | 10626.913 | NM_00421E | 24180.703 | 25058.691 |
| NM_012191 | 1292.77  | 1077.507 | AF151109  | 12562.229 | 12588.408 | NM_01653C | 14219.799 | 17154.025 |
| M33197    | 67937.94 | 62370.65 | NM_015414 | 60405.66  | 63951.766 | NM_014804 | 2480.864  | 2611.339  |
| AK000757  | 12777.64 | 10331.46 | L34070    | 3845.959  | 4083.192  | NM_01245E | 11231.744 | 10184.595 |
| AL359577  | 3420.835 | 3218.799 | AF038182  | 1400.848  | 989.871   | NM_00280E | 19578.264 | 15754.993 |
| NM_01813E | 4110.102 | 4978.125 | NM_01647E | 6841.926  | 5023.553  | M33197    | 66883.219 | 67854.859 |
| NM_01480E | 6895.141 | 7583.05  | AF086472  | 1082.395  | 795.084   | NM_00171E | 1971.799  | 1763.602  |
| AF052120  | 4337.434 | 4317.653 | NM_00186E | 53418.816 | 32130.766 | NM_00203C | 1188.95   | 749.21    |
| NM_014871 | 5296.092 | 5400.664 | NM_006441 | 8319.979  | 6004.566  | NM_006073 | 563.713   | 902.411   |
| AK026754  | 2101.602 | 1634.108 | NM_00191E | 2781.857  | 2358.879  | NM_006564 | 10310.078 | 9800.875  |
| M33197    | 64550.63 | 65156.18 | NM_01824E | 6265.183  | 4432.906  | NM_004802 | 3006.737  | 3398.503  |
| AK025794  | 10324.59 | 7653.624 | M33197    | 64217.805 | 57672.613 | M33197    | 63766.176 | 69314.867 |
| NM_003541 | 753.214  | 1380.781 | AF252390  | 1000.569  | 707.127   | NM_000074 | 13135.642 | 20152.953 |
| AF131835  | 1255.368 | 1447.805 | NM_012117 | 13941.729 | 7861.691  | M33197    | 63212.508 | 59943.035 |
| NM_00719E | 13121.82 | 16025.87 | D17130    | 63914.676 | 60902.77  | NM_002613 | 8047.943  | 5941.056  |
| M33197    | 65644.16 | 63471.16 | X76302    | 7519.893  | 7090.363  | NM_00441E | 10759.572 | 7834.844  |

|            |          |          |           |           |           |           |           |           |
|------------|----------|----------|-----------|-----------|-----------|-----------|-----------|-----------|
| AK023220   | 2915.665 | 3012.062 | AK026276  | 1000.41   | 1172.118  | U47635    | 17863.811 | 15067.141 |
| AK024566   | 1246.789 | 921.452  | M33197    | 63773.551 | 67863.43  | AK026945  | 40990     | 29961.074 |
| M33197     | 67665.95 | 65119.61 | X52354    | 1867.319  | 2360.812  | NM_002828 | 11591.711 | 11344.808 |
| AK024981   | 32718.02 | 38046.58 | NM_005413 | 1220.045  | 1221.153  | NM_014369 | 2953.796  | 2448.899  |
| AK027246   | 3368.551 | 3466.534 | NM_002315 | 3297.731  | 3891.61   | M33197    | 64425.191 | 59727.984 |
| U80766     | 6834.024 | 5831.02  | AK024191  | 1427.764  | 1316.757  | NM_001398 | 46248.828 | 39182.406 |
| AK001638   | 2219.99  | 1830.437 | D83781    | 2438.729  | 1823.119  | AB050049  | 8040.564  | 7307.963  |
| AF161386   | 9494.188 | 12439.31 | AL832699  | 2507.155  | 1693.758  | J05125    | 1791.17   | 1861.596  |
| AL365369   | 5913.436 | 8401.719 | NM_012191 | 887.708   | 654.353   | NM_005164 | 976.198   | 1062.53   |
| AK025454   | 2484.883 | 2642.974 | M33197    | 66468.586 | 63923.641 | NM_001995 | 3187.72   | 3766.571  |
| M33197     | 67841.38 | 63603.86 | AK000757  | 6056.121  | 6289.837  | NM_000183 | 17646.248 | 18072.49  |
| X05826     | 17983.4  | 18796.07 | AL359577  | 1940.134  | 1758.863  | AY004175  | 5187.341  | 6000.754  |
| M33197     | 66949.45 | 72351.7  | NM_018139 | 2041.672  | 1360.302  | NM_012327 | 7327.614  | 7226.314  |
| L77559     | 932.565  | 953.025  | NM_014805 | 3962.625  | 2694.9    | NM_000904 | 10002.89  | 11004.672 |
| Y10515     | 1021.57  | 1113.22  | AF052120  | 2055.069  | 1543.292  | NM_016048 | 13127.151 | 10041.235 |
| AK023636   | 3630.1   | 4257.538 | NM_014871 | 2482.901  | 2270.522  | NM_000375 | 14082.091 | 17694.693 |
| M33197     | 67982.55 | 63107.73 | AK026754  | 673.159   | 787.834   | NM_018849 | 11223.173 | 11670.211 |
| AB037771   | 802.679  | 930.765  | M33197    | 60372.34  | 62417.355 | AJ000096  | 1585.059  | 1737.62   |
| AK025931   | 14677.39 | 13102.73 | AL137552  | 2182.119  | 1795.558  | M16796    | 916.401   | 1161.484  |
| M33197     | 2852.413 | 2806.419 | AK025794  | 4537.391  | 5921.703  | AF015910  | 54707.105 | 55458.973 |
| M33197     | 66235.2  | 70795.24 | NM_003541 | 622.68    | 460.504   | BC009993  | 5664.357  | 4908.075  |
| AK001083   | 4027.933 | 3886.368 | AF131835  | 519.135   | 614.245   | M33197    | 62770.082 | 63595.531 |
| AK000185   | 2106.875 | 1994.146 | AK024522  | 1749.838  | 1655.97   | AB049150  | 1404.872  | 853.656   |
| NM_017962  | 1140.239 | 969.778  | NM_007198 | 8205.354  | 7820.995  | NM_016824 | 3914.331  | 6418.497  |
| AK027227   | 827.626  | 1154.845 | NM_014958 | 1004.388  | 1194.325  | NM_003031 | 9587.835  | 8117.775  |
| NM_017834  | 1221.226 | 1401.715 | M33197    | 59614.129 | 65640.016 | NM_007170 | 2732.25   | 3129.436  |
| AK000865   | 2343.083 | 2278.028 | AK023220  | 2090.173  | 2469.647  | NM_003008 | 2568.671  | 2554.414  |
| M33197     | 64998.62 | 67007.05 | AK024566  | 816.809   | 1270.396  | NM_004100 | 1232.225  | 1233.986  |
| AK024779   | 1147.713 | 1176.765 | AK025683  | 375.329   | 436.286   | M33197    | 60669.316 | 61914.605 |
| AK024406   | 785.471  | 659.081  | M33197    | 58631.891 | 57659.031 | AK027244  | 2833.946  | 3009.406  |
| NM_018381  | 2174.314 | 1810.195 | AK024981  | 19299.27  | 12609.365 | L40520    | 6549.374  | 6347.684  |
| AK022769   | 1233.819 | 1323.032 | AK027246  | 1715.295  | 1437.093  | NM_002633 | 24483.838 | 33853.512 |
| M33197     | 67587.37 | 66209.76 | U80766    | 4509.12   | 3577.218  | M33197    | 62083.016 | 63711.016 |
| AK026277   | 19369.54 | 22858.98 | AK001638  | 1689.779  | 1179.066  | NM_002878 | 15100.765 | 16520.35  |
| U10509     | 3447.867 | 3156.87  | AF161386  | 9178.291  | 5113.006  | NM_017723 | 4107.106  | 4975.156  |
| NM_007165  | 17844.48 | 19671.7  | AL365369  | 4293.971  | 2961.814  | AK022922  | 4533.381  | 4652.871  |
| NM_014018  | 13696.17 | 12294.34 | AK025454  | 5049.652  | 3534      | NM_006462 | 9672.882  | 11074.275 |
| AF085956   | 12989.07 | 11896.99 | M33197    | 59307.875 | 49145.91  | NM_000400 | 32425.248 | 44787.086 |
| NM_019116  | 2494.568 | 2969.381 | X05826    | 8969.23   | 6153.22   | AK027157  | 2046.622  | 1223.319  |
| AF147318   | 1116.812 | 1261.586 | Y11608    | 692.146   | 647.892   | NM_015889 | 64960.527 | 63740.816 |
| unknown (S | 2333.167 | 1800.396 | AJ001872  | 3267.756  | 2775.521  | M33197    | 67423.164 | 66081.563 |
| M33197     | 64320.86 | 63584.91 | AJ227882  | 505.28    | 330.886   | NM_004276 | 8014.977  | 8707.692  |
| AL137556   | 1616.096 | 2161.831 | M33197    | 60344.121 | 63321.695 | NM_002332 | 32476.768 | 32535.422 |
| NM_014696  | 6480.6   | 6374.99  | L77559    | 365.92    | 443.161   | NM_002859 | 5117.193  | 5072.165  |
| AL359055   | 1616.089 | 1872.017 | NM_005598 | 1500.052  | 1416.808  | NM_005246 | 6066.988  | 4755.25   |
| NM_014908  | 7674.627 | 8319.361 | Y10515    | 1616.18   | 1501.227  | NM_017651 | 2372.734  | 1831.548  |
| AF086125   | 1097.032 | 925.153  | AK023636  | 11647.086 | 11570.164 | AF161339  | 12583.713 | 10514.04  |
| AK023547   | 1319.071 | 1377.909 | D25272    | 2416.698  | 3045.76   | M33197    | 64842.551 | 62496.23  |
| U67847     | 2013.773 | 2602.642 | M33197    | 63943.574 | 66653.297 | AL137662  | 3015.163  | 2826.161  |
| AL137321   | 8144.781 | 6707.767 | NM_020168 | 2426.899  | 2388.876  | AK000354  | 8306.617  | 8775.514  |
| M33197     | 63732.55 | 59869.11 | AB037771  | 604.458   | 444.934   | AL161984  | 2702.991  | 2016.838  |
| AK024207   | 7797.094 | 7914.314 | AK025931  | 36711.703 | 21704.736 | NM_014882 | 2613.529  | 2460.775  |
| AK021843   | 2040.593 | 2447.535 | M33197    | 972.771   | 752.49    | NM_000836 | 1578.939  | 1343.342  |

|           |          |          |            |           |           |           |           |           |
|-----------|----------|----------|------------|-----------|-----------|-----------|-----------|-----------|
| AF075025  | 2804.875 | 3292.28  | M33197     | 58375.664 | 55207.949 | NM_006862 | 1539.492  | 1667.599  |
| AF088008  | 3310.529 | 3061.548 | AK001083   | 1849.55   | 1613.647  | NM_017901 | 3888.096  | 4494.145  |
| AK023528  | 772.83   | 748.103  | AK000185   | 1919.489  | 1604.538  | NM_004272 | 5529.157  | 7322.414  |
| AK023043  | 3780.581 | 2102.468 | NM_017962  | 1108.274  | 997.132   | AK023582  | 2492.137  | 1618.364  |
| M33197    | 64690.26 | 61997.16 | AK027227   | 463.735   | 318.651   | NM_000358 | 3740.498  | 5174.413  |
| AF147349  | 22795.68 | 24326.33 | NM_017834  | 954.467   | 809.391   | NM_001930 | 27241.064 | 32360.627 |
| AL050346  | 3656.905 | 4032.163 | AK000865   | 1239.507  | 1125.475  | AK025270  | 3152.716  | 2654.689  |
| AK001520  | 10659.9  | 11073.49 | M33197     | 68695.141 | 66207.781 | NM_001564 | 7740.794  | 8603.236  |
| AK021731  | 1186.393 | 990.208  | AK024779   | 1298.129  | 974.42    | M33197    | 61829.324 | 62437.754 |
| D90070    | 15960.53 | 13185.19 | AK024406   | 1613.624  | 1845.777  | AF263537  | 16385.316 | 13238.543 |
| M33197    | 57853.19 | 53838.76 | AK024568   | 11329.048 | 12849.972 | NM_000188 | 3136.03   | 3178.687  |
| AF086179  | 2861.112 | 2640.291 | NM_018381  | 1031.933  | 707.718   | AL050050  | 4283.356  | 2472.83   |
| AK025807  | 6256.708 | 8714.524 | AK022769   | 452.552   | 325.837   | NM_005256 | 2148.47   | 2007.747  |
| AK022478  | 1134.216 | 1359.851 | M33197     | 63586.617 | 64340.516 | NM_004690 | 3156.042  | 3089.669  |
| M33197    | 62870.63 | 59297.13 | AK026277   | 16104.078 | 9691.077  | NM_003252 | 15430.124 | 16460.906 |
| AK025266  | 8851.286 | 8934.304 | U10509     | 1868.255  | 1810.212  | NM_001228 | 6648.082  | 7716.868  |
| AK001843  | 8067.893 | 7699.366 | NM_007165  | 32687.871 | 18192.273 | AK026607  | 1311.03   | 943.418   |
| AK000548  | 59691.18 | 53579.1  | NM_014018  | 6372.246  | 5261.083  | NM_016561 | 49425.508 | 54750.742 |
| NM_003920 | 16294.86 | 18266.7  | AF085956   | 4015.017  | 3627.899  | NM_014245 | 52837.172 | 61231.961 |
| NM_004787 | 7146.491 | 5534.908 | NM_019116  | 1919.496  | 1368.8    | M33197    | 62044.684 | 63697.871 |
| AF087984  | 8782.291 | 7912.846 | AF147318   | 1533      | 1227.135  | L36531    | 1246.347  | 1243.983  |
| AF009302  | 3255.611 | 4393.987 | unknown (S | 1146.769  | 973.975   | AL110226  | 62695.664 | 66927.422 |
| M33197    | 64684.13 | 58234.01 | M33197     | 59930.117 | 61901.047 | AB046822  | 2232.048  | 2657.682  |
| AK022273  | 1471.439 | 1021.239 | AL137556   | 2120.678  | 2669.847  | AK024809  | 1096.231  | 1078.774  |
| AK024271  | 2936.402 | 3163.394 | NM_014696  | 10305.379 | 10417.271 | NM_000308 | 8894.416  | 6147.571  |
| AK021650  | 3536.916 | 2830.87  | AL359055   | 2234.252  | 3050.963  | X69636    | 5643.366  | 6207.585  |
| AL050210  | 3399.689 | 3778.509 | NM_014908  | 4503.204  | 5078.674  | NM_004173 | 32522.658 | 39363.035 |
| L37699    | 2629.707 | 2857.94  | AF086125   | 1139.113  | 645.411   | NM_013974 | 4379.022  | 6380.012  |
| M33197    | 67607.91 | 66680.26 | AK023547   | 743.379   | 437.5     | NM_017547 | 7796.767  | 6865.899  |
| AL050173  | 2100.97  | 1254.851 | U67847     | 1783.668  | 1432.005  | NM_003983 | 12229.003 | 11451.513 |
| D80002    | 2695.695 | 2903.093 | AL137321   | 4944.484  | 4228.887  | AK023708  | 1900.347  | 1817.521  |
| U17637    | 380.779  | 1380.152 | M33197     | 60681.836 | 52239.961 | NM_002108 | 1881.409  | 1845.178  |
| AF207831  | 2089.581 | 1942.669 | AK024207   | 3250.915  | 2003.058  | M33197    | 63220.605 | 62233.758 |
| AK023174  | 1675.326 | 3018.06  | AK021843   | 1495.169  | 965.091   | NM_018464 | 46044.961 | 34589.871 |
| NM_003548 | 1384.739 | 1414.062 | AF075025   | 2349.928  | 1671.413  | D43948    | 6061.281  | 4508.04   |
| M33197    | 64289.95 | 65852.78 | AF116623   | 525.134   | 421.563   | NM_012310 | 15655.728 | 13625.567 |
| NM_018272 | 1009.139 | 1309.54  | AF088008   | 1863.266  | 1740.637  | BE410824  | 1074.177  | 1514.336  |
| CY3Cy5    | 4689.383 | 214.032  | AK023528   | 835.599   | 848.578   | BF382116  | 13933.195 | 14469.712 |
| R19938    | 15898.54 | 11314.09 | AK023043   | 1741.55   | 2034.85   | NM_003193 | 19032.422 | 18822.174 |
| N94487    | 4242.236 | 3162.794 | M33197     | 61158.855 | 61302.367 | AK055825  | 62444.496 | 70549.258 |
| AI886795  | 8824.227 | 7414.023 | AF147349   | 10692.522 | 8860.131  | M33197    | 62214.391 | 65274.324 |
| D10495    | 1804.605 | 1541.633 | AL050346   | 22525.855 | 17163.688 | AF113216  | 2232.411  | 2490.643  |
| BF344679  | 2939.651 | 2790.42  | AK001520   | 5499.138  | 5743.598  | AL137421  | 63051.719 | 58326.977 |
| U87939    | 769.839  | 1394.009 | AK021731   | 604.275   | 873.994   | M33197    | 65208.5   | 62738.445 |
| U86961    | 1390.041 | 1626.586 | D90070     | 7672.79   | 9559.396  | NM_007241 | 4397.156  | 3464.249  |
| AK094237  | 5335.911 | 4316.96  | Y12235     | 719.809   | 1104.339  | NM_000124 | 1746.364  | 1926.79   |
| L07592    | 1339.89  | 1345.34  | M33197     | 60391.48  | 52521.242 | NM_017996 | 10706.565 | 10211.996 |
| NM_006981 | 1998.32  | 1732.03  | AF086179   | 1621.339  | 2333.079  | NM_014517 | 5547.22   | 5440.644  |
| SR2       | 55892.75 | 53020.55 | AK025807   | 4158.898  | 4103.061  | NM_005466 | 7776.562  | 5977.353  |
| SR4       | 21799.6  | 15970    | M33197     | 57202.961 | 61150.559 | NM_004269 | 12784.615 | 9212.759  |
| SR6       | 3029.268 | 1807.99  | AK025266   | 4691.872  | 5360.9    | NM_003409 | 2775.21   | 2209.03   |
| SR8       | 10669.32 | 22411.31 | AK001843   | 3894.9    | 3377.945  | M33197    | 65381.434 | 63148.977 |
| SR10      | 35176.84 | 9898.54  | AK000548   | 50985.309 | 36858.613 | D31765    | 3864.947  | 3653.354  |

|           |          |          |           |           |           |           |           |           |
|-----------|----------|----------|-----------|-----------|-----------|-----------|-----------|-----------|
| CY3Cy5    | 5821.475 | 310.873  | NM_00392C | 17096.572 | 12807.305 | NM_006107 | 16543.4   | 12530.028 |
| M33197    | 67341.96 | 63637.71 | NM_004787 | 9401.824  | 6891.206  | NM_004175 | 2872.467  | 2934.775  |
| NM_007369 | 1505.508 | 1470.483 | AF087984  | 4895.088  | 3706.026  | AF288288  | 44056.926 | 49780.426 |
| NM_014776 | 1625.469 | 1470.326 | AF009302  | 1318.09   | 586.402   | NM_017646 | 13102.466 | 15584.418 |
| NM_00648C | 3500.261 | 3354.984 | M33197    | 58037.32  | 58373.25  | AL050368  | 3263.047  | 3519.037  |
| NM_007223 | 26202.4  | 22223.73 | AK022273  | 4804.007  | 3988.784  | NM_003092 | 35625.152 | 33202.316 |
| NM_000145 | 1307.787 | 1373.432 | NM_015882 | 1336.176  | 748.708   | M33197    | 61148.945 | 62002.852 |
| NM_000871 | 663.837  | 539.464  | AK024271  | 1458.009  | 1327.994  | NM_005861 | 5975.882  | 7779.99   |
| M33197    | 67007.99 | 69549.66 | AK021650  | 6406.812  | 5626.909  | NM_018848 | 6320.79   | 8505.293  |
| NM_018968 | 889.925  | 932.718  | AL050210  | 3325      | 3242.789  | NM_00376C | 7478.182  | 11135.792 |
| AF086924  | 24999.39 | 40994.38 | L37699    | 2269.358  | 2286.58   | AB037759  | 3426.744  | 2792.128  |
| NM_000264 | 1122.229 | 1475.748 | M33197    | 59118.816 | 64067.617 | AK025998  | 5893.71   | 6449.027  |
| AB058740  | 6374.448 | 5805.188 | AL050173  | 1487.878  | 1815.356  | AL080080  | 21460.01  | 22926.314 |
| NM_001888 | 1154.697 | 985.891  | D80002    | 1765.131  | 1611.254  | H75678    | 6558.997  | 4375.516  |
| NM_001154 | 22011.81 | 19894.4  | U17637    | 5923.186  | 5722.688  | NM_002535 | 3010.355  | 2398.63   |
| NM_000175 | 5449.249 | 11623.49 | AF207831  | 1292.599  | 1209.03   | NM_006452 | 33549.48  | 28584.777 |
| NM_015725 | 6579.83  | 8752.551 | AK023174  | 558.747   | 1059.143  | AB002359  | 3513.501  | 2363.746  |
| R61452    | 4078.575 | 3312.144 | NM_003548 | 844.484   | 1395.478  | M33197    | 12406.786 | 8130.286  |
| NM_012455 | 9219.744 | 7521.086 | M33197    | 59228.418 | 61584.957 | AB007864  | 2371.034  | 2715.768  |
| NM_002806 | 15156.4  | 10464.34 | NM_018272 | 9888.266  | 11279.768 | NM_002198 | 8148.621  | 9318.132  |
| M33197    | 67641.77 | 61696.15 | CY3Cy5    | 2920.839  | 195.472   | AF024693  | 1478.633  | 1451.7    |
| NM_001716 | 1076.897 | 761.43   | R19938    | 8635.115  | 10183.926 | AK025905  | 2885.975  | 2974.835  |
| NM_004951 | 1514.242 | 1005.339 | N94487    | 8659.712  | 8408.402  | AL121733  | 3678.337  | 3915.648  |
| NM_006564 | 3801.328 | 4470.506 | AI886795  | 6039.214  | 5680.459  | BE958072  | 1671.838  | 2157.053  |
| NM_004802 | 2200.153 | 2722.271 | D10495    | 1080.627  | 1019.246  | M33197    | 58530.16  | 54788.551 |
| M33197    | 66126.86 | 66308.4  | BF344679  | 1541.016  | 1605.974  | NM_017532 | 1470.438  | 1787.126  |
| NM_000074 | 4643.021 | 5029.042 | M36634    | 1164.175  | 1385.143  | NM_01448C | 3820.702  | 5562.589  |
| BF434335  | 24146.64 | 23704.41 | M14156    | 6115.363  | 6337.033  | NM_005938 | 1189.824  | 1676.776  |
| M57627    | 871.771  | 812.512  | U87939    | 1018.812  | 680.469   | NM_014169 | 15022.721 | 18119.359 |
| M33197    | 64661.52 | 65091.09 | U86961    | 1423.265  | 1531.767  | NM_004964 | 50620.727 | 52617.242 |
| NM_003192 | 5673.727 | 4878.661 | AK094237  | 3824.087  | 4896.604  | AL117497  | 3319.664  | 3368.541  |
| NM_018449 | 4934.867 | 4571.581 | L07592    | 1121.679  | 1076.453  | AF075016  | 1391.39   | 1593.397  |
| AF086129  | 1229.843 | 1333.039 | NM_006981 | 1430.872  | 1788.037  | AK023612  | 1537.66   | 1389.704  |
| NM_014458 | 3472.229 | 4081.72  | SR2       | 58249.047 | 52386.613 | AF147437  | 2632.681  | 1793.26   |
| AF235049  | 4085.874 | 3915.45  | SR4       | 14515.591 | 14358.332 | M33197    | 66038.805 | 63261.863 |
| NM_005164 | 815.458  | 780.94   | SR6       | 2119.411  | 2037.285  | AF147360  | 1563.97   | 1087.31   |
| NM_001995 | 2743.273 | 2993.654 | SR8       | 7887.035  | 26632.063 | AL137269  | 19266.461 | 14026.516 |
| NM_000183 | 13762.07 | 11238.25 | SR10      | 29836.99  | 11262.194 | AK021983  | 4375.701  | 2982.579  |
| AY004175  | 3070.388 | 1826.204 | CY3Cy5    | 3870.508  | 350.92    | Y11681    | 17224.715 | 12367.705 |
| M33197    | 66952.49 | 62620.78 | M33197    | 64864.117 | 66891.656 | AL110135  | 40308.902 | 17383.686 |
| NM_012327 | 2099.667 | 1257.136 | NM_007369 | 1877.498  | 2062.403  | NM_006993 | 35519.527 | 26231.58  |
| NM_000904 | 7079.483 | 5707.364 | NM_014776 | 2746.501  | 2448.95   | NM_002336 | 1411.745  | 1373.574  |
| NM_016048 | 9242.794 | 8523.645 | NM_00648C | 25549.406 | 26355.896 | M33197    | 67795.141 | 63779.719 |
| NM_000375 | 7775.856 | 9904.276 | NM_007223 | 51894.609 | 48278.879 | AF086429  | 3342.782  | 1916.572  |
| NM_018849 | 2087.828 | 1984.854 | NM_000145 | 1086.065  | 1032.151  | NM_01906C | 1050.222  | 645.106   |
| NM_016601 | 838.656  | 983.758  | AF030107  | 1586.023  | 2094.426  | AF086302  | 4001.785  | 3330.564  |
| NM_017905 | 6684.597 | 5687.511 | NM_000871 | 924.62    | 1049.579  | AF086439  | 1942.548  | 1719.999  |
| NM_006815 | 31857.26 | 38342.13 | M33197    | 60342.77  | 62738.07  | M33197    | 64764.727 | 62231.59  |
| NM_001663 | 4798.616 | 5112.537 | NM_018968 | 1012.324  | 1140.763  | AF038171  | 1810.376  | 1690.403  |
| NM_004218 | 14679.21 | 17373.17 | AF086924  | 62034.355 | 60294.965 | AF052160  | 1231.346  | 1556.899  |
| NM_01653C | 11070.07 | 12333.62 | NM_000264 | 1013.914  | 1093.688  | AK026512  | 2369.967  | 1800.169  |
| NM_014804 | 1855.424 | 2295.867 | AB058740  | 11453.699 | 13294.211 | M33197    | 63907.438 | 63359.207 |
| L40520    | 6865.831 | 5534.507 | NM_004392 | 1196.124  | 1236.645  | AF085969  | 1106.24   | 842.489   |

|           |          |          |           |           |           |           |           |           |
|-----------|----------|----------|-----------|-----------|-----------|-----------|-----------|-----------|
| NM_002633 | 13843.02 | 14013.08 | M33197    | 64470.824 | 69995.984 | AF144233  | 4990.227  | 5092.651  |
| M33197    | 63854.73 | 56858.59 | NM_001154 | 12957.258 | 18974.23  | AK022986  | 822.774   | 558.406   |
| NM_002878 | 3706.486 | 3064.924 | NM_001819 | 1657.524  | 1510.93   | AF085975  | 3988.596  | 2823.673  |
| NM_017723 | 1818.107 | 1969.847 | NM_016938 | 1326.476  | 1337.278  | AF075103  | 2012.125  | 950.402   |
| AK022922  | 3392.969 | 2431.813 | NM_001993 | 1096.355  | 1048.311  | M33197    | 67273.828 | 71674.711 |
| NM_006462 | 8300.294 | 8484.229 | NM_000175 | 10365.685 | 6435.708  | AL137390  | 4040.876  | 4230.762  |
| NM_000400 | 9327.765 | 9197.066 | NM_015725 | 12764.742 | 12643.227 | AL137611  | 11385.081 | 11161.639 |
| M33197    | 64131.33 | 67196.16 | R61452    | 2509.725  | 4207.82   | AL359566  | 50453.199 | 47901.949 |
| NM_002613 | 4684.971 | 4114.794 | NM_012455 | 4946.388  | 6221.133  | AL133110  | 1073.851  | 901.153   |
| NM_004419 | 2239.98  | 2233.25  | NM_002806 | 8114.993  | 10719.095 | AL137427  | 5517.992  | 5897.014  |
| NM_018650 | 1677.474 | 1974.607 | M33197    | 63912.156 | 64036.809 | AL157460  | 6434.494  | 6679.963  |
| AK026945  | 30996.27 | 26388.82 | NM_001716 | 949.56    | 1365.808  | AL359595  | 1339.979  | 1224.682  |
| NM_014369 | 1446.801 | 1576.33  | NM_002030 | 462.701   | 555.417   | M33197    | 66777.766 | 64086.57  |
| M33197    | 67319.45 | 63722.43 | NM_006073 | 528.636   | 581.773   | AK026718  | 3023.791  | 2531.056  |
| NM_001398 | 25352.02 | 26753    | NM_006564 | 5434.108  | 5886.266  | AK022035  | 8536.757  | 4772.582  |
| AB050049  | 8056.247 | 8181.36  | NM_004802 | 1764.23   | 2236.473  | M33197    | 62644.07  | 60232.93  |
| J05125    | 1114.129 | 1489.673 | M33197    | 58200.52  | 63750.57  | NM_004337 | 4282.588  | 2342.895  |
| NM_001993 | 595.06   | 527.829  | NM_000074 | 9251.435  | 8964.823  | AK022141  | 1543.681  | 1774.215  |
| NM_000175 | 5703.626 | 9702.742 | M57627    | 993.057   | 1274.811  | AK023942  | 48782.051 | 48073.148 |
| NM_015725 | 5878.355 | 4666.319 | NM_002993 | 2073.382  | 1770.638  | M33197    | 67400.352 | 67347.063 |
| R61452    | 1359.122 | 1021.866 | AK026946  | 1836.548  | 1811.221  | AK022046  | 802.695   | 917.001   |
| N94487    | 2932.109 | 2162.083 | M33197    | 57597.652 | 62295.512 | AK027207  | 2568.219  | 1877.317  |
| AI886795  | 8111.022 | 7458.102 | NM_003192 | 4377.814  | 4461.493  | AJ227892  | 4626.234  | 2429.149  |
| D10495    | 1180.274 | 1475.863 | NM_014458 | 6775.468  | 8172.768  | M33197    | 64805.504 | 57609.07  |
| BF344679  | 2416.86  | 2499.405 | AF235049  | 5396.642  | 9128.397  | AK022013  | 2410.244  | 1645.381  |
| U87939    | 1582.757 | 1151.487 | NM_005164 | 526.245   | 721.808   | AK022155  | 5640.851  | 4406.229  |
| U86961    | 1536.968 | 1342.297 | NM_001995 | 2081.922  | 2056.616  | AK022288  | 3191.883  | 2792.674  |
| AK094237  | 5374.142 | 4588.224 | NM_000183 | 8601.444  | 9015.926  | AK021916  | 1461.272  | 1301.386  |
| L07592    | 869.71   | 810.179  | AY004175  | 2676.517  | 2949.64   | AK024201  | 1320.928  | 1602.685  |
| NM_006981 | 1188.161 | 1029.181 | M33197    | 64388.645 | 63430.02  | AK022174  | 978.529   | 937.893   |
| M33197    | 66431.62 | 67306.26 | NM_012327 | 2853.482  | 4264.411  | AK022331  | 1392.572  | 1586.1    |
| AK027244  | 2578.884 | 2802.725 | NM_000904 | 4891.727  | 6825.614  | M33197    | 65057.848 | 61979.797 |
| NM_018449 | 6152.501 | 5213.785 | NM_016048 | 6137.488  | 8962.944  | AK026878  | 1308.488  | 1208.392  |
| AF086129  | 1986.712 | 1625.315 | NM_000375 | 8322.672  | 8982.587  | AK021589  | 1093.267  | 998.745   |
| NM_014458 | 4308.055 | 3836.088 | NM_018849 | 7546.198  | 8269.935  | D17152    | 23119.598 | 19916.516 |
| M33197    | 67150.98 | 61047.75 | AJ000096  | 644.717   | 817.007   | AK024464  | 28171.156 | 31290.818 |
| NM_007369 | 1086.808 | 1255.207 | NM_002236 | 3286.042  | 3704.696  | AK026748  | 998.118   | 1389.764  |
| NM_014776 | 1848.354 | 1766.895 | NM_012069 | 4399.782  | 5438.748  | AK023638  | 1306.769  | 1160.081  |
| NM_006480 | 3000.145 | 4337.201 | NM_001689 | 58768.445 | 61270.879 | M33197    | 2404.847  | 1396.27   |
| NM_007223 | 23807.55 | 22967.73 | NM_016601 | 1706.195  | 2249.743  | AK025423  | 5206.3    | 4737.203  |
| M33197    | 65891.63 | 58781.72 | NM_017905 | 13770.906 | 22075.34  | AL050022  | 1134.714  | 1973.817  |
| NM_018968 | 1101.464 | 1023.634 | NM_001663 | 5890.072  | 9898.745  | M33197    | 67411.992 | 66624.281 |
| AF086924  | 22015.16 | 24285.2  | NM_004218 | 15139.652 | 18834.344 | AL080134  | 814.914   | 621.682   |
| NM_000264 | 959.84   | 1206.51  | NM_016530 | 10251.354 | 11934.664 | AL049846  | 1508.541  | 1564.763  |
| AB058740  | 5422.056 | 4992.287 | NM_014804 | 1878.067  | 2273.318  | AK024161  | 2148.013  | 1909.595  |
| NM_001888 | 739.831  | 902.091  | L40520    | 3950.062  | 4060.204  | AK021682  | 24009.492 | 24854.008 |
| M33197    | 66928.71 | 57789.38 | NM_002633 | 14228.193 | 11142.931 | AJ012500  | 5756.647  | 6844.403  |
| NM_001154 | 22987.1  | 20266.07 | M33197    | 62017.59  | 61468.492 | AF085833  | 1485.946  | 1624.948  |
| NM_001663 | 6245.785 | 6158.454 | NM_002878 | 6690.774  | 7322.344  | L19368    | 1117.365  | 1554.588  |
| NM_004218 | 17932.49 | 16934.44 | NM_002412 | 416.329   | 790.591   | U00944    | 1601.735  | 1483.231  |
| NM_016530 | 11138.65 | 11478.13 | NM_017723 | 2983.926  | 3381.923  | BC035058  | 8648.044  | 7865.239  |
| NM_014804 | 1911.073 | 1959.755 | AK022922  | 2861.73   | 5891.052  | X57566    | 14357.293 | 7093.544  |
| NM_012455 | 8268.183 | 7260.211 | NM_006462 | 5989.09   | 6528.898  | M33197    | 66698.109 | 64915.082 |



|           |          |          |           |           |           |           |           |           |
|-----------|----------|----------|-----------|-----------|-----------|-----------|-----------|-----------|
| NM_00280E | 14159.76 | 10787.5  | NM_00040C | 29167.744 | 32171.002 | NM_01861E | 17054.418 | 14941.277 |
| M33197    | 66698.81 | 61967.46 | NM_00261E | 3678.481  | 4856.58   | AK023809  | 4287.719  | 3046.376  |
| NM_00171E | 1035.897 | 921.889  | NM_00441E | 5763.785  | 7225.427  | M87943    | 62943.527 | 62821.473 |
| NM_00480E | 1972.498 | 1945.825 | U47635    | 7277.57   | 10415.049 | AL360137  | 2780.892  | 2931.743  |
| M33197    | 64872.07 | 64253.67 | NM_01865C | 2373.543  | 2851.251  | U28131    | 67108.773 | 73154.422 |
| NM_000074 | 4632.299 | 4381.819 | AK026945  | 18987.229 | 45269.66  | AY007106  | 6705.125  | 8280.378  |
| BF434335  | 23529.63 | 19443.84 | M33197    | 64262.145 | 68596.883 | M33197    | 65190.254 | 63393.297 |
| M57627    | 972.315  | 933.812  | NM_00139E | 32050.543 | 33592.113 | AF048848  | 906.895   | 1006.538  |
| AK026946  | 2466.15  | 2843.708 | AB050049  | 5596.864  | 6847.354  | AL117236  | 1109.699  | 793.573   |
| M33197    | 63046.35 | 64628.76 | J05125    | 1086.082  | 1249.615  | AL049299  | 955.317   | 1535.748  |
| NM_00319E | 6140.034 | 7343.349 | NM_00199E | 988.742   | 1085.97   | NM_00608E | 60707.746 | 55933.91  |
| NM_01436E | 1827.557 | 2272.864 | NM_00017E | 8430.898  | 4870.437  | AF130086  | 7771.163  | 6075.134  |
| M33197    | 66175.6  | 70602.66 | NM_01572E | 9876.727  | 9724.068  | AK023858  | 21225.025 | 16765.861 |
| NM_00139E | 28047.31 | 33859.72 | R61452    | 1211.64   | 1422.615  | M33197    | 67310.477 | 67512.359 |
| AB050049  | 8820.483 | 7322.434 | N94487    | 7783.296  | 8469.164  | AF250920  | 3666.594  | 2863.703  |
| J05125    | 1320.253 | 1224.948 | AI886795  | 5794.226  | 6210.579  | NM_01773E | 5479.287  | 5169.51   |
| NM_005164 | 643.144  | 1057.248 | D10495    | 1020.543  | 885.408   | NM_01404E | 21023.365 | 16257.574 |
| NM_00199E | 2728.231 | 3470.999 | BF344679  | 1670.281  | 2365.585  | M33197    | 61403.207 | 66900.641 |
| NM_00018E | 12858.65 | 13647.02 | M36634    | 1580.816  | 1775.565  | AF317550  | 2403.683  | 2258.451  |
| AY004175  | 2979.624 | 2835.051 | M14156    | 9444.061  | 8434.158  | AK025416  | 1718.735  | 1556.007  |
| M33197    | 65579.69 | 65680.73 | U87939    | 980.567   | 998.976   | AK022165  | 1532.562  | 1554.018  |
| NM_012327 | 2850.194 | 2285.558 | U47924    | 778.902   | 1019.941  | AF090883  | 1313.978  | 1440.019  |
| NM_000904 | 8165.411 | 8566.954 | NM_005191 | 670.213   | 1505.724  | U23860    | 1400.158  | 1232.721  |
| NM_01604E | 9409.607 | 8684.201 | AK094237  | 3346.629  | 6291.794  | M33197    | 63963.531 | 61343.617 |
| NM_00037E | 7835.284 | 10132.97 | AK056794  | 747.979   | 1379.216  | AL049263  | 1045.691  | 1069.2    |
| NM_00026E | 385.442  | 1099.192 | L07592    | 1634.949  | 2916.96   | AK022372  | 4522.693  | 5215.101  |
| NM_01884E | 1750.726 | 2060.407 | M33197    | 62386.078 | 63534.707 | AJ227863  | 959.819   | 1245.935  |
| M33197    | 64918.65 | 64506.55 | AK027244  | 1585.551  | 1989.938  | NM_01591E | 1335.079  | 1163.095  |
| AF279890  | 631.563  | 689.479  | NM_01844E | 4375.894  | 4646.722  | NM_00352C | 1650.392  | 1368.984  |
| NM_00168E | 51995.87 | 60031.6  | AF086129  | 1102.062  | 1315.788  | AL137380  | 953.892   | 1152.169  |
| NM_016601 | 1108.556 | 1344.028 | NM_01445E | 4832.068  | 4986.032  | M33197    | 62927.387 | 66386.703 |
| NM_006981 | 2063.462 | 1820.883 | M33197    | 65127.75  | 64887.113 | AL137658  | 42786.695 | 46997.359 |
| M33197    | 65475.15 | 65942.47 | NM_00736E | 1950.165  | 2201.62   | D16888    | 2428.535  | 2495.932  |
| AK027244  | 2448.761 | 2427.636 | NM_01477E | 2870.626  | 2745.414  | U79277    | 863.657   | 830.071   |
| L40520    | 6628.217 | 6448.783 | NM_00648C | 32255.672 | 37841.793 | AF068298  | 8625.183  | 10063.936 |
| NM_00263E | 14554.13 | 19981.78 | NM_00722E | 53863.516 | 56321.492 | Z70770    | 2884.8    | 3332.612  |
| M33197    | 63647.35 | 57671.27 | NM_00014E | 1223.216  | 1261.439  | AJ227900  | 7447.188  | 7589.978  |
| NM_00287E | 4185.206 | 4092.937 | AF030107  | 1684.189  | 1977.909  | AK023242  | 1663.9    | 1754.495  |
| NM_00241E | 1111.799 | 879.461  | NM_000871 | 1049.115  | 1412.07   | M33197    | 66858.328 | 68296.547 |
| NM_01772E | 1627.698 | 1881.813 | M33197    | 60999.164 | 62857.543 | CY3Cy5    | 15681.859 | 1477.644  |
| AK022922  | 3379.399 | 2652.328 | NM_01896E | 1538.903  | 2134.924  | Y10802    | 997.643   | 757.623   |
| NM_00646E | 7083.374 | 8516.749 | NM_000264 | 1243.044  | 1885.154  | AI417775  | 842.048   | 1134.55   |
| AK024750  | 2158.5   | 2513.159 | NM_00188E | 1153.569  | 1303.188  | BI762229  | 32139.795 | 34867.121 |
| NM_00040C | 8764.856 | 10702.81 | NM_00439E | 705.07    | 899.879   | BG618320  | 7829.747  | 7695.034  |
| M33197    | 62810.58 | 59129.5  | M33197    | 63416.926 | 70699.148 | Y00787    | 2094.347  | 2143.9    |
| NM_00261E | 3883.014 | 2962.273 | NM_001154 | 15276.308 | 26065.467 | NM_00727E | 6326.547  | 5262.052  |
| NM_00441E | 2050.831 | 1983.174 | NM_00181E | 1790.853  | 2258.889  | N34462    | 3484.358  | 3498.849  |
| U47635    | 9043.475 | 8344.361 | NM_01693E | 771.83    | 1172.628  | AI658778  | 3049.173  | 3244.902  |
| NM_01865C | 2029.158 | 2099.234 | NM_00681E | 28197.75  | 21772.979 | L19067    | 10802.385 | 11259.934 |
| NM_00188E | 1256.38  | 1211.318 | NM_00166E | 4732.554  | 3578.792  | Z48482    | 697.015   | 1467.841  |
| M33197    | 63999.4  | 65308.73 | NM_00421E | 12330.959 | 10920.291 | W60413    | 997.045   | 1194.405  |
| NM_001154 | 22989.9  | 19096.3  | NM_01653C | 8604.585  | 7947.182  | BI823365  | 5882.552  | 5780.869  |
| NM_00017E | 5577.794 | 12107.42 | NM_014804 | 1839.688  | 1551.883  | X06318    | 10880.804 | 13175.166 |

|           |          |          |           |           |           |           |           |           |
|-----------|----------|----------|-----------|-----------|-----------|-----------|-----------|-----------|
| NM_015725 | 5965.732 | 6321.125 | NM_012455 | 5982.954  | 7103.301  | AL834159  | 5164.284  | 4998.922  |
| R61452    | 2604.012 | 2485.011 | NM_002806 | 9346.64   | 12119.019 | NM_000164 | 29217.396 | 44503.176 |
| R19938    | 13124.44 | 10916.54 | M33197    | 64386.66  | 63405.18  | SR5       | 14499.425 | 15062.498 |
| N94487    | 3075.897 | 2926.405 | NM_001716 | 1275.533  | 1800.611  | SR7       | 12264.925 | 53519.695 |
| AI886795  | 8810.188 | 9708.039 | NM_002030 | 538.573   | 787.403   | SR9       | 42350.805 | 6028.267  |
| D10495    | 1465.71  | 1811.694 | NM_006073 | 694.539   | 640.854   | CY3Cy5    | 10968.135 | 266.169   |
| BF344679  | 2815.588 | 2892.606 | NM_006564 | 6520.855  | 7839.522  | NM_003682 | 1678.248  | 1831.088  |
| U87939    | 798.632  | 1088.326 | NM_004802 | 2269.313  | 2437.12   | NM_002531 | 913.359   | 585.833   |
| U86961    | 1482.403 | 1967.312 | NM_000074 | 8199.065  | 8780.626  | NM_006314 | 16320.803 | 17522.773 |
| AK094237  | 4127.518 | 3251.341 | BF434335  | 38712.23  | 33882.984 | NM_001782 | 3875.932  | 2749.12   |
| L07592    | 1041.909 | 1053.964 | M57627    | 723.391   | 1089.887  | NM_000797 | 7184.368  | 7752.068  |
| BF434335  | 27354.42 | 25811.81 | NM_002993 | 2349.423  | 2594.85   | NM_014927 | 1476.438  | 1319.056  |
| M57627    | 1481.136 | 1238.682 | AK026946  | 2168.359  | 3931.948  | NM_016293 | 16967.031 | 17010.705 |
| AK026946  | 2894.447 | 2832.386 | M33197    | 62232.598 | 65374.84  | AF217525  | 706.366   | 854.266   |
| M33197    | 64411.35 | 57103.29 | NM_003192 | 5270.583  | 6939.758  | AL080148  | 8706.835  | 8554.705  |
| NM_003192 | 5764.226 | 5882.541 | NM_014369 | 1239.906  | 780.316   | NM_006731 | 2441.504  | 2867.053  |
| NM_018449 | 5927.843 | 5222.205 | M33197    | 61098.051 | 61091.383 | NM_018487 | 1106.597  | 1557.656  |
| AF086129  | 1072.14  | 1477.856 | NM_001398 | 26578.52  | 17449.58  | NM_020134 | 1646.127  | 1784.072  |
| D79994    | 461.993  | 462.215  | AB050049  | 4884.714  | 4112.505  | NM_014061 | 1300.969  | 1516.933  |
| NM_014458 | 3921.91  | 4288.048 | J05125    | 1137.262  | 1051.052  | BC034395  | 1271.648  | 1308.995  |
| AF235049  | 3980.328 | 3700.586 | NM_005164 | 560.639   | 446.24    | NM_002479 | 1325.416  | 1336.379  |
| NM_007369 | 996.685  | 1734.26  | NM_001995 | 2612.82   | 1505.997  | NM_000348 | 7054.945  | 6920.902  |
| NM_014776 | 1757.89  | 1667.053 | NM_000183 | 9945.913  | 8320.876  | NM_005059 | 1972.701  | 2081.74   |
| NM_006480 | 3051.609 | 5230.554 | AY004175  | 3600.268  | 3147.833  | NM_004950 | 3151.941  | 3677.115  |
| NM_007223 | 23726.11 | 22927.97 | M33197    | 60125.199 | 61258.98  | NM_000724 | 7412.428  | 8410.131  |
| NM_000145 | 1356.04  | 1632.98  | NM_012327 | 4019.816  | 4354.099  | NM_002557 | 13067.837 | 16255.499 |
| AF030107  | 1354.076 | 1862.332 | NM_000904 | 5779.326  | 6568.836  | BE728156  | 679.171   | 649.025   |
| M33197    | 69453.97 | 63116.86 | NM_016048 | 6676.458  | 8842.589  | NM_005662 | 59944.77  | 58512.574 |
| NM_018968 | 748.384  | 781.486  | NM_000375 | 9003.938  | 8052.453  | NM_003060 | 1287.2    | 1616.982  |
| NM_000264 | 1249.293 | 1280.044 | NM_000265 | 772.066   | 943.565   | AK021489  | 39006.813 | 47878.988 |
| AB058740  | 5017.663 | 4337.524 | NM_018849 | 7634.115  | 7774.535  | NM_004525 | 1055.136  | 1154.355  |
| NM_002236 | 620.196  | 1744.738 | AJ000096  | 838.182   | 560.917   | NM_003895 | 1781.437  | 2075.035  |
| NM_012069 | 1280.43  | 1258.347 | M33197    | 58047.703 | 61898.09  | NM_004317 | 13539.26  | 13184.637 |
| NM_001689 | 58709.32 | 55453.97 | M16796    | 601.055   | 817.927   | NM_014645 | 5076.427  | 5189.401  |
| NM_017905 | 8722.134 | 7800.569 | AF279890  | 4317.123  | 4691.415  | NM_014708 | 5139.828  | 6790.718  |
| M33197    | 64150.9  | 61479.6  | NM_002236 | 4749.34   | 4218.205  | NM_003693 | 2806.082  | 2979.328  |
| NM_006815 | 35364.98 | 44748.16 | NM_012069 | 4514.468  | 6834.003  | NM_000356 | 40380.547 | 42414.387 |
| NM_001663 | 5802.149 | 7305.747 | NM_001689 | 60811.863 | 63437.273 | NM_018134 | 58918.523 | 65803.258 |
| NM_004218 | 18196.62 | 20145.31 | NM_016601 | 1930.296  | 2291.133  | NM_013247 | 15789.248 | 12036.594 |
| NM_016530 | 12365.92 | 13612.33 | NM_017905 | 14766.808 | 19730.332 | NM_006770 | 4288.194  | 5581.516  |
| NM_014804 | 2226.628 | 2080.13  | NM_006981 | 1308.022  | 1181.792  | BE394704  | 1283.721  | 1478.981  |
| NM_002806 | 16262.6  | 15290.41 | M33197    | 58775.246 | 60493.586 | NM_004703 | 5681.021  | 6557.755  |
| M33197    | 66815.28 | 64806.9  | AK027244  | 1524.758  | 915.229   | NM_001512 | 1808.938  | 2849.175  |
| NM_001716 | 1172.277 | 1083.473 | L40520    | 4336.774  | 3412.482  | NM_014706 | 13314.32  | 17478.719 |
| NM_006564 | 2965.51  | 3491.843 | NM_002633 | 16123.89  | 9618.207  | AK023172  | 932.608   | 1071.85   |
| NM_004802 | 1937.276 | 1805.785 | M33197    | 62050.664 | 56281.766 | AF139768  | 793.476   | 580.643   |
| NM_000074 | 4850.571 | 4944.753 | NM_002878 | 8795.925  | 7163.889  | AJ001348  | 1379.192  | 1809.033  |
| NM_002613 | 5490.781 | 4725.576 | NM_017723 | 3295.631  | 1638.56   | NM_014007 | 2681.703  | 3318.927  |
| NM_004419 | 2961.385 | 2842.182 | AK022922  | 2510.406  | 2026.925  | AB033006  | 5832.694  | 6806.062  |
| U47635    | 11695.76 | 10210.14 | NM_006462 | 6747.854  | 5227.343  | AF020314  | 3865.49   | 3194.732  |
| NM_018650 | 2323.215 | 2455.873 | AK024750  | 8562.266  | 5487.925  | NM_016332 | 17313.141 | 17611.117 |
| AK026945  | 38051.87 | 33045.05 | NM_000400 | 33926.957 | 33487.773 | AK023936  | 825.197   | 916.187   |
| NM_002828 | 8652.773 | 9501.492 | M33197    | 61095.941 | 61805.848 | NM_006457 | 4683.106  | 4849.087  |

|           |          |          |           |           |           |           |           |           |
|-----------|----------|----------|-----------|-----------|-----------|-----------|-----------|-----------|
| NM_01436E | 1513.626 | 2372.731 | NM_00261E | 5306.931  | 5897.314  | AF000381  | 9543.276  | 9179.688  |
| M33197    | 65930.56 | 67634.48 | NM_00441E | 8873.533  | 9821.823  | NM_01807E | 773.052   | 1058.768  |
| NM_00139E | 29595.33 | 42205.95 | U47635    | 9474.139  | 12517.113 | NM_01210E | 5739.766  | 9164.254  |
| AB050049  | 10033.39 | 10898.86 | NM_01865C | 3669.777  | 6482.7    | S82470    | 7187.739  | 8429.948  |
| J05125    | 1341.706 | 1580.781 | AK026945  | 23726.668 | 50346.965 | AB020695  | 3970.536  | 3470.559  |
| NM_005164 | 1620.058 | 1247.846 | NM_00188E | 1012.256  | 799.172   | AB028982  | 1563.802  | 1485.168  |
| NM_00199E | 3085.815 | 4159.995 | M33197    | 59316.738 | 60282.375 | NM_002004 | 3939.329  | 3977.396  |
| NM_00018E | 14402.03 | 14536.26 | NM_001154 | 11656.237 | 10184.762 | NM_005121 | 2372.834  | 2206.806  |
| AY004175  | 3892.524 | 3977.144 | NM_00181E | 1659.176  | 1513.076  | NM_020221 | 2064.09   | 2195.342  |
| M33197    | 67233.42 | 65789.12 | NM_01693E | 536.279   | 584.387   | NM_000747 | 4729.989  | 5487.435  |
| NM_012327 | 3027.302 | 2857.368 | NM_00199E | 1073.841  | 895.496   | NM_00541E | 6498.009  | 6015.942  |
| NM_000904 | 7374.358 | 8278.078 | NM_00017E | 10360.342 | 3705.398  | AL137708  | 335.654   | 918.52    |
| NM_01604E | 9375.017 | 9282.563 | NM_01572E | 12062.3   | 8640.682  | AJ275973  | 24257.033 | 29559.211 |
| NM_00037E | 7319.681 | 9581.291 | R61452    | 1283.468  | 1049.74   | NM_00649E | 7510.832  | 7550.391  |
| NM_01884E | 2066.714 | 2007.987 | N94487    | 9699.397  | 6248.671  | U76362    | 7322.679  | 9073.294  |
| AJ000096  | 463.43   | 1320.672 | AI886795  | 6283.702  | 5194.173  | AF040248  | 1660.964  | 1503.921  |
| M16796    | 1482.538 | 920.019  | D10495    | 1240.181  | 978.765   | NM_01422E | 2068.019  | 2074.458  |
| BC009993  | 3422.845 | 4362.554 | BF344679  | 1624.613  | 1437.854  | AL832292  | 3984.863  | 7544.509  |
| NM_016824 | 2990.152 | 5366.935 | M36634    | 1468.326  | 964.969   | NM_00304E | 17141.832 | 17025.289 |
| NM_003031 | 7693.567 | 6334.926 | M14156    | 9090.128  | 5035.623  | NM_00261E | 5007.33   | 6012.17   |
| NM_00717C | 2142.745 | 1847.339 | U87939    | 1051.531  | 580.32    | L27479    | 1670.537  | 1630.073  |
| NM_00300E | 2872.813 | 2270.842 | U86961    | 1356.971  | 892.854   | NM_00219E | 1881.426  | 2338.201  |
| M33197    | 64442.04 | 64363.46 | NM_005191 | 871.97    | 772.631   | NM_00138E | 12654.287 | 15286.578 |
| AK027244  | 2877.827 | 3656.89  | AK094237  | 4610.218  | 4238.386  | X76770    | 6239.404  | 5923.906  |
| L40520    | 7673.22  | 6828.973 | L07592    | 1320.549  | 1620.648  | AB037808  | 3419.846  | 3744.725  |
| NM_00263E | 15399.72 | 21706.41 | BF434335  | 28261.678 | 17637.947 | NM_01603E | 7647.977  | 7192.771  |
| M33197    | 64016.47 | 60800.16 | M57627    | 554.164   | 832.48    | Z36821    | 12043.027 | 14008.983 |
| NM_00287E | 4350.41  | 4341.745 | NM_00299E | 2362.109  | 1402.857  | AF289485  | 10677.556 | 9052.152  |
| NM_00241E | 941.129  | 1021.837 | AK026946  | 1704.089  | 761.077   | AF130092  | 2737.862  | 2909.469  |
| NM_01772E | 1572.245 | 1750.944 | M33197    | 57215.262 | 57665.273 | AK024794  | 2840.292  | 3612.628  |
| AK022922  | 3352.695 | 2995.416 | NM_00319E | 4000.766  | 2770.237  | NM_01985E | 16816.549 | 13641.124 |
| NM_00646E | 8045.315 | 10840.95 | NM_01844E | 4823.36   | 3114.723  | NM_01799E | 6582.275  | 5373.747  |
| NM_00040C | 9650.77  | 12906.46 | AF086129  | 1496.944  | 955.794   | NM_00540C | 1128.108  | 1226.47   |
| NM_01588E | 5332.573 | 4690.237 | NM_01445E | 6261.879  | 4874.249  | AK023061  | 1483.899  | 1254.111  |
| AK027157  | 1238.784 | 954.029  | NM_00736E | 2219.551  | 1544.246  | NM_00725E | 3808.989  | 4235.187  |
| NM_00021E | 821.057  | 770.717  | NM_01477E | 3087.407  | 2208.457  | NM_00366E | 14582.226 | 15670.099 |
| M33197    | 64498.39 | 62542.58 | NM_00648C | 36546.781 | 25968.309 | NM_013384 | 68915.813 | 61493.078 |
| NM_00427E | 5610.843 | 5352.06  | NM_00722E | 59296.262 | 38950.547 | NM_001187 | 3784.058  | 3448.031  |
| NM_00233E | 21828.74 | 20692.81 | NM_00014E | 1038.183  | 845.752   | NM_018241 | 7761.835  | 6668.878  |
| NM_00285E | 1605.544 | 3048.674 | AF030107  | 1496.158  | 924.215   | NM_005834 | 13256.218 | 11929.752 |
| NM_00524E | 2654.662 | 2662.555 | NM_000871 | 1107.007  | 901.749   | NM_000724 | 6987.436  | 7113.506  |
| NM_017651 | 1357.356 | 1154.994 | M33197    | 61758.91  | 57657.367 | NM_00055E | 770.96    | 1045.285  |
| AF161339  | 8073.447 | 8834.231 | NM_01896E | 1460.413  | 1241.003  | NM_002557 | 13136.624 | 16628.373 |
| M33197    | 65119.59 | 58965.22 | NM_000264 | 1169.714  | 1009.118  | BE728156  | 458.28    | 763.607   |
| AL137662  | 1144.437 | 2229.05  | AB058740  | 13138.216 | 10399.39  | AI417775  | 332.728   | 967.144   |
| AK000354  | 4630.783 | 5280.003 | NM_00338E | 982.888   | 677.842   | BI762229  | 32548.992 | 33887.406 |
| AL161984  | 1200.137 | 1452.117 | AF279890  | 4621.372  | 6561.821  | BG618320  | 6384.948  | 5509.079  |
| NM_01488E | 2284.918 | 2448.821 | NM_00223E | 4647.241  | 4824.617  | Y00787    | 2288.588  | 1828.568  |
| NM_00083E | 1406.453 | 1516.318 | NM_01206E | 5669.826  | 9673.858  | NM_00727E | 6175.085  | 5286.991  |
| NM_00151C | 953.547  | 1317.463 | NM_00168E | 60384.762 | 61491.996 | N34462    | 3405.74   | 3914.218  |
| AK024474  | 5058.518 | 7320.45  | NM_016601 | 2226.882  | 2576.135  | AI658778  | 3222.349  | 3554.488  |
| NM_00686E | 1101.466 | 1209.673 | NM_01790E | 12998.834 | 14640.026 | L19067    | 11530.45  | 10282.967 |
| NM_017901 | 1614.105 | 1866.519 | M33197    | 60495.105 | 61991.16  | Z48482    | 1010.846  | 1430.73   |

|           |          |          |           |           |           |           |           |           |
|-----------|----------|----------|-----------|-----------|-----------|-----------|-----------|-----------|
| NM_004272 | 3785.077 | 5728.196 | NM_006815 | 30880.164 | 20984.033 | W60413    | 1174.971  | 1412.679  |
| NM_017589 | 6036.975 | 5727.355 | NM_001663 | 5539.245  | 3579.197  | BI823365  | 5689.81   | 5641.285  |
| AK023582  | 4241.572 | 3824.952 | NM_004218 | 14969.112 | 12076.205 | X06318    | 11780.905 | 13864.197 |
| NM_000358 | 2254.356 | 2136.327 | NM_016530 | 9329.53   | 7385.846  | AL834159  | 5437.703  | 5805.999  |
| NM_001930 | 22641.02 | 23260.29 | NM_014804 | 1866.494  | 1201.201  | NM_000164 | 31869.02  | 45222.871 |
| AK025270  | 2531.246 | 1719.762 | NM_002806 | 10042.694 | 9474.046  | NM_016217 | 21864.494 | 19495.787 |
| NM_001564 | 5911.453 | 5518.287 | M33197    | 62016.41  | 62259.152 | AK025971  | 7096.187  | 6576.327  |
| M33197    | 63529.28 | 61886.4  | NM_001716 | 1539.162  | 1388.545  | NM_014007 | 2561.885  | 2407.082  |
| AF263537  | 9212.279 | 7920.663 | NM_002030 | 619.112   | 481.154   | AB033006  | 5958.944  | 5859.408  |
| NM_015895 | 20564.15 | 19455.72 | NM_006564 | 6257.806  | 4595.909  | AF020314  | 3581.489  | 3000.975  |
| NM_000189 | 2024.826 | 2524.282 | NM_004802 | 2319.713  | 1729.212  | NM_016332 | 15992.686 | 16906.775 |
| AL050050  | 5809.265 | 3398.059 | NM_000074 | 11762.093 | 7349.996  | AK023936  | 844.403   | 843.092   |
| NM_005256 | 883.107  | 1984.935 | M33197    | 60603.43  | 56915.098 | NM_006457 | 4572.19   | 4541.435  |
| NM_004690 | 2690.74  | 2718.739 | NM_002613 | 4366.796  | 3298.026  | NM_003682 | 1312.576  | 1397.259  |
| M33197    | 64174.71 | 67296.91 | NM_004419 | 7502.746  | 4989.643  | NM_000207 | 1291.647  | 1464.761  |
| NM_013374 | 44756.93 | 57806.48 | U47635    | 7046.463  | 5615.495  | NM_006314 | 11530.558 | 12366.794 |
| NM_003252 | 10807.02 | 16081.07 | NM_018650 | 2388.072  | 1815.63   | NM_001782 | 3573.419  | 2391.582  |
| NM_001228 | 6088.599 | 6379.813 | AK026945  | 17810.42  | 22897.656 | NM_000797 | 6201.041  | 5644.22   |
| AK026607  | 465.294  | 630.009  | NM_002828 | 8616.05   | 8951.275  | NM_014927 | 809.255   | 944.508   |
| NM_016561 | 41695.7  | 56632.45 | NM_014369 | 1872.072  | 1367.625  | NM_016293 | 17253.984 | 20969.082 |
| NM_014245 | 22592.2  | 33920.57 | M33197    | 62071.113 | 60266.891 | AF217525  | 807.167   | 941.903   |
| M33197    | 63976.5  | 62305.02 | NM_001398 | 44798.68  | 43782.246 | AL080148  | 8494.365  | 8581.31   |
| L36531    | 1020.223 | 844.086  | AB050049  | 6218.803  | 7612.096  | NM_006731 | 1741.032  | 1985.519  |
| AL110226  | 18104.81 | 22478.58 | J05125    | 1620.409  | 2475.164  | NM_018487 | 904.085   | 994.312   |
| AB046822  | 2820.421 | 3398.032 | NM_005164 | 990.746   | 895.985   | NM_020134 | 1256.619  | 1764.73   |
| M33197    | 4953.762 | 4466.464 | NM_001995 | 3147.491  | 2783.793  | NM_014061 | 1452.767  | 1777.844  |
| AK024809  | 1588.087 | 1661.498 | NM_000183 | 15491.692 | 19932.617 | BC034395  | 1147.026  | 871.829   |
| NM_000308 | 7560.284 | 6129.546 | AY004175  | 4212.907  | 4245.147  | NM_002479 | 987.483   | 1128.064  |
| X69636    | 2500.864 | 2699.864 | M33197    | 62451.699 | 59643.301 | NM_000348 | 3720.034  | 3604.072  |
| M33197    | 65991.75 | 62792.01 | NM_012327 | 3993.603  | 3583.396  | NM_005059 | 1556.959  | 1493.964  |
| NM_004173 | 3760.74  | 4293.332 | NM_000904 | 6250.502  | 5627.693  | NM_004950 | 2654.98   | 2857.264  |
| NM_013974 | 3819.895 | 5409.324 | NM_016048 | 6601.264  | 6088.979  | NM_006493 | 6130.873  | 7419.151  |
| NM_017547 | 7889.133 | 6999.932 | NM_000375 | 8397.902  | 5718.197  | U76362    | 7150.386  | 8961.402  |
| NM_003983 | 6504.474 | 7060.667 | NM_018849 | 7365.242  | 6191.28   | AF040248  | 1817.749  | 1734.59   |
| AK023708  | 2077.715 | 1748.134 | AJ000096  | 812.698   | 528.83    | NM_014228 | 2222.969  | 2473.246  |
| NM_002108 | 939.678  | 936.188  | M33197    | 62071.844 | 59362.348 | AL832292  | 3720.645  | 7379.632  |
| M33197    | 64234.04 | 66712.57 | M16796    | 663.612   | 526.228   | NM_003045 | 14244.617 | 16364.392 |
| NM_018464 | 30916.91 | 38404.82 | AF015910  | 51096.5   | 40070.223 | NM_005662 | 59333.348 | 53281.008 |
| D43948    | 4022.737 | 4543.604 | BC009993  | 3924.285  | 2846.359  | NM_003060 | 835.854   | 1227.74   |
| NM_012310 | 8689.781 | 11392.98 | M33197    | 59559.07  | 59763.379 | AK021489  | 39018.195 | 43003.598 |
| BE410824  | 1372.556 | 1131.303 | NM_016824 | 3913.291  | 1556.324  | NM_004525 | 628.417   | 690.92    |
| BF382116  | 11363.17 | 10429.94 | NM_003031 | 4950.433  | 4773.826  | NM_003895 | 1538.538  | 1637.896  |
| NM_003193 | 11376.63 | 11522.22 | NM_007170 | 1927.468  | 1270.42   | NM_004317 | 13986.162 | 12220.461 |
| AF113216  | 2327.759 | 2874.653 | NM_003008 | 1168.436  | 1041.01   | NM_014645 | 5346.16   | 5412.43   |
| NM_005197 | 14874.22 | 8995.108 | NM_004100 | 719.355   | 498.737   | NM_014708 | 5737.281  | 6630.717  |
| AL137421  | 22741.84 | 27370.96 | M33197    | 59986.195 | 60498.891 | NM_003693 | 2339.423  | 2361.085  |
| NM_007241 | 3148.145 | 2515.35  | AK027244  | 3481.779  | 3336.711  | NM_000356 | 39191.215 | 44350.871 |
| NM_000124 | 1193.265 | 1428.94  | L40520    | 6868.312  | 7715.571  | NM_018134 | 56151.723 | 60558.684 |
| NM_017996 | 7923.525 | 8681.497 | NM_002633 | 26935.449 | 25953.23  | NM_013247 | 14260.229 | 10615.871 |
| NM_014517 | 5294.121 | 6880.265 | M33197    | 63229.988 | 65752.727 | NM_006770 | 2113.215  | 3216.887  |
| NM_005466 | 8297.758 | 7836.878 | NM_002878 | 12819.428 | 15670.68  | BE394704  | 1119.105  | 1472.331  |
| NM_004269 | 14591.51 | 14990.74 | NM_017723 | 4447.952  | 3946.698  | NM_004703 | 5678.044  | 5643.652  |
| NM_003409 | 2742.583 | 2569.206 | AK022922  | 3177.494  | 4030.669  | NM_001512 | 1662.624  | 1944.878  |

|           |          |          |           |           |           |           |           |           |
|-----------|----------|----------|-----------|-----------|-----------|-----------|-----------|-----------|
| M33197    | 54478.38 | 51832.01 | NM_006462 | 7715.745  | 8487.385  | NM_014706 | 12993.689 | 11557.181 |
| D31765    | 2023.701 | 2003.21  | AK024750  | 10170.003 | 8217.466  | AK023172  | 1015.481  | 1034.009  |
| NM_006107 | 17482.99 | 12588.08 | NM_000400 | 39104.344 | 30336.367 | AJ001348  | 1474.492  | 1450.751  |
| NM_004175 | 3218.952 | 2640.715 | NM_015885 | 3865.075  | 3576.646  | NM_007255 | 3541.044  | 5332.007  |
| AF288288  | 10170.16 | 10073.72 | AK027157  | 865.581   | 1033.643  | NM_003668 | 14481.438 | 18068.041 |
| NM_017646 | 7852.345 | 7965.531 | NM_015889 | 57383.699 | 59761.691 | NM_013384 | 68596.414 | 61848.402 |
| AL050368  | 2921.736 | 2518.701 | M33197    | 62152.563 | 59630.031 | NM_001187 | 3463.098  | 4020.573  |
| NM_003092 | 30597.81 | 33447.61 | NM_004276 | 4916.313  | 3612.008  | NM_018241 | 7367.187  | 8265.318  |
| M33197    | 63192.18 | 64631.3  | NM_002332 | 17704.275 | 13941.297 | NM_005834 | 13019.09  | 13961.249 |
| NM_005861 | 758.85   | 986.196  | NM_002859 | 3621.076  | 1557.613  | AF000381  | 7807.568  | 8869.625  |
| NM_018848 | 3951.783 | 4443.073 | NM_005246 | 3219.789  | 2195.041  | NM_018075 | 455.397   | 1171.016  |
| NM_003760 | 3135.577 | 2633.194 | NM_017651 | 1061.725  | 929.607   | NM_012105 | 6057.586  | 8779.46   |
| AK025998  | 7530.829 | 7479.626 | AF161339  | 7406.568  | 4900.227  | S82470    | 6680.696  | 7034.684  |
| NM_018482 | 2972.386 | 2779.916 | M33197    | 65976.852 | 66450.156 | AB020695  | 4135.426  | 3072.183  |
| AF090945  | 3789.747 | 4639.047 | AL137662  | 1577.357  | 1864.533  | AB028982  | 1719.644  | 1553.669  |
| M33197    | 67230.48 | 65476.65 | AK000354  | 7900.114  | 10940.244 | NM_002004 | 4496.399  | 5385.62   |
| NM_001161 | 15736.68 | 15633.97 | AL161984  | 899.589   | 1338.124  | NM_005121 | 2377.232  | 2294.602  |
| NM_004044 | 14225.03 | 13689    | NM_003950 | 636.2     | 1165.592  | NM_020221 | 1805.477  | 1899.838  |
| NM_000221 | 12964.2  | 14515.16 | NM_014882 | 2548.928  | 3432.094  | NM_000747 | 5353.707  | 5345.748  |
| H75678    | 5584.458 | 5694.646 | NM_000836 | 1662.276  | 2657.411  | NM_005415 | 6497.855  | 5500.666  |
| NM_002535 | 2111.784 | 2434.097 | M33197    | 60706.102 | 63462.535 | AJ275973  | 29414.211 | 32390.207 |
| NM_006452 | 21220.25 | 17779.08 | NM_001510 | 2062.888  | 2338.672  | AL834159  | 4612.781  | 5198.963  |
| AB002359  | 3478.303 | 2802.851 | AK024474  | 12148.635 | 13833.727 | NM_000164 | 34664.32  | 53131.531 |
| M33197    | 5669.96  | 5002.055 | NM_006862 | 1115.36   | 1437.355  | NM_016217 | 27753.875 | 33426.852 |
| AB007864  | 3363.755 | 2111.034 | NM_017901 | 3024.77   | 3779.669  | AK025971  | 7342.314  | 8794.861  |
| NM_002198 | 9311.112 | 8932.972 | NM_004272 | 4579.214  | 2454.05   | NM_002618 | 4885.324  | 5885.599  |
| AK025905  | 3538.977 | 4218.944 | NM_017589 | 2198.332  | 1971.296  | L27479    | 1544.829  | 1517.98   |
| AL121733  | 2845.198 | 3589.802 | AK023582  | 2104.967  | 1691.311  | NM_002193 | 2258.705  | 2104.703  |
| M33197    | 46856.64 | 50020.67 | NM_000358 | 2340.588  | 2119.588  | NM_001388 | 11792.044 | 12625.279 |
| NM_017532 | 1086.594 | 1218.357 | NM_001930 | 15078.042 | 11929.543 | X76770    | 6541.837  | 5304.159  |
| NM_014480 | 1516.552 | 1680.848 | AK025270  | 1607.463  | 1322.921  | AB037808  | 3823.769  | 3569.81   |
| NM_005938 | 1327.461 | 1740.781 | NM_001564 | 4093.148  | 3237.36   | NM_016038 | 8343.495  | 7826.703  |
| NM_014169 | 10857.02 | 11563.99 | M33197    | 60102.332 | 61187.313 | AF090911  | 456.67    | 611.654   |
| AK023612  | 1015.595 | 1303.244 | AF263537  | 6417.874  | 5239.865  | Z36821    | 13587.68  | 18471.617 |
| M33197    | 65114.49 | 69016.2  | NM_015895 | 12566.337 | 10013.335 | AF289485  | 9902.581  | 9308.256  |
| AF147360  | 1739.106 | 1621.8   | NM_000189 | 819.018   | 579.878   | AF130092  | 2097.548  | 2266.852  |
| AL137269  | 23745.85 | 24564.71 | AL050050  | 1917.995  | 834.937   | AK024794  | 3225.366  | 3680.636  |
| AK021983  | 5843.195 | 5418.92  | NM_004690 | 2263.726  | 1760.791  | NM_019853 | 18116.537 | 14166.464 |
| Y11681    | 18222.51 | 17555.71 | M33197    | 61053.512 | 63827.625 | NM_017992 | 7891.46   | 5534.635  |
| AL110135  | 12013.58 | 8481.081 | NM_013374 | 55143.926 | 56299.336 | NM_005400 | 1488.323  | 1053.815  |
| NM_006993 | 24540.2  | 28055.31 | NM_003252 | 13665.138 | 13554.045 | AK023061  | 1650.365  | 1445.103  |
| NM_002336 | 1607.958 | 1485.502 | NM_001228 | 6831.375  | 6867.543  | NM_014061 | 1513.614  | 1374.2    |
| M33197    | 61645.57 | 58521.68 | AK026607  | 925.926   | 824.596   | BC034395  | 1193.626  | 1252.884  |
| AF086429  | 889.095  | 746.192  | NM_016561 | 40779.727 | 37292.801 | NM_002479 | 1500.984  | 1507.564  |
| NM_019060 | 863.232  | 691.522  | NM_001225 | 2974.78   | 4917.659  | NM_000348 | 7127.175  | 7992.939  |
| AF086377  | 939.306  | 1089.122 | NM_014245 | 46070.449 | 40469.723 | NM_005059 | 1709.477  | 2365.206  |
| AF086302  | 2107.228 | 3018.604 | M33197    | 60953.852 | 63121.816 | NM_004950 | 3024.958  | 4414.312  |
| AF086439  | 957.446  | 917.608  | L36531    | 687.355   | 822.131   | NM_000724 | 6633.62   | 6707.665  |
| M33197    | 65804.23 | 57917.52 | AL110226  | 61295.641 | 62445.336 | NM_002557 | 14239.609 | 14956.438 |
| AF038171  | 2430.013 | 2092.885 | AB046822  | 2070.974  | 2687.92   | BE728156  | 624.256   | 904.025   |
| AF052160  | 1203.381 | 1386.634 | M33197    | 2859.209  | 2797.208  | AI417775  | 1215.77   | 1540.209  |
| AF144233  | 2175.685 | 2261.408 | AK024809  | 702.007   | 497.8     | BI762229  | 33021.047 | 31149.93  |
| AK022986  | 882.755  | 1106.387 | NM_000308 | 3846.752  | 3823.647  | BG618320  | 8156.42   | 8293.506  |

|            |          |          |           |           |           |           |           |           |
|------------|----------|----------|-----------|-----------|-----------|-----------|-----------|-----------|
| AF085975   | 971.886  | 1044.428 | X69636    | 3376.17   | 2338.636  | Y00787    | 1803.989  | 1994.006  |
| AF075103   | 2791.849 | 2652.214 | M33197    | 59608.957 | 61434.758 | NM_007276 | 5656.944  | 6298.646  |
| AF085943   | 1140.203 | 1087.075 | NM_004173 | 29199.82  | 19776.541 | N34462    | 4121.767  | 3663.726  |
| M33197     | 66508.66 | 72933.57 | NM_013974 | 3351.848  | 1646.178  | AI658778  | 3568.193  | 3561.699  |
| AL137390   | 4190.852 | 4248.296 | NM_017547 | 4062.617  | 3750.23   | L19067    | 11719.187 | 10213.096 |
| AL137611   | 9133.95  | 9642.623 | NM_003983 | 6613.438  | 5524.462  | W60413    | 1375.573  | 1276.291  |
| AL359566   | 29331.6  | 35370.28 | AK023708  | 1485.412  | 1322.588  | BI823365  | 6358.147  | 4728.783  |
| AL133110   | 959.445  | 671.353  | NM_002108 | 1206.089  | 1222.303  | X06318    | 12245.381 | 11123.763 |
| AL137427   | 2138.606 | 1939.721 | M33197    | 62595.063 | 60690.406 | NM_004703 | 5524.095  | 5280.777  |
| AL157460   | 2742.415 | 2697.443 | NM_018464 | 32111.986 | 23414.041 | NM_001512 | 1403.54   | 1921.011  |
| AL359595   | 791.968  | 880.593  | D43948    | 5396.896  | 2471.286  | NM_014706 | 13409.894 | 14308.186 |
| AK023641   | 997.486  | 918.072  | NM_012310 | 12194.854 | 7781.153  | AK023172  | 901.81    | 1329.889  |
| AK026718   | 3180.636 | 4556.093 | BE410824  | 606.941   | 413.698   | AF139768  | 682.531   | 899.955   |
| AK022035   | 3506.073 | 3928.289 | BF382116  | 6646.065  | 4867.063  | AJ001348  | 1551.116  | 2079.108  |
| M33197     | 66116.06 | 74841.38 | NM_003193 | 10573.966 | 8076.938  | NM_014007 | 2499.404  | 3012.642  |
| NM_004337  | 4552.143 | 5534.718 | AK055825  | 59042.234 | 63432.574 | AB033006  | 5465.035  | 5371.864  |
| M33197     | 66979.41 | 68910.26 | M33197    | 59882.305 | 59353.941 | AF020314  | 4077.655  | 2995.938  |
| AK022046   | 1194.892 | 888.094  | AF113216  | 1503.725  | 879.917   | NM_016332 | 15391.679 | 14889.81  |
| AK027207   | 1855.426 | 2176.846 | NM_005197 | 10633.908 | 10365.744 | AK023936  | 1139.151  | 786.544   |
| AJ227892   | 2581.188 | 2440.629 | AL137421  | 55433.48  | 41834.664 | NM_006457 | 5144.518  | 5218.262  |
| M33197     | 66727.84 | 72592.24 | M33197    | 54785.371 | 50757.672 | NM_003682 | 1662.582  | 1657.901  |
| AK022013   | 1763.579 | 1813.537 | NM_007241 | 1605.986  | 1753.746  | NM_000207 | 1662.663  | 1519.145  |
| AK022155   | 3073.861 | 3330.318 | NM_000124 | 1204.874  | 1134.116  | NM_002531 | 1217.873  | 1285.749  |
| AK022288   | 2987.966 | 2267.117 | NM_017996 | 5122.843  | 5369.707  | NM_006314 | 14698.482 | 17492.639 |
| M33197     | 64346.32 | 67163.74 | NM_014517 | 3248.957  | 2337.194  | NM_001782 | 3957.953  | 3333.323  |
| AL359626   | 1346.473 | 1254.279 | NM_005466 | 3058.063  | 2081.376  | NM_002754 | 803.82    | 854.634   |
| AK026878   | 887.645  | 897.158  | NM_004269 | 6210.238  | 4341.91   | NM_000797 | 6550.946  | 7057.295  |
| AK000777   | 680.548  | 1087.976 | NM_003409 | 1162.286  | 893.869   | NM_016293 | 17943.09  | 16561.113 |
| AK021589   | 1034.078 | 1092.279 | M33197    | 59766.078 | 55688.492 | AF217525  | 1475.164  | 1101.62   |
| D17152     | 19442.32 | 17130.63 | D31765    | 2552.794  | 1753.298  | AL080148  | 9935.681  | 8286.953  |
| AK024464   | 18568.68 | 20503.43 | NM_006107 | 10511.301 | 6226.277  | NM_006731 | 1877.455  | 1694.871  |
| AK023638   | 1598.824 | 2339.283 | NM_004175 | 1743.883  | 973.37    | NM_018487 | 948.793   | 997.295   |
| M33197     | 3214.129 | 3288.724 | AF288288  | 34243.887 | 21562.1   | NM_020134 | 788.783   | 831.214   |
| AK025423   | 8550.565 | 10013.63 | NM_017646 | 8593.591  | 5416.188  | NM_020221 | 1748.651  | 1703.578  |
| unknown (S | 1590.627 | 570.455  | AL050368  | 2451.001  | 1741.435  | NM_000747 | 4363.764  | 4616.709  |
| M33197     | 64836.55 | 61610.87 | NM_003092 | 23383.104 | 16252.518 | NM_005415 | 6747.141  | 6573.323  |
| AL049846   | 1468.272 | 1232.186 | M33197    | 62102.617 | 60431.246 | AL137708  | 652.99    | 1051.03   |
| AK024161   | 2890.356 | 3462.87  | NM_005861 | 4443.832  | 2656.769  | AJ275973  | 27363.676 | 37303.984 |
| AK021682   | 3638.237 | 4255.409 | NM_018848 | 3459.561  | 1890.885  | NM_006493 | 6461.515  | 7772.441  |
| AJ012500   | 1540.264 | 1233.608 | NM_003760 | 5522.897  | 3366.563  | U76362    | 5926.65   | 8069.029  |
| AF085833   | 1950.794 | 1933.836 | AB037759  | 1854.17   | 1029.561  | AF040248  | 1594.224  | 1593.674  |
| L19368     | 1190.271 | 1082.692 | AK025998  | 3567.515  | 2416.96   | NM_014228 | 1972.945  | 2497.482  |
| U00944     | 2119.351 | 1707.034 | AL080080  | 13528.87  | 8878.355  | AL832292  | 3681.952  | 8266.632  |
| BC035058   | 6472.888 | 6892.021 | NM_018482 | 1770.292  | 1765.381  | NM_003045 | 18182.996 | 19516.43  |
| X57566     | 8030.852 | 5543.524 | NM_017880 | 2793.82   | 2784.342  | NM_005662 | 53599.672 | 53779.871 |
| M33197     | 64571.95 | 60736.26 | AF090945  | 5803.797  | 5035.745  | NM_003060 | 806.209   | 1428.071  |
| NM_018616  | 16810.73 | 19013.6  | M33197    | 61148.625 | 61225.742 | AK021489  | 40134.902 | 47139.719 |
| AK023809   | 3281.81  | 3547.031 | NM_001161 | 12296.272 | 20323.23  | NM_004525 | 735.356   | 819.149   |
| AL137590   | 594.329  | 765.973  | NM_004044 | 10811.847 | 12515.455 | NM_003895 | 1778.503  | 2493.114  |
| M87943     | 64369.03 | 65667.81 | NM_000221 | 32771.02  | 24699.178 | NM_004317 | 15853.808 | 15926.006 |
| AL360137   | 2396.707 | 2841.192 | H75678    | 2701.635  | 2566.362  | NM_014645 | 5263.874  | 5893.008  |
| U28131     | 32747.27 | 47342.02 | NM_002535 | 901.346   | 1036.997  | NM_014708 | 5280.721  | 5308.74   |
| AY007106   | 6046.589 | 6763.287 | NM_006452 | 20860.252 | 19703.146 | NM_003693 | 2991.777  | 3050.046  |

|           |          |          |           |           |           |           |           |           |
|-----------|----------|----------|-----------|-----------|-----------|-----------|-----------|-----------|
| M33197    | 65390.33 | 60126.04 | AB002359  | 2539.942  | 2316.321  | NM_000356 | 45379.809 | 47238.566 |
| AF048848  | 974.977  | 1157.113 | M33197    | 5584.455  | 4534.437  | NM_018134 | 57427.453 | 63604.492 |
| AL049299  | 1452.693 | 1345.621 | AB007864  | 2265.134  | 1390.617  | NM_013247 | 8426.278  | 5146.16   |
| NM_00608E | 31822.11 | 45303.79 | NM_00219E | 5267.042  | 3562.615  | NM_00677C | 3032.734  | 2926.717  |
| NM_01826E | 975.021  | 793.744  | AF024693  | 1348.206  | 1300.97   | BE394704  | 899.693   | 977.634   |
| AF130086  | 2639.867 | 2460.249 | AK025905  | 2905.761  | 3351.945  | AK024794  | 3049.899  | 3397.938  |
| AK023858  | 2117.209 | 2531.896 | AL121733  | 3595.344  | 4043.149  | NM_019853 | 17076.057 | 13820.301 |
| AF250920  | 5157.708 | 6568.122 | BE958072  | 1577.432  | 951.718   | NM_017992 | 6634.261  | 6196.501  |
| NM_017733 | 5213.952 | 6329.095 | NM_01448C | 3056.223  | 1615.258  | NM_00540C | 1191.294  | 1453.213  |
| NM_014042 | 17758.18 | 23255.68 | NM_00593E | 941.727   | 588.337   | AK023061  | 1442.989  | 1594.199  |
| M33197    | 63279.41 | 59197.31 | NM_01416E | 8980.397  | 5661.912  | NM_00725E | 3528.065  | 5505.816  |
| AF317550  | 1429.347 | 1252.159 | NM_004964 | 22659.373 | 14708.868 | NM_00366E | 14741.028 | 18505.361 |
| NM_003543 | 1587.352 | 1179.381 | AL117497  | 2009.668  | 1793.5    | NM_013384 | 63769.363 | 56194.633 |
| AK025416  | 3573.293 | 2845.719 | AF075016  | 671.386   | 585.086   | NM_001187 | 3288.857  | 3411.061  |
| AK022165  | 1419.307 | 1099.472 | AK023612  | 979.913   | 1042.649  | NM_018241 | 6544.4    | 6980.242  |
| U23860    | 920.637  | 937.33   | AF147437  | 2324.31   | 2305.792  | NM_005834 | 14219.063 | 14535.084 |
| M33197    | 65971.75 | 58361.11 | M33197    | 62582.23  | 66682.289 | AF000381  | 8985.283  | 9470.056  |
| AL049263  | 1211.616 | 1319.329 | AF147360  | 873.557   | 902.975   | NM_01807E | 711.067   | 944.006   |
| AK022372  | 4507.061 | 5651.402 | AL137269  | 10419.091 | 11276.356 | NM_01210E | 6307.508  | 8691.47   |
| AJ227863  | 1769.176 | 2670.865 | AK021983  | 2828.761  | 3367.406  | S82470    | 7697.299  | 8972.237  |
| NM_00352C | 2628.122 | 2987.371 | Y11681    | 14764.668 | 14594.759 | AB020695  | 3667.133  | 2776.156  |
| AL137380  | 1405.169 | 1468.717 | AL110135  | 36414.547 | 25582.381 | AB028982  | 1449.11   | 1974.116  |
| M33197    | 65225.96 | 66928.07 | NM_006993 | 22004.826 | 21410.098 | NM_002004 | 5810.517  | 5804.804  |
| AL137658  | 23137.26 | 32837.81 | NM_00233E | 969.022   | 871.042   | NM_005121 | 2799.555  | 2593.159  |
| D16888    | 1881.585 | 1610.364 | AF086316  | 802.418   | 726.882   | NM_001643 | 54836.824 | 48541.523 |
| U79277    | 671.245  | 719.833  | AF086429  | 3741.796  | 4678.637  | NM_01909E | 8504.955  | 8604.683  |
| AF068298  | 7401.967 | 9114.756 | NM_01906C | 2445.425  | 2117.618  | NM_01472E | 2681.977  | 3304.99   |
| Z70770    | 1910.051 | 2427.376 | AF086377  | 955.28    | 1011.475  | NM_006892 | 5719.334  | 4870.767  |
| AK023242  | 2028.088 | 1824.326 | AF086302  | 2963.252  | 1557.231  | NM_019117 | 2145.386  | 2551.938  |
| M33197    | 63955.02 | 61851.95 | M33197    | 62337.086 | 60595.477 | NM_01830E | 5171.943  | 5969.113  |
| CY3Cy5    | 9698.744 | 649.496  | AF038171  | 1309.873  | 1194.763  | NM_01765E | 7799.401  | 10034.547 |
| AI417775  | 885.232  | 1349.471 | AF052160  | 802.649   | 953.759   | NM_01867E | 15172.472 | 17946.324 |
| BI762229  | 27475.3  | 24146.13 | AK026512  | 1211.063  | 824.714   | NM_016643 | 1293.448  | 1478.269  |
| Y00787    | 324.767  | 466.221  | M33197    | 60461.188 | 62596.348 | NM_00677E | 5738.288  | 6260.564  |
| NM_00727E | 3890.043 | 3667.393 | AF085969  | 806.14    | 951.237   | NM_016217 | 26949.236 | 29364.154 |
| N34462    | 1395.864 | 1192.681 | AF144233  | 3571.191  | 3658.737  | AK025971  | 7093.18   | 7595.449  |
| AI658778  | 3125.667 | 2818.378 | AF085925  | 518.979   | 439.634   | NM_00261E | 4940.787  | 6873.959  |
| L19067    | 7563.351 | 7021.141 | AK022986  | 671.737   | 499.088   | L27479    | 2349.801  | 1758.861  |
| Z48482    | 286.885  | 601.836  | AF085975  | 2802.274  | 2866.884  | NM_002193 | 2141.113  | 2764.799  |
| W60413    | 744.978  | 675.534  | AF075103  | 1207.227  | 1347.013  | NM_00138E | 12304.189 | 14229.387 |
| BI823365  | 4498.742 | 4075.768 | AF085943  | 741.581   | 908.266   | X76770    | 6171.377  | 6315.349  |
| X06318    | 8263.123 | 7198.94  | M33197    | 62021.941 | 61812.164 | AB037808  | 3723.944  | 4150.593  |
| AL834159  | 2644.766 | 2875.265 | AL137390  | 2397.969  | 2672.115  | NM_01603E | 10457.48  | 9953.388  |
| NM_000164 | 977.637  | 515.268  | AL137611  | 6913.991  | 6302.492  | AF090911  | 616.377   | 883.895   |
| SR5       | 8276.892 | 5842.224 | AL359566  | 34488.613 | 30673.26  | Z36821    | 14996.102 | 20868.664 |
| SR7       | 8503.897 | 37195.23 | AL133110  | 471.966   | 575.065   | AF289485  | 11873.555 | 11749.587 |
| SR9       | 32244.23 | 4252.848 | AL137427  | 4438.61   | 4989.615  | AF130092  | 3504.307  | 4133.192  |
| CY3Cy5    | 7611.227 | 263.64   | AL359595  | 976.256   | 1196.095  | NM_01609E | 11630.951 | 12691.052 |
| NM_003682 | 890.655  | 828.403  | M33197    | 54406.969 | 58148.172 | AF300612  | 61925.73  | 59340.059 |
| NM_006314 | 721.591  | 600.625  | AK023641  | 786.93    | 816.631   | AB014557  | 2137.005  | 2680.667  |
| NM_001782 | 4099.052 | 2236.871 | AK026718  | 2790.295  | 2876.522  | NM_00557E | 8843.297  | 6211.716  |
| NM_000797 | 1064.891 | 952.982  | AK022035  | 9675.319  | 8217.851  | NM_003653 | 33820.902 | 37951.707 |
| NM_016293 | 10469.63 | 10555.8  | M33197    | 58306.164 | 59538.43  | NM_018457 | 32592.002 | 41666.512 |

|           |          |          |           |           |           |           |           |           |
|-----------|----------|----------|-----------|-----------|-----------|-----------|-----------|-----------|
| AF217525  | 625.087  | 270.533  | NM_004337 | 3247.212  | 2628.983  | NM_002953 | 11387.229 | 12410.976 |
| AL080148  | 903.756  | 522.846  | AK022141  | 1108.357  | 974.579   | NM_002187 | 1632.855  | 1805.511  |
| NM_006731 | 1496.037 | 1414.173 | AK023942  | 35941.977 | 37587.359 | NM_014246 | 11674.517 | 11459.169 |
| NM_018487 | 557.728  | 538.066  | M33197    | 60111.906 | 58597.359 | NM_014859 | 2055.324  | 2377.342  |
| NM_014061 | 970.044  | 880.331  | AK022046  | 507.154   | 630.928   | AF311912  | 912.516   | 758.496   |
| BC034395  | 722.783  | 372.16   | AK027207  | 1870.503  | 1577.945  | NM_001116 | 1649.087  | 1758.857  |
| NM_002479 | 332.118  | 419.252  | AF083120  | 456.757   | 456.072   | BC035395  | 18586.348 | 18672.334 |
| NM_000348 | 983.805  | 222.02   | AJ227892  | 3159.154  | 3739.458  | NM_001703 | 24216.896 | 25925.951 |
| NM_005059 | 1119.14  | 1138.799 | M33197    | 63286.945 | 61089.59  | NM_020126 | 8764.463  | 9863.933  |
| NM_000724 | 4865.446 | 4304.749 | AK022013  | 1895.949  | 1971.043  | NM_013982 | 5833.478  | 5680.734  |
| NM_002557 | 7289.384 | 8131.955 | AK022155  | 4549.331  | 4981.106  | NM_005049 | 5306.785  | 5771.413  |
| NM_005662 | 36470.97 | 37715.38 | AK022288  | 1963.5    | 2776.462  | NM_003882 | 1155.61   | 1508.764  |
| NM_003060 | 462.278  | 732.553  | AK021916  | 893.263   | 1279.56   | NM_004630 | 16667.055 | 21033.207 |
| AK021489  | 27342.09 | 27718.23 | AK024201  | 1031.314  | 1446.436  | AK023001  | 18417.443 | 19050.188 |
| NM_004525 | 437.766  | 563.136  | AK022174  | 813.874   | 1468.702  | NM_014826 | 25135.74  | 28899.705 |
| NM_003895 | 1409.09  | 1298.233 | AK022331  | 1619.461  | 1656.656  | AF201947  | 3257.38   | 2646.441  |
| NM_014645 | 2841.363 | 2612.243 | M33197    | 60294.402 | 61399.195 | U01147    | 4163.89   | 4882.016  |
| NM_014708 | 3953.59  | 3686.826 | AL359626  | 1013.26   | 1113.593  | NM_004040 | 18717.492 | 19385.154 |
| NM_003693 | 1018.531 | 905.307  | AK022084  | 910.922   | 1072.494  | NM_006116 | 6989.288  | 7582.629  |
| NM_000356 | 16377.08 | 13244.78 | AK021589  | 1050.856  | 828.906   | NM_005456 | 1085.546  | 1133.063  |
| NM_018134 | 2864.154 | 2659.336 | D17152    | 10955.597 | 13384.255 | NM_003587 | 22461.814 | 25489.732 |
| NM_013247 | 16072.15 | 12751.28 | AK024464  | 17183.697 | 17967.184 | X90978    | 2837.409  | 3520.737  |
| BE394704  | 1097.605 | 1069.818 | AK026748  | 904.991   | 682.633   | BF219403  | 49508.066 | 56619.23  |
| NM_004703 | 2992.161 | 3127.696 | AK023638  | 1253.024  | 1752.832  | NM_016119 | 9922.816  | 10776.788 |
| NM_001512 | 584.986  | 672.969  | M33197    | 1232.021  | 1632.517  | AK075450  | 5554.358  | 6676.015  |
| NM_014706 | 8587.813 | 6867.334 | AK025423  | 3582.921  | 3472.812  | AF178983  | 8337.021  | 9394.05   |
| AK023172  | 471.341  | 596.369  | unknown ( | 910.222   | 784.311   | NM_001324 | 14585.879 | 16494.752 |
| AF139768  | 378.129  | 429.46   | M33197    | 55825.02  | 59843.215 | AB037795  | 4353.377  | 4836.017  |
| NM_014007 | 2071.31  | 1797.165 | AL049846  | 2113.06   | 2392.22   | D43949    | 4949.931  | 5966.615  |
| AB033006  | 935.912  | 1022.298 | AK024161  | 1611.052  | 1730.67   | AF111849  | 45737.598 | 54177.191 |
| AF020314  | 2878.321 | 1812.369 | AK021682  | 39692.637 | 43532.172 | AK022975  | 1828.085  | 1732.288  |
| NM_016332 | 4847.496 | 3861.525 | AJ012500  | 4106.128  | 4793.003  | NM_015344 | 9115.795  | 7662.87   |
| NM_006457 | 3774.286 | 3281.216 | AF085833  | 684.31    | 950.604   | NM_004288 | 3906.888  | 4077.485  |
| AF000381  | 4224.915 | 4238.942 | L19368    | 760.597   | 823.355   | AL122055  | 6141.428  | 5773.425  |
| NM_018075 | 797.819  | 623.503  | U00944    | 1750.784  | 2243.462  | NM_005132 | 34168.602 | 35896.262 |
| NM_012105 | 3628.062 | 4875.064 | BC035058  | 5557.007  | 5740.623  | X07695    | 927.898   | 1056.62   |
| AB020695  | 2924.787 | 2394.894 | X57566    | 6285.779  | 6405.938  | D87458    | 2744.104  | 2541.76   |
| AB028982  | 321.073  | 359.506  | M33197    | 64597.352 | 63725.703 | NM_001399 | 640.915   | 764.294   |
| NM_002004 | 3807.775 | 3168.591 | NM_018616 | 12260.563 | 11910.973 | AK021750  | 11003.358 | 10439.06  |
| NM_005121 | 2434.626 | 2459.982 | AK023809  | 2487.122  | 2275.572  | NM_003626 | 3634.061  | 4663.225  |
| NM_020221 | 822.189  | 704.674  | M87943    | 61269.191 | 59044.473 | NM_006932 | 1764.407  | 1313.142  |
| NM_000747 | 3773.441 | 3051.018 | AL360137  | 1907.738  | 1984.573  | AK023594  | 11405.908 | 11939.679 |
| NM_005415 | 5477.123 | 4164.693 | U28131    | 63384.035 | 64172.051 | AB032989  | 846.019   | 900.971   |
| AJ275973  | 17550.32 | 19139.05 | AY007106  | 4010.478  | 5004.014  | AB010099  | 30120.389 | 37412.91  |
| NM_006493 | 4600.683 | 4469.458 | M33197    | 60499.199 | 62172.906 | AB039920  | 10781.907 | 11371.747 |
| AF040248  | 438.76   | 572.27   | AF048848  | 658.576   | 952.613   | AB046782  | 3682.333  | 4332.872  |
| NM_014228 | 1204.377 | 1207.828 | AL049299  | 762.993   | 1398.237  | NM_004190 | 37732.824 | 40960.09  |
| AL832292  | 2031.632 | 5699.36  | NM_006088 | 57425.238 | 61600.16  | NM_014275 | 9813.675  | 10672.771 |
| NM_003045 | 4403.366 | 6558.003 | NM_018265 | 1633.758  | 2402.482  | NM_000409 | 7177.331  | 7275.812  |
| NM_002618 | 2117.383 | 3092.4   | AF130086  | 8139.775  | 11305.676 | AF208005  | 3711.329  | 3106.587  |
| L27479    | 1347.161 | 1091.475 | M33197    | 65509.438 | 64778.797 | NM_002231 | 27276.586 | 27542.23  |
| NM_002193 | 420.515  | 334.664  | AF250920  | 4205.203  | 3954.953  | NM_020474 | 28265.887 | 19082.639 |
| NM_001388 | 6303.363 | 6387.079 | NM_017733 | 4845.191  | 5381.437  | NM_002643 | 7204.875  | 6839.26   |



|           |          |          |           |           |           |           |           |           |
|-----------|----------|----------|-----------|-----------|-----------|-----------|-----------|-----------|
| X76770    | 5368.72  | 4859.478 | NM_014042 | 17257.701 | 21140.742 | NM_017807 | 7658.425  | 9956.498  |
| AB037808  | 2497.667 | 2931.21  | M33197    | 62087.266 | 61278.559 | NM_014746 | 2759.021  | 2828.814  |
| NM_005915 | 696.645  | 647.282  | AF317550  | 727.047   | 1052.524  | NM_002788 | 66019.953 | 62217.137 |
| NM_016038 | 9727.162 | 10401.74 | AK025416  | 1203.692  | 1742.284  | NM_000462 | 19070.709 | 14142.239 |
| AF090911  | 653.742  | 780.978  | AK022165  | 1061.71   | 1118.97   | NM_003336 | 20404.906 | 14471.986 |
| Z36821    | 7339.212 | 10393.74 | AF090883  | 974.082   | 1027.193  | NM_005805 | 42203.789 | 36821.945 |
| AF289485  | 13127.1  | 13415.67 | U23860    | 1047.047  | 899.288   | NM_004181 | 1157.397  | 1037.067  |
| AF130092  | 2221.582 | 2024.354 | M33197    | 60806.871 | 60986.574 | NM_003900 | 7191.772  | 6912.372  |
| AK024794  | 2840.157 | 3162.749 | AK022372  | 3087.501  | 3361.441  | NM_003337 | 6993.993  | 5991.006  |
| NM_019853 | 10794.31 | 9275.427 | AJ227863  | 646.317   | 522.885   | AF298152  | 6211.417  | 4456.24   |
| NM_017992 | 5743.73  | 3921.021 | NM_003520 | 1071.343  | 1262.703  | AF117233  | 13798.455 | 14142.228 |
| NM_005400 | 474.723  | 440.658  | AL137380  | 1460.925  | 1866.233  | NM_015848 | 1647.186  | 1538.479  |
| AK023061  | 1749     | 1416.831 | M33197    | 60094.484 | 61835.902 | NM_001723 | 3344.876  | 3010.884  |
| NM_007255 | 1454.63  | 2456.278 | AL137658  | 25963.932 | 34726.313 | NM_016018 | 3509.131  | 3684.678  |
| NM_003668 | 8781.478 | 9417.301 | D16888    | 1604.412  | 2743.014  | M94362    | 30654.016 | 36184.461 |
| NM_013384 | 65984.43 | 49783.19 | U79277    | 893.507   | 1678.986  | AK024707  | 2994.598  | 2204.756  |
| NM_001187 | 2614.176 | 2839.406 | Z70770    | 3141.921  | 3351.112  | NM_014255 | 6350.304  | 6558.392  |
| NM_018241 | 5507.838 | 5764.648 | AJ227900  | 4720.742  | 5675.806  | AK022909  | 4228.189  | 4225.364  |
| NM_005834 | 14746.8  | 17137.74 | AK023242  | 1446.6    | 1572.863  | NM_006530 | 27162.336 | 26360.004 |
| NM_000724 | 4018.974 | 3825.786 | M33197    | 59840.648 | 61876.793 | AB033024  | 2004.444  | 1874.154  |
| NM_002557 | 6565.12  | 7509.495 | CY3Cy5    | 5993.072  | 583.749   | NM_018942 | 3667.455  | 3818.376  |
| BE728156  | 1247.251 | 1008.747 | BI762229  | 19132.953 | 20364.461 | NM_005531 | 25734.441 | 21570.57  |
| Y10802    | 379.425  | 379.004  | BG618320  | 4794.104  | 4077.806  | NM_006977 | 2668.317  | 2482.223  |
| BG618320  | 481.767  | 489.645  | Y00787    | 1470.256  | 1495.297  | AF217226  | 12323.65  | 11023.784 |
| Y00787    | 708.192  | 544.688  | NM_007276 | 4490.848  | 3740.734  | AL359578  | 1017.502  | 932.025   |
| NM_007276 | 4605.635 | 4353.011 | N34462    | 2480.062  | 2693.779  | NM_005522 | 1809.866  | 1651.925  |
| N34462    | 1550.661 | 1565.886 | AI658778  | 2121.969  | 2238.093  | NM_005760 | 14384.453 | 10029.046 |
| AI658778  | 2840.116 | 3601.472 | L19067    | 7554.695  | 7261.797  | NM_014212 | 1449.905  | 860.339   |
| L19067    | 6984.801 | 6715.547 | Z48482    | 884.163   | 874.684   | NM_007265 | 8458.224  | 7457.515  |
| Z48482    | 166.339  | 387.477  | W60413    | 1014.878  | 851.656   | AK023639  | 16459.184 | 13605.018 |
| W60413    | 291.738  | 290.911  | BI823365  | 3678.196  | 4233.489  | AL122118  | 758.203   | 1102.692  |
| BI823365  | 3919.682 | 3751.355 | X06318    | 7279.043  | 6531.369  | AL137700  | 2726.476  | 3012.716  |
| X06318    | 7896.384 | 8199.868 | AL834159  | 3261.222  | 2639.704  | NM_004904 | 2442.661  | 2517.989  |
| AL834159  | 2415.196 | 2375.853 | NM_000164 | 23134.35  | 13996.583 | NM_003083 | 7347.618  | 5910.985  |
| NM_000164 | 425.429  | 648.036  | SR5       | 9107.598  | 6772.508  | NM_006789 | 5193.75   | 4165.994  |
| NM_016217 | 9613.694 | 8580.204 | SR7       | 6897.672  | 41812.867 | NM_000982 | 2353.989  | 1947.902  |
| AK025971  | 4961.782 | 5285.026 | SR9       | 23510.592 | 3588.004  | NM_001024 | 63171.785 | 62422.285 |
| NM_014007 | 2161.538 | 1663.353 | CY3Cy5    | 3734.547  | 120.686   | NM_016093 | 63606.68  | 61428.457 |
| AB033006  | 1402.118 | 1117.691 | NM_003682 | 1264.922  | 2086.445  | NM_012423 | 59202.438 | 58588.941 |
| AF020314  | 2907.009 | 1608.874 | NM_000207 | 1021.135  | 1316.594  | AK026367  | 38486.227 | 41769.059 |
| NM_016332 | 6237.081 | 5303.86  | NM_006314 | 8855.82   | 9000.783  | AK026491  | 15262.442 | 17927.248 |
| NM_006457 | 5059.616 | 5245.07  | NM_001782 | 2036.379  | 2870.509  | NM_001015 | 57232.184 | 59123.199 |
| NM_003682 | 1366.352 | 1567.283 | NM_016293 | 10640.274 | 11813.814 | AL110170  | 35950.797 | 38872.484 |
| NM_006314 | 1196.5   | 902.528  | AL080148  | 6813.956  | 6246.192  | AK021747  | 2834.899  | 3173.025  |
| NM_001782 | 4902.646 | 2249.879 | NM_006731 | 1268.355  | 1292.362  | AK025640  | 12591.455 | 12574.91  |
| NM_002754 | 639.482  | 504.664  | NM_018487 | 665.881   | 1707.155  | NM_019101 | 1791.434  | 2303.52   |
| NM_000797 | 1396.939 | 956.891  | NM_020134 | 823.705   | 896.34    | NM_000920 | 5121.92   | 4573.991  |
| NM_014927 | 640.572  | 499.821  | NM_014061 | 825.993   | 950.173   | NM_020375 | 15149.937 | 14672.246 |
| NM_016293 | 9212.157 | 10224.27 | BC034395  | 675.448   | 712.62    | NM_016049 | 22735.383 | 27735.111 |
| AF217525  | 541.627  | 510.903  | NM_002479 | 919.435   | 772.715   | NM_013311 | 17097.963 | 20066.547 |
| AL080148  | 614.243  | 517.953  | NM_000348 | 3999.678  | 3251.458  | NM_000291 | 68331.258 | 71271.977 |
| NM_006731 | 1132.226 | 1462.028 | NM_005059 | 1159.039  | 613.792   | NM_018081 | 9464.973  | 7490.542  |
| NM_014061 | 713.295  | 721.909  | NM_004950 | 2624.619  | 2934.323  | NM_014649 | 7611.036  | 6978.085  |

|           |          |          |           |           |           |           |           |           |
|-----------|----------|----------|-----------|-----------|-----------|-----------|-----------|-----------|
| BC034395  | 1308.598 | 911.452  | NM_000724 | 4859.574  | 5925.175  | AL117488  | 3817.481  | 3646.11   |
| NM_002479 | 696.809  | 886.459  | NM_002557 | 10401.185 | 6465.766  | NM_012240 | 4578.881  | 3968.26   |
| NM_000348 | 687.202  | 638.564  | NM_005662 | 43430.23  | 50350.805 | NM_019005 | 20232.691 | 16603.041 |
| NM_005059 | 718.714  | 1690.307 | NM_003060 | 1252.339  | 1962.735  | NM_004739 | 24885.33  | 24539.627 |
| NM_004950 | 584.183  | 633.202  | AK021489  | 27040.033 | 34215.184 | AV752216  | 2778.137  | 2206.095  |
| NM_006493 | 3731.002 | 3418.334 | NM_003895 | 1337.689  | 1387.706  | NM_005341 | 3461.445  | 3687.146  |
| AF040248  | 2187.372 | 1544.329 | NM_004317 | 9090.584  | 10605.823 | AF181999  | 2319.519  | 2237.156  |
| NM_014228 | 2024.971 | 1337.925 | NM_014645 | 3676.984  | 3970.254  | NM_001934 | 9333.565  | 8693.582  |
| AL832292  | 1893.972 | 3970.123 | NM_003693 | 2157.506  | 2219.868  | AB011090  | 3350.693  | 2845.763  |
| NM_003045 | 3365.427 | 4638.648 | NM_000356 | 31060.449 | 29795.283 | NM_000209 | 1394.575  | 835.336   |
| NM_005662 | 36372.3  | 36305.9  | NM_018134 | 53415.504 | 51359.02  | NM_018682 | 12222.743 | 11672.619 |
| NM_003060 | 701.353  | 780.459  | NM_013247 | 7479.915  | 9972.251  | NM_006545 | 29247.854 | 30213.982 |
| AK021489  | 26607.24 | 24009.88 | NM_006770 | 3090.784  | 3140.909  | NM_016534 | 4981.697  | 5785.75   |
| NM_004525 | 526.179  | 562.209  | BE394704  | 947.281   | 1700.046  | AB021923  | 1271.846  | 1401.445  |
| NM_003895 | 1916.462 | 1478.026 | NM_004703 | 3170.809  | 3046.899  | AK024240  | 1534.26   | 1625.623  |
| NM_004317 | 14698.15 | 12322.42 | NM_001512 | 1175.301  | 616.579   | NM_016456 | 58582.313 | 53247.395 |
| NM_014645 | 3268.321 | 2697.055 | NM_014706 | 7724.188  | 7320.009  | AK022677  | 5926.2    | 5039.835  |
| NM_014708 | 3759.055 | 3864.433 | AJ001348  | 1063.5    | 909.536   | AL137645  | 18299.99  | 20422.559 |
| NM_003693 | 964.46   | 939.229  | NM_014007 | 1465.323  | 1170.412  | AK026141  | 2714.353  | 2555.054  |
| NM_000356 | 16101.46 | 14901.82 | AB033006  | 3406.292  | 2200.198  | AK022894  | 3907.354  | 4017.697  |
| NM_018134 | 2367.405 | 2017.102 | AF020314  | 1748.281  | 1666.288  | AF217993  | 8411.384  | 9528.271  |
| NM_013247 | 11696    | 7352.772 | NM_016332 | 10608.559 | 7460.918  | AF131823  | 1608.592  | 1591.167  |
| NM_006770 | 618.639  | 670.377  | NM_006457 | 2764.44   | 2422.997  | AK026324  | 15988.916 | 19787.533 |
| BE394704  | 955.176  | 882.818  | AF000381  | 6353.612  | 6630.482  | AK025253  | 3131.249  | 3539.841  |
| NM_004703 | 2873.576 | 3782.617 | NM_018075 | 564.899   | 689.156   | AK025004  | 2409.954  | 2012.108  |
| AK023172  | 993.425  | 1271.821 | NM_012105 | 4371.986  | 3251.288  | AL136818  | 3739.568  | 3008.516  |
| AF139768  | 608.541  | 658.071  | S82470    | 6064.692  | 5552.495  | AF146798  | 5132.587  | 4080.341  |
| NM_007255 | 654.451  | 1279.151 | AB020695  | 2917.164  | 3436.465  | AK022049  | 932.424   | 679.649   |
| NM_003668 | 8167.359 | 7521.022 | AB028982  | 1703.742  | 2900.857  | AF086517  | 15386.179 | 14175.924 |
| NM_013384 | 63616.76 | 53738.46 | NM_002004 | 3422.962  | 3997.144  | AK025740  | 33764.371 | 29111.33  |
| NM_001187 | 2676.013 | 2257.999 | NM_005121 | 2113.079  | 1684.229  | AK000311  | 10291.073 | 8354.659  |
| NM_018241 | 4941.706 | 4221.062 | NM_020221 | 1032.424  | 1185.461  | AK025346  | 65107.18  | 58119.008 |
| NM_005834 | 11262.25 | 10828.42 | NM_000747 | 3184.755  | 2694.585  | AK022583  | 7080.812  | 4284.597  |
| AF000381  | 3610.04  | 3647.522 | NM_005415 | 3539.573  | 2882.893  | AL137534  | 63890.691 | 60543.078 |
| NM_018075 | 1048.25  | 1275.865 | AJ275973  | 18303.887 | 12836.946 | AF052121  | 4678.056  | 3822.198  |
| NM_012105 | 3797.853 | 4845.482 | AL832292  | 7344.325  | 3630.735  | AL359062  | 3151.203  | 2240.56   |
| S82470    | 5401.544 | 4984.702 | NM_002618 | 4420.999  | 6058.417  | AK026869  | 2540.383  | 2186.151  |
| AB020695  | 2832.285 | 2217.765 | L27479    | 969.176   | 1757.404  | AK022192  | 947.907   | 655.385   |
| NM_002004 | 3085.531 | 3280.304 | NM_002193 | 1681.467  | 1732.931  | NM_019099 | 63814.273 | 56070.707 |
| NM_005121 | 1695.042 | 1999.573 | NM_001388 | 8882.564  | 8568.932  | Y12020    | 46852.18  | 45384.113 |
| NM_001643 | 32622.02 | 37964.45 | X76770    | 3691.086  | 4543.731  | AJ001905  | 2157.906  | 1852.749  |
| NM_020221 | 927.039  | 790.928  | AB037808  | 2524.907  | 2696.897  | U17635    | 2871.653  | 2933.181  |
| AL137708  | 682.18   | 542.924  | NM_016038 | 5988.012  | 9961.436  | AL049930  | 949.414   | 787.265   |
| AJ275973  | 17737.42 | 26867.72 | Z36821    | 11574.042 | 10873.991 | D55638    | 520.756   | 964.733   |
| AL834159  | 2154.058 | 2258.522 | AF289485  | 6705.971  | 7604.07   | L23870    | 1142.458  | 1309.263  |
| NM_016217 | 7580.541 | 5619.479 | AF130092  | 3455.27   | 3080.511  | D55644    | 1256.549  | 1270.17   |
| AK025971  | 4036.008 | 3787.554 | AK024794  | 2010.826  | 1984.492  | D16951    | 960.795   | 1400.888  |
| NM_002618 | 2205.889 | 2605.567 | NM_019853 | 11086.396 | 9803.597  | L19362    | 1003.975  | 1140.226  |
| L27479    | 1065.507 | 1602.8   | NM_017992 | 4457.312  | 4182.526  | L33807    | 3267.154  | 3861.13   |
| NM_002193 | 665.91   | 585.933  | NM_005400 | 1213.02   | 680.364   | AB007975  | 1279.142  | 1040.772  |
| NM_001388 | 6202.497 | 6851.534 | NM_007255 | 3821.319  | 2960.695  | AK021821  | 957.619   | 533.147   |
| X76770    | 4479.668 | 3688.616 | NM_003668 | 11380.108 | 9710.436  | AL049328  | 2099.689  | 1139.714  |
| AB037808  | 3496.314 | 3927.927 | NM_013384 | 64795.629 | 58922.07  | AK000030  | 1552.704  | 807.663   |

|           |          |          |           |           |           |           |           |           |
|-----------|----------|----------|-----------|-----------|-----------|-----------|-----------|-----------|
| NM_01603E | 9275.547 | 8712.397 | NM_001187 | 3384.557  | 3849.515  | NM_017932 | 1319.871  | 653.527   |
| AF090911  | 465.206  | 467.227  | NM_018241 | 5802.408  | 6541.84   | AK000910  | 4206.156  | 3122.471  |
| Z36821    | 6970.869 | 9206.045 | NM_000724 | 4270.691  | 6072.808  | AF252280  | 19646.096 | 16638.932 |
| AF289485  | 10454.81 | 11526.61 | NM_002557 | 11887.23  | 12282.097 | AK000107  | 1087.877  | 1196.831  |
| AF130092  | 1417.432 | 1301.782 | Y10802    | 871.665   | 636.384   | AK000951  | 1318.944  | 908.924   |
| NM_01609E | 8802.635 | 8791.518 | AI417775  | 692.413   | 490.086   | AK024518  | 31716.119 | 32567.82  |
| AK024794  | 2996.7   | 3445.413 | BI762229  | 21021.248 | 23426.27  | AK024586  | 953.935   | 927.349   |
| NM_019853 | 10580.88 | 11699.02 | BG618320  | 5869.91   | 5828.574  | AK025017  | 6148.203  | 7208.089  |
| NM_017992 | 5879.965 | 6031.82  | Y00787    | 1708.033  | 1400.359  | AK024534  | 1158.997  | 1815.238  |
| NM_00540C | 1080.48  | 1542.776 | NM_00727E | 4868.312  | 4723.391  | AK024914  | 5912.632  | 6357.351  |
| BF851643  | 1297.643 | 1069.518 | N34462    | 2312.004  | 2216.662  | BC030949  | 6916.407  | 5471.653  |
| AK023061  | 1460.427 | 1506.656 | AI658778  | 2095.448  | 1865.362  | AF116615  | 3190.586  | 3010.886  |
| NM_014061 | 729.967  | 671.667  | L19067    | 6920.226  | 4969.362  | U17636    | 64735.074 | 58953.988 |
| NM_00505E | 690.68   | 1263.489 | Z48482    | 1462.216  | 828.536   | NM_01854E | 7490.145  | 6430.751  |
| NM_00495C | 376.511  | 712.145  | W60413    | 1351.573  | 1617.057  | U52699    | 43170.586 | 33052.945 |
| NM_000724 | 4041.99  | 3199.762 | BI823365  | 5300.35   | 5666.392  | S71613    | 2316.794  | 1300.676  |
| NM_002557 | 6257.786 | 7515.354 | X06318    | 9402.131  | 11398.504 | AK024378  | 2130.516  | 1746.927  |
| AI417775  | 528.998  | 504.121  | AL834159  | 4716.466  | 4360.845  | NM_01402E | 12132.411 | 6431.676  |
| BI762229  | 28746.96 | 35801.98 | NM_000164 | 35183.805 | 27862.018 | D61703    | 12465.16  | 5916.9    |
| Y00787    | 429.081  | 548.499  | NM_016217 | 26960.082 | 24313.699 | AF086198  | 34537.68  | 29966.967 |
| NM_00727E | 3381.923 | 3375.254 | AK025971  | 6999.988  | 7938.505  | AL137382  | 61237.254 | 54373.895 |
| N34462    | 1235.796 | 1430.074 | NM_014007 | 1844.346  | 2356.938  | AK024599  | 9107.896  | 7245.144  |
| AI658778  | 2873.612 | 3023.991 | AB033006  | 4238.666  | 4428.737  | AK024928  | 805.373   | 1024.8    |
| L19067    | 6563.209 | 6871.485 | AF020314  | 2363.002  | 4375.792  | NM_01445C | 26616.045 | 30927.785 |
| Z48482    | 278.503  | 698.971  | NM_016332 | 12203.297 | 12142.939 | NM_017991 | 2221.683  | 1631.041  |
| W60413    | 334.628  | 436.093  | AK023936  | 599.381   | 595.186   | L37198    | 2063.304  | 1436.56   |
| BI823365  | 4061.937 | 3885.027 | NM_006457 | 2879.841  | 4293.143  | U67822    | 1677.578  | 1405.222  |
| X06318    | 7904.588 | 9059.96  | NM_003682 | 1092.225  | 971.486   | AK025431  | 3202.611  | 2349.308  |
| NM_004703 | 2716.572 | 3287.961 | NM_000207 | 16903.322 | 731.852   | AK023662  | 2328.561  | 1863.89   |
| NM_001512 | 569.554  | 665.338  | NM_006314 | 10021.947 | 8643.568  | AF086274  | 61358.09  | 52746.355 |
| NM_01470E | 9473.561 | 6821.107 | NM_001782 | 2250.859  | 4182.774  | AF000991  | 1879.401  | 1399.014  |
| AK023172  | 671.202  | 559.328  | NM_000797 | 5669.612  | 7715.056  | AK000685  | 18289.641 | 22078.277 |
| AF139768  | 391.12   | 451.647  | NM_016293 | 13425.276 | 16091.804 | D28381    | 33516.305 | 31636.551 |
| AJ001348  | 196.998  | 351.69   | AF217525  | 666.555   | 957.344   | AF130064  | 58665.246 | 45090.266 |
| NM_014007 | 1724.993 | 1758.332 | AL080148  | 8071.76   | 7793.204  | U17624    | 1777.375  | 1030.105  |
| AB033006  | 1373.603 | 1310.368 | NM_006731 | 1818.009  | 1425.57   | D16988    | 59683.68  | 50140.305 |
| AF020314  | 2878.137 | 1672.348 | NM_018487 | 974.213   | 1485.29   | AK001959  | 18654.725 | 10144.399 |
| NM_016332 | 4869.597 | 3923.047 | NM_020134 | 1627.5    | 2013.692  | U36217    | 4659.242  | 1882.361  |
| NM_006457 | 3979.677 | 3632.85  | NM_014061 | 1090.346  | 1697.368  | AL389880  | 890.416   | 828.034   |
| NM_003682 | 1398.666 | 1671.985 | BC034395  | 1469.813  | 1956.336  | AL157452  | 1548.673  | 856.282   |
| NM_000207 | 884.082  | 827.841  | NM_00247E | 1632.345  | 1523.847  | AK024155  | 41766.051 | 25032.166 |
| NM_002531 | 980.493  | 755.795  | NM_00034E | 6334.995  | 5878.368  | AL359334  | 20198.189 | 12352.191 |
| NM_006314 | 1011.434 | 1097.6   | NM_00505E | 1542.58   | 902.325   | AK027095  | 4877.038  | 2655.473  |
| NM_001782 | 4272.285 | 2282.305 | NM_00495C | 3524.72   | 3050.463  | AF062097  | 2040.896  | 1511.73   |
| NM_002754 | 518.716  | 481.395  | NM_006493 | 4321.796  | 5596.387  | NM_019847 | 2413.629  | 2687.509  |
| NM_000797 | 991.686  | 803.721  | U76362    | 6207.659  | 6439.639  | D17093    | 23763.197 | 15975.804 |
| NM_016293 | 8661.551 | 8590.74  | AF040248  | 1087      | 1281.104  | AK022784  | 1021.457  | 1061.023  |
| AL080148  | 704.776  | 543.178  | NM_01422E | 1640.838  | 1511.75   | AL117521  | 6331.875  | 4781.016  |
| NM_006731 | 1257.459 | 1286.681 | AL832292  | 5523.706  | 2861.091  | NM_000731 | 535.858   | 494.586   |
| NM_020134 | 389.414  | 324.096  | NM_00304E | 11555.631 | 11287.702 | AK021913  | 13164.68  | 8290.065  |
| NM_020221 | 852.914  | 499.695  | NM_005662 | 41907.969 | 39381.281 | AL137489  | 35204     | 26438.307 |
| NM_000747 | 3267.747 | 2615.345 | AK021489  | 26766.404 | 27860.045 | AF009311  | 8584.246  | 5958.549  |
| NM_00541E | 5244.682 | 4305.312 | NM_00389E | 1147.951  | 862.713   | S73397    | 3716.27   | 2438.682  |

|           |          |          |           |           |           |           |           |           |
|-----------|----------|----------|-----------|-----------|-----------|-----------|-----------|-----------|
| AJ275973  | 14064.16 | 14950.14 | NM_004317 | 8914.645  | 7907.974  | AK023939  | 1432.813  | 1250.579  |
| NM_006493 | 3713.013 | 4426.046 | NM_014645 | 4251.4    | 3078.398  | AL050219  | 1141.168  | 580.255   |
| U76362    | 528.681  | 456.117  | NM_014708 | 5239.971  | 6804.551  | AK024433  | 4811.504  | 3692.452  |
| AF040248  | 597.787  | 535.586  | NM_003693 | 2893.616  | 4033.69   | U82321    | 1182.865  | 1552.145  |
| NM_014228 | 1137.338 | 1155.647 | NM_018134 | 60386.977 | 61789.102 | AL050376  | 1475.212  | 805.484   |
| AL832292  | 2281.769 | 5448.393 | NM_013247 | 11729.749 | 20760.291 | AL359652  | 3017.199  | 2450.845  |
| NM_003045 | 4471.934 | 6923.116 | NM_006770 | 4007.743  | 4384.54   | AK022423  | 2799.667  | 2598.781  |
| NM_005662 | 40587.9  | 49673.61 | BE394704  | 1020.36   | 1423.967  | AF088021  | 11141.596 | 10859.762 |
| NM_003060 | 1389.522 | 1370.649 | NM_004703 | 4136.134  | 3968.731  | BF509267  | 5822.419  | 3925.094  |
| AK021489  | 27154.57 | 32150.3  | NM_001512 | 1588.765  | 872.533   | NM_002455 | 16777.83  | 11042.451 |
| NM_004525 | 423.446  | 603.139  | NM_014706 | 13904.068 | 19882.846 | NM_002959 | 18924.67  | 11536.331 |
| NM_003895 | 1281.808 | 1158.284 | AK023172  | 1073.188  | 1090.867  | AK000899  | 21140.373 | 11926.897 |
| NM_004317 | 11733.99 | 10739.23 | AF139768  | 519.073   | 981.859   | CY3Cy5    | 8961.807  | 271.619   |
| NM_014645 | 3088.269 | 3606.554 | AJ001348  | 1602.477  | 1664.974  | AW300857  | 23232.426 | 21358.75  |
| NM_014708 | 3505.04  | 3195.551 | NM_007255 | 4183.822  | 4464.92   | H85962    | 33603.859 | 34189.676 |
| NM_003693 | 1078.771 | 823.857  | NM_003668 | 11163.912 | 11890.199 | BG742446  | 1888.079  | 1879.885  |
| NM_000356 | 15067.19 | 12899.36 | NM_013384 | 57717.074 | 58826.098 | AA864554  | 3511.622  | 2044.975  |
| NM_018134 | 2482.991 | 2405.146 | NM_001187 | 2569.77   | 2362.78   | X66945    | 4024.681  | 5391.401  |
| NM_013247 | 11270.65 | 7604.027 | NM_018241 | 5257.6    | 4805.501  | X12830    | 2411.103  | 2561.182  |
| NM_006770 | 689.748  | 639.448  | NM_005834 | 9688.792  | 8445.791  | U00482    | 1741.768  | 1308.334  |
| BE394704  | 964.379  | 865.747  | AF000381  | 7277.188  | 5683.644  | K01904    | 8796.568  | 14147.08  |
| AK024794  | 2261.187 | 2868.653 | NM_018075 | 624.619   | 317.398   | BE538886  | 1340.124  | 1697.608  |
| NM_019853 | 10477.23 | 9978.538 | NM_012105 | 5306.36   | 3069.529  | NM_002228 | 12598.681 | 3682.323  |
| NM_017992 | 5299.167 | 4044.764 | S82470    | 7344.159  | 6228.956  | M57650    | 4678.973  | 4547.754  |
| NM_005400 | 716.28   | 738.231  | AB020695  | 3601.344  | 4268.771  | BC023978  | 1229.182  | 1257.943  |
| AK023061  | 1292.924 | 1234.198 | AB028982  | 1701.622  | 1606.423  | M21302    | 3039.336  | 3116.154  |
| NM_007255 | 1250.103 | 2483.47  | NM_005121 | 3170.407  | 2775.888  | NM_016346 | 4056.07   | 4086.744  |
| NM_003668 | 8770.946 | 9729.034 | NM_020221 | 1845.324  | 2067.392  | SR2       | 70651.641 | 63328.73  |
| NM_001187 | 2572.568 | 2646.5   | NM_000747 | 3738.947  | 3575.25   | SR4       | 27055.68  | 17350.9   |
| NM_018241 | 5531.558 | 6316.728 | NM_005415 | 5364.774  | 6842.847  | SR6       | 4176.826  | 2503.801  |
| NM_018075 | 1137.608 | 1191.764 | AJ275973  | 24247.736 | 22283.98  | SR8       | 14498.081 | 26348.096 |
| NM_012105 | 3232.251 | 5254.959 | AL834159  | 4847.737  | 7032.958  | SR10      | 51393.613 | 14367.277 |
| S82470    | 4839.206 | 4859.713 | NM_000164 | 38824.602 | 28605.975 | CY3Cy5    | 5645.93   | 171.673   |
| AB020695  | 2092.721 | 1967.466 | NM_016217 | 21932.74  | 21075.643 | NM_001525 | 51278.73  | 55922.477 |
| NM_002004 | 2940.21  | 2607.183 | AK025971  | 5546.161  | 4829.931  | NM_006055 | 6832.45   | 7318.227  |
| NM_005121 | 1511.697 | 1688.477 | NM_002618 | 3958.885  | 2896.495  | NM_004296 | 1660.948  | 1696.159  |
| NM_001643 | 32677.46 | 37526.73 | L27479    | 1094.447  | 1328.873  | NM_005048 | 1288.923  | 1323.876  |
| NM_019096 | 5130.497 | 4566.608 | NM_002193 | 1834.446  | 1115.283  | NM_005972 | 827.552   | 793.891   |
| NM_014725 | 1037.579 | 1218.155 | NM_001388 | 8803.593  | 4428.434  | NM_018841 | 1398.922  | 1690.43   |
| NM_006892 | 4188.456 | 4143.351 | X76770    | 4764.337  | 7000.236  | NM_005226 | 1306.251  | 1227.473  |
| NM_019117 | 453.435  | 488.329  | AB037808  | 2738.568  | 2838.938  | AL133105  | 4525.97   | 5232.209  |
| NM_018309 | 3072.304 | 3296.033 | NM_016038 | 8532.844  | 10720.723 | AK022859  | 3056.257  | 4856.109  |
| NM_017658 | 1051.781 | 951.555  | Z36821    | 17728.469 | 16175.915 | NM_000214 | 611.833   | 1210.188  |
| NM_018679 | 360.992  | 801.52   | AF289485  | 8955.239  | 9652.27   | NM_014864 | 10458.677 | 10781.82  |
| NM_016643 | 882.456  | 1264.932 | AF130092  | 5370.319  | 5109.689  | NM_003728 | 12670.295 | 13819.627 |
| NM_006779 | 1626.425 | 2527.169 | AK024794  | 3032.287  | 3553.868  | NM_014352 | 5606.945  | 5061.002  |
| NM_016217 | 8748.076 | 8562.027 | NM_019853 | 15656.411 | 14930.749 | NM_012481 | 2506.461  | 2063.429  |
| AK025971  | 4508.324 | 4718.125 | NM_017992 | 6441.857  | 7803.316  | L09102    | 17428.131 | 19523.932 |
| NM_002618 | 2452.364 | 3202.785 | NM_005400 | 1724.52   | 1563.064  | NM_016247 | 4103.599  | 3679.435  |
| L27479    | 1513.833 | 1604.027 | AK023061  | 1230.132  | 988.585   | NM_001157 | 1512.762  | 1255.725  |
| NM_002193 | 368.682  | 500.984  | NM_014061 | 1112.826  | 908.378   | NM_012282 | 2475.791  | 2034.518  |
| NM_001388 | 5992.776 | 7498.95  | BC034395  | 901.365   | 1054.361  | NM_006710 | 691.474   | 1286.886  |
| X76770    | 3452.277 | 3489.676 | NM_002479 | 1251.947  | 915.064   | NM_003323 | 26597.564 | 34234.359 |

|           |          |          |           |           |           |           |           |           |
|-----------|----------|----------|-----------|-----------|-----------|-----------|-----------|-----------|
| AB037808  | 2974.991 | 3341.179 | NM_000348 | 5137.523  | 4956.847  | BG685310  | 3571.477  | 3628.485  |
| NM_016038 | 7213.898 | 6873.75  | NM_005058 | 1583.951  | 759.388   | NM_018668 | 10133.697 | 11317.026 |
| AF090911  | 507.288  | 399.029  | NM_004958 | 2363.13   | 1734.17   | NM_004227 | 1911.26   | 2610.978  |
| Z36821    | 5113.594 | 5749.434 | NM_000724 | 4191.133  | 3242.808  | NM_005282 | 3656.379  | 4392.769  |
| AF289485  | 8443.409 | 7423.909 | NM_002557 | 10856.797 | 4884.881  | NM_001736 | 1339.137  | 1444.872  |
| AF130092  | 936.291  | 1023.374 | BE728156  | 646.002   | 832.124   | AB028949  | 2226.401  | 2464.39   |
| NM_016098 | 7999.366 | 9046.235 | AI417775  | 653.618   | 609.442   | AL137580  | 1458.085  | 1407.821  |
| AF300612  | 7505.754 | 10357.45 | BI762229  | 30797.402 | 35829.273 | NM_004101 | 1580.51   | 1790.925  |
| NM_006508 | 360.994  | 469.134  | AA131406  | 928.581   | 831.55    | NM_002998 | 51798.883 | 55264.047 |
| AB014557  | 500.543  | 547.025  | BG618320  | 8710.121  | 8546.098  | AB033114  | 968.173   | 1112.776  |
| NM_005578 | 3569.993 | 2688.53  | Y00787    | 2109.24   | 1915.937  | NM_015978 | 3014.462  | 4476.859  |
| NM_003658 | 22931.05 | 23522.37 | NM_007278 | 5819.744  | 5094.647  | NM_003818 | 6730.338  | 7164.317  |
| NM_018457 | 5130.439 | 6326.826 | N34462    | 3108.4    | 3003.055  | NM_004908 | 959.572   | 764.545   |
| NM_002958 | 6649.819 | 7982.068 | AI658778  | 2268.784  | 2772.309  | NM_005212 | 6644.62   | 8470.488  |
| NM_002187 | 771.181  | 741.79   | L19067    | 9856.202  | 10104.355 | NM_006418 | 1856.045  | 2224.683  |
| NM_014248 | 1378.937 | 1574.032 | Z48482    | 976.752   | 859.386   | AF035035  | 1377.05   | 879.737   |
| NM_014858 | 581.185  | 1060.232 | W60413    | 2193.832  | 3117.606  | AB020676  | 1007.417  | 1868.337  |
| NM_001116 | 502.284  | 477.333  | BI823365  | 5265.999  | 7604.705  | AK024715  | 1431.335  | 1559.516  |
| BC035395  | 14614.63 | 13014.46 | X06318    | 10833.311 | 9700.401  | U90942    | 65766.602 | 66383.438 |
| NM_001708 | 8839.83  | 8511.744 | NM_004708 | 3501.506  | 2654.837  | NM_018368 | 3360.289  | 3642.923  |
| NM_020128 | 3416.772 | 3877.718 | NM_001512 | 1384.746  | 661.152   | AL365415  | 2080.96   | 2965.453  |
| NM_013982 | 6764.93  | 6656.61  | NM_014708 | 8368.55   | 6505.984  | L29147    | 18877.596 | 20683.273 |
| NM_005048 | 3163.34  | 3496.211 | AJ001348  | 1155.21   | 568.273   | NM_020228 | 8461.87   | 9555.232  |
| NM_003882 | 655.623  | 750.023  | NM_014007 | 1576.473  | 747.085   | AK024685  | 5769.933  | 6507.582  |
| NM_004638 | 7522.07  | 7769.667 | AB033006  | 4307.437  | 2834.6    | NM_003678 | 19617.6   | 22876.23  |
| AK023001  | 2846.041 | 2829.056 | AF020314  | 1993.689  | 2567.402  | AF113007  | 2546.971  | 2086.864  |
| NM_014828 | 10909.76 | 10441.4  | NM_016332 | 14252.935 | 17059.971 | NM_000688 | 5664.776  | 5349.008  |
| AF201947  | 1444.869 | 994.471  | AK023936  | 776.817   | 1051.958  | U39573    | 978.376   | 1191.452  |
| U01147    | 1251.471 | 1307.91  | NM_006457 | 4105.162  | 7075.934  | D82061    | 4068.358  | 6006.665  |
| NM_004048 | 3286.621 | 3410.584 | NM_003682 | 1301.866  | 1243.353  | AJ293009  | 4843.207  | 6674.499  |
| NM_006116 | 1466.694 | 2122.824 | NM_000207 | 1578.435  | 1382.854  | NM_000374 | 4325.209  | 6673.988  |
| NM_005458 | 395.235  | 480.319  | NM_002531 | 774.828   | 886.707   | NM_000502 | 9198.491  | 13503.869 |
| NM_003587 | 1403.147 | 1331.021 | NM_006314 | 13470.887 | 11216.692 | NM_001358 | 31290.029 | 44487.082 |
| X90978    | 1658.044 | 2184.357 | NM_001782 | 3144.88   | 5350.031  | NM_004978 | 3650.737  | 3698.85   |
| BF219403  | 4631.302 | 5574.296 | NM_000797 | 8558.596  | 11568.724 | NM_002248 | 4928.879  | 5001.195  |
| NM_016119 | 6143.948 | 5129.397 | NM_014927 | 526.792   | 814.072   | D87445    | 11891.227 | 12361.067 |
| AK075450  | 726.533  | 754.001  | NM_016298 | 15019.323 | 21100.715 | NM_000238 | 5343.681  | 7244.52   |
| AF178983  | 1632.673 | 1589.799 | AF217525  | 743.967   | 775.048   | NM_002247 | 1994.046  | 2081.391  |
| NM_001324 | 9431.234 | 8744.724 | AL080148  | 10461.063 | 12122.448 | AB011094  | 28168.955 | 34047.914 |
| AB037795  | 2881.104 | 2261.508 | NM_006731 | 2047.752  | 3483.245  | NM_003224 | 3273.61   | 4221.365  |
| D43949    | 3819.981 | 4142.511 | NM_018487 | 1281.638  | 2119.2    | NM_001658 | 66261.68  | 75854.109 |
| AK022975  | 1556.58  | 1491.955 | NM_020134 | 1927.998  | 2359.552  | AK021761  | 11276.274 | 13863.581 |
| NM_015344 | 6315.041 | 4917.523 | NM_020221 | 1321.305  | 1102.492  | AK024536  | 1565.402  | 1540.699  |
| NM_004288 | 3978.126 | 3313.768 | NM_000747 | 2762.952  | 2058.637  | NM_001488 | 7900.86   | 8402.675  |
| AL122055  | 3617.461 | 3529.414 | NM_005418 | 4009.325  | 2735.507  | NM_018978 | 7677.743  | 12910.719 |
| NM_005132 | 20385.05 | 21294.01 | AJ275973  | 18602.967 | 11717.129 | NM_002591 | 10780.971 | 9260.299  |
| X07695    | 594.533  | 523.113  | NM_006498 | 4675.194  | 4112.216  | NM_020216 | 10344.818 | 12198.629 |
| D87458    | 821.17   | 1257.335 | U76362    | 7065.077  | 6610.354  | AK021860  | 2501.021  | 3416.752  |
| AK021750  | 3277.902 | 2827.784 | AF040248  | 1699.342  | 1847.657  | AK000119  | 18876.703 | 30144.721 |
| NM_003628 | 2485.142 | 2603.971 | NM_014228 | 1999.475  | 3064.275  | NM_016457 | 3453.035  | 5225.918  |
| NM_006932 | 969.993  | 722.068  | AL832292  | 6856.371  | 3322.126  | NM_005057 | 3078.724  | 3386.231  |
| AK023594  | 4568.421 | 4289.205 | NM_003048 | 20817.982 | 24409.297 | AF143321  | 1725.464  | 1675.42   |
| AB010099  | 2741.423 | 3143.591 | NM_005662 | 50250.871 | 55357.414 | AB046842  | 2965.88   | 3301.769  |

|           |          |          |           |           |           |           |           |           |
|-----------|----------|----------|-----------|-----------|-----------|-----------|-----------|-----------|
| AB039920  | 1839.857 | 1914.263 | NM_00306C | 746.328   | 934.574   | NM_00485C | 2426.505  | 3271.067  |
| AB046782  | 2690.719 | 3782.448 | AK021489  | 35385.527 | 40757.395 | BF306955  | 2052.363  | 3346.321  |
| NM_00419C | 23525.06 | 28396.32 | NM_00452E | 905.055   | 1066.59   | NM_001394 | 18288.672 | 18792.486 |
| NM_01427E | 4859.875 | 7917.12  | NM_00389E | 1951.224  | 2295.826  | NM_018441 | 19133.969 | 19956.982 |
| NM_00040E | 1600.065 | 1849.147 | NM_004317 | 10751.188 | 13509.065 | NM_00160E | 3113.784  | 4450.64   |
| AF208005  | 2396.465 | 1873.799 | NM_01464E | 6297.79   | 9043.811  | BE733234  | 1935.025  | 2247.728  |
| NM_002231 | 18679.67 | 16216.86 | NM_01470E | 5100.026  | 6558.986  | NM_001157 | 1567.747  | 1513.677  |
| NM_020474 | 17450.54 | 12971.37 | NM_00369E | 2618.181  | 2731.575  | NM_01228E | 2106.463  | 2675.399  |
| NM_00264E | 4787.921 | 4964.184 | NM_00035E | 38736.285 | 48864.609 | NM_00671C | 1121.053  | 924.046   |
| NM_017807 | 3782.775 | 6383.849 | NM_018134 | 55891.297 | 57483.336 | NM_00332E | 28581.76  | 31945.475 |
| NM_01474E | 2419.06  | 2598.626 | NM_013247 | 10417.311 | 18597.881 | BG685310  | 3457.272  | 3111.564  |
| NM_00046E | 11302.42 | 8959.409 | NM_00677C | 4447.239  | 5962.006  | AW300857  | 19819.85  | 16676.52  |
| NM_00333E | 13494.74 | 10308.57 | BE394704  | 1203.892  | 1292.172  | H85962    | 35731.688 | 35006.176 |
| NM_00580E | 24906.14 | 27153.67 | AK024794  | 2145.608  | 1486.218  | BG742446  | 2562.625  | 2266.387  |
| NM_004181 | 733.034  | 965.197  | NM_01985E | 10832.643 | 7318.837  | AA864554  | 3522.81   | 2226.014  |
| NM_00390C | 2352.452 | 2378.034 | NM_01799E | 4360.326  | 2838.588  | X66945    | 4526.308  | 6149.022  |
| NM_003337 | 3894.018 | 3427.144 | NM_00540C | 1473.866  | 751.817   | X12830    | 2510.945  | 3667.094  |
| AF298152  | 2603.789 | 1979.51  | AK023061  | 1474.917  | 803.053   | U00482    | 1743.771  | 1849.837  |
| AF117233  | 6736.985 | 7188.672 | NM_00725E | 5740.177  | 4514.868  | Z80998    | 497.753   | 1113.087  |
| NM_01584E | 475.499  | 288.736  | NM_00366E | 17651.156 | 20017.648 | K01904    | 9316.808  | 15030.686 |
| NM_00172E | 1745.018 | 1265.175 | NM_013384 | 56375.988 | 57859.711 | BE538886  | 1691.806  | 1691.328  |
| NM_01601E | 1972.653 | 1792.724 | NM_001187 | 2966.443  | 2796.41   | NM_00222E | 14246.8   | 4870.297  |
| AK024707  | 1884.411 | 1412.108 | NM_018241 | 7085.116  | 8707.58   | M57650    | 5279.118  | 7224.714  |
| NM_01425E | 1290.902 | 940.78   | NM_005834 | 12694.041 | 12353.176 | BC023978  | 1250.992  | 1636.007  |
| AK022909  | 2914.568 | 2639.026 | AF000381  | 9199.491  | 9079.061  | M21302    | 3418.688  | 3725.067  |
| NM_00653C | 16126.33 | 15694.45 | NM_01210E | 7329.899  | 4749.811  | NM_01634E | 4012.257  | 4908.006  |
| AB033024  | 1130.838 | 1154.339 | S82470    | 6028.804  | 4018.331  | AK024865  | 6422.413  | 7318.396  |
| NM_01894E | 926.357  | 968.216  | AB020695  | 2769.779  | 2312.665  | NM_00721C | 3108.962  | 2644.198  |
| NM_005531 | 13256.4  | 14768.66 | AB028982  | 1302.74   | 1120.623  | U90942    | 60683.172 | 62293.73  |
| NM_006977 | 1853.04  | 1547.486 | NM_002004 | 4194.215  | 3945.99   | NM_01494E | 1269.784  | 1563.155  |
| AF217226  | 4562.25  | 3852.905 | NM_005121 | 2113.978  | 1998.154  | NM_01836C | 3471.541  | 3841.421  |
| NM_00552E | 1627.947 | 1493.661 | NM_00164E | 47413.512 | 46396.578 | AL365415  | 2100.392  | 2712.511  |
| NM_00576C | 5251.22  | 3790.395 | NM_01909E | 5884.339  | 3918.106  | L29147    | 26242.131 | 22216.586 |
| NM_00726E | 4597.676 | 4841.565 | NM_01472E | 3222.598  | 1999.316  | NM_00152E | 48376.195 | 42487.621 |
| AK023639  | 9021.829 | 8426.661 | NM_00689E | 4331.722  | 3904.158  | NM_00429E | 1092.213  | 1309.941  |
| AL122118  | 837.702  | 781.997  | NM_019117 | 3202.321  | 2859.055  | NM_00504E | 1349.476  | 1548.184  |
| AL137700  | 3131.804 | 3070.385 | NM_01830E | 6134.28   | 6029.541  | NM_00597E | 865.648   | 1150.197  |
| NM_004904 | 1186.487 | 956.291  | NM_01765E | 10103.799 | 11605.393 | NM_00106C | 247.309   | 1631.377  |
| NM_00308E | 2504.677 | 2622.324 | NM_01867E | 17407.24  | 20534.279 | NM_018841 | 1567.009  | 2347.332  |
| NM_00678E | 3080.221 | 2498.539 | NM_01664E | 1245.794  | 1340.635  | NM_00522E | 1274.936  | 1668.851  |
| NM_00098E | 1828.646 | 1909.552 | NM_00677E | 5691.032  | 4902.902  | AL133105  | 4532.075  | 5574.275  |
| AK026491  | 12818.3  | 14254.94 | NM_016217 | 30172.385 | 27830.414 | AK022859  | 2778.313  | 3488.865  |
| NM_00101E | 64732.15 | 52566.15 | AK025971  | 6734.421  | 6545.419  | NM_000214 | 954.941   | 1402.784  |
| AL110170  | 21222.23 | 24707.56 | NM_00261E | 5391.182  | 4112.241  | NM_014864 | 11370.661 | 12534.605 |
| AK021747  | 937.699  | 907.782  | L27479    | 1541.361  | 1411.496  | NM_00372E | 13357.49  | 14725.016 |
| AK025640  | 4992.145 | 5297.542 | NM_00219E | 1973.966  | 1795.441  | NM_01435E | 5494.958  | 5393.486  |
| AF131772  | 651.769  | 682.31   | NM_00138E | 10014.063 | 8069.869  | NM_012481 | 2602.151  | 2087.833  |
| NM_019101 | 1137.542 | 866.314  | X76770    | 4381.109  | 5674.308  | L09102    | 16620.502 | 16148.422 |
| NM_00092C | 2418.63  | 2374.279 | AB037808  | 2965.541  | 2756.909  | U68488    | 1174.543  | 1077.977  |
| NM_02037E | 10622.52 | 8171.841 | NM_01603E | 6920.307  | 7578.985  | NM_016247 | 4024.51   | 3224.6    |
| NM_01604E | 14956.59 | 17195.01 | Z36821    | 13841.489 | 13810.513 | AB011094  | 22512.916 | 26611.529 |
| NM_013311 | 10836.49 | 14631.23 | AF289485  | 7495.95   | 8719.87   | NM_003224 | 3169.38   | 4103.255  |
| NM_000291 | 63804.49 | 51547.24 | AF130092  | 1830.363  | 1596.362  | NM_00165E | 63372.176 | 62299.141 |

|           |          |          |           |           |           |           |           |           |
|-----------|----------|----------|-----------|-----------|-----------|-----------|-----------|-----------|
| NM_018081 | 5811.599 | 6222.49  | NM_016095 | 8958.227  | 7970.56   | NM_006827 | 35805.926 | 37500.68  |
| NM_014649 | 5590.468 | 5809.465 | AF300612  | 60593.32  | 55087.5   | AK021761  | 12187.243 | 12617.375 |
| AL117488  | 1530.474 | 1825.99  | AB014557  | 3206.243  | 3203.146  | AK024536  | 2453.921  | 2404.612  |
| NM_012240 | 1792.532 | 1291.07  | NM_005578 | 9561.688  | 5426.693  | NM_018668 | 9332.427  | 8336.212  |
| NM_019005 | 7669.721 | 6439.085 | NM_003653 | 27221.709 | 26821.004 | NM_005282 | 3637.027  | 3974.404  |
| NM_004739 | 9074.918 | 10094.6  | NM_018457 | 36922.941 | 38150.262 | NM_001736 | 1165.419  | 1356.275  |
| AV752216  | 1674.095 | 1589.562 | NM_002953 | 10175.467 | 11169.578 | AB028949  | 2049.581  | 2582.881  |
| NM_005341 | 1582.054 | 1798.885 | NM_002187 | 2036.523  | 2462.524  | AL137580  | 1491.534  | 1935.245  |
| AF181999  | 919.275  | 1054.795 | NM_014246 | 9872.923  | 11807.001 | NM_004101 | 1229.778  | 1779.406  |
| NM_001934 | 5008.174 | 5221.904 | NM_014859 | 1793.628  | 1509.067  | NM_002995 | 48400.75  | 53305.957 |
| AB011090  | 2440.032 | 2518.929 | AF311912  | 716.832   | 822.74    | AB033114  | 1067.321  | 1318.965  |
| NM_000209 | 667.88   | 839.434  | NM_001116 | 1532.595  | 1424.009  | NM_015978 | 2815.414  | 3843.922  |
| NM_018682 | 8731.156 | 10745.11 | BC035395  | 13335.004 | 13172.193 | NM_003810 | 7305.311  | 6758.737  |
| AK022090  | 1223.324 | 652.397  | NM_001703 | 19669.059 | 16994.988 | NM_004908 | 973.045   | 1293.149  |
| NM_006545 | 11501.95 | 10276.89 | NM_020126 | 6843.162  | 5848.847  | NM_014443 | 4952.041  | 4172.021  |
| NM_016534 | 5734.96  | 4899.152 | NM_013982 | 6545.579  | 6130.966  | NM_005212 | 6374.246  | 6482.384  |
| AK024240  | 842.317  | 894.38   | NM_005049 | 3434.93   | 3627.996  | NM_006419 | 1931.813  | 1655.773  |
| NM_016456 | 33772.79 | 36608.25 | NM_003882 | 1044.973  | 1035.985  | AK024715  | 1534.842  | 1581.051  |
| AK022677  | 4140.251 | 3605.849 | NM_004630 | 15393.926 | 16746.428 | BF306955  | 1955.656  | 2712.96   |
| AF035288  | 771.583  | 645.368  | AK023001  | 16276.871 | 21205.42  | NM_001394 | 16339.277 | 19480.539 |
| AL137645  | 1103.881 | 1524.103 | NM_014826 | 18097.229 | 21999.074 | NM_018441 | 16243.501 | 16398.354 |
| AK026141  | 1383.111 | 1769.028 | AF201947  | 1446.788  | 3342.841  | NM_000778 | 19719.43  | 19959.443 |
| AK022894  | 3168.06  | 2546.63  | U01147    | 3161.263  | 3431.82   | NM_001609 | 2595.137  | 2964.288  |
| AF217993  | 3340.795 | 3657.422 | NM_004040 | 16895.855 | 19003.514 | BE733234  | 1994.158  | 2185.555  |
| AF131823  | 629.7    | 784.215  | NM_006116 | 8000.494  | 7087.953  | NM_020228 | 6821.681  | 7484.149  |
| AK026324  | 1785.66  | 2488.133 | NM_005456 | 1350.218  | 850.307   | NM_003676 | 15534.438 | 19513.545 |
| AK025253  | 843.409  | 1087.189 | NM_003587 | 28433.781 | 21397.887 | AF113007  | 2327.263  | 2984.475  |
| AK025004  | 938.719  | 997.845  | X90978    | 2736.453  | 2673.383  | NM_000688 | 6615.252  | 9172.225  |
| AL136818  | 2035.517 | 2004.007 | BF219403  | 45612.289 | 36013.75  | U39573    | 1048.426  | 1422.192  |
| AF146798  | 532.653  | 648.099  | NM_016119 | 6252.628  | 5651.731  | D82061    | 4232.375  | 8137.23   |
| AK022049  | 1034.549 | 804.953  | AK075450  | 4093.501  | 3724.92   | AJ293009  | 5110.795  | 8216.044  |
| AF086517  | 1276.524 | 2143.367 | AF178983  | 5672.285  | 5681.645  | NM_000374 | 3400.152  | 5047.482  |
| AK025740  | 14927.13 | 16651.35 | NM_001324 | 9146.408  | 8897.569  | NM_000502 | 7699.039  | 11308.025 |
| AK000311  | 10121.63 | 8976.826 | AB037795  | 2751.281  | 3103.388  | NM_001359 | 31763.674 | 36642.082 |
| AK025346  | 61569.5  | 51395.33 | D43949    | 5148.728  | 5685.079  | NM_001696 | 28516.584 | 24714.367 |
| AK022583  | 6231.754 | 6661.904 | AF111849  | 61009.645 | 60465.195 | NM_004975 | 3303.604  | 2381.025  |
| AL137534  | 28784.57 | 39269.03 | AK022975  | 2333.544  | 2516.196  | NM_002245 | 4596.801  | 3549.695  |
| AF052121  | 558.337  | 814.002  | NM_015344 | 6733.871  | 7778.114  | D87445    | 13658.33  | 9810.788  |
| AL359062  | 1630.335 | 1576.784 | NM_004288 | 2292.333  | 2152.191  | NM_000238 | 5450.615  | 5321.512  |
| AK026869  | 948.803  | 835.215  | AL122055  | 4868.818  | 3885.351  | NM_002247 | 1578.549  | 1196.156  |
| AK023150  | 507.685  | 418.028  | NM_005132 | 23375.842 | 20107.303 | NM_004980 | 24751.203 | 16983.912 |
| AK022192  | 601.215  | 580.489  | X07695    | 1007.835  | 992.337   | NM_016346 | 4193.998  | 5790.249  |
| NM_019095 | 60228.54 | 51362.38 | D87458    | 2196.654  | 2628.527  | AK024865  | 4951.961  | 5918.493  |
| Y12020    | 1213.87  | 1133.344 | NM_001399 | 555.398   | 800.469   | NM_007210 | 3448.514  | 3378.559  |
| AJ001905  | 634.913  | 842.52   | AK021750  | 8406.961  | 10211.129 | NM_001483 | 8979.691  | 9274.61   |
| U17635    | 741.027  | 507.481  | NM_003626 | 3376.301  | 3841.028  | NM_018973 | 8781.316  | 21425.561 |
| L23870    | 563.297  | 711.15   | NM_006932 | 942.596   | 1516.686  | NM_002591 | 13636.964 | 19133.225 |
| D55644    | 499.605  | 545.595  | AK023594  | 9406.472  | 10397.125 | NM_020216 | 7528.442  | 10867.077 |
| L33807    | 2536.171 | 2368.854 | AB010099  | 32123.053 | 36226.23  | AK021860  | 3107.389  | 3988.546  |
| AB007975  | 1231.817 | 1414.97  | AB039920  | 12085.836 | 12504.878 | AB046816  | 1828.904  | 1684.152  |
| AL137603  | 742.886  | 661.029  | AB046782  | 3464.035  | 3731.363  | AL137266  | 5961.818  | 5270.645  |
| AK026888  | 582.479  | 909.655  | NM_004190 | 35758.039 | 34253.594 | NM_016457 | 3679.037  | 3356.96   |
| AL049328  | 1323.924 | 1558.327 | NM_014275 | 9286.895  | 7826.936  | NM_005057 | 2842.436  | 2208.106  |

|           |          |          |           |           |           |           |           |           |
|-----------|----------|----------|-----------|-----------|-----------|-----------|-----------|-----------|
| AK000030  | 586.258  | 753.367  | NM_000409 | 8444.66   | 7042.083  | AF143321  | 1336.695  | 1193.103  |
| NM_017932 | 459.331  | 451.172  | AF208005  | 2549.345  | 2185.912  | AB046842  | 2777.089  | 2086.474  |
| AK000910  | 890.657  | 1269.076 | NM_002231 | 19771.064 | 16541.205 | NM_004850 | 2145.964  | 1531.664  |
| AF252280  | 424.102  | 563.43   | NM_020474 | 18013.391 | 19160.818 | NM_002822 | 7862.009  | 5528.888  |
| AK000107  | 408.792  | 542.262  | NM_002643 | 3538.034  | 4098.564  | NM_014352 | 8308.756  | 9481.316  |
| AK024518  | 18227.72 | 17894.26 | NM_017807 | 9201.752  | 6818.246  | NM_012481 | 1912.651  | 2441.83   |
| AK024586  | 458.669  | 469.776  | NM_014746 | 3880.782  | 5369.59   | L09102    | 25560.572 | 30097.297 |
| AK024889  | 247.745  | 725.023  | NM_002788 | 68146.711 | 78981.719 | U68488    | 936.689   | 992.848   |
| AK025017  | 678.894  | 876.889  | NM_000462 | 13491.579 | 16762.373 | NM_016247 | 5708.234  | 5860.124  |
| AK024616  | 765.336  | 383.791  | NM_003336 | 14386.388 | 14263.783 | NM_001157 | 1701.522  | 1781.988  |
| AK024914  | 1205.052 | 1640.649 | NM_005805 | 48742.773 | 54558.809 | NM_012282 | 2545.708  | 3045.507  |
| BC030949  | 7620.32  | 7878.273 | NM_004181 | 1022.981  | 953.314   | NM_006710 | 1006.744  | 1507.763  |
| AF116615  | 1259.978 | 1580.032 | NM_003900 | 5481.966  | 5902.768  | NM_003323 | 28864.736 | 43027.918 |
| U17636    | 55137.46 | 47710.87 | NM_003337 | 5051.004  | 6858.837  | BG685310  | 3630.549  | 4696.496  |
| NM_018546 | 3037.927 | 3802.684 | AF298152  | 4532.812  | 3725.911  | AW300857  | 14472.322 | 20490.982 |
| AK024378  | 1132.968 | 1209.108 | AF117233  | 10346.649 | 9018.132  | H85962    | 22821.379 | 32400.313 |
| NM_014026 | 8918.485 | 8897.447 | NM_015848 | 1897.515  | 2119.902  | BG742446  | 1904.24   | 2786.74   |
| D61703    | 1127.759 | 981.858  | NM_001723 | 3012.122  | 3365.527  | AA864554  | 3428.173  | 2960.814  |
| AF086198  | 19746.79 | 21812.34 | NM_016018 | 2287.998  | 3425.311  | X66945    | 4624.409  | 7692.179  |
| AL137382  | 3048.175 | 3334.54  | M94362    | 29750.779 | 37903.43  | AI160703  | 702.683   | 1516.568  |
| AK024599  | 2821.331 | 3121.687 | AK024707  | 1932.141  | 2755.647  | X12830    | 2196.783  | 2832.363  |
| AK024928  | 365.495  | 285.269  | NM_014255 | 6847.726  | 9714.822  | U00482    | 1480.458  | 1801.075  |
| NM_014450 | 15491.33 | 19633.6  | AK022909  | 3510.107  | 3298.413  | K01904    | 9229.271  | 9005.01   |
| NM_017991 | 2025.863 | 2438.474 | NM_006530 | 21548.689 | 21830.418 | BE538886  | 1529.887  | 1033.771  |
| L37198    | 573.331  | 767.484  | AB033024  | 1470.445  | 1101.304  | NM_002228 | 12298.601 | 2829.625  |
| U67822    | 1521.959 | 1552.728 | NM_018942 | 4195.94   | 3261.079  | M57650    | 4361.707  | 3440.888  |
| AK025431  | 2268.509 | 2124.23  | NM_005531 | 21723.166 | 18023.963 | BC023978  | 1072.881  | 842.024   |
| AK023662  | 1371.815 | 1199.058 | NM_006977 | 2618.667  | 2389.302  | M21302    | 2526.011  | 2549.114  |
| AF086274  | 39594.08 | 42085.56 | AF217226  | 11215.18  | 9610.404  | NM_005212 | 6520.152  | 7875.529  |
| AK023682  | 1819.928 | 1689.193 | NM_005522 | 1975.846  | 2041.714  | NM_006419 | 2239.168  | 2367.572  |
| AK024024  | 3101.182 | 3193.181 | NM_005760 | 12220.75  | 11041.554 | AF035035  | 1460.729  | 1017.596  |
| AK000685  | 9620.499 | 12112.18 | NM_014212 | 2108.438  | 3043.142  | AB020676  | 1308.665  | 1327.358  |
| D28381    | 20002.65 | 30393.2  | NM_007265 | 6204.485  | 6505.999  | AK024715  | 1546.062  | 1580.06   |
| BE706519  | 886.114  | 823.489  | AK023639  | 13228.654 | 13724.037 | U90942    | 66235.391 | 67231.703 |
| AF130064  | 31617.57 | 32209.98 | AL122118  | 594.294   | 645.398   | NM_014942 | 2279.951  | 3257.404  |
| U17624    | 1145.416 | 1164.298 | AL137700  | 2206.92   | 2361.294  | NM_018360 | 4303.29   | 5252.322  |
| AK025184  | 1241.215 | 563.81   | NM_004904 | 2554.612  | 3082.049  | AL365415  | 3525.039  | 5071.252  |
| D16988    | 36586    | 43356.57 | NM_003083 | 6760.166  | 6779.543  | NM_006055 | 7239.188  | 9562.586  |
| AK001959  | 8746.354 | 9076.228 | NM_006789 | 4331.684  | 5770.756  | NM_004296 | 1402.495  | 1271.288  |
| U36217    | 2101.188 | 1980.097 | NM_000982 | 2872.932  | 2744.127  | NM_005048 | 1205.163  | 1655.715  |
| AL389880  | 654.818  | 724.017  | NM_001024 | 60241.184 | 59845.516 | NM_005972 | 960.057   | 1384.087  |
| AL157452  | 531.163  | 350.728  | NM_016093 | 66787.648 | 69223.703 | NM_001060 | 635.548   | 1116.444  |
| AK024155  | 13411.61 | 13249.83 | NM_012423 | 60298.203 | 56640.883 | NM_018841 | 1803.271  | 1982.841  |
| AL359334  | 8307.775 | 8659.533 | AK026367  | 33902.445 | 32213.855 | NM_005226 | 1365.741  | 1337.937  |
| AK027095  | 949.415  | 1348.938 | AK026491  | 12551.979 | 11012.409 | AL133105  | 4813.253  | 4518.067  |
| AF062097  | 483.824  | 886.837  | NM_001015 | 58550.047 | 56161.23  | AK022859  | 3090.068  | 2730.246  |
| NM_019847 | 2896.967 | 4352.018 | AL110170  | 24728.424 | 24174.523 | NM_014864 | 9966.946  | 6999.071  |
| D17093    | 23455.9  | 27238.07 | AK021747  | 2585.618  | 2049.274  | NM_003728 | 8667.206  | 7630.121  |
| AK022784  | 1154.472 | 1543.938 | AK025640  | 9836.13   | 8816.31   | NM_004975 | 4270.351  | 3384.073  |
| AL117521  | 4880.817 | 5012.997 | NM_019101 | 1969.113  | 1727.176  | NM_002245 | 5064.787  | 4535.291  |
| NM_000731 | 543.736  | 692.026  | NM_000920 | 4086.557  | 3735.899  | D87445    | 13003.438 | 12183.973 |
| AK021913  | 1686.469 | 1962.855 | NM_020375 | 10744.674 | 11633.565 | NM_000238 | 6772.832  | 7703.258  |
| AL137489  | 19197.61 | 31806.57 | NM_016049 | 22206.277 | 17456.766 | NM_002247 | 1686.036  | 1769.156  |



|           |          |          |           |           |           |           |           |           |
|-----------|----------|----------|-----------|-----------|-----------|-----------|-----------|-----------|
| AF009311  | 1388.87  | 1439.724 | NM_013311 | 21566.617 | 16823.676 | NM_004980 | 40640.246 | 40377.371 |
| S73397    | 2329.594 | 2301.926 | NM_000291 | 63875.848 | 60352.422 | AB011094  | 25981.041 | 21543.836 |
| AK023939  | 1417.841 | 1610.837 | NM_018081 | 7699.139  | 6341.339  | NM_003224 | 2919.668  | 4104.182  |
| AK024433  | 2355.664 | 2081.905 | NM_014649 | 5134.36   | 5064.871  | NM_001658 | 64279.266 | 64024.473 |
| U82321    | 963.951  | 701.027  | AL117488  | 3894.583  | 3350.729  | NM_006827 | 38709.793 | 50103.668 |
| AL050376  | 596.656  | 694.24   | NM_012240 | 3597.704  | 3821.828  | AK021761  | 12498.338 | 15428.299 |
| AL359652  | 823.383  | 595.27   | NM_019005 | 17983.377 | 18582.49  | AK024536  | 2080.55   | 2426.026  |
| AK022423  | 862.354  | 1006.596 | NM_004739 | 27020.873 | 24713.898 | NM_018668 | 11919.666 | 12250.08  |
| AF088021  | 2950.924 | 3473.717 | AV752216  | 1962.044  | 1725.994  | NM_004227 | 2141.782  | 2633.49   |
| BF509267  | 1044.772 | 1252.991 | NM_005341 | 3018.627  | 2825.627  | NM_005282 | 3926.545  | 3810.082  |
| NM_002455 | 6586.021 | 6903.014 | AF181999  | 2360.855  | 3157.812  | NM_001736 | 1379.764  | 1287.412  |
| NM_002955 | 8088.025 | 7516.856 | NM_001934 | 7729.687  | 8598.71   | AB028949  | 2495.774  | 3080.138  |
| AB046773  | 431.151  | 518.668  | AB011090  | 2912.429  | 2892.961  | AL137580  | 1828.528  | 1786.915  |
| AK000899  | 10022.27 | 9492.521 | NM_000205 | 789.917   | 986.235   | NM_004101 | 1711.034  | 1943.182  |
| CY3Cy5    | 6505.135 | 249.026  | NM_018682 | 11425.494 | 8560.84   | NM_002995 | 49731.488 | 45376.902 |
| AW300857  | 5228.505 | 3797.804 | NM_006545 | 34371.66  | 25301.832 | AB033114  | 1088.929  | 1038.961  |
| H85962    | 4870.8   | 5218.39  | NM_016534 | 4214.056  | 3228.49   | NM_015978 | 3334.494  | 2813.919  |
| BG742446  | 1516.47  | 1638.371 | AB021923  | 1772.492  | 1736.019  | NM_003810 | 6484.553  | 3466.913  |
| AA864554  | 3701.439 | 1954.361 | AK024240  | 960.25    | 1202.411  | NM_016171 | 68334.852 | 62415.48  |
| X66945    | 3262.175 | 4421.275 | NM_016456 | 56671.094 | 57371.816 | NM_014443 | 4704.382  | 2840.813  |
| X12830    | 498.68   | 731.433  | AK022677  | 6550.817  | 9076.254  | NM_016457 | 3795.15   | 4726.437  |
| Z80998    | 3756.974 | 2089.14  | AF035288  | 845.482   | 984.863   | NM_005057 | 3298.991  | 3704.868  |
| K01904    | 6397.885 | 9852.693 | AL137645  | 44050.348 | 40575.879 | AF143321  | 1565.836  | 1579.048  |
| NM_002228 | 16676.11 | 4237.412 | AK026141  | 3202.354  | 4409.983  | AB046842  | 2855.224  | 2632.828  |
| M57650    | 1212.182 | 1221.807 | AK022894  | 3299.074  | 3130.606  | NM_004850 | 2698.699  | 2682.808  |
| BC023978  | 153.782  | 652.145  | AF217993  | 7332      | 6746.738  | NM_002822 | 10247.417 | 8836.699  |
| M21302    | 736.248  | 788.576  | AF131823  | 1487.042  | 1878.197  | BF306955  | 2241.903  | 2505.902  |
| NM_016348 | 1678.857 | 2172.657 | AK026324  | 19522.332 | 16648.316 | NM_001394 | 15713.536 | 16205.923 |
| SR6       | 3529.776 | 2346.477 | AK025253  | 4435.28   | 5720.287  | NM_018441 | 17616.34  | 16754.66  |
| SR8       | 12850.73 | 23162.92 | AK025004  | 3174.885  | 3540.076  | NM_000778 | 19924.234 | 21767.404 |
| SR10      | 38928.09 | 9718.77  | AL136818  | 3992.19   | 5338.063  | NM_001609 | 3076.376  | 3600.253  |
| CY3Cy5    | 6672.494 | 184.552  | AF146798  | 5984.287  | 7769.465  | BE733234  | 2313.375  | 2130.69   |
| NM_006055 | 5587.904 | 6044.262 | AK022049  | 797.306   | 1380.676  | NM_020228 | 6380.207  | 7167.046  |
| NM_004296 | 417.079  | 431.836  | AF086517  | 18564.736 | 19662.102 | AK024685  | 5531.151  | 6278.043  |
| NM_005972 | 508.866  | 399.302  | AK025740  | 36672.27  | 33646.277 | NM_003676 | 21132.418 | 19867.996 |
| NM_005226 | 1726.028 | 1545.915 | AK000311  | 10075.377 | 12986.544 | AF113007  | 2320.529  | 1965.165  |
| AL133105  | 2999.493 | 2731.13  | AK025346  | 58714.855 | 53660.637 | NM_000688 | 6328.999  | 5720.615  |
| NM_003728 | 1053.013 | 931.071  | AK022583  | 7438.127  | 6375.726  | U39573    | 1281.3    | 1016.73   |
| NM_014352 | 691.915  | 626.08   | AL137534  | 53625.48  | 57062.586 | D82061    | 3103.028  | 4680.254  |
| NM_012481 | 1700.007 | 1500.073 | AF052121  | 10495.673 | 8650.445  | AJ293009  | 5673.663  | 5118.845  |
| L09102    | 1945.068 | 2152.431 | AL359062  | 5433.239  | 4673.779  | NM_000374 | 3944.141  | 3070.595  |
| U68488    | 573.764  | 405.683  | AK026869  | 4266.899  | 3896.152  | NM_000502 | 7358.722  | 7147.004  |
| NM_016247 | 1541.312 | 1670.21  | AK023150  | 703.572   | 799.068   | NM_001359 | 29149.115 | 19965.748 |
| NM_001157 | 1490.901 | 1001.377 | AK022192  | 1055.655  | 1477.122  | NM_005175 | 65642.195 | 55485.766 |
| NM_012282 | 1931.263 | 1564.397 | NM_019095 | 51922.949 | 58483.68  | NM_001696 | 28843.635 | 19837.537 |
| NM_006710 | 812.238  | 800.149  | AJ227904  | 709.36    | 855.377   | AF190900  | 15066.097 | 21549.621 |
| BG685310  | 3406.716 | 2533.941 | Y12020    | 51952.535 | 54334.586 | NM_020404 | 22199.553 | 34867.234 |
| NM_018668 | 8907.636 | 7982.305 | AJ011597  | 915.599   | 1255.946  | BE972401  | 9633.291  | 9710.969  |
| NM_005282 | 2987.066 | 2664.432 | AJ001905  | 2482.004  | 2564.03   | NM_017425 | 4025.657  | 4767.394  |
| NM_001736 | 1283.886 | 1168.703 | U17635    | 3406.665  | 3959.268  | AB007922  | 1904.876  | 2055.818  |
| AB028949  | 1266.937 | 1458.068 | AL049930  | 1762.282  | 1796.728  | NM_015982 | 8631.497  | 10492.677 |
| AL137580  | 777.319  | 1076.77  | Z83946    | 902.743   | 993.642   | NM_003746 | 55845.762 | 57637.453 |
| NM_004101 | 1517.657 | 1274.237 | D55638    | 846.766   | 1364.528  | NM_002910 | 56651.867 | 53452.02  |

|           |          |          |           |           |           |           |           |           |
|-----------|----------|----------|-----------|-----------|-----------|-----------|-----------|-----------|
| NM_00299E | 11261.55 | 8339.765 | L23870    | 1125.914  | 951.245   | AC096970  | 32842.883 | 40068.934 |
| AB033114  | 2210.796 | 1912.171 | D55644    | 1356.547  | 1530.725  | AK024865  | 7245.768  | 7627.396  |
| NM_01597E | 2092.765 | 1815.664 | Z97017    | 765.655   | 971.627   | NM_00721C | 3149.306  | 3116.896  |
| NM_00381C | 6378.106 | 2884.251 | D16951    | 1569.744  | 1361.356  | NM_00148E | 8543.847  | 8138.32   |
| NM_00521E | 3626.347 | 4038.832 | L19362    | 1562.037  | 1512.281  | NM_01897E | 9054.396  | 13260.395 |
| NM_00641E | 1814.084 | 1760.745 | L33807    | 2610.013  | 3383.779  | NM_002591 | 8957.082  | 10061.965 |
| AK024715  | 1002.037 | 1207.514 | U80774    | 428.303   | 860.363   | NM_02021E | 8916.935  | 8116.068  |
| U90942    | 9980.997 | 10635.9  | AB007975  | 1619.829  | 1281.996  | AK021860  | 2250.458  | 1521.731  |
| NM_01836C | 2280.306 | 1932.665 | AK024152  | 1186.365  | 639.479   | AB046816  | 1627.029  | 1447.441  |
| L29147    | 636.058  | 680.654  | AL137603  | 934.791   | 530.83    | AL137266  | 6028.616  | 4649.826  |
| NM_02022E | 1209.012 | 1190.804 | AK021821  | 1241.885  | 824.868   | U95031    | 1319.773  | 1465.995  |
| AK024685  | 4127.078 | 4176.357 | AL049328  | 1937.5    | 1842.042  | AL137311  | 1479.794  | 1952.924  |
| NM_00367E | 14236.74 | 18559.25 | AK021415  | 771.988   | 698.575   | AF035300  | 3170.913  | 4003.338  |
| AF113007  | 1728.418 | 1565.16  | AK000030  | 2019.528  | 1949.685  | NM_01770E | 18199.719 | 17986.137 |
| D82061    | 1959.857 | 3492.979 | NM_01793E | 1221.912  | 1473.417  | NM_01532C | 8157.629  | 7580.562  |
| AJ293009  | 3885.599 | 3502.333 | AK000910  | 6453.016  | 7274.616  | NM_00405E | 4285.234  | 3949.213  |
| NM_000374 | 1679.334 | 1561.131 | AF252280  | 25458.418 | 27429.691 | NM_01472E | 29090.514 | 34283.617 |
| NM_00050E | 1242.762 | 1553.283 | AK000107  | 1472.529  | 1798.063  | AJ297349  | 4154.165  | 4229.119  |
| NM_00224E | 4881.56  | 4165.937 | AK000951  | 1527.276  | 2301.858  | NM_00582E | 11021.15  | 9942.798  |
| NM_002247 | 1196.429 | 1357.546 | AK024518  | 26696.494 | 35258.359 | NM_00161E | 4080.875  | 4563.555  |
| NM_00498C | 1168.823 | 1209.225 | AK024586  | 1053.294  | 1045.328  | NM_00659E | 5290.631  | 4671.501  |
| AB011094  | 24434.77 | 23645.47 | AK025017  | 6544.82   | 6266.43   | NM_00446E | 944.972   | 1271.492  |
| NM_003224 | 3658.944 | 4214.449 | AK024534  | 1201.107  | 1888.772  | NM_00593E | 1419.836  | 1921.603  |
| NM_00165E | 35859.02 | 44603.29 | AK024616  | 732.748   | 1019.388  | U43586    | 1804.277  | 1312.896  |
| NM_006827 | 28720.35 | 31772.21 | AK024914  | 8118.152  | 9393.694  | NM_006271 | 8216.361  | 8855.129  |
| AK021761  | 8798.66  | 7090     | AK025055  | 379.678   | 1110.958  | NM_018647 | 2623.763  | 2370.135  |
| AK024536  | 575.53   | 475.649  | BC030949  | 5563.407  | 5235.155  | NM_00302E | 1490.833  | 1635.023  |
| NM_00148E | 8825.686 | 7304.127 | AF116615  | 2911.587  | 2196.786  | NM_000721 | 63356.465 | 55810.227 |
| NM_002591 | 1358.737 | 655.708  | U17636    | 57667.055 | 55026.258 | NM_00393E | 3497.144  | 2987.364  |
| NM_02021E | 6600.133 | 7496.315 | NM_01854E | 9719.233  | 8482.674  | NM_00509E | 4073.009  | 2964.513  |
| AK021860  | 1177.947 | 1035.415 | U52699    | 33644.754 | 28533.568 | NM_00005E | 9235.455  | 6853.803  |
| NM_016457 | 5461.091 | 5072.893 | S71613    | 1551.557  | 1161.176  | NM_00316E | 9868.03   | 7279.379  |
| NM_005057 | 3148.644 | 2781.818 | NM_01402E | 11164.899 | 13913.821 | NM_019057 | 5930.479  | 8774.711  |
| AB046842  | 2744.606 | 2188.14  | D61703    | 11873.576 | 12992.899 | NM_002677 | 3037.828  | 3468.616  |
| NM_00485C | 1502.764 | 1702.16  | AF086198  | 30254.375 | 38964.609 | AF149724  | 4950.243  | 5185.067  |
| NM_00282E | 8230.755 | 6449.876 | AL137382  | 57803.773 | 60483.289 | BC020745  | 2080.562  | 2558.126  |
| BF306955  | 840.023  | 767.09   | AK024599  | 9296.624  | 10698.433 | NM_006367 | 36768.41  | 31208.656 |
| NM_001394 | 17735.8  | 16612.16 | AK024928  | 1859.386  | 1208.267  | NM_00673E | 53883.895 | 60021.488 |
| NM_018441 | 12742.05 | 12264.81 | NM_01445C | 20594.162 | 19960.613 | NM_004354 | 9705.969  | 9445.125  |
| NM_00077E | 21893.87 | 21914.5  | NM_017991 | 3248.676  | 3754.367  | NM_004661 | 8285.172  | 9114.983  |
| NM_00160E | 2978.193 | 2593.633 | L37198    | 3050.678  | 3179.43   | NM_00200E | 921.719   | 938.969   |
| BE733234  | 2653.824 | 1992.417 | U67822    | 2949.094  | 2949.605  | NM_00161C | 5864.874  | 5876.582  |
| NM_001157 | 1696.605 | 1216.757 | AK021921  | 1372.01   | 1208.218  | NM_001241 | 2938.296  | 2651.509  |
| NM_01228E | 2247.749 | 2119.509 | AK025431  | 2840.987  | 2364.389  | AF217504  | 5860.934  | 4217.539  |
| NM_00671C | 1094.648 | 897.005  | AK023662  | 1432.385  | 1493.906  | AK027102  | 10121.203 | 8060.794  |
| NM_00332E | 21291.19 | 23755.08 | AF086274  | 53811.398 | 46207.191 | AL109714  | 1682.762  | 1557.049  |
| BG685310  | 2943.291 | 2374.78  | AK023682  | 1840.307  | 1995.709  | NM_00463E | 5539.433  | 4630.634  |
| AW300857  | 5406.574 | 3550.432 | AK024024  | 8721.562  | 7890.36   | NM_01791E | 9549.874  | 9342.968  |
| H85962    | 5657.27  | 5188.405 | AF000991  | 809.575   | 1097.127  | NM_01445E | 6278.174  | 6016.292  |
| BG742446  | 2285.078 | 2155.573 | AK000685  | 18864.578 | 17602.438 | NM_00474C | 24518.154 | 21599.639 |
| AA864554  | 3387.488 | 2085.304 | D28381    | 30390.59  | 24666.408 | NM_00380E | 6574.043  | 4233.498  |
| X66945    | 2979.535 | 5529.023 | BE706519  | 1407.401  | 954.221   | NM_01988E | 7733.232  | 5792.777  |
| X12830    | 532.118  | 559.869  | AF130064  | 60105.844 | 47083.086 | NM_00327E | 58404.102 | 53361.918 |

|           |          |          |           |           |           |           |           |           |
|-----------|----------|----------|-----------|-----------|-----------|-----------|-----------|-----------|
| K01904    | 5394.751 | 8949.149 | U17624    | 2871.382  | 2236.621  | NM_000426 | 631.131   | 554.45    |
| BE538886  | 825.591  | 792.467  | AK025184  | 1276.109  | 848.549   | AK021957  | 65806.227 | 62335.664 |
| NM_00222E | 15769.3  | 3734.496 | D16988    | 58498.137 | 58178.285 | NM_016623 | 26280.863 | 35921.219 |
| M57650    | 1425.074 | 1081.492 | AK001959  | 15101.325 | 18741.834 | NM_004771 | 4136.024  | 4923.652  |
| M21302    | 810.972  | 724.715  | U36217    | 4155.05   | 5243.498  | AL365514  | 2791.367  | 2740.994  |
| NM_01634E | 2040.166 | 2025.297 | AL389880  | 2314.3    | 1760.341  | NM_01829E | 2701.458  | 2428.711  |
| AK024865  | 4829.992 | 4234.855 | AL157452  | 2297.52   | 1750.076  | NM_002104 | 2686.154  | 2506.864  |
| NM_00721C | 3903.145 | 2391.826 | AK024155  | 32327.699 | 25953.096 | NM_005504 | 11211.076 | 14675.487 |
| U90942    | 7464.25  | 8529.275 | AL359334  | 22431.211 | 18574.094 | AF234654  | 5071.467  | 6564.783  |
| NM_014942 | 468.073  | 484.895  | AK027095  | 3119.206  | 3924.657  | NM_000110 | 6208.639  | 6279.173  |
| NM_01836C | 2044.757 | 2471.251 | AF062097  | 2100.64   | 2189.172  | NM_016002 | 43596.957 | 38802.266 |
| AL365415  | 1641.193 | 1807.24  | NM_019847 | 2319.671  | 2333.934  | NM_01454E | 4651.322  | 3753.631  |
| L29147    | 825.464  | 611.624  | D17093    | 21283.744 | 22307.816 | NM_000531 | 755.353   | 1079.363  |
| NM_00152E | 38911.49 | 38184.01 | AK022784  | 1078.497  | 957.467   | NM_017832 | 2416.548  | 1850.117  |
| NM_00605E | 5515.064 | 5141.098 | AL117521  | 6769.125  | 9089.545  | NM_001713 | 8151.72   | 6345.754  |
| NM_00429E | 827.87   | 1168.761 | NM_000731 | 679.369   | 687.651   | NM_015367 | 16246.031 | 12233.804 |
| NM_005972 | 325.319  | 659.125  | AK021913  | 13786.851 | 13072.599 | NM_01449E | 4706.982  | 4060.318  |
| NM_00522E | 855.177  | 1008.788 | AL137489  | 39602.629 | 29094.611 | NM_00237E | 16463.492 | 13824.131 |
| AL133105  | 2581.504 | 2527.875 | AF009311  | 10796.536 | 9959.371  | NM_001813 | 7543.552  | 4425.759  |
| NM_014464 | 10316.47 | 3173.96  | S73397    | 2613.406  | 3872.635  | AF055016  | 5627.047  | 4383.74   |
| NM_000214 | 716.511  | 477.588  | AK023939  | 1372.097  | 1429.631  | NM_007234 | 33383.883 | 18611.863 |
| NM_014864 | 9159.961 | 6409.801 | AL050219  | 1783.811  | 1638.292  | Y16704    | 66628.453 | 63715.848 |
| NM_00372E | 1320.821 | 1187.1   | AK024433  | 4369.35   | 4380.46   | NM_014567 | 5350.676  | 3932.223  |
| NM_014352 | 599.382  | 619.216  | U82321    | 1761.655  | 1794.864  | NM_017842 | 6247.725  | 3988.54   |
| NM_012481 | 1800.543 | 1494.675 | AL050376  | 1411.614  | 1460.896  | AB037809  | 2855.372  | 3749.425  |
| L09102    | 2285.193 | 2651.671 | AL359652  | 2891.593  | 2656.536  | AB011129  | 3252.567  | 4347.747  |
| NM_016247 | 1621.467 | 1325.126 | AK022423  | 3356.049  | 2534.244  | NM_014391 | 17736.889 | 21696.521 |
| NM_003224 | 3104.421 | 4411.498 | AF088021  | 17638.719 | 13964.992 | NM_00427C | 4896.598  | 4353.838  |
| NM_00165E | 32502.48 | 44192.93 | BF509267  | 7711.179  | 6335.035  | NM_001537 | 9160.069  | 6425.468  |
| AK024536  | 413.851  | 634.466  | NM_00245E | 11114.971 | 8868.069  | U80743    | 2294.001  | 2234.683  |
| NM_01866E | 7959.021 | 6593.543 | NM_00295E | 12878.227 | 11821.843 | NM_001352 | 6654.152  | 7120.474  |
| NM_004227 | 1375.426 | 1482.134 | AK000899  | 23043.324 | 19765.959 | D15050    | 4319.374  | 2800.069  |
| NM_005282 | 2861.996 | 2438.589 | CY3Cy5    | 3127.097  | 116.047   | NM_006527 | 19209.723 | 16427.264 |
| NM_00173E | 1592.598 | 1249.28  | AW300857  | 17347.203 | 10506.893 | NM_006627 | 5829.864  | 4681.699  |
| AB028949  | 1465.803 | 1439.903 | H85962    | 29007.125 | 19443.295 | NM_007363 | 24725.521 | 18141.262 |
| AL137580  | 813.572  | 766.759  | BG742446  | 1428.205  | 1241.374  | NM_003093 | 58531.406 | 59853.375 |
| NM_004101 | 1347.584 | 1140.245 | AA864554  | 1196.639  | 1696.722  | U05589    | 2417.173  | 2526.4    |
| NM_00299E | 10500.42 | 7462.266 | X66945    | 3479.751  | 3477.015  | NM_014473 | 29631.488 | 17968.328 |
| AB033114  | 902.132  | 901.52   | AI160703  | 812.897   | 879.654   | NM_00309E | 65178.152 | 64340.375 |
| NM_01597E | 1302.202 | 1120.997 | X12830    | 2723.831  | 2555.145  | NM_01638E | 3222.831  | 2585.852  |
| NM_00381C | 6359.872 | 2853.344 | U00482    | 1477.587  | 1696.069  | NM_00229E | 68152.477 | 63588.809 |
| NM_00490E | 625.055  | 632.928  | K01904    | 9310.441  | 5670.904  | NM_001762 | 24085.605 | 9236.761  |
| NM_014443 | 956.233  | 726.65   | BE538886  | 1503.862  | 2413.426  | NM_01630E | 26144.43  | 14795.239 |
| NM_005212 | 3858.561 | 3876.077 | NM_00222E | 8963.227  | 10634.459 | NM_00375E | 1043.48   | 448.883   |
| NM_00641E | 2079.021 | 1533.101 | M57650    | 8044.561  | 13955.909 | NM_01323E | 9682.501  | 7007.913  |
| AK024715  | 813.893  | 838.091  | BC023978  | 1170.777  | 1181.148  | BE258640  | 28997.162 | 15342.701 |
| NM_001394 | 15835.8  | 22373.68 | M21302    | 4260.904  | 5028.468  | NM_003314 | 14697.697 | 7761.992  |
| NM_018441 | 12011.55 | 14153.08 | NM_01634E | 4449.631  | 4257.882  | AL355730  | 971.92    | 699.85    |
| NM_00160E | 2892.432 | 3285.215 | SR2       | 59436.699 | 56790.559 | U79273    | 2960.05   | 2977.979  |
| BE733234  | 2212.377 | 2197.465 | SR4       | 20350.273 | 16273.949 | AK022050  | 5717.858  | 4005.919  |
| NM_02022E | 1255.787 | 1079.016 | SR6       | 3094.323  | 2929.198  | NM_002512 | 65227.363 | 56377.035 |
| AK024685  | 4244.048 | 4420.617 | SR8       | 13367.053 | 53967.164 | NM_00124E | 988.691   | 711.1     |
| NM_00367E | 13692.88 | 17800.2  | SR10      | 35873.586 | 11866.608 | AL365411  | 7042      | 5121.927  |

|           |          |          |           |           |           |           |           |           |
|-----------|----------|----------|-----------|-----------|-----------|-----------|-----------|-----------|
| AF113007  | 2285.264 | 1861.139 | CY3Cy5    | 3508.759  | 199.422   | NM_016066 | 8178.379  | 5716.748  |
| NM_00068E | 7558.258 | 6968.423 | NM_00152E | 33280.492 | 25042.854 | NM_00124E | 2962.589  | 3000.132  |
| U39573    | 355.982  | 576.215  | NM_00429E | 1164.532  | 790.92    | AK024677  | 1452.671  | 1371.069  |
| D82061    | 1744.46  | 3187.196 | NM_00504E | 1083.575  | 1024.906  | NM_00003E | 2801.288  | 2508.073  |
| AJ293009  | 3871.703 | 3850.915 | NM_00597E | 1012.345  | 612.742   | AY004252  | 1651.739  | 871.689   |
| NM_000374 | 1685.004 | 1304.855 | NM_00106C | 1179.055  | 1209.354  | NM_006261 | 3324.642  | 2573.957  |
| NM_00050E | 1436.376 | 1347.667 | NM_018841 | 1858.141  | 1393.377  | AK027045  | 4459.302  | 5185.762  |
| NM_00135E | 21910.28 | 23653.31 | NM_00522E | 1157.284  | 936.615   | AF169796  | 5602.528  | 4771.982  |
| NM_00169E | 25510.29 | 24898.22 | AL133105  | 4069.23   | 5260.221  | NM_005937 | 65084.539 | 57845.297 |
| NM_00224E | 4999.036 | 3701.585 | AK022859  | 4070.571  | 5065.581  | AK001503  | 7439.204  | 7230.124  |
| D87445    | 12229.61 | 9864.513 | NM_000214 | 760.945   | 807.293   | AF075027  | 1016.485  | 820.892   |
| NM_00023E | 2295.034 | 3714.39  | NM_014864 | 8477.235  | 19431.426 | AK022880  | 3855.421  | 2611.635  |
| NM_002247 | 1292.137 | 1101.354 | NM_00372E | 15713.234 | 17172.781 | NM_003601 | 36918.211 | 24069.027 |
| NM_00498C | 1025.834 | 952.656  | NM_01435E | 6649.057  | 7296.342  | AK001228  | 4569.532  | 3010.311  |
|           | 934.897  | 387.589  | NM_012481 | 1788.898  | 1532.416  | AK026778  | 2791.755  | 2708.025  |
| AK024865  | 5591.657 | 5595.107 | L09102    | 23583.605 | 22977.785 | AF074987  | 2376.513  | 1782.113  |
| NM_00721C | 3295.703 | 2733.158 | U68488    | 807.842   | 698.711   | AK001058  | 42216.672 | 33167.82  |
| NM_00148E | 8418.024 | 8684.033 | NM_016247 | 4745.422  | 4355.693  | AK026239  | 4172.833  | 3470.001  |
| NM_01897E | 8344.673 | 16350.92 | NM_001157 | 1018.764  | 1293.88   | AF086283  | 2015.789  | 1283.028  |
| NM_002591 | 368.719  | 691.488  | NM_01228E | 1662.48   | 1674.015  | AF088047  | 1450.044  | 1202.269  |
| AL049334  | 826.85   | 421.443  | NM_00671C | 823.498   | 793.481   | AF086281  | 3827.865  | 3943.452  |
| NM_02021E | 7608.253 | 8396.62  | NM_00332E | 23191.9   | 17373.652 | AF086393  | 1791.367  | 2560.396  |
| AK021860  | 1398.247 | 1303.365 | BG685310  | 2563.474  | 1937.379  | AF086453  | 1380.917  | 2626.768  |
| AL137266  | 7542.847 | 7333.086 | NM_01866E | 7195.616  | 6739.175  | AF070621  | 18182.551 | 22869.213 |
| NM_016457 | 5766.441 | 5516.573 | NM_004227 | 1791.429  | 918.772   | NM_02024C | 11998.376 | 14488.922 |
| NM_005057 | 3595.868 | 3404.744 | NM_00173E | 790.057   | 1053.435  | AK023678  | 13623.894 | 16971.24  |
| AB046842  | 2377.41  | 2529.619 | AB028949  | 1823.817  | 1772.709  | AF052090  | 8843.093  | 8460.041  |
| NM_00485C | 1836.863 | 1797.42  | AL137580  | 1259.121  | 1199.159  | AK023718  | 12532.937 | 12840.289 |
| NM_00282E | 8030.298 | 5012.568 | NM_004101 | 1148.938  | 1360.376  | AF075089  | 8193.681  | 6914.199  |
| NM_01435E | 1116.398 | 1698.322 | NM_00299E | 47703.246 | 38982.289 | AF241255  | 1048.156  | 1019.541  |
| NM_00067E | 1057.412 | 702.295  | AB033114  | 775.451   | 744.31    | AF086007  | 63960.406 | 56857.586 |
| NM_016247 | 1463.204 | 1529.645 | NM_01597E | 3004.657  | 2985.257  | AK000803  | 5534.009  | 4912.099  |
| NM_001157 | 1569.935 | 1292.795 | NM_00381C | 4375.137  | 4319.649  | AK022374  | 2809.852  | 2033.445  |
| NM_01228E | 1947.079 | 2065.225 | NM_00521E | 5399.271  | 5008.167  | AF085926  | 28420.459 | 18808.691 |
| NM_00671C | 744.459  | 893.578  | NM_00641E | 1783.793  | 1459.717  | AL137307  | 8783.971  | 5540.794  |
| NM_00332E | 24538.31 | 30899.07 | AF035035  | 567.66    | 586.482   | AL137468  | 11338.06  | 7568.8    |
| BG685310  | 3542.143 | 3810.251 | AB020676  | 956.353   | 743.065   | AL162007  | 38428.742 | 44642.242 |
| AW300857  | 5549.915 | 4261.47  | AK024715  | 1123.769  | 1025.879  | AL390137  | 26563.021 | 35013.453 |
| H85962    | 5549.744 | 5815.132 | U90942    | 59903.352 | 61372.34  | AL137340  | 1377.24   | 1298.109  |
| BG742446  | 1472.634 | 1743.128 | NM_01836C | 3478.421  | 5624.523  | AL137542  | 1213.675  | 1435.39   |
| AA864554  | 3925.189 | 2405.196 | AL365415  | 2108.913  | 1498.895  | AL162045  | 1574.974  | 1474.229  |
| X66945    | 2944.419 | 5451.437 | L29147    | 28379.076 | 18457.854 | X92185    | 1359.11   | 1226.662  |
| AI160703  | 413.471  | 595.692  | NM_02022E | 7686.982  | 8752.296  | AK022437  | 40479.938 | 49392.988 |
| X12830    | 881.502  | 711.071  | AK024685  | 4778.833  | 4416.829  | AB042410  | 2206.772  | 2315.722  |
| U00482    | 507.234  | 653.77   | NM_00367E | 16350.442 | 15747.383 | AF086102  | 2035.602  | 2602.396  |
| K01904    | 5780.525 | 9776.933 | AF113007  | 1782.171  | 2064.76   | AF116682  | 60590.605 | 59684.203 |
| BE538886  | 1195.739 | 1464.847 | NM_00068E | 5036.443  | 5333.612  | AL137259  | 5111.435  | 8215.173  |
| NM_00222E | 16597.42 | 4145.634 | U39573    | 849.552   | 1216.635  | AL122107  | 6716.667  | 9329.675  |
| M57650    | 1368.343 | 1216.495 | D82061    | 4838.136  | 4284.712  | AF075021  | 2708.041  | 2750.418  |
| BC023978  | 453.143  | 549.574  | AJ293009  | 5070.597  | 4683.765  | AK025140  | 14954.938 | 10346.647 |
| M21302    | 660.654  | 575.926  | NM_000374 | 3068.811  | 2923.404  | AK023394  | 1671.652  | 1782.939  |
| NM_00521E | 4767.694 | 5944.884 | NM_00050E | 10246.143 | 8794.166  | AF090093  | 38625.035 | 34903.559 |
| AB020676  | 1957.191 | 2219.478 | NM_00135E | 27363.369 | 22780.947 | AF161340  | 12258.485 | 12060.468 |

|           |          |          |           |           |           |           |           |           |
|-----------|----------|----------|-----------|-----------|-----------|-----------|-----------|-----------|
| AK024715  | 885.187  | 978.28   | NM_005175 | 57492.082 | 47088.531 | AF242771  | 1941.667  | 2063.306  |
| U90942    | 9117.757 | 12248.41 | NM_001696 | 23822.256 | 21374.008 | NM_018562 | 27098.818 | 28208.459 |
| NM_01836C | 1919.427 | 2131.177 | NM_004975 | 5553.433  | 2752.431  | AF098666  | 1927.058  | 2220.644  |
| AL365415  | 2451.114 | 3216.878 | NM_002245 | 3963.825  | 2647.473  | AF161365  | 1107.058  | 1365.2    |
| L29147    | 934.074  | 756.491  | D87445    | 8893.307  | 7505.771  | AF290544  | 902.305   | 1324.025  |
| NM_001525 | 42701.32 | 45105.72 | NM_000238 | 5395.628  | 3745.659  | AK021969  | 2069.338  | 2173.831  |
| NM_006055 | 6844.607 | 7227.063 | NM_002247 | 1111.412  | 1049.791  | AK022065  | 1984.591  | 2165.47   |
| NM_004296 | 705.243  | 551.552  | NM_00498C | 30809.623 | 31083.535 | AK022221  | 6383.02   | 4936.96   |
| NM_005972 | 635.427  | 581.268  | AB011094  | 18438.486 | 18091.523 | AK022356  | 1193.096  | 745.957   |
| NM_00106C | 554.631  | 532.576  | NM_003224 | 2447.187  | 2224.601  | AK021998  | 2740.744  | 1268.762  |
| NM_018841 | 423.195  | 545.548  | NM_001655 | 58448.313 | 64497.176 | AK022126  | 4597.383  | 4877.303  |
| NM_005226 | 984.536  | 1018.768 | NM_006827 | 31689.242 | 30556.359 | AK022256  | 1598.756  | 1448.967  |
| AL133105  | 3713.885 | 3054.169 | AK021761  | 9416.565  | 7509.197  | AK022383  | 7488.92   | 6693.02   |
| AK022859  | 651.851  | 501.817  | AK024536  | 1917.874  | 1213.33   | AK027041  | 5466.43   | 4405.73   |
| NM_000214 | 509.84   | 468.389  | NM_001483 | 5710.018  | 7500.441  | AK022064  | 1082.187  | 1350.645  |
| NM_014864 | 10455.52 | 7386.796 | NM_018973 | 9890.43   | 5230.702  | AK024332  | 1305.659  | 1462.673  |
| NM_003725 | 1131.239 | 1123.03  | NM_002591 | 14170.281 | 11180.862 | NM_005355 | 35195.613 | 42525.91  |
| NM_004975 | 395.194  | 576.473  | NM_020216 | 8691.222  | 7843.43   | AK027195  | 784.582   | 1796.438  |
| NM_002245 | 5876.702 | 5802.039 | AK021860  | 2312.547  | 1680.869  | AK000937  | 1597.962  | 2194.098  |
| D87445    | 12731.62 | 13357.07 | AB046816  | 1447.953  | 1092.414  | AF035306  | 5111.549  | 7036.727  |
| NM_000238 | 2537.311 | 5665.171 | AL137266  | 4719.56   | 4094.477  | AK091662  | 1491.961  | 1589.987  |
| NM_002247 | 1400.727 | 1457.979 | NM_016457 | 2845.94   | 2903.589  | NM_003954 | 1957.29   | 1855.059  |
| NM_00498C | 1337.259 | 1296.903 | NM_005057 | 2403.947  | 1665.252  | NM_016345 | 2452.738  | 1771.03   |
| AB011094  | 22861.27 | 24299.6  | AF143321  | 1542.072  | 1327.037  | AK023877  | 1416.636  | 1268.351  |
| NM_003224 | 3694.968 | 4722.862 | AB046842  | 2072.054  | 2011.926  | AK025093  | 1315.121  | 1740.704  |
| NM_001655 | 36426.7  | 49307.19 | NM_00485C | 1988.286  | 1711.437  | AK022184  | 3694.586  | 5500.502  |
| NM_006827 | 30249.53 | 38298.29 | NM_002822 | 5992.41   | 8593.624  | AK024360  | 970.811   | 528.922   |
| AK021761  | 9727.311 | 9890.058 | BF306955  | 2655.32   | 2265.216  | AK024153  | 3259.128  | 2263.058  |
| AK024536  | 1105.15  | 991.669  | NM_001394 | 11488.949 | 11520.186 | Y10516    | 11478.33  | 7314.015  |
| NM_018665 | 9917.151 | 9140.01  | NM_018441 | 17945.074 | 27261.984 | AF056451  | 3342.003  | 2113.311  |
| NM_004227 | 1383.043 | 1972.107 | NM_000775 | 17425.367 | 17899.871 | AF015039  | 13005.51  | 9146.103  |
| NM_005282 | 3100.014 | 3284.179 | NM_001605 | 2202.02   | 1906.505  | U50528    | 3551.521  | 2177.825  |
| NM_001736 | 1458.14  | 1490.527 | BE733234  | 1303.986  | 831.308   | AB020632  | 7139.667  | 4443.453  |
| AB028949  | 1955.56  | 2088.058 | NM_001157 | 1149.655  | 1726.428  | NM_018614 | 66597.109 | 58726.973 |
| AL137580  | 996.753  | 1016.374 | NM_012282 | 1876.354  | 3051.509  | AL117549  | 3874.581  | 3249.416  |
| NM_004101 | 1561.504 | 1411.546 | NM_00671C | 883.921   | 1245.391  | NM_005222 | 14726.567 | 12234.226 |
| NM_002995 | 11613.5  | 9975.719 | NM_003323 | 25689.758 | 28668.568 | BC024308  | 23637.422 | 17807.424 |
| AB033114  | 1023.786 | 669.104  | BG685310  | 2745.187  | 3308.661  | NM_000535 | 6024.489  | 5625.021  |
| NM_015975 | 1665.337 | 1199.465 | AW300857  | 19488.221 | 15671.967 | AK001838  | 66623.531 | 66133.477 |
| NM_00381C | 7159.679 | 3110.839 | H85962    | 37952.016 | 30581.207 | NM_018295 | 1695.563  | 1643.993  |
| NM_004905 | 985.499  | 528.296  | BG742446  | 1986.937  | 2640.333  | AF070574  | 924.9     | 847.192   |
| NM_016457 | 6078.917 | 7654.836 | AA864554  | 1649.833  | 3273.148  | AF086262  | 6077.532  | 4455.375  |
| NM_005057 | 3531.181 | 3826.737 | X66945    | 4958.357  | 5868.277  | AF086292  | 11219.772 | 10226.912 |
| AF143321  | 425.486  | 522.947  | AI160703  | 534.767   | 579.713   | AK023769  | 916.158   | 1168.805  |
| AB046842  | 2713.327 | 3990.237 | X12830    | 2650.317  | 2108.758  | AK024342  | 24712.715 | 19999.293 |
| NM_00485C | 1529.768 | 1843.933 | U00482    | 1276.845  | 1093.448  | AL137712  | 13782.552 | 8901.568  |
| NM_002822 | 8348.716 | 6040.081 | K01904    | 9297.038  | 4711.345  | NM_018445 | 17669.637 | 15932.909 |
| BF306955  | 996.641  | 849.439  | BE538886  | 1189.178  | 927.69    | AK022743  | 11906.722 | 10543.857 |
| NM_001394 | 17090.98 | 16021.14 | NM_002225 | 7557.993  | 5269.816  | NM_014627 | 3173.731  | 2192.741  |
| NM_018441 | 13168.57 | 12698.89 | M57650    | 6548.732  | 4748.929  | NM_013935 | 22699.715 | 13661.559 |
| NM_000775 | 22669.69 | 27407.43 | BC023978  | 1402.733  | 1089.104  | NM_013986 | 62441.98  | 54653.266 |
| NM_001605 | 3010.529 | 3541.599 | M21302    | 4408.893  | 3783.862  | U55055    | 2172.402  | 1069.138  |
| BE733234  | 2700.405 | 3108.977 | NM_016345 | 5262.22   | 7297.065  | AB018319  | 5716.576  | 3140.077  |

|           |          |          |           |           |           |           |           |           |
|-----------|----------|----------|-----------|-----------|-----------|-----------|-----------|-----------|
| NM_02022E | 1466.657 | 1510.457 | AK024865  | 4588.375  | 3293.335  | AK001101  | 6580.53   | 4730.84   |
| AK024685  | 4386.207 | 5146.845 | NM_00721C | 1972.165  | 1304.089  | BM973473  | 3103.406  | 2290.734  |
| NM_00367E | 15490.13 | 19462.16 | U90942    | 64413.629 | 72298.203 | AK021637  | 2742.311  | 1704.158  |
| AF113007  | 2025.245 | 1880.541 | NM_01494Z | 1313.41   | 1503.257  | AK021658  | 1215.841  | 819.079   |
| NM_00068E | 7966.905 | 7735.476 | NM_01836C | 3646.093  | 5165.944  | U17631    | 2624.464  | 1536.879  |
| U39573    | 447.436  | 516.594  | AL365415  | 2164.672  | 2896.634  | AL137723  | 2672.808  | 1825.012  |
| D82061    | 1726.309 | 3302.96  | L29147    | 34209.855 | 36620.277 | AK000774  | 1270.484  | 1076.631  |
| AJ293009  | 3651.224 | 3921.012 | NM_00152E | 41423.695 | 36612.324 | AK024046  | 5907.272  | 4870.169  |
| NM_000374 | 1731.142 | 1708.164 | NM_00605E | 5604.72   | 5455.024  | NM_017931 | 5873.227  | 4710.89   |
| NM_00050Z | 808.236  | 1065.308 | NM_00429E | 1153.27   | 1355.935  | AK022793  | 4131.656  | 3078.935  |
| NM_00169E | 25473.35 | 22292.48 | NM_00504E | 1334.467  | 1420.099  | AJ227910  | 3437.145  | 2532.158  |
| AF190900  | 8342.273 | 12339.8  | NM_00597Z | 885.304   | 839.317   | AF001893  | 1887.677  | 1657.844  |
| NM_020404 | 2567.594 | 2754.981 | NM_00106C | 515.398   | 1041.312  | X04236    | 19089.059 | 17672.686 |
| BE972401  | 4091.938 | 4692.454 | NM_018841 | 1726.589  | 1455.393  | AK093746  | 20467.084 | 17624.967 |
| NM_01742E | 3472.905 | 3640.959 | NM_00522E | 1050.812  | 849.25    | D16875    | 1440.213  | 1346.713  |
| AB007922  | 1196.73  | 1115.768 | AL133105  | 3413.36   | 3268.188  | AK027171  | 3964.073  | 3337.579  |
| NM_01598Z | 3774.748 | 3852.312 | AK022859  | 2978.444  | 2381.67   | AK021945  | 12984.241 | 9763.138  |
| NM_00374E | 33677.29 | 48129.89 | NM_000214 | 4858.215  | 5759.927  | L23545    | 1399.985  | 1347.89   |
| NM_00291C | 2868.601 | 3611.306 | NM_014864 | 5196.146  | 5276.785  | CY3Cy5    | 13398.021 | 295.049   |
| AC096970  | 5410.38  | 6166.589 | NM_00372E | 15245.211 | 12593.734 | U13022    | 5328.261  | 3574.383  |
| AK024865  | 5507.866 | 6152.141 | NM_01435Z | 5964.068  | 5594.638  | R23251    | 31538.453 | 35474.223 |
| NM_00721C | 4143.292 | 3678.51  | NM_012481 | 2002.641  | 1906.413  | AA481944  | 37297.582 | 46455.391 |
| NM_00148Z | 9706.984 | 10181.29 | L09102    | 21001.68  | 19748.967 | AF038440  | 1408.811  | 2160.721  |
| NM_01897Z | 8016.24  | 15786.24 | U68488    | 863.034   | 683.676   | M31158    | 4044.02   | 4931.283  |
| NM_002591 | 653.627  | 544.667  | NM_016247 | 4023.694  | 2300.339  | H00742    | 3897.552  | 4950.895  |
| AL049334  | 806.167  | 512.17   | AB011094  | 19373.336 | 27662.008 | D42108    | 3941.895  | 3551.304  |
| NM_02021E | 7512.741 | 9747.203 | NM_003224 | 2379.297  | 2776.379  | BG700922  | 6775.967  | 6012.001  |
| AK021860  | 1450.844 | 1279.642 | NM_00165E | 60822.523 | 66502.703 | AI366068  | 3010.83   | 3229.092  |
| AL137266  | 8247.016 | 7898.481 | NM_006827 | 34298.051 | 36737.867 | N57553    | 1907.584  | 2532.75   |
| U95031    | 531.636  | 693.194  | AK021761  | 10737.147 | 14047.502 | AF080158  | 5158.788  | 6844.359  |
| NM_01428E | 16709.63 | 20131.56 | AK024536  | 2061.907  | 1950.335  | BM664556  | 3846.024  | 4108.782  |
| AF035300  | 1861.487 | 1389.6   | NM_01866E | 9024.489  | 8909.695  | SR5       | 17460.555 | 18337.494 |
| NM_01770Z | 12322.5  | 10979.8  | NM_004227 | 1819.035  | 1390.676  | SR7       | 12608.486 | 54188.285 |
| NM_01532C | 2083.751 | 1674.928 | NM_00528Z | 3069.145  | 2758.8    | SR9       | 50176.223 | 7109.506  |
| NM_00405E | 1092.432 | 1468.41  | NM_00173E | 878.92    | 1187.021  | CY3Cy5    | 18905.252 | 478.563   |
| NM_01472E | 8913.535 | 9213.993 | AB028949  | 2040.195  | 1940.237  | M33197    | 67286.82  | 63380.285 |
| AJ297349  | 3842.105 | 3293.133 | AL137580  | 1302.786  | 1462.794  | NM_007024 | 10080.96  | 9630.507  |
| NM_00582E | 8451.167 | 8041.759 | NM_004101 | 1331.099  | 1611.146  | NM_013231 | 3866.051  | 3596.737  |
| NM_00161E | 1907.764 | 2505.538 | NM_00299E | 49808.871 | 50155.43  | NM_01210E | 10072.159 | 11789.732 |
| NM_00659E | 1259.493 | 1621.135 | AB033114  | 938.744   | 1091.99   | NM_00442Z | 7738.199  | 8736.859  |
| NM_00446Z | 355.031  | 511.29   | NM_01597E | 3753.76   | 3814.224  | NM_01656Z | 1840.804  | 2315.031  |
| NM_00593E | 865.433  | 1314.65  | NM_00381C | 4771.723  | 5744.188  | NM_00489E | 11194.008 | 12699.787 |
| U43586    | 726.16   | 1247.257 | NM_00490E | 692.817   | 599.93    | U59748    | 2930.507  | 3252.901  |
| NM_006271 | 3509.275 | 4516.568 | NM_01444Z | 6228.596  | 3606.071  | L32537    | 1700.115  | 1610.428  |
| NM_018647 | 2322.356 | 2746.744 | NM_00521Z | 6135.525  | 5802.246  | NM_01430Z | 20031.23  | 25345.996 |
| NM_00302E | 1202.376 | 1120.9   | M14584    | 828.13    | 758.861   | NM_00311E | 7677.533  | 8450.48   |
| NM_000721 | 37039.15 | 39866.15 | NM_00641E | 1388.886  | 1153.997  | L02922    | 40455.172 | 49717.023 |
| NM_00393Z | 1186.355 | 1449.349 | AB020676  | 1338.444  | 690.529   | NM_001797 | 4147.667  | 5372.529  |
| NM_00509E | 3583.921 | 4570.488 | AK024715  | 1014.506  | 468.743   | NM_003154 | 3099.666  | 2991.163  |
| NM_00005E | 8027.099 | 7736.272 | BF306955  | 3209.246  | 2752.911  | NM_00423E | 1540.838  | 1587.941  |
| NM_00316Z | 747.547  | 807.966  | NM_001394 | 12742.473 | 15088.084 | AK023459  | 9013.481  | 10482.265 |
| NM_019057 | 4091.642 | 4583.272 | NM_018441 | 17637.801 | 22195.482 | BI762154  | 923.26    | 1408.726  |
| NM_002677 | 258.647  | 672.832  | NM_00077E | 16896.592 | 19879.52  | NM_01213E | 14296.058 | 11860.963 |

|           |          |          |           |           |           |           |           |           |
|-----------|----------|----------|-----------|-----------|-----------|-----------|-----------|-----------|
| NM_016205 | 2714.713 | 3141.714 | NM_001605 | 2814.827  | 2667.117  | AF121856  | 15937.624 | 11565.759 |
| NM_005755 | 4557.207 | 4690.278 | BE733234  | 1953.206  | 2471.857  | NM_006421 | 9549.515  | 9457.908  |
| AF149724  | 2761.702 | 2370.971 | NM_020225 | 9400.503  | 10160.716 | NM_017457 | 29592.543 | 33771.613 |
| BC020745  | 2289.333 | 2309.18  | AK024685  | 5205.265  | 4977.147  | NM_003765 | 26056.438 | 24670.23  |
| NM_006367 | 27961.25 | 24846.23 | NM_003675 | 19514.518 | 17439.766 | NM_018202 | 40862.43  | 44996.691 |
| NM_006732 | 15967.67 | 14201.74 | AF113007  | 1605.46   | 1768.91   | AB023197  | 11682.007 | 11217.372 |
| NM_004354 | 8144.568 | 7306.875 | NM_000685 | 5205.567  | 5474.473  | NM_022173 | 14273.174 | 15419.976 |
| NM_004661 | 7182.36  | 6705.545 | U39573    | 953.864   | 1103.374  | AB040970  | 11348.088 | 10514.851 |
| NM_002005 | 490.738  | 628.043  | D82061    | 5807.937  | 4857.226  | NM_018330 | 10937.407 | 10497.051 |
| NM_001610 | 4366.969 | 4589.631 | AJ293009  | 6217.655  | 6133.667  | AB023222  | 3062.932  | 3122.082  |
| NM_001241 | 2864.175 | 2822.01  | NM_000374 | 4154.514  | 4400.913  | M33197    | 67131.594 | 63637.715 |
| AF217504  | 4329.613 | 3987.86  | NM_000502 | 12401.678 | 12485.117 | U50342    | 8411.367  | 10736.078 |
| AK027102  | 3119.051 | 3695.809 | NM_001355 | 37452.199 | 40773.195 | AF026932  | 1002.187  | 1275.269  |
| AL109714  | 2344.757 | 1988.958 | NM_001695 | 25312.361 | 23920.266 | AF103795  | 2209.682  | 2128.023  |
| NM_004632 | 4559     | 5230.783 | NM_004975 | 5498.047  | 2821.607  | NM_006215 | 1332.493  | 1252.234  |
| NM_017915 | 5231.757 | 4915.844 | NM_002245 | 4636.441  | 3621.112  | U80018    | 1583.21   | 1533.728  |
| NM_014455 | 6933.942 | 7532.429 | D87445    | 10046.125 | 9831.561  | NM_000717 | 2784.884  | 2815.057  |
| NM_004740 | 24078.58 | 22474.09 | NM_000235 | 6711.948  | 3459.504  | M33197    | 66301.609 | 73881.383 |
| NM_003805 | 5896.104 | 5415.557 | NM_002247 | 1351.357  | 954.412   | NM_004845 | 4095.323  | 3882.931  |
| NM_019885 | 5881.377 | 5768.877 | NM_004980 | 30211.82  | 18967.535 | NM_007107 | 23855.621 | 22854.113 |
| NM_003275 | 14894.72 | 13964.17 | NM_016345 | 4942.004  | 5749.475  | NM_000047 | 12018.918 | 13411.621 |
| NM_000425 | 677.662  | 585.672  | AK024865  | 5794.309  | 6101.602  | NM_006315 | 8878.808  | 10498.045 |
| AK021957  | 57445.59 | 52765.63 | NM_007210 | 2300.847  | 3773.701  | NM_018225 | 8270.747  | 9212.106  |
| NM_016623 | 15785.29 | 12970.38 | NM_001483 | 7235.313  | 7799.342  | NM_004605 | 1921.171  | 1516.81   |
| NM_004771 | 4157.042 | 5280.248 | NM_018973 | 12670.136 | 6748.744  | Z36813    | 9556.844  | 11515.892 |
| AL365514  | 2924.065 | 2859.973 | NM_002591 | 19538.693 | 15756.846 | NM_006660 | 11761.147 | 11516.958 |
| NM_018295 | 1990.303 | 1739.621 | NM_020215 | 9632.416  | 9221.548  | NM_001485 | 5386.894  | 5837.078  |
| NM_002104 | 2180.305 | 1835.281 | AK021860  | 3328.456  | 3056.318  | NM_004727 | 1420.174  | 1571.925  |
| NM_005504 | 5687.366 | 7976.491 | AB046816  | 1750.85   | 2125.976  | NM_000555 | 1615.139  | 2101.538  |
| AF234654  | 4441.861 | 4105.604 | AL137266  | 6033.185  | 4737.315  | M33197    | 38589.855 | 38187.922 |
| NM_000110 | 3918.141 | 3530.736 | NM_016457 | 2464.183  | 2494.082  | NM_004045 | 18991.461 | 17300.021 |
| NM_016002 | 19478.5  | 18483.21 | NM_005057 | 2676.604  | 1855.257  | NM_001891 | 4750.903  | 4357.768  |
| NM_014545 | 1617.089 | 1485.723 | AF143321  | 1638.092  | 1762.696  | NM_001440 | 57750.723 | 51111.359 |
| NM_017832 | 1655.998 | 1886.766 | AB046842  | 2678.576  | 2297.303  | NM_016615 | 3952.432  | 3342.532  |
| NM_001713 | 1284.845 | 1097.262 | NM_004850 | 1910.25   | 1295.915  | AB014568  | 35695.438 | 36776.473 |
| NM_015367 | 13782.71 | 14774.26 | NM_002822 | 5491.2    | 4108.222  | AK022546  | 11384.332 | 13279.247 |
| NM_014495 | 2283.08  | 2213.67  | NM_014352 | 7733.438  | 8931.315  | NM_014067 | 10382.813 | 11181.268 |
| NM_002375 | 8662.924 | 9004.46  | NM_012481 | 3022.847  | 4661.829  | NM_002914 | 16522.787 | 17703.43  |
| NM_001813 | 7121.226 | 6426.346 | L09102    | 29092.457 | 38848.039 | NM_020385 | 3356.506  | 2747.045  |
| AF055016  | 6319.184 | 5705.743 | U68488    | 735.83    | 1042.464  | NM_014877 | 1251.707  | 1693.505  |
| NM_007234 | 30107.06 | 34671.01 | NM_016247 | 4645.632  | 5719.117  | NM_006541 | 4062.301  | 3770.114  |
| NM_017842 | 7830.143 | 7537.892 | NM_001157 | 1006.441  | 1501.32   | M33197    | 66786.82  | 67621.164 |
| AB037809  | 1897.603 | 2384.057 | NM_012282 | 2227.449  | 2456.49   | NM_005705 | 4847.158  | 6537.576  |
| AB011129  | 1853.459 | 1690.503 | NM_006710 | 944.479   | 1142.605  | NM_004325 | 3787.853  | 4989.087  |
| NM_014391 | 10479.49 | 10894.54 | NM_003323 | 29246.164 | 30527.996 | NM_004581 | 11473.732 | 12182.99  |
| NM_004270 | 5329.317 | 3854.175 | BG685310  | 2856.307  | 2464.597  | NM_006817 | 31750.34  | 35227.219 |
| NM_012082 | 489.695  | 578.232  | AW300857  | 23512.096 | 21259.768 | NM_015921 | 58830.848 | 58847.164 |
| NM_001537 | 8003.864 | 6515.973 | H85962    | 43053.98  | 39849.625 | AB040900  | 31308.637 | 40427.207 |
| U80743    | 2805.851 | 2912.378 | AA864554  | 2126.899  | 3475.982  | NM_001080 | 1891.36   | 1382.668  |
| NM_001352 | 5375.082 | 5410.975 | X66945    | 5504.158  | 6983.141  | NM_001482 | 1503.788  | 1303.311  |
| D15050    | 5591.368 | 2759.936 | AI160703  | 797.777   | 612.84    | NM_001797 | 2685.627  | 2968.837  |
| NM_006527 | 17425.72 | 14355.68 | X12830    | 2984.313  | 3633.937  | NM_003154 | 2604.153  | 2225.147  |
| NM_006627 | 7328.854 | 6361.894 | U00482    | 1530.233  | 1280.51   | NM_004235 | 1599.483  | 1613.415  |

|           |          |          |           |           |           |           |           |           |
|-----------|----------|----------|-----------|-----------|-----------|-----------|-----------|-----------|
| NM_007363 | 20198.46 | 19551.54 | K01904    | 9982.834  | 5004.136  | AK023459  | 9259.446  | 11268.539 |
| NM_003093 | 53891.94 | 51895.22 | BE538886  | 1170.525  | 739.846   | BG763477  | 1907.612  | 1272.189  |
| U05589    | 2945.367 | 3171.083 | NM_002228 | 6333.548  | 3927.842  | AA702640  | 2832.743  | 2760.275  |
| NM_014473 | 24275.81 | 25633.19 | M57650    | 6919.444  | 5194.071  | T68583    | 4555.369  | 6368.208  |
| NM_003095 | 61208.43 | 56059.45 | BC023978  | 1379.984  | 900.472   | AA481944  | 40242.563 | 46679.445 |
| NM_016388 | 2476.471 | 2621.898 | M21302    | 4397.319  | 4043.346  | AF038440  | 1318.298  | 1304.608  |
| NM_001762 | 22143.8  | 18569.31 | NM_005212 | 7491.916  | 10696.49  | M31158    | 4650.223  | 5316.486  |
| NM_016306 | 22258.4  | 21744.84 | M14584    | 853.683   | 1077.285  | H00742    | 4174.702  | 4307.898  |
| NM_003755 | 1386.806 | 1043.088 | NM_006419 | 2535.612  | 3239.785  | D42108    | 3852.647  | 3308.023  |
| BE258640  | 33454.08 | 28388.59 | AF035035  | 877.467   | 1205.216  | BG700922  | 6749.347  | 5801.261  |
| NM_003314 | 15989.31 | 14774.11 | AB020676  | 1169.225  | 1128.456  | AI366068  | 2941.12   | 2559.281  |
| AL355730  | 690.247  | 733.909  | AK024715  | 1167.253  | 1463.472  | N57553    | 2127.641  | 3289.581  |
| U79273    | 3037.182 | 2855.845 | U90942    | 60193.215 | 63588.121 | AF080158  | 5591.941  | 7875.744  |
| AK022050  | 989.625  | 814.85   | NM_014942 | 1062.105  | 1379.272  | BM664556  | 3679.213  | 4113.366  |
| NM_002512 | 68387.58 | 55028.05 | NM_018360 | 3955.859  | 4933.76   | M33197    | 67066.75  | 64957.785 |
| AL365411  | 4948.426 | 4608.117 | AL365415  | 2804.727  | 2814.132  | NM_016545 | 10126.646 | 9793.265  |
| M24470    | 536.148  | 686.911  | L29147    | 43823.699 | 45353.832 | NM_000295 | 1698.009  | 1859.229  |
| NM_016066 | 6771.501 | 6385.595 | NM_001525 | 48705.602 | 49741.137 | AF103795  | 1996.648  | 1716.259  |
| NM_001249 | 1246.483 | 1487.028 | NM_006055 | 7450.87   | 7679.075  | NM_007024 | 9406.761  | 11206.23  |
| AK024677  | 1062.486 | 1379.406 | NM_004296 | 1686.134  | 2557.594  | NM_013231 | 3921.691  | 4275.946  |
| NM_000036 | 1788.678 | 2357.604 | NM_005048 | 1584.088  | 2524.042  | NM_012106 | 10375.276 | 14554.876 |
| AF254082  | 42180.36 | 44603.32 | NM_005972 | 1084.02   | 1470.881  | NM_006254 | 2430.147  | 3237.572  |
| AF205718  | 3037.187 | 2908.392 | NM_001060 | 1443.501  | 1727.626  | X95425    | 3101.817  | 3237.962  |
| NM_003420 | 625.049  | 794.314  | NM_018841 | 2112.13   | 1737.372  | NM_004422 | 7277.23   | 9245.919  |
| AY004252  | 2096.558 | 1661.075 | NM_005226 | 1314.059  | 1144.199  | NM_016562 | 3803.638  | 3392.049  |
| NM_006261 | 1508.835 | 1588.969 | AL133105  | 3950.198  | 4059.841  | NM_004895 | 14330.07  | 16566.881 |
| AK027045  | 4482.688 | 4607.58  | AK022859  | 3104.421  | 2290.662  | U59748    | 3567.004  | 4199.861  |
| AF169796  | 5130.116 | 4096.321 | NM_000214 | 846.462   | 624.216   | L32537    | 1643.865  | 2162.907  |
| AK001814  | 6174.479 | 5719.932 | NM_014864 | 6829.774  | 6645.483  | NM_014303 | 22898.459 | 28292.453 |
| NM_007222 | 1583.248 | 2232.489 | NM_003728 | 13677.353 | 11207.164 | M33197    | 68013.633 | 63510.563 |
| NM_003435 | 3917.135 | 4196.786 | NM_004975 | 5844.683  | 4247.695  | M95610    | 36670.734 | 36022.363 |
| NM_016291 | 8022.563 | 10585.2  | NM_002245 | 5914.713  | 7686.847  | NM_003118 | 6357.395  | 6294.079  |
| NM_005937 | 41003.41 | 41714.76 | D87445    | 13657.529 | 21590.898 | M33197    | 32045.549 | 24485.857 |
| AK023259  | 471.962  | 652.078  | NM_000238 | 8419.62   | 7433.102  | NM_004045 | 20240.158 | 16601.344 |
| AK001503  | 1015.253 | 1308.122 | NM_002247 | 1230.418  | 1816.83   | NM_001891 | 3335.234  | 3546.115  |
| AK021812  | 568.916  | 761.322  | NM_004980 | 44339.16  | 52453.836 | NM_012139 | 12660.898 | 12870.339 |
| AK022880  | 848.871  | 1201.729 | AB011094  | 21133.355 | 27332.93  | AF121856  | 16060.459 | 12245.267 |
| NM_003601 | 28109.6  | 32679.6  | NM_003224 | 3330.025  | 3774.002  | NM_006421 | 6725.513  | 6834.981  |
| AF086375  | 715.295  | 961.03   | NM_001658 | 60430.934 | 64593.313 | NM_017457 | 27507.443 | 35448.523 |
| AK001228  | 5306.271 | 4731.32  | NM_006827 | 45412.813 | 47707.227 | NM_005868 | 2189.567  | 3278.245  |
| AK026778  | 4387.73  | 4094.555 | AK021761  | 14754.837 | 21468.031 | NM_018202 | 41269.664 | 38476.609 |
| AF074987  | 2360.254 | 2183.182 | AK024536  | 2944.504  | 4173.82   | AB023197  | 12904.516 | 12140.237 |
| AK001058  | 7765.106 | 8630.816 | NM_018668 | 11864.715 | 16344.261 | NM_022173 | 12604.105 | 12927.484 |
| AK026239  | 5170.883 | 5187.752 | NM_004227 | 2324.062  | 2300.655  | AB040970  | 11861.853 | 10116.634 |
| AF086283  | 1003.888 | 1132.268 | NM_005282 | 4978.345  | 5904.59   | NM_018330 | 10287.935 | 8075.927  |
| AF088047  | 719.136  | 601.263  | NM_001736 | 1168.22   | 1972.788  | AB023222  | 2989.923  | 2923.724  |
| AF086281  | 1221.244 | 1760.266 | AB028949  | 2818.416  | 3672.216  | AB033088  | 2673.891  | 2614.994  |
| AF086393  | 897.633  | 1110.45  | AL137580  | 1803.229  | 2247.523  | M33197    | 69871.508 | 63486.164 |
| AF086453  | 338.714  | 434.474  | NM_004101 | 1667.753  | 2176.868  | NM_015921 | 61210.02  | 57493.5   |
| AF070621  | 8783.905 | 8670.448 | NM_002995 | 52323.223 | 46172.41  | AB040900  | 26450.666 | 27899.162 |
| NM_020240 | 12327.35 | 9950.262 | AB033114  | 952.362   | 1067.346  | NM_001080 | 1909.378  | 1334.36   |
| AK023678  | 3324.193 | 3300.793 | NM_015978 | 3863.664  | 3779.44   | NM_001482 | 2135.2    | 1430.748  |
| AF052090  | 3947.993 | 3742.804 | NM_003810 | 4528.98   | 4233.23   | U80018    | 1964.721  | 1659.036  |



|           |          |          |           |           |           |           |           |           |
|-----------|----------|----------|-----------|-----------|-----------|-----------|-----------|-----------|
| AK023718  | 10847.68 | 12577.11 | NM_00490E | 789.86    | 802.844   | NM_000717 | 3287.104  | 2504.441  |
| AF075089  | 493.227  | 592.299  | NM_016171 | 62789.223 | 65621.313 | M33197    | 67825.609 | 63414.852 |
| AF241255  | 701.05   | 407.586  | NM_014443 | 6574.584  | 4035.927  | NM_004845 | 3921.94   | 3391.421  |
| AF086007  | 10992.49 | 11193.33 | NM_016457 | 3078.287  | 4176.281  | NM_007107 | 28320.48  | 26985.994 |
| AK000803  | 5765.041 | 4810.301 | NM_005057 | 2922.367  | 3833.323  | NM_006319 | 10002.74  | 11352.274 |
| AK022374  | 2405.047 | 2353.299 | AF143321  | 2046.721  | 3038.722  | NM_004605 | 2098.41   | 2107.355  |
| AF085926  | 1286.681 | 1623.448 | AB046842  | 2773.912  | 2754.236  | Z36813    | 10189.119 | 10592.566 |
| AF085948  | 636.216  | 516.899  | NM_00485C | 2362.046  | 2743.976  | NM_00666C | 13522.897 | 11372.731 |
| AL137307  | 7496.089 | 7856.653 | NM_002822 | 7475.79   | 9116.777  | NM_004727 | 1519.735  | 1655.923  |
| AL137468  | 8618.677 | 9079.453 | BF306955  | 3065.663  | 2679.357  | AF080158  | 6747.877  | 9058.023  |
| AL162007  | 30033.01 | 33821.61 | NM_001394 | 13687.176 | 12565.428 | BM664556  | 3500.991  | 4556.386  |
| AL390137  | 4790.318 | 5127.843 | NM_018441 | 18752.586 | 20398.924 | M33197    | 71575.93  | 63719.047 |
| AL137340  | 1064.799 | 1138.987 | NM_00077E | 20945.629 | 24006.125 | NM_016545 | 9797.802  | 14912.767 |
| AL137542  | 830.993  | 920.329  | NM_001609 | 2962.641  | 3034.348  | NM_00144C | 62376.719 | 62469.895 |
| AL162045  | 1279.818 | 1224.154 | BE733234  | 1720.732  | 1752.985  | NM_001201 | 1480.795  | 1834.901  |
| X92185    | 635.892  | 393.075  | NM_02022E | 8970.69   | 9369.705  | NM_01661E | 3936.013  | 4993.504  |
| AK022437  | 28505.92 | 27109.71 | AK024685  | 5559.8    | 5951.76   | AB014568  | 26621.809 | 39677.328 |
| AB042410  | 1119.48  | 1009.584 | NM_00367E | 19914.988 | 24776.469 | AK022238  | 1376.162  | 1688.896  |
| AF116682  | 42304.65 | 48011.03 | AF113007  | 2015.895  | 2649.283  | NM_012249 | 7023.256  | 10048.034 |
| AL137259  | 1489.139 | 1188.605 | NM_00068E | 6195.553  | 5942      | AK022546  | 10994.546 | 14382.654 |
| AL122107  | 1948.529 | 1928.287 | U39573    | 1174.852  | 1180.026  | NM_014067 | 8872.658  | 11725.307 |
| AF075021  | 1598.417 | 1195.523 | D82061    | 6139.009  | 5279.259  | NM_002914 | 15828.588 | 15371.249 |
| AK025140  | 12953.83 | 8873.643 | AJ293009  | 5892.363  | 5700.896  | NM_02038E | 3870.111  | 3427.845  |
| AK023394  | 1358.264 | 1583.796 | NM_000374 | 4718.968  | 5045.843  | NM_014877 | 1604.868  | 1512.209  |
| AF090093  | 28248.04 | 35607    | NM_000502 | 13716.547 | 12979.923 | NM_006541 | 2826.986  | 3064.063  |
| AF161340  | 7445.983 | 7842.852 | NM_00135E | 32522.094 | 26247.299 | NM_00570E | 6229.163  | 5097.852  |
| AF242771  | 622.303  | 808.195  | NM_00517E | 60131.609 | 49201.301 | NM_00432E | 4032.345  | 4051.708  |
| NM_018562 | 22462.91 | 27080.84 | NM_00169E | 22284.973 | 16509.934 | NM_004581 | 12536.818 | 8933.609  |
| AF098666  | 613.961  | 685.342  | AF190900  | 11204.489 | 10865.123 | NM_006817 | 30364.387 | 21399.26  |
| AF290544  | 563.624  | 529.099  | NM_020404 | 36409.625 | 45271.863 | M95610    | 35807.668 | 41290.273 |
| AK021969  | 1804.232 | 1906.705 | BE972401  | 14475.114 | 18119.139 | NM_00311E | 5959.724  | 8182.797  |
| AK022065  | 2437.69  | 2800.967 | U56725    | 729.78    | 705.579   | L02922    | 30214.99  | 43500.75  |
| AK022221  | 1152.071 | 1178.954 | NM_01742E | 2243.951  | 2360.488  | NM_001797 | 2261.665  | 3853.427  |
| AK022356  | 409.06   | 389.008  | AB007922  | 1622.952  | 1381.909  | NM_003154 | 2501.697  | 3254.386  |
| AK021998  | 555.301  | 479.3    | NM_015982 | 9356.433  | 7702.216  | NM_00423E | 908.962   | 1457.042  |
| AK022126  | 1543.299 | 1564.029 | NM_00374E | 49741.273 | 36237.914 | AK023459  | 8563.336  | 14129.313 |
| AK022256  | 555.22   | 682.008  | NM_00291C | 62178.859 | 60256.305 | U13022    | 5128.342  | 6403.422  |
| AK027041  | 5432.925 | 5340.091 | AC096970  | 42747.578 | 38601.176 | R23251    | 27761.875 | 47073.984 |
| AK024332  | 735.125  | 672.611  | AK024865  | 5845.49   | 5306.415  | BG763477  | 1158.104  | 1542.609  |
| NM_00535E | 3659.802 | 3866.635 | NM_00721C | 2354.807  | 1844.866  | AA702640  | 3212.677  | 3861.921  |
| AK027195  | 1035.487 | 651.934  | NM_001483 | 7926.822  | 7630.538  | T68583    | 5203.974  | 8152.258  |
| AK000937  | 924.509  | 714.023  | NM_018973 | 13184.274 | 7270.702  | AA481944  | 38527.914 | 46781.406 |
| AF035306  | 1427.093 | 1345.507 | NM_002591 | 23100.791 | 19187.35  | AF038440  | 1742.113  | 2163.894  |
| AK091662  | 875.955  | 1015.094 | NM_02021E | 10106.855 | 8281.705  | M31158    | 4011.995  | 4618.4    |
| NM_003954 | 1359.942 | 1323.598 | AK021860  | 3059.081  | 2628.076  | D42108    | 3964.76   | 3955.64   |
| NM_01634E | 1028.899 | 1030.643 | AB046816  | 1543.153  | 1155.546  | BG700922  | 6345.242  | 6312.508  |
| AK022003  | 802.075  | 743.784  | AL137266  | 5434.104  | 4758.055  | AI366068  | 3148.463  | 2923.235  |
| AK023877  | 1218.044 | 1085.345 | U95031    | 1052.598  | 1006.007  | N57553    | 1570.104  | 1963.615  |
| AK024213  | 18470.13 | 19198.29 | AF035300  | 2310.279  | 3522.276  | AB040970  | 13796.198 | 12271.263 |
| AK022184  | 568.169  | 513.724  | NM_017703 | 12141.513 | 12891.934 | NM_01833C | 11385.18  | 11288.659 |
| AB007959  | 888.579  | 863.607  | NM_01532C | 5975.403  | 8647.937  | AB033088  | 2786.118  | 2545.045  |
| AK026002  | 1066.309 | 913.29   | NM_00405E | 3330.288  | 2943.337  | M33197    | 66957.383 | 66606.313 |
| AK024360  | 707.538  | 842.464  | NM_01472E | 25043.25  | 29812.982 | U50342    | 7600.423  | 7901.727  |

|           |          |          |           |           |           |           |           |           |
|-----------|----------|----------|-----------|-----------|-----------|-----------|-----------|-----------|
| AK024153  | 2452.563 | 2816.65  | AJ297349  | 3132.938  | 3588.556  | NM_000295 | 1498.589  | 1978.816  |
| Y10516    | 6612.144 | 7796.028 | NM_005825 | 8884.703  | 8541.104  | AF103795  | 1967.182  | 1556.676  |
| AF056451  | 1221.405 | 969.516  | NM_001615 | 4039.244  | 3579.773  | NM_006215 | 926.441   | 785.549   |
| AF015039  | 6307.258 | 8104.625 | NM_006595 | 4294.614  | 4090.797  | NM_013231 | 4760.426  | 4149.907  |
| U50528    | 1891.136 | 1845.505 | NM_004463 | 1345.447  | 1024.059  | NM_012106 | 10669.259 | 10632.53  |
| AB020632  | 4714.023 | 4906.063 | NM_005936 | 2822.487  | 2968.341  | NM_006254 | 3460.515  | 3222.015  |
| NM_018614 | 57018.85 | 48229.49 | U43586    | 2083.872  | 2168.599  | X95425    | 3066.928  | 2904.066  |
| AL117549  | 2765.216 | 3193.266 | NM_006271 | 10499.872 | 9035.682  | NM_004422 | 8618.938  | 6622.925  |
| NM_005222 | 1485.859 | 1775.695 | NM_018647 | 1966.559  | 1872.679  | NM_016562 | 1969.042  | 1156.722  |
| BC024308  | 18662.29 | 21686.85 | NM_003026 | 1612.66   | 1180.811  | M33197    | 77767.32  | 64108.887 |
| NM_000535 | 5120.73  | 6931.141 | NM_000721 | 65793.438 | 64966.516 | AY009399  | 44040.48  | 39379.617 |
| AK001838  | 67427.93 | 56930    | NM_003933 | 4459.186  | 3856.677  | NM_004895 | 10936.687 | 8134.319  |
| NM_018295 | 500.771  | 773.16   | NM_018640 | 809.014   | 1111.797  | U59748    | 2962.969  | 2187.65   |
| AF070574  | 998.586  | 1153.32  | NM_005095 | 4536.308  | 3660.258  | L32537    | 1746.465  | 1643.994  |
| AF086262  | 3659.295 | 3536.399 | NM_000055 | 8772.991  | 7619.629  | NM_014303 | 20153.996 | 19584.58  |
| AF086292  | 559.995  | 993.488  | NM_003163 | 15818.658 | 10235.523 | NM_006660 | 14544.082 | 12617.988 |
| AK023769  | 753.165  | 715.079  | NM_019057 | 5450.539  | 4719.979  | NM_006685 | 40172.938 | 41914.914 |
| AK024342  | 2874.275 | 2848.93  | NM_002677 | 1866.445  | 1961.174  | NM_004045 | 19359.59  | 16079.764 |
| AL137712  | 2078.499 | 1760.278 | NM_005755 | 6622.796  | 6897.972  | NM_001891 | 2269.521  | 2178.346  |
| L77599    | 8225.363 | 8646.556 | AF149724  | 3629.271  | 3988.987  | NM_012139 | 12003.009 | 8379.525  |
| AK021673  | 28468.28 | 28327.77 | BC020745  | 1945.973  | 1431.648  | AF121856  | 14846.631 | 8126.174  |
| AB014543  | 2302.942 | 2443.998 | NM_006367 | 26880.455 | 32475.295 | NM_006421 | 7910.775  | 5824.377  |
| NM_018445 | 14371.06 | 11699.81 | NM_006732 | 50160.188 | 57337.609 | NM_017457 | 25834.902 | 19567.08  |
| AK022743  | 4313.986 | 3937.52  | NM_004354 | 7153.729  | 8268.342  | NM_003765 | 20776.926 | 14447.745 |
| NM_014627 | 1852.937 | 1731.56  | NM_004661 | 5857.581  | 5345.422  | NM_005865 | 1765.082  | 1768.725  |
| NM_013935 | 5816.602 | 6778.793 | NM_002005 | 875.24    | 783.443   | M33197    | 67438.734 | 63201.438 |
| NM_013985 | 37710.62 | 44101.99 | NM_001610 | 3888.833  | 2721.115  | NM_018202 | 34859.242 | 24321.129 |
| U55055    | 1838.619 | 1876.279 | NM_001241 | 2016.014  | 1953.964  | AB023197  | 8336.656  | 5258.059  |
| AB018319  | 3040.807 | 2641.273 | AF217504  | 4273.771  | 4612.418  | NM_022173 | 10423.636 | 6277.821  |
| AK001101  | 2496.836 | 2818.965 | AK027102  | 11036.305 | 9443.759  | M33197    | 67017     | 62171.133 |
| BM973473  | 1759.532 | 1642.663 | AL109714  | 1443.188  | 1886.581  | NM_005705 | 4827.282  | 5751.985  |
| AK021637  | 836.128  | 695.113  | NM_004632 | 5397.864  | 5277.898  | NM_004325 | 4306.564  | 4941.149  |
| AK021658  | 659.152  | 736.737  | NM_017915 | 10117.321 | 10933.606 | NM_004581 | 11492.355 | 10100.973 |
| AL137723  | 1708.743 | 1597.077 | NM_014456 | 6048.286  | 5919.508  | NM_006817 | 24880.232 | 24397.984 |
| AK024046  | 3853.519 | 3999.274 | NM_004740 | 26411.697 | 28833.855 | NM_007105 | 38179.621 | 54501.852 |
| NM_017931 | 1660.283 | 2423.349 | NM_003805 | 5911.722  | 6171.065  | AB040900  | 34194.875 | 40988.891 |
| AK022793  | 1268.824 | 1339.172 | NM_019886 | 7314.508  | 6985.187  | NM_001080 | 1732.435  | 1962.342  |
| AJ227910  | 2218.376 | 2366.417 | NM_003275 | 58937.633 | 61008.855 | NM_001482 | 1432.267  | 1808.888  |
| AF001893  | 1343.365 | 1267.281 | NM_000426 | 947.236   | 1170.709  | U80018    | 1991.56   | 2561.428  |
| X04236    | 9205.741 | 10084.66 | AK021957  | 55445.992 | 58834.277 | NM_000717 | 2665.49   | 2551.788  |
| AK093746  | 3431.228 | 3904.374 | NM_016623 | 17702.777 | 28876.502 | M33197    | 67014.203 | 63439.242 |
| D16875    | 634.416  | 797.358  | NM_001334 | 6170.612  | 8069.169  | NM_004845 | 3844.847  | 3730.605  |
| AK027171  | 3881.553 | 2878.778 | NM_004771 | 3729.659  | 3266.595  | NM_007107 | 23049.086 | 18732.943 |
| AK021945  | 9398.5   | 9897.368 | AL365514  | 2685.517  | 1798.938  | NM_000047 | 8715.783  | 7659.686  |
| L23545    | 921.781  | 911.711  | NM_018295 | 2373.519  | 1897.137  | NM_006315 | 8049.744  | 7860.2    |
| CY3Cy5    | 16270.09 | 859.927  | NM_002104 | 2139.853  | 2563.513  | NM_018226 | 7873.994  | 8262.519  |
| U13022    | 8614.094 | 6321.326 | NM_005504 | 10459.879 | 9960.089  | NM_004605 | 1423.166  | 887.623   |
| R23251    | 25254.02 | 24714.24 | AF234654  | 3734.955  | 4542.535  | Z36813    | 7200.026  | 9331.966  |
| AA702640  | 2740.49  | 1472.125 | NM_000110 | 5429.557  | 5764.992  | AB018327  | 5001.378  | 5336.559  |
| T68583    | 2333.914 | 1948.335 | NM_016002 | 42904.785 | 41716.961 | AF303889  | 2008.954  | 1746.637  |
| AA481944  | 2213.513 | 1822.172 | NM_014545 | 4621.554  | 4575.129  | M33197    | 67147.07  | 63402.461 |
| AF038440  | 871.853  | 822.782  | NM_000531 | 826.276   | 1280.104  | AK022649  | 11547.666 | 11283.997 |
| M31158    | 2286.29  | 2287.734 | NM_017832 | 1824.747  | 1919.025  | NM_016507 | 7557.552  | 8525.742  |

|           |          |          |           |           |           |           |           |           |
|-----------|----------|----------|-----------|-----------|-----------|-----------|-----------|-----------|
| H00742    | 865.897  | 690.709  | NM_001713 | 9408.29   | 8962.394  | NM_002024 | 13824.197 | 13021.336 |
| D42108    | 1478.117 | 1028.556 | NM_015367 | 14636.28  | 19108.641 | NM_002743 | 27357.984 | 36305.688 |
| BG700922  | 6133.812 | 3744.311 | NM_014498 | 5199.265  | 6208.609  | AF173358  | 20915.076 | 25004.309 |
| AI366068  | 2600.922 | 1780.238 | NM_002375 | 20668.127 | 25535.373 | NM_016366 | 4142.932  | 4648.421  |
| N57553    | 1140.008 | 947.9    | NM_001813 | 5156.222  | 5144.905  | NM_016545 | 9995.026  | 12756.034 |
| AF080158  | 5205.716 | 3401.26  | AF055016  | 5589.329  | 7804.355  | NM_001440 | 58067.828 | 61487.344 |
| BM664556  | 2103.965 | 1701.351 | NM_007234 | 30567.264 | 23964.859 | NM_001201 | 1058.583  | 1322.626  |
| SR1       | 70930.45 | 71432.51 | Y16704    | 64220.184 | 68378.375 | NM_016618 | 3731.137  | 3421.419  |
| SR3       | 52206.07 | 45301.08 | NM_014567 | 9226.929  | 9474.741  | AB014568  | 26226.184 | 30381.197 |
| SR5       | 9822.24  | 5024.448 | NM_017842 | 4674.081  | 2423.351  | NM_012249 | 6159.938  | 5927.159  |
| SR7       | 10129.95 | 35191.42 | AB037809  | 3200.076  | 2677.773  | AK022546  | 9924.458  | 8265.292  |
| SR9       | 30304.54 | 3178.072 | AB011129  | 2960.435  | 3575.582  | NM_014067 | 7036.649  | 8518.318  |
| CY3Cy5    | 18135.77 | 993.083  | NM_014391 | 17859.258 | 11853.525 | NM_002914 | 14241.017 | 12804.886 |
| M33197    | 70558.99 | 73284.39 | NM_004270 | 3074.376  | 3082.255  | NM_020385 | 3207.627  | 2806.439  |
| NM_007024 | 7134.942 | 6001.177 | NM_012082 | 792.952   | 897.539   | NM_014877 | 814.549   | 967.964   |
| NM_013231 | 1307.739 | 1498.306 | NM_001537 | 5296.689  | 6375.38   | NM_006541 | 3565.091  | 3668.16   |
| NM_012106 | 9988.017 | 12633.27 | U80743    | 2135.608  | 2411.521  | NM_018179 | 1670.761  | 1530.778  |
| NM_006254 | 2511.97  | 3559.994 | NM_001352 | 5603.917  | 5576.192  | NM_006197 | 15804.835 | 7133.388  |
| X95425    | 799.949  | 640.642  | D15050    | 3277.497  | 2177.534  | NM_014181 | 5279.313  | 4618.167  |
| NM_004422 | 6455.413 | 9217.311 | NM_006527 | 13563.643 | 12120.22  | M29273    | 2332.636  | 2397.115  |
| NM_004895 | 3333.471 | 2833.799 | NM_006627 | 3915.154  | 3981.838  | M33197    | 70267.617 | 63700.703 |
| U59748    | 1228.669 | 1337.213 | NM_007363 | 19086.959 | 17316.027 | NM_004854 | 6795.343  | 6221.188  |
| NM_014303 | 6997.703 | 7553.112 | NM_003093 | 58186.012 | 57758.859 | AJ245418  | 14858.543 | 19697.1   |
| NM_003118 | 2168.68  | 2064.757 | U05589    | 1972.007  | 1866.811  | NM_006377 | 5783.719  | 5451.247  |
| L02922    | 23254.33 | 18591.2  | NM_014473 | 23087.865 | 24886.635 | AF244129  | 4647.725  | 7610.533  |
| NM_001797 | 1189.676 | 754.03   | NM_003095 | 54602.254 | 61843.887 | NM_018362 | 8492.154  | 10571.593 |
| AK023459  | 5461.554 | 4774.896 | NM_016389 | 2693.244  | 2313.016  | M33197    | 70049.258 | 63639.285 |
| NM_012139 | 10515.1  | 10026.56 | NM_002295 | 64264.711 | 66166.977 | NM_004755 | 5204.987  | 4185.798  |
| AF121856  | 17516.92 | 13074.57 | NM_001762 | 17015.742 | 13393.813 | NM_002186 | 4917.129  | 5508.2    |
| NM_006421 | 7324.303 | 7057.755 | NM_016306 | 21274.111 | 19652.154 | AL137543  | 12489.471 | 10071.873 |
| NM_017457 | 25849.79 | 35925.88 | NM_003755 | 925.607   | 842.615   | NM_004444 | 9119.529  | 8365.918  |
| NM_003765 | 24046.88 | 22219.84 | NM_013238 | 12312.873 | 5997.49   | M33197    | 2020.23   | 1809.172  |
| NM_018202 | 32658.23 | 35570.54 | BE258640  | 19925.674 | 17486.926 | NM_001957 | 6487.835  | 4323.27   |
| AB023197  | 11687.93 | 12486.15 | NM_003314 | 10605.44  | 6774.779  | AK024533  | 16034.516 | 16209.71  |
| NM_022173 | 13104.22 | 14362.54 | AL355730  | 1555.866  | 1830.743  | NM_002736 | 37393.32  | 28793.234 |
| AB040970  | 11503.2  | 11290.08 | U79273    | 1875.647  | 1390.747  | NM_004246 | 7591.45   | 8141.548  |
| NM_018330 | 10021.7  | 8837.943 | AK022050  | 6743.563  | 7222.641  | NM_002285 | 3136.61   | 1940.226  |
| AB023222  | 3741.329 | 2642.65  | NM_002512 | 65044.68  | 55018.188 | NM_006694 | 41209.484 | 38629.316 |
| M33197    | 72467.88 | 62303.82 | NM_001246 | 1106.446  | 913.016   | NM_005207 | 4923.02   | 4071.283  |
| U50342    | 6340.864 | 3632.755 | AL365411  | 3416.113  | 4097.004  | NM_014467 | 1141.248  | 1094.402  |
| NM_000295 | 1121.212 | 720.79   | M24470    | 898.518   | 623.251   | NM_003087 | 3500.291  | 4312.808  |
| AF103795  | 2007.993 | 1034.365 | NM_016066 | 6225.488  | 7438.708  | NM_001630 | 4152.944  | 4700.311  |
| U80018    | 1597.624 | 1394.235 | NM_001249 | 3069.594  | 3126.235  | M33197    | 66652.961 | 70950.93  |
| NM_000717 | 3442.611 | 3625.569 | AK024677  | 1881.342  | 1929.363  | NM_002031 | 2158.694  | 2076.199  |
| M33197    | 70821.22 | 71368.02 | NM_000036 | 2731.331  | 2014.435  | AF305081  | 6824.149  | 6216.732  |
| NM_004845 | 2742.598 | 2210.983 | AF254082  | 50969.121 | 48904.328 | NM_004712 | 10557.738 | 13696.39  |
| NM_007107 | 24789.99 | 24115.83 | AF205718  | 11709.695 | 9937.096  | AF118078  | 2603.684  | 2858.336  |
| M68874    | 274.38   | 605.307  | AY004252  | 1128.145  | 1006.247  | AL157428  | 1177.604  | 1720.97   |
| NM_006319 | 12699.48 | 16026.8  | NM_006261 | 3705.833  | 3185.592  | M33197    | 56296.324 | 59085.602 |
| NM_018226 | 9325.485 | 11398.09 | AK027045  | 3387.972  | 2829.893  | BE904175  | 2289.697  | 1877.052  |
| NM_004605 | 2333.955 | 2117.852 | AF169796  | 4306.219  | 4462.002  | NM_005858 | 5892.947  | 4575.579  |
| Z36813    | 7786.269 | 8809.978 | AK026157  | 885.33    | 809.572   | AK025163  | 2066.207  | 1442.42   |
| NM_006660 | 13522.88 | 11686.12 | AK001814  | 6622.438  | 5910.443  | NM_014931 | 16428.717 | 16363.673 |

|           |          |          |           |           |           |           |           |           |
|-----------|----------|----------|-----------|-----------|-----------|-----------|-----------|-----------|
| NM_004727 | 741.074  | 1112.37  | NM_007222 | 2009.61   | 1531.463  | NM_014487 | 15418.614 | 14820.664 |
| NM_00668E | 2317.003 | 1662.287 | NM_00343E | 5091.705  | 5340.331  | NM_01807C | 11282.894 | 9223.51   |
| M33197    | 29508.17 | 18800.31 | NM_016291 | 11443.356 | 7902.55   | NM_002484 | 10189.438 | 8877.84   |
| NM_00404E | 17493.54 | 10205.64 | NM_005937 | 62090.223 | 54510.133 | M33197    | 66839.727 | 66840.383 |
| NM_001891 | 2280.39  | 1706.205 | AK023259  | 1078.842  | 1178.24   | NM_01824C | 66679.82  | 67808.922 |
| NM_00144C | 59092.19 | 60416.41 | AK001503  | 11301.172 | 14501.839 | AL162052  | 3280.323  | 3936.914  |
| NM_001201 | 1245.084 | 1156.794 | AK021812  | 533.529   | 475.566   | AK025941  | 2410.188  | 3579.663  |
| NM_01661E | 4505.569 | 4703.31  | AK022880  | 6731.859  | 8571.693  | M33197    | 66439.891 | 73052.047 |
| AB014568  | 13181.99 | 13566.94 | NM_003601 | 22975.84  | 23884.521 | NM_015914 | 3104.679  | 2657.927  |
| AK022238  | 1474.726 | 1564.407 | AF086375  | 557.908   | 804.027   | AF059531  | 8498.013  | 7881.474  |
| NM_01224E | 4546.247 | 5561.856 | AK001228  | 3464.053  | 2871.019  | NM_002707 | 19426.072 | 20389.207 |
| AK022546  | 7779.716 | 7606.608 | AK026778  | 2927.07   | 2670.561  | AF029777  | 2156.267  | 3009.647  |
| NM_014067 | 3914.11  | 5155.023 | AF074987  | 3971.008  | 3727.697  | NM_003352 | 2529.254  | 2513.673  |
| NM_002914 | 18172.24 | 15071.07 | AK001058  | 48348.598 | 45362.086 | AK026884  | 21344.254 | 23535.447 |
| NM_02038E | 2194.389 | 2148.605 | AK026239  | 4480.678  | 4597.385  | NM_002594 | 3668.441  | 3726.57   |
| NM_014877 | 2214.291 | 1616.706 | AF086283  | 2198.485  | 2124.083  | NM_031407 | 3783.708  | 4397.069  |
| NM_006541 | 2185.979 | 2269.215 | AF088047  | 773.669   | 820.471   | M33197    | 61796.266 | 62312.672 |
| M33197    | 68939.38 | 84206.69 | AF086445  | 606.316   | 992.924   | AK000410  | 43202.145 | 43234.496 |
| NM_00570E | 3101.261 | 2960.46  | AF086281  | 3494.32   | 2472.294  | NM_020193 | 4006.831  | 2372.59   |
| NM_00432E | 3491.894 | 4487.24  | AF086393  | 1377.228  | 1100.485  | D86982    | 924.492   | 770.101   |
| NM_004581 | 12044.33 | 11964.66 | AF086453  | 1056.445  | 1435.291  | NM_00561E | 1980.156  | 2045.033  |
| NM_006817 | 29015.98 | 38149.48 | AF070621  | 14111.655 | 13509.734 | AK000332  | 24898.926 | 24989.223 |
| NM_00710E | 36867.81 | 39362.18 | NM_02024C | 11502.788 | 15766.111 | AL080156  | 3014.915  | 1896.832  |
| NM_015921 | 48898.66 | 51998.6  | AK023678  | 18133.57  | 11762.504 | M33197    | 66471.953 | 73501.156 |
| AB040900  | 37688.73 | 33491.52 | AF052090  | 8085.002  | 5886.664  | NM_00673E | 5527.691  | 4392.814  |
| NM_00108C | 2939.121 | 1498.918 | AK023718  | 11416.565 | 14649.262 | NM_01626C | 3392.016  | 2907.009  |
| NM_001482 | 1421.897 | 977.526  | AF075089  | 12240.516 | 14560.582 | NM_00289E | 1854.707  | 1180.405  |
| NM_001797 | 2080.237 | 2530.833 | AF241255  | 1426.824  | 1398.674  | NM_013351 | 13359.533 | 12907.307 |
| NM_003154 | 1778.316 | 1124.244 | AF086007  | 58620.367 | 62872.531 | NM_01234C | 2345.469  | 2800.682  |
| AK023459  | 6813.783 | 9840.026 | AK000803  | 3813.162  | 4004.819  | NM_006022 | 2767.628  | 2532.333  |
| U13022    | 8355.714 | 7030.301 | AK022374  | 2862.333  | 2675.234  | AK025110  | 3100.565  | 2827.412  |
| AA702640  | 2828.065 | 2231.226 | AF085926  | 28036.434 | 29698.205 | X52339    | 61027.5   | 56543.617 |
| T68583    | 1904.617 | 2561.439 | AL137307  | 6360.625  | 7552.173  | M33197    | 52090.992 | 48032.586 |
| AA481944  | 1951.854 | 2198.761 | AL137468  | 9604.129  | 10209.629 | AB046830  | 6418.722  | 5940.951  |
| AF038440  | 725.849  | 1001.848 | AL162007  | 40226.105 | 34007.758 | NM_007122 | 5064.617  | 4817.386  |
| M31158    | 2202.461 | 2843.709 | AL390137  | 43642.535 | 41683.434 | NM_00148E | 2548.522  | 2046.759  |
| H00742    | 931.249  | 633.237  | AL137340  | 1199.816  | 1242.3    | NM_016202 | 5137.016  | 7637.644  |
| D42108    | 1281.921 | 1017.325 | AL137542  | 742.312   | 882.446   | NM_016604 | 2066.246  | 2029.078  |
| BG700922  | 5562.784 | 4941.814 | AL162045  | 1527.13   | 1597.651  | M33197    | 63997.195 | 64672.945 |
| AI366068  | 2641.619 | 2562.103 | AK022437  | 32196.67  | 28749.309 | NM_00627E | 2883.722  | 1686.687  |
| N57553    | 1156.308 | 1842.218 | AB042410  | 1859.95   | 2392.852  | NM_003407 | 4695.958  | 3224.899  |
| AF080158  | 5700.547 | 4770.275 | AF086102  | 3155.532  | 2121.144  | NM_00372E | 6348.968  | 6172.254  |
| BM664556  | 2234.664 | 1688.831 | AF116682  | 54164.883 | 42356.977 | L05096    | 38270.914 | 45692.961 |
| M33197    | 71223.79 | 69957.26 | AL137259  | 5842.723  | 4325.753  | BC015899  | 18039.543 | 22162.289 |
| NM_01654E | 11107.85 | 7747.072 | AL122107  | 8623.348  | 6450.289  | NM_01798E | 9938.813  | 11782.531 |
| NM_00029E | 1999.76  | 2255.532 | AF075021  | 1831.144  | 1716.137  | AK023629  | 3006.903  | 2688.124  |
| NM_00071E | 902.576  | 835.798  | AK025140  | 9790.654  | 9703.083  | AK024846  | 7472.051  | 5583.308  |
| AF026932  | 776.237  | 694.599  | AK026628  | 667.468   | 840.858   | AK001451  | 12831.227 | 9412.396  |
| AF103795  | 2291.521 | 1987.515 | AK023394  | 1589.099  | 1654.46   | M33197    | 56109.906 | 47991.914 |
| NM_00621E | 471.542  | 1878.723 | AF090093  | 29738.686 | 33325.855 | NM_00547E | 3741.153  | 4221.707  |
| NM_007024 | 6132.256 | 5796.873 | AF161340  | 11538.616 | 12792.154 | NM_00566C | 2448.909  | 3140.552  |
| NM_013231 | 982.346  | 913.971  | AF242771  | 3002.794  | 4196.435  | AK023902  | 2065.022  | 2110.593  |
| NM_01210E | 9400.332 | 11281.45 | NM_018562 | 18513.91  | 20874.818 | NM_000401 | 966.552   | 1505.095  |

|           |          |          |           |           |           |           |           |           |
|-----------|----------|----------|-----------|-----------|-----------|-----------|-----------|-----------|
| NM_006254 | 2536.039 | 3696.151 | AF098666  | 2299.599  | 2726.309  | AB011173  | 5548.282  | 7021.965  |
| NM_004422 | 5929.865 | 7348.497 | AF161365  | 1623.658  | 1468.9    | AB023195  | 1452.657  | 1123.801  |
| M33197    | 71333.52 | 68899.7  | AF290544  | 1502.824  | 1264.898  | M33197    | 64149.848 | 58050.461 |
| AY009399  | 41912.66 | 53481.97 | NM_014134 | 791.594   | 728.793   | AF068744  | 43284.676 | 39606.613 |
| NM_004895 | 2711.975 | 2401.826 | AK021969  | 2435.928  | 3887.497  | NM_004497 | 1136.155  | 1049.267  |
| U59748    | 928.991  | 1073.924 | AK022065  | 2903.205  | 3661.156  | AK000762  | 4811.728  | 5514.731  |
| L32537    | 831.54   | 1069.579 | AK022221  | 9650.887  | 11087.662 | NM_004571 | 1393.676  | 1896.89   |
| NM_014303 | 7965.914 | 12087.33 | AK022356  | 2733.112  | 3503.141  | AJ345030  | 5784.083  | 7296.811  |
| AF130062  | 1248.909 | 1512.467 | AK021998  | 4334.3    | 4318.223  | AK023631  | 4069.648  | 4011.566  |
| M95610    | 22345.84 | 14715.48 | AK022126  | 4566.014  | 4132.879  | AK023472  | 15252.988 | 12361.509 |
| NM_003118 | 2545.16  | 1996.512 | AK022256  | 1499.256  | 1905.41   | AL109729  | 2165.849  | 2235.101  |
| L02922    | 24536.65 | 22041.8  | AK022383  | 7286.424  | 9879.852  | AF007146  | 1820.449  | 3214.59   |
| M33197    | 31844.98 | 36510.03 | AK027041  | 5229.395  | 7261.684  | M33197    | 65128.934 | 66093.594 |
| NM_004045 | 21465.66 | 19454.2  | AK024332  | 828.755   | 791.258   | S79912    | 5809.975  | 6283.568  |
| NM_001891 | 2810.561 | 2666.827 | NM_005355 | 42727.527 | 36935.66  | AL110283  | 1546.092  | 2535.009  |
| NM_012139 | 9447.733 | 8096.153 | AK027195  | 882.221   | 840.355   | AK026892  | 6499.005  | 6361.33   |
| AF121856  | 16257.4  | 11268.13 | AK000937  | 1807.824  | 1084.284  | S83275    | 6797.229  | 5762.129  |
| NM_006421 | 6733.105 | 5939.454 | AK024890  | 851.193   | 631.619   | AL117427  | 6638.205  | 5513.742  |
| NM_017457 | 25419.76 | 29029.68 | AF035306  | 5819.804  | 7184.427  | M33197    | 66581.461 | 67408.75  |
| NM_003765 | 21782.3  | 16729.34 | AK091662  | 1179.634  | 1375.561  | AF052118  | 23474.99  | 19949.105 |
| NM_005865 | 4124.334 | 2713.506 | AB038318  | 1093.885  | 1267.9    | AK025166  | 5277.878  | 3852.911  |
| M33197    | 70630.51 | 71466.48 | NM_003954 | 1661.788  | 2163.513  | AL359586  | 961.142   | 1410.364  |
| NM_018202 | 31829.89 | 36014.6  | NM_016345 | 2782.126  | 2830.197  | AF147421  | 1757.001  | 1126.551  |
| AB023197  | 11361.98 | 10906.63 | AK022003  | 780.655   | 669.973   | AF035290  | 2345.984  | 2229.387  |
| NM_022173 | 13307.93 | 14184.91 | AK023877  | 1759.862  | 2071.186  | AK023216  | 2670.141  | 2840.823  |
| AB040970  | 11776.78 | 10258.18 | AK023640  | 1584.51   | 1353.518  | AK023288  | 3161.698  | 2536.073  |
| NM_018330 | 10635.12 | 9045.25  | AK024213  | 52758.746 | 50043.824 | AK022198  | 1997.501  | 2531.469  |
| AB033088  | 2912.106 | 2018.115 | AK025093  | 1307.796  | 974.618   | M33197    | 66349.313 | 68608.781 |
| M33197    | 72061.95 | 65036.92 | AK022184  | 3608.849  | 3220.052  | AK022428  | 4465.855  | 3163.425  |
| U50342    | 6553.654 | 3710.452 | AB007959  | 2047.055  | 1621.268  | AK023457  | 2312.691  | 1781.275  |
| NM_015921 | 55965.32 | 60933.29 | AK024360  | 890.088   | 823.414   | AK025089  | 14316.435 | 13813.307 |
| AB040900  | 30313.75 | 28080.85 | AK024153  | 2754.176  | 3968.768  | M33197    | 65303.129 | 68095.992 |
| NM_001080 | 4237.752 | 2719.041 | Y10516    | 7479.361  | 8771.137  | AK001279  | 5979.296  | 5161.109  |
| NM_001482 | 2501.206 | 2240.227 | AF056451  | 3098.583  | 3766.057  | AF086407  | 1351.036  | 1008.295  |
| U80018    | 1470.018 | 1111.152 | AF015039  | 10317.423 | 12329.514 | AK001567  | 2702.125  | 2852.953  |
| NM_000717 | 2724.298 | 2628.964 | U50528    | 3625.849  | 5115.898  | M33197    | 66432.266 | 68454.656 |
| M33197    | 70010.34 | 74343.59 | AB020632  | 4896.731  | 6416.189  | U42379    | 1134.252  | 1464.786  |
| NM_004845 | 2176.809 | 2452.564 | NM_018614 | 58584.387 | 58893.703 | U84528    | 1189.827  | 1229.294  |
| NM_007107 | 22544.58 | 24153.32 | AL117549  | 3854.187  | 3690.571  | M33197    | 66268.352 | 68926.914 |
| NM_000047 | 851.783  | 751.258  | NM_005222 | 16900.434 | 18592.266 | AK026984  | 56506.086 | 56103.418 |
| NM_006319 | 11667.6  | 13102.7  | BC024308  | 23247.117 | 22742.088 | NM_013391 | 5227.043  | 2584.99   |
| NM_018226 | 7864.124 | 9778.107 | NM_000535 | 5670.135  | 5481.458  | M33197    | 66986.836 | 65010.309 |
| NM_004605 | 2461.064 | 2038.161 | AK001838  | 58388.402 | 64268.707 | AL157466  | 8484.763  | 5774.263  |
| Z36813    | 8091.842 | 10760    | NM_018295 | 3136.088  | 4411.615  | AK024336  | 4375.996  | 5025.58   |
| NM_005835 | 1357.79  | 1504.162 | AF070574  | 1204.386  | 1416.291  | NM_018621 | 2112.064  | 2099.364  |
| NM_006660 | 12218.82 | 11628.85 | AF086262  | 4121.991  | 4670.689  | M33197    | 61847.512 | 60149.285 |
| NM_004727 | 827.629  | 822.565  | AF086292  | 15050.621 | 14700.117 | AK022118  | 3497.707  | 2837.402  |
| NM_006685 | 3178.238 | 2313.45  | AK023769  | 979.191   | 1013.377  | AK026453  | 12191.999 | 10199.076 |
| AF080158  | 5867.529 | 6064.622 | AK024342  | 32538.791 | 28741.85  | AK023305  | 16311.207 | 17959.355 |
| BM664556  | 2711.68  | 2596.547 | AL137712  | 14434.736 | 14072.608 | AK023763  | 3787.708  | 2943.678  |
| M33197    | 70244.76 | 75682.91 | AL137606  | 818.343   | 630.137   | AK023967  | 2234.637  | 2268.328  |
| NM_016545 | 11286.92 | 9045.935 | L77599    | 55829.93  | 58221.77  | AK022729  | 3636.023  | 2777.368  |
| NM_001440 | 51982.97 | 57719.45 | AK021673  | 41358.379 | 35105.688 | NM_006165 | 4448.244  | 3081.884  |

|           |          |          |           |           |           |           |           |           |
|-----------|----------|----------|-----------|-----------|-----------|-----------|-----------|-----------|
| NM_001201 | 889.781  | 872.23   | AB014543  | 3113.101  | 2855.83   | AL050374  | 1270.355  | 1406.5    |
| NM_01661E | 3525.353 | 4025.096 | NM_01844E | 11710.493 | 11544.889 | M33197    | 66725.586 | 68812.875 |
| AB014568  | 10444.36 | 11033.73 | AK022743  | 16236.696 | 12745.593 | M28639    | 6551.386  | 7114.021  |
| AK022238  | 1096.598 | 1340.427 | NM_014627 | 4186.574  | 4727.566  | AL122073  | 43143.926 | 46363.777 |
| NM_01224E | 4147.363 | 5136.895 | NM_01393E | 30957.113 | 31901.502 | AF116655  | 10068.406 | 10835.375 |
| AK022546  | 7387.287 | 7588.776 | NM_01398E | 60797.809 | 64232.094 | AJ243222  | 1439.776  | 1470.163  |
| NM_014067 | 3580.155 | 5882.419 | U55055    | 1498.258  | 2413.894  | AK026132  | 6781.87   | 5651.478  |
| NM_002914 | 17525.55 | 17799.33 | AK022186  | 1308.041  | 1797.363  | Y11162    | 1807.053  | 2157.475  |
| NM_02038E | 2139.96  | 1764.285 | AK021485  | 681.852   | 654.329   | M33197    | 64824.711 | 61592.93  |
| NM_014877 | 2005.953 | 1581.993 | AB018319  | 4557.328  | 4418.092  | AF070584  | 3506.851  | 3088.092  |
| NM_006541 | 2317.46  | 2063.962 | AK001101  | 7040.938  | 6280.428  | AF075006  | 1488.077  | 1330.498  |
| NM_00432E | 3566.277 | 4352.587 | BM973473  | 2718.161  | 2435.195  | AK023938  | 1569.505  | 2032.733  |
| NM_004581 | 12385.75 | 9176.253 | AK021637  | 4977.338  | 6110.223  | AF086565  | 3096.187  | 2736.395  |
| NM_006817 | 30516.66 | 22736.97 | AK021658  | 2962.601  | 2460.149  | AL110169  | 998.463   | 1717.528  |
| NM_00710E | 41192.63 | 41303.91 | D61705    | 950.51    | 1032.122  | L13743    | 2814.391  | 3265.001  |
| M33197    | 71406.86 | 69067.63 | U17631    | 4092.153  | 4096.56   | Z11849    | 10447.054 | 7025.775  |
| M95610    | 23771.68 | 24855.76 | AL137723  | 2529.798  | 3115.806  | AJ002788  | 5577.859  | 3017.176  |
| NM_00311E | 2441.698 | 2865.425 | AK024046  | 3611.158  | 4095.123  | U84527    | 5742.578  | 5311.755  |
| L02922    | 23899.09 | 25133.67 | NM_017931 | 6285.309  | 6197.481  | M33197    | 52127.699 | 46685.637 |
| BG763477  | 1176.195 | 849.255  | AK022793  | 3243.278  | 3565.077  | AF075050  | 2202.753  | 2654.463  |
| AA702640  | 2435.074 | 1834.258 | AJ227910  | 2508.723  | 2913.995  | AK024842  | 2625.917  | 2356.331  |
| T68583    | 1705.009 | 2348.884 | AF001893  | 1088.633  | 1265.69   | NM_01838E | 1488.655  | 1423.845  |
| AA481944  | 1748.706 | 2320.601 | X04236    | 17014.969 | 18539.648 | BC022303  | 4602.632  | 4058.958  |
| AF038440  | 473.603  | 916.17   | AK093746  | 23412.568 | 24735.9   | M33197    | 67025.633 | 64969.215 |
| M31158    | 2181.688 | 2919.884 | D16875    | 1339.145  | 913.588   | D17203    | 65565.219 | 67872.125 |
| D42108    | 2525.235 | 2186.826 | AK027171  | 2816.749  | 3496.384  | NM_00649E | 5490.63   | 5791.029  |
| BG700922  | 6417.918 | 5937.008 | AK021945  | 11409.052 | 11086.558 | AK022101  | 1056.589  | 1218.239  |
| AI366068  | 2365.152 | 1665.225 | L23545    | 1751.025  | 1792.771  | NM_003251 | 1305.656  | 1427.097  |
| N57553    | 922.841  | 1179.292 | CY3Cy5    | 3148.365  | 290.317   | AB046772  | 2404.798  | 1598.745  |
| AB040970  | 10970.44 | 11091.51 | U13022    | 2165.277  | 1600.153  | M33197    | 67059.516 | 63478.02  |
| NM_01833C | 9536.734 | 7435.454 | R23251    | 16257.195 | 10187.405 | AL442080  | 3460.704  | 3008.03   |
| AB023222  | 3387.362 | 2815.89  | AA702640  | 975.409   | 690.752   | AY007143  | 13642.356 | 16411.424 |
| AB033088  | 3432.835 | 2969.179 | T68583    | 2118.953  | 1596.105  | L15557    | 1686.073  | 1533.711  |
| NM_00071E | 808.844  | 828.111  | AA481944  | 17456.549 | 11325.225 | M33197    | 66969.469 | 65060.73  |
| AF103795  | 1669.725 | 1642.66  | AF038440  | 638.013   | 409.146   | NM_00026E | 1733.377  | 1447.63   |
| NM_00621E | 824.509  | 807.094  | M31158    | 1921.171  | 1356.368  | X89666    | 4591.439  | 4468.871  |
| NM_01210E | 7972.789 | 10087.13 | H00742    | 1888.642  | 1518.067  | NM_003104 | 15400.707 | 14719.173 |
| NM_006254 | 2280.369 | 3476.917 | D42108    | 1624.578  | 1585.535  | NM_014581 | 1872.822  | 1971.605  |
| NM_00442E | 5825.432 | 7998.153 | BG700922  | 2396.492  | 2735.329  | M33197    | 65585.961 | 64709.434 |
| M33197    | 72123.31 | 62422.63 | AI366068  | 1072.374  | 1410.458  | S68954    | 9954.24   | 12467.474 |
| AY009399  | 47627.75 | 56215.29 | N57553    | 764.908   | 570.269   | S81335    | 2426.406  | 3069.867  |
| U59748    | 1256.863 | 984.222  | BM664556  | 1250.474  | 1366.323  | AF052109  | 2693.509  | 3327.556  |
| L32537    | 1117.258 | 571.248  | SR5       | 6011.072  | 8309.161  | M33197    | 66697.516 | 63763.652 |
| NM_01430E | 7654.638 | 7261.749 | SR7       | 4840.283  | 45004.078 | NM_00335E | 27716.738 | 25827.098 |
| NM_00666C | 11199.35 | 8567.922 | SR9       | 10154.369 | 2439.631  | X82127    | 11463.029 | 10494.707 |
| NM_00668E | 2546.758 | 2428.608 | CY3Cy5    | 4784.808  | 573.883   | AL122044  | 2769.864  | 3733.871  |
| M33197    | 23473.07 | 27774.26 | M33197    | 74325.617 | 66607.023 | NM_01829E | 1790.345  | 2222.272  |
| NM_00404E | 16346.91 | 18881.67 | NM_007024 | 3850.161  | 2907.312  | M33197    | 66700.086 | 70704.32  |
| NM_001891 | 1913.099 | 2224.325 | NM_013231 | 1715.322  | 1220.495  | AF070578  | 2101.262  | 2237.271  |
| NM_006421 | 6305.796 | 6269.235 | NM_01210E | 5284.376  | 3799.353  | CY3Cy5    | 7961.865  | 204.237   |
| NM_017457 | 23353.22 | 31408.41 | NM_006254 | 941.247   | 511.056   | AA418907  | 1641.246  | 1981.636  |
| NM_00376E | 21116.32 | 22354.54 | X95425    | 1040.096  | 606.842   | M65291    | 584.255   | 1021.727  |
| NM_00586E | 4088.799 | 3696.437 | NM_00442E | 3466.421  | 2392.34   | AA115473  | 8146.004  | 9534.69   |

|           |          |          |           |           |           |             |           |           |
|-----------|----------|----------|-----------|-----------|-----------|-------------|-----------|-----------|
| NM_018202 | 34018.23 | 42663.3  | NM_016562 | 726.396   | 594.533   | AA872397    | 6460.962  | 6348.275  |
| AB023197  | 10963.21 | 7658.583 | M33197    | 65743.922 | 67433.352 | M24283      | 1561.149  | 1395.527  |
| NM_022173 | 12242.48 | 7884.413 | NM_004895 | 6390.741  | 5498.364  | AA709414    | 2523.849  | 2659.658  |
| NM_005705 | 2628.98  | 2434.048 | U59748    | 1260.461  | 1288.997  | D12676      | 6430.379  | 6946.866  |
| NM_004328 | 3028.573 | 3448.045 | L32537    | 7527.36   | 4613.525  | NM_000939   | 54635.074 | 58891.43  |
| NM_006817 | 28719.68 | 38154.93 | NM_014303 | 16303.699 | 16307.409 | NM_004295   | 39739.188 | 40105.434 |
| NM_007108 | 36422.34 | 48209.15 | NM_003118 | 3012.534  | 3097.259  | H-X 02812 I | 3743.582  | 3570.514  |
| NM_015921 | 46444.19 | 52413.76 | L02922    | 16860.58  | 18051.105 | U75898      | 3352.911  | 3417.355  |
| AB040900  | 22626.8  | 26399.55 | NM_001797 | 2331.958  | 3342.877  | M29039      | 1653.164  | 1681.056  |
| NM_001080 | 2688.491 | 2601.21  | NM_003154 | 1072.959  | 1788.563  | M59815      | 1109.57   | 1464.02   |
| NM_001482 | 1471.848 | 1959.372 | NM_004235 | 1014.805  | 1271.646  | M33210      | 1003.662  | 1394.491  |
| U80018    | 1100.707 | 1741.046 | AK023459  | 4777.212  | 5558.78   | NM_006917   | 1377.256  | 1668.915  |
| NM_000717 | 2535.825 | 2544.849 | BI762154  | 793.162   | 1106.412  | SR2         | 65419.676 | 65299.109 |
| NM_007107 | 22685.9  | 23709.91 | NM_012139 | 5431.127  | 4510.601  | SR4         | 29036.236 | 26735.422 |
| NM_000047 | 815.002  | 1028.85  | AF121856  | 5043.071  | 5605.071  | SR6         | 4408.968  | 3612.798  |
| NM_006319 | 12209.87 | 12132.26 | NM_006421 | 3550.646  | 2880.186  | SR8         | 16983.977 | 42352.582 |
| NM_018226 | 9739.485 | 14703.89 | NM_017457 | 14353.82  | 9865.466  | SR10        | 55748.309 | 17926.383 |
| NM_004605 | 2427.752 | 2482.819 | NM_003765 | 9920.556  | 8530.591  | CY3Cy5      | 7378.616  | 265.487   |
| Z36813    | 8477.893 | 7595.088 | NM_005868 | 717.977   | 853.93    | NM_004799   | 23276.004 | 25368.813 |
| AF303889  | 1704.014 | 1557.858 | NM_018202 | 17506.137 | 15335.394 | NM_006733   | 2179.675  | 1571.5    |
| AK022649  | 12897.4  | 13754.28 | AB023197  | 4960.652  | 4861.768  | NM_014047   | 36522.73  | 46632.648 |
| NM_016507 | 5610.114 | 5602.832 | NM_022173 | 6773.419  | 7247.894  | AK022901    | 3241.767  | 3959.537  |
| NM_002024 | 8144.271 | 6057.52  | AB040970  | 5010.174  | 4531.342  | M33197      | 66427.375 | 64528.277 |
| NM_002743 | 24058.4  | 35901.66 | NM_018330 | 4236.651  | 4038.982  | AF037332    | 14877.483 | 13021.979 |
| AF173358  | 12561.4  | 14899.73 | AB023222  | 1052.794  | 1252.346  | NM_014571   | 1124.472  | 1304.999  |
| NM_016545 | 10977.9  | 10533.75 | M33197    | 64417.754 | 64750.813 | NM_006052   | 3119.17   | 2728.717  |
| NM_001440 | 54262.26 | 65111.86 | U50342    | 4117.179  | 5364.078  | AB040912    | 6173.357  | 5425.979  |
| NM_001201 | 612.868  | 802.317  | NM_000295 | 8496.539  | 11066.629 | NM_006243   | 10137.019 | 10544.762 |
| NM_016618 | 3453.816 | 4083.403 | AF103795  | 1108.478  | 1676.642  | M33197      | 66826.133 | 70168.078 |
| AB014568  | 9545.594 | 10730.43 | NM_000717 | 915.318   | 766.712   | AJ011129    | 8523.653  | 11484.822 |
| AK022546  | 6718.796 | 6985.453 | M33197    | 67699.953 | 67453.477 | AF282874    | 1070.671  | 2028.593  |
| NM_014067 | 3611.044 | 6088.571 | NM_004845 | 1835.832  | 1766.429  | NM_001039   | 816.933   | 1530.339  |
| NM_002914 | 16737.25 | 13268.57 | NM_007107 | 10410.959 | 8847.753  | NM_006387   | 10583.103 | 11808.738 |
| NM_004435 | 1150.715 | 1356.947 | NM_000047 | 5287.378  | 3841.257  | NM_005646   | 4900.108  | 5629.51   |
| NM_020385 | 2975.208 | 2987.141 | NM_006319 | 5138.169  | 3902.768  | NM_006639   | 1458.464  | 1814.519  |
| NM_014877 | 2342.794 | 1678.544 | NM_018226 | 3966.582  | 3121.438  | NM_001692   | 739.027   | 1095.479  |
| NM_006541 | 2775.918 | 2219.69  | NM_004605 | 396.406   | 795.433   | BI767871    | 3480.967  | 3781.267  |
| NM_018179 | 1368.368 | 1260.114 | Z36813    | 5139.402  | 5002.033  | AK022817    | 4512.887  | 4578.704  |
| M33197    | 71559.89 | 67212.08 | NM_006660 | 5543.155  | 7111.493  | NM_018034   | 12230.174 | 14123.177 |
| NM_004854 | 4562.826 | 5071.658 | NM_004727 | 513.697   | 740.949   | M33197      | 66862.766 | 68947.406 |
| AJ245418  | 3932.151 | 4158.343 | M33197    | 13992.794 | 17617.533 | AB037831    | 3281.74   | 3239.58   |
| NM_006377 | 6905.2   | 5930.978 | NM_004045 | 7162.242  | 9387.667  | NM_012103   | 28184.707 | 32034.98  |
| AK026427  | 524.191  | 586.027  | NM_001891 | 2447.108  | 2480.877  | AL122077    | 25234.465 | 28015.996 |
| AF244129  | 3800.927 | 8194.178 | NM_001440 | 28735.811 | 19399.367 | NM_014632   | 2845.289  | 3012.861  |
| NM_018362 | 7716.715 | 8354.145 | NM_016618 | 1895.785  | 1080.225  | NM_006422   | 3298.141  | 3545.372  |
| NM_004755 | 7520.676 | 6830.737 | AB014568  | 16350.257 | 11068.375 | BE789195    | 1528.449  | 1526.596  |
| NM_002186 | 3603.831 | 6479.919 | NM_012249 | 4682.607  | 3418.745  | NM_016946   | 3977.45   | 4969.055  |
| NM_004444 | 2815.905 | 2459.791 | AK022546  | 4933.037  | 3547.505  | M33197      | 66727.109 | 72571.07  |
| M33197    | 2056.872 | 1977.011 | NM_014067 | 7927.525  | 6269.071  | NM_007259   | 5075.771  | 4052.749  |
| NM_001957 | 7041.533 | 6567.574 | NM_002914 | 8556.448  | 7480.212  | NM_018402   | 2270.805  | 1741.175  |
| AK024533  | 6214.009 | 6316.716 | NM_020385 | 2088.496  | 1426.704  | NM_018009   | 1798.873  | 1802.358  |
| NM_004246 | 3765.485 | 4346.366 | NM_014877 | 515.453   | 802.189   | AK075081    | 4456.196  | 4380.11   |
| NM_002285 | 2828.84  | 2230.391 | NM_006541 | 1008.765  | 1044.467  | NM_000895   | 20148.113 | 20491.26  |

|           |          |          |           |           |           |           |           |           |
|-----------|----------|----------|-----------|-----------|-----------|-----------|-----------|-----------|
| NM_005207 | 3203.179 | 3685.143 | M33197    | 59556.848 | 68401.141 | NM_003820 | 48505.027 | 56036.094 |
| NM_014467 | 1580.88  | 1407.421 | NM_005705 | 3959.109  | 4650.625  | NM_015915 | 6447.589  | 7988.057  |
| NM_003087 | 2036.436 | 2446.182 | NM_004328 | 2413.323  | 2436.811  | M33197    | 66995.57  | 66712.602 |
| NM_001630 | 5580.314 | 5507.462 | NM_004581 | 5464.36   | 7279.886  | NM_016518 | 18480.826 | 18614.473 |
| NM_002031 | 3182.76  | 3348.016 | NM_006817 | 12865.735 | 16646.725 | NM_006185 | 28101.719 | 32305.395 |
| AF305081  | 11731.23 | 10873.67 | NM_015921 | 33507.766 | 32930.676 | NM_014800 | 12934.079 | 16147.538 |
| NM_004712 | 15698.55 | 20791.31 | AB040900  | 10774.411 | 13662.013 | NM_001557 | 1689.756  | 1510.751  |
| AF118078  | 3817.955 | 4085.813 | NM_001080 | 546.501   | 783.659   | AF147311  | 6257.215  | 7891.451  |
| AL157428  | 1944.363 | 1643.174 | NM_001482 | 670.923   | 899.459   | NM_002131 | 54038.152 | 61466.293 |
| M33197    | 71182.17 | 69183.83 | NM_001797 | 1149.227  | 749.352   | NM_017927 | 5546.165  | 5799.345  |
| BE904175  | 1480.535 | 1659.378 | NM_003154 | 566.821   | 356.311   | NM_020151 | 19183.229 | 21053.199 |
| NM_005858 | 7233.664 | 6726.731 | AK023459  | 4496.11   | 2638.982  | NM_005891 | 52699.922 | 57531.992 |
| AK025163  | 1848.048 | 2164.446 | U13022    | 2528.596  | 1760.785  | NM_001645 | 2620.77   | 2663.347  |
| NM_002484 | 13029.92 | 12171.14 | R23251    | 17266.807 | 10766.985 | NM_003956 | 4588.592  | 5185.235  |
| AL162052  | 3156.383 | 3176.092 | AA702640  | 1166.473  | 1029.66   | M33197    | 66482.742 | 75865.383 |
| AK025941  | 1640.396 | 1557.281 | T68583    | 3217.321  | 2507.498  | NM_003500 | 12446.298 | 12493.302 |
| NM_015914 | 3362.626 | 4175.787 | AA481944  | 28079.008 | 19181.355 | NM_014317 | 6973.767  | 7033.844  |
| AF059531  | 7323.802 | 6923.692 | AF038440  | 631.129   | 396.108   | L09234    | 25062.973 | 27861.404 |
| NM_002707 | 26079.19 | 33431.4  | M31158    | 2311.245  | 1644.465  | NM_000059 | 4783.827  | 4789.719  |
| NM_003352 | 4602.744 | 4700.498 | H00742    | 2709.135  | 2843.79   | AK026740  | 1471.093  | 1668.178  |
| AK026884  | 30174.51 | 37690.86 | D42108    | 2250.141  | 2236.094  | NM_017881 | 13879.246 | 19548.627 |
| S82198    | 1704.466 | 1436.86  | BG700922  | 2571.711  | 3018.973  | NM_017634 | 16614.277 | 13618.79  |
| NM_002594 | 3755.556 | 4198.877 | AI366068  | 1189.05   | 1687.594  | NM_000813 | 1404.9    | 1609.9    |
| NM_001159 | 676.421  | 807.652  | N57553    | 751.431   | 437.608   | NM_018896 | 2036.401  | 2341.11   |
| NM_031407 | 6617.883 | 8329.586 | AF080158  | 2899.39   | 2769.59   | AJ300465  | 2270.269  | 3624.469  |
| M33197    | 69310.33 | 63734.81 | BM664556  | 1819.846  | 2125.8    | X86400    | 2906.371  | 3731.587  |
| AK000410  | 21559.93 | 31250.9  | M33197    | 72063.375 | 67142.258 | NM_000810 | 4202.758  | 4581.558  |
| NM_020193 | 4900.821 | 3930.731 | NM_016545 | 4200.506  | 6074.957  | AF069307  | 6476.965  | 7241.205  |
| NM_005619 | 2019.875 | 2059.269 | NM_000295 | 537.657   | 479.624   | M33197    | 63745.324 | 62568.168 |
| D87440    | 8215.13  | 8172.916 | AF103795  | 602.698   | 712.302   | U92978    | 5442.765  | 6250.711  |
| AL080156  | 3273.216 | 1469.882 | M33197    | 80178.828 | 66164.258 | NM_005738 | 1555.556  | 1687.676  |
| NM_006738 | 7778.28  | 5137.515 | NM_007024 | 4757.298  | 3656.011  | NM_014488 | 1629.522  | 1897.489  |
| NM_002895 | 2257.172 | 2545.479 | NM_013231 | 2457.63   | 1865.941  | NM_013389 | 6213.406  | 7529.432  |
| AF276513  | 1604.479 | 1108.193 | NM_012106 | 5503.657  | 4333.178  | AB014567  | 1242.103  | 1476.054  |
| NM_013351 | 27213.31 | 29698.17 | NM_006254 | 1175.677  | 782.147   | NM_005326 | 31811.188 | 34397.672 |
| NM_012340 | 2161.516 | 3053.183 | X95425    | 1828.792  | 1623.243  | NM_007286 | 795.223   | 1066.853  |
| NM_006022 | 4441.144 | 3754.772 | NM_004422 | 4571.468  | 3949.968  | NM_014069 | 3244.229  | 3591.729  |
| AK025110  | 4857.232 | 4563.167 | NM_016562 | 1107.971  | 1199.145  | AB035130  | 4568.769  | 3993.348  |
| X52339    | 57544.58 | 57592.56 | NM_004895 | 8215.281  | 9714.844  | NM_003359 | 3181.57   | 4090.452  |
| M33197    | 65872.52 | 67044.63 | U59748    | 1419.612  | 2275.194  | M33197    | 56628.914 | 56037.613 |
| AB046830  | 10185.57 | 9449.478 | L32537    | 677.688   | 743.091   | AF119917  | 1186.474  | 1315.682  |
| NM_007122 | 9052.2   | 9255.164 | NM_014303 | 18470.861 | 18863.441 | NM_017915 | 6667.836  | 6166.255  |
| NM_001488 | 4749.987 | 4499.965 | AF130062  | 974.455   | 1289.502  | AL050097  | 1472.778  | 1514.375  |
| NM_016202 | 6404.551 | 15685.62 | M33197    | 67539.867 | 67712.266 | AK021513  | 843.773   | 1015.924  |
| NM_012476 | 1186.624 | 1279.056 | M95610    | 14256.02  | 16666.869 | AL049283  | 3817.685  | 3096.575  |
| NM_016604 | 4542.849 | 5235.356 | NM_003118 | 2831.435  | 3275.933  | M33197    | 56649.953 | 58587.016 |
| M33197    | 70038.16 | 75521.62 | L02922    | 17577.465 | 17907.637 | NM_002401 | 51922.508 | 60205.477 |
| NM_003407 | 5435.716 | 4357.798 | M33197    | 12269.045 | 10532.286 | NM_001274 | 9740.516  | 10250.833 |
| NM_007209 | 70156.34 | 75332.51 | NM_004045 | 7410.499  | 6156.496  | NM_003913 | 2311.201  | 2726.009  |
| NM_003729 | 8323.788 | 9699.841 | NM_001891 | 1232.414  | 821.212   | NM_002227 | 7885.757  | 6914.009  |
| BC015899  | 23904.61 | 26400.88 | NM_012139 | 7278.316  | 6159.115  | NM_007199 | 1255.556  | 1361.022  |
| AK023629  | 1553.193 | 2089.162 | AF121856  | 5452.475  | 6074.896  | AB002301  | 1300.734  | 1626.855  |
| AK024846  | 8901.503 | 9167.336 | NM_006421 | 3718.772  | 3397.478  | AB014530  | 10862.623 | 12178.571 |



|           |          |          |           |           |           |             |           |           |
|-----------|----------|----------|-----------|-----------|-----------|-------------|-----------|-----------|
| AK001451  | 19461.83 | 19860.25 | NM_017457 | 15954.974 | 13602.397 | M33197      | 64429.352 | 65767.75  |
| M33197    | 69065.24 | 73879.87 | NM_003765 | 12520.213 | 14090.613 | NM_005989   | 4895.244  | 7278.743  |
| NM_00718C | 4897.897 | 4715.106 | NM_005868 | 1118.317  | 1453.101  | AB014607    | 7809.313  | 8384.371  |
| NM_005609 | 1860.443 | 2234.998 | M33197    | 62936.148 | 63386.133 | AF134401    | 1969.479  | 1653.02   |
| NM_005476 | 11929.66 | 13161.96 | NM_018202 | 18068.793 | 19363.332 | NM_006387   | 11228.026 | 13118.734 |
| NM_00566C | 8184.838 | 9773.164 | AB023197  | 4902.484  | 5251.035  | NM_005646   | 5641.045  | 6177.547  |
| AK023902  | 5249.517 | 5215.859 | NM_022173 | 6921.304  | 7457.944  | NM_006639   | 1819.795  | 1952.128  |
| NM_000401 | 3237.358 | 4823.038 | AB040970  | 4938.004  | 5407.342  | BI767871    | 3893.448  | 4607.092  |
| NM_005223 | 1687.478 | 1571.817 | NM_01833C | 4551.487  | 5528.374  | AA418907    | 1989.185  | 1746.412  |
| AB011173  | 12968.17 | 19616.04 | AB023222  | 975.802   | 1303.522  | M65291      | 1006.758  | 1334.078  |
| AB023195  | 6634.336 | 7151.687 | AB033088  | 1153.124  | 1086.238  | AA115473    | 9064.156  | 12328.526 |
| U43431    | 3030.481 | 3692.323 | M33197    | 74592.008 | 66406.797 | AA872397    | 4578.714  | 5609.275  |
| X57147    | 1083.915 | 758.672  | NM_015921 | 33709.539 | 23863.373 | M24283      | 1483.762  | 1381.702  |
| AK021563  | 2471.193 | 2769.894 | AB040900  | 17207.189 | 14506.308 | AA709414    | 2209.606  | 2788.632  |
| M33197    | 72171.37 | 63071.79 | NM_00108C | 688.269   | 569.059   | D12676      | 6299.041  | 7484.318  |
| AK097041  | 4900.801 | 5566.402 | U80018    | 708.873   | 607.585   | NM_000939   | 60549.93  | 57210.402 |
| AF068744  | 7443.288 | 7806.01  | NM_000717 | 1338.892  | 995.616   | NM_004295   | 39041.836 | 40988.047 |
| NM_004497 | 1120.315 | 1143.698 | M33197    | 61800.699 | 68223.242 | H-X 02812 I | 3911.213  | 4485.518  |
| AK000762  | 5323.528 | 5802.391 | NM_004845 | 2668.994  | 2795.65   | U75898      | 3105.198  | 3998.116  |
| NM_004571 | 1777.864 | 2203.989 | NM_007107 | 11025.626 | 11257.679 | M29039      | 1678.937  | 2089.08   |
| AJ345030  | 5666.545 | 5393.009 | NM_000047 | 8863.071  | 8662.77   | M59815      | 1430.747  | 1584.603  |
| AK023631  | 3512.029 | 4110.055 | NM_006319 | 4836.63   | 5130.213  | M33210      | 671.311   | 1354.549  |
| AK023472  | 19877.48 | 20715.4  | NM_018226 | 3624.095  | 4161.814  | NM_006917   | 1304.714  | 1444.365  |
| AK021796  | 1459.964 | 1817.634 | NM_004605 | 509.293   | 767.398   | M33197      | 2673.065  | 2862.623  |
| AL109729  | 2360.199 | 3069.377 | Z36813    | 5253.331  | 5194.062  | AB011146    | 7043.043  | 6288.665  |
| AF007146  | 902.954  | 1372.349 | NM_00666C | 5289.851  | 7057.546  | NM_006185   | 31400.828 | 37702.48  |
| M33197    | 68232.83 | 60319.13 | NM_001486 | 656.129   | 999.053   | NM_01480C   | 12311.194 | 13307.324 |
| S79912    | 2863.604 | 2938.973 | NM_004727 | 807.275   | 1170.18   | NM_001557   | 1576.95   | 1517.259  |
| AL110283  | 3395.138 | 4274.946 | AF080158  | 2694.501  | 1750.507  | AF147311    | 4595.926  | 4594.856  |
| S83275    | 1658.182 | 1940.253 | BM664556  | 1036.476  | 646.46    | NM_002131   | 53078.613 | 61828.695 |
| AL117427  | 9497.738 | 10288.15 | M33197    | 61438.145 | 66009.781 | NM_017927   | 6246.983  | 7789.297  |
| M33197    | 67478.47 | 64286.29 | NM_016545 | 5725.957  | 4635.845  | M33197      | 66817.273 | 70138.352 |
| AF052118  | 27250.27 | 36250.7  | NM_00144C | 34739.598 | 24409.949 | NM_001203   | 6966.971  | 6554.221  |
| AK025166  | 4953.886 | 4398.988 | NM_016618 | 2737.997  | 1679.11   | NM_004799   | 17901.256 | 19645.824 |
| AL359586  | 735.994  | 1728.214 | AB014568  | 26634.209 | 20426.023 | NM_006733   | 1897.14   | 1822.232  |
| AF147421  | 686.855  | 1265.21  | NM_012249 | 6865.208  | 5862.398  | NM_002039   | 621.555   | 799.221   |
| AK023216  | 4976.144 | 4882.992 | AK022546  | 6438.181  | 6288.241  | NM_014047   | 36177.703 | 46672.098 |
| M33197    | 69162.91 | 67427.37 | NM_014067 | 10403.536 | 11864.775 | AK022901    | 3095.336  | 3957.286  |
| AF086547  | 1465.464 | 2353.645 | NM_002914 | 7995.559  | 10070.797 | M33197      | 66424.414 | 65704.055 |
| AK023288  | 3443.673 | 2862.73  | NM_020385 | 2481.941  | 2493.72   | AF037332    | 12993.618 | 13923.738 |
| AK022198  | 1635.197 | 1370.181 | NM_006541 | 1192.188  | 1106.255  | NM_014571   | 1281.53   | 1958.517  |
| M33197    | 71634.22 | 66356.1  | NM_005705 | 3843.717  | 5187.891  | NM_006052   | 3095.223  | 3315.523  |
| AK022428  | 2957.73  | 3008.696 | NM_004328 | 2420.82   | 2926.942  | AB040912    | 5978.532  | 6640.632  |
| AK000788  | 610.12   | 890.773  | NM_004581 | 5226.975  | 8616.287  | NM_006243   | 10692.024 | 11982.564 |
| AK023457  | 3998.737 | 2842.093 | NM_006817 | 13387.567 | 18003.078 | M33197      | 66666.18  | 73738.938 |
| AK025089  | 18213.03 | 19483.05 | NM_007108 | 20804.68  | 26317.002 | AJ011129    | 9479.067  | 10411.934 |
| AK023298  | 864.575  | 1330.554 | M33197    | 68586.508 | 66280.023 | AF282874    | 1166.977  | 1741.678  |
| AK021431  | 1082.718 | 1223.386 | M95610    | 15373.102 | 10943.175 | NM_001039   | 1078.643  | 1472.353  |
| M33197    | 69541.15 | 60094.15 | NM_003118 | 3168.45   | 2584.385  | M33197      | 61710.387 | 65455.84  |
| AK001279  | 7165.285 | 5521.958 | L02922    | 18910.453 | 13760.191 | U92978      | 4099.784  | 4267.826  |
| AF086407  | 730.09   | 1181.698 | NM_001797 | 1794.167  | 1360.831  | NM_014488   | 1773.364  | 2509.505  |
| AF085949  | 776.421  | 1140.943 | NM_003154 | 894.714   | 649.006   | NM_013389   | 7576.274  | 9453.808  |
| AK001567  | 3353.648 | 3978.323 | NM_004235 | 694.394   | 518.007   | AB014567    | 1550.766  | 1884.774  |

|            |          |          |           |           |           |           |           |           |
|------------|----------|----------|-----------|-----------|-----------|-----------|-----------|-----------|
| M33197     | 68659.65 | 59840.06 | AK023459  | 5316.649  | 3746.497  | AK022817  | 2608.409  | 2721.496  |
| U52839     | 651.536  | 705.94   | BI762154  | 609.915   | 372.438   | NM_018034 | 9248.021  | 10911.281 |
| X78262     | 377.928  | 521.862  | U13022    | 2618.447  | 2197.739  | M33197    | 65054.055 | 64496.988 |
| U42379     | 1517.675 | 1139.482 | R23251    | 18656.232 | 15250.293 | AB037831  | 3729.163  | 4338.961  |
| U84528     | 505.231  | 669.579  | AA702640  | 1427.724  | 2103.946  | NM_012103 | 24478.359 | 29331.387 |
| M33197     | 68410.87 | 56151.96 | T68583    | 3285.91   | 3552.831  | AL122077  | 16921.41  | 17485.064 |
| AK026984   | 49296.39 | 48887.15 | AA481944  | 35490.637 | 29935.148 | NM_014632 | 1837.667  | 2372.654  |
| NM_013391  | 1920.122 | 2225.185 | AF038440  | 760.094   | 868.277   | NM_006422 | 2609.189  | 2876.417  |
| M33197     | 68904.09 | 57920.78 | M31158    | 2275.198  | 1903.882  | BE789195  | 1019.343  | 997.759   |
| AL157466   | 11635.01 | 12142.44 | D42108    | 2133.333  | 2409.783  | NM_016946 | 3437.516  | 4032.824  |
| AL389981   | 1684.353 | 981.178  | BG700922  | 2786.69   | 3804.94   | M33197    | 63802.84  | 66328     |
| AK024336   | 7566.806 | 7606.634 | AI366068  | 1131.395  | 2038.717  | NM_007259 | 4593.993  | 5304.119  |
| AK023862   | 1303.627 | 1308.12  | N57553    | 1495.814  | 2560.882  | NM_018402 | 2293.973  | 1624.771  |
| NM_018621  | 3517.878 | 3245.453 | AB040970  | 4905.252  | 3285.071  | NM_018009 | 1252      | 1719.485  |
| AK022016   | 835.249  | 813.579  | NM_018330 | 4676.017  | 2941.705  | AK075081  | 3787.636  | 4462.794  |
| AK021628   | 446.163  | 891.05   | AB023222  | 1149.175  | 938.132   | NM_000895 | 19645.92  | 21661.379 |
| M33197     | 68725.69 | 62720.55 | AB033088  | 1329.618  | 874.435   | NM_003820 | 51205.988 | 57521.18  |
| AK022118   | 3819.522 | 3742.6   | M33197    | 67432.133 | 60401.441 | NM_015915 | 6525.798  | 8310.273  |
| AK026453   | 15216.85 | 15959.43 | U50342    | 3570.358  | 3269.447  | M33197    | 66969.094 | 68194.922 |
| AK025673   | 1029.1   | 1006.804 | NM_000295 | 761.234   | 728.972   | AB002301  | 1711.624  | 2008.136  |
| M33197     | 70064.82 | 58174.15 | AF103795  | 1177.628  | 1202.631  | AB014530  | 11289.925 | 11267.501 |
| AK023305   | 2905.821 | 3341.484 | NM_013231 | 2923.024  | 2760.184  | M33197    | 65432.664 | 65807.359 |
| AK022729   | 3126.988 | 3117.655 | NM_012106 | 5340.658  | 5413.771  | NM_005989 | 5109.84   | 6229.268  |
| NM_006165  | 7792.338 | 8669.002 | NM_006254 | 1082.356  | 1267.652  | AB014607  | 8653.025  | 8568.506  |
| AL050374   | 2265.63  | 2913.081 | X95425    | 2193.557  | 2538.979  | AF134401  | 1786.742  | 1389.387  |
| M33197     | 65751.6  | 65515.71 | NM_004422 | 4886.523  | 4873.963  | NM_020151 | 15322.183 | 15117.042 |
| M28639     | 18435.25 | 17672.63 | NM_016562 | 1225.568  | 1146.919  | NM_005891 | 53935.59  | 58418.883 |
| AL122073   | 47775.28 | 55353.68 | M33197    | 70233.43  | 67438.375 | NM_001645 | 2768.006  | 2952.029  |
| AF116655   | 14143.91 | 17073.64 | AY009399  | 28611.461 | 28769.984 | NM_003956 | 3827.496  | 4899.258  |
| AJ243222   | 1557.738 | 1959.734 | U59748    | 1976.286  | 2963.41   | M33197    | 64875.242 | 63069.508 |
| AK026132   | 9466.298 | 9653.791 | L32537    | 712.987   | 731.35    | NM_003500 | 11038.307 | 12336.484 |
| Y11162     | 1960.465 | 2503.481 | NM_006660 | 5883.574  | 5124.844  | NM_014317 | 6642.949  | 6531.831  |
| BF507660   | 631.922  | 792.944  | NM_004727 | 620.198   | 415.3     | L09234    | 23117.629 | 23813.588 |
| M33197     | 69577.49 | 74987.13 | NM_006685 | 34364.297 | 27363.35  | NM_000059 | 4365.052  | 3323.966  |
| AF070584   | 4753.822 | 5265.544 | M33197    | 14953.207 | 12783.111 | AK026740  | 1565.512  | 1481.693  |
| AF075006   | 1272.116 | 1226.987 | NM_004045 | 9226.922  | 7720.597  | NM_017881 | 12065.198 | 13676.864 |
| unknown (S | 1944.58  | 1622.296 | NM_001891 | 2145.389  | 1541.958  | M33197    | 60865.582 | 63757.797 |
| M33197     | 67458.05 | 61022.5  | NM_012139 | 6582.562  | 8030.357  | NM_017634 | 14167.597 | 11354.182 |
| AK000903   | 44356.24 | 48345.07 | AF121856  | 5235.338  | 8630.445  | NM_000813 | 1589.831  | 1669.519  |
| AK023938   | 2829.099 | 2734.045 | NM_006421 | 3769.875  | 4425.861  | NM_018896 | 1600.937  | 1836.658  |
| AK026896   | 475.62   | 613.976  | NM_017457 | 14874.674 | 13881.829 | AJ300465  | 2443.789  | 3077.359  |
| AL110169   | 2967.213 | 3005.55  | NM_003765 | 12326.426 | 15608.36  | X86400    | 2688.384  | 3183.966  |
| L13743     | 1963.671 | 1726.794 | NM_005868 | 1256.586  | 1795.505  | NM_000810 | 4406.686  | 4725.582  |
| U84519     | 350.543  | 948.469  | NM_018202 | 20004.34  | 25035.738 | NM_006917 | 1419.293  | 1006.854  |
| Z11849     | 16701.54 | 16892.58 | AB023197  | 6008.201  | 6987.02   | M33197    | 2564.362  | 2079.581  |
| AJ002788   | 7653.807 | 6213.808 | M33197    | 46611.141 | 50700.434 | AB011146  | 4707.286  | 4071.245  |
| X58060     | 790.586  | 1324.538 | NM_005705 | 2934.841  | 2100.841  | NM_005326 | 28694.668 | 29694.547 |
| U84527     | 1442.001 | 1431.332 | NM_004328 | 2261.877  | 1273.75   | NM_003359 | 3008.455  | 3625.925  |
| M33197     | 67021.36 | 67714.06 | NM_004581 | 5537.405  | 5246.671  | M33197    | 60012.793 | 53118.809 |
| AF052103   | 884.847  | 1147.305 | NM_006817 | 15618.271 | 13252.712 | AF119917  | 608.494   | 1054.057  |
| AF075050   | 2949.188 | 3510.024 | NM_007108 | 21312.33  | 16856.166 | NM_017915 | 6221.217  | 4382.596  |
| AK024842   | 5551.794 | 4764.23  | NM_015921 | 35564.016 | 26315.234 | AK021513  | 772.193   | 1127.674  |
| AK022962   | 621.704  | 652.466  | AB040900  | 12489.113 | 11089.116 | NM_003579 | 5548.634  | 5221.643  |

|             |          |          |           |           |           |             |           |           |
|-------------|----------|----------|-----------|-----------|-----------|-------------|-----------|-----------|
| NM_018382   | 3076.068 | 2990.055 | NM_001080 | 966.646   | 907.552   | AL049283    | 4057.788  | 3629.704  |
| BC022303    | 6216.709 | 5827.866 | NM_001482 | 788.725   | 712.646   | M33197      | 59685.254 | 58362.906 |
| M33197      | 70152.9  | 72692.71 | U80018    | 816.172   | 729.638   | NM_002401   | 48663.945 | 55999.621 |
| D17203      | 69608.64 | 68260.02 | NM_000717 | 1674.711  | 1715.064  | NM_001274   | 9683.935  | 10405.132 |
| NM_006495   | 4655.619 | 6885.89  | M33197    | 68002.93  | 67534.969 | NM_003913   | 2153.048  | 2348.996  |
| AK022101    | 1327.201 | 1689.983 | NM_004845 | 3165.319  | 3691.515  | NM_002227   | 8667.616  | 6761.604  |
| NM_003251   | 2349.265 | 2105.21  | NM_007107 | 10366.215 | 12740.738 | NM_007199   | 3141.394  | 3766.144  |
| AF086203    | 986.918  | 996.254  | NM_000047 | 10141.103 | 10793.148 | NM_006243   | 9298.753  | 7789.521  |
| AB046772    | 3706.645 | 2771.71  | NM_006319 | 5898.437  | 7108.275  | M33197      | 62828.012 | 58992.973 |
| M33197      | 70762.77 | 65745.22 | NM_018226 | 4606.586  | 5300.994  | AJ011129    | 4010.474  | 2803.276  |
| AL442080    | 4052.941 | 3882.152 | NM_004605 | 603.016   | 1161.905  | NM_001039   | 1063.236  | 644.757   |
| AY007143    | 8514.847 | 12345.93 | Z36813    | 5914.317  | 7826.211  | NM_006387   | 10474.283 | 6881.983  |
| L15557      | 1478.196 | 1859.45  | AB018327  | 2532.763  | 1650.762  | NM_005646   | 4800.638  | 3255.547  |
| M33197      | 71365.43 | 62237.02 | M33197    | 60644.625 | 64441.48  | NM_006639   | 1358.042  | 1191.73   |
| NM_001563   | 14601.1  | 16733.59 | AK022649  | 5878.132  | 4030.956  | AA418907    | 1840.256  | 1276.288  |
| NM_000266   | 2764.775 | 2863.869 | NM_016507 | 4278.963  | 4407.075  | AA115473    | 8517.107  | 7009.063  |
| X89666      | 6440.168 | 7763.135 | NM_002024 | 7456.567  | 5577.191  | AA872397    | 4545.637  | 4138.611  |
| NM_017429   | 1494.542 | 1876.77  | NM_002743 | 16549.873 | 13823.91  | M24283      | 1569.425  | 900.08    |
| NM_003104   | 13525.01 | 13092.69 | AF173358  | 14912.886 | 13344.207 | AA709414    | 1852.255  | 1671.952  |
| NM_014581   | 3355.786 | 3559.441 | NM_016366 | 4474.074  | 4903.142  | D12676      | 6936.519  | 6056.495  |
| M33197      | 67348.5  | 60762.93 | M33197    | 61574.313 | 67694.016 | BC012593    | 1352.746  | 1100.62   |
| AK024448    | 7906.377 | 8544.206 | NM_016545 | 5170.353  | 5373.367  | H-X 02812 I | 3975.212  | 4063.777  |
| NM_014406   | 6996.147 | 7464.471 | NM_001440 | 36699.805 | 30960.52  | U75898      | 4589.415  | 5082.661  |
| Z11801      | 1722.424 | 2231.307 | NM_001201 | 817.176   | 1131.29   | M29039      | 2248.934  | 2489.898  |
| AK027253    | 1073.916 | 1079.533 | NM_016618 | 2530.896  | 2358.145  | M59815      | 1977.686  | 2135.568  |
| S68954      | 17365.23 | 20381.05 | AB014568  | 32216.125 | 29182.295 | M33210      | 1167.368  | 1629.611  |
| S81335      | 1558.645 | 2449.034 | NM_012249 | 7432.459  | 7950.224  | AK075081    | 4690.837  | 4542.933  |
| AF052109    | 2043.224 | 2373.681 | AK022546  | 6177.552  | 6274.956  | NM_000895   | 21623.121 | 20033.42  |
| M33197      | 66922.12 | 55673.83 | NM_014067 | 11733.277 | 15070.943 | NM_003820   | 32723.172 | 30944.082 |
| NM_003353   | 18206.43 | 26175.03 | NM_002914 | 8691.928  | 12416.203 | NM_015915   | 4018.933  | 3059.956  |
| AK026502    | 1869.022 | 2404.764 | NM_020385 | 2806.47   | 2979.771  | M33197      | 66983.602 | 68037.273 |
| X82127      | 6512.643 | 5465.455 | NM_014877 | 484.667   | 998.232   | NM_016518   | 12207.747 | 7918.326  |
| AL122044    | 2948.767 | 3676.024 | NM_006541 | 1329.333  | 2056.575  | NM_006185   | 28799.941 | 21839     |
| NM_018296   | 1669.206 | 1553.655 | NM_018179 | 783.613   | 507.279   | NM_014800   | 13055.004 | 11164.637 |
| M33197      | 70558.7  | 68356.41 | NM_006197 | 6486.917  | 3335.051  | NM_001557   | 1378.255  | 786.433   |
| AF070578    | 2495.829 | 2518.082 | NM_014181 | 2548.63   | 1706.823  | AF147311    | 6318.083  | 5286.595  |
| CY3Cy5      | 7344.877 | 217.691  | M29273    | 1237.728  | 934.601   | M33197      | 69633.797 | 63408.73  |
| AA418907    | 1376.715 | 1944.275 | M33197    | 68398.359 | 66895.164 | NM_001203   | 6154.234  | 5221.343  |
| M65291      | 1763.89  | 1345.804 | NM_004854 | 3031.997  | 3042.483  | NM_004799   | 16477.902 | 12116.567 |
| AA115473    | 4997.329 | 6240.894 | AJ245418  | 12809.649 | 11302.987 | NM_006733   | 1966.742  | 1235.03   |
| AA872397    | 1554.096 | 1396.917 | NM_006377 | 4554.756  | 4247.737  | NM_002039   | 1315.432  | 931.792   |
| M24283      | 1731.971 | 1243.358 | AK026427  | 1073.232  | 921.326   | NM_014047   | 36150.07  | 25813.684 |
| AA709414    | 670.971  | 733.34   | AF244129  | 4548.928  | 2244.913  | AK022901    | 3392.575  | 2616.275  |
| D12676      | 3969.877 | 3280.468 | NM_002436 | 5326.332  | 5487.729  | NM_001508   | 1523.023  | 893.727   |
| NM_000939   | 41955.61 | 55413.8  | NM_018362 | 4653.636  | 4145.112  | M33197      | 71437.859 | 63131.406 |
| NM_004295   | 7299.109 | 7889.546 | M33197    | 62264.367 | 66437.789 | AF037332    | 13248.6   | 10338.544 |
| H-X 02812 I | 6238.397 | 7677.061 | NM_004755 | 2448.128  | 3465.403  | NM_014571   | 2560.885  | 1749.682  |
| M29039      | 2105.748 | 2088.768 | NM_002186 | 4023.403  | 3760.957  | NM_006052   | 3428.73   | 2991.361  |
| M59815      | 1302.751 | 1328.185 | NM_006182 | 1079.529  | 1294.923  | AB040912    | 16485.213 | 18900.234 |
| M33210      | 1414.821 | 913.843  | AL137543  | 6284.034  | 7055.326  | NM_003871   | 1535.607  | 2017.015  |
| NM_006917   | 1550.644 | 1196.181 | NM_004444 | 12502.021 | 12407.643 | NM_000813   | 1552.894  | 1060.353  |
| SR2         | 63224.01 | 61577.98 | M33197    | 1444.909  | 1757.771  | NM_018896   | 2169.807  | 1618.49   |
| SR4         | 22231.68 | 19115.36 | NM_001957 | 2664.408  | 3867.506  | AJ300465    | 1441.091  | 1386.683  |

|           |          |          |           |           |           |           |           |           |
|-----------|----------|----------|-----------|-----------|-----------|-----------|-----------|-----------|
| SR6       | 2636.695 | 1708.328 | AK024533  | 19981.596 | 24873.051 | X86400    | 2167      | 2033.109  |
| SR8       | 10034.72 | 24057.83 | NM_002736 | 17267.68  | 27886.592 | NM_000810 | 2715.709  | 2432.441  |
| SR10      | 40066.31 | 12605.56 | NM_004246 | 5996.473  | 7256.808  | AF069307  | 4522.302  | 3603.567  |
| CY3Cy5    | 10160.89 | 421.652  | NM_004961 | 664.962   | 1188.09   | M33197    | 61165.664 | 63000.586 |
| NM_004796 | 5480.778 | 4891.411 | NM_002285 | 1384.91   | 1203.776  | U92978    | 4068.873  | 3756.979  |
| NM_006733 | 2067.92  | 1571.437 | NM_006694 | 23269.512 | 15526.402 | NM_005736 | 1345.684  | 771.605   |
| NM_014047 | 29238.22 | 32305.25 | NM_005207 | 2559.991  | 2070.853  | NM_014486 | 2056.691  | 1280.828  |
| AK022901  | 649.451  | 1089.975 | NM_014467 | 336.003   | 368.655   | AK022817  | 3319.095  | 3684.568  |
| AF037332  | 13185.07 | 17909.66 | NM_003087 | 2894.588  | 2653.81   | NM_018034 | 8494.804  | 8711.385  |
| NM_014571 | 937.914  | 1165.205 | NM_001630 | 3099.43   | 2596.208  | M33197    | 61692.785 | 62979.227 |
| NM_006052 | 6163.862 | 5281.294 | M33197    | 62139     | 66368.406 | AB037831  | 2701.59   | 2087.629  |
| AB040912  | 2252.53  | 2117.303 | NM_002031 | 1351.549  | 1259.184  | NM_012103 | 27477.98  | 26298.996 |
| NM_006243 | 6231.778 | 7401.25  | AF305081  | 5114.593  | 5160.85   | AL122077  | 18017.744 | 15909.549 |
| AJ011129  | 6381.799 | 9327.158 | NM_004712 | 10160.445 | 9456.118  | NM_014632 | 2541.974  | 1994.084  |
| AF282874  | 888.472  | 1207.262 | AF118078  | 2818.862  | 2657.208  | NM_006422 | 2816.635  | 2851.206  |
| NM_001036 | 1066.844 | 878.163  | NM_020166 | 835.157   | 1163.068  | BE789195  | 2148.051  | 1845.935  |
| NM_006387 | 8320.157 | 8125.046 | AL157428  | 1346.573  | 1334.785  | NM_016946 | 3834.367  | 3980.749  |
| NM_005646 | 5054.33  | 4725.415 | M33197    | 66576.992 | 67793.133 | M33197    | 61462.645 | 63739.277 |
| NM_006636 | 546.713  | 824.998  | NM_005856 | 3729.81   | 5101.156  | NM_007256 | 4233.076  | 3165.034  |
| NM_001692 | 971.844  | 640.341  | AK025163  | 1295.893  | 1406.872  | NM_018402 | 2312.049  | 1275.054  |
| BI767871  | 829.928  | 839.079  | NM_014931 | 10407.956 | 9047.487  | NM_018006 | 2319.169  | 2575.901  |
| AB037831  | 2564.299 | 1907.534 | NM_014487 | 8833.22   | 8377.209  | M33197    | 62556.07  | 58604.672 |
| NM_012103 | 23489.72 | 30013    | NM_018070 | 6386.871  | 7904.519  | NM_002401 | 44176.906 | 47326.219 |
| AL122077  | 1840.832 | 1908.296 | NM_002484 | 9575.808  | 11584.242 | NM_001274 | 8654.596  | 7998.065  |
| NM_014632 | 1698.241 | 1598.355 | M33197    | 66998.063 | 67735.625 | NM_003913 | 2921.174  | 1689.934  |
| NM_006422 | 3382.629 | 3081.525 | NM_018240 | 62687.852 | 73737.445 | NM_002227 | 6970.302  | 3986.031  |
| BE789195  | 775.595  | 565.077  | AL162052  | 1571.126  | 2440.504  | NM_007196 | 1194.62   | 902.205   |
| M33197    | 68272    | 73010.13 | AK025941  | 1932.829  | 2496.508  | AB002301  | 1772.198  | 1837.41   |
| NM_007256 | 5869.758 | 5953.317 | M33197    | 56305.945 | 60878.324 | AB014530  | 10279.917 | 8127.039  |
| NM_018402 | 2050.436 | 1849.456 | NM_015914 | 1805.356  | 1265.979  | NM_005986 | 4323.859  | 3839.71   |
| NM_018006 | 1477.388 | 1525.931 | AF059531  | 5110.715  | 4369.195  | AB014607  | 4411.547  | 3682.981  |
| AK075081  | 2301.39  | 2811.842 | NM_002707 | 11181.226 | 9856.675  | AF134401  | 1817.955  | 1636.366  |
| NM_000895 | 18611.12 | 20984.15 | AF029777  | 1994.806  | 2145.042  | NM_020151 | 17221.102 | 12204.938 |
| NM_003820 | 12637.49 | 14016.68 | NM_003352 | 2054.498  | 1729.276  | NM_005891 | 55795.207 | 56729.363 |
| M33197    | 68189.6  | 73768.63 | AK026884  | 19314.088 | 18189.68  | NM_001645 | 2262.854  | 1658.753  |
| NM_016516 | 15002.97 | 14518.5  | S82198    | 1009.914  | 954.666   | NM_003956 | 3727.407  | 2638.195  |
| NM_006185 | 6691.536 | 7699.931 | NM_002594 | 3280.085  | 3342.818  | M33197    | 61803.578 | 63009.121 |
| NM_014800 | 9226.541 | 11014.57 | NM_001159 | 899.332   | 1190.196  | NM_003500 | 12248.248 | 8896.28   |
| NM_001557 | 875.807  | 827.075  | NM_031407 | 4177.896  | 6015.08   | NM_014317 | 6931.316  | 4725.972  |
| AF147311  | 4358.22  | 5265.329 | M33197    | 56943.164 | 67265.313 | L09234    | 23641.588 | 18411.201 |
| NM_002131 | 37442.51 | 52198.84 | AK000410  | 56079.27  | 64983.883 | NM_000056 | 3856.622  | 2285.48   |
| NM_017927 | 3315.98  | 3779.117 | NM_020193 | 2588.661  | 3012.018  | AK026740  | 1954.491  | 1594.015  |
| NM_020151 | 12931.76 | 12285.7  | NM_005616 | 1243.487  | 1877.029  | NM_017881 | 14493.887 | 16786.975 |
| NM_005891 | 44465.23 | 52380.78 | D87440    | 9093.864  | 11222.963 | M33197    | 58007.645 | 57846.031 |
| NM_001645 | 2153.885 | 2266.276 | AK000332  | 23886.59  | 27378.139 | NM_017634 | 14755.99  | 10381.564 |
| NM_003956 | 4258.106 | 3958.104 | AL080156  | 1316.581  | 2288.23   | NM_017743 | 4821.862  | 5945.002  |
| M33197    | 64917.53 | 64053.69 | M33197    | 56632.938 | 66965.742 | NM_000300 | 4007.94   | 5331.1    |
| NM_003500 | 10445.05 | 9211.618 | NM_006736 | 2531.896  | 3003.999  | M33197    | 59620.922 | 65132.035 |
| NM_014317 | 6199.441 | 5346.846 | NM_016260 | 1955.48   | 1014.66   | AV756917  | 3671.307  | 3477.564  |
| L09234    | 30115.2  | 41373.1  | NM_002895 | 1190.435  | 821.915   | NM_018380 | 11337.628 | 10865.332 |
| NM_000056 | 5570.233 | 4126.791 | NM_013351 | 15279.885 | 13861.489 | AK001442  | 1677.478  | 1655.659  |
| AK026740  | 2117.944 | 1880.605 | NM_012340 | 4560.249  | 3730.252  | NM_012070 | 2140.144  | 1630.776  |
| NM_017881 | 5718.648 | 7394.061 | NM_006022 | 2103.532  | 2030.571  | NM_019036 | 3145.104  | 2684.052  |

|             |          |          |           |           |           |           |           |           |
|-------------|----------|----------|-----------|-----------|-----------|-----------|-----------|-----------|
| NM_017634   | 13085.96 | 11787.1  | AK025110  | 2115.534  | 1649.159  | M33197    | 2369.718  | 1751.359  |
| NM_000813   | 1455.769 | 1457.059 | X52339    | 47042.723 | 29700.574 | AB011146  | 6416.221  | 4390.167  |
| NM_018896   | 1074.663 | 943.267  | M33197    | 56804.473 | 63567.086 | NM_005326 | 27707.775 | 31654.076 |
| AJ300465    | 896.449  | 922.248  | AB046830  | 4588.534  | 4556.311  | NM_007286 | 2122.353  | 566.709   |
| X86400      | 3231.733 | 3705.066 | NM_007122 | 4087.95   | 5645.634  | NM_014069 | 2542.145  | 1872.038  |
| NM_000810   | 710.004  | 807.908  | NM_001488 | 2079.062  | 2209.562  | AB035130  | 4502.522  | 3047.223  |
| AF069307    | 5256.821 | 5580.986 | NM_016202 | 11583.141 | 8512.244  | NM_003359 | 4287.994  | 2894.032  |
| M33197      | 63060.11 | 62179.91 | NM_012476 | 878.619   | 812.037   | M33197    | 56581.234 | 53223.691 |
| U92978      | 2154.531 | 2444.918 | NM_016604 | 1212.118  | 1323.509  | AF119917  | 822.752   | 806.482   |
| NM_005738   | 968.211  | 1138.621 | M33197    | 58371.73  | 65556.742 | NM_017915 | 7062.467  | 3822.539  |
| NM_014488   | 1406.581 | 1836.793 | NM_006276 | 1527.222  | 2038.184  | AL050097  | 1407.709  | 1302.247  |
| NM_013389   | 1744.226 | 2160.978 | NM_003407 | 2872.425  | 3784.878  | NM_003579 | 7255.504  | 4786.666  |
| AB014567    | 1825.247 | 1624.924 | NM_007209 | 58733.672 | 66706.164 | AL049283  | 4293.488  | 2881.963  |
| NM_005326   | 15787.81 | 13655.68 | NM_003729 | 2862.747  | 3499.915  | NM_002214 | 866.403   | 960.129   |
| NM_007286   | 1060.604 | 960.141  | L05096    | 20217.664 | 23382.609 | AF005258  | 1451.451  | 1413.056  |
| NM_014069   | 913.988  | 1024.125 | BC015899  | 9145.934  | 10932.605 | NM_000887 | 1075.396  | 1397.518  |
| AB035130    | 2194.647 | 1343.116 | NM_017986 | 6429.539  | 4640.821  | AF277292  | 703.31    | 1155.899  |
| NM_003359   | 2941.508 | 2716.739 | AK023629  | 724.668   | 478.484   | M33197    | 66712.297 | 73664.641 |
| M33197      | 60796.27 | 59731.2  | AK024846  | 3990.77   | 3048.57   | X99659    | 62198.238 | 58053.445 |
| AF119917    | 557.514  | 554.931  | AK001451  | 8875.965  | 6481.887  | NM_015416 | 8939.26   | 8758.881  |
| AK021834    | 916.18   | 1094.504 | M33197    | 50330.547 | 35506.98  | NM_002731 | 4194.116  | 4725.495  |
| NM_017915   | 7719.731 | 6230.618 | NM_007180 | 1975.988  | 1549.578  | NM_003899 | 8298.769  | 7381.821  |
| AL050097    | 907.546  | 759.907  | NM_005609 | 928.996   | 541.548   | X99662    | 3988.693  | 4506.389  |
| AK021513    | 1085.395 | 963.449  | NM_005476 | 5495.359  | 3665.489  | M33197    | 65047.211 | 65937.641 |
| AL049283    | 3830.673 | 3740.553 | NM_005660 | 3510.837  | 2869.709  | NM_012453 | 1633.321  | 474.973   |
| M33197      | 62294.86 | 61500.15 | AK023902  | 1707.693  | 2104.061  | NM_006016 | 63232.668 | 56550.375 |
| NM_002401   | 18525.21 | 21908.03 | NM_000401 | 900.245   | 879.723   | NM_001242 | 7379.602  | 5027.491  |
| NM_001274   | 12602.8  | 13767.42 | AB011173  | 7440.815  | 6457.671  | NM_001882 | 1722.587  | 1284.751  |
| NM_003913   | 2296.886 | 2159.549 | AB023195  | 1877.521  | 2953.632  | NM_014891 | 26110.787 | 20878.777 |
| NM_002227   | 6143.201 | 4412.816 | U43431    | 1377.281  | 1913.343  | NM_013392 | 18055.924 | 13862.8   |
| NM_007199   | 1663.302 | 1662.703 | AK021563  | 761.134   | 950.616   | M33197    | 61213.512 | 55037.805 |
| AB002301    | 1303.552 | 1442.517 | AB006622  | 1352.853  | 853.951   | NM_002175 | 9759.054  | 5719.72   |
| AB014530    | 3489.383 | 4629.383 | M33197    | 60430.723 | 63216.848 | NM_003236 | 2921.324  | 2506.461  |
| M33197      | 63372.19 | 61079.7  | AK097041  | 7751.608  | 8819.814  | NM_003458 | 2277.568  | 1837.833  |
| NM_005989   | 1732.541 | 2018.295 | AF068744  | 47462.918 | 46271.746 | AF052692  | 3905.114  | 3421.097  |
| AB014607    | 1725.625 | 1770.847 | NM_004497 | 548.629   | 693.209   | NM_002820 | 1609.461  | 1189.806  |
| AF134401    | 1612.45  | 1499.163 | AK000762  | 2785.745  | 4228.092  | NM_005228 | 2174.873  | 2357.28   |
| NM_006387   | 9039.002 | 7083.496 | NM_004571 | 896.473   | 832.893   | NM_002354 | 2291.068  | 2486.945  |
| NM_005646   | 5318.844 | 4408.957 | AJ345030  | 3201.583  | 2094.438  | NM_000179 | 2272.991  | 2389.885  |
| NM_006639   | 1181.999 | 1331.269 | AK023631  | 1735.816  | 834.32    | NM_005215 | 537.499   | 939.582   |
| AA115473    | 5265.271 | 5873.003 | AK023472  | 12674.288 | 9637.505  | AF062739  | 1485.618  | 1643.416  |
| AA872397    | 1541.496 | 1400.448 | AK021796  | 486.458   | 310.173   | NM_006602 | 5132.832  | 5276.812  |
| M24283      | 1502.415 | 1378.24  | AL109729  | 1360.097  | 899.017   | NM_001260 | 3435.78   | 3382      |
| AA709414    | 977.943  | 1061.596 | AF007146  | 656.043   | 477.247   | NM_001950 | 8637.865  | 11354.53  |
| D12676      | 4715.927 | 5285.556 | M33197    | 68893.563 | 65925.281 | NM_006999 | 2294.949  | 2177.233  |
| NM_000939   | 42742.9  | 53746.06 | S79912    | 11281.734 | 9621.573  | NM_006286 | 5063.292  | 4181.917  |
| NM_004295   | 6910.393 | 8345.535 | AL110283  | 1193.223  | 767.392   | M33197    | 66515.172 | 63109.664 |
| H-X 02812 I | 6926.479 | 8810.729 | AK026892  | 3480.188  | 4683.114  | NM_004331 | 33400.121 | 33062.234 |
| U75898      | 530.061  | 1074.414 | S83275    | 37565.688 | 29993.535 | NM_015996 | 2191.309  | 2887.125  |
| M29039      | 2094.823 | 2096.636 | AL117427  | 7654.645  | 9020.857  | NM_015703 | 20808.043 | 19789.207 |
| M59815      | 783.951  | 952.684  | M33197    | 61553.691 | 67561.43  | AB018337  | 5101.045  | 4875.009  |
| M33210      | 560.092  | 589.66   | AF052118  | 15401.047 | 21092.285 | NM_014489 | 4147.472  | 4122.903  |
| M33197      | 1550.613 | 1203.078 | AK025166  | 4377.419  | 6061.196  | AK025273  | 10261.899 | 8438.788  |

|           |          |          |           |           |           |           |           |           |
|-----------|----------|----------|-----------|-----------|-----------|-----------|-----------|-----------|
| AB011146  | 3684.195 | 3010.102 | AL359586  | 938.949   | 671.714   | M33197    | 63864.273 | 60449.41  |
| NM_006185 | 7683.272 | 6997.714 | AF035290  | 1017.645  | 1072.313  | NM_001794 | 4123.313  | 3430.083  |
| NM_001557 | 1921.631 | 1673.828 | AK023216  | 1648.063  | 2393.061  | NM_002205 | 6713.636  | 5676.43   |
| AF147311  | 4589.696 | 5238.892 | M33197    | 69128.203 | 67341.93  | M33197    | 63626.672 | 67815.453 |
| NM_002131 | 39961.88 | 52327.41 | AF086547  | 976.308   | 1005.38   | NM_000131 | 1353.374  | 1585.102  |
| NM_017927 | 2888.34  | 2723.387 | AK023288  | 1528.714  | 2356.161  | NM_001836 | 2270.566  | 1467.036  |
| M33197    | 68245.59 | 75023.12 | AK022198  | 1741.702  | 2006.613  | NM_001911 | 54540.316 | 31553.252 |
| NM_001203 | 6131.527 | 6035.608 | M33197    | 63880.34  | 64626.488 | NM_000537 | 1361.205  | 1527.78   |
| NM_004799 | 5565.658 | 6227.808 | AK022428  | 1341.845  | 879.546   | NM_006503 | 4302.634  | 4352.92   |
| NM_006733 | 1689.207 | 1722.312 | AK023457  | 1123.41   | 1175.44   | M33197    | 3247.889  | 2732.333  |
| NM_014047 | 28270.38 | 41596.75 | AK025089  | 8338.7    | 7278.437  | AB020698  | 1169.07   | 1536.841  |
| AK022901  | 924.011  | 1036.286 | M33197    | 59553.488 | 63736.73  | U68382    | 2203.437  | 2739.193  |
| M33197    | 64355.86 | 63714.38 | AF085996  | 1180.426  | 1179.543  | NM_003969 | 4641.761  | 4881.412  |
| AF037332  | 13734.17 | 16877.26 | AK001279  | 2314.9    | 3383.985  | NM_004651 | 10663.892 | 8581.177  |
| NM_014571 | 1317.871 | 1485.305 | AF086407  | 637.563   | 957.01    | M33197    | 64450.367 | 63335.746 |
| NM_006052 | 5191.268 | 5409.093 | AK001567  | 1554.891  | 1669.633  | NM_017569 | 11962.438 | 12685.495 |
| AB040912  | 4323.915 | 4832.624 | M33197    | 60786.035 | 63565.703 | NM_001456 | 2619.296  | 3365.117  |
| NM_006243 | 4532.403 | 4803.818 | U52839    | 2040.42   | 2283.583  | NM_002906 | 3082.237  | 2789.221  |
| M33197    | 58920.25 | 56739.32 | U58667    | 702.95    | 1254.012  | AK024480  | 2626.471  | 2766.197  |
| AJ011129  | 4517.661 | 5895.479 | M33197    | 60329.734 | 63303.84  | Y13871    | 26209.457 | 26997.674 |
| AF282874  | 460.777  | 953.726  | AK026984  | 33697.34  | 36071.133 | NM_012134 | 1058.975  | 871.788   |
| NM_001039 | 997.947  | 983.947  | AK022088  | 404.985   | 330.737   | AL137725  | 20767.451 | 26948.594 |
| M33197    | 62974.13 | 59285.88 | NM_013391 | 678.06    | 496.692   | AJ008151  | 35769.633 | 44601.137 |
| NM_005738 | 1127.494 | 1209.519 | M33197    | 68243.266 | 65559.445 | AK024149  | 1868.37   | 2709.064  |
| NM_014488 | 1440.51  | 1402.644 | AL157466  | 4525.091  | 3343.782  | AK023094  | 1577.799  | 1931.586  |
| NM_013389 | 2052.969 | 2046.607 | AL389981  | 1063.073  | 646.143   | M33197    | 64760.176 | 62607.684 |
| AB014567  | 2174.956 | 1718.282 | AK024336  | 2636.523  | 1970.822  | NM_004091 | 3250.029  | 3500.871  |
| AK022817  | 3174.155 | 3477.96  | AK023862  | 661.568   | 896.992   | X74070    | 64079.879 | 60728.531 |
| NM_018034 | 5595.895 | 7407.329 | NM_018621 | 1372.827  | 1115.496  | AF027219  | 2262.969  | 2658.015  |
| M33197    | 68891.59 | 68199.55 | M33197    | 65324.027 | 66131.375 | BC022846  | 2035.367  | 2332.817  |
| AB037831  | 2262.271 | 2553.953 | AK022118  | 1743.993  | 2015.635  | NM_006333 | 15819.37  | 15268.261 |
| NM_012103 | 23003.92 | 36159.71 | AK026453  | 6719.872  | 8890.026  | M33197    | 60549.617 | 62799.27  |
| AL122077  | 3400.71  | 2669.548 | AK025673  | 829.517   | 972.49    | NM_002898 | 11583.944 | 11104.677 |
| NM_014632 | 1545.983 | 1790.208 | M33197    | 59726.41  | 60734.965 | AK022749  | 11984.301 | 15415.302 |
| NM_006422 | 3230.73  | 3453.27  | AK022431  | 763.279   | 1182.136  | BF031409  | 15138.876 | 13681.383 |
| BE789195  | 841.491  | 644.702  | AK023305  | 58935.117 | 60358.168 | BE378791  | 1633.858  | 1479.528  |
| NM_016946 | 3933.29  | 4139.343 | AK023763  | 5900.841  | 6007.438  | U94388    | 2536.403  | 2125.417  |
| M33197    | 66915.4  | 82577.84 | AK022729  | 1519.403  | 1343.773  | NM_012322 | 15566.713 | 15686.368 |
| NM_007259 | 5109.311 | 4668.948 | NM_006168 | 8983.882  | 6036.084  | M33197    | 62054.254 | 62997.27  |
| NM_018402 | 1321.413 | 1145.45  | AL050374  | 1891.293  | 1230.577  | NM_002109 | 8237.063  | 8160.559  |
| NM_018009 | 698.686  | 717.738  | M33197    | 57989.16  | 59426.152 | NM_000984 | 61624.828 | 62576.406 |
| AK075081  | 1788.196 | 2206.376 | M28639    | 7121.061  | 5426.015  | NM_002453 | 7667.591  | 10064.917 |
| NM_000895 | 13061.37 | 12554.88 | AL122073  | 30584.43  | 22812.256 | AK026721  | 5909.138  | 5581.145  |
| NM_003820 | 9058.195 | 9747.239 | AF116655  | 8457.361  | 5815.71   | AK023027  | 3825.178  | 4012.023  |
| NM_015915 | 3233.997 | 3453.144 | AJ243222  | 1307.526  | 1360.547  | AK025598  | 2464.577  | 2150.911  |
| M33197    | 63361.38 | 63415.64 | AK026132  | 3270.802  | 4082.442  | AB002348  | 58076.465 | 53722.02  |
| NM_016518 | 10521.24 | 11739.21 | Y11162    | 1093.432  | 975.054   | M33197    | 57285.945 | 49266.895 |
| AB002301  | 1444.855 | 1305.43  | M33197    | 58124.785 | 63697.91  | M64714    | 1690.896  | 1683.189  |
| AB014530  | 3959.16  | 4801.158 | AF070584  | 1964.384  | 2153.011  | NM_003000 | 35845.633 | 34318.09  |
| M33197    | 63013.91 | 64697.44 | AF075006  | 759.764   | 768.26    | NM_002495 | 36694.781 | 39477.039 |
| NM_005989 | 2339.207 | 2289.615 | M33197    | 58843.109 | 63335.879 | M33197    | 63202.891 | 61159.723 |
| AB014607  | 2656.277 | 2163.823 | AK000903  | 32430.779 | 38854.914 | NM_012257 | 3383.573  | 3319.498  |
| AF134401  | 2549.774 | 2091.861 | AK023938  | 1527.901  | 1847.717  | U37690    | 38802.391 | 43323.324 |

|           |          |          |           |           |           |           |           |           |
|-----------|----------|----------|-----------|-----------|-----------|-----------|-----------|-----------|
| NM_020151 | 15110.56 | 12287.98 | AL110169  | 1076.68   | 1970.427  | NM_005120 | 3341.909  | 4035.433  |
| NM_005891 | 52425.59 | 60222.16 | L13743    | 2234.654  | 1550.629  | NM_006290 | 2372.146  | 2711.444  |
| NM_001645 | 1878.085 | 2036.762 | U84519    | 1420.433  | 1043.061  | AF060936  | 21439.404 | 26087.912 |
| NM_003950 | 4601.443 | 5626.133 | Z11849    | 8561.275  | 6140.164  | NM_018167 | 2228.004  | 2037.797  |
| M33197    | 63964.4  | 63836.74 | AJ002788  | 3478.287  | 2080.322  | AL050088  | 13121.742 | 15045.713 |
| NM_003500 | 10541.77 | 10906.85 | M33197    | 63745.094 | 65812.406 | AK024939  | 10012.019 | 10151.41  |
| NM_014317 | 6277.833 | 5325.954 | AF052103  | 1052.51   | 1035.531  | AK001561  | 2488.725  | 2373.532  |
| L09234    | 28398.65 | 36505.33 | AF075050  | 1806.785  | 1348.32   | AB007880  | 4170.626  | 4293.781  |
| NM_000050 | 4829.212 | 3395.87  | AK024842  | 1667.068  | 1749.959  | AK024950  | 1381.439  | 1705.902  |
| AK026740  | 1042.704 | 1266.655 | NM_018380 | 1530.994  | 1298.92   | M33197    | 66731.617 | 66425.617 |
| NM_017881 | 5742.061 | 6390.503 | BC022303  | 2508.905  | 3300.811  | AF147356  | 10212.605 | 12410.106 |
| AF226730  | 1194.456 | 1026.5   | M33197    | 60411.207 | 64107.699 | NM_018840 | 7066.311  | 5206.568  |
| NM_017634 | 7911.578 | 6419.341 | D17203    | 58664.82  | 55320.855 | AK024275  | 1529.563  | 1523.366  |
| NM_000810 | 707.908  | 547.453  | NM_006490 | 3356.301  | 3583.894  | AL049461  | 3846.784  | 6760.638  |
| AJ300465  | 1260.432 | 889.202  | NM_005280 | 911.995   | 1368.953  | AL109782  | 13858.827 | 13741.676 |
| X86400    | 2397.832 | 2687.152 | AK022101  | 1126.818  | 1567.81   | AF086225  | 3060.623  | 2475.226  |
| NM_000810 | 1158.181 | 1611.357 | NM_003251 | 3096.882  | 4065.121  | NM_005844 | 8093.748  | 11843.217 |
| AF069307  | 5483.514 | 6748.594 | AB046772  | 1330.633  | 2343.129  | M33197    | 67113.539 | 64823.391 |
| M33197    | 2422.469 | 2231.576 | M33197    | 72669.922 | 67222.625 | AK025489  | 3575.564  | 4797.752  |
| AB011146  | 6032.296 | 4364.523 | AL442080  | 1816.819  | 1878.245  | AB075853  | 1511.16   | 2057.752  |
| NM_005320 | 20636.52 | 21158.43 | AY007143  | 13957.075 | 17307.672 | AL390152  | 6581.007  | 6924.805  |
| NM_007280 | 1027.629 | 1271.08  | L15557    | 1964.578  | 3639.56   | M33197    | 66655.477 | 73334.359 |
| NM_014060 | 3188.299 | 3339.349 | M33197    | 62399.27  | 66814.969 | NM_018120 | 4368.396  | 4392.552  |
| AB035130  | 3369.924 | 2542.281 | NM_001560 | 8022.949  | 6590.548  | AK024506  | 9236.685  | 9916.81   |
| NM_003350 | 3252.68  | 3391.734 | NM_000260 | 1437.247  | 1101.13   | NM_014170 | 4484.318  | 7746.4    |
| M33197    | 58655.78 | 58157.02 | X89666    | 3750.845  | 2680.052  | AF086326  | 7105.296  | 5938.425  |
| AF119917  | 759.202  | 758.992  | NM_017420 | 852.577   | 978.98    | M33197    | 66742.461 | 70490.594 |
| NM_017910 | 7273.886 | 4935.013 | NM_003104 | 7952.76   | 9508.56   | AL080057  | 2766.352  | 2579.321  |
| AL050097  | 839.644  | 865.739  | NM_014581 | 1920.794  | 2094.244  | AL117528  | 1430.334  | 1462.026  |
| AK021513  | 829.517  | 888.323  | M33197    | 62365.293 | 64417.441 | M33197    | 65377.508 | 66022.5   |
| AL049283  | 2893.712 | 2297.213 | AK024448  | 4680.308  | 4896.945  | AK025948  | 2307.218  | 2376.126  |
| M33197    | 61117.87 | 62964.63 | NM_014400 | 2662.295  | 2943.884  | AK000674  | 989.322   | 1328.063  |
| NM_002401 | 13723.11 | 13033.09 | Z11801    | 571.962   | 518.132   | AJ238555  | 1071.099  | 1452.331  |
| NM_001274 | 8976.983 | 9187.178 | S68954    | 7373.956  | 7714.329  | AL353948  | 35446.371 | 33593.484 |
| NM_003910 | 1434.079 | 1567.128 | S81335    | 2595.697  | 2790.607  | AL122043  | 1599.217  | 2172.259  |
| NM_002227 | 5676.31  | 4420.74  | AF052109  | 1919.532  | 2489.693  | M33197    | 64291.227 | 62704.207 |
| NM_007190 | 1823.487 | 1738.513 | M33197    | 53953.023 | 48041.074 | AK025869  | 16047.649 | 15397.413 |
| NM_006240 | 6238.267 | 5362.63  | NM_003350 | 49125.066 | 46118.859 | M33197    | 65988.758 | 64771.211 |
| NM_007250 | 814.949  | 1389.986 | X82127    | 31072.789 | 33866.117 | AF009281  | 1104.715  | 1411.179  |
| M33197    | 61489.84 | 62617.42 | AL122044  | 3498.688  | 4554.141  | AF023203  | 733.252   | 5471.246  |
| AJ011129  | 6137.554 | 6599.186 | NM_018290 | 2274.927  | 3422.162  | AF056430  | 3523.481  | 3810.673  |
| AF282874  | 1091.22  | 990.057  | NM_005750 | 2057.057  | 2014.975  | AF009291  | 2687.163  | 2475.352  |
| NM_006387 | 10819.39 | 8451.398 | M33197    | 56748.594 | 64397.348 | M33197    | 66768.961 | 66270.398 |
| NM_005640 | 6460.236 | 5301.188 | AF070578  | 1295.879  | 1102.61   | NM_018050 | 4531.197  | 4543.351  |
| NM_006630 | 1111.107 | 1067.744 | CY3Cy5    | 3507.529  | 253.598   | AK002199  | 3102.949  | 2432.709  |
| NM_001690 | 753.041  | 1064.685 | AA418907  | 1273.507  | 1538.482  | AK021662  | 4327.041  | 3830.62   |
| AA418907  | 1044.74  | 1004.859 | M65291    | 840.672   | 757.64    | AK001038  | 1912.655  | 1581.928  |
| M65291    | 850.718  | 952.278  | AA115473  | 8294.278  | 6403.193  | AK001802  | 2000.771  | 2138.612  |
| AA115473  | 5370.025 | 7688.58  | AA872397  | 5555.271  | 4884.787  | AK021469  | 4073.912  | 3431.057  |
| AA872397  | 1670.644 | 1506.632 | M24283    | 586.245   | 1006.958  | AK021706  | 1883.453  | 1794.292  |
| M24283    | 1454.973 | 1146.781 | AA709414  | 1041.914  | 1217.379  | M33197    | 67145.398 | 66759.781 |
| AA709414  | 1084.501 | 1079.897 | D12676    | 3641.647  | 3348.603  | AK025161  | 1407.06   | 1211.05   |
| D12676    | 4022.154 | 4547.439 | NM_000930 | 26225.662 | 25300.051 | AK025387  | 2038.081  | 1826.162  |

|           |          |          |           |           |           |           |           |           |
|-----------|----------|----------|-----------|-----------|-----------|-----------|-----------|-----------|
| NM_00093  | 30160.06 | 36656.08 | NM_00429  | 7749.688  | 7171.881  | AK026259  | 53438.652 | 47851.207 |
| NM_00429  | 5183.617 | 5351.892 | H-X 02812 | 3227.881  | 2951.8    | AJ008115  | 27305.967 | 34006.492 |
| H-X 02812 | 3709.656 | 4109.99  | U75898    | 3602.753  | 3600.686  | AF083125  | 5214.683  | 4500.731  |
| M29039    | 1401.388 | 1204.949 | M29039    | 1509.215  | 1731.479  | M33197    | 70555.078 | 63609.938 |
| AK075081  | 1993.076 | 2705.094 | M59815    | 1002.618  | 1542.191  | X51526    | 1466.845  | 5054.438  |
| NM_00089  | 17341.59 | 16951.06 | SR2       | 58326.711 | 52403.254 | AK022970  | 2436.488  | 2565.878  |
| NM_00382  | 14309.4  | 14314.34 | SR4       | 18478.26  | 17617.012 | AK026212  | 5738.725  | 5524.588  |
| NM_01591  | 3298.516 | 3247.117 | SR6       | 3009.844  | 2280.065  | AF086222  | 3614.702  | 4689.246  |
| M33197    | 61539.56 | 56998.54 | SR8       | 10163.531 | 35331.555 | AF086415  | 7548.652  | 6459.008  |
| NM_01651  | 17123.48 | 13220.16 | SR10      | 32668.137 | 10843.226 | M33197    | 68698.234 | 62993.547 |
| NM_00618  | 7307.731 | 6577.032 | CY3Cy5    | 5317.741  | 447.127   | AK024470  | 3663.843  | 2839.411  |
| NM_01480  | 12586.8  | 14667.21 | M33197    | 66328.367 | 66412.508 | NM_00422  | 14239.684 | 11827.726 |
| NM_001557 | 1129.409 | 1080.989 | NM_00120  | 4868.193  | 4868.438  | AK023400  | 1167.764  | 1115.985  |
| AF147311  | 4916.985 | 6182.382 | NM_00479  | 20703.715 | 16812.74  | NM_00643  | 27317.703 | 29989.039 |
| NM_002131 | 42454.65 | 55684.27 | NM_00673  | 1357.385  | 1594.971  | AF025441  | 8318.531  | 7230.729  |
| NM_017927 | 3032.864 | 3413.122 | NM_014047 | 22726.205 | 20583.105 | U62823    | 4871.558  | 3773.194  |
| NM_00479  | 6073.848 | 6907.794 | AK022901  | 1919.372  | 1315.685  | NM_00353  | 19768.682 | 16111.363 |
| NM_00673  | 1469.093 | 1490.921 | M33197    | 66390.641 | 74315.039 | AK026768  | 5708.499  | 5111.678  |
| NM_014047 | 29072.49 | 41748.99 | AF037332  | 8466.562  | 6147.291  | M33197    | 67186.289 | 62955.32  |
| AK022901  | 587.74   | 1019.179 | NM_00605  | 2288.797  | 2256.159  | AK000852  | 37712.559 | 38014.547 |
| M33197    | 67015.23 | 58743.01 | AB040912  | 9920.762  | 10602.677 | AF251188  | 9246      | 8999.062  |
| AF037332  | 6386.689 | 6601.403 | NM_003871 | 1480.065  | 1174.281  | AK026418  | 9364.045  | 10295.366 |
| NM_014571 | 546.28   | 706.03   | AJ011129  | 8628.239  | 6869.152  | AF086194  | 54282.172 | 46343.781 |
| NM_00605  | 3883.762 | 3173.043 | NM_00103  | 1143.333  | 1148.109  | AK026811  | 5455.084  | 5420.267  |
| AB040912  | 1771.751 | 1359.601 | NM_006387 | 8029.647  | 7857.273  | M33197    | 62695.727 | 55573.707 |
| NM_00081  | 1523.524 | 1521.302 | NM_00564  | 7251.806  | 8778.366  | AK023633  | 2753.222  | 2199.894  |
| NM_01889  | 1415.422 | 981.172  | NM_00663  | 1549.345  | 1622.058  | NM_00617  | 2115.161  | 2305.667  |
| AJ300465  | 737.189  | 1048.249 | BI767871  | 3286.428  | 3353.024  | AL360165  | 3957.968  | 3935.308  |
| X86400    | 3957.062 | 3398.294 | AK022817  | 3156.003  | 2794.217  | M33197    | 66624.719 | 64251.32  |
| AF069307  | 5731.723 | 5188.971 | NM_018034 | 10214.042 | 8263.924  | AJ008132  | 11624.312 | 9280.316  |
| M33197    | 63189.23 | 56535.57 | M33197    | 66415.211 | 70819.18  | NM_005281 | 11038.658 | 10613.868 |
| U92978    | 4143.732 | 4176.388 | AB037831  | 2423.298  | 2567.501  | NM_00554  | 4822.494  | 3732.052  |
| NM_00573  | 1570.233 | 1696.231 | NM_01210  | 21199.385 | 21495.176 | U12129    | 1456.803  | 1992.625  |
| NM_01448  | 1809.838 | 1932.757 | AL122077  | 7529.35   | 6742.981  | S81242    | 56746.633 | 54555.176 |
| NM_01338  | 2497.082 | 2648.929 | NM_01463  | 1918.928  | 1752.431  | AF230801  | 2981.859  | 3364.7    |
| AB014567  | 2367.095 | 2198.715 | NM_00642  | 1792.232  | 2039.968  | AF075072  | 4163.556  | 4555.501  |
| AB037831  | 2304.278 | 2280.886 | BE789195  | 736.285   | 1078.011  | M33197    | 65841.609 | 63702.227 |
| NM_01210  | 21915.39 | 34337.58 | NM_01694  | 2288.099  | 2423.573  | NM_00250  | 6801.704  | 6623.574  |
| AL122077  | 1984.039 | 2022.8   | M33197    | 66404.375 | 72813.867 | U38442    | 13396.408 | 10116.307 |
| NM_01463  | 1147.183 | 1468.397 | NM_00725  | 3094.215  | 3288      | AF110136  | 2010.733  | 2047.167  |
| NM_00642  | 2050.242 | 3036.46  | NM_01840  | 1077.107  | 1803.431  | AK026706  | 3317.05   | 4191.64   |
| NM_01694  | 1776.804 | 2077.719 | NM_01800  | 1409.345  | 1205.176  | AB007936  | 61218.746 | 56577.402 |
| M33197    | 61886.16 | 62454.47 | M33197    | 66285.844 | 71073.758 | D28391    | 51612.316 | 45968.316 |
| NM_00725  | 3359.412 | 2638.772 | NM_01651  | 14271.309 | 12714.318 | M33197    | 61370     | 54979.781 |
| NM_01840  | 793.087  | 627.862  | NM_00618  | 31855.355 | 28821.584 | AJ227896  | 9867.715  | 8966.326  |
| NM_01800  | 635.415  | 583.579  | NM_01480  | 13448.124 | 10534.809 | L32841    | 4308.272  | 3720.083  |
| NM_001274 | 11354.9  | 11002.76 | AF147311  | 4924.613  | 4376.791  | M33197    | 65037.332 | 64175.938 |
| NM_00391  | 2777.134 | 2444.439 | NM_002131 | 45637.125 | 38264.563 | AF131770  | 5889.975  | 5870.527  |
| NM_002227 | 6909.968 | 4499.567 | NM_017927 | 4109.004  | 4708.244  | CY3Cy5    | 8621.427  | 221.212   |
| NM_00719  | 1107.268 | 1221.394 | NM_020151 | 13032.672 | 11527.023 | AI298534  | 842.841   | 1119.325  |
| AB002301  | 1549.564 | 1542.249 | NM_005891 | 50374.906 | 41602.18  | R71691    | 1298.486  | 2684.063  |
| AB014530  | 4490.16  | 6193.114 | NM_00164  | 1612.029  | 1946.16   | AA424735  | 3692.924  | 4459.864  |
| NM_00598  | 2982.492 | 3408.913 | NM_00395  | 3127.019  | 3292.707  | U78294    | 7428.783  | 10616.691 |



|           |          |          |           |           |           |           |           |           |
|-----------|----------|----------|-----------|-----------|-----------|-----------|-----------|-----------|
| AB014607  | 3305.4   | 2764.697 | M33197    | 61457.047 | 66676.563 | AA171613  | 860.005   | 1033.734  |
| AF134401  | 2365.784 | 2673.337 | NM_00350C | 6946.489  | 6395.139  | BI760394  | 8313.86   | 13820.19  |
| NM_020151 | 13774.81 | 17242.7  | NM_014317 | 3873.812  | 3976.286  | AA555216  | 1219.446  | 1756.167  |
| NM_005891 | 42910.68 | 53114.58 | L09234    | 16987.9   | 14490.116 | U09117    | 10725.855 | 14053.622 |
| NM_00395E | 4414.563 | 4256.717 | NM_00005E | 2328.614  | 3004.99   | M21054    | 1202.865  | 1846.696  |
| M33197    | 64148.49 | 64560.04 | AK026740  | 829.102   | 945.63    | M18468    | 1756.118  | 2087.256  |
| NM_00350C | 9115.065 | 8915.512 | NM_017881 | 5560.624  | 4323.443  | H66070    | 6946.254  | 5854.957  |
| NM_014317 | 5327.914 | 4753.248 | NM_01889E | 2047.194  | 2281.458  | AA164741  | 16806.291 | 14919.726 |
| L09234    | 22975.25 | 24272.06 | AJ300465  | 3748.739  | 3844.196  | AI189375  | 1497.528  | 1399.15   |
| NM_00005E | 4504.765 | 3631.597 | NM_00081C | 6188.663  | 6405.099  | AI978885  | 4266.198  | 3737.722  |
| NM_017881 | 3583.167 | 4425.396 | AF069307  | 5246.414  | 5553.532  | AK054960  | 21827.826 | 21134.436 |
| M33197    | 61911.45 | 58024.65 | M33197    | 64899.289 | 63024.227 | L15344    | 6396.188  | 5094.437  |
| NM_017634 | 6765.452 | 5595.151 | U92978    | 6369.734  | 5785.373  | SR1       | 58534.238 | 58160.371 |
| NM_00030C | 2790.165 | 2985.54  | NM_00573E | 971.948   | 929.538   | SR3       | 57512.766 | 52644.691 |
| M33197    | 60993.22 | 63935.76 | NM_01448E | 2955.177  | 5766.461  | SR5       | 13419.197 | 7291.114  |
| AV756917  | 9890.346 | 8697.821 | NM_01338E | 5182.57   | 8543.613  | SR7       | 9369.05   | 44018.984 |
| NM_01838C | 12881.12 | 11491.91 | AB014567  | 1279.309  | 3840.396  | SR9       | 34225.945 | 3906.72   |
| AK001442  | 1202.713 | 1009.81  | NM_00532E | 19807.529 | 19137.465 | CY3Cy5    | 5921.94   | 105.961   |
| NM_01207C | 2400.213 | 1905.614 | NM_01406E | 870.166   | 939.293   | NM_01458E | 9733.362  | 11146.479 |
| NM_01903E | 1704.722 | 1893.162 | AB035130  | 1562.123  | 1848.638  | NM_01436E | 14850.607 | 19682.1   |
| NM_001351 | 1332.193 | 1520.359 | NM_00335E | 1904.14   | 1641.422  | NM_00092E | 1009.251  | 1664.327  |
| M33197    | 3464.521 | 2965.201 | M33197    | 50066.574 | 52730.992 | NM_00645E | 2474.634  | 3371.963  |
| AB011146  | 6143.88  | 5533.536 | NM_01791E | 3765.381  | 4352.974  | NM_01809E | 1855.143  | 3264.788  |
| NM_00532E | 18072.74 | 17494.49 | NM_001274 | 6979.07   | 9170.921  | AL390078  | 965.027   | 1322.811  |
| NM_00728E | 989.974  | 925.08   | NM_00391E | 2480.156  | 2940.833  | NM_00403E | 3330.638  | 4334.038  |
| NM_01406E | 2431.235 | 2435.67  | NM_002227 | 7359.338  | 7378.979  | NM_01598E | 6655.666  | 7727.802  |
| AB035130  | 2298.803 | 1963.05  | NM_00719E | 3128.836  | 3763.589  | NM_00654E | 1793.375  | 2278.592  |
| NM_00335E | 3269.702 | 2862.544 | AB002301  | 2095.055  | 1458.052  | NM_01495E | 3857.93   | 4711.583  |
| AF119917  | 1042.45  | 512.292  | AB014530  | 12553.947 | 11872.815 | NM_00399E | 7854.377  | 10409.571 |
| NM_01791E | 2997.006 | 2269.955 | M33197    | 66111.234 | 67685.906 | AF279265  | 3901.575  | 6700.915  |
| AL050097  | 750.344  | 426.692  | AF134401  | 2031.152  | 3458.255  | NM_00521E | 3148.303  | 4614.625  |
| NM_00357E | 3397.951 | 2815.376 | NM_006387 | 6809.997  | 6366.639  | AB040914  | 1957.609  | 2205.074  |
| AL049283  | 1883.272 | 1811.114 | NM_00564E | 3268.834  | 3161.44   | NM_002997 | 11654.269 | 13706.077 |
| AF005258  | 6571.485 | 6058.112 | BI767871  | 914.463   | 756.222   | NM_00237E | 27500.25  | 36188.961 |
| NM_000887 | 2663.35  | 2866.101 | AA115473  | 4948.692  | 3558.365  | AB007929  | 6611.935  | 7635.528  |
| M33197    | 65040.36 | 58764.72 | AA872397  | 1771.206  | 1378.053  | NM_00457E | 8884.89   | 10381.597 |
| X99659    | 11260.48 | 10792.94 | M24283    | 680.471   | 600.757   | AA203126  | 4482.171  | 4258.851  |
| NM_01541E | 9949.102 | 8400.026 | AA709414  | 1145.301  | 1253.322  | L12347    | 5316.352  | 5644.701  |
| NM_002731 | 4362.279 | 4622.472 | D12676    | 7272.317  | 6032.348  | NM_00162E | 3601.254  | 3423.214  |
| NM_00389E | 8779.033 | 9542.472 | NM_00093E | 53482.48  | 59489.531 | Z36788    | 1279.283  | 1470.944  |
| X99662    | 3286.69  | 3952.635 | U75898    | 6388.617  | 6356.493  | NM_018477 | 7613.038  | 6758.822  |
| NM_00347E | 19918.85 | 23941.31 | M29039    | 2132.183  | 2631.432  | U20536    | 4301.972  | 3383.272  |
| NM_01432E | 10042.05 | 9652.384 | M59815    | 1498.82   | 1680.858  | NM_00485E | 12152.659 | 15532.168 |
| NM_01775E | 1432.346 | 785.407  | M33210    | 1366.741  | 1384.034  | NM_001494 | 27491.645 | 34856.031 |
| NM_01245E | 616.72   | 810.979  | NM_006917 | 1786.711  | 1579.274  | NM_017707 | 1575.46   | 1840.522  |
| NM_00601E | 59720.66 | 53944.56 | M33197    | 2028.415  | 2957.757  | NM_00420E | 7542.625  | 9400.641  |
| NM_00124E | 2765.366 | 2539.085 | AB011146  | 6642.471  | 10649.545 | NM_00460E | 21645.479 | 27014.771 |
| NM_00188E | 1352.507 | 1165.076 | NM_00618E | 22234.314 | 19723.176 | AK022849  | 7235.968  | 7606.799  |
| NM_01339E | 6322.609 | 6896.091 | NM_01480C | 9365.901  | 7590.373  | AF040964  | 13491.249 | 14000.965 |
| M33197    | 64714.76 | 59946.01 | AF147311  | 3666.262  | 3515.167  | NM_00193E | 9954.761  | 12833.144 |
| NM_00323E | 524.65   | 542.478  | NM_002131 | 40779.285 | 38760.723 | NM_00327E | 18110.852 | 21127.096 |
| AF052692  | 774.158  | 1156.315 | NM_017927 | 3276.963  | 3615.075  | AB014599  | 8876.323  | 9005.478  |
| NM_00522E | 1279.806 | 1066.686 | M33197    | 66315.93  | 67723.148 | NM_00439E | 1391.849  | 1404.405  |

|           |          |          |           |           |           |           |           |           |
|-----------|----------|----------|-----------|-----------|-----------|-----------|-----------|-----------|
| NM_002354 | 2775.462 | 3339.146 | NM_001203 | 4796.453  | 3612.754  | AB018345  | 2044.846  | 1906.415  |
| NM_000179 | 2209.712 | 1678.966 | NM_004799 | 8783.652  | 5372.308  | AW407841  | 2678.043  | 3687.204  |
| NM_005215 | 1434.004 | 1369.736 | NM_006733 | 1317.68   | 1798.904  | U15197    | 236.068   | 541.405   |
| AF062739  | 1551.765 | 1257.633 | NM_014047 | 35736.551 | 27962.25  | NM_001879 | 4486.455  | 4622.26   |
| NM_006602 | 3770.283 | 2984.992 | AK022901  | 3516.301  | 3915.534  | AF264014  | 13465.204 | 15570.982 |
| M33197    | 64130.07 | 59759.21 | NM_001508 | 1059.502  | 959.206   | L09098    | 532.378   | 795.684   |
| AL079314  | 4459.549 | 6247.807 | M33197    | 64557.68  | 70667.734 | NM_004155 | 803.548   | 439.874   |
| NM_001260 | 4861.547 | 4412.693 | AF037332  | 11182.7   | 9694.991  | NM_001831 | 966.202   | 1543.017  |
| NM_001950 | 10395.11 | 15597.19 | NM_014571 | 1615.275  | 1516.49   | NM_000137 | 4892.345  | 5434.735  |
| AK026364  | 7584.009 | 7597.861 | NM_006052 | 2950.588  | 2967.591  | NM_012102 | 4364.787  | 5923.968  |
| NM_018117 | 1411.934 | 2294.854 | AB040912  | 19904.037 | 18242.617 | NM_005017 | 16553.855 | 17880.674 |
| NM_006286 | 7390.788 | 7932.679 | NM_003871 | 1524.578  | 989.833   | AF163572  | 21325.932 | 28322.539 |
| M33197    | 61831.7  | 62882.1  | NM_006243 | 9315.86   | 8887.345  | NM_000897 | 5304.502  | 5638.536  |
| NM_004331 | 25666.49 | 34289.94 | M33197    | 66262.172 | 68160.055 | NM_000487 | 1375.684  | 2041.927  |
| NM_015996 | 1373.618 | 2278.495 | AJ011129  | 13135.897 | 16826.156 | NM_006411 | 35188.77  | 44613.734 |
| NM_015703 | 8965.425 | 7838.395 | AF282874  | 1700.751  | 1947.238  | NM_014182 | 5813.001  | 8356.239  |
| AB018337  | 3689.849 | 3198.094 | NM_001039 | 1331.847  | 1705.337  | AB040884  | 545.491   | 1164.806  |
| NM_014489 | 3491.524 | 3476.962 | M33197    | 61056.57  | 59710.738 | NM_000492 | 19224.523 | 22233.521 |
| AK025273  | 10146.64 | 7835.819 | U92978    | 3120.769  | 3566.983  | NM_012089 | 3219.639  | 4041.249  |
| M33197    | 51665.67 | 47879.08 | NM_005738 | 1124.946  | 1254.428  | AK024382  | 966.35    | 589.333   |
| NM_001794 | 1740.395 | 1664.573 | NM_014488 | 816.251   | 1067.456  | NM_001170 | 9241.888  | 11397.253 |
| NM_002205 | 1809.465 | 1431.754 | NM_013389 | 5157.454  | 5199.628  | AL137716  | 1190.541  | 1013.858  |
| M33197    | 64752.24 | 59896.95 | AB014567  | 940.019   | 1566.286  | NM_004696 | 1320.169  | 1701.829  |
| NM_000131 | 1373.827 | 1082.014 | AK022817  | 2558.302  | 2315.7    | NM_014342 | 4474.827  | 4517.985  |
| NM_001836 | 2349.871 | 1735.148 | NM_018034 | 5678.143  | 4055.689  | Z50169    | 1292.823  | 1724.388  |
| NM_001911 | 45352.06 | 35308.17 | M33197    | 66206.102 | 66957.367 | AB043997  | 1844.192  | 1666.935  |
| NM_000537 | 605.481  | 542.464  | AB037831  | 2658.589  | 2982.373  | NM_001773 | 873.336   | 1032.857  |
| NM_006503 | 7215.863 | 6556.9   | NM_012103 | 24969.537 | 24444.07  | Z70704    | 1849.777  | 2561.787  |
| AB002321  | 2423.799 | 2874.017 | AL122077  | 20484.787 | 17056.039 | NM_014363 | 3060.204  | 3209.716  |
| NM_002515 | 1594.119 | 2192.112 | NM_014632 | 3269.552  | 3918.857  | NM_000557 | 5457.484  | 6525.442  |
| M33197    | 4083.329 | 3758.479 | NM_006422 | 3273.898  | 3951.915  | NM_003239 | 1644.677  | 1984.868  |
| AB020698  | 2893.371 | 3131.744 | BE789195  | 1230.909  | 1859.741  | NM_001375 | 9107.858  | 10157.578 |
| U68382    | 4296.803 | 3954.669 | NM_016946 | 2789.726  | 2436.473  | NM_002312 | 4864.776  | 7105.932  |
| NM_003969 | 11073.66 | 11304    | M33197    | 66283.813 | 67133.258 | M20699    | 5488.269  | 7888.52   |
| NM_004651 | 13519.37 | 12080.59 | NM_007259 | 3542.076  | 3043.329  | NM_004774 | 10391.322 | 9282.675  |
| NM_003363 | 2328.247 | 2481.151 | NM_018402 | 1313.146  | 1434.233  | NM_016937 | 4305.193  | 5772.895  |
| M33197    | 62856.11 | 56732.75 | NM_018009 | 1884.313  | 1434.516  | NM_002690 | 14484.688 | 14725.445 |
| NM_017569 | 8121.323 | 8680.678 | AK075081  | 5505.345  | 5437.234  | NM_012328 | 6104.463  | 6805.336  |
| NM_001456 | 2414.198 | 2046.815 | NM_000895 | 15215.81  | 15713.146 | NM_007341 | 1242.926  | 1630.86   |
| NM_002906 | 2265.937 | 2040.229 | NM_003820 | 49502.984 | 46171.07  | NM_016508 | 3658.254  | 2409.413  |
| AK024480  | 1323.093 | 936.434  | NM_016518 | 16397.871 | 23549.031 | NM_006456 | 14305.336 | 18375.385 |
| Y13871    | 7946.09  | 7863.682 | AB002301  | 1659.762  | 2935.477  | AK026062  | 7613.132  | 11294.667 |
| NM_012134 | 1241.051 | 803.643  | AB014530  | 10649.09  | 10801.115 | AF047002  | 49336.738 | 56420.039 |
| AL137725  | 9810.044 | 11668.16 | M33197    | 60197.746 | 64777.633 | AL050082  | 3671.841  | 4310.571  |
| M33197    | 57780.96 | 58081.58 | NM_005989 | 4337.97   | 3854.686  | NM_006623 | 65500.313 | 61701.441 |
| AJ008151  | 6182.156 | 5947.762 | AB014607  | 7003.889  | 9704.191  | NM_016588 | 51754.414 | 54505.969 |
| AK024149  | 1632.118 | 1941.408 | AF134401  | 1334.398  | 3138.989  | NM_003135 | 9557.17   | 7560.243  |
| AK023094  | 1018.87  | 1059.823 | NM_020151 | 13557.067 | 12711.852 | L12347    | 4184.303  | 4713.803  |
| M33197    | 64811.95 | 61127.36 | NM_005891 | 50344.191 | 56742.035 | NM_001622 | 3291.615  | 3702.61   |
| NM_004091 | 1852.542 | 1799.075 | NM_001645 | 3041.359  | 3130.655  | Z36788    | 1583.149  | 1296.232  |
| X74070    | 64713.32 | 61514.62 | NM_003956 | 4530.731  | 5292.983  | NM_018477 | 8497.958  | 9879.927  |
| AF027219  | 2080.753 | 1930.193 | M33197    | 59948.445 | 63596.508 | U20536    | 4614.595  | 4032.135  |
| BC022846  | 2547.345 | 3319.138 | NM_003500 | 7661.326  | 6815.821  | AI298534  | 817.903   | 944.346   |

|           |          |          |             |           |           |           |           |           |
|-----------|----------|----------|-------------|-----------|-----------|-----------|-----------|-----------|
| NM_006333 | 21088.45 | 22875.15 | NM_014317   | 5323.056  | 6222.562  | R71691    | 1836.975  | 1856.158  |
| M33197    | 61858.53 | 63506.68 | L09234      | 19511.08  | 18349.094 | AW167715  | 1272.755  | 1362.038  |
| NM_00289E | 8231.888 | 7459.169 | NM_00005E   | 3389.138  | 4789.229  | AA424735  | 4381.024  | 4053.208  |
| AK022749  | 4886.51  | 5214.842 | AK026740    | 1684.894  | 1515.45   | U78294    | 7212.92   | 8904.718  |
| BF031409  | 18738.08 | 15737.92 | NM_017881   | 16253.328 | 12189.198 | AA171613  | 439.509   | 534.354   |
| NM_007043 | 9690.197 | 8375.027 | NM_000813   | 1427.342  | 1576.527  | BI760394  | 8457.777  | 11781.914 |
| BE378791  | 1929.411 | 2112.3   | NM_01889E   | 2032.091  | 1921.886  | AA555216  | 957.414   | 1061.596  |
| U94388    | 2555.309 | 2362.991 | AJ300465    | 4014.798  | 3519.8    | U09117    | 15476.692 | 20393.826 |
| NM_012322 | 15143.12 | 14449.18 | X86400      | 2370.854  | 1641.511  | M21054    | 624.527   | 768.324   |
| M33197    | 62659.14 | 60728.66 | AF069307    | 5057.557  | 7029.475  | M18468    | 1304.107  | 1113.016  |
| NM_00488E | 40288.31 | 44120.3  | NM_006917   | 2008.244  | 2972.813  | H66070    | 4715.771  | 4124.332  |
| AK025314  | 3336.983 | 2763.738 | SB          | 2114.088  | 2433.578  | AA164741  | 17045.678 | 22139.477 |
| NM_00210E | 5329.665 | 5295.074 | AB011146    | 4450.227  | 4971.642  | AI189375  | 1469.478  | 1538.041  |
| NM_000984 | 68143.5  | 73546.58 | NM_00532E   | 34030.609 | 39958.188 | AI978885  | 3707.475  | 4629.117  |
| NM_002453 | 4688.864 | 4675.9   | NM_00728E   | 1380.751  | 789.412   | AK054960  | 20355.148 | 25213.529 |
| AK000780  | 42360.43 | 42515.98 | NM_01406E   | 3919.451  | 3533.577  | L15344    | 6812.515  | 8248.586  |
| AK026721  | 6245.8   | 6112.124 | AB035130    | 5800.206  | 5537.372  | NM_01447C | 1663.037  | 1260.292  |
| AK023027  | 1015.804 | 945.62   | NM_00335E   | 3184.731  | 2529.243  | NM_00166E | 31248.555 | 32321.063 |
| AK025598  | 2350.403 | 2089.044 | M33197      | 54274.93  | 54218.328 | NM_00187E | 3377.144  | 3583.279  |
| AB002348  | 16395.33 | 14712.09 | AF119917    | 787.521   | 938.507   | AF264014  | 10506.517 | 10111.869 |
| M33197    | 61263.98 | 54640.14 | NM_01791E   | 4568.616  | 5590.329  | L09098    | 1227.201  | 917.084   |
| M64714    | 1029.691 | 988.664  | AL050097    | 860.027   | 887.549   | NM_001831 | 1042.565  | 1650.904  |
| AK026043  | 1004.273 | 748.42   | AK021513    | 861.503   | 711.903   | NM_01458E | 10786.058 | 10268.079 |
| NM_00500E | 15452.71 | 13434.27 | NM_00357E   | 6083.192  | 5533.301  | NM_01436E | 12832.777 | 11018.519 |
| AK027033  | 5616.554 | 6887.969 | AL049283    | 3993.317  | 3792.428  | NM_000923 | 1038.29   | 910.451   |
| NM_00010E | 3725.705 | 4400.014 | M33197      | 58175.574 | 56397.07  | NM_006453 | 3114.739  | 3575.007  |
| NM_00300C | 33883.18 | 44057.1  | NM_002401   | 53713.211 | 57020.016 | NM_01809E | 2065.904  | 2791.233  |
| NM_00249E | 27844.47 | 37235.07 | NM_001274   | 8142.976  | 7937.219  | AL390078  | 969.454   | 1155.925  |
| M33197    | 65778.7  | 62282.38 | NM_003913   | 1997.722  | 2022.21   | NM_00403E | 3382.724  | 3654.346  |
| NM_016284 | 9262.651 | 10033.9  | NM_002227   | 7229.522  | 5947.391  | NM_01598E | 5658.088  | 5693.417  |
| NM_014593 | 8496.41  | 8764.738 | NM_00719E   | 4439.356  | 4353.259  | NM_00654E | 1994.859  | 1753.361  |
| NM_006833 | 28610.39 | 34481.38 | NM_006243   | 8617.843  | 9901.531  | NM_01495E | 4177.021  | 6906.874  |
| NM_012257 | 4009.893 | 4367.617 | NM_007252   | 1050.65   | 1592.646  | NM_003992 | 9463.6    | 12471.173 |
| U37690    | 25760.26 | 34734.05 | AJ011129    | 6430.586  | 5097.963  | AF279265  | 4671.786  | 6881.626  |
| NM_00512C | 2511.917 | 2823.695 | NM_00103E   | 798.302   | 1116.226  | NM_00735C | 401.024   | 741.656   |
| AB029012  | 7015.708 | 7299.583 | NM_006387   | 8377.889  | 9472.2    | NM_005213 | 3475.531  | 5718.896  |
| M33197    | 66946.63 | 67293.36 | NM_00564E   | 5802.917  | 5667.776  | AB040914  | 2232.079  | 2735.625  |
| NM_00629E | 1361.611 | 1004.96  | NM_00663E   | 2170.999  | 2965.389  | NM_002997 | 11328.076 | 13631.05  |
| AF060936  | 5575.856 | 4957.296 | NM_001692   | 1367.085  | 1099.556  | NM_00237E | 32284.443 | 39589.941 |
| NM_018167 | 1312.332 | 1344.745 | BI767871    | 4043.814  | 2939.384  | AB007929  | 6225.957  | 6677.795  |
| AL050088  | 9411.508 | 10620.85 | AA418907    | 1774.678  | 1603.903  | NM_00457E | 8741.061  | 8736.917  |
| AK024939  | 11577.3  | 10646.15 | M65291      | 864.022   | 1131.582  | AA203126  | 5117.898  | 3494.524  |
| AK001561  | 689.951  | 552.633  | AA115473    | 9431.843  | 9027.461  | Z50169    | 1778.706  | 2275.45   |
| AB007880  | 4021.453 | 3912.013 | AA872397    | 8521.253  | 10417.008 | NM_000452 | 1754.547  | 1820.372  |
| AK024950  | 555.584  | 695.952  | M24283      | 1288.283  | 1580.127  | AB043997  | 1580.62   | 2046.826  |
| M33197    | 65506.76 | 61729.41 | AA709414    | 2830.306  | 2514.668  | NM_004853 | 12145.939 | 11190.558 |
| NM_01414E | 819.087  | 846.584  | D12676      | 8215.085  | 6851.033  | NM_001494 | 28970.145 | 22193.086 |
| AF147356  | 12135.54 | 14837.74 | NM_00093E   | 58096.504 | 55132.117 | NM_017707 | 1277.998  | 936.236   |
| NM_018843 | 10296.69 | 9210.701 | NM_00429E   | 52052.66  | 45248.156 | NM_00420E | 6983.205  | 5763.314  |
| AK096204  | 1105.367 | 1271.234 | H-X 02812 I | 3372.079  | 3055.593  | NM_004603 | 24853.158 | 22194.229 |
| AK024275  | 772.672  | 1404.746 | U75898      | 5888.663  | 5164.039  | AK022849  | 6937.37   | 6009.17   |
| AL049461  | 2921.205 | 6787.371 | M29039      | 1471.504  | 1731.788  | AF040964  | 14520.073 | 12755.473 |
| AL137424  | 713.609  | 606.763  | M59815      | 1095.25   | 928.858   | NM_00193E | 9466.065  | 10532.05  |

|           |          |          |           |           |           |           |           |           |
|-----------|----------|----------|-----------|-----------|-----------|-----------|-----------|-----------|
| M33197    | 62728.58 | 62044.4  | M33210    | 971.843   | 990.781   | NM_003279 | 16051.907 | 17055.678 |
| AL109782  | 12277.29 | 12265.66 | AK075081  | 3477.586  | 3652.182  | AB014599  | 9809.365  | 8715.44   |
| AF086225  | 3075.368 | 2745.554 | NM_000895 | 12934.627 | 11393.006 | NM_004393 | 1563.487  | 1425.053  |
| NM_005844 | 1406.557 | 1636.113 | NM_015915 | 4947.703  | 2823.16   | AB018345  | 1935.232  | 1542.415  |
| AK024941  | 6575.214 | 6217.513 | M33197    | 66342.25  | 66165.008 | NM_005832 | 891.009   | 734.473   |
| M33197    | 46583.86 | 50287.54 | NM_016518 | 15012.12  | 15338.848 | AW407841  | 3242.447  | 2236.99   |
| AK025489  | 2008.642 | 2017.965 | NM_006185 | 35037.5   | 37878.066 | AL050082  | 4860.362  | 5463.677  |
| AL390152  | 984.286  | 822.177  | NM_014800 | 12645.99  | 10553.186 | NM_006623 | 61223.965 | 61224.457 |
| M33197    | 62832.16 | 59658.13 | NM_001557 | 1383.845  | 1264.062  | NM_016588 | 51510.813 | 52826.621 |
| NM_018126 | 6651.65  | 4782.919 | AF147311  | 6143.739  | 5315.943  | NM_003135 | 13985.214 | 14169.493 |
| AK024506  | 7998.635 | 7661.863 | NM_002131 | 50400.875 | 44773.445 | NM_000137 | 5313.768  | 6089.11   |
| NM_014179 | 5009.921 | 7665.795 | NM_017927 | 7770.712  | 9423.253  | NM_012102 | 8011.43   | 9576.967  |
| AF086326  | 7809.004 | 8137.61  | NM_004799 | 37850.5   | 45694.297 | NM_005017 | 41657.523 | 43995.211 |
| AF147409  | 500.665  | 851.211  | NM_006733 | 2110.212  | 1905.752  | AF163572  | 26864.061 | 28973.967 |
| M33197    | 65838.14 | 64048.23 | NM_014047 | 38248.813 | 33722.34  | NM_000897 | 3479.184  | 5453.089  |
| AL080057  | 2282.191 | 2492.924 | AK022901  | 3796.617  | 3182.069  | NM_000487 | 1368.105  | 1775.025  |
| AL117528  | 935.516  | 1092.647 | NM_001508 | 709.096   | 794.106   | NM_006411 | 37229.805 | 51377.117 |
| M33197    | 63554.96 | 58705.94 | M33197    | 65843.727 | 63939.977 | NM_014182 | 5780.916  | 7606.659  |
| AK025948  | 2932.897 | 2850.593 | AF037332  | 10787.678 | 9575.879  | AB040884  | 1023.867  | 997.666   |
| AK000674  | 788.655  | 630.333  | NM_014571 | 1427.897  | 1048.862  | NM_000492 | 20730.162 | 22524.607 |
| AJ238555  | 547.416  | 642.151  | NM_006052 | 2219.337  | 2298.336  | NM_012089 | 2487.705  | 2219.389  |
| AL353948  | 2032.772 | 2641.473 | AB040912  | 23949.412 | 24029.303 | NM_001170 | 10308.541 | 9652.883  |
| AL122043  | 795.414  | 1348.62  | NM_003871 | 1392.485  | 1320.503  | AL137716  | 1112.18   | 941.315   |
| M33197    | 57998.31 | 51726.42 | NM_000813 | 1120.792  | 1627.097  | NM_004696 | 1527.96   | 1539.217  |
| AK025869  | 5521.993 | 5598.062 | NM_018896 | 2094.148  | 2008.528  | NM_014342 | 6294.109  | 3831.656  |
| M33197    | 65599.56 | 57205.89 | AJ300465  | 2659.885  | 1351.534  | AK054960  | 17844.252 | 18386.645 |
| AF009281  | 810.736  | 568.842  | X86400    | 2104.166  | 1360.683  | L15344    | 4426.134  | 5693.18   |
| AF056430  | 1728.386 | 1728.132 | NM_000810 | 2961.396  | 1992.846  | NM_014470 | 1446.324  | 1265.667  |
| NM_014906 | 1190.165 | 1117.862 | AF069307  | 4688.797  | 4050.617  | NM_001665 | 21368.826 | 26624.254 |
| AF009291  | 2681.252 | 3044.006 | M33197    | 58377.207 | 59746.586 | NM_001773 | 1204.05   | 1036.097  |
| M33197    | 65791.49 | 60492    | U92978    | 5111.802  | 4647.895  | Z70704    | 1898.517  | 1556.935  |
| NM_018055 | 1040.295 | 1022.643 | NM_005738 | 1123.492  | 1027.834  | NM_014363 | 4268.66   | 4395.407  |
| AK002199  | 980.866  | 993.86   | NM_014488 | 1782.73   | 1820.673  | NM_000557 | 6393.255  | 7679.312  |
| AK021662  | 720.18   | 695.814  | NM_013389 | 14882.796 | 18422.674 | NM_003239 | 2134.589  | 1423.073  |
| AK001038  | 1625.58  | 1930.584 | AB014567  | 1562.623  | 2252.605  | NM_001375 | 6943.103  | 6374.333  |
| AK001802  | 845.893  | 919.189  | M33197    | 66138.719 | 70588.469 | NM_002312 | 4132.682  | 4040.138  |
| AK021469  | 2448.676 | 2304.431 | AB037831  | 3352.766  | 2923.103  | M20699    | 4533.768  | 4167.798  |
| M33197    | 64595.38 | 55066.68 | NM_012103 | 24353.525 | 22273.48  | NM_004774 | 8994.768  | 6426.405  |
| AK026601  | 871.834  | 732.392  | AL122077  | 24218.807 | 23742.848 | NM_016937 | 4647.38   | 3954.48   |
| AK025161  | 1608.349 | 1520.09  | NM_014632 | 3177.193  | 3398.357  | NM_002690 | 14850.775 | 10935.339 |
| AK026259  | 2456.748 | 3052.4   | NM_006422 | 2317.541  | 2791.564  | NM_012328 | 5263.869  | 5570.124  |
| AJ008115  | 17501.26 | 23089.48 | BE789195  | 1587.016  | 2880.306  | NM_007341 | 1439.136  | 1738.14   |
| AF083125  | 4063.405 | 2531.31  | NM_016946 | 3087.558  | 4667.468  | NM_016508 | 3797.386  | 2460.038  |
| U72851    | 931.579  | 1071.112 | M33197    | 66535.836 | 73740.742 | NM_006456 | 17707.512 | 13093.219 |
| M33197    | 65056.61 | 64262.65 | NM_007259 | 3872.834  | 3810.126  | AK026062  | 7196.162  | 7729.015  |
| X51526    | 914.513  | 707.015  | NM_018402 | 1781.602  | 1856.49   | AF047002  | 55165.281 | 57646.957 |
| AK022970  | 2389.777 | 2745.191 | NM_018009 | 1545.202  | 1633.336  | AB040914  | 1787.689  | 2110.212  |
| AK026212  | 7602.184 | 6053.164 | M33197    | 57736.047 | 57175.07  | NM_002997 | 7935.218  | 8852.934  |
| AF086222  | 3275.106 | 4965.228 | NM_002401 | 42751.098 | 30531.037 | NM_002379 | 25040.787 | 26334.252 |
| AF143866  | 553.873  | 548.829  | NM_001274 | 7856.188  | 7613.566  | AB007929  | 7462.221  | 7876.914  |
| AL049434  | 1192.407 | 1840.17  | NM_003913 | 1714.115  | 2175.008  | NM_004579 | 7911.462  | 8538.848  |
| AF086415  | 10852.04 | 10871.46 | NM_002227 | 6737.62   | 8392.216  | AA203126  | 3716.653  | 3567.854  |
| M33197    | 63810.48 | 59283.58 | NM_007199 | 1332.984  | 2177.112  | L12347    | 4455.677  | 5046.092  |

|           |          |          |           |           |           |           |           |           |
|-----------|----------|----------|-----------|-----------|-----------|-----------|-----------|-----------|
| AK024470  | 1625.62  | 1315.036 | AB002301  | 1292.763  | 1657.776  | NM_001622 | 2424.586  | 2948.85   |
| NM_017935 | 694.918  | 638.221  | AB014530  | 13776.039 | 11130.19  | NM_018477 | 8874.303  | 9098.738  |
| NM_004226 | 11133.24 | 9540.109 | NM_005985 | 8272.718  | 9759.91   | U20536    | 3461.82   | 2938.022  |
| AK023400  | 760.273  | 830.428  | AB014607  | 14154.232 | 14403.347 | AI298534  | 1056.379  | 1194.026  |
| NM_006432 | 25268.59 | 31745.4  | AF134401  | 2466.603  | 3071.52   | BI760394  | 9999.017  | 11361.119 |
| AK023897  | 1130.38  | 1584.728 | NM_001645 | 2512.702  | 2899.417  | AA555216  | 888.467   | 824.548   |
| AF025441  | 9384.061 | 7378.842 | NM_003956 | 3740.215  | 4351.644  | U09117    | 16827.625 | 16347.142 |
| U62823    | 4849.616 | 3605.444 | M33197    | 59891.523 | 60347.141 | M21054    | 997.158   | 938.303   |
| NM_003535 | 16994.16 | 13291.29 | NM_003500 | 9764.463  | 9851.522  | M18468    | 1583.519  | 1645.25   |
| AK026768  | 7095.344 | 7847.307 | NM_014317 | 5961.807  | 6560.006  | H66070    | 5541.231  | 3951.263  |
| M33197    | 66262.1  | 60525.35 | L09234    | 22026.629 | 22429.076 | AA164741  | 16851.953 | 14285.475 |
| AK000852  | 13685.4  | 14576.89 | NM_000055 | 3609.819  | 4719.177  | AI189375  | 1154.193  | 1130.333  |
| AF251188  | 13072.3  | 13405.54 | AK026740  | 1613.92   | 1627.453  | AI978885  | 3548.391  | 3865.507  |
| AK026418  | 11453.68 | 11122.93 | NM_017881 | 17161.178 | 16742.383 | AB014599  | 10888.362 | 9349.805  |
| AF086194  | 52967.42 | 50553.27 | NM_017634 | 12153.508 | 16991.418 | NM_004393 | 1528.934  | 1464.968  |
| AK026811  | 7095.923 | 6505.635 | NM_017743 | 2724.866  | 2464.479  | AB018345  | 2202.841  | 1585.658  |
| AL049973  | 670.803  | 584.687  | NM_000300 | 5914.251  | 4730.914  | NM_005832 | 891.146   | 1266.601  |
| M33197    | 63939.35 | 58716.73 | M33197    | 60399.371 | 63611.609 | AW407841  | 2785.043  | 2708.473  |
| AK023633  | 3685.447 | 3977.571 | AV756917  | 8285.024  | 10510.415 | NM_001879 | 2899.028  | 2290.675  |
| AF085967  | 937.945  | 821.981  | NM_018380 | 28346.908 | 34447.82  | AF264014  | 9825.719  | 11348.16  |
| NM_006175 | 1373.431 | 1588.479 | AK001442  | 5106.604  | 5278.283  | L09098    | 831.331   | 937.263   |
| AL360165  | 4324.814 | 4164.231 | NM_012070 | 2346.223  | 2620.88   | NM_001831 | 1184.931  | 1301.457  |
| M33197    | 61558.82 | 52801.2  | NM_019035 | 1689      | 2523.038  | NM_003037 | 894.19    | 588.754   |
| AJ008132  | 8590.54  | 8576.552 | NM_001351 | 2047.12   | 2697.896  | NM_014586 | 9633.723  | 8316.19   |
| NM_005281 | 2219.574 | 2471.687 | M33197    | 3360.361  | 4160.198  | NM_014366 | 15093.488 | 20213.387 |
| NM_005545 | 1043.039 | 1220.565 | AB011146  | 8056.119  | 11889.274 | NM_000923 | 1057.438  | 1117.041  |
| M33197    | 61423.57 | 56439.21 | NM_014065 | 4055.528  | 3748.953  | NM_006453 | 2672.242  | 2761.426  |
| U12129    | 1572.938 | 1389.676 | AB035130  | 7403.662  | 6803.152  | NM_018096 | 2095.743  | 2196.867  |
| S81242    | 58204.26 | 52932.02 | NM_003355 | 4323.449  | 3487.72   | AL390078  | 847.597   | 898.369   |
| AF230801  | 1790.305 | 1611.01  | M33197    | 53137.176 | 54437.156 | NM_004036 | 3403.959  | 3863.771  |
| AF075072  | 1650.085 | 2182.661 | AF119917  | 567.451   | 760.966   | NM_015986 | 6654.283  | 5328      |
| M33197    | 65637.03 | 59692.74 | AK021834  | 667.506   | 324.257   | NM_006546 | 2018.993  | 2391.767  |
| NM_002505 | 2253.003 | 2582.543 | NM_017915 | 3935.673  | 6666.282  | NM_014959 | 4495.199  | 6414.719  |
| U38442    | 14490.97 | 11832.32 | AL050097  | 792.953   | 1239.288  | NM_003992 | 8549.016  | 12229.606 |
| AF110136  | 1249.631 | 578.614  | AK021513  | 845.432   | 719.73    | AF279265  | 3650.183  | 5409.915  |
| AK026706  | 2598.655 | 2699.404 | AL049283  | 4485.177  | 5086.369  | NM_005213 | 2460.334  | 3621.187  |
| AB007936  | 14873.55 | 14648.57 | NM_002214 | 2169.473  | 1520.82   | AK024382  | 289.475   | 816.788   |
| D28391    | 46602.43 | 50576.78 | AF005258  | 2411.684  | 2201.06   | NM_001170 | 8489.829  | 9593.328  |
| M33197    | 63362.98 | 53961.6  | NM_000887 | 1980.097  | 1251.168  | AL137716  | 1503.645  | 1070.987  |
| AJ227885  | 609.701  | 843.14   | AF277292  | 1452.019  | 563.174   | NM_004696 | 1699.343  | 1986.285  |
| L32841    | 3299.938 | 3425.659 | M33197    | 63779.441 | 65419.684 | NM_014342 | 5552.677  | 5157.747  |
| M33197    | 59299    | 55166.3  | X99659    | 60848.781 | 58054.363 | Z50169    | 1526.917  | 1127.953  |
| AF131770  | 3386.477 | 3320.161 | NM_015416 | 6237.092  | 5708.986  | AB043997  | 1289.631  | 1488.578  |
| CY3Cy5    | 11361.81 | 686.716  | NM_002731 | 4482.771  | 3783.598  | NM_004853 | 12240.818 | 13600.773 |
| R71691    | 1000.645 | 1055.007 | NM_003895 | 14517.408 | 13230.703 | NM_001494 | 22130.91  | 20034.088 |
| AW167715  | 51.505   | 70.652   | X99662    | 11430.515 | 11088.613 | NM_017707 | 1284.048  | 1328.587  |
| AA424735  | 2507.375 | 1909.738 | NM_003473 | 62004.77  | 59558.215 | NM_004206 | 6662.26   | 6292.946  |
| U78294    | 1190.614 | 1366.606 | NM_014325 | 5562.263  | 6320.422  | NM_004603 | 20800.984 | 23745.914 |
| BI760394  | 3194.004 | 4151.272 | M33197    | 64593.438 | 60768.504 | AK022849  | 7044.954  | 8123.14   |
| AA555216  | 367.712  | 574.535  | NM_017753 | 1168.79   | 1960.321  | AF040964  | 13773.736 | 18881.93  |
| U09117    | 1033.136 | 1104.899 | NM_012453 | 1026.003  | 1203.27   | AK023527  | 752.237   | 775.132   |
| M21054    | 187.004  | 442.606  | NM_006016 | 61978.801 | 62071.121 | NM_001939 | 6932.207  | 6609.901  |
| M18468    | 712.423  | 608.445  | NM_001242 | 9137.015  | 9088.668  | NM_003279 | 9716.949  | 8820.417  |

|           |          |          |           |           |           |           |           |           |
|-----------|----------|----------|-----------|-----------|-----------|-----------|-----------|-----------|
| H66070    | 295.388  | 344.336  | NM_001882 | 5020.694  | 6292.651  | NM_01232E | 5083.063  | 5019.461  |
| AA164741  | 9855.37  | 10618.86 | NM_014891 | 19488.277 | 16133.616 | NM_007341 | 1327.095  | 1401.734  |
| AI189375  | 183.6    | 310.531  | NM_013392 | 22649.314 | 19553.545 | NM_01650E | 3722.539  | 2167.723  |
| AI978885  | 585.828  | 423.301  | M33197    | 60751.559 | 61227.371 | NM_00645E | 19241.549 | 12780.799 |
| AK054960  | 4593.974 | 4288.936 | NM_00217E | 799.508   | 864.917   | AK026062  | 9330.877  | 8397.77   |
| L15344    | 2766.59  | 2922.48  | NM_00323E | 3681.268  | 3558.946  | AL050082  | 5419.096  | 4468.749  |
| SR1       | 64759.61 | 43748.3  | NM_00345E | 1240.329  | 1883.657  | NM_00662E | 59902.492 | 57121.637 |
| SR3       | 23940.82 | 20345.56 | AF052692  | 3071.524  | 2992.042  | NM_01658E | 51128.188 | 45405.93  |
| SR5       | 3415.482 | 3137.958 | NM_00282C | 1112.284  | 1486.953  | NM_00313E | 14095.729 | 10426.218 |
| SR7       | 4001.865 | 25047.76 | NM_00522E | 2472.729  | 1835.165  | NM_000137 | 5877.982  | 5665.726  |
| SR9       | 12952.37 | 1644.038 | NM_002354 | 3121.096  | 3333.076  | NM_01210E | 8551.521  | 9979.355  |
| CY3Cy5    | 11183.7  | 671.386  | NM_00017E | 2562.323  | 2084.745  | NM_005017 | 33531.707 | 36024.879 |
| NM_01458E | 7001.954 | 6939.612 | AF062739  | 2861.413  | 3175.875  | AF163572  | 24702.773 | 23273.361 |
| NM_00092E | 420.702  | 582.21   | NM_00660E | 5825.527  | 6623.462  | NM_000897 | 4987.808  | 4714.219  |
| NM_00645E | 1970.629 | 2659.769 | M33197    | 60361.52  | 59263.238 | NM_000487 | 2128.061  | 1908.197  |
| NM_01809E | 1131.387 | 1499.304 | AL079314  | 3957.064  | 2947.777  | NM_006411 | 38132.344 | 35014.258 |
| AL390078  | 146.622  | 383.272  | NM_00126C | 5125.917  | 6997.675  | NM_01418E | 6167.045  | 7784.826  |
| NM_00403E | 1907.354 | 1853.939 | NM_00195C | 8537.061  | 9294.986  | AB040884  | 1103.894  | 1022.933  |
| NM_01598E | 3840.3   | 2926.602 | AK026364  | 4241.146  | 4090.7    | NM_00049E | 17296.707 | 17337.051 |
| NM_00654E | 1210.256 | 1485.453 | NM_018117 | 1848.163  | 1549.319  | NM_01208E | 3265.36   | 4054.699  |
| NM_01495E | 2234.531 | 1700.758 | NM_00699E | 1801.009  | 2085.693  | AJ272057  | 23206.688 | 16297.017 |
| NM_00399E | 5395.069 | 5636.642 | NM_00628E | 4982.357  | 5559.177  | Y16752    | 8160.871  | 6821.016  |
| AF279265  | 2710.106 | 3152.118 | M33197    | 62879.039 | 61448.816 | NM_014694 | 1970.953  | 1584.378  |
| NM_00735C | 900.707  | 522.442  | NM_004331 | 26449.566 | 26575.947 | NM_01483C | 4851.759  | 4680.278  |
| NM_00521E | 1090.99  | 1787.594 | NM_01599E | 2381.534  | 1646.886  | AF355402  | 4623.106  | 3609.738  |
| AB040914  | 289.685  | 382.339  | NM_01570E | 20574.199 | 18014.965 | AK000407  | 7565.68   | 7696.757  |
| NM_002997 | 3494.966 | 3165.546 | AB018337  | 3503.073  | 2763.895  | AK026164  | 1067.328  | 324.024   |
| NM_00237E | 9605.414 | 8385.205 | NM_01448E | 2574.141  | 2431.932  | NM_01447C | 1599.462  | 849.16    |
| AB007929  | 2615.636 | 2446.489 | AK025273  | 7486.15   | 7750.592  | NM_00166E | 32991.922 | 27516.58  |
| NM_00457E | 2948.844 | 4363.174 | M33197    | 59972.918 | 64213.871 | Z70704    | 3147.226  | 2727.152  |
| AA203126  | 1412.14  | 1528.984 | NM_001794 | 3198.26   | 3417.713  | NM_01436E | 4083.607  | 2428.099  |
| NM_00162E | 302.016  | 401.39   | NM_00220E | 5934.333  | 7671.552  | NM_000557 | 8393.782  | 6707.474  |
| Z36788    | 265.995  | 620.452  | M33197    | 63363.793 | 63309.195 | NM_00323E | 2432.925  | 1374.4    |
| NM_018477 | 3521.549 | 4940.336 | NM_000131 | 2141.579  | 2123.262  | NM_00137E | 14727.812 | 10738.29  |
| U20536    | 3735.237 | 3240.34  | NM_00183E | 1096.195  | 2793.135  | NM_00231E | 5222.587  | 4776.744  |
| NM_00034E | 191.564  | 251.09   | NM_001911 | 24355.326 | 38304.523 | M20699    | 5371.225  | 3918.703  |
| NM_001494 | 15976.89 | 17052.02 | NM_000537 | 2178.318  | 2673.049  | NM_004774 | 9782.4    | 6461.596  |
| NM_017707 | 1065.571 | 1332.824 | NM_00650E | 3592.395  | 3677.844  | NM_016937 | 5924.008  | 4301.64   |
| NM_00420E | 4765.497 | 5127.19  | AB002321  | 834.615   | 692.371   | NM_00269C | 17466.926 | 12620.413 |
| NM_00460E | 2177.169 | 2137.151 | NM_00251E | 1446.202  | 1056.562  | AB040877  | 7014.327  | 7193.815  |
| AK022849  | 3466.151 | 3295.277 | M33197    | 3491.409  | 3454.252  | NM_00628E | 9078.851  | 6731.254  |
| AF040964  | 7558.008 | 7322.735 | AB020698  | 1568.201  | 909.127   | NM_019067 | 7595.612  | 4501.462  |
| NM_00193E | 5446.334 | 5851.535 | U68382    | 2095.765  | 2028.461  | AF251025  | 3936.557  | 2512.336  |
| NM_00327E | 1191.008 | 1077.214 | NM_00396E | 5924.929  | 6229.017  | NM_00177E | 11806.876 | 8989.908  |
| AB014599  | 4731.853 | 5029.449 | NM_004651 | 8622.978  | 8829.038  | AB011087  | 1722.291  | 1462.751  |
| NM_00439E | 1124.609 | 1038.146 | NM_00336E | 812.52    | 827.446   | AF161341  | 5636.868  | 4320.373  |
| AB018345  | 888.989  | 927.414  | M33197    | 60885.227 | 62435.309 | AJ249902  | 3121.196  | 2508.805  |
| NM_00583E | 301.229  | 401.282  | NM_01756E | 19287.967 | 15724.133 | NM_004384 | 4873.124  | 4030.771  |
| AW407841  | 556.987  | 237.825  | NM_00145E | 2513.739  | 2679.093  | L05500    | 20568.121 | 12490.805 |
| U15197    | 247.983  | 308.729  | NM_00290E | 3066.844  | 2635.587  | NM_01230E | 33217.27  | 32661.541 |
| NM_00187E | 568.353  | 546.879  | AK024480  | 2973.421  | 3064.932  | AF222903  | 6875.349  | 5466.471  |
| AF264014  | 6426.212 | 6312.747 | Y13871    | 24747.67  | 24579.693 | NM_00622E | 7015.214  | 5700.707  |
| NM_001831 | 613.358  | 721.566  | NM_012134 | 775.698   | 1097.6    | L10374    | 18140.215 | 15232.691 |

|           |          |          |           |           |           |           |           |           |
|-----------|----------|----------|-----------|-----------|-----------|-----------|-----------|-----------|
| NM_000137 | 3440.065 | 3921.952 | AL137725  | 21795.367 | 20412.176 | AB016902  | 4609.566  | 4691.438  |
| NM_012102 | 2791.828 | 3317.368 | AJ008151  | 35873.641 | 40289.598 | NM_005860 | 9194.401  | 7903.869  |
| NM_005017 | 12871.17 | 14884.9  | AK024149  | 2112.482  | 1327.262  | AF095288  | 53039.586 | 41646.688 |
| AF163572  | 1324.277 | 1590.622 | AK023094  | 1724.968  | 1572.607  | AF090895  | 3521.497  | 2948.417  |
| NM_000897 | 796.379  | 791.526  | M33197    | 61601.883 | 58394.703 | NM_005610 | 11833.306 | 8450.661  |
| NM_000487 | 1332.484 | 1297.917 | NM_004091 | 3913.118  | 3854.594  | NM_003478 | 6227.996  | 5235.66   |
| NM_006411 | 8216.667 | 10355.45 | X74070    | 62862.422 | 57334.395 | NM_016237 | 8333.368  | 9528.146  |
| NM_014182 | 4066.978 | 4626.275 | AF027219  | 2502.516  | 1631.319  | NM_004924 | 9101.192  | 5905.029  |
| AB040884  | 579.368  | 726.234  | BC022846  | 2609.886  | 3196.484  | NM_001798 | 12611.232 | 9387.243  |
| NM_000492 | 12464.53 | 14656.36 | NM_006333 | 15635.124 | 17072.531 | NM_001211 | 10444.678 | 9048.207  |
| NM_012088 | 3174.467 | 4145.655 | M33197    | 60172.641 | 59634.621 | NM_006505 | 1607.361  | 1487.119  |
| NM_001170 | 1542.369 | 1501.719 | NM_002898 | 16515.164 | 17791.916 | AB033050  | 3773.994  | 3208.017  |
| NM_004696 | 123.141  | 266.348  | AK022749  | 19940.926 | 18912.014 | NM_004356 | 23289.58  | 23422.842 |
| NM_014342 | 2680.944 | 2236.183 | BF031409  | 14091.993 | 16495.012 | NM_001855 | 1262.816  | 902.383   |
| Z50169    | 76.891   | 132.249  | NM_007043 | 4639.724  | 6921.012  | BC015022  | 7286.051  | 6095.144  |
| AB043997  | 899.024  | 747.094  | BE378791  | 1772.027  | 1372.457  | NM_006697 | 16226.639 | 14761.889 |
| AF097645  | 328.841  | 326.766  | U94388    | 3027.928  | 2464.676  | M19182    | 1767.382  | 1759.471  |
| NM_014363 | 2581.329 | 2297.613 | NM_012322 | 14530.728 | 13972.505 | NM_002406 | 53685.246 | 53920.492 |
| NM_000557 | 781.405  | 1117.562 | M33197    | 62588.559 | 59099.879 | U87169    | 4428.376  | 3447.478  |
| NM_003238 | 335.783  | 758.562  | NM_004888 | 54969.887 | 57885.254 | NM_002073 | 2039.057  | 1688.217  |
| NM_001375 | 9041.593 | 9220.102 | AK025314  | 4853.591  | 4973.546  | NM_001749 | 2559.617  | 1368.707  |
| NM_002312 | 3002.263 | 4302.26  | NM_002108 | 7169.698  | 6206.264  | AF090327  | 1009.413  | 1002.823  |
| M20699    | 3996.712 | 4495.181 | NM_000984 | 62296.66  | 66120.266 | NM_003291 | 7296.743  | 5261.166  |
| NM_004774 | 4051.163 | 3072.027 | NM_002453 | 10193.06  | 11352.418 | AK022950  | 5043.47   | 3788.431  |
| NM_016937 | 2440.99  | 2163.92  | AK026721  | 3511.153  | 2623.065  | S75755    | 4172.094  | 4967.355  |
| NM_002690 | 6505.533 | 7415.901 | AK025598  | 1938.44   | 1580.823  | AF176518  | 1514.065  | 1542.364  |
| NM_012328 | 3697.327 | 3666.505 | AB002348  | 64549.371 | 52402.422 | AB014576  | 22739.695 | 21338.145 |
| NM_007341 | 639.969  | 984.288  | M33197    | 28364.77  | 28890.791 | NM_019044 | 8392.678  | 6112.07   |
| NM_016508 | 1328.51  | 835.667  | NM_005006 | 11433.63  | 18522.473 | AF174601  | 6738.521  | 6097.78   |
| NM_006456 | 590.969  | 652.867  | AK027033  | 5838.394  | 7393.939  | AF279865  | 1798.63   | 1337.892  |
| AK026062  | 2353.174 | 2938.932 | NM_000106 | 5103.655  | 4354.391  | NM_014700 | 1932.832  | 1710.858  |
| AF047002  | 16926.5  | 16749.47 | NM_003000 | 29951.883 | 29918.156 | NM_014714 | 1870.531  | 1201.343  |
| AL050082  | 2526.065 | 1947.389 | NM_002495 | 38036.617 | 32859.148 | NM_005687 | 8679.963  | 5834.282  |
| NM_006623 | 19679.95 | 22573.97 | M33197    | 60557.512 | 58132.766 | NM_005983 | 16258.004 | 11527.233 |
| NM_016588 | 24916.39 | 24201.44 | NM_016284 | 6084.799  | 5444.654  | NM_017652 | 14198.828 | 14752.28  |
| NM_003135 | 10470.52 | 8356.825 | NM_014593 | 6264.432  | 5424.238  | X59268    | 11508.332 | 13715.862 |
| Z36788    | 688.807  | 980.462  | NM_006833 | 23637.875 | 24887.139 | NM_001429 | 9488.643  | 11316.118 |
| NM_018477 | 4750.692 | 6828.606 | NM_012257 | 2909.161  | 3102.459  | M61870    | 1432.141  | 1843.499  |
| U20536    | 4306.826 | 4472.87  | U37690    | 44103.785 | 36272.559 | AK026980  | 2937.781  | 2567.195  |
| AI298534  | 459.617  | 291.586  | NM_005120 | 2552.322  | 2055.637  | AJ277915  | 906.262   | 963.592   |
| R71691    | 1290.442 | 995.537  | AB029012  | 35351.27  | 31832.855 | NM_020368 | 5538.81   | 5778.22   |
| AW167715  | 63.753   | 148.928  | M33197    | 64776.52  | 61390.547 | AF024708  | 31250.592 | 27695.111 |
| AA424735  | 2097.343 | 1819.74  | NM_006298 | 2059.486  | 3294.305  | NM_017566 | 8798.471  | 5849.133  |
| U78294    | 1417.846 | 1823.879 | AF060936  | 26674.41  | 29242.742 | NM_006582 | 1799.009  | 1115.655  |
| BI760394  | 2610.73  | 3411.853 | NM_005568 | 1894.577  | 1902.317  | AB033019  | 9096.927  | 6769.336  |
| AA555216  | 502.937  | 352.102  | NM_018167 | 1424.027  | 1165.281  | NM_001452 | 863.798   | 803.243   |
| U09117    | 1368.801 | 1187.699 | AL050088  | 13442.662 | 8781.796  | NM_006162 | 1195.989  | 1180.107  |
| M21054    | 136.831  | 406.588  | AK024939  | 10444.484 | 10762.226 | NM_014764 | 13511.713 | 11088.512 |
| M18468    | 562.296  | 451.243  | AK001561  | 8721.998  | 7895.609  | NM_018078 | 3117.645  | 3598.719  |
| AA164741  | 7410.491 | 8330.868 | AB007880  | 8566.089  | 5707.694  | NM_016013 | 1048.217  | 673.196   |
| AI978885  | 759.165  | 716.004  | AK024950  | 2377.753  | 1394.617  | NM_016050 | 1161.12   | 807.04    |
| AK054960  | 4067.658 | 4304.809 | M33197    | 66249.977 | 62577.066 | NM_007080 | 35825.82  | 32023.014 |
| L15344    | 2122.783 | 2572.337 | NM_014146 | 830.935   | 1017.116  | AK026912  | 6480.822  | 5628.865  |

|           |          |          |           |           |           |           |           |           |
|-----------|----------|----------|-----------|-----------|-----------|-----------|-----------|-----------|
| NM_01447C | 614.03   | 624.155  | AF147356  | 11627.826 | 11246.306 | AK023531  | 7344.838  | 6536.859  |
| NM_00166E | 13263.57 | 16190.72 | NM_018843 | 7316.05   | 7395.733  | AB011128  | 14396.606 | 16790.838 |
| AF264014  | 10085.44 | 11123.64 | AK024275  | 2056.167  | 1836.838  | AK025074  | 7744.591  | 8727.388  |
| L09098    | 110.006  | 429.081  | AL049461  | 5010.695  | 2393.142  | NM_000303 | 20571.318 | 20796.973 |
| NM_00415E | 318.551  | 337.427  | M33197    | 67046.852 | 61747.918 | NM_006242 | 729.289   | 977.235   |
| NM_001831 | 396.822  | 881.968  | AL109782  | 14476.096 | 12951.949 | X78712    | 2067.834  | 1838.363  |
| NM_01458E | 6525.713 | 6761.323 | AF086225  | 2350.497  | 2525.157  | NM_001497 | 1730.934  | 1480.174  |
| NM_01436E | 7593.306 | 8636.635 | NM_005844 | 20622.771 | 17259.037 | NM_00413C | 10345.718 | 9986.359  |
| NM_000923 | 547.023  | 538.91   | AK024941  | 7068.089  | 6465.365  | AF067972  | 26026.299 | 24204.51  |
| NM_006453 | 1419.446 | 2228.674 | AF056434  | 2641.004  | 2976.812  | NM_00495E | 2095.036  | 1890.354  |
| NM_01809E | 760.395  | 1396.815 | AF086199  | 1360.509  | 1245.518  | D87076    | 1777.342  | 1741.997  |
| NM_00403E | 1777.514 | 1500.856 | M33197    | 69495.711 | 64122.156 | NM_01414E | 1909.033  | 2153.643  |
| NM_01598E | 3275.145 | 2946.56  | AK025489  | 3348.401  | 3100.87   | AB020635  | 2876.401  | 3491.373  |
| NM_00654E | 1086.538 | 1621.427 | AL390152  | 9392.319  | 10056.91  | NM_00651E | 2475.84   | 2343.152  |
| NM_01495E | 2114.969 | 2284.381 | M33197    | 59326.711 | 58332.168 | NM_005224 | 1750.031  | 1487.173  |
| NM_002997 | 2646.001 | 2637.175 | NM_01812E | 4951.461  | 6322.076  | NM_012144 | 2631.744  | 2468.655  |
| NM_00237E | 10742.81 | 10316.97 | NM_01479E | 926.205   | 1211.452  | X65231    | 60115.461 | 54408.883 |
| AB007929  | 2643.381 | 2622.329 | AK024506  | 12378.583 | 9746.326  | NM_00290E | 2728.525  | 2392.967  |
| NM_00457E | 3866.087 | 4574.037 | NM_01417E | 5966.904  | 3481.832  | AF205632  | 2523.37   | 1908.21   |
| AA203126  | 1759.161 | 1511.642 | AF086326  | 6268.206  | 5504.591  | NM_00537E | 23761.615 | 21935.441 |
| AB043997  | 1091.773 | 1229.378 | M33197    | 63216.547 | 62631.605 | NM_002397 | 1844.324  | 626.074   |
| NM_004853 | 5460.492 | 6071.506 | AL080057  | 2162.883  | 1532.736  | AF000672  | 2589.301  | 2362.744  |
| NM_001494 | 17472.59 | 19540.61 | AL117528  | 2759.196  | 2198.611  | AJ227854  | 1357.622  | 1424.276  |
| NM_017707 | 1050.781 | 1408.309 | M33197    | 63066.48  | 62277.941 | AF086128  | 1263.261  | 1664.817  |
| NM_00420E | 3869.319 | 3833.96  | AK025948  | 1698      | 1982.814  | AK022850  | 5501.967  | 6027.358  |
| NM_004603 | 1032.423 | 1336.587 | AK000674  | 712.723   | 787.908   | NM_01649C | 2753.126  | 2936.448  |
| AK022849  | 2386.238 | 2775.702 | AJ238555  | 763.697   | 1099.165  | AF038193  | 1410.259  | 1068.729  |
| AF040964  | 2907.709 | 2969.463 | L23850    | 806.048   | 878.176   | AL137498  | 7694.6    | 7149.652  |
| NM_00193E | 2331.018 | 2184.483 | AL353948  | 44981.836 | 42760.172 | AK024289  | 2128.227  | 2177.691  |
| NM_00327E | 563.58   | 541.879  | AL122043  | 1704.018  | 886.55    | AK001942  | 703.937   | 417.39    |
| AB014599  | 3229.332 | 3052.261 | M33197    | 63441.41  | 63430.566 | NM_003851 | 22508.523 | 17028.414 |
| NM_004393 | 294.935  | 525.389  | AK025869  | 19845.855 | 27939.955 | U79244    | 789.17    | 544.51    |
| NM_005832 | 286.88   | 412.376  | M33197    | 64502.68  | 60346.68  | AK024150  | 2760.438  | 2828.682  |
| AW407841  | 845.093  | 493.683  | AF009281  | 1105.167  | 1047.907  | AF070536  | 3758.015  | 3614.651  |
| AL050082  | 3814.052 | 2790.746 | AF023203  | 1874.833  | 969.01    | AK022297  | 1399.831  | 1015.557  |
| NM_006623 | 39529.24 | 37478.37 | AF056430  | 1985.595  | 910.281   | U79300    | 1362.333  | 1195.022  |
| NM_01658E | 31516.14 | 30254.66 | NM_01490E | 683.959   | 712.013   | AK025151  | 7607.546  | 8094.659  |
| NM_00313E | 14398.93 | 12691.46 | AF009291  | 2187.875  | 1833.446  | AK025550  | 5072.058  | 3959.59   |
| NM_000137 | 3444.414 | 3682.575 | M33197    | 69926.633 | 63827.254 | AF088076  | 34524.031 | 32924.988 |
| NM_012102 | 2732.113 | 2864.011 | NM_01805E | 8287.223  | 5244.735  | AF086543  | 4528.483  | 5088.927  |
| NM_005017 | 11590.28 | 11551.85 | AK002199  | 2989.811  | 2051.176  | AB046797  | 1181.051  | 1432.936  |
| AF163572  | 1317.476 | 1230.75  | AK021662  | 5653.883  | 4722.933  | AK002098  | 5461.115  | 3890.544  |
| NM_000897 | 370.17   | 450.855  | AK001038  | 1270.55   | 1147.512  | AK025156  | 36690.012 | 45182.195 |
| NM_000487 | 1002.053 | 799.243  | AK001802  | 4654.058  | 3956.238  | AK024984  | 13493.341 | 15618.357 |
| NM_006411 | 6375.055 | 7645.859 | AK021469  | 3385.956  | 2252.464  | AK000276  | 1038.375  | 753.047   |
| NM_014182 | 1215.364 | 1752.673 | AK021706  | 3854.093  | 2945.385  | AF085981  | 862.85    | 1571.033  |
| AB040884  | 267.427  | 277.892  | M33197    | 62604.273 | 56735.039 | AF086008  | 2205.012  | 1769.202  |
| NM_000492 | 8003.603 | 7819.1   | AK026052  | 933.717   | 766.808   | AF087970  | 1123.538  | 1046.141  |
| NM_01208E | 1469.195 | 1640.128 | AK026601  | 1505.665  | 1175.508  | AF086029  | 1683.702  | 1768.559  |
| NM_001170 | 995.881  | 946.831  | AK025161  | 1533.246  | 1720.162  | AF075115  | 1261.577  | 1051.868  |
| NM_00469E | 441.151  | 372.467  | AK025387  | 1774.82   | 1523.848  | U05597    | 1327.97   | 1214.832  |
| NM_014342 | 2313.114 | 1766.724 | AK026259  | 61742.457 | 53613.184 | U52050    | 1121.809  | 1340.891  |
| AK054960  | 9432.59  | 8852.337 | AJ008115  | 43354.527 | 42765.039 | U73799    | 1700.388  | 1576.636  |



|           |          |          |           |           |           |           |           |           |
|-----------|----------|----------|-----------|-----------|-----------|-----------|-----------|-----------|
| L15344    | 3575.741 | 3252.412 | AF083125  | 2660.955  | 4104.438  | AK021668  | 54726.934 | 52166.66  |
| NM_01447C | 940.94   | 773.556  | AL049241  | 661.45    | 978.388   | AF086148  | 40979.91  | 40453.129 |
| NM_00166E | 13431.83 | 15501.55 | M33197    | 62136.867 | 55256.957 | NM_018363 | 1817.114  | 1830.404  |
| AF097645  | 75.623   | 129.397  | AK022970  | 3260.793  | 3375.2    | AJ245433  | 17602.768 | 20143.268 |
| Z70704    | 683.53   | 621.707  | AK026212  | 4042.999  | 4358.517  | AK021942  | 55610.422 | 57086.426 |
| NM_014363 | 2118.001 | 1814.658 | AF086222  | 4328.058  | 2936.464  | NM_014127 | 1412.451  | 1432.749  |
| NM_000557 | 510.87   | 559.924  | AF086415  | 8988.408  | 8189.508  | AK021817  | 3276.076  | 3846.189  |
| NM_003239 | 176.168  | 404.976  | M33197    | 63248.461 | 60074.254 | AK023217  | 4279.573  | 4310.275  |
| NM_00137E | 6598.966 | 6600.746 | AK024470  | 4536.703  | 3556.469  | AF119887  | 10037.473 | 11192.85  |
| NM_002312 | 2802.301 | 3726.85  | NM_00422E | 11842.885 | 9244.673  | AK091038  | 1437.082  | 1166.646  |
| M20699    | 2945.631 | 2902.429 | AL137436  | 1883.295  | 1795.368  | AK024193  | 3798.955  | 3776.718  |
| NM_004774 | 2267.184 | 1924.623 | AK023400  | 1328.443  | 1586.6    | NM_018543 | 479.622   | 839.388   |
| NM_016937 | 1037.89  | 1088.593 | AK023897  | 2059.046  | 1560.883  | AK024438  | 24671.568 | 27516.711 |
| NM_003479 | 486.561  | 56.769   | AF025441  | 4328.84   | 5753.325  | AK022482  | 2196.727  | 2595.879  |
| NM_00269C | 4987.878 | 4570.054 | U62823    | 5163.272  | 7195.88   | AK024135  | 1259.95   | 1353.519  |
| NM_01232E | 1836.316 | 1864.924 | NM_00353E | 41394.914 | 48461.641 | AK022803  | 2663.375  | 2827.523  |
| NM_007341 | 1159.616 | 822.176  | AK026768  | 4505.618  | 4002.387  | AK023517  | 3886.119  | 3629.764  |
| NM_01650E | 1074.026 | 811.494  | M33197    | 68315.539 | 64115.422 | AK023869  | 9626.626  | 8817.745  |
| NM_00645E | 595.369  | 472.481  | AK000852  | 46344.871 | 34364.203 | NM_01772E | 2403.274  | 2239.858  |
| AK026062  | 1527.409 | 1689.979 | AF251188  | 10194.414 | 8505.525  | U80772    | 740.014   | 1120.104  |
| AF047002  | 21578.98 | 24999.43 | AK026418  | 9799.715  | 11089.449 | NM_006189 | 1711.863  | 2022.036  |
| AB040914  | 397.389  | 411.973  | AF086194  | 64914.934 | 63406.281 | AJ272177  | 782.803   | 769.378   |
| NM_002997 | 3457.216 | 3410.55  | AK026811  | 6334.778  | 6266.593  | AK026402  | 28198.559 | 25759.016 |
| NM_002379 | 8658.893 | 7335.044 | M33197    | 66195.094 | 65883.977 | AF111846  | 1329.283  | 1492.221  |
| AB007929  | 3500.806 | 2495.491 | AK023633  | 3728.495  | 2817.887  | M11948    | 60440.66  | 59925.734 |
| NM_004579 | 4853.026 | 4628.141 | NM_00537Z | 805.372   | 991.311   | NM_00522C | 3724.346  | 4696.771  |
| AA203126  | 1753.229 | 1502.377 | AF085967  | 650.34    | 790.398   | AK026366  | 57737.707 | 53219.633 |
| L12347    | 342.613  | 290.948  | NM_006179 | 3253.57   | 3745.244  | AK024229  | 32295.891 | 32789.246 |
| NM_00162Z | 378.066  | 291.501  | AL360165  | 4990.201  | 4319.004  | AK021467  | 4249.478  | 4736.957  |
| Z36788    | 370.167  | 563.274  | M33197    | 68826.039 | 64029.031 | NM_020371 | 2813.288  | 2394.931  |
| NM_018477 | 3038.293 | 5105.331 | AJ008132  | 16803.08  | 17972.205 | AK022498  | 3843.253  | 2891.96   |
| U20536    | 2262.172 | 2556.995 | NM_005281 | 8049.485  | 8204.588  | U84506    | 3127.383  | 2850.126  |
| AI298534  | 105.853  | 99.311   | NM_005549 | 6050.619  | 5127.783  | U21556    | 63633.547 | 62512.184 |
| R71691    | 921.462  | 703.151  | U12129    | 7975.348  | 4990.952  | AB002444  | 1111.867  | 1191.065  |
| AA424735  | 1363.723 | 1029.385 | S81242    | 57982.648 | 62986.727 | AB002344  | 4923.001  | 4644.5    |
| U78294    | 711.72   | 1008.097 | AF230801  | 4295.608  | 3294.612  | BF210352  | 2270.974  | 2469.804  |
| BI760394  | 1884.068 | 2085.156 | AF075072  | 4275.763  | 2413.217  | NM_006829 | 3128.69   | 3737.855  |
| AA555216  | 511.865  | 300.152  | M33197    | 63552.211 | 64639.473 | NM_017669 | 19848.766 | 19593.287 |
| U09117    | 594.195  | 619.583  | NM_002509 | 11899.053 | 15809.313 | AF147379  | 50939.793 | 52492.184 |
| M18468    | 721.412  | 501.075  | U38442    | 12933.805 | 20255.34  | AK024205  | 3404.252  | 4032.458  |
| H66070    | 1907.092 | 731.661  | AF110136  | 3884.27   | 2988.036  | AF086034  | 35111.824 | 27129.787 |
| AA164741  | 4441.497 | 4749.875 | AK026706  | 3744.412  | 3197.307  | AK000174  | 1578.409  | 1640.021  |
| AI189375  | 182.043  | 216.484  | AB007936  | 61420.426 | 63705.941 | AF130071  | 818.943   | 753.911   |
| AI978885  | 280.455  | 548.411  | D28391    | 51972.695 | 43807.148 | AL390170  | 1604.787  | 1178.867  |
| AB014599  | 5089.371 | 4170.186 | M33197    | 63689.355 | 57953.797 | AK022887  | 1952.135  | 1758.206  |
| NM_004393 | 1025.206 | 975.559  | AJ227885  | 689.073   | 660.065   | AK000745  | 25270.854 | 25932.811 |
| AB018345  | 1467.262 | 925.365  | AF086086  | 846.329   | 674.101   | NM_005299 | 1026.647  | 1252.96   |
| NM_00583Z | 489.677  | 301.757  | AK026859  | 1532.094  | 1503.112  | NM_015901 | 1184.586  | 1888.792  |
| AW407841  | 816.032  | 503.805  | D86961    | 1173.186  | 866.717   | NM_00636E | 753.786   | 854.743   |
| NM_001879 | 385.085  | 522.181  | AJ227896  | 15984.155 | 17572.352 | AF093744  | 4626.736  | 4193.086  |
| AF264014  | 5556.469 | 5454.865 | L32841    | 6343.418  | 6313.987  | NM_018687 | 30339.83  | 29689.555 |
| L09098    | 307.388  | 251.247  | M33197    | 62577.449 | 63071.949 | M57417    | 33461.504 | 35371.375 |
| NM_001831 | 268.614  | 423.685  | AF131770  | 5370.231  | 6566.397  | NM_020524 | 11582.642 | 11450.739 |

|           |          |          |           |           |           |           |           |           |
|-----------|----------|----------|-----------|-----------|-----------|-----------|-----------|-----------|
| NM_01458€ | 4301.716 | 3243.48  | CY3Cy5    | 7412.825  | 632.959   | NM_00199€ | 4628.712  | 4951.977  |
| NM_01436€ | 3494.251 | 3659.781 | AI298534  | 863.258   | 758.222   | X64977    | 2730.514  | 3538.542  |
| NM_00092€ | 325.162  | 425.445  | R71691    | 1155.443  | 1810.21   | AF064851  | 1062.325  | 1778.108  |
| NM_00645€ | 983.054  | 1430.32  | AW167715  | 897.649   | 1220.371  | NM_00260€ | 20973.656 | 35458.395 |
| NM_01809€ | 290.495  | 646.021  | AA424735  | 3959.998  | 4567.089  | NM_01623€ | 1174.697  | 1263.016  |
| NM_00403€ | 1052.953 | 1267.78  | U78294    | 7058.81   | 9689.802  | NM_00338€ | 4175.445  | 3553.382  |
| NM_01598€ | 1558.903 | 1543.876 | BI760394  | 9607.776  | 9146.044  | D17271    | 4749.473  | 4663.562  |
| NM_00654€ | 451.899  | 579.589  | AA555216  | 1029.58   | 896.007   | AK026658  | 1548.547  | 1091.803  |
| NM_01495€ | 1140.066 | 1007.587 | U09117    | 27972.273 | 27878.059 | AF282264  | 21160.727 | 21076.047 |
| NM_00399€ | 3262.419 | 2990.138 | M21054    | 1025.505  | 1003.875  | AF086322  | 4820.531  | 4614.64   |
| AF279265  | 1343.176 | 1779.021 | M18468    | 1052.021  | 1333.004  | Z70717    | 1569.508  | 1770.472  |
| NM_00521€ | 659.742  | 1252.507 | H66070    | 4765.99   | 5736.496  | AK024736  | 954.895   | 1097.85   |
| AK024382  | 274.905  | 340.14   | AA164741  | 15726.836 | 15239.012 | X79308    | 2437.315  | 2349.784  |
| NM_001170 | 1909.451 | 2117.8   | AI189375  | 2557.636  | 2271.887  | AF086476  | 948.424   | 969.762   |
| AL137716  | 544.96   | 423.975  | AI978885  | 6357.249  | 6566.585  | NM_01766€ | 14360.402 | 14630.457 |
| NM_00469€ | 702.424  | 410.52   | AK054960  | 22283     | 19913.186 | AB011151  | 4437.725  | 4516.649  |
| NM_01434€ | 3361.425 | 2821.236 | L15344    | 6895.869  | 5912.55   | U92995    | 7862.081  | 9450.367  |
| NM_00045€ | 190.747  | 217.325  | SR1       | 56147.16  | 61408.164 | Z70769    | 839.031   | 815.643   |
| AB043997  | 644.6    | 677.618  | SR3       | 55740.613 | 54034.109 | NM_00710€ | 4242.328  | 3083.741  |
| NM_00485€ | 2003.49  | 2141.262 | SR5       | 11432.952 | 10655.596 | AL137555  | 2128.961  | 2801.093  |
| NM_001494 | 9476.758 | 10237.64 | SR7       | 7341.622  | 53736.422 | AL133017  | 2808.803  | 2456.581  |
| NM_017707 | 848.662  | 1028.377 | SR9       | 26895.158 | 4693.652  | CY3Cy5    | 4265.709  | 138.284   |
| NM_00420€ | 3265.343 | 3116.906 | CY3Cy5    | 4385.234  | 357.707   | X00588    | 1673.693  | 1066.402  |
| NM_00460€ | 1385.962 | 1347.688 | NM_01458€ | 7691.045  | 6855.203  | AI359037  | 52178.734 | 25649     |
| AK022849  | 1521.417 | 1579.973 | NM_01436€ | 12371.765 | 9800.754  | BI754285  | 913.483   | 440.802   |
| AF040964  | 2588.12  | 2620.258 | NM_00092€ | 1281.953  | 1137.748  | X15998    | 2873.197  | 1681.031  |
| NM_00193€ | 1460.57  | 1506.011 | NM_00645€ | 2543.104  | 2061.526  | M76482    | 958.64    | 923.728   |
| NM_00327€ | 786.349  | 803.329  | NM_01809€ | 2226.798  | 1739.931  | X17519    | 30946.012 | 13759.336 |
| NM_01232€ | 4087.846 | 3641.835 | AL390078  | 1552.844  | 1431.212  | NM_00188€ | 1818.38   | 1197.776  |
| NM_007341 | 811.182  | 866.099  | NM_00403€ | 3473.391  | 3000.257  | NM_00462€ | 3271.409  | 2015.904  |
| NM_01650€ | 2358.353 | 1462.29  | NM_01598€ | 5278.874  | 5491.459  | L31785    | 3772.236  | 2032.242  |
| NM_00645€ | 1045.024 | 1156.69  | NM_00654€ | 2128.538  | 2380.448  | H-M 69043 | 9174.572  | 6985.879  |
| AK026062  | 3366.47  | 3671.361 | NM_01495€ | 5058.358  | 6692.972  | AF077374  | 2468.605  | 2119.149  |
| AF047002  | 22187.01 | 26034.27 | NM_00399€ | 7780.186  | 7262.025  | U43901    | 2474.82   | 2440.6    |
| NM_01658€ | 22201.68 | 22744.5  | AF279265  | 5115.661  | 4484.414  | X59065    | 860.926   | 675.798   |
| NM_00313€ | 6914.953 | 6080.584 | NM_00735€ | 751.266   | 503.391   | M59828    | 11399.858 | 11121.766 |
| NM_00676€ | 104.369  | 190.131  | NM_00521€ | 5097.918  | 3602.334  | NM_016134 | 951.804   | 890.408   |
| NM_000137 | 2188.005 | 2382.026 | AB040914  | 2469.664  | 2119.839  | SR2       | 63531.656 | 60672.441 |
| NM_01210€ | 2380.478 | 2981.559 | NM_002997 | 10911.678 | 11069.802 | SR4       | 27247.979 | 20974.799 |
| NM_005017 | 10536.29 | 8896.583 | NM_00237€ | 24126.646 | 26103.375 | SR6       | 4207.045  | 2580.583  |
| AF163572  | 1077.087 | 1381.586 | AB007929  | 6928.351  | 6848.021  | SR10      | 50443.449 | 11308.867 |
| NM_000897 | 258.035  | 555.782  | NM_00457€ | 10339.698 | 9467.388  | CY3Cy5    | 6253.639  | 174.557   |
| NM_000487 | 853.93   | 1083.159 | AA203126  | 3396.597  | 3466.676  | NM_00061€ | 12917.35  | 8266.346  |
| NM_006411 | 5626.919 | 7578.454 | L12347    | 11592.142 | 11454.487 | NM_004257 | 18654.238 | 13343.478 |
| NM_01418€ | 2266.47  | 2050.895 | NM_00162€ | 4799.293  | 4422.047  | NM_002844 | 8987.233  | 3762.784  |
| AB040884  | 328.492  | 220.191  | Z36788    | 2432.885  | 2400.14   | NM_00068€ | 3233.048  | 2204.397  |
| NM_00049€ | 6352.957 | 6880.81  | NM_018477 | 9637.015  | 6962.182  | NM_00362€ | 4791.862  | 2963.758  |
| NM_01208€ | 1693.784 | 2141.766 | U20536    | 3849.06   | 3881.643  | NM_005901 | 14628.287 | 7637.451  |
| AJ272057  | 5386.364 | 4219.404 | NM_00485€ | 9518.02   | 7850.973  | NM_00424€ | 2457.63   | 2056.702  |
| NM_00440€ | 1773.177 | 1247.785 | NM_001494 | 18128.621 | 18283.766 | NM_00095€ | 2638.604  | 2257.725  |
| AK024216  | 20218.77 | 17225.44 | NM_017707 | 1172.22   | 1110.385  | NM_00131€ | 1302.281  | 1093.208  |
| Y16752    | 1035.485 | 800.987  | NM_00420€ | 5926.527  | 6905.736  | NM_00236€ | 1389.274  | 1216.251  |
| NM_014694 | 315.838  | 561.713  | NM_00460€ | 20853.506 | 23898.852 | NM_00479€ | 723.103   | 586.029   |

|           |          |          |           |           |           |           |           |           |
|-----------|----------|----------|-----------|-----------|-----------|-----------|-----------|-----------|
| NM_020156 | 4093.388 | 3386.722 | AK022849  | 5804.716  | 8841.363  | NM_000435 | 4144.979  | 4239.167  |
| NM_014830 | 2517.164 | 3668.933 | AF040964  | 12962.718 | 16384.582 | NM_001842 | 16724.49  | 12846.613 |
| NM_014470 | 642.874  | 384.416  | NM_001935 | 7556.056  | 6734.143  | AB017169  | 689.699   | 730.617   |
| NM_001665 | 8149.071 | 10522.1  | NM_003275 | 23706.83  | 23220.42  | AL080170  | 2947.253  | 2330.529  |
| AF097645  | 208.951  | 212.091  | AB014599  | 6354.414  | 5703.87   | AB039903  | 5627.692  | 5063.809  |
| NM_001773 | 353.612  | 440.923  | NM_004393 | 1265.832  | 1169.307  | NM_000542 | 17885.92  | 15035.171 |
| Z70704    | 911.131  | 845.155  | AB018345  | 1164.088  | 1427.236  | NM_014625 | 814.486   | 732.175   |
| NM_014363 | 1677.062 | 1434.774 | NM_005832 | 1217.42   | 1060.125  | AB001328  | 1051.505  | 996.437   |
| NM_000557 | 467.35   | 619.236  | AW407841  | 2196.272  | 1807.573  | NM_000945 | 1097.423  | 535.084   |
| NM_003235 | 376.894  | 409.9    | U15197    | 861.709   | 607.395   | H99588    | 2282.604  | 1281.001  |
| NM_001375 | 6323.028 | 6263.667 | NM_001875 | 3469.825  | 3063.357  | AK022600  | 12208.41  | 10964.815 |
| NM_002312 | 1538.499 | 2398.805 | AF264014  | 12048.525 | 10539.42  | AK023142  | 4134.239  | 4012.172  |
| M20699    | 2471.215 | 2974.87  | NM_001831 | 1375.129  | 1203.281  | U61740    | 20008.688 | 16391.793 |
| NM_004774 | 2840.844 | 2478.372 | NM_000137 | 4778.625  | 4785.708  | NM_006405 | 54875.477 | 55532.484 |
| NM_016937 | 1669.998 | 1456.537 | NM_012102 | 7803.115  | 7158.529  | AB049054  | 5084.844  | 6505.306  |
| NM_002690 | 3553.444 | 3236.718 | NM_005017 | 30857.355 | 43592.816 | NM_015071 | 2597.7    | 1659.45   |
| AB033086  | 392.749  | 544.058  | AF163572  | 21481.582 | 22298.754 | NM_013227 | 2557.802  | 1640.912  |
| NM_018235 | 3618.433 | 3404.469 | NM_000897 | 5082.306  | 5836.309  | Z83803    | 1238.172  | 860.279   |
| U88892    | 429.461  | 395.266  | NM_000487 | 1519.102  | 1550.842  | AF027205  | 47620.281 | 30981.203 |
| AK023755  | 4539.047 | 3426.716 | NM_006411 | 30461.904 | 40876.488 | NM_001570 | 1080.977  | 649.793   |
| NM_005725 | 2487.072 | 1985.585 | NM_014182 | 5255.048  | 6608.345  | NM_015655 | 1193.712  | 1241.817  |
| NM_012211 | 240.831  | 289.235  | AB040884  | 955.235   | 915.475   | NM_000585 | 3709.657  | 3017.513  |
| AB040877  | 697.219  | 533.308  | NM_000492 | 12661.739 | 11760.939 | NM_016545 | 15874.588 | 11745.611 |
| AB040927  | 630.642  | 941.657  | NM_012085 | 2964.946  | 2375.755  | AF309653  | 1520.159  | 1372.689  |
| NM_006285 | 3018.454 | 2995.715 | NM_001170 | 9739.464  | 10658.843 | NM_002620 | 21811.455 | 16891.256 |
| NM_019067 | 2638.362 | 2043.659 | AL137716  | 1182.389  | 1137.167  | S79267    | 1144.964  | 1002.536  |
| AF251025  | 634.383  | 826.388  | NM_004695 | 2299.253  | 1984.049  | NM_001815 | 1054.391  | 935.528   |
| NM_015677 | 6136.417 | 4541.119 | NM_014342 | 4400.76   | 5831.057  | NM_003784 | 54247.828 | 49937.168 |
| NM_001772 | 3172.129 | 2975.244 | Z50169    | 1324.933  | 983.415   | NM_000195 | 34090.023 | 27932.691 |
| AL162032  | 151.24   | 167.313  | AB043997  | 1451.693  | 1868.194  | NM_005445 | 17435.107 | 8021.376  |
| AB011087  | 732.23   | 911.76   | NM_001773 | 1354.248  | 1170.595  | NM_014895 | 3926.588  | 3196.472  |
| AF161341  | 565.642  | 800.811  | Z70704    | 1997.513  | 2236.851  | NM_003630 | 10627.934 | 8872.529  |
| AJ249902  | 795.822  | 808.237  | NM_014363 | 3630.589  | 3813.685  | NM_000045 | 4558.79   | 3257.669  |
| NM_004384 | 2111.143 | 2756.432 | NM_000557 | 11716.79  | 14267.328 | NM_003215 | 1734.147  | 1048.708  |
| L05500    | 3050.792 | 2827.654 | NM_003235 | 2010.206  | 2481.421  | NM_006705 | 4628.844  | 2561.774  |
| NM_012305 | 2419.468 | 2743.125 | NM_001375 | 9988.779  | 11026.021 | NM_004910 | 2501.258  | 3804.098  |
| AF222903  | 2320.83  | 2149.014 | NM_002312 | 6619.067  | 7556.511  | AB013452  | 1865.74   | 2550.733  |
| NM_006225 | 1392.386 | 1143.004 | M20699    | 4961.083  | 5932.613  | M93107    | 6079.873  | 8846.352  |
| L10374    | 2740.409 | 2597.26  | NM_004774 | 12579.498 | 14490.346 | BC001479  | 11229.293 | 18741.066 |
| AB016902  | 555.879  | 449.697  | NM_016937 | 6981.07   | 7769.987  | NM_002461 | 40456.109 | 45246.758 |
| AF272378  | 827.239  | 843.544  | NM_002690 | 11583.84  | 12923.881 | AB032986  | 55993.887 | 51846.102 |
| NM_000245 | 2212.805 | 2048.217 | NM_012325 | 5124.385  | 5190.334  | NM_017525 | 51700.496 | 56714.32  |
| NM_005860 | 2028.916 | 1949.818 | NM_007341 | 1611.799  | 1476.002  | NM_016032 | 8896.535  | 10861.361 |
| AF095288  | 12876.3  | 9899.174 | NM_016505 | 2451.78   | 3335.853  | NM_014324 | 55773.59  | 57658.711 |
| AK025116  | 514.133  | 392.371  | NM_006455 | 26619.236 | 20757.531 | NM_001687 | 31665.252 | 45035.992 |
| AF130114  | 379.635  | 346.372  | AK026062  | 7145.785  | 6565.478  | AK026374  | 3396.76   | 3200.843  |
| AF090895  | 763.078  | 744.248  | AF047002  | 47753.41  | 45465.652 | NM_001169 | 2561.509  | 3534.358  |
| NM_005610 | 6862.32  | 7083.104 | AL050082  | 5334.406  | 5855.477  | AK024648  | 6782.622  | 7435.599  |
| AL133651  | 2540.601 | 1869.734 | NM_006623 | 62724.152 | 55616.316 | NM_000715 | 654.841   | 809.35    |
| AB014532  | 1560.448 | 1812.007 | NM_016585 | 49594.371 | 51692.637 | NM_003455 | 6810.873  | 7725.884  |
| NM_003475 | 1523.987 | 1005.085 | NM_003135 | 11761.935 | 11958.383 | AB032526  | 767.815   | 606.997   |
| BE275227  | 529.16   | 640.935  | Z36788    | 1944.191  | 2079.146  | AL354615  | 3339.732  | 2565.486  |
| NM_016237 | 2225.344 | 3584.66  | NM_018477 | 8125.806  | 6506.544  | NM_013345 | 46373.469 | 46671.891 |

|           |          |          |           |           |           |           |           |           |
|-----------|----------|----------|-----------|-----------|-----------|-----------|-----------|-----------|
| NM_004924 | 2181.928 | 1879.261 | U20536    | 3385.55   | 4680.021  | NM_003705 | 4175.065  | 2959.281  |
| NM_00179E | 2991.069 | 2083.122 | AI298534  | 1904.124  | 1594.438  | NM_006861 | 3163.176  | 2862.301  |
| NM_001211 | 2890.455 | 2803.574 | AW167715  | 1425.774  | 1324.242  | NM_005829 | 8421.674  | 6226.808  |
| NM_006505 | 511.817  | 572.792  | AA424735  | 3368.997  | 4342.649  | NM_000466 | 3333.49   | 3058.566  |
| AB033050  | 1637.941 | 1747.835 | U78294    | 7405.436  | 9327.576  | NM_015544 | 3526.265  | 4711.959  |
| NM_00435E | 6841.843 | 7899.535 | AA171613  | 685.039   | 699.382   | NM_01590E | 33718.172 | 21645.842 |
| BC015022  | 1779.333 | 2022.382 | BI760394  | 11813.076 | 10144.261 | NM_00089E | 1677.872  | 1274.975  |
| NM_006697 | 6663.912 | 6245.502 | AA555216  | 940.356   | 809.473   | AB040672  | 4135.994  | 4408.064  |
| M19182    | 1101.185 | 909.635  | U09117    | 27614.271 | 27437.982 | NM_002192 | 3181.5    | 4461.307  |
| AK025707  | 1910.923 | 1869.744 | M21054    | 961.583   | 950.618   | NM_005491 | 11932.629 | 15830.045 |
| NM_00240E | 3924.033 | 3686.404 | M18468    | 1461.531  | 1297.057  | NM_00386E | 3495.999  | 4696.87   |
| U87169    | 2245.221 | 2362.95  | H66070    | 4727.454  | 4438.226  | AK025599  | 6513.834  | 8819.893  |
| NM_002073 | 510.283  | 510.013  | AA164741  | 14530.426 | 12310.515 | X63417    | 3010.865  | 3094.789  |
| NM_00174E | 778.885  | 612.646  | AI189375  | 2164.615  | 1850.725  | S94539    | 35339.434 | 44640.676 |
| NM_003291 | 1836.03  | 1388.279 | AI978885  | 6166.917  | 4985.418  | NM_006402 | 4580.523  | 4813.487  |
| AK022950  | 2831.968 | 2823.848 | AK054960  | 25103.355 | 22154.145 | NM_00578E | 3124.375  | 2764.343  |
| S75755    | 1117.606 | 1592.542 | L15344    | 6954.471  | 6489.644  | NM_01824E | 10222.951 | 8517.519  |
| AB014576  | 5269.146 | 6653.667 | NM_01447C | 1343.058  | 1136.46   | AK001695  | 10196.369 | 6138.633  |
| NM_019044 | 2593.892 | 2776.48  | NM_00166E | 32677.695 | 22927.537 | NM_01788E | 2846.428  | 3273.306  |
| AF174601  | 1957.661 | 1660.731 | NM_001831 | 1171.406  | 1416.453  | NM_006252 | 1920.778  | 1860.222  |
| AF279865  | 916.887  | 959.838  | NM_01458E | 7594.834  | 8188.715  | NM_001721 | 1694.574  | 1950.151  |
| NM_01470C | 484.159  | 848.478  | NM_01436E | 13586.364 | 12415.664 | NM_014397 | 3091.542  | 3106.789  |
| NM_014714 | 319.796  | 525.837  | NM_000923 | 1102.891  | 1428.901  | AB023182  | 4851.094  | 4471.801  |
| NM_005687 | 6464.421 | 5375.631 | NM_006453 | 2929.474  | 3196.661  | NM_003607 | 6635.06   | 3874.283  |
| NM_005983 | 8199.948 | 6477.832 | NM_01809E | 2554.34   | 2011.46   | NM_00657E | 3549.344  | 3753.18   |
| NM_017652 | 1411.275 | 1416.594 | AL390078  | 1793.142  | 1746.677  | NM_013254 | 5814.524  | 4220.348  |
| X59268    | 4931.807 | 4923.398 | NM_00403E | 3562.699  | 3145.002  | NM_000437 | 24373.535 | 19893.6   |
| D70832    | 27464.3  | 27622.66 | NM_01598E | 6385.626  | 7064.208  | AB046819  | 10848.744 | 9613.947  |
| NM_00142E | 3728.82  | 3331.814 | NM_00654E | 1764.125  | 1245.167  | NM_00609C | 10056.771 | 9533.636  |
| AK026980  | 816.973  | 1002.564 | NM_01495E | 4546.285  | 3473.374  | NM_00290C | 8095.182  | 7623.964  |
| NM_02036E | 1671.307 | 1661.46  | NM_003992 | 8575.879  | 7309.972  | NM_006851 | 1866.575  | 2687.886  |
| AF024708  | 8429.659 | 8265.312 | AF279265  | 5695.175  | 4554.017  | AK001560  | 1264.879  | 2075.214  |
| NM_006467 | 1584.048 | 1111.385 | NM_005213 | 4983.517  | 2390.572  | AB001328  | 1376.611  | 1695.872  |
| NM_01756E | 3084.335 | 2914.741 | AB040914  | 2533.545  | 1990.638  | NM_00094E | 562.081   | 672.692   |
| NM_006582 | 1324.279 | 994.536  | NM_002997 | 12175.203 | 9681.583  | H99588    | 1536.599  | 1405.024  |
| AB033019  | 924.592  | 941.463  | NM_00237E | 28629.582 | 27808.936 | X00588    | 1603.882  | 1637.902  |
| NM_001452 | 215.167  | 211.298  | AB007929  | 8009.937  | 7549.295  | AI359037  | 47007.168 | 43849.652 |
| NM_006162 | 232.125  | 311.204  | NM_00457E | 11663.902 | 10066.974 | BI754285  | 966.334   | 946.989   |
| NM_014764 | 5666.583 | 6064.091 | AA203126  | 4316.392  | 4639.733  | X15998    | 1712.439  | 2421.883  |
| NM_01807E | 1708.147 | 1306.332 | Z50169    | 1487.486  | 1702.824  | M76482    | 621.319   | 830.497   |
| NM_00708C | 11265.4  | 11889.21 | AB043997  | 1819.79   | 2417.91   | X17519    | 33992.965 | 21891.709 |
| AK026912  | 1393.815 | 1781.413 | NM_004853 | 10917.559 | 10892.689 | NM_001883 | 1988.983  | 1743.393  |
| AK023531  | 1178.995 | 1356.889 | NM_001494 | 21577.857 | 24062.018 | NM_00462E | 3559.436  | 2893.584  |
| AB011128  | 6918.493 | 6756.82  | NM_017707 | 1316.375  | 1356.732  | L31785    | 2884.188  | 1985.728  |
| AK026742  | 787.601  | 800.432  | NM_00420E | 6056.767  | 6570.266  | H-M 69043 | 6751.229  | 5705.743  |
| AK025074  | 2212.606 | 2297.707 | NM_004603 | 21601.357 | 21269.314 | AF077374  | 2186.562  | 2318.682  |
| NM_000303 | 2352.271 | 2604.173 | AK022849  | 5432.526  | 5164.444  | U43901    | 1585.181  | 1602.018  |
| X78712    | 754.781  | 857.262  | AF040964  | 11991.945 | 9837.245  | X59065    | 638.713   | 871.948   |
| NM_001497 | 664.753  | 548.231  | NM_00193E | 8442.416  | 7520.566  | M59828    | 9249.841  | 11036.695 |
| NM_00413C | 1665.168 | 1740.947 | NM_00327E | 25740.816 | 23350.895 | NM_016134 | 1178.343  | 1129.561  |
| NM_00634E | 530.697  | 555.085  | AB014599  | 8809.592  | 6476.146  | AJ010482  | 3801.572  | 3718.49   |
| AF067972  | 6112.116 | 4795.026 | NM_004393 | 1563.747  | 1215.121  | NM_00544E | 17009.414 | 12753.828 |
| NM_00495E | 904.269  | 1014.419 | AB018345  | 1307.081  | 1541.829  | NM_01489E | 3304.197  | 4843.483  |

|           |          |          |           |           |           |           |           |           |
|-----------|----------|----------|-----------|-----------|-----------|-----------|-----------|-----------|
| D87076    | 651.589  | 614.366  | NM_005832 | 1590.31   | 1385.825  | NM_003630 | 8173.058  | 10304.72  |
| NM_014149 | 103.299  | 162.537  | AW407841  | 2700.628  | 2217.885  | NM_000046 | 3070.408  | 3637.047  |
| AB020635  | 1252.776 | 1639.348 | U15197    | 666.16    | 748.085   | NM_003219 | 1705.677  | 2080.838  |
| NM_006515 | 500.297  | 463.578  | AL050082  | 5053.718  | 6936.031  | NM_006709 | 4255.037  | 4947.063  |
| NM_005224 | 1052.515 | 850.876  | NM_006623 | 58317.367 | 60586.551 | NM_000612 | 13618.171 | 14713.148 |
| X65231    | 36512.46 | 38587.59 | NM_016588 | 43710.227 | 51534.637 | NM_004257 | 21095.787 | 22814.32  |
| NM_002908 | 1982.296 | 2045.223 | NM_003135 | 10786.744 | 13023.563 | NM_002844 | 8198.598  | 6474.056  |
| AF205632  | 1684.813 | 1647.432 | NM_000137 | 4894.196  | 5155.374  | NM_000683 | 1799.719  | 1442.777  |
| NM_005378 | 2112.405 | 2688.17  | NM_012102 | 5000.586  | 4641.03   | NM_003629 | 3490.991  | 3147.919  |
| NM_002397 | 353.819  | 374.143  | NM_005017 | 36412.672 | 37496.18  | NM_005901 | 15547.148 | 14201.794 |
| AF000672  | 474.674  | 689.199  | AF163572  | 22110.76  | 21832.07  | NM_004248 | 1578.39   | 1588.269  |
| AK002195  | 365.63   | 621.161  | NM_000897 | 5345.525  | 4998.648  | NM_001313 | 852.555   | 716.187   |
| AF086128  | 338.198  | 638.44   | NM_000487 | 1427.977  | 1460.038  | NM_002362 | 1441.817  | 1278.416  |
| AK026099  | 452.026  | 155.685  | NM_006411 | 29133.836 | 26726.328 | NM_004796 | 598.177   | 764.668   |
| AK022850  | 421.401  | 478.559  | NM_014182 | 4670.171  | 4391.113  | NM_000435 | 3866.379  | 4234.609  |
| NM_016490 | 122.871  | 184.719  | NM_000492 | 14110.739 | 13853.804 | NM_001842 | 15707.132 | 15575.841 |
| AF038193  | 331.318  | 308.56   | NM_012089 | 3360.902  | 2566.851  | AB017169  | 827.372   | 799.407   |
| AL137498  | 2934.59  | 2737.998 | AK024382  | 798.431   | 331.159   | AL080170  | 4054.633  | 3641.606  |
| AK024289  | 319.806  | 365.162  | NM_001170 | 10861.741 | 10843.709 | AB039903  | 7042.505  | 7666.764  |
| S66168    | 438.151  | 483.806  | AL137716  | 1607.962  | 1227.072  | NM_000542 | 12848.383 | 13644.788 |
| AF131837  | 612.873  | 331.813  | NM_004696 | 2517.091  | 1940.461  | NM_003705 | 4760.301  | 4807.564  |
| AK001942  | 548.354  | 319.305  | NM_014342 | 4295.616  | 5578.953  | NM_006861 | 3150.448  | 3174.587  |
| NM_003851 | 2165.172 | 2001.213 | AK054960  | 21837.541 | 23926.322 | NM_005829 | 5874.605  | 6432.344  |
| U79244    | 267.494  | 272.832  | L15344    | 5802.641  | 7254.936  | NM_000466 | 3249.001  | 4762.531  |
| AK024150  | 585.36   | 621.786  | NM_014470 | 1141.899  | 1595.239  | AK023142  | 4164.216  | 4645.433  |
| AF070536  | 889.775  | 717.692  | NM_001665 | 30869.734 | 25623.906 | U61740    | 19834.363 | 22079.217 |
| AK022297  | 172.327  | 170.541  | NM_001773 | 1845.442  | 2261.518  | NM_006409 | 55669.758 | 56190.191 |
| U79300    | 301.799  | 213.319  | Z70704    | 2969.243  | 2918.09   | AB049054  | 6321.029  | 4456.386  |
| AK025151  | 1580.253 | 1976.355 | NM_014363 | 3994.694  | 3404.575  | NM_013227 | 3806.831  | 2121.572  |
| AK025550  | 3048.695 | 3068.285 | NM_000557 | 10362.231 | 8532.94   | Z83803    | 2219.051  | 983.423   |
| AF088076  | 5263.096 | 5377.389 | NM_003239 | 1783.826  | 2419.582  | AF027205  | 41783.887 | 39649.605 |
| AF086543  | 1996.804 | 2408.449 | NM_001375 | 11541.354 | 14326.943 | AF075012  | 1451.392  | 1597.64   |
| AB046797  | 710.663  | 500.317  | NM_002312 | 6328.646  | 5263.189  | NM_001570 | 1169.068  | 1801.078  |
| AK002098  | 763.206  | 723.986  | M20699    | 5227.868  | 4429.905  | NM_015658 | 932.336   | 968.711   |
| AK025156  | 13616.76 | 11087.27 | NM_004774 | 10857.661 | 9645.025  | NM_000589 | 4190.063  | 3862.423  |
| AK022116  | 496.434  | 469.529  | NM_016937 | 7549.032  | 5679.501  | NM_016546 | 16407.303 | 16230.813 |
| AF026526  | 1630.694 | 1434.923 | NM_002690 | 12061.988 | 12669.778 | AF309653  | 1787.267  | 1875.14   |
| AK026207  | 6449.003 | 3864.407 | NM_012328 | 5156.298  | 5176.639  | NM_002620 | 19194.494 | 23721.789 |
| AK024984  | 698.116  | 547.332  | NM_007341 | 1621.49   | 1408.13   | S79267    | 1287.493  | 1218.292  |
| AL110236  | 403.99   | 409.604  | NM_016508 | 2269.899  | 3401.484  | NM_001816 | 1089.172  | 1140.004  |
| AF085955  | 298.361  | 428.865  | NM_006456 | 27973.281 | 21002.012 | NM_003784 | 53509.641 | 52842.102 |
| AF075106  | 2410.817 | 2078.748 | AK026062  | 8306.313  | 6692.503  | NM_000195 | 29274.658 | 30119.623 |
| AK023339  | 1694.627 | 1512.301 | AF047002  | 56055.32  | 48127.398 | NM_006575 | 4378.809  | 3853.079  |
| AF086008  | 566.664  | 351.23   | AB040914  | 1859.903  | 1655.936  | NM_013254 | 4812.305  | 3764.329  |
| AF087970  | 661.776  | 446.821  | NM_002997 | 9204.104  | 8312.52   | NM_000437 | 21051.891 | 20244.15  |
| AF086029  | 768.476  | 832.137  | NM_002379 | 25067.658 | 25183.352 | AB046819  | 8577.573  | 11215.914 |
| AF075115  | 256.699  | 252.06   | AB007929  | 6299.527  | 7876.388  | NM_002900 | 10801.161 | 15672.112 |
| U05597    | 332.669  | 327.179  | NM_004579 | 9461.507  | 9561.995  | NM_004910 | 3005.893  | 5276.125  |
| AK021668  | 13823.99 | 12986.43 | AA203126  | 3186.408  | 3847.892  | AB013452  | 1539.333  | 1592.806  |
| AF086148  | 4523.938 | 4081.667 | L12347    | 11769.974 | 13007.873 | M93107    | 7754.453  | 6849.542  |
| NM_018363 | 1332.764 | 1142.017 | NM_001622 | 5980.313  | 5794.193  | BC001479  | 8055.166  | 7211.486  |
| AJ245433  | 4163.372 | 3453.399 | Z36788    | 2595.021  | 2650.357  | NM_002461 | 42872.621 | 42249.711 |
| AK021942  | 27342.92 | 25764.85 | NM_018477 | 8218.36   | 6151.361  | AB032986  | 56836.035 | 55576.918 |

|           |          |          |           |           |           |           |           |           |
|-----------|----------|----------|-----------|-----------|-----------|-----------|-----------|-----------|
| NM_014127 | 889.278  | 831.772  | U20536    | 4082.322  | 3628.05   | NM_017528 | 59742.563 | 56939.676 |
| AL360187  | 348.969  | 393.423  | AI298534  | 1707.279  | 2153.511  | NM_014324 | 48567.129 | 53530.066 |
| AK021878  | 105.53   | 214.072  | R71691    | 1615.899  | 2448.13   | NM_001687 | 28776.639 | 30513.99  |
| AK021817  | 410.782  | 448.03   | AW167715  | 1126.786  | 1625.905  | AK026374  | 3529.038  | 3257.335  |
| AL080103  | 418.256  | 357.773  | AA424735  | 4318.999  | 3954.75   | NM_001169 | 2358.02   | 3686.232  |
| AK023217  | 1708.356 | 1866.996 | U78294    | 8397.746  | 7156.872  | AK024648  | 7343.623  | 9627.276  |
| AF090902  | 1497.507 | 1488.711 | BI760394  | 12063.63  | 11827.054 | NM_000719 | 694.916   | 825.153   |
| AF119887  | 589.016  | 486.691  | AA555216  | 1491.098  | 1751.833  | NM_003459 | 7024.284  | 9268.893  |
| AK091038  | 709.736  | 613.995  | U09117    | 30461.789 | 29037.912 | AB032526  | 707.546   | 864.602   |
| AK024193  | 1949.206 | 1574.402 | M21054    | 967.817   | 936.349   | NM_000171 | 1118.584  | 768.068   |
| NM_018543 | 255.946  | 316.717  | M18468    | 1578.461  | 1379.489  | AL354615  | 4105.699  | 4056.437  |
| AK024438  | 2017.714 | 2093.235 | H66070    | 4414.921  | 4674.745  | NM_013349 | 50514.406 | 49562.801 |
| AK022482  | 425.447  | 421.666  | AA164741  | 15400.261 | 12080.113 | NM_016134 | 763.696   | 737.068   |
| AK023811  | 199.416  | 1732.294 | AI189375  | 2158.333  | 1800.354  | NM_000783 | 526.551   | 756.099   |
| AK022803  | 616.505  | 681.528  | AI978885  | 6711.498  | 5339.833  | NM_000896 | 1186.762  | 1691.568  |
| AK023517  | 634.13   | 747.046  | NM_004393 | 1276.5    | 1203.183  | AB040672  | 2306.276  | 2240.058  |
| AK023869  | 1936.109 | 2368.608 | AB018345  | 1224.667  | 1773.549  | NM_002192 | 2550.334  | 1519.902  |
| NM_017728 | 1199.451 | 1539.618 | NM_005832 | 1188.666  | 1700.391  | NM_005491 | 13361.978 | 19058.748 |
| U80772    | 299.059  | 593.901  | AW407841  | 2626.834  | 2538.222  | NM_003869 | 4293.153  | 6304.611  |
| NM_006189 | 299.312  | 389.649  | U15197    | 858.066   | 568.96    | AK025599  | 7733.546  | 8716.261  |
| AJ272177  | 655.864  | 626.018  | NM_001879 | 3217.715  | 2700.788  | X63417    | 2712.275  | 3192.192  |
| AK026402  | 7618.413 | 5461.694 | AF264014  | 11133.424 | 11695.65  | S94539    | 36209.984 | 46632.176 |
| AF111846  | 669.004  | 742.738  | L09098    | 420.59    | 554.889   | NM_006402 | 3993.488  | 3013.769  |
| M11948    | 60282.19 | 41830.05 | NM_004155 | 627.476   | 381.599   | NM_005785 | 3683.539  | 3242.717  |
| AK024618  | 860.113  | 690.061  | NM_001831 | 1331.029  | 1307.771  | NM_018248 | 9770.992  | 9200.699  |
| AL049969  | 683.3    | 669.627  | NM_014586 | 8159.156  | 7920.729  | AK001695  | 12593.229 | 8407.071  |
| NM_005220 | 382.763  | 549.637  | NM_014366 | 12516.468 | 10614.378 | NM_017886 | 2513.203  | 3489.246  |
| AK000470  | 379.345  | 344.125  | NM_000923 | 1277.407  | 833.278   | NM_006252 | 2160.413  | 2413.443  |
| NM_014566 | 284.808  | 300.337  | NM_006453 | 2469.489  | 1659.181  | NM_001721 | 1759.872  | 1547.377  |
| AK026366  | 25530.96 | 24227.37 | NM_018096 | 2356.322  | 1492.404  | NM_014397 | 4204.285  | 4263.403  |
| AK024229  | 5871.704 | 6905.243 | AL390078  | 1188.536  | 1298.89   | AB023182  | 5370.498  | 5861.444  |
| AK021824  | 151.16   | 256.477  | NM_004036 | 3251.414  | 3813.083  | NM_003607 | 7340.045  | 4378.212  |
| AK021467  | 208.745  | 248.33   | NM_015986 | 4851.121  | 5885.443  | AB017169  | 797.365   | 934.031   |
| NM_020371 | 509.684  | 627.393  | NM_006546 | 1461.938  | 1724.023  | AL080170  | 2805.643  | 2832.044  |
| AK022498  | 1944.893 | 1609.797 | NM_014959 | 4289.735  | 3576.616  | AB039903  | 5281.923  | 6087.653  |
| U84506    | 1658.636 | 1343.372 | NM_003992 | 8315.349  | 7726.304  | NM_000542 | 19080.094 | 22662.217 |
| U21556    | 23350.25 | 27071.98 | AF279265  | 5621.946  | 4016.532  | NM_006851 | 2003.122  | 1638.882  |
| AB002444  | 254.181  | 300.867  | NM_005213 | 5366.25   | 3163.728  | AK001560  | 2377.197  | 771.434   |
| AB002344  | 1928.486 | 1246.681 | NM_001170 | 9902.682  | 12786.815 | AB001328  | 1793.486  | 1370.085  |
| BF210352  | 938.921  | 942.085  | AL137716  | 1689.859  | 1660.95   | NM_000948 | 1124.377  | 969.487   |
| NM_006829 | 2151.091 | 2273.866 | NM_004696 | 1378.687  | 1419.554  | H99588    | 2364.738  | 1837.883  |
| NM_017669 | 7570.684 | 6487.293 | NM_014342 | 4182.141  | 5265.397  | X00588    | 1485.165  | 1298.664  |
| AK023760  | 1057.801 | 1566.754 | Z50169    | 1594.862  | 1505.811  | AI359037  | 53952.98  | 53676.637 |
| X98415    | 24717.39 | 28133.57 | AB043997  | 1619.955  | 1436.614  | X15998    | 1540.004  | 1318.659  |
| AK024205  | 696.191  | 717.675  | NM_004853 | 10650.899 | 8119.23   | M76482    | 710.9     | 665.699   |
| AF086034  | 4641.718 | 3011.059 | NM_001494 | 18412.449 | 17184.678 | X17519    | 38757.582 | 25115.662 |
| AK000174  | 574.974  | 633.504  | NM_017707 | 1352.984  | 1002.226  | NM_001883 | 1742.222  | 2134.097  |
| AF130071  | 277.806  | 291.463  | NM_004206 | 6252.791  | 6108.315  | NM_004628 | 3663.041  | 3674.51   |
| AK022887  | 770.197  | 596.048  | NM_004603 | 13062.208 | 13466.188 | L31785    | 3681.869  | 2768.424  |
| AK000745  | 5903.096 | 6027.98  | AK022849  | 4432.371  | 5193.87   | H-M 69043 | 8436.404  | 8309.873  |
| NM_005299 | 444.313  | 528.816  | AF040964  | 11038.438 | 12206.999 | U43901    | 1765.994  | 2630.879  |
| NM_015901 | 1091.632 | 775.042  | NM_001939 | 6528.434  | 7218.112  | X59065    | 1248.064  | 800.341   |
| AF130065  | 82.531   | 141.006  | NM_003279 | 15244.091 | 14695.227 | M59828    | 11523.484 | 13245.048 |

|           |          |          |           |           |           |           |           |           |
|-----------|----------|----------|-----------|-----------|-----------|-----------|-----------|-----------|
| NM_006365 | 107.741  | 224.76   | NM_012328 | 4576.933  | 4944.386  | AF309653  | 1283.965  | 1394.303  |
| AF093744  | 1272.837 | 1285.51  | NM_007341 | 1600.737  | 1424.67   | NM_002620 | 15467.479 | 15293.766 |
| NM_018687 | 2325.279 | 2999.565 | NM_016508 | 2444.198  | 3180.93   | S79267    | 660.836   | 1395.595  |
| M57417    | 3481.699 | 3857.79  | NM_006456 | 18094.91  | 17472.238 | NM_001816 | 1197.893  | 974.957   |
| NM_020524 | 6682.348 | 7470.49  | AK026062  | 6561.803  | 6524.852  | NM_003784 | 53185.723 | 49672.078 |
| NM_001995 | 4981.842 | 4658.538 | AF047002  | 48346.691 | 45045.387 | NM_000195 | 30131.146 | 24853.475 |
| X64977    | 2714.665 | 2843.787 | AL050082  | 5118.581  | 5850.623  | NM_005445 | 15830.511 | 4716.553  |
| AF064851  | 579.965  | 315.22   | NM_006623 | 59900.281 | 51570.34  | NM_014899 | 3839.025  | 4390.323  |
| NM_002602 | 3982.288 | 3707.328 | NM_016588 | 45770.773 | 39437.047 | NM_003630 | 9371.596  | 11978.443 |
| NM_016235 | 403.691  | 460.666  | NM_003135 | 10484.36  | 9654.926  | NM_000046 | 3500.169  | 3484.808  |
| X89672    | 515.838  | 699.77   | NM_000137 | 5987.194  | 5373.024  | NM_003219 | 1677.837  | 1815.778  |
| X91648    | 808.771  | 666.607  | NM_012102 | 6673.612  | 6154.784  | NM_006709 | 3985.465  | 5724.052  |
| AK026658  | 748.82   | 579.868  | NM_005017 | 24523.762 | 23403.893 | NM_002844 | 8174.531  | 4919.41   |
| AF282264  | 3072.044 | 3591.629 | AF163572  | 19848.359 | 20545.717 | NM_000683 | 1824.223  | 1550.682  |
| AF086322  | 1451.93  | 1263.376 | NM_000897 | 2336.408  | 2096.877  | NM_003629 | 4458.395  | 3689.466  |
| Z70717    | 1120.264 | 1079.814 | NM_000487 | 1632.257  | 1201.944  | NM_005901 | 15901.989 | 15753.642 |
| AK024736  | 389.423  | 270.636  | NM_006411 | 19156.275 | 17637.98  | NM_004248 | 1973.116  | 1806.319  |
| X79308    | 869.57   | 994.39   | NM_014182 | 4279.978  | 4962.613  | NM_000959 | 855.776   | 580.896   |
| AF086476  | 491.199  | 354.479  | AB040884  | 726.397   | 1055.718  | NM_001313 | 856.802   | 971.249   |
| NM_017660 | 3638.538 | 3089.742 | NM_000492 | 13798.655 | 13992.89  | NM_019066 | 1209.571  | 598.83    |
| AB011151  | 1041.583 | 1568.788 | NM_012085 | 2657.316  | 2634.575  | NM_000435 | 4069.386  | 4344.331  |
| U92995    | 1972.417 | 1975.954 | AJ272057  | 11428.229 | 10800.989 | NM_001842 | 18005.191 | 18656.52  |
| Z70769    | 190.799  | 381.254  | NM_004402 | 1360.272  | 1123.355  | NM_000719 | 464.787   | 589.279   |
| NM_007106 | 1793.338 | 1440.915 | AK024216  | 40116.605 | 40678.695 | NM_003459 | 4173.79   | 5347.331  |
| AL137555  | 845.417  | 986.373  | Y16752    | 9749.175  | 9148.157  | NM_000171 | 626.4     | 499.515   |
| AL133017  | 1226.714 | 902.251  | NM_014694 | 2584.923  | 2221.839  | AL354615  | 3524.908  | 3842.119  |
| CY3Cy5    | 8619.342 | 410.544  | NM_020156 | 4767.166  | 4575.121  | NM_013349 | 47845.742 | 33222.707 |
|           | 43.48    | 148.349  | NM_014830 | 4452.697  | 2969.068  | NM_003705 | 5449.887  | 5732.152  |
| X00588    | 488.238  | 587.477  | AF355402  | 4819.51   | 4800.735  | NM_006861 | 3531.992  | 4444.614  |
| AI359037  | 32844.61 | 29689.3  | AK000407  | 8215.013  | 5782.911  | NM_005829 | 5359.303  | 6327.999  |
| BI754285  | 488.364  | 523.184  | NM_014470 | 1105.349  | 1089.964  | NM_000466 | 3051.705  | 5316.594  |
| M76482    | 906.844  | 777.486  | NM_001665 | 29828.973 | 19880.701 | NM_015544 | 3468.792  | 8106.894  |
| X17519    | 25608.63 | 16995.39 | AF097645  | 1282.476  | 699.899   | NM_015908 | 32416.283 | 45173.75  |
| NM_001883 | 199.165  | 325.23   | NM_001773 | 1262.49   | 1173.103  | AK023142  | 3244.906  | 2445.393  |
| NM_004628 | 2089.377 | 1506.16  | Z70704    | 2262.605  | 2351.767  | U61740    | 18539.256 | 16472.135 |
| L31785    | 1894.126 | 1867.307 | NM_014363 | 4161.434  | 3762.299  | NM_006409 | 54636.066 | 55780.883 |
| H-M 69043 | 896.675  | 538.347  | NM_000557 | 8318.566  | 7012.682  | AB049054  | 5422.102  | 5224.219  |
| AF077374  | 510.98   | 843.46   | NM_003239 | 1546.274  | 1741.899  | NM_015071 | 1516.611  | 1628.842  |
| U43901    | 1018.389 | 1121.916 | NM_001375 | 8975.739  | 9572.724  | NM_013227 | 2525.717  | 2728.961  |
| X59065    | 231.218  | 232.948  | NM_002312 | 6109.737  | 3386.6    | Z83803    | 866.253   | 1229.875  |
| M59828    | 5498.81  | 8490.931 | M20699    | 5071.539  | 4403.316  | AF027205  | 45978.313 | 54158.742 |
| NM_016134 | 348.13   | 431.932  | NM_004774 | 9332.689  | 8673.747  | AF075012  | 2399.521  | 2594.906  |
| SR2       | 35157.31 | 28572.05 | NM_016937 | 6479.314  | 7640.901  | NM_015658 | 1658.307  | 2183.804  |
| SR4       | 11875.91 | 8230.342 | NM_002690 | 13834.283 | 14191.148 | NM_000589 | 5113.763  | 5667.795  |
| SR6       | 2107.973 | 1492.485 | AB033086  | 860.873   | 386.225   | NM_016546 | 20721.674 | 21247.115 |
| SR8       | 4835.418 | 10311.52 | NM_018235 | 8091.174  | 7919.513  | NM_017886 | 1727.622  | 1562.141  |
| SR10      | 26842.11 | 6210.035 | U88892    | 2242.89   | 1914.972  | NM_006252 | 1501.532  | 1740.436  |
| CY3Cy5    | 7265.723 | 363.661  | AK023755  | 1584.536  | 1708.691  | NM_001721 | 893.312   | 896.661   |
| NM_000612 | 4619.634 | 4547.745 | NM_005725 | 4494.762  | 3325.692  | NM_014397 | 2816.002  | 2185.594  |
| NM_004257 | 9081.82  | 10077.08 | NM_012211 | 1596.138  | 1450.537  | AB023182  | 5950.002  | 5147.455  |
| NM_002844 | 4636.979 | 3175.086 | AB040877  | 11963.575 | 8704.71   | NM_003607 | 7684.038  | 5360.706  |
| NM_000683 | 148.742  | 271.069  | AB040927  | 2643.999  | 2368.474  | NM_006575 | 4164.021  | 4999.303  |
| NM_003625 | 2552.141 | 2500.461 | AK026737  | 6454.21   | 5530.173  | NM_013254 | 4138.461  | 5122.175  |

|           |          |          |           |           |           |           |           |           |
|-----------|----------|----------|-----------|-----------|-----------|-----------|-----------|-----------|
| NM_005901 | 10763.61 | 12189.78 | NM_000210 | 6602.482  | 5749.233  | NM_000437 | 20255.221 | 29006.707 |
| NM_004248 | 459.143  | 533.068  | NM_006289 | 5606.341  | 6047.359  | AB046819  | 7676.724  | 9596.486  |
| NM_001313 | 532.715  | 761.529  | NM_019067 | 4276.885  | 4450.884  | NM_006090 | 10324.224 | 14634.141 |
| NM_019066 | 64.921   | 268.669  | AF251025  | 1928.836  | 1646.444  | NM_002900 | 7617.151  | 5029.417  |
| NM_002362 | 615.557  | 800.754  | NM_015677 | 7977.53   | 8574.297  | NM_004910 | 1958.683  | 2110.87   |
| NM_004796 | 146.662  | 187.203  | NM_001772 | 10854.292 | 10221.728 | AB013452  | 1059.316  | 958.149   |
| NM_000435 | 209.864  | 423.045  | AB011087  | 2037.572  | 1269.706  | M93107    | 8219.27   | 7279.075  |
| NM_001842 | 132.901  | 342.395  | AF161341  | 6402.409  | 5191.884  | BC001479  | 10353.065 | 9779.528  |
| AB017169  | 211.369  | 318.005  | AJ249902  | 1843.164  | 2242.946  | NM_002461 | 43520.074 | 43450.789 |
| AL080170  | 1321.309 | 1401.629 | NM_004384 | 4183.827  | 3580.446  | NM_005771 | 1074.178  | 1096.595  |
| AB039903  | 2399.193 | 3291.978 | L05500    | 17971.063 | 16578.943 | AB032986  | 54670.168 | 49869.355 |
| NM_000542 | 1348.327 | 1571.735 | NM_012306 | 32419.869 | 29506.996 | NM_017528 | 58278.84  | 52516.941 |
| NM_014625 | 276.905  | 252.515  | AF222903  | 5078.079  | 5156.373  | NM_016032 | 11733.002 | 14869.253 |
| NM_006851 | 741.829  | 858.182  | NM_006226 | 5536.729  | 5558.932  | NM_014324 | 57027.191 | 54004.375 |
| AK001560  | 412.82   | 338.362  | L10374    | 12106.379 | 10992.713 | NM_001687 | 35149.957 | 42609.32  |
| AB001328  | 204.702  | 201.485  | AB016902  | 4434.929  | 3669.938  | AK026374  | 5097.979  | 4367.853  |
| NM_000948 | 338.706  | 377.041  | AF272378  | 53944.117 | 53842.164 | NM_001169 | 3739.664  | 4195.164  |
| H99588    | 750.716  | 568.484  | NM_000249 | 6296.582  | 6221.348  | AK024648  | 8589.419  | 11479.2   |
| AK022600  | 272.625  | 343.878  | NM_014310 | 909.959   | 881.778   | NM_000795 | 1412.261  | 1119.68   |
| AK023142  | 2769.613 | 2175.417 | NM_005860 | 15650.495 | 13187.022 | AB037761  | 32745.531 | 26772.35  |
| U61740    | 5285.423 | 4947.631 | AF095288  | 45020.582 | 49378.105 | NM_014008 | 52562.801 | 54633.336 |
| NM_006409 | 42654.98 | 40129.2  | AK025116  | 746.815   | 1097.402  | NM_014731 | 1660.941  | 2359.66   |
| AB049054  | 2815.21  | 2814.366 | AK026271  | 26429.781 | 42018.18  | AF035191  | 28022.498 | 35994.172 |
| NM_015071 | 935.227  | 1071.988 | NM_001799 | 9731.44   | 13256.271 | NM_004058 | 2205.86   | 2700.945  |
| NM_013227 | 1032.606 | 1189.886 | AF090895  | 1131.447  | 987.629   | NM_004527 | 1352.7    | 1946.838  |
| Z83803    | 817.963  | 682.839  | NM_005610 | 8251.655  | 6297.548  | NM_012062 | 14186.623 | 15109.318 |
| AF027205  | 24265.99 | 28582.31 | AL133651  | 3154.042  | 3170.275  | AK026717  | 890.829   | 1161.524  |
| AF075012  | 722.597  | 679.122  | AB014532  | 8246.091  | 7070.922  | AJ010482  | 3249.466  | 2131.761  |
| NM_001570 | 622.757  | 769.655  | NM_003478 | 2649.745  | 3118.016  | AB040672  | 1991.291  | 1643.58   |
| NM_015658 | 810.857  | 652.857  | BE275227  | 1190.303  | 1298.568  | NM_002192 | 1768.714  | 1466.957  |
| NM_000589 | 886.562  | 823.706  | NM_016237 | 9459.115  | 6516.388  | NM_005491 | 14465.977 | 15053.243 |
| NM_016546 | 8691.251 | 8757.404 | NM_004924 | 4703.918  | 4909.48   | NM_003869 | 3886.953  | 3310.8    |
| NM_002620 | 2269.409 | 2251.661 | NM_001798 | 8887.024  | 15029.46  | AK025599  | 8502.343  | 9443.31   |
| S79267    | 230.389  | 351.553  | NM_001211 | 10054.093 | 11735.218 | X63417    | 2586.249  | 2609.103  |
| NM_001816 | 225.579  | 309.976  | NM_006505 | 1538.225  | 1252.945  | S94539    | 30276.773 | 36933.168 |
| NM_003784 | 23531.75 | 23733.31 | AB033050  | 2842.34   | 2474.822  | NM_006402 | 5212.232  | 4381.479  |
| NM_000195 | 4795.496 | 4728.849 | NM_004356 | 20315.68  | 19609.725 | NM_005785 | 4197.354  | 3934.055  |
| NM_005445 | 7382.286 | 4358.776 | NM_001855 | 685.451   | 1233.224  | NM_018248 | 11670.594 | 10669.089 |
| NM_014899 | 1855.725 | 1845.505 | BC015022  | 5351.751  | 6050.711  | AK001695  | 12666.988 | 9252.767  |
| NM_003630 | 5032.843 | 4802.848 | NM_006697 | 12991.485 | 12777.662 | AB040898  | 1191.045  | 1831.092  |
| NM_000046 | 2424.458 | 2378.717 | M19182    | 1662.663  | 1720.863  | AB031547  | 1761.881  | 1900.161  |
| NM_003219 | 399.081  | 486.359  | AK025707  | 2784.495  | 3429.305  | NM_003970 | 4643.188  | 4291.271  |
| NM_006709 | 1130.768 | 1247.082 | NM_002406 | 39304.957 | 45383.738 | AK022496  | 1557.266  | 1479.27   |
| NM_004910 | 1228.888 | 1592.915 | U87169    | 2856.41   | 2678.477  | AB042636  | 1422.804  | 1648.156  |
| AB013452  | 558.88   | 905.869  | NM_002073 | 2222.275  | 2122.848  | NM_002883 | 7105.865  | 8626.481  |
| M93107    | 2263.036 | 3252.777 | AF090327  | 1609.208  | 2181.461  | NM_019012 | 2862.143  | 4292.998  |
| NM_005771 | 389.348  | 562.221  | NM_003291 | 5761.73   | 4982.37   | NM_000141 | 680.923   | 1126.75   |
| AB032986  | 43894.68 | 37568.21 | AK022950  | 3880.717  | 2674.033  | NM_016150 | 2392.301  | 1097.669  |
| NM_017528 | 26625.95 | 27979.74 | S75755    | 6798.764  | 5338.214  | AL137452  | 3241.901  | 2574.957  |
| NM_016032 | 2527.883 | 3251.965 | AF176518  | 1914.081  | 1765.954  | NM_004312 | 39597.422 | 37335.039 |
| NM_014324 | 34561.83 | 35503.82 | AB014576  | 24509.334 | 23332.27  | NM_001347 | 7561.494  | 6907.204  |
| NM_001687 | 18160.12 | 18753.79 | NM_019044 | 7715.849  | 7609.363  | AK024549  | 17924.086 | 18158.844 |
| AK026374  | 1588.51  | 1239.322 | AK000145  | 993.657   | 963.875   | NM_006338 | 7744.312  | 8597.233  |



|           |          |          |           |           |           |           |           |           |
|-----------|----------|----------|-----------|-----------|-----------|-----------|-----------|-----------|
| NM_001169 | 1255.467 | 1228.772 | AF174601  | 6084.245  | 5780.259  | NM_007164 | 7494.925  | 8044.466  |
| AK024648  | 2487.669 | 3527.775 | AF279865  | 1162.3    | 1314.683  | NM_000261 | 2669.14   | 3084.036  |
| NM_003459 | 2092.234 | 2808.324 | NM_014700 | 1982.721  | 1837.149  | NM_002606 | 1967.282  | 2200.84   |
| AB032526  | 78.914   | 85.436   | NM_014714 | 1390.722  | 1350.023  | NM_002570 | 3279.211  | 2841.854  |
| AL354615  | 2071.708 | 2680.607 | NM_005687 | 10008.54  | 15714.731 | NM_003183 | 5252.04   | 5957.242  |
| NM_013349 | 13477.96 | 13870.41 | NM_005983 | 12001.339 | 15282.258 | NM_003585 | 779.389   | 1136.488  |
| NM_003705 | 956.935  | 1050.151 | NM_017652 | 15769.359 | 12454.484 | NM_019851 | 3076.306  | 3637.431  |
| NM_006861 | 1797.691 | 1733.925 | X59268    | 8747.423  | 9348.807  | NM_003238 | 816.166   | 717.836   |
| NM_005829 | 4651.201 | 3997.271 | D70832    | 53636.805 | 52861.098 | NM_018367 | 2838.56   | 2882.879  |
| NM_000466 | 2272.658 | 2574.754 | NM_001429 | 10593.751 | 9211.414  | NM_001363 | 15280.336 | 18353.537 |
| NM_015544 | 1371.948 | 3362.129 | M61870    | 800.015   | 796.737   | NM_014096 | 22335.273 | 27448.385 |
| NM_015908 | 14176.66 | 13680.09 | NM_017566 | 7755.239  | 6569.265  | NM_005706 | 6187.717  | 7569.835  |
| NM_000896 | 331.765  | 272.749  | NM_006582 | 2040.179  | 1666.974  | NM_001261 | 11034.443 | 12366.819 |
| AB040672  | 339.702  | 208.148  | AB033019  | 8794.651  | 8988.763  | NM_001977 | 5399.759  | 3737.98   |
| NM_002192 | 346.607  | 538.779  | NM_001452 | 736.68    | 704.141   | NM_007219 | 5499.829  | 5156.983  |
| NM_005491 | 8150.298 | 9305.053 | NM_006162 | 1321.833  | 1304.688  | AK026854  | 3716.955  | 5579.04   |
| NM_003869 | 1222.806 | 1559.284 | NM_014764 | 11606.292 | 11129.463 | NM_001269 | 10984.798 | 8078.542  |
| AK025599  | 4813.996 | 5491.932 | NM_018078 | 2517.839  | 2255.354  | NM_002506 | 901.656   | 702.418   |
| X63417    | 1619.871 | 1651.688 | NM_016013 | 580.191   | 853.021   | NM_004906 | 11595.523 | 8455.813  |
| S94539    | 4973.239 | 6829.873 | NM_007080 | 27703.814 | 27400.176 | NM_012447 | 13935.365 | 11697.479 |
| S45570    | 86.103   | 102.359  | AK026912  | 4725.604  | 4545.767  | NM_006366 | 1196.527  | 929.368   |
| NM_006402 | 2428.575 | 2143.011 | AK023531  | 6924.978  | 5858.592  | AK027013  | 50819.145 | 42650.512 |
| NM_005785 | 981.698  | 863.669  | AB011128  | 14475.19  | 12476.981 | NM_001344 | 48915.863 | 50870.094 |
| NM_018248 | 2880.552 | 2655.731 | AK026742  | 1657.048  | 1450.154  | NM_018294 | 9451.132  | 8528.354  |
| AK001695  | 4168.567 | 3469.486 | AK025074  | 5754.836  | 5515.342  | AL389934  | 3908.815  | 4711.399  |
| NM_017886 | 1146.757 | 1270.67  | NM_000303 | 14584.997 | 13281.004 | NM_004330 | 12895.979 | 13266.368 |
| NM_006252 | 974.285  | 695.342  | NM_006242 | 1062.737  | 686.002   | AF151802  | 13487.662 | 13076.48  |
| NM_001721 | 636.934  | 707.35   | NM_006348 | 1603.124  | 2387.39   | AB006746  | 4380.988  | 3710.182  |
| NM_014397 | 1007.697 | 1306.314 | AF067972  | 28278.393 | 29222.053 | NM_006498 | 2365.266  | 2674.468  |
| AB023182  | 1949.033 | 1517.107 | NM_004958 | 1935.37   | 1896.416  | AB023233  | 3700.715  | 4070.137  |
| NM_003607 | 2048.412 | 1549.058 | D87076    | 1321.941  | 1216.148  | NM_004369 | 1796.459  | 1936.672  |
| NM_006575 | 1652.044 | 2141.684 | NM_014149 | 1878.032  | 1453.069  | NM_004370 | 1017.855  | 862.826   |
| NM_013254 | 3232.778 | 2272.737 | AB020635  | 3273.501  | 3019.156  | NM_018130 | 13964.467 | 14080.931 |
| NM_000437 | 9550.226 | 8130.877 | NM_006515 | 2139.253  | 1214.464  | AF085878  | 1338.923  | 1568.03   |
| AB046819  | 4728.041 | 4165.972 | NM_005224 | 1365.172  | 853.811   | AB006630  | 4548.8    | 3428.042  |
| NM_006090 | 6087.972 | 6944.826 | NM_012144 | 4019.242  | 3499.46   | NM_016155 | 3902.574  | 3597.014  |
| NM_002900 | 2917.467 | 2152.961 | X65231    | 53490.145 | 58400.66  | NM_001224 | 23181.303 | 25032.143 |
| NM_006851 | 848.131  | 1079.315 | NM_002908 | 3025.531  | 3094.798  | NM_017811 | 20789.006 | 24821.684 |
| AK001560  | 466.544  | 395.404  | AF205632  | 2829.703  | 2366.608  | NM_001569 | 3764.212  | 3686.829  |
| AB001328  | 526.777  | 352.577  | NM_005378 | 29954.135 | 26831.684 | NM_004131 | 831.871   | 857.17    |
| NM_000948 | 393.975  | 382.817  | NM_002397 | 757.888   | 550.637   | AK023284  | 3163.011  | 2152.657  |
| H99588    | 892.152  | 688.671  | AF000672  | 2116.672  | 1660.609  | AF106069  | 1067.105  | 827.73    |
| X00588    | 507.603  | 404.486  | AK002195  | 718.501   | 906.82    | NM_005101 | 29504.629 | 26396.961 |
| AI359037  | 22416.92 | 16956.28 | AF086128  | 797.257   | 997.315   | NM_004205 | 868.348   | 563.064   |
| J04513    | 57.674   | 226.706  | AK026099  | 597.715   | 799.223   | AF130060  | 18921.875 | 17128.035 |
| BI754285  | 175.539  | 299.154  | AK022850  | 4907.159  | 4502.709  | NM_007057 | 27905.613 | 30254.063 |
| X15998    | 298.061  | 186.19   | S66168    | 17657.209 | 15861.391 | NM_000177 | 3573.057  | 3876.884  |
| M76482    | 214.752  | 282.534  | AF131837  | 1312.389  | 1304.777  | NM_003387 | 15051.754 | 16442.4   |
| X17519    | 9168.202 | 6866.959 | AK001942  | 454.507   | 659.013   | U60665    | 2067.279  | 2634.198  |
| NM_001883 | 80.574   | 221.866  | NM_003851 | 14364.884 | 16956.553 | NM_005507 | 54862.066 | 58046.871 |
| NM_004628 | 1047.212 | 1272.213 | AK024150  | 2618.4    | 2664.608  | AL080133  | 8264.354  | 7149.608  |
| L31785    | 1639.279 | 1458.48  | AF070536  | 4383.092  | 5560.458  | AY014403  | 2085.167  | 2673.879  |
| H-M 69043 | 2568.99  | 2257.061 | AK022297  | 1175.009  | 1320.669  | NM_006912 | 8214.801  | 11177.045 |

|           |          |          |           |           |           |           |           |           |
|-----------|----------|----------|-----------|-----------|-----------|-----------|-----------|-----------|
| AF077374  | 181.767  | 322.951  | U79300    | 2708.813  | 2779.033  | X12534    | 5273.47   | 6396.12   |
| U43901    | 725.492  | 740.182  | AK025151  | 23138.771 | 20803.467 | X65665    | 735.613   | 481.06    |
| X59065    | 230.066  | 341.045  | AK025550  | 7897.725  | 8986.85   | NM_003112 | 3032.336  | 2096.751  |
| M59828    | 4785.514 | 7466.215 | AF088076  | 34782.512 | 40509.82  | NM_014323 | 7961.851  | 8489.916  |
| AJ010482  | 2068.168 | 1719.93  | AF086543  | 5499.353  | 5456.565  | NM_003205 | 6236.701  | 10435.558 |
| NM_005445 | 4673.934 | 3306.02  | AB046797  | 1411.621  | 1110.189  | AB002324  | 2124.834  | 3274.317  |
| NM_014895 | 1310.265 | 1406.7   | AK002098  | 3270.925  | 4782.178  | NM_002165 | 653.237   | 527.237   |
| NM_003630 | 2954.206 | 3720.626 | AK025156  | 40127.867 | 42631.617 | AK026231  | 1861.449  | 1256.843  |
| NM_000046 | 1566.557 | 2015.28  | AK022116  | 4990.682  | 7056.111  | NM_002140 | 28278.074 | 20647.885 |
| NM_003219 | 527.861  | 450.558  | AF026526  | 2364.819  | 3797.206  | NM_020143 | 8420.113  | 6833.439  |
| NM_006709 | 1122.211 | 1449.19  | AK026207  | 7363.865  | 11907.252 | NM_012469 | 6980.99   | 6697.705  |
| NM_000612 | 3817.323 | 2751.074 | AK024984  | 10512.586 | 9212.506  | NM_005131 | 11279.628 | 9231.229  |
| NM_004257 | 8122.889 | 7376.001 | AL110236  | 1081.018  | 2387.427  | NM_007056 | 5645.189  | 6013.676  |
| NM_002844 | 2521.638 | 2005.122 | AF085981  | 1337.983  | 1238.468  | AF083383  | 9106.202  | 9872.979  |
| NM_000683 | 253.242  | 326.477  | AF086008  | 3039.633  | 2960.81   | NM_006925 | 7280.708  | 11655.356 |
| NM_003629 | 2028.414 | 2435.456 | AF087970  | 1242.063  | 1455.616  | NM_004890 | 47030.754 | 52164.859 |
| NM_005901 | 6457.611 | 6409.776 | AF086029  | 2095.427  | 2044.738  | AK023181  | 9270.919  | 8576.284  |
| NM_004248 | 401.846  | 227.711  | AF075115  | 1096.134  | 1249.282  | NM_004294 | 5546.373  | 3866.178  |
| NM_001313 | 920.612  | 579.085  | U05597    | 1575.273  | 1721.993  | NM_005051 | 35235.629 | 32748.898 |
| NM_002362 | 241.341  | 404.765  | U52050    | 1508.517  | 1966.44   | NM_001968 | 46515.191 | 45880.738 |
| NM_004796 | 304.339  | 282.478  | U73799    | 2586.939  | 2742.811  | D17259    | 47558.328 | 52792.746 |
| NM_000435 | 354.867  | 356.578  | Z36826    | 715.202   | 587.645   | AF264627  | 36804.023 | 45457.313 |
| NM_001842 | 301.667  | 326.969  | AK021668  | 51928.574 | 51751.91  | AL133053  | 2243.636  | 1608.316  |
| AB017169  | 142.342  | 251.664  | AF086148  | 40873.199 | 37034.844 | NM_018142 | 10219.521 | 7621.737  |
| AL080170  | 792.542  | 926.872  | NM_018363 | 1147.175  | 1706.935  | NM_017653 | 10267.398 | 7487.443  |
| AB039903  | 2622.056 | 2646.588 | AJ245433  | 19909.244 | 23597.324 | AL109695  | 22388.059 | 29387.607 |
| NM_000542 | 1009.177 | 1404.702 | AK021942  | 46580.652 | 47427.82  | NM_002168 | 8344.141  | 9845.302  |
| NM_014625 | 256.256  | 219.048  | NM_014127 | 1677.834  | 1966.812  | AK027115  | 478.978   | 943.215   |
| NM_003705 | 1901.797 | 1889.718 | AL360187  | 1841.959  | 2653.745  | NM_004453 | 6000.46   | 4422.97   |
| NM_006861 | 1357.129 | 1606.745 | AK021878  | 969.648   | 880.743   | NM_018244 | 5516.161  | 4371.888  |
| NM_005829 | 2792.625 | 2514.503 | AK021817  | 2817.98   | 3447.613  | NM_002492 | 38834.777 | 39523.281 |
| NM_000466 | 1071.503 | 1470.601 | AL080103  | 1323.562  | 1470.499  | AB046855  | 2108.104  | 1906.142  |
| NM_015544 | 713.454  | 2536.3   | AK023217  | 3218.04   | 3186.335  | NM_005642 | 9929.267  | 11391.863 |
| NM_015908 | 10779.63 | 10503.26 | AK021883  | 933.362   | 345.192   | NM_018105 | 6981.263  | 3602.623  |
| AK022600  | 188.209  | 212.027  | AF090902  | 6621.947  | 6346.347  | AK023452  | 5501.77   | 5992.582  |
| AK023142  | 2308.053 | 1696.491 | AF119887  | 17742.432 | 15879.274 | AF155065  | 554.831   | 540.074   |
| U61740    | 3050.719 | 3762.958 | AK091038  | 1186.263  | 1512.363  | NM_000332 | 1415.156  | 1504.583  |
| NM_006409 | 19059.24 | 21987.56 | AK024193  | 2994.118  | 2905.478  | AK022215  | 16847.121 | 17918.314 |
| AB049054  | 1560.43  | 1420.311 | NM_018578 | 1521.689  | 2076.59   | U90305    | 718.251   | 708.139   |
| NM_015071 | 910.496  | 923.007  | NM_018543 | 881.248   | 917.476   | NM_001527 | 22723.883 | 16781.637 |
| NM_013227 | 148.65   | 410.498  | AK024438  | 24130.631 | 22522.783 | AK025269  | 9079.983  | 7140.649  |
| Z83803    | 528.172  | 325.146  | AK022482  | 2670.172  | 2514.345  | NM_001438 | 1019.373  | 1405.153  |
| AF027205  | 12951.32 | 16183.61 | AK023811  | 516.022   | 1022.213  | AB040971  | 2284.411  | 2534.781  |
| AF075012  | 412.89   | 432.79   | AK024135  | 1361.737  | 802.592   | NM_006562 | 4633.383  | 6958.47   |
| NM_001570 | 455.698  | 376.604  | AK022803  | 6221.059  | 6271.975  | AK024254  | 1788.141  | 1897.67   |
| NM_015658 | 720.329  | 522.219  | AK023517  | 3374.849  | 3255.259  | NM_018456 | 5221.856  | 3450.452  |
| NM_000589 | 1337.593 | 1412.54  | AK023869  | 8918.221  | 9445.682  | NM_004717 | 429.777   | 945.82    |
| NM_016546 | 5707.48  | 5066.459 | NM_017728 | 2329.605  | 2035.373  | AK002183  | 2109.661  | 3310.496  |
| AF309653  | 117.089  | 242.611  | U80772    | 1537.416  | 1360.543  | AL137304  | 5729.969  | 5467.591  |
| NM_002620 | 1049.905 | 1249.775 | NM_006189 | 1539.764  | 1345.232  | AL049274  | 1636.926  | 1360.953  |
| S79267    | 401.56   | 294.113  | AK026402  | 37909.762 | 33757.66  | NM_018279 | 7904.584  | 6378.248  |
| NM_001816 | 322.298  | 246.988  | AF111846  | 3184.693  | 3623.069  | AK026883  | 2552.709  | 3485.285  |
| NM_003784 | 30855.77 | 26306.97 | M11948    | 54227.113 | 56599.496 | NM_014350 | 23033.637 | 30171.48  |

|           |          |          |           |           |           |           |           |           |
|-----------|----------|----------|-----------|-----------|-----------|-----------|-----------|-----------|
| NM_000195 | 3191.374 | 3202.805 | AK024618  | 3154.059  | 3617.275  | U00925    | 17528.516 | 17019.75  |
| NM_006575 | 1608.212 | 1971.294 | AL049969  | 1457.436  | 1196.945  | AL390185  | 2073.183  | 2103.039  |
| NM_013254 | 3928.343 | 2710.538 | NM_005220 | 4218.221  | 3437.148  | AF086235  | 10214.319 | 11000.345 |
| NM_000437 | 9806.433 | 8600.555 | NM_014566 | 752.798   | 757.567   | AF143886  | 2205.727  | 3344.917  |
| AB046819  | 3066.554 | 3454.266 | AK021824  | 1046.301  | 1295.275  | AK025975  | 2279.643  | 2723.087  |
| NM_006090 | 5994.495 | 6624.553 | AK021467  | 10554.245 | 12773.215 | AK025583  | 52700.551 | 47129.363 |
| NM_002900 | 2435.32  | 2421.988 | NM_020371 | 2600.02   | 2494.015  | NM_014664 | 4882.688  | 5171.602  |
| NM_004910 | 654.479  | 1004.767 | AK022498  | 3167.025  | 3634.717  | AL109788  | 1189.776  | 1568.792  |
| AB013452  | 329.034  | 517.542  | U84506    | 3181.29   | 2920.019  | NM_014952 | 50984.359 | 51420.102 |
| M93107    | 2618.779 | 3616.166 | NM_006825 | 4547.741  | 4134.652  | AB037765  | 1959.49   | 2600.053  |
| BC001479  | 2032.21  | 2073.487 | NM_017665 | 22576.891 | 25793.91  | AK025068  | 5684.08   | 4891.877  |
| NM_002461 | 12807.36 | 12514.5  | AF147379  | 53973.133 | 46706.777 | AK026720  | 2809.611  | 2509.145  |
| NM_005771 | 248.804  | 261.676  | AK023760  | 5719.876  | 4164.088  | AL050197  | 8949.672  | 6125.359  |
| AB032986  | 12917.43 | 13230.67 | X98415    | 56292.117 | 50366.262 | AF085870  | 4964.692  | 5685.808  |
| NM_017525 | 17574.77 | 18897.87 | AK024205  | 3333.76   | 2810.538  | AL117580  | 8715.919  | 12793.187 |
| NM_016032 | 2077.976 | 1859.386 | AF086034  | 18918.512 | 25169.555 | AL110190  | 2633.405  | 3757.703  |
| NM_014324 | 21763.92 | 25855.28 | AK000174  | 1275.882  | 920.558   | AL117656  | 1093.804  | 1076.149  |
| NM_001687 | 10296.25 | 11119.17 | AF130071  | 1567.279  | 1630.821  | AJ001893  | 3685.358  | 4387.867  |
| AK026374  | 681.697  | 453.068  | AL390170  | 1190.563  | 1501.91   | NM_014819 | 15523.004 | 15484.626 |
| NM_001169 | 1591.055 | 1408.42  | AK022887  | 1687.645  | 1738.802  | NM_017609 | 510.641   | 1131.994  |
| AK024648  | 2479.803 | 3986.783 | AK000745  | 21650.922 | 24288.656 | AF086040  | 1500.473  | 1486.964  |
| NM_000719 | 99.77    | 215.03   | NM_005295 | 1685.531  | 1596.136  | AB032988  | 5703.272  | 5886.569  |
| NM_003455 | 1425.875 | 1525.8   | M57417    | 51128.637 | 45659.227 | AK023559  | 8383.486  | 8874.145  |
| AL354615  | 1532.781 | 1905.288 | NM_020524 | 18048.164 | 18927.949 | AB037859  | 60964.617 | 61055.473 |
| NM_013345 | 10525.02 | 12217.82 | NM_001995 | 7014.734  | 8688.422  | AL049233  | 2761.933  | 3063.62   |
| NM_016134 | 249.112  | 335.402  | X64977    | 2993.037  | 3288.245  | NM_017696 | 3855.916  | 3439.976  |
| AJ010482  | 1513.234 | 1312.202 | AF064851  | 1125.751  | 585.869   | AL050166  | 8452.804  | 8892.563  |
| NM_000783 | 159.787  | 146.782  | NM_002602 | 19956.559 | 15506.022 | AK026705  | 2202.842  | 2609.358  |
| NM_000896 | 202.958  | 407.333  | NM_016235 | 1887.393  | 1392.995  | NM_003602 | 1238.881  | 1931.236  |
| AB040672  | 79.306   | 164.94   | NM_003383 | 5305.522  | 9481.704  | AF009258  | 55441.434 | 52423.887 |
| NM_002192 | 448.705  | 479.887  | D17271    | 14930.985 | 15356.969 | AF009305  | 1875.021  | 2482.837  |
| NM_005491 | 5644.417 | 5532.122 | X91648    | 1751.488  | 1895.959  | AF009270  | 804.859   | 685.008   |
| NM_003865 | 878.725  | 961.662  | AK026658  | 1192.846  | 913.407   | AF009318  | 1822.138  | 1678.141  |
| AK025599  | 3658.082 | 3933.404 | AF282264  | 9078.58   | 9005.29   | AF090889  | 655.657   | 871.165   |
| X63417    | 1436.198 | 1471.082 | AF086322  | 5457.299  | 6513.497  | AK001085  | 1292.672  | 1533.893  |
| S94539    | 2646.607 | 3510.683 | Z70717    | 2971.432  | 3018.41   | AK001906  | 2508.795  | 3377.344  |
| NM_006402 | 2183.797 | 1472.652 | AK024736  | 1628.863  | 1812.483  | AK021528  | 1419.93   | 1727.441  |
| NM_005785 | 1414.978 | 1506.972 | X79308    | 2277.468  | 2804.187  | AK021746  | 2338.843  | 2428.841  |
| NM_018245 | 3434.506 | 3319.707 | U92995    | 8671.807  | 10359.816 | AK001136  | 1040.739  | 1093.958  |
| AK001695  | 3137.104 | 2112.206 | Z70769    | 1621.851  | 1981.019  | AK021617  | 571.302   | 1041.543  |
| NM_017886 | 559.545  | 650.958  | AL133017  | 2524.702  | 2882.243  | AK021810  | 1181.825  | 1374.346  |
| NM_006252 | 261.355  | 414.374  | CY3Cy5    | 2555.588  | 231.144   | AK025190  | 490.359   | 613.91    |
| NM_001721 | 432.524  | 455.606  | X00588    | 2623.333  | 4379.229  | AK025595  | 451.253   | 772.747   |
| NM_014397 | 344.248  | 256.947  | AI359037  | 40780.945 | 53161.305 | AK026743  | 350.898   | 613.378   |
| AB023182  | 383.496  | 367.422  | J04513    | 751.494   | 587.239   | AK025214  | 837.174   | 959.727   |
| NM_003607 | 1366.158 | 958.485  | BI754285  | 1264.165  | 1273.582  | AK025846  | 1815.869  | 1736.632  |
| NM_007281 | 598.756  | 464.408  | X15998    | 7507.153  | 6632.957  | AK026805  | 4897.292  | 7434.854  |
| AB017169  | 168.849  | 287.491  | M76482    | 657.471   | 759.922   | AL389983  | 11993.874 | 12573.021 |
| AL080170  | 1471.73  | 1409.045 | X17519    | 20068.881 | 31151.158 | AJ008159  | 966.58    | 941.317   |
| AB039903  | 3740.343 | 4207.038 | NM_001883 | 4260.389  | 3656.543  | AK000995  | 1967.016  | 2138.589  |
| NM_000542 | 932.554  | 1596.68  | NM_004625 | 3784.233  | 3387.18   | U00959    | 1270.286  | 1623.713  |
| NM_014625 | 386.743  | 266.632  | L31785    | 2144.39   | 3534.345  | NM_014575 | 24125.922 | 29786.941 |
| NM_006851 | 788.17   | 1043.309 | H-M 69043 | 5350.135  | 7925.018  | AF147306  | 6471.4    | 8991.643  |

|           |          |          |           |           |           |           |           |           |
|-----------|----------|----------|-----------|-----------|-----------|-----------|-----------|-----------|
| AK001560  | 167.079  | 363.327  | AF077374  | 2784.239  | 2487.35   | AF086267  | 2986.867  | 3381.684  |
| AB001328  | 218.446  | 217.165  | U43901    | 1964.038  | 1508.734  | X74606    | 1160.991  | 1668.44   |
| NM_00094E | 247.115  | 301.608  | X59065    | 2250.108  | 2809.012  | NM_01218E | 2901.132  | 4476.229  |
| H99588    | 631.246  | 525.121  | M59828    | 14014.487 | 12592.797 | AK026785  | 2824.37   | 3628.212  |
| AI359037  | 7179.25  | 6141.97  | NM_016134 | 904.566   | 856.28    | AK022994  | 895.816   | 902.246   |
| J04513    | 148.907  | 158.621  | SR2       | 53888.668 | 52840.168 | NM_01822E | 41613.582 | 47248.109 |
| M76482    | 102.017  | 145.732  | SR4       | 17651.102 | 16000.771 | AK025534  | 1533.223  | 2864.779  |
| X17519    | 10856.08 | 7408.212 | SR6       | 2776.446  | 2205.306  | AK022577  | 1366.757  | 1717.661  |
| NM_00462E | 179.016  | 359.172  | SR8       | 10204.197 | 25927.416 | AF091526  | 1897.027  | 1906.197  |
| L31785    | 938.575  | 1691.715 | SR10      | 37299.789 | 13467.061 | AK022170  | 558.085   | 969.016   |
| H-M 69043 | 703.493  | 929.208  | CY3Cy5    | 1958.565  | 142.924   | M60749    | 4299.126  | 4015.67   |
| AF077374  | 207.868  | 265.625  | NM_00061E | 14542.712 | 17675.154 | X79986    | 957.802   | 965.719   |
| U43901    | 454.434  | 545.54   | NM_004257 | 19186.072 | 19609.428 | NM_00352E | 13107.106 | 10028.186 |
| X59065    | 57.501   | 148.145  | NM_002844 | 4871.258  | 8399.319  | X01448    | 1285.789  | 732.491   |
| M59828    | 3007.518 | 4600.531 | NM_00068E | 5886.945  | 6479.81   | NM_01650E | 7846.449  | 6590.234  |
| NM_00262C | 2093.756 | 2017.118 | NM_00362E | 4568.649  | 5233.645  | AK056351  | 43081.223 | 43386.266 |
| S79267    | 316.698  | 268.738  | NM_005901 | 14078.064 | 16319.946 | NM_01469C | 11127.436 | 12046.342 |
| NM_00181E | 223.839  | 338.599  | NM_00424E | 3314.09   | 3236.856  | NM_01769E | 5773.84   | 7299.326  |
| NM_003784 | 20583.38 | 22428.51 | NM_00095E | 731.634   | 1053.18   | AF086490  | 1952.416  | 2222.694  |
| NM_00019E | 4176.521 | 3598.856 | NM_00131E | 1571.9    | 2713.391  | AF131738  | 17130.34  | 15890.35  |
| NM_00544E | 3389.573 | 2861.563 | NM_00236E | 1320.809  | 1279.878  | AK021666  | 2421.402  | 2144.833  |
| NM_01489E | 1501.961 | 1437.708 | NM_00479E | 1010.352  | 917.741   | AK024081  | 1068.27   | 1174.04   |
| NM_00363C | 2063.127 | 2366.394 | NM_00043E | 13726.824 | 11464.546 | AK024825  | 6050.476  | 4985.229  |
| NM_00004E | 1216.767 | 1277.323 | NM_00184E | 45993.285 | 42018.207 | AF086317  | 9808.084  | 13137.146 |
| NM_00321E | 277.395  | 376.806  | AB017169  | 1697.389  | 1463.306  | U16850    | 11797.982 | 11956.796 |
| NM_00670E | 1123.264 | 1449.733 | AL080170  | 3358.871  | 2904.908  | AL390178  | 1565.34   | 1508.764  |
| NM_00061E | 2403.6   | 2173.185 | AB039903  | 6836.386  | 6014.109  | Z36806    | 3622.586  | 4188.719  |
| NM_004257 | 4788.565 | 4193.109 | NM_00054E | 20923.879 | 20389.205 | NM_01861E | 1971.768  | 2500.02   |
| NM_002844 | 1699.746 | 1221.741 | NM_006851 | 1852.44   | 1611.809  | AJ008121  | 44839.355 | 43835.863 |
| NM_00362E | 1641.165 | 1570.139 | AK001560  | 1335.968  | 1546.086  | AJ008153  | 2640.624  | 3187.063  |
| NM_005901 | 5259.562 | 5309.489 | AB001328  | 1088.849  | 1269.665  | AK023739  | 4174.351  | 3915.875  |
| NM_00424E | 132.305  | 182.634  | NM_00094E | 601.587   | 498.257   | NM_00583C | 19313.518 | 13942.373 |
| NM_00095E | 279.483  | 176.49   | H99588    | 1431.694  | 1331.617  | NM_001507 | 2101.555  | 1672.931  |
| NM_00236E | 369.959  | 266.043  | AK022600  | 13630.982 | 19981.283 | X92108    | 886.107   | 817.326   |
| NM_00479E | 179.363  | 315.459  | AK023142  | 3603.631  | 5276.663  | AL389876  | 1203.566  | 633.756   |
| NM_00184E | 128.705  | 167.088  | U61740    | 23150.672 | 28072.426 | AK022120  | 2691.293  | 2737.09   |
| NM_00345E | 2511.052 | 2716.48  | NM_00640E | 49632.805 | 61084.598 | Z70762    | 871.788   | 849.408   |
| NM_000171 | 188.091  | 199.322  | AB049054  | 6658.871  | 6161.921  | D17099    | 970.534   | 703.882   |
| AL354615  | 1636.605 | 2460.872 | NM_015071 | 3191.842  | 2709.413  | BF037206  | 1871.959  | 1733.104  |
| NM_01334E | 13498.06 | 15188.72 | NM_013227 | 3670.646  | 4350.168  | AK021474  | 15965.771 | 16309.101 |
| NM_00370E | 1351.921 | 1525.822 | Z83803    | 1260.815  | 1287.079  | AK023642  | 763.201   | 612.959   |
| NM_006861 | 1568.123 | 1491.488 | AF027205  | 48111.512 | 51810.91  | AW511510  | 371.608   | 799.321   |
| NM_00582E | 2601.611 | 2260.208 | AF075012  | 2090.125  | 2332.956  | AL049466  | 18322.379 | 17248.625 |
| NM_00046E | 1700.808 | 1673.432 | NM_00157C | 2403.58   | 2661      | AB037802  | 5387.984  | 8116.523  |
| NM_015544 | 719.388  | 1825.09  | NM_01565E | 1220.643  | 1190.96   | AL137450  | 4429.607  | 4808.94   |
| NM_01590E | 6099.356 | 6868.899 | NM_00058E | 3695.878  | 3621.308  | AK023058  | 1303.343  | 2187.406  |
| AK023142  | 1900.36  | 1653.581 | NM_01654E | 16078.348 | 15503.697 | AJ227878  | 670.276   | 519.827   |
| U61740    | 3282.447 | 3697.165 | AF309653  | 4568.191  | 4168.533  | NM_012064 | 5443.039  | 6226.295  |
| NM_00640E | 23745.37 | 24632.29 | NM_00262C | 32485.502 | 30812.102 | AK001460  | 1899.801  | 2046.213  |
| AB049054  | 1817.115 | 1640.718 | S79267    | 3821.91   | 3394.35   | AK092508  | 5142.131  | 5515.136  |
| NM_015071 | 704.698  | 778.935  | NM_00181E | 1034.319  | 1368.348  | AK027111  | 60894.004 | 52984.57  |
| NM_013227 | 593.922  | 578.349  | NM_003784 | 51714.891 | 57061.441 | NM_00351E | 782.446   | 1097.142  |
| AF027205  | 4640.644 | 5055.413 | NM_00019E | 39114.402 | 36478.063 |           |           |           |

|           |          |          |           |           |           |
|-----------|----------|----------|-----------|-----------|-----------|
| NM_00157C | 303.42   | 404.715  | NM_00544E | 12043.966 | 9863.2    |
| NM_01565E | 452.037  | 464.57   | NM_01489E | 3338.701  | 2749.869  |
| NM_00058E | 1845.415 | 1913.07  | NM_00363C | 7749.416  | 6715.417  |
| NM_01654E | 8764.395 | 7662.163 | NM_00004E | 3438.671  | 3283.089  |
| NM_01788E | 914.27   | 652.225  | NM_00321E | 1470.791  | 1294.719  |
| NM_00625Z | 305.413  | 236.528  | NM_00670E | 5076.763  | 4026.509  |
| NM_001721 | 386.525  | 491.577  | NM_00491C | 3307.339  | 3539.612  |
| NM_014397 | 941.006  | 953.364  | AB013452  | 1911.116  | 2675.098  |
| AB023182  | 1550.803 | 1332.281 | M93107    | 7791.554  | 7361.969  |
| NM_003607 | 1656.283 | 1543.436 | BC001479  | 12139.366 | 13983.772 |
| NM_00657E | 1854.923 | 1745.927 | NM_002461 | 41349.434 | 39770.16  |
| NM_013254 | 3006.111 | 2590.481 | NM_005771 | 1602.567  | 1803.393  |
| NM_000437 | 5846.337 | 5192.072 | AB032986  | 53875.016 | 51656.426 |
| AB046819  | 2935.571 | 2426.556 | NM_01752E | 49982.223 | 51840.816 |
| NM_00609C | 4912.623 | 5303.21  | NM_01603Z | 17601.758 | 18660.691 |
| NM_00290C | 613.993  | 768.427  | NM_014324 | 49982.797 | 55876.855 |
| NM_00491C | 377.007  | 353.509  | NM_001687 | 30745.664 | 27980.551 |
| AB013452  | 355.689  | 456.309  | AK026374  | 4187.294  | 3905.938  |
| M93107    | 1677.766 | 1737.841 | NM_001169 | 3261.847  | 3594.618  |
| BC001479  | 1300.608 | 1297.201 | AK024648  | 7048.055  | 5530.116  |
| NM_002461 | 7606.325 | 7471.261 | NM_000171 | 1585.803  | 1890.155  |
| NM_005771 | 335.232  | 320.221  | AL354615  | 3558.611  | 3970.911  |
| AB032986  | 14459.96 | 14661.31 | NM_01334E | 48333.051 | 47854.52  |
| NM_01752E | 5888.255 | 6782.085 | NM_00370E | 4187.759  | 4010.896  |
| NM_01603Z | 652.155  | 570.252  | NM_006861 | 2694.647  | 2256.156  |
| NM_014324 | 10073.72 | 12875.99 | NM_00582E | 5630.839  | 4726.189  |
| NM_001687 | 8774.273 | 9820.468 | NM_00046E | 3547.001  | 2749.263  |
| AK026374  | 752.497  | 773.079  | NM_015544 | 5722.827  | 1672.454  |
| NM_001169 | 1980.263 | 1713.046 | NM_01590E | 24540.555 | 18172.916 |
| AK024648  | 2649.944 | 3268.344 | NM_00089E | 2087.379  | 2547.141  |
| NM_00079E | 599.491  | 651.005  | AB040672  | 6972.172  | 7337.644  |
| AB037761  | 8892.374 | 8677.379 | NM_00219Z | 5780.119  | 5081.255  |
| NM_01400E | 8417.859 | 9334.494 | NM_005491 | 15447.36  | 16098.497 |
| NM_014731 | 375.232  | 276.579  | NM_00386E | 5689.21   | 5550.988  |
| AF035191  | 9351.49  | 13298.17 | AK025599  | 6179.938  | 7771.588  |
| NM_00405E | 981.468  | 516.483  | X63417    | 2521.184  | 2659.59   |
| NM_004527 | 477.788  | 582.336  | S94539    | 50084.039 | 56895.496 |
| NM_01206Z | 5936.465 | 6148.268 | NM_00640Z | 2370.993  | 3090.501  |
| AK026717  | 550.532  | 375.042  | NM_00578E | 3577.008  | 3808.275  |
| AJ010482  | 1363.242 | 1064.21  | NM_01824E | 8292.058  | 8910.708  |
| AB040672  | 96.3     | 217.057  | AK001695  | 8358.193  | 10658.041 |
| NM_00219Z | 266.658  | 218.852  | NM_001721 | 1205.915  | 1240.344  |
| NM_005491 | 3776.901 | 3578.474 | NM_014397 | 2766.122  | 2528.478  |
| NM_00386E | 657.268  | 702.073  | AB023182  | 3510.514  | 3909.968  |
| AK025599  | 1479.3   | 1963.957 | NM_003607 | 4853.153  | 5344.571  |
| X63417    | 655.678  | 517.364  | NM_00657E | 4257.236  | 3505.796  |
| S94539    | 350.264  | 539.86   | NM_013254 | 3551.231  | 4831.869  |
| NM_00640Z | 895.342  | 759.263  | NM_000437 | 20383.764 | 19002.68  |
| NM_00578E | 1350.359 | 1446.166 | AB046819  | 9227.922  | 8323.912  |
| NM_01824E | 2293.271 | 2181.993 | NM_00609C | 7642.408  | 6950.369  |
| AK001695  | 3720.172 | 2492.274 | NM_00290C | 11169.283 | 9422.672  |
| NM_00397C | 434.708  | 655.535  | NM_006851 | 1855.007  | 1784.959  |
| AK022496  | 455.492  | 718.098  | AK001560  | 2226.947  | 2058.133  |

|           |          |          |           |           |           |
|-----------|----------|----------|-----------|-----------|-----------|
| AB042636  | 322.573  | 164.948  | AB001328  | 1373.827  | 1481.254  |
| AB033035  | 557.968  | 484.886  | NM_000948 | 643.167   | 1073.57   |
| NM_002883 | 2151.583 | 2449.312 | H99588    | 2187.55   | 2097.18   |
| NM_019012 | 667.931  | 832.438  | X00588    | 2969.734  | 2994.737  |
| NM_000141 | 141.613  | 326.762  | AI359037  | 45346.352 | 47357.043 |
| NM_016150 | 315.05   | 409.654  | J04513    | 671.842   | 788.049   |
| U57058    | 341.081  | 339.338  | BI754285  | 1266.726  | 1693.801  |
| AL137452  | 1001.658 | 998.321  | X15998    | 7744.618  | 6557.203  |
| NM_004312 | 1798.88  | 2150.355 | M76482    | 939.9     | 683.183   |
| NM_001347 | 1755.333 | 1891.402 | X17519    | 19805.379 | 28370.234 |
| AK024549  | 922.907  | 991.174  | NM_001883 | 4592.649  | 3649.523  |
| NM_006338 | 353.63   | 364.689  | NM_004628 | 4267.55   | 3783.198  |
| NM_007164 | 602.637  | 782.334  | L31785    | 2174.277  | 2348.946  |
| NM_000261 | 206.42   | 414.336  | H-M 69043 | 5512.708  | 6736.555  |
| NM_002606 | 175.103  | 155.018  | AF077374  | 2624.024  | 2480.547  |
| NM_002570 | 348.569  | 212.096  | U43901    | 1871.902  | 1269.496  |
| NM_003183 | 809.818  | 777.036  | X59065    | 1535.051  | 1271.139  |
| NM_001657 | 193.654  | 157.741  | M59828    | 18181.408 | 16389.266 |
| NM_003588 | 227.136  | 234.561  | NM_016134 | 1522.362  | 1402.266  |
| NM_019851 | 1437.748 | 1461.267 | AJ010482  | 2793.686  | 2609.276  |
| NM_003238 | 84.411   | 165.463  | NM_005448 | 13528.563 | 12395.828 |
| NM_018367 | 777.875  | 796.542  | NM_014898 | 5648.724  | 5935.098  |
| NM_001363 | 2924.7   | 3218.034 | NM_003630 | 8093.043  | 7554.854  |
| NM_014098 | 1855.536 | 1950.746 | NM_000048 | 3206.018  | 3592.164  |
| NM_005708 | 495.648  | 788.842  | NM_003218 | 2876.634  | 2486.019  |
| NM_001261 | 3508.481 | 2935.017 | NM_006708 | 5794.316  | 6017.02   |
| NM_007218 | 1067.089 | 1017.143 | NM_000612 | 15755.955 | 19580.135 |
| AK026854  | 1406.99  | 1679.876 | NM_004257 | 20692.176 | 20102.455 |
| NM_001268 | 2967.881 | 2950.856 | NM_002844 | 5947.376  | 8410.294  |
| NM_004908 | 1205.069 | 1347.477 | NM_000683 | 7303.411  | 8624.055  |
| X98261    | 242.085  | 262.492  | NM_003628 | 6101.362  | 5939.428  |
| NM_012447 | 979.306  | 787.546  | NM_005901 | 14348.897 | 14980.751 |
| NM_006368 | 113.832  | 242.12   | NM_004248 | 3393.74   | 3012.762  |
| AK027013  | 2853.745 | 2236.011 | NM_000958 | 1104.514  | 998.446   |
| NM_001344 | 8737.526 | 8923.648 | NM_001313 | 1988.771  | 1822.058  |
| NM_018294 | 2257.527 | 2208.217 | NM_002362 | 1147.859  | 1284.604  |
| AL389934  | 322.858  | 379.185  | NM_004798 | 787.001   | 852.479   |
| NM_004330 | 4224.879 | 3726.384 | NM_000438 | 10324.894 | 8905.623  |
| AF151802  | 3203.924 | 3229.925 | NM_001842 | 44941.84  | 38930.73  |
| AB006746  | 701.038  | 647.904  | AB017169  | 1291.49   | 1143.683  |
| NM_006498 | 126.297  | 143.599  | AL080170  | 4497.401  | 4795.743  |
| AB023233  | 483.407  | 450.654  | AB039903  | 6555.485  | 5471.557  |
| NM_018130 | 3072.826 | 2805.279 | NM_000542 | 22489.646 | 16826.246 |
| AF085878  | 98.168   | 255.813  | NM_003708 | 3763.256  | 4682.802  |
| NM_016158 | 17985.04 | 13274.88 | NM_006861 | 2888.345  | 2492.371  |
| NM_001224 | 5303.938 | 6167.956 | NM_005828 | 6969.315  | 5975.258  |
| NM_001568 | 2724.35  | 3300.547 | NM_000468 | 4559.604  | 4706.765  |
| NM_004131 | 90.101   | 163.591  | NM_015544 | 6372.054  | 2684.332  |
| AK023284  | 1171.664 | 1540.832 | NM_015908 | 30344.809 | 31544.002 |
| NM_005101 | 697.022  | 649.17   | AK022600  | 18953.049 | 24936.68  |
| NM_004208 | 169.106  | 166.829  | AK023142  | 5440.274  | 7164.225  |
| AF130060  | 628.143  | 499.08   | U61740    | 29693.082 | 29283.426 |
| NM_007057 | 2860.335 | 2959.254 | NM_006408 | 54884.895 | 59900.52  |

|           |          |          |           |           |           |
|-----------|----------|----------|-----------|-----------|-----------|
| NM_000177 | 614.25   | 1118.307 | AB049054  | 7375.936  | 8134.199  |
| NM_003387 | 2378.766 | 2906.647 | NM_015071 | 3013.289  | 3762.264  |
| U60665    | 841.812  | 825.851  | NM_013227 | 4101.35   | 3747.044  |
| NM_005507 | 3823.601 | 4726.725 | Z83803    | 1313.762  | 1309.997  |
| AL080133  | 161.658  | 250.884  | AF027205  | 47111.758 | 42700.84  |
| AY014403  | 552.865  | 361.411  | AF075012  | 2298.258  | 2262.918  |
| NM_006912 | 858.966  | 777.795  | NM_001570 | 2397.258  | 2256.725  |
| X12534    | 437.702  | 789.987  | NM_015658 | 1265.566  | 1011.009  |
| NM_003112 | 1268.248 | 1388.028 | NM_000589 | 4178.341  | 3413.574  |
| NM_014323 | 903.871  | 954.539  | NM_016546 | 15451.549 | 14158.533 |
| NM_003205 | 2237.561 | 3677.85  | AF309653  | 4720.693  | 3618.728  |
| AB002324  | 426.471  | 376.628  | NM_002620 | 25731.092 | 20727.715 |
| NM_002165 | 245.987  | 158.353  | S79267    | 2062.563  | 1733.951  |
| AK026231  | 426.842  | 295.762  | NM_001816 | 1199.804  | 1061.379  |
| NM_002140 | 8169.533 | 6455.229 | NM_003784 | 53748.234 | 50874.434 |
| NM_020143 | 3408.695 | 2762.391 | NM_000195 | 38089.973 | 28213.391 |
| NM_012469 | 2313.223 | 3210.686 | NM_006575 | 4259.643  | 4727.473  |
| NM_005131 | 2036.037 | 1931.078 | NM_013254 | 3907.661  | 5579.954  |
| NM_007056 | 911.633  | 1096.165 | NM_000437 | 17102.93  | 19528.889 |
| AF083383  | 1087.953 | 847.776  | AB046819  | 10890.374 | 11813.575 |
| NM_006925 | 844.22   | 818.671  | NM_006090 | 8327.668  | 9001.434  |
| AK023181  | 1016.209 | 706.078  | NM_002900 | 13646.139 | 13999.705 |
| NM_004294 | 1088.963 | 896.357  | NM_004910 | 3211.845  | 3016.894  |
| NM_005051 | 1137.784 | 1031.65  | AB013452  | 1999.325  | 2283.171  |
| NM_001968 | 3964.011 | 3188.277 | M93107    | 9776.29   | 9952.597  |
| D17259    | 5126.809 | 4763.556 | BC001479  | 16905.15  | 17874.293 |
| AF264627  | 1595.397 | 1173.245 | NM_002461 | 48101.629 | 49233.98  |
| AL133053  | 782.583  | 524.621  | NM_005771 | 1595.839  | 1682.265  |
| NM_018142 | 2407.213 | 2460.388 | AB032986  | 47969.664 | 54819.879 |
| NM_017653 | 1845.79  | 1725.664 | NM_017528 | 45941.445 | 52493.992 |
| AL109695  | 3367.767 | 3952.82  | NM_016032 | 18131.807 | 16895.967 |
| NM_002168 | 2498.686 | 2613.992 | NM_014324 | 47284.973 | 55687.656 |
| NM_004453 | 1893.113 | 1349.701 | NM_001687 | 33850.637 | 33965.621 |
| AK024440  | 263.503  | 126.419  | AK026374  | 3518.532  | 4338.357  |
| NM_016229 | 671.953  | 782.645  | NM_001169 | 2532.125  | 3210.572  |
| NM_018244 | 937.241  | 953.181  | AK024648  | 6645.561  | 5012.664  |
| NM_002492 | 10266.48 | 8987.272 | NM_003459 | 8984.795  | 7705.517  |
| AB046855  | 806.209  | 737.437  | NM_000171 | 1956.118  | 1779.443  |
| NM_005642 | 4297.605 | 5532.907 | AL354615  | 3367.312  | 3014.552  |
| NM_018105 | 1628.717 | 1796.296 | NM_013349 | 46666.285 | 44128.48  |
| AK023452  | 2212.214 | 2500.325 | AJ010482  | 3146.438  | 3841.622  |
| AF155065  | 260.073  | 154.305  | NM_000896 | 2787.063  | 3729.605  |
| NM_000332 | 333.308  | 190.232  | AB040672  | 8611.979  | 8613.256  |
| AK022215  | 1672.543 | 1425.057 | NM_002192 | 6008.011  | 6329.317  |
| NM_001527 | 4650.106 | 3529.274 | NM_005491 | 17120.67  | 17152.926 |
| AK025269  | 1436.226 | 1160.059 | NM_003869 | 6532.557  | 6174.66   |
| AB040971  | 367.354  | 625.101  | AK025599  | 5581.922  | 7148.916  |
| NM_006562 | 208.256  | 257.781  | X63417    | 2579.524  | 3082.982  |
| AK024254  | 234.135  | 327.281  | S94539    | 53441.395 | 55630.082 |
| NM_018456 | 1171.166 | 709.148  | NM_006402 | 3191.133  | 3351.214  |
| NM_019021 | 404.301  | 558.123  | NM_005785 | 4113.426  | 4504.884  |
| NM_004717 | 694.6    | 260.633  | NM_018248 | 8285.418  | 10294.185 |
| AK002183  | 226.296  | 693.401  | AK001695  | 8100.003  | 9323.742  |

|           |          |          |           |           |           |
|-----------|----------|----------|-----------|-----------|-----------|
| NM_01899€ | 322.512  | 505.124  | NM_01788€ | 4591.076  | 3862.756  |
| AL137304  | 750.36   | 961.334  | NM_00625€ | 2210.03   | 2109.852  |
| AL049274  | 134.094  | 212.101  | NM_001721 | 1485.518  | 1486.273  |
| NM_01827€ | 945.803  | 1071.346 | NM_014397 | 2750.493  | 2354.758  |
| AF147369  | 315.568  | 135.434  | AB023182  | 3895.44   | 3488.434  |
| AK026883  | 652.527  | 575.638  | NM_003607 | 4922.159  | 3726.522  |
| NM_01435€ | 6511.889 | 7947.96  | AB017169  | 1977.846  | 2107.098  |
| U00925    | 2645.681 | 2457.419 | AL080170  | 2905.154  | 3555.017  |
| AL390185  | 532.088  | 272.849  | AB039903  | 7330.757  | 10153.696 |
| AF086235  | 1170.144 | 884.267  | NM_00054€ | 31794.422 | 28123.553 |
| AF143886  | 160.058  | 449.326  | NM_01462€ | 871.79    | 774.956   |
| AK025583  | 9490.581 | 9279.628 | NM_006851 | 1871.285  | 1581.251  |
| NM_014664 | 949.562  | 853.263  | AK001560  | 2004.182  | 2189.885  |
| AL109788  | 234.262  | 167.507  | AB001328  | 1582.026  | 1780.981  |
| NM_01495€ | 1909.138 | 2363.162 | NM_00094€ | 691.706   | 1209.285  |
| AB037765  | 715.842  | 533.888  | H99588    | 2075.508  | 2403.25   |
| AK025068  | 2041.275 | 1756.292 | X00588    | 2959.351  | 2845.697  |
| AK026720  | 653.467  | 924.565  | AI359037  | 42098.945 | 43133.539 |
| AL137566  | 954.939  | 1260.608 | J04513    | 849.537   | 686.297   |
| AF087962  | 381.642  | 492.274  | BI754285  | 1581.565  | 1423.537  |
| AL050197  | 149.521  | 199.243  | X15998    | 7263.496  | 5998.398  |
| AL117580  | 216.683  | 284.737  | M76482    | 982.516   | 704.98    |
| AL110190  | 468.519  | 719.256  | X17519    | 21621.086 | 29300.59  |
| AJ001893  | 712.952  | 582.167  | NM_00188€ | 4418.209  | 3472.598  |
| NM_01481€ | 1407.295 | 1428.734 | NM_00462€ | 3421.163  | 2707.578  |
| AB032988  | 1482.664 | 1464.268 | L31785    | 2013.119  | 1979.946  |
| AK023559  | 1187.203 | 845.497  | H-M 69043 | 4682.192  | 5460.512  |
| AB037859  | 8555.002 | 9219.813 | AF077374  | 2596.344  | 2120.452  |
| AL049233  | 431.026  | 407.322  | U43901    | 1505.036  | 1410.656  |
| NM_01769€ | 661.549  | 370.674  | X59065    | 1981.689  | 1897.551  |
| AL050166  | 1376.782 | 1290.019 | M59828    | 17604.086 | 13591.657 |
| AK026705  | 738.718  | 558.801  | AF309653  | 4776.673  | 4490.823  |
| NM_00360€ | 187.09   | 367.544  | NM_00262€ | 34551.148 | 37071.082 |
| AF009258  | 10984.99 | 10703.5  | S79267    | 3408.506  | 3838.392  |
| AF009305  | 357.149  | 297.701  | NM_00181€ | 1114.667  | 1279.669  |
| NM_00619€ | 189.266  | 289.049  | NM_003784 | 54999.273 | 57458.844 |
| AF009270  | 233.032  | 289.589  | NM_00019€ | 47793.719 | 47799.793 |
| AF056421  | 200.288  | 221.291  | NM_00544€ | 12434.838 | 10704.655 |
| AK001085  | 142.564  | 206.162  | NM_01489€ | 5378.123  | 5983.545  |
| AK021528  | 231.48   | 160.642  | NM_00363€ | 7513.419  | 7266.155  |
| AK021746  | 459.296  | 330.819  | NM_00004€ | 3501.899  | 3466.957  |
| AK002066  | 84.541   | 65.549   | NM_00321€ | 2726.349  | 2223.106  |
| AK026743  | 202.142  | 150.098  | NM_00670€ | 6406.267  | 5600.198  |
| AL389983  | 1728.089 | 1766.665 | NM_00061€ | 12053.757 | 13930.504 |
| AJ008159  | 481.11   | 381.149  | NM_004257 | 18522.834 | 16334.163 |
| AK000995  | 751.055  | 800.644  | NM_002844 | 5879.684  | 7815.917  |
| NM_01457€ | 1868.091 | 1654.275 | NM_00068€ | 6871.867  | 7886.131  |
| AF147306  | 1745.095 | 1974.749 | NM_00362€ | 5388.173  | 5937.717  |
| AF086267  | 910.876  | 932.634  | NM_005901 | 13416.128 | 14084.523 |
| X74606    | 286.914  | 271.989  | NM_00424€ | 3881.496  | 3034.845  |
| NM_01218€ | 99.027   | 246.867  | NM_00095€ | 940.769   | 829.628   |
| AK026785  | 1222.959 | 1136.607 | NM_00131€ | 1346.203  | 1203.723  |
| AK022994  | 293.926  | 206.977  | NM_00236€ | 1229.587  | 963.116   |



|           |          |          |           |           |           |
|-----------|----------|----------|-----------|-----------|-----------|
| NM_01822E | 4036.756 | 4267.547 | NM_00479E | 924.822   | 727.614   |
| AK025534  | 301.397  | 367.026  | NM_00043E | 10792.282 | 7571.328  |
| AK022577  | 485.376  | 374.874  | NM_00184E | 39777.848 | 28625.922 |
| AF091526  | 472.293  | 543.437  | NM_00071E | 882.796   | 1557.381  |
| AK022170  | 121.171  | 133.782  | NM_00345E | 11250.526 | 11269.187 |
| M60749    | 2657.732 | 2642.317 | AB032526  | 809.89    | 392.752   |
| X79986    | 527.402  | 320.113  | NM_000171 | 996.688   | 1230.196  |
| NM_00352E | 1356.638 | 1683.42  | AL354615  | 2809.817  | 2892.323  |
| X01448    | 314.973  | 368.526  | NM_01334E | 51887.703 | 49342.063 |
| NM_01650E | 2627.97  | 2653.461 | NM_00370E | 4750.493  | 4563.51   |
| AK056351  | 11792.77 | 13207.75 | NM_006861 | 2870.14   | 2987.951  |
| NM_01469C | 2588.85  | 2329.126 | NM_00582E | 7084.462  | 6668.464  |
| NM_01769E | 903.382  | 914.638  | NM_00046E | 5520.628  | 5272.294  |
| AF086490  | 511.007  | 485.857  | NM_01554E | 7128.395  | 3125.066  |
| AF131738  | 4908.274 | 5460.899 | NM_01590E | 28414.902 | 26560.543 |
| AK021666  | 734.598  | 616.648  | AK022600  | 19148.857 | 19703.402 |
| AK024081  | 298.943  | 214.68   | AK023142  | 5338      | 6038.063  |
| AK024825  | 1356.089 | 1015.223 | U61740    | 27503.541 | 25410.553 |
| AF086317  | 1221.94  | 972.047  | NM_00640E | 56104.152 | 61510.004 |
| U16850    | 2354.56  | 2099.834 | AB049054  | 8282.394  | 8412.657  |
| AL390178  | 170.378  | 271.603  | NM_015071 | 2999.76   | 2880.848  |
| Z36806    | 1104.981 | 912.663  | NM_013227 | 4394.343  | 4730.713  |
| NM_00536E | 158.009  | 180.114  | Z83803    | 1210.721  | 1106.889  |
| AJ008121  | 6442.932 | 4777.665 | AF027205  | 50924.371 | 41937.684 |
| AJ008153  | 644.47   | 573.263  | AF075012  | 1652.439  | 2016.259  |
| NM_00583C | 2699.788 | 2082.662 | NM_00157C | 1985.975  | 1905.437  |
| NM_001507 | 558.508  | 500.719  | NM_01565E | 1606.926  | 1474.619  |
| AK022120  | 193.054  | 381.294  | NM_00058E | 3717.849  | 3012.664  |
| U52830    | 69.424   | 228.683  | NM_01654E | 17637.311 | 17968.424 |
| BF037206  | 264.46   | 521.956  | NM_01788E | 3772.965  | 4466.613  |
| AK021474  | 1283.7   | 1165.505 | NM_00625E | 2144.7    | 2394.264  |
| AK023642  | 360.169  | 298.382  | NM_001721 | 1440.412  | 1297.181  |
| AW511510  | 83.712   | 215.237  | NM_014397 | 2659.35   | 2695.485  |
| U52827    | 278.446  | 133.871  | AB023182  | 4183.183  | 4529.914  |
| AL049466  | 1454.756 | 1039.704 | NM_003607 | 4816.362  | 5440.623  |
| AB037802  | 125.211  | 177.262  | NM_00657E | 5168.893  | 4378.961  |
| AL137450  | 1081.257 | 937.584  | NM_01325E | 3634.541  | 4639.35   |
| AJ227878  | 111.278  | 93.897   | NM_000437 | 17937.727 | 20076.582 |
| NM_01206E | 321.221  | 231.702  | AB046819  | 12806.56  | 12856.706 |
| AK001460  | 806.926  | 725.56   | NM_00609C | 8881.702  | 10656.199 |
| AK092508  | 260.549  | 241.672  | NM_00290C | 16644.377 | 15181.424 |
| AK027111  | 11544.16 | 10087.56 | NM_00491C | 3217.474  | 3163.267  |
|           |          |          | AB013452  | 2960.75   | 3452.036  |
|           |          |          | M93107    | 9081.713  | 8330.331  |
|           |          |          | BC001479  | 18323.303 | 18260.305 |
|           |          |          | NM_002461 | 49409.512 | 43849.797 |
|           |          |          | NM_005771 | 1752.375  | 1966.354  |
|           |          |          | AB032986  | 49305.883 | 47290.527 |
|           |          |          | NM_01752E | 50363.52  | 49668.438 |
|           |          |          | NM_01603E | 19527.23  | 17952.561 |
|           |          |          | NM_01432E | 52458.332 | 56781.074 |
|           |          |          | NM_001687 | 37254.555 | 39826.688 |
|           |          |          | AK024648  | 7440.343  | 4836.197  |

|           |           |           |
|-----------|-----------|-----------|
| NM_000795 | 1016.039  | 1287.304  |
| AB037761  | 27773.404 | 30096.574 |
| NM_014008 | 49960.195 | 56188.738 |
| NM_014731 | 3374.55   | 3330.405  |
| AF035191  | 25486.049 | 24419.775 |
| NM_004058 | 2447.608  | 2480.862  |
| NM_004527 | 2312.385  | 2352.627  |
| NM_012062 | 14400.913 | 15631.422 |
| AK026717  | 1761.083  | 1539.44   |
| AJ010482  | 3349.425  | 3999.535  |
| NM_000896 | 3009.412  | 2987.403  |
| AB040672  | 7185.448  | 7258.583  |
| NM_002192 | 7197.28   | 6391.979  |
| NM_005491 | 15843.407 | 14536.327 |
| NM_003869 | 7593.593  | 6582.916  |
| AK025599  | 6672.451  | 6841.068  |
| X63417    | 3057.226  | 2514.679  |
| S94539    | 58857.273 | 52546.559 |
| NM_006402 | 2884.251  | 3375.311  |
| AK001695  | 7595.846  | 7385.875  |
| AB040898  | 1885.724  | 1888.811  |
| AB031547  | 1702.256  | 1951.517  |
| NM_003970 | 3002.403  | 3684.026  |
| AK022496  | 1189.568  | 1675.588  |
| AB042636  | 3038.218  | 3232.262  |
| AB033035  | 623.393   | 770.93    |
| NM_002883 | 5690.453  | 5180.725  |
| NM_019012 | 2668.632  | 1953.468  |
| NM_000141 | 1352.777  | 1312.377  |
| NM_016150 | 5167.866  | 4662.864  |
| U57058    | 1194.161  | 1579.736  |
| AL137452  | 3204.929  | 3157.607  |
| NM_004312 | 54715.332 | 57338.199 |
| NM_001347 | 7738.218  | 6900.946  |
| AK024549  | 39486.906 | 29306.205 |
| NM_006338 | 27789.764 | 23913.74  |
| NM_007164 | 17507.625 | 16422.922 |
| NM_000261 | 2222.76   | 2022.275  |
| NM_002606 | 1610.625  | 1449.353  |
| NM_002570 | 3431.34   | 3499.667  |
| NM_003183 | 3712.602  | 4203.429  |
| NM_001657 | 700.047   | 723.317   |
| NM_003585 | 1492.075  | 666.515   |
| NM_019851 | 8288.087  | 6631.23   |
| NM_003238 | 1166.808  | 1114.308  |
| NM_018367 | 1462.228  | 1772.773  |
| NM_001363 | 9490.948  | 11807.599 |
| NM_014096 | 11689.565 | 13974.234 |
| NM_005706 | 6093.558  | 6598.518  |
| NM_001261 | 9474.108  | 9074.536  |
| NM_001977 | 2498.371  | 4457.457  |
| NM_007219 | 4355.738  | 4762.591  |
| AK026854  | 3267.613  | 2322.212  |

|           |           |           |
|-----------|-----------|-----------|
| NM_00126  | 8072.357  | 8157.893  |
| NM_00250  | 1701.176  | 1553.662  |
| NM_00490  | 10707.091 | 8580.896  |
| NM_01244  | 16163.872 | 18979.814 |
| NM_00636  | 2237.193  | 2398.099  |
| AK027013  | 39965.871 | 42710.816 |
| NM_00134  | 54164.859 | 49595.629 |
| NM_01829  | 10014.849 | 9831.133  |
| AL389934  | 9753.582  | 8211.586  |
| NM_00433  | 10342.601 | 10075.479 |
| AF151802  | 13573.208 | 12208.745 |
| AB006746  | 4887.628  | 3641.513  |
| NM_00649  | 5166.164  | 5216.554  |
| AB023233  | 4238.534  | 4041.965  |
| AL133071  | 748.155   | 628.368   |
| NM_00436  | 4263.642  | 3242.212  |
| NM_00437  | 803.851   | 650.847   |
| NM_01813  | 9579.771  | 12669.867 |
| AF085878  | 1283.395  | 1601.308  |
| AB006630  | 2235.765  | 3002.953  |
| NM_01615  | 4288.81   | 5135.908  |
| NM_00122  | 20686.992 | 21110.508 |
| NM_017811 | 16161.903 | 14861.903 |
| NM_00156  | 3060.844  | 3375.122  |
| NM_004131 | 1070.367  | 1151.951  |
| AK023284  | 2577.964  | 1876.476  |
| AF106069  | 863.414   | 945.24    |
| NM_005101 | 25800.217 | 25903.945 |
| NM_00420  | 799.968   | 515.027   |
| AF130060  | 43516.977 | 42764.523 |
| NM_007057 | 34447.203 | 28473.652 |
| NM_000177 | 3514.645  | 2757.905  |
| NM_003387 | 29760.557 | 24631.545 |
| U60665    | 2163.181  | 2015.011  |
| NM_005507 | 58534.77  | 56403.973 |
| AL080133  | 11289.301 | 10425.638 |
| AY014403  | 2470.295  | 2438.522  |
| NM_00691  | 14252.345 | 12449.601 |
| X12534    | 3961.86   | 2783.043  |
| X65665    | 796.138   | 623.022   |
| NM_003112 | 2823.291  | 2900.095  |
| NM_01432  | 6546.781  | 6839.093  |
| NM_00320  | 7011.557  | 9795.03   |
| AB002324  | 3907.425  | 3564.22   |
| NM_00216  | 653.349   | 705.018   |
| AK026231  | 2225.243  | 2387.579  |
| NM_00214  | 22257.123 | 19856.955 |
| NM_02014  | 6666.611  | 6781.884  |
| NM_01246  | 5853.697  | 5502.229  |
| NM_005131 | 6818.219  | 7587.855  |
| NM_00705  | 4731.047  | 4383.093  |
| AF083383  | 6885.337  | 6533.347  |
| NM_00692  | 8017.148  | 6732.016  |

|           |           |           |
|-----------|-----------|-----------|
| NM_00489C | 51064.504 | 55996.313 |
| AK023181  | 7457.506  | 6899.965  |
| NM_004294 | 4369.469  | 4910.247  |
| NM_005051 | 23381.957 | 22524.117 |
| NM_00196E | 30571.164 | 26666.221 |
| D17259    | 51793.223 | 57019.793 |
| AF264627  | 36597.156 | 27580.748 |
| AL133053  | 2198.481  | 2714.279  |
| NM_018142 | 9481.344  | 11454.798 |
| NM_017653 | 6142.37   | 8182.419  |
| AL109695  | 37612.32  | 33648.395 |
| NM_00216E | 5925.434  | 7323.839  |
| AK027115  | 393.698   | 471.988   |
| NM_004453 | 2624.615  | 4100.356  |
| NM_01622E | 6923.315  | 6295.121  |
| NM_018244 | 4120.578  | 4064.738  |
| NM_002492 | 42519.383 | 38620.512 |
| AB046855  | 1834.882  | 1978.501  |
| NM_005642 | 9330.506  | 6730.085  |
| NM_01810E | 4787.933  | 3798.054  |
| AK023452  | 5719.002  | 4603.532  |
| NM_000332 | 1274.036  | 1394.757  |
| AK022215  | 11363.919 | 11224.452 |
| U90305    | 1304.277  | 1387.539  |
| NM_001527 | 14893.244 | 13769.26  |
| AK025269  | 12640.294 | 10669.425 |
| NM_00143E | 1102.908  | 569.381   |
| AB040971  | 2292.105  | 1669.761  |
| NM_006562 | 6943.071  | 6570.438  |
| AK024254  | 2350.816  | 2375.131  |
| NM_01845E | 2418.25   | 4916.492  |
| AK026697  | 1246.13   | 1447.866  |
| NM_019021 | 3527.995  | 3398.852  |
| NM_004717 | 772.281   | 1101.661  |
| AK002183  | 2091.934  | 2203.447  |
| NM_01899E | 4583.485  | 3632.084  |
| AL137304  | 4763.849  | 4507.966  |
| AL049274  | 1220.958  | 1289.22   |
| NM_01827E | 5899.684  | 6682.104  |
| AK026883  | 4979.514  | 4989.292  |
| NM_01435C | 26298.15  | 20712.598 |
| U00925    | 16038.642 | 14577.442 |
| AL390185  | 6328.129  | 6087.719  |
| AF086235  | 11160.331 | 10430.862 |
| AF143886  | 3977.821  | 3470.477  |
| AK025975  | 9161.813  | 9161.325  |
| AK025583  | 54013.762 | 57483.902 |
| NM_014664 | 3834.679  | 3354.182  |
| AL109788  | 1387.174  | 1243.925  |
| NM_014952 | 56813.441 | 56545.484 |
| AB037765  | 1672.102  | 2591.536  |
| AK025068  | 4799.938  | 5724.197  |
| AK026720  | 2797.323  | 3134.356  |

|           |           |           |
|-----------|-----------|-----------|
| AL137566  | 7342.476  | 6625.743  |
| AF087962  | 6266.092  | 8466.752  |
| AL050197  | 6279.764  | 7237.089  |
| AF085870  | 19097.311 | 18540.115 |
| AL050063  | 584.785   | 540.915   |
| AL080217  | 497.375   | 851.163   |
| AL117580  | 23596.488 | 22073.932 |
| AL110190  | 4474.644  | 3447.619  |
| AL117656  | 2754.682  | 3413.766  |
| AJ001893  | 2973.964  | 3247.385  |
| NM_014819 | 9905.992  | 12093.062 |
| NM_017609 | 1195.194  | 1043.562  |
| AF086040  | 2435.658  | 2484.853  |
| AB032988  | 4160.742  | 4401.296  |
| AK023559  | 16450.865 | 13066.781 |
| AB037859  | 52826.102 | 59438.113 |
| AL049233  | 5987.501  | 4485.222  |
| NM_017696 | 6645.085  | 5658.921  |
| AL050166  | 6312.064  | 5102.55   |
| AK026705  | 3467.887  | 3459.617  |
| NM_003602 | 1629.736  | 2215.769  |
| AF009258  | 42281.031 | 42538.793 |
| AF009305  | 3682.129  | 3613.344  |
| NM_006193 | 541.73    | 525.749   |
| AF009270  | 1597.386  | 1917.49   |
| AF009318  | 2587.463  | 2936.849  |
| AF056421  | 3388.726  | 3415.843  |
| AF090889  | 872.18    | 999.852   |
| AK001085  | 3238.76   | 3586.382  |
| AK001906  | 7775.719  | 8150.516  |
| AK021528  | 2255.484  | 2441.652  |
| AK021746  | 10991.366 | 15363.743 |
| AK001136  | 3072.349  | 4482.433  |
| AK002066  | 544.257   | 779.056   |
| AK021617  | 631.35    | 1214.169  |
| AK021810  | 2401.088  | 3819.319  |
| AK025190  | 769.258   | 995.181   |
| AK025595  | 918.316   | 696.675   |
| AK025214  | 1715.02   | 1300.212  |
| AK025846  | 3163.591  | 2621.287  |
| AK026805  | 10019.453 | 8189.376  |
| AL389983  | 6860.98   | 6030.505  |
| AJ008159  | 1428.841  | 1621.272  |
| AK000995  | 2699.557  | 2258.588  |
| U00959    | 2431.482  | 2455.184  |
| NM_014578 | 34241.484 | 32663.029 |
| AF147306  | 6600.533  | 6580.157  |
| AF086267  | 4988.974  | 4500.187  |
| X74606    | 1272.933  | 1212.68   |
| NM_012183 | 5879.78   | 5385.057  |
| AK026785  | 2864.651  | 3871.459  |
| AK022994  | 835.344   | 767.752   |
| unknown ( | 1115.291  | 917.551   |

|           |           |           |
|-----------|-----------|-----------|
| NM_018225 | 42637.992 | 33689.207 |
| AK025534  | 2637.774  | 2321.16   |
| AK022577  | 773.969   | 771.758   |
| AF091526  | 4922.696  | 4872.723  |
| AL390169  | 533.356   | 402.715   |
| M60749    | 3525.173  | 4086.868  |
| X79986    | 1338.445  | 1918.673  |
| NM_003523 | 13904.161 | 16408.465 |
| X01448    | 1267.022  | 1728.387  |
| NM_016503 | 13501.158 | 20582.648 |
| AK056351  | 48318.289 | 48710.035 |
| NM_014690 | 10668.707 | 12481.992 |
| NM_017698 | 5267.058  | 5558.635  |
| AF086490  | 2047.901  | 1994.756  |
| AF131738  | 38310.035 | 34559.254 |
| AK021666  | 11528.188 | 12052.94  |
| AK024081  | 1992.745  | 1876.585  |
| AK024825  | 5786.999  | 5408.727  |
| AF086317  | 9912.921  | 8079.528  |
| U16850    | 12304.197 | 13919.239 |
| AL390178  | 2981.034  | 4107.105  |
| NM_005383 | 1992.683  | 2813.679  |
| AF147326  | 606.103   | 892.438   |
| Z36806    | 3049.82   | 3230.113  |
| NM_005368 | 1144.583  | 1037.203  |
| NM_018618 | 2028.113  | 1483.081  |
| AJ008121  | 43064.461 | 35150.754 |
| AJ008153  | 3557.194  | 2452.713  |
| AK023739  | 6031.5    | 6170.009  |
| NM_005830 | 13229.298 | 12798.778 |
| NM_001507 | 3138.334  | 4692.767  |
| X92108    | 852.401   | 1328.055  |
| AL389876  | 2319.057  | 2143.868  |
| AK022120  | 7627.155  | 8144.128  |
| U92015    | 1014.203  | 902.173   |
| AL137363  | 936.564   | 769.117   |
| Z70762    | 1333.345  | 1674.08   |
| D17099    | 1149.035  | 1203.275  |
| BF037206  | 6027.729  | 6699.927  |
| AK021474  | 44968.344 | 44714.789 |
| AK023642  | 770.694   | 994.775   |
| AW511510  | 855.814   | 735.633   |
| U52827    | 3591.376  | 2924.424  |
| AL049466  | 16357.848 | 18250.859 |
| AB037802  | 4517.009  | 4635.382  |
| AL137450  | 2930.233  | 3300.834  |
| AK023058  | 4115.033  | 3748.563  |
| NM_012064 | 13473.853 | 10757.824 |
| AK001460  | 1566.437  | 1653.402  |
| AK092508  | 9768.221  | 6950.12   |
| AK027111  | 51370.859 | 55121.477 |
| NM_003518 | 1758.63   | 636.789   |

| <i>Replicate 2</i> |                  |           | <i>Replicate 3</i> |                |           | <i>Replicate 3</i> |                  |           |
|--------------------|------------------|-----------|--------------------|----------------|-----------|--------------------|------------------|-----------|
| <i>control</i>     | <i>50uM zinc</i> |           | <i>50uM zinc</i>   | <i>control</i> |           | <i>control</i>     | <i>50uM zinc</i> |           |
| ID                 | AMPCH1           | AMPCH2    | ID                 | AMPCH1         | AMPCH2    | ID                 | AMPCH1           | AMPCH2    |
| CY3Cy5             | 9125.994         | 636.156   | CY3Cy5             | 10970.401      | 647.822   | CY3Cy5             | 2862.35          | 211.743   |
| NM_000041          | 18304.738        | 18326.705 | NM_000041          | 15223.796      | 25240.055 | NM_000041          | 9316.641         | 6599.053  |
| W69211             | 1664.564         | 1390.452  | W69211             | 675.946        | 909.913   | AA449931           | 1825.234         | 1157.583  |
| AA449931           | 8817.935         | 11272.262 | AA449931           | 2649.48        | 3943.818  | AA877347           | 18912.334        | 19850.389 |
| AA877347           | 29507.361        | 45195.855 | AA877347           | 23479.289      | 25340.518 | BI755551           | 247.188          | 735.133   |
| S57235             | 15223.996        | 14780.682 | S57235             | 9372.408       | 12020.355 | S57235             | 4374.686         | 4767.18   |
| AI376272           | 4348.756         | 4292.802  | AI376272           | 2147.074       | 3579.814  | AI376272           | 1085.934         | 1170.567  |
| BF242229           | 3302.907         | 3038.503  | BF242229           | 1097.238       | 1546.409  | BF242229           | 477.055          | 416.427   |
| X75756             | 53878.242        | 56091.035 | X75756             | 26674.27       | 35945.332 | X75756             | 10119.751        | 7283.037  |
| AI754623           | 3583.185         | 3552.419  | AI754623           | 2696.811       | 3088.414  | AI754623           | 2018.876         | 1963.222  |
| AA401326           | 18471.762        | 18392.881 | AA401326           | 10473.283      | 11024.572 | AA401326           | 7361.337         | 7958.157  |
| N55461             | 2066.714         | 1894.467  | N55461             | 891.283        | 1310.941  | N55461             | 774.022          | 1029.423  |
| AA504482           | 9875.039         | 9637.618  | AA504482           | 9233.853       | 4228.544  | AA504482           | 3710.739         | 2471.896  |
| BI602175           | 835.227          | 917.845   | NM_006003          | 21923.088      | 21224.439 | NM_006003          | 16923.107        | 9534.162  |
| NM_006003          | 22241.764        | 27978.281 | NM_006555          | 4454.078       | 5471.896  | NM_006555          | 3612.527         | 1987.83   |
| NM_006555          | 5821.378         | 6355.762  | SR5                | 6937.896       | 7665.185  | SR5                | 8640.903         | 8252.621  |
| SR5                | 11628.959        | 13908.727 | SR7                | 7222.417       | 46041.34  | SR7                | 6287.903         | 50476.875 |
| SR7                | 9468.973         | 57818.254 | SR9                | 28637.518      | 4664.823  | SR9                | 23011.512        | 4218.677  |
| SR9                | 31548.104        | 6953.4    | CY3Cy5             | 15642.007      | 1323.209  | CY3Cy5             | 2201.005         | 149.314   |
| CY3Cy5             | 9421.415         | 694.253   | NM_006869          | 26281.305      | 45976.688 | NM_006869          | 10780.727        | 8920.098  |
| NM_006869          | 23230.566        | 26599.779 | NM_015364          | 10545.762      | 12137.271 | NM_015364          | 5413.744         | 6289.664  |
| NM_015364          | 9504.99          | 13074.981 | NM_004963          | 2102.983       | 2544.791  | NM_004963          | 1499.615         | 1371.018  |
| NM_006611          | 866.115          | 986.648   | NM_005535          | 18041.094      | 25297.92  | NM_001181          | 302.602          | 868.308   |
| NM_004963          | 3332.837         | 3941.936  | AB037857           | 997.025        | 1588.137  | NM_005535          | 15067.538        | 21103.082 |
| NM_001181          | 901.115          | 567.232   | AF218021           | 1303.632       | 2021.914  | AB037857           | 321.552          | 626.629   |
| NM_005535          | 26263.672        | 29098.35  | NM_013262          | 14081.954      | 18179.266 | NM_005012          | 343.177          | 1103.469  |
| AB037857           | 1813.402         | 1836.26   | NM_007185          | 9840.361       | 13338.126 | AF218021           | 724.717          | 1627.798  |
| AF218021           | 2571.626         | 2346.549  | NM_003221          | 945.487        | 1173.448  | NM_013262          | 9056.085         | 7689.293  |
| NM_013262          | 16370.956        | 17020.809 | NM_003357          | 21267.873      | 18588.463 | NM_007185          | 4355.078         | 4593.673  |
| NM_007185          | 16258.151        | 23222.846 | AF195420           | 1011.027       | 1353.198  | NM_003357          | 5245.302         | 7783.943  |
| NM_003221          | 1693.567         | 1832.68   | AK023261           | 6462.884       | 5556.457  | AF195420           | 756.097          | 1136.589  |
| NM_003357          | 28784.754        | 25447.023 | NM_005097          | 1442.943       | 1342.048  | AK023261           | 3796.185         | 3464.425  |
| AF195420           | 1262.936         | 1549.769  | NM_012278          | 1419.415       | 1201.805  | NM_005097          | 824.301          | 659.224   |
| AK023261           | 5672.202         | 8283.675  | NM_014057          | 2129.538       | 2724.08   | NM_012278          | 956.661          | 638.325   |
| NM_005097          | 1280.572         | 1460.452  | NM_001550          | 3700.719       | 5532.561  | NM_014057          | 2839.818         | 2190.228  |
| NM_012278          | 1421.113         | 1367.414  | AK026849           | 2178.146       | 2227.974  | NM_001550          | 5792.051         | 5904.974  |
| AF023142           | 858.252          | 868.92    | NM_002785          | 636.895        | 1089.528  | AK026849           | 3752.885         | 8509.891  |
| NM_014057          | 3966.534         | 3812.6    | NM_016582          | 7168.665       | 7517.355  | NM_018677          | 756.882          | 923.814   |
| AK026849           | 3815.734         | 5544.565  | NM_014229          | 1710.603       | 1477.463  | NM_002785          | 779.479          | 805.997   |
| NM_018677          | 986.384          | 1329.808  | NM_013265          | 9582.086       | 18994.617 | NM_016582          | 1577.334         | 1754.424  |
| NM_002785          | 1321.981         | 1118.368  | NM_014964          | 3337.702       | 5554.434  | NM_014229          | 670.65           | 787.313   |
| NM_016582          | 5233.706         | 5850.967  | NM_014016          | 10654.751      | 11678.57  | NM_013265          | 8944.506         | 5337.036  |
| NM_014229          | 1827.594         | 2184.922  | NM_013433          | 2477.158       | 3200.095  | NM_014964          | 1776.467         | 1745.396  |
| NM_013265          | 15683.649        | 11404.161 | NM_003794          | 7153.631       | 8187.039  | NM_014016          | 6290.21          | 12370.29  |
| NM_014964          | 3387.173         | 3379.156  | NM_019892          | 4206.566       | 10889.05  | NM_013433          | 2271.345         | 5295.668  |
| NM_014016          | 13765.704        | 16781.293 | NM_016169          | 11242.973      | 13367.304 | AJ224867           | 354.085          | 871.064   |
| NM_013433          | 3304.004         | 3545.768  | BF307652           | 3303.339       | 4050.769  | NM_003794          | 5728.227         | 7448.938  |
| NM_003794          | 9578.921         | 11402.727 | NM_017772          | 3383.839       | 3698.096  | NM_019892          | 5498.303         | 5427.424  |

|           |           |           |           |           |           |           |           |           |
|-----------|-----------|-----------|-----------|-----------|-----------|-----------|-----------|-----------|
| NM_019892 | 9139.865  | 7158.415  | AF116574  | 3962.75   | 4324.888  | NM_016165 | 3964.717  | 4043.585  |
| NM_016165 | 15127.2   | 15281.556 | NM_005529 | 713.013   | 825.123   | BF307652  | 1025.627  | 1580.117  |
| BF307652  | 3227.468  | 3572.155  | NM_005869 | 9500.643  | 9220.032  | NM_017772 | 2048.82   | 4681.945  |
| NM_017772 | 3498.384  | 4336.367  | AF105067  | 3114.201  | 3790.947  | AF116574  | 2113.13   | 2767.586  |
| AF116574  | 4816.732  | 4479.781  | NM_018676 | 2841.1    | 3528.563  | NM_005529 | 401.874   | 291.443   |
| NM_005529 | 653.733   | 844.289   | NM_006014 | 2110.281  | 1910.742  | NM_005869 | 5840.308  | 5295.068  |
| NM_005869 | 9530.179  | 10846.329 | NM_002066 | 1223.585  | 1371.245  | AF105067  | 1665.327  | 986.333   |
| AF105067  | 3224.975  | 3569.838  | NM_007355 | 64191.148 | 68340.102 | NM_018676 | 1605.286  | 970.558   |
| NM_018676 | 3301.849  | 3275.901  | NM_006096 | 1273.045  | 2255.511  | NM_012072 | 536.669   | 224.932   |
| NM_012072 | 595.315   | 719.852   | NM_012288 | 5784.643  | 6144.58   | NM_006014 | 1503.39   | 1112.141  |
| NM_006014 | 1865.462  | 2385.728  | NM_005264 | 3301.559  | 5348.41   | NM_002066 | 1609.765  | 1462.056  |
| NM_006280 | 59616.387 | 60014.859 | NM_020373 | 1672.403  | 2175.783  | NM_007355 | 53171.637 | 59295.703 |
| NM_001771 | 699.012   | 1103.178  | NM_000714 | 1969.052  | 2783.935  | NM_006096 | 1191.066  | 1254.444  |
| NM_012288 | 5722.298  | 7290.741  | NM_002556 | 3301.83   | 4076.494  | NM_012288 | 3001.657  | 3540.231  |
| NM_005264 | 5631.16   | 4956.314  | NM_018089 | 4591.881  | 5509.372  | NM_005264 | 3000.749  | 4400.949  |
| NM_020373 | 2190.461  | 2026.564  | L21934    | 2680.89   | 3085.106  | NM_020373 | 1617.863  | 2443.769  |
| NM_000714 | 2185.455  | 2530.813  | AL117442  | 7260.447  | 8934.478  | NM_000714 | 1741.177  | 3155.43   |
| NM_002556 | 4859.567  | 4957.253  | NM_004695 | 1686.228  | 1347.888  | NM_002556 | 2343.069  | 3736.582  |
| NM_018089 | 6075.228  | 6822.89   | AF299075  | 1790.881  | 1769.902  | NM_018089 | 3167.755  | 3888.062  |
| L21934    | 3309.766  | 3260.468  | NM_007188 | 4047.175  | 6983.355  | L21934    | 2021.191  | 1626.891  |
| AL117442  | 10555.851 | 9248.896  | NM_001214 | 10830.119 | 13575.241 | AL117442  | 3920.002  | 8129.367  |
| NM_004695 | 1719.678  | 1790.768  | AK022409  | 1097.287  | 1506.363  | NM_004695 | 681.325   | 2500.173  |
| AF299075  | 1944.263  | 1783.372  | U16851    | 10831.429 | 12468.333 | AF299075  | 603.756   | 868.087   |
| NM_000340 | 1263.478  | 1036.83   | NM_014341 | 6624.159  | 8556.325  | NM_000340 | 516.718   | 814.644   |
| NM_007188 | 6907.35   | 5900.282  | NM_000341 | 1081.041  | 1282.888  | NM_007188 | 3511.665  | 2462.954  |
| NM_001214 | 10835.837 | 10296.53  | AK023533  | 720.596   | 1319.9    | NM_001214 | 3620.074  | 2196.271  |
| AK022409  | 1463.619  | 1522.993  | NM_012450 | 1512.199  | 2024.74   | AK022409  | 1046.516  | 445.943   |
| U16851    | 11506.809 | 11541.132 | NM_007071 | 9356.913  | 12047.63  | U16851    | 11469.09  | 4375.338  |
| NM_014341 | 8404.758  | 9336.002  | NM_012135 | 997.971   | 1274.707  | NM_014341 | 6932.646  | 3813.816  |
| NM_020309 | 2004.308  | 1753.403  | M37190    | 533.585   | 1282.299  | NM_000341 | 870.736   | 1110.439  |
| NM_000341 | 1834.841  | 1961.85   | NM_006812 | 10589.022 | 13383.829 | AK023533  | 884.494   | 671.755   |
| AK023533  | 2182.899  | 2280.461  | AK024434  | 7040.463  | 9724.578  | NM_012450 | 825.05    | 967.166   |
| NM_012450 | 2785.425  | 3102.034  | NM_002388 | 10368.804 | 12442.838 | NM_007071 | 9677.61   | 8827.405  |
| NM_007071 | 13570.291 | 16142.692 | NM_016069 | 23434.316 | 29428.996 | NM_012135 | 493.714   | 1078.715  |
| NM_012135 | 775.116   | 784.268   | NM_017612 | 2750.299  | 3537.818  | NM_006812 | 9114.229  | 15085.246 |
| M37190    | 940.646   | 719.406   | NM_013236 | 12206.922 | 12200.095 | AK024434  | 6500.938  | 12749.828 |
| NM_006812 | 12391.821 | 14772.947 | NM_017841 | 9059.388  | 10308.854 | NM_002388 | 9169.655  | 15274.856 |
| AK024434  | 3763.721  | 4211.467  | NM_001254 | 5190.234  | 4303.147  | NM_016069 | 30288.539 | 43310.637 |
| NM_002388 | 14414.209 | 14857.501 | NM_020412 | 21111.436 | 25560.477 | NM_017612 | 2865.077  | 5750.632  |
| NM_016069 | 31634.264 | 35876.594 | NM_003032 | 6472.15   | 9506.863  | NM_013236 | 8943.282  | 15631.075 |
| NM_017612 | 4654.755  | 4921.555  | NM_017453 | 14616.818 | 14393.711 | NM_017841 | 7749.643  | 14134.075 |
| NM_013236 | 17048.572 | 16368.332 | AF038564  | 4965.802  | 5874.864  | NM_001254 | 3070.5    | 5351.771  |
| NM_017841 | 11833.417 | 10525.095 | AB033768  | 1104.838  | 1224.021  | NM_020412 | 9651.119  | 10527.889 |
| NM_001254 | 6058.301  | 7625.544  | NM_017659 | 2019.454  | 2563.121  | NM_003032 | 4222.154  | 4615.419  |
| NM_020412 | 29678.326 | 28684.875 | NM_006904 | 6881.674  | 6124.142  | NM_017453 | 10414.347 | 6049.575  |
| NM_003032 | 9862.114  | 8318.477  | NM_004217 | 14483.78  | 19193.24  | AF038564  | 3527.662  | 1665.043  |
| NM_017453 | 17568.139 | 20982.705 | NM_006347 | 28881.721 | 37951.051 | AB033768  | 898.1     | 503.597   |
| AF038564  | 5500.704  | 6073.263  | NM_020406 | 1709.188  | 2267.279  | NM_017659 | 1739.097  | 760.664   |
| AB033768  | 1103.225  | 1592.336  | NM_014685 | 11634.541 | 14697.042 | NM_006904 | 4440.213  | 3601.774  |
| NM_017659 | 2712.798  | 3136.93   | NM_001550 | 5961.949  | 6701.703  | NM_004217 | 11857.903 | 7805.939  |
| NM_006904 | 6401.061  | 7684.81   | AK026849  | 3417.697  | 2902.166  | NM_006347 | 25106.592 | 16322.998 |
| NM_004217 | 18642.006 | 17157.641 | NM_018677 | 1002.695  | 1151.47   | NM_020406 | 1796.399  | 1278.12   |
| NM_006347 | 32923.016 | 36585.559 | NM_002785 | 1374.102  | 1533.872  | NM_014685 | 11556.523 | 7513.308  |



|           |           |           |           |           |           |           |           |           |
|-----------|-----------|-----------|-----------|-----------|-----------|-----------|-----------|-----------|
| NM_02040E | 2586.368  | 3026.948  | NM_000041 | 11599.81  | 14777.138 | NM_00155C | 3708.464  | 4197.844  |
| NM_01468E | 16896.242 | 19546.891 | W69211    | 384.313   | 1245.295  | AK026849  | 2276.366  | 6447.575  |
| NM_00155C | 5264.298  | 5409.729  | AA449931  | 2622.742  | 3259.724  | NM_018677 | 705.439   | 1687.947  |
| AK026849  | 1925.004  | 2681.824  | AA877347  | 24924.574 | 27613.252 | NM_00278E | 550.449   | 796.157   |
| NM_018677 | 1071.616  | 1678.771  | S57235    | 8476.519  | 9179.351  | X78947    | 68.059    | 853.321   |
| NM_00278E | 578.198   | 744.078   | AI376272  | 2588.91   | 2996.298  | NM_000041 | 14204.396 | 12412.15  |
| NM_000041 | 14561.522 | 14604.251 | BF242229  | 1302.348  | 1228.011  | W69211    | 629.997   | 792.237   |
| W69211    | 1449.566  | 1326.894  | X75756    | 30503.166 | 38485.34  | AA449931  | 2136.237  | 2075.585  |
| AA449931  | 8542.26   | 8416.567  | AI754623  | 2603.319  | 2524.727  | AA877347  | 22156.014 | 20877.414 |
| AA877347  | 32571.914 | 44952.645 | AA401326  | 10906.155 | 13144.104 | S57235    | 4838.2    | 5478.935  |
| BI755551  | 596.083   | 766.887   | N55461    | 1034.759  | 1208.98   | AI376272  | 1098.556  | 1204.419  |
| S57235    | 16608.477 | 14672.918 | AA504482  | 7131.367  | 7064.947  | BF242229  | 703.015   | 1099.278  |
| AI376272  | 4527.501  | 3929.003  | NM_006003 | 18812.055 | 21472.865 | X75756    | 11596.104 | 16659.791 |
| BF242229  | 3323.715  | 3048.846  | NM_00655E | 5784.866  | 7876.056  | AI754623  | 1838.749  | 1975.519  |
| X75756    | 50325.188 | 53309.57  | NM_01651E | 2235.063  | 4015.26   | AA401326  | 7036.122  | 5452.219  |
| AI754623  | 2786.904  | 3091.548  | AF263538  | 1691.672  | 1780.541  | N55461    | 685.987   | 368.226   |
| AA401326  | 11968.377 | 12665.516 | NM_00628C | 51583.016 | 56817.516 | AA504482  | 7394.51   | 3290.743  |
| N55461    | 1388.114  | 1826.937  | NM_00215E | 3627.696  | 8160.082  | BI602175  | 629.272   | 413.24    |
| NM_006003 | 19077.305 | 25377.521 | NM_001771 | 680.518   | 441.571   | NM_006003 | 18789.035 | 11170.205 |
| NM_00655E | 5050.499  | 7327.44   | NM_00206E | 2450.932  | 2340.822  | NM_00655E | 3920.44   | 3147.171  |
| NM_01651E | 3563.288  | 3101.836  | NM_00735E | 68249.898 | 73798.727 | NM_01651E | 2119.459  | 1259.266  |
| AF263538  | 1244.684  | 1670.782  | NM_00609E | 1359.27   | 2117.289  | AF263538  | 763.609   | 803.81    |
| NM_001771 | 781.065   | 680.353   | NM_00686E | 31187.1   | 40528.461 | NM_00628C | 39139.805 | 38098.02  |
| NM_00206E | 1197.465  | 1562.919  | NM_015364 | 10706.966 | 10305.321 | NM_00215E | 4600.751  | 3981.219  |
| NM_00735E | 64203.609 | 60869.723 | NM_006611 | 1067.001  | 802.684   | NM_001771 | 401.642   | 568.307   |
| NM_00609E | 1759.757  | 1738.721  | NM_004963 | 2648.791  | 2088.144  | NM_00206E | 1227.061  | 1618.153  |
| NM_00686E | 30071.781 | 32056.375 | NM_00553E | 24966.561 | 25439.613 | NM_00735E | 54501.039 | 68251.344 |
| NM_015364 | 9917.81   | 14786.465 | AB037857  | 722.516   | 917.147   | NM_00609E | 1258.524  | 1644.119  |
| NM_006611 | 775.18    | 759.549   | AF218021  | 1305.213  | 1551.286  | NM_00686E | 16527.596 | 12095.71  |
| NM_004963 | 3711.008  | 3455.942  | NM_013262 | 14043.947 | 14060.612 | NM_015364 | 6377.248  | 6419.121  |
| NM_001181 | 663.852   | 486.38    | NM_00718E | 10896.847 | 13125.69  | NM_006611 | 480.461   | 387.612   |
| NM_00553E | 42661.621 | 47745.598 | NM_003221 | 973.63    | 619.383   | NM_004963 | 1513.887  | 1816.568  |
| AB037857  | 1941.938  | 1815.84   | NM_003357 | 16796.514 | 15191.876 | NM_001181 | 313.563   | 1500.182  |
| AF218021  | 2650.658  | 2325.136  | AF195420  | 431.805   | 905.241   | NM_00553E | 10657.19  | 9804.503  |
| NM_013262 | 16266.93  | 14791.739 | AK023261  | 5741.799  | 5666.153  | AB037857  | 341.652   | 329.463   |
| NM_00718E | 13060.446 | 13432.304 | NM_005097 | 1177.803  | 1401.043  | AF218021  | 773.296   | 1618.513  |
| NM_003221 | 1377.133  | 1856.825  | NM_01227E | 1036.403  | 1489.233  | NM_013262 | 9448.908  | 11888.334 |
| AK023261  | 5026.538  | 6919.677  | AF023142  | 803.154   | 909.567   | NM_00718E | 5633.921  | 4063.891  |
| NM_005097 | 1667.535  | 1847.142  | NM_01610C | 946.851   | 1212.811  | NM_003221 | 514.851   | 331.089   |
| NM_01227E | 1597.154  | 2566.382  | NM_014057 | 3690.371  | 3968.105  | NM_003357 | 10195.737 | 5127.708  |
| AF023142  | 788.569   | 841.912   | NM_000341 | 1226.961  | 1784.685  | AK023261  | 3550.771  | 3026.078  |
| NM_01610C | 1039.974  | 1100.675  | AK023533  | 1154.991  | 1865.251  | NM_005097 | 911.228   | 891.971   |
| NM_014057 | 2968.503  | 3756.745  | NM_01245C | 2697.79   | 2661.573  | NM_01227E | 786.882   | 852.048   |
| NM_02030E | 1561.764  | 1416.772  | NM_007071 | 12364.338 | 13217.056 | AF023142  | 420.112   | 575.661   |
| NM_000341 | 943.893   | 1499.378  | NM_016582 | 6273.562  | 6803.838  | NM_014057 | 2020.975  | 2053.733  |
| AK023533  | 1332.039  | 1370.264  | NM_01422E | 1459.436  | 1520.781  | NM_02030E | 846.129   | 861.604   |
| NM_01245C | 1378.279  | 1164.45   | NM_01326E | 12205.377 | 17921.242 | NM_000341 | 1212.276  | 777.605   |
| NM_007071 | 10055.664 | 11795.521 | NM_014964 | 3197.62   | 3254.27   | AK023533  | 1035.402  | 904.826   |
| NM_016582 | 3497.022  | 4298.421  | NM_01401E | 12992.959 | 11110.661 | NM_01245C | 1186.928  | 2875.341  |
| NM_01422E | 1614.128  | 2431.706  | NM_013433 | 2820.261  | 3334.387  | NM_007071 | 9036.498  | 12845.615 |
| NM_01326E | 23004.467 | 19421.146 | NM_003794 | 9793.971  | 7862.234  | NM_016582 | 2167.629  | 1985.729  |
| NM_014964 | 5271.512  | 4041.533  | NM_019892 | 6445.584  | 9155.272  | NM_01422E | 1012.072  | 2152.616  |
| NM_01401E | 14373.704 | 16215.147 | NM_01616E | 13494.209 | 12926.468 | NM_01326E | 10765.563 | 8448.197  |

|           |           |           |           |           |           |           |           |           |
|-----------|-----------|-----------|-----------|-----------|-----------|-----------|-----------|-----------|
| NM_013433 | 4030.021  | 4186.16   | BF307652  | 2804.204  | 2777.478  | NM_014964 | 1430.416  | 2017.543  |
| NM_003794 | 10965.097 | 11594.071 | NM_017772 | 2576.04   | 2849.692  | NM_014016 | 5461.862  | 12761.338 |
| NM_019892 | 9379.917  | 7810.984  | AF116574  | 3077.358  | 3689.062  | NM_013433 | 2058.848  | 3066.67   |
| NM_016166 | 14119.512 | 13398.402 | NM_005869 | 8936.739  | 11215.803 | NM_003794 | 5191.624  | 7738.573  |
| BF307652  | 2572.582  | 2541.35   | AF105067  | 2884.095  | 3585.411  | NM_019892 | 5485.483  | 5172.912  |
| NM_017772 | 2958.191  | 4831.695  | NM_018676 | 2801.37   | 3325.128  | NM_016166 | 5296.485  | 5870.088  |
| AF116574  | 4195.212  | 4697.731  | NM_012072 | 770.037   | 1261.235  | BF307652  | 2143.96   | 947.659   |
| NM_005869 | 9894.327  | 11226.996 | NM_006014 | 2529.293  | 2464.683  | NM_017772 | 2318.654  | 1414.237  |
| AF105067  | 3889.071  | 4445.274  | NM_006904 | 6596.905  | 5581.304  | AF116574  | 2346.026  | 1148.408  |
| NM_018676 | 3860.522  | 4462.467  | NM_004217 | 12873.096 | 13820.426 | NM_005869 | 6079.885  | 4770.346  |
| NM_006014 | 2817.494  | 3418.862  | NM_006347 | 27585.162 | 32652.52  | AF105067  | 2330.542  | 1928.666  |
| NM_006904 | 6836.943  | 7344.475  | NM_020406 | 2333.952  | 2877.352  | NM_018676 | 1644.442  | 1316.941  |
| NM_004217 | 16471.623 | 14600.452 | NM_014685 | 12478.632 | 14482.899 | NM_012072 | 485.129   | 397.145   |
| NM_006347 | 32926.516 | 35076.781 | NM_012288 | 6461.534  | 7075.657  | NM_006014 | 1314.973  | 1648.786  |
| NM_020406 | 1789.423  | 1606.096  | NM_005264 | 4092.236  | 5630.72   | NM_006904 | 2632.339  | 1990.43   |
| NM_014685 | 14877.001 | 14488.562 | NM_020373 | 2021.163  | 2355.278  | NM_004217 | 7039.667  | 4302.878  |
| NM_012288 | 5205.636  | 7037.738  | NM_000714 | 2645.024  | 2333.697  | NM_006347 | 20578.729 | 10512.434 |
| NM_005264 | 6743.942  | 8563.872  | NM_002556 | 4208.456  | 5742.144  | NM_020406 | 1341.612  | 1008.735  |
| NM_020373 | 2939.388  | 3135.018  | NM_018089 | 5801.654  | 5078.995  | NM_014685 | 10611.971 | 5446.058  |
| NM_000714 | 3227.549  | 3539.896  | L21934    | 3943.715  | 2941.154  | NM_012288 | 3653.87   | 3152.797  |
| NM_002556 | 5685.428  | 5507.623  | AL117442  | 5866.725  | 5794.841  | NM_005264 | 3004.865  | 1840.968  |
| NM_018089 | 6302.109  | 7188.954  | NM_004695 | 1289.432  | 930.489   | NM_020373 | 1324.903  | 655.547   |
| L21934    | 2824.927  | 3285.47   | AF299075  | 1279.407  | 1294.382  | NM_000714 | 1392.093  | 1233.666  |
| AL117442  | 7377.495  | 7473.314  | NM_007188 | 3981.993  | 4957.67   | NM_002556 | 2240.86   | 4157.51   |
| NM_004695 | 1456.032  | 1980.097  | NM_001214 | 8468.365  | 9254.099  | NM_018089 | 3058.556  | 2315.601  |
| AF299075  | 1393.855  | 1473.445  | NM_006003 | 18486.686 | 15078.706 | L21934    | 2020.683  | 2088.13   |
| NM_000340 | 1314.159  | 760.151   | NM_006555 | 4083.324  | 4469.169  | AL117442  | 5321.439  | 2317.511  |
| NM_007188 | 6886.179  | 6366.963  | NM_016516 | 2574.415  | 4013.074  | NM_004695 | 715.93    | 701.358   |
| NM_001214 | 13769.826 | 13065.533 | AF263538  | 2123.192  | 1373.596  | AF299075  | 1027.547  | 356.66    |
| AK022409  | 1424.134  | 1610.367  | NM_012135 | 775.238   | 950.423   | NM_000340 | 357.732   | 217.602   |
| U16851    | 15679.847 | 17918.273 | M37190    | 785.979   | 647.396   | NM_007188 | 3834.068  | 2503.145  |
| NM_014341 | 10894.729 | 11617.062 | NM_006812 | 11670.775 | 10170.775 | NM_001214 | 3566.104  | 3145.485  |
| NM_006003 | 23473.85  | 22715.686 | AK024434  | 11244.185 | 9677.371  | AK022409  | 1085.183  | 1117.68   |
| NM_006555 | 5268.273  | 5295.984  | NM_002388 | 15043.233 | 11111.037 | U16851    | 12875.068 | 8804.854  |
| NM_016516 | 3459.133  | 2759.954  | NM_016069 | 37357.328 | 29565.916 | NM_014341 | 6505.508  | 5209.919  |
| AF263538  | 1259.045  | 1550.765  | NM_017612 | 3603.616  | 3191.288  | NM_006003 | 12919.109 | 5936.723  |
| NM_012135 | 1043.538  | 1471.975  | NM_013236 | 10998.175 | 8541.203  | NM_006555 | 2999.821  | 1771.201  |
| M37190    | 883.442   | 905.426   | NM_017841 | 8644.49   | 7318.726  | NM_016516 | 2040.265  | 807.419   |
| NM_006812 | 15357.357 | 18111.297 | NM_001254 | 4626.257  | 3340.456  | AF263538  | 788.464   | 532.839   |
| AK024434  | 12578.249 | 17078.488 | NM_020412 | 19736.027 | 14382.051 | NM_012135 | 422.914   | 198.861   |
| NM_002388 | 16418.1   | 16799.082 | NM_003032 | 7674.726  | 7527.691  | NM_006812 | 6353.514  | 3499.706  |
| NM_016069 | 23643.023 | 24725.566 | NM_017453 | 17263.271 | 11546.982 | AK024434  | 4374.158  | 2716.909  |
| NM_017612 | 4085.684  | 4700.446  | AK023261  | 5435.819  | 4628.321  | NM_002388 | 7303.895  | 7536.222  |
| NM_013236 | 11594.162 | 11882.299 | NM_005097 | 948.533   | 783.018   | NM_017612 | 2027.864  | 2094.695  |
| NM_017841 | 9643.963  | 10587.555 | NM_012278 | 947.884   | 1060.366  | NM_013236 | 8011.31   | 3502.3    |
| NM_001254 | 4551.786  | 5306.121  | AF023142  | 646.16    | 596.313   | NM_017841 | 5329.839  | 3339.519  |
| NM_003032 | 11973.667 | 11295.317 | NM_016100 | 652.521   | 1040.949  | NM_001254 | 3237.727  | 2132.759  |
| NM_017453 | 16779.797 | 18454.227 | NM_014057 | 3582.076  | 2709.465  | NM_020412 | 10398.112 | 7467.214  |
| AF038564  | 6570.364  | 7177.139  | NM_001550 | 6167.995  | 5066.205  | NM_003032 | 4485.206  | 3341.794  |
| AB033768  | 1475.895  | 1881.797  | AK026849  | 3281.673  | 2205.286  | NM_017453 | 11458.027 | 8711.561  |
| NM_017659 | 2727.47   | 2572.805  | NM_018677 | 1203.268  | 757.569   | AF038564  | 3989.975  | 4077.907  |
| AK023261  | 5327.133  | 5925.714  | NM_002785 | 1037.656  | 809.753   | AB033768  | 1010.461  | 1228.12   |
| NM_005097 | 872.12    | 750.974   | NM_000041 | 24908.063 | 16973.141 | NM_017659 | 1603.019  | 1503.513  |

|           |           |           |           |           |           |           |           |           |
|-----------|-----------|-----------|-----------|-----------|-----------|-----------|-----------|-----------|
| NM_01227E | 1038.634  | 898.926   | W69211    | 1133.737  | 894.627   | AK023261  | 2984.039  | 1797.882  |
| NM_01610C | 775.125   | 525.375   | AA449931  | 5625.01   | 3937.624  | NM_005097 | 714.834   | 570.37    |
| NM_014057 | 2312.003  | 2376.794  | AA877347  | 33907.926 | 23540.43  | NM_01227E | 782.05    | 419.464   |
| NM_00155C | 4468.223  | 4885.472  | S57235    | 8660.683  | 6850.063  | AF023142  | 671.115   | 353.017   |
| AK026849  | 2829.742  | 3615.126  | AI376272  | 2625.089  | 2413.274  | NM_01610C | 645.045   | 553.613   |
| NM_018677 | 1365.02   | 1420      | BF242229  | 1008.845  | 882.277   | NM_014057 | 1817.964  | 1049.953  |
| NM_00278E | 1331.228  | 1810.952  | X75756    | 25521.051 | 22172.32  | NM_00155C | 2963.702  | 1575.711  |
| NM_000041 | 27961.361 | 35035.73  | AI754623  | 2144.855  | 2084.332  | AK026849  | 969.26    | 490.827   |
| W69211    | 1643.777  | 1466.688  | AA401326  | 12208.804 | 13419.629 | NM_018677 | 519.366   | 316.136   |
| AA449931  | 8476.66   | 8297.874  | AA504482  | 11087.878 | 15788.223 | NM_000041 | 7548.879  | 3228.58   |
| AA877347  | 31226.82  | 48298.746 | NM_005869 | 6945.948  | 5053.161  | W69211    | 616.876   | 697.23    |
| R54049    | 364.965   | 1099.636  | AF105067  | 2528.383  | 1892.153  | AA877347  | 19114.775 | 16797.729 |
| S57235    | 10413.414 | 10671.214 | NM_01867E | 2304.148  | 1902.295  | S57235    | 5599.503  | 2540.636  |
| AI376272  | 3081.436  | 2786.069  | NM_012072 | 709.31    | 612.671   | AI376272  | 1454.03   | 648.16    |
| BF242229  | 2347.773  | 2234.543  | NM_006014 | 2083.476  | 1374.779  | BF242229  | 585.666   | 547.611   |
| AI754623  | 3166.912  | 2929.248  | NM_00628C | 58608.285 | 56166.586 | X75756    | 11077.282 | 7671.897  |
| AA401326  | 14520.739 | 14951.646 | NM_00215E | 3440.386  | 5669.291  | AI754623  | 1354.456  | 1269.861  |
| N55461    | 1576.081  | 1644.615  | NM_00206E | 2063.559  | 1511.778  | AA401326  | 3564.008  | 3180.532  |
| AA504482  | 8461.797  | 9020.849  | NM_00735E | 62571.898 | 59204.594 | N55461    | 681.721   | 561.319   |
| BI602175  | 829.267   | 679.522   | NM_00609E | 1973.773  | 1601.24   | AA504482  | 3774.347  | 3633.962  |
| NM_00586E | 6719.262  | 7392.301  | NM_015364 | 11262.75  | 8056.775  | BI602175  | 515.265   | 255.064   |
| AF105067  | 2298.063  | 2193.572  | NM_00496C | 2747.565  | 2622.015  | NM_00552E | 519.582   | 206.162   |
| NM_01867E | 2802.624  | 2309.99   | NM_00553E | 25836.719 | 34124.074 | NM_006014 | 1073.023  | 1587.982  |
| NM_012072 | 424.817   | 428.636   | AB037857  | 939.974   | 1171.396  | NM_00628C | 31395.711 | 23987.113 |
| NM_006014 | 1549.458  | 2211.147  | AF218021  | 1482.666  | 2310.129  | NM_00215E | 3668.773  | 1127.295  |
| NM_00628C | 45621.191 | 53215.191 | NM_01326E | 16461.066 | 23654.736 | NM_001771 | 394.627   | 248.205   |
| NM_00215E | 7543.271  | 5859.574  | NM_00718E | 12622.687 | 17936.201 | NM_00206E | 638.673   | 343.383   |
| NM_001771 | 802.438   | 904.723   | NM_00718E | 3898.538  | 3147.803  | NM_00735E | 52156.594 | 18209.811 |
| NM_00206E | 2751.715  | 3835.564  | NM_001214 | 7481.854  | 6267.884  | NM_00609E | 1122.772  | 445.925   |
| NM_00609E | 2583.284  | 2725.169  | AK022409  | 1296.67   | 886.761   | NM_00686E | 12395.196 | 9925.653  |
| NM_00686E | 57780.875 | 49957.555 | U16851    | 11397.279 | 7761.044  | NM_015364 | 6134.709  | 9081.645  |
| NM_015364 | 10394.522 | 13605.702 | NM_02030E | 1476.115  | 1775.769  | NM_00496C | 1510.457  | 678.414   |
| NM_006611 | 673.379   | 1143.037  | NM_000341 | 1225.754  | 1064.512  | NM_00553E | 12833.342 | 6190.78   |
| NM_00496C | 2888.42   | 4137.871  | AK023533  | 1163.479  | 1579.278  | AF218021  | 595.771   | 634.435   |
| NM_00553E | 24622.008 | 27906.229 | NM_01245C | 3500.694  | 3011.903  | NM_01326E | 8131.081  | 5887.861  |
| AB037857  | 940.6     | 1089.891  | NM_007071 | 16193.796 | 20217.973 | NM_00718E | 3985.027  | 3432.949  |
| AF218021  | 1414.702  | 1464.425  | NM_01422E | 2241.697  | 2750.566  | NM_003357 | 7809.971  | 6175.398  |
| NM_01326E | 16047.5   | 14450.75  | NM_01326E | 16913.199 | 27735.502 | AF195420  | 419.289   | 615.09    |
| NM_00718E | 14173.246 | 14410.741 | NM_014964 | 3963.463  | 4619.947  | NM_000341 | 883.036   | 847.301   |
| NM_003221 | 709.46    | 919.569   | NM_01401E | 11268.74  | 9415.323  | AK023533  | 960.929   | 714.593   |
| NM_003357 | 16229.878 | 14597.226 | NM_01343C | 2416.064  | 2919.479  | NM_01245C | 826.224   | 358.262   |
| AF195420  | 937.305   | 875.617   | NM_003794 | 8192.546  | 6968.747  | NM_007071 | 6174.732  | 2613.875  |
| NM_00718E | 4321.156  | 3488.039  | NM_01989E | 5945.791  | 8540.755  | NM_01658E | 1281.652  | 1007.294  |
| NM_001214 | 5421.309  | 4645.271  | NM_01616E | 12327.402 | 9666.61   | NM_01326E | 11943.833 | 3812.667  |
| AK022409  | 1010.859  | 534.25    | BF307652  | 1955.923  | 2442.732  | NM_014964 | 1780.045  | 835.282   |
| U16851    | 8479.218  | 7466.73   | NM_01777E | 2434.683  | 2580.339  | NM_01401E | 5298.375  | 3443.001  |
| NM_014341 | 8057.583  | 7974.319  | AF116574  | 3061.91   | 3148.922  | NM_01343C | 1883.249  | 972.321   |
| NM_02030E | 1207.395  | 1390.706  | NM_02041E | 22225.861 | 17705.553 | NM_003794 | 3729.322  | 2633.4    |
| NM_000341 | 1692.146  | 2041.52   | NM_00303E | 7904.947  | 7100.795  | NM_01989E | 4591.845  | 2513.355  |
| AK023533  | 1828.073  | 2801.375  | NM_01745E | 16205.396 | 11051.571 | NM_01616E | 4066.723  | 3643.329  |
| NM_007071 | 15640.719 | 17435.836 | AF038564  | 5196.255  | 6178.436  | BF307652  | 1403.938  | 1015.415  |
| NM_01658E | 12796.667 | 14894.86  | AB033768  | 1487.231  | 1746.188  | NM_01777E | 1917.774  | 1827.035  |
| NM_01422E | 2438.16   | 2642.033  | NM_01765E | 2755.746  | 4493.018  | AF116574  | 2111.762  | 1466.164  |

|           |           |           |           |           |           |           |           |           |
|-----------|-----------|-----------|-----------|-----------|-----------|-----------|-----------|-----------|
| NM_013265 | 21112.82  | 15988.502 | NM_006904 | 10309.023 | 11679.84  | AB033768  | 1264.255  | 3354.054  |
| NM_014964 | 3530.829  | 3343.506  | NM_004217 | 17535.23  | 23070.686 | NM_006904 | 3795.662  | 9305.04   |
| NM_014016 | 12891.888 | 16071.455 | NM_020406 | 1927.032  | 2564.317  | NM_004217 | 7179.14   | 8696.241  |
| NM_013433 | 2973.275  | 3360.526  | NM_014685 | 15580.668 | 16339.831 | NM_020406 | 1011.52   | 708.71    |
| NM_003794 | 7964.513  | 10366.494 | NM_012288 | 7882.037  | 7904.465  | NM_014685 | 9209.303  | 3196.34   |
| NM_019892 | 8780.314  | 6190.907  | NM_005264 | 4553.589  | 5410.527  | NM_012288 | 2915.476  | 1401.525  |
| NM_016169 | 10106.749 | 9231.628  | NM_020373 | 2028.457  | 2204.036  | NM_005264 | 2825.806  | 861.226   |
| BF307652  | 1925.515  | 1400.027  | NM_000714 | 2189.778  | 2663.75   | NM_020373 | 1103.979  | 352.923   |
| NM_017772 | 3591.958  | 3585.646  | NM_002556 | 3487.746  | 2944.281  | NM_000714 | 1700.414  | 651.842   |
| AF116574  | 2762.325  | 3088.804  | NM_018089 | 5344.427  | 4443.687  | NM_002556 | 1670.922  | 1038.081  |
| NM_020412 | 17090.328 | 13334.899 | L21934    | 3145.098  | 2495.752  | NM_018089 | 2452.828  | 1832.493  |
| NM_003032 | 7496.659  | 6297.808  | AF299075  | 950.287   | 1232.204  | L21934    | 1707.274  | 1524.153  |
| NM_017453 | 16657.479 | 15020.59  | AK026663  | 2568.379  | 2972.177  | AL117442  | 5436.937  | 4779.51   |
| AF038564  | 4139.366  | 3937.331  | NM_001174 | 5420.404  | 6700.791  | NM_004695 | 845.909   | 1113.959  |
| AB033768  | 763.053   | 911.118   | U69645    | 17219.045 | 31888.637 | NM_001424 | 806.217   | 2476.507  |
| NM_017659 | 2475.01   | 2114.284  | NM_019082 | 9674.539  | 11229.313 | AB040950  | 1428.353  | 3618.766  |
| NM_006904 | 5937.372  | 7073.398  | NM_001424 | 2756.054  | 2852.75   | NM_014003 | 3880.143  | 10069.17  |
| NM_004217 | 15359.421 | 16730.414 | AB040950  | 2039.067  | 2539.755  | NM_001356 | 1123.974  | 2352.394  |
| NM_020406 | 2393.095  | 2545.864  | NM_014003 | 8089.795  | 8825.705  | AB037805  | 2593.247  | 3358.174  |
| NM_014685 | 17558.254 | 20528.629 | NM_001356 | 2232.963  | 1970.502  | NM_016516 | 1958.482  | 928.098   |
| NM_012288 | 6255.905  | 8314.882  | AB037805  | 11203.119 | 8509.779  | AF263538  | 759.982   | 370.808   |
| NM_005264 | 5521.518  | 5612.458  | NM_016516 | 3043.962  | 2723.15   | NM_006812 | 6608.099  | 2645.225  |
| NM_020373 | 2494.78   | 3091.257  | AF263538  | 2330.169  | 1554.681  | AK024434  | 5209.634  | 2370.032  |
| NM_000714 | 2674.103  | 3193.265  | NM_012135 | 1118.125  | 1040.676  | NM_002388 | 6313.925  | 4268.372  |
| NM_002556 | 3888.147  | 4867.635  | M37190    | 968.923   | 902.038   | NM_016069 | 21147.766 | 12903.76  |
| NM_018089 | 4769.444  | 6173.773  | NM_006812 | 12810.666 | 10252.33  | NM_017612 | 1716.908  | 1463.07   |
| L21934    | 3411.413  | 3614.675  | AK024434  | 7163.821  | 4522.647  | NM_013236 | 9281.522  | 7427.331  |
| AL117442  | 5410.504  | 5461.593  | NM_002388 | 12967.542 | 9559.764  | NM_017841 | 6475.155  | 5202.067  |
| NM_004695 | 944.923   | 1120.416  | NM_016069 | 34931.066 | 25938.225 | NM_001254 | 3185.146  | 3210.067  |
| AF299075  | 1066.829  | 1343.436  | NM_017612 | 3760.819  | 3146.781  | NM_004389 | 595.142   | 2006.707  |
| AK026663  | 1071.196  | 1212.183  | NM_004389 | 1250.296  | 773.709   | AF278532  | 338.935   | 1104.644  |
| NM_001174 | 3251.163  | 3431.403  | NM_005928 | 4588.25   | 3046.807  | NM_005928 | 3697.495  | 10079.311 |
| U69645    | 24606.033 | 17166.666 | NM_003952 | 3249.708  | 2413.783  | NM_003952 | 2041.662  | 5289.851  |
| NM_019082 | 8574.818  | 7172.06   | NM_005424 | 3251.651  | 2734.007  | NM_005424 | 1246.927  | 2909.666  |
| NM_001424 | 2816.094  | 2498.543  | NM_005975 | 3885.463  | 3748.725  | NM_005975 | 4000.149  | 8601.144  |
| AB040950  | 1947.123  | 2319.776  | AY007220  | 11600.327 | 8102.209  | AY007220  | 4926.265  | 11497.853 |
| NM_014003 | 7448.14   | 8053.656  | NM_004438 | 1877.888  | 2443.007  | X89399    | 1220.597  | 855.569   |
| NM_001356 | 2344.566  | 2146.412  | X89399    | 1087.446  | 1132.979  | NM_003808 | 1419.655  | 1182.882  |
| AB037805  | 20295.59  | 23690.488 | NM_003808 | 1729.603  | 1205.078  | NM_005399 | 916.003   | 554.854   |
| NM_016516 | 3234.858  | 3167.815  | AK023666  | 1829.975  | 1167.725  | NM_006573 | 403.886   | 290.852   |
| AF263538  | 1788.969  | 1974.481  | NM_005399 | 1308.206  | 1463.539  | NM_005118 | 496.516   | 545.667   |
| NM_012135 | 1002.276  | 1564.355  | NM_006573 | 610.333   | 592.14    | NM_015185 | 1549.993  | 559.915   |
| NM_006812 | 13164.952 | 14940.988 | NM_005118 | 1561.779  | 1722.409  | NM_005374 | 695.113   | 551.833   |
| AK024434  | 7600.435  | 7641.691  | NM_015185 | 2343.714  | 2016.428  | NM_003632 | 971.643   | 896.331   |
| NM_002388 | 12895.495 | 12797.603 | NM_005374 | 1235.544  | 445.628   | NM_002194 | 1180.871  | 606.862   |
| NM_016069 | 30778.445 | 33796.453 | NM_003632 | 2826.286  | 2619.536  | NM_000530 | 699.611   | 889.039   |
| NM_017612 | 3734.876  | 4002.203  | NM_002194 | 2171.629  | 1898.465  | AB028989  | 633.835   | 502.261   |
| NM_013236 | 12920.886 | 13042.194 | NM_000530 | 1196.532  | 1089.083  | NM_016166 | 12444.121 | 8283.548  |
| NM_017841 | 9605.431  | 9203.617  | NM_016166 | 9483.921  | 9811.755  | NM_002086 | 13869.485 | 10265.575 |
| NM_001254 | 4373.006  | 5168.144  | NM_020482 | 3676.424  | 3148.312  | NM_016248 | 1270.77   | 1679.702  |
| NM_004389 | 842.032   | 845.759   | NM_002398 | 890.608   | 365.692   | NM_005489 | 13150.146 | 9535.504  |
| NM_005928 | 4484.657  | 4852.067  | NM_005417 | 2217.966  | 1473.696  | AF191770  | 354.478   | 1582.452  |
| NM_003952 | 3567.411  | 2746.141  | NM_002649 | 4104.285  | 1979.403  | NM_020482 | 1592.601  | 3470.056  |

|           |           |           |           |           |           |           |           |           |
|-----------|-----------|-----------|-----------|-----------|-----------|-----------|-----------|-----------|
| NM_005424 | 4835.791  | 4090.513  | AK025329  | 23697.877 | 15246.736 | NM_004464 | 443.905   | 1513.093  |
| NM_005975 | 4992.388  | 5285.439  | NM_001259 | 1744.753  | 943.877   | NM_002398 | 443.127   | 1315.301  |
| AY007220  | 9172.183  | 8317.396  | AL137679  | 3431.265  | 2543.875  | NM_005417 | 1694.063  | 3430.203  |
| X89399    | 2429.255  | 1182.947  | NM_001786 | 16334.629 | 10007.241 | NM_002648 | 1932.237  | 4650.435  |
| NM_003808 | 1885.061  | 1924.4    | AB040965  | 1016.592  | 755.921   | AK025329  | 14012.964 | 33646.375 |
| AK023666  | 1995.773  | 2014.613  | AK025026  | 3906.392  | 2871.107  | NM_001258 | 1399.726  | 3799.843  |
| NM_005398 | 2186.367  | 1837.41   | AK023052  | 2541.379  | 2279.944  | AL137679  | 2301.054  | 8981.285  |
| NM_006573 | 1061.729  | 1841.26   | AB018350  | 827.84    | 735.867   | AK023052  | 1446.248  | 439.494   |
| NM_015185 | 3319.823  | 3058.348  | NM_006455 | 57419.125 | 49583.18  | AB018350  | 430.321   | 161.911   |
| NM_005374 | 1813.134  | 1704.848  | NM_017541 | 480.03    | 639.403   | NM_006455 | 43270.207 | 14370.902 |
| AF011757  | 512.821   | 846.885   | NM_018460 | 12302.476 | 12215.801 | NM_018460 | 9880.628  | 4804.999  |
| NM_003632 | 2584.279  | 2388.519  | NM_002705 | 8174.979  | 8034.91   | NM_002705 | 3758.257  | 2489.007  |
| NM_002194 | 2266.47   | 2465.095  | NM_005591 | 12479.909 | 12560.561 | NM_005591 | 7592.512  | 6167.974  |
| NM_000530 | 992.062   | 1370.75   | NM_002545 | 891.969   | 1367.566  | NM_003128 | 409.139   | 390.346   |
| AB028989  | 1081.762  | 935.987   | NM_005411 | 2734.092  | 3920.808  | NM_002545 | 1015.669  | 1143.476  |
| NM_016168 | 13147.836 | 12444.605 | NM_004855 | 6341.934  | 4186.547  | NM_006688 | 49469.48  | 41338.281 |
| NM_002088 | 17771.561 | 15183.11  | NM_006952 | 667.712   | 718.516   | NM_005411 | 3347.685  | 3227.338  |
| NM_016248 | 1241.914  | 1812.88   | NM_004808 | 937.402   | 817.25    | NM_004855 | 4539.574  | 7854.262  |
| NM_005488 | 13511.353 | 12214.877 | NM_004617 | 1671.836  | 1013.208  | NM_006952 | 645.913   | 1064.96   |
| NM_020482 | 3387.879  | 2602.198  | NM_005668 | 5861.096  | 4540.703  | NM_005055 | 493.731   | 1579.954  |
| NM_002398 | 791.118   | 673.355   | NM_006748 | 11865.483 | 6461.261  | NM_004808 | 1435.293  | 2932.439  |
| NM_005417 | 2012.456  | 1957.87   | NM_012177 | 5830.254  | 4913.803  | NM_004617 | 1495.658  | 3316.388  |
| NM_002648 | 3714.415  | 3538.03   | NM_006666 | 33312.16  | 28960.742 | NM_005668 | 5331.411  | 11918.534 |
| AK025329  | 25441.773 | 23732.115 | NM_002807 | 23249.137 | 13827.338 | NM_006748 | 8295.556  | 22456.189 |
| NM_001258 | 1798.459  | 1538.177  | NM_002799 | 57486.121 | 50413.563 | NM_012177 | 5632.361  | 13784.147 |
| AL137679  | 3872.115  | 5306.25   | NM_002790 | 40618.289 | 35891.73  | NM_006666 | 23487.516 | 50752.223 |
| NM_001786 | 19093.754 | 19363.809 | NM_018386 | 8087.819  | 7017.904  | NM_002790 | 30196.457 | 13635.173 |
| AB040965  | 1459.592  | 1121.087  | NM_014948 | 2304.963  | 2182.222  | NM_018386 | 4890.874  | 933.679   |
| AK025026  | 5839.835  | 4601.608  | BF217579  | 18028.256 | 16490.518 | NM_014948 | 1252.045  | 453.651   |
| AK023052  | 3428.246  | 3141.309  | NM_004335 | 5022.471  | 4161.812  | BF217579  | 10428.283 | 4041.02   |
| AB018350  | 765.393   | 870.455   | AF040965  | 14478.447 | 12472.67  | NM_004335 | 2000.512  | 1414.88   |
| NM_006455 | 60886.672 | 53276.879 | AB037840  | 1308.587  | 1474.582  | AF040965  | 6465.071  | 3852.261  |
| NM_017541 | 1042.146  | 763.601   | Y10210    | 1312.244  | 1264.158  | AB037840  | 1388.267  | 1235.666  |
| NM_018460 | 18698.654 | 15211.348 | AB020689  | 1066.262  | 1093.153  | NM_007011 | 595.37    | 497.143   |
| NM_002705 | 9819.559  | 8863.254  | AF177238  | 699.906   | 2291.505  | Y10210    | 3281.323  | 2943.708  |
| NM_005591 | 12784.139 | 16555.236 | AL096747  | 1016.824  | 497.09    | AB020689  | 1039.366  | 1236.729  |
| NM_002373 | 1221.972  | 1347.453  | NM_012406 | 8193.219  | 8037.894  | NM_003203 | 596.025   | 851.113   |
| NM_003128 | 1047.052  | 530.419   | NM_014947 | 25995.93  | 20725.379 | NM_002514 | 475.017   | 900.817   |
| NM_002545 | 1248.232  | 1079.247  | AL355698  | 1126.501  | 722.964   | AF177238  | 840.035   | 725.863   |
| NM_006688 | 50192.984 | 43362.406 | AB033112  | 1793.263  | 1259.802  | AB021641  | 385.589   | 1074.461  |
| NM_005411 | 2197.021  | 2171.567  | AK023243  | 1183.242  | 757.37    | NM_012406 | 4442.491  | 7032.807  |
| NM_004855 | 7118.781  | 5877.163  | NM_014409 | 2002.047  | 1598.154  | NM_014947 | 7491.684  | 12028.127 |
| NM_006952 | 1055.881  | 925.004   | NM_001422 | 3788.642  | 2408.251  | AL355698  | 1198.308  | 2675.905  |
| NM_005055 | 678.88    | 568.003   | AK022358  | 3051.469  | 2132.01   | AB033112  | 1212.621  | 2961.181  |
| NM_004808 | 1786.42   | 1093.595  | NM_000977 | 4346.183  | 3706.577  | NM_014079 | 149.392   | 878.586   |
| NM_004617 | 1487.596  | 1164.433  | NM_014205 | 6784.622  | 6795.465  | NM_005674 | 482.09    | 1462.49   |
| NM_005668 | 6834.693  | 5141.451  | NM_018141 | 5992.698  | 4820.753  | NM_001422 | 1656.542  | 848.096   |
| NM_006748 | 10063.959 | 10088.816 | X96646    | 17587.133 | 17811.809 | AK022358  | 1952.039  | 1812.328  |
| NM_012177 | 8191.925  | 8317.421  | AB032991  | 10775.913 | 8945.819  | NM_000977 | 15616.065 | 7759.529  |
| NM_006666 | 41128.875 | 36853.957 | AK026985  | 5382.293  | 4361.7    | NM_014205 | 31700.219 | 17833.533 |
| NM_002807 | 24100.693 | 24205.32  | NM_004109 | 7582.888  | 5858.722  | NM_018141 | 9475.301  | 7269.49   |
| NM_002798 | 67535.273 | 63634.047 | NM_003198 | 9421.275  | 7967.488  | NM_016504 | 17641.59  | 21306.295 |
| NM_002790 | 49058.496 | 49794     | AF220415  | 950.858   | 795.329   | AB032991  | 6255.258  | 10328.64  |

|           |           |           |           |           |           |           |           |           |
|-----------|-----------|-----------|-----------|-----------|-----------|-----------|-----------|-----------|
| NM_01838E | 10466.725 | 10074.494 | NM_005174 | 65789.992 | 55351.09  | AK026985  | 1781.657  | 4938.37   |
| NM_01494E | 3461.888  | 2558.795  | NM_00036E | 3260.311  | 3081.43   | NM_00410E | 6250.267  | 13747.138 |
| BF217579  | 22289.963 | 17818.965 | AF110322  | 2236.881  | 3790.309  | NM_00319E | 8035.505  | 15576.752 |
| NM_00433E | 5883.739  | 5452.994  | NM_01345C | 3077.429  | 2957.69   | NM_015954 | 691.706   | 1723.217  |
| AF040965  | 13155.028 | 12264.3   | NM_00453E | 1860.035  | 1805.415  | AF220415  | 992.433   | 3643.16   |
| AB037840  | 3628.583  | 3650.634  | NM_003077 | 2815.587  | 2809.567  | NM_00036E | 2871.593  | 2054.844  |
| NM_007011 | 1981.5    | 1902.016  | NM_00210E | 1973.663  | 1420.504  | AF110322  | 2590.68   | 346.699   |
| Y10210    | 6134.221  | 6495.343  | L13203    | 1236.914  | 1045.812  | NM_01345C | 2021.05   | 625.309   |
| AB020689  | 3522.972  | 3402.797  | NM_01804C | 2459.261  | 1781.904  | NM_00453E | 1293.268  | 674.892   |
| NM_00320E | 4174.378  | 4878.867  | AB042646  | 3636.418  | 3690.06   | NM_003077 | 2189.446  | 1068.517  |
| AF177238  | 1079.577  | 867.109   | NM_003431 | 1913.484  | 2045.896  | NM_00210E | 3671.175  | 2321.006  |
| AB021641  | 634.671   | 662.313   | M29581    | 1037.049  | 854.228   | NM_01848E | 1300.047  | 1252.004  |
| NM_01240E | 12475.235 | 8421.678  | AL050204  | 2615.153  | 2493.356  | L13203    | 1597.067  | 1479.385  |
| NM_014947 | 19361.197 | 14302.455 | AK025316  | 3026.299  | 1708.06   | NM_01804C | 1344.998  | 1605.724  |
| AL355698  | 1044.756  | 732.601   | AK026357  | 3927.996  | 2779.894  | AB042646  | 2098.897  | 1618.134  |
| AB033112  | 1690.358  | 1284.629  | NM_01832E | 4840.165  | 3808.6    | NM_003431 | 1337.186  | 1603.505  |
| AK023243  | 2013.655  | 1600.752  | NM_01423E | 8359.293  | 7985.881  | M29581    | 882.789   | 1036.326  |
| NM_01440E | 4551.722  | 3926.593  | AK026922  | 1484.045  | 961.523   | AL050204  | 1288.954  | 3303.725  |
| BE791857  | 1044.66   | 1004.987  | AK022645  | 984.958   | 619.95    | AF085999  | 873.17    | 1352.737  |
| NM_006867 | 597.322   | 639.579   | NM_01435E | 1240.684  | 3931.091  | AK025316  | 1044.406  | 1748.048  |
| NM_00142E | 3496.91   | 3672.87   | AF070541  | 816.802   | 796.485   | AK026357  | 2533.234  | 3899.707  |
| AK022358  | 4865.639  | 5011.269  | AK022006  | 42818.93  | 35287.617 | NM_01832E | 3437.53   | 9316.238  |
| NM_000977 | 25464.379 | 22629.346 | AF070552  | 8521.34   | 9107.028  | AK024146  | 378.144   | 1786.492  |
| NM_01420E | 46358.258 | 46513.5   | NM_004271 | 10511.448 | 9209.526  | AK022645  | 823.632   | 658.659   |
| NM_018141 | 16033.235 | 16210.484 | NM_01826E | 2882.857  | 2666.165  | NM_01435E | 2769.506  | 676.339   |
| NM_016504 | 30714.877 | 38408.813 | NM_004867 | 17455.926 | 25797.859 | AK022006  | 14761.564 | 5535.39   |
| U25752    | 66460.82  | 59670.398 | AL050021  | 5920.765  | 4575.788  | AF070552  | 6132.746  | 3285.448  |
| X96646    | 32662.225 | 38907.195 | NM_00383E | 1754.662  | 1540.532  | AJ270695  | 360.459   | 396.459   |
| AB032991  | 13697.081 | 11984.772 | AK023089  | 6431.706  | 4365.282  | NM_004271 | 5227.894  | 3889.919  |
| AK026985  | 7515.197  | 6577.499  | AK026059  | 59559.367 | 51064.098 | AK022282  | 476.615   | 452.728   |
| NM_00410E | 7585.314  | 7515.896  | AK026942  | 1061.041  | 698.802   | NM_01826E | 2400.675  | 1838.405  |
| NM_00319E | 8392.109  | 6515.514  | AK025814  | 4215.664  | 2155.576  | NM_004867 | 23017.383 | 12924.238 |
| AF220415  | 959.608   | 1194.174  | AK000655  | 10002.188 | 9587.663  | AL050021  | 9555.146  | 7505.41   |
| NM_005174 | 66133.398 | 56791.289 | AL117611  | 1050.692  | 714.837   | NM_00383E | 1109.106  | 1932.696  |
| NM_00036E | 5054.676  | 4534.218  | NM_01793E | 4355.128  | 3653.709  | AK023089  | 2074.829  | 2254.201  |
| AF110322  | 5349.52   | 3339.559  | D63134    | 1293.249  | 1106.479  | AK026059  | 21070.523 | 19853.83  |
| NM_01345C | 4211.253  | 3297.538  | Y12018    | 62632.012 | 46682.793 | AK025814  | 1313.609  | 980.364   |
| NM_00453E | 2526.331  | 1754.706  | Y10513    | 1621.073  | 1399.321  | AK000655  | 5092.179  | 4034.875  |
| NM_003077 | 3679.743  | 3077.605  | NM_01402E | 16338.045 | 15112.704 | AL117611  | 768.059   | 1364.973  |
| NM_00210E | 7304.049  | 5733.271  | Z83937    | 1306.225  | 940.649   | Y10209    | 622.198   | 304.22    |
| NM_01848E | 2174.767  | 1972.457  | L08443    | 1883.892  | 1437.884  | D63134    | 668.536   | 282.812   |
| L13203    | 2124.568  | 2029.679  | AK025818  | 2346.795  | 1329.539  | Y12018    | 33190.211 | 15659.021 |
| NM_01804C | 2349.798  | 2214.627  | AK026345  | 1219.62   | 1163.275  | X64990    | 341.812   | 283.789   |
| AB042646  | 2417.544  | 2052.249  | NM_01827E | 2563.43   | 2244.027  | Y10513    | 685.611   | 626.648   |
| NM_003431 | 2186.064  | 2314.727  | AK026328  | 480.755   | 998.674   | M21536    | 391.404   | 340.324   |
| M29581    | 2180.865  | 2324.7    | AK000864  | 4117.366  | 3379.758  | NM_01402E | 39082.266 | 18644.346 |
| AL359622  | 898.763   | 410.935   | AK022414  | 1627.99   | 1353.008  | Z83937    | 922.151   | 733.894   |
| AL050204  | 3116.554  | 2379.499  | NM_017624 | 13170.858 | 11120.505 | L08443    | 1111.068  | 1136.679  |
| AF085999  | 1077.553  | 698.85    | NM_01792E | 702.591   | 840.729   | D55643    | 315.895   | 252.031   |
| AK025316  | 3540.377  | 2893.132  | AK000907  | 6930.055  | 5081.177  | AK025818  | 577.642   | 580.403   |
| AK026357  | 3354.266  | 3092.742  | AK024390  | 884.761   | 617.742   | AK023185  | 663.171   | 1042.725  |
| NM_01832E | 4071.662  | 3519.334  | AK024887  | 1740.151  | 1811.42   | AK095686  | 353.588   | 265.723   |
| NM_01423E | 7930.65   | 7238.234  | AK095587  | 5066.855  | 4656      | AB007971  | 411.474   | 408.822   |

|           |           |           |           |           |           |           |           |           |
|-----------|-----------|-----------|-----------|-----------|-----------|-----------|-----------|-----------|
| AK026922  | 1964.594  | 1310.645  | AF086043  | 1426.817  | 1074.826  | NM_01827E | 1889.69   | 1323.447  |
| AK022645  | 1380.329  | 1176.464  | AK024174  | 449.522   | 629.835   | AK000417  | 518.162   | 207.194   |
| NM_01435E | 5732.59   | 1564.951  | AK000038  | 1622.532  | 1405.279  | AK000864  | 1380.203  | 799.77    |
| AF070541  | 1045.008  | 583.161   | BC010084  | 855.791   | 836.792   | AK022414  | 1246.354  | 819.343   |
| AK022006  | 44334.984 | 33694.586 | U10513    | 2330.36   | 3336.278  | NM_017624 | 4875.321  | 3426.897  |
| AF070552  | 12258.695 | 10551.521 | L10151    | 922.303   | 914.313   | NM_01792E | 343.709   | 170.562   |
| NM_004271 | 12337.414 | 11349.29  | AK022203  | 826.189   | 909.69    | AK000907  | 2439.893  | 1484.99   |
| AK022282  | 777.196   | 795.538   | AK023037  | 1714.601  | 1886.574  | AK024390  | 993.675   | 590.979   |
| NM_01826E | 4305.958  | 3423.657  | AK000839  | 5394.173  | 5045.402  | AK024517  | 453.841   | 396.273   |
| NM_004867 | 36754.883 | 20253.621 | AK002209  | 863.531   | 792.004   | AK095587  | 2898.703  | 2211.658  |
| AL050021  | 15053.836 | 15605.035 | NM_014354 | 2109.337  | 1551.345  | AF086043  | 624.897   | 492.761   |
| AB002448  | 1162.481  | 1131.076  | AL137548  | 10845.137 | 9063.834  | AK000038  | 970.921   | 633.537   |
| NM_00383E | 2143.869  | 2754.206  | AF088062  | 656.173   | 1019.972  | BC010084  | 1231.293  | 3217.226  |
| AK023089  | 7096.845  | 5224.223  | AK024929  | 1187.099  | 1061.445  | L10151    | 843.063   | 1621.752  |
| AK026059  | 57098.805 | 39330.383 | D17232    | 19463.504 | 13486.171 | AK022203  | 584.803   | 1452.214  |
| AK026942  | 1066.308  | 721.103   | NM_00526C | 2277.399  | 2228.146  | BC032236  | 328.56    | 625.415   |
| AK025814  | 3715.65   | 3047.458  | AF085880  | 8948.596  | 8896.576  | AK023037  | 1706.613  | 1088.135  |
| AK000655  | 8325.183  | 6528.834  | AF000990  | 934.919   | 921.843   | S71611    | 294.248   | 249.528   |
| AL117611  | 1037.602  | 520.516   | NM_016094 | 5446.234  | 5975.992  | AK055950  | 742.296   | 670.89    |
| NM_01793E | 5456.971  | 4858.316  | AK025003  | 2623.436  | 2397.538  | AK000839  | 827.138   | 684.228   |
| D63134    | 1944.888  | 1710.931  | AK023601  | 700.4     | 1303.592  | AK002209  | 713.906   | 640.74    |
| AJ227893  | 1132.317  | 501.401   | NM_001427 | 3908.104  | 5023.595  | NM_017854 | 30372.836 | 14166.831 |
| Y12018    | 64514.73  | 52056.258 | NM_01617E | 1526.801  | 1610.751  | NM_014354 | 822.07    | 589.346   |
| Y10513    | 2043.79   | 1731.864  | M15639    | 4443.018  | 3459.851  | AL137548  | 3509.123  | 2658.798  |
| M21536    | 728.709   | 777.997   | AF130084  | 783.376   | 843.08    | AK095051  | 323.464   | 220.817   |
| NM_01402E | 54314.922 | 44091.367 | AF133334  | 2686.96   | 2379.794  | AF088062  | 563.725   | 1233.09   |
| Z83937    | 1166.841  | 1053.487  | NM_003894 | 1809.556  | 1411.983  | AK024929  | 850.263   | 2027.12   |
| L08443    | 1664.746  | 1755.279  | AK001007  | 4331.003  | 3885.201  | NM_01777E | 246.456   | 924.596   |
| L38936    | 682.845   | 859.488   | AF116655  | 8598.321  | 6922.205  | D17232    | 9310.859  | 18137.805 |
| D55643    | 2202.647  | 2854.976  | AF009308  | 26202.254 | 20431.674 | NM_00526C | 1661.772  | 1232.849  |
| AK025818  | 2155.553  | 2885.027  | AB032969  | 40999.77  | 35919.273 | AF085880  | 4732.014  | 1396.401  |
| AK023185  | 6939.141  | 10168.23  | Y11610    | 742.343   | 700.812   | AF000990  | 674.998   | 362.83    |
| AK026345  | 1353.646  | 941.683   | NM_004627 | 13741.636 | 6924.143  | NM_016094 | 3523.141  | 2272.014  |
| AB007971  | 1521.001  | 760.648   | AK026523  | 2655.331  | 2323.976  | AK025003  | 1006.885  | 778.626   |
| NM_01827E | 4099.779  | 2551.454  | AL050217  | 11378.263 | 10827.959 | AK023601  | 304.289   | 475.828   |
| AK026328  | 950.416   | 629.265   | L37704    | 589.917   | 923.473   | NM_001427 | 1977.983  | 1056.431  |
| AK000417  | 845.67    | 569.899   | NM_005162 | 2405.176  | 2172.582  | NM_01617E | 1109.64   | 934.923   |
| AK000864  | 2892.75   | 2416.52   | AB007968  | 1961.173  | 1827.174  | M15639    | 4888.081  | 4658.37   |
| AK022414  | 2113.504  | 1556.575  | NM_005664 | 30155.57  | 30805.506 | AF130084  | 576.773   | 651.503   |
| NM_017624 | 14454.003 | 10490.776 | NM_00627C | 30048.529 | 25677.953 | AF133334  | 2002.43   | 1301.729  |
| NM_01792E | 549.073   | 914.697   | U50277    | 1194.273  | 1767.9    | NM_01629C | 1363.734  | 822.971   |
| AK000907  | 7320.738  | 6775.518  | M62627    | 2028.476  | 2543.771  | AK026498  | 644.31    | 414.823   |
| AK024390  | 1431.582  | 1141.075  | NM_00668E | 978.738   | 862.06    | NM_003894 | 651.834   | 802.953   |
| AK024517  | 1510.113  | 1651.998  | CY3Cy5    | 10627.704 | 276.312   | NM_00637E | 17437.676 | 18026.975 |
| AK024585  | 506.563   | 702.708   | AI889961  | 3113.624  | 4435.641  | AK001007  | 2621.528  | 2052.434  |
| AK024887  | 1598.321  | 1418.672  | AI360116  | 1241.6    | 1640.54   | NM_01448E | 1494.635  | 1739.755  |
| AK025005  | 570.597   | 597.015   | AI572835  | 4223.659  | 4556.002  | AF116655  | 10612.332 | 23424.266 |
| AK095587  | 4333.3    | 3768.974  | R20392    | 4708.528  | 5972.324  | AF009308  | 18227.604 | 31916.986 |
| AF086043  | 1080.135  | 875.279   | N56684    | 279.897   | 372.935   | AB032969  | 32627.539 | 50079.34  |
| AK000038  | 1280.429  | 1054.181  | M55153    | 1056.944  | 838.405   | Y11610    | 787.537   | 520.019   |
| BC010084  | 760.39    | 753.964   | AK097322  | 748.738   | 1096.716  | NM_004627 | 3647.267  | 3820.214  |
| U10513    | 4157.809  | 2898.438  | AL136131  | 10110.989 | 9771.865  | AK026523  | 1201.91   | 932.202   |
| L10151    | 1319.146  | 1089.909  | NM_033357 | 5500.975  | 6757.12   | AL050217  | 3533.206  | 2434.945  |

|           |           |           |           |           |           |           |           |           |
|-----------|-----------|-----------|-----------|-----------|-----------|-----------|-----------|-----------|
| AK022203  | 1424.091  | 1042.535  | AF335109  | 1935.642  | 1895.618  | NM_005162 | 831.852   | 792.451   |
| BC032236  | 1296.089  | 618.908   | NM_003263 | 978.94    | 786.316   | AB007968  | 687.674   | 338.162   |
| AK023037  | 2967.696  | 2469.131  | U59911    | 8616.721  | 10199.247 | NM_005664 | 17437.461 | 9955.092  |
| AK055950  | 993.83    | 1182.442  | NM_002054 | 1463.94   | 1467.308  | NM_006270 | 18466.678 | 13685.849 |
| AL050122  | 1570.326  | 1479.13   | CY3Cy5    | 9867.9    | 271.845   | Z48633    | 750.594   | 698.836   |
| AK000839  | 4748.881  | 6725.74   | NM_000865 | 1746.649  | 2379.617  | M62627    | 4102.966  | 3598.371  |
| AK002209  | 1218.755  | 1009.677  | NM_000867 | 1368.365  | 2256.33   | NM_006686 | 1398.606  | 1096.715  |
| NM_017854 | 54930.605 | 37665.906 | AF076642  | 2093.608  | 3990.269  | CY3Cy5    | 1930.539  | 130.788   |
| NM_014354 | 1702.814  | 1388.655  | NM_002386 | 1803.366  | 2355.6    | AI889961  | 3262.958  | 2521.899  |
| AL137548  | 8095.351  | 5991.912  | NM_005314 | 1559.52   | 2345.102  | AI360116  | 2239.269  | 1458.857  |
| AK095051  | 1433.827  | 175.347   | NM_004885 | 2316.855  | 3045.595  | NM_013983 | 477.892   | 510.414   |
| AF088062  | 1315.434  | 806.608   | NM_005145 | 162.866   | 732.544   | AI572835  | 5588.683  | 4697.011  |
| AK024929  | 1781.975  | 1320.57   | NM_012152 | 10374.426 | 10743.997 | R20392    | 6213.388  | 4963.405  |
| NM_017779 | 1017.112  | 469.453   | AK024093  | 2266.742  | 2434.506  | AA486367  | 4034.56   | 2634.881  |
| D17232    | 16192.969 | 15456.006 | NM_001940 | 2491.986  | 3213.218  | N56684    | 485.911   | 370.236   |
| NM_005260 | 3199.303  | 2404.652  | U83115    | 17573.02  | 17031.773 | M55153    | 711.289   | 690.35    |
| AF085880  | 10635.259 | 8496.038  | NM_001264 | 16611.332 | 18774.283 | AF414120  | 540.421   | 504.626   |
| AF000990  | 1458.605  | 818.184   | NM_013364 | 11277.801 | 11829.634 | AK097322  | 378.637   | 222.075   |
| NM_016094 | 7303.043  | 5782.137  | NM_014368 | 1516.845  | 2154.357  | AL136131  | 7974.438  | 6920.851  |
| AK025003  | 2521.843  | 1891.447  | NM_000850 | 5047.164  | 5789.638  | NM_033357 | 4016.592  | 3056.204  |
| NM_001427 | 5367.748  | 5088.824  | NM_004676 | 1528.378  | 1676.666  | AF335109  | 1188.669  | 1126.969  |
| NM_016175 | 1769.984  | 1291.399  | NM_007193 | 539.623   | 862.82    | NM_003263 | 496.638   | 709.524   |
| M15639    | 10160.648 | 10684.351 | NM_001994 | 7080.9    | 8815.722  | U59911    | 6357.701  | 5527.494  |
| AF130084  | 2728.944  | 2753.676  | J00129    | 34698.648 | 38070.164 | NM_002054 | 1276.125  | 976.868   |
| AF133334  | 14056.656 | 12425.901 | NM_003320 | 4626.851  | 6507.227  | SR2       | 59405.93  | 66044.492 |
| NM_016290 | 3844.715  | 3750.142  | AF142063  | 877.079   | 1182.315  | SR4       | 13183.729 | 12820.832 |
| AK026498  | 1414.682  | 1321.814  | W42849    | 3064.201  | 2676.957  | SR8       | 10514.192 | 33505.785 |
| NM_003894 | 2744.907  | 1908.383  | AK022790  | 34756.75  | 33399.176 | SR10      | 28064.809 | 11006.82  |
| NM_006373 | 38785.375 | 37294.676 | NM_004311 | 17534.867 | 19882.236 | CY3Cy5    | 3736.182  | 184.154   |
| AK001007  | 5167.035  | 3611.142  | NM_005624 | 723.886   | 1101.505  | NM_000865 | 2627.784  | 2304.341  |
| AF116655  | 9113.76   | 8694.205  | NM_002302 | 930.705   | 1106.059  | NM_000867 | 1997.096  | 1210.814  |
| AF009308  | 30082.441 | 25399.846 | AB020672  | 1540.568  | 3149.826  | AF076642  | 3378.652  | 2400.536  |
| AB032969  | 50495.98  | 40853.148 | AK026958  | 522.842   | 1321.891  | NM_002386 | 3935.996  | 2906.09   |
| Y11610    | 1384.345  | 822.963   | NM_000579 | 1404.439  | 1226.214  | NM_005314 | 2174.315  | 1861.281  |
| AF085940  | 786.865   | 566.648   | AF263462  | 2986.706  | 3826.273  | NM_004885 | 3173.302  | 2957.967  |
| L37695    | 1346.391  | 650.551   | NM_000639 | 2091.346  | 1683.514  | NM_005145 | 763.193   | 350.179   |
| NM_004627 | 8774.726  | 10803.646 | AV697672  | 630.233   | 766.434   | NM_012152 | 11063.936 | 8293.839  |
| AK026523  | 2758.382  | 1966.933  | NM_000942 | 22448.24  | 30242.047 | AK024093  | 2845.281  | 2836.292  |
| AL050217  | 11007.913 | 7028.901  | NM_002982 | 1065.283  | 1505.683  | NM_001940 | 3058.067  | 2236.819  |
| L37704    | 504.511   | 444.845   | NM_002190 | 347.386   | 424.725   | U83115    | 13436.19  | 13400.688 |
| NM_005162 | 1660.126  | 1788.367  | AK056773  | 5821.235  | 7093.921  | NM_001264 | 11367.059 | 8155.257  |
| AB007968  | 1146.112  | 1006.794  | NM_002182 | 15944.445 | 18526.631 | NM_013364 | 6606.031  | 7199.191  |
| NM_005664 | 26919.07  | 25598.521 | NM_016470 | 5556.377  | 4976.881  | NM_014368 | 1194.399  | 1367.95   |
| NM_006270 | 42328.266 | 48178.355 | AL365408  | 50566.543 | 51031.453 | NM_000850 | 3589.764  | 3596.817  |
| U50277    | 1708.214  | 2367.861  | AK026204  | 8354.318  | 8102.337  | NM_004676 | 1270.917  | 1296.405  |
| Z48633    | 2140.738  | 1877.105  | NM_014635 | 3571.24   | 2291.678  | NM_007193 | 529.81    | 370.942   |
| M62627    | 11775.121 | 14564.316 | NM_004145 | 8614.809  | 9202.059  | NM_001994 | 5450.017  | 5088.65   |
| NM_006686 | 5270.847  | 5478.316  | AK023196  | 1296.017  | 1574.243  | J00129    | 26972.91  | 31805.252 |
| CY3Cy5    | 6599.34   | 245.618   | NM_018728 | 3983.703  | 3697.418  | NM_003320 | 5377.222  | 4700.709  |
| AI889961  | 4609.19   | 3832.666  | AK024014  | 4430.005  | 4840.011  | L10146    | 5885.054  | 8404.128  |
| AI360116  | 2000.799  | 2054.816  | NM_016234 | 8481.085  | 9665.46   | AK025657  | 10692.718 | 6827.821  |
| NM_013983 | 287.624   | 1011.403  | NM_001876 | 6012.903  | 7396.535  | AF142063  | 2030.236  | 1240.552  |
| AI572835  | 5522.047  | 6107.074  | NM_016144 | 9797.921  | 11223.827 | W42849    | 2637.526  | 3418.677  |



|           |           |           |           |           |           |           |           |           |
|-----------|-----------|-----------|-----------|-----------|-----------|-----------|-----------|-----------|
| R20392    | 8350.138  | 7499.239  | AL133099  | 4136.775  | 6346.008  | AK022790  | 32347.633 | 29511.752 |
| AA486367  | 5733.22   | 4747.363  | NM_016082 | 1709.16   | 2920.391  | NM_004311 | 17872.758 | 17493.041 |
| N56684    | 660.375   | 641.984   | NM_000433 | 1226.944  | 1707.961  | NM_005624 | 2492.802  | 2400.823  |
| M55153    | 1029.412  | 822.591   | NM_000190 | 7694.646  | 10512.332 | NM_002302 | 1423.548  | 1096.997  |
| AF414120  | 376.822   | 894.718   | X15667    | 2316.355  | 2302.419  | AK026958  | 730.039   | 783.738   |
| AK097322  | 540.437   | 647.536   | NM_017512 | 1485.249  | 1272.007  | NM_000579 | 1356.256  | 966.269   |
| AL136131  | 10829.135 | 14667.075 | NM_018661 | 899.41    | 969.997   | NM_001480 | 456.742   | 377.939   |
| NM_033357 | 5983.819  | 5296.536  | AK023078  | 13196.864 | 10527.402 | AF263462  | 3281.712  | 2757.961  |
| AF335109  | 1566.807  | 1719.403  | NM_002239 | 57777.117 | 53909.793 | AB040962  | 667.347   | 515.397   |
| U59911    | 9620.218  | 10568.061 | NM_002249 | 44929.574 | 43904.18  | NM_000639 | 1691.455  | 1459.116  |
| NM_002054 | 1169.4    | 1039.13   | NM_015684 | 6858.893  | 4963.985  | AV697672  | 593.632   | 587.747   |
| SR2       | 70953.82  | 64837.582 | NM_003945 | 35067.242 | 36543.914 | NM_000942 | 18296.998 | 14822.656 |
| SR4       | 23609.563 | 24082.922 | NM_004981 | 20288.4   | 19465.322 | NM_002982 | 595.587   | 794.268   |
| SR6       | 3492.715  | 3543.875  | AK096507  | 1022.134  | 1449.964  | NM_002190 | 418.531   | 446.223   |
| SR8       | 11365.371 | 38224.566 | NM_016524 | 2939.487  | 2609.938  | AK056773  | 3215.61   | 3238.417  |
| SR10      | 43616.121 | 18485.572 | AL137631  | 11122.827 | 11059.73  | NM_002182 | 11410.051 | 12426.675 |
| CY3Cy5    | 8397.224  | 393.048   | NM_016057 | 17286.045 | 21096.545 | NM_016470 | 4280.472  | 4933.356  |
| NM_000865 | 3264.026  | 2658.748  | NM_014677 | 3286.306  | 3236.395  | AL365408  | 42843.055 | 41585.633 |
| NM_000867 | 2450.653  | 1538.735  | NM_006855 | 1849.896  | 2558.045  | AK026204  | 7050.791  | 7346.677  |
| AF076642  | 4059.032  | 2676.106  | NM_015599 | 1254.78   | 724.905   | NM_014635 | 3262.169  | 2923.655  |
| NM_002386 | 3309.697  | 3383.474  | NM_018696 | 5314.952  | 7202.322  | NM_004145 | 6463.924  | 7901.38   |
| NM_005314 | 2562.133  | 2286.583  | AL157456  | 975.349   | 1194.508  | AK023196  | 1648.23   | 1687.158  |
| NM_004885 | 3286.606  | 3289.979  | NM_000380 | 3700.899  | 2986.318  | NM_018728 | 4074.804  | 3984.212  |
| NM_005145 | 1322.922  | 339.701   | NM_004628 | 2062.167  | 1389.054  | AK024014  | 2699.05   | 3452.542  |
| NM_012152 | 10189.837 | 8795.516  | NM_014876 | 4561.688  | 3394.46   | NM_016234 | 10981.71  | 9106.579  |
| AK024093  | 3441.854  | 4014.395  | NM_005406 | 8441.396  | 7827.548  | NM_001876 | 7577.305  | 7230.786  |
| NM_001940 | 3799.48   | 3467.366  | NM_003328 | 3669.626  | 4241.692  | NM_016144 | 11280.008 | 8923.149  |
| U83115    | 17652.32  | 20100.137 | X93921    | 3077.87   | 2914.489  | AL133099  | 5582.335  | 4641.967  |
| NM_001264 | 13440.754 | 10905.264 | AF073482  | 4913.514  | 4922.643  | NM_016082 | 3136.787  | 2334.566  |
| NM_013364 | 6634.219  | 8391.815  | NM_005990 | 4000.368  | 3605.678  | NM_000433 | 1949.806  | 1816.116  |
| NM_014368 | 1351.911  | 1938.062  | NM_016276 | 56839.914 | 52156.355 | NM_000190 | 10255.184 | 8638.201  |
| NM_000850 | 4959.651  | 6018.228  | NM_017762 | 5846.244  | 5422.617  | X15667    | 9139.33   | 8131.936  |
| NM_004676 | 1383.871  | 1061.438  | NM_000921 | 11679.96  | 12214.386 | NM_017512 | 4309.18   | 5241.516  |
| NM_007193 | 584.223   | 697.835   | NM_000098 | 3130.551  | 3752.996  | NM_018661 | 776.167   | 837.378   |
| NM_001994 | 6287.381  | 3967.357  | NM_000016 | 26948.932 | 40206.926 | NM_001678 | 413.62    | 340.185   |
| J00129    | 33861.199 | 42228.086 | AK026913  | 9098.804  | 12764.206 | AK023078  | 8252.621  | 13183.771 |
| NM_003320 | 6420.005  | 5664.184  | W42849    | 1593.09   | 2757.104  | NM_002239 | 47025.465 | 54657.605 |
| L10146    | 8712.972  | 10280.288 | AI572835  | 2922.003  | 2176.574  | NM_002249 | 35979.395 | 33847.391 |
| AK025657  | 13650.876 | 8025.502  | AF414120  | 958.678   | 981.585   | NM_015684 | 4296.408  | 6377.274  |
| AF142063  | 1104.781  | 1028.201  | AL136131  | 12123.665 | 11226.839 | NM_003945 | 31110.549 | 32537.119 |
| W42849    | 2428.94   | 2624.692  | AF335109  | 1827.898  | 2312.132  | NM_004981 | 9887.011  | 11281.826 |
| AK022790  | 30227.051 | 37541.785 | NM_002054 | 1566.245  | 1167.199  | AK096507  | 876.091   | 1065.697  |
| NM_004311 | 17613.305 | 17890.311 | NM_004482 | 718.204   | 646.162   | NM_016524 | 1875.325  | 2787.03   |
| NM_005624 | 1726.202  | 1706.562  | AK023196  | 2049.432  | 3208.102  | NM_007126 | 44386.379 | 47414.301 |
| NM_002302 | 1547.552  | 1291.949  | NM_018728 | 3370.645  | 3500.438  | AL137631  | 12023.438 | 13592.729 |
| AB020672  | 1030.904  | 750.602   | AK024014  | 1890.304  | 1707.707  | NM_016057 | 17878.289 | 17548.631 |
| AK026958  | 611.237   | 587.631   | NM_000865 | 861.833   | 655.602   | NM_014677 | 3240.244  | 3612.758  |
| NM_000579 | 1402.68   | 1129.975  | AF076642  | 1267.795  | 1595.688  | NM_006855 | 1231.245  | 1842.839  |
| AF263462  | 3586.834  | 2836.902  | NM_005314 | 5007.985  | 5833.056  | NM_015599 | 1349.521  | 645.875   |
| AB040962  | 903.057   | 519.735   | NM_004885 | 1028.193  | 845.623   | AB037902  | 624.715   | 408.836   |
| NM_000639 | 2085.564  | 1696.505  | NM_012152 | 10771.041 | 12820.963 | NM_018696 | 13386.514 | 9853.019  |
| AV697672  | 470.679   | 610.889   | AK024093  | 3875.742  | 3798.884  | NM_000136 | 25871.748 | 19450.461 |
| NM_000942 | 25515.055 | 23311.926 | NM_001940 | 3402.337  | 3939.059  | AL157456  | 2264.099  | 1930.372  |

|           |           |           |           |           |           |           |           |           |
|-----------|-----------|-----------|-----------|-----------|-----------|-----------|-----------|-----------|
| NM_00219C | 511.32    | 449.49    | U83115    | 21146.055 | 21091.217 | AL162056  | 1473.382  | 1542.457  |
| AK056773  | 4691.433  | 3864.641  | NM_001264 | 16303.554 | 17915.363 | NM_00038C | 10042.866 | 9003.341  |
| NM_002182 | 8609.28   | 8304.08   | NM_013364 | 9202.876  | 9031.565  | NM_00462E | 2378.53   | 3046.855  |
| NM_01647C | 5497.504  | 5371.914  | NM_01436E | 1504.369  | 1573.108  | NM_01487E | 2960.062  | 3832.805  |
| AL365408  | 36365.434 | 39864.637 | NM_00085C | 5442.355  | 5844.685  | NM_00540E | 5513.504  | 5678.576  |
| AK026204  | 7523.903  | 6930.307  | NM_00467E | 1453.447  | 1298.395  | NM_00332E | 4590.109  | 4758.962  |
| NM_01463E | 4179.844  | 3374.054  | NM_001994 | 6177.198  | 6203.452  | X93921    | 2584.497  | 2927.302  |
| NM_00414E | 7601.012  | 7076.058  | J00129    | 33038.988 | 32661.611 | AF073482  | 4472.697  | 5473.69   |
| AK023196  | 1754.173  | 1659.508  | NM_00332C | 5786.575  | 6103.395  | NM_00599C | 3324.869  | 3817.875  |
| NM_01872E | 4817.391  | 4436.289  | NM_016057 | 16957.145 | 19419.068 | NM_01627E | 42943.332 | 51493.93  |
| AK024014  | 1554.831  | 2129.944  | NM_014677 | 3446.733  | 2966.821  | NM_017762 | 4647.059  | 6632.145  |
| NM_016234 | 10590.572 | 10558.241 | AK022790  | 14533.164 | 9835.771  | NM_001863 | 56123.922 | 63197.609 |
| NM_00187E | 6963.312  | 6774.435  | NM_004311 | 10499.814 | 12088.221 | NM_000921 | 11566.202 | 13668.375 |
| NM_016144 | 13252.347 | 13312.256 | NM_005624 | 1150.734  | 1884.685  | NM_00009E | 3266.124  | 4620.593  |
| AL133099  | 7028.886  | 6850.41   | NM_002302 | 647.995   | 1022.423  | NM_00001E | 27792.799 | 33314.906 |
| NM_016082 | 3322.192  | 2849.351  | NM_000579 | 572.061   | 489.776   | AK026913  | 7502.439  | 11114.438 |
| NM_000433 | 1927.672  | 2021.531  | AF263462  | 3001.219  | 2423.592  | L10146    | 5610.954  | 5744.136  |
| NM_00019C | 13041.164 | 10012.244 | AB040962  | 869.71    | 611.61    | AK025657  | 10388.07  | 3837.388  |
| X15667    | 6157.853  | 4760.183  | NM_000639 | 3350.166  | 4094.049  | AF142063  | 1191.619  | 599.343   |
| NM_017512 | 6184.484  | 6006.451  | AV697672  | 780.311   | 1178.858  | W42849    | 2706.92   | 2005.539  |
| NM_018661 | 282.578   | 599.238   | NM_000942 | 22983.875 | 27777.369 | AI889961  | 3851.366  | 3047.176  |
| AK023078  | 8162.701  | 12283.967 | NM_002982 | 941.643   | 1267.26   | AI360116  | 2113.836  | 1771.212  |
| NM_00223E | 51786.16  | 46498.574 | NM_00219C | 490.044   | 1107.559  | NM_013983 | 793.413   | 542.947   |
| NM_00224E | 33241.68  | 31755.172 | AK056773  | 5059.027  | 6166.68   | AI572835  | 4418.875  | 4467.904  |
| NM_015684 | 5032.336  | 5040.779  | NM_002182 | 13009.217 | 14124.784 | R20392    | 6192.598  | 5535.974  |
| NM_00394E | 33387.48  | 36550.461 | NM_01647C | 5657.077  | 5610.492  | AA486367  | 3965.331  | 2745.408  |
| NM_004981 | 6386.142  | 5321.637  | AL365408  | 40696.18  | 44015.008 | N56684    | 439.943   | 189.282   |
| AK096507  | 1058.174  | 591.814   | NM_017762 | 5876.623  | 4800.017  | M55153    | 681.362   | 722.951   |
| NM_016524 | 1702.516  | 2052.636  | NM_000921 | 14918.747 | 18744.129 | AF414120  | 607.448   | 558.173   |
| NM_00712E | 38631.102 | 41558.164 | NM_00009E | 3343.481  | 4141.351  | AK097322  | 470.876   | 857.342   |
| AL137631  | 10341.483 | 10902.202 | NM_00001E | 8009.724  | 10641.856 | AL136131  | 8537.074  | 10842.586 |
| NM_016057 | 22827.084 | 22047.629 | AK026913  | 3562.32   | 3617.357  | NM_033357 | 4547.998  | 4270.939  |
| NM_014677 | 3528.764  | 3484.698  | NM_016234 | 3981.421  | 3672.034  | AF335109  | 1225.201  | 1667.768  |
| NM_00685E | 1045.637  | 1282.668  | NM_00187E | 2660.36   | 3229.27   | NM_003263 | 668.78    | 1039.844  |
| NM_01559E | 1179.984  | 1140.099  | NM_016144 | 1701.174  | 1641.104  | U59911    | 7519.518  | 10257.803 |
| AB037902  | 618.541   | 370.422   | AL133099  | 1517.621  | 1158.754  | SB        | 803.57    | 875.492   |
| NM_01869E | 8333.555  | 6848.099  | NM_016082 | 792.418   | 642.497   | NM_002054 | 1254.009  | 1547.402  |
| NM_00013E | 16866.57  | 15234.51  | NM_000433 | 1212.545  | 530.461   | NM_004482 | 945.281   | 818.697   |
| AL157456  | 1045.343  | 618.52    | NM_00019C | 8241.252  | 7883.051  | AK026204  | 7864.972  | 4539.516  |
| AL162056  | 1377.188  | 1184.765  | X15667    | 7811.548  | 6758.77   | NM_01463E | 3302.986  | 1768.87   |
| NM_00038C | 6114.436  | 6255.623  | NM_017512 | 7198.583  | 6015.398  | NM_00414E | 7944.006  | 6436.794  |
| NM_00462E | 3241.527  | 3323.901  | NM_018661 | 1322.021  | 925.181   | AK023196  | 1878.016  | 1535.912  |
| NM_01487E | 3653.737  | 3806.32   | NM_00167E | 802.114   | 909.395   | NM_01872E | 3586.446  | 2888.747  |
| NM_00540E | 6816.174  | 6273.693  | AK023078  | 13004.331 | 9284.022  | AK024014  | 3437.04   | 3041.695  |
| NM_00332E | 3529.026  | 3508.41   | NM_00223E | 62214.344 | 47618.574 | NM_00086E | 3041.405  | 2351.41   |
| X93921    | 2672.016  | 2483.613  | NM_00224E | 40991.457 | 36935.586 | NM_000867 | 2058.491  | 1572.876  |
| AF073482  | 4144.246  | 4420.502  | NM_015684 | 6488.567  | 4708.353  | AF076642  | 3199.854  | 2900.295  |
| NM_00599C | 3253.603  | 3011.775  | NM_00394E | 31981.184 | 34202.234 | NM_00238E | 2610.995  | 2971.275  |
| NM_01627E | 29932.59  | 29095.936 | NM_004981 | 9041.053  | 9663.955  | NM_005314 | 2055.603  | 2422.791  |
| NM_017762 | 4930.226  | 5764.584  | AK096507  | 742.148   | 1050      | NM_00488E | 2973.939  | 3605.438  |
| NM_001863 | 57287.777 | 55217.082 | NM_00462E | 3601.432  | 2114.265  | NM_00514E | 654.848   | 212.815   |
| NM_000921 | 13058.868 | 14304.064 | NM_01487E | 5772.067  | 6032.674  | NM_012152 | 9574.101  | 8875.373  |
| NM_00009E | 3913.233  | 4391.087  | NM_00540E | 8763.188  | 9548.595  | AK024093  | 2228.651  | 3610.67   |

|           |           |           |           |           |           |           |           |           |
|-----------|-----------|-----------|-----------|-----------|-----------|-----------|-----------|-----------|
| NM_00001E | 27188.676 | 38178.688 | NM_00332E | 4769.351  | 5357.56   | NM_00194C | 3040.469  | 3397.534  |
| AK026913  | 8634.225  | 8123.393  | X93921    | 3303.303  | 3013.786  | U83115    | 12202.052 | 14687.064 |
| AF142063  | 1418.98   | 1071.405  | AF073482  | 5166.244  | 5404.669  | NM_001264 | 12397.833 | 12806.861 |
| W42849    | 2514.531  | 2199.348  | NM_00599C | 3346.479  | 3185.886  | NM_013364 | 8043.281  | 10997.971 |
| AI889961  | 4298.913  | 3464.525  | NM_01627E | 45546.793 | 43318.172 | NM_01436E | 1505.374  | 2797.56   |
| AI360116  | 1768.291  | 1674.662  | NM_00085C | 5269.374  | 4132.236  | NM_00085C | 3952.953  | 5223.602  |
| AI572835  | 2803.025  | 3011.327  | NM_00467E | 1386.941  | 968.811   | NM_00467E | 1227.974  | 1529.21   |
| AF414120  | 511.797   | 694.54    | NM_001994 | 3396.21   | 2557.563  | NM_00719E | 433.568   | 959.554   |
| AL136131  | 8837.831  | 12323.461 | AL136131  | 11385.501 | 11069.421 | NM_001994 | 6906.318  | 8357.146  |
| AF335109  | 1146.723  | 1416.604  | NM_00298E | 1133.762  | 759.412   | J00129    | 34749.652 | 46228.496 |
| NM_00326E | 585.591   | 496.326   | AL365408  | 7682.66   | 5835.078  | NM_00332C | 7497.053  | 10710.043 |
| U59911    | 8701.139  | 8840.005  | AK026204  | 1010.934  | 686.658   | NM_016524 | 2111.928  | 1809.729  |
| NM_002054 | 1080.608  | 1409.131  | NM_00414E | 1598.756  | 1321.411  | NM_00712E | 50611.035 | 31870.602 |
| NM_00448E | 999.38    | 973.854   | NM_000867 | 805.771   | 1909.642  | AL137631  | 13052.71  | 9179.291  |
| AK026204  | 6454.992  | 5314.466  | AF076642  | 1653.914  | 4072.487  | NM_016057 | 16888.813 | 10739.085 |
| NM_01463E | 2887.469  | 2920.762  | NM_00488E | 3329.253  | 2763.639  | NM_014677 | 3136.728  | 3277.234  |
| NM_00414E | 6350.752  | 5810.02   | NM_01215E | 12167.06  | 12215.171 | NM_00685E | 1074.439  | 980.791   |
| AK023196  | 1960.599  | 1267.946  | AK024093  | 3341.302  | 2804.687  | AK022790  | 31603.51  | 28160.764 |
| NM_01872E | 3522.239  | 3394.841  | NM_00194C | 3229.86   | 3656.347  | NM_004311 | 18143.805 | 20130.387 |
| AK024014  | 1935.641  | 1751.709  | U83115    | 19225.842 | 16557.334 | NM_005624 | 1956.598  | 2338.006  |
| NM_00086E | 2259.526  | 1994.994  | NM_001264 | 16992.393 | 16644.508 | NM_00230E | 1125.489  | 1201.962  |
| NM_000867 | 1782.153  | 1141.786  | NM_013364 | 10335.557 | 8455.016  | AB020672  | 667.897   | 1232.639  |
| AF076642  | 2984.817  | 2444.115  | NM_01436E | 1374.358  | 1180.806  | AK026958  | 864.081   | 1637.345  |
| NM_00238E | 1354.139  | 1738.018  | NM_00223E | 62981.688 | 52250.512 | NM_00057E | 1134.545  | 1632.781  |
| NM_005314 | 1829.245  | 1523.696  | NM_00712E | 12424.381 | 10352.778 | NM_00148C | 719.199   | 648.476   |
| NM_00488E | 2880.87   | 2919.496  | AL137631  | 1470.378  | 1379.997  | AF263462  | 2654.322  | 3553.014  |
| NM_00514E | 1293.592  | 199.705   | NM_00057E | 1003.874  | 474.764   | AB040962  | 667.486   | 626.401   |
| NM_01215E | 8484.726  | 6989.204  | NM_00148C | 842.682   | 633.656   | NM_00063E | 1593.521  | 2283.775  |
| AK024093  | 2928.601  | 3423.83   | AF263462  | 4484.999  | 4428.812  | AV697672  | 593.209   | 810.315   |
| NM_00194C | 3227.888  | 3287.628  | AB040962  | 914.208   | 872.61    | NM_00094E | 21385.932 | 20956.91  |
| U83115    | 14776.452 | 18348.539 | NM_00063E | 2397.806  | 2069.899  | AK056773  | 3689.215  | 5302.405  |
| NM_001264 | 11901.28  | 11128.972 | AV697672  | 545.841   | 633.612   | NM_00218E | 14113.35  | 18828.434 |
| NM_013364 | 4627.291  | 5844.017  | NM_00094E | 21420.691 | 25323.348 | NM_01647C | 6699.185  | 11023.24  |
| NM_01436E | 1395.362  | 1372.025  | AF073482  | 2710.148  | 1585.804  | AL365408  | 47568.941 | 56259.852 |
| NM_00085C | 4909.219  | 5486.751  | NM_01627E | 33978.527 | 29825.201 | NM_01776E | 4700.411  | 3377.796  |
| NM_00467E | 1019.679  | 1171.266  | NM_000921 | 2265.111  | 1625.562  | NM_00186E | 54391.563 | 59211.047 |
| NM_00719E | 366.477   | 1056.175  | NM_00043E | 1155.923  | 948.852   | NM_000921 | 10025.282 | 7039.322  |
| NM_001994 | 6331.242  | 5634.46   | NM_00019C | 11883.551 | 15130.621 | NM_00009E | 3224.647  | 2409.093  |
| J00129    | 31363.814 | 39231.734 | X15667    | 9950.711  | 11246.451 | NM_00001E | 26978.498 | 27482.938 |
| NM_00332C | 6116.684  | 6538.568  | NM_01751E | 6891.074  | 6510.046  | AK026913  | 6354.192  | 5796.09   |
| NM_016524 | 1896.336  | 1901.073  | NM_018661 | 1153.028  | 1023.817  | NM_016234 | 11488.104 | 9852.069  |
| NM_00712E | 37490.57  | 37778.145 | AK023078  | 10604.61  | 8265.152  | NM_00187E | 7424.664  | 7534.358  |
| AL137631  | 11049.154 | 11199.404 | NM_001454 | 61707.957 | 54468.359 | NM_016144 | 12364.959 | 11200.389 |
| NM_016057 | 18154.541 | 15062.856 | NM_00655E | 273.385   | 407.836   | AL133099  | 5603.517  | 5595.01   |
| NM_014677 | 2830.441  | 2750.701  | NM_005797 | 379.426   | 1065.615  | NM_01608E | 2981.524  | 3698.197  |
| NM_00685E | 864.018   | 1002.625  | U83191    | 2180.216  | 1336.844  | NM_00043E | 1572.082  | 2253.681  |
| AK022790  | 29231.516 | 36728.129 | NM_01395E | 4981.345  | 3544.449  | NM_00019C | 11987.902 | 10793.125 |
| NM_004311 | 16271.771 | 18440.254 | NM_00013E | 31145.971 | 32690.748 | X15667    | 9707.291  | 9951.649  |
| NM_005624 | 1063.16   | 926.905   | AL157456  | 2249.551  | 2570.475  | NM_01751E | 5264.748  | 6903.453  |
| NM_00230E | 688.38    | 1026.461  | AL162056  | 2051.637  | 2062.496  | NM_018661 | 815.698   | 1191.28   |
| NM_00148C | 361.77    | 576.964   | NM_00038C | 25500.783 | 30213.955 | NM_00167E | 668.568   | 1764.774  |
| AF263462  | 2678.819  | 2578.806  | NM_00462E | 4117.257  | 4483.692  | AK023078  | 8736.899  | 15523.522 |
| AB040962  | 584.226   | 474.679   | NM_01487E | 5516.65   | 5912.68   | NM_00223E | 50769.004 | 53235.113 |

|           |           |           |           |           |           |           |           |           |
|-----------|-----------|-----------|-----------|-----------|-----------|-----------|-----------|-----------|
| NM_000639 | 1753.065  | 1704.788  | AB032958  | 1579.842  | 1598.044  | NM_002249 | 37377.078 | 42145.996 |
| NM_000942 | 23111.594 | 20752.58  | AK024427  | 2385.229  | 2758.34   | NM_015684 | 4502.008  | 6994.144  |
| NM_002982 | 975.429   | 501.983   | NM_003006 | 823.914   | 1157.693  | NM_003945 | 33191.902 | 42404.027 |
| AK056773  | 3714.789  | 3660.972  | NM_000965 | 841.172   | 2378.232  | NM_004981 | 14607.202 | 23373.852 |
| NM_002182 | 11203.734 | 11822.879 | NM_013403 | 1580.781  | 2226.41   | AK096507  | 1180.722  | 1312.605  |
| NM_016470 | 5674.556  | 7057.4    | NM_004123 | 1207.448  | 1191.103  | NM_002054 | 1203.605  | 788.224   |
| AL365408  | 41971.902 | 45912.367 | NM_000674 | 2317.973  | 2129.993  | NM_004482 | 772.611   | 613.376   |
| NM_017762 | 4708.525  | 5648.861  | NM_000206 | 22886.709 | 23549.877 | NM_000352 | 398.969   | 351.129   |
| NM_001863 | 59552.715 | 54438.906 | NM_018255 | 2393.149  | 2975.194  | NM_015599 | 883.761   | 706.263   |
| NM_000921 | 10782.82  | 9955.796  | M74161    | 1727.735  | 1571.325  | AB037902  | 607.569   | 587.201   |
| NM_000098 | 3944.164  | 3471.784  | NM_016542 | 7095.124  | 6139.456  | NM_018699 | 13835.497 | 11299.283 |
| NM_000016 | 24936.643 | 29626.465 | NM_000484 | 2924.095  | 3050.189  | NM_000136 | 24950.07  | 21713.668 |
| AK026913  | 6755.841  | 6366.252  | S40369    | 15801.473 | 18811.764 | AL157456  | 1825.354  | 1750.474  |
| NM_016234 | 10383.659 | 10523.516 | NM_015831 | 11083.23  | 12305.464 | AL162056  | 1734.235  | 1718.729  |
| NM_001876 | 6442.794  | 6419.208  | AK023154  | 5562.424  | 5671.989  | NM_000380 | 11674.302 | 12517.249 |
| NM_016144 | 9953.205  | 10975.778 | Z36820    | 2978.098  | 3095.306  | NM_004628 | 2467.224  | 3562.701  |
| AL133099  | 5277.058  | 4739.979  | NM_003967 | 4790.131  | 4336.824  | NM_014876 | 4308.341  | 4667.861  |
| NM_016082 | 2953.73   | 2443.79   | NM_012451 | 4950.072  | 6410.734  | NM_005406 | 5823.522  | 6976.73   |
| NM_000433 | 1800.59   | 1806.351  | NM_006624 | 854.292   | 1007.7    | NM_003328 | 4186.063  | 4404.249  |
| NM_000190 | 10772.307 | 9299.444  | NM_017667 | 833.072   | 1016.458  | X93921    | 2759.842  | 3620.64   |
| X15667    | 5896.19   | 5021.878  | AK002211  | 2029.398  | 2082.184  | AF073482  | 6358.131  | 10394.114 |
| NM_017512 | 6142.311  | 7161.729  | NM_012127 | 1669.12   | 2427.299  | NM_005990 | 4890.181  | 5706.181  |
| NM_018661 | 671.142   | 692.632   | NM_014454 | 735.328   | 878.314   | NM_016276 | 47824.059 | 53559.668 |
| AK023078  | 8733.68   | 13413.177 | NM_017489 | 4745.779  | 3702.196  | NM_000850 | 3267.275  | 2572.401  |
| NM_002239 | 58778.391 | 47594.613 | NM_002824 | 14391.552 | 16011.488 | NM_004676 | 964.478   | 682.416   |
| NM_002249 | 31846.93  | 32500.828 | NM_006835 | 20389.877 | 20578.053 | NM_007193 | 392.544   | 355.383   |
| NM_015684 | 4887.747  | 5099.33   | NM_006023 | 17200.605 | 11741.5   | NM_001994 | 6183.617  | 3963.108  |
| NM_003945 | 33629.75  | 40746.016 | NM_014673 | 5537.498  | 5220.338  | J00129    | 31617.025 | 21252.99  |
| NM_004981 | 7827.128  | 8966.201  | AL137509  | 14858.068 | 13350.388 | NM_003320 | 5917.998  | 3852.729  |
| AK096507  | 1472.712  | 1030.295  | NM_006538 | 2721.172  | 2472.502  | AK025657  | 7403.077  | 4068.043  |
| NM_002054 | 825.385   | 1115.159  | NM_019887 | 12153.123 | 12221.57  | AF142063  | 1294.233  | 1112.009  |
| NM_004482 | 816.51    | 717.515   | NM_004050 | 6684.355  | 7450.494  | W42849    | 2345.455  | 2519.406  |
| NM_015599 | 1238.499  | 928.401   | NM_006024 | 11696.096 | 10707.271 | AI889961  | 3399.804  | 3384.433  |
| NM_018699 | 8073.336  | 6084.476  | NM_020191 | 5721.831  | 4504.726  | AI360116  | 1971.699  | 2149.743  |
| NM_000136 | 19688.113 | 17100.783 | NM_017434 | 4492.582  | 4230.987  | AI572835  | 4973.429  | 6666.907  |
| AL157456  | 784.396   | 986.525   | NM_020182 | 11404.418 | 7079.777  | R20392    | 8177.383  | 10674.137 |
| AL162056  | 1687.079  | 1502.919  | AL137669  | 4483.242  | 4884.349  | AA486367  | 5418.139  | 4765.698  |
| NM_000380 | 6709.814  | 8544.494  | AJ275213  | 728.486   | 1245.902  | N56684    | 842.1     | 1139.433  |
| NM_004628 | 3204.585  | 3884.634  | NM_004793 | 755.834   | 1278.877  | M55153    | 814.416   | 1378.253  |
| NM_014876 | 4478.364  | 4976.276  | NM_014263 | 2442.431  | 2374.106  | AF414120  | 640.515   | 503.702   |
| NM_005406 | 7790.004  | 6947.208  | NM_020361 | 799.626   | 1472.772  | AK097322  | 514.803   | 767.282   |
| NM_003328 | 3393.104  | 3447.625  | NM_015907 | 1289.857  | 1048.078  | AL136131  | 9684.396  | 11645.987 |
| X93921    | 2711.899  | 3110.136  | AK026343  | 4464.601  | 2129.583  | NM_033357 | 6206.057  | 8474.248  |
| AF073482  | 5153.693  | 6000.098  | NM_001912 | 3641.652  | 4785.967  | AF335109  | 2039.882  | 3160.744  |
| NM_005990 | 3473.407  | 3913.823  | NM_013267 | 1315.209  | 1513.126  | NM_003263 | 817.824   | 924.841   |
| NM_016276 | 43069.609 | 42301.332 | NM_002454 | 2230.636  | 1864.876  | U59911    | 7391.923  | 8421.498  |
| NM_000850 | 4872.146  | 4475.808  | NM_001917 | 7071.396  | 6080.609  | NM_002982 | 564.71    | 565.806   |
| NM_004676 | 763.55    | 918.015   | NM_005956 | 32609.744 | 29322.617 | NM_002190 | 305.231   | 204.781   |
| NM_007193 | 1086.157  | 272.118   | NM_003043 | 6157.734  | 6046.646  | AK056773  | 2850.495  | 2085.24   |
| NM_001994 | 3858.434  | 3338.571  | D87077    | 1936.703  | 1555.889  | NM_002182 | 14131.863 | 8107.063  |
| J00129    | 27072.611 | 32693.563 | L07033    | 2780.813  | 2629.628  | NM_016470 | 5529.617  | 3565.923  |
| W42849    | 1601.214  | 1380.642  | AK000142  | 1481.407  | 1052.849  | AL365408  | 46214.047 | 28373.967 |
| AK097322  | 367.659   | 591.919   | NM_005993 | 8722.348  | 9602.084  | AK026204  | 7290.193  | 5140.766  |

|           |           |           |           |           |           |           |           |           |
|-----------|-----------|-----------|-----------|-----------|-----------|-----------|-----------|-----------|
| AL136131  | 9873.285  | 12726.442 | AK026341  | 4575.626  | 5706.922  | NM_014635 | 2660.985  | 2288.864  |
| AF335109  | 1216.722  | 1718.766  | NM_018943 | 4428.137  | 5343.393  | NM_004145 | 7771.16   | 7640.962  |
| NM_002982 | 1019.279  | 567.244   | AJ292757  | 696.399   | 816.928   | AK023196  | 1872.53   | 1508.978  |
| NM_002190 | 481.94    | 298.464   | U01922    | 942.785   | 831.861   | NM_018725 | 3709.511  | 3675.83   |
| AK056773  | 2956.745  | 2383.326  | NM_003999 | 1386.344  | 929.559   | AK024014  | 3616.876  | 3668.839  |
| NM_002182 | 7951.892  | 6552.982  | NM_018561 | 1669.327  | 2294.744  | NM_000865 | 3197.342  | 3350.445  |
| NM_016470 | 5311.3    | 5379.577  | NM_001270 | 3432.312  | 3879.658  | NM_000867 | 2284.02   | 1914.258  |
| AL365408  | 32726.514 | 31897.535 | NM_001952 | 8061.66   | 6128.12   | AF076642  | 4290.008  | 3848.528  |
| AK026204  | 5753.703  | 5649.255  | NM_003223 | 5037.074  | 5444.033  | NM_002386 | 4042.483  | 5201.784  |
| NM_014635 | 2347.897  | 2661.085  | NM_006713 | 60869.324 | 51109.551 | NM_005314 | 2452.22   | 3749.468  |
| NM_004145 | 3836.142  | 4074.053  | NM_020201 | 6193.887  | 8018.176  | NM_004885 | 3910.712  | 5363.013  |
| AK023196  | 2043.948  | 1906.695  | NM_016019 | 12619.166 | 7978.803  | NM_012152 | 11391.263 | 11216.902 |
| AK024014  | 1316.544  | 1457.472  | NM_012245 | 15437.978 | 8308.14   | AK024093  | 2382.572  | 3490.537  |
| NM_000865 | 2152.556  | 2086.659  | NM_001533 | 24089.514 | 26307.094 | NM_001940 | 3796.026  | 4873.649  |
| NM_000867 | 1836.535  | 1391.371  | NM_006929 | 12814.973 | 12603.491 | U83115    | 14745.588 | 23820.414 |
| AF076642  | 3169.395  | 2601.279  | NM_003977 | 30790.646 | 29899.297 | NM_001264 | 13294.612 | 15003.344 |
| NM_002386 | 1613.358  | 1635.186  | NM_005998 | 30280.289 | 36904.605 | NM_013364 | 8249.313  | 9864.499  |
| NM_005314 | 1668.341  | 1767.244  | U28424    | 3134.485  | 3260.536  | NM_014368 | 1261.484  | 1405.104  |
| NM_004885 | 2741.718  | 3383.146  | BF541372  | 4445.418  | 4158.848  | NM_002235 | 49058     | 35832.387 |
| NM_005145 | 956.431   | 289.854   | AF092137  | 4252.708  | 4365.119  | NM_002245 | 30845.908 | 21053.84  |
| NM_012152 | 9321.416  | 7806.579  | NM_004623 | 2532.65   | 2859.293  | NM_015684 | 3623.167  | 2829.673  |
| AK024093  | 3189.736  | 3545.576  | NM_016551 | 1123.111  | 1013.531  | NM_003945 | 27199.258 | 17264.082 |
| NM_001940 | 3660.017  | 4109.784  | AK026949  | 433.728   | 913.87    | NM_004981 | 6542.035  | 4619.451  |
| U83115    | 17550.34  | 26987.326 | NM_004957 | 3441.565  | 3700.506  | AK096507  | 685.285   | 316.494   |
| NM_001264 | 13328.166 | 13708.564 | AL050028  | 5744.225  | 4895.229  | NM_016524 | 2354.821  | 2068.345  |
| NM_013364 | 6604.798  | 8830.795  | BE732255  | 9228.958  | 9637.14   | NM_007126 | 46749.168 | 38326.688 |
| NM_014368 | 1361.534  | 1335.364  | NM_004955 | 1271.933  | 1194.7    | AL137631  | 11890.094 | 11632.714 |
| NM_002235 | 60674.969 | 41908.477 | NM_003364 | 1736.808  | 1831.543  | NM_016057 | 16543.83  | 12993.781 |
| NM_002245 | 28038.301 | 22191.744 | NM_017803 | 1938.101  | 1686.751  | NM_014677 | 2528.796  | 2888.557  |
| NM_015684 | 5114.508  | 4667.77   | NM_005994 | 6644.819  | 6593.929  | NM_006855 | 897.906   | 1258.631  |
| NM_003945 | 30201.99  | 29008.014 | AB027508  | 7396.563  | 4399.659  | AK022790  | 32824.695 | 33379.871 |
| NM_004981 | 5602.687  | 4939.19   | NM_016331 | 4038.163  | 4676.982  | NM_004311 | 17979.959 | 22714.719 |
| AK096507  | 768.098   | 702.861   | NM_014360 | 19240.764 | 40183.449 | NM_005624 | 1923.235  | 3265.144  |
| NM_016524 | 1644.153  | 1842.805  | NM_018952 | 867.707   | 823.014   | NM_002302 | 1560.014  | 2380.52   |
| NM_007126 | 16905.402 | 19121.072 | AB033053  | 3873.352  | 3373.902  | AB020672  | 598.934   | 849.483   |
| AL137631  | 7197.88   | 8446.263  | NM_007358 | 12060.06  | 12781.991 | AK026958  | 867.013   | 1205.811  |
| NM_006855 | 1106.2    | 1023.043  | NM_018108 | 3600.2    | 3020.827  | NM_000575 | 1253.237  | 1320.118  |
| AK022790  | 29299.738 | 37101.133 | NM_003408 | 865.449   | 803.171   | NM_001480 | 764.156   | 919.469   |
| NM_004311 | 16929.172 | 20650.158 | NM_003450 | 1590.147  | 1914.965  | AF263462  | 2706.516  | 3851.495  |
| NM_005624 | 1403.559  | 929.625   | AK021577  | 2028.27   | 1896.034  | NM_000635 | 1627.553  | 2706.193  |
| NM_002302 | 1033.491  | 1147.941  | AF075019  | 544.078   | 434.163   | AV697672  | 633.263   | 708.068   |
| AB020672  | 412.233   | 471.163   | AK021498  | 2828.383  | 2654.429  | NM_000942 | 20164.01  | 18838.582 |
| AK026958  | 647.149   | 600.454   | AF085874  | 2185.942  | 2034.269  | NM_005406 | 5827.513  | 3864.279  |
| NM_000575 | 1164.325  | 1072.706  | AK026959  | 6316.511  | 6593.155  | NM_003328 | 4033.452  | 2796.352  |
| NM_001480 | 372.296   | 641.425   | NM_019556 | 984.713   | 1568.137  | X93921    | 2909.179  | 1584.79   |
| AF263462  | 3147.069  | 3094.091  | NM_004753 | 5642.377  | 6546.972  | AF073482  | 3890.119  | 2739.771  |
| AB040962  | 937.386   | 191.884   | NM_015462 | 5812.191  | 6597.336  | NM_005990 | 2633.798  | 1987.57   |
| NM_000635 | 1869.955  | 1923.103  | AK026700  | 1539.324  | 698.298   | NM_016276 | 46068.547 | 34082.91  |
| AV697672  | 494.09    | 579.811   | AF086370  | 871.508   | 1070.802  | NM_017762 | 5021.193  | 4869.687  |
| NM_000942 | 27645.051 | 28957.139 | AF086332  | 24967.156 | 35928.289 | NM_001863 | 51852.059 | 55952.078 |
| NM_005406 | 6518.892  | 5101.682  | AJ404614  | 16619.121 | 14758.125 | NM_000921 | 10703.969 | 9957.577  |
| NM_003328 | 3291.352  | 2318.907  | AK001043  | 8454.548  | 10370.187 | NM_000098 | 2843.315  | 3405.917  |
| X93921    | 2483.535  | 2166.552  | AK024535  | 10807.983 | 12072.654 | NM_000016 | 23359.414 | 23405.92  |

|           |           |           |           |           |           |           |           |           |
|-----------|-----------|-----------|-----------|-----------|-----------|-----------|-----------|-----------|
| AF073482  | 4487.152  | 4389.338  | AL359608  | 1327.988  | 1174.874  | AK026913  | 6088      | 5937.688  |
| NM_00599C | 3958.795  | 3226.306  | NM_01649E | 34737.348 | 37003.805 | NM_016234 | 10845.62  | 10670.504 |
| NM_01627E | 37436.035 | 33843.797 | AF085934  | 875.977   | 883.948   | NM_00187E | 7318.944  | 7910.721  |
| NM_01776Z | 4794.781  | 6252.83   | AF075088  | 1567.829  | 1061.695  | NM_016144 | 11687.84  | 13661.489 |
| NM_000921 | 10111.482 | 10781.632 | AK023971  | 29265.266 | 36044.758 | AL133099  | 4367.084  | 4689.901  |
| NM_00009E | 2717.91   | 2648.486  | AK024738  | 1300.275  | 1356.03   | NM_01608Z | 3288.998  | 3991.692  |
| NM_00001E | 20752.965 | 24448.887 | BC015321  | 1318.618  | 1059.703  | NM_00043Z | 1604.365  | 2516.446  |
| AK026913  | 6922.095  | 5823.025  | AL157450  | 1983.155  | 1873.441  | NM_00019C | 13208.817 | 17219.68  |
| NM_016234 | 10433.218 | 10530.582 | AL359594  | 1188.972  | 1351.3    | X15667    | 7034.056  | 10599.778 |
| NM_00187E | 6042.729  | 6817.743  | AL137293  | 2510.861  | 1691.287  | NM_01751Z | 4814.054  | 7185.777  |
| NM_016144 | 10984.172 | 12672.417 | AL137458  | 1427.634  | 1299.699  | NM_00167E | 270.408   | 326.071   |
| AL133099  | 5489.267  | 6734.151  | AL157490  | 18821.531 | 19546.439 | AK023078  | 6550.106  | 11644.396 |
| NM_01608Z | 2944.896  | 3024.883  | AL390167  | 4360.233  | 5275.663  | NM_014737 | 5493.471  | 3975.306  |
| NM_00043Z | 1822.875  | 2152.104  | AK023657  | 985.327   | 1096.213  | NM_00348E | 6543.993  | 4741.236  |
| NM_00019C | 13252.595 | 11333.721 | AF086068  | 1391.978  | 1567.351  | NM_001454 | 54492.5   | 55493.035 |
| X15667    | 8725.499  | 7726.908  | AF075018  | 1141.726  | 1054.587  | NM_00655E | 11946.647 | 4766.279  |
| NM_01751Z | 6594.258  | 7716.981  | AK024239  | 1254.816  | 1052.266  | Z22780    | 537.759   | 388.764   |
| NM_018661 | 616.867   | 919.54    | AK021838  | 5080.3    | 4387.517  | NM_005797 | 983.7     | 531.013   |
| AK023078  | 10110.193 | 16540.098 | AF083118  | 784.995   | 526.106   | NM_004824 | 2588.327  | 1589.415  |
| NM_014737 | 6042.742  | 5274.808  | AF089811  | 651.897   | 561.027   | M17733    | 52628.113 | 57621.961 |
| NM_00348E | 7475.709  | 6395.458  | AK021909  | 963.143   | 1178.185  | U83191    | 4548.556  | 5621.507  |
| NM_001454 | 61577.875 | 54106.012 | AK022043  | 640.409   | 579.839   | NM_01395Z | 8811.275  | 9506.56   |
| NM_00655E | 14941.37  | 10047.064 | AK022168  | 966.127   | 781.335   | NM_00448Z | 868.724   | 598.665   |
| Z22780    | 655.082   | 525.258   | AK022327  | 1037.371  | 988.135   | NM_00035Z | 334.602   | 285.435   |
| NM_005797 | 1120.788  | 818.239   | AK022201  | 1836.539  | 1471.093  | NM_01559E | 1270.868  | 1067.341  |
| NM_004824 | 2168.219  | 2423.111  | AK022353  | 3458.301  | 3071.807  | AB037902  | 408.122   | 641.136   |
| U83191    | 2100.634  | 2046.506  | AK026868  | 1595.927  | 1204.76   | NM_01869E | 11299.607 | 10633.596 |
| NM_01395Z | 9030.552  | 9457.265  | AK022200  | 5312.238  | 5367.297  | NM_00013E | 24822.16  | 23726.857 |
| NM_00448Z | 1082.441  | 887.688   | AK023396  | 478.241   | 549.461   | AL157456  | 1485.995  | 2315.77   |
| NM_01559E | 969.342   | 1280.205  | NM_018101 | 5389.236  | 4878.856  | AL162056  | 2241.518  | 3745.493  |
| AB037902  | 319.083   | 639.084   | BF526704  | 1212.635  | 804.027   | NM_00038C | 9114.797  | 12619.188 |
| NM_01869E | 10069.889 | 9138.272  | AJ491695  | 7101.328  | 6285.817  | NM_00462E | 2458.79   | 3524.638  |
| NM_00013E | 24363.182 | 22574.498 | AF052107  | 12974.859 | 11186.691 | AF085734  | 376.311   | 735.571   |
| AL157456  | 1143.62   | 1227.052  | AK022430  | 1268.384  | 1130.813  | NM_01487E | 3884.309  | 4974.798  |
| AL162056  | 2077.892  | 1716.083  | AK001022  | 3540.68   | 4785.637  | AB032958  | 1423.832  | 1305.406  |
| NM_00038C | 9948.383  | 12158.51  | AL049351  | 11959.724 | 11937.17  | AK024427  | 3488.686  | 2784.219  |
| NM_00462E | 4000.773  | 4797.917  | AK021826  | 4172.848  | 4683.075  | NM_00300E | 1934.81   | 1428.207  |
| NM_01487E | 6409.16   | 6951.289  | AK024138  | 1400.602  | 1223.304  | NM_00049Z | 558.435   | 492.155   |
| AB032958  | 1129.995  | 1118.5    | Y10505    | 1287.873  | 525.891   | AF272035  | 3577.735  | 3125.439  |
| AK024427  | 4548.779  | 4321.94   | U00946    | 6262.688  | 5986.834  | AY009133  | 1480.479  | 1314.004  |
| NM_00300E | 2395.35   | 2102.803  | NM_00561E | 3551.277  | 3436.498  | NM_00096E | 563.281   | 565.087   |
| NM_00049Z | 501.706   | 649.326   | Z34290    | 709.677   | 862.576   | NM_01340Z | 2759.676  | 2365.449  |
| AF272035  | 4836.137  | 4730.056  | AF070642  | 5347.547  | 4605.23   | NM_000674 | 2095.028  | 1754.556  |
| AY009133  | 1256.99   | 1734.827  | AK027125  | 2962.95   | 2937.507  | AB020671  | 502.515   | 797.404   |
| NM_00096E | 511.913   | 553.964   | AK025311  | 715.314   | 607.787   | NM_00020E | 29602.824 | 23411.713 |
| NM_01340Z | 2944.719  | 2665.947  | D16918    | 592.435   | 1692.454  | NM_01825E | 3525.997  | 3104.92   |
| NM_00412Z | 416.298   | 332.536   | D16467    | 1217.638  | 1371.055  | NM_01623Z | 1251.711  | 1582.984  |
| NM_000674 | 2439.207  | 1857.776  | AF090932  | 1800.8    | 1439.983  | AF178930  | 801.761   | 665.287   |
| AB020671  | 764.075   | 570.504   | U61089    | 5055.553  | 3806.024  | M74161    | 1620.611  | 1805.389  |
| NM_00020E | 32211.678 | 30248.033 | AK001036  | 2974.502  | 1495.739  | NM_01654Z | 5545.236  | 6490.698  |
| NM_01825E | 3841.582  | 3737.607  | AK024858  | 10345.683 | 9367.394  | NM_000484 | 1929.769  | 2136.281  |
| NM_01623Z | 880.474   | 947.649   | NM_00104E | 5177.607  | 3888.171  | S40369    | 13378.231 | 18311.449 |
| AF178930  | 816.124   | 660.979   | AK024554  | 1482.808  | 1720.112  | NM_015831 | 8278.366  | 9857.16   |

|           |           |           |           |           |           |           |           |           |
|-----------|-----------|-----------|-----------|-----------|-----------|-----------|-----------|-----------|
| M74161    | 2145.813  | 2154.917  | AF068294  | 3823.337  | 3494.963  | AK023154  | 4015.019  | 5429.937  |
| NM_016542 | 7155.818  | 8866.799  | AK025909  | 6295.959  | 6165.149  | Z36820    | 2279.89   | 2350.658  |
| NM_000484 | 2449.607  | 1835.49   | AK026138  | 1858.511  | 1379.569  | NM_003967 | 3697.226  | 5191.834  |
| S40369    | 11958.959 | 11687.939 | Z70706    | 569.106   | 565.822   | NM_012451 | 3427.882  | 4764.042  |
| NM_015831 | 9769.565  | 11415.579 | AK021434  | 3625.498  | 2986.267  | NM_002510 | 771.28    | 630.885   |
| AK023154  | 5797.495  | 7019.982  | NM_016479 | 10490.605 | 10130.146 | NM_020386 | 680.041   | 736.713   |
| Z36820    | 3067.823  | 2742.419  | AK000933  | 7914.571  | 6970.92   | NM_006624 | 6922.042  | 4363.629  |
| NM_003967 | 5546.066  | 7384.517  | NM_014626 | 974.506   | 762.44    | AF130079  | 713.428   | 511.226   |
| NM_012451 | 4319.209  | 4904.3    | AK025277  | 917.893   | 877.188   | NM_017667 | 1365.064  | 1192.438  |
| NM_002510 | 933.71    | 1031.255  | AF086095  | 1261.668  | 818.251   | AK002211  | 3406.971  | 2802.197  |
| NM_006624 | 7342.1    | 7860.978  | NM_018352 | 2902.625  | 1284.278  | NM_012127 | 3603.321  | 2389.927  |
| AF130079  | 798.704   | 768.242   | AK026880  | 1766.363  | 1746.526  | NM_014454 | 1152.76   | 1560.329  |
| NM_017667 | 1466.258  | 2155.145  | AF086061  | 263.806   | 1067.102  | NM_017486 | 4470.608  | 4632.101  |
| AK002211  | 2418.233  | 2488.179  | AL080092  | 9829.752  | 11331.502 | NM_002824 | 13453.236 | 8162.75   |
| NM_012127 | 4421.724  | 3618.521  | AK025037  | 1176.357  | 948.286   | NM_006836 | 20230.131 | 18290.631 |
| NM_017486 | 5740.346  | 6162.889  | AK021874  | 5724.261  | 5383.699  | NM_006023 | 15163.734 | 23998.264 |
| NM_002824 | 16900.086 | 11628.707 | AF086384  | 65923.664 | 58221.145 | NM_014673 | 5723.036  | 6506.916  |
| NM_006836 | 24412.318 | 24747.906 | M77818    | 19148.293 | 18979.498 | AB002330  | 1945.273  | 2180.719  |
| NM_006023 | 14869.161 | 20048.361 | AF009267  | 2498.98   | 2328.301  | AL137509  | 24328.273 | 19338.9   |
| NM_014673 | 5025.99   | 7042.112  | AK027129  | 4712.459  | 4404.319  | NM_006536 | 3182.917  | 2931.955  |
| AB002330  | 2311.362  | 2658.288  | L19367    | 548.919   | 437.966   | NM_019887 | 12706.595 | 11553.992 |
| AL137509  | 23037.793 | 22618.311 | NM_015696 | 5942.202  | 5801.939  | NM_004050 | 5038.627  | 4825.717  |
| NM_006536 | 3386.912  | 3843.65   | CY3Cy5    | 15982.447 | 593.917   | NM_006024 | 7774.744  | 9253.135  |
| NM_019887 | 13974.122 | 15006.128 | BG696293  | 1927.065  | 2317.288  | NM_020191 | 3668.888  | 6190.146  |
| NM_004050 | 3253.094  | 2927.932  | AA777410  | 2177.121  | 1959.892  | NM_017434 | 1853.616  | 3063.512  |
| NM_006024 | 8728.269  | 10852.229 | BG113873  | 960.225   | 1468.415  | NM_020405 | 187.931   | 647.275   |
| NM_020191 | 4584.929  | 6923.694  | BC013135  | 19693.375 | 24480.484 | NM_020182 | 5474.737  | 7990.822  |
| NM_017434 | 1180.642  | 1519.232  | AI625002  | 819.862   | 1858.345  | AL137669  | 4228.179  | 4622.304  |
| NM_020405 | 1192.187  | 1105.818  | H07899    | 409.879   | 627.017   | AJ275213  | 849.066   | 1160.113  |
| NM_020182 | 6588.458  | 9907.238  | AA281652  | 2182.431  | 3076.923  | NM_004793 | 8137.375  | 5517.491  |
| AL137669  | 5634.766  | 6199.746  | U31905    | 1161.111  | 1314.607  | NM_014263 | 4804.772  | 4536.6    |
| AJ275213  | 1066.121  | 1349.093  | X52479    | 4762.513  | 4730.474  | NM_020361 | 728.668   | 691.349   |
| NM_004793 | 11609.065 | 12356.142 | BC013200  | 33982.945 | 39656.531 | NM_015907 | 1290.1    | 1057.784  |
| NM_014263 | 5518.797  | 5173.733  | AW408832  | 6241.508  | 6761.125  | AK026343  | 2660.397  | 4604.443  |
| NM_020361 | 888.027   | 809.657   | AA486364  | 14117.373 | 15773.231 | NM_001912 | 1053.295  | 926.314   |
| NM_015907 | 1819.056  | 2216.432  | M15476    | 21659.029 | 26881.945 | NM_013267 | 1203.586  | 1107.337  |
| AK026343  | 3829.716  | 7521.117  | U57456    | 4223.649  | 4777.288  | NM_002454 | 1958.102  | 2000.732  |
| NM_001912 | 1037.877  | 790.221   | N70057    | 16179.424 | 15406.567 | NM_001917 | 6179.161  | 5534.959  |
| NM_013267 | 1724.638  | 2238.777  | NM_006497 | 12655.079 | 12697.874 | NM_005956 | 22189.416 | 19310.82  |
| NM_002454 | 2207.408  | 2353.626  | NM_006892 | 1726.044  | 2184.907  | NM_003043 | 4637.082  | 4848.441  |
| NM_001917 | 7572.338  | 7588.651  | SR5       | 13392.264 | 13751.543 | D87077    | 1329.323  | 1290.336  |
| NM_005956 | 21933.855 | 19621.752 | SR7       | 11153.375 | 49445.754 | NM_014306 | 872.239   | 977.551   |
| NM_003043 | 3575.601  | 3080.527  | SR9       | 41046.063 | 4633.201  | L07033    | 2409.672  | 2704.852  |
| D87077    | 1284.796  | 1720.382  | CY3Cy5    | 13954.1   | 416.062   | AK023934  | 275.658   | 550.278   |
| NM_014306 | 863.807   | 882.295   | AF254067  | 4609.616  | 4156.925  | AK000142  | 1298.904  | 1011.871  |
| L07033    | 3037.95   | 3453.339  | NM_016363 | 5322.333  | 4855.356  | NM_005993 | 8035.138  | 8162.489  |
| AK023934  | 696.197   | 599.971   | AY009090  | 1155.88   | 1594.285  | AK026341  | 4714.206  | 4083.728  |
| AK000142  | 1370.918  | 1597.741  | NM_005592 | 462.029   | 607.071   | NM_018943 | 4289.65   | 3961.855  |
| NM_005993 | 9211.2    | 10253.141 | U81380    | 1079.954  | 1317.242  | U01922    | 794.437   | 805.452   |
| AK026341  | 5385.752  | 5546.728  | NM_002303 | 848.937   | 644.293   | NM_003996 | 1144.861  | 1278.123  |
| NM_018943 | 2536.938  | 2353.822  | NM_016509 | 1450.24   | 1748.696  | NM_004466 | 642.575   | 323.458   |
| AJ292757  | 1051.719  | 1056.646  | AF041038  | 2428.058  | 2998.36   | NM_003433 | 3156.66   | 1752.987  |
| U01922    | 805.901   | 734.503   | NM_004536 | 4550.599  | 4650.116  | NM_005221 | 1437.352  | 1025.246  |

|           |           |           |           |           |           |           |           |           |
|-----------|-----------|-----------|-----------|-----------|-----------|-----------|-----------|-----------|
| NM_00399E | 1838.677  | 1368.519  | NM_014672 | 4353.96   | 5131.741  | NM_00587C | 728.807   | 786.101   |
| NM_00446E | 740.458   | 1205.439  | AB058719  | 2066.073  | 2621.438  | NM_018561 | 2258.947  | 2988.27   |
| NM_003433 | 9284.32   | 7011.045  | AK025935  | 3550.075  | 3834.012  | NM_00127C | 3264.608  | 2396.538  |
| NM_005221 | 3602.359  | 3350.225  | AB032953  | 651.02    | 1133.324  | NM_001952 | 5858.226  | 4509.954  |
| NM_00587C | 521.739   | 592.806   | NM_016441 | 2247.67   | 2471.13   | NM_003223 | 4485.925  | 2784.212  |
| NM_018561 | 3410.184  | 2776.709  | NM_006334 | 4596.535  | 4704.602  | NM_006713 | 53827.605 | 44440.852 |
| NM_00127C | 6323.253  | 5909.46   | NM_003474 | 2346.71   | 2255.838  | NM_020201 | 6141.276  | 4533.28   |
| NM_001952 | 10449.923 | 10342.314 | NM_004625 | 4663.887  | 5417.622  | AK023530  | 619.273   | 539.628   |
| NM_003223 | 8051.593  | 7819.275  | NM_007179 | 29155.08  | 27518.609 | NM_01601E | 9245.168  | 7674.443  |
| NM_006713 | 64504.281 | 50832.805 | NM_00130E | 1333.362  | 1910.005  | NM_01224E | 11198.692 | 9587.396  |
| NM_020201 | 9812.831  | 7307.461  | AB046861  | 2506.199  | 2750.261  | NM_001533 | 22572.813 | 18270.785 |
| AK023530  | 660.072   | 558.681   | NM_00594C | 1120.102  | 1025.976  | NM_00692E | 9307.16   | 7411.313  |
| NM_01601E | 9687.191  | 9342.062  | AF061034  | 17189.232 | 26282.201 | NM_003977 | 24322.27  | 27887.947 |
| NM_01224E | 14211.494 | 13329.895 | X03655    | 1359.808  | 1331.887  | NM_00599E | 23849.002 | 35387.461 |
| NM_001533 | 25532.906 | 27266.104 | NM_00310C | 4571.979  | 5083.212  | U28424    | 1467.512  | 1700.669  |
| NM_00692E | 8239.807  | 6776.384  | NM_005387 | 6497.513  | 8877.04   | BF541372  | 1722.536  | 2004.492  |
| NM_003977 | 19527.059 | 22712.473 | NM_00684E | 854.293   | 1146.888  | AF092137  | 249.804   | 386.673   |
| NM_00599E | 34717.75  | 41020.055 | AF228704  | 6020.497  | 4351.34   | NM_016551 | 1002.911  | 611.958   |
| U28424    | 3604.393  | 3414.61   | AK022746  | 4449.288  | 3632.968  | AF087977  | 261.203   | 423.169   |
| BF541372  | 2233.152  | 2716.595  | NM_00656E | 9145.968  | 8183.581  | NM_004957 | 3398.9    | 2536.592  |
| AF092137  | 6701.282  | 7639.386  | NM_00644C | 3481.858  | 3693.638  | AL050028  | 3495.67   | 2914.787  |
| NM_004623 | 2332.689  | 2859.803  | NM_004847 | 14508.103 | 13079.443 | NM_000371 | 480.512   | 277.114   |
| NM_016551 | 6991.837  | 5784.137  | NM_00225E | 8441      | 6381.177  | BE732255  | 2350.974  | 1396.48   |
| AF087977  | 757.66    | 553.204   | BC034483  | 1903.748  | 1884.857  | NM_00495E | 852.382   | 558.924   |
| AK026949  | 1225.128  | 2241.599  | NM_00362C | 3747.529  | 3854.758  | NM_017803 | 1063.752  | 1107.533  |
| NM_004957 | 5202.209  | 5321.063  | NM_01328E | 5695.15   | 5568.036  | NM_005994 | 3750.927  | 3553.808  |
| AL050028  | 9180.272  | 9572.252  | AA586375  | 1947.683  | 1916.412  | AB027508  | 4564.112  | 4167.176  |
| NM_000371 | 800.354   | 387.092   | BE910339  | 31260.307 | 33312.734 | NM_016331 | 2529.433  | 2363.636  |
| BE732255  | 12726.887 | 12981.681 | U89715    | 8814.905  | 9896.393  | NM_01436C | 34187.133 | 8291.468  |
| NM_00495E | 1574.611  | 1775.35   | NM_005227 | 4318.261  | 5343.766  | NM_018952 | 519.008   | 747.568   |
| NM_003364 | 1323.939  | 1596.084  | NM_00028E | 10177.607 | 9905.271  | AB033053  | 1365.163  | 1658.302  |
| NM_017803 | 1564.011  | 2106.313  | NM_016454 | 26529.434 | 33981.371 | NM_00735E | 6084.384  | 5940.295  |
| NM_005994 | 5754.51   | 5305.3    | NM_00346E | 5023.89   | 5587.625  | NM_001571 | 1653.475  | 1852.658  |
| AB027508  | 4029.056  | 4906.356  | NM_016433 | 1485.263  | 1939.229  | NM_01810E | 1341.331  | 3453.698  |
| NM_016331 | 4235.127  | 4503.274  | NM_00085E | 3281.619  | 5346.259  | AK021498  | 1351.655  | 1225.601  |
| NM_01436C | 26598.982 | 23229.418 | NM_00548C | 2844.481  | 4096.026  | AF085874  | 2608.073  | 1981.666  |
| AB033053  | 2926.497  | 3944.555  | AB034694  | 1336.495  | 1392.427  | AF147346  | 720.082   | 651.384   |
| NM_00735E | 9677.243  | 9685.6    | NM_003273 | 2626.549  | 4599.521  | AK026959  | 722.396   | 787.304   |
| NM_001571 | 2795.535  | 3442.447  | AK026404  | 2664.805  | 2044.408  | NM_01955E | 505.8     | 362.515   |
| AF126749  | 1195.135  | 820.665   | NM_01794E | 8637.076  | 7226.85   | NM_004753 | 2704.395  | 2352.406  |
| NM_01810E | 3157.631  | 4106.794  | NM_000392 | 2475.557  | 2527.454  | NM_015462 | 3375.011  | 3006.198  |
| NM_00345C | 1835.931  | 1739.633  | AB037848  | 1092.773  | 815.724   | AK026700  | 1043.061  | 1611.104  |
| AK021577  | 1854.337  | 2106.497  | AF082657  | 3019.109  | 2811.324  | AF086242  | 598.385   | 385.969   |
| AF147390  | 438.436   | 428.665   | NM_006744 | 1372.466  | 1639.422  | AF086370  | 843.555   | 672.656   |
| AF085879  | 361.896   | 517.626   | AF297659  | 846.412   | 1228.86   | AF086332  | 8333.12   | 6880.289  |
| AF075019  | 1389.193  | 1326.526  | NM_018231 | 4396.674  | 3739.097  | AF086432  | 242.773   | 221.572   |
| AK021498  | 2783.959  | 3041.664  | NM_000583 | 6990.504  | 6233.321  | AJ404614  | 8598.135  | 8412.837  |
| AF085874  | 3016.8    | 3296.406  | NM_014914 | 7056.76   | 7515.901  | AF086347  | 3340.733  | 3332.41   |
| AF147346  | 598.44    | 762.084   | NM_01828E | 2989.047  | 3276.044  | AF086388  | 1318.412  | 1080.479  |
| AK026959  | 2628.908  | 3442.514  | AB018260  | 978.292   | 1235.714  | AK001043  | 2667.997  | 2920.009  |
| NM_01955E | 2267.8    | 1688.758  | NM_01476E | 3892.507  | 4713.082  | AK024535  | 2190.219  | 2128.946  |
| NM_004753 | 3678.574  | 3459.626  | NM_016627 | 32249.453 | 29199.256 | NM_01649E | 8099.072  | 6424.709  |
| NM_015462 | 7721.627  | 8608.748  | NM_016121 | 3735.683  | 3305.049  | AF147423  | 359.352   | 252.389   |



|           |           |           |           |           |           |            |           |           |
|-----------|-----------|-----------|-----------|-----------|-----------|------------|-----------|-----------|
| AF147377  | 654.136   | 369.196   | NM_014769 | 4672.28   | 4390.506  | AK023971   | 29511.211 | 20917.463 |
| AK026700  | 1644.721  | 2136.008  | NM_006349 | 44037.563 | 52366.902 | AK024738   | 602.815   | 655.944   |
| AF086242  | 684.657   | 683.002   | AK026264  | 10945.8   | 8888.31   | AL157450   | 814.426   | 591.912   |
| AF086370  | 854.487   | 653.68    | AF222927  | 4511.165  | 3970.029  | AL359594   | 846.19    | 722.677   |
| AF086332  | 10195.82  | 9876.413  | NM_014345 | 2489.378  | 2500.994  | AL137293   | 1403.787  | 1324.964  |
| AJ404614  | 15316.544 | 15777.207 | NM_018217 | 8022.382  | 5928.613  | AL137458   | 764.731   | 840.068   |
| AF086347  | 5542.24   | 5253.451  | AF241831  | 4430.704  | 3477      | AL157490   | 12581.225 | 10512.854 |
| AF086444  | 1651.801  | 1065.016  | NM_003033 | 2951.658  | 2382.656  | AL390167   | 3184.002  | 3424.607  |
| AK001043  | 5434.529  | 6296.244  | U96113    | 2354.176  | 1521.089  | AK023657   | 609.303   | 401.841   |
| AK024535  | 10564.354 | 10517.949 | NM_002733 | 4338.574  | 3275.627  | NM_014332  | 654.69    | 839.146   |
| AL359608  | 1416.378  | 1547.846  | M31008    | 1350.349  | 790.567   | AF086068   | 924.835   | 930.732   |
| NM_01649E | 34547.555 | 38195.266 | NM_00628E | 1879.839  | 1916.146  | AK026322   | 467.99    | 514.053   |
| AF088025  | 619.027   | 552.757   | NM_016224 | 6848.723  | 9837.981  | AF086091   | 519.816   | 1588.839  |
| AF085934  | 855.929   | 917.132   | AB046861  | 3978.355  | 3710.13   | AF075018   | 320.893   | 433.657   |
| AF147423  | 684.954   | 698.627   | NM_005940 | 884.76    | 786.231   | AK021838   | 2594.873  | 1822.626  |
| AF075088  | 869.689   | 905.973   | AF061034  | 13261.576 | 17341.002 | AF083118   | 542.963   | 327.524   |
| AK023971  | 38623.668 | 40352.164 | X03655    | 1364.889  | 1071.337  | AF211977   | 465.911   | 273.557   |
| AK024738  | 1719.208  | 2262.914  | BG696293  | 1905.984  | 2160.785  | AK000957   | 518.806   | 474.894   |
| AL133103  | 827.266   | 1188.146  | AA777410  | 1977.719  | 1647.658  | AF089811   | 550.778   | 213.164   |
| BC015321  | 1253.27   | 1293.072  | BG113873  | 1049.95   | 1348.928  | AF147444   | 364.09    | 251.289   |
| AL157450  | 874.234   | 1069.453  | BC013135  | 21117.502 | 21704.283 | AK022043   | 427.202   | 209.419   |
| AL359594  | 1679.527  | 1321.694  | AI625002  | 695.391   | 1491.775  | AK022168   | 797.603   | 537.477   |
| AL137293  | 1545.172  | 1290.751  | H07899    | 931.483   | 383.894   | AK022327   | 755.426   | 1319.809  |
| AL137458  | 900.358   | 1103.987  | AA281652  | 1993.829  | 1994.934  | AK022061   | 470.543   | 494.91    |
| AL157490  | 14419.923 | 13502.544 | U31905    | 815.457   | 1053.914  | AK022201   | 1342.277  | 1199.285  |
| AL390167  | 3755.695  | 4489.986  | X52479    | 4482.659  | 3062.274  | AK022353   | 1548.353  | 1677.701  |
| AK023657  | 795.099   | 684.417   | BC013200  | 30071.881 | 27270.316 | AK026868   | 923.171   | 946.718   |
| AF086068  | 1675.462  | 1822.179  | AW408832  | 4623.321  | 4969.478  | AK022245   | 425.443   | 637.701   |
| AF086059  | 1086.793  | 965.516   | AA486364  | 14438.681 | 15234.835 | AK022200   | 2477.593  | 2293.119  |
| AF075018  | 1148.16   | 1374.284  | M15476    | 27436.096 | 31292.393 | NM_018101  | 2442.021  | 1648.721  |
| AK024239  | 997.047   | 1309.813  | U57456    | 3326.5    | 3267.298  | AF293366   | 403.519   | 190.279   |
| AK021838  | 6241.221  | 5454.652  | N70057    | 13694.449 | 10903.135 | BF526704   | 688.406   | 438.953   |
| AF083118  | 1734.163  | 1049.899  | NM_006497 | 12039.734 | 10929.209 | AJ491695   | 3335.431  | 1962.252  |
| AK000957  | 645.051   | 366.009   | NM_006892 | 1937.032  | 2227.91   | AF052107   | 9391.344  | 5610.549  |
| AF089811  | 1045.732  | 1133.712  | AK000124  | 1848.447  | 1228.71   | AK022430   | 1112.364  | 835.501   |
| AF147444  | 824.035   | 1265.145  | NM_004480 | 3529.941  | 3647.975  | unknown (S | 1048.22   | 2828.385  |
| AK021909  | 1262.658  | 1231.39   | BC034483  | 1944.831  | 1716.301  | AK001022   | 2055.661  | 2155.316  |
| AK022043  | 405.133   | 639.005   | NM_003620 | 4342.41   | 3396.952  | AL049351   | 6685.773  | 7976.734  |
| AK022168  | 643.072   | 605.97    | NM_013289 | 6582.4    | 4853.042  | AK021826   | 2833.849  | 2553.377  |
| AK022327  | 807.991   | 582.679   | AA586375  | 1301.946  | 1002.402  | AK024138   | 1710.239  | 983.617   |
| AK022061  | 703.916   | 1073.682  | BE910339  | 25051.393 | 24811.316 | Y10505     | 422.36    | 421.189   |
| AK022201  | 1614.246  | 1780.019  | AF254067  | 5091.538  | 3972.624  | U00946     | 5536.476  | 3002.827  |
| AK022353  | 2399.049  | 2428.389  | NM_016363 | 4867.641  | 4616.605  | NM_005615  | 1636.308  | 1097.172  |
| AK026868  | 739.31    | 1094.492  | AY009090  | 1009.874  | 1133.236  | Z34290     | 923.608   | 678.393   |
| AK022245  | 552.391   | 557.939   | NM_005592 | 489.493   | 550.48    | AF070642   | 2663.044  | 1775.509  |
| AK022200  | 3065.116  | 3022.12   | U81380    | 1468.452  | 1170.486  | AK027125   | 1775.299  | 1409.093  |
| AK023396  | 564.091   | 761.693   | NM_016509 | 1163.515  | 1061.521  | D16918     | 508.422   | 558.42    |
| AF264625  | 356.089   | 647.755   | AF041038  | 1750.778  | 1458.943  | D16467     | 1152.712  | 1005.567  |
| NM_018101 | 11131.798 | 9712.25   | NM_004536 | 3909.344  | 3059.599  | AF166125   | 781.873   | 659.558   |
| AF293366  | 1021.987  | 933.849   | NM_014672 | 3571.2    | 2783.31   | AF225425   | 1505.659  | 1961.51   |
| BF526704  | 2052.827  | 1574.542  | AB058719  | 1511.26   | 1370.353  | AF064848   | 12517.181 | 16186.828 |
| AJ491695  | 7830.996  | 6177.964  | AK025935  | 2348.791  | 2118.42   | U61089     | 4020.573  | 5511.908  |
| AF052107  | 22001.832 | 17910.031 | AB032953  | 880.348   | 795.006   | AK001036   | 1408.297  | 3186.374  |

|           |           |           |           |           |           |           |           |           |
|-----------|-----------|-----------|-----------|-----------|-----------|-----------|-----------|-----------|
| AK022430  | 1711.604  | 1447.921  | NM_016441 | 2461.518  | 2149.546  | AK024858  | 8517.883  | 8705.383  |
| AK001022  | 2774.556  | 3263.508  | NM_006334 | 3882.657  | 3103.323  | Y16697    | 673.247   | 851.914   |
| AL049351  | 3631.402  | 3958.908  | NM_003474 | 2842.579  | 1921.674  | NM_001045 | 3521.421  | 4482.293  |
| AK021826  | 4292.374  | 3794.84   | NM_004625 | 2230.746  | 1309.365  | AK024554  | 1154.044  | 1204.015  |
| AK024541  | 614.517   | 640.311   | NM_007179 | 21533.975 | 15888.208 | AF068294  | 2286.882  | 4303.045  |
| AK024138  | 3049.865  | 2808.725  | NM_001306 | 1211.836  | 1074.653  | AK025909  | 5293.657  | 8703.904  |
| Y10505    | 1902.553  | 2038.647  | AF297659  | 992.47    | 890.417   | AK026138  | 783.607   | 1014.585  |
| U00946    | 12540.617 | 10207.883 | NM_018231 | 2900.212  | 2628.324  | AK021434  | 2209.863  | 1023.376  |
| NM_005615 | 2596.898  | 2447.942  | NM_000583 | 5909.24   | 5615.631  | NM_016475 | 7011.792  | 3035.138  |
| Z34290    | 1162.077  | 1086.848  | NM_003100 | 5136.889  | 5187.348  | AK000933  | 9117.238  | 4208.563  |
| AF070642  | 5880.747  | 5195.528  | NM_005387 | 4298.61   | 4058.992  | Y10205    | 833.032   | 307.487   |
| AK027125  | 3784.711  | 3829.268  | NM_006846 | 760.059   | 550.103   | NM_014626 | 635.497   | 405.082   |
| AK025311  | 882.414   | 666.613   | AF228704  | 6322.485  | 4368.437  | AK025277  | 708.943   | 455.379   |
| D16918    | 1373.673  | 1292.098  | AK022746  | 4167.218  | 3335.024  | AF086095  | 535.564   | 675.916   |
| D16467    | 2030.062  | 2296.906  | NM_006568 | 8776.4    | 8383.469  | NM_018352 | 962.131   | 1472.192  |
| AF090932  | 2050.712  | 1620.259  | NM_006440 | 2813.622  | 3064.617  | AK026880  | 1687.664  | 1144.813  |
| AF166125  | 1102.728  | 1182.166  | NM_004847 | 11983.759 | 8992.98   | AL080092  | 9019.86   | 7234.04   |
| AF225425  | 1219.074  | 1235.969  | NM_002255 | 7652.201  | 5777.085  | AF075069  | 654.71    | 876.913   |
| AF064848  | 14568.971 | 12475.315 | NM_002733 | 3852.918  | 3122.313  | AL137279  | 1546.054  | 1850.862  |
| U61089    | 5810.736  | 4431.256  | NM_006288 | 3078.92   | 3395.806  | AK023981  | 975.364   | 1107.005  |
| AK001036  | 3030.416  | 5274.341  | NM_016224 | 5967.064  | 8521.349  | AK025037  | 616.054   | 1126.275  |
| AK024858  | 11457.438 | 11327.203 | NM_005227 | 4007.173  | 5242.447  | AK021874  | 2501.769  | 2519.808  |
| Y16697    | 788.964   | 1036.806  | NM_000286 | 11558.424 | 10701.571 | AF086384  | 54264.188 | 59909.145 |
| NM_001045 | 4683.996  | 5174.778  | NM_016454 | 25751.084 | 30698.027 | M77818    | 19255.854 | 24053.797 |
| AK024554  | 2120.802  | 1751.757  | NM_003469 | 3674.517  | 3915.259  | AF009267  | 2978.66   | 5597.25   |
| AF068294  | 4604.376  | 4946.022  | NM_016433 | 1313.192  | 1066.587  | AK027129  | 4146.882  | 4901.925  |
| AK025909  | 7396.503  | 8209.245  | NM_000859 | 1940.947  | 3351.062  | L19367    | 391.722   | 443.427   |
| AK026138  | 1686.437  | 2058.461  | NM_005480 | 2539.795  | 2854.729  | NM_015695 | 626.584   | 752.551   |
| Z70706    | 329.462   | 535.228   | NM_003273 | 2562.825  | 3736.985  | CY3Cy5    | 6920.239  | 228.25    |
| AK021434  | 6049.758  | 4610.611  | AK026404  | 2079.834  | 2138.424  | BG696293  | 2077.415  | 2400.24   |
| NM_016475 | 11443.124 | 7800.081  | NM_017948 | 7763.631  | 6653.879  | AA777410  | 2086.986  | 2563.903  |
| AK000933  | 14819.957 | 14728.615 | NM_000392 | 2456.788  | 2065.117  | BG113873  | 1300.547  | 1404.174  |
| Y10205    | 2012.939  | 2617.981  | AB037848  | 1124.162  | 728.601   | BC013135  | 27660.557 | 34626.293 |
| NM_014626 | 1510.626  | 1266.64   | AF082657  | 4198.284  | 3862.911  | AI625002  | 1617.316  | 953.471   |
| AK025277  | 1116.945  | 887.121   | NM_006744 | 1382.443  | 1328.189  | H07899    | 679.564   | 938.819   |
| AF086095  | 1265.206  | 1553.635  | NM_006497 | 10201.916 | 11668.991 | AA281652  | 2406.287  | 2993.247  |
| NM_018352 | 1969.517  | 4535.454  | NM_006892 | 1998.14   | 2381.554  | U31905    | 1348.369  | 1440.685  |
| AK026880  | 2951.663  | 2406.561  | AK000124  | 1869.931  | 2445.076  | X52479    | 5781.844  | 5014.996  |
| AF086061  | 657.203   | 576.519   | NM_004480 | 3517.674  | 2770.986  | BC013200  | 31947.775 | 34822.5   |
| AL080092  | 13369.898 | 13537.396 | NM_014914 | 6503.125  | 6490.903  | AW408832  | 6229.04   | 5884.209  |
| AF075069  | 906.059   | 752.356   | NM_018289 | 2811.126  | 3470.558  | AA486364  | 16671.949 | 16240.654 |
| AL137279  | 1628.979  | 1586.043  | AB018260  | 894.356   | 1054.754  | M15476    | 38812.504 | 27135.125 |
| AK023981  | 1633.467  | 1433.816  | NM_014766 | 4563.078  | 5234.935  | U57456    | 4708.546  | 3803.759  |
| AK025037  | 835.167   | 926.917   | NM_016627 | 28546.018 | 28235.484 | N70057    | 14860.643 | 15924.368 |
| AK021874  | 2575.081  | 2468.845  | NM_016121 | 2670.516  | 2591.915  | NM_006497 | 14995.161 | 15710.196 |
| AF086384  | 66801.289 | 56371.539 | NM_014769 | 4258.839  | 3900.667  | NM_006892 | 2497.222  | 2089.584  |
| M77818    | 20671.918 | 20683.547 | NM_006349 | 42285.152 | 49903.879 | SR5       | 9940.699  | 10357.037 |
| AF009267  | 2038.809  | 2046.989  | AK026264  | 11047.886 | 11165.217 | SR7       | 7844.728  | 57547.699 |
| AK027129  | 6426.26   | 7435.023  | AF222927  | 4195.122  | 5132.635  | SR9       | 29292.229 | 5421.328  |
| L19367    | 465.999   | 726.69    | AF241831  | 3977.389  | 3242.471  | CY3Cy5    | 5823.042  | 226.938   |
| NM_015695 | 6628.364  | 7392.172  | NM_003033 | 3238.821  | 2487.675  | AF254067  | 4169.078  | 6407.309  |
| CY3Cy5    | 14782.554 | 955.424   | NM_016441 | 2160.635  | 2528.389  | NM_016363 | 5657.016  | 6881.666  |
| BG696293  | 1995.631  | 2639.406  | NM_006334 | 3122.746  | 2934.505  | AY009090  | 1420.742  | 1492.702  |

|           |           |           |           |           |           |           |           |           |
|-----------|-----------|-----------|-----------|-----------|-----------|-----------|-----------|-----------|
| AA777410  | 1742.614  | 2765.384  | NM_003474 | 1456.152  | 1257.023  | NM_005592 | 713.724   | 742.943   |
| BG113873  | 1123.935  | 1368.071  | NM_004625 | 2001.637  | 1812.817  | U81380    | 1348.329  | 1660.382  |
| BC013135  | 14523.235 | 17270.848 | NM_007179 | 20023.455 | 22410.617 | NM_002303 | 578.325   | 1189.043  |
| AI625002  | 1430.524  | 628.873   | NM_001306 | 979.161   | 1092.636  | NM_016509 | 1583.119  | 1947.39   |
| AA281652  | 1951.255  | 2260.479  | AB046861  | 2611.077  | 2823.811  | NM_012296 | 6780.392  | 4382.939  |
| U31905    | 591.391   | 894.555   | NM_005940 | 788.773   | 930.89    | AF041038  | 3427.367  | 3567.467  |
| X52479    | 4120.077  | 3906.775  | AF061034  | 10781.474 | 20539.148 | NM_004536 | 4782.16   | 5661.083  |
| BC013200  | 29903.645 | 42362.613 | X03655    | 1139.118  | 1423.602  | NM_014672 | 2989.926  | 3919.025  |
| AW408832  | 3808.4    | 2584.102  | BG696293  | 1558.352  | 1886.615  | AB058719  | 2013.329  | 2348.881  |
| AA486364  | 14109.251 | 13296.99  | AA777410  | 1391.165  | 1686.496  | AK025935  | 3270.259  | 3441.092  |
| M15476    | 21626.861 | 19806.344 | BG113873  | 873.632   | 1375.604  | AB032953  | 951.516   | 785.908   |
| U57456    | 4292.742  | 3613.469  | BC013135  | 15899.154 | 18534.291 | NM_016441 | 2631.501  | 2824.159  |
| N70057    | 10818.674 | 10528.318 | AI625002  | 641.065   | 1202.69   | NM_006334 | 3741.693  | 3843.659  |
| NM_006497 | 9375.865  | 8056.134  | AA281652  | 2204.392  | 1638.25   | NM_003474 | 1944.643  | 2114.609  |
| NM_006892 | 2215.32   | 1954.581  | U31905    | 1047.713  | 1136.262  | NM_004625 | 4625.023  | 4102.678  |
| SR5       | 8724.994  | 9483.697  | X52479    | 3455.019  | 3863.047  | NM_007179 | 23582.088 | 22951.578 |
| SR7       | 9337.096  | 50936.336 | BC013200  | 27569.871 | 28407.545 | NM_001306 | 1386.789  | 1076.324  |
| SR9       | 30799.457 | 6886.516  | AA486364  | 15315.157 | 18471.648 | AB046861  | 3765.288  | 3674.675  |
| CY3Cy5    | 12472.747 | 760.687   | M15476    | 27796.215 | 25025.967 | NM_005940 | 1001.555  | 615.956   |
| AF254067  | 3324.644  | 6259.757  | U57456    | 3748.158  | 2961.733  | AF061034  | 16874.947 | 11056.029 |
| NM_016363 | 3629.783  | 5279.38   | N70057    | 12704.198 | 8841.327  | X03655    | 1205.913  | 1056.935  |
| AY009090  | 1054.831  | 1510.857  | AK022746  | 1636.636  | 1533.517  | NM_005833 | 4500.447  | 5246.049  |
| U81380    | 834.903   | 863.771   | NM_006568 | 3118.552  | 2201.488  | NM_003100 | 5724.204  | 6720.909  |
| NM_012296 | 5854.983  | 4128.084  | NM_006440 | 2240.69   | 3335.716  | NM_013322 | 14072.294 | 26995.48  |
| AF041038  | 1412.56   | 1689.819  | NM_004847 | 7772.153  | 8026.897  | AB020627  | 3718.109  | 4563.878  |
| NM_004536 | 3577.567  | 4216.154  | NM_002255 | 7277.967  | 9827.349  | NM_005387 | 5985.967  | 7409.861  |
| NM_014672 | 2888.96   | 3573.936  | BC034483  | 1696.818  | 1476.171  | NM_006846 | 1170.034  | 1509.784  |
| AB058719  | 1311.06   | 947.36    | NM_003620 | 2679.587  | 2200.057  | AL137938  | 10369.57  | 8960.39   |
| AK025935  | 2155.747  | 1992.649  | NM_013289 | 5297.8    | 4568.755  | AF228704  | 5217.666  | 6285.958  |
| NM_016441 | 2418.24   | 2914.943  | AA586375  | 994.615   | 1178.939  | AK022746  | 4201.337  | 4424.989  |
| NM_004625 | 1950.24   | 2014.205  | AF254067  | 5175.657  | 4328.152  | NM_006568 | 8758.723  | 9984.728  |
| NM_001306 | 1074.265  | 1079.002  | NM_016363 | 4301.043  | 3746.007  | NM_006440 | 4661.293  | 3933.663  |
| AB046861  | 4042.291  | 3758.833  | AY009090  | 888.551   | 1158.239  | NM_004847 | 14041.272 | 14383.009 |
| NM_005940 | 867.916   | 919.236   | U81380    | 1162.456  | 1122.056  | NM_002255 | 10041.873 | 10159.432 |
| AF061034  | 15128.754 | 14080.613 | NM_002303 | 1015.219  | 392.087   | AF151889  | 20903.605 | 15654.801 |
| X03655    | 948.257   | 1251.752  | NM_016509 | 1331.655  | 1010.364  | BC034483  | 1748.65   | 1841.937  |
| NM_003100 | 5496.952  | 6907.467  | AF041038  | 2276.839  | 1959.758  | NM_003620 | 3310.804  | 3022.284  |
| NM_013322 | 6982.955  | 10796.223 | NM_004536 | 3234.916  | 2240.565  | NM_013289 | 5731.085  | 6814.782  |
| NM_005387 | 6292.404  | 6482.439  | NM_014672 | 2859.665  | 1880.035  | AA586375  | 1636.93   | 1273.464  |
| NM_006846 | 817.614   | 713.995   | AB058719  | 2853.588  | 2378.56   | BE910339  | 27437.217 | 21819.904 |
| AL137938  | 11229.53  | 8951.25   | AK025935  | 3049.445  | 2542.2    | U89715    | 9771.712  | 9818.589  |
| AF228704  | 5130.713  | 5004.978  | AB032953  | 1355.347  | 1319.156  | NM_005227 | 5271.769  | 5112.552  |
| AK022746  | 4164.994  | 4397.574  | AB037848  | 759.544   | 998.387   | NM_000286 | 11649.845 | 9248.607  |
| NM_006568 | 8970.766  | 9402.165  | AF082657  | 3220.37   | 5173.149  | NM_016454 | 25900.924 | 32033.838 |
| NM_004847 | 11143.028 | 9036.409  | NM_006744 | 1318.568  | 1441.15   | NM_003469 | 5160.355  | 7888.108  |
| NM_002255 | 6930.629  | 6638.549  | AF297659  | 432.969   | 604.081   | NM_016433 | 1248.99   | 2082.707  |
| BC034483  | 1954.94   | 1516.791  | NM_018231 | 2975.97   | 3448.745  | NM_000859 | 5056.771  | 4579.948  |
| NM_003620 | 3893.601  | 3871.143  | NM_000583 | 5054.458  | 6462.21   | NM_005480 | 3434.183  | 4248.584  |
| NM_013289 | 6715.871  | 8225.203  | NM_003100 | 3379.665  | 3777.299  | AB034694  | 1027.802  | 1591.301  |
| AA586375  | 1200.744  | 1181.636  | NM_006846 | 591.429   | 708.503   | NM_003273 | 4347.431  | 3888.895  |
| BE910339  | 26470.754 | 21729.576 | AF228704  | 6549.52   | 4766.829  | AK026404  | 1944.212  | 3128.199  |
| U89715    | 10710.905 | 16391.787 | AF222927  | 2657.02   | 3068.002  | NM_017948 | 7231.169  | 9512.312  |
| NM_005227 | 4635.83   | 5770.476  | NM_014345 | 730.7     | 704.599   | NM_000392 | 3298.106  | 3360.913  |

|           |           |           |           |           |           |           |           |           |
|-----------|-----------|-----------|-----------|-----------|-----------|-----------|-----------|-----------|
| NM_000286 | 13345.215 | 13658.361 | NM_018217 | 7310.228  | 7085.021  | AF208536  | 1563.69   | 1568.711  |
| NM_016454 | 27387.041 | 41087.598 | AF241831  | 3001.408  | 4001.411  | AB037848  | 1449.37   | 1334.525  |
| NM_003469 | 3267.44   | 5334.509  | NM_003033 | 2566.831  | 3767.817  | NM_018417 | 550.692   | 430.612   |
| NM_016433 | 1401.797  | 2302.442  | U96113    | 2234.232  | 2179.173  | AF082657  | 4950.508  | 3962.126  |
| NM_000859 | 3255.807  | 2878.688  | NM_002733 | 3558.665  | 3744.124  | NM_006744 | 2184.022  | 1955.63   |
| NM_005480 | 3047.313  | 3099.732  | M31008    | 1546.774  | 1761.602  | AF297659  | 1136.869  | 894.128   |
| AB034694  | 1832.303  | 1702.718  | NM_006288 | 2433.681  | 3055.96   | NM_018231 | 4376.651  | 3977.118  |
| NM_003273 | 4469.066  | 3826.706  | NM_016224 | 8919.73   | 16372.598 | NM_007163 | 331.49    | 623.915   |
| AK026404  | 2345.208  | 2817.774  | NM_005227 | 4463.134  | 6273.644  | NM_000583 | 7246.943  | 7479.416  |
| NM_017948 | 8056.132  | 9633.733  | NM_000286 | 11403.841 | 10462.877 | NM_014914 | 5202.121  | 6119.865  |
| NM_000392 | 2025.702  | 2385.649  | NM_016454 | 20996.881 | 21591.6   | NM_018289 | 2575.954  | 3454.18   |
| AF208536  | 1875.385  | 2497.729  | NM_003469 | 2886.958  | 3012.315  | AB018260  | 799.695   | 1252.582  |
| AB037848  | 1289.074  | 1129.71   | NM_016433 | 1044.254  | 1170.946  | NM_015985 | 471.209   | 822.956   |
| AF082657  | 5475.036  | 5048.933  | NM_000859 | 2939.053  | 4121.602  | NM_014766 | 4966.488  | 5540.333  |
| NM_006744 | 1881.604  | 1768.118  | NM_005480 | 2536.269  | 2693.57   | NM_016627 | 25132.77  | 39777.668 |
| AF297659  | 1053.362  | 632.579   | AB034694  | 1583.728  | 1181.449  | NM_016121 | 2804.385  | 3799.566  |
| NM_018231 | 3585.581  | 3230.844  | NM_003273 | 2645.395  | 3801.839  | NM_014769 | 3807.215  | 4772.714  |
| NM_000583 | 6560.396  | 6421.257  | AK026404  | 2421.466  | 2267.702  | NM_006349 | 49405.762 | 51415.012 |
| NM_014914 | 5009.998  | 7974.879  | NM_017948 | 7526.702  | 6229.133  | AK026264  | 11803.152 | 11811.724 |
| NM_018289 | 2880.568  | 4155.277  | NM_000392 | 2924.196  | 2891.104  | AF222927  | 5749.445  | 4778.79   |
| AB018260  | 1003.762  | 1593.946  | NM_000267 | 3847.386  | 3039.199  | NM_014345 | 3205.55   | 3481.086  |
| NM_014766 | 4143.992  | 3586.163  | NM_016603 | 781.695   | 565.605   | NM_018217 | 9018.307  | 8571.702  |
| NM_016627 | 29474.57  | 41441.469 | NM_004398 | 27288.543 | 29361.578 | AF241831  | 4749.497  | 4001.931  |
| NM_016121 | 3438.395  | 3589.502  | NM_014966 | 5354.258  | 6110.669  | NM_003033 | 3722.382  | 2766.619  |
| NM_014769 | 4077.683  | 3188.966  | NM_014962 | 2252.819  | 2701.348  | U96113    | 2181.566  | 2002.097  |
| NM_006349 | 50371.242 | 45640.121 | D87684    | 13491.637 | 9957.789  | NM_002733 | 3516.622  | 3736.427  |
| AK026264  | 10738.122 | 9871.507  | NM_001586 | 1235.951  | 1404.695  | M31008    | 1383.397  | 1106.167  |
| AF222927  | 5137.333  | 4453.118  | NM_006317 | 1912.303  | 2696.513  | NM_006288 | 3565.982  | 2344.867  |
| NM_014345 | 3446.84   | 3214.99   | NM_001219 | 8568.134  | 7246.853  | NM_016224 | 9356.522  | 6069.442  |
| NM_018217 | 8762.305  | 8685.271  | AK000124  | 2403.527  | 2738.365  | AB046861  | 3230.104  | 3628.156  |
| AF241831  | 5419.503  | 4572.887  | NM_004480 | 4099.87   | 4224.741  | NM_005940 | 1109.17   | 1001.695  |
| NM_003033 | 4289.072  | 3286.727  | NM_014914 | 6035.721  | 6996.989  | AF061034  | 14127.746 | 13313.095 |
| U96113    | 3202.279  | 2828.771  | NM_018289 | 2986.984  | 2804.853  | X03655    | 1502.131  | 1517.206  |
| NM_002733 | 4663.709  | 5718.753  | AB018260  | 750.062   | 941.889   | BG696293  | 2108.678  | 2000.962  |
| M31008    | 1578.101  | 1482.996  | NM_014766 | 1918.271  | 2119.921  | AA777410  | 1826.047  | 2320.739  |
| NM_006288 | 3498.499  | 3233.826  | NM_016627 | 30924.584 | 27871.127 | BG113873  | 1350.773  | 1186.173  |
| NM_016224 | 9315.218  | 9411.639  | NM_016121 | 3006.323  | 3040.209  | BC013135  | 21214.35  | 23444.066 |
| AB046861  | 3344.116  | 4382.666  | NM_014769 | 3739.002  | 3565.447  | AI625002  | 1507.275  | 935.096   |
| NM_005940 | 3001.586  | 2968.389  | NM_006349 | 45129.73  | 52641.488 | H07899    | 550.047   | 804.025   |
| AF061034  | 15637.887 | 21408.918 | AK026264  | 16019.191 | 15402.143 | AA281652  | 1557.313  | 1616.608  |
| X03655    | 1242.628  | 1326.547  | NM_004385 | 2880.902  | 2746.75   | U31905    | 1827.789  | 1536.682  |
| BG696293  | 1799.566  | 2003.124  | NM_005876 | 41605.719 | 42002.387 | X52479    | 5273.536  | 4220.248  |
| AA777410  | 1732.23   | 2273.055  | NM_004934 | 563.58    | 729.467   | BC013200  | 31190.684 | 32193.852 |
| BG113873  | 1338.538  | 1293.464  | AF284436  | 529.486   | 556.177   | AW408832  | 5466.769  | 4810.477  |
| BC013135  | 25153.721 | 30138.6   | NM_004445 | 1700.901  | 2763.658  | AA486364  | 15234.14  | 13168.653 |
| AI625002  | 1924.938  | 1043.295  | U39657    | 7432.087  | 7951.455  | M15476    | 39024.551 | 28989.748 |
| H07899    | 743.274   | 701.317   | NM_016340 | 2717.742  | 2839.638  | U57456    | 4741.023  | 4263.64   |
| AA281652  | 1923.807  | 1785.848  | NM_018373 | 1234.313  | 1643.768  | N70057    | 14944.032 | 14382.452 |
| U31905    | 1134.443  | 979.381   | NM_006449 | 1274.134  | 1914.118  | NM_006497 | 14930.23  | 14245.569 |
| X52479    | 5181.479  | 4436.559  | BF216030  | 7124.735  | 7684.088  | NM_006892 | 2377.769  | 2144.966  |
| BC013200  | 33290.504 | 38825.77  | AF131839  | 1006.804  | 1156.941  | AK000124  | 2247.723  | 1843.425  |
| AW408832  | 5800.86   | 4633.072  | NM_002757 | 6065.752  | 8246.137  | NM_004480 | 3657.478  | 3313.5    |
| AA486364  | 14520.912 | 11747.932 | NM_003684 | 2675.336  | 2968.884  | BC034483  | 1989.155  | 1703.649  |

|           |           |           |           |           |           |           |           |           |
|-----------|-----------|-----------|-----------|-----------|-----------|-----------|-----------|-----------|
| M15476    | 27203.516 | 26347.529 | NM_005657 | 1706.979  | 2039.348  | NM_00362C | 2781.708  | 3915.929  |
| U57456    | 4841.624  | 4110.915  | NM_017671 | 1192.067  | 935.554   | NM_01328E | 4442.349  | 7464.916  |
| N70057    | 12757.526 | 12533.562 | AB040883  | 5435.902  | 3360.398  | AA586375  | 1237.5    | 2065.432  |
| NM_006497 | 12972.766 | 11329.968 | NM_018639 | 6814.869  | 5749.85   | BE910339  | 23848.811 | 26385.127 |
| NM_006892 | 2868.253  | 2527.422  | AF264628  | 1021.289  | 698.227   | U89715    | 9399.4    | 15126.048 |
| AK000124  | 2480.173  | 2559.754  | NM_001715 | 4582.159  | 6011.283  | AF254067  | 4266.288  | 6055.108  |
| NM_00448C | 3733.458  | 4855.293  | NM_004395 | 7699.031  | 9883.085  | NM_016363 | 3564.224  | 5306.622  |
| BC034483  | 1763.954  | 2099.32   | NM_002663 | 1041.771  | 1086.284  | AY009090  | 1272.719  | 1114.976  |
| NM_00362C | 2971.98   | 4132.854  | NM_006094 | 8426.844  | 8179.068  | U81380    | 1472.339  | 1427.844  |
| NM_01328E | 5950.866  | 10190.414 | AF080158  | 2657.726  | 2870.217  | NM_002303 | 733.106   | 1020.487  |
| AA586375  | 1547.858  | 1606.381  | AB037794  | 12428.864 | 11878.781 | NM_016505 | 1315.527  | 1530.892  |
| BE910339  | 29795.438 | 36527.918 | NM_005935 | 633.116   | 819.976   | NM_01229E | 6195.57   | 3504.181  |
| U89715    | 9233.568  | 13998.689 | NM_012415 | 2743.058  | 2064.419  | AF041038  | 2300.406  | 2020.855  |
| AF254067  | 4358.333  | 6037.299  | NM_01417E | 6495.118  | 6923.748  | NM_00453E | 3769.342  | 3960.766  |
| NM_016363 | 5346.771  | 5602.21   | NM_001251 | 20871.574 | 21067.922 | NM_014672 | 3053.607  | 3830.647  |
| AY009090  | 1504.492  | 1517.146  | AB011112  | 5662.524  | 5740.89   | AB058719  | 2335.031  | 2430.639  |
| U81380    | 1155.024  | 1106.914  | NM_018669 | 4223.348  | 4639.954  | AK025935  | 3879.132  | 3491.441  |
| NM_016505 | 1269.071  | 1180.999  | NM_002623 | 2787.347  | 3585.461  | AB032953  | 910.501   | 1092.961  |
| AF041038  | 1652.611  | 1491.956  | NM_018844 | 4723.757  | 5144.621  | NM_016441 | 2295.469  | 2925.737  |
| NM_00453E | 3965.186  | 3639.987  | AF279778  | 1756.64   | 2428.76   | NM_006334 | 3476.299  | 3047.706  |
| NM_014672 | 3136.598  | 3490.431  | NM_015477 | 5897.461  | 5567.301  | NM_003474 | 1996.618  | 1749.117  |
| AB058719  | 1590.376  | 1667.395  | AK023212  | 4601.339  | 4656.256  | NM_004625 | 3827.443  | 2890.417  |
| AK025935  | 3752.69   | 4385.992  | AL353943  | 1813.447  | 2100.979  | NM_007175 | 20710.986 | 18727.77  |
| AB032953  | 738.242   | 771.207   | BE568801  | 1078.578  | 1005.626  | NM_00130E | 1262.639  | 927.742   |
| NM_016441 | 2830.454  | 3071.241  | AB002336  | 1079.611  | 2372.282  | AF297659  | 1030.695  | 1067.982  |
| NM_006334 | 4139.045  | 3644.094  | NM_003127 | 742.386   | 883.336   | NM_018231 | 3021.284  | 3577.777  |
| NM_003474 | 3102.474  | 2132.599  | NM_01328E | 7883.28   | 8396.041  | NM_000583 | 7086.237  | 9137.493  |
| NM_004625 | 2953.086  | 2629.084  | NM_006082 | 66499.164 | 65056.496 | NM_005833 | 4075.049  | 5351.674  |
| NM_007175 | 23138.061 | 25887.174 | NM_006633 | 4273.411  | 3289.131  | NM_00310C | 3672.305  | 4416.638  |
| NM_00130E | 906.061   | 1051.958  | NM_016262 | 1768.188  | 1917.113  | NM_013322 | 11457.554 | 17022.834 |
| AF297659  | 477.132   | 801.018   | AB011116  | 8048.487  | 9127.204  | NM_005387 | 4871.856  | 5900.474  |
| NM_018231 | 2803.187  | 3240.54   | AB037858  | 4368.61   | 3878.876  | NM_00684E | 1003.844  | 724.315   |
| NM_007163 | 515.834   | 670.188   | NM_005775 | 4791.738  | 9171.06   | AL137938  | 11080.533 | 7473.41   |
| NM_000583 | 7538.826  | 9446.933  | NM_017639 | 4279.392  | 3951.201  | AF228704  | 5562.442  | 5528.52   |
| NM_00310C | 6923.406  | 6938.403  | NM_016591 | 778.375   | 924.309   | AK022746  | 4750.82   | 4233.586  |
| NM_005387 | 5527.885  | 5328.387  | AL157437  | 12218.816 | 13474.966 | NM_00656E | 8207.905  | 7399.722  |
| AF228704  | 6981.76   | 6397.811  | L25629    | 525.7     | 508.909   | NM_00644C | 4542.74   | 3066.874  |
| AK022746  | 6090.855  | 5240.264  | AJ245539  | 412.261   | 584.532   | NM_004847 | 12435.94  | 10414.877 |
| NM_00656E | 12278.259 | 12886.272 | NM_00149C | 1548.229  | 1499.853  | NM_002255 | 10698.996 | 9301.065  |
| NM_00644C | 4915.847  | 4020.04   | NM_01774C | 4534.876  | 4635.5    | AF151889  | 20067.875 | 13681.881 |
| NM_004847 | 14723.08  | 11951.421 | AB033052  | 2608.67   | 2425.076  | U96113    | 1909.318  | 2248.938  |
| NM_002255 | 6855.111  | 8285.731  | NM_018227 | 2592.458  | 2186.686  | NM_002733 | 3586.992  | 4783.081  |
| U96113    | 2154.483  | 2945.017  | AF050199  | 925.801   | 913.008   | M31008    | 1582.492  | 1244.463  |
| NM_002733 | 3545.156  | 6427.207  | NM_00334C | 43376.238 | 49087.719 | NM_00628E | 3156.251  | 3859.623  |
| M31008    | 1529.5    | 1642.845  | U46752    | 2247.125  | 2026.335  | NM_016224 | 6863.072  | 7137.005  |
| NM_00628E | 3390.198  | 3241.309  | NM_002794 | 61728.609 | 48400.363 | NM_005227 | 4944.763  | 4919.392  |
| NM_016224 | 7544.84   | 8258.845  | BF244646  | 55014.121 | 46743.289 | NM_00028E | 13219.799 | 9866.919  |
| NM_005227 | 4858.89   | 5335.025  | AK024030  | 2897.712  | 4136.994  | NM_016454 | 23636.666 | 29949.67  |
| NM_00028E | 16360.378 | 13431.913 | AF275808  | 1158.369  | 1342.018  | NM_00346E | 4467.794  | 5536.393  |
| NM_016454 | 30200.402 | 35351.629 | AK024038  | 5805.7    | 6174.33   | NM_016433 | 1342.446  | 1342.181  |
| NM_00346E | 4388.435  | 4667.374  | NM_002055 | 1308.614  | 946.722   | NM_00085E | 3739.459  | 2513.631  |
| NM_016433 | 2063.442  | 2297.172  | NM_005803 | 12534.743 | 12638.019 | NM_00548C | 3204.26   | 2892.71   |
| NM_00085E | 4968.386  | 4043.549  | NM_015515 | 6516.457  | 5248.927  | AB034694  | 1313.722  | 1375.893  |

|           |           |           |           |           |           |           |           |           |
|-----------|-----------|-----------|-----------|-----------|-----------|-----------|-----------|-----------|
| NM_00548C | 3841.183  | 3415.943  | AK001579  | 11099.082 | 9706.686  | NM_003273 | 4612.96   | 2792.837  |
| AB034694  | 1584.157  | 1572.924  | NM_00267C | 6144.057  | 6590.946  | AK026404  | 2465.058  | 1916.989  |
| NM_003273 | 4937.757  | 3067.634  | AF163302  | 3178.448  | 3438.043  | NM_01794E | 8022.4    | 8068.821  |
| AK026404  | 2534.38   | 2325.246  | NM_00640E | 2850.963  | 4189.472  | NM_000392 | 3244.93   | 3028.019  |
| NM_01794E | 8395.364  | 8003.534  | NM_002419 | 4426.85   | 4245.52   | AF208536  | 1740.518  | 1833.318  |
| NM_000392 | 3283.628  | 2820.149  | NM_005604 | 1921.036  | 1691.628  | AB037848  | 1167.168  | 800.093   |
| AL096777  | 316.216   | 1963.544  | S69023    | 1622.626  | 1587.604  | NM_018417 | 918.037   | 9.341     |
| AF208536  | 2887.451  | 2699.279  | NM_003454 | 3050.228  | 2228.737  | AF082657  | 4686.375  | 3564.999  |
| AB037848  | 1190.296  | 954.719   | NM_00341E | 15158.986 | 19370.391 | NM_006744 | 1762.53   | 1401.502  |
| AF082657  | 6769.035  | 6416.285  | NM_01790E | 3677.421  | 4453.377  | NM_006497 | 9506.324  | 10733.551 |
| NM_006744 | 2125.101  | 2222.247  | NM_00688E | 3032.128  | 3070.886  | NM_006892 | 1734.755  | 2064.999  |
| NM_006497 | 10141.787 | 11673.007 | M25077    | 7193.796  | 5661.332  | AK000124  | 1746.03   | 2107.775  |
| NM_006892 | 2147.156  | 2388.425  | NM_018702 | 2572.341  | 2311.246  | NM_00448C | 2883.263  | 3918.901  |
| AK000124  | 2249.516  | 2478.574  | M62843    | 529.167   | 873.226   | NM_014914 | 5151.543  | 7086.977  |
| NM_00448C | 3135.268  | 4180.716  | NM_004593 | 2040.136  | 1475.559  | NM_004484 | 927.564   | 1069.942  |
| NM_014914 | 4379.543  | 5712.72   | NM_00577E | 9802.211  | 10077.084 | NM_01828E | 2437.603  | 2932.346  |
| NM_01828E | 3903.15   | 2998.614  | NM_001032 | 65193.977 | 56727.516 | AB018260  | 846.033   | 876.331   |
| AB018260  | 981.492   | 978.42    | NM_018084 | 16944.014 | 16490.807 | NM_01476E | 4378.008  | 4470.765  |
| NM_01476E | 5894.131  | 4971.194  | AF164797  | 56699.609 | 52251.297 | NM_016627 | 25945.406 | 30888.594 |
| NM_016627 | 27655.508 | 32600.371 | AK001052  | 35822.473 | 41463.691 | NM_016121 | 3400.548  | 3086.321  |
| NM_016121 | 3227.793  | 2978.805  | NM_00141E | 49544.961 | 43062.453 | NM_01476E | 3854.776  | 3166.609  |
| NM_01476E | 3559.583  | 2742.948  | NM_004564 | 5077.943  | 4934.517  | NM_00634E | 48267.406 | 40611.898 |
| NM_00634E | 56290.23  | 52099.059 | NM_00096E | 62107.895 | 50963.422 | AK026264  | 14747.413 | 12001.823 |
| AK026264  | 13064.743 | 10390.287 | AL355743  | 2790.526  | 3310.822  | AF222927  | 5682.133  | 4177.044  |
| AF222927  | 6136.457  | 5764.336  | L77571    | 1035.088  | 966.644   | NM_01434E | 3212.392  | 2447.873  |
| NM_01434E | 3979.091  | 3541.68   | X81896    | 887.593   | 799.855   | NM_018217 | 7957.059  | 5976.6    |
| NM_018217 | 10893.062 | 10271.953 | NM_002202 | 2160.129  | 2360.143  | AF241831  | 4329.066  | 2959.791  |
| AF241831  | 5350.151  | 4084.731  | NM_00600E | 2939.476  | 3239.442  | NM_003033 | 3404.92   | 2695.912  |
| NM_003033 | 5203.411  | 4669.42   | NM_00168E | 52554.086 | 45030.574 | NM_016441 | 1971.237  | 2432.5    |
| NM_016441 | 2356.754  | 3447.557  | NM_006067 | 38401.844 | 42780.234 | NM_006334 | 2772.225  | 4026.53   |
| NM_006334 | 3274.709  | 3785.046  | NM_000284 | 9848.865  | 9715.971  | NM_003474 | 1284.05   | 1496.694  |
| NM_003474 | 1420.618  | 1942.155  | NM_004813 | 7186.715  | 8157.69   | NM_00462E | 2576.618  | 2959.893  |
| NM_00462E | 1778.911  | 2387.953  | AK023008  | 3272.371  | 4160.613  | NM_00717E | 17502.174 | 22414.383 |
| NM_00717E | 16273.062 | 21103.928 | NM_00468E | 6677.004  | 6431.478  | NM_00130E | 965.655   | 915.023   |
| NM_00130E | 912.789   | 1050.198  | NM_00602E | 30363.736 | 33379.367 | AB046861  | 3272.532  | 4198.55   |
| AB046861  | 1646.905  | 1856.955  | AB040956  | 3839.728  | 4780.125  | NM_00594C | 772.082   | 835.231   |
| NM_00594C | 946.249   | 1015.391  | NM_016587 | 2009.961  | 1949.885  | AF061034  | 13269.816 | 11793.443 |
| AF061034  | 15910.938 | 14736.298 | NM_00351E | 2727.448  | 2393.897  | X03655    | 1008.297  | 969.387   |
| X03655    | 1085.289  | 1017.81   | NM_017953 | 5082.714  | 4209.615  | BG696293  | 2303.138  | 2174.499  |
| BG696293  | 2053.108  | 2161.804  | BC000124  | 4412.104  | 3993.769  | AA777410  | 1758.818  | 2039.739  |
| AA777410  | 1332.879  | 1477.068  | NM_006914 | 1350.914  | 1663.2    | BG113873  | 1306.413  | 1304.788  |
| BC013135  | 16904.014 | 18235.857 | NM_00344E | 18241.494 | 42328.086 | BC013135  | 22103.984 | 21766.842 |
| AI625002  | 1737.757  | 653.439   | NM_00148E | 7166.031  | 6509.404  | AI625002  | 1624.77   | 827.27    |
| AA281652  | 2312.115  | 2283.201  | NM_002702 | 1355.466  | 1329.208  | H07899    | 530.265   | 587.099   |
| U31905    | 809.364   | 1149.389  | AK021510  | 1385.638  | 1652.62   | AA281652  | 2121.49   | 1648.787  |
| X52479    | 6325.61   | 5451.57   | AK022711  | 2225.827  | 2054.871  | U31905    | 3135.31   | 3393.702  |
| BC013200  | 40267.527 | 43778.027 | AK024310  | 834.313   | 683.561   | X52479    | 4838.548  | 3376.658  |
| AW408832  | 6781.24   | 5174.7    | AK023039  | 1849.95   | 1502.666  | BC013200  | 31141.555 | 27769.572 |
| AA486364  | 20188.285 | 17869.697 | AL109688  | 5197.364  | 6563.861  | AW408832  | 5334.979  | 3580.591  |
| M15476    | 30001.809 | 28085.123 | AF074981  | 1037.836  | 1160.119  | AA486364  | 16803.199 | 12735.025 |
| U57456    | 4992.209  | 3844.348  | AK023009  | 548.568   | 852.06    | M15476    | 35010.211 | 20645.82  |
| N70057    | 15342.509 | 14145.087 | AK026149  | 1389.583  | 1021.782  | U57456    | 4148.558  | 3150.017  |
| AK022746  | 4849.559  | 5855.367  | AF038185  | 7715.223  | 8665.275  | N70057    | 12268.446 | 10613.237 |

|           |           |           |           |           |           |           |           |           |
|-----------|-----------|-----------|-----------|-----------|-----------|-----------|-----------|-----------|
| NM_00656E | 9920.668  | 13317.881 | AB027011  | 20296.799 | 23820.076 | AK022746  | 3268.824  | 4397.489  |
| NM_00644C | 3427.453  | 3991.484  | AK025305  | 1612.988  | 1727.265  | NM_00656E | 7059.598  | 10535.369 |
| NM_00225E | 4520.714  | 5857.82   | AF131788  | 485.68    | 571.088   | NM_00644C | 3914.547  | 4122.211  |
| BC034483  | 1191.428  | 993.653   | AL117415  | 16372.609 | 18132.326 | NM_004847 | 9722.768  | 11921.101 |
| NM_00362C | 2846.728  | 3080.018  | AK023616  | 2174.933  | 2209.609  | NM_00225E | 8545.443  | 11810.411 |
| NM_01328E | 5529.884  | 7496.279  | AK025665  | 4871.146  | 4708.186  | AF151889  | 21644.113 | 20258.891 |
| AA586375  | 880.541   | 1218.492  | AL355694  | 1446.142  | 1216.42   | BC034483  | 1860.302  | 2243.877  |
| AF254067  | 3757.97   | 4663.285  | AK027152  | 2467.353  | 3411.933  | NM_00362C | 2742.016  | 4075.179  |
| NM_01636E | 3684.149  | 3884.57   | AF191492  | 1099.429  | 919.5     | NM_01328E | 4237.061  | 7138.154  |
| AY009090  | 1079.844  | 1054.76   | BC037530  | 37067.703 | 36971.559 | AA586375  | 1273.624  | 1382.918  |
| U81380    | 1078.818  | 874.356   | NM_014851 | 12177.843 | 10593.685 | BE910339  | 22871.209 | 22975.248 |
| NM_00230E | 409.498   | 432.491   | AK022811  | 2158.731  | 1462.366  | U89715    | 9286.396  | 12551.227 |
| NM_01650E | 1441.12   | 1266.95   | AL117635  | 1571.975  | 1504.165  | AF254067  | 4790.01   | 6808.415  |
| AF041038  | 1784.107  | 1450.984  | AB040929  | 1448.299  | 2573.297  | NM_01636E | 3620.102  | 4110.598  |
| NM_00453E | 5749.185  | 4789.826  | D17010    | 469.667   | 760.673   | AY009090  | 1397.045  | 1197.559  |
| NM_014672 | 3725.218  | 4263.477  | AJ011596  | 4908.522  | 5821.42   | U81380    | 1338.265  | 1135.405  |
| AB058719  | 2010.272  | 1830.022  | U17639    | 956.106   | 993.832   | NM_00230E | 298.595   | 767.509   |
| AK025935  | 3805.428  | 4009.261  | AL049215  | 48671.875 | 44013.84  | NM_01650E | 1195.542  | 1152.878  |
| AB032953  | 668.904   | 735.907   | X51779    | 4313.32   | 3545.656  | NM_01229E | 5695.565  | 2764.576  |
| AB037848  | 969.365   | 949.79    | X81001    | 684.487   | 967.954   | AF041038  | 2566.642  | 2489.33   |
| AF082657  | 4833.18   | 5932.525  | AL049254  | 2416.936  | 2719.507  | NM_00453E | 4168.172  | 3961.767  |
| NM_006744 | 1350.41   | 1567.417  | Z83954    | 6180.217  | 6523.098  | NM_014672 | 2998.803  | 2519.306  |
| NM_018231 | 2489.756  | 2404.469  | M74093    | 4132.523  | 3580.678  | AB058719  | 1691.283  | 1341.257  |
| NM_00716E | 421.759   | 395.147   | M28219    | 2387.518  | 1836.728  | AK025935  | 2608.68   | 2592.187  |
| NM_00058E | 6426.641  | 7353.537  | L17326    | 1218.441  | 1085.511  | AB032953  | 708.785   | 737.117   |
| NM_00310C | 5240.205  | 5054.196  | D17207    | 6835.507  | 7712.916  | AF208536  | 1275.181  | 2006.552  |
| NM_00684E | 1050.604  | 679.3     | D55640    | 3798.939  | 3300.967  | AB037848  | 1215.001  | 1838.624  |
| AF228704  | 8906.142  | 7763.112  | AF085897  | 829.69    | 654.815   | AF082657  | 4138.725  | 4068.99   |
| AF222927  | 5724.868  | 6059.626  | AF085822  | 1168.345  | 1602.186  | NM_006744 | 2049.26   | 2259.791  |
| NM_01434E | 3538.074  | 4495.808  | AK021551  | 1882.884  | 4236.815  | AF297659  | 855.646   | 1062.641  |
| NM_018217 | 8653.34   | 12606.082 | AK025117  | 1440.199  | 1332.289  | NM_018231 | 3629.614  | 4362.083  |
| AF241831  | 3639.923  | 4167.832  | AK000024  | 8582.254  | 11987.62  | NM_00716E | 635.136   | 663.15    |
| NM_00303E | 3278.08   | 3526.095  | AK026693  | 1899.63   | 2230.357  | NM_00058E | 6224.204  | 8153.154  |
| U96113    | 1981.845  | 2260.42   | NM_01228E | 771.415   | 693.153   | NM_00310C | 5445.789  | 4545.142  |
| NM_00273E | 3860.177  | 5196.409  | AK001128  | 1638.558  | 1562.927  | NM_01332E | 13395.229 | 16301.047 |
| M31008    | 1638.327  | 1687.528  | AK000794  | 4585.1    | 4532.565  | NM_005387 | 5166.909  | 4778.303  |
| NM_00628E | 3094.846  | 2805.84   | AK000950  | 7292.953  | 6459.178  | NM_00684E | 865.306   | 717.685   |
| NM_016224 | 7674.608  | 7083.57   | AK026812  | 3784.712  | 2991.994  | AL137938  | 9987.999  | 6124.403  |
| NM_005227 | 4597.167  | 4105.723  | AK000176  | 1963.755  | 2292.484  | AF228704  | 5911.171  | 4907.79   |
| NM_00028E | 12698.776 | 9583.819  | AK000831  | 5729.208  | 4652.791  | AF222927  | 5379.766  | 4811.091  |
| NM_016454 | 27802.285 | 28166.072 | AK000981  | 2005.145  | 1530.796  | NM_01434E | 2417.765  | 3223.971  |
| NM_00346E | 4054.964  | 3838.924  | AK024615  | 907.96    | 766.995   | NM_018217 | 8422.77   | 9796.517  |
| NM_01643E | 2000.867  | 2074.942  | AK025054  | 3163.455  | 2618.871  | AF241831  | 4314.138  | 4455.441  |
| NM_00085E | 5338.797  | 3624.215  | AK024556  | 1190.092  | 1355.642  | NM_00303E | 3588.604  | 4262.17   |
| NM_00548C | 4160.212  | 3785.746  | AK024935  | 1627.658  | 1903.484  | U96113    | 2177.256  | 3905.2    |
| AB034694  | 1603.701  | 1667.283  | AK025325  | 7352.416  | 8356.545  | NM_00273E | 3660.976  | 5866.646  |
| NM_00327E | 5250.445  | 3118.417  | U50531    | 1715.739  | 1325.775  | M31008    | 1417.689  | 1635.359  |
| AK026404  | 2949.172  | 2425.302  | NM_00531E | 4827.658  | 5099.023  | NM_00628E | 2850.949  | 3073.475  |
| NM_01794E | 9410.012  | 10133.044 | L09099    | 1205.451  | 1214.865  | NM_016224 | 7962.171  | 8106.863  |
| NM_00039E | 4138.473  | 3564.372  | AL117474  | 1882.843  | 1749.374  | NM_005227 | 4452.967  | 4628.256  |
| NM_000267 | 4705.065  | 6111.329  | NM_005421 | 1742.047  | 1549.377  | NM_00028E | 12974.497 | 8095.673  |
| NM_01660E | 5187.395  | 7677.033  | AK024580  | 39615.262 | 36971.238 | NM_016454 | 24941.793 | 23920.08  |
| NM_00439E | 31027.395 | 42392.906 | AL442093  | 5302.713  | 4009.628  | NM_00346E | 4316.964  | 4317.926  |

|           |           |           |           |           |           |           |           |           |
|-----------|-----------|-----------|-----------|-----------|-----------|-----------|-----------|-----------|
| NM_016181 | 1033.45   | 1620.118  | AK024331  | 2021.043  | 1177.759  | NM_016433 | 1374.097  | 1352.162  |
| NM_014966 | 8057.049  | 8945.108  | AK024452  | 2321.079  | 1906.586  | NM_000859 | 4102.877  | 2580.818  |
| NM_014962 | 3010.688  | 2465.091  | AJ249975  | 757.471   | 971.088   | NM_005480 | 3022.399  | 2601.738  |
| D87684    | 11581.172 | 14983.809 | AK021733  | 1624.581  | 1897.892  | AB034694  | 1370.129  | 1393.895  |
| NM_001586 | 961.524   | 1096.49   | NM_012449 | 2024.62   | 2200.079  | NM_003273 | 4308.241  | 2160.441  |
| NM_006317 | 1643.681  | 1539.639  | AK000543  | 15063.597 | 15604.199 | AK026404  | 2106.635  | 1433.932  |
| NM_001219 | 7431.174  | 12027.818 | AK026683  | 5301.555  | 4482.506  | NM_017948 | 7966.272  | 7008.007  |
| AK000124  | 2151.963  | 2358.634  | D16906    | 2899.472  | 2463.554  | NM_000392 | 2648.607  | 2309.981  |
| NM_004480 | 3558.177  | 4194.15   | AL079309  | 3703.448  | 3310.963  | NM_000267 | 3622.471  | 4076.055  |
| NM_014914 | 6824.737  | 7743.58   | AK022335  | 1422.473  | 493.175   | NM_016603 | 3728.531  | 6142.457  |
| NM_018289 | 3211.063  | 2878.34   | AL110280  | 2057.41   | 1846.142  | NM_004399 | 45686.719 | 49049.531 |
| AB018260  | 1169.51   | 1077.296  | AK024235  | 289.022   | 384.376   | NM_016181 | 562.299   | 887.519   |
| NM_014766 | 6106.043  | 5480.71   | NM_017458 | 1100.174  | 930.186   | NM_014966 | 7354.993  | 7514.259  |
| NM_016627 | 27014.467 | 26218     | AF086196  | 730.513   | 674.35    | NM_014962 | 2971.291  | 3623.792  |
| NM_016121 | 4078.499  | 3960.031  | NM_005542 | 35941.914 | 42557.656 | D87684    | 12189.851 | 15098.24  |
| NM_014769 | 5045.872  | 4027.997  | X95095    | 2025.406  | 1797.134  | NM_001586 | 1427.92   | 1490.292  |
| NM_006349 | 56498.578 | 53990.078 | AF078528  | 12693.163 | 9263.46   | NM_006317 | 1951.815  | 1995.096  |
| AK026264  | 14259.53  | 14265.027 | AF161411  | 3002.321  | 2781.409  | NM_001219 | 6042.341  | 9869.852  |
| NM_004385 | 1515.476  | 1903.958  | AK000450  | 30812.863 | 22102.496 | AK000124  | 1849.403  | 1955.084  |
| NM_005876 | 29587.281 | 37183.688 | NM_018224 | 10633.032 | 7897.689  | NM_004480 | 2705.984  | 2698.388  |
| AF039697  | 545.228   | 627.761   | NM_019896 | 4258.325  | 3293.392  | NM_014914 | 4522.382  | 4875.686  |
| NM_004934 | 827.606   | 798.67    | NM_018569 | 7827.067  | 7065.054  | NM_018289 | 1808.175  | 1399.382  |
| AF284436  | 539.779   | 587.001   | J04118    | 880.393   | 851.557   | AB018260  | 880.052   | 933.697   |
| NM_004445 | 2578.098  | 2693.534  | NM_000730 | 4565.67   | 11583.847 | NM_014766 | 4785.32   | 4407.107  |
| U39657    | 7505.318  | 8996.98   | U31734    | 50013.332 | 39013.059 | NM_016627 | 23800.227 | 24820.297 |
| NM_018373 | 1329.759  | 1530.442  | AF085885  | 2553.175  | 2251.631  | NM_016121 | 3092.273  | 2710.189  |
| NM_006449 | 1226.71   | 1474.655  | M24751    | 1028.54   | 735.175   | NM_014769 | 3820.581  | 3031.019  |
| BF216030  | 4073.878  | 5451.053  | AK026569  | 68649     | 67938.766 | NM_006349 | 50748.926 | 37975.137 |
| AF131839  | 1152.282  | 1066.506  | AL049974  | 1570.149  | 1117.753  | AK026264  | 14884.19  | 10046.547 |
| NM_002757 | 4825.079  | 6074.59   | AF009319  | 2947.683  | 2014.823  | NM_004385 | 2369.525  | 2015.417  |
| NM_003684 | 3331.517  | 4011.337  | AL365519  | 1020.938  | 734.753   | NM_005876 | 26513.709 | 28327.342 |
| NM_005657 | 3127.228  | 2436.368  | NM_018465 | 10738.948 | 8471.668  | AF039697  | 703.617   | 786.692   |
| NM_017671 | 1412.245  | 1122.4    | Z36845    | 1031.512  | 904.562   | NM_004934 | 973.873   | 1253.442  |
| AB040883  | 5388.797  | 6401.692  | M73792    | 1049.827  | 912.376   | AF284436  | 1109.696  | 1237.551  |
| NM_018639 | 8206.735  | 8106.214  | NM_016127 | 9511.183  | 8892.434  | NM_004445 | 2999.021  | 3034.789  |
| AF264628  | 953.434   | 1065.606  | AF085939  | 1214.632  | 721.071   | U39657    | 9203.301  | 12321.239 |
| NM_001715 | 3519.291  | 3024.735  | NM_006792 | 19522.631 | 16825.6   | NM_016340 | 2020.57   | 2138.372  |
| NM_004395 | 11391.208 | 8102.934  | Z36874    | 45487.406 | 41908.18  | NM_018373 | 1379.769  | 1787.989  |
| NM_002663 | 1889.982  | 1282.051  | AK095477  | 1139.396  | 1770.791  | NM_006449 | 1554.26   | 1477.419  |
| NM_006094 | 10301.336 | 7722.873  | AK022462  | 1844.367  | 1558.425  | BF216030  | 3832.866  | 4513.707  |
| AF080158  | 4902.003  | 3926.67   | NM_020530 | 1199.995  | 1337.272  | AF131839  | 801.544   | 645.55    |
| AB037794  | 13674.604 | 14756.368 | AK022418  | 2152.604  | 1593.711  | NM_002757 | 1775.441  | 2363.459  |
| NM_005935 | 1585.802  | 1750.113  | AF279777  | 2074.999  | 1244.804  | NM_003684 | 1037.582  | 1170.627  |
| NM_012415 | 2631.867  | 4570.059  | AK021748  | 2471.487  | 2702.287  | NM_005657 | 1122.575  | 1110.484  |
| NM_014178 | 4073.455  | 6494.744  | AL137257  | 11784.484 | 9181.885  | AB040883  | 4241.728  | 5188.277  |
| NM_001251 | 21230.145 | 26230.473 | AF086503  | 655.139   | 644.741   | NM_018639 | 6512.232  | 7463.305  |
| AB011112  | 5623.583  | 6609.494  | CY3Cy5    | 7934.51   | 286.291   | AF264628  | 820.106   | 1205.595  |
| NM_002623 | 3715.284  | 4409.582  | AA778392  | 8766.558  | 10598.983 | NM_001715 | 4050.788  | 3721.785  |
| NM_018844 | 4454.856  | 4570.656  | AI478178  | 2342.828  | 2498.462  | NM_004395 | 9563.755  | 5607.836  |
| AF279778  | 1630.723  | 1782.4    | AA101279  | 4543.108  | 4650.14   | NM_002663 | 2404.242  | 1793.384  |
| NM_015477 | 7358.616  | 7573.977  | M19154    | 1577.205  | 1591.766  | NM_006094 | 8374.657  | 6130.344  |
| AK023212  | 5328.341  | 5178.941  | AA399410  | 6070.028  | 5472.702  | AF080158  | 3484.354  | 2206.29   |
| AL353943  | 2642.353  | 2227.816  | AA137031  | 1294.03   | 1216.353  | AB037794  | 10316.436 | 8858.802  |



|           |           |           |           |           |           |           |           |           |
|-----------|-----------|-----------|-----------|-----------|-----------|-----------|-----------|-----------|
| BE568801  | 1408.917  | 1203.778  | AA292226  | 2564.255  | 2134.83   | NM_00593E | 1095.429  | 782.018   |
| AB002336  | 3367.158  | 1405.675  | NM_00050C | 2385.553  | 2075.298  | NM_01241E | 2160.244  | 3568.206  |
| NM_003127 | 1128.302  | 903.899   | J04449    | 1457.412  | 1397.916  | NM_01417E | 7567.381  | 8722.298  |
| NM_01328E | 11868.717 | 10539.904 | BC007031  | 5620.776  | 4617.67   | NM_001251 | 20785.615 | 24604.072 |
| NM_00608E | 58606.352 | 60162.887 | AF129756  | 16130.28  | 10301.578 | NM_00660E | 479.102   | 670.653   |
| NM_00663E | 5170.694  | 4007.012  | NM_002957 | 13680.603 | 9269.138  | AB011112  | 5615.983  | 6085.303  |
| NM_01626E | 2603.72   | 2172.725  | BC036369  | 3096.464  | 1914.072  | NM_01866E | 3817.363  | 5128.464  |
| AB011116  | 11441.096 | 9473.682  | X12492    | 14953.927 | 12381.477 | NM_00262E | 3156.877  | 3885.669  |
| AB037858  | 4916.359  | 4511.154  | U93051    | 11510.543 | 15721.56  | NM_01884E | 3970.796  | 4907.219  |
| NM_00577E | 11486.931 | 6680.981  | SR2       | 67859.836 | 65187.879 | AF279778  | 982.971   | 1288.361  |
| NM_01763E | 1676.367  | 1288.807  | SR4       | 27705.52  | 44883.934 | NM_015477 | 3412.024  | 3923.574  |
| NM_00327C | 1090.076  | 1337.094  | SR6       | 4152.501  | 7122.293  | AK023212  | 2756.068  | 2406.415  |
| NM_016591 | 502.14    | 715.134   | SR8       | 16259.845 | 57808.406 | AL353943  | 783.531   | 597.911   |
| AL157437  | 9554.384  | 11451.315 | SR10      | 54018.215 | 34782.551 | BE568801  | 652.233   | 492.2     |
| L25629    | 573.811   | 668.39    | CY3Cy5    | 11427.35  | 1078.187  | AB002336  | 813.435   | 302.914   |
| NM_00149C | 1968.061  | 2128.867  | NM_00568E | 2236.978  | 2433.308  | NM_003127 | 1107.173  | 859.584   |
| NM_01774C | 4328.464  | 4524.554  | NM_00292E | 1205.717  | 1747.403  | NM_01328E | 8221.004  | 9648.035  |
| AB033052  | 2534.91   | 2834.783  | NM_00023E | 325.744   | 750.797   | NM_00608E | 54564.695 | 78447.43  |
| NM_018227 | 3030.936  | 4459.787  | NM_018697 | 1297.799  | 1682.466  | NM_00663E | 4649.057  | 3483.261  |
| AF050199  | 533.606   | 588.363   | AF090116  | 848.991   | 765.956   | NM_01626E | 2291.504  | 1871.923  |
| NM_00334C | 46582.57  | 50765.672 | NM_01403C | 39203.125 | 34012.285 | AB011116  | 9854.728  | 7593.93   |
| U46752    | 2750.48   | 2138.282  | NM_00422E | 4149.917  | 9363.161  | AB037858  | 3936.683  | 3481.261  |
| NM_00279E | 59270.523 | 55310.566 | NM_00025E | 7212.848  | 5755.187  | NM_00577E | 8032.172  | 3881.522  |
| BF244646  | 55717.859 | 50267.898 | Z21967    | 9050.234  | 8640.443  | NM_01763E | 1401.232  | 992.923   |
| AK024030  | 5853.641  | 3238.097  | NM_00373E | 1177.145  | 1171.19   | NM_00327C | 1609.684  | 1915.537  |
| AF275808  | 1995.321  | 1739.007  | NM_01618E | 53385.066 | 45145.285 | NM_016591 | 814.565   | 683.542   |
| AK024038  | 8916.717  | 8219.775  | NM_012110 | 15123.796 | 11731.027 | AL157437  | 8559.394  | 7443.204  |
| NM_00205E | 2298.725  | 2220.441  | NM_005461 | 838.06    | 476.783   | L25629    | 471.245   | 734.927   |
| NM_00580E | 16422.863 | 14716.548 | AF052693  | 4244.61   | 2261.204  | NM_00149C | 1503.436  | 1809.963  |
| NM_01551E | 7929.125  | 6046.67   | NM_001129 | 21741.068 | 8206.049  | NM_01774C | 5891.457  | 7216.518  |
| AK001579  | 13534.185 | 11747.411 | L09100    | 1404.853  | 887.841   | AB033052  | 2668.31   | 2673.685  |
| NM_00267C | 7311.333  | 6177.725  | NM_00547E | 1349.347  | 2590.062  | NM_018227 | 2426.15   | 2661.792  |
| AF163302  | 4513.667  | 3560.017  | NM_00431E | 724.762   | 2131.804  | AF050199  | 456.419   | 518.559   |
| NM_00640E | 2642.418  | 2008.623  | NM_01343E | 661.13    | 1869.99   | NM_00334C | 36459.465 | 34111.875 |
| NM_00241E | 7273.138  | 6705.244  | NM_00013E | 21515.893 | 35832.027 | U46752    | 945.292   | 1112.109  |
| NM_00560E | 1717.215  | 1841.736  | NM_001727 | 3816.65   | 7953.087  | NM_00279E | 39868.219 | 39870     |
| S69023    | 1748.187  | 2012.302  | NM_00407E | 1795.976  | 5428.126  | BF244646  | 41381.102 | 33880.563 |
| NM_00345E | 2633.443  | 5208.834  | BG717460  | 3646.888  | 8192.192  | AK024030  | 1126.387  | 489.765   |
| NM_00341E | 22975.422 | 23626.465 | NM_004161 | 11117.229 | 10851.179 | AF275808  | 1490.162  | 1587.317  |
| NM_01790E | 5212.563  | 5285.572  | NM_00129E | 2181.448  | 1676.409  | AK024038  | 6066.442  | 5955.976  |
| M25077    | 8268.173  | 9337.813  | NM_005161 | 1851.227  | 2904.545  | NM_00205E | 1828.228  | 1699.105  |
| NM_01870E | 3605.22   | 3256.125  | AB037749  | 761.191   | 720.614   | NM_00580E | 10543.361 | 12095.455 |
| M62843    | 1129.622  | 597.155   | NM_020347 | 1239.942  | 1693.74   | NM_01551E | 5874.335  | 5237.163  |
| U96131    | 936.004   | 984.119   | NM_00146E | 2847.99   | 3383.85   | AK001579  | 9242.204  | 9115.41   |
| NM_00459E | 3479.72   | 3840.401  | NM_00407E | 1051.82   | 1205.027  | NM_00267C | 5676.766  | 5046.274  |
| NM_00577E | 19701.719 | 17828.078 | AB040957  | 7844.182  | 5668.174  | AF163302  | 2816.503  | 2309.295  |
| NM_00103E | 58702.695 | 58448.238 | NM_00689C | 862.006   | 1127.441  | NM_00640E | 2572.377  | 1743.755  |
| NM_01808E | 29766.521 | 24495.281 | NM_003110 | 9633.798  | 11145.115 | NM_00241E | 4850.759  | 3533.071  |
| AF164797  | 58792.637 | 53498.504 | NM_00361E | 3888.611  | 3734.937  | NM_00198E | 10797.99  | 11387.392 |
| NM_01784C | 43779.594 | 40712.117 | NM_01323C | 2577.308  | 2148.388  | NM_00265E | 4206.264  | 1909.407  |
| AK001052  | 45163.402 | 39286.551 | X72308    | 6431.691  | 4036.283  | NM_00560E | 1428.22   | 1246.323  |
| NM_00141E | 51235.172 | 50187.871 | NM_00540E | 1019.19   | 550.096   | S69023    | 1566.115  | 1631.35   |
| NM_00456E | 7220.544  | 6035.948  | BC008376  | 9759.191  | 5396.275  | NM_00345E | 2492.189  | 3766.043  |

|           |           |           |           |           |           |           |           |           |
|-----------|-----------|-----------|-----------|-----------|-----------|-----------|-----------|-----------|
| NM_00096  | 61339.996 | 55985.273 | X87895    | 1425.765  | 779.808   | NM_00341  | 9474.61   | 7739.453  |
| AL355743  | 3226.214  | 2749.449  | AB041269  | 1476.169  | 852.831   | NM_01790  | 2888.795  | 2979.149  |
| L77571    | 598.507   | 899.531   | AK024908  | 7844.516  | 12935.257 | NM_00688  | 782.763   | 812.64    |
| X81896    | 950.336   | 1409.828  | NM_018270 | 8295.542  | 17571.33  | M25077    | 4352.171  | 4498.496  |
| AF070595  | 500.82    | 718.868   | NM_000260 | 14105.601 | 26094.555 | NM_01870  | 1455.351  | 1426.541  |
| NM_00220  | 2607.042  | 3253.569  | NM_014160 | 8139.291  | 18799.947 | M62843    | 619.647   | 617.429   |
| NM_00600  | 3253.536  | 3637.27   | AF230877  | 2889.448  | 6703.593  | NM_00459  | 2317.045  | 2470.449  |
| NM_00262  | 57026.207 | 55740.238 | AB033049  | 15877.566 | 29248.385 | NM_00577  | 12627.656 | 15651.465 |
| NM_01436  | 1500.334  | 1538.007  | NM_004377 | 4940      | 7143.723  | NM_00103  | 54486.305 | 67213.406 |
| NM_00168  | 60310.141 | 55204.863 | AB037815  | 16814.496 | 14879.499 | NM_01808  | 21368.658 | 18523.082 |
| NM_00606  | 33063.059 | 39371.91  | NM_00364  | 8659.577  | 11060.682 | AF164797  | 56642.598 | 60594.25  |
| NM_00028  | 7802.854  | 9860.956  | AF263613  | 4721.334  | 3848.522  | NM_01784  | 39407.254 | 29770.844 |
| NM_00481  | 8481.184  | 8419.202  | NM_017750 | 3389.522  | 3361.628  | AK001052  | 41189.023 | 28953.217 |
| AK023008  | 5385.907  | 3985.243  | AK026196  | 2833.664  | 3723.576  | NM_00141  | 46069.879 | 32479.084 |
| NM_00468  | 7985.206  | 8260.187  | AL137668  | 1283.252  | 1296.39   | NM_00456  | 4902.645  | 3221.689  |
| NM_00602  | 40104.523 | 39061.41  | AV704019  | 693.523   | 789.824   | NM_00096  | 53014.938 | 50089.715 |
| BG339855  | 1085.587  | 764.595   | NM_01334  | 4152.522  | 4541.623  | AL355743  | 1787.672  | 1518.761  |
| AB040956  | 6531.452  | 4925.603  | NM_004977 | 12096.485 | 8526.061  | L77571    | 841.973   | 584.229   |
| NM_016587 | 4261.197  | 2936.217  | NM_01228  | 11149.862 | 5454.943  | X81896    | 1585.864  | 1536.463  |
| NM_00351  | 4265.447  | 3387.485  | NM_004700 | 1177.04   | 795.224   | AF070595  | 518.634   | 546.064   |
| NM_01795  | 8210.082  | 7918.232  | NM_00416  | 12774.978 | 19172.762 | NM_00220  | 1895.844  | 2457.172  |
| BC000124  | 5623.314  | 4684.053  | NM_00686  | 11508.459 | 19668.477 | NM_00600  | 2455.742  | 2784.672  |
| Z11773    | 2635.254  | 1622.445  | AB020706  | 5193.355  | 10654.38  | NM_00262  | 53479.844 | 57106.965 |
| NM_00691  | 2169.184  | 1029.344  | NM_00716  | 8557.574  | 17206.721 | NM_01436  | 1063.523  | 1146.819  |
| NM_00344  | 55618.02  | 48889.836 | NM_00286  | 11539.611 | 19944.711 | NM_00168  | 51483.801 | 58934.523 |
| NM_00148  | 8099.151  | 5769.481  | NM_00675  | 5747.068  | 5167.917  | NM_00606  | 32860.609 | 36731.957 |
| NM_00270  | 2137.844  | 1597.389  | NM_00588  | 3536.182  | 2749.603  | NM_00028  | 6250.459  | 7026.806  |
| AK021510  | 1679.031  | 2082.706  | L40519    | 1277.799  | 1178.495  | NM_00481  | 5928.47   | 5791.548  |
| AK022711  | 2013.75   | 3235.282  | NM_00420  | 2784.931  | 3562.603  | AK023008  | 2183.612  | 1637.542  |
| AK024310  | 561.147   | 788.949   | AK002181  | 1864.724  | 2146.697  | NM_00468  | 4869.673  | 3984.955  |
| AK023039  | 2446.449  | 3419.072  | BC015750  | 56660.219 | 58894.371 | NM_00602  | 18572.762 | 16866.42  |
| AL109688  | 3128.027  | 3480.406  | AK025769  | 6870.252  | 7632.34   | AB040956  | 5427.686  | 3972.14   |
| AF074981  | 850.614   | 1025.169  | AW945166  | 2137.479  | 1887.886  | NM_016587 | 3155.275  | 2630.235  |
| AK025863  | 2550.714  | 2268.743  | NM_00523  | 8894.969  | 7502.15   | NM_00351  | 3205.116  | 3511.993  |
| D42044    | 3062.222  | 3873.412  | NM_00638  | 19122.641 | 16552.918 | NM_01795  | 5676.867  | 6521.616  |
| AK023009  | 697.935   | 546.72    | NM_00625  | 5362.542  | 2871.526  | BC000124  | 4347.729  | 4562.81   |
| AK026149  | 1320.34   | 1338.717  | NM_00284  | 2663.583  | 4831.323  | Z11773    | 1906.401  | 1470.602  |
| AF038185  | 8271.037  | 6556.768  | NM_002837 | 6006.481  | 2656.064  | NM_00691  | 1681.396  | 853.707   |
| AB027011  | 19110.279 | 17399.623 | U06715    | 617.58    | 1431.088  | NM_00344  | 48185.586 | 14118.351 |
| AK025305  | 2527.877  | 2169.049  | NM_00266  | 690.946   | 1463.594  | NM_00148  | 6213.934  | 3802.006  |
| AL117415  | 13803.671 | 12362.383 | NM_00013  | 17704.844 | 17437.07  | NM_00270  | 1369.69   | 632.74    |
| AK023616  | 1731.724  | 1028.726  | NM_001727 | 6175.223  | 6998.063  | AK022711  | 1423.146  | 1666.589  |
| AK025665  | 5908.379  | 4352.183  | NM_00407  | 1950.942  | 3812.349  | AK024310  | 899.834   | 934.408   |
| AL355694  | 1154.374  | 1012.827  | BG717460  | 3132.843  | 3390.941  | AK023039  | 1779.403  | 2076.785  |
| AK027152  | 4944.513  | 2935.24   | AA778392  | 8922.012  | 9753.484  | AL109688  | 1951.922  | 2850.57   |
| AF191492  | 1419.993  | 529.332   | AI478178  | 2620.449  | 3380.887  | AF074981  | 837.361   | 1114.951  |
| BC037530  | 37651.598 | 32197.406 | AA101279  | 5030.758  | 6409.772  | AK025863  | 2585.207  | 2327.137  |
| NM_01485  | 12293.264 | 9839.115  | AA399410  | 9033.047  | 9019.726  | D42044    | 2381.083  | 2538.437  |
| AK022811  | 2989.2    | 4172.372  | AA137031  | 2199.824  | 2239.458  | AK023009  | 794.697   | 649.637   |
| AL117635  | 1759.151  | 2568.823  | AA292226  | 3885.63   | 5468.154  | AK026149  | 791.285   | 1179.713  |
| AK025332  | 740.531   | 1330.514  | NM_00050  | 2681.705  | 3199.589  | AF038185  | 4422.863  | 3943.471  |
| AB020735  | 1047.91   | 1003.908  | J04449    | 2043.465  | 1397.246  | AB027011  | 10945.212 | 11297.812 |
| AJ011596  | 3142.696  | 2452.229  | BC007031  | 6729.538  | 7375.317  | AK025305  | 968.202   | 1285.886  |

|           |           |           |           |           |           |           |           |           |
|-----------|-----------|-----------|-----------|-----------|-----------|-----------|-----------|-----------|
| U17639    | 895.079   | 877.32    | AF129756  | 21049.609 | 12588.519 | AL117415  | 5653.063  | 5199.844  |
| AL049215  | 45599.613 | 41795.102 | NM_002957 | 12326.414 | 9793.755  | AK023616  | 1414.766  | 1494.567  |
| X51779    | 1848.262  | 1662.607  | BC036369  | 2519.842  | 1512.787  | AK022249  | 374.833   | 947.832   |
| X81001    | 496.254   | 444.389   | X12492    | 14498.301 | 8173.19   | AK025665  | 6614.325  | 10537.022 |
| AL049254  | 2480.827  | 1367.73   | U93051    | 7295.23   | 4550.342  | AL355694  | 1359.306  | 1162.247  |
| Z83954    | 5560.598  | 4079.277  | NM_017540 | 2079.301  | 4248.24   | AK027152  | 3159.504  | 2003.163  |
| M74093    | 4118.353  | 3211.997  | NM_000260 | 53284.379 | 55989.488 | AF191492  | 1152.572  | 907.969   |
| M28219    | 2398.809  | 1674.757  | NM_014160 | 5121.772  | 7893.676  | BC037530  | 27879.516 | 21892.035 |
| L17326    | 1074.769  | 689.16    | NM_017668 | 7171.191  | 6643.136  | NM_014851 | 10068.792 | 7677.896  |
| D17207    | 9500.18   | 6367.175  | AB033049  | 54174.48  | 57369.934 | AK022811  | 1414.451  | 1777.884  |
| D55640    | 4313.073  | 3293.467  | NM_005682 | 2589.851  | 1960.318  | AL117635  | 1615.166  | 1838.591  |
| AF085897  | 628.878   | 484.105   | NM_002926 | 1619.72   | 2009.873  | AK025332  | 1124.934  | 1198.362  |
| AF085822  | 2468.806  | 1490.506  | NM_000233 | 549.044   | 810.032   | AB040929  | 1097.678  | 1953.433  |
| AK021551  | 3715.988  | 3595.885  | NM_018697 | 1661.941  | 2484.573  | AB020735  | 843.678   | 1330.627  |
| AK025117  | 1393.709  | 1856.096  | AF090116  | 806.141   | 1229.121  | AL109700  | 608.537   | 1036.193  |
| AK000024  | 1671.878  | 2180.715  | NM_014030 | 53253.734 | 60233.422 | D17010    | 604.558   | 551.087   |
| AK026693  | 1938.265  | 2343.209  | NM_004224 | 5873.205  | 14139.533 | AJ011596  | 2427.58   | 2924.73   |
| NM_01228E | 599.764   | 414.277   | NM_000254 | 9505.009  | 6895.418  | AL049215  | 28063.445 | 29778.09  |
| AK001128  | 1073.826  | 921.192   | Z21967    | 10388.616 | 9785.832  | X51779    | 1205.791  | 1553.203  |
| AK000090  | 1012.141  | 700.102   | NM_003738 | 1478.08   | 765.833   | AL049254  | 1174.812  | 1176.676  |
| AK000794  | 5414.597  | 4510.188  | NM_016185 | 54880.828 | 41242.336 | Z83954    | 5136.118  | 4939.438  |
| AK000950  | 7348.67   | 6867.6    | NM_012110 | 8196.503  | 7123.325  | M74093    | 3997.56   | 5094.542  |
| AK026812  | 4657.73   | 4506.259  | AF052693  | 2258.168  | 1220.205  | M28219    | 2626.499  | 4611.514  |
| AK000176  | 2341.545  | 2100.546  | NM_001129 | 18093.311 | 5886.47   | L17326    | 938.943   | 1223.016  |
| AK000831  | 5451.889  | 4705.371  | L09100    | 1245.63   | 364.797   | D17207    | 8324.021  | 7441.652  |
| AK000981  | 1922.27   | 1345.49   | NM_005472 | 1685.385  | 2860.292  | D55640    | 2988.281  | 2579.836  |
| AK024615  | 1061.565  | 746.779   | NM_004313 | 1312.374  | 2261.482  | AF085897  | 982.169   | 1137.14   |
| AK025054  | 2303.982  | 1941.424  | NM_013435 | 831.917   | 1868.629  | AF085822  | 1452.108  | 938.155   |
| AK024556  | 772.913   | 846.224   | NM_007166 | 8106.509  | 9219.047  | AK021551  | 1294.122  | 596.332   |
| AK024935  | 1342.515  | 708.914   | NM_004161 | 12249.206 | 13356.063 | AK025117  | 623.9     | 674.232   |
| AK025325  | 5988.932  | 6743.655  | NM_001295 | 2082.37   | 1597.522  | AK000024  | 5155.076  | 6341.36   |
| U50531    | 2642.423  | 3601.897  | NM_005161 | 1990.36   | 2971.673  | AK026693  | 1868.951  | 2119.933  |
| NM_00531E | 8667.437  | 9067.754  | AB037749  | 768.974   | 1160.515  | NM_01228E | 738.272   | 1491.806  |
| L09099    | 764.754   | 791.924   | NM_020347 | 1651.653  | 1944.202  | AK001128  | 501.651   | 748.201   |
| AL117474  | 2912.786  | 2781.611  | NM_001462 | 4239.536  | 3883.767  | AK000090  | 715.293   | 639.7     |
| NM_005421 | 1794.832  | 1343.551  | NM_004072 | 1699.527  | 1834.105  | AK000794  | 3100.404  | 3024.158  |
| AK024580  | 45585.938 | 39824.477 | AB040957  | 8986.689  | 5496.22   | AK000950  | 4122.614  | 3241.74   |
| AL442093  | 8575.642  | 8352.874  | NM_006890 | 995.203   | 1087.434  | AK026812  | 2449.872  | 2106.34   |
| AK024331  | 1873.493  | 1772.632  | NM_003110 | 9449.118  | 8979.476  | AK000176  | 684.944   | 532.607   |
| AK024452  | 2200.257  | 1671.214  | NM_003612 | 1859.504  | 1350.186  | AK000831  | 7478.155  | 7281.453  |
| AK021733  | 2052.452  | 1371.179  | NM_013230 | 2384.661  | 1601.156  | AK000981  | 2494.107  | 2447.235  |
| NM_01244E | 2251.218  | 1774.805  | X72308    | 1365.084  | 579.015   | AK025054  | 2239.503  | 1922.421  |
| AK000543  | 17328.266 | 21791.309 | BC008376  | 6279.74   | 2530.489  | AK024556  | 1245.069  | 960.169   |
| AK026683  | 5941.9    | 8074.027  | AB041269  | 2667.828  | 2777.745  | AK024935  | 1427.406  | 1046.598  |
| D16906    | 6523.474  | 7485.333  | AK024908  | 7936.321  | 15366.738 | AK025325  | 3813.427  | 3623.838  |
| AK022335  | 671.229   | 727.707   | NM_002837 | 4968.065  | 8685.425  | U50531    | 1686.502  | 1853.606  |
| AL110280  | 943.079   | 1047.169  | AL133077  | 24494.516 | 34718.84  | L09099    | 1339.516  | 1458.305  |
| NM_01745E | 881.55    | 526.231   | AK025211  | 2601.655  | 3447.815  | AL442093  | 2835.531  | 2853.023  |
| AF086196  | 1020.492  | 1091.971  | U06715    | 1247.786  | 2088.658  | AK024331  | 1548.193  | 1741.18   |
| NM_005542 | 55344.926 | 45073.996 | NM_013402 | 10335.903 | 13398.115 | AK024452  | 1930.205  | 1639.98   |
| X95095    | 3833.631  | 3657.59   | NM_002662 | 620.685   | 581.37    | AK021556  | 645.138   | 130.036   |
| AF078528  | 22320.555 | 17585.121 | NM_004377 | 5305.054  | 6955.48   | AJ249975  | 850.106   | 657.352   |
| AF161411  | 5259.92   | 5238.132  | AB037815  | 18016.307 | 16898.531 | AK021733  | 1669.841  | 1096.375  |

|           |           |           |           |           |           |           |           |           |
|-----------|-----------|-----------|-----------|-----------|-----------|-----------|-----------|-----------|
| AK000450  | 39332.227 | 41230.855 | NM_003645 | 10226.71  | 11416.507 | NM_012445 | 2066.377  | 1407.109  |
| NM_018224 | 9279.552  | 8315.32   | AF263613  | 4809.43   | 4832.895  | AK000543  | 6146.883  | 4832.124  |
| NM_019895 | 4578.032  | 4330.95   | NM_017750 | 3406.67   | 3513.037  | AK026683  | 1749.982  | 1883.438  |
| NM_018565 | 8853.582  | 7552.481  | AK026196  | 2924.865  | 3289.552  | D16906    | 1051.359  | 1304.497  |
| J04118    | 1213.175  | 760.592   | AL137668  | 1491.939  | 1137.608  | AK024235  | 1182.352  | 1091.36   |
| NM_000730 | 14704.465 | 16061.883 | AV704019  | 904.086   | 675.98    | AF014457  | 819.772   | 511.094   |
| U31734    | 53536.727 | 49197.93  | NM_013345 | 935.274   | 758.965   | NM_017455 | 1254.333  | 1032.276  |
| AF085885  | 3673.144  | 4862.206  | NM_004977 | 2143.465  | 1301.462  | AK024203  | 1017.35   | 655.544   |
| AK022953  | 459.821   | 368.866   | NM_004885 | 54067.844 | 37308.438 | AF086196  | 1396.579  | 1161.347  |
| AF009319  | 1987.574  | 2342.875  | NM_012283 | 14208.234 | 5685.638  | NM_005542 | 33707.516 | 24782.295 |
| AL365519  | 1334.09   | 1403.737  | NM_004700 | 2381.013  | 2443.609  | X95095    | 1687.414  | 1380.327  |
| NM_018465 | 13591.17  | 14943.931 | U93051    | 16479.742 | 28570.563 | AF078528  | 18877.311 | 12660.126 |
| Z36845    | 1828.721  | 1354.613  | NM_017540 | 1351.124  | 1905.477  | AF161411  | 4301.417  | 3772.05   |
| M73792    | 1456.978  | 1193.972  | NM_006755 | 7464.165  | 6538.399  | AK000450  | 35690.609 | 30340.641 |
| NM_016127 | 15046.634 | 12930.778 | NM_005881 | 4260.583  | 3744.135  | NM_018224 | 11566.084 | 10035.145 |
| AF085939  | 2285.296  | 2343.95   | L40519    | 1531.69   | 1369.02   | NM_019895 | 4369.5    | 3270      |
| NM_006792 | 39003.289 | 40929.129 | NM_004204 | 3554.703  | 4531.024  | NM_018565 | 7291.864  | 5305.276  |
| Z36874    | 55615.906 | 53627.652 | AK025769  | 6794.972  | 5993.919  | J04118    | 1199.802  | 521.527   |
| AK095477  | 2715.898  | 2669.472  | AW945166  | 2089.644  | 1481.923  | NM_000730 | 3152.544  | 1047.34   |
| AK023326  | 1507.805  | 919.385   | NM_005236 | 9186.673  | 7179.497  | U31734    | 10525.736 | 9164.579  |
| AK022462  | 3154.141  | 3052.688  | NM_006384 | 18653.525 | 9977.421  | AF085885  | 2062.5    | 2220.535  |
| NM_020530 | 1419.504  | 1386.125  | NM_014225 | 50094.262 | 28626.307 | AK022953  | 690.747   | 1412.529  |
| AK022418  | 1709.459  | 1517.041  | NM_002846 | 2673.075  | 6561.974  | AF009319  | 2245.334  | 2211.784  |
| AF279777  | 1505.22   | 1002.382  | AF052693  | 4005.36   | 5953.439  | AL365519  | 791.368   | 969.011   |
| AK021748  | 2539.158  | 1422.829  | NM_001129 | 22675.688 | 18048.453 | NM_018465 | 10240.032 | 11373.371 |
| AL137257  | 14866.24  | 9511.573  | L09100    | 2780.064  | 3181.623  | Z36845    | 838.513   | 984.923   |
| CY3Cy5    | 7511.733  | 368.297   | NM_005472 | 2609.349  | 2220.83   | NM_006792 | 14483.625 | 13827.631 |
| AA778392  | 6117.778  | 6502.623  | NM_004313 | 845.031   | 902.507   | Z36874    | 39351.777 | 36590.785 |
| AI478178  | 1823.55   | 2762.802  | NM_013435 | 1178.099  | 1894.951  | AK095477  | 1528.421  | 1430.704  |
| AA101279  | 7455.604  | 10123.161 | NM_000132 | 19387.641 | 16139.767 | AK023326  | 1165.533  | 911.921   |
| M19154    | 1898.618  | 3112.566  | NM_001727 | 8492.084  | 9487.36   | AK022462  | 3844.375  | 3131.654  |
| AA399410  | 10813.479 | 11442.692 | NM_004076 | 3159.798  | 4054.453  | NM_020530 | 1541.8    | 1163.813  |
| AA137031  | 2008.271  | 2057.895  | NM_007123 | 50131.027 | 47926.516 | AK022418  | 2720.776  | 1940.731  |
| AA292226  | 2850.234  | 3319.66   | BG717460  | 3795.537  | 4073.939  | AF279777  | 1889.978  | 1406.587  |
| NM_000500 | 2483.898  | 3936.617  | AA778392  | 7898.954  | 8943.049  | AK021748  | 2868.134  | 1568.54   |
| M29873    | 274.421   | 856.388   | AA101279  | 4935.737  | 5592.564  | AL137257  | 9378.281  | 8889.39   |
| AF129756  | 12863.5   | 13059.124 | AA137031  | 1801.785  | 1573.877  | AF086503  | 816.974   | 316.829   |
| NM_002957 | 16312.856 | 17744.508 | AA292226  | 2942.755  | 2877.092  | CY3Cy5    | 2167.047  | 182.755   |
| BC036369  | 3415.284  | 3479.585  | NM_000500 | 2597.815  | 2701.271  | AA778392  | 7639.367  | 6645.485  |
| X12492    | 18686.559 | 15698.321 | J04449    | 2042.549  | 1674.245  | AI478178  | 1983.759  | 2079.104  |
| U93051    | 14935.959 | 14244.738 | BC007031  | 10285.725 | 9107.139  | AA101279  | 3535.939  | 3497.62   |
| SR2       | 61152.262 | 64413.164 | AF129756  | 10715.96  | 6283.818  | M19154    | 1205.667  | 1383.519  |
| SR4       | 26285.035 | 38680.289 | NM_002957 | 6842.924  | 4986.199  | AA399410  | 5451.914  | 3670.837  |
| SR6       | 3494.58   | 2239.784  | BC036369  | 2350.045  | 1043.172  | AA137031  | 1373.474  | 899.514   |
| SR8       | 13460.364 | 43825.59  | X12492    | 13223.6   | 6397.992  | AA292226  | 2176.374  | 1623.205  |
| SR10      | 43033.438 | 9642.556  | X72308    | 4166.65   | 4691.763  | NM_000500 | 1712.22   | 1316.215  |
| CY3Cy5    | 4501.379  | 169.889   | NM_005405 | 826.771   | 940.295   | J04449    | 1210.649  | 998.792   |
| NM_005682 | 1932.042  | 2015.354  | BC008376  | 19767.805 | 18886.32  | BC007031  | 4743.868  | 3938.099  |
| NM_002925 | 1478.213  | 1702.214  | AB041269  | 3698.723  | 4396.099  | AF129756  | 11624.388 | 10694.117 |
| NM_000233 | 672.871   | 1027.627  | AK024908  | 5721.081  | 6927.965  | NM_002957 | 15633.583 | 12305.559 |
| NM_018697 | 1885.341  | 2616.904  | NM_018270 | 11970.71  | 12095.94  | BC036369  | 2570.878  | 1908.692  |
| AF090116  | 1460.87   | 2418.99   | NM_014160 | 6428.311  | 7292.636  | X12492    | 13507.846 | 11479.925 |
| NM_014030 | 52955.711 | 63775.992 | AB033049  | 55374.473 | 57009.953 | U93051    | 12315.096 | 10588.437 |

|           |           |           |           |           |           |           |           |           |
|-----------|-----------|-----------|-----------|-----------|-----------|-----------|-----------|-----------|
| NM_004224 | 2915.875  | 4898.119  | NM_000406 | 720.23    | 660.747   | SR2       | 53154.836 | 53307.191 |
| NM_000254 | 9168.048  | 11854.386 | NM_005682 | 2324.691  | 1981.129  | SR4       | 12315.068 | 9599.245  |
| Z21967    | 10365.213 | 10497.574 | NM_002926 | 1544.619  | 1639.672  | SR6       | 1831.485  | 1955.989  |
| NM_003738 | 989.766   | 1920.109  | NM_000233 | 611.981   | 723.032   | SR8       | 7845.878  | 19391.311 |
| NM_016185 | 63664.43  | 65027.695 | NM_018697 | 1412.315  | 1655.258  | SR10      | 26096.279 | 8354.932  |
| NM_012110 | 9875.104  | 9476.265  | AF090116  | 785.608   | 824.655   | CY3Cy5    | 1552.793  | 165.779   |
| NM_005461 | 1130.424  | 1203.344  | NM_004224 | 5419.983  | 11558.684 | NM_005682 | 1251.948  | 1148.398  |
| AF052693  | 3532.573  | 3085.808  | NM_000254 | 8215.075  | 4595.625  | NM_002926 | 1019.643  | 799.211   |
| NM_001129 | 21355.342 | 15779.638 | Z21967    | 7422.646  | 6461.493  | NM_018697 | 1162.42   | 878.22    |
| L09100    | 1518.557  | 1515.622  | NM_003738 | 973.699   | 616.704   | AF090116  | 531.867   | 403.942   |
| NM_005472 | 1948.839  | 1212.802  | NM_016185 | 52437.207 | 35334.027 | NM_014030 | 36058.824 | 24528.426 |
| NM_004313 | 1229.07   | 2239.501  | NM_012110 | 7332.291  | 4992.803  | NM_004224 | 6728.264  | 3074.257  |
| NM_013435 | 1070.93   | 957.625   | NM_013348 | 2978.357  | 3209.324  | NM_000254 | 4574.345  | 4266.073  |
| NM_000132 | 18919.238 | 13667.541 | NM_004977 | 11040.148 | 10864.751 | Z21967    | 5682.84   | 4046.986  |
| NM_001727 | 7415.87   | 5148.992  | NM_012283 | 63115.789 | 58135.602 | NM_003738 | 674.309   | 665.826   |
| NM_004076 | 3028.363  | 1724.658  | NM_004162 | 20222.814 | 22280.299 | NM_016185 | 45247     | 25463.59  |
| NM_007123 | 57877.117 | 51981.344 | NM_004161 | 12227.959 | 13401.385 | NM_012110 | 10127.059 | 10816.795 |
| BG717460  | 4099.004  | 2722.396  | NM_001295 | 2389.967  | 1582.215  | NM_005461 | 504.322   | 418.083   |
| NM_004161 | 14131.766 | 17077.367 | NM_005161 | 1861.275  | 2627.571  | AF052693  | 4109.015  | 2971.346  |
| NM_001295 | 1293.26   | 1644.918  | AB037749  | 842.34    | 864.138   | NM_001129 | 28483.176 | 20030.191 |
| NM_005161 | 2134.331  | 1347.833  | NM_020347 | 1639.782  | 1847.545  | L09100    | 2400.933  | 3071.698  |
| AB037749  | 875.151   | 1072.838  | NM_004072 | 1368.734  | 1434.92   | NM_005472 | 1402.837  | 1236.41   |
| NM_020347 | 2091.251  | 1728.15   | AF068286  | 854.524   | 787.752   | NM_004313 | 724.363   | 847.531   |
| NM_001462 | 3635.381  | 4745.583  | AB040957  | 7426.143  | 3425.199  | NM_013435 | 712.093   | 953.857   |
| NM_004072 | 1123.174  | 2957.062  | NM_006890 | 1582.203  | 1101.385  | NM_000132 | 12034.992 | 12681.973 |
| AF068286  | 913.672   | 797.666   | NM_003110 | 6501.434  | 6303.986  | NM_001727 | 5137.104  | 4738.832  |
| AB040957  | 7370.082  | 8006.989  | NM_013230 | 2041.21   | 2236.193  | NM_004076 | 2039.797  | 1461.659  |
| NM_006890 | 1062.939  | 1247.065  | NM_002837 | 4257.647  | 5845.08   | NM_007123 | 35350.262 | 30645.93  |
| NM_003110 | 6054.067  | 8343.249  | AK025211  | 2382.993  | 2086.238  | BG717460  | 1929.142  | 2156.76   |
| NM_003612 | 1717.481  | 1874.9    | U06715    | 1058.928  | 1032.662  | NM_004161 | 7598.79   | 7488.548  |
| NM_013230 | 2420.583  | 3076.704  | NM_013402 | 12002.568 | 13451.515 | NM_001295 | 1170.604  | 1748.494  |
| X72308    | 2014.012  | 3351.501  | NM_002662 | 846.128   | 772.935   | NM_005161 | 1490.813  | 1026.482  |
| NM_005408 | 772.941   | 635.411   | NM_004377 | 6098.825  | 8479.73   | AB037749  | 541.19    | 352.723   |
| BC008376  | 12245.067 | 12260.244 | AB037815  | 19996.055 | 17987.098 | NM_020347 | 933.101   | 537.14    |
| AB041269  | 2110.147  | 1519.695  | NM_003645 | 9343.787  | 11231.195 | NM_001462 | 2320.633  | 2117.113  |
| AK024908  | 9497.483  | 10925.495 | NM_017750 | 2981.028  | 3047.237  | NM_004072 | 1003.026  | 1028.62   |
| NM_018270 | 11847.492 | 12477.707 | AK026196  | 3157.564  | 3179.778  | AB040957  | 4187.228  | 3304.035  |
| NM_000260 | 35326.992 | 33997.664 | AL137668  | 977.472   | 683.885   | NM_006890 | 569.391   | 646.112   |
| NM_014160 | 9245.178  | 6708.32   | NM_016444 | 1348.711  | 1424.495  | NM_003110 | 7941.035  | 7717.363  |
| AF230877  | 4596.021  | 2638.804  | NM_017839 | 788.363   | 1018.464  | NM_003612 | 2432.028  | 1986.134  |
| NM_017668 | 10106.928 | 6526.53   | NM_003707 | 9197.146  | 9981.88   | NM_013230 | 1607.505  | 1642.502  |
| AB033049  | 39833.137 | 37915.313 | AL137718  | 3621.66   | 3201.536  | X72308    | 4088.755  | 2770.659  |
| NM_004377 | 7869.967  | 8104.544  | NM_003460 | 8667.515  | 12570.999 | NM_005408 | 693.583   | 515.179   |
| AB037815  | 14810.508 | 12781.778 | NM_002904 | 21708.961 | 35655.137 | BC008376  | 12506.109 | 9014.855  |
| NM_003645 | 11814.794 | 11423.123 | NM_005686 | 2199.992  | 2253.183  | AB041269  | 2124.455  | 1927.223  |
| AF263613  | 3969.717  | 4188.584  | NM_006767 | 1120.396  | 1237.626  | AK024908  | 4525.462  | 4105.142  |
| NM_000097 | 3687.885  | 4244.396  | NM_017540 | 2469.507  | 1873.381  | NM_018270 | 8381.043  | 8192.106  |
| NM_018095 | 1469.381  | 4002.325  | NM_006755 | 7733.983  | 8305.459  | NM_000260 | 50317.008 | 51930.371 |
| NM_017750 | 4324.592  | 6021.729  | NM_005881 | 4161.718  | 4158.714  | NM_014160 | 5464.338  | 4770.129  |
| AK026196  | 4029.185  | 4505.82   | NM_005794 | 691.84    | 574.145   | AF230877  | 4093.286  | 3291.972  |
| AL137668  | 1239.67   | 1325.69   | L40519    | 1322.255  | 1274.361  | NM_017668 | 5505.18   | 5108.6    |
| AV704019  | 860.298   | 687.028   | NM_004204 | 3504.946  | 3917.506  | AB033049  | 32990.59  | 29111.51  |
| NM_013348 | 1670.831  | 1575.256  | AK002181  | 2631.356  | 2180.219  | NM_004377 | 5536.543  | 5681.55   |

|           |           |           |           |           |           |           |           |           |
|-----------|-----------|-----------|-----------|-----------|-----------|-----------|-----------|-----------|
| NM_004977 | 7403.483  | 7835.913  | NM_001641 | 19665.365 | 18713.375 | AB037815  | 13804.27  | 18544.568 |
| NM_004888 | 55909.422 | 60010.355 | BC015750  | 56261.063 | 57126.25  | NM_003645 | 7803.789  | 9200.799  |
| NM_012283 | 52524.496 | 52880.891 | AK025769  | 6166.162  | 4552.114  | AF263613  | 2616.52   | 3230.586  |
| NM_004700 | 1388.816  | 1855.232  | AW945166  | 4827.587  | 2987.733  | NM_000097 | 2387.948  | 2386.164  |
| NM_004162 | 16017.228 | 11014.863 | NM_005236 | 7948.95   | 4536.434  | AK022878  | 5551.941  | 4651.93   |
| NM_006868 | 13179.328 | 9692.519  | NM_002589 | 6936.083  | 7183.783  | NM_018095 | 946.847   | 1245.133  |
| AB020706  | 6155.611  | 4432.091  | AF064846  | 1918.333  | 2247.79   | NM_017750 | 2526.091  | 1908.169  |
| NM_007166 | 10139.277 | 5917.008  | AL110227  | 1388.67   | 1388.155  | AK026196  | 2316.635  | 1953.379  |
| NM_016223 | 65880.25  | 65869.125 | NM_001400 | 8370.646  | 8800.055  | AL137668  | 723.089   | 447.732   |
| NM_002869 | 9910.526  | 9797.632  | AB033281  | 4734.144  | 5206.075  | AV704019  | 382.558   | 312.773   |
| NM_006755 | 8307.834  | 11494.769 | NM_002882 | 47042.777 | 50325.688 | NM_013348 | 2432.594  | 1781.593  |
| NM_005881 | 4049.554  | 4426.557  | AB011161  | 1498.673  | 2086.214  | NM_004977 | 6561.852  | 5734.564  |
| L40519    | 1151.903  | 883.92    | NM_000827 | 889.581   | 959.306   | NM_004888 | 42706.906 | 30858.613 |
| NM_004204 | 3854.247  | 3126.674  | NM_002944 | 1721.416  | 1972.405  | NM_012283 | 50801.176 | 48190.629 |
| AK002181  | 1718.104  | 2807.432  | AF327354  | 2355.145  | 2135.026  | NM_004700 | 1076.582  | 949.079   |
| NM_001641 | 23668.723 | 22676.957 | NM_006259 | 1366.151  | 1100.101  | NM_004162 | 17424.484 | 16771.293 |
| BC015750  | 51987.59  | 61147.164 | AB014513  | 14272.218 | 13251.142 | NM_006868 | 8511.243  | 8273.188  |
| AK025769  | 9191.599  | 14173.241 | NM_004747 | 2904.985  | 2767.81   | AB020706  | 3307.68   | 2679.726  |
| AW945166  | 1885.957  | 2398.123  | NM_002341 | 18501.74  | 10251.457 | NM_007166 | 5021.914  | 3485.302  |
| NM_005236 | 9634.52   | 11484.397 | AL137651  | 2973.406  | 3393.541  | NM_016223 | 60698.426 | 75340.531 |
| NM_006384 | 20150.377 | 17089.877 | NM_018945 | 8173.269  | 7669.797  | NM_002869 | 4524.114  | 5091.957  |
| NM_013257 | 2432.918  | 2856.353  | NM_000818 | 4624.827  | 4384.862  | NM_006755 | 6221.56   | 7563.735  |
| AB044546  | 1631.73   | 2620.091  | NM_006650 | 1399.962  | 1327.878  | NM_005881 | 2671.9    | 4034.383  |
| NM_014225 | 50491.063 | 55681.293 | AK024436  | 5691.708  | 5482.855  | NM_005794 | 446.025   | 221.185   |
| AF163473  | 5372.521  | 5922.568  | NM_006648 | 6642.835  | 5763.452  | L40519    | 1089.875  | 1015.676  |
| NM_006256 | 8113.958  | 7311.779  | NM_000868 | 1083.161  | 746.373   | NM_004204 | 2538.043  | 2216.824  |
| NM_002846 | 2650.685  | 12999.077 | NM_004711 | 2287.905  | 1643.826  | AK002181  | 1340.693  | 1584.66   |
| NM_002837 | 5353.653  | 3091.057  | U63542    | 676.278   | 649.877   | NM_001641 | 12105.942 | 7591.631  |
| AL133077  | 27121.6   | 23367.709 | AF161361  | 1161.118  | 799.379   | BC015750  | 50480.203 | 71385.336 |
| AK025211  | 3087.31   | 3077.218  | NM_006463 | 13015.247 | 8963.694  | AK025769  | 3728.741  | 3593.059  |
| U06715    | 1109.22   | 1090.739  | NM_001444 | 44581.027 | 35029.074 | AW945166  | 1233.911  | 1027.809  |
| NM_013402 | 18486.334 | 13677.599 | AK027208  | 785.97    | 1464.533  | NM_005236 | 4740.138  | 3807.806  |
| NM_002662 | 982.419   | 870.161   | NM_016521 | 11452.112 | 21014.6   | NM_006384 | 11238.651 | 7770.079  |
| NM_001727 | 8408.063  | 10131.508 | X98494    | 7606.603  | 7414.929  | NM_013257 | 1354.785  | 1011.436  |
| NM_004076 | 3701.688  | 3644.022  | NM_001240 | 4558.791  | 3351.563  | AB044546  | 1167.012  | 550.545   |
| NM_007123 | 53170.43  | 53115.758 | NM_002709 | 17454.965 | 17501.082 | NM_014225 | 38812.754 | 27662.281 |
| BG717460  | 3907.792  | 3246.276  | NM_001099 | 1772.24   | 1805.485  | AF163473  | 2668.859  | 2629.99   |
| AA778392  | 6964.707  | 6658.97   | NM_006823 | 7579.446  | 7455.198  | NM_006256 | 4431.651  | 3102.011  |
| AI478178  | 2098.991  | 3789.123  | NM_007031 | 1335.644  | 1080.41   | NM_002846 | 1999.335  | 6187.975  |
| AA101279  | 7608.056  | 8716.741  | NM_002657 | 1484.624  | 1806.974  | NM_002837 | 2358.995  | 2235.073  |
| M19154    | 1878.973  | 2212.427  | NM_001350 | 15646.361 | 11681.25  | AL133077  | 14416.272 | 14866.28  |
| AA399410  | 13251.522 | 16439.15  | NM_014809 | 2977.883  | 3262.091  | AK025211  | 1719.431  | 1679.669  |
| AA137031  | 2052.943  | 2213.438  | NM_016074 | 31179.633 | 25411.996 | U06715    | 529.482   | 357.322   |
| AA292226  | 3078.352  | 2678.875  | NM_003921 | 5148.133  | 4379.337  | NM_013402 | 8778.991  | 6900.929  |
| NM_000500 | 2661.904  | 3735.307  | NM_004208 | 21349.48  | 20092.682 | NM_002662 | 373.392   | 218.238   |
| J04449    | 2144.056  | 2679.579  | NM_001843 | 4428.291  | 3790.798  | NM_000132 | 16075.511 | 20672.672 |
| BC007031  | 5021.498  | 7549.463  | NM_013266 | 807.855   | 447.64    | NM_001727 | 5931.371  | 8348.885  |
| AF129756  | 14026.429 | 19517.93  | NM_000419 | 1480.906  | 967.64    | NM_004076 | 2803.818  | 2787.871  |
| NM_002957 | 15385.141 | 9807.104  | NM_017768 | 5746.612  | 4447.725  | NM_007123 | 40088.965 | 40177.055 |
| BC036369  | 3418.418  | 2445.247  | NM_002776 | 1686.523  | 1227.579  | BG717460  | 1995.21   | 2449.231  |
| X12492    | 19389.611 | 11380.69  | AK023398  | 3343.564  | 4171.413  | AA778392  | 6378.878  | 6102.288  |
| U93051    | 14994.347 | 8541.51   | NM_001907 | 1040.473  | 1897.087  | AI478178  | 1737.893  | 1920.449  |
| NM_017540 | 2344.522  | 1551.157  | NM_000050 | 1428.255  | 1366.961  | AA101279  | 3546.736  | 3437.952  |

|           |           |           |           |           |           |           |           |           |
|-----------|-----------|-----------|-----------|-----------|-----------|-----------|-----------|-----------|
| NM_01416C | 7762.709  | 9168.315  | NM_000481 | 1494.543  | 1384.194  | M19154    | 1512.764  | 1332.305  |
| AF230877  | 4618.731  | 4022.888  | AK025681  | 3489.647  | 2953.258  | AA399410  | 5356.744  | 3862.434  |
| NM_01766E | 8350.704  | 6503.91   | NM_01490E | 6071.665  | 5350.008  | AA137031  | 1335.243  | 1054.557  |
| AB033049  | 49216.668 | 53673.043 | NM_012137 | 5188.492  | 5755.847  | AA292226  | 2391.838  | 1701.445  |
| NM_00568E | 1928.593  | 3018.479  | NM_00448E | 24495.311 | 19939.17  | NM_00050C | 1576.064  | 1248.116  |
| NM_00292E | 1915.668  | 2465.384  | NM_00151E | 42462.004 | 40743.273 | M29873    | 303.644   | 320.419   |
| NM_00023E | 765.748   | 1006.495  | NM_001281 | 7500.312  | 5954.648  | J04449    | 1189.84   | 788.732   |
| NM_018697 | 1991.589  | 2201.765  | NM_01683E | 1942.619  | 2226.156  | BC007031  | 4508.496  | 3767.748  |
| AF090116  | 740.568   | 1741.124  | NM_003981 | 24943.275 | 26238.109 | AF129756  | 9881.372  | 9113.972  |
| NM_01403C | 30053.193 | 36121.129 | NM_01487E | 13185.265 | 8798.231  | NM_002957 | 13811.03  | 11600.228 |
| NM_004224 | 2135.408  | 2746.429  | AB033023  | 16307.198 | 11184.817 | BC036369  | 2086.986  | 1505.624  |
| NM_000254 | 9504.958  | 10890.473 | BC027895  | 2151.869  | 951.035   | X12492    | 11438.735 | 8288.01   |
| Z21967    | 9640.971  | 7229.36   | NM_01652E | 2890.482  | 1960.872  | U93051    | 10808.777 | 7775.185  |
| NM_00373E | 1358.568  | 1383.388  | AF116238  | 2358.912  | 4531.964  | NM_01754C | 1335.061  | 910.104   |
| NM_01618E | 56152.613 | 46365.734 | AB033085  | 3866.588  | 1894.003  | NM_01827C | 10598.701 | 14669.505 |
| NM_012110 | 12407.008 | 21693.613 | AF024703  | 16007.854 | 11559.677 | NM_00026C | 52938.699 | 67615.484 |
| AF052693  | 4035.773  | 2402.712  | NM_016531 | 843.027   | 1043.968  | NM_01416C | 6319.116  | 7340.912  |
| NM_00112E | 33521.551 | 22216.33  | NM_00359E | 13939.501 | 19106.543 | AF230877  | 4486.773  | 5824.577  |
| L09100    | 1900.45   | 1580.831  | NM_000244 | 5897.953  | 8671.034  | NM_01766E | 6059.775  | 5382.088  |
| NM_00547E | 2112.537  | 1518.74   | NM_01428E | 4505.445  | 3164.911  | AB033049  | 45231.18  | 40575.344 |
| NM_00431E | 1101.365  | 1331.949  | AF026816  | 23408.723 | 14120.823 | NM_00568E | 1370.025  | 1327.451  |
| NM_01343E | 951.801   | 1081.539  | NM_00471E | 2733.335  | 1472.469  | NM_00292E | 1092.633  | 578.037   |
| NM_00416E | 20899.047 | 26947.584 | NM_01855E | 2327.287  | 2345.922  | NM_00023E | 380.367   | 457.435   |
| NM_00686E | 14681.369 | 15560.014 | NM_004704 | 4185.649  | 3257.075  | NM_018697 | 1058.432  | 982.093   |
| NM_00716E | 9089.683  | 7549.165  | NM_00545E | 6872.101  | 5889.482  | AF090116  | 530.572   | 608.492   |
| NM_004161 | 15520.341 | 14142.531 | NM_01463E | 6251.851  | 5286.956  | NM_01403C | 35281.922 | 19575.652 |
| NM_00129E | 1252.222  | 3035.23   | NM_00197C | 55330.883 | 57053.977 | NM_004224 | 6490.452  | 2801.091  |
| NM_005161 | 2702.211  | 3319.367  | NM_00411E | 4916.721  | 3506.489  | NM_000254 | 4371.776  | 3648.973  |
| AB037749  | 1170.291  | 2293.959  | AK024508  | 5084.036  | 4481.072  | Z21967    | 5514.952  | 4011.997  |
| NM_020347 | 2223.607  | 1835.539  | AK027213  | 5441.496  | 3716.946  | NM_01618E | 43099.676 | 25163.506 |
| NM_00146E | 3316.532  | 4696.639  | AL096749  | 23696.525 | 27148.141 | NM_012110 | 7876.695  | 6831.107  |
| NM_00407E | 1345.719  | 1757.421  | AK023620  | 2168.498  | 2874.759  | NM_005461 | 392.374   | 331.535   |
| AF068286  | 969.033   | 922.957   | AF086189  | 7586.091  | 7582.977  | AF052693  | 2997.553  | 1931.321  |
| AB040957  | 7085.87   | 8533.391  | AL050055  | 4802.738  | 5762.523  | NM_00112E | 25558.881 | 16885.902 |
| NM_003110 | 6830.903  | 7520.666  | NM_00500E | 9086.692  | 11216.299 | L09100    | 2002.168  | 2273.589  |
| NM_00361E | 1850.279  | 1362.301  | NM_01459E | 9874.202  | 8883.777  | NM_00547E | 1196.551  | 1014.624  |
| NM_01323C | 2427.056  | 2307.604  | NM_00670E | 8482.59   | 9113.227  | NM_00431E | 720.285   | 775.833   |
| X72308    | 2310.86   | 1703.049  | NM_004037 | 2617.194  | 3177.248  | NM_01343E | 841.211   | 799.145   |
| NM_00540E | 872.748   | 672.745   | NM_00511E | 2156.457  | 2593.785  | NM_00416E | 23198.615 | 29398.504 |
| BC008376  | 12471.674 | 7992.477  | NM_00276E | 4127.879  | 5191.315  | NM_00686E | 10638.284 | 13970.532 |
| AB041269  | 2563.778  | 2262.669  | NM_00078E | 16021.263 | 12505.141 | AB020706  | 3553.753  | 4477.11   |
| AK024908  | 8851.163  | 7721.933  | AF254088  | 1846.806  | 1479.681  | NM_00716E | 5089.83   | 6253.836  |
| NM_002837 | 5562.982  | 7524.75   | NM_00142C | 1509.531  | 2008.783  | NM_00286E | 4842.606  | 5411.047  |
| AL133077  | 28895.293 | 38484.332 | NM_00024E | 1665.389  | 1517.831  | NM_004161 | 8646.719  | 5981.459  |
| AK025211  | 2978.341  | 4044.021  | AB031046  | 2622.679  | 2030.094  | NM_00129E | 924.967   | 1262.718  |
| U06715    | 1002.721  | 775.609   | NM_00244E | 31031.146 | 28109.875 | NM_005161 | 1679.391  | 845.564   |
| NM_004377 | 7584.462  | 5897.884  | AK025388  | 2158.38   | 2141.275  | AB037749  | 432.795   | 198.52    |
| AB037815  | 11721.227 | 13019.237 | NM_006147 | 636.786   | 695.479   | NM_020347 | 1343.312  | 649.876   |
| NM_00364E | 11798.688 | 13313.918 | AB006631  | 1611.07   | 1808.944  | NM_00146E | 1962.781  | 1960.864  |
| AF263613  | 4552.585  | 6076.38   | AF291181  | 1148.624  | 1112.088  | NM_00407E | 859.102   | 800.871   |
| NM_01775C | 4298.906  | 4235.161  | NM_005741 | 4523.553  | 4013.896  | AF068286  | 420.797   | 271.809   |
| AK026196  | 4013.039  | 3014.331  | NM_000964 | 4027.244  | 3171.281  | AB040957  | 4125.119  | 3103.68   |
| AL137668  | 1492.277  | 1215.779  | BF343886  | 1241.504  | 1136.011  | NM_00689C | 535.771   | 1058.682  |

|           |           |           |           |           |           |           |           |           |
|-----------|-----------|-----------|-----------|-----------|-----------|-----------|-----------|-----------|
| AV704019  | 722.859   | 681.128   | NM_013263 | 9316.039  | 6857.051  | NM_003110 | 6551.014  | 6452.125  |
| NM_01334E | 1873.95   | 1300.098  | AL137407  | 6880.5    | 8198.635  | NM_003612 | 2055.662  | 1332.311  |
| NM_004977 | 8761.231  | 7444.897  | NM_01817E | 2819.353  | 2530.018  | NM_01323C | 1352.098  | 1219.491  |
| NM_00488E | 57363.004 | 60982.664 | AK025204  | 1556.916  | 2044.792  | X72308    | 3068.79   | 2552.804  |
| NM_01228E | 57255.078 | 56933.547 | AK027256  | 554.272   | 691.252   | NM_00540E | 568.54    | 542.312   |
| NM_00470C | 1508.318  | 1756.388  | NM_01900C | 2121.609  | 4035.831  | BC008376  | 11010.91  | 7158.561  |
| U93051    | 20783.662 | 21430.137 | AF143330  | 1208.483  | 2120.056  | AB041269  | 2192.503  | 2065.75   |
| NM_01754C | 1759.48   | 1521.218  | AK025178  | 5906.736  | 6559.449  | AK024908  | 4232.734  | 3624.384  |
| NM_00675E | 7949.946  | 7571.328  | AF147359  | 1403.406  | 1247.75   | NM_002837 | 2997.335  | 4423.723  |
| NM_005881 | 4897.771  | 4627.155  | NM_01483E | 9678.608  | 10243.731 | AL133077  | 17845.527 | 23774.068 |
| NM_005794 | 726.035   | 358.34    | AK001822  | 6381.775  | 5281.644  | AK025211  | 1978.953  | 2963.717  |
| L40519    | 1664.26   | 979.859   | AK026969  | 3977.058  | 4230.019  | U06715    | 806.996   | 1095.173  |
| NM_004204 | 3873.235  | 3784.21   | AF086287  | 3148.474  | 2362.66   | NM_00266E | 447.165   | 341.506   |
| AK002181  | 1270.354  | 1271.62   | AF086409  | 919.525   | 962.524   | NM_004377 | 5010.381  | 3985.631  |
| AK025769  | 8806.698  | 10916.064 | AK024268  | 3121.93   | 3051.078  | AB037815  | 12051.533 | 7535.039  |
| AW945166  | 2111.115  | 1850.872  | AF086295  | 1006.122  | 1258.789  | NM_00364E | 7127.49   | 6340.724  |
| NM_00523E | 9785.943  | 8018.169  | AF086344  | 2994.712  | 3042.422  | AF263613  | 2346.233  | 3101.039  |
| NM_006384 | 22407.932 | 15065.438 | AF086424  | 1161.223  | 1121.885  | NM_000097 | 2355.92   | 1903.264  |
| NM_013257 | 2635.819  | 2025.486  | AF052116  | 781.709   | 812.062   | AK022878  | 6458.674  | 4575.203  |
| NM_01422E | 60073.77  | 59312.906 | NM_018087 | 5292.012  | 2728.774  | NM_01809E | 897.218   | 1241.741  |
| NM_00625E | 8513.812  | 6101.893  | AL360260  | 1945.527  | 1342.013  | NM_01775C | 2396.617  | 1466.057  |
| NM_00284E | 3184.149  | 10519.044 | AK023647  | 1474.84   | 1137.986  | AK026196  | 2097.463  | 1626.465  |
| AF052693  | 5645.355  | 6274.324  | BC031635  | 1337.716  | 1555.478  | AL137668  | 673.664   | 408.199   |
| NM_00112E | 27854.449 | 33954.281 | AF085916  | 621.256   | 1017.103  | AV704019  | 366.595   | 274.896   |
| L09100    | 2698.355  | 3880.813  | AL359598  | 980.179   | 1882.387  | NM_01334E | 1738.563  | 1223.932  |
| NM_00547E | 3578.603  | 4268.517  | AF085980  | 633.776   | 903.365   | NM_004977 | 5902.29   | 4723.9    |
| NM_00431E | 898.707   | 1298.715  | AF085927  | 2338.044  | 2550.656  | NM_00488E | 42043.922 | 31746.215 |
| NM_01343E | 1552.025  | 1448.228  | AF085954  | 17576.09  | 29294.279 | NM_01228E | 47433.219 | 37836.555 |
| NM_00013E | 18179.984 | 15233.991 | AL137337  | 794.562   | 1261.639  | NM_00470C | 1252.055  | 881.856   |
| NM_001727 | 8352.64   | 6732.329  | AL161969  | 858.88    | 727.115   | U93051    | 13164.046 | 14410.487 |
| NM_00407E | 3374.18   | 3405.777  | AL442095  | 3389.768  | 2688.249  | NM_01754C | 1498.251  | 1746.859  |
| NM_00712E | 55801.699 | 63863.457 | AL137378  | 1684.027  | 1868.793  | NM_00675E | 5921.474  | 5488.734  |
| BG717460  | 5828.734  | 9579.515  | AL137609  | 29699.426 | 28463.324 | NM_005881 | 2071.481  | 1980.02   |
| AA778392  | 8290.563  | 11413.584 | AL353946  | 2800.06   | 2916.608  | NM_005794 | 288.315   | 363.246   |
| AI478178  | 2152.317  | 2013.562  | X69081    | 6318.385  | 6312.884  | L40519    | 937.649   | 663.247   |
| AA101279  | 7219.919  | 7972.092  | NM_005714 | 4132.154  | 4323.798  | NM_004204 | 2703.129  | 2019.767  |
| M19154    | 1784.639  | 1471.243  | AL359931  | 4960.57   | 4038.304  | AK002181  | 1176.238  | 1250.814  |
| AA137031  | 2088.782  | 1537.26   | AF086052  | 785.274   | 1168.129  | NM_001641 | 12492.344 | 7485.304  |
| AA292226  | 2801.907  | 1475.714  | AK000954  | 3084.211  | 3384.452  | BC015750  | 51005.117 | 66016.25  |
| NM_00050C | 2782.339  | 1847.079  | AF086099  | 829.665   | 831.677   | AK025769  | 4095.272  | 3711.808  |
| J04449    | 1967.563  | 1639.069  | AK025800  | 7710.614  | 4845.148  | AW945166  | 1397.75   | 882.214   |
| BC007031  | 4074.847  | 3570.914  | AK022333  | 2013.122  | 1594.248  | NM_00523E | 4240.35   | 3414.101  |
| AF129756  | 14047.817 | 11560.723 | AK023294  | 561.441   | 1069.896  | NM_006384 | 10705.97  | 6946.46   |
| NM_002957 | 17124.1   | 13261.367 | AF095854  | 1819.323  | 2260.398  | NM_013257 | 1203.827  | 1042.328  |
| BC036369  | 3547.104  | 2000.889  | NM_01416E | 1045.719  | 1155.792  | AB044546  | 1152.388  | 778.172   |
| X12492    | 20956.707 | 17282.064 | NM_01413E | 633.479   | 715.248   | NM_01422E | 40786.605 | 28169.287 |
| X72308    | 4273.214  | 4581.534  | AF159093  | 5793.133  | 9284.315  | AF163473  | 2919.859  | 2177.656  |
| NM_00540E | 859.347   | 1738.215  | AF113679  | 1139.97   | 1307.471  | NM_00625E | 4896.996  | 3664.112  |
| BC008376  | 18695.07  | 19284.875 | AK021997  | 2750.562  | 3286.434  | NM_00284E | 2214.117  | 10613.666 |
| AB041269  | 4410.738  | 4233.989  | AK022125  | 1342.468  | 1039.016  | AF052693  | 3303.847  | 3846.684  |
| AK024908  | 8413.877  | 8654.707  | AK022244  | 8440.718  | 8141.484  | NM_00112E | 28667.568 | 31552.762 |
| NM_01827C | 10580.347 | 9163.429  | AK022381  | 5949.571  | 6434.023  | L09100    | 2290.525  | 3521.519  |
| NM_00026C | 55783.961 | 49356.48  | AK022149  | 1944.422  | 1585.307  | NM_00547E | 2262.584  | 3124.62   |



|           |           |           |           |           |           |           |           |           |
|-----------|-----------|-----------|-----------|-----------|-----------|-----------|-----------|-----------|
| NM_01416C | 7586.65   | 6540.166  | AK022286  | 2900.535  | 1759.192  | NM_004313 | 670.305   | 1092.484  |
| AF230877  | 3525.893  | 3793.583  | AK022613  | 7731.497  | 7248.61   | NM_01343E | 811.144   | 1494.633  |
| NM_01766E | 9538.178  | 8226.771  | AL359557  | 1437.928  | 1244.631  | NM_00013Z | 14713.297 | 14539.433 |
| AB033049  | 50089.07  | 52866.887 | AK027257  | 993.735   | 688.828   | NM_001727 | 4538.699  | 4050.03   |
| NM_00568Z | 1596.953  | 2004.242  | AK024582  | 848.744   | 782.844   | NM_00407E | 2071.891  | 1419.367  |
| NM_00292E | 1986.991  | 2169.318  | AK022099  | 776.053   | 542.755   | NM_00712Z | 39328.805 | 32085.543 |
| NM_00023Z | 831.534   | 537.379   | NM_014367 | 2783.057  | 4516.369  | BG717460  | 2312.14   | 2323.019  |
| NM_018697 | 1988.047  | 2276.386  | AK024901  | 624.668   | 856.001   | AA778392  | 5000.015  | 4138.43   |
| AF090116  | 1003.426  | 800.927   | NM_01907Z | 721.683   | 799.256   | AI478178  | 1657.516  | 1304.096  |
| NM_01403C | 33287.914 | 20294.51  | NM_00236E | 1450.262  | 2627.121  | AA101279  | 3369.828  | 3346.203  |
| NM_004224 | 2576.131  | 1972.515  | AF161441  | 19907.998 | 28189.168 | M19154    | 1292.415  | 838.069   |
| NM_000254 | 9281.215  | 5877.62   | AL137474  | 2647.85   | 2032.045  | AA399410  | 5221.629  | 3671.302  |
| Z21967    | 10273.084 | 6783.575  | AL133023  | 833.89    | 611.637   | AA137031  | 1149.763  | 759.328   |
| NM_00373E | 941.609   | 815.387   | AK021572  | 1780.007  | 1578.781  | AA292226  | 1879.195  | 1228.67   |
| NM_012110 | 9540.168  | 14363.676 | AK026757  | 1135.401  | 1184.227  | NM_00050C | 1902.15   | 1080.346  |
| NM_005461 | 1242.755  | 962.721   | AF119908  | 2487.397  | 2072.012  | J04449    | 1120.075  | 825.132   |
| NM_01334E | 2916.138  | 3198.784  | U50539    | 1033.005  | 1455.756  | BC007031  | 4035.971  | 3303.923  |
| NM_004977 | 11762.472 | 13302.529 | AK000653  | 16952.307 | 12606.093 | AF129756  | 9842.229  | 7638.133  |
| NM_00488E | 57650.273 | 59590.172 | AK000908  | 1605.664  | 1142.045  | NM_002957 | 13480.811 | 8561.42   |
| NM_01228Z | 60894.945 | 59408.727 | Z70696    | 1298.8    | 1115.311  | BC036369  | 2561.758  | 2691.244  |
| NM_00416Z | 20337.621 | 22509.615 | NM_00579Z | 11671.884 | 10911.21  | X12492    | 13262.075 | 16925.029 |
| NM_00686E | 14522.898 | 12085.59  | AF048847  | 9664.619  | 8961.451  | X72308    | 3277.264  | 4051.414  |
| NM_004161 | 16841.453 | 20110.926 | L37718    | 62321.719 | 73725.125 | NM_00540E | 644.935   | 963.491   |
| NM_00129E | 1158.353  | 2628.984  | AL137717  | 4515.91   | 3323.442  | BC008376  | 15420.376 | 18773.758 |
| NM_005161 | 2261.658  | 2372.664  | AF035297  | 2642.223  | 2595.507  | AB041269  | 3047.354  | 3891.336  |
| NM_020347 | 2088.53   | 1182.275  | NM_01403E | 4913.75   | 3516.377  | AK024908  | 5230.982  | 6473.009  |
| NM_00146Z | 3005.589  | 2625.759  | S67154    | 3692.588  | 4781.557  | NM_01827C | 9803.632  | 10259.795 |
| NM_00407Z | 1164.952  | 832.474   | AK026181  | 11916.143 | 11374.537 | NM_00026C | 50366.555 | 53212.805 |
| AF068286  | 926.722   | 276.216   | AK021451  | 933.601   | 2787.695  | NM_01416C | 5120.381  | 3979.91   |
| AB040957  | 6286.993  | 3664.888  | AK001971  | 924.587   | 1225.749  | AF230877  | 4730.183  | 4393.12   |
| NM_00689C | 1141.672  | 608.19    | AF086468  | 2124.999  | 2418.225  | NM_01766E | 5513.57   | 4353.183  |
| NM_00361Z | 1610.125  | 2430.516  | AF005082  | 21668.023 | 16949.213 | AB033049  | 44581.945 | 37085.059 |
| NM_01323C | 2606.143  | 3833.076  | AL117595  | 4004.742  | 2813.48   | NM_00040E | 301.803   | 153.546   |
| NM_01422E | 59951.859 | 58763.984 | AB028988  | 30597.064 | 25705.016 | NM_00568Z | 1215.366  | 1162.054  |
| NM_002837 | 5116.146  | 4675.014  | AK023072  | 1767.409  | 958.117   | NM_00292E | 950.641   | 391.499   |
| AL133077  | 26422.305 | 26198.035 | AF086105  | 9807.852  | 19902.74  | NM_00023Z | 374.335   | 285.43    |
| AK025211  | 2992.641  | 2995.813  | AK026600  | 2196.214  | 3288.793  | NM_018697 | 1240.325  | 659.5     |
| NM_01340Z | 16929.777 | 10144.92  | Y10697    | 1978.161  | 1923.265  | NM_01403C | 30944.398 | 16576.947 |
| NM_00266Z | 945.54    | 1105.958  | AY007166  | 19072.084 | 16636.625 | NM_004224 | 6049.344  | 3251.113  |
| NM_004377 | 7346.89   | 5157.901  | NM_004937 | 4570.531  | 4180.699  | NM_000254 | 4203.181  | 3607.534  |
| AB037815  | 10916.466 | 9477.912  | CY3Cy5    | 4585.527  | 229.997   | Z21967    | 5386.931  | 3218.299  |
| NM_00364E | 14884.938 | 23273.861 | AI298884  | 16020.839 | 17985.32  | NM_00373E | 675.694   | 589.987   |
| NM_01775C | 3995.563  | 2549.333  | D87845    | 1890.279  | 1384.512  | NM_01618E | 51657.082 | 42982.859 |
| AL137668  | 1445.405  | 2234.271  | M83254    | 2435.357  | 2417.465  | NM_012110 | 9646.671  | 14887.362 |
| AV704019  | 602.356   | 963.068   | S56770    | 738.642   | 648.022   | NM_005461 | 699.326   | 537.617   |
| NM_016444 | 1710.585  | 2671.247  | H58872    | 10477.715 | 9860.531  | NM_01334E | 1797.601  | 2664.758  |
| NM_01783E | 1279.567  | 1588.895  | J04543    | 7307.039  | 7188.424  | NM_004977 | 7463.831  | 11158.276 |
| NM_003707 | 10785.885 | 13423.398 | S60415    | 724.122   | 782.567   | NM_00488E | 46923.465 | 53658.496 |
| AL137718  | 3568.611  | 5425.422  | AA456295  | 1065.795  | 1672.351  | NM_01228Z | 48677.355 | 62864.918 |
| NM_00346C | 7704.814  | 7575.418  | BE733577  | 3255.351  | 3092.742  | NM_00470C | 1780.383  | 3625.558  |
| U94354    | 1812.058  | 1394.364  | AI817942  | 5403.355  | 4586.6    | NM_00416Z | 21433.34  | 24132.873 |
| NM_002904 | 35448.813 | 43521.645 | BG762340  | 1118.28   | 1110.329  | NM_00686E | 9278.793  | 9180.768  |
| NM_01418E | 12446.188 | 10118.802 | AA009484  | 762.988   | 1901.499  | AB020706  | 3175.121  | 2801.784  |

|           |           |           |           |           |           |           |           |           |
|-----------|-----------|-----------|-----------|-----------|-----------|-----------|-----------|-----------|
| NM_00568E | 2059.476  | 1722.495  | SR5       | 5483.369  | 4940.326  | NM_00716E | 5102.247  | 3380.359  |
| NM_006767 | 1429.515  | 869.609   | SR7       | 431.64    | 6233.987  | NM_01622E | 52485.863 | 66352.711 |
| NM_01754C | 2040.328  | 1743.938  | SR9       | 3902.418  | 590.462   | NM_00286E | 5296.699  | 6216.235  |
| NM_00675E | 9560.05   | 12163.031 | CY3Cy5    | 7381.876  | 312.378   | NM_004161 | 8119.995  | 4821.208  |
| NM_005881 | 5044.868  | 3664.85   | NM_01645E | 1497.174  | 1744.135  | NM_00129E | 858.384   | 1204.126  |
| L40519    | 1720.195  | 1129.554  | NM_017701 | 851.565   | 986.066   | NM_005161 | 1534.99   | 687.891   |
| NM_004204 | 3386.183  | 3529.237  | NM_01422E | 1238.328  | 1447.549  | AB037749  | 484.147   | 460.801   |
| AK002181  | 1020.597  | 428.68    | AF142567  | 1229.217  | 1307.76   | NM_020347 | 1159.463  | 562.517   |
| NM_001641 | 25173.781 | 13373.92  | NM_005621 | 3842.043  | 4535.821  | NM_00146E | 2055.84   | 2101.595  |
| BC015750  | 60683.656 | 57581.016 | NM_00620E | 46022.547 | 48206.012 | NM_00407E | 847.528   | 818.71    |
| AK025769  | 7470.664  | 12855.474 | NM_01741C | 924.361   | 1335.136  | AF068286  | 295.591   | 221.888   |
| AW945166  | 2406.748  | 4810.451  | AY009398  | 279.062   | 964.878   | AB040957  | 4137.441  | 2569.596  |
| NM_00523E | 10854.503 | 19641.586 | X99680    | 4551.651  | 6047.72   | NM_00689C | 632.908   | 472.761   |
| NM_00258E | 8563.072  | 10283.09  | NM_00144E | 1160.465  | 1493.437  | NM_00311C | 6003.239  | 8824.712  |
| AF064846  | 2874.578  | 3921.758  | NM_01607E | 6610.456  | 7563.707  | NM_00361E | 2684.998  | 5200.675  |
| AL110227  | 1693.46   | 2636.878  | AK026349  | 12547.078 | 17205.004 | NM_01323C | 2125.306  | 4804.595  |
| NM_00140C | 6223.497  | 5627.948  | AK023204  | 4288.791  | 5812.747  | AF163473  | 1764.796  | 3014.117  |
| AB033281  | 4982.961  | 6520.644  | NM_00247E | 1502.013  | 1679.645  | NM_00625E | 5890.597  | 7332.879  |
| NM_00288E | 49226.148 | 49968.781 | D28449    | 4073.005  | 3055.747  | NM_00284E | 3004.074  | 12982.964 |
| AB011161  | 1969.749  | 1563.099  | AA460480  | 382.796   | 634.502   | NM_002837 | 2879.976  | 2752.736  |
| NM_000827 | 1260.06   | 1701.104  | S78774    | 6056.606  | 6194.155  | AL133077  | 16444.953 | 18237.219 |
| NM_002944 | 1584.658  | 1473.322  | NM_00492E | 3652.942  | 3961.95   | AK025211  | 1771.234  | 2057.819  |
| AF327354  | 3181.876  | 3227.906  | NM_002871 | 1198.722  | 894.578   | U06715    | 740.435   | 457.964   |
| NM_00625E | 999.376   | 905.339   | BE873653  | 37792.699 | 35843.547 | NM_01340E | 9922.164  | 7671.263  |
| AB014513  | 8480.679  | 8110.088  | NM_006987 | 655.784   | 690.913   | NM_00266E | 442.541   | 450.954   |
| NM_004747 | 2564.553  | 1896.729  | NM_00128E | 4847.546  | 3632.936  | NM_004377 | 5527.472  | 3507.206  |
| NM_002341 | 10924.35  | 20843.889 | NM_01683C | 2282.964  | 2194.112  | AB037815  | 11699.847 | 9776.382  |
| AL137651  | 2920.451  | 2014.247  | NM_01610E | 1575.151  | 1736.998  | NM_00364E | 6467.091  | 5300.226  |
| NM_01894E | 8314.274  | 5393.686  | AL133654  | 3842.397  | 3079.981  | AF263613  | 2658.642  | 2643.896  |
| NM_00081E | 4168.916  | 2754.021  | AL137262  | 1003.359  | 1195.884  | NM_000097 | 2025.582  | 1820.941  |
| NM_00665C | 1604.713  | 1859.766  | NM_020437 | 1657.529  | 1291.691  | NM_01809E | 649.34    | 611.385   |
| AK024436  | 9613.735  | 11599.473 | NM_01864E | 689.007   | 950.821   | NM_01775C | 2284.359  | 1522.723  |
| NM_00664E | 11480.127 | 16791.277 | NM_01337E | 2876.12   | 3049.089  | AK026196  | 2479.836  | 3030.776  |
| NM_00086E | 1027.969  | 1934.851  | NM_00108E | 349.698   | 713.495   | AL137668  | 807.362   | 1364.508  |
| NM_004711 | 3140.116  | 5037.156  | NM_00611C | 490.631   | 553.392   | AV704019  | 558.293   | 1001.423  |
| U63542    | 748.707   | 1027.135  | NM_00286C | 6403.133  | 6146.874  | NM_016444 | 882.186   | 1271.586  |
| AF161361  | 1421.885  | 1498.398  | NM_00616E | 2532.11   | 2511.458  | NM_01783E | 879.946   | 1523.6    |
| NM_00646E | 15671.859 | 21001.861 | NM_00121E | 839.36    | 781.778   | AL137718  | 2420.514  | 4082.314  |
| NM_001444 | 47701.133 | 57181.148 | NM_01418E | 888.51    | 828.073   | NM_00346C | 8062.106  | 9704.269  |
| AK027208  | 1038.846  | 1121.333  | AB046780  | 13569.524 | 13014.522 | U94354    | 642.805   | 1022.751  |
| NM_016521 | 10550.209 | 11443.363 | NM_01835E | 3155.433  | 2346.228  | NM_002904 | 25163.369 | 23390.9   |
| X98494    | 11073.316 | 8945.15   | NM_00356C | 24932.35  | 20922.727 | NM_01418E | 7758.009  | 8370.434  |
| NM_00124C | 6192.288  | 4838.017  | NM_01440E | 1434.654  | 1630.712  | NM_00568E | 1776.164  | 2035.978  |
| NM_00270E | 21867.217 | 16999.939 | AL050100  | 1185.393  | 1347.849  | NM_006767 | 856.007   | 711.375   |
| NM_00109E | 2449.482  | 2102.635  | NM_02013E | 1948.337  | 1990.339  | NM_01754C | 1373.193  | 1120.264  |
| NM_00682E | 9548.903  | 6534.13   | AL080207  | 396.628   | 713.398   | NM_00675E | 6011.959  | 3235.488  |
| NM_007031 | 1213.5    | 1368.424  | NM_00004E | 3847.625  | 4531.568  | NM_005881 | 2465.707  | 1958.685  |
| NM_002657 | 2288.723  | 1519.045  | NM_00492E | 8039.373  | 13250.253 | NM_005794 | 343.097   | 249.595   |
| NM_00135C | 16813.965 | 13316.688 | NM_003234 | 583.354   | 501.642   | L40519    | 965.833   | 482.329   |
| NM_01480E | 3845.061  | 2524.883  | NM_00485E | 659.873   | 669.325   | NM_004204 | 2439.066  | 1832.494  |
| NM_016074 | 31826.346 | 21812.373 | AB051826  | 650.449   | 688.913   | AK002181  | 1250.818  | 1112.931  |
| NM_003921 | 6285.796  | 3301.053  | AK024964  | 514.021   | 852.025   | NM_001641 | 12625.386 | 7651.614  |
| NM_00420E | 25367.625 | 20197.238 | M20697    | 2799.584  | 3401.133  | BC015750  | 47965.301 | 68220.492 |

|           |           |           |           |           |           |           |           |           |
|-----------|-----------|-----------|-----------|-----------|-----------|-----------|-----------|-----------|
| NM_001843 | 3023.081  | 5919.111  | NM_015046 | 4515.388  | 3330.816  | AK025769  | 4672.496  | 6432.457  |
| NM_013266 | 780.951   | 1347.964  | NM_006927 | 2989.916  | 4419.562  | AW945166  | 1458.136  | 2387.076  |
| NM_000419 | 1979.319  | 3180.413  | NM_014601 | 488.009   | 773.68    | NM_005236 | 5561.67   | 11929.911 |
| NM_017768 | 7114.314  | 10592.171 | NM_017761 | 2138.59   | 2622.095  | NM_006384 | 13887.294 | 21810.469 |
| NM_002776 | 1170.561  | 1043.38   | D38163    | 550.98    | 572.129   | NM_002586 | 5303.943  | 6494.678  |
| AK023398  | 5931.434  | 6177.385  | D28449    | 18502.656 | 13561.596 | AF064846  | 1371.719  | 2335.105  |
| NM_001907 | 1257.885  | 1404.544  | NM_003281 | 420.053   | 659.171   | AL110227  | 1330.705  | 1638.973  |
| NM_015711 | 63731.797 | 63250.867 | AA460480  | 758.101   | 723.637   | NM_001400 | 6279.578  | 8108.421  |
| NM_000050 | 1494.832  | 986.946   | AI298884  | 17857.816 | 16120.007 | AB033281  | 3783.027  | 5688.682  |
| NM_000481 | 2052.021  | 1206.015  | D87845    | 2250.756  | 1821.627  | NM_002882 | 38197.383 | 35301.047 |
| AK025681  | 3556.606  | 3103.814  | M83254    | 2344.907  | 2537.202  | AB011161  | 1094.936  | 1073.691  |
| NM_014905 | 9488.578  | 7846.218  | S56770    | 728.054   | 685.272   | NM_000827 | 833.386   | 732.402   |
| NM_012137 | 3287.586  | 1940.077  | H58872    | 10199.445 | 8079.642  | NM_002944 | 1225.993  | 1133.317  |
| NM_004483 | 24620.496 | 24585.285 | J02938    | 1770.722  | 1354.607  | AF327354  | 2058.038  | 2461.789  |
| NM_001513 | 60321.438 | 57682.773 | J04543    | 8571.111  | 5442.014  | NM_006256 | 599.07    | 775.453   |
| NM_001281 | 8769.806  | 10808.055 | S60415    | 465.78    | 659.528   | AB014513  | 8175.31   | 6305.896  |
| NM_016835 | 2600.582  | 1419.807  | AA456295  | 1221.259  | 1160.682  | NM_004747 | 1777.13   | 1136.977  |
| NM_003981 | 33494.285 | 21199.572 | BE733577  | 3284.48   | 3573.294  | AK024430  | 47612.613 | 36002.91  |
| U26596    | 41557.676 | 25651.6   | NM_006534 | 2213.012  | 2293.617  | NM_002341 | 7370.385  | 9476.65   |
| AB014522  | 21122.748 | 37287.809 | M30142    | 886.348   | 713.322   | AL137651  | 2874.992  | 2577.863  |
| NM_014875 | 13569.121 | 22253.244 | NM_005018 | 607.768   | 510.099   | NM_018945 | 4095.76   | 3012.242  |
| AB033023  | 14876.878 | 22840.1   | NM_013378 | 6980.398  | 6383.229  | NM_000818 | 2855.692  | 2200.826  |
| BC027895  | 2357.096  | 4677.679  | NM_001085 | 1295.148  | 1308.673  | NM_006650 | 1076.068  | 814.483   |
| NM_016529 | 5168.426  | 6686.874  | NM_006110 | 1277.173  | 1205.407  | AK024436  | 5153.949  | 7526.217  |
| AF116238  | 2671.261  | 4219.791  | NM_016453 | 1564.885  | 1429.614  | NM_006648 | 7528.027  | 15541.25  |
| NM_006982 | 1113.998  | 1166.937  | NM_017701 | 1213.77   | 1343.557  | NM_000868 | 554.575   | 1418.833  |
| AB033085  | 3713.154  | 3705.651  | NM_014226 | 1802.045  | 1583.856  | NM_004711 | 2230.092  | 4445.029  |
| AF024703  | 18550.125 | 15802.535 | AF142567  | 921.206   | 1144.874  | U63542    | 357.5     | 918.142   |
| NM_016531 | 1398.359  | 943.294   | NM_005621 | 3559.251  | 4223.644  | AF161361  | 810.391   | 1366.453  |
| NM_003593 | 18589.838 | 18052.771 | NM_006202 | 48469.621 | 44751.949 | NM_006463 | 10643.569 | 11677.461 |
| NM_014383 | 58469.715 | 55279.184 | NM_017410 | 1442.721  | 2309.117  | NM_001444 | 36195.758 | 37323.723 |
| NM_000244 | 9717.572  | 9178.453  | AY009398  | 754.867   | 554.491   | AK027208  | 393.313   | 469.196   |
| NM_014285 | 5989.262  | 6350.365  | X99680    | 2708.978  | 3602.551  | NM_016521 | 6145.966  | 5269.243  |
| AF026816  | 29006.104 | 26332.998 | NM_001448 | 799.901   | 1212.758  | X98494    | 7222.006  | 4562.959  |
| NM_004719 | 3266.807  | 1795.822  | AK026349  | 745.631   | 1370.865  | NM_001240 | 3462.966  | 2652.448  |
| NM_018553 | 3571.261  | 1736.403  | D12485    | 551.46    | 645.875   | NM_002709 | 13141.548 | 11522.226 |
| NM_004704 | 4215.479  | 2887.354  | AK023204  | 3071.446  | 2835.094  | NM_001099 | 1829.72   | 1682.885  |
| NM_005455 | 8181.941  | 5382.15   | NM_003449 | 1897.495  | 1984.842  | NM_006823 | 4733.452  | 3782.127  |
| NM_014633 | 7376.726  | 3947.806  | NM_002478 | 1969.668  | 2505.182  | NM_007031 | 765.391   | 520.965   |
| NM_001970 | 62404.664 | 48220.906 | NM_003234 | 5146.48   | 3066.025  | NM_002657 | 1188.169  | 786.22    |
| NM_006810 | 25683.141 | 19727.299 | NM_004858 | 2000.272  | 1308.892  | NM_004086 | 3615.638  | 3927.794  |
| NM_001969 | 743.938   | 975.321   | S78774    | 6841.644  | 6298.438  | NM_001350 | 10134.718 | 8419.416  |
| NM_004116 | 5355.272  | 5848.93   | NM_004922 | 3653.688  | 4294.136  | NM_014809 | 2025.071  | 1623.155  |
| AK024508  | 6837.765  | 9332.373  | NM_002871 | 1128.564  | 989.337   | NM_016074 | 17033.355 | 12262.848 |
| AK027213  | 7574.701  | 11309.169 | NM_006987 | 730.864   | 709.257   | NM_003921 | 2970.743  | 1761.314  |
| AL096749  | 22881.623 | 24491.043 | NM_001282 | 4389.614  | 2647.122  | NM_004208 | 14083.353 | 12300.808 |
| AK023620  | 2227.555  | 1907.908  | NM_016830 | 2355.154  | 1929.198  | NM_001843 | 2621.473  | 5915.428  |
| AF086189  | 13447.161 | 14016.668 | U44105    | 535.913   | 679.084   | NM_013266 | 704.998   | 1469.823  |
| AL050055  | 4350.498  | 4544.343  | NM_016103 | 2096.104  | 1672.514  | NM_000419 | 1145.277  | 2715.435  |
| NM_005009 | 18497.15  | 15471.701 | AL133654  | 4083.42   | 3571.55   | NM_017768 | 4878.917  | 12175.813 |
| NM_014596 | 17821.129 | 18984.199 | AL137262  | 539.111   | 927.734   | NM_002776 | 1297.9    | 2135.092  |
| NM_006703 | 13596.313 | 11688.859 | NM_018643 | 794.453   | 1193.854  | AK023398  | 3052.242  | 2918.771  |
| NM_004037 | 4026.761  | 4550.366  | NM_006927 | 13151.451 | 11148.116 | NM_001907 | 791.391   | 788.561   |

|           |           |           |           |           |           |           |           |           |
|-----------|-----------|-----------|-----------|-----------|-----------|-----------|-----------|-----------|
| NM_005116 | 3724.73   | 3957.391  | NM_014601 | 1603.366  | 1562.729  | NM_015711 | 53861.184 | 63874.875 |
| NM_002766 | 7521.977  | 5951.614  | NM_017761 | 12974.057 | 14658.842 | NM_00005C | 846.337   | 617.299   |
| NM_00078E | 22020.875 | 22788.84  | NM_00692E | 551.642   | 498.836   | NM_000481 | 1064.717  | 761.441   |
| AF254088  | 2352.462  | 1364.452  | AF237700  | 939.352   | 673.858   | AK025681  | 1588.26   | 1375.598  |
| NM_00142C | 1319.119  | 918.422   | NM_00286C | 7659.938  | 7592.169  | NM_01490E | 4362.475  | 3196.219  |
| NM_00024E | 1070.92   | 555.649   | NM_00616E | 3182.519  | 3166.77   | NM_012137 | 2983.313  | 3014.02   |
| AB031046  | 1636.104  | 749.294   | NM_00121E | 890.582   | 861.568   | NM_00448E | 13777.465 | 14206.531 |
| NM_00244E | 28610.174 | 17861.605 | NM_01418E | 901.33    | 893.56    | NM_00151E | 46238.773 | 41524.922 |
| AK025388  | 1956.645  | 1139.328  | NM_01835E | 2894.088  | 1826.841  | NM_001281 | 4081.66   | 3595.117  |
| NM_006147 | 998.754   | 321.513   | NM_00356C | 25936.971 | 22639.457 | NM_01683E | 1446.408  | 723.338   |
| AB006631  | 1870.276  | 2579.865  | NM_01440E | 1692.133  | 1701.428  | NM_003981 | 18423.662 | 9045.736  |
| AF291181  | 1070.766  | 1860.959  | AL050100  | 640.029   | 1118.165  | U26596    | 24215.176 | 14409.093 |
| NM_005741 | 5944.737  | 9013.55   | NM_00074E | 6766.734  | 8294.983  | NM_01487E | 8058.342  | 20009.9   |
| NM_000964 | 2679.259  | 3708.886  | NM_00004E | 3093.654  | 2940.884  | AB033023  | 12673.563 | 28622.66  |
| BF343886  | 1282.78   | 2360.197  | NM_00492E | 8925.215  | 15207.918 | BC027895  | 1491.226  | 4059.996  |
| NM_01326E | 10892.774 | 15437.31  | NM_00545E | 1000.826  | 944.141   | NM_01652E | 3200.984  | 5821.726  |
| AL137407  | 7664.796  | 9273.652  | NM_006534 | 4234.306  | 3694.229  | AF116238  | 1773.304  | 2953.593  |
| AF085839  | 883.077   | 653.65    | AB051826  | 744.353   | 971.139   | NM_00698E | 762.875   | 792.866   |
| NM_01817E | 3882.945  | 3432.739  | NM_002014 | 5387.43   | 8520.293  | AB033085  | 1916.238  | 2360.728  |
| AK025204  | 1421.586  | 1402.215  | NM_00253E | 2348.61   | 2687.435  | AF024703  | 9064.844  | 8013.125  |
| AL365406  | 768.348   | 633.709   | NM_01658E | 10797.66  | 13201.185 | NM_016531 | 598.725   | 512.447   |
| NM_01900C | 2252.217  | 2333.831  | AK026349  | 8262.505  | 8596.811  | NM_00359E | 8993.979  | 8071.141  |
| AF143330  | 1819.457  | 1937.775  | NM_01473E | 1147.768  | 1130.95   | NM_01438E | 47859.375 | 32841.352 |
| AK025178  | 8418.359  | 8862.549  | D12485    | 1111.675  | 1241.001  | NM_000244 | 5338.897  | 4359.045  |
| AF147359  | 1233.676  | 1060.324  | AK023204  | 4651.257  | 3889.669  | NM_01428E | 2666.966  | 1988.402  |
| NM_01483E | 11590.611 | 10356.391 | NM_00344E | 2518.186  | 2281.699  | AF026816  | 12970.757 | 8112.103  |
| AK001822  | 4998.141  | 3697.84   | NM_00247E | 2719.83   | 3103.959  | NM_00471E | 937.691   | 538.36    |
| AK026969  | 5831.331  | 3721.539  | D38163    | 561.751   | 562.142   | NM_01855E | 1463.952  | 719.405   |
| AF086287  | 3003.349  | 1834.402  | D28449    | 17601.805 | 12050.755 | NM_004704 | 2469.432  | 1726.123  |
| AF086409  | 1024.177  | 464.099   | AA460480  | 658.971   | 742.389   | NM_00545E | 3628.286  | 2480.385  |
| AK024268  | 3456.047  | 2038.75   | AI298884  | 15130.275 | 12610.981 | NM_01463E | 3426.072  | 2031.654  |
| AF086295  | 1426.394  | 877.038   | D87845    | 1391.782  | 1154.409  | NM_00197C | 34939.512 | 18487.521 |
| AF086344  | 3342.775  | 4894.411  | M83254    | 2127.449  | 1901.617  | NM_00681C | 12638.236 | 11240.286 |
| AF086424  | 1006.265  | 1923.389  | S56770    | 720.69    | 654.355   | NM_00196E | 424.591   | 431.474   |
| AL110130  | 1057.033  | 1487.45   | H58872    | 4341.097  | 4289.485  | NM_00411E | 3728.318  | 7575.63   |
| AF052116  | 913.706   | 1306.378  | J04543    | 1014.811  | 1249.053  | AK024508  | 4008.683  | 7303.299  |
| NM_018087 | 5698.848  | 11521.497 | AA456295  | 586.288   | 745.183   | AK027213  | 4471.605  | 6536.703  |
| AL360260  | 1052.824  | 1525.039  | BE733577  | 2164.103  | 2559.93   | AL096749  | 17050.178 | 21818.199 |
| AK023647  | 1281.82   | 1922.938  | NM_01864E | 1618.523  | 1261.182  | AK023620  | 1377.984  | 1667.113  |
| BC031635  | 1389.433  | 1523.547  | M30142    | 1144.85   | 1150.83   | AF086189  | 5852.474  | 7692.738  |
| AF085916  | 1057.042  | 1173.424  | NM_00501E | 770.492   | 781.7     | AL050055  | 3242.977  | 5204.536  |
| AL359598  | 1433.278  | 1684.193  | NM_01337E | 5636.571  | 5247.518  | NM_00500E | 11196.768 | 7947.82   |
| AF085980  | 855.311   | 1150.417  | NM_00108E | 1236.749  | 989.048   | NM_01459E | 7809.42   | 6748.325  |
| AF085927  | 2916.29   | 3228.51   | NM_006110 | 930.616   | 771.573   | NM_00670E | 7569.926  | 7339.527  |
| AF085954  | 16619.082 | 27158.338 | NM_01645E | 943.402   | 738.505   | NM_004037 | 2353.184  | 1914.712  |
| AL137337  | 1535.552  | 1766.902  | NM_017701 | 934.508   | 997.485   | NM_00511E | 1773.148  | 1474.167  |
| AL161969  | 1715.308  | 1543.38   | NM_01422E | 2123.778  | 2130.939  | NM_00276E | 4204.366  | 2259.547  |
| AL442095  | 3867.76   | 2638.419  | AF142567  | 1632.892  | 2235.13   | NM_00078E | 11067.894 | 9964.46   |
| AL137378  | 2117.565  | 1324.101  | NM_00620E | 28792.688 | 27704.068 | AF254088  | 1190.555  | 1010.65   |
| AL137609  | 37565.914 | 19817.447 | NM_01741C | 1070.809  | 1856.764  | NM_00142C | 1201.645  | 1164.724  |
| AL353946  | 5051.947  | 3003.009  | X99680    | 5514.386  | 9720.584  | NM_00024E | 1230.576  | 843.645   |
| X69081    | 3374.967  | 1826.58   | NM_00144E | 1174.001  | 2131.905  | AB031046  | 1320.65   | 888.338   |
| NM_005714 | 3526.765  | 2146.981  | NM_01607E | 6121.545  | 9097.666  | NM_00244E | 22241.395 | 16187.273 |

|           |           |           |           |           |           |           |           |           |
|-----------|-----------|-----------|-----------|-----------|-----------|-----------|-----------|-----------|
| AL359931  | 3622.555  | 2871.905  | NM_000748 | 8400.794  | 8233.525  | AK025388  | 1640.516  | 875.536   |
| AF086052  | 1326.515  | 1794.81   | NM_000048 | 2763.597  | 2790.537  | NM_006147 | 461.614   | 428.753   |
| AK000954  | 4474.689  | 5898.851  | AF104032  | 29050.303 | 29280.016 | AB006631  | 781.604   | 1147.878  |
| AK021922  | 524.898   | 1068.086  | U53531    | 628.406   | 458.188   | AF291181  | 797.535   | 969.919   |
| AK025800  | 9277.49   | 14831.025 | NM_004925 | 13298.617 | 19175.529 | NM_005741 | 3678.109  | 5971.189  |
| AK022333  | 1055.206  | 1578.234  | NM_003234 | 5612.559  | 3024.122  | NM_000964 | 2868.322  | 5962.316  |
| AK023294  | 896.89    | 875.121   | NM_004858 | 1705.038  | 1140.184  | BF343886  | 918.706   | 1621.725  |
| AF095854  | 2355.115  | 2645.45   | S78774    | 5406.181  | 3304.681  | NM_013263 | 7190.901  | 14615.4   |
| NM_014162 | 817.839   | 799.753   | NM_004922 | 3896.987  | 3703.958  | AL137407  | 4710.545  | 8188.88   |
| NM_014133 | 810.226   | 697.651   | NM_002871 | 1297.253  | 880.722   | NM_018178 | 1831.851  | 2430.433  |
| AF159093  | 6533.461  | 6667.446  | NM_001282 | 770.854   | 727.608   | AK025204  | 966.724   | 1116.012  |
| AF113679  | 1191.865  | 1150.538  | NM_016830 | 1551.686  | 1459.327  | AK027256  | 409.501   | 315.697   |
| AK021997  | 5824.738  | 5766.097  | NM_016103 | 1249.673  | 1364.551  | NM_019000 | 1027.051  | 1090.745  |
| AK022125  | 1719.121  | 1351.798  | AL133654  | 4166.494  | 4302.731  | AF143330  | 868.134   | 1065.838  |
| AK022244  | 10552.811 | 5047.841  | AL137262  | 1434.309  | 1695.623  | AK025178  | 3449.149  | 3230.125  |
| AK022381  | 7627.8    | 3570.245  | NM_020437 | 1901.473  | 2178.428  | AF147359  | 1154.768  | 929.564   |
| AK022012  | 1193.362  | 847.381   | NM_002014 | 11876.895 | 12751.659 | NM_014835 | 6429.915  | 6660.064  |
| AK022286  | 2419.729  | 1662.331  | NM_002538 | 5910.637  | 5230.029  | AK001822  | 4396.604  | 5255.114  |
| AK022613  | 7577.164  | 11177.932 | NM_016585 | 13410.332 | 13325.501 | AK026969  | 3000.409  | 2705.948  |
| AL359557  | 702.65    | 1609.197  | NM_006927 | 14512.209 | 10842.284 | AF086287  | 1407.447  | 970.094   |
| AK027257  | 861.25    | 1297.26   | NM_014601 | 2679.035  | 2043.422  | AF086409  | 557.662   | 370.891   |
| AK024582  | 1012.771  | 1469.649  | NM_017761 | 13970.972 | 14928.832 | AK024268  | 2257.594  | 1623.164  |
| AK022099  | 539.937   | 861.448   | AF237700  | 1040.719  | 309.514   | AF086295  | 932.399   | 915.282   |
| NM_014367 | 3353.054  | 3643.102  | NM_002860 | 5522.63   | 3636.218  | AF086344  | 1737.057  | 2727.192  |
| AK024901  | 737.488   | 1119.652  | NM_006169 | 3415.408  | 2604.259  | AF086424  | 667.473   | 899.113   |
| NM_019073 | 1371.251  | 1084.346  | NM_001218 | 712.874   | 623.928   | AL110130  | 534.052   | 1543.598  |
| NM_002365 | 1800.234  | 1103.86   | NM_014183 | 958.454   | 886.159   | AF052116  | 614.679   | 1435.033  |
| AF161441  | 21397.141 | 17860.455 | NM_018353 | 454.074   | 285.334   | NM_018087 | 3324.426  | 7402.985  |
| AL137474  | 1927.104  | 3385.654  | NM_003560 | 22857.762 | 18882.463 | AL360260  | 875.264   | 1436.338  |
| AK021572  | 1958.143  | 2946.183  | NM_014403 | 1547.9    | 2101.807  | AK023647  | 889.875   | 1642.041  |
| AK026757  | 1453.472  | 2174.236  | AL050100  | 1381.515  | 1609.343  | BC031635  | 955.521   | 1423.382  |
| AF119908  | 2593.093  | 2511.691  | NM_020139 | 2283.223  | 5232.52   | AF085916  | 648.941   | 1261.178  |
| U50539    | 860.036   | 701.289   | AL080207  | 645.903   | 958.238   | AF085950  | 365.579   | 876.964   |
| AK000653  | 19252.488 | 14433.864 | NM_017730 | 5248.669  | 4927.769  | AL359598  | 956.069   | 1351.067  |
| AK000908  | 2396.394  | 1481.304  | AB051826  | 785.113   | 1025.426  | AF085980  | 603.35    | 839.758   |
| X96660    | 4578.576  | 2827.387  | AK024964  | 405.113   | 579.024   | AF085927  | 1637.402  | 1947.623  |
| Z70696    | 1517.192  | 1136.13   | M20697    | 2824.554  | 3655.903  | AF085954  | 10597.58  | 19274.615 |
| NM_005792 | 15395.817 | 16303.529 | NM_015046 | 3938.145  | 3824.889  | AL137337  | 510.026   | 367.472   |
| AF048847  | 13176.069 | 23550.42  | AF231022  | 16901.51  | 15831.7   | AL161969  | 627.823   | 346.972   |
| L37718    | 64720.473 | 69962.172 | NM_016327 | 2792      | 2972.648  | AL442095  | 2137.57   | 1942.463  |
| AL137717  | 4576.156  | 6503.822  | NM_006322 | 1825.504  | 2339.77   | AL137378  | 1227.224  | 1959.391  |
| AF035297  | 3319.304  | 5098.136  | AB014593  | 1093.038  | 820.062   | AL137609  | 16693.527 | 9370.614  |
| NM_014039 | 4267.462  | 7411.069  | NM_016269 | 52488.66  | 41424.504 | AL353946  | 2495.595  | 1725.204  |
| S67154    | 7655.493  | 9009.79   | NM_006235 | 1875.573  | 1096.951  | X69081    | 3380      | 2073.143  |
| AK026181  | 4413.177  | 5175.329  | AK026353  | 1665.079  | 1224.895  | NM_005714 | 3461.563  | 2390.836  |
| AK021451  | 2563.465  | 1637.753  | L24123    | 3437.441  | 3269.11   | AL359931  | 3248.614  | 4376.856  |
| AK001971  | 1153.038  | 1220.318  | AF071111  | 877.353   | 1154.049  | AF086052  | 824.513   | 1518.002  |
| AF086468  | 3322.282  | 2478.112  | NM_015942 | 5956.476  | 4495.275  | AK000954  | 3469.622  | 6773.429  |
| AK027239  | 3208.567  | 2293.852  | NM_017907 | 6254.447  | 4797.459  | AF086099  | 746.248   | 1768.267  |
| AF005082  | 27820.521 | 20736.906 | NM_002044 | 7002.178  | 5655.413  | AK025800  | 2106.62   | 3162.589  |
| AL117595  | 4369.732  | 2841.588  | AJ272267  | 1437.818  | 1037.711  | AK022333  | 1071.272  | 1613.859  |
| AB028988  | 33459.27  | 23559.699 | NM_000673 | 617.01    | 524.9     | AK023294  | 675.713   | 671.461   |
| AK023072  | 2272.284  | 1742.268  | NM_002103 | 3668.677  | 3139.62   | NM_017808 | 383.856   | 729.07    |

|           |           |           |           |           |           |           |           |           |
|-----------|-----------|-----------|-----------|-----------|-----------|-----------|-----------|-----------|
| AF086105  | 6826.551  | 3750.095  | NM_006665 | 2959.269  | 2728.359  | AF095854  | 2072.074  | 2844.251  |
| AK026600  | 2673.848  | 1680.527  | NM_000270 | 6810.322  | 3552.298  | NM_014162 | 1120.273  | 2535.272  |
| AK021495  | 4558.541  | 3909.182  | U89277    | 2368.246  | 2623.796  | AF288405  | 407.495   | 414.719   |
| AF067777  | 60463.57  | 48359.605 | AK022332  | 2798.511  | 3344.599  | AF159093  | 4027.303  | 4453.745  |
| Y10697    | 1349.3    | 2760.894  | NM_006465 | 1402.391  | 2190.632  | AF113679  | 592.985   | 598.384   |
| AY007166  | 18617.17  | 25688.551 | NM_006769 | 3541.928  | 4041.752  | AK021997  | 2107.635  | 1461.983  |
| NM_004937 | 3291.325  | 5667.047  | NM_006992 | 586.176   | 787.268   | AK022125  | 737.367   | 695.607   |
| CY3Cy5    | 9118.71   | 482.624   | AL365370  | 1930.259  | 3547.78   | AK022244  | 6226.815  | 4690.498  |
| AI298884  | 25452.727 | 26156.814 | AK022204  | 638.415   | 582.449   | AK022381  | 3411.553  | 2214.165  |
| D87845    | 2362.664  | 2340.626  | AK001127  | 1293.718  | 1409.685  | AK022012  | 784.1     | 491.789   |
| M83254    | 3463.651  | 3525.348  | AF052176  | 551.418   | 822.267   | AK022149  | 346.018   | 274.697   |
| S56770    | 852.168   | 565.899   | NM_001412 | 5415.619  | 5120.338  | AK022286  | 1331.99   | 1317.595  |
| H58872    | 13452.51  | 13381.659 | AF095771  | 1605.131  | 1307.77   | AK022613  | 5786.826  | 10955.231 |
| J02938    | 831.246   | 637.869   | AF086205  | 1580.727  | 1103.681  | AL359557  | 711.143   | 2622.103  |
| J04543    | 10961.296 | 10185.605 | AF087967  | 551.046   | 506.466   | AK027257  | 880.269   | 1549.925  |
| S60415    | 613.277   | 585.197   | AF085985  | 791.328   | 711.244   | AK024582  | 574.394   | 1113.747  |
| AA456295  | 1112.858  | 1088.781  | AK025217  | 527.579   | 643.909   | AK024143  | 609.224   | 1538.03   |
| BE733577  | 3165.524  | 3032.367  | U03241    | 568.251   | 717.893   | AK022099  | 447.056   | 618.09    |
| AI817942  | 7321.875  | 7768.911  | NM_005117 | 1105.587  | 1125.662  | NM_014367 | 2601.078  | 3830.796  |
| BG762340  | 844.335   | 726.949   | AK021625  | 2365.233  | 1957.789  | AK024901  | 497.56    | 898.811   |
| NM_005456 | 1865.805  | 3225.208  | AK021679  | 887.875   | 721.546   | NM_019073 | 926.185   | 1785.857  |
| NM_006534 | 4593.06   | 7169.205  | AK001380  | 5263.962  | 2372.229  | AK025835  | 797.313   | 2389.071  |
| SR5       | 9009.002  | 11922.627 | AK024938  | 850.329   | 874.208   | NM_002365 | 1486.063  | 1442.613  |
| SR7       | 7569.853  | 55877.352 | AK025312  | 2353.822  | 1857.491  | AF161441  | 13163.688 | 10966.472 |
| SR9       | 26042.576 | 6009.109  | AK026493  | 937.452   | 907.763   | AL137474  | 2314.244  | 5424.752  |
| CY3Cy5    | 7651.355  | 618.276   | AK023963  | 6096.829  | 7101.75   | AL133023  | 599.127   | 1380.502  |
| NM_016453 | 1953.351  | 2511.615  | AK023810  | 1024.764  | 1518.233  | AK023484  | 496.192   | 1133.451  |
| NM_017701 | 2422.848  | 1908.791  | U80761    | 7250.044  | 8523.341  | AK021572  | 1349.47   | 2970.13   |
| NM_014226 | 3160.685  | 2722.68   | U61100    | 619.613   | 557.855   | AK026757  | 819.689   | 627.339   |
| AF142567  | 1961.874  | 1414.602  | AF130117  | 732.119   | 507.556   | AF119908  | 1431.493  | 2768.408  |
| NM_005621 | 5693.219  | 5265.364  | AK024125  | 882.724   | 707.064   | AK000653  | 13927.922 | 18368.004 |
| NM_006202 | 53468.551 | 44651.77  | AK024761  | 10870.283 | 7505.354  | AK000908  | 1451.667  | 1615.533  |
| NM_017410 | 1698.386  | 1468.202  | NM_014335 | 10112.887 | 4859.613  | X96660    | 2701.453  | 1733.914  |
| X99680    | 7514.284  | 5438.096  | AF086067  | 3584.798  | 2493.236  | Z70696    | 1180.911  | 1419.427  |
| NM_001448 | 1424.947  | 1494.319  | AK024967  | 5636.245  | 4315.049  | NM_005792 | 9151.009  | 13704.237 |
| NM_016072 | 8649.795  | 8917.206  | AK025102  | 1830.328  | 1320.4    | AF048847  | 7434.532  | 15507.702 |
| AK026349  | 11803.77  | 13848.095 | AF086562  | 1226.333  | 1195.685  | L37718    | 56122.469 | 80568.336 |
| NM_014733 | 1321.603  | 1788.618  | AY007113  | 1000.917  | 920.281   | AL137717  | 3440.538  | 6443.865  |
| D12485    | 1651.143  | 2126.022  | AF130083  | 13287.194 | 11831.816 | AF035297  | 2464.282  | 5896.086  |
| AK023204  | 4458.355  | 5505.631  | NM_002700 | 7607.4    | 6526.115  | NM_014035 | 3698.222  | 10691.25  |
| NM_002478 | 3808.563  | 3624.532  | AB002437  | 17833.789 | 9158.515  | S67154    | 4766.476  | 6289.507  |
| D38163    | 531.219   | 791.228   | AK023496  | 502.152   | 323.778   | AK026181  | 4126.406  | 4008.932  |
| S78774    | 9064.067  | 8352.853  | NM_006777 | 1438.92   | 1413.213  | AK021451  | 1527.576  | 1105.924  |
| NM_004922 | 7958.123  | 7384.88   | AK024969  | 6205.805  | 4397.607  | AK001971  | 1024.981  | 1527.846  |
| NM_002871 | 1595.8    | 1928.521  | AK022250  | 1043.106  | 700.194   | AF086468  | 2243.877  | 2925.777  |
| BE873653  | 52203.621 | 54895.789 | NM_012369 | 1068.383  | 800.22    | AK027239  | 1844.187  | 3073.8    |
| NM_006987 | 999.426   | 800.786   | AK025092  | 1035.229  | 772.276   | AF005082  | 18594.438 | 25067.445 |
| NM_001282 | 4382.592  | 4355.46   | Z83944    | 1092.561  | 606.587   | AL117595  | 3229.707  | 4575.327  |
| NM_016830 | 2850.486  | 2612.074  | AF085871  | 2178.732  | 1665.773  | AB028988  | 21909.764 | 21010.096 |
| U44105    | 826.216   | 739.998   | AF026564  | 1175.576  | 1350.904  | AK023072  | 1036.912  | 1470.652  |
| NM_016103 | 2250.917  | 2070.922  | NM_019063 | 16662.41  | 31799.648 | AF086105  | 7377.649  | 5173.867  |
| AL133654  | 5033.489  | 3565.612  | NM_014336 | 1310.293  | 1671.661  | AK026600  | 1504.471  | 1147.679  |
| AL137262  | 1276.204  | 900.476   | AB002308  | 1052.228  | 945.837   | AK021495  | 2172.09   | 1431.365  |

|           |           |           |           |           |           |           |           |           |
|-----------|-----------|-----------|-----------|-----------|-----------|-----------|-----------|-----------|
| NM_020437 | 1983.149  | 1931.336  | NM_012143 | 6161.17   | 4499.847  | AF067777  | 52587.773 | 64206.922 |
| NM_018643 | 1383.771  | 1434.685  | AF085892  | 2402.318  | 1443.634  | Y10697    | 1448.688  | 3670.834  |
| M30142    | 1873.552  | 1630.237  | AF075114  | 5661.307  | 4405.264  | AY007166  | 14934.913 | 27546.658 |
| NM_005018 | 712.89    | 869.298   | AK022218  | 56403.383 | 41246.699 | NM_004937 | 2621.467  | 5770.895  |
| NM_001085 | 851.732   | 1782.033  | NM_007112 | 6198.253  | 3609.882  | D87845    | 1261.272  | 4767.01   |
| NM_006110 | 956.379   | 1490.126  | S82075    | 1384.923  | 1212.438  | M83254    | 1754.45   | 4619.345  |
| NM_002860 | 9613.389  | 9788.967  | AK000660  | 12432.745 | 7251.118  | S56770    | 468.142   | 1302.77   |
| NM_006169 | 3988.72   | 4169.06   | NM_014711 | 3967.809  | 2633.519  | H58872    | 3122.631  | 1052.697  |
| NM_001218 | 1116.769  | 1519.569  | AK022015  | 1637.184  | 1795.882  | J04543    | 3966.245  | 2721.504  |
| NM_014183 | 1412.662  | 1379.841  | D17234    | 681.42    | 690.405   | S60415    | 435.991   | 265.648   |
| AB046780  | 16916.316 | 17785.768 | D63135    | 737.315   | 714.835   | AA456295  | 456.112   | 464.757   |
| NM_018353 | 2859.775  | 2693.354  | CY3Cy5    | 7007.539  | 369.453   | BE733577  | 1343.596  | 1442.655  |
| NM_003560 | 29228.553 | 28584.344 | BI821333  | 11531.728 | 16466.932 | AI817942  | 3558.686  | 3485.67   |
| NM_014403 | 1608.173  | 1447.153  | X51841    | 21461.932 | 52679.348 | BG762340  | 561.968   | 518.464   |
| AL050100  | 1452.766  | 1176.946  | AF051344  | 6325.063  | 7258.165  | NM_005456 | 878.372   | 833.536   |
| NM_020139 | 2217.06   | 1620.951  | BG506100  | 12275.502 | 11314.529 | NM_006534 | 1580.524  | 1507.724  |
| NM_000748 | 10289.566 | 9617.941  | X53586    | 4288.315  | 3383.823  | SR5       | 1667.776  | 3078.466  |
| NM_000048 | 2691.169  | 3450.313  | M17176    | 898.4     | 1000.655  | SR7       | 1611.124  | 16627.996 |
| NM_004925 | 21614.26  | 17724.871 | M26576    | 895.883   | 1527.735  | SR9       | 7403.967  | 1321.323  |
| NM_003234 | 3867.893  | 7279.693  | M32972    | 6216.53   | 9542.391  | CY3Cy5    | 1920.645  | 155.927   |
| NM_004858 | 1657.5    | 2782.804  | D11151    | 302.815   | 448.446   | NM_016453 | 919.503   | 2281.89   |
| AB051826  | 1534.85   | 1075.54   | D89854    | 1291.963  | 1168.814  | NM_017701 | 674.953   | 1917.209  |
| M20697    | 3077.586  | 3133.244  | M13207    | 630.509   | 617.102   | NM_014226 | 1164.129  | 2478.213  |
| NM_015046 | 2632.015  | 2803.451  | X14885    | 861.618   | 868.338   | AF142567  | 806.844   | 1064.369  |
| NM_002014 | 17254.441 | 16318.315 | M97815    | 838.972   | 993.696   | NM_005621 | 1575.441  | 1538.052  |
| NM_002538 | 6868.685  | 8440.59   | NM_006325 | 6341.505  | 6286.964  | NM_003391 | 334.4     | 151.538   |
| NM_006927 | 12917.459 | 17499.148 | SR2       | 59409.234 | 60531.031 | NM_017410 | 915.721   | 747.635   |
| NM_014601 | 1332.225  | 1716.192  | SR4       | 20987.805 | 16049.392 | X99680    | 1490.599  | 1275.975  |
| NM_017761 | 16208.15  | 16127.466 | SR6       | 3547.273  | 2855.905  | NM_001448 | 1029.041  | 1122.016  |
| NM_006928 | 695.022   | 672.378   | SR8       | 12043.479 | 27097.197 | NM_016072 | 4878.838  | 4090.637  |
| AF237700  | 631.849   | 675.524   | SR10      | 39526.203 | 10610.032 | NM_014733 | 686.189   | 872.548   |
| D28449    | 18426.094 | 24035.236 | CY3Cy5    | 7603.369  | 268.919   | D12485    | 688.673   | 666.523   |
| NM_003281 | 428.274   | 738.759   | AK025588  | 3147.186  | 4533.632  | AK023204  | 1412.715  | 1401.538  |
| AA460480  | 559.947   | 675.381   | NM_003188 | 4466.346  | 4723.269  | NM_003449 | 771.574   | 784.305   |
| AI298884  | 19923.795 | 21324.447 | U59431    | 5285.373  | 6410.648  | NM_002478 | 1008.987  | 1845.247  |
| D87845    | 1815.3    | 2092.789  | U49349    | 959.78    | 1162.182  | D28449    | 7069.703  | 9176.714  |
| M83254    | 1905.902  | 1779.025  | NM_020152 | 2470.573  | 2213.355  | S78774    | 3876.444  | 12090.89  |
| S56770    | 766.876   | 510.648   | NM_013404 | 1052.731  | 1263.274  | NM_004922 | 2553.161  | 4717.385  |
| H58872    | 12516.95  | 12803.351 | AF300648  | 1531.876  | 1589.827  | NM_002871 | 532.197   | 1004.052  |
| J04543    | 9438.746  | 10857.986 | NM_006157 | 919.014   | 585.125   | BE873653  | 33468.531 | 47934.031 |
| S60415    | 537.053   | 566.529   | NM_003966 | 1480.527  | 1624.145  | NM_006987 | 451.613   | 588.066   |
| AA456295  | 1044.58   | 1171.03   | AK024443  | 64611.473 | 67373.234 | NM_016103 | 1249.313  | 906.501   |
| BE733577  | 2598.094  | 2945.103  | X06710    | 2974.683  | 3035.834  | AL133654  | 2580.426  | 1609.174  |
| AI817942  | 5616.658  | 7873.335  | AK000896  | 2011.887  | 2691.781  | AL137262  | 892.807   | 930.206   |
| AA009484  | 602.556   | 1205.923  | NM_020384 | 3553.743  | 3415.59   | NM_020437 | 933.539   | 852.827   |
| NM_005456 | 998.128   | 1214.983  | NM_006058 | 15560.16  | 13582.146 | NM_018643 | 513.232   | 563.365   |
| NM_006534 | 4943.972  | 4654.801  | NM_006628 | 10714.807 | 9689.495  | M30142    | 483.014   | 579.656   |
| M30142    | 1442.019  | 1194.219  | AK026074  | 2018.696  | 2495.563  | NM_005018 | 344.676   | 341.115   |
| NM_005018 | 1216.487  | 984.59    | NM_003172 | 11372.276 | 10007.159 | NM_013378 | 3341.205  | 3223.08   |
| NM_013378 | 7003.393  | 5898.789  | NM_004809 | 3806.769  | 3401.918  | NM_001085 | 732.126   | 796.104   |
| NM_001085 | 1325.829  | 1713.843  | AA903183  | 2988.425  | 3112.759  | NM_006110 | 506.319   | 599.68    |
| NM_006110 | 1198.761  | 880.401   | NM_017817 | 2796.735  | 4452.943  | NM_002860 | 3573.295  | 9083.537  |
| NM_016453 | 1532.177  | 1538.899  | NM_018184 | 12496.216 | 15584.215 | NM_006169 | 1847.064  | 3298.909  |

|           |           |           |           |           |           |           |           |           |
|-----------|-----------|-----------|-----------|-----------|-----------|-----------|-----------|-----------|
| NM_017701 | 934.822   | 917.323   | AB046823  | 1656.131  | 2025.114  | NM_00121E | 305.038   | 758.065   |
| NM_01422E | 1858.236  | 1251.762  | NM_004929 | 945.384   | 1151.898  | NM_014183 | 496.058   | 790.422   |
| AF142567  | 1077.588  | 1009.007  | NM_004662 | 615.811   | 793.202   | AB046780  | 9692.313  | 17037.924 |
| NM_005621 | 5544.493  | 4823.088  | NM_016639 | 50850.313 | 56631.086 | NM_018353 | 1532.309  | 1383.409  |
| NM_006202 | 42985.676 | 43307.438 | U61739    | 10165.471 | 10586.471 | NM_00356C | 14800.696 | 8817.474  |
| NM_01741C | 1142.193  | 1331.251  | AJ132089  | 1153.195  | 1128.782  | NM_014403 | 865.969   | 382.159   |
| X99680    | 2581.697  | 3165.981  | U92819    | 12827.686 | 14609.867 | AL050100  | 826.622   | 593.091   |
| NM_00144E | 1237.904  | 1336.222  | AB020626  | 1130.072  | 1357.136  | NM_02013C | 1020.94   | 920.737   |
| NM_016072 | 9021.315  | 9082.289  | NM_002036 | 12824.991 | 14462.904 | AL080207  | 350.271   | 367.668   |
| AK026349  | 12806.24  | 14198.312 | NM_01240C | 1053.689  | 1503.663  | NM_00004E | 1112.428  | 1458.33   |
| NM_014733 | 1029.484  | 1286.698  | NM_005384 | 3827.033  | 4733.249  | NM_00492E | 6574.458  | 4079.072  |
| D12485    | 1480.31   | 1403.23   | AB013103  | 754.494   | 994.628   | NM_003234 | 1401.285  | 2463.02   |
| AK023204  | 4674.701  | 5553.32   | AF019225  | 3179.037  | 3722.851  | NM_00485E | 1041.685  | 966.694   |
| NM_00344C | 2938.079  | 3304.856  | Z36803    | 8535.422  | 10310.992 | AB051826  | 513.839   | 562.222   |
| NM_00247E | 2903.356  | 2340.506  | NM_013371 | 713.232   | 890.611   | M20697    | 1769.253  | 1494.352  |
| NM_003234 | 4263.697  | 5497.034  | NM_000707 | 6606.013  | 8520.753  | NM_01504E | 1489.209  | 1535.288  |
| NM_00485E | 1559.908  | 1941.176  | AF202092  | 16239.887 | 15613.1   | NM_01658E | 7074.498  | 6652.347  |
| S78774    | 4562.207  | 4620.859  | AB011139  | 2744.976  | 2430.036  | NM_006927 | 6144.417  | 7336.505  |
| NM_004922 | 5302.32   | 3865.563  | NM_006919 | 1413.73   | 2108.943  | NM_014601 | 852.605   | 1165.859  |
| NM_002871 | 1253.447  | 1638.109  | AK022625  | 13753.366 | 12578.878 | NM_017761 | 7566.718  | 6243.348  |
| NM_006987 | 897.311   | 787.831   | AK023084  | 6247.247  | 5432.234  | AF237700  | 379.824   | 151.84    |
| NM_001282 | 3915.947  | 4920.167  | BC012333  | 6489.642  | 6661.451  | D38163    | 336.739   | 1203.483  |
| NM_01683C | 3213.968  | 3897.589  | AF237952  | 6535.317  | 7114.57   | NM_004967 | 163.779   | 861.8     |
| U44105    | 697.455   | 601.33    | AL079287  | 3048.903  | 3563.211  | D28449    | 9462.532  | 32018.355 |
| NM_016103 | 1704.968  | 2472.007  | NM_014427 | 15287.285 | 15858.55  | NM_003281 | 288.744   | 812.654   |
| AL133654  | 4400.132  | 5659.749  | AB046769  | 5267.645  | 6334.726  | M83254    | 592.229   | 346.015   |
| AL137262  | 1027.184  | 1223.27   | NM_015922 | 9314.299  | 11491.666 | H58872    | 4635.516  | 4223.794  |
| NM_020437 | 1686.514  | 2182.911  | NM_020381 | 2738.615  | 3172.091  | J02938    | 501.233   | 523.427   |
| NM_018643 | 1235.104  | 953.344   | NM_002957 | 5812.632  | 5725.794  | J04543    | 4236.955  | 4043.94   |
| NM_006927 | 14753.846 | 16716.24  | NM_018106 | 10345.897 | 10411.535 | BE733577  | 1296.297  | 1426.176  |
| NM_014601 | 1465.856  | 1374.995  | NM_00372E | 4606.931  | 3394.25   | AI817942  | 1775.835  | 1384.306  |
| NM_017761 | 19685.846 | 14805.425 | BE899154  | 2469.942  | 2657.241  | AA009484  | 256.16    | 139.811   |
| NM_00692E | 593.535   | 786.405   | NM_004863 | 3110.511  | 3501.867  | NM_00545E | 655.093   | 580.918   |
| AF237700  | 884.745   | 538.916   | AK024573  | 3481.947  | 4278.254  | NM_006534 | 2420.529  | 2445.565  |
| NM_00286C | 6270.446  | 6333.212  | NM_002299 | 4127.76   | 3965.128  | M30142    | 645.919   | 862.584   |
| NM_00616C | 3106.889  | 3116.615  | D79998    | 5162.828  | 5033.988  | NM_00501E | 363.326   | 1131.267  |
| NM_00121E | 570.524   | 845.312   | NM_00038E | 1445.935  | 3028.766  | NM_016453 | 645.482   | 438.434   |
| NM_014183 | 733.07    | 1106.585  | AF301013  | 5092.783  | 3045.215  | NM_01422E | 464.455   | 244.274   |
| NM_018353 | 3137.172  | 2519.531  | U15688    | 2162.944  | 2663.47   | AF142567  | 489.396   | 606.516   |
| NM_016373 | 268.841   | 398.527   | NM_000483 | 1631.345  | 1720.242  | NM_005621 | 1425.172  | 1100.583  |
| NM_00356C | 31570.945 | 38959.531 | NM_001659 | 16475.02  | 16802.664 | NM_006202 | 7913.939  | 5625.991  |
| NM_014403 | 1672.954  | 1755.137  | AB020663  | 4504.365  | 4062.692  | NM_01741C | 735.271   | 613.734   |
| AL050100  | 1322.855  | 1599.655  | AF297866  | 6714.59   | 6931.761  | X99680    | 2550.203  | 2063.206  |
| NM_02013C | 2081.098  | 1721.58   | NM_002864 | 3069.357  | 2625.057  | NM_00144E | 601.282   | 453.82    |
| AL080207  | 639.865   | 436.942   | NM_01430E | 2587.635  | 2855.319  | NM_016072 | 4200.332  | 3011.604  |
| NM_00568E | 471.77    | 604.46    | NM_012123 | 10537.702 | 8230.587  | AK026349  | 6100.655  | 6638.602  |
| NM_00074E | 13084.221 | 10828.982 | U87972    | 3906.442  | 4193.101  | NM_014733 | 689.384   | 519.265   |
| NM_00004E | 3004.904  | 3703.814  | NM_01792E | 3060.561  | 2872.76   | D12485    | 622.101   | 688.677   |
| NM_00492E | 19942.975 | 10349.16  | NM_003171 | 3248.537  | 3412.774  | AK023204  | 1833.89   | 1771.383  |
| NM_00545E | 1603.708  | 1717.154  | NM_006437 | 10514.218 | 12223.853 | NM_00344C | 1326.175  | 1380.883  |
| NM_006534 | 4818.045  | 4316.367  | NM_01789C | 2853.849  | 2982.741  | NM_00247E | 1191.525  | 1290.379  |
| AB051826  | 894.241   | 644.074   | AK021654  | 2673.993  | 2695.594  | NM_00485E | 873.022   | 307.292   |
| AK024964  | 417.054   | 555.448   | NM_016481 | 2664.298  | 2043.434  | S78774    | 1311.565  | 1008.823  |



|           |           |           |           |           |           |           |          |          |
|-----------|-----------|-----------|-----------|-----------|-----------|-----------|----------|----------|
| M20697    | 3722.694  | 3864.815  | NM_003925 | 15429.733 | 17097.873 | NM_004922 | 1782.499 | 1253.923 |
| NM_015046 | 2977.514  | 3065.405  | Z15114    | 7767.089  | 8116.589  | NM_002871 | 682.496  | 830.837  |
| NM_002014 | 19117.082 | 15746.927 | AB040812  | 23553.316 | 26459.711 | BE873653  | 7749.154 | 5874.048 |
| NM_002538 | 9246.748  | 9491.098  | NM_017625 | 919.678   | 1131.317  | NM_001282 | 1591.872 | 1143.479 |
| AK026349  | 13616.124 | 12314.362 | NM_006285 | 7692.535  | 7653.764  | NM_016830 | 726.417  | 827.802  |
| NM_014733 | 1686.178  | 1462.762  | NM_001348 | 4174.005  | 4546.211  | NM_016103 | 521.188  | 671.475  |
| D12485    | 1590.301  | 1412.913  | NM_000215 | 5569.113  | 5957.446  | AL133654  | 1336.18  | 911.337  |
| AK023204  | 5123.021  | 5173.303  | NM_005084 | 6847.715  | 6303.562  | AL137262  | 567.758  | 477.988  |
| NM_003449 | 3124.925  | 3163.236  | NM_007283 | 5195.093  | 5609.141  | NM_020437 | 658.118  | 642.23   |
| NM_002478 | 3545.939  | 2937.71   | NM_006111 | 8821.409  | 7858.586  | NM_018643 | 606.445  | 588.134  |
| D38163    | 739.656   | 394.991   | AK026071  | 12020.931 | 11646.322 | NM_017761 | 7561.397 | 3797.162 |
| D28449    | 15568.767 | 20440.576 | AK026074  | 1210.235  | 1261.004  | NM_006928 | 305.073  | 164.454  |
| NM_003281 | 371.322   | 485.608   | NM_003172 | 8844.881  | 8689.545  | NM_002860 | 2129.013 | 1543.605 |
| AI298884  | 23303.66  | 30650.436 | NM_004809 | 4300.351  | 4157.722  | NM_006169 | 1205.828 | 1142.067 |
| D87845    | 2121.144  | 3400.918  | AA903183  | 685.402   | 813.589   | NM_001218 | 618.734  | 644.812  |
| M83254    | 1596.342  | 2274.99   | H41522    | 1673.026  | 1529.233  | NM_014183 | 805.486  | 665.293  |
| S56770    | 602.71    | 573.019   | AA460291  | 8228.077  | 9231.103  | AB046780  | 7859.268 | 5749.445 |
| H58872    | 10972.175 | 12588.221 | BI821333  | 13612.178 | 18878.031 | NM_018353 | 1299.89  | 900.799  |
| J04543    | 9641.638  | 7217.889  | X51841    | 23384.094 | 53598.957 | NM_014403 | 394.713  | 407.714  |
| S60415    | 677.236   | 314.098   | AF051344  | 6986.076  | 7186.809  | AL050100  | 348.509  | 234.403  |
| AA456295  | 1063.912  | 1045.331  | BG506100  | 14698.43  | 12725.53  | NM_020139 | 649.743  | 514.448  |
| BE733577  | 2595.92   | 2558.329  | X53586    | 3606.236  | 2600.428  | NM_000748 | 3113.12  | 3528.71  |
| AI817942  | 6284.676  | 6496.443  | M17176    | 1264.472  | 1162.263  | NM_000048 | 1412.906 | 2059.138 |
| NM_018643 | 1090.84   | 913.818   | M26576    | 943.899   | 838.941   | NM_004925 | 9262.652 | 6111.597 |
| M30142    | 1251.829  | 1057.124  | M32972    | 6018.933  | 6411.49   | NM_005456 | 549.309  | 355.822  |
| NM_005018 | 870.937   | 347.839   | D89854    | 1449.211  | 1295.595  | NM_006534 | 2289.395 | 760.225  |
| NM_013378 | 7282.561  | 5951.109  | M97815    | 757.806   | 1181.832  | AB051826  | 582.516  | 450.833  |
| NM_001085 | 994.302   | 1548.463  | NM_006325 | 6408.822  | 5691.989  | AK026289  | 669.086  | 557.72   |
| NM_006110 | 1284.044  | 1912.238  | AF085893  | 1042.498  | 1165.047  | M20697    | 1146.887 | 1189.204 |
| NM_016453 | 2000.521  | 3734.66   | NM_003201 | 5960.061  | 4473.745  | NM_015046 | 1327.406 | 1382.932 |
| NM_017701 | 912.415   | 927.902   | AB011139  | 1957.099  | 1497.163  | NM_002014 | 7680.977 | 5712.179 |
| NM_014226 | 1553.879  | 977.696   | NM_006919 | 1197.645  | 1004.2    | AK026349  | 5001.63  | 2257.115 |
| AF142567  | 1274.058  | 1010.661  | AK022625  | 9104.034  | 8919.428  | NM_014733 | 442.509  | 205.474  |
| NM_005621 | 5185.883  | 4199.189  | NM_005425 | 445.68    | 572.766   | D12485    | 560.612  | 391.841  |
| NM_006202 | 44283.516 | 32877.625 | AK023084  | 4775.083  | 4184.182  | AK023204  | 1960.591 | 1268.304 |
| NM_017410 | 1876.747  | 2211.124  | AK025588  | 4068.574  | 4028.876  | NM_003449 | 1161.336 | 774.969  |
| X99680    | 4222.241  | 4688.027  | NM_003188 | 5927.785  | 6175.889  | D28449    | 7205.094 | 9217.614 |
| NM_001448 | 1657.604  | 1895.653  | NM_007118 | 665.151   | 583.381   | AA460480  | 388.215  | 316.125  |
| NM_016072 | 8917.661  | 8863.604  | U59431    | 5253.031  | 6158.554  | AI298884  | 7265.41  | 5809.461 |
| NM_000748 | 10484.431 | 9928.345  | U49349    | 1030.401  | 1553.948  | D87845    | 720.315  | 814.918  |
| NM_000048 | 3542.003  | 5734.754  | NM_020152 | 2898.854  | 2716.672  | H58872    | 4539.363 | 4267.421 |
| U53531    | 429.728   | 732.942   | NM_013404 | 1443.584  | 1517.602  | J04543    | 3352.116 | 3072.417 |
| NM_004925 | 17005.762 | 10692.815 | AF300648  | 523.899   | 667.727   | AA456295  | 549.761  | 365.344  |
| NM_003234 | 3362.023  | 5044.164  | NM_003966 | 1033.806  | 877.2     | BE733577  | 1458.863 | 1751.404 |
| NM_004858 | 2183.787  | 2415.167  | X06710    | 2448.224  | 2786.215  | AI817942  | 2529.204 | 4022.553 |
| S78774    | 5671.807  | 5796.522  | AK000896  | 2812.861  | 2603.899  | BG762340  | 370.715  | 325.186  |
| NM_004922 | 4746.842  | 3323.811  | AV682011  | 661.304   | 578.573   | NM_005018 | 590.919  | 554.144  |
| NM_002871 | 1105.623  | 1407.749  | NM_020384 | 2906.388  | 2547.374  | NM_013378 | 1333.99  | 1450.361 |
| BE873653  | 36381.512 | 42606.59  | NM_006058 | 18324.232 | 13781.288 | NM_001085 | 601.186  | 516.587  |
| NM_001282 | 5433.44   | 6844.82   | NM_006628 | 8967.376  | 8057.428  | NM_006110 | 516.256  | 469.833  |
| NM_016830 | 4126.969  | 4905.761  | M97496    | 25279.188 | 29676.066 | NM_016453 | 431.306  | 488.96   |
| U44105    | 731.819   | 1053.636  | NM_000483 | 4893.402  | 4649.271  | NM_017701 | 312.961  | 508.801  |
| NM_016103 | 2105.315  | 1915.275  | NM_018448 | 6961.186  | 6486.766  | NM_014226 | 618.785  | 327.961  |

|           |           |           |           |           |           |           |           |           |
|-----------|-----------|-----------|-----------|-----------|-----------|-----------|-----------|-----------|
| AL133654  | 5648.631  | 4918.692  | NM_001659 | 17187.273 | 17571.793 | AF142567  | 421.404   | 371.935   |
| AL137262  | 1424.197  | 1254.572  | AB020663  | 4497.336  | 3832.631  | NM_005621 | 1848.917  | 1224.311  |
| NM_020437 | 1698.016  | 1537.132  | AF297866  | 3855.508  | 3499.446  | NM_006202 | 27211.146 | 19350.523 |
| NM_002014 | 20873.93  | 16632.369 | NM_002864 | 1131.345  | 857.267   | NM_01741C | 654.487   | 709.294   |
| NM_00253E | 8081.631  | 9526.689  | NM_017817 | 5493.392  | 5115.435  | X99680    | 3591.932  | 4454.846  |
| NM_006927 | 13361.874 | 13934.926 | NM_018184 | 15611.82  | 16448.467 | NM_00144E | 795.056   | 1850.045  |
| NM_014601 | 1145.493  | 975.495   | AB046823  | 1980.099  | 2482.347  | NM_016072 | 3242.931  | 2749.327  |
| NM_017761 | 13907.42  | 9027.601  | NM_004929 | 1358.174  | 1489.217  | NM_00074E | 4883.311  | 3137.687  |
| NM_00692E | 651.595   | 480.087   | NM_004662 | 1067.482  | 934.449   | NM_00004E | 1344.999  | 1260.419  |
| AF237700  | 811.948   | 595.417   | NM_016639 | 61170.473 | 57389.816 | AF104032  | 15935.651 | 12152.188 |
| NM_00286C | 7491.123  | 8958.929  | U61739    | 13791.169 | 15666.631 | NM_00492E | 8269.095  | 4136.577  |
| NM_00616E | 4789.589  | 5411.63   | AJ132089  | 1172.13   | 1390.904  | NM_003234 | 1706.148  | 2297.046  |
| NM_00121E | 766.943   | 1497.891  | U92819    | 12992.348 | 14598.374 | NM_00485E | 700.623   | 715.885   |
| AB046780  | 17683.176 | 17913.533 | AB020626  | 1112.308  | 1268.926  | S78774    | 722.731   | 1014.288  |
| NM_018353 | 2965.572  | 2151.232  | NM_002036 | 12086.246 | 15709.521 | NM_004922 | 1470.669  | 1370.013  |
| NM_00356C | 38038.793 | 40861.027 | NM_01240C | 826.705   | 1068.249  | BE873653  | 24586.287 | 18659.771 |
| NM_014403 | 2133.632  | 1421.665  | NM_005384 | 3893.771  | 3944.947  | NM_001282 | 1595.871  | 1292.948  |
| AL050100  | 1579.035  | 1431.662  | AB013103  | 1308.455  | 1232.608  | NM_01683C | 1505.005  | 2000.826  |
| NM_02013E | 1489.03   | 1122.441  | AF019225  | 3190.491  | 3419.067  | NM_016103 | 940.635   | 1151.985  |
| NM_01773C | 8805.799  | 5950.64   | Z36803    | 8755.69   | 9111.365  | AL133654  | 2465.772  | 2442.049  |
| AB051826  | 1443.657  | 1049.264  | NM_013371 | 2670.36   | 2714.357  | AL137262  | 721.854   | 1067.05   |
| M20697    | 3670.563  | 2499.953  | NM_000707 | 6371.06   | 8782.346  | NM_020437 | 865.941   | 1069.36   |
| NM_01504E | 2901.896  | 2202.496  | AF202092  | 18607.389 | 17336.857 | NM_002014 | 7009.932  | 3622.587  |
| AF231022  | 22571.459 | 15589.232 | NM_00021E | 6591.642  | 6976.572  | NM_00253E | 3328.258  | 2978.923  |
| NM_016327 | 3182.744  | 3090.236  | AK027148  | 7424.055  | 6855.374  | NM_01658E | 7263.548  | 5799.594  |
| NM_006322 | 2855.206  | 1867.434  | NM_005084 | 5742.506  | 5841.388  | NM_006927 | 6603.654  | 7234.831  |
| U66702    | 47960.16  | 36239.309 | NM_007283 | 759.453   | 952.045   | NM_00692E | 324.955   | 191.519   |
| AF216381  | 12892.761 | 10151.721 | NM_006111 | 7826.628  | 10419.262 | AF237700  | 417.64    | 313.833   |
| AB014593  | 1358.504  | 730.457   | AK026071  | 10457.658 | 11174.241 | NM_00616E | 1448.781  | 1828.119  |
| AK074832  | 27437.146 | 17782.41  | BC012333  | 12609.931 | 12560.385 | NM_00121E | 240.981   | 197.495   |
| NM_01626E | 66945.328 | 51480.449 | AF237952  | 8779.659  | 9323.771  | NM_014183 | 462.445   | 956.071   |
| NM_00623E | 2057.847  | 1459.178  | AL079287  | 4404.41   | 5362.237  | AB046780  | 10150.551 | 10821.288 |
| AK026353  | 1443.707  | 938.317   | NM_014427 | 17082.385 | 22548.209 | NM_018353 | 1362.91   | 1192.757  |
| L24123    | 3770.393  | 2796.703  | AB046769  | 6837.134  | 8829.279  | NM_00356C | 17432.287 | 20107.75  |
| AF071111  | 980.471   | 578.28    | NM_015922 | 11171.46  | 18005.529 | NM_014403 | 977.425   | 963.84    |
| NM_015942 | 7184.091  | 4116.738  | NM_020381 | 5396.552  | 6693.227  | AL050100  | 749.723   | 842.121   |
| NM_017907 | 9091.075  | 4583.622  | NM_002957 | 6820.202  | 8233.479  | NM_02013E | 1043.413  | 1320.808  |
| NM_002044 | 9994.567  | 6912.173  | NM_01810E | 10644.124 | 11204.873 | NM_01773C | 2690.075  | 2386.933  |
| AJ272267  | 1853.089  | 1530.057  | NM_00372E | 4158.68   | 3232.95   | M20697    | 1253.482  | 1501.169  |
| NM_000673 | 902.258   | 508.688   | BE899154  | 1767.737  | 1878.604  | NM_01504E | 1510.414  | 1769.182  |
| NM_002103 | 5207.305  | 2891.001  | NM_004863 | 2300.061  | 2839.984  | AF231022  | 8427.656  | 5688.143  |
| NM_00666E | 2962.784  | 2393.099  | AK024573  | 3000.543  | 3912.063  | NM_016327 | 1631.365  | 1294.867  |
| NM_00027C | 9788.069  | 8485.662  | NM_00229E | 3041.669  | 3352.149  | NM_006322 | 1336.994  | 1306.627  |
| U89277    | 2293.283  | 2381.03   | D79998    | 4729.532  | 4276.963  | U66702    | 36974.859 | 24168.332 |
| AK026670  | 810.368   | 1691.686  | AB032963  | 2095.46   | 2903.657  | AF216381  | 5113.463  | 6201.536  |
| NM_00287E | 3288.032  | 4369.32   | NM_00038E | 1684.863  | 1436.245  | AB014593  | 610.547   | 355.169   |
| AK022332  | 3683.412  | 4172.816  | AF301013  | 4990.9    | 3335.154  | AK074832  | 10011.188 | 7838.134  |
| NM_00646E | 2617.115  | 1972.878  | NM_018992 | 61127.246 | 62857.891 | NM_01626E | 39055.246 | 26897.105 |
| NM_00676E | 4067.307  | 4006.241  | U15688    | 1551.278  | 1374.112  | NM_00623E | 1155.924  | 1078.823  |
| NM_001189 | 1195.261  | 2436.861  | NM_00632E | 5210.266  | 5293.203  | AK026353  | 668.701   | 743.675   |
| NM_006992 | 859.202   | 801.84    | AF085893  | 1230.254  | 1537.984  | L24123    | 1803.166  | 1710.51   |
| AL365370  | 1951.202  | 1760.17   | NM_003102 | 813.52    | 775.76    | AF071111  | 405.665   | 268.047   |
| AK022204  | 853.031   | 337.065   | NM_01430E | 4516.21   | 4530.518  | NM_015942 | 3128.973  | 2484.584  |

|           |           |           |           |           |           |           |          |          |
|-----------|-----------|-----------|-----------|-----------|-----------|-----------|----------|----------|
| AK001127  | 1509.986  | 1334.55   | NM_012123 | 12923.893 | 12184.739 | NM_017907 | 3872.774 | 3588.64  |
| U79256    | 8409.064  | 8143.166  | U87972    | 6892.535  | 11390.361 | NM_002044 | 3686.317 | 2957.667 |
| AL832550  | 1288.69   | 1424.991  | NM_017925 | 3914.151  | 5686.44   | AJ272267  | 867.398  | 762.906  |
| AF086205  | 1853.711  | 998.389   | NM_003171 | 3841.449  | 3211.018  | NM_000673 | 442.886  | 244.143  |
| AK024169  | 917.554   | 657.512   | NM_006437 | 9865.491  | 11247.415 | NM_002103 | 1300.6   | 1109.884 |
| AF147395  | 2603.268  | 2394.588  | NM_017890 | 2893.429  | 3542.204  | NM_006665 | 1097.734 | 969.531  |
| AF085985  | 680.344   | 491.617   | AK021654  | 2125.872  | 2161.829  | NM_000270 | 2258.91  | 1721.722 |
| AK025217  | 730.47    | 821.933   | NM_016481 | 1921.969  | 1300.287  | U89277    | 904.083  | 906.013  |
| AL137342  | 2312.556  | 2977.852  | NM_003925 | 12437.702 | 13744.954 | AK026670  | 307.279  | 646.894  |
| AF075105  | 1858.761  | 2062.155  | Z15114    | 6693.925  | 6789.704  | NM_002876 | 1114.161 | 1313.18  |
| NM_005117 | 1071.536  | 884.762   | AB040812  | 22285.104 | 25053.771 | AK022332  | 1339.327 | 1137.768 |
| AJ007733  | 944.533   | 770.267   | NM_006285 | 6493.106  | 5323.501  | NM_006465 | 935.035  | 636.017  |
| AK021625  | 3505.491  | 2833.963  | NM_003656 | 49730.227 | 44411.23  | NM_006765 | 1660.961 | 1717.521 |
| AK021679  | 959.425   | 624.08    | NM_001348 | 2718.51   | 2957.221  | NM_001189 | 516.284  | 831.199  |
| AK001380  | 3596.098  | 2348.775  | NM_020384 | 2897.036  | 3122.442  | NM_006992 | 307.593  | 494.881  |
| AK025312  | 2357.997  | 1930.559  | NM_006058 | 13674.17  | 11124.407 | AF055009  | 2252.029 | 1883.552 |
| AK002042  | 709.758   | 580.441   | NM_006628 | 9560.039  | 8686.817  | AL365370  | 953.165  | 927.632  |
| AL049268  | 909.139   | 826.959   | M97496    | 22201.629 | 29194.553 | AK022204  | 344.301  | 320.033  |
| AK023963  | 8032.55   | 8296.052  | AK026074  | 1795.963  | 1745.956  | U79256    | 3089.131 | 2931.02  |
| AK022473  | 5371.758  | 4673.027  | NM_003172 | 11206.485 | 13464.114 | AL832550  | 375.692  | 351.81   |
| U80761    | 8881.682  | 9157.274  | NM_004809 | 4360.381  | 5643.207  | AK001731  | 1328.071 | 1186.12  |
| AF130117  | 902.211   | 657.786   | AA903183  | 995.134   | 1317.53   | AF052176  | 235.372  | 145.689  |
| AK024761  | 12282.925 | 11908.177 | H41522    | 2205.865  | 2943.732  | NM_001412 | 1531.137 | 1661.377 |
| M55536    | 2492.67   | 2552.8    | AA460291  | 11582.074 | 14101.896 | AF086205  | 627.934  | 574.033  |
| NM_014335 | 16186.694 | 15332.682 | BI821333  | 14460.061 | 17950.713 | AK024169  | 345.699  | 449.94   |
| AF086067  | 6005.074  | 5929.446  | X51841    | 19794.107 | 47940.551 | AF147395  | 998.981  | 1164.743 |
| AK024967  | 6829.926  | 6934.104  | AF051344  | 4215.516  | 4603.111  | AF085985  | 276.044  | 275.371  |
| AK025102  | 2368.53   | 2308.135  | BG506100  | 11243.011 | 9613.955  | AF075105  | 761.451  | 724.846  |
| AF086562  | 783.866   | 1105.645  | X53586    | 4132.294  | 3787.789  | NM_005117 | 407.895  | 463.922  |
| AY007113  | 1259.925  | 1090.114  | M17176    | 1109.245  | 1581.32   | AJ007733  | 326.205  | 308.859  |
| AF130083  | 10808.513 | 11260.124 | M26576    | 813.196   | 2068.187  | AK021625  | 1549.58  | 1169.625 |
| NM_002700 | 5548.09   | 4438.847  | M32972    | 3754.286  | 4214.452  | AK021679  | 360.082  | 292.164  |
| AB002437  | 17550.367 | 17902.256 | D89854    | 1518.922  | 1315.66   | AK001380  | 2088.517 | 1634.119 |
| NM_006777 | 1585.53   | 1239.339  | M13207    | 499.456   | 570.49    | AK025312  | 939.541  | 753.806  |
| AK024969  | 6017.167  | 6141.3    | M97815    | 714.182   | 877.498   | AK023963  | 3271.581 | 4071.759 |
| NM_012369 | 1883.337  | 1865.089  | AB013103  | 743.52    | 1464.381  | AK022473  | 2511.704 | 3498.667 |
| AK025092  | 2128.937  | 2267.183  | AF019225  | 2673.109  | 2712.239  | AK023810  | 629.149  | 747.955  |
| Z83944    | 1088.179  | 1141.065  | Z36803    | 7740.718  | 8906.131  | U80761    | 4786.021 | 5151.255 |
| AF085871  | 2565.525  | 2910.776  | NM_013371 | 726.025   | 934.052   | U61100    | 312.457  | 220.977  |
| AF026564  | 1945.736  | 1785.087  | NM_000707 | 4865.09   | 4913.462  | NM_018582 | 196.952  | 292.878  |
| X97301    | 2844.272  | 2525.648  | AF202092  | 15760.353 | 13752.271 | M21539    | 266.265  | 345.304  |
| NM_019063 | 41969.086 | 33857.652 | NM_003201 | 6757.222  | 4650.125  | AK024125  | 256.978  | 285.08   |
| NM_014336 | 1170.025  | 1085.891  | AB011139  | 2642.607  | 2327.941  | AK024761  | 4583.655 | 3911.198 |
| AB002308  | 1297.395  | 1239.1    | NM_006919 | 1320.56   | 1436.916  | NM_014335 | 3249.74  | 2059.535 |
| NM_012143 | 7103.495  | 7253.048  | AK022625  | 13731.64  | 15619.369 | AF086067  | 1926.704 | 1313.606 |
| AF085892  | 1920.733  | 1606.245  | NM_005425 | 1155.305  | 843.48    | AK024967  | 1697.192 | 1613.119 |
| AF075114  | 3308.59   | 3251.666  | AK023084  | 7924.426  | 8749.188  | AF086562  | 452.288  | 750.785  |
| AK022218  | 61224.809 | 49931.375 | AK025588  | 5235.586  | 5257.807  | AY007113  | 376.241  | 340.943  |
| NM_007112 | 7908.415  | 9155.769  | NM_003188 | 6539.19   | 5603.641  | AF130083  | 5702.967 | 5339.1   |
| S82075    | 3049.791  | 2541.413  | NM_007118 | 626.674   | 554.446   | NM_002700 | 3941.82  | 2550.013 |
| Z70766    | 667.692   | 707.155   | U59431    | 3940.37   | 4651.853  | AB002437  | 8243.062 | 5749.845 |
| AK000660  | 8735.345  | 10217.126 | U49349    | 1093.265  | 972.001   | AK023496  | 208.545  | 283.271  |
| NM_014711 | 3570.674  | 4162.909  | NM_020152 | 2558.127  | 2559.163  | NM_006777 | 609.682  | 499.216  |

|           |           |           |           |           |           |           |           |           |
|-----------|-----------|-----------|-----------|-----------|-----------|-----------|-----------|-----------|
| AK022015  | 1545.874  | 1973.353  | NM_013404 | 1212.167  | 1578.323  | AK024969  | 1962.738  | 1981.473  |
| D17234    | 808.853   | 604.68    | NM_003966 | 565.817   | 604.213   | AK025092  | 509.946   | 471.246   |
| D63135    | 1009.232  | 889.56    | AK024443  | 63082.211 | 64238.848 | AF085871  | 981.36    | 1615.943  |
| AB033083  | 2095.977  | 2329.778  | X06710    | 2098.168  | 1899.285  | NM_019063 | 18560.535 | 5709.738  |
| NM_01782E | 12968.311 | 15108.154 | AK000896  | 1587.904  | 1821.607  | NM_01433E | 497.316   | 490.986   |
| CY3Cy5    | 6403.145  | 482.706   | D79998    | 5133.646  | 6755.928  | AB002308  | 663.554   | 520.527   |
| H41522    | 1160.687  | 1468.432  | AB032963  | 3188.282  | 3801.729  | NM_003324 | 2109.139  | 512.892   |
| X51841    | 35678.965 | 34424.234 | NM_000385 | 1396.41   | 1651.527  | NM_012143 | 3547.164  | 3055.679  |
| AF051344  | 5475.524  | 6490.994  | AF301013  | 5782.588  | 5188.968  | AF085892  | 983.701   | 769.193   |
| BG506100  | 12425.483 | 19842.861 | U15688    | 1569.295  | 1623.898  | AF075114  | 1547.895  | 1146.48   |
| X53586    | 6760.313  | 9710.114  | NM_000483 | 5286.51   | 5606.531  | AK022218  | 41373.813 | 28673.174 |
| M17176    | 937.981   | 1163.004  | NM_01844E | 8419.389  | 8865.918  | NM_007112 | 1876.302  | 1969.259  |
| M26576    | 911.273   | 1085.033  | NM_001659 | 20320.381 | 23535.283 | S82075    | 561.983   | 627.084   |
| M32972    | 5013.763  | 6862.813  | AB020663  | 4817.45   | 4605.992  | AK000660  | 3004.957  | 4771.306  |
| D89854    | 1008.742  | 1807.623  | AF297866  | 4380.143  | 4062.216  | NM_014711 | 923.553   | 1317.385  |
| X14885    | 517.144   | 652.767   | NM_002864 | 2575.401  | 3069.017  | AK022015  | 478.962   | 742.375   |
| M97815    | 880.892   | 937.972   | NM_017817 | 5663.844  | 5041.99   | D63135    | 621.057   | 1255.102  |
| NM_00632E | 5130.115  | 7448.357  | NM_018184 | 16533.141 | 15203.999 | AB033083  | 1208.023  | 2069.469  |
| SR2       | 54175.484 | 59947.172 | AB046823  | 1506.057  | 1721.578  | NM_01782E | 5565.953  | 6871.451  |
| SR4       | 17401.307 | 24172.586 | NM_004929 | 1177.248  | 1297.87   | CY3Cy5    | 1822.997  | 157.066   |
| SR6       | 2481.777  | 3282.691  | NM_004662 | 737.31    | 669.459   | H41522    | 926.725   | 515.312   |
| SR8       | 9716.519  | 41721.809 | U61739    | 11481.721 | 11415.658 | AA460291  | 4575.208  | 2481.25   |
| SR10      | 37160.848 | 19774.158 | AJ132089  | 1235.133  | 1243.868  | BI821333  | 11355.311 | 6991.092  |
| CY3Cy5    | 7940.512  | 630.605   | U92819    | 12127.514 | 15377.218 | X51841    | 43037.793 | 12350.87  |
| AK025588  | 3057.956  | 3457.499  | AB020626  | 1019.207  | 1276.3    | AF051344  | 3143.85   | 2144.135  |
| NM_00318E | 5810.433  | 7467.533  | NM_002036 | 10506.065 | 13505.156 | BG506100  | 6523.893  | 6590.953  |
| NM_007118 | 526.297   | 933.011   | NM_005384 | 2704.503  | 2702.332  | X53586    | 2258.859  | 2717.146  |
| U59431    | 3032.351  | 2966.434  | Z15114    | 6150.591  | 6600.426  | M17176    | 580.429   | 537.492   |
| U49349    | 1361.353  | 1635.905  | AB040812  | 23921.777 | 25505.547 | M32972    | 2343.127  | 2477.023  |
| NM_020152 | 2413.324  | 3618.703  | NM_017625 | 580.167   | 669.027   | D11151    | 340.494   | 617.407   |
| NM_013404 | 1231.523  | 1498.409  | NM_006285 | 6872.745  | 7159.159  | D89854    | 536.752   | 843.323   |
| NM_003966 | 634.325   | 1120.935  | NM_00134E | 2317.845  | 2624.097  | M13207    | 489.399   | 498.422   |
| AK000896  | 1542.06   | 2125.666  | NM_000215 | 6693.523  | 8175.48   | X14885    | 698.279   | 667.266   |
| AV682011  | 348.481   | 487.434   | AK027148  | 9317.261  | 9295.528  | M97815    | 868.593   | 949.482   |
| NM_003872 | 465.165   | 524.594   | NM_005084 | 6920.634  | 7635.28   | NM_00632E | 4054.246  | 6225.729  |
| NM_020384 | 2783.712  | 3005.734  | NM_007283 | 698.72    | 855.394   | SR2       | 53098.398 | 66200.414 |
| NM_00605E | 11852.328 | 17961.832 | NM_006111 | 7243.083  | 8961.697  | SR6       | 2143.919  | 3724.169  |
| NM_00662E | 12173.486 | 14309.267 | AK026071  | 14967.646 | 14997.478 | SR8       | 7333.061  | 36743.602 |
| AK026074  | 1352.326  | 2168.904  | BC012333  | 13134.907 | 11483.471 | SR10      | 28802.721 | 14430.828 |
| NM_003172 | 10569.324 | 13901.641 | AF237952  | 8708.12   | 8797.823  | CY3Cy5    | 2740.954  | 175.213   |
| NM_00480E | 2338.302  | 4063.78   | AL079287  | 4569.061  | 4615.749  | AK025588  | 1059.521  | 567.547   |
| AA903183  | 538.381   | 681.562   | NM_014427 | 14003.821 | 13772.407 | NM_00318E | 2216.28   | 1522.228  |
| NM_017817 | 5127.087  | 6182.603  | AB046769  | 4548.438  | 4134.095  | U59431    | 2415.669  | 1339.679  |
| NM_018184 | 13758.389 | 18598.596 | NM_020381 | 3526.496  | 4087.454  | U49349    | 844.273   | 723.909   |
| AB046823  | 1573.23   | 1746.784  | NM_002957 | 4978.502  | 4706.22   | NM_020152 | 1290.553  | 1157.872  |
| NM_00492E | 1208.054  | 1288.083  | NM_01810E | 11665.292 | 16973.428 | NM_013404 | 808.661   | 604.167   |
| NM_004662 | 929.89    | 1291.852  | NM_003725 | 2065.629  | 4279.826  | NM_003966 | 802.47    | 1166.643  |
| NM_01663E | 45042.195 | 52331.66  | BE899154  | 2532.101  | 3451.013  | AK024443  | 55444.367 | 64883.426 |
| U61739    | 6438.445  | 8833.736  | NM_004863 | 2097.713  | 3127.922  | X06710    | 1264.639  | 2394.349  |
| AJ132089  | 1409.774  | 1704.62   | AK024573  | 2057.783  | 2461.282  | AK000896  | 1304.567  | 1301.943  |
| U92819    | 15877.508 | 21881.326 | NM_00229E | 2525.502  | 2164      | NM_003872 | 822.081   | 1618.465  |
| AB020626  | 893.751   | 1432.082  | NM_003830 | 957.523   | 777.434   | NM_020384 | 2440.595  | 3229.586  |
| NM_00203E | 8390.32   | 9740.094  | NM_000842 | 653.042   | 848.881   | NM_00605E | 11121.317 | 17146.945 |

|           |           |           |           |           |           |           |           |           |
|-----------|-----------|-----------|-----------|-----------|-----------|-----------|-----------|-----------|
| NM_01240C | 630.984   | 998.418   | NM_015642 | 1370.906  | 1155.477  | NM_00662E | 7697.517  | 10603.656 |
| AB013103  | 1010.263  | 2170.216  | NM_016222 | 5521.243  | 8384.345  | AK026074  | 1348.641  | 2218.048  |
| AF019225  | 2517.785  | 4618.047  | AB037823  | 3730.42   | 4556.882  | NM_003172 | 8189.803  | 12027.032 |
| Z36803    | 7067.046  | 6654.958  | NM_01538C | 18428.162 | 21806.779 | NM_00480E | 2432.846  | 2992.319  |
| NM_013371 | 402.035   | 708.271   | BE254485  | 2624.639  | 3005.461  | AA903183  | 437.136   | 633.088   |
| NM_000707 | 5934.36   | 6192.381  | NM_002732 | 888.507   | 1158.945  | NM_017817 | 2633.248  | 2336.505  |
| AF202092  | 16695     | 22986.969 | AF085893  | 1182.138  | 1464.295  | NM_018184 | 6065.3    | 5454.017  |
| AB011139  | 1660.617  | 2305.382  | NM_003102 | 997.468   | 594.166   | AB046823  | 716.853   | 409.98    |
| NM_00691E | 827.212   | 1017.85   | NM_01430E | 4482.903  | 4518.487  | NM_00492E | 852.652   | 463.845   |
| AK022625  | 2763.809  | 2995.707  | NM_012123 | 9696.457  | 6248.386  | NM_004662 | 615.006   | 415.613   |
| AK023084  | 4935.862  | 5100.003  | U87972    | 4768.057  | 3840.029  | NM_01663E | 34105.699 | 26653.447 |
| BC012333  | 12030.543 | 12829.119 | NM_01792E | 2544.208  | 2281.174  | U61739    | 9654.195  | 7414.313  |
| AF237952  | 8606.779  | 9844.666  | NM_003171 | 3438.919  | 3184.12   | AJ132089  | 852.239   | 719.405   |
| AL079287  | 4835.339  | 6150.41   | NM_006437 | 8770.665  | 10689.756 | U92819    | 8357.577  | 8029.015  |
| NM_014427 | 16190.15  | 16509.713 | NM_01789C | 3347.629  | 3933.039  | AB020626  | 1137.294  | 1669.334  |
| AB046769  | 5408.357  | 4938.215  | AK021654  | 2789.379  | 2549.295  | NM_00203E | 6630.304  | 9786.642  |
| NM_015922 | 12804.084 | 14138.94  | NM_016481 | 2097.061  | 1187.48   | NM_01240C | 447.678   | 819.011   |
| NM_020381 | 2823.128  | 3967.742  | NM_00392E | 11615.109 | 11164.095 | NM_005384 | 3234.583  | 2962.113  |
| NM_002957 | 4527.442  | 4984.194  | AF217974  | 5943.801  | 5925.224  | NM_00685C | 482.599   | 545.82    |
| NM_01810E | 12079.205 | 17888.791 | NM_00328E | 1022.854  | 564.487   | AB013103  | 638.474   | 1262.488  |
| NM_00372E | 3684.26   | 7603.293  | NM_00088E | 4346.907  | 4451.141  | AF019225  | 2187.104  | 2329.895  |
| BE899154  | 2431.004  | 3403.057  | NM_00356E | 4053.037  | 5496.776  | Z36803    | 6162.792  | 6021.365  |
| NM_00486E | 3360.531  | 4317.266  | NM_004841 | 2795.354  | 2541.559  | NM_000707 | 5647.948  | 6536.916  |
| AK024573  | 4139.255  | 4577.099  | NM_004114 | 442.144   | 845.357   | AF202092  | 15208.427 | 21377.4   |
| NM_00229E | 2760.288  | 2772.844  | NM_01844C | 15040.423 | 14526.315 | NM_003201 | 2089.343  | 3605.738  |
| D79998    | 3915.219  | 4348.045  | AK025470  | 1779.597  | 1402.252  | AB011139  | 1331.194  | 2586.972  |
| AB032963  | 3951.758  | 4644.519  | M35410    | 9839.662  | 13676.887 | NM_00691E | 1236.866  | 2536.737  |
| NM_00038E | 1560.727  | 2240.311  | AB023227  | 1661.853  | 1380.104  | AK022625  | 8540.877  | 11881.818 |
| AF301013  | 4738.917  | 6778.562  | NM_00577E | 22232.43  | 23885.373 | NM_00542E | 458.143   | 603.962   |
| U15688    | 1830.313  | 1206.453  | AK023071  | 5054.215  | 4356.798  | AK023084  | 3453.549  | 4493.796  |
| NM_00048E | 5525.93   | 4013.532  | NM_004041 | 1686.7    | 1526.34   | BC012333  | 6407.412  | 4142.798  |
| NM_01844E | 9585.335  | 9100.054  | AK022888  | 3185.577  | 3297.994  | AF237952  | 4589.848  | 3337.159  |
| NM_00165E | 17263.984 | 12473.194 | AK024484  | 6515.532  | 5831.915  | AL079287  | 2293.368  | 1739.92   |
| AB020663  | 3868.757  | 3945.994  | NM_002632 | 974.316   | 487.454   | NM_014427 | 8583.325  | 6511.054  |
| AF297866  | 1843.613  | 1697.134  | NM_00195E | 57851.645 | 59889.109 | AB046769  | 3784.717  | 2719.478  |
| NM_002864 | 2528.266  | 3209.254  | NM_00140E | 1059.497  | 1095.668  | NM_015922 | 8485.985  | 7010.203  |
| NM_01430E | 3814.14   | 4159.774  | NM_002292 | 2237.73   | 2207.169  | NM_020381 | 2760.054  | 2952.808  |
| NM_01212E | 10311.822 | 13466.435 | NM_00016E | 2364.768  | 1540.228  | NM_002957 | 3188.532  | 2919.427  |
| U87972    | 4150.329  | 4812.947  | AL570170  | 3409.772  | 3292.247  | NM_01810E | 8333.396  | 9857.218  |
| NM_01792E | 3722.698  | 5638.371  | D56495    | 1140.349  | 863.818   | NM_00372E | 2348.702  | 4068.557  |
| NM_003171 | 4171.906  | 5704.103  | NM_00661E | 8115.508  | 7225.712  | BE899154  | 1329.896  | 2098.921  |
| NM_006437 | 14687.217 | 18370.74  | NM_00463E | 4457.831  | 4724.484  | NM_00486E | 1419.359  | 1754.342  |
| NM_01789C | 3143.969  | 3965.816  | L40027    | 4802.896  | 6875.325  | AK024573  | 2444.083  | 2581.669  |
| AK021654  | 2961.144  | 2957.444  | NM_00371E | 43927.379 | 48915.68  | NM_00229E | 1863.37   | 2286.13   |
| NM_016481 | 1791.587  | 2492.673  | NM_007062 | 1501.595  | 1038.037  | D79998    | 2763.88   | 2973.675  |
| NM_00392E | 14552.626 | 13769.031 | NM_01418C | 40310.047 | 35093.02  | AB032963  | 1089.569  | 1003.067  |
| Z15114    | 6156.665  | 4406.302  | NM_01770E | 2504.459  | 2413.069  | NM_00038E | 1181.652  | 1457.066  |
| AB040812  | 27850.25  | 23498.631 | AF334406  | 1806.855  | 1489.385  | AF301013  | 2521.365  | 4136.795  |
| NM_01762E | 796.531   | 747.968   | NM_01599E | 9397.556  | 7934.368  | U15688    | 1601.36   | 2569.88   |
| NM_00628E | 10270.231 | 10231.889 | NM_003804 | 13300.149 | 10610.177 | NM_00048E | 3700.169  | 5728.14   |
| NM_00134E | 4657.279  | 4081.399  | NM_01845E | 12057.427 | 8749.906  | NM_01844E | 4167.044  | 7341.809  |
| NM_00021E | 9613.952  | 9347.421  | NM_00470E | 62920.297 | 61531.082 | NM_00165E | 14230.106 | 22778.756 |
| AK027148  | 8532.157  | 7261.644  | NM_016001 | 14971.405 | 9453.381  | AB020663  | 3133.457  | 6058.241  |

|           |           |           |           |           |           |           |           |           |
|-----------|-----------|-----------|-----------|-----------|-----------|-----------|-----------|-----------|
| NM_005084 | 7658.173  | 5893.885  | NM_016108 | 8179.787  | 6959.224  | AF297866  | 2114.185  | 3476.405  |
| NM_006111 | 8485.726  | 7261.653  | AL137722  | 684.478   | 597.23    | NM_002864 | 1981.582  | 2706.799  |
| AK026071  | 10614.026 | 8328.669  | S49432    | 1583.637  | 1346.819  | NM_014305 | 2009.882  | 1356.649  |
| AK026074  | 1656.132  | 1155.773  | D86984    | 1718.836  | 1012.371  | NM_012123 | 6223.626  | 4968.556  |
| NM_003172 | 11122.598 | 9949.228  | AK026904  | 2816.028  | 3495.734  | U87972    | 4060.479  | 3126.173  |
| NM_004809 | 2348.591  | 1979.779  | NM_001910 | 2427.101  | 2225.112  | NM_017925 | 2021.428  | 2586.726  |
| H41522    | 1078.654  | 757.598   | NM_001909 | 7808.316  | 7600.166  | NM_003171 | 2146.8    | 2466.737  |
| AA460291  | 8873.882  | 6265.973  | NM_012198 | 3440.381  | 3085.3    | NM_006437 | 7009.235  | 8417.806  |
| BI821333  | 18646.824 | 14442.619 | NM_003368 | 7600.421  | 5848.853  | NM_017890 | 1668.442  | 2219.824  |
| X51841    | 31779.191 | 21343.441 | AB040886  | 1108.649  | 1693.398  | AK021654  | 1188.447  | 1338.57   |
| AF051344  | 4191.049  | 3360.906  | AB029020  | 4007.797  | 5530.984  | NM_016481 | 990.195   | 1885.359  |
| BG506100  | 12986.288 | 11198.347 | AK022759  | 3465.462  | 2813.067  | NM_003925 | 9951.274  | 11120.815 |
| X53586    | 6420.326  | 5851.193  | NM_012333 | 10689.989 | 9431.27   | Z15114    | 3870.24   | 3529.822  |
| M17176    | 980.157   | 706.599   | AF217798  | 3362.104  | 3298.696  | AB040812  | 12121.608 | 11484.611 |
| M26576    | 700.463   | 504.295   | AF161472  | 6608.97   | 5287.345  | NM_017625 | 706.662   | 841.162   |
| M32972    | 3475.867  | 2701.183  | AL133642  | 20824.303 | 19205.082 | NM_006285 | 7000.117  | 8986.441  |
| D89854    | 1430.159  | 1161.959  | AB011154  | 1567.63   | 1709.436  | NM_001348 | 2840.834  | 4607.007  |
| M97815    | 1073.385  | 792.786   | AF124432  | 3825.396  | 4199.135  | NM_000215 | 3840.184  | 5582.941  |
| NM_006325 | 6314.179  | 5961.289  | NM_006330 | 11173.437 | 7480.07   | AK027148  | 5633.984  | 10313.524 |
| AF085893  | 1009.95   | 408.356   | NM_015873 | 4265.577  | 4533.066  | NM_005084 | 5480.272  | 11144.505 |
| NM_003201 | 5083.928  | 5696.444  | NM_000377 | 5906.403  | 4600.148  | NM_007283 | 486.18    | 748.212   |
| AB011139  | 2079      | 1732.532  | NM_006818 | 1085.49   | 753.002   | NM_006111 | 5285.104  | 6762.364  |
| AK022625  | 2851.95   | 2382.557  | NM_016823 | 2086.781  | 1822.234  | AK026071  | 7651.085  | 10273.468 |
| AK023084  | 4930.866  | 3473.802  | NM_003120 | 1780.529  | 1650.101  | AK026074  | 674.084   | 443.481   |
| AK025588  | 2365.581  | 1785.27   | X52360    | 3397.535  | 3057.114  | NM_003172 | 5682.151  | 3140.476  |
| NM_003188 | 3563.714  | 3329.479  | NM_002636 | 16765.031 | 16256.804 | NM_004809 | 1504.184  | 907.018   |
| U59431    | 1872.842  | 1095.86   | NM_016494 | 28521.035 | 29529.207 | AA903183  | 471.74    | 363.242   |
| U49349    | 978.903   | 716.437   | U09410    | 3614.911  | 4143.059  | H41522    | 1307.866  | 973.381   |
| NM_020152 | 2178.269  | 1940.323  | NM_020229 | 1066.125  | 957.82    | AA460291  | 5444.844  | 3700.619  |
| NM_013404 | 1292.839  | 780.35    | NM_001186 | 4664.955  | 4331.479  | BI821333  | 11629.959 | 8083.747  |
| X06710    | 3033.252  | 2864.415  | NM_004502 | 6773.432  | 6325.977  | X51841    | 47560.047 | 19320.074 |
| AK000896  | 2356.833  | 2355.68   | AF000560  | 8691.875  | 8688.931  | AF051344  | 2965.476  | 3281.623  |
| AV682011  | 396.976   | 528.924   | NM_013282 | 6086.212  | 6123.268  | BG506100  | 5648.79   | 6999.064  |
| NM_020384 | 3484.694  | 3078.362  | NM_005777 | 6781.214  | 6075.918  | X53586    | 2406.257  | 2808.799  |
| NM_006058 | 14194.075 | 19171.012 | NM_012345 | 4458.776  | 4463.769  | M17176    | 747.788   | 607.608   |
| NM_006628 | 16564.557 | 13824.292 | NM_005826 | 19971.596 | 23656.539 | M26576    | 359.86    | 402.922   |
| M97496    | 30682.285 | 27581.404 | NM_004592 | 2555.296  | 2183.466  | M32972    | 1958.686  | 1756.588  |
| NM_000483 | 4235.24   | 2863.971  | NM_015001 | 11187.793 | 9703.514  | D89854    | 710.677   | 893.226   |
| NM_018448 | 9113.084  | 7784.147  | NM_019027 | 1447.811  | 1223.505  | M13207    | 536.373   | 801.914   |
| NM_001659 | 15782.52  | 10867.45  | NM_016107 | 3022.98   | 2378.341  | X14885    | 558.255   | 592.443   |
| AB020663  | 3903.862  | 3885.433  | NM_002567 | 24575.111 | 22010.422 | M97815    | 1241.54   | 1506.609  |
| AF297866  | 2278.848  | 2393.054  | NM_001404 | 3413.967  | 2688.302  | NM_006325 | 5563.264  | 10582.635 |
| NM_002864 | 2412.809  | 2467.692  | NM_001605 | 12885.611 | 15552.188 | NM_003201 | 2880.311  | 2319.563  |
| NM_017817 | 5055.21   | 4070.316  | AF225422  | 8604.017  | 8080.89   | AB011139  | 951.282   | 644.859   |
| NM_018184 | 14297.362 | 12649.357 | AB040960  | 8463.564  | 6034.45   | NM_006919 | 605.879   | 495.197   |
| AB046823  | 908.951   | 906.052   | NM_015946 | 12166.267 | 5653.964  | AK022625  | 5384.611  | 3499.116  |
| NM_004929 | 1111.402  | 722.278   | NM_006303 | 6429.824  | 6802.23   | NM_005425 | 487.65    | 384.138   |
| NM_004662 | 670.775   | 729.38    | AL080059  | 2786.845  | 3554.843  | AK023084  | 3801.637  | 2623.28   |
| NM_016639 | 42159.773 | 46929.98  | AL080219  | 2629.893  | 3641.269  | AK025588  | 2146.254  | 1523.214  |
| U61739    | 6952.061  | 8484.058  | AK026709  | 1300.882  | 1190.993  | NM_003188 | 3165.517  | 2502.288  |
| AJ132089  | 1479.94   | 2031.742  | AK024165  | 1383.221  | 1361.783  | NM_007118 | 432.94    | 711.782   |
| U92819    | 18582.102 | 21172.563 | NM_003001 | 1445.717  | 1834.617  | U59431    | 2047.884  | 1827.942  |
| AB020626  | 1448.876  | 1394.548  | NM_001985 | 4711.153  | 4764.371  | NM_020152 | 1018.408  | 1407.518  |

|           |           |           |           |           |           |           |           |           |
|-----------|-----------|-----------|-----------|-----------|-----------|-----------|-----------|-----------|
| NM_002036 | 10720.597 | 13000.17  | NM_000102 | 1105.328  | 1288.188  | NM_013404 | 736.986   | 951.047   |
| NM_005384 | 5979.835  | 6868.582  | NM_002490 | 24590.836 | 22913.084 | NM_006157 | 460.165   | 710.388   |
| NM_006850 | 404.009   | 1009.545  | BE563532  | 1721.462  | 1901.609  | NM_003966 | 805.923   | 755.409   |
| AB013103  | 1343.561  | 1464.476  | NM_001916 | 4866.659  | 6686.509  | AK024443  | 57779.27  | 64090.355 |
| AF019225  | 3139.608  | 4040.781  | NM_002491 | 7286.062  | 1845.107  | X06710    | 1472.448  | 1752.232  |
| Z36803    | 8819.482  | 8269.294  | NM_015425 | 2476.587  | 2844.597  | AK000896  | 1772.146  | 1687.263  |
| NM_013371 | 814.122   | 1040.727  | NM_015153 | 6059.181  | 5406.844  | AV682011  | 846.523   | 624.968   |
| NM_000707 | 7102.6    | 8681.533  | AB032966  | 20856.604 | 21258.545 | NM_003872 | 912.552   | 1525.264  |
| AF202092  | 21464.537 | 30865.258 | M26747    | 5057.241  | 3841.461  | NM_020384 | 2574.049  | 4521.891  |
| NM_000215 | 7786.654  | 6513.424  | NM_014820 | 6396.333  | 4578.057  | NM_006058 | 11234.686 | 18187.77  |
| AK027148  | 6756.806  | 5379.781  | NM_005035 | 1540.996  | 1269.793  | NM_006628 | 7205.781  | 12050.771 |
| NM_005084 | 7065.856  | 5973.83   | NM_019014 | 3713.404  | 2923.251  | M97496    | 23424.975 | 20913.9   |
| NM_007283 | 883.335   | 576.76    | NM_002097 | 25491.523 | 28555.914 | NM_000483 | 2684.853  | 1672.311  |
| NM_006111 | 8584.209  | 10303.571 | X04706    | 5312.975  | 4402.263  | NM_018448 | 3752.358  | 2881.447  |
| AK026071  | 14079.405 | 14603.689 | NM_018039 | 1118.731  | 802.425   | NM_001658 | 9799.732  | 5494.698  |
| BC012333  | 13946.484 | 14367.152 | NM_006494 | 6120.645  | 5766.473  | AB020663  | 2285.558  | 2049.628  |
| AF237952  | 8290.719  | 10100.576 | X52343    | 4873.682  | 3869.781  | AF297866  | 1851.039  | 2009.771  |
| AL079287  | 4523.211  | 5853.081  | NM_005853 | 3304.586  | 2436.004  | NM_002864 | 1440.06   | 1133.441  |
| NM_014427 | 12687.386 | 15108.796 | X99681    | 1080.013  | 917.788   | NM_017817 | 3425.358  | 2960.453  |
| AB046769  | 3696.217  | 4434.588  | NM_014068 | 1396.681  | 1433.441  | NM_018184 | 9935.688  | 10917.431 |
| NM_015922 | 12200.919 | 11711.303 | NM_017814 | 5271.153  | 5445.894  | AB046823  | 817.028   | 933.97    |
| NM_020381 | 3901.365  | 4108.678  | AF074996  | 1299.146  | 1048.018  | NM_004928 | 618.195   | 923.762   |
| NM_002957 | 4540.353  | 3498.285  | AF131811  | 3741.34   | 2778.523  | NM_004662 | 547.327   | 539.709   |
| NM_018106 | 12157.411 | 9026.355  | AF293026  | 12957.684 | 9971.79   | NM_016638 | 23374.932 | 24620.033 |
| NM_003725 | 3831.191  | 4209.57   | AF236158  | 923.262   | 663.894   | U61739    | 7375.704  | 7103.211  |
| BE899154  | 2541.07   | 1804.059  | AF217986  | 4220.342  | 3335.005  | AJ132089  | 712.171   | 756.234   |
| NM_004863 | 3739.41   | 2802.728  | AK026320  | 1611.505  | 2341.793  | U92819    | 7718.333  | 6193.239  |
| AK024573  | 4641.697  | 3463.445  | AL137530  | 3025.937  | 4049.072  | AB020626  | 547.517   | 450.128   |
| NM_002298 | 3404.262  | 2619.969  | AK024775  | 2642.736  | 1896.398  | NM_002036 | 7527.77   | 7378.015  |
| D79998    | 4718.268  | 3191.397  | AK025562  | 3315.326  | 1988.106  | NM_012400 | 775.011   | 662.043   |
| AB032963  | 4291.06   | 3462.798  | AF088024  | 665.225   | 441.999   | NM_005384 | 3378.198  | 3057.615  |
| NM_000385 | 1217.215  | 1103.485  | AK025887  | 1816.257  | 1039.019  | AB013103  | 812.575   | 1318.071  |
| AF301013  | 4841.763  | 5418.262  | AB037719  | 2547.725  | 1986.378  | AF019225  | 3435.943  | 5081.087  |
| NM_018992 | 55982.949 | 59342.66  | AK024694  | 994.942   | 1863.374  | Z36803    | 7929.43   | 8717.272  |
| U15688    | 2175.955  | 1768.925  | AF086229  | 2893.778  | 4849.142  | NM_013371 | 689.319   | 930.771   |
| NM_006325 | 6013.788  | 5273.204  | AK026143  | 2317.276  | 2095.288  | NM_000707 | 5309.907  | 6084.54   |
| AF085893  | 787.043   | 943.675   | AL110252  | 2152.516  | 922.192   | AF202092  | 15654.957 | 21102.629 |
| NM_014305 | 3962.26   | 3644.619  | AL050143  | 1657.953  | 842.792   | NM_000215 | 3800.417  | 2349.725  |
| NM_012123 | 9159.743  | 9566.262  | AL137616  | 1594.472  | 1813.056  | AK027148  | 3480.734  | 2649.735  |
| U87972    | 4048.904  | 3159.859  | AK021752  | 1403.37   | 1298.908  | NM_005084 | 3673.141  | 3028.062  |
| NM_017925 | 3496.862  | 2489.962  | AL050012  | 1092.119  | 806.714   | NM_006111 | 5474.309  | 4438.561  |
| NM_003171 | 3401.865  | 3161.772  | AL109706  | 14254.547 | 11853.714 | AK026071  | 8140.094  | 7136.861  |
| NM_006437 | 14288.569 | 12064.408 | AK001118  | 1260.962  | 1240.689  | BC012333  | 8020.663  | 6360.754  |
| NM_017890 | 3048.238  | 2272.245  | AF035291  | 51954.102 | 46039.859 | AF237952  | 5373.046  | 5998.089  |
| AK021654  | 2178.775  | 1817.169  | AK026291  | 12322.577 | 11818.65  | AL079287  | 2512.567  | 3510.335  |
| NM_016481 | 1522.085  | 1793.277  | AK021924  | 764.363   | 710.03    | NM_014427 | 8872.214  | 10765.341 |
| NM_003925 | 15661.578 | 11696.381 | AL049285  | 1409.883  | 1017.86   | AB046769  | 2759.228  | 2922.24   |
| Z15114    | 6626.967  | 4076.782  | AL049303  | 1490.776  | 2128.237  | NM_015922 | 7369.213  | 6576.967  |
| AB040812  | 26493.861 | 20828.285 | AL080208  | 1005.117  | 1716.819  | NM_020381 | 2217.018  | 2456.013  |
| NM_006285 | 8476.332  | 7829.96   | L23851    | 2844.357  | 2743.265  | NM_002957 | 2649.062  | 2820.332  |
| NM_003656 | 63239.637 | 52152.617 | L35592    | 10180.304 | 8692.337  | NM_018106 | 7353.84   | 6200.241  |
| NM_001348 | 3998.781  | 3233.065  | NM_012079 | 1429.131  | 1267.902  | NM_003725 | 2124.743  | 2586.96   |
| NM_020384 | 2968.508  | 2617.117  | BC017695  | 775.043   | 493.601   | BE899154  | 1101.504  | 1034.32   |

|           |           |           |           |           |           |           |           |           |
|-----------|-----------|-----------|-----------|-----------|-----------|-----------|-----------|-----------|
| NM_00605E | 13634.333 | 16574.986 | AL360274  | 19298.406 | 23442.85  | NM_00486E | 1744.517  | 1677.313  |
| NM_00662E | 12889.44  | 12334.85  | AK021858  | 775.924   | 1308.3    | AK024573  | 2309.389  | 2197.714  |
| M97496    | 23538.906 | 13977.303 | NM_01405C | 9372.111  | 9679.09   | NM_00229E | 2058.161  | 1914.347  |
| AK026074  | 1311.378  | 1028.441  | AF085854  | 822.787   | 844.006   | D79998    | 3134.52   | 3736.647  |
| NM_00317E | 10352.512 | 8793.911  | AF074997  | 866.33    | 607.572   | AB032963  | 2083.199  | 2746.209  |
| NM_00480E | 2874.452  | 2109.33   | AK027027  | 1274.317  | 1064.709  | NM_00038E | 1041.48   | 1254.065  |
| H41522    | 1020.85   | 587.059   | NM_014911 | 1127.24   | 1011.431  | AF301013  | 2840      | 5449.941  |
| AA460291  | 8016.906  | 5167.058  | AF009289  | 5298.384  | 5447.478  | NM_01899E | 55199.688 | 63741.07  |
| BI821333  | 17749.326 | 12512.479 | AF040247  | 1786.869  | 1262.615  | U15688    | 1132.107  | 1755.882  |
| X51841    | 31976.588 | 17900.119 | AF056439  | 724.687   | 941.619   | NM_00632E | 3020.112  | 2513.546  |
| AF051344  | 4014.016  | 3329.312  | AF009303  | 2563.478  | 3108.858  | AF085893  | 528.83    | 426.063   |
| BG506100  | 12429.9   | 10935.229 | NM_004474 | 5170.197  | 5225.649  | NM_00310E | 455.46    | 1023.22   |
| X53586    | 5658.11   | 4478.883  | AF056449  | 1532.909  | 1096.846  | NM_01430E | 2361.605  | 2372.054  |
| M17176    | 781.376   | 736.037   | AK021698  | 348.502   | 507.396   | NM_01212E | 6578.654  | 8934.401  |
| M26576    | 550.009   | 652.254   | AK001082  | 3734.926  | 4497.012  | U87972    | 2923.439  | 2536.072  |
| M32972    | 2625.229  | 2065.719  | AK001871  | 607.671   | 545.899   | NM_01792E | 1784.399  | 1902.655  |
| D89854    | 1309.625  | 1256.391  | AK021743  | 6086.753  | 4869.406  | NM_003171 | 2190.336  | 1770.042  |
| X14885    | 693.6     | 531.165   | AK026699  | 1077.672  | 1114.542  | NM_006437 | 7304.579  | 5795.161  |
| M97815    | 808.756   | 588.825   | AK025589  | 5356.236  | 4475.597  | NM_01789C | 1358.211  | 916.795   |
| AB013103  | 725.692   | 1095.875  | AK026734  | 576.045   | 565.738   | AK021654  | 1095.14   | 739.679   |
| AF019225  | 2820.142  | 2474.945  | NM_01663E | 38992.941 | 38324.578 | NM_016481 | 922.651   | 1032.846  |
| Z36803    | 7134.943  | 5123.066  | AK023250  | 5836.727  | 5977.293  | NM_00392E | 11422.847 | 10795.051 |
| NM_013371 | 848.722   | 551.887   | AK024882  | 2875.053  | 2885.633  | Z15114    | 4845.031  | 5653.623  |
| NM_000707 | 7184.286  | 4859.203  | NM_01406E | 10757.796 | 10092.696 | AB040812  | 20221.402 | 24258.129 |
| AF202092  | 17611.578 | 11982.478 | AL109720  | 426.102   | 466.113   | NM_01762E | 391.511   | 723.697   |
| NM_003201 | 5205.291  | 4192.616  | NM_006304 | 58071.066 | 53872.004 | NM_00628E | 5823.583  | 6908.385  |
| AB011139  | 1702.131  | 1502.625  | X74804    | 1246.935  | 1122.281  | NM_00365E | 54966.953 | 48194.648 |
| NM_00691E | 1063.654  | 853.131   | AF293367  | 2960.827  | 2566.703  | NM_00134E | 2735.705  | 3547.618  |
| AK022625  | 4674.433  | 3786.357  | AL133438  | 2402.273  | 2649.202  | NM_020384 | 1626.343  | 1298.89   |
| AK023084  | 5517.632  | 4310.694  | AK022310  | 663.246   | 542.596   | NM_00605E | 9246.788  | 8976.03   |
| AK025588  | 2936.903  | 2134.971  | AK021784  | 572.034   | 807.188   | NM_00662E | 6405.512  | 5226.027  |
| NM_00318E | 4695.349  | 4308.417  | AF230800  | 1774.862  | 1213.517  | M97496    | 17291.803 | 9971.93   |
| U59431    | 2173.734  | 1489.485  | NM_01852C | 1554.985  | 1639.581  | AK026074  | 806.204   | 689.152   |
| U49349    | 1319.503  | 920.323   | AK022152  | 1004.814  | 792.634   | NM_00317E | 6177.833  | 6381.378  |
| NM_02015E | 2130.634  | 2076.043  | NM_003534 | 45363.012 | 35815.387 | NM_00480E | 1469.446  | 1093.825  |
| NM_013404 | 1006.557  | 562.515   | L08437    | 3678.746  | 2997.849  | AA903183  | 1933.349  | 2216.123  |
| NM_002364 | 1705.531  | 2194.266  | AK057143  | 14649.862 | 12002.147 | H41522    | 847.217   | 810.274   |
| NM_00396E | 1031.722  | 1475.273  | NM_015594 | 24627.307 | 25933.586 | AA460291  | 3985.456  | 2877.967  |
| AK024443  | 63385.352 | 64100.797 | AF056423  | 3106.842  | 2796.389  | BI821333  | 9535.85   | 7257.06   |
| X06710    | 2747.445  | 2795.821  | X04293    | 1230.63   | 779.377   | X51841    | 38187.527 | 10411.438 |
| AK000896  | 1672.088  | 1788.237  | AK026475  | 1088.441  | 1455.266  | AF051344  | 2405.37   | 1809.42   |
| D79998    | 6040.046  | 6646.114  | NM_00052E | 766.641   | 594.481   | BG506100  | 4721.188  | 4446.782  |
| AB032963  | 4064.614  | 3943.124  | AK026130  | 29471.635 | 24637.582 | X53586    | 1947.829  | 1916.428  |
| NM_00038E | 1418.276  | 934.7     | NM_01248C | 6966.165  | 6240.513  | M17176    | 582.417   | 386.293   |
| AF301013  | 4747.187  | 5369.855  | AK024144  | 9111.469  | 7698.776  | M26576    | 891.502   | 678.469   |
| NM_01899E | 63473.035 | 57719.367 | Y08959    | 1597.161  | 1417.89   | M32972    | 2541.02   | 2851.943  |
| U15688    | 1898.524  | 833.891   | NM_00534E | 18768.268 | 17463.443 | D89854    | 745.75    | 875.072   |
| NM_00048E | 4078.743  | 1590.044  | NM_00534E | 27186.281 | 22870.443 | M13207    | 460.206   | 605.996   |
| NM_01844E | 8886.228  | 5249.197  | AB032985  | 705.435   | 466.185   | X14885    | 753.903   | 596.245   |
| NM_00165E | 16910.518 | 8009.057  | AF196865  | 2062.146  | 1585.246  | M97815    | 983.973   | 936.172   |
| AB020663  | 3720.262  | 2315.627  | AJ008114  | 54093.207 | 44164.699 | AB013103  | 474.81    | 382.187   |
| AF297866  | 2186.473  | 1688.285  | AJ008141  | 351.7     | 705.049   | AF019225  | 1898.813  | 1596.47   |
| NM_002864 | 881.156   | 714.697   | AF147432  | 3419.274  | 2351.641  | Z36803    | 5140.615  | 3745.517  |



|           |           |           |           |           |           |           |           |           |
|-----------|-----------|-----------|-----------|-----------|-----------|-----------|-----------|-----------|
| NM_017817 | 5200.412  | 4333.088  | AK024690  | 1045.116  | 987.389   | NM_013371 | 371.783   | 393.679   |
| NM_018184 | 15617.917 | 17253.029 | BC005946  | 53660.895 | 44515.914 | NM_000707 | 4056.537  | 3334.1    |
| AB046823  | 1397.072  | 1321.869  | AK021893  | 3743.909  | 3382.963  | AF202092  | 12229.468 | 11475.496 |
| NM_004929 | 1026.198  | 1370.836  | NM_001048 | 8374.499  | 6446.363  | NM_003201 | 2899.061  | 3049.7    |
| NM_004662 | 761.419   | 747.246   | AK026497  | 3059.927  | 2399.507  | AB011139  | 1103.029  | 1253.592  |
| NM_016639 | 44399.402 | 52118.457 | BE958139  | 1594.676  | 1502.874  | NM_006919 | 657.791   | 825.198   |
| U61739    | 5342.881  | 6336.888  | AF085359  | 786.027   | 699.704   | AK022625  | 4707.48   | 4528.813  |
| AJ132089  | 1428.746  | 1456.953  | AF086516  | 1226.502  | 1234.879  | NM_005425 | 444.525   | 469.499   |
| U92819    | 15930.85  | 15214.475 | D86978    | 7745.356  | 6590.689  | AK023084  | 2652.77   | 3472.909  |
| AB020626  | 969.239   | 1755.301  | AL080060  | 10370.334 | 9061.641  | AK025588  | 1445.634  | 1179.77   |
| NM_002036 | 8865.099  | 10068.254 | NM_005267 | 3610.82   | 3212.45   | NM_003188 | 2027.229  | 2016.614  |
| NM_012400 | 717.289   | 1509.781  | AF086017  | 851.052   | 1093.73   | NM_007118 | 370.925   | 185.288   |
| NM_005384 | 5219.031  | 5336.317  | AK024978  | 12753.948 | 11563.383 | U59431    | 2103.367  | 1545.64   |
| NM_006850 | 219.476   | 443.685   | U12897    | 3928.955  | 2965.676  | U49349    | 747.58    | 499.406   |
| Z15114    | 8539.482  | 8379.934  | NM_020357 | 14146.323 | 10005.343 | NM_020152 | 1347.382  | 1131.922  |
| AB040812  | 28091.549 | 21003.631 | AK026836  | 2094.355  | 1507.679  | NM_013404 | 600.363   | 581.717   |
| NM_006285 | 7795.92   | 5456.827  | T59562    | 26059.27  | 18221.328 | NM_002364 | 1117.049  | 2297.467  |
| NM_001348 | 3636.143  | 4055.242  | NM_018219 | 3100.376  | 2572.813  | NM_003966 | 569.577   | 248.206   |
| NM_000215 | 7498.463  | 6459.067  | NM_014114 | 2434.755  | 2536.918  | AK024443  | 56301.766 | 65279.156 |
| AK027148  | 8243.975  | 8278.118  | U62822    | 7239.994  | 2695.963  | X06710    | 1476.071  | 1763.747  |
| NM_005084 | 7537.896  | 8368.543  | CY3Cy5    | 9468.927  | 354.685   | AK000896  | 1116.116  | 1444.499  |
| NM_007283 | 1186.419  | 637.195   | AA220921  | 4685.082  | 4580.172  | D79998    | 2113      | 1549.595  |
| NM_006111 | 7807.943  | 5002.507  | U90065    | 1974.66   | 1590.296  | AB032963  | 1755.343  | 1156.476  |
| AK026071  | 8765.13   | 4457.668  | AJ005898  | 2180.054  | 2011.384  | NM_000385 | 754.224   | 688.355   |
| BC012333  | 12749.206 | 9534.182  | X57303    | 3281.665  | 3375.772  | AF301013  | 2450.167  | 2833.668  |
| AF237952  | 8788.598  | 10148.412 | AA463224  | 1152.923  | 1079.745  | NM_018992 | 54882.285 | 59447.207 |
| AL079287  | 5026.857  | 7440.396  | BG248802  | 7506.001  | 8312.706  | U15688    | 1041.603  | 816.943   |
| NM_014427 | 14353.203 | 16412.451 | L19605    | 2929.327  | 4481.036  | NM_000483 | 3618.531  | 3107.979  |
| AB046769  | 5651.969  | 5219.626  | AA876532  | 9421.831  | 11348.373 | NM_018448 | 4303.33   | 4879.668  |
| NM_015922 | 12750.786 | 12249.796 | S74349    | 1578.454  | 2536.622  | NM_001659 | 11201.279 | 10395.481 |
| NM_020381 | 4206.941  | 5015.028  | NM_006079 | 1293.447  | 1348.554  | AB020663  | 2957.67   | 3908.594  |
| NM_002957 | 3824.184  | 3808.877  | NM_006696 | 752.548   | 1382.363  | AF297866  | 2020.569  | 2341.342  |
| NM_018106 | 11976.813 | 11648.438 | SR5       | 10597.585 | 7160.104  | NM_002864 | 1744.861  | 2138.001  |
| NM_003725 | 4049.245  | 5677.751  | SR7       | 8538.378  | 47410.902 | NM_017817 | 3489.239  | 4086.124  |
| BE899154  | 2366.996  | 3267.479  | SR9       | 34621.613 | 5214.296  | NM_018184 | 8467.328  | 9666.384  |
| NM_004863 | 3721.644  | 4787.416  | CY3Cy5    | 8007.975  | 273.784   | AB046823  | 611.96    | 547.153   |
| AK024573  | 4691.19   | 4686.474  | AK002163  | 4034.072  | 3360.622  | NM_004929 | 607.754   | 678.644   |
| NM_002299 | 3055.188  | 3686.871  | NM_002287 | 7154.825  | 4130.454  | NM_004662 | 436.451   | 483.776   |
| NM_003830 | 1292.524  | 1155.306  | NM_012344 | 1665.416  | 1509.108  | NM_016639 | 12150.955 | 9868.391  |
| NM_000842 | 902.254   | 617.642   | NM_014385 | 1221.338  | 928.364   | U61739    | 6069.025  | 4855.392  |
| NM_015642 | 1517.336  | 1068.985  | NM_001704 | 608.404   | 390.71    | AJ132089  | 855.53    | 787.604   |
| NM_004640 | 20620.268 | 19359.055 | AB036432  | 5212.206  | 4351.019  | U92819    | 8248.233  | 8878.084  |
| NM_016222 | 11153.579 | 8948.919  | NM_014872 | 4132.685  | 4528.694  | AB020626  | 1204.096  | 1509.377  |
| AB037823  | 3748.435  | 3578.177  | NM_003643 | 1218.123  | 1730.401  | NM_002036 | 7537.146  | 8218.74   |
| NM_015380 | 21926.385 | 16836.094 | NM_003480 | 1332.811  | 1501.442  | NM_012400 | 550.03    | 679.735   |
| BE254485  | 1837.581  | 2249.925  | NM_032951 | 1416.263  | 1416.099  | NM_005384 | 3099.798  | 3317.124  |
| NM_002732 | 862.505   | 1049.243  | NM_000503 | 3142.17   | 4281.522  | NM_006850 | 252.044   | 421.51    |
| NM_014305 | 4099.925  | 4243.514  | NM_002405 | 10198.609 | 15334.377 | Z15114    | 3307.194  | 2055.615  |
| NM_012123 | 10387.865 | 14458.567 | AK000004  | 2018.715  | 2719.637  | AB040812  | 15329.564 | 9872.433  |
| U87972    | 3985.154  | 4669.713  | NM_012421 | 19017.965 | 18378.762 | NM_017625 | 320.782   | 560.094   |
| NM_017925 | 3555.173  | 4606.338  | AB014601  | 986.103   | 1100.587  | NM_006285 | 4783.461  | 3918.8    |
| NM_003171 | 3659.207  | 4485.649  | AK001393  | 9108.243  | 9408.01   | NM_003656 | 46946.223 | 32108.244 |
| NM_006437 | 14108.472 | 17816.555 | NM_000023 | 4479.245  | 4227.322  | NM_001348 | 1924.533  | 1707.786  |

|           |           |           |           |           |           |           |           |           |
|-----------|-----------|-----------|-----------|-----------|-----------|-----------|-----------|-----------|
| NM_01789C | 3534.264  | 5014.281  | AF022654  | 548.012   | 619.26    | NM_00021E | 5021.353  | 4474.375  |
| AK021654  | 2767.651  | 2694.368  | NM_001143 | 693.772   | 891.835   | AK027148  | 4402.496  | 5045.628  |
| NM_016481 | 2059.588  | 3309.426  | AK022638  | 8451.844  | 8836.585  | NM_005084 | 4280.417  | 5334.96   |
| NM_00392E | 16465.006 | 18653.832 | BG698409  | 2583.952  | 3920.358  | NM_00728E | 492.55    | 733.266   |
| AF217974  | 3582.081  | 2382.801  | M91368    | 796.672   | 648.321   | NM_006111 | 5178.826  | 5587.986  |
| NM_00088E | 4982.141  | 4698.298  | NM_006594 | 2003.434  | 1860.707  | AK026071  | 8183.292  | 9500.967  |
| NM_00059E | 3915.631  | 3796.075  | NM_004177 | 931.709   | 1245.254  | BC012333  | 8134.859  | 7462.039  |
| X99663    | 3241.474  | 2535.121  | NM_01242E | 1290.819  | 1187.432  | AF237952  | 5139.59   | 6427.64   |
| NM_01655E | 2854.603  | 2644.502  | NM_004871 | 2064.637  | 1180.943  | AL079287  | 1929.521  | 2378.652  |
| NM_00356E | 4342.393  | 3608.207  | NM_01492E | 555.109   | 991.455   | NM_014427 | 7724.637  | 7220.207  |
| NM_004841 | 1647.314  | 2540.399  | NM_005477 | 7054.502  | 9090.459  | AB046769  | 2019.871  | 1714.662  |
| NM_01844C | 12888.402 | 11804.034 | NM_00431E | 805.257   | 947.296   | NM_01592E | 5982.909  | 3780.106  |
| AK025470  | 1399.92   | 716.83    | NM_00264C | 5532.377  | 3263.582  | NM_020381 | 1929.449  | 1759.591  |
| M35410    | 15385.766 | 10629.008 | M15530    | 6845.553  | 6792.558  | NM_002957 | 2642.115  | 2743.293  |
| AB023227  | 1957.354  | 2050.792  | NM_001877 | 1428.08   | 1788.059  | NM_01810E | 7450.271  | 8787.335  |
| NM_00577E | 29409.285 | 28907.941 | NM_014207 | 10634.96  | 13215.537 | NM_00372E | 2606.953  | 6124.62   |
| AK023071  | 6307.914  | 6058.531  | NM_00405E | 501.534   | 660.641   | BE899154  | 1337.705  | 2036.091  |
| NM_004041 | 1234.543  | 1371.11   | NM_001634 | 15614.176 | 11656.608 | NM_00486E | 1675.916  | 1905.774  |
| AK022888  | 4148.218  | 5009.422  | NM_002267 | 6468.708  | 3002.743  | AK024573  | 2716.995  | 2582.207  |
| AK024484  | 7414.304  | 9179.036  | NM_00641E | 3653.5    | 2621.434  | NM_00229E | 1936.587  | 2213.619  |
| NM_00263E | 1119.142  | 982.304   | NM_00306E | 4968.51   | 4437.927  | NM_00383C | 541.999   | 460.184   |
| NM_00140E | 891.698   | 999.268   | NM_014041 | 39264.102 | 20026.092 | NM_00084E | 517.26    | 320.768   |
| NM_00229E | 2686.506  | 2875.253  | NM_00716E | 3241.165  | 2269.3    | NM_01564E | 836.635   | 572.309   |
| NM_00016E | 3067.29   | 3459.539  | AF178941  | 13842.581 | 18448.77  | NM_00464C | 13158.488 | 9729.558  |
| AF305200  | 724.732   | 846.57    | NM_01603E | 8763.688  | 7349.449  | NM_002901 | 5512.66   | 4349.65   |
| AL570170  | 3932.158  | 3008.971  | NM_01758E | 5666.181  | 7237.164  | NM_01622E | 5492.761  | 4057.635  |
| D56495    | 1575.381  | 1579.61   | U61737    | 27589.986 | 35015.898 | AB037823  | 1980.146  | 2073.449  |
| NM_00661E | 6642.015  | 5242.43   | X06389    | 1211.243  | 920.014   | NM_01538C | 12755.839 | 11536.796 |
| NM_00463E | 7522.323  | 4752.243  | NM_00003E | 1744.21   | 2370.802  | BE254485  | 1697.396  | 2056.808  |
| L40027    | 5171.603  | 3837.775  | NM_014861 | 734.166   | 900.805   | NM_00273E | 1092.099  | 1648.625  |
| NM_00371E | 42180.043 | 36554.688 | NM_012434 | 492.026   | 948.418   | AF085893  | 826.029   | 965.246   |
| NM_00706E | 1128.682  | 1588.7    | NM_005694 | 9667.288  | 9551.921  | NM_00310E | 703.619   | 765.752   |
| NM_01418C | 35948.898 | 48778.344 | NM_01486E | 7960.119  | 5820.876  | NM_01430E | 2331.551  | 2354.112  |
| NM_01770E | 1864.841  | 1717.127  | AL442089  | 6373.827  | 3670.572  | NM_01212E | 4270.82   | 4461.622  |
| AF334406  | 2136.158  | 1303.105  | NM_014321 | 3672.699  | 1690.601  | U87972    | 2809.516  | 1969.11   |
| NM_017444 | 6426.507  | 5557.771  | AK022733  | 2758.285  | 2172.56   | NM_01792E | 1571.338  | 1873.42   |
| NM_01802E | 5830.325  | 10429.794 | NM_02036E | 6331.994  | 5525.104  | AK022208  | 577.928   | 555.646   |
| NM_01599E | 10569.714 | 11688.122 | AF275798  | 12456.661 | 11660.034 | NM_003171 | 2178.443  | 3180.078  |
| NM_003804 | 14247.673 | 13711.259 | NM_005441 | 4642.417  | 5077.147  | NM_006437 | 8386.14   | 12519.151 |
| NM_01845E | 12223.11  | 15944.281 | NM_01607E | 11914.436 | 11583.376 | NM_01789C | 1451.333  | 1817.463  |
| NM_00470E | 62479.836 | 61957.887 | AK023108  | 3260.83   | 4697.091  | AK021654  | 1466.673  | 1528.302  |
| NM_016001 | 11018.553 | 15716.947 | AK026409  | 14930.886 | 14676.277 | NM_016481 | 1084.858  | 1588.965  |
| AL137722  | 467.35    | 505.82    | AF097025  | 8520.359  | 9512.113  | NM_00392E | 11374.103 | 14308.838 |
| S49432    | 947.41    | 1184.885  | Y11339    | 7186.388  | 7577.72   | AF217974  | 2683.56   | 1573.038  |
| D86984    | 2956.135  | 3169.638  | AB030176  | 833.445   | 744.862   | NM_00088E | 2539.47   | 1749.538  |
| NM_01595E | 1330.828  | 1707.983  | NM_002537 | 10498.629 | 8142.697  | NM_00059E | 4069.984  | 4667.325  |
| AK026904  | 3233.583  | 3271.759  | NM_00313E | 6985.098  | 9208.885  | X99663    | 2429.468  | 2229.503  |
| NM_00379E | 929.56    | 1033.179  | NM_01231E | 6729.47   | 7659.534  | NM_01655E | 2589.651  | 2151.228  |
| NM_00191C | 2143.669  | 2506.229  | AF022654  | 473.644   | 600.837   | NM_00356E | 2112.135  | 1653.706  |
| NM_00190E | 6329.561  | 5635.301  | AA220921  | 4110.613  | 9348.105  | NM_004841 | 1308.284  | 2078.9    |
| NM_01219E | 1890.731  | 1692.92   | AA463224  | 602.022   | 807.175   | NM_004114 | 889.851   | 1358.637  |
| NM_00336E | 6507.915  | 8437.396  | BG248802  | 4733.708  | 5752.833  | NM_01844C | 7784.146  | 7577.854  |
| AB040886  | 1445.493  | 1423.632  | L19605    | 1205.404  | 1295.369  | AK025470  | 1013.285  | 1058.662  |

|           |           |           |           |           |           |           |           |           |
|-----------|-----------|-----------|-----------|-----------|-----------|-----------|-----------|-----------|
| AB029020  | 2466.395  | 1633.454  | AA876532  | 5345.55   | 5551.386  | M35410    | 9724.203  | 7252.403  |
| AK022759  | 3486.215  | 3162.087  | X07979    | 19231.564 | 20709.58  | AB023227  | 781.222   | 912.009   |
| NM_012333 | 12336.774 | 12926.963 | BG744224  | 8557.505  | 9382.932  | NM_005776 | 11163.566 | 7842.129  |
| AF217798  | 4956.644  | 6627.098  | NM_006079 | 4104.827  | 5854.919  | AK023071  | 1866.605  | 1487.885  |
| AF161472  | 6552.933  | 9233.456  | NM_006696 | 1519.268  | 2384.758  | NM_004041 | 1041.273  | 800.312   |
| AL133642  | 25365.943 | 28302.994 | NM_018026 | 2941.497  | 3777.259  | AK022888  | 2192.639  | 2494.63   |
| AB011154  | 2025.687  | 2138.892  | NM_001707 | 19783.896 | 18923.26  | AK024484  | 4486.116  | 6392.786  |
| AF124432  | 4751.006  | 4685.949  | M15530    | 4492.907  | 2646.623  | NM_002632 | 990.868   | 1235.179  |
| NM_006330 | 10254.903 | 15154.831 | NM_014207 | 9381.46   | 20836.949 | NM_001953 | 49748.727 | 59022.758 |
| NM_015873 | 4806.613  | 5186.9    | AK002163  | 3606.207  | 6513.609  | NM_001406 | 677.744   | 1084.743  |
| NM_000377 | 7437.387  | 8109.446  | NM_014385 | 1204.056  | 1271.836  | NM_002292 | 2230.48   | 2813.999  |
| NM_006818 | 1314.982  | 1624.009  | AB036432  | 7535.155  | 9714.191  | NM_000166 | 2382.374  | 5795.714  |
| NM_016823 | 4550.243  | 4621.495  | NM_014872 | 3846.597  | 4916.246  | AF305200  | 1310.554  | 1364.834  |
| NM_003120 | 2056.283  | 1513.008  | NM_003480 | 1691.783  | 2160.356  | AL570170  | 2175.528  | 1590.246  |
| X52360    | 3212.195  | 2201.548  | NM_000899 | 744.736   | 1064.069  | D56495    | 563.552   | 679.5     |
| NM_002636 | 12079.87  | 8146.403  | NM_032951 | 2064.732  | 2343.863  | NM_006613 | 5538.676  | 3506.322  |
| NM_016494 | 28864.455 | 24645.578 | NM_000503 | 4857.182  | 4652.394  | NM_004638 | 6708.424  | 4982.993  |
| U09410    | 5002.817  | 3903.239  | NM_002405 | 6349.748  | 6548.188  | NM_005373 | 432.018   | 125.211   |
| NM_020229 | 983.124   | 703.056   | AK000004  | 1272.026  | 1500.83   | L40027    | 2489.909  | 2076.997  |
| NM_001186 | 4493.82   | 4197.516  | NM_012421 | 17069.105 | 15090.604 | NM_003718 | 32337.59  | 26233.988 |
| NM_004502 | 4868.936  | 3180.938  | AB014601  | 1048.401  | 1085.569  | NM_007062 | 970.418   | 1169.882  |
| AF000560  | 6728.675  | 4811.479  | AK001393  | 10881.245 | 10368.907 | NM_014180 | 24155.998 | 25381.082 |
| NM_013282 | 7656.504  | 7512.616  | NM_000023 | 5648.24   | 6182.4    | NM_017706 | 1429.454  | 1221.385  |
| NM_005777 | 6845.699  | 7575.742  | NM_005694 | 7988.515  | 14770.837 | AF334406  | 609.763   | 709.383   |
| NM_012345 | 5004.768  | 4372.867  | M91368    | 593.032   | 1699.047  | NM_017444 | 4476.449  | 3874.547  |
| NM_004592 | 2817.334  | 2794.407  | NM_012429 | 1908.528  | 1491.721  | NM_018025 | 4065.272  | 7003.469  |
| NM_015001 | 10550.193 | 9407.982  | NM_004871 | 2952.057  | 2431.025  | NM_015999 | 3693.318  | 3300.54   |
| NM_019027 | 1338.231  | 2166.912  | NM_005698 | 9060.896  | 8291.74   | NM_003804 | 3917.469  | 3056.246  |
| NM_016107 | 2917.178  | 4741.162  | AF202146  | 9965.03   | 9080.447  | NM_018453 | 6650.029  | 7521.208  |
| NM_002567 | 27789.545 | 36661.07  | NM_006393 | 937.006   | 1533.251  | NM_004708 | 53039.094 | 67849.367 |
| NM_001404 | 3707.109  | 4088.94   | NM_005477 | 6056.133  | 6350.896  | NM_016001 | 9186.884  | 15608.592 |
| NM_001605 | 28631.945 | 29180.387 | NM_004318 | 548.473   | 589.998   | NM_016108 | 5537.184  | 7229.104  |
| AF225422  | 9805.909  | 11481.579 | L09089    | 616.958   | 1014.933  | D86984    | 1819.133  | 1227.056  |
| AB040960  | 13352.199 | 14493.917 | NM_002640 | 8945.795  | 4300.781  | NM_015959 | 777.074   | 1163.844  |
| NM_015946 | 11417.582 | 16985.781 | Y11339    | 6743.888  | 6164.092  | AK026904  | 1939.727  | 1673.79   |
| NM_006303 | 8433.308  | 11474.484 | AB030176  | 1141.201  | 663.425   | AB002364  | 239.11    | 424.835   |
| AL080059  | 3943.519  | 2150.062  | NM_006412 | 3373.189  | 3118.138  | NM_003793 | 781.568   | 477.139   |
| AL080219  | 3667.368  | 2126.466  | NM_003063 | 4999.563  | 4737.643  | NM_001910 | 1631.898  | 1683.748  |
| AK026709  | 422.609   | 568.038   | NM_007169 | 4170.874  | 6617.54   | NM_001909 | 4234.842  | 4473.699  |
| NM_003001 | 2326.01   | 2177.948  | NM_014313 | 514.066   | 661.961   | NM_012198 | 1568.216  | 2392.928  |
| NM_001985 | 6090.426  | 5034.164  | AK024966  | 2145.101  | 2248.508  | NM_003368 | 2493.779  | 2969.891  |
| NM_000102 | 657.31    | 545.418   | AF178941  | 16993.998 | 18177.191 | AB040886  | 992.509   | 718.378   |
| NM_002490 | 24361.637 | 24745.215 | NM_016033 | 8928.776  | 7184.845  | NM_001460 | 344.039   | 379.824   |
| BE563532  | 1677.929  | 1844.993  | NM_017585 | 6442.496  | 7610.814  | AB029020  | 1336.245  | 1115.769  |
| NM_001916 | 7577.94   | 6610.909  | U61737    | 27292.162 | 30935.521 | AK022759  | 2416.733  | 2224.555  |
| NM_002491 | 1888.769  | 7254.055  | X06389    | 1167.743  | 1028.751  | NM_012333 | 6955.818  | 5456.225  |
| NM_015425 | 2530.227  | 2709.721  | NM_000033 | 2250.869  | 2740.402  | AF217798  | 1362.444  | 1237.639  |
| AB032966  | 9123.603  | 7261.853  | NM_006079 | 1766.754  | 1809.713  | AF161472  | 4503.958  | 5721.701  |
| M26747    | 3764.068  | 4291.976  | NM_006696 | 2771.109  | 2701.563  | AL133642  | 15463.499 | 26893.01  |
| NM_014820 | 5816.311  | 7379.124  | NM_001200 | 3371.385  | 2821.298  | AB011154  | 1532.093  | 2403.088  |
| NM_005035 | 1753.597  | 2888.761  | NM_002552 | 4220.889  | 5367.585  | AF124432  | 3519.836  | 3612.63   |
| NM_019014 | 4495.799  | 5588.544  | NM_014321 | 4080.958  | 4040.2    | NM_006330 | 7479.451  | 10532.271 |
| NM_002097 | 26958.697 | 33706.109 | AK022733  | 1408.809  | 1631.795  | NM_015873 | 3867.416  | 4125.622  |

|           |           |           |           |           |           |           |           |           |
|-----------|-----------|-----------|-----------|-----------|-----------|-----------|-----------|-----------|
| X04706    | 3577.938  | 4452.34   | AB011132  | 5996.326  | 6805.967  | NM_000377 | 4718.509  | 4852.652  |
| NM_01803E | 1101.979  | 1840.767  | NM_020362 | 12311.648 | 9649.29   | NM_00681E | 955.942   | 1027.202  |
| NM_006494 | 4721.449  | 4721.162  | AB040937  | 700.465   | 778.147   | NM_01682E | 2150.135  | 2217.205  |
| X52343    | 3227.608  | 3460.264  | AF275798  | 14584.983 | 13738.104 | NM_00312C | 1239.087  | 781.216   |
| NM_00585E | 3717.311  | 4384.417  | NM_005441 | 6642.228  | 6370.755  | X52360    | 2055.362  | 1322.589  |
| X99681    | 731.578   | 936.558   | NM_01607E | 14917.554 | 11405.315 | NM_00263E | 10857.816 | 6124.002  |
| NM_01406E | 1124.899  | 1031.811  | AK023108  | 2696.37   | 2634.286  | NM_016494 | 20573.422 | 12933.201 |
| NM_017814 | 4992.611  | 2487.876  | AK026409  | 21757.15  | 20840.941 | U09410    | 3030.309  | 1964.261  |
| AF074996  | 846.973   | 604.635   | AF097025  | 12644.271 | 10937.72  | NM_02022E | 776.672   | 584.524   |
| AF131811  | 2544.223  | 1777.192  | NM_00240E | 8678.038  | 9120.893  | NM_00118E | 2837.91   | 3191.889  |
| AF293026  | 12668.917 | 11629.359 | AK000004  | 1756.307  | 1500.852  | NM_00450E | 4410.814  | 4739.898  |
| AF236158  | 1052.34   | 874.624   | NM_012421 | 16956.734 | 10739.574 | AF000560  | 5543.226  | 5585.644  |
| AF217986  | 2845.612  | 3242.923  | AB014601  | 809.447   | 397.246   | NM_01328E | 4025.931  | 4081.58   |
| AK026320  | 1397.498  | 1590.44   | AK001393  | 5422.992  | 3130.29   | NM_005777 | 3327.537  | 3965.526  |
| AL137530  | 2262.168  | 2190.327  | NM_00002E | 3508.581  | 2119.308  | NM_01234E | 2305.994  | 2146.84   |
| NM_01595E | 9985.215  | 10672.772 | AA220921  | 4265.425  | 5139.125  | U94387    | 764.764   | 861.378   |
| AF147310  | 1235.147  | 1269.59   | N67770    | 739.323   | 812.346   | NM_00582E | 12700.251 | 12156.324 |
| AK024775  | 2348.161  | 1774.434  | U90065    | 3343.254  | 5068.506  | NM_00459E | 1545.313  | 1541.436  |
| AK025562  | 2579.761  | 4617.822  | AJ005898  | 3358.425  | 4080.103  | NM_015001 | 6805.851  | 5873.357  |
| AF088024  | 1433.947  | 2424.52   | X57303    | 3086.198  | 4679.52   | NM_019027 | 798.254   | 746.519   |
| AK025887  | 2280.97   | 2808.484  | AA463224  | 927.428   | 994.448   | NM_016107 | 2232.399  | 2314.418  |
| AB037719  | 4479.771  | 5482.555  | BG248802  | 5692.063  | 6800.995  | NM_002567 | 21346.869 | 25991.91  |
| AK024694  | 1489.398  | 1690.266  | L19605    | 1645.736  | 1790.148  | NM_001404 | 2474.377  | 2729.872  |
| AK026143  | 2972.872  | 3111.403  | AA876532  | 5834.45   | 6732.022  | NM_00160E | 16329.6   | 11234.161 |
| AL137578  | 337.002   | 589.104   | S74349    | 717.889   | 866.355   | AF225422  | 8329.216  | 8007.618  |
| AL110252  | 1205.815  | 3379.455  | X07979    | 28927.414 | 25248.682 | AB040960  | 6154.814  | 6900.083  |
| AL050143  | 1522.798  | 2115.837  | BG744224  | 12913.497 | 14481.894 | NM_01594E | 7121.722  | 10450.184 |
| AL137616  | 887.377   | 789.076   | NM_005477 | 7119.646  | 7139.81   | NM_00630E | 4347.25   | 4767.305  |
| AK021752  | 1320.193  | 915.522   | NM_00431E | 663.519   | 628.714   | AL080059  | 2010.595  | 1080.55   |
| AL050012  | 2045.43   | 849.715   | NM_00264C | 6872.533  | 2134.685  | AL080219  | 1672.501  | 908.09    |
| AL109706  | 10672.508 | 7822.269  | AK002163  | 2854.874  | 2699.588  | AK026709  | 504.395   | 416.985   |
| AK001118  | 1101.046  | 890.487   | NM_012344 | 1418.166  | 1598.517  | AK024165  | 421.338   | 237.205   |
| AF035291  | 57660.977 | 52714.055 | NM_001704 | 1686.257  | 2994.308  | NM_003001 | 1409.938  | 904.588   |
| AK026291  | 14934.063 | 16555.867 | AB036432  | 5761.29   | 7258.76   | NM_00198E | 3908.539  | 2790.992  |
| AK021924  | 634.169   | 1149.541  | NM_01487E | 3142.608  | 3746.739  | NM_00010E | 1139.877  | 734.249   |
| AL049285  | 1153.199  | 1270.774  | NM_00348C | 1257.902  | 1178.277  | NM_00249C | 17091.891 | 13912.075 |
| AL049303  | 854.401   | 898.165   | NM_032951 | 3651.656  | 3810.44   | BE563532  | 1269.073  | 1419.25   |
| AL080208  | 1182.331  | 918.685   | NM_00050E | 6584.071  | 6389.008  | NM_00191E | 4002.08   | 3597.139  |
| L23851    | 807.792   | 1073.361  | NM_01758E | 5941.969  | 6125.818  | NM_002491 | 840.499   | 3463.998  |
| L35592    | 9967.935  | 11657.409 | U61737    | 28036.635 | 25768.107 | NM_01542E | 1750.248  | 1356.627  |
| NM_01207E | 2102.772  | 1832.998  | X06389    | 810.188   | 625.373   | NM_01515E | 3625.688  | 3718.732  |
| BC017695  | 484.274   | 587.431   | NM_00003E | 1485.629  | 1185.492  | AB032966  | 10836.687 | 11077.775 |
| AL360274  | 24703.039 | 30050.986 | M91368    | 750.703   | 668.896   | M26747    | 2725.19   | 3117.073  |
| AK021858  | 549.182   | 651.942   | AF224741  | 532.264   | 553.556   | NM_01482C | 2196.689  | 2332.476  |
| NM_01405C | 10329.834 | 12674.432 | NM_006594 | 4844.322  | 5415.866  | NM_00503E | 1766.45   | 1947.427  |
| AF085854  | 810.567   | 1329.703  | NM_004177 | 2180.017  | 2999.537  | NM_019014 | 2075.688  | 2402.233  |
| AF074997  | 885.477   | 1076.22   | NM_01242E | 841.44    | 1331.217  | NM_002097 | 13888.603 | 12270.654 |
| AK097417  | 1325.619  | 1729.88   | NM_004871 | 1937.263  | 2451.07   | X04706    | 3415.926  | 2578.205  |
| AK027027  | 1009.287  | 843.459   | NM_00569E | 5436.793  | 4904.341  | NM_01803E | 722.495   | 982.022   |
| AF009289  | 5157.56   | 3082.012  | AF202146  | 9319.137  | 6942.892  | NM_006494 | 2429.165  | 2434.189  |
| AF040247  | 2226.295  | 1675.266  | NM_00639E | 1047.407  | 1140.087  | X52343    | 3329.023  | 2607.214  |
| AF009303  | 1869.965  | 2691.96   | NM_01492E | 707.953   | 773.283   | NM_00585E | 2308.974  | 2288.518  |
| NM_004474 | 4203.443  | 4405.915  | AF275798  | 22339.578 | 21719.949 | X99681    | 716.691   | 762.668   |

|           |           |           |           |           |           |           |           |           |
|-----------|-----------|-----------|-----------|-----------|-----------|-----------|-----------|-----------|
| AF056449  | 807.105   | 1137.753  | NM_005441 | 9007.68   | 8016.129  | NM_01406E | 389.478   | 330.662   |
| AK001033  | 1639.185  | 1383.811  | NM_016079 | 17110.836 | 11622.243 | NM_017814 | 2936.658  | 1832.743  |
| AK001781  | 1060.822  | 778.563   | AK023108  | 2078.988  | 1613.695  | AF074996  | 695.69    | 364.597   |
| AK021463  | 1395.007  | 928.547   | AK026409  | 17233.793 | 14542.372 | AF131811  | 1727.737  | 916.057   |
| AK001082  | 1877.383  | 1399.286  | AF097025  | 7814.981  | 7255.853  | AF293026  | 8279.615  | 5855.319  |
| AK001871  | 687.903   | 959       | NM_001634 | 14423.025 | 13505.06  | AF236158  | 669.237   | 615.167   |
| AK021521  | 769.517   | 732.717   | NM_002267 | 5612.329  | 6131.934  | AF217986  | 2748.116  | 2744.548  |
| AK021743  | 2608.118  | 3706.932  | NM_006412 | 3185.103  | 5932.306  | AK026320  | 1106.318  | 1080.068  |
| AK026699  | 1061.176  | 1356.581  | NM_003063 | 2725.306  | 3666.632  | AL137530  | 1731.125  | 1714.37   |
| AK025589  | 5251.104  | 7162.945  | NM_014041 | 41373.297 | 52331.754 | NM_015953 | 6632.461  | 7903.094  |
| AK026734  | 902.81    | 699.867   | NM_007169 | 3704.336  | 5730.616  | AF147310  | 597.527   | 752.327   |
| NM_016633 | 32267.271 | 25615.195 | NM_014313 | 656.251   | 720.557   | AK024775  | 846.545   | 760.744   |
| AK023250  | 6460.066  | 4894.371  | AK024966  | 2454.911  | 2141.562  | AK025562  | 1161.055  | 1684.971  |
| AK024882  | 3782.419  | 2881.592  | AF178941  | 21290.439 | 19334.814 | AK025887  | 1196.884  | 1210.917  |
| NM_014062 | 12849.415 | 7462.385  | NM_016033 | 10513.876 | 6843.88   | AB037719  | 1202.063  | 1304.118  |
| NM_006304 | 63630.32  | 62967.621 | NM_013439 | 30225.607 | 29688.287 | AK024694  | 1130.777  | 795.052   |
| X74804    | 1373.488  | 1101.519  | NM_003406 | 45232.383 | 39354.465 | AF086229  | 552.412   | 581.362   |
| AF293367  | 4064.177  | 4634.98   | NM_018316 | 2042.089  | 1888.887  | AK026143  | 1964.708  | 1420.814  |
| AF086231  | 4009.775  | 4002.222  | AB011180  | 1056.808  | 928.263   | AL110252  | 784.78    | 1579.091  |
| AK001494  | 2336.655  | 2246.442  | NM_007167 | 4474.324  | 4209.239  | AL050143  | 1260.391  | 1223.874  |
| AL133438  | 2942.363  | 2445.702  | NM_014832 | 1990.97   | 2290.961  | AL137616  | 745.069   | 559.802   |
| AK022310  | 699.227   | 891.399   | NM_01486E | 7941.164  | 9154.855  | AK021752  | 549.733   | 548.042   |
| AK021784  | 997.069   | 723.488   | AL442089  | 6450.954  | 7987.411  | AL109706  | 5459.652  | 4257.697  |
| AF230800  | 1808.675  | 1767.409  | NM_001200 | 2262.113  | 3963.523  | AK001118  | 560.613   | 598.438   |
| NM_018520 | 1988.42   | 1959.779  | AB007964  | 3246.14   | 7650.924  | AF035291  | 49636.07  | 41898.035 |
| AK026647  | 543.684   | 1132.217  | AF128541  | 5213.475  | 7116.392  | AK026291  | 10830.696 | 9369.756  |
| AK022152  | 1240.643  | 894.004   | AK026305  | 5977.885  | 6679.884  | AK021924  | 899.114   | 1058.658  |
| NM_003534 | 41352.488 | 38714.289 | NM_002552 | 5702.058  | 6023.428  | AL049285  | 833.101   | 803.569   |
| L08437    | 3723.554  | 3678.845  | NM_014321 | 5920.317  | 4630.031  | AL117520  | 643.728   | 707.894   |
| AK057143  | 13057.38  | 12512.414 | AK022733  | 1265.725  | 967.225   | AL049303  | 798.54    | 1227.567  |
| NM_015594 | 25687.568 | 15050.114 | AB011132  | 6772.687  | 5328.416  | AL080208  | 617.42    | 664.103   |
| AF056423  | 3440.567  | 2875.393  | NM_020362 | 15125.594 | 10355.66  | L23851    | 666.433   | 916.03    |
| X04293    | 1594.35   | 690.933   | AB040937  | 1193.513  | 1136.802  | L35592    | 6410.237  | 5923.884  |
| AK026475  | 1920.136  | 973.485   | NM_000095 | 7590.648  | 8355.487  | NM_01207E | 1105.429  | 1076.398  |
| K01884    | 1707.079  | 803.412   | AL137493  | 762.802   | 761.254   | AL360274  | 13367.407 | 12797.509 |
| U00962    | 12336.096 | 7233.453  | NM_00133E | 4477.949  | 4745.938  | AK021858  | 427.006   | 417.349   |
| AK026130  | 29521.527 | 21366.008 | NM_006382 | 2074.379  | 2121.228  | NM_014050 | 6664.992  | 7072.89   |
| NM_012480 | 8487.301  | 8022.55   | NM_004811 | 13332.376 | 12846.174 | AF085854  | 507.193   | 703.329   |
| AK024144  | 16667.135 | 18415.076 | AK021910  | 56846.941 | 60428.656 | AF074997  | 731.788   | 551.458   |
| Y08959    | 4570.816  | 4788.801  | M62402    | 2139.728  | 2890.523  | AK027027  | 717.996   | 481.667   |
| NM_00534E | 24186.006 | 30475.896 | NM_00474E | 1129.072  | 1677.941  | NM_014911 | 484.991   | 629.245   |
| AF086047  | 2314.392  | 1542.801  | NM_00266E | 15947.346 | 11960.053 | AF009289  | 4039.547  | 3187.699  |
| NM_005343 | 25432.104 | 30749.936 | NM_00105E | 341.607   | 1043.272  | AF040247  | 894.966   | 672.821   |
| AF196865  | 2277.012  | 2692.186  | NM_014316 | 43927.852 | 31434.295 | AF056439  | 798.828   | 505.335   |
| AJ008114  | 57461.492 | 49223.59  | NM_004054 | 6126.216  | 4929.926  | AF007835  | 461.669   | 398.638   |
| AJ008141  | 1031.461  | 2507.84   | NM_001138 | 4807.886  | 4229      | AF009303  | 2443.675  | 2000.641  |
| AF147432  | 4127.816  | 3545.984  | NM_007289 | 1724.413  | 1935.253  | NM_004474 | 3354.065  | 4271.426  |
| AK024690  | 1167.854  | 1166.182  | NM_004219 | 61745.742 | 62907.777 | AF056449  | 574.338   | 820.349   |
| BC005946  | 49747.664 | 40638.918 | NM_003443 | 54388.012 | 50880.297 | AK001033  | 1114.032  | 943.197   |
| AK021893  | 3150.879  | 2577.097  | NM_002025 | 7013.175  | 5370.7    | AK001781  | 497.295   | 617.604   |
| NM_00104E | 10039.612 | 9188.419  | AB015228  | 6996.678  | 18301.426 | AK021463  | 898.888   | 930.667   |
| AK026497  | 3353.727  | 3071.074  | AF226048  | 5383.263  | 7419.614  | AK001082  | 2248.587  | 2023.667  |
| BE958139  | 2010.198  | 1800.817  | NM_005573 | 5663.039  | 5128.961  | AK021521  | 284.234   | 908.595   |

|           |           |           |           |           |           |           |           |           |
|-----------|-----------|-----------|-----------|-----------|-----------|-----------|-----------|-----------|
| AF085359  | 1226.289  | 771.258   | D50918    | 12974.236 | 17690.248 | AK021743  | 3073.131  | 2755.006  |
| AF086516  | 1937.304  | 2010.209  | U48734    | 9941.256  | 9450.184  | AK026699  | 783.98    | 541.845   |
| D86978    | 10881.62  | 9335.229  | NM_006400 | 11363.966 | 14888.649 | AK025589  | 4088.44   | 3713.185  |
| AL080060  | 2123.688  | 1460.631  | NM_003903 | 3096.652  | 3280.593  | AK026734  | 1648.011  | 1433.889  |
| NM_005267 | 3215.03   | 3171.639  | NM_017955 | 3960.998  | 4186.798  | NM_016633 | 16967.072 | 11789.681 |
| U80763    | 651.747   | 390.842   | NM_016060 | 7061.486  | 6350.349  | AK023250  | 4373.19   | 3803.387  |
| AF086017  | 1495.323  | 1027.141  | NM_002208 | 23996.094 | 16126.56  | AK024882  | 1716.825  | 1455.342  |
| AK024978  | 14047.841 | 15553.528 | NM_007216 | 2094.065  | 1772.288  | NM_014062 | 8798.311  | 5892.649  |
| U12897    | 4021.66   | 5209.207  | AK023518  | 1457.779  | 1138.478  | NM_006304 | 54282.18  | 42936.914 |
| NM_020357 | 16197.382 | 18618.615 | NM_000944 | 2792.19   | 2137.024  | AF293367  | 1981.34   | 2348.122  |
| NM_018219 | 2590.142  | 3364.158  | NM_012239 | 1577.839  | 1955.453  | AF086231  | 2189.498  | 2053.698  |
| NM_014114 | 2774.059  | 3335.369  | NM_012262 | 1291.968  | 1278.614  | AK001494  | 1747.683  | 1606.594  |
| U62822    | 5836.334  | 6455.25   | NM_013390 | 5948.373  | 5469.833  | AL133438  | 1898.109  | 1697.188  |
| CY3Cy5    | 11459.004 | 1291.033  | NM_002829 | 3348.729  | 1555.294  | AK022310  | 500.883   | 334.458   |
| U36798    | 582.53    | 1637.893  | J02783    | 18042.15  | 17251.326 | AK021784  | 512.846   | 372.278   |
| AA220921  | 6880.598  | 14635.982 | AB044343  | 6303.032  | 6744.56   | AF230800  | 901.522   | 836.352   |
| N67770    | 666.756   | 1013.548  | NM_005178 | 7197.149  | 12112.693 | NM_018520 | 1438.439  | 1218.208  |
| AA486200  | 57917.605 | 60983.926 | NM_017702 | 3225.805  | 10149.272 | NM_003534 | 17734.248 | 15567.305 |
| U90065    | 2779.554  | 4061.752  | AB014516  | 3052.403  | 3344.498  | L08437    | 1639.188  | 1499.66   |
| AJ005898  | 2204.912  | 3207.554  | Z83950    | 1684.999  | 1558.414  | AK057143  | 6140.977  | 7336.988  |
| X57303    | 3266.32   | 4907.475  | AL080063  | 2454.716  | 2613.662  | NM_015594 | 16687.219 | 11300.259 |
| AA463224  | 992.439   | 1359.671  | NM_005625 | 14722.702 | 11196.185 | AK024399  | 66.022    | 319.913   |
| BG248802  | 8740.522  | 9696.569  | X15262    | 3401.009  | 2801.458  | AF056423  | 1872.769  | 1486.449  |
| L19605    | 2094.213  | 2570.232  | NM_005475 | 660.387   | 376.128   | X04293    | 669.755   | 812.394   |
| AA876532  | 12125.7   | 12382.976 | AB040918  | 1719.734  | 1894.553  | AK026475  | 330.271   | 442.077   |
| S74349    | 1300.968  | 1289.498  | NM_015859 | 3106.715  | 2536.312  | K01884    | 411.302   | 432.547   |
| X07979    | 28406.422 | 23342.799 | X60152    | 926.437   | 996.718   | U00962    | 10639.512 | 9523.47   |
| BG744224  | 11254.023 | 10480.518 | NM_002316 | 1958.786  | 1623.67   | NM_000522 | 635.706   | 732.825   |
| NM_006079 | 1968.07   | 1796.743  | AB023232  | 1695.219  | 1519.33   | AK026130  | 15485.88  | 12906.69  |
| NM_006696 | 5105.743  | 4242.524  | NM_002805 | 1244.453  | 870.02    | NM_012480 | 3372.63   | 2505.45   |
| SR5       | 8809.347  | 7832.087  | NM_002939 | 11007.474 | 12182.335 | AK024144  | 7138.942  | 5492.001  |
| SR7       | 7139.52   | 49727.316 | NM_015836 | 26114.781 | 28621.869 | Y08959    | 1178.516  | 1065.194  |
| SR9       | 29611.957 | 4923.532  | NM_004713 | 1475.892  | 904.725   | NM_005346 | 9330.28   | 8072.676  |
| CY3Cy5    | 5942.746  | 233.225   | NM_001698 | 11627.084 | 8825.95   | NM_005343 | 20796.164 | 16703.986 |
| AK002163  | 4247.973  | 7251.889  | NM_000661 | 62058.258 | 60266.508 | AB032985  | 473.562   | 434.202   |
| NM_002287 | 6992.386  | 13194.662 | NM_000973 | 58522.734 | 59045.297 | AJ008114  | 41802.23  | 26892.395 |
| NM_012344 | 1504.806  | 1931.22   | AF086431  | 1561.053  | 1619.652  | BC005946  | 40649.953 | 35285.496 |
| NM_002351 | 29807.33  | 33235.141 | NM_014188 | 45605.527 | 46085.082 | AK021893  | 1658.722  | 1354.903  |
| NM_014385 | 1937.942  | 2238.735  | AK026365  | 2653.239  | 2414.175  | NM_001048 | 4138.708  | 4372.246  |
| NM_001704 | 551.192   | 497.772   | S70004    | 2735.888  | 2167.451  | AK026497  | 1759.867  | 1435.646  |
| AB036432  | 4722.75   | 4239.706  | AB032987  | 1272.176  | 1054.157  | BE958139  | 1203.492  | 990.992   |
| NM_014872 | 3839.97   | 3524.62   | NM_017567 | 7864.353  | 7000.586  | AF085359  | 441.081   | 459.159   |
| NM_003480 | 1354.394  | 1265.963  | D86971    | 11724.875 | 8876.006  | AF086516  | 636.422   | 727.938   |
| NM_000899 | 659.197   | 492.772   | NM_003073 | 8609.6    | 8973.446  | D86978    | 3890.676  | 3522.737  |
| NM_032951 | 3467.04   | 3064.033  | NM_014048 | 812.55    | 809.376   | AF086017  | 660.967   | 471.648   |
| NM_000503 | 5785.082  | 4493.583  | AF274863  | 1038.384  | 1498.177  | NM_005780 | 610.688   | 558.625   |
| NM_002405 | 10924.194 | 9799.166  | AF024697  | 3051.969  | 2961.48   | AK024978  | 7773.26   | 7567.779  |
| AK000004  | 1576.666  | 1644.207  | NM_018651 | 571.318   | 466.703   | U12897    | 1390.76   | 1306.376  |
| NM_012421 | 15572.764 | 16384.959 | AF164156  | 468.051   | 337.918   | NM_020357 | 9397.533  | 6760.392  |
| AB014601  | 1366.24   | 1077.522  | NM_005612 | 4301.05   | 2438.978  | AK026836  | 1446.152  | 878.09    |
| AK001393  | 9840.946  | 8528.266  | D17018    | 596.267   | 1121.81   | T59562    | 11477.271 | 7480.537  |
| NM_000023 | 5283.759  | 3811.763  | AB046852  | 1013.178  | 883.505   | NM_018219 | 1331.496  | 1074.619  |
| AF022654  | 887.969   | 748.822   | AF086167  | 983.118   | 875.015   | AF147414  | 1461.004  | 1345.913  |

|           |           |           |           |           |           |           |           |           |
|-----------|-----------|-----------|-----------|-----------|-----------|-----------|-----------|-----------|
| NM_001143 | 1173.447  | 606.754   | AL109727  | 2556.121  | 1429.366  | U62822    | 4058.512  | 2756.47   |
| AK022638  | 8312.768  | 6940.379  | AF085891  | 4286.285  | 4629.992  | CY3Cy5    | 5892.31   | 321.557   |
| BG698409  | 1766.693  | 1731.568  | AF019618  | 1797.601  | 1815.012  | U36798    | 583.173   | 395.875   |
| M91368    | 768.566   | 844.25    | AK025656  | 1829.209  | 1288.385  | AA220921  | 5262.494  | 9294.83   |
| AF224741  | 670.294   | 915.876   | AF138859  | 1207.334  | 740.334   | N67770    | 654.316   | 1073.479  |
| NM_006594 | 1879.832  | 2451.446  | AF161414  | 4148.682  | 3459.147  | AA486200  | 56783.969 | 70047.773 |
| NM_004177 | 1732.823  | 1306.856  | AK025967  | 753.412   | 801.052   | U90065    | 2508.976  | 2955.457  |
| NM_012429 | 1631.04   | 2372.748  | AL110177  | 1366.673  | 933.273   | AJ005898  | 1379.492  | 2180.462  |
| NM_004871 | 2517.384  | 2748.602  | NM_002763 | 13237.931 | 11593.771 | X57303    | 2101.276  | 3983.346  |
| NM_005698 | 7836.067  | 8226.115  | NM_015434 | 1302.673  | 1268.478  | AA463224  | 1097.476  | 1682.628  |
| AF202146  | 9097.07   | 6582.484  | NM_014055 | 1961.526  | 1562.064  | BG248802  | 5733.571  | 7433.39   |
| NM_014923 | 981.226   | 772.526   | NM_018691 | 1751.469  | 1627.999  | L19605    | 1195.327  | 1315.442  |
| NM_005477 | 4942.905  | 5006.279  | AK001020  | 650.058   | 671.887   | AA876532  | 5266.485  | 5467.791  |
| NM_007018 | 650.016   | 501.119   | AK022098  | 1389.083  | 1457.472  | S74349    | 559.449   | 597.998   |
| NM_004318 | 990.253   | 899.964   | AB040933  | 998.253   | 1253.612  | BG744224  | 8041.1    | 7739.921  |
| NM_002640 | 4704.477  | 7055.341  | AK021875  | 654.811   | 465.063   | NM_006079 | 1796.182  | 1875.732  |
| M15530    | 6900.134  | 6546.127  | AK022072  | 1305.73   | 1130.156  | NM_006696 | 3733.701  | 3213.743  |
| NM_000488 | 701.759   | 592.297   | AK026900  | 7396.235  | 6378.167  | SR5       | 7578.07   | 7574.028  |
| NM_001877 | 1432.808  | 1675.521  | AK025020  | 6312.868  | 4902.521  | SR7       | 6220.464  | 45592.582 |
| NM_014207 | 11305.983 | 15274.107 | AF086009  | 1563.735  | 1817.67   | SR9       | 22081.473 | 4145.518  |
| NM_004059 | 645.225   | 676.571   | AF086463  | 2734.276  | 3167.708  | CY3Cy5    | 4286.966  | 215.008   |
| NM_001634 | 19123.922 | 14040.911 | AK024130  | 645.842   | 678.22    | AK002163  | 1046.511  | 1287.369  |
| NM_002267 | 5483.42   | 5682.416  | AK024598  | 1910.996  | 2033.658  | NM_002351 | 27725.471 | 28824.426 |
| NM_006412 | 4756.383  | 3867.107  | AF087983  | 851.656   | 717.859   | NM_014385 | 1300.233  | 2311.393  |
| NM_003063 | 5756.961  | 6971.534  | NM_020234 | 4045.627  | 3930.089  | AB036432  | 5171.355  | 6845.577  |
| NM_014041 | 49366.668 | 48752.633 | Z36825    | 1869.28   | 1994.075  | NM_014872 | 15862.864 | 22527.07  |
| NM_007169 | 6421.472  | 4723.431  | U30889    | 705.847   | 872.522   | NM_003480 | 668.898   | 466.72    |
| NM_014313 | 859.928   | 823.74    | AF086157  | 2070.537  | 2004.193  | NM_032951 | 1742.997  | 2121.128  |
| AK024966  | 1525.249  | 1231.995  | AL109710  | 679.658   | 1078.735  | NM_002405 | 2152.698  | 1717.989  |
| AF178941  | 10818.875 | 8619.002  | AK023793  | 2504.881  | 3003.756  | NM_012421 | 18301.479 | 22142.705 |
| NM_016033 | 9553.615  | 10670.028 | AK023286  | 2797.136  | 2668.599  | AB014601  | 1252.272  | 1174.362  |
| NM_017585 | 7045.705  | 6108.698  | AK021544  | 531.035   | 447.949   | AK001393  | 9940.075  | 9886.563  |
| U61737    | 34789.242 | 26842.705 | AL079282  | 638.493   | 1684.623  | AF022654  | 654.985   | 457.204   |
| X06389    | 1083.454  | 2520.113  | AF116714  | 498.915   | 888.07    | NM_001143 | 796.923   | 626.199   |
| NM_000033 | 2118.239  | 2650.713  | NM_014058 | 988.731   | 1298.749  | AK022638  | 9222.019  | 8011.358  |
| NM_014861 | 1053.797  | 961.904   | AK026340  | 697.759   | 1179.562  | BG698409  | 1895.942  | 1405.008  |
| NM_012434 | 714.474   | 805.872   | AK027170  | 939.446   | 1494.471  | NM_012429 | 1161.019  | 1689.662  |
| NM_005694 | 10368.294 | 9631.73   | AK022686  | 4512.434  | 4533      | NM_004871 | 2154.691  | 3148.587  |
| NM_014868 | 8523.903  | 8174.985  | AK023516  | 3881.948  | 3858.754  | NM_005698 | 6444.894  | 9385.499  |
| AL442089  | 4826.798  | 5164.844  | AK023864  | 3396.362  | 3284.28   | AF202146  | 6250.377  | 5062.488  |
| NM_001200 | 1592.218  | 1573.051  | AK023017  | 4169.741  | 3632.968  | NM_002640 | 4072.414  | 7071.674  |
| AB007964  | 967.069   | 846.037   | AK023908  | 4656.303  | 3649.87   | M15530    | 7166.427  | 6217.677  |
| AF128541  | 3889.57   | 3379.474  | AK024236  | 740.065   | 523.519   | NM_001877 | 1435.374  | 1110.673  |
| AK026305  | 3874.971  | 4125.074  | Z24724    | 4960.398  | 5189.81   | NM_014207 | 10031.01  | 8486.754  |
| NM_002552 | 5164.82   | 5257.641  | AK022712  | 8367.795  | 7146.751  | NM_001634 | 3647.946  | 2720.692  |
| NM_014321 | 6571.151  | 7804.576  | AK021863  | 18138.256 | 14304.188 | NM_002267 | 4579.113  | 5857.867  |
| AK022733  | 1515.782  | 1426.034  | NM_005684 | 956.491   | 941.79    | NM_006412 | 1855.122  | 1837.852  |
| AB011132  | 7063.114  | 9979.802  | NM_014565 | 7002.89   | 6521.624  | NM_003063 | 3875.858  | 5376.454  |
| NM_020362 | 11105.987 | 21870.822 | AJ011377  | 1815.185  | 2284.035  | AK024966  | 1336.872  | 1577.627  |
| AB040937  | 1207.593  | 2080.962  | AL137734  | 1242.614  | 682.564   | AF178941  | 7058.642  | 6062.077  |
| AF275798  | 29163.43  | 49361.684 | AK026323  | 1882.885  | 1227.593  | NM_016033 | 5944.32   | 7050.367  |
| NM_005441 | 13018.715 | 21505.066 | NM_003493 | 57151.059 | 57190.91  | U61737    | 11966.563 | 9999.957  |
| NM_016079 | 19249.348 | 29951.461 | AL133430  | 17166.838 | 15727.876 | X06389    | 1121.606  | 1475.109  |

|           |           |           |           |           |           |           |           |           |
|-----------|-----------|-----------|-----------|-----------|-----------|-----------|-----------|-----------|
| AK023108  | 2740.298  | 3825.4    | AF070633  | 34619.41  | 31744.242 | NM_000033 | 1842.4    | 1446.671  |
| AK026409  | 14609.538 | 14510.63  | AF054996  | 13200.313 | 11983.988 | NM_014861 | 808.463   | 787.698   |
| AF097025  | 8760.304  | 10119.258 | AL133555  | 1261.556  | 1904.716  | NM_012434 | 602.579   | 482.187   |
| Y11339    | 7056.331  | 6577.999  | AK024979  | 21394.852 | 22133.902 | NM_005694 | 8265.702  | 6311.75   |
| AB030176  | 1101.171  | 1136.68   | AF233648  | 1713.768  | 1551.26   | AL442089  | 464.427   | 584.583   |
| NM_002537 | 9776.351  | 8849.309  | NM_018584 | 1154.531  | 2339.693  | NM_001200 | 936.61    | 1465.781  |
| NM_003139 | 8275.148  | 5824.017  | AK026776  | 832.793   | 1595.508  | AB007964  | 3824.094  | 3071.791  |
| NM_012316 | 7121.203  | 5444.111  | AY007126  | 8922.376  | 11078.145 | AF128541  | 3395.078  | 4874.398  |
| AF022654  | 559.134   | 593.622   | AF085951  | 4089.268  | 3529.211  | NM_014321 | 2929.198  | 3689.37   |
| NM_001143 | 768.859   | 876.745   | AF131787  | 761.319   | 963.126   | AB011132  | 1956.157  | 2756.785  |
| NM_003282 | 337.183   | 591.125   | AF087989  | 1107.657  | 892.403   | NM_020362 | 10751.446 | 13078.174 |
| AK022638  | 7660.249  | 8953.591  | Z70715    | 1133.185  | 970.013   | AB040937  | 7281.645  | 8076.072  |
| BG698409  | 1521.607  | 1863.999  | NM_018182 | 4903.046  | 3979.635  | AF275798  | 15242.318 | 19916.604 |
| AA220921  | 3448.085  | 7647.466  | U80771    | 7794.55   | 5264.729  | NM_016079 | 3357.96   | 3483.831  |
| N67770    | 861.078   | 1587.512  | AJ272173  | 13019.268 | 9543.669  | AK023108  | 2485.696  | 2714.361  |
| AA486200  | 60614.656 | 64094.531 | Y17180    | 62415.348 | 72445.469 | AK026409  | 16880.477 | 15941.438 |
| U90065    | 3804.009  | 4538.361  | NM_005649 | 2926.199  | 3747.721  | AF097025  | 7538.974  | 7200.448  |
| AJ005898  | 2602.161  | 3031.452  | NM_002037 | 5493.561  | 5135.755  | Y11339    | 7805.451  | 8415.163  |
| X57303    | 3458.245  | 4830.382  | NM_020157 | 22733.643 | 20429.359 | AB030176  | 1073.247  | 1556.444  |
| AA463224  | 1150.728  | 1341.644  | X64991    | 1417.277  | 1514.622  | NM_003937 | 585.014   | 608.73    |
| BG248802  | 8185.676  | 8349.465  | NM_018322 | 8893.488  | 8903.191  | NM_002537 | 8787.023  | 7184.928  |
| L19605    | 2031.26   | 1956.265  | AK025862  | 18157.045 | 15812.015 | NM_003139 | 6457.106  | 4757.902  |
| AA876532  | 11054.036 | 9992.529  | AK026495  | 1738.943  | 1366.707  | NM_012316 | 6835.703  | 5815.297  |
| S74349    | 1258.479  | 1210.95   | AK025052  | 3063.088  | 3036.576  | AF022654  | 889.429   | 1819.21   |
| X07979    | 29251.881 | 21072.229 | NM_014388 | 1593.18   | 2397.409  | AK022638  | 598.976   | 964.802   |
| BG744224  | 10916.417 | 9649.358  | U85044    | 1234.302  | 803.388   | BG698409  | 1739.921  | 2751.206  |
| NM_006079 | 2392.045  | 1727.043  | BC018880  | 805.202   | 1073.743  | AA220921  | 3177.737  | 5186.419  |
| NM_006696 | 5264.092  | 4042.606  | AF086090  | 1816.029  | 2005.272  | AA486200  | 56334.539 | 71901.914 |
| NM_018026 | 3794.134  | 2426.653  | AK002173  | 18846.109 | 17758.451 | U90065    | 2711.703  | 2809.279  |
| NM_001707 | 19720.629 | 12464.274 | NM_017746 | 1126.26   | 868.938   | AJ005898  | 1769.699  | 2478.045  |
| M15530    | 5717.862  | 9060.626  | NM_020188 | 26435.227 | 18426.146 | X57303    | 1955.657  | 2679.489  |
| NM_001877 | 1108.521  | 1654.038  | M87929    | 894.626   | 420.324   | AA463224  | 890.009   | 767.074   |
| NM_014207 | 9714.881  | 11465.849 | U88897    | 6852.934  | 4973.557  | S74349    | 484.428   | 622.821   |
| AF169158  | 1562.894  | 2119.539  | CY3Cy5    | 3556.479  | 237.682   | X07979    | 26103.814 | 24037.422 |
| AK002163  | 3974.184  | 4354.985  | BG617923  | 254.433   | 1043.917  | BG744224  | 11875.732 | 10227.473 |
| NM_002287 | 7341.175  | 8562.364  | U37448    | 2501.898  | 3777.636  | NM_006079 | 2029.197  | 1875.411  |
| NM_012344 | 2174.473  | 1854.695  | BG435851  | 373.125   | 678.177   | NM_006696 | 4034.205  | 3121.846  |
| NM_002351 | 32611.24  | 28249.768 | AA927698  | 3416.005  | 3068.528  | NM_018026 | 3272.337  | 2039.209  |
| NM_014385 | 2661.076  | 2476.372  | AI498426  | 743.843   | 753.241   | NM_001707 | 16520.793 | 13450.892 |
| NM_001704 | 850.617   | 624.404   | D01038    | 16225.417 | 13299.954 | NM_002287 | 5386.478  | 8943.144  |
| AB036432  | 4731.503  | 3543.562  | AB019205  | 1914.366  | 4277.378  | NM_012344 | 884.568   | 1361.301  |
| NM_014872 | 5271.793  | 4841.409  | J05008    | 1631.954  | 4120.874  | NM_002351 | 25533.453 | 27827.918 |
| NM_003643 | 540.606   | 401.739   | U11087    | 759.973   | 1188.92   | NM_014385 | 818.484   | 1249.011  |
| NM_003480 | 1271.206  | 902.989   | D50640    | 1755.951  | 2340.946  | NM_003643 | 2624.934  | 3753.714  |
| NM_032951 | 3785.929  | 3808.056  | D43747    | 753.792   | 1566.444  | NM_003480 | 951.139   | 1092.23   |
| NM_000503 | 7194.546  | 5620.609  | M98776    | 2500.47   | 5106.961  | NM_000899 | 7549.621  | 9844.64   |
| NM_002405 | 11892.862 | 10368.669 | X99135    | 59313.699 | 54503.715 | NM_032951 | 2971.135  | 2754.448  |
| AK000004  | 1720.049  | 1449.177  | AF009744  | 2089.223  | 1677.974  | NM_000503 | 6049.738  | 4581.9    |
| NM_012421 | 18700.977 | 16623.533 | NM_172140 | 4169.377  | 4731.139  | NM_002405 | 10054.601 | 9716.715  |
| AB014601  | 1150.924  | 1136.499  | SR2       | 56962.742 | 57792.031 | AK000004  | 2106.02   | 2018.943  |
| AK001393  | 9573.147  | 8148.9    | SR4       | 20789.625 | 16680.412 | NM_012421 | 19294.016 | 18266.68  |
| NM_000023 | 4618.032  | 3454.343  | SR6       | 3481.639  | 2720.252  | AB014601  | 1156.374  | 1028.502  |
| NM_014861 | 782.54    | 891.995   | SR8       | 12039.765 | 27667.406 | AK001393  | 11364.883 | 9996.494  |



|           |           |           |           |           |           |           |           |           |
|-----------|-----------|-----------|-----------|-----------|-----------|-----------|-----------|-----------|
| NM_012434 | 394.878   | 676.025   | SR10      | 40970.504 | 11249.604 | NM_000023 | 4655.453  | 4328.517  |
| NM_005694 | 8561.487  | 8878.62   | CY3Cy5    | 2436.254  | 160.044   | NM_005694 | 3795.471  | 4775.125  |
| M91368    | 445.421   | 526.506   | NM_005311 | 1375.649  | 2523.624  | M91368    | 438.636   | 651.413   |
| AF224741  | 710.631   | 650.071   | NM_005905 | 3597.174  | 5339.849  | NM_006594 | 2416.431  | 3561.47   |
| NM_006594 | 1960.25   | 1635.182  | NM_016235 | 713.273   | 1483.77   | NM_005694 | 5490.125  | 6149.615  |
| NM_004177 | 2062.134  | 1196.669  | NM_000960 | 662.332   | 988.669   | AF202146  | 6843.893  | 5231.119  |
| NM_012429 | 1892.808  | 1648.171  | AF172932  | 820.193   | 1606.805  | NM_006393 | 566.568   | 788.938   |
| NM_004871 | 3278.461  | 2904.491  | NM_005359 | 1355.46   | 1703.989  | NM_014923 | 889.099   | 709.225   |
| NM_005694 | 8425.493  | 7910.931  | NM_002511 | 1823.766  | 1971.486  | NM_005477 | 7807.961  | 6918.231  |
| AF202146  | 10588.14  | 7085.313  | AF295378  | 4023.476  | 6284.459  | NM_004314 | 1067.486  | 607.668   |
| NM_014923 | 1012.447  | 1094.532  | AF320908  | 1710.538  | 3125.693  | NM_002640 | 4468.87   | 5633.894  |
| NM_005477 | 5481.367  | 5036.054  | NM_004085 | 4549.027  | 8082.822  | Y11339    | 4865.627  | 6304.909  |
| NM_004314 | 904.194   | 648.689   | NM_012445 | 25459.615 | 29262.578 | AB030176  | 479.608   | 979.361   |
| NM_002640 | 4619.558  | 6055.026  | NM_018104 | 3054.096  | 4021.761  | NM_002537 | 1435.348  | 1576.535  |
| Y11339    | 7261.678  | 7996.635  | NM_006080 | 337.143   | 942.019   | NM_003139 | 661.28    | 731.579   |
| AB030176  | 1217.255  | 1228.784  | NM_004429 | 3589.46   | 3850.33   | NM_002267 | 4619.207  | 6390.158  |
| NM_002537 | 8372.939  | 8824.738  | U64564    | 1594.932  | 1421.426  | NM_007169 | 3662.003  | 2827.125  |
| NM_003139 | 7594.206  | 7236.601  | NM_006470 | 1908.935  | 2238.651  | NM_014313 | 477.78    | 894.109   |
| NM_012316 | 8429.757  | 11922.627 | NM_002855 | 5247.133  | 5932.419  | AK024966  | 1373.154  | 1535.985  |
| NM_004059 | 878.51    | 523.02    | AB038463  | 1187.768  | 822.245   | AF178941  | 14866.248 | 14112.125 |
| NM_001634 | 20421.969 | 15542.845 | M30262    | 3393.692  | 3383.734  | NM_016033 | 8442.11   | 8047.551  |
| NM_002267 | 6447.347  | 5766.034  | NM_005460 | 1264.028  | 1458.361  | NM_017585 | 7311.03   | 5380.195  |
| NM_006412 | 4870.164  | 3413.099  | AF160477  | 3208.188  | 3156.637  | U61737    | 35267.965 | 22032.617 |
| NM_003063 | 6898.226  | 6064.002  | NM_003226 | 463.148   | 725.794   | X06389    | 1059.152  | 1172.075  |
| NM_014041 | 52124.379 | 43466.789 | M12883    | 4573.355  | 5003.982  | NM_000033 | 2403.846  | 1723.731  |
| NM_007169 | 6928.844  | 4687.531  | BG288747  | 9603.2    | 8121.873  | NM_006079 | 1368.9    | 1816.554  |
| NM_014313 | 795.722   | 723.086   | AI524814  | 2939.366  | 4125.717  | NM_006696 | 2003.265  | 2086.715  |
| AK024966  | 1458.684  | 1313.882  | AB024411  | 2625.594  | 4288.996  | NM_018026 | 1040.191  | 1221.784  |
| AF178941  | 12900.089 | 9713.124  | NM_002444 | 25797.143 | 41503.598 | NM_001707 | 3361.948  | 3542.356  |
| NM_016033 | 9524.769  | 10720.022 | NM_001104 | 1498.879  | 2842.034  | AK022983  | 689.746   | 728.513   |
| NM_017585 | 6742.468  | 4888.245  | NM_002989 | 6576.791  | 8457.534  | AK026305  | 2946.406  | 2780.862  |
| U61737    | 28892.213 | 19929.666 | U88898    | 8105.24   | 12128.139 | NM_002552 | 2692.221  | 3374.753  |
| X06389    | 950.98    | 1397.033  | NM_020154 | 28065.832 | 18852.34  | NM_014321 | 3399.773  | 4148.213  |
| NM_000033 | 1868.306  | 1442.168  | NM_004665 | 1870.623  | 1418.48   | AK022733  | 760.219   | 901.958   |
| NM_006079 | 2291.76   | 2330.051  | NM_005300 | 1118.249  | 2338.478  | AB011132  | 3899.324  | 3811.103  |
| NM_006696 | 4474.373  | 4433.107  | NM_000893 | 1527.948  | 2281.099  | NM_020362 | 9071.227  | 11134.287 |
| AK022983  | 824.58    | 240.306   | NM_000698 | 36172.258 | 52421.113 | AB040937  | 897.796   | 651.974   |
| NM_014864 | 11920.229 | 7983.81   | AF031167  | 2259.482  | 3012.498  | AF275798  | 18853.855 | 17584.166 |
| AL442089  | 6222.373  | 5531.607  | NM_003204 | 3582.574  | 3542.563  | NM_005441 | 9009.628  | 6934.199  |
| NM_001200 | 1986.482  | 1707.924  | AF254069  | 1004.58   | 901.504   | NM_016079 | 14600.322 | 10787.274 |
| AB007964  | 953.357   | 699.252   | AL117600  | 11616.308 | 10633.302 | AK023108  | 2706.921  | 2167.867  |
| AF128541  | 8067.199  | 5539.859  | NM_004487 | 15854.155 | 18278.955 | AK026409  | 22352.695 | 13797.445 |
| AK026305  | 4882.224  | 5030.91   | AB029000  | 6244.216  | 7813.438  | AF097025  | 8440.127  | 5699.507  |
| NM_002552 | 5319.17   | 5381.872  | AK026965  | 23440.012 | 29001.863 | NM_002405 | 7632.31   | 9044.531  |
| NM_014321 | 6359.26   | 7678.355  | AK025859  | 6366.021  | 6115.488  | AK000004  | 970.506   | 1248.034  |
| AK022733  | 1448.466  | 1324.945  | AL117499  | 14772.586 | 13580.655 | NM_012421 | 7965.912  | 10662.537 |
| AB011132  | 7362.51   | 7352.099  | NM_007054 | 1703.684  | 1680.653  | AK001393  | 2106.308  | 2553.347  |
| NM_020362 | 10435.649 | 15037.948 | AK000160  | 4433.789  | 3997.864  | NM_000023 | 1715.408  | 2008.115  |
| AB040937  | 1147.226  | 1285.577  | NM_006032 | 4513.883  | 6737.527  | NM_001143 | 680.985   | 475.588   |
| AF275798  | 26246.307 | 30904.322 | NM_014788 | 2723.376  | 3327.544  | AK022638  | 6613.171  | 9699.88   |
| NM_005441 | 10481.118 | 11213.034 | NM_002153 | 1101.124  | 1734.098  | BG698409  | 855.641   | 762.526   |
| NM_016079 | 16114.305 | 18296.115 | AB040890  | 5229.212  | 9589.873  | AA220921  | 4383.663  | 6386.031  |
| AK023108  | 2256.001  | 3152.996  | AK024233  | 1698.774  | 2877.896  | AA486200  | 51566.406 | 65746.742 |

|           |           |           |           |           |           |           |           |           |
|-----------|-----------|-----------|-----------|-----------|-----------|-----------|-----------|-----------|
| AK026409  | 13505.778 | 11083.825 | AK021870  | 1592.811  | 2581.933  | U90065    | 1972.011  | 1370.884  |
| AF097025  | 8162.713  | 8004.023  | U06680    | 1100.684  | 1142.725  | AJ005898  | 1660.043  | 1734.553  |
| NM_002405 | 9963.532  | 12061.183 | NM_005123 | 551.866   | 1044.864  | X57303    | 2710.445  | 2947.06   |
| AK000004  | 1801.488  | 2602.844  | NM_015584 | 10181.952 | 18806.43  | AA463224  | 812.54    | 877.313   |
| NM_012421 | 17545.574 | 24910.627 | AB032525  | 197.213   | 1189.18   | BG248802  | 6130.677  | 4212.308  |
| AF022654  | 885.617   | 953.49    | NM_002063 | 916.971   | 1419.674  | L19605    | 1516.898  | 1503.58   |
| NM_001143 | 811.038   | 827.276   | NM_006667 | 56001.012 | 55162.16  | AA876532  | 7713.985  | 5405.868  |
| AK022638  | 7224.05   | 8684.435  | NM_000815 | 1377.75   | 1059.507  | S74349    | 877.361   | 403.355   |
| BG698409  | 1447.439  | 1558.963  | NM_001293 | 745.623   | 808.32    | X07979    | 18177.748 | 11701.385 |
| AA220921  | 6920.664  | 10319.384 | AB023173  | 5101.618  | 5117.761  | BG744224  | 9955.404  | 6635.799  |
| N67770    | 844.364   | 775.54    | AF156548  | 3984.895  | 4654.972  | NM_005477 | 5315.702  | 6431.719  |
| AA486200  | 59268.668 | 61156.523 | NM_000387 | 15504.394 | 14124.37  | NM_004318 | 621.994   | 804.316   |
| U90065    | 3604.231  | 3096.495  | NM_004663 | 1958.705  | 1986.681  | NM_002640 | 1195.931  | 2561.444  |
| AJ005898  | 2602.946  | 2537.578  | NM_015310 | 1224.992  | 1473.515  | M15530    | 4703.059  | 6296.725  |
| X57303    | 3433.602  | 4669      | NM_016154 | 20267.344 | 20752.432 | NM_014207 | 4865.7    | 4805.676  |
| AA463224  | 1099.037  | 1376.907  | AB002338  | 1838.313  | 1554.008  | AK002163  | 2358.846  | 3047.452  |
| BG248802  | 8565.282  | 9353.127  | NM_001072 | 1505.908  | 2198.895  | NM_002287 | 5035.08   | 7546.495  |
| L19605    | 2093.709  | 2310.647  | NM_014070 | 1093.688  | 1307.438  | NM_012344 | 1322.03   | 1531.154  |
| AA876532  | 10278.545 | 11672.146 | NM_016280 | 357.386   | 808.717   | NM_002351 | 20715.229 | 15122.671 |
| S74349    | 949.983   | 1018.872  | NM_016027 | 1298.97   | 891.649   | NM_014385 | 1451.206  | 1511.24   |
| X07979    | 24352.959 | 24063.15  | NM_014297 | 8866.03   | 10648.368 | AB036432  | 4352.542  | 2875.206  |
| BG744224  | 11114.578 | 10740.088 | NM_018156 | 17130.783 | 20946.383 | NM_014872 | 3837.782  | 2654.947  |
| NM_005477 | 5508.489  | 8209.801  | X98266    | 1236.904  | 919.194   | NM_003480 | 1003.262  | 625.568   |
| NM_004318 | 730.684   | 1200.552  | U00930    | 8939.566  | 8703.773  | NM_000895 | 425.364   | 352.861   |
| X03084    | 340.764   | 596.955   | AK024958  | 784.867   | 897.411   | NM_032951 | 2542.316  | 2224.537  |
| M15530    | 5999.289  | 6473.822  | AL117552  | 1539.266  | 1992.186  | NM_000503 | 4367.641  | 2932.716  |
| NM_001877 | 866.992   | 1695.598  | NM_002692 | 9164.858  | 16153.689 | NM_017585 | 4516.441  | 4717.323  |
| NM_014207 | 9673.73   | 10146.343 | AB023190  | 31370.613 | 34203.27  | U61737    | 23969.412 | 22102.443 |
| AK002163  | 4644.094  | 5615.515  | NM_007064 | 1684.16   | 1364.517  | X06389    | 408.31    | 783.482   |
| NM_002287 | 8293.282  | 10900.808 | NM_006281 | 2060.095  | 947.055   | NM_000033 | 1122.474  | 1433.158  |
| NM_012344 | 1634.976  | 1702.961  | NM_002738 | 7228.868  | 7742.597  | NM_014861 | 641.362   | 903.242   |
| NM_002351 | 32651.318 | 26459.42  | U23460    | 35088.602 | 31039.875 | NM_012434 | 454.243   | 434.391   |
| NM_014385 | 2529.243  | 2140.727  | Z25434    | 4565.612  | 4621.511  | NM_005694 | 4155.279  | 3587.599  |
| NM_001704 | 466.682   | 736.307   | NM_005884 | 11313.317 | 16186.424 | AF224741  | 469.712   | 567.359   |
| AB036432  | 4757.566  | 5040.581  | NM_012399 | 11351.546 | 12747.485 | NM_006594 | 1641.121  | 1703.426  |
| NM_014872 | 4739.428  | 5063.025  | AF229804  | 46972.691 | 52703.75  | NM_004177 | 1104.943  | 780.94    |
| NM_003643 | 527.071   | 506.308   | U90552    | 9626.257  | 10550.136 | NM_012425 | 1274.108  | 1195.956  |
| NM_003480 | 1240.063  | 1040.779  | NM_005460 | 789.104   | 1124.338  | NM_004871 | 1486.177  | 1209.746  |
| NM_000895 | 244.914   | 871.284   | AF160477  | 2094.547  | 3118.134  | AB040903  | 867.714   | 1385.851  |
| NM_032951 | 3112.961  | 3024.145  | NM_003226 | 391.678   | 794.777   | NM_005695 | 6896.133  | 4255.598  |
| NM_000503 | 5047.222  | 4662.789  | M12883    | 4315.223  | 5252.28   | AF202146  | 8148.58   | 4042.308  |
| NM_017585 | 5542.125  | 6977.368  | BG288747  | 8553.119  | 9344.452  | NM_006393 | 665.168   | 547.255   |
| U61737    | 12489.659 | 15379.415 | BG617923  | 1388.139  | 2972.657  | NM_014923 | 718.524   | 559.07    |
| X06389    | 812.46    | 1609.973  | U37448    | 2193.803  | 3083.882  | AF275798  | 15097.359 | 21017.859 |
| NM_000033 | 2799.254  | 2990.761  | AA927698  | 2625.962  | 2208.441  | NM_005441 | 7427.623  | 9693.19   |
| NM_014861 | 663.16    | 934.085   | AI498426  | 779.315   | 878.812   | NM_016075 | 13941.161 | 19102.248 |
| NM_012434 | 379.879   | 784.459   | D01038    | 19389.572 | 29562.082 | AK023108  | 2467.813  | 3340.082  |
| NM_005694 | 8881.699  | 10600.567 | AB019205  | 1409.069  | 1100.182  | AK026409  | 17813.617 | 21597.602 |
| M91368    | 763.828   | 923.114   | J05008    | 1691.741  | 3465.148  | AF097025  | 4601.266  | 6824.902  |
| AF224741  | 990.083   | 825.503   | U11087    | 915.766   | 1108.56   | Y11339    | 2926.441  | 3784.124  |
| NM_006594 | 2410.477  | 2871.259  | D50640    | 1947.628  | 2223.056  | NM_003937 | 291.417   | 304.782   |
| NM_004177 | 2097.671  | 1486.167  | D43747    | 1005.213  | 557.221   | NM_002537 | 8341.468  | 13140.043 |
| NM_012425 | 1857.333  | 1687.755  | M98776    | 2638.299  | 2767.86   | NM_003135 | 2514.558  | 2614.411  |

|           |           |           |           |           |           |           |           |           |
|-----------|-----------|-----------|-----------|-----------|-----------|-----------|-----------|-----------|
| NM_004871 | 2797.193  | 2825.63   | X99135    | 56136.93  | 46792.48  | NM_01231E | 5502.972  | 6449.896  |
| NM_00569E | 9684.05   | 10203.816 | AF009744  | 2062.103  | 1731.946  | NM_00405E | 432.618   | 488.928   |
| AF202146  | 10646.049 | 8258.5    | NM_17214C | 4432.062  | 3577.052  | NM_001634 | 12144.427 | 9655.61   |
| NM_00639E | 648.964   | 688.868   | AK026965  | 13508.786 | 18191.99  | NM_002267 | 4260.206  | 4216.581  |
| NM_01492E | 1229.018  | 1021.597  | AK025859  | 4833.987  | 5053.316  | NM_00641E | 3307.303  | 2497.571  |
| AF275798  | 24399.904 | 34679.777 | AL117499  | 11579.962 | 15599.06  | NM_00306E | 4931.04   | 4468.461  |
| NM_01607E | 14721.68  | 22070.293 | NM_007054 | 1734.113  | 2423.101  | NM_014041 | 39547.582 | 28015.629 |
| AK023108  | 1741.214  | 2601.46   | AK000160  | 2797.347  | 3519.461  | NM_00716E | 4653.057  | 2141.436  |
| AK026409  | 8680.288  | 10541.833 | NM_005311 | 759.261   | 1108.326  | NM_01431E | 540.098   | 426.127   |
| AF097025  | 5100.123  | 7491.96   | NM_00590E | 4176.841  | 3237.836  | AK024966  | 1450.945  | 1038.721  |
| Y11339    | 5484.171  | 7394.391  | NM_01623E | 837.656   | 916.501   | AF178941  | 12984.238 | 10380.209 |
| AB030176  | 881.233   | 1654.932  | NM_00096C | 628.63    | 662.285   | NM_01603E | 7871.639  | 5708.413  |
| NM_002537 | 8784.464  | 10972.572 | AF172932  | 977.777   | 1376.001  | NM_01343E | 19235.488 | 18913.795 |
| NM_00313E | 7360.349  | 7151.42   | NM_00535E | 794.04    | 1457.939  | NM_00340E | 39590.332 | 40428.309 |
| NM_01231E | 6394.053  | 7285.947  | NM_002511 | 1584.395  | 1586.459  | NM_01831E | 1998.293  | 2028.24   |
| NM_00405E | 651.999   | 515.235   | AF295378  | 4296.725  | 5085.791  | AB011180  | 935.514   | 1148.393  |
| NM_001634 | 20640.449 | 17134.385 | AF320908  | 1889.91   | 1511.469  | NM_007167 | 4014.622  | 5173.115  |
| NM_002267 | 7275.805  | 8234.256  | NM_00408E | 4111.791  | 3740.61   | NM_01483E | 1334.744  | 1454.809  |
| NM_00641E | 5674.191  | 4146.862  | NM_01244E | 25028.508 | 20975.428 | NM_002477 | 5431.052  | 11117.988 |
| NM_00306E | 6209.521  | 6115.386  | NM_018104 | 2546.997  | 2223.205  | NM_00467E | 515.35    | 542.208   |
| NM_014041 | 50111.188 | 50320.375 | NM_00442E | 3742.4    | 5329.638  | NM_01802E | 2304.832  | 2038.84   |
| NM_00716E | 7697.623  | 5722.726  | U64564    | 1564.795  | 1429.138  | NM_001707 | 18043.287 | 21133.465 |
| NM_01431E | 1054.874  | 936.089   | NM_00647C | 1915.47   | 2071.413  | NM_01486E | 2738.794  | 2580.549  |
| AK024966  | 1856.306  | 1432.211  | NM_00285E | 4691.97   | 3581.404  | AL442089  | 5143.176  | 5154.71   |
| AF178941  | 15064.721 | 11429.132 | AB038463  | 1013.083  | 926.943   | NM_00120C | 1487.64   | 1798.634  |
| NM_01603E | 10801.257 | 11360.835 | M30262    | 2051.832  | 2109.909  | AB007964  | 518.532   | 296.381   |
| NM_01343E | 37147.367 | 43589.02  | NM_000387 | 15076.29  | 20840.094 | AF128541  | 5966.912  | 4321.97   |
| NM_01831E | 1918.43   | 2384.335  | NM_00466E | 1601.332  | 2112.996  | AK026305  | 2770.685  | 1477.066  |
| AB011180  | 599.214   | 752.669   | NM_01531C | 1111.841  | 1325.18   | NM_00255E | 4002.122  | 2518.975  |
| NM_007167 | 5598.818  | 5874.24   | NM_00501E | 51612.789 | 60450.441 | NM_014321 | 4484.994  | 3295.086  |
| NM_01483E | 6271.625  | 7260.811  | AB002338  | 1753.426  | 2667.114  | AK022733  | 1079.847  | 966.108   |
| NM_00324E | 656.453   | 735.287   | AI524814  | 3061.376  | 3035.787  | AB011132  | 4408.618  | 3351.307  |
| NM_002477 | 5113.153  | 5774.417  | AB024411  | 2035.082  | 3007.088  | NM_02036E | 8539.916  | 7347.978  |
| NM_01802E | 3888.453  | 3457.513  | NM_002444 | 24998.818 | 20436.256 | AB040937  | 921.122   | 604.485   |
| NM_001707 | 20791.586 | 20791.92  | NM_001104 | 1675.975  | 1954.983  | NM_00009E | 4626.031  | 4231.94   |
| AK022983  | 758.471   | 684.401   | NM_00298E | 7000.32   | 6784.654  | AL137493  | 306.476   | 582.432   |
| NM_01486E | 11742.834 | 11381.476 | U88898    | 8739.514  | 13743.352 | NM_004797 | 354.149   | 663.68    |
| AL442089  | 7152.041  | 7085.548  | NM_020154 | 38279.52  | 58938.57  | NM_00133E | 4942.832  | 5120.149  |
| NM_00120C | 2282.102  | 2221.384  | NM_00466E | 1861.304  | 1740.323  | NM_003637 | 482.419   | 950.389   |
| AB007964  | 835.473   | 912.697   | NM_00530C | 950.985   | 785.929   | NM_00423E | 1340.594  | 2201.195  |
| AF128541  | 7628.902  | 6246.293  | NM_00089E | 1080.166  | 1103.817  | NM_001544 | 984.644   | 1718.092  |
| AK026305  | 5116.521  | 5198.523  | NM_005091 | 422.104   | 508.319   | X58531    | 979.855   | 1363.873  |
| NM_00255E | 5639.42   | 5835.351  | AF031167  | 2173.243  | 1156.662  | AB011168  | 2376.596  | 2438.591  |
| NM_014321 | 7790.283  | 8189.59   | NM_003204 | 3451.409  | 3740.453  | BE794262  | 1691.403  | 1280.626  |
| AK022733  | 1561.744  | 1370.756  | AF254069  | 991.831   | 1213.766  | NM_00321E | 7570.885  | 8894.863  |
| AB011132  | 9421.141  | 8257.907  | AL117600  | 10826.394 | 11550.639 | NM_00638E | 1419.206  | 1646.422  |
| NM_02036E | 12912.568 | 14335.229 | NM_004487 | 15665.947 | 14100.183 | NM_004811 | 9869.366  | 9484.998  |
| AB040937  | 1480.24   | 1404.809  | AB029000  | 5277.835  | 5314.548  | AK021910  | 54875.23  | 53588.785 |
| NM_00009E | 4120.551  | 4520.199  | Z25434    | 3651.297  | 4748.309  | M62402    | 1419.863  | 1840.012  |
| NM_00133E | 2470.725  | 2523.891  | NM_005884 | 10889.864 | 18316.629 | NM_00474E | 1737.365  | 1218.924  |
| NM_003637 | 568.902   | 823.635   | NM_01239E | 9603.135  | 11592.706 | NM_00266E | 9956.925  | 7555.689  |
| BC035133  | 621.063   | 766.992   | AF151638  | 3204.54   | 4080.982  | NM_01431E | 38165.957 | 19591.826 |
| NM_00423E | 6259.967  | 8365.824  | U90552    | 6041.992  | 8090.978  | NM_004054 | 2865.902  | 2041.667  |

|           |           |           |           |           |           |           |           |           |
|-----------|-----------|-----------|-----------|-----------|-----------|-----------|-----------|-----------|
| NM_001544 | 4959.796  | 6262.123  | NM_006032 | 5113.829  | 6579.483  | NM_001138 | 1808.658  | 1407.82   |
| AB011168  | 5147.88   | 5322.351  | NM_014788 | 2447.988  | 3001.116  | NM_004219 | 65450.895 | 70277.633 |
| BE794262  | 3137.509  | 2972.337  | NM_002153 | 878.995   | 1494.778  | NM_003443 | 50289.328 | 44258.035 |
| NM_003212 | 11194.836 | 10553.617 | AB040890  | 3304.999  | 3360.274  | NM_002025 | 6099.254  | 7270.744  |
| NM_006382 | 1081.398  | 1278.751  | AK024233  | 1258.255  | 1565.851  | AB015228  | 17905.156 | 7402.978  |
| NM_004811 | 15134.042 | 14507.203 | AK021870  | 1176.125  | 1611.903  | AL049685  | 1617.648  | 2207.694  |
| AK021910  | 60692.711 | 53109.918 | U06680    | 981.809   | 1137.822  | AK026800  | 2620.345  | 2794.702  |
| M62402    | 2296.473  | 2668.249  | NM_005123 | 645.633   | 1682.862  | NM_017775 | 791.164   | 846.562   |
| NM_004748 | 2189.545  | 2131.61   | NM_015584 | 9157.694  | 8605.003  | AK001958  | 701.394   | 1287.445  |
| NM_002668 | 15139.313 | 15990.753 | NM_001697 | 35738.945 | 26474.924 | AK025947  | 768.819   | 867.639   |
| NM_001058 | 534.282   | 548.32    | NM_002063 | 923.055   | 416.881   | AF217973  | 658.949   | 606.696   |
| NM_014316 | 49808.93  | 44082.555 | NM_006667 | 51174.836 | 38930.57  | NM_007033 | 11627.645 | 14423.911 |
| NM_004054 | 2778.846  | 2590.441  | AK025125  | 721.064   | 645.341   | AF226048  | 5573.137  | 4473.796  |
| NM_001138 | 3313.601  | 3091.777  | NM_000815 | 1476.061  | 1965.219  | NM_005573 | 5589.624  | 4908.959  |
| NM_007289 | 829.449   | 892.29    | NM_001293 | 765.272   | 836.502   | D50918    | 14231.474 | 10012.996 |
| NM_003443 | 29950.16  | 34304.934 | AB023173  | 5412.157  | 5190.011  | U48734    | 5948.302  | 6419.063  |
| NM_002025 | 7299.44   | 7077.723  | AF156548  | 3488.396  | 3285.318  | NM_006400 | 9730.516  | 11864.893 |
| AB015228  | 24511.725 | 13028.935 | NM_172140 | 2692.362  | 3404.316  | NM_003903 | 3090.563  | 1977.261  |
| AL049685  | 2190.372  | 2385.716  | NM_001072 | 1496.65   | 1496.396  | NM_017955 | 3194.207  | 1585.123  |
| AK026800  | 5597.04   | 6550.3    | NM_014070 | 1066.195  | 1063.131  | NM_016060 | 5604.286  | 2768.209  |
| NM_001442 | 1562.078  | 1962.567  | NM_016280 | 851.787   | 1108.265  | NM_002208 | 14588.286 | 9973.223  |
| NM_017775 | 6061.98   | 6302.545  | NM_016027 | 1364.463  | 937.186   | NM_007216 | 1609.662  | 1066.007  |
| AK025947  | 5349.232  | 5251.613  | NM_014297 | 7850.551  | 5745.357  | AK023518  | 702.516   | 482.547   |
| AF217973  | 5585.377  | 5669.365  | NM_018156 | 19531.477 | 14178.891 | NM_000944 | 1672.371  | 2629.895  |
| NM_007033 | 16374.117 | 17916.682 | X98266    | 1453.833  | 2367.397  | NM_012239 | 1486.862  | 1533.001  |
| AF226048  | 8164.172  | 6893.704  | U00930    | 13392.077 | 30673.918 | NM_013390 | 5389.103  | 5180.317  |
| NM_005573 | 7716.5    | 8091.938  | AK024958  | 718.026   | 979.989   | NM_002829 | 1670.167  | 3859.658  |
| D50918    | 22160.596 | 16892.367 | NM_014575 | 4323.459  | 2649.223  | J02783    | 20401.305 | 27229.506 |
| U48734    | 7398.735  | 7849.657  | AL117552  | 1656.8    | 1486.102  | NM_006577 | 7930.781  | 10117.232 |
| NM_006400 | 13139.944 | 17950.434 | NM_002692 | 8124.543  | 5638.104  | NM_005317 | 1265.6    | 1172.524  |
| NM_003903 | 4551.92   | 4662.234  | AB023190  | 30742.201 | 25864.516 | U12597    | 642.811   | 590.582   |
| NM_017955 | 3741.933  | 3581.887  | NM_007064 | 1611.311  | 1782.116  | AB044343  | 4671.73   | 4023.611  |
| NM_016060 | 7939.065  | 6107.813  | NM_006281 | 2357.024  | 1833.645  | NM_018409 | 496.99    | 666.45    |
| NM_002208 | 18936.316 | 20439.568 | NM_002738 | 7481.789  | 6942.469  | NM_014662 | 773.026   | 514.711   |
| NM_007216 | 2569.985  | 2328.193  | U23460    | 37936.121 | 29807.309 | NM_005178 | 6448.701  | 5085.79   |
| AK023518  | 1103.591  | 699.319   | NM_005356 | 34045.336 | 30366.143 | NM_017702 | 5429.765  | 1958.497  |
| NM_000944 | 2310.28   | 2827.17   | NM_004429 | 2943.907  | 5329.334  | AB014516  | 4134.772  | 2566.135  |
| NM_012239 | 2175.418  | 2652.778  | U64564    | 1329.125  | 1762.607  | Z83950    | 1217.252  | 856.396   |
| NM_012262 | 1893.18   | 1953.673  | NM_006470 | 1620.104  | 2194.861  | AL080063  | 1910.502  | 1278.375  |
| NM_013390 | 6554.093  | 8190.807  | NM_002855 | 4650.113  | 4773.208  | NM_005625 | 8774.335  | 5826.387  |
| NM_002829 | 2464.94   | 5834.241  | AB038463  | 781.761   | 1407.624  | X15262    | 2287.989  | 1073.168  |
| J02783    | 30034.842 | 40396.898 | M30262    | 1620.861  | 2436.63   | NM_005475 | 566.499   | 388.969   |
| NM_018137 | 745.962   | 678.192   | NM_005460 | 778.297   | 877.639   | AB040918  | 1799.81   | 2146.245  |
| NM_006577 | 26283.893 | 29697.432 | AF160477  | 2962.721  | 2925.214  | NM_015859 | 2769.198  | 2625.004  |
| NM_004413 | 681.966   | 1013.991  | NM_003226 | 349.91    | 598.661   | NM_002316 | 1393.582  | 1248.01   |
| AF120493  | 827.9     | 839.008   | M12883    | 3693.494  | 3363.016  | AB023232  | 1410.933  | 1749.44   |
| U12597    | 2632.414  | 2666.018  | BG288747  | 7209.109  | 5245.769  | AL137589  | 691.522   | 594.762   |
| U28055    | 890.881   | 553.581   | U37448    | 2046.735  | 1601.517  | NM_002502 | 1734.169  | 2093.131  |
| AB044343  | 3512.677  | 3170.391  | AA927698  | 3528.258  | 4342.361  | AF226732  | 801.341   | 582.745   |
| NM_018409 | 1078.985  | 668.651   | AI498426  | 886.396   | 1028.737  | NM_006312 | 1839.66   | 1545.232  |
| NM_014662 | 735.137   | 810.549   | D01038    | 16476.092 | 12050.515 | NM_002805 | 778.231   | 636.54    |
| NM_005178 | 4711.268  | 3577.743  | AB019205  | 1495.676  | 2595.058  | NM_002939 | 8904.559  | 4028.672  |
| NM_017702 | 8984.839  | 4422.669  | J05008    | 1704.904  | 999.865   | NM_015836 | 23121.334 | 13054.901 |

|           |           |           |           |           |           |           |           |           |
|-----------|-----------|-----------|-----------|-----------|-----------|-----------|-----------|-----------|
| AB014516  | 4903.507  | 4056.001  | U11087    | 1107.141  | 981.753   | NM_004713 | 1249.171  | 561.768   |
| Z83950    | 1839.201  | 1509.242  | D50640    | 2187.565  | 2512.503  | NM_003769 | 522.721   | 224.203   |
| AL080063  | 2435.221  | 2374.463  | D43747    | 975.699   | 730.839   | NM_001698 | 8351.096  | 4437.223  |
| NM_005625 | 14124.226 | 12786.875 | M98776    | 3107.453  | 3063.411  | NM_000661 | 61450.332 | 72105.945 |
| X15262    | 2693.079  | 1867.143  | X99135    | 56732.059 | 54400.461 | NM_000973 | 54982.484 | 60052.527 |
| NM_005475 | 1051.341  | 746.686   | AF009744  | 2482.466  | 1595.482  | AF086431  | 1490.928  | 1487.659  |
| AB040918  | 2108.016  | 2538.89   | NM_003204 | 3555.881  | 5072.116  | AL110204  | 718.926   | 417.58    |
| NM_015859 | 3955.82   | 5033.103  | AF254069  | 823.88    | 1381.928  | NM_014188 | 37086.582 | 30382.262 |
| NM_002316 | 1767.49   | 1902.065  | AL117600  | 9391.169  | 11790.408 | AK026365  | 818.433   | 981.837   |
| AB023232  | 2467.664  | 2998.788  | NM_001712 | 694.134   | 743.834   | S70004    | 1761.149  | 1973.093  |
| AL137589  | 1746.224  | 1550.876  | NM_004487 | 16887.896 | 19507.539 | AF105378  | 1352.043  | 1667.678  |
| AF226732  | 5266.276  | 4699.061  | AB029000  | 4687.767  | 6652.429  | NM_000167 | 1656.649  | 1887.095  |
| NM_006312 | 5256.028  | 5496.655  | AK026965  | 12433.106 | 14564.476 | AY007125  | 506.519   | 405.477   |
| NM_002805 | 1077.382  | 1088.704  | AK025859  | 4550.854  | 4673.559  | AB032987  | 1111.456  | 891.713   |
| NM_002939 | 13329.471 | 11685.871 | AL117499  | 11757.901 | 10028.914 | NM_017567 | 1528.528  | 1280.616  |
| NM_015836 | 31708.473 | 29742.229 | NM_007054 | 1640.074  | 1953.279  | D86971    | 7440.273  | 6820.708  |
| NM_004713 | 1989.46   | 1457.279  | AB007957  | 1181.414  | 1641.816  | NM_003073 | 7392.676  | 5864.497  |
| NM_003769 | 711.163   | 758.787   | AK000160  | 2884.639  | 2145.113  | NM_014048 | 536.837   | 401.266   |
| NM_001698 | 6984.354  | 6958.606  | NM_005311 | 903.882   | 531.302   | AF274863  | 1352.648  | 539.712   |
| NM_000661 | 56189.191 | 58564.754 | NM_005905 | 3272.122  | 1957.531  | AF319458  | 489.136   | 299.531   |
| NM_000973 | 62220.605 | 55597.809 | NM_016235 | 637.34    | 1372.824  | AF024697  | 2405.188  | 1239.51   |
| AF086431  | 1726.354  | 2197.324  | NM_000960 | 938.454   | 1971.606  | NM_005612 | 2889.62   | 1082.128  |
| AK026365  | 3288.324  | 6402.001  | AF172932  | 905.344   | 672.524   | D17018    | 496.612   | 663.304   |
| S70004    | 1953.22   | 1703.589  | NM_005359 | 773.427   | 378.592   | AB046852  | 706.021   | 834.249   |
| AF105378  | 666.62    | 965.282   | NM_002511 | 1516.038  | 2236.52   | AF086167  | 691.253   | 753.121   |
| NM_000167 | 4031.645  | 4456.338  | AF295378  | 3707.208  | 2702.158  | AF085891  | 3418.677  | 4007.552  |
| AY007125  | 2448.583  | 2462.549  | AF320908  | 2163.686  | 2276.378  | AF019618  | 434.57    | 523.771   |
| AB032987  | 1626.191  | 1279.388  | NM_004085 | 4348.517  | 4787.274  | AK025656  | 693.713   | 848.058   |
| NM_017567 | 10073.191 | 8692.124  | NM_018104 | 2752.43   | 2570.109  | AF161414  | 941.233   | 1127.893  |
| NM_000691 | 3949.406  | 4272.026  | NM_006080 | 393.618   | 502.294   | AK025967  | 563.707   | 681.508   |
| D86971    | 12727.308 | 10512.574 | NM_006667 | 56566.891 | 55576.324 | AL110177  | 924.049   | 847.518   |
| NM_003073 | 8700.253  | 8343.335  | AK025125  | 337.845   | 809.81    | NM_002763 | 9778.497  | 8429.165  |
| NM_014048 | 1155.035  | 992.446   | NM_000815 | 1472.809  | 2272.572  | AF070628  | 608.04    | 444.681   |
| AF274863  | 2450.73   | 1613.318  | NM_001293 | 807.666   | 1352.738  | NM_015434 | 1986.249  | 1116.838  |
| AF319458  | 757.201   | 767.372   | AB023173  | 5054.842  | 7434.104  | NM_014055 | 2063.682  | 1123.923  |
| AF024697  | 2875.89   | 2590.654  | AF156548  | 3575.348  | 4274.422  | NM_018691 | 1571.615  | 930.762   |
| NM_018651 | 505.594   | 457.066   | NM_000387 | 13794.393 | 16270.719 | AK001020  | 662.271   | 327.916   |
| AF164156  | 817.364   | 463.487   | NM_004663 | 1335.498  | 1340.6    | AK022098  | 1079.378  | 1136.104  |
| NM_005612 | 5088.808  | 3205.904  | NM_015310 | 1418.345  | 1964.778  | AB040933  | 963.41    | 893.499   |
| D17018    | 1045.826  | 1890.488  | NM_016154 | 17621.504 | 15319.772 | AK021875  | 698.505   | 954.203   |
| AB046852  | 1195.74   | 1281.688  | NM_005013 | 54058.023 | 44044.129 | AK022072  | 873.324   | 1022.726  |
| AF085891  | 2693.152  | 2753.019  | AB002338  | 1418.731  | 1189.143  | AK026900  | 3763.068  | 6199.415  |
| AF019618  | 1838.141  | 2035.881  | AI524814  | 2588.276  | 1628.3    | AK025020  | 4357.883  | 8824.355  |
| AK025656  | 1783.279  | 1849.232  | AB024411  | 2457.667  | 2006.979  | AF086463  | 1266.816  | 1310.711  |
| AF161414  | 3940.352  | 4832.328  | NM_002444 | 27123.365 | 29466.641 | AK024598  | 1742.467  | 1790.835  |
| AK025967  | 1007.508  | 857.067   | Z83802    | 188.06    | 1292.435  | AF087983  | 616.242   | 630.794   |
| AL110177  | 1626.638  | 1505.774  | NM_001104 | 1191.676  | 1591.335  | NM_020234 | 2980.818  | 2981.897  |
| NM_002763 | 16002.133 | 12933.964 | NM_002989 | 6695.349  | 3737.624  | Z36825    | 1585.014  | 1144.771  |
| AF070628  | 589.867   | 862.312   | U88898    | 7288.782  | 5832.819  | U30889    | 563.71    | 416.724   |
| NM_015434 | 2943.865  | 2436.02   | NM_020154 | 32048.084 | 30477.121 | Z36846    | 320.482   | 162.453   |
| NM_014055 | 2687.831  | 2283.771  | NM_004665 | 2043.749  | 1211.801  | AF086127  | 549.543   | 261.106   |
| NM_018691 | 2443.431  | 1981.913  | NM_005300 | 1304.53   | 768.739   | AF086157  | 2473.941  | 1372.724  |
| AK001020  | 898.472   | 775.612   | NM_000893 | 1077.169  | 983.821   | AL109710  | 1468.612  | 1302.06   |

|           |           |           |           |           |           |           |           |           |
|-----------|-----------|-----------|-----------|-----------|-----------|-----------|-----------|-----------|
| AK022098  | 1737.376  | 3245.427  | NM_005091 | 513.232   | 260.818   | AK021538  | 422.985   | 481.833   |
| AB040933  | 1059.258  | 1406.641  | AF031167  | 2163.885  | 1341.467  | AK023793  | 2720.575  | 3576.656  |
| AK021875  | 701.94    | 783.087   | AB023190  | 35707.637 | 36511.691 | AK022185  | 604.337   | 959.416   |
| AK022072  | 684.76    | 408.592   | NM_007064 | 1687.288  | 2214.469  | AK023286  | 1763.634  | 2004.907  |
| AK026900  | 7171.973  | 6979.566  | NM_006281 | 2339.998  | 1926.682  | AK021544  | 282.32    | 599.419   |
| AK025020  | 6412.124  | 7107.471  | NM_002738 | 7254.862  | 9689.89   | AL079282  | 578.949   | 698.979   |
| AF086009  | 722.384   | 741.365   | NM_005356 | 32818.164 | 39108.109 | NM_014058 | 871.544   | 852.399   |
| AF086463  | 2658.873  | 2454.583  | Z25434    | 3779.162  | 4220.598  | AK026340  | 660.48    | 466.811   |
| AK024130  | 653.543   | 840.024   | NM_005884 | 4747.87   | 6958.989  | AK022388  | 364.403   | 932.76    |
| AK024598  | 2308.734  | 2627.64   | NM_012399 | 9742.258  | 9820.219  | AK022686  | 4630.792  | 2851.511  |
| AF087983  | 1105.611  | 1048.752  | AF229804  | 29907.025 | 29895.172 | AK023516  | 3377.515  | 2231.091  |
| NM_020234 | 4763.716  | 4384.36   | AF151638  | 2645.269  | 3469.324  | AK023864  | 3054.747  | 1844.617  |
| U70772    | 550.361   | 411.612   | U90552    | 7003.077  | 4615.004  | AK023017  | 3386.324  | 2260.372  |
| Z36825    | 1957.767  | 1673.992  | NM_006032 | 5109.878  | 3193.532  | AK023610  | 306.748   | 260.617   |
| AF086127  | 927.161   | 542.148   | NM_014788 | 2765.348  | 1595.512  | AK023908  | 3527.357  | 2334.784  |
| AF086157  | 2839.145  | 2691.941  | NM_002153 | 744.113   | 829.038   | AK024236  | 701.957   | 457.244   |
| AL109710  | 995.27    | 1268.711  | AB040890  | 4444.354  | 7014.803  | AK024132  | 893.639   | 809.715   |
| AK023793  | 2230.606  | 2022.628  | AK024233  | 1336.48   | 1790.125  | AK021863  | 14090.022 | 19179.092 |
| AK022185  | 683.636   | 817.67    | AK021870  | 1074.088  | 1081.109  | AK024208  | 556.674   | 759.624   |
| AK023286  | 2800.93   | 2007.854  | U06680    | 1017.972  | 597.8     | NM_005684 | 408.806   | 558.815   |
| AK021544  | 853.285   | 281.455   | NM_005123 | 847.577   | 594.791   | AK022293  | 468.354   | 765.21    |
| AL079282  | 1197.873  | 713.847   | NM_015584 | 9664.541  | 8609.379  | AL117439  | 628.148   | 815.573   |
| NM_014058 | 1189.294  | 818.69    | NM_001697 | 39502.457 | 30539.953 | AL133065  | 1767.593  | 2392.008  |
| AK026340  | 898.289   | 740.616   | NM_016098 | 18506.119 | 10294.769 | NM_005297 | 8317.27   | 6741.457  |
| AK027170  | 571.78    | 437.942   | NM_002063 | 887.778   | 827.817   | S80491    | 353.527   | 414.89    |
| AK022686  | 5070.217  | 4644.853  | AL137479  | 556.774   | 969.19    | AJ011377  | 2130.834  | 880.804   |
| AK023516  | 4295.654  | 3621.951  | NM_004211 | 2239.94   | 2504.493  | AL137734  | 753.178   | 446.699   |
| AK023864  | 2827.216  | 2283.819  | Y10776    | 2793.222  | 3216.142  | AK026323  | 1239.18   | 710.248   |
| AK023017  | 3811.417  | 3054.944  | AK027241  | 4923.686  | 6368.87   | AF070633  | 27979.867 | 21167.828 |
| AK023908  | 2707.892  | 2197.403  | NM_004561 | 803.517   | 1052.26   | AF054996  | 7519.607  | 8802.172  |
| AK024236  | 1058.973  | 891.56    | AK024812  | 3651.727  | 5321.563  | AF090098  | 1542.777  | 1285.412  |
| Z24724    | 7611.583  | 8548.401  | M20642    | 1582.39   | 1723.456  | AF146694  | 2742.096  | 2726.774  |
| AK022712  | 7872.265  | 8805.754  | AK026412  | 2271.262  | 2403.333  | AK057104  | 1276.127  | 1199.572  |
| AK024132  | 1336.101  | 1277.746  | X89669    | 2107.328  | 2503.255  | AL133555  | 1203.406  | 856.399   |
| AK021863  | 15205.38  | 13956.886 | NM_001072 | 1672.469  | 922.284   | AK024979  | 12327.313 | 11300.839 |
| AK022293  | 951.904   | 642.483   | NM_014070 | 1183.96   | 678.088   | AF233648  | 1381.951  | 1241.846  |
| AL117439  | 1041.919  | 904.727   | NM_016280 | 642.621   | 636.167   | AK021781  | 364.444   | 403.534   |
| AL133065  | 3554.969  | 3540.128  | NM_016027 | 1375.724  | 1193.522  | NM_018584 | 1135.577  | 924.26    |
| NM_005297 | 11151.068 | 7641.328  | NM_014297 | 8245.173  | 6724.423  | AY007126  | 5801.885  | 3575.508  |
| U80769    | 1118.851  | 1067.655  | NM_018156 | 18981.027 | 10691.909 | AF085951  | 2989.34   | 2253.366  |
| S80491    | 695.4     | 758.549   | X98266    | 1682.667  | 546.169   | AF131787  | 668.489   | 290.612   |
| AK021678  | 580.131   | 585.183   | U00930    | 11098.969 | 7181.438  | AF087989  | 828.011   | 576.621   |
| AJ011377  | 2870.915  | 2853.501  | AK024958  | 638.64    | 349.291   | Z70715    | 1308.727  | 638.052   |
| AL137734  | 929.03    | 971.065   | NM_014575 | 4530.221  | 2415.571  | NM_018182 | 5016.297  | 3053.171  |
| AK023784  | 865.669   | 469.672   | NM_002439 | 5415.738  | 4659.506  | U80771    | 4869.197  | 2543.527  |
| AK026323  | 1685.192  | 1585.61   | NM_002692 | 9457.099  | 7956.295  | NM_006188 | 357.919   | 210.147   |
| AL133430  | 15361.469 | 17569.68  | X55525    | 1062.012  | 1061.849  | AJ272173  | 10189.106 | 6264.357  |
| AF070633  | 39456.215 | 29154.922 | AB040878  | 890.699   | 1202.989  | AK021566  | 643.298   | 566.027   |
| S51971    | 57959.391 | 60981.512 | S74647    | 861.539   | 1226.199  | NM_002037 | 3646.071  | 6112.485  |
| AF054996  | 12072.025 | 8267.043  | NM_003506 | 1574.137  | 1666.985  | NM_020157 | 21229.662 | 23211.525 |
| AF090098  | 3553.592  | 3799.756  | NM_018093 | 5617.397  | 6922.214  | X64991    | 694.91    | 446.149   |
| AF146694  | 3515.242  | 2972.354  | NM_003389 | 4652.027  | 5532.497  | NM_014320 | 1553.045  | 1855.784  |
| AK057104  | 2361.087  | 2177.682  | NM_000430 | 1577.543  | 1672.687  | AK025703  | 3378.841  | 2509.636  |

|           |           |           |           |           |           |           |           |           |
|-----------|-----------|-----------|-----------|-----------|-----------|-----------|-----------|-----------|
| AL133555  | 3276.349  | 2648.076  | AB033030  | 900.732   | 1153.306  | NM_01818E | 1789.655  | 1483.244  |
| AK024979  | 13040.62  | 12524.511 | NM_016656 | 2595.744  | 1244.857  | AK022598  | 2463.797  | 1815.615  |
| AF233648  | 2531.995  | 2295.565  | NM_015963 | 4355.629  | 3980.238  | AK024306  | 504.433   | 550.817   |
| AK021781  | 809.848   | 521.324   | AB007871  | 3729.207  | 2486.936  | NM_01832E | 4345.479  | 3776.802  |
| NM_018584 | 2531.948  | 1847.974  | NM_017813 | 5089.379  | 2994.08   | AK025862  | 11944.444 | 8031.874  |
| AY007126  | 9449.274  | 6978.086  | NM_003840 | 5617.661  | 2583.775  | AK026495  | 1684.167  | 1476.867  |
| AF085951  | 4693.938  | 5085.677  | NM_01837E | 1190.744  | 931.224   | AK025052  | 1806.525  | 1647.976  |
| AF131787  | 1195.111  | 682.781   | NM_018423 | 1456.212  | 1496.238  | NM_01438E | 910.061   | 669.142   |
| AF087989  | 1100.067  | 1203.134  | NM_001741 | 8183.972  | 8923.345  | U85044    | 714.339   | 973.168   |
| Z70715    | 1638.62   | 1328.383  | NM_000745 | 2705.237  | 1832.271  | BC018880  | 459.125   | 330.846   |
| NM_01818E | 6957.293  | 5801.542  | AF116705  | 7779.21   | 2916.346  | AF086090  | 1615.361  | 974.712   |
| U80771    | 8671.322  | 7023.77   | NM_004460 | 1093.324  | 507.038   | AK002173  | 17668.148 | 11005.422 |
| NM_00618E | 429.485   | 692.742   | NM_006072 | 2200.583  | 984.996   | NM_01774E | 1364.628  | 975.667   |
| AJ272173  | 14752.26  | 13691.387 | BE794490  | 708.121   | 566.043   | NM_02018E | 16939.322 | 11188.654 |
| NM_00564E | 3766.924  | 3760.882  | NM_003561 | 2879.459  | 1830.881  | M87929    | 707.793   | 450.775   |
| NM_002037 | 4578.782  | 4031.688  | NM_002991 | 514.459   | 500.045   | U88897    | 6535.436  | 3049.3    |
| NM_01634E | 1451.473  | 1050.262  | NM_004071 | 2926.522  | 4777.681  | CY3Cy5    | 2112.867  | 201.807   |
| NM_020157 | 15858.38  | 13544.303 | NM_001316 | 11926.14  | 8566.365  |           | 359.617   | 2833.01   |
| NM_014320 | 3285.854  | 2761.936  | AJ008149  | 5576.815  | 6459.892  | BG617923  | 707.528   | 1973.851  |
| AK025703  | 8854.313  | 11185.131 | NM_001192 | 418.597   | 685.595   | U37448    | 2382.604  | 4420.598  |
| NM_01818E | 3111.158  | 3110.44   | NM_002353 | 1180.176  | 1015.048  | BG435851  | 421.187   | 466.496   |
| AK022598  | 4028.399  | 3587.839  | NM_012153 | 1950.917  | 2210.804  | AA927698  | 2419.516  | 3892.715  |
| AK024306  | 1439.222  | 1087.292  | NM_013241 | 1955.818  | 2330.651  | AI498426  | 883.055   | 1175.389  |
| NM_01832E | 9245.228  | 8002.021  | NM_01798E | 53087.531 | 58940.336 | D01038    | 17593.471 | 12011.449 |
| AK025862  | 19654.594 | 15396.713 | NM_015535 | 1068.646  | 1273.588  | AB019205  | 968.567   | 610.391   |
| AK026495  | 1896.525  | 1805.738  | Z24725    | 3081.876  | 3063.257  | J05008    | 1250.321  | 811.746   |
| AK025052  | 2544.228  | 2563.629  | AF161362  | 2769.923  | 2836.535  | U11087    | 561.949   | 408.035   |
| NM_01438E | 1615.16   | 1260.879  | NM_015939 | 9926.222  | 3864.641  | D50640    | 1550.672  | 885.694   |
| NM_00254E | 430.528   | 664.782   | AB046840  | 2933.203  | 1715.369  | D43747    | 942.748   | 666.856   |
| U85044    | 1910.423  | 1658.886  | AF174487  | 1301.182  | 1876.641  | M98776    | 3255.441  | 2060.788  |
| BC018880  | 1013.055  | 928.352   | NM_01769E | 546.385   | 837.244   | X99135    | 50264.344 | 52673.398 |
| AF086090  | 2602.865  | 2683.473  | NM_005041 | 391.179   | 288.588   | AF009744  | 1404.101  | 2609.947  |
| AK002173  | 24053     | 21890.758 | NM_006407 | 10600.342 | 4658.759  | NM_17214C | 3162.711  | 4903.911  |
| NM_01774E | 2043.825  | 1830.247  | NM_007373 | 2119.508  | 615.612   | SR6       | 2957.589  | 5782.346  |
| NM_02018E | 23861.502 | 22388.068 | M34572    | 403.926   | 314.092   | SR8       | 9647.139  | 35032.152 |
| M87929    | 540.27    | 552.691   | NM_006263 | 30784.729 | 15929.743 | SR10      | 30407.514 | 6258.371  |
| U88897    | 10329.231 | 8161.063  | NM_004791 | 2713.092  | 1494.92   | CY3Cy5    | 570.164   | 187.253   |
| CY3Cy5    | 2088.828  | 210.887   | Z36876    | 2332.753  | 2686.953  | NM_005311 | 1259.901  | 3498.949  |
| BG617923  | 461.702   | 849.896   | NM_000892 | 1168.692  | 1181.593  | NM_00590E | 3191.281  | 6177.605  |
| U37448    | 3440.406  | 3128.73   | NM_00504E | 465.752   | 455.439   | NM_01623E | 713.98    | 1190.529  |
| BG435851  | 583.213   | 720.377   | NM_001873 | 629.413   | 707.419   | NM_00096C | 736.137   | 987.953   |
| AA927698  | 2960.257  | 3922.006  | AB029025  | 437.539   | 825.937   | AF172932  | 674.419   | 868.514   |
| AI498426  | 1101.041  | 1463.096  | NM_007100 | 32046.125 | 34797.828 | NM_00535E | 771.807   | 618.508   |
| D01038    | 15735.433 | 20787.76  | NM_002954 | 45902.637 | 55457.305 | NM_002511 | 1225.674  | 1547.667  |
| AB019205  | 2236.247  | 3500.391  | NM_003940 | 436.426   | 690.518   | AF295378  | 3739.821  | 2477.875  |
| J05008    | 2157.84   | 2830.325  | NM_016572 | 1073.836  | 692.417   | AF320908  | 1752.358  | 930.159   |
| U11087    | 1085.754  | 1900.647  | NM_000027 | 916.907   | 428.92    | NM_00408E | 3568.123  | 2530.885  |
| D50640    | 4750.814  | 5350.79   | NM_01754E | 16518.107 | 13974.817 | NM_01244E | 16611.977 | 8796.707  |
| D43747    | 1504.069  | 2189.207  | AF134802  | 1024.806  | 1492.715  | NM_018104 | 2287.766  | 1666.595  |
| M98776    | 6002.736  | 6758.056  | NM_005740 | 2548.633  | 1664.002  | NM_00442E | 4688.22   | 6035.209  |
| X99135    | 57780.684 | 60588.918 | NM_00430E | 11780.661 | 4756.107  | U64564    | 1640.229  | 2865.659  |
| AF009744  | 2337.957  | 3933.723  | AF112366  | 2948.865  | 897.446   | NM_00647C | 1420.293  | 1775.268  |
| NM_17214C | 4360.704  | 6866.263  | NM_004274 | 1256.927  | 561.236   | NM_00285E | 3252.988  | 6961.168  |

|           |           |           |           |           |           |           |           |           |
|-----------|-----------|-----------|-----------|-----------|-----------|-----------|-----------|-----------|
| SR2       | 61336.391 | 68705.914 | AK024002  | 10641.781 | 5543.871  | M30262    | 1262.229  | 2784.504  |
| SR4       | 20570.027 | 38006.734 | NM_020399 | 8255.616  | 3394.699  | NM_00546C | 746.212   | 1744.079  |
| SR6       | 2776.351  | 5339.148  | AB011117  | 1446.585  | 1082.591  | AF160477  | 1778.316  | 2243.561  |
| SR8       | 10989.088 | 56250.559 | AF060935  | 1903.126  | 1585.734  | NM_00322E | 287.616   | 280.697   |
| SR10      | 36114.148 | 16474.057 | AK026886  | 1210.163  | 1465.659  | M12883    | 3171.136  | 1466.011  |
| CY3Cy5    | 2642.199  | 227.152   | D83778    | 1020.729  | 1843.134  | BG288747  | 6025.601  | 3406.086  |
| NM_005311 | 1240.108  | 1459.496  | NM_004264 | 4411.424  | 4093.788  | AI524814  | 2660.792  | 4459.941  |
| NM_00590E | 3701.795  | 3844.965  | AK024788  | 1491.054  | 1146.107  | AB024411  | 2155.856  | 2812.209  |
| NM_01623E | 1019.685  | 1616.672  | NM_004473 | 496.687   | 614.427   | NM_002444 | 30510.529 | 35714.063 |
| NM_00096C | 934.778   | 1455.537  | AK022696  | 2752.528  | 1792.947  | Z83802    | 323.965   | 903.829   |
| AF172932  | 1396.872  | 2187.171  | NM_001206 | 1396.383  | 1004.003  | NM_001104 | 1576.88   | 2167.978  |
| NM_00535E | 893.786   | 1720.901  | NM_005016 | 3168.508  | 4437.457  | NM_00298E | 5902.5    | 7910.264  |
| NM_002511 | 1653.217  | 3147.001  | NM_014469 | 2294.349  | 2216.775  | U88898    | 9841.237  | 8178.185  |
| AF295378  | 5093.953  | 6373.432  | NM_000344 | 12676.221 | 6862.47   | NM_020154 | 34677.043 | 25535.273 |
| AF320908  | 2742.638  | 2903.861  | AF248650  | 2868.239  | 1069.194  | NM_00466E | 1580.197  | 1247.268  |
| NM_00408E | 4828.205  | 5489.459  | S74678    | 31336.357 | 13731.311 | NM_00530C | 1083.554  | 957.339   |
| NM_01244E | 35949.535 | 51163.773 | AF248651  | 637.423   | 545.589   | NM_00089E | 854.891   | 817.394   |
| NM_018104 | 4188.295  | 5665.151  | NM_00135E | 31340.547 | 22285.41  | NM_00069E | 24057.85  | 13415.575 |
| NM_00608C | 598.593   | 1072.028  | NM_00483E | 6003.059  | 5126.764  | NM_005091 | 354.944   | 186.305   |
| NM_00442E | 4311.333  | 6161.37   | AB037751  | 3406.929  | 1855.278  | AF031167  | 921.103   | 1182.803  |
| U64564    | 2283.575  | 2853.082  | S79281    | 3520.344  | 1488.755  | NM_003204 | 3006.79   | 3543.398  |
| NM_00647C | 2352.598  | 3669.438  | AK025585  | 1844.116  | 499.687   | AF254069  | 932.692   | 1086.636  |
| NM_00285E | 3776.774  | 9754.981  | NM_001414 | 6057.044  | 1821.783  | AL117600  | 12337.958 | 16259.088 |
| AB038463  | 1293.661  | 3064.864  | D16891    | 1896.934  | 634.06    | NM_00171E | 554.551   | 1398.749  |
| M30262    | 1482.502  | 2898.901  | NM_01776C | 2993.833  | 789.373   | NM_004487 | 13048.155 | 20522.699 |
| NM_00546C | 1110.376  | 2074.919  | NM_01593E | 7805.913  | 4322.468  | AB029000  | 7195.543  | 15251.239 |
| AF160477  | 1893.179  | 3388.612  | AL109698  | 2125.682  | 1961.88   | AK026965  | 6162.625  | 11974.669 |
| NM_00322E | 299.028   | 1036.088  | AF217980  | 5304.404  | 4868.327  | AK025859  | 4027.631  | 6204.248  |
| M12883    | 4256.981  | 6125.94   | AL117461  | 1780.236  | 1440.96   | AL117499  | 12631.812 | 24547.193 |
| BG288747  | 9379.826  | 21084.227 | NM_01649E | 1098.387  | 1097.123  | NM_007054 | 1264.308  | 1089.189  |
| AI524814  | 3473.004  | 7828.013  | AF104921  | 16637.477 | 24288.021 | AB007957  | 327.144   | 199.673   |
| AB024411  | 3443.451  | 4855.552  | NM_00012E | 12237.362 | 10595.747 | AK000160  | 3035.468  | 1909.219  |
| NM_002444 | 41936.438 | 56659.473 | BF239974  | 1878.005  | 2142.436  | NM_00603E | 4550.439  | 5202.921  |
| NM_001104 | 1455.589  | 1409.524  | NM_000104 | 1045.536  | 1281.337  | NM_01478E | 2492.714  | 3786.262  |
| NM_00298E | 7114.742  | 8372.765  | NM_00501E | 13399.86  | 9998.082  | NM_00215E | 1007.461  | 1090.568  |
| U88898    | 13161.37  | 14149.16  | NM_00425E | 55094.574 | 45956.91  | AB040890  | 3638.121  | 4667.641  |
| NM_020154 | 37386.039 | 36085.934 | NM_00026E | 41041.301 | 35695.797 | AK024233  | 1526.677  | 2143.821  |
| NM_00466E | 2058.642  | 2540.82   | AF182288  | 2659.472  | 2856.575  | AK021870  | 1638.423  | 1810.916  |
| NM_00530C | 1413.603  | 1115.867  | NM_004491 | 2364.878  | 603.638   | U06680    | 1024.693  | 1249.21   |
| NM_00089E | 1139.066  | 1332.297  | AK026810  | 3344.482  | 1793.646  | NM_00512E | 676.031   | 604.446   |
| NM_00069E | 26918.771 | 22441.416 | NM_01562E | 6422.643  | 5560.172  | NM_015584 | 7841.734  | 6748.637  |
| NM_005091 | 622.295   | 982.177   | AF218032  | 5468.443  | 3943.044  | NM_001697 | 36659.352 | 22784.465 |
| AF031167  | 2367.262  | 5343.523  | NM_01754E | 7173.518  | 4387.996  | NM_01609E | 13307.922 | 8383.097  |
| NM_003204 | 4686.004  | 7339.537  | AK024407  | 729.364   | 408.62    | AB032525  | 354.4     | 191.453   |
| AF254069  | 1458.256  | 2376.054  | NM_00418E | 18906.264 | 6164.482  | NM_00206E | 309.653   | 499.647   |
| AL117600  | 14415.592 | 19701.65  | NM_01424C | 555.381   | 249.797   | NM_006667 | 50753.594 | 39212.527 |
| NM_00171E | 853.597   | 1845.178  | BE379399  | 812.14    | 555.136   | AK025125  | 528.761   | 582       |
| NM_004487 | 14487.986 | 26335.604 | NM_015877 | 2142.023  | 1185.793  | NM_00081E | 1202.933  | 1774.029  |
| AB029000  | 5413.681  | 11328.007 | AL117598  | 2189.817  | 1769.711  | NM_00129E | 628.571   | 1284.503  |
| AK026965  | 7660.959  | 13767.411 | AL109670  | 1580.559  | 1618.891  | AB023173  | 6225.168  | 11175.427 |
| AK025859  | 5369.188  | 11528.062 | AF085831  | 888.808   | 824.628   | AF156548  | 4091.057  | 7440.504  |
| AL117499  | 15942.396 | 24819.223 | AL832149  | 3216.935  | 2346.477  | NM_000387 | 8160.039  | 14091.142 |
| NM_007054 | 2071.204  | 4351.94   | AK022839  | 2244.497  | 2938.813  | NM_00466E | 1202.931  | 1900.265  |



|           |           |           |           |           |           |           |           |           |
|-----------|-----------|-----------|-----------|-----------|-----------|-----------|-----------|-----------|
| AB007957  | 439.469   | 1330.45   | NM_01835C | 1939.171  | 2315.178  | NM_01531C | 744.746   | 1899.571  |
| AK000160  | 4204.198  | 8178.814  | AK025839  | 2756.073  | 2056.84   | NM_016154 | 9903.909  | 14185.754 |
| NM_006032 | 4664.061  | 4025.253  | NM_003946 | 1286.595  | 1409.654  | NM_005013 | 53966.734 | 60874.59  |
| NM_01478E | 3253.874  | 3051.65   | AB045292  | 2584.896  | 2822.234  | AB002338  | 1441.441  | 1226.052  |
| NM_002153 | 1505.098  | 2080.681  | AK022998  | 1936.328  | 1842.973  | NM_001072 | 1453.404  | 1545.277  |
| AB040890  | 6415.771  | 9974.359  | AK025699  | 15235.796 | 16643.646 | NM_01407C | 998.759   | 992.396   |
| AK024233  | 1966.096  | 2765.346  | AF147353  | 688.269   | 739.352   | NM_01628C | 345.397   | 860.997   |
| AK021870  | 2268.254  | 2169.015  | NM_018024 | 7844.93   | 2766.295  | NM_016027 | 769.691   | 1477.059  |
| U06680    | 1257.025  | 1565.1    | AK027173  | 673.722   | 284.996   | NM_014297 | 8419.784  | 8991.883  |
| NM_005123 | 985.763   | 1288.184  | AK026783  | 932.6     | 512.267   | NM_01815E | 18855.537 | 15962.391 |
| NM_015584 | 10461.774 | 8631.706  | AK021814  | 1814.053  | 1328.064  | X98266    | 1164.789  | 1107.924  |
| NM_001697 | 48390.688 | 37069.004 | AF088035  | 1595.531  | 806.887   | U00930    | 12349.108 | 9893.82   |
| NM_01609E | 20006.648 | 17242.984 | NM_018092 | 7183.661  | 4347.16   | AK024958  | 907.551   | 883.222   |
| NM_002063 | 823.476   | 599.431   | NM_005842 | 2800.743  | 1637.046  | NM_01457E | 3884.574  | 3614.056  |
| NM_006667 | 58456.125 | 49815.664 | AF147419  | 3610.827  | 3776.886  | NM_00243E | 3881.744  | 2556.958  |
| AK025125  | 825.85    | 1168.804  | AK024280  | 888.558   | 1038.82   | AL117552  | 1262.625  | 683.878   |
| NM_00081E | 1858.29   | 2663.614  | AF075036  | 1208.012  | 1226.631  | NM_002692 | 6658.307  | 4606.683  |
| NM_001293 | 1147.367  | 2119.122  | NM_014797 | 3256.283  | 3536.255  | AB023190  | 33623.871 | 27407.648 |
| AB023173  | 8439.062  | 13072.863 | AK027139  | 635.07    | 1136.536  | NM_007064 | 1212.348  | 1919.319  |
| AF156548  | 5301.517  | 7921.374  | AL831841  | 5116.058  | 5159.442  | NM_006281 | 1648.653  | 5714.131  |
| NM_000387 | 11632.684 | 19177.42  | AL110165  | 2599.277  | 2272.534  | NM_00273E | 8649.389  | 14678.498 |
| NM_004663 | 1825.613  | 4341.489  | AL117652  | 1098.084  | 828.658   | U23460    | 27844.354 | 40032.086 |
| NM_01531C | 1112.558  | 2144.356  | AL050168  | 2130.977  | 1224.568  | NM_00535E | 48239.918 | 70521.859 |
| NM_016154 | 18813.867 | 36285.145 | AL122122  | 5373.125  | 2076.872  | Z25434    | 1901.469  | 2846.482  |
| NM_005013 | 59936.715 | 64842.84  | AK000122  | 12409.733 | 10699.55  | NM_005884 | 10156.91  | 10521.999 |
| AB002338  | 1669.299  | 3669.376  | AK023159  | 2188.817  | 1630.495  | NM_01239E | 9398.127  | 7789.762  |
| NM_001072 | 1612.922  | 1472.496  | AK001091  | 3123.53   | 2530.292  | AF229804  | 14386.98  | 15113.538 |
| NM_01407C | 906.843   | 1231.777  | AK025310  | 3628.485  | 1203.974  | AF151638  | 2606.138  | 4036.868  |
| NM_016027 | 989.156   | 2155.204  | AF009269  | 1188.892  | 1291.879  | U90552    | 6824.825  | 5917.776  |
| NM_014297 | 10434.849 | 10325.977 | AF009313  | 4162.916  | 3599.83   | NM_00546C | 651.548   | 822.992   |
| NM_01815E | 13794.3   | 12545.878 | AF056420  | 3365.698  | 1058.417  | AF160477  | 2156.651  | 2516.182  |
| X98266    | 1470.294  | 1517.854  | AF090887  | 1023.754  | 813.998   | NM_00322E | 320.594   | 401.488   |
| U00930    | 12940.369 | 10464.035 | AF009279  | 648.499   | 741.755   | M12883    | 3651.961  | 4161.786  |
| AK024958  | 864.62    | 946.756   | NM_015883 | 1659.813  | 2054.796  | BG288747  | 6296.615  | 7409.319  |
| NM_01457E | 4921.724  | 4009.774  | AF056429  | 676.715   | 714.585   | BG617923  | 348.685   | 305.517   |
| NM_00243E | 4080.223  | 4205.26   | AF070547  | 3140.725  | 2387.993  | U37448    | 2349.846  | 2642.581  |
| AL117552  | 1631.716  | 1385.525  | AK001110  | 9613.238  | 8752.879  | BG435851  | 342.557   | 481.806   |
| NM_002692 | 10876.736 | 6861.54   | AK002184  | 593.555   | 361.469   | AA927698  | 2071.203  | 2481.09   |
| AB023190  | 18292.355 | 11894.299 | AK021652  | 844.434   | 387.629   | AI498426  | 964.891   | 715.5     |
| NM_007064 | 1616.492  | 1127.114  | AK021859  | 1780.215  | 708.177   | D01038    | 17949.75  | 8596.968  |
| NM_006281 | 2172.661  | 2934.432  | AK025826  | 690.47    | 927.089   | AB019205  | 1068.381  | 613.159   |
| NM_00273E | 12581.591 | 14853.521 | AK026439  | 1325.168  | 2336.312  | J05008    | 1293.66   | 603.048   |
| U23460    | 41658.848 | 37975.469 | AK025278  | 554.912   | 262.336   | U11087    | 903.702   | 1265.916  |
| NM_00535E | 43208.199 | 63487.527 | AK026466  | 440.35    | 209.827   | D50640    | 2123.85   | 2996.429  |
| Z25434    | 3960.023  | 7186.379  | AY007163  | 8876.285  | 8705.567  | D43747    | 902.64    | 1896.821  |
| NM_005884 | 17954.68  | 34891.695 | NM_00623E | 28871.146 | 21906.92  | M98776    | 4651.573  | 6905.851  |
| NM_01239E | 13190.49  | 25195.6   | AK023734  | 1043.603  | 709.791   | X99135    | 48418.051 | 63277.262 |
| AF229804  | 24036.07  | 40625.395 | D17265    | 34286.207 | 28661.021 | AF009744  | 1687.004  | 5657.71   |
| AF151638  | 3622.534  | 7729.277  | Y08266    | 35935.848 | 27676.129 | NM_17214C | 2862.626  | 3917.903  |
| U90552    | 9681.505  | 17391.787 | AK002171  | 4439.804  | 3243.216  | AK026965  | 10362.716 | 9416.948  |
| NM_00546C | 681.222   | 918.63    | AJ002572  | 1725.721  | 1681.677  | AK025859  | 4114.928  | 4366.727  |
| AF160477  | 2319.708  | 1859.959  | AK026897  | 6860.756  | 5671.789  | AL117499  | 11394.231 | 10426.298 |
| M12883    | 5190.99   | 4856.639  | AB037861  | 6540.877  | 5682.052  | NM_007054 | 1146.848  | 1357.009  |

|           |           |           |           |           |           |           |           |           |
|-----------|-----------|-----------|-----------|-----------|-----------|-----------|-----------|-----------|
| BG288747  | 9541.439  | 13759.149 | AK021887  | 3378.248  | 3914.557  | AB007957  | 499.262   | 797.829   |
| BG617923  | 576.127   | 780.099   | AF086180  | 7061.413  | 6939.809  | AK000160  | 2799.616  | 3971.063  |
| U37448    | 2732.152  | 2194.92   | AK022135  | 2239.183  | 3827.555  | NM_005311 | 841.395   | 944.577   |
| AA927698  | 3050.759  | 3288.838  | AK022898  | 1755.22   | 5864.214  | NM_005905 | 2696.372  | 2263.943  |
| AI498426  | 899.383   | 977.023   | AL117406  | 878.05    | 525.938   | NM_016235 | 774.279   | 682.484   |
| D01038    | 14463.282 | 11858.59  | NM_017559 | 19383.051 | 9693.721  | NM_000960 | 641.071   | 573.446   |
| AB019205  | 1713.586  | 1554.481  | NM_003547 | 2242.79   | 1333.618  | AF172932  | 921.522   | 794.458   |
| J05008    | 2121.09   | 1282.414  | AL049980  | 3393.502  | 2213.555  | NM_005355 | 796.108   | 609.035   |
| D50640    | 3365.767  | 1973.51   | NM_006683 | 933.674   | 768.646   | NM_002511 | 1407.131  | 953.829   |
| D43747    | 1234.027  | 726.829   | AF070529  | 772.504   | 676.585   | AF295378  | 3997.387  | 4002.172  |
| M98776    | 5957.625  | 3227.764  | AK022978  | 1801.1    | 1469.531  | AF320908  | 1904.674  | 2694.147  |
| X99135    | 57425.496 | 53637.988 | AK021447  | 5240.845  | 4414.851  | NM_004085 | 4578.55   | 8967.21   |
| AF009744  | 3040.165  | 5167.961  | AK025096  | 1212.827  | 1012.199  | NM_012445 | 19750.748 | 30234.307 |
| NM_172140 | 4567.751  | 8750.833  | AF131774  | 1742.195  | 1504.46   | NM_018104 | 1764.202  | 3711.121  |
| AK026965  | 9868.867  | 8107.365  | AK025793  | 673.038   | 552.804   | NM_006080 | 460.238   | 907.963   |
| AK025859  | 4512.073  | 3462.054  | AK000151  | 898.004   | 878.845   | NM_004425 | 2424.469  | 3022.652  |
| AL117499  | 13203.563 | 10483.658 | AL389942  | 954.719   | 1110.541  | U64564    | 644.421   | 630.625   |
| NM_007054 | 1995.15   | 1691.445  | D17052    | 1532.637  | 1203.427  | NM_006470 | 1060.817  | 840.644   |
| AK000160  | 3926.431  | 3582.158  | D28378    | 56652.637 | 46055.965 | NM_002855 | 2489.026  | 2625.46   |
| NM_005311 | 858.677   | 1195.866  | M64700    | 541.018   | 616.927   | AB038463  | 852.08    | 1135.922  |
| NM_005905 | 3397.223  | 2390.424  | L41143    | 7339.621  | 9894.509  | M30262    | 994.822   | 1627.747  |
| NM_016235 | 858.696   | 800.207   | NM_005331 | 34772.57  | 49962.98  | NM_000387 | 13955.702 | 11805.315 |
| NM_000960 | 663.61    | 732.954   | NM_014111 | 1261.792  | 2081.76   | NM_004663 | 1404.618  | 1664.97   |
| AF172932  | 1024.817  | 1150.362  | S85075    | 608.102   | 1391.32   | NM_015310 | 795.229   | 1178.116  |
| NM_005355 | 660.211   | 961.714   | AJ008129  | 3652.221  | 7952.696  | NM_016154 | 14935.575 | 16344.32  |
| NM_002511 | 1480.661  | 1753.682  | AJ008158  | 1429.087  | 546.104   | NM_005013 | 54699.609 | 51851.301 |
| AF295378  | 5003.51   | 5126.733  | AF161451  | 11997.495 | 3646.823  | AB002338  | 1314.056  | 1772.566  |
| AF320908  | 2432.98   | 2507.569  | X02067    | 18483.178 | 2835.535  | AI524814  | 2307.515  | 3139.551  |
| NM_004085 | 3924.048  | 3596.369  | U92013    | 9107.409  | 12904.303 | AB024411  | 1840.055  | 1719.857  |
| NM_012445 | 28177.244 | 27467.586 | AK023965  | 1847.666  | 1495.044  | NM_002444 | 25212.904 | 17257.803 |
| NM_018104 | 3674.196  | 2212.723  | AK026211  | 1405.242  | 866.045   | NM_001104 | 1326.42   | 1047.689  |
| NM_006080 | 727.991   | 707.935   | X58968    | 2877.047  | 2629.949  | NM_002985 | 5694.813  | 3772.554  |
| NM_004425 | 6185.26   | 11195.137 | U92020    | 5559.151  | 4519.458  | U88898    | 8100.509  | 3532.909  |
| U64564    | 2054.476  | 3823.29   | AL117542  | 1202.27   | 1208.551  | NM_020154 | 28690.563 | 12785.063 |
| NM_006470 | 1824.909  | 3688.858  | AL109712  | 20644.438 | 18348.096 | NM_004665 | 1412.781  | 1565.14   |
| NM_002855 | 2696.74   | 7794.884  | X04215    | 581.348   | 553.612   | NM_005300 | 1026.43   | 2091.29   |
| AB038463  | 1408.233  | 2886.391  | NM_017782 | 2569.643  | 3016.104  | NM_000893 | 997.551   | 2056.237  |
| M30262    | 606.672   | 1791.717  | NM_018149 | 3939.54   | 4053.205  | NM_000695 | 23172.207 | 38567.648 |
| NM_000387 | 11223.216 | 9409.87   | NM_018465 | 14690.05  | 14499.459 | NM_005091 | 577.699   | 547.156   |
| NM_004663 | 1381.662  | 1471.842  | Z36814    | 1449.649  | 922.482   | AF031167  | 1441.105  | 4553.922  |
| NM_015310 | 1027.553  | 1024.503  | D17045    | 1424.064  | 932.77    | NM_003204 | 2154.288  | 4487.52   |
| NM_016154 | 17498.191 | 19193.59  | AK000827  | 2991.704  | 2211.479  | AF254069  | 660.398   | 710.502   |
| AB002338  | 1431.016  | 2190.288  | NM_002503 | 33161.371 | 8842.76   | AL117600  | 8751.741  | 5143.591  |
| AI524814  | 3497.809  | 4474.005  | NM_005319 | 6345.591  | 1216.39   | NM_001712 | 506.365   | 398.474   |
| AB024411  | 2667.228  | 2751.223  | NM_019055 | 579.487   | 267.671   | NM_004487 | 11130.92  | 15010.075 |
| NM_002444 | 32455.238 | 37837.719 | AK022351  | 2259.541  | 2128.63   | AB029000  | 6475.132  | 13180.948 |
| NM_001104 | 1244.308  | 1515.751  | AK022059  | 711.27    | 1509.487  | Z25434    | 2995.797  | 2782.044  |
| NM_002985 | 3484.833  | 4989.492  | NM_020194 | 8056.339  | 15560.665 | NM_005884 | 12541.475 | 15165.108 |
| U88898    | 11860.514 | 12472.258 | AK026853  | 762.004   | 1776.315  | NM_012395 | 8527.914  | 7532.82   |
| NM_020154 | 36783.813 | 38425.215 | AF038183  | 18010.465 | 40189.348 | AF229804  | 40208.672 | 23751.742 |
| NM_004665 | 2289.207  | 2968.997  | NM_017882 | 3297.958  | 1943.955  | AF151638  | 2179.101  | 2936.544  |
| NM_005300 | 1463.784  | 1480.652  | NM_003521 | 2158.485  | 555.42    | U90552    | 7633.118  | 7797.39   |
| NM_000893 | 1292.765  | 1173.254  | CY3Cy5    | 5451.254  | 261.221   | NM_006032 | 4285.1    | 3678.281  |

|           |           |           |           |           |           |           |           |           |
|-----------|-----------|-----------|-----------|-----------|-----------|-----------|-----------|-----------|
| NM_00069E | 29639.588 | 25119.877 | J03571    | 10705.225 | 13787.288 | NM_01478E | 2435.407  | 2731.863  |
| AF031167  | 1828.287  | 1555.319  | X56134    | 634.376   | 575.539   | NM_00215E | 791.576   | 759.161   |
| NM_003204 | 5006.41   | 4298.746  | NM_00145E | 676.027   | 1053.277  | AB040890  | 3722.898  | 3562.791  |
| AF254069  | 1272.514  | 2459.981  | H44784    | 802.181   | 515.047   | AK024233  | 1476.252  | 1447.886  |
| AL117600  | 12253.499 | 22590.066 | AI421041  | 33306.215 | 35979.973 | AK021870  | 1643.651  | 1096.936  |
| NM_00171E | 861.837   | 2322.951  | BI759091  | 1791.603  | 2046.226  | U06680    | 908.143   | 658.176   |
| NM_004487 | 10108.846 | 14510.461 | BG685843  | 8414.581  | 7564.086  | NM_01785E | 89.276    | 72.278    |
| AB029000  | 6352.778  | 12930.16  | BI490011  | 1545.891  | 1147.281  | NM_00512E | 590.23    | 714.464   |
| Z25434    | 4103.091  | 4099.354  | AF035771  | 743.385   | 509.721   | NM_015584 | 8661.697  | 14239.557 |
| NM_005884 | 15517.355 | 18557.453 | N20475    | 2313.423  | 1988.609  | NM_001697 | 45897.668 | 66144.594 |
| NM_01239E | 10287.454 | 11255.093 | BI199286  | 2992.045  | 4472.74   | NM_01609E | 20874.82  | 41199.73  |
| AF229804  | 34184.773 | 31318.482 | H61726    | 1003.227  | 992.469   | AB032525  | 438.404   | 704.494   |
| U90552    | 9048.178  | 11137.464 | NM_004774 | 4723.257  | 5181.065  | NM_00206E | 574.489   | 882.483   |
| NM_00603E | 4046.097  | 4571.659  | SR5       | 7592.177  | 8110.069  | NM_006667 | 14572.163 | 11365.816 |
| NM_01478E | 2797.475  | 3656.966  | SR7       | 6026.837  | 46702.422 | AK025125  | 297.764   | 320.139   |
| NM_00215E | 1182.501  | 1348.339  | SR9       | 22785.674 | 3979.084  | NM_00081E | 1157.851  | 675.711   |
| AB040890  | 4708.516  | 6972.684  | CY3Cy5    | 7459.231  | 314.671   | NM_00129E | 423.281   | 324.8     |
| AK024233  | 1562.658  | 2112.949  | AF212842  | 460.156   | 1702.926  | AB023173  | 5606.317  | 8359.101  |
| AK021870  | 2424.567  | 3325.597  | NM_018404 | 393.589   | 894.077   | AF156548  | 4521.396  | 6860.197  |
| U06680    | 1361.675  | 1960.269  | M27544    | 2237.158  | 3300.942  | NM_17214C | 2706.624  | 2466.053  |
| NM_00512E | 916.602   | 1207.224  | NM_001118 | 778.321   | 672.481   | AB018283  | 375.923   | 783.633   |
| NM_015584 | 10589.975 | 13359.277 | AL133097  | 3792.905  | 3431.824  | NM_00107E | 1275.43   | 1132.873  |
| NM_001697 | 47470.797 | 42912.754 | NM_001165 | 3924.536  | 2982.69   | NM_01407C | 949.435   | 819.219   |
| NM_01609E | 18982.977 | 15199.899 | NM_001381 | 58776.508 | 60770.445 | NM_01628C | 263.373   | 270.684   |
| NM_00206E | 810.348   | 483.159   | NM_00645E | 3032.32   | 2596.848  | NM_016027 | 879.579   | 1011.136  |
| NM_006667 | 53189.563 | 30993.701 | NM_00409E | 984.518   | 397.986   | NM_014297 | 7923.247  | 4765.242  |
| AK025125  | 1398.216  | 1812.818  | NM_00144E | 4887.276  | 4900.051  | NM_01815E | 14243.703 | 6417.575  |
| NM_00081E | 1622.071  | 3754.331  | AF086122  | 4312.778  | 3858.902  | X98266    | 1240.972  | 593.463   |
| NM_00129E | 771.922   | 1630.341  | AK024397  | 7703.056  | 8927.396  | U00930    | 10697.06  | 5572.181  |
| AB023173  | 8365.269  | 14883.229 | NM_003564 | 1628.185  | 2529.161  | AK024958  | 780.593   | 1219.739  |
| AF156548  | 5754.421  | 8712.287  | AF317516  | 7132.599  | 9406.104  | NM_01457E | 5120.666  | 9046.865  |
| NM_17214C | 2836.083  | 3359.753  | NM_002581 | 1214.337  | 3261.618  | NM_00243E | 4122.663  | 11335.249 |
| NM_00107E | 1687.87   | 2300.073  | AI417964  | 1097.909  | 1393.151  | AL117552  | 1466.968  | 1979.348  |
| NM_01407C | 819.554   | 1161.666  | S78203    | 3268.518  | 5003.286  | NM_00269E | 7440.12   | 3471.761  |
| NM_016027 | 951.038   | 1650.923  | NM_01620E | 6545.411  | 8558.152  | AB023190  | 5468.899  | 2289.778  |
| NM_014297 | 10548.021 | 14402.89  | NM_00563E | 9900.918  | 7636.415  | NM_007064 | 555.751   | 222.294   |
| NM_01815E | 16393.244 | 19091.141 | NM_00723E | 13448.873 | 10781.285 | NM_006281 | 1279.783  | 1026.931  |
| X98266    | 1485.638  | 2012.091  | NM_00726E | 2370.917  | 2304.475  | NM_00273E | 6745.6    | 4524.459  |
| U00930    | 14364.043 | 15685.957 | AK026014  | 2889.934  | 2864.353  | U23460    | 25141.633 | 34063.629 |
| AK024958  | 981.821   | 1246.174  | NM_01484E | 2309.24   | 1780.264  | NM_00535E | 42567.566 | 59681.41  |
| NM_01457E | 5023.483  | 5612.784  | NM_00429E | 4003.413  | 2756.728  | NM_00442E | 3427.529  | 3400.525  |
| NM_00243E | 4417.432  | 6360.358  | NM_007181 | 2570.382  | 1866.131  | U64564    | 1381.774  | 1600.097  |
| AL117552  | 1910.801  | 1373.258  | AB007857  | 677.473   | 422.628   | NM_00647C | 1172.362  | 1299.999  |
| NM_00269E | 11350.14  | 8209.604  | NM_00177E | 22124.992 | 20418.436 | NM_00285E | 2537.776  | 3060.944  |
| AB023190  | 19941.639 | 8060.798  | NM_004997 | 10551.845 | 7479.802  | AB038463  | 693.502   | 846.82    |
| NM_007064 | 1338.196  | 869.659   | NM_00592E | 4519.284  | 3771.886  | M30262    | 1042.917  | 1345.088  |
| NM_006281 | 2710.069  | 6020.466  | NM_00346E | 1733.08   | 2026.237  | NM_00546C | 609.736   | 715.982   |
| NM_00273E | 11183.371 | 25844.711 | AF289028  | 388.726   | 946.29    | AF160477  | 1712.447  | 1798.188  |
| U23460    | 13483.519 | 23056.156 | NM_00662E | 670.644   | 955.821   | M12883    | 3261.223  | 2699.58   |
| NM_00535E | 45052.109 | 59837.5   | NM_00396E | 2188.899  | 1728.384  | BG288747  | 5784.548  | 5001.953  |
| NM_00442E | 3085.884  | 3882.848  | NM_004584 | 3480.038  | 4922.548  | U37448    | 2220.237  | 843.973   |
| U64564    | 1592.922  | 1772.629  | AK023618  | 5492.934  | 6016.996  | BG435851  | 383.596   | 420.519   |
| NM_00647C | 1494.072  | 2008.656  | NM_00149E | 652.116   | 977.822   | AA927698  | 2003.993  | 1333.936  |

|           |           |           |           |           |           |           |           |           |
|-----------|-----------|-----------|-----------|-----------|-----------|-----------|-----------|-----------|
| NM_00285E | 2409.093  | 4221.889  | AB012643  | 16384.854 | 19575.68  | AI498426  | 791.858   | 940.715   |
| AB038463  | 1035.653  | 1403.095  | AB023170  | 1385.427  | 1720.823  | D01038    | 17160.691 | 30916.273 |
| M30262    | 1287.199  | 1914.855  | NM_014153 | 9238.853  | 8558.216  | AB019205  | 1290.721  | 1484.193  |
| NM_00546C | 852.569   | 1385.398  | NM_000414 | 3943.968  | 4173.689  | J05008    | 1212.804  | 436.256   |
| AF160477  | 1970.881  | 2918.064  | NM_01884E | 3850.098  | 3362.27   | D50640    | 1801.928  | 557.593   |
| M12883    | 4374.222  | 5455.086  | NM_00550E | 1062.03   | 1003.081  | D43747    | 446.671   | 190.213   |
| BG288747  | 8661.427  | 14976.586 | NM_001134 | 954.383   | 756.262   | M98776    | 3263.066  | 1770.878  |
| BG617923  | 303.855   | 706.184   | NM_01601E | 4414.742  | 6045.023  | X99135    | 48473.434 | 57662.691 |
| U37448    | 2827.047  | 2939.105  | NM_020407 | 1061.201  | 1333.39   | AF009744  | 1808.921  | 5064.678  |
| BG435851  | 658.392   | 567.018   | AF118274  | 9487.96   | 9332.494  | NM_003204 | 2298.818  | 2593.428  |
| AA927698  | 2712.3    | 4108.388  | NM_018344 | 2054.034  | 3537.231  | AF254069  | 620.328   | 608.636   |
| AI498426  | 932.05    | 1374.301  | NM_00007E | 5711.14   | 7817.971  | AL117600  | 8938.983  | 7056.276  |
| D01038    | 15068.093 | 14225.872 | NM_00008E | 1060.793  | 1560.422  | NM_00171E | 487.369   | 732.046   |
| AB019205  | 1630.903  | 1567.793  | AL110245  | 3219.457  | 4914.896  | NM_004487 | 12172.848 | 10325.865 |
| J05008    | 2001.972  | 1015.833  | NM_00562E | 20106.055 | 22393.107 | AB029000  | 4520.965  | 5179.223  |
| U11087    | 899.718   | 644.648   | NM_003951 | 569.497   | 779.32    | AK026965  | 8796.129  | 7543.126  |
| D50640    | 3606.933  | 1514.044  | X74609    | 24838.637 | 25211.934 | AK025859  | 3672.203  | 2936.223  |
| D43747    | 687.534   | 316.814   | AB002316  | 827.841   | 690.591   | AL117499  | 10009.002 | 8156.173  |
| M98776    | 5877.52   | 8533.987  | NM_01336E | 912.556   | 732.581   | NM_007054 | 1117.835  | 1158.586  |
| X99135    | 25748.291 | 46717.633 | NM_000947 | 4934.355  | 3292.02   | AB007957  | 341.925   | 281.284   |
| AF009744  | 2160.003  | 4938.698  | NM_01904E | 2184.033  | 2438.798  | AK000160  | 2913.844  | 2316.492  |
| NM_003204 | 2753.502  | 3331.438  | AF130101  | 963.126   | 875.049   | NM_005311 | 859.004   | 545.64    |
| AF254069  | 960.666   | 991.042   | NM_00465E | 4128.756  | 4720.284  | NM_00590E | 2484.656  | 874.204   |
| AL117600  | 10159.948 | 9405.976  | NM_00557E | 981.077   | 1843.229  | NM_01623E | 703.063   | 286.876   |
| NM_00171E | 636.178   | 841.979   | AF071569  | 1006.318  | 1630.54   | NM_00096C | 497.28    | 478.181   |
| NM_004487 | 10318.68  | 10466.175 | NM_00226E | 2432.518  | 3752.828  | AF172932  | 994.268   | 1930.296  |
| AB029000  | 5877.344  | 7480.353  | J04948    | 1252.963  | 1487.388  | NM_00535E | 943.705   | 2576.713  |
| AK026965  | 10082.992 | 11604.833 | NM_01804E | 729.407   | 1010.173  | NM_002511 | 662.797   | 1269.859  |
| AK025859  | 4975.332  | 7156.412  | AK022564  | 60310.672 | 71892.133 | AF295378  | 3242.09   | 2223.625  |
| AL117499  | 14695.573 | 17992.182 | NM_003564 | 1757.586  | 1907.579  | AF320908  | 1683.414  | 919.846   |
| NM_007054 | 1693.713  | 2943.249  | AF317516  | 5164.113  | 4726.556  | NM_00408E | 2566.656  | 2118.317  |
| AB007957  | 744.966   | 1986.027  | NM_002581 | 792.636   | 934.687   | NM_01244E | 16991.311 | 21501.449 |
| AK000160  | 4184.985  | 5243.896  | AI417964  | 451.466   | 525.793   | NM_018104 | 1719.974  | 4854.439  |
| NM_005311 | 1237.13   | 1514.748  | J03571    | 8325.359  | 5938.861  | NM_00608C | 528.141   | 1233.557  |
| NM_00590E | 3889.553  | 2842.643  | X56134    | 971.309   | 748.881   | NM_006667 | 42386.57  | 29442.375 |
| NM_01623E | 993.573   | 1015.094  | NM_00145E | 779.774   | 1081.983  | NM_00081E | 1104.099  | 1343.145  |
| AF172932  | 1217.614  | 1034.064  | H44784    | 1095.96   | 314.591   | AB023173  | 4132.208  | 3997.443  |
| NM_00535E | 488.541   | 574.183   | BI759091  | 1240.689  | 1010.674  | AF156548  | 2996.562  | 2751.021  |
| NM_002511 | 1349.277  | 1041.326  | BG685843  | 7044.853  | 6628.974  | NM_000387 | 10529.066 | 8117.939  |
| AF295378  | 5483.88   | 4311.93   | BI490011  | 1358.417  | 1136.392  | NM_00466E | 1204.373  | 1452.909  |
| AF320908  | 2740.157  | 1520.399  | AF035771  | 549.405   | 711.371   | NM_01531C | 874.6     | 740.809   |
| NM_00408E | 1571.596  | 452.128   | N20475    | 4674.27   | 5040.151  | NM_016154 | 13423.343 | 11362.706 |
| NM_01244E | 14219.047 | 8396.309  | BI199286  | 2974.309  | 5035.142  | NM_00501E | 53209.137 | 40586.852 |
| NM_018104 | 2139.779  | 3787.199  | AA026626  | 764.319   | 1026.311  | AB002338  | 1290.717  | 998.948   |
| NM_00608C | 536.004   | 1876.438  | H61726    | 678.324   | 1033.324  | AI524814  | 2357.892  | 1469.023  |
| NM_006667 | 53322.086 | 44413.215 | NM_004774 | 4313.311  | 3811.118  | AB024411  | 1651.982  | 1072.348  |
| AK025125  | 548.555   | 409.414   | NM_005234 | 3293.572  | 4970.366  | NM_002444 | 22981.393 | 9138.505  |
| NM_00081E | 1346.851  | 1615.209  | NM_00521E | 6450.157  | 5059.02   | NM_001104 | 1002.903  | 1937.087  |
| NM_00129E | 621.849   | 844.316   | NM_00662E | 563.105   | 621.336   | NM_00298E | 4226.93   | 9343.344  |
| AB023173  | 6424.591  | 6837.633  | NM_00396E | 2044.799  | 1051.035  | U88898    | 9379.233  | 16085.841 |
| AF156548  | 3965.005  | 4405.763  | NM_004584 | 2787.066  | 2924.544  | NM_020154 | 23456.602 | 30266.641 |
| NM_000387 | 11974.937 | 12480.253 | X15183    | 58966.633 | 61099.52  | NM_00466E | 1368.792  | 2803.087  |
| NM_00466E | 2493.17   | 4045.888  | AK023618  | 3449.058  | 2833.595  | NM_00530C | 1074.977  | 1359.224  |

|           |           |           |           |           |           |           |           |           |
|-----------|-----------|-----------|-----------|-----------|-----------|-----------|-----------|-----------|
| NM_015310 | 1393.838  | 2498.669  | AF212842  | 345.734   | 712.983   | NM_000893 | 644.233   | 776.3     |
| NM_016154 | 17691.262 | 24598.25  | NM_018404 | 433.669   | 455.452   | NM_000698 | 17761.699 | 25892.531 |
| NM_005013 | 58418.395 | 59525.297 | M27544    | 2607.101  | 2955.777  | NM_005091 | 468.207   | 1227.134  |
| AB002338  | 1812.823  | 1957.134  | NM_001118 | 1078.943  | 801.949   | AF031167  | 1839.652  | 6187.041  |
| AI524814  | 3464.356  | 3437.427  | NM_001165 | 3572.006  | 1472.774  | AB023190  | 24084.359 | 18110.863 |
| AB024411  | 2481.308  | 2566.532  | NM_001381 | 59955.18  | 59664.008 | NM_007064 | 1133.233  | 1276.865  |
| NM_002444 | 34086.215 | 33269.426 | NM_006458 | 2550.499  | 2746.685  | NM_006281 | 1281.345  | 2224.37   |
| NM_001104 | 1177.465  | 1193.846  | NM_004093 | 1507.406  | 1948.733  | NM_002738 | 5666.378  | 5234.571  |
| NM_002988 | 5806.086  | 5421.177  | NM_001449 | 6469.314  | 11090.337 | U23460    | 38180.426 | 29228.213 |
| U88898    | 11167.657 | 8357.461  | NM_001387 | 213.549   | 2610.571  | NM_005356 | 32875.809 | 23768.377 |
| NM_020154 | 35748.664 | 27506.193 | AF086122  | 4412.005  | 4729.89   | Z25434    | 2617.196  | 2089.049  |
| NM_004665 | 2159.036  | 1809.855  | AK024397  | 6202.303  | 7365.925  | NM_005884 | 9980.927  | 10443.345 |
| NM_005300 | 1533.548  | 1103.905  | NM_018047 | 1948.635  | 3114.951  | NM_012398 | 8011.88   | 6643.871  |
| NM_000893 | 913.117   | 567.97    | NM_005022 | 861.637   | 1192.106  | AF229804  | 35644.008 | 19348.166 |
| NM_000698 | 10658.071 | 4585.514  | NM_000083 | 1366.007  | 1262.4    | AF151638  | 2102.813  | 2267.77   |
| NM_005091 | 819.988   | 963.696   | AL110245  | 3629.51   | 3941.286  | U90552    | 6537.927  | 4782.294  |
| AF031167  | 2508.62   | 6229.801  | NM_005628 | 17789.463 | 14674.36  | NM_006032 | 3725.74   | 1724.214  |
| AB023190  | 18252.225 | 17673.387 | NM_016605 | 20832.455 | 15867.522 | NM_014788 | 2265.228  | 1552.916  |
| NM_007064 | 1370.691  | 1662.697  | S78203    | 3416.133  | 3144.134  | NM_002153 | 628.993   | 323.09    |
| NM_006281 | 1867.311  | 2430.781  | NM_016208 | 9119.911  | 6485.598  | AB040890  | 3174.493  | 2526.994  |
| NM_002738 | 9191.256  | 9180.637  | NM_005638 | 10962.394 | 6828.373  | AK024233  | 1332.953  | 2465.637  |
| U23460    | 38890.27  | 31177.793 | NM_007235 | 16280.429 | 9459.348  | AK021870  | 1811.211  | 2933.889  |
| NM_005356 | 42629.203 | 39631.293 | NM_007269 | 2164.961  | 1221.512  | U06680    | 934.181   | 1979.562  |
| Z25434    | 4558.207  | 4819.603  | AK026014  | 3088.989  | 2285.426  | NM_005123 | 698.943   | 1304.077  |
| NM_005884 | 17767.172 | 33006.293 | NM_014845 | 2523.67   | 1977.481  | NM_015584 | 8385.433  | 14398.834 |
| NM_012398 | 11667.047 | 17322.906 | NM_004298 | 3420.844  | 2758.974  | NM_001697 | 40486.102 | 45294.414 |
| AF229804  | 34405.461 | 36578.57  | NM_001232 | 3969.919  | 4832.765  | NM_016098 | 19751.906 | 36010.883 |
| AF151638  | 3464.414  | 4130.124  | NM_007181 | 5248.272  | 7280.787  | AB032525  | 440.45    | 1189.504  |
| U90552    | 8556.436  | 8036.58   | AB007857  | 5696.392  | 7886.664  | NM_002063 | 752.219   | 1989.226  |
| NM_006032 | 4620.458  | 4898.425  | NM_001778 | 21877.148 | 25469.414 | AL137479  | 590.533   | 510.865   |
| NM_014788 | 2870.464  | 2860.788  | NM_004997 | 9832.638  | 7379.637  | NM_004211 | 1759.876  | 1958.486  |
| NM_002153 | 1032.226  | 1095.419  | NM_005923 | 3726.957  | 3551.413  | Y10776    | 2312.061  | 2357.425  |
| AB040890  | 4908.559  | 3353.885  | NM_003465 | 1657.295  | 2398.089  | AK027241  | 2660.489  | 2204.164  |
| AK024233  | 1485.007  | 1412.147  | NM_005127 | 8742.071  | 8536.843  | NM_006978 | 3878.543  | 4281.482  |
| AK021870  | 2346.977  | 1709.036  | NM_005567 | 4110.488  | 5840.095  | NM_004561 | 793.746   | 919.11    |
| U06680    | 1269.274  | 1122.314  | AF071569  | 1141.083  | 1864.374  | AK024812  | 2769.938  | 2733.12   |
| NM_005123 | 971.63    | 487.174   | NM_002269 | 2166.763  | 2702.122  | M20642    | 1039.46   | 1071.62   |
| NM_015584 | 9819.835  | 7144.495  | J04948    | 1004.827  | 914.795   | AK026412  | 1775.754  | 1368.241  |
| NM_001697 | 44325.551 | 23223.408 | NM_018043 | 706.557   | 551.493   | X89669    | 1889.089  | 1807.818  |
| NM_016098 | 18238.84  | 10370.942 | AK022564  | 58757.184 | 56470.52  | NM_001072 | 1170.573  | 748.502   |
| AB032525  | 485.352   | 271.884   | NM_001492 | 845.756   | 648.613   | NM_014070 | 824.2     | 437.97    |
| NM_002063 | 1345.163  | 1582.287  | AB012643  | 20848.93  | 14350.833 | NM_016280 | 289.984   | 271.751   |
| AL137479  | 1188.25   | 1003.055  | AB023170  | 2921.772  | 2223.589  | NM_016027 | 791.01    | 1393.36   |
| NM_004211 | 2077.137  | 1990.567  | NM_014153 | 11394.394 | 8461.062  | NM_014297 | 10022.544 | 22391.141 |
| Y10776    | 3426.91   | 3500.473  | NM_002296 | 15756.716 | 10271.147 | NM_018156 | 9520.899  | 15110.197 |
| AK027241  | 3559.76   | 2860.895  | NM_000414 | 6185.599  | 4318.78   | X98266    | 1030.612  | 806.256   |
| NM_006978 | 6154.449  | 7353.718  | NM_018845 | 4336.706  | 2759.099  | U00930    | 10691.911 | 8724.506  |
| NM_004561 | 847.693   | 972.591   | NM_005505 | 1430.807  | 1086.631  | AK024958  | 745.246   | 845.022   |
| AK024812  | 5579.896  | 8293.216  | NM_001134 | 1941.228  | 1224.343  | NM_014575 | 3917.45   | 3288.865  |
| M20642    | 2376.775  | 3779.806  | NM_016016 | 5703.377  | 5772.755  | NM_002438 | 4404.021  | 9421.243  |
| AK026412  | 3070.952  | 4907.208  | NM_020407 | 1071.943  | 1254.328  | AL117552  | 1803.07   | 3619.43   |
| X89669    | 2123.42   | 2336.927  | AF118274  | 12473.052 | 10761.865 | NM_002692 | 9430.669  | 18303.66  |
| NM_001072 | 1466.97   | 1871.428  | NM_018344 | 1675.041  | 1595.99   | X55525    | 1124.748  | 1219.252  |

|           |           |           |           |           |           |           |           |           |
|-----------|-----------|-----------|-----------|-----------|-----------|-----------|-----------|-----------|
| NM_01407C | 798.709   | 805.319   | NM_000079 | 5367.314  | 6148.225  | NM_000242 | 535.135   | 541.242   |
| NM_016027 | 1136.397  | 1464.456  | NM_004774 | 3963.035  | 3524.946  | AB040878  | 699.834   | 895.809   |
| NM_014297 | 10412.233 | 8029.774  | NM_005234 | 3285.147  | 3184.041  | NM_003506 | 1014.122  | 998.258   |
| NM_018156 | 16546.57  | 10471.803 | AB002316  | 1712.129  | 2089.292  | NM_018093 | 4297.71   | 3939.372  |
| X98266    | 1916.303  | 1456.103  | NM_018990 | 9081.044  | 12165.321 | NM_003388 | 3324.048  | 3129.269  |
| U00930    | 14485.354 | 11602.97  | NM_013363 | 1031.426  | 1213.327  | NM_00043C | 1278.52   | 1085.739  |
| AK024958  | 856.792   | 667.833   | NM_000947 | 5664.909  | 3529.241  | AB033030  | 329.818   | 324.561   |
| NM_014575 | 5648.584  | 2823.435  | AL096750  | 52866.59  | 58857.816 | NM_016656 | 1443.958  | 1037.792  |
| NM_002439 | 3999.529  | 2885.553  | NM_016061 | 4386.926  | 5804.933  | NM_015963 | 4575.351  | 2791.932  |
| AL117552  | 2270.369  | 1045.133  | NM_004153 | 2809.514  | 4247.13   | AB007871  | 3536.641  | 1410.973  |
| NM_002692 | 10533.563 | 4057.012  | AK024740  | 3440.076  | 4487.901  | NM_017813 | 4032.008  | 1650.824  |
| X55525    | 860.274   | 1071.291  | AF078164  | 7469.815  | 5622.889  | NM_00384C | 4548.063  | 1821.125  |
| NM_000242 | 434.519   | 693.801   | NM_019049 | 2512.811  | 2938.649  | NM_018378 | 986.174   | 637.282   |
| AB040878  | 467.034   | 478.658   | NM_012413 | 867.398   | 1182.452  | NM_018423 | 1202.108  | 1819.224  |
| S74647    | 928.674   | 947.655   | AF130101  | 1219.781  | 1724.014  | NM_001741 | 7539.585  | 11495.3   |
| NM_003506 | 1527.224  | 1506.738  | NM_004656 | 1869.736  | 2027.31   | NM_000745 | 2354.663  | 2239.32   |
| NM_018093 | 6492.472  | 6771.61   | NM_005576 | 961.569   | 1597.678  | AF116705  | 5430.009  | 2341.674  |
| NM_003012 | 479.94    | 563.457   | AF086122  | 4550.205  | 2760.12   | NM_00446C | 535.993   | 214.125   |
| NM_003388 | 5487.521  | 5671.813  | AK024397  | 6432.402  | 5543.196  | NM_006072 | 1338.757  | 645.907   |
| NM_00043C | 2056.603  | 1879.781  | NM_018047 | 1875.342  | 1193.885  | BE794490  | 496.084   | 289.965   |
| AB033030  | 457.116   | 512.122   | NM_005022 | 601.893   | 525.519   | NM_003561 | 2125.39   | 1447.354  |
| NM_016656 | 1928.647  | 2013.662  | NM_003564 | 2182.836  | 2660.762  | NM_002991 | 608.871   | 912.003   |
| NM_015963 | 6447.896  | 5232.106  | AK023414  | 531.799   | 621.621   | NM_004071 | 4510.104  | 8483.601  |
| AB007871  | 2092.42   | 1716.801  | NM_002581 | 1573.488  | 2485.475  | NM_001316 | 6929.881  | 10142.175 |
| NM_017813 | 6352.85   | 5163.366  | AI417964  | 1126      | 1722.926  | AJ008149  | 3544.921  | 3683.344  |
| NM_00384C | 5415.162  | 3645.011  | J03571    | 17327.303 | 25397.73  | NM_001192 | 423.004   | 668.615   |
| NM_018378 | 1086.753  | 733.328   | X56134    | 1430.605  | 2517.069  | NM_002353 | 663.667   | 1006.429  |
| NM_018423 | 1347.038  | 1115.551  | H44784    | 1216.81   | 1239.311  | NM_012153 | 1570.108  | 1428.893  |
| NM_001741 | 9446.323  | 7579.54   | AI421041  | 46632.137 | 62463.934 | NM_013241 | 1762.03   | 1524.575  |
| NM_000745 | 3826.073  | 2134.258  | BI759091  | 2192.757  | 3514.277  | NM_017988 | 53655.301 | 50966.082 |
| AF116705  | 9064.518  | 5775.371  | BG685843  | 9581.857  | 18325.988 | NM_015535 | 1113.878  | 691.986   |
| NM_006072 | 2182.696  | 1831.779  | BI490011  | 2471.748  | 4863.229  | Z24725    | 2536.138  | 2228.039  |
| BE794490  | 528.233   | 424.651   | AF035771  | 819.483   | 1883.887  | AF161362  | 2306.959  | 1374.226  |
| NM_003561 | 2133.482  | 1315.193  | N20475    | 7178.887  | 11066.815 | AK024078  | 413.721   | 237.933   |
| NM_004071 | 5842.403  | 4822.028  | BI199286  | 4598.526  | 10846.919 | NM_003928 | 55518.824 | 64205.059 |
| NM_001316 | 10254.876 | 14268.063 | AA026626  | 1210.171  | 2186.903  | M57399    | 48049.527 | 23368.285 |
| AJ008149  | 2461.105  | 2486.667  | H61726    | 823.556   | 1267.354  | NM_015938 | 6662.524  | 3484.609  |
| NM_001192 | 324.685   | 657.173   | NM_004997 | 9822.486  | 6298.358  | AB046840  | 2290.678  | 2057.042  |
| NM_002353 | 1119.121  | 1250.784  | NM_005923 | 4096.006  | 2879.957  | AF174487  | 1154.032  | 1335.043  |
| NM_012153 | 2120.615  | 1741.278  | NM_003465 | 1187.69   | 1127.205  | NM_017698 | 501.071   | 673.494   |
| NM_013241 | 2741.816  | 2281.875  | NM_005127 | 8095.173  | 7227.294  | NM_005041 | 375.468   | 245.086   |
| NM_017988 | 47013.152 | 53489.84  | NM_005567 | 4937.478  | 6829.189  | NM_006407 | 8656.57   | 2216.565  |
| NM_015535 | 1555.407  | 942.892   | NM_005216 | 7672.313  | 9109.406  | NM_007373 | 1402.341  | 395.447   |
| Z24725    | 4028.289  | 3643.936  | NM_006626 | 726.036   | 947.615   | M34572    | 244.636   | 141.384   |
| AF161362  | 3383.063  | 2313.387  | NM_003965 | 3108.86   | 3650.401  | NM_006263 | 23625.451 | 15644.16  |
| NM_015938 | 8732.834  | 7064.729  | NM_004584 | 4410.568  | 6635.291  | NM_004791 | 1846.115  | 1595.447  |
| AB046840  | 2583.85   | 2356.247  | AK023618  | 6685.312  | 7684.576  | Z36876    | 1702.449  | 1654.574  |
| AF174487  | 1639.638  | 1265.331  | AF212842  | 568.662   | 1593.515  | NM_000892 | 1069.948  | 1169.459  |
| NM_017698 | 578.71    | 541.445   | NM_018404 | 929.582   | 1424.798  | NM_005046 | 358.273   | 475.677   |
| NM_005041 | 562.768   | 817.794   | M27544    | 5980.418  | 9547.483  | NM_001873 | 469.458   | 488.475   |
| NM_006407 | 13865.162 | 8318.214  | NM_002258 | 550.003   | 1235.555  | AB029025  | 312.458   | 490.083   |
| NM_007373 | 2574.418  | 1613.239  | NM_001118 | 2741.122  | 4597.511  | NM_00710C | 35282.598 | 19783.398 |
| M34572    | 841.367   | 560.175   | AL133097  | 7383.339  | 9887.674  | NM_002954 | 52896.566 | 51793.906 |

|           |           |           |           |           |           |           |           |           |
|-----------|-----------|-----------|-----------|-----------|-----------|-----------|-----------|-----------|
| NM_006263 | 32858.66  | 15416.513 | NM_001165 | 5158.543  | 4770.103  | M26880    | 144.255   | 96.204    |
| NM_004791 | 651.23    | 319.048   | NM_001381 | 56079.168 | 59896.344 | NM_016572 | 988.303   | 589.308   |
| Z36876    | 3459.704  | 3336.866  | NM_006458 | 4049.159  | 5572.135  | NM_000027 | 696.136   | 378.042   |
| NM_000892 | 1070.342  | 934.396   | NM_014459 | 469.613   | 1185.435  | NM_017548 | 14938.685 | 14778.937 |
| AB029025  | 509.207   | 466.747   | NM_004093 | 1399.228  | 2433.678  | AF134802  | 1215.164  | 2877.456  |
| NM_007100 | 43550.559 | 31696.811 | NM_001449 | 9798.191  | 20490.57  | NM_018222 | 787.344   | 861.189   |
| NM_002954 | 57040.316 | 63100.535 | NM_016016 | 6682.527  | 14121.81  | NM_005740 | 1994.364  | 992.067   |
| NM_016572 | 1908.763  | 925.827   | NM_020407 | 1214.771  | 1711.42   | NM_004308 | 9667.22   | 2893.524  |
| NM_000027 | 972.646   | 896.904   | AF118274  | 10110.606 | 12623.685 | AF112366  | 1188.067  | 541.84    |
| NM_017548 | 15407.393 | 9153.335  | NM_018344 | 1828.243  | 2485.302  | NM_004274 | 772.243   | 362.602   |
| AF134802  | 1188.08   | 985.054   | NM_000079 | 5454.49   | 7710.645  | AK024002  | 6387.521  | 2331.691  |
| NM_018222 | 947.124   | 578.818   | NM_000083 | 1570.07   | 1617.913  | NM_020399 | 5713.818  | 3813.267  |
| NM_005740 | 4480.294  | 2099.9    | AL110245  | 5274.07   | 7015.448  | AB011117  | 1011.254  | 1354.606  |
| NM_004308 | 16840.908 | 9171.215  | NM_005628 | 27000.322 | 35130.344 | AF060935  | 1692.782  | 1270.241  |
| AF112366  | 2542.803  | 1419.54   | NM_003951 | 732.35    | 943.476   | AK026886  | 1028.879  | 1153.523  |
| NM_004274 | 931.249   | 723.421   | NM_004172 | 612.221   | 961.472   | D83778    | 986.811   | 1241.594  |
| AK024002  | 9572.88   | 4031.167  | S78203    | 4671.313  | 3536.679  | NM_004264 | 2860.833  | 2970.231  |
| NM_020399 | 6758.643  | 3928.46   | NM_016208 | 11854.36  | 20257.355 | AK024788  | 1465.916  | 1340.968  |
| AB011117  | 1688.564  | 757.586   | NM_005638 | 11991.042 | 15131.152 | NM_004473 | 448.184   | 305.914   |
| AF060935  | 2496.433  | 2153.161  | NM_007235 | 18436.875 | 20631.428 | AK022696  | 1561.189  | 1139.724  |
| AK026886  | 1661.806  | 1681.638  | NM_007269 | 3085.849  | 2832.018  | NM_001206 | 1085.673  | 1368.983  |
| D83778    | 1602.977  | 1267.533  | AK026014  | 3252.974  | 2076.598  | NM_005016 | 1628.377  | 1264.583  |
| NM_004264 | 4852.68   | 3913.94   | NM_014845 | 2701.75   | 1515.551  | NM_014469 | 1182.065  | 710.806   |
| AK024788  | 1778.423  | 1517.505  | NM_004298 | 3773.544  | 2662.214  | NM_014852 | 1951.482  | 759.278   |
| NM_004473 | 576.174   | 409.49    | NM_007181 | 2655.025  | 2327.085  | NM_000344 | 10297.247 | 4550.284  |
| AK022696  | 2020.84   | 1465.724  | AB007857  | 1082.026  | 971.256   | AF248650  | 2059.161  | 640.837   |
| NM_001206 | 1514.937  | 1537.457  | NM_001778 | 23244.928 | 20422.607 | S74678    | 24755.143 | 15012.705 |
| NM_005016 | 2280.754  | 1619.295  | NM_019049 | 3437.815  | 5393.56   | AF248651  | 460.016   | 676.764   |
| NM_014469 | 1072.33   | 1075.479  | NM_005447 | 572.06    | 861.494   | NM_001358 | 33678.02  | 59315.418 |
| NM_014852 | 2475.692  | 1676.63   | AF130101  | 1074.13   | 753.011   | NM_004836 | 5014.87   | 3828.727  |
| NM_000344 | 14904.423 | 10382.334 | NM_004656 | 3380.979  | 2062.89   | AB037751  | 2864.09   | 1428.189  |
| AF248650  | 3045.198  | 1991.612  | NM_005576 | 918.644   | 1240.566  | S79281    | 3181.895  | 929.39    |
| S74678    | 30791.807 | 17870.09  | AF071569  | 1414.869  | 1667.757  | AK025585  | 1975.373  | 678.268   |
| AF248651  | 689.387   | 597.911   | NM_002269 | 3871.614  | 5170.555  | NM_001414 | 4712.922  | 2072.887  |
| NM_001358 | 29951.672 | 18982.035 | J04948    | 1729.073  | 1454.652  | D16891    | 1459.225  | 391.236   |
| NM_004836 | 7675.315  | 4368.053  | NM_018043 | 953.271   | 713.534   | NM_017760 | 2321.755  | 1812.356  |
| AB037751  | 4619.187  | 2505.903  | AK022564  | 59648.141 | 56741.176 | NM_015936 | 5437.383  | 9006.794  |
| S79281    | 5036.445  | 2278.505  | AB012643  | 25232.021 | 19212.615 | AL109698  | 1918.699  | 2021.779  |
| AK025585  | 3999.936  | 2840.542  | AB023170  | 3506.272  | 3627.811  | AF217980  | 3980.878  | 3711.635  |
| NM_001414 | 8239.747  | 3565.177  | NM_014153 | 11524.995 | 13774.483 | AL117461  | 1240.699  | 1347.299  |
| D16891    | 2613.654  | 1669.559  | NM_002296 | 16168.114 | 11850.117 | NM_016499 | 597.63    | 840.42    |
| NM_017760 | 4301.072  | 1896.715  | NM_000414 | 6609.007  | 5015.02   | AF104921  | 21801.758 | 10789.13  |
| NM_015936 | 7302.59   | 4016.477  | NM_018845 | 4160.42   | 3168.98   | NM_000126 | 8782.993  | 9239.663  |
| AL109698  | 3192.497  | 2894.679  | NM_005505 | 1000.91   | 1139.295  | BF239974  | 1632.693  | 1388.191  |
| AF217980  | 5628.051  | 4786.619  | AK026964  | 755.549   | 398.914   | NM_000104 | 711.614   | 629.013   |
| AL117461  | 1852.959  | 1826.207  | NM_001134 | 1772.882  | 1857.771  | NM_005015 | 9650.499  | 6730.013  |
| NM_016499 | 856.351   | 861.077   | NM_006695 | 2614.355  | 2611.164  | NM_004255 | 47710.137 | 30187.557 |
| AF104921  | 35169.957 | 22622.494 | NM_004815 | 3838.047  | 3686.314  | NM_000269 | 33266.566 | 14117.646 |
| NM_000126 | 13710.916 | 13088.288 | NM_004147 | 887.882   | 585.683   | AF182288  | 1785.892  | 1048.827  |
| AK022291  | 644.439   | 667.922   | AK000959  | 3082.894  | 1608.951  | NM_004491 | 1093.927  | 323.656   |
| BF239974  | 1591.938  | 910.316   | AB037743  | 2616.987  | 1413.229  | AK026810  | 2391.465  | 1290.568  |
| NM_000104 | 1257.251  | 951.133   | AB046820  | 5330.699  | 3330.144  | NM_015629 | 6114.079  | 6606.166  |
| NM_005015 | 14774.808 | 11949.406 | AK025922  | 670.415   | 246.259   | AF218032  | 4313.484  | 2007.022  |

|           |           |           |           |           |           |           |           |           |
|-----------|-----------|-----------|-----------|-----------|-----------|-----------|-----------|-----------|
| NM_00425E | 55636.664 | 54508.852 | NM_01464E | 2145.783  | 1704.943  | NM_01754E | 4138.594  | 1457.586  |
| NM_00026E | 37685.25  | 23801.363 | NM_00637E | 1260.841  | 871.563   | AK024407  | 534.906   | 196.502   |
| AF182288  | 2644.855  | 2284.768  | AF123659  | 4942.587  | 3687.691  | NM_00418E | 17858.348 | 6816.881  |
| NM_004491 | 1795.951  | 733.586   | X74609    | 48710.879 | 36579.695 | NM_01841E | 317.315   | 209.534   |
| AK026810  | 3301.163  | 2297.423  | AB002316  | 1145.188  | 723.418   | NM_01424C | 687.5     | 302.497   |
| NM_01562E | 7882.997  | 5858.352  | NM_01899C | 8461.944  | 8998.334  | BE379399  | 773.365   | 967.762   |
| AF218032  | 6364.656  | 3889.086  | NM_01336E | 1111.514  | 1122.367  | NM_015877 | 1379.525  | 3020.339  |
| NM_01754E | 8481.969  | 5618.516  | NM_000947 | 4488.618  | 3791.787  | AL117598  | 1760.272  | 1994.693  |
| AK024407  | 1184.397  | 615.027   | AL096750  | 47801.512 | 55284.367 | AL109670  | 1160.702  | 1260.44   |
| NM_00418E | 23904.838 | 14676.403 | NM_016061 | 4341.159  | 5137.992  | AF085831  | 853.507   | 824.216   |
| NM_01841E | 569.842   | 417.362   | NM_01606E | 39290.098 | 46164.988 | AL832149  | 1936.996  | 1932.054  |
| NM_01424C | 1126.419  | 700.097   | NM_00415E | 2131.546  | 2901.3    | AK022839  | 1952.722  | 1543.196  |
| BE379399  | 1035.03   | 609.435   | AK024740  | 2697.905  | 3218.293  | NM_01835C | 1479.316  | 1792.687  |
| NM_015877 | 946.726   | 547.408   | AF078164  | 8116.157  | 7814.871  | AK025839  | 1908.279  | 1983.345  |
| AL117598  | 2348.091  | 2527.304  | NM_00362E | 2394.369  | 1932.411  | NM_00394E | 1053.808  | 818.834   |
| AL109670  | 1517.719  | 1257.286  | AF029325  | 1726.061  | 1319.109  | AB045292  | 2486.532  | 1948.227  |
| AF085831  | 1286.284  | 1273.965  | NM_005704 | 1500.614  | 1089.643  | AK022998  | 1282.003  | 944.79    |
| AL832149  | 4212.879  | 3164.2    | AF097021  | 1051.467  | 657.578   | AK025699  | 12264.639 | 6078.336  |
| AK022839  | 3608.172  | 2263.986  | NM_00136E | 1268.167  | 942.38    | AF147353  | 293.665   | 233.319   |
| NM_01835C | 1842.502  | 1594.993  | NM_000677 | 4911.105  | 3465.18   | NM_018024 | 4075.501  | 1640.476  |
| AK025839  | 2342.192  | 2631.039  | BF308728  | 2215.312  | 1707.517  | AK027173  | 353.314   | 467.654   |
| NM_00394E | 1506.474  | 1340.949  | NM_01328C | 1352.034  | 798.894   | AK026783  | 643.225   | 525.664   |
| AB045292  | 4008.252  | 2123.384  | NM_01831E | 33933.879 | 23354.449 | AF088040  | 295.442   | 446.8     |
| AK022998  | 2288.681  | 1534.531  | AF051151  | 1242.683  | 823.415   | AK021814  | 1438.862  | 1035.296  |
| AK025699  | 13021.695 | 8893.094  | AF142421  | 2681.934  | 2455.383  | AF088035  | 785.672   | 448.28    |
| AF147353  | 546.24    | 295.244   | AB037836  | 1313.596  | 1708.009  | AF086251  | 355.916   | 161.587   |
| NM_018024 | 6022.334  | 3980.267  | NM_014247 | 1999.321  | 1521.085  | NM_01809E | 10613.459 | 14978.886 |
| AK026783  | 857.826   | 849.595   | NM_01869E | 61887.008 | 61653.051 | NM_00584E | 3261.424  | 8967.772  |
| AK021814  | 1770.547  | 1004.314  | NM_00634E | 829.047   | 1402.238  | NM_003787 | 288.455   | 658.818   |
| AF088035  | 1301.434  | 749.564   | NM_01478E | 1579.894  | 2793.664  | AK024492  | 179.855   | 166.161   |
| NM_01809E | 10784.025 | 5957.287  | NM_00142E | 1183.154  | 2525.559  | AF147419  | 1567.131  | 1505.931  |
| NM_00584E | 3310.962  | 1596.094  | NM_01571E | 5174.99   | 8868.741  | AK024280  | 560.364   | 588.308   |
| NM_003787 | 316.549   | 374.651   | NM_00395E | 405.306   | 891.712   | AF075036  | 824.064   | 1015.879  |
| AF147419  | 2109.465  | 1605.333  | NM_00573E | 3798.679  | 5487.297  | NM_014797 | 2948.168  | 2688.939  |
| AK024280  | 788.123   | 440.296   | AB023166  | 1718.72   | 2193.124  | AK027139  | 592.827   | 656.316   |
| AF075036  | 1006.739  | 848.916   | AB028966  | 10996.553 | 11100.991 | AL831841  | 3561.927  | 2454.09   |
| NM_014797 | 3903.023  | 3263.149  | NM_00575E | 5557.888  | 4262.685  | AL110165  | 1485.038  | 1111.892  |
| AK027139  | 879.859   | 751.323   | AF044774  | 1988.69   | 1610.639  | AL117652  | 567.527   | 505.564   |
| AL831841  | 4327.096  | 2594.706  | NM_00540E | 5723.523  | 4161.404  | AL050263  | 126.811   | 113.308   |
| AL110165  | 1292.804  | 632.313   | AF055027  | 3449.097  | 3040.527  | AL050168  | 1645.66   | 687.724   |
| AL050168  | 2120.35   | 1105.404  | U63541    | 3478.502  | 2382.186  | AL117447  | 322.862   | 243.887   |
| AL122122  | 4022.329  | 1826.181  | AB033045  | 1635.182  | 987.23    | AL122122  | 3863.411  | 3256.738  |
| AK000122  | 10194.171 | 5879.213  | AF055006  | 5133.472  | 3553.242  | AK000122  | 6688.604  | 9348.368  |
| AK023159  | 2878.233  | 2402.167  | NM_00493E | 4735.391  | 3395.56   | AK023159  | 2245.789  | 4308.024  |
| AK001091  | 2526.128  | 2040.944  | NM_006951 | 1769.64   | 1067.836  | AK001091  | 1114.002  | 803.989   |
| AF086428  | 406.029   | 277.78    | NM_00189E | 7225.22   | 4962.665  | U80775    | 328.194   | 235.462   |
| AK025310  | 2484.76   | 1526.674  | NM_01402E | 1415.506  | 953.681   | AF086428  | 398.508   | 428.943   |
| AL049353  | 854.731   | 608.276   | NM_00274E | 4676.481  | 3476.462  | AK025310  | 2641.497  | 9450.72   |
| NM_01489E | 497.51    | 778.882   | D26488    | 2044.114  | 956.106   | AL049353  | 443.037   | 963.291   |
| AF009269  | 1025.504  | 915.632   | NM_00143E | 1029.272  | 721.24    | NM_01489E | 576.218   | 588.408   |
| AF009313  | 2577.35   | 1969.496  | AK002193  | 1169.15   | 1090.075  | AF009269  | 850.334   | 874.913   |
| AF056420  | 808.128   | 663.86    | AB014554  | 1961.632  | 2139.631  | AF009313  | 1840.898  | 2067.752  |
| AF090887  | 1008.538  | 826.425   | AF097431  | 3290.963  | 5794.914  | AF056420  | 622.567   | 420.181   |



|           |           |           |           |           |           |           |           |           |
|-----------|-----------|-----------|-----------|-----------|-----------|-----------|-----------|-----------|
| AF009279  | 682.81    | 778.536   | NM_001978 | 1261.682  | 2144.611  | AF090887  | 612.001   | 767.428   |
| NM_015883 | 1677.756  | 1222.038  | NM_005897 | 1046.184  | 1670.63   | AF009279  | 403.268   | 421.676   |
| AF056429  | 387.153   | 331.714   | NM_002579 | 545.95    | 1185.447  | NM_015883 | 1333.796  | 1097.66   |
| AF070547  | 2585.265  | 1769.434  | NM_004221 | 5906.739  | 5958.227  | AF070547  | 2239.228  | 1719.948  |
| AK001110  | 7061.016  | 3216.646  | NM_004061 | 2606.044  | 1467.994  | AK001110  | 8122.55   | 4888.663  |
| AK002184  | 503.581   | 369.503   | NM_003019 | 1586.757  | 2088.296  | AK002184  | 586.531   | 357.167   |
| AK021652  | 584.857   | 882.07    | AL109790  | 1143.412  | 1251.138  | AK021652  | 499.499   | 668.759   |
| AK021859  | 1005.444  | 1043.217  | NM_006923 | 3518.771  | 4402.16   | AK021859  | 898.609   | 1076.935  |
| AK025826  | 688.427   | 868.626   | NM_004615 | 21430.268 | 28108.691 | AK026439  | 628.927   | 633.239   |
| AK026439  | 1005.132  | 505.314   | AF119889  | 9067.95   | 9086.615  | AK025278  | 470.474   | 387.09    |
| AK026828  | 996.866   | 572.092   | M90657    | 714.143   | 311.745   | AY007163  | 5777.316  | 4993.583  |
| AY007163  | 8123.126  | 8247.503  | NM_006699 | 2413.521  | 1635.923  | NM_006236 | 19613.42  | 14483.628 |
| NM_006236 | 27660.795 | 21624.207 | AK025645  | 13186.926 | 13218.924 | AK023734  | 572.293   | 588.896   |
| AK023734  | 890.95    | 661.944   | AK023266  | 908.286   | 818.529   | D17265    | 23822.34  | 16915.494 |
| D17265    | 36619.77  | 27880.059 | NM_006814 | 14953.874 | 11643.795 | AF085827  | 485.469   | 418.073   |
| AF085827  | 795.878   | 708.518   | NM_005067 | 7437.621  | 5336.998  | Y08266    | 21969.076 | 18196.68  |
| Y08266    | 29116.74  | 22474.531 | AB007899  | 1101.606  | 721.039   | AK002171  | 2818.598  | 3459.991  |
| AK002171  | 4569.772  | 4380.961  | NM_002817 | 17409.023 | 12488.756 | AJ002572  | 1521.14   | 1049.09   |
| AJ002572  | 2111.343  | 1359.589  | NM_002801 | 8964.245  | 3308.728  | AK026897  | 4654.172  | 4530.986  |
| AK026897  | 7230.47   | 5542.177  | BE905810  | 1510.019  | 2168.002  | AB037861  | 4261.232  | 3577.484  |
| AB037861  | 4855.769  | 2321.273  | NM_014780 | 1317.109  | 1265.816  | AK021887  | 3089.089  | 2111.795  |
| AK021887  | 4428.541  | 2532.618  | NM_014730 | 9295.311  | 14684.635 | AF086180  | 4816.721  | 2833.289  |
| AF086180  | 7486.806  | 4020.524  | NM_014167 | 1119.996  | 1746.384  | AK022135  | 932.781   | 761.322   |
| AK022135  | 1390.437  | 1239.739  | NM_016063 | 2258.889  | 3261.011  | AK022898  | 2268.4    | 950.202   |
| AK022898  | 3844.39   | 3229.143  | U82987    | 2122.146  | 2629.858  | NM_017559 | 8666.764  | 10109.209 |
| NM_017559 | 12351.782 | 8794.098  | NM_005732 | 1905.638  | 2886.467  | AL117592  | 302.432   | 786.357   |
| NM_003547 | 1194.528  | 1438.74   | NM_014890 | 807.141   | 914.377   | AK024897  | 182.874   | 464.9     |
| AL049980  | 3712.913  | 3384.743  | AK056481  | 3473.965  | 5032.674  | NM_003547 | 1033.177  | 1024.013  |
| NM_006683 | 934.135   | 1022.886  | NM_005433 | 1111.518  | 1232.369  | AL049980  | 2187.587  | 1832.458  |
| AK022978  | 1832.642  | 2009.516  | L35035    | 4290.477  | 3724.024  | NM_006683 | 569.438   | 533.806   |
| AK021447  | 5031.287  | 2834.429  | NM_007152 | 2135.265  | 1955.841  | AF070529  | 524.489   | 496.835   |
| AK025096  | 853.529   | 799.967   | NM_018293 | 1537.15   | 1136.733  | AK022978  | 1069      | 1275.48   |
| AF131774  | 2068.306  | 1460.752  | NM_001938 | 4306.196  | 3518.616  | AK021447  | 3568.596  | 2912.493  |
| AK025793  | 466.701   | 269.612   | AF230808  | 3570.032  | 2760.776  | AK025096  | 577.326   | 376.254   |
| AL389942  | 671.029   | 823.951   | U18910    | 1982.93   | 1200.368  | L31955    | 201.906   | 180.639   |
| D17052    | 2023.309  | 1564.611  | NM_005238 | 5083.973  | 4074.944  | AF131774  | 1276.34   | 987.759   |
| D28378    | 57465.082 | 48282.246 | AK075306  | 5050.874  | 3595.346  | AK000151  | 309.274   | 341.504   |
| M64700    | 521.761   | 800.658   | AB037820  | 260.059   | 877.373   | AL389942  | 673.334   | 439.25    |
| NM_001267 | 514.17    | 1037.078  | NM_002948 | 46897.738 | 40929.145 | D17052    | 938.113   | 402.693   |
| L41143    | 9485.088  | 9678.854  | AF113008  | 1605.686  | 2073.128  | D28378    | 49783.242 | 29284.4   |
| NM_005331 | 23836.117 | 20842.598 | NM_020217 | 1259.116  | 1552.132  | M64700    | 274.167   | 159.893   |
| NM_014111 | 1300.905  | 1786.063  | NM_018135 | 53567.395 | 51503.25  | NM_001267 | 372.463   | 444.957   |
| S85075    | 719.787   | 801.963   | AF205435  | 12429.442 | 12532.511 | L41143    | 6384.347  | 7944.681  |
| AJ008129  | 3646.147  | 3427.399  | AF085983  | 635.378   | 685.132   | NM_005331 | 7250.302  | 7714.279  |
| AJ008158  | 356.329   | 311.268   | AF052105  | 3428.019  | 3322.147  | NM_014111 | 535.788   | 737.43    |
| AF161451  | 13077.998 | 6734.824  | AK001204  | 6880.264  | 4157.433  | S85075    | 496.737   | 630.677   |
| X02067    | 15758.521 | 6760.185  | M15465    | 3107.156  | 2052.68   | AJ008129  | 2093.079  | 1667.616  |
| U92013    | 14413.571 | 11302.563 | J03866    | 5429.88   | 5036.914  | AJ008158  | 253.413   | 282.935   |
| AK023965  | 1864.61   | 1962.779  | AK022836  | 3733.053  | 2985.084  | AF161451  | 9910.758  | 15809.614 |
| AK026211  | 1574.287  | 1499.63   | NM_012343 | 12416.118 | 7806.058  | X02067    | 11945.924 | 10673.235 |
| X58968    | 2135.77   | 1467.941  | NM_000397 | 1074.854  | 732.755   | U92013    | 11190.583 | 3863.71   |
| U92020    | 5866.137  | 4086.373  | AL157461  | 681.438   | 2162.515  | AK023965  | 1478.143  | 1372      |
| AL117542  | 617.549   | 633.233   | NM_003078 | 2243.083  | 3716.686  | AK026211  | 925.518   | 660.379   |

|           |           |           |           |           |           |           |           |           |
|-----------|-----------|-----------|-----------|-----------|-----------|-----------|-----------|-----------|
| AL109712  | 11662.463 | 7798.365  | AL137703  | 622.614   | 1029.778  | X58968    | 1854.179  | 1500.322  |
| X04215    | 702.267   | 543.397   | NM_001809 | 6517.407  | 10448.358 | U92020    | 3576.832  | 3739.765  |
| NM_017782 | 3674.555  | 2409.49   | AL117477  | 3137.072  | 4003.559  | AL117542  | 1095.525  | 918.888   |
| NM_018149 | 3520.204  | 1679.622  | NM_012107 | 3517.641  | 4112.838  | AL109712  | 15467.851 | 10525.739 |
| NM_018468 | 19157.857 | 12031.947 | AB037760  | 1546.517  | 2129.927  | X04215    | 473.476   | 303.248   |
| Z36814    | 1528.076  | 924.287   | NM_015680 | 2042.426  | 2624.799  | NM_017782 | 2190.786  | 1788.591  |
| D17045    | 1016.705  | 796.769   | M22637    | 1202.175  | 1799.774  | NM_018149 | 2755.376  | 2061.678  |
| AK000827  | 3728.835  | 3285.257  | NM_018364 | 5628.742  | 2896.216  | D16944    | 242.425   | 192.907   |
| NM_002503 | 37260.242 | 43446.887 | NM_006778 | 766.894   | 721.659   | NM_018468 | 12495.454 | 6049.484  |
| NM_005319 | 7501.857  | 6195.313  | NM_007022 | 3700.648  | 1981.234  | Z36814    | 699.639   | 292.602   |
| NM_019058 | 851.981   | 1110.188  | AL049943  | 21270.109 | 11914.869 | D17045    | 560.999   | 379.57    |
| AK022351  | 2312.829  | 2927.416  | AL137303  | 1983.842  | 1490.138  | AK000827  | 2292.347  | 1090.917  |
| S74319    | 376.974   | 1388.076  | AL355708  | 914.147   | 758.701   | NM_002503 | 25232.412 | 10091.015 |
| AK022059  | 640.07    | 699.022   | AL161980  | 438.908   | 518.628   | NM_005319 | 4679.799  | 2463.542  |
| NM_020194 | 7038.71   | 7315.411  | AB002449  | 936.21    | 424.155   | NM_019058 | 629.295   | 1167.278  |
| AK026853  | 598.986   | 424.481   | AK001489  | 1674.113  | 2203.756  | AK022351  | 1387.102  | 722.347   |
| AF038183  | 18875.158 | 16530.793 | NM_015681 | 5196.806  | 3998.353  | S74319    | 278.136   | 299.106   |
| NM_017882 | 3084.469  | 1803.804  | AF070582  | 2149.271  | 2116.526  | AK022059  | 382.074   | 285.693   |
| NM_003521 | 1757.842  | 952.706   | NM_006383 | 7537.443  | 7960.614  | NM_020194 | 4938.652  | 3899.614  |
| CY3Cy5    | 8021.577  | 511.95    | NM_015400 | 6692.816  | 9157.035  | AK026853  | 270.174   | 152.45    |
| J03571    | 10215.233 | 7920.871  | AL359561  | 2115.567  | 4212.368  | AF038183  | 16877.891 | 17741.074 |
| X56134    | 937.19    | 1304.729  | AK026464  | 1604.9    | 2009.288  | NM_017882 | 2587.748  | 4793.6    |
| NM_001456 | 1910.464  | 1928.103  | AK001362  | 837.473   | 1054.602  | NM_003521 | 1120.106  | 1290.909  |
| BI759091  | 2194.648  | 3006.862  | AK023491  | 782.928   | 1023.583  | CY3Cy5    | 959.097   | 179.825   |
| BG685843  | 12279.058 | 12058.222 | AK022400  | 1354.598  | 1674.356  | J03571    | 5101.358  | 4648.676  |
| BI490011  | 1802.545  | 1457.127  | AF052100  | 2426.812  | 3035.156  | X56134    | 616.495   | 529.675   |
| AF035771  | 1153.273  | 895.253   | AL110235  | 790.017   | 1328.48   | NM_001456 | 593.475   | 414.145   |
| N20475    | 7321.885  | 9843.11   | U79245    | 980.832   | 1119.09   | H44784    | 300.573   | 356.056   |
| BI199286  | 8926.388  | 6797.065  | AF086124  | 1094.595  | 1010.167  | AI421041  | 20687.385 | 16949.264 |
| AA026626  | 1175.927  | 990.111   | AK024820  | 1234.748  | 811.073   | BI759091  | 282.507   | 411.185   |
| H61726    | 1314.147  | 1214.331  | AB033105  | 1553.359  | 951.558   | BG685843  | 2855.48   | 2404.039  |
| NM_004774 | 4511.38   | 5221.488  | AF038192  | 1119.455  | 747.057   | AF035771  | 271.704   | 241.499   |
| NM_005234 | 3543.952  | 3118.947  | AJ001865  | 1278.396  | 706.637   | N20475    | 1626.243  | 2165.91   |
| SR5       | 6884.398  | 8107.691  | D61704    | 18222.727 | 9392.403  | BI199286  | 2561.199  | 2173.528  |
| SR7       | 6796.559  | 53899.793 | AJ227889  | 1751.583  | 1444.485  | H61726    | 302.768   | 270.574   |
| SR9       | 14811.812 | 2942.295  | Y12017    | 1104.887  | 986.575   | NM_004774 | 1566.142  | 2457.459  |
| CY3Cy5    | 8118.825  | 535.559   | X64989    | 819.873   | 760.707   | SR5       | 3645.042  | 5059.652  |
| AF212842  | 534.135   | 907.603   | Y10512    | 930.896   | 952.043   | SR7       | 2897.431  | 30616.027 |
| M27544    | 1790.055  | 1431.649  | L34409    | 22037.539 | 29223.635 | SR9       | 9459.018  | 2645.207  |
| NM_001118 | 551.937   | 998.623   | U12210    | 4020.831  | 6519.227  | CY3Cy5    | 1805.01   | 180.625   |
| AL133097  | 5053.8    | 5109.412  | Z83936    | 619.438   | 936.298   | NM_018404 | 301.816   | 193.416   |
| NM_001165 | 4106.067  | 5520.113  | L08440    | 8482.319  | 11832.613 | M27544    | 1690.211  | 1246.185  |
| NM_006458 | 3340.896  | 2881.217  | M73799    | 2499.114  | 3038.811  | NM_001118 | 377.957   | 385.768   |
| NM_004093 | 1166.447  | 1942.998  | AF086119  | 1478.333  | 1840.265  | AL133097  | 1904.764  | 2073.495  |
| NM_001449 | 12762.752 | 17673.686 | NM_003782 | 2570.861  | 3455.211  | NM_001165 | 1582.33   | 2096.601  |
| AF086122  | 5702.252  | 6358.671  | AL442096  | 1705.841  | 1194.172  | NM_001381 | 45744.84  | 41775.977 |
| AK024397  | 5553.312  | 4616.029  | AK023299  | 864.993   | 372.336   | NM_006458 | 870.891   | 837.715   |
| NM_018047 | 2906.205  | 2287.276  | NM_018228 | 1252.257  | 760.083   | NM_001449 | 3101.682  | 2901.537  |
| NM_001288 | 4183.151  | 5222.863  | AJ270693  | 1211.669  | 695.565   | AF086122  | 1758.165  | 2270.408  |
| NM_003564 | 2166.988  | 2602.298  | NM_017790 | 2002.214  | 1559.426  | AK024397  | 1959.552  | 2111.669  |
| NM_002581 | 1010.059  | 1357.819  | AK000861  | 754.362   | 743.27    | NM_018047 | 1247.22   | 1433.447  |
| S78203    | 3261.717  | 4236.566  | AK000023  | 2778.604  | 2450.782  | NM_003564 | 811.768   | 1338.793  |
| NM_016208 | 10246.217 | 10560.735 | AK024351  | 1342.081  | 1266.105  | AF317516  | 3709.211  | 4270.225  |

|           |           |           |           |           |           |           |           |           |
|-----------|-----------|-----------|-----------|-----------|-----------|-----------|-----------|-----------|
| NM_00563E | 8569.385  | 9925.383  | AK024867  | 1496.69   | 1438.338  | NM_002581 | 530.538   | 449.576   |
| NM_00723E | 15098.637 | 18823.008 | AK024886  | 943.874   | 1018.546  | AI417964  | 413.502   | 481.049   |
| NM_00726E | 4151.992  | 4475.233  | AK025002  | 3481.346  | 3790.21   | S78203    | 1488.145  | 1786.934  |
| AK026014  | 3923.387  | 4814.719  | AK024011  | 1994.143  | 1005.353  | NM_01620E | 4046.894  | 3809.947  |
| NM_01484E | 2649.017  | 3971.513  | AF119913  | 2601.955  | 580.329   | NM_00563E | 4415.179  | 4712.866  |
| NM_00429E | 3413.139  | 4804.968  | NM_01834C | 2527.008  | 1196.767  | NM_00723E | 4611.53   | 5801.098  |
| NM_007181 | 3529.599  | 3597.207  | AF049883  | 1924.007  | 1429.093  | NM_00726E | 1262.259  | 1338.878  |
| AB007857  | 1598.201  | 1120.876  | L10148    | 1570.486  | 781.346   | AK026014  | 1347.639  | 1298.311  |
| NM_00177E | 38800.715 | 40247.922 | AK026247  | 892.3     | 965.829   | NM_01484E | 1095.064  | 1281.654  |
| NM_004997 | 10414.983 | 9861.049  | AK024893  | 908.528   | 564.125   | NM_00429E | 563.371   | 685.129   |
| NM_00592E | 5592.826  | 5682.584  | AL110175  | 1157.103  | 1286.916  | NM_007181 | 1050.681  | 682.731   |
| NM_00346E | 1855.454  | 1764.363  | AK027156  | 16063.09  | 17157.895 | AB007857  | 414.071   | 388.013   |
| NM_005127 | 12222.943 | 12317.495 | AL157504  | 13036.729 | 11971.958 | NM_00177E | 6864.953  | 5622.57   |
| NM_005567 | 2755.661  | 2779.526  | AK023328  | 7460.141  | 8648.968  | NM_004997 | 2162.543  | 2154.396  |
| NM_00521E | 11511.449 | 13391.159 | AF119879  | 35290.656 | 23225.811 | NM_00592E | 1682.03   | 1812.911  |
| NM_00662E | 1048.285  | 1244.391  | Y10482    | 19766.479 | 19714.809 | NM_00346E | 1003.755  | 792.872   |
| NM_00396E | 1985.872  | 3359.359  | AY007095  | 854.902   | 709.82    | NM_005127 | 5603.35   | 6051.77   |
| NM_00149E | 769.853   | 670.472   | AF086244  | 3929.615  | 2553.408  | NM_005567 | 578.639   | 402.145   |
| AB012643  | 14511.948 | 18934.281 | AL161992  | 12891.15  | 6700.1    | NM_00521E | 2664.944  | 2858.481  |
| AB023170  | 1387.18   | 1163.555  | AK023910  | 2808.035  | 1902.467  | NM_00396E | 829.677   | 1178.265  |
| NM_01415E | 9794.321  | 9551.661  | D16991    | 3648.921  | 2176.431  | NM_004584 | 1574.009  | 1327.338  |
| NM_00229E | 16941.959 | 16275.042 | AK023538  | 1048.245  | 591.439   | X15183    | 54758.066 | 75097.133 |
| NM_000414 | 7088.785  | 5640.087  | X77485    | 30120.898 | 26340.469 | AK023618  | 1933.098  | 2331.981  |
| NM_01884E | 6230.766  | 5881.708  | NM_01449E | 2847.218  | 1969.518  | NM_00149E | 343.767   | 271.403   |
| NM_00550E | 1713.652  | 2026.252  | AK021555  | 2162.107  | 1385.407  | AB012643  | 6263.867  | 5803.941  |
| NM_001134 | 1526.699  | 1468.603  | AB046765  | 1636.356  | 1792.09   | AB023170  | 599.106   | 718.144   |
| NM_01601E | 13615.172 | 7729.228  | AF133333  | 10572.615 | 8849.182  | NM_01415E | 3786.725  | 4769.498  |
| NM_020407 | 1000.436  | 840.065   | NM_01836E | 1553.05   | 1512.726  | NM_000414 | 2504.159  | 2208.803  |
| AF118274  | 4920.755  | 3957.51   | NM_004881 | 33793.957 | 22959.203 | NM_01884E | 1884.734  | 1943.623  |
| NM_018344 | 2709.626  | 2887.763  | U94903    | 1015.375  | 687.138   | NM_00550E | 576.223   | 595.841   |
| NM_00007E | 6712.835  | 6520.017  | NM_00515E | 15073.285 | 9581.872  | NM_01601E | 3074.826  | 2022.438  |
| NM_00008E | 1502.428  | 2298.086  | NM_01909E | 9884.077  | 6967.978  | NM_020407 | 356.043   | 253.179   |
| AL110245  | 4195.987  | 3691.19   | U80764    | 13721.6   | 8489.233  | AF118274  | 2020.301  | 2049.644  |
| NM_00562E | 27612.227 | 34499.555 | AB020684  | 8855.844  | 5438.683  | NM_018344 | 694.157   | 642.944   |
| X74609    | 22469.406 | 21318.75  | AF077036  | 39618.602 | 22051.236 | NM_00007E | 1923.268  | 1911.576  |
| NM_01899C | 8920.617  | 7195.671  | NM_020421 | 3695.465  | 2527.008  | AL110245  | 1164.1    | 1034.698  |
| NM_01336E | 773.368   | 1090.954  | D17094    | 2618.08   | 1898.341  | NM_00562E | 8143.961  | 11330.676 |
| NM_000947 | 5695.557  | 6463.016  | L37690    | 23648.154 | 15454.769 | NM_01660E | 11093.479 | 9648.685  |
| AL096750  | 36892.754 | 35208.559 | D61707    | 1073.369  | 922.454   | X74609    | 14315.487 | 13181.78  |
| NM_016061 | 4611.995  | 5021.515  | AK021610  | 2663.352  | 2118.824  | AB002316  | 366.429   | 330.185   |
| NM_01606E | 50210.859 | 53282.52  | AK023767  | 7281.873  | 5060.673  | NM_01336E | 493.888   | 497.895   |
| NM_00415E | 2711.948  | 2587.643  | AF084516  | 1526.852  | 1747.822  | NM_000947 | 1915.949  | 3034.063  |
| NM_01904E | 4228.527  | 3790.857  | AJ001907  | 1666.141  | 1628.702  | NM_01606E | 17101.184 | 16623.566 |
| NM_01241E | 693.661   | 747.503   | M32220    | 3929.092  | 4336.977  | AK024740  | 2121.757  | 3056.26   |
| AF130101  | 1450.635  | 1190.536  | D17188    | 5739.029  | 6851.197  | AF078164  | 1488.703  | 1287.988  |
| NM_00465E | 5520.134  | 5274.159  | AJ001432  | 25463.176 | 26505.916 | NM_01904E | 795.457   | 844.278   |
| NM_00557E | 2412.771  | 1854.001  | NM_02043E | 9281.694  | 9919.136  | AF130101  | 338.462   | 417.596   |
| AF071569  | 2420.289  | 1795.165  | AF052169  | 2916.515  | 3161.277  | NM_00465E | 1798.422  | 1824.289  |
| NM_00226E | 3955.915  | 4374.829  | CY3Cy5    | 5807.095  | 196.405   | NM_00557E | 641.542   | 346.411   |
| AK022564  | 62694.031 | 65932.063 | BF942101  | 2246.517  | 2718.768  | AF071569  | 733.897   | 572.189   |
| NM_003564 | 2080.979  | 1855.105  | BI825012  | 12508.627 | 15431.334 | NM_00226E | 1280.569  | 1337.086  |
| AF317516  | 8803.301  | 8530.353  | M21574    | 1975.805  | 2349.83   | J04948    | 565.454   | 531.301   |
| J03571    | 10727.972 | 9040.745  | BM051302  | 2503.062  | 3544.319  | AK022564  | 45423.57  | 48922.145 |

|           |           |           |           |           |           |           |           |           |
|-----------|-----------|-----------|-----------|-----------|-----------|-----------|-----------|-----------|
| X56134    | 1027.085  | 844.438   | BE314182  | 4581.103  | 5196.686  | NM_003564 | 847.7     | 838.433   |
| NM_001456 | 1467.523  | 1403.996  | AI808029  | 642.954   | 1022.766  | AF317516  | 3161.033  | 3327.369  |
| BI759091  | 2835.834  | 3333.429  | X03225    | 2717.538  | 3833.704  | NM_002581 | 557.928   | 654.427   |
| BG685843  | 15401.813 | 14237.887 | AK097395  | 5411.668  | 6135.859  | J03571    | 4675.478  | 4538.144  |
| BI490011  | 2438.596  | 2231.43   | M12783    | 1506.935  | 1717.004  | X56134    | 335.961   | 517.213   |
| AF035771  | 1490.099  | 1162.84   | AK091535  | 412.973   | 809.099   | AI421041  | 11460.54  | 9358.369  |
| N20475    | 7894.313  | 9179.361  | AF085357  | 5077.607  | 7151.144  | BG685843  | 3343.859  | 2477.696  |
| BI199286  | 9705.29   | 7789.894  | AK092768  | 743.33    | 750.222   | BI490011  | 588.502   | 390.755   |
| AA026626  | 989.194   | 1073.549  | NM_003841 | 4674.169  | 14094.19  | AF035771  | 317.254   | 478.461   |
| H61726    | 1233.012  | 1175.679  | NM_080824 | 406.983   | 555.594   | N20475    | 1208.281  | 1417.586  |
| NM_004774 | 4891.02   | 6637.435  | SR2       | 58149.418 | 56616.891 | BI199286  | 2424.146  | 1666.235  |
| NM_005234 | 4711.601  | 4716.399  | SR4       | 16775.07  | 16119.115 | AA026626  | 308.046   | 462.885   |
| NM_005216 | 8325.948  | 7977.769  | SR6       | 3023.68   | 2572.533  | H61726    | 402.673   | 433.739   |
| NM_006626 | 941.731   | 887.64    | SR8       | 9725.716  | 24193.496 | NM_004774 | 1824.409  | 2205.493  |
| NM_003965 | 2002.445  | 2409.688  | SR10      | 33762.875 | 8423.677  | NM_005234 | 1732.133  | 2026.296  |
| NM_004584 | 4200.913  | 3290.809  | CY3Cy5    | 5459.189  | 179.004   | NM_005216 | 2746.222  | 2393.437  |
| X15183    | 67145.68  | 66131.172 | NM_014322 | 1429.434  | 1484.618  | NM_006626 | 252.923   | 219.724   |
| AK023618  | 3536.816  | 3818.233  | NM_004122 | 2558.833  | 3099.981  | NM_003965 | 579.579   | 889.147   |
| AF212842  | 445.23    | 987.987   | NM_002928 | 4887.001  | 5805.594  | NM_004584 | 1767.448  | 1563.124  |
| M27544    | 2179.227  | 1819.022  | NM_000160 | 1459.291  | 1919.776  | X15183    | 43420.523 | 59747.453 |
| NM_001118 | 780.171   | 1116.501  | NM_003301 | 757.849   | 1178.758  | AK023618  | 1659.062  | 2284.579  |
| NM_001165 | 6503.021  | 5627.056  | NM_000955 | 1092.019  | 1812.997  | M27544    | 435.377   | 368.941   |
| NM_001381 | 62642.988 | 60986.414 | U27768    | 909.599   | 1459.893  | AL133097  | 566.619   | 440.692   |
| U90908    | 880.649   | 1065.947  | AF305550  | 4372.077  | 5127.063  | NM_001165 | 680.947   | 726.337   |
| NM_006458 | 4885.002  | 3961.462  | U66582    | 5646.174  | 5658.584  | NM_001381 | 38439.727 | 32288.127 |
| NM_014458 | 1166.636  | 847.56    | S73288    | 600.009   | 569.639   | NM_006458 | 794.307   | 732.749   |
| NM_004093 | 1940.222  | 2187.012  | NM_006198 | 3261.401  | 3362.873  | NM_004093 | 487.941   | 388.94    |
| NM_001448 | 14327.884 | 12128.405 | NM_003812 | 1009.528  | 1323.028  | NM_001448 | 3963.375  | 3802.026  |
| AF086122  | 6310.988  | 7407.985  | NM_000849 | 1078.838  | 1095.946  | AF086122  | 1942.959  | 2207.129  |
| AK024397  | 7277.313  | 5941.737  | NM_004678 | 1603.877  | 1692.512  | AK024397  | 2484.792  | 1795.018  |
| NM_018047 | 4217.439  | 3380.288  | NM_000950 | 20133.592 | 22021.246 | NM_018047 | 1042.649  | 844.345   |
| NM_005022 | 1085.111  | 1343.276  | NM_005139 | 4544.604  | 5364.251  | NM_005022 | 380.955   | 328.248   |
| NM_000083 | 1228.81   | 1528.735  | NM_000039 | 58122.25  | 58240.77  | NM_000083 | 373.04    | 365.633   |
| AL110245  | 2610.508  | 2228.93   | NM_020470 | 2844.378  | 3934.141  | AL110245  | 1294.601  | 1040.33   |
| NM_005628 | 23927.707 | 24133.639 | AA478950  | 1236.459  | 1223.245  | NM_005628 | 5397.709  | 5239.04   |
| NM_003951 | 500.549   | 813.337   | AB029033  | 9012.622  | 11101.496 | NM_016605 | 7680.51   | 7157.316  |
| NM_016605 | 19039.047 | 16496.865 | AF091034  | 4975.572  | 4816.544  | S78203    | 1032.226  | 1104.453  |
| S78203    | 3271.088  | 3909.373  | NM_005301 | 24628.719 | 29155.652 | NM_016208 | 2476.312  | 1957.836  |
| NM_016208 | 11237.443 | 12211.166 | NM_016653 | 4262.274  | 5342.352  | NM_005638 | 1104.924  | 1141.406  |
| NM_005638 | 12675.323 | 15205.742 | AB035124  | 7430.853  | 6275.356  | NM_007235 | 1509.985  | 1735.473  |
| NM_007235 | 17553.375 | 22355.068 | AF060170  | 1212.109  | 1454.682  | NM_007268 | 1156.536  | 1132.785  |
| NM_007268 | 3619.684  | 4556.197  | NM_016602 | 825.399   | 1447.979  | AK026014  | 1312.91   | 1307.238  |
| AK026014  | 4290.329  | 5153.94   | NM_004409 | 11052.839 | 19243.582 | NM_014845 | 502.177   | 616.305   |
| NM_014845 | 3766.751  | 4428.853  | AK023397  | 2564.749  | 3197.343  | NM_004298 | 3279.209  | 25702.152 |
| NM_004298 | 5193.107  | 6536.969  | NM_001725 | 2194.199  | 2653.029  | NM_007181 | 1260.445  | 1104.608  |
| NM_007181 | 4971.379  | 5770.858  | NM_004079 | 4076.722  | 4297.214  | AB007857  | 327.399   | 240.219   |
| AB007857  | 1689.751  | 1836.947  | NM_002996 | 1058.628  | 790.749   | NM_001778 | 12663.894 | 9616.521  |
| NM_001778 | 38934.68  | 37263.855 | NM_000383 | 837.144   | 1164.908  | NM_004997 | 2382.527  | 1989.004  |
| NM_004997 | 8129.233  | 7445.049  | NM_004633 | 1062.138  | 330.094   | NM_005923 | 1796.666  | 1529.189  |
| NM_005923 | 5959.145  | 5212.541  | X01394    | 49118.086 | 49356.227 | NM_003465 | 799.999   | 507.224   |
| NM_003465 | 2271.548  | 2131.605  | NM_000041 | 14597.651 | 18539.533 | NM_005127 | 4849.525  | 4353.084  |
| NM_005127 | 12608.041 | 13392.718 | NM_002984 | 2156.793  | 1860.018  | NM_005567 | 1181.296  | 1260.068  |
| NM_005567 | 1718.724  | 1895.627  | AB037752  | 4094.681  | 3890.443  | AF071569  | 770.956   | 471.915   |

|           |           |           |           |           |           |           |           |           |
|-----------|-----------|-----------|-----------|-----------|-----------|-----------|-----------|-----------|
| AF071569  | 2026.514  | 1561.965  | AK024821  | 14490.685 | 15170.521 | NM_002265 | 1088.688  | 871.923   |
| NM_002265 | 3563.229  | 3008.654  | AB002340  | 2297.863  | 2654.068  | J04948    | 463.914   | 537.391   |
| J04948    | 1451.981  | 963.482   | NM_000224 | 1658.65   | 1971.597  | AK022564  | 41834.617 | 40614.5   |
| AK022564  | 61970.563 | 58985.594 | NM_014328 | 5203.469  | 4964.528  | NM_001492 | 219.532   | 123.866   |
| NM_001492 | 991.753   | 684.333   | NM_006414 | 4664.034  | 4656.829  | AB012643  | 3530.126  | 3401.459  |
| AB012643  | 13450.53  | 11397.399 | NM_018479 | 12069.335 | 14554.314 | AB023170  | 406.444   | 390.701   |
| AB023170  | 1605.129  | 1529.601  | NM_014362 | 6941.457  | 5143.1    | NM_014153 | 2029.723  | 2294.015  |
| NM_014153 | 13615.764 | 14479.337 | NM_018308 | 2905.615  | 2973.789  | NM_002296 | 4117.253  | 3942.313  |
| NM_002296 | 19480.139 | 19657.664 | NM_001832 | 23220.633 | 25161.727 | NM_000414 | 760.181   | 582.338   |
| NM_000414 | 7055.673  | 5663.367  | NM_017774 | 16006.886 | 17118.193 | NM_018845 | 1792.822  | 1742.799  |
| NM_018845 | 6592.248  | 6713.004  | AB037716  | 2211.231  | 2313.886  | NM_005505 | 479.367   | 452.211   |
| AY008372  | 631.593   | 976.77    | NM_004827 | 331.603   | 600.782   | AK026964  | 205.951   | 347.065   |
| NM_005505 | 2221.728  | 2510.412  | NM_016297 | 3146.269  | 3588.047  | NM_001134 | 453.83    | 455.882   |
| NM_001134 | 1510.154  | 1499.01   | NM_001752 | 3006.942  | 3590.947  | NM_016016 | 3942.41   | 2298.21   |
| NM_016016 | 14746.594 | 10999.351 | BC003406  | 2677.666  | 2204.983  | NM_020407 | 416.349   | 277.226   |
| NM_020407 | 1273.247  | 1500.803  | AL137672  | 704.937   | 851.957   | AF118274  | 2911.712  | 2768.642  |
| AF118274  | 6425.391  | 5885.868  | X64177    | 1077.092  | 1103.092  | NM_018344 | 853.217   | 799.876   |
| NM_018344 | 2147.901  | 1724.148  | NM_015994 | 9904.181  | 8306.813  | NM_000079 | 2225.89   | 2014.284  |
| NM_000079 | 5537.526  | 4415.683  | NM_014065 | 2088.708  | 2099.818  | NM_004774 | 1477.208  | 1617.435  |
| NM_004774 | 4215.311  | 4738.589  | NM_001695 | 4473.458  | 4084.61   | NM_005234 | 1933.604  | 1755.517  |
| NM_005234 | 4811.176  | 4381.505  | NM_002248 | 3443.545  | 3236.137  | X74609    | 9536.779  | 8602.244  |
| X74609    | 42441.078 | 45553.844 | NM_012281 | 1856.628  | 2401.519  | NM_018990 | 3438.57   | 3395.509  |
| AB002316  | 540.94    | 1398.202  | AK025772  | 4455.135  | 3206.144  | NM_000947 | 1720.205  | 2794.281  |
| NM_018990 | 12818.486 | 10986.362 | NM_005509 | 2022.918  | 2076.446  | AL096750  | 14833.75  | 11409.53  |
| NM_013363 | 1643.924  | 1333.327  | NM_152747 | 1092.184  | 1034.047  | NM_016061 | 1844.968  | 1790.541  |
| NM_000947 | 7324.102  | 9174.908  | NM_017415 | 1464.595  | 1184.303  | NM_016062 | 22153.361 | 19931.006 |
| AL096750  | 30103.793 | 24371.451 | NM_001667 | 26544.104 | 26657.912 | NM_004153 | 882.514   | 992.785   |
| NM_016061 | 4919.597  | 5238.266  | AB046834  | 1008.692  | 863.367   | AK024740  | 1065.34   | 1995.294  |
| NM_004153 | 2778.658  | 2863.863  | NM_000262 | 1025.978  | 1235.914  | AF078164  | 3160.729  | 3765.107  |
| NM_019049 | 4907.583  | 5566.276  | NM_017831 | 1519.312  | 1683.864  | NM_019049 | 1219.177  | 1132.241  |
| NM_005447 | 801.834   | 1012.109  | AK022537  | 12393.938 | 11597.448 | AF130101  | 414.173   | 619.194   |
| NM_012413 | 830.263   | 865.015   | AF116632  | 863.237   | 865.009   | NM_004656 | 2122.74   | 1651.898  |
| AF130101  | 1637.361  | 2144.74   | AF064597  | 958.954   | 1070.478  | NM_005576 | 754.739   | 470.15    |
| NM_004656 | 5913.017  | 7261.04   | NM_006345 | 4838.535  | 5136.127  | AF086122  | 1952.351  | 2137.36   |
| NM_005576 | 2276.404  | 1445.452  | NM_006875 | 2208.034  | 1784.504  | AK024397  | 2878.202  | 2495.125  |
| AF086122  | 5985.529  | 7932.363  | D87119    | 3690.698  | 3656.625  | NM_018047 | 1452.77   | 1173.889  |
| AK024397  | 6679.702  | 5576.985  | AL050040  | 1005.4    | 831.902   | NM_005022 | 494.375   | 463.013   |
| NM_018047 | 2995.044  | 2680.502  | NM_006556 | 12166.375 | 12291.037 | NM_003564 | 591.73    | 670.979   |
| NM_005022 | 1365.082  | 1625.323  | AL133066  | 748.652   | 568.315   | AF317516  | 2360      | 2277.712  |
| NM_001288 | 750.66    | 640.022   | AF264717  | 1837.917  | 2222.925  | NM_002581 | 414.564   | 502.045   |
| NM_003564 | 2223.401  | 2635.619  | NM_012260 | 7755.216  | 6833.539  | J03571    | 1781.522  | 1288.122  |
| AF317516  | 13045.721 | 17668.818 | NM_001141 | 5287.111  | 5115.253  | X56134    | 369.175   | 544.413   |
| NM_002581 | 1515.222  | 1334.537  | NM_000018 | 8695.583  | 11280.753 | NM_001456 | 525.16    | 340.257   |
| AI417964  | 513.462   | 403.183   | AB028992  | 2127.914  | 1103.827  | AI421041  | 23194.348 | 18075.588 |
| J03571    | 16603.135 | 15992.297 | NM_020470 | 4066.859  | 4847.244  | BI759091  | 901.764   | 1094.282  |
| X56134    | 843.137   | 1387.317  | NM_006574 | 570.43    | 795.339   | BG685843  | 4891.827  | 3842.134  |
| AI421041  | 55843.52  | 56631.227 | AA478950  | 1813.155  | 1760.703  | BI490011  | 449.513   | 520.325   |
| BI759091  | 3938.697  | 3747.048  | BF942101  | 1815.795  | 2020.133  | AF035771  | 524.828   | 350.485   |
| BG685843  | 15421.257 | 14426.88  | BI825012  | 8824.464  | 9250.551  | N20475    | 2014.981  | 1995.258  |
| BI490011  | 3030.987  | 3701.993  | M21574    | 591.098   | 681.891   | BI199286  | 2611.426  | 1668.086  |
| AF035771  | 1449.583  | 1160.747  | BM051302  | 995.748   | 1347.768  | AA026626  | 345.158   | 183.75    |
| N20475    | 7406.617  | 8363.16   | BE314182  | 5923.83   | 5189.882  | H61726    | 316.142   | 253.214   |
| BI199286  | 8559.605  | 6516.682  | AI808029  | 986.719   | 684.332   | NM_004997 | 3532.679  | 3502.021  |

|           |           |           |           |           |           |           |           |           |
|-----------|-----------|-----------|-----------|-----------|-----------|-----------|-----------|-----------|
| AA026626  | 948.184   | 765.016   | X03225    | 2838.453  | 2842.669  | NM_005923 | 1729.375  | 1599.542  |
| H61726    | 1077.884  | 790.477   | AK097395  | 7224.549  | 6492.418  | NM_003465 | 977.728   | 546.306   |
| NM_004997 | 7480.921  | 6478.823  | M12783    | 1571.544  | 1457.641  | AF289028  | 293.609   | 255.084   |
| NM_005923 | 5111.831  | 4205.266  | AK091535  | 615.649   | 480.714   | NM_005127 | 4624.708  | 4618.666  |
| NM_003465 | 2040.456  | 1621.053  | AF085357  | 4540.077  | 5058.932  | NM_005567 | 835.303   | 894.371   |
| NM_005127 | 14134.07  | 12379.286 | NM_003841 | 5489.66   | 15459.829 | NM_005216 | 2601.533  | 2861.471  |
| NM_005567 | 1892.945  | 1999.577  | AF296673  | 686.52    | 354.157   | NM_006626 | 207.333   | 218.471   |
| NM_005216 | 10723.197 | 10416.049 | NM_018002 | 2315.676  | 3185.237  | NM_003965 | 652.659   | 825.656   |
| NM_006626 | 927.497   | 1327.08   | AB002340  | 2649.427  | 2122.435  | NM_004584 | 1733.677  | 1462.518  |
| NM_003965 | 2437.326  | 3460.798  | NM_000224 | 2306.385  | 2136.394  | X15183    | 50901.777 | 66414.297 |
| NM_004584 | 7062.017  | 7190.573  | NM_014328 | 7126.03   | 6338.159  | AK023618  | 939.302   | 1072.009  |
| X15183    | 64852.32  | 70243.836 | NM_006414 | 5642.346  | 4836.132  | NM_018404 | 391.627   | 349.533   |
| AK023618  | 6786.248  | 8909.138  | NM_014322 | 1405.478  | 821.938   | M27544    | 1539.075  | 1061.079  |
| AF212842  | 875.617   | 1733.89   | NM_004122 | 1948.093  | 2157.615  | NM_001118 | 324.583   | 403.882   |
| NM_018404 | 1059.977  | 1311.359  | NM_002928 | 4417.378  | 3979.445  | AL133097  | 1284.004  | 1188.9    |
| M27544    | 2609.719  | 2390.307  | NM_000160 | 1130.42   | 1101.32   | NM_001165 | 1328.762  | 1638.23   |
| NM_001118 | 998.471   | 997.251   | NM_003301 | 676.627   | 644.357   | NM_001381 | 30028.154 | 20603.318 |
| AL133097  | 5799.445  | 5052.131  | NM_000955 | 1316.18   | 1046.393  | NM_006458 | 1396.408  | 1047.462  |
| NM_001165 | 4308.477  | 6003.717  | U27768    | 1235.207  | 627.679   | NM_004093 | 587.188   | 422.609   |
| NM_006458 | 4471.729  | 3837.138  | AF305550  | 3863.791  | 2388.809  | NM_001448 | 3889.922  | 2787.653  |
| NM_014458 | 1105.336  | 1236.767  | U66582    | 5477.848  | 4110.113  | NM_016016 | 3729.448  | 2468.096  |
| NM_004093 | 1575.105  | 1747.198  | NM_006198 | 3139.113  | 2595.511  | NM_020407 | 377.397   | 384.741   |
| NM_001448 | 12030.419 | 11016.452 | NM_003812 | 683.269   | 787.397   | AF118274  | 3367.968  | 2998.829  |
| NM_016016 | 11141.073 | 8393.303  | NM_000849 | 1110.583  | 759.61    | NM_018344 | 820.289   | 706.749   |
| NM_020407 | 729.986   | 693.934   | NM_004678 | 1786.707  | 1535.302  | NM_000079 | 1929.168  | 2413.207  |
| AF118274  | 2803.569  | 2141.192  | NM_000950 | 28424.07  | 35812.457 | NM_000083 | 311.929   | 449.375   |
| NM_018344 | 2290.394  | 2188.739  | NM_005139 | 6319.428  | 5583.749  | AL110245  | 782.264   | 785.507   |
| NM_000079 | 5529.145  | 5382.964  | NM_001275 | 65360.887 | 59651.113 | NM_005628 | 6965.513  | 8294.701  |
| NM_000083 | 1028.377  | 1872.242  | NM_000322 | 52764.383 | 58915.914 | NM_016605 | 7255.582  | 6577.492  |
| AL110245  | 3397.175  | 2743.42   | AK025772  | 4931.458  | 2243.003  | S78203    | 907.102   | 901.526   |
| NM_005628 | 30391.861 | 35887.836 | NM_005509 | 910.899   | 633.008   | NM_016208 | 4143.503  | 3913.053  |
| NM_016605 | 29225.965 | 29396.863 | NM_152747 | 1708.98   | 1180.303  | NM_005638 | 4478.223  | 5436.093  |
| S78203    | 6122.13   | 7169.956  | NM_001667 | 21668.217 | 15198.562 | NM_007235 | 5545.46   | 7183.617  |
| NM_016208 | 13065.464 | 15076.708 | AB046834  | 803.764   | 357.49    | NM_007268 | 1232.897  | 1161.42   |
| NM_005638 | 13233.145 | 16589.373 | AB029033  | 6659.826  | 4453.747  | AK026014  | 1388.306  | 1115.519  |
| NM_007235 | 19641.498 | 25182.389 | AF091034  | 4307.955  | 2617.326  | NM_014845 | 1019.594  | 876.029   |
| NM_007268 | 4039.845  | 4053.956  | NM_005301 | 19954.992 | 14953.558 | NM_004298 | 1181.82   | 1367.37   |
| NM_004298 | 5053.504  | 6128.672  | NM_016653 | 3920.918  | 2892.192  | NM_007181 | 1490.123  | 1213.388  |
| NM_007181 | 3669.681  | 4435.774  | AB035124  | 7144.283  | 3844.924  | AB007857  | 536.548   | 573.795   |
| AB007857  | 1717.614  | 1497.53   | AF060170  | 1187.049  | 967.092   | NM_001778 | 14772.045 | 11087.787 |
| NM_001778 | 38395.281 | 35480.422 | NM_016602 | 989.642   | 814.51    | NM_019048 | 1188.652  | 1027.311  |
| NM_019048 | 4194.811  | 5530.687  | NM_004409 | 10891.698 | 7558.184  | NM_012413 | 154.419   | 213.473   |
| AF130101  | 1400.405  | 1339.151  | AK023397  | 2654.233  | 2021.811  | AF130101  | 344.674   | 516.543   |
| NM_004658 | 6400.976  | 6060.858  | NM_001725 | 2668.625  | 2251.45   | NM_004658 | 2062.724  | 1795.848  |
| NM_005576 | 2058.856  | 1517.747  | NM_004079 | 4575.368  | 3882.018  | NM_005576 | 736.517   | 520.296   |
| AF071569  | 2590.053  | 1978.425  | NM_002996 | 1223.406  | 1885.33   | AF071569  | 694.89    | 473.639   |
| NM_002268 | 4439.94   | 3979.684  | NM_000383 | 1188.875  | 1505.096  | NM_002268 | 1033.587  | 977.454   |
| J04948    | 1677.648  | 1663.781  | NM_004633 | 879.708   | 913.319   | J04948    | 686.009   | 713.977   |
| NM_018043 | 875.771   | 1016.26   | X01394    | 51399.168 | 54323.078 | NM_018043 | 334.545   | 374.292   |
| AK022564  | 66996.195 | 66568.82  | NM_000041 | 43563.027 | 54735.512 | AK022564  | 42738.25  | 38524.539 |
| NM_001492 | 1136.293  | 1278.512  | NM_002984 | 2610.274  | 3278.537  | AB012643  | 2261.213  | 2479.518  |
| AB012643  | 19669.535 | 19965.484 | AB037752  | 7235.99   | 9554.051  | AB023170  | 497.672   | 391.798   |
| AB023170  | 3290.917  | 3874.547  | AF317425  | 3292.797  | 3114.489  | NM_014153 | 2436.236  | 2631.972  |

|           |           |           |           |           |           |           |           |           |
|-----------|-----------|-----------|-----------|-----------|-----------|-----------|-----------|-----------|
| NM_014153 | 14537.923 | 17583.789 | AF264717  | 2029.421  | 1601.969  | NM_002296 | 6179.818  | 7092.082  |
| NM_002296 | 22817.068 | 25642.65  | NM_012260 | 6294.292  | 4868.617  | NM_000414 | 2298.079  | 1922.496  |
| NM_000414 | 8109.08   | 7381.883  | NM_001141 | 5388.643  | 4196.42   | NM_018845 | 1943.942  | 1871.372  |
| NM_018845 | 7141.93   | 8114.555  | NM_000018 | 6558.273  | 7270.558  | NM_005505 | 781.523   | 599.283   |
| AY008372  | 1145.111  | 914.035   | AB028992  | 1993.568  | 1173.251  | AK026964  | 171.616   | 371.392   |
| NM_005505 | 2308.292  | 2284.738  | NM_018479 | 10425.095 | 6844.749  | NM_001134 | 793.874   | 758.461   |
| AK026964  | 876.169   | 862.116   | NM_014362 | 6165.19   | 2984.101  | NM_006695 | 1076.599  | 966.677   |
| NM_001134 | 1223.952  | 1287.201  | NM_018308 | 2408.196  | 1634.046  | NM_004815 | 1575.911  | 1832.861  |
| NM_006695 | 1505.587  | 1843.794  | NM_001832 | 20563.051 | 21488.059 | NM_004147 | 452.194   | 570.952   |
| NM_004815 | 4149.559  | 4137.92   | NM_017774 | 17697.324 | 16876.283 | AK000959  | 2054.481  | 1630.592  |
| NM_004147 | 848.451   | 1158.453  | AB037716  | 2428.456  | 2653.911  | AB037743  | 1391.758  | 1299.633  |
| AK000959  | 5544.364  | 5118.354  | NM_004827 | 318.246   | 689.282   | AB046820  | 2533.264  | 2542.127  |
| AB037743  | 4056.47   | 4223.468  | NM_016297 | 3909.078  | 3932.299  | AK025922  | 387.674   | 454.816   |
| AB046820  | 8832.733  | 6950.014  | NM_001752 | 3427.966  | 5087.624  | NM_014646 | 689.198   | 662.955   |
| AK025922  | 943.612   | 713.197   | BC003406  | 3371.766  | 3691.712  | NM_006375 | 424.161   | 448.782   |
| NM_014646 | 3203.563  | 2736.073  | AL137672  | 1055.102  | 1403.047  | AF123659  | 1483.351  | 1622.777  |
| NM_006375 | 1818.2    | 2223.837  | X64177    | 1135.56   | 1790.329  | NM_016436 | 253.512   | 162.64    |
| AF123659  | 6392.993  | 6860.053  | NM_015994 | 10653.709 | 8798.718  | X74609    | 9579.947  | 9705.861  |
| X74609    | 47446.383 | 53005.754 | NM_014065 | 2061.487  | 1535.445  | NM_018990 | 3689.723  | 4316.451  |
| AB002316  | 783.996   | 1366.669  | NM_001695 | 5205.575  | 2493.57   | NM_013363 | 504.102   | 343.023   |
| NM_018990 | 12412.533 | 14480.955 | NM_002248 | 3897.549  | 3953.761  | NM_000947 | 2027.607  | 2811.369  |
| NM_013363 | 1806.032  | 1902.859  | NM_012281 | 1858.099  | 1659.925  | AL096750  | 11822.271 | 10683.819 |
| NM_000947 | 7481.719  | 8884.276  | NM_080824 | 526.871   | 518.474   | NM_016061 | 2000.354  | 1995.188  |
| AL096750  | 46332.453 | 47405.902 | NM_000262 | 1399.777  | 1720.516  | NM_016062 | 25733.178 | 19559.283 |
| NM_016061 | 6037.444  | 6345.111  | NM_017831 | 1886.518  | 2218.659  | NM_004153 | 1385.447  | 1164.064  |
| NM_016062 | 58346.77  | 54440.563 | AK024393  | 568.325   | 550.346   | AK024740  | 1365.375  | 1362.588  |
| NM_004153 | 4190.615  | 4524.755  | AK022537  | 14927.323 | 10087.445 | AF078164  | 3185.79   | 2931.59   |
| AK024740  | 3665.948  | 4751.364  | AF116632  | 1187.603  | 1305.289  | NM_003628 | 1026.246  | 906.391   |
| AF078164  | 10260.247 | 13077.221 | AF064597  | 1401.354  | 878.396   | AF029325  | 734.279   | 683.519   |
| NM_003628 | 2877.571  | 2682.887  | NM_006345 | 4714.76   | 3647.059  | NM_005704 | 1036.749  | 617.973   |
| NM_004648 | 585.732   | 600.22    | NM_006875 | 2054.517  | 1406.009  | AF097021  | 471.199   | 396.043   |
| AF029325  | 1372.974  | 1406.471  | D87119    | 3902.672  | 2661.923  | NM_001365 | 661.856   | 539.218   |
| NM_005704 | 2468.534  | 1832.158  | AL050040  | 906.133   | 495.221   | NM_000677 | 2867.505  | 2884.57   |
| AF097021  | 1558.582  | 1702.956  | NM_006556 | 11892.559 | 9476.779  | BF308728  | 523.469   | 384.785   |
| NM_001365 | 2384.542  | 2379.861  | AL133066  | 879.659   | 454.491   | NM_013280 | 472.864   | 529.563   |
| NM_000677 | 10120.965 | 9521.251  | NM_000849 | 1108.745  | 1341.075  | NM_018315 | 5715.711  | 5375.634  |
| BF308728  | 1990.591  | 2044.963  | NM_004678 | 1945.201  | 2626.862  | AF051151  | 509.627   | 623.758   |
| NM_013280 | 1188.086  | 1422.221  | NM_000950 | 23879.807 | 37376.34  | AF142421  | 1757.563  | 1286.041  |
| NM_018315 | 25594.623 | 25297.814 | L10139    | 1529.483  | 1774      | M84131    | 295.73    | 311.743   |
| AF051151  | 1761.855  | 2512.819  | NM_000039 | 56411.867 | 56575.063 | AB037836  | 820.292   | 590.614   |
| AF142421  | 4089.357  | 4682.296  | NM_020470 | 4626.479  | 7304.202  | NM_014247 | 785.395   | 691.64    |
| AF257238  | 8200.964  | 3650.766  | NM_006574 | 543.467   | 771.482   | NM_018695 | 37871.848 | 37538.813 |
| AB037836  | 3334.409  | 2588.453  | AA478950  | 2586.133  | 2268.903  | NM_014786 | 788.07    | 883.096   |
| NM_014247 | 2642.124  | 2458.619  | BF942101  | 2351.256  | 1852.426  | NM_001423 | 1179.878  | 1171.381  |
| NM_018695 | 64182.262 | 60630.34  | BI825012  | 12754.703 | 9942.705  | NM_015716 | 2994.587  | 1851.246  |
| NM_006343 | 1295.671  | 1326.804  | BM051302  | 1061.632  | 809.571   | NM_005739 | 1913.823  | 1454.646  |
| NM_014786 | 2515.845  | 2392.467  | BE314182  | 6032.441  | 3577.527  | AB028966  | 3465.45   | 3160.985  |
| NM_001423 | 1388.95   | 1076.197  | AI808029  | 1094.921  | 830.437   | NM_005758 | 1803.358  | 2391.27   |
| NM_015716 | 7717.005  | 5905.668  | AI971217  | 1499.425  | 1256.929  | AF044774  | 1327.29   | 669.28    |
| NM_003955 | 886.737   | 482.872   | X03225    | 2186.055  | 1872.74   | NM_005402 | 2021.495  | 1877.401  |
| NM_005739 | 7390.393  | 9267.451  | AK097395  | 5885.688  | 3933.928  | AF055027  | 2367.008  | 1708.837  |
| AB028966  | 4081.444  | 4346.744  | M12783    | 1559.002  | 965.846   | U63541    | 1787.521  | 1845.375  |
| NM_005758 | 6308.652  | 7501.311  | AK091535  | 403.405   | 298.642   | AB033045  | 682.694   | 797.526   |

|           |           |           |           |           |           |           |           |           |
|-----------|-----------|-----------|-----------|-----------|-----------|-----------|-----------|-----------|
| AF044774  | 3475.42   | 2213.033  | AF085357  | 4051.189  | 3956.091  | AF055006  | 2294.885  | 2315.569  |
| NM_005402 | 4529.789  | 4729.079  | NM_003841 | 5390.323  | 11515.609 | NM_004935 | 2075.13   | 2161.983  |
| AF055027  | 7291.645  | 5845.447  | X01394    | 51052.219 | 43554.648 | NM_006951 | 797.187   | 888.952   |
| U63541    | 5152.637  | 5814.454  | AB037752  | 7391.699  | 6309.773  | NM_001896 | 3573.985  | 2532.291  |
| AB033045  | 2615.417  | 2767.696  | AF317425  | 3922.392  | 2087.724  | NM_014023 | 851.918   | 655.916   |
| AF055006  | 7259.556  | 6944.779  | NM_018002 | 2725.668  | 2310.114  | NM_002745 | 2127.201  | 1761.435  |
| NM_004935 | 8415.845  | 8686.052  | AK024821  | 14103.03  | 9217.255  | D26488    | 2263.644  | 1506.502  |
| NM_006951 | 1741.061  | 2965.534  | AB002340  | 3282.223  | 2080.485  | NM_001432 | 592.682   | 531.714   |
| NM_001896 | 11868.229 | 10517.822 | NM_000224 | 3924.252  | 3055.5    | AK002193  | 451.111   | 365.911   |
| NM_014023 | 2489.571  | 1893.932  | NM_014328 | 9963.571  | 9463.656  | AB014554  | 792.651   | 479.242   |
| NM_002745 | 7391.146  | 7459.932  | NM_006414 | 7230.723  | 7174.421  | AF097431  | 1717.979  | 1681.428  |
| D26488    | 6464.887  | 6597.145  | NM_014322 | 1549.842  | 747.331   | NM_001978 | 638.892   | 417.233   |
| NM_001432 | 1840.943  | 2450.896  | NM_004122 | 2410.81   | 1878.303  | NM_005897 | 474.024   | 382.627   |
| AK002193  | 1761.009  | 1708.844  | NM_002928 | 4379.061  | 2909.645  | NM_002579 | 349.71    | 212.633   |
| AB014554  | 2375.686  | 2231.794  | NM_000160 | 1380.482  | 932.208   | NM_004221 | 1806.304  | 1809.503  |
| AF097431  | 4941.315  | 4108.324  | NM_003301 | 749.724   | 535.596   | NM_004061 | 606.092   | 846.098   |
| NM_001978 | 1969.425  | 1694.661  | NM_000955 | 884.197   | 651.118   | NM_006923 | 2129.709  | 2328.305  |
| NM_005897 | 1620.898  | 2033.786  | U27768    | 1821.104  | 975.643   | NM_004615 | 18025.527 | 11650.258 |
| NM_002579 | 1182.381  | 1466.884  | AF305550  | 3957.733  | 2801.422  | AF119889  | 6252.419  | 5642.244  |
| NM_004221 | 9379.979  | 12289.829 | U66582    | 5364.875  | 4367.097  | M90657    | 441.419   | 325.746   |
| NM_006923 | 4778.898  | 4264.34   | NM_006198 | 2439.944  | 1969.073  | NM_006696 | 1377.543  | 1207.821  |
| NM_004615 | 44695.871 | 35018.473 | NM_003812 | 569.125   | 468.501   | AK025645  | 8935.153  | 8467.542  |
| AF119889  | 7582.282  | 6542.345  | NM_001695 | 5042.811  | 4197.424  | AK023266  | 595.724   | 879.407   |
| NM_002407 | 411.209   | 933.13    | NM_002248 | 3265.654  | 3208.588  | NM_006814 | 4913.462  | 3919.062  |
| M90657    | 1123.385  | 870.711   | NM_012281 | 2603.148  | 1923.91   | NM_005067 | 4129.509  | 3683.482  |
| NM_006696 | 4573.321  | 4098.28   | AK025772  | 4523.198  | 2320.642  | AB007899  | 685.47    | 688.746   |
| AK025645  | 28442.824 | 26380.328 | NM_005509 | 990.936   | 720.186   | NM_002817 | 8952.819  | 8801.306  |
| AK023266  | 1471.609  | 1718.15   | NM_152747 | 1831.905  | 1168.356  | NM_002801 | 3681.496  | 3876.409  |
| NM_006814 | 19395.91  | 18446.943 | NM_017415 | 1622.424  | 1311.081  | BE905810  | 457.225   | 360.526   |
| NM_005067 | 12260.153 | 11563.177 | NM_001667 | 36844.164 | 35044.094 | NM_014780 | 704.687   | 454.503   |
| AB007899  | 1704.263  | 1741.825  | AB046834  | 1321.754  | 1168.849  | NM_014730 | 4350.75   | 6269.499  |
| NM_002817 | 24468.346 | 23882.98  | AB029033  | 9371.637  | 7013.587  | NM_014167 | 583.531   | 584.325   |
| NM_002801 | 10230.791 | 12752.688 | AF091034  | 4226.806  | 3324.743  | NM_016063 | 1101.333  | 770.024   |
| BE905810  | 1014.337  | 964.885   | NM_005301 | 23920.461 | 20811.473 | U82987    | 1741.409  | 1484.892  |
| NM_014780 | 2029.724  | 1902.543  | NM_016653 | 4004.384  | 3487.268  | NM_005732 | 717.5     | 703.237   |
| NM_014730 | 11870.95  | 13071.507 | AB035124  | 6029.956  | 4468.659  | NM_014890 | 280.289   | 277.765   |
| NM_014167 | 1282.74   | 1253.855  | AF060170  | 1304.954  | 1226.813  | AK056481  | 1817.223  | 1396.247  |
| NM_016063 | 4361.104  | 4056.095  | NM_016602 | 994.787   | 742.719   | NM_018118 | 273.619   | 200.371   |
| U82987    | 4320.518  | 4056.619  | NM_004409 | 9708.092  | 8104.542  | L35035    | 2391.135  | 2104.849  |
| NM_005732 | 3467.516  | 3167.421  | AK023397  | 1944.667  | 2268.318  | NM_007152 | 1303.776  | 1057.781  |
| NM_014890 | 1213.762  | 1725.395  | NM_001725 | 2353.522  | 1945.868  | NM_002955 | 435.845   | 380.307   |
| AK056481  | 7401.472  | 9333.287  | NM_004079 | 3879.094  | 3765.026  | NM_001938 | 2664.882  | 2653.856  |
| NM_018118 | 704.424   | 1069.926  | NM_002996 | 953.861   | 560.979   | AF230808  | 1430.12   | 1336.983  |
| L35035    | 7896.439  | 9585.91   | NM_000383 | 3539.424  | 4580.475  | U18910    | 579.38    | 906.59    |
| NM_007152 | 2512.148  | 2261.499  | NM_006875 | 2191.956  | 1762.835  | NM_005238 | 1777.21   | 1068.068  |
| NM_018293 | 2584.573  | 2020.269  | D87119    | 4102.979  | 5022.907  | AK075306  | 2330.972  | 1879.33   |
| NM_002955 | 1377.497  | 1187.509  | AF264717  | 2596.767  | 2566.335  | AB037820  | 321.121   | 156.496   |
| NM_001938 | 10193.111 | 7704.651  | NM_012260 | 9107.677  | 8925.076  | NM_001280 | 10781.847 | 14189.118 |
| AF230808  | 6180.409  | 4999.019  | NM_001141 | 6064.809  | 6961.15   | AB019572  | 43195.719 | 39948.684 |
| U18910    | 2032.594  | 2886.675  | NM_000018 | 7635.558  | 13101.648 | NM_002948 | 32414.193 | 27150.412 |
| NM_005238 | 6885.932  | 5504.266  | AB028992  | 2548.277  | 1876.925  | AF113008  | 962.003   | 1107.301  |
| S83390    | 764.672   | 519.373   | NM_018479 | 11807.255 | 11517.496 | NM_020217 | 773.33    | 856.894   |
| AK075306  | 9213.484  | 8456.053  | NM_014362 | 6786.538  | 4645.919  | NM_018135 | 38340.445 | 33457.621 |



|           |           |           |           |           |           |           |          |          |
|-----------|-----------|-----------|-----------|-----------|-----------|-----------|----------|----------|
| AB037820  | 790.886   | 1059.701  | NM_018308 | 3396.579  | 3588.244  | AF205435  | 4983.306 | 6652.146 |
| NM_001280 | 24196.619 | 28183.867 | NM_001832 | 22697.434 | 24852.535 | AF052105  | 1779.677 | 1613.982 |
| AB019572  | 64056.883 | 62897.82  | NM_017774 | 17059.217 | 14904.185 | M15465    | 1215.082 | 1273.606 |
| NM_002948 | 60557.363 | 59627.77  | AB037716  | 1985.685  | 2113.843  | J03866    | 5129.438 | 3933.49  |
| AF113008  | 2700.067  | 2497.351  | NM_016297 | 3209.952  | 2351.25   | AK022836  | 2097.668 | 2196.503 |
| NM_020217 | 2712.916  | 2788.207  | NM_001752 | 2414.659  | 2426.253  | NM_012343 | 2987.733 | 3149.964 |
| NM_018135 | 56086.98  | 61415.578 | BC003406  | 2147.581  | 1756.41   | NM_000397 | 567.307  | 510.096  |
| AF205435  | 15950.166 | 20119.334 | AL137672  | 556.618   | 696.383   | BF217340  | 330.501  | 479.182  |
| L05093    | 66918.672 | 68177.547 | X64177    | 898.319   | 1106.033  | NM_003078 | 1506.227 | 1223.139 |
| AF085983  | 737.668   | 1512.036  | NM_015994 | 8667.619  | 8374.851  | AL137703  | 567.866  | 799.938  |
| AF052105  | 6323.177  | 6255.555  | NM_018476 | 28500.732 | 31360.059 | NM_001805 | 4176.362 | 7114.615 |
| AK001204  | 8245.555  | 6534.4    | AF220492  | 8361.33   | 9337.549  | AL117477  | 2839.491 | 5551.466 |
| M15465    | 5282.12   | 4243.975  | NM_005895 | 5111.414  | 4775.861  | NM_012107 | 2197.818 | 4843.407 |
| J03866    | 14421.955 | 11481.094 | D82345    | 13277.219 | 16378.083 | AB037760  | 1264.899 | 2032.992 |
| AK022836  | 8105.681  | 6669.541  | NM_003814 | 2094.34   | 2176.343  | NM_015680 | 1508.183 | 2446.624 |
| NM_012343 | 15690.136 | 13262.748 | NM_002968 | 1253.32   | 1544.113  | M22637    | 972.689  | 1900.8   |
| NM_000397 | 1730.621  | 1681.862  | AB032956  | 704.145   | 809.324   | NM_018364 | 3339.406 | 3430.62  |
| NM_002046 | 66926.609 | 68570.203 | AL137698  | 413.548   | 2520.878  | AL137303  | 1065.254 | 1796.91  |
| BF217340  | 933.698   | 956.69    | NM_016256 | 623.618   | 2029.959  | AL355708  | 573.929  | 906.832  |
| NM_003078 | 5810.378  | 4242.125  | NM_000262 | 1593.306  | 1312.378  | AL161980  | 419.85   | 420.436  |
| AL137703  | 714.059   | 665.462   | NM_017831 | 1857.494  | 1691.625  | AB002449  | 498.92   | 867.303  |
| NM_001805 | 9127.541  | 10007.847 | AK024393  | 359.746   | 535.948   | U79248    | 414.428  | 559.116  |
| AL117477  | 5913.331  | 6385.504  | AK022537  | 13505.885 | 10765.521 | AK001489  | 1469.884 | 1696.691 |
| NM_012107 | 6579.042  | 7135.646  | AF116632  | 877.941   | 999.572   | NM_015681 | 1616.611 | 2318.768 |
| AB037760  | 2812.82   | 2488.544  | AF064597  | 1270.792  | 1012.005  | AF070582  | 1195.596 | 2183.069 |
| NM_015680 | 3451.964  | 3545.972  | NM_006345 | 3165.129  | 3327.245  | NM_006383 | 1442.294 | 2059.892 |
| M22637    | 1476.19   | 1599.158  | NM_003259 | 22167.023 | 22030.826 | NM_015400 | 2461.741 | 4804.261 |
| NM_018364 | 9801.118  | 8746.251  | AL080128  | 4856.754  | 5013.29   | AK026464  | 923.91   | 1591.889 |
| NM_007022 | 5412.461  | 5769.411  | AB037787  | 7368.338  | 10518.41  | AK001362  | 597.787  | 1391.033 |
| AL049943  | 17170.004 | 14786.483 | AB002360  | 380.651   | 786.923   | AK023491  | 752.32   | 1019.339 |
| AL137303  | 3451.199  | 3257.855  | NM_018268 | 26741.713 | 26129.623 | AK022400  | 963.258  | 1613.905 |
| AL355708  | 1949.672  | 1738.576  | AF230904  | 10965.187 | 11940.253 | AF052100  | 1551.828 | 2487.446 |
| AL161980  | 933.657   | 632.708   | NM_017596 | 10000.23  | 10511.551 | AL110235  | 724.409  | 1367.706 |
| AB002449  | 1512.915  | 1586.258  | AL157480  | 3893.949  | 6213.815  | U79245    | 816.485  | 2362.895 |
| NM_016480 | 35505.164 | 34674.305 | AF312678  | 620.832   | 1304.283  | AF086124  | 1078.909 | 1032.684 |
| AK001489  | 3494.128  | 2707.536  | NM_006253 | 6986.38   | 9476.808  | AK024820  | 900.757  | 1240.759 |
| NM_015681 | 4809.188  | 3801.411  | NM_003866 | 1151.08   | 851.912   | AF085932  | 408.557  | 715.987  |
| AF070582  | 3651.878  | 3939.236  | NM_018262 | 1197.924  | 1289.738  | AF038192  | 649.405  | 897.277  |
| NM_006383 | 8826.58   | 7418.382  | NM_006207 | 2276.044  | 1968.225  | NM_017938 | 305.66   | 685.25   |
| NM_015400 | 4370.474  | 3582.811  | NM_003220 | 2196.647  | 2477.354  | AJ001865  | 846.253  | 1595.314 |
| AL359561  | 2246.424  | 1866.415  | AF009674  | 8779.159  | 9716.343  | AJ227875  | 339.538  | 569.872  |
| AK026464  | 1741.43   | 2187.406  | NM_000360 | 1268.722  | 1668.589  | D61704    | 3231.878 | 5852.443 |
| AK001362  | 815.037   | 1170.339  | NM_000844 | 1155.959  | 1410.386  | AJ227889  | 667.895  | 1083.529 |
| AK023491  | 1423.115  | 703.383   | NM_005510 | 6105.681  | 6641.451  | Y12017    | 529.115  | 849.517  |
| AK022400  | 1892.971  | 1655.042  | Z36817    | 812.524   | 968.727   | X64989    | 410.451  | 371.98   |
| AF052100  | 3611.761  | 3871.423  | NM_014505 | 26221.025 | 28194.848 | Y10512    | 776.202  | 1165.71  |
| AL110235  | 975.9     | 1334.669  | NM_004209 | 3753.266  | 3963.8    | U12210    | 2827.567 | 4134.001 |
| U79245    | 1364.934  | 1167.353  | NM_016162 | 2527.859  | 2441.178  | Z83936    | 447.568  | 726.432  |
| AF086124  | 3285.513  | 1934.886  | AF130056  | 2386.089  | 2329.76   | L08440    | 3318.402 | 3545.232 |
| AK024820  | 2282.885  | 2021.663  | NM_002201 | 56613.074 | 55287.516 | M73799    | 1256.631 | 1305.716 |
| AB033105  | 2711.881  | 2246.064  | AK025047  | 2477.7    | 3128.207  | AF086119  | 1397.697 | 1429.628 |
| AF038192  | 1392.675  | 1199.242  | NM_006806 | 2514.324  | 3565.278  | NM_003782 | 2083.676 | 2898.28  |
| AJ001865  | 1019.245  | 1029.137  | NM_006763 | 2880.47   | 3163.113  | AL442096  | 475.468  | 765.705  |

|           |           |           |           |           |           |           |           |           |
|-----------|-----------|-----------|-----------|-----------|-----------|-----------|-----------|-----------|
| D61704    | 17988.533 | 16651.875 | NM_006119 | 2405.62   | 2596.515  | NM_01822E | 584.799   | 665.724   |
| AJ227889  | 1893.326  | 1700.021  | NM_004465 | 1148.452  | 1181.15   | AJ270693  | 512.098   | 505.04    |
| Y12017    | 1429.917  | 1409.139  | AK026927  | 2892.931  | 3132.579  | NM_01779C | 894.374   | 1017.103  |
| Y10512    | 1259.252  | 1372.339  | NM_014059 | 18652.643 | 15058.695 | AK000861  | 469.661   | 493.318   |
| L34409    | 20622.824 | 20597.852 | NM_001761 | 7058.381  | 7873.91   | AK000023  | 1391.125  | 1208.753  |
| U12210    | 6299.911  | 5588.567  | BE884341  | 3876.876  | 6111.623  | AK000901  | 294.453   | 452.087   |
| Z83936    | 661.126   | 931.632   | NM_007125 | 2685.959  | 3813.322  | AK024351  | 469.861   | 532.046   |
| L08440    | 4814.247  | 3885.471  | NM_00259E | 4779.566  | 5116.058  | AK024867  | 523.117   | 562.079   |
| M73799    | 1797.558  | 2131.592  | NM_020184 | 993.449   | 869.759   | AK025002  | 1582.67   | 1551.368  |
| AF086119  | 1073.309  | 1173.888  | NM_005815 | 2598.256  | 1869.391  | AK024011  | 1107.54   | 1310.517  |
| NM_003782 | 4218.338  | 3374.669  | NM_001229 | 1280.78   | 1593.531  | NM_01834C | 952.701   | 1564.99   |
| AL442096  | 1853.989  | 1599.975  | NM_014916 | 650.796   | 541.336   | AF049883  | 1248.545  | 1430.938  |
| NM_01822E | 1239.742  | 1171.627  | NM_00025C | 1155.259  | 1248.041  | L10148    | 488.174   | 420.124   |
| AJ270693  | 1321.86   | 1342.968  | NM_018147 | 10875.396 | 12164.186 | AL110175  | 558.689   | 486.433   |
| NM_01779C | 3118.068  | 2905.221  | NM_018967 | 5705.048  | 10468.352 | AF288406  | 518.936   | 544.326   |
| AK000861  | 1266.608  | 1339.394  | NM_00185C | 1191.785  | 1609.954  | AK027156  | 8648.148  | 7199.512  |
| AK000023  | 4557.949  | 3821.305  | NM_00216C | 1734.185  | 1759.652  | AL157504  | 5796.064  | 7090.941  |
| AK000901  | 1012.618  | 951.869   | NM_005675 | 1519.749  | 2171.325  | AK023328  | 3968.131  | 3934.408  |
| AK024011  | 3885.059  | 3842.149  | NM_00277C | 1466.739  | 1904.674  | AJ012499  | 45179.535 | 58959.168 |
| AL390145  | 1125.458  | 800.033   | BC030636  | 1853.507  | 2042.942  | AK024900  | 1473.649  | 1695.863  |
| AF119913  | 2606.634  | 2200.468  | D21064    | 329.758   | 439.862   | AF119879  | 6097.783  | 5213.563  |
| NM_01834C | 2303.209  | 2615.11   | NM_002812 | 4003.777  | 3930.484  | Y10482    | 5636.523  | 2302.345  |
| AF049883  | 3216.741  | 3009.123  | NM_020365 | 3403.431  | 3289.84   | AY007095  | 501.992   | 307.516   |
| L10148    | 2194.993  | 1525.928  | NM_003982 | 1367.099  | 1447.333  | AF086244  | 1076.938  | 820.392   |
| AK026247  | 1168.086  | 1091.682  | NM_002079 | 7306.032  | 7997.952  | AL161992  | 5689.675  | 5069.71   |
| AL110175  | 1152.893  | 741.109   | NM_002112 | 4232.103  | 5374.635  | AK023551  | 389.27    | 302.628   |
| AF288406  | 1221.136  | 1238.201  | NM_004121 | 2710.637  | 4016.114  | AK023910  | 853.227   | 681.207   |
| AK027156  | 18038.936 | 16477.439 | AY007092  | 3112.949  | 3566.283  | D16991    | 1698.105  | 1501.896  |
| AJ012499  | 75513.984 | 63648.617 | AL137605  | 41148.301 | 39768.07  | NM_01449E | 1156.068  | 907.275   |
| AK024900  | 4553.682  | 4815.038  | NM_016261 | 1909.468  | 1270.051  | AK021555  | 722.15    | 609.127   |
| AF119879  | 32191.73  | 23162.287 | NM_006519 | 1030.272  | 1433.198  | AB046765  | 907.468   | 631.329   |
| Y10482    | 34015.09  | 22732.236 | NM_012076 | 967.35    | 886.83    | AF133333  | 6395.992  | 3508.88   |
| AY007095  | 1905.171  | 1277.415  | NM_007285 | 20885.342 | 24372.311 | NM_01836E | 619.117   | 569.479   |
| AF086244  | 5375.462  | 4056.487  | D14678    | 7694.251  | 8961.475  | NM_004881 | 8907.017  | 9309.956  |
| AL161992  | 15174.795 | 17364.5   | NM_016221 | 2382.165  | 2815.542  | NM_00515E | 2739.697  | 2180.418  |
| AK023551  | 997.65    | 884.95    | NM_018113 | 1444.135  | 1727.174  | NM_01909E | 5160.549  | 4214.211  |
| AK023910  | 2928.412  | 3331.716  | NM_005187 | 1061.741  | 1364.513  | U80764    | 6128.696  | 5455.465  |
| D16991    | 5118.442  | 5137.822  | U73377    | 2778.518  | 2830.639  | AB020684  | 4036.041  | 3368.485  |
| AK023538  | 811.998   | 814.349   | NM_002199 | 4115.076  | 4218.121  | AF077036  | 21986.779 | 15428.241 |
| X77485    | 15148.767 | 12333.549 | BC005219  | 4360.007  | 4727.115  | NM_020421 | 2251.291  | 1259.594  |
| NM_01449E | 3225.521  | 3659.697  | NM_00426E | 1479.243  | 1845.45   | D17094    | 1056.354  | 627.135   |
| AK021555  | 2014.17   | 2159.292  | NM_006662 | 7526.712  | 8953.137  | L37690    | 3437.688  | 1991.202  |
| AB046765  | 2360.221  | 2487.427  | NM_004031 | 3119.471  | 4822.464  | D61707    | 373.856   | 295.646   |
| AF133333  | 15404.955 | 13375.496 | NM_004514 | 3175.575  | 4472.349  | AK021610  | 1074.951  | 740.308   |
| NM_004881 | 29463.135 | 21458.533 | NM_006163 | 1225.548  | 1354.778  | Z36835    | 2466.291  | 1774.514  |
| U94903    | 1782.479  | 1132.419  | NM_001272 | 11079.271 | 8286.89   | AF084516  | 613.744   | 803.689   |
| NM_00515E | 13850.734 | 10005.302 | NM_016303 | 7171.044  | 7796.542  | AJ001907  | 936.915   | 666.396   |
| NM_01909E | 18851.072 | 16113.647 | NM_006196 | 28064.02  | 30420.371 | M32220    | 2181.885  | 1555.719  |
| U80764    | 21297.24  | 23115.848 | AV733560  | 771.997   | 1143.174  | D17188    | 2902.579  | 2211.889  |
| AB020684  | 11474.855 | 9060.164  | AL137730  | 4214.511  | 4241.382  | AJ001432  | 20484.803 | 12501.356 |
| AF077036  | 52379.727 | 51435.766 | NM_00450C | 28262.727 | 25180.662 | NM_02043E | 4005.878  | 4266.932  |
| NM_020421 | 6623.849  | 4571.575  | AL137681  | 2228.734  | 2919.633  | AF052169  | 764.466   | 480.735   |
| D17094    | 2835.765  | 2648.74   | AK025694  | 59886.766 | 58847.195 | CY3Cy5    | 1495.808  | 142.761   |

|           |           |           |           |           |           |           |           |           |
|-----------|-----------|-----------|-----------|-----------|-----------|-----------|-----------|-----------|
| L37690    | 17282.568 | 13524.587 | NM_002157 | 59099.039 | 57005.68  | BF942101  | 1173.642  | 2016.068  |
| D61707    | 1439.904  | 1231.305  | NM_004095 | 8897.99   | 10390.158 | BI825012  | 2549.361  | 3516.61   |
| AK021610  | 2901.446  | 2678.354  | NM_014365 | 888.449   | 359.314   | BM051302  | 346.425   | 372.495   |
| Z36835    | 8671.655  | 9170.683  | NM_005147 | 3354.965  | 3072.031  | BE314182  | 2470.085  | 2838.443  |
| AK023767  | 3740.478  | 3780.464  | NM_014665 | 2307.202  | 2445.097  | AI808029  | 386.532   | 487.891   |
| AF084516  | 2155.613  | 2012.522  | AK023609  | 1689.233  | 2126.372  | X03225    | 1441.142  | 1535.681  |
| AL137554  | 1039.285  | 985.135   | NM_018019 | 2906.345  | 3077.662  | AF085357  | 4100.168  | 2107.342  |
| AJ001907  | 2462.882  | 2274.699  | AK027220  | 3388.313  | 2556.273  | NM_003841 | 9887.921  | 1999.657  |
| M32220    | 5296.435  | 4312.297  | NM_018011 | 6582.528  | 8065.264  | SR6       | 1257.883  | 1159.359  |
| D17188    | 10453.876 | 9726.861  | NM_000476 | 794.138   | 552.146   | CY3Cy5    | 2504.17   | 163.285   |
| AJ001432  | 41911.102 | 41909.891 | AF132733  | 2120.936  | 2278.833  | NM_014322 | 603.118   | 1330.079  |
| AF052169  | 2132.524  | 2602.165  | NM_001071 | 37980.27  | 33809.191 | NM_004122 | 1247.284  | 3244.79   |
| CY3Cy5    | 6331.702  | 316.158   | NM_006187 | 1623.103  | 2168.485  | NM_002928 | 1305.714  | 1967.995  |
| BF942101  | 3672.911  | 3503.934  | NM_020354 | 7848.079  | 8512.62   | NM_000160 | 787.662   | 743.753   |
| BI825012  | 10019.45  | 6382.419  | AF202637  | 2752.874  | 4493.915  | NM_003301 | 469.105   | 236.547   |
| BM051302  | 1601.299  | 1135.722  | NM_000026 | 33614.551 | 33172.891 | NM_000955 | 755.048   | 815.274   |
| BE314182  | 7506.424  | 7437.194  | AB037864  | 1862.965  | 1564.226  | U27768    | 481.13    | 730.397   |
| AI808029  | 1419.257  | 1412.238  | L26494    | 1796.394  | 1732.164  | AF305550  | 2034.903  | 2031.338  |
| X03225    | 4164.963  | 3462.431  | BF382513  | 3855.743  | 4245.913  | U66582    | 3397.419  | 2794.593  |
| AK097395  | 4985.963  | 4649.724  | AB020713  | 10899.657 | 10165.698 | S73288    | 731.152   | 745.367   |
| M12783    | 1754.2    | 1907.92   | AK025426  | 1367.384  | 1134.917  | NM_006198 | 1884.802  | 1381.978  |
| AK091535  | 831.13    | 657.699   | NM_016558 | 3575.581  | 3681.439  | NM_003812 | 672.581   | 429.355   |
| AF085357  | 8876.438  | 5600.694  | NM_007145 | 3514.261  | 3435.706  | NM_000848 | 436.774   | 339.974   |
| NM_003841 | 4793.914  | 3428.181  | AL133112  | 727.622   | 450.806   | NM_004678 | 1174.762  | 1233.509  |
| NM_080824 | 928.294   | 735.179   | AK002078  | 2651.212  | 2627.556  | NM_000950 | 12027.307 | 6886.529  |
| SR2       | 57510.023 | 59547.988 | AF085837  | 1834.246  | 2716.571  | NM_005138 | 3211.724  | 2552.305  |
| SR4       | 20214.664 | 22830.965 | AK023165  | 1158.733  | 885.102   | L10139    | 584.104   | 585.593   |
| SR6       | 3096.919  | 3074.896  | NM_016115 | 3372.382  | 2551.634  | AA478950  | 543.36    | 228.612   |
| SR8       | 10326.526 | 35290.074 | NM_014950 | 3467.929  | 3050.267  | AB029033  | 3079.032  | 3234.588  |
| CY3Cy5    | 6380.559  | 220.898   | AL080180  | 1551.168  | 1710.408  | NM_016653 | 1480.194  | 1465.964  |
| NM_014322 | 1309.919  | 1476.518  | X89067    | 1514.693  | 1590.387  | AB035124  | 2208.871  | 2725.858  |
| NM_004122 | 3549.233  | 2671.501  | AF147376  | 1263.666  | 1130.246  | AF060170  | 403.904   | 757.171   |
| NM_002928 | 4796.147  | 4327.212  | AF086427  | 440.625   | 397.001   | NM_016602 | 442.455   | 521.151   |
| NM_000160 | 1843.726  | 1810.027  | AK024196  | 691.725   | 479.484   | NM_004408 | 4509.637  | 3647.946  |
| NM_003301 | 1061.226  | 867.741   | AK001099  | 584.797   | 518.472   | AK023397  | 1242.148  | 1494.062  |
| NM_000955 | 1451.958  | 1238.807  | AK023753  | 2349.724  | 2818.818  | NM_001725 | 782.226   | 559.348   |
| U27768    | 898.975   | 1002.665  | AF086441  | 14031.845 | 13099.294 | NM_004079 | 2916.839  | 2090.921  |
| AF305550  | 5963.286  | 5619.849  | AK027255  | 562.18    | 514.206   | NM_000383 | 436.125   | 388.172   |
| U66582    | 7965.978  | 8401.202  | NM_014117 | 4393.022  | 4564.102  | X01394    | 21783.537 | 13046.796 |
| NM_006198 | 3036.316  | 3302.695  | AF086087  | 6181.997  | 5364.891  | NM_000041 | 15063.6   | 12905.164 |
| NM_003812 | 697.748   | 458.814   | AK000671  | 48112.875 | 42084.176 | NM_002984 | 1154.794  | 848.507   |
| NM_000848 | 1489.094  | 1106.511  | AK094020  | 647.471   | 561.785   | AB037752  | 2961.251  | 2605.768  |
| NM_004678 | 1986.37   | 1973.906  | AL137425  | 1427.659  | 1172.256  | AK024821  | 7132.677  | 8162.183  |
| NM_000950 | 18589.088 | 15368.788 | AL137637  | 723.957   | 377.964   | AB002340  | 715.56    | 856.395   |
| NM_005138 | 8214.514  | 8137.958  | AL359584  | 1043.726  | 1105.444  | NM_018479 | 6100.774  | 6426.775  |
| L10139    | 781.591   | 935.738   | AK024874  | 576.369   | 689.633   | NM_001832 | 7301.029  | 9288.728  |
| AA478950  | 1487.195  | 1593.972  | AF086071  | 696.658   | 936.517   | NM_017774 | 9827.91   | 10869.427 |
| AB029033  | 6627.713  | 6000.479  | AK021847  | 751.757   | 667.992   | AB037716  | 934.155   | 1000.326  |
| AF091034  | 4857.683  | 5119.559  | AK023086  | 4758.091  | 3962.048  | NM_016297 | 1382.468  | 1600.691  |
| NM_005301 | 24922.826 | 21570.873 | AF241534  | 721.861   | 631.898   | NM_001752 | 1476.818  | 1467.136  |
| NM_016653 | 6360.206  | 5423.905  | NM_017621 | 9141.278  | 7776.62   | BC003406  | 1134.503  | 1330.097  |
| AB035124  | 9342.847  | 9080.31   | AK023574  | 1434.465  | 1530.762  | AL137672  | 540.032   | 345.574   |
| AF060170  | 1414.684  | 1406.806  | AF083117  | 694.891   | 749.592   | X64177    | 697.587   | 485.727   |

|           |           |           |           |           |           |           |           |           |
|-----------|-----------|-----------|-----------|-----------|-----------|-----------|-----------|-----------|
| NM_016602 | 1005.434  | 994.914   | AF131767  | 4196.011  | 3205.755  | NM_015994 | 4554.625  | 3461.44   |
| NM_004409 | 12183.035 | 8790.056  | AK021907  | 1487.141  | 1638.739  | NM_002235 | 290.638   | 110.462   |
| AK023397  | 3325.47   | 3308.844  | NM_018280 | 2256.573  | 2448.974  | NM_014065 | 1654.468  | 1920.573  |
| NM_001725 | 2500.96   | 2127.368  | AK024381  | 656.226   | 669.542   | NM_001695 | 2552.147  | 1999.725  |
| NM_004079 | 4399.463  | 4547.359  | AK026503  | 998.786   | 1164.255  | NM_002248 | 1860.902  | 1424.508  |
| NM_002996 | 894.237   | 930.043   | AK026671  | 1595.303  | 1472.355  | NM_012281 | 1398.953  | 974.031   |
| NM_000383 | 1111.915  | 1286.644  | AK025522  | 14571.025 | 12251.472 | AK025772  | 2220.983  | 2380.204  |
| NM_004633 | 345.535   | 1058.311  | AK025464  | 58936.773 | 50988.563 | NM_005509 | 4310.232  | 2961.952  |
| X01394    | 35970.355 | 33935.117 | AL049962  | 2884.781  | 3224.872  | NM_152747 | 705.492   | 1158.281  |
| NM_000041 | 19949.604 | 18460.623 | NM_016941 | 1849.266  | 2509.787  | NM_017415 | 695.49    | 1000.641  |
| NM_002984 | 2308.523  | 1863.679  | NM_020408 | 1234.388  | 1338.675  | NM_001667 | 12722.188 | 12604.488 |
| AB037752  | 7145.496  | 6372.769  | AL080151  | 2151.533  | 2564.97   | NM_017831 | 535.07    | 683.165   |
| NM_018002 | 2875.153  | 2993.335  | AL050085  | 1032.006  | 1243.338  | AK024393  | 519.759   | 930.753   |
| AK024821  | 14086.063 | 16410.658 | AK001308  | 712.479   | 899.55    | AK022537  | 6582.848  | 8732.984  |
| AB002340  | 2422.518  | 2930.633  | AK024127  | 857.743   | 907.111   | AF116632  | 562.31    | 471.056   |
| NM_000224 | 2107.259  | 2333.91   | AK024243  | 570.202   | 321.075   | AF064597  | 545.908   | 585.588   |
| NM_014328 | 9945.322  | 12369.865 | AK021574  | 2495.546  | 3096.998  | NM_006345 | 2253.534  | 1305.365  |
| NM_006414 | 7095.402  | 6891.456  | AF119911  | 7991.689  | 7730.127  | NM_006875 | 823.656   | 692.59    |
| NM_018479 | 14115.916 | 13715.915 | AF116656  | 5823.348  | 4806.429  | D87119    | 2226.738  | 1705.151  |
| NM_014362 | 5868.17   | 6554.022  | NM_001050 | 3316.225  | 3795.5    | AL050040  | 723.142   | 846.21    |
| NM_018308 | 2846.232  | 2575.184  | AF132206  | 1337.52   | 1564.117  | NM_006556 | 8612.761  | 7113.525  |
| NM_001832 | 17185.887 | 14080.668 | AJ001869  | 9328.291  | 11182.524 | AL133066  | 710.102   | 638.474   |
| NM_017774 | 22625.137 | 21700.859 | AJ002969  | 6495.927  | 9028.511  | AF264717  | 898.835   | 705.663   |
| AB037716  | 3313.326  | 3123.811  | NM_005295 | 2187.653  | 2673.634  | NM_012260 | 2338.026  | 2634.559  |
| NM_004827 | 650.366   | 455.331   | NM_020213 | 5070.478  | 7564.204  | NM_001141 | 3188.57   | 3226.531  |
| NM_016297 | 4559.611  | 3652.685  | D17267    | 7609.647  | 7853.216  | NM_000018 | 5794.129  | 6558.186  |
| NM_001752 | 3922.934  | 3350.613  | U61088    | 814.187   | 828.992   | AB028992  | 932.534   | 1248.646  |
| BC003406  | 3153.842  | 3811.147  | AF086467  | 1517.823  | 1486.592  | L10139    | 553.813   | 550.318   |
| AL137672  | 851.979   | 909.349   | AL137345  | 2638.386  | 2211.019  | NM_006574 | 328.367   | 271.404   |
| X64177    | 1339.895  | 1135.835  | AK000967  | 2370.999  | 2463.984  | AA478950  | 624.247   | 720.752   |
| NM_015994 | 10542.905 | 16187.022 | AK021583  | 2205.899  | 2446.937  | BF942101  | 722.669   | 833.492   |
| NM_002235 | 708.001   | 1298.882  | AL137442  | 2944.623  | 2352.068  | BI825012  | 2709.748  | 2367.706  |
| NM_014065 | 2682.663  | 2536.917  | AL049281  | 943.552   | 1134.031  | BM051302  | 734.708   | 681.931   |
| NM_001695 | 5896.963  | 5335.371  | NM_001208 | 29130.168 | 28307.121 | BE314182  | 2888.933  | 2801.283  |
| NM_002248 | 4291.599  | 3820.858  | AL050061  | 2887.708  | 2388.043  | AI808029  | 675.031   | 622.563   |
| NM_012281 | 2145.558  | 1893.453  | AL050206  | 765.021   | 604.737   | X03225    | 1379.796  | 988.574   |
| AK025772  | 3870.088  | 4847.021  | AK026898  | 2655.933  | 2234.728  | AK097395  | 3207.108  | 2445.258  |
| NM_005509 | 1046.437  | 959.881   | AK022419  | 1095.679  | 1111.433  | M12783    | 1030.418  | 760.522   |
| NM_152747 | 1719.298  | 1841.322  | AJ251832  | 941.323   | 938.612   | AF085357  | 4078.44   | 2326.311  |
| NM_017415 | 1318.486  | 1583.591  | NM_014624 | 664.288   | 759.497   | NM_003841 | 9109.541  | 1773.114  |
| NM_001667 | 23234.693 | 22424.295 | NM_013936 | 1506.094  | 1732.207  | AF296673  | 346.012   | 254.2     |
| AB046834  | 628.8     | 470.472   | AF086145  | 1135.853  | 1122.944  | NM_080824 | 306.62    | 385.426   |
| NM_000262 | 1050.953  | 913.382   | Z70709    | 596.458   | 668.515   | AB032956  | 249.375   | 307.232   |
| NM_017831 | 2048.982  | 1911.833  | BC002538  | 2333.084  | 1949.241  | NM_018002 | 1161.226  | 1256.896  |
| AK024393  | 655.111   | 589.477   | AK022355  | 653.925   | 777.838   | NM_000224 | 855.448   | 716.859   |
| AK022537  | 11728.133 | 22756.121 | NM_017836 | 3992.723  | 2167.539  | NM_014328 | 2764.086  | 3333.259  |
| AF116632  | 1248.368  | 1374.218  | AK096584  | 34546.688 | 31317.898 | NM_006414 | 1990.574  | 2404.305  |
| AF064597  | 1200.69   | 1178.826  | AL078636  | 1991.366  | 2000.265  | NM_014322 | 493.966   | 848.882   |
| NM_006345 | 5589.159  | 5499.035  | AK022382  | 796.713   | 424.182   | NM_004122 | 1143.445  | 1120.727  |
| NM_006875 | 2400.929  | 3505.238  | AF147362  | 716.834   | 610.281   | NM_002928 | 1490.55   | 2099.018  |
| D87119    | 3226.502  | 2713.403  | AF147365  | 581.097   | 564.344   | NM_000160 | 871.674   | 688.978   |
| AL050040  | 816.18    | 973.193   | S72917    | 640.487   | 791.696   | NM_003301 | 385.021   | 495.143   |
| NM_006556 | 14586.345 | 14799.204 | AF076617  | 57687.117 | 55361.52  | NM_000955 | 620.554   | 339.235   |

|           |           |           |           |           |           |           |           |           |
|-----------|-----------|-----------|-----------|-----------|-----------|-----------|-----------|-----------|
| AF264717  | 2652.514  | 1999.407  | AK025129  | 1598.272  | 1295.542  | U27768    | 460.707   | 333.879   |
| NM_01226C | 6529.969  | 6043.264  | NM_014392 | 7972.249  | 9407.908  | AF305550  | 3053.483  | 2045.464  |
| NM_001141 | 7468.599  | 6271.775  | AK023291  | 8417.583  | 7774.205  | U66582    | 3857.731  | 3280.484  |
| NM_00001E | 11210.367 | 9558.977  | BF541820  | 771.304   | 1080.928  | NM_00619E | 1855.091  | 1288.785  |
| AB028992  | 2319.101  | 2047.659  | CY3Cy5    | 6487.724  | 310.773   | NM_003812 | 368.906   | 337.572   |
| L10139    | 832.554   | 762.293   | X07696    | 2274.137  | 3615.346  | NM_00084E | 589.965   | 534.203   |
| NM_02047C | 3874.709  | 2872.916  | AA481015  | 1074.41   | 1019.839  | NM_00467E | 762.537   | 863.216   |
| AA478950  | 2813.96   | 2302.509  | AI925826  | 3799.197  | 3819.964  | NM_00095C | 3090.186  | 2173.384  |
| BF942101  | 4092.905  | 4321.023  | AI393201  | 3666.76   | 6041.41   | NM_00513E | 3583.233  | 4372.373  |
| BI825012  | 13644.297 | 10505.884 | M55284    | 2793.677  | 2097.944  | NM_00127E | 53037.246 | 68655.023 |
| M21574    | 650.279   | 724.504   | AA679391  | 1586.728  | 1764.101  | NM_000322 | 42473.367 | 44471.203 |
| BM051302  | 1811.968  | 1629.4    | BG682146  | 3425.089  | 2740.094  | AK025772  | 2091.751  | 2742.809  |
| X03225    | 4221.242  | 3376.772  | NM_00506C | 1943.63   | 1787.853  | NM_152747 | 690.402   | 1314.344  |
| AK097395  | 5440.102  | 4422.797  | NM_005437 | 6347.337  | 6764.555  | NM_01741E | 474.829   | 647.891   |
| M12783    | 2118.276  | 1769.36   | SR5       | 8500.109  | 7995.924  | NM_001667 | 9055.81   | 8781.89   |
| AK091535  | 780.577   | 846.951   | SR7       | 7087.682  | 47009.559 | AB046834  | 247.381   | 508.355   |
| AF085357  | 10503.653 | 6469.462  | SR9       | 26500.771 | 2990.581  | AB029033  | 1773.662  | 1788.224  |
| NM_003841 | 5457.647  | 3148.792  | CY3Cy5    | 4633.947  | 169.204   | AF091034  | 2082.604  | 2788.856  |
| NM_080824 | 981.098   | 866.202   | NM_003974 | 5671.893  | 8980.239  | NM_005301 | 8306.33   | 10248.296 |
| NM_018002 | 2781.717  | 2521.912  | NM_01433E | 15893.26  | 24637.717 | NM_01665E | 2059.094  | 1762.529  |
| AB002340  | 3045.143  | 3436.801  | NM_00149E | 1056.682  | 1611.908  | AB035124  | 2281.088  | 2048.014  |
| NM_000224 | 3057.617  | 2265.914  | NM_00228E | 764.111   | 1278.363  | AF060170  | 330.71    | 335.221   |
| NM_01432E | 12578.381 | 15098.621 | NM_00441E | 8519.769  | 4853.605  | NM_016602 | 545.826   | 410.613   |
| NM_006414 | 8631.747  | 9435.876  | NM_00062E | 5998.692  | 5612.18   | NM_00440E | 8021.073  | 4463.574  |
| NM_014322 | 1574.655  | 2339.671  | AK000184  | 447.882   | 784.281   | AK023397  | 2065.214  | 1425.584  |
| NM_004122 | 3961.019  | 3395.459  | AF055020  | 3877.75   | 5367.365  | NM_00172E | 1467.083  | 1764.879  |
| NM_00292E | 4429.402  | 4373.316  | NM_00698E | 2612.427  | 3067.991  | NM_00407E | 2589.263  | 2191.335  |
| NM_00095E | 1371.654  | 1650.537  | AF272043  | 7258.785  | 7599.965  | NM_00299E | 363.762   | 391.85    |
| U27768    | 1231.189  | 1380.319  | NM_002587 | 9985.816  | 10951.179 | NM_00038E | 431.169   | 234.465   |
| AF305550  | 6657.747  | 6365.225  | NM_00223E | 1800.302  | 1543.385  | NM_00463E | 244.129   | 541.33    |
| U66582    | 9077.352  | 12049.66  | NM_00486E | 1120.861  | 1032.754  | X01394    | 25943.936 | 18653.498 |
| NM_00619E | 4240.762  | 4939.281  | NM_00702E | 9039.266  | 12844.063 | NM_000041 | 5936.072  | 4226.74   |
| NM_003812 | 842.151   | 1289.183  | AF130728  | 1414.708  | 2841.008  | NM_002984 | 1309.815  | 1073.118  |
| NM_00084E | 1560.123  | 1086.29   | NM_00128E | 17538.664 | 17876.459 | AB037752  | 4159.457  | 4326.294  |
| NM_00467E | 2637.074  | 2420.028  | NM_001131 | 20468.793 | 20010.572 | AF317425  | 1729.59   | 1659.648  |
| NM_00095C | 20221.943 | 14996.185 | AL133580  | 17592.408 | 25141.383 | AF264717  | 1300.316  | 1504.508  |
| NM_00513E | 7702.482  | 7385.21   | NM_01466E | 10980.878 | 24888.131 | NM_01226C | 1910.18   | 2026.923  |
| NM_000322 | 59417.902 | 60696.457 | NM_005451 | 1427.785  | 2662.661  | NM_001141 | 2614.074  | 2653.19   |
| AK025772  | 3732.969  | 4927.125  | NM_007172 | 4030.221  | 4423.469  | NM_00001E | 3511.271  | 3026.125  |
| NM_00550E | 1433.649  | 1430.044  | NM_006152 | 3052.946  | 3242.001  | AB028992  | 565.377   | 805.643   |
| NM_152747 | 2125.017  | 2679.118  | NM_01333E | 12018.701 | 14249.69  | NM_01847E | 6043.057  | 7019.874  |
| NM_01741E | 1958.369  | 2374.45   | NM_00233E | 2036.881  | 1845.599  | NM_014362 | 2646.002  | 4385.796  |
| NM_001667 | 32470.07  | 41209.984 | NM_00340C | 7235.624  | 5244.547  | NM_01830E | 650.719   | 862.729   |
| AB046834  | 967.522   | 1484.921  | NM_00670E | 2415.782  | 2147.008  | NM_00183E | 8214.255  | 8733.24   |
| AB029033  | 5994.801  | 6942.231  | NM_01443E | 776.35    | 798.326   | NM_017774 | 8775.997  | 6447.772  |
| AF091034  | 5030.609  | 7250.186  | NM_005582 | 659.878   | 648.157   | AB037716  | 1151.233  | 796.433   |
| NM_005301 | 24665.049 | 29142.178 | NM_01226E | 4550.558  | 4442.305  | NM_016297 | 1887.038  | 1809.837  |
| NM_01665E | 5350.199  | 4718.727  | NM_00455E | 1833.52   | 2322.354  | NM_00175E | 2139.847  | 1997.351  |
| AB035124  | 7193.82   | 7987.188  | X56692    | 4483.743  | 6169.313  | BC003406  | 1936.389  | 3174.803  |
| AF060170  | 2160.823  | 2291.68   | NM_01427E | 3161.532  | 2845.437  | X64177    | 701.704   | 563.191   |
| NM_016602 | 918.698   | 862.614   | NM_000734 | 9539.914  | 9978.509  | NM_015994 | 5473.161  | 5242.434  |
| NM_00440E | 11323.724 | 7073.114  | NM_012331 | 2237.075  | 1683.016  | NM_002241 | 344.849   | 112.587   |
| AK023397  | 2625.803  | 2428.011  | NM_006644 | 5942.627  | 4264.711  | NM_01406E | 580.789   | 556.849   |

|           |           |           |           |           |           |           |           |           |
|-----------|-----------|-----------|-----------|-----------|-----------|-----------|-----------|-----------|
| NM_001725 | 4323.207  | 3750.679  | NM_006583 | 54357.234 | 2209.736  | NM_001695 | 2637.615  | 2662.635  |
| NM_004079 | 7225.582  | 9749.941  | X82693    | 12750.731 | 18419.363 | NM_002245 | 1747.613  | 1830.952  |
| NM_002996 | 723.839   | 941.749   | NM_007176 | 16576.055 | 29488.814 | NM_012281 | 1109.1    | 919.524   |
| NM_000383 | 1303.266  | 996.613   | NM_002722 | 2568.707  | 4371.608  | NM_080824 | 429.537   | 270.687   |
| NM_004633 | 489.694   | 1005.719  | AF317058  | 579.178   | 929.958   | AL137698  | 473.305   | 669.554   |
| X01394    | 48625.898 | 45228.672 | NM_014904 | 693.905   | 723.809   | NM_000262 | 579.757   | 568.594   |
| NM_000041 | 30143.963 | 26988.207 | AL137576  | 6655.378  | 5325.399  | NM_017831 | 885.51    | 668.122   |
| NM_002984 | 2301.927  | 2216.422  | NM_018355 | 4438.033  | 3790.998  | AK024393  | 752.824   | 302.228   |
| AF317425  | 3766.296  | 3130.262  | NM_013356 | 696.787   | 380.798   | AK022537  | 7991.94   | 10916.577 |
| AF264717  | 3425.192  | 3080.845  | AF131781  | 7258.095  | 3657.869  | AF116632  | 1006.511  | 1372.444  |
| NM_012260 | 9546.129  | 11483.673 | NM_006516 | 16302.068 | 13643.482 | AF064597  | 672.368   | 941.641   |
| NM_001141 | 7403.021  | 7462.326  | NM_015865 | 887.014   | 820.275   | AF198444  | 225.291   | 110.899   |
| NM_000015 | 14956.358 | 16949.949 | NM_003055 | 6580.928  | 8316.865  | NM_006345 | 2526.881  | 1850.933  |
| AB028992  | 2672.749  | 3496.044  | NM_005075 | 412.742   | 598.203   | NM_006875 | 797.927   | 927.903   |
| NM_018479 | 13489.058 | 13443.131 | NM_006841 | 698.617   | 757.379   | D87119    | 2251.344  | 2075.933  |
| NM_014362 | 5637.888  | 7153.067  | NM_014824 | 1699.182  | 1591.425  | AL050040  | 591.152   | 701.781   |
| NM_018305 | 2708.634  | 2203.035  | NM_014504 | 1807.536  | 1633.67   | NM_006556 | 8254.979  | 8287.157  |
| AB037716  | 2629.389  | 3138.701  | NM_014405 | 12708.451 | 8426.401  | AL133066  | 498.966   | 544.43    |
| NM_004827 | 857.432   | 1165.97   | NM_014741 | 2991.059  | 2375.428  | NM_000845 | 524.702   | 281.824   |
| NM_016297 | 2869.75   | 3052.633  | AF212247  | 3723.941  | 3288.692  | NM_004675 | 743.346   | 693.024   |
| NM_001752 | 3335.443  | 3409.539  | AF161407  | 14143.499 | 9822.041  | NM_000950 | 8827.759  | 6216.386  |
| BC003406  | 2637.048  | 3928.583  | NM_014735 | 2504.616  | 1954.265  | NM_005135 | 2928.004  | 2919.299  |
| AL137672  | 968.045   | 959.833   | AF174605  | 4604.832  | 3845.077  | NM_000035 | 39991.934 | 49508.375 |
| X64177    | 1573.122  | 1178.722  | NM_014453 | 13864.28  | 9740.865  | NM_020470 | 2205.634  | 1952.484  |
| NM_015994 | 11176.616 | 13723.116 | NM_005713 | 2126.187  | 1306.535  | AA478950  | 1007.937  | 848.326   |
| NM_014065 | 2901.664  | 2961.271  | AK023553  | 2781.15   | 1976.088  | BF942101  | 891.304   | 755.505   |
| NM_001695 | 5190.758  | 6033.806  | NM_014600 | 1393.046  | 1754.469  | BI825012  | 4034.585  | 2267.042  |
| NM_002245 | 5348.808  | 4886.237  | NM_016733 | 2752.298  | 3425.214  | M21574    | 309.08    | 319.011   |
| NM_012281 | 3035.861  | 2445.997  | AF181994  | 2689.991  | 4278.172  | BM051302  | 559.815   | 354.561   |
| NM_080824 | 436.737   | 1001.364  | NM_018962 | 1505.674  | 2667.292  | BE314182  | 3598.797  | 3380.019  |
| NM_000262 | 1439.603  | 1443.59   | AF125100  | 3214.164  | 5513.057  | AI808029  | 1005.81   | 1830.99   |
| AK024393  | 1068.309  | 1153.077  | NM_006114 | 14736.299 | 17181.979 | AI971217  | 1166.872  | 2331.337  |
| AK022537  | 12574.12  | 20191.197 | AF130728  | 1689.416  | 1374.347  | X03225    | 1514.244  | 1477.205  |
| AF116632  | 1354.025  | 1071.645  | NM_001289 | 16665.1   | 13096.998 | AK097395  | 3079.673  | 2517.112  |
| AF064597  | 1354.047  | 1540.411  | NM_001131 | 23617.18  | 17835.826 | M12783    | 1003.424  | 889.252   |
| NM_006345 | 6773.683  | 6015.869  | X07696    | 2770      | 2265.869  | AK091535  | 308.729   | 368.138   |
| NM_006875 | 2769.048  | 3993.843  | AA481015  | 884.48    | 593.576   | AF085357  | 2198.81   | 1290.562  |
| D87119    | 4059.776  | 3817.468  | AI925826  | 4860.738  | 5469.991  | NM_003841 | 10030.214 | 2162.126  |
| AL050040  | 815.15    | 1208.337  | U04209    | 7251.526  | 4113.055  | AF296673  | 347.042   | 365.716   |
| NM_006556 | 15180.148 | 15683.875 | M55284    | 3759.772  | 2497.424  | X01394    | 24626.723 | 19613.297 |
| AL133066  | 1130.591  | 777.457   | AA001218  | 675.271   | 764.451   | NM_000041 | 11006.929 | 8810.873  |
| NM_000845 | 1292.664  | 1104.94   | AA679391  | 1110.967  | 1308.647  | NM_002984 | 677.742   | 461.987   |
| NM_004675 | 1909.491  | 2081.013  | BG682146  | 2531.385  | 2885.243  | AB037752  | 1314.421  | 1118.79   |
| NM_000950 | 18304.549 | 14264.818 | AA884709  | 1280.61   | 1303.369  | AF317425  | 1393.577  | 1455.611  |
| NM_005135 | 6495.856  | 7135.388  | NM_005060 | 1957.005  | 2634.346  | NM_018002 | 2191.998  | 2424.061  |
| NM_000322 | 58659.938 | 57075.23  | NM_005437 | 7262.717  | 11360.668 | AK024821  | 8013.194  | 9219.639  |
| L10139    | 938.435   | 804.816   | AK022417  | 1470.789  | 2261.988  | AB002340  | 1071.167  | 1276.787  |
| NM_000035 | 61804.535 | 61130.383 | U50534    | 758.598   | 1424.239  | NM_000224 | 1378.208  | 951.68    |
| NM_020470 | 4712.1    | 4076.501  | NM_014275 | 2538.24   | 2293.562  | NM_014325 | 4340.917  | 3886.391  |
| AA478950  | 2198.349  | 1706.039  | NM_000734 | 8879.367  | 7685.313  | NM_006414 | 2705.921  | 2249.832  |
| BF942101  | 2911.621  | 3847.776  | NM_012331 | 1876.85   | 1796.907  | NM_014322 | 804.586   | 801.82    |
| BE314182  | 6805.129  | 8354.664  | NM_006644 | 6156.117  | 4213.632  | NM_004122 | 1425.739  | 1144.513  |
| AI808029  | 1032.856  | 1434.034  | NM_006583 | 61862.313 | 4202.785  | NM_002925 | 1680.042  | 1420.491  |

|           |           |           |           |           |           |           |           |           |
|-----------|-----------|-----------|-----------|-----------|-----------|-----------|-----------|-----------|
| X03225    | 4418.881  | 4079.402  | NM_003974 | 6091.37   | 6185.537  | NM_00016C | 858.68    | 512.232   |
| AK097395  | 6293.972  | 7055.962  | NM_006065 | 629.067   | 863.695   | NM_003301 | 686.6     | 1397.432  |
| M12783    | 4003.996  | 5465.938  | NM_014339 | 19374.705 | 22444.475 | NM_000955 | 725.519   | 865.467   |
| AK091535  | 717.2     | 1117.574  | NM_001495 | 1242.741  | 1079.014  | U27768    | 634.792   | 932.414   |
| AF085357  | 10240.778 | 7532.625  | NM_002288 | 1126.592  | 1716.753  | NM_001742 | 198.168   | 1042.449  |
| NM_003841 | 4768.078  | 3717.622  | NM_004416 | 12929.467 | 7222.542  | AF305550  | 1723.114  | 2035.604  |
| NM_004633 | 438.124   | 967.426   | NM_000628 | 7760.202  | 10623.085 | U66582    | 1576.439  | 1795.254  |
| X01394    | 44907.824 | 42282.961 | NM_000325 | 10884.032 | 18476.111 | S73288    | 302.792   | 450.902   |
| NM_000041 | 25822.555 | 22330.889 | AF015041  | 1807.935  | 2927.558  | NM_006195 | 1949.633  | 2041.301  |
| NM_002984 | 2271.623  | 1962.311  | NM_002363 | 753.325   | 1121.761  | NM_003812 | 236.54    | 306.92    |
| AF317425  | 3622.331  | 3453.3    | AK000184  | 951.418   | 1466.742  | NM_014065 | 851.038   | 717.919   |
| NM_018002 | 3147.558  | 2884.614  | AF055020  | 4991.451  | 9111.804  | NM_001695 | 942.841   | 697.674   |
| AK024821  | 14042.241 | 15577.005 | NM_006986 | 3500.226  | 6275.399  | NM_002248 | 418.54    | 311.933   |
| AB002340  | 2444.758  | 2633.544  | AF272043  | 8445.674  | 12760.326 | NM_012281 | 803.052   | 618.065   |
| NM_000224 | 2545.215  | 2360.634  | NM_002587 | 13711.69  | 22257.141 | AK025772  | 1572.72   | 1820.257  |
| NM_014328 | 12285.752 | 14049.498 | NM_002238 | 2257.342  | 3606.757  | NM_005505 | 784.051   | 866.363   |
| NM_006414 | 9077.305  | 10227.371 | NM_004868 | 1250.904  | 1763.221  | NM_152747 | 858.66    | 987.394   |
| NM_014322 | 1095.049  | 2345.612  | NM_004669 | 1367.951  | 2320.396  | NM_017415 | 761.923   | 1122.163  |
| NM_004122 | 2776.836  | 2629.297  | NM_007028 | 11072.31  | 17585.791 | NM_001667 | 15820.158 | 13896.403 |
| NM_002928 | 3496.146  | 3663.508  | AF131781  | 8010.473  | 6600.606  | AB046834  | 348.398   | 384.58    |
| NM_00016C | 1866.274  | 2071.919  | NM_006516 | 15624.695 | 16076.886 | AB029033  | 2856.274  | 2078.616  |
| NM_003301 | 813.758   | 989.561   | NM_015865 | 777.753   | 1099.664  | AF091034  | 2278.191  | 2151.087  |
| NM_000955 | 1288.085  | 1336.556  | NM_003055 | 8216.987  | 11246.465 | NM_005301 | 8350.912  | 5156.104  |
| U27768    | 1095.954  | 1086.777  | NM_005075 | 402.595   | 833.753   | NM_004167 | 383.526   | 165.938   |
| AF305550  | 6588.758  | 7200.124  | NM_006841 | 636.54    | 1048.932  | NM_016653 | 2661.072  | 2662.58   |
| U66582    | 9844.909  | 11199.981 | NM_002414 | 64756.332 | 67498.406 | AB035124  | 3709.212  | 3639.529  |
| NM_006195 | 3545.15   | 3875.211  | NM_000355 | 1524.073  | 2291.995  | AF060170  | 715.505   | 1155.31   |
| NM_003812 | 931.013   | 668.026   | AL133580  | 18978.631 | 17991.725 | NM_016602 | 1956.286  | 3124.537  |
| NM_014065 | 2429.733  | 2614.844  | NM_005451 | 2239.01   | 2702.93   | NM_004405 | 6267.644  | 6373.489  |
| NM_001695 | 5014.717  | 5595.917  | NM_007172 | 3966.889  | 4031.476  | AK023397  | 1153.758  | 1204.827  |
| NM_002248 | 4646.691  | 4624.987  | NM_006152 | 5469.042  | 7219.551  | NM_001725 | 1049.447  | 1094.582  |
| NM_012281 | 2454.698  | 1936.117  | NM_013333 | 17474.141 | 35365.391 | NM_004075 | 2847.732  | 3829.803  |
| AK025772  | 3389.949  | 5006.321  | NM_002333 | 3322.506  | 6913.338  | NM_002996 | 534.43    | 823.152   |
| NM_005505 | 911.842   | 1071.491  | NM_00340C | 8055.212  | 8403.147  | NM_000383 | 682.764   | 553.041   |
| NM_152747 | 1627.732  | 2266.604  | NM_006705 | 2978.471  | 3363.65   | NM_006875 | 1064.788  | 1828.403  |
| NM_017415 | 1366.712  | 1842.539  | NM_014439 | 1407.935  | 1606.407  | D87119    | 1498.428  | 1318.387  |
| NM_001667 | 27816.84  | 27774.578 | NM_005582 | 919.478   | 936.817   | AL050040  | 296.365   | 147.774   |
| AB046834  | 929.948   | 974.611   | NM_012266 | 5884.617  | 6395.534  | NM_006556 | 5268.237  | 4847.313  |
| AB029033  | 6638.06   | 7535.974  | NM_004559 | 2305.206  | 2230.11   | AL133066  | 387.207   | 446.797   |
| AF091034  | 4420.836  | 5285.643  | X56692    | 5105.034  | 5364.816  | AF264717  | 1414.705  | 1262.877  |
| NM_005301 | 20539.514 | 18986.695 | NM_01460C | 1147.307  | 2000.011  | NM_01226C | 4634.525  | 4815.705  |
| NM_016653 | 5236.262  | 5334.202  | NM_016733 | 1809.969  | 2728.553  | NM_001141 | 3352.661  | 3807.736  |
| AB035124  | 8032.378  | 9188.518  | AF181994  | 2476.214  | 3719.693  | NM_000018 | 6420.615  | 6948.428  |
| AF060170  | 1117.971  | 1403.632  | NM_018962 | 1594.343  | 2643.774  | AB028992  | 410.354   | 665.907   |
| NM_016602 | 974.655   | 1111.664  | AF125100  | 2815.448  | 4368.201  | NM_018475 | 6390.097  | 5417.537  |
| NM_004405 | 12899.156 | 10587.469 | NM_006114 | 13934.888 | 16770.318 | NM_014362 | 2776.43   | 2765.969  |
| AK023397  | 3092.351  | 3415.811  | X82693    | 16174.835 | 19910.66  | NM_018308 | 1063.525  | 829.058   |
| NM_001725 | 2822.621  | 4114.83   | NM_007176 | 16781.23  | 18553.973 | NM_001832 | 7534.112  | 5901.538  |
| NM_004075 | 9998.461  | 10244.203 | AF317058  | 771.977   | 774.921   | NM_017774 | 13614.911 | 12814.521 |
| NM_002996 | 816.366   | 1268.852  | M22538    | 42805.391 | 40915.59  | AB037716  | 2095.348  | 1784.06   |
| NM_000383 | 1393.021  | 1143.036  | NM_006028 | 1099.505  | 1121.083  | NM_004827 | 872.574   | 1152.67   |
| NM_006875 | 2503.917  | 3239.073  | NM_014904 | 843.287   | 712.813   | NM_001926 | 215.024   | 429.254   |
| D87119    | 4215.874  | 3405.473  | AL137576  | 7083.195  | 4859.82   | NM_016297 | 1905.168  | 2611.892  |

|           |           |           |           |           |           |           |           |           |
|-----------|-----------|-----------|-----------|-----------|-----------|-----------|-----------|-----------|
| AL050040  | 1191.862  | 966.174   | NM_018358 | 4625.29   | 4174.862  | NM_001752 | 2117.57   | 1849.519  |
| NM_006556 | 13953.196 | 15432.281 | NM_016321 | 617.7     | 314.216   | BC003406  | 1334.15   | 1825.293  |
| AL133066  | 681.776   | 895.359   | NM_005060 | 1438.08   | 1213.161  | AL137672  | 451.607   | 544.352   |
| AF264717  | 2398.329  | 2413.671  | NM_005437 | 4855.037  | 4570.034  | X64177    | 788.044   | 683.639   |
| NM_012260 | 6498.396  | 9765.072  | AK022417  | 1420.317  | 1317.447  | NM_015994 | 5719.059  | 5785.708  |
| NM_001141 | 7212.979  | 6708.971  | U50534    | 797.56    | 599.091   | NM_018476 | 17876.363 | 11873.029 |
| NM_000018 | 13093.688 | 13551.6   | NM_014824 | 1399.073  | 1352.971  | AF220492  | 4089.374  | 3839.461  |
| AB028992  | 2529.083  | 2430.054  | NM_014504 | 1592.4    | 945.978   | X89671    | 1559.65   | 1638.42   |
| NM_018479 | 14410.694 | 15087.118 | NM_014408 | 15491.912 | 16682.744 | NM_014941 | 2073.346  | 1238.541  |
| NM_014362 | 5336.005  | 7557.09   | NM_014741 | 4014.764  | 5135.81   | NM_018372 | 2284.413  | 2621.54   |
| NM_018308 | 2544.014  | 2209.653  | AF212247  | 4876.583  | 4733.582  | NM_013253 | 957.281   | 1069.447  |
| NM_001832 | 13547.642 | 12711.242 | AF161407  | 16964.512 | 12438.182 | NM_005895 | 2722.931  | 2933.697  |
| NM_017774 | 20477.77  | 22913.049 | NM_014738 | 3450.763  | 2838.057  | D82345    | 11573.488 | 9409.536  |
| AB037716  | 3635.446  | 4245.781  | NM_016406 | 3527.773  | 2059.611  | NM_003814 | 1638.78   | 2333.455  |
| NM_004827 | 800.266   | 858.845   | NM_018080 | 8370.11   | 6819.875  | NM_002968 | 763.505   | 962.524   |
| NM_001926 | 1259.161  | 1430.273  | AF174605  | 4852.877  | 3492.961  | AB032956  | 427.187   | 325.972   |
| NM_016297 | 4091.47   | 3627.187  | NM_014453 | 15586.803 | 14615.669 | NM_015957 | 236.298   | 150.752   |
| NM_001752 | 4411.048  | 3893.946  | NM_005713 | 1858.845  | 1429.519  | NM_000262 | 384.512   | 201.344   |
| BC003406  | 2836.568  | 4122.993  | AK023553  | 2613.723  | 1175.352  | NM_017831 | 1210.337  | 946.624   |
| AL137672  | 1151.188  | 745.951   | AF272043  | 5761.908  | 4472.152  | AK024393  | 635.417   | 1390.048  |
| X64177    | 1657.92   | 1432.94   | NM_002587 | 7830.279  | 6591.973  | AK022537  | 7349.489  | 10884.032 |
| NM_015994 | 12274.089 | 13034.746 | NM_002238 | 1532.783  | 1402.378  | AF116632  | 623.201   | 672.554   |
| NM_018476 | 27249.018 | 25785.023 | NM_004868 | 924.008   | 463.751   | AF064597  | 730.111   | 825.166   |
| AF220492  | 11482.573 | 9483.033  | NM_004669 | 907.744   | 729.449   | NM_006345 | 3492.088  | 2548.935  |
| X89671    | 3039.501  | 3773.641  | NM_007028 | 8084.802  | 5472.04   | NM_003255 | 10488.086 | 8714.139  |
| NM_014941 | 5010.889  | 4715.806  | AF130728  | 1235.759  | 764.791   | AL080128  | 1782.965  | 1713.12   |
| NM_018372 | 8489.162  | 8377.107  | NM_001289 | 15741.008 | 8179.991  | AB037787  | 3683.691  | 2535.027  |
| NM_013253 | 2202.076  | 2340.724  | X07696    | 2558.654  | 1545.208  | AB033072  | 490.034   | 493.954   |
| NM_005895 | 6013.005  | 6973.618  | AA481015  | 758.573   | 599.917   | AB040892  | 951.114   | 985.562   |
| D82345    | 18861.322 | 19258.432 | AI925826  | 3967.144  | 3989.275  | NM_001822 | 1406.787  | 908.945   |
| NM_003814 | 3140.887  | 4216.194  | U04209    | 6193.632  | 3264.789  | NM_018268 | 12453.091 | 10310.319 |
| NM_002968 | 905.101   | 898.862   | AI393201  | 4282.258  | 5098.173  | NM_014386 | 598.075   | 783.101   |
| AL137698  | 800.781   | 523.438   | M34664    | 60427.969 | 64515.457 | NM_018110 | 1450.563  | 868.191   |
| NM_000262 | 1050.372  | 1348.736  | Z15108    | 970.429   | 829.252   | AF312678  | 393.585   | 317.112   |
| AK022537  | 14773.973 | 20645.211 | M55284    | 3160.047  | 3173.184  | NM_006253 | 6742.357  | 2783.899  |
| AF116632  | 1627.253  | 1313.727  | AA001218  | 440.244   | 798.197   | NM_003866 | 458.549   | 376.03    |
| AF064597  | 1658.942  | 1654.986  | AA679391  | 1854.019  | 1700.281  | NM_018262 | 772.508   | 1016.885  |
| NM_006345 | 5919.562  | 6224.609  | BG682146  | 2720.765  | 1959.912  | NM_003220 | 1590.49   | 1416.78   |
| NM_003255 | 21175.002 | 20488.279 | NM_012266 | 5019.407  | 4716.219  | AF009674  | 4650.729  | 5778.589  |
| AL080128  | 4430.332  | 4275.175  | NM_004559 | 1988.434  | 2175.491  | NM_000360 | 1279.252  | 3944.489  |
| AB037787  | 8704.351  | 6949.545  | X56692    | 4568.898  | 4982.52   | NM_000844 | 429.563   | 651.674   |
| AB033072  | 969.521   | 1398.961  | NM_014278 | 2138.893  | 1201.04   | NM_005510 | 4690.373  | 6185.964  |
| AB040892  | 2380.964  | 1777.469  | NM_000734 | 7838.104  | 4427.392  | Z36817    | 659.433   | 732.202   |
| NM_001822 | 2681.447  | 2893.113  | NM_012331 | 1923.443  | 1074.32   | NM_014505 | 22779.441 | 24093.445 |
| NM_018268 | 18786.631 | 17347.389 | NM_006644 | 4057.563  | 2470.119  | NM_004209 | 4541.636  | 5192.229  |
| AF230904  | 15145.807 | 13826.903 | NM_006583 | 58899.988 | 1203.584  | NM_016162 | 1118.488  | 829.099   |
| NM_017596 | 14272.567 | 14664.615 | NM_003974 | 5583.809  | 3038.697  | AF130056  | 802.491   | 765.384   |
| AL157480  | 6298.651  | 5465.031  | NM_014339 | 14337.533 | 10381.047 | NM_002201 | 35318.316 | 23612.072 |
| NM_014386 | 1936.858  | 2306.912  | NM_001495 | 1228.902  | 998.702   | AK025047  | 1095.136  | 1042.618  |
| NM_018110 | 3892.294  | 3079.768  | NM_002288 | 877.924   | 1157.215  | NM_006806 | 1662.592  | 1716.773  |
| NM_006253 | 14984.452 | 10459.502 | NM_004416 | 10057.674 | 5202.395  | NM_006763 | 1771.587  | 1189.426  |
| NM_003866 | 660.937   | 893.083   | NM_000628 | 7430.851  | 6754.279  | NM_006119 | 1792.354  | 1575.031  |
| NM_018262 | 1606.159  | 1998.151  | AB005216  | 993.153   | 1356.465  | NM_004465 | 826.295   | 608.868   |



|           |           |           |           |           |           |           |           |           |
|-----------|-----------|-----------|-----------|-----------|-----------|-----------|-----------|-----------|
| NM_00036C | 2038.041  | 2965.678  | NM_00032E | 10062.778 | 10110.563 | AK026927  | 2310.33   | 1998.389  |
| NM_000844 | 2062.083  | 1990.867  | AF015041  | 1764.144  | 1459.767  | BE884341  | 1859.297  | 1797.101  |
| NM_00551C | 9749.798  | 10168.105 | NM_002363 | 593.052   | 680.776   | AF231997  | 1251.235  | 877.552   |
| Z36817    | 1088.664  | 1024.679  | AK000184  | 489.573   | 851.696   | NM_00712E | 1513.738  | 1384.66   |
| NM_01450E | 29319.824 | 34209.934 | AF055020  | 6099.512  | 6278.866  | NM_00259E | 3707.274  | 3233.28   |
| NM_00420E | 11859.447 | 14787.282 | NM_00698E | 2940.224  | 2998.814  | NM_020184 | 592.86    | 542.951   |
| NM_01616E | 3724.032  | 4032.73   | NM_014904 | 591.742   | 746.527   | NM_00581E | 1630.664  | 2197.975  |
| AF130056  | 2928.845  | 3215.542  | AL137576  | 5984.344  | 6267.864  | NM_00122E | 1202.587  | 1855.687  |
| NM_002201 | 55764.68  | 56256.254 | NM_01835E | 4205.053  | 4974.455  | NM_01491E | 239.12    | 811.478   |
| AK025047  | 2752.757  | 2749.551  | NM_016321 | 444.206   | 505.6     | NM_00025C | 777.924   | 1521.172  |
| NM_00680E | 4596.898  | 5001.616  | AF131781  | 5770.91   | 3692.506  | NM_018147 | 7972.271  | 16024.256 |
| NM_00676E | 3930.945  | 3700.046  | NM_00651E | 13246.709 | 8180.354  | NM_018967 | 2314.184  | 3234.123  |
| NM_006119 | 3191.922  | 3248.519  | NM_01586E | 496.674   | 370.954   | AJ278018  | 517.177   | 808.556   |
| NM_00446E | 1128.94   | 1516.254  | NM_00305E | 5603.486  | 3692.993  | NM_00185C | 939.986   | 1611.607  |
| AK026927  | 4227.157  | 4645.579  | NM_002414 | 56484.473 | 32611.123 | NM_00216C | 1568.866  | 2368.083  |
| NM_001761 | 10363.051 | 8847.261  | NM_00035E | 1024.334  | 898.405   | NM_00567E | 2092.878  | 2229.94   |
| BE884341  | 4573.462  | 4443.865  | AL133580  | 12990.257 | 8252.117  | NM_00277C | 1265.73   | 1524.842  |
| AF231997  | 3336.553  | 2419.782  | NM_01466E | 6531.438  | 6103.026  | BC030636  | 1240.237  | 1051.761  |
| NM_00712E | 3397.24   | 3038.035  | NM_005451 | 1916.491  | 1908.174  | NM_006587 | 244.89    | 359.397   |
| NM_00259E | 7836.799  | 7400.77   | NM_00717E | 2843.548  | 3088.432  | NM_00281E | 3028.182  | 2976.743  |
| NM_020184 | 1454.119  | 1170.862  | NM_00615E | 3490.759  | 3617.976  | NM_02036E | 1615.446  | 2033.433  |
| NM_00581E | 2985.432  | 4388.292  | NM_01333E | 13371.278 | 16558.73  | NM_00398E | 1075.884  | 1209.928  |
| NM_00122E | 1835.034  | 2033.449  | NM_00233E | 2994.297  | 2596.813  | NM_00207E | 5076.82   | 6960.28   |
| NM_01491E | 560.091   | 1044.597  | NM_00340C | 11421.611 | 9960.602  | NM_00211E | 3526.177  | 3741.634  |
| NM_00025C | 1378.48   | 1233.284  | NM_00670E | 3759.551  | 3505.63   | NM_004121 | 1281.514  | 1583.295  |
| NM_018147 | 12382.831 | 11102.348 | NM_01443E | 1468.174  | 1336.33   | AY007092  | 2328.151  | 3588.425  |
| NM_018967 | 3254.051  | 3521.972  | NM_00558E | 1669.2    | 1247.083  | NM_00190E | 1851.218  | 3212.049  |
| AJ278018  | 402.188   | 761.988   | AF174605  | 4275.167  | 4747.455  | AL137605  | 26421.521 | 24199.891 |
| NM_00185C | 1119.638  | 1391.408  | AL050107  | 509.404   | 777.358   | NM_016261 | 1150.065  | 2048.559  |
| NM_00567E | 3636.679  | 3303.448  | NM_01445E | 14182.201 | 16148.669 | NM_00651E | 1063.788  | 1372.491  |
| NM_00558E | 2060.923  | 2316.171  | NM_00571E | 1898.627  | 1819.555  | NM_01207E | 2438.112  | 3586.014  |
| NM_00277C | 2839.801  | 2365.107  | AK023553  | 2684.773  | 1972.736  | D14678    | 5952.268  | 8145.176  |
| BC030636  | 2781.577  | 2822.052  | NM_01460C | 1160.972  | 852.881   | NM_016221 | 2397.829  | 3030.514  |
| D21064    | 813.109   | 675.304   | NM_01673E | 1452.229  | 1158.035  | NM_01811E | 1485.287  | 1651.531  |
| NM_00281E | 5737.754  | 7147.823  | AF181994  | 2020.01   | 1521.105  | NM_005187 | 1260.917  | 1277.889  |
| NM_02036E | 4650.083  | 7143.45   | NM_01896E | 1672.53   | 1638.675  | U73377    | 1859.423  | 2016.848  |
| NM_00207E | 9836.075  | 11781.316 | NM_006114 | 10686.945 | 8549.829  | NM_00219E | 3568.916  | 6291.617  |
| NM_00211E | 6295.382  | 3983.295  | X82693    | 11878.25  | 8652.862  | BC005219  | 4778.257  | 6708.506  |
| NM_004121 | 2817.623  | 2526.265  | NM_00717E | 15501.465 | 16154.82  | NM_00426E | 1419.486  | 2029.767  |
| AY007092  | 3456.788  | 3481.855  | NM_00272E | 2138.438  | 2345.723  | NM_00154E | 316.915   | 464.984   |
| NM_00190E | 3055.692  | 4247.225  | AF317058  | 356.854   | 962.883   | NM_00666E | 4488.062  | 6520.894  |
| AL137605  | 37243.941 | 39553.867 | NM_00602E | 783.056   | 1035.299  | NM_004031 | 1065.267  | 1188.537  |
| NM_016261 | 1826.806  | 2487.785  | NM_012297 | 15168.013 | 14228.051 | NM_004514 | 3521.151  | 3238.873  |
| NM_00651E | 1703.05   | 2577.228  | AB007925  | 41085.445 | 40623.496 | NM_00616E | 892.135   | 1025.497  |
| NM_004607 | 62859.242 | 60081.316 | NM_01818C | 740.904   | 732.512   | NM_00127E | 9884.146  | 7576.757  |
| NM_01207E | 1017.183  | 1070.004  | NM_000361 | 7757.294  | 7988.544  | NM_01630E | 7518.023  | 8955.511  |
| D14678    | 11167.047 | 9320.545  | NM_00247E | 45930.188 | 44930.512 | NM_00619E | 32011.436 | 29748.734 |
| NM_016221 | 3495.093  | 3613.67   | NM_00383E | 8122.014  | 7602.662  | AV733560  | 1403.91   | 1784.505  |
| NM_01811E | 2064.355  | 2025.88   | NM_017987 | 454.459   | 371.831   | D17129    | 40187.336 | 34130.047 |
| NM_005187 | 1817.084  | 1418.606  | NM_014824 | 1205.888  | 1088.243  | NM_003091 | 15780.525 | 17995.01  |
| U73377    | 2754.229  | 2876.371  | NM_014504 | 1654.604  | 1297.407  | NM_004247 | 2296.323  | 2833.76   |
| NM_00219E | 4210.24   | 4884.37   | NM_01440E | 13796.66  | 25397.598 | NM_01772E | 2606.63   | 3170.042  |
| BC005219  | 6841.405  | 6155.554  | NM_014741 | 3360.078  | 5190.322  | AL137730  | 2957.898  | 3511.403  |

|           |           |           |           |           |           |           |           |           |
|-----------|-----------|-----------|-----------|-----------|-----------|-----------|-----------|-----------|
| NM_00426E | 2300.478  | 1846.036  | AF212247  | 4435.267  | 5795.676  | NM_00450C | 28330.326 | 26279.629 |
| NM_00666E | 6194.449  | 5409.004  | AF161407  | 18300.988 | 18808.033 | AL137681  | 2306.016  | 2844.308  |
| NM_004031 | 1837.008  | 1906.15   | NM_01473E | 3077.57   | 3426.907  | NM_002157 | 49600.035 | 63388.363 |
| NM_004514 | 5742.536  | 5523.091  | NM_01808C | 8636.401  | 7111.019  | NM_00409E | 6730.929  | 7151.964  |
| NM_00616E | 1841.99   | 2134.732  | NM_007115 | 1167.084  | 1360.128  | NM_005147 | 2227.987  | 2398.52   |
| NM_00127E | 16114.576 | 13604.239 | NM_00461E | 834.907   | 1395.122  | NM_01466E | 1859.471  | 1417.505  |
| NM_01630E | 9669.056  | 11137.406 | NM_00436C | 1289.803  | 1444.076  | AK023609  | 1854.756  | 1940.403  |
| NM_00619E | 31829.537 | 35808.938 | NM_01769E | 4032.856  | 3699.698  | NM_01801E | 2939.358  | 4832.453  |
| AV733560  | 1329.999  | 1615.953  | NM_00397E | 3717.661  | 3923.326  | AK027220  | 2302.391  | 3747.47   |
| D17129    | 44665.152 | 46354.352 | NM_004834 | 5935.323  | 8750.306  | NM_018011 | 5915.825  | 7279.614  |
| NM_003091 | 27339.588 | 31118.934 | NM_00358C | 2116.792  | 1829.518  | AK022132  | 236.644   | 87.222    |
| NM_004247 | 5124.695  | 5241.651  | NM_00650E | 1580.701  | 905.696   | NM_00047E | 570.065   | 775.562   |
| NM_00450C | 41465.762 | 49765.164 | NM_00323E | 4232.287  | 3487.823  | AF132733  | 1374.615  | 1664.743  |
| NM_00327E | 10879.113 | 6751.625  | AB042562  | 1672.9    | 926.061   | NM_001071 | 28033.988 | 29580.557 |
| AL137681  | 3141.375  | 2647.128  | NM_01600E | 5332.687  | 5711.778  | NM_006187 | 1141.238  | 1482.71   |
| NM_002157 | 59977.551 | 61745.523 | NM_00237E | 1836.526  | 1839.263  | NM_020354 | 5928.485  | 8794.792  |
| NM_00409E | 12488.916 | 14239.386 | NM_00372E | 3356.041  | 6303.302  | AF202637  | 3675.128  | 2927.672  |
| NM_01436E | 635.562   | 914.921   | NM_017431 | 803.357   | 841.446   | NM_00002E | 26411.928 | 26148.77  |
| NM_005147 | 4218.194  | 4205.496  | NM_006097 | 8298.845  | 7790.39   | AB033016  | 4174.873  | 2921.595  |
| NM_01466E | 3794.687  | 3421.84   | NM_006113 | 2961.379  | 2659.438  | D87452    | 984.764   | 582.653   |
| AK023609  | 2754.141  | 2558.957  | NM_01531E | 15003.758 | 9602.204  | AB037864  | 1306.795  | 927.491   |
| NM_01801E | 3857.299  | 3442.046  | AK022287  | 10321.737 | 7391.815  | L26494    | 832.539   | 741.657   |
| AK027220  | 3715.056  | 4175.594  | NM_015897 | 3690.449  | 2512.589  | NM_00034E | 1026.28   | 1421.931  |
| NM_018011 | 7289.385  | 7156.229  | NM_00543E | 5694.234  | 9171.051  | BF382513  | 2081.485  | 1700.578  |
| AF132733  | 2374.582  | 2865.49   | AF177473  | 23340.395 | 26286.289 | AB020713  | 6740.95   | 5675.477  |
| NM_001071 | 45652.168 | 54646.086 | NM_00054E | 3616.212  | 4538.864  | AK025426  | 823.63    | 651.183   |
| NM_006187 | 2960.71   | 2430.332  | AB023223  | 818.858   | 1089.812  | NM_01655E | 3075.683  | 2043.743  |
| NM_020354 | 12580.746 | 10260.814 | AB018257  | 2831.667  | 2529.996  | NM_00714E | 3567.998  | 3376.438  |
| AF202637  | 7524.25   | 4709.298  | NM_00270E | 20685.221 | 20159.59  | AL133112  | 410.228   | 378.349   |
| NM_00002E | 50283.98  | 49898.172 | AK001059  | 1421.129  | 1686.954  | AF085877  | 475.081   | 600.807   |
| BF382513  | 3695.101  | 3758.999  | AK025133  | 6057.313  | 6206.244  | AK002078  | 1514.961  | 1979.201  |
| NM_01655E | 6584.543  | 6362.331  | AB020704  | 1447.704  | 1855.038  | AF085837  | 1118.855  | 985.071   |
| NM_00714E | 6920.698  | 6593.122  | NM_004087 | 4976.071  | 2325.166  | NM_016115 | 1905.865  | 1707.546  |
| AL133112  | 1124.829  | 880.468   | NM_01870C | 963.942   | 1679.046  | NM_01495C | 1719.606  | 1671.816  |
| AF085877  | 675.229   | 517.282   | NM_000119 | 4321.745  | 4745.085  | AL080180  | 437.522   | 452.326   |
| AK002078  | 2512.205  | 3020.225  | NM_00106E | 6712.539  | 7599.708  | X89067    | 486.276   | 440.973   |
| AF085837  | 2949.541  | 2023.637  | AK027100  | 1399.306  | 1264.572  | AF147376  | 1498.663  | 956.616   |
| AK023165  | 1245.245  | 2127.127  | AY010111  | 831.112   | 426.384   | AK027190  | 545.816   | 534.719   |
| NM_016115 | 3430.58   | 3848.047  | NM_00362E | 1737.106  | 923.398   | AL360136  | 791.904   | 571.104   |
| NM_01495C | 2696.287  | 2296.623  | AK021645  | 919.267   | 1162.794  | AF086259  | 557.034   | 370.118   |
| AL080180  | 926.384   | 1114.107  | NM_01333E | 2649.747  | 3752.937  | AF086369  | 438.89    | 266.311   |
| X89067    | 1382.914  | 1000.072  | NM_001491 | 1951.149  | 2354.314  | AF086328  | 1098.752  | 570.948   |
| AF147376  | 1481.909  | 1573.016  | AK026541  | 1561.059  | 2617.454  | AF086427  | 372.962   | 226.242   |
| AK027190  | 1690.264  | 1505.06   | NM_00589E | 18127.857 | 23195.65  | AK024196  | 360.199   | 222.716   |
| AL360136  | 1177.74   | 1353.363  | NM_01647E | 41632.445 | 25457.791 | AK001099  | 713.845   | 1679.821  |
| AF086259  | 1870.761  | 1668.96   | NM_01590E | 1027.307  | 754.734   | AK023753  | 1156.2    | 875.487   |
| AF086427  | 894.388   | 972.809   | NM_02015E | 2952.496  | 2593.222  | AF086441  | 4643.816  | 3171.019  |
| AK001099  | 1079.432  | 1178.062  | BE874471  | 4137.089  | 4185.982  | AK027255  | 374.213   | 344.881   |
| AK023753  | 1915.274  | 1890.349  | NM_006121 | 3611.295  | 3747.458  | NM_014117 | 1386.073  | 733.686   |
| NM_014117 | 2863.861  | 3520.966  | AK023520  | 5556.37   | 3934.333  | AF086087  | 4772.948  | 3893.137  |
| AF086087  | 8211.19   | 8025.981  | NM_00469E | 698.046   | 634.449   | AF075084  | 894.966   | 609.382   |
| AK000671  | 41375.73  | 39342.934 | NM_007211 | 10757.853 | 8026.203  | AK000671  | 17422.236 | 11893.722 |
| AK094020  | 640.843   | 947.076   | AB011152  | 1394.996  | 1550.143  | AL137425  | 299.769   | 303.366   |

|           |           |           |           |           |           |           |           |           |
|-----------|-----------|-----------|-----------|-----------|-----------|-----------|-----------|-----------|
| AL137425  | 1726.397  | 1366.994  | NM_014956 | 7486.369  | 6564.011  | AL157489  | 359.534   | 231.027   |
| AL137637  | 757.801   | 669.72    | AB014592  | 725.959   | 620.566   | AL390157  | 530.069   | 334.816   |
| AL359584  | 1221.884  | 937.524   | NM_016952 | 1679.287  | 1341.989  | AK021649  | 427.401   | 334.45    |
| AL137285  | 1253.231  | 1093.73   | NM_001654 | 3095.567  | 3000.236  | AK024874  | 480.584   | 591.603   |
| AL137456  | 1395.125  | 1523.493  | NM_007147 | 15553.987 | 21485.188 | AK021847  | 378.812   | 241.494   |
| AL157489  | 1608.026  | 1392.66   | X65463    | 2808.998  | 3845.476  | AK023086  | 2183.849  | 1545.998  |
| AL390157  | 952.747   | 993.158   | AK024418  | 2588.988  | 2719.795  | NM_017621 | 4481.555  | 3621.806  |
| AK021649  | 1128.573  | 1444.56   | NM_003367 | 3717.404  | 4230.385  | AK023574  | 515.766   | 473.249   |
| AF086071  | 832.195   | 666.699   | NM_005194 | 10613.203 | 10415.536 | AF083117  | 1040.187  | 698.665   |
| AK021847  | 703.454   | 716.909   | NM_012087 | 2095.265  | 2578.975  | AF131767  | 1883.634  | 1410.816  |
| AK023086  | 5549.675  | 4600.125  | AF165520  | 1027.427  | 774.68    | AF090920  | 745.427   | 677.189   |
| AF241534  | 10053.705 | 10423.565 | AK026072  | 724.369   | 480.522   | AK022058  | 312.498   | 192.287   |
| NM_017621 | 7010.432  | 5827.748  | NM_015679 | 4677.445  | 4376.776  | NM_018280 | 458.906   | 182.465   |
| AK023574  | 1553.782  | 889.421   | AF299118  | 60317.383 | 60859.445 | AK026503  | 578.013   | 472.583   |
| AF131767  | 2039.422  | 1761.008  | AK025353  | 15047.066 | 12566.679 | AK025522  | 8609.493  | 6470.772  |
| AK021907  | 2252.494  | 2082.156  | AK056896  | 23127.604 | 21588.754 | AK025464  | 44228.504 | 35675.348 |
| AK022029  | 1708.503  | 1410.391  | AK022763  | 22158.617 | 19162.773 | AL049962  | 2288.628  | 1452.896  |
| AK022320  | 978.633   | 1047.543  | AF288207  | 34322.898 | 27483.35  | NM_016941 | 1285.802  | 756.08    |
| AK022058  | 1090.599  | 995.133   | NM_001001 | 52285.219 | 39958.969 | NM_020408 | 425.501   | 397.452   |
| AK026503  | 1647.32   | 1393.316  | AK026992  | 3326.69   | 6854.881  | NM_004988 | 4683.361  | 1995.044  |
| AK026671  | 1683.021  | 1491.24   | X81895    | 455.684   | 817.76    | AL080151  | 1077.263  | 694.663   |
| AK025522  | 17970.375 | 18547.08  | NM_004541 | 31956.555 | 49378.773 | AK024127  | 387.259   | 285.944   |
| AK025464  | 57065.992 | 50512.324 | NM_006830 | 50867.113 | 54302.449 | AK024243  | 254.453   | 201.484   |
| AL049962  | 5324.384  | 4421.143  | AK026414  | 9833.959  | 9657.635  | AK021574  | 998.034   | 651.502   |
| NM_016941 | 3421.265  | 2908.238  | D17297    | 769.847   | 806.606   | AF119911  | 5803.853  | 5157.771  |
| NM_020408 | 1838.621  | 2189.564  | NM_004074 | 28209.834 | 24180.521 | AF116656  | 2869.801  | 2668.651  |
| NM_004988 | 17351.965 | 13621.247 | NM_002626 | 32090.305 | 25173.479 | NM_001050 | 1936.379  | 1308.372  |
| AL080151  | 2103.566  | 1754.266  | NM_018436 | 14712.807 | 9665.545  | AF132206  | 714.784   | 558.451   |
| AL050085  | 781.75    | 683.736   | AF157115  | 6457.044  | 3712.76   | AJ001869  | 3108.231  | 2086.851  |
| AK001308  | 1426.132  | 5003.612  | AJ223353  | 4829.753  | 4139.85   | NM_005295 | 490.536   | 473.918   |
| AK024127  | 2512.977  | 3280.044  | NM_012241 | 4998.184  | 4820.953  | NM_020213 | 2128.403  | 1053.618  |
| AK024243  | 1328.511  | 814.476   | AF250288  | 1114.451  | 944.612   | D17267    | 2401.538  | 1524.534  |
| AK021574  | 3761.549  | 2525.216  | NM_018486 | 1695.491  | 2079.282  | AB040944  | 442.466   | 321.945   |
| AF119911  | 12976.013 | 11627.142 | NM_005324 | 24940.996 | 16928.438 | NM_018145 | 1092.333  | 615.919   |
| AF116656  | 5932.689  | 5994.784  | AL080201  | 17602.529 | 15118.236 | AK024326  | 703.266   | 437.624   |
| NM_001050 | 3803.32   | 3398.739  | NM_015363 | 938.107   | 698.607   | U61088    | 330.743   | 163.074   |
| AF132206  | 1980.489  | 1736.245  | NM_001806 | 8031.735  | 7618.002  | AL137345  | 1443.552  | 1551.825  |
| AJ001869  | 5130.324  | 3458.541  | AB040941  | 4716.385  | 4086.365  | AK000967  | 1045.041  | 866.821   |
| NM_005295 | 2149.537  | 2255.989  | AL137241  | 830.342   | 858.934   | AK021583  | 1484.793  | 961.482   |
| NM_020213 | 10013.544 | 8254.267  | AB037742  | 1246.238  | 1386.831  | AL049281  | 739.749   | 511.168   |
| D17267    | 13729.521 | 14554.911 | AK023754  | 794.158   | 1990.742  | NM_001208 | 10748.53  | 6541.724  |
| AJ238214  | 620.411   | 813.687   | AK021689  | 424.13    | 994.927   | AL050061  | 545       | 498.95    |
| AB040944  | 2392.912  | 1893.758  | AK024737  | 1718      | 2819.611  | AL050206  | 401.535   | 392.727   |
| NM_018145 | 4100.716  | 3909.586  | AB007890  | 8940.518  | 9520.805  | AK026898  | 1799.82   | 976.452   |
| AK024326  | 1785.346  | 1984.366  | AF070591  | 717.275   | 800.045   | NM_006637 | 556.184   | 471.154   |
| U61088    | 1134.289  | 1195.083  | AF286160  | 5867.488  | 5743.869  | AK022419  | 536.537   | 454.926   |
| AL137345  | 2737.859  | 2969.171  | NM_020411 | 565.918   | 363.036   | NM_014624 | 502.232   | 262.009   |
| AK000967  | 3321.838  | 2884.272  | AF275800  | 1994.543  | 1864.838  | NM_013936 | 465.389   | 498.96    |
| AK021583  | 3784.724  | 2893.142  | AL359605  | 2730.335  | 2017.921  | AF086145  | 416.695   | 431.444   |
| AL137442  | 4763.821  | 3890.474  | AB020633  | 4227.91   | 2226.309  | BC002538  | 669.616   | 604.155   |
| AL049281  | 2216.28   | 5179.551  | AK025445  | 9032.6    | 5561.865  | NM_017836 | 830.554   | 640.366   |
| NM_001208 | 29111.891 | 25007.861 | AL357200  | 2802.004  | 2454.227  | AK096584  | 12240.663 | 5215.152  |
| AL050061  | 1496.658  | 1242.891  | NM_017727 | 12932.783 | 14662.458 | AF076617  | 38956.078 | 31863.383 |

|           |           |           |           |           |           |           |           |           |
|-----------|-----------|-----------|-----------|-----------|-----------|-----------|-----------|-----------|
| AL050206  | 1533.446  | 1384.956  | NM_018319 | 4647.467  | 5333.981  | M91159    | 364       | 253.824   |
| AK026898  | 3888.803  | 2939.015  | AL359559  | 1210.893  | 864.215   | L19366    | 1040.753  | 938.424   |
| NM_006637 | 465.228   | 1016.891  | AK021714  | 1488.291  | 1634.943  | X07696    | 2193.15   | 3373.863  |
| AK022419  | 1008.561  | 771.588   | NM_020314 | 7256.389  | 6740.287  | AI925826  | 1976.065  | 2287.509  |
| AJ251832  | 705.412   | 745.12    | AK022972  | 4061.84   | 2615.933  | U04209    | 2156.277  | 2784.511  |
| NM_014624 | 1016.533  | 746.994   | AK025996  | 1825.133  | 1730.283  | AI393201  | 2320.805  | 2388.348  |
| NM_013936 | 1787.115  | 1766.476  | AF088015  | 1530.007  | 706.04    | M34664    | 39788.641 | 43461.797 |
| AF086145  | 1509.338  | 1421.097  | AK026702  | 525.545   | 751.701   | M55284    | 1251.861  | 1334.314  |
| BC002538  | 3169.258  | 3990.06   | AF086168  | 892.262   | 1029.033  | AA679391  | 991.672   | 1250.438  |
| AK022355  | 1722.18   | 4694.294  | AF007132  | 868.089   | 1030.084  | BG682146  | 1465.066  | 1613.897  |
| NM_017836 | 3237.898  | 5100.119  | NM_004869 | 6565.388  | 12338.986 | NM_005060 | 898.161   | 882.36    |
| AK096584  | 15320.481 | 12411.357 | AF136408  | 791.04    | 1288.077  | NM_005437 | 3056.311  | 2416.626  |
| Z29070    | 1356.252  | 1235.135  | AL110203  | 552.62    | 889.226   | SR7       | 3766.136  | 25702.904 |
| AL078636  | 2886.282  | 2492.411  | AJ011602  | 529.198   | 495.01    | SR9       | 13796.456 | 2387.287  |
| S72917    | 752.452   | 741.225   | AJ002787  | 5483.547  | 3642.652  | CY3Cy5    | 1701.689  | 152.459   |
| AF076617  | 63225.551 | 57223.125 | Z70764    | 2050.212  | 1927.117  | NM_014336 | 12939.969 | 15448.336 |
| NM_014392 | 5747.886  | 4034.887  | AL049252  | 382.687   | 964.983   | NM_001495 | 610.907   | 1196.841  |
| AK023291  | 8784.957  | 10642.355 | Z83948    | 1090.151  | 1458.971  | NM_002288 | 559.867   | 940.592   |
| AK001117  | 1778.441  | 3657.634  | M25785    | 1505.458  | 1637.519  | NM_004416 | 2193.462  | 5285.059  |
| CY3Cy5    | 7306.865  | 384.287   | M32443    | 4791.468  | 3765.824  | NM_000628 | 3356.437  | 5523.16   |
| AI925826  | 6065.028  | 3379.019  | M73048    | 709.243   | 481.725   | AB005216  | 495.082   | 782.5     |
| U04209    | 4960.887  | 3309.692  | D16908    | 733.235   | 821.644   | NM_000325 | 5695.711  | 7320.767  |
| Z15108    | 952.515   | 705.181   | D16477    | 1057.684  | 1023.76   | AF015041  | 566.637   | 666.647   |
| M55284    | 3358.368  | 3870.766  | AK024759  | 933.164   | 615.398   | AF055020  | 1969.765  | 1785.661  |
| AA001218  | 377.969   | 475.629   | AK026808  | 462.746   | 507.996   | NM_006986 | 1553.871  | 1826.045  |
| AA679391  | 1584.667  | 1615.212  | AK022309  | 1079.825  | 835.906   | AF272043  | 4318.235  | 4439.191  |
| BG682146  | 2426.567  | 2935.806  | AK000063  | 1030.163  | 482.762   | NM_002587 | 5715.547  | 6000.187  |
| NM_005060 | 1588.041  | 1544.378  | AK000949  | 1249.86   | 782.456   | NM_002238 | 944.028   | 1165.8    |
| NM_005437 | 8604.694  | 7760.454  | AK027068  | 478.241   | 428.633   | NM_004868 | 511.393   | 302.255   |
| SR5       | 9002.629  | 8270.007  | AK000165  | 509.168   | 358.373   | AF130728  | 723.181   | 416.86    |
| SR7       | 7077.356  | 51809.375 | AK000974  | 2004.16   | 1404.571  | AL133580  | 10302.55  | 17240.133 |
| SR9       | 27651.969 | 5320.328  | AK025051  | 1002.175  | 1219.776  | NM_014666 | 6225.342  | 7116.525  |
| CY3Cy5    | 5101.14   | 220.033   | AK024553  | 37187.719 | 43452.078 | NM_005451 | 992.431   | 1712.026  |
| NM_003974 | 8029.369  | 7239.028  | AK024930  | 855.525   | 662.059   | NM_007172 | 1799.006  | 2878.424  |
| AB005216  | 1600.45   | 1083.817  | AF143879  | 5338.445  | 6049.299  | NM_006152 | 1198.994  | 1591.175  |
| NM_000325 | 10420.073 | 8591.035  | AK024621  | 19658.246 | 18150.121 | NM_013333 | 10489.959 | 11986.648 |
| AF055020  | 3477.525  | 2978.299  | AL157449  | 14828.104 | 13745.537 | NM_002333 | 1425.245  | 1530.258  |
| NM_006986 | 4319.605  | 3825.508  | AL117582  | 603.921   | 801.218   | NM_003400 | 2916.771  | 5027.067  |
| AF272043  | 10529.646 | 9898.738  | AK025525  | 1552.337  | 1967.581  | NM_006705 | 1012.544  | 986.513   |
| NM_002587 | 8117.816  | 7069.13   | NM_018233 | 18497.227 | 13492.551 | NM_014436 | 468.958   | 555.231   |
| NM_002238 | 2707.837  | 2220.864  | AV740891  | 2062.715  | 1425.478  | NM_012266 | 3252.753  | 3647.651  |
| NM_004868 | 1075.195  | 950.335   | AF090916  | 1245.587  | 427.901   | NM_004556 | 1334.078  | 1448.032  |
| NM_007028 | 13137.626 | 12147.142 | AF086214  | 355.529   | 1230.372  | X56692    | 2706.222  | 2217.012  |
| AF130728  | 1279.376  | 1279.54   | AK026860  | 7166.082  | 16411.281 | NM_014278 | 1246.794  | 1273.609  |
| NM_002414 | 60579.871 | 62921.512 | AK024211  | 1577.374  | 1647.828  | NM_000734 | 6526.812  | 4404.234  |
| NM_000355 | 759.691   | 899.728   | NM_014898 | 1870.564  | 2073.588  | NM_006644 | 4809.742  | 2730.104  |
| NM_014666 | 15060.136 | 24143.646 | AK023435  | 3245.874  | 2045.184  | NM_006583 | 18044.74  | 613.787   |
| NM_005451 | 1929.539  | 2344.435  | AF086035  | 5215.016  | 5629.657  | X82693    | 4579.638  | 5894.672  |
| NM_007172 | 5943.607  | 6162.298  | AK022159  | 5692.351  | 5082.31   | NM_007176 | 13768.396 | 13872.139 |
| NM_002333 | 1890.099  | 1242.844  | U25750    | 7422.097  | 7180.451  | NM_002722 | 2024.039  | 2328.551  |
| NM_003400 | 12892.334 | 12344.5   | AK023691  | 7238.749  | 6479.842  | AF317058  | 534.317   | 969.346   |
| NM_006705 | 2876.448  | 3143.287  | AK023502  | 404.485   | 667.34    | NM_014904 | 363.429   | 432.074   |
| NM_005582 | 657.472   | 985.219   | AK026744  | 936.902   | 463.184   | AL137576  | 4385.215  | 3693.327  |

|           |           |           |           |           |           |           |           |           |
|-----------|-----------|-----------|-----------|-----------|-----------|-----------|-----------|-----------|
| NM_012266 | 7216.63   | 7079.73   | AK002105  | 768.476   | 284.528   | NM_01835E | 2089.648  | 1982.238  |
| NM_00455E | 3042.974  | 2645.794  | NM_005234 | 5445.735  | 2010.864  | AF131781  | 3036.723  | 3144.247  |
| X56692    | 5442.798  | 3855.179  | BC023536  | 1051.513  | 537.193   | NM_00651E | 9247.848  | 6692.485  |
| NM_01447E | 528.412   | 447.956   | NM_001803 | 4839.897  | 2409.336  | NM_01586E | 810.563   | 464.828   |
| NM_01427E | 3341.328  | 4220.958  | NM_006233 | 14086.088 | 6639.75   | NM_00305E | 4574.389  | 3571.651  |
| NM_000734 | 11847.174 | 10715.014 | AK021889  | 803.068   | 593.633   | NM_00507E | 407.99    | 323.033   |
| NM_012331 | 2395.906  | 1792.525  | AK000992  | 965.52    | 792.298   | NM_014824 | 948.857   | 1363.762  |
| NM_006644 | 8813.967  | 7354.093  | L23544    | 17620.328 | 18820.135 | NM_014504 | 697.219   | 1262.473  |
| NM_006583 | 58630.105 | 1974.829  | NM_019020 | 4137.844  | 4339.922  | NM_01440E | 5878.28   | 9568.439  |
| X82693    | 9530.186  | 8166.269  | NM_016474 | 1819.834  | 1278.766  | NM_014741 | 1676.409  | 2371.533  |
| NM_002722 | 2827.354  | 4842.677  | NM_000910 | 1473.446  | 1662.003  | AF212247  | 1848.735  | 2507.923  |
| AF317058  | 1120.905  | 992.237   | AF086001  | 46978.172 | 44039.902 | AF161407  | 6626.101  | 7103.179  |
| NM_00602E | 686.963   | 611.226   | AL117560  | 22390.307 | 18601.973 | NM_01473E | 1624.774  | 1447.289  |
| NM_014904 | 961.112   | 1145.978  | M24749    | 6080.568  | 5251.043  | NM_018080 | 3278.336  | 3872.999  |
| AL137576  | 10063.734 | 8839.756  | NM_005831 | 51154.223 | 44475.875 | AF174605  | 1952.998  | 2238.781  |
| NM_01835E | 5315.577  | 4976.853  | NM_005850 | 60494.953 | 58426.289 | NM_014453 | 6974.22   | 5179.428  |
| AF131781  | 8367.361  | 12317.161 | NM_000554 | 37618.793 | 26825.188 | NM_005713 | 923.591   | 961.052   |
| NM_00651E | 17671.057 | 15005.18  | AF009317  | 5270.861  | 4532.532  | AK023553  | 1164.224  | 704.947   |
| NM_01586E | 749.552   | 560.746   | AK026583  | 5477.708  | 4165.519  | NM_014600 | 773.015   | 666.942   |
| NM_00305E | 8569.511  | 6715.44   | AF218031  | 6612.365  | 4756.105  | NM_016733 | 1216.349  | 1035.789  |
| NM_00507E | 641.885   | 906.129   | AF210650  | 1413.544  | 666.918   | AF181994  | 1471.097  | 966.995   |
| NM_006841 | 736.607   | 640.372   | NM_01835E | 2729.362  | 872.907   | NM_018962 | 909.538   | 682.238   |
| NM_014824 | 3150.478  | 2869.146  | AF085896  | 1339.33   | 458.716   | AF125100  | 1806.011  | 1244.953  |
| NM_014504 | 2278.354  | 3034.689  | X74613    | 43150.141 | 15048     | NM_006114 | 7054.456  | 5889.629  |
| NM_01440E | 16249.178 | 13905.502 | AF075080  | 22457.145 | 8673.239  | AF130728  | 638.843   | 1191.414  |
| AF161407  | 9704.76   | 11443.556 | Y13897    | 594.032   | 406.666   | NM_00128E | 11285.496 | 10948.354 |
| NM_01473E | 4186.669  | 6899.168  | AK001857  | 877.802   | 588.889   | NM_001131 | 9620.186  | 12181.139 |
| NM_018080 | 7264.793  | 6755.799  | AK021525  | 507.298   | 493.162   | X07696    | 1092.511  | 1406.168  |
| AF174605  | 6098.417  | 6630.341  | AF067801  | 1528.978  | 1339.272  | AA481015  | 460.907   | 676.341   |
| NM_014453 | 17847.863 | 16289.142 | AL133577  | 2817.557  | 3467.043  | AI925826  | 1405.485  | 1396.78   |
| NM_005713 | 2908.789  | 2194.333  | AF279773  | 581.616   | 977.458   | U04209    | 2203.516  | 2240.727  |
| AK023553  | 2562.104  | 2848.594  | AK025378  | 2090.762  | 2276.946  | Z15108    | 440.553   | 355.631   |
| NM_014600 | 1077.503  | 839.485   | NM_000479 | 2105.12   | 1846.364  | M55284    | 1440.172  | 1649.882  |
| NM_016733 | 2733.324  | 2862.303  | AF038199  | 2710.942  | 1396.161  | AA679391  | 444.243   | 437.707   |
| AF181994  | 2984.49   | 2467.257  | CY3Cy5    | 2537.606  | 124.16    | BG682146  | 897.514   | 869.052   |
| NM_018962 | 1516.32   | 1163.322  | BE908993  | 1216.773  | 1373.101  | NM_005060 | 905.687   | 634.962   |
| AF125100  | 3742.997  | 2664.295  | AB012701  | 1370.866  | 1512.018  | NM_005437 | 4236.14   | 2598.592  |
| NM_006114 | 14806.332 | 12500.688 | M61156    | 1819.048  | 1706.33   | AK022417  | 979.101   | 657.605   |
| AF130728  | 1482.187  | 2454.166  | R44005    | 1241.601  | 1226.034  | U50534    | 434.976   | 279.296   |
| NM_004987 | 1452.205  | 4109.085  | AI942392  | 2355.38   | 2436.572  | NM_01427E | 842.259   | 1514.143  |
| NM_001131 | 16970.895 | 26205.424 | M55040    | 500.168   | 625.136   | NM_000734 | 4838.182  | 5265.336  |
| AA481015  | 1256.625  | 1105.497  | BC036805  | 4956.998  | 5313.536  | NM_012331 | 1186.285  | 1321.419  |
| AI925826  | 4277.302  | 3687.047  | Z74615    | 18753.484 | 16120.605 | NM_006644 | 2838.702  | 2968.272  |
| U04209    | 4299.342  | 5527.75   | X03884    | 40309.98  | 24433.195 | NM_006583 | 10444.054 | 834.738   |
| Z15108    | 680.15    | 939.838   | U36759    | 625.347   | 577.81    | NM_003974 | 3273.156  | 4201.663  |
| M55284    | 3399.325  | 3943.465  | X91625    | 3878.908  | 3500.185  | NM_01433E | 7609.779  | 7793.263  |
| AA001218  | 519.558   | 434.938   | AF090901  | 457.658   | 950.303   | NM_00149E | 422.199   | 598.741   |
| AA679391  | 1398.614  | 1329.235  | AF004231  | 777.651   | 1460.342  | NM_00228E | 645.259   | 487.103   |
| BG682146  | 2865.162  | 2591.054  | AF001862  | 11259.901 | 13363.53  | NM_00441E | 3335.626  | 13097.661 |
| AA884709  | 1184.181  | 1088.166  | SR6       | 2754.893  | 5742.038  | NM_00062E | 4495.979  | 12422.157 |
| NM_005060 | 1904.522  | 1346.096  | SR8       | 11378.494 | 53124.195 | AB005216  | 626.1     | 880.017   |
| NM_005437 | 9322.44   | 7991.879  | SR10      | 39506.41  | 23014.984 | NM_00032E | 5839.537  | 6403.061  |
| AK022417  | 1893.576  | 1130.351  | CY3Cy5    | 2873.007  | 190.522   | AF015041  | 501.406   | 541.561   |

|           |           |           |           |           |           |           |           |           |
|-----------|-----------|-----------|-----------|-----------|-----------|-----------|-----------|-----------|
| U50534    | 746.795   | 680.963   | U87460    | 5000.439  | 4150.875  | NM_002363 | 367.067   | 285.067   |
| NM_014278 | 2580.373  | 3722.552  | NM_003617 | 451.361   | 421.261   | AF055020  | 1760.222  | 1186.132  |
| NM_005838 | 1216.528  | 2474.287  | NM_001841 | 959.438   | 636.579   | NM_006986 | 1617.121  | 758.364   |
| NM_012331 | 2679.207  | 4055.127  | NM_002054 | 2746.633  | 2464.233  | AF272043  | 4049.368  | 2201.261  |
| NM_006644 | 7622.089  | 8957.427  | AF300649  | 2292.635  | 2104.943  | NM_002587 | 5050.57   | 2971.744  |
| NM_006583 | 24509.797 | 1527.925  | NM_004125 | 1046.016  | 1033.253  | NM_002238 | 1064.578  | 718.017   |
| NM_001495 | 683.913   | 632.884   | NM_000823 | 2895.078  | 2535.253  | NM_004868 | 555.222   | 474.229   |
| NM_002288 | 1481.903  | 1415.834  | NM_004414 | 3629.707  | 3264.655  | NM_004668 | 865.333   | 375.607   |
| NM_004416 | 5953.076  | 11337.368 | NM_003317 | 5067.161  | 5059.836  | NM_007028 | 5900.487  | 3222.073  |
| NM_000628 | 9047.563  | 12104.844 | NM_001139 | 2038.605  | 2389.715  | AF131781  | 2699.331  | 5689.852  |
| AB005216  | 1843.069  | 2393.979  | NM_004609 | 31307.113 | 34007.852 | NM_006516 | 7443.629  | 10270.165 |
| NM_000325 | 10526.326 | 11523.206 | NM_003772 | 1214.003  | 3202.554  | NM_003055 | 3671.961  | 4394.782  |
| AF015041  | 1111.926  | 1539.23   | NM_001541 | 4571.125  | 6591.519  | NM_002414 | 41028.738 | 55195.441 |
| AK000184  | 430.459   | 320.878   | NM_005416 | 1662.546  | 2519.378  | AL133580  | 8186.01   | 13667.647 |
| AF055020  | 3698.935  | 2904.013  | L09081    | 4868.551  | 4654.092  | NM_014666 | 5190.162  | 5078.163  |
| NM_006986 | 4426.067  | 3669.227  | NM_000218 | 69011.688 | 57895.449 | NM_005451 | 1007.155  | 1414.499  |
| AF272043  | 9721.037  | 7511.517  | NM_016113 | 3989.253  | 11944.777 | NM_007172 | 2226.85   | 2877.973  |
| NM_002587 | 7332.575  | 5579.43   | NM_014222 | 2214.647  | 6471.88   | NM_006152 | 2071      | 2329.92   |
| NM_002238 | 2556.415  | 2214.93   | L14819    | 294.026   | 1167.631  | NM_013333 | 11863.892 | 11031.134 |
| NM_004868 | 1023.896  | 907.263   | NM_000509 | 2195.592  | 3787.401  | NM_002333 | 1332.299  | 1038.221  |
| NM_004668 | 1983.717  | 1382.11   | NM_004542 | 666.246   | 2252.847  | NM_003400 | 4179.852  | 4920.583  |
| NM_007028 | 14180.518 | 11714.584 | X06182    | 1282.452  | 3858.446  | NM_006705 | 1120.859  | 1041.944  |
| AF131781  | 6278.819  | 10424.71  | BF217496  | 5390.435  | 5305.739  | NM_012266 | 2954.833  | 1625.87   |
| NM_006516 | 15306.877 | 16712.203 | NM_004762 | 8695.837  | 9834.929  | NM_004558 | 1308.167  | 726.167   |
| NM_015865 | 1059.159  | 985.169   | NM_006641 | 51461.227 | 46323.105 | X56692    | 2665.084  | 1442.504  |
| AL133580  | 17749.291 | 15896.565 | NM_000634 | 6592.94   | 9196.736  | NM_014600 | 625.646   | 775.719   |
| NM_014666 | 14939.428 | 11659.71  | NM_014679 | 37524.785 | 32521.264 | NM_016733 | 1022.072  | 1506.371  |
| NM_005451 | 1905.29   | 2106.66   | AB040969  | 2851.578  | 4746.995  | AF181994  | 1063.659  | 1328.911  |
| NM_007172 | 8048.404  | 10355.874 | NM_003467 | 24103.32  | 27756.078 | NM_018962 | 633.109   | 792.108   |
| NM_006152 | 3813      | 4270.897  | NM_014936 | 2335.539  | 3823.888  | AF125100  | 1031.664  | 1385.53   |
| NM_013333 | 20021.139 | 23199.332 | NM_003943 | 1863.759  | 3865.065  | NM_006114 | 5315.156  | 9088.015  |
| NM_002333 | 2184.144  | 2186.966  | NM_019052 | 10345.151 | 20495.756 | X82693    | 5917.189  | 15748.049 |
| NM_003400 | 12566.691 | 14820.396 | NM_003202 | 21650.793 | 26435.699 | NM_007176 | 12599.449 | 12208.137 |
| NM_006705 | 2314.05   | 1762.736  | AF119902  | 708.731   | 1936.308  | NM_002722 | 1383.112  | 1774.148  |
| NM_014439 | 758.797   | 501.091   | NM_020525 | 5122.896  | 8782.015  | AF317058  | 762.237   | 563.654   |
| NM_012266 | 7090.319  | 6067.38   | X62468    | 561.265   | 891.266   | M22538    | 21741.598 | 41659.145 |
| NM_004558 | 3355.707  | 2509.571  | NM_003890 | 4447.296  | 7736.695  | NM_014904 | 563.14    | 258.324   |
| X56692    | 5753.648  | 4519.925  | BF127978  | 4219.127  | 6066.903  | AL137576  | 4450.883  | 2312.311  |
| NM_014600 | 1419.672  | 1439.79   | AF110801  | 1555.091  | 1726.65   | NM_018358 | 1823.845  | 1059.983  |
| NM_016733 | 2168.63   | 2792.093  | NM_016579 | 18931.453 | 15637.939 | NM_005060 | 2157.491  | 2978.715  |
| AF181994  | 2741.705  | 2354.062  | AB018297  | 1430.818  | 2824.325  | NM_005437 | 3312.775  | 3642.199  |
| NM_018962 | 1448.329  | 1642.848  | AK022565  | 6605.62   | 18453.037 | AK022417  | 725.163   | 888.539   |
| NM_007176 | 26566.576 | 17781.564 | AK023151  | 2168.414  | 7387.412  | NM_014824 | 683.115   | 905.748   |
| NM_002722 | 2875.389  | 3083.987  | AB033076  | 1292.976  | 3667.383  | NM_014504 | 635.56    | 959.921   |
| AF317058  | 992.102   | 932.221   | AK022876  | 2167.222  | 6146.997  | NM_014408 | 9317.226  | 10372.032 |
| M22538    | 45947.512 | 40687.113 | AF134894  | 1041.003  | 3011.883  | NM_014741 | 2975.081  | 2634.854  |
| NM_006028 | 702.525   | 883.3     | NM_003938 | 3574.401  | 8646.746  | AF212247  | 3102.936  | 2764.333  |
| NM_014904 | 1291.043  | 1070.261  | NM_014827 | 19292.238 | 39386.691 | AF161407  | 7842.826  | 7483.374  |
| AL137576  | 10399.771 | 7833.565  | NM_001441 | 1798.415  | 3296.439  | NM_014738 | 1877.603  | 1456.703  |
| NM_018358 | 5696.184  | 5135.721  | NM_018324 | 1394.494  | 2814.373  | NM_016406 | 863.355   | 1916.769  |
| NM_016321 | 246.576   | 910.847   | AF064255  | 35780.148 | 44092.859 | NM_018080 | 3199.015  | 2262.43   |
| NM_013356 | 440.526   | 520.08    | NM_016368 | 60193.258 | 54401.57  | AF174605  | 2498.143  | 1453.354  |
| NM_005060 | 2173.595  | 1995.847  | U08853    | 3420.855  | 6232.894  | NM_014453 | 7473.342  | 3649.372  |

|           |           |           |           |           |           |           |           |           |
|-----------|-----------|-----------|-----------|-----------|-----------|-----------|-----------|-----------|
| NM_005437 | 8339.991  | 7506.167  | NM_004261 | 29704.018 | 51697.945 | NM_005713 | 988.212   | 658.708   |
| AK022417  | 1507.943  | 948.693   | NM_016006 | 2074.976  | 3604.568  | AK023553  | 1208.975  | 930.042   |
| NM_014824 | 2997.337  | 2146.75   | NM_016245 | 7495.351  | 12702.731 | AF272043  | 3701.531  | 4483.226  |
| NM_014408 | 17489.701 | 19051.586 | AF005632  | 3137.446  | 5304.696  | NM_002587 | 4793.732  | 6199.64   |
| NM_014741 | 6301.421  | 8976.626  | NM_000903 | 2931.456  | 5423.502  | NM_002238 | 874.447   | 938.325   |
| AF212247  | 6010.382  | 5926.03   | NM_004493 | 19748.996 | 26189.104 | NM_004868 | 404.151   | 608.061   |
| AF161407  | 11861.7   | 10548.741 | AF309489  | 566.328   | 980.406   | NM_004668 | 426.513   | 720.465   |
| NM_014738 | 5523.626  | 4211.38   | NM_004047 | 26022.875 | 32588.002 | NM_007028 | 4479.05   | 6119.374  |
| NM_016406 | 3239.333  | 3936.671  | NM_004823 | 2737.601  | 4057.833  | NM_001288 | 12414.66  | 11058.639 |
| NM_018080 | 7760.042  | 6066.735  | Y17179    | 70705.375 | 63808.75  | NM_001131 | 14656.146 | 16565.801 |
| AF174605  | 6943.9    | 6703.503  | NM_000891 | 1077.19   | 704.065   | M54894    | 261.319   | 398.998   |
| NM_014453 | 17149.908 | 13639.753 | AF239613  | 756.218   | 3832.196  | X07696    | 1599.996  | 1088.465  |
| NM_005713 | 2555.072  | 2480.571  | AK026840  | 3319.267  | 7820.234  | AA481015  | 548.737   | 521.594   |
| AK023553  | 2562.468  | 2671.384  | NM_000288 | 2253.027  | 4835.699  | AI925826  | 2140.839  | 1707.401  |
| AF272043  | 11185.686 | 10074.359 | AK026317  | 10027.574 | 21650.861 | U04209    | 1547.234  | 1052.789  |
| NM_002587 | 10376.159 | 8026.83   | X82207    | 27571.574 | 46923.602 | AI393201  | 2315.275  | 1091.551  |
| NM_002238 | 2200      | 2495.959  | NM_015044 | 788.913   | 3127.989  | M34664    | 39317.078 | 17429.961 |
| NM_004868 | 767.913   | 734.122   | NM_002867 | 411.111   | 1801.522  | M55284    | 1347.809  | 896.403   |
| NM_004668 | 1361.359  | 1177.603  | NM_000520 | 4088.505  | 6374.119  | AA679391  | 473.864   | 236.264   |
| NM_007028 | 10967.108 | 10625.607 | NM_000289 | 1635.048  | 2160.764  | BG682146  | 1146.647  | 793.854   |
| AF130728  | 1400.812  | 1188.753  | NM_001500 | 3138.727  | 5365.052  | NM_012268 | 2581.037  | 3152.473  |
| NM_001288 | 26551.178 | 20773.053 | NM_004388 | 3692.885  | 5997.945  | NM_004558 | 1209.598  | 1140.678  |
| NM_001131 | 17131.109 | 16271.131 | NM_020379 | 534.523   | 1483.222  | X56692    | 2328.224  | 2278.612  |
| AA831963  | 3977.648  | 275.766   | AL110127  | 2063.711  | 3746.077  | NM_000734 | 4983.688  | 5374.339  |
| X07696    | 2722.575  | 2690.621  | AK001997  | 524.142   | 969.151   | NM_012331 | 1309.05   | 1321.207  |
| AA481015  | 1516.784  | 1486.544  | NM_002528 | 3786.863  | 6436.194  | NM_006644 | 4294.352  | 3358.964  |
| AI925826  | 5136.079  | 4280.618  | D38438    | 4988.13   | 7534.197  | NM_006583 | 8800.706  | 582.11    |
| U04209    | 5742.685  | 4372.05   | AV714945  | 1011.178  | 1866.537  | NM_003974 | 4551.711  | 3679.686  |
| Z15108    | 941.171   | 837.697   | AF089897  | 177.43    | 1194.385  | NM_014338 | 10527.241 | 7822.614  |
| M55284    | 3922.658  | 3782.441  | AF007872  | 4435.53   | 5730.636  | NM_002288 | 631.246   | 527.381   |
| AA679391  | 1231.913  | 1410.38   | M30938    | 10310.534 | 12613.679 | NM_004418 | 2593.269  | 2725.8    |
| BG682146  | 2746.866  | 2758.6    | NM_015148 | 1835.422  | 2538.61   | NM_000628 | 4278.844  | 2562.473  |
| NM_012268 | 7304.4    | 7184.213  | NM_004714 | 2229.941  | 3397.748  | AB005216  | 1188.819  | 754.656   |
| NM_004558 | 3330.214  | 3443.942  | NM_005401 | 550.87    | 870.664   | NM_000328 | 5321.15   | 2386.21   |
| X56692    | 6966.33   | 5229.2    | NM_002497 | 22480.158 | 18201.67  | AF015041  | 657.803   | 322.859   |
| NM_014278 | 2742.536  | 3388.626  | AB025194  | 10562.374 | 27609.711 | NM_002363 | 616.787   | 283.97    |
| NM_000734 | 12054.936 | 10644.219 | NM_006239 | 1503.76   | 4342.061  | AF055020  | 1576.943  | 684.597   |
| NM_012331 | 2517.188  | 1967.648  | BC020863  | 473.678   | 1665.162  | NM_006988 | 1872.078  | 1102.875  |
| NM_006644 | 7462.078  | 7494.969  | NM_017897 | 3853.753  | 9410.106  | NM_014904 | 451.378   | 719.106   |
| NM_006583 | 49245.445 | 1942.89   | NM_004265 | 19130.945 | 55258.957 | AL137576  | 3554.769  | 3789.397  |
| NM_003974 | 8326.258  | 8249.722  | NM_002572 | 4299.257  | 11732.714 | NM_018358 | 1984.845  | 2175.377  |
| NM_006065 | 539.639   | 585.368   | L14819    | 487.82    | 991.845   | NM_013358 | 236.348   | 507.805   |
| NM_014338 | 22634.119 | 19652.188 | NM_000509 | 2841.999  | 3908.396  | AF131781  | 3162.404  | 11650.94  |
| NM_001495 | 1001.074  | 1065.984  | NM_004542 | 756.275   | 1553.116  | NM_006518 | 7850.586  | 13128.021 |
| NM_002288 | 1571.178  | 1187.764  | X06182    | 1329.098  | 2355.644  | NM_003055 | 3481.696  | 3929.343  |
| NM_004418 | 7403.878  | 10800.806 | BE908993  | 1722.914  | 3102.339  | NM_005075 | 407.714   | 144.181   |
| NM_000628 | 10286.509 | 10474.979 | AB012701  | 1355.832  | 2376.135  | NM_002414 | 42993.766 | 33894.184 |
| AB005216  | 1367.62   | 1342.87   | M61156    | 1986.401  | 4034.097  | NM_000355 | 1078.799  | 764.403   |
| NM_000328 | 12452.557 | 10283.746 | R44005    | 1320.258  | 2355.099  | AL133580  | 10355.891 | 10499.717 |
| AF015041  | 1109.373  | 1051.261  | AI942392  | 3181.421  | 4728.81   | NM_014668 | 7383.099  | 5508.403  |
| AF055020  | 3861.32   | 2649.508  | M55040    | 641.064   | 1656.877  | NM_005451 | 857.309   | 826.477   |
| NM_006988 | 5077.126  | 3498.989  | AW009739  | 667.876   | 1649.879  | NM_007172 | 2147.164  | 1785.633  |
| NM_014904 | 1009.995  | 1258.653  | BC036805  | 7141      | 12724.854 | NM_006152 | 2089.76   | 1199.289  |

|           |           |           |           |           |           |           |           |           |
|-----------|-----------|-----------|-----------|-----------|-----------|-----------|-----------|-----------|
| AL137576  | 8871.788  | 8497.426  | Z74615    | 31416.373 | 36915.453 | NM_013333 | 10584.635 | 4366.204  |
| NM_01835E | 5418.096  | 5565.103  | X03884    | 50694.336 | 48259.535 | NM_002333 | 885.918   | 467.803   |
| AF131781  | 6803.25   | 9642.812  | U36759    | 712.063   | 1200.087  | NM_00340C | 3802.747  | 2874.66   |
| NM_00651E | 14621.249 | 13554.89  | X91625    | 4578.954  | 4852.747  | NM_00670E | 939.826   | 754.207   |
| NM_01586E | 889.646   | 988.497   | AF090901  | 533.713   | 552.252   | NM_01443E | 471.4     | 280.967   |
| NM_00305E | 10460.253 | 8984.578  | AF004231  | 647.585   | 365.055   | AF174605  | 2544.995  | 3247.857  |
| NM_00507E | 440.819   | 1249.834  | AF001862  | 10144.541 | 27232.377 | NM_01445E | 7395.958  | 7427.347  |
| NM_006841 | 978.263   | 1256.445  | NM_058197 | 125.396   | 1351.209  | NM_005713 | 1131.683  | 1307.477  |
| NM_002414 | 61315.352 | 60711.172 | NM_016044 | 1455.606  | 6547.363  | AK023553  | 1322.831  | 2708.628  |
| NM_00035E | 1464.002  | 1588.567  | AK023151  | 2426.234  | 4420.002  | NM_01460C | 713.395   | 1037.27   |
| AL133580  | 20499.846 | 23422.9   | AB033076  | 1331.296  | 2841.131  | NM_016733 | 1240.157  | 2132.605  |
| NM_01466E | 15534.706 | 12988.381 | AK022876  | 2208.281  | 4682.959  | AF181994  | 1154.064  | 1569.619  |
| NM_005451 | 2624.455  | 2567.33   | AF134894  | 1135.578  | 2344.397  | NM_018962 | 575.797   | 777.016   |
| NM_007172 | 7838.775  | 6725.887  | NM_00393E | 4899.536  | 8779.664  | AF125100  | 1296.082  | 1492.521  |
| NM_006152 | 4420.081  | 3496.739  | NM_014827 | 20132.682 | 28597.986 | NM_006114 | 5137.951  | 5194.942  |
| NM_013333 | 20693.652 | 20419.457 | NM_00412E | 429.233   | 862.148   | X82693    | 5777.041  | 5097.689  |
| NM_002333 | 2180.018  | 2232.85   | U87460    | 6988.725  | 9168.084  | NM_00717E | 13335.693 | 10646.024 |
| NM_00340C | 13553.214 | 13082.231 | NM_003617 | 655.457   | 982.193   | NM_002722 | 1441.949  | 1799.908  |
| NM_00670E | 2839.899  | 2124.4    | NM_001841 | 1080.149  | 701.388   | AF317058  | 480.005   | 392.492   |
| AF174605  | 5874.359  | 8681.717  | NM_002054 | 3126.184  | 2759.355  | NM_00602E | 349.375   | 701.718   |
| NM_01445E | 16570.381 | 17368.715 | AF300649  | 2903.102  | 3097.155  | NM_012297 | 9012.812  | 9887.518  |
| NM_005713 | 2291.751  | 2544.266  | NM_00412E | 1351.564  | 1396.528  | AB007925  | 19668.484 | 23685.193 |
| AK023553  | 2470.89   | 3563.832  | NM_000823 | 4445.536  | 4527.627  | NM_01818C | 356.31    | 346.217   |
| NM_01460C | 1405.926  | 1025.531  | NM_004414 | 4626.154  | 5022.547  | NM_000361 | 4532.455  | 5208.1    |
| NM_016733 | 2377.01   | 2583.727  | NM_003317 | 6358.284  | 8537.034  | NM_00247E | 25793.777 | 33528.238 |
| AF181994  | 2974.987  | 2369.366  | NM_001139 | 2951.103  | 4336.88   | NM_00383E | 3372.967  | 4813.083  |
| NM_018962 | 1767.207  | 1632.939  | NM_00460E | 38273.711 | 32590.326 | NM_017987 | 413.404   | 996.128   |
| AF125100  | 3150.193  | 3925.889  | NM_003772 | 1210.884  | 1665.786  | NM_01903E | 515.609   | 945.358   |
| NM_00717E | 30162.322 | 24790.666 | NM_001541 | 3119.711  | 8622.964  | NM_018203 | 343.733   | 767.122   |
| NM_002722 | 2903.135  | 3213.236  | NM_00541E | 1223.171  | 3205.557  | AK022417  | 648.878   | 1083.361  |
| AF317058  | 1394.834  | 876.679   | NM_00467C | 445.019   | 1455.274  | U50534    | 552.195   | 826.554   |
| M22538    | 44142.73  | 34261.703 | L09081    | 3833.947  | 12307.4   | NM_014824 | 1555.232  | 2245.464  |
| NM_00602E | 728.594   | 604.216   | NM_016113 | 3747.33   | 9113.094  | NM_014504 | 1420.187  | 2499.418  |
| NM_012297 | 16790.455 | 22471.541 | NM_014222 | 2424.169  | 6107.12   | NM_01440E | 11065.292 | 14292.797 |
| AB007925  | 44889.984 | 44415.25  | AK026840  | 3531.95   | 3643.341  | NM_014741 | 3262.559  | 3524.316  |
| NM_000361 | 10891.07  | 10765.66  | NM_00028E | 2178.833  | 2457.641  | AF212247  | 3984.447  | 4191.73   |
| NM_00247E | 46552.836 | 46153.926 | AK026317  | 9727.06   | 10960.459 | AF161407  | 9642.927  | 12477.045 |
| NM_00383E | 5438.211  | 4826.516  | X82207    | 30847.045 | 30256.197 | NM_01473E | 4230.785  | 5001.354  |
| NM_017987 | 981.243   | 913.808   | NM_015044 | 1171.964  | 2080.986  | NM_01808C | 4324.028  | 6522.535  |
| NM_018203 | 872.965   | 719.3     | NM_002867 | 417.86    | 696.974   | NM_007115 | 795.462   | 1466.264  |
| AK022417  | 2394.974  | 2247.964  | BF217496  | 6374.291  | 5300.717  | NM_00461E | 600.367   | 720.084   |
| U50534    | 1014.568  | 1265.654  | NM_004762 | 8944.359  | 10996.16  | NM_00436C | 674.137   | 1466.084  |
| NM_014824 | 3643.623  | 3134.275  | NM_006641 | 57895.199 | 33496.094 | NM_003821 | 334.585   | 558.329   |
| NM_014504 | 2701.847  | 3275.879  | NM_000634 | 6842.438  | 4706.104  | NM_017692 | 3122.162  | 5596.67   |
| NM_01440E | 17847.219 | 16285.294 | NM_01467E | 31286.057 | 14808.333 | NM_00397E | 3185.67   | 5852.59   |
| NM_014741 | 5295.212  | 4715.392  | AB040969  | 1847.712  | 1307.927  | NM_004834 | 8445.777  | 13840.778 |
| AF212247  | 6218.55   | 4828.452  | NM_003467 | 16410.494 | 7819.521  | NM_000812 | 1088.999  | 1928.337  |
| AF161407  | 10656.981 | 9084.428  | NM_01493E | 1861.324  | 1422.957  | AK024747  | 16250.492 | 29255.42  |
| NM_01473E | 5553.974  | 4435.625  | NM_003943 | 1476.743  | 1664.334  | NM_00639C | 1490.779  | 2240.249  |
| NM_01640E | 2397.875  | 3415.625  | NM_019052 | 8527.905  | 6815.619  | NM_00358C | 1935.757  | 3787.086  |
| NM_01808C | 7146.357  | 6086.555  | NM_003202 | 19650.193 | 11780.195 | NM_00650E | 1149.754  | 2093.185  |
| NM_007115 | 1427.249  | 2492.447  | AF119902  | 820.933   | 886.013   | NM_00323E | 2058.677  | 2890.173  |
| NM_00461E | 1047.307  | 1142.143  | NM_02052E | 7900.692  | 6895.45   | AB042562  | 1009.917  | 1778.005  |



|           |           |           |           |           |           |           |           |           |
|-----------|-----------|-----------|-----------|-----------|-----------|-----------|-----------|-----------|
| NM_00436C | 1886.176  | 1827.783  | X62468    | 597.015   | 538.18    | NM_01600C | 5012.97   | 7066.82   |
| NM_01769Z | 4623.422  | 5202.018  | NM_00389C | 4015.614  | 10991.743 | NM_00237E | 1257.291  | 1988.984  |
| NM_00397E | 4447.146  | 4385.76   | BF127978  | 4162.195  | 9232.695  | NM_001364 | 369.22    | 482.285   |
| NM_004834 | 15272.37  | 13182.989 | AF110801  | 1294.246  | 3304.653  | NM_00372C | 2961.57   | 3330.325  |
| NM_00081Z | 1755.778  | 2012.116  | AB018297  | 1227.163  | 3721.212  | NM_017431 | 784.163   | 968.01    |
| AK024747  | 29969.598 | 33253.074 | AK022565  | 5337.065  | 13378.731 | NM_006097 | 6157.319  | 8272.99   |
| NM_00639C | 4376.618  | 5393.831  | AB025194  | 8600.8    | 7967.392  | NM_006113 | 2410.628  | 2863.427  |
| NM_00358C | 5741.388  | 5804.828  | NM_00623C | 1155.381  | 1456.975  | NM_015897 | 1707.117  | 2843.375  |
| NM_00650C | 3371.463  | 3141.304  | BC020863  | 477.758   | 370.645   | NM_00543C | 3304.741  | 6179.279  |
| NM_00323E | 5631.007  | 4454.644  | NM_017897 | 4761.816  | 2829.451  | AF177473  | 10363.299 | 17100.533 |
| AB042562  | 2795.283  | 2993.074  | NM_00426E | 20583.238 | 21445.086 | NM_00054E | 2519.519  | 3703.029  |
| NM_01600C | 10595.148 | 13864.95  | NM_00257Z | 5575.091  | 3764.404  | AB023223  | 543.656   | 1267.105  |
| NM_00237E | 2708.055  | 2628.979  | NM_001441 | 1384.463  | 1279.561  | AB018257  | 2110.103  | 3477.817  |
| NM_001364 | 743.498   | 655.728   | NM_018324 | 1350.005  | 1053.131  | NM_00270E | 14984.506 | 34633.645 |
| NM_00372C | 5085.676  | 3940.369  | AF064255  | 35193.105 | 19710.449 | AK001059  | 740.643   | 1617.347  |
| NM_006097 | 6090.657  | 5721.123  | NM_01636E | 51865.852 | 31318.752 | NM_00728Z | 3106.135  | 5223.244  |
| NM_006113 | 3745.584  | 3087.681  | U08853    | 2655.268  | 2435.852  | NM_01761C | 535.193   | 757.271   |
| NM_01531Z | 19221.762 | 18446.066 | NM_004261 | 21122.4   | 20736.367 | AK025133  | 5050.448  | 5055.938  |
| AK022287  | 11754.522 | 8777.03   | NM_01600C | 1556.844  | 1340.892  | AB020704  | 1030.431  | 1100.726  |
| NM_015897 | 3804.314  | 3566.207  | NM_01624E | 6472.879  | 4983.821  | NM_004087 | 1746.384  | 4379.8    |
| NM_00543C | 6081.615  | 7730.971  | AF005632  | 3403.739  | 2272.752  | NM_01870C | 760.504   | 354.493   |
| AF177473  | 19453.932 | 20282.623 | NM_00090Z | 2090.366  | 1659.08   | NM_000119 | 1495.723  | 1247.8    |
| NM_00054E | 5184.259  | 4961.63   | NM_00449Z | 14721.788 | 8470.279  | NM_00106E | 3654.673  | 2629.693  |
| AB023223  | 1135.06   | 1356.112  | AF309489  | 453.441   | 251.445   | AK027100  | 969.597   | 708.272   |
| AB018257  | 3526.916  | 3712.553  | NM_004047 | 18805.43  | 10352.527 | NM_00362Z | 732.866   | 394.697   |
| NM_00270E | 23249.297 | 31995.652 | AF287303  | 799.585   | 582.724   | NM_001774 | 896.805   | 1300.723  |
| AK001059  | 1428.178  | 1888.319  | NM_00482Z | 2746.694  | 7702.248  | AK021645  | 456.268   | 559.509   |
| NM_00728Z | 6273.87   | 5504.694  | Y17179    | 60402.91  | 63618.039 | NM_01333C | 1608.899  | 2388.062  |
| NM_01761C | 1321.339  | 1566.855  | NM_000891 | 617.032   | 1904.167  | NM_001491 | 851.117   | 1243.134  |
| AL122070  | 701.263   | 727.625   | AF239613  | 743.464   | 3413.743  | AK026541  | 1280.041  | 1346.667  |
| AK025133  | 12036.876 | 11698.943 | NM_016044 | 1455.502  | 2174.681  | NM_00589C | 8587.16   | 10210.989 |
| AB020704  | 2992.633  | 2777.422  | NM_00052C | 3097.214  | 2262.211  | D42055    | 4818.668  | 6923.742  |
| NM_020197 | 611.077   | 812.833   | NM_00028C | 1499.95   | 1165.756  | AL137349  | 1353.05   | 1858.705  |
| NM_004087 | 4937.073  | 10337.736 | NM_00150C | 3910.928  | 2957.912  | NM_00333C | 341.034   | 524.451   |
| NM_01870C | 1854.103  | 1213.554  | NM_00438E | 2988.964  | 2309.557  | NM_01647E | 17124.822 | 23095.648 |
| NM_000119 | 4347.014  | 3302.632  | AL110127  | 1707.663  | 1630.74   | NM_01590Z | 653.21    | 696.251   |
| NM_00106E | 9632.867  | 8228.672  | NM_00252E | 3600.331  | 2309.846  | NM_02015E | 1706.304  | 1493.945  |
| AK027100  | 1617.449  | 1988.481  | D38438    | 4857.656  | 2884.161  | BE874471  | 3085.563  | 3036.344  |
| AY010111  | 514.377   | 821.447   | AV714945  | 803.6     | 355.828   | NM_006121 | 2235.86   | 1701.142  |
| NM_00362Z | 2068.448  | 1392.625  | AF007872  | 3465.218  | 1769.31   | AK023520  | 2902.672  | 2183.379  |
| NM_001774 | 2969.121  | 3195.518  | M30938    | 9193.86   | 2967.297  | NM_007211 | 3389.621  | 1791.649  |
| AK021645  | 1456.415  | 1978.658  | NM_01514E | 2612.914  | 3571.233  | AB011152  | 949.602   | 441.919   |
| NM_01333C | 3455.656  | 4283.975  | NM_004714 | 1782.924  | 5844.426  | NM_01495C | 3856.21   | 1922.119  |
| NM_001491 | 2764.46   | 3270.9    | NM_005401 | 328.324   | 1475.265  | AB014592  | 1084.287  | 662.796   |
| NM_00264Z | 725.765   | 723.15    | NM_002497 | 21816.521 | 34426.434 | NM_01695Z | 669.977   | 291.409   |
| AK026541  | 2905.129  | 2708.596  | NM_00541C | 1010.479  | 1359.596  | NM_001654 | 1776.753  | 676.144   |
| NM_00589C | 16485.838 | 16229.806 | NM_00467C | 373.75    | 362.24    | NM_01451C | 1512.538  | 1476.662  |
| D42055    | 9912.444  | 12509.821 | L09081    | 3140.851  | 3347.355  | NM_007147 | 4275.282  | 4397.154  |
| AL137349  | 3004.066  | 3313.572  | NM_00021E | 62172.441 | 56104.676 | X65463    | 1414.336  | 1036.745  |
| NM_00333C | 957.684   | 1114.152  | NM_016113 | 4330.978  | 4317.569  | AK024418  | 938.993   | 936.225   |
| NM_01647E | 45653.555 | 57496.906 | NM_01422Z | 2270.497  | 2389.656  | NM_003367 | 2244.257  | 1732.809  |
| NM_01590Z | 2286.129  | 2222.968  | L14819    | 274.408   | 273.002   | NM_005194 | 6802.02   | 5963.442  |
| NM_02015E | 4552.797  | 4547.477  | NM_00050C | 2238.212  | 1832.429  | AB002296  | 1026.69   | 768.603   |

|           |           |           |           |           |           |           |           |           |
|-----------|-----------|-----------|-----------|-----------|-----------|-----------|-----------|-----------|
| BE874471  | 8642.269  | 9839.212  | NM_004542 | 728.648   | 524.028   | NM_014315 | 3070.436  | 1915.649  |
| NM_006121 | 6049.92   | 5670.709  | X06182    | 1421.309  | 1401.152  | NM_012087 | 1265.239  | 875.429   |
| AK023520  | 7399.159  | 9398.503  | BE908993  | 1550.964  | 1359.755  | NM_015679 | 2809.569  | 2446.762  |
| NM_004693 | 652.06    | 780.942   | AB012701  | 948.053   | 1049.894  | AF299118  | 41430.23  | 37979.188 |
| AB011152  | 2274.314  | 1807.481  | M61156    | 1554.347  | 1573.444  | AK025353  | 9050.521  | 4412.662  |
| NM_014956 | 10329.826 | 7958.299  | R44005    | 1074.908  | 693.895   | AK056896  | 13039.001 | 5831.853  |
| AB014592  | 1008.863  | 896.551   | AI942392  | 1986.512  | 1583.473  | AK022763  | 12575.081 | 4450.841  |
| NM_016952 | 1517.784  | 1068.5    | M55040    | 429.791   | 438.512   | NM_000976 | 41356.832 | 21837.756 |
| NM_001654 | 5101.499  | 3933.598  | AW009739  | 407.668   | 392.672   | NM_001000 | 46413.637 | 36165.012 |
| NM_014519 | 2596.401  | 3604.627  | BC036805  | 4726.005  | 2104.766  | AF288207  | 20239.063 | 8493.332  |
| NM_002517 | 1640.122  | 2661.255  | Z74615    | 23653.912 | 7126.425  | NM_001001 | 33065.703 | 11801.797 |
| NM_007147 | 6653.99   | 6793.818  | X03884    | 36915.965 | 13377.908 | NM_005715 | 2316.496  | 2043.205  |
| X65463    | 2685.356  | 3505.743  | U36759    | 666.896   | 1999.74   | AK026992  | 1459.977  | 1652.421  |
| AK024418  | 2436.947  | 3087.247  | X91625    | 3873.225  | 9662.903  | X81895    | 265.236   | 542.467   |
| NM_003367 | 4286.996  | 4961.552  | AF001862  | 8422.768  | 24648.152 | NM_004541 | 23826.932 | 13616.117 |
| NM_005194 | 14409.743 | 15440.278 | NM_003890 | 3951.16   | 4338.388  | NM_006830 | 31145.238 | 22248.115 |
| AB002296  | 7087.548  | 6733.468  | BF127978  | 3958.23   | 3045.177  | AK026414  | 6012.584  | 4857.188  |
| NM_014315 | 6737.338  | 6316.988  | AF110801  | 1268.097  | 1076.105  | D17297    | 446.659   | 312.619   |
| NM_012087 | 2467.173  | 2622.926  | NM_016579 | 14221.856 | 11887.419 | NM_004074 | 17187.398 | 14453.403 |
| AF165520  | 1317.072  | 1686.858  | AB018297  | 1129.809  | 1184.054  | NM_002626 | 19947.322 | 14231.925 |
| AK026072  | 843.259   | 1083.657  | AK022565  | 5315.915  | 3938.723  | NM_018436 | 9385.328  | 6618.175  |
| NM_004289 | 813.201   | 1017.523  | AK023151  | 1932.898  | 1784.087  | AF157115  | 1022.544  | 840.287   |
| NM_015679 | 6501.281  | 6664.293  | AB033076  | 1102.66   | 1206.693  | AJ223353  | 2900.034  | 2331.154  |
| AF299118  | 59116.746 | 58995.074 | AK022876  | 1572.708  | 1521.999  | NM_012241 | 2174.065  | 2182.118  |
| AK056896  | 35376.633 | 29495.563 | AF134894  | 693.534   | 724.398   | AF250288  | 447.094   | 232.238   |
| AF288207  | 41574.32  | 35730.715 | NM_003938 | 3716.22   | 3164.342  | NM_018486 | 1242.244  | 690.546   |
| NM_001001 | 60021.051 | 52792.371 | NM_014827 | 13469.8   | 10614.131 | NM_005324 | 14468.278 | 8682.257  |
| NM_005715 | 4463.95   | 6992.491  | NM_004126 | 384.616   | 485.04    | AL080201  | 11648.141 | 4371.522  |
| AK026992  | 3536.706  | 5549.137  | U87460    | 7116.22   | 4551.898  | NM_001806 | 3695.612  | 1621.624  |
| AL137343  | 1185.282  | 1862.261  | NM_003617 | 516.491   | 388.098   | AB040941  | 1334.604  | 691.469   |
| NM_004541 | 46033.949 | 43562.23  | NM_001841 | 893.171   | 711.748   | AL137241  | 483.782   | 197.873   |
| NM_006830 | 53807.09  | 53549.016 | NM_002054 | 2283.046  | 1409.743  | AB037742  | 606.604   | 299.692   |
| AK026414  | 12144.958 | 11334.643 | AF300649  | 2547.356  | 1634.233  | AF272375  | 538.848   | 397.792   |
| D17297    | 1144.952  | 1396.404  | NM_004125 | 904.014   | 416.283   | AK025078  | 466.651   | 352.461   |
| NM_004074 | 44145.129 | 42080.082 | NM_000823 | 3592.452  | 1154.461  | AK023754  | 327.014   | 157.686   |
| NM_002626 | 42605.805 | 44003.535 | NM_004414 | 2993.61   | 1124.509  | AK024737  | 638.054   | 611.579   |
| NM_018436 | 19279.377 | 22362.021 | NM_001139 | 2231.277  | 6800.801  | AB007890  | 3176.507  | 2522.557  |
| AF157115  | 7390.564  | 11153.981 | NM_004609 | 29675.59  | 46959.043 | AF286160  | 3692.245  | 3022.967  |
| AJ223353  | 8864.093  | 14504.229 | NM_003772 | 1149.947  | 4644.555  | AF275800  | 1479.474  | 707.109   |
| NM_012241 | 5431.476  | 6602.01   | NM_001541 | 3007.444  | 7903.813  | AL359605  | 948.649   | 985.471   |
| AF250288  | 1246.511  | 1117.522  | NM_004823 | 2014.888  | 2385.89   | AB020633  | 1243.267  | 2800.598  |
| NM_018486 | 2576.347  | 1531.451  | Y17179    | 60528.254 | 55522.992 | AK025445  | 4122.777  | 5193.598  |
| NM_015363 | 702.641   | 447.242   | NM_000891 | 700.984   | 801.875   | AL357200  | 1108.065  | 1024.983  |
| NM_001806 | 8920.619  | 8469.996  | AF239613  | 688.786   | 1096.731  | NM_017727 | 7159.404  | 6810.345  |
| AB040941  | 4796.724  | 3156.469  | AK026840  | 3284.854  | 2520.367  | NM_018319 | 2469.178  | 2306.446  |
| AL137241  | 1481.076  | 1168.983  | NM_000288 | 1806.122  | 1410.786  | AL359559  | 2303.721  | 1601.622  |
| AB037742  | 2447.009  | 1985.174  | AK026317  | 8721.685  | 6922.338  | AK021714  | 792.796   | 256.889   |
| AF272375  | 1552.369  | 1350.433  | X82207    | 27714.66  | 19714.977 | NM_020314 | 3651.415  | 1739.415  |
| AK025078  | 970.782   | 1069.794  | NM_015044 | 815.439   | 1200.01   | AK022972  | 1908.054  | 921.125   |
| AK024737  | 2646.364  | 2990.346  | NM_002867 | 535.868   | 747.349   | AK025996  | 730.675   | 450.688   |
| AB007890  | 7977.493  | 6823.163  | BF217496  | 5800.567  | 4973.922  | AF088015  | 401.885   | 424.518   |
| AF070591  | 585.023   | 706.731   | NM_004762 | 7818.754  | 7541.084  | AK026711  | 618.343   | 500.613   |
| AF286160  | 8718.166  | 8710.629  | NM_006641 | 54461.594 | 29945.863 | NM_017864 | 2179.583  | 2323.055  |

|           |           |           |           |           |           |           |           |           |
|-----------|-----------|-----------|-----------|-----------|-----------|-----------|-----------|-----------|
| AF275800  | 4094.757  | 5557.086  | NM_000634 | 7361.432  | 5136.87   | NM_004865 | 2452.648  | 2364.027  |
| AL359605  | 2533.02   | 2554.966  | NM_014679 | 32598.152 | 14844.559 | AF136408  | 392.549   | 393.118   |
| AB020633  | 4900.247  | 5692.994  | AB040969  | 1995.029  | 1310.172  | AL110203  | 266.807   | 323.155   |
| AK025445  | 11801.597 | 13350.173 | NM_003467 | 15952.634 | 6395.503  | AJ011602  | 375.344   | 822.603   |
| AL357200  | 2998.708  | 2837.869  | NM_014936 | 1774.693  | 645.809   | AJ002787  | 1860.799  | 2275.829  |
| NM_017727 | 15481.316 | 17369.141 | NM_003943 | 1120.185  | 642.697   | Z70764    | 816.354   | 684.46    |
| NM_018319 | 5530.335  | 5493.018  | NM_003202 | 24545.344 | 47247.84  | Z83948    | 644.109   | 454.324   |
| AL359559  | 1043.219  | 1389.239  | AF119902  | 613.394   | 2632.695  | M25785    | 649.595   | 324.267   |
| AK021714  | 2380.179  | 1774.276  | NM_020525 | 5429.511  | 13461.11  | M32443    | 1923.805  | 900.565   |
| NM_020314 | 8733.061  | 8069.877  | X62468    | 433.122   | 1217.18   | D16477    | 508.447   | 328.649   |
| AK022972  | 5541.474  | 5128.813  | NM_015148 | 1663.662  | 1953.131  | AK022309  | 449.854   | 306.031   |
| AK025996  | 2406.196  | 1448.031  | NM_004714 | 2093.116  | 1950.766  | AK000063  | 405.534   | 442.324   |
| AF088015  | 1199.987  | 1919.442  | NM_005401 | 307.916   | 233.481   | AK000949  | 712.365   | 537.929   |
| AK026702  | 6920.481  | 10887.978 | NM_002497 | 16347.558 | 10396.847 | AK027068  | 578.327   | 474.556   |
| AF086168  | 732.716   | 608.942   | AB025194  | 10074.741 | 9270.788  | AK000974  | 1022.879  | 663.324   |
| AF007132  | 845.123   | 1301.078  | NM_006239 | 675.806   | 771.818   | AK024910  | 935.866   | 282.328   |
| AK026711  | 1463.24   | 1444.684  | BC020863  | 440.084   | 371.948   | AK025051  | 564.143   | 324.003   |
| NM_017864 | 4520.832  | 6645      | NM_017897 | 4195.738  | 3326.788  | AK024553  | 10511.543 | 3968.365  |
| NM_004865 | 5154.065  | 5374.015  | NM_004265 | 18993.096 | 19855.904 | AF143879  | 2563.072  | 2296.732  |
| AF136408  | 836.73    | 1153.11   | NM_002572 | 4390.021  | 3828.676  | AK024621  | 9329.899  | 9473.97   |
| X51527    | 1855.821  | 2098.299  | NM_001441 | 1402.046  | 1489.268  | AL157449  | 5294.299  | 3699.953  |
| AJ011602  | 1019.58   | 1042.019  | NM_018324 | 986.027   | 1228.809  | AL117582  | 383.186   | 277.593   |
| AJ002787  | 4316.966  | 4235.256  | AF064255  | 36511.375 | 21585.855 | AK025525  | 620.362   | 379.369   |
| Z70764    | 2569.673  | 2251.469  | NM_016368 | 61162.965 | 32733.295 | NM_018233 | 5350.359  | 5251.382  |
| Z83948    | 1048.639  | 984.745   | U08853    | 3394.654  | 2025.534  | AV740891  | 797.515   | 798.101   |
| M25785    | 1580.549  | 1605.168  | NM_004261 | 19661.299 | 14242.715 | AK026860  | 3280.915  | 1094.621  |
| M32443    | 4494.003  | 3131.689  | NM_016006 | 1544.252  | 1144.501  | NM_014895 | 1775.315  | 736.184   |
| D16908    | 681.856   | 748.021   | NM_016245 | 6144.796  | 2826.434  | AK023435  | 869.057   | 680.741   |
| D16477    | 1434.603  | 1232.4    | AF005632  | 2561.75   | 805.842   | AF086035  | 2634.26   | 2522.803  |
| AK024759  | 885.46    | 718.871   | NM_000903 | 2306.968  | 1376.898  | AK022159  | 1724.967  | 1640.55   |
| AK025041  | 7616.225  | 12062.721 | NM_004493 | 22844.203 | 50041.246 | U25750    | 2376.587  | 1908.887  |
| AK026808  | 667.688   | 782.422   | AF309489  | 724.103   | 2862.88   | AK023691  | 3060.024  | 3077.432  |
| AK022309  | 1051.671  | 1042.753  | NM_004047 | 24104.049 | 48696.664 | AK026744  | 409.635   | 325.612   |
| AK000063  | 619.907   | 707.754   | AF287303  | 341.108   | 1560.678  | NM_005234 | 2093.335  | 1560.089  |
| AK000949  | 1949.991  | 2361.661  | NM_006773 | 1759.759  | 1607.767  | BC023536  | 399.634   | 358.954   |
| AK027068  | 1570.81   | 1821.551  | AK024439  | 8469.637  | 7656.47   | NM_001803 | 2961.551  | 2169.576  |
| AK000974  | 1902.089  | 2141.223  | X89676    | 1037.224  | 1386.677  | NM_006233 | 10856.873 | 7184.554  |
| AK024527  | 2055.593  | 2759.529  | NM_012444 | 458.271   | 646.049   | AK021889  | 659.3     | 456.914   |
| AK025051  | 1409.777  | 1183.29   | Z32684    | 2089.823  | 2053.274  | AK000992  | 531.136   | 427.483   |
| AK024553  | 15461.398 | 10961.593 | NM_016512 | 1013.098  | 1352.933  | L23544    | 10381.56  | 3909.763  |
| AF143879  | 5695.678  | 5801.926  | NM_017488 | 4527.846  | 4434.575  | NM_019020 | 2198.821  | 968.514   |
| AK024621  | 20669.795 | 24416.527 | NM_005069 | 811.295   | 1032.725  | NM_016474 | 811.547   | 515.491   |
| AL157449  | 14739.324 | 15836.094 | NM_016044 | 1682.635  | 1767.374  | NM_000910 | 722.951   | 807.426   |
| AL117582  | 558.143   | 924.274   | NM_000520 | 3209.542  | 2281.759  | AF086001  | 15875.085 | 15000.763 |
| AK025525  | 5296.064  | 7115.798  | NM_000289 | 1281.527  | 969.569   | AL117560  | 9430.671  | 7894.226  |
| NM_018233 | 14959.656 | 14100.264 | NM_001500 | 3545.749  | 2171.106  | M24749    | 2804.472  | 2303.653  |
| AV740891  | 3720.446  | 4191.899  | NM_004388 | 3151.671  | 2317.679  | NM_005831 | 30679.98  | 23084.279 |
| AF090916  | 835.336   | 1040.526  | NM_020379 | 448.089   | 569.633   | NM_005850 | 39889.828 | 40146.555 |
| AK026860  | 8239.379  | 5638.899  | AL110127  | 2078.279  | 1079.608  | NM_000554 | 18216.99  | 13926.597 |
| NM_014895 | 2675.49   | 1846.618  | AK001997  | 317.751   | 249.358   | AF009317  | 2471.416  | 1927.046  |
| AK023435  | 2924.514  | 2460.316  | NM_002528 | 2988.131  | 1155.279  | AK026583  | 2654.808  | 2285.298  |
| AF086035  | 6700.012  | 7993.854  | D38438    | 3508.119  | 1348.671  | AF218031  | 2949.685  | 2225.123  |
| AK022159  | 3716.912  | 3665.426  | AV714945  | 1209.668  | 3011.239  | AF210650  | 801.062   | 720.819   |

|           |           |           |           |           |           |           |           |           |
|-----------|-----------|-----------|-----------|-----------|-----------|-----------|-----------|-----------|
| U25750    | 7820.541  | 7608.061  | AF089897  | 362.917   | 1476.895  | NM_018356 | 1130.782  | 1087.206  |
| AK023691  | 8800.294  | 9740.364  | AF007872  | 3308.38   | 7517.235  | AF085896  | 390.698   | 384.889   |
| AK023502  | 1810.257  | 2629.689  | M30938    | 10253.63  | 21116.336 | X74613    | 15624.661 | 11975.039 |
| AK026744  | 1161.418  | 3014.094  | NM_017586 | 12571.836 | 11882.669 | AF075080  | 11944.893 | 7612.859  |
| NM_005234 | 5015.786  | 5587.238  | NM_004148 | 3893.262  | 3280.423  | AL390183  | 428.536   | 408.237   |
| BC023536  | 837.079   | 1383.891  | X03168    | 1244.201  | 1466.177  | Y13897    | 474.133   | 312.624   |
| NM_001803 | 6686.636  | 7202.095  | NM_005168 | 2274.403  | 2211.23   | AK001857  | 595.515   | 422.436   |
| NM_006233 | 21649.301 | 19648.238 | NM_017801 | 8843.355  | 6807.648  | AL133577  | 1142.087  | 432.959   |
| AK021889  | 1355.867  | 1302.858  | NM_007348 | 3727.395  | 2833.878  | NM_000479 | 1052.871  | 541.414   |
| AK000992  | 2722.961  | 2092.674  | U65473    | 6253.168  | 5331.655  | AF038199  | 866.68    | 688.236   |
| L23544    | 31178.594 | 28947.938 | D63481    | 13691.472 | 10006.409 | CY3Cy5    | 1082.17   | 187.755   |
| NM_019020 | 7089.709  | 5990.372  | AY009951  | 9590.757  | 10057.914 | BE908993  | 932.205   | 1231.692  |
| NM_016474 | 1904.797  | 1871.966  | AL157424  | 957.001   | 895.069   | AB012701  | 526.523   | 756.814   |
| NM_000910 | 2181.355  | 3623.631  | AK024422  | 443.754   | 571.305   | M61156    | 734.809   | 1461.263  |
| AF086001  | 37598.152 | 35153.043 | NM_002673 | 478.007   | 907.019   | R44005    | 671.883   | 647.593   |
| AL117560  | 23135.279 | 23840.92  | NM_003876 | 3233.877  | 2515.475  | AI942392  | 1601.504  | 1866.313  |
| M24749    | 5321.73   | 6629.063  | NM_012295 | 4568.678  | 3403.172  | M55040    | 285.725   | 279.326   |
| NM_005831 | 58294.953 | 61808.602 | NM_015910 | 690.243   | 406.398   | AW009739  | 289.801   | 186.565   |
| NM_005850 | 60594.121 | 61853.93  | NM_000222 | 572.788   | 414.405   | BC036805  | 3108.158  | 3083.111  |
| AK026583  | 4752.19   | 5521.198  | AL133666  | 2234.03   | 1164.617  | Z74615    | 7015.11   | 7106.862  |
| AF218031  | 7447.62   | 7380.045  | NM_000663 | 1571.803  | 638.913   | X03884    | 21589.365 | 13823.503 |
| AF210650  | 2055.924  | 2711.033  | NM_004710 | 3356.406  | 1243.451  | U36759    | 249.469   | 256.778   |
| NM_018356 | 5341.083  | 6216.299  | NM_004396 | 13158.101 | 7202.577  | X91625    | 1998.024  | 1114.615  |
| X74613    | 29794.516 | 27294.084 | NM_017999 | 3081.658  | 11323.024 | AF090901  | 315.755   | 570.81    |
| AF075080  | 9768.4    | 8369.008  | NM_015989 | 46087.551 | 50236.664 | AF004231  | 334.383   | 169.052   |
| AL390183  | 1003.359  | 820.177   | NM_001043 | 2010.646  | 5000.518  | AF001862  | 6677.848  | 4142.668  |
| Y13897    | 978.809   | 1041.937  | NM_004779 | 8756.896  | 8204.514  | SR2       | 45526.09  | 24794.994 |
| AK001857  | 1443.509  | 1540.508  | NM_019071 | 3300.205  | 2905.375  | SR4       | 8396.196  | 4302.146  |
| AL133577  | 3675.727  | 2721.707  | NM_014399 | 3505.418  | 3151.07   | SR6       | 1398.765  | 914.93    |
| AK025378  | 1634.572  | 1186.274  | AF113685  | 709.612   | 884.666   | SR8       | 5712.945  | 15643.4   |
| NM_000479 | 2667.88   | 2119.781  | NM_005470 | 2880.956  | 2907.718  | SR10      | 22396.311 | 12074.675 |
| AF038199  | 2411.401  | 2496.216  | AF142570  | 481.975   | 374.988   | CY3Cy5    | 501.454   | 141.702   |
| CY3Cy5    | 3103.248  | 192.175   | NM_004225 | 8604.179  | 7614.151  | NM_004126 | 281.049   | 624.036   |
| BE908993  | 1490.398  | 1890.108  | NM_003862 | 951.332   | 887.685   | U87460    | 3710.271  | 5083.367  |
| AB012701  | 863.496   | 731.844   | NM_002873 | 3732.802  | 2039.821  | NM_003617 | 280.821   | 323.39    |
| M61156    | 1263.667  | 1438.281  | NM_015571 | 4683.292  | 2757.107  | NM_001841 | 528.121   | 746.617   |
| R44005    | 961.838   | 1155.948  | NM_004701 | 8286.443  | 5290.931  | NM_002054 | 1477.368  | 1654.273  |
| AI942392  | 3140.338  | 2872.953  | AK025554  | 1678.026  | 1215.065  | AF300649  | 1223.07   | 1341.139  |
| M55040    | 558.109   | 443.46    | BI824151  | 5768.172  | 4372.523  | NM_004125 | 448.6     | 788.151   |
| AW009739  | 630.786   | 363.702   | AK021791  | 6279.46   | 4129.74   | NM_000823 | 1544.998  | 1617.261  |
| BC036805  | 5734.086  | 4296.539  | NM_004052 | 16157.473 | 11125.419 | NM_004414 | 1615.52   | 2167.426  |
| Z74615    | 5953.091  | 4128.735  | NM_004394 | 5073.146  | 3090.418  | NM_003317 | 2709.075  | 2603.608  |
| X03884    | 40129.645 | 27051.77  | NM_005727 | 21063.469 | 13281.644 | NM_001139 | 799.858   | 1180.023  |
| U36759    | 533.553   | 516.332   | AK027242  | 1594.737  | 798.802   | NM_004609 | 9569.262  | 5470.767  |
| X91625    | 4036.342  | 4568.633  | NM_001279 | 9253.462  | 5823.74   | NM_003772 | 891.701   | 541.056   |
| AF090901  | 287.313   | 733.713   | NM_005010 | 1183.642  | 508.827   | NM_001541 | 1722.803  | 804.775   |
| AF004231  | 356.507   | 311.363   | NM_019055 | 2652.713  | 3251.558  | NM_005416 | 670.413   | 264.313   |
| AF001862  | 12709.456 | 9829.81   | NM_020199 | 1763.734  | 4541.579  | L09081    | 1207.872  | 1449.909  |
| SR2       | 55475.758 | 49428.313 | U96136    | 483.51    | 1405.401  | NM_000218 | 48330.547 | 72051.086 |
| SR4       | 15116.977 | 10628.881 | NM_005941 | 291.102   | 536.349   | NM_016113 | 1030.364  | 1197.534  |
| SR6       | 2191.182  | 2219.069  | AF201380  | 2200.993  | 2493.091  | NM_014222 | 995.784   | 863.597   |
| SR8       | 8606.868  | 25438.535 | NM_012392 | 6053.994  | 4521.641  | L14819    | 180.201   | 158.477   |
| SR10      | 29303.395 | 8471.466  | NM_014833 | 10998.687 | 7905.624  | NM_000509 | 1773.628  | 1618.138  |

|           |           |           |           |           |           |           |           |           |
|-----------|-----------|-----------|-----------|-----------|-----------|-----------|-----------|-----------|
| CY3Cy5    | 1449.627  | 119.066   | NM_000045 | 659.118   | 439.929   | NM_004542 | 417.053   | 721.34    |
| NM_004126 | 382.546   | 486.267   | NM_003878 | 7349.359  | 4777.877  | X06182    | 665.641   | 494.08    |
| U87460    | 8207.15   | 8335.027  | NM_004832 | 581.156   | 777.644   | BF217496  | 2678.397  | 3269.221  |
| NM_003617 | 397.593   | 503.522   | NM_005957 | 629.93    | 712.84    | NM_004762 | 5539.252  | 6340.035  |
| NM_001841 | 1018.909  | 1341.695  | AK024374  | 1560.628  | 1294.231  | NM_006641 | 27007.393 | 23936.324 |
| NM_002054 | 2178.225  | 2181.955  | NM_007101 | 669.821   | 662.514   | NM_000634 | 2929.928  | 4161.392  |
| AF300649  | 1638.568  | 1573.574  | AB033062  | 969.649   | 606.988   | NM_014679 | 18037.996 | 16796.768 |
| NM_004125 | 623.237   | 749.625   | NM_016437 | 21634.695 | 11544.389 | AB040969  | 1384.832  | 1630.877  |
| NM_000823 | 2281.145  | 1499.859  | NM_002720 | 8868.34   | 4065.412  | NM_003467 | 9617.647  | 9148.573  |
| NM_004414 | 3122.294  | 2526.221  | AK024716  | 9008.591  | 4025.677  | NM_014936 | 1062.85   | 1259.335  |
| NM_003317 | 3773.117  | 2657.592  | X67155    | 1896.907  | 883.785   | NM_003943 | 987.968   | 1187.171  |
| NM_001139 | 1678.4    | 1276.283  | NM_020380 | 5594.136  | 1270.191  | NM_019052 | 5935.15   | 7120.498  |
| NM_004609 | 16564.438 | 13608.306 | NM_002890 | 20474.355 | 7078.091  | NM_003202 | 9650.585  | 10188.673 |
| NM_003772 | 1658.701  | 1953.923  | NM_015927 | 1166.393  | 4284.819  | AF119902  | 297.504   | 258.888   |
| NM_001541 | 2009.581  | 2141.603  | NM_005122 | 687.519   | 820.799   | NM_020525 | 2064.777  | 1664.819  |
| NM_005416 | 1415.649  | 1259.591  | NM_014552 | 3815.764  | 3122.494  | NM_003890 | 1727.256  | 948.208   |
| NM_004670 | 806.12    | 2087.917  | NM_003072 | 7144.087  | 5960.697  | BF127978  | 1772.632  | 817.468   |
| L09081    | 2914.26   | 4936.9    | NM_001913 | 1871.634  | 2257.282  | AF110801  | 769.028   | 723.903   |
| NM_000218 | 55216.191 | 62500.313 | AK025594  | 650.515   | 696.753   | NM_016579 | 6458.491  | 5726.778  |
| NM_016113 | 3134.763  | 6745.851  | AB040931  | 3086.31   | 2441.271  | AB018297  | 763.249   | 697.48    |
| NM_014222 | 2368.501  | 2907.88   | NM_003599 | 951.211   | 606.689   | AK022565  | 2562.584  | 2139.801  |
| L14819    | 517.237   | 1168.287  | NM_015911 | 877.075   | 786.416   | AK023151  | 937.039   | 598.077   |
| NM_000509 | 4893.108  | 7735.261  | BC011826  | 5286.045  | 3705.067  | AB033076  | 539.251   | 450.199   |
| NM_004542 | 720.628   | 1060.98   | NM_017647 | 6618.872  | 4064.45   | AK022876  | 1139.109  | 3073.659  |
| X06182    | 1376.614  | 965.374   | NM_012091 | 1562.088  | 1000.33   | AF134894  | 453.234   | 887.945   |
| BF217496  | 3189.501  | 4188.039  | NM_012321 | 3356.559  | 1960.433  | NM_003938 | 2501.122  | 2648.804  |
| NM_004762 | 10557.106 | 10432.48  | D13642    | 2498.706  | 1767.851  | NM_014827 | 10663.431 | 14172.346 |
| NM_006641 | 40296.902 | 35546.691 | NM_004741 | 6976.758  | 3422.976  | NM_001441 | 689.925   | 811.85    |
| NM_000634 | 5584.515  | 5409.279  | NM_018032 | 4388.946  | 2733.532  | NM_018324 | 590.835   | 737.717   |
| NM_014679 | 28552.424 | 23077.215 | NM_003675 | 8233.823  | 4229.76   | AF064255  | 10859.783 | 11120.087 |
| AB040969  | 2883.089  | 2493.61   | NM_017518 | 1773.1    | 1266.014  | NM_016368 | 23397.633 | 21626.199 |
| NM_003467 | 19918.352 | 20161.24  | NM_004117 | 2037.167  | 1173.68   | U08853    | 1699.794  | 2155.912  |
| NM_014936 | 2225.26   | 2613.933  | NM_016594 | 4451.237  | 1700.301  | NM_004261 | 20311.121 | 13044.887 |
| NM_003943 | 1436.436  | 1716.689  | NM_030752 | 6253.689  | 1672.059  | NM_016006 | 900.278   | 1700.167  |
| NM_019052 | 10286.82  | 9285.098  | D26068    | 16323.646 | 4673.001  | NM_016245 | 3469.714  | 4675.637  |
| NM_003202 | 15925.211 | 13623.802 | NM_018559 | 12169.604 | 3414.713  | AF005632  | 1282.442  | 1523.111  |
| AF119902  | 484.82    | 355.685   | NM_004282 | 12869.82  | 30778.182 | NM_000903 | 1364.605  | 1613.18   |
| NM_020525 | 2825.923  | 2444.815  | AK025695  | 1761.414  | 1906.995  | NM_004493 | 8710.812  | 8198.744  |
| NM_003890 | 2631.124  | 3513.225  | AK025442  | 5926.083  | 4418.133  | AF309489  | 200.065   | 138.918   |
| BF127978  | 3140.849  | 4722.934  | AL050041  | 771.786   | 830.754   | NM_004047 | 11732.151 | 7547.25   |
| AF110801  | 1937.736  | 3628.935  | NM_002451 | 1831.148  | 1478.806  | AF287303  | 227.431   | 188.673   |
| NM_016579 | 11615.672 | 13962.825 | NM_013411 | 854.519   | 937.26    | NM_004823 | 953.866   | 417.094   |
| AB018297  | 1390.637  | 1461.069  | NM_020200 | 384.238   | 519.696   | Y17179    | 51557.688 | 19347.871 |
| AK022565  | 5901.597  | 6226.962  | NM_000180 | 9174.23   | 7021.548  | NM_000891 | 290.114   | 248.393   |
| AK023151  | 1842.49   | 1762.515  | NM_000858 | 6949.47   | 4805.484  | AF239613  | 614.59    | 395.824   |
| AB033076  | 1918.147  | 3068.606  | AF254087  | 1024.842  | 918.812   | AK026840  | 1250.379  | 1063.724  |
| AK022876  | 2363.722  | 3713.891  | NM_017715 | 973.379   | 727.548   | NM_000288 | 1013.316  | 944.127   |
| AF134894  | 1167.907  | 2373.972  | AL117607  | 2434.393  | 1392.43   | AK026317  | 4341.721  | 8517.223  |
| NM_003938 | 4998.103  | 5081.726  | AB037774  | 1960.262  | 1176.554  | X82207    | 10016.372 | 21395.639 |
| NM_014827 | 17795.195 | 15066.306 | NM_005438 | 561.273   | 362.813   | NM_015044 | 323.978   | 510.236   |
| NM_001441 | 1591.524  | 1960.22   | AK024361  | 1228.705  | 879.277   | NM_002867 | 263.995   | 179.486   |
| NM_018324 | 876.473   | 1052.496  | NM_004350 | 1237.348  | 667.292   | NM_000520 | 1734.466  | 2221.228  |
| AF064255  | 18932.969 | 16509.031 | NM_018044 | 2476.697  | 1189.495  | NM_000288 | 620.399   | 1044.28   |

|           |           |           |           |           |           |           |           |           |
|-----------|-----------|-----------|-----------|-----------|-----------|-----------|-----------|-----------|
| NM_01636E | 36990.652 | 27467.604 | NM_004503 | 259.025   | 260.191   | NM_00150C | 1946.256  | 2096.435  |
| U08853    | 3596.294  | 3755.884  | NM_001717 | 298.645   | 160.64    | NM_00438E | 1644.132  | 2372.056  |
| NM_004261 | 34951.324 | 22336.191 | AF274347  | 3997.394  | 743.377   | NM_02037E | 288.261   | 426.561   |
| NM_01600E | 2116.195  | 2464      | NM_01855E | 4835.085  | 10525.333 | AL110127  | 1076.963  | 1579.749  |
| NM_01624E | 5975.327  | 6520.999  | AK023525  | 3208.426  | 2555.223  | AK001997  | 244.431   | 243.432   |
| AF005632  | 2358.138  | 2179.262  | AF085829  | 1110.549  | 1361.154  | NM_00252E | 1617.736  | 1930.163  |
| NM_00090E | 2636.084  | 1668.409  | AF075029  | 446.622   | 516.499   | D38438    | 1377.753  | 1476.339  |
| NM_00449E | 16185.729 | 14294.773 | AK021903  | 4959.346  | 3354.694  | AV714945  | 364.853   | 321.377   |
| AF309489  | 498.09    | 367.898   | AL390143  | 4622.46   | 3156.269  | AF089897  | 188.407   | 236.59    |
| NM_004047 | 23487.826 | 21747.398 | AL162075  | 1130.924  | 714.419   | AF007872  | 1667.501  | 1431.984  |
| AF287303  | 494.497   | 601.253   | AF147384  | 789.143   | 539.596   | M30938    | 3602.916  | 2253.871  |
| NM_00482E | 1769.898  | 2793.427  | AK021595  | 866.672   | 662.951   | NM_01514E | 802.696   | 453.957   |
| AB013889  | 179.445   | 684.799   | AK021648  | 817.557   | 617.05    | NM_004714 | 785.222   | 357.257   |
| Y17179    | 54248.387 | 60273.156 | AF147358  | 12117.268 | 8948.246  | NM_005401 | 168.664   | 220.958   |
| NM_000891 | 448.614   | 702.297   | NM_01841C | 3915.461  | 2713.947  | NM_017677 | 134.003   | 137.708   |
| AF239613  | 1145.057  | 1191.81   | AF086278  | 259.094   | 371.898   | NM_002497 | 11084.986 | 6744.88   |
| AK026840  | 2978.863  | 2874.357  | AF086355  | 470.113   | 418.383   | AB025194  | 2829.924  | 1554.279  |
| NM_00028E | 2357.431  | 3583.59   | AF086314  | 607.154   | 392.834   | NM_00623E | 441.387   | 371.273   |
| AK026317  | 10553.111 | 12988.372 | NM_016364 | 720.58    | 445.602   | BC020863  | 298.836   | 534.431   |
| X82207    | 24532.623 | 35712.016 | AF086419  | 3057.219  | 1479.882  | NM_017897 | 2206.082  | 3811.742  |
| NM_002867 | 476.379   | 559.149   | AF086461  | 742.077   | 321.828   | NM_00426E | 16943.559 | 18907.699 |
| NM_00052C | 4031.734  | 5798.925  | AL833296  | 1767.354  | 730.65    | NM_00257E | 2319.159  | 1595.301  |
| NM_00028E | 1448.155  | 1450.873  | AL110240  | 3376.042  | 1402.78   | NM_00050E | 1489.398  | 1193.766  |
| NM_00150C | 3708.446  | 4451.816  | AF075081  | 281.182   | 547.308   | NM_00454E | 289.177   | 462.472   |
| NM_00438E | 3418.759  | 3815.472  | NM_01537E | 621.625   | 781.153   | X06182    | 697.057   | 1013.509  |
| NM_02037E | 485.01    | 668.983   | AF085933  | 690.954   | 418.485   | BE908993  | 840.59    | 1098.938  |
| AL110127  | 1538.389  | 2067.391  | AF147431  | 541.273   | 447.93    | AB012701  | 579.456   | 712.258   |
| AK001997  | 372.903   | 370.129   | AK026422  | 8602.871  | 7120.93   | M61156    | 789.196   | 1038.879  |
| NM_00252E | 3299.255  | 2309.494  | AF085938  | 1153.976  | 888.002   | R44005    | 666.75    | 888.855   |
| D38438    | 2263.22   | 1818.282  | AK022264  | 887.339   | 805.612   | AI942392  | 1322.373  | 1485.836  |
| AV714945  | 950.201   | 639.094   | AL137331  | 836.009   | 858.988   | M55040    | 239.151   | 210.169   |
| AF089897  | 325.031   | 382.266   | AL162040  | 4459.979  | 2890.117  | AW009739  | 405.788   | 327.299   |
| AF007872  | 4416.472  | 4615.816  | AL442084  | 686.824   | 657.484   | BC036805  | 2739.109  | 1831.26   |
| M30938    | 8584.872  | 8699.218  | AL137371  | 7655.203  | 4544.956  | Z74615    | 5897.415  | 3011.297  |
| NM_01514E | 1846.825  | 2282.009  | AL137596  | 2984.581  | 1809.181  | X03884    | 19417.793 | 6033.641  |
| NM_004714 | 2063.459  | 3713.178  | AL353942  | 11808.2   | 7972.986  | U36759    | 193.277   | 189.729   |
| NM_005401 | 305.624   | 598.263   | Z38010    | 12075.457 | 8408.057  | X91625    | 1606.901  | 978.567   |
| NM_002497 | 19343.047 | 20493.553 | AK024713  | 437.807   | 232.289   | AF004231  | 166.6     | 170.227   |
| AB025194  | 8210.438  | 12753.407 | AF086114  | 336.399   | 269.062   | AF001862  | 5317.45   | 2326.679  |
| NM_00623E | 975.807   | 1054.617  | AK024204  | 520.778   | 457.283   | NM_058197 | 162.727   | 145.628   |
| BC020863  | 426.877   | 747.183   | AK023737  | 2417.184  | 707.28    |           | 244.98    | 525.636   |
| NM_017897 | 4465.906  | 6554.564  | NM_00660E | 2869.667  | 609.518   | NM_016044 | 967.822   | 1109.053  |
| NM_00426E | 39668.824 | 43270.93  | AK023643  | 574.771   | 600.524   | AK023151  | 899.766   | 1132.73   |
| NM_00257E | 3781.52   | 2691.002  | AL390159  | 327.898   | 519.052   | AB033076  | 1056.877  | 1077.872  |
| NM_00050E | 3123.208  | 2958.257  | NM_014157 | 692.702   | 803.872   | AK022876  | 896.538   | 1478.791  |
| NM_00454E | 840.171   | 1023.555  | AF111851  | 5725.335  | 3604.74   | AF134894  | 450.044   | 568.58    |
| X06182    | 1108.093  | 1363.133  | AF152529  | 372.634   | 583.18    | NM_00393E | 2384.701  | 1861.471  |
| BE908993  | 1551.798  | 1760.027  | AL360200  | 416.045   | 375.896   | NM_014827 | 9822.995  | 8727.677  |
| AB012701  | 1033.019  | 742.572   | AK021992  | 359.678   | 347.931   | NM_00412E | 182.691   | 413.832   |
| M61156    | 1542.56   | 1444.838  | AK022102  | 342.198   | 340.355   | U87460    | 3671.303  | 4391.375  |
| R44005    | 817.472   | 578.36    | AK022235  | 373.868   | 411.837   | NM_003617 | 227.775   | 267.12    |
| AI942392  | 2721.378  | 2218.377  | AK022378  | 1626.457  | 1656.61   | NM_001841 | 505.522   | 659.568   |
| M55040    | 503.221   | 526.22    | AK027174  | 248.403   | 260.379   | NM_002054 | 1234.709  | 1003.565  |

|           |           |           |           |           |           |           |           |           |
|-----------|-----------|-----------|-----------|-----------|-----------|-----------|-----------|-----------|
| AW009739  | 448.752   | 348.073   | AL110173  | 532.935   | 349.719   | AF300649  | 1013.493  | 845.542   |
| BC036805  | 6188.224  | 7330.538  | AK025833  | 410.457   | 292.455   | NM_004125 | 383.965   | 221.131   |
| Z74615    | 10731.658 | 11195.599 | AK027254  | 1335.029  | 677.707   | NM_000823 | 1274.966  | 888.32    |
| X03884    | 49667.258 | 47371.402 | AK021772  | 1174.045  | 431.313   | NM_004414 | 1498.767  | 589.164   |
| U36759    | 474.312   | 785.602   | AK026297  | 360.725   | 206.798   | NM_003317 | 2178.86   | 714.569   |
| X91625    | 3714.937  | 2517.095  | AK054831  | 31312.059 | 23793.557 | NM_001139 | 903.431   | 553.013   |
| AF090901  | 338.582   | 227.305   | AK021770  | 912.108   | 794.372   | NM_004609 | 6119.396  | 3372.236  |
| AF004231  | 297.301   | 486.204   | AK027248  | 1134.449  | 961.426   | NM_003772 | 971.37    | 689.11    |
| AF001862  | 16288.97  | 22054.977 | AK022804  | 7653.313  | 6449.26   | NM_001541 | 988.662   | 742.052   |
| NM_058197 | 507.842   | 556.458   | AF009263  | 2269.783  | 2175.95   | NM_005416 | 516.076   | 270.992   |
| NM_016044 | 2710.884  | 3673.518  | AF086329  | 3731.035  | 2572.077  | NM_004670 | 185.395   | 196.303   |
| AK023151  | 1853.505  | 2330.583  | AK025799  | 487.745   | 360.799   | L09081    | 1038.844  | 1667.737  |
| AB033076  | 1128.372  | 1181.933  | AK022857  | 311.447   | 171.131   | NM_014222 | 1024.018  | 1268.959  |
| AK022876  | 1858.126  | 2226.593  | AL110206  | 1291.364  | 821.999   | AK026840  | 1291.71   | 1716.25   |
| AF134894  | 904.603   | 1393.813  | NM_004821 | 1265.256  | 433.848   | NM_000288 | 929.279   | 1500.89   |
| NM_003938 | 5279.434  | 4119.106  | AK024292  | 677.245   | 265.036   | AK026317  | 4150.071  | 5621.232  |
| NM_014827 | 17880.867 | 14799.109 | AK026263  | 1103.374  | 338.58    | X82207    | 9834.389  | 9796.828  |
| U87460    | 9026.089  | 9063.716  | U50526    | 584.792   | 676.288   | NM_015044 | 518.244   | 489.3     |
| NM_003617 | 428.315   | 952.763   | S75105    | 4734.487  | 3951.39   | NM_002867 | 227.474   | 265.018   |
| NM_001841 | 1017.598  | 812.527   | AF056455  | 8340.359  | 5752.191  | BF217496  | 2899.729  | 2920.385  |
| NM_002054 | 2091.25   | 1684.348  | NM_018510 | 1054.516  | 1027.827  | NM_004762 | 5817.653  | 5076.595  |
| AF300649  | 1644.448  | 1377.674  | U50537    | 339.245   | 663.022   | NM_006641 | 27611.162 | 20698.25  |
| NM_000823 | 2966.865  | 2808.104  | AK024988  | 545.43    | 534.805   | NM_000634 | 3261.424  | 3520.314  |
| NM_004414 | 4164.797  | 6480.238  | AK025719  | 384.777   | 528.488   | NM_014679 | 16479.424 | 11198.765 |
| NM_003317 | 7195.508  | 15144.875 | AF026943  | 1359.457  | 953.864   | AB040969  | 1323.008  | 1114.127  |
| NM_001139 | 2325.498  | 2926.436  | L77582    | 481.636   | 401.679   | NM_003467 | 9419.279  | 5412.29   |
| NM_004609 | 19414.674 | 30422.672 | NM_020448 | 1023.957  | 805.602   | NM_014936 | 926.406   | 514.708   |
| NM_003772 | 2070.363  | 3216.46   | NM_005419 | 1157.872  | 874.285   | NM_003943 | 729.993   | 442.134   |
| NM_001541 | 2077.309  | 1958.011  | NM_003479 | 25612.596 | 12700.956 | NM_019052 | 4896.764  | 2727.516  |
| NM_005416 | 1537.959  | 1233.575  | NM_020224 | 4600.798  | 2251.706  | NM_003202 | 9201.931  | 4458.143  |
| NM_004670 | 482.781   | 943.454   | U17617    | 1424.264  | 958.617   | AF119902  | 255.58    | 232.814   |
| L09081    | 2146.924  | 1960.526  | AK022952  | 5835.334  | 2327.219  | NM_020525 | 1585.481  | 1151.71   |
| NM_000218 | 60788.531 | 60833.648 | BF218888  | 563.914   | 358.117   | X62468    | 202.103   | 185.384   |
| NM_016113 | 3649.961  | 6565.72   | AF086401  | 2720.576  | 2746.134  | NM_003890 | 1022.596  | 596.178   |
| NM_014222 | 2766.786  | 4266.423  | L23869    | 1123.43   | 1277.892  | BF127978  | 1314.282  | 887.547   |
| AK026840  | 2918.036  | 3895.178  | Z21853    | 1641.356  | 1536      | AF110801  | 1206.911  | 2400.314  |
| NM_000288 | 2156.401  | 2762.109  | U80770    | 733.457   | 591.353   | AB018297  | 886.764   | 2142.989  |
| AK026317  | 8889.118  | 10416.682 | AB075846  | 435.041   | 457.201   | AK022565  | 2850.829  | 5682.638  |
| X82207    | 16126.211 | 14806.99  | NM_018342 | 800.301   | 462.782   | AB025194  | 3503.333  | 3150.174  |
| NM_015044 | 1170.48   | 1244.786  | BC020260  | 1654.844  | 1112.731  | NM_006239 | 492.778   | 638.425   |
| NM_002867 | 589.846   | 518.041   | D17156    | 4989.307  | 2335.561  | BC020863  | 211.346   | 224.38    |
| BF217496  | 4050.424  | 3729.621  | L04461    | 381.241   | 350.927   | NM_017897 | 1997.643  | 2497.28   |
| NM_004762 | 11070.494 | 10070.793 | AK026938  | 10345.585 | 7183.14   | NM_004265 | 15299.813 | 10858.104 |
| NM_006641 | 39027.512 | 23601.258 | AK024373  | 8015.972  | 5115.784  | NM_002572 | 2483.811  | 2736.548  |
| NM_000634 | 5676.533  | 4461.804  | AK022343  | 6962.926  | 3390.279  | NM_001441 | 755.946   | 1040.867  |
| NM_014679 | 28164.012 | 20146.334 | AK026400  | 933.372   | 713.912   | NM_018324 | 719.824   | 722.456   |
| AB040969  | 2798.275  | 2084.838  | U92989    | 6718.743  | 4035.257  | AF064255  | 12832.049 | 9703.002  |
| NM_003467 | 17143.797 | 15877.947 | AF075102  | 1071.128  | 670.553   | NM_016368 | 21994.6   | 17774.795 |
| NM_014936 | 2337.084  | 1989.548  | NM_018463 | 7970.812  | 3516.651  | U08853    | 1520.06   | 1347.493  |
| NM_003943 | 1911.666  | 2670.229  | X74956    | 16450.029 | 8447.953  | NM_004261 | 20370.689 | 9464.304  |
| NM_019052 | 12655.224 | 27972.064 | AF132197  | 4636.636  | 1772.439  | NM_016006 | 821.217   | 848.553   |
| NM_003202 | 22596.424 | 34482.703 | AK025546  | 646.577   | 511.274   | NM_016245 | 3494.909  | 2244.065  |
| AF119902  | 688.377   | 1568.961  | AL137487  | 1169.988  | 797.015   | AF005632  | 1118.015  | 914.342   |

|           |           |           |           |           |           |           |           |           |
|-----------|-----------|-----------|-----------|-----------|-----------|-----------|-----------|-----------|
| NM_020525 | 3426.89   | 6400.376  | AK023800  | 495.024   | 279.933   | NM_000903 | 1214.912  | 621.415   |
| X62468    | 321.034   | 316.205   | AK024120  | 1273.904  | 683.913   | NM_004493 | 8205.764  | 3367.157  |
| NM_003890 | 2948.725  | 2862.584  | CY3Cy5    | 4430.263  | 240.934   | AF309489  | 219.283   | 150.105   |
| BF127978  | 3297.068  | 4939.538  | W96179    | 1639.852  | 1270.876  | NM_004047 | 12133.191 | 6612.313  |
| AF110801  | 1665.601  | 3127.4    | AW247841  | 3171.956  | 2569.073  | AF287303  | 214.737   | 230.967   |
| NM_016579 | 13628.412 | 19985.924 | BG568198  | 271.129   | 294.39    | NM_004823 | 909.607   | 604.118   |
| AB018297  | 1645.86   | 1946.114  | M76559    | 1651.721  | 1647.306  | AB013889  | 172.046   | 132.064   |
| AK022565  | 9194.181  | 16791.158 | U11058    | 264.418   | 294.257   | NM_004974 | 144.859   | 429.491   |
| AB025194  | 7360.598  | 8501.614  | AI222585  | 399.401   | 504.072   | AF239613  | 833.602   | 2256.911  |
| NM_006239 | 1004.371  | 1455.517  | AA411678  | 6727.675  | 5800.247  | NM_016044 | 1219.262  | 1293.84   |
| BC020863  | 436.798   | 560.523   | AA862813  | 14358.542 | 12152.349 | NM_000520 | 1586.361  | 1727.115  |
| NM_017897 | 4158.989  | 4224.238  | AA398427  | 1525.938  | 1797.8    | NM_000289 | 757.927   | 950.016   |
| NM_004265 | 30476.699 | 20698.686 | T55728    | 4536.039  | 3739.355  | NM_001500 | 1812.876  | 2021.088  |
| NM_002572 | 5380.247  | 5391.007  | H20856    | 1486.597  | 1446.575  | NM_004389 | 1737.719  | 1906.553  |
| NM_001441 | 1263.27   | 1520.851  | N62586    | 4325.861  | 6918.148  | NM_020379 | 229.513   | 250.552   |
| NM_018324 | 1027.861  | 1200.978  | AA242743  | 7643.555  | 20535.123 | AL110127  | 1055.146  | 941.238   |
| AF064255  | 20974.383 | 17595.619 | NM_004758 | 2701.149  | 3008.972  | AK001997  | 246.875   | 165.226   |
| NM_016369 | 37277.102 | 23371.465 | SR5       | 6183.188  | 6431.392  | NM_002529 | 1679.002  | 958.799   |
| U08853    | 3457.095  | 2874.945  | CY3Cy5    | 5657.336  | 368.774   | D38438    | 1374.887  | 796.747   |
| NM_004261 | 29912.943 | 14650.852 | NM_016382 | 1400.718  | 576.08    | AV714945  | 348.508   | 203.659   |
| NM_016006 | 1754.771  | 2353.544  | AK023117  | 1482.969  | 1600.356  | AF089897  | 211.487   | 323.871   |
| NM_016245 | 6810.896  | 11735.315 | AL122046  | 948.877   | 850.406   | AF007872  | 1715.018  | 1130.657  |
| AF005632  | 2448.583  | 3663.736  | NM_000855 | 1735.567  | 1582.867  | M30938    | 3967.694  | 2616.535  |
| NM_000903 | 3006.126  | 5973.102  | NM_005536 | 5428.305  | 3544.746  | NM_015149 | 868.683   | 627.467   |
| NM_004493 | 18899.953 | 23619.359 | NM_005077 | 1060.612  | 973.171   | NM_004714 | 1053.769  | 1396.304  |
| AF309489  | 493.638   | 671.258   | NM_004423 | 4445.28   | 4210.695  | NM_002497 | 16871.813 | 45392.52  |
| NM_004047 | 29854.926 | 47556.078 | NM_001990 | 840.728   | 688.582   | NM_007050 | 142.07    | 183.254   |
| AF287303  | 364.311   | 426.959   | NM_002141 | 629.843   | 766.8     | NM_005416 | 549.198   | 573.41    |
| NM_004823 | 2123.046  | 2244.063  | NM_003311 | 1963.774  | 1888.319  | NM_004670 | 192.283   | 385.875   |
| Y17179    | 51509.277 | 61382.523 | NM_003776 | 2869.59   | 4394.511  | L09081    | 985.562   | 1069.604  |
| NM_000891 | 652.29    | 426.726   | NM_007099 | 391.752   | 605.278   | NM_000219 | 50243.707 | 62323.48  |
| AF239613  | 1751.822  | 2852.341  | NM_015719 | 800.487   | 2286.927  | NM_016113 | 1464.656  | 1862.046  |
| NM_016044 | 2815.846  | 2051.24   | NM_012464 | 212.102   | 472.512   | NM_014222 | 1013.938  | 1639.379  |
| NM_000520 | 3505.106  | 4264.819  | NM_006129 | 1085.119  | 1382.049  | NM_000509 | 1327.215  | 1092.706  |
| NM_000289 | 1324.149  | 1338.303  | NM_000582 | 2261.774  | 3126.76   | NM_004542 | 408.117   | 352.775   |
| NM_001500 | 4020.925  | 3773.307  | NM_005593 | 1018.629  | 1343.544  | X06182    | 572.745   | 544.43    |
| NM_004389 | 3432.719  | 2264.137  | NM_004684 | 374.965   | 1031.248  | BE908993  | 857.458   | 968.566   |
| NM_020379 | 400.939   | 249.645   | BF338709  | 589.962   | 819.909   | AB012701  | 457.327   | 449.318   |
| AL110127  | 1144.09   | 1171.906  | AF204171  | 380.473   | 798.867   | M61156    | 789.779   | 326.42    |
| AK001997  | 435.373   | 725.434   | M18182    | 366.703   | 391.527   | R44005    | 532.234   | 583.117   |
| NM_002529 | 4328.382  | 8778.826  | AF100756  | 4442.943  | 3444.704  | AI942392  | 1286.796  | 759.751   |
| D38438    | 2652.71   | 4624.788  | NM_006825 | 2367.771  | 2409.383  | M55040    | 192.946   | 160.571   |
| AV714945  | 831.543   | 936.252   | NM_004862 | 215.132   | 466.034   | AW009739  | 246.326   | 404.368   |
| AF089897  | 285.484   | 240.377   | NM_001661 | 550.78    | 559.085   | BC036805  | 2594.235  | 1907.555  |
| AF007872  | 5045.618  | 9564.624  | NM_014563 | 680.313   | 609.934   | Z74615    | 4027.53   | 3115.421  |
| M30938    | 9546.183  | 18520.332 | NM_020150 | 2466.395  | 2236.517  | X03884    | 23644.736 | 14212.83  |
| NM_015149 | 2026.549  | 2067.163  | NM_007150 | 2268.672  | 1609.82   | X91625    | 2914.688  | 4470.775  |
| NM_004714 | 2292.489  | 2207.748  | NM_006831 | 1606.391  | 1394.532  | AF090901  | 328.078   | 1373.295  |
| NM_005401 | 294.435   | 311.389   | AL162044  | 3309.795  | 2953.869  | AF004231  | 210.57    | 1338.939  |
| NM_002497 | 20967.139 | 27006.012 | AK024004  | 871.133   | 1146.17   | AF001862  | 6948.136  | 17455.514 |
| NM_005416 | 1317.348  | 1483.652  | AK022365  | 548.88    | 461.194   | NM_003890 | 1076.404  | 1268.328  |
| NM_004670 | 407.533   | 614.184   | BE892273  | 44236.172 | 62815.91  | BF127978  | 1510.335  | 1451.679  |
| L09081    | 1591.08   | 1788.759  | AF026929  | 447.112   | 477.899   | AF110801  | 743.897   | 1101.033  |



|           |           |           |           |           |           |           |           |           |
|-----------|-----------|-----------|-----------|-----------|-----------|-----------|-----------|-----------|
| NM_00021E | 56711.242 | 61643.113 | NM_016734 | 515.777   | 463.632   | NM_01657E | 5437.86   | 6063.701  |
| NM_016113 | 3071.398  | 3163.708  | AF035803  | 413.66    | 516.023   | AB018297  | 812.175   | 791.785   |
| NM_014222 | 2410.333  | 2222.21   | Y08147    | 2512.327  | 3844.635  | AK022565  | 2963.243  | 2825.791  |
| L14819    | 321.604   | 369.562   | D00174    | 7394.641  | 8589.462  | AK023151  | 913.111   | 818.36    |
| NM_00050E | 3132.389  | 2102.53   | AB000520  | 713.935   | 1028.712  | AB033076  | 680.196   | 518.961   |
| NM_004542 | 823.177   | 791.392   | NM_006907 | 437.638   | 426.989   | AK022876  | 925.249   | 959.065   |
| X06182    | 1168.613  | 912.883   | NM_00268E | 330.755   | 383.995   | AF134894  | 452.832   | 566.438   |
| BE908993  | 1695.452  | 1420.116  | NM_006267 | 829.802   | 732.05    | NM_00393E | 2190.554  | 1531.337  |
| AB012701  | 1010.202  | 903.805   | NM_002661 | 6109.741  | 4261.264  | NM_014827 | 9482.965  | 8650.029  |
| M61156    | 1893.721  | 1786.944  | AK023982  | 668.432   | 590.03    | NM_00412E | 188.683   | 215.315   |
| R44005    | 1033.049  | 1320.118  | NM_01846E | 1210.217  | 996.938   | U87460    | 3693.283  | 3879.229  |
| AI942392  | 2723.921  | 3021.502  | Y11312    | 1181.635  | 927.445   | NM_003617 | 319.221   | 218.1     |
| M55040    | 504.869   | 925.054   | AB014533  | 4637.047  | 4055.586  | NM_001841 | 548.77    | 953.635   |
| AW009739  | 534.926   | 240.06    | M11427    | 360.883   | 277.522   | NM_002054 | 1420.695  | 1143.154  |
| BC036805  | 6666.35   | 7665.27   | NM_000744 | 641.877   | 814.616   | AF300649  | 1081.191  | 1306.962  |
| Z74615    | 11141.124 | 13429.551 | NM_00303E | 896.504   | 902.839   | NM_00412E | 457.902   | 825.715   |
| X03884    | 47554.41  | 60179.188 | NM_01450E | 399.886   | 588.163   | NM_00082E | 1451.294  | 2324.552  |
| U36759    | 414.755   | 384.268   | U26662    | 187.834   | 459.252   | NM_004414 | 2222.086  | 4231.458  |
| X91625    | 4038.728  | 3582.032  | NM_02037E | 2608.614  | 3061.113  | NM_003317 | 3181.83   | 3845.906  |
| AF090901  | 479.715   | 1169.694  | NM_00263E | 39505.547 | 33221.508 | NM_00113E | 1346.349  | 2025.901  |
| AF004231  | 323.48    | 344.719   | NM_00497E | 415.827   | 435.537   | NM_00460E | 5646.979  | 16532.889 |
| AF001862  | 14007.795 | 14697.335 | NM_016077 | 1930.451  | 2902.26   | NM_00377E | 1231.041  | 4024.385  |
| NM_00389C | 2913.129  | 3096.337  | NM_015537 | 2160.994  | 1977.388  | NM_001541 | 942.575   | 3765.467  |
| BF127978  | 2803.142  | 2895.198  | NM_01652C | 14029.283 | 8110.682  | NM_00482E | 903.782   | 1068.967  |
| AF110801  | 1479.683  | 2044.558  | AB018353  | 2150.038  | 2272.929  | AB013889  | 157.448   | 154.246   |
| NM_01657E | 10938.806 | 10320.937 | NM_00703E | 2271.034  | 1433.094  | Y17179    | 56778.457 | 39961.207 |
| AB018297  | 1348.074  | 1498.81   | NM_002617 | 1892.707  | 1755.913  | NM_000891 | 307.706   | 680.919   |
| AK022565  | 7044.42   | 6716.32   | NM_00331E | 7969.594  | 7406.691  | AF239613  | 550.21    | 1108.055  |
| AK023151  | 1824.613  | 1770.59   | AF090907  | 1663.939  | 1472.118  | AK026840  | 1065.57   | 1785.203  |
| AB033076  | 1250.589  | 1319.187  | AK024476  | 2400.234  | 2349.612  | NM_00028E | 1127.191  | 2136.6    |
| AK022876  | 1799.77   | 1350.131  | X74794    | 3678.379  | 2955.294  | AK026317  | 4237.127  | 8555.054  |
| AF134894  | 978.65    | 933.182   | AL050298  | 1641.867  | 1138.057  | X82207    | 12155.126 | 17418.078 |
| NM_00393E | 4692.813  | 2026.516  | NM_00707E | 20644.537 | 18614.842 | NM_015044 | 569.883   | 1060.503  |
| NM_014827 | 18418.549 | 13024.154 | M20696    | 1786.728  | 2091.483  | NM_002867 | 458.141   | 719.342   |
| U87460    | 8975.363  | 13362.894 | NM_00291E | 506.799   | 298.313   | BF217496  | 3403.921  | 5775.9    |
| NM_003617 | 675.002   | 1663.819  | NM_00673E | 1947.864  | 1797.068  | NM_00476E | 8194.433  | 10537.956 |
| NM_001841 | 1033.14   | 1097.145  | NM_00364C | 1520.68   | 1183.349  | NM_006641 | 40431.199 | 45190.84  |
| NM_002054 | 2618.574  | 3310.651  | NM_014444 | 2550.281  | 2545.05   | NM_000634 | 4978.114  | 7611.517  |
| AF300649  | 1596.723  | 1276.182  | NM_01224E | 3775.982  | 3248.25   | NM_01467E | 27531.025 | 24137.211 |
| NM_00412E | 569.72    | 387.266   | NM_01497C | 2779.26   | 2699.433  | AB040969  | 2183.707  | 3029.885  |
| NM_00082E | 2705.088  | 2338.988  | NM_01439E | 3312.924  | 3622.411  | NM_003467 | 15721.457 | 19705.234 |
| NM_004414 | 3455.302  | 3806.979  | NM_00422E | 9595.383  | 10170.264 | NM_01493E | 1587.453  | 3011.118  |
| NM_003317 | 5164.672  | 5037.58   | NM_00681E | 604.592   | 690.314   | NM_00394E | 1233.158  | 1818.031  |
| NM_00113E | 2274.444  | 3051.933  | NM_00135E | 8378.866  | 10231.751 | NM_01905E | 7981.925  | 11279.217 |
| NM_00460E | 23023.986 | 31980.082 | NM_00121E | 132.077   | 632.127   | NM_00320E | 15234.826 | 15667.363 |
| NM_00377E | 1845.019  | 2372.849  | U63336    | 532.118   | 636.905   | AF119902  | 382.964   | 2074.802  |
| NM_001541 | 1686.026  | 1500.464  | BF338709  | 525.632   | 352.121   | NM_02052E | 1428.518  | 5390.333  |
| NM_00482E | 2163.939  | 2189.05   | AF204171  | 414.993   | 194.569   | X62468    | 220.517   | 700.925   |
| Y17179    | 57378.91  | 57539.664 | M18182    | 256.613   | 146.975   | NM_01514E | 1224.952  | 2203.951  |
| NM_000891 | 499.442   | 747.125   | W96179    | 1618.823  | 1121.926  | NM_004714 | 1574.22   | 2693.877  |
| AF239613  | 1284.868  | 1053.892  | AW247841  | 2917.33   | 2170.318  | NM_005401 | 239.081   | 578.759   |
| AK026840  | 3103.674  | 3186.578  | M76559    | 1693.017  | 1816.528  | NM_00705C | 74.343    | 305       |
| NM_00028E | 1939.56   | 2474.219  | AI222585  | 356.432   | 431.938   | AB025194  | 6198.804  | 10594.464 |

|           |           |           |           |           |           |           |           |           |
|-----------|-----------|-----------|-----------|-----------|-----------|-----------|-----------|-----------|
| AK026317  | 9628.129  | 8626.682  | AA411678  | 6651.24   | 6121.409  | NM_00623E | 696.802   | 1434.912  |
| X82207    | 17621.322 | 14108.823 | AA862813  | 13486.779 | 12927.59  | BC020863  | 357.077   | 968.034   |
| NM_015044 | 1187.524  | 819.178   | AA398427  | 1421.699  | 1514.199  | NM_017897 | 2604.488  | 6433.408  |
| NM_002867 | 601.288   | 426.764   | T55728    | 3860.132  | 2757.015  | NM_00426E | 21135.287 | 21597.979 |
| BF217496  | 2931.682  | 2807.311  | H20856    | 1253.097  | 654.868   | NM_00257E | 3722.196  | 6966.915  |
| NM_00476E | 5651.082  | 7053.01   | N62586    | 2619.953  | 2472.76   | NM_001441 | 1131.227  | 1753.886  |
| NM_006641 | 49080.754 | 51964.723 | AA242743  | 4403.505  | 4618.657  | NM_018324 | 660.851   | 1519.032  |
| NM_000634 | 6852.674  | 8756.073  | NM_00475E | 2568.043  | 1690.849  | AF064255  | 15516.118 | 18535.021 |
| NM_01467E | 34645.449 | 32329.061 | NM_00516E | 3777.465  | 4580.561  | NM_01636E | 32059.092 | 33695.32  |
| AB040969  | 3255.244  | 5836.025  | NM_015361 | 9062.758  | 10013.806 | U08853    | 2785.538  | 4495.902  |
| NM_003467 | 22078.805 | 24183.744 | NM_00431C | 6313.053  | 10742.965 | NM_004261 | 32016.854 | 22789.697 |
| NM_01493E | 2397.624  | 2641.981  | Y08147    | 1530.514  | 1544.728  | NM_01600E | 1495.615  | 3303.94   |
| NM_00394E | 1756.56   | 3265.553  | D00174    | 3887.066  | 3316.75   | NM_01624E | 5088.098  | 11279.207 |
| NM_01905E | 11463.184 | 23097.947 | AB000520  | 531.938   | 469.922   | AF005632  | 1676.445  | 2744.813  |
| NM_00320E | 24590.504 | 39577.973 | NM_01638E | 1321.88   | 378.08    | NM_00090E | 1826.419  | 3056.72   |
| AF119902  | 695.249   | 1278.12   | AK023117  | 1361.975  | 1670.344  | NM_00449E | 14830.061 | 14249.479 |
| NM_02052E | 3372.986  | 3022.176  | AL122046  | 987.268   | 623.848   | AF309489  | 248.785   | 1581.729  |
| NM_01514E | 1829.374  | 2705.704  | NM_00085E | 1440.982  | 1293.844  | NM_004047 | 20727.646 | 47709.484 |
| NM_004714 | 1951.865  | 2674.514  | NM_00553E | 5745.405  | 3658.254  | AF287303  | 271.928   | 1654.27   |
| NM_005401 | 357.802   | 346.255   | NM_005077 | 1106.432  | 950.063   | NM_00677E | 1664.707  | 3076.591  |
| NM_002497 | 17767.674 | 17624.934 | NM_00442E | 4179.858  | 4428.38   | AK024439  | 8334.488  | 15218.404 |
| AB025194  | 7973.072  | 7230.253  | NM_00199C | 707.701   | 685.489   | X89676    | 809.205   | 1573.54   |
| NM_00623E | 890.161   | 711.224   | NM_002141 | 731.977   | 776.321   | NM_012444 | 420.853   | 518.375   |
| BC020863  | 491.577   | 535.809   | NM_003311 | 1664.483  | 1594.853  | NM_00132E | 153.565   | 294.605   |
| NM_017897 | 4167.502  | 3980.563  | NM_00377E | 2427.052  | 3129.004  | NM_01651E | 792.045   | 2021.252  |
| NM_00426E | 30414.506 | 16183.17  | NM_00709E | 294.601   | 214.797   | NM_01748E | 4305.889  | 7524.913  |
| NM_00257E | 5421.814  | 3208.521  | NM_01571E | 597.946   | 1021.717  | AY009400  | 421.75    | 669.295   |
| NM_001441 | 1332.275  | 1480.074  | NM_012464 | 311.104   | 267.712   | NM_00506E | 477.475   | 819.492   |
| NM_018324 | 456.119   | 908.506   | NM_00612E | 729.331   | 1154.643  | NM_016044 | 1645.166  | 2345.412  |
| AF064255  | 20383.961 | 14448.263 | NM_00058E | 1650.537  | 2767.024  | NM_00052C | 2068.089  | 4193.603  |
| NM_01636E | 47548.676 | 54328.203 | NM_00559E | 1009.865  | 1159.267  | NM_00028E | 1080.799  | 1950.45   |
| U08853    | 3785.241  | 4774.081  | NM_00497E | 574.663   | 300.228   | NM_00150C | 2412.93   | 3470.186  |
| NM_004261 | 37325.121 | 24503.252 | NM_016077 | 1847.789  | 1171.89   | NM_00438E | 1824.527  | 3296.164  |
| NM_01600E | 1800.089  | 2739.473  | AF100756  | 4338.827  | 3261.893  | NM_02037E | 217.863   | 256.587   |
| NM_01624E | 7400.499  | 8923.638  | NM_00682E | 2157.614  | 2305.476  | AL110127  | 1204.856  | 1568.807  |
| AF005632  | 2552.812  | 2543.347  | NM_00486E | 397.755   | 316.367   | AK001997  | 183.859   | 347.303   |
| NM_00090E | 2942.242  | 3511.567  | NM_001661 | 428.064   | 442.38    | NM_00252E | 1896.407  | 2778.721  |
| NM_00449E | 23256.473 | 37403.461 | NM_01456E | 787.249   | 669.064   | D38438    | 1128.061  | 1581.269  |
| NM_00677E | 2268.386  | 2935.209  | NM_02015C | 2261.518  | 2323.049  | AV714945  | 525.452   | 1222.9    |
| AK024439  | 11000.415 | 12725.112 | NM_00715C | 2325.914  | 1857.868  | AF089897  | 367.873   | 956.948   |
| X89676    | 1137.311  | 1060.327  | NM_006831 | 1373.163  | 1021.021  | AF007872  | 2097.802  | 9191.847  |
| NM_012444 | 463.289   | 429.715   | AL162044  | 2986.784  | 2545.661  | M30938    | 5410.786  | 23450.977 |
| Z32684    | 2277.805  | 2755.404  | AK024004  | 920.693   | 1211.944  | NM_01758E | 4989.688  | 7182.667  |
| NM_01651E | 954.033   | 999.507   | BE892273  | 42320.258 | 41057.738 | NM_00414E | 2059.225  | 3223.269  |
| NM_01748E | 5438.887  | 4290.864  | AF026929  | 308.079   | 603.364   | X03168    | 606.486   | 1039.764  |
| NM_00506E | 971.126   | 771.341   | NM_016734 | 410.807   | 507.002   | NM_00516E | 1536.829  | 2257.804  |
| NM_016044 | 2551.489  | 1275.828  | NM_01439E | 3764.906  | 2605.355  | NM_017801 | 4521.318  | 7171.363  |
| NM_00052C | 3716.304  | 3827.686  | NM_00422E | 10347.677 | 7398.204  | NM_00734E | 2427.866  | 3847.63   |
| NM_00028E | 1508.984  | 2385.937  | NM_00681E | 550.342   | 425.042   | NM_01695E | 330.991   | 343.782   |
| NM_00150C | 4129.612  | 4564.663  | NM_00135E | 7763.831  | 5535.734  | U65473    | 3817.229  | 4112.52   |
| NM_00438E | 3518.831  | 4607.177  | U63336    | 492.138   | 432.95    | D63481    | 5535.164  | 6306.229  |
| AL110127  | 1746.097  | 1967.694  | NM_006907 | 565.27    | 233.06    | AY009951  | 8714.041  | 6329.604  |
| AK001997  | 415.436   | 312.277   | NM_00268E | 500.964   | 330.97    | AL157424  | 491.858   | 836.117   |

|           |           |           |           |           |           |           |           |           |
|-----------|-----------|-----------|-----------|-----------|-----------|-----------|-----------|-----------|
| NM_00252E | 3809.205  | 3545.526  | NM_006267 | 923.738   | 993.17    | AK024422  | 209.204   | 304.341   |
| D38438    | 2506.946  | 3590.274  | NM_002661 | 4691.674  | 3369.788  | NM_002673 | 623.538   | 296.565   |
| AV714945  | 1255.476  | 2332.776  | NM_001263 | 140.841   | 425.186   | NM_00387E | 2200.996  | 1453.127  |
| AF089897  | 293.027   | 1137.822  | AK023982  | 639.843   | 560.49    | AJ276310  | 320.603   | 415.56    |
| AF007872  | 4403      | 5249.979  | NM_01846E | 1241.199  | 752.763   | NM_01229E | 2674.542  | 1592.005  |
| M30938    | 8338.238  | 5698.44   | Y11312    | 1039.266  | 860.147   | NM_01591C | 438.029   | 844.094   |
| NM_01758E | 9468.026  | 9440.893  | AB014533  | 7123.769  | 6828.318  | NM_00022E | 199.096   | 215.653   |
| NM_00414E | 4312.36   | 4284.986  | M11427    | 653.939   | 410.591   | AL133666  | 750.044   | 472.117   |
| X03168    | 975.499   | 1311.358  | NM_000744 | 732.825   | 972.101   | NM_00066E | 1165.34   | 849.437   |
| NM_00516E | 2570.427  | 2572.939  | NM_00303E | 1008.291  | 1093.129  | NM_00471C | 2172.064  | 1115.044  |
| NM_017801 | 8434.202  | 9351.498  | NM_01450E | 533.299   | 854.236   | NM_00439E | 9824.57   | 11081.367 |
| NM_00734E | 4753.886  | 4735.552  | NM_00475E | 2386.31   | 1095.138  | NM_01799E | 2792.685  | 6389.094  |
| NM_01695E | 395.447   | 622.634   | NM_00516E | 4035.759  | 2768.516  | NM_01598E | 13526.631 | 37056.992 |
| U65473    | 5435.624  | 4005.15   | NM_015361 | 10907.298 | 6166.211  | NM_00104E | 1334.726  | 5492.576  |
| D63481    | 8774.405  | 7108.274  | NM_00431C | 7236.542  | 6164.725  | NM_00477E | 4323.88   | 4067.294  |
| AY009951  | 14499.11  | 10014.329 | NM_015537 | 3078.803  | 2559.695  | NM_019071 | 1702.084  | 2003.762  |
| AL157424  | 1192.337  | 1190.748  | NM_01652C | 16995.025 | 10176.726 | NM_01439E | 2181.371  | 1474.091  |
| AK024422  | 418.926   | 493.299   | AB018353  | 2026.273  | 2195.607  | AF113685  | 303.003   | 293.129   |
| NM_00267E | 1272.294  | 585.1     | NM_00703E | 2864.466  | 1910.886  | NM_00547C | 2069.443  | 1601.26   |
| NM_00387E | 4433.194  | 4894      | NM_002617 | 1684.088  | 1226.751  | AF142570  | 235.871   | 236.708   |
| AJ276310  | 736.89    | 1249.162  | NM_00331E | 10663.37  | 9448.919  | NM_00422E | 5641.723  | 4597.388  |
| NM_01229E | 5174.379  | 4348.235  | AF090907  | 1942.241  | 2220.324  | NM_00386E | 665.316   | 954.181   |
| NM_01591C | 906.297   | 957.157   | AK024476  | 3168.622  | 3379.366  | NM_00287E | 1539.518  | 1487.58   |
| NM_00022E | 340.699   | 213.367   | X74794    | 4611.983  | 3887.57   | NM_015571 | 2706.868  | 2452.296  |
| AL133666  | 1407.859  | 935.34    | AL050298  | 2448.242  | 2392.96   | NM_004701 | 4462.048  | 4267.444  |
| NM_00066E | 2563.158  | 2606.592  | NM_00707E | 35110.547 | 38160.184 | AK025554  | 781.497   | 1020.906  |
| NM_00471C | 4555.248  | 4233.469  | M20696    | 3088.894  | 2935.49   | BI824151  | 3708.324  | 1959.849  |
| NM_00439E | 21936.514 | 37354.348 | NM_00291E | 678.504   | 546.494   | AK021791  | 3322.743  | 2565.563  |
| NM_01799E | 4836.803  | 9722.624  | NM_00673E | 2578.372  | 3202.459  | NM_00405E | 9555.812  | 4852.499  |
| NM_01598E | 36282.363 | 33280.598 | NM_00364C | 1566.22   | 1715.234  | NM_00439A | 3515.998  | 1125.242  |
| NM_00104E | 1754.312  | 1100.906  | NM_014444 | 3213.1    | 3721.034  | NM_00572E | 7811.745  | 2373.635  |
| NM_00477E | 9219.367  | 11417.635 | NM_01224E | 4134.147  | 4998.162  | AK027242  | 716.231   | 440.379   |
| NM_019071 | 4197.117  | 5286.088  | NM_01571E | 540.821   | 635.518   | NM_00127E | 7062.37   | 2637.565  |
| NM_01439E | 4937.122  | 4378.366  | NM_00612E | 962.317   | 667.929   | NM_00501C | 742.191   | 1110.434  |
| AF113685  | 426.967   | 413.589   | NM_00058E | 2433.941  | 2017.178  | NM_01905E | 2280.551  | 3557.779  |
| NM_00547C | 4145.854  | 3346.833  | NM_00559E | 1037.455  | 816.084   | NM_02019E | 1569.787  | 4329.034  |
| AF142570  | 563.654   | 499.54    | AJ224741  | 629.984   | 1105.143  | U96136    | 1747.903  | 5418.376  |
| NM_00422E | 11321.015 | 10087.457 | NM_004684 | 506.157   | 117.817   | NM_015884 | 176.632   | 125.948   |
| NM_00386E | 1384.014  | 1306.764  | BF338709  | 634.411   | 412.367   | AF201380  | 1305.643  | 1336.166  |
| NM_00287E | 3469.51   | 3150.193  | AF204171  | 554.043   | 432.152   | NM_01239E | 4020.21   | 2883.317  |
| NM_015571 | 5411.023  | 6008.734  | M18182    | 194.611   | 262.944   | NM_01483E | 6421.472  | 5548.553  |
| NM_004701 | 10134.809 | 9618.18   | W96179    | 1375.509  | 1271.834  | NM_00004E | 268.201   | 290.915   |
| AK025554  | 1562.974  | 1377.224  | AW247841  | 3530.446  | 2930.019  | NM_00387E | 4311.578  | 3425.202  |
| BI824151  | 7429.153  | 6570.833  | BG568198  | 242.993   | 283.239   | NM_00483E | 357.902   | 266.228   |
| AK021791  | 6078.813  | 5867.96   | M76559    | 1697.701  | 2277.174  | NM_00595E | 439.295   | 320.839   |
| NM_00405E | 21519.893 | 19526.742 | U03884    | 359.281   | 579.952   | AK024374  | 684.633   | 444.185   |
| NM_00439A | 8179.279  | 6744.533  | U11058    | 372.48    | 489.419   | NM_007101 | 304.163   | 336.043   |
| NM_00572E | 15852.676 | 8636.066  | AI222585  | 883.675   | 949.612   | NM_018234 | 192.53    | 191.145   |
| AK027242  | 2128.979  | 1478.491  | AA411678  | 8262.828  | 6985.569  | AB033062  | 555.736   | 374.835   |
| NM_00127E | 18808.285 | 16223.017 | AA862813  | 17969.975 | 19285.783 | NM_01643E | 13632.082 | 4462.133  |
| NM_00501C | 2153.455  | 4730.349  | AA398427  | 2176.422  | 2508.316  | NM_00272C | 4678.22   | 1653.55   |
| NM_01905E | 2697.84   | 3072.551  | T55728    | 5187.582  | 4761.074  | AK024716  | 5578.714  | 2652.344  |
| NM_02019E | 1909.475  | 1346      | H20856    | 1171.948  | 1233.866  | X67155    | 744.619   | 421.969   |

|           |           |           |           |           |           |           |           |           |
|-----------|-----------|-----------|-----------|-----------|-----------|-----------|-----------|-----------|
| U96136    | 440.889   | 260.831   | AK022365  | 376.832   | 363.061   | NM_02038C | 3071.079  | 2126.13   |
| NM_005941 | 317.649   | 174.996   | BE892273  | 32590.41  | 17596.219 | AL137519  | 1377.141  | 899.981   |
| NM_015884 | 373.764   | 583.075   | AF026929  | 327.605   | 422.869   | NM_00289C | 18111.43  | 10174.781 |
| AF201380  | 2885.363  | 2680.161  | NM_016734 | 524.011   | 306.935   | NM_00133C | 13913.105 | 22647.277 |
| NM_012392 | 8992.101  | 7701.791  | Y08147    | 1962.069  | 1816.783  | NM_005122 | 330.084   | 211.416   |
| NM_014832 | 13863.368 | 12298.357 | D00174    | 3883.208  | 2745.501  | NM_014552 | 1498.423  | 1511.634  |
| NM_000045 | 311.759   | 278.233   | AB000520  | 520.986   | 591.413   | NM_003072 | 3859.651  | 3029.149  |
| NM_003878 | 9243.697  | 6363.736  | NM_016382 | 1451.712  | 468.839   | NM_001913 | 934.508   | 988.31    |
| NM_004832 | 613.141   | 509.269   | AK023117  | 1657.587  | 2172.378  | AK025594  | 301.206   | 396.69    |
| NM_005957 | 732.257   | 707.695   | AL122046  | 979.174   | 975.354   | AB040931  | 1563.288  | 1012.038  |
| AK024374  | 1364.593  | 1064.448  | AF119914  | 357.594   | 611.255   | NM_00359C | 530.166   | 521.143   |
| NM_007101 | 722.875   | 1233.378  | NM_000855 | 4029.27   | 8954.824  | NM_015911 | 507.76    | 480.401   |
| NM_018234 | 395.619   | 520.014   | NM_005536 | 6947.309  | 5983.431  | BC011826  | 2699.615  | 2048.631  |
| AB033062  | 1287.839  | 1039.397  | NM_005077 | 1638.574  | 1913.647  | NM_017647 | 3518.419  | 3062.969  |
| NM_016437 | 35487.66  | 25408.984 | NM_004423 | 6874.35   | 8292.089  | NM_012091 | 1030.71   | 1028.369  |
| NM_00272C | 10731.281 | 6881.495  | NM_00199C | 956.644   | 1027.987  | NM_012321 | 1545.066  | 1034.095  |
| AK024716  | 11214.214 | 9194.701  | NM_002141 | 1186.682  | 1727.85   | D13642    | 1417.379  | 924.107   |
| X67155    | 2316.669  | 1497.719  | NM_000744 | 525.927   | 262.23    | NM_004741 | 3048.345  | 1525.128  |
| NM_02038C | 9069.057  | 21609.166 | NM_003039 | 820.663   | 538.271   | NM_018032 | 2685.155  | 1032.305  |
| AL137519  | 588.38    | 1547.744  | NM_014509 | 374.472   | 394.025   | NM_003675 | 3808.135  | 1317.178  |
| NM_00289C | 28900.346 | 21345.291 | U26662    | 449.008   | 231.469   | NM_017518 | 844.122   | 324.801   |
| NM_00133C | 35904.996 | 17822.471 | NM_020372 | 3345.998  | 2199.69   | NM_004117 | 1209.249  | 702.141   |
| NM_015927 | 444.519   | 311.096   | NM_002635 | 39322.039 | 20754.527 | NM_016594 | 2268.397  | 934.158   |
| NM_005122 | 768.95    | 821.066   | NM_004979 | 548.665   | 217.561   | NM_030752 | 2803.25   | 1348.827  |
| NM_014552 | 2600.638  | 2275.923  | NM_016077 | 1397.732  | 1309.117  | D26068    | 9904.269  | 3159.69   |
| NM_003072 | 9080.3    | 7764.503  | AF100756  | 5753.428  | 7627.849  | NM_01855C | 3881.314  | 2920.967  |
| NM_001913 | 2766.614  | 1950.072  | NM_006825 | 4782.354  | 7895.505  | NM_017593 | 1428.314  | 1188.315  |
| AK025594  | 935.656   | 816.118   | NM_004862 | 592.691   | 617.268   | NM_004282 | 7845.371  | 8930.859  |
| AB040931  | 3530.456  | 3852.933  | NM_001661 | 752.048   | 840.412   | AK025695  | 847.397   | 883.847   |
| NM_00359C | 1194.281  | 1498.665  | NM_014563 | 1123.418  | 1235.796  | AK025442  | 2615.567  | 3078.607  |
| NM_015911 | 1029.076  | 878.665   | NM_02015C | 3959.091  | 4466.971  | AL050041  | 340.699   | 336.53    |
| BC011826  | 5818.277  | 4273.884  | NM_00715C | 3526.763  | 3637.635  | NM_002451 | 875.227   | 858.936   |
| NM_017647 | 4985.228  | 4035.559  | NM_006831 | 1994.768  | 3136.049  | NM_013411 | 566.819   | 535.332   |
| NM_012091 | 1776.502  | 1177.784  | AL162044  | 3452.204  | 4659.122  | AB007956  | 206.334   | 189.255   |
| NM_012321 | 3229.429  | 2380.86   | AK024004  | 917.5     | 2100.736  | NM_02020C | 249.739   | 214.532   |
| D13642    | 3149.763  | 1831.581  | NM_006736 | 1961.221  | 1515.307  | NM_00015C | 233.5     | 241.1     |
| NM_004741 | 5742.686  | 9232.154  | NM_00364C | 1307.168  | 1000.812  | NM_00018C | 3239.988  | 2817.283  |
| NM_018032 | 4422.338  | 2579.768  | NM_014444 | 3016.208  | 2148.881  | NM_00085E | 4190.325  | 2724.377  |
| NM_003675 | 6807.525  | 3554.045  | NM_012248 | 4468.014  | 3253.524  | AF254087  | 675.789   | 521.51    |
| NM_017518 | 2362.611  | 1307.584  | NM_01497C | 2824.082  | 2018.378  | NM_017715 | 628.363   | 559.1     |
| NM_004117 | 2699.059  | 1926.422  | NM_014393 | 3301.448  | 2389.513  | AL117607  | 1030.952  | 537.045   |
| NM_016594 | 4818.145  | 2929.659  | NM_004223 | 8749.841  | 6643.01   | AB037774  | 1042.048  | 667.16    |
| NM_030752 | 6052.653  | 12190.871 | NM_006813 | 466.593   | 271.611   | NM_00543E | 244.972   | 134.374   |
| D26068    | 29429.588 | 40657.168 | NM_001355 | 6666.5    | 5030.346  | AK024361  | 554.023   | 193.668   |
| NM_01855C | 6138.874  | 5134.706  | NM_001216 | 147.836   | 308.149   | NM_00435C | 693.83    | 422.629   |
| NM_017593 | 2438.92   | 1027.938  | U63336    | 421.179   | 259.673   | NM_018044 | 1597.712  | 733.103   |
| NM_004282 | 10340.848 | 4989.671  | NM_006907 | 573.182   | 474.749   | NM_004503 | 183.845   | 501.756   |
| AF070549  | 237.239   | 299.564   | NM_002686 | 480.004   | 437.453   | NM_001717 | 591.751   | 300.852   |
| AK025695  | 3116.596  | 2540.879  | NM_006267 | 1179.57   | 1358.715  | AF274347  | 587.992   | 249.102   |
| AK025442  | 6356.921  | 8494.95   | NM_002661 | 7780.265  | 8022.114  | NM_01855E | 1014.43   | 435.761   |
| AL050041  | 756.286   | 986.917   | NM_001263 | 616.727   | 594.371   | AK023525  | 1590.206  | 1745.863  |
| NM_002451 | 2005.972  | 1762.823  | AK023982  | 699.813   | 954.604   | AF085829  | 539.843   | 426.367   |
| NM_013411 | 1140.69   | 1392.612  | NM_018466 | 1626.088  | 1750.576  | AF075029  | 213.996   | 308.796   |

|           |           |          |           |           |           |           |          |          |
|-----------|-----------|----------|-----------|-----------|-----------|-----------|----------|----------|
| AB007956  | 393.575   | 332.225  | Y11312    | 1724.533  | 1902.631  | AK021903  | 1892.608 | 1448.886 |
| NM_02020C | 396.653   | 401.029  | AB014533  | 5912.75   | 8314.724  | AL390143  | 2010.721 | 1607.503 |
| NM_00124E | 395.418   | 398.705  | M11427    | 398.216   | 1641.614  | AL162075  | 519.115  | 547.255  |
| NM_00015E | 491.718   | 412.685  | AK022097  | 2464.149  | 2066.711  | AF147384  | 180.666  | 216.41   |
| NM_00018C | 6381.002  | 4147.193 | NM_00216E | 11191.862 | 8227.094  | AK021595  | 446.367  | 476.595  |
| NM_00085E | 7772.601  | 3933.146 | NM_00466C | 5663.114  | 4066.438  | AK021648  | 448.559  | 442.421  |
| AF254087  | 1607.143  | 1269.371 | NM_00616E | 1889.488  | 1827.316  | AF147358  | 6327.915 | 5292.71  |
| NM_01771E | 1080.283  | 1740.259 | NM_016011 | 8603.369  | 6471.267  | NM_01841C | 1931.952 | 1463.683 |
| AL117607  | 1591.109  | 970.184  | AL035307  | 2472.767  | 2651.93   | AF147404  | 225.048  | 161.788  |
| AB037774  | 2229.486  | 1144.297 | AK023772  | 432.728   | 380.155   | AF086355  | 260.964  | 188.911  |
| NM_00543E | 431.243   | 214.194  | NM_012234 | 3584.68   | 2982.824  | AF086403  | 219.255  | 208.967  |
| AK024361  | 1602.231  | 1105.891 | NM_015361 | 7653.956  | 6033.812  | AF086314  | 170.402  | 124.409  |
| NM_00435C | 1732.11   | 999.867  | NM_00431C | 5811.116  | 6968.393  | NM_016364 | 228.43   | 138.222  |
| NM_018044 | 4411.582  | 3733.681 | NM_015537 | 2588.257  | 3459.79   | AF086419  | 901.13   | 513.009  |
| NM_00450E | 358.022   | 1005.828 | NM_01652C | 15368.368 | 11554.746 | AF086461  | 365.107  | 213.804  |
| AF274347  | 4073.639  | 2122.085 | AB018353  | 2518.021  | 2987.632  | AL833296  | 892.706  | 384.225  |
| NM_01855E | 2908.763  | 1243.955 | NM_00703E | 4112.726  | 3983.972  | AL110240  | 2123.015 | 1090.333 |
| AK023525  | 4493.376  | 4220.059 | NM_002617 | 2918.363  | 2960.445  | AF075081  | 119.601  | 188.903  |
| AF085829  | 1400.045  | 1078.531 | NM_00331E | 16695.691 | 18967.453 | NM_01537E | 250.618  | 302.153  |
| AF075029  | 587.216   | 629.719  | AF090907  | 3125.892  | 3859.145  | AF085933  | 296.3    | 337.942  |
| AK021903  | 2633.348  | 2208.057 | AK024476  | 3605.243  | 4260.46   | AF147431  | 192.163  | 179.997  |
| AL390143  | 4589.227  | 3739.402 | X74794    | 6154.725  | 6854.481  | AK026422  | 3632.584 | 2227.558 |
| AL162075  | 1127.071  | 1160.566 | AL050298  | 2563.664  | 3511.637  | AF085938  | 549.582  | 522.361  |
| AK021595  | 1232.941  | 1253.193 | NM_00707E | 33366.211 | 47574.051 | AK022264  | 385.918  | 363.165  |
| AK021648  | 1042.346  | 908.286  | M20696    | 1858.774  | 2800.428  | AL137331  | 397.061  | 222.005  |
| AF147358  | 12218.497 | 6842.919 | NM_00291E | 538.013   | 958.853   | AL162040  | 1989.329 | 1412.445 |
| AL110290  | 250.669   | 155.022  | NM_00656E | 2657.297  | 719.213   | AL442084  | 287.478  | 284.401  |
| NM_01841C | 4347.423  | 3512.891 | AK026154  | 5885.229  | 3337.965  | AL137371  | 3514.612 | 2212.966 |
| AF086355  | 410.574   | 322.063  | AL117546  | 14334.942 | 8222.777  | AL137596  | 1149.755 | 1156.67  |
| AF086403  | 252.159   | 132.137  | AK027073  | 588.498   | 520.865   | AL353942  | 6330.879 | 3055.615 |
| AF086314  | 547.761   | 345.504  | NM_000384 | 623.307   | 418.932   | Z38010    | 3411.044 | 1652.272 |
| NM_016364 | 627.951   | 320.915  | AB018325  | 2846.381  | 2418.301  | AF088003  | 129.217  | 132.716  |
| AF086419  | 2194.37   | 2763.01  | AL157482  | 3686.952  | 3018.806  | AK024713  | 197.938  | 110.798  |
| AF086461  | 769.202   | 1868.843 | NM_00542E | 3403.834  | 3738.695  | AK024204  | 274.777  | 159.891  |
| AF131795  | 599.699   | 454.392  | NM_017974 | 745.544   | 902.148   | AK023737  | 1346.271 | 575.318  |
| AL833296  | 1760.298  | 1106.905 | NM_00397E | 382.273   | 572.008   | NM_00660E | 1017.028 | 584.465  |
| AL110240  | 3986.302  | 1822.112 | X14677    | 1367.958  | 1607.9    | NM_01411E | 289.552  | 251.613  |
| AF075081  | 318.431   | 553.652  | NM_00586E | 2427.424  | 2071.282  | AK023643  | 231.55   | 167.727  |
| NM_01537E | 589.325   | 848.56   | U17077    | 2394.626  | 1906.954  | AL390159  | 200.396  | 159.297  |
| AF085933  | 690.559   | 799.61   | NM_00091E | 3083.684  | 2820.55   | NM_014157 | 320.241  | 430.026  |
| AF147431  | 550.132   | 624.821  | NM_002344 | 460.882   | 555.145   | AF090933  | 226.892  | 231.29   |
| AK026422  | 8294.458  | 5722.592 | AK024475  | 846.748   | 1596.594  | AF111851  | 1118.604 | 1054.831 |
| AF085938  | 1173.712  | 1431.163 | AJ278865  | 1596.668  | 1568.718  | AF152529  | 200.335  | 219.142  |
| AK022264  | 916.405   | 997.283  | NM_01443E | 801.111   | 2037.583  | AL360200  | 216.676  | 185.112  |
| AL137331  | 744.642   | 765.897  | NM_00206E | 7892.057  | 12975.401 | AK021992  | 255.653  | 242.5    |
| AL162040  | 3503.701  | 1932.342 | NM_014394 | 42309.82  | 61513.32  | AK022102  | 242.226  | 247.645  |
| AL442084  | 617.944   | 319.436  | NM_00524E | 8775.826  | 6813.672  | AK022235  | 297.924  | 513.928  |
| AL137371  | 8393.806  | 5679.312 | NM_00621E | 934.426   | 884.572   | AK022378  | 912.903  | 533.518  |
| AL137596  | 1400.949  | 652.998  | NM_01814C | 2110.438  | 1861.292  | AK022009  | 193.748  | 117.145  |
| AL353942  | 8130.896  | 4242.424 | NM_01694E | 1871.24   | 1200.626  | AK022139  | 171.968  | 64.378   |
| Z38010    | 6102.626  | 3371.006 | NM_00014E | 847.749   | 691.023   | AK022274  | 126.024  | 167.409  |
| AK024713  | 439.546   | 373.654  | AF272372  | 15842.271 | 10255.071 | AK022401  | 154.939  | 204.073  |
| AF086114  | 483.197   | 331.759  | AK097045  | 2119.031  | 1853.842  | AL110173  | 263.759  | 140.944  |

|           |           |           |           |           |           |           |           |           |
|-----------|-----------|-----------|-----------|-----------|-----------|-----------|-----------|-----------|
| AK024204  | 744.142   | 1561.25   | AF161356  | 53781.383 | 61967.652 | AK025833  | 127.409   | 133.351   |
| AK023737  | 1736.571  | 2426.085  | AB014548  | 3803.324  | 3700.849  | AK027254  | 245.928   | 221.339   |
| NM_006609 | 2966.938  | 1389.329  | NM_018256 | 3207.774  | 2055.804  | NM_017597 | 677.205   | 585.137   |
| NM_014157 | 1319.082  | 1271.721  | AK025150  | 568.596   | 496.998   | AK021772  | 413.555   | 274.554   |
| AF090933  | 486.499   | 344.534   | AK024611  | 6545.88   | 7923.928  | AK054831  | 21198.166 | 11135.604 |
| AF111851  | 3735.117  | 2961.85   | BC010420  | 3730.252  | 4060.725  | AK021770  | 362.404   | 377.11    |
| AL360200  | 623.286   | 558.766   | NM_012280 | 15952.689 | 19002.352 | AK027248  | 484.349   | 768.542   |
| AK021992  | 481.237   | 453.44    | NM_018172 | 3085.193  | 4198.835  | AK022804  | 3401.093  | 3605.201  |
| AK022102  | 355.542   | 270.728   | U03886    | 573.715   | 746.31    | AF009263  | 911.054   | 1020.439  |
| AK022235  | 746.001   | 698.211   | AK022040  | 855.351   | 941.757   | AF009283  | 274.532   | 312.39    |
| AK022378  | 1062.664  | 405.17    | AK022722  | 957.361   | 806.923   | M15640    | 93.216    | 97.823    |
| AL110173  | 925.599   | 990.742   | NM_003591 | 11442.987 | 11588.315 | AF086329  | 1208.042  | 878.678   |
| AK024106  | 389.614   | 641.243   | AB037821  | 3231.049  | 9242.965  | AK025799  | 208.948   | 204.999   |
| AK027254  | 708.375   | 486.425   | NM_003829 | 1746.501  | 2274.069  | AK022857  | 203.144   | 122.695   |
| NM_017597 | 275.856   | 186.212   | AL110168  | 3819.344  | 5668.332  | AL110206  | 320.946   | 195.939   |
| AK021772  | 777.999   | 482.464   | NM_014522 | 356.228   | 516.863   | NM_004821 | 370.482   | 373.195   |
| AK026297  | 379.29    | 259.689   | NM_002831 | 5606.66   | 2885.772  | AK024292  | 442.416   | 423.222   |
| AK054831  | 10278.41  | 9311.859  | AL833409  | 2518.089  | 2555.978  | AK026263  | 443.355   | 422.448   |
| AK021770  | 1025.803  | 1179.235  | NM_015966 | 706.591   | 346.764   | S75105    | 1120.337  | 1247.311  |
| AK027248  | 1377.64   | 1668.058  | NM_016147 | 3566.632  | 2434.893  | AF056455  | 1670.19   | 1387.861  |
| AK022804  | 9976.335  | 9034.727  | NM_002833 | 1324.807  | 885.959   | NM_018510 | 406.904   | 727.349   |
| AF009263  | 1735.97   | 1551.747  | NM_016592 | 753.506   | 559.346   | U50537    | 187.161   | 200.255   |
| AF009283  | 483.855   | 587.75    | NM_018326 | 4183.424  | 2983.494  | AK024988  | 318.114   | 331.758   |
| AF086329  | 2289.496  | 1086.811  | NM_014773 | 234.215   | 682.653   | AV749548  | 136.298   | 161.484   |
| AK025799  | 683.595   | 855.699   | NM_005606 | 3997.009  | 17518.869 | AK025719  | 152.819   | 145.612   |
| AK022857  | 522.404   | 753.533   | AF134707  | 752.726   | 1192.527  | AF026943  | 442.719   | 562.561   |
| AL110206  | 1274.581  | 588.304   | BE730629  | 978.624   | 1395.732  | L77582    | 282.489   | 243.013   |
| NM_004821 | 1145.314  | 829.292   | NM_018162 | 315.209   | 154.639   | NM_020448 | 401.036   | 396.206   |
| AK024292  | 820.12    | 435.15    | AK027167  | 1913.007  | 1890.01   | NM_005419 | 689.707   | 683.335   |
| AK026263  | 1081.92   | 536.135   | AK025265  | 2818.788  | 2933.934  | L31956    | 174.18    | 206.095   |
| U50526    | 682.353   | 690.773   | NM_013279 | 473.621   | 764.04    | NM_003479 | 12904.202 | 7397.849  |
| S75105    | 3430.297  | 3529.803  | NM_018652 | 13608.519 | 22000.414 | AF075101  | 143.67    | 89.969    |
| AF056455  | 3967.694  | 3172.774  | AB011166  | 5125.024  | 6673.594  | AF130108  | 168.988   | 113.629   |
| NM_018510 | 1176.753  | 956.65    | AK024460  | 4534.938  | 7695.026  | NM_020224 | 1707.589  | 578.571   |
| U50537    | 437.314   | 615.622   | NM_006606 | 3297.994  | 5831.215  | U17617    | 504.713   | 194.39    |
| AK024988  | 810.964   | 694.656   | S78570    | 449.159   | 584.957   | NM_014100 | 156.934   | 85.416    |
| AF026943  | 1261.971  | 1609.98   | NM_006442 | 15948.677 | 14114.996 | AK022952  | 2797.24   | 1081.161  |
| L77582    | 606.636   | 508.717   | NM_003902 | 5367.713  | 5944.12   | BF218888  | 291.917   | 199.177   |
| NM_020448 | 1069.733  | 600.636   | NM_016427 | 5439.185  | 6565.379  | AF147407  | 124.398   | 86.905    |
| NM_005419 | 1444.67   | 770.199   | NM_006706 | 399.522   | 239.504   | AK021604  | 115.22    | 122.085   |
| NM_003479 | 24693.238 | 11138.249 | U80741    | 1825.48   | 1983.159  | AF086401  | 1168.589  | 1082.747  |
| AF130108  | 470.767   | 885.254   | NM_014497 | 1161.515  | 888.457   | L23869    | 492.264   | 427.077   |
| NM_020224 | 3955.725  | 5320.561  | AL133598  | 4384.57   | 4364.609  | Z21853    | 603.672   | 681.389   |
| U17617    | 1384.003  | 1461.795  | NM_004504 | 219.716   | 234.354   | AL050183  | 160.604   | 110.198   |
| AK022952  | 6746.034  | 4140.818  | NM_015511 | 3322.305  | 6693.698  | U80770    | 242.2     | 234.453   |
| BF218888  | 826.981   | 500.304   | NM_006625 | 1482.273  | 3610.918  | AB075846  | 202.905   | 191.018   |
| AF086401  | 3624.556  | 3591.123  | NM_004891 | 16530.373 | 21233.33  | NM_018342 | 341.736   | 290.924   |
| L23869    | 1268.397  | 1272.676  | NM_000147 | 33.725    | 584.298   | BC020260  | 534.997   | 405.721   |
| Z21853    | 2437.489  | 2030.735  | NM_002879 | 468.395   | 387.216   | D17156    | 2499.9    | 2032.467  |
| U80770    | 737.212   | 600.698   | AF075068  | 23415.693 | 16707.586 | L04461    | 254.884   | 279.578   |
| AB075846  | 335.892   | 327.317   | AF086474  | 341.725   | 778.425   | AK026938  | 4591.245  | 2904.339  |
| NM_018342 | 780.57    | 934.789   | AF086529  | 331.049   | 255.266   | AK024373  | 3590.408  | 2042.086  |
| BC020260  | 1405.744  | 1029.468  | AK024366  | 776.145   | 455.369   | AK022343  | 2230.604  | 1516.749  |

|           |           |           |           |           |           |           |           |           |
|-----------|-----------|-----------|-----------|-----------|-----------|-----------|-----------|-----------|
| D17156    | 5653.979  | 4566.302  | AK022171  | 480.743   | 510.204   | AK026400  | 355.127   | 304.956   |
| L04461    | 434.669   | 412.965   | AK021930  | 343.843   | 324.997   | U92989    | 3722.264  | 1850.876  |
| AK026938  | 10517.156 | 5554.067  | NM_018354 | 957.421   | 1129.806  | AF075102  | 593.161   | 262.859   |
| AK024373  | 8639.032  | 4365.144  | X78938    | 388.266   | 389.506   | NM_018463 | 2557.49   | 929.753   |
| AK022343  | 5038.768  | 4297.245  | AK022379  | 825.723   | 847.841   | X74956    | 6091.373  | 1881.681  |
| AK026400  | 884.201   | 429.792   | AK001439  | 410.095   | 86.265    | AF132197  | 1878.848  | 662.851   |
| U92989    | 7162.182  | 3678.685  | AK023462  | 802.871   | 326.52    | AK025546  | 249.153   | 372.665   |
| AF075102  | 1445.874  | 960.606   | AK001115  | 1031.175  | 966.923   | AF278761  | 146.739   | 221.192   |
| NM_018463 | 5000.763  | 3102.239  | NM_014099 | 1921.357  | 1713.588  | AL137487  | 540.653   | 316.228   |
| X74956    | 19631.928 | 19144.566 | AL133050  | 724.853   | 1038.705  | AK023800  | 333.071   | 288.828   |
| AF132197  | 5252.528  | 6963.21   | AK022452  | 512.325   | 560.581   | AF086120  | 134.938   | 116.398   |
| AK025546  | 957.29    | 1195.217  | AK023781  | 433.352   | 336.987   | AK024120  | 575.116   | 447.035   |
| AF278761  | 382.467   | 257.32    | AF085881  | 2800.718  | 2935.74   | CY3Cy5    | 1396.315  | 243.963   |
| AL137487  | 1196.854  | 811.831   | AK022737  | 8599.034  | 6418.206  | W96179    | 759.976   | 1547.238  |
| AK023800  | 566.767   | 342.03    | NM_003472 | 37961.828 | 20518.066 | M76559    | 764.597   | 957.724   |
| AK024120  | 955.498   | 551.617   | U92980    | 1655.796  | 1016.639  | AI222585  | 386.033   | 331.218   |
| CY3Cy5    | 10860.983 | 950.301   | AF133658  | 800.999   | 655.619   | AA411678  | 3807.745  | 4222.372  |
| W96179    | 3129.112  | 3364.918  | AB048287  | 4467.038  | 3115.096  | AA862813  | 11233.315 | 9067.253  |
| AW247841  | 5614.485  | 5618.366  | Y11159    | 969.302   | 1233.439  | AA398427  | 1131.985  | 1349.524  |
| BG568198  | 532.504   | 443.564   | AB020648  | 2318.319  | 2938.321  | T55728    | 1705.787  | 2050.488  |
| M76559    | 3765.43   | 3939.011  | AK025798  | 12223.609 | 9786.432  | H20856    | 327.302   | 270.807   |
| AI222585  | 933.603   | 875.749   | AF086173  | 384.052   | 205.267   | N62586    | 851.786   | 1175.759  |
| AA411678  | 10613.85  | 14599.553 | AK025164  | 485.625   | 555.188   | NM_004758 | 679.698   | 1191.475  |
| AA862813  | 32092.281 | 40659.461 | NM_018366 | 2653.957  | 3823.762  | NM_005163 | 2083.62   | 3084.43   |
| AA398427  | 2536.603  | 3346.29   | AB040290  | 822.262   | 1037.277  | SR5       | 2551.931  | 2721.063  |
| T55728    | 5930.303  | 8651.581  | NM_019848 | 7899.921  | 12016.6   | SR7       | 2083.662  | 18005.576 |
| H20856    | 1750.695  | 2082.918  | AL359056  | 306.113   | 311.67    | SR9       | 6534.857  | 1237.598  |
| N62586    | 4268.795  | 5946.609  | AK021497  | 1108.661  | 759.451   | CY3Cy5    | 1219.802  | 290.717   |
| AA242743  | 4062.659  | 5076.268  | AF124367  | 618.267   | 840.482   | NM_016382 | 334.545   | 828.778   |
| NM_004758 | 2414.507  | 5208.452  | AK000798  | 355.154   | 422.925   | AK023117  | 1075.764  | 1376.215  |
| NM_005163 | 7547.082  | 9391.204  | AK025615  | 1652.082  | 2098.227  | NM_000858 | 510.387   | 502.46    |
| SR5       | 7118.737  | 8662.025  | AK023803  | 740.789   | 876.709   | NM_005538 | 1900.791  | 2439.826  |
| SR7       | 6253.706  | 59553.414 | AK025168  | 337.599   | 364.958   | NM_003311 | 626.587   | 805.704   |
| SR9       | 21666.213 | 5320.805  | AK026947  | 21587.125 | 20826.117 | NM_003778 | 741.511   | 684.341   |
| CY3Cy5    | 11655.355 | 1769.66   | U84526    | 9087.315  | 4989.029  | NM_006128 | 597.653   | 1768.167  |
| NM_016382 | 813.934   | 1996.413  | L23401    | 1430.015  | 1269.889  | NM_000582 | 593.67    | 593.364   |
| AK023117  | 3656.728  | 2569.344  | NM_018090 | 49820.707 | 44903.098 | NM_005593 | 331.009   | 207.762   |
| AL122046  | 1699.132  | 1741.865  | AK022728  | 20884.998 | 19432.471 | AF204171  | 176.948   | 155.512   |
| NM_000858 | 2590.031  | 2425.096  | AL109678  | 944.955   | 690.049   | NM_006828 | 1108.715  | 1206.323  |
| NM_005538 | 8797.883  | 10313.496 | AL137524  | 1083.964  | 1015.947  | NM_020150 | 1414.478  | 1349.245  |
| NM_005077 | 1748.908  | 1483.994  | AF218008  | 2525.884  | 2201.884  | NM_007150 | 1634.274  | 1247.96   |
| NM_004423 | 6850.059  | 6626.374  | M22404    | 12560.558 | 14304.517 | AK024004  | 508.71    | 664.913   |
| NM_001990 | 1720.201  | 1790.708  | AF052115  | 632.824   | 588.927   | BE892273  | 5419.372  | 6999.688  |
| NM_002141 | 893.736   | 707.139   | NM_014019 | 9270.396  | 8126.184  | AF026929  | 184.432   | 380.878   |
| NM_003311 | 2637.42   | 2882.298  | Z70711    | 722.245   | 757.906   | NM_016734 | 240.489   | 224.585   |
| NM_003778 | 6321.675  | 7093.827  | AF116653  | 486.703   | 543.957   | Y08147    | 595.479   | 616.658   |
| NM_007098 | 754.731   | 661.511   | NM_013326 | 5051.225  | 6253.18   | D00174    | 1138.99   | 1071.569  |
| NM_015719 | 927.567   | 1526.681  | BC037322  | 1039.768  | 732.797   | AB000520  | 255.597   | 205.064   |
| NM_012464 | 591.902   | 405.314   | Y12022    | 1252.076  | 1088.014  | NM_006907 | 274.694   | 292.335   |
| NM_006128 | 1689.225  | 2061.283  | AK001375  | 1034.865  | 824.281   | NM_001263 | 124.933   | 174.558   |
| NM_005593 | 1426.62   | 1371.993  | NM_019597 | 4399.984  | 4022.991  | AK023982  | 321.537   | 448.332   |
| NM_004684 | 536.712   | 998.824   | AL137559  | 859.567   | 776.8     | Y11312    | 213.067   | 159.264   |
| BF338709  | 466.602   | 795.187   | AF026944  | 2587.042  | 2436.523  | M11427    | 278.872   | 70.71     |

|           |           |           |           |           |           |           |           |           |
|-----------|-----------|-----------|-----------|-----------|-----------|-----------|-----------|-----------|
| AF204171  | 515.186   | 801.232   | AK021493  | 2011.282  | 2955.764  | NM_00303E | 303.986   | 641.958   |
| AF100756  | 7761.944  | 7848.896  | NM_006161 | 6446.205  | 6721.992  | NM_00263E | 20756.818 | 22621.523 |
| NM_00682E | 3341.148  | 3002.365  | NM_006192 | 473.571   | 597.571   | NM_016077 | 874.158   | 662.373   |
| NM_004862 | 755.635   | 581.443   | NM_006204 | 343.347   | 563.665   | NM_015537 | 1279.879  | 1548.626  |
| NM_001661 | 874.865   | 1000.528  | NM_01215E | 3456.456  | 3165.923  | NM_01652C | 6631.494  | 7577.763  |
| NM_01456E | 1500.487  | 1451.411  | AF144700  | 1415.163  | 930.861   | AB018353  | 1169.779  | 1197.269  |
| NM_02015C | 5956.913  | 5861.095  | NM_00410E | 6385.506  | 4332.68   | NM_002617 | 984.218   | 1270.223  |
| NM_00715C | 4987.538  | 5442.369  | AB046825  | 1868.731  | 1463.947  | NM_00331E | 2275.84   | 2034.06   |
| NM_006831 | 3751.039  | 3619.319  | X64975    | 777.749   | 674.449   | AK024476  | 267.019   | 461.414   |
| AL162044  | 6085.896  | 6480.319  | AL050297  | 2092.706  | 2578.685  | X74794    | 493.331   | 1060.085  |
| AK024004  | 1875.359  | 2127.73   | AK026966  | 1438.737  | 852.349   | AL050298  | 806.153   | 540.207   |
| AK022365  | 583.453   | 620.739   | AF185573  | 461.994   | 496.586   | NM_00673E | 585.722   | 1173.053  |
| BE892273  | 23868.441 | 26093.354 | AK025268  | 1228.864  | 2291.116  | NM_01497C | 1228.021  | 2022.934  |
| AF026929  | 586.677   | 497.543   | AL833005  | 4998.318  | 3748.76   | NM_01439E | 1377.17   | 2235.977  |
| NM_016734 | 608.871   | 862.456   | L43366    | 1687.8    | 1657.834  | NM_00422E | 3675.876  | 4366.241  |
| AF035803  | 533.187   | 438.204   | AK026124  | 4336.782  | 3345.59   | NM_00681E | 166.406   | 377.11    |
| Y08147    | 1721.568  | 1617.493  | NM_01550E | 3205.326  | 2323.169  | NM_00135E | 2893.705  | 3227.785  |
| D00174    | 4115.009  | 4904.681  | AL110157  | 2317.217  | 1827.903  | NM_004684 | 178.343   | 140.133   |
| AB000520  | 892.623   | 1787.261  | NM_00231E | 4025.823  | 4063.459  | BF338709  | 164.051   | 162.074   |
| NM_006907 | 849.706   | 846.546   | L38712    | 6093.174  | 6037.87   | AF204171  | 183.336   | 177.771   |
| NM_00268E | 603.041   | 679.747   | U84508    | 1141.97   | 1240.94   | AW247841  | 1129.846  | 1488.428  |
| NM_006267 | 1580.634  | 1359.949  | NM_01779E | 3861.527  | 4771.431  | AI222585  | 261.937   | 331.709   |
| NM_002661 | 7304.904  | 6810.431  | NM_012131 | 1198.561  | 1902.554  | AA411678  | 2772.068  | 3541.619  |
| NM_00126E | 353.491   | 546.174   | S41540    | 1241.336  | 1372.592  | T55728    | 1437.39   | 2691.056  |
| AK023982  | 1120.881  | 1289.296  | CY3Cy5    | 1507.246  | 93.698    | H20856    | 570.768   | 530.646   |
| NM_01846E | 1933.41   | 2288.87   | AI417481  | 1311.288  | 841.486   | N62586    | 1092.707  | 1940.131  |
| Y11312    | 1933.689  | 2207.225  | BI906766  | 378.147   | 446.099   | AA242743  | 1705.677  | 1833.589  |
| AB014533  | 4606.148  | 4486.137  | U60519    | 1128.659  | 1124.585  | NM_00475E | 710.022   | 1219.332  |
| M11427    | 284.803   | 587.129   | AA282906  | 1548.653  | 1767.438  | NM_00516E | 1558.364  | 1637.728  |
| NM_000744 | 822.864   | 932.148   | L02870    | 2664.433  | 2939.54   | NM_015361 | 2758.288  | 2655.16   |
| NM_00303E | 1035.458  | 1245.258  | BG755482  | 5000.831  | 5200.065  | NM_00431C | 2560.272  | 1836.64   |
| NM_01450E | 884.67    | 761.601   | AI480307  | 6076.529  | 6608.231  | AF035803  | 333.767   | 32.264    |
| U26662    | 646.194   | 501.976   | X51420    | 1041.145  | 1253.599  | Y08147    | 753.972   | 835.163   |
| NM_02037E | 2200.696  | 1713.033  | D28235    | 345.001   | 437.537   | D00174    | 985.194   | 1196.068  |
| NM_00263E | 52481.73  | 58430.113 | X51757    | 2632.15   | 4617.058  | NM_01638E | 412.777   | 742.108   |
| NM_00497E | 562.203   | 679.681   | L24038    | 1694.486  | 1154.022  | NM_00199C | 441.887   | 409.281   |
| NM_016077 | 3277.144  | 3590.499  | NM_05305E | 530.237   | 628.032   | NM_002141 | 258.153   | 354.553   |
| NM_015537 | 2558.992  | 2758.213  | NM_00618E | 517.487   | 580.891   | NM_003311 | 695.694   | 743.211   |
| NM_01652C | 15981.02  | 13515.442 | NM_002751 | 1223.438  | 1342.969  | NM_00377E | 1471.041  | 1344.177  |
| AB018353  | 3562.961  | 2710.8    | M55593    | 1173.957  | 1342.859  | NM_01571E | 230.89    | 258.234   |
| NM_00703E | 4820.849  | 3723.15   | NM_078467 | 3024.963  | 3852.658  | NM_00612E | 428.501   | 327.393   |
| NM_002617 | 3505.936  | 3726.13   | SR2       | 56357.59  | 51535.961 | NM_00058E | 578.984   | 603.639   |
| NM_00331E | 8592.457  | 7603.612  | SR4       | 14762.043 | 10406.668 | NM_00559E | 267.963   | 296.175   |
| AF090907  | 2689.478  | 2899.2    | SR6       | 2662.121  | 1693.033  | NM_016077 | 955.754   | 961.97    |
| AK024476  | 4286.104  | 4943.206  | SR8       | 8465.308  | 22779.682 | NM_01456E | 298.56    | 337.009   |
| X74794    | 6638.758  | 7560.676  | SR10      | 30378.832 | 8660.937  | NM_02015C | 1265.753  | 1223.044  |
| AL050298  | 3252.724  | 4113.577  | CY3Cy5    | 1813.271  | 140.061   | NM_00715C | 1171.78   | 1129.65   |
| NM_00707E | 27646.447 | 28795.922 | NM_01684E | 4347.852  | 3497.758  | NM_006831 | 890.926   | 830.761   |
| M20696    | 3408.348  | 4116.246  | NM_000514 | 2278.986  | 2735.505  | AL162044  | 1614.093  | 1551.466  |
| NM_00291E | 810.885   | 1192.038  | AL137432  | 1516.037  | 1538.766  | AK024004  | 340.979   | 197.444   |
| NM_00673E | 3228.489  | 4648.483  | NM_000957 | 2306.164  | 2326.995  | BE892273  | 8077.9    | 7785.99   |
| NM_00364C | 2307.677  | 2799.449  | NM_01904E | 3968.96   | 3617.655  | NM_016734 | 244.086   | 231.199   |
| NM_014444 | 6055.752  | 6565.976  | NM_00324C | 2737.582  | 2379.794  | NM_01439E | 1621.276  | 2262.596  |



|           |           |           |           |           |           |           |           |           |
|-----------|-----------|-----------|-----------|-----------|-----------|-----------|-----------|-----------|
| NM_01224E | 8118.45   | 8504.674  | NM_016564 | 30006.723 | 31236.148 | NM_00422E | 4271.109  | 5462.841  |
| NM_01497C | 3353.428  | 3952.452  | NM_00079E | 965.556   | 1578.273  | NM_00681E | 285.041   | 128.333   |
| NM_01439E | 4627.571  | 6426.417  | AF279656  | 2017.96   | 2687.573  | NM_00135E | 3206.913  | 3414.749  |
| NM_00422E | 14287.912 | 17272.961 | AK021660  | 1614.467  | 1750.791  | NM_00121E | 258.909   | 83.608    |
| NM_00681E | 546.795   | 372.824   | AB007933  | 39901.43  | 38083.113 | U63336    | 229.648   | 268.824   |
| NM_00135E | 10227.101 | 11626.795 | NM_00670E | 6209.486  | 5488.23   | NM_00690E | 325.647   | 235.722   |
| NM_00121E | 628.12    | 376.816   | NM_00139E | 5845.993  | 4849.559  | NM_00268E | 269.462   | 89.288    |
| U63336    | 667.073   | 606.431   | NM_014474 | 1453.49   | 1538.873  | NM_00266E | 1615.257  | 1257.132  |
| NM_004684 | 430.733   | 520.903   | NM_01624E | 1777.666  | 1352.35   | AK023982  | 319.027   | 450.304   |
| BF338709  | 442.899   | 664.032   | NM_00618E | 1711.183  | 1392.633  | NM_01846E | 534.908   | 608.934   |
| AF204171  | 599.633   | 530.875   | NM_00379E | 15325.513 | 12292.638 | Y11312    | 408.058   | 389.052   |
| W96179    | 3063.299  | 3391.527  | NM_00297E | 2140.948  | 2655.29   | AB014533  | 1473.854  | 1411.178  |
| AW247841  | 5165.305  | 5620.946  | NM_00443E | 17812.049 | 17353.09  | M11427    | 199.413   | 184.153   |
| BG568198  | 582.318   | 504.937   | NM_00658E | 2779.292  | 2940.553  | NM_000744 | 263.015   | 203.52    |
| M76559    | 4063.961  | 3775.987  | NM_00130E | 1393.237  | 1444.254  | NM_00303E | 318.935   | 335.854   |
| U11058    | 626.206   | 143.41    | NM_00508E | 582.662   | 753.396   | NM_01450E | 278.974   | 75.662    |
| AI222585  | 801.877   | 999.131   | D17028    | 27532.326 | 28077.277 | NM_02037E | 1562.24   | 1101.897  |
| AA411678  | 10993.659 | 14532.407 | NM_01344E | 25754.734 | 24323.266 | NM_00263E | 17657.523 | 15515.934 |
| AA862813  | 36982.508 | 45989.656 | BG611243  | 2087.687  | 1977.864  | NM_00475E | 840.16    | 1441.882  |
| AA398427  | 3324.496  | 4011.842  | AK023221  | 3442.222  | 3257.848  | NM_00516E | 2020.367  | 2537.59   |
| T55728    | 8025.882  | 9928.01   | NM_003664 | 3380.614  | 2319.237  | NM_01536E | 3280.306  | 3190.15   |
| H20856    | 2474.615  | 2425.989  | NM_00242E | 2018.823  | 1967.991  | NM_00431E | 4033.611  | 3419.284  |
| N62586    | 5489.175  | 5849.896  | AK027182  | 739.443   | 960.304   | NM_01553E | 1413.963  | 1355.172  |
| AA242743  | 4149.619  | 4694.545  | J03651    | 2341.148  | 2702.668  | NM_01652E | 7088.744  | 5979.364  |
| NM_00475E | 2357.936  | 4305.48   | U61738    | 3980.414  | 3734.132  | AB018353  | 1319.776  | 997.782   |
| NM_00516E | 6223.618  | 7303.432  | AJ132087  | 598.17    | 764.001   | NM_00703E | 1611.385  | 1292.562  |
| NM_01536E | 10675.461 | 10502.226 | U92818    | 888.821   | 997.092   | NM_00261E | 1102.873  | 1235.61   |
| AF035803  | 484.069   | 297.892   | NM_00044E | 4843.77   | 4207.043  | NM_00331E | 3433.515  | 2812.952  |
| Y08147    | 1828.856  | 1487.888  | NM_002934 | 2688.221  | 2118.9    | AF090907  | 837.583   | 1021.434  |
| D00174    | 3647.598  | 2878.489  | AK023011  | 13624.863 | 13282.923 | AK024476  | 1094.178  | 1404.026  |
| AB000520  | 843.536   | 860.967   | NM_01681E | 2020.153  | 1305.164  | X74794    | 1526.975  | 1900.988  |
| NM_01638E | 1122.006  | 2111.474  | L17325    | 1408.867  | 1152.103  | AL050298  | 858.066   | 838.576   |
| AK023117  | 3331.087  | 2570.167  | NM_01771E | 1024.387  | 1151.297  | NM_00707E | 10111.801 | 8561.308  |
| AL122046  | 1529.404  | 1880.766  | M58603    | 7652.618  | 5426.099  | M20696    | 1109.736  | 837.039   |
| NM_00085E | 2386.693  | 2193.162  | NM_00363E | 1995.204  | 2468.749  | NM_00291E | 257.207   | 241.613   |
| NM_00553E | 8546.854  | 11669.248 | NM_00154E | 363.775   | 283.843   | NM_00673E | 835.582   | 1212.152  |
| NM_00507E | 2630.853  | 2399.151  | NM_00011E | 3265.333  | 3189.198  | NM_00364E | 437.888   | 397.638   |
| NM_00442E | 8874.329  | 10180.3   | AF308801  | 3474.82   | 4638.512  | NM_014444 | 1246.505  | 1522.676  |
| NM_00199E | 2261.215  | 2488.819  | NM_00731E | 59152.23  | 59890.125 | NM_01224E | 1555.359  | 1323.57   |
| NM_00214E | 1367.166  | 1300.162  | NM_014874 | 901.682   | 1060.403  | NM_01497C | 1055.403  | 1177.94   |
| NM_00331E | 3920.686  | 3012.395  | NM_00576E | 19716.643 | 20599.621 | NM_01571E | 215.86    | 367.271   |
| NM_00377E | 6879.72   | 6765.373  | NM_00276E | 1326.899  | 1561.91   | NM_00612E | 378.47    | 295.482   |
| NM_00709E | 404.022   | 534.225   | NM_006324 | 13819.115 | 11798.294 | NM_00058E | 624.664   | 590.182   |
| NM_01571E | 871.437   | 1238.608  | NM_00546E | 10223.052 | 9163.178  | NM_00559E | 372.096   | 422.844   |
| NM_00612E | 1359.876  | 1453.753  | NM_01636E | 3235.342  | 2761.761  | NM_004684 | 183.725   | 128.007   |
| NM_00058E | 1511.053  | 1398.646  | NM_00370E | 50003.816 | 45686.98  | BF338709  | 146.259   | 127.394   |
| NM_00497E | 561.262   | 601.507   | NM_01434E | 5726.218  | 6091.146  | W96179    | 782.393   | 798.52    |
| NM_01607E | 3543.587  | 2982.641  | AB040895  | 550.557   | 1062.786  | AW247841  | 1570.77   | 1533.339  |
| AF100756  | 7435.654  | 8994.948  | NM_00482E | 356.158   | 388.148   | M76559    | 928.866   | 933.363   |
| NM_00682E | 3942.033  | 3812.215  | NM_01821E | 2713.979  | 3140.452  | AI222585  | 295.408   | 156.044   |
| NM_00486E | 626.381   | 743.077   | NM_00109E | 3794.382  | 4374.673  | AA411678  | 2867.125  | 1667.802  |
| NM_00166E | 1129.488  | 1197.901  | NM_016014 | 5151.036  | 5356.252  | AA862813  | 8493.085  | 5920.768  |
| NM_01456E | 1779.714  | 1837.699  | NM_01832E | 938.251   | 989.895   | AA398427  | 708.732   | 575.841   |

|           |           |           |           |           |           |           |           |           |
|-----------|-----------|-----------|-----------|-----------|-----------|-----------|-----------|-----------|
| NM_02015C | 6906.631  | 7348.081  | NM_017581 | 2081.75   | 2763.089  | T55728    | 1503.073  | 1268.358  |
| NM_00715C | 6017.284  | 6061.325  | AA488804  | 9143.817  | 8460.736  | H20856    | 525.156   | 391.622   |
| NM_006831 | 4525.749  | 4304.902  | NM_006539 | 492.11    | 521.726   | N62586    | 878.503   | 935.792   |
| AL162044  | 7050.498  | 6058.395  | NM_001684 | 1636.414  | 1549.101  | AA242743  | 1382.725  | 1435.117  |
| AK024004  | 1829.2    | 2054.764  | AB028977  | 269.392   | 278.55    | AK022365  | 158.042   | 191.188   |
| AK022365  | 580.832   | 618.315   | NM_000808 | 410.034   | 477.025   | BE892273  | 12631.458 | 12862.714 |
| BE892273  | 24874.33  | 23214.201 | NM_016318 | 11087.237 | 14554.585 | AF026929  | 203.797   | 102.128   |
| AF026929  | 411.102   | 666.445   | NM_013309 | 1118.04   | 1394.292  | NM_016734 | 215.311   | 168.289   |
| NM_014393 | 5141.31   | 7288.254  | NM_019891 | 991.099   | 1411.815  | AF035803  | 235.48    | 46.01     |
| NM_004223 | 12061.618 | 12318.324 | AF038186  | 4115.233  | 4093.582  | Y08147    | 608.277   | 460.018   |
| NM_001355 | 11026.25  | 9829.01   | NM_016277 | 6342.795  | 5458.031  | D00174    | 1262.99   | 1023.468  |
| NM_001216 | 660.933   | 371.85    | NM_007247 | 4496.131  | 4757.927  | AB000520  | 262.187   | 202.315   |
| U63336    | 506.927   | 885.897   | NM_006554 | 3551.455  | 3478.124  | NM_016382 | 355.358   | 457.471   |
| NM_006907 | 934.062   | 838.436   | X99962    | 10519.664 | 8697.409  | AK023117  | 929.329   | 809.251   |
| NM_002686 | 579.643   | 701.081   | AK021492  | 2125.903  | 1743.015  | AL122046  | 448.875   | 477.533   |
| NM_006267 | 1530.277  | 1246.273  | AB033103  | 1443.529  | 1629.187  | NM_000855 | 771.767   | 901.429   |
| NM_002661 | 6936.471  | 7412.317  | NM_002907 | 2206.44   | 1685.184  | NM_005536 | 2526.357  | 2364.409  |
| AK023982  | 1125.196  | 1561.099  | AK024098  | 1273.88   | 1363.603  | NM_005077 | 544.957   | 274.129   |
| NM_018466 | 2422.801  | 3382.735  | AK001116  | 1559.243  | 4060.34   | NM_004423 | 2184.413  | 1321.806  |
| Y11312    | 2407.748  | 2679.246  | AK022371  | 4390.758  | 3426.138  | NM_00199C | 468.761   | 317.498   |
| AB014533  | 5079.121  | 3681.677  | D42045    | 2911.751  | 2348.243  | NM_002141 | 277.349   | 175.668   |
| M11427    | 476.478   | 538.068   | AB007953  | 1831.168  | 1410.156  | NM_003311 | 693.69    | 564.991   |
| NM_000744 | 833.725   | 914.272   | NM_014002 | 3357.313  | 3137.749  | NM_003776 | 1184.569  | 968.035   |
| NM_003039 | 1186.462  | 1305.74   | NM_004197 | 6352.78   | 5724.579  | NM_000744 | 273.196   | 413.789   |
| NM_014509 | 638.651   | 629.743   | NM_004073 | 1718.642  | 1688.609  | NM_003039 | 367.884   | 366.282   |
| U26662    | 428.772   | 284.166   | NM_001278 | 4086.084  | 3523.363  | NM_014509 | 287.134   | 394.394   |
| NM_020372 | 1541.322  | 1210.849  | NM_019105 | 2951.752  | 3152.908  | NM_020372 | 737.816   | 630.747   |
| NM_004758 | 2112.691  | 3665.055  | NM_000294 | 5949.717  | 9286.241  | NM_002635 | 18923.25  | 21935.443 |
| NM_005163 | 3878.26   | 3804.714  | AJ272212  | 1938.033  | 3121.14   | NM_004979 | 304.64    | 71.105    |
| NM_015361 | 13359.606 | 11862.695 | NM_001626 | 32507.295 | 36496.629 | NM_016077 | 1184.927  | 727.692   |
| NM_00431C | 14801.558 | 12951.887 | NM_005677 | 3015.9    | 3142.883  | AF100756  | 1952.478  | 2205.336  |
| NM_015537 | 2401.565  | 2551.832  | AF229803  | 695.685   | 804.482   | NM_006825 | 993.393   | 1200.992  |
| NM_01652C | 23336.838 | 19797.699 | AF151810  | 1020.925  | 2014.762  | NM_004862 | 153.204   | 176.628   |
| AB018353  | 4737.9    | 4309.536  | NM_00213C | 19481.803 | 30023.83  | NM_001661 | 306.725   | 173.029   |
| NM_007036 | 5113.904  | 4889.283  | NM_001305 | 1661.793  | 1283.341  | NM_014563 | 337.374   | 200.567   |
| NM_002617 | 3016.244  | 4494.983  | NM_005082 | 599.129   | 474.635   | NM_02015C | 1387.238  | 1223.706  |
| NM_003313 | 10145.824 | 8696.814  | D17028    | 27801.963 | 28261.531 | NM_00715C | 1180.787  | 730.539   |
| AF090907  | 3980.722  | 3973.214  | BG611243  | 1728.319  | 2541.26   | NM_006831 | 934.47    | 699.748   |
| AK024476  | 6175.774  | 6095.735  | AI417481  | 669.71    | 660.002   | AL162044  | 1429.674  | 1125.318  |
| X74794    | 9107.846  | 9833.824  | AI480307  | 7207.719  | 6548.004  | AK024004  | 349.325   | 505.296   |
| AL050298  | 3604.07   | 4079.364  | X51420    | 1081.773  | 1035.104  | NM_006736 | 967.306   | 1560.408  |
| NM_007079 | 25313.9   | 24001.27  | X51757    | 2355.829  | 4022.19   | NM_00364C | 420.196   | 692.219   |
| M20696    | 4480.057  | 3379.318  | L24038    | 1192.238  | 926.109   | NM_014444 | 1364.048  | 1701.443  |
| NM_002915 | 962.515   | 1276.744  | NM_053056 | 404.391   | 553.161   | NM_012248 | 2006.34   | 2791.737  |
| NM_006736 | 3387.023  | 3614.822  | NM_006186 | 501.368   | 586.38    | NM_01497C | 1271.935  | 1670.013  |
| NM_00364C | 1987.539  | 2586.232  | NM_002751 | 1506.999  | 1966.904  | NM_014393 | 1320.418  | 2042.264  |
| NM_014444 | 5199.78   | 5266.234  | M55593    | 1259.652  | 1958.819  | NM_004223 | 4029.944  | 4851.981  |
| NM_012248 | 7857.054  | 7451.909  | NM_078467 | 3792.217  | 4698.356  | NM_001355 | 3181.354  | 2682.668  |
| NM_007098 | 307.914   | 516.087   | AK001883  | 23315.637 | 31091.42  | U63336    | 187.154   | 313.774   |
| NM_015719 | 651.429   | 1112.329  | NM_014629 | 3417.281  | 3765.957  | NM_006907 | 332.442   | 220.866   |
| NM_012464 | 152.151   | 410.165   | NM_007318 | 58767.004 | 57286.023 | NM_002686 | 224.335   | 287.586   |
| NM_006129 | 1529.167  | 1424.974  | NM_014874 | 1154.661  | 1003.065  | NM_006267 | 469.317   | 804.759   |
| NM_000582 | 1643.568  | 1699.634  | NM_002762 | 1435.51   | 1326.124  | NM_002661 | 2126.06   | 2052.903  |

|           |           |           |           |           |           |           |           |           |
|-----------|-----------|-----------|-----------|-----------|-----------|-----------|-----------|-----------|
| NM_005593 | 1158.786  | 898.138   | NM_006324 | 13409.647 | 11575.123 | AK023982  | 294.437   | 278.361   |
| NM_004684 | 453.673   | 524.093   | NM_003240 | 2525.519  | 2154.337  | NM_018466 | 477.142   | 400.272   |
| AF204171  | 449.904   | 871.123   | NM_016564 | 27439.191 | 26506.824 | Y11312    | 410.134   | 284.919   |
| W96179    | 2861.049  | 3063.603  | NM_000796 | 582.662   | 458.187   | AB014533  | 1403.898  | 1417.247  |
| AW247841  | 4933.468  | 5142.091  | AF279656  | 801.782   | 830.612   | AK022097  | 1062.092  | 1533.572  |
| BG568198  | 689.767   | 483.651   | AK021660  | 612.138   | 662.75    | NM_002166 | 3709.17   | 4463.668  |
| M76559    | 5367.798  | 4737.114  | AB007933  | 34590.344 | 36245.801 | NM_004660 | 3184.623  | 3264.878  |
| U11058    | 533.192   | 616.284   | NM_006702 | 6272.299  | 5173.796  | NM_006165 | 958.014   | 943.085   |
| AI222585  | 1058.214  | 755.255   | NM_001396 | 6311.608  | 5668.594  | NM_016011 | 2528.935  | 3111.808  |
| AA411678  | 11841.574 | 12297.639 | NM_014474 | 1889.858  | 2397.689  | AL035307  | 939.617   | 1099.452  |
| AA862813  | 33179.68  | 32933.93  | NM_016249 | 2768.42   | 2638.469  | AK023772  | 205.49    | 61.91     |
| AA398427  | 2798.179  | 3098.707  | NM_006181 | 1321.592  | 1919.498  | NM_012234 | 1511.571  | 1479.449  |
| T55728    | 6686.211  | 7104.107  | NM_003796 | 13832.363 | 14832.831 | NM_015361 | 2792.885  | 2731.323  |
| H20856    | 2276.225  | 1883.921  | NM_002973 | 1841.819  | 3027.446  | NM_004310 | 3706.765  | 2697.668  |
| N62586    | 5125.807  | 5219.522  | NM_004436 | 15577.453 | 17010.922 | NM_015537 | 709.55    | 721.493   |
| AK022365  | 465.37    | 739.46    | NM_006580 | 2994.96   | 2833.222  | NM_016520 | 6523.742  | 5572.161  |
| BE892273  | 25792.813 | 23095.863 | NM_019891 | 1118.487  | 1246.154  | AB018353  | 1231.716  | 825.008   |
| NM_016734 | 610.526   | 610.708   | AF038186  | 3974.795  | 2904.365  | NM_007036 | 1188.023  | 1069.84   |
| AF035803  | 474.487   | 328.589   | NM_016277 | 6575.076  | 4806.628  | NM_002617 | 831.237   | 763.34    |
| Y08147    | 1830.128  | 1849.395  | NM_007247 | 4431.147  | 4857.585  | NM_003313 | 3352.28   | 2996.359  |
| D00174    | 4727.238  | 4671.694  | NM_006554 | 3931.931  | 4110.264  | AF090907  | 789.46    | 620.871   |
| AB000520  | 1046.947  | 937.336   | X99962    | 9256.223  | 9091.114  | AK024476  | 1273.522  | 1079.415  |
| NM_016382 | 1099.809  | 2385.519  | AK023221  | 3792.549  | 4727.319  | X74794    | 1625.064  | 1115.568  |
| AK023117  | 4149.729  | 3881.852  | J03651    | 3041.827  | 2556.803  | AL050298  | 736.198   | 709.021   |
| AL122046  | 1725.072  | 2160.084  | U61738    | 4027.875  | 3491.02   | NM_007079 | 5461.382  | 4707.307  |
| AF119914  | 343.05    | 439.436   | U92818    | 810.479   | 792.005   | M20696    | 952.974   | 722.681   |
| NM_000855 | 3218.528  | 3315.355  | NM_000442 | 4973.602  | 3678.572  | NM_002915 | 198.701   | 90.764    |
| NM_005536 | 9123.134  | 9475.183  | NM_002934 | 2172.954  | 2218.795  | AK026015  | 164.011   | 120.418   |
| NM_005077 | 2767.184  | 2336.861  | AK023011  | 16188.265 | 17193.904 | NM_005203 | 194.435   | 216.55    |
| NM_004423 | 8814.938  | 6521.438  | NM_016816 | 2277.558  | 1379.904  | NM_006566 | 715.641   | 1195.164  |
| NM_001990 | 1895.938  | 1805.5    | L17325    | 1276.458  | 1547.694  | AK026154  | 2642.668  | 3288.094  |
| NM_002141 | 1000.387  | 1026.117  | NM_017716 | 882.897   | 1031.377  | AL117546  | 7301.749  | 7098.444  |
| NM_003311 | 2914.962  | 2779.725  | M58603    | 8299.217  | 8949.528  | AK027073  | 273.678   | 265.07    |
| NM_003776 | 7482.272  | 6213.851  | NM_003639 | 1869.994  | 1810.807  | NM_000384 | 258.354   | 183.242   |
| NM_000744 | 805.411   | 815.435   | NM_001549 | 296.334   | 251.987   | AB018325  | 879.769   | 763.975   |
| NM_003039 | 1136.572  | 979.568   | NM_000115 | 2945.362  | 2753.825  | AL157482  | 918.427   | 840.391   |
| NM_014509 | 622.161   | 586.599   | AF308801  | 3561.926  | 4182.866  | NM_005428 | 2078.25   | 1756.526  |
| NM_020372 | 1134.779  | 775.501   | AJ272212  | 1987.733  | 2132.615  | NM_017974 | 350.99    | 300.058   |
| NM_002635 | 51787.133 | 51781.578 | NM_001626 | 37731.648 | 31816.191 | X14677    | 676.619   | 591.527   |
| NM_004979 | 420.099   | 526.717   | NM_005677 | 2986.931  | 2880.422  | NM_005863 | 1287.679  | 1035.392  |
| NM_016077 | 3976.428  | 3757.274  | AF229803  | 856.196   | 775.114   | U17077    | 609.033   | 559.309   |
| AF100756  | 8958.941  | 10219.31  | AF151810  | 1535.024  | 2738.577  | NM_000915 | 751.909   | 755.804   |
| NM_006825 | 5190.372  | 4667.254  | NM_002130 | 21896.188 | 35144.34  | AK024475  | 534.338   | 329.512   |
| NM_004862 | 733.185   | 837.812   | NM_005469 | 8594.294  | 9686.771  | AB026542  | 4651.923  | 3301.216  |
| NM_001661 | 1034.931  | 971.17    | NM_016361 | 1495.739  | 2730.39   | NM_019846 | 1172.806  | 823.297   |
| NM_014563 | 1989.856  | 1777.142  | NM_003708 | 52193.188 | 51898.648 | NM_014433 | 336.711   | 215.392   |
| NM_020150 | 6150.019  | 5433.161  | AB040895  | 757.29    | 926.894   | NM_002062 | 1704.815  | 1332.67   |
| NM_007150 | 5978.174  | 5863.415  | NM_018210 | 3064.448  | 2808.598  | NM_014394 | 17813.348 | 14480.855 |
| NM_006831 | 3335.972  | 3423.692  | NM_001096 | 3906.703  | 4367.486  | NM_005243 | 4059.304  | 5315.689  |
| AL162044  | 6230.946  | 7264.269  | NM_016014 | 5627.309  | 5058.906  | NM_006218 | 510.527   | 921.203   |
| AK024004  | 2132.834  | 2333.231  | NM_018327 | 997.755   | 1358.753  | NM_018140 | 1572.038  | 1734.974  |
| NM_006736 | 3513.847  | 4902.616  | NM_017581 | 2141.922  | 2933.174  | NM_016948 | 859.468   | 1109.167  |
| NM_003640 | 1960.177  | 2332.028  | AA488804  | 9782.593  | 10283.233 | NM_000142 | 743.966   | 506.426   |

|           |           |           |           |           |           |           |           |           |
|-----------|-----------|-----------|-----------|-----------|-----------|-----------|-----------|-----------|
| NM_014444 | 4341.972  | 4045.419  | NM_006539 | 639.053   | 628.405   | AF272372  | 6914.717  | 6771.226  |
| NM_012248 | 6306.7    | 5616.308  | NM_001684 | 1613.668  | 1802.317  | AK097045  | 976.277   | 915.535   |
| NM_014970 | 3807.276  | 4279.104  | NM_000808 | 438.248   | 396.866   | AF161356  | 36525.004 | 55739.285 |
| NM_014393 | 3687.789  | 4763.165  | NM_016318 | 11333.995 | 13882.456 | AB014548  | 999.795   | 979.461   |
| NM_004223 | 14482.761 | 15358.384 | NM_013309 | 957.977   | 1269.065  | NM_018256 | 1105.54   | 1371.25   |
| NM_001355 | 12394.322 | 12760.291 | NM_078467 | 3740.002  | 3900.997  | AK025150  | 343.612   | 27.986    |
| NM_001216 | 656.36    | 532.239   | AK001883  | 17580.266 | 15785.067 | AK024611  | 3368.304  | 3102.428  |
| U63336    | 906.855   | 1113.107  | NM_014629 | 3617.336  | 3777.706  | BC010420  | 1260.731  | 1398.47   |
| NM_006907 | 1227.512  | 1273.903  | AK025587  | 443.372   | 300.773   | NM_012280 | 4495.405  | 4319.315  |
| NM_002686 | 852.674   | 985.771   | AL050114  | 693.85    | 462.731   | NM_018172 | 1551.567  | 1310.431  |
| NM_006267 | 1929.332  | 1816.434  | AK021492  | 2037.858  | 1770.339  | U03886    | 304.232   | 209.998   |
| NM_002661 | 9679.883  | 9732.889  | AK023794  | 18324.42  | 17678.066 | AK022040  | 333.909   | 255.257   |
| NM_001263 | 704.444   | 363.148   | NM_019885 | 2651.855  | 2226.404  | AK022722  | 303.475   | 214.791   |
| AK023982  | 1163.961  | 1317.696  | AB033103  | 1105.776  | 1160.972  | NM_003591 | 4894.699  | 3216.085  |
| NM_018466 | 2341.427  | 2669.01   | NM_002907 | 2675.295  | 1510.418  | AL080111  | 5065.304  | 2492.565  |
| Y11312    | 2343.344  | 2177.006  | AK024098  | 1420.535  | 1317.295  | NM_003550 | 1939.158  | 1219.063  |
| AB014533  | 7246.721  | 10762.746 | AK001116  | 620.611   | 788.14    | NM_014642 | 975.415   | 734.476   |
| M11427    | 2799.042  | 3192.29   | AB007953  | 1828.042  | 1771.843  | NM_003829 | 561.953   | 320.874   |
| AK022097  | 3214.581  | 2297.803  | NM_014002 | 3681.886  | 3712.935  | AL110168  | 682.816   | 595.943   |
| NM_002166 | 17306.254 | 16883.334 | NM_004197 | 6989.685  | 7426.962  | NM_002831 | 2169.772  | 3233.424  |
| NM_004660 | 11168.246 | 9873.425  | NM_004073 | 1655.444  | 1862.942  | AL833409  | 1124.483  | 1497.205  |
| NM_006165 | 2823.52   | 1960.861  | NM_001278 | 4182.115  | 3642.025  | NM_015966 | 334.443   | 321.477   |
| NM_016011 | 7345.216  | 7036.569  | NM_019105 | 3258.649  | 2815.7    | NM_016147 | 1189.774  | 1395.987  |
| AL035307  | 2655.131  | 2516.067  | NM_000294 | 4898.524  | 5510.67   | NM_002833 | 686.496   | 762.196   |
| NM_012234 | 6734.303  | 6135.205  | NM_016249 | 1896.237  | 1542.19   | NM_016592 | 423.566   | 517.144   |
| NM_015361 | 13416.671 | 11105     | NM_006181 | 662.7     | 596.26    | NM_018326 | 2047.09   | 1853.02   |
| NM_004310 | 15174.569 | 12367.209 | NM_003796 | 13753.451 | 11842.914 | NM_005606 | 2147.156  | 953.445   |
| NM_015537 | 4331.544  | 4241.509  | NM_002973 | 1728.732  | 2005.935  | AF134707  | 327.124   | 379.662   |
| NM_016520 | 24515.432 | 22133.908 | NM_004436 | 14587.594 | 13150.34  | BE730629  | 351.85    | 342.523   |
| AB018353  | 4710.312  | 3879.454  | NM_006580 | 2240.274  | 1773.23   | AK027167  | 799.518   | 602.295   |
| NM_007036 | 5955.44   | 5814.188  | NM_001305 | 1102.976  | 749.319   | AK025265  | 1373.332  | 665.667   |
| NM_002617 | 4357.123  | 4769.042  | NM_005082 | 458.573   | 592.936   | NM_013279 | 305.083   | 134.202   |
| NM_003313 | 13561.891 | 10847.797 | D17028    | 23665.086 | 23490.957 | NM_018652 | 3992.575  | 2296.676  |
| AF090907  | 3555.48   | 3004.135  | NM_013442 | 22928.748 | 20390.105 | AB011166  | 843.985   | 950.426   |
| AK024476  | 5544.117  | 4867.868  | BG611243  | 1470.914  | 1489.902  | AK024460  | 1276.965  | 1259.038  |
| X74794    | 7261.061  | 7169.944  | U60519    | 1172.28   | 1102.571  | NM_006606 | 1017.816  | 775.648   |
| AL050298  | 2995.637  | 3599.043  | AA282906  | 1649.296  | 1439.615  | NM_006442 | 6533.903  | 6108.674  |
| NM_007079 | 31046.441 | 31631.988 | L02870    | 3288.884  | 3371.686  | NM_003902 | 2400.996  | 1825.829  |
| M20696    | 4077.476  | 5319.302  | BG755482  | 5206.057  | 4820.605  | NM_016427 | 2488.303  | 2071.53   |
| NM_002915 | 1057.911  | 1380.336  | AI480307  | 6560.374  | 6567.27   | NM_006706 | 227.23    | 166.563   |
| AK026015  | 447.933   | 514.623   | X51420    | 1257.879  | 1767.288  | U80741    | 1279.042  | 924.241   |
| NM_006566 | 2218.289  | 2553.833  | D28235    | 323.532   | 559.252   | NM_014497 | 436.245   | 262.222   |
| AK026154  | 7517.83   | 5154.301  | X51757    | 2168.42   | 4999.868  | AL133598  | 2407.109  | 1632.444  |
| AL117546  | 19402.35  | 14194.975 | L24038    | 1206.767  | 1018.069  | NM_015511 | 1133.555  | 904.055   |
| AK027073  | 1068.183  | 617.76    | NM_053056 | 643.875   | 791.737   | NM_006625 | 884.319   | 816.616   |
| NM_000384 | 950.54    | 805.526   | NM_006186 | 523.461   | 752.371   | NM_004891 | 5872.69   | 5553.622  |
| AB018325  | 3048.188  | 2389.396  | NM_002751 | 1558.417  | 1672.708  | AF086538  | 199.908   | 181.357   |
| AL157482  | 2696.786  | 2412.27   | M55593    | 1381.378  | 1945.47   | AF075068  | 13080.891 | 9811.716  |
| NM_003603 | 539.238   | 574.904   | NM_017716 | 683.768   | 1180.534  | AF086474  | 149.147   | 70.568    |
| NM_005428 | 9304.613  | 8416.349  | M58603    | 7466.436  | 8231.664  | AK024366  | 233.608   | 202.283   |
| NM_017974 | 1644.224  | 1315.19   | NM_000115 | 2453.847  | 2168.027  | AK023443  | 60.469    | 155.967   |
| NM_003979 | 669.673   | 651.066   | AF308801  | 3670.766  | 3096.993  | NM_018354 | 610.929   | 408.012   |
| X14677    | 1211.413  | 1424.509  | NM_007318 | 48630.801 | 39146.914 | X78938    | 239.995   | 208.291   |

|           |           |           |           |           |           |           |           |           |
|-----------|-----------|-----------|-----------|-----------|-----------|-----------|-----------|-----------|
| NM_005863 | 4786.232  | 4445.814  | NM_014874 | 1041.498  | 960.088   | AK022379  | 406.309   | 494.996   |
| U17077    | 2284.435  | 1983.232  | NM_005765 | 20597.93  | 15398.829 | AK023296  | 149.736   | 74.596    |
| NM_000915 | 4821.193  | 3828.343  | NM_002762 | 769.614   | 534.023   | AK023462  | 213.119   | 943.299   |
| NM_002344 | 559.921   | 517       | NM_006324 | 12409.706 | 10136.614 | AK001115  | 334.669   | 706.83    |
| AK024475  | 2917.795  | 2034.02   | NM_016848 | 3659.998  | 3191.573  | NM_014095 | 566.584   | 1164.446  |
| AJ278865  | 512.856   | 472.762   | NM_000514 | 2439.225  | 2355.448  | AK024131  | 150.919   | 116.854   |
| AB026542  | 17205.625 | 16426.709 | AL137432  | 1986.672  | 1740.45   | AK023343  | 179.398   | 271.849   |
| NM_019846 | 3789.129  | 3229.015  | NM_000957 | 2881.454  | 2829.406  | AK022452  | 211.187   | 308.7     |
| NM_014433 | 1064.199  | 863.594   | NM_019043 | 3750.937  | 3967.737  | AF085881  | 1046.404  | 1148.832  |
| NM_002062 | 9237.815  | 7639.132  | NM_003240 | 2326.249  | 2711.888  | AK022737  | 2663.538  | 3598.052  |
| NM_014394 | 52883.688 | 55133.656 | NM_016564 | 15059.904 | 18695.664 | NM_003472 | 13960.841 | 16163.798 |
| NM_005243 | 14953.569 | 18318.256 | NM_000796 | 417.898   | 642.126   | U92980    | 1005.721  | 883.437   |
| NM_006218 | 2053.988  | 1449.167  | AF279656  | 800.222   | 1003.486  | AF133658  | 405.174   | 469.604   |
| NM_018140 | 5014.029  | 4425.018  | AK021660  | 594.996   | 513.756   | AB048287  | 1833.599  | 1548.197  |
| NM_016948 | 2616.417  | 2693.917  | AB007933  | 29376.439 | 29322.459 | Y11159    | 419.854   | 440.666   |
| NM_000142 | 2142.175  | 1578.623  | NM_006702 | 5456.148  | 4952.328  | AB020648  | 1226.294  | 1701.75   |
| AF272372  | 22734.877 | 21221.766 | NM_001396 | 5245.272  | 5436.072  | AK025798  | 4871.604  | 4975.919  |
| AK097045  | 3850.97   | 3224.068  | NM_014474 | 1847.984  | 2798.556  | AF086173  | 260.653   | 82.802    |
| AF161356  | 52693.625 | 59330.715 | NM_006539 | 651.066   | 851.336   | AK025164  | 218.526   | 174.215   |
| AB014548  | 6632.281  | 5435.423  | NM_001684 | 1578.002  | 1951.715  | NM_018366 | 1042.65   | 649.905   |
| NM_018256 | 5133.595  | 5883.523  | NM_016318 | 6325.442  | 6737.933  | AB040290  | 207.687   | 304.494   |
| AK025150  | 860.2     | 676.892   | NM_013309 | 857.693   | 862.78    | NM_019848 | 2420.628  | 1968.719  |
| AK024611  | 12080.103 | 11988.403 | NM_019891 | 1020.511  | 1160.649  | AL359056  | 183.457   | 298.311   |
| BC010420  | 5960.126  | 8616.305  | AF038186  | 3678.108  | 2743.568  | AK021497  | 240.718   | 322.403   |
| NM_012280 | 16617.018 | 15749.852 | NM_016277 | 6200.559  | 4505.92   | AK000798  | 104.893   | 161.329   |
| NM_018172 | 6328.328  | 5687.605  | NM_006554 | 3986.262  | 2862.494  | AK023803  | 193.17    | 170.912   |
| U03886    | 895.632   | 881.3     | X99962    | 9169.931  | 7921.874  | AK026947  | 10222.292 | 12572.18  |
| AK022040  | 1856.097  | 1721.464  | AK023221  | 3498.164  | 3932.975  | U84526    | 2377.969  | 4473.498  |
| AK022722  | 1510.998  | 1607.689  | NM_003664 | 3532.844  | 3955.336  | L23401    | 658.569   | 887.313   |
| NM_003591 | 20809.107 | 22970.219 | NM_002426 | 2441.477  | 2975.497  | NM_018090 | 24033.771 | 22859.389 |
| AL080111  | 23183.234 | 16311.469 | AK027182  | 1083.931  | 1005.384  | AK022728  | 10745.977 | 8735.367  |
| NM_003550 | 8145.508  | 6737.338  | J03651    | 2724.896  | 2810.652  | AL109678  | 488.872   | 520.057   |
| NM_014642 | 4777.448  | 4306.408  | U61738    | 4340.975  | 4353.884  | AL137524  | 374.901   | 380.146   |
| NM_003829 | 3440.36   | 2540.129  | AJ132087  | 640.68    | 704.466   | AF218008  | 1436.242  | 932.012   |
| AL110168  | 3403.402  | 3194.47   | U92818    | 747.663   | 753.49    | M22404    | 7771.958  | 3360.216  |
| NM_014522 | 667.044   | 579.311   | NM_000442 | 4706.947  | 4243.412  | AF052115  | 311.608   | 224.338   |
| NM_002831 | 7741.98   | 8055.195  | NM_002934 | 2106.58   | 2400.264  | NM_014019 | 4197.64   | 2496.739  |
| AL833409  | 3076.559  | 2443.691  | AK023011  | 14545.419 | 16848.625 | AF116653  | 240.961   | 96.658    |
| NM_015966 | 873.948   | 809.393   | NM_016816 | 2232.375  | 1915.91   | NM_012368 | 521.201   | 329.798   |
| NM_016147 | 4286.733  | 4019.056  | L17325    | 1454.553  | 1778.771  | AK025323  | 239.741   | 347.038   |
| NM_002833 | 2621.28   | 2130.733  | NM_014002 | 3907.038  | 5076.67   | NM_013326 | 1488.481  | 1145.88   |
| NM_016592 | 1339.043  | 971.983   | NM_001278 | 4330.17   | 5867.994  | BC037322  | 455.812   | 467.216   |
| NM_018326 | 8939.934  | 7534.818  | NM_019105 | 2347.777  | 2136.785  | Y12022    | 521.646   | 373.394   |
| NM_014773 | 536.784   | 515.98    | NM_000294 | 4249.688  | 3980.93   | AK001375  | 433.153   | 559.045   |
| NM_005606 | 11451.921 | 8017.325  | AJ272212  | 851.319   | 906.037   | NM_019597 | 1946.709  | 1263.106  |
| AF134707  | 1613.308  | 1300.698  | NM_001626 | 16222.919 | 13402.707 | AL137559  | 378.268   | 203.496   |
| BE730629  | 1049.713  | 756.042   | NM_005677 | 1913.771  | 1972.634  | AF026944  | 1488.143  | 689.608   |
| AK027167  | 2619.396  | 2325.54   | AF151810  | 888.463   | 1944.083  | AK021493  | 1037.381  | 583.363   |
| AK025265  | 5976.866  | 4166.978  | NM_002130 | 23375.779 | 34896.324 | NM_006161 | 1484.362  | 1169.753  |
| NM_013279 | 1240.449  | 651.558   | NM_005469 | 7998.87   | 8730.735  | NM_006192 | 227.394   | 246.21    |
| NM_018652 | 17814.039 | 14830.137 | NM_014349 | 8141.268  | 9130.822  | NM_012155 | 1674.147  | 1753.668  |
| AB011166  | 4048.257  | 5041.495  | NM_018210 | 3022.499  | 3740.242  | AF144700  | 622.301   | 1004.088  |
| AK024460  | 5950.753  | 6515.307  | NM_001096 | 4482.772  | 5279.619  | NM_004105 | 3219.598  | 3205.851  |

|           |           |           |           |           |           |           |           |           |
|-----------|-----------|-----------|-----------|-----------|-----------|-----------|-----------|-----------|
| NM_00660E | 4996.301  | 4162.758  | NM_016014 | 5433.111  | 4732.966  | AB046825  | 1205.77   | 975.912   |
| S78570    | 718.512   | 382.345   | NM_018327 | 1307.36   | 1652.005  | X64975    | 417.405   | 659.037   |
| NM_006442 | 31250.51  | 28261.598 | NM_017581 | 3002.599  | 7246.619  | AL050297  | 1440.691  | 571.121   |
| NM_003902 | 8710.059  | 6771.863  | AA488804  | 12265.058 | 15772.876 | AK026966  | 476.179   | 406.754   |
| NM_016427 | 9633.187  | 8127.823  | L29496    | 471.375   | 541.896   | AF147398  | 155.14    | 111.526   |
| NM_00670E | 881.956   | 638.459   | NM_012121 | 747.649   | 929.223   | AK025268  | 581.851   | 539.133   |
| U80741    | 5194.372  | 4358.897  | NM_003255 | 4802.351  | 4841.803  | AL833005  | 1460.464  | 1166.091  |
| NM_014497 | 1773.38   | 1357.663  | NM_014155 | 2001.414  | 2204.025  | L43366    | 621.466   | 283.177   |
| AL133598  | 10242.468 | 9108.639  | AK026331  | 7282.83   | 6449.063  | AK026124  | 2243.14   | 812.734   |
| NM_015511 | 6231.058  | 4614.091  | M30773    | 2508.855  | 2179.143  | NM_01550E | 1564.597  | 1126.698  |
| NM_00662E | 4868.031  | 4186.466  | NM_01633E | 7560.653  | 7968.152  | AL110157  | 1344.234  | 970.546   |
| NM_004891 | 23117.176 | 24526.969 | AK001883  | 24790.977 | 20540.684 | NM_00231E | 2038.83   | 1027.232  |
| NM_00393E | 935       | 1013.09   | NM_01462E | 3557.072  | 3981.743  | L38712    | 2492.517  | 1730.002  |
| NM_00287E | 963.485   | 405.125   | AK023794  | 17732.131 | 19696.934 | U84508    | 383.999   | 125.935   |
| NM_004641 | 14.86     | 855.997   | NM_01988E | 3063.493  | 3378.966  | NM_01779E | 1795.076  | 1089.413  |
| AF075068  | 37173.48  | 32585.971 | NM_00532E | 375.763   | 4160.833  | NM_012131 | 1078.693  | 490.023   |
| AK024366  | 786.77    | 797.991   | AB033103  | 1781.172  | 1982.709  | S41540    | 396.41    | 323.821   |
| NM_018354 | 2193.247  | 1684.38   | NM_002907 | 2712.051  | 1484.278  | CY3Cy5    | 492.85    | 200.96    |
| AK022379  | 1269.664  | 890.172   | AK024098  | 1311.796  | 1600.013  | AI417481  | 113.074   | 219.541   |
| AK001439  | 655.945   | 716.46    | AK001116  | 697.287   | 687.657   | BI906766  | 188.589   | 57.113    |
| AK023462  | 819.578   | 387.473   | AK022371  | 5230.987  | 5651.309  | U60519    | 223.144   | 347.852   |
| AK001115  | 1505.253  | 1112.103  | D42045    | 4522.178  | 4297.545  | AA282906  | 237.938   | 638.706   |
| NM_01409E | 2246.605  | 2235.976  | AB007953  | 2392.029  | 2310.443  | L02870    | 431.982   | 733.718   |
| AK027233  | 735.766   | 699.266   | NM_01782E | 1301.478  | 1818.133  | BG755482  | 1104.869  | 1770.463  |
| AK022452  | 744.737   | 762.68    | NM_003734 | 4057.057  | 5660.39   | AI480307  | 1279.078  | 1438.511  |
| AK023781  | 609.501   | 693.478   | NM_01493E | 3377.527  | 3597.914  | X51420    | 194.721   | 206.573   |
| AF085881  | 4844.165  | 4531.97   | X99660    | 4298.76   | 3674.851  | X51757    | 676.182   | 605.344   |
| AK022737  | 8527.846  | 7219.75   | X03635    | 1928.377  | 1792.697  | NM_00618E | 92.698    | 104.158   |
| NM_00347E | 42149.492 | 33171.645 | X97671    | 515.304   | 272.28    | NM_002751 | 324.412   | 364.592   |
| U92980    | 3264.76   | 2127.221  | NM_004351 | 1881.051  | 1879.339  | M55593    | 559.389   | 630.548   |
| AF133658  | 785.116   | 757.722   | AB011093  | 5927.379  | 5649.139  | NM_078467 | 1224.735  | 1236.23   |
| AB048287  | 6694.308  | 5292.251  | NM_02053E | 7703.571  | 7694.803  | SR2       | 24631.363 | 25386.611 |
| Y11159    | 1501.587  | 1211.362  | NM_001894 | 8635.133  | 9380.368  | SR4       | 4066.381  | 4781.86   |
| AB020648  | 3933.019  | 4027.54   | NM_000614 | 726.917   | 964.817   | SR6       | 696.262   | 575.183   |
| AK025798  | 17611.279 | 16607.738 | NM_00662E | 9757.774  | 7930.931  | SR8       | 3104.48   | 11256.485 |
| AF086173  | 496.689   | 443.331   | NM_001397 | 875.836   | 1118.106  | SR10      | 10389.196 | 4666.176  |
| AK025164  | 832.254   | 678.308   | NM_00554E | 657.423   | 527.981   | CY3Cy5    | 307.086   | 73.725    |
| NM_01836E | 5586.507  | 5116.082  | Y08770    | 550.044   | 829.929   | NM_01684E | 1264.172  | 1563.735  |
| AB040290  | 947.243   | 1306.812  | NM_00477E | 5797.825  | 5081.154  | NM_000514 | 580.469   | 620.043   |
| NM_01984E | 8151.559  | 8377.174  | NM_003714 | 6004.75   | 5963.564  | AL137432  | 271.83    | 139.346   |
| AL359056  | 558.069   | 740.42    | NM_004004 | 546.145   | 729.798   | NM_000957 | 641.256   | 990.266   |
| AK021497  | 777.891   | 837.216   | AF024540  | 1602.673  | 1330.975  | NM_01904E | 1228.735  | 1170.04   |
| AK025615  | 3531.195  | 4892.676  | NM_002881 | 5007.238  | 5734.101  | NM_00324E | 402.729   | 297.375   |
| AK025168  | 850.077   | 973.738   | NM_00366E | 1313.761  | 1055.906  | NM_016564 | 4301.226  | 5137.287  |
| AK026947  | 20101.283 | 16811.492 | NM_01824E | 833.049   | 376.672   | AF279656  | 271.091   | 212.442   |
| U84526    | 9717.627  | 13403.375 | M83822    | 2825.697  | 2028.81   | AB007933  | 3357.001  | 3137.175  |
| L23401    | 2034.636  | 1500.084  | NM_018434 | 7288.163  | 9550.728  | NM_00670E | 1311.711  | 1170.345  |
| NM_01809E | 45929.898 | 38298.848 | NM_02042E | 1803.303  | 1275.046  | NM_00139E | 772.582   | 939.488   |
| AK022728  | 29995.389 | 25942.096 | AK021437  | 1945.716  | 1882.961  | NM_014474 | 522.618   | 391.809   |
| AL109678  | 1450.175  | 1258.563  | NM_003831 | 4139.555  | 3255.311  | NM_01624E | 282.587   | 233.969   |
| AL137524  | 1072.032  | 966.271   | NM_00175E | 506.869   | 483.302   | NM_006181 | 267.906   | 310.291   |
| AF218008  | 4364.189  | 3938.793  | AB007965  | 7098.475  | 6897.46   | NM_00379E | 1652.492  | 2181.422  |
| M22404    | 11709.142 | 9765.418  | NM_01764E | 806.327   | 853.609   | NM_00297E | 764.291   | 893.033   |

|           |           |           |           |           |           |           |           |           |
|-----------|-----------|-----------|-----------|-----------|-----------|-----------|-----------|-----------|
| AF052115  | 1125.199  | 1162.071  | NM_000066 | 1033.705  | 1323.954  | NM_004436 | 6809.527  | 8927.259  |
| NM_014019 | 17648.836 | 16483.42  | NM_017744 | 850.671   | 1239.892  | NM_006580 | 910.173   | 846.412   |
| Z70711    | 913.87    | 1081.238  | NM_001924 | 3746.603  | 3251.442  | NM_001305 | 369.354   | 323.168   |
| AF116653  | 597.944   | 981.538   | NM_017705 | 2587.6    | 2629.126  | NM_005082 | 189.746   | 303.457   |
| NM_012368 | 1310.562  | 1444.282  | NM_001796 | 4126.154  | 3353.54   | D17028    | 9484.745  | 10484.838 |
| AK025323  | 830.484   | 1165.751  | AB040880  | 687.954   | 574.919   | NM_013442 | 9596.593  | 10987.272 |
| NM_013326 | 2973.331  | 3808.489  | NM_009587 | 9866.893  | 9087.187  | BG611243  | 860.621   | 1131.516  |
| BC037322  | 1602.41   | 2682.28   | AL133566  | 587.198   | 709.94    | AK023221  | 1004.685  | 1027.868  |
| Y10202    | 544.761   | 519.128   | NM_002630 | 793.791   | 671.693   | NM_003664 | 738.959   | 809.845   |
| Y12022    | 2412.841  | 2785.018  | NM_013438 | 1801.056  | 2076.01   | NM_002426 | 314.876   | 378.64    |
| AK001375  | 2343.954  | 2025.61   | NM_014688 | 7355.174  | 5710.855  | AK027182  | 214.647   | 132.491   |
| NM_019597 | 9344.433  | 11169.468 | AB037784  | 604.504   | 656.897   | J03651    | 757.709   | 1677.008  |
| AL137559  | 1327.876  | 1351.96   | AL359623  | 2168.61   | 2033.57   | U61738    | 762.972   | 960.781   |
| AF026944  | 4769.366  | 3932.752  | AK026920  | 3411.101  | 3334.17   | AJ132087  | 161.865   | 106.677   |
| AK021493  | 4363.641  | 4088.043  | AL137255  | 1390.885  | 1480.207  | U92818    | 204.854   | 226.191   |
| NM_006161 | 3738.959  | 3719.345  | NM_003370 | 9028.568  | 10863.145 | NM_000442 | 1258.37   | 1378.559  |
| NM_006192 | 661.15    | 602.073   | AB037715  | 2857.013  | 3394.748  | NM_002934 | 515.657   | 353.46    |
| NM_006204 | 545.533   | 975.316   | AF250924  | 10085.291 | 7783.472  | AK023011  | 1974.474  | 998.475   |
| NM_012155 | 5900.027  | 8232.756  | D86979    | 1660.329  | 1585.97   | NM_016816 | 298.617   | 331.799   |
| AF144700  | 1990.324  | 2509.224  | AF018081  | 19571.744 | 19000.338 | L17325    | 127.212   | 36.255    |
| NM_004105 | 12344.001 | 13592.754 | NM_020202 | 14363.491 | 12830.406 | NM_017716 | 310.333   | 224.226   |
| AB046825  | 3861.303  | 4127.226  | AK022889  | 5374.663  | 6067.133  | M58603    | 1835.692  | 1213.338  |
| X64975    | 1038.234  | 1270.581  | NM_001668 | 774.951   | 943.478   | NM_003636 | 986.328   | 944.375   |
| AL050297  | 6622.098  | 4976.134  | AK025362  | 738.585   | 602.337   | NM_001546 | 189.697   | 500.176   |
| AK026966  | 3109.803  | 4379.305  | AK021776  | 2612.588  | 1928.043  | NM_000115 | 1116.874  | 1162.232  |
| AF185573  | 656.668   | 769.588   | AK026042  | 1329.638  | 1266.845  | AF308801  | 1185.757  | 2449.034  |
| AK025268  | 1830.176  | 2196.816  | NM_002137 | 61484.75  | 56085.578 | NM_007318 | 21292.549 | 22207.326 |
| AL833005  | 3430.146  | 2647.025  | NM_002911 | 1926.547  | 1943.989  | NM_014874 | 307.921   | 219.325   |
| L43366    | 2341.289  | 2045.789  | U94386    | 806.608   | 859.526   | NM_005765 | 8159.936  | 9665.105  |
| AK026124  | 7478.959  | 6837.039  | NM_016000 | 18178.252 | 18893.744 | NM_002762 | 283.088   | 491.685   |
| NM_015508 | 5990.133  | 6325.672  | NM_006372 | 5183.417  | 5484.145  | NM_006324 | 4344.291  | 5911.615  |
| AL110157  | 4716.637  | 4679.182  | NM_014150 | 2069.099  | 2101.416  | NM_005466 | 1799.039  | 1683.615  |
| NM_002318 | 8020.963  | 7423.841  | NM_006805 | 21465.301 | 24434.629 | NM_016361 | 460.884   | 372.451   |
| L38712    | 8520.543  | 6285.948  | AF132027  | 19295.348 | 16951.703 | NM_003708 | 15069.283 | 18274.053 |
| U84508    | 1182.346  | 1058.157  | NM_004681 | 15758.338 | 12553.11  | NM_014346 | 950.346   | 1461.03   |
| NM_017793 | 6717.177  | 4219.884  | AB033096  | 7074.695  | 5293.124  | AB040895  | 2794.902  | 3363.514  |
| NM_012131 | 3743.747  | 2552.33   | NM_014886 | 5569.062  | 1012.178  | NM_018210 | 510.335   | 639.665   |
| S41540    | 1627.937  | 1355.799  | L31408    | 8243.638  | 6370.166  | NM_001096 | 1710.586  | 2023.22   |
| CY3Cy5    | 3772.052  | 173.343   | NM_001545 | 8220.184  | 10455.535 | NM_016014 | 1589.243  | 1631.804  |
| AI417481  | 664.216   | 564.233   | NM_004446 | 9197.508  | 10150.571 | NM_018327 | 140.976   | 245.456   |
| BI906766  | 984.962   | 518.267   | AF070625  | 3747.449  | 3426.523  | NM_017581 | 349.872   | 438.883   |
| U60519    | 1450.389  | 1879.299  | AK001740  | 5409.21   | 5889.28   | AA488804  | 1374.398  | 1152.478  |
| AA282906  | 992.324   | 1082.472  | AF131793  | 1187.029  | 1254.719  | NM_006536 | 149.113   | 186.867   |
| L02870    | 1360.202  | 1818.294  | NM_005333 | 17283.139 | 17775.195 | NM_001684 | 337.94    | 328.611   |
| BG755482  | 5580.309  | 7699.712  | AK026161  | 2828.618  | 2577.303  | NM_016318 | 3186.99   | 3068.931  |
| AI480307  | 5658.32   | 7264.03   | NM_004553 | 29093.92  | 33695.125 | NM_013306 | 214.177   | 217.467   |
| X51420    | 1262.622  | 1514.423  | D63484    | 4532.841  | 6933.266  | NM_019891 | 503.372   | 875.918   |
| X51757    | 5702.464  | 4190.566  | AK026745  | 6526.24   | 6824.792  | AF038186  | 1213.766  | 1659.522  |
| L24038    | 1440.72   | 2008.225  | AL157440  | 3899.889  | 3949.364  | NM_016277 | 1805.477  | 2016.507  |
| NM_053056 | 677.138   | 652.188   | NM_016423 | 7856.28   | 10203.337 | NM_007247 | 1445.393  | 1593.505  |
| NM_006186 | 760.091   | 489.321   | AB040975  | 1607.897  | 1765.004  | NM_006554 | 1481.761  | 1850.63   |
| NM_002751 | 1556.806  | 1517.743  | NM_005119 | 9079.921  | 10316.875 | X99962    | 3548.744  | 4502.155  |
| M55593    | 1243.675  | 1288.278  | NM_003168 | 24140.512 | 25308.764 | AK025587  | 95.563    | 79.632    |

|           |           |           |           |           |           |           |           |           |
|-----------|-----------|-----------|-----------|-----------|-----------|-----------|-----------|-----------|
| NM_078467 | 3448.141  | 3265.512  | AK055844  | 1119.162  | 1078.015  | AL050114  | 135.321   | 81.626    |
| SR2       | 54648.953 | 56122.672 | NM_018288 | 11363.1   | 8987.124  | AK021492  | 536.915   | 715.482   |
| SR4       | 16087.443 | 16810.15  | NM_003146 | 4192.503  | 5151.093  | AK023794  | 1962.975  | 2754.373  |
| SR6       | 1948.897  | 1869.477  | X52342    | 939.422   | 879.817   | NM_019885 | 704.911   | 887.175   |
| CY3Cy5    | 4987.687  | 204       | NM_003131 | 12865.912 | 12886.702 | AB033103  | 361.744   | 344.413   |
| NM_016848 | 4340.787  | 4974.442  | NM_005239 | 2791.909  | 2962.321  | NM_002907 | 264.618   | 308.403   |
| NM_000514 | 2227.369  | 2383.812  | AB014526  | 958.916   | 943.731   | AK024098  | 227.988   | 396.63    |
| AL137432  | 2412.113  | 2469.892  | NM_013346 | 1481.268  | 1295.434  | AK001116  | 197.977   | 183.717   |
| NM_000957 | 1770.029  | 1497.802  | AF131784  | 1732.393  | 667.197   | AK022371  | 776.464   | 546.657   |
| NM_003240 | 1851.833  | 2066.535  | NM_017851 | 3211.069  | 2804.61   | D42045    | 625.177   | 264.325   |
| NM_016564 | 26407.199 | 27471.33  | AK026182  | 63090.113 | 52365.633 | AB007953  | 381.107   | 326.693   |
| AF279656  | 1097.87   | 1059.954  | AL117502  | 3741.949  | 3305.181  | NM_014002 | 1040.824  | 816.697   |
| AB007933  | 20461.336 | 22845.156 | AK001846  | 2450.097  | 2158.09   | NM_004197 | 1480.989  | 1184.227  |
| NM_006702 | 5931.463  | 7232.957  | AF147300  | 471.087   | 550.362   | NM_004073 | 330.235   | 371.943   |
| NM_001396 | 2741.946  | 2585.033  | AK024637  | 1159.377  | 2261.09   | NM_019105 | 771.978   | 991.923   |
| NM_014474 | 2183.025  | 1829.484  | AK024108  | 1318.584  | 1939.4    | NM_000294 | 1141.431  | 1556.583  |
| NM_016249 | 981.771   | 741.29    | AL110293  | 709.97    | 619.392   | AJ272212  | 339.344   | 399.873   |
| NM_006181 | 1040.732  | 979.679   | NM_013345 | 526.428   | 447.068   | NM_001626 | 4850.597  | 8827.035  |
| NM_003796 | 15596.875 | 18123.148 | AL117454  | 24265.99  | 27790.561 | NM_005677 | 734.227   | 553.077   |
| NM_002973 | 2488.178  | 3732.58   | AF272890  | 1962.936  | 2196.649  | AF229803  | 198.966   | 162.465   |
| NM_004436 | 21387.74  | 22261.148 | U00684    | 1295.567  | 1506.486  | AF151810  | 618.826   | 446.931   |
| NM_006580 | 3375.429  | 2795.065  | NM_016459 | 21463.479 | 22316.436 | NM_002130 | 13402.664 | 10401.128 |
| NM_001305 | 1492.049  | 1300.301  | AF086227  | 1487.769  | 1534.787  | NM_001305 | 460.758   | 859.686   |
| NM_005082 | 857.903   | 532.745   | AK026246  | 4855.541  | 3881.262  | NM_005082 | 186.519   | 333.378   |
| AK023221  | 4830.868  | 4924.95   | AF070524  | 592.247   | 433.818   | D17028    | 6151.675  | 10274.301 |
| NM_003664 | 2978.76   | 3492.965  | AF035281  | 1235.984  | 1837.221  | NM_013442 | 4170.208  | 4838.584  |
| NM_002426 | 2133.988  | 2119.933  | AL133446  | 3209.455  | 2879.099  | BG611243  | 407.089   | 340.547   |
| AK027182  | 683.663   | 765.226   | AF147406  | 862.345   | 629.955   | AI417481  | 164.079   | 80.496    |
| J03651    | 3737.765  | 3918.458  | NM_006553 | 852.635   | 444.477   | BI906766  | 155.4     | 84.529    |
| U61738    | 2396.081  | 2624.47   | U56251    | 1895.911  | 1329.336  | U60519    | 242.392   | 303.144   |
| AJ132087  | 1083.159  | 1201.471  | AK024689  | 965.622   | 712.068   | AA282906  | 309.977   | 710.569   |
| U92818    | 696.455   | 677.957   | BC035667  | 942.139   | 801.969   | L02870    | 439.553   | 433.667   |
| NM_000442 | 4529.498  | 5823.709  | AL049277  | 2223.356  | 1624.203  | BG755482  | 979.068   | 1054.306  |
| NM_002934 | 2316.037  | 2477.815  | AL049988  | 1489.866  | 1420.567  | AI480307  | 854.083   | 556.045   |
| AK023011  | 12655.103 | 13944.128 | AL117506  | 1310.673  | 914.047   | D28235    | 97.063    | 35.636    |
| NM_016816 | 1757.328  | 2600.237  | AL049302  | 563.891   | 584.477   | X51757    | 892.083   | 412.444   |
| L17325    | 1056.554  | 1447.776  | AL050043  | 1860.77   | 1766.244  | L24038    | 327.996   | 251.673   |
| NM_017716 | 1101.71   | 1387.002  | AL117571  | 1863.259  | 1961.795  | NM_053056 | 222.027   | 263.795   |
| M58603    | 10880.372 | 11096.418 | L22263    | 592.175   | 991.626   | NM_002751 | 418.537   | 359.9     |
| NM_003639 | 2821.54   | 3878.114  | AK091573  | 1086.032  | 834.974   | M55593    | 353.472   | 250.207   |
| NM_000115 | 3476.397  | 4058.151  | AF131814  | 3120.704  | 2390.206  | NM_078467 | 999.057   | 912.437   |
| AF308801  | 4300.618  | 4765.589  | AL359600  | 2575.781  | 2879.157  | AK001883  | 6619.05   | 5872.965  |
| NM_007318 | 38356.867 | 37126.809 | AL360144  | 1702.255  | 1729.331  | NM_014629 | 1647.784  | 1361.924  |
| NM_014874 | 1420.096  | 1353.151  | BC028617  | 777.092   | 777.473   | NM_007318 | 25896.311 | 28073.77  |
| NM_005765 | 19892.119 | 23636.52  | AL117653  | 531.408   | 617.972   | NM_014874 | 219.818   | 171.953   |
| NM_002762 | 620.54    | 516.523   | AF087999  | 576.297   | 1029.61   | NM_005765 | 3968.441  | 4894.563  |
| NM_006324 | 11542.753 | 16661.227 | NM_003740 | 2824.852  | 2596.998  | NM_002762 | 238.104   | 426.387   |
| NM_005469 | 9812.644  | 10111.759 | AL050078  | 1414.434  | 1460.875  | NM_006324 | 2345.436  | 3355.948  |
| NM_016361 | 2633.941  | 2058.993  | AK022933  | 1343.845  | 1233.772  | NM_016848 | 1125.484  | 1040.432  |
| NM_003708 | 38186.566 | 38002.434 | NM_014276 | 6643.962  | 4872.337  | NM_000514 | 329.227   | 448.3     |
| NM_014349 | 6413.983  | 5952.481  | AF035303  | 954.225   | 640.268   | AL137432  | 383.713   | 269.283   |
| AB040895  | 1044.927  | 463.425   | AF056438  | 1972.958  | 1476.985  | NM_000957 | 277.562   | 260.58    |
| NM_018210 | 4342.177  | 3344.956  | AF003737  | 49939.621 | 39667.836 | NM_019043 | 854.483   | 407.676   |



|           |           |           |           |           |           |           |           |           |
|-----------|-----------|-----------|-----------|-----------|-----------|-----------|-----------|-----------|
| NM_001096 | 9823.076  | 8465.929  | AF009296  | 1426.026  | 1084.951  | NM_003240 | 336.153   | 242.999   |
| NM_016014 | 8964.148  | 9302.36   | AF056448  | 1074.952  | 922.252   | NM_016564 | 4471.154  | 3263.556  |
| NM_015940 | 2075.109  | 2480.62   | AK001011  | 9746.242  | 7595.731  | NM_000796 | 171.123   | 116.401   |
| NM_018327 | 3741.84   | 5200.068  | AK021457  | 574.784   | 622.56    | AB007933  | 2718.783  | 2166.737  |
| NM_017581 | 3340.493  | 2661.468  | AK021690  | 2103.759  | 1957.126  | NM_006702 | 830.843   | 873.208   |
| AA488804  | 11330.153 | 12655.606 | AK001840  | 1635.083  | 1820.664  | NM_001396 | 840.555   | 750.913   |
| NM_006539 | 584.268   | 675.752   | AK021486  | 1235.668  | 1453.981  | NM_014474 | 477.806   | 454.548   |
| NM_001684 | 2409.166  | 2167.823  | AK021740  | 495.466   | 665.898   | NM_016249 | 135.184   | 123.169   |
| NM_016318 | 9303.587  | 11066.655 | AK025148  | 868.805   | 529.381   | NM_006181 | 290.068   | 218.145   |
| NM_013309 | 1044.812  | 829.078   | AK026238  | 777.492   | 877.374   | NM_003796 | 4935.792  | 5875.507  |
| NM_019891 | 1793.185  | 1012.497  | AK026694  | 886.115   | 773.781   | NM_002973 | 802.218   | 1241.289  |
| AF038186  | 3559.114  | 3800.013  | AK025564  | 1370.767  | 1305.302  | NM_004436 | 6255.277  | 6213.93   |
| NM_016277 | 5369.093  | 5515.685  | AK026286  | 1415.392  | 1437.735  | NM_006580 | 820.628   | 978.238   |
| NM_007247 | 4581.702  | 4633.518  | AK026731  | 1314.174  | 1690.906  | NM_019891 | 318.958   | 413.647   |
| NM_006554 | 4270.826  | 4790.788  | NM_004192 | 2956.701  | 2358.046  | AF038186  | 559.978   | 700.094   |
| X99962    | 10966.98  | 12169.461 | AK024160  | 1630.122  | 1250.422  | NM_016277 | 916.524   | 1320.961  |
| AK025587  | 677.632   | 854.008   | AK025077  | 1358.231  | 898.975   | NM_007247 | 949.822   | 1176.099  |
| AL050114  | 678.833   | 553.505   | NM_006417 | 5966.668  | 4164.743  | NM_006554 | 855.605   | 1043.48   |
| AK021492  | 2414.269  | 2185.652  | L43350    | 887.334   | 699.165   | X99962    | 2092.341  | 2575.451  |
| AK023794  | 11994.347 | 11651.034 | NM_020317 | 5035.272  | 5531.891  | AK023221  | 938.995   | 1206.893  |
| NM_019885 | 3417.448  | 3543.448  | AL080234  | 4977.771  | 3070.284  | NM_003664 | 713.111   | 804.297   |
| AB033103  | 2943.966  | 2779.033  | AK027025  | 1389.827  | 957.812   | NM_002426 | 193.233   | 288.025   |
| NM_002907 | 1963.338  | 2577.813  | AK025105  | 729.547   | 607.651   | J03651    | 566.874   | 375.315   |
| AK024098  | 2126.33   | 1723.51   | AK021675  | 850.052   | 746.282   | U61738    | 699.325   | 344.894   |
| AK001116  | 538.955   | 684.522   | AF212220  | 4415.517  | 3465.302  | U92818    | 176.957   | 155.051   |
| AK022371  | 5258.885  | 6412.091  | AK025010  | 532.934   | 495.432   | NM_000442 | 1268.811  | 1196.148  |
| D42045    | 3910.388  | 4610.514  | AK022082  | 763.454   | 585.443   | NM_002934 | 240.031   | 213.108   |
| AB007953  | 1845.767  | 2169.88   | AL137709  | 1801.942  | 2384.067  | AK023011  | 1938.012  | 1382.698  |
| NM_014002 | 3953.898  | 4298.312  | AK023277  | 3021.342  | 1891.594  | NM_016816 | 452.821   | 483.784   |
| NM_004197 | 4786.068  | 5013.741  | AK000425  | 2570.448  | 2946.334  | L17325    | 241.489   | 203.188   |
| NM_004073 | 1132.743  | 1302.708  | Z27200    | 1241.067  | 1130.594  | M58603    | 2558.847  | 2322.288  |
| NM_001278 | 4220.024  | 4932.451  | AF070571  | 4754.438  | 2552.601  | NM_003639 | 901.572   | 961.729   |
| NM_019105 | 2239.634  | 2675.874  | AK023554  | 1192.18   | 979.472   | NM_000115 | 1184.114  | 1180.776  |
| NM_000294 | 4862.982  | 5576.736  | NM_003513 | 6622.556  | 5137.482  | AF308801  | 1309.945  | 1391.019  |
| AJ272212  | 1324.685  | 1723.395  | AL079294  | 858.09    | 435.873   | AJ272212  | 453.103   | 631.57    |
| NM_001626 | 19445.053 | 18475.48  | AK024844  | 1059.915  | 787.723   | NM_001626 | 7048.888  | 7397.13   |
| NM_005677 | 2180.914  | 2137.96   | AL049437  | 1542.381  | 742.994   | NM_005677 | 635.803   | 978.406   |
| AF229803  | 495.149   | 628.801   | AK000315  | 12533.67  | 10890.664 | AF229803  | 193.348   | 405.336   |
| AF151810  | 1849.663  | 782.917   | AK023248  | 1165.528  | 1123.733  | AF151810  | 949.247   | 1064.357  |
| NM_002130 | 32387.459 | 19559.117 | NM_012404 | 15929.414 | 14399.415 | NM_002130 | 10146.675 | 7730.72   |
| NM_005082 | 832.608   | 964.844   | AF251190  | 657.331   | 646.309   | NM_005469 | 2565.355  | 3183.968  |
| D17028    | 32693.279 | 33462.617 | AF130075  | 14422.933 | 12839.272 | NM_016361 | 606.546   | 418.884   |
| NM_013442 | 31736.625 | 35407.836 | NM_005444 | 5752.349  | 4876.948  | NM_003708 | 12105.991 | 11229.044 |
| BG611243  | 2544.168  | 2521.905  | V00589    | 27825.002 | 46459.281 | NM_014349 | 912.26    | 816.285   |
| AI417481  | 678.981   | 605.919   | AL390163  | 1260.132  | 1167.449  | NM_018210 | 783.779   | 698.173   |
| U60519    | 1353.304  | 2011.773  | NM_018572 | 2116.917  | 1450.164  | NM_001096 | 544.201   | 347.213   |
| AA282906  | 1455.063  | 1552.367  | AK024838  | 1391.513  | 1338.312  | NM_016014 | 1968.031  | 1554.815  |
| L02870    | 1622.684  | 1870.257  | AK000175  | 4265.536  | 4791.317  | NM_017581 | 1017.991  | 815.32    |
| BG755482  | 6335.496  | 6514.571  | AL137736  | 4861.132  | 4718.732  | AA488804  | 2709.093  | 2984.612  |
| AI480307  | 8196.257  | 8706.772  | AF143870  | 764.02    | 1050.612  | NM_006539 | 235.449   | 123.309   |
| X51420    | 1475.06   | 2324.433  | AK021897  | 5529.555  | 4468.628  | NM_001684 | 303.835   | 301.532   |
| X51757    | 4935.049  | 3932.007  | AK001051  | 1088.701  | 887.706   | NM_000808 | 306.222   | 717.371   |
| L24038    | 1669.957  | 2326.79   | NM_018317 | 1383.146  | 1269.464  | NM_016318 | 3300.171  | 2578.114  |

|           |           |           |           |           |           |           |           |           |
|-----------|-----------|-----------|-----------|-----------|-----------|-----------|-----------|-----------|
| NM_053056 | 506.404   | 551.285   | AF086051  | 556.567   | 447.087   | NM_013306 | 364.253   | 217.981   |
| NM_006186 | 508.289   | 646.933   | AK026434  | 649.175   | 441.959   | NM_078467 | 1191.838  | 1374.514  |
| NM_002751 | 1467.657  | 1524.792  | AK024356  | 1059.628  | 1005.656  | AK001883  | 7516.016  | 6931.008  |
| M55593    | 1274.966  | 1345.687  | AL049370  | 1252.819  | 908.518   | NM_014626 | 1800.735  | 1591.8    |
| NM_078467 | 3290.42   | 3041.282  | D17082    | 14300.159 | 11959.95  | AK025587  | 227.795   | 183.592   |
| AK001883  | 16541.818 | 15532.533 | D17252    | 54998.16  | 45724.652 | AL050114  | 281.954   | 243.409   |
| NM_014626 | 4513.525  | 3850.921  | D16476    | 844.686   | 1539.111  | AK021492  | 617.455   | 746.78    |
| NM_014874 | 1701.769  | 1497.978  | NM_003673 | 2393.469  | 2258.592  | AK023794  | 2884.219  | 2572.337  |
| NM_005765 | 22459.539 | 26440.4   | Z36823    | 5799.207  | 5176.236  | NM_002907 | 219.468   | 157.249   |
| NM_006324 | 12517.733 | 17389.807 | AF147387  | 2549.206  | 3375.94   | AK024098  | 464.409   | 253.205   |
| NM_016846 | 5009.509  | 3589.599  | NM_012081 | 3534.816  | 6602.976  | AK001116  | 142.873   | 191.059   |
| NM_000514 | 2125.595  | 2018.742  | AL137463  | 797.302   | 1011.134  | AK022371  | 489.675   | 894.084   |
| AL137432  | 2701.155  | 2496.25   | AF085909  | 24014.043 | 21575.803 | D42045    | 940.951   | 841.558   |
| NM_000957 | 1820.909  | 1773.393  | AF090888  | 969.713   | 515.559   | AB007953  | 510.515   | 515.317   |
| NM_019043 | 5434.493  | 4174.127  | AK027193  | 2436.339  | 1984.964  | NM_014002 | 1316.828  | 1348.828  |
| NM_003240 | 1851.147  | 1897.588  | AF086471  | 7615.12   | 7255.038  | NM_004197 | 676.42    | 785.4     |
| NM_016564 | 25979.223 | 26358.43  | NM_018455 | 13271.994 | 11594.206 | NM_001276 | 1513.597  | 2103.513  |
| NM_000796 | 500.363   | 1035.599  | AF113018  | 1468.147  | 1258.257  | NM_019105 | 792.693   | 926.471   |
| AF279656  | 871.298   | 839.479   | AK021996  | 2414.241  | 2656.12   | NM_000294 | 1697.41   | 1859.244  |
| AB007933  | 17793.379 | 17744.063 | AL049337  | 2860.304  | 2243.783  | NM_016246 | 387.512   | 310.03    |
| NM_006702 | 5640.372  | 6937.034  | CY3Cy5    | 4204.687  | 213.718   | NM_006181 | 342.206   | 532.029   |
| NM_001396 | 2499.838  | 2206.497  | U13697    | 661.127   | 551.625   | NM_003796 | 4252.186  | 4871.375  |
| NM_014474 | 1993.768  | 1739.027  | U04270    | 6162.512  | 6101.462  | NM_002973 | 694.52    | 1004.125  |
| NM_016246 | 704.436   | 837.118   | L02840    | 591.276   | 416.884   | NM_004436 | 6080.853  | 7250.713  |
| NM_006181 | 792.295   | 864.265   | AA629719  | 56819.238 | 54653.34  | NM_006580 | 867.7     | 827.677   |
| NM_003796 | 13831.195 | 13633.086 | AA927528  | 2702.463  | 2758.857  | NM_001305 | 322.696   | 395.201   |
| NM_002973 | 2577.777  | 3495.011  | BG676364  | 2189.136  | 3003.503  | NM_005082 | 250.955   | 365.067   |
| NM_004436 | 23567.227 | 22135.713 | BG181154  | 1438.39   | 1512.01   | D17028    | 8963.931  | 8763.081  |
| NM_006580 | 3092.238  | 2929.844  | AA843679  | 11801.573 | 3020.279  | NM_013442 | 7910.07   | 7911.984  |
| NM_016277 | 6705.11   | 6288.328  | NM_004957 | 1562.501  | 1074.209  | BG611243  | 615.785   | 717.942   |
| NM_007247 | 3340.964  | 2693.969  | NM_005252 | 1143.962  | 743.335   | U60519    | 310.632   | 469.655   |
| NM_006554 | 4432.024  | 4055.832  | SR9       | 24132.596 | 2957.686  | AA282906  | 289.284   | 219.56    |
| X99962    | 13720.477 | 16389.424 | CY3Cy5    | 3190.464  | 164.339   | L02870    | 342.506   | 280.904   |
| AK023221  | 4924.657  | 4824.909  | NM_004380 | 11605.81  | 10562.369 | BG755482  | 313.049   | 231.459   |
| NM_003664 | 3419.761  | 4230.531  | NM_004119 | 466.899   | 351.705   | AI480307  | 1769.125  | 3263.544  |
| NM_002426 | 996.094   | 890.512   | AY007378  | 3846.57   | 3669.13   | X51420    | 322.152   | 233.469   |
| AK027182  | 785.385   | 991.907   | D26070    | 1419.373  | 1135.84   | D28235    | 108.449   | 57.811    |
| J03651    | 3289.239  | 3489.737  | NM_001642 | 6383.544  | 4926.174  | X51757    | 1259.12   | 608.889   |
| U61738    | 2049.121  | 2219.28   | NM_001542 | 779.146   | 593.677   | L24038    | 196.71    | 234.922   |
| AJ132087  | 774.076   | 1080.404  | NM_002280 | 851.392   | 795.688   | NM_006186 | 177.476   | 153.534   |
| U92818    | 573.889   | 622.236   | NM_015193 | 1635.209  | 1255.918  | NM_002751 | 386.098   | 261.774   |
| NM_016816 | 1321.945  | 2052.519  | X98834    | 3239.376  | 1417.615  | M55593    | 318.272   | 275.356   |
| L17325    | 1196.1    | 1168.376  | NM_007035 | 5650.947  | 2517.258  | NM_017716 | 189.661   | 90.81     |
| NM_017716 | 1130.106  | 1265.428  | AB019562  | 958.601   | 820.016   | M58603    | 1593.076  | 1206.563  |
| M58603    | 11411.492 | 10974.603 | AF036364  | 3269.172  | 2433.663  | NM_003636 | 566.336   | 652.422   |
| NM_003636 | 2986.82   | 2944.128  | AK022847  | 2183.76   | 2243.724  | NM_001546 | 118.775   | 95.832    |
| NM_000115 | 3506.563  | 5087.466  | NM_020203 | 890.056   | 1112.417  | NM_000115 | 984.887   | 1017.821  |
| AF308801  | 5418.738  | 5172.621  | U20582    | 3281.531  | 3209.265  | AF308801  | 1153.451  | 1528.784  |
| NM_005677 | 3210.339  | 2921.813  | NM_002079 | 6144.605  | 4563.43   | NM_007316 | 25740.723 | 27042.396 |
| AF229803  | 580.105   | 964.172   | NM_006806 | 19978.322 | 18312.033 | NM_014874 | 346.651   | 438.755   |
| AF151810  | 2376.019  | 1332.853  | NM_006634 | 11383.065 | 9697.247  | NM_012397 | 164.117   | 523.77    |
| NM_002130 | 39143.805 | 26444.371 | NM_016465 | 1247.722  | 1760.591  | NM_005765 | 6732.562  | 6499.898  |
| NM_005466 | 10698.417 | 11486.16  | NM_000326 | 716.46    | 722.865   | NM_002762 | 360.761   | 297.068   |

|           |           |           |           |           |           |           |           |          |
|-----------|-----------|-----------|-----------|-----------|-----------|-----------|-----------|----------|
| NM_016361 | 2742.251  | 2668.854  | NM_013399 | 3620.222  | 3023.159  | NM_01684E | 1106.007  | 702.024  |
| NM_00370E | 38576.645 | 36149.684 | NM_00248C | 7312.676  | 16289.935 | NM_000514 | 735.174   | 498.101  |
| NM_01434E | 6633.844  | 8408.936  | L03169    | 612.115   | 461.449   | AL137432  | 629.764   | 460.489  |
| NM_01821C | 4781.876  | 4354.095  | NM_00192E | 4695.608  | 6454.401  | NM_000957 | 443.757   | 314.134  |
| NM_00109E | 7545.352  | 7619.224  | NM_00018E | 3565.907  | 3077.217  | NM_01904E | 582.506   | 350.198  |
| NM_016014 | 7532.325  | 7062.844  | Y00816    | 714.783   | 731.418   | NM_00324C | 625.568   | 563.386  |
| AA488804  | 11355.74  | 12829.122 | NM_004512 | 3723.973  | 3267.866  | NM_016564 | 5030.896  | 4354.285 |
| NM_001684 | 2225.78   | 2043.905  | NM_00105E | 18138.947 | 20603.684 | AF279656  | 215.154   | 307.86   |
| NM_01631E | 10469.183 | 14067.331 | NM_002271 | 33638.609 | 29551.832 | AK021660  | 119.77    | 82.719   |
| NM_01330E | 967.054   | 781.326   | NM_018361 | 3735.163  | 2680.482  | AB007933  | 2870.783  | 2764.255 |
| AK001883  | 17809.293 | 15451.656 | AB040966  | 3789.415  | 3390.269  | NM_006702 | 1579.077  | 1862.201 |
| NM_01462E | 6432.005  | 5551.969  | NM_020132 | 1551.167  | 1458.177  | NM_00139E | 902.67    | 711.352  |
| AL050114  | 574.838   | 1029.907  | NM_016467 | 13442.609 | 5755.351  | NM_014474 | 398.536   | 383.845  |
| AK021492  | 2693.663  | 2651.834  | NM_01910E | 1126.441  | 4538.613  | NM_00653E | 137.976   | 226.561  |
| AK023794  | 14768.554 | 18272.816 | L08436    | 659.116   | 2702.429  | NM_001684 | 277.297   | 277.153  |
| NM_01988E | 3938.898  | 5710.225  | AB033002  | 359.891   | 1796.221  | NM_00080E | 522.941   | 532.571  |
| NM_00532E | 1190.814  | 1890.344  | NM_01417C | 3695.215  | 1683.853  | NM_01631E | 2713.766  | 2388.714 |
| AB033103  | 1974.634  | 1744.419  | AF116652  | 51663.379 | 38440.07  | NM_01330E | 259.416   | 290.399  |
| NM_002907 | 2205.097  | 3758.957  | NM_00083E | 661.636   | 1005.22   | NM_019891 | 286.521   | 212.373  |
| AK024098  | 1655.552  | 1264.892  | AK000271  | 542.439   | 448.187   | AF038186  | 1722.489  | 5324.764 |
| AB007953  | 1951.882  | 2484.688  | NM_01414E | 778.545   | 956.286   | NM_016277 | 1384.083  | 2362.227 |
| NM_014002 | 4412.74   | 4351.555  | NM_01883E | 2759.745  | 3175.276  | NM_007247 | 1195.683  | 1141.835 |
| NM_004197 | 5831.231  | 5098.497  | NM_003401 | 2629.237  | 2130.444  | AK023221  | 1389.641  | 1028.66  |
| NM_00407E | 1709.659  | 1635.799  | AL137724  | 3062.625  | 4236.893  | NM_003664 | 798.449   | 769.517  |
| NM_00127E | 4655.037  | 5360.641  | NM_00475E | 6163.875  | 3226.925  | NM_00242E | 526.966   | 408.294  |
| NM_01910E | 2208.254  | 3057.81   | NM_002913 | 1896.723  | 1985.039  | AK027182  | 154.081   | 74.158   |
| NM_000294 | 5059.981  | 5357.682  | AK022797  | 905.626   | 666.491   | J03651    | 850.097   | 1142.767 |
| NM_006181 | 1224.301  | 1225.556  | NM_00737C | 4263.46   | 3404.245  | U61738    | 856.545   | 897.915  |
| NM_00379E | 17363.756 | 17950.199 | NM_006231 | 947.011   | 653.901   | AJ132087  | 178.111   | 156.178  |
| NM_00297E | 2859.833  | 3087.277  | J04474    | 5630.511  | 2507.134  | U92818    | 223.082   | 188.995  |
| NM_00443E | 23090.426 | 21092.674 | NM_003761 | 2408.096  | 1506.574  | NM_000442 | 1157.641  | 1522.266 |
| NM_00658C | 3435.118  | 3218.365  | NM_00472E | 665.822   | 641.526   | NM_002934 | 331.344   | 512.214  |
| NM_00130E | 1332.552  | 1249.621  | NM_014011 | 1457.605  | 1619.105  | AK023011  | 3268.759  | 3201.521 |
| NM_005082 | 860.8     | 835.049   | AK025994  | 1927.322  | 2524.659  | NM_01681E | 489.626   | 634.87   |
| D17028    | 32204.516 | 34094.305 | L29306    | 491.205   | 724.47    | L17325    | 490.371   | 744.82   |
| NM_013442 | 29910.195 | 45522.035 | NM_01398E | 3073.563  | 2976.492  | NM_014002 | 984.891   | 937.227  |
| BG611243  | 2299.727  | 2088.204  | NM_00173E | 1089.879  | 1232.24   | NM_004197 | 1441.339  | 1312.45  |
| AI417481  | 516.566   | 701.392   | NM_020203 | 768.072   | 835.205   | NM_00407E | 340.917   | 370.277  |
| BI906766  | 878.066   | 588.082   | U20582    | 3201.185  | 3421.99   | NM_00127E | 797.64    | 913.576  |
| U60519    | 1342.736  | 1565.228  | NM_00207E | 5222.413  | 5100.769  | NM_01910E | 758.601   | 1534.799 |
| AA282906  | 831.193   | 986.19    | U13697    | 566.955   | 521.807   | NM_000294 | 1569.639  | 1816.184 |
| X51757    | 5031.509  | 3519.437  | U04270    | 4722.033  | 3993.618  | AJ272212  | 562.144   | 884.717  |
| L24038    | 1270.362  | 1726.901  | BG181154  | 5213.797  | 1842.123  | NM_00162E | 3888.501  | 5395.932 |
| NM_05305E | 821.293   | 598.977   | AA843679  | 9795.09   | 3599.336  | NM_005677 | 621.517   | 1121.963 |
| NM_00618E | 531.224   | 547.774   | H68922    | 492.9     | 599.876   | AF151810  | 638.327   | 357.29   |
| NM_002751 | 1332.72   | 1444.164  | NM_004957 | 2592.698  | 4417.075  | NM_00213C | 9450.663  | 5175.435 |
| M55593    | 1361.13   | 1073.89   | NM_005252 | 1183.565  | 1754.131  | NM_00546E | 2947.314  | 2655.862 |
| NM_01771E | 1534.372  | 1601.404  | AF090906  | 2024.266  | 2193.014  | NM_016361 | 762.732   | 331.168  |
| M58603    | 12686.575 | 11129.815 | AB023219  | 2399.13   | 2120.775  | NM_00370E | 10863.471 | 8860.048 |
| NM_00363E | 3325.983  | 3557.917  | NM_00192E | 4212.987  | 7147.354  | NM_01434E | 2021.897  | 1496.867 |
| NM_00154E | 766.625   | 994.964   | NM_00639E | 393.501   | 431.526   | AB040895  | 489.621   | 825.964  |
| NM_00011E | 3954.371  | 3436.77   | NM_01896E | 349.309   | 425.107   | NM_01821C | 907.722   | 1409.699 |
| AF308801  | 5498.021  | 5035.144  | NM_00018E | 3430.592  | 3405.731  | NM_00109E | 966.305   | 753.574  |

|           |           |           |           |           |           |           |          |           |
|-----------|-----------|-----------|-----------|-----------|-----------|-----------|----------|-----------|
| NM_00731E | 54536.949 | 53016.762 | Y00816    | 576.584   | 803.011   | NM_016014 | 1568.231 | 1291.205  |
| NM_014874 | 1895.017  | 1884.7    | NM_004512 | 3216.037  | 3052.332  | NM_018327 | 143.708  | 153.415   |
| NM_00576E | 24693.193 | 30310.871 | NM_004380 | 11756.95  | 9385.308  | NM_017581 | 1109.793 | 819.521   |
| NM_002762 | 576.317   | 533.762   | NM_004119 | 450.496   | 311.633   | AA488804  | 2921.058 | 2460.989  |
| NM_006324 | 13694.035 | 18319.215 | AY007378  | 3365.906  | 2574.365  | L29496    | 259.928  | 235.073   |
| NM_01684E | 4503.563  | 4479.168  | NM_000501 | 37781.414 | 18116.461 | NM_00092E | 135.305  | 262.585   |
| NM_000514 | 2183.929  | 2253.181  | NM_000114 | 2096.734  | 1442.033  | NM_007002 | 3667.142 | 4294.431  |
| AL137432  | 2721.406  | 2181.086  | NM_00515E | 2785.807  | 3183.935  | NM_012121 | 367.473  | 325.915   |
| NM_000957 | 1776.734  | 1423.594  | NM_015193 | 660.459   | 1450.756  | NM_00325E | 1713.821 | 1633.637  |
| NM_016564 | 25332.744 | 24007.928 | X98834    | 3580.876  | 4494.172  | NM_01415E | 786.623  | 743.022   |
| AF279656  | 1314.713  | 1202.768  | NM_00703E | 6656.232  | 5675.642  | AK026331  | 4021.968 | 4668.724  |
| AB007933  | 16251.29  | 14793.157 | AB019562  | 1008.943  | 944.054   | M30773    | 501.513  | 509.432   |
| NM_006702 | 6271.732  | 6576.31   | AF036364  | 2211.798  | 1890.825  | NM_01633E | 3071.503 | 5414.826  |
| NM_00139E | 2494.234  | 2286.35   | AK022847  | 2592.851  | 2402.406  | AF113699  | 5088.069 | 14716.081 |
| NM_014474 | 2172.899  | 1738.011  | AK000271  | 293.463   | 199.693   | AK001883  | 6442.385 | 4353.322  |
| NM_00653E | 710.538   | 636.986   | NM_00680E | 19485.48  | 12595.183 | NM_01462E | 1320.537 | 775.838   |
| NM_001684 | 2503.274  | 2837.056  | NM_006634 | 11116.632 | 5769.488  | AK025587  | 93.184   | 199.145   |
| NM_01631E | 12466.881 | 10542.377 | NM_00032E | 1340.629  | 2108.215  | AL050114  | 190.903  | 224.482   |
| NM_01330E | 1321.933  | 1172.237  | NM_01339E | 3258.518  | 6041.68   | AK021492  | 853.876  | 700.034   |
| NM_019891 | 1894.403  | 1172.262  | NM_002410 | 724.969   | 737.882   | AK023794  | 2738.539 | 2537.849  |
| AF038186  | 4697.211  | 4665.783  | AL122120  | 2154.241  | 868.861   | NM_01988E | 876.464  | 904.211   |
| NM_016277 | 6161.035  | 6528.913  | NM_014684 | 795.823   | 270.13    | AB033103  | 325.044  | 393.071   |
| NM_007247 | 6076.625  | 5617.108  | AK027247  | 713.996   | 443.015   | NM_002907 | 333.366  | 366.263   |
| NM_006554 | 6083.323  | 7381.206  | NM_002480 | 4995.821  | 3922.203  | AK024098  | 280.054  | 453.566   |
| X99962    | 13442.876 | 15884.846 | NM_017571 | 5974.441  | 3679.685  | AK001116  | 134.405  | 136.842   |
| AK023221  | 5452.458  | 5217.819  | L03169    | 914.299   | 807.109   | AK022371  | 1579.421 | 2733.229  |
| NM_003664 | 3039.208  | 3271.422  | NM_014011 | 1230.14   | 1590.329  | D42045    | 1158.275 | 1282.739  |
| NM_00242E | 1745.657  | 1703.737  | AK025994  | 2326.943  | 2421.737  | AB007953  | 971.663  | 794.181   |
| AK027182  | 511.874   | 605.239   | L29306    | 434.427   | 567.604   | NM_017820 | 244.512  | 252.412   |
| J03651    | 3313.903  | 3130.042  | NM_01398E | 3193.748  | 2861.329  | NM_00184E | 258.816  | 321.217   |
| U61738    | 1952.992  | 1771.71   | NM_00173E | 1700.102  | 1992.044  | NM_003734 | 1984.659 | 1848.202  |
| AJ132087  | 732.852   | 1049.731  | NM_00105E | 18351.17  | 17143.977 | NM_01493E | 1943.947 | 2200.589  |
| U92818    | 705.543   | 830.834   | NM_002271 | 32574.031 | 22595.811 | X99660    | 2581.213 | 2459.167  |
| NM_000442 | 5029.834  | 5108.292  | NM_018361 | 3538.217  | 2057.516  | X03635    | 520.286  | 492.559   |
| NM_002934 | 2631.305  | 2144.618  | AB040966  | 2976.563  | 3663.773  | NM_004351 | 998.698  | 1179.295  |
| AK023011  | 12560.537 | 10444.324 | NM_016467 | 13461.394 | 7538.8    | NM_00423E | 3080.694 | 3508.302  |
| NM_01681E | 1558.787  | 2392.702  | NM_007253 | 3395.826  | 1739.302  | AB011093  | 1944.077 | 1390.953  |
| L17325    | 1308.599  | 1250.972  | NM_01910E | 1045.365  | 1162.535  | NM_00561E | 256.498  | 713.726   |
| NM_014002 | 5172.194  | 5580.256  | L08436    | 645.189   | 546.526   | NM_02053E | 2204.778 | 1968.203  |
| NM_004197 | 5789.271  | 5645.008  | NM_00055E | 5201.246  | 5916.163  | NM_001894 | 2129.785 | 1889.748  |
| NM_00407E | 2662.662  | 4035.846  | NM_014170 | 4024.046  | 3663.531  | NM_000614 | 181.602  | 202.56    |
| NM_00127E | 6343.313  | 7984.004  | AF116652  | 55633.246 | 55687.348 | AK022884  | 504.611  | 349.822   |
| NM_01910E | 3389.391  | 3788.073  | NM_00083E | 663.801   | 774.134   | NM_006620 | 1808.738 | 2575.684  |
| NM_000294 | 6768.444  | 8287.649  | NM_004957 | 2009.176  | 2220.567  | NM_001397 | 436.712  | 771.285   |
| AJ272212  | 2381.578  | 2560.163  | NM_005252 | 1282.275  | 1253.729  | NM_00554E | 185.681  | 248.603   |
| NM_00162E | 30051.547 | 28903.826 | AF090906  | 1183.318  | 1005.628  | Y08770    | 272.436  | 399.561   |
| NM_005677 | 3552.501  | 3082.384  | AB023219  | 1942.085  | 1972.631  | NM_004772 | 1159.555 | 1105.679  |
| AF229803  | 757.734   | 733.311   | NM_01414E | 1024.939  | 684.201   | NM_003714 | 1318.042 | 1899.178  |
| AF151810  | 2853.096  | 1653.947  | NM_01883E | 2649.452  | 2996.196  | NM_004004 | 225.669  | 136.436   |
| NM_002130 | 43797.172 | 48293.285 | NM_003401 | 2665.848  | 1748.78   | AF024540  | 466.416  | 214.554   |
| NM_00546E | 11058.125 | 11887.216 | AL137724  | 3500.241  | 3451.821  | NM_00218E | 396.134  | 566.342   |
| NM_016361 | 2952.597  | 2223.285  | NM_00475E | 7130.633  | 2559.694  | U42977    | 1083.256 | 1061.952  |
| NM_00370E | 45901.902 | 42996.27  | NM_002913 | 2617.749  | 2321.712  | NM_002881 | 1892.264 | 1908.045  |

|           |           |           |           |           |           |           |           |           |
|-----------|-----------|-----------|-----------|-----------|-----------|-----------|-----------|-----------|
| NM_01434  | 6667.334  | 7053.459  | AK022797  | 1257.652  | 1023.503  | NM_00366  | 638.961   | 310.332   |
| AB040895  | 776.303   | 543.01    | NM_007370 | 4409.667  | 5007.813  | NM_00328  | 830.838   | 700.226   |
| NM_018210 | 5113.868  | 3910.045  | NM_006231 | 1459.064  | 1182.428  | M83822    | 433.858   | 495.999   |
| NM_00109  | 8854.489  | 7340.306  | AK023471  | 1889.654  | 1359.1    | NM_018434 | 3730.232  | 2739.107  |
| NM_016014 | 7755.11   | 7112.161  | AF044578  | 1850.155  | 1070.994  | NM_003914 | 535.488   | 828.871   |
| NM_017581 | 3140.849  | 2335.92   | NM_00194  | 3195.34   | 1533.186  | NM_02042  | 497.886   | 340.045   |
| AA488804  | 13052.511 | 12937.458 | NM_001067 | 15220.995 | 8221.86   | AK021437  | 293.466   | 161.937   |
| L29496    | 861.35    | 637.054   | NM_014034 | 8027.174  | 8052.853  | NM_003831 | 834.392   | 571.799   |
| NM_00700  | 15071.536 | 21645.512 | NM_005335 | 23059.934 | 19085.842 | NM_00175  | 155.897   | 181.704   |
| NM_012121 | 1448.628  | 1553.888  | J04474    | 6142.43   | 6267.073  | AB007965  | 1551.95   | 1276.046  |
| NM_00325  | 7018.001  | 5785.957  | NM_003761 | 2729.396  | 3123.521  | NM_01764  | 500.045   | 799.208   |
| NM_01415  | 4713.1    | 4483.781  | X98834    | 3037.392  | 3295.238  | NM_00006  | 283.892   | 134.739   |
| AK026331  | 25116.582 | 22128.717 | NM_007035 | 5742.876  | 4166.8    | NM_00119  | 5175.04   | 4023.716  |
| M30773    | 4374.511  | 4605.597  | AB019562  | 1038.575  | 1043.363  | NM_01600  | 518.257   | 365.67    |
| NM_01633  | 15739.986 | 13425.286 | AF036364  | 1373.716  | 1461.12   | NM_017744 | 215.137   | 182.498   |
| AF113699  | 11853.026 | 11444.316 | AK022847  | 3678.272  | 3103.203  | NM_01770  | 565.273   | 640.97    |
| AK001883  | 18853.871 | 18401.699 | NM_02020  | 675.031   | 463.746   | NM_00179  | 186.497   | 152.284   |
| NM_01462  | 6747.024  | 6559.123  | U20582    | 3423.197  | 2932.883  | AB040880  | 300.429   | 600.505   |
| AK025587  | 267.89    | 337.702   | NM_000337 | 5017.908  | 3503.458  | NM_009587 | 1345.394  | 1177.925  |
| AL050114  | 583.08    | 860.405   | NM_00207  | 6716.198  | 4460.987  | AL133566  | 210.667   | 325.762   |
| AK021492  | 2908.497  | 2873.165  | U13697    | 908.743   | 781.106   | M36118    | 1137.792  | 1218.517  |
| AK023794  | 16632.768 | 16365.745 | U04270    | 4570.521  | 7119.354  | NM_00339  | 2426.841  | 2427.876  |
| NM_01988  | 4193.256  | 4037.195  | AA629719  | 59160.77  | 65657.117 | NM_00263  | 222.428   | 191.381   |
| AB033103  | 2314.351  | 2107.781  | AA927528  | 2403.798  | 1910.991  | AJ295149  | 6612.912  | 5951.556  |
| NM_002907 | 2667.942  | 3327.72   | X02152    | 60443.684 | 66016.383 | NM_01343  | 1326.294  | 1294.502  |
| AK024098  | 1886.238  | 1652.81   | BG676364  | 1632.672  | 2169.235  | NM_01468  | 1128.731  | 589.893   |
| AK001116  | 786.1     | 600.678   | BG181154  | 1297.109  | 1306.715  | AB037784  | 202.442   | 117.453   |
| AK022371  | 5208.903  | 5095.784  | AA843679  | 12668.099 | 16591.506 | AL359623  | 594.349   | 478.515   |
| D42045    | 5068.838  | 4621.021  | H68922    | 555.123   | 700.989   | NM_00667  | 102.573   | 160.365   |
| AB007953  | 2728.352  | 2624.042  | NM_017571 | 5527.868  | 3616.612  | AK026920  | 852.682   | 697.055   |
| NM_017820 | 1255.993  | 1269.596  | AK026095  | 1330.125  | 1034.529  | AL137255  | 544.631   | 408.901   |
| NM_00184  | 1085.167  | 1327.347  | L03169    | 765.398   | 983.029   | NM_003370 | 3071.01   | 2445.255  |
| NM_003734 | 8758.133  | 8167.379  | NM_00192  | 4045.837  | 5511.851  | AB037715  | 722.937   | 508.61    |
| NM_01493  | 11166.936 | 9045.827  | NM_00018  | 5565.299  | 3899.131  | AF250924  | 1586.215  | 1697.66   |
| X99660    | 11502.004 | 9949.48   | Y00816    | 765.843   | 626.195   | D86979    | 307.154   | 212.622   |
| X03635    | 3237.309  | 2975.667  | NM_00451  | 5172.738  | 3750.466  | NM_01821  | 166.92    | 411.394   |
| NM_004351 | 6424.466  | 4880.776  | NM_004380 | 16656.764 | 26358.805 | AB023230  | 137.956   | 212.828   |
| NM_00423  | 12060.372 | 13400.795 | U86813    | 3646.583  | 9747.484  | AF018081  | 3823.76   | 4371.992  |
| AB011093  | 8261.854  | 7877.906  | NM_004119 | 701.185   | 1457.224  | NM_02020  | 4466.093  | 4134.189  |
| NM_02053  | 8892.827  | 8567.305  | AY007378  | 4481.786  | 3390.858  | AK022889  | 2350.565  | 2100.021  |
| NM_001894 | 8067.55   | 7923.211  | D26070    | 1449.342  | 598.627   | X52357    | 11013.64  | 9336.664  |
| AK022884  | 1985.9    | 1681.406  | NM_00164  | 6021.156  | 3193.448  | AF211891  | 406.883   | 429.056   |
| NM_006620 | 9760.165  | 12081.446 | NM_000501 | 45257.188 | 51432.895 | NM_005641 | 817.133   | 564.156   |
| NM_001397 | 1833.509  | 1304.889  | NM_000114 | 2289.013  | 2226.064  | NM_00166  | 350.125   | 459.6     |
| NM_00554  | 686.463   | 574.15    | NM_00515  | 2764.54   | 2658.693  | AK025362  | 210.927   | 256.583   |
| Y08770    | 1233.137  | 993.642   | NM_00055  | 4460.939  | 5099.736  | AK021776  | 794.213   | 879.807   |
| NM_00477  | 6969.467  | 5586.835  | NM_014170 | 3279.642  | 3253.454  | AK026042  | 370.946   | 407.902   |
| NM_003714 | 6358.286  | 5025.306  | AF116652  | 50713.348 | 49222.227 | NM_01423  | 4096.622  | 2946.899  |
| NM_004004 | 890.555   | 637.109   | NM_00083  | 685.845   | 721.31    | NM_002137 | 28413.945 | 14980.346 |
| AF024540  | 2098.296  | 1253.918  | NM_001149 | 675.763   | 4060.76   | NM_002911 | 429.942   | 251.386   |
| NM_00218  | 1622.446  | 1266.209  | NM_00680  | 24317.193 | 26342.646 | U94386    | 371.042   | 200.243   |
| U42977    | 5347.375  | 4888.723  | NM_006634 | 11785.698 | 5674.842  | NM_01600  | 2180.907  | 1235.31   |
| NM_002881 | 8299.323  | 7959.029  | NM_01646  | 764.804   | 356.233   | NM_00637  | 1682.611  | 1284.394  |

|           |           |           |           |           |           |           |           |           |
|-----------|-----------|-----------|-----------|-----------|-----------|-----------|-----------|-----------|
| NM_00366E | 1817.494  | 1589.703  | NM_00032E | 935.529   | 610.213   | NM_01415C | 461.26    | 284.236   |
| NM_00328E | 5644.333  | 4610.309  | NM_01339E | 3703.573  | 3703.738  | NM_00680E | 6266.937  | 4319.621  |
| NM_01824E | 707.578   | 714.711   | AL122120  | 2100.185  | 1979.345  | AF132027  | 4865.514  | 3812.03   |
| M83822    | 4150.092  | 4791.233  | NM_014684 | 1212.449  | 1196.919  | NM_004681 | 4262.447  | 3693.664  |
| NM_018434 | 16607.697 | 10926.342 | AK027247  | 947.678   | 665.11    | AB033096  | 2176.965  | 1858.06   |
| NM_003914 | 1675.38   | 3292.254  | NM_00248C | 5781.201  | 4439.793  | NM_01488E | 355.163   | 915.622   |
| NM_02042E | 1857.985  | 2470.399  | NM_014034 | 6348.929  | 6328.766  | L31408    | 2274.897  | 2549.18   |
| AK021437  | 1162.443  | 992.523   | NM_00533E | 22858.949 | 17906.369 | NM_00154E | 3275.726  | 2112.57   |
| NM_003831 | 3306.339  | 3612.883  | J04474    | 4948.761  | 5065.156  | NM_00444E | 2340.827  | 2133.37   |
| NM_00175E | 536.713   | 542.667   | NM_003761 | 2266.25   | 2670.252  | AF070625  | 654.29    | 759.456   |
| AB007965  | 7605.056  | 6232.408  | NM_014011 | 1411.479  | 1130.158  | AL365512  | 922.382   | 893.669   |
| NM_01764E | 1311.674  | 1475.689  | AK025994  | 2040.314  | 2046.764  | AK001740  | 1599.456  | 1391.188  |
| NM_00006E | 953.581   | 604.958   | NM_01398E | 3413.04   | 2874.19   | AF131793  | 355.153   | 277.019   |
| NM_00119E | 20319.502 | 19520.725 | NM_00173E | 1167.634  | 1285.277  | NM_00591E | 5235.698  | 5466.456  |
| NM_01600E | 2359.857  | 2231.975  | NM_00105E | 23538.059 | 19741.906 | J02625    | 3220.522  | 3632.686  |
| NM_017744 | 1301.25   | 766.679   | NM_002271 | 41863.434 | 24963.119 | Y17175    | 40703.57  | 51164.098 |
| NM_001924 | 4787.711  | 4498.291  | NM_018361 | 3836.028  | 1420.689  | NM_00454E | 8306.326  | 5784.139  |
| NM_01770E | 3790.152  | 3858.171  | NM_01989E | 473.404   | 233.91    | NM_00533E | 6992.265  | 5558.097  |
| NM_00179E | 2862.051  | 2421.573  | AB040966  | 5000.15   | 3561.371  | AK026161  | 755.811   | 489.517   |
| AB040880  | 1129.356  | 1219.469  | NM_02013E | 1631.109  | 2113.99   | NM_00455E | 8716.765  | 4446.853  |
| NM_009587 | 9649.791  | 8395.935  | NM_016467 | 15413.96  | 12410.816 | D63484    | 521.282   | 302.543   |
| AL133566  | 798.205   | 1044.951  | NM_00725E | 3941.231  | 4770.275  | AK026745  | 1560.72   | 1091.49   |
| M36118    | 2519.212  | 2212.253  | NM_01910E | 1317.506  | 2047.328  | AL157440  | 901.643   | 698.701   |
| NM_00339E | 11014.279 | 9947.138  | L08436    | 789.603   | 879.704   | NM_01642E | 1173.004  | 517.812   |
| NM_00263C | 966.444   | 913.249   | NM_005607 | 2096.98   | 3052.504  | AB040975  | 538.705   | 464.738   |
| AJ295149  | 42261.59  | 38090.652 | NM_006761 | 49867.164 | 46598.688 | NM_00511E | 2141.57   | 1323.944  |
| NM_01343E | 7497.047  | 7512.66   | NM_014897 | 1439.969  | 1435.035  | NM_00316E | 7438.34   | 7303.046  |
| NM_01468E | 8051.047  | 7600.038  | NM_00345E | 6232.426  | 5386.893  | AK055844  | 267.196   | 283.109   |
| AB037784  | 755.247   | 808.053   | NM_018371 | 22342.463 | 23209.643 | NM_01828E | 2936.677  | 3366.93   |
| AL359623  | 2120.474  | 2058.458  | NM_01439C | 9884.386  | 9961.253  | NM_00314E | 1537.46   | 899.628   |
| AK026920  | 3833.997  | 3454.383  | NM_01814E | 814.449   | 910.325   | X52342    | 288.619   | 328.21    |
| AL137255  | 1990.314  | 2419.324  | X78924    | 15803.481 | 13024.086 | NM_003131 | 3202.93   | 2703.652  |
| NM_00337C | 12881.462 | 13260.451 | NM_01325C | 702.17    | 596.149   | NM_00523E | 1367.85   | 2789.265  |
| AB037715  | 2089.922  | 2182.903  | AF090906  | 1007.582  | 1115.555  | AB014526  | 285.441   | 268.779   |
| AF250924  | 10301.463 | 10275.113 | AB023219  | 2150.26   | 1835.472  | NM_01853E | 249.705   | 251.046   |
| D86979    | 3690.285  | 2725.374  | NM_01414E | 1146.677  | 867.807   | NM_01334E | 299.482   | 294.064   |
| AF018081  | 34237.383 | 28578.49  | NM_01883E | 3015.071  | 3128.192  | AF131784  | 252.424   | 366.327   |
| NM_02020E | 20166.15  | 18228.953 | NM_003401 | 3094.07   | 1555.092  | NM_017851 | 553.47    | 458.11    |
| AK022889  | 9076.734  | 7697.384  | NM_00291E | 2133.948  | 765.665   | AK026182  | 27650.047 | 26472.352 |
| X52357    | 44413.074 | 39218.684 | AK022797  | 917.919   | 378.018   | AK025603  | 527.654   | 511.427   |
| AF211891  | 2139.799  | 2148.37   | NM_00737C | 4688.853  | 3746.27   | NM_01608E | 6999.517  | 4483.884  |
| NM_005641 | 3310.47   | 3264.165  | NM_006231 | 1249.655  | 1453.426  | AK025768  | 1240.69   | 732.927   |
| NM_00166E | 1662.502  | 1353.48   | AK023471  | 1760.063  | 1945.069  | AL117502  | 699.258   | 526.319   |
| AK025362  | 1377.518  | 1316.011  | AF044578  | 3002.656  | 3167.427  | AK001846  | 321.547   | 216.996   |
| AK021776  | 4501.473  | 4444.625  | NM_00194E | 4411.905  | 3170.921  | AF147300  | 140.749   | 141.943   |
| AK026042  | 1634.018  | 1456.073  | NM_001067 | 15930.772 | 11763.372 | AK024108  | 213.119   | 330.382   |
| NM_01423E | 18642.596 | 21523.541 | AF063936  | 732.347   | 727.776   | AL110293  | 192.593   | 127.886   |
| NM_002911 | 2206.679  | 1468.097  | AB028984  | 729.356   | 894.369   | NM_01334E | 150.115   | 148.688   |
| U94386    | 830.533   | 782.649   | NM_00560E | 1512.032  | 1280.521  | AL117454  | 4298.715  | 2887.27   |
| NM_01600C | 7967.017  | 6829.713  | NM_00357E | 5211.124  | 5113.02   | AF272890  | 586.253   | 535.891   |
| NM_00637E | 5903.264  | 4772.86   | NM_00029E | 5261.583  | 4608.16   | U00684    | 379.107   | 521.831   |
| NM_01415C | 1781.108  | 1642.457  | NM_01230E | 9780.398  | 11632.113 | NM_01645E | 7338.479  | 6062.664  |
| NM_00680E | 18771.348 | 16539.719 | NM_01742E | 16427.162 | 11499.704 | AF086227  | 321.766   | 230.814   |

|           |           |           |           |           |           |           |          |          |
|-----------|-----------|-----------|-----------|-----------|-----------|-----------|----------|----------|
| AF132027  | 25017.203 | 24834.869 | NM_006149 | 584.192   | 473.503   | AK026246  | 855.307  | 723.32   |
| NM_004681 | 15178.272 | 14188.91  | NM_005879 | 956.522   | 858.167   | AF070524  | 311.738  | 207.402  |
| AB033096  | 12029.309 | 10508.567 | AF147790  | 845.393   | 828.105   | AF035281  | 522.759  | 532.243  |
| NM_014886 | 1831.599  | 4627.507  | NM_004112 | 4028.229  | 3585.074  | AK026304  | 479.871  | 889.449  |
| L31408    | 14667.215 | 12622.828 | NM_002659 | 1314.436  | 681.634   | AL133446  | 409.537  | 453.071  |
| NM_001545 | 16500.154 | 11344.881 | Z36776    | 3471.379  | 6998.545  | AK024689  | 212.846  | 298.635  |
| NM_004446 | 14834.604 | 12669.649 | AB029015  | 1961.885  | 2329.117  | BC035667  | 246.565  | 172.792  |
| AF070625  | 3632.525  | 2393.599  | NM_002067 | 24664.854 | 21252.014 | AL049277  | 258.288  | 162.971  |
| AL365512  | 3902.933  | 2962.008  | NM_002430 | 493.177   | 607.084   | AL049988  | 104.57   | 168.2    |
| AK001740  | 6514.738  | 5017.337  | NM_006150 | 3490.313  | 2974.669  | AL117506  | 213.75   | 177.353  |
| AF131793  | 1524.314  | 1337.506  | NM_020345 | 1144.717  | 1353.686  | AL049302  | 179.123  | 124.913  |
| NM_005918 | 24046.102 | 23789.27  | NM_003287 | 858.365   | 868.998   | AL050043  | 233.515  | 145.046  |
| J02625    | 13601.155 | 12196.492 | NM_012325 | 15855.452 | 12595.385 | AL117571  | 711.016  | 657.387  |
| Y17175    | 63115.332 | 69783.75  | NM_014434 | 1272.323  | 1660.683  | L22263    | 238.512  | 108.61   |
| NM_004549 | 34300.293 | 28183.883 | NM_019607 | 4235.301  | 3347.34   | AK091573  | 382.654  | 369.687  |
| NM_005333 | 26399.539 | 24598.342 | U79260    | 9283.965  | 5725.082  | AF131814  | 876.164  | 958.283  |
| NM_004553 | 38948.293 | 40465.867 | NM_001895 | 9509.301  | 7898.875  | AL359600  | 738.856  | 440.458  |
| D63484    | 2967.271  | 2799.991  | NM_006447 | 2443.767  | 2290.73   | AL360144  | 447.033  | 586.193  |
| AK026745  | 6808.161  | 6901.612  | AF119851  | 748.613   | 912.996   | BC028617  | 196.814  | 168.286  |
| AL157440  | 3692.485  | 3541.67   | D87455    | 2527.587  | 2146.56   | AL117653  | 230.844  | 176.109  |
| NM_016423 | 10832.281 | 7348.585  | AF080577  | 1145.247  | 1136.864  | AF087999  | 258.195  | 241.843  |
| AB040975  | 1916.805  | 2055.063  | L22005    | 4453.373  | 3163.97   | NM_003740 | 929.091  | 1010.286 |
| NM_005119 | 8514.739  | 8076.612  | NM_003807 | 12593.214 | 25618.369 | AL050078  | 455.003  | 1023.886 |
| NM_003168 | 28370.662 | 28455.889 | NM_001790 | 2345.971  | 2536.248  | AK022933  | 181.095  | 185.046  |
| AK055844  | 1760.181  | 1574.452  | NM_018243 | 2744.433  | 1626.535  | NM_014276 | 915.563  | 766.066  |
| NM_018288 | 12360.951 | 15504.102 | NM_014939 | 1668.89   | 1518.196  | AF009288  | 222.671  | 373.775  |
| NM_003146 | 12583.69  | 7591.421  | Y17866    | 883.69    | 755.064   | AF056438  | 301.48   | 381.521  |
| X52342    | 1602.306  | 1354.701  | AK024247  | 542.67    | 811.735   | AF003737  | 4547.552 | 4005.509 |
| NM_003131 | 22042.443 | 21421.004 | NM_003005 | 9310.853  | 5260.334  | AF009296  | 277.394  | 237.514  |
| NM_005239 | 6645.958  | 5661.319  | NM_002842 | 2553.394  | 3080.142  | AF056448  | 169.855  | 344.6    |
| AB014526  | 1300.898  | 919.508   | NM_004418 | 2932.075  | 2722.131  | AK001011  | 1501.648 | 978.438  |
| NM_018538 | 1124.854  | 935.193   | NM_000917 | 12540.654 | 12752.054 | AK021457  | 224.082  | 199.46   |
| NM_013346 | 1720.367  | 1513.484  | NM_005389 | 17183.389 | 13860.536 | AK021690  | 642.701  | 311.16   |
| AF131784  | 1000.082  | 2024.091  | NM_014445 | 24744.289 | 19025.73  | AK001078  | 133.446  | 129.921  |
| NM_017851 | 3888.089  | 3599.509  | AL832826  | 1429.722  | 1263.63   | AK001840  | 408.904  | 530.89   |
| AK026182  | 60842.582 | 59929.922 | NM_016123 | 1329.204  | 1339.419  | AK021486  | 187.748  | 280.946  |
| AK025603  | 4155.007  | 3892.305  | NM_000391 | 3429.687  | 3449.098  | AK021740  | 176.258  | 189.447  |
| NM_016085 | 28137.254 | 21922.813 | AF229179  | 483.518   | 383.631   | AK026238  | 475.893  | 594.213  |
| AK025768  | 4504.208  | 3230.802  | NM_002275 | 4714.084  | 11375.649 | AK025564  | 361.29   | 308.205  |
| AL117502  | 4502.067  | 4283.537  | BF569160  | 1186.401  | 1034.333  | AK026731  | 504.991  | 533.972  |
| AK001846  | 1541.592  | 1420.016  | AK024625  | 551.761   | 372.518   | NM_004192 | 933.842  | 1045.288 |
| AF147300  | 753.34    | 655.868   | NM_018131 | 7021.887  | 4767.005  | AK024160  | 303.928  | 265.98   |
| AK024637  | 1032.78   | 879.467   | NM_017636 | 8597.72   | 7194.068  | AK025077  | 247.97   | 200.641  |
| AK024108  | 1345.794  | 1214.068  | NM_012468 | 826.026   | 795.576   | NM_006417 | 1031.356 | 1463.904 |
| AL117454  | 15857.995 | 17666.781 | M27877    | 22344.381 | 21112.516 | L43350    | 281.909  | 214.616  |
| AF272890  | 2575.251  | 3603.571  | D70836    | 37374.406 | 31877.244 | NM_020317 | 2213.9   | 1750.159 |
| U00684    | 903.624   | 943.565   | D16878    | 454.658   | 555.653   | AL080234  | 809.694  | 1078.442 |
| NM_016459 | 31602.877 | 29804.74  | NM_014943 | 2445.799  | 3024.416  | AK027025  | 251.9    | 184.672  |
| AF086227  | 2254.327  | 2323.153  | AK024392  | 2379.453  | 2705.192  | AK025105  | 201.967  | 319.848  |
| AK026246  | 5104.162  | 4589.499  | NM_013260 | 1701.276  | 1439.757  | AB002446  | 102.492  | 148.232  |
| AF070524  | 811.994   | 703.637   | NM_018300 | 1462.263  | 984.229   | AF212220  | 1279.591 | 388.727  |
| AF035281  | 4516.205  | 4117.937  | NM_004875 | 1321.132  | 1752.533  | AK025010  | 262.869  | 819.654  |
| AK026304  | 1307.144  | 1544.424  | NM_017745 | 1614.807  | 2497.472  | AL137709  | 702.587  | 492.075  |

|           |           |           |           |           |           |           |           |           |
|-----------|-----------|-----------|-----------|-----------|-----------|-----------|-----------|-----------|
| AL133446  | 2898.554  | 2659.092  | NM_018433 | 2361.373  | 4325.882  | AK023277  | 833.455   | 703.66    |
| U56251    | 1769.585  | 2113.006  | NM_000937 | 716.559   | 806.536   | AK000425  | 932.845   | 730.073   |
| AK024689  | 975.487   | 977.377   | NM_004043 | 4416.436  | 2751.897  | Z27200    | 349.285   | 343.042   |
| BC035667  | 823.859   | 903.231   | BM458096  | 10069.84  | 7279.625  | AF070571  | 933.402   | 1143.064  |
| AL049277  | 3429.906  | 2764.623  | NM_005626 | 8029.642  | 6027.436  | AK023554  | 256.401   | 173.261   |
| AL117506  | 932.958   | 867.384   | D29958    | 14331.771 | 10922.732 | NM_003513 | 2977.864  | 3043.963  |
| AL050043  | 1047.141  | 1202.933  | NM_015971 | 7802.034  | 6034.33   | AL079294  | 140.958   | 67.669    |
| AL080205  | 899.76    | 738.423   | D17257    | 54704.418 | 45984.059 | AK024844  | 255.771   | 224.739   |
| AL117571  | 2457.013  | 2931.318  | AK000724  | 1843.563  | 2390.219  | AL049437  | 292.066   | 504.214   |
| L22263    | 833.286   | 738.691   | NM_003720 | 14907.257 | 11970.24  | AK023248  | 317.309   | 402.071   |
| AK091573  | 1302.087  | 1797.971  | AF097159  | 990.325   | 1686.933  | NM_012404 | 6533.321  | 4021.089  |
| AF131814  | 3401.756  | 4941.272  | NM_004807 | 1293.604  | 1637.487  | AF251190  | 241.026   | 182.824   |
| AL359600  | 5084.843  | 4894.238  | J03569    | 53772.395 | 48542.262 | AF130075  | 1955.749  | 1147.197  |
| AL360144  | 1258.773  | 1421.841  | NM_003115 | 4581.17   | 4218.716  | NM_005444 | 1331.341  | 723.779   |
| BC028617  | 1177.176  | 1199.892  | NM_018200 | 1258.783  | 1285.766  | V00589    | 10088.069 | 3784.516  |
| AL117653  | 899.909   | 1119.136  | NM_005710 | 6553.869  | 4930.768  | AL390163  | 397.611   | 405.665   |
| AF087999  | 2140.727  | 2107.866  | AF252284  | 1197.27   | 872.461   | NM_018572 | 660.948   | 452.04    |
| NM_003740 | 5007.694  | 5205.628  | NM_014930 | 1832.245  | 1340.216  | AK024838  | 152.643   | 106.068   |
| AL050078  | 1310.369  | 1187.042  | NM_001530 | 3050.533  | 2795.069  | AK000175  | 666.647   | 864.813   |
| AK022933  | 267.499   | 823.877   | U80232    | 13248.924 | 11120.064 | AL137736  | 856.04    | 563.933   |
| AF035303  | 643.791   | 777.37    | AF086526  | 1058.304  | 1333.846  | AK021427  | 105.745   | 77.439    |
| AF056438  | 2137.626  | 2342.158  | AK025788  | 2574.565  | 3493.984  | AK021897  | 2040.591  | 1845.72   |
| AF003737  | 31821.227 | 33418.691 | AF086164  | 1285.563  | 1322.913  | AK001051  | 249.812   | 220.993   |
| AF009296  | 1778.394  | 1721.433  | AK025577  | 1337.914  | 2064.702  | NM_018317 | 414.158   | 357.25    |
| AK001011  | 10637.006 | 13161.214 | AK000216  | 2635.034  | 2874.147  | AF086051  | 267.515   | 188.069   |
| AK021457  | 1019.062  | 693.98    | AK023440  | 1109.667  | 1673.372  | AK024356  | 353.481   | 250.56    |
| AK021690  | 1808.42   | 1834.641  | AB033041  | 14731.606 | 11447.273 | AL049370  | 209.704   | 263.006   |
| AK001078  | 1409.78   | 2406.674  | AY007155  | 5300.234  | 7036.403  | NM_003673 | 562.193   | 286.819   |
| AK001840  | 2629.31   | 2522.422  | AK027160  | 2492.092  | 1966.269  | AF086456  | 214.613   | 291.68    |
| AK021486  | 706.079   | 990.388   | AL359211  | 1265.046  | 1582.507  | Z36823    | 1290.245  | 538.586   |
| AK021740  | 741.533   | 781.084   | U79264    | 3193.392  | 6446.678  | AF147387  | 499.669   | 250.185   |
| AK025148  | 675.106   | 865.195   | AF070530  | 14162.266 | 8006.143  | NM_012081 | 590.999   | 793.566   |
| AK026238  | 1321.591  | 1144.408  | NM_006420 | 997.078   | 896.219   | AF085909  | 2851.203  | 1971.758  |
| AK025564  | 1224.258  | 1061.977  | AF131855  | 943.132   | 730.664   | AF090888  | 241.194   | 183.503   |
| AK026286  | 1543.708  | 1617.235  | AF086046  | 2276.154  | 1957.375  | AK027193  | 498.728   | 715.269   |
| AK026731  | 1996.977  | 1265.595  | AK024962  | 879.056   | 1320.691  | AF086471  | 1857.583  | 1445.899  |
| NM_004192 | 5306.243  | 5583.322  | AK025135  | 6388.48   | 4560.726  | NM_018455 | 2474.421  | 2159.585  |
| NM_006417 | 6365.97   | 8862.224  | NM_017926 | 1861.142  | 2575.648  | AF113018  | 361.001   | 202.452   |
| L43350    | 1165.818  | 1256.142  | AY007145  | 4781.55   | 5294.738  | AK021996  | 514.095   | 208.778   |
| NM_020317 | 10533.793 | 7987.882  | AK021573  | 1603.593  | 2599.847  | AL049337  | 495.823   | 775.752   |
| AL080234  | 6633.135  | 6937.447  | D38549    | 2950.885  | 3907.255  | CY3Cy5    | 612.333   | 226.495   |
| AK027025  | 1957.699  | 1431.119  | AK024780  | 1235.138  | 1267.259  | U13697    | 327.491   | 373.171   |
| AK025105  | 1056.776  | 873.238   | AF085947  | 1334.884  | 1583.628  | U04270    | 1380.643  | 1762.086  |
| AF212220  | 7298.897  | 6543.224  | AF086000  | 419.562   | 596.964   | AA629719  | 37720.375 | 58933.957 |
| AL137470  | 7650.237  | 4275.152  | AL359591  | 785.298   | 787.528   | AA927528  | 417.419   | 642.987   |
| AL137709  | 4334.204  | 3007.377  | U10510    | 7188.934  | 5561.1    | BG181154  | 468.664   | 538.951   |
| AK023277  | 4306.853  | 4606.598  | Z36842    | 955.741   | 1044.619  | AA843679  | 1519.46   | 2661.921  |
| AK000425  | 3492.814  | 2682.249  | AF086137  | 776.808   | 610.283   | NM_004957 | 689.87    | 662.681   |
| Z27200    | 1564.336  | 1637.662  | AF086155  | 811.686   | 454.015   | NM_005252 | 303.323   | 291.516   |
| AF070571  | 5250.456  | 7289.854  | NM_014159 | 3967.409  | 2155.584  | SR5       | 2149.162  | 1405.951  |
| AK023554  | 1312.875  | 1896.695  | AK021795  | 1056.972  | 1257.807  | SR7       | 2097.503  | 11885.449 |
| NM_003513 | 13358.259 | 17324.4   | AL162042  | 4339.01   | 6564.891  | SR9       | 6549.002  | 962.834   |
| AK024844  | 1190.448  | 813.951   | AK026131  | 1816.344  | 1876.636  | CY3Cy5    | 555.484   | 157.509   |



|           |           |           |           |           |           |           |           |           |
|-----------|-----------|-----------|-----------|-----------|-----------|-----------|-----------|-----------|
| AL049437  | 1340.116  | 1331.032  | AK023312  | 1014.646  | 1336.533  | NM_00438C | 3063.881  | 4110.924  |
| AF161427  | 67553.5   | 64237.434 | AK021462  | 922.048   | 928.43    | AY007378  | 1331.227  | 1917.092  |
| AK021715  | 14173.377 | 13016.868 | AK023012  | 1424.213  | 1467.181  | D26070    | 379.917   | 671.441   |
| AK000315  | 19027.072 | 17532.164 | AK023906  | 3574.148  | 3076.534  | NM_001642 | 2143.438  | 3788.566  |
| AK023248  | 1657.882  | 1790.47   | AK024234  | 747.986   | 793.581   | NM_00515E | 1046.098  | 1153.935  |
| NM_012404 | 26616.639 | 26868.447 | NM_012409 | 2798.033  | 3739.078  | X98834    | 1434.304  | 1611.036  |
| AF251190  | 924.281   | 617.159   | AL050205  | 3996.207  | 4150.88   | NM_00703E | 2294.916  | 2564.247  |
| AF130075  | 12887.525 | 9324.159  | AK023947  | 488.731   | 692.457   | AB019562  | 257.298   | 529.371   |
| NM_005444 | 9499.441  | 8499.806  | NM_005691 | 1153.739  | 1661.734  | AF036364  | 463.14    | 549.01    |
| V00589    | 30687.969 | 29133.568 | AF086156  | 596.295   | 821.828   | AK022847  | 686.214   | 643.17    |
| AL390163  | 1517.735  | 2170.736  | AK023814  | 712.455   | 1221.426  | U20582    | 1420.864  | 891.51    |
| NM_018572 | 2405.819  | 2445.221  | AF130063  | 761.943   | 890.501   | NM_00207E | 2021.268  | 1493.905  |
| AK024838  | 980.845   | 871.379   | AF086528  | 596.604   | 877.481   | NM_00680E | 7656.688  | 7901.874  |
| AK000175  | 4237.083  | 3453.052  | AF251187  | 823.616   | 859.712   | NM_006634 | 3353.196  | 4965.257  |
| AK021897  | 9120.519  | 7981.461  | NM_006543 | 990.503   | 870.394   | NM_01646E | 605.858   | 1012.424  |
| AK001051  | 1573.656  | 1317.713  | AK022672  | 1400.528  | 997.978   | NM_00032E | 351.097   | 273.553   |
| NM_018317 | 2252.989  | 1905.115  | AK023870  | 1774.165  | 1364.129  | NM_01339E | 1472.139  | 1665.116  |
| AF086051  | 1212.756  | 1225.951  | AK021599  | 1515.786  | 1311.722  | AL122120  | 644.83    | 858.302   |
| AK024356  | 1035.535  | 916.778   | AK024263  | 965.696   | 1170.521  | NM_00248C | 1252.156  | 1510.366  |
| AL049370  | 698.113   | 419.834   | NM_016613 | 3120.912  | 3241.362  | NM_017571 | 2034.204  | 1921.728  |
| AL365410  | 9126.557  | 7432.316  | AF086414  | 1731.248  | 2588.136  | L03169    | 304.742   | 314.947   |
| D17082    | 28852.809 | 26891.16  | AJ012490  | 5025.848  | 7798.082  | NM_00192E | 2201.173  | 1083.511  |
| D17252    | 57611.453 | 53354.324 | U84516    | 9120.851  | 9660.582  | NM_00639E | 237.633   | 221.603   |
| NM_003673 | 3896.599  | 3284.68   | AL049270  | 1024.236  | 1585.097  | NM_00018E | 911.969   | 744.329   |
| AF086456  | 563.918   | 1183.795  | U88834    | 14350.836 | 15280.595 | Y00816    | 270.128   | 215.324   |
| Z36823    | 7508.056  | 5807.479  | BC025324  | 1085.196  | 1194.3    | NM_004512 | 1446.675  | 1453.136  |
| NM_012081 | 3281.877  | 4581.802  | NM_003533 | 1351.648  | 2141.935  | NM_00105E | 3647.591  | 3765.801  |
| AF090888  | 1482.894  | 1441.137  | AL157478  | 628.902   | 502.038   | NM_002271 | 15460.846 | 16529.943 |
| AK027193  | 2110.77   | 1951.783  | AK023726  | 8622.583  | 9484.181  | NM_018361 | 895.365   | 1726.321  |
| AF086471  | 11700.21  | 10325.227 | AK024906  | 1040.205  | 685.185   | NM_019893 | 267.517   | 833.692   |
| NM_01845E | 17631.291 | 16699.887 | AF131836  | 2317.137  | 1748.238  | AB040966  | 1327.827  | 2046.687  |
| AL049337  | 1622.835  | 1512.21   | AF275804  | 21173.84  | 17353.924 | NM_020132 | 476.981   | 488.21    |
| U13697    | 479.668   | 728.195   | AL137488  | 2028.129  | 1758.167  | NM_016467 | 3885.98   | 5175.336  |
| U04270    | 4060.679  | 3763.318  | AK024365  | 3799.191  | 2969.551  | NM_007253 | 801.531   | 726.184   |
| AA629719  | 64341.914 | 72199.039 | AJ251759  | 1279.843  | 1304.557  | NM_01910E | 386.352   | 471.215   |
| AA927528  | 1969.961  | 2918.621  | AK024371  | 2354.27   | 2363.841  | NM_00055E | 987.73    | 962.256   |
| X02152    | 64797.715 | 70514.664 | NM_005454 | 1409.779  | 1506.081  | NM_01417C | 1295.725  | 1365.183  |
| BG676364  | 2313.089  | 3425.673  | NM_001889 | 8614.389  | 13984.706 | AF116652  | 8558.379  | 6757.362  |
| BG181154  | 1662.617  | 1963.701  | X89668    | 16257.494 | 48729.195 | NM_00083E | 275.02    | 216.889   |
| AA843679  | 5367.939  | 7922.543  | NM_00445E | 3198.231  | 4612.597  | NM_01414E | 236.209   | 328.902   |
| H68922    | 801.42    | 840.995   | NM_006901 | 990.095   | 1379.774  | NM_01883E | 1068.005  | 1526.67   |
| NM_004957 | 2718.918  | 2687.859  | NM_01853C | 15064.576 | 15514.966 | NM_003401 | 579.847   | 1144.739  |
| NM_005252 | 922.36    | 774.4     | AJ003145  | 607.692   | 1105.436  | AL137724  | 878.767   | 697.931   |
| SR5       | 7739.968  | 7483.676  | AK022855  | 21225.82  | 18760.369 | NM_00475E | 1000.424  | 2415.074  |
| SR7       | 7276.732  | 43254.961 | AL050102  | 975.172   | 828.561   | NM_002913 | 809.64    | 1382.243  |
| SR9       | 28576.373 | 4468.205  | AF305686  | 2322.587  | 4150.948  | AK022797  | 304.128   | 269.505   |
| CY3Cy5    | 4321.836  | 244.758   | AF085832  | 999.687   | 977.664   | NM_00737C | 1407.612  | 1807.866  |
| NM_00438C | 9731.364  | 9799.912  | AK025981  | 2800.982  | 2959.071  | NM_006231 | 417.122   | 609.254   |
| AY007378  | 3626.003  | 4487.979  | AF086266  | 801.744   | 644.889   | AK023471  | 569.783   | 1993.925  |
| D26070    | 975.876   | 1459.075  | AF086252  | 1089.534  | 1008.424  | AF044578  | 408.961   | 705.42    |
| NM_001642 | 6330.823  | 7796.187  | AK026703  | 659.456   | 673.91    | NM_00194E | 783.493   | 1093.477  |
| NM_001542 | 1111.264  | 994.37    | NM_01786E | 8603.861  | 6418.045  | NM_001067 | 3674.444  | 5313.24   |
| NM_000501 | 23677.559 | 25096.574 | NM_00353E | 1591.202  | 1154.026  | NM_014034 | 2345.606  | 2796.345  |

|           |           |           |           |           |           |           |           |           |
|-----------|-----------|-----------|-----------|-----------|-----------|-----------|-----------|-----------|
| X98834    | 4664.706  | 4651.965  | AF116707  | 2678.333  | 2545.592  | NM_00533E | 6243.068  | 7844.431  |
| NM_00703E | 7972.738  | 9168.592  | U90910    | 10934.861 | 8132.448  | J04474    | 1895.631  | 1866.517  |
| AB019562  | 1265.126  | 1692.743  | CY3Cy5    | 1394.755  | 153.976   | NM_003761 | 465.071   | 410       |
| NM_02020E | 919.663   | 505.866   | AA143087  | 5633.074  | 6202.177  | NM_014011 | 422.595   | 427.005   |
| U20582    | 5776.257  | 4670.454  | U25804    | 2728.059  | 2210.767  | AK025994  | 524.837   | 367.299   |
| NM_00207E | 8502.961  | 7355.132  | BI870965  | 2241.969  | 2598.375  | L29306    | 217.86    | 303.008   |
| NM_01646E | 2281.144  | 2790.258  | NM_00190E | 4927.671  | 6658.712  | NM_01398E | 667.186   | 438.202   |
| NM_00032E | 1009.892  | 773.305   | BI835536  | 7023.842  | 7043.583  | NM_00173E | 456.561   | 546.895   |
| NM_01339E | 4100.302  | 4227.796  | BF205051  | 1843.031  | 2046.318  | U20582    | 1186.962  | 1929.405  |
| NM_00241C | 1011.373  | 1379.252  | X02761    | 1197.986  | 1278.908  | NM_00207E | 1801.126  | 2563.933  |
| AL122120  | 2316.789  | 2286.033  | M91463    | 642.169   | 424.834   | U13697    | 296.302   | 209.37    |
| NM_014684 | 891.637   | 1020.699  | J03060    | 2121.167  | 1852.557  | U04270    | 1063.596  | 1071.919  |
| AK027247  | 594.015   | 924.213   | X54156    | 363.897   | 632.167   | AA927528  | 666.955   | 1207.928  |
| NM_00248C | 6062.388  | 6969.811  | NM_00374E | 939.058   | 952.49    | X02152    | 43211.945 | 62621.391 |
| NM_017571 | 6822.044  | 5488.481  | AA829383  | 2828.149  | 2632.871  | BG676364  | 412.118   | 442.727   |
| L03169    | 1318.889  | 1623.037  | AF012434  | 5171.79   | 4006.066  | BG181154  | 423.311   | 620.658   |
| NM_00639E | 841.296   | 511.051   | SR2       | 48832.465 | 25521.104 | AA843679  | 892.599   | 1196.818  |
| NM_00018E | 3798.084  | 2243.427  | SR4       | 11231.568 | 6422.972  | NM_004957 | 599.202   | 480.826   |
| Y00816    | 1112.004  | 805.97    | SR6       | 1780.341  | 948.784   | NM_00525E | 364.94    | 411.58    |
| NM_00451E | 3130.786  | 2167.421  | SR8       | 6245.211  | 9625.466  | AB023219  | 774.819   | 619.118   |
| NM_00105E | 15770.841 | 14656.595 | SR10      | 21229.85  | 3299.175  | NM_00192E | 2243.308  | 1379.345  |
| NM_002271 | 33310.051 | 37471.621 | CY3Cy5    | 973.926   | 149.98    | NM_00639E | 201.749   | 216.91    |
| NM_018361 | 3701.099  | 7681.785  | NM_00590E | 776.918   | 894.62    | NM_00018E | 601.41    | 644.061   |
| AB040966  | 5740.816  | 6665.371  | NM_00285C | 48816.93  | 76395.211 | NM_00451E | 687.164   | 1023.039  |
| NM_02013E | 1263.761  | 1461.546  | NM_00430E | 303.911   | 377.834   | NM_00438C | 2786.307  | 3454.117  |
| NM_016467 | 12261.865 | 13044.86  | NM_00590E | 1048.947  | 950.721   | AY007378  | 1009.444  | 1321.924  |
| NM_00725E | 4110.031  | 3317.48   | NM_000861 | 434.976   | 573.116   | NM_00164E | 1607.482  | 2250.311  |
| NM_01910E | 1635.73   | 1134.329  | AB037734  | 604.477   | 441.269   | NM_000501 | 5306.686  | 4761.832  |
| L08436    | 816.37    | 806.181   | U77493    | 487.176   | 497.466   | NM_000114 | 325.307   | 278.891   |
| NM_00055E | 4128.303  | 3040.436  | NM_01906E | 465.101   | 460.499   | NM_00515E | 797.282   | 472.153   |
| NM_00419E | 2305.474  | 1830.414  | NM_00026E | 778.246   | 586.658   | X98834    | 1421.014  | 1283.415  |
| NM_01417C | 5173.838  | 5215.085  | AF073519  | 3989.417  | 3791.689  | NM_00703E | 1443.744  | 1279.104  |
| AF116652  | 18376.369 | 16015.806 | AB001451  | 304.157   | 226.736   | AF036364  | 588.301   | 444.131   |
| NM_00083E | 1578.929  | 1345.806  | NM_01758E | 1242.713  | 1412.127  | AK022847  | 863.055   | 667.63    |
| NM_01414E | 464.46    | 588.973   | Y16132    | 5907.992  | 5035.675  | NM_00680E | 7242.818  | 7667.734  |
| NM_01883E | 2749.864  | 2309.684  | NM_01659E | 501.888   | 467.998   | NM_006634 | 2985.629  | 4195.86   |
| NM_003401 | 837.583   | 1421.351  | NM_002521 | 451.009   | 548.201   | NM_01646E | 342.015   | 346.344   |
| AL137724  | 2551.804  | 2420.605  | NM_001150 | 466.376   | 301.175   | NM_00032E | 209.964   | 256.222   |
| NM_00475E | 2393.045  | 5238.685  | NM_00285E | 682.564   | 734.498   | NM_01339E | 1213.386  | 1161.713  |
| NM_00291E | 1800.994  | 1987.467  | NM_00322E | 578.02    | 393.091   | AL122120  | 718.869   | 675.814   |
| AK022797  | 1142.773  | 1008.182  | NM_00009E | 898.816   | 823.751   | NM_014684 | 260.583   | 213.046   |
| NM_00737C | 4611.509  | 4990.683  | AA418251  | 551.15    | 453.708   | AK027247  | 223.258   | 285.126   |
| NM_006231 | 1143.985  | 1031.904  | NM_01904E | 635.925   | 774.485   | NM_00248C | 1489.868  | 787.686   |
| AK023471  | 1703.476  | 2139.579  | NM_00638C | 2528.336  | 2445.791  | NM_017571 | 1695.361  | 769.2     |
| AF044578  | 1460.59   | 1804.253  | AB020710  | 1434.264  | 1384.925  | L03169    | 284.072   | 173.988   |
| NM_00194E | 3266.841  | 3803.469  | NM_016174 | 3308.745  | 4614.82   | NM_014011 | 372.052   | 391.991   |
| NM_001067 | 15019.673 | 15872.669 | NM_020377 | 522.288   | 636.979   | AK025994  | 655.514   | 990.288   |
| NM_014034 | 8414.838  | 7402.169  | U88896    | 1060.943  | 1264.604  | NM_01398E | 580.637   | 787.437   |
| NM_00533E | 25004.057 | 26781.502 | NM_005724 | 4808.123  | 5316.574  | NM_00173E | 357.197   | 565.471   |
| J04474    | 7349.816  | 5737.03   | X58794    | 905.128   | 1026.075  | NM_00105E | 4360.712  | 4615.559  |
| NM_003761 | 1607.429  | 1431.728  | NM_00173E | 1459.714  | 1651.018  | NM_002271 | 14442.167 | 14709.312 |
| NM_00472E | 1822.779  | 1234.331  | NM_00234E | 558.005   | 481.589   | NM_018361 | 916.984   | 1607.001  |
| NM_014011 | 2314.186  | 2326.9    | NM_00508C | 9752.93   | 8555.615  | AB040966  | 1024.855  | 1134.443  |

|           |           |           |           |           |           |           |           |           |
|-----------|-----------|-----------|-----------|-----------|-----------|-----------|-----------|-----------|
| AK025994  | 2516.699  | 2328.176  | NM_004887 | 4602.958  | 4263.203  | NM_020132 | 438.985   | 519.56    |
| L29306    | 742.792   | 462.596   | NM_006404 | 328.325   | 273.729   | NM_016467 | 3635.506  | 4748.453  |
| NM_013989 | 3313.407  | 2663.964  | NM_014795 | 434.151   | 322.49    | NM_007253 | 916.183   | 855.291   |
| NM_001738 | 1890.33   | 1562.788  | NM_002986 | 604.004   | 702.989   | NM_019106 | 507.669   | 334.889   |
| NM_020203 | 506.805   | 786.196   | M15330    | 671.823   | 778.86    | NM_000558 | 402.876   | 291.377   |
| L40992    | 572.691   | 575.204   | NM_014396 | 2006.571  | 1652.562  | NM_014170 | 1084.363  | 848.247   |
| U20582    | 2992.782  | 3028.101  | AK027201  | 1431.386  | 1391.32   | AF116652  | 2467.6    | 1610.143  |
| NM_002079 | 3469.474  | 4274.632  | NM_000489 | 4699.15   | 3926.766  | NM_000835 | 264.314   | 389.363   |
| U04270    | 3846.865  | 3175.26   | X98507    | 1579.792  | 1211.895  | NM_004957 | 549.708   | 547.944   |
| AA629719  | 56570.973 | 62565.023 | NM_016030 | 38296.43  | 28697.197 | NM_005252 | 628.472   | 739.385   |
| AA927528  | 2216.744  | 2381.334  | NM_014669 | 5053.699  | 3198.207  | AF090906  | 272.307   | 302.724   |
| BG181154  | 2428.924  | 1837.381  | NM_005652 | 3278.552  | 2546.2    | AB023219  | 624.33    | 768.174   |
| AA843679  | 7560.817  | 8483.347  | AL133064  | 2475.613  | 3326.005  | NM_014148 | 215.666   | 325.961   |
| H68922    | 857.444   | 395.076   | NM_006227 | 2661.914  | 4696.27   | NM_018835 | 1239.106  | 1194.332  |
| NM_004957 | 2663.321  | 2261.354  | NM_002905 | 3575.622  | 5046.549  | NM_003401 | 695.876   | 1037.623  |
| NM_005252 | 993.732   | 766.797   | NM_000700 | 35332.922 | 37259.414 | AL137724  | 1530.953  | 1088.379  |
| AF090906  | 2567.694  | 2113.543  | NM_019028 | 8746.512  | 10370.882 | NM_004758 | 1068.02   | 1979.538  |
| AB023219  | 3423.803  | 2692.684  | NM_000431 | 1500.083  | 2079.368  | NM_002913 | 1303.431  | 2082.369  |
| NM_001928 | 7292.789  | 5377.084  | NM_013421 | 993.717   | 1317.505  | AK022797  | 284.491   | 257.828   |
| NM_006399 | 715.064   | 530.591   | AB033118  | 2656.923  | 5628.267  | NM_007370 | 1402.538  | 1727.275  |
| NM_000185 | 2046.127  | 2349.271  | NM_019606 | 2033.111  | 1797.079  | NM_006231 | 410.599   | 425.034   |
| Y00816    | 787.074   | 1018.509  | NM_001690 | 5041.22   | 5380.092  | AK023471  | 412.948   | 644.521   |
| NM_004512 | 3038.828  | 3434.961  | AF034374  | 6035.345  | 6494.38   | AF044578  | 610.944   | 478.741   |
| NM_004380 | 9134.199  | 9537.675  | NM_016118 | 5251.249  | 2833.076  | NM_001948 | 900.038   | 885.917   |
| AY007378  | 4331.093  | 4066.735  | NM_018674 | 15368.113 | 15279.337 | NM_001067 | 3655.282  | 2797.789  |
| D26070    | 1825.337  | 2277.957  | NM_001683 | 17456.73  | 12673.538 | J04474    | 1704.428  | 1625.11   |
| NM_001642 | 7330.978  | 8037.715  | NM_001682 | 1128.61   | 1194.489  | NM_003761 | 388.157   | 346.611   |
| NM_001542 | 572.048   | 517.673   | NM_014405 | 1641.743  | 1931.166  | X98834    | 1071.066  | 1431.609  |
| NM_000501 | 22433.139 | 20979.225 | NM_000816 | 612.272   | 732.788   | NM_007035 | 1829.243  | 2279.355  |
| NM_000114 | 1749.469  | 1818.26   | NM_014928 | 1034.141  | 979.6     | AB019562  | 228.907   | 365.973   |
| NM_005156 | 5181.044  | 4143.968  | AK025130  | 3210.137  | 3230.23   | AF036364  | 480.925   | 859.593   |
| X98834    | 4858.121  | 4252.855  | NM_017875 | 1434.162  | 1479.33   | AK022847  | 878.579   | 965.938   |
| NM_007035 | 8013.396  | 7064.78   | AK023232  | 1854.109  | 1630.579  | NM_020203 | 318.865   | 495.436   |
| AB019562  | 1146.019  | 1227.158  | NM_000271 | 6054.34   | 5221.646  | U20582    | 1256.262  | 1424.748  |
| AF036364  | 2585.459  | 2684.154  | NM_006184 | 11602.362 | 10324.639 | NM_002079 | 1781.779  | 2305.801  |
| AK022847  | 3029.294  | 2288.317  | AB018268  | 3784.733  | 3360.643  | U13697    | 195.097   | 254.388   |
| NM_001149 | 971.018   | 1328.577  | Z70701    | 8957.65   | 10609.497 | U04270    | 759.942   | 729.658   |
| NM_006808 | 27367.369 | 26215.658 | AB040972  | 3639.115  | 5144.91   | AA629719  | 37288.906 | 22693.564 |
| NM_006634 | 11989.532 | 11507.671 | AF148505  | 2198.443  | 2971.325  | AA927528  | 407.817   | 453.18    |
| NM_016465 | 2859.359  | 2798.923  | BE260997  | 601.31    | 492.906   | X02152    | 35526.238 | 25033.838 |
| NM_000328 | 2373.541  | 2267.856  | NM_018686 | 10335.775 | 9251.852  | BG676364  | 398.561   | 272.844   |
| NM_013399 | 4349.381  | 4031.704  | NM_017676 | 1173.912  | 1363.013  | BG181154  | 318.214   | 199.373   |
| NM_002410 | 649.64    | 514.616   | AK021764  | 442.489   | 440.744   | AA843679  | 582.64    | 755.56    |
| AL122120  | 2681.644  | 2273.12   | NM_005431 | 1925.918  | 1852.21   | NM_017571 | 1508.523  | 1209.35   |
| NM_014684 | 1479.077  | 1164.065  | AB036063  | 1641.213  | 1576.62   | L03169    | 319.816   | 482.708   |
| AK027247  | 1101.11   | 1193.234  | NM_002894 | 5167.829  | 3825.569  | NM_001928 | 2495.909  | 1203.751  |
| NM_002480 | 8139.665  | 6248.995  | NM_004629 | 6293.755  | 5606.712  | NM_006399 | 167.746   | 216.419   |
| NM_017571 | 7983.165  | 5486.262  | NM_004260 | 6055.002  | 5300.814  | NM_000185 | 807.596   | 711.108   |
| AB007946  | 952.19    | 478.22    | AL050067  | 1488.32   | 919.616   | NM_004512 | 785.392   | 976.091   |
| L03169    | 1182.734  | 720.346   | NM_004972 | 3869.699  | 3028.712  | NM_004380 | 2644.774  | 3089.746  |
| NM_014011 | 1485.11   | 2232.019  | NM_006251 | 3159.827  | 2861.477  | AY007378  | 995.196   | 869.577   |
| AK025994  | 2948.58   | 2608.265  | NM_004103 | 5064.168  | 4321.993  | D26070    | 339.499   | 420.683   |
| L29306    | 436.56    | 688.954   | NM_002314 | 3272.599  | 3136.336  | NM_001642 | 1861.299  | 2268.081  |

|           |           |           |           |           |           |           |           |           |
|-----------|-----------|-----------|-----------|-----------|-----------|-----------|-----------|-----------|
| NM_01398E | 2887.495  | 3089.281  | NM_001744 | 3478.967  | 3792.841  | NM_000501 | 3004.081  | 1543.094  |
| NM_00173E | 1241.57   | 1906.08   | NM_00629E | 1492.252  | 1672.28   | NM_000114 | 270.384   | 220.441   |
| NM_00105E | 18517.412 | 16255.771 | Z25433    | 2580.961  | 2396.083  | NM_00515E | 699.854   | 454.661   |
| NM_01587E | 410.85    | 669.02    | NM_00592E | 2065.958  | 1727.346  | NM_00055E | 870.218   | 677.849   |
| NM_002271 | 51703.559 | 50652.516 | NM_01863E | 3181.176  | 2580.435  | NM_01417C | 1121.032  | 1489.474  |
| NM_018361 | 3560.317  | 4253.681  | NM_00391E | 1507.969  | 1217.342  | AF116652  | 13370.225 | 13194.732 |
| NM_01989E | 842.659   | 764.187   | NM_00038E | 1856.344  | 1569.985  | NM_00083E | 200.444   | 333.854   |
| AB040966  | 6360.535  | 6241.22   | NM_001150 | 559.649   | 977.909   | NM_00680E | 7929.588  | 5832.182  |
| NM_02013E | 3015.302  | 3202.389  | NM_00285E | 747.844   | 1277.299  | NM_00663E | 3302.692  | 3056.834  |
| NM_016467 | 13595.293 | 14429.229 | NM_00322E | 673.591   | 690.135   | NM_01646E | 420.395   | 374.433   |
| NM_00725E | 4345.005  | 3503.715  | NM_00009E | 817.359   | 1076.042  | NM_00032E | 312.849   | 200.147   |
| NM_01910E | 2203.858  | 1466.612  | AA418251  | 456.489   | 845.703   | NM_01339E | 1221.707  | 927.909   |
| L08436    | 878.216   | 664.367   | AA143087  | 4839.81   | 5004.962  | NM_00241C | 300.024   | 215.125   |
| NM_00055E | 4424.691  | 3154.431  | U25804    | 2423.719  | 1809.723  | AL122120  | 642.873   | 397.56    |
| NM_00419E | 676.244   | 390.45    | BI870965  | 1858.138  | 2220.576  | NM_01468E | 378.614   | 290.022   |
| NM_01417C | 5595.881  | 4971.221  | NM_00190E | 4754.996  | 5699.464  | AK027247  | 329.947   | 215.403   |
| AF116652  | 40281.34  | 27690.322 | BI835536  | 6278.374  | 5554.253  | NM_00248C | 1668.394  | 1043.6    |
| NM_00083E | 1072.53   | 715.733   | BF205051  | 1883.329  | 1487.106  | NM_01403E | 2083.455  | 3005.156  |
| NM_004957 | 2670.689  | 3533.436  | X02761    | 1211.743  | 1252.256  | NM_00533E | 7093.229  | 8414.296  |
| AF090906  | 908.937   | 887.725   | M91463    | 484.852   | 276.058   | J04474    | 1703.025  | 2310.849  |
| AB023219  | 2859.353  | 3038.708  | J03060    | 2086.478  | 1599.728  | NM_003761 | 549.073   | 546.825   |
| NM_01414E | 780.576   | 1044.532  | X54156    | 326.15    | 217.742   | NM_014011 | 472.29    | 758.019   |
| NM_01883E | 4072.739  | 4371.235  | NM_00374E | 822.994   | 581.659   | AK025994  | 606.948   | 652.073   |
| NM_003401 | 2374.917  | 3662.276  | AA829383  | 2213.721  | 2018.357  | NM_01398E | 638.511   | 691.587   |
| AL137724  | 5519.405  | 4542.161  | AF012434  | 4658.879  | 3501.594  | NM_00173E | 397.32    | 395.74    |
| NM_00475E | 3828.164  | 6815.802  | AB037791  | 854.881   | 835.61    | NM_00105E | 3864.826  | 3241.152  |
| NM_00291E | 2913.085  | 2564.201  | NM_01812E | 4072.873  | 2563.165  | NM_01587E | 202.531   | 207.357   |
| AK022797  | 1796.792  | 1414.472  | NM_00048E | 5943.423  | 8732.144  | NM_002271 | 16055.186 | 13322.695 |
| NM_00737C | 5457.62   | 4214.684  | X98507    | 1406.23   | 1964.556  | NM_018361 | 989.551   | 1284.314  |
| NM_006231 | 1538.438  | 1171.085  | NM_01603C | 41585.91  | 49877.141 | NM_01989E | 192.483   | 158.385   |
| AK023471  | 2142.786  | 2276.362  | NM_01466E | 5048.799  | 6737.041  | AB040966  | 10275.762 | 15912.961 |
| AF044578  | 2609.918  | 2196      | NM_00565E | 3536.546  | 4452.049  | NM_02013E | 388.72    | 339.947   |
| NM_00194E | 3556.69   | 4541.208  | AK026686  | 320.447   | 447.582   | NM_016467 | 3375.871  | 2467.956  |
| NM_01403E | 9368.475  | 8646.989  | NM_00590E | 556.787   | 818.403   | NM_00725E | 500.036   | 348.969   |
| NM_00533E | 25977.428 | 23000.934 | NM_00285C | 48391.605 | 55173.887 | NM_01910E | 419.815   | 247.767   |
| J04474    | 9628.097  | 9199.928  | NM_00430E | 231.145   | 314.327   | NM_005607 | 844.155   | 1009.624  |
| NM_003761 | 1562.453  | 1361.864  | NM_00590E | 1248.784  | 857.244   | NM_006761 | 23863.803 | 20012.227 |
| NM_00472E | 1415.649  | 672.165   | NM_000861 | 605.104   | 354.29    | NM_014897 | 525.158   | 501.456   |
| NM_01519E | 437.761   | 1046.842  | AB037734  | 561.702   | 435.083   | NM_00345E | 2020.776  | 2491.064  |
| X98834    | 4426.73   | 7588.402  | U77493    | 440.381   | 308.84    | NM_018371 | 8547.071  | 8284.138  |
| NM_00703E | 5936.794  | 7649.522  | NM_01906E | 417.983   | 299.264   | NM_01439C | 3049.142  | 3280.082  |
| AB019562  | 741.307   | 952.969   | NM_00387E | 332.417   | 209.951   | X78924    | 3486.692  | 4153.429  |
| AF036364  | 1542.17   | 2255.9    | NM_00026E | 659.358   | 489.515   | NM_01325C | 310.63    | 336.364   |
| AK022847  | 2405.734  | 2942.896  | AF073519  | 4182.3    | 3059.063  | AF090906  | 329.101   | 317.747   |
| NM_02020E | 925.302   | 1147.785  | AB001451  | 282       | 284.458   | AB023219  | 790.316   | 627.593   |
| U20582    | 3943.679  | 4581.276  | NM_01758E | 1578.146  | 1430.749  | NM_01414E | 260.296   | 663.814   |
| NM_00207E | 7431.493  | 7721.458  | Y16132    | 5242.194  | 3099.484  | NM_01883E | 1327.5    | 1387.809  |
| U04270    | 5388.947  | 3958.008  | NM_01659E | 436.108   | 553.877   | NM_003401 | 535.32    | 1171.12   |
| AA927528  | 3062.249  | 3460.59   | NM_002521 | 464.039   | 268.432   | AL137724  | 1571.264  | 1062.282  |
| BG676364  | 2022.947  | 1895.114  | NM_01787E | 1309.175  | 2193.395  | NM_00475E | 1212.397  | 1863.946  |
| BG181154  | 3719.408  | 2519.045  | AK023232  | 2422.543  | 3401.188  | NM_00291E | 1001.098  | 807.596   |
| AA843679  | 5193.937  | 6116.879  | NM_000271 | 7635.425  | 9298.377  | AK022797  | 10742.374 | 33474.152 |
| H68922    | 555.772   | 670.313   | NM_00618E | 12461.853 | 16887.943 | NM_006231 | 345.808   | 292.381   |

|           |           |           |           |           |           |           |          |          |
|-----------|-----------|-----------|-----------|-----------|-----------|-----------|----------|----------|
| NM_017571 | 5471.581  | 6465.514  | AB018268  | 4290.877  | 6167.491  | AK023471  | 476.288  | 473.106  |
| L03169    | 811.024   | 1230.179  | NM_019045 | 541.817   | 716.069   | AF044578  | 472.725  | 457.886  |
| NM_001928 | 7116.631  | 4628.702  | NM_006380 | 2389.37   | 2154.552  | NM_001948 | 915.878  | 786.506  |
| NM_006398 | 701.143   | 617.503   | AB020710  | 1427.672  | 1071.308  | NM_001067 | 3871.983 | 2868.296 |
| NM_018965 | 615.969   | 1253.063  | NM_016174 | 2852.555  | 3135.218  | NM_005602 | 393.224  | 195.223  |
| NM_000185 | 2338.388  | 2037.511  | NM_020377 | 490.748   | 391.378   | NM_003573 | 1084.543 | 1256.093 |
| Y00816    | 756.417   | 957.935   | U88896    | 1024.619  | 940.13    | NM_000296 | 1353.268 | 1198.988 |
| NM_004512 | 1933.255  | 2173.797  | NM_005724 | 4341.306  | 4195.201  | NM_017422 | 1805.714 | 2121.896 |
| NM_004380 | 10849.929 | 12001.895 | X58794    | 832.009   | 943.734   | NM_005879 | 358.499  | 381.102  |
| U86813    | 2264.288  | 2237.347  | NM_001735 | 1792.354  | 1724.594  | AF147790  | 410.088  | 329.922  |
| AY007378  | 5799.641  | 4822.162  | NM_002349 | 582.086   | 617.618   | NM_004112 | 865.386  | 866.923  |
| D26070    | 1685.084  | 2301.548  | NM_004887 | 4221.832  | 4381.685  | AK025592  | 1276.525 | 999.137  |
| NM_001642 | 9259.584  | 10301.166 | NM_006404 | 351.609   | 240.515   | NM_004635 | 2590.56  | 2323.21  |
| NM_001542 | 967.877   | 1377.925  | NM_014795 | 437.937   | 389.107   | AK023023  | 2295.302 | 1605.762 |
| NM_000501 | 10162.758 | 8356.374  | NM_002986 | 594.482   | 538.849   | NM_015993 | 1175.768 | 947.65   |
| NM_000114 | 1028.147  | 804.959   | M15330    | 677.682   | 518.155   | NM_002658 | 289.227  | 259.079  |
| NM_005156 | 4643.042  | 3943.422  | NM_014396 | 2131.849  | 1658.791  | Z36776    | 479.551  | 326.14   |
| NM_000558 | 4208.997  | 6226.383  | AK027201  | 1502.931  | 1173.803  | AB029015  | 1412.599 | 686.821  |
| NM_004198 | 548.703   | 914.422   | Z25433    | 2918.385  | 4726.677  | NM_002067 | 2042.353 | 803.296  |
| NM_014170 | 4775.783  | 5990.975  | NM_005922 | 2166.038  | 2974.98   | NM_006150 | 451.296  | 650.696  |
| AF116652  | 51196.723 | 49670.852 | NM_018638 | 4379.713  | 6853.99   | NM_020345 | 313.381  | 357.61   |
| NM_000835 | 503.803   | 731.77    | NM_003915 | 1618.44   | 2538.329  | NM_003287 | 282.607  | 661.594  |
| AK000271  | 417.671   | 801.677   | NM_000382 | 1809.462  | 2063.911  | NM_012325 | 5291.963 | 9843.794 |
| NM_006808 | 33958.684 | 26236.434 | AL133064  | 2346.835  | 2530.372  | NM_019607 | 1275.327 | 1562.768 |
| NM_006634 | 14377.698 | 13978.64  | NM_006227 | 2640.376  | 3677.301  | U79260    | 2563.557 | 3196.934 |
| NM_016465 | 2792.37   | 2429.351  | NM_002905 | 3616.357  | 3850.703  | NM_001895 | 2720.959 | 3584.195 |
| NM_000328 | 1374.342  | 1211.745  | NM_000700 | 32265.654 | 28534.92  | NM_006447 | 631.474  | 843.483  |
| NM_013398 | 5655.104  | 4694.196  | NM_019028 | 8609.12   | 9120.199  | AF119851  | 213.268  | 352.161  |
| NM_002410 | 718.224   | 823.697   | NM_000431 | 1588.288  | 1718.584  | NM_014128 | 1506.328 | 1326.892 |
| AL122120  | 2627.073  | 1936.134  | NM_013421 | 937.142   | 783.792   | D87455    | 733.126  | 417.867  |
| NM_014684 | 1386.19   | 1256.2    | AB033118  | 2562.176  | 4679.112  | AF080577  | 494.298  | 403.508  |
| AK027247  | 1144.197  | 881.406   | NM_019606 | 1932.97   | 1523.522  | L22005    | 2474.242 | 1855.352 |
| NM_002480 | 8633.857  | 6027.327  | NM_001690 | 5223.781  | 3951.913  | NM_012291 | 4497.276 | 3869.592 |
| NM_014034 | 8645.747  | 11064.227 | NM_018674 | 21560.293 | 38045     | NM_013368 | 778.868  | 671.333  |
| NM_005335 | 26111.402 | 31842.787 | NM_001683 | 15971.711 | 12257.859 | NM_003807 | 1899.384 | 920.054  |
| J04474    | 8194.822  | 9019.6    | NM_001682 | 1257.529  | 781.797   | NM_004358 | 1010.047 | 678.34   |
| NM_003761 | 1840.474  | 2282.822  | NM_014405 | 1562.274  | 2067.466  | NM_018243 | 1071.962 | 416.821  |
| NM_004726 | 1129.199  | 1576.108  | NM_000816 | 584.276   | 608.119   | NM_014938 | 2837.445 | 1997.724 |
| NM_014011 | 1689.455  | 2636.493  | NM_014928 | 1078.839  | 916.13    | Y17866    | 1754.99  | 1824.338 |
| NM_013988 | 2684.842  | 2456.377  | AK025130  | 3141.015  | 3036.16   | AK024247  | 336.48   | 311.568  |
| NM_001738 | 1695.927  | 1924.237  | AB037791  | 876.754   | 955.203   | NM_003005 | 2107.964 | 2386.564 |
| NM_001055 | 11440.328 | 9286.382  | NM_018124 | 4321.148  | 5094.418  | NM_002842 | 435.229  | 532.585  |
| NM_015878 | 542.585   | 756.899   | Z70701    | 8560.874  | 8507.465  | AB033025  | 291.891  | 393.879  |
| NM_002271 | 48204.895 | 45891.168 | AB040972  | 3639.156  | 3976.75   | NM_004418 | 701.222  | 1081.918 |
| NM_018361 | 4065.32   | 5111.439  | AF148505  | 2307.707  | 2154.419  | NM_000917 | 4108.545 | 3683.661 |
| NM_019893 | 1246.421  | 631.585   | BE260997  | 581.657   | 758.307   | NM_005388 | 5333.338 | 5338.674 |
| AB040966  | 7168.311  | 6465.308  | NM_018686 | 8986.406  | 7090.666  | NM_014445 | 7864.131 | 7397.473 |
| NM_020132 | 1988.126  | 1553.603  | NM_017676 | 1252.582  | 941.395   | AL832826  | 390.932  | 331.197  |
| NM_016467 | 16418.355 | 17256.377 | AK021764  | 401.396   | 331.663   | NM_016123 | 450.498  | 389.895  |
| NM_007253 | 3254.569  | 2457.75   | NM_005431 | 1785.911  | 1504.838  | AB048365  | 343.769  | 273.622  |
| NM_019106 | 2138.908  | 1128.716  | AB036063  | 1702.635  | 1366.79   | NM_000391 | 746.398  | 769.827  |
| NM_005607 | 3720.508  | 3603.834  | NM_002894 | 4662.408  | 2906.672  | AF229179  | 291.073  | 232.92   |
| NM_006761 | 57839.09  | 62171.035 | NM_004260 | 9529.687  | 26207.709 | NM_014771 | 2953.072 | 2105.644 |

|           |           |           |           |           |           |           |           |           |
|-----------|-----------|-----------|-----------|-----------|-----------|-----------|-----------|-----------|
| NM_014897 | 2412.239  | 2324.566  | AL050067  | 1833.81   | 2581.523  | NM_002275 | 755.479   | 476.822   |
| NM_003453 | 10000.533 | 8634.046  | NM_004972 | 4176.394  | 4695.954  | AK024625  | 404.658   | 102.342   |
| NM_018371 | 29615.656 | 25840.475 | NM_006251 | 3390.47   | 3102.101  | NM_018131 | 2128.839  | 1353.328  |
| NM_014390 | 12682.116 | 12963.271 | NM_004103 | 5335.418  | 5495.694  | NM_017630 | 1615.127  | 1381.418  |
| NM_013250 | 1259.62   | 1231.314  | NM_002314 | 3482.016  | 2860.905  | NM_014943 | 775.905   | 1206.995  |
| AF090906  | 1430.378  | 1500.741  | NM_001744 | 3241.645  | 3265.3    | AK024392  | 772.478   | 770.347   |
| AB023219  | 3487.079  | 2676.521  | NM_006290 | 1085.98   | 1337.416  | NM_018300 | 373.612   | 510.753   |
| NM_014148 | 1150.609  | 1291.351  | AF073519  | 4246.615  | 6615.218  | NM_004875 | 561.996   | 534.857   |
| NM_018835 | 4611.231  | 4290.009  | AB001451  | 299.55    | 604.177   | NM_018254 | 1372.837  | 938.464   |
| NM_003401 | 2478.275  | 3680.592  | NM_017583 | 1521.143  | 2368.175  | NM_017745 | 292.778   | 309.693   |
| NM_004758 | 4593.403  | 8281.302  | Y16132    | 6740.865  | 8518.89   | NM_018433 | 674.351   | 494.676   |
| NM_002913 | 4090.944  | 3775.405  | NM_016593 | 445.451   | 683.096   | NM_000937 | 308.747   | 284.901   |
| AK022797  | 1740.774  | 1539.865  | NM_002521 | 475.802   | 483.445   | AB028451  | 207.138   | 298.896   |
| NM_007370 | 6757.156  | 5426.942  | NM_001150 | 585.798   | 722.429   | AK024810  | 4693.871  | 1908.963  |
| NM_006231 | 1809.799  | 1569.635  | NM_002850 | 819.318   | 1148.562  | BM458096  | 4083.337  | 3439.269  |
| AK023471  | 2005.023  | 2097.659  | NM_003225 | 528.212   | 604.867   | NM_005620 | 2402.092  | 1612.143  |
| AF044578  | 2097.164  | 2035.645  | NM_000090 | 840.885   | 836.145   | D29958    | 5368.393  | 4195.555  |
| NM_001948 | 4517.106  | 3614.957  | AA418251  | 508.245   | 678.882   | NM_015971 | 2592.736  | 1654.272  |
| NM_001067 | 17616.762 | 12866.81  | AA143087  | 5203.133  | 4227.198  | D17257    | 22909.678 | 11394.843 |
| AK025337  | 745.997   | 621.272   | U25804    | 2164.971  | 1192.376  | AK000724  | 725.113   | 762.61    |
| AB028984  | 529.445   | 667.95    | BI870965  | 2034.056  | 1944.598  | NM_003720 | 4771.587  | 5396.674  |
| NM_005602 | 1752.54   | 1557.82   | NM_001903 | 4655.855  | 4536.438  | AF097159  | 367.968   | 402.664   |
| NM_003573 | 4651.217  | 3993.014  | BI835536  | 6611.08   | 4533.252  | NM_004807 | 295.551   | 356.463   |
| NM_000290 | 5534.91   | 4090.307  | BF205051  | 1664.515  | 1141.113  | J03569    | 18058.037 | 13662.221 |
| NM_005879 | 1355.079  | 1368.907  | X02761    | 1089.949  | 866.73    | NM_003115 | 1961.553  | 4677.972  |
| AF147790  | 1572.915  | 1628.539  | M91463    | 603.246   | 475.876   | NM_000687 | 3699.986  | 2988.086  |
| NM_004112 | 2153.82   | 2362.143  | J03060    | 2062.552  | 1780.935  | NM_018200 | 479.381   | 359.242   |
| NM_004635 | 11060.278 | 11027.29  | X54156    | 343.174   | 282.953   | NM_014830 | 969.798   | 520.507   |
| AK023023  | 10943.78  | 7962.312  | NM_003743 | 777.007   | 622.973   | NM_007212 | 1201.505  | 408.261   |
| NM_015993 | 6287.301  | 4632.34   | AA829383  | 2523.686  | 1799.535  | NM_005710 | 2111.908  | 951.839   |
| NM_002650 | 1514.582  | 1155.219  | AF012434  | 4778.854  | 2939.37   | AF252284  | 482.791   | 457.691   |
| Z36776    | 2057.476  | 1647.754  | NM_006404 | 417.353   | 545.585   | NM_001530 | 1019.305  | 483.121   |
| AB029015  | 3131.619  | 2384.503  | NM_014795 | 472.059   | 554.709   | U80232    | 2694.205  | 3616.11   |
| NM_002067 | 10115.399 | 6999.872  | NM_002980 | 674.942   | 904.347   | AF086526  | 287.858   | 421.637   |
| NM_006150 | 2001.33   | 2168.789  | M15330    | 605.896   | 866.163   | AK025788  | 951.389   | 855.952   |
| NM_020345 | 1495.146  | 1590.938  | NM_014390 | 2016.584  | 2443.251  | AF086164  | 411.477   | 575.564   |
| NM_003287 | 880.175   | 1132.578  | AK027201  | 1201.644  | 1352.165  | AK025577  | 433.142   | 319.923   |
| NM_012325 | 18617.697 | 17850.25  | NM_000480 | 5776.773  | 6029.802  | AK000216  | 367.866   | 272.68    |
| NM_014434 | 1528.391  | 1771.652  | X98507    | 1313.844  | 1448.364  | AK023440  | 317.895   | 310.953   |
| NM_019607 | 5334.151  | 4382.116  | NM_014660 | 5125.747  | 5829.761  | AB033041  | 5763.779  | 4955.162  |
| U79260    | 10568.471 | 12183.514 | NM_005652 | 3738.937  | 3888.185  | NM_014894 | 23291.771 | 15280.13  |
| NM_001895 | 10421.524 | 12412.448 | AK026686  | 328.655   | 263.616   | AY007155  | 1873.196  | 1260.766  |
| NM_006447 | 3194.198  | 3461.615  | NM_005902 | 605.5     | 627.823   | AK027160  | 869.595   | 410.596   |
| NM_014120 | 5961.599  | 7242.342  | NM_002850 | 46559.285 | 47663.117 | AL359211  | 385.082   | 207.759   |
| D87455    | 2962.588  | 2993.104  | NM_005903 | 1123.823  | 835.202   | AF070526  | 209.664   | 163.489   |
| AF080577  | 2190.3    | 2871.198  | NM_000861 | 541.408   | 428.329   | AF070530  | 4393.143  | 2584.779  |
| L22005    | 8765.092  | 7742.383  | NM_000024 | 267.6     | 440.934   | NM_006420 | 461.11    | 237.813   |
| NM_003807 | 6671.695  | 4873.425  | AB037734  | 653.538   | 577.28    | AF131855  | 321.063   | 305.778   |
| NM_004350 | 5485.306  | 4843.399  | U77493    | 383.179   | 281.37    | AF086046  | 1565.778  | 1114.554  |
| NM_001790 | 3151.425  | 3730.268  | NM_019062 | 354.661   | 260.672   | AK024962  | 287.892   | 266.607   |
| NM_018243 | 5242.7    | 3706.056  | NM_000263 | 645.196   | 476.07    | AK025135  | 1376.179  | 2205.876  |
| NM_014930 | 2955.569  | 3137.255  | NM_001683 | 19492.396 | 23708.771 | NM_017920 | 641.979   | 530.712   |
| Y17866    | 1074.168  | 1104.47   | NM_001682 | 995.698   | 1566.827  | AY007145  | 826.254   | 833.045   |

|           |           |           |           |           |           |           |           |           |
|-----------|-----------|-----------|-----------|-----------|-----------|-----------|-----------|-----------|
| AK024247  | 939.113   | 1068.696  | NM_014405 | 1934.653  | 3369.005  | D38549    | 702.894   | 571.19    |
| NM_003005 | 5522.401  | 9262.841  | NM_000816 | 818.255   | 999.233   | AK024780  | 422.215   | 373.645   |
| NM_002842 | 1997.392  | 2288.027  | NM_014928 | 1287.017  | 1564.133  | U10510    | 1910.697  | 902.383   |
| NM_012126 | 792.204   | 458.78    | AK025130  | 2702.025  | 3936.807  | Z36842    | 392.632   | 427.466   |
| NM_004418 | 3090.266  | 3165.179  | NM_017875 | 1124.561  | 1491.517  | AF086137  | 360.478   | 170.056   |
| NM_000917 | 15024.697 | 13307.876 | AK023232  | 2344.917  | 2464.456  | AF086155  | 468.238   | 279.498   |
| NM_005389 | 21728.531 | 19565.965 | NM_018209 | 3006.524  | 3711.085  | NM_014155 | 1200.843  | 691.773   |
| AL832826  | 1630.022  | 1776.685  | NM_006184 | 12611.958 | 14211.131 | AK021795  | 253.257   | 298.962   |
| AB048365  | 710.161   | 651.415   | AB018268  | 4377.845  | 3819.474  | AL162042  | 510.864   | 884.858   |
| NM_000391 | 4218.164  | 5204.77   | NM_019045 | 601.146   | 570.596   | AK026131  | 269.739   | 155.201   |
| AF229179  | 945.43    | 1348.177  | NM_006380 | 2517.866  | 1815.459  | AK023312  | 264.063   | 122.784   |
| NM_002275 | 4172.22   | 4950.95   | AB020710  | 1283.906  | 1115.316  | AL133570  | 276.274   | 201.685   |
| AB032945  | 615.781   | 792.413   | NM_016174 | 3046.197  | 2638.66   | AK022678  | 349.678   | 314.426   |
| AK025215  | 14891.307 | 21138.186 | NM_020377 | 551.055   | 466.425   | AK023012  | 1076.254  | 1010.372  |
| BF569160  | 1320.113  | 1297.753  | U88896    | 1291.119  | 1056.093  | NM_012405 | 1078.522  | 1213.07   |
| AK024625  | 445.729   | 1199.548  | AF116702  | 40522.051 | 24514.949 | AL050205  | 1586.514  | 1557.122  |
| NM_014834 | 846.15    | 1318.507  | NM_005724 | 4409.06   | 3744.503  | NM_005691 | 438.886   | 611.892   |
| NM_017636 | 10246     | 12921.307 | X58794    | 845.092   | 894.751   | AF130063  | 170.608   | 147.835   |
| NM_012468 | 920.121   | 1875.634  | NM_001735 | 1373.21   | 1305.114  | AF086528  | 232.08    | 205.039   |
| M27877    | 29213.367 | 23266.721 | NM_002349 | 413.087   | 297.555   | AL162043  | 201.94    | 287.806   |
| D70836    | 51802.988 | 42912.18  | NM_005080 | 10087.641 | 9169.681  | NM_006543 | 331.867   | 278.712   |
| D16878    | 1073.205  | 1133.658  | NM_004887 | 4582.853  | 4203.043  | AK024263  | 284.298   | 344.227   |
| NM_014943 | 2629.541  | 2541.754  | NM_004972 | 4153.172  | 6971.472  | NM_016613 | 779.51    | 752.973   |
| AK024392  | 4569.269  | 4620.935  | NM_006251 | 3190.508  | 5117.507  | AF086414  | 445.792   | 308.848   |
| NM_004875 | 3123.385  | 4161.708  | NM_004103 | 5541.045  | 7961.63   | AJ012490  | 2136.125  | 1642.771  |
| NM_018254 | 5110.874  | 5827.694  | NM_002314 | 3564.835  | 5313.965  | U84516    | 2985.712  | 2040.524  |
| NM_017745 | 2730.833  | 3807.058  | NM_001744 | 3332.394  | 4467.406  | AL049270  | 443.078   | 355.986   |
| NM_018433 | 4207.436  | 7696.21   | NM_006296 | 1391.802  | 2137.51   | U88834    | 2134.587  | 2285.571  |
| AK024810  | 25672.639 | 27597.182 | Z25433    | 2497.82   | 2910.747  | NM_006087 | 47689.004 | 74693.234 |
| AK022615  | 41530.438 | 51753.906 | NM_005922 | 2028.424  | 2153.046  | NM_003533 | 593.614   | 341.299   |
| NM_004043 | 9052.562  | 10668.878 | NM_018638 | 3899.677  | 5106.216  | AK023726  | 1377.62   | 966.883   |
| NM_015971 | 13951.597 | 15844.423 | AL137593  | 12001.175 | 12528.895 | AK024906  | 217.969   | 98.181    |
| D17257    | 57864.734 | 64427.191 | NM_003915 | 1903.951  | 1888.368  | AF131836  | 399.935   | 258.047   |
| AK023309  | 691.396   | 988.407   | NM_000382 | 1860.222  | 2058.634  | AF275804  | 8217.558  | 4315.02   |
| AK000724  | 6611.123  | 8116.1    | AL133064  | 1890.451  | 1918.574  | AL137488  | 365.919   | 226.713   |
| NM_003720 | 18985.656 | 28272.932 | NM_006227 | 2641.314  | 2907.801  | AL049447  | 28288.42  | 19974.752 |
| AF097159  | 1753.984  | 2489.471  | NM_002905 | 3738.85   | 3488.966  | NM_020527 | 672.491   | 502.679   |
| NM_004807 | 2352.791  | 2965.099  | NM_000700 | 33428.262 | 23547.814 | AB020637  | 2474.124  | 1844.664  |
| AF219140  | 379.471   | 1190.554  | NM_019028 | 8255.916  | 7087.233  | NM_005286 | 853.811   | 1009.796  |
| J03569    | 47458.391 | 59085.535 | NM_000431 | 1623.191  | 1745.719  | AK024365  | 541.333   | 1040.621  |
| NM_018200 | 2973.727  | 3242.348  | NM_013421 | 940.321   | 742.421   | AJ251759  | 528.042   | 811.645   |
| NM_014838 | 5633.774  | 5411.083  | NM_012474 | 6730.354  | 6112.095  | NM_001885 | 4057.872  | 2582.558  |
| NM_007212 | 5505.31   | 5183.156  | AB033118  | 2645.086  | 4732.008  | X89668    | 9146.382  | 2357.318  |
| AF005067  | 3408.496  | 2681.84   | NM_019606 | 2062.651  | 1673.719  | NM_004458 | 1408.735  | 931.425   |
| NM_005710 | 10310.957 | 7176.848  | NM_001690 | 4607.644  | 3669.539  | NM_006901 | 354.245   | 352.76    |
| AF252284  | 2177.304  | 1555.861  | AF034374  | 5357.489  | 4059.517  | NM_018530 | 2771.882  | 2505.876  |
| NM_014930 | 2054.766  | 1161.418  | NM_016118 | 5192.296  | 3599.039  | AJ003145  | 195.653   | 161.391   |
| NM_001530 | 5158.826  | 3943.463  | NM_018674 | 13198.569 | 12196.283 | AK022855  | 3510.677  | 3600.923  |
| U80232    | 15411.226 | 9260.892  | NM_000068 | 1518.9    | 2073.166  | AK023816  | 514.693   | 1099.089  |
| AK025788  | 6748.221  | 8017.263  | AB033046  | 7923.896  | 10830.048 | AF305686  | 1227.038  | 525.358   |
| AF086164  | 2014.722  | 2659.383  | NM_015918 | 7152.591  | 9735.229  | AK025981  | 495.097   | 623.196   |
| AK025577  | 1597.777  | 2333.05   | AK023228  | 525.868   | 579.036   | AF086266  | 247.942   | 359.209   |
| AK000216  | 2057.049  | 3086.89   | AB029041  | 24640.574 | 30141.594 | AF086252  | 420.181   | 248.499   |

|           |           |           |           |           |           |           |           |           |
|-----------|-----------|-----------|-----------|-----------|-----------|-----------|-----------|-----------|
| AK023440  | 953.642   | 1229.159  | AK026642  | 7317.373  | 9251.775  | AK026703  | 267.815   | 199.351   |
| AB033041  | 25263.992 | 25020.721 | AL359063  | 987.88    | 1130.929  | NM_017866 | 2745.638  | 5619.074  |
| NM_014894 | 58445     | 57192.477 | AL079292  | 2538.951  | 2393.879  | AJ131244  | 274.203   | 718.805   |
| AY007155  | 8177.404  | 7386.403  | X89667    | 2110.577  | 2616.135  | NM_003536 | 691.86    | 2168.879  |
| AK027160  | 3585.829  | 2448.116  | AB037791  | 912.471   | 879.517   | AF116707  | 1154.86   | 4104.1    |
| AL359211  | 1551.257  | 1268.719  | NM_018124 | 5057.364  | 4442.855  | U90910    | 1693.747  | 5715.168  |
| AF070526  | 926.452   | 1021.182  | Z70701    | 10542.829 | 7365.196  | AL049979  | 264.319   | 935.716   |
| U79264    | 2401.924  | 1685.115  | AB040972  | 3424.375  | 2945.384  | CY3Cy5    | 366.685   | 171.314   |
| NM_015696 | 14342.958 | 9153.813  | AF148505  | 2080.489  | 1978.255  | AA143087  | 1706.613  | 1984      |
| AF070530  | 25505.551 | 17965.992 | BE260997  | 660.539   | 524.062   | U25804    | 696.295   | 2788.763  |
| AF086487  | 950.542   | 308.457   | NM_018686 | 9342.921  | 6893.461  | BI870965  | 965.865   | 997.227   |
| NM_006420 | 1771.88   | 1348.886  | NM_017676 | 1428.613  | 977.836   | NM_001903 | 2410.978  | 2853.074  |
| AF131855  | 1292.665  | 681.217   | AK021764  | 427.987   | 271.862   | BI835536  | 3050.942  | 4080.858  |
| AF086046  | 2202.304  | 1890.748  | NM_005431 | 1844.516  | 1787.819  | BF205051  | 547.437   | 711.006   |
| AK024962  | 1766.949  | 1402.278  | AB036063  | 1869.656  | 1799.355  | X02761    | 317.191   | 344.377   |
| AK022164  | 653.546   | 927.308   | NM_002894 | 5371.738  | 3574.094  | M91463    | 277.534   | 284.663   |
| AK025135  | 7512.316  | 10908.786 | NM_004629 | 6127.193  | 4361.218  | J03060    | 875.135   | 1205.85   |
| NM_017926 | 3207.165  | 4200.186  | NM_004260 | 6500.617  | 5952.238  | X54156    | 194.863   | 480.803   |
| AY007145  | 4493.138  | 5265.688  | AL050067  | 1665.123  | 1275.068  | NM_003743 | 423.496   | 401.06    |
| D38549    | 2909.059  | 2133.911  | NM_015564 | 1010.617  | 1332.278  | AA829383  | 1171.968  | 991.476   |
| AK024780  | 1727.343  | 1452.97   | AF160476  | 394.422   | 700.717   | AF012434  | 2483.466  | 2057.702  |
| AF085947  | 1050.884  | 729.228   | L22650    | 1082.55   | 1388.745  | SR2       | 21597.18  | 7587.635  |
| AF086000  | 892.173   | 379.107   | AB014520  | 7544.048  | 11180.854 | SR4       | 4208.961  | 2785.247  |
| AL359591  | 926.893   | 1038.87   | AF161420  | 938.199   | 1183.247  | SR6       | 714.032   | 550.096   |
| AK024184  | 474.518   | 1037.956  | NM_004907 | 1589.602  | 1953      | SR8       | 2933.396  | 4827.226  |
| U10510    | 9470.572  | 6098.791  | NM_002891 | 583.313   | 555.35    | SR10      | 9707.638  | 2452.05   |
| Z36842    | 1743.369  | 1144.646  | BE083789  | 379.408   | 170.669   | CY3Cy5    | 465.953   | 218.132   |
| AF086137  | 1148.878  | 696.864   | X04526    | 10116.269 | 8519.217  | NM_005902 | 315.458   | 267.096   |
| AF086155  | 1239.538  | 638.105   | D26067    | 3051.576  | 2379.297  | NM_002850 | 30377.537 | 33636.523 |
| AF116677  | 1318.838  | 1584.068  | AF227924  | 1712.216  | 1543.287  | NM_004302 | 174.456   | 187.7     |
| AK022010  | 2652.429  | 4502.129  | NM_005716 | 14283.799 | 11919.757 | NM_005903 | 454.405   | 656.982   |
| NM_014156 | 6192.394  | 6205.344  | NM_006183 | 1199.092  | 1006.189  | NM_000861 | 221.126   | 275.633   |
| AK021795  | 768.372   | 770.693   | NM_016087 | 333.446   | 254.279   | NM_000024 | 146.122   | 227.348   |
| AL162042  | 1717.262  | 2446.975  | S59184    | 1063.269  | 1096.757  | AB037734  | 219.856   | 242.917   |
| AK026131  | 965.145   | 1061.712  | NM_006661 | 2812.881  | 2408.142  | U77493    | 200.133   | 246.201   |
| AK023312  | 1428.189  | 1176.315  | NM_005746 | 8297.087  | 7355.148  | NM_019062 | 163.331   | 441.362   |
| AK026496  | 351.685   | 706.482   | NM_004588 | 706.774   | 720.746   | NM_000263 | 297.678   | 250.148   |
| AK021462  | 1115.711  | 779.375   | U16126    | 811.173   | 577.57    | AF073519  | 2361.127  | 1737.837  |
| AK022678  | 1591.424  | 1667.358  | NM_002172 | 13320.11  | 10134.792 | NM_017583 | 822.496   | 481.404   |
| AK023835  | 2654.85   | 2029.493  | NM_002614 | 529.534   | 948.361   | Y16132    | 1965.605  | 1182.582  |
| AK023012  | 1390.989  | 792.309   | NM_005655 | 1757.454  | 2514.602  | NM_016593 | 209.542   | 115.514   |
| AK023906  | 3315.353  | 1926.518  | AJ008144  | 408.021   | 414.584   | NM_002521 | 175.258   | 117.324   |
| AK024234  | 903.307   | 477.163   | NM_007314 | 2629.327  | 2731.42   | NM_002856 | 247.284   | 195.823   |
| NM_012406 | 3756.594  | 3817.537  | NM_016073 | 2198.084  | 2251.406  | NM_003225 | 262.1     | 228.207   |
| AK021708  | 653.982   | 1041.492  | NM_006600 | 11338.957 | 12609.568 | NM_000096 | 460.912   | 424.263   |
| AL050205  | 5880.209  | 7335.792  | AF297709  | 1334.332  | 1248.945  | AA418251  | 433.832   | 474.455   |
| NM_005691 | 1304.968  | 1442.978  | L77564    | 787.704   | 785.56    | NM_019045 | 257.748   | 350.846   |
| AK023814  | 1007.126  | 1150.222  | NM_015384 | 2054.028  | 1523.288  | NM_006380 | 959.169   | 1328.188  |
| AF130063  | 611.399   | 592.93    | AK023327  | 1122.374  | 1318.743  | AB020710  | 555.873   | 1125.626  |
| AF086528  | 1048.929  | 1385.272  | AB046858  | 1128.757  | 1073.146  | Z83801    | 85.519    | 876.485   |
| AK024171  | 847.852   | 479.13    | D50914    | 1731.376  | 2244.287  | NM_016174 | 1325.513  | 1377.733  |
| AK023018  | 2015.526  | 1651.178  | BE878692  | 565.486   | 449.108   | NM_020377 | 202.172   | 222.272   |
| AK022672  | 2130.065  | 1648.771  | NM_002007 | 363.522   | 292.068   | U88896    | 391.605   | 709.93    |



|           |           |           |           |           |           |           |           |           |
|-----------|-----------|-----------|-----------|-----------|-----------|-----------|-----------|-----------|
| AK023870  | 1234.644  | 653.591   | NM_015896 | 769.525   | 400.177   | AF116702  | 19918.604 | 19272.578 |
| AK021599  | 2063.162  | 1495.39   | NM_002305 | 32708.539 | 14095.301 | NM_005724 | 2174.656  | 2344.162  |
| AK024263  | 1355.264  | 1788.696  | AK025439  | 1916.579  | 1424.699  | X58794    | 289.143   | 375.016   |
| NM_016613 | 4785.509  | 8052.335  | NM_001737 | 1248.361  | 1897.141  | NM_001735 | 723.518   | 750.804   |
| AF086414  | 1348.98   | 1306.127  | Z36784    | 476.236   | 395.704   | NM_002345 | 187.058   | 183.555   |
| AJ012490  | 6863.346  | 4549.141  | NM_016626 | 5577.863  | 5015.368  | NM_005080 | 4457.014  | 5055.349  |
| U84516    | 16991.848 | 13909.036 | NM_007213 | 1862.977  | 1425.706  | NM_004887 | 1851.287  | 1834.73   |
| AL049270  | 1782.996  | 1514.113  | NM_019064 | 742.598   | 391.343   | NM_006404 | 203.826   | 276.039   |
| U88834    | 7833.051  | 7209.322  | NM_000094 | 2123.895  | 1595.255  | NM_014795 | 233.356   | 374.273   |
| BC025324  | 961.112   | 814.776   | AJ295148  | 775.092   | 904.31    | NM_002986 | 244.232   | 383.446   |
| NM_003533 | 2526.676  | 2880.105  | AF176701  | 370.581   | 484.342   | M15330    | 294.279   | 217.787   |
| AF131836  | 2733.748  | 2643.638  | NM_016302 | 2189.265  | 2965.652  | NM_014396 | 821.976   | 433.539   |
| AF275804  | 29641.498 | 19660.158 | NM_004159 | 15506.382 | 13964.44  | AK027201  | 435.674   | 232.952   |
| AL137488  | 1513.18   | 743.85    | AK021866  | 440.152   | 448.013   | NM_000485 | 1307.756  | 492.097   |
| AL049447  | 56896.781 | 46528.09  | NM_003249 | 2881.185  | 3836.205  | X98507    | 503.947   | 334.018   |
| NM_020527 | 3497.863  | 2005.03   | M21897    | 558.779   | 589.838   | NM_016030 | 6544.46   | 4036.596  |
| AB020637  | 11724.66  | 5028.535  | AF301463  | 806.123   | 758.672   | NM_014665 | 2337.357  | 1318.926  |
| NM_005286 | 4581.906  | 3127.332  | NM_015984 | 4356.373  | 3638.571  | NM_005652 | 1108.966  | 767.152   |
| AK024365  | 3502.704  | 1765.765  | AK025969  | 796.043   | 538.096   | AK026686  | 248.572   | 247.02    |
| AJ251759  | 1492.58   | 888.934   | NM_006894 | 845.389   | 680.463   | AL133064  | 919.927   | 1153.025  |
| AK024371  | 1492.779  | 906.788   | AK023031  | 1262.682  | 1124.108  | NM_006227 | 1213.827  | 1494.092  |
| AB019569  | 61419.332 | 51515.223 | NM_005717 | 35909.891 | 22821.918 | NM_002905 | 1586.67   | 2472.031  |
| NM_001889 | 17317.408 | 15891.271 | NM_012090 | 4028.822  | 1749.947  | NM_000700 | 16036.236 | 20379.752 |
| NM_004995 | 1035.991  | 958.742   | BE793385  | 692.044   | 1086.676  | NM_019028 | 2743.52   | 4018.619  |
| X89668    | 29171.848 | 25281.898 | AF177292  | 252.153   | 302.96    | NM_000431 | 958.137   | 1216.661  |
| NM_004458 | 7201.449  | 5645.005  | NM_003088 | 4744.296  | 4109.896  | NM_013421 | 257.228   | 298.964   |
| NM_006901 | 1765.817  | 1397.567  | AF043290  | 385.457   | 394.63    | NM_012474 | 3042.415  | 4100.311  |
| NM_018530 | 10814.925 | 7680.083  | NM_004082 | 2179.705  | 2107.156  | AB033118  | 2070.761  | 1394.383  |
| AJ003145  | 1173.345  | 776.071   | NM_014398 | 3590.02   | 2983.386  | NM_019606 | 807.137   | 1352.886  |
| AK022855  | 20044.789 | 16700.787 | NM_005934 | 8839.755  | 7072.444  | NM_001690 | 2392.473  | 2688.159  |
| AF305686  | 5301.163  | 2958.958  | NM_007129 | 3093.221  | 4705.903  | AF034374  | 1529.37   | 2230.788  |
| AF086252  | 1614.24   | 1238.166  | AY004253  | 4540.578  | 6545.39   | NM_016118 | 1905.146  | 2426.01   |
| AK026703  | 740.26    | 769.484   | Z46967    | 299.958   | 394.77    | NM_018674 | 5114.684  | 5623.953  |
| NM_017595 | 944.294   | 982.077   | NM_002698 | 416.382   | 390.399   | NM_001683 | 6040.23   | 4699.317  |
| NM_017866 | 11858.085 | 8371.604  | NM_002148 | 818.656   | 624.109   | NM_001682 | 553.622   | 468.652   |
| AJ131244  | 1235.876  | 611.841   | AL137449  | 1191.17   | 1198.315  | NM_014405 | 705.775   | 392.716   |
| NM_003536 | 1977.906  | 1035.55   | U88153    | 933.394   | 880.556   | NM_000816 | 305.571   | 261.851   |
| AF116707  | 4808.774  | 2271.264  | X03910    | 11094.877 | 10677.86  | NM_014928 | 360.237   | 314.966   |
| U90910    | 6705.913  | 3886.342  | NM_018428 | 4645.866  | 3936.915  | AK025130  | 842.927   | 337.47    |
| AK025765  | 1384.042  | 612.012   | NM_006924 | 13182.124 | 10033.18  | NM_017875 | 550.935   | 347.003   |
| CY3Cy5    | 1856.495  | 279.238   | NM_016024 | 4431.279  | 3163.01   | AK023232  | 521.766   | 368.525   |
| AA143087  | 4082.72   | 3968.245  | NM_018107 | 1894.658  | 1678.922  | NM_000271 | 1450.723  | 828.995   |
| U25804    | 2200.191  | 3400.154  | NM_012279 | 934.766   | 660.529   | NM_006184 | 8535.143  | 4983.418  |
| BI870965  | 2403.13   | 2928.995  | NM_018387 | 5629.691  | 3893.167  | AB018268  | 1079.586  | 1596.225  |
| NM_001903 | 8550.248  | 7587.16   | BF310673  | 1040.361  | 727.926   | Z70701    | 2686.358  | 3483.25   |
| BI835536  | 10471.828 | 10135.644 | R97012    | 13804.552 | 13188.774 | AB040972  | 1017.991  | 1430.685  |
| BF205051  | 2280.549  | 2074.027  | U77700    | 4597.797  | 3817.146  | AF148505  | 830.652   | 1209.629  |
| X02761    | 752.858   | 684.962   | NM_006567 | 4440.677  | 2751.069  | BE260997  | 208.795   | 192.147   |
| M91463    | 568.459   | 634.32    | AF038554  | 11977.609 | 7083.894  | NM_018686 | 3629.589  | 5384.725  |
| J03060    | 2331.854  | 1497.344  | AF264621  | 2298.186  | 1507.771  | NM_017676 | 565.968   | 591.041   |
| X54156    | 432.19    | 349.751   | NM_005875 | 11041.928 | 8012.661  | AK021764  | 201.277   | 114.904   |
| NM_003743 | 872.65    | 517.593   | NM_004184 | 2132.96   | 1586.904  | NM_005431 | 709.785   | 922.779   |
| AA829383  | 3504.079  | 1854.146  | AK075087  | 673.148   | 920.042   | AB036063  | 649.48    | 960.066   |

|           |           |           |           |           |           |           |           |           |
|-----------|-----------|-----------|-----------|-----------|-----------|-----------|-----------|-----------|
| AF012434  | 6527.333  | 4537.577  | AK026571  | 2604.497  | 4732.236  | NM_002894 | 2123.408  | 2732.384  |
| NM_033334 | 342.764   | 911.234   | AK024673  | 2981.283  | 3729.995  | NM_004625 | 2946.832  | 3222.238  |
| SR6       | 1724.588  | 1147.805  | AF070618  | 721.727   | 848.644   | NM_004260 | 1973.648  | 2440.904  |
| SR8       | 6727.251  | 10860.031 | AF131748  | 2228.935  | 3457.137  | AL050067  | 413.334   | 348.078   |
| SR10      | 23216.439 | 3959.183  | NM_000456 | 1881.565  | 1883.429  | NM_004972 | 1458.641  | 1374.756  |
| CY3Cy5    | 751.687   | 171.182   | NM_002496 | 5598.506  | 6227.96   | NM_006251 | 1573.732  | 1530.339  |
| NM_005902 | 1049.672  | 1032.536  | NM_016243 | 2520.015  | 2743.773  | NM_004103 | 1732.416  | 1323.45   |
| NM_002850 | 51003.617 | 51874.406 | X53943    | 398.429   | 359.019   | NM_002314 | 1651.651  | 1623.892  |
| NM_004302 | 497.737   | 517.041   | NM_014402 | 43836.656 | 34248.598 | NM_001744 | 1515.452  | 660.071   |
| NM_005903 | 1335.573  | 1619.483  | NM_004649 | 2844.284  | 2560.131  | NM_006296 | 601.753   | 330.513   |
| NM_000861 | 671.394   | 767.015   | NM_006540 | 1826.922  | 1326.002  | Z25433    | 854.726   | 519.923   |
| NM_000024 | 323.489   | 508.286   | NM_017766 | 1022.047  | 1074.233  | NM_005922 | 699.321   | 644.928   |
| AB037734  | 614.022   | 431.722   | NM_002811 | 8333.808  | 5107.058  | NM_018638 | 1330.19   | 669.867   |
| U77493    | 450.49    | 402.861   | NM_020310 | 1149.138  | 963.223   | NM_003915 | 917.931   | 694.636   |
| NM_019062 | 368.649   | 263.177   | NM_005802 | 2334.91   | 1780.336  | NM_000382 | 1146.75   | 2209.603  |
| NM_000263 | 568.584   | 384.281   | AB002331  | 2580.109  | 2294.418  | NM_001150 | 210.002   | 195.55    |
| AF073519  | 5090.516  | 2663.087  | NM_002504 | 1287.207  | 951.437   | NM_002856 | 345.606   | 390.673   |
| NM_017583 | 2483.511  | 4186.315  | AB046775  | 1060.32   | 687.502   | NM_003225 | 257.504   | 238.662   |
| Y16132    | 7001.467  | 12299.764 | X74862    | 612.737   | 558.565   | NM_000096 | 462.138   | 1128.292  |
| NM_002521 | 803.951   | 573.733   | X65663    | 2752.558  | 1690.435  | AA418251  | 290.772   | 153.638   |
| NM_002856 | 887.768   | 417.227   | NM_003185 | 1198.397  | 1206.748  | AA143087  | 1627.349  | 1753.567  |
| NM_003225 | 718.47    | 329.749   | NM_004456 | 3926.309  | 3771.103  | U25804    | 707.562   | 1460.553  |
| NM_000096 | 1485.702  | 862.279   | NM_004284 | 4669.846  | 4032.017  | BI870965  | 866.191   | 830.938   |
| AA418251  | 858.364   | 418.632   | NM_012243 | 827.566   | 1424.66   | NM_001903 | 2525.245  | 2334.76   |
| NM_019045 | 960.732   | 1201.606  | AK025743  | 975.432   | 1922.453  | BI835536  | 3187.832  | 3687.12   |
| NM_006380 | 2778.559  | 4005.876  | AL122040  | 245.495   | 524.213   | BF205051  | 699.785   | 748.512   |
| AB020710  | 1267.606  | 1744.146  | AK023974  | 1897.43   | 2219.402  | X02761    | 316.176   | 310.126   |
| NM_016174 | 2762.762  | 2878.685  | AK023768  | 1192.882  | 1299.482  | M91463    | 196.068   | 213.331   |
| NM_020377 | 365.244   | 659.342   | NM_014729 | 553.832   | 662.749   | U88317    | 112.373   | 175.038   |
| U88896    | 1320.963  | 1274.865  | AF147335  | 680.475   | 661.545   | J03060    | 787.303   | 647.255   |
| AF116702  | 51454.453 | 42617.668 | AK000711  | 752.251   | 619.46    | X54156    | 244.636   | 151.641   |
| NM_005724 | 6829.412  | 5405.321  | BI768072  | 467.917   | 386.819   | NM_003743 | 343.94    | 460.364   |
| X58794    | 865.829   | 864.742   | AK022216  | 3030.043  | 2047.486  | AA829383  | 1215.614  | 955.655   |
| NM_001735 | 1901.166  | 1524.418  | AK025812  | 3412.822  | 3084.429  | AF012434  | 2129.309  | 1057.834  |
| NM_002349 | 325.315   | 351.057   | AK021459  | 309.304   | 196.367   | AB037791  | 439.544   | 257.519   |
| NM_005080 | 13476.225 | 9259.893  | U00960    | 1130.987  | 1109.436  | NM_018124 | 2043.247  | 3767.133  |
| NM_004887 | 3835.482  | 1952.562  | AK022262  | 929.842   | 927.578   | NM_000489 | 1266.97   | 1043.588  |
| NM_006404 | 346.374   | 238.486   | AF088039  | 48110.273 | 65860.5   | NM_016030 | 9904.77   | 11491.562 |
| NM_014795 | 325.639   | 258.919   | AF086220  | 1065.714  | 1084.333  | NM_014669 | 2039.036  | 2653.88   |
| NM_014396 | 2571.61   | 4043.056  | AK023941  | 1141.396  | 1218.261  | NM_005652 | 1010.134  | 1065.303  |
| AK027201  | 1506.353  | 2447.467  | AF086265  | 379.54    | 402.956   | AK026686  | 160.498   | 295.048   |
| NM_000489 | 3871.517  | 2930.336  | AL390083  | 4031.744  | 3163.906  | NM_005902 | 344.215   | 364.514   |
| X98507    | 1790.942  | 1204.793  | AB020702  | 692.604   | 575.711   | NM_002850 | 26593.326 | 22459.26  |
| NM_016030 | 33510.469 | 11972.125 | AL050227  | 654.213   | 811.358   | NM_004302 | 164.092   | 168.899   |
| NM_014669 | 6425.075  | 3188.308  | AF085905  | 718.289   | 461.863   | NM_005903 | 396.522   | 393.474   |
| NM_005652 | 3078.338  | 1709.793  | NM_013355 | 789.673   | 1016.171  | NM_000861 | 208.718   | 199.975   |
| AK026686  | 504.44    | 398.404   | NM_003847 | 19024.941 | 20968.801 | NM_000024 | 172.258   | 374.641   |
| AL133064  | 3036.7    | 4749.717  | AK021973  | 1569.983  | 2322.385  | AB037734  | 241.124   | 390.741   |
| NM_006227 | 4026.981  | 4604.939  | AL110155  | 575.351   | 225.034   | U77493    | 206.944   | 124.438   |
| NM_002905 | 4037.167  | 4963.571  | AL117638  | 378.884   | 185.726   | NM_019062 | 171.229   | 350.951   |
| NM_000700 | 43097.488 | 36330.188 | AL050165  | 49871.426 | 64168.434 | NM_003873 | 166.6     | 128.731   |
| NM_019028 | 6862.971  | 7466.826  | AL117445  | 1140.335  | 1140.439  | NM_000263 | 227.085   | 118.754   |
| NM_000431 | 3167.89   | 3119.789  | AL122113  | 7812.996  | 7375.751  | AF073519  | 1953.386  | 502.212   |

|           |           |           |           |           |           |           |          |           |
|-----------|-----------|-----------|-----------|-----------|-----------|-----------|----------|-----------|
| NM_013421 | 592.508   | 623.363   | AK024415  | 1967.721  | 1659.703  | AB001451  | 147.044  | 308.793   |
| NM_012474 | 10307.974 | 10338.294 | AL049365  | 3016.249  | 3177.032  | NM_017583 | 672.145  | 401.107   |
| AB033118  | 6238.989  | 3978.626  | AB007877  | 344.933   | 295.447   | Y16132    | 1392.687 | 793.447   |
| NM_019606 | 2526.413  | 2756.292  | AK025132  | 507.559   | 525.022   | NM_016593 | 216.803  | 149.939   |
| NM_001690 | 6225.18   | 4950.024  | AK025157  | 694.69    | 520.536   | NM_002521 | 198.467  | 203.797   |
| AF034374  | 4526.672  | 2580.44   | NM_020215 | 570.007   | 801.653   | NM_017875 | 583.864  | 505.927   |
| NM_016118 | 5590.311  | 3611.153  | AK022001  | 1638.197  | 1074.878  | NM_000271 | 1703.708 | 2214.92   |
| NM_018674 | 4375.11   | 2817.839  | AK022633  | 637.085   | 439.949   | NM_018209 | 1170.878 | 1567.703  |
| NM_001683 | 20350.232 | 8029.832  | AK027199  | 561.241   | 449.126   | NM_006184 | 6707.376 | 6538.87   |
| NM_001682 | 1383.468  | 1272.824  | AK000079  | 1244.437  | 1473.863  | AB018268  | 953.328  | 1552.332  |
| NM_017875 | 1775.562  | 1107.599  | AJ227874  | 968.09    | 1103.06   | NM_019045 | 280.993  | 272.469   |
| AK023232  | 1646.295  | 1025.832  | AF009268  | 424.212   | 673.461   | NM_006380 | 928.946  | 1149.522  |
| NM_000271 | 5143.7    | 2370.304  | AF009312  | 488.64    | 653.826   | AB020710  | 504.729  | 438.276   |
| NM_018209 | 4786.125  | 2735.621  | AF009276  | 810.776   | 783.202   | NM_016174 | 1164.799 | 1206.091  |
| NM_006184 | 18116.928 | 8147.394  | AF056428  | 9343.582  | 9657.185  | NM_020377 | 195.447  | 174.43    |
| AB018268  | 4710.976  | 4361.414  | AF069136  | 474.563   | 504.646   | U88896    | 398.559  | 303.665   |
| Z70701    | 8845.717  | 8318.613  | AK001097  | 278.568   | 174.203   | NM_005724 | 2023.964 | 1798.11   |
| AB040972  | 2770.291  | 2929.899  | AK001995  | 412.865   | 323.972   | X58794    | 295.554  | 276.769   |
| AF148505  | 2204.23   | 2408.878  | AK021594  | 407.272   | 392.692   | NM_001735 | 706.572  | 598.464   |
| BE260997  | 523.375   | 695.284   | AK002150  | 432.25    | 567.937   | NM_002349 | 212.569  | 437.422   |
| NM_018686 | 10038.41  | 12664.604 | AK021635  | 963.734   | 856.837   | NM_005080 | 4146.969 | 2803.7    |
| NM_017676 | 1462.176  | 1730.684  | AK021856  | 1177.388  | 1027.5    | NM_004887 | 1538.07  | 634.46    |
| AK021764  | 473.657   | 820.662   | AK025276  | 2667.73   | 2197.725  | NM_014795 | 196.792  | 141.214   |
| NM_005431 | 1811.175  | 1797.85   | AK026457  | 908.878   | 552.724   | NM_002986 | 216.621  | 77.536    |
| AB036063  | 1906.585  | 1799.763  | AK026825  | 307.385   | 319.623   | M15330    | 267.153  | 282.657   |
| NM_002894 | 5457.672  | 4578.399  | AJ008131  | 22010.152 | 31012.484 | NM_014396 | 893.094  | 311.297   |
| NM_004629 | 7675.046  | 3634.34   | AF086338  | 754.02    | 1219.573  | AK027201  | 599.01   | 444.918   |
| NM_004260 | 5793.275  | 4044.965  | NM_006272 | 245.502   | 545.035   | Z25433    | 746.36   | 985.321   |
| AL050067  | 514.33    | 267.314   | AK024303  | 614.64    | 984.53    | NM_018638 | 1492.623 | 1479.452  |
| NM_004972 | 3255.77   | 1592.094  | AL160131  | 5314.972  | 8650.184  | AL137593  | 2948.214 | 3423.571  |
| NM_006251 | 3588.629  | 4456.976  | AF086045  | 2178.686  | 3519.649  | NM_003915 | 770.589  | 786.011   |
| NM_001744 | 5607.259  | 12253.715 | AK027028  | 1092.417  | 1183.99   | NM_000382 | 841.403  | 1265.932  |
| Z25433    | 2925.123  | 1880.244  | AK027069  | 322.543   | 403.737   | AL133064  | 1035.141 | 1176.457  |
| NM_005922 | 2726.198  | 1293.448  | AK026916  | 2924.306  | 2726.26   | NM_006227 | 1249.246 | 1435.435  |
| NM_018638 | 3784.911  | 1484.054  | AK026914  | 1886.561  | 2047.262  | NM_002905 | 1492.841 | 1915.862  |
| AL137593  | 8810.983  | 3703.882  | Y13808    | 409.381   | 469.199   | NM_000700 | 16716.02 | 17755.955 |
| NM_003915 | 2563.127  | 1616.857  | Y11166    | 1068.621  | 1061.669  | NM_019028 | 2674.73  | 3385.154  |
| NM_000382 | 2580.686  | 2792.868  | AK023515  | 1334.521  | 1157.566  | NM_000431 | 1007.096 | 827.965   |
| NM_001150 | 404.286   | 538.491   | AL137623  | 12173.493 | 10541.898 | NM_013421 | 283.201  | 282.994   |
| NM_002856 | 1144.544  | 1151.46   | AK026485  | 406.942   | 357.093   | AB033118  | 1984.258 | 1232.162  |
| NM_003225 | 778.67    | 881.618   | NM_003546 | 2098.635  | 2799.091  | NM_019606 | 810.43   | 1132.026  |
| NM_000096 | 1480.69   | 1685.203  | AF118077  | 2383.081  | 3879.441  | NM_001690 | 2339.122 | 1932.641  |
| AA418251  | 1028.295  | 758.713   | AL137625  | 1027.47   | 1740.884  | AF034374  | 1684.334 | 1381.677  |
| AA143087  | 4550.086  | 4635.958  | AK025750  | 1098.57   | 1595.227  | NM_016118 | 1939.87  | 1196.87   |
| U25804    | 1736.479  | 3395.354  | BF031253  | 475.344   | 760.315   | NM_018674 | 3913.724 | 2233.327  |
| BI870965  | 2268.616  | 2245.187  | AK025783  | 1132.454  | 1330.991  | NM_001683 | 3797.845 | 1378.895  |
| NM_001903 | 8460.346  | 5393.614  | AF113675  | 1172.713  | 1520.594  | NM_001682 | 549.521  | 285.316   |
| BI835536  | 10058.438 | 7490.34   | AK024514  | 483.374   | 556.631   | NM_014405 | 549.612  | 238.46    |
| BF205051  | 2225.288  | 1281.827  | NM_020119 | 4211.495  | 3001.636  | NM_000816 | 254.576  | 211.033   |
| X02761    | 632.362   | 375.645   | AL049417  | 6080.068  | 5506.214  | NM_014928 | 248.142  | 174.742   |
| M91463    | 499.492   | 307.316   | AK023507  | 476.879   | 647.248   | AK025130  | 1324.77  | 1055.077  |
| U88317    | 252.434   | 126.115   | NM_005169 | 4432.035  | 3618.77   |           | 15.29    | 706.143   |
| J03060    | 2181.328  | 918.02    | AL109818  | 486.462   | 343.356   | AB037791  | 337.872  | 343.835   |

|           |           |           |           |           |           |           |          |          |
|-----------|-----------|-----------|-----------|-----------|-----------|-----------|----------|----------|
| X54156    | 459.919   | 559.27    | NM_017929 | 631.141   | 563.53    | NM_018124 | 1539.081 | 2167.525 |
| AA829383  | 5254.416  | 9708.512  | NM_018605 | 265.548   | 255.635   | Z70701    | 2924.779 | 3467.695 |
| AB037791  | 1140.21   | 825.173   | NM_018472 | 859.715   | 801.965   | AB040972  | 892.551  | 1049.619 |
| NM_018124 | 4978.705  | 4608.928  | AJ008128  | 20452.848 | 16608.336 | AF148505  | 989.535  | 1243.458 |
| NM_000489 | 4296.757  | 4177.238  | AL449243  | 5459.005  | 4746.813  | BE260997  | 258.774  | 282.905  |
| X98507    | 1593.683  | 1915.154  | M12211    | 1761.338  | 1490.933  | NM_018686 | 3893.802 | 5458.59  |
| NM_016030 | 34931.895 | 28958.311 | AK026449  | 9080.052  | 18064.182 | NM_017676 | 605.603  | 847.751  |
| NM_014669 | 7593.82   | 7077.163  | NM_014027 | 2325.883  | 3867.852  | AK021764  | 197.663  | 257.084  |
| NM_005652 | 3257.849  | 3939.844  | NM_020467 | 2407.942  | 3545.871  | NM_005431 | 833.324  | 844.138  |
| AK026686  | 551.414   | 637.307   | AF116621  | 3223.435  | 4007.197  | AB036063  | 627.423  | 754.813  |
| NM_005902 | 1040.123  | 841.533   | AF086554  | 2415.808  | 3513.274  | NM_002894 | 2203.168 | 1730.083 |
| NM_002850 | 53841.496 | 43441.25  | AL390136  | 15740.941 | 21342.223 | NM_004629 | 2922.022 | 2286.206 |
| NM_004302 | 503.922   | 358.639   | AK023156  | 590.027   | 562.074   | NM_004260 | 2107.334 | 1736.919 |
| NM_005903 | 1421.777  | 623.889   | AF086398  | 46724.047 | 65589.516 | AL050067  | 422.614  | 239.382  |
| NM_000861 | 471.013   | 404.25    | AK024545  | 710.834   | 731.728   | NM_004972 | 1334.17  | 545.309  |
| AB037734  | 517.989   | 245.069   | AK023444  | 426.563   | 368.474   | NM_006251 | 1343.494 | 541.411  |
| AF073519  | 5987.789  | 2535.757  | AK025953  | 597.049   | 532.38    | NM_004103 | 1379.469 | 762.549  |
| AB001451  | 286.796   | 216.004   | NM_003180 | 1277.911  | 1665.957  | NM_002314 | 1696.699 | 1079.235 |
| NM_017583 | 2121.851  | 681.599   | AF086406  | 7441.264  | 6282.44   | NM_001744 | 1571.11  | 514.316  |
| Y16132    | 5984.515  | 3332.918  | D17216    | 2502.121  | 2238.524  | NM_006296 | 784.622  | 549.612  |
| NM_016593 | 519.782   | 602.068   | AL137581  | 1282.184  | 1130.079  | AF073519  | 2027.082 | 1519.25  |
| NM_002521 | 470.732   | 672.881   | AK024942  | 1495.012  | 1592.009  | NM_017583 | 675.849  | 608.16   |
| NM_017875 | 1774.049  | 2012.904  | AJ227873  | 14363.891 | 8986.151  | Y16132    | 1708.183 | 2220.292 |
| AK023232  | 1792.137  | 2301.528  | AK022886  | 2728.82   | 2659.145  | NM_016593 | 228.325  | 170.057  |
| NM_000271 | 5559.261  | 5609.838  | AK024665  | 6118.717  | 4694.744  | NM_002521 | 177.569  | 263.384  |
| NM_018209 | 4363.383  | 4128.309  | AF147363  | 662.057   | 515.17    | NM_001150 | 192.697  | 107.118  |
| NM_006184 | 20731.367 | 17091.221 | AJ227880  | 556.317   | 353.228   | NM_002856 | 294.816  | 297.978  |
| AB018268  | 5196.58   | 5355.326  | AK000691  | 1040.241  | 982.954   | NM_003225 | 211.996  | 245.98   |
| NM_019045 | 881.328   | 1016.731  | AK001448  | 1086.983  | 934.63    | NM_000096 | 376.527  | 634.728  |
| NM_006380 | 2905.171  | 3190.127  | AK026890  | 305.618   | 348.237   | AA418251  | 261.061  | 267.281  |
| AB020710  | 1641.954  | 1285.956  | AL049321  | 3010.821  | 2416.735  | AA143087  | 1570.732 | 1943.576 |
| NM_016174 | 2784.767  | 2272.342  | CY3Cy5    | 2093.779  | 195.1     | U25804    | 782.93   | 1324.111 |
| NM_020377 | 347.271   | 183.492   | W74254    | 10410.368 | 14584.179 | BI870965  | 876.075  | 744.244  |
| U88896    | 1228.202  | 753.003   | M58603    | 4275.913  | 3664.289  | NM_001903 | 2710.247 | 2091.334 |
| AF116702  | 50458.891 | 20288.766 | AA443286  | 643.979   | 323.732   | BI835536  | 3254.705 | 3071.695 |
| NM_005724 | 5790.366  | 2575.818  | AB003334  | 4502.762  | 3571.997  | BF205051  | 699.443  | 520.912  |
| NM_001735 | 1447.026  | 5103.691  | AA490737  | 444.983   | 236.436   | X02761    | 305.905  | 370.753  |
| NM_002349 | 421.358   | 2048.241  | AI878886  | 10113.239 | 9124.938  | M91463    | 252.4    | 135.055  |
| NM_005080 | 20209.512 | 44049.93  | BG697179  | 4225.823  | 3547.678  | J03060    | 703.635  | 307.207  |
| NM_006404 | 822.858   | 821.143   | NM_002136 | 22384.379 | 20600.754 | X54156    | 196.474  | 119.348  |
| NM_014795 | 454.14    | 264.265   | BM012504  | 2419.162  | 2472.684  | NM_003743 | 342.596  | 270.069  |
| NM_002986 | 641.381   | 348.373   | AA664145  | 676.715   | 639.562   | AA829383  | 1141.117 | 718.306  |
| M15330    | 967.385   | 1361.396  | X72308    | 6347.761  | 6278.671  | AF012434  | 2321.497 | 1028.852 |
| NM_014396 | 2559.77   | 2820.823  | R48168    | 8284.27   | 7473.859  | NM_006404 | 150.583  | 181.979  |
| AK027201  | 1708.337  | 1379.811  | NM_003942 | 1170.792  | 1173.086  | NM_014795 | 220.97   | 251.317  |
| Z25433    | 3224.169  | 5106.883  | SR5       | 4883.253  | 4895.945  | NM_002986 | 262.054  | 169.958  |
| NM_005922 | 2798.324  | 3741.997  | SR7       | 4427.884  | 32487.148 | M15330    | 243.015  | 597.532  |
| NM_018638 | 4546.676  | 4118.874  | SR9       | 15459.977 | 2705.446  | NM_014396 | 842.547  | 1080.254 |
| AL137593  | 10553.98  | 9746.961  | CY3Cy5    | 2525.183  | 120.782   | AK027201  | 463.465  | 375.058  |
| NM_003915 | 2617.825  | 2639.612  | NM_000418 | 292.085   | 445.505   | NM_000489 | 1370.543 | 1328.58  |
| NM_000382 | 2384.155  | 3058.718  | NM_013246 | 459.702   | 361.133   | X98507    | 445.046  | 502.829  |
| AL133064  | 2858.307  | 3788.306  | NM_000591 | 1184.589  | 848.16    | NM_016030 | 8633.724 | 7033.064 |
| NM_006227 | 4054.94   | 4039.162  | NM_000565 | 898.513   | 750.607   | NM_014669 | 2117.114 | 2439.789 |

|           |           |           |           |           |           |           |           |           |
|-----------|-----------|-----------|-----------|-----------|-----------|-----------|-----------|-----------|
| NM_00290E | 4344.703  | 3814.921  | NM_002019 | 988.401   | 1005.391  | NM_00565Z | 1139.133  | 985.036   |
| NM_00070C | 43793.73  | 29383.871 | AF253318  | 499.059   | 320.139   | AK026686  | 182.79    | 194.173   |
| NM_01902E | 7532.118  | 5822.799  | NM_017767 | 4955.244  | 5390.395  | NM_00590Z | 330.462   | 302.831   |
| NM_000431 | 3290.965  | 1383.579  | AK024848  | 4127.786  | 3637.855  | NM_00285C | 24930.598 | 19166.457 |
| NM_013421 | 516.175   | 573.557   | NM_00485Z | 765.522   | 839.242   | NM_00430Z | 204.606   | 200.671   |
| NM_012474 | 9262.592  | 4663.192  | NM_00054Z | 604.655   | 573.079   | NM_00590Z | 418.329   | 338.329   |
| AB033118  | 5206.105  | 1761.664  | U06699    | 3053.718  | 3489.212  | NM_000861 | 181.558   | 207.592   |
| NM_00169C | 6304.555  | 15488.365 | AJ290954  | 6877.746  | 6803.234  | AB037734  | 354.695   | 237.425   |
| AF034374  | 6917.299  | 17790.461 | AK025451  | 936.764   | 896.487   | U77493    | 169.823   | 160.761   |
| NM_016118 | 8169.745  | 21228.098 | NM_00278Z | 1006.124  | 841.65    | NM_01906Z | 105.441   | 265.831   |
| NM_00168Z | 21458.816 | 7112.673  | AK024396  | 1101.624  | 1784.994  | NM_00026Z | 222.372   | 210.889   |
| NM_00168Z | 1634.602  | 480.26    | U58514    | 890.734   | 1568.388  | NM_00168Z | 2740.633  | 2753.98   |
| NM_01440E | 2036.215  | 1011.672  | M57627    | 920.28    | 1178.354  | NM_00168Z | 426.289   | 603.632   |
| NM_00081E | 908.024   | 977.003   | NM_000544 | 1170.542  | 1822.835  | NM_01440E | 641.327   | 551.893   |
| NM_01492E | 1023.306  | 852.015   | NM_001044 | 570.141   | 321.126   | NM_00081E | 269.65    | 418.866   |
| AK025130  | 3573.313  | 2876.717  | NM_004644 | 675.128   | 677.425   | NM_01492E | 354.194   | 565.612   |
| NM_033334 | 312.421   | 508.318   | AV681967  | 1178.049  | 1028.267  | AK025130  | 1072.51   | 1476.953  |
| AB037791  | 1241.197  | 1149.031  | NM_01825C | 1242.148  | 1300.703  | NM_01787E | 570.903   | 543.354   |
| NM_018124 | 5762.243  | 5439.851  | NM_01655Z | 4268.798  | 3334.349  | AK023232  | 544.092   | 746.671   |
| Z70701    | 7835.875  | 6742.953  | AB023136  | 531.773   | 443.754   | NM_000271 | 1623.24   | 1918.849  |
| AB040972  | 3031.825  | 2449.576  | NM_00379E | 17163.227 | 12071.79  | NM_01820E | 1372.916  | 1663.517  |
| AF148505  | 2620.115  | 2902.242  | NM_01423Z | 3032.111  | 2724.079  | AB018268  | 1030.306  | 1617.777  |
| BE260997  | 550.686   | 559.203   | NM_005701 | 909.989   | 747.138   | NM_01904E | 366.674   | 368.86    |
| NM_01868E | 6930.129  | 4663.037  | NM_00681E | 26189.289 | 22907.795 | NM_00638C | 1015.561  | 1066.32   |
| NM_01767E | 1434.742  | 1115.111  | NM_014744 | 2140.313  | 1239.034  | AB020710  | 548.181   | 562.765   |
| AK021764  | 521.311   | 294.534   | AF146759  | 963.212   | 1071.861  | NM_016174 | 1327.452  | 793.045   |
| NM_005431 | 1432.53   | 719.928   | AB032993  | 3719.157  | 2584.962  | NM_020377 | 211.605   | 220.689   |
| NM_002894 | 5843.169  | 16310.095 | NM_000854 | 2419.209  | 1785.037  | U88896    | 514.042   | 325.29    |
| NM_00462E | 11100.887 | 27103.555 | AL117423  | 2001.518  | 2356.411  | AF116702  | 18448.334 | 8667.711  |
| NM_00426C | 9310.601  | 22969.596 | NM_002084 | 1364.043  | 1434.482  | NM_005724 | 2078.377  | 837.932   |
| NM_00497Z | 4175.949  | 1490.149  | NM_00475C | 1339.809  | 1794.891  | X58794    | 266.028   | 187.651   |
| NM_006251 | 4688.569  | 1633.966  | NM_00729E | 2159.048  | 2615.341  | NM_00173E | 739.284   | 430.616   |
| NM_00410Z | 5272.072  | 4150.55   | NM_003651 | 4803.887  | 7249.499  | NM_00234E | 191.959   | 153.472   |
| NM_002314 | 5047.547  | 4076.913  | NM_00326Z | 1675.236  | 1672.911  | NM_00508C | 4946.414  | 3058.139  |
| NM_001744 | 5334.225  | 4270.15   | AK022832  | 1929.88   | 1648.307  | NM_00488Z | 2278.438  | 1148.187  |
| NM_00629E | 1919.767  | 2239.597  | NM_014641 | 1734.15   | 1028.003  | NM_00497Z | 1231.638  | 1571.97   |
| AF073519  | 6537.076  | 7598.808  | NM_00446Z | 5476.921  | 4687.829  | NM_006251 | 1446.801  | 1862.779  |
| AB001451  | 406.273   | 747.586   | AB020664  | 1958.407  | 1811.709  | NM_00410Z | 1981.261  | 2231.914  |
| NM_01758Z | 2374.703  | 1841.955  | NM_00664C | 11334.81  | 10857.371 | NM_002314 | 1752.719  | 2252.528  |
| Y16132    | 6462.636  | 5661.511  | NM_01911Z | 1733.113  | 1998.369  | NM_001744 | 1748.422  | 1839.564  |
| NM_01659Z | 638.315   | 729.525   | NM_01233E | 7477.63   | 6157.896  | NM_00629E | 684.418   | 799.841   |
| NM_002521 | 599.021   | 528.504   | NM_02024E | 930.54    | 832.166   | Z25433    | 1033.869  | 1254.667  |
| NM_001150 | 337.28    | 401.117   | NM_000084 | 1212.654  | 1272.092  | NM_00592Z | 739.034   | 1081.089  |
| NM_00285E | 949.987   | 875.49    | NM_016354 | 682.711   | 1230.335  | NM_01863E | 1438.738  | 1242.421  |
| NM_00322E | 779.382   | 786.054   | NM_00303E | 890.156   | 954.672   | AL137593  | 3836.314  | 3921.151  |
| NM_00009E | 1401.893  | 1234.604  | NM_01815E | 2811.013  | 3484.825  | NM_00038Z | 941.365   | 1368.163  |
| AA418251  | 820.165   | 491.742   | AL050358  | 1989.978  | 2850.677  | AL133064  | 1173.396  | 1324.848  |
| AA143087  | 4636.661  | 2012.568  | NM_004731 | 1364.657  | 1459.517  | NM_00622Z | 1333.164  | 1464.215  |
| U25804    | 2147.863  | 1843.846  | AB023139  | 1887.483  | 1940.325  | NM_00290E | 1983.891  | 1706.03   |
| BI870965  | 2209.851  | 1049.535  | NM_01788E | 1874.809  | 1527.283  | NM_00070C | 17930.693 | 14497.309 |
| NM_00190Z | 5481.053  | 1915.697  | D80004    | 622.191   | 385.131   | NM_01902E | 3369.299  | 2976.454  |
| BF205051  | 2466.905  | 6888.744  | NM_00094E | 4648.167  | 2893.177  | NM_000431 | 1042.088  | 518.143   |
| X02761    | 1013.229  | 2548.531  | NM_01607C | 1322.87   | 1026.529  | NM_013421 | 311.902   | 206.852   |

|           |           |           |           |           |           |           |          |          |
|-----------|-----------|-----------|-----------|-----------|-----------|-----------|----------|----------|
| M91463    | 673.615   | 1326.897  | NM_016101 | 3792.811  | 2954.601  | NM_012474 | 3025.22  | 2000.473 |
| J03060    | 2647.699  | 832.809   | NM_005859 | 33202.355 | 24871.814 | AB033118  | 2331.87  | 668.546  |
| X54156    | 360.957   | 216.889   | NM_020313 | 1125.023  | 927.955   | NM_019606 | 769.376  | 360.555  |
| NM_003743 | 1227.746  | 1009.866  | NM_014628 | 5124.131  | 4813.24   | NM_001690 | 2537.814 | 1868.615 |
| AA829383  | 3862.32   | 3386.499  | AK025630  | 1507.156  | 1607.59   | AF034374  | 1389.738 | 967.224  |
| AF012434  | 7426.644  | 7285.389  | AL365404  | 16510.314 | 19090.611 | NM_016118 | 2228.071 | 1544.719 |
| NM_006404 | 595.728   | 946.351   | AK022907  | 5100.062  | 5852.374  | NM_018674 | 3952.02  | 2747.045 |
| NM_014795 | 481.206   | 1005.99   | NM_014793 | 2248.57   | 2207.307  | NM_000068 | 330.816  | 271.511  |
| NM_002986 | 689.645   | 904.771   | NM_004245 | 997.514   | 1074.937  | AB033046  | 3826.507 | 4961.843 |
| M15330    | 922.423   | 1311.073  | NM_003241 | 1140.405  | 1235.695  | NM_015918 | 3340.002 | 3790.273 |
| NM_014396 | 2554.073  | 2930.196  | NM_002685 | 2173.272  | 2148.551  | AK023228  | 179.635  | 204.068  |
| AK027201  | 1686.676  | 1542.944  | AK024504  | 780.577   | 1216.57   | NM_013245 | 148.648  | 293.368  |
| NM_000489 | 4097.351  | 3463.233  | AF039023  | 1310.186  | 2153.612  | AB029041  | 3659.877 | 3548.17  |
| X98507    | 1693.318  | 1545.698  | NM_005511 | 2922.711  | 4483.166  | AK026642  | 4031.911 | 4467.176 |
| NM_016030 | 31740.801 | 21006.32  | NM_014698 | 15951.143 | 21825.834 | AL359063  | 467.031  | 750.651  |
| NM_014669 | 7913.202  | 5799.219  | NM_018475 | 4141.688  | 6172.095  | AL079292  | 944.398  | 909.631  |
| NM_005652 | 3517.448  | 2305.269  | X52005    | 3069.429  | 9041.708  | X89667    | 511.261  | 755.251  |
| AK026686  | 353.6     | 240.528   | AK024396  | 892.608   | 1165.184  | AB037791  | 388.189  | 468.545  |
| NM_005902 | 895.939   | 362.59    | U58514    | 642.552   | 819.547   | NM_018124 | 1970.325 | 2711.573 |
| NM_002850 | 49317.613 | 26125.129 | M58603    | 3762.217  | 3281.21   | Z70701    | 3397.325 | 3341.569 |
| NM_004302 | 804.539   | 2357.929  | AA443286  | 599.249   | 344.949   | AB040972  | 1087.364 | 899.573  |
| NM_005903 | 1608.98   | 4482.153  | AB003334  | 4038.558  | 3136.142  | AF148505  | 1046.506 | 1043.248 |
| NM_000861 | 680.247   | 1558.08   | AA490737  | 728.247   | 555.65    | BE260997  | 298.239  | 277.181  |
| AB037734  | 721.239   | 378.793   | AI878886  | 13577.246 | 12727.606 | NM_018686 | 4144.917 | 3526.256 |
| U77493    | 523.76    | 364.4     | BG697179  | 5846.318  | 5543.643  | NM_017676 | 588.63   | 455.258  |
| NM_019062 | 819.136   | 1843.416  | NM_002136 | 33031.605 | 42392.063 | AK021764  | 245.418  | 500.371  |
| NM_003873 | 238.769   | 511.43    | BM012504  | 4422.993  | 7135.646  | NM_005431 | 801.268  | 562.746  |
| NM_000263 | 795.665   | 712.848   | AA664145  | 732.709   | 1429.502  | AB036063  | 613.583  | 447.804  |
| NM_001683 | 11163.61  | 10502.755 | X72308    | 7375.498  | 7844.836  | NM_002894 | 2351.802 | 1615.575 |
| NM_001682 | 1862.068  | 1995.336  | R48168    | 9447.757  | 8556.199  | NM_004629 | 3170.384 | 2381.991 |
| NM_014405 | 2041.373  | 1906.074  | NM_003942 | 1293.131  | 1882.785  | NM_004260 | 2008.19  | 1192.616 |
| NM_000816 | 864.152   | 1209.699  | NM_004452 | 841.844   | 1398.06   | AL050067  | 413.544  | 242.748  |
| NM_014928 | 949.011   | 1119.718  | NM_002084 | 1485.625  | 1179.789  | J05158    | 146.098  | 172.708  |
| AK025130  | 3528.188  | 4082.463  | D16892    | 11738.462 | 7954.171  | NM_015564 | 442.653  | 388.916  |
| NM_017875 | 2053.557  | 1854.853  | NM_004750 | 1482.199  | 1289.03   | AF160476  | 190.351  | 247.933  |
| AK023232  | 1926.499  | 1947.483  | NM_007295 | 2111.436  | 1196.264  | L22650    | 405.123  | 751.936  |
| NM_000271 | 5695.741  | 4798.674  | NM_000591 | 1245.947  | 1306.808  | AB014520  | 1239.245 | 1522.541 |
| NM_018209 | 5071.276  | 4129.115  | NM_000565 | 1222.424  | 1104.333  | AF161420  | 323.385  | 371.796  |
| NM_006184 | 21905.961 | 13056.685 | NM_002019 | 1967.809  | 5107.966  | NM_004907 | 356.099  | 442.97   |
| AB018268  | 4610.232  | 2805.913  | AF253318  | 1211.525  | 2241.578  | NM_002891 | 177.775  | 227.928  |
| NM_019045 | 943.21    | 565.511   | NM_017767 | 5877.955  | 8143.399  | NM_001775 | 191.255  | 94.498   |
| NM_006380 | 3059.518  | 1419.133  | AK024848  | 3732.649  | 3956.68   | X04526    | 5537.72  | 4390.941 |
| AB020710  | 968.06    | 578.384   | NM_004852 | 455.078   | 841.291   | D26067    | 1581.822 | 1994.277 |
| NM_016174 | 4332.908  | 9734.62   | NM_000543 | 820.606   | 858.209   | AF227924  | 842.524  | 825.935  |
| NM_020377 | 532.197   | 1833.919  | U06699    | 5460.722  | 7943.397  | NM_005716 | 4439.572 | 3374.191 |
| U88896    | 1341.878  | 2592.798  | AJ290954  | 8058.628  | 12759.41  | NM_006183 | 638.805  | 453.888  |
| NM_005724 | 6719.041  | 2742.479  | NM_016354 | 841.804   | 756.185   | NM_016087 | 211.446  | 210.648  |
| X58794    | 947.452   | 512.534   | NM_003038 | 1198.822  | 789.181   | S59184    | 782.078  | 487.57   |
| NM_001735 | 2464.304  | 6074.254  | NM_018155 | 3078.094  | 1965.989  | NM_005130 | 198.482  | 252.489  |
| NM_002349 | 591.679   | 1134.695  | AL050358  | 1342.105  | 1139.588  | NM_006661 | 935.369  | 523.608  |
| NM_005080 | 16471.186 | 15150.655 | NM_004731 | 960.627   | 711.003   | NM_005746 | 4725.989 | 1821.696 |
| NM_004887 | 7325.323  | 6458.223  | NM_000544 | 831.855   | 950.838   | NM_004588 | 290.246  | 268.435  |
| NM_004972 | 4075.233  | 5528.765  | NM_004644 | 657.584   | 483.395   | U16126    | 209.817  | 215.953  |

|           |           |           |           |           |           |           |           |           |
|-----------|-----------|-----------|-----------|-----------|-----------|-----------|-----------|-----------|
| NM_004103 | 5419.96   | 6216.877  | AV681967  | 1156.927  | 1249.969  | NM_004572 | 159.359   | 80.871    |
| NM_002314 | 5817.47   | 6365.954  | NM_018250 | 1334.819  | 1406.47   | NM_002172 | 4001.509  | 1835.985  |
| NM_001744 | 5176.257  | 5148.23   | NM_016553 | 5119.418  | 4195.504  | NM_002614 | 298.918   | 230.287   |
| NM_006296 | 1906.047  | 2379.105  | AB023136  | 651.893   | 764.828   | NM_005655 | 680.982   | 1120.546  |
| Z25433    | 2975      | 4019.753  | NM_003795 | 22787.475 | 28321.65  | AJ008144  | 196.978   | 197.474   |
| NM_005922 | 2953.695  | 3154.198  | NM_005701 | 1033.558  | 1537.735  | NM_007314 | 1076.549  | 1269.708  |
| NM_018638 | 4344.191  | 3907.505  | NM_001231 | 518.513   | 710.737   | NM_016073 | 833.154   | 1211.204  |
| AL137593  | 12050.753 | 8579.549  | NM_006819 | 30598.512 | 28156.119 | NM_006600 | 5294.049  | 4940.452  |
| NM_003915 | 2720.678  | 1926.747  | NM_014744 | 2281.76   | 1620.353  | AF297709  | 556.108   | 702.457   |
| NM_000382 | 2525.057  | 1392.899  | AF146759  | 809.146   | 1027.546  | L77564    | 298.594   | 269.33    |
| AL133064  | 2977.272  | 2760.208  | AB032993  | 4481.293  | 3515.972  | NM_015384 | 591.313   | 779.583   |
| NM_006227 | 4170.863  | 2971.538  | NM_000854 | 2629.734  | 2746.782  | AK023327  | 519.892   | 531.792   |
| NM_002905 | 3168.037  | 2170.466  | AL117423  | 2201.026  | 4450.742  | AB046858  | 582.834   | 529.054   |
| NM_000700 | 49176.898 | 57894.152 | NM_002685 | 2455.726  | 1768.082  | D50914    | 982.618   | 818.154   |
| NM_000431 | 4181.448  | 11115.45  | AK024504  | 929.971   | 901.132   | BE878692  | 207.989   | 280.022   |
| NM_013421 | 912.025   | 3091.377  | AF039023  | 1538.491  | 1172.805  | NM_002007 | 184.396   | 144.703   |
| AB033118  | 6324.028  | 2438.319  | NM_005511 | 2797.199  | 2457.249  | NM_015896 | 398.864   | 532.458   |
| NM_019606 | 2639.4    | 1207.515  | NM_014698 | 13779.109 | 8634.96   | NM_002305 | 10079.545 | 14490.991 |
| NM_001690 | 7336.365  | 4638.319  | NM_018475 | 3167.967  | 2441.537  | AK025439  | 889.06    | 684.065   |
| AF034374  | 6021.757  | 10094.933 | NM_003262 | 2146.279  | 1486.326  | NM_001737 | 639.085   | 345.481   |
| NM_016118 | 6328.703  | 5934.443  | NM_020125 | 285.779   | 553.863   | Z36784    | 305.686   | 167.254   |
| NM_018674 | 5459.386  | 5870.348  | AK022832  | 2049.375  | 1542.566  | NM_016626 | 3540.743  | 1602.628  |
| NM_000068 | 959.397   | 917.593   | NM_014641 | 1878.37   | 1941.355  | NM_007213 | 888.037   | 423.143   |
| AK023228  | 879.294   | 968.658   | NM_004462 | 7883.197  | 10386.969 | NM_019064 | 280.381   | 237.129   |
| NM_013249 | 375.758   | 583.228   | AB020664  | 1719.28   | 1891.415  | NM_000094 | 577.405   | 339.011   |
| AB029041  | 7523.478  | 8306.482  | NM_006640 | 9946.455  | 10543.461 | NM_000439 | 177.905   | 124.914   |
| AK026642  | 12000.479 | 13812.76  | NM_000343 | 592.913   | 737.705   | AJ295148  | 289.977   | 241.39    |
| AL359063  | 1496.927  | 2277.948  | NM_019112 | 1946.274  | 3185.719  | NM_016302 | 1200.94   | 851.056   |
| AL079292  | 3622.555  | 5442.965  | NM_012336 | 8250.933  | 10978.366 | NM_004159 | 5304.37   | 6300.055  |
| X89667    | 1660.682  | 2113.537  | NM_020246 | 1415.897  | 2385.713  | AK021866  | 199.082   | 150.644   |
| AB037791  | 1389.986  | 1377.2    | NM_003942 | 1404.026  | 1189.078  | NM_003249 | 1921.782  | 1738.297  |
| NM_018124 | 5691.737  | 6572.004  | NM_004452 | 986.656   | 1171.084  | M21897    | 269.676   | 217.6     |
| Z70701    | 11649.075 | 13365.403 | AB040954  | 2921.452  | 1475.719  | AF301463  | 300.083   | 375.962   |
| AB040972  | 3458.572  | 5021.025  | NM_002081 | 1050.079  | 927.466   | NM_015984 | 1937.442  | 2056.688  |
| AF148505  | 3880.294  | 6950.625  | AB023139  | 2346.42   | 2081.36   | AF229438  | 81.332    | 191.649   |
| NM_018686 | 10223.982 | 28719.813 | NM_017885 | 2058.945  | 1351.083  | AK025969  | 455.075   | 359.884   |
| NM_017676 | 2055.129  | 7316.732  | D80004    | 587.525   | 514.031   | NM_006894 | 298.231   | 229.562   |
| NM_005431 | 2300.424  | 1283.166  | NM_000946 | 4955.55   | 3335.225  | AK023031  | 523.14    | 416.932   |
| AB036063  | 2033.413  | 595.955   | NM_016070 | 1897.937  | 2048.885  | NM_005717 | 16293.803 | 10855.624 |
| NM_002894 | 5947.096  | 3245.412  | NM_016390 | 1445.795  | 1587.653  | NM_012090 | 1176.897  | 996.233   |
| NM_004629 | 9223.514  | 6791.809  | NM_016101 | 4530.759  | 4103.696  | BE793385  | 339.273   | 308.72    |
| NM_004260 | 7822.875  | 7690.479  | NM_005859 | 41307.391 | 34217.328 | AF177292  | 160.466   | 135.033   |
| AL050067  | 743.556   | 933.12    | NM_020313 | 1236.561  | 952.834   | NM_003088 | 1485.073  | 606.257   |
| J05158    | 475.565   | 853.358   | NM_014628 | 4545.953  | 4961.985  | AF043290  | 170.758   | 167.544   |
| NM_015564 | 1941.437  | 2978.87   | AK025630  | 1242.107  | 1537.036  | NM_004082 | 1246.565  | 779.791   |
| AF160476  | 454.755   | 1010.963  | AL365404  | 17742.82  | 19401.154 | NM_014398 | 1226.246  | 691.409   |
| L22650    | 1564.873  | 3043.378  | AK022907  | 5524.742  | 7780.312  | NM_005934 | 2217.473  | 1149.635  |
| AB014520  | 2965.012  | 6117.172  | NM_014793 | 3016.09   | 4630.856  | NM_007129 | 1528.004  | 724.094   |
| AF161420  | 1834.29   | 3443.329  | NM_004245 | 1183.168  | 2079.566  | AY004253  | 1546.219  | 948.437   |
| NM_004907 | 1214.424  | 2720.645  | NM_003241 | 1120.024  | 1697.746  | Z46967    | 167.749   | 206.473   |
| NM_002891 | 966.386   | 1599.327  | NM_000543 | 1009.125  | 780.701   | NM_002148 | 257.841   | 329.895   |
| NM_001775 | 745.709   | 1757.568  | U06699    | 5562.246  | 4072.82   | AL137449  | 604.808   | 942.161   |
| BE083789  | 310.595   | 1156.171  | AJ290954  | 8264.321  | 5549.385  | U88153    | 409.785   | 533.719   |

|           |           |           |           |           |           |           |           |           |
|-----------|-----------|-----------|-----------|-----------|-----------|-----------|-----------|-----------|
| X04526    | 23214.145 | 32834.648 | AK025451  | 1584.843  | 968.943   | X03910    | 3784.977  | 3048.232  |
| D26067    | 6088.097  | 10019.732 | NM_002783 | 1247.119  | 944.018   | NM_018428 | 1556.219  | 1891.92   |
| AF227924  | 3184.034  | 5794.757  | X52005    | 3738.375  | 9360.722  | NM_006924 | 5953.523  | 4892.642  |
| NM_005716 | 18414.441 | 20525.053 | AK024396  | 876.674   | 963.233   | NM_016024 | 2619.176  | 1891.331  |
| NM_006183 | 2419.036  | 4775.967  | U58514    | 1111.019  | 991.157   | NM_018107 | 1249.84   | 1361.659  |
| S59184    | 1992.918  | 5070.74   | W74254    | 10894.887 | 12419.84  | NM_012279 | 399.945   | 351.165   |
| NM_005130 | 270.96    | 915.779   | M58603    | 3740.783  | 3218.904  | NM_018387 | 2652.822  | 1951.136  |
| NM_005746 | 12732.297 | 4047.626  | AA443286  | 704.073   | 755.829   | BF310673  | 506.566   | 309.471   |
| NM_004588 | 829.205   | 379.357   | AB003334  | 4681.43   | 5033.992  | R97012    | 6500.258  | 2909.465  |
| U16126    | 971.575   | 910.074   | AI878886  | 11231.761 | 11104.66  | U77700    | 2613.118  | 1514.404  |
| NM_004572 | 280.368   | 156.928   | BG697179  | 4348.582  | 4458.841  | NM_006567 | 1897.004  | 788.734   |
| NM_002172 | 16243.088 | 10624.618 | NM_002136 | 25401.848 | 26606.988 | AF038554  | 6099.792  | 2185.165  |
| NM_002614 | 773.656   | 1518.605  | BM012504  | 3239.183  | 4822.601  | AF264621  | 1010.755  | 635.862   |
| NM_005655 | 2961.321  | 8657.887  | AA664145  | 640.882   | 2106.105  | NM_005875 | 5533.637  | 2672.947  |
| AJ008144  | 420.293   | 1069.673  | X72308    | 7649.833  | 10852.956 | NM_004184 | 1257.759  | 554.077   |
| NM_007314 | 5184.78   | 11226.268 | T70999    | 356.018   | 811.325   | AK075087  | 331.252   | 335.613   |
| NM_016073 | 3649.448  | 9283.389  | T50790    | 546.764   | 841.967   | AK026571  | 970.53    | 699.131   |
| NM_006600 | 29235.408 | 44051.477 | R48168    | 10678.25  | 12997.943 | AK024673  | 1983.412  | 1649.598  |
| AF297709  | 2154.138  | 5224.316  | AB032993  | 4594.662  | 2118.909  | AF070618  | 297.078   | 268.585   |
| L77564    | 2113.975  | 2808.161  | NM_000854 | 3191.739  | 2030.506  | AF131748  | 1052.42   | 945.527   |
| NM_015384 | 3109.7    | 7954.006  | AL117423  | 2720.833  | 2083.264  | NM_000456 | 758.308   | 920.417   |
| AK023327  | 1712.108  | 3397.331  | NM_002084 | 1489.958  | 1038.375  | NM_002496 | 2545.391  | 2889.385  |
| AB046858  | 2235.792  | 3776.001  | D16892    | 10451.44  | 5845.962  | NM_016243 | 1137.168  | 3398.519  |
| D50914    | 3882.852  | 5906.341  | NM_004750 | 1055.645  | 1178.056  | X53943    | 173.843   | 242.295   |
| BE878692  | 872.189   | 2022.615  | NM_007295 | 1914.589  | 1296.172  | NM_014402 | 24975.387 | 23703.232 |
| NM_002007 | 671.617   | 1319.524  | NM_003651 | 4451.288  | 4669.881  | NM_004646 | 1516.634  | 1742.492  |
| NM_015896 | 1382.636  | 1841.789  | NM_000591 | 1061.669  | 941.864   | NM_006540 | 925.125   | 1032.645  |
| NM_002305 | 34689.648 | 54459.48  | NM_000565 | 949.981   | 870.716   | NM_017766 | 465.55    | 470.438   |
| NM_001737 | 1448.945  | 3234.292  | NM_002019 | 1115.262  | 1353.873  | NM_002811 | 4331.536  | 3028.122  |
| Z36784    | 665.34    | 1716.922  | AF253318  | 1063.959  | 3654.723  | NM_020310 | 649.255   | 585.907   |
| NM_007213 | 2517.569  | 1102.19   | NM_017767 | 6525.665  | 11728.38  | AK024444  | 189.028   | 548.466   |
| NM_019064 | 905.851   | 488.922   | AK024848  | 4273.94   | 6359.138  | NM_005802 | 1213.209  | 641.554   |
| NM_000094 | 1647.059  | 1285.67   | NM_004852 | 681.535   | 1501.828  | AB002331  | 1221.399  | 614.508   |
| NM_000439 | 381.345   | 944.887   | NM_000343 | 613.746   | 751.487   | NM_002504 | 698.211   | 342.34    |
| AJ295148  | 1147.116  | 3376.399  | NM_019112 | 2086.658  | 1631.711  | AB046775  | 391.989   | 234.074   |
| AF176701  | 533.87    | 1422.425  | NM_012336 | 9507.447  | 6218.152  | X74862    | 231.877   | 150.2     |
| NM_016302 | 4646.972  | 7765.691  | NM_020246 | 1143.11   | 930.871   | X65663    | 1179.01   | 847.092   |
| NM_004159 | 19595.914 | 31165.512 | NM_000084 | 1308.253  | 809.344   | NM_003185 | 695.33    | 512.351   |
| AK021866  | 694.031   | 1138.44   | NM_016354 | 542.223   | 578.11    | NM_004456 | 2366.989  | 1050.049  |
| NM_003249 | 6930.158  | 9319.234  | NM_003038 | 930.129   | 550.36    | NM_004284 | 2243.238  | 1355.961  |
| M21897    | 763.974   | 1234.497  | NM_018155 | 2649.626  | 1967.753  | NM_012243 | 462.606   | 274.747   |
| AF301463  | 1161.453  | 1719.543  | AL050358  | 1300.483  | 1403.599  | AK025743  | 1097.639  | 768.246   |
| NM_015984 | 7343.661  | 7714.338  | NM_004731 | 781.906   | 479.64    | AL137466  | 509.91    | 351.395   |
| AK025969  | 914.75    | 947.72    | NM_000544 | 1070.051  | 1067.172  | AL122040  | 134.501   | 120.677   |
| NM_012090 | 3923.09   | 9172.639  | NM_004644 | 666.484   | 569.366   | AK023974  | 669.688   | 1120.491  |
| AF177292  | 339.154   | 594.78    | AV681967  | 1199.561  | 1314.424  | AK023768  | 339.871   | 582.272   |
| NM_003088 | 6114.458  | 2533.327  | NM_018250 | 1136.47   | 1330.698  | NM_014729 | 294.456   | 203.907   |
| AF043290  | 765.539   | 693.459   | NM_016553 | 4234.385  | 3764.521  | AF147335  | 221.264   | 450.01    |
| NM_004082 | 3420.426  | 1609.271  | AB023136  | 644.77    | 920.401   | AK022216  | 998.219   | 1136.555  |
| NM_014398 | 3304.295  | 2566.838  | NM_003795 | 19952.518 | 19583.922 | AK025812  | 804.36    | 798.228   |
| NM_005934 | 6541.035  | 4218.203  | NM_014232 | 3978.157  | 5400.242  | AK021459  | 165.699   | 96.862    |
| NM_007129 | 5380.739  | 6734.293  | NM_005701 | 724.757   | 1103.988  | U00960    | 403.058   | 550.031   |
| AY004253  | 4603.058  | 5443.057  | NM_001231 | 337.547   | 520.138   | AK022262  | 315.471   | 317.51    |



|           |           |           |           |           |           |           |           |           |
|-----------|-----------|-----------|-----------|-----------|-----------|-----------|-----------|-----------|
| Z46967    | 404.629   | 447.569   | NM_006819 | 34733.551 | 46863.574 | AF088039  | 25369.611 | 21405.256 |
| NM_00269E | 365.052   | 566.182   | NM_014744 | 2458.301  | 2440.635  | AF143888  | 150.686   | 125.15    |
| AF069138  | 271.083   | 226.224   | AF146759  | 1066.655  | 2038.216  | AF086220  | 469.234   | 271.022   |
| NM_00214E | 843.309   | 1356.645  | AL365404  | 15559.03  | 12305.431 | AK023941  | 584.388   | 290.089   |
| AL137449  | 1828.746  | 2082.3    | AK022907  | 5397.525  | 4653.238  | AL390083  | 1348.33   | 402.428   |
| U88153    | 1429.223  | 1234.638  | NM_014793 | 2739.291  | 1832.943  | AB020702  | 366.554   | 216.773   |
| X03910    | 14149.924 | 8569.115  | NM_00424E | 1217.204  | 783.63    | AL050227  | 326.668   | 170.386   |
| NM_01842E | 4399.032  | 3041.405  | NM_003241 | 477.723   | 451.717   | AF085905  | 295.492   | 346.31    |
| NM_006924 | 14727.697 | 6928.454  | NM_00268E | 2077.841  | 1646.963  | NM_01335E | 331.779   | 160.805   |
| NM_016024 | 6724.174  | 2761.359  | AK024504  | 725.424   | 737.918   | NM_003847 | 2557.877  | 2729.172  |
| NM_018107 | 3065.997  | 1597.794  | AF039023  | 1283.459  | 1355.697  | AK021973  | 366.94    | 194.886   |
| NM_018387 | 10154.598 | 15417.015 | NM_005511 | 2571.881  | 2245.606  | AL049918  | 125.781   | 99.865    |
| U77700    | 6410.136  | 5369.683  | NM_01469E | 10452.477 | 9974.709  | AL050165  | 21406.441 | 20898.699 |
| NM_006567 | 4977.445  | 1938.631  | NM_01847E | 2908.053  | 2456.43   | AL117445  | 529.021   | 396.679   |
| AF038554  | 16484.871 | 5908.17   | NM_00326E | 1769.016  | 1539.866  | AL122113  | 2597.206  | 2943.915  |
| AF264621  | 3080.105  | 2939.718  | AK022832  | 1772.205  | 1481.919  | AK024415  | 867.312   | 950.498   |
| NM_00587E | 16321.953 | 7098.234  | NM_014641 | 1998.825  | 1690.712  | AL049365  | 1724.581  | 1000.944  |
| NM_004184 | 3659.56   | 2637.782  | NM_00446E | 7138.708  | 9996.043  | AB007877  | 235.177   | 183.033   |
| AK075087  | 629.24    | 949.439   | AB020664  | 1733.313  | 2961.352  | AK025132  | 305.932   | 306.595   |
| AK026571  | 3163.318  | 3234.527  | NM_00664C | 10886.462 | 14305.857 | AK025157  | 423.328   | 249.375   |
| AK024673  | 3856.216  | 4726.955  | NM_000857 | 769.504   | 607.912   | NM_02021E | 336.789   | 146.551   |
| AF070618  | 931.755   | 1101.792  | L20688    | 53417.715 | 30289.682 | AK022001  | 900.493   | 501.281   |
| AF131748  | 3358.447  | 3323.018  | X69111    | 16048.527 | 7704.317  | AK022633  | 366.896   | 256.317   |
| NM_00045E | 1966.094  | 2251.337  | AB037799  | 2157.303  | 1413.225  | AK027199  | 318.599   | 579.682   |
| AF190122  | 290.389   | 564.873   | AB007950  | 7081.767  | 4901.435  | AK000079  | 973.357   | 667.232   |
| NM_00249E | 8234.051  | 6808.048  | AK025593  | 1619.251  | 1294.981  | AL137361  | 189.961   | 205.779   |
| NM_016243 | 2756.493  | 2877.159  | AB018304  | 906.224   | 860.4     | AJ227874  | 324.982   | 175.074   |
| NM_01440E | 50646.516 | 39909.086 | NM_007061 | 7476.32   | 7339.011  | AF009268  | 324.094   | 557.909   |
| NM_00464E | 4913.938  | 2751.209  | AB040954  | 1954.769  | 1419.303  | AF009312  | 170.116   | 382.887   |
| NM_00654C | 2491.333  | 1241.147  | NM_002081 | 627.057   | 473.71    | AF009276  | 196.766   | 145.508   |
| NM_01776E | 1434.802  | 769.773   | AB023139  | 1799.915  | 2345.193  | AF019616  | 152.064   | 156.911   |
| NM_002811 | 11990.462 | 5041.882  | NM_01788E | 1627.533  | 1612.852  | AF056428  | 1126.782  | 1358.24   |
| NM_02031C | 1788.982  | 827.724   | D80004    | 663.312   | 993.747   | AK021594  | 174.832   | 258.144   |
| NM_00580E | 3858.239  | 7007.673  | NM_00094E | 4966.664  | 4401.266  | AK001151  | 175.039   | 166.046   |
| AB002331  | 3512.515  | 5521.435  | NM_01607C | 1530.739  | 1912.911  | AK002150  | 179.765   | 240.869   |
| NM_002504 | 2030.278  | 3533.405  | NM_01639C | 1424.975  | 1536.387  | AK021635  | 627.124   | 707.943   |
| AB046775  | 1176.52   | 1329.398  | NM_016101 | 4451.774  | 5727.292  | AK021856  | 308.029   | 370.967   |
| X74862    | 726.831   | 411.409   | NM_00585E | 45094.57  | 50690.727 | AK026789  | 95.373    | 184.758   |
| X65663    | 2828.867  | 1418.699  | NM_02031E | 1322.508  | 1862.446  | AK025276  | 558.045   | 538.015   |
| NM_00318E | 2350.559  | 2137.01   | NM_01462E | 5245.36   | 6447.154  | AK026027  | 153.885   | 181.69    |
| NM_00445E | 6404.623  | 3068.221  | AK025630  | 1388.133  | 2116.371  | AK026457  | 305.259   | 379.977   |
| NM_004284 | 6568.521  | 4506.148  | NM_005761 | 1175.103  | 674.886   | AJ008131  | 3035.292  | 3370.664  |
| NM_01224E | 1940.398  | 1850.252  | NM_01471E | 2013.255  | 1431.364  | AF086338  | 133.696   | 135.604   |
| AK025743  | 938.75    | 726.209   | NM_00063E | 756.382   | 586.257   | NM_00627E | 166.45    | 223.507   |
| AL122040  | 395.833   | 254.857   | AB002298  | 612.06    | 427.745   | AK024303  | 196.729   | 130.651   |
| AK023974  | 2093.772  | 2838.427  | AK024488  | 7694.698  | 4282.808  | AL160131  | 3094.307  | 2514.32   |
| AK023768  | 910.443   | 1429.76   | AK023249  | 27187.988 | 16684.006 | AF086045  | 1335.517  | 1543.886  |
| NM_01472E | 947.339   | 947.379   | NM_01744E | 4016.716  | 3150.752  | AK027028  | 545.708   | 967.741   |
| AF147335  | 466.448   | 586.707   | NM_00074E | 1460.161  | 1027.358  | AK027069  | 137.504   | 166.435   |
| BI768072  | 448.158   | 452.535   | NM_00721E | 1600.7    | 1322.585  | AK026916  | 1135.436  | 1582.632  |
| AK022216  | 2221.279  | 983.062   | Z25436    | 2087.707  | 1974.33   | AK026914  | 571.274   | 1023.335  |
| AK025812  | 1902.274  | 848.173   | NM_00527E | 4241.789  | 3675.588  | Y13808    | 227.57    | 336.105   |
| AK021459  | 316.667   | 239.337   | NM_00200E | 11202.006 | 11624.997 | Y11166    | 533.338   | 955.272   |

|           |           |           |           |           |           |           |           |           |
|-----------|-----------|-----------|-----------|-----------|-----------|-----------|-----------|-----------|
| U00960    | 1150.582  | 628.559   | NM_012324 | 2792.916  | 3639.128  | AK023515  | 617.419   | 1142.658  |
| AF086220  | 1510.943  | 2443.085  | AK000039  | 919.459   | 1335.517  | AL137544  | 155.066   | 159.483   |
| AK023941  | 2326.127  | 2288.243  | AL137352  | 1170.457  | 1511.978  | AL137623  | 4120.026  | 7526.11   |
| AF086265  | 234.551   | 218.179   | NM_014749 | 1152.544  | 1621.648  | AK026485  | 244.808   | 631.513   |
| AL390083  | 4609.629  | 1407.344  | NM_004489 | 2457.381  | 4225.135  | NM_003546 | 671.956   | 1437.482  |
| AB020702  | 777.736   | 361.401   | BF240063  | 357.791   | 538.313   | AF118077  | 892.87    | 1586.607  |
| AL050227  | 1083.269  | 1047.949  | BI461699  | 1200.568  | 2311.872  | AL137625  | 480.946   | 623.768   |
| AF085905  | 1021.301  | 876.111   | AK090409  | 659.324   | 1468.195  | AK025750  | 479.033   | 1087.136  |
| NM_012202 | 243.773   | 313.755   | AF172264  | 2195.536  | 2845.653  | BF031253  | 278.085   | 552.927   |
| NM_013355 | 353.076   | 315.837   | Y08267    | 1055.603  | 842.409   | AF143887  | 151.866   | 105.329   |
| NM_003847 | 4620.234  | 4115.926  | U80756    | 12161.876 | 7121.836  | AK025783  | 545.504   | 1293.462  |
| AK021973  | 876.684   | 1318.66   | NM_018161 | 1179.456  | 784.495   | AF113675  | 374.733   | 1049.709  |
| AL117638  | 445.689   | 209.422   | NM_005248 | 1574.336  | 980.455   | AK024514  | 296.508   | 755.451   |
| AL050165  | 38523.391 | 15293.394 | NM_004810 | 3283.453  | 4071.038  | NM_020119 | 1477.462  | 4046.87   |
| AL117445  | 610.801   | 320.031   | AL117629  | 2713.387  | 1798.141  | AL049417  | 2450.596  | 7101.506  |
| AL122113  | 5684.391  | 3521.201  | NM_002595 | 1181.655  | 1264.925  | AK023507  | 339.577   | 1219.647  |
| AK025132  | 658.19    | 429.867   | NM_015726 | 1011.451  | 555.077   | NM_005165 | 1808.446  | 3849.283  |
| AK025157  | 1270.403  | 1644.584  | AF174604  | 1396.742  | 1043.639  | AL109818  | 281.533   | 478.421   |
| NM_020215 | 828.918   | 548.045   | AB002379  | 4232.715  | 3532.786  | S97393    | 256.603   | 445.906   |
| AK022001  | 1898.774  | 651.388   | AF113223  | 1089.188  | 1313.154  | BE698533  | 186.217   | 350.101   |
| AK022633  | 729.127   | 222.023   | AB046851  | 1137.205  | 1297.784  | NM_017925 | 411.669   | 792.598   |
| AK027199  | 1139.024  | 1410.374  | NM_018174 | 693.64    | 650.123   | NM_018605 | 117.06    | 184.428   |
| AK000079  | 2390.155  | 1094.575  | NM_014548 | 1836.265  | 2412.445  | AF189269  | 186.344   | 226.146   |
| AL137361  | 299.667   | 429.697   | NM_004437 | 1337.44   | 1610.382  | NM_018472 | 510.465   | 1548.25   |
| AJ227874  | 1190.808  | 2075.661  | NM_000226 | 156.671   | 838.554   | AL133108  | 125.703   | 77.525    |
| AF009268  | 427.271   | 547.473   | AB037779  | 40454.238 | 40678.023 | AF085923  | 184.195   | 204.875   |
| AF009312  | 467.223   | 512.849   | NM_000655 | 15316.552 | 11867.465 | AJ008128  | 10348.834 | 13458.543 |
| AF009276  | 802.973   | 909.261   | NM_000889 | 2107.343  | 2265.803  | AL449243  | 3879.982  | 7121.529  |
| AF056428  | 4118.591  | 3280.148  | NM_003859 | 10433.992 | 7049.836  | M12211    | 381.33    | 1125.822  |
| AF069136  | 618.183   | 572.675   | NM_000236 | 1126.639  | 802.33    | AK026449  | 3911.844  | 4413.705  |
| AK001097  | 263.568   | 166.062   | NM_002903 | 19360.023 | 13743.29  | NM_014027 | 748.501   | 1279.017  |
| AK001995  | 308.334   | 463.302   | NM_012339 | 1869.107  | 1399.183  | NM_020467 | 1764.086  | 2212.36   |
| AK021594  | 419.185   | 305.787   | NM_005787 | 11859.859 | 9571.008  | AF116621  | 1327.823  | 3116.951  |
| AK021635  | 1984.031  | 1959.347  | NM_002143 | 2010.962  | 1574.303  | AF086554  | 945.707   | 1472.7    |
| AK021856  | 920.979   | 2135.152  | AF284421  | 8900.284  | 6690.608  | AL390136  | 3427.248  | 6149.72   |
| AK025670  | 327.915   | 550.075   | NM_006048 | 5159.658  | 3151.74   | AK023156  | 217.458   | 276.597   |
| AK025276  | 1583.955  | 488.329   | NM_006360 | 21538.342 | 14690.406 | AF086398  | 26751.898 | 63759.773 |
| AK026027  | 511.761   | 72.464    | NM_003968 | 3937.76   | 3196.779  | AK024545  | 319.467   | 977.079   |
| AK026457  | 908.167   | 1033.017  | NM_002786 | 5761.487  | 3409.668  | AK023444  | 328.462   | 838.819   |
| AJ008131  | 16798.611 | 14662.604 | NM_003343 | 8282.975  | 9101.307  | AK025953  | 412.082   | 1038.548  |
| AF086338  | 398.976   | 729.133   | NM_002789 | 44614.504 | 47651.031 | NM_003180 | 778.081   | 2387.503  |
| NM_006272 | 509.987   | 633.102   | NM_003470 | 14736.548 | 14755.856 | AF086406  | 6246.622  | 9992.659  |
| AK024303  | 809.375   | 902.679   | AL080137  | 512.529   | 1355.673  | D17216    | 1652.959  | 3430.613  |
| AL160131  | 8889.972  | 6464.964  | NM_017679 | 1037.167  | 1450.354  | AL137581  | 807.273   | 1880.8    |
| AF086045  | 3493.988  | 3289.138  | BC006359  | 1152.502  | 1424.598  | AK024942  | 830       | 1780.43   |
| AK027028  | 1384.596  | 2011.804  | AK026127  | 729.533   | 1277.423  | AJ227873  | 7966.552  | 16135.605 |
| AK027069  | 287.989   | 502.236   | BC016062  | 13045.9   | 18146.105 | AK022886  | 2299.063  | 3986.695  |
| AK026916  | 3856.529  | 3287.894  | NM_002814 | 2230.286  | 4278.045  | AK024665  | 4983.983  | 9504.411  |
| AK026914  | 2050.333  | 1371.921  | NM_012250 | 1578.92   | 3255.18   | AF147363  | 560.906   | 704.417   |
| Y13808    | 326.327   | 274.533   | NM_006283 | 9883.188  | 11696.654 | AJ227880  | 378.625   | 867.694   |
| Y11166    | 1589.378  | 1085.948  | NM_005693 | 370.845   | 458.058   | AK000691  | 822.76    | 1047.522  |
| AK023515  | 1542.228  | 1257.04   | X97303    | 8808.136  | 3696.061  | AK001448  | 661.726   | 1393.784  |
| AL137623  | 11501.867 | 9359.739  | NM_017530 | 1281.243  | 967.537   | AK026890  | 272.924   | 375.984   |

|           |           |           |           |           |           |           |           |           |
|-----------|-----------|-----------|-----------|-----------|-----------|-----------|-----------|-----------|
| AK026485  | 495.05    | 375.715   | AB029030  | 664.317   | 580.574   | AL049321  | 1224.879  | 3202.185  |
| NM_003546 | 2113.642  | 3389.4    | AL360183  | 1097.512  | 776.564   | CY3Cy5    | 767.099   | 225.983   |
| AF118077  | 2391.057  | 3362.598  | AK027046  | 1143.379  | 751.856   | W74254    | 7517.297  | 9054.989  |
| AL137625  | 519.396   | 593.608   | NM_003113 | 2169.577  | 1284.911  | M58603    | 2153.714  | 4474.87   |
| AK025750  | 1537.362  | 1628.956  | NM_016578 | 2045.997  | 1867.793  | AB003334  | 2430.018  | 2127.898  |
| AK025783  | 1331.238  | 1061.681  | NM_015832 | 6859.572  | 7412.411  | AW276315  | 221.693   | 124.221   |
| AF113675  | 611.976   | 613.972   | NM_014319 | 1823.1    | 2359.042  | AA490737  | 257.009   | 179.808   |
| AK024514  | 521.242   | 550.123   | NM_004865 | 4869.767  | 14434.028 | AI878886  | 5260.784  | 4266.711  |
| NM_020119 | 4571.886  | 3875.737  | NM_002047 | 19808.277 | 17843.643 | BG697179  | 1813.638  | 2001.231  |
| AL049417  | 5029.535  | 4179.259  | NM_001031 | 60896.227 | 70240.5   | NM_002136 | 11900.997 | 8664.31   |
| AK023507  | 625.941   | 445.593   | NM_007208 | 9161.422  | 10933.82  | BM012504  | 1040.427  | 805.496   |
| NM_005169 | 1810.957  | 929.087   | NM_000999 | 57346.555 | 67031.766 | AA664145  | 368.147   | 385.69    |
| AL109818  | 514.458   | 261.947   | NM_000985 | 9364.292  | 12549.399 | X72308    | 2145.85   | 1878.603  |
| NM_017929 | 634.449   | 472.516   | BF130622  | 9520.139  | 11260.552 | T70999    | 220.875   | 131.606   |
| NM_018472 | 937.746   | 853.441   | BU165106  | 1063.293  | 735.114   | T50790    | 265.641   | 156.898   |
| AJ008128  | 14812.752 | 4605.537  | AF038202  | 1037.508  | 854.146   | R48168    | 4537.351  | 4175.56   |
| AL449243  | 7262.847  | 3253.664  | AB040925  | 681.851   | 386.168   | NM_003942 | 604.378   | 502.984   |
| M12211    | 532.63    | 693.967   | BC008837  | 530.206   | 561.067   | NM_004452 | 340.038   | 180.945   |
| AK026449  | 7920.47   | 7634.492  | NM_001861 | 550.254   | 505.975   | SR5       | 1989.541  | 1731.919  |
| NM_014027 | 3264.157  | 4315.42   | AK025558  | 4126.953  | 2940.119  | SR7       | 1997.385  | 13389.738 |
| NM_020467 | 3895.122  | 3903.993  | AK024355  | 890.166   | 696.228   | SR9       | 5943.737  | 1197.201  |
| AF116621  | 3112.07   | 3297.098  | NM_001864 | 19563.822 | 16262.512 | CY3Cy5    | 746.499   | 129.683   |
| AF086554  | 1524.475  | 1531.982  | NM_003477 | 5461.8    | 4039.03   | NM_000418 | 249.203   | 169.978   |
| AL390136  | 11701.971 | 8971.4    | NM_002654 | 30747.494 | 21222.637 | NM_000591 | 533.422   | 495.061   |
| AK023156  | 361.045   | 308.232   | NM_020382 | 2659.653  | 2427.532  | NM_000565 | 420.133   | 257.38    |
| AF086398  | 48792.594 | 39977.391 | NM_007192 | 7425.407  | 8332.928  | NM_002019 | 439.885   | 481.193   |
| AK024545  | 683.974   | 664.286   | AB002337  | 8477.032  | 9916.347  | AF253318  | 185.856   | 161.67    |
| AK023444  | 370.456   | 637.163   | NM_014933 | 3144.554  | 4369.321  | NM_017767 | 1709.102  | 1234.308  |
| AK025953  | 1079.591  | 1060.357  | NM_006385 | 1328.892  | 1277.22   | AK024848  | 1539.793  | 1521.703  |
| NM_003180 | 1807.219  | 1291.234  | NM_003456 | 2588.355  | 4300.346  | NM_004852 | 424.735   | 360.914   |
| AF086406  | 13475.827 | 5934.346  | NM_002585 | 3786.745  | 5399.336  | NM_000543 | 295.652   | 333.197   |
| D17216    | 4456.93   | 2169.192  | AB029016  | 1436.647  | 1722.26   | U06699    | 1240.247  | 980.389   |
| AL137581  | 1554.085  | 842.442   | AL049390  | 838.432   | 617.728   | AJ290954  | 4064.868  | 3370.149  |
| AK024942  | 999.071   | 333.145   | AK000584  | 3662.439  | 2695.209  | AK025451  | 697.255   | 464.25    |
| AJ227873  | 14673.591 | 5969.67   | AJ297363  | 636.949   | 426.299   | NM_002783 | 307.286   | 566.25    |
| AK022886  | 4555.825  | 5124.244  | AK026379  | 1484.95   | 1040.26   | AK024396  | 337.854   | 469.003   |
| AK024665  | 10816.762 | 10442.76  | AK022965  | 2457.103  | 1450.059  | U58514    | 548.48    | 418.559   |
| AF147363  | 917.992   | 927.546   | AK024278  | 3080.829  | 2932.9    | NM_000544 | 541.817   | 832.635   |
| AJ227880  | 793.522   | 582.905   | NM_018022 | 823.71    | 732.912   | NM_001044 | 219.212   | 145.996   |
| AK000691  | 1190.025  | 815.559   | AB056722  | 6186.993  | 5903.045  | NM_004644 | 292.58    | 224.815   |
| AK001448  | 1320.599  | 552.61    | NM_013242 | 4890.97   | 3823.257  | AV681967  | 665.779   | 784.972   |
| AK026890  | 315.349   | 477.316   | NM_012066 | 10342.491 | 10734.468 | NM_018250 | 714.576   | 603.468   |
| AL049321  | 3059.742  | 4718.689  | AF052168  | 8279.375  | 8290.158  | NM_016553 | 1812.34   | 2758.727  |
| CY3Cy5    | 6780.562  | 491.521   | NM_014650 | 793.068   | 1114.73   | AB023136  | 261.751   | 249.856   |
| W74254    | 23536.068 | 19978.371 | AK022632  | 1695.781  | 1851.686  | NM_003795 | 8404.679  | 8957.519  |
| M58603    | 8178.72   | 8395.925  | AK021554  | 1961.342  | 2078.317  | NM_014232 | 1322.53   | 1393.428  |
| AB003334  | 8804.096  | 9349.487  | NM_020235 | 2571.728  | 2506.784  | NM_005701 | 278.694   | 292.251   |
| AW276315  | 848.548   | 1015.967  | AL109681  | 648.005   | 857.464   | NM_006819 | 7355.657  | 7034.593  |
| AA490737  | 817.051   | 896.937   | AL162039  | 5680.947  | 5081.883  | NM_014744 | 588.978   | 806.675   |
| AI878886  | 20799.898 | 20214.293 | AK024896  | 1385.264  | 2801.018  | AF146759  | 337.786   | 380.196   |
| BG697179  | 8121.602  | 8897.756  | AK024059  | 1751.092  | 859.574   | AB032993  | 1634.086  | 1509.381  |
| NM_002136 | 49618.156 | 47268.754 | AB007928  | 1805.85   | 967.51    | NM_000854 | 1111.299  | 1229.239  |
| BM012504  | 3634.019  | 3950.237  | AK023645  | 993.458   | 659.496   | AL117423  | 1331.609  | 1527.34   |

|           |           |           |           |           |           |           |          |           |
|-----------|-----------|-----------|-----------|-----------|-----------|-----------|----------|-----------|
| AA664145  | 1583.976  | 1565.687  | D83543    | 512.469   | 582.97    | NM_002084 | 605.542  | 1206.625  |
| X72308    | 5473.634  | 5532.285  | NM_016930 | 2159.439  | 1885.401  | NM_004750 | 448.287  | 511.099   |
| T70999    | 767.878   | 890.941   | AJ001861  | 1459.978  | 1288.002  | NM_007295 | 646.468  | 1172.583  |
| T50790    | 634.35    | 808.064   | X64981    | 1108.69   | 1263.881  | NM_003651 | 2599.018 | 3696.492  |
| R48168    | 13062.223 | 17896.117 | X75692    | 3394.996  | 3058.981  | NM_003262 | 682.772  | 1018.133  |
| NM_003942 | 2313.761  | 2916.68   | X64988    | 587.123   | 439.456   | NM_020125 | 194.116  | 274.879   |
| SR5       | 6696.917  | 7240.482  | Y10511    | 8030.818  | 7321.83   | AK022832  | 1028.832 | 1333.595  |
| SR7       | 5537.456  | 50068.52  | M26147    | 3995.248  | 4004.038  | NM_014641 | 850.626  | 854.291   |
| SR9       | 21825.926 | 4323.605  | AF018254  | 779.277   | 1110.532  | NM_004462 | 2786.08  | 2805.106  |
| CY3Cy5    | 5357.203  | 376.026   | NM_016240 | 1386.119  | 1844.739  | AB020664  | 962.458  | 1169.997  |
| NM_000591 | 1490.118  | 1993.432  | AK026459  | 1194.106  | 1412.135  | NM_006640 | 4396.447 | 5201.047  |
| NM_000565 | 950.497   | 1080.293  | AK026416  | 14084.262 | 12400.704 | NM_000343 | 289.944  | 376.753   |
| NM_002019 | 1966.838  | 1802.224  | AK025797  | 664.444   | 497.909   | NM_019112 | 855.697  | 1258.825  |
| NM_017767 | 6848.454  | 7142.492  | AK000019  | 602.787   | 828.965   | NM_012336 | 4457.64  | 9820.314  |
| AK024848  | 7379.063  | 8972.578  | AK000645  | 596.198   | 875.021   | NM_020161 | 344.96   | 964.565   |
| NM_004852 | 1759.104  | 1638.346  | AK024947  | 1357.637  | 1198.707  | NM_020246 | 619.258  | 1427.508  |
| NM_000543 | 1291.52   | 1828.564  | NM_017503 | 688.66    | 541.642   | NM_000084 | 734.171  | 2149.931  |
| U06699    | 3277.784  | 3477.939  | AK024606  | 4270.611  | 2874.832  | NM_016354 | 478.907  | 1150.459  |
| AJ290954  | 16215.25  | 21211.523 | NM_016417 | 15620.121 | 9706.739  | NM_003038 | 443.955  | 1399.828  |
| AK024396  | 1391.044  | 1177.537  | NM_019108 | 1406.942  | 649.589   | NM_018155 | 1215.519 | 3502.793  |
| U58514    | 1753.55   | 1925.097  | AL080118  | 4788.3    | 3526.234  | AL050358  | 488.439  | 1016.363  |
| NM_000544 | 2348.052  | 2844.712  | AL049378  | 3675.678  | 3077.186  | NM_004731 | 268.424  | 1049.497  |
| NM_004644 | 621.866   | 1028.237  | L09086    | 718.096   | 1053.95   | AB023139  | 1190.416 | 1963.867  |
| AV681967  | 2175.182  | 2361.69   | AK021832  | 481.069   | 556.666   | NM_017885 | 1123.202 | 1812.137  |
| NM_018250 | 2631.82   | 2405.597  | AK021505  | 1396.615  | 1706.611  | D80004    | 421.137  | 656.992   |
| NM_016553 | 7433.857  | 8849.296  | AK021598  | 5768.105  | 8576.059  | NM_000946 | 1981.013 | 3960.044  |
| AB023136  | 1011.937  | 970.751   | NM_005973 | 11431.466 | 7138.241  | NM_016070 | 508.293  | 822.77    |
| NM_003795 | 30972.682 | 28760.293 | X04547    | 1793.381  | 1199.451  | NM_016390 | 429.401  | 637.205   |
| NM_014232 | 6023.082  | 6096.363  | AK025823  | 1703.557  | 1827.519  | NM_016101 | 1494.952 | 2693.958  |
| NM_005701 | 1479.96   | 2052.07   | AK026691  | 655.902   | 541.685   | NM_005855 | 6543.65  | 9144.278  |
| NM_006819 | 42212.879 | 42093.281 | AL359941  | 3096.254  | 1949.449  | NM_020313 | 357.228  | 623.746   |
| NM_014744 | 2883.297  | 3653.645  | U52076    | 678.284   | 804.833   | NM_014628 | 2383.69  | 6996.586  |
| AF146759  | 798.02    | 1292.347  | AF035278  | 1255.378  | 1299.796  | AK025630  | 738.679  | 1255.477  |
| AB032993  | 5506.314  | 5077.322  | AL050202  | 790.384   | 784.96    | AL365404  | 5616.042 | 12815.338 |
| NM_000854 | 3725.942  | 4704.697  | U32999    | 8632.687  | 9529.453  | AK022907  | 1665.152 | 3815.768  |
| NM_001901 | 230.553   | 830.179   | AF086288  | 1180.961  | 1917.203  | NM_014793 | 1454.746 | 3333.687  |
| AL117423  | 5229.483  | 5996.111  | NM_016944 | 479.035   | 381.605   | NM_004245 | 639      | 1236.574  |
| NM_002084 | 2943.704  | 3120.644  | AK023109  | 1517.596  | 1007.236  | NM_003241 | 612.945  | 1451.123  |
| NM_004750 | 1964.403  | 1887.528  | NM_005293 | 26371.697 | 15613.339 | NM_002685 | 1167.559 | 3272.475  |
| NM_007295 | 2929.336  | 3210.998  | AF133332  | 5522.147  | 5173.47   | AK024504  | 608.047  | 1270.296  |
| NM_003651 | 11541.203 | 14442.898 | NM_001088 | 12638.657 | 11175.895 | AF039023  | 870.7    | 2375.66   |
| NM_003262 | 3081.854  | 3623.49   | BC015991  | 11817.39  | 5889.7    | NM_005511 | 1208.216 | 3842.349  |
| AK022832  | 3646.659  | 3677.933  | U46214    | 2637.876  | 1757.238  | NM_014696 | 2390.073 | 5878.776  |
| NM_014641 | 3169.248  | 2776.625  | NM_000310 | 7289.564  | 5270.491  | NM_018475 | 1838.688 | 6163.796  |
| NM_004462 | 13922.152 | 12635.849 | AF161343  | 3531.748  | 2025.9    | X52005    | 4388.007 | 2603.813  |
| AB020664  | 3993.772  | 3616.506  | NM_004765 | 5840.394  | 3550.577  | NM_001047 | 219.85   | 228.702   |
| NM_006640 | 20632.521 | 23839.268 | AK022246  | 1181.219  | 979.068   | AK024396  | 492.72   | 1187.449  |
| NM_000343 | 1070.321  | 1253.258  | X75684    | 622.089   | 576.311   | U58514    | 649.941  | 2041.58   |
| NM_019112 | 2679.541  | 2951.144  | AF113701  | 4234.471  | 3791.737  | M57627    | 176.512  | 601.687   |
| NM_012336 | 16102.862 | 17299.961 | L37702    | 11511.396 | 22366.43  | M58603    | 2736.589 | 7081.97   |
| NM_020246 | 1753.876  | 1732.163  | AK022812  | 2362.172  | 3692.788  | AA443286  | 252.371  | 468.9     |
| NM_000084 | 3795.722  | 2900.9    | U79301    | 4536.059  | 4413.168  | AB003334  | 2904.77  | 5802.763  |
| NM_016354 | 1958.654  | 1545.628  | AK022260  | 3736.005  | 3159.414  | AW276315  | 290.386  | 548.132   |

|           |           |           |           |           |           |           |           |           |
|-----------|-----------|-----------|-----------|-----------|-----------|-----------|-----------|-----------|
| NM_00303E | 2074.99   | 2610.458  | M32219    | 7926.652  | 8549.967  | AA490737  | 363.773   | 687.293   |
| NM_01815E | 3861.695  | 4584.403  | BC018868  | 885.694   | 992.349   | BG697179  | 3238.591  | 7778.229  |
| AL050358  | 1380.073  | 1331.598  | AF007128  | 8122.391  | 8853.528  | NM_00213E | 22552.885 | 38968.469 |
| NM_004731 | 1160.446  | 1778.258  | CY3Cy5    | 2898.033  | 105.369   | BM012504  | 1753.305  | 4091.315  |
| AB023139  | 4773.101  | 3881.8    | AI351740  | 4966.556  | 2986.916  | AA664145  | 517.725   | 758.391   |
| NM_01788E | 3846.409  | 4448.96   | AA444051  | 600.182   | 441.013   | X72308    | 2572.354  | 5338.114  |
| D80004    | 1531.707  | 998.333   | NM_007164 | 2138.293  | 2237.207  | T70999    | 263.575   | 747.352   |
| NM_00094E | 7584.807  | 8571.397  | AI004656  | 612.977   | 663.898   | T50790    | 304.631   | 587.863   |
| NM_01607C | 2275.553  | 2094.094  | AK092872  | 1894.263  | 3069.412  | R48168    | 6077.593  | 13159.603 |
| NM_016101 | 6220.718  | 6559.451  | AF230496  | 591.827   | 556.259   | NM_00394E | 828.513   | 1814.907  |
| NM_00585E | 21617.678 | 21733.971 | M16801    | 493.205   | 568.498   | NM_00445E | 597.839   | 842.44    |
| NM_02031E | 1213.887  | 1551.235  | NM_145904 | 12305.388 | 13572.94  | AB040954  | 602.947   | 837.851   |
| NM_01462E | 8709.945  | 10350.026 | SR2       | 57405.695 | 48629.637 | NM_002081 | 274.228   | 385.935   |
| AK025630  | 1762.189  | 2286.693  | SR4       | 14132.501 | 12538.344 | NM_002084 | 688.846   | 2403.843  |
| AL365404  | 18315.025 | 21218.82  | SR10      | 30137.127 | 9542.158  | D16892    | 6837.409  | 16732.756 |
| AK022907  | 5324.194  | 5834.075  | CY3Cy5    | 4375.217  | 260.014   | NM_00475C | 851.971   | 2378.872  |
| NM_01479E | 3875.72   | 3177.244  |           | 908.382   | 600.709   | NM_00729E | 1178.799  | 3721.415  |
| NM_00424E | 1574.133  | 1444.873  | NM_00241E | 641.389   | 672.018   | AK023317  | 192.801   | 335.497   |
| NM_00268E | 4417.324  | 4359.656  | NM_00448E | 3038.35   | 1379.749  | NM_01324E | 204.109   | 704.871   |
| AK024504  | 2413.809  | 2475.711  | NM_005307 | 1345.423  | 1190.138  | NM_018431 | 226.043   | 598.371   |
| AF039023  | 3120.84   | 2815.612  | NM_00595E | 1166.162  | 1388.763  | NM_000591 | 549.622   | 1138.374  |
| NM_005511 | 3888.886  | 4292.036  | NM_01343E | 1362.794  | 1817.026  | NM_016614 | 138.939   | 171.146   |
| X52005    | 17690.719 | 15209.393 | AF225426  | 1861.684  | 2526.93   | NM_00201E | 819.582   | 1531.884  |
| AK024396  | 1256.946  | 1336.4    | NM_00520E | 5957.048  | 9042.889  | AF253318  | 272.648   | 368.086   |
| U58514    | 1750.291  | 1889.75   | AF218941  | 3257.25   | 3346.963  | NM_017767 | 2339.105  | 2777.2    |
| W74254    | 24031.313 | 17265.475 | AL137264  | 7393.23   | 7683.065  | AK024848  | 2001.662  | 3379.09   |
| M58603    | 7851.09   | 7889.497  | X84370    | 7312.468  | 7048.281  | NM_00485E | 518.386   | 536.208   |
| AB003334  | 8267.113  | 7837.177  | NM_00403E | 966.602   | 1194.128  | NM_00363E | 298.43    | 329.492   |
| AW276315  | 609.644   | 673.652   | AB014558  | 929.968   | 861.172   | NM_00054E | 474.015   | 627.972   |
| AA490737  | 896.245   | 859.644   | NM_00011E | 2593.005  | 2356.466  | U06699    | 1077.166  | 1039.921  |
| AI878886  | 26326.539 | 26948.279 | NM_00091E | 573.066   | 756.589   | AJ290954  | 3986.489  | 4825.261  |
| BG697179  | 10207.017 | 10937.818 | NM_00129E | 34061.387 | 61032.793 | AK025451  | 517.556   | 542.082   |
| NM_00213E | 54578.043 | 57252.422 | BG325046  | 1846.582  | 2314.923  | NM_00278E | 259.984   | 257.928   |
| BM012504  | 4673.055  | 5853.803  | AK026248  | 1503.345  | 941.433   | NM_000084 | 611.593   | 2294.75   |
| AA664145  | 2096.963  | 1814.352  | NM_00457E | 1630.46   | 1265.45   | NM_016354 | 452.406   | 915.105   |
| X72308    | 6198.212  | 5724.464  | AB046793  | 546.622   | 519.16    | NM_00303E | 562.626   | 2073.706  |
| T70999    | 887.359   | 830.01    | NM_017604 | 1286.125  | 1417.37   | NM_01815E | 1566.114  | 4180.61   |
| T50790    | 436.962   | 729.516   | NM_01773E | 9546.698  | 7306.584  | AL050358  | 770.614   | 1874.62   |
| R48168    | 15940.053 | 16723.381 | NM_016557 | 1302.224  | 1310.725  | NM_004731 | 398.235   | 1095.871  |
| NM_00394E | 2809.093  | 2834.64   | NM_00062E | 2241.149  | 2099.069  | NM_000544 | 587.118   | 818.795   |
| NM_00445E | 853.466   | 888.29    | AF161348  | 1314.993  | 1437.235  | NM_001044 | 228.038   | 54.069    |
| NM_002084 | 2368.802  | 2944.786  | NM_018467 | 9921.565  | 11214.97  | NM_004644 | 290.1     | 432.128   |
| D16892    | 21064.83  | 19471.689 | NM_00203E | 8253.074  | 5400.597  | AV681967  | 622.668   | 747.83    |
| NM_00475C | 2546.527  | 2082.736  | NM_00572E | 5464.163  | 5426.343  | NM_01825C | 684.9     | 681.886   |
| NM_00729E | 3073.921  | 3088.885  | NM_01549E | 1260.251  | 1237.694  | NM_01655E | 1855.743  | 3171.156  |
| NM_003651 | 11033.44  | 9568.197  | NM_003747 | 1692.84   | 1632.469  | AB023136  | 239.532   | 248.05    |
| NM_000591 | 1684.957  | 2287.799  | AB037744  | 1344.018  | 1387.433  | NM_00379E | 8921.056  | 12616.448 |
| NM_00056E | 1361.918  | 1338.278  | AF141901  | 1308.306  | 1127.473  | NM_01423E | 1527.287  | 1942.646  |
| NM_00201E | 2051.591  | 2041.73   | NM_00700E | 686.424   | 816.298   | NM_005701 | 321.122   | 318.553   |
| NM_017767 | 7590.257  | 7843.359  | AL109708  | 992.086   | 964.06    | NM_001231 | 201.939   | 169.453   |
| AK024848  | 6656.254  | 8235.751  | L29143    | 548.103   | 694.648   | NM_00681E | 9851.364  | 8786.057  |
| NM_00485E | 1652.214  | 1431.468  | AF234532  | 1438.15   | 1641.042  | NM_014744 | 785.397   | 946.484   |
| NM_00054E | 1580.755  | 1519.337  | AF099740  | 1537.198  | 1649.813  | AF146759  | 322.295   | 568.094   |

|           |           |           |           |           |           |           |          |          |
|-----------|-----------|-----------|-----------|-----------|-----------|-----------|----------|----------|
| U06699    | 3957.856  | 3545.214  | NM_006117 | 15390.935 | 12807.256 | AB032993  | 1537.183 | 987.732  |
| NM_000084 | 3098.73   | 2858.523  | NM_002225 | 2434.473  | 2194.787  | NM_000854 | 1136.406 | 1102.39  |
| NM_016354 | 1193.704  | 1282.334  | NM_006229 | 670.905   | 531.748   | AL117423  | 954.822  | 832.737  |
| NM_003038 | 1820.939  | 2537.633  | NM_015415 | 19401.441 | 16412.709 | NM_002685 | 900.306  | 1922.156 |
| NM_018155 | 4088.864  | 4943.538  | NM_004897 | 3592.186  | 2915.646  | AK024504  | 485.099  | 789.718  |
| AL050358  | 1646.121  | 1511.655  | NM_002555 | 1436.078  | 1398.861  | AF039023  | 693.987  | 1021.517 |
| NM_004731 | 1038.754  | 1433.498  | AF225418  | 839.665   | 852.897   | NM_005511 | 1301.64  | 1838.334 |
| NM_000544 | 1891.55   | 2438.576  | NM_000309 | 1008.65   | 957.734   | NM_014698 | 2157.912 | 3299.01  |
| NM_004644 | 909.33    | 1000.687  | NM_004528 | 22831.799 | 20446.34  | NM_018475 | 1436.433 | 2416.454 |
| AV681967  | 2301.5    | 2436.779  | NM_002450 | 11466.838 | 14971.217 | NM_003262 | 700.658  | 1034.067 |
| NM_018250 | 2586.889  | 2773.229  | NM_001686 | 740.028   | 942.989   | NM_020125 | 278.793  | 65.939   |
| NM_016553 | 7627.501  | 10644.781 | NM_000705 | 837.875   | 983.817   | AK022832  | 953.623  | 1139.298 |
| AB023136  | 476.016   | 962.524   | NM_004231 | 61668.859 | 55822.832 | NM_014641 | 817.125  | 735.661  |
| NM_003795 | 36545.398 | 41082.734 | AK023107  | 6431.459  | 6131.685  | NM_004462 | 3228.986 | 2477.877 |
| NM_014232 | 7210.598  | 6935.481  | NM_006854 | 8076.388  | 7886.646  | AB020664  | 992.954  | 666.35   |
| NM_005701 | 2123.653  | 2578.346  | NM_004580 | 4466.027  | 3746.664  | NM_006640 | 5027.613 | 4130.036 |
| NM_006819 | 43909.023 | 42305.332 | NM_007246 | 1188.426  | 1448.242  | NM_000343 | 258.303  | 254.949  |
| NM_014744 | 2945.59   | 3277.712  | AF150735  | 4862.865  | 3939.086  | NM_019112 | 995.883  | 734.958  |
| AF146759  | 1035.811  | 996.388   | NM_018183 | 1717.105  | 1561.221  | NM_012336 | 3383.635 | 3648.185 |
| AB032993  | 5909.498  | 4539.444  | NM_012382 | 3554.386  | 3264.64   | NM_020246 | 318.185  | 390.853  |
| NM_000854 | 4589.083  | 3870.34   | BF038366  | 602.297   | 719.148   | NM_003942 | 675.267  | 999.382  |
| NM_002685 | 4288.401  | 5064.441  | NM_016440 | 15981.794 | 12877.527 | NM_004452 | 282.833  | 339.596  |
| AK024504  | 2215.767  | 2260.85   | NM_007194 | 3810.054  | 2566.738  | AB040954  | 1101.983 | 1070.994 |
| AF039023  | 2620.072  | 2177.009  | NM_000314 | 5022.921  | 4958.33   | NM_002081 | 356.793  | 402.5    |
| NM_005511 | 4652.84   | 4796.62   | AB002369  | 1029.643  | 985.985   | AB023139  | 414.335  | 421.402  |
| NM_014698 | 10658.68  | 9855.137  | S74620    | 3011.011  | 2355.948  | NM_017885 | 1107.901 | 719.05   |
| NM_018475 | 6509.568  | 5730.227  | AF305239  | 1330.651  | 773.585   | D80004    | 376.934  | 282.131  |
| NM_003262 | 2640.949  | 3073.111  | NM_002827 | 5514.48   | 4643.12   | NM_016070 | 597.672  | 393.121  |
| AK022832  | 2976.855  | 2975.748  | NM_001946 | 681.456   | 711.423   | NM_016390 | 414.8    | 432.935  |
| NM_014641 | 3484.399  | 3700.63   | BF035425  | 31744.23  | 29859.883 | NM_016101 | 1602.529 | 1368.967 |
| NM_004462 | 17089.418 | 15378.745 | NM_014638 | 1533.716  | 1467.701  | NM_005859 | 7442.287 | 6481.983 |
| AB020664  | 3531.429  | 2861.969  | NM_006287 | 652.663   | 1004.304  | NM_020313 | 313.561  | 102.929  |
| NM_006640 | 18865.463 | 17154.111 | NM_000118 | 2592.077  | 1816.324  | NM_014628 | 2275.011 | 1687.098 |
| NM_000343 | 800.831   | 894.072   | NM_000913 | 698.543   | 602.375   | AK025630  | 559.309  | 298.472  |
| NM_019112 | 2412.368  | 2263.439  | NM_001298 | 37871.637 | 58756.152 | AL365404  | 4888.573 | 3129.315 |
| NM_012336 | 12750.006 | 13184.474 | BG325046  | 1525.314  | 1768.669  | AK022907  | 1304.674 | 834.818  |
| NM_020246 | 1255.944  | 1265.134  | AI351740  | 5571.877  | 2906.555  | NM_014793 | 857.441  | 705.283  |
| NM_003942 | 2804.432  | 3525.933  | AA444051  | 680.533   | 571.583   | NM_004245 | 331.018  | 173.476  |
| NM_004452 | 739.559   | 942.704   | NM_007164 | 2235.536  | 1756.432  | NM_000543 | 409.99   | 554.23   |
| AB040954  | 4088.809  | 3805.043  | BE783826  | 21880.352 | 20355.262 | U06699    | 1278.718 | 1484.901 |
| NM_002081 | 1130.055  | 1021.021  | X04827    | 1665.7    | 1182.554  | AJ290954  | 3922.873 | 4617.064 |
| AB023139  | 3873.776  | 3594.686  | H07088    | 784.016   | 583.335   | AK025451  | 694.794  | 543.469  |
| NM_017885 | 2659.929  | 2773.112  | AI004656  | 695.409   | 618.091   | NM_002783 | 512.14   | 454.565  |
| D80004    | 1350.12   | 1317.918  | BC020596  | 1483.384  | 1562.845  | X52005    | 3541.92  | 1147.285 |
| NM_000946 | 7442.75   | 9392.655  | AF116606  | 47662.191 | 40740.68  | AK024396  | 334.998  | 333.836  |
| NM_016070 | 2107.697  | 2379.138  | X98922    | 3649.833  | 3343.581  | U58514    | 431.941  | 309.989  |
| NM_016390 | 1577.877  | 1961.719  | AK098435  | 4046.99   | 4036.922  | W74254    | 7337.667 | 3888.705 |
| NM_016101 | 7075.728  | 7531.42   | AK092872  | 2168.57   | 2130.778  | AA443286  | 222.809  | 67.982   |
| NM_005859 | 20677.26  | 20270.391 | AF230496  | 457.293   | 612.046   | AB003334  | 2034.279 | 1526.655 |
| NM_020313 | 1323.103  | 1483.024  | M16801    | 623.242   | 818.755   | AW276315  | 247.584  | 77.255   |
| NM_014628 | 8236.747  | 8156.376  | NM_145904 | 13419.493 | 12982.442 | AA490737  | 261.269  | 212.598  |
| AK025630  | 1727.939  | 1625.456  | NM_021969 | 322.06    | 435.583   | AI878886  | 5726.701 | 3165.584 |
| AL365404  | 17062.193 | 14939.071 | NM_013334 | 5608.478  | 6275.877  | BG697179  | 2019.063 | 1664.859 |

|           |           |           |           |           |           |           |           |          |
|-----------|-----------|-----------|-----------|-----------|-----------|-----------|-----------|----------|
| AK022907  | 4506.041  | 3862.114  | AF141901  | 1296.196  | 1327.446  | NM_002136 | 14725.798 | 7868.933 |
| NM_014793 | 3700.379  | 2983.503  | NM_007008 | 1192.648  | 2276.443  | BM012504  | 1288.033  | 670.634  |
| NM_004245 | 1093.694  | 934.291   | AL109708  | 1134.107  | 880.329   | AA664145  | 357.845   | 254.161  |
| NM_000543 | 1788.86   | 2000.327  | AF234532  | 825.484   | 849.909   | X72308    | 1214.964  | 827.895  |
| U06699    | 4115.886  | 4104.263  | NM_002418 | 679.373   | 486.558   | T50790    | 187.422   | 124.573  |
| AJ290954  | 15583.857 | 16989.539 | NM_004485 | 3413.678  | 1616.349  | R48168    | 4246.991  | 5362.546 |
| AK025451  | 2274.82   | 2977.261  | NM_012419 | 529.71    | 478.652   | AB032993  | 1802.644  | 2086.253 |
| NM_002783 | 1447.492  | 1808.14   | NM_013296 | 5199.486  | 4523.967  | NM_000854 | 1186.835  | 1767.556 |
| X52005    | 17919.637 | 14232.731 | AL117478  | 645.779   | 629.5     | AL117423  | 1058.382  | 1249.49  |
| AK024396  | 991.776   | 1216.312  | NM_005307 | 1471.535  | 1318.991  | NM_002084 | 516.613   | 483.228  |
| U58514    | 1694.437  | 1710.085  | NM_005958 | 1224.728  | 1153.619  | D16892    | 4700.576  | 3376.957 |
| W74254    | 24052.1   | 18921.672 | NM_013436 | 1299.892  | 1500.526  | NM_004750 | 448.291   | 535.228  |
| M58603    | 7662.769  | 8532.952  | AF225426  | 690.562   | 521.811   | NM_007295 | 716.4     | 627.624  |
| AB003334  | 8437.207  | 9306.425  | NM_005208 | 5286.127  | 4450.609  | NM_003651 | 2584.41   | 2006.299 |
| AA490737  | 667.676   | 951.6     | NM_000421 | 1104.418  | 729.998   | NM_000418 | 185.292   | 87.709   |
| AI878886  | 21137.877 | 21411.297 | AK025687  | 13114.077 | 13397.295 | NM_000591 | 396.984   | 266.717  |
| BG697179  | 8980.221  | 8224.419  | AF218941  | 3891.556  | 3835.612  | NM_000565 | 292.15    | 244.662  |
| NM_002136 | 48246.551 | 40174.234 | AL137264  | 8367.775  | 9439.463  | NM_002019 | 616.229   | 335.493  |
| BM012504  | 3908.027  | 3813.084  | NM_002226 | 283.994   | 639.984   | NM_017767 | 1747.902  | 1110.292 |
| AA664145  | 1470.696  | 1259.995  | X84370    | 7648.866  | 8436.071  | AK024848  | 1476.681  | 1492.613 |
| X72308    | 5134.71   | 4261.544  | NM_004039 | 1151.915  | 1182.811  | NM_004852 | 437.243   | 326.573  |
| R48168    | 14531.243 | 15295.731 | NM_000508 | 253.823   | 245.296   | NM_003633 | 300.283   | 112.588  |
| AB032993  | 6070.552  | 4887.501  | AB014558  | 885.564   | 783.629   | NM_000343 | 287.762   | 330.155  |
| NM_000854 | 4113.542  | 3873.917  | NM_016577 | 751.523   | 1139.161  | NM_019112 | 988.416   | 1210.547 |
| AL117423  | 5189.495  | 4906.811  | AK023107  | 6362.015  | 6272.95   | NM_012336 | 3924.356  | 5288.387 |
| NM_002084 | 3414.04   | 3800.933  | NM_006854 | 7727.963  | 8064.271  | NM_020161 | 241.561   | 99.921   |
| D16892    | 21667.57  | 19043.174 | NM_004580 | 4433.665  | 3492.235  | NM_020246 | 468.658   | 593.838  |
| NM_004750 | 2005.291  | 1969.403  | NM_020387 | 37350.23  | 31246.41  | NM_000084 | 422.685   | 509.321  |
| NM_007295 | 2789.998  | 3044.947  | NM_007246 | 1328.03   | 1101.292  | NM_016354 | 366.7     | 444.209  |
| NM_003651 | 11312.103 | 10880.449 | AK026248  | 1124.989  | 997.847   | NM_003038 | 272.469   | 395.207  |
| NM_000418 | 665.496   | 1100.348  | NM_004578 | 1667.748  | 1161.757  | NM_018155 | 1077.757  | 836.081  |
| NM_000591 | 1568.932  | 1846.442  | NM_000647 | 371.45    | 692.745   | AL050358  | 473.181   | 271.224  |
| NM_000565 | 1037.354  | 1048.136  | AB046793  | 509.732   | 720.76    | NM_004731 | 226.783   | 299.327  |
| NM_002019 | 2085.967  | 1611.157  | NM_017604 | 1314.199  | 1197.227  | NM_000544 | 520.219   | 357.734  |
| NM_017767 | 6658.993  | 5612.292  | NM_017738 | 9479.289  | 7296.696  | NM_001044 | 212.944   | 129.668  |
| AK024848  | 6684.66   | 6352.786  | NM_016557 | 1366.973  | 1105.296  | AV681967  | 376.255   | 353.16   |
| NM_004852 | 1558.601  | 1717.223  | NM_000623 | 2032.875  | 1851.763  | NM_018250 | 456.562   | 317.977  |
| NM_000343 | 862.563   | 1147.026  | AF161348  | 1481.898  | 988.443   | NM_016553 | 1579.731  | 1295.67  |
| NM_019112 | 3413.607  | 3178.909  | NM_018467 | 10209.765 | 7647.053  | AB023136  | 279.94    | 107.174  |
| NM_012336 | 17431.406 | 17982.209 | NM_006068 | 1496.263  | 1134.139  | NM_003795 | 8304.772  | 5181.215 |
| NM_020161 | 777.063   | 735.428   | NM_002704 | 576.483   | 494.412   | NM_014232 | 1437.021  | 1248.129 |
| NM_020246 | 1827.782  | 1918.026  | NM_002038 | 8806.219  | 6350.753  | NM_005701 | 328.194   | 157.519  |
| NM_000084 | 2778.342  | 3011.607  | NM_005729 | 7303.683  | 7423.402  | NM_006819 | 7975.119  | 7452.451 |
| NM_016354 | 1485.94   | 1445.579  | NM_015493 | 1080.594  | 1138.994  | NM_014744 | 593.792   | 651.254  |
| NM_003038 | 1947.881  | 2388.513  | NM_003747 | 1801.866  | 1872.587  | AL365404  | 6556.355  | 8702.25  |
| NM_018155 | 3976.449  | 5819.704  | NM_002827 | 6713.208  | 5278.558  | AK022907  | 2023.412  | 2817.662 |
| AL050358  | 1458.824  | 1427.685  | NM_001946 | 816.68    | 645.959   | NM_014793 | 1144.581  | 1425.809 |
| NM_004731 | 997.322   | 1739.129  | BF035425  | 27434.17  | 22552.461 | NM_004245 | 358.173   | 445.946  |
| NM_000544 | 2565.827  | 3221.917  | NM_001608 | 521.533   | 834.69    | NM_003241 | 236.671   | 318.7    |
| NM_004644 | 1034.014  | 1484.978  | NM_000159 | 60225.992 | 58751.613 | NM_002685 | 905.342   | 821.998  |
| AV681967  | 2731.387  | 2681.751  | NM_014638 | 1267.671  | 1223.148  | AK024504  | 462.149   | 378.456  |
| NM_018250 | 2549.862  | 2670.318  | AF099740  | 1227.302  | 1180.462  | AF039023  | 764.364   | 455.376  |
| NM_016553 | 7691.689  | 8984.767  | NM_006117 | 15927.445 | 14632.646 | NM_005511 | 1050.387  | 1010.343 |

|           |           |           |           |           |           |           |           |           |
|-----------|-----------|-----------|-----------|-----------|-----------|-----------|-----------|-----------|
| AB023136  | 863.644   | 833.107   | NM_002225 | 2308.462  | 1991.557  | NM_01469E | 2273.265  | 2364.324  |
| NM_00379E | 31848.203 | 31725.68  | NM_006229 | 596.44    | 654.578   | NM_01847E | 1201.097  | 845.374   |
| NM_014232 | 5995.367  | 5608.44   | NM_01541E | 19614.002 | 16917.418 | NM_003262 | 648.602   | 570.955   |
| NM_005701 | 1558.734  | 1630.305  | NM_004897 | 3460.532  | 2878.371  | NM_02012E | 191.766   | 124.409   |
| NM_00681E | 44519.219 | 38945.297 | NM_00255E | 1503.131  | 1228.278  | AK022832  | 845.966   | 753.988   |
| NM_014744 | 2731.829  | 2841.217  | AF225418  | 751.895   | 857.682   | NM_014641 | 860.21    | 486.868   |
| AF146759  | 1033.07   | 763.985   | NM_000309 | 1010.403  | 729.627   | NM_004462 | 3570.226  | 2266.305  |
| AL365404  | 22289.352 | 22005.525 | NM_00452E | 23322.961 | 17627.506 | AB020664  | 492.073   | 601.233   |
| AK022907  | 6058.75   | 5791.424  | AK026381  | 20923.174 | 15699.765 | NM_00664C | 4147.157  | 4724.926  |
| NM_014793 | 4778.215  | 3953.117  | NM_00245C | 12701.229 | 11742.033 | NM_000857 | 392.7     | 401.902   |
| NM_00424E | 1457.724  | 1513.354  | NM_00168E | 841.319   | 830.373   | AF252283  | 219.605   | 254.055   |
| NM_003241 | 675.581   | 833.17    | NM_00497E | 443.235   | 551.992   | AB037799  | 953.779   | 827.115   |
| NM_00268E | 4809.103  | 5036.727  | NM_00070E | 665.925   | 943.057   | AB007950  | 3187.904  | 2420.046  |
| AK024504  | 2256.558  | 2233.609  | NM_004231 | 54541.793 | 56392.777 | AL133111  | 178.154   | 326.947   |
| AF039023  | 3525.466  | 3398.038  | NM_002243 | 2704.624  | 2476.138  | AK025593  | 732.372   | 772.116   |
| NM_005511 | 5173.775  | 4671.375  | NM_145904 | 14185.57  | 13478.738 | AB018304  | 469.262   | 403.934   |
| NM_01469E | 13390.387 | 12208.364 | NM_013334 | 4401.485  | 3579.388  | NM_007061 | 2743.802  | 2364.819  |
| NM_01847E | 7048.21   | 7901.436  | AF150735  | 5348.185  | 4253.187  | AB040954  | 680.301   | 575.948   |
| NM_003262 | 3184.562  | 4164.075  | NM_018183 | 1768.947  | 1228.936  | NM_002081 | 330.08    | 229.467   |
| AK022832  | 4161.941  | 4597.739  | NM_012382 | 3674.4    | 2829.556  | AB023139  | 1049.511  | 847.745   |
| NM_014641 | 3227.054  | 2468.011  | BF038366  | 680.941   | 673.948   | NM_01788E | 965.479   | 681.202   |
| NM_004462 | 16336.485 | 12929.232 | NM_002452 | 18319.92  | 19212.422 | D80004    | 290.308   | 317.537   |
| AB020664  | 3633.152  | 2429.673  | NM_012304 | 890.747   | 858.523   | NM_00094E | 1722.932  | 1083.326  |
| NM_00664C | 21469.826 | 17388.195 | NM_01644C | 16168.77  | 15579.761 | NM_01607C | 612.107   | 367.164   |
| NM_000857 | 1946.449  | 1663.305  | NM_007194 | 3838.836  | 3104.161  | NM_01639C | 510.68    | 259.732   |
| L20688    | 57967.105 | 61685.047 | NM_000314 | 5440.218  | 6930.626  | NM_016101 | 1531.534  | 1510.589  |
| X69111    | 21389.717 | 25090.461 | AB002369  | 797.156   | 1214.951  | NM_00585E | 4637.917  | 3323.464  |
| AF252283  | 772.91    | 843.198   | S74620    | 2426.724  | 2352.955  | NM_020313 | 259.375   | 317.771   |
| AB037799  | 4072.564  | 3941.696  | AF305239  | 1067.2    | 1226.398  | NM_01462E | 1755.676  | 1849.683  |
| AB007950  | 12307.119 | 9936.266  | AL137264  | 9530.951  | 8846.124  | AK025630  | 460.673   | 365.812   |
| AL133111  | 868.588   | 733.552   | X84370    | 7661.487  | 7083.67   | NM_005761 | 611.267   | 589.126   |
| AK025593  | 3088.14   | 3703.772  | NM_004039 | 1078.646  | 714.737   | NM_01471E | 1095.762  | 970.334   |
| AB018304  | 2262.168  | 1882.723  | AB014558  | 980.896   | 533.854   | AB028953  | 308.301   | 224.605   |
| NM_007061 | 12856.549 | 10832.098 | NM_006287 | 632.767   | 628.129   | NM_000632 | 330.174   | 322.079   |
| AB040954  | 3354.304  | 3448.561  | NM_000118 | 2499.814  | 1501.532  | AB002298  | 308.023   | 153.38    |
| NM_002081 | 1606.751  | 1652.901  | NM_000913 | 470.286   | 528.473   | AK024488  | 2551.024  | 2633.751  |
| AB023139  | 4538.891  | 5464.865  | NM_00129E | 34201.035 | 61177.035 | AK023249  | 14357.133 | 10316.585 |
| NM_01788E | 5439.137  | 6029.378  | BG325046  | 1519.302  | 1704.185  | NM_017442 | 1595.773  | 1005.724  |
| D80004    | 2114.896  | 1755.675  | AI351740  | 5397.159  | 3236.211  | NM_000743 | 634.013   | 474.518   |
| NM_00094E | 7846.47   | 7793.07   | AA444051  | 626.836   | 348.279   | NM_00721E | 737.828   | 725.993   |
| NM_01607C | 2213.678  | 2360.466  | NM_007164 | 2124.093  | 1907.01   | Z25436    | 828.241   | 357.957   |
| NM_01639C | 2473.005  | 1973.688  | BE783826  | 20685.91  | 19241.68  | NM_00527E | 1573.518  | 1021.303  |
| NM_016101 | 7250.607  | 6354.043  | X04827    | 1420.318  | 1007.929  | NM_003844 | 2519.451  | 1630.833  |
| NM_00585E | 32010.266 | 27393.957 | H07088    | 617.772   | 525.951   | NM_00200E | 2106.568  | 1714.244  |
| NM_020313 | 975.04    | 1157.746  | AI004656  | 388.697   | 561.53    | NM_012324 | 932.008   | 585.786   |
| NM_01462E | 7559.61   | 7553.49   | BC020596  | 1535.111  | 1633.431  | AK000039  | 328.631   | 182.534   |
| AK025630  | 2055.764  | 1760.441  | AF116606  | 47898.789 | 53735.07  | AL137352  | 419.805   | 305.495   |
| NM_005761 | 2948.901  | 2234.161  | X98922    | 3897.869  | 4109.84   | NM_01474E | 305.045   | 244.098   |
| NM_01471E | 3911.81   | 3201.453  | AK098435  | 2535.582  | 3226.677  | NM_00448E | 919.6     | 528.502   |
| NM_000632 | 1654.963  | 1206.079  | AK092872  | 2194.671  | 2689.769  | BI461699  | 268.917   | 208.083   |
| AB002298  | 1094.803  | 1191.835  | M16801    | 585.224   | 767.34    | AK090409  | 248.507   | 343.454   |
| AK024488  | 10809.354 | 12868.792 | NM_00203E | 8067.04   | 4899.877  | AF172264  | 738.052   | 822.021   |
| AK023249  | 56169.52  | 51051.457 | NM_005729 | 6848.892  | 4850.976  | Y08267    | 644.236   | 770.365   |



|           |           |           |           |           |           |           |           |           |
|-----------|-----------|-----------|-----------|-----------|-----------|-----------|-----------|-----------|
| NM_00736C | 831.739   | 963.507   | NM_015493 | 998.614   | 911.994   | U80756    | 7850.124  | 6121.639  |
| NM_017442 | 3737.58   | 3515.709  | NM_003747 | 2111.875  | 1477.181  | NM_018161 | 541.414   | 710.76    |
| NM_000743 | 3240.669  | 3516.565  | AB037744  | 1458.423  | 992.974   | NM_00524E | 709.742   | 869.298   |
| NM_00721E | 3220.228  | 3664.619  | AF141901  | 1169.669  | 895.382   | NM_00481C | 2495.182  | 925.566   |
| Z25436    | 4229.997  | 4002.29   | NM_00700E | 756.267   | 753.722   | AL117629  | 1241.465  | 1225.396  |
| NM_00527E | 8163.432  | 9415.806  | AL109708  | 939.936   | 587.204   | NM_00259E | 910.975   | 556.13    |
| NM_003844 | 10682.025 | 9736.911  | L29143    | 482.164   | 398.689   | NM_01572E | 439.8     | 381.314   |
| NM_00200E | 19146.801 | 17131.963 | AF234532  | 1179.413  | 1002.872  | AF174604  | 425.596   | 429.785   |
| NM_012324 | 4509.047  | 4095.061  | NM_00241E | 751.682   | 434.003   | AB002379  | 1617.04   | 1336.591  |
| AK000039  | 1306.378  | 884.205   | NM_00448E | 3086.314  | 1408.344  | AF113223  | 629.898   | 467.81    |
| AL137352  | 1395.819  | 1250.729  | NM_01241E | 598.545   | 405.495   | AB046851  | 731.393   | 506.437   |
| NM_01474E | 1561.823  | 1725.039  | NM_01329E | 4950.509  | 4613.289  | NM_00574E | 8544.484  | 5459.556  |
| NM_00448E | 4373.769  | 3414.1    | AL117478  | 628.554   | 423.583   | NM_01985E | 14525.411 | 8479.778  |
| BI461699  | 1153.826  | 1115.372  | NM_005307 | 1295.245  | 1145.639  | NM_018174 | 443.738   | 116.458   |
| AK090409  | 1047.692  | 1279.546  | NM_00595E | 1072.74   | 1405.66   | NM_01454E | 488.553   | 282.766   |
| AF172264  | 3234.764  | 2659.56   | NM_01343E | 1358.566  | 1782.651  | NM_004437 | 568.917   | 316.465   |
| Y08267    | 2643.72   | 2670.066  | AF225426  | 1448.249  | 1440.609  | AK025875  | 516.508   | 180.684   |
| U80756    | 30096.107 | 24946.883 | NM_00520E | 5745.242  | 6420.164  | BC014152  | 9761.604  | 4537.901  |
| NM_018161 | 2399.582  | 2146.878  | NM_000421 | 859.008   | 1231.063  | AB037779  | 2895.548  | 1657.344  |
| NM_00524E | 2200.163  | 2438.206  | AK025687  | 9739.525  | 10009.673 | NM_00065E | 3495.153  | 4832.834  |
| NM_00481C | 12429.166 | 8419.736  | AF218941  | 3138.413  | 3738.976  | NM_00039E | 279.454   | 216.829   |
| AL117629  | 6176.697  | 6119.229  | NM_00070E | 508.922   | 426.163   | NM_00088E | 428.807   | 424.123   |
| NM_00259E | 2828.033  | 2400.544  | NM_004231 | 58880.625 | 47896.648 | NM_00385E | 4400.23   | 5916.363  |
| NM_01572E | 2065.556  | 1886.948  | NM_016577 | 702.553   | 750.37    | NM_00023E | 593.962   | 688.808   |
| AF174604  | 2066.188  | 2143.334  | AK023107  | 5531.856  | 4913.116  | NM_00290E | 9897.385  | 10564.063 |
| AB002379  | 5366.854  | 4390.352  | NM_006854 | 7427.978  | 7769.79   | NM_01233E | 1321.199  | 1026.391  |
| AF113223  | 2732.214  | 2746.406  | NM_00458C | 4155.765  | 3857.158  | NM_005787 | 7469.85   | 5575.386  |
| AB046851  | 3310.969  | 3247.351  | NM_020387 | 40567.773 | 32709.838 | NM_00214E | 1156.852  | 973.875   |
| NM_018174 | 1598.435  | 1973.126  | NM_00724E | 1125.515  | 1269.809  | AF284421  | 2944.465  | 2642.85   |
| NM_01454E | 3213.422  | 2871.029  | AK026248  | 1096.849  | 709.376   | NM_00604E | 1537.774  | 1942.586  |
| NM_004437 | 2945.47   | 2946.713  | NM_00457E | 1790.157  | 927.83    | NM_00636C | 10270.789 | 8224.702  |
| AK025875  | 2410.955  | 1597.196  | AB046793  | 551.516   | 489.328   | NM_00396E | 2207.247  | 1511.023  |
| BC014152  | 61320.863 | 58940.215 | NM_017604 | 1264.214  | 1098.191  | NM_00278E | 1985.504  | 1873.677  |
| AB037779  | 25682.682 | 19083.271 | NM_01773E | 9000.485  | 6723.958  | NM_00334E | 2823.802  | 2269.23   |
| NM_00065E | 17461.9   | 22921.215 | NM_016557 | 1314.784  | 1490.304  | NM_00278E | 16031.993 | 12285.827 |
| NM_00039E | 954.399   | 1070.531  | NM_00062E | 2069.691  | 1930.222  | NM_00347C | 4325.068  | 3406.137  |
| NM_00088E | 1798.851  | 2351.425  | AF161348  | 1376.28   | 1784.962  | AL080137  | 190.894   | 316.616   |
| NM_00385E | 19658.195 | 20642.803 | NM_018467 | 10490.613 | 12830.234 | NM_01767E | 224.847   | 290.377   |
| NM_00023E | 2204.894  | 2398.294  | NM_00606E | 1041.381  | 1341.355  | AF155103  | 330.862   | 786.288   |
| NM_00290E | 38705.262 | 32632.514 | NM_002704 | 595.553   | 528.246   | NM_017704 | 774.502   | 418.789   |
| NM_01233E | 4993.674  | 4369.078  | NM_01644C | 15344.825 | 11103.163 | BC006359  | 427.83    | 248.003   |
| NM_005787 | 32014.199 | 27346.656 | NM_007194 | 2928.211  | 1947.417  | AK026127  | 519.018   | 280.586   |
| NM_00214E | 4607.259  | 4899.777  | NM_000314 | 5754.853  | 5565.923  | BC016062  | 5438.846  | 2783.207  |
| AF284421  | 7746.408  | 5959.089  | AB002369  | 1189.76   | 1049.892  | NM_002814 | 964.912   | 604.875   |
| NM_00604E | 4908.184  | 6565.82   | S74620    | 2656.751  | 2395.414  | NM_01225C | 1084.515  | 425.877   |
| NM_00636C | 47438.652 | 48896.641 | AF305239  | 1400.496  | 918.337   | NM_00628E | 1684.375  | 2100.804  |
| NM_00396E | 10306.263 | 9723.725  | NM_002827 | 4943.291  | 3771.997  | NM_002701 | 326.841   | 273.135   |
| NM_00278E | 9498.531  | 12656.345 | NM_00194E | 604.321   | 740.816   | NM_00569E | 216.603   | 197.8     |
| NM_00334E | 12473.075 | 14290.279 | BF035425  | 27868.402 | 23795.629 | X97303    | 4037.012  | 3509.432  |
| NM_00278E | 58474.531 | 63881.031 | NM_00015E | 59620.164 | 57140.281 | NM_01753C | 903.842   | 627.145   |
| NM_00347C | 19388.178 | 30194.799 | NM_01463E | 1272.499  | 1268.007  | AB029030  | 177.954   | 365.983   |
| AL080137  | 800.456   | 1198.007  | AF099740  | 1329.314  | 1133.999  | AL360183  | 605.845   | 536.909   |
| NM_01767E | 1536.981  | 1853.092  | NM_006117 | 16549.486 | 14181.18  | AK027046  | 486.575   | 269.54    |

|           |           |           |           |           |           |           |           |           |
|-----------|-----------|-----------|-----------|-----------|-----------|-----------|-----------|-----------|
| AF155103  | 558.532   | 985.983   | NM_002225 | 2634.943  | 2254.961  | NM_003113 | 1047.773  | 860.719   |
| NM_017704 | 4349.95   | 4078.126  | NM_006229 | 615.696   | 524.702   | NM_016578 | 1274.531  | 650.358   |
| BC006359  | 2789.244  | 2739.344  | NM_015415 | 19663.303 | 16817.549 | NM_015832 | 3689.301  | 1931.991  |
| AK026127  | 2999.665  | 2338.558  | NM_004897 | 4306.541  | 5064.541  | NM_014319 | 796.627   | 404.567   |
| BC016062  | 24560.957 | 20603.105 | NM_002555 | 1654.004  | 2068.431  | NM_004865 | 1981.752  | 932.199   |
| NM_002814 | 4684.711  | 3491.077  | AF225418  | 806.922   | 933.294   | AB019566  | 27883.543 | 15760.785 |
| NM_012250 | 3779.577  | 3127.035  | NM_000309 | 1782.747  | 2827.304  | NM_000981 | 28708.146 | 16564.592 |
| NM_006283 | 10841.927 | 10189.875 | NM_004528 | 21656.436 | 20506.775 | NM_002047 | 7387.534  | 3850.355  |
| NM_002701 | 991.823   | 882.707   | AK026381  | 15873.615 | 17798.064 | NM_001031 | 30248.248 | 27928.461 |
| NM_005693 | 1285.405  | 886.668   | NM_002450 | 11930.734 | 14424.205 | NM_007208 | 3802.53   | 2632.842  |
| X97303    | 17240.803 | 15780.415 | NM_001686 | 797.241   | 1257.018  | BF130622  | 2918.023  | 2533.971  |
| L32162    | 665.104   | 934.165   | NM_014723 | 2275.672  | 2360.085  | BU165106  | 497.024   | 650.156   |
| NM_017530 | 3309.635  | 2495.891  | AB011106  | 1771.939  | 1328.378  | AF038202  | 660.763   | 719.267   |
| AB029030  | 1322.465  | 1077.156  | D26362    | 2388.263  | 2213.336  | AL360198  | 320.161   | 286.162   |
| AL360183  | 2506.608  | 2560.62   | NM_013452 | 2917.733  | 2167.338  | AB040925  | 394.801   | 392.928   |
| AK027046  | 2585.484  | 1969.865  | AL133073  | 490.057   | 402.057   | BC008837  | 370.264   | 231.442   |
| NM_003113 | 4416.058  | 4955.538  | AY009402  | 3307.532  | 3156.931  | NM_001861 | 371.119   | 403.812   |
| NM_016578 | 4891.363  | 4252.152  | NM_018451 | 1440.448  | 823.888   | AK025558  | 1932.806  | 1782.232  |
| NM_003822 | 724.109   | 952.589   | NM_012443 | 832.521   | 753.411   | AK024355  | 549.995   | 330.38    |
| NM_015832 | 16990.299 | 14457.11  | NM_002584 | 2879.481  | 2804.518  | NM_001864 | 11407.512 | 7121.502  |
| NM_014319 | 2927.484  | 3037.688  | NM_013334 | 5991.368  | 5225.804  | NM_003477 | 2962.328  | 2099.98   |
| NM_004865 | 8615.146  | 8902.832  | AF150735  | 5200.436  | 4912.686  | NM_002654 | 13515.627 | 9544.201  |
| AB019566  | 64774.301 | 67952.102 | NM_018183 | 1998.124  | 1759.389  | NM_015478 | 260.179   | 41.476    |
| NM_000981 | 62590.078 | 68438.492 | NM_012382 | 3573.917  | 3231.713  | NM_020382 | 1176.343  | 551.054   |
| NM_002047 | 35557.77  | 30053.096 | BF038366  | 790.932   | 828.915   | NM_007192 | 2120.446  | 1647.68   |
| NM_001031 | 62897.746 | 71784.227 | NM_002452 | 19728.336 | 23420.342 | AB002337  | 2668.065  | 1880.833  |
| NM_007208 | 18673.02  | 16812.813 | NM_012304 | 608.76    | 788.665   | NM_014933 | 1477.035  | 701.433   |
| NM_000999 | 62731.438 | 68518.102 | AF245505  | 1188.038  | 1075.62   | NM_003076 | 6270.353  | 3220.479  |
| NM_000985 | 21959.285 | 18429.805 | AB037776  | 725.805   | 492.185   | NM_006385 | 489.76    | 327.896   |
| BF130622  | 13711.816 | 11565.149 | AF196976  | 5126.135  | 4365.779  | NM_003456 | 765.378   | 524.591   |
| BU165106  | 2186.479  | 2416.925  | AL050379  | 1375.233  | 822.555   | AB029016  | 372.558   | 599.148   |
| AF038202  | 2629.179  | 2532.299  | NM_003161 | 1960.389  | 1830.443  | AL049390  | 424.241   | 276.421   |
| AL360198  | 863.49    | 693.078   | NM_014496 | 797.997   | 597.257   | AK000584  | 2286.466  | 2453.424  |
| AB040925  | 1708.721  | 1906.832  | NM_016215 | 23000.787 | 22217.365 | AJ297363  | 364.939   | 738.977   |
| BC008837  | 1474.36   | 1083.153  | AK026919  | 1748.161  | 1251.65   | AK026379  | 931.613   | 601.326   |
| NM_001861 | 1470.184  | 1402.445  | NM_001501 | 7386.12   | 9942.123  | AK022965  | 882.343   | 811.098   |
| AK025558  | 7990.397  | 7802.4    | NM_006176 | 49827.504 | 57025.324 | AK024278  | 2023.805  | 1306.329  |
| AK024355  | 2157.747  | 2210.217  | AL137459  | 1855.972  | 2223.365  | AB056722  | 1751.882  | 1345.746  |
| NM_001864 | 50249.145 | 47254.578 | AB037812  | 351.235   | 419.984   | NM_013242 | 2043.839  | 1081.677  |
| NM_003477 | 14820.911 | 14538.672 | AB007932  | 2339.798  | 2005.762  | NM_012066 | 3303.548  | 2021.874  |
| NM_002654 | 55945.141 | 51550.629 | AF219257  | 34065.965 | 31298.605 | AF052168  | 1811.014  | 1061.082  |
| NM_020382 | 5132.312  | 5265.235  | NM_003978 | 962.489   | 1082.685  | NM_014650 | 168.364   | 281.205   |
| NM_007192 | 11800.18  | 14954.693 | NM_002561 | 7738.816  | 5495.072  | AK022632  | 660.864   | 191.466   |
| AB002337  | 13312.382 | 12356.56  | NM_006103 | 23437.957 | 22177.09  | AK021554  | 457.4     | 101.052   |
| NM_014933 | 7859.393  | 7006.85   | NM_006206 | 464.445   | 455.32    | NM_020235 | 921.64    | 327.725   |
| NM_003076 | 30207.813 | 28785.928 | NM_000805 | 452.674   | 453.336   | AK000532  | 167.332   | 147.349   |
| NM_006385 | 2774.845  | 2685.638  | AL359933  | 13509.245 | 10842.829 | AL162039  | 1455.861  | 953.852   |
| NM_003456 | 4303.689  | 2958.938  | NM_001302 | 780.086   | 809.051   | AK024896  | 548.22    | 369.112   |
| NM_002585 | 3535.284  | 3765.132  | M17783    | 5040.585  | 4916.02   | AK095125  | 324.178   | 443.513   |
| AB029016  | 2249.897  | 2356.986  | NM_018590 | 6488.072  | 7322.49   | AK024059  | 846.492   | 942.453   |
| AL049390  | 1578.251  | 1596.667  | NM_003178 | 1705.688  | 2058.958  | AB007928  | 664.145   | 930.878   |
| AK000584  | 9060.582  | 7717.635  | NM_012437 | 7679.395  | 9554.813  | AK023645  | 447.386   | 304.475   |
| AJ297363  | 1539.787  | 1344.776  | AF090944  | 1318.762  | 1082.755  | D83543    | 316.317   | 339.321   |

|           |           |           |           |           |           |           |          |          |
|-----------|-----------|-----------|-----------|-----------|-----------|-----------|----------|----------|
| AK026379  | 4060.747  | 3863.912  | NM_002607 | 624.414   | 789.249   | NM_01693C | 1317.754 | 882.734  |
| AK022965  | 3790.441  | 4635.142  | NM_002527 | 1357.804  | 1397.776  | AJ001861  | 929.932  | 539.762  |
| AK024278  | 7021.432  | 5310.008  | NM_00589C | 1808.667  | 2355.993  | X64981    | 461.106  | 212.738  |
| NM_018022 | 2146.899  | 1755.573  | AF149785  | 3435.89   | 3788.59   | AJ001890  | 137.238  | 283.915  |
| AB056722  | 5723.911  | 5032.746  | NM_012068 | 7359.251  | 7622.168  | X75692    | 683.507  | 435.55   |
| NM_013242 | 11004.933 | 11431.492 | NM_004064 | 6910.976  | 6047.366  | Y10511    | 3469.483 | 2412.044 |
| NM_012066 | 15335.683 | 17406.258 | NM_001256 | 6359.112  | 6072.592  | M26147    | 1968.981 | 387.392  |
| AF052168  | 8274.632  | 8447.59   | NM_014704 | 6034.389  | 5218.115  | AF018254  | 251.701  | 105.357  |
| NM_01465C | 1273.405  | 1078.916  | NM_020205 | 980.317   | 525.935   | NM_01624C | 394.801  | 466.78   |
| AK022632  | 3096.095  | 3051.84   | NM_001227 | 2310.074  | 2581.263  | AK026416  | 3537.862 | 1861.716 |
| AK021554  | 1793.797  | 1746.512  | NM_001191 | 3799.683  | 4456.155  | AK025797  | 308.031  | 450.346  |
| AF070620  | 820.896   | 1410.313  | U15174    | 398.023   | 442.2     | AK000853  | 246.186  | 73.3     |
| NM_020235 | 4443      | 4680.497  | NM_013342 | 3628.188  | 3133.221  | AK000085  | 175.427  | 126.317  |
| AL109681  | 645.886   | 569.8     | NM_014344 | 1246.015  | 1378.513  | AK000019  | 302.456  | 236.3    |
| AL162039  | 6460.987  | 5030.454  | AB040917  | 696.871   | 977.067   | AK000645  | 216.572  | 316.195  |
| AK024896  | 3215.143  | 2154.495  | AL110261  | 6131.217  | 6614.579  | AK024947  | 324.663  | 131.067  |
| AL353952  | 650.385   | 805.595   | AA203539  | 490.806   | 785.405   | NM_017503 | 371.688  | 483.792  |
| AK095125  | 1219.813  | 1514.854  | AK021786  | 808.48    | 965.423   | AK024606  | 1431.319 | 1189.384 |
| AK024059  | 3495.884  | 3875.311  | NM_005932 | 845.32    | 535.877   | NM_016417 | 6055.561 | 5214.431 |
| AB007928  | 2914.812  | 3157.363  | NM_001908 | 3896.165  | 4539.139  | NM_019108 | 554.36   | 581.318  |
| AK023645  | 1879.988  | 2007.457  | NM_000285 | 7691.951  | 6764.572  | AL080118  | 2178.447 | 2125.709 |
| D83543    | 1246.557  | 1181.748  | AV702690  | 1193.482  | 1268.996  | AL049378  | 904.945  | 462.464  |
| NM_01693C | 5639.591  | 5093.086  | AL117452  | 4333.015  | 3278.655  | AF087959  | 228.161  | 1258.444 |
| AJ001861  | 3309.987  | 3069.998  | NM_01223C | 1603.463  | 1259.682  | L09086    | 380.382  | 276.834  |
| X64981    | 1865.162  | 1260.306  | NM_014038 | 7492.707  | 7856.811  | AK021505  | 219.128  | 146.549  |
| X75692    | 3220.469  | 3086.599  | NM_002061 | 4825.776  | 3555.876  | AK021598  | 1006.336 | 716.183  |
| Y10511    | 15668.072 | 13686.684 | AF169974  | 4642.214  | 3596.759  | AJ012498  | 294.371  | 209.502  |
| M26147    | 7586.028  | 5763.328  | NM_004522 | 633.36    | 580.83    | NM_005973 | 4927.771 | 4340.666 |
| AF018254  | 1093.921  | 1045.659  | NM_005733 | 1861.594  | 1761.821  | X04547    | 992.904  | 480.623  |
| NM_01624C | 2393.293  | 1282.665  | NM_018138 | 2880.656  | 3251.926  | AK025823  | 994.712  | 547.056  |
| AK026416  | 9986.399  | 5056.276  | NM_019619 | 4438.033  | 4385.846  | AL359941  | 858.658  | 661.238  |
| AK025797  | 1145.681  | 679.461   | AF183411  | 1313.419  | 1704.009  | U52076    | 338.566  | 354.763  |
| AK000019  | 1286.349  | 986.189   | BF244591  | 976.38    | 909.172   | AF035278  | 607.951  | 482.621  |
| AK000645  | 686.198   | 415.321   | NM_005886 | 8815.392  | 15423.27  | AL050202  | 188.197  | 163.662  |
| AK024947  | 1359.237  | 786.866   | U63785    | 502.865   | 1145.549  | U32999    | 2467.671 | 1448.35  |
| NM_017503 | 1497.563  | 1123.91   | NM_005966 | 1021.395  | 1323.382  | U66052    | 1791.173 | 1091.238 |
| AK024606  | 5724.157  | 3661.453  | NM_003156 | 2231.518  | 2324.157  | AK024156  | 538.508  | 354.29   |
| NM_016417 | 21918.549 | 13365.946 | NM_003108 | 767.662   | 789.978   | AF086288  | 458.684  | 345.601  |
| NM_019108 | 2064.115  | 1582.716  | NM_01331C | 5382.889  | 3907.791  | AK023109  | 565.942  | 358.885  |
| AL080118  | 8811.927  | 5268.358  | BC004958  | 2905.92   | 3807.521  | NM_005293 | 2318.382 | 1314.01  |
| AL049378  | 4848.641  | 2513.117  | NM_014553 | 1312.467  | 1169.58   | AF133332  | 1447.61  | 507.491  |
| AK021505  | 1453.681  | 970.375   | NM_00344C | 772.209   | 1329.241  | AK022805  | 186.33   | 169.441  |
| AK021598  | 7455.876  | 4144.142  | NM_004698 | 4383.256  | 5181.04   | NM_001088 | 3194.741 | 3598.381 |
| AJ012498  | 1036.465  | 1058.5    | U41387    | 12773.941 | 7451.66   | BC015991  | 5108.856 | 5547.821 |
| NM_005973 | 18045.6   | 14695.168 | NM_004516 | 7741.922  | 6953.394  | U94902    | 277.712  | 105.297  |
| X04547    | 3749.505  | 3242.143  | NM_006513 | 1677.266  | 1362.954  | U46214    | 724.75   | 705.316  |
| AK025823  | 4104.504  | 1801.595  | NM_003685 | 16773.453 | 14698.366 | NM_00031C | 3443.24  | 3210.117 |
| AK026691  | 1184.485  | 793.273   | NM_006295 | 3454.371  | 4121.276  | AF161343  | 1118.255 | 1087.869 |
| AL359941  | 1448.496  | 887.67    | NM_00154C | 2217.685  | 2256.912  | NM_004765 | 2289.702 | 1673.748 |
| AF035278  | 1633.604  | 1205.588  | NM_012111 | 13369.268 | 13903.918 | AK022246  | 501.057  | 331.645  |
| U32999    | 13480.849 | 9827.96   | NM_00447C | 13189.881 | 12435.263 | X75684    | 377.738  | 432.168  |
| U66052    | 8760.031  | 7356.224  | NM_001418 | 6867.85   | 6832.97   | D17200    | 199.252  | 292.322  |
| AK024156  | 2470.02   | 2043.495  | NM_003756 | 22784.443 | 20033.795 | AF113701  | 1661.918 | 1246.487 |

|           |           |           |           |           |           |           |           |           |
|-----------|-----------|-----------|-----------|-----------|-----------|-----------|-----------|-----------|
| AF086288  | 2714.307  | 2738.825  | AL049680  | 2566.292  | 2555.639  | Y11158    | 637.974   | 426.639   |
| NM_016944 | 762.455   | 679.925   | AK001595  | 2366.339  | 1480.125  | NM_006771 | 4323.245  | 2624.015  |
| AK023109  | 2374.342  | 2449.735  | NM_018015 | 3397.532  | 2111.595  | L37702    | 3020.082  | 1633.786  |
| NM_005293 | 13991.463 | 12182     | AF182419  | 4758.14   | 7115.217  | AK022812  | 1052.559  | 658.943   |
| AF133332  | 8803.186  | 6260.765  | NM_004293 | 445.402   | 1200.574  | AF238318  | 121.451   | 492.944   |
| NM_001085 | 11148.356 | 12645.359 | NM_007016 | 2978.237  | 3521.351  | U79301    | 953.024   | 306.96    |
| BC015991  | 23115.643 | 29159.439 | NM_002703 | 6291.776  | 6568.964  | AK022260  | 872.573   | 414.812   |
| U94902    | 1377.73   | 1701.742  | NM_005375 | 5501.963  | 10753.052 | M32219    | 3054.387  | 1399.146  |
| U46214    | 3721.826  | 4609.233  | NM_005985 | 6797.832  | 8297.001  | BC018868  | 247.675   | 117.529   |
| NM_000310 | 16696.408 | 21763.482 | NM_015906 | 5934.965  | 8927.653  | AF086174  | 224.441   | 215.718   |
| AF161343  | 4524.042  | 5454.06   | AK023759  | 1991.533  | 2020.813  | AF007128  | 2643.711  | 2195.982  |
| NM_004765 | 12019.577 | 14391.364 | L25270    | 25745.09  | 28940.277 | CY3Cy5    | 577.733   | 119.922   |
| AK022246  | 1630.149  | 2321.452  | AB033111  | 1721.662  | 2380.804  | AI351740  | 1215.657  | 1614.63   |
| X75684    | 1860.135  | 1932.54   | AJ276316  | 2026.545  | 2275.672  | NM_007164 | 522.979   | 550.246   |
| D17200    | 570.281   | 1174.497  | AF229246  | 11713.516 | 12496.745 | BE783826  | 2613.458  | 2871.376  |
| AF113701  | 10084.146 | 12869.604 | S64709    | 3292.999  | 4763.813  | X04827    | 377.682   | 580.614   |
| Y11158    | 4012.295  | 4035.751  | NM_018485 | 911.492   | 820.084   | H07088    | 241.715   | 256.934   |
| NM_006771 | 27619.268 | 30204.082 | X56465    | 682.101   | 828.797   | AI004656  | 139.628   | 275.541   |
| L37702    | 21416.203 | 24104.629 | NM_003071 | 8016.489  | 5831.489  | BC020596  | 539.948   | 498.273   |
| AK022812  | 6973.143  | 7916.886  | AK021494  | 4566.113  | 3531.071  | AF116606  | 21874.563 | 16957.973 |
| AK022433  | 597.287   | 798.343   | AK022117  | 819.311   | 782.816   | X98922    | 1336.198  | 948.724   |
| U79301    | 4007.287  | 4544.931  | AF075023  | 2291.179  | 2928.579  | AK098435  | 1293.24   | 987.604   |
| AK022260  | 6204.193  | 6815.256  | AK001092  | 55655.188 | 50466.547 | AK092872  | 778.996   | 539.641   |
| M32219    | 15414.368 | 20332.65  | AK023427  | 376.945   | 348.968   | NM_145904 | 6292.741  | 7039.172  |
| BC018868  | 1525.689  | 1779.793  | NM_014144 | 1430.206  | 1603.813  | SR2       | 19163.783 | 23169.33  |
| AF086174  | 739.457   | 785.99    | AF147345  | 1425.67   | 1457.329  | SR4       | 4692.09   | 6915.829  |
| AF007128  | 14098.828 | 16061.242 | AF086303  | 573.06    | 660.995   | SR6       | 814.08    | 882.448   |
| CY3Cy5    | 5435.58   | 355.745   | AF086434  | 994.711   | 1016.708  | SR8       | 1772.29   | 6633.862  |
| AI351740  | 5714.295  | 8350.564  | AK022063  | 5082.291  | 6189.024  | SR10      | 9574.979  | 4315.732  |
| AA444051  | 788.074   | 707.942   | AF086464  | 971.016   | 1323.946  |           | 40.44     | 1206.945  |
| NM_007164 | 1317.517  | 1616.693  | AL049278  | 2437.318  | 2452.009  | CY3Cy5    | 835.778   | 165.15    |
| BE783826  | 10007.566 | 11713     | AL117519  | 533.83    | 671.873   | NM_002415 | 271.969   | 276.892   |
| X04827    | 1142.112  | 1836.195  | AK025063  | 536.64    | 397.152   | NM_004485 | 693.954   | 1094.407  |
| H07088    | 975.109   | 1094.056  | NM_005060 | 1718.918  | 2232.534  | NM_013295 | 1962.586  | 2351.419  |
| BC020596  | 1675.314  | 1555.036  | AF075097  | 4455.207  | 3852.137  | AL117478  | 254.444   | 238.936   |
| AF116606  | 52813.563 | 64239.234 | AK022801  | 1739.299  | 1308.557  | NM_005307 | 235.946   | 203.761   |
| X98922    | 5486.917  | 5612.562  | AL133075  | 13598.565 | 12639.199 | NM_005955 | 448.129   | 742.639   |
| AK098435  | 7864.366  | 7847.565  | AL137692  | 627.424   | 778.997   | NM_013435 | 537.837   | 632.347   |
| AK092872  | 4168.586  | 4581.651  | AL137630  | 2424.865  | 3108.387  | AF225426  | 267.828   | 395.9     |
| SR2       | 60292.383 | 63553.277 | AL137277  | 16831.332 | 31908.951 | NM_005205 | 1454.839  | 1966.712  |
| SR4       | 16476.873 | 17841.074 | AL157467  | 856.526   | 955.445   | NM_000421 | 311.786   | 313.391   |
| SR6       | 2550.816  | 2856.878  | BC023609  | 1915.618  | 2124.922  | AK025687  | 1853.182  | 2174.553  |
| SR8       | 8749.147  | 30705.189 | AK025100  | 591.986   | 815.973   | AF218941  | 819.265   | 1539.981  |
| SR10      | 30443.258 | 12100.785 | AF086049  | 3725.292  | 4292.999  | AL137264  | 2606.322  | 4076.242  |
| NM_004485 | 2306.257  | 4365.195  | AF114263  | 1313.937  | 1576.704  | NM_002225 | 288.98    | 375.802   |
| NM_012415 | 720.528   | 1036.566  | AK026142  | 2142.526  | 1634.026  | X84370    | 3044.903  | 5632.58   |
| NM_013295 | 7609.11   | 9870.638  | AF161369  | 6746.85   | 6515.421  | NM_004035 | 395.19    | 788.208   |
| AL117478  | 712.424   | 1138.421  | AK027176  | 18752.191 | 18327.238 | AB014558  | 483.737   | 1451.727  |
| NM_005307 | 404.848   | 1189.579  | AF073328  | 913.043   | 1932.892  | NM_000115 | 752.432   | 2019.233  |
| AF225426  | 636.945   | 908.403   | AF129266  | 807.967   | 735.753   | NM_000913 | 279.947   | 560.89    |
| NM_005205 | 5590.014  | 5516.807  | AF211968  | 574.083   | 980.931   | AK026248  | 401.806   | 639.154   |
| NM_000421 | 865.857   | 1076.648  | Y12019    | 5665.045  | 6016.924  | NM_004575 | 466.005   | 1110.905  |
| AK025687  | 13879.583 | 14955.052 | AF147418  | 557.287   | 676.112   | NM_000647 | 177.559   | 199.719   |

|           |           |           |           |           |           |           |           |           |
|-----------|-----------|-----------|-----------|-----------|-----------|-----------|-----------|-----------|
| AF218941  | 4773.022  | 5333.498  | AK021898  | 3684.395  | 4209.037  | AB046793  | 230.977   | 76.239    |
| AL137264  | 8277.484  | 8578.06   | AK022024  | 2667.573  | 3838.254  | NM_017604 | 590.267   | 879.697   |
| NM_00222E | 771.336   | 569.224   | AK022163  | 954.676   | 817.531   | NM_01773E | 1748.974  | 2816.185  |
| X84370    | 7599.606  | 8934.641  | AK022301  | 1412.414  | 1817.909  | NM_016557 | 589.966   | 834.935   |
| NM_00403E | 1520.387  | 1913.175  | AK021948  | 2422.974  | 2417.337  | NM_00062E | 859.174   | 1661.579  |
| AB014558  | 1155.007  | 1720.413  | AK022054  | 1069.125  | 1137.573  | AF161348  | 641.182   | 1499.958  |
| NM_000118 | 2665.177  | 4070.876  | AK022341  | 957.59    | 807.243   | NM_018467 | 2891.131  | 6800.745  |
| AK026248  | 1071.117  | 1222.76   | AK026861  | 1004.182  | 977.013   | NM_00606E | 434.356   | 475.391   |
| NM_00457E | 1351.22   | 2344.456  | AK021642  | 6273.028  | 7001.353  | U16752    | 152.597   | 372.099   |
| AB046793  | 624.493   | 854.845   | AK022455  | 1085.091  | 1119.263  | M30134    | 190.72    | 271.612   |
| NM_017604 | 1602.553  | 2137.318  | AK021987  | 1806.439  | 1878.929  | NM_00088C | 307.189   | 601.103   |
| NM_01773E | 8040.823  | 9040.975  | AK026905  | 4216.512  | 4656.206  | NM_00203E | 3079.822  | 8980.68   |
| NM_016557 | 1497.681  | 2092.923  | AK023449  | 473.893   | 862.469   | NM_00572E | 1908.185  | 4095.985  |
| NM_00062E | 2335.448  | 2367.858  | NM_000134 | 554.029   | 597.67    | NM_01549E | 484.402   | 751.516   |
| NM_018467 | 7052.037  | 9343.512  | NM_00663E | 5438.43   | 3555.056  | NM_003747 | 658.79    | 1764.142  |
| NM_00606E | 884.913   | 1183.957  | X14675    | 2586.045  | 2574.557  | AB037744  | 713.953   | 1616.528  |
| NM_00203E | 10243.463 | 14018.44  | AF071170  | 1072.836  | 1237.648  | AF141901  | 527.902   | 848.298   |
| NM_00572E | 8243.759  | 9973.574  | AF075075  | 1889.462  | 3270.609  | NM_00700E | 446.641   | 527.84    |
| NM_01549E | 940.867   | 1098.946  | NM_018304 | 8990.743  | 8745.981  | AL109708  | 425.055   | 441.095   |
| NM_003747 | 1975.859  | 2536.873  | AK023264  | 462.605   | 427.012   | L29143    | 276.55    | 316.363   |
| AB037744  | 1703.601  | 1499.485  | AK024457  | 9542.474  | 9170.086  | AF234532  | 457.605   | 636.357   |
| AF141901  | 1734.052  | 1613.779  | AL389977  | 611.672   | 415.784   | AF099740  | 548.322   | 1030.514  |
| NM_00700E | 1184.106  | 1702.278  | AK026894  | 1097.082  | 1320.067  | NM_006117 | 8861.313  | 19173.34  |
| AF099740  | 1469.169  | 1731.485  | AK026372  | 794.171   | 937.987   | NM_00222E | 856.153   | 1547.066  |
| NM_006117 | 21279.627 | 25130.992 | AL109684  | 710.44    | 675.508   | NM_01541E | 9713.462  | 17179.072 |
| NM_00222E | 3083.671  | 2685.231  | NM_01418E | 10345.374 | 7601.744  | NM_004897 | 1450.191  | 3088.944  |
| NM_00622E | 794.427   | 941.166   | AF056442  | 2686.034  | 2470.017  | NM_00255E | 584.205   | 1179.514  |
| NM_01541E | 25669.973 | 27036.434 | AK024752  | 35552.785 | 33274.055 | AF225418  | 456.131   | 820.116   |
| NM_004897 | 3409.71   | 3665.302  | BG117194  | 1667.003  | 2015.589  | NM_00245C | 7985.2    | 9814.622  |
| NM_00255E | 1388.675  | 1610.328  | AK024181  | 311.517   | 541.792   | NM_00168E | 456.798   | 890.054   |
| NM_00030E | 1245.072  | 1482.748  | AF131859  | 3971.859  | 3540.075  | NM_00497E | 259.381   | 457.387   |
| NM_00452E | 21970.768 | 27541.607 | AK001864  | 565.992   | 1275.578  | NM_00070E | 410.281   | 1066.118  |
| AK026381  | 17118.863 | 16644.539 | AK023632  | 799.377   | 823.799   | NM_016577 | 522.052   | 870.229   |
| NM_00245C | 15983.294 | 11443.035 | AF086118  | 5983.74   | 6212.951  | AK023107  | 3327.092  | 4765.59   |
| NM_00168E | 1085.81   | 1349.147  | NM_01413E | 1536.777  | 1586.379  | NM_006854 | 3044.81   | 3493.664  |
| NM_00497E | 220.106   | 1128.785  | AK025044  | 2190.858  | 2279.927  | NM_00458C | 1657.081  | 2369.311  |
| NM_00070E | 661.467   | 916.094   | AK023690  | 984.045   | 1115.343  | NM_020387 | 10051.499 | 9843.121  |
| NM_004231 | 57748.742 | 58271.262 | AF230317  | 925.541   | 803.465   | NM_00724E | 524.11    | 486.378   |
| NM_016577 | 597.954   | 365.749   | AK023806  | 3470.694  | 3129.554  | AF113125  | 163.308   | 357.997   |
| AK023107  | 8865.492  | 7814.94   | AF088068  | 748.611   | 628.836   | NM_000507 | 128.205   | 214.183   |
| NM_006854 | 11402.525 | 12358.982 | Y16696    | 22877.527 | 24585.529 | AF150735  | 2644.129  | 5797.498  |
| AF150735  | 6730.063  | 8554.316  | AK026094  | 3393.546  | 3542.976  | NM_01818E | 506.387   | 1657.426  |
| NM_01818E | 2137.637  | 3205.146  | AF161344  | 13872.186 | 14042.581 | BF038366  | 346.756   | 177.377   |
| NM_01238E | 3814.687  | 4531.369  | AF086027  | 1684.469  | 1987.644  | NM_007194 | 1005.812  | 2611.718  |
| BF038366  | 785.079   | 1422.502  | NM_001207 | 62894.363 | 58305.559 | NM_000314 | 2158.774  | 2498.742  |
| NM_00245E | 26513.857 | 26037.658 | AK022154  | 362.989   | 431.131   | S74620    | 598.91    | 628.082   |
| NM_012304 | 871.152   | 818.397   | AK022199  | 2222.605  | 1953.12   | AF305239  | 452.508   | 731.921   |
| NM_01644C | 20901.328 | 21318.139 | NM_006211 | 552.373   | 703.279   | NM_002827 | 1298.742  | 1604.865  |
| NM_007194 | 3673.982  | 4849.563  | NM_003524 | 5377.227  | 4313.009  | NM_00194E | 270.861   | 304.847   |
| NM_000314 | 8298.151  | 6701.228  | AK021438  | 486.83    | 688.397   | BF035425  | 6270.985  | 5371.034  |
| AB002369  | 1846.645  | 1838.894  | NM_00591E | 968.48    | 924.581   | NM_00160E | 155.999   | 79.382    |
| S74620    | 3172.19   | 3036.969  | S39891    | 1016.347  | 1271.458  | NM_00015E | 16596.303 | 12407.904 |
| AF305239  | 1301.56   | 1524.011  | AK021624  | 924.538   | 1224.977  | NM_01463E | 434.845   | 371.041   |

|           |           |           |           |           |           |           |           |           |
|-----------|-----------|-----------|-----------|-----------|-----------|-----------|-----------|-----------|
| NM_002827 | 4735.356  | 4821.436  | AF278605  | 16009.567 | 11044.568 | NM_006287 | 164.393   | 377.073   |
| NM_001946 | 991.238   | 866.691   | NM_006497 | 18421.443 | 20582.057 | NM_000118 | 728.367   | 1674.995  |
| BF035425  | 5956.105  | 6532.537  | AK022329  | 698.106   | 589.51    | NM_001296 | 26805.031 | 16281.468 |
| NM_000156 | 55154.629 | 63971.5   | AL133599  | 1322.547  | 1845.129  | BG325046  | 664.498   | 1027.392  |
| NM_014636 | 1949.478  | 2526.217  | AK022380  | 600.642   | 585.165   | AI351740  | 1250.395  | 2597.918  |
| NM_000118 | 2491.104  | 3801.607  | NM_016472 | 3777.627  | 3935.375  | AA444051  | 174.442   | 401.307   |
| NM_000913 | 573.893   | 845.513   | AF086064  | 871.816   | 1017.925  | NM_007164 | 553.576   | 877.356   |
| AI351740  | 6398.952  | 10244.797 | AK023042  | 4120.955  | 3689.271  | BE783826  | 3256.336  | 6371.319  |
| NM_007164 | 1313.797  | 1607.436  | AK026429  | 798.053   | 742.786   | X04827    | 330.329   | 507.313   |
| BE783826  | 13605.503 | 12738.237 | NM_016550 | 4625.297  | 5782.739  | H07088    | 265.764   | 241.677   |
| X04827    | 1264.138  | 1821.496  | AK024813  | 8964.908  | 9203.444  | BC020596  | 760.593   | 764.698   |
| H07088    | 1271.051  | 1439.291  | AJ227909  | 27233.99  | 28429.982 | X98922    | 1397.002  | 1950.158  |
| AI004656  | 448.932   | 891.704   | AK021880  | 820.711   | 1204.958  | AK098435  | 1465.696  | 1205.096  |
| BC020596  | 1757.961  | 1610.781  | AK024107  | 646.438   | 897.628   | AK092872  | 785.554   | 611.889   |
| AF116606  | 55260.441 | 62246.949 | CY3Cy5    | 5506.021  | 243.234   | AF230496  | 164.425   | 144.582   |
| X98922    | 4634.898  | 4796.356  | BG698522  | 6259.106  | 7484.626  | M16801    | 276.826   | 353.632   |
| AK098435  | 7009.871  | 6339.12   | AA152346  | 531.48    | 789.764   | NM_145904 | 5611.252  | 4010.169  |
| AK092872  | 3344.698  | 2844.518  | L15189    | 2261.474  | 2176.115  | NM_021966 | 252.143   | 253.72    |
| AF230496  | 397.944   | 621.925   | AB023420  | 8489.421  | 11734.579 | NM_013334 | 1086.284  | 520.763   |
| M16801    | 613.266   | 367.31    | BI822179  | 814.165   | 1126.163  | AB037744  | 517.07    | 1883.007  |
| NM_145904 | 26810.445 | 29881.316 | AF022912  | 5217.416  | 4425.47   | AF141901  | 356.95    | 600.321   |
| NM_013334 | 4396.678  | 4593.409  | AA477428  | 23388.697 | 27700.902 | NM_007006 | 306.907   | 349.393   |
| AB037744  | 1747.436  | 1748.552  | AA156342  | 1002.19   | 1182.209  | AL109708  | 224.4     | 278.23    |
| AF141901  | 1736.354  | 1664.807  | R45594    | 14805.314 | 13537.57  | L29143    | 199.338   | 187.572   |
| NM_007006 | 1172.63   | 1922.356  | H46425    | 1222.237  | 1128.51   | AF234532  | 278.619   | 289.034   |
| AF234532  | 820.012   | 1348.086  | AA278152  | 11613.797 | 9680.688  | NM_002416 | 237.968   | 314.878   |
| NM_002416 | 882.729   | 880.497   | H75530    | 1481.935  | 1161.376  | NM_013296 | 2114.658  | 2338.062  |
| NM_004485 | 2992.855  | 4329.588  | SR5       | 7068.064  | 4441.807  | AL117478  | 234.718   | 79.445    |
| NM_012416 | 577.78    | 897.432   | SR7       | 5832.803  | 26682.527 | NM_005307 | 205.207   | 181.462   |
| NM_013296 | 8235.36   | 9445.736  | SR9       | 22184.441 | 1980.479  | NM_005956 | 439.537   | 308.069   |
| AL117478  | 708.233   | 1038.585  | CY3Cy5    | 3104.371  | 176.018   | NM_013436 | 628.132   | 766.801   |
| NM_005307 | 552.567   | 1338.397  | NM_001315 | 4413.355  | 8788.996  | AF225426  | 220.721   | 274.816   |
| NM_005956 | 1914.286  | 1898.406  | AF286095  | 2012.146  | 2519.785  | NM_005206 | 1236.919  | 1006.961  |
| NM_013436 | 2041.583  | 1498.434  | NM_000876 | 798.585   | 1090.12   | NM_000421 | 276.315   | 384.669   |
| AF225426  | 784.892   | 694.706   | S66407    | 1144.451  | 1431.827  | AK025687  | 1352.421  | 798.329   |
| NM_005206 | 5714.665  | 4869.043  | NM_016523 | 780.021   | 910.351   | AF218941  | 626.499   | 437.911   |
| NM_000421 | 1000.002  | 871.618   | NM_004256 | 51792.168 | 50625.328 | AL137264  | 1363.954  | 1038.307  |
| AK025687  | 11983.257 | 11457.971 | NM_001981 | 3365.347  | 2996.369  | NM_002226 | 194.412   | 90.141    |
| AF218941  | 3712.144  | 3910.356  | NM_014654 | 436.21    | 681.402   | X84370    | 2034.372  | 1522.278  |
| AL137264  | 6902.385  | 5669.822  | AK026108  | 7379.311  | 6456.189  | NM_004036 | 400.845   | 324.836   |
| NM_002226 | 577.252   | 437.702   | NM_006379 | 2217.786  | 2499.021  | AB014558  | 298.849   | 388.111   |
| X84370    | 8719.429  | 9448.522  | BF571428  | 3369.262  | 3361.695  | NM_016577 | 264.841   | 339.174   |
| NM_004036 | 2097.916  | 2754.395  | AB037723  | 5176.209  | 4068.01   | AK023107  | 3115.159  | 2663.136  |
| NM_000506 | 1444.13   | 2078.689  | NM_006246 | 5058.774  | 3873.44   | NM_006854 | 3710.56   | 3258.828  |
| AB014558  | 1297.158  | 1774.328  | NM_004316 | 544.486   | 323.761   | NM_004580 | 1536.26   | 1831.688  |
| NM_016577 | 537.656   | 291.979   | NM_012323 | 1418.6    | 1018.566  | NM_020387 | 9189.885  | 9077.961  |
| AK023107  | 8828.729  | 7707.553  | NM_013943 | 890.563   | 827.403   | NM_007246 | 560.777   | 508.216   |
| NM_006854 | 11106.764 | 10636.656 | NM_001639 | 4513.982  | 4950.957  | AK026248  | 346.58    | 385.629   |
| NM_004580 | 5473.271  | 6954.197  | AF182404  | 1876.016  | 2186.897  | NM_017604 | 540.499   | 449.864   |
| NM_020387 | 47904.93  | 45232.789 | NM_006555 | 3701.367  | 4955.834  | NM_017736 | 1715.563  | 1148.497  |
| NM_007246 | 1754.852  | 2181.83   | NM_014521 | 400.775   | 568.943   | NM_016557 | 385.477   | 244.225   |
| AK026248  | 1144.48   | 1492.804  | NM_002445 | 1506.987  | 1960.358  | NM_000623 | 841.54    | 439.067   |
| NM_004576 | 1775.968  | 2633.708  | NM_017809 | 850.951   | 1071.998  | AF161348  | 462.313   | 369.866   |

|           |           |           |           |           |           |           |           |           |
|-----------|-----------|-----------|-----------|-----------|-----------|-----------|-----------|-----------|
| NM_017604 | 2981.765  | 2912.417  | AK023202  | 2752.613  | 3233.159  | NM_018467 | 2021.763  | 1579.716  |
| NM_017738 | 9928.762  | 9582.401  | D63877    | 3852.182  | 3406.293  | NM_002038 | 1848.986  | 2006.696  |
| NM_016557 | 2044.023  | 2568.894  | AF131760  | 1120.086  | 1168.25   | NM_005728 | 1972.744  | 4120.166  |
| NM_000623 | 3277.533  | 2962.285  | NM_018698 | 1634.021  | 1645.934  | NM_003747 | 523.45    | 411.116   |
| AF161348  | 2122.901  | 1930.23   | NM_018201 | 2307.714  | 2029.533  | NM_002827 | 1253.738  | 1585.997  |
| NM_018467 | 8265.341  | 8654.571  | NM_014880 | 1333.358  | 1405.502  | NM_001948 | 278.131   | 346.657   |
| NM_006068 | 1110.764  | 1044.55   | NM_003764 | 4323.344  | 3150.698  | BF035425  | 3798.774  | 4130.442  |
| NM_002038 | 9667.364  | 14208.322 | NM_006793 | 24859.389 | 14136.554 | NM_000158 | 13646.437 | 12645.839 |
| NM_005728 | 8686.939  | 11698.786 | NM_001538 | 2583.701  | 3795.51   | NM_014638 | 571.991   | 546.647   |
| NM_015493 | 1106.931  | 1469.729  | X97261    | 7844.017  | 7493.87   | AF099740  | 461.074   | 757.183   |
| NM_003747 | 2339.552  | 2365.373  | NM_001468 | 1908.313  | 1791.833  | NM_015418 | 7893.902  | 6631.431  |
| NM_002827 | 4984.546  | 5096.421  | D87666    | 59592.492 | 54222.813 | NM_004897 | 1072.516  | 715.928   |
| NM_001948 | 1059.083  | 954.521   | AF149304  | 522.509   | 874.367   | NM_002558 | 384.831   | 240.943   |
| BF035425  | 5135.446  | 4975.11   | NM_012098 | 6112.542  | 7926.328  | AF225418  | 320.987   | 277.991   |
| NM_000158 | 55883.957 | 55974.934 | NM_016438 | 572.728   | 514.009   | NM_000308 | 475.61    | 384.589   |
| NM_014638 | 1698.11   | 2032.997  | AF264781  | 1236.139  | 1028.686  | NM_004528 | 7997.754  | 7861.02   |
| AF099740  | 1842.983  | 2083.673  | NM_000608 | 8216.444  | 10778.993 | AK026381  | 3814.372  | 3657.073  |
| NM_006117 | 24609.082 | 26655.078 | NM_016124 | 3999.396  | 5185.419  | NM_002450 | 5523.329  | 2402.401  |
| NM_002228 | 3740.386  | 3517.23   | U53530    | 3206.339  | 2467.154  | NM_001688 | 401.157   | 644.699   |
| NM_006228 | 753.941   | 1098.716  | NM_015948 | 3278.873  | 2550.947  | NM_000708 | 197.098   | 187.141   |
| NM_015418 | 30492.207 | 30468.336 | NM_003054 | 3900.868  | 3270.082  | NM_004231 | 15719.292 | 8753.882  |
| NM_004897 | 4688.402  | 6451.237  | NM_003042 | 1131.305  | 1052.268  | NM_016611 | 320.998   | 135.885   |
| NM_002558 | 2221.646  | 2448.591  | NM_004790 | 526.2     | 327.12    | NM_013334 | 1135.763  | 950.847   |
| AF225418  | 1528.384  | 1489.34   | NM_002218 | 7552.51   | 5648.524  | AF150735  | 1989.783  | 1398.403  |
| NM_000308 | 1500.58   | 1595.087  | NM_002828 | 2874.104  | 3635.738  | NM_018183 | 405.874   | 413.954   |
| NM_004528 | 24214.576 | 24466.484 | NM_002420 | 663.733   | 686.368   | NM_012382 | 1272.196  | 1271.605  |
| AK026381  | 19679.127 | 15852.604 | NM_016458 | 29140.242 | 30304.186 | BF038366  | 278.118   | 182.823   |
| NM_002450 | 17255.561 | 11364.765 | AK022233  | 2309.198  | 2514.817  | NM_002452 | 8410.946  | 5131.199  |
| NM_001688 | 1229.902  | 1770.626  | NM_006622 | 1123.543  | 1438.812  | NM_012304 | 240.811   | 459.816   |
| AF004711  | 1634.711  | 2830.347  | AB011156  | 1085.052  | 817.93    | NM_016440 | 4740.03   | 3366.177  |
| NM_000708 | 671.116   | 1138.02   | NM_018079 | 1165.394  | 637.489   | NM_007194 | 1087.727  | 1024.432  |
| NM_004231 | 66259.789 | 65040.32  | NM_004760 | 15728.419 | 15338.361 | NM_000314 | 1610.003  | 874.961   |
| NM_145904 | 27416.469 | 24312.311 | NM_006752 | 3544.515  | 2934.324  | AB002369  | 619.91    | 376.449   |
| NM_013334 | 4705.53   | 3758.287  | NM_004428 | 382.402   | 492.469   | S74620    | 317.261   | 213.35    |
| AF150735  | 7024.849  | 7584.367  | NM_006809 | 4673.222  | 4365.871  | AF305239  | 307.655   | 244.986   |
| NM_018183 | 2187.415  | 3741.888  | NM_018199 | 345.266   | 549.622   | AL137264  | 1501.672  | 1425.244  |
| NM_012382 | 4283.043  | 3656.199  | NM_013943 | 997.296   | 1341.979  | NM_002228 | 208.921   | 150.836   |
| BF038366  | 1043.619  | 1062.922  | NM_001639 | 4399.563  | 8562.515  | X84370    | 2490.079  | 2836.769  |
| NM_002452 | 26718.318 | 22474.459 | BG698522  | 8705.158  | 8733.438  | NM_004038 | 425.799   | 416.493   |
| NM_012304 | 745.581   | 653.339   | AA152346  | 451.503   | 821.212   | AB014558  | 328.46    | 310.445   |
| NM_016440 | 23238.826 | 22825.77  | L15189    | 1563.863  | 1088.912  | NM_000118 | 831.237   | 1250.017  |
| NM_007194 | 4038.418  | 5927.429  | AA278152  | 11548.183 | 8791.006  | NM_000913 | 141.677   | 186.293   |
| NM_000314 | 8556.329  | 7510.314  | H75530    | 1112.184  | 1075.383  | NM_001298 | 24685.943 | 11144.725 |
| AB002369  | 2095.902  | 1996.276  | NM_004176 | 2712.85   | 2383.665  | BG325046  | 935.573   | 466.024   |
| S74620    | 2995.862  | 2898.619  | NM_004548 | 23604.268 | 21198.188 | AI351740  | 1269.662  | 1297.472  |
| AF305239  | 1322.023  | 1216.657  | AK000554  | 2498.677  | 2323.07   | AA444051  | 205.333   | 142.469   |
| AL137264  | 6512.547  | 6207.012  | NM_006472 | 1343.318  | 989.943   | NM_007164 | 456.861   | 410.54    |
| NM_002228 | 537.002   | 250.136   | NM_001538 | 3605.89   | 8323.091  | BE783826  | 3127.554  | 2188.992  |
| X84370    | 8324.541  | 7927.769  | X97261    | 7549.273  | 12930.511 | X04827    | 346.472   | 389.004   |
| NM_004038 | 1598.732  | 1672.946  | NM_001468 | 1949.276  | 2728.116  | H07088    | 262.65    | 304.038   |
| AB014558  | 1296.981  | 1544.322  | D87666    | 57768.09  | 62155.34  | AI004656  | 233.86    | 205.206   |
| NM_000118 | 2713.932  | 4286.085  | NM_001318 | 4429.89   | 5939.047  | BC020596  | 797.346   | 1889.457  |
| NM_000913 | 969.429   | 687.941   | AF286095  | 2471.429  | 2185.384  | AF116606  | 19561.92  | 13831.459 |

|           |           |           |           |           |           |           |           |           |
|-----------|-----------|-----------|-----------|-----------|-----------|-----------|-----------|-----------|
| NM_00129E | 55364.93  | 51047.93  | NM_00087E | 1742.458  | 1417.137  | X98922    | 1203.832  | 868.176   |
| BG325046  | 2739.489  | 2860.029  | S66407    | 1490.217  | 1417.785  | AK098435  | 1076.096  | 611.497   |
| AI351740  | 6010.343  | 8329.354  | NM_006379 | 1699.041  | 2136.837  | AK092872  | 708.007   | 459.641   |
| AA444051  | 768.79    | 805.194   | BF571428  | 2654.578  | 2618.178  | NM_00203E | 2443.36   | 3733.934  |
| NM_007164 | 1248.969  | 1379.887  | AB037723  | 4427.505  | 3314.904  | NM_00572E | 1843.294  | 1926.058  |
| BE783826  | 13446.141 | 12017.539 | NM_00624E | 5271.33   | 3908.451  | NM_01549E | 409.337   | 408.031   |
| X04827    | 1272.098  | 1564.633  | NM_00431E | 443.958   | 386.306   | NM_003747 | 627.592   | 599.853   |
| H07088    | 763.662   | 947.869   | U58096    | 20600.979 | 17845.52  | AB037744  | 471.432   | 408.787   |
| BC020596  | 1538.825  | 1280.537  | NM_016929 | 5277.468  | 4435.214  | AF141901  | 273.028   | 232.726   |
| AF116606  | 53696.543 | 54214.758 | NM_01232E | 1266.933  | 1080.811  | NM_00700E | 338.421   | 256.841   |
| X98922    | 4572.875  | 3837.76   | NM_01594E | 2707.337  | 4032.967  | AL109708  | 303.855   | 314.644   |
| AK098435  | 7192.14   | 6058.072  | NM_003054 | 4390.971  | 5398.009  | L29143    | 215.843   | 57.686    |
| AK092872  | 3895.645  | 3031.041  | NM_00304E | 1315.067  | 1584.684  | AF234532  | 254.121   | 130.6     |
| M16801    | 367.592   | 586.923   | NM_00479C | 450.52    | 558.302   | NM_00241E | 166.587   | 192.462   |
| NM_00203E | 9496.703  | 11515.142 | NM_002219 | 3921.507  | 4572.247  | NM_00209C | 225.598   | 690.406   |
| NM_00572E | 7540.907  | 8423.61   | AF182404  | 2266.195  | 2284.111  | NM_00448E | 565.416   | 653.633   |
| NM_01549E | 1094.271  | 1311.824  | NM_000804 | 582.848   | 426.327   | NM_01329E | 1893.187  | 1763.537  |
| NM_003747 | 2266.152  | 2246.192  | NM_00655E | 3730.412  | 4231.451  | AL117478  | 160.65    | 149.294   |
| AB037744  | 1655.603  | 1753.749  | NM_014521 | 921.458   | 816.888   | NM_005307 | 191.217   | 191.105   |
| AF141901  | 1634.287  | 1445.362  | NM_00244E | 1587.229  | 1331.101  | NM_00595E | 466.44    | 374.633   |
| NM_00700E | 1399.393  | 1040.598  | NM_01780E | 872.594   | 891.274   | NM_01343E | 440.285   | 426.222   |
| AL109708  | 1159.916  | 962.699   | AK023202  | 2700.868  | 3211.544  | NM_00520E | 1043.644  | 1162.702  |
| AF234532  | 837.677   | 978.449   | D63877    | 2867.317  | 3653.006  | NM_000421 | 229.001   | 251.11    |
| NM_00241E | 715.11    | 852.889   | NM_006461 | 2551.723  | 3590.711  | AK025687  | 1416.955  | 1227.768  |
| NM_00448E | 2512.682  | 3580.41   | NM_018201 | 2058.252  | 1878.13   | AF218941  | 466.852   | 301.906   |
| NM_01241E | 623.858   | 626.39    | NM_01443E | 887.609   | 706.905   | AF004711  | 144.984   | 130.334   |
| NM_01329E | 7837.333  | 6410.182  | NM_01488C | 1113.786  | 984.612   | NM_00070E | 215.599   | 187.755   |
| AL117478  | 603.652   | 486.868   | NM_003764 | 4531.838  | 2632.622  | NM_004231 | 18620.254 | 13283.104 |
| NM_005307 | 474.527   | 377.608   | NM_00482E | 955.606   | 656.452   | NM_016577 | 305.804   | 336.722   |
| NM_00595E | 1989.058  | 1543.062  | NM_00679E | 24904.012 | 15204.335 | AK023107  | 2906.38   | 2295.896  |
| NM_01343E | 1787.47   | 1134.265  | NM_01807E | 1229.68   | 927.321   | NM_006854 | 3328.626  | 2266.22   |
| AF225426  | 896.074   | 434.653   | NM_00476C | 16123.08  | 23664.604 | NM_00458C | 1401.325  | 1384.717  |
| NM_00520E | 5333.542  | 4224.418  | NM_00675E | 3328.776  | 4671.447  | NM_020387 | 7741.297  | 4651.165  |
| NM_000421 | 1031.612  | 805.903   | NM_00442E | 219.22    | 739.144   | NM_00724E | 407.518   | 267.259   |
| AK025687  | 12897.589 | 8534.857  | NM_00680E | 3797.728  | 4283.072  | AK026248  | 302.545   | 184.582   |
| AF218941  | 4181.196  | 3939.021  | AF149304  | 677.47    | 747.094   | NM_00457E | 353.778   | 474.76    |
| NM_00497E | 269.925   | 791.304   | NM_01209E | 4987.367  | 4556.839  | AB046793  | 166.054   | 164.522   |
| NM_00070E | 975.365   | 573.313   | NM_01643E | 580.691   | 534.746   | NM_017604 | 514.246   | 411.082   |
| NM_004231 | 60498.297 | 57244.883 | X73079    | 20057.232 | 17733.721 | NM_01773E | 1307.51   | 1025.206  |
| NM_016577 | 743.553   | 492.773   | NM_019091 | 1464.843  | 1146.113  | NM_016557 | 409.099   | 351.209   |
| AK023107  | 10337.933 | 8385.658  | AF264781  | 981.334   | 1027.602  | NM_00062E | 829.774   | 402.809   |
| NM_006854 | 10832.451 | 9445.375  | NM_00245E | 451.873   | 727.205   | AF161348  | 541.98    | 435.676   |
| NM_00458C | 5572.913  | 5740.501  | AK024215  | 4077.373  | 3213.359  | NM_018467 | 1588.681  | 1513.137  |
| NM_020387 | 44868.375 | 37307.477 | AB044661  | 5165.851  | 3468.419  | U16752    | 186.419   | 151.244   |
| NM_00724E | 1985.377  | 1987.196  | NM_00060E | 10209.036 | 9452.539  | NM_01644C | 5397.252  | 5501.936  |
| AK026248  | 1345.003  | 1461.777  | NM_016124 | 3807.646  | 4167.856  | NM_007194 | 1066.034  | 1362.369  |
| NM_00457E | 1708.136  | 2682.267  | U53530    | 2432.963  | 1680.83   | NM_000314 | 2252.374  | 1611.383  |
| NM_000647 | 437.164   | 467.179   | NM_00659E | 2268.394  | 2885.435  | AB002369  | 318.893   | 505.012   |
| AB046793  | 681.966   | 386.365   | NM_00417E | 2521.915  | 3055.746  | S74620    | 330.934   | 378.527   |
| NM_017604 | 1682.052  | 1429.727  | NM_00454E | 23820.506 | 29868.201 | AF305239  | 351.976   | 364.871   |
| NM_01773E | 9094.578  | 5988.627  | AK000554  | 3170.124  | 3482.696  | NM_002827 | 1140.558  | 1203.238  |
| NM_016557 | 1837.589  | 1369.235  | NM_00647E | 1109.927  | 1153.836  | NM_00194E | 323.488   | 376.82    |
| AF161348  | 1592.196  | 1190.033  | NM_00282E | 2771.899  | 2572.296  | BF035425  | 3647.532  | 3231.85   |



|           |           |           |           |           |           |           |           |           |
|-----------|-----------|-----------|-----------|-----------|-----------|-----------|-----------|-----------|
| NM_018467 | 7656.596  | 5458.154  | AF159141  | 4256.197  | 3997.907  | NM_000155 | 13476.709 | 8847.825  |
| NM_016440 | 25480.746 | 21801.473 | NM_002420 | 474.333   | 479.424   | NM_014638 | 410.57    | 343.896   |
| NM_007194 | 3655.604  | 3932.471  | NM_016458 | 26971.377 | 24272.889 | AF099740  | 573.425   | 759.544   |
| NM_000314 | 8695.362  | 6723.076  | AK022233  | 2034.688  | 2048.613  | NM_006117 | 6530.547  | 4392.954  |
| AB002369  | 1813.226  | 1828.623  | AK026410  | 14710.396 | 15844.607 | NM_002225 | 352.269   | 192.623   |
| S74620    | 3361.064  | 3209.881  | NM_014637 | 4427.313  | 8292.576  | NM_006225 | 174.172   | 165.546   |
| AF305239  | 1582.804  | 1308.184  | NM_013379 | 18025.547 | 21250.271 | NM_015415 | 7052.363  | 5708.484  |
| NM_002827 | 5528.281  | 6215.958  | AF113208  | 13261.084 | 10764.387 | NM_004897 | 956.12    | 794.299   |
| NM_001946 | 984.608   | 829.33    | NM_006153 | 5992.647  | 5522.327  | NM_002555 | 433.572   | 346.58    |
| BF035425  | 5430.523  | 4905.258  | NM_012164 | 3005.999  | 3314.034  | AF225418  | 343.234   | 224.779   |
| NM_000155 | 55954.805 | 52665.484 | NM_004721 | 531.973   | 380.308   | NM_000305 | 397.002   | 349.211   |
| NM_002225 | 3123.15   | 2302.745  | AB011156  | 1099.565  | 1106.611  | NM_004528 | 7748.136  | 14077.965 |
| NM_006225 | 1198.949  | 892.906   | NM_006246 | 4900.975  | 5007.686  | NM_002450 | 4602.599  | 2083.311  |
| NM_015415 | 28393.285 | 19484.633 | NM_004316 | 484.586   | 595.601   | NM_001686 | 371.084   | 233.807   |
| NM_004897 | 3477.461  | 2682.976  | U58096    | 20271.898 | 24824.471 | NM_014723 | 1282.069  | 1139.21   |
| NM_002555 | 2780      | 2096.307  | NM_016929 | 4429.048  | 5833.195  | AB011106  | 679.53    | 642.287   |
| AK026381  | 18900.537 | 15205.464 | NM_012323 | 1226.159  | 1234.078  | D26362    | 1027.676  | 672.785   |
| NM_002450 | 17188.031 | 10239.264 | NM_013943 | 756.156   | 709.82    | NM_013452 | 311.251   | 230.697   |
| NM_001686 | 1073.713  | 1222.795  | NM_001639 | 4157.764  | 6046.903  | AL133073  | 195.685   | 548.429   |
| NM_014723 | 4301.172  | 3004.383  | H39560    | 302.28    | 486.138   | AY009402  | 512.607   | 536.576   |
| AB011106  | 3475.513  | 2674.53   | BG698522  | 7351.727  | 6016.31   | NM_018451 | 400.298   | 329.917   |
| D26362    | 4597.46   | 3517.839  | AA152346  | 680.99    | 501.289   | NM_012443 | 333.987   | 242.206   |
| NM_013452 | 1906.703  | 1573.278  | L15189    | 1327.678  | 952.324   | NM_007005 | 206.442   | 174.039   |
| AY009402  | 2577.465  | 2272.39   | AB023420  | 8399.813  | 7459.703  | NM_002584 | 1324.402  | 1910.097  |
| NM_018451 | 1728.648  | 1433.842  | BI822179  | 938.283   | 912.607   | NM_013334 | 1282.939  | 647.333   |
| NM_012443 | 1061.345  | 1207.608  | AF022912  | 5479.248  | 4519.419  | AF150735  | 2250.678  | 1872.038  |
| NM_007005 | 609.466   | 679.724   | AA477428  | 22189.209 | 19735.48  | NM_018183 | 493.731   | 687.741   |
| NM_002584 | 4633.194  | 5314.58   | AA156342  | 1065.853  | 855.898   | NM_012382 | 1057.732  | 1046.345  |
| NM_013334 | 4635.625  | 4674.001  | R45594    | 13428.654 | 13342.605 | BF038366  | 475.17    | 314.411   |
| AF150735  | 8986.875  | 7907.217  | H46425    | 1052.999  | 693.266   | AF245505  | 541.849   | 634.683   |
| BF038366  | 1007.235  | 632.991   | AI355949  | 606.993   | 607.824   | AB037776  | 305.382   | 411.36    |
| NM_002452 | 25897.971 | 21619.988 | AA278152  | 11223.381 | 9800.105  | AF196976  | 1092.381  | 899.782   |
| NM_012304 | 1628.51   | 628.772   | H75530    | 1558.966  | 1308.419  | AL050379  | 308.435   | 221.35    |
| AF245505  | 1621.531  | 1414.145  | NM_003764 | 4111.262  | 3877.428  | NM_003161 | 563.425   | 498.506   |
| AB037776  | 1110.462  | 1040.905  | NM_004829 | 655.872   | 949.596   | NM_014496 | 250.476   | 188.388   |
| AF196976  | 5703.896  | 3631.602  | NM_006793 | 21911.811 | 21501.643 | NM_016215 | 3282.167  | 3541.768  |
| AL050379  | 1567.986  | 1210.137  | NM_001538 | 2259.461  | 4538.594  | AK026919  | 373.219   | 793.222   |
| NM_003161 | 3258.085  | 2852.672  | X97261    | 7375.481  | 8815.857  | NM_001501 | 852.673   | 849.57    |
| NM_005455 | 2619.659  | 3558.516  | NM_001468 | 1747.132  | 1732.151  | NM_006176 | 10375.993 | 5648.681  |
| NM_016215 | 21243.486 | 20650.004 | D87666    | 59417.984 | 57372.277 | AL137459  | 506.705   | 194.553   |
| AK026919  | 1140.193  | 1717.025  | NM_001315 | 3878.019  | 4240.427  | AB007932  | 1098.732  | 1344.954  |
| NM_001501 | 5182.748  | 4572.258  | AF286095  | 1828.497  | 1637.166  | AF219257  | 4550.62   | 3001.271  |
| NM_006176 | 44736.793 | 34331.766 | NM_000878 | 1067.752  | 909.473   | NM_002561 | 1427.894  | 913.914   |
| AL137459  | 3262.79   | 2439.936  | S66407    | 1568.416  | 1584.827  | NM_006103 | 5029.177  | 3365.435  |
| AB007932  | 1948.052  | 1480.783  | NM_004258 | 52640.336 | 47355.746 | AL359933  | 3602.601  | 3171.458  |
| AF219257  | 24747.061 | 19152.43  | NM_001981 | 3596.701  | 2443.551  | NM_001302 | 239.274   | 236.342   |
| NM_003978 | 1204.161  | 722.499   | NM_014654 | 470.681   | 476.385   | M17783    | 1426.832  | 1062.88   |
| NM_002561 | 6545.003  | 6477.098  | NM_001585 | 48202.371 | 40615.539 | NM_012437 | 3289.178  | 1690.764  |
| NM_006103 | 32960.266 | 21488.582 | AK026108  | 7534.927  | 5894.108  | NM_002607 | 392.961   | 326.086   |
| NM_006206 | 1371.571  | 1301.303  | NM_006379 | 1783.398  | 1911.292  | NM_005890 | 739.586   | 690.44    |
| NM_000805 | 1135.523  | 1050.059  | BF571428  | 2885.481  | 2705.233  | NM_007065 | 10482.43  | 7543.249  |
| M17783    | 7768.249  | 5149.156  | AB037723  | 5038.814  | 3774.935  | AF149785  | 976.314   | 647.909   |
| NM_018590 | 12098.246 | 9156.065  | NM_000606 | 7502.258  | 10206.237 | NM_012068 | 1783.895  | 1102.155  |

|           |           |           |           |           |           |           |           |          |
|-----------|-----------|-----------|-----------|-----------|-----------|-----------|-----------|----------|
| NM_00317E | 2171.86   | 1893.6    | NM_016124 | 3355.415  | 5633.144  | NM_004064 | 1812.333  | 1128.731 |
| AF090944  | 1322.378  | 763.258   | NM_019079 | 443.853   | 685.727   | NM_00125E | 1609.042  | 1085.377 |
| NM_002607 | 1464.954  | 556.5     | U53530    | 1969.124  | 2602.226  | NM_014704 | 1005.554  | 474.658  |
| AF116626  | 3592.933  | 3663.011  | NM_00659E | 2338.18   | 3728.042  | NM_02020E | 209.811   | 70.922   |
| NM_00176C | 25379.182 | 23505.162 | NM_01594E | 2126.321  | 2446.556  | NM_001227 | 897.01    | 533.924  |
| NM_002527 | 886.588   | 806.187   | NM_003054 | 3345.235  | 3556.209  | NM_001191 | 1044.704  | 642.713  |
| NM_00589C | 3734.6    | 2779.019  | NM_003042 | 862.411   | 1129.95   | U15174    | 130.507   | 247.807  |
| NM_00706E | 43151.926 | 43008.855 | NM_002219 | 5426.935  | 4637.371  | NM_013342 | 1222.749  | 1597.899 |
| AF149785  | 5350.616  | 4411.342  | AF182404  | 1846.666  | 1854.678  | NM_014344 | 341.281   | 289.264  |
| NM_01206E | 9989.636  | 8012.62   | NM_00655E | 3454.865  | 3026.039  | AB040917  | 302.885   | 266.479  |
| NM_004064 | 8337.53   | 8172.469  | NM_014521 | 667.388   | 807.049   | NM_005932 | 286.7     | 187.492  |
| NM_00125E | 9124.815  | 9148.202  | NM_00244E | 1357.978  | 1514.734  | NM_00427E | 2735.823  | 2140.579 |
| NM_014704 | 4640.244  | 3940.51   | NM_017809 | 1017.123  | 859.561   | NM_004851 | 206.44    | 40.481   |
| NM_001227 | 3287.712  | 3520.774  | AK023202  | 3442.761  | 2497.652  | NM_00190E | 655.452   | 629.909  |
| NM_001191 | 5228.832  | 4444.517  | D63877    | 4368.467  | 2857.095  | NM_00028E | 3367.786  | 3730.425 |
| U15174    | 1177.174  | 1325.103  | AF131760  | 1402.813  | 930.906   | NM_005911 | 4096.889  | 3458.1   |
| NM_014344 | 1714.432  | 1578.171  | NM_01869E | 1496.742  | 1201.847  | AV702690  | 472.028   | 327.87   |
| AL110261  | 6592.996  | 4898.355  | NM_006461 | 3299.853  | 2813.352  | AL117452  | 1268.585  | 808.754  |
| NM_005932 | 1224.6    | 992.861   | NM_018201 | 2661.843  | 2111.511  | NM_01223C | 488.642   | 346.808  |
| NM_00427E | 9160.792  | 8361.664  | NM_01443E | 1009.014  | 755.272   | NM_01403E | 2758.649  | 941.777  |
| NM_00190E | 2168.022  | 2199.75   | NM_01488C | 1228.061  | 1010.992  | NM_002061 | 1178.208  | 595.824  |
| NM_00028E | 12181.601 | 12731.683 | NM_006153 | 5475.569  | 8005.061  | AF169974  | 815.152   | 350.721  |
| NM_005911 | 21807.088 | 18075.34  | NM_012164 | 3263.941  | 5259.855  | NM_004522 | 257.606   | 249.401  |
| AV702690  | 1962.605  | 1949.299  | AB011156  | 1084.191  | 1362.076  | NM_005733 | 416.846   | 255.846  |
| AL117452  | 5910.677  | 6599.766  | NM_018079 | 991.937   | 809.768   | NM_01813E | 924.431   | 540.875  |
| NM_01223C | 2367.627  | 2231.014  | NM_00476C | 14105.338 | 15703.269 | NM_01961E | 1374.839  | 659.799  |
| NM_01403E | 11612.161 | 9796.865  | NM_006752 | 3719.308  | 3698.924  | AF183411  | 448.15    | 254.723  |
| NM_002061 | 7039.396  | 6605.602  | NM_00442E | 168.341   | 521.2     | BF244591  | 233.622   | 296.187  |
| AF169974  | 4561.952  | 3794.814  | NM_006809 | 3805.195  | 3748.017  | NM_00588E | 3089.1    | 1263.96  |
| AF183411  | 1880.472  | 1625.458  | AF149304  | 572.483   | 555.67    | U63785    | 374.143   | 435.48   |
| BF244591  | 1231.885  | 758.484   | NM_01209E | 5162.412  | 4596.876  | NM_00596E | 412.515   | 254.836  |
| NM_00588E | 12397.817 | 8558.524  | NM_01643E | 516.567   | 414.71    | NM_00315E | 754.821   | 367.982  |
| U63785    | 1280.353  | 1229.566  | X73079    | 17575.818 | 16749.748 | NM_00310E | 299.012   | 126.493  |
| NM_00596E | 1705.76   | 1510.297  | NM_019091 | 1663.348  | 1577.112  | NM_01331C | 1888.115  | 1483.02  |
| NM_00315E | 4952.596  | 3381.143  | AF264781  | 1337.107  | 755.801   | BC004958  | 867.991   | 915.599  |
| NM_00310E | 1019.812  | 834.791   | NM_00245E | 688.883   | 398.94    | NM_005762 | 2436.925  | 1860.049 |
| NM_01331C | 7690.084  | 5215.933  | AK024215  | 5016.619  | 4195.583  | NM_006473 | 338.187   | 274.9    |
| BC004958  | 3847.627  | 3559.424  | AB044661  | 5428.662  | 3805.874  | NM_005653 | 363.117   | 324.306  |
| NM_005762 | 12336.668 | 9974.816  | NM_01537E | 1232.744  | 1754.7    | NM_014553 | 416.424   | 414.704  |
| NM_006473 | 1473.113  | 1162.613  | NM_00117E | 771.076   | 1125.213  | NM_00344C | 231.572   | 302.857  |
| NM_014643 | 967.875   | 814.39    | NM_013341 | 628.915   | 782.342   | NM_00469E | 1891.857  | 1237.963 |
| NM_005653 | 1734.517  | 1516.059  | NM_01653E | 984.703   | 1262.526  | U41387    | 2897.188  | 1820.257 |
| NM_014553 | 1730.895  | 1729.666  | NM_00406E | 455.603   | 665.501   | NM_003094 | 126.178   | 260.63   |
| NM_00344C | 1488.953  | 1412.357  | NM_004941 | 6216.599  | 5074.589  | NM_00451E | 2114.125  | 728.765  |
| NM_00469E | 8013.879  | 7233.886  | AF151831  | 2823.49   | 2691.021  | NM_006513 | 424.591   | 179.3    |
| U41387    | 11481.953 | 14856.481 | AB011121  | 530.413   | 515.039   | NM_00368E | 5917.251  | 3121.646 |
| NM_00451E | 12426.057 | 10415.314 | AF083255  | 3908.832  | 3688.339  | NM_00629E | 1530.021  | 831.742  |
| NM_006513 | 3122.738  | 2032.418  | AK022605  | 726.521   | 883.998   | NM_00154C | 870.485   | 450.43   |
| NM_012111 | 16895.529 | 15268.071 | AK000554  | 2266.785  | 2107.688  | NM_012111 | 3648.373  | 2281.727 |
| NM_00447C | 14834.06  | 10354.854 | NM_006472 | 1109.777  | 1032.037  | NM_00447C | 4488.664  | 4295.209 |
| NM_00141E | 12105.92  | 9866.678  | NM_00282E | 2723.216  | 2609.786  | NM_00141E | 1863.056  | 1342.21  |
| NM_00375E | 38732.965 | 32060.398 | AF159141  | 4381.886  | 4192.784  | NM_00375E | 10195.752 | 5647.861 |
| AL049680  | 4315.084  | 4020.505  | NM_00242C | 759.745   | 521.86    | AL049680  | 861.404   | 492.696  |

|           |           |           |           |           |           |           |          |          |
|-----------|-----------|-----------|-----------|-----------|-----------|-----------|----------|----------|
| AL133660  | 562.907   | 387.179   | NM_016458 | 39170.945 | 31145.6   | AK001595  | 636.345  | 735.324  |
| AK001595  | 2317.149  | 2588.625  | AK022233  | 2570.364  | 1928.854  | NM_018015 | 816.847  | 938.247  |
| NM_018015 | 3165.193  | 3139.131  | AK026410  | 17105.582 | 14332.727 | NM_003715 | 1421.771 | 1212.032 |
| NM_003715 | 7239.33   | 6048.019  | NM_014637 | 3869.314  | 2935.791  | M94065    | 399.668  | 369.693  |
| M94065    | 1604.98   | 1687.567  | NM_013379 | 8935.663  | 7321.807  | BF036874  | 509.853  | 599.478  |
| BF036874  | 1620.022  | 1485.403  | AF113208  | 15268.194 | 11842.275 | AF182419  | 741.219  | 741.473  |
| AF182419  | 2867.714  | 2945.695  | AF019382  | 1066.525  | 1860.991  | NM_007016 | 947.725  | 1159.835 |
| NM_007016 | 3976.499  | 3460.102  | BC012757  | 861.95    | 1362.345  | NM_002703 | 1006.58  | 649.314  |
| NM_002703 | 7805.844  | 7580.22   | M96686    | 348.577   | 677.339   | NM_005375 | 2836.259 | 807.294  |
| NM_005375 | 13149.45  | 6908.795  | NM_004062 | 2256.645  | 2656.108  | NM_005985 | 1179.494 | 491.688  |
| NM_005985 | 3246.16   | 2268.615  | NM_005883 | 1055.875  | 1298.667  | NM_015906 | 1286.949 | 617.728  |
| AJ276316  | 2699.67   | 1855.233  | NM_004449 | 857.836   | 1119.633  | AK023759  | 361.234  | 229.522  |
| AF229246  | 9199.058  | 6011.275  | NM_014591 | 2064.718  | 2695.1    | L25270    | 5656.518 | 2930.508 |
| S64709    | 4751.062  | 3597.947  | NM_014592 | 629.068   | 821.018   | AB033111  | 375.915  | 285.74   |
| NM_018485 | 674.913   | 967.337   | NM_001945 | 2462.786  | 2253.042  | AJ276316  | 506.278  | 471.249  |
| X56465    | 1138.066  | 968.495   | NM_020039 | 2421.734  | 2904.511  | AF229246  | 1892.183 | 1340.017 |
| NM_003071 | 11906.868 | 11542.641 | NM_006653 | 1275.741  | 1762.005  | S64709    | 709.03   | 310.365  |
| AK021494  | 3903.325  | 2485.615  | NM_014442 | 5751.519  | 4862.837  | NM_018485 | 189.537  | 127.642  |
| AK022117  | 445.988   | 430.622   | AB002313  | 1078.943  | 941.875   | X56465    | 272.374  | 209.488  |
| AL360160  | 11495.013 | 9629.549  | AB011167  | 1109.877  | 1272.2    | NM_003071 | 2223.843 | 1688.124 |
| AK001092  | 25550.764 | 20864.723 | NM_005409 | 1447.23   | 1180.467  | AK021494  | 713.69   | 505.722  |
| NM_014144 | 1170.33   | 935.6     | NM_000208 | 4565.125  | 3866.896  | AK022117  | 259.967  | 49.737   |
| AF147345  | 866.431   | 623.27    | NM_002188 | 44599.766 | 39759.828 | AF075023  | 227.645  | 233.821  |
| AF147373  | 1562.653  | 1390.358  | AK027119  | 17371.984 | 14225.523 | AL360160  | 3413.844 | 3227.258 |
| AF086253  | 1064.601  | 863.712   | AB037727  | 46074.523 | 39019.492 | AK001092  | 3886.397 | 3038.383 |
| AF086303  | 728.579   | 212.982   | NM_005426 | 2559.511  | 2129.503  | AK023427  | 121.968  | 638.207  |
| AF086345  | 4092.768  | 2161.008  | NM_004763 | 1573.394  | 1145.003  | AF147373  | 644.849  | 833.228  |
| AF086464  | 779.05    | 630.949   | NM_014063 | 8467.904  | 6999.602  | AF086253  | 342.871  | 230.151  |
| AL049278  | 3713.113  | 2254.479  | D86964    | 6001.743  | 4510.023  | AF086303  | 257.381  | 188.824  |
| AL117519  | 1242.765  | 1040.816  | AL049801  | 3718.557  | 2661.171  | AF086434  | 376.013  | 253.541  |
| AK055338  | 1859.278  | 2056.556  | NM_016395 | 15317.769 | 10609.216 | AK022063  | 1088.437 | 560.614  |
| NM_013315 | 468.516   | 177.018   | NM_003152 | 955.115   | 843.785   | AF086345  | 868.169  | 453.78   |
| NM_005060 | 1799.878  | 1253.278  | NM_014727 | 2210.58   | 3774.998  | AF086464  | 295.873  | 551.386  |
| AF085935  | 2159.765  | 1252.516  | BE885010  | 322.893   | 887.907   | AL049278  | 572.423  | 354.435  |
| AL035369  | 3208.408  | 2287.559  | NM_006342 | 5441.279  | 7263.271  | AL117519  | 252.084  | 149.015  |
| AF075097  | 1225.971  | 745.465   | NM_016396 | 4016.235  | 4054.829  | AK025063  | 177.894  | 29.465   |
| AK022801  | 2043.699  | 1664.038  | NM_005689 | 1598.61   | 1859.319  | NM_005060 | 279.323  | 238.368  |
| AL133075  | 8798.698  | 6413      | NM_005552 | 21563.076 | 24952.143 | AF085935  | 223.629  | 191      |
| AL137630  | 2643.397  | 1789.335  | NM_006717 | 1835.625  | 1882.936  | AL035369  | 831.735  | 917.292  |
| AK055236  | 570.57    | 519.334   | AL109786  | 987.449   | 1574.349  | AF075097  | 294.159  | 329.403  |
| AL137277  | 6535.516  | 3676.536  | AK026479  | 2523.953  | 2246.051  | AK022801  | 510.817  | 505.053  |
| AL137447  | 699.193   | 463.851   | AK022860  | 3671.419  | 3210.362  | AL133075  | 2922.969 | 3009.517 |
| BC023609  | 1438.657  | 1003.61   | X60188    | 29285.045 | 25840.725 | AK055236  | 249.304  | 117.852  |
| AK025100  | 644.263   | 404.04    | NM_005977 | 2046.248  | 1658.446  | AL137277  | 1905.014 | 1180.705 |
| AF086395  | 11006.199 | 5926.618  | NM_006265 | 20469.309 | 17492.488 | AL137447  | 278.428  | 113.487  |
| AF086049  | 1105.941  | 914.105   | NM_003126 | 654.564   | 630.19    | AL157467  | 251.019  | 149.278  |
| AF114263  | 2249.857  | 1847.657  | NM_006059 | 1971.568  | 1850.041  | BC023609  | 504.025  | 249.584  |
| AK026142  | 3329.67   | 1773.229  | NM_000347 | 8907.493  | 7607.457  | AF086395  | 2379.816 | 1489.358 |
| AF161369  | 3140.475  | 1880.432  | M13452    | 1851.599  | 1581.873  | AF086049  | 819.771  | 620.466  |
| AK027176  | 4694.119  | 3306.251  | AF082075  | 834.73    | 726.47    | AF088020  | 286.323  | 479.694  |
| AF073328  | 412.173   | 314.556   | NM_016114 | 2916.445  | 2263.46   | AF114263  | 351.965  | 609.462  |
| Y12019    | 2250.762  | 1330.749  | AY007114  | 1568.055  | 1246.814  | AK026142  | 747.645  | 378.906  |
| AK021898  | 1395.153  | 959.235   | AF086604  | 1269.873  | 685.883   | AF161369  | 412.522  | 325.345  |

|           |           |           |           |           |           |           |           |           |
|-----------|-----------|-----------|-----------|-----------|-----------|-----------|-----------|-----------|
| AK022024  | 2799.017  | 1656.917  | AB000895  | 1450.27   | 1038.643  | AK027176  | 1215.966  | 1297.38   |
| AK022301  | 1617.471  | 976.016   | X80031    | 1104.234  | 692.171   | AF211968  | 180.246   | 114.136   |
| AK021948  | 1345.428  | 963.193   | AK022178  | 1237.896  | 1212.761  | Y12019    | 381.207   | 280.511   |
| AK022054  | 982.052   | 501.534   | NM_006011 | 644.742   | 936.305   | AF147418  | 144.207   | 296.298   |
| AK026861  | 909.517   | 716.183   | L00635    | 1966.225  | 2177.686  | AF232217  | 181.09    | 104.427   |
| AK021642  | 4571.284  | 3603.384  | NM_015601 | 729.429   | 892.92    | AL137326  | 187.66    | 103.044   |
| AK022455  | 777.74    | 798.579   | NM_001780 | 10432.15  | 13234.753 | AK021898  | 564.685   | 853.109   |
| AK026905  | 5533.335  | 5145.562  | AJ277442  | 846.247   | 1195.158  | AK022024  | 1219.299  | 633.886   |
| AK023449  | 537.379   | 350.603   | NM_004569 | 7220.856  | 7062.87   | AK022301  | 529.26    | 151.14    |
| NM_00663E | 5132.794  | 6085.137  | AF089088  | 1087.52   | 1323.388  | AK021948  | 464.388   | 258.626   |
| X14675    | 1747.003  | 1105.437  | L07557    | 5030.059  | 4617.158  | AK022054  | 239.497   | 83.776    |
| AF071170  | 1051.699  | 782.808   | NM_002796 | 35859.352 | 36033.598 | AK022341  | 193.679   | 276.104   |
| AF075075  | 1128.736  | 966.287   | D78514    | 6358.042  | 5627.681  | AK026861  | 201.624   | 149.385   |
| NM_018304 | 10523.57  | 7511.617  | NM_013366 | 773.889   | 614.142   | AK021642  | 979.737   | 571.899   |
| AK023264  | 727.755   | 880.964   | NM_002787 | 36017.789 | 31574.236 | AK022455  | 258.866   | 121.837   |
| AK024457  | 3012.348  | 3166.753  | U95006    | 16659.396 | 12687.975 | AK021987  | 368.739   | 383.944   |
| AK026894  | 1344.552  | 1545.781  | NM_003347 | 7888.838  | 5420.912  | AK026905  | 887.094   | 471.949   |
| AK026372  | 1382.166  | 1181.866  | AF273051  | 684.001   | 907.737   | AK023449  | 176.577   | 297.28    |
| AL109684  | 745.398   | 690.971   | NM_014516 | 16878.408 | 12037.927 | NM_000134 | 202.459   | 154.521   |
| NM_01418E | 9810.129  | 12088.618 | AK021868  | 1924.771  | 1597.037  | NM_00663E | 1112.166  | 1541.157  |
| AF056442  | 1681.155  | 965.182   | AK000643  | 57395.742 | 61863.055 | X14675    | 353.619   | 403.097   |
| AK024752  | 46845.148 | 32173.264 | NM_018421 | 5801.766  | 4042.942  | AF071170  | 196.56    | 217.576   |
| BG117194  | 2864.005  | 2050.888  | NM_020127 | 1190.05   | 1235.337  | AF161364  | 197.333   | 171.723   |
| AF131859  | 6002.745  | 3931.947  | NM_015623 | 6463.14   | 5030.958  | AF075075  | 306.685   | 339.771   |
| AF086118  | 7428.353  | 5311.838  | AB045116  | 1706.982  | 1223.711  | NM_018304 | 1620.728  | 932.471   |
| NM_01413E | 2067.178  | 1922.009  | L49054    | 711.416   | 501.532   | AK023264  | 130.484   | 308.207   |
| AK023690  | 692.944   | 1310.647  | NM_001675 | 880.87    | 1903.168  | AK024457  | 1361.778  | 1251.303  |
| U48697    | 1076.368  | 1483.549  | NM_003422 | 3788.057  | 4488.978  | AL389977  | 275.781   | 737.901   |
| AF230317  | 585.679   | 741.89    | NM_001451 | 2031.886  | 1815.335  | AK026894  | 361.062   | 263.18    |
| Y16696    | 28806.807 | 31979.402 | NM_014779 | 1147.192  | 1318.337  | AK026372  | 357.133   | 110.622   |
| AK026094  | 4775.926  | 6766.104  | NM_002943 | 4840.022  | 5590.505  | AF056442  | 296.04    | 288.296   |
| AF161344  | 12846.022 | 13362.948 | AL133649  | 1132.189  | 1540.614  | AK024752  | 14821.499 | 11303.177 |
| AF075045  | 2127.863  | 1615.599  | AB018303  | 787.822   | 576.234   | BG117194  | 531.025   | 458.914   |
| AK022154  | 779.563   | 556.358   | NM_006454 | 4430.17   | 6126.021  | AF131859  | 864.311   | 1036.722  |
| AK022199  | 3057.292  | 2943.877  | NM_015846 | 6022.897  | 5649.177  | AK023632  | 198.224   | 392.494   |
| NM_003524 | 8789.3    | 6417.158  | NM_015972 | 10051.097 | 7874.387  | AF086118  | 1383.736  | 1798.626  |
| AK021438  | 933.763   | 1167.348  | NM_016132 | 2154.184  | 2210.233  | NM_01413E | 395.342   | 520.988   |
| NM_005913 | 997.581   | 1031.2    | NM_018006 | 2099.842  | 1690.845  | AK023644  | 317.959   | 95.678    |
| AK022315  | 446.044   | 493.329   | NM_016090 | 2200.081  | 1499.115  | AK023806  | 447.028   | 285.178   |
| S39891    | 1849.991  | 1278.112  | NM_001013 | 37083.551 | 34088.68  | Y16696    | 5888.674  | 1505.479  |
| R17536    | 785.679   | 959.964   | AK024040  | 3002.81   | 2670.81   | AK026094  | 730.514   | 295.529   |
| AK021624  | 1545.847  | 1123.406  | NM_005061 | 3106.394  | 2388.83   | AF161344  | 2975.056  | 1579.396  |
| AF278605  | 18285.004 | 27473.623 | AF182417  | 29746.918 | 23529.789 | AF022793  | 106.61    | 75.396    |
| NM_006497 | 14849.029 | 16452.594 | AL137354  | 13339.031 | 10466.666 | AF086027  | 553.884   | 574.734   |
| AK022329  | 725.637   | 939.301   | NM_001023 | 57141.234 | 59113.043 | NM_001207 | 28746.844 | 17488.076 |
| AL133599  | 1929.256  | 2039.423  | AK021571  | 5237.896  | 4605.682  | AK022199  | 590.936   | 298.868   |
| AK022380  | 733.932   | 922.677   | AF052149  | 5943.167  | 8227.566  | NM_006211 | 137.651   | 169.174   |
| NM_016472 | 5276.134  | 5837.295  | AK025586  | 690.818   | 958.968   | NM_003524 | 2272.442  | 1276.578  |
| AF086064  | 1165.544  | 1605.401  | AL137512  | 998.433   | 1522.232  | AK021438  | 217.219   | 169.815   |
| AK023042  | 5924.801  | 7582.461  | NM_005036 | 640.59    | 653.077   | AK022315  | 126.32    | 210.649   |
| AF086501  | 908.963   | 835.848   | NM_002541 | 1632.215  | 2011.289  | S39891    | 407.729   | 269.283   |
| AK026429  | 934.621   | 1356.492  | NM_000056 | 3752.279  | 3409.867  | R17536    | 210.518   | 125.619   |
| NM_01655C | 9058.853  | 9682.219  | NM_016311 | 25263.09  | 23860.662 | AK021624  | 303.056   | 272.42    |

|           |           |           |           |           |           |           |           |           |
|-----------|-----------|-----------|-----------|-----------|-----------|-----------|-----------|-----------|
| L19365    | 655.691   | 838.977   | NM_000290 | 4789.291  | 4488.386  | AF278605  | 4463.837  | 3987.864  |
| AK024107  | 1350.46   | 1422.376  | NM_016538 | 4079.847  | 3555.41   | NM_006497 | 1634.298  | 1032.611  |
| CY3Cy5    | 5722.469  | 486.344   | AK023275  | 8279.828  | 4767.792  | AL133599  | 354.535   | 128.904   |
| BG698522  | 2891.51   | 3228.35   | AJ223352  | 4333.644  | 3587.954  | AK026429  | 191.65    | 288.261   |
| AA152346  | 662.807   | 563.672   | NM_012238 | 2218.868  | 1921.892  | NM_016550 | 1781.217  | 691.51    |
| L15189    | 1396.656  | 2721.016  | NM_016539 | 8035.274  | 4017.289  | AK024813  | 1470.102  | 1079.422  |
| AB023420  | 9925.754  | 11316.919 | NM_006807 | 24629.541 | 21758.51  | AJ227909  | 4615.615  | 5348.43   |
| BI822179  | 1072.35   | 1017.607  | L16464    | 855.142   | 663.22    | CY3Cy5    | 1235.01   | 178.424   |
| AF022912  | 5534.27   | 5245.255  | NM_006532 | 4311.203  | 3608.683  | BG698522  | 1170.589  | 2593.749  |
| AA477428  | 22525.869 | 25078.314 | U07132    | 4222.298  | 3865.462  | AA152346  | 321.798   | 338.688   |
| AA156342  | 1300.01   | 1096.714  | NM_003436 | 677.621   | 685.098   | L15189    | 364.258   | 1294.256  |
| AA278152  | 14167.023 | 14049.012 | AL035301  | 1580.649  | 2661.648  | AB023420  | 3797.786  | 6442.254  |
| H75530    | 2761.092  | 1908.212  | NM_017687 | 1195.315  | 1737.343  | BI822179  | 307.248   | 811.293   |
| NM_004176 | 4208.196  | 2847.409  | NM_017975 | 3268.544  | 2496.652  | AF022912  | 1917.578  | 3777.054  |
| NM_004548 | 34169.922 | 23110.043 | AK025036  | 1069.729  | 1806.003  | AA477428  | 7365.44   | 11691.957 |
| SR5       | 5738.489  | 5733.031  | AK024843  | 13109.683 | 16375.192 | AA156342  | 427.242   | 780.865   |
| SR7       | 5554.202  | 43965.832 | AF074994  | 971.718   | 1914.45   | R45594    | 8269.211  | 11193.17  |
| SR9       | 20569.727 | 4047.957  | NM_017670 | 5076.339  | 6097.5    | H46425    | 326.858   | 477.38    |
| CY3Cy5    | 3405.147  | 250.653   | AF286598  | 869.423   | 843.617   | AI355949  | 260.071   | 512.499   |
| NM_001315 | 5104.894  | 6449.616  | AK021468  | 832.476   | 649.697   | AA278152  | 5026.806  | 7158.867  |
| AF286095  | 2170.722  | 3009.779  | BC033020  | 1074.668  | 1255.934  | H75530    | 479.052   | 611.281   |
| NM_000878 | 843.616   | 971.019   | NM_004366 | 13036.668 | 11932.691 | NM_004176 | 1235.05   | 1792.172  |
| S66407    | 1051.943  | 1231.684  | AK026168  | 1151.1    | 1036.814  | SR9       | 8771.047  | 5955.483  |
| NM_004258 | 27886.857 | 25698.463 | AJ296152  | 6809.359  | 4737.703  | CY3Cy5    | 1496.074  | 176.774   |
| NM_001981 | 3532.753  | 3706.119  | AK001067  | 2384.144  | 1942.606  | NM_001315 | 2106.431  | 4156.165  |
| NM_014654 | 537.482   | 302.417   | AK027088  | 11891.017 | 8717.378  | AF286095  | 632.943   | 1480.652  |
| NM_001585 | 10524.928 | 8906.883  | AB037721  | 11098.744 | 10256.942 | NM_000878 | 407.256   | 984.483   |
| NM_006379 | 1864.221  | 1337.925  | AK027120  | 1527.759  | 1544.742  | S66407    | 385.212   | 904.018   |
| BF571428  | 1863.586  | 2193.937  | AB029001  | 1745.742  | 1329.288  | NM_004258 | 11925.753 | 13053.752 |
| AB037723  | 1745.963  | 1379.586  | AB006624  | 5807.601  | 4664.804  | NM_001981 | 926.807   | 2103.881  |
| NM_006246 | 5919.575  | 5098.173  | AL109717  | 1687.406  | 1634.95   | NM_001585 | 7578.24   | 9923.643  |
| NM_014446 | 886.097   | 770.788   | AK025473  | 1294.523  | 834.295   | AK026108  | 1411.654  | 2661.242  |
| U58096    | 27203.963 | 18252.623 | AF146693  | 1862.914  | 1450.391  | NM_006379 | 920.708   | 1510.683  |
| NM_012323 | 847.965   | 960.002   | AF271070  | 12127.345 | 7272.431  | BF571428  | 817.441   | 1552.39   |
| NM_018199 | 362.846   | 367.751   | NM_014903 | 729.36    | 617.591   | AB037723  | 828.383   | 1363.315  |
| NM_013943 | 1065.228  | 904.252   | AK055959  | 970.146   | 1176.5    | NM_006246 | 1577.493  | 2210.997  |
| NM_001639 | 10558.49  | 6568.51   | AF052141  | 824.533   | 467.553   | NM_004316 | 266.293   | 467.102   |
| AF182404  | 2359.251  | 4158.586  | AK021705  | 4401.091  | 3830.843  | NM_016929 | 1340.934  | 3189.873  |
| NM_006555 | 4577.956  | 6488.891  | NM_016141 | 12127.959 | 16130.146 | NM_001639 | 2468.378  | 2734.36   |
| NM_014521 | 487.963   | 706.018   | AL109702  | 1189.563  | 1825.511  | H39560    | 243.503   | 553.371   |
| NM_002445 | 1331.892  | 1520.361  | AK025624  | 4722.406  | 5970.478  | AF182404  | 727.417   | 1885.492  |
| NM_017809 | 680.893   | 907.925   | AK026684  | 1835.142  | 2014.389  | NM_006555 | 1539.147  | 2535.747  |
| AK023202  | 3196.088  | 3977.429  | AL110125  | 5579.884  | 6745.034  | NM_014521 | 199.186   | 257.598   |
| D63877    | 3817.861  | 6902.169  | AK022764  | 1367.24   | 1635.024  | NM_002445 | 288.624   | 402.652   |
| AF131760  | 977.226   | 1057.495  | AJ011600  | 2627.453  | 1938.544  | NM_017809 | 521.425   | 470.229   |
| NM_018698 | 1759.282  | 1219.035  | AJ002785  | 1753.829  | 1489.629  | AK023202  | 866.702   | 1344.932  |
| NM_006461 | 4043.298  | 3486.186  | Z70716    | 1138.458  | 1041.315  | D63877    | 1144.054  | 1812.574  |
| NM_018201 | 2581.944  | 2217.987  | AL049251  | 716.436   | 604.576   | AF131760  | 240.149   | 251.441   |
| NM_014438 | 628.301   | 524.881   | Z83945    | 2637.513  | 2307.178  | NM_018698 | 511.71    | 527.805   |
| NM_003764 | 4116.196  | 2843.586  | L32606    | 853.418   | 890.785   | NM_006461 | 995.908   | 1061.716  |
| NM_001538 | 2077.107  | 1131.577  | L05148    | 7041.911  | 5228.182  | NM_018201 | 765.781   | 992.825   |
| X97261    | 12375.446 | 9283.399  | AK091125  | 1422.659  | 1315.009  | NM_014438 | 312.627   | 277.772   |
| NM_001468 | 2839.041  | 2456.533  | D16474    | 13843.716 | 11384.903 | NM_014880 | 313.108   | 232.344   |

|           |           |           |           |           |           |           |           |           |
|-----------|-----------|-----------|-----------|-----------|-----------|-----------|-----------|-----------|
| D87666    | 51855.531 | 60977.078 | AL080072  | 1055.589  | 1125.557  | NM_003764 | 961.867   | 1026.806  |
| AF149304  | 615.944   | 937.493   | AK024898  | 1007.35   | 872.376   | NM_006793 | 5639.916  | 7620.425  |
| NM_012095 | 7518.672  | 11139.334 | AL049280  | 2304.005  | 3416.055  | NM_001538 | 830.959   | 840.655   |
| NM_016438 | 362.397   | 678.344   | AK025212  | 7525.051  | 9617.689  | X97261    | 3257.482  | 3069.451  |
| X73079    | 17256.975 | 20924.904 | AL157503  | 3906.677  | 3477.143  | NM_001468 | 643.071   | 452.058   |
| NM_019091 | 1374.493  | 1825.373  | AK000053  | 794.723   | 685.981   | D87666    | 42379.824 | 32088.592 |
| AF264781  | 987.2     | 1500.251  | AK000786  | 1774.735  | 1850.628  | NM_002921 | 342.297   | 1004.03   |
| AK022823  | 286.286   | 549.555   | AK000935  | 913.307   | 664.537   | AF149304  | 165.038   | 355.004   |
| NM_002456 | 473.911   | 583.443   | AK021458  | 2882.522  | 2348.115  | NM_012095 | 1517.79   | 2082.505  |
| AK024215  | 4264.759  | 4495.784  | NM_017674 | 5853.354  | 4672.142  | X73079    | 7091.645  | 6453.401  |
| AB044661  | 4821.476  | 5108.817  | AK000811  | 634.61    | 489.74    | NM_019091 | 475.363   | 440.865   |
| NM_000606 | 6045.735  | 4467.508  | AK000966  | 985.978   | 799.397   | AF264781  | 284.038   | 275.76    |
| NM_016124 | 3807.237  | 3452.148  | AK024525  | 6825.147  | 4747.07   | AK024215  | 1423.155  | 1424.324  |
| NM_019079 | 591.145   | 742.836   | AK024909  | 1689.046  | 1311.739  | AB044661  | 1423.1    | 1060.897  |
| U53530    | 2038.877  | 1930.863  | AK024544  | 2529.811  | 1934.291  | NM_000606 | 1862.509  | 1129.677  |
| NM_006598 | 3890.291  | 2569.455  | AK001880  | 7042.516  | 9707.135  | NM_016124 | 1457.5    | 783.777   |
| NM_015948 | 2014.916  | 1609.934  | AF156166  | 5283.93   | 6507.018  | U53530    | 433.503   | 688.842   |
| NM_003054 | 4276.755  | 3600.943  | NM_014373 | 3329.42   | 4192.513  | NM_006598 | 921.605   | 1167.82   |
| NM_003042 | 1017.912  | 831.523   | NM_014206 | 24838.898 | 32146.324 | NM_015948 | 527.056   | 672.272   |
| NM_002219 | 10516.389 | 10900.216 | NM_001651 | 4213.962  | 6764.19   | NM_003054 | 939.202   | 638.803   |
| NM_006782 | 675.096   | 1572.86   | L32786    | 1978.673  | 2163.776  | NM_003042 | 260.966   | 240.931   |
| NM_002826 | 3011.457  | 4948.198  | U03239    | 442.931   | 506.075   | NM_004790 | 248.034   | 453.944   |
| AF159141  | 3546.92   | 4416.033  | AL355720  | 1208.449  | 1271.396  | NM_002219 | 4163.484  | 16438.613 |
| NM_002420 | 472.486   | 388.803   | AK002023  | 5773.35   | 6051.017  | NM_002826 | 848.456   | 874.038   |
| NM_016458 | 15491.394 | 14899.017 | AF150156  | 554.682   | 847.859   | AF159141  | 934.979   | 881.055   |
| AK022233  | 2912.592  | 3338.78   | NM_016464 | 728.851   | 1130.86   | NM_016458 | 3778.442  | 3113.328  |
| AL137713  | 391.489   | 276.803   | L40402    | 3299.872  | 2999.553  | AK022233  | 543.93    | 561.672   |
| AK026410  | 10481.857 | 8674.235  | AF086216  | 500.469   | 347.923   | AK026410  | 2691.34   | 2189.558  |
| NM_014637 | 3880.107  | 3571.513  | AK022422  | 2287.584  | 1976.69   | NM_014637 | 1100.231  | 1024.649  |
| NM_013379 | 14522.121 | 14002.253 | AK023485  | 639.555   | 396.242   | NM_013379 | 4032.681  | 3648.598  |
| AF113208  | 8554.604  | 8711.739  | AK022474  | 16194.41  | 16701.994 | AF113208  | 2520.488  | 2006.363  |
| NM_006153 | 5569.74   | 4031.586  | AK022392  | 10641.119 | 8722.294  | NM_006153 | 1655.05   | 755.428   |
| NM_012164 | 4665.918  | 3418.277  | AL117451  | 859.162   | 541.216   | NM_012164 | 1014.447  | 477.066   |
| AK026010  | 816.384   | 1065.747  | AK025949  | 1748.332  | 2425.648  | NM_018079 | 279.619   | 331.21    |
| NM_004721 | 656.524   | 671.138   | Y10259    | 3131.042  | 3217.025  | NM_004760 | 6183.888  | 4283.362  |
| AB011156  | 1038.486  | 823.543   | AK021725  | 2388.114  | 3215.693  | NM_006752 | 1103.495  | 988.206   |
| NM_018079 | 1073.216  | 1244.189  | NM_002408 | 3110.515  | 4159.174  | NM_004428 | 200.662   | 174.681   |
| NM_004760 | 18933.848 | 15305.052 | AK024282  | 1268.335  | 2085.97   | NM_006809 | 1312.92   | 1073.751  |
| NM_006752 | 4890.612  | 4966.506  | AF085838  | 6449.078  | 3730.628  | NM_018199 | 214.801   | 163.234   |
| NM_004428 | 546.164   | 207.325   | NM_018277 | 1172.154  | 1138.758  | BG698522  | 777.86    | 746.626   |
| NM_006809 | 4388.837  | 4690.423  | AF014455  | 730.354   | 756.858   | AA152346  | 230.941   | 155.812   |
| NM_018199 | 476.794   | 1605.758  | AF086335  | 2851.01   | 3126.417  | L15189    | 316.319   | 311.859   |
| NM_013943 | 913.999   | 1476.092  | AB011118  | 21038.332 | 19056.441 | AB023420  | 2391.125  | 1962.701  |
| NM_001639 | 9528.939  | 8644.462  | S66666    | 508.459   | 632.911   | BI822179  | 320.577   | 245.935   |
| BG698522  | 3725.225  | 3364.909  | AK021476  | 2704.931  | 2641.67   | AF022912  | 1766.238  | 1467.351  |
| AA152346  | 791.994   | 376.908   | NM_018630 | 6425.093  | 4035.107  | AA477428  | 8169.096  | 5373.433  |
| L15189    | 1568.33   | 2343.263  | AF086175  | 1038.158  | 781.559   | AA156342  | 287.453   | 251.891   |
| AB023420  | 11772.46  | 13496.406 | AK002196  | 587.998   | 791.769   | R45594    | 4841.612  | 2407.963  |
| BI822179  | 1219.827  | 1058.653  | NM_004576 | 2447.597  | 2341.319  | AA278152  | 3474.306  | 2734.998  |
| AF022912  | 6509.806  | 5126.935  | AF040097  | 1676.613  | 1437.073  | H75530    | 427.488   | 309.914   |
| AA477428  | 24579.631 | 24708.656 | NM_020436 | 589.286   | 548.479   | NM_004176 | 854.86    | 443.022   |
| AA156342  | 1346.812  | 1053.096  | AK024182  | 1095.838  | 891.339   | NM_004548 | 9975.149  | 5118.352  |
| R45594    | 16818.203 | 13810.78  | NM_006913 | 11478.345 | 10082.253 | AK000554  | 802.523   | 440.23    |

|           |           |           |           |           |           |           |           |           |
|-----------|-----------|-----------|-----------|-----------|-----------|-----------|-----------|-----------|
| H46425    | 559.074   | 383.968   | NM_000499 | 11678.563 | 8896.415  | NM_006472 | 409.112   | 360.42    |
| AI355949  | 579.888   | 212.302   | AL049955  | 11740.81  | 22709.061 | NM_00153E | 736.318   | 369.176   |
| AA278152  | 15322.007 | 13591.121 | AF155654  | 11289.846 | 15378.037 | X97261    | 2665.304  | 2577.153  |
| H75530    | 2176.813  | 1761.255  | AF088044  | 463.468   | 876.17    | NM_00146E | 917.607   | 697.831   |
| NM_00417E | 3913.986  | 3107.076  | AK000028  | 2550.421  | 4211.522  | D87666    | 40183.363 | 15678.558 |
| NM_00454E | 32911.688 | 21336.982 | NM_01332C | 50552.289 | 57036.934 | NM_00131E | 1534.757  | 1110.108  |
| AK000554  | 3430.732  | 3151.868  | AJ245902  | 787.34    | 1011.662  | AF286095  | 457.416   | 358.417   |
| NM_006472 | 1062.44   | 1122.42   | AL050039  | 886.888   | 936.568   | NM_00087E | 227.228   | 287.754   |
| NM_00153E | 2323.932  | 3169.904  | AF009316  | 695.515   | 368.413   | S66407    | 229.825   | 256.544   |
| NM_00146E | 2346.883  | 4665.47   | AF087987  | 664.446   | 939.544   | NM_00425E | 6641.021  | 3414.909  |
| D87666    | 54775.598 | 71029.344 | AK021723  | 515.726   | 186.415   | NM_001981 | 631.437   | 382.993   |
| NM_00131E | 5589.627  | 5256.606  | H09474    | 2619.777  | 2572.846  | NM_014654 | 219.07    | 92.526    |
| AF286095  | 2325.244  | 1621.891  | AB002368  | 9701.234  | 9684.297  | NM_00158E | 3648.405  | 1500.54   |
| NM_00087E | 940.717   | 666.652   | AL360263  | 55441.883 | 54300.445 | AK026108  | 858.168   | 388.604   |
| S66407    | 1292.968  | 920.941   | Z36780    | 2159.952  | 2639.648  | NM_00637E | 552.768   | 735.869   |
| NM_00425E | 31948.789 | 22633.422 | AK022403  | 2308.47   | 2359.801  | BF571428  | 510.437   | 279.818   |
| NM_001981 | 3895.104  | 3555.989  | AK022955  | 6151.777  | 6692.723  | AB037723  | 557.435   | 315.454   |
| NM_014654 | 680.614   | 380.078   | AF131741  | 647.864   | 500.997   | NM_00624E | 1359.803  | 756.318   |
| NM_00158E | 8292.274  | 6054.755  | AK021760  | 611.24    | 526.914   | U58096    | 8426.522  | 3724.759  |
| AK026108  | 3511.292  | 3123.492  | BC035855  | 3582.393  | 2301.297  | NM_01692E | 1156.178  | 561.239   |
| NM_00637E | 1927.428  | 1288.757  | AL137408  | 13125.053 | 11171.419 | NM_01232E | 309.384   | 573.126   |
| BF571428  | 2306.131  | 1793.683  | AF054995  | 1588.33   | 1199.501  | NM_01594E | 508.857   | 594.549   |
| AB037723  | 1874.399  | 1051.649  | AL080176  | 3025.99   | 2198.993  | NM_003054 | 1273.467  | 1073.541  |
| NM_00624E | 5929.058  | 5440.222  | AK023627  | 2702.473  | 2145.735  | NM_00479C | 211.338   | 339.354   |
| U58096    | 26771.711 | 19427.641 | CY3Cy5    | 1920.562  | 194.765   | NM_00221E | 2551.979  | 2012.827  |
| NM_01692E | 4921.285  | 3449.325  | BI759406  | 1770.619  | 2310.207  | AF182404  | 651.442   | 762.599   |
| NM_01232E | 823.378   | 893.012   | R76099    | 521.05    | 663.609   | NM_00655E | 1285.644  | 1055.723  |
| NM_003054 | 4481.806  | 7062.397  | S74445    | 383.826   | 601.823   | NM_00244E | 269.893   | 168.441   |
| NM_003042 | 996.125   | 1081.744  | BI763360  | 1088.021  | 1165.783  | NM_01780E | 210.664   | 157.28    |
| NM_00479C | 447.25    | 475.695   | D25538    | 962.89    | 742.033   | AK023202  | 782.714   | 869.231   |
| NM_00221E | 10305.174 | 12137.967 | NM_00036C | 3687.854  | 4437.679  | D63877    | 937.41    | 771.532   |
| AF182404  | 2463.161  | 3132.251  | NM_00184E | 326.917   | 266.205   | AF131760  | 242.658   | 229.681   |
| NM_00655E | 4430.991  | 4322.487  | X03635    | 1427.267  | 1606.843  | NM_01869E | 386.157   | 429.502   |
| NM_014521 | 402.425   | 271.244   | AF353674  | 4742.673  | 4220.705  | NM_006461 | 833.833   | 462.523   |
| NM_00244E | 1261.446  | 1049.159  | BC002645  | 2351.95   | 1777.003  | NM_018201 | 547.242   | 794.684   |
| NM_01780E | 561.731   | 467.216   | NM_021138 | 1675.185  | 1391.218  | NM_01443E | 181.032   | 237.621   |
| AK023202  | 3518.472  | 3083.445  | BC002792  | 598.739   | 673.535   | NM_01488C | 146.194   | 170.166   |
| D63877    | 4062.222  | 4640.986  | NM_02100E | 619.698   | 898.376   | NM_003764 | 996.362   | 512.165   |
| AF131760  | 1364.309  | 1056.741  | SB        | 290.619   | 254.13    | NM_00482E | 191.715   | 132.541   |
| NM_01869E | 1855.856  | 1500.877  | SR2       | 44834.797 | 20583.852 | NM_00679E | 8888.208  | 26524.822 |
| NM_006461 | 4408.123  | 3602.248  | SR4       | 10982.973 | 5202.396  | NM_01807E | 415.245   | 422.26    |
| NM_018201 | 2937.574  | 2035.54   | SR6       | 1637.6    | 872.909   | NM_00476C | 5866.111  | 4426.563  |
| NM_01443E | 866.41    | 795.052   | SR8       | 5568.169  | 7932.146  | NM_00675E | 1246.67   | 946.632   |
| NM_003764 | 5393.985  | 4233.092  | SR10      | 20676.943 | 3286.288  | NM_00442E | 216.655   | 301.792   |
| NM_00482E | 480.319   | 377.737   | CY3Cy5    | 1426.177  | 167.314   | NM_00680E | 1497.999  | 1563.323  |
| NM_00679E | 21387.311 | 21524.354 | X07203    | 469.445   | 720.009   | AF149304  | 253.131   | 267.207   |
| NM_01807E | 1027.248  | 1993.639  | NM_003834 | 2643.987  | 3460.224  | NM_01209E | 1739.38   | 1449.127  |
| NM_00476C | 18434.361 | 24777.992 | NM_00595E | 2816.293  | 3417.952  | NM_01643E | 213.351   | 148.894   |
| NM_00675E | 4844.37   | 5458.426  | NM_003381 | 890.743   | 1134.697  | X73079    | 8352.042  | 5389.198  |
| NM_00442E | 518.222   | 342.578   | NM_00575E | 574.589   | 727.244   | NM_019091 | 514.295   | 387.083   |
| NM_00680E | 4176.596  | 5589.397  | NM_00370E | 6706.976  | 6790.924  | AF264781  | 359.596   | 250.437   |
| AF149304  | 490.126   | 685.522   | NM_00036E | 577.53    | 765.044   | NM_00245E | 177.687   | 282.3     |
| NM_01209E | 7324.41   | 8501.325  | NM_016351 | 874.657   | 1184.88   | AK024215  | 1089.581  | 1345.496  |

|           |           |           |           |           |           |           |           |           |
|-----------|-----------|-----------|-----------|-----------|-----------|-----------|-----------|-----------|
| NM_01643E | 390.975   | 622.82    | NM_00440E | 2383.834  | 2312.839  | AB044661  | 886.877   | 439.507   |
| X73079    | 20192.029 | 19364.438 | NM_00606C | 1513.822  | 1222.023  | NM_00060E | 1572.181  | 615.436   |
| NM_019091 | 1340.127  | 1491.142  | NM_005667 | 2182.675  | 2066.746  | NM_016124 | 1304.606  | 515.591   |
| AF264781  | 1236.993  | 1369.152  | NM_00630E | 414.772   | 348.107   | NM_01907E | 176.232   | 302.178   |
| NM_00245E | 579.37    | 519.634   | NM_00006C | 371.129   | 230.014   | U53530    | 559.884   | 469.564   |
| AK024215  | 4235.133  | 4457.024  | L09080    | 1559.217  | 1428.091  | NM_00659E | 968.458   | 504.893   |
| AB044661  | 4964.606  | 3930.781  | NM_00732E | 3292.331  | 2232.355  | NM_00417E | 647.152   | 488.479   |
| NM_00060E | 7959.069  | 5690.714  | NM_00188E | 3277.413  | 2363.417  | NM_00454E | 9275.813  | 5271.182  |
| NM_016124 | 4753.568  | 4126.417  | NM_004467 | 395.507   | 306.957   | AK000554  | 806.799   | 1021.277  |
| NM_01907E | 585.292   | 557.832   | NM_005622 | 480.994   | 392.27    | NM_00647E | 401.076   | 313.633   |
| U53530    | 2830.596  | 2024.769  | NM_01805E | 5315.935  | 2996.541  | NM_00282E | 968.36    | 908.204   |
| NM_00659E | 4208.574  | 3041.06   | NM_00454E | 5962.51   | 8061.659  | AF159141  | 1154.6    | 1104.077  |
| NM_00417E | 3423.309  | 3525.99   | X69079    | 16936.531 | 12542.748 | NM_00242C | 1248.062  | 1827.331  |
| NM_00454E | 31221.811 | 28947.609 | AF091033  | 763.709   | 980.878   | NM_01645E | 5033.812  | 3421.425  |
| AK000554  | 3656.988  | 3993.421  | NM_001122 | 13169.316 | 18252.666 | AK022233  | 755.294   | 532.434   |
| NM_00647E | 1097.333  | 1290.978  | NM_004591 | 1797.31   | 2427.531  | AK026410  | 3073.215  | 833.875   |
| NM_00282E | 2984.322  | 4141.308  | AL133027  | 1293.311  | 1570.499  | NM_014637 | 1009.046  | 915.494   |
| AF159141  | 3279.703  | 3202.173  | AB037732  | 1062.307  | 1583.6    | NM_01337E | 3888.577  | 6266.408  |
| NM_01645E | 14683.55  | 12538.676 | NM_005767 | 377.168   | 345.114   | AF113208  | 2455.736  | 989.955   |
| AK022233  | 2723.764  | 2735.291  | NM_001837 | 508.077   | 435.07    | NM_00615E | 1531.549  | 528.907   |
| AL137713  | 334.6     | 173.851   | NM_00183E | 57541.852 | 72580.945 | NM_012164 | 1001.367  | 371.153   |
| AK026410  | 11467.837 | 8162.72   | BC016029  | 484.511   | 514.308   | NM_004721 | 180.319   | 212.603   |
| NM_014637 | 4616.555  | 3613.296  | M27487    | 845.981   | 883.545   | AB011156  | 333.878   | 223.728   |
| NM_01337E | 13988.122 | 12468.511 | NM_00228E | 50793.32  | 43954.313 | NM_00624E | 2108.033  | 1670.902  |
| AF113208  | 8828.531  | 8400.349  | NM_002164 | 628.624   | 468.092   | NM_00431E | 546.626   | 341.056   |
| NM_00615E | 6142.403  | 5361.601  | NM_003811 | 2597.113  | 2509.04   | U58096    | 9124.968  | 5029.145  |
| NM_012164 | 4723.534  | 3123.863  | NM_002981 | 3590.442  | 3145.191  | NM_01692E | 1137.989  | 1044.675  |
| AK026010  | 480.086   | 404.95    | NM_001244 | 970.185   | 896.051   | NM_01232E | 321.58    | 520.586   |
| NM_004721 | 451.164   | 366.882   | NM_01227E | 328.902   | 232.037   | NM_01819E | 159.148   | 191.067   |
| AB011156  | 926.195   | 966.881   | NM_006137 | 3231.043  | 1987.68   | NM_01394E | 256.068   | 238.066   |
| NM_00624E | 5791.826  | 7297.302  | NM_01613E | 29546.006 | 19553.619 | NM_00163E | 2263.067  | 1245.144  |
| NM_00431E | 843.801   | 855.361   | AL117468  | 7014.33   | 4852.248  | H39560    | 343.087   | 197.404   |
| U58096    | 24699.037 | 23481.334 | NM_01961E | 5730.283  | 3081.168  | BG698522  | 864.491   | 419.97    |
| NM_01692E | 4368.752  | 4046.974  | NM_00538E | 576.789   | 535.187   | AA152346  | 226.679   | 178.012   |
| NM_01232E | 882.746   | 1326.313  | AK027086  | 2896.055  | 2216.265  | L15189    | 329.414   | 239.414   |
| NM_01819E | 441.429   | 442.698   | AB032997  | 697.415   | 514.788   | AB023420  | 2479.881  | 596.621   |
| NM_01394E | 725.976   | 904.426   | AL096857  | 2167.346  | 1768.323  | BI822179  | 341.701   | 217.365   |
| NM_00163E | 9118.791  | 10066.846 | AF073770  | 2594.204  | 3918.917  | AF022912  | 1393.197  | 895.241   |
| BG698522  | 3073.823  | 2585.517  | AL359401  | 4493.298  | 9232.406  | AA477428  | 6110.444  | 2897.136  |
| AA152346  | 757.488   | 294.939   | NM_01221E | 1936.287  | 3163.529  | AA156342  | 284.237   | 133.954   |
| L15189    | 1467.354  | 1852.009  | NM_01657E | 2721.686  | 3800.467  | R45594    | 4444.406  | 1680.411  |
| AB023420  | 10426.879 | 8806.259  | NM_00130E | 6936.302  | 7820.301  | H46425    | 321.951   | 858.151   |
| BI822179  | 1097.36   | 708.679   | M21304    | 703.997   | 1057.883  | AI355949  | 482.164   | 1629.716  |
| AF022912  | 6087.513  | 4509.046  | NM_00197E | 3621.106  | 4644.121  | AA278152  | 5408.367  | 16233.132 |
| AA477428  | 23626.93  | 22624.469 | AB040896  | 1106.985  | 1320.028  | H75530    | 463.403   | 335.038   |
| AA156342  | 1248.033  | 931.306   | NM_001107 | 4645.776  | 5307.023  | NM_003764 | 1074.327  | 1129.771  |
| R45594    | 17581.463 | 14687.731 | AF151851  | 4462.725  | 4224.347  | NM_00482E | 385.161   | 502.459   |
| H46425    | 512.164   | 519.051   | NM_00363E | 8604.293  | 7085.845  | NM_00679E | 5885.266  | 4860.911  |
| AA278152  | 14645.493 | 13593.826 | NM_002234 | 2245.839  | 1938.108  | NM_00153E | 1007.224  | 724.998   |
| H75530    | 2357.023  | 1792.614  | NM_000701 | 1609.523  | 1432.528  | X97261    | 2868.566  | 2524.768  |
| NM_003764 | 5228.023  | 5453.124  | AB022696  | 4491.342  | 3750.668  | NM_00146E | 754.849   | 865.334   |
| NM_00679E | 20005.801 | 26462.928 | AF137372  | 4044.383  | 2948.116  | D87666    | 37249.176 | 14364.232 |
| NM_00153E | 2533.083  | 2452.817  | AF220417  | 1206.067  | 1050.87   | NM_00131E | 1711.756  | 1012.4    |



|           |           |           |           |           |           |           |          |          |
|-----------|-----------|-----------|-----------|-----------|-----------|-----------|----------|----------|
| X97261    | 12006.573 | 10880.437 | D83782    | 3922.135  | 3146.562  | AF286095  | 543.377  | 385.743  |
| NM_00146E | 2307.854  | 2720.759  | NM_00207E | 1651.875  | 996.966   | NM_00087E | 217.908  | 207.775  |
| D87666    | 48729.555 | 70359.156 | NM_000287 | 1551.617  | 1436.263  | S66407    | 245.333  | 185.794  |
| NM_00131E | 6004.175  | 5101.666  | NM_00165E | 1072.322  | 1130.072  | NM_00425E | 6625.833 | 2182.815 |
| AF286095  | 2418.052  | 1749.962  | Z70705    | 837.265   | 587.151   | NM_001981 | 831.098  | 545.076  |
| NM_00087E | 806.86    | 572.904   | NM_002611 | 1313.221  | 1729.181  | NM_00158E | 6717.868 | 4220.086 |
| S66407    | 1060.683  | 787.952   | NM_017417 | 840.792   | 873.049   | AK026108  | 908.683  | 1945.025 |
| NM_00425E | 26746.941 | 19554.666 | AL133602  | 1772.468  | 2105.058  | NM_00637E | 822.068  | 3884.835 |
| NM_001981 | 3813.306  | 3584.927  | AF037219  | 3569.018  | 3159.694  | BF571428  | 830.192  | 3071.356 |
| NM_014654 | 634.704   | 337.494   | AK026075  | 930.071   | 1646.708  | AB037723  | 618.545  | 417.071  |
| NM_00158E | 11426.02  | 7638.559  | NM_000251 | 2180.175  | 1880.253  | NM_00060E | 902.041  | 747.898  |
| AK026108  | 3523.475  | 2898.705  | NM_00603E | 2879.497  | 2731.768  | NM_016124 | 1401.238 | 1153.78  |
| NM_00637E | 2324.766  | 1865.052  | AB011133  | 2433.611  | 1667.737  | NM_01907E | 292.307  | 210.644  |
| BF571428  | 2346.611  | 1534.244  | NM_017572 | 26218.922 | 15122.145 | U53530    | 960.595  | 805.496  |
| AB037723  | 1674.983  | 1183.345  | NM_018444 | 1567.236  | 1592.295  | NM_00659E | 998.488  | 994.452  |
| NM_00060E | 6685.135  | 6856.811  | NM_000252 | 1291.431  | 1059.758  | NM_01594E | 678.143  | 559.755  |
| NM_016124 | 3828.531  | 4909.148  | NM_006947 | 8445.216  | 6211.775  | NM_003054 | 1224.258 | 843.273  |
| NM_01907E | 390.577   | 430.261   | NM_017917 | 2508.928  | 1241.837  | NM_003042 | 321.217  | 442.488  |
| U53530    | 2170.932  | 2237.484  | NM_00409C | 3668.722  | 2549.36   | NM_00221E | 2487.04  | 2020.098 |
| NM_00659E | 3630.469  | 2993.317  | NM_014634 | 5897.734  | 3754.991  | AF182404  | 610.682  | 582.556  |
| NM_01594E | 1912.73   | 1906.798  | NM_00191E | 5004.559  | 3559.579  | NM_00655E | 1080.19  | 492.102  |
| NM_003054 | 4624.743  | 4360.235  | BC031485  | 1303.091  | 1206.603  | NM_00244E | 324.048  | 192.385  |
| NM_003042 | 1104.188  | 1141.93   | NM_004092 | 5884.722  | 4433.134  | NM_01780E | 188.381  | 189.844  |
| NM_00479C | 324.329   | 927.361   | X15624    | 1324.025  | 1466.356  | AK023202  | 796.35   | 392.03   |
| NM_00221E | 10057.773 | 12589.707 | NM_004467 | 441.129   | 796.562   | D63877    | 1079.821 | 677.475  |
| AF182404  | 2586.957  | 3056.475  | NM_005622 | 666.176   | 1039.663  | AF131760  | 342.539  | 230.024  |
| NM_00655E | 4971.307  | 4112.174  | NM_01805E | 6169.741  | 6839.798  | NM_01869E | 440.417  | 457.778  |
| NM_00244E | 1258.599  | 1276.174  | NM_00454E | 5452.028  | 11618.437 | NM_006461 | 1123.934 | 2054.151 |
| NM_01780E | 589.934   | 579.781   | X69079    | 21059.836 | 22018.105 | NM_018201 | 890.471  | 4665.096 |
| AK023202  | 3638.223  | 3445.18   | BI759406  | 1838.521  | 2388.23   | NM_01443E | 335.792  | 1180.139 |
| D63877    | 4266.732  | 4364.551  | R76099    | 498.548   | 481.504   | NM_00615E | 1541.134 | 855.457  |
| AF131760  | 1224.218  | 1057.562  | S74445    | 507.312   | 497.847   | NM_012164 | 1097.639 | 708.188  |
| NM_01869E | 1835.159  | 1283.128  | BI763360  | 1024.499  | 1046.024  | NM_004721 | 453.836  | 367.574  |
| NM_006461 | 4624.38   | 3615.479  | D25538    | 1021.921  | 759.883   | AB011156  | 291.264  | 278.618  |
| NM_018201 | 3044.093  | 2434.749  | NM_00036C | 3536.575  | 4073.993  | NM_01807E | 229.607  | 299.354  |
| NM_01443E | 718.182   | 543.904   | D49950    | 264.769   | 280.766   | NM_00476C | 6223.879 | 4584.444 |
| AB011156  | 1178.118  | 1100.438  | X03635    | 1562.449  | 1680.893  | NM_006752 | 1183.784 | 1218.778 |
| NM_01807E | 1016.472  | 1407.566  | X03348    | 1146.44   | 991.432   | NM_00442E | 201.376  | 140.736  |
| NM_00476C | 21043.93  | 18478.07  | AF353674  | 4999.814  | 4031.663  | NM_00680E | 1396.098 | 1767.8   |
| NM_006752 | 6183.896  | 6577.285  | BC002645  | 2635.811  | 2092.53   | AF149304  | 188.495  | 159.46   |
| NM_00442E | 688.532   | 379.022   | NM_021138 | 1704.046  | 1317.019  | NM_01209E | 1742.255 | 1217.813 |
| NM_00680E | 4758.599  | 5210.205  | BC002792  | 714.942   | 460.613   | X73079    | 6207.144 | 2006.19  |
| AF149304  | 890.336   | 802.184   | NM_02100E | 829.003   | 823.524   | NM_019091 | 443.622  | 274.732  |
| NM_01209E | 7404.596  | 7986.211  | SB        | 504.928   | 484.421   | AF264781  | 305.798  | 308.049  |
| NM_01643E | 700.765   | 707.311   | NM_001523 | 504.401   | 400.047   | NM_00245E | 201.046  | 262.621  |
| X73079    | 22267.385 | 18325.301 | NM_017423 | 1894.378  | 1098.988  | AK024215  | 1513.269 | 1792.257 |
| NM_019091 | 1740.614  | 1404.223  | NM_019613 | 6102.145  | 6932.042  | AB044661  | 1342.322 | 688.889  |
| AF264781  | 1200.482  | 1802.445  | NM_005382 | 582.567   | 919.816   | NM_01537E | 305.629  | 219.351  |
| NM_00245E | 555.285   | 836.283   | AK027086  | 2936.958  | 4069.493  | NM_00117E | 261.001  | 626.428  |
| AK024215  | 4434.14   | 4369.474  | AB032997  | 664.088   | 866.745   | NM_00406E | 454.68   | 486.087  |
| AB044661  | 5885.012  | 5078.338  | AL096857  | 2381.59   | 2618.412  | NM_004941 | 1536.609 | 1051.991 |
| NM_00117E | 770.594   | 1608.122  | X07203    | 441.505   | 457.374   | AF151831  | 844.205  | 808.741  |
| NM_00406E | 601.348   | 828.787   | NM_003834 | 2873.421  | 3004.576  | AF083255  | 1544.851 | 1431.826 |

|           |           |           |           |           |           |           |          |          |
|-----------|-----------|-----------|-----------|-----------|-----------|-----------|----------|----------|
| NM_004941 | 5908.547  | 4810.658  | NM_005959 | 2514.683  | 2729.199  | AK022605  | 288.4    | 289.011  |
| AF151831  | 4339.044  | 4577.836  | NM_003381 | 966.076   | 1096.664  | AK000554  | 785.784  | 693.359  |
| AB011121  | 682.243   | 577.933   | NM_005756 | 663.374   | 578.103   | NM_006472 | 414.16   | 460.378  |
| AF083255  | 6779.125  | 6652.291  | NM_003702 | 7220.505  | 5406.346  | NM_002826 | 848.58   | 713.369  |
| AK022605  | 1316.016  | 712.949   | NM_000369 | 517.249   | 474.142   | AF159141  | 916.057  | 461.919  |
| AK000554  | 3913.024  | 3742.445  | NM_004405 | 2407.548  | 2074.822  | NM_016458 | 4558.883 | 2116.143 |
| NM_006472 | 1575.094  | 1508.647  | NM_001988 | 6087.198  | 5416.512  | AK022233  | 636.487  | 382.351  |
| NM_002826 | 3568.865  | 3771.217  | NM_006060 | 1673.261  | 1936.053  | AK026410  | 3145.646 | 967.2    |
| AF159141  | 3634.547  | 3178.066  | NM_005667 | 2266.945  | 1879.995  | NM_014637 | 1048.821 | 497.232  |
| NM_016458 | 18213.316 | 14743.858 | NM_006308 | 407.627   | 271.005   | NM_013379 | 3458.039 | 2138.882 |
| AK022233  | 2963.514  | 2912.641  | NM_000060 | 485.844   | 276.234   | AF113208  | 3302.756 | 1376.336 |
| AL137713  | 298.206   | 394.997   | L09080    | 1824.505  | 1214.242  | BC012757  | 258.834  | 260.456  |
| AK026410  | 12779.979 | 10187.007 | NM_007326 | 3189.22   | 2451.65   | NM_004448 | 274.348  | 198.859  |
| NM_014637 | 4372.998  | 4097.273  | AK023080  | 273.031   | 253.917   | NM_014591 | 682.15   | 486.792  |
| NM_013379 | 16622.492 | 16049.188 | NM_001886 | 3670.171  | 2256.974  | NM_014592 | 219.913  | 196.835  |
| AF113208  | 10293.039 | 10496.969 | AF137372  | 5041.259  | 8915.925  | NM_001945 | 603.897  | 871.138  |
| NM_004062 | 3184.334  | 3702.891  | AF220417  | 968.992   | 1514.555  | NM_020038 | 695.983  | 684.407  |
| NM_005883 | 645.766   | 712.12    | D83782    | 5550.674  | 6898.266  | NM_006653 | 510.867  | 309.798  |
| NM_004448 | 1140.213  | 923.386   | NM_002078 | 1809.108  | 2247.164  | NM_014442 | 668.364  | 1098.06  |
| NM_014591 | 3856.803  | 2874.673  | NM_000287 | 1624.207  | 2626.788  | AB002313  | 202.983  | 118.269  |
| NM_014592 | 542.526   | 486.765   | NM_001656 | 1318.176  | 1857.449  | AB011167  | 441.69   | 341.392  |
| NM_001945 | 2983.814  | 2921.308  | AF091033  | 658.495   | 853.233   | NM_005408 | 342.469  | 161.114  |
| NM_020038 | 4129.606  | 2028.948  | NM_001122 | 10798.472 | 11814.762 | NM_000208 | 685.313  | 191.85   |
| NM_006653 | 2471.537  | 1778.949  | NM_004591 | 1573.7    | 1774.117  | NM_002188 | 7810.335 | 3424.702 |
| NM_014442 | 1834.735  | 1232.384  | AL133027  | 1215.574  | 1050.718  | AK027119  | 3515.451 | 4538.763 |
| AB002313  | 456.806   | 540.818   | AB037732  | 996.631   | 1246.233  | AB037727  | 6443.735 | 2629.801 |
| AB011167  | 2104.546  | 1620.524  | NM_005767 | 317.796   | 243.523   | NM_005426 | 604.179  | 347.588  |
| NM_005408 | 790.822   | 446.381   | NM_001837 | 499.918   | 368.341   | NM_004763 | 387.87   | 190.783  |
| NM_000208 | 3186.098  | 2514.076  | BC016029  | 506.769   | 374.007   | NM_014063 | 2052.291 | 716.836  |
| NM_002188 | 27952.443 | 21528.441 | M27487    | 711.795   | 593.371   | D86964    | 1838.476 | 1432.957 |
| AK027119  | 11124.095 | 10375.307 | NM_002164 | 662.507   | 419.981   | AL049801  | 1381.504 | 1125.182 |
| AB037727  | 21881.074 | 16591.328 | NM_003811 | 2377.019  | 2428.407  | NM_016395 | 4464.03  | 3854.203 |
| NM_005426 | 3452.216  | 3233.025  | NM_002981 | 3795.196  | 2819.702  | NM_003152 | 271.914  | 141.478  |
| NM_004763 | 1895.812  | 1827.595  | NM_001244 | 1216.701  | 1004.842  | NM_014727 | 574.59   | 391.642  |
| NM_014063 | 9387.601  | 7025.028  | NM_012275 | 332.223   | 274.419   | NM_016396 | 906.222  | 1198.859 |
| D86964    | 7805.085  | 5890.421  | NM_006137 | 3682.523  | 1717.427  | NM_005688 | 473.311  | 774.879  |
| AL049801  | 5513.066  | 4923.051  | NM_016139 | 32579.379 | 23334.748 | NM_005552 | 4559.748 | 4004.552 |
| NM_016395 | 14407.076 | 14448.733 | AL117468  | 5747.134  | 3489.755  | NM_006717 | 824.153  | 646.718  |
| NM_003152 | 1442.86   | 701.27    | NM_004090 | 3550.537  | 5182.498  | AL109786  | 498.048  | 468.103  |
| NM_016396 | 4694.472  | 5591.89   | NM_014634 | 7017.362  | 9084.997  | AK026479  | 663.072  | 788.59   |
| NM_005688 | 2348.665  | 2357.462  | NM_001919 | 8900.75   | 11182.798 | AK022860  | 1030.611 | 912.307  |
| NM_005552 | 15404.133 | 13221.535 | BC031485  | 1808.998  | 2597.278  | X60188    | 5794.413 | 4183.49  |
| NM_006717 | 4483.732  | 3806.779  | NM_004092 | 5900.32   | 7052.141  | NM_005977 | 746.255  | 608.221  |
| AL109786  | 3232.641  | 1362.47   | X15624    | 1395.686  | 1958.217  | NM_002747 | 229.32   | 68.175   |
| AK026479  | 4267.128  | 3066.265  | AF073770  | 2691.233  | 3002.172  | NM_006265 | 8647.241 | 2378.734 |
| AK022860  | 5113.231  | 5104.303  | AL359401  | 4377.038  | 7335.016  | NM_006058 | 436.99   | 281.857  |
| X60188    | 32531.182 | 24028.992 | NM_012213 | 2007.427  | 2498.494  | NM_000347 | 985.673  | 401.958  |
| NM_005977 | 3793.805  | 2490.709  | NM_016573 | 2931.856  | 3253.156  | M13452    | 434.394  | 213.419  |
| NM_002747 | 616.474   | 538.521   | NM_001303 | 6432.007  | 6199.655  | NM_016114 | 1015.609 | 851.017  |
| NM_006265 | 35584.289 | 21606.885 | M21304    | 646.814   | 608.45    | AK022178  | 339.032  | 376.693  |
| NM_003126 | 796.189   | 567.773   | NM_001979 | 3816.593  | 3897.384  | L00635    | 207.054  | 158.404  |
| NM_006058 | 1557.013  | 1283.044  | AB040896  | 1258.35   | 951.793   | NM_015601 | 224.329  | 302.689  |
| NM_000347 | 2143.179  | 1290.582  | AF084645  | 359.498   | 309.577   | NM_001780 | 2284.387 | 2200.954 |

|           |           |           |           |           |           |           |           |           |
|-----------|-----------|-----------|-----------|-----------|-----------|-----------|-----------|-----------|
| M13452    | 2600.846  | 1598.695  | NM_003636 | 8062.419  | 6141.27   | AJ277442  | 317.09    | 199.77    |
| AF082075  | 451.374   | 333.618   | NM_002234 | 2321.915  | 2013.531  | NM_004566 | 1816      | 1914.939  |
| NM_016114 | 3653.601  | 2247.638  | NM_000701 | 1710.179  | 1423.396  | AF089088  | 425.662   | 287.588   |
| AY007114  | 2051.175  | 1527.492  | AB022696  | 4095.259  | 2424.556  | L07557    | 1625.161  | 1276.565  |
| AF086604  | 653.81    | 537.062   | NM_021005 | 592.552   | 1537.374  | NM_002796 | 23985.727 | 11400.889 |
| AB000895  | 1307.869  | 884.841   | NM_001523 | 749.297   | 1120.932  | D78514    | 2103.562  | 1333.555  |
| X80031    | 1355.684  | 1079.405  | NM_017423 | 2094.118  | 2068.017  | AK021665  | 209.722   | 250.766   |
| L00635    | 1043.438  | 868.785   | Z70705    | 752.078   | 604.226   | NM_013366 | 199.307   | 188.065   |
| NM_015601 | 878.295   | 1203.274  | NM_002611 | 1452.907  | 1728.069  | NM_002787 | 13830.724 | 7320.781  |
| NM_001780 | 12133.949 | 12041.405 | NM_017417 | 785.359   | 720.919   | U95006    | 4543.734  | 2217.968  |
| AJ277442  | 1046.522  | 771.312   | AL133602  | 1788.674  | 1529.513  | NM_003347 | 1252.984  | 376.937   |
| NM_004566 | 7005.913  | 7027.931  | AF037219  | 3092.463  | 2191.335  | AF273051  | 294.25    | 223.039   |
| AF089088  | 1502.012  | 991.908   | AK026075  | 923.066   | 1343.461  | NM_014516 | 1795.369  | 760.904   |
| L07557    | 5922.837  | 4660.865  | NM_000251 | 2332.926  | 1591.225  | AK021868  | 695.234   | 301.455   |
| NM_002796 | 40826.16  | 35373.293 | NM_006036 | 3144.313  | 2713.708  | AK000643  | 39019.633 | 19239.803 |
| D78514    | 9107.394  | 6193.749  | AB011133  | 2144.613  | 1610.57   | NM_018421 | 2058.351  | 1324.264  |
| AK021665  | 940.42    | 883.793   | NM_017572 | 23775.656 | 15389.583 | NM_020127 | 707.57    | 3346.825  |
| NM_013366 | 1015.443  | 818.506   | NM_018444 | 1736.185  | 1258.854  | NM_015623 | 3112.158  | 15932.636 |
| NM_002787 | 43627.887 | 34939.262 | NM_000252 | 1236.608  | 1017.413  | AB045116  | 367.372   | 1986.211  |
| U95006    | 17103.506 | 15921.508 | NM_006947 | 7846.799  | 6365.901  | L49054    | 285.693   | 396.553   |
| NM_003347 | 6385.448  | 6294.381  | NM_017917 | 2711.258  | 1164.343  | NM_001675 | 319.942   | 408.45    |
| AF273051  | 1410.713  | 930.981   | NM_000060 | 618.016   | 613.232   | NM_003422 | 445.145   | 440.358   |
| NM_014516 | 6296.375  | 4714.458  | L09080    | 1955.419  | 3464.903  | NM_001451 | 336.307   | 268.673   |
| AK021868  | 2204.741  | 1588.565  | NM_007326 | 4867.69   | 6238.09   | NM_014779 | 368.196   | 328.058   |
| AK000643  | 48086.59  | 53359.973 | NM_001886 | 3361.278  | 3923.676  | NM_000192 | 192.79    | 87.284    |
| NM_018421 | 7161.688  | 5101.982  | NM_004467 | 346.772   | 454.172   | NM_002943 | 877.228   | 843.682   |
| AB014574  | 44743.105 | 34972.676 | NM_005622 | 645.594   | 715.337   | AL133649  | 419.131   | 637.565   |
| NM_020127 | 2219.82   | 1582.165  | NM_018058 | 6200.495  | 5500.283  | NM_006454 | 1873.811  | 879.6     |
| NM_015623 | 9481.726  | 5366.261  | NM_004548 | 4865.748  | 9578.336  | NM_015846 | 1601.733  | 1537.767  |
| AB045116  | 1209.502  | 781.967   | X69079    | 21536.82  | 18284.424 | NM_015972 | 2815.222  | 2647.578  |
| L49054    | 617.21    | 438.614   | BI759406  | 2052.491  | 1991.807  | NM_016132 | 910.268   | 441.685   |
| NM_001675 | 1561.166  | 1290.138  | R76099    | 459.637   | 368.297   | NM_018006 | 614.445   | 299.49    |
| NM_003422 | 2199.929  | 2828.48   | S74445    | 456.154   | 410.506   | NM_016090 | 644.856   | 334.221   |
| NM_001451 | 2638.983  | 2215.646  | BI763360  | 1075.54   | 951.627   | NM_001013 | 17977.828 | 4279.124  |
| NM_014779 | 1709.306  | 1705.384  | D25538    | 1014.358  | 648.266   | AK024040  | 1313.565  | 521.372   |
| NM_002943 | 3778.383  | 3253.681  | NM_000360 | 3888.738  | 3660.422  | AL137354  | 9362.612  | 25345.391 |
| AL133649  | 1803.513  | 1154.582  | X03635    | 1572.109  | 1142.498  | NM_001023 | 45728.93  | 72736.273 |
| AB018303  | 938.484   | 482.795   | BC011847  | 56740.918 | 68991.445 | AK021571  | 3078.503  | 11308.524 |
| NM_006454 | 7669.582  | 3687.583  | X03348    | 957.24    | 946.991   | AF052149  | 1389.282  | 1142.46   |
| NM_015972 | 13465.395 | 9551.764  | AF353674  | 4303.69   | 2988.208  | AK025586  | 219.282   | 141.988   |
| NM_016132 | 4018.444  | 2144.197  | BC002645  | 2454.981  | 1391.098  | AL137512  | 250.828   | 240.932   |
| NM_018006 | 3349.215  | 2871.675  | NM_021138 | 1367.345  | 1307.959  | NM_005036 | 198.091   | 173.734   |
| NM_016090 | 2517.577  | 1558.577  | BC002792  | 725.562   | 577.429   | NM_002541 | 392.417   | 363.045   |
| NM_001013 | 51848.172 | 35635.719 | NM_002981 | 3661.774  | 4862.661  | NM_000056 | 1043.467  | 859.368   |
| AK024040  | 5046.606  | 3986.176  | NM_001244 | 1006.413  | 1802.971  | NM_016311 | 9239.274  | 5833.133  |
| NM_005061 | 4842.472  | 4475.359  | NM_006137 | 2690.384  | 3202.64   | NM_000290 | 816.316   | 782.177   |
| NM_000997 | 50505.965 | 68023.188 | NM_016139 | 29924.76  | 32712.305 | NM_016538 | 1246.932  | 938.461   |
| AF182417  | 45300.633 | 39332.09  | AL117468  | 7726.805  | 8693.505  | AK023275  | 1990.606  | 1057.81   |
| AL137354  | 20450.361 | 16107.188 | NM_019613 | 6258.256  | 5540.184  | AJ223352  | 1351.104  | 576.634   |
| NM_001023 | 59464.094 | 72720.406 | NM_005382 | 504.869   | 671.099   | NM_012238 | 603.177   | 280.929   |
| AK021571  | 7595.382  | 6043.606  | AK027086  | 2672.164  | 3608.359  | NM_016536 | 2160.106  | 563.988   |
| AF052149  | 7821.532  | 7143.402  | AB032997  | 839.325   | 761.548   | NM_006807 | 8907.74   | 2882.106  |
| AK025586  | 2435.965  | 1907.655  | AL096857  | 2706.577  | 2038.04   | U07132    | 1572.233  | 8947.053  |

|           |           |           |           |           |           |           |          |           |
|-----------|-----------|-----------|-----------|-----------|-----------|-----------|----------|-----------|
| AL137512  | 693.388   | 676.893   | X07203    | 469.123   | 502.339   | NM_003436 | 253.047  | 1043.25   |
| NM_005036 | 771.285   | 587.573   | AB040104  | 356.588   | 332.602   | AB034691  | 257.618  | 665.073   |
| NM_002541 | 1992.84   | 1261.62   | NM_003834 | 2647.009  | 1923.474  | AL035301  | 504.348  | 480.422   |
| NM_000056 | 5896.567  | 3951.179  | NM_005959 | 2678.14   | 2044.524  | NM_017687 | 471.573  | 297.605   |
| NM_016311 | 34241.637 | 19643.803 | NM_003381 | 1016.578  | 750.621   | NM_017975 | 541.364  | 773.808   |
| NM_001867 | 57619.16  | 56538.191 | NM_005756 | 689.433   | 687.097   | AK025036  | 436.724  | 370.621   |
| NM_000290 | 4848.016  | 3280.49   | NM_003702 | 7733.806  | 5559.313  | AK024843  | 3482.817 | 3291.87   |
| NM_016536 | 4632.776  | 3218.663  | NM_000369 | 508.801   | 382.999   | AF074994  | 230.187  | 242.095   |
| AK023275  | 9128.031  | 7483.769  | NM_016351 | 972.399   | 777.749   | NM_017670 | 1499.238 | 1120.356  |
| AJ223352  | 6526.154  | 5341.561  | NM_004405 | 2521.44   | 1679.926  | AF286598  | 274.805  | 382.63    |
| NM_012236 | 2816.097  | 2167.926  | NM_001988 | 5132.136  | 3898.274  | AK021468  | 271.345  | 214.758   |
| NM_016536 | 10583.203 | 11155.545 | NM_006060 | 1535.221  | 1283.885  | BC033020  | 281.091  | 221.666   |
| NM_006807 | 40375.863 | 41528.121 | NM_005667 | 2035.685  | 1839.393  | NM_004366 | 2079.396 | 1823.445  |
| NM_000326 | 665.372   | 892.175   | NM_006308 | 423.389   | 331.974   | AK026168  | 374.425  | 478.491   |
| L16464    | 1024.237  | 1276.848  | NM_002234 | 2896.145  | 5576.589  | AJ296152  | 2573.626 | 2044.68   |
| NM_006532 | 3331.519  | 4180.977  | NM_000701 | 1676.477  | 2572.789  | AK001067  | 494.643  | 354.192   |
| U07132    | 4255.19   | 6237.138  | AB022696  | 6371.36   | 8865.087  | AK027088  | 3120.103 | 1906.822  |
| NM_003436 | 818.537   | 1232.356  | AF137372  | 4169.385  | 5341.578  | AB037721  | 1108.116 | 388.652   |
| AB034691  | 491.115   | 1030.596  | AF220417  | 965.858   | 1235.653  | AK027120  | 308.107  | 186.156   |
| AL035301  | 2160.93   | 1161.531  | D83782    | 5398.517  | 5264.225  | AB029001  | 298.99   | 117.441   |
| NM_017687 | 2116.448  | 1204.131  | NM_002078 | 1770.214  | 2092.698  | AB006624  | 909.335  | 344.016   |
| NM_017975 | 2617.427  | 2467      | NM_000287 | 1575.578  | 2036.931  | AK025473  | 534.495  | 2013.445  |
| AK025036  | 1449.662  | 860.326   | NM_001656 | 1258.549  | 1554.679  | AF146693  | 451.992  | 2682.434  |
| AK024843  | 12459.229 | 7473.751  | AF091033  | 854.085   | 626.131   | AF271070  | 4776.505 | 22165.195 |
| NM_017670 | 6647.167  | 3202.926  | NM_001122 | 11548.469 | 9628.236  | NM_014903 | 220.604  | 1398.455  |
| AF286598  | 1154.517  | 692.311   | NM_004591 | 1951.245  | 1563.724  | AK055959  | 562.389  | 2120.401  |
| AK021468  | 1297.306  | 734.335   | AL133027  | 1260.262  | 949.921   | AF052141  | 213.92   | 1182.145  |
| BC033020  | 1405.747  | 1336.545  | AB037732  | 1004.932  | 905.076   | AK021705  | 1037.28  | 1061.179  |
| NM_004366 | 8754.676  | 8881.391  | NM_005767 | 413.322   | 252.037   | NM_016141 | 2565.551 | 2188.082  |
| AK026168  | 2569.479  | 2549.282  | NM_001837 | 447.339   | 419.536   | AL109702  | 410.997  | 474.948   |
| AJ296152  | 12493.733 | 23043.512 | NM_001839 | 59110.609 | 71370.891 | AK025624  | 2486.84  | 3326.305  |
| AK001067  | 3533.627  | 6871.508  | BC016029  | 503.501   | 477.423   | AK026684  | 567.953  | 779.14    |
| AK027088  | 15598.494 | 26366.512 | M27487    | 971.376   | 767.993   | AL110125  | 1717.54  | 1066.001  |
| AB037721  | 4775.534  | 6193.271  | NM_002286 | 43034.242 | 26519.41  | AK022764  | 527.668  | 891.366   |
| AK027120  | 1448.369  | 2516.401  | NM_002164 | 701.691   | 607.236   | AJ011600  | 300.459  | 405.964   |
| AB029001  | 2079.468  | 2909.406  | NM_003811 | 2660.297  | 2488.677  | AJ002785  | 284.153  | 233.186   |
| AB006624  | 5998.128  | 9940.675  | AB011133  | 2037.333  | 3545.79   | Z70716    | 230.879  | 155.568   |
| AL109717  | 1021.753  | 1250.434  | NM_017572 | 29777.279 | 31854.055 | AL049251  | 227.412  | 499.165   |
| AK025473  | 1809.722  | 2404.125  | NM_018444 | 2112.733  | 2903.748  | Z83945    | 353.811  | 133.454   |
| AF146693  | 1622.584  | 2082.923  | NM_000252 | 1322.77   | 2233.681  | L05148    | 3365.664 | 14150.128 |
| AF271070  | 14400.127 | 28559.531 | NM_006947 | 8903.275  | 12341.899 | AK091125  | 309.371  | 1371.361  |
| NM_014903 | 960.959   | 1320.026  | NM_017917 | 2796.052  | 2542.328  | D16904    | 186.545  | 927.174   |
| AK055959  | 1477.775  | 2097.48   | NM_004090 | 3602.189  | 5317.159  | D16474    | 2232.248 | 8403.005  |
| AF052141  | 1121.992  | 1276.011  | NM_014634 | 6771.134  | 7479.627  | AL080072  | 344.039  | 1220.686  |
| AK021705  | 4348.913  | 4694.549  | NM_001919 | 7854.019  | 8346.39   | AK024898  | 267.641  | 874.389   |
| NM_016141 | 14781.061 | 11475.964 | BC031485  | 1688.746  | 1974.571  | AL049280  | 530.453  | 333.114   |
| AL109702  | 1877.435  | 1695.796  | NM_004092 | 5575.494  | 5798.765  | AK025212  | 2212.144 | 1277.617  |
| AK025624  | 11806.559 | 13960.619 | X15624    | 1459.648  | 1690.081  | AL157503  | 1295.32  | 942.418   |
| AK026684  | 2287.406  | 2473.361  | AF073770  | 2475.584  | 2159.292  | AK000053  | 208.741  | 252.563   |
| AL110125  | 3294.563  | 1869.434  | AL359401  | 4419.91   | 5152.988  | AK000786  | 407.755  | 296.048   |
| AK022764  | 2132.151  | 1313.365  | NM_012213 | 1749.462  | 1775.937  | AK000935  | 261.213  | 197.088   |
| X89744    | 537.731   | 798.942   | NM_016573 | 2882.342  | 2970.551  | AK021458  | 625.505  | 332.479   |
| AJ011600  | 1510.017  | 2092.148  | NM_001303 | 6356.972  | 5165.059  | NM_017674 | 611.294  | 356.905   |

|           |           |           |           |           |           |           |           |           |
|-----------|-----------|-----------|-----------|-----------|-----------|-----------|-----------|-----------|
| AJ002785  | 1436.933  | 1972.271  | M21304    | 586.863   | 441.904   | AK000966  | 390.65    | 214.224   |
| Z70716    | 959.389   | 1381.954  | NM_001979 | 3767.563  | 3487.542  | AK024525  | 1303.019  | 2904.282  |
| AL049251  | 941.979   | 1049.879  | AB040896  | 1406.409  | 1039.505  | AK024909  | 331.206   | 1041.911  |
| Z83945    | 1989.174  | 2917.964  | NM_001107 | 4238.033  | 3389.7    | AK024544  | 453.215   | 1905.042  |
| L32606    | 1005.568  | 1154.552  | AF084645  | 283.431   | 277.584   | AK024629  | 195.246   | 775.225   |
| L05148    | 9961.859  | 16758.135 | AF151851  | 4091.224  | 3083.118  | AK001880  | 2690.396  | 2032.458  |
| AK091125  | 886.274   | 1301.77   | NM_005176 | 234.36    | 326.398   | AF156166  | 1302.329  | 1009.217  |
| D16474    | 6772.932  | 7831.178  | NM_003636 | 8640.126  | 5902.099  | NM_014373 | 943.974   | 686.769   |
| AL080072  | 1153.531  | 1484.241  | AF040723  | 14629.393 | 21400.215 | NM_014206 | 11214.978 | 5764.858  |
| AK024898  | 1314.201  | 1681.95   | NM_015527 | 4085.1    | 7699.745  | NM_001651 | 1547.809  | 4794.71   |
| AL049280  | 1606.111  | 604.026   | X89675    | 1542.363  | 2636.462  | L32786    | 652.999   | 543.878   |
| AK025212  | 8963.788  | 6685.761  | NM_012189 | 726.48    | 1017.152  | AL355720  | 207.635   | 117.152   |
| AL157503  | 6498.002  | 9503.649  | NM_005798 | 8040.541  | 10382.711 | AK002023  | 792.056   | 722.109   |
| AK000053  | 1062.181  | 1515.423  | NM_004216 | 2432.174  | 2711.877  | L40402    | 289.424   | 189.151   |
| AK000786  | 1858.798  | 2720.1    | NM_016289 | 30636.375 | 29187.596 | AF086216  | 219.51    | 435.951   |
| AK000935  | 962.478   | 1891.658  | NM_001464 | 871.925   | 972.88    | AK022422  | 303.362   | 963.735   |
| AK021458  | 3000.986  | 3804.832  | NM_002051 | 2801.26   | 3834.924  | AK023485  | 246.266   | 520.456   |
| NM_017674 | 2476.349  | 3648.271  | NM_001523 | 767.48    | 864.316   | AK022474  | 9087.619  | 17907.801 |
| AK000811  | 786.816   | 1386.551  | NM_017423 | 1963.742  | 1434.427  | AK022392  | 2700.262  | 10244.892 |
| AK000966  | 1283.557  | 2339.995  | Z70705    | 759.948   | 526.796   | AL117451  | 224.932   | 1184.669  |
| AK024525  | 2091.772  | 2477.534  | NM_002611 | 1407.749  | 1334.905  | AK025949  | 495.287   | 499.424   |
| AK024909  | 874.726   | 1228.532  | NM_017417 | 743.698   | 465.204   | Y10259    | 780.268   | 693.778   |
| AK024544  | 1614.301  | 2875.337  | AL133602  | 1861.33   | 1518.815  | AK021725  | 647.539   | 632.803   |
| AK024629  | 616.686   | 803.398   | AF037219  | 3331.729  | 2086.677  | NM_002408 | 1229.753  | 1669.572  |
| AK024924  | 560.424   | 628.552   | AK026075  | 786.325   | 955.081   | AK024282  | 569.183   | 331.105   |
| AK025097  | 618.217   | 507.178   | NM_000251 | 2277.697  | 1455.791  | AF085838  | 1191.125  | 2881.516  |
| AK001880  | 8643.717  | 10736.403 | NM_006038 | 2694.247  | 1681.88   | NM_018277 | 356.74    | 239.549   |
| AF156166  | 5197.259  | 7357.646  | U87223    | 4756.814  | 7002.315  | AF014455  | 247.067   | 257.74    |
| NM_014373 | 4415.684  | 6805.239  | NM_000093 | 810.12    | 1450.241  | AF086335  | 352.466   | 257.393   |
| NM_014206 | 44998.063 | 61057.727 | NM_001779 | 4748.066  | 6337.156  | AB011118  | 2489.746  | 1506.323  |
| NM_001651 | 7475.48   | 11916.428 | AB033059  | 946.041   | 1304.147  | S66666    | 229.861   | 140.079   |
| L32786    | 2690.042  | 3654.326  | NM_016484 | 3481.58   | 4321.619  | AK021476  | 324.47    | 181.208   |
| U03239    | 640.011   | 1676.969  | AK026114  | 503.64    | 884.551   | NM_018630 | 1670.273  | 1743.699  |
| AK002023  | 4694.354  | 6540.484  | NM_014452 | 1217.215  | 1700.569  | AF086175  | 347.247   | 243.181   |
| AF150156  | 491.263   | 836.826   | NM_014683 | 352.889   | 377.09    | AK002196  | 456.104   | 244.285   |
| NM_016464 | 876.139   | 1498.582  | AK021536  | 7444.335  | 7100.219  | NM_004576 | 605.564   | 856.066   |
| L40402    | 1285.326  | 2297.613  | NM_002600 | 639.728   | 610.054   | AF040097  | 531.633   | 1617.178  |
| AF086216  | 500.962   | 502.534   | NM_003646 | 9498.578  | 8910.006  | NM_020436 | 352.504   | 1490.95   |
| AK022422  | 1019.486  | 1229.892  | NM_006663 | 1007.069  | 752.791   | AK024182  | 369.483   | 1616.002  |
| AK023485  | 766.479   | 459.177   | NM_006092 | 982.692   | 791.324   | NM_006913 | 4797.558  | 17478.5   |
| AK022474  | 18628.418 | 18169.545 | NM_003939 | 703.295   | 513.376   | NM_000499 | 3680.054  | 12639.951 |
| AK022392  | 7111.278  | 7553.246  | NM_012424 | 802.949   | 641.228   | AL049955  | 6303.167  | 2165.413  |
| AL117451  | 967.589   | 857.244   | NM_002446 | 1972.612  | 1958.88   | AF155654  | 4189.253  | 3141.19   |
| AK025949  | 2206.032  | 4247.734  | NM_000863 | 1153.214  | 716.433   | AF088044  | 285.663   | 404.155   |
| Y10259    | 3887.768  | 7985.96   | NM_006651 | 2674.194  | 2492.766  | AK000028  | 1635.121  | 1812.313  |
| AK021725  | 4730.824  | 6775.741  | NM_005336 | 4887.341  | 3840.231  | NM_013320 | 24883.936 | 14348.526 |
| NM_002408 | 5768.903  | 9069.131  | NM_001419 | 8048.761  | 5533.25   | AJ245902  | 290.656   | 347.077   |
| AK024282  | 1911.326  | 2946.695  | AF119817  | 18401.035 | 14289.952 | AL050039  | 612.219   | 749.95    |
| AF085838  | 7078.786  | 20424.947 | AL035306  | 1667.775  | 1032.047  | AF087987  | 219.27    | 259.829   |
| AF086335  | 2068.957  | 2918.904  | NM_001328 | 22941.166 | 39765.727 | H09474    | 280.897   | 238.571   |
| AL355741  | 1824.848  | 5432.366  | NM_005749 | 2415.537  | 3782.198  | AB002368  | 3505.483  | 4422.443  |
| AB011118  | 13580.947 | 20519.852 | NM_004230 | 4372.895  | 6960.799  | AL360263  | 39591.293 | 29221.057 |
| S66666    | 1192.592  | 1225.553  | NM_014503 | 934.268   | 975.13    | Z36780    | 752.624   | 1462.424  |

|           |           |           |           |           |           |           |          |           |
|-----------|-----------|-----------|-----------|-----------|-----------|-----------|----------|-----------|
| AK021476  | 1868.833  | 2511.314  | NM_014659 | 1462.958  | 2209.128  | AK022403  | 691.112  | 1533.835  |
| NM_01863C | 7392.162  | 12101.415 | NM_004399 | 2952.648  | 4494.544  | AK022955  | 2721.007 | 4443.884  |
| AF086175  | 1540.047  | 1804.557  | NM_006337 | 4364.799  | 5643.96   | AF131741  | 375.268  | 532.773   |
| AK002196  | 1332.047  | 1053.984  | NM_004507 | 3096.209  | 2657.836  | AK021760  | 258.377  | 1349.765  |
| NM_00457E | 1952.152  | 2140.635  | NM_00271C | 8215.116  | 8729.661  | BC035855  | 506.685  | 1548.995  |
| AF040097  | 1146.317  | 1380.047  | NM_01406C | 3681.948  | 3556.317  | AL137408  | 2337.68  | 7751.998  |
| NM_02043E | 1096.272  | 1027.865  | NM_004749 | 8605.009  | 8111      | AF054995  | 397.423  | 2460.18   |
| AK024182  | 1338.628  | 1206.271  | BQ446064  | 1335.15   | 1328.976  | AL080176  | 626.179  | 2065.781  |
| NM_006913 | 9613.681  | 8715.528  | AF302502  | 7268.609  | 5276.185  | AK023627  | 980.261  | 4618.547  |
| NM_00049E | 10901.464 | 5043.172  | AF274571  | 1180.08   | 1020.682  | CY3Cy5    | 677.822  | 287.937   |
| AL049955  | 28301.205 | 21597.168 | NM_005449 | 1926.041  | 1250.688  | BI759406  | 372.936  | 378.179   |
| AF155654  | 16537.84  | 24394.701 | NM_003879 | 1440.302  | 1317.787  | R76099    | 141.075  | 285.854   |
| AF088044  | 793.737   | 1624.905  | NM_016052 | 4832.625  | 2587.005  | S74445    | 131.969  | 279.19    |
| AK000028  | 7149.712  | 11249.473 | NM_00671E | 597.893   | 626.621   | BI763360  | 254.79   | 332.853   |
| NM_01332C | 48035.91  | 65341.953 | NM_005427 | 579.161   | 392.552   | D25538    | 296.697  | 545.631   |
| AJ245902  | 1873.597  | 2962.557  | NM_016312 | 715.81    | 376.211   | NM_00036C | 1169.32  | 1861.779  |
| AL050039  | 1610.136  | 2645.762  | AF234887  | 347.517   | 481.322   | D49950    | 150.515  | 201.134   |
| AF087987  | 4761.438  | 16023.329 | NM_00177E | 1076.873  | 665.704   | NM_00184E | 200.353  | 234.842   |
| Z36840    | 1655.265  | 4784.217  | NM_001792 | 312.43    | 220.066   | X03635    | 301.655  | 429.002   |
| H09474    | 1654.791  | 1473.052  | NM_001903 | 5403.946  | 3860.979  | AF353674  | 1916.023 | 2996.681  |
| AB002368  | 10674.014 | 12731.46  | NM_005857 | 3597.28   | 4983.303  | BC002645  | 990.535  | 1695.602  |
| AL360263  | 52099.703 | 56994.195 | NM_000429 | 1031.215  | 1115.193  | NM_02113E | 430.692  | 539.816   |
| Z36780    | 2339.805  | 1635.537  | AK027037  | 484.035   | 508.52    | BC002792  | 303.034  | 423.955   |
| AK022403  | 1600.618  | 1264.703  | NM_00387E | 6981.964  | 6285.552  | NM_02100E | 430.199  | 370.163   |
| AK022955  | 11963.251 | 7813.886  | AF191687  | 2591.151  | 2485.543  | SB        | 216.267  | 225.113   |
| AK021760  | 868.792   | 702.552   | NM_000274 | 7516.42   | 6683.119  | SR2       | 19815    | 20113.816 |
| BC035855  | 1546.537  | 619.711   | NM_00017C | 1984.598  | 1718.628  | SR4       | 3524.518 | 3685.236  |
| AL137408  | 8272.996  | 4146.517  | NM_000281 | 9501.72   | 7709.92   | SR6       | 573.6    | 577.65    |
| AF054995  | 1676.83   | 694.668   | AK001295  | 384.743   | 445.965   | SR8       | 2035.213 | 4037.019  |
| AL080176  | 4055.287  | 2000.543  | NM_006031 | 2076.288  | 1459.275  | SR10      | 6774.213 | 2526.769  |
| AK023627  | 3488.097  | 2137.998  | NM_00271E | 3771.978  | 3858.407  | CY3Cy5    | 349.643  | 196.75    |
| CY3Cy5    | 2446.84   | 251.262   | NM_00102C | 49483.465 | 58379.984 | X07203    | 179.532  | 118.371   |
| BI759406  | 1518.812  | 1540.003  | AB020660  | 2064.325  | 1555.859  | AB040104  | 126.459  | 133.037   |
| R76099    | 569.338   | 730.758   | NM_006659 | 20780.756 | 15496.094 | NM_003834 | 606.499  | 581.924   |
| S74445    | 512.34    | 574.122   | NM_018051 | 954.313   | 703.268   | NM_00595E | 671.734  | 909.931   |
| BI763360  | 554.336   | 675.27    | NM_015371 | 3219.389  | 2129.96   | NM_003381 | 272.939  | 183.582   |
| D25538    | 1226.614  | 1461.306  | AB040915  | 1398.78   | 944.388   | NM_00575E | 217.183  | 183.504   |
| NM_00036C | 5274.363  | 3882.34   | AF147791  | 508.48    | 310.333   | NM_003702 | 2644.66  | 4196.437  |
| NM_00184E | 338.858   | 397.088   | NM_006481 | 1480.68   | 1958.618  | NM_00036E | 168.393  | 225.068   |
| X03635    | 1328.047  | 805.205   | AB011115  | 764.173   | 1141.706  | NM_016351 | 419.091  | 423.648   |
| BC011847  | 53303.754 | 53913.824 | NM_00391C | 21442.391 | 22468.928 | NM_00440E | 478.763  | 998.583   |
| X03348    | 1495.216  | 771.439   | AB007913  | 1455.479  | 2165.631  | NM_00198E | 1585.582 | 1376.507  |
| AF353674  | 6849.504  | 2223.614  | NM_00669E | 2773.472  | 4276.619  | NM_00606C | 652.314  | 785.878   |
| BC002645  | 3228.209  | 1441.427  | NM_004599 | 3855.236  | 6210.867  | NM_005667 | 826.846  | 1461.708  |
| NM_02113E | 1331.425  | 489.747   | NM_006037 | 6611.799  | 6102.119  | NM_00630E | 183.837  | 220.973   |
| BC002792  | 962.58    | 448.238   | NM_015871 | 3130.415  | 4156.383  | NM_00006C | 201.391  | 263.16    |
| NM_02100E | 1293.263  | 479.766   | NM_019037 | 3226.006  | 4021.956  | NM_00958E | 168.783  | 75.043    |
| SB        | 684.321   | 342.37    | NM_015891 | 3199.41   | 2230.877  | L09080    | 387.613  | 545.911   |
| SR2       | 52561.602 | 33745.426 | NM_006802 | 624.337   | 556.968   | NM_00732E | 777.253  | 846.115   |
| SR4       | 13799.963 | 11118.851 | AB037778  | 823.569   | 689.606   | AK023080  | 170.585  | 117.248   |
| SR6       | 1918.3    | 1187.316  | NM_00506E | 18760.586 | 14795.676 | NM_00188E | 984.06   | 1236.463  |
| SR8       | 6572.394  | 7306.926  | NM_003089 | 4090.964  | 3909.602  | NM_004467 | 139.27   | 184.079   |
| SR10      | 23693.684 | 2684.885  | NM_003753 | 9477.228  | 6073.452  | NM_005622 | 270.762  | 189.577   |

|           |           |           |           |           |           |           |           |           |
|-----------|-----------|-----------|-----------|-----------|-----------|-----------|-----------|-----------|
| CY3Cy5    | 1792.57   | 204.133   | NM_01759C | 1332.011  | 959.783   | NM_01805E | 1753.04   | 1808.171  |
| NM_003834 | 2283.961  | 1962.349  | AB011145  | 3673.904  | 2730.326  | NM_00454E | 3045.845  | 1356.662  |
| NM_00595E | 3837.597  | 3355.318  | NM_00375C | 10745.488 | 5443.778  | X69079    | 3158.551  | 2589.015  |
| NM_003381 | 998.011   | 969.208   | M92422    | 1761.964  | 1140.322  | AF091033  | 228.614   | 1724.976  |
| NM_00575E | 868.173   | 848.646   | NM_01786E | 1262.569  | 887.708   | NM_001122 | 2121.12   | 3083.043  |
| NM_00370Z | 12878.299 | 7724.491  | AK021888  | 759.236   | 1165.307  | NM_004591 | 290.124   | 115.274   |
| NM_00036E | 725.248   | 450.691   | AK022848  | 2734.87   | 4051.855  | AL133027  | 267.993   | 304.677   |
| NM_016351 | 1044.117  | 951.87    | AL049957  | 799.997   | 3068.736  | AB037732  | 350.605   | 341.961   |
| NM_00440E | 2396.323  | 1549.158  | NM_005847 | 179.176   | 1783.326  | NM_005767 | 131.407   | 156.504   |
| NM_00198E | 6984.603  | 2628.105  | NM_01815E | 23175.428 | 25762.883 | NM_001837 | 170.327   | 197.695   |
| NM_00606C | 3050.234  | 1169.232  | NM_00081E | 4899.467  | 6229.252  | NM_00183E | 25817.256 | 42785.809 |
| NM_005667 | 2616.058  | 983.018   | NM_00251E | 2509.488  | 2964.834  | BC016029  | 250.312   | 247.333   |
| NM_00630E | 309.389   | 203.787   | NM_017424 | 3654.224  | 3549.826  | M27487    | 237.553   | 239.177   |
| NM_00006C | 480.312   | 260.302   | NM_00152Z | 5677.932  | 7821.524  | NM_00228E | 10839.913 | 11037.608 |
| L09080    | 923.101   | 396.775   | NM_00088E | 5792.834  | 4907.634  | NM_002164 | 227.769   | 238.885   |
| NM_00732E | 3564.723  | 1924.318  | AF254086  | 1322.054  | 1501.248  | NM_003811 | 818.122   | 1174.985  |
| NM_00188E | 5381.856  | 11225.37  | AL390142  | 1348.288  | 1192.879  | NM_002981 | 1378.863  | 2205.561  |
| NM_00562Z | 539.564   | 324.272   | NM_00656E | 1630.142  | 1473.42   | NM_001244 | 306.976   | 252.706   |
| NM_01805E | 6501.024  | 2679.686  | AB007930  | 3716.223  | 3170.252  | NM_01227E | 188.473   | 163.508   |
| NM_00454E | 17531.346 | 3160.422  | AJ005273  | 3722.145  | 3238.281  | NM_006137 | 1077.622  | 1227.926  |
| X69079    | 19415.398 | 4843.789  | AK021892  | 1982.513  | 1722.47   | NM_01613E | 12104.687 | 9663.774  |
| AF091033  | 639.903   | 935.536   | NM_003121 | 306.634   | 228.698   | AL117468  | 2048.688  | 2031.27   |
| NM_001122 | 6854.876  | 6517.58   | NM_003437 | 1070.006  | 851.485   | NM_01961E | 1738.866  | 1650.116  |
| NM_004591 | 603.783   | 572.62    | NM_018337 | 5801.696  | 3993.248  | NM_00538Z | 263.466   | 188.253   |
| AL133027  | 1049.911  | 1410.95   | AA193295  | 6572.853  | 3359.138  | AK027086  | 1131.53   | 703.438   |
| AB037732  | 1387.228  | 1373.359  | NM_01804E | 4515.766  | 3478.604  | AB032997  | 264.934   | 347.654   |
| NM_005767 | 335.373   | 355.907   | NM_01480E | 1524.921  | 2598.357  | AL096857  | 581.837   | 434.073   |
| NM_001837 | 441.102   | 376.784   | AK024956  | 517.493   | 898.176   | AF073770  | 955.002   | 3028.567  |
| NM_00183E | 57357.637 | 72633.086 | AF147386  | 1992.218  | 2861.945  | AL359401  | 2060.352  | 3483.268  |
| BC016029  | 762.288   | 442.445   | AF273052  | 5349.061  | 7292.808  | NM_01221E | 526.269   | 504.527   |
| M27487    | 679.636   | 636.529   | NM_01794E | 6817.405  | 8007.79   | NM_01657E | 595.573   | 411.822   |
| NM_00228E | 51415.457 | 28191.98  | AF147383  | 1470.011  | 2073.798  | NM_00130E | 1609.446  | 1535.711  |
| NM_002164 | 706.708   | 419.372   | AK025682  | 1400.427  | 1776.96   | M21304    | 197.412   | 185.269   |
| NM_003811 | 2846.809  | 1302.401  | NM_01335Z | 586.796   | 714.058   | NM_00197E | 1398.093  | 1552.985  |
| NM_002981 | 4926.059  | 2092.079  | NM_01647E | 12789.335 | 12012.921 | AB040896  | 220.169   | 409.57    |
| NM_001244 | 990.879   | 484.918   | AL389986  | 7033.921  | 5247.797  | NM_001107 | 1712.63   | 1926.294  |
| NM_01227E | 270.896   | 152.142   | AF088052  | 1344.003  | 1218.958  | AF084645  | 164.872   | 165.272   |
| NM_006137 | 4882.659  | 1936.783  | AF086342  | 273.68    | 207.02    | AF151851  | 1000.332  | 1140.736  |
| NM_01613E | 48014.063 | 23537.537 | AF086310  | 257.802   | 178.594   | NM_00517E | 123.371   | 212.93    |
| AL117468  | 8842.816  | 5964.455  | AF086387  | 780.588   | 662.614   | NM_00363E | 2923.738  | 4170.226  |
| NM_01961E | 10317.658 | 18402.291 | AL389941  | 643.574   | 468.577   | NM_002234 | 361.172   | 422.519   |
| NM_00538Z | 340.289   | 264.246   | AK001853  | 2742.805  | 2672.754  | NM_003471 | 113.569   | 162.335   |
| AK027086  | 4602.806  | 1955.154  | AK025071  | 653.151   | 904.579   | NM_000701 | 582.947   | 885.777   |
| AB032997  | 774.227   | 307.135   | AF075082  | 500.942   | 633.111   | AB022696  | 761.954   | 790.677   |
| AL096857  | 3004.808  | 1089.218  | NM_01537C | 2706.557  | 4068.714  | NM_00223E | 106.959   | 100.864   |
| AF073770  | 3289.472  | 3829.679  | AF085917  | 962.225   | 1865.024  | NM_01437E | 121.229   | 253.963   |
| AL359401  | 8653.858  | 5793.665  | AF085989  | 783.933   | 1085.357  | AF137372  | 1482.693  | 1345.002  |
| NM_01221E | 2656.424  | 2753.753  | AL360139  | 50409.113 | 59120.957 | AF220417  | 503.106   | 322.901   |
| NM_01657E | 2876.102  | 2007.428  | AF075110  | 12521.813 | 11604.771 | D83782    | 1089.358  | 582.263   |
| NM_00130E | 8088.9    | 5735.28   | AL137323  | 709.324   | 440.625   | NM_00207E | 706.316   | 534.966   |
| M21304    | 653.44    | 698.466   | AL137494  | 3087.204  | 4108.498  | NM_000287 | 563.052   | 298.686   |
| NM_00197E | 6180.476  | 4115.029  | AL162037  | 3122.745  | 4298.585  | NM_00165E | 430.063   | 308.051   |
| AB040896  | 1242.146  | 1565.502  | AL390150  | 934.87    | 1050.744  | Z70705    | 203.688   | 353.16    |

|           |           |           |           |           |           |           |           |           |
|-----------|-----------|-----------|-----------|-----------|-----------|-----------|-----------|-----------|
| NM_001107 | 7460.895  | 4878.168  | AL137359  | 347.752   | 348.57    | NM_002611 | 422.973   | 701.426   |
| AF151851  | 4439.355  | 2443.122  | NM_002761 | 474.96    | 479.374   | NM_017417 | 184.707   | 102.216   |
| NM_003636 | 13282.115 | 4492.479  | AF086063  | 528.141   | 585.325   | AL133602  | 191.714   | 307.331   |
| NM_002234 | 780.191   | 421.554   | AF086098  | 1572.48   | 1234.408  | AF037219  | 851.121   | 1433.467  |
| NM_000701 | 2331.625  | 873.625   | AF086076  | 538.823   | 579.047   | AK026075  | 483.681   | 319.095   |
| AB022696  | 2446.819  | 901.159   | AL833393  | 2109.268  | 1268.213  | NM_000251 | 594.785   | 1066.971  |
| AF137372  | 6696.192  | 4487.396  | AF088005  | 1002.062  | 479.291   | NM_006036 | 808.029   | 1018.561  |
| AF220417  | 1146.011  | 827.238   | AF086096  | 4106.331  | 3205.484  | AB011133  | 793.961   | 1200.026  |
| D83782    | 4930.439  | 1620.292  | AL390132  | 428.279   | 277.694   | NM_017572 | 9698.866  | 10778.957 |
| NM_002076 | 2258.013  | 712.808   | NM_017933 | 3333.61   | 2667.082  | NM_018444 | 632.545   | 859.21    |
| NM_000287 | 2131.895  | 712.388   | NM_017819 | 6997.159  | 3899.066  | NM_000252 | 384.622   | 495.933   |
| NM_001656 | 1754.152  | 417.639   | AK024653  | 25132.512 | 32625.016 | NM_006947 | 3139.355  | 3569.716  |
| Z70705    | 523.85    | 738.995   | AF103907  | 1434.513  | 2274.069  | NM_017917 | 603.705   | 1026.082  |
| NM_002611 | 1859.778  | 1706.899  | AF094508  | 737.414   | 1079.435  | NM_004090 | 1302.537  | 1491.946  |
| NM_017417 | 748.849   | 639.703   | AF161351  | 1038.092  | 1984.484  | NM_014634 | 1841.084  | 1224.164  |
| AL133602  | 835.753   | 565.271   | AF257098  | 466.562   | 863.009   | NM_001919 | 735.908   | 456.313   |
| AF037219  | 4308.78   | 4295.46   | AF111782  | 3499.125  | 4280.139  | BC031485  | 532.18    | 329.152   |
| AK026075  | 2234.083  | 1159.848  | AF151530  | 1310.925  | 2355.419  | NM_004092 | 1641.131  | 1214.967  |
| NM_000251 | 2628.764  | 2236.522  | AK021991  | 406.669   | 470.223   | X15624    | 456.247   | 289.741   |
| NM_006036 | 2843.153  | 1838.071  | AK022093  | 6000.214  | 5673.326  | NM_004467 | 154.201   | 120.027   |
| NM_002485 | 923.759   | 1195.553  | AK022376  | 408.742   | 410.594   | NM_005622 | 239.441   | 166.433   |
| AB011133  | 3360.063  | 1446.711  | AK022005  | 567.376   | 391.27    | NM_018056 | 1385.165  | 1603.26   |
| NM_017572 | 33933.848 | 12914.07  | AK022137  | 265.585   | 325.026   | NM_004546 | 2225.233  | 626.786   |
| NM_018444 | 2008.21   | 670.849   | AK022272  | 1327.732  | 1137.131  | X69079    | 2739.153  | 1522.126  |
| NM_000252 | 1647.648  | 565.773   | AK027155  | 4735.148  | 3783.021  | BI759406  | 363.555   | 378.25    |
| NM_006947 | 13788.444 | 5394.899  | AF221846  | 469.31    | 457.836   | R76099    | 207.913   | 125.704   |
| NM_017917 | 2854.858  | 3427.066  | AF264626  | 288.033   | 211.35    | S74445    | 172.818   | 257.334   |
| BC031485  | 2421.112  | 1042.511  | AK024528  | 7527.211  | 5727.774  | BI763360  | 265.924   | 281.74    |
| NM_004092 | 7693.108  | 3687.41   | AL049311  | 547.722   | 873.933   | D25538    | 288.861   | 782.334   |
| X15624    | 1750.93   | 474.535   | AK000016  | 1270.71   | 2232.817  | NM_000360 | 1222.771  | 1349.872  |
| NM_005622 | 821.919   | 788.212   | AK023367  | 1389.853  | 1653.279  | D49950    | 168.242   | 112.788   |
| NM_018056 | 7503.53   | 6564.735  | AL080209  | 1506.76   | 2409.745  | NM_001846 | 219.859   | 164.392   |
| NM_004546 | 21351.824 | 8012.416  | AL137431  | 599.467   | 988.217   | X03635    | 334.15    | 374.997   |
| X69079    | 19660.264 | 11060.485 | NM_016255 | 1273.665  | 1505.114  | BC011847  | 24528.207 | 29558.602 |
| BI759406  | 1868.377  | 1714.357  | NM_014316 | 1639.862  | 1597.797  | X03348    | 377.478   | 434.477   |
| R76099    | 686.113   | 481.973   | AK021962  | 279.676   | 230.9     | AF353674  | 1996.415  | 2328.428  |
| S74445    | 528.638   | 497.04    | AK056674  | 1024.209  | 614.563   | BC002645  | 991.536   | 1385.562  |
| BI763360  | 649.126   | 433.544   | AK022856  | 390.293   | 548.201   | NM_021138 | 420.335   | 363.153   |
| D25538    | 1383.818  | 1345.163  | AK022042  | 614.949   | 435.096   | BC002792  | 285.877   | 372.727   |
| NM_000360 | 5996.318  | 3231.436  | AL117588  | 557.835   | 444.061   | NM_021005 | 423.889   | 297.482   |
| D49950    | 317.02    | 193.904   | NM_017706 | 396.919   | 1077.979  | SB        | 188.531   | 167.747   |
| NM_001846 | 312.632   | 212.491   | BE895529  | 4196.149  | 7168.193  | NM_001523 | 211.44    | 185.965   |
| X03635    | 1069.328  | 384.948   | AK000964  | 526.43    | 736.246   | NM_017423 | 537.354   | 301.74    |
| BC011847  | 54572.305 | 48045.813 | AL117536  | 1756.38   | 2765.495  | NM_019613 | 1586.857  | 3490.475  |
| X03348    | 1709.124  | 730.338   | NM_017751 | 5949.831  | 9506.492  | NM_005382 | 371.123   | 361.12    |
| AF353674  | 7592.852  | 2283.101  | NM_003771 | 1825.91   | 2922.366  | AK027086  | 932.324   | 739.443   |
| BC002645  | 3527.384  | 1463.336  | NM_017860 | 518.826   | 760.069   | AB032997  | 206.915   | 240.203   |
| NM_021138 | 1802.84   | 1333.976  | X91195    | 37670.93  | 37553.914 | AL096857  | 428.326   | 390.708   |
| NM_021005 | 1661.937  | 1761.031  | AF086190  | 1147.96   | 1638.748  | AB002351  | 83.929    | 148.898   |
| SB        | 775.36    | 778.099   | NM_006143 | 580.492   | 1059.23   | X07203    | 134.763   | 97.095    |
| NM_001523 | 722.516   | 238.907   | AL050035  | 3286.831  | 3848.225  | AB040104  | 151.154   | 104.53    |
| NM_017423 | 2037.619  | 526.507   | AK024449  | 641.646   | 702.841   | NM_003834 | 541.594   | 771.909   |
| NM_019613 | 8159.921  | 8676.291  | AL357201  | 334.512   | 224.695   | NM_005956 | 767.86    | 1178.091  |



|           |           |           |           |           |           |           |           |          |
|-----------|-----------|-----------|-----------|-----------|-----------|-----------|-----------|----------|
| NM_005382 | 633.3     | 496.608   | AF279780  | 31387.949 | 26538.26  | NM_003381 | 274.295   | 260.993  |
| AK027086  | 5348.673  | 4651.954  | AK022510  | 1737.923  | 1352.267  | NM_005756 | 270.529   | 262.175  |
| AB032997  | 851.506   | 705.237   | AK023878  | 1235.581  | 1420.189  | NM_003702 | 2809.897  | 4059.035 |
| AL096857  | 2997.379  | 2570.974  | AK021851  | 1411.777  | 1066.399  | NM_000366 | 219.289   | 184.34   |
| AB040104  | 500.798   | 296.812   | L37717    | 393.987   | 482.57    | NM_016351 | 391.234   | 579.603  |
| NM_003834 | 2101.375  | 1746.03   | AJ131609  | 1747.602  | 1679.175  | NM_004405 | 626.58    | 1015.985 |
| NM_005959 | 3995.727  | 2911.507  | BC019280  | 2333.934  | 2460.212  | NM_001988 | 1632.567  | 1249.236 |
| NM_003381 | 921.053   | 624.759   | AF086498  | 462.975   | 450.474   | NM_00606C | 587.711   | 515.143  |
| NM_005756 | 859.482   | 614.092   | AK000687  | 493.108   | 363.823   | NM_005667 | 837.598   | 850.507  |
| NM_003702 | 13220.011 | 5371.637  | AF079567  | 1566.251  | 956.921   | NM_006308 | 174.903   | 204.454  |
| NM_000366 | 715.496   | 295.598   | AK022177  | 664.376   | 1233.662  | NM_00006C | 190.952   | 192.703  |
| NM_016351 | 1222.273  | 409.569   | AK023852  | 531.176   | 1059.589  | NM_009588 | 152.05    | 112.98   |
| NM_004405 | 2840.222  | 1461.241  | AF086466  | 2157.188  | 3130.93   | L09080    | 333.554   | 404.007  |
| NM_001988 | 6474.121  | 1360.322  | AB007962  | 3532.697  | 5380.325  | NM_007326 | 570.776   | 354.982  |
| NM_00606C | 2857.084  | 1149.434  | AF005081  | 1298.68   | 2535.993  | AK023080  | 141.737   | 135.32   |
| NM_006308 | 794.377   | 1866.356  | AK026438  | 511.018   | 859.611   | NM_001886 | 837.058   | 547.886  |
| NM_00006C | 626.698   | 1926.294  | AK021546  | 483.532   | 540.659   | AF137372  | 1566.253  | 2853.599 |
| NM_009588 | 492.306   | 1059.123  | AL050186  | 16322.464 | 19203.488 | AF220417  | 371.487   | 440.604  |
| L09080    | 1178.038  | 1643.27   | AK021918  | 2281.587  | 3129.029  | D83782    | 2000.549  | 1740.299 |
| NM_007326 | 3662.796  | 3396.059  | AF069137  | 308.926   | 503.11    | NM_002078 | 475.185   | 355.304  |
| AK023080  | 941.221   | 438.123   | AK021669  | 3037.554  | 3320.823  | NM_000287 | 472.359   | 242.693  |
| NM_001886 | 3963.306  | 1558.025  | AL080113  | 25143.41  | 20596.354 | NM_001656 | 368.529   | 473.055  |
| AF137372  | 6795.405  | 6333.674  | AL050083  | 1272.479  | 1181.529  | AF091033  | 158.657   | 173.827  |
| AF220417  | 1738.216  | 1865.101  | AK022766  | 495.789   | 633.123   | NM_001122 | 2072.252  | 3232.846 |
| D83782    | 5303.938  | 3622.892  | AL049422  | 5574.43   | 4064.303  | NM_004591 | 215.187   | 222.391  |
| NM_002078 | 2387.565  | 1818.795  | AL133089  | 1216.001  | 1166.711  | NM_006274 | 113.139   | 219.458  |
| NM_000287 | 2651.858  | 1878.612  | AK023526  | 1604.901  | 1825.291  | AL133027  | 330.371   | 501.796  |
| NM_001656 | 1664.965  | 1569.663  | BE266129  | 655.746   | 662.412   | AB037732  | 380.171   | 451.728  |
| AF091033  | 618.915   | 474.121   | AK025602  | 6614.599  | 6083.398  | NM_005767 | 145.021   | 162.447  |
| NM_001122 | 7413.808  | 5306.97   | AK026309  | 3463.115  | 2897.318  | NM_001837 | 154.787   | 339.905  |
| NM_004591 | 570.365   | 723.747   | AL137486  | 2748.292  | 2510.389  | M27487    | 249.299   | 288.337  |
| AL133027  | 1159.17   | 933.857   | AL110162  | 734.231   | 508.435   | NM_002164 | 210.846   | 263.255  |
| AB037732  | 1604.682  | 1350.876  | AK022681  | 7438.25   | 5346.793  | NM_003811 | 833.443   | 885.389  |
| NM_005767 | 396.526   | 277.706   | CY3Cy5    | 1925.492  | 177.432   | NM_002981 | 1449.408  | 1601.335 |
| NM_001837 | 451.112   | 279.98    | Y18483    | 811.107   | 1673.305  | NM_001244 | 281.827   | 327.881  |
| NM_001838 | 62904.734 | 39433.035 | AI565117  | 47222.512 | 29187.74  | NM_012275 | 124.275   | 178.556  |
| BC016029  | 716.392   | 227.489   | M59979    | 517.134   | 128.923   | NM_006137 | 1109.562  | 1274.809 |
| M27487    | 466.233   | 204.887   | AB011098  | 519.309   | 400.311   | NM_016138 | 11704.182 | 6465.796 |
| NM_003811 | 5288.118  | 10024.75  | AA609759  | 913.104   | 735.072   | AL117468  | 1875.474  | 932.676  |
| NM_002981 | 7684.885  | 15449.74  | AA029418  | 3683.652  | 3038.634  | NM_00409C | 1372.196  | 3740.494 |
| NM_001244 | 1796.061  | 3265.494  | L20815    | 5022.523  | 3637.937  | NM_014634 | 2229.518  | 2814.365 |
| NM_012275 | 513.76    | 790.797   | AI364483  | 7554.164  | 6174.11   | NM_001919 | 1812.888  | 2537.976 |
| NM_006137 | 5273.935  | 5325.924  | AA456001  | 5615.816  | 6149.01   | BC031485  | 416.443   | 348.019  |
| NM_016138 | 53731.543 | 61037.625 | AA451686  | 4444.227  | 7884.85   | NM_004092 | 1594.503  | 1818.215 |
| AL117468  | 10927.848 | 13376.88  | NM_003822 | 754.035   | 914.181   | X15624    | 404.801   | 380.977  |
| NM_00409C | 6207.241  | 6180.135  | NM_004412 | 4458.644  | 3896.992  | AF073770  | 787.434   | 1119.906 |
| NM_014634 | 8869.578  | 6247.933  | SR5       | 5394.526  | 3680.545  | AL359401  | 1902.286  | 2063.36  |
| NM_001919 | 3731.516  | 3087.336  | SR7       | 3929.823  | 24098.691 | NM_012213 | 502.904   | 515.141  |
| BC031485  | 2321.935  | 1956.65   | SR9       | 14356.084 | 2145.219  | NM_016573 | 629.759   | 851.747  |
| NM_004092 | 8789.975  | 9129.599  | CY3Cy5    | 3298.516  | 232.136   | NM_001303 | 1807.511  | 2494.433 |
| X15624    | 2042.031  | 1964.501  | NM_019555 | 1120.399  | 992.031   | M21304    | 229.033   | 205.368  |
| AF073770  | 3607.177  | 3191.081  | NM_012096 | 5637.035  | 2508.171  | NM_001979 | 1371.073  | 1465.857 |
| AL359401  | 8902.504  | 5414.74   | NM_003905 | 15642.872 | 5939.32   | AB040896  | 398.658   | 463.744  |

|           |           |           |           |           |           |           |           |          |
|-----------|-----------|-----------|-----------|-----------|-----------|-----------|-----------|----------|
| NM_012213 | 2370.937  | 1897.242  | L12052    | 2483.916  | 2530.856  | AF084645  | 161.306   | 163.453  |
| NM_016573 | 3407.51   | 2236.591  | AB028976  | 1549.039  | 1247.442  | NM_005176 | 154.814   | 147.256  |
| NM_001303 | 8443.437  | 4866.688  | NM_015869 | 483.027   | 332.27    | NM_003636 | 2914.362  | 2888.791 |
| M21304    | 569.386   | 385.188   | AB031038  | 523.45    | 385.573   | NM_002234 | 405.563   | 602.351  |
| NM_001979 | 6680.308  | 2673.846  | NM_004626 | 369.838   | 328.672   | NM_003471 | 137.322   | 136.049  |
| AB040896  | 1849.575  | 743.199   | NM_001899 | 470.563   | 521.824   | NM_000701 | 549.539   | 528.264  |
| NM_001107 | 6874.15   | 1917.067  | NM_004305 | 28200.613 | 29126.625 | AB022696  | 672.152   | 446.822  |
| AF084645  | 344.86    | 191.664   | NM_006089 | 6619.005  | 6980.813  | NM_002233 | 115.732   | 197.835  |
| NM_005176 | 630.65    | 1550.117  | NM_003144 | 25888.604 | 23618.592 | NM_021005 | 373.821   | 879.675  |
| NM_003636 | 19856.59  | 35821.125 | AB011102  | 4478.674  | 2652.246  | SB        | 206.446   | 552.622  |
| NM_002234 | 1133.145  | 1853.575  | D63480    | 1292.497  | 1069.138  | NM_001523 | 210.551   | 231.894  |
| NM_000701 | 2955.987  | 6799.83   | NM_002969 | 1397.74   | 1113.362  | NM_017423 | 405.859   | 497.897  |
| AB022696  | 2616.643  | 4507.63   | NM_004620 | 916.18    | 803.779   | Z70705    | 198.408   | 223.297  |
| NM_021005 | 1343.555  | 958.184   | AF087940  | 1685.819  | 1913.962  | NM_002611 | 385.584   | 410.486  |
| SB        | 703.208   | 477.191   | AJ277587  | 991.983   | 1531.119  | NM_017417 | 204.866   | 75.706   |
| NM_001523 | 967.134   | 767.466   | D87432    | 3184.425  | 8392.843  | AL133602  | 349.454   | 482.307  |
| NM_017423 | 2179.517  | 2093.938  | AK023749  | 422.464   | 385.316   | AF037219  | 873.457   | 1193.291 |
| Z70705    | 598.211   | 394.291   | NM_002337 | 1899.438  | 1288.859  | AK026075  | 437.185   | 367.213  |
| NM_002611 | 1965.475  | 1817.051  | NM_013245 | 700.088   | 635.124   | NM_000251 | 538.045   | 986.061  |
| NM_017417 | 594.022   | 556.219   | NM_006423 | 15942.462 | 10076.224 | AF118071  | 103.011   | 72.447   |
| AL133602  | 833.017   | 469.896   | NM_004766 | 1474.974  | 1227.149  | NM_006036 | 744.453   | 887.078  |
| AF037219  | 4888.706  | 2373.744  | NM_005819 | 3671.035  | 2956.214  | NM_002485 | 130.258   | 83.839   |
| AK026075  | 587.804   | 378.635   | AK024722  | 332.775   | 366.375   | AB011133  | 793.56    | 591.283  |
| NM_000251 | 2541.51   | 1255.529  | AK025520  | 1723.391  | 941.465   | NM_017572 | 8898.728  | 7466.016 |
| NM_006036 | 1559.607  | 2656.405  | NM_004892 | 7658.599  | 4391.661  | NM_018444 | 536.919   | 511.303  |
| NM_002485 | 248.331   | 856.57    | NM_014597 | 9996.895  | 5998.363  | NM_000252 | 462.145   | 619.551  |
| AB011133  | 4430.479  | 10204.297 | NM_017896 | 6875.052  | 5576.251  | NM_006947 | 3233.61   | 1712.723 |
| NM_017572 | 45544.078 | 66800.383 | AB002374  | 2549.453  | 2507.299  | NM_017917 | 611.001   | 785.306  |
| NM_018444 | 3153.688  | 6279.626  | U17327    | 696.78    | 1083.517  | NM_000060 | 204.516   | 656.239  |
| NM_000252 | 1162.609  | 1871.712  | M87790    | 9674.528  | 5272.888  | NM_009586 | 152.906   | 309.921  |
| NM_006947 | 16636.699 | 23513.059 | NM_001768 | 3096.985  | 2189.04   | L09080    | 382.406   | 351.32   |
| NM_017917 | 2960.659  | 6890.453  | NM_000029 | 4934.96   | 3108.917  | NM_007326 | 740.768   | 372.135  |
| NM_000060 | 533.299   | 535.715   | NM_000715 | 440.916   | 308.066   | AK023080  | 136.26    | 118.617  |
| L09080    | 925.583   | 537.664   | AF035802  | 1942.807  | 1404.676  | NM_001886 | 818.509   | 926.12   |
| NM_007326 | 2773.525  | 1854.117  | Y08145    | 1127.859  | 1015.893  | NM_004467 | 144.094   | 44.795   |
| AK023080  | 338.703   | 327.116   | M26123    | 321.816   | 516.366   | NM_005622 | 240.183   | 251.963  |
| NM_001886 | 4489.179  | 3679.319  | NM_001838 | 758.583   | 1409.631  | NM_018056 | 1426.917  | 2190.145 |
| NM_004467 | 339.302   | 360.245   | NM_013328 | 12851.579 | 8263.987  | NM_004546 | 3105.556  | 2263.178 |
| NM_005622 | 810.679   | 801.968   | NM_002660 | 2493.202  | 1938.296  | X69079    | 3322.552  | 4492.465 |
| NM_018056 | 8159.992  | 6357.785  | NM_003706 | 724.436   | 513.036   | BI759406  | 315.733   | 643.737  |
| NM_004546 | 22461.373 | 7635.136  | AL122071  | 725.474   | 1016.828  | R76099    | 173.251   | 205.602  |
| X69079    | 19713.238 | 8933.889  | AB033054  | 9663.686  | 10160.228 | S74445    | 186.88    | 183.606  |
| BI759406  | 1889.755  | 1199.148  | NM_016122 | 1089.881  | 779.579   | BI763360  | 244.386   | 228.06   |
| R76099    | 629.119   | 345.23    | AF153330  | 1048.871  | 813.204   | D25538    | 276.138   | 416.34   |
| S74445    | 455.991   | 280.236   | D87446    | 2784.43   | 2024.92   | NM_000360 | 1067.647  | 1673.739 |
| BI763360  | 609.238   | 454.459   | BF540935  | 1621.581  | 1198.286  | D49950    | 154.807   | 106.117  |
| D25538    | 1270.531  | 556.032   | NM_004466 | 493.02    | 211.361   | NM_001846 | 168.826   | 214.895  |
| NM_000360 | 6314.84   | 3963.704  | NM_007081 | 2291.041  | 1747.616  | X03635    | 316.67    | 341.585  |
| D49950    | 662.586   | 1365.668  | AB032964  | 2472.708  | 2109.184  | BC011847  | 22604.764 | 20433.07 |
| NM_001846 | 539.056   | 1483.007  | BE733605  | 3117.849  | 2150.732  | X03348    | 356.135   | 409.997  |
| X03635    | 1975.258  | 3535.585  | NM_003334 | 15803.958 | 11368.938 | AF353674  | 1714.865  | 1221.587 |
| BC011847  | 57626.598 | 84759.453 | NM_002693 | 4077.019  | 3662.197  | BC002645  | 913.137   | 916.313  |
| X03348    | 1744.352  | 3853.281  | NM_003671 | 900.779   | 990.093   | NM_021138 | 354.306   | 387.224  |

|           |           |           |           |           |           |           |           |           |
|-----------|-----------|-----------|-----------|-----------|-----------|-----------|-----------|-----------|
| AF353674  | 10559.388 | 15058.43  | M20695    | 839.765   | 1044.52   | BC002792  | 331.673   | 155.772   |
| BC002645  | 3769.978  | 8074.529  | AK026000  | 3113.333  | 3671.053  | NM_002981 | 1049.11   | 2104.759  |
| NM_021138 | 1785.423  | 3838.344  | NM_017833 | 1186.072  | 777.331   | NM_001244 | 212.196   | 216.792   |
| BC002792  | 1369.323  | 2798.6    | NM_006675 | 4079.781  | 3533.414  | NM_012275 | 155.678   | 95.563    |
| NM_002981 | 5157.042  | 5202.644  | NM_003022 | 4354.253  | 2668.454  | NM_006137 | 794.248   | 586.693   |
| NM_001244 | 1109.388  | 790.092   | NM_004873 | 2803.52   | 1856.123  | NM_016135 | 8389.021  | 4131.24   |
| NM_012275 | 358.688   | 296.101   | NM_019842 | 924.176   | 348.483   | AL117468  | 1804.421  | 1888.175  |
| NM_006137 | 5338.696  | 3863.392  | NM_002951 | 13369.42  | 7226.6    | NM_019613 | 1607.838  | 1825.69   |
| NM_016135 | 54061.16  | 35422.328 | NM_002317 | 962.968   | 433.452   | NM_005382 | 212.877   | 238.47    |
| AL117468  | 9139.836  | 6075.809  | NM_000320 | 2519.405  | 1554.894  | AK027086  | 879.452   | 928.954   |
| NM_019613 | 9656.271  | 7484.73   | NM_003136 | 9630.84   | 8947.046  | AB032997  | 191.569   | 244.331   |
| NM_005382 | 854.464   | 542.268   | NM_004620 | 655.393   | 423.975   | AL096857  | 501.949   | 1065.749  |
| AK027086  | 6949.839  | 4562.565  | AF087940  | 1187.971  | 962.39    | AB040104  | 132.46    | 120.27    |
| AB032997  | 1072.867  | 885.51    | AJ277587  | 488.462   | 437.383   | NM_003834 | 578.108   | 743.725   |
| AL096857  | 3142.92   | 2155.177  | D87432    | 1711.692  | 1157.077  | NM_005955 | 667.64    | 713.432   |
| X07203    | 275.579   | 167.327   | Y18483    | 304.009   | 317.36    | NM_003381 | 262.072   | 122.657   |
| AB040104  | 315.173   | 394.023   | AI565117  | 47224.016 | 29830.527 | NM_005755 | 235.264   | 215.901   |
| NM_003834 | 2237.322  | 729.377   | AI299075  | 504.339   | 158.632   | NM_003702 | 2522.399  | 2533.91   |
| NM_005955 | 3881.368  | 1732.077  | AB011098  | 664.229   | 594.472   | NM_000365 | 202.337   | 222.56    |
| NM_003381 | 1567.746  | 2543.199  | AA609759  | 942.31    | 964.785   | NM_016351 | 370.199   | 290.013   |
| NM_005755 | 1167.074  | 2929.663  | AA029418  | 4375.582  | 3420.77   | NM_004405 | 601.396   | 441.873   |
| NM_003702 | 17612.66  | 32661.627 | L20815    | 5943.98   | 3830.011  | NM_001985 | 1271.44   | 659.443   |
| NM_000365 | 978.641   | 2541.243  | AI364483  | 9042.459  | 6734.954  | NM_006060 | 584.705   | 672.923   |
| NM_004405 | 3706.771  | 7306.101  | AA456001  | 5368.51   | 3824.756  | NM_005667 | 813.323   | 542.434   |
| NM_001985 | 10382.469 | 12610.818 | AA451686  | 3773.778  | 3244.466  | NM_006305 | 143.387   | 218.015   |
| NM_006060 | 3752.047  | 5858.958  | NM_003822 | 845.266   | 747.839   | NM_002234 | 331.585   | 374.419   |
| NM_005667 | 3777.01   | 6915.476  | NM_004412 | 3842.505  | 2913.869  | NM_003471 | 128.302   | 99.829    |
| NM_006305 | 680.261   | 1171.879  | NM_002050 | 1116.3    | 1203.006  | NM_000701 | 433.292   | 412.66    |
| NM_002234 | 892.729   | 1033.892  | NM_007097 | 5007.151  | 5457.204  | AB022696  | 704.275   | 546.86    |
| NM_000701 | 2438.272  | 2220.853  | NM_000029 | 3364.677  | 2149.59   | NM_002233 | 197.15    | 91.281    |
| AB022696  | 2723.955  | 1831.234  | AF035802  | 943.236   | 860.944   | NM_014375 | 129.798   | 84.405    |
| AF137372  | 7098.761  | 5483.764  | Y08145    | 539.453   | 307.126   | AF137372  | 1294.475  | 1438.912  |
| AF220417  | 1987.635  | 1747.113  | M26123    | 384.723   | 397.926   | AF220417  | 429.311   | 550.128   |
| D83782    | 6118.078  | 3499.325  | NM_001835 | 626.656   | 578.982   | D83782    | 950.792   | 852.807   |
| NM_002075 | 3067.073  | 1966.928  | NM_019555 | 1399.097  | 898.756   | NM_002075 | 608.197   | 426.435   |
| NM_000287 | 2638.301  | 1582.322  | NM_012096 | 6222.502  | 2956.104  | NM_000287 | 491.658   | 620.417   |
| NM_001655 | 1769.817  | 1273.664  | NM_003905 | 18334.416 | 8361.888  | NM_001655 | 413.591   | 384.849   |
| AF091033  | 641.719   | 420.244   | L12052    | 2926.054  | 2959.774  | AF091033  | 190.934   | 241.59    |
| NM_001122 | 7264.77   | 2831.735  | AB028976  | 2203.479  | 1788.889  | NM_001122 | 2115.667  | 1894.705  |
| NM_004591 | 586.026   | 278.014   | NM_015865 | 481.022   | 275.575   | NM_004591 | 293.714   | 258.511   |
| AL133027  | 1803.033  | 4959.51   | AB031038  | 562.376   | 278.686   | NM_006274 | 107.022   | 133.382   |
| AB037732  | 1366.462  | 3435.073  | NM_004305 | 28909.852 | 11459.525 | AL133027  | 273.719   | 425.327   |
| NM_005767 | 624.26    | 1403.228  | NM_006085 | 6349.033  | 3763.29   | AB037732  | 362.791   | 368.517   |
| NM_001837 | 1202.967  | 2875.484  | AF072506  | 219.804   | 709.05    | NM_005767 | 137.298   | 177.589   |
| BC016029  | 1069.192  | 2435.199  | NM_005992 | 296.302   | 1097.897  | NM_001837 | 160.272   | 180.94    |
| M27487    | 873.193   | 1463.571  | NM_003144 | 27288.361 | 30306.48  | NM_001835 | 26906.809 | 25607.656 |
| NM_002164 | 684.223   | 1527.547  | NM_000905 | 663.186   | 541.43    | BC016029  | 247.061   | 279.037   |
| NM_003811 | 4285.272  | 9429.815  | AB011102  | 4229.749  | 1532.058  | M27487    | 219.664   | 203.641   |
| AB011133  | 4053.135  | 4129.841  | D63480    | 872.526   | 890.526   | NM_002285 | 8721.748  | 6522.369  |
| NM_017572 | 37768.273 | 24097.059 | NM_002965 | 1348.823  | 2512.825  | NM_002164 | 213.242   | 156.688   |
| NM_018444 | 2627.772  | 2086.205  | AK023749  | 514.23    | 361.689   | NM_003811 | 711.727   | 437.879   |
| NM_000252 | 1872.688  | 1436.027  | NM_002337 | 2639.507  | 2057.041  | AB011133  | 650.58    | 765.128   |
| NM_006947 | 15380.544 | 10339.077 | NM_013245 | 907.281   | 1003.414  | NM_017572 | 6879.77   | 4324.307  |

|           |           |           |           |           |           |           |          |          |
|-----------|-----------|-----------|-----------|-----------|-----------|-----------|----------|----------|
| NM_017917 | 2650.402  | 3168.426  | NM_006423 | 16006.394 | 11594.024 | NM_018444 | 523.412  | 755.237  |
| NM_00409C | 6069.835  | 5075.017  | NM_004766 | 1600.948  | 996.137   | NM_000252 | 404.247  | 263.212  |
| NM_014634 | 9359.854  | 5475.765  | NM_005819 | 4891.331  | 3793.621  | NM_006947 | 2410.067 | 835.045  |
| NM_001919 | 4309.367  | 3603.031  | AK024722  | 581.795   | 602.929   | NM_017917 | 588.91   | 537.632  |
| BC031485  | 2690.227  | 1759.049  | AK025520  | 1888.884  | 740.396   | NM_00409C | 1121.496 | 869.041  |
| NM_004092 | 9032.263  | 6898.721  | NM_004892 | 6050.592  | 3200.721  | NM_014634 | 1484.581 | 1296.563 |
| X15624    | 2076.403  | 1485.99   | NM_014597 | 8819.692  | 3388.826  | NM_001919 | 944.231  | 927.521  |
| AF073770  | 3709.924  | 2055.018  | NM_017896 | 5650.153  | 2855.963  | BC031485  | 394.474  | 428.223  |
| AL359401  | 8586.89   | 3477.705  | AB002374  | 2183.237  | 2030.592  | NM_004092 | 967.381  | 2183.067 |
| NM_012213 | 2484.294  | 1264.219  | U17327    | 973.051   | 1068.099  | X15624    | 375.509  | 555.908  |
| NM_016573 | 4091.508  | 4244.154  | M87790    | 7467.855  | 4505.979  | AF073770  | 677.388  | 803.762  |
| NM_001303 | 11751.991 | 22603.434 | NM_001768 | 2744.56   | 4739.609  | AL359401  | 1736.335 | 1790.882 |
| M21304    | 774.963   | 1426.403  | NM_002951 | 14259.296 | 8675.579  | NM_012213 | 585.813  | 528.403  |
| NM_001979 | 8921.369  | 11782.667 | NM_002317 | 723.115   | 373.207   | NM_016573 | 623.331  | 699.179  |
| AB040896  | 2565.52   | 4963.364  | NM_000320 | 2270.28   | 1897.036  | NM_001303 | 1654.424 | 1450.634 |
| NM_001107 | 9704.463  | 13790.188 | NM_003136 | 9096.008  | 5220.384  | M21304    | 187.235  | 159.411  |
| AF084645  | 565.762   | 1504.618  | NM_013328 | 12969.629 | 8172.433  | NM_001979 | 1345.542 | 733.349  |
| NM_005176 | 362.513   | 746.962   | NM_000790 | 431.247   | 227.118   | AB040896  | 364.138  | 244.752  |
| NM_003636 | 19992.947 | 33360.984 | NM_002660 | 2893.523  | 2679.223  | NM_001107 | 1611.115 | 1341.53  |
| AF040723  | 5801.626  | 4372.472  | NM_015900 | 600.078   | 416.404   | AF084645  | 147.011  | 116.643  |
| NM_015527 | 7924.656  | 5521.96   | NM_003706 | 814.367   | 531.866   | AF151851  | 927.527  | 755.502  |
| X89675    | 1190.806  | 995.309   | AF153330  | 871.836   | 1723.223  | NM_005176 | 125.203  | 136.816  |
| NM_012189 | 477.709   | 504.795   | NM_003822 | 728.2     | 492.803   | NM_003636 | 2760.031 | 1270.589 |
| NM_005799 | 11833.243 | 7827.125  | NM_004412 | 4203.296  | 2382.66   | AF040723  | 1632.449 | 1152.104 |
| NM_004216 | 3079.241  | 2506.008  | NM_002050 | 734.868   | 528.465   | NM_015527 | 1053.384 | 576.869  |
| NM_016289 | 22838.434 | 12580.709 | NM_007097 | 4347.723  | 2729.992  | X89675    | 361.915  | 288.495  |
| NM_001464 | 955.834   | 1091.788  | D87446    | 2999.345  | 1988.963  | NM_018069 | 158.894  | 100.781  |
| NM_002051 | 4807.708  | 3110.011  | BF540935  | 2395.625  | 1559.265  | NM_012189 | 203.329  | 146.011  |
| NM_001523 | 953.523   | 608.156   | NM_007081 | 2721.309  | 1563.988  | NM_005799 | 2498.604 | 1205.054 |
| NM_017423 | 2333.876  | 1760.97   | AB032964  | 2663.762  | 2312.059  | NM_004216 | 674.915  | 680.404  |
| Z70705    | 595.245   | 369.618   | BE733605  | 3014.824  | 2263.616  | NM_016289 | 4764.361 | 5038.779 |
| NM_002611 | 2165.55   | 1477.781  | NM_003334 | 18260.863 | 12039.976 | NM_001464 | 242.061  | 218.457  |
| NM_017417 | 1201.813  | 2791.837  | NM_002693 | 4509.133  | 2510.076  | NM_002051 | 907.395  | 1016.073 |
| AL133602  | 1168.059  | 2802.239  | NM_003671 | 1252.819  | 951.119   | NM_001523 | 195.848  | 224.018  |
| AF037219  | 4748.532  | 7772.433  | NM_019842 | 1048.398  | 1666.334  | NM_017423 | 400.941  | 706.815  |
| AK026075  | 2685.412  | 3100.722  | NM_003144 | 26147.857 | 13036.095 | Z70705    | 200.772  | 209.512  |
| NM_000251 | 3263.825  | 5117.051  | NM_000908 | 493.509   | 263.613   | NM_002611 | 379.001  | 422.576  |
| NM_006039 | 4354.509  | 8789.671  | AB011102  | 4591.247  | 2412.852  | NM_017417 | 206.126  | 159.737  |
| NM_002485 | 369.841   | 731.733   | D63480    | 1100.133  | 675.462   | AL133602  | 355.561  | 277.976  |
| U87223    | 2479.854  | 2057.779  | NM_002969 | 1089.525  | 675.154   | AF037219  | 906.467  | 1015.109 |
| NM_000093 | 815.062   | 754.065   | NM_004620 | 641.193   | 469.433   | AK026075  | 426.131  | 361.654  |
| NM_001779 | 4286.705  | 2791.251  | AF087940  | 1401.65   | 1104.566  | NM_000251 | 603.271  | 742.207  |
| AB033059  | 816.145   | 853.865   | AJ277587  | 741.15    | 786.487   | AF118071  | 91.858   | 148.468  |
| NM_016484 | 5610.603  | 4608.62   | D87432    | 1897.484  | 1316.838  | NM_006039 | 699.666  | 760.396  |
| NM_014452 | 1958.461  | 1294.392  | AI565117  | 47899.363 | 27659.982 | NM_002485 | 97.867   | 192.912  |
| AF023130  | 366.544   | 227.401   | AI299075  | 351.513   | 339.084   | U87223    | 536.097  | 313.752  |
| AK021536  | 12443.508 | 8107.835  | M59979    | 417.174   | 294.804   | NM_000093 | 192.645  | 159.326  |
| U31285    | 404.723   | 222.287   | AB011098  | 695.052   | 287.149   | NM_001779 | 855.884  | 432.541  |
| NM_002600 | 923.694   | 1124.103  | L20815    | 5795.883  | 17919.828 | AB033059  | 259.781  | 176.363  |
| NM_003646 | 23835.637 | 19305.389 | AI364483  | 8641.803  | 19340.336 | NM_016484 | 795.724  | 489.96   |
| NM_006663 | 1737.283  | 2860.45   | M87790    | 6301.881  | 3805.356  | AK026114  | 168.036  | 92.45    |
| NM_006092 | 1428.367  | 1640.887  | NM_001768 | 2142.712  | 1577.608  | NM_014452 | 340.995  | 368.868  |
| NM_003939 | 1203.521  | 2166.088  | NM_000029 | 3126.728  | 2321.456  | NM_014683 | 169.665  | 136.575  |

|           |           |           |           |           |           |           |           |           |
|-----------|-----------|-----------|-----------|-----------|-----------|-----------|-----------|-----------|
| NM_012424 | 1291.5    | 2839.957  | AF035802  | 1041.322  | 1005.39   | AF023130  | 141.055   | 110.299   |
| NM_002446 | 2147.696  | 4333.827  | Y08145    | 819.664   | 639.476   | AK021536  | 1904.005  | 2810.529  |
| NM_000863 | 1437.679  | 1882.524  | M26123    | 422.53    | 254.402   | NM_00260C | 169.475   | 170.016   |
| NM_006651 | 3072.762  | 3425.663  | NM_001838 | 585.428   | 608.054   | NM_003646 | 3399.449  | 2434.114  |
| NM_005336 | 9428.083  | 7932.795  | NM_019555 | 1372.544  | 823.263   | NM_006663 | 261.991   | 408.331   |
| NM_001419 | 14953.38  | 15854.497 | NM_012096 | 6278.457  | 4598.882  | NM_006092 | 242.067   | 359.498   |
| AF119817  | 16024.073 | 27348.611 | NM_003905 | 18012.568 | 13912.469 | NM_003939 | 218.662   | 202.577   |
| AL035306  | 1607.701  | 4965.155  | L12052    | 3175.895  | 5005.176  | NM_012424 | 229.534   | 260.701   |
| NM_001328 | 21069.652 | 8595.303  | AB028976  | 2019.001  | 2001.072  | NM_002446 | 422.538   | 351.474   |
| NM_005749 | 4495.953  | 2950.055  | AK026337  | 504.357   | 1609.8    | NM_000863 | 362.55    | 252.312   |
| NM_00423C | 2349.448  | 2171.243  | NM_015869 | 499.031   | 1325.768  | NM_006651 | 779.324   | 500.081   |
| AK024372  | 433.895   | 399.512   | AB031038  | 386.04    | 973.15    | NM_005336 | 1604.901  | 1235.411  |
| NM_014503 | 1110.805  | 1540.9    | AB033054  | 9203.449  | 7825.392  | NM_001419 | 2882.299  | 3117.509  |
| NM_014659 | 1934.607  | 1425.439  | NM_016122 | 933.987   | 642.686   | AF119817  | 2780.188  | 1506.937  |
| NM_004399 | 5738.831  | 4942.453  | AF153330  | 813.698   | 883.099   | AL035306  | 532.062   | 441.507   |
| NM_006337 | 8474.97   | 9043.902  | AK023749  | 661.321   | 1051.745  | NM_005749 | 611.287   | 419.043   |
| NM_004507 | 4739.182  | 8234.285  | NM_002337 | 2764.9    | 5903.728  | NM_00423C | 624.425   | 334.908   |
| NM_00271C | 21332.143 | 24667.482 | NM_013245 | 993.02    | 2918.399  | AK024372  | 130.44    | 123.759   |
| NM_01406C | 6672.815  | 12443.433 | NM_006423 | 20617.873 | 25321.596 | NM_014503 | 170.726   | 265.566   |
| NM_004749 | 13017.916 | 18627.123 | NM_005819 | 5156.79   | 14814.19  | NM_014659 | 332.485   | 256.671   |
| BQ446064  | 2872.477  | 4558.299  | AK024722  | 438.538   | 1369.304  | NM_004399 | 967.558   | 400.691   |
| AF302502  | 13136.693 | 15277.441 | AK025520  | 1621.584  | 2232.722  | NM_006337 | 1190.542  | 991.428   |
| AF274571  | 2596.097  | 2634.455  | NM_004892 | 7369.671  | 7403.413  | NM_004507 | 624.173   | 748.622   |
| NM_005449 | 2447.141  | 3034.496  | NM_014597 | 8839.451  | 9774.566  | NM_00271C | 2257.349  | 2323.009  |
| NM_003879 | 2661.748  | 3781.665  | NM_017833 | 952.189   | 1306.931  | NM_01406C | 810.474   | 1324.637  |
| NM_016052 | 6900.973  | 13371.584 | NM_006675 | 3858.19   | 5478.099  | NM_004749 | 1643.675  | 2083.168  |
| NM_006718 | 1603.234  | 2601.797  | NM_003022 | 5482.151  | 6564.185  | BQ446064  | 444.033   | 594.634   |
| NM_005427 | 1042.95   | 1903.896  | NM_004873 | 3700.635  | 5469.123  | AF302502  | 1685.735  | 1650.927  |
| NM_016312 | 923.191   | 1450.787  | NM_019842 | 963.633   | 1343.902  | AF274571  | 380.686   | 273.442   |
| AF234887  | 1178.993  | 1555.187  | NM_002951 | 14028.266 | 19191.346 | NM_005449 | 394.841   | 610.868   |
| NM_001776 | 1846.232  | 4205.929  | NM_002317 | 726.331   | 1056.779  | NM_003879 | 438.696   | 422.666   |
| NM_001792 | 396.571   | 1143.545  | NM_00032C | 1990.833  | 4390.587  | NM_016052 | 1094.148  | 1177.228  |
| NM_001903 | 11229.577 | 13625.046 | NM_003136 | 9597.776  | 10519.639 | NM_006718 | 276.611   | 222.668   |
| NM_001869 | 289.762   | 485.647   | NM_013328 | 12664.965 | 17631.375 | NM_005427 | 279.85    | 196.068   |
| NM_005857 | 7181.478  | 11271.039 | NM_00266C | 4359.499  | 7275.611  | NM_016312 | 250.365   | 167.875   |
| NM_000429 | 1568.187  | 3250.766  | NM_003706 | 965.571   | 1979.841  | AF234887  | 253.926   | 240.74    |
| AK027037  | 1201.89   | 2254.353  | AF182218  | 436.993   | 524.498   | NM_001776 | 342.632   | 294.41    |
| NM_003875 | 14817.562 | 19511.777 | NM_014913 | 35744.496 | 40727.145 | NM_001792 | 164.094   | 168.139   |
| AF191687  | 4882.011  | 7841.838  | NM_005864 | 447.802   | 920.646   | NM_001903 | 2081.086  | 874.282   |
| NM_003046 | 631.162   | 1248.716  | NM_012341 | 3969.46   | 4441.101  | X69637    | 150.154   | 55.312    |
| NM_000274 | 16595.979 | 16757.111 | NM_003256 | 14917.08  | 16809.52  | NM_005857 | 1031.257  | 526.904   |
| NM_00017C | 1371.486  | 1794.97   | D87450    | 3838.283  | 5320.843  | NM_000429 | 257.189   | 214.653   |
| NM_000281 | 18444.881 | 16692.504 | NM_017797 | 11932.59  | 16619.74  | AK027037  | 138.381   | 155.145   |
| NM_006031 | 3852.151  | 8855.688  | AK021919  | 335.756   | 629.333   | NM_003875 | 1834.743  | 2323.378  |
| NM_002715 | 9779.502  | 15554.176 | AF000562  | 2688.809  | 3975.514  | AF191687  | 592.92    | 732.988   |
| NM_00102C | 54177     | 75548.906 | AK025713  | 3427.383  | 3885      | NM_003046 | 147.069   | 155.067   |
| AB020660  | 4331.017  | 8127.875  | NM_01810C | 867.683   | 843.287   | NM_000274 | 2386.435  | 2234.681  |
| NM_006659 | 20581.975 | 29319.291 | NM_00205C | 1120.43   | 1815.367  | NM_00017C | 311.118   | 260.454   |
| NM_018051 | 1862.864  | 4097.102  | NM_007097 | 4638.93   | 5673.473  | NM_000281 | 2693.663  | 3015.181  |
| NM_015371 | 2747.529  | 4108.472  | D87446    | 3377.85   | 4981.533  | AK001295  | 149.651   | 203.329   |
| AB040915  | 2356.41   | 5972.948  | BF540935  | 4611.048  | 6665.146  | NM_006031 | 596.787   | 562.814   |
| AF147791  | 709.035   | 1670.996  | NM_004466 | 805.794   | 1335.391  | NM_002715 | 1496.918  | 909.311   |
| NM_006481 | 4670.194  | 7930.084  | AB032964  | 2941.936  | 9556.566  | NM_00102C | 23441.006 | 29234.932 |

|           |           |           |           |           |           |           |          |          |
|-----------|-----------|-----------|-----------|-----------|-----------|-----------|----------|----------|
| AB011115  | 1555.064  | 2646.173  | BE733605  | 3466.137  | 8707.633  | AB020660  | 686.923  | 490.647  |
| NM_003910 | 34799.926 | 44441.137 | NM_003334 | 20474.975 | 29171.041 | NM_006650 | 3547.473 | 2443.126 |
| AB007913  | 945.086   | 1173.205  | NM_002693 | 4124.337  | 7702.278  | NM_018051 | 351.246  | 288.178  |
| NM_006690 | 6704.645  | 8837.711  | NM_005814 | 931.871   | 1101.554  | NM_015371 | 513.668  | 344.173  |
| NM_004590 | 12020.081 | 12115.802 | NM_016279 | 466.904   | 782.023   | AB040915  | 425.241  | 305.82   |
| NM_006037 | 13262.262 | 14655.296 | NM_000211 | 5976.665  | 6419.522  | AF147791  | 180.896  | 131.062  |
| NM_015871 | 8699.274  | 11032.584 | AB037830  | 1040.618  | 1657.827  | NM_006481 | 900.486  | 3572.567 |
| NM_019037 | 5823.509  | 7184.909  | NM_015685 | 1999.806  | 2743.54   | AB011115  | 222.681  | 264.545  |
| NM_015891 | 7178.189  | 7986.111  | NM_004357 | 16270.279 | 14243.629 | AB007913  | 289.603  | 287.99   |
| NM_006802 | 1289.844  | 1873.507  | X03324    | 2143.077  | 2145.278  | NM_006690 | 892.513  | 453.412  |
| AB037778  | 738.643   | 1189.89   | AF130988  | 537.305   | 409.535   | NM_004590 | 1265.278 | 1100.311 |
| NM_005060 | 42442.734 | 25263.086 | NM_014934 | 490.661   | 417.925   | NM_006037 | 1710.566 | 1302.115 |
| NM_003080 | 9454.957  | 12884.074 | NM_003690 | 3874.236  | 2554.641  | NM_015871 | 1005.34  | 829.463  |
| NM_003753 | 16595.725 | 28781.67  | NM_000870 | 3208.908  | 3004.302  | NM_019037 | 794.638  | 745.535  |
| NM_017590 | 2618.445  | 5057.566  | NM_014214 | 2151.088  | 2344.899  | NM_015891 | 986.038  | 624.389  |
| AB011145  | 5659.532  | 10929.438 | NM_000850 | 327.095   | 580.125   | NM_006802 | 231.449  | 196.026  |
| NM_003750 | 15534.081 | 17042.467 | NM_005232 | 626.621   | 2726.496  | AB037778  | 243.808  | 186.875  |
| M92422    | 2741.387  | 3704.448  | NM_002752 | 2679.297  | 7865.824  | NM_005060 | 6517.378 | 4538.954 |
| NM_017860 | 1568.195  | 1959.31   | NM_013281 | 1016.885  | 1772.35   | NM_003080 | 1422.359 | 1280.643 |
| AK021888  | 1286.834  | 2316.164  | X85106    | 1225.088  | 4435.621  | NM_003753 | 2911.396 | 2938.747 |
| AK022848  | 2613.999  | 5191.068  | NM_003931 | 1381.472  | 3756.542  | NM_006223 | 167.593  | 208.269  |
| AL049957  | 1693.643  | 2636.348  | NM_004367 | 1030.755  | 837.301   | NM_017590 | 487.454  | 426.211  |
| NM_018150 | 18697.766 | 22789.416 | AL157475  | 2547.247  | 1850.06   | AB011145  | 1115.428 | 1057.934 |
| NM_000810 | 7696.619  | 9949.72   | NM_006060 | 12717.386 | 10581.92  | NM_003750 | 2478.132 | 1390.043 |
| NM_002513 | 4493.997  | 7189.372  | NM_006534 | 2395.385  | 2047.095  | M92422    | 534.746  | 316.576  |
| NM_017424 | 7720.195  | 9195.618  | NM_017601 | 1221.456  | 1065.072  | NM_017860 | 349.621  | 215.548  |
| NM_001522 | 10263.61  | 13213.659 | AF110265  | 5186.146  | 3557.705  | AK021888  | 254.658  | 2154.392 |
| NM_000883 | 10380.347 | 12204.23  | AF272371  | 44497.543 | 51561.742 | AK022848  | 295.382  | 755.475  |
| AF254086  | 2185.653  | 3177.327  | AK021848  | 1023.134  | 741.988   | AK055302  | 116.288  | 106.902  |
| AL390142  | 1160.521  | 1675.613  | NM_003704 | 910.176   | 682.801   | NM_005847 | 99.42    | 499.513  |
| NM_006560 | 4656.857  | 5201.412  | AK023140  | 820.535   | 519.879   | NM_018150 | 3535.41  | 2532.422 |
| AB007930  | 8064.629  | 7552.124  | AF084362  | 480.985   | 387.926   | NM_000810 | 1113.302 | 1034.674 |
| X76978    | 399.379   | 475.194   | NM_001553 | 1072.958  | 880.413   | NM_002513 | 825.739  | 1190.214 |
| AJ005273  | 5691.161  | 10788.256 | NM_014173 | 10751.119 | 9283.297  | NM_017424 | 894.224  | 736.983  |
| AK021892  | 3022.14   | 5104.08   | NM_001731 | 10676.521 | 8162.292  | NM_001522 | 1347.262 | 1236.313 |
| NM_017637 | 262.647   | 888.881   | AL137506  | 986.117   | 873.593   | NM_000883 | 1351.996 | 1491.812 |
| NM_003121 | 582.942   | 1338.958  | AK022961  | 1816.162  | 2459.331  | AF254086  | 438.829  | 470.548  |
| NM_003437 | 1540.412  | 2937.642  | NM_007370 | 4216.131  | 6794.806  | AL390142  | 291.117  | 363.269  |
| NM_018337 | 8901.804  | 8250.389  | NM_014371 | 2439.94   | 3535.274  | NM_006560 | 563.143  | 523.586  |
| AA193295  | 12210.446 | 7807.517  | AF290512  | 2091.283  | 3938.061  | AB007930  | 1244.174 | 1724.216 |
| NM_018040 | 6329.609  | 4892.205  | NM_020180 | 2934.34   | 2505.874  | X76978    | 99.719   | 162.949  |
| NM_014803 | 2875.599  | 5409.657  | NM_002832 | 28221.809 | 17217.547 | AJ005273  | 972.967  | 784.487  |
| AK024956  | 589.841   | 736.83    | NM_017732 | 2904.978  | 2122.261  | AK021892  | 727.337  | 678.627  |
| AF147386  | 2264.274  | 3389.643  | NM_002851 | 1553.972  | 967.767   | NM_003121 | 131.498  | 199.053  |
| AF273052  | 13966.48  | 15023.675 | NM_005330 | 10933.618 | 5251.151  | NM_003437 | 417.411  | 278.507  |
| NM_017943 | 13830.477 | 20025.732 | NM_001900 | 2755.056  | 2193.171  | NM_018337 | 1544.63  | 1061.412 |
| AF147383  | 698.504   | 799.93    | NM_004142 | 453.417   | 216.06    | AA193295  | 2235.196 | 1744.182 |
| AK025682  | 1873.435  | 2909.255  | AF108138  | 1864.855  | 1704.465  | NM_018040 | 1115.916 | 706.872  |
| NM_013352 | 1140.539  | 2122.683  | BF340302  | 3028.882  | 2973.562  | NM_014803 | 425.689  | 5313.331 |
| NM_016470 | 10611.646 | 13475.375 | AK024210  | 740.132   | 983.108   | AF147386  | 402.887  | 665.24   |
| AL389986  | 13207.399 | 15635.059 | NM_002270 | 1920.219  | 1661.936  | NM_017943 | 1764.333 | 811.196  |
| AF086279  | 539.999   | 700.705   | AL133087  | 2338.963  | 2647.951  | AF147383  | 209.429  | 207.026  |
| AF088052  | 1527.411  | 1829.952  | NM_018010 | 1476.466  | 3235.927  | AK025682  | 371.211  | 198.12   |

|           |           |           |           |           |           |           |           |           |
|-----------|-----------|-----------|-----------|-----------|-----------|-----------|-----------|-----------|
| AF086310  | 400.523   | 783.547   | NM_000243 | 2260.228  | 2970.227  | NM_013352 | 192.255   | 103.22    |
| AF086387  | 988.188   | 2036.854  | NM_012256 | 8166.193  | 3690.261  | NM_016478 | 1828.269  | 2311.381  |
| AL389941  | 822.362   | 1257.95   | NM_016325 | 1631.073  | 1185.706  | AL389986  | 2076.069  | 2758.465  |
| AB037756  | 1938.159  | 1605.876  | NM_001604 | 10462.107 | 447.32    | AF086279  | 123.62    | 217.626   |
| AK001853  | 5017.304  | 8203.348  | NM_017656 | 1190.197  | 475.825   | AF088052  | 299.575   | 283.235   |
| AK025071  | 1765.466  | 2710.091  | X16282    | 4531.723  | 3042.511  | AF086342  | 143.176   | 137.07    |
| AF075082  | 444.081   | 827.768   | NM_014415 | 1903.366  | 1040.397  | AF086451  | 139.192   | 104.343   |
| NM_01537C | 3061.275  | 4208.234  | S75264    | 4799.679  | 2992.843  | AF086310  | 94.013    | 191.359   |
| AF085917  | 1917.662  | 2525.378  | AF027513  | 888.813   | 804.159   | AF086387  | 225.487   | 201.907   |
| AF085989  | 1362.292  | 2146.677  | NM_001379 | 1537.302  | 1016.15   | AF086443  | 120.242   | 118.214   |
| AL360139  | 50325.992 | 59814.156 | NM_018664 | 2475.184  | 3248.442  | AL389941  | 234.921   | 239.177   |
| AF075110  | 18077.348 | 17554.383 | NM_005034 | 326.623   | 375.614   | AB037756  | 440.372   | 475.918   |
| AK022157  | 318.095   | 488.083   | NM_003926 | 3767.487  | 3638.464  | AK001853  | 906.39    | 425.489   |
| AL137323  | 905.39    | 1419.715  | AF085356  | 836.276   | 780.845   | AK025071  | 290.005   | 184.369   |
| AL137494  | 5059.265  | 4952.087  | NM_016047 | 23784.842 | 16578.875 | AF075082  | 160.597   | 643.221   |
| AL162037  | 6346.743  | 6685.335  | NM_001499 | 5828.571  | 5594.953  | NM_01537C | 453.833   | 2299.733  |
| AL390150  | 1938.175  | 2632.303  | BF030165  | 7592.373  | 7935.075  | AF085917  | 232.179   | 557.301   |
| AL137359  | 638.949   | 884.122   | NM_016732 | 10554.31  | 10242.24  | AF085989  | 233.463   | 485.897   |
| AL137575  | 362.946   | 889.92    | NM_014763 | 8178.022  | 8152.504  | AL360139  | 14129.996 | 3602.382  |
| NM_002761 | 849.38    | 1066.904  | AK026261  | 341.871   | 299.989   | AF075110  | 3170.836  | 1585.337  |
| AF086063  | 777.202   | 1370.222  | AF086534  | 521.676   | 295.788   | AL137323  | 214.105   | 141.512   |
| AF086098  | 2213.389  | 4170.562  | AF070617  | 2002.295  | 514.411   | AL137494  | 759.312   | 690.352   |
| AF086076  | 1174.13   | 1517.642  | NM_014918 | 4117.517  | 2801.008  | AL162037  | 1034.276  | 704.72    |
| AL833393  | 2780.398  | 4844.261  | NM_000152 | 4125.246  | 3068.764  | AL390150  | 249.679   | 248.434   |
| AF088005  | 1794.564  | 1019.165  | D17222    | 6083.622  | 4390.347  | AL137359  | 147.748   | 234.003   |
| AF086096  | 5182.465  | 5254.576  | NM_000154 | 1597.251  | 1257.925  | NM_002761 | 180.583   | 235.558   |
| AL390132  | 691.918   | 899.248   | NM_003549 | 325.543   | 285.799   | AF086063  | 177.917   | 338.233   |
| NM_017933 | 2666.445  | 4595.814  | NM_000671 | 2502.907  | 2208.735  | AF086098  | 348.269   | 333.572   |
| NM_017819 | 12661.222 | 15672.016 | NM_006297 | 6560.429  | 6227.504  | AF086076  | 317.686   | 290.4     |
| AK024653  | 19568.682 | 20474.313 | X85325    | 40116.711 | 31390.205 | AL833393  | 619.779   | 529.549   |
| AF103907  | 1354.087  | 1800.113  | AF318366  | 3268.533  | 4485.698  | AF088005  | 252.845   | 144.598   |
| AF094508  | 737.155   | 662.67    | AF182423  | 1191.904  | 927.818   | AF086096  | 1198.813  | 824.92    |
| AF161351  | 1084.063  | 986.844   | D26018    | 3078.762  | 2715.068  | AL390132  | 214.18    | 194.251   |
| AF257098  | 668.183   | 538.817   | AB037863  | 792.079   | 868.112   | NM_017933 | 498.301   | 300.845   |
| NM_01413C | 276.359   | 445.354   | BC000363  | 695.802   | 1105.98   | NM_017819 | 2141.118  | 1221.176  |
| AF111782  | 945.664   | 670.984   | NM_007237 | 1797.771  | 2240.175  | AK024653  | 2243.033  | 12721.194 |
| AF151530  | 929.283   | 427.72    | NM_004608 | 801.581   | 1019.333  | AF103907  | 280.338   | 983.423   |
| AK021991  | 560.669   | 545.552   | NM_018257 | 3179.36   | 4188.472  | AF094508  | 149.678   | 560.911   |
| AK022093  | 4668.375  | 2495.789  | NM_005919 | 1692.996  | 2026.259  | AF161351  | 289.297   | 640.804   |
| AK022376  | 433.475   | 266.078   | AF085931  | 1620.257  | 1005.799  | NM_01413C | 94.458    | 138.897   |
| AK022005  | 401.725   | 527.384   | AF086112  | 444.705   | 242.881   | AF111782  | 338.286   | 177.489   |
| AK022272  | 888.239   | 1066.472  | AL137254  | 1458.363  | 1053.875  | AF151530  | 236.112   | 200.518   |
| AK027155  | 4023.547  | 6510.286  | AK026359  | 746.913   | 617.461   | AK021991  | 154.245   | 235.631   |
| AF221846  | 465.221   | 700.487   | AF085884  | 1135.903  | 955.81    | AK022093  | 821.45    | 666.131   |
| AF264626  | 426.809   | 435.24    | S81522    | 2648.782  | 1818.473  | AK022232  | 112.571   | 167.246   |
| AK024528  | 6048.823  | 8403.897  | AF075070  | 329.291   | 305.82    | AK022376  | 117.411   | 129.546   |
| AL049311  | 623.38    | 652.415   | S94541    | 986.085   | 944.11    | AK022005  | 200.553   | 120.389   |
| AK000016  | 746.45    | 997.724   | AK024228  | 1404.551  | 2586.886  | AK022137  | 155.375   | 145.907   |
| AK023367  | 1612.6    | 1998.087  | NM_016647 | 875.898   | 1896.717  | AK022272  | 249.868   | 297.537   |
| AL080209  | 2353.516  | 2318      | AK024695  | 1048.348  | 1428.548  | AK022394  | 83.715    | 87.181    |
| NM_01625E | 1895.466  | 1124.73   | AF038174  | 3005.329  | 3539.087  | AK027155  | 824.06    | 614.093   |
| NM_01431E | 1934.287  | 843.274   | NM_013243 | 556.035   | 883.114   | AF221846  | 155.917   | 202.171   |
| AK021962  | 355.384   | 608.091   | AF161359  | 1354.179  | 2124.155  | AF264626  | 210.986   | 125.52    |

|           |           |           |           |           |           |           |           |          |
|-----------|-----------|-----------|-----------|-----------|-----------|-----------|-----------|----------|
| AK056674  | 1395.531  | 2629.563  | AL365520  | 1565.595  | 2373.003  | AK027219  | 162.829   | 142.064  |
| AK022856  | 467.256   | 990.732   | AL359338  | 784.973   | 737.531   | AK024528  | 1168.038  | 600.63   |
| AK022042  | 817.34    | 1341.197  | AK023623  | 1778.928  | 2391.646  | AL049311  | 153.909   | 147.427  |
| AL117588  | 705.849   | 1004.916  | AK021539  | 3153.876  | 2359.58   | AK000016  | 271.795   | 1248.107 |
| NM_01770E | 433.632   | 453.958   | AK021819  | 397.467   | 284.38    | AK023367  | 367.541   | 2725.988 |
| BE895529  | 2947.933  | 2436.273  | AK026738  | 2190.24   | 1068.958  | AL080209  | 463.1     | 1539.361 |
| AK000964  | 550.292   | 521.393   | AK025011  | 753.349   | 510.479   | L27642    | 122.746   | 23.94    |
| AL117536  | 2617.607  | 1753.174  | AL157491  | 1096.769  | 567.686   | NM_01625E | 442.195   | 292.553  |
| NM_017751 | 9047.015  | 4911.934  | NM_00526E | 2090.02   | 1535.59   | NM_01431E | 360.647   | 322.784  |
| NM_003771 | 1372.856  | 965.234   | AF087965  | 692.596   | 434.509   | AK024119  | 60.311    | 159.735  |
| NM_01786C | 617.914   | 515.665   | AF085998  | 1015.031  | 933.734   | AK021962  | 145.392   | 82.601   |
| X91195    | 52520.961 | 34265.559 | AB030240  | 424.531   | 234.823   | AK056674  | 378.125   | 334.993  |
| AF086190  | 642.712   | 509.411   | AK024681  | 696.995   | 741.367   | AK022856  | 172.189   | 138.031  |
| NM_00614E | 369.663   | 303.151   | X68742    | 540.217   | 536.75    | AK022042  | 222.386   | 208.622  |
| AL050035  | 3093.068  | 1819.836  | NM_014221 | 3520.842  | 4647.694  | AL117588  | 226.031   | 71.117   |
| AK024449  | 854.981   | 613.564   | U58663    | 207.973   | 410.882   | AK021569  | 101.111   | 107.908  |
| AF090101  | 182.214   | 211.649   | U84515    | 981.577   | 1351.25   | NM_01770E | 143.023   | 653.063  |
| AL357201  | 429.837   | 197.489   | AF086143  | 5457.43   | 6025.515  | BE895529  | 893.009   | 4960.871 |
| AF279780  | 45690.297 | 17659.377 | AK022364  | 364.777   | 372.405   | AF056453  | 100.694   | 255.146  |
| AK022510  | 2618.4    | 1387.514  | AK024674  | 420.334   | 153.408   | AK000964  | 174.228   | 735.138  |
| AK021851  | 845.596   | 2179.904  | AK024244  | 2150.763  | 1980.018  | AL117536  | 451.423   | 1022.46  |
| L37717    | 577.031   | 979.593   | AL390084  | 1340.179  | 1062.338  | NM_017751 | 1987.609  | 2753.507 |
| AJ131609  | 2219.588  | 4654.002  | AK023565  | 527.413   | 455.324   | NM_003771 | 329.66    | 229.158  |
| BC019280  | 5578.819  | 8224.143  | AK021479  | 805.261   | 564.513   | NM_01786C | 182.834   | 138.414  |
| AF086498  | 1098.97   | 2075.023  | NM_00383E | 1424.869  | 1079.526  | X91195    | 10660.137 | 6586.928 |
| AK000687  | 741.916   | 1308.656  | AK000245  | 1518.217  | 1153.31   | AF086190  | 220.61    | 134.32   |
| L77565    | 498.705   | 856.476   | AF118072  | 576.973   | 652.054   | NM_00614E | 213.83    | 209.699  |
| AF079567  | 2841.231  | 5099.267  | AK024112  | 332.598   | 424.718   | AL050035  | 578.533   | 516.928  |
| AK022177  | 1680.615  | 1172.723  | AF085900  | 17596.205 | 20224.785 | AK024449  | 207.725   | 444.631  |
| AK023852  | 1099.228  | 856.595   | AK022420  | 843.54    | 1042.421  | AL357201  | 233.259   | 105.239  |
| AF086466  | 1398.102  | 1032.075  | AK023254  | 424.02    | 546.789   | AF279780  | 12147.405 | 8929.552 |
| AB007962  | 3646.14   | 2075.27   | AK023945  | 10161.096 | 9825.385  | AK022510  | 606.95    | 556.774  |
| AF005081  | 1278.612  | 1062.471  | AK022446  | 703.903   | 844.727   | AK023878  | 189.632   | 172.996  |
| AK026438  | 722.336   | 549.399   | AK023352  | 362.824   | 503.199   | AK021851  | 254.252   | 189.265  |
| AK021546  | 822.193   | 603.454   | AK023773  | 563.76    | 798.276   | L37717    | 237.853   | 125.69   |
| AL050186  | 24955.688 | 16011.064 | AK024123  | 191.534   | 548.061   | AJ131609  | 478.056   | 278.082  |
| AK021918  | 4681.644  | 2627.526  | AF116709  | 755.35    | 649.07    | BC019280  | 938.419   | 357.087  |
| AK021669  | 3223.801  | 2198.517  | AK025533  | 991.17    | 783.091   | AF086498  | 288.684   | 190.206  |
| AL080113  | 35543.68  | 17334.326 | AK021911  | 6983.873  | 4309.338  | AK000687  | 176.123   | 222.567  |
| AL050083  | 1596.681  | 971.264   | D17225    | 1127.792  | 1507.371  | L77565    | 145.395   | 184.079  |
| AK022766  | 425.949   | 364.503   | AF147430  | 337.212   | 416.007   | AF079567  | 510.963   | 264.108  |
| AL049422  | 7597.862  | 3386.758  | AK025766  | 4012.902  | 2813.647  | AK022177  | 371.57    | 1505.56  |
| AL133089  | 383.428   | 189.327   | U35875    | 21821.592 | 14583.888 | AK023852  | 212.661   | 509.731  |
| AK023526  | 2683.569  | 1079      | AK021857  | 23347.127 | 13861.391 | AF086466  | 389.499   | 2167.764 |
| BE266129  | 1317.054  | 1874.169  | AK022257  | 1608.187  | 1155.284  | AB007962  | 835.056   | 4184.615 |
| X66227    | 346.563   | 794.802   | BE887356  | 34328.965 | 30787.914 | AF005081  | 327.218   | 485.263  |
| AK025602  | 15648.64  | 23465.451 | X84369    | 700.425   | 860.026   | AK026438  | 414.294   | 781.116  |
| AK026309  | 5949.111  | 10359.089 | AK023329  | 6497.742  | 5742.986  | AK021546  | 201.409   | 171.157  |
| AL137486  | 3046.677  | 5373.382  | AK025181  | 445.354   | 576.872   | AL050186  | 4553.751  | 1890.683 |
| AL110162  | 1360.126  | 3550.896  | AK021773  | 1193.334  | 2007.281  | AK021918  | 645.874   | 280.518  |
| AF119880  | 441.412   | 715.456   | AK027074  | 1464.253  | 1569.589  | AF069137  | 126.076   | 65.412   |
| AK022681  | 16731.561 | 25701.768 | AL365456  | 491.889   | 715.402   | AK021669  | 638.074   | 574.789  |
| CY3Cy5    | 4149.714  | 366.293   | NM_01803E | 491.265   | 898.172   | AL080113  | 6883.28   | 6759.262 |



|           |           |           |            |           |           |           |           |           |
|-----------|-----------|-----------|------------|-----------|-----------|-----------|-----------|-----------|
| Y18483    | 757.61    | 570.06    | AK025048   | 523.586   | 196.866   | AL050083  | 406.277   | 462.104   |
| AI565117  | 55474.609 | 61407.52  | U84522     | 2621.932  | 1561.859  | AK022766  | 171.591   | 124.526   |
| AI299075  | 420.436   | 211.614   | AK021694   | 1201.01   | 812.388   | AL049422  | 1452.577  | 1478.797  |
| M59979    | 389.476   | 215.434   | U84505     | 2633.347  | 1773.479  | AL133089  | 277.892   | 189.634   |
| AB011098  | 1067.599  | 656.803   | X81005     | 1542.972  | 1178.642  | AK023526  | 566.099   | 403.963   |
| AA609759  | 1427.305  | 994.506   | AL049265   | 2243.9    | 1198.226  | BE266129  | 234.007   | 221.031   |
| AA029418  | 6213.101  | 2926.454  | AK022225   | 415.624   | 177.747   | AK025602  | 2465.56   | 1429.703  |
| L20815    | 7137.253  | 3879.372  | AL137635   | 686.543   | 528.262   | AK026309  | 1142.598  | 644.463   |
| AI364483  | 4630.796  | 2667.223  | AL049430   | 1758.853  | 1450.754  | AL137486  | 714.575   | 312.171   |
| AA456001  | 6944.488  | 5096.229  | AK021461   | 586.596   | 507.609   | AL110162  | 254.577   | 247.781   |
| AA451686  | 7494.226  | 6509.574  | AB015349   | 549.028   | 428.512   | AF119880  | 160.267   | 142.558   |
| NM_003822 | 782.103   | 881.715   | AL079274   | 15263.199 | 14185.664 | AK022681  | 2574.002  | 1963.253  |
| NM_004412 | 7652.625  | 8436.973  | AL137398   | 1341.807  | 1154.14   | CY3Cy5    | 491.368   | 149.629   |
| SR1       | 58448.152 | 65815.586 | Y12021     | 1285.768  | 1565.681  | Y18483    | 215.17    | 173.656   |
| SR3       | 52421.066 | 42702.496 | Z83949     | 408.806   | 844.257   | AI565117  | 20917.055 | 22903.018 |
| SR5       | 7580.745  | 7051.223  | NM_013300  | 11149.906 | 16111.818 | AI299075  | 175.701   | 133.45    |
| SR7       | 6250.863  | 47935.77  | AK026039   | 4757.782  | 6671.812  | M59979    | 149.326   | 139.15    |
| SR9       | 24434.414 | 4144.786  | AF108756   | 8236.938  | 11159.799 | AB011098  | 224.726   | 175.786   |
| CY3Cy5    | 4600.565  | 248.284   | NM_004075  | 4229.327  | 3581.699  | AA609759  | 356.538   | 345.75    |
| NM_019555 | 2530.531  | 2309.937  | NM_001887  | 1636.116  | 2946.753  | AA029418  | 1465.301  | 688.275   |
| NM_012096 | 9896.196  | 8255.739  | NM_006533  | 2431.8    | 1799.603  | L20815    | 1335.994  | 1007.744  |
| NM_003905 | 23105.082 | 22998.416 | AK026747   | 2641.202  | 4064.067  | AI364483  | 1290.275  | 764.954   |
| L12052    | 6827.414  | 5083.192  | AL110150   | 8242.861  | 4251.275  | AA456001  | 2081.803  | 3316.005  |
| AB028976  | 3084.595  | 2121.837  | NM_001998  | 5747.906  | 3649.574  | AA176581  | 308.545   | 14.207    |
| NM_015869 | 683.609   | 413.566   | X87825     | 3165.257  | 2654.264  | BI818232  | 123.727   | 88.22     |
| AB031038  | 685.157   | 543.135   | NM_000914  | 344.482   | 225.869   | AA451686  | 1083.944  | 717.624   |
| NM_004626 | 480.539   | 356.29    | AK001285   | 17239.35  | 8562.745  | NM_003822 | 237.79    | 126.065   |
| NM_001899 | 667.125   | 736.221   | D17215     | 5594.38   | 3585.364  | NM_004412 | 1398.827  | 913.834   |
| NM_004305 | 22795.826 | 20183.348 | NM_015714  | 22309.723 | 15693.695 | SR5       | 1677.212  | 1396.641  |
| NM_006089 | 8374.783  | 12397.204 | AK075564   | 907.524   | 755.84    | SR9       | 4294.904  | 649.047   |
| NM_003144 | 39287.824 | 46245.695 | AK026219   | 1679.574  | 1605.723  | CY3Cy5    | 425.016   | 164.168   |
| NM_000908 | 683.129   | 932.643   | D28446     | 1225.461  | 2094.319  | NM_019555 | 446.947   | 709.609   |
| AB011102  | 5502.852  | 8908.643  | AK024756   | 1795.326  | 1679.82   | NM_012096 | 2446.084  | 2449.465  |
| D63480    | 1966.961  | 2237.885  | NM_017911  | 1259.218  | 1278.21   | NM_003905 | 5999.083  | 6821.069  |
| NM_002969 | 1670.982  | 2068.954  | AJ224168   | 1561.688  | 1503.555  | L12052    | 1503.545  | 1484.568  |
| NM_004620 | 954.949   | 1412.336  | S69873     | 600.824   | 739.974   | AB028976  | 651.845   | 552.219   |
| AF087940  | 1308.096  | 1459.211  | AF147325   | 60665.016 | 69479.547 | AK026337  | 153.38    | 124.95    |
| AJ277587  | 1241.291  | 1169.318  | NM_014428  | 1282.144  | 2113.672  | NM_015869 | 177.05    | 214.049   |
| D87432    | 3581.452  | 3757.845  | NM_018497  | 291.183   | 660.805   | AB031038  | 182.562   | 161.012   |
| NM_002337 | 4556.714  | 4808.191  | AK023584   | 814.732   | 1061.625  | NM_004626 | 160.629   | 148.145   |
| NM_013245 | 2653.183  | 1422.169  | NM_003774  | 320.956   | 912.966   | NM_001899 | 188.488   | 404.645   |
| NM_006423 | 32368.156 | 24965.93  | D87466     | 4577.592  | 7545.337  | NM_004305 | 5024.089  | 3437.442  |
| NM_004766 | 2915.836  | 2715.168  | CY3Cy5     | 1819.849  | 138.815   | NM_006089 | 1999.946  | 1585.193  |
| NM_005819 | 4808.408  | 4352.822  | AA608568   | 8908.519  | 14815.226 | AF072506  | 107.649   | 160.42    |
| AK024722  | 860.582   | 730.572   | BG831301   | 23930.176 | 23633.715 | NM_003144 | 11237.717 | 6527.077  |
| AK025520  | 2899.58   | 2157.479  | M14764     | 497.836   | 460.771   | NM_000908 | 179.226   | 163.347   |
| NM_004892 | 10300.149 | 12435.411 | AA478647   | 6424.681  | 6277.383  | AB011102  | 1081.339  | 709.123   |
| NM_014597 | 17059.762 | 15502.034 | ID 2623896 | 1664.059  | 1518.377  | NM_002969 | 374.63    | 229.491   |
| NM_017896 | 11971.601 | 10544.256 | ID 2602214 | 2592.681  | 2293.522  | NM_004620 | 189.18    | 267.381   |
| AB002374  | 3921.825  | 4491.708  | ID 2071279 | 8549.755  | 6556.212  | AF087940  | 199.769   | 196.57    |
| U17327    | 1981.031  | 2127.661  | L10709     | 6443.625  | 9745.099  | AJ277587  | 285.919   | 173.385   |
| M87790    | 8739.953  | 9668.286  | N35489     | 573.482   | 479.227   | D87432    | 353.618   | 237.366   |
| NM_001768 | 3486.363  | 3515.623  | AI928195   | 1088.785  | 851.447   | AK023749  | 161.291   | 358.887   |

|           |           |           |           |           |           |           |          |          |
|-----------|-----------|-----------|-----------|-----------|-----------|-----------|----------|----------|
| NM_000029 | 4391.655  | 5082.61   | AA482489  | 309.638   | 528.954   | NM_002337 | 1099.873 | 1117.125 |
| NM_000715 | 481.061   | 412.102   | AA458922  | 1756.656  | 3055.23   | NM_013245 | 533.318  | 703.324  |
| AF035802  | 1568.988  | 1465.514  | NM_145659 | 2242.029  | 2437.656  | NM_006423 | 9037.286 | 7459.442 |
| NM_001838 | 1316.353  | 985.008   | SR10      | 29060.479 | 9012.331  | NM_004766 | 603.849  | 563.925  |
| NM_013328 | 28069.158 | 24886.998 | CY3Cy5    | 2279.679  | 112.979   | NM_005819 | 1191.496 | 1101.875 |
| NM_002660 | 5724.652  | 4959.671  | NM_017729 | 1146.952  | 802.292   | AK024722  | 233.598  | 225.527  |
| NM_003706 | 896.297   | 1259.767  | NM_005259 | 3414.221  | 3642.009  | AK025520  | 663.98   | 477.273  |
| AL122071  | 1367.857  | 1401.586  | NM_002840 | 675.169   | 640.725   | NM_004892 | 2508.807 | 2479.213 |
| AB033054  | 15287.903 | 15145.007 | NM_006174 | 721.528   | 679.913   | NM_014597 | 4073.113 | 2686.832 |
| NM_016122 | 1282.008  | 2222.154  | NM_015850 | 3963.665  | 4203.278  | NM_017896 | 2545.08  | 1767.45  |
| AF153330  | 1625.709  | 1761.889  | NM_002838 | 9897.396  | 11138.669 | AB002374  | 778.959  | 567.676  |
| NM_001652 | 407.919   | 322.092   | AK027377  | 323.376   | 576.064   | U17327    | 325.367  | 298.745  |
| D87446    | 6370.383  | 6504.139  | NM_014686 | 51631.902 | 49130.473 | M87790    | 1123.255 | 1040.599 |
| BF540935  | 1011.16   | 995.333   | BF528358  | 1307.81   | 889.852   | NM_001768 | 705.486  | 541.178  |
| NM_007081 | 3977.691  | 3579.377  | NM_016339 | 941.183   | 658.181   | NM_000029 | 686.32   | 410.562  |
| AB032964  | 4985.733  | 4301.563  | NM_002487 | 6446.607  | 6445.457  | NM_000715 | 140.413  | 255.752  |
| BE733605  | 3161.093  | 2755.957  | NM_013340 | 779.72    | 565.92    | AF035802  | 317.884  | 240.245  |
| NM_003334 | 22311.852 | 18032.58  | NM_005462 | 893       | 925.101   | M26123    | 172.191  | 177.456  |
| NM_002693 | 7813.329  | 6751.746  | NM_012319 | 2382.317  | 2495.717  | NM_001838 | 336.418  | 271.128  |
| NM_003671 | 1512.698  | 1337.7    | AK026235  | 376.967   | 432.952   | NM_013328 | 6377.376 | 6281.509 |
| M20695    | 1762.842  | 1648.578  | NM_020245 | 4419.352  | 6802.449  | NM_000790 | 143.839  | 116.693  |
| AK026000  | 4651.227  | 4978.689  | NM_007175 | 1133.877  | 2033.511  | NM_002660 | 1119.8   | 1096.382 |
| NM_017833 | 1113.534  | 1053.722  | AB046381  | 818.339   | 1137.173  | NM_003706 | 246.837  | 258.122  |
| NM_006675 | 6425.506  | 6868.221  | AJ011497  | 2146.446  | 2955.476  | AL122071  | 311.902  | 180.946  |
| NM_003022 | 7817.462  | 9384.547  | NM_000336 | 731.272   | 1344.132  | AB033054  | 2943.217 | 1816.545 |
| NM_004873 | 5316.561  | 5612.318  | W61100    | 51230.809 | 55696.41  | NM_016122 | 247.977  | 185.418  |
| NM_019842 | 1066.231  | 1337.682  | AF215923  | 4322.602  | 3768.997  | AF153330  | 356.086  | 264.361  |
| NM_002951 | 23660.754 | 26260.881 | U66621    | 7612.133  | 7563.18   | NM_001652 | 174.552  | 95.802   |
| NM_002317 | 768.808   | 1097.94   | NM_005720 | 13818.328 | 11678.226 | D87446    | 1393.325 | 1586.185 |
| NM_000320 | 4632.469  | 2978.421  | AB040936  | 499.673   | 447.532   | BF540935  | 371.163  | 466.147  |
| NM_003136 | 10901.528 | 11589.771 | U61736    | 852.441   | 819.179   | NM_004466 | 226.575  | 308.292  |
| NM_004620 | 1328.881  | 1530.693  | AJ132086  | 755.587   | 821.145   | NM_007081 | 1150.01  | 1418.552 |
| AF087940  | 1141.825  | 1152.223  | U92816    | 9998.673  | 9480.848  | AB032964  | 961.575  | 777.081  |
| AJ277587  | 1008.073  | 1013.583  | BC011987  | 6596.615  | 4273.707  | BE733605  | 1173.964 | 1146.056 |
| D87432    | 3284.277  | 2595.888  | NM_004106 | 950.264   | 889.282   | NM_003334 | 5099.931 | 3348.309 |
| Y18483    | 593.885   | 452.754   | NM_003485 | 2362.91   | 2200.233  | NM_002693 | 1617.539 | 1484.313 |
| AI565117  | 57394.703 | 55702     | NM_005038 | 9867.421  | 6768.237  | NM_003671 | 375.045  | 293.166  |
| AI299075  | 577.794   | 844.214   | M95923    | 2171.336  | 2623.511  | M20695    | 376.056  | 526.433  |
| M59979    | 481.971   | 551.88    | NM_002415 | 55637.117 | 56278.406 | AK026000  | 959.558  | 817.476  |
| AB011098  | 1050.616  | 732.956   | NM_006332 | 12502.69  | 10753.983 | NM_017833 | 230.099  | 257.269  |
| AA609759  | 1269.737  | 1321.619  | NM_000916 | 3962.207  | 4551.053  | NM_006675 | 934.941  | 870.472  |
| AA029418  | 5489.125  | 3589.183  | NM_018663 | 3095.255  | 5810.111  | NM_003022 | 1321.658 | 959.136  |
| L20815    | 5598.745  | 4726.5    | NM_145904 | 6042.761  | 9373.707  | NM_004873 | 895.352  | 663.257  |
| AI364483  | 5387.98   | 5249.024  | NM_006796 | 13439.231 | 15528.872 | NM_019842 | 201.754  | 174.418  |
| AA456001  | 7065.602  | 6902.564  | NM_000706 | 1050.769  | 1366.291  | NM_002951 | 4089.238 | 2705.744 |
| AA451686  | 5869.029  | 6588.013  | NM_015941 | 2787.624  | 3242.831  | NM_002317 | 167.592  | 156.156  |
| NM_003822 | 698.969   | 700.483   | NM_003655 | 4580.101  | 6734.521  | NM_000320 | 677.622  | 305.281  |
| NM_004412 | 7849.828  | 7959.083  | NM_014837 | 4553.981  | 4734.509  | NM_003136 | 2468.711 | 1735.775 |
| NM_002050 | 1261.509  | 983.385   | AK025111  | 2014.862  | 1433.918  | NM_004620 | 255.007  | 309.651  |
| NM_007097 | 10758.682 | 9886.257  | NM_001732 | 1937.407  | 1428.439  | AF087940  | 368.997  | 441.215  |
| NM_000029 | 6634.067  | 6964.317  | NM_018690 | 5916.744  | 4924.813  | AJ277587  | 322.854  | 281.399  |
| NM_000715 | 445.264   | 267.586   | NM_000860 | 5172.81   | 3968.022  | D87432    | 661.49   | 1068.105 |
| AF035802  | 1532.905  | 1141.51   | AB037798  | 1947.645  | 1758.022  | Y18483    | 181.61   | 107.61   |

|           |           |           |            |           |           |           |           |          |
|-----------|-----------|-----------|------------|-----------|-----------|-----------|-----------|----------|
| M26123    | 602.974   | 474.492   | AF272663   | 10122.225 | 10280.078 | AI565117  | 20755.025 | 23024.07 |
| NM_00183E | 1172.092  | 874.94    | NM_01219C  | 1074.019  | 1188.964  | M59979    | 149.953   | 240.425  |
| NM_01955E | 1558.497  | 1270.93   | AF277719   | 633.55    | 778.577   | AB011098  | 240.421   | 291.706  |
| NM_01209E | 7184.498  | 4049.177  | NM_000791  | 1878.599  | 1963.979  | AA609759  | 264.778   | 334.501  |
| NM_00390E | 20646.707 | 15209.748 | NM_003681  | 1261      | 2218.655  | AA029418  | 1252.585  | 656.194  |
| L12052    | 4326.55   | 2327      | NM_00480C  | 9045.098  | 8632.106  | L20815    | 1065.99   | 1133.246 |
| AB028976  | 2241.601  | 1250.85   | NM_014954  | 30793.723 | 35848.496 | AI364483  | 1204.223  | 938.453  |
| NM_01586E | 439.63    | 407.263   | NM_000807  | 848.868   | 797.102   | AA456001  | 674.394   | 408.409  |
| AB031038  | 651.956   | 695.694   | NM_01490E  | 4383.357  | 5054.49   | BI818232  | 378.599   | 12.699   |
| NM_00462E | 358.547   | 342.411   | X91148     | 1191.271  | 1238.683  | AA451686  | 913.233   | 652.696  |
| NM_00189E | 676.559   | 902.965   | NM_01570C  | 8882.75   | 8147.513  | AA934644  | 131.115   | 102.553  |
| NM_00430E | 20978.711 | 17818.814 | NM_019087  | 1942.16   | 2198.945  | NM_00382E | 199.217   | 165.232  |
| NM_00608E | 7281.698  | 10313.099 | NM_01632E  | 688.593   | 1048.584  | NM_00441E | 1044.32   | 674.375  |
| NM_003144 | 38057.43  | 36963.074 | NM_004277  | 275.85    | 718.817   | NM_00205C | 191.823   | 132.441  |
| NM_00090E | 531.286   | 854.342   | NM_00507E  | 629.35    | 1026.791  | NM_007097 | 1389.205  | 917.697  |
| AB011102  | 5457.47   | 8134.844  | AF308802   | 1970.964  | 1165.077  | NM_00002E | 1258.221  | 1495.42  |
| D63480    | 2033.606  | 2457.165  | S76984     | 8861.697  | 6678.347  | NM_00071E | 177.406   | 228.569  |
| NM_00296E | 1993.849  | 2926.81   | NM_01449E  | 56187.172 | 53176.027 | AF035802  | 396.159   | 572.025  |
| AK023749  | 489.742   | 248.612   | NM_014081  | 996.509   | 845.955   | Y08145    | 231.864   | 196.74   |
| NM_002337 | 4032.535  | 2171.799  | NM_005651  | 634.903   | 593.123   | M26123    | 171.394   | 129.272  |
| NM_01324E | 1833.267  | 785.253   | NM_00719E  | 1721.381  | 1708.124  | NM_00183E | 336.505   | 378.077  |
| NM_00642E | 24541.783 | 12244.076 | AK023337   | 3594.748  | 3189.04   | NM_01955E | 397.726   | 536.421  |
| NM_00476E | 2290.409  | 1135.753  | NM_01327E  | 11827.259 | 10207.035 | NM_01209E | 2230.875  | 1910.797 |
| NM_00581E | 4290.344  | 2408.462  | AB037842   | 875.354   | 726.046   | NM_00390E | 5536.806  | 5268.969 |
| AK024722  | 713.478   | 371.533   | U92074     | 568.293   | 468.944   | L12052    | 1091.245  | 897.973  |
| AK025520  | 2620.282  | 1442.053  | NM_019011  | 3058.315  | 3321.328  | AB028976  | 547.556   | 443.606  |
| NM_00489E | 9974.808  | 9059.644  | AF459094   | 4371.085  | 4699.724  | AK026337  | 164.961   | 84.524   |
| NM_014597 | 14677.588 | 13751.541 | NM_003157  | 1942.692  | 2449.444  | NM_01586E | 188.95    | 114.237  |
| NM_01789E | 9670.014  | 8144.01   | NM_00493E  | 1161.889  | 1128.41   | AB031038  | 163.874   | 146.727  |
| AB002374  | 3477.573  | 4656.148  | NM_01432E  | 554.224   | 735.489   | NM_00462E | 132.767   | 241.712  |
| U17327    | 1484.48   | 2035.292  | NM_015981  | 1440.086  | 1399.895  | NM_00189E | 226.973   | 43.881   |
| NM_002951 | 27844.74  | 28481.424 | NM_00045E  | 2884.155  | 2893.412  | NM_00430E | 3040.517  | 1212.531 |
| NM_002317 | 1036.325  | 1182.29   | NM_014791  | 11763.207 | 13080.268 | NM_00608E | 1588.283  | 908.832  |
| NM_00032C | 4722.369  | 2251.843  | NM_00331E  | 9556.007  | 11649.593 | NM_003144 | 9316.513  | 3171.216 |
| NM_00313E | 10651.401 | 6919.149  | NM_00436E  | 4951.125  | 6725.84   | NM_00090E | 160.629   | 149.671  |
| NM_01332E | 21569.547 | 15074.222 | NM_00018E  | 6881.535  | 11031.477 | AB011102  | 918.918   | 805.641  |
| NM_00266C | 4741.875  | 3693.226  | AK023384   | 2027.267  | 4116.809  | D63480    | 339.181   | 262.509  |
| NM_00370E | 703.923   | 677.123   | NM_01602E  | 14891.604 | 15351.782 | NM_00296E | 384.526   | 364.692  |
| AL122071  | 1747.114  | 2469.376  | AB046381   | 662.587   | 359.835   | AK023749  | 158.335   | 297.315  |
| AB033054  | 15712.123 | 16257.267 | AJ011497   | 2365.77   | 2260.345  | NM_002337 | 985.687   | 754.348  |
| NM_01612E | 1405.237  | 2189.823  | NM_00301E  | 951.69    | 2019.496  | NM_01324E | 452.94    | 269.903  |
| AF153330  | 2361.007  | 1851.244  | NM_00033E  | 732.918   | 880.07    | NM_00642E | 8806.068  | 5563.632 |
| NM_00382E | 894.689   | 1157.926  | W61100     | 55409.051 | 48728.625 | NM_00476E | 535.76    | 431.805  |
| NM_00441E | 8164.738  | 8431.722  | AA608568   | 7286.707  | 6055.533  | NM_00581E | 995.965   | 689.37   |
| NM_00205C | 1117.878  | 608.146   | BG831301   | 25005.451 | 29917.801 | AK024722  | 231.687   | 265.427  |
| NM_007097 | 9023.44   | 7284.454  | AA478647   | 6404.95   | 6080.082  | AK025520  | 567.982   | 310.517  |
| D87446    | 4174.048  | 3520.652  | ID 2623896 | 1012.331  | 822.209   | NM_00489E | 2112.4    | 1280.231 |
| BF540935  | 506.783   | 474.681   | ID 2602214 | 2369.604  | 2020.56   | NM_014597 | 2714.514  | 1026.953 |
| NM_00446E | 946.635   | 1663.01   | ID 2071279 | 8140.666  | 5804.655  | NM_01789E | 1542.803  | 549.837  |
| NM_007081 | 4766.177  | 8609.263  | L10709     | 7926.93   | 10786.02  | AB002374  | 721.663   | 374.076  |
| AB032964  | 4323.49   | 2994.481  | AI928195   | 977.449   | 926.794   | U17327    | 333.934   | 200.49   |
| BE733605  | 4333.021  | 2984.39   | AA458922   | 1381.723  | 2405.406  | AB040938  | 165.522   | 52.541   |
| NM_003334 | 18239.75  | 9155.479  | NM_14565E  | 1996.652  | 1753.025  | M87790    | 1298.066  | 1156.909 |

|           |           |           |           |           |           |           |          |           |
|-----------|-----------|-----------|-----------|-----------|-----------|-----------|----------|-----------|
| NM_002693 | 7394.958  | 5638.718  | NM_001719 | 5674.955  | 6907.176  | NM_00176E | 953.551  | 1669.537  |
| NM_003671 | 1472.3    | 1383.635  | AL080062  | 1762.537  | 1737.328  | NM_002951 | 5678.682 | 7968.623  |
| M20695    | 1712.693  | 1775.546  | NM_145904 | 6301.669  | 5456.087  | NM_002317 | 304.224  | 300.351   |
| AK026000  | 4844.76   | 6439.166  | NM_00679E | 12770.216 | 10425.385 | NM_00032C | 917.946  | 1131.665  |
| NM_017833 | 758.082   | 1413.758  | NM_00070E | 1156.961  | 1538.398  | NM_017921 | 131.42   | 113.229   |
| NM_00667E | 5870.491  | 6318.289  | NM_015941 | 3203.165  | 2443.221  | NM_00313E | 2940.844 | 2849.666  |
| NM_003022 | 7962.79   | 8804.951  | NM_00365E | 4702.399  | 4631.432  | NM_01332E | 5879.57  | 4548.41   |
| NM_004873 | 9489.039  | 11945.666 | NM_014837 | 4411.824  | 3786.544  | NM_00079C | 143.314  | 148.35    |
| NM_019842 | 2851.543  | 4733.084  | NM_017729 | 984.409   | 709.016   | NM_00266C | 966.055  | 811.51    |
| NM_003144 | 39024.688 | 39471.691 | NM_005259 | 3361.425  | 3763.561  | NM_01590C | 218.067  | 152.8     |
| NM_00090E | 520.671   | 411.586   | NM_00284C | 640.058   | 752.901   | NM_00370E | 198.941  | 393.093   |
| AB011102  | 4788.65   | 3501.273  | NM_006174 | 658.527   | 722.248   | AF182218  | 332.817  | 22.027    |
| D63480    | 1440.394  | 1498.503  | NM_01585C | 3592.588  | 3642.214  | NM_00521E | 150.889  | 189.446   |
| NM_00296E | 1886.034  | 1594.402  | NM_00283E | 9694.67   | 10067.789 | AL122071  | 431.536  | 904.349   |
| NM_00462C | 988.967   | 1071.983  | NM_01468E | 53589.582 | 47456.176 | AB033054  | 4868.893 | 7343.442  |
| AF087940  | 1327.172  | 2126.251  | BF528358  | 946.699   | 613.277   | NM_016122 | 335.25   | 791.748   |
| AJ277587  | 1314.696  | 1806.669  | NM_016339 | 758.055   | 771.788   | NM_016583 | 197.257  | 347.338   |
| D87432    | 3998.906  | 6166.081  | NM_002487 | 6860.984  | 5487.086  | AF153330  | 519.222  | 1171.222  |
| Y18483    | 651.605   | 1165.695  | NM_01334C | 499.37    | 296.657   | NM_001652 | 266.046  | 222       |
| AI565117  | 56638.328 | 57837.219 | NM_005462 | 946.742   | 740.732   | NM_014742 | 195.382  | 174.666   |
| AI299075  | 912.333   | 1336.723  | NM_012319 | 1801.415  | 1565.291  | NM_003822 | 242.517  | 213.026   |
| M59979    | 529.541   | 270.979   | AK026235  | 364.091   | 507.045   | NM_004412 | 1599.354 | 1992.426  |
| AB011098  | 939.717   | 497.739   | NM_00651C | 6602.448  | 10194.153 | NM_00205C | 284.548  | 197.279   |
| AA609759  | 1127.522  | 994.12    | NM_003141 | 2673.344  | 3608.59   | NM_007097 | 1800.839 | 1833      |
| AA029418  | 4344.587  | 2855.15   | NM_02024E | 2126.32   | 2747.118  | D87446    | 1316.991 | 1405.709  |
| L20815    | 5462.809  | 4955.467  | NM_00717E | 1041.451  | 1062.954  | BF540935  | 348.356  | 386.254   |
| AI364483  | 6071.121  | 7898.595  | X91148    | 1239.043  | 1453.098  | NM_00446E | 158.753  | 222.481   |
| AA456001  | 7454.906  | 6938.295  | NM_01570C | 9256.191  | 6525.127  | NM_007081 | 902.021  | 815.933   |
| AA451686  | 7542.086  | 7805.392  | NM_019087 | 2093.535  | 1649.821  | AB032964  | 1164.485 | 1103.413  |
| AA934644  | 248.969   | 640.328   | NM_016322 | 862.357   | 702.825   | BE733605  | 1172.497 | 1081.716  |
| M87790    | 9223.227  | 6186.734  | NM_004277 | 44.027    | 641.414   | NM_003334 | 4546.331 | 3358.383  |
| NM_00176E | 4350.029  | 2187.385  | NM_005072 | 649.824   | 720.443   | NM_002693 | 1743.134 | 2329.481  |
| NM_00002E | 4843.693  | 3264.513  | AF215923  | 4464.485  | 5285.909  | NM_003671 | 434.566  | 671.207   |
| NM_00071E | 339.162   | 221.18    | U66621    | 6076.104  | 7733.834  | M20695    | 652.421  | 1073.494  |
| AF035802  | 1142.343  | 792.874   | NM_00572C | 15779.521 | 22933.705 | AK026000  | 1680.891 | 2930.905  |
| Y08145    | 561.566   | 688.62    | AB040936  | 787.344   | 1215.752  | NM_017833 | 350.264  | 499.026   |
| M26123    | 534.965   | 539.625   | U61736    | 440.73    | 973.254   | NM_00667E | 1900.241 | 3339.042  |
| NM_00183E | 1249.717  | 844.369   | AJ132086  | 736.824   | 961.118   | NM_003022 | 2274.435 | 4244.793  |
| NM_01955E | 1854.476  | 1027.221  | U92816    | 9743.236  | 9240.326  | NM_01330E | 158.15   | 367.165   |
| NM_01209E | 7732.428  | 4920.999  | BC011987  | 6570.056  | 3567.742  | NM_004873 | 1303.239 | 1611.077  |
| NM_00390E | 20307.359 | 15880.775 | NM_00410E | 1231.766  | 1027.955  | NM_019842 | 326.215  | 171.547   |
| L12052    | 6317.266  | 4811.065  | NM_00348E | 2401.943  | 2357.723  | NM_005992 | 150.124  | 76.269    |
| AB028976  | 3091.466  | 1711.725  | NM_00503E | 10607.247 | 6386.41   | NM_003144 | 12356.88 | 11087.986 |
| NM_01586E | 601.773   | 351.996   | M95923    | 836.374   | 589.661   | NM_00090E | 154.32   | 150.103   |
| AB031038  | 2258.251  | 3997.797  | NM_00241E | 55262.961 | 55713.027 | AB011102  | 1317.831 | 2198.572  |
| NM_00462E | 634.615   | 1348.514  | NM_006332 | 11728.757 | 9172.99   | D63480    | 366.186  | 514.944   |
| NM_00189E | 590.166   | 539.206   | NM_00091E | 2893.304  | 2797.871  | NM_00296E | 387.655  | 430.526   |
| NM_00430E | 22820.08  | 19707.227 | NM_018663 | 2263.586  | 3585.542  | NM_00647E | 230.184  | 36.776    |
| NM_00608E | 8880.281  | 12084.665 | NM_014791 | 11648.627 | 12276.484 | NM_00462C | 267.18   | 158.449   |
| AF072506  | 4228.84   | 8440.882  | NM_00331E | 8547.28   | 5108.293  | AF087940  | 373.56   | 312.978   |
| AB033054  | 12364.258 | 8565.993  | NM_004362 | 5518.249  | 4723.409  | AJ277587  | 360.175  | 384.104   |
| NM_016122 | 1332.71   | 1133.482  | NM_000182 | 8659.537  | 8600.885  | D87432    | 855.693  | 2256.096  |
| AF153330  | 1829.919  | 1077.288  | AK023384  | 1989.347  | 2061.79   | Y18483    | 205.788  | 212.065   |

|           |           |           |            |           |           |           |          |           |
|-----------|-----------|-----------|------------|-----------|-----------|-----------|----------|-----------|
| NM_001652 | 420.815   | 257.632   | NM_016026  | 15342.713 | 12100.723 | AI565117  | 25970.59 | 37395.246 |
| NM_004766 | 3322.302  | 975.258   | AK025111   | 646.124   | 700.013   | U28015    | 151.33   | 165.878   |
| NM_005819 | 4813.795  | 2016.046  | NM_001732  | 1909.804  | 1842.031  | AI299075  | 203.741  | 237.45    |
| AK024722  | 913.938   | 413.799   | NM_018690  | 6346.252  | 7766.875  | M59979    | 150.632  | 160.847   |
| AK025520  | 3094.686  | 5302.188  | NM_000860  | 5138.808  | 6969.533  | AB011098  | 331.656  | 475.836   |
| NM_004892 | 8895.388  | 10518.308 | AB037798   | 2135.554  | 2352.926  | AI364483  | 1316.917 | 1873.321  |
| NM_014597 | 15572.151 | 14054.658 | NM_000780  | 732.96    | 1495.419  | AA456001  | 736.997  | 968.869   |
| NM_017896 | 10632.027 | 9691.066  | AF272663   | 15377.574 | 30293.994 | AA176581  | 213.307  | 28.621    |
| AB002374  | 4152.925  | 4777.006  | NM_012190  | 2470.081  | 3054.309  | BI818232  | 119.582  | 146.737   |
| U17327    | 1294.32   | 1715.463  | AF277719   | 941.589   | 607.169   | AA451686  | 1417.549 | 1048.83   |
| NM_017833 | 900.352   | 741.023   | NM_000791  | 2352.14   | 2178.62   | AA934644  | 113.411  | 171.725   |
| NM_006675 | 5874.173  | 3437.63   | NM_003681  | 2084.952  | 2025.886  | M87790    | 2064.263 | 2179.22   |
| NM_003022 | 7795.72   | 4449.418  | NM_004800  | 9997.014  | 8091.412  | NM_001768 | 981.477  | 1421.699  |
| NM_004873 | 6647.048  | 6826.463  | NM_014954  | 28146.195 | 28759.832 | NM_000029 | 1296.51  | 2835.191  |
| NM_019842 | 1503.744  | 1263.54   | NM_000807  | 638.062   | 1063.367  | NM_000715 | 206.724  | 368.368   |
| NM_002951 | 23993.529 | 14707.087 | NM_014909  | 3009.346  | 3387.313  | AF035802  | 472.575  | 1242.216  |
| NM_002317 | 1046.35   | 1025.922  | NM_145659  | 1719.091  | 1305.888  | Y08145    | 252.159  | 411.691   |
| NM_017921 | 608.655   | 569.277   | NM_021957  | 398.967   | 455.992   | M26123    | 257.352  | 233.555   |
| NM_003136 | 11328.398 | 19053.516 | NM_001719  | 8949.754  | 9507.727  | NM_001838 | 381.12   | 381.054   |
| NM_013328 | 24246.775 | 27737.146 | AL080062   | 1651.37   | 1392.385  | NM_019555 | 464.484  | 795.588   |
| NM_000790 | 579.129   | 664.426   | AF308802   | 1329.341  | 1253.387  | NM_012096 | 2634.928 | 2971.494  |
| NM_003706 | 853.637   | 1072.937  | NM_005651  | 626.718   | 1189.934  | NM_003905 | 6423.672 | 7985.962  |
| NM_005218 | 267.456   | 629.567   | AK023699   | 511.579   | 773.535   | L12052    | 1123.063 | 1136.841  |
| AL122071  | 2557.205  | 3549.956  | NM_007195  | 2884.091  | 2567.659  | AB028976  | 555.467  | 356.244   |
| NM_014913 | 46099.852 | 30728.879 | AK023337   | 4003.659  | 4335.661  | AK026337  | 178.263  | 154.007   |
| NM_012341 | 6670.158  | 4175.833  | NM_013275  | 16225.967 | 14192.652 | NM_015866 | 167.159  | 149.825   |
| NM_003256 | 27288.25  | 28037.158 | AB037842   | 1015.013  | 808.47    | AB031038  | 178.638  | 212.515   |
| D87450    | 6718.398  | 12380.115 | NM_019011  | 3615.249  | 3582.346  | NM_004626 | 202.813  | 79.961    |
| NM_017797 | 20160.371 | 18991.248 | AF459094   | 4791.855  | 5326.894  | NM_001896 | 253.743  | 226.923   |
| AK021919  | 472.062   | 328.394   | NM_003157  | 2149.188  | 2231.726  | NM_004305 | 3396.551 | 4472.422  |
| AK025713  | 6118.17   | 12221.621 | NM_004938  | 1563.559  | 1222.677  | NM_006088 | 2270.316 | 7505.721  |
| NM_018100 | 1280.982  | 2325.694  | NM_014326  | 626.74    | 630.696   | AB033054  | 4652.025 | 6142.699  |
| NM_002050 | 2141.317  | 2671.588  | NM_004448  | 526.859   | 503.349   | NM_016122 | 301.363  | 863.606   |
| NM_007097 | 13586.835 | 25051.842 | NM_015981  | 1440.67   | 2092.398  | AF153330  | 551.424  | 1416.5    |
| D87446    | 7289.944  | 13284.688 | NM_000455  | 2512.993  | 2882.78   | NM_001652 | 237.158  | 345.168   |
| BF540935  | 1028.02   | 1036.543  | NM_012319  | 1956.81   | 1002.054  | AK023749  | 176.354  | 195.166   |
| NM_004466 | 805.471   | 888.027   | NM_006510  | 6629.938  | 6851.988  | NM_002337 | 830.594  | 434.416   |
| AB032964  | 5787.628  | 2928.879  | NM_003141  | 1894.966  | 1519.966  | NM_013245 | 469.755  | 235.961   |
| BE733605  | 5149.92   | 3336.547  | NM_020245  | 2063.261  | 1828.576  | NM_006423 | 7641.403 | 4413.726  |
| NM_003334 | 24098.586 | 19768.273 | NM_007175  | 931.48    | 838.669   | NM_004766 | 486.285  | 290.795   |
| NM_002693 | 7670.488  | 8178.321  | AB046381   | 527.517   | 786.817   | NM_005819 | 980.6    | 614.363   |
| NM_003671 | 1940.638  | 2103.132  | AJ011497   | 1665.233  | 1748.895  | AK024722  | 252.764  | 117.038   |
| M20695    | 1589.458  | 1675.573  | NM_000336  | 575.748   | 1113.034  | AK025520  | 638.273  | 415.876   |
| AK026000  | 4147.233  | 4384.676  | W61100     | 61608.938 | 58372.469 | NM_004892 | 2863.435 | 3846.076  |
| NM_005814 | 868.488   | 410.131   | AA608568   | 10104.135 | 12240.084 | NM_014597 | 3900.118 | 6189.495  |
| NM_000211 | 11693.862 | 6462.15   | BG831301   | 27060.826 | 31716.611 | NM_017896 | 2356.49  | 4156.504  |
| AB037830  | 1228.3    | 1684.945  | M14764     | 641.087   | 654.144   | AB002374  | 971.546  | 1995.708  |
| NM_015685 | 3212.926  | 5494.279  | AA478647   | 7709.693  | 7343.951  | U17327    | 325.864  | 423.535   |
| NM_004357 | 24040.016 | 22532.164 | AW058501   | 554.331   | 285.899   | NM_017833 | 388.925  | 1801.326  |
| AF130988  | 1072.588  | 2190.817  | ID 2623896 | 803.187   | 969.232   | NM_006675 | 2393.436 | 6806.325  |
| NM_014934 | 1000.853  | 2607.761  | ID 2602214 | 2186.169  | 2461.865  | NM_003022 | 2272.992 | 6050.38   |
| NM_015385 | 722.106   | 1315.516  | ID 2071279 | 8584.98   | 6533.438  | NM_013306 | 117.556  | 130.858   |
| NM_003690 | 6949.379  | 14178.739 | L10709     | 5739.699  | 8140.939  | NM_004873 | 1624.384 | 4035.511  |

|           |           |           |           |           |           |           |           |           |
|-----------|-----------|-----------|-----------|-----------|-----------|-----------|-----------|-----------|
| NM_000876 | 6592.688  | 8512.832  | N35489    | 446.526   | 525.709   | NM_019842 | 349.834   | 1070.522  |
| NM_014214 | 6867.116  | 11351.922 | AI928195  | 1168.451  | 2160.64   | NM_002951 | 6313.713  | 9579.338  |
| NM_000856 | 1121.416  | 1321.884  | AA482489  | 40.093    | 2580.271  | NM_002317 | 274.681   | 258.484   |
| NM_005232 | 1130.972  | 734.412   | AA458922  | 1667.477  | 2545.211  | NM_000320 | 939.703   | 873.207   |
| NM_002752 | 4008.704  | 4044.178  | M95923    | 759.057   | 448.216   | NM_017921 | 163.602   | 70.248    |
| NM_013281 | 1324.487  | 1059.886  | NM_002415 | 61086.336 | 55977.73  | NM_003136 | 2433.833  | 1473.125  |
| Y11306    | 1816.859  | 1427.985  | NM_006332 | 11503.563 | 8037.767  | NM_013328 | 5304.079  | 2937.887  |
| NM_003931 | 2359.691  | 908.51    | NM_000916 | 2122.579  | 1700.851  | NM_000790 | 151.499   | 111.176   |
| NM_006681 | 382.986   | 934.274   | NM_018663 | 2374.944  | 2789.196  | NM_002660 | 842.087   | 420.729   |
| NM_012479 | 32463.277 | 31824.748 | NM_145904 | 4266.018  | 4283.349  | NM_015900 | 260.608   | 414.711   |
| AF250226  | 14275.359 | 17338.619 | NM_006796 | 11006.927 | 9494.113  | NM_006656 | 134.758   | 144.052   |
| NM_003217 | 47015.996 | 42403.078 | NM_000706 | 685.058   | 962.393   | NM_002340 | 188.905   | 40.704    |
| AL157475  | 4234.19   | 5088.591  | NM_015941 | 2556.891  | 1958.27   | NM_003706 | 222.84    | 210.976   |
| NM_006534 | 3478.214  | 1833.415  | NM_003655 | 4948.054  | 5787.979  | AL122071  | 370.247   | 1297.841  |
| NM_017601 | 2532.219  | 2568.005  | NM_014837 | 5379.644  | 5259.537  | NM_014913 | 21810.129 | 47647.313 |
| AF110265  | 12632.703 | 16527.041 | NM_017729 | 1382.708  | 932.342   | NM_005864 | 266.7     | 1193.329  |
| AF272371  | 52255.043 | 53046.32  | NM_005259 | 4886.432  | 6328.949  | NM_012341 | 1480.642  | 1895.165  |
| NM_003704 | 2459.652  | 4671.363  | NM_002840 | 743.931   | 563.38    | NM_003256 | 5642.119  | 4492.497  |
| AK023140  | 1658.265  | 2428.634  | NM_006174 | 1011.428  | 1037.077  | D87450    | 1159.414  | 1237.496  |
| AF084362  | 656.575   | 1100.924  | NM_015850 | 5764.764  | 6037.532  | NM_017797 | 5316.722  | 3764.34   |
| NM_001553 | 1287.435  | 1725.725  | NM_004864 | 406.018   | 576.266   | AK021919  | 175.258   | 238.375   |
| NM_014173 | 30426.324 | 40173.297 | NM_002838 | 9305.829  | 12924.657 | AF000562  | 1093.393  | 753.435   |
| NM_001731 | 26227.246 | 52917.379 | NM_014686 | 56873.73  | 50885.34  | AK025713  | 909.092   | 534.436   |
| AL137506  | 1845.271  | 2310.839  | BF528358  | 1213.947  | 1072.638  | NM_018100 | 226.15    | 143.587   |
| AK022961  | 4433.952  | 5733.936  | NM_002487 | 6451.947  | 12436.014 | NM_002050 | 323.129   | 174.215   |
| NM_007375 | 7562.037  | 9016.032  | NM_013340 | 1133.382  | 1307.19   | NM_007097 | 1717.245  | 1171.886  |
| NM_014371 | 5785.168  | 5385.453  | NM_005462 | 624.243   | 1015.03   | D87446    | 1223.546  | 1865.581  |
| AF290512  | 1887.976  | 1403.216  | NM_014954 | 26137.242 | 22619.885 | BF540935  | 333.681   | 784.597   |
| NM_006716 | 10717.896 | 9185.54   | NM_000807 | 737.667   | 527.088   | NM_004466 | 157.849   | 150.256   |
| AK022587  | 6105.522  | 8204.156  | NM_014909 | 3268.424  | 2441.759  | NM_007081 | 1155.583  | 3622.302  |
| NM_005506 | 2952.556  | 3558.107  | X91148    | 853.222   | 889.585   | AB032964  | 1030.393  | 781.311   |
| NM_005723 | 2199.508  | 1957.506  | NM_015700 | 7822.371  | 5678.429  | BE733605  | 1219.272  | 1385.499  |
| AL137404  | 53135.664 | 45984.996 | NM_019087 | 1443.447  | 1370.438  | NM_003334 | 3770.692  | 2339.91   |
| NM_020185 | 5537.872  | 4900.719  | NM_016322 | 1291.224  | 947.522   | NM_002693 | 1332.085  | 1368.481  |
| NM_002832 | 46607.422 | 24546.201 | NM_005072 | 860.85    | 844.24    | NM_003671 | 279.24    | 322.773   |
| NM_002851 | 3376.44   | 2615.457  | AF215923  | 5094.599  | 5963.837  | M20695    | 440.794   | 415.348   |
| NM_005339 | 17849.1   | 18706.121 | U66621    | 12017.755 | 17563.072 | AK026000  | 967.368   | 937.339   |
| NM_001906 | 7763.052  | 10087.414 | NM_005720 | 18523.479 | 18357.182 | NM_005814 | 339.276   | 613.867   |
| NM_004142 | 477.87    | 618.868   | AB040936  | 584.843   | 688.993   | NM_000211 | 2333.172  | 2160.586  |
| AF108138  | 5594.097  | 11010.431 | AB023161  | 67.888    | 1412.461  | AB037830  | 385.825   | 206.286   |
| NM_004347 | 1014.052  | 1056.954  | U61736    | 1320.936  | 1780.256  | NM_015685 | 593.295   | 476.115   |
| BF340302  | 5513.252  | 9793.146  | AJ132086  | 915.587   | 1205.244  | X03324    | 901.085   | 932.808   |
| AK024210  | 1701.364  | 1769.044  | U92816    | 10780.534 | 11063.329 | AF130988  | 189.93    | 110.413   |
| NM_002276 | 1331.302  | 1127.16   | BC011987  | 6634.649  | 5708.48   | NM_014934 | 179.681   | 115.632   |
| AL133087  | 2636.602  | 2415.597  | NM_004106 | 1092.228  | 1181.889  | NM_015385 | 187.241   | 93.79     |
| AL080200  | 467.574   | 665.329   | NM_003485 | 3259.259  | 4423.654  | NM_003690 | 934.622   | 880.022   |
| BF337874  | 1843.191  | 2397.546  | NM_005038 | 10320.037 | 8823.308  | NM_000876 | 744.912   | 652.88    |
| NM_003475 | 10224.777 | 10583.816 | NM_003157 | 2279.1    | 1722.066  | NM_014214 | 1150.51   | 1242.346  |
| NM_000243 | 3135.224  | 4083.942  | NM_004938 | 1490.199  | 2477.404  | NM_005232 | 163.348   | 155.318   |
| NM_004383 | 12904.047 | 13016.631 | NM_014326 | 755.413   | 526.838   | NM_002752 | 695.576   | 611.526   |
| NM_012256 | 7329.295  | 5773.667  | NM_004448 | 507.781   | 480.515   | NM_013281 | 222.768   | 215.131   |
| NM_001604 | 1955.181  | 1629.095  | NM_015981 | 1548.327  | 1015.518  | Y11306    | 330.851   | 982.499   |
| NM_017656 | 2255.706  | 1958.219  | NM_000455 | 2352.495  | 2209.471  | NM_016112 | 193.417   | 560.255   |

|           |           |           |           |           |           |           |           |           |
|-----------|-----------|-----------|-----------|-----------|-----------|-----------|-----------|-----------|
| AK022519  | 599.051   | 931.933   | NM_014791 | 11488.418 | 9506.784  | X85106    | 329.263   | 229.849   |
| NM_014415 | 4058.455  | 3934.272  | NM_003318 | 8189.975  | 6043.056  | NM_003931 | 440.439   | 384.029   |
| S75264    | 9955.495  | 11506.921 | NM_004362 | 4858.048  | 4812.236  | NM_006681 | 148.949   | 218.604   |
| AF027513  | 2398.125  | 4700.987  | NM_000182 | 7089.982  | 8856.289  | NM_012479 | 8446.838  | 7765.059  |
| NM_001379 | 3612.496  | 3502.223  | AK023384  | 2208.864  | 2504.574  | AF250226  | 3079.923  | 7700.721  |
| NM_018664 | 8693.453  | 7126.687  | NM_016026 | 16424.543 | 13620.251 | NM_003217 | 12870.38  | 7588.357  |
| NM_005034 | 1178.679  | 1500.449  | AK025111  | 727.952   | 779.135   | AL157475  | 1458.707  | 1601.099  |
| NM_003926 | 7513.993  | 7071.195  | NM_001732 | 2688.051  | 2494.997  | NM_006069 | 4202.048  | 3612.3    |
| AF085356  | 921.644   | 852.681   | NM_018690 | 7583.653  | 7270.116  | NM_006534 | 918.376   | 1077.569  |
| BF030165  | 12061.363 | 7703.456  | NM_000860 | 6588.757  | 6484.866  | NM_017601 | 560.525   | 515.279   |
| NM_016732 | 20250.082 | 14871.903 | AB037798  | 1960.457  | 2247.634  | AF110265  | 2347.255  | 2402.03   |
| AB046824  | 3443.701  | 6118.83   | NM_000780 | 902.551   | 1136      | AK021848  | 473.793   | 354.476   |
| NM_014763 | 10454.512 | 9773.807  | AF272663  | 13030.787 | 22351.934 | NM_003704 | 387.907   | 374.473   |
| AK026261  | 882.581   | 1060.502  | NM_012190 | 1353.078  | 1655.813  | AK023140  | 335.162   | 209.363   |
| AF086534  | 1262.301  | 1663.941  | AB033015  | 411.925   | 873.454   | AF084362  | 171.216   | 82.083    |
| NM_000152 | 8841.47   | 12965.977 | AF277719  | 736.052   | 1131.868  | NM_001553 | 246.929   | 278.588   |
| D17222    | 15705.419 | 15520.601 | NM_000791 | 2540.577  | 2729.369  | NM_014173 | 5288.713  | 4929.366  |
| NM_000154 | 3173.013  | 2741.72   | NM_003681 | 1935.151  | 2780.592  | NM_001731 | 5400.238  | 7285.59   |
| NM_003549 | 964.442   | 629.746   | NM_004800 | 10277.893 | 10065.139 | AL137506  | 358.934   | 269.191   |
| NM_000671 | 4368.788  | 5344.101  | AB037738  | 307.022   | 600.814   | AK022961  | 755.236   | 574.095   |
| NM_006297 | 10429.102 | 7819.796  | NM_004952 | 2993.066  | 2353.346  | NM_007375 | 1230.967  | 790.801   |
| X85325    | 63842.93  | 78168.258 | AY007239  | 508.895   | 263.413   | NM_014371 | 836.592   | 529.923   |
| AF318366  | 7904.852  | 10248.317 | NM_020414 | 3982.046  | 3174.56   | AF290512  | 394.231   | 312.967   |
| AF182423  | 1862.112  | 2974.212  | AB037730  | 2695.096  | 2057.632  | NM_006716 | 2339.018  | 2372.402  |
| D26018    | 4891.791  | 5174.76   | AF147429  | 344.989   | 414.379   | AB002323  | 750.784   | 726.544   |
| AK023029  | 377.951   | 288.49    | NM_001357 | 9208.779  | 6571.155  | AK022241  | 1978.765  | 1712.234  |
| NM_007237 | 2276.9    | 2147.29   | NM_003893 | 2379.093  | 2125.458  | AK022587  | 1096.072  | 951.65    |
| NM_004608 | 1117.188  | 1386.916  | AB037816  | 1422.816  | 1347.991  | NM_005512 | 235.15    | 37.983    |
| NM_018257 | 4238.148  | 4450.958  | NM_014380 | 42777.547 | 47506.203 | NM_005506 | 587.582   | 487.729   |
| NM_005919 | 2234.195  | 2144.156  | NM_014265 | 490.082   | 461.355   | NM_005723 | 427.373   | 383.242   |
| AF085931  | 4358.044  | 3554.937  | NM_001719 | 9873.846  | 8803.845  | NM_020185 | 1250.303  | 1752.048  |
| AK022211  | 1115.208  | 995.229   | AL080062  | 2106.481  | 1528.113  | NM_002832 | 14031.272 | 11299.167 |
| AF086112  | 1296.234  | 1477.077  | AF308802  | 2233.04   | 1867.765  | NM_017732 | 1502.467  | 1551.673  |
| S81522    | 5938.243  | 8276.345  | S76984    | 10472.475 | 7430.331  | NM_002851 | 590.008   | 607.483   |
| S94541    | 1189.749  | 1766.932  | NM_014495 | 53064.398 | 50411.547 | NM_002071 | 155.296   | 116.106   |
| L36587    | 41857.051 | 56185.207 | NM_014081 | 1071.928  | 1238.772  | NM_005339 | 4173.305  | 2351.976  |
| AK024228  | 2098.321  | 3479.651  | NM_005651 | 918.197   | 980.585   | NM_001906 | 1265.151  | 652.941   |
| NM_016647 | 3172.678  | 2356.194  | NM_007195 | 2298.93   | 2921.261  | NM_004142 | 161.327   | 193.852   |
| AK024695  | 1582.967  | 1299.868  | AK023337  | 5883.632  | 7018.873  | AF108138  | 932.302   | 1473.015  |
| NM_018659 | 840.881   | 1006.267  | NM_013275 | 17984.951 | 22838.953 | NM_004347 | 148.757   | 142.74    |
| AF161359  | 2492.758  | 2230.95   | AB037842  | 1396.119  | 1479.245  | BF340302  | 854.084   | 2371.485  |
| AL365520  | 2973.862  | 4933.269  | U92074    | 505.52    | 794.326   | AK024210  | 298.265   | 117.024   |
| AL359338  | 486.888   | 529.82    | NM_019011 | 3564.126  | 4382.701  | NM_002276 | 235.077   | 143.268   |
| AK023623  | 927.415   | 974.147   | AF459094  | 5829.862  | 6655.649  | AL133087  | 791.4     | 2425.846  |
| AK026202  | 953.312   | 512.27    | NM_002544 | 690.361   | 339.093   | NM_018010 | 664.329   | 2623.939  |
| AK021539  | 5675.678  | 4608.738  | AB011542  | 1369.683  | 990.188   | NM_002274 | 1551.156  | 1836.985  |
| NM_005266 | 2414.068  | 3736.985  | NM_001853 | 1757.766  | 1664.997  | AL080200  | 167.886   | 81.562    |
| AF087965  | 848.104   | 1189.071  | U41737    | 933.961   | 706.174   | BF337874  | 379.625   | 466.486   |
| AF085998  | 1975.31   | 3676.084  | X99661    | 621.321   | 629.141   | NM_003475 | 2293.754  | 3216.699  |
| AB030240  | 383.791   | 563.802   | NM_005927 | 3099.626  | 2173.794  | NM_000243 | 798.048   | 1681.848  |
| AK024681  | 962.963   | 1579.12   | AB028983  | 2697.413  | 2140.59   | NM_012256 | 2689.306  | 2269.271  |
| X68742    | 619.425   | 1356.261  | AB037800  | 1264.118  | 1095.895  | NM_006006 | 190.996   | 192.086   |
| AF085990  | 704.841   | 935.62    | AK026377  | 1917.151  | 1785.153  | NM_016325 | 606.753   | 766.639   |

|           |           |           |           |           |           |           |          |          |
|-----------|-----------|-----------|-----------|-----------|-----------|-----------|----------|----------|
| NM_014907 | 32095.758 | 44469.98  | NM_018660 | 2883.001  | 3598.12   | NM_001604 | 465.897  | 396.121  |
| AB007977  | 3978.575  | 4682.75   | NM_003394 | 6126.715  | 5670.443  | NM_017656 | 563.385  | 436.975  |
| NM_014221 | 6911.269  | 5240.4    | NM_014636 | 1326.76   | 633.24    | X16282    | 2190.479 | 1740.173 |
| U58663    | 429.84    | 309.359   | NM_006747 | 1459.469  | 1609.385  | AK022519  | 159.312  | 86.893   |
| U84515    | 2048.959  | 2917.845  | NM_007086 | 3718.133  | 2674.459  | NM_014415 | 837.221  | 625.696  |
| AF086106  | 520.044   | 721.182   | NM_003870 | 11149.749 | 8537.326  | S75264    | 1757.762 | 1025.808 |
| AF086143  | 4952.096  | 4186.593  | AK024507  | 963.955   | 928.415   | AF027513  | 433.171  | 484.742  |
| AK022364  | 865.506   | 918.74    | NM_001243 | 4448.931  | 3301.335  | NM_001379 | 587.879  | 611.57   |
| AK024674  | 1188.639  | 980.064   | AK025997  | 523.015   | 601.794   | NM_018664 | 1748.363 | 1115.821 |
| AK024244  | 2934.396  | 1596.191  | NM_005546 | 2112.577  | 2877.047  | NM_005034 | 200.574  | 170.198  |
| NM_003835 | 1754.555  | 3121.388  | NM_000299 | 1280.496  | 2634.443  | NM_003926 | 1188.506 | 577.454  |
| AK000245  | 2006.106  | 3430.649  | NM_005478 | 3574.634  | 7120.322  | AF085356  | 210.936  | 308.344  |
| AF118072  | 1415.651  | 1582.745  | S51112    | 1137.425  | 2287.197  | NM_016047 | 9836.637 | 8178.617 |
| AK023724  | 896.882   | 805.077   | NM_014887 | 4761.444  | 5298.724  | NM_001499 | 2000.047 | 1848.667 |
| AF085900  | 14239.719 | 18933.33  | NM_002590 | 785.271   | 717.201   | BF030165  | 3478.581 | 9470.773 |
| AK022420  | 1563.576  | 1675.75   | NM_018556 | 21310.523 | 21417.582 | NM_016732 | 6259.969 | 8170.336 |
| AK023254  | 1539.551  | 1141.03   | NM_005824 | 804.142   | 697.992   | NM_014763 | 3550.172 | 5129.712 |
| AF116709  | 1248.075  | 1371.927  | AF052211  | 4358.927  | 3697.061  | AK026261  | 129.53   | 168.677  |
| AK025533  | 1313.658  | 1112.804  | NM_005235 | 311.523   | 456.29    | AF086534  | 249.701  | 244.742  |
| AK026499  | 519.127   | 419.242   | NM_005600 | 3957.709  | 2619.561  | AF070617  | 318.349  | 1174.611 |
| AK021911  | 13873.096 | 10573.511 | NM_005967 | 2378.178  | 1859.69   | NM_014918 | 1707.268 | 1347.251 |
| D17225    | 4290.755  | 1925.297  | AB014566  | 1698.861  | 1530.194  | NM_003654 | 172.758  | 73.215   |
| AK022257  | 2870.345  | 5008.617  | NM_015678 | 571.171   | 262.969   | NM_000152 | 1703.343 | 1277.211 |
| BE887356  | 35350.355 | 43399.137 | NM_014223 | 1398.14   | 1310.197  | D17222    | 3064.795 | 1406.906 |
| X84369    | 898.353   | 2386.588  | NM_016194 | 1575.359  | 1261.798  | NM_000154 | 783.552  | 289.186  |
| AK023329  | 11373.028 | 8868.032  | AL050385  | 1539.162  | 938.958   | NM_006213 | 123.447  | 220.088  |
| AK021773  | 2660.423  | 1918.312  | NM_007027 | 3419.92   | 2299.511  | NM_003549 | 192.996  | 165.723  |
| AK027074  | 2479.894  | 2290.299  | NM_000633 | 32902.809 | 31197.297 | NM_000671 | 887.388  | 1221.783 |
| AL365456  | 2383.785  | 2802.923  | AB037855  | 936.07    | 775.607   | NM_006297 | 2737.375 | 6879.605 |
| NM_018038 | 1053.888  | 750.306   | AK024524  | 5473.487  | 5202.033  | AF318366  | 1143.502 | 541.271  |
| U84522    | 2772.819  | 2588.683  | NM_000562 | 1718.828  | 1689.822  | AF182423  | 357.921  | 214.771  |
| AK021694  | 1979.851  | 1298.249  | NM_020353 | 699.029   | 945.089   | D26018    | 1062.955 | 1668.046 |
| AF086013  | 916.717   | 660.744   | NM_019011 | 20529.914 | 20487.256 | AK023029  | 120.968  | 103.467  |
| U84505    | 2871.232  | 2202.805  | NM_004879 | 2889.182  | 3729.052  | NM_017643 | 166.49   | 66.59    |
| X81005    | 2948.678  | 1860.532  | AB020694  | 4567.198  | 4966.148  | AB037863  | 194.979  | 113.481  |
| AL049265  | 2803.993  | 1796.521  | NM_016071 | 22723.215 | 40453.695 | BC000363  | 370.301  | 1228.077 |
| AB015349  | 1026.036  | 354.801   | AL050131  | 1487.657  | 1259.071  | NM_007237 | 544.797  | 581.163  |
| AF127771  | 1847.272  | 1923.095  | NM_004475 | 6661.973  | 7023.333  | NM_004608 | 203.428  | 193.587  |
| NM_013300 | 16434.789 | 15275.064 | NM_001627 | 3472.697  | 3379.096  | NM_018257 | 731.791  | 344.271  |
| AK026039  | 7586.21   | 5909.116  | NM_001226 | 2783.097  | 2366.017  | NM_005919 | 481.804  | 1611.621 |
| AF108756  | 10809.915 | 7578.926  | AB050716  | 1307.309  | 1735.993  | AF085931  | 909.103  | 1086.092 |
| AF086394  | 389.642   | 401.576   | X77690    | 2012.43   | 1540.969  | AF086112  | 198.462  | 344.636  |
| NM_004075 | 7521.717  | 11401.459 | NM_006536 | 757.544   | 715.89    | AL137254  | 447.137  | 933.085  |
| NM_001887 | 6737.949  | 5716.458  | NM_005658 | 1274.27   | 1396.443  | AK026359  | 361.973  | 252.893  |
| NM_006533 | 2282.282  | 2367.704  | NM_002422 | 983.972   | 845.814   | AF085884  | 372.718  | 312.729  |
| AK026747  | 8933.527  | 6198.19   | NM_006690 | 2353.195  | 2201.205  | S81522    | 893.931  | 503.82   |
| AL110150  | 2537.814  | 2091.36   | AF218022  | 2109.069  | 1661.811  | AF075070  | 165.267  | 181.993  |
| NM_001998 | 7257.521  | 5149.297  | NM_003348 | 3669.099  | 4956.051  | S94541    | 273.532  | 1331.462 |
| X87825    | 2902.819  | 2179.725  | AL137663  | 815.094   | 798.541   | AK024228  | 412.852  | 303.371  |
| AK001285  | 25972.365 | 14583.201 | AB006198  | 15674.288 | 20521.467 | NM_016647 | 484.506  | 296.689  |
| AF147325  | 57338.684 | 52303.137 | U72518    | 3433.334  | 3335.562  | AK024695  | 531.27   | 1028.227 |
| NM_014428 | 2500.608  | 2175.37   | AF264765  | 1089.057  | 1069.284  | AF038174  | 817.924  | 957.518  |
| NM_018497 | 649.334   | 540.352   | NM_015322 | 3413.033  | 4486.062  | NM_013243 | 171.859  | 143.814  |



|            |           |           |           |           |           |           |          |          |
|------------|-----------|-----------|-----------|-----------|-----------|-----------|----------|----------|
| AK023584   | 1216.145  | 915.317   | NM_016607 | 4710.222  | 6164.95   | AF070632  | 160.25   | 135.179  |
| NM_003774  | 510.01    | 605.314   | NM_003275 | 779.239   | 1489.61   | AF161359  | 546.889  | 604.373  |
| D87466     | 6244.248  | 5707.646  | NM_000268 | 28461.252 | 31999.799 | AL365520  | 336.028  | 233.493  |
| CY3Cy5     | 2294.144  | 216.617   | M30493    | 32155.631 | 34583.051 | AL359338  | 126.642  | 163.994  |
| AA608568   | 12788.276 | 9930.692  | AJ008160  | 901.277   | 880.922   | AK023623  | 350.699  | 259.93   |
| BG831301   | 25159.938 | 15951.149 | NM_004343 | 19409.717 | 15761.885 | AK026202  | 174.717  | 111.304  |
| AA478647   | 11213.904 | 11793.986 | X52355    | 5667.259  | 4904.867  | AK021523  | 122.616  | 105.315  |
| ID 2623896 | 2034.36   | 1491.096  | NM_006963 | 9411.672  | 12598.258 | AK021539  | 1302.453 | 1188.285 |
| ID 2602214 | 3457.885  | 1982.853  | NM_000307 | 262.581   | 285.706   | AK021819  | 203.937  | 208.431  |
| ID 2071279 | 10163.44  | 7004.409  | U66561    | 5305.035  | 4162.273  | AK026738  | 596.229  | 600.742  |
| L10709     | 9193.394  | 5926.274  | NM_000306 | 1935.139  | 1656.209  | AK025011  | 312.41   | 309.116  |
| NM_145659  | 1923.323  | 1471.06   | NM_002200 | 1510.804  | 1269.207  | AL157491  | 402.11   | 440.394  |
| SR2        | 54953.297 | 43169.539 | AF017433  | 1815.862  | 1684.105  | NM_005266 | 554.58   | 343.627  |
| SR4        | 17406.998 | 10371.37  | AF130111  | 2785.981  | 2756.315  | AF087965  | 182.7    | 139.17   |
| SR6        | 2502.191  | 1786.87   | NM_016307 | 3494.132  | 2957.455  | AF085998  | 353.652  | 189.431  |
| SR8        | 9566.449  | 18558.391 | AB028449  | 3647.911  | 2474.955  | AB030240  | 126.886  | 171.775  |
| SR10       | 34042.516 | 8667.827  | NM_004697 | 3384.622  | 2926.332  | AK024681  | 243.616  | 467.953  |
| CY3Cy5     | 1812.988  | 222.847   | U94384    | 2312.802  | 4647.545  | X68742    | 212.275  | 272.372  |
| NM_017729  | 1295.459  | 1163.518  | NM_007040 | 28924.373 | 28997.422 | AF085990  | 167.427  | 401.879  |
| NM_005259  | 1664.115  | 1159.421  | NM_014483 | 4757.918  | 4083.251  | NM_014907 | 6101.672 | 4492.562 |
| NM_006174  | 1008.211  | 1462.171  | AK024249  | 2909.511  | 2396.579  | AB007977  | 1412.76  | 2507.891 |
| NM_014686  | 50367.398 | 56912.672 | AF239156  | 8990.729  | 8578.189  | NM_014221 | 1339.368 | 932.644  |
| BF528358   | 1512.407  | 2274.738  | NM_020390 | 2798.096  | 2064.337  | U37688    | 193.23   | 263.996  |
| NM_016339  | 1297.522  | 1525.446  | NM_003321 | 27973.016 | 25593.211 | U58663    | 217.295  | 817.286  |
| NM_002487  | 7764.656  | 9177.021  | U18937    | 7578.639  | 8087.619  | U84515    | 292.42   | 408.832  |
| NM_006510  | 8449.602  | 6815.031  | U01925    | 746.958   | 832.074   | AF086143  | 896.804  | 489.439  |
| NM_003141  | 2340.602  | 2939.619  | AJ420488  | 59232.527 | 56965.121 | AK022239  | 163.06   | 177.162  |
| NM_020245  | 3994.254  | 5267.469  | AF268872  | 1442.444  | 1959.233  | AK022364  | 190.826  | 112.391  |
| NM_007175  | 1529.759  | 1472.873  | AK022180  | 50361.918 | 47509.754 | AK024674  | 186.906  | 198.373  |
| AB046381   | 867.388   | 1079.578  | AK001384  | 1199.863  | 707.919   | AK024244  | 848.352  | 872.359  |
| AJ011497   | 1091.61   | 1078.068  | AK025437  | 4019.249  | 3279.034  | AK023812  | 156.565  | 167.149  |
| NM_000336  | 1218.809  | 755.844   | AK074164  | 730.754   | 619.5     | AL390084  | 360.633  | 279.485  |
| W61100     | 20072.338 | 21667.773 | NM_004168 | 7157.245  | 5499.005  | AK023565  | 196.084  | 110.932  |
| AF215923   | 6929.987  | 5768.717  | AF161353  | 9243.191  | 7174.425  | AK021479  | 285.881  | 173.614  |
| U66621     | 7568.566  | 5464.619  | NM_000764 | 1310.212  | 1024.976  | NM_003835 | 564.622  | 412.954  |
| NM_005720  | 16501.602 | 15898.645 | NM_004146 | 17295.146 | 14517.347 | AK000245  | 497.934  | 570.125  |
| U92816     | 10622.114 | 12391.533 | NM_003002 | 15554.79  | 13108.179 | AF118072  | 212.45   | 177.963  |
| BC011987   | 6049.412  | 11663.317 | D42047    | 1573.41   | 1619.845  | AK023724  | 209.131  | 137.469  |
| NM_004106  | 1122.854  | 1321.095  | NM_014717 | 1571.743  | 1898.229  | AK024112  | 178.701  | 136.607  |
| NM_003485  | 2390.876  | 2421.407  | NM_017922 | 3008.248  | 2716.362  | AF085900  | 5540.459 | 7790.282 |
| NM_005038  | 11295.817 | 12638.425 | NM_002823 | 59585.492 | 56675.09  | AK026195  | 163.591  | 113.046  |
| NM_006332  | 9968.753  | 11623.278 | NM_017916 | 22975.408 | 20716.877 | AK022420  | 309.001  | 230.498  |
| NM_000916  | 1202.363  | 1585.957  | NM_001805 | 14698.118 | 14023.498 | AK023254  | 204.829  | 125.964  |
| NM_018663  | 5048.218  | 7972.541  | AK022360  | 3820.947  | 3052.611  | AK023945  | 4392.088 | 1707.126 |
| NM_145904  | 10502.245 | 11188.125 | AK095694  | 2139.551  | 1772.784  | AK022446  | 229.327  | 88.706   |
| NM_006796  | 12415.85  | 12281.365 | X52341    | 58945.117 | 55472.742 | AK023773  | 204.797  | 153.086  |
| NM_000706  | 1052.83   | 1039.829  | NM_003082 | 7377.626  | 7937.481  | AF116709  | 380.361  | 317.585  |
| NM_015941  | 3194.117  | 3546.51   | AL133632  | 3359.252  | 3388.537  | AK025533  | 425.953  | 436.475  |
| NM_003655  | 7153.988  | 7111.19   | AK024551  | 1066.962  | 742.782   | AK026499  | 159.169  | 209.147  |
| NM_014837  | 5860.982  | 9649.652  | AL833249  | 3331.656  | 2911.155  | AK021911  | 2583.448 | 1766.25  |
| AK025111   | 613.563   | 659.118   | NM_018374 | 3040.26   | 2264.673  | D17225    | 704.123  | 371.783  |
| NM_001732  | 1077.785  | 850.59    | AF131852  | 403       | 463.188   | AF147430  | 199.01   | 158.638  |
| NM_018690  | 4737.913  | 4626.593  | AK021894  | 2146.702  | 2072.551  | AK025766  | 1556.549 | 798.555  |

|            |           |           |           |           |           |           |           |           |
|------------|-----------|-----------|-----------|-----------|-----------|-----------|-----------|-----------|
| NM_00086C  | 6572.528  | 5160.275  | NM_020424 | 4397.808  | 3251.27   | U35875    | 5899.114  | 1714.64   |
| AB037798   | 2734.048  | 3335.955  | AL137761  | 2908.152  | 3163.747  | AK021857  | 5570.22   | 4938.883  |
| NM_01219C  | 2212.643  | 3402.732  | AK022138  | 1722.025  | 1688.768  | AK022257  | 639.826   | 525.813   |
| AF277719   | 950.601   | 1161.93   | AF086191  | 13111.475 | 12453.237 | BE887356  | 14705.91  | 6816.206  |
| NM_000791  | 4253.8    | 3458.633  | AF143880  | 841.538   | 779.976   | X84369    | 290.34    | 979.013   |
| NM_003681  | 2473.021  | 2098.123  | NM_01763E | 15335.438 | 9723.071  | AK023329  | 2775.16   | 2618.55   |
| NM_00480C  | 10052.424 | 9954.498  | AL133052  | 2857.901  | 1944.454  | AK025181  | 157.805   | 206.85    |
| NM_014954  | 12348.31  | 12303.53  | AB037824  | 3889.426  | 3520.083  | AK021773  | 528.349   | 301.893   |
| NM_000807  | 2017.503  | 2687.584  | AF361494  | 2555.513  | 2222.35   | AK027074  | 598.429   | 467.055   |
| NM_01490E  | 1845.453  | 1855.761  | AK022810  | 2359.99   | 4436.507  | AL365456  | 216.651   | 130.375   |
| X91148     | 698.173   | 827.191   | NM_005110 | 907.721   | 988.992   | NM_01803E | 196.21    | 144.837   |
| NM_01570C  | 9320.394  | 9667.55   | X92110    | 368.949   | 748.856   | AK025048  | 183.408   | 216.137   |
| NM_019087  | 2629.718  | 2204.876  | AF147408  | 2552.885  | 1566.377  | U84522    | 1078.27   | 1292.255  |
| NM_01632Z  | 919.409   | 755.694   | AK027222  | 6057.08   | 4832.818  | AK021694  | 470.871   | 563.077   |
| NM_004277  | 556.013   | 404.584   | NM_01846E | 2765.551  | 3003.524  | AF086013  | 271.658   | 215.45    |
| NM_00507Z  | 926.572   | 1097.161  | NM_014867 | 3372.458  | 3433.036  | U84505    | 634.978   | 568.988   |
| AF308802   | 1761.821  | 1506.62   | AL359932  | 1720.91   | 1802.256  | X81005    | 565.247   | 378.017   |
| S76984     | 10368.645 | 9752.637  | AB037850  | 8798.147  | 8806.521  | AL049265  | 858.728   | 604       |
| NM_01449E  | 54700.375 | 60575.789 | AK002197  | 6510.461  | 4927.295  | AK022225  | 211.954   | 106.35    |
| NM_014081  | 603.085   | 473.306   | AF087996  | 13644.689 | 17413.939 | AL137635  | 265.53    | 268.621   |
| NM_005651  | 1088.461  | 1078.392  | AK021710  | 3207.482  | 2799.43   | AL049430  | 582.127   | 481.609   |
| NM_00719E  | 2378.554  | 2975.082  | NM_007017 | 2025.303  | 2403.773  | AK021461  | 232.439   | 339.383   |
| AK023337   | 2427.033  | 2332.358  | AL137446  | 4717.486  | 3519.079  | AB015349  | 202.63    | 130.905   |
| NM_01327E  | 18499.289 | 13395.603 | AB025286  | 4815.655  | 3596.273  | AL079274  | 2873.27   | 1594.397  |
| AB037842   | 1088.027  | 1255.813  | AF009286  | 606.787   | 600.116   | S46403    | 229.913   | 168.433   |
| U92074     | 919.731   | 798.707   | AF056437  | 1237.587  | 983.966   | AL137398  | 326.775   | 256.024   |
| NM_019011  | 4384.515  | 4671.372  | AB032364  | 740.37    | 638.875   | Y12021    | 325.467   | 443.389   |
| AF459094   | 6587.828  | 6399.511  | NM_01807E | 846.672   | 1134.081  | AF127771  | 271.571   | 364.818   |
| NM_003157  | 2787.945  | 2599.172  | AK021730  | 933.082   | 1196.043  | Z83949    | 173.572   | 236.61    |
| NM_00493E  | 2457.793  | 2669.614  | AK025317  | 19129.824 | 19248.301 | NM_01330C | 6824.343  | 7774.921  |
| NM_01432E  | 1332.848  | 1130.375  | AK026119  | 2314.476  | 2423.891  | AK026039  | 2475.151  | 4431.058  |
| NM_00444E  | 345.57    | 545.578   | AK025177  | 550.865   | 491.187   | AF108756  | 4345.673  | 5470.879  |
| NM_015981  | 1046.611  | 860.144   | AK025552  | 774.572   | 830.139   | AF086394  | 163.175   | 62.016    |
| NM_00045E  | 3762.463  | 3923.281  | AK026725  | 5817.607  | 6074.815  | NM_00407E | 2029.525  | 2327.405  |
| NM_014791  | 13574.146 | 12647.256 | AJ008118  | 61857.734 | 56487.352 | NM_001887 | 1974.285  | 667.425   |
| NM_00331E  | 8290.67   | 8509.467  | AK000939  | 1529.547  | 710.607   | NM_00653E | 764.938   | 857.722   |
| NM_00436Z  | 4177.063  | 3919.56   | AL109674  | 880.444   | 707.337   | AK026747  | 2205.013  | 1126.658  |
| NM_00018Z  | 12911.314 | 8434.077  | AK024512  | 7800.106  | 5696.116  | AL110150  | 985.64    | 830.569   |
| AK023384   | 2960.074  | 2438.307  | AK023454  | 2513.255  | 2032.219  | NM_00199E | 1534.152  | 1294.285  |
| NM_01602E  | 17767.279 | 14016.467 | L23207    | 1736.646  | 1622.64   | X87825    | 741.882   | 514.237   |
| AB046381   | 823.865   | 861.402   | AL157458  | 478.445   | 549.899   | NM_000914 | 145.854   | 81.597    |
| AJ011497   | 1148.838  | 1192.795  | NM_015377 | 1229.851  | 1586.762  | AK001285  | 8896.684  | 3940.176  |
| NM_00033E  | 1500.42   | 1136.871  | AL137531  | 3137.225  | 2783.152  | D17215    | 1534.074  | 1554.746  |
| W61100     | 22104.729 | 16928.813 | AK022210  | 706.79    | 1005.014  | BE781513  | 232.919   | 194.667   |
| AA608568   | 11881.094 | 10589.249 | AL080085  | 8693.687  | 7259.643  | NM_015714 | 5286.8    | 4092.634  |
| BG831301   | 18993.41  | 14205.045 | AK022106  | 1035.613  | 1383.573  | AK075564  | 338.169   | 185.258   |
| AA478647   | 10687.467 | 9043.118  | AF086519  | 936.742   | 1018.463  | AK026219  | 557.834   | 307.206   |
| ID 2623896 | 1291.357  | 1620.707  | AF055012  | 2359.382  | 2032.448  | D28446    | 359.581   | 277.142   |
| ID 2602214 | 2753.002  | 2410.117  | AK022307  | 5280.913  | 3513.236  | AK024756  | 907.314   | 929.317   |
| ID 2071279 | 10270.655 | 8583.488  | AK022611  | 9109.651  | 9138.889  | NM_017911 | 707.209   | 1645.398  |
| L10709     | 10974.087 | 9123.701  | NM_005377 | 639.687   | 665.58    | AJ224168  | 807.324   | 1906.583  |
| N35489     | 1226.181  | 2835.013  | NM_01763Z | 15822.774 | 15554.442 | S69873    | 329.878   | 1320.93   |
| AI928195   | 1016.245  | 1418.568  | AF086186  | 23593.936 | 19796.012 | AF147325  | 24437.572 | 32597.842 |

|           |           |           |           |           |           |            |           |           |
|-----------|-----------|-----------|-----------|-----------|-----------|------------|-----------|-----------|
| AA458922  | 3754.074  | 2815.893  | NM_017802 | 7364.588  | 8101.728  | NM_01442E  | 667.458   | 1208.021  |
| NM_14565E | 1995.534  | 1428.756  | AF155194  | 340.088   | 577.114   | NM_018497  | 199.59    | 170.844   |
| NM_00171E | 8607.077  | 7746.105  | AK023667  | 1929.788  | 1371.975  | AK023584   | 284.434   | 386.986   |
| AL080062  | 2206.849  | 2072.771  | AJ008137  | 21667.004 | 22166.25  | NM_003774  | 221.683   | 340.253   |
| NM_145904 | 9851.881  | 7564.332  | AF085841  | 2159.044  | 2530.679  | D87466     | 2118.16   | 3226.28   |
| NM_00679E | 12661.314 | 10818.602 | AL049232  | 484.785   | 642.637   | AA608568   | 2994.179  | 2999.094  |
| NM_00070E | 766.341   | 742.98    | U92026    | 1934.402  | 1995.383  | BG831301   | 3998.81   | 2972.018  |
| NM_015941 | 3318.019  | 4020.837  | AF086234  | 28698.023 | 23893.035 | AA478647   | 2617.878  | 2326.441  |
| NM_00365E | 6713.885  | 4590.753  | AK023680  | 5809.63   | 4399.488  | ID 2623896 | 284.049   | 276.844   |
| NM_014837 | 4296.974  | 3584.356  | AF009324  | 4317.909  | 2972.304  | ID 2602214 | 605.615   | 222.413   |
| NM_01772E | 1338.508  | 1851.695  | AF019226  | 1133.03   | 975.162   | ID 2071279 | 2943.936  | 939.833   |
| NM_00525E | 1767.209  | 1824.16   | AB028968  | 2047.396  | 1853.604  | SR6        | 1139.287  | 1893.403  |
| NM_006174 | 824.431   | 1210.178  | AK001202  | 1003.971  | 886.42    | SR8        | 4634.92   | 20886.305 |
| NM_01585C | 3360.883  | 2361.389  | AF147374  | 2421.894  | 1701.989  | SR10       | 15804.344 | 6734.753  |
| NM_00283E | 15523.898 | 10495.453 | L43338    | 28453.057 | 29074.93  | CY3Cy5     | 1029.327  | 195.83    |
| NM_01468E | 53025.531 | 54521.777 | AJ227866  | 46657.297 | 46933.754 | NM_01772E  | 367.84    | 501.433   |
| BF528358  | 1058.926  | 2452.813  | AF458223  | 6466.063  | 5943.386  | NM_00525E  | 646.322   | 443.606   |
| NM_01633E | 6031.322  | 10629.213 | AK026822  | 1755.54   | 1525.078  | NM_00284C  | 181.727   | 90.988    |
| NM_002487 | 8434.17   | 10948.638 | AK022838  | 24886.928 | 26433.377 | NM_006174  | 422.802   | 292.877   |
| NM_01334C | 492.356   | 556.972   | NM_00350E | 1716.509  | 1351.472  | NM_01585C  | 906.422   | 504.82    |
| NM_00546E | 741.139   | 759.109   | CY3Cy5    | 8169.348  | 363.29    | NM_00283E  | 3508      | 2278.164  |
| NM_01231E | 2884.924  | 2550.431  | AA700390  | 3621.53   | 4320.964  | NM_01468E  | 29954.094 | 12390.887 |
| NM_00651C | 8601.677  | 6821.853  | AA436163  | 1078.311  | 1221.663  | BF528358   | 316.678   | 481.214   |
| NM_003141 | 2382.57   | 2087.614  | BI907981  | 984.761   | 1071.532  | NM_01633E  | 251.023   | 262.227   |
| NM_02024E | 2466.31   | 2246.667  | BI603841  | 2671.52   | 2286.541  | NM_00546E  | 252.837   | 785.578   |
| NM_00717E | 1385.37   | 1293.602  | M19888    | 416.877   | 482.738   | NM_01231E  | 629.123   | 3511.54   |
| X91148    | 756.482   | 894.518   | Y08136    | 512.122   | 547.937   | AB046381   | 284.217   | 443.846   |
| NM_01570C | 8331.319  | 8825.386  | AA156863  | 4488.998  | 3704.98   | AJ011497   | 820.944   | 1869.523  |
| NM_019087 | 2381.074  | 2060.006  | BI915199  | 2781.986  | 1797.257  | NM_00033E  | 373.572   | 294.229   |
| NM_01632E | 635.566   | 896.606   | R82957    | 59835.43  | 49994.652 | W61100     | 17498.068 | 17170.953 |
| NM_00507E | 926.287   | 731.536   | BI830442  | 576.141   | 600.973   | AF215923   | 1750.329  | 1626.95   |
| AF215923  | 6656.528  | 7470.913  | AI218732  | 2359.252  | 2054.696  | U66621     | 1785.821  | 1217.65   |
| AB023161  | 1440.069  | 3752.693  | NM_00410E | 4260.507  | 3825.167  | NM_00572C  | 4619.478  | 3466.075  |
| U61736    | 355.125   | 367.131   | NM_004544 | 4767.379  | 3237.781  | AJ132086   | 330.273   | 456.838   |
| AJ132086  | 941.227   | 1062.404  | SR5       | 8060.966  | 4635.02   | U92816     | 2015.187  | 1698.133  |
| U92816    | 9821.269  | 8156.915  | SR7       | 6505.493  | 26519.109 | BC011987   | 1583.651  | 3166.229  |
| BC011987  | 4116.231  | 11220.834 | SR9       | 22024.383 | 2008.829  | NM_00410E  | 360.115   | 280.305   |
| NM_00410E | 1232.113  | 1962.848  | CY3Cy5    | 5363.577  | 174.279   | NM_00348E  | 979.799   | 1105.267  |
| NM_00348E | 2594.083  | 3315.471  | NM_01804E | 4802.783  | 6314.029  | M95923     | 230.341   | 1853.264  |
| NM_00503E | 13155.593 | 14233.938 | AJ133439  | 1635.067  | 2433.977  | NM_00241E  | 40228.477 | 81520.516 |
| M95923    | 490.835   | 465.715   | NM_00516C | 7129.087  | 8333.674  | NM_00091E  | 735.985   | 3394.047  |
| NM_00241E | 56341.465 | 59598.262 | X78817    | 12503.964 | 11591.312 | NM_00679E  | 6235.644  | 8867.582  |
| NM_00633E | 10561.596 | 12427.794 | AB023135  | 1321.669  | 1098.092  | NM_00070E  | 544.445   | 796.276   |
| NM_00091E | 1379.613  | 1312.285  | AY009401  | 709.394   | 721.699   | NM_015941  | 1029.384  | 2215.812  |
| NM_01866E | 4524.448  | 3127.078  | AF294628  | 1343.614  | 1361.961  | NM_00365E  | 2291.594  | 2308.423  |
| NM_014791 | 11956.063 | 10931.118 | AK026960  | 685.802   | 571.133   | NM_014837  | 1139.709  | 1183.326  |
| NM_00331E | 8009.555  | 6996.026  | NM_001991 | 1374.139  | 1131.59   | AK025111   | 232.007   | 169.644   |
| NM_00436E | 3884.022  | 3402.033  | NM_00019E | 2448.111  | 2071.366  | NM_00173E  | 299.407   | 174.325   |
| NM_00018E | 11913.999 | 8935.433  | BC014586  | 560.634   | 580.604   | NM_01869C  | 1251.827  | 960.319   |
| AK023384  | 2544.682  | 2246.968  | NM_00244E | 3094.379  | 3127.555  | NM_00086C  | 1722.097  | 1685.047  |
| NM_01602E | 16655.451 | 17010.268 | AF053952  | 21252.494 | 14282.166 | AB037798   | 902.2     | 712.482   |
| AK025111  | 820.024   | 714.205   | NM_00321E | 6318.317  | 4283.087  | NM_00078C  | 365.865   | 401.934   |
| AB037798  | 2130.423  | 2226.34   | BF184738  | 695.635   | 483.312   | AF272663   | 2344.609  | 1600.23   |

|            |           |           |           |           |           |            |           |           |
|------------|-----------|-----------|-----------|-----------|-----------|------------|-----------|-----------|
| AF272663   | 7441.068  | 5947.218  | NM_014044 | 2986.248  | 2114.891  | NM_01219C  | 620.075   | 524.697   |
| NM_01219C  | 1984.143  | 2156.266  | NM_00090C | 1285.888  | 930.825   | AB033015   | 259.606   | 286.475   |
| NM_000791  | 3837.006  | 4360.608  | AK023684  | 7152.119  | 5289      | AF277719   | 361.074   | 787.938   |
| NM_003681  | 2647.249  | 2397.595  | NM_000232 | 3046.839  | 2952.212  | NM_000791  | 1268.309  | 2101.209  |
| NM_00480C  | 11475.507 | 9947.802  | NM_015057 | 541.014   | 752.441   | NM_003681  | 640.205   | 1112.602  |
| NM_014954  | 11225.435 | 11116.068 | AF303398  | 9735.878  | 12181.922 | NM_00480C  | 3304.576  | 5255.343  |
| NM_000807  | 908.229   | 795.873   | NM_01481C | 2703.012  | 1329.774  | NM_004677  | 105.106   | 967.585   |
| NM_01490C  | 2094.219  | 2640.518  | NM_00473E | 2735.351  | 2474.204  | NM_01570C  | 3032.23   | 3868.581  |
| NM_14565E  | 1405.44   | 1136.247  | NM_007357 | 5943.15   | 6016.963  | NM_019087  | 718.298   | 569.478   |
| NM_00171E  | 7422.909  | 6943.664  | NM_003763 | 5162.598  | 5940.449  | NM_016322  | 380.101   | 378.441   |
| AL080062   | 2213.506  | 2828.355  | AK023448  | 1327.337  | 981.181   | AF308802   | 407.85    | 153.858   |
| AF308802   | 1856.362  | 2958.74   | Y18213    | 2170.99   | 1895.495  | S76984     | 3288.62   | 2115.251  |
| S76984     | 10875.64  | 20139.027 | NM_003283 | 2544.187  | 1943.628  | NM_01449E  | 43032.012 | 50243.215 |
| NM_01449E  | 53199.758 | 61582.09  | AF249898  | 7643.203  | 4868.627  | NM_014081  | 354.381   | 349.787   |
| NM_014081  | 900.48    | 1011.648  | M69181    | 10867.129 | 7318.305  | NM_005651  | 295.552   | 349.848   |
| NM_005651  | 823.537   | 926.483   | AK027224  | 1135.194  | 235.772   | AK023699   | 239.777   | 490.959   |
| NM_00719E  | 2531.923  | 2662.882  | NM_001311 | 3482.819  | 2952.391  | NM_00541E  | 122.059   | 246.327   |
| AK023337   | 2121.385  | 1692.914  | NM_01779E | 9412.153  | 6333.44   | NM_00719E  | 819.031   | 1723.718  |
| NM_01327E  | 17842.199 | 12455.617 | NM_01241C | 3097.484  | 2053.435  | AK023337   | 1007.903  | 2008.285  |
| AB037842   | 1230.774  | 1358.369  | NM_001111 | 7047.248  | 5882.733  | NM_01327E  | 6717.893  | 7830.229  |
| U92074     | 1047.367  | 1153.347  | NM_001611 | 1236.216  | 2046.806  | AB037842   | 311.855   | 419.73    |
| NM_019011  | 4653.689  | 4119.259  | AB018310  | 4883.131  | 4776.08   | U92074     | 289.922   | 433.497   |
| AF459094   | 6957.767  | 7256.24   | NM_020133 | 825.25    | 893.22    | NM_019011  | 900.238   | 1498.219  |
| NM_003157  | 2835.724  | 3429.138  | NM_01537E | 17867.357 | 17386.451 | NM_003157  | 814.904   | 3812.138  |
| NM_00493E  | 2599.641  | 5582.524  | NM_00487E | 664.373   | 688.578   | NM_00493E  | 534.702   | 1797.233  |
| NM_01432E  | 592.075   | 605.99    | NM_000742 | 1247.582  | 991.48    | NM_01432E  | 680.952   | 1903.635  |
| NM_015981  | 1673.411  | 1979.803  | NM_00235E | 10108.415 | 8095.564  | NM_015981  | 324.676   | 125.464   |
| NM_01231E  | 2230.424  | 2151.423  | AK026608  | 4092.771  | 2978.332  | NM_00331E  | 2580.325  | 1845.057  |
| NM_00651C  | 8786.512  | 7911.433  | AB046836  | 1067.672  | 1220.2    | NM_004362  | 1456.009  | 637.829   |
| NM_003141  | 2058.927  | 2414.384  | AJ224166  | 1381.669  | 1508.984  | NM_000182  | 2836.558  | 1174.564  |
| NM_02024E  | 2080.203  | 1916.182  | AK026098  | 4633.3    | 4672.087  | AK023384   | 741.089   | 400.907   |
| NM_00717E  | 1269.637  | 1557.891  | NM_012381 | 3153.886  | 2602.43   | NM_01602E  | 4587.018  | 1761.825  |
| AB046381   | 822.554   | 1348.52   | M20702    | 1828.682  | 1571.067  | AJ011497   | 506.733   | 520.129   |
| NM_00033E  | 1189.246  | 1541.875  | NM_006397 | 23513.93  | 19582.701 | NM_00301E  | 225.237   | 385.986   |
| W61100     | 22817.078 | 22008.965 | D83776    | 2192.649  | 1835.081  | NM_00033E  | 455.926   | 550.563   |
| AA608568   | 11532.336 | 11944.825 | NM_00408E | 2594.852  | 2731.89   | W61100     | 19354.896 | 21679.547 |
| BG831301   | 22162.898 | 16199.495 | NM_00013E | 3478.975  | 2688.643  | AA608568   | 5566.904  | 8728.935  |
| AA478647   | 9086.627  | 8714.103  | NM_018163 | 1430.757  | 1138.206  | BG831301   | 8702.009  | 11789.665 |
| ID 2623896 | 1278.263  | 1247.891  | AK026362  | 5047.034  | 2810.023  | M14764     | 207.595   | 201.482   |
| ID 2602214 | 2850.136  | 2180.04   | NM_00496E | 2751.726  | 2805.633  | AA478647   | 4271.011  | 6139.606  |
| ID 2071279 | 10362.865 | 10200.666 | NM_00590E | 2076.479  | 2385.772  | ID 2623896 | 397.925   | 393.95    |
| L10709     | 9690.117  | 7371.322  | NM_00478E | 3321.241  | 3250.613  | L10709     | 3390.349  | 2661.832  |
| N35489     | 673.691   | 999.24    | AK024079  | 610.699   | 524.309   | N35489     | 170.987   | 150.125   |
| AI928195   | 929.227   | 1356.279  | NM_00242E | 2088.729  | 1837.322  | AI928195   | 264.665   | 282.29    |
| AA482489   | 1411.816  | 1734.048  | NM_014674 | 3857.038  | 3411.271  | NM_00171E  | 2566.644  | 1980.553  |
| AA458922   | 4620.936  | 6007.846  | NM_018271 | 1335.951  | 943.485   | AL080062   | 580.718   | 142.338   |
| M95923     | 415.821   | 331.781   | NM_014652 | 976.394   | 522.47    | NM_145904  | 3435.839  | 3284.289  |
| NM_00241E  | 56893.867 | 62186.277 | AL133020  | 5531.874  | 4176.81   | NM_00679E  | 6380.287  | 6256.917  |
| NM_006332  | 9270.457  | 15609.256 | NM_014044 | 2505.103  | 2636.362  | NM_00070E  | 569.65    | 944.579   |
| NM_00091E  | 1065.59   | 1000.727  | NM_00090C | 1140.81   | 1311.545  | NM_015941  | 1259.021  | 1989.107  |
| NM_018663  | 4576.808  | 3031.494  | AK023684  | 6121.23   | 7045.205  | NM_00365E  | 2585.753  | 3245.011  |
| NM_145904  | 10468.134 | 11544.733 | NM_000232 | 1732.983  | 2160.321  | NM_014837  | 1685.748  | 2957.792  |
| NM_015941  | 2906.894  | 5366.812  | AA700390  | 4245.982  | 4748.644  | NM_01772E  | 515.967   | 1421.55   |

|           |           |           |           |           |           |           |           |          |
|-----------|-----------|-----------|-----------|-----------|-----------|-----------|-----------|----------|
| NM_00365E | 6327.983  | 6628.667  | Y18474    | 560.089   | 546.072   | NM_00525E | 1163.622  | 1872.146 |
| NM_014837 | 4582.415  | 4872.361  | AA436163  | 782.759   | 1371.03   | NM_00284C | 139.876   | 159.421  |
| NM_01772E | 1320.75   | 1555.005  | BI907981  | 880.361   | 931.637   | NM_006174 | 284.638   | 369.507  |
| NM_00525E | 2020.255  | 1716.835  | BI603841  | 2409.317  | 2503.464  | NM_01585C | 818.7     | 432.959  |
| NM_00284C | 657.519   | 984.046   | Y08136    | 325.46    | 596.62    | NM_00283E | 2424.552  | 838.828  |
| NM_006174 | 838.373   | 773.645   | AA156863  | 4882.984  | 3752.733  | NM_01231E | 608.701   | 1196.694 |
| NM_01585C | 4351.52   | 3257.789  | BI915199  | 2896.914  | 1799.022  | NM_00651C | 2199.319  | 911.944  |
| NM_004864 | 302.721   | 281.819   | R82957    | 58606.73  | 47274.004 | NM_003141 | 662.682   | 363.743  |
| NM_00283E | 16733.609 | 9918.461  | BI830442  | 837.401   | 727.592   | NM_02024E | 454.832   | 237.895  |
| NM_01468E | 55543.246 | 45145.691 | AI218732  | 2400.64   | 1915.255  | NM_00717E | 324.586   | 163.666  |
| BF528358  | 1515.157  | 1787.699  | NM_004102 | 2568.102  | 1970.227  | X91148    | 375.277   | 772.611  |
| NM_01633E | 927.353   | 888.593   | NM_004544 | 5336.391  | 4135.505  | NM_01570C | 4067.827  | 5394.205 |
| NM_002487 | 7898.715  | 8134.915  | NM_01889C | 26921.67  | 16296.01  | NM_019087 | 891.722   | 1231.903 |
| NM_01334C | 1194.74   | 4485.995  | NM_016204 | 1267.616  | 752.689   | NM_01632E | 398.946   | 588.055  |
| NM_01490E | 1574.573  | 1688.905  | NM_002652 | 556.769   | 389.956   | NM_00507E | 367.919   | 711.541  |
| X91148    | 761.755   | 1604.436  | NM_001311 | 3180.51   | 3519.759  | AF215923  | 2802.361  | 4782.864 |
| NM_01570C | 8650.574  | 13863.456 | NM_01779E | 8252.614  | 9448.858  | U66621    | 2261.44   | 4515.222 |
| NM_019087 | 2343.743  | 2502.64   | NM_01241C | 1967.568  | 1891.236  | NM_00572C | 4536.622  | 4024.079 |
| NM_00507E | 1166.162  | 2280.446  | NM_001111 | 5262.837  | 6448.549  | AJ132086  | 184.834   | 355.796  |
| AF215923  | 7599.888  | 6968.504  | NM_01804E | 4260.039  | 6149.111  | U92816    | 1850.869  | 1300.131 |
| U66621    | 9842.867  | 9147.199  | NM_00516C | 5958.243  | 5858.115  | NM_00503E | 2795.225  | 3662.251 |
| NM_00572C | 18973.684 | 17460.697 | X78817    | 11482.981 | 11229.053 | M95923    | 256.766   | 306.344  |
| U61736    | 526.792   | 327.296   | AB023135  | 1054.294  | 845.723   | NM_00241E | 41702.789 | 17135.34 |
| AJ132086  | 1694.46   | 1581.581  | AY009401  | 540.859   | 455.353   | NM_00633E | 3054.841  | 2040.279 |
| U92816    | 7528.077  | 5989.396  | AF294628  | 1306.066  | 1130.519  | NM_00091E | 456.728   | 182.601  |
| BC011987  | 4902.044  | 8832.726  | AK026960  | 638.788   | 576.342   | NM_01866E | 1290.397  | 376.763  |
| NM_00410E | 1042.228  | 1058.084  | NM_001991 | 1113.457  | 871.421   | NM_014791 | 5233.781  | 4475.685 |
| NM_00348E | 2403.351  | 2127.604  | NM_00019E | 2593.221  | 2431.146  | NM_00331E | 3586.311  | 2790.039 |
| NM_00503E | 11792.469 | 11450.751 | BC014586  | 432.979   | 453.733   | NM_00436E | 1650.849  | 1287.046 |
| NM_003157 | 2314      | 1652.752  | NM_00244E | 2932.636  | 2551.52   | NM_00018E | 3239.348  | 1802.282 |
| NM_014791 | 9767.436  | 14470.289 | AF053952  | 20247.201 | 13662.504 | AK023384  | 906.443   | 416.265  |
| NM_00331E | 9268.487  | 11477.229 | NM_00321E | 5889.967  | 3928.344  | NM_01602E | 6738.685  | 4902.159 |
| NM_00436E | 3870.38   | 4273.271  | BF184738  | 731.882   | 444.891   | AK025111  | 279.558   | 128.995  |
| NM_00018E | 13179.928 | 10226.037 | AF303398  | 7039.663  | 5982.931  | NM_00173E | 412.8     | 510.38   |
| AK023384  | 2897.369  | 2176.762  | NM_01481C | 2578.752  | 1065.968  | NM_01869C | 1222.463  | 1154.392 |
| NM_01602E | 18707.012 | 23825.541 | NM_00473E | 2491.215  | 2678.113  | NM_00086C | 1287.837  | 1005.358 |
| AK025111  | 785.234   | 790.183   | NM_007357 | 4769.208  | 4447.325  | AB037798  | 829.893   | 512.878  |
| NM_00173E | 1215.515  | 1496.601  | NM_00376E | 4160.162  | 4129.087  | NM_00078C | 146.435   | 209.293  |
| NM_00086C | 6879.361  | 5504.793  | AK023448  | 1279.32   | 1025.676  | AF272663  | 1654.724  | 928.351  |
| AB037798  | 2316.747  | 2545.79   | Y18213    | 2320.951  | 1876.902  | NM_01219C | 442.072   | 337.543  |
| NM_00078C | 638.878   | 821.277   | NM_00328E | 2431.615  | 2111.337  | AF277719  | 474.982   | 770.534  |
| AF272663  | 8459.918  | 5806.663  | AF249898  | 7915.699  | 5622.945  | NM_000791 | 943.245   | 897.575  |
| NM_01219C | 2471.929  | 1946.429  | M69181    | 11094.851 | 7591.245  | NM_003681 | 566.732   | 609.576  |
| NM_000791 | 3767.368  | 4914.893  | NM_00242E | 1384.042  | 1970.432  | NM_00480C | 3035.245  | 3336.472 |
| NM_003681 | 2176.954  | 1789.569  | NM_014674 | 2936.018  | 3997.112  | AB037738  | 106.538   | 602.991  |
| NM_00480C | 11498.448 | 8915.389  | NM_018271 | 867.317   | 975.242   | S82769    | 431.722   | 319.303  |
| AB037738  | 825.574   | 628.102   | NM_000547 | 245.615   | 812.603   | NM_014954 | 3722.29   | 2239.892 |
| NM_00495E | 4189.357  | 2861.534  | NM_01465E | 921.879   | 880.704   | NM_000807 | 262.242   | 95.814   |
| NM_01438C | 57103.359 | 48823.09  | AL133020  | 5524.52   | 6059.125  | NM_01490E | 571.407   | 257.253  |
| NM_00171E | 9551.004  | 8232.245  | NM_00502E | 7592.766  | 7700.722  | NM_14565E | 493.03    | 180.127  |
| AL080062  | 2194.48   | 2515.792  | NM_001611 | 1397.56   | 1221.354  | NM_00171E | 2086.225  | 1270.34  |
| AF308802  | 2417.685  | 2488.375  | AB018310  | 4874.763  | 4894.534  | AL080062  | 521.221   | 674.65   |
| S76984    | 12315.284 | 16400.219 | NM_02013E | 748.786   | 578.074   | AF308802  | 504.765   | 482.413  |

|           |           |           |           |           |           |            |           |           |
|-----------|-----------|-----------|-----------|-----------|-----------|------------|-----------|-----------|
| NM_014495 | 51859.602 | 61514.211 | NM_015379 | 16536.363 | 15497.669 | S76984     | 3290.729  | 2980.279  |
| NM_014081 | 862.063   | 1546.793  | NM_004878 | 491.942   | 569.888   | NM_014495  | 44223.594 | 41771.34  |
| NM_005651 | 981.142   | 1027.396  | NM_005502 | 454.069   | 452.151   | NM_014081  | 183.739   | 265.984   |
| NM_007195 | 2535.96   | 2871.004  | NM_000742 | 1266.454  | 820.589   | NM_005651  | 232.388   | 311.636   |
| AK023337  | 1668.103  | 1436.743  | NM_002355 | 9606.415  | 6380.347  | NM_007195  | 534.627   | 246.275   |
| NM_013275 | 11586.467 | 8069.796  | AK026608  | 5657.037  | 3338.886  | AK023337   | 482.46    | 340.946   |
| AB037842  | 1138.916  | 1114.175  | NM_004102 | 1825.291  | 2338.417  | NM_013275  | 3092.595  | 2206.638  |
| U92074    | 693.786   | 857.291   | NM_004544 | 4452.845  | 5817.615  | U92074     | 229.055   | 88.162    |
| NM_019011 | 4299.149  | 3767.369  | NM_018890 | 25524.449 | 26000.01  | NM_019011  | 706.952   | 517.505   |
| AF459094  | 6637.488  | 5396.12   | NM_016204 | 1822.696  | 2315.351  | AF459094   | 1483.221  | 1170.51   |
| AB037800  | 1049.77   | 888.789   | AB046836  | 1411.474  | 1241.378  | NM_003157  | 614.029   | 468.815   |
| AK026377  | 2317.766  | 2422.601  | AJ224166  | 1218.008  | 1154.699  | NM_004938  | 1001.027  | 893.168   |
| NM_018660 | 5385.707  | 4353.73   | AK026098  | 4230.106  | 3593.333  | NM_014326  | 541.483   | 342.177   |
| NM_003394 | 2452.66   | 1574.51   | NM_012381 | 3327.644  | 2514.227  | NM_015981  | 334.032   | 271.188   |
| NM_014636 | 1592.144  | 950.779   | M20702    | 1743.042  | 2029.059  | NM_000455  | 1129.409  | 524.142   |
| AK024507  | 1416.165  | 1823.367  | NM_006397 | 23685.717 | 17827.311 | NM_012319  | 550.12    | 184.191   |
| NM_001243 | 6378.184  | 10597.85  | D83776    | 2228.245  | 1516.979  | NM_006510  | 1768.33   | 543.364   |
| NM_005546 | 3430.83   | 2495.223  | NM_004088 | 2574.316  | 2788.336  | NM_003141  | 698.334   | 406.77    |
| NM_014887 | 4783.138  | 4618.195  | NM_000138 | 3318.965  | 2533.602  | NM_020245  | 492.254   | 223.961   |
| NM_018556 | 11821.094 | 10088.785 | NM_018163 | 1819.558  | 1251.979  | AJ011497   | 385.594   | 334.694   |
| NM_005824 | 1395.785  | 805.075   | AK026362  | 5512.571  | 3354.184  | NM_000336  | 245.926   | 152.546   |
| NM_005600 | 4149.726  | 3016.748  | NM_004968 | 2557.213  | 2384.787  | W61100     | 6494.567  | 4993.239  |
| NM_005967 | 1357.733  | 1060.76   | NM_005908 | 2243.617  | 2045.606  | AA608568   | 2573.826  | 2082.217  |
| AB014566  | 2357.228  | 2111.183  | NM_004785 | 3601.441  | 2940.359  | BG831301   | 3326.35   | 2352.545  |
| NM_015678 | 1708.864  | 2386.359  | AK024079  | 745.601   | 496.216   | AA478647   | 2034.241  | 1453.129  |
| NM_014223 | 1598.818  | 1601.211  | NM_000193 | 2113.056  | 3991.727  | ID 2623896 | 309.169   | 312.599   |
| NM_016194 | 2446.421  | 2223.655  | BC014586  | 614.947   | 690.132   | ID 2602214 | 680.283   | 488.273   |
| AL050385  | 1700.932  | 1390.277  | NM_002448 | 3130.792  | 4365.958  | ID 2071279 | 2635.226  | 1184.039  |
| NM_007027 | 3562.823  | 4258.021  | AF053952  | 21648.049 | 30066.971 | L10709     | 2924.446  | 898.782   |
| NM_000562 | 1460.385  | 1441.633  | NM_003213 | 6126.693  | 6528.767  | AI928195   | 310.684   | 180.489   |
| NM_020353 | 982.427   | 1369.132  | BF184738  | 968.489   | 1071.509  | AA458922   | 634.562   | 266.905   |
| NM_019011 | 12408.522 | 9419.226  | NM_014044 | 2673.112  | 2921.998  | M95923     | 329.875   | 51.838    |
| NM_004879 | 4469.386  | 4387.644  | NM_000900 | 1735.652  | 1922.083  | NM_002415  | 38597.406 | 38944.344 |
| AB020694  | 2277.66   | 1979.644  | AK023684  | 7451.529  | 7653.891  | NM_006332  | 3384.013  | 2652.081  |
| NM_016071 | 24237.932 | 15947.892 | NM_000232 | 2834.179  | 2668.337  | NM_000916  | 376.578   | 266.631   |
| AL050131  | 696.205   | 388.999   | AA700390  | 5154.841  | 4300.641  | NM_018663  | 1293.955  | 404.492   |
| NM_004475 | 5548.604  | 4611.569  | AA436163  | 960.811   | 1309.912  | NM_145904  | 2481.712  | 1376.425  |
| NM_001627 | 3077.701  | 3019.851  | BI907981  | 953.043   | 711.652   | NM_006796  | 3722.556  | 2805.458  |
| NM_001226 | 4818.272  | 5173.773  | BI603841  | 2273.62   | 2336.286  | NM_000706  | 351.069   | 222.153   |
| AB050716  | 888.044   | 902.995   | M19888    | 505.394   | 466.236   | NM_015941  | 625.813   | 692.385   |
| X77690    | 1618.698  | 1323.844  | Y08136    | 552.973   | 672.213   | NM_003655  | 1684.504  | 1117.854  |
| NM_006536 | 457.862   | 413.14    | AA156863  | 4558.521  | 3464.492  | NM_014837  | 547.002   | 573.469   |
| NM_005658 | 689.107   | 669.512   | BI915199  | 2838.567  | 2096.376  | NM_017729  | 434.723   | 411.837   |
| NM_002422 | 1022.618  | 624.12    | R82957    | 60245.547 | 46627.93  | NM_005259  | 514.187   | 311.152   |
| NM_006690 | 1180.085  | 1367.315  | BI830442  | 591.575   | 400.058   | NM_006174  | 291.705   | 186.594   |
| AF218022  | 2530.881  | 2941.346  | AI218732  | 2440.163  | 1921.847  | NM_015850  | 692.632   | 472.982   |
| NM_003348 | 4418.567  | 4987.525  | AF249898  | 6799.06   | 10855.113 | NM_004864  | 215.482   | 160.338   |
| AL137663  | 1021.313  | 1016.415  | M69181    | 11588.552 | 13918.665 | NM_002838  | 2298.051  | 1291.436  |
| AB006198  | 19747.133 | 16316.859 | AK027224  | 763.292   | 542.759   | NM_014686  | 24429.324 | 6589.328  |
| U72518    | 7035.832  | 9483.942  | L09078    | 487.44    | 647.183   | BF528358   | 359.441   | 679.653   |
| AF264765  | 609.584   | 603.486   | NM_002652 | 509.479   | 546.824   | NM_016339  | 315.492   | 280.277   |
| NM_015322 | 4028.69   | 2977.412  | NM_001311 | 3705.995  | 3708.116  | NM_002487  | 2031.153  | 1391.057  |
| NM_016607 | 3606.081  | 2731.118  | NM_017798 | 9176.295  | 9271.697  | NM_014954  | 3958.934  | 5760.496  |

|           |           |           |           |           |           |           |           |           |
|-----------|-----------|-----------|-----------|-----------|-----------|-----------|-----------|-----------|
| NM_003275 | 1357.513  | 739.564   | NM_012410 | 4394.998  | 3724.991  | NM_014905 | 510.85    | 371.392   |
| NM_000265 | 11506.25  | 8289.44   | NM_001111 | 6733.851  | 5549.843  | X91148    | 267.408   | 310.211   |
| M30493    | 18953.854 | 11676.072 | NM_018049 | 5015.108  | 4747.092  | NM_015700 | 3051.459  | 3148.128  |
| AJ008160  | 526.889   | 400.227   | NM_005160 | 5714.691  | 5396.521  | NM_019087 | 626.948   | 414.495   |
| NM_004343 | 42468.527 | 31220.129 | AB023135  | 1262.7    | 1089.49   | NM_016322 | 217.496   | 484.044   |
| X52355    | 5641.133  | 4692.166  | AY009401  | 711.791   | 661.839   | AF215923  | 1365      | 1167.418  |
| NM_006963 | 15902.992 | 9337.104  | AF294628  | 1232.006  | 1270.961  | U66621    | 1305.826  | 1078.995  |
| U66561    | 6524.353  | 4371.118  | AK026960  | 597.303   | 471.913   | NM_005720 | 4013.565  | 2816.077  |
| NM_000306 | 1714.54   | 1198.281  | NM_001991 | 1242.658  | 907.981   | U92816    | 1844.27   | 1026.401  |
| NM_002200 | 2456.416  | 2549.119  | NM_000742 | 1597.312  | 1925.458  | BC011987  | 1259.663  | 1697.264  |
| AF017433  | 2398.109  | 2576.332  | NM_002355 | 10016.79  | 11923.601 | NM_004106 | 346.569   | 204.174   |
| AF130111  | 5472.663  | 4759.596  | AK026608  | 4555.905  | 5939.399  | NM_003485 | 822.924   | 456.81    |
| NM_016307 | 1395.046  | 997.551   | NM_015057 | 768.705   | 497.712   | NM_005035 | 2723.525  | 1921.51   |
| AB028449  | 3611.099  | 3506.808  | AF303398  | 9570.974  | 9340.474  | NM_003157 | 588.223   | 377.375   |
| NM_004697 | 4864.745  | 4434.101  | NM_004735 | 2741.98   | 2468.347  | NM_004935 | 383.376   | 461.637   |
| AF131776  | 6134.343  | 5221.776  | NM_007357 | 5635.718  | 5450.449  | NM_015981 | 174.035   | 247.08    |
| NM_020525 | 6405.614  | 6070.857  | NM_003763 | 4803.352  | 6245.606  | NM_000455 | 1061.962  | 706.638   |
| NM_007040 | 37723.113 | 29604.939 | AK023448  | 1413.097  | 720.847   | NM_014791 | 3207.101  | 1737.398  |
| NM_014483 | 9228.394  | 8562.673  | Y18213    | 2161.807  | 1668.26   | NM_003315 | 2542.429  | 2265.668  |
| AK024249  | 2130.13   | 2296.686  | NM_003283 | 2475.202  | 1777.823  | NM_004362 | 1351.542  | 1036.036  |
| AF239156  | 12144.065 | 13941.004 | NM_018163 | 1474.352  | 1752.842  | NM_000182 | 2111.494  | 2100.722  |
| NM_020390 | 2856.21   | 3158.85   | AK026362  | 6512.42   | 6733.542  | AK023384  | 804.726   | 738.678   |
| NM_003321 | 25617.883 | 21200.865 | NM_004965 | 3231.681  | 5738.721  | NM_016025 | 3969.434  | 3272.001  |
| U18937    | 12252.337 | 8858.846  | NM_005905 | 3326.072  | 4812.85   | AK025111  | 254.277   | 331.892   |
| U01925    | 1014.369  | 756.097   | NM_004785 | 4272.639  | 5880.78   | NM_018690 | 1413.769  | 1103.474  |
| AJ420488  | 60845.285 | 62509.313 | AK024079  | 771.696   | 1131.709  | NM_000860 | 1208.093  | 653.357   |
| AF268872  | 2597.78   | 1754.761  | NM_002425 | 2856.044  | 3947.707  | AB037798  | 787.819   | 571.342   |
| AK022180  | 24526.871 | 12863.434 | NM_014674 | 4603.406  | 5384.5    | NM_000780 | 249.788   | 254.973   |
| AK001384  | 1433.202  | 2811.599  | NM_018271 | 2060.263  | 2697.011  | AF272663  | 2142.915  | 1535.388  |
| AK025437  | 4300.521  | 4329.097  | NM_000547 | 591.197   | 1421.472  | NM_012190 | 452.884   | 298.802   |
| AK074164  | 626.873   | 651.297   | NM_014652 | 1050.785  | 1177.83   | AF277719  | 579.359   | 1423.882  |
| NM_004165 | 11643.357 | 8280.675  | AL133020  | 6319.488  | 6845.252  | NM_000791 | 719.753   | 420.106   |
| AF161353  | 12506.494 | 11529.33  | NM_001611 | 1415.317  | 1298.101  | NM_003681 | 506.892   | 278.022   |
| NM_000764 | 573.879   | 536.63    | AB018310  | 7255.561  | 6525.241  | NM_004800 | 3253.674  | 2463.867  |
| NM_004145 | 24130.965 | 17505.49  | NM_020133 | 758.835   | 745.589   | NM_004952 | 1536.378  | 4373.812  |
| NM_003002 | 20391.723 | 13568.825 | NM_015379 | 17814.805 | 17483.752 | NM_020414 | 1390.128  | 600.947   |
| D42047    | 1813.622  | 1792.589  | NM_004875 | 797.06    | 730.917   | AB037730  | 1142.448  | 613.299   |
| AB009282  | 24486.393 | 15871.761 | BF028822  | 484.811   | 566.789   | NM_001357 | 1706.472  | 604.656   |
| NM_005004 | 41719.867 | 33100.582 | NM_001777 | 46282.031 | 50835.352 | NM_003893 | 1016.63   | 261.593   |
| NM_003670 | 4583.089  | 5228.434  | U79457    | 8180.939  | 8992.415  | AB037816  | 398.097   | 362.362   |
| NM_014635 | 6410.319  | 5050.266  | AB037832  | 1240.627  | 1655.381  | NM_014380 | 31629.389 | 12638.646 |
| NM_006392 | 4741.142  | 4291.662  | NM_014347 | 11351.608 | 13665.232 | NM_001715 | 2866.824  | 2679.531  |
| NM_014717 | 1912.609  | 1632.279  | NM_001296 | 11826.342 | 15529.909 | AL080062  | 687.724   | 777.526   |
| NM_017922 | 4858.023  | 3686.245  | NM_004344 | 16468.504 | 19674.336 | AF308802  | 302.717   | 239.893   |
| NM_002823 | 55652.406 | 62255.449 | AF085972  | 867.982   | 1023.026  | S76984    | 1191.803  | 1271.737  |
| NM_001805 | 8127.167  | 3832.127  | NM_000757 | 1715.354  | 2040.278  | NM_014495 | 41114.801 | 38776.406 |
| AK022360  | 2867.558  | 2532.526  | AB046786  | 1555.799  | 1980.146  | NM_014081 | 320.269   | 219.132   |
| AK095694  | 1530.003  | 1633.596  | NM_016620 | 31282.967 | 51426.672 | NM_007195 | 402.027   | 348.911   |
| X52341    | 56509.605 | 45178.227 | NM_018890 | 28394.098 | 33768.68  | AK023337  | 609.727   | 383.335   |
| NM_003082 | 10264.655 | 5792.699  | NM_016204 | 2535.665  | 2459.441  | NM_013275 | 3382.641  | 2211.593  |
| AL133632  | 3435.142  | 2563.187  | AB046836  | 1921.299  | 1668.703  | AB037842  | 216.649   | 200.485   |
| AL833249  | 2352.754  | 2037.992  | AJ224166  | 1396.313  | 1315.623  | NM_019011 | 985.76    | 536.929   |
| NM_018374 | 4000.749  | 3548.601  | AK026098  | 5402.752  | 4414.037  | AF459094  | 1910.816  | 1013.249  |

|           |           |           |           |           |           |           |           |          |
|-----------|-----------|-----------|-----------|-----------|-----------|-----------|-----------|----------|
| AF131852  | 523.071   | 547.609   | NM_012381 | 3638.164  | 2987.247  | AB011542  | 513.803   | 744.992  |
| AK021894  | 2501.289  | 3044.625  | M20702    | 1914.877  | 2320.216  | NM_001853 | 455.306   | 658.365  |
| NM_020424 | 6344.145  | 8101.912  | NM_006397 | 29827.375 | 25494.742 | NM_005799 | 249.722   | 201.414  |
| AF438313  | 840.636   | 756.957   | D83776    | 2372.4    | 1913.041  | X99661    | 601.791   | 256.174  |
| AB033009  | 27235.512 | 16307.468 | NM_004088 | 2738.595  | 2696.622  | NM_005927 | 733.49    | 267.748  |
| AL137761  | 4075.527  | 4137.673  | NM_000138 | 3729.219  | 2649.154  | AB028983  | 678.294   | 270.123  |
| AK022086  | 774.591   | 590.476   | AB011541  | 1100.35   | 1055.357  | AB037800  | 299.299   | 261.103  |
| AF147320  | 2032.694  | 1447.388  | BC032460  | 5447.401  | 6044.435  | AK026377  | 879.158   | 821.896  |
| AK027024  | 1468.251  | 1627.498  | NM_014071 | 4566.897  | 4990.849  | NM_018660 | 1626.655  | 1008.135 |
| AK022339  | 1778.782  | 1340.806  | AK024404  | 1128.44   | 1711.81   | NM_003394 | 751.354   | 611.818  |
| AK022138  | 1706.337  | 1647.895  | NM_006329 | 1632.031  | 2542.247  | NM_014636 | 613.063   | 252.797  |
| AF086191  | 5045.679  | 4326.266  | AB032369  | 636.95    | 873.11    | NM_006747 | 387.179   | 288.845  |
| NM_017638 | 14459.972 | 13956.078 | NM_005166 | 1738.84   | 2182.897  | NM_007086 | 593.284   | 621.743  |
| AL133052  | 2704.739  | 2301.11   | NM_015516 | 10450.161 | 9584.738  | NM_003870 | 2074.586  | 1969.012 |
| AB037824  | 3618.325  | 3053.063  | AB033065  | 1112.483  | 773.418   | NM_001243 | 1205.544  | 800.534  |
| AF361494  | 1020.546  | 601.605   | NM_005211 | 1030.488  | 823.386   | NM_005546 | 404.739   | 273.174  |
| AK022810  | 1930.854  | 849.914   | NM_004857 | 26972.57  | 21618.748 | NM_014887 | 1428.644  | 569.285  |
| NM_005110 | 872.955   | 706.159   | NM_012108 | 1037.036  | 888.704   | NM_018556 | 3827.606  | 2129.598 |
| AF147408  | 3035.219  | 3033.522  | NM_003253 | 1782.829  | 1563.092  | AF052211  | 1469.435  | 854.859  |
| AK027222  | 14266.408 | 16825.432 | NM_013285 | 6822.461  | 4451.646  | NM_005600 | 1253.009  | 667.553  |
| AF085868  | 550.547   | 561.265   | NM_002872 | 10571.737 | 10820.554 | NM_005967 | 325.614   | 123.817  |
| AK054767  | 690.042   | 668.248   | NM_000490 | 2682.319  | 2706.4    | AB014566  | 597.057   | 238.175  |
| AL117486  | 2049.473  | 5850.625  | AJ225028  | 635.838   | 421.438   | NM_014223 | 547.411   | 555.458  |
| AL049301  | 968.766   | 808.668   | NM_004839 | 3433.876  | 4067.629  | NM_016194 | 539.291   | 547.045  |
| AL050042  | 2856.177  | 2507.412  | NM_012193 | 3497.35   | 2663.859  | AL050385  | 394.057   | 243.346  |
| AL117570  | 397.847   | 344.587   | NM_003405 | 14767.356 | 10836.828 | NM_007027 | 635.592   | 502.341  |
| NM_014867 | 4929.3    | 4858.156  | NM_004720 | 8269.741  | 6176.304  | NM_000633 | 3727.827  | 2722.424 |
| AL359932  | 814.655   | 750.7     | NM_001057 | 2182.951  | 1478.274  | AB037855  | 229.529   | 330.518  |
| AB037850  | 6850.745  | 5234.392  | NM_005561 | 9536.699  | 9009.956  | AK024524  | 1980.268  | 1177.589 |
| AK002197  | 2783.144  | 2753.346  | AF272381  | 9366.203  | 10983.448 | NM_019011 | 2410.849  | 1789.524 |
| AF087996  | 1454.628  | 814.615   | NM_004524 | 1806.392  | 2292.421  | NM_004879 | 520.459   | 353.491  |
| AK021710  | 2612.715  | 1863.433  | NM_006315 | 2830.509  | 4043.588  | AB020694  | 589.782   | 320.598  |
| AL137446  | 1432.937  | 898.383   | NM_018401 | 1091.988  | 1064.814  | NM_016071 | 9353.043  | 3627.305 |
| AB025286  | 2209.339  | 1672.539  | NM_005163 | 3327.003  | 4861.222  | AL050131  | 337.41    | 66.764   |
| AF009286  | 765.371   | 799.782   | NM_007273 | 34957.098 | 35788.02  | NM_004475 | 1431.679  | 716.19   |
| AF056437  | 982.47    | 1802.095  | BE894943  | 2149.794  | 2830.643  | NM_001627 | 657.75    | 560.731  |
| AB032364  | 466.582   | 462.419   | AF085994  | 549.344   | 1101.39   | NM_001226 | 904.202   | 299.71   |
| NM_005029 | 3478.907  | 3855.414  | NM_016422 | 3715.235  | 5083.048  | NM_001336 | 174.515   | 140.444  |
| AF056447  | 1668.69   | 1466.944  | NM_017878 | 9550.133  | 10529.403 | AB050716  | 269.428   | 157.151  |
| AK001010  | 1409.22   | 1156.649  | NM_004494 | 42135.539 | 42178.418 | X77690    | 309.485   | 127.159  |
| NM_018076 | 1180.642  | 2302.167  | AL049687  | 2193.549  | 1767.497  | NM_005658 | 421.64    | 466.846  |
| AK021442  | 1735.355  | 1850.496  | NM_005643 | 18345.078 | 16056.047 | NM_006690 | 287.146   | 281.825  |
| AK001076  | 1141.096  | 1134.716  | NM_003592 | 5949.96   | 5096.601  | AF218022  | 631.115   | 619.352  |
| AK001820  | 622.445   | 524.306   | NM_014953 | 4288.581  | 2602.281  | NM_003348 | 889.685   | 1029.479 |
| AK021482  | 3533.803  | 2870.775  | AF179995  | 1769.804  | 2555.099  | AL137663  | 311.03    | 251.799  |
| AK021730  | 580.855   | 591.746   | NM_016195 | 4721.994  | 1604.537  | AB006198  | 4625.85   | 3632.497 |
| AK025317  | 8262.504  | 6397.301  | NM_004523 | 4172.682  | 3395.139  | U72518    | 709.92    | 424.81   |
| AK026119  | 713.66    | 560.69    | NM_004404 | 11389.727 | 10191.354 | NM_015322 | 915.287   | 518.581  |
| AK026725  | 1992.74   | 977.375   | NM_002960 | 11275.241 | 10110.685 | NM_016607 | 1143.085  | 721.133  |
| AJ008118  | 54777.191 | 54116.629 | AB046788  | 759.075   | 428.184   | NM_003275 | 267.913   | 119.879  |
| AK000939  | 426.205   | 297.911   | NM_006790 | 5939.567  | 4496.517  | NM_000268 | 4786.833  | 2127.245 |
| AL109674  | 829.365   | 593.555   | AL117522  | 14604.436 | 11197     | M30493    | 4043.303  | 2043.85  |
| AK024512  | 11057.898 | 8320.716  | NM_006572 | 14766.791 | 11009.05  | NM_004343 | 10399.341 | 3098.735 |



|           |           |           |           |           |           |           |           |           |
|-----------|-----------|-----------|-----------|-----------|-----------|-----------|-----------|-----------|
| AK023454  | 2176.316  | 2178.439  | NM_004784 | 582.934   | 517.681   | X52355    | 1546.894  | 2193.751  |
| L23207    | 697.385   | 1369.316  | NM_019061 | 5222.23   | 4853.346  | NM_006963 | 5862.752  | 2441.075  |
| NM_018062 | 1281.847  | 2087.732  | AB033007  | 4556.975  | 6862.417  | U66561    | 2171.254  | 599.945   |
| NM_007128 | 12260.762 | 8811.198  | NM_003781 | 446.875   | 430.986   | NM_000306 | 482.221   | 294.245   |
| NM_007160 | 608.982   | 683.441   | NM_001304 | 591.51    | 870.921   | NM_002200 | 356.121   | 122.998   |
| NM_015377 | 696.207   | 630.684   | NM_003130 | 1716.381  | 1414.638  | AF017433  | 708.446   | 316.033   |
| AL137531  | 1571.687  | 1314.112  | NM_004716 | 23030.941 | 23889.797 | AF130111  | 1443.524  | 761.477   |
| AK022210  | 787.771   | 711.591   | D29810    | 3140.496  | 3776.55   | NM_016307 | 692.606   | 786.608   |
| AL080085  | 7172.215  | 4999.002  | NM_000128 | 3679.184  | 4367.61   | AB028449  | 931.951   | 1224.393  |
| AF055012  | 3229.291  | 1743.563  | AB002384  | 5442.866  | 5589.424  | NM_004697 | 977.67    | 1826.266  |
| AK022307  | 4290.064  | 2705.542  | NM_018437 | 1568.674  | 2703.549  | U94384    | 287.801   | 624.676   |
| NM_005172 | 2096.278  | 1797.107  | NM_000422 | 1517.333  | 880.633   | AF131776  | 966.436   | 783.472   |
| AK025192  | 4019.546  | 3582.373  | AK023164  | 2592.081  | 2555.038  | NM_020528 | 786.614   | 520.801   |
| AK022611  | 10950.665 | 9878.331  | NM_005379 | 2472.245  | 2469.8    | NM_007040 | 7393.354  | 4370.465  |
| NM_006158 | 7660.82   | 6344.904  | AK027121  | 13890.31  | 9201.022  | NM_014483 | 1868.687  | 1274.76   |
| NM_006346 | 1999.573  | 1914.807  | NM_017433 | 5115.167  | 4004.156  | AK024249  | 358.487   | 281.339   |
| AK025240  | 2720.394  | 2945.359  | AL117661  | 5605.554  | 4157.182  | AF239156  | 2928.117  | 1708.044  |
| NM_017633 | 13446.67  | 11110.682 | X64643    | 1877.398  | 1228.206  | NM_020390 | 562.138   | 370.39    |
| AF086186  | 8619.435  | 11102.052 | NM_005380 | 7462.333  | 6018.003  | NM_003321 | 8628.508  | 4698.02   |
| NM_017802 | 5214.978  | 5452.853  | NM_005269 | 878.351   | 936.272   | U18937    | 2645.321  | 2088.591  |
| AK023667  | 1522.185  | 1532.54   | NM_002697 | 2287.312  | 2136.534  | U01925    | 326.751   | 115.119   |
| AJ008137  | 4915.644  | 3309.831  | NM_001518 | 11826.959 | 13197.931 | AJ420488  | 42275.16  | 37073.777 |
| AF085841  | 1310.787  | 708.083   | NM_003412 | 50330.445 | 53709.613 | AF268872  | 551.725   | 312.282   |
| U92026    | 1046.882  | 551.248   | NM_018336 | 1082.547  | 1436.348  | AK022180  | 10146.93  | 3111.301  |
| AF086234  | 38128     | 18442.406 | AK022668  | 4807.398  | 4827.988  | AK001384  | 265.409   | 174.163   |
| AK023680  | 7609.814  | 4390.341  | AW975132  | 2776.731  | 3191.771  | AK025437  | 1106.579  | 540.917   |
| AF009324  | 5909.414  | 4140.811  | NM_006051 | 10825.788 | 13845.763 | AK074164  | 286.279   | 867.006   |
| AF019226  | 2104.717  | 2165.403  | NM_018427 | 5777.704  | 6262.956  | NM_004168 | 2234.045  | 1026.079  |
| AL137480  | 16732.893 | 11742.595 | NM_014663 | 1692.147  | 1656.692  | AF161353  | 3944.12   | 1550.205  |
| AK022182  | 699.713   | 603.874   | AF007217  | 1808.357  | 1164.893  | NM_004146 | 5532.365  | 1403.317  |
| D16473    | 2632.198  | 2559.529  | AB037753  | 3591.971  | 3717.914  | NM_003002 | 7960.078  | 2828.73   |
| AB028968  | 1959.858  | 3118.864  | NM_004674 | 2881.016  | 2724.431  | D42047    | 388.295   | 334.432   |
| AK001202  | 841.644   | 1034.781  | AB037801  | 4129.895  | 4374.281  | AB009282  | 8143.729  | 6088.474  |
| AF195764  | 48380.949 | 53709.219 | AL080159  | 28766.174 | 26574.457 | NM_005004 | 15891.198 | 12382.439 |
| AF055029  | 1589.179  | 1230.286  | NM_017823 | 25197.93  | 26590.244 | NM_003670 | 790.021   | 975.536   |
| S82164    | 1297.377  | 1268.418  | U55185    | 1024.432  | 1096.022  | NM_014639 | 1580.728  | 1367.801  |
| AK024394  | 3444.513  | 3459.421  | U30828    | 9375.371  | 6687.916  | NM_006392 | 933.677   | 638.572   |
| AF147374  | 2224.728  | 2544.737  | AF085886  | 46600.18  | 45568.273 | NM_014717 | 543.519   | 556.61    |
| AF130091  | 1366.02   | 1356.432  | AK023828  | 8550.482  | 6731.138  | NM_017922 | 1056.67   | 754.401   |
| L43338    | 7485.395  | 8494.304  | AK022664  | 832.702   | 879.604   | NM_002823 | 42032.598 | 28834.537 |
| AJ227866  | 17651.002 | 27289.391 | AL080223  | 3075.038  | 4740.009  | NM_017916 | 8965.735  | 6176.381  |
| AF458223  | 7068.535  | 8611.283  | NM_014612 | 32043.867 | 38600.18  | NM_001805 | 2273.927  | 1539.603  |
| AK026822  | 2329.701  | 1435.188  | AF079098  | 995.618   | 1270.772  | AK022360  | 904.054   | 1847.905  |
| AK022838  | 9913.174  | 6189.409  | AK021815  | 949.378   | 513.428   | AK095694  | 535.526   | 939.621   |
| NM_003509 | 888.143   | 353.18    | NM_001543 | 1711.421  | 2335.948  | X52341    | 33490.496 | 26831.266 |
| CY3Cy5    | 6247.091  | 667.557   | NM_016641 | 8656.563  | 9912.281  | NM_003082 | 3217.573  | 4124.611  |
| BI603841  | 1888.27   | 1863.67   | AB018010  | 1183.813  | 1726.693  | AL133632  | 1064.224  | 1586.405  |
| Y08136    | 482.801   | 679.765   | NM_014610 | 14326.988 | 17464.539 | AL833249  | 503.926   | 441.339   |
| AA156863  | 4622.731  | 5784.604  | NM_004737 | 828.144   | 1676.238  | NM_018374 | 1206.512  | 779.776   |
| BI915199  | 3422.006  | 3488.083  | NM_000689 | 1660.574  | 3339.796  | AK021894  | 738.302   | 554.379   |
| R82957    | 51557.66  | 61162.371 | NM_006621 | 5222.105  | 5459.386  | NM_020424 | 1629.78   | 583.938   |
| BI830442  | 366.366   | 514.866   | BF347398  | 13065.622 | 14144.757 | AB033009  | 6211.905  | 4007.82   |
| AI218732  | 2991.535  | 3146.57   | AK026762  | 3140.946  | 3586.674  | AL137761  | 960.636   | 752.266   |

|           |           |           |           |           |           |           |          |          |
|-----------|-----------|-----------|-----------|-----------|-----------|-----------|----------|----------|
| NM_004102 | 1639.279  | 1829.77   | AF078844  | 486.095   | 547.846   | AF147320  | 402.94   | 227.642  |
| NM_004544 | 6352.915  | 6574.072  | NM_004412 | 1194.247  | 1735.412  | AK022138  | 574.826  | 696.391  |
| SR5       | 6019.444  | 7115.033  | L48516    | 2749.741  | 2310.305  | AF086191  | 1287.073 | 1225.267 |
| SR7       | 5788.061  | 49543.18  | NM_016648 | 10057.052 | 9274.897  | AF143880  | 255.218  | 310.067  |
| SR9       | 18839.838 | 3481.7    | AF083930  | 1976.809  | 1863.557  | NM_017638 | 6223.416 | 9733.252 |
| CY3Cy5    | 5000.815  | 485.836   | AB040907  | 501.969   | 986.865   | AL050013  | 346.528  | 469.521  |
| NM_018048 | 7173.812  | 8221.986  | NM_003426 | 925.149   | 909.356   | AL133052  | 1026.332 | 1875.767 |
| AB023135  | 798.078   | 1300.317  | NM_014862 | 1180.501  | 988.717   | AB037824  | 1307.653 | 2119.948 |
| AY009401  | 558.17    | 399.761   | AK027159  | 1687.149  | 1229.322  | AF361494  | 428.858  | 787.152  |
| AF294628  | 1439.039  | 1234.147  | AF075112  | 766.555   | 803.01    | AK022810  | 964.707  | 1124.058 |
| AK026960  | 916.101   | 647.899   | AK001796  | 1417.833  | 1220.284  | NM_005110 | 384.002  | 125.897  |
| NM_001991 | 1275.237  | 1545.228  | AF086152  | 21441.492 | 23850.461 | AF147408  | 765.782  | 391.983  |
| NM_000193 | 1497.7    | 1251.234  | U78519    | 2807.235  | 3292.222  | AK027222  | 1075.333 | 1788.627 |
| BC014586  | 658.546   | 804.82    | AK026872  | 4711.165  | 5728.38   | AK054767  | 299.048  | 318.415  |
| NM_002448 | 3120.44   | 2786.794  | AL157505  | 1528.953  | 2069.926  | AL049301  | 323.978  | 565.943  |
| AF053952  | 9934.639  | 11493.581 | S77361    | 406.052   | 779.894   | AL050042  | 514.996  | 958.698  |
| NM_003213 | 5140.736  | 6411.848  | NM_007190 | 7599.121  | 7625.995  | NM_018468 | 428.565  | 726.233  |
| NM_014044 | 3674.878  | 3715.188  | AF043897  | 1726.216  | 2124.755  | NM_014867 | 920.486  | 1210.29  |
| NM_000900 | 888.434   | 1276.662  | U79246    | 2204.774  | 2329.432  | AB037850  | 1531.287 | 2328.405 |
| AK023684  | 6217.486  | 6658.286  | AF052140  | 738.794   | 922.717   | AK002197  | 1207.902 | 2170.003 |
| NM_000232 | 2490.649  | 2645.98   | NM_018836 | 2007.895  | 2187.579  | AF087996  | 1931.865 | 1848.398 |
| NM_004738 | 2853.693  | 4477.333  | AF007147  | 1664.356  | 1797.859  | AK021710  | 919.737  | 1368.845 |
| NM_007357 | 6315.914  | 5797.7    | AF052127  | 9620.471  | 12519.436 | NM_007017 | 292.678  | 157.467  |
| NM_003763 | 7075.737  | 4208.387  | AK024261  | 988.406   | 975.36    | AL137446  | 521.675  | 207.962  |
| AK023448  | 1536.554  | 1326.104  | AF052150  | 1139.841  | 1150.844  | AB025286  | 536.26   | 150.654  |
| Y18213    | 2886.136  | 2407.051  | AF086481  | 805.449   | 559.253   | AF009286  | 388.913  | 261.194  |
| NM_003283 | 3324.636  | 2759.085  | AL355689  | 547.716   | 293.356   | AF056437  | 240.471  | 167.796  |
| AF249898  | 7939.633  | 6506.297  | AK024885  | 2597.166  | 2281.306  | AB032364  | 158.944  | 315.795  |
| M69181    | 8143.738  | 6027.14   | AK022441  | 2205.8    | 3454.902  | NM_005028 | 804.308  | 938.228  |
| AK027224  | 462.803   | 852.092   | AK026208  | 3906.897  | 5040.404  | AF056447  | 660.926  | 1232.973 |
| NM_001311 | 4751.667  | 3560.341  | NM_016947 | 40101.836 | 46563.059 | AK001010  | 564.236  | 749.924  |
| NM_017798 | 10270.68  | 8176.858  | AY007136  | 1005.178  | 1540.104  | NM_018078 | 343.994  | 557.245  |
| NM_012410 | 1478.324  | 1233.31   | AK026759  | 624.077   | 748.716   | AK021442  | 796.704  | 1208.351 |
| NM_001111 | 6718.611  | 5098.608  | AL359940  | 3202.267  | 5390.344  | AK001076  | 511.597  | 810.033  |
| NM_005028 | 8958.286  | 11869.7   | NM_018286 | 601.29    | 1316.349  | AK021482  | 1030.597 | 1493.382 |
| NM_001611 | 1064.627  | 1616.886  | AK024925  | 29548.957 | 42644.863 | AK021730  | 197.434  | 181.541  |
| AB018310  | 3153.756  | 2897.821  | AL049460  | 10891.27  | 13943.989 | AK025317  | 1057.136 | 1265.96  |
| NM_020133 | 786.894   | 366.457   | AK022396  | 3119.784  | 5504.625  | AK026725  | 959.466  | 1119.656 |
| NM_015378 | 19617.096 | 13843.108 | AF075113  | 968.242   | 1062.348  | AK000939  | 175.418  | 243.759  |
| AF144638  | 51289.281 | 33422.441 | AF086037  | 746.117   | 497.752   | AL109674  | 185.597  | 291.7    |
| NM_005502 | 420.132   | 371.191   | AK022892  | 16687.953 | 11758.593 | AK024512  | 4242.56  | 5680.014 |
| NM_000742 | 994.829   | 1434.173  | U50536    | 376.826   | 485.318   | AK023454  | 501.961  | 1020.136 |
| NM_002355 | 9857.378  | 8251.082  | Z36807    | 31012.789 | 34362.91  | L23207    | 365.733  | 443.114  |
| AK026608  | 3499.179  | 4601.038  | U20896    | 767.652   | 708.354   | NM_018062 | 965.774  | 909.183  |
| AB046836  | 839.035   | 1114.97   | U52836    | 720.465   | 688.96    | NM_007128 | 5719.894 | 5365.183 |
| AJ224166  | 1446.843  | 1199.555  | NM_017939 | 1785.275  | 1370.687  | NM_007160 | 323.142  | 429.526  |
| AK026098  | 4892.982  | 5176.524  | AK021837  | 2335.249  | 2029.093  | AB002442  | 165.764  | 443.124  |
| NM_012381 | 2673.667  | 3005.531  | AK022193  | 597.302   | 620.616   | NM_018627 | 225.985  | 290.749  |
| M20702    | 2200.821  | 1911.097  | AK000106  | 2357.976  | 2846.049  | NM_015377 | 523.772  | 839.707  |
| NM_006397 | 15676.245 | 12365.915 | AK022370  | 1550.032  | 2329.788  | AL137531  | 627.877  | 835.727  |
| D83776    | 1952.325  | 1538.763  | AK026765  | 4017.081  | 8656.416  | AL080085  | 2575.116 | 4214.589 |
| NM_004088 | 2216.869  | 2393.126  | AL117530  | 1092.953  | 2317.393  | AF086519  | 331.22   | 616.773  |
| NM_002180 | 1354.811  | 1854.22   | AK025016  | 388.287   | 859.006   | AF055012  | 1114.535 | 870.253  |

|           |           |           |           |           |           |           |           |           |
|-----------|-----------|-----------|-----------|-----------|-----------|-----------|-----------|-----------|
| NM_00013E | 3984.981  | 3612.057  | AL080191  | 5673.471  | 7706.317  | AK022307  | 1328.875  | 1395.983  |
| NM_018163 | 1534.346  | 1152.293  | AK021639  | 884.818   | 1298.613  | AF132201  | 209.137   | 328.232   |
| AK026362  | 3672.538  | 3452.554  | AK023189  | 1857.57   | 1880.232  | U00950    | 274.229   | 142.856   |
| NM_00496E | 2583.14   | 2433.236  | AK023872  | 1171.767  | 832.794   | NM_005172 | 679.788   | 1350.51   |
| NM_00590E | 2429.866  | 2533.191  | AK022127  | 726.006   | 867.448   | AK025192  | 2630.495  | 3925.781  |
| NM_00478E | 4596.131  | 4530.371  | AF118062  | 609.063   | 832.268   | NM_012403 | 693.968   | 1149.029  |
| AK024079  | 907.596   | 851.46    | AF306347  | 1739.165  | 2050.522  | AK022611  | 3245.446  | 5282.938  |
| NM_00242E | 2267.467  | 2195.36   | AK001164  | 1491.094  | 1999.066  | NM_00615E | 3393.77   | 4890.458  |
| NM_014674 | 5144.529  | 4246.184  | AL359651  | 426.041   | 515.478   | NM_00634E | 492.339   | 726.26    |
| NM_018271 | 641.361   | 813.617   | AK022619  | 899.109   | 789.177   | AK025240  | 903.299   | 1776.293  |
| NM_000547 | 704.315   | 391.83    | AK023464  | 4194.989  | 3959.561  | NM_017633 | 5628.533  | 5118.202  |
| NM_014652 | 997.109   | 1241.331  | AK024157  | 1215.639  | 1172.866  | AF086186  | 5983.507  | 7016.729  |
| AL133020  | 5331.759  | 4528.44   | AK023905  | 5315.284  | 4037.326  | NM_017802 | 1733.653  | 2429.047  |
| NM_014044 | 3087.434  | 4075.482  | AK024231  | 5806.886  | 4879.028  | AK023667  | 450.282   | 594.25    |
| NM_00090C | 690.924   | 666.887   | NM_01694C | 3007.718  | 4360.26   | AJ008137  | 6395.853  | 6176.408  |
| AK023684  | 6342.144  | 7775.272  | AK025757  | 4618.717  | 6711.482  | AF085841  | 447.446   | 842.153   |
| NM_000232 | 2241.814  | 2299.462  | Y16713    | 806.95    | 888.076   | AL049232  | 185.665   | 644.249   |
| AA700390  | 5999.031  | 5461.456  | L07394    | 14444.776 | 16383.987 | U92026    | 464.89    | 482.056   |
| AA436163  | 1163.432  | 680.254   | AK056133  | 1171.366  | 1489.91   | AF086234  | 20115.018 | 12942.494 |
| BI907981  | 502.765   | 487.626   | NM_017845 | 13514.628 | 13716.471 | AK023680  | 2384.766  | 3038.872  |
| BI603841  | 1596.252  | 1083.965  | AF130080  | 924.224   | 1126.693  | AF009324  | 1516.502  | 2740.739  |
| Y08136    | 495.377   | 465.381   | AK026006  | 779.381   | 1001.22   | AF019226  | 464.477   | 415.587   |
| AA156863  | 4895.698  | 3674.407  | NM_019089 | 7134.438  | 7721.927  | AL137480  | 6172.754  | 5561.644  |
| BI915199  | 3607.768  | 3004.687  | AF147440  | 525.715   | 726.237   | AK022182  | 364.478   | 732.882   |
| R82957    | 50458.973 | 48995.215 | AL122072  | 3856.301  | 5247.194  | D16473    | 900.091   | 2078.96   |
| AI218732  | 2916.215  | 2944.106  | AK026221  | 907.743   | 1039.628  | AB028968  | 634.662   | 1381.565  |
| NM_004102 | 1766.167  | 1607.117  | Y13870    | 1022.038  | 1270.198  | AK001202  | 281.672   | 564.034   |
| NM_004544 | 6771.874  | 7220.186  | AK026403  | 2098.458  | 2850.007  | AF195764  | 34885.188 | 45585.047 |
| NM_01889C | 23846.645 | 23619.477 | AK002162  | 658.636   | 620.749   | AF055029  | 207.118   | 311.137   |
| NM_001311 | 2885.804  | 3018.893  | AK022980  | 1244.959  | 1199.491  | S82164    | 519.497   | 943.949   |
| NM_01779E | 9965.932  | 11365.889 | AL359058  | 1123.94   | 1065.938  | AK024394  | 686.706   | 1372.543  |
| NM_01241C | 1778.423  | 1673.731  | AK022439  | 585.382   | 817.994   | AF147374  | 774.138   | 975.266   |
| NM_001111 | 6947.975  | 5143.276  | AK026237  | 3177.855  | 2857.843  | AF130091  | 226.948   | 486.367   |
| NM_01804E | 7930.662  | 5895.844  | AK023687  | 1492.263  | 996.49    | L43338    | 8045.968  | 8796.817  |
| NM_00516C | 10839.509 | 6033.902  | NM_017632 | 2821.235  | 3572.506  | AJ227866  | 16818.676 | 16549.195 |
| X78817    | 7149.241  | 4880.5    | AK026655  | 1869.656  | 1928.83   | AF458223  | 2870.753  | 4025.397  |
| AB023135  | 532.978   | 650.67    | NM_005279 | 639.008   | 892.307   | AK026822  | 816.417   | 1186.117  |
| AY009401  | 389.345   | 354.865   | AF129926  | 1568.381  | 2720.882  | AK022838  | 7734.752  | 9285.94   |
| AF294628  | 1442.914  | 1050.839  | AK025822  | 2353.086  | 2591.677  | NM_00350E | 364.663   | 543.457   |
| AK026960  | 755.244   | 748.867   | AL360140  | 740.899   | 914.753   | CY3Cy5    | 3596.165  | 390.429   |
| NM_001991 | 1225.934  | 1386.308  | AF201937  | 32907.84  | 35752.441 | AA700390  | 2192.156  | 3000.182  |
| NM_000193 | 1520.524  | 1512.068  | AL390128  | 3721.557  | 4311.053  | AA436163  | 471.053   | 660.916   |
| BC014586  | 634.259   | 547.552   | AL157429  | 18665.143 | 22453.445 | BI907981  | 369.195   | 595.259   |
| NM_00244E | 3024.915  | 2497.644  | NM_012071 | 36339.664 | 41674.145 | BI603841  | 697.341   | 1297.007  |
| AF053952  | 10152.407 | 8918.838  | AF055018  | 31810.064 | 44058.621 | M19888    | 200.37    | 496.653   |
| NM_003213 | 5452.707  | 7200.825  | AF070599  | 5066.139  | 9035.556  | Y08136    | 290.336   | 514.771   |
| BF184738  | 331.969   | 228.483   | NM_00545C | 7151.554  | 8614.394  | AA156863  | 2230.734  | 3800.856  |
| NM_015057 | 577.585   | 499.662   | AK023600  | 1280.795  | 1320.243  | BI915199  | 1250.822  | 2964.106  |
| AF303398  | 4144.358  | 2834.008  | Z83952    | 2235.914  | 1825.101  | R82957    | 38931.063 | 60745.27  |
| NM_01481C | 1850.466  | 1332.15   | NM_00552E | 964.465   | 538.874   | BI830442  | 297.474   | 411.284   |
| NM_00473E | 2740.071  | 2803.344  | NM_00528E | 6024.049  | 6539.405  | AI218732  | 1334.532  | 2364.16   |
| NM_007357 | 4406.297  | 2835.778  | AK001918  | 1797.77   | 1511.34   | NM_004102 | 1313.412  | 2323.84   |
| NM_003763 | 6067.842  | 4048.026  | NM_01863E | 46062.484 | 36116.41  | NM_004544 | 2718.045  | 2042.847  |

|           |           |           |            |           |           |           |          |           |
|-----------|-----------|-----------|------------|-----------|-----------|-----------|----------|-----------|
| AK023448  | 1630.299  | 1421.883  | AF086048   | 4125.769  | 3739.533  | SR5       | 3423.466 | 8460.232  |
| Y18213    | 2766.422  | 2721.95   | L15616     | 4898.694  | 4129.344  | SR7       | 3142.349 | 67156.102 |
| NM_003283 | 3015.762  | 3294.817  | AB019565   | 9066.431  | 7093      | SR9       | 8365.543 | 3848.986  |
| AF249898  | 7036.167  | 6226.391  | D16914     | 64018.895 | 59191.969 | CY3Cy5    | 2390.703 | 372.69    |
| M69181    | 7957.521  | 6349.566  | AA084879   | 801.258   | 1366.486  | NM_018048 | 3159.457 | 3422.271  |
| AK027224  | 418.355   | 1099.658  | NM_000833  | 4169.546  | 5219.233  | NM_014395 | 340.528  | 496.224   |
| L09078    | 418.58    | 637.985   | NM_000283  | 6446.156  | 8579.731  | NM_005160 | 4073.307 | 3977.212  |
| NM_002428 | 2972.642  | 4104.565  | NM_012460  | 3076.371  | 4843.439  | NM_000596 | 178.624  | 378.673   |
| NM_014674 | 5397.871  | 5250.553  | X64980     | 776.982   | 791.304   | X78817    | 3083.58  | 3417.335  |
| NM_018271 | 793.011   | 787.181   | NM_012118  | 3810.79   | 4877.049  | AB023135  | 320.919  | 551.361   |
| NM_000547 | 601.179   | 325.164   | AK024092   | 5071.513  | 5312.651  | AF294628  | 563.504  | 543.03    |
| NM_014652 | 1164.305  | 852.039   | AK026285   | 509.717   | 867.601   | NM_001991 | 473.794  | 508.456   |
| AL133020  | 6083.572  | 4996.3    | AK022226   | 772.773   | 969.998   | NM_017852 | 175.475  | 236.655   |
| NM_001611 | 1312.898  | 758.474   | AK002044   | 3998.096  | 4210.862  | NM_000193 | 585.408  | 900.657   |
| AB018310  | 2872.073  | 2188.491  | AK021967   | 761.697   | 1005.837  | BC014586  | 312.423  | 555.495   |
| NM_020133 | 783.116   | 493.806   | AK022206   | 3462.861  | 4682.379  | NM_002448 | 2251.854 | 2243.19   |
| NM_015379 | 20050.496 | 13491.429 | U90904     | 8804.108  | 9569.257  | AF053952  | 4176.571 | 3309.559  |
| NM_004878 | 633.828   | 538.548   | AF088053   | 7036.203  | 6668.992  | NM_003213 | 2690.372 | 6828.241  |
| AF144638  | 50657.688 | 50472.258 | AL133662   | 1407.734  | 2078.199  | BF184738  | 198.699  | 518.853   |
| NM_005502 | 357.597   | 466.19    | NM_002565  | 1398.787  | 1517.968  | NM_014044 | 1381.589 | 4659.071  |
| NM_000742 | 1157.319  | 841.581   | U90903     | 1172.044  | 933.558   | NM_000900 | 451.945  | 1938.676  |
| NM_002355 | 9750.092  | 8400.73   | AF278760   | 4924.784  | 4359.138  | AK023684  | 3014.809 | 8214.032  |
| AK026608  | 3673.986  | 3931.343  | X58061     | 801.193   | 532.721   | NM_000232 | 859.198  | 2763.627  |
| NM_004102 | 1192.93   | 1698.502  | AB032954   | 5907.796  | 5480.029  | NM_015057 | 263.122  | 216.813   |
| NM_004544 | 6400.99   | 7886.772  | NM_006003  | 30462.443 | 22781.189 | AF303398  | 2042.237 | 1805.344  |
| NM_018890 | 24853.896 | 20633.408 | AL110197   | 4688.958  | 4750.877  | NM_014810 | 698.356  | 352.47    |
| NM_016204 | 510.059   | 472.558   | AF085995   | 1546.99   | 861.08    | NM_004738 | 769.271  | 541.834   |
| AB046836  | 903.22    | 948.261   | CY3Cy5     | 1587.43   | 156.503   | AK023448  | 612.877  | 292.94    |
| NM_017816 | 9326.313  | 5981.112  | AA029300   | 2365.475  | 2903.451  | Y18213    | 774.502  | 328.955   |
| AJ224166  | 1601.363  | 1053.884  | X06256     | 2193.112  | 2913.365  | NM_003283 | 941.289  | 544.361   |
| AK026098  | 4928.966  | 3683.793  | AA709271   | 419.056   | 523.018   | AF249898  | 1964.151 | 1017.24   |
| NM_012381 | 2535.43   | 2443.513  | M34057     | 989.404   | 797.398   | M69181    | 1365.772 | 850.668   |
| M20702    | 2218.624  | 1986.851  | ID 1984668 | 4405.753  | 1376.921  | NM_002652 | 239.804  | 547.103   |
| NM_006397 | 16372.161 | 13448.749 | ID 1832579 | 1439.5    | 1338.314  | NM_001311 | 2004.723 | 4924.201  |
| D83776    | 1701.484  | 1805.883  | H-430185 N | 1146.764  | 1107.311  | NM_017798 | 4294.511 | 14020.775 |
| NM_004088 | 2562.685  | 2372.298  | D16583     | 1489.692  | 1019.107  | NM_012410 | 454.064  | 1933.143  |
| NM_002180 | 1318.813  | 2179.792  | H44051     | 387.651   | 630.803   | NM_001111 | 2842.006 | 6219.643  |
| NM_000138 | 3283.778  | 3866.254  | AA481547   | 11469.28  | 6868.715  | NM_001611 | 480.363  | 281.737   |
| NM_018163 | 1410.627  | 1496.472  | AA831880   | 747.758   | 648.329   | AB018310  | 825.919  | 338.905   |
| AK026362  | 3409.01   | 4282.282  | T64880     | 1601.426  | 1063.881  | NM_000742 | 359.89   | 210.01    |
| NM_004968 | 2596.968  | 2946.062  | NM_020967  | 816.251   | 578.576   | NM_002355 | 3381.216 | 2114.479  |
| NM_005908 | 2081.28   | 2493.528  | NM_001071  | 37956.965 | 19110.568 | AK026608  | 1194.473 | 1388.602  |
| NM_004785 | 4235.622  | 3870.721  | SR2        | 48177.793 | 20067.43  | AB046836  | 289.015  | 134.279   |
| AK024079  | 1135.521  | 1061.63   | SR4        | 12110.887 | 5475.368  | AJ224166  | 399.977  | 221.429   |
| NM_000193 | 1670.307  | 2271.816  | SR6        | 1804.467  | 739.332   | AK026098  | 1391.205 | 921.581   |
| BC014586  | 646.113   | 924.133   | SR8        | 7011.425  | 8223.225  | NM_012381 | 973.459  | 685.984   |
| NM_002448 | 2984.126  | 3401.115  | SR10       | 22460.85  | 2994.047  | M20702    | 670.026  | 440.513   |
| AF053952  | 12414.714 | 13289.767 | CY3Cy5     | 808.189   | 131.631   | NM_006397 | 6210.268 | 3677.355  |
| NM_003213 | 5317.873  | 6273.063  | NM_005027  | 1059.373  | 1695.125  | D83776    | 536.185  | 424.65    |
| NM_014044 | 4100.545  | 4796.672  | NM_004612  | 1110.624  | 1347.378  | NM_004088 | 758.086  | 775.451   |
| NM_000900 | 935.429   | 801.626   | NM_005608  | 13893.261 | 17862.369 | NM_000138 | 1073.354 | 1004.392  |
| AK023684  | 6573.937  | 5659.65   | NM_001106  | 2217.783  | 2036.272  | NM_018163 | 361.333  | 359.929   |
| NM_000232 | 2608.271  | 1552.073  | NM_015583  | 1665.604  | 2342.621  | AK026362  | 1150.843 | 929.894   |

|           |           |           |           |           |           |           |           |           |
|-----------|-----------|-----------|-----------|-----------|-----------|-----------|-----------|-----------|
| AA700390  | 5705.42   | 3433.956  | NM_018490 | 1752.954  | 2012.32   | NM_004968 | 890.034   | 434.167   |
| AA436163  | 1192.113  | 838.21    | NM_004778 | 905.226   | 776.07    | NM_005908 | 594.919   | 361.942   |
| BI907981  | 561.048   | 446.338   | NM_006245 | 3195.818  | 3788.595  | NM_004785 | 1290.015  | 983.041   |
| BI603841  | 1451.459  | 1364.17   | NM_004822 | 657.353   | 800.684   | NM_002428 | 755.715   | 2188.03   |
| Y08136    | 601.202   | 517.795   | AK022349  | 3534.822  | 2578.93   | NM_014674 | 629.819   | 1575.771  |
| AA156863  | 4545.406  | 5239.459  | NM_005750 | 651.244   | 721.717   | NM_018271 | 259.676   | 805.482   |
| BI915199  | 3111.076  | 3060.717  | NM_004973 | 3866.351  | 2264.683  | NM_000547 | 299.644   | 288.434   |
| R82957    | 50100.051 | 55592.324 | NM_007245 | 6041.975  | 4262.763  | NM_014652 | 381.339   | 1591.493  |
| BI830442  | 368.286   | 405.661   | NM_001890 | 559.16    | 305.68    | AL133020  | 3223.669  | 7173.087  |
| AI218732  | 3043.171  | 2711.11   | NM_001286 | 2105.971  | 1413.631  | NM_014044 | 768.984   | 389.537   |
| AF249898  | 7749.254  | 9644.689  | NM_000951 | 3010.888  | 1560.034  | NM_000900 | 299.633   | 223.433   |
| M69181    | 8741.475  | 9031.984  | X52599    | 617.927   | 440.66    | AK023684  | 2143.206  | 1312.365  |
| AK027224  | 461.619   | 929.52    | AK000158  | 5546.886  | 8243.804  | NM_000232 | 681.417   | 515.708   |
| NM_001311 | 4264.529  | 3222.867  | NM_005769 | 1254.714  | 2619.49   | AA700390  | 1288.27   | 665.022   |
| NM_017798 | 9571.511  | 7342.013  | AK024500  | 11087.826 | 16179.649 | BI603841  | 361.973   | 303.506   |
| NM_012410 | 1530.974  | 1137.597  | NM_002564 | 7922.689  | 9622.468  | BG696638  | 235.911   | 808.895   |
| NM_001111 | 6445.406  | 3701.685  | NM_000963 | 2488.752  | 1984.867  | AA156863  | 1280.321  | 882.989   |
| NM_018049 | 7019.287  | 4851.203  | NM_013308 | 3526.981  | 3268.972  | BI915199  | 753.83    | 544.764   |
| NM_005160 | 10650.565 | 6386.063  | AF027302  | 2966.89   | 2856.355  | R82957    | 30272.459 | 10313.059 |
| X78817    | 9696.743  | 7965.817  | NM_002852 | 3011.74   | 3170.748  | NM_004544 | 2550.883  | 6429.708  |
| AB023135  | 730.41    | 1100.295  | NM_001817 | 3120.661  | 2871.315  | NM_018890 | 13649.108 | 33093.012 |
| AY009401  | 472.664   | 476.41    | AF063611  | 739.072   | 902.125   | NM_016204 | 301.262   | 826.638   |
| AF294628  | 1450.533  | 1207.943  | NM_006039 | 669.705   | 547.774   | NM_002652 | 320.987   | 200.281   |
| AK026960  | 1044.258  | 1180.068  | NM_002089 | 569.201   | 438.171   | NM_001311 | 1069.892  | 470.494   |
| NM_001991 | 1307.93   | 1143.294  | NM_014656 | 5328.583  | 3459.888  | NM_017798 | 3270.75   | 1583.413  |
| NM_000742 | 942.297   | 1563.136  | NM_002076 | 3551.777  | 2348.761  | NM_012410 | 295.254   | 205.636   |
| NM_002355 | 9732.357  | 11178.831 | X05299    | 4245.7    | 2106.981  | NM_001111 | 1627.4    | 811.341   |
| AK026608  | 3788.817  | 5409.308  | BM468475  | 889.878   | 547.879   | NM_018049 | 1608.518  | 985.433   |
| NM_015057 | 537.309   | 337.467   | NM_000318 | 3869.284  | 2296.289  | NM_001561 | 340.859   | 289.73    |
| AF303398  | 4167.029  | 3370.592  | NM_002060 | 5464.174  | 3452.518  | NM_005160 | 2130.026  | 769.419   |
| NM_014810 | 2077.245  | 1669.786  | AK001230  | 1798.795  | 1019.364  | X78817    | 1805.514  | 1515.126  |
| NM_004738 | 3335.809  | 3693.08   | NM_014680 | 3962.84   | 2016.908  | AB023135  | 304.491   | 100.528   |
| NM_007357 | 5763.698  | 4801.834  | NM_006224 | 57449.746 | 59709.734 | AF294628  | 654.906   | 1109.689  |
| NM_003763 | 6061.782  | 4072.059  | AL137300  | 4106.297  | 5627.467  | NM_001991 | 512.804   | 294.832   |
| AK023448  | 1497.897  | 1491.964  | NM_000229 | 3167.485  | 4718.886  | NM_017852 | 439.853   | 430.877   |
| Y18213    | 3053.613  | 2323.905  | NM_001956 | 4056.838  | 5069.722  | AF053952  | 4015.975  | 11205.805 |
| NM_003283 | 3037.535  | 2256.577  | AB033064  | 2768.738  | 4255.818  | NM_003213 | 2793.402  | 8747.377  |
| NM_018163 | 1183.766  | 1693.466  | AK022317  | 6336.896  | 8610.604  | NM_015057 | 244.406   | 179.677   |
| AK026362  | 3704.525  | 4765.33   | NM_018396 | 9200.172  | 8095.155  | AF303398  | 1326.524  | 1089.802  |
| NM_004968 | 2314.768  | 2515.97   | NM_003124 | 6804.165  | 6528.994  | NM_014810 | 688.124   | 295.784   |
| NM_005908 | 1836.166  | 2739.082  | NM_004531 | 11088.102 | 7683.898  | NM_004738 | 738.37    | 643.241   |
| NM_004785 | 3941.033  | 4880.745  | AL133581  | 2140.502  | 2245.824  | NM_007357 | 1466.798  | 1038.65   |
| AK024079  | 747.311   | 951.44    | NM_002558 | 984.525   | 758.073   | NM_003763 | 1817.803  | 822.028   |
| NM_002428 | 2389.07   | 2639.603  | NM_005031 | 6250.269  | 4957.966  | AK023448  | 564.483   | 229.863   |
| NM_014674 | 4676.982  | 4564.828  | AB040920  | 1158.531  | 661.524   | Y18213    | 882.344   | 206.876   |
| NM_018271 | 623.856   | 1005.484  | NM_000720 | 1308.501  | 862.115   | NM_003283 | 949.077   | 460.587   |
| NM_000547 | 473.592   | 244.498   | NM_004842 | 1936.38   | 1366.629  | AF249898  | 2530.789  | 2265.349  |
| NM_014652 | 921.922   | 1033.486  | AK024639  | 2028.813  | 1621.428  | M69181    | 2571.24   | 2060.487  |
| AL133020  | 5120.103  | 4270.826  | NM_015720 | 6861.233  | 4227.694  | NM_002428 | 596.639   | 293.566   |
| BU565263  | 54324.195 | 72088.344 | AB007915  | 966.722   | 668.886   | NM_014674 | 941.595   | 590.525   |
| NM_005028 | 7719.536  | 6395.768  | NM_018229 | 1830.207  | 1044.393  | NM_018271 | 292.872   | 147.859   |
| NM_001611 | 1135.889  | 895.279   | NM_006325 | 6219.784  | 3305.173  | NM_000547 | 269.159   | 207.196   |
| AB018310  | 3009.299  | 2892.18   | AY009127  | 12533.8   | 6074.941  | NM_014652 | 227.781   | 182.689   |

|           |           |           |            |           |           |           |           |          |
|-----------|-----------|-----------|------------|-----------|-----------|-----------|-----------|----------|
| NM_020133 | 882.568   | 793.904   | NM_014869  | 1278.965  | 862.923   | AL133020  | 1598.777  | 779.191  |
| NM_015379 | 20066.732 | 18201.15  | NM_006708  | 22966.996 | 24788.072 | AB018310  | 768.58    | 570.177  |
| NM_004878 | 634.284   | 493.002   | AB037835   | 1456.164  | 2014.103  | NM_020133 | 301.757   | 132.897  |
| AF144638  | 44045.078 | 34121.133 | NM_000157  | 4728.234  | 6574.269  | NM_015379 | 7129.372  | 2618.531 |
| NM_001777 | 42231.531 | 44764.277 | NM_000712  | 13865.626 | 20986.477 | NM_018470 | 273.947   | 409.952  |
| U79457    | 12283.522 | 15124.688 | NM_018088  | 1067.85   | 1168.752  | NM_000742 | 363.729   | 192.435  |
| AB037832  | 1351.388  | 1418.968  | BC013695   | 9493.417  | 13190.499 | NM_002355 | 3455.414  | 1406.763 |
| NM_014347 | 7150.096  | 7724.887  | NM_014846  | 3380.082  | 4075.914  | NM_004102 | 684.279   | 335.113  |
| NM_001296 | 11364.175 | 13009.062 | AB011164   | 3690.28   | 3002.632  | NM_004544 | 1329.581  | 686.853  |
| NM_004344 | 15726.401 | 17334.627 | M24750     | 1779.56   | 1289.089  | NM_018890 | 8551.337  | 4177.796 |
| AF085972  | 1451.07   | 3278.702  | NM_005965  | 2087.183  | 2114.2    | NM_016204 | 250.899   | 216.919  |
| NM_000757 | 1122.965  | 2140.285  | NM_002740  | 2400.161  | 1759.791  | AB046836  | 569.596   | 368.351  |
| AB046786  | 614.204   | 940.266   | AL117482   | 2551.27   | 2235.117  | AJ224166  | 590.845   | 247.233  |
| NM_016620 | 27258.648 | 21807.33  | NM_006549  | 34384.113 | 21805.916 | AK026098  | 1665.056  | 922.277  |
| NM_018890 | 23497.199 | 22300.596 | AB018324   | 8526.589  | 5746.924  | NM_012381 | 1041.694  | 741.593  |
| NM_016204 | 383.536   | 445.749   | NM_002742  | 54122.609 | 63697.703 | M20702    | 711.102   | 364.733  |
| AB046836  | 835.224   | 1301.664  | Z25431     | 2722.039  | 1589.88   | NM_006397 | 6575.575  | 2913.21  |
| NM_017816 | 8351.769  | 7529.46   | NM_005627  | 3136.862  | 1582.639  | D83776    | 648.088   | 453.904  |
| AJ224166  | 1532.198  | 1297.738  | M64497     | 912.074   | 888.528   | NM_000138 | 1000.649  | 491.226  |
| AK026098  | 4931.608  | 4721.426  | NM_007274  | 9082.848  | 5549.697  | NM_018163 | 498.813   | 358.285  |
| NM_012381 | 2709.622  | 3179.775  | NM_003356  | 4718.77   | 2955.868  | AK026362  | 1424.481  | 755.27   |
| M20702    | 2245.894  | 2287.872  | AF238315   | 594.656   | 279.924   | NM_004968 | 924.986   | 448.838  |
| NM_006397 | 17937.359 | 17386.555 | NM_014648  | 589.793   | 857.131   | NM_005908 | 783.378   | 397.569  |
| D83776    | 2093.344  | 2304.598  | NM_000951  | 3110.466  | 3933.761  | NM_004785 | 1439.442  | 482.797  |
| NM_004088 | 2638.582  | 2896.845  | X52599     | 722.91    | 1208.176  | AK024079  | 346.219   | 186.989  |
| NM_002180 | 1409.35   | 2236.261  | AA029300   | 2117.342  | 2866.754  | NM_000193 | 545.108   | 522.918  |
| NM_000138 | 4032.121  | 4033.639  | BG708842   | 36195.617 | 34108.605 | NM_002448 | 1139.776  | 486.196  |
| AB011541  | 720.523   | 969.715   | M19723     | 54860.141 | 66528.453 | AF053952  | 2772.294  | 1672.183 |
| AK024404  | 1720.981  | 2116.082  | X06256     | 2993.307  | 2978.519  | NM_003213 | 1658.877  | 1123.464 |
| NM_006329 | 1265.693  | 1936.102  | M34057     | 955.681   | 958.878   | NM_014044 | 736.303   | 452.666  |
| NM_000213 | 13438.634 | 14171.954 | ID 1984668 | 4228.314  | 944.932   | NM_000900 | 661.396   | 908.858  |
| BE906107  | 7400.405  | 7032.771  | ID 1832579 | 1338.479  | 1345.097  | AK023684  | 2559.396  | 1915.533 |
| NM_015516 | 5331.275  | 5065.295  | H-430185 N | 1108.818  | 867.922   | NM_000232 | 730.184   | 482.045  |
| AB033065  | 2149.162  | 2529.977  | D16583     | 2175.359  | 1493.127  | AA700390  | 1743.228  | 991.912  |
| NM_004857 | 4073.274  | 4507.651  | H44051     | 611.025   | 335.45    | AA436163  | 2510.333  | 1406.469 |
| NM_012108 | 780.51    | 674.489   | AA481547   | 11495.488 | 6730.344  | BI907981  | 295.458   | 129.85   |
| NM_003253 | 708.783   | 664.005   | AA831880   | 759.323   | 532.923   | BI603841  | 380.098   | 213.127  |
| NM_013285 | 5517.358  | 5362.554  | T64880     | 1300.284  | 750.686   | AA156863  | 1723.441  | 856.41   |
| NM_002872 | 15478.356 | 12271.866 | NM_020967  | 860.552   | 519.736   | BI915199  | 877.046   | 510.121  |
| NM_000490 | 767.806   | 948.373   | NM_001071  | 32748.582 | 16375.212 | R82957    | 28606.086 | 6129.186 |
| AJ225028  | 327.138   | 427.04    | AB028990   | 760.293   | 449.353   | AI218732  | 849.369   | 328.137  |
| NM_004839 | 3663.367  | 2828.279  | X05299     | 4132.625  | 4377.511  | M69181    | 1876.595  | 1272.497 |
| NM_012193 | 1462.469  | 1326.179  | BM468475   | 814.167   | 1525.644  | NM_001311 | 1110.221  | 1046.426 |
| NM_003405 | 9944.333  | 8459.163  | NM_000318  | 5252.59   | 11659.885 | NM_017798 | 3192.787  | 1659.068 |
| NM_004720 | 8566.8    | 9941.995  | NM_002060  | 9296.601  | 14835.147 | NM_000354 | 194.834   | 283.074  |
| NM_001057 | 1918.294  | 2000.999  | AK001230   | 2035.09   | 2951.372  | NM_012410 | 325.896   | 278.004  |
| NM_005561 | 8850.927  | 11269.933 | NM_014680  | 4780.195  | 6409.805  | NM_001111 | 1943.329  | 969.313  |
| AF085994  | 513.736   | 764.327   | NM_005027  | 1307.457  | 1719.12   | NM_018048 | 2902.179  | 1255.741 |
| NM_016422 | 3721.011  | 3784.068  | NM_004612  | 1237.327  | 1579.811  | NM_005160 | 2777.911  | 1195.521 |
| NM_017878 | 2025.516  | 2164.027  | NM_005608  | 13546.939 | 11982.114 | AB023135  | 294.068   | 321.55   |
| NM_004494 | 48977.234 | 67930.297 | NM_001106  | 2247.124  | 1732.838  | AY009401  | 260.58    | 163.615  |
| AL049687  | 1389.347  | 2305.148  | NM_015583  | 1711.986  | 1956.686  | AF294628  | 542.547   | 298.609  |
| NM_005643 | 9883.567  | 16026.268 | NM_018490  | 1482.295  | 1296.37   | AK026960  | 278.117   | 293.24   |

|           |           |           |           |           |           |           |          |          |
|-----------|-----------|-----------|-----------|-----------|-----------|-----------|----------|----------|
| NM_003592 | 3297.075  | 3261.086  | NM_004778 | 884.55    | 588.873   | NM_001991 | 538.329  | 205.71   |
| NM_014953 | 3073.482  | 2281.133  | NM_006245 | 2918.135  | 2792.577  | NM_000742 | 317.304  | 137.022  |
| AF179995  | 2652.47   | 1636.922  | NM_004822 | 621.315   | 575.455   | NM_002355 | 1744.889 | 958.819  |
| NM_016195 | 3953.879  | 2116.596  | AK022349  | 3291.837  | 2704.037  | AK026608  | 664.271  | 697.06   |
| NM_004523 | 4022.333  | 3639.106  | NM_005750 | 513.166   | 507.123   | NM_015057 | 276.584  | 120.998  |
| NM_004404 | 10730.465 | 9426.517  | NM_004973 | 3404.717  | 1944.506  | AF303398  | 824.763  | 448.362  |
| NM_002960 | 4359.657  | 3391.573  | NM_007245 | 5809.166  | 3647.8    | NM_004738 | 858.973  | 379.42   |
| AB046788  | 548.983   | 453.617   | NM_001890 | 534.237   | 344.562   | NM_007357 | 1836.086 | 838.1    |
| NM_006790 | 2370.334  | 2551.823  | NM_001286 | 1941.496  | 1485.339  | NM_003763 | 2038.443 | 901.135  |
| AL117522  | 5051.177  | 3848.518  | AB007915  | 962.272   | 1229.033  | NM_003763 | 2038.443 | 901.135  |
| NM_006572 | 6232.297  | 10503.383 | AB033070  | 414.612   | 1286.796  | AK023448  | 518.978  | 349.903  |
| NM_019061 | 3831.172  | 6543.177  | NM_018229 | 2079.643  | 3372.923  | Y18213    | 838.637  | 366.37   |
| NM_001304 | 733.909   | 736.431   | AY009127  | 14164.65  | 16470.721 | NM_003283 | 1089.785 | 311.167  |
| NM_003130 | 1641.823  | 3760.905  | NM_014869 | 1642.551  | 2540.086  | NM_018163 | 353.197  | 200.748  |
| NM_004716 | 12958.561 | 15427.547 | AK000158  | 4967.729  | 6473.041  | AK026362  | 734.331  | 606.644  |
| D29810    | 2927.886  | 3310.33   | NM_005769 | 930.813   | 1324.157  | NM_004968 | 724.218  | 480.814  |
| NM_000128 | 751.752   | 526.04    | AK024500  | 9899.115  | 10681.051 | NM_005908 | 385.262  | 235.022  |
| AB002384  | 1863.727  | 1539.794  | NM_002564 | 6366.458  | 6829.656  | NM_004785 | 758.135  | 443.297  |
| NM_018437 | 1048.059  | 1044.938  | NM_000963 | 2129.632  | 1526.298  | NM_002428 | 405.913  | 190.852  |
| NM_000422 | 784.031   | 731.678   | NM_013308 | 3171.483  | 2579.045  | NM_018271 | 292.671  | 186.662  |
| AK023164  | 2618.51   | 3089.241  | AF027302  | 2470.893  | 1957.82   | NM_014652 | 622.42   | 453.231  |
| NM_005379 | 726.847   | 958.878   | NM_002852 | 2569.515  | 2458.115  | AL133020  | 2417.261 | 1437.583 |
| AK027121  | 9923.798  | 10672.797 | NM_001817 | 2860.655  | 2390.711  | NM_005028 | 3729.307 | 1795.183 |
| NM_017433 | 947.007   | 978.197   | AF063611  | 824.061   | 707.786   | NM_001611 | 1330.185 | 607.427  |
| AL117661  | 4811.611  | 4521.556  | NM_006039 | 517.461   | 593.389   | AB018310  | 1408.844 | 580.987  |
| X64643    | 2243.554  | 1999.696  | NM_014656 | 3995.804  | 2570.304  | NM_020133 | 299.748  | 211.664  |
| NM_005380 | 9320.181  | 7243.81   | NM_002076 | 3391.442  | 2029.091  | NM_015379 | 8217.625 | 3029.514 |
| NM_005269 | 503.336   | 638.152   | Z25431    | 2873.226  | 2940.825  | NM_001777 | 19594.41 | 8720.641 |
| D70835    | 53753.59  | 46403.938 | NM_005627 | 3239.943  | 3544.758  | U79457    | 1844.066 | 790.229  |
| NM_002697 | 2488.91   | 3326.747  | M64497    | 725.398   | 1847.1    | AB037832  | 321.839  | 315.227  |
| NM_001518 | 11453.316 | 12378.332 | NM_003356 | 10293.198 | 12979.085 | NM_014347 | 1895.672 | 788.199  |
| NM_003412 | 8891.172  | 8361.728  | AF238315  | 758.422   | 974.504   | NM_001296 | 2012.466 | 1034.898 |
| NM_018336 | 1551.042  | 1614.883  | NM_006224 | 54866.621 | 64945.836 | NM_004344 | 3956.627 | 1537.417 |
| AK022668  | 2634.141  | 2624.371  | AL137300  | 4443.299  | 5001.665  | NM_016620 | 9649.142 | 4785.927 |
| AW975132  | 1821.045  | 2001.483  | NM_000229 | 2876.957  | 4078.404  | NM_018890 | 8658.372 | 4089.289 |
| NM_006051 | 4530.714  | 3469.09   | NM_006995 | 18526.631 | 20139.033 | AB046836  | 347.431  | 137.103  |
| NM_018427 | 3532.328  | 4110.389  | NM_003129 | 13571.188 | 18099.758 | AJ224166  | 747.404  | 518.219  |
| AB037814  | 563.753   | 418.586   | NM_001956 | 3511.705  | 3940.374  | NM_012381 | 1066.442 | 637.837  |
| NM_014663 | 1568.89   | 1638.746  | AB033064  | 2673.261  | 3095.006  | M20702    | 800.581  | 417.389  |
| AF007217  | 1098.741  | 704.615   | AK022317  | 5129.534  | 5450.257  | D83776    | 846.567  | 494.384  |
| AB037753  | 3839.557  | 3364.058  | NM_018396 | 8559.046  | 6426.318  | NM_004088 | 1181.521 | 1076.984 |
| NM_004674 | 2888.645  | 2653.556  | NM_003124 | 6029.523  | 5324.032  | NM_000138 | 1430.023 | 1696.544 |
| AB037801  | 4491.166  | 3078.118  | NM_006886 | 53891.551 | 56766.563 | BC032460  | 1308.8   | 705.778  |
| AL080159  | 11798.787 | 9520.841  | NM_004531 | 9695.249  | 5955.634  | NM_014071 | 441.935  | 414.328  |
| NM_017823 | 32954.328 | 23831.355 | AL133581  | 2214.576  | 1748.598  | AK024404  | 311.928  | 220.812  |
| U55185    | 1347.836  | 1278.425  | NM_002558 | 864.776   | 721.319   | NM_006329 | 269.713  | 196.502  |
| U30828    | 12921.83  | 9384.413  | NM_005031 | 5631.326  | 4263.898  | NM_005166 | 423.021  | 107.11   |
| AF085886  | 50178.539 | 49039.566 | AB040920  | 978.125   | 583.972   | AB040930  | 1187.406 | 715.875  |
| AK023828  | 2631.866  | 1860.839  | NM_000720 | 951.52    | 723.124   | NM_015516 | 1323.515 | 1070.745 |
| AL080223  | 4295.835  | 3407.949  | NM_004842 | 2036.808  | 979.097   | AB033065  | 396.469  | 350.265  |
| AK001630  | 8500.671  | 6036.932  | AK024639  | 1823.931  | 1149.07   | NM_004857 | 511.749  | 581.915  |
| NM_014612 | 7645.225  | 7991.783  | NM_015720 | 5509.688  | 3291.188  | NM_000490 | 472.592  | 478.895  |
| AF079098  | 1057.217  | 2251.302  | NM_020967 | 714.008   | 704.548   | AJ225028  | 164.722  | 283.127  |
|           |           |           |           |           |           | NM_012193 | 880.14   | 1212.934 |

|           |           |           |            |           |           |           |           |           |
|-----------|-----------|-----------|------------|-----------|-----------|-----------|-----------|-----------|
| AK021815  | 1504.51   | 1485.767  | AB028990   | 1143.803  | 1068.562  | NM_003405 | 5076.179  | 4326.526  |
| NM_001543 | 1071.646  | 1183.422  | NM_006708  | 24025.184 | 22678.104 | NM_004720 | 3433.279  | 3154.459  |
| NM_016641 | 8345.705  | 8205.33   | AB037835   | 1486.479  | 1777.23   | NM_001057 | 858.08    | 1055.104  |
| AB018010  | 854.052   | 932.304   | NM_016228  | 1313.083  | 1404.867  | NM_005561 | 583.715   | 382.794   |
| NM_014610 | 13035.104 | 12844.495 | NM_000157  | 4913.353  | 4878.968  | AF272381  | 758.533   | 409.627   |
| NM_004737 | 759.996   | 769.58    | NM_000712  | 13104.604 | 14694.908 | NM_004524 | 357.949   | 152.123   |
| NM_000689 | 865.856   | 892.662   | NM_018088  | 11110.841 | 5643.898  | NM_006315 | 673.286   | 234.655   |
| NM_006621 | 4874.25   | 4520.787  | BC013695   | 9098.993  | 8746.311  | NM_018401 | 298.33    | 204.077   |
| BF347398  | 1100.623  | 975.014   | AK023035   | 1824.981  | 1466.023  | NM_005163 | 798.137   | 525.117   |
| AK026762  | 2500.812  | 1830.497  | NM_014846  | 3288.25   | 3089.631  | NM_007273 | 9414.325  | 4414.313  |
| NM_004412 | 1450.983  | 1038.535  | AB011164   | 3836.036  | 2115.991  | BE894943  | 302.642   | 278.194   |
| L48516    | 2627.978  | 1642.361  | M24750     | 1686.27   | 1153.285  | AL049687  | 721.85    | 656.77    |
| NM_016648 | 10242.039 | 8139.799  | NM_005965  | 1208.204  | 970.256   | NM_016195 | 2130.79   | 1656.978  |
| AF083930  | 2669.934  | 2135.284  | NM_002740  | 1988.268  | 1155.854  | NM_004523 | 1754.4    | 2383.513  |
| AB040907  | 831.896   | 504.617   | AL117482   | 2942.313  | 1829.958  | NM_004404 | 5010.181  | 5789.846  |
| NM_003426 | 1572.071  | 838.985   | NM_006549  | 24437.098 | 13156.909 | AB046788  | 214.328   | 438.007   |
| NM_014862 | 1246.528  | 1225.04   | AB018324   | 7211.856  | 4578.757  | NM_006790 | 1063.742  | 1213.615  |
| AK027159  | 1960.112  | 1355.105  | NM_002742  | 54259.672 | 47269.512 | AL117522  | 2664.016  | 2357.488  |
| AF075112  | 720.577   | 820.969   | NM_005750  | 719.984   | 1055.943  | NM_006572 | 1749.721  | 1342.726  |
| AK001796  | 522.244   | 495.945   | NM_007245  | 6765.987  | 8815.767  | NM_019061 | 703.112   | 532.782   |
| AF086152  | 2880.739  | 2433.727  | NM_001286  | 2027.411  | 2759.839  | AB033007  | 626.211   | 279.63    |
| U78519    | 2124.604  | 2801.891  | NM_014648  | 611.806   | 656.798   | NM_001304 | 336.223   | 354.226   |
| AK026872  | 1023.723  | 1291.47   | NM_005073  | 379.272   | 554.752   | NM_018437 | 467.792   | 742.75    |
| NM_007190 | 3404.074  | 2764.772  | NM_000951  | 3309.035  | 3737.284  | NM_000422 | 404.189   | 419.049   |
| AF043897  | 1193.621  | 972.023   | X52599     | 698.161   | 939.805   | AK023164  | 960.22    | 1745.967  |
| U79246    | 2187.667  | 1836.552  | BG708842   | 32503.65  | 25062.902 | NM_005379 | 548.436   | 904.487   |
| AF052140  | 541.813   | 551.691   | M19723     | 54430.242 | 60864.988 | AK027121  | 5300.448  | 7770.155  |
| NM_018836 | 744.936   | 673.68    | X06256     | 2405.348  | 2216.637  | NM_017433 | 829.508   | 856.449   |
| AF007147  | 1168.02   | 998.071   | M34057     | 818.283   | 656.601   | AL117661  | 2191.92   | 2204.016  |
| AF052127  | 1977.051  | 1932.099  | ID 1984668 | 4293.928  | 853.228   | X64643    | 813.677   | 821.479   |
| AK024261  | 504.605   | 537.797   | ID 1832579 | 1478.974  | 942.728   | NM_005380 | 3444.823  | 2890.144  |
| AF052150  | 506.422   | 334.867   | H-430185 N | 1168.726  | 813.018   | D70835    | 27548.455 | 13011.888 |
| AF086481  | 730.31    | 682.896   | D16583     | 1781.185  | 1175.877  | NM_002697 | 571.669   | 639.512   |
| AL355689  | 392.716   | 364.442   | H44051     | 430.993   | 305.779   | NM_001518 | 3370.115  | 2776.68   |
| AK024885  | 3758.665  | 2799.33   | AA481547   | 11520.973 | 5173.914  | NM_003412 | 7744.786  | 3801.126  |
| AK022441  | 971.341   | 693.624   | AA831880   | 607.287   | 632.233   | NM_018336 | 419.54    | 488.46    |
| AK026208  | 4348.038  | 3149.312  | T64880     | 1561.249  | 789.41    | AK022668  | 815.226   | 1105.067  |
| NM_016947 | 42077.605 | 29143.227 | NM_006039  | 570.398   | 961.605   | AW975132  | 568.29    | 964.427   |
| AY007136  | 890.582   | 962.496   | NM_002089  | 336.449   | 748.036   | NM_006051 | 1875.127  | 2219.982  |
| AL359940  | 1900.53   | 1682.044  | NM_014656  | 6693.159  | 7757.198  | NM_018427 | 1205.113  | 1984.39   |
| NM_018286 | 549       | 361.641   | NM_002076  | 3428.439  | 4933.696  | NM_004674 | 1124.474  | 1776.356  |
| AL049460  | 2006.029  | 1592.25   | X05299     | 4020.576  | 4328.295  | AB037801  | 1535.678  | 1745.61   |
| AK022396  | 908.546   | 772.341   | BM468475   | 779.588   | 1189.68   | AL080159  | 5453.794  | 5513.972  |
| AF075113  | 976.049   | 861.878   | NM_000318  | 4230.366  | 5253.156  | NM_017823 | 13276.031 | 12177.784 |
| AK022892  | 3237.029  | 1605.135  | NM_002060  | 8391.154  | 10237.431 | U55185    | 486.321   | 702.712   |
| U50536    | 565.229   | 341.617   | AK001230   | 2070.974  | 2170.337  | U30828    | 4569.672  | 3349.231  |
| Z36807    | 15493.729 | 11292.531 | NM_005027  | 1303.594  | 1517.685  | AF085886  | 30309.943 | 19248.234 |
| U20896    | 877.66    | 878.309   | NM_004612  | 1244.908  | 933.575   | AK023828  | 1691.007  | 1743.594  |
| U52836    | 497.571   | 495.329   | NM_005608  | 13183.878 | 9320.802  | AL080223  | 906.064   | 1287.081  |
| NM_017938 | 1949.397  | 1808.167  | NM_001106  | 2176.233  | 1324.152  | AK001630  | 3695.281  | 4201.051  |
| AK021837  | 1170.737  | 929.706   | NM_015583  | 1549.177  | 1518.32   | NM_014612 | 4750.334  | 5274.423  |
| AK002088  | 6348.89   | 4034.325  | NM_018490  | 1356.669  | 1188.187  | AF079098  | 2423.544  | 3689.99   |
| X98206    | 337.019   | 297.806   | NM_004778  | 863.901   | 555.879   | NM_001543 | 338.571   | 430.551   |



|           |           |           |           |           |           |           |           |           |
|-----------|-----------|-----------|-----------|-----------|-----------|-----------|-----------|-----------|
| AK022193  | 638.738   | 431.804   | NM_006245 | 2907.671  | 2255.181  | NM_016641 | 2876.277  | 3623.219  |
| AK000106  | 2558.322  | 2731.369  | NM_004822 | 613.669   | 655.611   | AB018010  | 315.022   | 256.656   |
| AK022370  | 1227.477  | 1284.811  | AK022349  | 3510.141  | 2547.96   | NM_014610 | 4640.018  | 4818.816  |
| AK026765  | 1020.441  | 883.543   | NM_005031 | 6544.167  | 8721.947  | NM_000685 | 266.304   | 364.914   |
| AL117530  | 838.597   | 797.245   | AB040920  | 1022.048  | 1081.816  | NM_006621 | 1470.035  | 2119.009  |
| AL080191  | 1611.452  | 2271.568  | NM_000720 | 1226.679  | 1652.989  | BF347398  | 790.361   | 1109.784  |
| AK021639  | 558.024   | 902.473   | NM_004842 | 2090.202  | 2775.938  | AK026762  | 1184.81   | 1554.422  |
| AK023189  | 1053.56   | 1445.863  | AK024639  | 2490.389  | 4572.411  | NM_004412 | 607.563   | 443.054   |
| AF306347  | 673.527   | 578.478   | NM_015720 | 9334.165  | 12719.468 | L48516    | 1047.834  | 1388.878  |
| AK001164  | 1651.395  | 1268.645  | AB007915  | 846.144   | 1420.926  | NM_016645 | 5094.225  | 4236.495  |
| AK022619  | 382.332   | 633.435   | AB033070  | 595.452   | 1255.297  | AF083930  | 829.669   | 969.055   |
| AK023464  | 825.745   | 975.256   | NM_018229 | 1780.596  | 2715.852  | AB040907  | 361.825   | 230.823   |
| AK024157  | 408.149   | 544.829   | NM_006325 | 7375.874  | 8798.769  | NM_003425 | 708.232   | 742.834   |
| AK022963  | 790.413   | 698.407   | AY009127  | 13704.069 | 12692.997 | NM_014862 | 434.5     | 434.564   |
| AK023563  | 284.552   | 275.142   | NM_014869 | 1759.289  | 1915.867  | AK027159  | 682.025   | 764.789   |
| AK023905  | 1530.22   | 1668.876  | AK000158  | 5128.17   | 5203.625  | AF075112  | 218.563   | 360.473   |
| AK024231  | 2194.254  | 1924.399  | NM_005769 | 1158.133  | 1021.947  | AK001796  | 310.655   | 445.536   |
| NM_016940 | 3109.948  | 2009.893  | AK024500  | 10038.38  | 7899.583  | AF086152  | 2303.386  | 2832.203  |
| AK025757  | 3960.586  | 2390.41   | NM_002564 | 5714.678  | 5220.154  | U78519    | 644.074   | 1300.741  |
| Y16713    | 506.128   | 382.598   | NM_000963 | 2203.818  | 1058.357  | AK026872  | 538.31    | 674.687   |
| L07394    | 5536.641  | 4316.268  | NM_013308 | 2666.339  | 1660.192  | AL157505  | 369.643   | 253.53    |
| AK056133  | 1086.874  | 1174.036  | AF027302  | 2539.389  | 1721.317  | NM_007190 | 678.799   | 810.864   |
| NM_017845 | 9959.003  | 8907.853  | NM_002852 | 2232.984  | 1757.869  | AF043897  | 549.393   | 628.116   |
| AF130080  | 630.807   | 719.577   | NM_001817 | 2719.345  | 2059.868  | U79246    | 801.264   | 1159.315  |
| AK026006  | 1110.858  | 832.363   | AF063611  | 805.41    | 677.625   | AF052140  | 312.146   | 386.094   |
| NM_019085 | 4136.952  | 3623.668  | NM_005965 | 1818.152  | 2224.441  | NM_018835 | 394.264   | 331.013   |
| AF147440  | 496.85    | 450.697   | NM_002740 | 2266.263  | 2722.677  | AF007147  | 585.486   | 633.341   |
| AL122072  | 2054.887  | 1974.292  | AL117482  | 3154.645  | 4008.912  | AF052127  | 1649.533  | 2421.346  |
| AK026221  | 474.725   | 490.411   | NM_006549 | 45231.559 | 54967.582 | AK024261  | 428.577   | 300.184   |
| Y13870    | 772.397   | 572.896   | AB018324  | 9685.123  | 18517.389 | AF086481  | 332.48    | 197.155   |
| AK026403  | 1645.098  | 1035.326  | NM_002742 | 55382.301 | 68144.555 | AL355689  | 221.403   | 279.182   |
| AK002162  | 353.111   | 451.52    | Z25431    | 2868.478  | 3354.533  | AK024885  | 1315.044  | 1762.886  |
| AK022980  | 675.323   | 1298.417  | NM_005627 | 3622.502  | 4119.486  | AK026208  | 1062.37   | 1409.504  |
| AL359058  | 1305.812  | 1499.093  | M64497    | 732.155   | 2010.259  | NM_016947 | 19664.049 | 21201.869 |
| AK022439  | 760.876   | 542.266   | NM_007274 | 12365.8   | 15165.494 | AY007136  | 332.97    | 330.045   |
| AK026237  | 1986.976  | 1908.956  | NM_003356 | 10476.79  | 10439.702 | AL359940  | 725.623   | 1340.108  |
| AK023687  | 798.665   | 902.943   | AF238315  | 745.728   | 698.837   | NM_018285 | 319.477   | 307.971   |
| AK026655  | 1340.276  | 928.923   | NM_006224 | 54734.949 | 50083.574 | AK024925  | 3489.787  | 3196.012  |
| AF129926  | 1838.505  | 938.472   | AL137300  | 4259.078  | 3935.434  | AL049460  | 2364.063  | 2340.701  |
| AK025822  | 2264.396  | 1907.531  | NM_000229 | 3188.93   | 3333.195  | AK022396  | 633.703   | 765.148   |
| AL360140  | 367.484   | 173.407   | NM_006995 | 18737.582 | 15420.566 | AF075113  | 328.159   | 921.646   |
| AF201937  | 36976.164 | 21938.1   | NM_003129 | 12984.744 | 13171.516 | AF086037  | 138.516   | 644.95    |
| AL390128  | 1757.922  | 1211.275  | NM_001956 | 3926.811  | 3111.778  | AK022892  | 2269.977  | 1628.736  |
| AL157429  | 3114.445  | 2668.84   | AB033064  | 2409.824  | 2097.096  | U50536    | 238.631   | 308.151   |
| NM_012071 | 33723.496 | 18038.58  | AK022317  | 4767.407  | 4058.314  | Z36807    | 10182.505 | 10974.325 |
| AF055018  | 3876.135  | 2706.485  | NM_018396 | 7808.482  | 5034.784  | U20896    | 378.504   | 707.943   |
| AF070599  | 595.988   | 578.878   | NM_003124 | 4560.771  | 3231.097  | U52836    | 199.083   | 319.087   |
| NM_005450 | 1276.119  | 1019.18   | NM_004531 | 8878.819  | 4402.366  | NM_017935 | 784.741   | 1068.258  |
| AK023600  | 903.745   | 770.932   | AL133581  | 1843.315  | 1729.429  | AK021837  | 825.862   | 888.6     |
| NM_005285 | 1637.586  | 1834.249  | NM_002558 | 715.369   | 399.262   | AK002088  | 2623.752  | 2339.141  |
| AK001918  | 1072.738  | 1922.431  | NM_003586 | 1411.324  | 1686.197  | X98206    | 400.414   | 574.022   |
| NM_018635 | 20255.234 | 16054.104 | NM_000922 | 3013.498  | 4548.263  | AK000106  | 1094.47   | 1664.799  |
| AF086048  | 3801.027  | 3299.486  | NM_013232 | 9340.101  | 10515.968 | AK022370  | 368.08    | 524.993   |

|            |           |           |           |           |           |           |           |           |
|------------|-----------|-----------|-----------|-----------|-----------|-----------|-----------|-----------|
| L15616     | 4369.338  | 4185.435  | NM_000362 | 567.44    | 829.939   | AK026765  | 364.969   | 497.224   |
| AB019565   | 8569.383  | 6233.094  | NM_014429 | 2252.592  | 2872.926  | AL117530  | 386.581   | 500.751   |
| NM_000833  | 2117.895  | 998.279   | AK000770  | 1949.675  | 2791.39   | AL080191  | 1307.787  | 1624.266  |
| NM_000283  | 4419.734  | 2706.929  | NM_002370 | 24418.627 | 25637.293 | AK021639  | 321.518   | 327.151   |
| NM_012460  | 2387.816  | 1419.756  | NM_015670 | 2523.327  | 3223.066  | AK023189  | 683.804   | 859.087   |
| NM_012118  | 3625.447  | 2817.63   | NM_014709 | 1076.511  | 1252.105  | AK023872  | 124.249   | 278.964   |
| AK024092   | 2384.107  | 1914.754  | AB028990  | 915.451   | 1035.32   | AK022127  | 190.203   | 177.055   |
| AK002044   | 3543.271  | 2191.543  | NM_006708 | 23357.686 | 18810.334 | AF306347  | 368.038   | 588.467   |
| U90904     | 6900.546  | 5532.195  | AB037835  | 1627.477  | 1596.724  | AK001164  | 861.345   | 737.824   |
| AF088053   | 4119.997  | 4995.826  | NM_016228 | 1393.216  | 1249.701  | AK022619  | 274.492   | 404.137   |
| AF278760   | 1699.738  | 1941.504  | NM_000157 | 4476.619  | 3836.499  | AK023464  | 1180.754  | 1847.642  |
| X58061     | 1037.704  | 1534.604  | NM_000712 | 12825.286 | 12806.909 | AK024157  | 244.815   | 613.913   |
| AB032954   | 3076.726  | 2908.221  | NM_018088 | 1147.14   | 526.013   | AK022963  | 408.927   | 295.879   |
| NM_006003  | 30377.563 | 22651.027 | BC013695  | 7850.251  | 7091.058  | AK023905  | 1245.581  | 951.13    |
| AL110197   | 5134.461  | 4845.318  | NM_014846 | 3351.912  | 2169.59   | AK024231  | 1393.387  | 1924.304  |
| AF085995   | 1079.077  | 1094.589  | AB011164  | 3357.7    | 2149.58   | NM_016940 | 463.693   | 808.99    |
| CY3Cy5     | 1531.82   | 249.949   | M24750    | 1707.851  | 1190.758  | AK025757  | 1330.732  | 2562.085  |
| AA029300   | 2537.909  | 3187.194  | AB046776  | 1305.744  | 1678.215  | L07394    | 2689.169  | 4375.078  |
| BG708842   | 17619.178 | 16663.742 | NM_002687 | 12982.466 | 17164.723 | AK056133  | 449.97    | 593.802   |
| M19723     | 42074.305 | 45674.492 | NM_000627 | 1769.478  | 3043.302  | NM_017845 | 4592.482  | 6642.099  |
| X06256     | 1983.581  | 2742.429  | NM_000038 | 1298.909  | 889.376   | AF130080  | 306.445   | 673.511   |
| M34057     | 512.516   | 384.548   | NM_000825 | 1282.101  | 1793.146  | AK026006  | 512.009   | 854.31    |
| ID 1984668 | 1898.521  | 6395.59   | NM_004334 | 1991.859  | 2999.152  | NM_019085 | 4027.911  | 3826.492  |
| ID 1832579 | 1808.096  | 1834.534  | NM_003886 | 5006.696  | 6207.529  | AL122072  | 1273.604  | 2059.495  |
| H-430185 N | 1391.54   | 1332.191  | NM_005843 | 1633.296  | 1859.046  | AK026221  | 374.046   | 442.458   |
| D16583     | 1492.003  | 1027.788  | NM_003854 | 528.832   | 674.664   | Y13870    | 373.473   | 537.254   |
| AA481547   | 14065.402 | 10532.771 | NM_017980 | 3925.966  | 3104.097  | AK026403  | 752.099   | 1232.502  |
| AA831880   | 586.78    | 502.415   | NM_001252 | 1014.156  | 1474.889  | AF086361  | 124.234   | 391.614   |
| T64880     | 1425.325  | 1038.587  | AF053712  | 1976.676  | 1992.243  | AK022980  | 386.778   | 1051.216  |
| NM_020967  | 1171.171  | 783.152   | NM_003947 | 1105.409  | 1045.375  | AL359058  | 604.507   | 1371.516  |
| NM_001071  | 37180.875 | 31312.457 | NM_002821 | 16946.008 | 11713.387 | AK022439  | 434.2     | 609.971   |
| SR6        | 1857.972  | 6223.683  | M96652    | 20089.186 | 16019.917 | AK026237  | 1341.052  | 2226.399  |
| SR8        | 6101.319  | 43101.629 | L41690    | 1654.661  | 1193.742  | AK023687  | 473.792   | 939.191   |
| SR10       | 28899.887 | 30565.281 | NM_018059 | 954.893   | 902.923   | NM_017632 | 642.067   | 1371.298  |
| CY3Cy5     | 2480.976  | 443.15    | NM_000939 | 52077.047 | 39796.727 | AK026655  | 601.255   | 1547.918  |
| NM_005027  | 730.795   | 1065.495  | NM_006514 | 2561.887  | 1620.453  | AF129926  | 770.343   | 801.191   |
| NM_004612  | 1229.649  | 1476.311  | AF065164  | 3135.583  | 2479.457  | AK025822  | 1017.539  | 2091.516  |
| NM_005608  | 14479.746 | 17409.344 | AB028991  | 3563.039  | 3845.56   | AL360140  | 289.876   | 357.055   |
| NM_001106  | 1900.026  | 2226.817  | AF263547  | 7635.781  | 7592.675  | AF201937  | 23752.215 | 24320.939 |
| NM_015583  | 1946.061  | 2141.826  | AJ008143  | 10251.861 | 12231.954 | AL390128  | 1210.747  | 1882.43   |
| NM_018490  | 799.91    | 927.016   | NM_007144 | 3101.393  | 4513.566  | AL157429  | 4041.785  | 4443.073  |
| NM_004778  | 544.325   | 561.508   | NM_004424 | 6516.643  | 8777.205  | NM_012071 | 22696.438 | 24860.252 |
| NM_006245  | 4680.129  | 4353.246  | AL133117  | 2187.03   | 3571.259  | AF055018  | 4222.86   | 4985.696  |
| NM_005103  | 308.49    | 285.335   | AB033040  | 1605.465  | 2102.961  | AF070599  | 987.584   | 2107.983  |
| NM_004822  | 539.84    | 273.453   | AF070586  | 5322.562  | 6457.907  | NM_005450 | 936.41    | 1550.042  |
| AK022349   | 4568.524  | 2955.704  | NM_014412 | 1265.668  | 1516.079  | AK023600  | 457.301   | 868.068   |
| NM_005750  | 619.928   | 324.2     | NM_013303 | 2857.537  | 2498.379  | Z83952    | 263.153   | 687.136   |
| NM_004973  | 4695.822  | 2942.489  | NM_012227 | 2838.506  | 3903.281  | NM_005525 | 256.184   | 570.971   |
| NM_007245  | 8054.03   | 4496.909  | NM_006101 | 6165.953  | 4630.285  | NM_005285 | 1049.831  | 1472.442  |
| NM_014648  | 864.793   | 3801.005  | NM_001237 | 7958.066  | 7070.175  | AK001918  | 436.293   | 898.871   |
| NM_005073  | 482.513   | 2078.731  | NM_002507 | 2209.828  | 1616.15   | NM_018635 | 15232.158 | 18454.449 |
| NM_000951  | 3071.93   | 13271.774 | NM_015962 | 2570.269  | 2182.092  | AF086048  | 2871.242  | 3413.796  |
| X52599     | 367.729   | 1382.562  | NM_016145 | 1691.025  | 633.123   | L15616    | 2882.561  | 3968.629  |

|           |           |           |           |           |           |            |           |           |
|-----------|-----------|-----------|-----------|-----------|-----------|------------|-----------|-----------|
| AK000158  | 3022.353  | 3530.24   | NM_016078 | 4897.114  | 3777.16   | AB019565   | 5004.053  | 4918.415  |
| NM_005769 | 332.976   | 321.098   | NM_003798 | 703.199   | 282.193   | D16914     | 51871.883 | 72160.5   |
| AK024500  | 6285.32   | 5473.903  | NM_004401 | 1925.326  | 1441.244  | AA084879   | 679.044   | 1029.185  |
| NM_002564 | 2038.172  | 2078.549  | NM_001849 | 7022.196  | 6802.663  | NM_000283  | 2346.188  | 4102.787  |
| NM_000963 | 1376.678  | 3065.699  | AF255910  | 989.481   | 703.453   | NM_012460  | 1380.8    | 1935.755  |
| NM_013308 | 2144.448  | 4134.127  | NM_016146 | 4942.078  | 3847.831  | NM_012118  | 2218.352  | 2824.56   |
| AF027302  | 3202.905  | 2929.843  | AK024343  | 2940.391  | 3120.123  | AK001133   | 268.374   | 385.284   |
| NM_002852 | 2116.349  | 2428.386  | NM_001936 | 1079.234  | 1418.397  | AK024092   | 1658.929  | 3036.906  |
| NM_001817 | 2637.393  | 2177.267  | NM_002569 | 916.827   | 1182.574  | AK022226   | 176.036   | 399.832   |
| AF063611  | 968.199   | 882.522   | D42084    | 3836.031  | 5669.991  | AK002044   | 1645.837  | 2602.503  |
| NM_006039 | 481.657   | 265.314   | NM_001734 | 284.962   | 978.368   | AK022206   | 441.556   | 836.563   |
| NM_002089 | 308.314   | 295.468   | NM_014693 | 1269.133  | 1787.872  | U90904     | 3015.473  | 5487.142  |
| NM_014656 | 2613.218  | 1436.462  | AB007896  | 1117.156  | 1270.604  | AF088053   | 2171.46   | 3707.836  |
| NM_002076 | 3560.971  | 1945.443  | AB007916  | 8882.793  | 13004.827 | AL133662   | 433.886   | 534.01    |
| BM468475  | 1311.344  | 4535.391  | NM_002874 | 678.771   | 840.121   | NM_002565  | 412.171   | 464.548   |
| NM_000318 | 6023.416  | 17036.363 | AF049140  | 3300.958  | 2385.34   | U90903     | 343.83    | 387.031   |
| NM_002060 | 3567.613  | 11528.741 | AL136794  | 1809.398  | 1727.954  | AF278760   | 577.694   | 511.649   |
| AK001230  | 1547.778  | 5350.102  | BC035601  | 48687.344 | 41786.973 | X58061     | 371.437   | 423.692   |
| NM_014680 | 5010.922  | 12682.091 | NM_001458 | 1993.841  | 1897.414  | AB032954   | 1674.868  | 1860.859  |
| NM_006224 | 39847.488 | 41224.598 | NM_020388 | 6774.503  | 4812.358  | NM_006003  | 15361.403 | 12766.395 |
| NM_000229 | 2702.879  | 2790.169  | AB046829  | 1982.883  | 1420.299  | AL110197   | 2513.8    | 2312.362  |
| NM_003129 | 18411.281 | 16193.208 | NM_016445 | 690.4     | 406.218   | AF085995   | 489.6     | 382.491   |
| NM_001956 | 1802.735  | 2150.945  | NM_003379 | 21391.547 | 13043.45  | CY3Cy5     | 801.765   | 323.489   |
| AB033064  | 1911.811  | 2010.109  | NM_004521 | 7551.639  | 3336.472  | AA029300   | 1214.152  | 3864.975  |
| AK022317  | 4220.68   | 4803.009  | AF229162  | 1696.72   | 1143.445  | BG708842   | 9770.054  | 24688.268 |
| NM_003124 | 3055.141  | 2870.097  | U02309    | 44436.996 | 40434.531 | M19723     | 33111.809 | 55928.816 |
| NM_002558 | 612.255   | 333.882   | NM_005257 | 10463.32  | 12273.938 | X06256     | 898.795   | 1423.516  |
| NM_005031 | 4541.901  | 3337.343  | AF011573  | 6740.26   | 9053.189  | AA149811   | 322.97    | 175.484   |
| AB040920  | 996.565   | 807.863   | NM_002145 | 4118.609  | 4744.504  | ID 1984668 | 449.742   | 787.455   |
| NM_000720 | 912.208   | 757.57    | NM_003923 | 251.856   | 623.209   | ID 1832579 | 452.212   | 223.513   |
| NM_004842 | 1835.059  | 1458.76   | NM_004831 | 784.56    | 1808.366  | H-430185 N | 353.553   | 272.35    |
| AK024639  | 2509.126  | 1179.83   | NM_014213 | 7294.95   | 8303.844  | D16583     | 428.411   | 224.916   |
| NM_015720 | 2369.399  | 1078.764  | NM_000168 | 3209.276  | 4288.416  | AA481547   | 5106.165  | 1670.815  |
| AB033070  | 1015.364  | 1090.824  | AF294629  | 3800.445  | 4799.171  | AA831880   | 242.571   | 331.407   |
| NM_018229 | 2873.255  | 9057.228  | NM_000545 | 7747.269  | 9358.856  | T64880     | 525.921   | 287.682   |
| AY009127  | 13054.162 | 38240.664 | NM_002136 | 44470.121 | 49596.965 | NM_020967  | 335.478   | 180.624   |
| NM_014869 | 1158.599  | 2506.963  | AK025571  | 1806.786  | 1882.562  | NM_001071  | 17207.971 | 5025.51   |
| AB037835  | 1238.181  | 1679.244  | NM_004940 | 636.805   | 683.498   | SR2        | 23890.986 | 6625.277  |
| NM_000157 | 3789.931  | 3945.938  | NM_014463 | 40537.723 | 30134.559 | SR4        | 4920.282  | 1196.106  |
| NM_000712 | 14683.023 | 15249.354 | NM_005520 | 13664.728 | 13205.988 | SR6        | 678.832   | 265.702   |
| NM_018088 | 702.484   | 732.125   | AK023265  | 2171.967  | 2446.042  | SR8        | 3139.861  | 1984.959  |
| M24750    | 1848.529  | 1600.12   | NM_018723 | 708.089   | 604.184   | SR10       | 10282.909 | 1254.243  |
| NM_005965 | 1496.855  | 1483.396  | AB029009  | 1462.316  | 1291.233  | CY3Cy5     | 383.152   | 293.265   |
| NM_002740 | 2466.174  | 2119.86   | AF112207  | 1841.947  | 1356.517  | NM_005027  | 486.739   | 2303.615  |
| AL117482  | 3375.39   | 2180.122  | NM_005594 | 33553.148 | 20609.455 | NM_004612  | 687.301   | 2767.996  |
| NM_006549 | 16316.722 | 11225.712 | NM_004461 | 50618.578 | 40235.602 | NM_005608  | 7888.839  | 28929.16  |
| AB018324  | 7878.086  | 4806.064  | NM_018473 | 10358.486 | 5078.599  | NM_001106  | 1115.612  | 2143.706  |
| NM_002742 | 32988.68  | 16499.469 | BF106121  | 1118.463  | 836.154   | NM_015583  | 929.276   | 1399.838  |
| NM_005627 | 2502.971  | 818.205   | AK022590  | 963.072   | 631.041   | NM_018490  | 334.126   | 174.401   |
| NM_003356 | 2772.536  | 9155.569  | AK023719  | 4790.146  | 5984.119  | NM_004778  | 237.876   | 154.61    |
| AF238315  | 526.333   | 1870.42   | AK025590  | 1149.705  | 1532.399  | NM_006245  | 1184.103  | 296.659   |
| NM_014648 | 793.717   | 1285.579  | AY007149  | 3683.492  | 3615.202  | NM_004822  | 225.604   | 275.071   |
| NM_005073 | 372.682   | 450.298   | M12078    | 1237.394  | 2076.268  | AK022349   | 1584.252  | 491.223   |

|            |           |           |           |           |           |           |           |           |
|------------|-----------|-----------|-----------|-----------|-----------|-----------|-----------|-----------|
| NM_000951  | 2049.15   | 3145.659  | NM_004550 | 7180.588  | 9338.575  | NM_004973 | 1639.386  | 684.712   |
| AA029300   | 2403.52   | 3417.773  | NM_000785 | 1169.796  | 2000.869  | NM_007245 | 2514.527  | 842.953   |
| BG708842   | 16611.82  | 17152.672 | NM_004110 | 9204.942  | 9351.454  | NM_001890 | 261.183   | 224.711   |
| M19723     | 43965.996 | 42160.418 | NM_013387 | 44492.344 | 50088.852 | NM_001286 | 867.327   | 362.132   |
| X06256     | 1690.069  | 2123.296  | NM_005262 | 12720.21  | 13017.607 | NM_014645 | 348.404   | 161.288   |
| M34057     | 427.142   | 459.859   | NM_005757 | 1469.845  | 1399.508  | NM_000951 | 871.768   | 738.705   |
| ID 1984668 | 1498.915  | 4505.55   | NM_016483 | 360.75    | 542.235   | X52599    | 291.309   | 740.917   |
| ID 1832579 | 1553.092  | 1218.967  | NM_020125 | 1117.052  | 825.509   | AK000158  | 2219.83   | 8804.432  |
| H-430185 N | 1306.613  | 1239.456  | NM_005065 | 4866.792  | 4424.72   | NM_005765 | 352.165   | 2170.862  |
| D16583     | 1282.865  | 1017.698  | NM_018223 | 1892.858  | 2564.311  | AK024500  | 4226.584  | 12872.12  |
| AA481547   | 11942.507 | 9318.355  | NM_006693 | 9813.916  | 9022.184  | NM_002564 | 1805.005  | 2699.953  |
| AA831880   | 630.701   | 324.407   | NM_001722 | 1854.737  | 1681.873  | NM_001884 | 298.712   | 205.998   |
| T64880     | 1479.158  | 1162      | AB046802  | 2733.406  | 1904.497  | NM_000963 | 384.165   | 534.464   |
| NM_020967  | 1002.573  | 569.349   | NM_003297 | 798.078   | 844.991   | NM_013305 | 533.77    | 234.748   |
| NM_001071  | 29543.766 | 12571.239 | X74861    | 370.266   | 723.846   | AF027302  | 829.013   | 368.302   |
| AB028990   | 1372.137  | 2971.724  | NM_018269 | 5223.184  | 2956.615  | NM_002852 | 683.422   | 410.983   |
| AK002089   | 397.295   | 1770.565  | AK024633  | 3471.016  | 2568.577  | NM_001817 | 1111.276  | 521.802   |
| X05299     | 5129.199  | 5580.012  | NM_001453 | 3371.658  | 2523.001  | AF063611  | 345.084   | 285.969   |
| BM468475   | 975.991   | 1206.385  | NM_012075 | 1489.608  | 1602.208  | NM_006035 | 263.642   | 228.657   |
| NM_000315  | 5001.507  | 4019.898  | AB004851  | 1007.918  | 1270.107  | NM_002085 | 219.629   | 224.247   |
| NM_002060  | 2417.535  | 2478.57   | NM_013381 | 427.765   | 926.592   | NM_014655 | 1419.683  | 584.891   |
| AK001230   | 1311.531  | 1715.92   | AK023911  | 9316.771  | 11307.988 | NM_002075 | 1331.288  | 415.942   |
| NM_014680  | 3852.673  | 4765.019  | NM_001283 | 2162.595  | 3500.916  | X05299    | 1736.325  | 385.936   |
| NM_005027  | 766.911   | 1049.459  | AL110237  | 1041.495  | 1624.897  | BM468475  | 363.347   | 145.433   |
| NM_004612  | 1234.944  | 1806.582  | D87470    | 1639.875  | 2261.611  | NM_000315 | 1979.121  | 408.712   |
| NM_005605  | 12225.923 | 15126.056 | AF147307  | 8316.075  | 8880.69   | NM_002060 | 1913.836  | 970.446   |
| NM_001106  | 1580.231  | 2118.881  | AK001829  | 2196.796  | 4846.527  | AK001230  | 835.572   | 1297.308  |
| NM_015583  | 1981.247  | 1727.12   | NM_016525 | 2982.219  | 4633.703  | NM_014680 | 2911.35   | 11185.362 |
| NM_018490  | 577.984   | 585.545   | AK024931  | 14822.158 | 13075.052 | NM_000225 | 1566.625  | 7082.609  |
| NM_004775  | 431.271   | 486.006   | AL109715  | 612.518   | 720.977   | NM_001955 | 868.498   | 1532.635  |
| NM_006245  | 4235.877  | 3139.753  | AF086181  | 746.149   | 691.391   | AB033064  | 1029.172  | 1132.02   |
| NM_004822  | 379.121   | 305.226   | AK021540  | 656.958   | 521.189   | AK022317  | 1524.292  | 521.211   |
| AK022349   | 4429.792  | 2152.287  | D86985    | 378.067   | 418.664   | NM_018395 | 3025.622  | 819.503   |
| NM_005750  | 548.858   | 286.431   | AK022258  | 859.381   | 762.364   | NM_003124 | 998.52    | 372.154   |
| NM_004973  | 3864.302  | 1834.497  | AF131799  | 480.551   | 430.01    | NM_006885 | 29956.186 | 4137.232  |
| NM_007245  | 7601.186  | 2555.801  | AK000455  | 1649.634  | 752.739   | NM_004531 | 3094.103  | 1193.661  |
| NM_001890  | 473.925   | 197.042   | NM_005230 | 773.299   | 726.955   | AL133581  | 1015.479  | 298.812   |
| NM_001286  | 3390.221  | 5348.158  | AL365407  | 1219.834  | 1311.793  | NM_002555 | 283.127   | 274.184   |
| AB007915   | 1225.051  | 1340.001  | AK000840  | 12500.546 | 14950.07  | NM_005031 | 1829.854  | 676.59    |
| AB033070   | 548.172   | 502.193   | AL162073  | 1571.394  | 2335.228  | AB040920  | 347.626   | 336.264   |
| NM_018225  | 1994.73   | 2426.004  | AL390160  | 1296.733  | 1754.588  | NM_000720 | 413.452   | 290.977   |
| NM_006325  | 4818.541  | 6491.792  | AJ006835  | 2172.483  | 4337.423  | NM_004842 | 692.887   | 600.208   |
| AY009127   | 11871.766 | 17451.162 | AF085890  | 663.098   | 1871.185  | AK024639  | 932.045   | 371.409   |
| NM_014865  | 1128.439  | 1426.761  | AL110138  | 1097.001  | 1511.672  | NM_015720 | 854.541   | 400.33    |
| AK000158   | 2686.181  | 3053.579  | AL122039  | 591.073   | 641.607   | AB007915  | 378.216   | 199.371   |
| AK024500   | 5745.252  | 5067.661  | AF070577  | 10577.909 | 9461.981  | AB033070  | 320.666   | 120.782   |
| NM_002564  | 1808.778  | 2163.848  | AL157484  | 11560.195 | 9058.818  | NM_018225 | 760.441   | 263.273   |
| NM_000963  | 1479.817  | 2550.598  | AK024850  | 979.31    | 808.542   | AY009127  | 8264.355  | 28444.637 |
| NM_013305  | 2091.854  | 2603.528  | Y09836    | 1003.802  | 703.636   | NM_014865 | 753.744   | 2785.31   |
| AF027302   | 2910.207  | 2788.641  | AL137597  | 2938.093  | 2040.866  | NM_006705 | 12474.132 | 25348.668 |
| NM_002852  | 2003.463  | 1686.213  | AK022144  | 2015.35   | 1234.427  | AB037835  | 914.861   | 3392.132  |
| NM_001817  | 2880.71   | 2068.069  | AF086044  | 638.932   | 412.654   | NM_000712 | 9736.554  | 18905.551 |
| AF063611   | 853.982   | 629.286   | AF131790  | 706.536   | 470.591   | NM_018085 | 392.087   | 322.125   |

|           |           |           |           |           |           |            |           |          |
|-----------|-----------|-----------|-----------|-----------|-----------|------------|-----------|----------|
| NM_006039 | 514.897   | 274.105   | AJ011378  | 868.615   | 1305.933  | BC013695   | 4554.878  | 918.526  |
| NM_014656 | 2793.51   | 1586.591  | AF009266  | 799.237   | 1136.941  | AK023035   | 1287.997  | 910.796  |
| NM_002076 | 3311.081  | 864.451   | AF009310  | 896.59    | 1898.159  | NM_014846  | 1403.674  | 348.37   |
| Z25431    | 2697.265  | 3535.184  | AF054991  | 799.3     | 1414.344  | AB011164   | 1272.589  | 505.62   |
| NM_005627 | 3153.898  | 5483.289  | AF060168  | 1658.988  | 2487.856  | M24750     | 684.878   | 393.334  |
| M64497    | 1526.887  | 1215.398  | AF009275  | 1259.665  | 2023.577  | NM_005965  | 623.31    | 473.823  |
| NM_007274 | 9799.588  | 9839.654  | AF015251  | 770.742   | 1077.273  | NM_002740  | 901.138   | 341.214  |
| NM_003356 | 1729.45   | 1911.497  | AF056426  | 1397.588  | 2144.566  | AL117482   | 1386.965  | 507.93   |
| NM_006224 | 34222.348 | 31062.459 | AF064850  | 302.945   | 761.714   | NM_006546  | 8855.532  | 2389.372 |
| AL137300  | 3303.388  | 4293.325  | AK001096  | 506.196   | 793.456   | AB018324   | 4166.441  | 994.771  |
| NM_000229 | 2419.06   | 2807.466  | NM_018329 | 1169.344  | 1747.108  | NM_002742  | 22623.549 | 5718.698 |
| NM_006995 | 20757.074 | 22514.773 | AK021778  | 698.201   | 824.775   | Z25431     | 998.979   | 325.695  |
| NM_003129 | 17595.6   | 15459.996 | AK001150  | 4299.614  | 3779.823  | NM_005627  | 1211.036  | 467.434  |
| NM_001956 | 1614.082  | 1939.098  | AK002123  | 671.362   | 671.117   | M64497     | 662.474   | 196.973  |
| AB033064  | 1829.105  | 1707.209  | AK021633  | 1878.861  | 2004.625  | NM_003356  | 1954.848  | 6877.208 |
| AK022317  | 4431.336  | 3569.661  | AK025659  | 1764.24   | 1668.318  | AF238315   | 216.135   | 1272.676 |
| NM_018396 | 8864.323  | 8177.845  | AK026407  | 548.132   | 321.712   | NM_014646  | 335.572   | 1539.927 |
| NM_003124 | 2816.021  | 2451.902  | AK026788  | 1812.673  | 1505.579  | NM_019604  | 135.745   | 391.94   |
| NM_006886 | 45843.809 | 54963.938 | AK025272  | 787.652   | 621.162   | NM_000951  | 1201.722  | 3353.063 |
| NM_004531 | 7885.385  | 9120.358  | AK026824  | 694.946   | 547.221   | X52599     | 283.043   | 574.018  |
| AL133581  | 2544.363  | 1584.087  | AJ008130  | 32423.318 | 33615.039 | AA029300   | 1271.279  | 2733.355 |
| NM_002556 | 639.754   | 601.808   | NM_003669 | 484.688   | 801.92    | BG708842   | 7193.246  | 2479.532 |
| NM_005031 | 5117.515  | 3308.652  | AF086502  | 3204.12   | 4273.715  | M19723     | 25699.861 | 7802.505 |
| AB040920  | 664.058   | 522.313   | L39924    | 1284.313  | 1860.627  | X06256     | 593.526   | 276.299  |
| NM_000720 | 770.09    | 419.237   | U52054    | 7734.251  | 8565.622  | AA709271   | 274.867   | 183.434  |
| NM_004842 | 1571.805  | 1142.335  | D17226    | 266.384   | 1293.712  | M34057     | 265.702   | 148.14   |
| AK024639  | 2758.415  | 1772.941  | AK023325  | 1531.429  | 3361.478  | ID 1984668 | 645.41    | 925.367  |
| NM_015720 | 2739.374  | 1656.022  | NM_017985 | 2053.545  | 3711.351  | ID 1832579 | 556.605   | 338.268  |
| NM_020967 | 1163.457  | 1236.44   | AK025866  | 2063.44   | 4364.763  | H-430185 N | 465.942   | 217.029  |
| NM_001071 | 36760.465 | 38780.676 | AF088058  | 9069.657  | 12933.457 | D16583     | 514.069   | 288.402  |
| AB028990  | 1051.722  | 1302.461  | NM_000513 | 1754.541  | 2596.344  | H44051     | 172.289   | 184.289  |
| NM_006706 | 18457.367 | 23227.215 | Y11165    | 1992.046  | 2859.795  | AA481547   | 4916.31   | 1308.498 |
| AB037835  | 1269.031  | 1429.862  | BC028422  | 586.637   | 432.367   | AA831880   | 275.849   | 108.296  |
| NM_016226 | 1262.73   | 1244.914  | AK022219  | 420.03    | 385.242   | T64880     | 447.038   | 272.82   |
| NM_000157 | 3770.972  | 4163.91   | NM_003545 | 832.601   | 1253.696  | NM_020967  | 324.08    | 182.438  |
| NM_000712 | 15364.861 | 15060.567 | AK024413  | 1661.647  | 2601.207  | NM_001071  | 17965.418 | 4807.44  |
| NM_018086 | 764.142   | 816.998   | AL137752  | 357.952   | 778.281   | AB028990   | 525.189   | 1534.262 |
| BC013695  | 12348.561 | 9108.925  | AK022247  | 1388.592  | 2171.071  | AK002089   | 124.957   | 800.621  |
| AK023035  | 4185.428  | 3901.902  | AK001453  | 3959.617  | 7752.167  | X05299     | 2476.502  | 8033.398 |
| NM_014846 | 4417.09   | 3984.553  | AB007972  | 4682.034  | 7860.71   | BM468475   | 521.068   | 1438.172 |
| AB011164  | 3410.121  | 2894.436  | AL390144  | 15078.61  | 23266.807 | NM_000316  | 2646.127  | 2601.382 |
| M24750    | 1824.618  | 1360.187  | AK024017  | 1630.86   | 2608.996  | NM_002060  | 2185.839  | 1797.693 |
| NM_005965 | 1191.047  | 942.531   | X56196    | 794.979   | 1448.102  | AK001230   | 802.869   | 2082.548 |
| NM_002740 | 2278.091  | 1577.633  | D17220    | 8015.587  | 11897.429 | NM_014680  | 1741.459  | 1301.053 |
| AL117482  | 2652.376  | 1569.942  | D28363    | 51811.543 | 62270.527 | NM_005027  | 389.592   | 622.382  |
| NM_006546 | 17100.592 | 8930.705  | AB011171  | 1430.48   | 2214.688  | NM_004612  | 384.209   | 169.915  |
| AB018324  | 7620.492  | 5187.501  | AF090099  | 293.851   | 555.361   | NM_005606  | 4375.878  | 1031.791 |
| NM_002742 | 35533.531 | 25734.572 | AF189251  | 468.158   | 757.128   | NM_001106  | 641.132   | 467.007  |
| NM_005750 | 672.388   | 718.532   | NM_005322 | 3557.411  | 3915.003  | NM_015583  | 612.119   | 449.535  |
| NM_004973 | 4254.23   | 5237.369  | AK024465  | 1494.453  | 1675.127  | NM_018490  | 357.546   | 294.81   |
| NM_007245 | 7940.171  | 8818.564  | AK021478  | 4076.464  | 3938.958  | NM_004776  | 259.276   | 204.394  |
| NM_001890 | 480.264   | 565.465   | AF131782  | 1809.049  | 1594.579  | NM_006245  | 1559.169  | 491.269  |
| NM_001286 | 2269.665  | 2778.508  | NM_014210 | 2154.765  | 2218.922  | NM_004822  | 260.067   | 167.496  |

|            |           |           |           |           |           |           |           |           |
|------------|-----------|-----------|-----------|-----------|-----------|-----------|-----------|-----------|
| NM_01464E  | 781.142   | 1243.681  | AK021603  | 4161.706  | 2831.603  | AK022349  | 1723.088  | 479.969   |
| NM_019604  | 239.583   | 145.758   | AL110136  | 2727.854  | 2471.162  | NM_00575C | 275.876   | 90.896    |
| NM_005073  | 433.08    | 409.725   | AK002203  | 610.012   | 1063.213  | NM_004973 | 1844.042  | 750.023   |
| NM_000951  | 2225.826  | 3184.025  | AK026469  | 9161.96   | 9933.697  | NM_00724E | 4553.136  | 10373.792 |
| AA029300   | 2524.002  | 2557.792  | D16935    | 2948.802  | 5140.195  | NM_00189C | 311.617   | 1457.019  |
| BG708842   | 17273.908 | 16290.795 | U92019    | 925.752   | 1755.13   | NM_00128E | 1283.691  | 3310.741  |
| M19723     | 41267.477 | 30995.295 | U52835    | 3327.87   | 5540.869  | AB033070  | 308.888   | 705.81    |
| X06256     | 1923.329  | 1703.642  | NM_00075E | 2626.153  | 3781.971  | NM_01822E | 1066.283  | 1239.367  |
| M34057     | 497.393   | 321.652   | AK022148  | 1363.542  | 2082.517  | AY009127  | 6335.846  | 11524.947 |
| ID 1984668 | 1631.227  | 3809.766  | Z36811    | 53349.203 | 64430.277 | NM_01486E | 594.367   | 757.693   |
| ID 1832579 | 1559.644  | 1364.613  | NM_01895C | 14194.029 | 14509.833 | AK000158  | 1179.802  | 451.708   |
| H-430185 N | 1284.419  | 958.211   | K03200    | 5998.339  | 8483.744  | NM_00576E | 220.886   | 185.229   |
| D16583     | 1622.223  | 728.105   | U17629    | 2754.866  | 4418.027  | AK024500  | 2659.801  | 1440.656  |
| AA481547   | 10316.785 | 7381.936  | NM_02042E | 3968.712  | 5037.964  | NM_002564 | 1340.798  | 1240.88   |
| AA831880   | 570.134   | 554.002   | U79265    | 1615.496  | 1809.978  | NM_000963 | 649.198   | 499.088   |
| T64880     | 1251.573  | 1018.944  | AK022868  | 5204.425  | 4371.726  | NM_01330E | 705.609   | 424.921   |
| NM_00603E  | 594.524   | 579.632   | NM_00353C | 520.692   | 770.32    | AF027302  | 1121.534  | 365.897   |
| NM_01465E  | 2669.72   | 3372.59   | AJ227871  | 1490.306  | 1007.426  | NM_002852 | 869.261   | 347.784   |
| NM_00207E  | 2779.758  | 3389.174  | AK025344  | 1970.877  | 2143.627  | NM_001817 | 1153.534  | 506.793   |
| X05299     | 4981.413  | 5560.295  | D28589    | 29715.619 | 15842.805 | AF063611  | 401.114   | 184.787   |
| BM468475   | 879.108   | 926.643   | AF301223  | 564.278   | 730.803   | NM_00603E | 354.441   | 169.987   |
| NM_00031E  | 4549.592  | 4148.763  | NM_017867 | 34489.004 | 18182.975 | NM_01465E | 1619.988  | 4746.754  |
| NM_00206C  | 2785.161  | 2699.566  | U92820    | 4091.671  | 3687.379  | NM_00207E | 1763.618  | 3494.496  |
| AK001230   | 1275.428  | 1706.114  | NM_017937 | 1979.534  | 1366.112  | NM_005627 | 1496.96   | 4303.209  |
| NM_01468C  | 3933.603  | 3969.647  | AL360266  | 1997.465  | 1763.53   | M64497    | 1053.087  | 2002.466  |
| NM_005027  | 720.562   | 915.337   | AL160132  | 30924.457 | 34386.008 | NM_00335E | 1668.529  | 1034.543  |
| NM_004612  | 1338.398  | 1242.477  | NM_019557 | 3767.422  | 4340.193  | AF238315  | 242.171   | 449.687   |
| NM_00560E  | 12363.951 | 12576.377 | CY3Cy5    | 1594.49   | 162.5     | NM_006224 | 16335.626 | 10140.446 |
| NM_001106  | 1581.879  | 1891.356  | AA150828  | 582.815   | 476.398   | AL137300  | 1230.349  | 713.989   |
| NM_015583  | 1996.65   | 1338.921  | H64379    | 3865.695  | 2449.199  | NM_00022E | 815.371   | 431.96    |
| NM_01849C  | 831.678   | 515.045   | BE208258  | 59938.098 | 47344.656 | NM_00699E | 7478.334  | 2490.451  |
| NM_00477E  | 417.136   | 453.654   | T72202    | 464.251   | 381.158   | NM_00312E | 7010.94   | 3908.033  |
| NM_00624E  | 4362.834  | 3124.542  | BI831922  | 1291.471  | 1304.708  | NM_00195E | 631.454   | 933.611   |
| NM_005103  | 244.073   | 258.135   | M69238    | 822.696   | 660.367   | AB033064  | 803.201   | 294.642   |
| AK022349   | 3761.988  | 1274.943  | AA599158  | 4013.668  | 6905.799  | AK022317  | 1697.417  | 563.88    |
| NM_005031  | 4870.761  | 6324.914  | NM_002711 | 769.621   | 1500.043  | NM_01839E | 4120.699  | 1504.636  |
| AB040920   | 628.437   | 1003.01   | SR5       | 4162.161  | 5585.036  | NM_003124 | 1564.272  | 752.324   |
| NM_00072C  | 899.004   | 788.661   | SR7       | 3609.18   | 38351.992 | NM_00688E | 34094.844 | 11293.819 |
| NM_004842  | 1909.513  | 1900.395  | SR9       | 12617.749 | 3839.161  | NM_004531 | 3664.194  | 2101.384  |
| AK024639   | 2468.416  | 2545.931  | CY3Cy5    | 2534.466  | 195.965   | AL133581  | 1123.684  | 473.485   |
| NM_01572C  | 1733.938  | 2127.194  | NM_005261 | 429.379   | 294.589   | NM_00255E | 307.793   | 238.296   |
| AB007915   | 1158.098  | 1604.865  | NM_00156C | 252.273   | 250.989   | NM_005031 | 2604.472  | 2054.205  |
| AB033070   | 552.756   | 655.425   | NM_001783 | 8291.777  | 6083.208  | AB040920  | 447.014   | 784.411   |
| NM_01822E  | 1943.047  | 2040.356  | J03171    | 3308.055  | 2364.611  | NM_00072C | 536.446   | 623.835   |
| NM_00632E  | 4849.975  | 5740.036  | NM_004323 | 9995.645  | 5859.77   | NM_004842 | 1052.692  | 3267.527  |
| AY009127   | 11427.203 | 15514.972 | NM_005312 | 958.674   | 917.453   | AK024639  | 1705.962  | 4105.091  |
| NM_01486E  | 950.379   | 1208.237  | NM_001711 | 738.183   | 546.699   | NM_01572C | 1397.884  | 3577.04   |
| AK000158   | 2774.342  | 2105.619  | NM_00421C | 8609.99   | 6933.685  | NM_020967 | 573.907   | 1198.723  |
| NM_00576E  | 305.474   | 226.695   | NM_02014C | 1423.263  | 1551.701  | NM_001071 | 12485.006 | 13855.727 |
| AK024500   | 5393.31   | 4575.206  | NM_00250C | 789.567   | 1110.261  | AB028990  | 413.599   | 269.536   |
| NM_002564  | 1962.03   | 1713.054  | AK026232  | 2818.873  | 5775.445  | NM_00670E | 8626.388  | 4428.825  |
| NM_000963  | 1521.254  | 2290.585  | AK023827  | 1814.151  | 4266.243  | AB037835  | 483.061   | 291.152   |
| NM_01330E  | 1832.165  | 2318.609  | NM_001117 | 400.438   | 577.27    | NM_01622E | 496.376   | 405       |

|           |           |           |           |           |           |            |           |           |
|-----------|-----------|-----------|-----------|-----------|-----------|------------|-----------|-----------|
| AF027302  | 2654.772  | 2630.282  | NM_000231 | 1002.752  | 1220.99   | NM_000157  | 1770.56   | 1979.575  |
| NM_002852 | 2079.66   | 1474.423  | L07517    | 1268.343  | 2577.688  | NM_000712  | 6874.003  | 2897.287  |
| NM_001817 | 2659.86   | 1960.767  | AK022451  | 976.534   | 2530.332  | NM_01808E  | 2212.979  | 1002.486  |
| AF063611  | 610.484   | 374.245   | NM_014359 | 62667.77  | 75051.547 | BC013695   | 5837.891  | 2413.356  |
| NM_00596E | 1064.336  | 1510.442  | BM918441  | 745.797   | 1282.206  | AK023035   | 1848.895  | 954.586   |
| NM_00274C | 2510.479  | 3081.54   | NM_00104E | 4956.145  | 4175.673  | NM_01484E  | 1989.107  | 1155.613  |
| AL117482  | 3212.103  | 3052.256  | NM_005697 | 4306.18   | 3421.211  | AB011164   | 1732.697  | 1430.691  |
| NM_00654E | 17173.271 | 15601.563 | NM_003099 | 4058.848  | 4320.044  | M24750     | 974.968   | 1229.076  |
| AB018324  | 8692.438  | 9650.696  | NM_004781 | 1052.179  | 824.579   | NM_00596E  | 782.832   | 1004.53   |
| NM_002742 | 33328.75  | 33892.363 | NM_018303 | 1716.564  | 1330.733  | NM_00274C  | 1416.462  | 1387.061  |
| Z25431    | 2669.807  | 3490.201  | NM_01475E | 3223.385  | 2331.916  | AL117482   | 1796.573  | 1331.847  |
| NM_005627 | 3261.633  | 4704.292  | AL133047  | 362.895   | 181.376   | NM_00654E  | 12202.631 | 18915.508 |
| M64497    | 1457.05   | 1200.676  | NM_005124 | 1934.911  | 1348.816  | AB018324   | 5517.555  | 13975.895 |
| NM_007274 | 10297.17  | 10976.919 | AK000947  | 1609.992  | 1461.238  | NM_002742  | 30816.834 | 52199.48  |
| NM_00335E | 1625.208  | 1891.198  | L08240    | 950.675   | 736.496   | NM_00575C  | 251.034   | 156.046   |
| AF238315  | 390.51    | 415.441   | NM_017952 | 769.588   | 769.572   | NM_004973  | 1414.947  | 1137.473  |
| NM_006224 | 37283.121 | 28427.729 | NM_016081 | 6280.171  | 10174.782 | NM_00724E  | 3693.805  | 3174.416  |
| AL137300  | 3095.484  | 3413.145  | NM_006389 | 1928.436  | 4243.138  | NM_00189C  | 284.462   | 371.284   |
| NM_00022E | 2430.702  | 2284.453  | M30818    | 407.832   | 498.975   | NM_00128E  | 808.758   | 481.184   |
| NM_00699E | 20923.203 | 19161.109 | NM_01433C | 21717.266 | 44267.098 | NM_01464E  | 250.794   | 258.312   |
| NM_00312E | 17083.598 | 15662.317 | NM_007034 | 414.709   | 1274.745  | NM_005073  | 209.428   | 167.72    |
| NM_00195E | 2098.193  | 2250.235  | NM_007214 | 6068.54   | 4772.596  | NM_000951  | 739.73    | 994.402   |
| AB033064  | 1761.051  | 1483.935  | NM_000311 | 6303.305  | 5334.028  | X52599     | 319.232   | 244.137   |
| AK022317  | 4100.044  | 3955.16   | NM_017909 | 2169.585  | 1549.585  | AA029300   | 815.959   | 949.117   |
| NM_01839E | 8721.307  | 7678.736  | NM_00633E | 8524.479  | 6476.361  | BG708842   | 6690.751  | 2970.307  |
| NM_003124 | 2716.28   | 2178.625  | NM_00078E | 244.827   | 183.615   | M19723     | 28597.658 | 8924.275  |
| NM_004531 | 7726.254  | 7460.959  | AB040891  | 1993.87   | 1485.666  | X06256     | 814.854   | 619.06    |
| NM_00255E | 592.415   | 729.187   | AB037780  | 654.157   | 664.452   | AA709271   | 160.837   | 164.325   |
| NM_00358E | 752.285   | 1287.193  | NM_016209 | 7373.176  | 8501.942  | M34057     | 349.044   | 349.114   |
| NM_000922 | 3652.299  | 4022.48   | AK075415  | 1250.705  | 1219.125  | ID 1984668 | 743.212   | 2982.739  |
| NM_013232 | 2531.237  | 2584.236  | AK025616  | 310.306   | 726.52    | ID 1832579 | 871.604   | 1012.36   |
| NM_000362 | 586.243   | 515.086   | NM_018964 | 3431.249  | 5135.188  | H-430185 N | 634.269   | 863.763   |
| NM_01442E | 2511.58   | 2119.569  | NM_00008C | 808.329   | 1129.223  | D16583     | 684.438   | 581.367   |
| AK000770  | 835.483   | 1290.772  | NM_00725E | 388.007   | 637.269   | AA481547   | 6711.135  | 11504.896 |
| NM_00237C | 24225.023 | 26563.271 | AF283645  | 2175.139  | 3641.066  | AA831880   | 356.192   | 1048.901  |
| NM_01567C | 3548.647  | 4135.537  | NM_01657E | 2345.498  | 4158.711  | T64880     | 664.305   | 1816.588  |
| NM_01470E | 1252.108  | 1327.168  | NM_003897 | 2046.269  | 1211.998  | NM_00603E  | 186.058   | 205       |
| AB028990  | 1135.472  | 1147.173  | NM_01416E | 9351.095  | 6767.938  | NM_01465E  | 1683.892  | 2719.365  |
| NM_00670E | 18226.568 | 17790.053 | AL442085  | 2383.528  | 1648.437  | NM_00207E  | 1385.128  | 2717.145  |
| AB037835  | 1235.705  | 1319.406  | NM_013313 | 4122.936  | 2738.098  | X05299     | 2042.739  | 3570.58   |
| NM_01622E | 1160.62   | 1631.567  | NM_01473E | 10026.154 | 6876.031  | BM468475   | 420.292   | 880.225   |
| NM_000157 | 3818.7    | 3920.651  | AK023886  | 894.247   | 711.023   | NM_00031E  | 2459.69   | 3913.668  |
| NM_000712 | 14241.773 | 12627.805 | NM_002553 | 1593.392  | 1242.26   | NM_00206C  | 2295.057  | 3213.016  |
| NM_01808E | 693.706   | 585.284   | AJ404615  | 2306.085  | 1840.199  | AK001230   | 662.727   | 1488.516  |
| BC013695  | 11482.386 | 8311.953  | AB007869  | 1600.723  | 1725.636  | NM_01468C  | 2212.896  | 1900.313  |
| NM_01484E | 4544.924  | 3790.967  | AB046844  | 692.99    | 1158.011  | NM_005027  | 443.844   | 662.049   |
| M24750    | 1776.957  | 1184.882  | NM_000302 | 883.01    | 848.72    | NM_004612  | 523.922   | 908.624   |
| AB046776  | 426.954   | 683.952   | NM_01323E | 14218.684 | 16014.023 | NM_00560E  | 7228.46   | 8212.973  |
| NM_002687 | 10783.432 | 9938.754  | NM_01601E | 6607.475  | 6978.125  | NM_00110E  | 990.335   | 1331.031  |
| NM_000627 | 1358.186  | 1155.13   | NM_02012C | 919.831   | 742.543   | NM_01558E  | 905.51    | 1171.83   |
| NM_00003E | 1268.756  | 1024.219  | AK022900  | 603.426   | 724.14    | NM_01849C  | 431.594   | 440.437   |
| NM_00082E | 843.33    | 1280.647  | AB023216  | 305.421   | 518.596   | NM_00477E  | 349.177   | 506.584   |
| NM_00196E | 353.932   | 489.263   | NM_00226E | 25674.754 | 33506.203 | NM_00624E  | 2389.228  | 1580.162  |

|           |           |           |           |           |           |           |           |           |
|-----------|-----------|-----------|-----------|-----------|-----------|-----------|-----------|-----------|
| NM_004334 | 353.859   | 394.047   | NM_014400 | 3893.861  | 8023.971  | NM_004822 | 328.453   | 983.288   |
| NM_003886 | 2023.038  | 3009.775  | AL157492  | 1006.731  | 1678.594  | AK022349  | 2300.517  | 5097.888  |
| NM_005843 | 1457.704  | 2124.083  | AL353957  | 2239.749  | 4947.492  | NM_005031 | 1751.193  | 1121.58   |
| NM_003854 | 511.538   | 454.485   | NM_000231 | 724.238   | 275.459   | AB040920  | 320.308   | 470.947   |
| NM_017980 | 3492.497  | 5962.198  | L07517    | 2017.246  | 1062.518  | NM_000720 | 398.318   | 289.013   |
| NM_001252 | 1399.704  | 989.307   | AK022451  | 781.398   | 710.99    | NM_004842 | 723.979   | 925.791   |
| AF053712  | 665.56    | 755.917   | AA150828  | 592.237   | 329.126   | AK024639  | 757.204   | 640.974   |
| NM_003947 | 611.502   | 890.009   | AI859208  | 317.416   | 208.609   | NM_015720 | 800.931   | 639.704   |
| NM_002821 | 13868.635 | 13691.539 | H64379    | 4139.617  | 2923.78   | AB007915  | 374.275   | 618.993   |
| M96652    | 4883.42   | 5128.231  | BI831922  | 1004.023  | 1220.73   | NM_018229 | 1114.001  | 1397.894  |
| L41690    | 1983.22   | 2001.404  | M69238    | 390.625   | 449.099   | NM_006325 | 3225.472  | 4039.767  |
| NM_018059 | 1568.167  | 669.762   | AA664180  | 334.767   | 341.982   | AY009127  | 6610.031  | 9594.373  |
| NM_000939 | 46367.598 | 46220.836 | NM_002711 | 671.303   | 1072.842  | NM_014869 | 704.513   | 948.682   |
| NM_006514 | 1521.667  | 1066.521  | AK026092  | 2840.519  | 5948.779  | AK000158  | 1967.718  | 2376.28   |
| AF065164  | 1813.894  | 1257.578  | AK001175  | 1010.915  | 2243.336  | NM_005769 | 377.189   | 782.009   |
| AB028991  | 3028.756  | 3724.754  | NM_003329 | 54959.23  | 32149.295 | AK024500  | 4077.404  | 3429.302  |
| AF263547  | 7642.001  | 9716.276  | NM_003299 | 23071.57  | 14114.257 | NM_002564 | 1932.077  | 1934.464  |
| AJ008143  | 2485.78   | 2128.89   | NM_007034 | 423.416   | 310.615   | NM_001884 | 166.864   | 52.251    |
| NM_007144 | 3325.113  | 3439.641  | NM_005261 | 407.212   | 384.632   | NM_000963 | 882.856   | 1289.948  |
| NM_005093 | 329.399   | 261.244   | NM_001783 | 8532.596  | 5072.436  | NM_013308 | 962.726   | 1176.235  |
| NM_004424 | 3450.441  | 3806.083  | J03171    | 2780.357  | 1660.815  | AF027302  | 1397.813  | 1168.75   |
| AL133117  | 2953.146  | 3117.795  | NM_005312 | 762.311   | 1121.641  | NM_002852 | 1451.646  | 1814.494  |
| AB033040  | 1340.967  | 1815.599  | NM_001711 | 543.45    | 605.845   | NM_001817 | 1578.793  | 2237.821  |
| AF070586  | 1364.413  | 1526.419  | NM_004210 | 6769.187  | 7793.861  | AF063611  | 481.501   | 1111.415  |
| NM_014412 | 1326.712  | 1596.283  | NM_020140 | 1288.036  | 1770.561  | NM_005965 | 603.466   | 610.85    |
| NM_013303 | 2981.528  | 3087.537  | NM_001496 | 2969.685  | 2566.584  | NM_002740 | 1221.587  | 878.525   |
| NM_012227 | 4949.029  | 6807.699  | NM_002500 | 646.26    | 915.796   | AL117482  | 1505.942  | 1310.247  |
| NM_006101 | 5755.514  | 6829.56   | AK026232  | 3529.461  | 3876.828  | NM_006549 | 12022.52  | 11601.922 |
| NM_001237 | 8156.117  | 7630.104  | NM_014892 | 11509.028 | 19480.5   | AB018324  | 5451.648  | 7228.573  |
| NM_002507 | 1357.474  | 1518.243  | AK023827  | 2777.508  | 5550.646  | NM_002742 | 25517.307 | 23369.197 |
| NM_015962 | 1657.764  | 2310.856  | NM_001117 | 469.659   | 905.459   | Z25431    | 1205.938  | 1661.704  |
| NM_016145 | 677.485   | 2313.099  | NM_001829 | 1232.395  | 801.287   | NM_005627 | 1644.479  | 2345.203  |
| NM_016078 | 3077.114  | 2475.984  | NM_007256 | 402.451   | 268.146   | M64497    | 751.381   | 619.65    |
| NM_003798 | 547.184   | 532.171   | AF283645  | 2429.974  | 1834.019  | NM_007274 | 5430.6    | 5386.549  |
| NM_004401 | 2452.551  | 1746.301  | NM_016575 | 1573.75   | 1011.559  | NM_003356 | 2303.81   | 2111.702  |
| NM_001849 | 1201.308  | 1222.188  | NM_018557 | 288.353   | 252.171   | AF238315  | 255.416   | 236.025   |
| AF255910  | 498.835   | 346.733   | NM_001045 | 5856.725  | 4587.653  | NM_003129 | 9705.048  | 7776.799  |
| NM_016146 | 5165.153  | 4037.408  | NM_005697 | 4323.243  | 2526.223  | NM_001956 | 1113.043  | 1011.161  |
| AK024343  | 2987.74   | 3126.406  | NM_003099 | 3935.026  | 3115.364  | AB033064  | 1380.811  | 975.772   |
| NM_002569 | 764.943   | 598.898   | NM_004781 | 1031.848  | 747.041   | AK022317  | 2255.451  | 1984.853  |
| D42084    | 4353.442  | 4895.653  | NM_018303 | 1378.148  | 1089.992  | NM_018396 | 4533.071  | 3729.073  |
| NM_001734 | 309.157   | 459.463   | NM_014758 | 3005.343  | 2864.706  | NM_003124 | 1750.933  | 1252.925  |
| NM_014693 | 755.966   | 821.009   | NM_005124 | 1754.316  | 1717.067  | NM_006886 | 36968.148 | 25548.063 |
| AB007896  | 980.316   | 1190.761  | AK000947  | 1580.111  | 2210.501  | NM_004531 | 4255.182  | 4650.434  |
| AB007916  | 9077.711  | 8620.286  | L08240    | 1101.003  | 1174.38   | AL133581  | 1144.515  | 1309.399  |
| NM_002874 | 805.75    | 971.169   | NM_017952 | 589.607   | 472.402   | NM_002558 | 385.369   | 1239.803  |
| AF049140  | 2598.85   | 3032.747  | NM_002940 | 2069.874  | 1587.976  | NM_003586 | 565.815   | 822.115   |
| AL136794  | 2281.125  | 2638.489  | NM_016081 | 5288.346  | 4857.334  | NM_000922 | 2000.728  | 2309.128  |
| BC035601  | 29345.137 | 26010.195 | NM_006389 | 1979.507  | 2563.263  | NM_013232 | 2842.552  | 3332.228  |
| NM_001458 | 1505.786  | 1304.801  | M30818    | 579.415   | 727.529   | NM_000362 | 225.991   | 447.413   |
| NM_020388 | 3320.723  | 3055.319  | NM_000163 | 517.357   | 715.251   | NM_014429 | 1254.615  | 1314.144  |
| NM_004202 | 42743.711 | 38760.23  | NM_005755 | 287.635   | 761.394   | AK000770  | 495.275   | 713.016   |
| AB046829  | 1902.182  | 1786.674  | AB023216  | 256.501   | 271.477   | NM_002370 | 12914.62  | 14578.423 |



|           |           |           |           |           |           |           |           |           |
|-----------|-----------|-----------|-----------|-----------|-----------|-----------|-----------|-----------|
| NM_003379 | 10559.804 | 7451.799  | NM_002266 | 23605.785 | 13134.389 | NM_015670 | 1412.353  | 1512.779  |
| NM_004521 | 7991.066  | 5939.739  | NM_014400 | 4034.796  | 2917.651  | NM_014709 | 511.183   | 715.2     |
| AF229162  | 1595.425  | 1627.432  | AL157492  | 894.752   | 782.623   | AB028990  | 439.646   | 557.581   |
| U02309    | 32790.273 | 21570.656 | AL353957  | 2260.719  | 1291.031  | NM_006708 | 11690.05  | 13057.709 |
| NM_005257 | 11914.996 | 9740.974  | NM_007214 | 5393.632  | 3219.945  | AB037835  | 705.998   | 959.576   |
| AF011573  | 5042.375  | 4499.31   | NM_000311 | 6002.464  | 3961.17   | NM_016228 | 712.474   | 939.363   |
| NM_002145 | 2898.309  | 3056.471  | NM_017909 | 2177.188  | 1125.35   | NM_000157 | 2490.766  | 2130.617  |
| NM_003923 | 251.035   | 341.951   | NM_006335 | 7516.174  | 4751.663  | NM_000712 | 9572.179  | 7676.956  |
| NM_004831 | 1370.303  | 1416.172  | AB040891  | 1752.23   | 1911.909  | NM_018088 | 386.381   | 378.605   |
| NM_014213 | 5823.082  | 5532.907  | AB037780  | 729.793   | 684.706   | BC013695  | 6907.222  | 4136.257  |
| NM_000168 | 2194.709  | 2558.963  | NM_005845 | 9025.586  | 6655.239  | AK023035  | 1966.126  | 1664.175  |
| AF294629  | 1893.804  | 1680.173  | NM_018964 | 4645.896  | 6655.55   | NM_014846 | 2315.66   | 1550.324  |
| NM_000545 | 3906.131  | 3915.454  | NM_000080 | 1494.896  | 2509.387  | AB011164  | 1875.775  | 2916.479  |
| NM_002136 | 43714.512 | 36331.906 | NM_002711 | 816.477   | 545.231   | M24750    | 1043.276  | 2556      |
| AK025571  | 678.984   | 618.559   | AK026092  | 2340.72   | 1504.739  | AB046776  | 330.643   | 610.922   |
| NM_014463 | 31416.09  | 25304.676 | AK001175  | 821.737   | 513.237   | NM_002687 | 7509.29   | 7467.499  |
| NM_005520 | 18735.898 | 13173.134 | NM_003897 | 2255.63   | 1209.683  | NM_000627 | 772.25    | 1156.972  |
| AK023265  | 1689.561  | 1726.521  | NM_014165 | 8994.027  | 6256.575  | NM_000038 | 498.747   | 343.949   |
| NM_018723 | 457.24    | 481.266   | AL442085  | 2260.627  | 1960.548  | NM_000825 | 591.374   | 737.539   |
| AB029009  | 1623.399  | 1658.396  | NM_013313 | 3545.861  | 4868.287  | NM_001963 | 253.513   | 434.129   |
| AF112207  | 2166.891  | 2073.4    | NM_002553 | 1437.245  | 1670.28   | NM_004334 | 513.67    | 777.33    |
| AJ420488  | 48309.234 | 81713.203 | AJ404615  | 1739.985  | 1730.239  | NM_003886 | 1489.874  | 1698.138  |
| NM_005594 | 13647.948 | 9518.249  | NM_016053 | 18320.391 | 18296.736 | NM_005843 | 777.076   | 1357.71   |
| NM_004461 | 42836.199 | 42409.629 | NM_000302 | 1066.492  | 1068.475  | NM_003854 | 294.644   | 510.252   |
| NM_018473 | 10577.312 | 9135.896  | NM_013235 | 19902.898 | 22042.031 | NM_017980 | 1947.073  | 2581.6    |
| BF106121  | 1111.521  | 998.895   | NM_016015 | 8521.07   | 14434.14  | NM_001252 | 728.458   | 533.383   |
| AK022590  | 1394.245  | 1025.979  | AK022900  | 818.881   | 1663.047  | AF053712  | 539.729   | 756.166   |
| AK023719  | 3309.964  | 4430.095  | AK026232  | 2819.41   | 1932.495  | NM_003947 | 376.091   | 366.267   |
| AK025590  | 680.648   | 929.731   | NM_014892 | 8747.445  | 7542.317  | NM_002821 | 7346.397  | 6592.576  |
| AY007149  | 2869.172  | 3120.522  | AK023827  | 2215.879  | 1727.172  | M96652    | 4931.091  | 3848.527  |
| M12078    | 747.234   | 785.489   | NM_001117 | 545.425   | 369.127   | L41690    | 911.689   | 1178.128  |
| NM_004550 | 8599.698  | 8479.559  | NM_000231 | 818.703   | 377.242   | NM_018059 | 543.774   | 644.552   |
| NM_000785 | 1295.854  | 1436.883  | L07517    | 1822.622  | 1374.364  | NM_000939 | 34203.609 | 22486.057 |
| NM_004110 | 3819.349  | 3678.955  | AK022451  | 1083.436  | 860.731   | NM_006514 | 680.235   | 712.594   |
| NM_013387 | 41533.051 | 40516.336 | NM_014359 | 56542.406 | 63439.902 | AF065164  | 1160.089  | 1615.724  |
| NM_005262 | 4882.094  | 4614.351  | BM918441  | 676.726   | 526.814   | AB028991  | 1516.794  | 1939.737  |
| NM_005757 | 1351.642  | 1346.229  | AA150828  | 561.728   | 434.851   | AF263547  | 4192.901  | 5314.585  |
| NM_016483 | 571.092   | 520.592   | H64379    | 3134.925  | 3304.197  | AJ008143  | 2854.784  | 2440.728  |
| NM_020128 | 1102.577  | 1231.391  | AA664180  | 558.213   | 740.729   | NM_007144 | 1595.189  | 1484.147  |
| NM_005068 | 2249.526  | 2083.171  | NM_016081 | 4545.439  | 3563.062  | NM_004424 | 2386.83   | 1927.138  |
| NM_018223 | 2884.679  | 3040.954  | NM_006389 | 1920.512  | 1537.43   | AL133117  | 1713.956  | 1445.808  |
| NM_006693 | 12749.65  | 10583.105 | NM_000163 | 345.108   | 322.997   | AB033040  | 661.35    | 1106.281  |
| NM_001722 | 1832.903  | 2037.036  | NM_003329 | 56246.715 | 28905.391 | AF070586  | 1455.205  | 1535.601  |
| AB046802  | 1140.87   | 987.924   | NM_003299 | 29245.053 | 15731.939 | NM_014412 | 602.751   | 846.247   |
| NM_003297 | 1316.409  | 864.625   | NM_014330 | 18488.596 | 11197.252 | NM_013303 | 1584.841  | 1702.457  |
| X74861    | 363.407   | 173.223   | NM_007034 | 450.016   | 276.769   | NM_012227 | 2045.311  | 1784.371  |
| NM_018269 | 6069.558  | 4294.189  | NM_005261 | 276.956   | 256.824   | NM_006101 | 3569.328  | 4518.062  |
| AK024633  | 3994.583  | 2857.838  | NM_001560 | 315.818   | 386.999   | NM_001237 | 4343.156  | 5116.157  |
| NM_001453 | 5194.814  | 2766.608  | NM_001783 | 8090.096  | 7910.615  | NM_002507 | 727.07    | 1071.454  |
| NM_012075 | 927.771   | 815.431   | J03171    | 2207.195  | 2207.426  | NM_015962 | 1296.224  | 1470.122  |
| AB004851  | 515.072   | 504.351   | AK075415  | 212.501   | 371.255   | NM_016145 | 290.404   | 1115.327  |
| AK023911  | 1042.656  | 945.565   | NM_018964 | 3437.613  | 2512.08   | NM_016078 | 2603.318  | 1699.587  |
| NM_001283 | 3362.378  | 4110.51   | NM_000080 | 985.973   | 696.093   | NM_003798 | 297.943   | 374.755   |

|           |          |           |           |           |           |           |           |           |
|-----------|----------|-----------|-----------|-----------|-----------|-----------|-----------|-----------|
| AL110237  | 754.106  | 709.242   | NM_001829 | 1543.556  | 1226.747  | NM_004401 | 1400.433  | 1056.857  |
| D87470    | 1770.531 | 2609.064  | NM_007256 | 415.412   | 314.671   | NM_001846 | 3327.986  | 1283.865  |
| AF147307  | 7559.278 | 9369.042  | AF283645  | 2331.118  | 1619.681  | AF255910  | 333.977   | 398.164   |
| AK001829  | 3205.736 | 2616.886  | NM_016575 | 1761.745  | 1014.073  | NM_000425 | 413.503   | 221.568   |
| NM_016525 | 3625.486 | 3313.03   | NM_001045 | 4785.904  | 4896.287  | NM_016146 | 2558.642  | 6488.46   |
| AK024931  | 7799.995 | 7775.478  | NM_005697 | 3964.361  | 3315.178  | AK024343  | 1756.493  | 1811.896  |
| AL109715  | 613.672  | 552.751   | NM_003099 | 2973.628  | 3465.325  | NM_001936 | 274.299   | 407.175   |
| AF086181  | 383.904  | 243.333   | NM_004781 | 815.323   | 893.819   | NM_002566 | 389.927   | 503.789   |
| AK021540  | 373.832  | 585.35    | L08240    | 1133.53   | 1565.227  | D42084    | 1959.158  | 2374.821  |
| D86985    | 406.3    | 298.12    | NM_002940 | 2342.154  | 2684.938  | NM_001734 | 193.391   | 235.427   |
| AK022258  | 1290.937 | 1350.762  | AB046844  | 838.091   | 628.024   | NM_014693 | 395.644   | 397.956   |
| AK000930  | 299.527  | 227.882   | NM_000302 | 897.457   | 593.913   | AB007896  | 442.663   | 844.136   |
| AF088043  | 289.363  | 394.962   | NM_013235 | 16858.545 | 11152.065 | AB007916  | 5574.763  | 5116.087  |
| AF131799  | 409.55   | 196.576   | NM_016015 | 8819.487  | 6716.103  | NM_002874 | 355.768   | 486.203   |
| AK000455  | 1387.816 | 1361.242  | NM_020120 | 941.901   | 559.721   | AF049140  | 1481.865  | 2253.699  |
| NM_005230 | 878.155  | 806.34    | AK022900  | 1008.859  | 666.487   | AB037793  | 240.543   | 45.379    |
| AL365407  | 579.069  | 753.203   | AB023216  | 380.879   | 336.116   | AL136794  | 1045.412  | 1024.071  |
| AK000840  | 948.841  | 808.011   | NM_002266 | 25978.754 | 13688.026 | AJ224172  | 129.849   | 136.671   |
| AL162073  | 1016.851 | 908.807   | NM_014400 | 4260.895  | 2678.38   | BC035601  | 19026.115 | 14414.196 |
| AJ006835  | 5011.767 | 4414.311  | AL157492  | 663.906   | 648.389   | NM_001458 | 766.729   | 739.235   |
| AF085890  | 583.649  | 690.247   | AL353957  | 1451.265  | 1117.771  | NM_020388 | 2411.692  | 2096.981  |
| AL110138  | 623.352  | 540.426   | NM_007214 | 4135.005  | 2824.249  | AB046829  | 1240.845  | 1021.699  |
| AL122039  | 585.875  | 477.372   | NM_000311 | 4280.955  | 3806.11   | NM_016445 | 288.392   | 158.747   |
| AF070577  | 4162.231 | 3759.198  | NM_017909 | 1675.74   | 1414.417  | NM_003379 | 7400.57   | 4510.681  |
| AL157484  | 2033.097 | 2157.158  | NM_006335 | 6654.464  | 6812.203  | NM_004521 | 3986.382  | 2934.085  |
| AK024850  | 599.092  | 738       | AB037780  | 933.356   | 1346.068  | AF229162  | 686.084   | 873.821   |
| Y09836    | 827.755  | 793.161   | NM_005845 | 12181.431 | 17818.939 | U02309    | 20781.848 | 30117.721 |
| AL137597  | 3230.402 | 3263.108  | NM_016209 | 9664.05   | 13663.31  | NM_005257 | 5598.729  | 4413.854  |
| AK022144  | 1743.876 | 1939.504  | AK002114  | 4429.959  | 2827.391  | AF011573  | 3007.005  | 2861.332  |
| AF086044  | 436.429  | 407.431   | AL390184  | 408.298   | 327.2     | NM_002145 | 1561.317  | 1868.761  |
| NM_014926 | 383.932  | 407.316   | NM_018699 | 320.933   | 230.707   | NM_004831 | 471.092   | 1019.972  |
| AF131790  | 543.567  | 571.706   | NM_018048 | 264.665   | 197.286   | NM_014213 | 2216.853  | 2232.609  |
| AJ011378  | 403.187  | 734.238   | AK026318  | 770.766   | 730.289   | NM_000168 | 1091.188  | 1450.249  |
| AF009266  | 669.783  | 761.864   | AF291673  | 1070.262  | 707.526   | AF294629  | 1234.283  | 1451.802  |
| AF009310  | 592.901  | 545.882   | NM_004365 | 9112.121  | 5878.356  | NM_000545 | 2073.045  | 1968.512  |
| AF060168  | 1167.541 | 1007.555  | NM_016355 | 3814.615  | 2383.03   | NM_002136 | 29928.74  | 21100.736 |
| AF009275  | 736.205  | 790.083   | AJ296290  | 1674.451  | 1213.682  | AK025571  | 533.471   | 944.873   |
| AF015251  | 451.005  | 593.045   | AK026092  | 2011.564  | 1480.343  | NM_004940 | 190.882   | 160.976   |
| AF056426  | 958.001  | 916.929   | AK001175  | 506.346   | 418.963   | NM_014463 | 25174.652 | 19554.293 |
| AK001096  | 302.501  | 420.348   | NM_003897 | 1826.506  | 1765.817  | NM_005520 | 9666.016  | 7324.397  |
| NM_018326 | 747.911  | 909.245   | NM_014165 | 8184.132  | 8207.053  | AK023265  | 1181.374  | 1059.986  |
| AK021565  | 209.501  | 199.095   | AL442085  | 3516.931  | 3042.021  | NM_018723 | 253.94    | 525.391   |
| AK021778  | 296.111  | 391.914   | AJ404615  | 2508.943  | 3345.01   | AB029009  | 801.19    | 837.765   |
| AK001150  | 2022.096 | 2029.521  | NM_016053 | 23461.779 | 23085.428 | AF112207  | 1002.564  | 1186.684  |
| AK002123  | 407.24   | 337.463   | AB007869  | 2184.507  | 3928.771  | NM_005594 | 14608.759 | 10524.016 |
| AK021633  | 1026.295 | 1159.792  | M64108    | 1983.926  | 1674.545  | NM_004461 | 29748.488 | 22828.613 |
| AK025659  | 1567.693 | 1286.341  | Y17867    | 1397.398  | 975.526   | NM_018473 | 5671.44   | 4286.945  |
| AK026788  | 1099.515 | 1022.96   | M92642    | 448.895   | 462.473   | BF106121  | 554.98    | 395.911   |
| AK025272  | 894.056  | 884.577   | NM_018071 | 1751.423  | 913.019   | AK022590  | 576.765   | 1234.189  |
| AK026824  | 501.918  | 447.639   | NM_004333 | 1825.918  | 1777.488  | AK023719  | 1981.779  | 1807.038  |
| AJ008130  | 15909.57 | 15179.895 | M31520    | 55615.203 | 58977.352 | AF035317  | 102.564   | 270.605   |
| AF086502  | 1244.654 | 1472.985  | NM_002020 | 6158.347  | 5352.802  | AK025590  | 461.329   | 536.03    |
| L39924    | 1115.584 | 1665.603  | AL050137  | 926.371   | 413.883   | AY007149  | 1566.607  | 2519.65   |

|           |           |           |           |           |           |           |           |           |
|-----------|-----------|-----------|-----------|-----------|-----------|-----------|-----------|-----------|
| U52054    | 5841.92   | 8333.999  | AK024423  | 1431.999  | 985.388   | M12078    | 535.298   | 1226.892  |
| D17226    | 286.857   | 462.302   | NM_005043 | 16790.014 | 10458.185 | NM_00455C | 3951.515  | 3237.604  |
| AK023325  | 1275.295  | 1204.471  | NM_005979 | 5845.553  | 4521.041  | NM_00078E | 485.812   | 831.784   |
| NM_01798E | 1653.046  | 1348.69   | NM_006282 | 2678.864  | 1747.498  | NM_00411C | 2812.488  | 2270.34   |
| AK025866  | 3083.879  | 3537.325  | NM_020321 | 586.062   | 522.262   | NM_013387 | 25890.434 | 20017.162 |
| AF088058  | 9343.204  | 7369.754  | NM_01592C | 9550.611  | 12882.537 | NM_00526Z | 3821.457  | 3549.569  |
| NM_000513 | 1739.356  | 2621.847  | AB011113  | 1776.192  | 1716.926  | NM_005757 | 711.221   | 1064.822  |
| Y11165    | 1385.267  | 1578.323  | NM_004115 | 1251.165  | 988.53    | NM_01648Z | 167.13    | 319.201   |
| AL137445  | 269.037   | 318.09    | NM_018287 | 627.339   | 831.292   | NM_02012E | 527.384   | 790.214   |
| BC028422  | 755.656   | 845.858   | L20686    | 3463.724  | 4424.403  | NM_00506E | 2059.643  | 1726.987  |
| AK022219  | 455.562   | 415.505   | NM_000304 | 1663.81   | 1580.651  | NM_01822Z | 1783.353  | 1932.304  |
| NM_00354E | 598.295   | 783.367   | AK023362  | 583.546   | 958.486   | NM_00669Z | 7659.955  | 6878.492  |
| AK024413  | 675.779   | 972.706   | S72604    | 18012.836 | 12610.753 | NM_00172Z | 1009.682  | 1177.219  |
| AK022247  | 878.547   | 886.675   | NM_017984 | 264.299   | 281.502   | AB046802  | 1239.122  | 1175.688  |
| AK001453  | 4871.441  | 4193.033  | NM_00267E | 1194.482  | 906.447   | NM_003297 | 573.684   | 718.248   |
| AB007972  | 2175.173  | 2459.155  | NM_01243Z | 11264.853 | 7395.147  | X74861    | 202.891   | 346.591   |
| AL390144  | 17693.295 | 15004.295 | NM_005007 | 5520.066  | 3168.872  | NM_01826C | 3795.868  | 2241.846  |
| AK024017  | 1066.033  | 1068.725  | AK024996  | 2825.456  | 2344.158  | AK024633  | 1793.494  | 1155.893  |
| X56196    | 832.27    | 810.573   | NM_004417 | 409.922   | 341.821   | NM_00145Z | 2386.232  | 3308.082  |
| D17220    | 7550.098  | 9045.685  | NM_01229C | 3450.741  | 2193.019  | NM_01207E | 493.58    | 602.68    |
| D28363    | 43748.418 | 52350.352 | NM_002431 | 2319.823  | 2190.089  | AB004851  | 360.176   | 589.464   |
| AB011171  | 929.312   | 1189.641  | NM_001827 | 40626.816 | 22494.393 | AK023911  | 2082.212  | 2435.349  |
| NM_00532Z | 2966.427  | 3772.345  | NM_02046E | 1721.927  | 1216.93   | NM_00128Z | 1637.606  | 1867.89   |
| AK024465  | 955.771   | 670.234   | NM_00285Z | 2627.491  | 2325.365  | AL110237  | 378.36    | 774.359   |
| AK021478  | 4185.758  | 4157.675  | NM_003174 | 901.838   | 1088.437  | D87470    | 719.35    | 1261.256  |
| AF131782  | 820.995   | 860.92    | NM_012307 | 8756.938  | 7905.746  | AF147307  | 4320.172  | 5040.886  |
| NM_01421C | 3243.46   | 2635.649  | NM_00254C | 1011.582  | 960.87    | AK001829  | 2329.684  | 2433.94   |
| AK021603  | 781.66    | 739.485   | NM_006371 | 1161.313  | 1287.411  | NM_01652E | 2841.598  | 2974.347  |
| AL110136  | 2662.365  | 2172.465  | NM_018834 | 922.763   | 956.623   | AK024931  | 5496.696  | 5886.978  |
| AK002203  | 414.085   | 592.972   | AK026882  | 2339.575  | 3886.237  | AL109715  | 328.93    | 471.75    |
| AK026469  | 1024.375  | 1457.549  | NM_004574 | 2195.218  | 3781.875  | AF086181  | 347.201   | 325.287   |
| D16935    | 4184.799  | 4890.436  | NM_00484E | 1124.553  | 1522.216  | AK021540  | 222.302   | 360.488   |
| U92019    | 505.347   | 703.491   | NM_001944 | 387.814   | 772.604   | D86985    | 270.223   | 236.6     |
| U52835    | 1719.857  | 1650.232  | NM_01481Z | 959.351   | 1512.462  | AK022258  | 684.426   | 1287.766  |
| NM_00075E | 1827.492  | 2363.259  | AF014459  | 2928.976  | 7982.253  | AF088043  | 219.174   | 293.943   |
| AK022148  | 363.691   | 309.397   | AK024601  | 5040.501  | 3409.199  | AF131799  | 309.735   | 430.093   |
| Z36811    | 42504.25  | 69903.008 | S68069    | 7112.088  | 4068.014  | AK000455  | 911.944   | 1061.246  |
| NM_01895C | 8873.467  | 12442.154 | AB011095  | 1222.433  | 801.237   | NM_00523C | 548.35    | 339.607   |
| K03200    | 6516.084  | 7062.595  | NM_00150Z | 677.235   | 623.405   | AL365407  | 359.713   | 788.554   |
| U17629    | 2674.01   | 3116.122  | NM_00630Z | 1693.835  | 1165.529  | AK000840  | 3035.891  | 4043.549  |
| NM_02042E | 3882.354  | 3806.866  | AJ224875  | 4164.565  | 2837.937  | AL162073  | 754.733   | 1322.495  |
| U79265    | 1521.03   | 1522.913  | NM_00214Z | 1808.522  | 1553.681  | AL390160  | 421.59    | 504.988   |
| AK022868  | 5001.413  | 4163.74   | AF043324  | 3528.293  | 2464.552  | AJ006835  | 1898.655  | 2523.123  |
| NM_00353C | 673.588   | 482.742   | AK024172  | 883.265   | 562.308   | AF085890  | 170.243   | 425.031   |
| AJ227871  | 1450.927  | 1811.003  | NM_014814 | 5642.215  | 3528.391  | AL110138  | 362.091   | 555.37    |
| AK025344  | 2385.523  | 2846.645  | NM_002797 | 11654.954 | 7536.792  | AL117625  | 110.724   | 242.471   |
| D28589    | 19333.658 | 25386.125 | AK024318  | 1390.17   | 995.988   | AL049445  | 203.472   | 190.857   |
| AF301223  | 680.54    | 811.194   | NM_01612Z | 4667.056  | 4291.322  | AL050153  | 212.033   | 162.931   |
| NM_017867 | 30833.477 | 25201.406 | NM_00280Z | 7998.487  | 6243.198  | AL122039  | 295.825   | 226.503   |
| U92820    | 4251.075  | 3063.31   | NM_01791Z | 6488.758  | 5558.834  | AF070577  | 3055.41   | 1359.192  |
| NM_017937 | 1612.266  | 1555.812  | NM_00042Z | 3068.615  | 3525.364  | AL157484  | 3117.626  | 1261.672  |
| AL360266  | 2770.064  | 2549.313  | AB046838  | 1929.161  | 2031.432  | AK024850  | 357.57    | 280.328   |
| AL160132  | 16243.603 | 17799.797 | AK026339  | 482.731   | 536.449   | Y09836    | 319.195   | 252.117   |

|           |           |           |           |           |           |           |           |           |
|-----------|-----------|-----------|-----------|-----------|-----------|-----------|-----------|-----------|
| NM_019557 | 4036.118  | 4653.486  | X98411    | 2685.009  | 3623.982  | AL137597  | 1369.222  | 842.895   |
| CY3Cy5    | 4556.842  | 256.394   | AF116658  | 5738.219  | 9230.137  | AK022144  | 856.564   | 528.842   |
| AA150828  | 973.912   | 1109.199  | NM_014865 | 6944.1    | 10046.481 | AF086044  | 421.752   | 540.078   |
| H90764    | 755.82    | 2906.873  | AB032977  | 9872.172  | 13120.63  | NM_014926 | 290.382   | 321.102   |
| AI859208  | 1355.807  | 1699.861  | AK001725  | 955.845   | 1726.922  | AF131790  | 318.59    | 632.018   |
| H64379    | 4186.683  | 3849.282  | NM_003036 | 1028.943  | 2054.049  | AJ011378  | 299.92    | 565.549   |
| BE208258  | 57707.324 | 65664.367 | NM_020529 | 3013.076  | 5366.971  | AF009266  | 405.793   | 715.546   |
| T72202    | 658.849   | 558.614   | NM_020395 | 2638.025  | 1818.818  | AF009310  | 284.583   | 810.695   |
| BI831922  | 2178.085  | 1329.221  | NM_003425 | 969.908   | 596.203   | AF054991  | 293.754   | 408.67    |
| M69238    | 1332.936  | 974.071   | NM_013388 | 4858.152  | 3065.155  | AF060168  | 755.779   | 1331.762  |
| AA664180  | 981.638   | 827.813   | AF038951  | 7251.861  | 4317.271  | AF009275  | 443.933   | 908.877   |
| AA599158  | 6721.619  | 6702.676  | AK021811  | 1275.743  | 1046.091  | AF015251  | 218.942   | 593.996   |
| NM_002711 | 1847.865  | 1707.34   | NM_003428 | 2183.304  | 1899.362  | AF056426  | 801.551   | 491.644   |
| SR7       | 5909.473  | 64571.555 | AF055030  | 889.051   | 884.051   | AK001096  | 280.992   | 281.647   |
| SR9       | 16660.189 | 3206.245  | AK000589  | 1079.021  | 456.603   | NM_018325 | 366.537   | 260.605   |
| CY3Cy5    | 7179.666  | 543.549   | X53281    | 5702.575  | 4075.851  | AK021565  | 180.593   | 94.942    |
| NM_005261 | 724.686   | 769.592   | BC012782  | 947.45    | 857.6     | AK001150  | 1425.947  | 722.42    |
| NM_001783 | 12657.192 | 12251.694 | AF132026  | 30352.482 | 17698.266 | AK002123  | 260.759   | 324.302   |
| J03171    | 4593.965  | 4797.202  | AL050353  | 1185.689  | 951.43    | AK021633  | 415.983   | 523.562   |
| NM_004323 | 12317.349 | 16769.781 | AB037788  | 4818.959  | 4202.469  | AK025659  | 743.498   | 345.058   |
| NM_005312 | 2195.742  | 1608.873  | NM_004587 | 3718.989  | 3549.828  | AK026407  | 217.355   | 172.934   |
| NM_001711 | 1064.99   | 798.577   | AK024570  | 11397.1   | 19989.043 | AK026788  | 454.706   | 98.275    |
| NM_004210 | 10066.041 | 7694.986  | AF161401  | 8648.428  | 12019.325 | AK025272  | 401.11    | 211.981   |
| NM_020140 | 1461.221  | 1752.669  | NM_000990 | 5162.237  | 9620.97   | AK026456  | 290.925   | 120.408   |
| NM_001496 | 4182.931  | 4260.165  | NM_014740 | 2057.536  | 3041.708  | AK026824  | 385.191   | 244.576   |
| U65404    | 1480.937  | 937.218   | NM_015956 | 5145.97   | 9740.632  | AJ008130  | 7144.302  | 7558.922  |
| AK026232  | 5543.363  | 5944.132  | AF075008  | 2094.836  | 619.239   | NM_003665 | 169.813   | 111.354   |
| NM_014892 | 15415.662 | 14212.896 | NM_006504 | 2347.759  | 1269.014  | AF086502  | 1053.776  | 1310.013  |
| AK023827  | 3240.815  | 3486.244  | AF070538  | 643.142   | 518.974   | L39924    | 533.316   | 1046.113  |
| NM_001117 | 868.125   | 1611.806  | AL137430  | 536.624   | 435.556   | U52054    | 2633.294  | 3315.438  |
| NM_000231 | 697.173   | 1535.355  | NM_000696 | 6761.698  | 4497.377  | D17226    | 261.381   | 46.658    |
| L07517    | 2320.562  | 2646.909  | NM_002488 | 16750.439 | 11129.446 | AK023325  | 680.132   | 280.652   |
| AK022451  | 502.338   | 676.644   | NM_004003 | 8834.613  | 5409.003  | NM_017985 | 622.598   | 314.851   |
| NM_014355 | 64236.156 | 66203.922 | NM_000188 | 1287.392  | 1115.513  | AK025866  | 780.236   | 460.9     |
| NM_001045 | 5658.533  | 4501.2    | BF244401  | 1841.381  | 1179.428  | AF088058  | 3664.103  | 1035.78   |
| NM_005697 | 5548.32   | 4739.312  | NM_004718 | 19099.43  | 10924.403 | NM_000513 | 584.305   | 456.505   |
| NM_003095 | 8451.296  | 7977.302  | AL359585  | 2606.45   | 1715.177  | Y11165    | 664.038   | 376.615   |
| NM_004781 | 2033.56   | 2496.117  | AB046850  | 1547.907  | 1279.46   | AL137445  | 262.378   | 152.954   |
| NM_018303 | 2147.847  | 2903.465  | NM_014801 | 2005.042  | 1348.051  | BC028422  | 362.771   | 170.378   |
| NM_014758 | 3603.721  | 3437.834  | NM_003642 | 7556.215  | 4431.408  | AK022219  | 175.694   | 241.136   |
| NM_005124 | 2556.422  | 2967.273  | AB027013  | 2918.192  | 2931.173  | AK024192  | 477.966   | 716.111   |
| AK000947  | 2241.856  | 1952.025  | BF185480  | 2141.272  | 2711.702  | NM_003545 | 238.995   | 232.102   |
| L08240    | 1325.63   | 1113.894  | NM_002128 | 12432.346 | 10644.894 | AK024413  | 514.655   | 355.157   |
| NM_017952 | 1068.689  | 1089.955  | AL360195  | 1733.816  | 3066.665  | AK022247  | 344.566   | 272.387   |
| NM_002940 | 2127.961  | 2752.357  | U14383    | 566.183   | 753.914   | AK001453  | 2345.641  | 1132.75   |
| NM_016081 | 10301.653 | 6691.575  | NM_017810 | 1585      | 2363.905  | AB007972  | 897.272   | 561.966   |
| NM_006385 | 5359.172  | 5230.15   | NM_003181 | 60220.898 | 65690.695 | AL390144  | 8053.856  | 2946.797  |
| M30818    | 624.643   | 695.196   | NM_004451 | 1024.827  | 1727.369  | AK024017  | 448.394   | 317.15    |
| NM_000163 | 490.147   | 619.35    | NM_004364 | 645.926   | 1158.297  | D17220    | 2404.801  | 1185.855  |
| NM_005755 | 1416.252  | 5406.948  | AK023505  | 2400.997  | 1961.232  | D28363    | 28944.314 | 13122.577 |
| NM_003325 | 63375.027 | 74597.367 | AB037851  | 5060.849  | 3987.763  | AB011171  | 388.973   | 368.176   |
| NM_003295 | 33167.109 | 26265.68  | AL050389  | 4747.083  | 3469.164  | AF090099  | 414.716   | 178.235   |
| NM_014330 | 11640.264 | 11224.923 | AK025855  | 1307.974  | 647.731   | AF189251  | 176.475   | 184.007   |

|           |           |           |           |           |           |           |           |           |
|-----------|-----------|-----------|-----------|-----------|-----------|-----------|-----------|-----------|
| NM_007214 | 9307.955  | 8099.049  | AK024684  | 1507.657  | 1141.673  | NM_005322 | 1559.173  | 3283.737  |
| NM_000311 | 10756.898 | 9472.168  | NM_014945 | 10261.148 | 6195.88   | AK024465  | 649.809   | 2013.408  |
| NM_017909 | 3577.732  | 3186.125  | AK001546  | 897.038   | 639.737   | AK021478  | 2006.446  | 719.05    |
| NM_006335 | 13860.636 | 13326.122 | NM_006537 | 3886.253  | 3526.25   | AF131782  | 473.904   | 225.456   |
| NM_000786 | 491.908   | 572.83    | AF007155  | 6399.416  | 5431.704  | NM_01421C | 1136.25   | 349.493   |
| NM_017731 | 765.018   | 1034.118  | AK023055  | 395.594   | 357.068   | AK021603  | 921.913   | 542.82    |
| AB040891  | 2432.195  | 4943.953  | AL049282  | 3331.603  | 2106.233  | AL110136  | 1016.992  | 335.176   |
| AB037780  | 741.42    | 448.506   | AK021443  | 3709.804  | 1894.79   | AK026469  | 1031.124  | 895.932   |
| NM_005845 | 15991.922 | 14929.557 | AF070569  | 377.411   | 406.837   | D16935    | 1317.864  | 595.668   |
| NM_016209 | 13538.409 | 10809.128 | NM_020233 | 2180.744  | 2572.67   | U52835    | 924.006   | 691.983   |
| AK075415  | 473.89    | 495.946   | AF143873  | 519.503   | 751.656   | NM_000756 | 558.839   | 243.903   |
| AK025616  | 416.962   | 504.462   | AL355732  | 2012.471  | 2373.76   | Z36811    | 31804.885 | 14768.807 |
| NM_018964 | 4124.708  | 3521.383  | NM_017966 | 1580.81   | 1608.504  | NM_01895C | 4515.004  | 2545.212  |
| NM_00008C | 1244.434  | 1043.249  | AF143327  | 1687.113  | 1965.47   | K03200    | 2739.371  | 1524.422  |
| NM_001829 | 2325.693  | 2482.82   | AL137535  | 467.418   | 546.148   | U17629    | 1318.702  | 713.327   |
| AF283645  | 3522.876  | 2929.648  | AL049991  | 406.577   | 822.329   | NM_02042E | 1383.442  | 636.238   |
| NM_016575 | 1339.857  | 702.748   | AL049990  | 977.938   | 1455.992  | U79265    | 527.072   | 455.986   |
| NM_003897 | 3801.156  | 3363.505  | AF131843  | 1317.704  | 2514.535  | AK022868  | 2225.03   | 1470.515  |
| NM_014165 | 16840.814 | 19201.723 | AK026653  | 1008.574  | 1497.903  | NM_00353C | 266.704   | 320.963   |
| AL442085  | 3188.757  | 2873.048  | NM_020231 | 1150.886  | 1927.396  | AJ227871  | 756.39    | 2043.895  |
| NM_013313 | 5846.95   | 6313.507  | AL133118  | 3423.123  | 2587.21   | AK025344  | 794.161   | 541.01    |
| NM_014736 | 14548.031 | 18215.752 | AK023571  | 1954.135  | 1210.882  | D28589    | 9998.638  | 6966.255  |
| AJ404615  | 4235.562  | 5941.571  | AF131783  | 274.283   | 363.968   | AF301223  | 331.716   | 246.497   |
| NM_016053 | 28114.074 | 25610.594 | NM_001702 | 3148.505  | 2193.822  | NM_017867 | 16789.748 | 5598.904  |
| AB007869  | 2429.066  | 1473.746  | AK026657  | 1290.92   | 1401.459  | U92820    | 1832.264  | 628.87    |
| AB046844  | 1635.393  | 1072.792  | AF087991  | 11381.424 | 8676.013  | NM_017937 | 598.809   | 262.427   |
| NM_000302 | 1576.527  | 1506.147  | Y12839    | 556.54    | 568.98    | AL360266  | 926.928   | 424.852   |
| NM_013235 | 33106.746 | 26937.354 | AJ227884  | 1104.992  | 1067.602  | AL160132  | 11931.078 | 2739.13   |
| NM_016015 | 14419.196 | 13001.456 | X64986    | 10149.118 | 11020.037 | NM_019557 | 1724.256  | 893.236   |
| NM_02012C | 1378.592  | 1573.844  | Y10510    | 314.189   | 421.408   | CY3Cy5    | 596.724   | 159.699   |
| AK022900  | 1391.111  | 1426.036  | L38282    | 2315.499  | 2289.618  | AA150828  | 294.068   | 541.333   |
| AB023216  | 675.998   | 623.7     | NM_018056 | 2218.37   | 2836.208  | AI859208  | 266.004   | 447.374   |
| NM_002266 | 45175.246 | 34464.727 | NM_019008 | 1659.301  | 2446.4    | H64379    | 1602.676  | 1937.142  |
| NM_01440C | 5842.722  | 4860.009  | M20838    | 753.696   | 1368.489  | BE208258  | 43166.691 | 73983.664 |
| AL157492  | 1483.099  | 588.75    | AK022738  | 1209.267  | 1462.301  | T72202    | 334.709   | 429.316   |
| AL353957  | 2713.026  | 2538.542  | AK024252  | 393.897   | 301.538   | BI831922  | 1189.059  | 1941.927  |
| NM_000231 | 904.986   | 1780.321  | AK002095  | 968.106   | 696.504   | M69238    | 410.16    | 584.546   |
| L07517    | 3066.753  | 3005.082  | AK000821  | 4333.875  | 2785.649  | AA599158  | 2425.45   | 2640.573  |
| AK022451  | 734.599   | 442.525   | AK024526  | 6658.256  | 4433.378  | NM_002711 | 509.866   | 622.537   |
| NM_014355 | 63050.527 | 65784.828 | AK000848  | 761.661   | 626.493   | SR5       | 3102.177  | 3147.866  |
| BM918441  | 709.173   | 696.255   | NM_01761E | 2647.1    | 1849.899  | SR7       | 3022.663  | 22063.379 |
| AA150828  | 983.127   | 756.863   | AK024315  | 6749.185  | 7299.307  | SR9       | 8169.5    | 1891.746  |
| H64379    | 4171.256  | 4987.017  | AK024945  | 2212.733  | 3327.219  | CY3Cy5    | 929.548   | 148.6     |
| T72202    | 869.183   | 830.2     | AK024579  | 3279.528  | 5132.32   | NM_005261 | 267.471   | 1023.396  |
| BI831922  | 2661.194  | 1969.03   | AK024877  | 983.511   | 1439.097  | NM_001783 | 6469.313  | 8941.853  |
| M69238    | 1166.131  | 861.817   | S75708    | 7124.495  | 4090.348  | J03171    | 1772.107  | 3488.915  |
| BE294756  | 1359.654  | 1934.766  | U79291    | 7233.223  | 4696.546  | NM_004323 | 6435.195  | 7777.028  |
| NM_002711 | 1824.405  | 2273.908  | D17172    | 13298.445 | 10049.874 | NM_005312 | 828.6     | 914.947   |
| AK026092  | 2690.941  | 1106.92   | AJ227859  | 1014.033  | 733.909   | NM_001711 | 341.028   | 832.572   |
| AK001175  | 1095.083  | 627.722   | NM_018544 | 423.92    | 419.015   | NM_00421C | 8659.452  | 13985.432 |
| NM_003329 | 62023.594 | 66675.336 | AB020699  | 3810.988  | 2791.352  | NM_02014C | 1021.3    | 1668.063  |
| NM_003299 | 37289.512 | 26077.943 | AF086269  | 1615.994  | 945.969   | NM_001496 | 2133.763  | 3192.935  |
| NM_01433C | 14436.888 | 13288.567 | U90437    | 6978.232  | 4401.242  | AK026232  | 1993.453  | 2071.552  |

|           |           |           |           |           |           |           |           |          |
|-----------|-----------|-----------|-----------|-----------|-----------|-----------|-----------|----------|
| NM_007034 | 957.508   | 751.362   | AK000842  | 11277.514 | 18720.215 | NM_014892 | 6548.726  | 4714.296 |
| NM_005261 | 866.224   | 1078.003  | AK023386  | 13308.092 | 20803.266 | AK023827  | 1539.104  | 1216.219 |
| NM_001783 | 10695.614 | 11141.278 | NM_007053 | 22104.645 | 32492.695 | L07517    | 980.15    | 1393.565 |
| J03171    | 4110.803  | 5091.898  | AK022153  | 2485.6    | 3908.884  | NM_014355 | 61838.332 | 73602    |
| NM_005312 | 2116.099  | 1607.734  | AK022789  | 882.596   | 979.693   | NM_001045 | 2368.452  | 4938.697 |
| NM_001711 | 1018.129  | 916.561   | AK023756  | 870.265   | 1852.977  | NM_005697 | 2681.115  | 4424.383 |
| NM_004210 | 11487.885 | 10112.475 | NM_001126 | 3907.249  | 2552.648  | NM_003095 | 3881.221  | 4752.568 |
| NM_020140 | 1690.481  | 1870.765  | AK023673  | 3320.413  | 1950.902  | NM_004781 | 480.039   | 1163.815 |
| AK026232  | 6010.383  | 5927.309  | NM_018252 | 2219.642  | 1568.228  | NM_018303 | 941.298   | 1112.171 |
| NM_014892 | 15157.353 | 11834.867 | NM_018000 | 35118.969 | 16141.727 | NM_014755 | 1607.66   | 1546.166 |
| AK023827  | 2989.396  | 1580.658  | AF164963  | 742.29    | 756.94    | NM_005124 | 1097.95   | 1843.168 |
| NM_001117 | 1651.616  | 1443.339  | AF124366  | 19052.119 | 11329.108 | AK000947  | 1044.715  | 1601.69  |
| NM_001825 | 3161.925  | 2730.781  | AF130112  | 960.927   | 595.241   | L08240    | 486.916   | 1107.748 |
| NM_007256 | 598.029   | 570.975   | NM_000551 | 3795.356  | 2317.482  | NM_017952 | 303.382   | 273.416  |
| AF283645  | 4338.892  | 3930.283  | AL365518  | 986.208   | 733.996   | NM_002940 | 609.669   | 738.279  |
| NM_016575 | 1623.456  | 1339.624  | AF086257  | 2317.326  | 1013.977  | NM_016081 | 2952.788  | 1699.528 |
| NM_018557 | 527.221   | 708.437   | AF075056  | 647.893   | 523.871   | NM_006385 | 1350.166  | 848.348  |
| NM_001045 | 4550.874  | 3800.952  | AC119751  | 476.835   | 339.114   | NM_014330 | 8460.213  | 8339.972 |
| NM_005697 | 5112.958  | 4802.443  | U00928    | 740.468   | 747.098   | NM_007034 | 267.07    | 307.614  |
| NM_003095 | 7631.788  | 7746.455  | NM_019056 | 3904.885  | 2768.36   | NM_007214 | 3877.606  | 5099.129 |
| NM_004781 | 1811.289  | 2074.852  | AF279783  | 4159.132  | 3030.63   | NM_000311 | 4797.11   | 5433.66  |
| NM_018303 | 2147.704  | 2882.917  | AF182422  | 9089.219  | 7349.882  | NM_017905 | 1184.543  | 1527.24  |
| NM_014755 | 3707.597  | 3763.375  | NM_016943 | 634.495   | 708.742   | NM_006335 | 5602.884  | 6967.803 |
| NM_005124 | 3185.166  | 2908.72   | AF070602  | 1092.115  | 1312.008  | NM_017731 | 281.725   | 178.393  |
| AK000947  | 2807.941  | 2838.02   | BE393290  | 1286.833  | 1753.187  | AB040891  | 1124.09   | 540.205  |
| L08240    | 1698.496  | 1734.863  | NM_017622 | 1437.728  | 1878.428  | AB037780  | 250.196   | 171.688  |
| NM_017952 | 887.693   | 651.79    | AF133331  | 7855.134  | 18784.498 | NM_005845 | 4977.752  | 1333.323 |
| NM_002940 | 2060.584  | 2958.013  | AK022289  | 978.014   | 2249.412  | NM_016205 | 3995.198  | 1068.75  |
| NM_016081 | 9716.526  | 5826.75   | L34408    | 437.89    | 780.496   | NM_018964 | 1533.094  | 860.285  |
| NM_006385 | 5087.113  | 3686.231  | AF161403  | 11699.901 | 17014.652 | NM_000080 | 369.285   | 174.213  |
| M30818    | 427.139   | 385.224   | NM_020183 | 2916.248  | 2268.838  | AF283645  | 1492.32   | 2030.754 |
| AB023216  | 903.758   | 512.493   | NM_018029 | 493.146   | 295.98    | NM_016575 | 483.622   | 441.618  |
| NM_002266 | 49549.313 | 34645.277 | NM_019852 | 978.039   | 785.823   | NM_003897 | 1097.54   | 745.728  |
| NM_014400 | 7617.026  | 6319.749  | NM_006118 | 4657.539  | 1587.389  | NM_014165 | 7148.775  | 3923.766 |
| AL157492  | 2007.886  | 1628.564  | AK026225  | 19843.379 | 11632.835 | AL442085  | 1167.208  | 709.36   |
| AL353957  | 3735.303  | 3551.102  | AL050032  | 2217.893  | 2074.324  | NM_013313 | 2336.395  | 1177.271 |
| NM_007214 | 8413.105  | 8284.438  | AF009304  | 342.278   | 319.056   | NM_014736 | 5965.134  | 2079.352 |
| NM_000311 | 10825.939 | 9767.032  | AF086177  | 5850.301  | 4285.819  | AK023886  | 506.191   | 332.997  |
| NM_017905 | 3604.68   | 3639.179  | NM_018949 | 1073.006  | 1070.041  | NM_002553 | 685.024   | 281.873  |
| NM_006335 | 12137.216 | 15187.02  | D17187    | 1088.14   | 776.919   | AJ404615  | 757.429   | 336.454  |
| AK023180  | 738.559   | 903.819   | AJ243672  | 961.336   | 824.532   | NM_016053 | 8515.65   | 2031.01  |
| NM_017731 | 838.608   | 588.117   | AL122087  | 691.311   | 547.747   | AB007869  | 752.521   | 278.569  |
| AB040891  | 3527.881  | 4116.334  | D17169    | 40930.98  | 23118.523 | AB046844  | 494.677   | 244.935  |
| AB037780  | 932.78    | 562.669   | NM_017924 | 6813.738  | 7404.496  | NM_000302 | 327.349   | 204.864  |
| NM_005845 | 20897.559 | 27596.082 | S81578    | 702.815   | 816.594   | NM_013235 | 9199.321  | 1932.045 |
| NM_016205 | 14237.789 | 15406.44  | NM_017546 | 5238.48   | 4945.491  | NM_016015 | 4649.859  | 963.003  |
| AK075415  | 556.186   | 588.924   | AJ001889  | 774.143   | 794.281   | AK022900  | 377.785   | 150.398  |
| AK025616  | 502.814   | 483.147   | AF086210  | 305.072   | 574.074   | NM_002266 | 17112.684 | 5961.441 |
| NM_018964 | 4864.866  | 5611.24   | AL137400  | 2452.015  | 2302.205  | NM_014400 | 1852.009  | 991.209  |
| NM_002711 | 2320.949  | 3179.38   | NM_006511 | 925.66    | 1656.361  | AL157492  | 407.83    | 281.858  |
| AK026092  | 4418.101  | 2967.169  | AF007142  | 2103.804  | 3509.998  | AL353957  | 678.189   | 594.128  |
| AK001175  | 1198.37   | 1297.899  | AF119853  | 5201.553  | 8540.798  | NM_000231 | 175.844   | 299.286  |
| NM_003897 | 3728.882  | 3820.526  | CY3Cy5    | 2381.851  | 128.607   | L07517    | 683.67    | 443.812  |

|           |           |           |           |           |           |           |           |           |
|-----------|-----------|-----------|-----------|-----------|-----------|-----------|-----------|-----------|
| NM_013313 | 8350.851  | 12406.763 | AI248827  | 2856.61   | 2517.977  | AK022451  | 233.262   | 197.093   |
| NM_014736 | 21269.725 | 23930.746 | R45026    | 2505.975  | 1662.786  | AA150828  | 326.044   | 193.386   |
| AK023886  | 1984.229  | 2530.947  | AI970239  | 3348.478  | 1853.564  | H64379    | 885.568   | 348.786   |
| NM_002553 | 5714.919  | 12849.597 | AA496452  | 2476.179  | 2439.083  | BI831922  | 548.357   | 194.9     |
| AJ404615  | 5696.245  | 8041.341  | X67594    | 1285.76   | 1077.553  | M69238    | 248.665   | 112.121   |
| NM_016053 | 37837.852 | 43309.367 | BC008837  | 866.388   | 613.81    | NM_002711 | 333.062   | 172.702   |
| AB007869  | 2856.03   | 2880.707  | AB000734  | 1483.03   | 1298.622  | AK026092  | 751.357   | 628.76    |
| AB046844  | 2129.491  | 2962.326  | NM_033199 | 2166.849  | 2489.507  | AK001175  | 261.56    | 176.123   |
| NM_000302 | 2115.053  | 2861.238  | NM_015001 | 1851.911  | 1685.113  | NM_003329 | 38898.18  | 12004.04  |
| NM_013235 | 34207.141 | 31315.451 | SR6       | 2301.375  | 1404.145  | NM_003295 | 11008.737 | 3490.311  |
| NM_016015 | 15385.085 | 14459.559 | SR8       | 8839.449  | 18491.07  | NM_001783 | 3758.771  | 1220.951  |
| NM_001962 | 1001.517  | 667.947   | SR10      | 31111.758 | 7813.927  | J03171    | 1298.655  | 624.2     |
| AK026232  | 7234.377  | 7855.708  | CY3Cy5    | 2624.825  | 99.541    | NM_005312 | 494.115   | 222.857   |
| NM_014892 | 18847.432 | 20031.512 | X00094    | 1213.17   | 988.456   | NM_004210 | 3523.406  | 595.106   |
| AK023827  | 4745.504  | 5836.797  | NM_003775 | 873.702   | 957.277   | NM_020140 | 498.343   | 226.679   |
| NM_001117 | 1034.245  | 1387.694  | NM_002082 | 5793.991  | 4812.255  | NM_002500 | 789.743   | 381.423   |
| NM_000231 | 1009.509  | 2918.897  | AF155657  | 12951.032 | 11081.647 | NM_014892 | 3350.191  | 1092.299  |
| L07517    | 3465.644  | 5180.396  | NM_006056 | 2205.317  | 1751.021  | AK023827  | 724.957   | 376.785   |
| AK022451  | 1094.185  | 1006.383  | AF045229  | 8500.574  | 6920.684  | NM_001829 | 649.264   | 461.252   |
| NM_014359 | 63429.949 | 69099.109 | NM_001840 | 4018.274  | 3838.08   | AF283645  | 1187.679  | 724.177   |
| BM918441  | 882.935   | 1164.595  | AK025099  | 2087.373  | 2180.58   | NM_016575 | 521.637   | 328.805   |
| AA150828  | 1213.443  | 1440.12   | NM_016099 | 18166.174 | 14942.529 | NM_001045 | 1814.094  | 542.567   |
| AI859208  | 957.475   | 957.08    | NM_000394 | 661.656   | 722.766   | NM_005697 | 1815.185  | 736.305   |
| H64379    | 6957.497  | 8142.444  | NM_000830 | 640.75    | 712.959   | NM_003099 | 2673.605  | 952.837   |
| BE208258  | 60382.238 | 69252.008 | AF263523  | 1920.424  | 2112.553  | NM_004781 | 564.989   | 812.725   |
| T72202    | 956.602   | 892.013   | L08441    | 3470.971  | 10107.185 | NM_016315 | 8320.998  | 22828.775 |
| BI831922  | 2452.469  | 1802.836  | AA641953  | 2222.891  | 2141.849  | NM_018303 | 692.619   | 307.102   |
| M69238    | 938.406   | 823.674   | AL137764  | 10135.333 | 11013.472 | NM_014758 | 949.93    | 284.862   |
| NM_016081 | 13761.849 | 14828.635 | NM_001660 | 17197.59  | 14160.513 | NM_005124 | 621.802   | 353.574   |
| NM_006389 | 6883.374  | 8818.649  | NM_000710 | 611.198   | 725.866   | AK000947  | 570.563   | 212.28    |
| M30818    | 560.388   | 543.819   | NM_000752 | 1257.691  | 1089.422  | L08240    | 312.815   | 187.219   |
| NM_003329 | 63800.844 | 70389.758 | NM_002018 | 8395.041  | 6089.425  | NM_002940 | 525.117   | 440.745   |
| NM_003295 | 31846.766 | 22572.479 | NM_006018 | 420.326   | 330.568   | NM_016081 | 2653.843  | 538.535   |
| NM_014330 | 13314.997 | 13605.34  | AF161383  | 5365.44   | 4032.946  | NM_006389 | 955.849   | 417.173   |
| NM_007034 | 831.945   | 746.656   | NM_000410 | 9723.785  | 9342.368  | NM_002266 | 16984.666 | 6988.545  |
| NM_001783 | 11514.472 | 8620.365  | AF224266  | 1921.299  | 1567.015  | NM_014400 | 2525.376  | 1224.593  |
| J03171    | 4714.822  | 3712.558  | U72882    | 7404.636  | 7057.108  | AL157492  | 469.599   | 202.335   |
| NM_004323 | 13071.663 | 16964.994 | NM_014337 | 7972.842  | 8012.562  | AL353957  | 993.103   | 515.696   |
| NM_005312 | 2328.458  | 1559.869  | NM_007161 | 10746.89  | 11248.546 | NM_007214 | 3076.234  | 958.972   |
| NM_001711 | 1125.801  | 775.245   | NM_012463 | 2391.968  | 2447.711  | NM_000311 | 3478.413  | 708.293   |
| NM_004210 | 11752.821 | 10927.77  | L29140    | 29291.033 | 30109.078 | NM_017909 | 863.384   | 555.028   |
| NM_020140 | 1798.434  | 1989.042  | AK026448  | 5786.911  | 6270.222  | NM_006335 | 5141.612  | 3779.778  |
| AK075415  | 1461.544  | 1921.177  | AK057418  | 3960.301  | 4273.424  | AB040891  | 845.793   | 366.377   |
| AK025616  | 475.662   | 455.351   | AF148646  | 5594.334  | 5539.823  | AB037780  | 226.543   | 333.326   |
| NM_018964 | 5745.148  | 4574.306  | AL110218  | 1247.295  | 1341.929  | NM_005845 | 5198.208  | 1517.116  |
| NM_000080 | 1411.665  | 907.749   | AB023201  | 4089.931  | 4938.898  | NM_016209 | 4185.309  | 1605.511  |
| NM_001829 | 2659.525  | 2665.364  | NM_000072 | 604.31    | 881.995   | AK075415  | 419.459   | 203.616   |
| AF283645  | 4355.677  | 4572.36   | NM_000697 | 2401.08   | 2703.749  | NM_018964 | 1660.892  | 938.751   |
| NM_016575 | 1585.327  | 1321.907  | NM_000017 | 9395.838  | 7407.604  | NM_000080 | 284.301   | 195.027   |
| NM_018557 | 512.691   | 744.222   | NM_018346 | 6001.075  | 5396.124  | NM_002711 | 393.956   | 252.427   |
| NM_001045 | 5230.637  | 4047.661  | AL122054  | 2092.122  | 1593.022  | AK026092  | 1249.404  | 679.604   |
| NM_005697 | 5724.532  | 4432.026  | AB011182  | 1229.735  | 1188.59   | AK001175  | 314.834   | 317.915   |
| NM_003099 | 7830.04   | 6592.698  | NM_000140 | 6489.23   | 5480.141  | NM_003897 | 1060.276  | 543.241   |

|           |           |           |           |           |           |           |           |           |
|-----------|-----------|-----------|-----------|-----------|-----------|-----------|-----------|-----------|
| NM_004781 | 1926.924  | 1572.841  | NM_005125 | 948.192   | 1159.311  | NM_014165 | 5518.343  | 2500.319  |
| NM_018303 | 2096.706  | 2161.759  | NM_020038 | 617.499   | 727.783   | AL442085  | 625.174   | 220.633   |
| NM_014758 | 4348.361  | 3599.057  | NM_016246 | 1399.479  | 1431.018  | NM_013313 | 1458.008  | 395.567   |
| AL133047  | 485.35    | 403.796   | NM_015926 | 10014.609 | 10338.522 | NM_014736 | 4826.499  | 800.214   |
| NM_005124 | 3036.685  | 2619.947  | X03757    | 4099.442  | 3787.254  | AK023886  | 292.255   | 193.431   |
| AK000947  | 3098.242  | 3314.681  | NM_005136 | 755.835   | 718.132   | NM_016015 | 4269.793  | 2739.97   |
| L08240    | 2352.489  | 2936.089  | AK094513  | 926.395   | 1023.812  | AK022900  | 457.017   | 196.903   |
| NM_002940 | 2176.858  | 2614.849  | NM_001183 | 8217.329  | 7913.645  | AK026232  | 1624.259  | 820.394   |
| AB046844  | 2170.195  | 2308.918  | NM_000890 | 4221.458  | 4128.727  | NM_014892 | 5221.913  | 2124.544  |
| NM_000302 | 1729.172  | 1599.635  | NM_004976 | 15738.721 | 15013.646 | AK023827  | 1183.094  | 541.317   |
| NM_013235 | 31915.131 | 22805.98  | NM_006803 | 1907.063  | 2353.741  | NM_000231 | 349.943   | 589.779   |
| NM_016015 | 16277.827 | 13974.508 | NM_002533 | 1714.563  | 1909.202  | L07517    | 712.676   | 353.823   |
| NM_020120 | 1945.395  | 1979.802  | AF235022  | 802.597   | 749.57    | AK022451  | 285.479   | 129.298   |
| AK022900  | 1900.375  | 1673.665  | AF182814  | 2804.951  | 2949.802  | NM_014355 | 56812.66  | 37644.031 |
| AB023216  | 772.725   | 1004.414  | NM_005329 | 588.925   | 720.459   | BI831922  | 621.926   | 463.336   |
| NM_002266 | 50473.703 | 40594.352 | NM_000107 | 3700.337  | 3204.77   | NM_016081 | 3388.212  | 1586.725  |
| NM_014400 | 7743.221  | 6826.004  | AL157445  | 2153.361  | 1619.341  | NM_006385 | 1558.117  | 878.444   |
| AL157492  | 1696.782  | 2048.063  | NM_001517 | 7505.326  | 6490.334  | NM_003325 | 35822.551 | 9177.315  |
| AL353957  | 3745.954  | 3906.766  | NM_005053 | 2699.073  | 2777.759  | NM_003295 | 11656.538 | 1668.06   |
| NM_007214 | 8783      | 8845.071  | D86974    | 4110.595  | 3304.033  | NM_014330 | 4651.851  | 2979.628  |
| NM_000311 | 11141.606 | 10849.436 | NM_018283 | 2961.746  | 3101.993  | J03171    | 1458.741  | 1390.083  |
| NM_017905 | 3626.984  | 3366.784  | NM_001983 | 1464.363  | 2783.354  | NM_005312 | 457.119   | 430.312   |
| NM_006335 | 13689.073 | 13596.274 | Y12337    | 2027.363  | 2322.958  | NM_001711 | 300.859   | 322.014   |
| NM_000786 | 503.756   | 360.233   | M29551    | 13400.097 | 11820.184 | NM_004210 | 4071.556  | 2836.994  |
| NM_017731 | 1017.811  | 840.139   | AB023148  | 560.638   | 664.87    | NM_018964 | 1823.065  | 1217.28   |
| AB040891  | 3246.394  | 4460.235  | NM_002929 | 1492.831  | 1370.318  | NM_000080 | 493.761   | 284.421   |
| AB037780  | 939.171   | 999.272   | BC028375  | 2164.304  | 2569.902  | NM_001825 | 645.698   | 295.987   |
| NM_005845 | 19080.816 | 21319.131 | AB026436  | 6849.483  | 6595.953  | AF283645  | 1077.417  | 656.349   |
| NM_016205 | 15527.33  | 14173.89  | NM_016029 | 8599.322  | 10392.032 | NM_016575 | 352.092   | 166.691   |
| AK002114  | 7732.538  | 6518.657  | AK024562  | 2375.978  | 2721.666  | NM_005697 | 1841.856  | 2642.889  |
| AL390184  | 630.692   | 618.488   | NM_014066 | 1425.134  | 1334.273  | NM_003095 | 3262.911  | 5049.144  |
| NM_018695 | 529.448   | 559.629   | NM_004573 | 2333.266  | 2469.934  | NM_004781 | 633.052   | 2108.603  |
| NM_018045 | 696.529   | 718.225   | NM_001495 | 55236.895 | 53144.262 | NM_018303 | 646.024   | 1143.933  |
| AK026318  | 1973.508  | 2156.755  | AF263523  | 2357.118  | 2995.242  | NM_014755 | 1532.021  | 4155.913  |
| AF291673  | 2196.033  | 2815.878  | L08441    | 3723.824  | 8932.721  | NM_005124 | 878.323   | 771.275   |
| NM_004365 | 14652.481 | 19988.4   | AA641953  | 2002.431  | 1814.036  | AB046844  | 464.468   | 372.546   |
| NM_016355 | 6517.152  | 7720.104  | AI248827  | 2832.928  | 2559.506  | NM_000302 | 453.113   | 451.632   |
| AJ296290  | 3840.661  | 3484.895  | R45026    | 2622.253  | 2051.112  | NM_013235 | 12750.142 | 5171.641  |
| AK026092  | 3939.493  | 3873.432  | BG386057  | 210.585   | 695.494   | NM_016015 | 5607.807  | 2921.138  |
| AK001175  | 1458.548  | 2381.141  | AI970239  | 3636.836  | 2380.847  | NM_020120 | 327.345   | 226.356   |
| NM_003897 | 4112.998  | 3719.755  | NM_001631 | 665.149   | 556.653   | AK022900  | 438.69    | 161.984   |
| NM_014165 | 17215.791 | 15973.014 | AB000734  | 1151.858  | 1287.252  | AB023216  | 252.631   | 113.677   |
| AL442085  | 3986.917  | 3278.904  | NM_005987 | 66123.609 | 57628.848 | NM_002266 | 18029.305 | 7291.72   |
| NM_013313 | 6824.614  | 6191.682  | X87838    | 2195.604  | 2340.112  | NM_014400 | 2537.788  | 1404.523  |
| NM_014736 | 19097.949 | 15130.073 | NM_033195 | 2911.068  | 2952.155  | AL157492  | 452.218   | 204.724   |
| AK023886  | 1971.27   | 2065.287  | NM_015001 | 1904.314  | 1936.267  | NM_000311 | 6242.131  | 12414.133 |
| NM_002553 | 3364.439  | 3503.665  | NM_000169 | 6083.521  | 5886.265  | NM_017905 | 1192.437  | 5502.875  |
| AJ404615  | 4573.571  | 4360.942  | AK057418  | 3390.724  | 4388.088  | NM_006335 | 5956.196  | 8687.679  |
| NM_016053 | 30338.035 | 27303.896 | NM_007260 | 2070.879  | 2463.037  | AB040891  | 1001.272  | 1743.412  |
| AB007869  | 2778.892  | 2571.146  | AF148646  | 5924.194  | 4633.151  | AK002114  | 1985.159  | 1435.646  |
| M64108    | 2616.967  | 1914.788  | AL110218  | 1078.518  | 987.444   | AK026318  | 336.307   | 199.807   |
| Y17867    | 1413.802  | 1156.158  | AB023201  | 2625.231  | 2101.734  | AF291673  | 429.008   | 216.831   |
| M92642    | 616.927   | 648.272   | X00094    | 1089.678  | 788.155   | NM_004365 | 5056.023  | 1418.13   |



|           |           |           |           |           |           |           |           |           |
|-----------|-----------|-----------|-----------|-----------|-----------|-----------|-----------|-----------|
| NM_018071 | 2751.316  | 3605.079  | NM_003775 | 940.504   | 926.284   | NM_01635E | 2259.935  | 3151.68   |
| NM_004333 | 4653.498  | 5220.242  | NM_002082 | 7660.377  | 6625.517  | AJ296290  | 1476.765  | 1313.764  |
| M31520    | 56705.039 | 69024.664 | AF155657  | 14051.674 | 18981.098 | AK026092  | 1372.834  | 555.103   |
| NM_002020 | 5008.742  | 6409.941  | NM_006056 | 3945.026  | 5701.067  | NM_003897 | 1489.763  | 4221.315  |
| AL050137  | 709.028   | 1309.665  | AF045229  | 9971.58   | 16824.889 | NM_01416E | 8026.228  | 11678.345 |
| AK024423  | 2028.901  | 2694.882  | NM_001840 | 5058.749  | 6193.902  | AL442085  | 1365.776  | 3576.781  |
| NM_005043 | 20508.578 | 22807.998 | AK025099  | 2310.29   | 2797.826  | NM_013313 | 2094.567  | 2704.303  |
| NM_005979 | 11445.43  | 14922.259 | NM_016099 | 22355.602 | 19419.281 | NM_014736 | 7213.229  | 6222.398  |
| NM_006282 | 7952.204  | 12998.592 | NM_000830 | 923.606   | 843.068   | AK023886  | 290.513   | 497.961   |
| NM_020321 | 987.588   | 1530.665  | NM_005209 | 732.615   | 581.271   | NM_002553 | 768.48    | 772.957   |
| NM_015920 | 25087.385 | 16917.146 | AF148950  | 1399.065  | 1329.276  | AJ404615  | 1136.182  | 1182.316  |
| AB011113  | 1736.465  | 1894.076  | NM_001155 | 6926.46   | 5614.734  | NM_016053 | 8412.748  | 5387.794  |
| NM_004115 | 1533.534  | 1286.367  | M62896    | 26698.65  | 27185.08  | M64108    | 684.159   | 512.156   |
| NM_018287 | 1453.944  | 2048.379  | NM_017736 | 2748.44   | 2329.319  | Y17867    | 423.203   | 314.163   |
| NM_00195E | 1555.827  | 1689.537  | NM_000390 | 971.362   | 1546.842  | NM_018071 | 716.854   | 380.359   |
| AF016004  | 2233.996  | 2590.683  | AK021597  | 2660.474  | 3052.436  | NM_002020 | 2020.54   | 471.399   |
| NM_003567 | 2248.412  | 1878.42   | NM_005737 | 37495.547 | 36574.477 | AL050137  | 274.241   | 172.533   |
| NM_00731E | 2819.963  | 2028.283  | NM_000014 | 603.132   | 554.651   | AK024423  | 819.634   | 558.867   |
| AK023362  | 688.925   | 725.142   | NM_006803 | 2250.4    | 2164.417  | NM_006282 | 2744.785  | 6276.456  |
| S72604    | 25043.268 | 14736.721 | NM_002533 | 2056.907  | 1602.52   | NM_020321 | 375.876   | 1236.593  |
| NM_017984 | 408.926   | 514.916   | AF235022  | 759.616   | 589.046   | NM_015920 | 13305.843 | 21039.061 |
| NM_002460 | 671.917   | 632.736   | AL137764  | 10629.412 | 9433.598  | AB011113  | 758.909   | 1617.927  |
| NM_00267E | 1773.646  | 1751.431  | NM_001660 | 15963.895 | 11420.412 | NM_004115 | 383.47    | 543.348   |
| NM_012432 | 14138.397 | 13377.638 | NM_000710 | 563.899   | 617.536   | NM_018287 | 279.381   | 329.173   |
| NM_005007 | 5678.936  | 8724.676  | NM_000752 | 1417.175  | 1193.377  | NM_00195E | 536.254   | 917.189   |
| AK024996  | 6158.94   | 8915.075  | AB040945  | 411.544   | 612.486   | AF016004  | 790.826   | 1250.377  |
| NM_004417 | 821.381   | 1333.841  | NM_00201E | 9326.883  | 11907.969 | NM_003567 | 856.445   | 1479.256  |
| NM_012290 | 5551.348  | 6907.092  | NM_002377 | 1546.238  | 1539.714  | NM_00731E | 746.367   | 933.782   |
| NM_002431 | 8866.13   | 8275.466  | AF161383  | 5497.036  | 5309.956  | L20686    | 1076.724  | 2151.172  |
| NM_02046E | 4270.145  | 6976.53   | NM_000410 | 9209.087  | 9373.946  | NM_000304 | 607.63    | 1329.88   |
| AL079280  | 548.947   | 825.538   | AF224266  | 2113.746  | 1869.491  | S72604    | 7681.845  | 3498.416  |
| NM_002853 | 5054.121  | 5218.501  | U72882    | 12978.829 | 11531.772 | NM_00267E | 539.962   | 291.736   |
| NM_003174 | 2158.368  | 1815.326  | NM_014337 | 11697.091 | 12396.267 | NM_012432 | 4683.893  | 2004.429  |
| NM_012307 | 9604.035  | 6822.492  | NM_007161 | 16906.83  | 17633.502 | NM_005007 | 1715.315  | 949.062   |
| NM_002540 | 2122.587  | 1830.842  | NM_014387 | 18933.186 | 25692.674 | AK024996  | 1525.951  | 428.519   |
| NM_006371 | 2249.038  | 2408.069  | NM_003641 | 4297.963  | 4402.398  | NM_001827 | 44909.918 | 73240.344 |
| NM_018834 | 1079.828  | 1464.111  | NM_012463 | 2288.105  | 2643.92   | NM_02046E | 1073.852  | 1379.786  |
| AK026882  | 1123.44   | 1273.452  | L29140    | 30726.977 | 30211.061 | AL079280  | 204.167   | 612.393   |
| NM_004574 | 545.06    | 418.36    | AK026448  | 5086.105  | 6828.159  | NM_002853 | 2095.32   | 3468.302  |
| NM_00484E | 1389.517  | 1064.787  | AB026436  | 4076.049  | 3738.309  | NM_003174 | 789.665   | 1278.113  |
| AF014459  | 2615.586  | 3012.514  | NM_016029 | 10268.161 | 12223.771 | NM_012307 | 6139.337  | 6739.138  |
| AK024601  | 7113.544  | 4496.577  | AK024562  | 1884.478  | 1734.912  | NM_002540 | 533.126   | 599.539   |
| S68069    | 9223.979  | 10012.421 | NM_014066 | 1176.076  | 1464.376  | NM_006371 | 553.056   | 793.979   |
| AB011095  | 1127.933  | 943.665   | NM_004573 | 1852.958  | 1671.265  | NM_018834 | 429.745   | 574.228   |
| NM_001503 | 1268.317  | 1075.584  | NM_000072 | 416.589   | 344.288   | NM_004574 | 266.231   | 353.989   |
| NM_006302 | 3682.227  | 3532.448  | NM_000697 | 1920.243  | 1836.385  | NM_00484E | 357.296   | 1068.932  |
| AJ224875  | 8015.516  | 9193.154  | NM_000017 | 8441.938  | 6491.511  | NM_001944 | 621.367   | 1787.707  |
| NM_00214E | 4127.241  | 4709.788  | NM_000237 | 436.507   | 901.657   | NM_014813 | 347.87    | 870.976   |
| AF043324  | 8242.395  | 8923.605  | NM_018346 | 7123.898  | 6188.21   | AF014459  | 689.997   | 553.307   |
| AK024172  | 1405.495  | 1412.483  | AL122054  | 2441.396  | 2015.033  | AK024601  | 2253.199  | 1189.471  |
| NM_014814 | 8620.047  | 11704.52  | AB011182  | 2246.595  | 2259.209  | S68069    | 2810.626  | 2130.687  |
| NM_002797 | 20137.209 | 28510.014 | NM_000140 | 7779.151  | 9095.469  | AB011095  | 334.721   | 191.425   |
| NM_00280E | 17834.227 | 21561.271 | NM_00512E | 3398.632  | 3110.431  | NM_006302 | 820.591   | 384.706   |

|           |           |           |           |           |           |           |           |           |
|-----------|-----------|-----------|-----------|-----------|-----------|-----------|-----------|-----------|
| NM_017912 | 3600.72   | 3335.04   | NM_020038 | 655.78    | 825.763   | AJ224875  | 2261.165  | 719.132   |
| NM_000423 | 5337.686  | 4679.256  | NM_016246 | 1589.135  | 1613.555  | NM_002146 | 923.56    | 321.354   |
| AB046838  | 4045.298  | 3746.51   | NM_015926 | 19023.34  | 21187.572 | AF043324  | 1385.59   | 467.063   |
| AK026339  | 755.997   | 661.921   | X03757    | 4270.195  | 4373.521  | NM_002797 | 11235.331 | 21107.229 |
| X98411    | 4151.333  | 3711.738  | NM_018658 | 22115.713 | 25234.971 | AK024318  | 1110.552  | 3490.789  |
| AF116658  | 5119.093  | 5255.594  | NM_005136 | 900.649   | 706.169   | NM_017912 | 3700.106  | 8115.96   |
| NM_014865 | 5738.815  | 4685.319  | AK094513  | 1407.235  | 1209.921  | NM_000423 | 2126.696  | 4472.518  |
| AB032977  | 4038.639  | 2840.149  | NM_001183 | 8416.582  | 8706.198  | AB046838  | 920.385   | 2405.889  |
| AK001725  | 1403.805  | 1278.99   | NM_000890 | 4405.712  | 5019.093  | AK026339  | 283.04    | 1116.246  |
| NM_003036 | 1877.031  | 1442.931  | NM_004976 | 16986.27  | 17614.195 | X98411    | 1888      | 3688.572  |
| NM_020529 | 3778.583  | 3687.08   | NM_033199 | 2477.181  | 2536.317  | AF116658  | 1834.469  | 3050.688  |
| NM_020395 | 3881.512  | 2521.375  | NM_015001 | 1803.698  | 1572.506  | NM_014865 | 2388.335  | 3952.303  |
| NM_003425 | 1596.2    | 1489.738  | NM_000169 | 4006.668  | 3677.969  | AB032977  | 3250.906  | 5194.849  |
| NM_013388 | 8719.464  | 7221.11   | AF182814  | 2714.394  | 2282.347  | AK001725  | 453.913   | 1646.284  |
| AF038951  | 13398.451 | 9475.207  | NM_005329 | 928.923   | 880.146   | NM_003036 | 997.455   | 1864.177  |
| AK021811  | 3328.407  | 2920.335  | NM_000107 | 3862.278  | 3592.277  | NM_020529 | 1367.718  | 1218.243  |
| NM_003428 | 2525.372  | 1946.162  | AL157445  | 2395.763  | 2016.279  | NM_020395 | 1171.846  | 861.03    |
| AF055030  | 2529.702  | 1553.349  | NM_001517 | 7640.761  | 6779.774  | NM_003425 | 318.006   | 286.224   |
| AK000589  | 2273.94   | 1669.362  | NM_005053 | 3425.108  | 2865.008  | NM_013388 | 2686.312  | 1403.138  |
| X53281    | 5544.313  | 5491.951  | D86974    | 4294.037  | 3251.997  | AF038951  | 3197.96   | 1373.701  |
| BC012782  | 2796.479  | 2162.583  | NM_018283 | 2829.769  | 2206.86   | AK021811  | 871.449   | 353.132   |
| AF132026  | 55901.766 | 51257.215 | NM_001983 | 1600.305  | 2069.201  | AK000589  | 791.135   | 1155.815  |
| AL050353  | 3173.42   | 1984.463  | Y12337    | 2473.444  | 2376.892  | X53281    | 3656.01   | 6661.266  |
| AB037788  | 10654.138 | 7957.734  | M29551    | 15490.52  | 13239.294 | BC012782  | 867.739   | 1418.061  |
| NM_004587 | 4805.478  | 2639.004  | AB023148  | 620.945   | 824.402   | AF132026  | 29073.059 | 24483.109 |
| NM_000975 | 57092.258 | 64128.266 | NM_002929 | 1926.12   | 2219.653  | AL050353  | 1174.796  | 1782.115  |
| AF147412  | 13139.433 | 9322.436  | BC028375  | 2899.998  | 3396.012  | AB037788  | 2963.105  | 3682.636  |
| AK024570  | 18562.533 | 13543.487 | AF148950  | 728.793   | 464.606   | NM_004587 | 2052.634  | 1582.098  |
| AF161401  | 14056.048 | 10347.585 | NM_001155 | 6052.56   | 5925.111  | NM_000975 | 44575.238 | 81577.766 |
| NM_000990 | 12916.567 | 9617.253  | M62896    | 13483.868 | 21038.379 | AF161401  | 6047.121  | 7939.397  |
| NM_014740 | 4472.591  | 4304.425  | NM_017736 | 2233.754  | 2347.246  | NM_000990 | 4401.59   | 5955.203  |
| NM_015956 | 10785.411 | 8204.897  | NM_000390 | 1218.907  | 1753.744  | NM_014740 | 1447.895  | 3127.754  |
| AF075008  | 2518.463  | 1982.316  | NM_001498 | 48135.07  | 42761.125 | NM_015956 | 2436.764  | 1304.45   |
| NM_006504 | 3494.684  | 3017.869  | AF263523  | 1883.087  | 1497.463  | AF075008  | 677.995   | 851.697   |
| AF070538  | 1268.782  | 559.722   | L08441    | 3268.41   | 7503.768  | NM_006504 | 980.261   | 648.74    |
| AL137430  | 719.333   | 499.673   | AA641953  | 1778.784  | 1723.089  | AF070538  | 250.683   | 190.914   |
| NM_000696 | 12478.26  | 8051.791  | AI248827  | 2309.722  | 2030.471  | NM_000696 | 3404.022  | 1403.932  |
| NM_002488 | 34506.301 | 17584.918 | R45026    | 2482.381  | 1948.348  | NM_002488 | 10398.964 | 2700.941  |
| NM_004003 | 6866.509  | 4241.703  | AI970239  | 3855.58   | 1936.393  | NM_004003 | 2441.599  | 793.631   |
| NM_000188 | 2982.371  | 1721.663  | AA496452  | 2293.118  | 2146.26   | BF244401  | 733.684   | 2494.46   |
| BF244401  | 1725.689  | 1317.457  | X67594    | 1593.656  | 1066.17   | NM_004718 | 16660.525 | 16550.428 |
| NM_004718 | 41251.063 | 25360.822 | NM_001631 | 557.473   | 545.036   | AL359585  | 1855.357  | 1936.064  |
| AL359585  | 3319.799  | 2167.874  | AB000734  | 1606.558  | 1886.815  | AB046850  | 1270.305  | 2250.762  |
| AB046850  | 3519.896  | 2466.175  | NM_007161 | 13807.55  | 12111.436 | NM_014801 | 1318.389  | 1923.002  |
| NM_014801 | 2020.077  | 1646.411  | NM_014387 | 17776.318 | 24627.584 | NM_003642 | 4365.739  | 6661.892  |
| NM_003642 | 12264.426 | 12899.147 | NM_003641 | 3707.708  | 3967.096  | AB027013  | 1818.625  | 3550.928  |
| AB027013  | 2119.895  | 1915.479  | NM_012463 | 1861.599  | 2338.248  | BF185480  | 1610.82   | 3111.378  |
| BC032686  | 699.948   | 456.62    | L29140    | 25367.779 | 25498.307 | NM_002128 | 10629.686 | 10188.229 |
| BF185480  | 3186.217  | 2197.954  | AK026448  | 4327.49   | 5600.778  | NM_007105 | 202.793   | 308.715   |
| NM_002128 | 32705.783 | 16309.952 | AK057418  | 3241.515  | 2731.572  | NM_003074 | 1402.087  | 1503.776  |
| NM_007105 | 548.033   | 468.399   | L37199    | 1090.072  | 769.53    | AL360195  | 600.993   | 1475.902  |
| NM_003074 | 3605.16   | 2588.055  | NM_007260 | 2044.633  | 1638.273  | NM_017810 | 712.795   | 948.731   |
| AL360195  | 1623.655  | 930.753   | AF148646  | 5133.546  | 3526.986  | NM_003181 | 36851.516 | 60729.863 |

|           |           |           |           |           |           |           |           |          |
|-----------|-----------|-----------|-----------|-----------|-----------|-----------|-----------|----------|
| U14383    | 925.344   | 862.535   | AL110218  | 892.123   | 892.604   | NM_004451 | 632.158   | 1724.098 |
| NM_017810 | 3206.329  | 3363.223  | AB023201  | 2565.063  | 2017.536  | NM_004364 | 392.195   | 184.216  |
| NM_003181 | 57977.605 | 62238.156 | X00094    | 969.217   | 678.833   | AK023505  | 1016.571  | 494.65   |
| NM_004451 | 3032.191  | 3541.627  | NM_003775 | 1054.576  | 909.964   | AB037851  | 1929.781  | 775.067  |
| NM_004364 | 1086.6    | 788.923   | NM_002082 | 7412.194  | 5864.34   | AL050389  | 2191.574  | 588.578  |
| NM_014951 | 471.425   | 388.332   | AF155657  | 13358.928 | 12958.215 | AK025855  | 385.581   | 317.014  |
| AK023505  | 3484.131  | 2537.962  | NM_006056 | 2606.613  | 2401.078  | AK024684  | 413.938   | 225.506  |
| AB037851  | 6764.282  | 4681.043  | AF045229  | 8818.91   | 8236.42   | NM_014945 | 6309.292  | 2383.555 |
| AL050389  | 9451.175  | 6657.047  | NM_001840 | 4391.598  | 3989.873  | AK001546  | 662.19    | 1504.858 |
| AK025855  | 2168.291  | 2235.739  | AK025099  | 2277.775  | 2237.299  | NM_006537 | 3769.367  | 4947.258 |
| AK024684  | 2047.082  | 2184.304  | NM_016099 | 20754.283 | 18244.303 | AF007155  | 5741.29   | 9763.689 |
| NM_014945 | 15768.762 | 13241.34  | NM_000228 | 429.316   | 850.492   | AL049282  | 1777.31   | 3601.291 |
| AK001546  | 2129.734  | 1923.294  | NM_000830 | 1222.008  | 1503.239  | AK021443  | 1767.023  | 4029.579 |
| NM_006537 | 9544.674  | 11491.596 | NM_005136 | 1036.07   | 1359.5    | AF070569  | 347.121   | 488.791  |
| AF007155  | 10453.013 | 13582.039 | AK094513  | 1103.692  | 1005.993  | NM_020233 | 1389.758  | 1234.912 |
| AK023055  | 1200.424  | 1137.712  | NM_001183 | 8602.321  | 10059.696 | AL355732  | 1138.427  | 3109.929 |
| AL049282  | 6685.129  | 5553.918  | NM_000890 | 2293.698  | 2270.716  | NM_017966 | 1051.547  | 3714.426 |
| AK021443  | 5529.207  | 9663.519  | NM_004976 | 16106.187 | 14009.281 | AF143327  | 570.83    | 1102.968 |
| AF070569  | 1659.927  | 2449.703  | AK021597  | 1852.158  | 1579.245  | AL049990  | 460.427   | 1342.537 |
| NM_020233 | 4693.679  | 6713.303  | NM_005737 | 33487.688 | 29474.367 | AF131843  | 458.169   | 1115.604 |
| AF143873  | 805.383   | 513.386   | NM_000014 | 607.463   | 769.289   | AK026653  | 506.461   | 1163.679 |
| AL355732  | 3636.607  | 2882.368  | NM_006803 | 1944.283  | 1812.369  | NM_020231 | 1029.82   | 1217.633 |
| NM_017966 | 3964.91   | 5484.683  | NM_002533 | 1616.009  | 1360.492  | AL133118  | 1867.879  | 1216.051 |
| AF143327  | 2288.961  | 2828.518  | AF235022  | 524.485   | 438.239   | AK023571  | 843.192   | 570.491  |
| AL137535  | 1048.641  | 1406.731  | AL137764  | 9613.398  | 9432.988  | NM_001702 | 1444.617  | 649.251  |
| AL049991  | 934.103   | 1345.215  | NM_001660 | 16892.592 | 11672.439 | AK026657  | 789.03    | 283.074  |
| AL049990  | 1657.909  | 2903.631  | NM_000710 | 520.567   | 401.746   | AF087991  | 11119.377 | 17697.76 |
| AF131843  | 1432.308  | 1772.219  | NM_000752 | 1445.605  | 993.87    | Y12839    | 248.906   | 708.005  |
| AK026653  | 2328.511  | 1882.744  | NM_002018 | 9386.802  | 8296.285  | AJ227884  | 403.043   | 604.594  |
| NM_020231 | 2102.048  | 1927.829  | NM_002377 | 454.932   | 438.556   | X64986    | 4122.292  | 2996.115 |
| AL133118  | 6760.993  | 8949.984  | NM_006018 | 413.605   | 272.437   | Y10510    | 256.87    | 533.207  |
| AK023571  | 2126.614  | 1946.193  | AF161383  | 5224.765  | 4956.523  | L38282    | 1166.467  | 2679.755 |
| AF052148  | 1061.796  | 1296.557  | NM_000410 | 9902.25   | 9815.357  | NM_018056 | 2297.471  | 6051.275 |
| NM_001702 | 7808.741  | 11426.024 | AF224266  | 3056.452  | 2909.396  | NM_019008 | 883.843   | 2422.19  |
| AK026657  | 4591.402  | 5052.466  | U72882    | 12905.717 | 12047.654 | M20838    | 303.02    | 1170.668 |
| AL833558  | 846.567   | 1191.899  | NM_014337 | 11688.772 | 12348.861 | AK022738  | 365.436   | 1450.641 |
| NM_018050 | 1046.166  | 1117.329  | Y12337    | 1560.757  | 2470.819  | AK024252  | 342.539   | 313.139  |
| AF087991  | 28438.213 | 35536.969 | M29551    | 11582.616 | 13792.329 | AK002095  | 540.079   | 545.13   |
| AJ227862  | 1055.842  | 940.665   | AB023148  | 655.015   | 843.693   | AK000821  | 1903.817  | 4174.479 |
| Y12839    | 837.409   | 1371.532  | NM_002929 | 1536.85   | 1949.199  | AK024526  | 4268.554  | 7765.003 |
| AJ001876  | 1069      | 1477.803  | BC028375  | 2340.688  | 2727.797  | AK000848  | 253.66    | 781.64   |
| AJ227884  | 1173.858  | 1647.571  | AB026436  | 4458.64   | 4021.439  | AK023307  | 211.676   | 325.49   |
| X64986    | 4640.304  | 5418.664  | NM_016029 | 7517.463  | 8807.857  | NM_017618 | 1060.816  | 1305.452 |
| L38282    | 3189.77   | 3812.017  | AK024562  | 1682.879  | 1695.751  | NM_017848 | 221.522   | 1149.048 |
| NM_018056 | 6431.098  | 9230.881  | NM_014066 | 1138.471  | 1214.324  | AK024315  | 5866.021  | 7221.768 |
| Y16185    | 825.162   | 1453.321  | NM_004573 | 1812.199  | 1666.63   | AK024945  | 558.175   | 1926.958 |
| NM_019008 | 3827.149  | 4528.205  | NM_000072 | 467.236   | 589.906   | AK024579  | 1222.064  | 2440.762 |
| M20838    | 1059.823  | 863.876   | NM_000697 | 2613.303  | 2581.68   | S75708    | 4053.552  | 2397.688 |
| AK022738  | 1117.859  | 1116.659  | NM_000017 | 10966.427 | 8394.718  | U79291    | 4192.764  | 2202.9   |
| AK024252  | 1471.487  | 1520.665  | NM_000237 | 734.42    | 696.754   | D17172    | 9995.788  | 3451.751 |
| AK002095  | 1599      | 1497.067  | NM_018346 | 7158.304  | 7137.966  | AJ227859  | 534.329   | 345.123  |
| AK000821  | 5992.964  | 5677.313  | AL122054  | 2351.175  | 2100.551  | NM_018544 | 299.939   | 178.663  |
| AK024526  | 8421.048  | 7269.068  | AB011182  | 1637.342  | 1472.758  | AB020699  | 2903.07   | 5553.82  |

|           |           |           |           |           |           |           |           |           |
|-----------|-----------|-----------|-----------|-----------|-----------|-----------|-----------|-----------|
| AK000848  | 1017.272  | 796.231   | AB023151  | 590.881   | 674.235   | AF086269  | 750.163   | 1583.753  |
| AK023307  | 677.229   | 531.942   | NM_000140 | 8964.031  | 10033.196 | U90437    | 5994.384  | 7530.173  |
| NM_017618 | 2251.948  | 2059.409  | NM_005125 | 3347.055  | 3593.02   | NM_007053 | 12476.178 | 17097.229 |
| NM_017848 | 600.623   | 736.733   | NM_020038 | 641.33    | 739.841   | AK022153  | 436.093   | 744.873   |
| AK024315  | 14118.854 | 17433.664 | NM_016246 | 2052.813  | 2140.897  | AK022789  | 356.049   | 456.101   |
| AK024560  | 460.782   | 344.14    | NM_015926 | 21557.15  | 25283.164 | AK023756  | 285.139   | 382.016   |
| AK024579  | 2436.733  | 1623.288  | X03757    | 3995.65   | 4450.312  | NM_001126 | 2408.67   | 1406.465  |
| AK024998  | 879.205   | 818.023   | NM_020248 | 21452.328 | 35490.961 | AK023673  | 1886.073  | 908.479   |
| S75708    | 9128.289  | 7239.711  | X89670    | 1864.818  | 2238.631  | NM_018252 | 1136.132  | 531.723   |
| U79291    | 11824.307 | 7210.618  | NM_001726 | 487.443   | 731.079   | NM_018000 | 20418.449 | 7343.731  |
| D17172    | 26499.693 | 20743.811 | NM_004053 | 4202.811  | 5793.716  | AF130112  | 636.539   | 599.105   |
| AJ227859  | 2202.147  | 3070.967  | NM_020374 | 3751.223  | 2873.6    | NM_000551 | 2366.992  | 3824.965  |
| NM_018544 | 1270.129  | 1878.498  | NM_014922 | 1763.397  | 1933.384  | AL365518  | 625.06    | 1107.661  |
| AK022670  | 872.926   | 1238.847  | NM_000169 | 4165.803  | 3595.323  | AF086257  | 1282.537  | 3417.249  |
| AB020699  | 7317.134  | 7669.5    | AF182814  | 3581.281  | 2957.206  | AF075056  | 361.825   | 798.348   |
| AF086269  | 2459      | 3194.03   | NM_005329 | 884.246   | 983.076   | AC119751  | 315.393   | 363.693   |
| U90437    | 16085.197 | 30104.518 | NM_000107 | 2401.874  | 2222.151  | NM_019056 | 2031.267  | 2380.026  |
| AK000842  | 13808.261 | 12147.47  | AL157445  | 4940.779  | 4868.963  | AF279783  | 1094.507  | 2257.304  |
| AK023386  | 10752.371 | 8265.718  | NM_001517 | 9355.156  | 9679.929  | AF182422  | 6782.99   | 10233.962 |
| NM_007053 | 23676.139 | 16902.693 | NM_005053 | 6283.081  | 6390.945  | NM_016943 | 295.555   | 621.9     |
| AK022153  | 898.675   | 789.201   | D86974    | 5322.618  | 4481.562  | AF070602  | 620.68    | 1265.996  |
| AK022789  | 826.793   | 706.791   | NM_018283 | 3028.014  | 2411.079  | BE393290  | 815.164   | 1986.14   |
| AK023756  | 1841.546  | 1250.694  | NM_001983 | 1462.723  | 2459.558  | NM_017622 | 881.641   | 1426.208  |
| NM_001126 | 7406.292  | 6327.511  | NM_004993 | 946.871   | 948.021   | AF133331  | 5566.578  | 10795.777 |
| AK023673  | 6134.553  | 4621.967  | NM_001793 | 17549.158 | 16172.567 | AK022289  | 427.976   | 1306.719  |
| NM_018252 | 4888.829  | 4107.167  | NM_001943 | 2579.121  | 2492.739  | AF161403  | 2596.96   | 2107.319  |
| NM_018000 | 52596.5   | 47542.676 | NM_004927 | 6506.431  | 6678.34   | NM_020183 | 2579.769  | 1250.212  |
| AF164963  | 1147.792  | 1409.98   | AB040928  | 473.095   | 666.148   | NM_018029 | 380.077   | 244.923   |
| AF124366  | 43277.281 | 50243.711 | NM_001459 | 2797.096  | 3649.333  | AL389954  | 285.909   | 220.59    |
| AF130112  | 1734.982  | 2181.852  | NM_015513 | 10221.426 | 13434.395 | NM_019852 | 574.517   | 261.486   |
| NM_000551 | 7243.959  | 8585.989  | NM_017412 | 1242.808  | 2192.391  | AL050032  | 1633.349  | 1493.683  |
| AL365518  | 2530.14   | 3340.359  | NM_005544 | 815.448   | 613.231   | AF009304  | 376.359   | 209.688   |
| AF086257  | 4864.041  | 7130.49   | NM_002964 | 22426.574 | 18819.072 | AF086177  | 4776.142  | 7728.054  |
| AC119751  | 601.793   | 807.631   | NM_003215 | 926.021   | 623.692   | NM_018949 | 880.582   | 2089.863  |
| U00928    | 1108.463  | 937.407   | NM_016447 | 1367.698  | 1476.6    | D17187    | 872.94    | 1354.945  |
| NM_019056 | 6223.596  | 5487.183  | NM_015626 | 5795.365  | 4528.014  | AJ243672  | 376.106   | 688.563   |
| AF279783  | 3445.825  | 3727.118  | NM_004899 | 4377.822  | 3579.32   | AL122087  | 478.097   | 1404.068  |
| AF182422  | 16847.041 | 19364.52  | AB006628  | 16750.424 | 15547.168 | D17169    | 31158.875 | 37178.531 |
| AF070602  | 1011.563  | 1676.199  | AF272036  | 11263.985 | 9237.931  | NM_017924 | 6746.251  | 9890.016  |
| BE393290  | 2728.211  | 4247.469  | AF231023  | 4258.316  | 3557.573  | S81578    | 282.726   | 1547.609  |
| NM_017622 | 3705.941  | 3185.207  | NM_005148 | 2535.913  | 2996.699  | NM_017546 | 4485.068  | 8277.459  |
| AF133331  | 11946.021 | 9212.104  | NM_004746 | 1679.862  | 1790.649  | AL137400  | 904.134   | 3092.073  |
| AK022289  | 1595.96   | 1306.547  | AF146019  | 9692.979  | 9965.017  | NM_006511 | 329.509   | 329.955   |
| AF161403  | 4308.92   | 3037.197  | Z36782    | 6740.379  | 6289.144  | AF007142  | 901.485   | 1079.153  |
| NM_020183 | 6520.918  | 5201.784  | M70435    | 548.417   | 515.067   | AF119853  | 1297.86   | 1681.196  |
| NM_018029 | 1221.228  | 767.253   | NM_003490 | 32570.277 | 47167.012 | CY3Cy5    | 770.524   | 195.984   |
| AL389954  | 827.867   | 700.44    | AF210651  | 806.037   | 722.066   | AI248827  | 1326.886  | 1180.818  |
| NM_019852 | 2568.808  | 1905.76   | AF090942  | 820.776   | 860.621   | R45026    | 786.42    | 1075.679  |
| NM_006118 | 5724.156  | 10203.783 | AF508940  | 2438.71   | 2147.328  | NM_015869 | 211.593   | 354.701   |
| AK026225  | 43801.77  | 46465.984 | NM_020237 | 854.13    | 1194.286  | NM_001631 | 215.151   | 496.012   |
| AL050032  | 2089.085  | 2493.526  | NM_001951 | 1682.38   | 1496.821  | AB000734  | 432.238   | 713.441   |
| AF009304  | 1230.172  | 1585.287  | NM_002391 | 2075.773  | 1672.811  | NM_005987 | 41143.805 | 76704.648 |
| AF086177  | 12275.955 | 16666.148 | NM_003674 | 54533.078 | 52342.242 | X87838    | 510.096   | 1051.599  |

|           |           |           |           |           |           |           |           |           |
|-----------|-----------|-----------|-----------|-----------|-----------|-----------|-----------|-----------|
| NM_01894  | 1912.19   | 3990.456  | NM_001197 | 2829.306  | 3149.284  | NM_03319  | 629.421   | 1252.305  |
| AK021593  | 651.667   | 1152.058  | NM_006682 | 1571.844  | 1545.364  | NM_015001 | 394.379   | 827.756   |
| Z36847    | 363.364   | 1128.176  | NM_006410 | 788.079   | 646.336   | SR2       | 26425.332 | 24793.959 |
| D17187    | 2948.534  | 3117.34   | NM_014977 | 61497.32  | 55367.469 | SR4       | 3451.663  | 3465.35   |
| AJ243672  | 1366.428  | 1224.931  | AK026325  | 2587.964  | 3436.056  | SR6       | 629.93    | 453.533   |
| AL122087  | 1023.281  | 1142.123  | U83857    | 1343.28   | 1286.468  | SR8       | 2474.874  | 7889.675  |
| D17169    | 52520.281 | 52443.559 | NM_001230 | 2630.827  | 2544.843  | SR10      | 7711.609  | 1479.604  |
| NM_017924 | 15637.234 | 13912.445 | AK025662  | 2219.907  | 2337.738  | CY3Cy5    | 293.57    | 134.589   |
| S81578    | 801.005   | 1025.168  | NM_000201 | 1897.679  | 2223.574  | X00094    | 314.454   | 476.82    |
| NM_01754  | 4851.513  | 6626.592  | AB011539  | 3352.78   | 4106.507  | NM_000394 | 154.529   | 420.588   |
| AJ001889  | 321.726   | 796.662   | U37028    | 4592.72   | 5486.752  | NM_000830 | 335.108   | 750.955   |
| AL137400  | 2630.572  | 2967.15   | AB014597  | 2480.211  | 2377.227  | AF148950  | 143.85    | 230.526   |
| NM_006511 | 1492.083  | 1129.994  | S81361    | 735.41    | 875.583   | NM_001155 | 1392.896  | 1172.329  |
| AF007142  | 3313.518  | 2469.051  | AK024313  | 4383.617  | 5741.909  | M62896    | 1232.611  | 881.65    |
| AF119853  | 3028.336  | 2523.372  | NM_015524 | 7329.277  | 3454.745  | NM_01773  | 288.068   | 310.521   |
| CY3Cy5    | 2303.786  | 233.89    | NM_001673 | 5188.607  | 6330.545  | NM_000390 | 425.561   | 120.362   |
| AI248827  | 2303.065  | 1433.395  | AK023167  | 963.242   | 428.473   | NM_00149  | 8780.132  | 3995.33   |
| R45026    | 3204.737  | 2530.312  | NM_016510 | 4634.545  | 5486.144  | AF263523  | 379.093   | 226.331   |
| AI970239  | 1747.484  | 3591.083  | NM_014270 | 4073.565  | 5726.039  | L08441    | 2618.402  | 464.897   |
| AA496452  | 3819.287  | 4765.473  | NM_000071 | 2847.916  | 3088.243  | AA641953  | 618.497   | 295.573   |
| X67594    | 875.801   | 963.268   | NM_006843 | 3614.508  | 3279.278  | NM_002377 | 257.341   | 570.171   |
| NM_01586  | 258.283   | 218.948   | NM_004321 | 3338.676  | 3243.334  | U72882    | 1617.172  | 2126.379  |
| NM_001631 | 370.438   | 317.208   | AF311212  | 6485.427  | 6073.799  | NM_014337 | 2560.395  | 2903.267  |
| X87838    | 1475.563  | 2519.124  | NM_006915 | 1887.994  | 1611.517  | NM_007161 | 2566.154  | 2546.923  |
| NM_03319  | 1704.604  | 2011.676  | NM_006035 | 1820.068  | 2103.317  | NM_014387 | 8079.062  | 4033.961  |
| NM_015001 | 1900.825  | 2229.742  | NM_00608  | 8581.188  | 9708.125  | NM_003641 | 429.158   | 281.399   |
| SR2       | 52889.344 | 44525.199 | NM_004520 | 9376.913  | 9331.163  | NM_01246  | 256.662   | 106.457   |
| SR4       | 12532.578 | 10319.189 | AK027118  | 11398.164 | 10790.084 | L29140    | 1411.203  | 729.588   |
| SR6       | 1726.167  | 1885.765  | AK022882  | 7105.659  | 13384.612 | AK026448  | 594.87    | 279.907   |
| NM_00208  | 1527.036  | 1142.988  | NM_006105 | 3417.402  | 3866.01   | AK057418  | 270.042   | 144.673   |
| AF155657  | 13040.537 | 6977.277  | NM_005981 | 633.905   | 779.853   | NM_007260 | 290.556   | 243.989   |
| NM_00605  | 1401.744  | 1255.792  | NM_016264 | 1324.145  | 1984.99   | AF148646  | 969.312   | 543.828   |
| AF045229  | 9858.348  | 9370.604  | NM_006079 | 14225.093 | 15248.354 | AL110218  | 234.352   | 231.152   |
| NM_001840 | 5557.435  | 5080.664  | AB037837  | 1621.844  | 1897.178  | AB023201  | 926.854   | 495.816   |
| AK025099  | 3132.353  | 2486.868  | NM_014595 | 6460.942  | 7534.111  | NM_000697 | 625.039   | 546.58    |
| NM_01609  | 8733.403  | 6254.325  | NM_01478  | 994.086   | 1198.119  | NM_000017 | 1581.261  | 2027.942  |
| NM_000830 | 762.92    | 701.908   | AB046784  | 1330.02   | 1189.234  | AL122054  | 978.189   | 1435.518  |
| NM_001155 | 5881.094  | 7910.368  | X52402    | 4321.758  | 4907.295  | AB011182  | 681.274   | 680.933   |
| M62896    | 5173.23   | 5389.138  | AL133663  | 1021.026  | 1033.053  | AB023151  | 293.282   | 354.004   |
| NM_01773  | 2157.162  | 2051.375  | NM_004992 | 973.917   | 1426.801  | NM_01624  | 411.563   | 628.186   |
| NM_000390 | 1321.743  | 760.057   | NM_014462 | 2780.327  | 2299.584  | X03757    | 993.904   | 1464.453  |
| NM_00149  | 16380.904 | 21384.309 | NM_01415  | 60092.184 | 52981.133 | NM_01865  | 865.765   | 1283.622  |
| AL137764  | 4314.012  | 2454.441  | NM_003137 | 6020.229  | 4829.983  | NM_001183 | 256.444   | 440.641   |
| NM_001660 | 2374.501  | 4010.901  | NM_00693  | 36389.961 | 43788.887 | NM_00497  | 1157.049  | 803.811   |
| NM_00075  | 705.717   | 976.21    | NM_004515 | 572.283   | 405.3     | NM_005737 | 3583.584  | 2385.68   |
| NM_00201  | 3632.598  | 1379.425  | NM_02015  | 3518.089  | 2559.007  | NM_00680  | 440.7     | 322.299   |
| AF161383  | 7957.927  | 7208.478  | AF176085  | 2543.319  | 2477.654  | NM_00253  | 541.604   | 405.736   |
| NM_000410 | 4374.519  | 3482.676  | NM_006985 | 13446.724 | 12767.822 | AF235022  | 172.654   | 155.687   |
| AF224266  | 582.987   | 486.397   | AF265228  | 2049.454  | 1761.241  | BE799167  | 182.922   | 127.775   |
| U72882    | 1989.381  | 2009.597  | NM_003757 | 27926.225 | 34966.891 | AF182814  | 907.832   | 699.914   |
| NM_014337 | 3806.842  | 3664.566  | AK025561  | 4631.979  | 4429.402  | NM_00003  | 459.145   | 15.531    |
| NM_007161 | 6274.449  | 6240.628  | NM_018602 | 42098.648 | 42441.535 | NM_000107 | 1244.572  | 1008.369  |
| NM_014387 | 21645.746 | 15329.739 | NM_00409  | 2949.094  | 3627.239  | AL157445  | 359.415   | 318.745   |

|           |           |           |           |           |           |           |           |           |
|-----------|-----------|-----------|-----------|-----------|-----------|-----------|-----------|-----------|
| NM_003641 | 2970.452  | 2812.723  | NM_017629 | 7320.162  | 8383.638  | NM_005053 | 550.96    | 827.815   |
| NM_012463 | 1865.999  | 2249.031  | AL049681  | 2555.492  | 3331.926  | D86974    | 882.419   | 1572.435  |
| L29140    | 7266.556  | 7322.822  | NM_006584 | 1065.164  | 1095.679  | NM_018283 | 1073.968  | 1668.182  |
| AK026448  | 4508.001  | 2976.029  | AF052181  | 3022.255  | 3805.856  | NM_004993 | 290.349   | 611.866   |
| AK057418  | 2354.647  | 2375.631  | AL050074  | 9995.952  | 12767.696 | NM_003384 | 1058.192  | 2198.802  |
| NM_007260 | 678.674   | 914.038   | AK026436  | 729.496   | 1091.636  | Y12337    | 269.601   | 895.831   |
| AF148646  | 3857.228  | 3515.921  | NM_018061 | 2670.551  | 3220.778  | M29551    | 601.39    | 1425.87   |
| AL110218  | 781.091   | 816.442   | AK023059  | 764.776   | 994.407   | AB026436  | 221.225   | 187.241   |
| AB023201  | 2052.328  | 1417.447  | NM_003551 | 2771.084  | 2833.768  | NM_016029 | 1324.023  | 964.832   |
| AL122054  | 1436.117  | 842.937   | AF305210  | 754.077   | 878.346   | AK024562  | 307.005   | 331.503   |
| AB011182  | 969.777   | 536.36    | AK021900  | 2038.765  | 2230.417  | NM_014066 | 450.025   | 334.396   |
| NM_000140 | 5184.716  | 4615.532  | NM_002764 | 10929.683 | 9574.118  | NM_004573 | 435.122   | 241.441   |
| NM_005125 | 4450.854  | 5880.284  | NM_015455 | 32474.338 | 30125.455 | NM_000313 | 223.593   | 82.835    |
| NM_016246 | 638.071   | 718.068   | AF024702  | 13247.142 | 12808.402 | NM_001498 | 4442.466  | 2312.466  |
| NM_015926 | 3557.873  | 2440.059  | NM_001964 | 2350.341  | 1741.02   | AF263523  | 376.733   | 252.728   |
| X03757    | 3036.433  | 2140.527  | NM_005962 | 6076.98   | 5227.271  | L08441    | 2353.158  | 287.786   |
| NM_018658 | 3887.234  | 3447.521  | X74864    | 4574.875  | 4401.239  | AA641953  | 712.609   | 438.063   |
| AK094513  | 1150.395  | 2850.134  | AK026804  | 5265.207  | 5658.177  | AI248827  | 822.327   | 268.29    |
| NM_001183 | 8677.355  | 10092.443 | NM_016170 | 11098.433 | 19857.055 | R45026    | 513.244   | 256.979   |
| AK021597  | 1043.76   | 1603.234  | NM_006166 | 3522.652  | 2973.062  | BI768063  | 233.612   | 94.532    |
| NM_005737 | 33957.633 | 29322.473 | S72620    | 28442.561 | 29414.717 | BG386057  | 248.082   | 95.615    |
| NM_006803 | 1714.381  | 1459.534  | NM_016831 | 810.313   | 981.585   | AI970239  | 671.871   | 1353.371  |
| NM_002533 | 1428.532  | 890.55    | NM_005263 | 12920.114 | 14032.907 | AF363393  | 273.217   | 241.411   |
| AF235022  | 659.839   | 586.713   | AB033022  | 8111.763  | 8740.07   | BC008837  | 205.351   | 331.718   |
| AF182814  | 1369.578  | 1335.152  | AF147397  | 862.145   | 824.206   | NM_001631 | 361.013   | 2223.055  |
| NM_000107 | 2940.741  | 2711.942  | AK027158  | 863.139   | 975.654   | AB000734  | 268.815   | 365.807   |
| AL157445  | 924.328   | 619.036   | AK002187  | 643.348   | 673.947   | NM_000862 | 160.032   | 142.895   |
| NM_001517 | 4721.115  | 2776.882  | AF085836  | 2104.47   | 2496.185  | NM_005987 | 36316.969 | 22409.178 |
| NM_005053 | 833.546   | 613.943   | AL049449  | 2215.66   | 2121.873  | NM_033199 | 221.999   | 284.725   |
| D86974    | 1790.261  | 1048.433  | AL359654  | 1506.214  | 1504.869  | NM_015001 | 177.206   | 241.418   |
| NM_018283 | 2165.812  | 1536.787  | AK024224  | 5988.032  | 3746.67   | NM_000169 | 471.299   | 503.56    |
| NM_001983 | 1845.525  | 1012.931  | NM_015362 | 15377.554 | 11987.377 | AK057418  | 592.609   | 228.023   |
| NM_003384 | 11352.938 | 10447.824 | AF147344  | 1241.012  | 1072.615  | L37199    | 156.484   | 197.714   |
| Y12337    | 816.099   | 114.356   | AF147371  | 797.272   | 834.954   | NM_007260 | 434.172   | 421.89    |
| M29551    | 7200.586  | 6188.92   | AK023745  | 1032.703  | 1044.162  | AF148646  | 747.511   | 296.444   |
| AB023148  | 596.084   | 306.475   | NM_018982 | 4942.161  | 4231.345  | AL110218  | 273.712   | 173.894   |
| NM_002929 | 945.887   | 1123.148  | AF086254  | 4764.049  | 4191.079  | AB023201  | 613.165   | 205.052   |
| BC028375  | 2053.57   | 2940.378  | AF086294  | 468.652   | 588.825   | X00094    | 340.954   | 161.335   |
| AB026436  | 3101.256  | 3797.755  | AF086367  | 2260.474  | 2399.487  | NM_003775 | 231.962   | 221.01    |
| NM_016029 | 2420.477  | 1754.301  | AF086437  | 2112.995  | 2543.376  | NM_002082 | 949.672   | 1082.099  |
| AK024562  | 1110.074  | 941.459   | NM_003596 | 5755.985  | 5513.344  | NM_006056 | 481.856   | 692.296   |
| NM_014066 | 1425.277  | 1140.632  | NM_018838 | 5302.706  | 4740.087  | AF045229  | 2853.293  | 3282.759  |
| NM_004573 | 1776.615  | 1301.801  | AF075083  | 518.242   | 873.978   | NM_001840 | 256.679   | 270.023   |
| NM_001498 | 16234.16  | 20994.182 | AK021454  | 2191.248  | 2931.963  | AK025099  | 213.274   | 147.69    |
| AF263523  | 825.809   | 882.624   | AK022069  | 1741.717  | 1994.448  | NM_016099 | 886.049   | 1266.076  |
| L08441    | 8148.951  | 7476.813  | AL137457  | 2074.792  | 2069.379  | NM_000394 | 92.028    | 264.099   |
| AA641953  | 1031.159  | 804.126   | AF075092  | 1813.374  | 1672.857  | NM_001155 | 1161.887  | 1281.965  |
| AI248827  | 2422.169  | 2238.842  | AF085913  | 335.344   | 399.201   | M62896    | 1973.406  | 1809.004  |
| BG386057  | 412.378   | 556.278   | AF085944  | 1739.351  | 2025.836  | NM_017736 | 524.786   | 567.341   |
| AI970239  | 2249.246  | 2578.576  | AL133038  | 1270.671  | 1326.033  | NM_000390 | 421.58    | 278.227   |
| AA496452  | 2214.277  | 1488.556  | AL137414  | 1374.187  | 1594.117  | AK021597  | 233.845   | 155.472   |
| X67594    | 724.899   | 526.341   | AL359574  | 3322.136  | 3232.683  | NM_005737 | 6216.875  | 2088.649  |
| NM_001631 | 408.955   | 440.16    | AL133569  | 10201.969 | 8890.467  | NM_000014 | 243.565   | 78.148    |

|           |           |           |           |           |           |           |          |          |
|-----------|-----------|-----------|-----------|-----------|-----------|-----------|----------|----------|
| AB000734  | 568.529   | 603.45    | AL137435  | 661.935   | 803.891   | NM_006803 | 376.833  | 183.59   |
| NM_005987 | 59152.23  | 66311.703 | AL157463  | 849.509   | 719.136   | NM_002533 | 474.616  | 251.413  |
| X87838    | 2462.02   | 2557.669  | AL359604  | 696.658   | 924.965   | AL137764  | 2092.407 | 1072.537 |
| NM_033199 | 2285.078  | 2397.65   | AK027189  | 1665.216  | 1211.885  | NM_001660 | 4153.167 | 3396.758 |
| NM_015001 | 4620.537  | 6244.761  | AF086093  | 1043.413  | 1277.847  | NM_000710 | 265.315  | 314.608  |
| NM_000169 | 2948.191  | 2154.342  | U92022    | 1114.023  | 1017.504  | NM_000752 | 348.566  | 328.019  |
| AK057418  | 2750.836  | 6165.95   | NM_003650 | 13245.464 | 14343.742 | AB040945  | 205.756  | 193.926  |
| NM_007260 | 878.113   | 1325.054  | AL157488  | 1218.95   | 1756.769  | NM_002018 | 1222.305 | 1255.658 |
| AF148646  | 2793.747  | 2969.672  | NM_016644 | 1844.37   | 1945.124  | NM_002377 | 208.71   | 108.653  |
| AL110218  | 493.207   | 656.024   | AF085842  | 1134.812  | 1207.391  | AF161383  | 649.917  | 678.395  |
| AB023201  | 778.896   | 915.427   | AK023882  | 704.186   | 556.063   | NM_003494 | 179.082  | 177.889  |
| NM_003775 | 401.383   | 381.331   | AK026750  | 1867.594  | 2182.034  | NM_000410 | 398.189  | 1032.101 |
| NM_002082 | 2602.981  | 1791.67   | AF072164  | 2411.042  | 2429.717  | U72882    | 1917.585 | 2393.346 |
| AF155657  | 6692.921  | 3891.274  | NM_018610 | 744.409   | 806.198   | NM_014337 | 537.464  | 566.968  |
| NM_006056 | 1006.309  | 644.929   | AF083122  | 1414.985  | 1557.089  | NM_007161 | 682.367  | 568.195  |
| AF045229  | 7280.715  | 5552.13   | AF232216  | 988.268   | 1447.123  | NM_014387 | 2008.507 | 921.735  |
| NM_001840 | 4539.698  | 4009.469  | NM_017773 | 7463.034  | 7041.639  | NM_003641 | 518.031  | 368.069  |
| AK025099  | 2772.852  | 1968.883  | AK021885  | 710.904   | 607.895   | NM_012463 | 323.745  | 325.294  |
| NM_016099 | 10949.237 | 8764.396  | AK022018  | 462.793   | 961.314   | L29140    | 3721.108 | 3284.048 |
| NM_000830 | 965.13    | 1021.162  | AK022161  | 465.128   | 580.595   | AK026448  | 1488.495 | 1039.868 |
| AF148950  | 316.348   | 768.445   | AK022296  | 633.961   | 542.699   | AB026436  | 645.623  | 287.524  |
| NM_001155 | 2302.794  | 2365.229  | AK021940  | 1397.763  | 1428.432  | NM_016029 | 2142.706 | 430.577  |
| M62896    | 5624.46   | 4742.606  | AK022189  | 853.502   | 986.451   | AK024562  | 251.21   | 135.14   |
| NM_017736 | 1784.832  | 1061.735  | AK022338  | 1029.211  | 899.911   | NM_014066 | 328.766  | 136.322  |
| NM_000390 | 1285.41   | 474.621   | AK026856  | 917.169   | 909.479   | NM_004573 | 397.619  | 145.057  |
| AK021597  | 1037.327  | 3004.443  | AL162033  | 4359.479  | 3821.974  | NM_000072 | 261.065  | 170.353  |
| NM_005737 | 34638.742 | 57327.34  | AL162010  | 651.758   | 755.347   | NM_000697 | 288.737  | 190.048  |
| NM_006803 | 1515.632  | 2251.469  | AK026893  | 1051.985  | 746.728   | NM_000017 | 1112.252 | 1147.737 |
| NM_002533 | 1043.075  | 1726.569  | AK026761  | 1307.322  | 1124.365  | NM_000237 | 213.127  | 266.45   |
| NM_000710 | 392.983   | 272.559   | NM_005001 | 22341.955 | 21000.326 | NM_018346 | 1692.292 | 2116.919 |
| NM_000752 | 1181.342  | 923.537   | AK024175  | 4291.041  | 5397.8    | AL122054  | 317.26   | 506.234  |
| NM_002018 | 4196.758  | 2378.792  | NM_000510 | 1364.765  | 1689.503  | NM_000140 | 345.563  | 456.104  |
| AF161383  | 7252.97   | 7153.724  | NM_017787 | 3305.066  | 3038.202  | NM_016246 | 191.07   | 352.156  |
| NM_000410 | 6331.617  | 6232.03   | NM_020315 | 8167.682  | 8021.738  | NM_015926 | 1995.668 | 1963.1   |
| AF224266  | 737.817   | 765.295   | AK001910  | 3402.814  | 3136.75   | X03757    | 509.657  | 544.577  |
| U72882    | 3837.512  | 3634.913  | AK023892  | 1042.987  | 965.827   | NM_018658 | 908.039  | 681.517  |
| NM_014337 | 6103.746  | 6494.793  | AF124368  | 2228.258  | 2234.522  | NM_001183 | 1044.818 | 1272.411 |
| NM_007161 | 9108.824  | 9260.404  | AF265210  | 2209.563  | 2325.31   | NM_000890 | 204.68   | 144.738  |
| NM_014387 | 26053.607 | 16527.32  | AK024241  | 1648.631  | 1594.332  | NM_004976 | 2464.642 | 2500.079 |
| NM_003641 | 1765.949  | 1168.8    | AK025061  | 3841.177  | 3361.448  | NM_033199 | 352.002  | 173.509  |
| NM_012463 | 2228.286  | 1530.046  | AF088067  | 10894.753 | 10143.368 | NM_015001 | 399.641  | 244.786  |
| L29140    | 8201.506  | 4387.644  | AK022213  | 782.888   | 799.308   | NM_000169 | 407.198  | 287.839  |
| AK026448  | 4676.457  | 1557.903  | AF056441  | 2624.727  | 2845.385  | BE799167  | 160.987  | 221.65   |
| AB026436  | 2686.369  | 5793.104  | Y10509    | 1212.773  | 1300.129  | AF182814  | 930.673  | 964.559  |
| NM_016029 | 4643.926  | 8044.574  | AK024389  | 7786.639  | 7827.58   | AK026147  | 264.208  | 35.796   |
| AK024562  | 835.359   | 1325.902  | AK026793  | 2611.382  | 3588.226  | NM_005329 | 255.578  | 231.763  |
| NM_014066 | 1447.8    | 1996.291  | NM_001672 | 956.171   | 1092.2    | NM_000107 | 221.745  | 311.675  |
| NM_004573 | 721.499   | 1050.356  | AJ276253  | 20829.088 | 18954.293 | NM_001517 | 429.84   | 379.8    |
| NM_000017 | 5880.309  | 2872.057  | AF147314  | 1266.625  | 1221.629  | D86974    | 398.702  | 520.095  |
| NM_000237 | 513.684   | 494.742   | NM_018980 | 5190.992  | 5408.221  | NM_018283 | 437.418  | 842.338  |
| NM_018346 | 7197.93   | 7709.643  | AF086201  | 2212.286  | 2926.72   | NM_001983 | 188.04   | 193.387  |
| AL122054  | 1362.99   | 1136.371  | AK024712  | 720.468   | 822.809   | Y12337    | 178.345  | 182.738  |
| AB011182  | 1154.554  | 988.183   | U48696    | 1526.306  | 1282.446  | M29551    | 633.262  | 512.681  |

|           |           |           |           |           |           |           |           |          |
|-----------|-----------|-----------|-----------|-----------|-----------|-----------|-----------|----------|
| AB023151  | 389.254   | 343.003   | AF230316  | 6370.362  | 6310.893  | NM_002925 | 157.031   | 152.747  |
| NM_000140 | 4404.967  | 4075.728  | K00629    | 515.801   | 431.727   | BC028375  | 322.15    | 245.731  |
| NM_005125 | 2692.972  | 2338.561  | AK024515  | 8674.685  | 8565.621  | NM_005205 | 403.328   | 323.082  |
| NM_020035 | 505.424   | 493.089   | AF085862  | 5649.244  | 5189.267  | AF148950  | 146.689   | 128.935  |
| NM_016245 | 1307.442  | 1323.148  | NM_017995 | 2238.825  | 2218.18   | NM_001155 | 1393.912  | 485.21   |
| NM_015925 | 4663.386  | 3699.208  | AL049271  | 40780.707 | 37461.418 | M62896    | 988.694   | 231.332  |
| X03757    | 4857.152  | 5190.723  | AK023079  | 27536.035 | 24473.324 | NM_017735 | 511.948   | 166.612  |
| NM_005135 | 513.167   | 498.927   | NM_019605 | 2562.251  | 2453.691  | NM_000390 | 343.985   | 191.667  |
| NM_001183 | 10197.544 | 9219.338  | AK026198  | 3450.705  | 3354.526  | NM_000313 | 237.264   | 108.406  |
| NM_000890 | 412.617   | 323.743   | AF183570  | 965.957   | 1243.196  | NM_001495 | 3851.14   | 1982.364 |
| NM_004975 | 16879.346 | 6531.425  | NM_005497 | 30184.9   | 31511.533 | AF263523  | 434.329   | 424.582  |
| NM_033195 | 2143.181  | 3763.932  | AK024048  | 4486.173  | 4414.782  | L08441    | 2294.784  | 985.649  |
| NM_015001 | 1868.158  | 3336.587  | AB033093  | 4997.021  | 4726.838  | AA641953  | 633.673   | 691.74   |
| NM_000165 | 3014.913  | 3063.949  | NM_005912 | 1013.162  | 916.195   | AI248827  | 849.023   | 880.851  |
| NM_005325 | 1234.746  | 869.078   | NM_005905 | 34609.484 | 37419.195 | R45026    | 221.13    | 142.194  |
| NM_000107 | 3399.866  | 3119.18   | AK001948  | 204.15    | 866.616   | AA496452  | 251.758   | 335.984  |
| AL157445  | 1179.805  | 1061.34   | AK021879  | 504.733   | 736.872   | NM_001631 | 190.171   | 113.851  |
| NM_001517 | 4850.119  | 3669.786  | AL355717  | 531.278   | 505.551   | NM_005987 | 36220.273 | 25549.6  |
| NM_005053 | 1489.851  | 1745.979  | AK055991  | 1287.305  | 1719.892  | X87838    | 234.287   | 151.763  |
| D86974    | 3067.96   | 2487.645  | AF113697  | 1122.862  | 1323.495  | NM_007161 | 1753.017  | 325.171  |
| NM_018283 | 3336.832  | 2701.094  | AK022326  | 3138.979  | 2331.429  | NM_014387 | 5176.871  | 1059.763 |
| NM_001983 | 4200.963  | 3111.297  | AF085991  | 1722.715  | 1261.209  | NM_003641 | 471.195   | 217.483  |
| M29551    | 9534.438  | 9895.325  | NM_005683 | 1807.106  | 1385.087  | NM_012463 | 441.933   | 165.243  |
| AB023148  | 545.272   | 506.951   | NM_020427 | 14819.716 | 12178.117 | L29140    | 799.913   | 236.516  |
| NM_002925 | 1436.955  | 871.381   | AF085920  | 2073.349  | 1808.931  | AK026448  | 893.021   | 204.865  |
| NM_001155 | 5600.487  | 10596.694 | AK023173  | 24349.047 | 25526.891 | AK057418  | 723.307   | 380.038  |
| M62896    | 2856.927  | 2955.356  | AK025225  | 995.048   | 834.494   | NM_007260 | 530.269   | 516.926  |
| NM_017735 | 1756.587  | 1762.089  | U79275    | 11130.209 | 10031.732 | AF148646  | 911.336   | 842.425  |
| NM_001495 | 21975.563 | 26535.57  | AJ227908  | 986.977   | 768.7     | AL110218  | 339.778   | 319.622  |
| AF263523  | 1630.17   | 2205.224  | AF007193  | 3059.354  | 2438.797  | AB023201  | 779.937   | 745.863  |
| L08441    | 10746.755 | 6216.472  | AK022367  | 2492.229  | 2015.814  | X00094    | 201.336   | 244.675  |
| AA641953  | 1974.029  | 1260.268  | BC028589  | 1851.399  | 1932.969  | NM_002082 | 254.937   | 351.062  |
| AI248827  | 3608.214  | 2338.574  | CY3Cy5    | 4773.644  | 154.948   | AF155657  | 903.58    | 816.972  |
| R45026    | 1937.23   | 1475.509  | K02765    | 3324.253  | 2782.904  | NM_006055 | 186.255   | 222.474  |
| BG386057  | 275.507   | 248.976   | M65134    | 764.629   | 759.192   | AF045229  | 800.798   | 746.515  |
| AI970239  | 1975.496  | 3034.86   | BG539651  | 2353.557  | 2068.716  | NM_001840 | 361.744   | 427.734  |
| AA496452  | 4329.802  | 3432.939  | N52646    | 23404.463 | 26214.607 | AK025099  | 247.864   | 256.081  |
| X67594    | 1128.943  | 969.962   | AW160671  | 57639.418 | 55484.758 | NM_016095 | 1497.232  | 1332.29  |
| BC008837  | 784.385   | 600.166   | BI870529  | 18930.104 | 16622.039 | NM_000830 | 163.837   | 213.51   |
| NM_001631 | 532.831   | 362.201   | AA702698  | 874.657   | 1273.142  | NM_018655 | 562.913   | 223.924  |
| X87838    | 2174.218  | 751.151   | AI681514  | 1685.789  | 1288.776  | NM_005135 | 245.225   | 129.838  |
| L37199    | 966.53    | 1120.628  | NM_001300 | 5001.825  | 4626.274  | NM_001183 | 1977.397  | 630.74   |
| NM_007260 | 2156.891  | 2406.257  | BG748827  | 3081.711  | 3854.558  | NM_000890 | 198.461   | 75.133   |
| AF148646  | 3761.849  | 2626.788  | AA952897  | 1797.604  | 1836.138  | NM_004975 | 2886.686  | 539.632  |
| AL110218  | 831.355   | 911.392   | BG760342  | 3738.586  | 5688.026  | AK021597  | 343.093   | 140.853  |
| AB023201  | 1841.865  | 1295.463  | AA703141  | 1374.487  | 1457.311  | NM_005737 | 7011.299  | 2822.423 |
| X00094    | 865.587   | 784.905   | AA195244  | 591.97    | 506.012   | NM_000014 | 229.916   | 65.056   |
| NM_003775 | 461.94    | 550.911   | AI122630  | 8359.797  | 9833.937  | NM_006803 | 454.111   | 472.259  |
| NM_002082 | 3163.876  | 2976.238  | SR1       | 59256.168 | 58086.055 | NM_002533 | 598.151   | 680.433  |
| AF155657  | 18633.848 | 14077.165 | SR3       | 54930.316 | 37431.316 | AF235022  | 207.716   | 324.784  |
| NM_006055 | 1369.321  | 1326.443  | SR5       | 8529.397  | 6471.205  | AL137764  | 1993.541  | 2064.112 |
| AF045229  | 11904.389 | 8400.86   | SR7       | 6302.133  | 29308.629 | NM_001660 | 490.795   | 702.929  |
| NM_001840 | 7126.891  | 4662.952  | SR9       | 20976.955 | 2115.985  | NM_002015 | 1206.507  | 1300.191 |



|           |           |           |           |           |           |           |          |          |
|-----------|-----------|-----------|-----------|-----------|-----------|-----------|----------|----------|
| NM_01609  | 12210.044 | 8184.34   | CY3Cy5    | 3034.173  | 81.074    | NM_002377 | 288.081  | 500.344  |
| NM_001183 | 8045.553  | 11997.201 | NM_012428 | 7168.331  | 10833.047 | AF161383  | 465.373  | 433.602  |
| NM_000890 | 503.582   | 922.158   | NM_013269 | 935.412   | 711.673   | NM_000410 | 999.681  | 1034.692 |
| NM_004976 | 16807.973 | 18323.561 | NM_001728 | 3395.041  | 3599.088  | AF224266  | 202.578  | 287.522  |
| AK021597  | 943.529   | 1285.881  | NM_005565 | 7281.021  | 7460.697  | U72882    | 1253.029 | 1129.298 |
| NM_005737 | 36666.727 | 38540.828 | NM_003824 | 7352.482  | 8320.944  | NM_014337 | 972.99   | 897.87   |
| NM_006803 | 1788.381  | 1041.736  | NM_000686 | 1423.47   | 1608.722  | M29551    | 733.703  | 210.22   |
| NM_002533 | 1461.423  | 1197.813  | NM_012452 | 6094.176  | 5255.724  | AB023148  | 191.9    | 171.123  |
| AF235022  | 718.557   | 782.712   | AF229166  | 1318.796  | 1540.709  | NM_002929 | 402.977  | 161.198  |
| AL137764  | 9068.252  | 6510.813  | NM_005137 | 3284.225  | 3602.469  | BC028375  | 423.913  | 141.282  |
| NM_001660 | 14060.539 | 14193.457 | NM_006764 | 2902.343  | 2629.93   | AB026436  | 667.331  | 268.947  |
| NM_000710 | 598.682   | 591.715   | NM_001386 | 3813.641  | 6303.377  | NM_016029 | 2361.523 | 1513.327 |
| NM_000752 | 1368.82   | 1167.997  | NM_001163 | 2009.701  | 2247.196  | AK024562  | 237.658  | 355.953  |
| AB040945  | 494.473   | 546.697   | NM_005878 | 5120.896  | 6761.571  | NM_014066 | 334.287  | 507.855  |
| NM_002018 | 5175.004  | 3270.138  | AF308602  | 1300.2    | 1082.089  | NM_004573 | 448.779  | 606.375  |
| AF161383  | 8780.325  | 5412.985  | AB011089  | 901.612   | 1073.245  | NM_000072 | 216.755  | 202.174  |
| NM_003494 | 715.136   | 470.876   | NM_016157 | 2209.893  | 2033.686  | NM_000697 | 145.169  | 229.62   |
| NM_000410 | 8503.236  | 6301.377  | NM_014915 | 6305.798  | 19246.365 | NM_000017 | 181.699  | 207.243  |
| NM_014337 | 5624.193  | 3323.702  | NM_012286 | 1888.074  | 1478.24   | NM_018346 | 1565.192 | 3262.815 |
| M29551    | 8785.713  | 9129.568  | NM_002195 | 6265.361  | 4518.853  | AL122054  | 216.57   | 465.553  |
| AB023148  | 833.494   | 737.866   | D84294    | 1400.808  | 1722.744  | AB011182  | 139.947  | 218.17   |
| NM_002929 | 1066.604  | 1246.871  | X59770    | 227.976   | 150.421   | NM_000140 | 329.149  | 358.131  |
| BC028375  | 2209.655  | 2763.495  | M31659    | 1066.104  | 1414.988  | NM_005125 | 817.481  | 642.958  |
| AB026436  | 2805.606  | 2840.644  | NM_016226 | 19153.854 | 17220.229 | NM_016246 | 230.557  | 426.866  |
| NM_016029 | 10324.278 | 6073.088  | AK024311  | 748.28    | 1245.152  | NM_015926 | 1653.636 | 1371.785 |
| AK024562  | 1056.191  | 904.632   | AF052155  | 6499.182  | 7116.584  | X03757    | 575.271  | 442.849  |
| NM_014066 | 1569.116  | 1091.146  | NM_005085 | 2896.168  | 3742.761  | NM_020248 | 1929.759 | 292.452  |
| NM_004573 | 2434.585  | 2069.465  | AF060902  | 2173.744  | 2712.801  | X89670    | 194.852  | 166.97   |
| NM_000072 | 674.352   | 577.073   | AF121858  | 8072.529  | 9586.354  | NM_001726 | 174.762  | 131.915  |
| NM_000697 | 1983.937  | 1832.374  | NM_013437 | 7316.158  | 7993.132  | NM_004053 | 603.333  | 212.349  |
| NM_000017 | 6852.273  | 5095.156  | NM_017681 | 1682.302  | 1825.779  | NM_001489 | 170.514  | 306.349  |
| NM_000237 | 462.633   | 465.553   | X57655    | 7281.736  | 12998.595 | M20259    | 254.279  | 67.892   |
| NM_018346 | 7782.711  | 7133.624  | AK025966  | 3930.313  | 3496.968  | NM_020374 | 829.201  | 616.677  |
| AL122054  | 2351.026  | 1900.017  | NM_018725 | 860.751   | 1155.304  | NM_014922 | 273.823  | 204.152  |
| AB023151  | 559.835   | 451.525   | NM_003081 | 12654.869 | 16621.668 | NM_000169 | 645.01   | 723.138  |
| NM_000140 | 5772.028  | 5361.931  | NM_016495 | 8822.916  | 8316.254  | NM_003896 | 224.65   | 207.242  |
| NM_005125 | 2570.537  | 2138.082  | D50402    | 16682.033 | 20532.035 | BE799167  | 127.638  | 234.776  |
| NM_016246 | 1126.661  | 907.694   | M73547    | 5665.241  | 10628.189 | AF182814  | 84.648   | 381.571  |
| X03757    | 3869.748  | 2079.238  | AF181722  | 637.176   | 977.843   | NM_000107 | 674.149  | 850.508  |
| X89670    | 845.938   | 946.981   | NM_003687 | 1456.017  | 1572.864  | AL157445  | 199.902  | 264.229  |
| NM_004053 | 2961.193  | 2573.956  | NM_004134 | 3884.708  | 3054.216  | NM_001517 | 1612.319 | 1734.461 |
| NM_001489 | 1531.415  | 1585.043  | NM_005955 | 5959.429  | 5202.849  | NM_005053 | 492.946  | 500.247  |
| M20259    | 540.888   | 405.58    | NM_004048 | 694.976   | 765.692   | D86974    | 281.676  | 317.636  |
| NM_020374 | 2393.833  | 2659.448  | NM_017765 | 39729.207 | 47237.863 | NM_018283 | 737.935  | 614.201  |
| NM_014922 | 1140.472  | 668.194   | NM_000428 | 1136.168  | 1286.843  | NM_001983 | 374.195  | 173.423  |
| NM_000169 | 3956.84   | 2390.698  | AB040967  | 844.134   | 1420.342  | NM_001793 | 1076.174 | 407.487  |
| AF182814  | 4225.74   | 3046.545  | NM_003578 | 931.985   | 1129.645  | NM_001943 | 330.594  | 225.586  |
| NM_005329 | 1213.997  | 1142.739  | NM_014721 | 1485.443  | 1962.69   | NM_004927 | 940.33   | 262.88   |
| AL157445  | 1437.061  | 1594.871  | AK026352  | 1991.96   | 3454.076  | AB040928  | 160.93   | 160.743  |
| NM_001517 | 6397.609  | 5784.588  | AL137705  | 2767.308  | 3622.771  | NM_001459 | 495.788  | 247.267  |
| NM_005053 | 1447.29   | 1637.122  | U41898    | 1103.16   | 1420.734  | NM_015513 | 397.55   | 173.052  |
| D86974    | 3273.247  | 3683.182  | NM_020346 | 441.756   | 587.493   | NM_006219 | 1183.917 | 237.255  |
| NM_018283 | 3962.459  | 4135.918  | AF169257  | 606.864   | 541.805   | NM_004443 | 263.883  | 188.834  |

|           |           |           |           |           |           |           |          |          |
|-----------|-----------|-----------|-----------|-----------|-----------|-----------|----------|----------|
| NM_001793 | 9665.43   | 8033.354  | NM_014848 | 936.217   | 1143.139  | NM_017412 | 532.995  | 295.081  |
| NM_001943 | 2884.245  | 2562.547  | BF217766  | 758.816   | 1391.77   | NM_005544 | 170.446  | 264.579  |
| NM_004927 | 7686.622  | 6035.251  | NM_000184 | 1317.041  | 1706.903  | NM_002964 | 851.221  | 962.018  |
| AB040928  | 550.378   | 351.43    | NM_016180 | 1532.317  | 1557.234  | AF311862  | 4521.487 | 4895.241 |
| NM_001459 | 2266.279  | 1567.029  | NM_000112 | 673.702   | 528.211   | NM_015626 | 292.1    | 488.732  |
| NM_015513 | 4863.47   | 3756.263  | NM_005827 | 8857.311  | 9914.373  | NM_004899 | 274.111  | 427.25   |
| NM_006219 | 6244.609  | 4789.929  | NM_003053 | 7299.001  | 5934.511  | AB006628  | 1639.482 | 1987.991 |
| NM_004443 | 2004.571  | 2176.198  | NM_003044 | 2674.486  | 2300.392  | AF272036  | 2099.336 | 2524.41  |
| NM_001932 | 640.712   | 666.378   | NM_006672 | 11840.123 | 9297.418  | AF231023  | 684.818  | 1018.945 |
| NM_017412 | 1807.276  | 2186.64   | AB007875  | 1409.026  | 1952.094  | NM_005148 | 697.7    | 718.007  |
| NM_005544 | 617.583   | 796.231   | NM_014796 | 6081.467  | 6186.804  | NM_004746 | 171.647  | 168.909  |
| NM_002964 | 7648.938  | 8672.597  | NM_001147 | 548.488   | 706.323   | AF146019  | 924.217  | 1159.26  |
| AF311862  | 33589.086 | 29008.377 | AL050288  | 24702.109 | 29455.285 | Z36782    | 598.093  | 595.472  |
| NM_016447 | 1478.006  | 1658.731  | NM_005040 | 2177.263  | 3462.817  | NM_003490 | 2481.891 | 1846.308 |
| NM_015626 | 6382.53   | 7632.733  | NM_016391 | 10001.251 | 11027.842 | AF210651  | 258.491  | 124.469  |
| NM_004899 | 4133.281  | 6116.443  | M80783    | 721.029   | 705.616   | AF090942  | 207.602  | 165.429  |
| AB006628  | 6722.056  | 6945.52   | AF075033  | 5799.308  | 6469.609  | AF508940  | 411.475  | 253.655  |
| AF231023  | 4994.532  | 7343.876  | D50911    | 13336.621 | 16285.263 | NM_020237 | 252.968  | 144.761  |
| NM_005148 | 4350.3    | 4964.167  | AB011104  | 1621.932  | 1878.708  | AF130051  | 152.883  | 241.802  |
| Z36782    | 6823.47   | 8863.346  | AK024069  | 5229.483  | 6246.733  | M25753    | 3907.941 | 1048.863 |
| M70435    | 879.284   | 1348.675  | NM_004582 | 20544.369 | 28339.508 | NM_003883 | 553.691  | 216.775  |
| AF210651  | 1570.029  | 2416.517  | NM_015640 | 11949.417 | 16879.896 | NM_014929 | 679.906  | 275.581  |
| AF090942  | 1033.889  | 1164.872  | AF233450  | 1028.212  | 1303.495  | NM_004203 | 1793.097 | 938.049  |
| AF508940  | 2084.383  | 2690.051  | NM_016233 | 1701.149  | 1547.028  | NM_001951 | 381.642  | 381.924  |
| NM_005429 | 404.668   | 252.268   | NM_000821 | 30514.928 | 28264.213 | NM_002391 | 486.733  | 470.925  |
| NM_020237 | 1215.083  | 1139.87   | NM_020121 | 829.01    | 630.05    | NM_007066 | 750.302  | 841.022  |
| AF130051  | 989.747   | 1807.284  | NM_003145 | 30287.416 | 24745.924 | NM_003674 | 4370.123 | 4502.107 |
| M25753    | 26779.307 | 31263.73  | NM_001632 | 1242.972  | 1103.193  | NM_001197 | 221.057  | 346.212  |
| NM_003883 | 3887.927  | 5226.134  | NM_012264 | 1288.631  | 958.699   | NM_014977 | 6802.752 | 5653.776 |
| NM_014929 | 3250.282  | 5386.021  | AF311312  | 2424.17   | 1496.514  | AK026325  | 450.425  | 392.434  |
| NM_004203 | 9459.842  | 11615.245 | NM_014915 | 6444.984  | 21346.648 | U83857    | 200.677  | 131.22   |
| NM_001951 | 2393.162  | 3129.487  | NM_012286 | 1740.438  | 2084.215  | NM_001230 | 313.156  | 527.862  |
| NM_002391 | 3137.65   | 4023.996  | NM_002195 | 6243.854  | 6529.499  | AK025662  | 242.327  | 297.518  |
| NM_007066 | 4281.586  | 5948.85   | D84294    | 1372.825  | 2624.115  | NM_000201 | 197.274  | 139.935  |
| NM_003674 | 17767.529 | 21037.541 | K02765    | 2433.623  | 2674.203  | AB011539  | 212.888  | 327.92   |
| NM_001197 | 3413.435  | 4028.14   | M65134    | 582.667   | 692.419   | U37028    | 254.711  | 590.6    |
| NM_006682 | 1147.675  | 1301.609  | BG539651  | 2018.112  | 1977.137  | AB014597  | 306.777  | 611.957  |
| NM_014977 | 23274.701 | 25049.488 | N52646    | 18811.705 | 20626.121 | AK024313  | 451.385  | 196.349  |
| AK026325  | 2656.368  | 3571.487  | AW160671  | 56656.246 | 56537.102 | NM_003891 | 336.188  | 179.253  |
| NM_001230 | 2143.465  | 3651.315  | BI870529  | 18283.791 | 18184.219 | NM_002022 | 231.282  | 258.754  |
| AK025662  | 2587.127  | 3695.381  | AA702698  | 832.046   | 1145.787  | NM_015524 | 792.609  | 763.948  |
| U37028    | 938.406   | 1479.019  | AI681514  | 1394.492  | 1433.58   | NM_001673 | 1677.629 | 1041.897 |
| S81361    | 873.571   | 1308.23   | NM_001300 | 5289.589  | 4556.46   | AK023167  | 161.547  | 319.208  |
| AK024313  | 4928.362  | 7191.433  | BG748827  | 3691.141  | 4278.082  | NM_016510 | 904.683  | 1173.839 |
| NM_003891 | 2715.466  | 3236.73   | AA952897  | 2416.346  | 2745.536  | NM_014270 | 368.072  | 461.549  |
| AL359575  | 623.667   | 920.776   | BG760342  | 4067.041  | 5811.332  | NM_004321 | 174.981  | 109.273  |
| NM_002022 | 578.246   | 1467.567  | AA703141  | 1896.918  | 1775.256  | AF311212  | 258.329  | 442.971  |
| NM_015524 | 4525.345  | 11889.933 | AI122630  | 8455.479  | 7044.876  | NM_006035 | 199.604  | 283.855  |
| NM_001673 | 10880.786 | 12318.571 | NM_002103 | 32961.102 | 32341.07  | NM_006086 | 1184.794 | 1274.274 |
| AK023167  | 712.134   | 2154.832  | NM_003379 | 6285.731  | 5771.826  | NM_004520 | 1119.462 | 1214.948 |
| NM_016510 | 3989.944  | 5366.016  | NM_006589 | 3598.127  | 2971.687  | AK027118  | 1970.123 | 2148.624 |
| NM_014270 | 2443.129  | 4420.653  | NM_004134 | 4014.879  | 3561.35   | AK022882  | 2113.652 | 1008.361 |
| NM_000071 | 3334.075  | 4776.413  | NM_005955 | 6585.937  | 6955.741  | NM_006105 | 610.579  | 544.596  |

|           |           |           |           |           |           |           |           |           |
|-----------|-----------|-----------|-----------|-----------|-----------|-----------|-----------|-----------|
| NM_006843 | 1667.234  | 1890.435  | NM_004048 | 685.204   | 1094.794  | NM_005981 | 289.354   | 21.24     |
| NM_004321 | 2168.427  | 3452.584  | NM_012428 | 7187.732  | 7434.804  | NM_016264 | 191.019   | 166.023   |
| AF311212  | 8050.624  | 10917.079 | NM_013269 | 947.808   | 822.88    | NM_006079 | 3659.088  | 1000.284  |
| NM_006915 | 2685.239  | 4423.287  | NM_001728 | 3589.802  | 3926.954  | AB037837  | 366.496   | 246.65    |
| NM_006035 | 2295.407  | 4008.352  | NM_005565 | 7360.361  | 7036.563  | NM_014595 | 502.627   | 190.739   |
| NM_006086 | 5350.219  | 8655.823  | NM_003824 | 7481.328  | 7808.842  | NM_014785 | 217.586   | 148.789   |
| NM_004520 | 9345.519  | 12544.767 | NM_000686 | 1555.566  | 1650.88   | AB046784  | 199.433   | 219.685   |
| AK027118  | 13688.932 | 17979.24  | NM_012452 | 8412.314  | 6275.774  | X52402    | 439.861   | 307.678   |
| NM_000474 | 546.76    | 721.474   | AF229166  | 1104.188  | 1167.667  | AL133663  | 360.841   | 46.044    |
| NM_016264 | 1176.577  | 1910.574  | NM_005137 | 3784.133  | 4257.587  | NM_004992 | 256.015   | 278.935   |
| NM_006079 | 24545.883 | 35507.527 | NM_006764 | 2627.375  | 2437.411  | NM_014462 | 613.833   | 320.216   |
| AB037837  | 2537.673  | 3991.062  | NM_001386 | 4289.934  | 6260.371  | NM_014156 | 15589.848 | 9872.752  |
| NM_014595 | 3842.276  | 5842.331  | NM_001163 | 2154.615  | 1627.048  | NM_003137 | 1548.908  | 2501.586  |
| NM_014785 | 1057.562  | 1352.262  | NM_005878 | 6595.902  | 5395.361  | NM_006938 | 16664.973 | 14738.852 |
| AB046784  | 1146.486  | 1477.371  | AF308602  | 3448.131  | 3277.262  | NM_020158 | 318.115   | 379.489   |
| X52402    | 1626.046  | 1947.026  | AB011089  | 1988.31   | 1486.799  | NM_006985 | 689.361   | 878.138   |
| AL133663  | 852.982   | 1394.311  | NM_001276 | 5350.828  | 3694.258  | NM_003757 | 6927.014  | 5551.558  |
| NM_004992 | 1448.338  | 2329.745  | NM_016157 | 1959.081  | 1444.2    | AK025561  | 730.253   | 691.972   |
| NM_014462 | 3414.217  | 4462.974  | NM_000112 | 1065.162  | 1815.076  | NM_018602 | 4513.18   | 4003.107  |
| NM_014156 | 50356.785 | 61800.855 | NM_005827 | 8819.406  | 12677.706 | NM_004096 | 685.622   | 633.449   |
| NM_003137 | 6536.663  | 10043.379 | NM_003053 | 10646.932 | 12321.16  | NM_017629 | 751.457   | 672.721   |
| NM_006938 | 50170.707 | 48902.738 | NM_003044 | 3414.395  | 3710.457  | AL049681  | 245.849   | 448.916   |
| NM_004515 | 888.153   | 1323.776  | NM_006672 | 16473.738 | 18984.66  | AL050074  | 987.218   | 446.672   |
| NM_020158 | 3254.492  | 3515.823  | NM_000338 | 718.534   | 541.617   | AK026436  | 223.729   | 128.624   |
| AF176085  | 2911.318  | 3263.982  | M31659    | 1355.861  | 1011.348  | NM_018061 | 388.108   | 245.06    |
| NM_006985 | 11562.433 | 13651.966 | NM_016226 | 19459.385 | 16098.241 | AK023059  | 208.017   | 97.489    |
| AF265228  | 2796.994  | 2678.022  | AK024311  | 1042.078  | 1146.456  | NM_003551 | 538.058   | 154.947   |
| NM_003757 | 39847.891 | 23690.93  | AF052155  | 7069.635  | 7141.204  | AF305210  | 132.746   | 145.145   |
| AK025561  | 3909.307  | 4590.826  | NM_005085 | 4047.451  | 3187.621  | AK021900  | 385.77    | 232.267   |
| NM_018602 | 11534.632 | 9438.135  | AF060902  | 2513.562  | 2360.461  | NM_002764 | 2227.82   | 616.443   |
| NM_004096 | 4270.415  | 3562.611  | AF121858  | 9364.073  | 9165.174  | NM_015455 | 11792.312 | 8419.771  |
| NM_017629 | 5656.04   | 4594.794  | NM_013437 | 7531.38   | 7168.156  | AF024702  | 724.595   | 612.598   |
| AK026436  | 987.926   | 1023.98   | NM_017681 | 1565.954  | 1386.687  | NM_001964 | 165.721   | 185.982   |
| NM_018061 | 2485.037  | 3845.095  | X57655    | 7716.017  | 12203.105 | NM_005962 | 525.841   | 511.304   |
| AK023059  | 1175.735  | 1510.711  | AK025966  | 3676.81   | 3502.745  | X74864    | 256.102   | 251.016   |
| NM_003551 | 3504.983  | 3478.385  | NM_018725 | 788.712   | 1092.326  | AK026804  | 287.897   | 231.23    |
| AF305210  | 540.709   | 512.389   | NM_003081 | 24802.34  | 21694.02  | NM_016170 | 881.493   | 730.319   |
| AK021900  | 2139.039  | 1615.037  | NM_016495 | 10508.146 | 6585.417  | NM_006166 | 680.278   | 680.671   |
| NM_002764 | 9658.063  | 6101.918  | D50402    | 31445.111 | 21353.334 | NM_005263 | 1763.691  | 2021.961  |
| NM_019857 | 440.373   | 375.462   | M73547    | 8182.697  | 7250.115  | AB033022  | 553.612   | 418.629   |
| NM_015455 | 47485.305 | 34822.777 | NM_003687 | 2107.347  | 1562.937  | AK027158  | 286.762   | 104.536   |
| AF024702  | 5744.179  | 4613.468  | NM_003145 | 34010.41  | 36827.664 | AF085836  | 262.577   | 45.371    |
| NM_001964 | 1945.967  | 2709.893  | NM_001632 | 1613.071  | 1953.207  | AF147347  | 118.812   | 162.574   |
| NM_005962 | 5406.326  | 5464.483  | NM_012264 | 1698.138  | 2403.363  | AL359654  | 217.59    | 195.59    |
| X74864    | 1490.944  | 1497.341  | AF311312  | 3538.042  | 3571.418  | AK024224  | 739.313   | 1083.24   |
| AK026804  | 2804.618  | 2186.925  | NM_001179 | 748.725   | 685.679   | NM_015362 | 3223.423  | 1735.643  |
| NM_016170 | 4101.565  | 3287.83   | NM_017765 | 33047.844 | 38970.719 | AF147344  | 229.978   | 157.167   |
| NM_006166 | 2412.786  | 2077.59   | NM_000428 | 1186.921  | 1181.126  | AF147371  | 244.118   | 203.665   |
| S72620    | 28400.994 | 16274.125 | AB040967  | 909.55    | 1629.918  | AK023745  | 201.035   | 405.086   |
| S73501    | 469.421   | 428.216   | NM_003578 | 574.677   | 526.337   | NM_018982 | 956.372   | 789.719   |
| NM_005263 | 7138.225  | 5333.616  | NM_014721 | 1362.849  | 1108.833  | AF086254  | 620.06    | 580.559   |
| AB033022  | 2235.76   | 2016.346  | AK026352  | 1672.426  | 3202.938  | AF086294  | 242.728   | 389.605   |
| AF147397  | 794.06    | 905.672   | AL137705  | 2396.033  | 2758.327  | NM_003596 | 403.925   | 394.231   |

|           |           |           |           |           |           |            |           |           |
|-----------|-----------|-----------|-----------|-----------|-----------|------------|-----------|-----------|
| AK027158  | 598.301   | 437.606   | U41898    | 1159.067  | 1006.313  | AF075083   | 203.164   | 79.137    |
| AL049449  | 408.23    | 300.611   | NM_014848 | 1320.969  | 798.733   | AK021454   | 334.569   | 161.712   |
| AL359654  | 549.139   | 413.223   | BF217766  | 1075.465  | 810.147   | AK022069   | 201.454   | 142.276   |
| AK024224  | 2733.833  | 3682.763  | NM_000184 | 1666.859  | 1515.847  | AL137457   | 197.092   | 81.006    |
| NM_015362 | 12653.354 | 9740.585  | NM_016180 | 1810.527  | 1371.075  | AF085944   | 303.179   | 574.511   |
| AF147344  | 749.907   | 643.301   | NM_002103 | 34674.496 | 42239.047 | AL133038   | 373.629   | 251.096   |
| AF147371  | 684.054   | 731.773   | NM_003379 | 6298.953  | 7720.004  | AL137414   | 593.416   | 478.97    |
| NM_018982 | 4668.119  | 4571.254  | NM_006589 | 4440.817  | 6623.305  | AL359574   | 302.439   | 136.864   |
| AF086254  | 4308.369  | 4063.992  | NM_002191 | 667.473   | 1049.84   | AL133569   | 1050.169  | 635.565   |
| AF086294  | 442.109   | 622.093   | AB007875  | 1767.23   | 1608.249  | AL157463   | 220.497   | 249.106   |
| AF086261  | 338.792   | 420.86    | NM_018261 | 1936.19   | 1822.721  | AK027189   | 167.322   | 265.65    |
| AF086367  | 1225.605  | 1228.321  | NM_014796 | 6146.978  | 7173.805  | AL109719   | 143.625   | 189.694   |
| AF086437  | 439.232   | 514.184   | AL050288  | 27677.193 | 24297.457 | AF086093   | 230.212   | 318.352   |
| AK025088  | 3176.999  | 2983.274  | NM_005040 | 3541.811  | 4244.484  | NM_016644  | 234.014   | 290.288   |
| U79295    | 411.307   | 371.628   | NM_016391 | 15343.295 | 13070.429 | AF085842   | 144.546   | 297.807   |
| AK002107  | 468.298   | 364.544   | AF075033  | 6171.135  | 5008.074  | AK026750   | 295.498   | 96.184    |
| NM_003596 | 1551.864  | 1075.728  | D50911    | 11637.813 | 8850.916  | AF072164   | 311.614   | 136.68    |
| NM_018838 | 5709.328  | 4215.343  | AB011104  | 1519.798  | 1473.254  | AF181286   | 124.477   | 293.063   |
| AK021454  | 2082.295  | 1587.429  | AK024069  | 6114.348  | 4732.148  | AF232216   | 191.345   | 155.268   |
| AK022069  | 3066.427  | 1912.681  | NM_004582 | 20928.357 | 17914.256 | NM_017773  | 564.237   | 275.772   |
| AF085913  | 438.597   | 554.819   | NM_015640 | 13294.898 | 10095.747 | AK021885   | 361.176   | 177.4     |
| AF085944  | 431.389   | 554.718   | AF233450  | 1090.432  | 954.318   | AK022161   | 178.605   | 100.962   |
| AL133038  | 1209.916  | 784.384   | NM_016233 | 1609.365  | 1348.396  | AK021940   | 331.472   | 544.575   |
| AL137414  | 1548.748  | 1013.19   | NM_000821 | 33988.563 | 25209.104 | AK022052   | 847.683   | 3337.918  |
| AL359574  | 1722.037  | 1391.29   | AF308602  | 3381.653  | 3387.767  | AK022338   | 173.955   | 473.827   |
| AL133569  | 4539.54   | 3149.078  | AB011089  | 1743.366  | 2624.541  | AL162033   | 551.834   | 746.313   |
| AL137435  | 418.403   | 254.887   | AF007192  | 648.774   | 1385.808  | NM_005001  | 7186.182  | 3387.559  |
| AL359604  | 333.025   | 295.756   | NM_001276 | 5400.537  | 5725.321  | AK024175   | 1387.444  | 393.618   |
| AK027189  | 1542.032  | 2146.763  | NM_016157 | 2110.803  | 2367.082  | NM_000510  | 342.623   | 133.529   |
| AF088014  | 370.98    | 435.696   | NM_014915 | 5898.195  | 18912.061 | NM_017787  | 640.201   | 322.589   |
| AL109719  | 450.515   | 376.594   | NM_012286 | 1751.165  | 1791.546  | NM_020315  | 1605.531  | 816.886   |
| AF086093  | 1339.711  | 1280.626  | NM_002195 | 6560.948  | 6572.843  | unknown (S | 289.537   | 36.335    |
| U92022    | 726.279   | 651.154   | D84294    | 1423.248  | 1953.588  | AK001910   | 314.29    | 525.751   |
| NM_003650 | 10860.194 | 9703.643  | K02765    | 3020.121  | 2482.703  | AF124368   | 196.934   | 465       |
| AK022119  | 649.847   | 594.495   | M65134    | 952.105   | 575.154   | AF265210   | 675.709   | 1352.121  |
| NM_016644 | 1049.37   | 1032.604  | BG539651  | 2485.777  | 2092.676  | AK024241   | 185.835   | 298.725   |
| AF085842  | 342.374   | 469.584   | N52646    | 24759.246 | 20399.27  | AK025061   | 370.589   | 233.59    |
| AK026750  | 734.472   | 816.707   | AW160671  | 55868.551 | 53480.359 | AF088067   | 1634.63   | 581.068   |
| AF072164  | 1747.024  | 2290.16   | BI870529  | 17736.154 | 15137.735 | AF056441   | 334.234   | 210.812   |
| AF232216  | 419.845   | 246.054   | AA702698  | 762.081   | 828.096   | Y10509     | 271.368   | 298.97    |
| NM_017773 | 2031.117  | 1404.851  | AI681514  | 1121.642  | 1028.56   | AK024389   | 1785.217  | 572.761   |
| AK021885  | 1552.214  | 1462.954  | NM_001300 | 4604.974  | 3598.168  | AK026793   | 456.424   | 294.644   |
| AK022161  | 332.8     | 303.876   | BG748827  | 2928.267  | 3188.895  | NM_001672  | 214.406   | 99.017    |
| AK022296  | 541.049   | 412.036   | AA952897  | 1936.302  | 1154.521  | AJ276253   | 3263.389  | 1116.529  |
| AK021940  | 601.779   | 789.723   | BG760342  | 3629.317  | 3099.404  | AF147314   | 249.241   | 475.998   |
| AK022189  | 362.647   | 480.724   | AA703141  | 1790.009  | 1241.641  | NM_018980  | 652.195   | 657.205   |
| AK022338  | 437.219   | 424.44    | AI122630  | 8546.467  | 6657.641  | AF086201   | 399.736   | 187.01    |
| AK026856  | 673.201   | 758.845   | NM_003081 | 21682.025 | 26778.973 | U48696     | 219.868   | 268.459   |
| AL162033  | 545.911   | 590.073   | NM_016495 | 9454.977  | 8386.472  | AF230316   | 328.415   | 412.667   |
| NM_005001 | 35081.484 | 33407.789 | D50402    | 28096.496 | 25831.334 | AK024515   | 892.586   | 1447.966  |
| AK024175  | 5476.733  | 5684.028  | M73547    | 7442.508  | 10212.851 | AF085862   | 688.323   | 855.69    |
| NM_000510 | 1559.868  | 1889.712  | AF181722  | 613.916   | 552.063   | NM_017998  | 368.093   | 358.193   |
| NM_017787 | 2228.541  | 1712.501  | NM_003687 | 1336.34   | 1796      | AL049271   | 11674.128 | 10802.879 |

|           |           |           |           |           |           |           |           |           |
|-----------|-----------|-----------|-----------|-----------|-----------|-----------|-----------|-----------|
| NM_020315 | 8655.341  | 8031.702  | NM_004134 | 3908.385  | 4179.427  | AK023079  | 6031.998  | 6192.514  |
| AF265210  | 1707.945  | 1494.04   | NM_005955 | 4924.406  | 5164.836  | NM_019605 | 261.986   | 603.373   |
| AK024241  | 637.356   | 474.318   | NM_004048 | 657.315   | 1164.483  | AK026198  | 449.157   | 571.154   |
| AK025061  | 727.537   | 605.481   | NM_012428 | 6383.347  | 5651.802  | AF183570  | 296.116   | 83.094    |
| AF088067  | 7336.697  | 13067.833 | NM_013269 | 833.884   | 553.371   | NM_005497 | 1967.452  | 410.719   |
| AF056441  | 1589.761  | 1460.473  | NM_001728 | 3089.381  | 2993.228  | AK024048  | 683.477   | 244.2     |
| Y10509    | 880.988   | 1250.666  | NM_005565 | 6664.032  | 6248.881  | AB033093  | 1354.395  | 289.838   |
| AK024389  | 4782.029  | 4791.033  | NM_003824 | 6798.671  | 6416.456  | NM_005912 | 262.4     | 131.132   |
| AK026793  | 1439.368  | 1302.425  | NM_000686 | 1402.549  | 1166.703  | NM_005905 | 6902.511  | 2427.875  |
| NM_001672 | 607.522   | 439.209   | NM_012452 | 6956.106  | 4740.676  | AK021879  | 311.708   | 42.4      |
| AJ276253  | 20023.135 | 13826.075 | AF229166  | 979.44    | 1035.985  | AK055991  | 399.474   | 333.583   |
| AF147314  | 3485.614  | 3089.174  | NM_005137 | 3503.335  | 3619.528  | AK022326  | 281.746   | 236.961   |
| NM_018980 | 1673.135  | 1561.619  | NM_006764 | 2550.599  | 1907.52   | AF085991  | 309.758   | 439.04    |
| AF086201  | 1347.155  | 1196.046  | NM_001386 | 3914.235  | 5295.023  | NM_005683 | 178.791   | 126.534   |
| U48696    | 1250.358  | 1686.453  | NM_001163 | 2131.548  | 1427.412  | NM_020427 | 1595.434  | 1538.33   |
| AF230316  | 5747.739  | 5153.718  | NM_005878 | 7150.977  | 5171.835  | AF085920  | 167.23    | 226.66    |
| K00629    | 289.882   | 444.074   | NM_014848 | 1053.349  | 1548.495  | AK023173  | 2392.404  | 2675.094  |
| AK024515  | 1648.539  | 2395.07   | BF217766  | 932.235   | 901.225   | U79275    | 1113.409  | 1691.453  |
| AF085862  | 3322.5    | 3019.205  | NM_000184 | 2007.325  | 2280.702  | AJ227908  | 160.041   | 285.067   |
| NM_017995 | 1547.843  | 1467.732  | NM_016180 | 1657.2    | 1963.947  | AF007193  | 277.202   | 438.344   |
| AL049271  | 47909.207 | 33458.457 | NM_000112 | 506.916   | 772.324   | AK022367  | 277.717   | 259.823   |
| AK023079  | 31117.775 | 20260.455 | NM_005827 | 7944.671  | 11288.072 | BC028589  | 248.412   | 264.041   |
| NM_019605 | 1553.621  | 1394.67   | NM_003053 | 7703.793  | 8318.201  | CY3Cy5    | 559.919   | 152.81    |
| AK026198  | 1084.009  | 835.206   | NM_003044 | 2996.969  | 3766.378  | K02765    | 320.366   | 52.212    |
| AF183570  | 885.753   | 1076.468  | NM_006672 | 14717.051 | 20964.461 | M65134    | 219.766   | 150.878   |
| NM_005497 | 7087.584  | 6889.614  | NM_000338 | 360.029   | 577.751   | BG539651  | 282.614   | 186.679   |
| AK024048  | 5652.391  | 5793.345  | M31659    | 1218.01   | 1117.107  | N52646    | 2511.697  | 856.443   |
| AB033093  | 5846.146  | 3774.887  | NM_003056 | 5795.938  | 5303.304  | AW160671  | 13633.291 | 4709.655  |
| NM_005912 | 1004.483  | 1321.996  | NM_016226 | 18097.949 | 12247.188 | BI870529  | 3851.189  | 2193.819  |
| NM_005905 | 24759.355 | 19840.02  | AK024311  | 824.693   | 1056.211  | AA702698  | 943.451   | 877.043   |
| AK055991  | 1564.899  | 1067.507  | AF052155  | 6039.2    | 5975.356  | AI681514  | 866.369   | 894.934   |
| AF113697  | 537.97    | 497.613   | NM_005085 | 3067.263  | 2442.515  | NM_001300 | 1299.963  | 1242.806  |
| AK022326  | 1256.423  | 1194.616  | AF060902  | 2589.899  | 1889.47   | BG748827  | 1131.136  | 713.254   |
| AF085991  | 1027.835  | 1339.734  | AF121858  | 8537.797  | 8083.458  | AA952897  | 454.632   | 381.813   |
| NM_005683 | 1423.457  | 1477.029  | NM_013437 | 6819.987  | 6850.158  | BG760342  | 1451.597  | 1110.925  |
| NM_020427 | 12072.807 | 10727.164 | NM_017681 | 1685.297  | 1288.931  | AA703141  | 570.42    | 276.776   |
| AF085920  | 632.73    | 603.284   | X57655    | 6628.835  | 8942.836  | AA195244  | 171.949   | 224.071   |
| AK023173  | 2623.169  | 2825.587  | AK025966  | 3933.058  | 2233.331  | AI122630  | 3158.865  | 1999.414  |
| AK025225  | 1115.158  | 2434.375  | NM_018725 | 862.43    | 629.414   | NM_002103 | 5897.46   | 4844.065  |
| U79275    | 884.787   | 1080.502  | AK024069  | 6417.676  | 7205.081  | NM_003375 | 2430.244  | 1968.226  |
| AJ227908  | 1631.136  | 1059.156  | NM_004582 | 21952.25  | 28643.168 | SR5       | 2483.177  | 1798.698  |
| AF007193  | 393.64    | 373.142   | NM_015640 | 12893.03  | 14399.182 | SR7       | 1920.053  | 13562.198 |
| AK022367  | 913.232   | 987.975   | AF233450  | 1212.503  | 1679.331  | SR9       | 5899.922  | 748.84    |
| BC028589  | 1796.29   | 1496.639  | NM_016233 | 1702.387  | 1845.16   | CY3Cy5    | 553.679   | 128.829   |
| BG539651  | 691.003   | 532.245   | NM_000821 | 33479.801 | 40180.34  | NM_012428 | 1621.939  | 912.236   |
| N52646    | 7473.962  | 4301.312  | NM_020121 | 849.161   | 1154.286  | NM_013265 | 241.777   | 299.385   |
| AW160671  | 49873.828 | 32636.107 | NM_003145 | 32035.223 | 37019.07  | NM_001728 | 1096.762  | 527.407   |
| BI870529  | 21636.057 | 17772.994 | NM_001632 | 1686.281  | 2254.887  | NM_005565 | 1421.665  | 827.34    |
| NM_001300 | 3455.233  | 3304.593  | NM_012264 | 1588.955  | 2301.907  | NM_003824 | 1313.204  | 800.175   |
| BG748827  | 4588.673  | 3344.469  | AF311312  | 3303.989  | 2895.116  | NM_012452 | 659.517   | 448.145   |
| AA952897  | 1839.338  | 1305.028  | NM_005313 | 32245.068 | 30391.369 | AF229166  | 1623.056  | 2586.178  |
| BG760342  | 4864.446  | 3141.454  | NM_017765 | 35735.648 | 35228.434 | NM_005137 | 730.993   | 514.971   |
| AA703141  | 1950.366  | 1240.351  | NM_000428 | 894.104   | 975.173   | NM_006764 | 448.743   | 258.684   |

|           |           |           |           |           |           |           |          |          |
|-----------|-----------|-----------|-----------|-----------|-----------|-----------|----------|----------|
| AI122630  | 9084.489  | 8693.189  | AB040967  | 759.798   | 1218.693  | NM_00138€ | 291.726  | 64.054   |
| NM_00210€ | 21863.883 | 39792.867 | NM_00357€ | 617.149   | 511.389   | NM_00116€ | 411.269  | 375.762  |
| NM_00337€ | 9938.445  | 15553.646 | NM_014721 | 1374.268  | 935.097   | NM_00587€ | 491.532  | 341.634  |
| SR5       | 5003.018  | 5444.664  | AK026352  | 1754.506  | 2807.161  | AF308602  | 1061.155 | 736.442  |
| SR7       | 5134.451  | 31281.867 | AL137705  | 2880.81   | 2455.515  | AB011089  | 467.742  | 259.588  |
| SR9       | 15936.263 | 2795.773  | U41898    | 1060.323  | 738.73    | AF007192  | 257.091  | 197.692  |
| CY3Cy5    | 1922.889  | 244.64    | NM_00726€ | 23021.488 | 23358.373 | NM_00127€ | 2238.483 | 2098.853 |
| NM_01326€ | 782.729   | 1146.82   | NM_01478€ | 10840.332 | 10208.542 | NM_016157 | 466.62   | 615.094  |
| NM_00172€ | 5397.299  | 2199.021  | NM_01405€ | 3803.113  | 3737.705  | NM_01491€ | 7116.179 | 1662.336 |
| NM_00556€ | 5818.762  | 3182.156  | NM_002571 | 2773.844  | 2787.491  | NM_01228€ | 537.67   | 425.027  |
| NM_003824 | 5543.309  | 3280.252  | NM_00493€ | 3386.981  | 4990.504  | NM_00219€ | 1925.668 | 1327.661 |
| NM_01245€ | 1121.997  | 767.265   | NM_00142€ | 9821.274  | 13537.081 | D84294    | 676.531  | 195.318  |
| AF229166  | 788.578   | 1048.81   | NM_01571€ | 2058.757  | 2192.22   | M31659    | 265.523  | 210.455  |
| NM_006764 | 919.645   | 760.709   | NM_01415€ | 5676.57   | 5145.736  | NM_00305€ | 1446.825 | 1062.699 |
| NM_00138€ | 353.89    | 495.733   | AK021591  | 2784.866  | 3666.249  | NM_01622€ | 4277.007 | 3962.183 |
| NM_00116€ | 1198.959  | 866.494   | NM_01467€ | 4358.647  | 4098.468  | AK024311  | 313.986  | 297.087  |
| NM_00587€ | 885.745   | 642.199   | NM_00658€ | 5106.994  | 7397.865  | AF052155  | 1751.709 | 1035.91  |
| AF308602  | 2169.17   | 1777.616  | NM_002191 | 516.631   | 549.551   | NM_00508€ | 354.095  | 233.809  |
| AB011089  | 835.191   | 928.727   | AB007875  | 2027.748  | 2555.972  | AF060902  | 408.383  | 240.777  |
| AF007192  | 522.934   | 1136.887  | NM_018261 | 2994.13   | 1788.55   | AF121858  | 625.736  | 338.312  |
| NM_00127€ | 4472.604  | 8356.553  | NM_01479€ | 6426.011  | 4516.886  | NM_013437 | 3629.736 | 3560.001 |
| NM_01491€ | 20542.75  | 10198.361 | NM_00504€ | 3520.578  | 3791.48   | NM_017681 | 425.657  | 330.215  |
| NM_01228€ | 991.972   | 916.628   | NM_016391 | 13895.094 | 12404.312 | X57655    | 3973.569 | 1732.586 |
| NM_00219€ | 4884.949  | 4457.3    | M80783    | 443.742   | 478.26    | AK025966  | 896.178  | 591.363  |
| D84294    | 2168.066  | 1878.983  | AF075033  | 6394.871  | 4747.36   | NM_01872€ | 205.89   | 177.99   |
| M31659    | 1388.797  | 815.223   | D50911    | 11080.197 | 8045.974  | NM_003081 | 4370.976 | 3639.041 |
| NM_00305€ | 4233.589  | 2983.562  | AB011104  | 1327.519  | 1257.978  | NM_01649€ | 2675.379 | 2449.548 |
| NM_01622€ | 15803.911 | 9580.839  | NM_00107€ | 1936.175  | 2353.732  | D50402    | 5551.182 | 4027.732 |
| AK024311  | 965.354   | 681.222   | NM_00055€ | 8053.999  | 9244.63   | M73547    | 3028.275 | 1906.497 |
| AF052155  | 8189.752  | 4150.65   | NM_00380€ | 795.723   | 827.912   | NM_003687 | 438.523  | 307.581  |
| NM_00508€ | 896.583   | 572.247   | AK000860  | 4638.015  | 5669.425  | NM_004134 | 1907.579 | 3411.805 |
| AF060902  | 988.413   | 609.863   | NM_014961 | 1207.832  | 1424.356  | NM_00595€ | 922.382  | 797.146  |
| AF121858  | 2916.914  | 1531.53   | NM_02014€ | 1986.81   | 2366.515  | NM_00404€ | 399.979  | 149.471  |
| NM_013437 | 4846.727  | 4081.791  | AK021529  | 6095.116  | 6634.891  | AF028832  | 112.597  | 137.984  |
| NM_017681 | 690.655   | 581.877   | AB037845  | 5110.623  | 4231.316  | NM_01776€ | 3053.009 | 2613.669 |
| X57655    | 11244.175 | 4216.448  | NM_00598€ | 1767.968  | 2032.326  | NM_00042€ | 228.968  | 380.329  |
| AK025966  | 2264.83   | 1122.321  | NM_01619€ | 57809.027 | 56189.199 | AB040967  | 361.742  | 187.02   |
| NM_01872€ | 1294.093  | 1227.183  | AL137579  | 21255.811 | 21345.838 | NM_014721 | 333.23   | 249.003  |
| NM_003081 | 6482.039  | 5317.282  | NM_01238€ | 17240.152 | 14269.35  | AK026352  | 301.254  | 223.488  |
| NM_01649€ | 5151.458  | 4976.628  | AJ271684  | 4058.634  | 2564.376  | AL137705  | 917.575  | 726.497  |
| D50402    | 8893.543  | 5555.143  | AF255342  | 20971.854 | 17990.27  | U41898    | 341.124  | 861.973  |
| M73547    | 8348.716  | 4961.605  | NM_00330€ | 8862.843  | 7567.14   | NM_01484€ | 221.062  | 194.627  |
| NM_003687 | 519.826   | 423.933   | AK026682  | 2437.448  | 1847.329  | BF217766  | 342.236  | 362.808  |
| NM_004134 | 2631.328  | 3074.846  | NM_00465€ | 2594.386  | 2113.971  | NM_000184 | 535.469  | 566.943  |
| NM_00595€ | 1656.651  | 1274.574  | NM_00394€ | 2328.334  | 2288.042  | NM_01618€ | 243.375  | 172.309  |
| NM_00404€ | 580.648   | 535.06    | NM_006471 | 53158.668 | 50782.5   | NM_000112 | 337.404  | 398.664  |
| NM_001179 | 998.255   | 890.838   | NM_00416€ | 4109.702  | 2007.905  | NM_005827 | 3678.615 | 2138.48  |
| NM_00531€ | 26900.215 | 10970.629 | NM_00036€ | 2612.244  | 1883.989  | NM_00305€ | 1071.483 | 941.76   |
| NM_01776€ | 7255.053  | 4137.685  | NM_01658€ | 2519.374  | 2574.116  | NM_003044 | 429.62   | 373.038  |
| NM_00042€ | 3234.672  | 7169.155  | NM_00414€ | 872.245   | 843.536   | NM_00667€ | 1983.078 | 1166.979 |
| AB040967  | 996.861   | 581.305   | NM_00286€ | 20810.535 | 23621.27  | AB007875  | 401.502  | 342.63   |
| NM_014721 | 1287.91   | 720.059   | AK023847  | 458.979   | 1197.369  | NM_01479€ | 1404.967 | 1072.285 |
| AK026352  | 722.018   | 462.195   | NM_00386€ | 5178.071  | 5434.361  | AL050288  | 6442.303 | 5373.143 |

|           |           |           |           |           |           |           |           |          |
|-----------|-----------|-----------|-----------|-----------|-----------|-----------|-----------|----------|
| AL137705  | 1979.701  | 1108.171  | NM_005414 | 955.356   | 774.234   | NM_00504C | 762.582   | 359.003  |
| U41898    | 1215.467  | 1026.506  | NM_00446E | 17307.143 | 19741.625 | NM_016391 | 1954.679  | 1616.505 |
| NM_000112 | 740.874   | 816.185   | NM_016031 | 9173.021  | 9727.706  | AF075033  | 856.407   | 569.849  |
| NM_005827 | 7179.109  | 4274.205  | NM_004804 | 1598.736  | 2138.088  | D50911    | 2481.235  | 5177.399 |
| NM_003053 | 1566.875  | 1349.645  | M92439    | 9259.835  | 9343.646  | AB007921  | 541.887   | 489.769  |
| NM_003044 | 362.103   | 296.084   | AL117665  | 3441.697  | 3897.742  | AB011104  | 486.097   | 550.044  |
| NM_006672 | 2428.1    | 2118.412  | AF263541  | 2585.268  | 3733.645  | AK024069  | 1844.652  | 1500.685 |
| AB007875  | 837.561   | 554.612   | AK027169  | 664.76    | 694.575   | NM_004582 | 8454.518  | 7153.351 |
| NM_01479E | 4001.23   | 1474.283  | NM_001262 | 8876.902  | 7848.008  | NM_01564C | 4764.722  | 4290.544 |
| AL050288  | 28477.279 | 17247.717 | BE873030  | 5327.125  | 4126.179  | AF233450  | 357.726   | 254.194  |
| NM_00504C | 4547.497  | 2684.001  | NM_00244C | 1121.671  | 932.219   | NM_016233 | 421.785   | 318.392  |
| NM_016391 | 9757.775  | 6816.104  | NM_003625 | 1478.831  | 1560.378  | NM_000821 | 5468.381  | 3835.781 |
| AF075033  | 6164.425  | 3549.754  | BC006990  | 13508.996 | 10850.265 | NM_020121 | 242.191   | 173.838  |
| D50911    | 13997.102 | 16952.461 | NM_002277 | 10184.158 | 7384.098  | NM_00314E | 12816.062 | 8720.813 |
| AB011104  | 1344.97   | 689.757   | NM_019114 | 2887.238  | 2541.751  | NM_001632 | 537.028   | 396.278  |
| AK024069  | 4224.561  | 2531.968  | M33552    | 12070.223 | 11501.913 | NM_012264 | 560.666   | 330.852  |
| NM_004582 | 21654.25  | 9426.368  | AJ252060  | 2364.982  | 2444.928  | AF311312  | 900.316   | 775.055  |
| NM_01564C | 7007.02   | 4035.872  | NM_006403 | 6087.405  | 5081.077  | NM_01491E | 5885.695  | 1077.985 |
| NM_016233 | 837.497   | 652.931   | NM_018977 | 1348.275  | 1112.174  | NM_01228E | 377.339   | 280.236  |
| NM_000821 | 8707.628  | 4853.712  | AJ001402  | 1737.47   | 1473.018  | NM_00219E | 1406.261  | 1071.067 |
| NM_00314E | 30793.551 | 19593.498 | NM_00454C | 528.758   | 564.448   | D84294    | 562.744   | 252.011  |
| NM_001632 | 1373.76   | 1232.778  | NM_000235 | 6562.187  | 5447.238  | K02765    | 246.597   | 146.304  |
| NM_012264 | 1585.611  | 1443.096  | NM_015879 | 835.853   | 1512.985  | M65134    | 221.997   | 80.222   |
| AF311312  | 1980.188  | 1883.95   | AF068236  | 55827.078 | 60870.816 | BG539651  | 341.904   | 325.193  |
| K02765    | 1415.006  | 1511.686  | L25628    | 1226.743  | 1132.868  | N52646    | 2680.574  | 1383.346 |
| BG539651  | 876.758   | 1746.627  | M37033    | 14237.408 | 19963.521 | AW160671  | 14471.451 | 8865.199 |
| N52646    | 8949.161  | 5285.151  | NM_007171 | 6261.165  | 8448.257  | BI870529  | 4574.766  | 4639.823 |
| AW160671  | 47655.5   | 27615.938 | NM_00427E | 1814.661  | 2981.635  | AA702698  | 308.327   | 205.769  |
| BI870529  | 22962.32  | 23987.805 | NM_005632 | 1112.202  | 1861.173  | AI681514  | 295.458   | 161.848  |
| AA702698  | 960.31    | 766.557   | AK021499  | 917.767   | 977.038   | NM_00130C | 1316.905  | 1426.382 |
| AI681514  | 420.557   | 424.347   | AK000336  | 3158.907  | 3531.6    | BG748827  | 1011.031  | 749.534  |
| NM_00130C | 3519.345  | 1797.186  | NM_00279E | 55338.844 | 56950.063 | AA952897  | 442.45    | 507.98   |
| BG748827  | 4851.909  | 1926.232  | NM_006292 | 8649.771  | 6666.446  | BG760342  | 1129.696  | 849.123  |
| AA952897  | 1015.209  | 700.291   | AB007948  | 2054.24   | 1737.857  | AA703141  | 520.159   | 648.244  |
| BG760342  | 3853.642  | 2133.353  | AB033066  | 1935.253  | 1456.457  | AI122630  | 3448.473  | 2775.578 |
| AA703141  | 1920.493  | 1025.291  | AF126028  | 2860.902  | 2335.829  | NM_002103 | 5962.769  | 5944.03  |
| AI122630  | 8915.523  | 6354.461  | NM_007019 | 22397.775 | 17041.229 | NM_00337E | 2334.819  | 2185.526 |
| NM_002103 | 19089.453 | 13564.266 | NM_00707E | 864.574   | 719.633   | NM_00658E | 1693.608  | 1212.485 |
| NM_00337E | 6919.192  | 5540.872  | NM_016042 | 2912.972  | 2501.607  | NM_004134 | 1106.576  | 841.891  |
| NM_00658E | 5525.999  | 5273.366  | NM_01764C | 1393.462  | 1817.772  | NM_00595E | 760.627   | 754.801  |
| NM_01242E | 4476.163  | 9364.776  | NM_017721 | 2206.214  | 1745.976  | NM_00404E | 288.148   | 116.092  |
| NM_01326E | 399.821   | 367.87    | NM_01908E | 7128.936  | 7440.546  | NM_01242E | 1574.825  | 1242.587 |
| NM_00172E | 5720.482  | 5990.978  | AB002373  | 2759.361  | 2306.139  | NM_01326E | 194.703   | 228.991  |
| NM_00556E | 4452.189  | 2585.69   | NM_01635C | 34388.109 | 38752.25  | NM_00172E | 1236.486  | 641.237  |
| NM_003824 | 6602.138  | 8246.705  | AK024167  | 6405.497  | 6977.102  | NM_00556E | 1851.968  | 1693.223 |
| NM_00068E | 562.283   | 705.905   | AK025308  | 550.652   | 503.985   | NM_003824 | 1886.779  | 1516.403 |
| NM_012452 | 1064.187  | 799.554   | NM_00502E | 2011.864  | 1449.888  | NM_00068E | 359.473   | 267.478  |
| AF229166  | 749.193   | 776.138   | AF213356  | 1123.812  | 1194.22   | NM_012452 | 426.261   | 276.813  |
| NM_005137 | 1992.611  | 759.854   | BC035716  | 2169.834  | 2891.279  | AF229166  | 216.233   | 259.79   |
| NM_006764 | 873.023   | 508.889   | NM_018014 | 3164.319  | 5544.912  | NM_005137 | 866.143   | 664.663  |
| NM_001163 | 1049.891  | 830.585   | NM_00235E | 20228.807 | 23842.074 | NM_006764 | 498.837   | 360.169  |
| NM_00587E | 974.158   | 575.66    | AF230809  | 3970.377  | 4504.521  | NM_00138E | 292.284   | 299.549  |
| AF308602  | 3801.159  | 3583.083  | NM_017894 | 58818.203 | 56704.57  | NM_001163 | 425.991   | 376.538  |

|           |           |           |           |           |           |           |           |          |
|-----------|-----------|-----------|-----------|-----------|-----------|-----------|-----------|----------|
| AB011089  | 1498.667  | 1165.57   | NM_006509 | 2174.88   | 1826.352  | NM_005878 | 738.806   | 535.085  |
| AF007192  | 949.852   | 1154.982  | AK025447  | 1359.485  | 1929.257  | AF308602  | 1102.039  | 1130.226 |
| NM_001276 | 5808.376  | 6644.007  | NM_002624 | 54990.848 | 48824.605 | AB011089  | 470.441   | 273.868  |
| NM_016157 | 459.353   | 332.043   | AF006199  | 1467.429  | 1601.937  | NM_001312 | 162.787   | 78.865   |
| NM_000112 | 557.167   | 382.012   | NM_004554 | 10398.565 | 11326.869 | AF007192  | 190.604   | 216.329  |
| NM_003044 | 574.885   | 771.553   | NM_018119 | 3012.695  | 2696.989  | NM_001276 | 1496.087  | 1107.408 |
| NM_006672 | 3911.705  | 8597.972  | NM_014576 | 497.022   | 539.381   | NM_016157 | 332.343   | 298.079  |
| M31659    | 917.152   | 1149.123  | AL162035  | 950.656   | 894.473   | NM_000112 | 240.357   | 111.558  |
| NM_005085 | 849.282   | 410.575   | NM_006692 | 4236.012  | 3804.793  | NM_005827 | 2696.454  | 1755.303 |
| AF060902  | 1154.917  | 1000      | NM_003084 | 3601.118  | 2890.182  | NM_003053 | 947.55    | 878.496  |
| AF121858  | 3571.234  | 2362.751  | NM_002582 | 10644.071 | 8188.708  | NM_003044 | 629.158   | 1047.291 |
| NM_013437 | 4482.715  | 1935.953  | NM_001009 | 61099.445 | 59453.867 | NM_006672 | 1651.153  | 1384.744 |
| NM_017681 | 728.945   | 444.553   | D17289    | 3897.253  | 3716.141  | NM_003056 | 1496.532  | 1780.139 |
| X57655    | 10099.73  | 3125.359  | NM_002949 | 17015.744 | 14244.196 | NM_016226 | 4133.646  | 5244.56  |
| AK025966  | 2321.279  | 1592.91   | NM_014230 | 5123.706  | 5059.753  | AK024311  | 362.249   | 288.734  |
| NM_018725 | 431.705   | 432.512   | NM_017748 | 13462.537 | 14925.95  | AF052155  | 1836.538  | 1391.292 |
| NM_003081 | 15475.968 | 10817.025 | AK025374  | 1985.102  | 2444.195  | NM_005085 | 406.647   | 180.077  |
| NM_016495 | 10693.383 | 15904.845 | NM_014901 | 11800.075 | 13520.339 | AF060902  | 382.609   | 330.406  |
| D50402    | 6863.056  | 6792.623  | AK000005  | 2790.631  | 4161.827  | AF121858  | 1203.521  | 1061.729 |
| M73547    | 11251.972 | 7254.105  | AF086790  | 3430.631  | 4706.446  | NM_013437 | 1703.336  | 1638.026 |
| NM_003687 | 522.582   | 486.16    | U28480    | 3126.821  | 3268.519  | NM_017681 | 445.143   | 464.725  |
| NM_003145 | 34211.121 | 43911.543 | NM_000108 | 16377.922 | 14889.194 | X57655    | 4073.247  | 2282.733 |
| NM_001632 | 1625.333  | 1529.075  | NM_018128 | 3217.367  | 3193.56   | AK025966  | 173.931   | 196.25   |
| NM_012264 | 2226.459  | 2323.763  | NM_016931 | 15243.228 | 14404.98  | NM_014440 | 156.454   | 105.469  |
| NM_017765 | 7196.664  | 5508.387  | NM_004373 | 57140.906 | 51446.164 | NM_018725 | 254.346   | 121.886  |
| NM_000428 | 592.3     | 333.358   | NM_005566 | 58907.793 | 55385.688 | NM_003081 | 5167.492  | 4964.728 |
| AK026352  | 791.493   | 627.861   | NM_000162 | 6255.812  | 5513.615  | NM_016495 | 2215.978  | 2510.862 |
| AL137705  | 2573.314  | 1886.933  | AK027067  | 1015.045  | 819.393   | D50402    | 4093.043  | 3148.632 |
| U41898    | 436.734   | 404.859   | NM_016287 | 11291.955 | 9251.921  | M73547    | 2241.242  | 1227.484 |
| NM_014848 | 398.821   | 481.226   | NM_003864 | 9966.866  | 6422.784  | NM_003687 | 276.96    | 104.88   |
| BF217766  | 1054.628  | 1192.823  | NM_006824 | 26619.664 | 20081.777 | NM_003145 | 10384.267 | 8655.532 |
| NM_000184 | 1394.081  | 1268.886  | NM_002107 | 1275.095  | 1023.485  | NM_001632 | 464.355   | 1043.395 |
| NM_002103 | 19170.232 | 13331.85  | NM_002694 | 14948.535 | 15270.312 | NM_012264 | 428.442   | 368.965  |
| NM_003379 | 7737.479  | 11931.708 | NM_004454 | 1781.054  | 1770.988  | AF311312  | 672.874   | 896.474  |
| AB007875  | 1235.844  | 2756.619  | NM_000966 | 826.212   | 758.544   | NM_001179 | 259.338   | 517.133  |
| NM_018261 | 1870.947  | 3580.029  | NM_012482 | 3691.285  | 2427.68   | NM_005313 | 11080.177 | 8606.528 |
| NM_014796 | 2565.493  | 1797.041  | AF217227  | 1280.232  | 1336.008  | NM_017765 | 2606.653  | 2529.258 |
| AL050288  | 33736.02  | 28804.641 | AK024141  | 7982.342  | 6840.077  | AB040967  | 266.868   | 249.684  |
| NM_016391 | 8603.848  | 5670.989  | U13706    | 1224.071  | 1016.676  | NM_014721 | 260.6     | 420.208  |
| AF075033  | 4136.878  | 1852.788  | NM_002813 | 33801.941 | 38940.773 | AK026352  | 244.8     | 213.601  |
| D50911    | 11348.658 | 5352.165  | NM_001198 | 734.631   | 955.405   | AL137705  | 571.354   | 581.567  |
| AB011104  | 1193.189  | 1124.419  | AK022745  | 5598.948  | 5046.954  | AF169257  | 149.496   | 208.736  |
| AK024069  | 4147.596  | 4568.041  | AL049450  | 8946.393  | 8402.333  | NM_014848 | 238.37    | 181.327  |
| NM_004582 | 22208.127 | 13638.936 | AK023481  | 905.869   | 962.84    | NM_000184 | 252.866   | 302.507  |
| NM_015640 | 13219.247 | 8359.325  | AK022011  | 480.247   | 438.356   | NM_002103 | 3070.383  | 2178.303 |
| AF233450  | 834.308   | 659.115   | NM_005086 | 60829.215 | 59276.926 | NM_003379 | 892.326   | 422.565  |
| NM_016233 | 788.479   | 721.135   | NM_007238 | 4646.799  | 5214.536  | NM_006588 | 1658.141  | 1350.799 |
| NM_000821 | 9547.802  | 5751.09   | AL049340  | 711.158   | 916.025   | NM_002191 | 665.74    | 1191.123 |
| AF308602  | 3087.991  | 2741.469  | NM_017606 | 2751.054  | 4228.297  | AB007875  | 302.053   | 296.966  |
| AB011089  | 1305.32   | 1094.227  | AK024644  | 13247.809 | 12588.44  | NM_018261 | 326.941   | 348.222  |
| AF007192  | 1993.491  | 1871.557  | AB019573  | 1063.902  | 985.917   | NM_014796 | 1232.707  | 1024.106 |
| NM_001276 | 7674.276  | 21269.652 | U68494    | 1045.662  | 1238.971  | AL050288  | 5639.712  | 5825.872 |
| NM_016157 | 627.531   | 1357.282  | AF064254  | 1733.428  | 1467.649  | NM_005040 | 496.571   | 410.579  |



|           |           |           |           |           |           |           |           |          |
|-----------|-----------|-----------|-----------|-----------|-----------|-----------|-----------|----------|
| NM_01491E | 30047.727 | 34248.91  | AK021524  | 1275.422  | 998.854   | NM_016391 | 1245.341  | 1260.904 |
| NM_01228E | 1556.494  | 2560.786  | AL137360  | 5145.604  | 5253.173  | AF075033  | 1920.951  | 2266.479 |
| NM_00219E | 5691.278  | 8562.682  | AF143331  | 3044.824  | 2817.404  | D50911    | 2212.521  | 1880.372 |
| D84294    | 2516.774  | 2394.641  | AK000819  | 2024.286  | 2014.72   | AB011104  | 314.695   | 295.203  |
| K02765    | 561.254   | 367.104   | AF201941  | 2950.637  | 2833.53   | AK024069  | 1115.296  | 1031.983 |
| M65134    | 450.48    | 196.924   | AF143325  | 1231.105  | 882.615   | NM_00458E | 6296.295  | 5289.597 |
| BG539651  | 1513.567  | 1222.538  | AF143878  | 857.623   | 790.652   | NM_01564C | 2773.299  | 2390.476 |
| N52646    | 8587.614  | 4922.099  | AF026941  | 2048.025  | 1790.462  | AF233450  | 179.105   | 215.132  |
| AW160671  | 55277.637 | 34228.582 | NM_00707C | 5491.491  | 3675.839  | NM_01623E | 244.98    | 317.565  |
| BI870529  | 18419.793 | 6371.343  | AL133019  | 5760.165  | 5370.296  | NM_000821 | 3959.025  | 3377.966 |
| AA702698  | 1750.502  | 1864.384  | AK026192  | 636.38    | 698.351   | AF308602  | 641.628   | 756.297  |
| AI681514  | 402.516   | 261.114   | NM_01489E | 3084.415  | 2287.807  | AB011089  | 256.601   | 221.052  |
| NM_00130C | 2827.792  | 2815.772  | AK024883  | 7486.365  | 8354.756  | AF007192  | 155.429   | 235.856  |
| BG748827  | 4677.522  | 3855.087  | AF217989  | 4770.621  | 5210.601  | NM_00127E | 1375.473  | 1781.798 |
| AA952897  | 1800.049  | 1599.893  | NM_017654 | 3699.834  | 2670.509  | NM_01491E | 5829.555  | 1375.705 |
| BG760342  | 5211.37   | 3711.966  | L77561    | 579.158   | 660.093   | NM_01228E | 404.488   | 537.561  |
| AA703141  | 2319.713  | 1587.97   | AL109696  | 938.781   | 1205.797  | NM_00219E | 1182.02   | 823.38   |
| AI122630  | 8998.572  | 6703.483  | AK022190  | 2194.401  | 2692.173  | D84294    | 690.893   | 455.474  |
| NM_003081 | 15658.174 | 11125.662 | AJ011593  | 3137.02   | 3196.868  | K02765    | 236.885   | 86.334   |
| NM_01649E | 7513.782  | 8665.623  | AJ227907  | 830.41    | 800.137   | BG539651  | 347.612   | 458.562  |
| D50402    | 10254.292 | 7065.416  | X89743    | 1001.804  | 926.447   | N52646    | 2733.444  | 1825.76  |
| M73547    | 10476.736 | 14644.547 | AJ011599  | 479.962   | 634.537   | AW160671  | 23172.068 | 16297.6  |
| NM_003687 | 1024.381  | 1322.689  | AJ002784  | 391.019   | 493.346   | BI870529  | 3268.435  | 3684.709 |
| NM_004134 | 3421.822  | 8604.166  | U17621    | 894.221   | 792.628   | AA702698  | 231.613   | 263.976  |
| NM_00595E | 1780.68   | 2955.939  | AL049239  | 5541.376  | 4296.834  | NM_00130C | 965.813   | 823.756  |
| NM_00404E | 501.815   | 945.487   | NM_01328E | 1907.491  | 1654.333  | BG748827  | 824.827   | 590.015  |
| NM_01242E | 6037.959  | 5179.331  | M60721    | 2151.489  | 1995.368  | AA952897  | 400.702   | 332.527  |
| NM_00172E | 5977.339  | 4104.008  | L39061    | 4224.767  | 3346.36   | BG760342  | 1278.239  | 2508.418 |
| NM_00556E | 4944.215  | 2326.833  | AF071508  | 5260.692  | 5745.729  | AA703141  | 582.211   | 624.424  |
| NM_003824 | 5258.074  | 2039.511  | L07265    | 46585.672 | 46553.066 | AI122630  | 2693.792  | 2330.574 |
| NM_00068E | 307.367   | 255.156   | D16472    | 9853.714  | 8219.868  | NM_003081 | 3302.928  | 3368.447 |
| NM_01245E | 935.339   | 861.107   | AK022467  | 677.414   | 577.282   | NM_01649E | 1370.389  | 1475.413 |
| AF229166  | 819.453   | 1231.066  | AL157459  | 2932.296  | 3558.187  | D50402    | 3442.96   | 2674.552 |
| NM_001163 | 1350.451  | 1214.539  | AL157421  | 494.692   | 561.214   | M73547    | 1634.618  | 1433.909 |
| NM_00587E | 549.122   | 470.524   | AB020654  | 508.621   | 463.218   | AF181722  | 253.666   | 898.334  |
| BF217766  | 922.303   | 2269.823  | AL353954  | 4501.24   | 3782.241  | NM_00595E | 845.257   | 995.317  |
| NM_000184 | 1238.727  | 1671.677  | NM_01763C | 1137.278  | 990.088   | NM_00404E | 232.207   | 557.815  |
| NM_000112 | 622.329   | 503.432   | AK000778  | 4240.582  | 3824.765  | BE548044  | 172.471   | 427.354  |
| NM_005827 | 6321.162  | 6405.187  | AK000932  | 602.733   | 473.025   | NM_01242E | 836.358   | 728.618  |
| NM_00305E | 1764.787  | 2581.142  | AL133573  | 13986.387 | 12129.076 | NM_00172E | 939.359   | 772.171  |
| NM_00667E | 2322.221  | 3225.796  | AK000115  | 764.328   | 926.907   | NM_00556E | 1378.914  | 1386.34  |
| M31659    | 1350.06   | 1652.855  | NM_01795E | 475.29    | 670.904   | NM_003824 | 1614.872  | 1663.111 |
| NM_00305E | 3906.223  | 3669.922  | AK000958  | 1354.641  | 1077.055  | NM_00068E | 274.289   | 260.215  |
| NM_01622E | 17571.982 | 23142.154 | AK024523  | 1303.917  | 1359.417  | NM_01245E | 271.747   | 227.634  |
| AK024311  | 1017.518  | 552.166   | AK024600  | 2079.945  | 2205.758  | NM_005137 | 707.177   | 566.831  |
| AF052155  | 7912.612  | 3476.04   | AK024543  | 6057.673  | 5760.827  | NM_006764 | 568.032   | 435.166  |
| NM_00508E | 635.379   | 294.007   | AK024624  | 27517.457 | 24836.205 | NM_00138E | 298.797   | 133.182  |
| AF060902  | 1301.829  | 1624.718  | AK025090  | 2940.588  | 3689.917  | NM_001163 | 438.44    | 450.38   |
| AF121858  | 2858.091  | 3591.729  | NM_01415E | 775.8     | 1047.653  | NM_00587E | 620.206   | 573.033  |
| AK025966  | 2335.974  | 1482.171  | AF086473  | 769.726   | 1016.452  | NM_01484E | 147.293   | 99.499   |
| NM_01872E | 461.186   | 419.849   | D87682    | 979.423   | 988.098   | BF217766  | 153.302   | 172.932  |
| AK024069  | 4366.579  | 6665.273  | AF321617  | 12000.951 | 13116.04  | NM_005827 | 2752.53   | 1872.241 |
| AF233450  | 914.375   | 1995.61   | AF223389  | 815.962   | 956.672   | NM_00305E | 3247.269  | 3945.982 |

|           |           |           |           |           |           |           |          |          |
|-----------|-----------|-----------|-----------|-----------|-----------|-----------|----------|----------|
| NM_016233 | 1057.001  | 1448.391  | AV710479  | 512.065   | 545.964   | NM_003044 | 225.501  | 222.603  |
| NM_000821 | 11264.374 | 15174.044 | NM_006950 | 1356.705  | 749.671   | NM_006672 | 1654.988 | 1214.147 |
| NM_003145 | 28926.369 | 31912.865 | NM_000682 | 910.798   | 872.527   | NM_000338 | 651.162  | 983.77   |
| NM_001632 | 894.211   | 1065.933  | AF086208  | 4875.506  | 5520.456  | AK024311  | 257.526  | 288.021  |
| NM_012264 | 1032.347  | 1106.512  | AK023335  | 4218.353  | 5233.128  | AF052155  | 1616.25  | 1395.322 |
| AF311312  | 1796.315  | 4536.905  | AK023187  | 1295.076  | 1244.364  | NM_005085 | 311.803  | 325.395  |
| NM_001179 | 504.92    | 751.009   | AK022231  | 964.954   | 908.814   | AF060902  | 380.148  | 267.062  |
| NM_017765 | 6233.219  | 4771.875  | NM_019033 | 1835.754  | 2171.338  | AF121858  | 1100.596 | 994.85   |
| NM_000428 | 1183.053  | 818.128   | AL133101  | 3269.276  | 3396.105  | NM_013437 | 1762.243 | 1988.216 |
| AB040967  | 1214.836  | 412.645   | AK024602  | 40671.984 | 43160.227 | NM_017681 | 430.845  | 323.045  |
| NM_014721 | 1195.153  | 951.316   | NM_018507 | 915.667   | 1002.453  | X57655    | 3814.97  | 1944.366 |
| AL137705  | 2259.281  | 1887.394  | NM_000485 | 6069.466  | 8090.99   | AK025966  | 967.83   | 780.726  |
| U41898    | 369.885   | 313.902   | NM_018542 | 3504.229  | 3372.875  | NM_014440 | 129.973  | 142.043  |
| NM_007262 | 37991.082 | 48739.934 | AK025503  | 3875.437  | 4409.548  | NM_018725 | 225.534  | 316.537  |
| NM_014783 | 8398.969  | 10466.493 | AF130073  | 5535.063  | 4948.979  | AK024069  | 634.739  | 389.101  |
| NM_014053 | 5007.06   | 10496.98  | AK024225  | 18860.053 | 21974.162 | NM_004582 | 3054.429 | 2329.286 |
| NM_002571 | 936.006   | 2269.203  | AF086334  | 2362.08   | 3019.276  | NM_015640 | 2572.505 | 2296.638 |
| NM_004939 | 3996.166  | 6889.542  | AL137602  | 593.362   | 726.285   | AF233450  | 194.066  | 218.918  |
| NM_001425 | 13490.156 | 19652.459 | NM_003696 | 479.064   | 659.891   | NM_016233 | 249.982  | 241.984  |
| NM_015710 | 664.059   | 1044.507  | AF075035  | 54267.715 | 46395.758 | NM_000821 | 2026.855 | 2523.037 |
| NM_014158 | 3288.41   | 4920.576  | AL110180  | 6840.956  | 6655.804  | NM_020121 | 112.517  | 302.975  |
| AK021591  | 1926.891  | 1818.651  | U00949    | 348.845   | 466.248   | AB040967  | 478.446  | 274.752  |
| NM_014675 | 669.155   | 727.792   | BC024924  | 6781.702  | 5524.579  | NM_014721 | 543.375  | 660.277  |
| NM_006589 | 4424.275  | 5703.603  | NM_017906 | 11191.888 | 9601.438  | AK026352  | 329.732  | 422.459  |
| AB007875  | 938.238   | 1376.607  | AL110286  | 8285.591  | 7226.781  | AL137705  | 932.324  | 1114.96  |
| NM_014796 | 4787.137  | 1673.365  | AL162066  | 44131.5   | 41576.324 | U41898    | 220.978  | 271.302  |
| AL050288  | 29827.908 | 14054.646 | NM_016096 | 31203.256 | 27892.555 | NM_007262 | 1396.881 | 1312.468 |
| NM_005040 | 4638.299  | 2758.121  | U79290    | 3316.866  | 2844.737  | NM_014783 | 565.56   | 459.386  |
| NM_016391 | 9763.154  | 7336.976  | X98114    | 1939.751  | 1191.896  | NM_014053 | 343.919  | 360.045  |
| M80783    | 550.463   | 394.56    | NM_014040 | 6601.065  | 7770.305  | NM_002571 | 218.31   | 156.779  |
| AF075033  | 7442.249  | 5781.579  | AK000799  | 8542.847  | 10835.109 | NM_004939 | 318.797  | 209.402  |
| D50911    | 15854.731 | 9211.983  | NM_015582 | 10965.339 | 11232.927 | NM_001425 | 292.736  | 153.589  |
| AB011104  | 1450.998  | 1180.842  | AK027091  | 3003.154  | 2274.953  | NM_015710 | 227.613  | 75.222   |
| NM_000552 | 4990.208  | 11648.507 | NM_001526 | 4610.236  | 5123.23   | NM_014158 | 816.404  | 722.826  |
| NM_003809 | 568.102   | 1463.098  | U31738    | 1224.475  | 1654.838  | NM_014796 | 1545.047 | 1848.964 |
| AK000860  | 1877.705  | 3569.585  | AF179890  | 6215.333  | 6931.781  | AL050288  | 6759.866 | 7603.672 |
| NM_014961 | 1082.744  | 1867.853  | AK023536  | 13007.451 | 13653.971 | NM_005040 | 1268.392 | 794.581  |
| NM_020145 | 2100.903  | 4425.255  | AK026561  | 4124.538  | 5288.567  | NM_016391 | 3142.853 | 4095.427 |
| AK021529  | 1361.369  | 2038.347  | AK021568  | 19832.182 | 20097.473 | AF075033  | 1909.229 | 2023.047 |
| AB037845  | 2698.974  | 3992.311  | Z36838    | 1908.796  | 1620.875  | D50911    | 3583.998 | 3552.087 |
| NM_005980 | 1216.71   | 3451.684  | AF088054  | 949.849   | 566.754   | AB011104  | 513.29   | 483.049  |
| NM_016190 | 29423.377 | 39671.813 | AK023881  | 4722.958  | 4884.807  | NM_000552 | 370.446  | 257.966  |
| AL137579  | 4929.793  | 9943.31   | AK027114  | 59493.207 | 61645.352 | AK000860  | 267.164  | 437.281  |
| NM_012383 | 12906.355 | 13204.065 | NM_016298 | 2765.531  | 2176.883  | NM_020145 | 342.362  | 218.125  |
| AJ271684  | 753.352   | 643.842   | AK002146  | 1805.27   | 1489.505  | AK021529  | 364.659  | 281.01   |
| AF255342  | 2977.367  | 3289.509  | NM_003159 | 2357.29   | 2043.507  | AB037845  | 1089.861 | 940.312  |
| NM_003300 | 4864.152  | 1637.621  | NM_015492 | 9322.78   | 8123.021  | NM_005980 | 390.785  | 344.291  |
| AK026682  | 1785.069  | 737.862   | NM_006933 | 1342.752  | 1237.191  | NM_016190 | 9826.199 | 8281.471 |
| NM_017720 | 49185.004 | 27309.727 | AF132204  | 6987.637  | 7393.703  | AL137579  | 2147.609 | 1963.585 |
| NM_004655 | 2182.628  | 1244.22   | AK022874  | 6948.092  | 5326.891  | NM_012383 | 4281.613 | 4844.32  |
| NM_003942 | 2642.6    | 2083.46   | CY3Cy5    | 3242.672  | 125.467   | AJ271684  | 357.753  | 378.078  |
| NM_006471 | 53181.207 | 29575.885 | BI912037  | 773.871   | 638.507   | AF255342  | 1530.564 | 1681.55  |
| NM_004165 | 2557.589  | 1255.644  | AA454646  | 768.343   | 938.445   | NM_003300 | 1608.246 | 1836.294 |

|           |           |           |           |           |           |           |           |           |
|-----------|-----------|-----------|-----------|-----------|-----------|-----------|-----------|-----------|
| NM_00036E | 2645.639  | 2230.348  | U18087    | 45201.523 | 42226.363 | AK026682  | 695.566   | 1447.073  |
| NM_01658E | 3503.909  | 2243.246  | U66349    | 1507.063  | 1107.562  | NM_01772C | 36401.625 | 43612.352 |
| NM_00414C | 934.817   | 1906.62   | AA057156  | 1199.173  | 2027.71   | NM_00465E | 563.36    | 541.62    |
| NM_00286E | 5490.173  | 7120.02   | AF166327  | 16437.793 | 16825.275 | NM_00394Z | 819.802   | 684.331   |
| NM_00386C | 1247.034  | 2300.655  | AF260739  | 1090.518  | 1267.465  | NM_006471 | 20883.76  | 20710.969 |
| NM_005414 | 763.633   | 1789.101  | AF531423  | 3060.341  | 2789.248  | NM_00416E | 1048.483  | 598.846   |
| NM_00446E | 4199.273  | 9130.194  | X76555    | 871.405   | 827.182   | NM_00036E | 842.489   | 857.874   |
| NM_016031 | 7883.394  | 14721.213 | NM_00543Z | 2248.24   | 1578.477  | NM_01658E | 953.533   | 795.205   |
| NM_004804 | 2441.146  | 5037.975  | L10386    | 2420.517  | 1853.88   | NM_00286E | 905.126   | 672.842   |
| M92439    | 2048.362  | 3603.962  | AF061812  | 4370.567  | 3478.422  | NM_00386C | 370.305   | 350.164   |
| AL117665  | 4102.054  | 8518.051  | AL136756  | 1030.181  | 1126.987  | NM_00446E | 1001.292  | 688.942   |
| AF263541  | 3250.618  | 6822.322  | NM_01246E | 7796.041  | 6224.614  | NM_016031 | 365.742   | 255.907   |
| NM_00126Z | 7637.881  | 15599.184 | NM_13426C | 8689.765  | 4733.339  | NM_004804 | 163.527   | 162.325   |
| BE873030  | 1255.249  | 1327.671  | SR2       | 55217.762 | 26133.572 | M92439    | 1095.646  | 1117.614  |
| NM_00362E | 1487.429  | 1468.243  | SR4       | 12341.035 | 5476.908  | AL117665  | 793.566   | 945.965   |
| BC006990  | 9673.03   | 4102.829  | SR6       | 2067.971  | 831.992   | AF263541  | 733.91    | 948.146   |
| NM_002277 | 765.206   | 476.161   | SR8       | 6982.035  | 8482.276  | NM_00126Z | 2029.45   | 2249.203  |
| NM_019114 | 2570.017  | 1265.345  | SR10      | 24851.346 | 2633.11   | BE873030  | 499.381   | 610.797   |
| M33552    | 5650.36   | 3380.881  | CY3Cy5    | 1696.839  | 78.021    | NM_00362E | 253.748   | 331.933   |
| AJ252060  | 2508.32   | 1492.587  | AL080157  | 2031.827  | 2436.738  | BC006990  | 3103.051  | 3777.306  |
| NM_00640Z | 4448.014  | 3680.284  | NM_00530E | 2290.967  | 2299.75   | NM_002277 | 890.716   | 1051.037  |
| NM_018977 | 728.105   | 650.116   | NM_007227 | 665.746   | 615.141   | NM_019114 | 846.477   | 812.715   |
| AJ001402  | 512.863   | 505.446   | NM_00702Z | 511.153   | 650.958   | M33552    | 2653.507  | 2717.52   |
| NM_01587E | 649.017   | 1151.259  | NM_014461 | 657.525   | 825.752   | AJ252060  | 782.357   | 735.416   |
| AF068236  | 18843.549 | 19299.523 | NM_00386E | 1141.944  | 1248.346  | NM_00640Z | 1746.581  | 1911.645  |
| L25628    | 537.882   | 1252.755  | AB015330  | 3817.928  | 3836.919  | NM_018977 | 302.763   | 719.37    |
| M37033    | 13129.614 | 18639.307 | NM_00145E | 2637.583  | 2823.729  | AJ001402  | 503.319   | 366.876   |
| NM_007171 | 7132.787  | 14076.221 | L09071    | 460.022   | 475.984   | NM_00454C | 187.6     | 151.005   |
| NM_00427E | 1970.865  | 4030.721  | NM_00332Z | 1218.135  | 675.163   | NM_00023E | 362.346   | 250.647   |
| NM_00563Z | 1056.445  | 1990.911  | BC036375  | 14725.439 | 6492.623  | AF068236  | 8068.128  | 6545.083  |
| AK021499  | 702.891   | 1731.859  | NM_00636Z | 4779.631  | 4096.362  | M37033    | 2415.995  | 1844.949  |
| AK000336  | 2220.717  | 5827.269  | NM_02041E | 2996.383  | 2726.032  | NM_007171 | 502.637   | 455.32    |
| NM_00279E | 43702.652 | 60537.199 | AL049667  | 4767.304  | 4536.548  | AK021499  | 271.111   | 335.181   |
| NM_00629Z | 6798.117  | 15864.937 | NM_000334 | 2496.725  | 3500.902  | AK000336  | 675.257   | 675.111   |
| AB007948  | 1479.15   | 2739.002  | NM_02040C | 1630.527  | 1696.274  | NM_00279E | 14645.737 | 13861.949 |
| AB033066  | 1035.733  | 830.068   | D50926    | 2282.85   | 3337.19   | NM_00629Z | 2115.824  | 2514.672  |
| AF126028  | 2361.6    | 2695.737  | BF205683  | 3179.613  | 4817.697  | AB007948  | 632.095   | 731.464   |
| NM_00701E | 21892.105 | 15851.653 | NM_00156E | 985.454   | 728.397   | AB033066  | 553.517   | 336.356   |
| NM_00707E | 372.006   | 178.185   | NM_00154E | 905.106   | 445.711   | AF126028  | 771.417   | 987.338   |
| NM_01604Z | 1739.286  | 756.072   | NM_00075E | 4192.283  | 3963.394  | NM_00701E | 5687.798  | 8102.679  |
| NM_01764C | 1010.96   | 503.125   | M17017    | 561.598   | 576.11    | NM_00707E | 611.195   | 883.942   |
| NM_017721 | 2232.221  | 1141.867  | NM_00299C | 3419.471  | 3916.999  | NM_01604Z | 635.779   | 784.257   |
| NM_01908E | 5977.537  | 4184.063  | NM_00243Z | 2395.467  | 1586.57   | NM_01764C | 462.169   | 373.489   |
| AB002373  | 2729.719  | 2523.734  | AB033037  | 1142.709  | 810.084   | NM_017721 | 706.609   | 887.189   |
| NM_01635C | 6149.243  | 5778.678  | L40400    | 4017.117  | 2600.146  | NM_01908E | 2036.951  | 2525.574  |
| AK024167  | 8583.587  | 5292.889  | AK025688  | 2143.429  | 1450.075  | AB002373  | 763.928   | 1262.499  |
| NM_00502E | 1723.008  | 1201.443  | NM_01444E | 1255.906  | 676.209   | NM_01635C | 6552.908  | 5661.745  |
| AF230809  | 1417.363  | 4493.12   | NM_00431E | 6281.458  | 6620.65   | AK024167  | 2868.192  | 4575.859  |
| NM_017894 | 13976.481 | 24601.328 | NM_02016E | 3664.225  | 3327.12   | NM_00502E | 640.337   | 428.65    |
| NM_00650E | 1358.641  | 4600.494  | S56138    | 1058.759  | 1015.007  | NM_018014 | 765.938   | 359.972   |
| AK025447  | 1193.597  | 2617.511  | AK023860  | 2134.058  | 2550.106  | NM_00235E | 2249.485  | 2150.993  |
| NM_002624 | 16057.791 | 23897.959 | NM_000031 | 2919.904  | 3935.919  | AF230809  | 413.294   | 408.16    |
| AF006199  | 1563.963  | 3479.723  | NM_00208E | 23594.041 | 31172.666 | NM_017894 | 3761.272  | 3101.417  |

|           |           |           |           |           |           |           |           |           |
|-----------|-----------|-----------|-----------|-----------|-----------|-----------|-----------|-----------|
| NM_004554 | 1337.859  | 2259.507  | AK026061  | 1272.881  | 1676.209  | NM_002624 | 10937.115 | 9980.805  |
| NM_018119 | 1571.024  | 2559.686  | NM_016286 | 7096.888  | 8859.527  | AF006199  | 387.673   | 355.744   |
| NM_014576 | 426.874   | 625.981   | NM_001567 | 1224.983  | 1676.525  | NM_004554 | 838.289   | 892.135   |
| AL162035  | 516.537   | 547.698   | NM_004905 | 10451.269 | 9450.187  | NM_018119 | 859.497   | 859.746   |
| NM_006692 | 1127.697  | 622.584   | AF217971  | 4632.087  | 5561.965  | NM_014576 | 226.95    | 182.641   |
| NM_003084 | 3419.095  | 1811.244  | NM_001925 | 591.914   | 887.229   | AL162035  | 309.691   | 597.138   |
| NM_002582 | 4379.685  | 1767.45   | AF245517  | 1249.073  | 1334.241  | NM_006692 | 532.78    | 528.587   |
| NM_001009 | 55705.965 | 52499.656 | NM_004982 | 1330.499  | 1285.398  | NM_003084 | 905.124   | 1470.453  |
| NM_001026 | 59169.992 | 60673.117 | NM_001694 | 61545.047 | 60672.047 | NM_002582 | 2083.852  | 3683.774  |
| NM_001011 | 52578.781 | 66651.281 | AF286370  | 718.865   | 531.453   | NM_001009 | 36221.098 | 43362.391 |
| AB061315  | 401.134   | 183.95    | NM_000217 | 441.161   | 439.824   | D17289    | 1614.879  | 1332.023  |
| D17289    | 4741.571  | 3659.499  | AK026180  | 1159.303  | 726.299   | NM_002949 | 5701.368  | 5414.783  |
| NM_002949 | 18497.723 | 12217.561 | NM_005817 | 4167.036  | 2208.83   | NM_014230 | 2190.249  | 1867.3    |
| NM_014230 | 6413.492  | 4692.585  | NM_003916 | 3788.793  | 1895.513  | NM_017748 | 829.175   | 739.424   |
| NM_017748 | 3930.435  | 3897.507  | NM_002870 | 21102.344 | 12504.763 | AK025374  | 216.229   | 102.595   |
| AK025374  | 1409.139  | 724.774   | NM_001478 | 39747.816 | 32062.572 | NM_014901 | 2246.194  | 1931.219  |
| NM_000108 | 10261.433 | 16598.705 | AF135422  | 2003.297  | 2403.63   | AK000005  | 576.953   | 429.709   |
| NM_018128 | 2553.609  | 5879.471  | NM_004479 | 16130.4   | 19102.895 | AF086790  | 384.314   | 491.583   |
| NM_016931 | 4060.928  | 9283.219  | NM_002610 | 1020.545  | 1260.377  | U28480    | 256.65    | 398.329   |
| NM_000162 | 1268.192  | 1025.962  | AF070587  | 5073.592  | 4467.455  | NM_000108 | 1217.24   | 1424.618  |
| AK027067  | 976.935   | 1682.519  | BE250526  | 787.895   | 955.813   | NM_018128 | 302.311   | 248.858   |
| NM_016287 | 11446.985 | 5427.943  | NM_016819 | 1828.635  | 2095.799  | NM_016931 | 2050.134  | 2491.744  |
| NM_003864 | 5679.261  | 3160.711  | NM_012222 | 5808.051  | 8437.937  | NM_000162 | 1097.48   | 1004.968  |
| NM_006824 | 23127.078 | 9848.257  | NM_005002 | 3771.614  | 3617.793  | AK027067  | 490.216   | 838.378   |
| NM_002107 | 1017.424  | 975.736   | NM_006596 | 3061.478  | 3936.777  | NM_016287 | 3322.768  | 4063.644  |
| NM_002694 | 12154.103 | 9602.9    | AK023214  | 7519.112  | 7196.271  | NM_003864 | 2128      | 3595.079  |
| NM_004454 | 2188.62   | 2738.877  | NM_001469 | 7338.752  | 8220.914  | NM_006824 | 8940.478  | 11215.802 |
| NM_000966 | 546.64    | 584.969   | NM_003600 | 7346.815  | 6704.663  | NM_002107 | 367.326   | 254.3     |
| NM_012482 | 2462.011  | 2009.389  | NM_017490 | 3572.561  | 3177.977  | NM_002694 | 4855.815  | 4833.16   |
| AF217227  | 992.46    | 798.397   | NM_002718 | 1775.683  | 1391.328  | NM_004454 | 724.378   | 1050.972  |
| AK024141  | 1031.925  | 1145.845  | AK026727  | 1693.733  | 1170.994  | NM_000966 | 261.65    | 372.605   |
| NM_002813 | 7766.557  | 6562.441  | NM_002830 | 859.312   | 460.029   | NM_012482 | 1023.772  | 1053.719  |
| AK022745  | 4120.209  | 2667.531  | NM_006247 | 4843.225  | 3137.228  | AF217227  | 319.007   | 201.24    |
| NM_005086 | 25867.26  | 31763.584 | AB032983  | 1394.03   | 1015.694  | AK024141  | 879.193   | 888.639   |
| NM_007238 | 3568.217  | 8582.016  | NM_018281 | 4605.563  | 2796.734  | U13706    | 236.338   | 341.071   |
| AL049340  | 1306.775  | 3673.688  | NM_004457 | 4750.852  | 2185.246  | NM_002813 | 3891.531  | 3301.896  |
| NM_017606 | 2640.507  | 4874.292  | NM_014049 | 2288.872  | 1177.036  | NM_001198 | 114.307   | 104.112   |
| AK024644  | 6683.552  | 6316.358  | BC036375  | 17529.246 | 12490.799 | AK022745  | 680.695   | 584.971   |
| AB019573  | 725.486   | 862.812   | BI912037  | 1241.352  | 1578.11   | AL049450  | 1297.403  | 1260.532  |
| U68494    | 979.217   | 1267.87   | AA454646  | 781.167   | 931.304   | AK022011  | 171.524   | 1540.441  |
| AF064254  | 966.146   | 677.664   | U66349    | 1286.497  | 1230.92   | NM_005086 | 9091.702  | 3974.177  |
| AL137360  | 2586.215  | 1260.343  | AA057156  | 1589.083  | 1724.365  | NM_007238 | 934.748   | 542.973   |
| AF201941  | 3551.282  | 4196.167  | AF166327  | 17650.773 | 14972.1   | AL049340  | 309.641   | 436.085   |
| AF026941  | 1030.411  | 1366.773  | AF260739  | 1257.099  | 1620.526  | NM_017606 | 990.991   | 961.167   |
| NM_007070 | 3464.816  | 4542.412  | AF531423  | 2681.904  | 2449.958  | AK024644  | 3488.966  | 3310.272  |
| AL133019  | 3621.444  | 3442.087  | X76555    | 729.733   | 823.28    | AB019573  | 217.7     | 247.861   |
| NM_014895 | 815.72    | 533.283   | NM_005432 | 2069.648  | 1430.25   | U68494    | 243.75    | 365.398   |
| AK024883  | 4315.628  | 4510.578  | L10386    | 2438.154  | 2301.72   | AF064254  | 537.119   | 678.289   |
| AF217989  | 1861.582  | 990.601   | AF061812  | 4587.51   | 3307.363  | AL137360  | 1335.369  | 2075.909  |
| NM_017654 | 1466.321  | 1161.617  | AL136756  | 1132.416  | 985.296   | AF143331  | 497.667   | 785.328   |
| AL109696  | 1250.924  | 1950.115  | NM_012469 | 7621.424  | 5267.441  | AK000819  | 242.534   | 308.133   |
| AK022190  | 854.307   | 1375.282  | NM_134260 | 7686.666  | 3904.877  | AF201941  | 950.148   | 1009.924  |
| AJ011593  | 2412.773  | 6808.546  | AK025688  | 1989.177  | 2421.811  | AF143878  | 148.965   | 447.717   |

|           |           |           |           |           |           |           |          |           |
|-----------|-----------|-----------|-----------|-----------|-----------|-----------|----------|-----------|
| AJ227907  | 938.828   | 1150.53   | NM_001195 | 276.539   | 553.831   | AF026941  | 351.072  | 368.404   |
| X89743    | 1033.611  | 1326.182  | NM_014448 | 1818.594  | 2799.307  | NM_00707C | 1131.607 | 1793.345  |
| U17621    | 450.671   | 671.67    | AL080157  | 2881.366  | 3683.538  | AL133019  | 1310.572 | 1515.791  |
| AL049239  | 1090.302  | 861.824   | NM_00510C | 588.294   | 1096.498  | AK026192  | 136.102  | 246.609   |
| NM_01328E | 908.468   | 765.241   | NM_000911 | 411.854   | 493.456   | NM_01489E | 431.523  | 727.862   |
| M60721    | 2117.74   | 2601.499  | NM_007227 | 722.13    | 973.409   | AK024883  | 1284.854 | 1432.406  |
| L39061    | 4387.235  | 9198.258  | NM_007023 | 593.562   | 616.53    | AF217989  | 792.2    | 618.159   |
| D16472    | 732.575   | 597.879   | NM_014461 | 690.335   | 773.274   | NM_017654 | 640.902  | 576.928   |
| AK022467  | 390.003   | 308.776   | NM_00386E | 1021.225  | 945.687   | AK022190  | 242.33   | 427.361   |
| AL157459  | 2119.361  | 1619.799  | AB015330  | 4398.009  | 4006.081  | AJ011593  | 806.862  | 1052.098  |
| AL133573  | 2804.018  | 3918.775  | NM_00145E | 2853.156  | 2512.065  | AJ227907  | 209.932  | 363.681   |
| AK000958  | 537.34    | 486.501   | L09071    | 428.601   | 320.435   | X89743    | 338.588  | 457.743   |
| AK024523  | 826.163   | 783.649   | NM_003322 | 1120.663  | 759.579   | AJ002784  | 254.855  | 458.142   |
| AK024543  | 1410.885  | 1204.316  | AK026180  | 1622.058  | 1502.542  | U17621    | 261.908  | 283.723   |
| AK024624  | 3404.941  | 2634.303  | NM_005817 | 5394.905  | 5519.609  | AL049239  | 1298.969 | 1910.796  |
| AF086473  | 428.317   | 561.489   | NM_003916 | 4885.989  | 4384.732  | NM_01328E | 517.551  | 535.644   |
| D87682    | 549.793   | 621.857   | NM_00287C | 34368.938 | 38920.691 | M60721    | 553.7    | 1017.316  |
| AF321617  | 2424.534  | 4354.616  | NM_006363 | 5417.41   | 6080.479  | L39061    | 1033.357 | 1374.69   |
| AF086208  | 2380.09   | 2706.154  | NM_02041E | 3305.847  | 3968.209  | AF071508  | 738.619  | 874.576   |
| AK023335  | 1194.986  | 982.201   | AL049667  | 5041.382  | 5989.109  | L07265    | 4565.91  | 6346.083  |
| AK023187  | 565.965   | 726.9     | NM_000334 | 3085.194  | 4160.403  | D16472    | 1726.691 | 2376.504  |
| AL133101  | 1898.361  | 1257.472  | NM_02040C | 1531.772  | 1697.118  | AK022467  | 237.072  | 148.065   |
| AK024602  | 4675.464  | 5310.682  | NM_001504 | 1347.801  | 1878.076  | AL157459  | 558.977  | 456.923   |
| AK024225  | 19135.783 | 14175.664 | D50926    | 2424.426  | 1939.774  | NM_00425E | 133.365  | 1151.859  |
| BC024924  | 4699.995  | 3394.855  | BF205683  | 2901.587  | 2585.655  | AL353954  | 467.164  | 496.52    |
| NM_01790E | 7014.918  | 4406.648  | NM_00156E | 360.336   | 485.44    | NM_01763C | 359.256  | 635.401   |
| AL110286  | 3146.837  | 2094.84   | NM_00154E | 884.564   | 422.631   | AK000778  | 671.949  | 733.632   |
| AF086374  | 325.282   | 397.668   | NM_00075E | 3762.366  | 2706.489  | AK000932  | 191.043  | 606.749   |
| AL162066  | 6691.159  | 5412.373  | M17017    | 558.85    | 422.715   | AL133573  | 2089.822 | 2996.391  |
| NM_01609E | 29918.645 | 17603.602 | NM_00299C | 3537.386  | 3284.853  | AK000115  | 322.997  | 635.589   |
| U79290    | 1777.577  | 1142.668  | NM_002432 | 2069.649  | 890.049   | NM_01795E | 336.285  | 556.689   |
| NM_01404C | 4871.552  | 4863.247  | AB033037  | 978.038   | 519.739   | AK000958  | 357.051  | 752.085   |
| AK000799  | 6717.078  | 5587.91   | L40400    | 3451.809  | 2131.573  | AK024523  | 412.197  | 557.237   |
| AF179890  | 4334.397  | 6006.98   | NM_006247 | 5123.893  | 4910.066  | AK024543  | 809.318  | 1253.826  |
| AK023536  | 7844.401  | 7344.218  | AB032983  | 1982.635  | 1925.467  | AK024624  | 3173.991 | 3375.84   |
| AK023881  | 2574.386  | 1384.125  | NM_018281 | 5425.307  | 6171.75   | AK025090  | 376.942  | 372.543   |
| AK027114  | 45256.27  | 25115.861 | NM_004457 | 5934.517  | 5857.966  | AF086473  | 155.694  | 70.624    |
| NM_01629E | 1474.484  | 772.869   | NM_01404E | 2627.513  | 3012.991  | D87682    | 281.837  | 149.383   |
| AK002146  | 363.841   | 289.408   | NM_00539E | 479.706   | 974.26    | AF321617  | 1168.12  | 1533.236  |
| NM_00315E | 728.237   | 538.75    | NM_00431E | 6723.625  | 8663.509  | NM_00695C | 268.215  | 354.346   |
| NM_015492 | 2247.112  | 1158.251  | NM_02016E | 3888.309  | 5079.779  | NM_000682 | 272.935  | 170.407   |
| AF132204  | 578.061   | 1001.143  | S56138    | 463.375   | 711.106   | AF086208  | 1392.33  | 2065.295  |
| AK022874  | 5886.036  | 4969.979  | AK023860  | 2820.637  | 3798.264  | AK023335  | 769.631  | 927.424   |
| CY3Cy5    | 1672.505  | 250.87    | NM_000031 | 3234.99   | 4757.757  | AK023187  | 416.671  | 631.895   |
| BI912037  | 866.153   | 758.645   | NM_00208E | 21749.691 | 24066.965 | NM_019033 | 295.327  | 549.731   |
| AA454646  | 595.495   | 787.307   | AK026061  | 1464.806  | 1649.135  | AL133101  | 655.951  | 681.507   |
| U18087    | 10642.027 | 10310.761 | NM_01628E | 7424.083  | 8238.113  | AF143875  | 431.24   | 1538.035  |
| U66349    | 978.57    | 1166.135  | NM_001567 | 1450.168  | 1765.815  | AK024602  | 9988.972 | 15464.096 |
| AA057156  | 1248.71   | 993.901   | NM_00490E | 10110.335 | 9212.691  | NM_018507 | 183.104  | 267.831   |
| AF166327  | 15077.027 | 15030.569 | AF217971  | 3848.114  | 3459.996  | NM_00048E | 2224.408 | 1907.928  |
| AF260739  | 622       | 565.724   | NM_00192E | 706.477   | 742.23    | NM_018542 | 338.376  | 304.561   |
| AF531423  | 2551.179  | 2849.64   | AF245517  | 973.092   | 641.736   | AK025503  | 410.24   | 220.386   |
| X76555    | 813.934   | 952.413   | NM_004982 | 1326.352  | 909.742   | AF130073  | 638.283  | 595.447   |

|           |           |           |           |           |           |           |           |           |
|-----------|-----------|-----------|-----------|-----------|-----------|-----------|-----------|-----------|
| NM_005432 | 1201.858  | 940.675   | NM_001694 | 54945.273 | 43274.813 | AF075035  | 10115.451 | 13534.59  |
| L10386    | 2694.519  | 2440.95   | AF286370  | 444.49    | 331.948   | AL110180  | 1416.82   | 1914.96   |
| AF061812  | 1253.85   | 862.216   | NM_012469 | 7941.841  | 7917.001  | BC024924  | 1928.841  | 3183.026  |
| AL136756  | 734.109   | 682.479   | NM_134260 | 6792.02   | 5746.547  | NM_017906 | 3089.662  | 5060.4    |
| NM_012469 | 4411.941  | 4450.076  | NM_001478 | 45873.199 | 52133.297 | AL110286  | 1384.175  | 2300.784  |
| NM_134260 | 6534.26   | 5659.173  | NM_002612 | 382.637   | 715.63    | AL162066  | 5607.691  | 8559.396  |
| SR6       | 1687.35   | 1493.608  | AF135422  | 2498.596  | 3720.024  | NM_016096 | 11674.869 | 12873.327 |
| CY3Cy5    | 1546.411  | 897.426   | NM_004479 | 15944.497 | 23140.82  | U79290    | 693.552   | 894.53    |
| AL080157  | 1699.305  | 1635.174  | NM_002610 | 1189.356  | 1412.623  | AK022121  | 131.454   | 143.947   |
| NM_005308 | 1762.886  | 1909.908  | AF070587  | 5265.529  | 4281.319  | X98114    | 184       | 215.242   |
| NM_007227 | 553.127   | 612.73    | BE250526  | 772.956   | 890.104   | AK024197  | 249.793   | 75.891    |
| NM_007023 | 742.86    | 790.646   | NM_016819 | 1882.124  | 1529.365  | NM_014040 | 1444.131  | 1506.163  |
| NM_005873 | 4826.802  | 4338.272  | NM_012222 | 5271.573  | 5832.556  | AK000799  | 2143.645  | 2377.103  |
| NM_004624 | 1182.35   | 1236.462  | NM_005002 | 3266.007  | 2705.506  | NM_015582 | 3534.113  | 3378.393  |
| NM_014461 | 631.664   | 704.898   | NM_006596 | 3097.337  | 3182.343  | AK027091  | 619.949   | 807.72    |
| AB015330  | 1582.011  | 1477.885  | AK023214  | 6949.064  | 5077.977  | NM_001526 | 656.47    | 731.762   |
| NM_001455 | 2802.402  | 2781.795  | NM_001469 | 6657.235  | 5232.704  | U31738    | 457.298   | 135.379   |
| L09071    | 429.412   | 367.155   | NM_003600 | 6153.25   | 4448.932  | AF179890  | 1402.329  | 1924.443  |
| NM_003322 | 928.365   | 779.224   | NM_017490 | 3189.128  | 2173.158  | AK023536  | 3028.819  | 4082.983  |
| NM_003568 | 5633.225  | 13859.993 | NM_002718 | 1704.345  | 1002.845  | AK026561  | 717.237   | 808.561   |
| NM_006363 | 4276.837  | 5717.558  | AK026727  | 1511.255  | 927.11    | AK021568  | 3421.347  | 4996.023  |
| NM_020415 | 1841.83   | 2224.044  | NM_002830 | 710.254   | 375.402   | Z36838    | 219.269   | 295.174   |
| AL049667  | 4103.193  | 5019.857  | L09071    | 414.111   | 683.556   | AF088054  | 216.639   | 108.289   |
| NM_000334 | 1314.67   | 1293.57   | NM_003322 | 1145.959  | 1666.051  | AK027114  | 37399.434 | 50582.789 |
| NM_020400 | 1357.066  | 1122.018  | BC036375  | 18892.92  | 25967.389 | NM_016298 | 534.386   | 771.451   |
| NM_001504 | 480.101   | 583.303   | BI912037  | 1368.129  | 2918.053  | AK002146  | 363.436   | 288.07    |
| D50926    | 2013.571  | 2300.869  | AA454646  | 724.455   | 1170.628  | NM_015492 | 1351.107  | 1922.814  |
| BF205683  | 1200.609  | 1055.711  | U18087    | 44533.164 | 40464.84  | NM_006933 | 1339.371  | 2542.472  |
| NM_001565 | 294.379   | 312.153   | U66349    | 1292.974  | 907.3     | AF132204  | 884.345   | 1369.666  |
| NM_001548 | 393.445   | 592.643   | AA057156  | 1140.38   | 1196.927  | AK022874  | 2221.093  | 2647.828  |
| NM_000758 | 3433.291  | 3392.755  | AF166327  | 16601.393 | 11487.398 | CY3Cy5    | 937.97    | 201.101   |
| M17017    | 328.131   | 251.225   | AF260739  | 1108.814  | 614.884   |           | 144.7     | 110.842   |
| NM_002990 | 4654.025  | 3225.084  | AF531423  | 2664.782  | 1791.63   | BI912037  | 299.782   | 190.158   |
| NM_002432 | 971.821   | 1546.767  | X76555    | 629.573   | 558.211   | AA454646  | 274       | 184.82    |
| AB033037  | 1016.787  | 975.678   | NM_005432 | 1958.866  | 1006.468  | U18087    | 6139.269  | 3088.994  |
| L40400    | 3090.521  | 3010.113  | L10386    | 2144.022  | 1253.953  | U66349    | 313.033   | 335.672   |
| AK025688  | 2044.861  | 1684.493  | AF061812  | 4405.769  | 2448.718  | AA057156  | 351.461   | 263.367   |
| NM_001195 | 307.547   | 315.981   | AL136756  | 1027.05   | 636.228   | AF166327  | 5251.25   | 4233.723  |
| NM_014448 | 704.859   | 708.651   | NM_002990 | 4120.204  | 4838.608  | AF260739  | 260.3     | 216.041   |
| S56138    | 384.984   | 254.736   | NM_002432 | 1833.677  | 1328.624  | AF531423  | 1210.762  | 887.155   |
| AK023860  | 940.84    | 806.964   | AB033037  | 1278.113  | 1397.572  | X76555    | 272.282   | 170.666   |
| NM_000031 | 3304.062  | 3368.814  | L40400    | 4539.374  | 5507.834  | NM_005432 | 508.079   | 297.412   |
| AK026061  | 560.805   | 530.619   | AK025688  | 2306.772  | 4869.072  | L10386    | 804.233   | 623.341   |
| NM_016286 | 7799.354  | 7453.332  | NM_001195 | 268.316   | 731.653   | AF061812  | 740.19    | 492.605   |
| NM_001567 | 1024.038  | 960.376   | NM_014448 | 2118.732  | 3318.443  | AL136756  | 341.908   | 204.791   |
| NM_004905 | 8342.51   | 9164.414  | AL080157  | 2755.099  | 4177.85   | NM_012469 | 1728.648  | 2031.969  |
| AF217971  | 1992.514  | 1669.013  | NM_005100 | 342.199   | 423.855   | NM_134260 | 2897.687  | 1542.69   |
| NM_001925 | 405.14    | 387.156   | NM_005308 | 2423.534  | 2617.364  | SR6       | 702.499   | 383.189   |
| AF245517  | 1018.171  | 1215.102  | NM_000911 | 450.756   | 296.475   | SR8       | 2306.346  | 2457.85   |
| NM_004982 | 579.025   | 382.221   | NM_007227 | 729.192   | 632.124   | SR10      | 8571.744  | 1213.712  |
| NM_001694 | 40079.512 | 47203.039 | NM_007023 | 629.213   | 501.493   | CY3Cy5    | 861.351   | 169.409   |
| NM_000217 | 288.042   | 230.588   | NM_005873 | 4420.254  | 3472.147  | AL080157  | 476.884   | 342.133   |
| NM_005817 | 4444.293  | 4298.085  | NM_004624 | 1558.279  | 1381.732  | NM_005100 | 118.747   | 69.993    |

|           |           |           |           |           |           |           |          |          |
|-----------|-----------|-----------|-----------|-----------|-----------|-----------|----------|----------|
| NM_00391E | 2998.914  | 2954.161  | NM_00386E | 1316.615  | 821.899   | NM_00530E | 664.357  | 589.811  |
| NM_00287C | 9206.666  | 6664.521  | AB015330  | 4238.225  | 2718.515  | NM_007227 | 174.74   | 352.828  |
| NM_00147E | 14822.989 | 13815.785 | NM_00145E | 2796.706  | 1579.339  | NM_00702E | 173.722  | 190.005  |
| NM_00261E | 266.995   | 106.82    | NM_00498E | 1047.775  | 1149.337  | NM_00587E | 1395.325 | 810.642  |
| AF135422  | 2033.058  | 1894.456  | NM_00169A | 57027.988 | 59875.199 | NM_00462A | 771.227  | 477.426  |
| NM_00447E | 4210.898  | 3792.756  | AF286370  | 602.857   | 782.437   | NM_014461 | 199.79   | 188.013  |
| AF070587  | 4494.189  | 3573.334  | NM_000217 | 346.585   | 617.336   | NM_00386E | 257.661  | 320.652  |
| NM_01681E | 1205.652  | 1344.626  | AK026180  | 1182.921  | 1660.789  | AB015330  | 827.908  | 502.641  |
| NM_01222E | 3434.13   | 3083.92   | NM_005817 | 5432.956  | 7031.336  | NM_00145E | 930.813  | 706.975  |
| NM_00500E | 2705.701  | 3011.108  | NM_00391E | 5230.942  | 5000.646  | L09071    | 211.738  | 118.878  |
| NM_00659E | 3566.733  | 4027.356  | NM_00287C | 34913.199 | 42811.355 | NM_00332E | 401.071  | 301.493  |
| AK023214  | 5746.507  | 5549.283  | NM_00636E | 5394.82   | 5077.22   | N54821    | 99.275   | 155.015  |
| NM_00146E | 8316.244  | 8333.551  | NM_02041E | 3100.854  | 3265.528  | NM_00636E | 1500.509 | 1294.978 |
| NM_00360C | 1963.485  | 1534.031  | AL049667  | 4612.718  | 4139.539  | NM_02041E | 775.948  | 525.011  |
| NM_01749C | 2995.862  | 2765.547  | NM_00033A | 2551.702  | 2609.333  | AL049667  | 807.703  | 875.078  |
| NM_00271E | 1205.388  | 918.342   | NM_02040C | 1722.136  | 1236.198  | NM_00033A | 542.42   | 516.119  |
| AK026727  | 1053.918  | 1032.103  | NM_00150A | 1593.438  | 1107.954  | NM_02040C | 341.953  | 374.506  |
| NM_00283C | 532.35    | 533.821   | D50926    | 2223.018  | 1578.719  | NM_00150A | 261.927  | 213.667  |
| AB032983  | 1548.316  | 1245.34   | BF205683  | 2658.968  | 1934.441  | D50926    | 495.838  | 406.279  |
| NM_018281 | 3473.059  | 3453.236  | NM_00154E | 719.765   | 210.192   | BF205683  | 475.981  | 388.888  |
| NM_004457 | 4399.657  | 3393.01   | NM_00075E | 3725.316  | 2555.327  | NM_00156E | 146.367  | 138.851  |
| NM_01404E | 2430.006  | 2181.662  | M17017    | 533.145   | 319.012   | NM_00154E | 150.812  | 116.714  |
| NM_00539E | 304.546   | 177.669   | NM_00360C | 7800.038  | 7612.458  | NM_00075E | 1445.056 | 1303.654 |
| BC036375  | 11454.143 | 15064.658 | NM_01749C | 3583.22   | 3490.996  | M17017    | 632.634  | 787.51   |
| BI912037  | 989.777   | 1041.844  | NM_00271E | 1681.031  | 1611.92   | NM_00299C | 1509.161 | 704.612  |
| AA454646  | 704.099   | 687.822   | AK026727  | 1744.231  | 2218.958  | NM_00243E | 490.719  | 399.268  |
| U18087    | 10267.631 | 8047.346  | NM_00283C | 676.803   | 728.003   | AB033037  | 392.735  | 233.458  |
| U66349    | 1011.305  | 1145.667  | NM_006247 | 5330.637  | 5726.22   | L40400    | 1241.378 | 752.023  |
| AA057156  | 1085.009  | 1054.492  | AB032983  | 2008.725  | 3207.561  | AK025688  | 865.493  | 443.072  |
| AF166327  | 15007.327 | 14667.993 | NM_018281 | 5147.679  | 7993.031  | NM_00119E | 196.295  | 105.298  |
| AF260739  | 529.815   | 444.954   | NM_004457 | 5334.125  | 7132.682  | NM_01444E | 372.645  | 290.854  |
| AF531423  | 2524.001  | 2517.91   | NM_01404E | 2852.926  | 3656.031  | NM_00431E | 2064.385 | 2182.759 |
| X76555    | 743.359   | 705.193   | NM_00539E | 551.498   | 808.47    | NM_02016E | 854.213  | 999.939  |
| NM_00543E | 998.703   | 1010.574  | NM_00431E | 7096.057  | 7809.356  | S56138    | 198.7    | 163.296  |
| L10386    | 2682.706  | 2623.979  | NM_02016E | 4001.378  | 4056.624  | AK023860  | 493.686  | 542.417  |
| NM_13426C | 7324.013  | 5634.963  | S56138    | 524.979   | 419.118   | AK026061  | 262.034  | 203.834  |
| AK025688  | 1869.185  | 2022.637  | AK023860  | 2399.43   | 2714.473  | NM_01628E | 2123.877 | 1764.569 |
| NM_00119E | 250.161   | 210.173   | NM_000031 | 2814.829  | 3089.104  | NM_001567 | 294.414  | 284.951  |
| NM_01444E | 578.633   | 684.656   | NM_00208E | 21347.555 | 17703.633 | NM_00490E | 3107.028 | 3163.814 |
| AL080157  | 2042.268  | 1653.974  | AK026061  | 1139.003  | 973.765   | AF217971  | 840.253  | 997.317  |
| NM_00530E | 1719.928  | 1701.818  | NM_01628E | 6125.887  | 5789.944  | NM_00192E | 186.614  | 222.095  |
| NM_007227 | 418.311   | 468.957   | NM_001567 | 969.318   | 1023.519  | AF245517  | 390.776  | 353.294  |
| NM_00702E | 425.405   | 675.791   | NM_00490E | 9242.099  | 5919.624  | NM_00498E | 354.675  | 262.85   |
| NM_014461 | 520.623   | 678.972   | AF217971  | 3033.716  | 2263.563  | AF286370  | 224.257  | 132.943  |
| NM_00386E | 756.399   | 845.244   | NM_00192E | 540.271   | 342.235   | NM_000217 | 158.511  | 93.87    |
| AB015330  | 1527.754  | 1356.765  | AF245517  | 1089.046  | 608.939   | AK026180  | 352.513  | 230.812  |
| NM_00145E | 2753.541  | 2450.112  | X78926    | 2830.35   | 2770.83   | NM_005817 | 1401.202 | 598.476  |
| L09071    | 385.354   | 342.52    | AJ278110  | 777.524   | 1019.018  | NM_00391E | 1323.703 | 513.1    |
| NM_00332E | 979.884   | 756.07    | NM_014237 | 2028.422  | 2401.007  | NM_00287C | 4015.914 | 1172.622 |
| AK026180  | 663.51    | 863.794   | NM_02039E | 656.289   | 899.359   | NM_00147E | 7458.674 | 6516.687 |
| NM_005817 | 4355.082  | 4963.346  | AF029900  | 7588.363  | 7497.313  | NM_00261E | 169.218  | 147.299  |
| NM_00391E | 3032.463  | 3419.747  | NM_00332E | 7317.327  | 12188.617 | AF135422  | 621.075  | 630.839  |
| NM_00287C | 9188.406  | 8466.209  | NM_01617E | 2037.518  | 2428.524  | NM_00447E | 2917.923 | 2376.716 |

|           |           |           |           |           |           |           |          |          |
|-----------|-----------|-----------|-----------|-----------|-----------|-----------|----------|----------|
| NM_006363 | 4157.593  | 5171.907  | AK022639  | 1623.954  | 1957.623  | AF070587  | 1565.283 | 913.459  |
| NM_020415 | 1895.313  | 1701.057  | D31766    | 9262.191  | 10457.436 | BE250526  | 183.611  | 160.727  |
| AL049667  | 3827.035  | 4096.916  | NM_006547 | 1570.456  | 1593.12   | NM_016819 | 354.107  | 301.327  |
| NM_000334 | 1073.321  | 1185.963  | NM_001478 | 49186.254 | 52142.891 | NM_012222 | 1416.495 | 1269.436 |
| NM_020400 | 1281.914  | 1442.014  | NM_002612 | 428.708   | 360.405   | NM_005002 | 1035.194 | 1235.498 |
| NM_001504 | 504.918   | 770.208   | AF135422  | 2481.121  | 2985.074  | NM_006596 | 1009.001 | 888.787  |
| D50926    | 1794.575  | 1945.25   | NM_004479 | 15898.236 | 16007.043 | AK023214  | 2039.873 | 1574.197 |
| BF205683  | 1226.021  | 1164.121  | NM_002610 | 1029.658  | 898.878   | NM_001469 | 2471.971 | 2286.421 |
| NM_000758 | 3860.432  | 3563.393  | AF070587  | 4722.017  | 3179.349  | NM_003600 | 1436.211 | 1313.05  |
| NM_002990 | 4484.956  | 3339.934  | BE250526  | 647.167   | 675.581   | NM_017490 | 1170.906 | 846.522  |
| NM_002432 | 913.296   | 1135.623  | NM_016819 | 1692.872  | 1176.989  | U27831    | 66.812   | 108.597  |
| AB033037  | 1002.594  | 942.84    | NM_012222 | 4638.015  | 4441.778  | AK026727  | 495.757  | 327.278  |
| L40400    | 3300.871  | 2731.799  | NM_005002 | 3321.018  | 2024.174  | NM_002830 | 262.663  | 151.987  |
| NM_006247 | 4735.583  | 5811.841  | NM_006596 | 2922.196  | 1807.666  | NM_006247 | 1610.223 | 1044.236 |
| AB032983  | 1400.859  | 1329.162  | AK023214  | 6048.171  | 3441.026  | AB032983  | 583.674  | 349.002  |
| NM_018281 | 3818.256  | 3529.132  | NM_001469 | 6813.427  | 4839.746  | NM_018281 | 1264.621 | 589.487  |
| NM_004457 | 4429.192  | 3957.896  | BC036368  | 941.587   | 955.779   | NM_004457 | 1758.586 | 646.382  |
| NM_014049 | 2384.237  | 2643.734  | NM_001851 | 3769.128  | 3407.79   | NM_014049 | 831.403  | 304.399  |
| NM_004315 | 4902.589  | 6751.805  | S67789    | 1364.921  | 1132.805  | NM_005396 | 186.854  | 121.387  |
| NM_020166 | 2816.835  | 2911.619  | AK022689  | 4466.458  | 4175.581  | BC036375  | 4489.136 | 5432.053 |
| S56138    | 428.499   | 264.585   | NM_016227 | 1294.011  | 1491.868  | BI912037  | 263.968  | 186.018  |
| AK023860  | 861.09    | 791.922   | NM_004195 | 22380.545 | 26740.293 | AA454646  | 264.759  | 257.978  |
| NM_000031 | 3283.8    | 3173.367  | NM_004705 | 3433.443  | 4677.236  | U18087    | 4970.34  | 3164.652 |
| NM_002085 | 22344.314 | 22003.152 | NM_020190 | 13472.825 | 13646.406 | U66349    | 311.462  | 223.244  |
| AK026061  | 574.237   | 484.062   | AK024003  | 817.333   | 1172.09   | AA057156  | 352.106  | 236.026  |
| NM_016286 | 7568.243  | 7459.477  | NM_014357 | 3680.149  | 4943.606  | U19487    | 120.999  | 122.66   |
| NM_001567 | 1058.313  | 715.062   | NM_004067 | 1304.677  | 1950.299  | AF166327  | 5942.399 | 4990.413 |
| AF245517  | 1083.493  | 1397.007  | NM_000121 | 9690.997  | 9328.822  | AF260739  | 281.826  | 210.006  |
| NM_004982 | 486.611   | 490.507   | NM_002091 | 9122.714  | 11880.966 | AF531423  | 1118.324 | 715.905  |
| NM_001694 | 39906.793 | 41099.406 | AB033092  | 3531.725  | 4884.609  | X76555    | 228.238  | 253.921  |
| AF286370  | 382.434   | 228.759   | M89957    | 327.096   | 461.392   | NM_005432 | 571.762  | 347.566  |
| NM_000217 | 370       | 311.211   | NM_003023 | 1443.821  | 1350.233  | L10386    | 777.46   | 550.294  |
| NM_012469 | 4326.222  | 4504.603  | BC035030  | 4914.802  | 5466.899  | AF061812  | 737.821  | 470.255  |
| NM_134260 | 5860.763  | 6543.875  | NM_005340 | 53716.293 | 43735.758 | AL136756  | 346.438  | 220.397  |
| NM_001478 | 15295.059 | 12092.415 | NM_016201 | 2624.029  | 2278.479  | NM_012469 | 1626.032 | 708.35   |
| AF135422  | 2073.69   | 1364.975  | NM_000864 | 2134.23   | 1898.985  | NM_134260 | 2734.715 | 999.782  |
| NM_004479 | 3342.514  | 3294.75   | NM_017977 | 2629.365  | 1669.653  | NM_016383 | 91.805   | 65.28    |
| NM_002610 | 1498.717  | 1327.543  | AF147727  | 1602.052  | 1171.345  | AK025688  | 734.022  | 679.976  |
| AF070587  | 4310.415  | 3007.813  | NM_006751 | 3056.29   | 1990.874  | NM_001195 | 141.245  | 136.296  |
| BE250526  | 471.723   | 274.576   | AB037834  | 2720.502  | 1756.729  | NM_014448 | 358.422  | 302.616  |
| NM_016819 | 939.417   | 1051.655  | NM_003569 | 1630.554  | 923.078   | AL080157  | 477.729  | 453.676  |
| NM_012222 | 2967.456  | 2492.408  | NM_014052 | 19675.74  | 16594.752 | NM_005308 | 443.207  | 318.975  |
| NM_006596 | 4054.6    | 5152.741  | NM_002777 | 816.759   | 1090.401  | NM_000911 | 142.813  | 124.042  |
| AK023214  | 6041.589  | 6060.896  | AF202635  | 798.466   | 1092.091  | NM_007227 | 228.702  | 494.698  |
| NM_001469 | 7630.58   | 7715.123  | NM_014125 | 711.677   | 820.75    | NM_007023 | 171.625  | 117.567  |
| NM_003600 | 2320.115  | 2143.491  | NM_017904 | 997.015   | 1274.672  | NM_005873 | 1640.123 | 1033.348 |
| NM_017490 | 2854.697  | 2434.426  | NM_013367 | 3542.163  | 3965.996  | NM_004624 | 454.612  | 256.791  |
| NM_002718 | 1122.302  | 1133.127  | AL137550  | 432.304   | 380.046   | NM_014461 | 202.062  | 173.973  |
| AK026727  | 1013.241  | 957.4     | NM_001709 | 3878.208  | 3922.647  | AB015330  | 807.619  | 610.888  |
| NM_002830 | 463.21    | 539.004   | NM_006191 | 3155.727  | 5074.744  | NM_001455 | 910.808  | 752.588  |
| L09071    | 528.211   | 564.594   | NM_001800 | 7571.357  | 7512.074  | L09071    | 166.908  | 90.827   |
| NM_003322 | 1033.497  | 1032.295  | NM_004336 | 8882.525  | 11685.188 | NM_003322 | 374.87   | 180.504  |
| BC036375  | 10734.765 | 12095.597 | NM_015949 | 1806.219  | 3072.823  | AK026180  | 392.942  | 567.878  |



|           |           |           |           |           |           |           |           |           |
|-----------|-----------|-----------|-----------|-----------|-----------|-----------|-----------|-----------|
| BI912037  | 683.855   | 661.293   | NM_013979 | 4504.162  | 4878.493  | NM_005817 | 1250.97   | 1615.112  |
| AA454646  | 664.63    | 650.805   | NM_003790 | 3271.123  | 3765.787  | NM_003916 | 1159.816  | 1278.556  |
| U18087    | 10156.464 | 8604.523  | NM_000494 | 3720.488  | 3369.356  | NM_002870 | 5164.95   | 5151.387  |
| U66349    | 988.031   | 1203.09   | NM_016023 | 1843.185  | 1065.062  | NM_006363 | 784.788   | 930.707   |
| AA057156  | 1123.984  | 678.07    | NM_003722 | 9027.067  | 7353.574  | NM_020415 | 659.724   | 741.533   |
| U19487    | 556.582   | 1389.835  | NM_014430 | 845.044   | 364.498   | AL049667  | 1255.843  | 1254.524  |
| AF166327  | 14470.336 | 13910.518 | NM_000495 | 780.181   | 487.086   | NM_000334 | 523.81    | 551.16    |
| AF260739  | 428.785   | 431.178   | AF085883  | 3192.232  | 1850.197  | NM_020400 | 435.782   | 391.751   |
| AF531423  | 2697.843  | 2647.789  | NM_016571 | 1685.647  | 843.473   | NM_001504 | 332.177   | 335.221   |
| X76555    | 628.805   | 480.707   | NM_003688 | 546.476   | 400.226   | D50926    | 469.756   | 520.927   |
| NM_005432 | 1076.386  | 1038.355  | NM_016446 | 3644.941  | 2305.171  | BF205683  | 473.571   | 380.153   |
| L10386    | 2570.801  | 2347.36   | NM_002516 | 1103.513  | 1318.426  | NM_001565 | 190.564   | 172.064   |
| AF061812  | 1225.487  | 939.755   | NM_001870 | 1159.781  | 1696.545  | NM_001548 | 304.958   | 384.92    |
| AL136756  | 644.4     | 476.371   | AJ271216  | 1564.476  | 2013.009  | NM_000758 | 1658.585  | 1347.089  |
| NM_002990 | 3926.259  | 2980.402  | U23028    | 3397.23   | 4852.891  | M17017    | 213.822   | 137.65    |
| NM_002432 | 834.689   | 1327.975  | NM_000817 | 7150.783  | 9924.51   | NM_002990 | 1482.302  | 803.422   |
| AB033037  | 896.817   | 811.351   | NM_001875 | 591.406   | 806.829   | NM_002432 | 499.801   | 355.541   |
| L40400    | 3185.078  | 3021.985  | AK022680  | 2320.662  | 4049.136  | AB033037  | 453.486   | 252.001   |
| AK025688  | 1907.391  | 1802.306  | NM_018946 | 7921.714  | 10520.927 | L40400    | 1116.99   | 424.84    |
| Z36819    | 42410.613 | 39342.176 | NM_016359 | 9730.792  | 10401.567 | NM_006247 | 1439.727  | 1952.747  |
| NM_001195 | 304.282   | 576.595   | NM_004156 | 4632.525  | 6351.187  | AB032983  | 419.921   | 518.401   |
| NM_014448 | 561.129   | 522.876   | AK000561  | 775.639   | 969.679   | NM_018281 | 1135.784  | 1302.07   |
| AL080157  | 1652.142  | 1343.749  | AB051449  | 21377.152 | 19358.568 | NM_004457 | 1682.535  | 1597.04   |
| NM_005308 | 1575.14   | 1776.918  | BC009187  | 7817.796  | 4463.054  | NM_014048 | 685.815   | 722.807   |
| NM_007023 | 759.272   | 1185.376  | NM_016485 | 8478.621  | 3727.625  | NM_005396 | 111.16    | 98.168    |
| NM_005873 | 4460.791  | 3656.245  | NM_002615 | 697.677   | 514.863   | NM_004315 | 1710.571  | 2211.369  |
| NM_004624 | 1154.745  | 1207.72   | AF090894  | 882.928   | 290.877   | NM_020166 | 907.905   | 980.968   |
| NM_003865 | 891.127   | 974.535   | AK000049  | 406.773   | 571.69    | S56138    | 152.558   | 101.118   |
| AB015330  | 1828.437  | 1429.263  | NM_020149 | 1601.828  | 2596.013  | AK023860  | 382.828   | 428.088   |
| NM_001455 | 2834.123  | 2346.692  | NM_006237 | 1853.198  | 3393.747  | NM_000031 | 1053.683  | 1106.537  |
| NM_004982 | 598.126   | 617.004   | NM_001271 | 5035.119  | 4630.854  | NM_002085 | 6362.419  | 5878.831  |
| NM_001694 | 39285.152 | 37038.328 | NM_003683 | 2396.396  | 3907.586  | AK026061  | 341.365   | 458.679   |
| AF286370  | 276.331   | 226.86    | AF039019  | 4289.755  | 4896.027  | NM_016286 | 2236.512  | 2058.964  |
| AK026180  | 649.89    | 960.403   | NM_012255 | 3790.652  | 6319.704  | NM_001567 | 287.081   | 300.767   |
| NM_013365 | 2540.434  | 2998.877  | NM_004818 | 5587.063  | 8204.215  | NM_004905 | 3125.539  | 2950.597  |
| NM_005817 | 4525.891  | 4963.727  | J04205    | 9542.236  | 12711.083 | AF217971  | 946.349   | 849.046   |
| NM_003916 | 2864.94   | 3479.692  | D38491    | 5774.462  | 3730.556  | AF245517  | 392.235   | 456.442   |
| NM_002870 | 10692.71  | 11401.979 | AK026835  | 2292.021  | 2846.396  | NM_004982 | 430.241   | 337.83    |
| NM_006363 | 3932.112  | 4512.487  | NM_002819 | 15528.162 | 17093.053 | NM_001694 | 21284.137 | 10693.177 |
| NM_020415 | 1889.223  | 2109.956  | NM_013264 | 4763.408  | 2664.558  | AF286370  | 200.665   | 139.891   |
| NM_000334 | 1118.692  | 935.727   | NM_003315 | 8966.947  | 7677.061  | NM_000217 | 170.987   | 136.032   |
| NM_020400 | 1304.562  | 1349.018  | NM_005570 | 11211.965 | 9409.416  | NM_012468 | 1322.152  | 1165.026  |
| NM_001504 | 551.891   | 598.537   | NM_000086 | 12424.276 | 7355.027  | NM_134260 | 1918.523  | 1695.622  |
| D50926    | 1862.899  | 2125.004  | NM_003752 | 3083.767  | 2318.434  | NM_016383 | 88.067    | 164.815   |
| BF205683  | 1260.006  | 872.365   | NM_003932 | 13388.205 | 7374.344  | NM_001478 | 7010.924  | 5808.148  |
| NM_001565 | 354.157   | 260.399   | NM_016491 | 10790.357 | 6910.538  | NM_002612 | 109.501   | 153.819   |
| NM_001548 | 468.194   | 464.319   | NM_006429 | 24687.455 | 13779.673 | AF135422  | 630.795   | 504.341   |
| NM_000758 | 4013.114  | 3857.713  | NM_003307 | 4303.341  | 4526.012  | NM_004479 | 2906.54   | 2673.588  |
| M17017    | 325.183   | 260.504   | AF070565  | 1046.994  | 1489.363  | NM_002610 | 220.432   | 209.911   |
| NM_003600 | 2626.127  | 2203.898  | NM_015944 | 917.719   | 1641.07   | AF070587  | 1481.237  | 1241.237  |
| NM_017490 | 2990.791  | 2757.649  | NM_002064 | 2144.222  | 2254.39   | BE250526  | 267.639   | 180.776   |
| NM_002718 | 1283.6    | 1216.898  | NM_015523 | 11842.416 | 14089.562 | NM_016819 | 347.274   | 345.535   |
| AK026727  | 1115.554  | 1278.265  | NM_015960 | 10578.413 | 16552.77  | NM_012222 | 1597.798  | 1253.887  |

|           |           |           |           |           |           |           |           |           |
|-----------|-----------|-----------|-----------|-----------|-----------|-----------|-----------|-----------|
| NM_00283C | 503.675   | 590.045   | NM_006085 | 4428.23   | 4957.645  | NM_005002 | 1125.997  | 1479.954  |
| NM_006247 | 5238.526  | 5302.496  | NM_000907 | 7205.046  | 8051.763  | NM_006596 | 976.585   | 660.23    |
| AB032983  | 1520.692  | 784.692   | AF254085  | 3946.953  | 3996.295  | AK023214  | 2003.664  | 1314.679  |
| NM_018281 | 3924.098  | 3626.799  | AK023541  | 284.704   | 513.667   | NM_001466 | 2423.101  | 1664.566  |
| NM_004457 | 4585.254  | 3906.903  | NM_001987 | 968.623   | 1307.585  | NM_00360C | 1486.011  | 1061.501  |
| NM_014049 | 2594.625  | 2907.287  | AF244088  | 1868.353  | 1867.968  | NM_01749C | 1032.413  | 510.492   |
| NM_005396 | 221.398   | 513.443   | NM_007136 | 1115.589  | 1171.623  | NM_002718 | 553.047   | 383.541   |
| NM_004315 | 5387.485  | 7851.2    | AK025434  | 542.316   | 514.374   | AK026727  | 455.377   | 278.423   |
| NM_020166 | 2991.452  | 2639.901  | AJ251845  | 690.115   | 605.802   | NM_00283C | 238.879   | 189.629   |
| NM_000031 | 3354.935  | 3544.884  | AK000435  | 1687.206  | 1479.089  | L09071    | 338.082   | 640.071   |
| NM_002085 | 23075.146 | 20960.604 | AK000569  | 4270.889  | 2868.021  | NM_003322 | 309.568   | 282.468   |
| AK026061  | 545.527   | 500.474   | NM_006049 | 2383.227  | 1524.759  | BC036375  | 3821.812  | 3399.789  |
| NM_016286 | 7352.432  | 6513.619  | NM_017661 | 2675.838  | 1444.139  | BI912037  | 294.708   | 135.675   |
| NM_001567 | 1046.554  | 1015.638  | BC016698  | 12527.177 | 5523.481  | AA454646  | 208.76    | 399.14    |
| NM_004905 | 8011.343  | 7419.127  | NM_007374 | 3167.566  | 4460.177  | U18087    | 6319.63   | 4126.066  |
| AF217971  | 1948.92   | 1399.587  | AK027185  | 2157.292  | 1839.252  | U66349    | 322.108   | 254.838   |
| NM_001925 | 410.614   | 368.29    | AK025576  | 2204.398  | 2364.402  | AA057156  | 400.859   | 319.869   |
| AF245517  | 901.25    | 1136.028  | AK026784  | 452.272   | 541.649   | U19487    | 176.773   | 121.903   |
| X78926    | 3037.059  | 2323.488  | BC034819  | 5408.8    | 6622.656  | AF166327  | 5697.627  | 4803.552  |
| AJ278110  | 1009.299  | 1063.702  | AF147313  | 21531.568 | 25376.016 | AF260739  | 274.143   | 221.482   |
| NM_014237 | 1007.802  | 865.155   | AF147382  | 52848.578 | 57845.535 | AF531423  | 1217.163  | 864.479   |
| NM_020396 | 326.787   | 274.475   | AK001957  | 7159.488  | 7718.05   | X76555    | 279.227   | 124.088   |
| AF029900  | 1687.637  | 1867.151  | AK000850  | 1075.524  | 1379.556  | NM_005432 | 515.407   | 343.1     |
| NM_003325 | 8872.01   | 11923.306 | AK021833  | 2608.349  | 3064.756  | L10386    | 742.164   | 435.868   |
| NM_016178 | 1913.579  | 2499.528  | AF143867  | 2891.128  | 3799.82   | AF061812  | 944.575   | 414.363   |
| AK022639  | 742.822   | 601.056   | AK025889  | 5719.993  | 5596.188  | AL136756  | 292.931   | 148.747   |
| D31766    | 6590.077  | 7150.658  | NM_014715 | 3140.044  | 3553.094  | NM_00299C | 1324.398  | 1035.522  |
| NM_006547 | 1365.442  | 1017.12   | AF086272  | 468.63    | 403.229   | NM_002432 | 417.929   | 572.716   |
| NM_001478 | 17421.619 | 15115.338 | AF086448  | 3019.44   | 2365.833  | AB033037  | 354.611   | 435.899   |
| NM_004479 | 3892.311  | 4175.588  | AB019391  | 639.858   | 376.668   | L40400    | 1494.684  | 1891.02   |
| NM_00261C | 1412.972  | 1248.356  | AF086386  | 2011.952  | 1552.558  | AK025688  | 816.399   | 926.271   |
| AF070587  | 4484.717  | 3306.097  | AF086413  | 341.98    | 366.285   | NM_001195 | 137.554   | 284.277   |
| BE250526  | 452.41    | 229.092   | AF086457  | 1248.055  | 1121.02   | NM_014448 | 379.248   | 373.364   |
| NM_016819 | 1042.84   | 1355.538  | AK025469  | 1331.507  | 1057.581  | AL080157  | 514.471   | 344.619   |
| NM_012222 | 3331.425  | 2302.224  | NM_020239 | 5696.968  | 3556.169  | NM_005308 | 908.883   | 912.39    |
| NM_005002 | 2633.618  | 2645.325  | AF070581  | 1171.046  | 785.936   | NM_000911 | 128.168   | 100.644   |
| NM_006596 | 3553.138  | 3490.04   | AK024187  | 1337.197  | 679.793   | NM_007227 | 226.32    | 141.009   |
| AK023214  | 5707.013  | 4681.893  | AF075079  | 484.821   | 619.524   | NM_007023 | 189.313   | 232.694   |
| BC036368  | 362.654   | 376.337   | AK022479  | 4007.039  | 3626.15   | NM_005873 | 1499.688  | 908.546   |
| NM_001851 | 2084.783  | 2483.836  | AK023572  | 1148.002  | 1244.29   | NM_004624 | 311.933   | 300.637   |
| S67789    | 1324.845  | 1043.062  | AF086004  | 18636.502 | 21322.863 | NM_003865 | 372.415   | 200.961   |
| AK022689  | 3507.72   | 4101.103  | AF147433  | 853.232   | 1113.474  | AB015330  | 785.516   | 418.942   |
| NM_016227 | 1272.754  | 1279.748  | AF085978  | 762.392   | 845.316   | NM_001455 | 923.335   | 452.099   |
| NM_004195 | 6467.772  | 6009.854  | AF085930  | 587.067   | 865.474   | NM_002385 | 175.262   | 91.121    |
| NM_004705 | 3571.523  | 2949.181  | AF086006  | 729.031   | 952.48    | NM_004982 | 284.561   | 347.938   |
| NM_02019C | 3885.066  | 2955.887  | AL137318  | 1433.84   | 1752.511  | NM_001694 | 21157.465 | 20745.592 |
| AK024003  | 560.681   | 527.69    | AL137482  | 974.658   | 1172.854  | AF286370  | 272.951   | 321.966   |
| NM_014357 | 1776.496  | 1855.497  | AL162011  | 12625.008 | 15915.756 | NM_000217 | 170.24    | 263.889   |
| NM_004067 | 1015.824  | 1279.815  | AL390177  | 760.453   | 800.79    | AK026180  | 1022.528  | 1266.273  |
| NM_000121 | 4806.722  | 4368.369  | AL137678  | 559.896   | 550.864   | NM_005817 | 1219.191  | 1565.901  |
| NM_002091 | 1327.984  | 1131.243  | AK056111  | 1061.244  | 1508.102  | NM_003916 | 1194.935  | 1738.383  |
| AB033092  | 3457.145  | 3194.86   | Y13807    | 1124.666  | 1513.424  | NM_00287C | 4950.427  | 5084.633  |
| NM_003023 | 1100.037  | 1042.256  | AK023038  | 1835.808  | 1638.585  | NM_006363 | 684.995   | 1077.087  |

|           |           |           |           |           |           |           |          |          |
|-----------|-----------|-----------|-----------|-----------|-----------|-----------|----------|----------|
| BC035030  | 2440.248  | 1846.963  | AK026206  | 1821.228  | 2211.058  | NM_020415 | 751.955  | 683.753  |
| NM_005340 | 42225.73  | 41599.234 | AF086074  | 2968.927  | 2125.346  | NM_014875 | 227.578  | 292.814  |
| NM_016201 | 551.264   | 692.682   | AK023964  | 3634.409  | 2940.547  | AL049667  | 1355.438 | 2015.893 |
| NM_000864 | 2495.034  | 2765.745  | AF086084  | 1296.483  | 937.813   | NM_000334 | 677.023  | 697.47   |
| NM_017977 | 1979.881  | 1526.25   | AK000156  | 538.34    | 268.477   | NM_020400 | 506.024  | 640.694  |
| AF147727  | 1217.645  | 1117.723  | AL050184  | 1109.985  | 855.391   | NM_001504 | 302.979  | 303.659  |
| NM_006751 | 3547.092  | 2625.63   | AF085853  | 680.673   | 335.658   | D50926    | 766.1    | 572.894  |
| AB037834  | 2843.321  | 2188.947  | AK027112  | 4287.16   | 4237.422  | BF205683  | 617.624  | 453.845  |
| NM_014052 | 12477.286 | 12550.87  | AL049314  | 2750.918  | 3115.624  | NM_001565 | 135.509  | 261.138  |
| NM_002777 | 516.186   | 334.139   | AF093016  | 14045.932 | 12983.275 | NM_001545 | 178.579  | 131.968  |
| AF202635  | 996.167   | 1072.987  | AF161345  | 747.975   | 1010.998  | NM_000755 | 1526.586 | 766.512  |
| NM_017904 | 432.783   | 492.725   | -         | 1253.863  | 1505.844  | M17017    | 184.33   | 178.831  |
| NM_013367 | 3259.53   | 3536.689  | AF090925  | 1584.242  | 1770.072  | NM_003600 | 1226.965 | 1414.217 |
| NM_000321 | 5841.267  | 5976.366  | NM_014163 | 13189.669 | 13259.779 | NM_017490 | 933.893  | 1265.702 |
| NM_006341 | 12738.758 | 10793.507 | AK021659  | 551.735   | 841.752   | NM_002715 | 453.505  | 290.55   |
| NM_001705 | 2795.39   | 2409.176  | NM_014137 | 815.1     | 1204.418  | AK026727  | 617.894  | 705.492  |
| NM_006191 | 4003.136  | 4278.469  | AK021974  | 1470.421  | 2264.609  | NM_002830 | 211.564  | 541.582  |
| NM_001800 | 5066.887  | 6589.79   | AK022068  | 890.486   | 1190.722  | NM_006247 | 1397.757 | 1669.239 |
| NM_004335 | 7367.197  | 6560.749  | AK022229  | 2050.367  | 2017.121  | AB032983  | 432.099  | 323.293  |
| NM_015945 | 2479.402  | 2239.02   | AK022362  | 4367.021  | 4747.372  | NM_018281 | 1120.135 | 1334.908 |
| NM_013975 | 3628.771  | 4291.922  | AK022004  | 5154.992  | 5118.472  | NM_004457 | 1750.947 | 1632.318 |
| NM_003790 | 803.764   | 618.925   | AK022136  | 413.052   | 489.8     | NM_014045 | 811.875  | 1110.285 |
| NM_000494 | 2205.006  | 2829.702  | AK022265  | 547.47    | 530.957   | NM_005395 | 274.639  | 254.711  |
| NM_016023 | 1230.908  | 1468.783  | AK022390  | 1812.463  | 2848.97   | NM_020165 | 944.173  | 1061.065 |
| NM_003722 | 2604.992  | 2455.851  | AK027134  | 873.773   | 1060.743  | AK023860  | 491.002  | 545.119  |
| NM_014430 | 643.397   | 655.911   | AK024168  | 903.786   | 1046.377  | NM_000031 | 1356.669 | 1169.147 |
| NM_000495 | 428.786   | 395.049   | AF264622  | 1227.979  | 1127.011  | NM_002085 | 6892.57  | 6505.057 |
| AF085883  | 2507.366  | 2608.283  | AK027203  | 642.892   | 589.701   | AK026061  | 316.872  | 311.156  |
| NM_016571 | 849.258   | 657.953   | AK021793  | 3453.358  | 2067.366  | NM_016285 | 2309.959 | 1654.415 |
| NM_003685 | 373.547   | 434.762   | AK022255  | 6797.909  | 4598.481  | NM_001567 | 371.908  | 296.294  |
| NM_016445 | 1924.098  | 1274.945  | AK023730  | 553.74    | 709.547   | NM_004905 | 3167.563 | 2571.509 |
| NM_002515 | 339.007   | 360.213   | AF161360  | 2172.546  | 2144.908  | AF217971  | 977.14   | 638.384  |
| AK023237  | 369.693   | 346.215   | AK021720  | 1800.994  | 1858.718  | NM_001925 | 187.198  | 132.564  |
| NM_001870 | 626.209   | 669.237   | NM_016497 | 47283.668 | 33259.602 | AF245517  | 374.692  | 261.189  |
| AJ271216  | 1721.244  | 1847.668  | AK000617  | 358.714   | 537.273   | X78926    | 867.694  | 1193.651 |
| U23028    | 3233.1    | 3136.254  | AF009261  | 1039.238  | 2002.238  | AJ278110  | 283.805  | 376.7    |
| NM_000817 | 3582.667  | 4119.351  | AB037792  | 1363.829  | 1639.068  | NM_014237 | 370.399  | 323.38   |
| NM_006571 | 7965.591  | 8408.862  | AK022480  | 647.776   | 765.713   | NM_020395 | 746.714  | 957.873  |
| NM_001875 | 432.499   | 261.841   | AK024158  | 1196.803  | 917.135   | AF029900  | 1475.797 | 1778.909 |
| AK022680  | 2130.344  | 2250.612  | AL080082  | 850.174   | 446.898   | NM_003325 | 2565.093 | 2595.714 |
| NM_016355 | 8841.554  | 8945.84   | AK021623  | 1328.246  | 969.652   | NM_016175 | 597.835  | 1193.279 |
| NM_004155 | 6307.302  | 4117.217  | AK023733  | 454.964   | 519.709   | AK022639  | 235.347  | 375.325  |
| AK000561  | 704.071   | 645.476   | U79242    | 1167.538  | 1874.65   | D31766    | 2157.166 | 2569.525 |
| AB051449  | 9650.908  | 9344.189  | AF056452  | 1256.571  | 1883.882  | NM_006547 | 467.621  | 388.932  |
| BC009187  | 6188.759  | 5577.497  | AF119901  | 4972.67   | 6018.61   | NM_002612 | 136.33   | 122.113  |
| AL133617  | 670.359   | 405.042   | AK001936  | 1542.665  | 1701.679  | AF135422  | 674.432  | 657.212  |
| NM_016485 | 6778.854  | 6203.715  | NM_003770 | 56883.402 | 57206.695 | NM_004475 | 3579.553 | 3196.93  |
| NM_002615 | 636.989   | 399.75    | AK001395  | 4398.823  | 5347.847  | NM_002610 | 429.31   | 467.566  |
| AF090894  | 367.088   | 438.083   | S57803    | 9541.892  | 12557.816 | AF070587  | 1572.396 | 1173.288 |
| NM_006167 | 3312.668  | 3199.159  | AF131822  | 1039.18   | 2168.464  | BE250526  | 214.356  | 133.188  |
| NM_016357 | 3778.736  | 4238.402  | AK023131  | 3223.384  | 4612.234  | NM_016815 | 426.982  | 271.589  |
| NM_014500 | 7248.624  | 7416.79   | AJ276248  | 381.128   | 569.984   | NM_012222 | 1582.803 | 1097.53  |
| NM_020145 | 1161.717  | 1191.922  | AF090100  | 340.904   | 601.394   | NM_005002 | 1137.643 | 742.472  |

|           |           |           |           |           |           |           |           |           |
|-----------|-----------|-----------|-----------|-----------|-----------|-----------|-----------|-----------|
| NM_006237 | 2068.89   | 1608.828  | AL360138  | 312.234   | 911.714   | NM_006596 | 1129.087  | 735.216   |
| NM_001271 | 3525.931  | 2973.906  | U61096    | 717.208   | 1008.828  | AK023214  | 2082.884  | 905.27    |
| NM_003683 | 2503.125  | 2295.481  | AF085865  | 4777.733  | 5999.965  | NM_001466 | 2341.742  | 1446.471  |
| AF039019  | 3193.491  | 3888.33   | X78261    | 645.765   | 734.184   | BC036368  | 224.506   | 230.08    |
| NM_012255 | 4899.466  | 4626.797  | AK025521  | 3723.176  | 5321.761  | NM_001851 | 814.698   | 1597.242  |
| NM_004818 | 5838.081  | 5159.977  | NM_001053 | 54748.754 | 57129.164 | S67789    | 530.66    | 602.479   |
| J04205    | 9561.448  | 8746.113  | Z70694    | 5215.681  | 4962.462  | AK022689  | 1441.452  | 1961.383  |
| NM_002819 | 13257.499 | 17502.824 | L77602    | 1437.819  | 1454.603  | NM_016227 | 378.512   | 511.325   |
| NM_013264 | 3292.791  | 4153.711  | NM_015421 | 10273.126 | 7458.264  | NM_004195 | 3553.759  | 5726.396  |
| NM_003315 | 9169.465  | 8312.572  | AF086081  | 3565.072  | 2148.37   | NM_020190 | 2205.236  | 2297.076  |
| NM_005570 | 6080.873  | 5473.247  | NM_018634 | 666.681   | 403.509   | AK024003  | 150.316   | 253.838   |
| NM_000086 | 3618.38   | 3351.975  | NM_018111 | 918.066   | 787.632   | NM_014357 | 811.51    | 1009.54   |
| NM_003752 | 3069.593  | 2552.832  | L23867    | 1811.864  | 1970.048  | NM_004067 | 473.453   | 696.784   |
| NM_003932 | 11999.863 | 9349.019  | AB020968  | 754.545   | 816.406   | NM_000121 | 1867.518  | 1842.141  |
| NM_016491 | 10611.438 | 9045.045  | AL138690  | 2957.985  | 3194.75   | NM_002091 | 1234.533  | 1456.609  |
| NM_006429 | 23835.477 | 14783.84  | AK000394  | 1245.802  | 1446.274  | AB033092  | 956.597   | 1052.062  |
| NM_003307 | 2976.874  | 3326.153  | NM_013941 | 1410.299  | 1434.143  | M89957    | 131.839   | 122.795   |
| AF070565  | 301.196   | 322.421   | AF074989  | 1057.196  | 1471.588  | NM_003023 | 367.178   | 271.045   |
| AK021644  | 1310.778  | 1261.923  | AK001107  | 1270.351  | 1562.436  | BC035030  | 1076.715  | 839.344   |
| NM_015944 | 946.189   | 772.331   | AF147393  | 1025.517  | 1236.761  | NM_005435 | 104.128   | 97.05     |
| NM_002064 | 1308.885  | 1868.651  | AK022368  | 377.595   | 847.626   | NM_005340 | 17896.127 | 15168.276 |
| NM_015523 | 10596.199 | 11722.767 | AL080112  | 2189.896  | 3586.309  | NM_016201 | 463.795   | 758.269   |
| NM_015960 | 6191.072  | 5686.745  | AK022299  | 658.254   | 599.311   | NM_000864 | 826.404   | 1036.465  |
| NM_006085 | 4531.306  | 4054.272  | AL137325  | 782.542   | 1027.256  | NM_017977 | 738.489   | 489.031   |
| NM_000907 | 6505.366  | 7258.003  | AF147361  | 1646.952  | 2362.279  | AF147727  | 548.732   | 305.736   |
| AF254085  | 3896.505  | 3600.463  | AL133086  | 1758.307  | 2405.16   | NM_006751 | 1066.862  | 885.256   |
| AK023541  | 273.086   | 359.413   | NM_012151 | 32309.371 | 45116.051 | AB037834  | 1092.678  | 442.849   |
| NM_000451 | 2314.03   | 5162.976  | AF087994  | 2186.116  | 2501.214  | NM_003566 | 550.7     | 434.653   |
| NM_001987 | 1129.276  | 902.377   | AJ227912  | 1894.814  | 2212.921  | NM_013344 | 125.367   | 103.491   |
| AF244088  | 1146.958  | 869.616   | NM_018195 | 3120.387  | 3414.426  | NM_014052 | 5605.945  | 7789.266  |
| NM_007136 | 823.477   | 1114.295  | AK025532  | 9049.378  | 8916.403  | NM_002777 | 160.028   | 310.147   |
| AK025434  | 623.421   | 413.795   | AK021789  | 455.392   | 541.241   | AF202635  | 264.238   | 281.371   |
| AJ251845  | 669.141   | 419.27    | NM_003522 | 1234.327  | 844.796   | NM_014125 | 236.144   | 213.672   |
| AK000435  | 1008.154  | 772.677   | BF217847  | 1318.166  | 1098.757  | NM_017904 | 240.365   | 476.667   |
| AK000569  | 2222.436  | 1452.73   | NM_005320 | 6746.805  | 3499.355  | AL137550  | 113.499   | 67.701    |
| NM_006049 | 2561.799  | 2206.134  | CY3Cy5    | 1463.761  | 128.453   | NM_000321 | 903.62    | 1363.567  |
| NM_017661 | 2600.647  | 2147.822  | BI830936  | 372.159   | 361.461   | NM_006341 | 3668.218  | 3697.784  |
| BC016698  | 9662.083  | 10085.448 | U79292    | 2105.631  | 1988.588  | NM_001709 | 905.541   | 879.951   |
| NM_007374 | 8841.117  | 3312.209  | AA947915  | 497.93    | 149.749   | NM_006191 | 1193.986  | 1147.826  |
| AK027185  | 1465.934  | 1672.793  | X68314    | 685.583   | 546.833   | NM_001800 | 1926.525  | 2589.617  |
| AK025576  | 750.511   | 1011.861  | X71973    | 11905.104 | 8878.058  | NM_004336 | 2511.886  | 3054.91   |
| AL442086  | 3278.555  | 3472.335  | T49651    | 7691.948  | 5511.414  | NM_015949 | 689.258   | 604.522   |
| BC034819  | 2929.833  | 2751.596  | N51014    | 969.305   | 579.39    | NM_013979 | 1247.661  | 1457.698  |
| AF147313  | 3111.433  | 3382.03   | BE392471  | 7531.52   | 5996.501  | NM_003790 | 639.15    | 1090.262  |
| AF147382  | 11226.591 | 11101.2   | AI802950  | 818.713   | 583.765   | NM_000494 | 865.506   | 1095.295  |
| AK001957  | 5038.503  | 5913.353  | AA682423  | 370.724   | 144.335   | NM_016023 | 471.733   | 479.636   |
| AK000850  | 761.101   | 793.371   | AL043686  | 3193.767  | 2730.015  | NM_003722 | 1804.962  | 1968.173  |
| AK021833  | 1852.856  | 2609.192  | AA490172  | 538.339   | 680.801   | NM_014430 | 189.954   | 136.604   |
| AF143867  | 763.977   | 681.596   | AA775212  | 2772.761  | 2457.166  | NM_000495 | 233.987   | 217.009   |
| AK025889  | 5037.09   | 4672.734  | NM_000945 | 1210.695  | 1525.579  | AF085883  | 795.666   | 627.494   |
| NM_014715 | 1937.955  | 2068.066  | SR5       | 4935.371  | 6253.784  | NM_016571 | 431.51    | 324.959   |
| AF086448  | 1932.743  | 2123.574  | SR7       | 4040.045  | 39342.793 | NM_003688 | 381.788   | 732.967   |
| AF086386  | 1653.991  | 1293.078  | SR9       | 12351.78  | 3208.414  | NM_016446 | 954.64    | 610.444   |

|            |           |           |           |           |           |           |          |          |
|------------|-----------|-----------|-----------|-----------|-----------|-----------|----------|----------|
| AF086413   | 293.217   | 364.022   | CY3Cy5    | 2772.015  | 328.012   | NM_002516 | 256.315  | 259.81   |
| AF086457   | 966.285   | 675.217   | NM_003371 | 4795.418  | 3210.995  | AK023237  | 283.128  | 140.524  |
| AK025469   | 1448.623  | 1598.374  | AK023114  | 2260.93   | 1768.481  | NM_001870 | 208.969  | 372.281  |
| NM_020239  | 5536.475  | 3973.311  | NM_003678 | 2303.598  | 1465.332  | AJ271216  | 417.398  | 371.973  |
| AF070581   | 404.48    | 325.944   | NM_012301 | 329.007   | 107.263   | U23028    | 760.817  | 1016.118 |
| AK024187   | 1604.191  | 2824.602  | NM_005631 | 439.151   | 834.994   | NM_000817 | 1576.802 | 2087.232 |
| AF075079   | 427.44    | 250.641   | NM_014419 | 1509.098  | 1157.678  | NM_001875 | 154.432  | 127.568  |
| AK022479   | 531.176   | 479.205   | NM_014938 | 1526.736  | 1425.382  | AK022680  | 457.392  | 583.898  |
| AK023572   | 419.727   | 541.734   | AF049460  | 318.404   | 307.49    | NM_018946 | 2552.043 | 3024.438 |
| AF086004   | 3897.864  | 4810.531  | AK026066  | 861.136   | 743.386   | NM_016359 | 2616.348 | 3390.368 |
| AF147433   | 517.931   | 772.119   | NM_005244 | 1810.222  | 1478.861  | NM_004156 | 2268.072 | 1522.174 |
| AF085930   | 522.665   | 1036.624  | NM_005270 | 448.08    | 464.611   | AK000561  | 248.305  | 357.855  |
| AF086006   | 381.456   | 518.495   | NM_014815 | 1069.188  | 1323.954  | AB051449  | 4487.758 | 4070.484 |
| AL137318   | 1357.016  | 1419.895  | NM_007221 | 3708.116  | 4373.513  | BC009187  | 2177.252 | 1831.851 |
| AL137482   | 631.509   | 521.857   | X54163    | 9761.217  | 12720.081 | AL133617  | 316.912  | 208.561  |
| AL162011   | 9390.262  | 8289.928  | AK025395  | 536.086   | 498.947   | NM_016485 | 2649.342 | 1949.428 |
| AL390177   | 335.272   | 402.362   | NM_000388 | 329.619   | 423.701   | NM_002615 | 191.748  | 134.528  |
| AL137678   | 247.294   | 247.135   | NM_002469 | 399.638   | 770.432   | AF090894  | 226.118  | 229.87   |
| AK056111   | 541.242   | 564.517   | NM_014668 | 680.28    | 429.698   | AK000049  | 109.047  | 71.636   |
| AL162055   | 296.957   | 169.518   | NM_004722 | 1321.249  | 1516.829  | NM_006167 | 986.432  | 1249.542 |
| Y13807     | 1036.02   | 851.813   | NM_014425 | 649.476   | 613.786   | NM_016357 | 1435.817 | 1791.642 |
| AK023038   | 686.742   | 438.81    | NM_012133 | 1844.129  | 1143.739  | NM_014500 | 3159.319 | 3680.079 |
| AK026206   | 563.662   | 550.778   | NM_017954 | 620.82    | 490.197   | AK023792  | 126.322  | 93.13    |
| AF086074   | 686.479   | 401.301   | NM_006612 | 639.959   | 546.75    | NM_020149 | 520.488  | 722.816  |
| AK023964   | 2467.821  | 2555.751  | NM_016451 | 1425.947  | 1024.913  | NM_006237 | 680.972  | 643.247  |
| AF086084   | 854.8     | 699.064   | NM_007351 | 12116.533 | 8731.162  | NM_001271 | 1221.313 | 1143.529 |
| AL050184   | 1860.143  | 2537.976  | AK026266  | 5712.977  | 3560.343  | NM_003683 | 649.312  | 763.964  |
| AK027112   | 3266.245  | 4186.026  | NM_007124 | 2708.959  | 1891.796  | AF039019  | 863.614  | 1572.499 |
| AL049314   | 3083.429  | 3388.057  | NM_003176 | 1957.988  | 1525.961  | NM_012255 | 1439.899 | 1494.761 |
| AF093016   | 8956.547  | 11791.805 | NM_000723 | 594.388   | 478.666   | NM_004818 | 1685.167 | 1496.537 |
| -          | 344.457   | 439.111   | AL096751  | 3395.975  | 2746.393  | J04205    | 3053.972 | 2864.828 |
| AF090925   | 415.957   | 486.804   | NM_000364 | 336.389   | 485.656   | D38491    | 1394.166 | 1333.311 |
| NM_014163  | 1534.819  | 1756.1    | AF026920  | 2040.134  | 2350.155  | AK026835  | 724.425  | 958.159  |
| AK021659   | 516.694   | 608.236   | NM_004931 | 2172.649  | 2446.971  | NM_002819 | 4280.958 | 5594.094 |
| NM_014137  | 586.203   | 601.419   | NM_000607 | 8502.896  | 12066.695 | NM_013264 | 1125.292 | 1761.894 |
| AK021974   | 1256.683  | 1297.213  | NM_002575 | 2021.327  | 7146.318  | NM_003315 | 3420.481 | 5279.763 |
| AK022068   | 761.621   | 884.074   | NM_004244 | 2006.6    | 3694.057  | NM_005570 | 3285.804 | 2362.588 |
| AK022229   | 785.713   | 775.414   | AK001500  | 676.195   | 404.039   | NM_000086 | 1834.859 | 2480.053 |
| AK022362   | 3171.366  | 3152.905  | NM_006774 | 319.296   | 195.426   | NM_003752 | 1031.738 | 815.032  |
| AK022004   | 4139.413  | 3526      | NM_020129 | 1270.92   | 508.619   | NM_003932 | 3974.401 | 2972.195 |
| AK022390   | 851.547   | 949.755   | Y16521    | 1914.704  | 1491.933  | NM_016491 | 3527.148 | 2903.311 |
| AK027134   | 609.886   | 452.797   | AL050371  | 2456.651  | 2061.018  | NM_006429 | 8585.919 | 5315.152 |
| AK024168   | 408.937   | 286.41    | NM_002651 | 1631.536  | 1271.969  | NM_003307 | 1168.979 | 1630.147 |
| AF264622   | 282.663   | 271.304   | NM_002413 | 1815.474  | 1448.345  | AF070565  | 215.704  | 238.767  |
| AK021793   | 1553.12   | 1015.458  | NM_017577 | 415.51    | 444.882   | AK021644  | 602.107  | 744.491  |
| AK023730   | 338.518   | 453.831   | NM_001647 | 1421.869  | 1457.441  | NM_016599 | 135.323  | 162.558  |
| AF161360   | 938.023   | 1168.39   | NM_018158 | 1473.153  | 1398.619  | NM_015944 | 280.57   | 343.508  |
| AK021720   | 1178.688  | 1764.511  | NM_016301 | 3647.133  | 2755.288  | NM_002064 | 588.327  | 850.09   |
| NM_016497  | 32059.805 | 42110.598 | AK021975  | 468.283   | 485.741   | NM_015523 | 3490.15  | 3786.147 |
| AK000617   | 431.763   | 586.139   | AB032952  | 10895.897 | 9553.025  | NM_015960 | 2140.466 | 2841.972 |
| AF009261   | 830.425   | 874.007   | NM_002522 | 11667.483 | 13487.401 | NM_006085 | 1135.692 | 1477.791 |
| unknown (S | 438.325   | 1451.913  | NM_002978 | 1342.149  | 2557.885  | NM_000907 | 1946.509 | 2574.662 |
| AB037792   | 1651.852  | 1740.11   | AB040879  | 493.383   | 645.701   | AF254085  | 1399.277 | 1440.607 |

|           |           |           |           |           |           |           |           |           |
|-----------|-----------|-----------|-----------|-----------|-----------|-----------|-----------|-----------|
| AK024158  | 281.569   | 258.847   | AL049935  | 6965.919  | 5391.008  | AK023541  | 140.95    | 116.23    |
| AL080082  | 744.168   | 559.971   | AB033043  | 3956.044  | 3827.387  | NM_000451 | 68.371    | 70.123    |
| AK021623  | 1101.98   | 1090.698  | NM_014999 | 3003.889  | 2034.353  | NM_001987 | 367.762   | 238.699   |
| AK023733  | 858.501   | 1071.89   | AK025220  | 1338.324  | 1283.256  | AF244088  | 648.674   | 580.446   |
| U79242    | 388.882   | 508.185   | NM_016308 | 8876.371  | 6684.727  | NM_007136 | 383.636   | 370.659   |
| AF119901  | 3117.975  | 9690.263  | D42046    | 2396.07   | 2119.598  | AK025434  | 267.229   | 217.29    |
| AK001936  | 1441.149  | 2454.009  | NM_001033 | 6773.996  | 4472.778  | AJ251845  | 228.9     | 207.463   |
| NM_003770 | 13942.931 | 16465.287 | NM_004526 | 11613.753 | 8287.284  | AK000435  | 519.001   | 420.379   |
| AK001395  | 3877.858  | 4650.398  | NM_002526 | 3116.096  | 2567.342  | AK000569  | 1242.409  | 897.404   |
| S57803    | 4304.966  | 6038.429  | NM_020135 | 3070.298  | 2567.808  | NM_006045 | 837.822   | 523.234   |
| AF131822  | 1149.239  | 966.227   | NM_018518 | 2226.468  | 2141.945  | NM_017661 | 942.146   | 621.273   |
| AK023131  | 807.313   | 1246.751  | AK023149  | 1340.394  | 1222.485  | BC016698  | 3435.135  | 3092.898  |
| AJ276248  | 335.228   | 324.358   | AK023168  | 2034.703  | 1741.104  | NM_007374 | 2460.987  | 581.488   |
| AL360138  | 671.501   | 1314.469  | NM_006646 | 649.773   | 751.966   | AK027185  | 595.203   | 973.928   |
| AF085865  | 4561.354  | 4973.266  | NM_004742 | 825.603   | 682.847   | AK025576  | 369.975   | 571.667   |
| AK025521  | 3656.441  | 3008.778  | NM_014753 | 1466.199  | 1456.071  | AF147385  | 210.716   | 212.927   |
| NM_001053 | 24823.232 | 19248.072 | NM_006585 | 18869.809 | 19662.873 | AL442086  | 1248.605  | 1444.688  |
| Z70694    | 2015.274  | 1756.715  | NM_014331 | 2390.713  | 2779.673  | AK026784  | 132.886   | 101.986   |
| L77602    | 310.761   | 177.242   | NM_006795 | 7465.546  | 10357.503 | BC034819  | 1221.015  | 1239.172  |
| NM_015421 | 8973.821  | 9155.119  | AF070568  | 1800.379  | 2248.273  | AF147313  | 3663.75   | 4645.37   |
| AF086081  | 3328.211  | 3940.526  | NM_000277 | 144.852   | 579.616   | AF147382  | 11092.637 | 14553.095 |
| NM_018634 | 337.838   | 219.28    | NM_000240 | 2860.786  | 4895.04   | AK001957  | 1099.741  | 1669.935  |
| L23867    | 673.682   | 611.649   | AK055733  | 6556.879  | 11480.184 | AK000850  | 245.203   | 456.899   |
| AB020968  | 527.058   | 1015.642  | AF298880  | 3899.933  | 6665.167  | AK021833  | 518.273   | 1046.486  |
| AL138690  | 2073.618  | 3799.63   | AK025395  | 380.782   | 178.128   | AF143867  | 567.681   | 806.234   |
| AK000394  | 584.726   | 1112.263  | NM_000388 | 406.09    | 220.587   | AK025889  | 1027.547  | 1400.916  |
| NM_013941 | 1367.951  | 2675.003  | NM_002469 | 284.934   | 160.929   | NM_014715 | 737.422   | 1180.681  |
| AF074989  | 967.984   | 1101.483  | BI830936  | 254.378   | 164.733   | AF086272  | 112.739   | 218.351   |
| AK001107  | 758.716   | 779.515   | U79292    | 1842.437  | 1586.087  | AF086448  | 813.631   | 1493.46   |
| AF147393  | 582.318   | 674.078   | AA947915  | 448.383   | 312.374   | AB019391  | 161.65    | 90.83     |
| AL080112  | 1831.005  | 2289.744  | X68314    | 666.239   | 468.424   | AF086386  | 463.031   | 695.186   |
| AK022299  | 245.776   | 283.753   | X71973    | 9375.167  | 7157.856  | AF086413  | 140.281   | 197.832   |
| AL137325  | 630.086   | 818.735   | T49651    | 6319.199  | 5142.673  | AF086457  | 447.315   | 344.505   |
| AF147361  | 1223.832  | 1087.673  | N51014    | 569.667   | 339.56    | AK025469  | 512.646   | 398.328   |
| AL133086  | 1057.22   | 1704.313  | BE392471  | 5368.063  | 6151.237  | NM_020235 | 2161.372  | 1418.143  |
| NM_012151 | 29144.029 | 29508.246 | AI802950  | 684.927   | 693.036   | AF070581  | 306.299   | 201.969   |
| AF087994  | 2397.607  | 3119.997  | AL043686  | 2509.595  | 2632.315  | AK024187  | 317.171   | 258.473   |
| AJ227912  | 1444.836  | 2308.383  | AA775212  | 1939.369  | 2061.61   | AF075079  | 213.507   | 281.779   |
| NM_018195 | 2409.08   | 3028.227  | NM_000945 | 983.232   | 1451.794  | AK022479  | 236.044   | 402.325   |
| AK025532  | 2279.145  | 2647.945  | NM_002574 | 52958.078 | 52607.316 | AK023572  | 179.588   | 233.334   |
| AK021789  | 380.513   | 265.855   | AB011174  | 1518.667  | 1974.276  | AF086004  | 2336.351  | 3806.03   |
| AF086383  | 372.709   | 60.508    | AB043635  | 371.354   | 689.959   | AF147433  | 189.256   | 290.279   |
| NM_003522 | 874.892   | 764.643   | NM_000607 | 5799.804  | 4885.224  | AF085978  | 128.972   | 152.791   |
| CY3Cy5    | 3483.273  | 190.632   | NM_002575 | 852.359   | 856.269   | AF085930  | 182.609   | 202.179   |
| BI830936  | 537.995   | 558.645   | NM_004244 | 1906.264  | 1490.23   | AL137318  | 431.047   | 748.165   |
| U79292    | 1755.587  | 1426.59   | NM_003371 | 5208.825  | 3984.676  | AL137482  | 288.508   | 356.16    |
| AA947915  | 539.697   | 1136.571  | AK023114  | 2001.752  | 1820.688  | AL162011  | 3977.948  | 5070.755  |
| BI830753  | 604.711   | 531.949   | NM_003678 | 2223.356  | 2626.732  | AL390177  | 267.736   | 628.847   |
| X68314    | 1816.936  | 2907.638  | NM_005631 | 308.279   | 540.026   | AL137678  | 176.903   | 124.898   |
| X71973    | 30242.914 | 35417.242 | NM_014419 | 1267.801  | 932.791   | AK056111  | 304.695   | 396.579   |
| T49651    | 18627.947 | 18802.137 | NM_014938 | 1246.337  | 1373.359  | AL162055  | 140.693   | 207.246   |
| N51014    | 2003.352  | 2361.006  | AK026066  | 813.411   | 795.797   | Y13807    | 403.715   | 436.707   |
| BE392471  | 20918.797 | 17958.553 | NM_005244 | 1489.414  | 1533.859  | AK022053  | 149.196   | 195.824   |

|           |           |           |           |           |           |           |           |           |
|-----------|-----------|-----------|-----------|-----------|-----------|-----------|-----------|-----------|
| AI802950  | 1408.485  | 1533.208  | NM_005270 | 420.243   | 630.623   | AK023038  | 433.708   | 617.948   |
| AL043686  | 6011.97   | 4274.447  | NM_014815 | 969.822   | 1216.123  | AK026206  | 426.113   | 534.724   |
| AA490172  | 505.229   | 457.637   | NM_005443 | 1614.746  | 2072.153  | AF086074  | 500       | 1288.25   |
| AA775212  | 5563.007  | 5322.602  | NM_007221 | 4033.715  | 6796.763  | AK023964  | 1074.86   | 1427.634  |
| NM_000945 | 3080.871  | 3874.84   | X54163    | 11074.508 | 17448.465 | AF086084  | 305.448   | 411.55    |
| NM_002574 | 55893.449 | 67220.125 | NM_002978 | 611.312   | 418.822   | AK000156  | 142.961   | 132.01    |
| SR5       | 7917.802  | 6655.944  | NM_014668 | 738.041   | 813.466   | AL050184  | 417.84    | 276.39    |
| SR7       | 6374.404  | 46597.648 | NM_004722 | 1646.427  | 1245.426  | AF085853  | 171.444   | 155.114   |
| SR9       | 19666.637 | 3320.542  | NM_014425 | 630.797   | 750.295   | AK027112  | 1202.31   | 1888.219  |
| CY3Cy5    | 4120.622  | 268.225   | NM_012133 | 1713.58   | 1295.729  | AL049314  | 1124.907  | 2020.555  |
| NM_003371 | 2677.942  | 2398.245  | NM_017954 | 593.311   | 676.967   | AF093016  | 3812.263  | 6014.132  |
| AK023114  | 4196.82   | 4119.581  | NM_006612 | 469.173   | 321.564   | AF161345  | 174.679   | 245.671   |
| NM_003678 | 4773.879  | 7444.612  | NM_016451 | 1002.502  | 820.896   | -         | 256.81    | 494.65    |
| NM_005631 | 2011.403  | 1565.22   | NM_007351 | 8172.719  | 8000.147  | AF090925  | 166.461   | 288.306   |
| NM_014419 | 1741.646  | 1928.68   | AK026266  | 3972.789  | 3600.981  | AF100637  | 123.653   | 503.964   |
| NM_014938 | 4330.553  | 3255.682  | NM_007124 | 1654.427  | 1856.987  | NM_014163 | 1786.101  | 2511.779  |
| AF049460  | 749.104   | 796.361   | NM_003176 | 1249.937  | 1297.675  | AK021659  | 138.744   | 213.412   |
| AK026066  | 1501.305  | 1213.256  | NM_000723 | 667.148   | 801.958   | NM_014137 | 160.432   | 224.276   |
| NM_005244 | 1345.576  | 1278.023  | AL096751  | 2980.82   | 3803.272  | AK021974  | 417.29    | 611.936   |
| NM_005270 | 779.577   | 696.333   | NM_000364 | 449.404   | 541.676   | AK022068  | 418.109   | 921.416   |
| NM_014815 | 2666.288  | 2576.419  | AF026920  | 2636.994  | 3937.01   | AK022229  | 407.591   | 815.041   |
| NM_005443 | 2515.282  | 3243.014  | NM_004931 | 2218.009  | 3565.163  | AK022362  | 1395.801  | 1763.931  |
| NM_007221 | 8061.391  | 10866.108 | NM_006795 | 4535.043  | 3815.088  | AK022004  | 1661.629  | 1758.236  |
| X54163    | 21341.625 | 18220.787 | AF070568  | 1509.747  | 1037.61   | AK022136  | 190.417   | 100.122   |
| AK025395  | 787.795   | 611.244   | NM_000240 | 1633.319  | 1412.309  | AK022390  | 407.236   | 394.025   |
| NM_000388 | 756.961   | 762.484   | AK055733  | 5508.855  | 4580.286  | AK027134  | 265.613   | 262.934   |
| X58377    | 384.064   | 359.653   | AF298880  | 3449.023  | 2616.547  | AK024168  | 268.738   | 563.814   |
| NM_002469 | 339.31    | 414.534   | AK001500  | 778.53    | 721.827   | AF222857  | 124.347   | 91.752    |
| NM_014668 | 909.104   | 979.469   | NM_006774 | 353.9     | 343.54    | AF264622  | 248.267   | 215.679   |
| NM_004722 | 2501.218  | 2151.453  | NM_020129 | 1202.064  | 831.594   | AK027203  | 120.153   | 129.35    |
| NM_014425 | 1218.648  | 1509.93   | Y16521    | 1859.431  | 1591.092  | AK021793  | 796.494   | 621.583   |
| NM_012133 | 3760.472  | 7610.673  | AL050371  | 1924.086  | 1824.675  | AK022255  | 937.179   | 1020.3    |
| NM_017954 | 1154.094  | 1723.678  | NM_002651 | 1345.091  | 1327.845  | AK023730  | 184.41    | 272.862   |
| NM_006612 | 1000.87   | 1185.507  | NM_002413 | 1691.184  | 1739.554  | AF161360  | 533.615   | 1004.212  |
| NM_016451 | 3005.374  | 3517.568  | NM_017577 | 328.716   | 295.215   | AK021720  | 356.143   | 499.689   |
| NM_007351 | 26156.277 | 21447.531 | NM_001647 | 1289.963  | 1607.768  | NM_016497 | 12405.133 | 21965.568 |
| AK026266  | 12716.864 | 10639.69  | NM_018158 | 1497.007  | 1818.939  | AK000617  | 126.79    | 178.777   |
| NM_007124 | 5693.959  | 4958.636  | NM_016301 | 4168.754  | 4368.784  | AF009261  | 366.768   | 467.861   |
| NM_003176 | 3586.679  | 3476.142  | AK021975  | 433.007   | 487.948   | AB037792  | 624.56    | 878.828   |
| NM_000723 | 1626.171  | 1409.968  | AB032952  | 13318.694 | 18076.752 | AK022480  | 223.316   | 272.751   |
| AL096751  | 4061.889  | 3746.625  | NM_002522 | 16003.413 | 20525.666 | AK024158  | 331.029   | 311.739   |
| NM_000364 | 693.757   | 728.841   | NM_000945 | 855.013   | 717.157   | AL080082  | 311.994   | 298.373   |
| AF026920  | 2942.418  | 2358.985  | NM_002574 | 49488.73  | 29774.922 | AK021623  | 494.325   | 1112.401  |
| NM_004931 | 2974.764  | 2957.607  | AB011174  | 1042.834  | 795.609   | AK023733  | 173.561   | 134.154   |
| NM_000607 | 11515.123 | 8937.845  | AB043635  | 409.183   | 394.501   | U79242    | 164.254   | 271.763   |
| NM_002575 | 1799.277  | 1402.21   | AB040879  | 672.412   | 627.191   | AF056452  | 175.02    | 254.619   |
| NM_004244 | 2515.979  | 2225.523  | AL049935  | 7197.895  | 6117.832  | AF119901  | 1126.868  | 1923.937  |
| AK001500  | 794.071   | 624.373   | AB033043  | 4284.73   | 5405.778  | AK001936  | 414.941   | 670.866   |
| NM_020129 | 2087.004  | 6122.239  | NM_014999 | 3112.61   | 2372.235  | NM_003770 | 17806.508 | 23694.592 |
| Y16521    | 3071.442  | 4893.789  | AK025220  | 1520.161  | 1150.1    | AK001395  | 910.849   | 1581.962  |
| AL050371  | 3677.322  | 4259.226  | NM_016308 | 8171.862  | 5521.683  | S57803    | 2321.861  | 3979.02   |
| NM_002651 | 3201.675  | 3947.046  | D42046    | 2043.008  | 2038.875  | AF131822  | 540.017   | 656.93    |
| NM_002413 | 2221.675  | 1660.56   | NM_001033 | 5582.297  | 4560.583  | AK023131  | 535.475   | 689.37    |

|           |           |           |           |           |           |           |           |           |
|-----------|-----------|-----------|-----------|-----------|-----------|-----------|-----------|-----------|
| NM_017577 | 525.276   | 701.779   | NM_004526 | 10502.26  | 8160.695  | AJ276248  | 151.82    | 91.3      |
| NM_001647 | 1119.039  | 926.281   | NM_002526 | 3584.466  | 4078.396  | AF090100  | 109.628   | 181.28    |
| NM_018158 | 3455.797  | 2704.333  | NM_020135 | 2802.819  | 3241.978  | AL360138  | 145.848   | 57.374    |
| NM_016301 | 6824.331  | 7538.949  | NM_018518 | 2384.608  | 2628.612  | U61096    | 190.795   | 219.291   |
| AK021975  | 656.28    | 749.089   | AK023149  | 1137.964  | 1469.566  | AF085865  | 1460.817  | 2188.72   |
| AB032952  | 10131.877 | 8528.817  | AK023168  | 1993.073  | 2550.065  | X78261    | 183.135   | 249.329   |
| NM_002522 | 2192.569  | 1634.294  | NM_006646 | 784.517   | 1418.99   | AK025521  | 1626.798  | 1798.543  |
| NM_002978 | 705.619   | 736.037   | NM_004742 | 1092.921  | 1524.368  | NM_001053 | 22454.367 | 33765.668 |
| AB040879  | 860.866   | 726.816   | NM_014753 | 1425.083  | 2251.875  | Z70694    | 1359.145  | 1498.616  |
| AL049935  | 15742.169 | 8772.891  | NM_006585 | 19288.955 | 23555.986 | L77602    | 362.997   | 307.253   |
| AB033043  | 5458.371  | 5599.25   | NM_014331 | 2011.745  | 3410.868  | NM_015421 | 3286.764  | 2696.708  |
| NM_014998 | 7256.138  | 8395.674  | NM_005270 | 366.566   | 225.574   | AF086081  | 1092.4    | 1298.805  |
| AK025220  | 3405.526  | 3851.686  | NM_014815 | 940.934   | 691.302   | NM_018634 | 152.81    | 259.83    |
| NM_016308 | 13939.682 | 18331.309 | NM_005443 | 1624.873  | 1003.621  | NM_018111 | 313.811   | 177.265   |
| D42046    | 4118.029  | 3395.275  | NM_007221 | 3566.496  | 2756.426  | AK022175  | 114.988   | 166.722   |
| NM_001033 | 13139.471 | 12821.962 | X54163    | 8597.502  | 6972.134  | L23867    | 309.216   | 270.58    |
| NM_004526 | 20448.188 | 25208.496 | AK025395  | 415.576   | 339.72    | AL138690  | 954.443   | 1783.219  |
| NM_002526 | 3010.162  | 2569.724  | NM_000388 | 377.061   | 268.584   | AK000394  | 295.878   | 575.201   |
| NM_020135 | 7053.186  | 6126.365  | U79292    | 1948.125  | 1668.821  | NM_013941 | 391.783   | 845.602   |
| NM_018518 | 4364.291  | 4005.881  | AA947915  | 389.599   | 176.612   | AF074989  | 373.569   | 475.324   |
| AK023149  | 2144.2    | 2275.93   | X68314    | 798.734   | 745.069   | AK001107  | 357.568   | 674.077   |
| AK023168  | 2936.34   | 2710.876  | X71973    | 9316.351  | 9461.3    | AF147393  | 298.617   | 467.376   |
| NM_006646 | 1190.376  | 840.834   | T49651    | 6399.068  | 6554.103  | AK022368  | 147.325   | 106.989   |
| NM_004742 | 1622.045  | 1358.515  | N51014    | 598.292   | 516.922   | AL080112  | 792.308   | 1059.03   |
| NM_014753 | 2807.967  | 2100.665  | BE392471  | 5705.761  | 7421.555  | AK022299  | 243.527   | 451.982   |
| NM_006585 | 36132.547 | 28863.748 | AI802950  | 734.598   | 753.323   | AL137325  | 295.981   | 565.035   |
| NM_014331 | 4742.824  | 4627.175  | AI741278  | 189.196   | 406.025   | AF147361  | 546.456   | 780.142   |
| NM_006795 | 8135.756  | 6340.584  | AA682423  | 273.86    | 298.338   | AL133086  | 434.139   | 433.854   |
| AF070568  | 3124.252  | 3174.63   | AL043686  | 2996.113  | 4411.626  | NM_012151 | 14663.778 | 18314.949 |
| NM_000240 | 2095.01   | 1770.21   | AA490172  | 510.809   | 820.155   | AF087994  | 570.862   | 819.485   |
| AK055733  | 11240.989 | 10316.696 | AA775212  | 2004.825  | 3418.418  | AJ227912  | 490.16    | 733.9     |
| AF298880  | 4838.503  | 3669.792  | NM_000723 | 537.838   | 434.484   | NM_018195 | 977.151   | 1477.143  |
| AK025395  | 526.885   | 462.532   | AL096751  | 2253.817  | 1563.744  | AK025532  | 2705.047  | 4170.97   |
| NM_000388 | 495.16    | 383.377   | NM_000364 | 427.342   | 274.801   | AK021789  | 149.319   | 130.73    |
| X58377    | 845.809   | 583.836   | AF026920  | 1692.175  | 1278.782  | AF086383  | 130.428   | 93.817    |
| NM_002468 | 528.302   | 392.139   | NM_004931 | 1968.01   | 1629.418  | NM_003522 | 505.518   | 469.871   |
| BI830936  | 641.829   | 697.824   | NM_000607 | 7754.706  | 7559.087  | BF217847  | 326.189   | 372.412   |
| U79292    | 1627.65   | 1275.749  | NM_002575 | 1105.768  | 1727.786  | NM_005320 | 1139.375  | 654.23    |
| AA947915  | 347.703   | 920.804   | NM_004244 | 2264.749  | 2029.449  | AA947915  | 162.878   | 643.499   |
| BI830753  | 388.673   | 338.697   | NM_003371 | 5630.065  | 5160.074  | BI830753  | 194.82    | 205.029   |
| X68314    | 1236.659  | 980.905   | AK023114  | 1992.099  | 2000.863  | X68314    | 277.043   | 319.517   |
| X71973    | 24683.102 | 21627.879 | NM_003678 | 2138.018  | 2205.846  | X71973    | 5386.065  | 1490.101  |
| T49651    | 14708.352 | 12134.925 | NM_012301 | 389.871   | 249.101   | T49651    | 4604.732  | 3344.962  |
| N51014    | 1380.27   | 1459.717  | NM_005631 | 453.663   | 879.055   | N51014    | 425.37    | 1038.648  |
| BE392471  | 14552.322 | 10637.011 | NM_014419 | 1699.671  | 2135.388  | AI802950  | 506.627   | 2732.6    |
| AI802950  | 1118.484  | 912.567   | NM_014938 | 1355.441  | 2373.642  | AL043686  | 1296.424  | 1288.668  |
| AL043686  | 5156.848  | 3324.912  | AF049460  | 373.223   | 496.673   | AA490172  | 195.27    | 225.478   |
| AA490172  | 391.587   | 263.935   | AK026066  | 690.81    | 965.618   | AA775212  | 1247.211  | 2611.332  |
| AA775212  | 4566.985  | 4150.348  | NM_005244 | 2007.547  | 3315.784  | NM_000945 | 710.914   | 1178.973  |
| NM_000945 | 2418.306  | 2258.456  | NM_018158 | 1652.503  | 1150.487  | SR5       | 1811.371  | 1438.002  |
| NM_002574 | 59892.691 | 66340.859 | NM_016301 | 4105.575  | 2648.086  | SR7       | 1656.758  | 9299.023  |
| AB011174  | 1388.568  | 1787.388  | AK021975  | 293.511   | 213.739   | AK023114  | 1371.786  | 2489.053  |
| AB043635  | 631.147   | 381.574   | AB032952  | 8598.236  | 6752.26   | NM_003678 | 1198.588  | 2361.188  |



|           |           |           |           |           |           |           |          |          |
|-----------|-----------|-----------|-----------|-----------|-----------|-----------|----------|----------|
| NM_000607 | 9224.052  | 6513.869  | NM_002522 | 12087.473 | 8192.434  | NM_014271 | 504.896  | 8.77     |
| NM_002575 | 2038.358  | 1656.151  | NM_002978 | 1066.833  | 813.387   | NM_012301 | 221.629  | 60.386   |
| NM_004244 | 3144.406  | 2933.256  | NM_014668 | 898.452   | 1108.611  | NM_005631 | 415.582  | 231.973  |
| NM_003371 | 2663.789  | 2150.493  | NM_004722 | 1781.393  | 1806.739  | NM_014419 | 800.619  | 1958.781 |
| AK023114  | 4198.239  | 4021.323  | NM_014425 | 825.192   | 590.578   | AF049460  | 259.684  | 1982.896 |
| NM_003678 | 4416.995  | 4882.928  | NM_012133 | 1907.502  | 1982.618  | NM_000441 | 444.92   | 1046.812 |
| NM_005631 | 1740.032  | 1123.428  | NM_017954 | 876.241   | 1067.013  | AK026066  | 295.88   | 911.216  |
| NM_014419 | 1331.482  | 1065.419  | NM_006612 | 581.058   | 768.722   | NM_005244 | 400.645  | 1002.758 |
| NM_014938 | 3134.152  | 2430.623  | NM_016451 | 1170.932  | 1639.436  | NM_005270 | 233.181  | 323.887  |
| AK026066  | 1204.807  | 1191.761  | NM_007351 | 10598.778 | 11916.198 | NM_014815 | 450.496  | 476.851  |
| NM_005244 | 1025.133  | 1057.937  | AK026266  | 4679.799  | 6172.385  | NM_007221 | 1944.975 | 1207.559 |
| NM_005270 | 763.636   | 578.412   | NM_007124 | 2293.667  | 2541.181  | X54163    | 4114.584 | 2416.643 |
| NM_014815 | 2301.081  | 1992.444  | NM_003176 | 1544.471  | 2362.246  | NM_014668 | 336.002  | 636.354  |
| NM_005443 | 3171.26   | 3137.81   | AK023168  | 2139.446  | 2122.13   | NM_004722 | 803.083  | 1836.118 |
| NM_007221 | 7522.449  | 5984.911  | NM_006646 | 746.089   | 795.013   | NM_014425 | 266.205  | 376.104  |
| X54163    | 18050.191 | 16261.299 | NM_004742 | 864.677   | 818.406   | NM_012133 | 968.582  | 1469.113 |
| NM_002978 | 835.108   | 791.896   | NM_014753 | 1430.756  | 1123.414  | NM_017954 | 294.481  | 611.476  |
| NM_014668 | 731.446   | 699.687   | NM_006585 | 21205.965 | 11729.605 | NM_006612 | 301.729  | 218.064  |
| NM_004722 | 2191.565  | 1761.148  | NM_014331 | 2785.25   | 2431.094  | NM_016451 | 499.597  | 879.768  |
| NM_014425 | 1153.421  | 1042.908  | NM_006795 | 7771.258  | 7067.575  | NM_007351 | 6327.577 | 7557.54  |
| NM_012133 | 3146.953  | 3117.583  | AF070568  | 1954.654  | 1593.037  | AK026266  | 3191.338 | 9024.296 |
| NM_017954 | 963.095   | 1129.307  | NM_000277 | 369.897   | 382.278   | NM_007124 | 1073.565 | 1905.144 |
| NM_006612 | 1208.051  | 994.085   | NM_000240 | 2592.05   | 2150.406  | NM_003176 | 687.665  | 1095.547 |
| NM_016451 | 2625.093  | 2712.692  | AK055733  | 6909.826  | 6063.786  | NM_000723 | 337.756  | 438.828  |
| NM_007351 | 17661.48  | 17224.441 | AF298880  | 3279.892  | 3367.692  | AL096751  | 886.98   | 684.651  |
| AK026266  | 8339.374  | 7775.984  | AK001500  | 881.747   | 730.241   | NM_000364 | 201.716  | 143.754  |
| NM_007124 | 3947.102  | 3222.336  | NM_006774 | 426.333   | 524.73    | AF026920  | 601.232  | 431.36   |
| NM_003176 | 2818.511  | 2918.079  | NM_020129 | 1356.337  | 1045.593  | NM_004931 | 835.784  | 440.786  |
| NM_000723 | 1417.873  | 980.992   | Y16521    | 2726.81   | 2896.153  | NM_002575 | 414.902  | 248.386  |
| AL096751  | 4296.042  | 3558.738  | AL050371  | 2472.353  | 2870.385  | NM_004244 | 549.017  | 409.085  |
| NM_000364 | 757.285   | 584.845   | NM_002651 | 1618.835  | 2162.001  | AK001500  | 315.096  | 473.721  |
| AF026920  | 3274.767  | 2709.265  | NM_002413 | 2739.522  | 3447.466  | NM_006774 | 210.302  | 182.675  |
| NM_004931 | 2764.242  | 2381.71   | NM_017577 | 397.938   | 590.571   | NM_020129 | 386.049  | 1617.79  |
| NM_006795 | 10213.335 | 6247.863  | NM_001647 | 1834.816  | 2977.504  | Y16521    | 1018.421 | 1404.649 |
| AF070568  | 3568.288  | 3191.575  | NM_006228 | 468.366   | 500.337   | AL050371  | 1346.672 | 4279.12  |
| NM_000240 | 2755.421  | 1944.119  | NM_003768 | 3705.902  | 2981.213  | NM_002651 | 912.675  | 1279.906 |
| AK055733  | 11132.846 | 10089.234 | NM_018393 | 943.674   | 783.828   | NM_002413 | 533.657  | 881.953  |
| AF298880  | 5792.027  | 5479.827  | BF032535  | 1695.051  | 915.603   | NM_017577 | 210.917  | 415.671  |
| AK001500  | 1104.193  | 1256.73   | NM_018332 | 2287.813  | 1757.694  | NM_001757 | 92.012   | 351.195  |
| NM_006774 | 499.378   | 700.099   | NM_005096 | 6241.893  | 3643.984  | NM_001647 | 452.937  | 1397.853 |
| NM_020129 | 1103.732  | 2243.62   | NM_006760 | 839.532   | 722.734   | NM_018158 | 777.407  | 2106.355 |
| Y16521    | 2689.763  | 2669.646  | NM_012289 | 3416.709  | 2140.235  | NM_016301 | 1791.772 | 2405.18  |
| AL050371  | 3558.558  | 4484.121  | AB037775  | 1149.603  | 1098.69   | AK021975  | 189.326  | 229.52   |
| NM_002651 | 3274.067  | 3876.238  | L27560    | 854.128   | 933.414   | AB032952  | 3238.878 | 1872.437 |
| NM_002413 | 1845.405  | 1821.702  | AB011174  | 1428.757  | 1312.851  | NM_002522 | 2399.345 | 1722.255 |
| NM_017577 | 534.006   | 668.501   | AB040879  | 846.48    | 771.383   | NM_018607 | 132.924  | 221.695  |
| NM_018158 | 2730.666  | 2329.31   | AL049935  | 7470.328  | 7870.156  | NM_002978 | 293.317  | 181.677  |
| NM_016301 | 7004.023  | 8778.686  | AB033043  | 5482.592  | 7626.588  | AB040879  | 366.822  | 1065.4   |
| AK021975  | 765.578   | 897.653   | NM_014999 | 3486.268  | 3646.614  | AL049935  | 5414.495 | 6415.098 |
| AB032952  | 12842.546 | 11461.068 | AK025220  | 2091.348  | 2134.558  | AB033043  | 1880.475 | 4007.126 |
| NM_002522 | 2413.381  | 2509.388  | NM_016308 | 9674.437  | 8171.985  | NM_014999 | 1898.06  | 2876.74  |
| NM_000945 | 2728.763  | 2071.6    | D42046    | 2861.265  | 3592.246  | AK025220  | 918.611  | 1282.403 |
| NM_002574 | 60259.453 | 62527.703 | NM_001033 | 8003.651  | 7801.055  | NM_016308 | 4728.867 | 6727.252 |

|           |           |           |           |           |           |           |           |           |
|-----------|-----------|-----------|-----------|-----------|-----------|-----------|-----------|-----------|
| AB011174  | 2552.463  | 2708.577  | NM_004526 | 12347.318 | 13272.107 | D42046    | 1312.65   | 1035.805  |
| AB043635  | 724.258   | 623.544   | NM_002526 | 6029.716  | 8152.889  | NM_001033 | 3614.313  | 10459.65  |
| AB040879  | 1184.508  | 942.066   | NM_020135 | 3717.336  | 5561.388  | NM_004526 | 5934.046  | 12371.002 |
| AL049935  | 16321.354 | 10752.52  | NM_018518 | 2865.355  | 4831.794  | NM_002526 | 1232.021  | 1543.771  |
| AB033043  | 5760.43   | 6253.104  | AK023149  | 1436.419  | 2829.265  | NM_020135 | 1800.45   | 2469.482  |
| NM_014998 | 6649.431  | 6263.084  | NM_006438 | 848.304   | 602.917   | NM_018518 | 1294.738  | 3812.299  |
| AK025220  | 3005.642  | 2797.865  | AK024697  | 1640.908  | 1755.027  | AK023149  | 748.466   | 3331.504  |
| NM_016308 | 14190.353 | 17214.295 | NM_006460 | 1848.963  | 1232.415  | AK023168  | 1101.984  | 2667.343  |
| D42046    | 4206.623  | 4542.766  | L34156    | 458.608   | 354.654   | NM_006646 | 387.063   | 645.099   |
| NM_001033 | 13103.159 | 17814.076 | NM_003749 | 1106.743  | 825.85    | NM_004742 | 259.158   | 277.277   |
| NM_002526 | 3052.761  | 3696.483  | NM_003557 | 3913.949  | 3668.397  | NM_014753 | 684.074   | 481.9     |
| NM_020135 | 6290.473  | 6038.75   | NM_001257 | 11120.202 | 8333.858  | NM_006795 | 2227.203  | 760.793   |
| NM_018518 | 4410.905  | 4177.033  | D85245    | 4784.198  | 4829.522  | AF070568  | 643.469   | 456.626   |
| AK023149  | 2452.367  | 2980.575  | NM_000943 | 685.292   | 670.129   | NM_000277 | 171.819   | 46.301    |
| AK023168  | 2920.877  | 2950.33   | NM_004658 | 2736.531  | 2616.226  | NM_000240 | 596.262   | 526.501   |
| NM_006646 | 1562.174  | 1237.861  | NM_001250 | 3407.997  | 3262.586  | AK055733  | 2228.243  | 1949.773  |
| NM_004742 | 1081.316  | 740.383   | AF298812  | 954.526   | 892.782   | AF298880  | 1258.971  | 973.857   |
| NM_014753 | 3270.403  | 2539.125  | NM_004969 | 1297.464  | 1354.042  | AK025395  | 289.75    | 451.156   |
| NM_006585 | 37201.094 | 29809.734 | AJ249900  | 518.423   | 391.228   | NM_000388 | 323.729   | 333.025   |
| NM_014331 | 5056.648  | 5065.453  | AK022581  | 3464.26   | 4089.491  | X58377    | 316.193   | 328.822   |
| NM_005270 | 806.567   | 593.958   | NM_018054 | 1285.331  | 1768.344  | NM_002465 | 330.657   | 496.999   |
| NM_014815 | 2714.843  | 2214.687  | NM_006186 | 801.335   | 914.39    | AI673575  | 315.467   | 207.412   |
| NM_005443 | 3177.196  | 3769.731  | NM_000958 | 4261.83   | 5353.532  | AA947915  | 146.383   | 212.742   |
| NM_007221 | 6482.587  | 5700.299  | NM_001401 | 719.307   | 1131.738  | X68314    | 299.537   | 834.65    |
| X54163    | 20131.596 | 18549.514 | NM_013271 | 6285.561  | 7818.21   | X71973    | 6425.641  | 13477.663 |
| AK025395  | 873.515   | 599.824   | NM_004157 | 1135.91   | 1341.882  | T49651    | 3991.158  | 5051.142  |
| NM_000388 | 697.988   | 714.279   | NM_000684 | 693.985   | 1229.299  | N51014    | 424.018   | 863.124   |
| X58377    | 399.732   | 265.992   | NM_015913 | 9619.409  | 7004.3    | BE392471  | 4521.46   | 16349.484 |
| NM_002465 | 519.31    | 409.732   | NM_005157 | 4201.04   | 3459.284  | AI802950  | 269.619   | 796.001   |
| BI830936  | 540.271   | 494.644   | NM_007354 | 482.496   | 325.89    | AI741278  | 139.31    | 211.982   |
| U79292    | 1492.836  | 1413.968  | U67037    | 793.629   | 857.701   | AA682423  | 211.954   | 63.225    |
| AA947915  | 317.476   | 1278.251  | NM_004960 | 7988.531  | 5334.926  | AL043686  | 1181.333  | 688.147   |
| BI830753  | 494.282   | 449.788   | AF272370  | 6504.318  | 6148.75   | AA775212  | 949.721   | 294.165   |
| T49651    | 15170.467 | 14979.395 | AF130050  | 3016.087  | 2108.817  | NM_000945 | 467.424   | 229.019   |
| N51014    | 1517.091  | 1229.664  | AF119898  | 337.108   | 335.033   | NM_002574 | 25098.148 | 10071.514 |
| BE392471  | 14912.78  | 11831.493 | AK023045  | 564.392   | 365.567   | AB011174  | 385.815   | 371.42    |
| AI802950  | 1025.697  | 876.663   | NM_012197 | 6307.22   | 5009.64   | NM_000607 | 3101.344  | 2287.102  |
| AL043686  | 5607.837  | 3846.742  | AK024016  | 3667.622  | 3287.457  | AF090409  | 179.578   | 204.744   |
| AA490172  | 393.568   | 328.045   | NM_003581 | 2950.706  | 3080.266  | NM_002575 | 578.894   | 288.365   |
| AA775212  | 4688.103  | 4014.114  | NM_002888 | 316.832   | 134.635   | AK023114  | 1148.839  | 2046.703  |
| NM_000723 | 1548.261  | 787.109   | NM_012407 | 1067.56   | 1229.869  | NM_003678 | 1288.972  | 5021.348  |
| AL096751  | 4436.341  | 3487.55   | AF302505  | 1032.959  | 1329.239  | NM_005631 | 386.036   | 356.515   |
| NM_000364 | 882.54    | 1153.449  | NM_007186 | 2146.904  | 1950.492  | NM_014419 | 624.586   | 1513.992  |
| AF026920  | 2903.296  | 3356.939  | NM_007044 | 2463.792  | 2648.145  | NM_014938 | 754.544   | 838.798   |
| NM_004931 | 2950.877  | 3018.362  | AF294326  | 4886.701  | 4472.043  | AF049460  | 174.247   | 213.07    |
| NM_000607 | 12231.401 | 9831.695  | NM_014678 | 1607.327  | 2213.093  | NM_005244 | 319.64    | 280.487   |
| NM_002575 | 2093.51   | 1675.442  | NM_012317 | 51444.516 | 63712.168 | NM_005270 | 174.665   | 397.532   |
| NM_004244 | 3317.131  | 3706.123  | NM_017853 | 3340.143  | 3756.484  | NM_014815 | 356.163   | 342.643   |
| NM_003371 | 3088.075  | 3258.686  | NM_016097 | 7476.771  | 8424.272  | NM_005443 | 433.993   | 563       |
| AK023114  | 4728.764  | 6048.037  | AB035301  | 429.549   | 411.728   | NM_007221 | 1783.671  | 2699.255  |
| NM_003678 | 4200.242  | 7126.871  | AB046800  | 2837.195  | 4308.999  | X54163    | 3791.838  | 3965.193  |
| NM_005631 | 1882.104  | 1836.495  | NM_002162 | 6328.001  | 10971.697 | NM_002978 | 306.376   | 191.482   |
| NM_014419 | 1293.687  | 1044.359  | NM_015458 | 1230.707  | 963.232   | NM_014425 | 363.234   | 1886.04   |

|           |           |           |           |           |           |           |           |           |
|-----------|-----------|-----------|-----------|-----------|-----------|-----------|-----------|-----------|
| NM_01493E | 2694.901  | 2299.048  | D13540    | 5299.553  | 3385.681  | NM_01213E | 1127.41   | 4148.479  |
| AF049460  | 439.881   | 656.434   | NM_01657C | 7627.541  | 4418.168  | NM_017954 | 243.556   | 534.159   |
| AK026066  | 1327.591  | 1514.846  | AF209198  | 1872.785  | 1786.791  | NM_00661E | 286.652   | 458.311   |
| NM_005244 | 1149.327  | 1133.392  | M69012    | 29868.287 | 21719.977 | NM_016451 | 488.083   | 694.228   |
| NM_01815E | 3036.124  | 1953.13   | NM_00693E | 11310.992 | 10570.839 | NM_007351 | 4664.832  | 2894.59   |
| NM_016301 | 7392.301  | 7775.628  | NM_001327 | 10878.76  | 7937.234  | NM_00317E | 572.37    | 246.954   |
| NM_00297E | 979.342   | 939.301   | NM_00365E | 349.085   | 253.44    | NM_00072E | 323.629   | 147.842   |
| NM_01466E | 660.05    | 1065.928  | NM_00006E | 1028.695  | 881.051   | AL096751  | 1020.004  | 1262.114  |
| NM_00472E | 2337.818  | 2625.577  | NM_01838E | 1045.631  | 1469.486  | NM_000364 | 186.953   | 243.016   |
| NM_01442E | 1112.8    | 1076.973  | AB033026  | 655.204   | 584.216   | AF026920  | 520.966   | 864.398   |
| NM_01213E | 3928.125  | 4819.271  | AF104914  | 9403.661  | 16967.664 | NM_004931 | 657.014   | 535.882   |
| NM_017954 | 1135.197  | 1545.506  | NM_01471E | 6874.136  | 9190.416  | NM_00679E | 2573.504  | 2289.097  |
| NM_00661E | 1134.147  | 1324.222  | AK023845  | 1305.006  | 1303.105  | AF070568  | 741.118   | 591.007   |
| NM_016451 | 2445.993  | 2619.606  | NM_00263E | 4166.016  | 5209.767  | NM_000277 | 149.525   | 239.65    |
| NM_007351 | 19417.863 | 19666.32  | NM_016487 | 1169.583  | 1799.739  | NM_00024C | 759.981   | 572.737   |
| AK026266  | 9375.354  | 8338.72   | NM_00580E | 8258.044  | 12645.44  | AK055733  | 3073.753  | 1900.149  |
| NM_007124 | 4199.056  | 4041.529  | NM_006401 | 23149.215 | 34925.387 | AF298880  | 1772.005  | 891.88    |
| NM_00317E | 2893.722  | 3156.946  | AF269249  | 745.163   | 723.516   | AK001500  | 282.073   | 218.316   |
| AK023168  | 3242.385  | 1956.432  | X51417    | 319.972   | 265.28    | NM_006774 | 188.132   | 160.709   |
| NM_00664E | 1777.233  | 665.821   | D31763    | 2659.788  | 1637.003  | NM_02012E | 404.808   | 3019.216  |
| NM_014331 | 5743.902  | 8295.313  | NM_01816E | 7112.646  | 3183.051  | Y16521    | 1141.226  | 3693.088  |
| NM_00679E | 10045.183 | 13870.608 | AK021452  | 773.635   | 1451.541  | AL050371  | 1366.035  | 3091.76   |
| AF070568  | 2976.683  | 3519.763  | NM_00450E | 2228.784  | 1545.598  | NM_002651 | 827.761   | 1139.871  |
| NM_00024C | 2731.597  | 3017.129  | S74529    | 26818.664 | 18206.576 | NM_00241E | 624.979   | 615.666   |
| AK055733  | 11971.866 | 14144.852 | NM_00593E | 564.651   | 414.816   | NM_001757 | 152.479   | 311.755   |
| AF298880  | 5390.696  | 5567.914  | NM_00559E | 171.634   | 161.715   | NM_001647 | 368.742   | 304.054   |
| AK001500  | 1187.203  | 1365.925  | NM_001421 | 335.383   | 348.622   | NM_01815E | 549.94    | 541.925   |
| NM_006774 | 491.435   | 410.458   | M73837    | 1218.097  | 1884.013  | NM_016301 | 1455.319  | 1508.898  |
| NM_02012E | 1241.404  | 2583.99   | U69127    | 11975.085 | 13137.403 | AK021975  | 252.481   | 185.094   |
| Y16521    | 3056.597  | 3427.915  | NM_00583E | 7325.978  | 5896.208  | AB032952  | 3045.322  | 2220.416  |
| AL050371  | 4013.215  | 3795.2    | AK023379  | 3297.977  | 3076.525  | NM_00252E | 2225.051  | 1913.788  |
| NM_002651 | 3132.469  | 3113.664  | NM_00607E | 931.271   | 1074.832  | NM_00094E | 568.421   | 459.317   |
| NM_00241E | 2043.76   | 1599.796  | AK021904  | 3978.652  | 4566.739  | NM_002574 | 28204.148 | 16454.713 |
| NM_017577 | 874.878   | 792.08    | -         | 690.09    | 839.274   | AB011174  | 542.898   | 482.047   |
| NM_001647 | 1075.564  | 1114.796  | NM_01829E | 463.091   | 532.039   | AB043635  | 205.987   | 119.439   |
| NM_00622E | 542.751   | 354.236   | AL049705  | 4917.989  | 9096.751  | AB040879  | 365.62    | 255.433   |
| NM_00376E | 6397.912  | 4070.406  | AK022294  | 1905.223  | 1533.039  | AB033043  | 2351.039  | 10518.016 |
| NM_00509E | 8799.429  | 15047.134 | AF086507  | 829.359   | 722.987   | NM_01499E | 2089.49   | 4544.015  |
| NM_00676C | 1466.742  | 2448.12   | U79289    | 1131.66   | 715.376   | AK025220  | 1018.949  | 2455.31   |
| NM_01228E | 5920.73   | 7672.181  | NM_01402E | 4319.129  | 2552.527  | NM_01630E | 5921.963  | 26223.561 |
| AB037775  | 1742.881  | 1800.084  | NM_00040E | 1237.44   | 587.311   | D42046    | 1642.233  | 5521.049  |
| L27560    | 1149.53   | 1158.535  | NM_00427E | 231.562   | 261.906   | NM_00103E | 3941.907  | 11912.028 |
| AB011174  | 2104.39   | 2855.492  | NM_00069C | 1316.328  | 1103.883  | NM_00452E | 6405.109  | 17052.307 |
| AB043635  | 830.57    | 732.613   | NM_00015E | 6222.479  | 4421.905  | NM_00252E | 1597.774  | 1693.032  |
| AB040879  | 1049.705  | 1205.147  | AK024489  | 764.016   | 494.322   | NM_01851E | 914.937   | 489.71    |
| AL049935  | 17354.088 | 12925.248 | NM_000181 | 2865.6    | 2376.787  | AK023149  | 543.926   | 438.269   |
| AB033043  | 6868.181  | 7317.198  | NM_000667 | 265.084   | 139.346   | AK023168  | 836.018   | 921.432   |
| NM_01499E | 7640.52   | 6852.33   | NM_014121 | 685.224   | 584.313   | NM_00664E | 344.163   | 305.526   |
| AK025220  | 3890.011  | 3844.974  | NM_00673C | 748.569   | 640.939   | NM_00474E | 283.085   | 157.789   |
| NM_01630E | 14553.126 | 21361.182 | NM_005644 | 4550.95   | 4052.621  | NM_01475E | 607.065   | 518.086   |
| D42046    | 4388.502  | 5058.766  | NM_01844E | 2252.129  | 2521.145  | NM_00658E | 8727.152  | 8169.19   |
| NM_00103E | 13389.157 | 13535.059 | AF182416  | 4225.36   | 4344.792  | NM_014331 | 763.656   | 989.099   |
| NM_00452E | 20204.35  | 22836.566 | NM_00599E | 11533.926 | 11645.648 | NM_00527C | 213.295   | 299.661   |

|           |           |           |           |           |           |           |           |          |
|-----------|-----------|-----------|-----------|-----------|-----------|-----------|-----------|----------|
| NM_00252E | 2483.496  | 2336.339  | NM_00601E | 805.324   | 1161.724  | NM_01481E | 494.7     | 395.815  |
| NM_02013E | 7386.267  | 6223.911  | NM_00463A | 1942.794  | 2354.353  | NM_00544E | 654.461   | 607.082  |
| NM_01851E | 4771.839  | 4841.965  | NM_002017 | 3662.354  | 4921.198  | NM_007221 | 2112.914  | 1604.846 |
| AK023149  | 2296.436  | 2387.192  | NM_01752E | 5642.56   | 6011.396  | X54163    | 5266.579  | 2971.461 |
| NM_00643E | 646.234   | 537.153   | NM_00238E | 18353.984 | 26528.791 | AK02539E  | 362.309   | 31.61    |
| AK024697  | 4180.546  | 4159.216  | NM_00215E | 428.65    | 646.759   | NM_00038E | 238.526   | 154.829  |
| NM_00646C | 4169.712  | 4493.215  | U13223    | 7367.954  | 9840.516  | AI67357E  | 304.08    | 18.154   |
| L34156    | 777.878   | 1251.481  | NM_01627C | 1457.92   | 2425.324  | BI830936  | 257.741   | 1286.386 |
| NM_00374E | 2615.343  | 5948.762  | AK001357  | 396.364   | 327.949   | U79292    | 958.944   | 4855.458 |
| NM_003557 | 5814.181  | 6946.373  | NM_015721 | 2616.224  | 1985.35   | AA94791E  | 233.005   | 899.885  |
| NM_001257 | 10050.422 | 10093.454 | AF086298  | 1013.364  | 708.334   | BI830753  | 188.377   | 141.92   |
| NM_00179E | 544.225   | 379.34    | AK027238  | 825.627   | 678.688   | X68314    | 381.037   | 558.689  |
| D85245    | 5768.455  | 6201.639  | AK000032  | 371.125   | 383.726   | T49651    | 3439.854  | 1251.599 |
| NM_00094E | 1137.987  | 2100.728  | S94540    | 22719.088 | 18740.861 | N51014    | 284.64    | 275.261  |
| NM_00465E | 3408.058  | 4784.769  | U79297    | 675.897   | 950.27    | BE392471  | 3300.882  | 1496.506 |
| NM_00125C | 2969.837  | 3050.304  | AK002164  | 718.846   | 956.536   | AI802950  | 266.227   | 220.606  |
| NM_00496E | 2786.003  | 3234.87   | AF052122  | 6436.631  | 7388.648  | AI741278  | 175.012   | 74.424   |
| AJ249900  | 1369.271  | 964.692   | NM_00131C | 1513.912  | 1988.133  | AL043686  | 1204.813  | 1272.094 |
| AK022581  | 7084.269  | 8464.522  | AK026924  | 2852.728  | 3056.65   | AA490172  | 204.145   | 203.198  |
| NM_00095E | 8313.618  | 7971.515  | AL122047  | 4265.839  | 5205.117  | AA775212  | 806.3     | 783.052  |
| NM_001401 | 1353.944  | 1293.941  | AF052091  | 1931.806  | 1999.492  | NM_00072E | 346.606   | 306.139  |
| NM_013271 | 2119.817  | 1941.84   | AK024447  | 51527.352 | 55356.137 | AL096751  | 1121.955  | 858.386  |
| NM_004157 | 1922.233  | 2082.515  | AF052145  | 751.707   | 1170.729  | NM_000364 | 235.802   | 199.604  |
| NM_000684 | 908.086   | 858.814   | AF086458  | 2916.569  | 4002.59   | AF026920  | 666.505   | 497.844  |
| NM_01591E | 12785.239 | 8749.211  | AF086548  | 2838.224  | 3771.949  | NM_004931 | 1078.361  | 658.874  |
| NM_005157 | 7560.225  | 4228.398  | AK024350  | 317.596   | 852.867   | NM_000607 | 3789.734  | 1482.12  |
| NM_007354 | 545.613   | 332.045   | AK023717  | 932.887   | 2383.093  | NM_00068C | 19.916    | 165.851  |
| U67037    | 1210.995  | 681.933   | AK023727  | 1007.384  | 741.582   | NM_005631 | 411.23    | 249.939  |
| NM_00496C | 16831.338 | 16701.135 | AK025271  | 511.859   | 568.794   | NM_01441E | 492.941   | 401.796  |
| AF272370  | 9230.041  | 11531.888 | AF086204  | 3080.334  | 2172.021  | NM_01493E | 645.329   | 652.165  |
| AF130050  | 5297.181  | 7695.595  | NM_007021 | 645.646   | 447.737   | AF049460  | 200.468   | 87.228   |
| AF119898  | 478.82    | 745.166   | AK026283  | 185.905   | 320.641   | AK026066  | 258.795   | 505.294  |
| AK023045  | 674.305   | 657.221   | AK022076  | 366.454   | 353.146   | NM_005244 | 389.66    | 410.59   |
| NM_012197 | 9531.968  | 12803.481 | NM_01767E | 333.678   | 306.189   | NM_01815E | 752.715   | 852.253  |
| AK024016  | 6306.326  | 7692.437  | AK021570  | 1167.62   | 1028.604  | NM_016301 | 1747.49   | 2121.963 |
| NM_003581 | 4722.864  | 4997.232  | AL360204  | 840.952   | 395.35    | AK021975  | 245.424   | 195.426  |
| NM_012407 | 1663.533  | 2152.873  | AK000103  | 1901.681  | 1649.232  | AB032952  | 4539.271  | 3106.553 |
| AF302505  | 2217.126  | 2417.604  | AF085959  | 651.248   | 548.115   | NM_00252E | 3094.932  | 2284.634 |
| NM_00718E | 3113.801  | 3380.48   | AK023104  | 599.118   | 927.417   | NM_018607 | 117.306   | 131.249  |
| NM_007044 | 5676.512  | 7532.275  | AK022181  | 320.181   | 285.257   | NM_01213E | 730.066   | 442.565  |
| AF294326  | 8135.466  | 12133.834 | AK026923  | 2550.51   | 2788.571  | NM_017954 | 415.802   | 668.692  |
| NM_01785E | 6788.863  | 5983.716  | AK021691  | 13244.523 | 15385.577 | NM_00661E | 296.633   | 158.256  |
| NM_016097 | 13555.934 | 13478.823 | AK02359E  | 760.623   | 1360.294  | NM_016451 | 488.858   | 579.361  |
| AB035301  | 585.989   | 879.212   | AK022037  | 185.922   | 304.039   | NM_007351 | 4558.199  | 3401.645 |
| AB046800  | 1880.412  | 1609.881  | AK000141  | 4775.779  | 3616.097  | AK026266  | 2004.213  | 1357.763 |
| NM_00216E | 12655.709 | 13241.573 | AL137758  | 1768.584  | 1154.843  | NM_007124 | 780.333   | 754.548  |
| NM_01545E | 1721.856  | 966.783   | AK025786  | 866.984   | 756.899   | NM_00317E | 584.531   | 663.4    |
| D13540    | 7559.075  | 5537.562  | AK024188  | 1330.03   | 989.365   | AK023168  | 965.534   | 1034.276 |
| NM_01657C | 12255.712 | 10123.67  | AK024379  | 524.204   | 374.29    | NM_00664E | 442.982   | 460.327  |
| AF209198  | 4653.461  | 3674.822  | AK026820  | 487.951   | 540.815   | NM_00474E | 383.353   | 343.451  |
| M69012    | 27412.65  | 25901.766 | AK001716  | 3454.902  | 2569.394  | NM_01475E | 733.141   | 466.209  |
| NM_00693E | 25490.484 | 20816.158 | AF113683  | 343.51    | 313.552   | NM_00658E | 11404.595 | 7380.573 |
| NM_001327 | 17298.678 | 18912.693 | NM_01409E | 382.767   | 163.223   | NM_014331 | 1308.561  | 778.367  |

|           |           |           |           |           |           |           |          |          |
|-----------|-----------|-----------|-----------|-----------|-----------|-----------|----------|----------|
| AB037722  | 483.774   | 762.017   | AK026821  | 1226.164  | 1036.372  | NM_00679E | 2977.01  | 1779.012 |
| NM_000063 | 464.648   | 893.016   | AK026280  | 1938.941  | 2110.726  | AF070568  | 910.535  | 553.778  |
| NM_01838E | 2710.372  | 4575.951  | AF113017  | 5264.403  | 7914.893  | NM_000277 | 200.595  | 80.679   |
| AB033026  | 1451.428  | 1990.786  | AL080232  | 7348.878  | 7052.886  | NM_00024C | 1060.979 | 698.693  |
| NM_01471E | 13056.668 | 17877.953 | AK001120  | 7065.872  | 7641.371  | NM_02012E | 349.16   | 437.602  |
| AK023845  | 1758.899  | 2024.743  | AF264629  | 277.601   | 339.226   | Y16521    | 727.613  | 419.799  |
| NM_00263E | 3225.532  | 3265.399  | AK022416  | 712.716   | 900.622   | AL050371  | 1063.934 | 1387.31  |
| NM_016487 | 1477.985  | 1737.785  | AK023224  | 2776.34   | 3144.614  | NM_002651 | 637.11   | 323.757  |
| NM_00580E | 13263.989 | 11952.854 | AK023731  | 1278.446  | 2008.322  | NM_002413 | 566.453  | 444.761  |
| NM_006401 | 41928.242 | 41647.082 | AK022442  | 591.375   | 802.424   | NM_017577 | 199.229  | 114.508  |
| AF269249  | 1459.501  | 537.481   | AK023336  | 750.392   | 1000.981  | NM_001647 | 391.236  | 402.599  |
| X51417    | 534.411   | 345.183   | AK023771  | 362.578   | 533.328   | NM_00622E | 216.165  | 218.963  |
| D31763    | 4158.146  | 2640.729  | AK026873  | 3363.406  | 2851.794  | NM_00376E | 1851.328 | 1268.432 |
| NM_01816E | 8436.265  | 12660.92  | AK026394  | 3847.928  | 2951.677  | NM_018393 | 477.254  | 579.853  |
| AK021452  | 4149.499  | 1862.957  | NM_00544E | 814.418   | 724.283   | BF032535  | 684.561  | 631.483  |
| NM_00450E | 4255.651  | 4153.761  | AK025943  | 17883.014 | 10263.368 | NM_018332 | 913.525  | 724.533  |
| S74529    | 37140.93  | 30350.41  | BG106479  | 697.849   | 674.16    | NM_00509E | 1989.575 | 1662.242 |
| NM_005933 | 744.143   | 926.039   | AF130069  | 9300.425  | 6807.106  | NM_00676C | 372.525  | 256.143  |
| NM_00559E | 403.531   | 444.506   | AL109669  | 2336.489  | 1834.42   | NM_01228E | 1349.552 | 740.876  |
| NM_001421 | 588.205   | 657.935   | AB037766  | 1345.029  | 684.02    | AB037775  | 498.627  | 167.796  |
| M73837    | 4943.063  | 2730.737  | AK026995  | 587.427   | 279.324   | L27560    | 280.832  | 216.378  |
| NM_00422E | 366.904   | 282.992   | AL133091  | 825.298   | 942.51    | AB011174  | 553.25   | 464.67   |
| NM_00583E | 13595.608 | 12709.778 | BF842915  | 627.806   | 562.339   | AL049935  | 4204.63  | 1562.85  |
| NM_00607E | 1515.505  | 1494.261  | AF086212  | 291.795   | 246.09    | AB033043  | 1744.375 | 1242.022 |
| AK021904  | 9183.973  | 7803.483  | X82545    | 4091.464  | 4505.508  | NM_01499E | 1481.667 | 772.342  |
| -         | 1217.625  | 1324.294  | AK024632  | 6317.232  | 8295.739  | AK025220  | 613.022  | 352.042  |
| NM_018292 | 778.691   | 466.599   | NM_018474 | 4476.868  | 5058.903  | NM_01630E | 3452.053 | 3597.747 |
| AL049705  | 11157.844 | 11744.368 | AK024937  | 1233.828  | 1616.508  | D42046    | 1089.027 | 894.8    |
| AK022294  | 1925.636  | 973.056   | D17178    | 889.345   | 1047.942  | NM_001033 | 2696.544 | 2774.08  |
| AF086507  | 1152.502  | 855.935   | AK022094  | 2872.183  | 3362.125  | NM_00452E | 4897.212 | 4735.565 |
| U79289    | 1196.637  | 705.098   | AK026695  | 697.235   | 1193.23   | NM_00252E | 1479.224 | 1149.548 |
| NM_01402E | 5310.944  | 5919.251  | AK022220  | 373.093   | 598.184   | NM_02013E | 1443.174 | 1390.2   |
| NM_000402 | 2146.219  | 2084.506  | U84520    | 2555.085  | 2207.466  | NM_01851E | 976.731  | 1006.905 |
| NM_004273 | 379.027   | 555.516   | Z11853    | 405.948   | 314.519   | AK023149  | 434.594  | 547.278  |
| NM_00069C | 1853.243  | 1961.67   | AL133616  | 4010.027  | 4002.719  | NM_00643E | 380.493  | 278.631  |
| NM_00015E | 9043.577  | 8468.671  | AK026382  | 1743.954  | 1537.092  | AK024697  | 1077.281 | 699.796  |
| AK024489  | 1161.15   | 1348.359  | AK091169  | 2410.725  | 2090.689  | NM_00646C | 845.42   | 623.119  |
| NM_000181 | 4466.306  | 4928.317  | NM_014745 | 36083.711 | 29565.258 | L34156    | 210.669  | 266.477  |
| NM_014121 | 1242.766  | 1382.922  | AF086026  | 8404.042  | 6835.678  | NM_00374E | 447.987  | 426.896  |
| NM_00673C | 1171.035  | 1856.126  | AL133011  | 858.544   | 644.901   | NM_003557 | 1814.443 | 841.845  |
| NM_005644 | 8352.155  | 10434.905 | NM_01630C | 1125.153  | 1446.845  | NM_001257 | 3649.976 | 1983.252 |
| NM_018442 | 3843.923  | 3572.624  | NM_015607 | 15772.365 | 12475.287 | NM_00179E | 169.925  | 454.395  |
| AF182416  | 8012.138  | 8183.9    | AK026955  | 1383.741  | 1182.312  | D85245    | 1447.092 | 501.062  |
| NM_00599E | 20746.389 | 16174.919 | AL110202  | 19142.098 | 17357.939 | NM_000943 | 313.921  | 135.721  |
| NM_00601E | 1936.711  | 1785.101  | AK021980  | 867.82    | 743.601   | NM_00465E | 973.189  | 652.878  |
| NM_002017 | 8139.367  | 7405.294  | S46402    | 1068.502  | 959.843   | NM_00125C | 947.996  | 541.296  |
| NM_017523 | 10306.772 | 9208.504  | Z83940    | 837.72    | 1163.039  | AF298812  | 263.415  | 169.334  |
| NM_002382 | 11750.941 | 10337.74  | NM_00580C | 1596.509  | 2515.35   | NM_00496E | 487.246  | 368.266  |
| NM_00215E | 625.709   | 551.079   | AF019617  | 7640.422  | 9774.613  | AK022581  | 1529.119 | 927.612  |
| U13223    | 9464.353  | 9543.285  | AL137305  | 4292.565  | 4886.458  | NM_018054 | 474.449  | 310.237  |
| NM_01627C | 1790.337  | 1780.541  | NM_00529C | 558.751   | 683.544   | NM_00095E | 1543.115 | 1307.076 |
| AK001357  | 939.237   | 502.157   | AK025802  | 522.343   | 672.86    | NM_001401 | 289.814  | 327.898  |
| NM_015721 | 3047.183  | 1956.565  | AF085973  | 428.093   | 742.21    | NM_013271 | 1230.184 | 997.951  |

|           |           |           |             |           |           |           |           |           |
|-----------|-----------|-----------|-------------|-----------|-----------|-----------|-----------|-----------|
| AF086298  | 1169.465  | 772.908   | NM_018013   | 3286.923  | 5613.967  | NM_004157 | 342.413   | 332.658   |
| AK027238  | 1259.692  | 1110.49   | AK022517    | 1540.401  | 1215.543  | NM_000684 | 314.231   | 201.026   |
| AK000032  | 633.909   | 637.519   | NM_000329   | 15236.955 | 12989.652 | NM_015913 | 3625.64   | 3968.261  |
| AK025758  | 467.229   | 559.623   | NM_001182   | 5290.537  | 4902.571  | NM_005157 | 2197.702  | 1558.854  |
| S94540    | 7571.938  | 7230.581  | NM_000333   | 1844.3    | 1603.253  | NM_007354 | 208.731   | 258.741   |
| U79297    | 1912.943  | 2239.878  | NM_000172   | 4693.407  | 3008.509  | U67037    | 326.314   | 238.789   |
| AK002164  | 1330.085  | 1460.194  | NM_002297   | 4394.601  | 3087.958  | NM_004960 | 3523.49   | 3075.25   |
| AF052122  | 6610.848  | 6052.641  | AB040968    | 10310.488 | 8191.862  | AF272370  | 2930.14   | 2457.614  |
| NM_001310 | 3532.248  | 4091.473  | X85323      | 1015.376  | 623.579   | AF130050  | 1334.963  | 968.864   |
| AK026924  | 1689.083  | 1337.774  | U17615      | 1621.726  | 1512.561  | AK023045  | 238.25    | 174.228   |
| AL122047  | 6866.576  | 8088.312  | NM_005303   | 1723.692  | 1840.547  | NM_012197 | 2798.535  | 1412.042  |
| AF052091  | 962.113   | 842.307   | NM_016126   | 7706.504  | 7104.048  | AK024016  | 1589.04   | 720.868   |
| AK024447  | 59698.395 | 55533.711 | U84119      | 1332.516  | 1243.345  | NM_003581 | 1282.183  | 696.902   |
| AF052145  | 467.424   | 475.409   | NM_003608   | 2823.128  | 2897.521  | NM_002888 | 158.368   | 110.783   |
| AF086458  | 5554.365  | 3990.84   | AF302079    | 8955.374  | 9400.167  | NM_012407 | 419.118   | 225.221   |
| AF086548  | 2330.999  | 2197.371  | NM_002550   | 520.389   | 796.636   | AF302505  | 448.826   | 239.539   |
| AK024350  | 1072.291  | 877.54    | NM_000692   | 732.208   | 966.421   | NM_007188 | 598.929   | 348.219   |
| AK023717  | 1756.539  | 1198.286  | AF086062    | 887.604   | 1178.98   | NM_007044 | 798.818   | 756.043   |
| AK023727  | 1508.628  | 840.303   | L47668      | 22438.482 | 26120.303 | AF294326  | 1486.865  | 1505.611  |
| AK025271  | 728.013   | 312.339   | NM_017920   | 4551.438  | 6346.491  | NM_014678 | 467.081   | 251.551   |
| AF086204  | 3217.919  | 1947.365  | AK025345    | 570.864   | 761.412   | NM_012317 | 22298.445 | 11911.293 |
| NM_007021 | 790.818   | 521.584   | D25274      | 5343.587  | 6126.586  | NM_017853 | 894.744   | 843.628   |
| AK026283  | 641.918   | 672.769   | CY3Cy5      | 1710.367  | 85.054    | NM_016097 | 3012.717  | 3132.659  |
| AK022076  | 443.777   | 562.088   | AA488757    | 4210.885  | 6015.026  | AB035301  | 181.417   | 145.653   |
| AK023065  | 465.1     | 642.208   | H07071      | 739.983   | 802.987   | AB046800  | 712.364   | 578.36    |
| NM_017678 | 1189.237  | 1399.078  | M25322      | 6301.114  | 2281.777  | NM_002162 | 2767.766  | 2790.699  |
| AK021570  | 1680.492  | 1683.852  | H-L 27586 I | 2623.729  | 2865.721  | NM_015458 | 489.79    | 547.472   |
| AL360204  | 887.411   | 1129.158  | ID 214180   | 614.063   | 519.599   | D13540    | 2271.677  | 1957.104  |
| AK000103  | 2100.624  | 2448.848  | ID 1867426  | 3098.323  | 2586.671  | NM_016570 | 3366.877  | 2994.625  |
| AF085959  | 984.14    | 1304.516  | W99328      | 735.221   | 629.918   | AF209198  | 931.423   | 548.459   |
| AF075107  | 702.294   | 1006.68   | AI434176    | 495.567   | 662.084   | L09247    | 193.283   | 144.123   |
| AK023104  | 1205.686  | 2432.608  | H08563      | 557.306   | 664.317   | M69012    | 13303.859 | 8689.982  |
| NM_000541 | 839.62    | 1091.489  | BE735403    | 693.74    | 714.081   | NM_016347 | 140.257   | 173.43    |
| AK026923  | 1579.671  | 1958.878  | NM_022552   | 4499.367  | 3276.635  | NM_006938 | 6985.753  | 3611.947  |
| U84511    | 319.94    | 347.826   | SR4         | 13881.011 | 10074.16  | NM_001327 | 5366.395  | 3058.499  |
| Y11177    | 927.995   | 1280.361  | SR6         | 2323.635  | 1423.681  | AB037722  | 280.118   | 109.003   |
| U61091    | 301.331   | 573.513   | SR8         | 8155.412  | 17126.893 | NM_003652 | 196.973   | 114.304   |
| AK021691  | 25598.77  | 22365.107 | SR10        | 30675.686 | 7357.146  | NM_000063 | 287.576   | 157.491   |
| AK023595  | 758.746   | 999.184   | CY3Cy5      | 1476.168  | 97.897    | NM_018388 | 494.258   | 326.066   |
| AK000141  | 6768.382  | 4359.292  | AK025175    | 378.696   | 636.23    | AB033026  | 253.605   | 160.742   |
| AL137758  | 2389.353  | 1910.849  | NM_005811   | 3589.374  | 3251.622  | AF104914  | 6054.566  | 2363.185  |
| AK023865  | 250.961   | 430.17    | NM_005764   | 764.494   | 753.593   | NM_014718 | 2081.712  | 1400.959  |
| AK025786  | 1397.759  | 1292.353  | NM_016362   | 787.555   | 652.398   | AB002354  | 212.857   | 81.355    |
| AK024188  | 2072.057  | 3327.806  | NM_004214   | 10823.776 | 9093.964  | AK023845  | 354.876   | 498.359   |
| AK024379  | 1501.479  | 2307.359  | NM_004329   | 8447.99   | 8569.41   | NM_002638 | 1121.244  | 1046.086  |
| AK026820  | 848.663   | 1424.822  | NM_002836   | 3182.363  | 3111.787  | NM_016487 | 481.735   | 439.86    |
| AK001716  | 3424.626  | 4047.904  | NM_020167   | 939.422   | 1012.701  | NM_005808 | 3565.181  | 3182.492  |
| AF113683  | 507.17    | 697.378   | AL049963    | 19450.307 | 19075.883 | NM_006401 | 10093.089 | 10224.575 |
| NM_014095 | 651.02    | 764.726   | NM_016058   | 43885.695 | 29118.656 | AF269249  | 310.663   | 259.099   |
| AK026821  | 1324.174  | 1233.653  | NM_014005   | 997.641   | 851.559   | X51417    | 154.289   | 211.486   |
| AK026280  | 781.303   | 1014.77   | NM_004636   | 651.513   | 753.951   | D31763    | 1175.379  | 914.069   |
| AF113017  | 2483.286  | 3576.736  | NM_004896   | 3277.548  | 2300.583  | NM_018168 | 2425.133  | 3388.579  |
| AL080232  | 1608.075  | 1849.525  | NM_017688   | 1427.895  | 1197.516  | AK021452  | 955.734   | 338.8     |

|           |           |           |           |           |           |           |           |           |
|-----------|-----------|-----------|-----------|-----------|-----------|-----------|-----------|-----------|
| AK001120  | 3925.439  | 3994.333  | NM_012268 | 1534.087  | 1631.835  | NM_004506 | 902.432   | 862.687   |
| AK022416  | 1077.43   | 1206.98   | NM_012203 | 663.87    | 824.738   | S74529    | 9642.312  | 6503.666  |
| AK023224  | 2328.451  | 2071.413  | NM_004736 | 4217.996  | 3705.61   | NM_001421 | 195.289   | 109.465   |
| AK023731  | 1282.826  | 1022.535  | NM_006459 | 5052.532  | 5178.569  | M73837    | 811.575   | 285.408   |
| AK022442  | 790.88    | 1002.506  | NM_003827 | 11747.634 | 10232.857 | U69127    | 4154.802  | 2648.74   |
| AK023336  | 800.998   | 860.294   | NM_004583 | 799.834   | 640.746   | NM_005836 | 2841.729  | 1285.992  |
| AK023771  | 604.323   | 874.759   | NM_001103 | 777.709   | 781.245   | AK023379  | 1174.756  | 918.394   |
| AK024099  | 880.372   | 712.544   | NM_018399 | 895.044   | 705.494   | NM_006076 | 368.442   | 305.639   |
| AK026873  | 4895.088  | 2539.095  | AY007131  | 18321.977 | 22745.564 | AK021904  | 1560.51   | 1302.045  |
| AK026394  | 6059.584  | 2928.299  | U61735    | 3362.644  | 2979.86   | -         | 252.303   | 408.192   |
| NM_005446 | 959.002   | 879.243   | NM_001144 | 4094.375  | 5152.682  | NM_018292 | 177.4     | 255.952   |
| AK025943  | 39882.465 | 25667.311 | AK023766  | 4120.042  | 3672.826  | AL049705  | 2418.53   | 2664.721  |
| BG106479  | 1563.679  | 1308.972  | NM_001897 | 1146.547  | 1139.492  | AK022294  | 618.538   | 586.374   |
| AF130069  | 10447.033 | 11032.827 | NM_003853 | 1140.858  | 1293.038  | AF086507  | 292.019   | 285.551   |
| AL109669  | 3873.172  | 5146.995  | AB033109  | 1577.243  | 1553.35   | U79289    | 350.276   | 400.396   |
| AB037766  | 1606.855  | 1853      | NM_002053 | 14247.252 | 14313.709 | NM_014026 | 1404.016  | 1466.094  |
| AK026995  | 1064.355  | 1266.086  | NM_006889 | 1047.901  | 961.948   | NM_000402 | 535.237   | 553.082   |
| AL133091  | 968.49    | 1393.002  | NM_002436 | 1153.812  | 1069.058  | NM_004273 | 167.956   | 108.065   |
| BF842915  | 725.854   | 856.199   | NM_014589 | 2680.845  | 2785.843  | NM_000690 | 345.07    | 432.577   |
| AF086212  | 312.4     | 528.614   | NM_000759 | 1596.554  | 1471.602  | NM_000155 | 1953.809  | 1314.041  |
| X82545    | 6631.51   | 8226.718  | AK023334  | 1239.023  | 846.602   | AK024489  | 276.966   | 189.759   |
| AK024632  | 4901.643  | 4304.187  | NM_002563 | 12034.417 | 11185.492 | NM_000181 | 772.955   | 650.033   |
| NM_018474 | 5304.49   | 4955.169  | NM_002437 | 1423.62   | 1356.851  | NM_014121 | 339.523   | 255.479   |
| AK024937  | 2185.527  | 2478.586  | D79991    | 2104.197  | 2187.463  | NM_006730 | 249.023   | 257.726   |
| D17178    | 1622.055  | 1372.182  | NM_000054 | 7428.687  | 6617.07   | NM_005644 | 1701.685  | 1081.31   |
| AK022094  | 4084.028  | 3270.526  | NM_014713 | 11272.021 | 11494.14  | NM_018442 | 743.573   | 398.9     |
| AK026695  | 1089.114  | 1072.744  | NM_001812 | 2080.302  | 1444.494  | AF182416  | 1384.095  | 936.007   |
| U84520    | 2026.543  | 923.859   | NM_014785 | 641.97    | 877.462   | NM_005996 | 4244.231  | 2860.272  |
| AL133616  | 10298.17  | 5031.212  | NM_006033 | 5965.273  | 4787.473  | NM_006015 | 295.045   | 246.058   |
| AK023391  | 469.979   | 473.331   | NM_004837 | 8535.665  | 6991.053  | NM_004634 | 479.957   | 600.147   |
| AK026382  | 4099.879  | 2462.971  | NM_000370 | 1784.311  | 2030.858  | NM_002017 | 1449.47   | 1095.939  |
| AK091169  | 3354.251  | 4307.271  | NM_003123 | 36099.551 | 37563.309 | NM_017523 | 2273.566  | 2066.081  |
| NM_014745 | 32351.363 | 29282.492 | AY005822  | 1477.214  | 1429.131  | NM_002382 | 7334.499  | 3691.584  |
| AF086026  | 9839.139  | 9755.801  | NM_018129 | 23369.936 | 23424.227 | NM_002156 | 204.74    | 158.056   |
| AL133011  | 593.509   | 569.26    | AF289022  | 2725.582  | 3291.685  | U13223    | 2808.732  | 2721.017  |
| NM_016300 | 2280.861  | 3026.775  | AB002326  | 482.453   | 756.349   | NM_016270 | 520.569   | 524.413   |
| NM_015607 | 32669.582 | 35569.348 | M17252    | 648.395   | 706.983   | AK001357  | 184.705   | 128.154   |
| AK026955  | 2970.65   | 5767.325  | NM_016025 | 8611.783  | 10108.647 | NM_015721 | 696.413   | 940.488   |
| AL110202  | 30341.488 | 39869.918 | NM_013319 | 2082.135  | 2217.752  | AF086298  | 323.756   | 377.414   |
| AK021980  | 1243.073  | 1528.025  | NM_000746 | 2413.484  | 2296.384  | AK027238  | 266.801   | 258.678   |
| S46402    | 1268.399  | 1841.967  | NM_000722 | 1042.862  | 1361.482  | AK000032  | 216.907   | 215.489   |
| AF075048  | 826.345   | 497.586   | NM_006030 | 1220.535  | 1246.115  | AK025758  | 160.119   | 191.703   |
| Z83940    | 946.039   | 1125.172  | NM_020410 | 5271.553  | 5818.039  | S94540    | 5438.769  | 2741.783  |
| NM_005800 | 2805.177  | 3014.438  | AF000143  | 21172.857 | 21367.197 | U79297    | 357.57    | 227.806   |
| AF019617  | 4582.18   | 3910.717  | NM_014211 | 626.643   | 637.632   | AK002164  | 310.58    | 153.359   |
| AL137305  | 4890.65   | 6403.322  | NM_000814 | 2564.589  | 2265.062  | AF052122  | 1424.086  | 1100.753  |
| NM_005290 | 746.582   | 1539.845  | NM_000453 | 2560.004  | 2954.53   | NM_001310 | 678.746   | 588.255   |
| AK025802  | 741.151   | 718.88    | J03077    | 16692.975 | 19035.332 | AK026924  | 683.193   | 524.167   |
| AF085973  | 797.104   | 797.91    | J03048    | 7847.355  | 8028.318  | AL122047  | 1632.733  | 1550.078  |
| NM_018013 | 3309.072  | 2813.349  | AL157469  | 1015.644  | 1209.365  | AF052091  | 287.829   | 323.422   |
| AK022517  | 2593.738  | 1083.847  | NM_002866 | 3104.196  | 3503.447  | AK024447  | 20955.816 | 10811.253 |
| NM_000329 | 17296.654 | 8161.338  | AK024100  | 3056.666  | 6138.796  | AF052145  | 245.862   | 285.87    |
| NM_001182 | 3828.105  | 2158.373  | NM_005135 | 810.876   | 785.589   | AF086458  | 1432.888  | 962.611   |

|             |           |           |             |           |           |           |          |          |
|-------------|-----------|-----------|-------------|-----------|-----------|-----------|----------|----------|
| NM_000333   | 3166.966  | 2677.697  | NM_000317   | 18211.965 | 12842.845 | AF086548  | 828.897  | 778.302  |
| NM_000172   | 7138.963  | 5724.42   | NM_018376   | 5829.446  | 3966.01   | AK024350  | 180.852  | 331.635  |
| NM_002297   | 4477.768  | 4475.616  | NM_017615   | 831.371   | 634.886   | AK023717  | 547.782  | 603.344  |
| AB040968    | 10864.296 | 8875.545  | NM_017438   | 3417.861  | 3432.802  | AK023727  | 420.207  | 695.47   |
| X85323      | 1494.176  | 1334.857  | U59209      | 2299.136  | 2911.822  | AK025271  | 189.934  | 424.101  |
| U17615      | 1959.693  | 2593.118  | NM_020195   | 9843.653  | 6926.958  | AF086204  | 1040.427 | 1165.422 |
| NM_005303   | 1078.092  | 1476.39   | AK023824    | 3509.607  | 4950.263  | NM_007021 | 194.367  | 276.824  |
| NM_016126   | 17885.938 | 22141.436 | AL133069    | 4443.545  | 4898.125  | AK026283  | 185.815  | 130.652  |
| U84119      | 1682.092  | 3372.12   | AL117574    | 866.012   | 878.925   | NM_017678 | 115.587  | 318.48   |
| NM_003608   | 6630.328  | 12020.46  | AK026055    | 6478.511  | 8955.45   | AK021570  | 436.267  | 342.85   |
| AF302079    | 13451.628 | 13762.345 | AK024126    | 1041.718  | 1146.224  | AL360204  | 237.578  | 249.269  |
| AJ224167    | 385.478   | 555.86    | NM_001516   | 3931.127  | 3944.183  | AK000103  | 451.197  | 365.894  |
| NM_000692   | 1462.981  | 1246.721  | NM_002744   | 4126.463  | 3996.124  | AF085959  | 282.479  | 203.645  |
| AF086062    | 1364.957  | 1728.184  | NM_015917   | 13157.376 | 12346.681 | AF075107  | 189.305  | 72.096   |
| L47668      | 21986.57  | 15586.813 | NM_020397   | 838.229   | 1163.272  | AK023104  | 231.804  | 149.103  |
| NM_017920   | 3456.739  | 3145.617  | NM_000061   | 1172.929  | 837.83    | AK022181  | 233.188  | 52.698   |
| AK025345    | 1185.226  | 1022.888  | AB046859    | 8385.817  | 8225.024  | AK026923  | 454.985  | 498.385  |
| D25274      | 10043.473 | 9886.193  | NM_005109   | 9964.057  | 10714.712 | AK021691  | 7365.157 | 6739.563 |
| CY3Cy5      | 1715.035  | 171.644   | AK023573    | 2180.481  | 2469.533  | AK023595  | 259.129  | 185.602  |
| D50373      | 727.544   | 662.655   | NM_002730   | 7039.71   | 6819.998  | AK022037  | 167.834  | 136.334  |
| AA488757    | 1502.5    | 1322.681  | NM_004828   | 1469.887  | 1765.335  | AK000141  | 2103.631 | 1981.001 |
| AA205399    | 327.612   | 810.543   | AB011540    | 33833.07  | 42597.938 | AL137758  | 850.406  | 992.946  |
| M25322      | 1755.124  | 2310.509  | NM_000040   | 6536.44   | 6766.314  | AK023865  | 180.099  | 363.115  |
| H-L 27586 I | 3036.796  | 2745.079  | NM_004631   | 2926.22   | 3141.531  | AK025786  | 307.988  | 246.813  |
| ID 1867426  | 2161.216  | 1398.053  | NM_004736   | 3953.271  | 3449.676  | AK024188  | 497.35   | 430.256  |
| W99328      | 443.941   | 314.549   | NM_006459   | 5376.488  | 4445.545  | AK024379  | 241.418  | 198.008  |
| AI434176    | 862.426   | 924.836   | D50373      | 953.606   | 1197.363  | AK026820  | 226.793  | 283.244  |
| BE735403    | 1246.794  | 1277.94   | AA488757    | 6968.066  | 6348.05   | AK001716  | 936.331  | 735.413  |
| NM_022552   | 3543.856  | 3404.035  | AA205399    | 907.156   | 541.996   | AF113683  | 187.878  | 117.178  |
| NM_014388   | 3455.231  | 3852.769  | H07071      | 792.649   | 928.382   | AK026821  | 308.804  | 259.167  |
| SR6         | 1878.263  | 1691.828  | M25322      | 6404.982  | 3161.369  | AK026280  | 316.383  | 327.739  |
| SR8         | 7046.051  | 17685.713 | H-L 27586 I | 2682.772  | 2767.167  | AF113017  | 1491.246 | 1207.145 |
| SR10        | 23726.199 | 6932.142  | ID 214180   | 455.637   | 304.098   | AL080232  | 1391.311 | 1085.748 |
| CY3Cy5      | 922.289   | 119.003   | ID 1867426  | 2676.675  | 2789.201  | AK001120  | 1791.707 | 1334.845 |
| AK025175    | 930.737   | 1762.236  | W99328      | 1716.974  | 1860.135  | AK022416  | 319.239  | 384.176  |
| NM_005811   | 2813.122  | 3387.973  | AI434176    | 600.429   | 709.231   | AK023224  | 638.526  | 694.716  |
| NM_004214   | 10953.955 | 9983.45   | H08563      | 789.142   | 592.399   | AK023731  | 594.018  | 365.183  |
| NM_004329   | 6426.267  | 5334.438  | BE735403    | 754.826   | 666.044   | AK022442  | 258.619  | 235.656  |
| NM_002836   | 2497.262  | 1939.299  | NM_022552   | 4501.817  | 4439.106  | AK023336  | 311.215  | 269.728  |
| AL049963    | 19518.488 | 13222.384 | NM_014389   | 6070.948  | 8518.231  | AK023771  | 270.294  | 149.127  |
| NM_016058   | 37945.141 | 30112.852 | AF116659    | 2079.463  | 1959.941  | AK026873  | 1098.253 | 1744.9   |
| NM_004896   | 2461.075  | 2427.65   | D79991      | 2201.494  | 1409.121  | AK026394  | 1312.83  | 1424.121 |
| NM_017688   | 1774.885  | 2070.846  | NM_000054   | 5792.687  | 4218.136  | NM_005448 | 343.754  | 453.885  |
| AK025612    | 2436.39   | 2911.041  | NM_014713   | 11338.31  | 9821.497  | AK025943  | 9454.3   | 7836.191 |
| NM_004736   | 4604.87   | 5527.253  | NM_001812   | 2084.57   | 1478.597  | BG106479  | 342.428  | 337.949  |
| NM_006895   | 1652.476  | 2994.803  | NM_014785   | 883.605   | 915.315   | AF130069  | 2506.345 | 2473.658 |
| NM_006459   | 2858.364  | 2724.662  | AK025175    | 475.575   | 745.051   | AL109669  | 731.446  | 711.948  |
| NM_003827   | 13205.882 | 10952.77  | NM_005811   | 5505.083  | 6399.321  | AB037766  | 528.459  | 353.993  |
| NM_004583   | 514.639   | 585.281   | NM_005764   | 1029.455  | 1038.88   | AK026995  | 296.217  | 165.008  |
| NM_001103   | 714.705   | 600.159   | NM_016362   | 1179.689  | 1669.482  | AL133091  | 300.289  | 250.37   |
| AF228710    | 5541.921  | 5086.367  | NM_004214   | 11856.857 | 11935.911 | BF842915  | 275.246  | 110.789  |
| AY007131    | 15571.182 | 11417.197 | NM_004329   | 9794.849  | 10318.569 | X82545    | 1364.332 | 938.503  |
| U61735      | 3164.648  | 4656.368  | NM_002836   | 3267.839  | 3581.535  | AK024632  | 1838.492 | 1316.555 |



|           |           |           |           |           |           |           |           |           |
|-----------|-----------|-----------|-----------|-----------|-----------|-----------|-----------|-----------|
| NM_001144 | 5608.406  | 4066.173  | NM_020167 | 1207.148  | 1192.653  | NM_018474 | 1351.07   | 1070.978  |
| AK023766  | 5320.343  | 4177.925  | AL049963  | 20967.768 | 18371.828 | AK024937  | 505.629   | 648.166   |
| NM_001897 | 792.84    | 873.373   | NM_016058 | 45582.707 | 27526.811 | D17178    | 313.112   | 411.679   |
| NM_003853 | 1646.494  | 772.757   | NM_014005 | 1004.754  | 967.182   | AK022094  | 1362.565  | 980.392   |
| AB033109  | 1426.328  | 1056.631  | NM_004636 | 692.263   | 1311.621  | AK026695  | 329.775   | 318.394   |
| NM_002053 | 2975.826  | 2265      | NM_004896 | 3462.679  | 2524.201  | AK022220  | 214.007   | 128.361   |
| NM_006889 | 595.446   | 523.429   | NM_017688 | 1464.175  | 1568.457  | AL137539  | 174.834   | 199.103   |
| NM_002438 | 449.13    | 440.943   | AK025612  | 4302.059  | 4570.53   | U84520    | 726.695   | 842.181   |
| NM_014589 | 612.481   | 519.407   | NM_012268 | 1932.437  | 2249.924  | Z11853    | 136.523   | 147.12    |
| AK023334  | 1086.203  | 1190.739  | NM_012203 | 1088.162  | 1109.08   | AL133616  | 2723.925  | 1949.135  |
| NM_002563 | 15691.415 | 13100.669 | J03077    | 13605.315 | 10567.448 | AK026382  | 932.968   | 910.738   |
| NM_002437 | 781.836   | 697.502   | J03048    | 5506.77   | 5008.489  | AK091169  | 807.73    | 1250.517  |
| D79991    | 2845.982  | 2659.578  | AL157469  | 1223.993  | 1080.233  | NM_014745 | 14215.324 | 10975.435 |
| AK022425  | 995.405   | 2338.066  | NM_002868 | 2862.405  | 3587.847  | AF086026  | 3572.534  | 3135.047  |
| NM_014713 | 8719.147  | 8068.334  | AK024100  | 3131.701  | 7397.488  | AL133011  | 245.923   | 246.804   |
| NM_001812 | 1053.922  | 728.372   | NM_005135 | 1066.422  | 706.157   | NM_01630C | 504.145   | 699.432   |
| NM_014785 | 624.235   | 350.442   | NM_003827 | 11922.579 | 11494.672 | NM_015607 | 7399.021  | 5239.008  |
| NM_006033 | 1593.768  | 1588.398  | NM_004583 | 797.342   | 722.47    | AK026955  | 479.041   | 437.259   |
| NM_004837 | 7735.827  | 7669.106  | NM_001103 | 976.262   | 938.582   | AL110202  | 7092.729  | 5535.923  |
| NM_00037C | 1514.275  | 1857.514  | NM_018399 | 691.3     | 791.159   | AK021980  | 338.932   | 279.785   |
| BE865893  | 3030.38   | 3705.188  | AY007131  | 25227.166 | 29343.928 | S46402    | 325.002   | 228.494   |
| NM_003123 | 40521.738 | 32457.334 | U61735    | 2998.007  | 2647.385  | AF075048  | 180.95    | 155.465   |
| AY005822  | 1037.361  | 1075.92   | NM_001144 | 3546.295  | 4804.425  | Z83940    | 340.709   | 308.886   |
| NM_018129 | 7034.97   | 6420.546  | AK023766  | 3990.071  | 3444.757  | NM_00580C | 603.633   | 684.295   |
| AF289022  | 3528.463  | 2864.427  | NM_001897 | 1130.085  | 769.575   | AF019617  | 1697.399  | 1326.165  |
| NM_016025 | 12571.579 | 7716.282  | NM_003853 | 947.017   | 1101.131  | AL137305  | 1328.758  | 1412.44   |
| NM_013319 | 3481.839  | 2518.291  | AB033109  | 1466.466  | 1718.132  | NM_00529C | 266.112   | 149.522   |
| NM_000746 | 1887.391  | 1329.047  | NM_002053 | 12942.884 | 13644.326 | AK025802  | 240.339   | 235.268   |
| NM_02041C | 8711.125  | 12336.962 | NM_006889 | 1002.996  | 936.172   | AF085973  | 213.658   | 304.02    |
| AF000143  | 2541.902  | 2400.501  | NM_002438 | 1108.731  | 1095.954  | NM_00543C | 141.646   | 127.363   |
| NM_000814 | 1456.357  | 1537.177  | NM_014589 | 1497.06   | 1436.212  | NM_018013 | 1357.304  | 1799.317  |
| NM_000453 | 1069.509  | 1140.664  | NM_000759 | 1989.851  | 2139.168  | AK022517  | 606.211   | 495.584   |
| J03077    | 21265.027 | 17124.723 | AK023334  | 1257.39   | 1079.379  | NM_000329 | 6236.416  | 5547.912  |
| J03048    | 3071.945  | 3185.65   | NM_002563 | 12980.028 | 12049.693 | NM_001182 | 1833.648  | 1781.501  |
| NM_002868 | 2058.777  | 3045.838  | NM_002437 | 2039.74   | 1967.466  | NM_000333 | 677.33    | 587.898   |
| AK024100  | 4620.723  | 1887.103  | AK023573  | 3173.122  | 2070.287  | NM_000172 | 1466.749  | 1294.907  |
| NM_005135 | 441.383   | 549.969   | NM_00273C | 6558.637  | 4799.046  | NM_002297 | 1150.25   | 1237.9    |
| NM_000317 | 13981.074 | 12027.033 | NM_004828 | 1279.028  | 978.641   | AB040968  | 3284.422  | 2918.197  |
| NM_018376 | 4896.04   | 6203.309  | AB011540  | 37115.891 | 32640.832 | X85323    | 308.864   | 378.95    |
| NM_017615 | 924.409   | 692.84    | NM_00004C | 9390.088  | 8513.358  | AK000802  | 218.528   | 34.095    |
| NM_017438 | 4246.133  | 4896.26   | NM_004631 | 3249.417  | 3228.06   | U17615    | 749.027   | 630.429   |
| U59209    | 4074.14   | 3490.148  | NM_006033 | 6309.943  | 6896.952  | NM_005303 | 693.936   | 578.561   |
| NM_020195 | 10028.768 | 12416.368 | NM_004837 | 8302.152  | 8146.088  | NM_016126 | 3801.648  | 3135.746  |
| AK023824  | 3350.2    | 1935.883  | NM_00037C | 1672.682  | 1660.878  | U84119    | 381.679   | 296.439   |
| AL133069  | 4550.591  | 3353.187  | BE865893  | 4378.684  | 5410.814  | NM_003608 | 952.723   | 839.056   |
| AL117574  | 628.525   | 657.498   | NM_003123 | 59353.102 | 57226.305 | AF302079  | 3385.578  | 2856.482  |
| AK026055  | 7737.613  | 5583.811  | AY005822  | 1258.032  | 1373.003  | AJ224167  | 167.557   | 163.185   |
| AK024126  | 1112.75   | 973.237   | NM_018129 | 19966.072 | 20191.219 | NM_00255C | 246.325   | 53.483    |
| NM_001516 | 4420.266  | 4027.013  | AF289022  | 2256.499  | 2628.445  | NM_000692 | 230.797   | 260.76    |
| NM_002744 | 2559.84   | 4363.038  | NM_016025 | 8335.523  | 8345.09   | AF086062  | 245.91    | 241.566   |
| NM_015917 | 12320.857 | 13061.874 | NM_013319 | 2169.896  | 1835.509  | L47668    | 7242.526  | 5827.878  |
| NM_020397 | 739.801   | 513.303   | NM_000746 | 2095.926  | 1764.243  | NM_01792C | 1277.475  | 1143.002  |
| NM_000061 | 821.442   | 874.043   | NM_000722 | 881.694   | 1026.741  | AK025345  | 268.966   | 275.317   |

|           |           |           |             |           |           |             |           |           |
|-----------|-----------|-----------|-------------|-----------|-----------|-------------|-----------|-----------|
| AB046859  | 3112.243  | 2702.501  | NM_006030   | 1161.737  | 1215.717  | D25274      | 2560.02   | 3069.716  |
| NM_005109 | 6340.409  | 6122.368  | NM_020410   | 4614.464  | 4482.772  | CY3Cy5      | 174.009   | 240.37    |
| AK023573  | 1783.753  | 1581.712  | AF000143    | 26754.4   | 26297.309 | D50373      | 253.66    | 176.323   |
| NM_002730 | 5634.768  | 5980.18   | NM_014211   | 842.784   | 926.279   | AA488757    | 513.817   | 175.716   |
| NM_004829 | 1051.452  | 1420.981  | NM_000814   | 3840.199  | 3897.271  | M25322      | 577.076   | 810.251   |
| AB011540  | 4400.242  | 5512.991  | NM_000453   | 2575.435  | 3381.333  | H-L 27586 I | 824.778   | 498.008   |
| NM_000040 | 1033.244  | 1004.474  | NM_022552   | 3818.279  | 2611.392  | ID 1867426  | 640.679   | 535.525   |
| NM_004631 | 1929.411  | 1877.356  | NM_014389   | 4311.89   | 3468.349  | ID 396450   | 248.248   | 252.493   |
| NM_004736 | 5736.402  | 7601.723  | NM_001718   | 418.636   | 358.927   | W99328      | 156.515   | 110.816   |
| NM_006459 | 5360.626  | 7898.054  | AF116659    | 1612.328  | 1312.798  | AI434176    | 420.487   | 368.976   |
| D50373    | 1316.564  | 1884.08   | NM_000317   | 20043.975 | 16853.459 | NM_022552   | 644.508   | 683.959   |
| AA488757  | 1924.654  | 1612.577  | NM_018376   | 5229.747  | 4491.41   | SR2         | 14929.157 | 10896.467 |
| AA205399  | 201.591   | 1161.671  | NM_017615   | 582.903   | 780.225   | SR4         | 1899.888  | 1593.85   |
| M25322    | 1746.395  | 4535.825  | NM_017438   | 2951.625  | 2969.103  | SR6         | 357.301   | 249.356   |
| W99328    | 411.129   | 627.907   | U59209      | 1941.183  | 2384.927  | SR8         | 1124.287  | 3314.43   |
| AI434176  | 626.905   | 925.808   | NM_020195   | 7431.625  | 5619.976  | SR10        | 4091.458  | 1295.319  |
| NM_022552 | 2403.26   | 3373.737  | AK023824    | 3373.551  | 4557.236  | CY3Cy5      | 507.454   | 152.699   |
| NM_014389 | 3598.011  | 3467.474  | AL133069    | 4049.537  | 5242.748  | NM_005811   | 897.215   | 510.88    |
| AF116659  | 830.424   | 562.403   | AL117574    | 932.031   | 596.029   | NM_005764   | 153.039   | 91.384    |
| D79991    | 2799.928  | 2656.093  | AK026055    | 5444.392  | 5399.875  | NM_004214   | 2762.022  | 1509.874  |
| NM_000054 | 1959.787  | 1735.645  | AK024126    | 889.762   | 1040.56   | NM_004329   | 1693.913  | 767.732   |
| NM_014713 | 13000.521 | 11390.054 | NM_001516   | 4538.018  | 3728.946  | NM_002836   | 801.399   | 468.032   |
| NM_001812 | 1682.045  | 1588.148  | NM_002744   | 5437.729  | 4739.63   | NM_020167   | 319.14    | 412.265   |
| NM_014785 | 908.953   | 695.742   | NM_015917   | 13780.172 | 12711.504 | AL049963    | 5844.468  | 3883.309  |
| NM_005811 | 3578.891  | 3139.925  | NM_020397   | 1193.214  | 1069.506  | NM_016058   | 11097.627 | 11494.275 |
| NM_004214 | 12450.322 | 10467.313 | NM_000061   | 1067.848  | 939.168   | NM_014005   | 245.218   | 313.013   |
| NM_004329 | 4165.948  | 2613.846  | AB046859    | 16788.111 | 17261.738 | NM_004636   | 242.691   | 197.761   |
| NM_002836 | 3130.61   | 2826.058  | NM_005109   | 15209.7   | 19390.629 | NM_004896   | 954.244   | 720.971   |
| NM_016058 | 37696.883 | 45898.289 | NM_003976   | 474.215   | 592.997   | AK025612    | 358.305   | 254.477   |
| NM_004636 | 457.013   | 261.815   | NM_017688   | 1134.93   | 1199.194  | NM_012268   | 191.798   | 133.138   |
| NM_004896 | 2277.684  | 2910.418  | AK025612    | 3556.458  | 3030.157  | NM_004736   | 949.275   | 789.472   |
| NM_017688 | 1630.783  | 1704.711  | NM_012268   | 1294.57   | 1219.483  | NM_006459   | 881.391   | 924.217   |
| AK025612  | 2258.688  | 2631.847  | NM_012203   | 876.898   | 773.659   | AA427949    | 507.228   | 659.911   |
| NM_012203 | 436.513   | 502.161   | NM_004736   | 3498.666  | 3870.938  | NM_003827   | 3392.35   | 1125.163  |
| J03077    | 24395.75  | 19485.727 | NM_006459   | 3485.425  | 4054.384  | NM_004583   | 194.999   | 137.361   |
| J03048    | 6012.729  | 4681.968  | D50373      | 585.833   | 922.238   | NM_001103   | 200.243   | 166.638   |
| AL157469  | 1156.283  | 1115.57   | AA488757    | 3805.693  | 3856.644  | AF228710    | 1816.047  | 828.072   |
| NM_002868 | 3764.1    | 3289.475  | AA205399    | 928.89    | 384.509   | AY007131    | 4582      | 2498.791  |
| AK024100  | 7329.115  | 2745.885  | H07071      | 512.123   | 480.813   | U61735      | 781.724   | 612.943   |
| NM_005135 | 782.214   | 940.906   | M25322      | 5554.731  | 2421.737  | NM_001144   | 1364.338  | 755.943   |
| NM_003827 | 15606.565 | 13076.19  | AA436187    | 306.732   | 236.088   | AK023766    | 1233.977  | 1068.891  |
| NM_004583 | 634.463   | 814.521   | H-L 27586 I | 2682.494  | 2721.171  | NM_001897   | 269.104   | 219.147   |
| NM_001103 | 618.353   | 610.186   | ID 214180   | 397.497   | 590.086   | NM_003853   | 197.622   | 156.044   |
| AF228710  | 5721.131  | 4735.502  | ID 1867426  | 3715.045  | 3040.065  | AB033109    | 346.818   | 259.075   |
| AY007131  | 12351.71  | 7362.994  | ID 396450   | 216.379   | 626.56    | NM_002053   | 2245.632  | 1791.773  |
| U61735    | 2846.429  | 2743.795  | W99328      | 840.065   | 993.128   | NM_006889   | 218.365   | 104.385   |
| NM_001144 | 6288.231  | 5219.011  | AI434176    | 672.455   | 768.333   | NM_002438   | 161.564   | 153.336   |
| NM_001897 | 591.148   | 798.517   | H08563      | 923.555   | 1079.967  | NM_014589   | 518.577   | 506.641   |
| NM_003853 | 419.117   | 405.207   | BE735403    | 1154.406  | 1357.725  | NM_000759   | 175.311   | 153.391   |
| AB033109  | 1012.147  | 1040.669  | NM_002438   | 1422.756  | 1082.747  | AK023334    | 155.044   | 152.752   |
| NM_002053 | 3070.345  | 2935.54   | NM_014589   | 1700.55   | 2121.547  | NM_002563   | 1735.209  | 1438.352  |
| NM_014589 | 640.17    | 751.736   | NM_000759   | 1157.289  | 1632.292  | NM_002437   | 152.365   | 253.788   |
| NM_000759 | 544.209   | 527.741   | AK023334    | 1043.841  | 783.628   | D79991      | 539.338   | 528.108   |

|           |           |           |           |           |           |           |           |          |
|-----------|-----------|-----------|-----------|-----------|-----------|-----------|-----------|----------|
| AK023334  | 715.595   | 1113.995  | NM_002563 | 11695.114 | 10137.775 | AK022425  | 73.059    | 93.915   |
| NM_002563 | 13092.505 | 10495.507 | NM_002437 | 1255.903  | 1157.906  | NM_000054 | 628.033   | 579.662  |
| NM_002437 | 1737.213  | 1779.193  | D79991    | 2612.742  | 1935.195  | NM_014713 | 2213.047  | 2024.503 |
| AK023573  | 2240.726  | 2103.941  | AK022425  | 372.107   | 485.005   | NM_001812 | 254.975   | 202.563  |
| NM_002730 | 7192.001  | 6942.646  | NM_000054 | 3921.728  | 4358.155  | NM_014785 | 516.703   | 567.64   |
| NM_004828 | 1312.554  | 1313.969  | NM_014713 | 10699.966 | 14316.944 | NM_006033 | 766.642   | 408.576  |
| AB011540  | 5826.599  | 4342.806  | NM_001812 | 1575.379  | 1250.645  | NM_004837 | 2607.184  | 1573.553 |
| NM_000040 | 2368.441  | 2223.367  | NM_014785 | 692.338   | 630.247   | NM_000370 | 556.851   | 288.094  |
| NM_004631 | 3180.835  | 3512.427  | NM_005811 | 3442.326  | 3567.818  | BE865893  | 691.925   | 404.732  |
| NM_006033 | 1886.953  | 1526.169  | NM_005764 | 687.145   | 675.669   | NM_003123 | 11985.007 | 6966.31  |
| NM_004837 | 7837.097  | 7072.254  | NM_016362 | 1521.76   | 1941.843  | AY005822  | 308.394   | 198.679  |
| NM_000370 | 1501.787  | 1042.286  | NM_004214 | 11004.256 | 9906.885  | NM_018129 | 2822.02   | 1805.433 |
| BE865893  | 1835.84   | 1421.17   | NM_004329 | 10207.903 | 10355.205 | AF289022  | 777.804   | 826.471  |
| NM_003123 | 32848.184 | 18123.764 | NM_002836 | 3731.824  | 3314.493  | AB002326  | 122.872   | 100.215  |
| AY005822  | 560.629   | 553.938   | NM_020167 | 1223.859  | 1201.934  | NM_016025 | 2888.228  | 2055.269 |
| NM_018129 | 5335.667  | 4040.372  | AL049963  | 21865.783 | 15710.843 | NM_013319 | 861.97    | 1148.298 |
| AF289022  | 3443.276  | 2655.975  | NM_016058 | 45557.246 | 26558.404 | NM_000746 | 716.857   | 759.737  |
| NM_016025 | 11057.867 | 7794.682  | NM_014005 | 1060.109  | 1150.703  | NM_000722 | 272.836   | 221.27   |
| NM_013319 | 2436.572  | 2195.719  | NM_004636 | 832.602   | 1147.649  | NM_006030 | 339.707   | 473.405  |
| NM_000746 | 1721.916  | 1638.301  | AK022603  | 853.123   | 607.495   | NM_020410 | 969.261   | 652.522  |
| NM_000722 | 496.625   | 303.422   | NM_004896 | 3579.032  | 3093.193  | AF000143  | 1798.856  | 1436.869 |
| NM_020410 | 4297.897  | 4802.677  | NM_006030 | 1160.586  | 1164.143  | NM_000814 | 290.878   | 231.042  |
| AF000143  | 3237.92   | 3314.445  | NM_020410 | 5140.212  | 5860.193  | J03077    | 2643.24   | 2595.131 |
| NM_014211 | 1737.956  | 2888.886  | AF000143  | 23264.5   | 36233.719 | J03048    | 1054.275  | 933.244  |
| NM_000814 | 1208.61   | 1336.803  | NM_014211 | 703.004   | 948.831   | AL157469  | 287.503   | 253.663  |
| NM_000453 | 894.417   | 685.32    | NM_000814 | 2570.595  | 2479.395  | NM_002868 | 784.421   | 1053.997 |
| NM_022552 | 4029.233  | 3281.44   | NM_000453 | 2211.45   | 2171.802  | AK024100  | 1694.812  | 973.807  |
| NM_014389 | 4707.368  | 3839.028  | J03077    | 18883.088 | 18867.641 | NM_005135 | 405.937   | 572.442  |
| AF116659  | 1250.179  | 929.938   | J03048    | 6613.186  | 6206.957  | NM_000317 | 3620.93   | 2698.433 |
| NM_000317 | 18038.752 | 14383.383 | AL157469  | 1139.615  | 1260.738  | NM_018376 | 1774.069  | 1000.875 |
| NM_018376 | 5785.007  | 5759.872  | NM_002868 | 2355.027  | 3920.344  | NM_017615 | 279.198   | 242.602  |
| NM_017615 | 625.221   | 420.905   | AK024100  | 2660.006  | 6595.486  | NM_017438 | 1083.076  | 572.307  |
| NM_017438 | 3903.039  | 3492.787  | NM_005135 | 726.252   | 778.298   | U59209    | 833.549   | 445.752  |
| U59209    | 3973.403  | 2824.114  | NM_003827 | 9142.344  | 11139.063 | NM_020195 | 1983.017  | 2517.07  |
| NM_020195 | 9016.099  | 8102.972  | NM_004583 | 638.635   | 524.721   | AK023824  | 1226.656  | 950.512  |
| AK023824  | 3589.78   | 1530.033  | NM_001103 | 719.496   | 922.912   | AL133069  | 1264.274  | 1567.982 |
| AL133069  | 4007.717  | 2754.483  | AF228710  | 13332.966 | 15829.539 | AL117574  | 399.413   | 907.406  |
| AL117574  | 564.599   | 608.1     | NM_018399 | 601.665   | 654.733   | AK026055  | 1687.258  | 2314.837 |
| AK026055  | 6853.836  | 5660.7    | AY007131  | 22984.801 | 27523.805 | AK024126  | 305.124   | 224.961  |
| AK024126  | 974.5     | 1128.664  | U61735    | 2839.228  | 2557.43   | NM_001516 | 1232.11   | 896.32   |
| NM_001516 | 3919.785  | 3183.4    | NM_001144 | 3607.126  | 4809.173  | NM_002744 | 888.776   | 787.563  |
| NM_002744 | 2292.44   | 2432.853  | AK023766  | 4472.256  | 3442.347  | NM_015917 | 2626.767  | 1921.759 |
| NM_015917 | 12469.922 | 13055.061 | NM_001897 | 1040.395  | 1017.281  | NM_020397 | 1072.989  | 1564.093 |
| AB046859  | 3342.267  | 3136.975  | NM_003853 | 1262.217  | 1448.174  | NM_000061 | 292.451   | 489.348  |
| NM_005109 | 6512.065  | 5766.574  | AB033109  | 1879.49   | 2027.649  | AB046859  | 1053.057  | 1193.353 |
| NM_003976 | 724.538   | 902.018   | NM_002053 | 17249.121 | 17272.254 | NM_005109 | 1169.502  | 1014.038 |
| NM_017688 | 1983.285  | 1876.127  | NM_006889 | 1341.849  | 1307.569  | AK023573  | 352.086   | 379.525  |
| AK025612  | 3065.081  | 2770.713  | NM_002744 | 3532.211  | 3586.35   | NM_002730 | 1483.281  | 1749     |
| NM_012268 | 854.475   | 737.045   | NM_015917 | 13358.451 | 11481.625 | NM_004828 | 310.654   | 227.518  |
| NM_012203 | 934.875   | 1106.009  | NM_020397 | 1163.192  | 1360.478  | AB011540  | 6336.345  | 6380.144 |
| NM_004736 | 5319.506  | 5438.788  | NM_000061 | 1099.196  | 880.97    | NM_000040 | 735.009   | 954.984  |
| NM_006459 | 3773.438  | 3628.629  | AB046859  | 12813.739 | 11164.522 | NM_004631 | 476.691   | 582.465  |
| D50373    | 554.908   | 506.46    | NM_005109 | 13152.938 | 10687.897 | NM_004736 | 1421.521  | 1412.85  |

|             |           |           |           |           |           |             |           |           |
|-------------|-----------|-----------|-----------|-----------|-----------|-------------|-----------|-----------|
| AA488757    | 1067.829  | 722.919   | AK023573  | 2846.356  | 2882.973  | NM_00689E   | 153.376   | 82.541    |
| M25322      | 1265.956  | 2163.926  | NM_002730 | 7669.408  | 5974.275  | NM_00645E   | 1234.662  | 810.382   |
| H-L 27586 I | 2792.672  | 2991.815  | NM_00482E | 1486.957  | 1396.092  | D50373      | 237.462   | 174.365   |
| ID 1867426  | 1825.953  | 1951.102  | AB011540  | 26833.619 | 37001.699 | AA488757    | 653.031   | 666.415   |
| NM_00243E   | 607.966   | 449.23    | NM_000040 | 7042.748  | 9073.53   | AA205399    | 197.042   | 306.637   |
| NM_01458E   | 593.081   | 523.301   | NM_004631 | 2453.72   | 3195.287  | AI394286    | 263.182   | 38.965    |
| NM_00075E   | 810.341   | 869.998   | NM_006033 | 4982.508  | 8205.616  | H07071      | 137.829   | 278.767   |
| AK023334    | 706.772   | 711.005   | NM_004837 | 7682.678  | 8825.032  | M25322      | 443.168   | 1674.479  |
| NM_00256E   | 16948.094 | 14881.971 | NM_000370 | 1459.906  | 1639.226  | AA436187    | 170.561   | 141.951   |
| NM_002437   | 1470.75   | 1244.761  | BE865893  | 4203.115  | 5651.359  | H-L 27586 I | 650.957   | 654.282   |
| D79991      | 2887.142  | 2862.301  | NM_003123 | 62240.703 | 56051.41  | ID 214180   | 143.232   | 72.313    |
| NM_000054   | 1936.21   | 1647.005  | AY005822  | 1556.201  | 1801.663  | ID 1867426  | 990.192   | 1381.302  |
| NM_01471E   | 11620.224 | 7903.046  | NM_01812E | 18222     | 19305.574 | W99328      | 303.68    | 491.467   |
| NM_00181E   | 1177.969  | 930.945   | AF289022  | 1810.456  | 2534.321  | H08563      | 180.787   | 167.284   |
| NM_01478E   | 704.832   | 385.2     | NM_01602E | 9357.841  | 9722.016  | BE735403    | 187.694   | 173.563   |
| NM_005811   | 2782.676  | 1911.958  | NM_01331E | 2927.145  | 2678.069  | NM_02255E   | 1114.443  | 983.848   |
| NM_01636E   | 395.725   | 303.878   | NM_00074E | 2976.724  | 3327.68   | NM_01438E   | 1452.61   | 1613.658  |
| NM_004214   | 9687.41   | 8308.071  | NM_00072E | 1671.08   | 1798.211  | AF116659    | 171.772   | 176.227   |
| NM_00432E   | 4536.311  | 3271.185  | NM_00092E | 825.163   | 564.751   | D79991      | 775.216   | 470.832   |
| NM_00283E   | 2163.131  | 2071.711  | NM_01865E | 2095.898  | 1605.986  | NM_000054   | 639.52    | 267.291   |
| NM_00489E   | 1840.435  | 2443.436  | NM_00566E | 1864.547  | 1737.815  | NM_01471E   | 3455.64   | 1662.306  |
| NM_006030   | 1012.109  | 1039.548  | X89960    | 734.538   | 764.203   | NM_00181E   | 434.156   | 240.89    |
| NM_020410   | 7079.729  | 6334.09   | NM_006550 | 1693.101  | 1424.252  | NM_01478E   | 212.697   | 108.546   |
| AF000143    | 6162.31   | 5484.64   | NM_00577E | 3472.123  | 2968.877  | NM_005811   | 939.872   | 901.35    |
| NM_014211   | 607.479   | 696.219   | NM_017644 | 3864.052  | 4152.304  | NM_005764   | 137.027   | 226.866   |
| NM_000814   | 2188.649  | 2029.153  | NM_00248E | 1452.651  | 891.327   | NM_004214   | 2862.259  | 2905.847  |
| NM_00045E   | 1564.354  | 1788.599  | AF116659  | 1771.218  | 1854.102  | NM_00432E   | 2072.859  | 2452.727  |
| J03077      | 27848.377 | 22490.74  | NM_000317 | 19521.973 | 23201.865 | NM_00283E   | 313.948   | 1521.129  |
| J03048      | 5876.553  | 5074.125  | NM_01837E | 4844.718  | 5442.773  | NM_020167   | 234.395   | 213.254   |
| AL157469    | 1768.553  | 3288.208  | NM_01761E | 876.038   | 790.264   | AL049963    | 4961.242  | 4507.722  |
| NM_00286E   | 3356.744  | 3261.088  | NM_01743E | 3021.349  | 3066.303  | NM_01605E   | 10755.124 | 11069.381 |
| AK024100    | 6070.007  | 1924.155  | U59209    | 2099.311  | 2622.466  | NM_01400E   | 275.082   | 176.666   |
| NM_00513E   | 710.003   | 380.006   | NM_02019E | 8379.036  | 6138.507  | NM_00463E   | 381.648   | 252.819   |
| NM_003827   | 11527.014 | 7768.777  | AK023824  | 2711.568  | 4987.342  | NM_00489E   | 762.087   | 836.111   |
| NM_001103   | 564.217   | 394.745   | AL133069  | 3890.666  | 3879.723  | NM_00397E   | 301.02    | 507.421   |
| AF228710    | 2937.049  | 1843.549  | AL117574  | 594.715   | 706.701   | NM_01768E   | 371.214   | 368.344   |
| AY007131    | 8841.734  | 5933.488  | AK026055  | 6199.168  | 6350.662  | AK025612    | 870.431   | 971.369   |
| U61735      | 2087.979  | 2136.309  | AK024126  | 1074.57   | 1375.376  | NM_01226E   | 297.145   | 437.639   |
| NM_00688E   | 983.387   | 1019.255  | NM_00151E | 4225.749  | 4520.731  | NM_01220E   | 508.477   | 796.862   |
| NM_002744   | 2778.434  | 2765.849  | NM_01908E | 1822.377  | 1715.725  | J03077      | 4691.059  | 3391.508  |
| NM_015917   | 17470.156 | 14170.335 | NM_006670 | 2573.2    | 1886.971  | J03048      | 1414.633  | 715.405   |
| NM_020397   | 1158.078  | 977.178   | NM_01242E | 5578.029  | 3956.396  | AL157469    | 320.543   | 208.013   |
| NM_000061   | 1036.161  | 1052.473  | NM_00581E | 1923.92   | 2009.456  | NM_00286E   | 916.338   | 564.661   |
| AB046859    | 5102.721  | 4211.134  | NM_002750 | 10615.017 | 11439.02  | AK024100    | 1684.639  | 361.428   |
| NM_00510E   | 9207.48   | 8502.838  | AK024134  | 4625.235  | 4827.989  | NM_00513E   | 264.908   | 153.793   |
| AK023573    | 2316.514  | 2729.226  | NM_003014 | 1312.232  | 1586.445  | NM_003827   | 2921.922  | 2476.259  |
| NM_002730   | 7829.54   | 8991.943  | NM_01855E | 751.246   | 883.205   | NM_00458E   | 189.904   | 150.945   |
| NM_00482E   | 1326.827  | 1544.86   | NM_001974 | 3608.476  | 2937.549  | NM_001103   | 228.086   | 257.797   |
| AB011540    | 4418.708  | 3514.104  | NM_013957 | 1140.545  | 973.277   | AF228710    | 1947.285  | 1838.102  |
| NM_000040   | 1638.074  | 1406.748  | NM_00246E | 6913.147  | 6344.749  | AY007131    | 5390.006  | 4698.325  |
| NM_004631   | 2489.624  | 2294.432  | NM_00302E | 1372.769  | 1887.223  | U61735      | 831.892   | 651.617   |
| NM_00603E   | 1330.337  | 758.494   | NM_00156E | 671.054   | 892.612   | NM_001144   | 1270.961  | 833.932   |
| NM_004837   | 7090.561  | 5506.766  | NM_016541 | 1459.749  | 1485.824  | AK02376E    | 1068.022  | 1205.539  |

|           |           |           |           |           |           |           |           |          |
|-----------|-----------|-----------|-----------|-----------|-----------|-----------|-----------|----------|
| NM_00037C | 1631.255  | 1059.382  | NM_01854E | 5354.254  | 6046.809  | NM_00385E | 285.602   | 328.252  |
| BE865893  | 1624.641  | 1067.011  | NM_013401 | 1070.224  | 1768.561  | AB033109  | 460.283   | 429.714  |
| NM_00312E | 16585.438 | 10052.314 | NM_01823E | 6213.977  | 7078.263  | NM_00205E | 3394.705  | 3419.18  |
| AY005822  | 448.448   | 437.932   | NM_00685E | 12213.44  | 14604.454 | NM_00688E | 240.006   | 343.48   |
| NM_01812E | 3266.657  | 2973.34   | NM_00140E | 10438.994 | 10304.953 | NM_00243E | 314.403   | 312.972  |
| AF289022  | 2418.522  | 2245.452  | NM_00388C | 1647.981  | 1851.664  | NM_01458E | 330.959   | 322.465  |
| NM_01611E | 335.848   | 294.947   | AF131778  | 1908.289  | 2069.193  | NM_00075E | 307.683   | 413.6    |
| NM_01865E | 2481.43   | 2413.915  | NM_00156E | 2440.647  | 2782.824  | AK023334  | 224.262   | 249.413  |
| NM_00566E | 2525.852  | 2422.896  | NM_01327E | 4598.184  | 4184.519  | NM_00256E | 3862.844  | 4580.59  |
| NM_00655C | 1539.745  | 1542.813  | NM_003487 | 8904.482  | 4461.613  | NM_002437 | 269.708   | 276.075  |
| NM_00248E | 986.587   | 1340.977  | NM_006887 | 9952.987  | 7618.74   | AK023573  | 496.941   | 440.399  |
| NM_00171E | 304.952   | 311.641   | NM_006477 | 1444.546  | 1440.839  | NM_00273C | 2010.437  | 1732.87  |
| AF116659  | 1493.714  | 866.677   | NM_00288C | 3862.496  | 3811.771  | NM_00482E | 329.631   | 276.394  |
| NM_000317 | 13286.311 | 8775.956  | NM_00067E | 7811.973  | 7779.605  | AB011540  | 2844.494  | 2119.799 |
| NM_01837E | 5142.339  | 5287.132  | NM_00106E | 1254.732  | 1136.757  | NM_00004C | 812.864   | 671.268  |
| NM_01761E | 953.832   | 920.406   | NM_004657 | 3163.402  | 2805.551  | NM_004631 | 785.931   | 665.176  |
| NM_01743E | 4954.57   | 3259.201  | NM_01817C | 2523.72   | 2093.057  | NM_00603E | 782.23    | 808.736  |
| U59209    | 3145.802  | 2135.296  | NM_003867 | 1468.293  | 1678.475  | NM_004837 | 2361.887  | 2815.77  |
| NM_02019E | 6869.453  | 7780.333  | AK022588  | 412.238   | 458.679   | NM_00037C | 457.925   | 401.028  |
| AK023824  | 2546.309  | 1612.72   | AL162062  | 569.321   | 749.134   | BE865893  | 704.24    | 808.926  |
| AL133069  | 2866.406  | 4692.766  | NM_00317E | 7315.724  | 6836.254  | NM_00312E | 12023.916 | 9395.035 |
| AK024126  | 1045.365  | 1942.24   | NM_00503C | 9805.393  | 9715.695  | AY005822  | 343.097   | 221.396  |
| NM_01908E | 1225.885  | 1087.833  | NM_017584 | 3483.757  | 3388.135  | NM_01812E | 3500.516  | 2725.739 |
| NM_00667C | 3672.498  | 4551.079  | NM_02035E | 3003.778  | 3938.948  | AF289022  | 645.809   | 729.514  |
| NM_01242E | 7749.156  | 7628.684  | NM_00258E | 4876.245  | 5850.841  | M17252    | 114.97    | 154.058  |
| NM_00581E | 2132.906  | 1875.168  | NM_00657C | 17374.023 | 21469.297 | NM_01602E | 3048.085  | 2777.763 |
| NM_00275C | 9423.697  | 7711.584  | NM_02034E | 1407.838  | 1441.79   | NM_01331E | 751.484   | 626.987  |
| AK024134  | 4262.842  | 3378.699  | AB040943  | 597.961   | 864.235   | NM_00074E | 680.491   | 593.825  |
| NM_003014 | 1829.321  | 2533.236  | NM_005201 | 15193.536 | 15219.271 | NM_00072E | 269.665   | 295.892  |
| NM_01855E | 1112.366  | 1172.329  | NM_00009E | 670.671   | 665.659   | NM_00603C | 305.385   | 534.78   |
| NM_001974 | 3855.505  | 3571.383  | AF174600  | 7583.044  | 6098.418  | NM_02041C | 1703.145  | 1715.961 |
| NM_013957 | 578.921   | 460.506   | AK001003  | 1135.921  | 1798.488  | AF000143  | 2797.46   | 3175.067 |
| NM_00246E | 7661.759  | 6475.826  | NM_00280C | 19516.166 | 16902.135 | NM_014211 | 193.608   | 119.542  |
| NM_00302E | 1771.162  | 1254.037  | NM_018384 | 18173.395 | 15463.248 | NM_00045E | 757.795   | 917.307  |
| NM_00156E | 1365.927  | 849.37    | NM_00187E | 540.671   | 394.867   | NM_02255E | 1186.811  | 576.862  |
| NM_01854E | 7841.666  | 5586.431  | AF282617  | 7784.317  | 6759.362  | NM_01438E | 1043.255  | 917.094  |
| NM_013401 | 1245.082  | 678.677   | AF157323  | 2978.07   | 3147.085  | AF116659  | 189.427   | 162.28   |
| NM_01823E | 2324.402  | 1727.339  | NM_00602E | 451.548   | 667.889   | NM_000317 | 3260.635  | 3179.527 |
| NM_00685E | 3585.704  | 5275.759  | NM_005877 | 9325.718  | 9217.001  | NM_01837E | 1440.744  | 1898.926 |
| NM_00140E | 3513.302  | 3486.258  | NM_00333E | 7651.124  | 10646.909 | NM_01761E | 378.76    | 494.925  |
| NM_003487 | 8444.033  | 6704.429  | NM_01339E | 823.158   | 1099.347  | NM_01743E | 995.41    | 819.291  |
| NM_006887 | 12453.597 | 12617.007 | D26069    | 8128.333  | 8452.271  | U59209    | 757.253   | 689.456  |
| NM_006477 | 1367.631  | 1240.356  | BF107577  | 22862.814 | 25274.396 | NM_02019E | 1914.679  | 2679.492 |
| NM_00288C | 5607.711  | 5287.863  | NM_005837 | 12277.851 | 15993.964 | AK023824  | 1067.173  | 662.309  |
| NM_00067E | 3429.023  | 2999.756  | NM_00613E | 9334.283  | 9774.507  | AL133069  | 1067.911  | 1287.214 |
| NM_00106E | 2697.067  | 4477.862  | AF237772  | 2548.687  | 4039.454  | AL117574  | 153.169   | 183.508  |
| NM_004657 | 913.017   | 1083.117  | AK025934  | 2007.488  | 2326.268  | AK026055  | 1934.396  | 2387.71  |
| NM_01817C | 2909.009  | 2158.265  | AJ008154  | 1452.367  | 1913.24   | AK024126  | 399.594   | 545.916  |
| NM_003867 | 651.138   | 522.503   | NM_002147 | 539.428   | 521.87    | NM_00151E | 1407.501  | 1158.963 |
| AK022588  | 669.648   | 532.029   | U90919    | 2725.78   | 2632.256  | NM_002744 | 1311.908  | 1471.918 |
| AL162062  | 1164.476  | 968.956   | NM_006177 | 1385.461  | 1100.307  | NM_015917 | 4196.434  | 4415.417 |
| NM_00317E | 6988.154  | 5744.837  | AL137286  | 5583.628  | 4535.392  | NM_020397 | 414.815   | 270.051  |
| NM_00503C | 10442.626 | 8218.635  | NM_01627E | 11382.874 | 11668.814 | NM_000061 | 266.558   | 273.698  |

|           |           |           |           |           |           |             |           |           |
|-----------|-----------|-----------|-----------|-----------|-----------|-------------|-----------|-----------|
| NM_017584 | 2782.142  | 1812.219  | NM_020418 | 4261.068  | 5191.08   | NM_01768E   | 459.131   | 313.03    |
| NM_02035E | 3978.044  | 2538.151  | NM_013293 | 6531.281  | 8835.056  | AK025612    | 830.366   | 594.371   |
| AB014541  | 8114.886  | 5536.133  | AF315592  | 3973.997  | 5219.115  | NM_01226E   | 245.639   | 401.78    |
| NM_002583 | 2526.143  | 1990.218  | AF095844  | 2195.472  | 1578.001  | NM_012203   | 240.887   | 186.909   |
| NM_00657C | 10372.676 | 8428.844  | NM_015833 | 1903.917  | 2178.777  | NM_00473E   | 1439.891  | 1442.678  |
| NM_02034E | 1176.387  | 1135.066  | NM_00098E | 63239.523 | 59752.367 | NM_00689E   | 104.278   | 129.311   |
| NM_006034 | 4292.161  | 5343.842  | AK026760  | 14725.894 | 17961.535 | NM_00645E   | 927.782   | 743.916   |
| AF174600  | 8667.012  | 9636.328  | NM_014772 | 2113.948  | 2762.368  | AA488757    | 604.069   | 490.821   |
| AK001003  | 1719.678  | 1611.199  | AK025248  | 3309.906  | 2692.867  | AA205399    | 138.433   | 199.61    |
| NM_00280C | 22873.434 | 24393.361 | NM_00453E | 13977.849 | 17057.578 | M25322      | 612.824   | 1789.54   |
| NM_018384 | 16802.453 | 14700.383 | NM_00642E | 12610.648 | 14029.954 | AA436187    | 155.241   | 200.242   |
| AF282617  | 9661.752  | 9865.455  | NM_00428C | 21248.916 | 18736.701 | H-L 27586 I | 1034.36   | 1069.893  |
| AF157323  | 3437.804  | 3641.903  | AF110399  | 1104.516  | 1481.83   | ID 214180   | 159.207   | 189.272   |
| NM_00602E | 1016.249  | 735.924   | AK027094  | 4153      | 4253.729  | ID 1867426  | 896.72    | 1194.996  |
| NM_005877 | 13195.805 | 10265.442 | AL359596  | 2257.953  | 2205.861  | ID 396450   | 137.853   | 115.662   |
| NM_00333E | 7517.841  | 6254.373  | AL133585  | 1950.216  | 1337.685  | W99328      | 208.263   | 154.089   |
| NM_01339E | 1338.396  | 1128.637  | NM_002631 | 9175.362  | 9992.443  | AI434176    | 215.205   | 95.502    |
| NM_017752 | 1433.859  | 1241.829  | NM_00077E | 750.611   | 545.896   | BE735403    | 308.462   | 336.897   |
| D26069    | 7764.797  | 5901.673  | AB032981  | 781.766   | 521.386   | NM_00243E   | 307.924   | 205.225   |
| BF107577  | 2702.931  | 2690.808  | NM_005917 | 16599.354 | 16713.252 | NM_01458E   | 263.508   | 288.689   |
| NM_005837 | 10547.566 | 9896.3    | BC017044  | 665.172   | 890.631   | NM_00075E   | 200.165   | 131.527   |
| NM_01662E | 4968.279  | 4198.225  | AV758498  | 1635.69   | 1514.419  | AK023334    | 212.557   | 136.858   |
| NM_017493 | 1336.289  | 1119.048  | NM_02019E | 2043.833  | 2758.105  | NM_002563   | 3984.335  | 2931.887  |
| NM_00613E | 5608.059  | 8130.619  | AK024113  | 854.693   | 808.578   | NM_002437   | 285.488   | 158.67    |
| AK025934  | 1567.471  | 2465.177  | NM_018657 | 793.649   | 979.244   | D79991      | 677.396   | 663.678   |
| AJ008154  | 805.854   | 1257.444  | L40410    | 15259.293 | 13904.463 | NM_000054   | 731.734   | 629.516   |
| NM_00685E | 5581.746  | 5651.264  | NM_00705E | 1196.083  | 1468.597  | NM_014713   | 3319.023  | 2209.011  |
| X52350    | 60066.23  | 57544.102 | NM_016652 | 1626.378  | 1472.129  | NM_001812   | 420.404   | 361.029   |
| NM_006177 | 629.393   | 1039.299  | NM_01631C | 9630.273  | 10261.715 | NM_01478E   | 310.778   | 183.418   |
| AL137286  | 6798.234  | 6015.488  | AK021562  | 782.643   | 1037.47   | NM_005811   | 1153.93   | 1216.477  |
| NM_01635E | 2543.71   | 2037.525  | AF060938  | 32812.215 | 35124.988 | NM_005764   | 171.754   | 182.288   |
| NM_01627E | 18909.68  | 12342.602 | NM_001973 | 10892.052 | 11613.42  | NM_016362   | 218.983   | 199.416   |
| NM_02041E | 2396.753  | 2056.384  | NM_01446E | 4808.221  | 5946.309  | NM_004214   | 3442.173  | 4776.93   |
| NM_013293 | 6909.621  | 6656.125  | AL050015  | 2041.175  | 1389.019  | NM_00432E   | 2225.645  | 2428.118  |
| AF315592  | 4019.223  | 3492.058  | AY007117  | 5024.007  | 4189.161  | NM_00283E   | 845.353   | 1124.068  |
| AF095844  | 1465.158  | 1773.432  | AF039698  | 2912.082  | 3302.664  | NM_020167   | 364.96    | 266.819   |
| NM_015833 | 2027.279  | 1098.726  | AL109679  | 939.226   | 652.347   | AL049963    | 6760.682  | 7433.78   |
| NM_00098E | 58227.402 | 59391.855 | AB046828  | 3462.412  | 3688.508  | NM_01605E   | 13297.611 | 18492.145 |
| AK026760  | 3175.465  | 2073.678  | AF144487  | 1142.564  | 987.318   | NM_01400E   | 401.974   | 427.685   |
| NM_014772 | 2294.493  | 2329.12   | AL137532  | 2642.42   | 1538.362  | NM_00463E   | 485.986   | 401.929   |
| AK025248  | 2116.984  | 2739.239  | AK025419  | 2323.568  | 1730.693  | AK022603    | 113.868   | 226.225   |
| NM_00453E | 11913.432 | 12540.88  | NM_017413 | 386.971   | 911.656   | NM_00489E   | 985.63    | 1384.117  |
| NM_00642E | 11273.539 | 10580.336 | NM_01325E | 9303.235  | 7820.302  | NM_00603C   | 216.228   | 169.191   |
| NM_00428C | 16685.846 | 19596.504 | NM_01837E | 6412.498  | 6631.613  | NM_02041C   | 1689.203  | 1088.455  |
| AF110399  | 770.493   | 985.714   | NM_004913 | 294.45    | 746.303   | AF000143    | 2647.07   | 1696.853  |
| AK027094  | 2747.192  | 3431.999  | AK026838  | 1746.424  | 2169.797  | NM_014211   | 145.349   | 128.063   |
| AL359596  | 1575.261  | 1391.957  | AK022443  | 1792.785  | 1700.283  | NM_000814   | 626.254   | 376.739   |
| U79249    | 747.868   | 1165.176  | AK023371  | 3573.218  | 4028.733  | NM_000453   | 491.346   | 401.44    |
| NM_00077E | 524.429   | 709.912   | AK025015  | 1190.156  | 1796.436  | J03077      | 5149.328  | 4266.786  |
| AB032981  | 542.468   | 586.638   | AF086187  | 2483.931  | 2330.233  | J03048      | 1457.939  | 1115.972  |
| BF217864  | 4906.571  | 4651.493  | AF305836  | 57294.957 | 50525.996 | AL157469    | 323.664   | 288.428   |
| NM_005917 | 37065.773 | 24783.445 | AL109784  | 845.787   | 692.369   | NM_00286E   | 295.073   | 245.705   |
| BC017044  | 726.203   | 755.901   | AL035295  | 5574.522  | 6293.982  | AK024100    | 1869.631  | 714.973   |

|           |           |           |           |           |           |           |           |           |
|-----------|-----------|-----------|-----------|-----------|-----------|-----------|-----------|-----------|
| AV758498  | 2456.23   | 2495.679  | AK027252  | 5287.197  | 5417.883  | NM_00513E | 219.806   | 251.729   |
| NM_02019E | 4174.545  | 4611.037  | AF165527  | 4923.678  | 5537.761  | NM_003827 | 3082.685  | 3378.037  |
| AK024113  | 844.005   | 729.785   | NM_014092 | 1126.474  | 1345.205  | NM_004583 | 192.892   | 145.727   |
| NM_018657 | 1461.576  | 1062.454  | AL110133  | 9846.725  | 6247.48   | NM_001103 | 237.357   | 229.299   |
| L40410    | 21975.246 | 14854.314 | AL050053  | 583.114   | 558.808   | AF228710  | 2705.498  | 2847.965  |
| NM_00705E | 1441.185  | 1367.586  | AK000529  | 5838.659  | 4055.704  | AY007131  | 5407.459  | 5358.625  |
| NM_016652 | 2191.893  | 2021.901  | AK027243  | 1973.083  | 2445.645  | U61735    | 996.341   | 1117.64   |
| NM_01631C | 11064.902 | 9669.087  | AF147415  | 987.861   | 936.398   | NM_001144 | 1679.939  | 1602.704  |
| AK021562  | 737.219   | 655.18    | AL049984  | 510.905   | 1081.817  | AK023766  | 1122.42   | 1597.388  |
| BC006560  | 397.002   | 294.299   | AK098474  | 668.053   | 536.896   | NM_001897 | 320.021   | 322.551   |
| NM_00629E | 470.754   | 285.25    | AL117475  | 1936.336  | 1680.52   | NM_003853 | 381.386   | 527.762   |
| AF060938  | 15302.549 | 11145.68  | AL049300  | 974.655   | 792.034   | AB033109  | 652.267   | 973.42    |
| NM_001973 | 1895.24   | 2342.216  | NM_01753E | 6374.557  | 7653.302  | NM_002053 | 4785.11   | 6127.507  |
| NM_01446E | 3801.599  | 4005.656  | AL080161  | 220.939   | 605.265   | NM_00688E | 468.832   | 852.502   |
| AL050015  | 1724.567  | 2046.371  | L23852    | 1072.193  | 1044.138  | NM_002744 | 1081.51   | 762.34    |
| AL109679  | 848.085   | 2268.012  | NM_003887 | 2410.219  | 2823.846  | NM_015917 | 3986.763  | 2979.03   |
| AF144487  | 1541.097  | 1797.455  | NM_004267 | 17175.576 | 17687.686 | NM_020397 | 409.278   | 226.534   |
| AL137532  | 2040.092  | 1921.079  | AL357212  | 735.041   | 716.299   | NM_000061 | 268.344   | 240.72    |
| AK025419  | 2919.594  | 3149.236  | AK026687  | 2962.781  | 2521.833  | AB046859  | 2046.464  | 1618.82   |
| NM_01325E | 3332.504  | 2890.667  | NM_017994 | 11946.308 | 13100.67  | NM_00510E | 2840.495  | 2601.149  |
| NM_01837E | 4136.173  | 3433.582  | AK021693  | 3720.297  | 3167.179  | AK023573  | 652.293   | 561.806   |
| AK022443  | 1574.776  | 1739.619  | AB023177  | 624.975   | 809.999   | NM_00273C | 1978.128  | 1857.992  |
| AK023371  | 1023.499  | 755.657   | Y11609    | 2984.051  | 2289.349  | NM_00482E | 338.446   | 351.656   |
| AF086187  | 3751.883  | 3643.319  | NM_012122 | 12870.955 | 8918.043  | AB011540  | 3972.455  | 3645.177  |
| AF305836  | 19958.682 | 13244.779 | AF009285  | 11198.235 | 8316.621  | NM_00004C | 1368.55   | 1281.006  |
| AL035295  | 747.148   | 694.462   | AF009294  | 4120.721  | 4300.692  | NM_004631 | 893.326   | 917.744   |
| NM_018302 | 5058.511  | 4997.516  | NM_001524 | 1573.992  | 1022.347  | NM_006033 | 1080.56   | 977.659   |
| AK027252  | 1368.025  | 1245.29   | AK000998  | 681.818   | 800.422   | NM_004837 | 2493.103  | 2935.574  |
| AF165527  | 2021.58   | 2013.824  | AK001225  | 717.029   | 666.771   | NM_00037C | 582.43    | 719.865   |
| NM_014092 | 869.821   | 696.807   | AK021435  | 596.442   | 644.216   | BE865893  | 1175.487  | 1232.758  |
| AL110133  | 6852.492  | 6332.305  | AK021684  | 4076.256  | 4985.52   | NM_003123 | 19826.766 | 17557.283 |
| AF147415  | 863.271   | 818.036   | AK001060  | 546.344   | 748.526   | AY005822  | 456.103   | 622.035   |
| AK098474  | 645.543   | 776.022   | AK001819  | 711.286   | 900.726   | NM_01812E | 5068.045  | 5512.449  |
| AL117475  | 1251.002  | 1429.237  | AK021480  | 1012.31   | 1044.853  | AF289022  | 793.926   | 1113.543  |
| NM_01753E | 2012.438  | 2218.694  | AK025112  | 2008      | 1526.944  | M17252    | 286.55    | 455.012   |
| NM_004267 | 3911.73   | 2642.222  | AK026079  | 512.913   | 641.92    | NM_01602E | 3903.468  | 4576.595  |
| AK026687  | 1282.279  | 1432.492  | AK026675  | 698.655   | 452.909   | NM_01331E | 939.756   | 1127.955  |
| AL117444  | 833.698   | 921.499   | AK025173  | 7897.377  | 6407.987  | NM_00074E | 789.406   | 1098.152  |
| NM_017994 | 8634.89   | 7428.702  | AK025430  | 1306.043  | 1411.948  | NM_000722 | 309.894   | 369.927   |
| AK021693  | 1373.996  | 1763.106  | AK026722  | 1017.431  | 928.822   | NM_00092E | 141.481   | 114.776   |
| AB023177  | 661.397   | 712.958   | AF117338  | 7430.761  | 5630.266  | NM_01865E | 675.257   | 528.787   |
| Y11609    | 1258.357  | 1120.145  | AK025567  | 3387.704  | 2754.606  | NM_005663 | 546.801   | 403.936   |
| NM_012122 | 11829.611 | 13723.5   | NM_019102 | 454.422   | 421.168   | X89960    | 175.515   | 221.948   |
| NM_01212E | 3393.998  | 5060.854  | U56857    | 5889.918  | 4077.421  | NM_00655C | 459.744   | 327       |
| AF009294  | 4130.15   | 5288.801  | BE905682  | 897.214   | 1470.093  | NM_005773 | 1087.268  | 1068.231  |
| AK001225  | 1077.977  | 1396.876  | AF086421  | 2036.486  | 1475.471  | NM_017644 | 1038.226  | 1058.287  |
| AK021684  | 8060.847  | 13017.844 | AK001612  | 876.002   | 920.71    | AB032971  | 114.368   | 146.595   |
| AK001060  | 474.525   | 795.684   | AF161522  | 6130.985  | 4640.646  | NM_002482 | 326.312   | 414.487   |
| AK021480  | 749.024   | 415.703   | AF086028  | 12629.019 | 23026.83  | NM_00171E | 146.871   | 126.746   |
| AK021726  | 7211.256  | 11545.144 | AK025365  | 1265.845  | 1356.523  | AF116659  | 425.371   | 254.613   |
| AK025112  | 8992.725  | 12619.516 | AK023445  | 340.732   | 453.534   | NM_000317 | 6446.09   | 5498.375  |
| AK025173  | 810.184   | 718.01    | AK023489  | 1122.065  | 1067.093  | NM_01837E | 1755.783  | 2210.959  |
| AF117338  | 2782.152  | 2283.286  | AK021561  | 4504.615  | 4484.893  | NM_01761E | 207.66    | 248.923   |

|            |           |           |           |           |           |           |          |          |
|------------|-----------|-----------|-----------|-----------|-----------|-----------|----------|----------|
| AK025567   | 2538.812  | 2495.735  | AK025222  | 403.409   | 272.778   | NM_01743E | 1145.062 | 1199.845 |
| NM_019102  | 872.305   | 745.783   | NM_003531 | 3610.803  | 2309.313  | U59209    | 1065.879 | 1338.299 |
| U56857     | 2608.966  | 2903.079  | L08434    | 313.989   | 282.001   | NM_02019E | 2422.846 | 4352.589 |
| L43349     | 6537.597  | 14299.83  | NM_017799 | 1136.712  | 742.471   | AK023824  | 1407.032 | 1150.563 |
| BE905682   | 531.973   | 1049.998  | NM_003510 | 975.11    | 775.679   | AL133069  | 1415.657 | 2415.081 |
| AF086421   | 1585.238  | 2202.57   | AL137403  | 9300.817  | 7618.124  | AK026055  | 1327.004 | 2095.64  |
| AK001612   | 1017.873  | 923.756   | AL049348  | 1346.004  | 1371.603  | AK024126  | 389.499  | 341.569  |
| AF161522   | 7508.24   | 7471.773  | NM_018534 | 1089.228  | 1182.189  | NM_00151E | 1496.228 | 1767.854 |
| AF086028   | 1979.047  | 1624.332  | AB037847  | 2303.527  | 1996.03   | NM_01908E | 841.342  | 513.498  |
| unknown (S | 1497.75   | 337.002   | NM_005170 | 1873.916  | 1714.476  | NM_006670 | 886.092  | 750.158  |
| AK025365   | 1091.399  | 1700.257  | S96437    | 1664.965  | 1637.854  | NM_01242E | 1761.329 | 1406.16  |
| AK023445   | 341.88    | 716.53    | NM_01517E | 1554.157  | 1407.63   | NM_00581E | 607.012  | 349.231  |
| AK023489   | 417.553   | 461.572   | AL353939  | 1256.584  | 1072.307  | NM_002750 | 2868.43  | 2125.686 |
| AK025222   | 763.633   | 728.662   | AL117573  | 4722.557  | 3301.214  | AK024134  | 1432.687 | 1013.369 |
| NM_003531  | 2905.381  | 3144.584  | AL080186  | 1183.193  | 1270.59   | NM_003014 | 437.602  | 376.653  |
| NM_01779E  | 1374.524  | 1409.681  | NM_00530E | 46869.551 | 45476.324 | NM_01855E | 226.691  | 321.417  |
| NM_003510  | 645.533   | 568.326   | NM_00164E | 22453.32  | 22342.809 | NM_001974 | 729.851  | 858.666  |
| AL137403   | 1639.057  | 2405.368  | AL137327  | 3351.09   | 3724.283  | NM_013957 | 377.144  | 289.259  |
| NM_018534  | 763.707   | 715.887   | AF358454  | 3433.058  | 4029.532  | NM_00246E | 2272.92  | 2766.019 |
| AB037847   | 2541.305  | 2288.771  | AK026090  | 1876.814  | 1726.221  | NM_00302E | 622.304  | 617.351  |
| NM_005170  | 3135.14   | 2852.944  | AF070637  | 554.713   | 593.094   | NM_00156E | 360.588  | 253.861  |
| S96437     | 1616.685  | 1252.737  | AL137634  | 830.763   | 988.79    | NM_016541 | 340.884  | 329.925  |
| NM_01517E  | 1554.954  | 1706.769  | AK024863  | 4231.938  | 4824.194  | NM_01854E | 1488.515 | 1760.25  |
| AL353939   | 1043.187  | 966.234   | AJ008135  | 53033.66  | 46823.996 | NM_013401 | 547.089  | 359.982  |
| AL117573   | 4387.179  | 5171.441  | AK026908  | 13508.189 | 12806.341 | NM_01823E | 1691.172 | 2087.201 |
| AL080186   | 891.694   | 1234.117  | AL050068  | 714.637   | 373.384   | NM_00685E | 3405.198 | 3909.772 |
| NM_00530E  | 4821.111  | 4219.043  | AB046766  | 763.016   | 526.758   | NM_00140E | 2809.103 | 3449.309 |
| NM_00164E  | 1388.54   | 1162.36   | AF009323  | 832.866   | 845.261   | NM_003880 | 519.165  | 351.521  |
| AK026090   | 1060.2    | 1565.918  | U52829    | 1178.736  | 1014.491  | NM_00546E | 166.155  | 539.454  |
| AF070637   | 644.448   | 2004.848  | AK001526  | 4704.225  | 3755.829  | AF131778  | 556.779  | 613.05   |
| AL137634   | 1739.323  | 1482.652  | AF086183  | 1062.183  | 909.613   | NM_00156E | 875.116  | 1348.255 |
| AK024863   | 4565.75   | 5885.177  | AK000525  | 1416.792  | 1095.274  | NM_01327E | 565.456  | 770.012  |
| AJ008135   | 18132.275 | 17795.275 | AL137434  | 1494.802  | 1354.936  | NM_003487 | 2658.177 | 1101.42  |
| AK026908   | 3996.488  | 4414.993  | Z36795    | 1683.785  | 1395.804  | NM_006887 | 3297.207 | 2242.495 |
| U92025     | 438.103   | 604.019   | AL080216  | 1941.66   | 1587.741  | NM_006477 | 468.732  | 267.71   |
| AB046766   | 770.092   | 1291.601  | NM_019897 | 1942.695  | 1922.934  | NM_002880 | 1326.482 | 759.158  |
| AK001526   | 4810.331  | 5198.433  | AF038188  | 12499.623 | 11833.332 | NM_00067E | 1819.578 | 1264.256 |
| AF086183   | 953.204   | 770.22    | AJ227888  | 802.018   | 656.424   | NM_00106E | 458.1    | 305.617  |
| AK000525   | 1919.62   | 2145.959  | D17046    | 861.434   | 917.634   | NM_004657 | 485.148  | 399.123  |
| AL137434   | 817.387   | 961.465   | NM_01764E | 8995.261  | 12214.231 | NM_018170 | 643.714  | 436.387  |
| Z36795     | 3202.31   | 3118.246  | AJ227864  | 253.456   | 733.998   | NM_003867 | 317.558  | 196.935  |
| AL080216   | 2260.579  | 2118.917  | AF157562  | 3294.013  | 3539.765  | AL162062  | 349.427  | 289.667  |
| AJ227864   | 832.304   | 1256.799  | AK021958  | 3054.307  | 7010.396  | NM_00317E | 2690.622 | 3038.228 |
| AF113674   | 16708.111 | 17929.654 | M31164    | 585.303   | 1145.937  | NM_005030 | 3935.647 | 4334.282 |
| NM_003511  | 676.098   | 2127.914  | AF113674  | 13357.392 | 12710.771 | NM_017584 | 1338.499 | 1489.36  |
| CY3Cy5     | 3375.511  | 253.913   | NM_003511 | 617.986   | 2239.981  | NM_02035E | 1214.675 | 1344.613 |
| H97792     | 684.233   | 936.817   | CY3Cy5    | 5258.022  | 97.856    | AB014541  | 5975.649 | 6817.221 |
| W95082     | 689.239   | 404.177   | H97792    | 1382.561  | 1586.329  | NM_00258E | 1205.485 | 1538.202 |
| AA733033   | 2089.786  | 1153.022  | L33404    | 848.563   | 659.242   | NM_006570 | 5997.787 | 5709.292 |
| AA583574   | 968.165   | 506.238   | M13509    | 1961.622  | 1753.074  | NM_02034E | 377.607  | 416.183  |
| AI690184   | 7262.847  | 3570.701  | X04076    | 2464.993  | 3137.445  | NM_006034 | 3433.226 | 3971.858 |
| AA927490   | 1324.847  | 1049.9    | W95082    | 1484.348  | 1612.575  | NM_005201 | 3343.197 | 3582.835 |
| NM_001824  | 15930.026 | 7920.914  | AA485362  | 3833.64   | 3317.124  | NM_00009E | 326.91   | 259.658  |



|           |           |           |           |           |           |           |           |           |
|-----------|-----------|-----------|-----------|-----------|-----------|-----------|-----------|-----------|
| NM_002964 | 281.495   | 503.192   | AJ222801  | 4119.908  | 4267.826  | AF174600  | 2630.165  | 2021.279  |
| SR5       | 5664.879  | 5000.134  | W72207    | 2999.55   | 3380.937  | AK001003  | 574.275   | 282.694   |
| SR7       | 5152.074  | 27679.914 | BI772354  | 3400.71   | 4047.719  | NM_00280C | 6549.014  | 4574.418  |
| SR9       | 15751.852 | 2115.046  | AA733033  | 2291.44   | 1943.132  | NM_018384 | 5275.976  | 3348.571  |
| CY3Cy5    | 2320.531  | 222.811   | AA583574  | 1654.023  | 1510.808  | NM_001872 | 132.906   | 138.734   |
| NM_01781E | 2029.485  | 1891.271  | AI690184  | 25633.18  | 24995.502 | AF282617  | 2754.958  | 2292.862  |
| NM_001767 | 2305.561  | 2410.792  | AA927490  | 1356.712  | 972.233   | AF157323  | 894.926   | 885.111   |
| AF028823  | 3101.045  | 2911.067  | NM_001824 | 69616.32  | 62285.527 | NM_00602E | 170.696   | 238.285   |
| NM_00429E | 4172.905  | 2889.957  | SR3       | 53489.953 | 41497.301 | NM_005877 | 3412.605  | 3192.801  |
| NM_002087 | 3261.188  | 2059.817  | SR5       | 9621.167  | 7058.815  | NM_00333E | 2811.787  | 3356.999  |
| NM_01458E | 1277.084  | 810.914   | SR7       | 6872.341  | 34886.52  | NM_01339E | 372.695   | 400.075   |
| NM_013441 | 1773.257  | 995.61    | SR9       | 23858.893 | 2398.313  | NM_017752 | 514.337   | 688.443   |
| NM_014421 | 362.591   | 264.988   | CY3Cy5    | 6318.016  | 139.585   | D26069    | 2352.215  | 2881.424  |
| M60499    | 1267.302  | 1142.094  | NM_01781E | 3384.597  | 3445.525  | BF107577  | 4895.405  | 5725.764  |
| NM_003833 | 5909.213  | 4337.397  | NM_020433 | 1300.092  | 1073.566  | NM_005837 | 4500.22   | 5026.759  |
| AK000868  | 3362.296  | 2323.484  | NM_001767 | 5245.306  | 5840.601  | NM_01662E | 2728.909  | 3182.631  |
| NM_001233 | 2151.683  | 1740.257  | AF028823  | 7490.608  | 7458.465  | NM_01749E | 749.469   | 816.336   |
| NM_001234 | 740.652   | 714.442   | NM_00429E | 36359.703 | 40663.469 | NM_00613E | 3323.042  | 4098.018  |
| BF679789  | 679.704   | 739.239   | NM_002087 | 4596.167  | 4811.551  | AF237772  | 1494.989  | 1646.024  |
| AB007859  | 1016.477  | 820.354   | NM_01458E | 2534.933  | 2578.589  | AK025934  | 843.714   | 1353.535  |
| NM_006754 | 559.997   | 445.81    | AF200815  | 612.886   | 854.384   | AJ008154  | 392.998   | 459.469   |
| NM_001127 | 1662.681  | 1390.123  | NM_013441 | 3457.223  | 2643.995  | NM_00685E | 1810.119  | 1281.199  |
| NM_01243C | 1726.895  | 1388.933  | NM_014421 | 1762.68   | 1616.476  | X52350    | 37899.098 | 18887.461 |
| NM_003917 | 3403.545  | 2666.567  | M60499    | 1154.473  | 1153.93   | AF071554  | 631.211   | 456.351   |
| NM_007077 | 405.373   | 445.685   | NM_003833 | 10329.584 | 9229.487  | NM_002147 | 176.585   | 146.832   |
| NM_00295E | 1039.257  | 667.31    | AK000868  | 3912.124  | 2832.658  | U90919    | 1023.255  | 664.367   |
| AB018739  | 556.488   | 300.446   | NM_001233 | 2687.965  | 1926.456  | NM_006177 | 307.841   | 340.412   |
| NM_00675C | 15842.307 | 10664.045 | NM_001234 | 1092.091  | 695.728   | AL137286  | 1662.844  | 1449.977  |
| NM_020164 | 3215.222  | 1854.851  | BF679789  | 1549.764  | 1414.063  | NM_01635E | 869.21    | 731.51    |
| AK023521  | 2957.302  | 1575.725  | AB007859  | 870.289   | 1013.448  | NM_01627E | 4644.473  | 3721.422  |
| NM_014267 | 18295.811 | 12409.738 | NM_001127 | 2452.551  | 2848.498  | NM_02041E | 1331.067  | 1109.42   |
| NM_001481 | 442.687   | 284.612   | NM_01243C | 3708.751  | 3722.156  | NM_01329E | 1968.054  | 2484.956  |
| U30872    | 767.328   | 575.332   | NM_003917 | 24282.602 | 28675.234 | AF315592  | 1439.39   | 1631.193  |
| NM_02046E | 2431.855  | 1545.085  | NM_007077 | 1500.618  | 1545.478  | AF095844  | 435.79    | 1044.455  |
| NM_014734 | 1517.598  | 1057.484  | NM_00295E | 2180.294  | 2162.545  | NM_01583E | 631.445   | 915.518   |
| AK026408  | 1298.848  | 1199.976  | AB018739  | 878.477   | 853.353   | NM_00098E | 44237.781 | 71588.313 |
| NM_00502E | 1255.026  | 506.323   | NM_00675C | 18897.781 | 16796.658 | AK026760  | 4382.548  | 5075.735  |
| NM_00105E | 612.232   | 694.739   | NM_020164 | 4091.897  | 2792.901  | NM_014772 | 808.705   | 863.327   |
| AY026461  | 2376.121  | 2221.531  | AK023521  | 3690.958  | 2731.876  | AK025248  | 779.997   | 1283.989  |
| AK025708  | 2035.101  | 1708.881  | NM_014267 | 24820.064 | 17979.871 | NM_00453E | 5177.684  | 6708.245  |
| NM_005564 | 24196.043 | 19138.709 | NM_001481 | 528.629   | 480.157   | NM_00642E | 5608.626  | 6461.999  |
| NM_00450E | 2068.67   | 1314.433  | U30872    | 1227.618  | 852.682   | NM_00428C | 8326.476  | 12544.169 |
| NM_00640E | 2846.653  | 2069.568  | NM_02046E | 3878.877  | 3364.041  | AF110399  | 416.808   | 965.031   |
| NM_00674E | 600.667   | 601.978   | NM_014734 | 1890.99   | 1623.558  | AK027094  | 773.544   | 1414.02   |
| AL137619  | 589.108   | 373.12    | NM_00228E | 853.221   | 461.863   | AL359596  | 692.64    | 404.676   |
| NM_00430C | 9278.733  | 7524.878  | AK026408  | 2566.752  | 2043.321  | U79249    | 258.673   | 180.285   |
| AF319476  | 1162.137  | 1247.908  | NM_00502E | 1401.979  | 1327.748  | AK022114  | 394.619   | 234.863   |
| AK001913  | 3792.745  | 2781.96   | NM_006307 | 804.884   | 468.267   | AL133585  | 552.845   | 578.586   |
| NM_017737 | 559.107   | 390.914   | M74782    | 887.568   | 475.335   | NM_002631 | 4891.201  | 2840.016  |
| NM_004292 | 1009.596  | 625.925   | NM_00105E | 1180.935  | 1312.482  | AB032981  | 201.239   | 112.485   |
| NM_015484 | 3661.717  | 3158.282  | AY026461  | 4701.601  | 4779.606  | BF217864  | 1638.354  | 1593.512  |
| NM_01804E | 1006.292  | 844.899   | AK025708  | 5420.653  | 4873.876  | NM_005917 | 5261.827  | 3333.094  |
| NM_01331E | 792.559   | 509.093   | NM_00040E | 1355.594  | 1522.017  | NM_007052 | 152.658   | 166.342   |

|           |           |           |           |           |           |           |           |           |
|-----------|-----------|-----------|-----------|-----------|-----------|-----------|-----------|-----------|
| M20701    | 3993.008  | 2638.525  | NM_005564 | 50786.93  | 50353.754 | BC017044  | 256.786   | 283.707   |
| NM_002912 | 482.984   | 393.644   | NM_004508 | 3282.561  | 3457.524  | AV758498  | 672.914   | 871.823   |
| NM_013284 | 2231.454  | 1947.434  | NM_006405 | 30686.826 | 25801.875 | NM_020196 | 970.614   | 1044.714  |
| NM_006739 | 1731.667  | 1208.265  | AJ245946  | 878.436   | 468.796   | AK024113  | 240.98    | 343.864   |
| NM_013274 | 3140.076  | 2268.885  | NM_006749 | 1222.598  | 1206.642  | NM_018657 | 413.845   | 321.164   |
| AL050187  | 632.543   | 508.81    | NM_000324 | 879.486   | 552.04    | L40410    | 6112.847  | 8280.364  |
| NM_012387 | 11183.463 | 9184.54   | AL137619  | 3897.82   | 3657.81   | NM_007055 | 469.104   | 616.124   |
| NM_014735 | 1625.13   | 1584.77   | NM_004300 | 12246.953 | 7303.271  | NM_016652 | 702.529   | 965.379   |
| NM_004252 | 16077.552 | 13990.835 | AF319476  | 2055.897  | 2640.246  | NM_016310 | 3929.702  | 5318.092  |
| AF172929  | 11795.522 | 10766.889 | AK001913  | 4728.974  | 5914.303  | AK021562  | 377.454   | 355.988   |
| NM_006398 | 7500.238  | 6201.825  | NM_017737 | 1157.434  | 1604.767  | BC006560  | 382.179   | 478.858   |
| AK025655  | 2094.813  | 1970.88   | NM_004292 | 1627.669  | 1910.245  | NM_006298 | 255.502   | 139.405   |
| NM_004056 | 1630.475  | 1145.269  | NM_015484 | 5725.363  | 6410.446  | AF060938  | 8675.492  | 9612.302  |
| NM_003833 | 4337.984  | 3864.772  | NM_018046 | 2705.827  | 2521.719  | NM_001973 | 1658.665  | 2609.655  |
| AK000868  | 2254.003  | 1888.807  | NM_013316 | 3234.249  | 3482.414  | NM_014468 | 1799.776  | 2876.777  |
| NM_001233 | 1694.782  | 1984.896  | M20701    | 14580.279 | 14329.538 | AL050015  | 572.143   | 434.551   |
| NM_001234 | 475.329   | 453.404   | NM_002912 | 2166.748  | 1691.811  | AY007117  | 2020.411  | 1666.717  |
| BF679789  | 528.717   | 373.993   | NM_013284 | 4734.792  | 4724.929  | AF039698  | 1457.027  | 952.783   |
| H97792    | 664.524   | 478.594   | NM_006739 | 2310.381  | 2476.844  | AL109679  | 186.682   | 108.959   |
| X04076    | 1547.763  | 986.185   | NM_013274 | 4963.686  | 4653.013  | AB046828  | 1778.207  | 905.087   |
| W95082    | 724.026   | 532.309   | AL050187  | 1509.589  | 1341.11   | AF144487  | 548.594   | 340.078   |
| AA485362  | 692.804   | 527.431   | NM_012387 | 17595.652 | 15896.906 | AL137532  | 654.812   | 714.912   |
| AJ222801  | 1381.556  | 818.011   | NM_014735 | 1790.872  | 1577.709  | AK025419  | 742.382   | 914.931   |
| W72207    | 1429.071  | 736.461   | NM_004252 | 19607.85  | 19297.979 | NM_017413 | 186.428   | 257.053   |
| BI772354  | 2539.913  | 2172.128  | AF172929  | 16710.854 | 11178.962 | NM_013258 | 1945.699  | 2876.184  |
| AA733033  | 2331.531  | 2045.519  | NM_006398 | 12898.584 | 13301.86  | NM_018375 | 1528.037  | 1658.978  |
| AA583574  | 1252.264  | 1028.698  | AK025655  | 2650.565  | 2642.956  | AK026838  | 713.906   | 867.232   |
| AI690184  | 6919.969  | 4840.107  | NM_001362 | 993.66    | 692.054   | AK022443  | 716.924   | 1054.713  |
| AA927490  | 1260.615  | 1093.516  | NM_004056 | 1832.109  | 1260.563  | AK023371  | 918.707   | 1325.158  |
| NM_001824 | 22389.471 | 17964.918 | NM_003833 | 8729.347  | 10064.763 | AF086187  | 928.039   | 1419.013  |
| NM_002964 | 965.639   | 1245.743  | AK000868  | 3582.333  | 3660.19   | AF305836  | 24236.656 | 22787.639 |
| NM_005052 | 11869.74  | 7655.031  | NM_001233 | 2378.828  | 2610.918  | AL137383  | 179.707   | 147.577   |
| NM_014734 | 802.727   | 642.583   | NM_001234 | 814.542   | 1175.994  | AL035295  | 1082.685  | 1547.948  |
| AK026408  | 934.839   | 1094.326  | BF679789  | 1313.333  | 1462.792  | NM_018302 | 1968.886  | 2974.101  |
| NM_005025 | 844.074   | 591.445   | H97792    | 1436.199  | 1267.518  | AK027252  | 1069.015  | 1620.075  |
| NM_017818 | 2153.591  | 1784.119  | L33404    | 749.086   | 724.936   | AF165527  | 1206.593  | 1506.728  |
| NM_020433 | 763.309   | 1017.348  | M13509    | 1800.152  | 1768.997  | NM_014092 | 416.498   | 408.246   |
| NM_001767 | 3387.86   | 2859.735  | X04076    | 2104.673  | 3204.375  | AL110133  | 2839.324  | 1959.959  |
| AF028823  | 3229.691  | 2429.41   | W95082    | 1566.05   | 1924.475  | AK000529  | 2246.346  | 1782.658  |
| NM_004295 | 4444.163  | 3185.995  | AA485362  | 4035.829  | 3111.361  | AK027243  | 874.269   | 487.102   |
| NM_002087 | 3098.59   | 2238.895  | AJ222801  | 4815.474  | 4123.692  | AF147415  | 303.618   | 217.31    |
| NM_014585 | 1725.925  | 2086.01   | W72207    | 3183.786  | 3070.745  | AL049273  | 177.431   | 144.331   |
| AF200815  | 477.184   | 330.154   | BI772354  | 4177.804  | 3363.398  | AK098474  | 228.449   | 129.95    |
| NM_013441 | 1930.557  | 1676.512  | AA733033  | 2882.177  | 2292.443  | AL117475  | 443.464   | 418.092   |
| NM_014421 | 387.674   | 531.829   | AA583574  | 2302.308  | 1775.861  | NM_017535 | 1618.345  | 1957.997  |
| M60499    | 1321.057  | 1429.839  | AI690184  | 33637.938 | 32109.67  | AL117539  | 175.231   | 79.139    |
| NM_001614 | 54935.809 | 80416.906 | AA927490  | 1358.934  | 1006.77   | NM_003887 | 378.904   | 550.54    |
| NM_004300 | 5771.45   | 6274.315  | NM_001824 | 68239.266 | 66792.648 | NM_004267 | 4587.258  | 5568.181  |
| AB007859  | 608.992   | 711.374   | NM_005052 | 10392.901 | 9964.959  | AL357212  | 154.691   | 210.751   |
| NM_001127 | 1891.152  | 3158.673  | BF038439  | 860.636   | 732.079   | AK026687  | 714.142   | 957.002   |
| NM_012430 | 1403.952  | 1283.03   | NM_014734 | 1611.077  | 2291.257  | NM_017994 | 5044.378  | 6007.36   |
| NM_003917 | 3897.186  | 3444.132  | NM_002289 | 716.451   | 791.425   | AK021693  | 752.248   | 1124.777  |
| NM_007077 | 802.773   | 735.156   | AK026408  | 2044.487  | 2107.239  | AB023177  | 299.928   | 197.39    |

|           |           |           |           |           |           |           |           |           |
|-----------|-----------|-----------|-----------|-----------|-----------|-----------|-----------|-----------|
| NM_002956 | 1349.185  | 983.192   | NM_005025 | 1301.801  | 1791.739  | Y11609    | 976.759   | 669.271   |
| AB018739  | 763.497   | 529.169   | NM_006307 | 703.909   | 598.587   | AJ278482  | 137.256   | 118.024   |
| NM_006750 | 16186.842 | 15156.791 | M74782    | 328.808   | 525.972   | NM_012122 | 4873.762  | 3877.199  |
| NM_020164 | 3645.612  | 3314.856  | NM_017818 | 3184.581  | 3634.313  | AF009285  | 3154.475  | 2396.554  |
| AK023521  | 3326.921  | 3078.824  | NM_020433 | 1376.233  | 1209.796  | NM_012125 | 1813.987  | 1088.814  |
| NM_014267 | 18939.803 | 19525.486 | NM_001767 | 6443.252  | 7202.963  | AF056435  | 267.004   | 467.976   |
| NM_001481 | 713.01    | 577.244   | AF028823  | 9238.788  | 13501.849 | AB032363  | 179.861   | 165.148   |
| U30872    | 880.486   | 1203.626  | NM_004295 | 35175.902 | 36105.664 | AF009294  | 980.542   | 885.85    |
| AF111783  | 298.667   | 236.972   | NM_002087 | 5508.035  | 5333.567  | NM_001524 | 274.37    | 255.656   |
| NM_020469 | 2543.208  | 1885.549  | NM_014585 | 2862.611  | 2305.487  | AF056445  | 106.444   | 82.297    |
| NM_002639 | 778.081   | 511.308   | AF200815  | 480.545   | 901.309   | AK000998  | 195.288   | 353.75    |
| NM_006398 | 5635.807  | 5692.474  | NM_013441 | 3637.764  | 2780.571  | AK001225  | 196.665   | 337.991   |
| AK025655  | 1520.076  | 1711.302  | NM_014421 | 1811.109  | 2154.328  | AK021684  | 849.935   | 1081.428  |
| NM_004056 | 1203.082  | 1087.322  | NM_017680 | 356.731   | 606.555   | AK001060  | 308.778   | 348.197   |
| NM_001056 | 478.48    | 597.72    | M60499    | 1221.63   | 981.537   | AK001819  | 187.463   | 228.392   |
| AY026461  | 1640.716  | 1744.438  | NM_004300 | 10197.504 | 9672.05   | AK021480  | 359.514   | 500.016   |
| AK025708  | 2037.049  | 2468.005  | AB007859  | 1226.202  | 1418.039  | AK021726  | 136.061   | 166.483   |
| NM_005564 | 20592.033 | 20450.047 | NM_006754 | 559.624   | 456.239   | AK025112  | 376.145   | 482.745   |
| NM_004508 | 2180.196  | 2508.843  | NM_001127 | 2863.238  | 3299.855  | AK026675  | 180.118   | 324.022   |
| NM_006405 | 4171.811  | 4755.023  | NM_012430 | 3725.977  | 2939.477  | AK026269  | 110.505   | 249.746   |
| NM_006749 | 1085.592  | 1561.755  | NM_003917 | 32146.047 | 29985.994 | AK026722  | 204.539   | 373.563   |
| AL137619  | 699.564   | 570.963   | NM_007077 | 2015.747  | 1555.168  | AF117338  | 1971.372  | 1251.489  |
| NM_001824 | 20714.793 | 17461.473 | NM_002956 | 2420.741  | 1887.165  | AK025567  | 1576.901  | 1159.747  |
| NM_005052 | 8977.306  | 6002.838  | AB018739  | 816.693   | 723.314   | NM_019102 | 244.455   | 197.148   |
| AF319476  | 975.587   | 1223.448  | NM_006750 | 19728.744 | 16218.784 | U56857    | 1687.069  | 1298.907  |
| AK001913  | 3707.652  | 3821.469  | NM_020164 | 3943.684  | 3332.25   | L43349    | 323.264   | 234.978   |
| NM_017737 | 782.978   | 967.32    | AK023521  | 3643.752  | 3896.603  | BE905682  | 185.474   | 118.296   |
| NM_004292 | 1222.999  | 1126.281  | NM_014267 | 25282.947 | 34025.551 | AF086421  | 334.044   | 394.377   |
| NM_015484 | 4375.923  | 4139.858  | NM_001481 | 612.713   | 727.08    | AK001612  | 239.1     | 414.639   |
| NM_018046 | 1787.786  | 1754.732  | U30872    | 1025.546  | 1011.574  | AF161522  | 2155.008  | 2639.247  |
| NM_013316 | 1106.677  | 1059.913  | AF111783  | 1055.571  | 934.197   | AF086028  | 8188.766  | 3100.362  |
| M20701    | 5640.736  | 4294.205  | NM_002639 | 1162.201  | 919.65    | AK025365  | 670.335   | 1002.349  |
| NM_002912 | 993.185   | 870.121   | NM_006398 | 14425.794 | 22657.367 | AK023489  | 318.861   | 331.633   |
| NM_013284 | 2813.999  | 2776.547  | AK025655  | 2550.663  | 3368.351  | NM_003531 | 1111.867  | 750.643   |
| NM_006739 | 2425.528  | 2529.521  | NM_001362 | 386.089   | 774.366   | L08434    | 161.891   | 120.773   |
| NM_013274 | 4020.265  | 4088.325  | NM_001056 | 1087.614  | 1569.537  | NM_017799 | 425.094   | 340.142   |
| AL050187  | 999.732   | 1115.573  | AY026461  | 6417.466  | 5556.18   | NM_003510 | 353.528   | 134.896   |
| NM_012387 | 11862.185 | 12083.316 | AK025708  | 6534.985  | 5660.753  | AL137403  | 756.309   | 839.643   |
| NM_014735 | 1088.405  | 1441.17   | NM_000405 | 1401.757  | 1344.263  | AL049348  | 207.414   | 163.377   |
| NM_004252 | 15950.541 | 11628.35  | NM_005564 | 56187.867 | 55202.766 | NM_018534 | 253.938   | 312.018   |
| AF172929  | 13664.718 | 12642.822 | NM_004508 | 3822.273  | 4276.692  | AB037847  | 682.941   | 776.975   |
| M60499    | 787.808   | 952.024   | NM_006405 | 29599.035 | 34167.297 | NM_005170 | 958.329   | 903.098   |
| NM_001614 | 52049.695 | 77589.281 | NM_006749 | 952.628   | 1061.446  | S96437    | 406.598   | 421.967   |
| NM_003833 | 4242.038  | 3887.675  | NM_004694 | 869.466   | 483.19    | NM_015176 | 545.181   | 699.126   |
| AK000868  | 2387.996  | 2116.2    | NM_000324 | 651.517   | 488.171   | AL353939  | 386.698   | 371.195   |
| NM_001233 | 1909.117  | 3557.407  | AL137619  | 3887.773  | 3690.404  | AL117573  | 1417.761  | 3144.473  |
| NM_001234 | 911.201   | 2573.922  | NM_005052 | 7495.297  | 12212.44  | AL080186  | 321.091   | 641.573   |
| BF679789  | 501.315   | 671.308   | BF038439  | 567.94    | 679.092   | NM_005306 | 17888.117 | 17299.939 |
| H97792    | 630.919   | 481.481   | AF319476  | 1911.704  | 2366.647  | NM_001646 | 5316.525  | 6224.48   |
| M13509    | 363.283   | 287.528   | AK001913  | 5317.733  | 7046.176  | AL137327  | 1032.808  | 1372.818  |
| X04076    | 2313.206  | 1547.176  | NM_017737 | 1168.359  | 1548.659  | AF358454  | 1500.375  | 1825.957  |
| W95082    | 1367.467  | 1387.182  | NM_004292 | 2288.457  | 2155.029  | AK026090  | 467.238   | 734.343   |
| AA485362  | 823.879   | 841.218   | NM_015484 | 6329.092  | 6147.316  | AF070637  | 199.178   | 120.031   |

|           |           |           |           |           |           |           |           |           |
|-----------|-----------|-----------|-----------|-----------|-----------|-----------|-----------|-----------|
| AJ222801  | 1656.189  | 1996.419  | NM_018046 | 2859.502  | 2417.168  | AL137634  | 321.161   | 348.413   |
| W72207    | 2175.264  | 2184.336  | NM_013316 | 3605.438  | 3599.494  | AK024863  | 1904.618  | 2397.843  |
| BI772354  | 3359.218  | 3690.16   | M20701    | 21623.918 | 21474.258 | AJ008135  | 37524.508 | 36301.82  |
| AA733033  | 2785.575  | 3677.5    | NM_002912 | 2208.961  | 1844.582  | AL050068  | 189.786   | 120.093   |
| AA583574  | 1112.325  | 982.969   | NM_013284 | 4624.98   | 4354.813  | U92025    | 129.477   | 191.425   |
| AI690184  | 8119.564  | 6872.845  | NM_006739 | 2208.656  | 3315.11   | AB046766  | 294.721   | 196.284   |
| AA927490  | 1416.376  | 1217.134  | NM_013274 | 4306.91   | 5055.43   | AF009323  | 364.444   | 210.999   |
| NM_001481 | 329.944   | 508.998   | AL050187  | 1474.301  | 1769.645  | U52829    | 175.241   | 79.787    |
| U30872    | 476.446   | 989.431   | NM_012387 | 15978.827 | 16614.799 | Z25437    | 77.819    | 238.941   |
| NM_020469 | 2692.615  | 2123.007  | NM_014735 | 1623.96   | 1469.229  | AK001526  | 1455.345  | 1725.495  |
| NM_002639 | 653.401   | 916.025   | NM_004252 | 18777.057 | 21544.529 | AF086183  | 159.399   | 276.44    |
| NM_014734 | 1220.713  | 1435.198  | AF172929  | 16448.627 | 11520.945 | AK000525  | 376.33    | 589.708   |
| AK026408  | 1040.588  | 1666.922  | M60499    | 1294.161  | 1569.869  | AL137434  | 399.626   | 547.986   |
| NM_005025 | 947.985   | 1272.348  | NM_003833 | 6813.12   | 7954.036  | Z36795    | 723.121   | 853.336   |
| NM_017818 | 3033.212  | 2851.274  | AK000868  | 4149.004  | 3359.266  | AL080216  | 650.78    | 1043.305  |
| NM_001767 | 4663.433  | 3722.113  | NM_001233 | 2393.698  | 2802.122  | NM_019897 | 124.74    | 107.742   |
| AF028823  | 4591.962  | 3995.584  | NM_001234 | 1575.504  | 1365.182  | AF038188  | 3145.315  | 3901.428  |
| NM_004970 | 1569.014  | 3169.128  | BF679789  | 2062.187  | 1914.263  | AJ227888  | 161.982   | 240.335   |
| NM_004295 | 9183.373  | 16593.055 | H97792    | 2047.67   | 1406.249  | D17046    | 299.718   | 530.927   |
| NM_002087 | 5433.702  | 11601.726 | L33404    | 617.502   | 620.887   | NM_017645 | 4288.23   | 3257.238  |
| NM_014585 | 2073.932  | 1992.945  | M13509    | 1776.566  | 1711.088  | AJ227864  | 250.604   | 197.865   |
| AF200815  | 554.699   | 434.121   | X04076    | 2519.693  | 3432.035  | AF157562  | 1461.031  | 1804.366  |
| NM_013441 | 2017.08   | 1408.512  | W95082    | 1513.659  | 1171.626  | AK021958  | 2625.897  | 1400.138  |
| NM_014421 | 578.74    | 635.517   | AA485362  | 3217.017  | 2630.638  | M31164    | 598.835   | 215.166   |
| NM_006749 | 640.729   | 1087.65   | AJ222801  | 4379.386  | 5552.584  | AF113674  | 5735.978  | 8062.212  |
| AL137619  | 662.026   | 629.508   | W72207    | 3116.469  | 5058.804  | NM_003511 | 336.068   | 2548.729  |
| NM_004300 | 7706.875  | 9585.815  | BI772354  | 3556.249  | 3922.687  | CY3Cy5    | 975.99    | 110.053   |
| AB007859  | 900.47    | 1049.14   | AA733033  | 2804.986  | 2742.86   | H97792    | 568.255   | 358.689   |
| NM_006754 | 390.462   | 382.414   | AA583574  | 2269.962  | 2432.996  | M13509    | 334.867   | 302.366   |
| NM_001127 | 2323.35   | 2934.996  | AI690184  | 32469.867 | 32481.916 | X04076    | 922.901   | 453.21    |
| NM_012430 | 2485.076  | 3868.944  | AA927490  | 1374.964  | 1041.183  | W95082    | 492.503   | 466.374   |
| NM_003917 | 6154.793  | 9066.231  | U30872    | 932.545   | 1128.993  | AA485362  | 347.392   | 208.434   |
| NM_007077 | 889.118   | 1120.469  | NM_002639 | 1586.233  | 2016.927  | AJ222801  | 1001.619  | 510.051   |
| NM_002956 | 1793.915  | 1699.429  | NM_014734 | 1603.504  | 2013.847  | W72207    | 770.175   | 376.24    |
| AB018739  | 1137.284  | 1287.428  | NM_002289 | 574.229   | 762.703   | BI772354  | 1298.072  | 861.937   |
| NM_006750 | 19411.797 | 19147.303 | AK026408  | 2016.271  | 2069.429  | AA733033  | 828.621   | 661.521   |
| NM_020164 | 5654.728  | 6647.092  | NM_005025 | 1280.755  | 1873.573  | AA583574  | 530.588   | 379.921   |
| AK023521  | 4189.534  | 3999.668  | NM_006307 | 910.19    | 811.811   | AI690184  | 5346.423  | 4027.625  |
| NM_014267 | 20539.508 | 18123.869 | M74782    | 609.685   | 677.978   | AA927490  | 382.79    | 357.786   |
| AL050187  | 740.992   | 881.924   | NM_017818 | 4119.101  | 3366.004  | NM_001824 | 32212.42  | 19598.492 |
| NM_012387 | 11364.36  | 12711.83  | NM_020433 | 1647.965  | 1383.493  | SR5       | 3186.836  | 2918.867  |
| NM_014735 | 885.954   | 689.002   | NM_001767 | 5872.147  | 5590.15   | SR7       | 2277.045  | 15776.744 |
| NM_004252 | 17731.348 | 15466.467 | AF028823  | 8289.968  | 8354.169  | SR9       | 8123.826  | 1230.936  |
| AF172929  | 12312.922 | 14648.101 | NM_004295 | 34030.621 | 40954.07  | CY3Cy5    | 827.655   | 129.887   |
| NM_006398 | 9386.528  | 7606.207  | NM_002087 | 4449.732  | 4892.792  | NM_017818 | 721.263   | 606.382   |
| AK025655  | 1789.086  | 2436.37   | NM_014585 | 3002.876  | 2607.242  | NM_001767 | 2336.46   | 1432.004  |
| NM_004056 | 1484.4    | 1875.24   | AF200815  | 821.35    | 1022.839  | AF028823  | 2133.973  | 1388.976  |
| NM_001056 | 817.636   | 943.55    | NM_013441 | 4012.8    | 2846.994  | NM_004295 | 7386.289  | 5649.825  |
| AY026461  | 2147.604  | 2231.087  | NM_014421 | 2077.926  | 1994.267  | NM_002087 | 1343.496  | 1071.078  |
| AK025708  | 2790.536  | 3720.794  | NM_006749 | 701.57    | 768.894   | NM_014585 | 831.791   | 651.565   |
| NM_000405 | 436.482   | 601.805   | NM_004694 | 594.292   | 739.802   | NM_013441 | 778.81    | 577.825   |
| NM_005564 | 26261.846 | 20514.727 | NM_000324 | 1123.183  | 999.983   | M60499    | 581.013   | 581.43    |
| NM_004508 | 2687.017  | 2953.183  | AL137619  | 2568.824  | 2820.691  | NM_003833 | 2436.18   | 1750.71   |

|           |           |           |           |           |           |           |           |           |
|-----------|-----------|-----------|-----------|-----------|-----------|-----------|-----------|-----------|
| NM_006405 | 3955.482  | 3614.018  | NM_004300 | 12240.281 | 12271.205 | AK000868  | 1254.37   | 902.418   |
| NM_002390 | 5238.348  | 6626.459  | AB007859  | 1170.324  | 906.592   | NM_001233 | 884.081   | 766.622   |
| NM_006142 | 838.894   | 705.386   | NM_006754 | 410.703   | 477.047   | NM_001234 | 367.935   | 283.369   |
| NM_014910 | 2846.928  | 2685.732  | NM_001127 | 2582.629  | 2475.656  | BF679789  | 675.522   | 554.411   |
| AK001064  | 2688.954  | 2631.812  | NM_012430 | 3604.925  | 3558.008  | NM_001127 | 979.842   | 771.585   |
| AB029031  | 4559.1    | 4376.237  | NM_003917 | 25700.533 | 28301.998 | NM_012430 | 1033.34   | 993.626   |
| NM_001294 | 4836.488  | 4948.048  | NM_007077 | 1866.397  | 1793.897  | NM_003917 | 3777.746  | 2644.815  |
| NM_014241 | 6104.36   | 6083.788  | NM_002956 | 2373.795  | 2443.422  | NM_007077 | 308.906   | 282.809   |
| AF302786  | 2265.386  | 3009.864  | AB018739  | 809.345   | 763.012   | NM_002956 | 612.513   | 433.272   |
| AL122083  | 1517.176  | 1949.314  | NM_006750 | 20498.246 | 18771.953 | AB018739  | 282.285   | 333.31    |
| NM_005052 | 10063.132 | 8765.218  | NM_020164 | 4553.427  | 3443.559  | NM_006750 | 7908.589  | 6645.941  |
| AF319476  | 1560.731  | 1349.896  | AK023521  | 4017.401  | 3256.365  | NM_020164 | 1557.723  | 1155.768  |
| AK001913  | 4886.305  | 4082.409  | NM_014267 | 24990.246 | 19388.902 | AK023521  | 1296.46   | 992.977   |
| NM_017737 | 587.094   | 589.884   | AL050187  | 983.276   | 1659.421  | NM_014267 | 8215.526  | 8082.676  |
| NM_004292 | 1437.646  | 1522.713  | NM_007127 | 461.774   | 569.331   | NM_001481 | 219.994   | 113.466   |
| NM_015484 | 5154.083  | 5874.999  | NM_012387 | 11224.784 | 11819.008 | U30872    | 265.526   | 334.349   |
| NM_018046 | 2150.951  | 4438.491  | NM_014735 | 1592.699  | 1868.459  | NM_020466 | 1303.063  | 892.5     |
| NM_013316 | 1133.822  | 1108.313  | NM_004252 | 14184.325 | 17342.521 | NM_014734 | 590.166   | 494.27    |
| M20701    | 6928.661  | 6665.947  | AF172929  | 14760.606 | 13755.494 | AK026408  | 566.403   | 295.34    |
| NM_002912 | 1011.558  | 1067.013  | NM_006396 | 8263.788  | 12312.521 | NM_005025 | 679.088   | 423.317   |
| NM_013284 | 3061.863  | 2597.256  | AK025655  | 4277.889  | 5158.022  | NM_001056 | 256.795   | 322.846   |
| NM_006739 | 2842.163  | 2570.691  | NM_001362 | 386.096   | 649.817   | AY026461  | 1176.46   | 1150.633  |
| NM_013274 | 4352.911  | 4251.47   | NM_004056 | 2241.328  | 2868.22   | AK025708  | 1167.428  | 961.745   |
| AL157500  | 572.232   | 1060.837  | NM_001056 | 1060.76   | 1376.836  | NM_000405 | 586.581   | 956.08    |
| AK024955  | 10099.797 | 8978.646  | AY026461  | 4747.807  | 4609.396  | NM_005564 | 14263.563 | 10502.388 |
| NM_016580 | 845.388   | 965.699   | AK025708  | 5807.12   | 4570.426  | NM_004508 | 1086.731  | 972.685   |
| AF169693  | 539.812   | 560.415   | NM_000405 | 1496.235  | 1570.271  | NM_006405 | 3823.582  | 3205.269  |
| L23206    | 2222.479  | 1674.726  | NM_005564 | 51904.172 | 53095.441 | NM_006746 | 367.497   | 353.314   |
| NM_012192 | 5941.454  | 5593.35   | NM_004508 | 3698.134  | 3494.537  | NM_005639 | 679.178   | 728.675   |
| NM_006293 | 2652.856  | 2418.472  | NM_006405 | 32363.373 | 31716.375 | NM_000324 | 422.22    | 342.749   |
| NM_007229 | 2870.172  | 2420.924  | AJ245946  | 874.119   | 641.721   | AL137619  | 765.892   | 574.424   |
| AB011105  | 944.353   | 945.105   | NM_014910 | 2227.278  | 2262.113  | NM_004300 | 3557.957  | 3757.216  |
| NM_004814 | 9587.313  | 8286.442  | AK001064  | 2331.851  | 2660.717  | AF319476  | 519.856   | 561.82    |
| D86976    | 17413.059 | 16111.236 | AB029031  | 4925.996  | 6051.86   | AK001913  | 1583.531  | 1254.798  |
| NM_004057 | 665.631   | 547.076   | NM_001294 | 5889.072  | 7550.903  | NM_017737 | 379.651   | 287.175   |
| NM_018971 | 353.368   | 245.508   | NM_014241 | 10839.729 | 15920.487 | NM_004292 | 589.245   | 259.473   |
| K03175    | 474.321   | 431.33    | AF302786  | 4038.2    | 4360.85   | NM_015484 | 2503.905  | 2012.087  |
| NM_003711 | 2163.09   | 2989.3    | AL122083  | 2537.854  | 2477.162  | NM_018046 | 742.678   | 438.795   |
| NM_006496 | 9949.359  | 12585.927 | NM_005052 | 6883.533  | 10085.928 | NM_013316 | 553.795   | 490.602   |
| NM_004826 | 619.411   | 569.512   | BF038439  | 1167.452  | 1007.086  | M20701    | 3855.579  | 2995.526  |
| NM_013314 | 816.538   | 888.775   | AF319476  | 2119.253  | 2069.517  | NM_002912 | 481.715   | 490.027   |
| NM_002072 | 2840.523  | 2435.381  | AK001913  | 5282.083  | 4972.494  | NM_013284 | 1250.136  | 964.15    |
| NM_003182 | 469.933   | 321.406   | NM_017737 | 1147.939  | 1556.426  | NM_006739 | 960.299   | 733.201   |
| BE904126  | 5945.026  | 6753.959  | NM_004292 | 2121.009  | 1752.426  | NM_013274 | 1342.761  | 1285.326  |
| AF272380  | 14515.304 | 14858.187 | NM_015484 | 6605.761  | 6295.35   | AL050187  | 492.241   | 667.812   |
| NM_004431 | 1782.58   | 2258.675  | NM_018046 | 2577.575  | 2135.265  | NM_012387 | 4851.476  | 3866.108  |
| NM_002012 | 1011.461  | 1100.06   | NM_013316 | 3380.501  | 3391.154  | NM_014735 | 316.344   | 189.601   |
| NM_002070 | 38863.102 | 31305.08  | M20701    | 20100.336 | 20144.223 | NM_004252 | 5964.335  | 5538.464  |
| AF227969  | 2454.222  | 2790.567  | NM_002912 | 1874.42   | 1803.241  | AF172929  | 4400.846  | 5294.028  |
| AF116657  | 366.432   | 450.188   | NM_013284 | 4455.971  | 5166.301  | NM_006396 | 4959.418  | 3686.313  |
| NM_003944 | 10707.405 | 8395.771  | NM_006739 | 2149.18   | 2778.32   | AK025655  | 1111.432  | 844.545   |
| NM_016120 | 34861.656 | 26993.748 | NM_013274 | 4375.396  | 4874.458  | NM_004056 | 923.387   | 740.275   |
| NM_002893 | 1078.83   | 997.257   | NM_016580 | 1517.638  | 1618.916  | NM_003833 | 1429.106  | 1186.518  |

|           |           |           |           |           |           |           |           |           |
|-----------|-----------|-----------|-----------|-----------|-----------|-----------|-----------|-----------|
| NM_002393 | 3667.652  | 3152.352  | AF169693  | 1408.73   | 1408.78   | AK000868  | 993.398   | 805.175   |
| NM_002669 | 8431.521  | 8783.486  | L23206    | 1230.762  | 899.62    | NM_001233 | 627.934   | 555.418   |
| AB014600  | 1557.159  | 1354.035  | NM_012192 | 6030.547  | 6303.415  | NM_001234 | 407.576   | 328.904   |
| NM_018312 | 1548.638  | 1466.966  | NM_006293 | 830.488   | 1124.22   | BF679789  | 490.238   | 488.564   |
| X98259    | 488.001   | 364.101   | NM_007229 | 3890.632  | 6172.843  | H97792    | 380.004   | 312.352   |
| NM_007217 | 11845.499 | 14417.013 | AB011105  | 2229.655  | 2539.038  | L33404    | 236.571   | 142.157   |
| NM_014777 | 3373.073  | 3403.212  | NM_002213 | 331.832   | 387.085   | M13509    | 711.248   | 440.154   |
| NM_001102 | 7655.326  | 7046.949  | NM_018970 | 865.119   | 719.875   | X04076    | 786.156   | 566.384   |
| NM_002818 | 49923.336 | 51918.523 | NM_004814 | 11863.541 | 11126.979 | W95082    | 464.804   | 402.03    |
| NM_001937 | 1782.937  | 1824.809  | D86976    | 15221.11  | 16774.027 | AA485362  | 391.009   | 294.364   |
| AK024778  | 1310.146  | 1214.449  | AF307080  | 963.037   | 855.529   | AJ222801  | 1008.439  | 727.561   |
| AK021608  | 1741.496  | 2622.523  | NM_004057 | 3706.858  | 2736.339  | W72207    | 983.199   | 618.318   |
| NM_004297 | 739.255   | 656.007   | NM_018971 | 1041.7    | 1121.107  | BI772354  | 791.398   | 667.709   |
| NM_006044 | 4744.893  | 6527.628  | K03175    | 1336.572  | 1156.719  | AA733033  | 921.171   | 910.456   |
| AK025498  | 2024.556  | 2397.659  | NM_003265 | 978.888   | 882.471   | AA583574  | 474.063   | 378.053   |
| NM_001395 | 1638.884  | 1743.303  | NM_003015 | 1487.984  | 1161.081  | AI690184  | 5403.527  | 4555.419  |
| NM_002068 | 12193.581 | 8747.656  | NM_003711 | 2156.459  | 1840.963  | AA927490  | 329.251   | 524.309   |
| NM_013338 | 2259.74   | 2339.571  | NM_006496 | 14262.351 | 12063.589 | NM_001824 | 34210.723 | 20887.359 |
| NM_014671 | 2076.595  | 2530.127  | NM_000828 | 730.054   | 614.932   | NM_005052 | 4980.314  | 2527.116  |
| NM_001814 | 6744.943  | 5277.307  | NM_004826 | 1805.165  | 1823.092  | NM_014734 | 353.287   | 292.14    |
| NM_005656 | 1345.84   | 1228.973  | NM_013314 | 797.094   | 402.593   | AK026408  | 267.114   | 239.406   |
| NM_006012 | 7823.841  | 8201.51   | NM_002072 | 3373.269  | 4145.227  | NM_005025 | 648.29    | 451.331   |
| NM_002151 | 437.542   | 574.57    | NM_003182 | 724.011   | 691.663   | NM_017818 | 1403.382  | 1452.597  |
| NM_014889 | 1223.653  | 847.281   | BE904126  | 37309.387 | 42200.398 | NM_020433 | 550.57    | 518.889   |
| AF173935  | 1414.204  | 1850.97   | AF272380  | 15176.389 | 17014.096 | NM_001767 | 1459.07   | 908.115   |
| AK025322  | 3727.12   | 3013.877  | NM_004431 | 4312.924  | 4336.089  | AF028823  | 2146.816  | 1792.44   |
| NM_017887 | 7057.628  | 8166.976  | NM_002012 | 1587.874  | 1508.936  | NM_004295 | 8230.187  | 7132.166  |
| AF007152  | 1444.587  | 1776.004  | NM_002070 | 42269.668 | 40822.746 | NM_002087 | 1437.067  | 1229.318  |
| NM_017575 | 791.705   | 908.909   | AF227969  | 2307.02   | 3282.1    | NM_014585 | 537.496   | 358.968   |
| NM_005310 | 749.49    | 772.758   | NM_004102 | 1269.237  | 1631.45   | NM_013441 | 655.04    | 405.18    |
| NM_014423 | 7231.106  | 12246.954 | NM_003944 | 17197.633 | 21856.939 | NM_014421 | 294.132   | 245.563   |
| NM_018083 | 931.569   | 1238.162  | NM_016120 | 52442.164 | 54350.652 | M60499    | 389.439   | 370.594   |
| AL110188  | 3727.125  | 4114.378  | NM_002893 | 1947.567  | 2050.084  | NM_004300 | 3653.592  | 3257.53   |
| D70834    | 16511.107 | 15846.441 | NM_002393 | 14933.302 | 15082.166 | NM_001127 | 574.512   | 482.366   |
| NM_000970 | 50052.906 | 77941.758 | NM_002669 | 12568.063 | 9768.339  | NM_012430 | 907.712   | 1040.744  |
| AK000102  | 1090.973  | 1159.791  | AB014600  | 5452.844  | 5399.236  | NM_003917 | 4095.852  | 3198.631  |
| AB040916  | 1479.87   | 1614.907  | NM_018312 | 4096.335  | 3789.307  | NM_007077 | 308.026   | 244.768   |
| NM_005587 | 1483.301  | 1348.552  | X98259    | 1412.388  | 1220.483  | NM_002956 | 485.529   | 425.869   |
| AF038362  | 1816.504  | 1585.923  | NM_014792 | 732.41    | 842.365   | NM_006750 | 5959.579  | 4259.214  |
| NM_005195 | 4046.723  | 3102.247  | U05255    | 1063.989  | 1372.733  | NM_020164 | 1643.635  | 1142.197  |
| NM_005481 | 1861.38   | 1395.054  | X98260    | 5681.386  | 5255.753  | AK023521  | 1506.864  | 1322.213  |
| NM_004715 | 1553.947  | 1297.259  | NM_007217 | 15496.794 | 12580.983 | NM_014267 | 8952.121  | 8243.986  |
| L40392    | 1908.297  | 1924.037  | NM_014777 | 14308.525 | 13396.074 | NM_001481 | 289.628   | 266.854   |
| NM_001007 | 47159.207 | 72113.531 | NM_001102 | 7785.048  | 6363.397  | U30872    | 198.327   | 277.585   |
| NM_003017 | 6462.97   | 5872.742  | NM_003803 | 4788.168  | 3176.05   | NM_002639 | 468.152   | 509.518   |
| NM_020366 | 3147.082  | 3809.713  | NM_002818 | 44724.441 | 39693.359 | NM_006398 | 4300.315  | 3639.299  |
| AF086497  | 840.166   | 1134.982  | NM_001937 | 8746.394  | 8806.751  | AK025655  | 1021.897  | 1223.562  |
| NM_020141 | 4489.07   | 4997.909  | AK024778  | 1309.146  | 1186      | NM_004056 | 594.9     | 542.625   |
| NM_006482 | 477.377   | 628.914   | AK021608  | 2641.8    | 2152.391  | NM_001056 | 399.674   | 301.019   |
| NM_003635 | 1303.507  | 1258.96   | NM_004297 | 1336.979  | 1381.799  | AY026461  | 735.088   | 594.274   |
| NM_000662 | 2554.314  | 3007.173  | NM_006044 | 6832.435  | 7648.865  | AK025708  | 853.927   | 1357.607  |
| NM_000292 | 1780.993  | 1845.071  | AK025498  | 3244.118  | 3652.33   | NM_000405 | 717.431   | 739.737   |
| NM_003689 | 24281.986 | 17546.689 | NM_001395 | 7026.796  | 7345.383  | NM_005564 | 18737.871 | 13064.559 |

|           |           |           |           |           |           |           |           |           |
|-----------|-----------|-----------|-----------|-----------|-----------|-----------|-----------|-----------|
| NM_016173 | 919.863   | 450.585   | NM_002068 | 7643.644  | 9875.352  | NM_004508 | 1260.712  | 1136.621  |
| NM_002875 | 1743.465  | 1268.828  | NM_019854 | 238.812   | 499.331   | NM_006405 | 4545.733  | 3713.069  |
| NM_004427 | 3937.549  | 2325.345  | NM_013338 | 3086.325  | 2945.034  | NM_006749 | 321.222   | 210.563   |
| U90549    | 5524.453  | 4257.089  | NM_014671 | 5974.145  | 6517.856  | AL137619  | 708.92    | 562.524   |
| NM_013240 | 7106.337  | 5245.023  | NM_001814 | 8594.161  | 12104.678 | NM_001824 | 29101.635 | 21069.309 |
| NM_015874 | 17506.902 | 10562.388 | NM_005656 | 1956.737  | 1662.5    | NM_005052 | 3109.508  | 2655.151  |
| NM_004965 | 43214.559 | 32136.316 | NM_006012 | 9005.282  | 6833.647  | AF319476  | 851.07    | 944.543   |
| AF312393  | 14011.099 | 9181.124  | NM_002151 | 3768.938  | 3557.252  | NM_004292 | 371.544   | 266.668   |
| AF272898  | 3723.689  | 2848.677  | NM_014889 | 2518.892  | 2369.825  | NM_015484 | 1927.48   | 1803.321  |
| AB037817  | 339.858   | 196.117   | AF173935  | 2736.681  | 2260.395  | NM_018046 | 901.854   | 840.194   |
| AB032951  | 3754.158  | 3290.402  | AK025322  | 15717.034 | 16646.277 | NM_013316 | 1222.828  | 1205.991  |
| NM_003417 | 912.269   | 673.993   | NM_017887 | 8728.417  | 7255.896  | M20701    | 4183.438  | 3642.164  |
| NM_005149 | 6824.992  | 8865.664  | NM_017650 | 673.77    | 498.795   | NM_002912 | 637.373   | 513.255   |
| AK024073  | 747.72    | 830.821   | NM_000526 | 5136.672  | 4433.373  | NM_013284 | 1680.34   | 1645.108  |
| NM_005887 | 2849.216  | 4237.808  | AF007152  | 2024.369  | 1515.939  | NM_006739 | 1057.781  | 808.173   |
| AK026103  | 1956.642  | 2268.843  | NM_017575 | 1501.688  | 1504.446  | NM_013274 | 1769.942  | 1562.213  |
| NM_016353 | 5032.861  | 4197.341  | AL122100  | 2738.787  | 2020.3    | AL050187  | 524.277   | 373.636   |
| AK022567  | 1057.474  | 861.192   | NM_005310 | 2171.163  | 1887.247  | NM_012387 | 5357.223  | 4581.564  |
| S77357    | 725.754   | 894.66    | NM_014423 | 9447.368  | 8049.569  | NM_014735 | 567.1     | 391.197   |
| AK023450  | 877.629   | 761.811   | NM_018083 | 2467.308  | 2353.117  | NM_004252 | 7637.885  | 6541.386  |
| AL080280  | 672.499   | 534.946   | AL110188  | 15977.883 | 18408.658 | AF172929  | 4973.861  | 5695.549  |
| AF035314  | 661.517   | 642.75    | NM_033288 | 724.456   | 908.913   | NM_003833 | 1706.026  | 1542.292  |
| NM_018036 | 929.769   | 620.94    | AK000102  | 1870.475  | 1629.91   | AK000868  | 934.672   | 736.332   |
| AF052087  | 1264.476  | 1230.435  | AB040916  | 2601.851  | 2864.979  | NM_001233 | 277.099   | 399.617   |
| AF007143  | 690.44    | 741.19    | NM_005587 | 2351.18   | 3175.103  | H97792    | 388.56    | 326.185   |
| AF147417  | 429.947   | 265.08    | AF038362  | 2021.984  | 1516.112  | M13509    | 318.432   | 421.579   |
| AK023656  | 714.685   | 900.018   | NM_005195 | 7628.122  | 7552.717  | X04076    | 654.73    | 431.446   |
| AF086511  | 1592.324  | 1979.536  | NM_005481 | 1832.771  | 2154.33   | W95082    | 450.405   | 580.176   |
| AK022989  | 1895.567  | 2886.427  | NM_004715 | 4986.879  | 4620.504  | AA485362  | 562.879   | 535.703   |
| AK001604  | 3678.954  | 4513.457  | L40392    | 2067.599  | 2092.235  | AJ222801  | 984.246   | 858.277   |
| AK021619  | 658.745   | 701.47    | BF541482  | 717.147   | 450.249   | W72207    | 1144.498  | 889.649   |
| AF131762  | 16195.371 | 19531.529 | NM_001007 | 66777.313 | 62035.168 | BI772354  | 1450.866  | 1082.545  |
| AY007089  | 1427.944  | 2225.36   | NM_003017 | 7681.15   | 6690.499  | AA733033  | 860.465   | 1010.411  |
| AK021816  | 1840.902  | 2311.13   | NM_020366 | 4146.878  | 3526.708  | AA583574  | 588.983   | 630.658   |
| D43770    | 9884.519  | 11727.233 | AF086497  | 2230.072  | 1777.557  | AI690184  | 6252.014  | 5207.703  |
| AF085960  | 455.138   | 499.391   | NM_020141 | 8756.042  | 10512.035 | AA927490  | 428.769   | 454.234   |
| AF087976  | 524.86    | 717.812   | NM_006482 | 1918.586  | 2775.034  | U30872    | 241.008   | 334.205   |
| AK021519  | 1203.381  | 1336.311  | NM_003779 | 673.984   | 754.694   | NM_014734 | 404.611   | 245.59    |
| NM_014254 | 2717.568  | 1539.264  | NM_003635 | 3269.757  | 3046.856  | AK026408  | 325.017   | 261.26    |
| AF086010  | 495.442   | 317.222   | NM_000662 | 4923.325  | 5177.43   | NM_017818 | 1104.777  | 1236.256  |
| U09197    | 2090.523  | 1796.446  | NM_000292 | 2422.736  | 3671.328  | NM_020433 | 203.791   | 216.218   |
| U15553    | 1585.92   | 1374.267  | NM_003689 | 47117.078 | 51802.133 | NM_001767 | 2044.016  | 1787.615  |
| AK024734  | 5496.684  | 10088.078 | NM_016173 | 1115.206  | 1600.903  | AF028823  | 1988.988  | 1900.487  |
| NM_017741 | 1766.824  | 2606.521  | NM_002875 | 8835.248  | 9361.989  | NM_004295 | 9566.5    | 8422.598  |
| AK000144  | 1047.224  | 1318.641  | NM_004427 | 18775.305 | 20736.238 | NM_002087 | 1489.302  | 1441.67   |
| AK000942  | 696.209   | 785.844   | U90549    | 5944.46   | 6689.875  | NM_014585 | 813.682   | 808.002   |
| AL117533  | 545.705   | 582.218   | NM_013240 | 6842.335  | 8822.087  | AF200815  | 306.555   | 278.255   |
| AK026036  | 962.677   | 1692.516  | NM_015874 | 26018.826 | 20313.305 | NM_013441 | 1050.854  | 890.97    |
| AK023422  | 544.706   | 584.64    | NM_004965 | 49614.895 | 57699.734 | NM_006749 | 308.798   | 317.227   |
| AK022796  | 1471.713  | 1185.847  | AF312393  | 49007.945 | 50230.73  | AL137619  | 607.97    | 790.833   |
| AK095193  | 481.495   | 403.161   | AF272898  | 10369.549 | 8558.98   | NM_004300 | 896.172   | 1035.77   |
| AL122088  | 987.942   | 1275.769  | AB037817  | 1075.218  | 771.038   | AB007859  | 317.54    | 453.559   |
| AL137518  | 498.912   | 763.26    | AB032951  | 18142.203 | 14797.748 | NM_001127 | 942.313   | 1170.292  |

|           |           |           |           |           |           |           |           |           |
|-----------|-----------|-----------|-----------|-----------|-----------|-----------|-----------|-----------|
| AK023437  | 1130.882  | 831.294   | NM_003417 | 1674.509  | 1175.923  | NM_01243C | 1264.343  | 1234.871  |
| AK022897  | 3496.927  | 5997.273  | NM_005149 | 13897.765 | 10956.23  | NM_003917 | 5438.634  | 4439.752  |
| NM_01904C | 5016.326  | 6960.291  | AK024073  | 978.774   | 953.14    | NM_007077 | 440.843   | 432.035   |
| NM_00597E | 1002.682  | 1068.449  | AK022223  | 1259.812  | 1949.93   | NM_00295E | 644.483   | 744.331   |
| Y16711    | 506.289   | 762.569   | NM_005887 | 6122.945  | 6190.468  | AB018739  | 404.339   | 343.679   |
| AJ272179  | 1948.662  | 2850.675  | AK024921  | 2761.476  | 3249.544  | NM_00675C | 8934.149  | 8343.43   |
| AJ007015  | 2064.866  | 3645.863  | AL110232  | 592.966   | 695.739   | NM_020164 | 2113.923  | 1768.733  |
| AL049317  | 1160.459  | 1681.286  | AK026103  | 3510.529  | 3719.522  | AK023521  | 1719.827  | 1815.052  |
| AL050090  | 1108.003  | 1056.897  | NM_016353 | 20582.252 | 22685.803 | NM_014267 | 9535.748  | 10330.085 |
| AF086309  | 1089.115  | 1333.532  | AK022567  | 2201.182  | 2945.161  | AL050187  | 482.487   | 437.067   |
| AF238870  | 431.083   | 646.296   | S77357    | 1015.473  | 669.831   | NM_012387 | 5500.409  | 6656.444  |
| AK026279  | 4400.346  | 4175.261  | AK023450  | 1056.496  | 1077.799  | NM_01473E | 557.459   | 704.351   |
| AF130094  | 5647.359  | 5346.118  | AL080280  | 19163.293 | 17187.895 | NM_00425Z | 8046.339  | 7857.923  |
| AK026673  | 1806.061  | 1698.768  | AB028947  | 4379.537  | 4167.635  | AF172929  | 5252.981  | 6646.01   |
| NM_00545Z | 3472.204  | 3920.692  | AF035314  | 1608.461  | 1615.531  | NM_00639E | 2818.719  | 2133.549  |
| AF170935  | 9688.861  | 9298.923  | NM_01803E | 1921.096  | 1706.06   | AK025655  | 730.274   | 833.528   |
| AK025218  | 705.313   | 518.333   | AF052087  | 1726.521  | 1530.262  | NM_01808E | 1460.909  | 1094.001  |
| AJ227899  | 1329.54   | 1551.215  | AF007143  | 8209.448  | 7389.589  | NM_00105E | 662.765   | 666.437   |
| AL359607  | 620.265   | 623.399   | AF147417  | 1502.722  | 1477.893  | AY026461  | 1415.429  | 1402.794  |
| AF161371  | 9827.899  | 15474.521 | AK023656  | 1040.411  | 1005.776  | AK025708  | 1523.679  | 2029.763  |
| U84509    | 1266.506  | 1714.075  | AF086511  | 5731.246  | 5376.674  | NM_00040E | 401.429   | 555.201   |
| AK002036  | 3671.759  | 4789.195  | AK022989  | 6903.031  | 6463.079  | NM_005564 | 20665.332 | 14922.778 |
| AK025775  | 3237.212  | 4647.029  | AK001604  | 7008.181  | 5794.072  | NM_00450E | 1597.072  | 1620.905  |
| AB046791  | 707.18    | 906.941   | AK021619  | 1655.034  | 2139.019  | NM_00640E | 6006.016  | 5983.569  |
| AF043469  | 1623.898  | 942.752   | AK022347  | 678.22    | 595.956   | NM_00239C | 2533.322  | 2624.606  |
| AL109671  | 572.855   | 731.49    | AK025872  | 1882.457  | 2537.177  | NM_00614Z | 778.995   | 738.614   |
| AK022008  | 1143.806  | 898.803   | AF131762  | 38143.27  | 30402.555 | NM_01491C | 3269.562  | 3314.667  |
| NM_01818E | 3094.784  | 2545.504  | AY007089  | 1947.86   | 2025.188  | AK001064  | 1461.089  | 1414.335  |
| AL080188  | 2316.942  | 1837.237  | AK021816  | 19422.201 | 22048.906 | AB029031  | 2104.603  | 2159.265  |
| T99941    | 1265.357  | 1287.807  | D43770    | 14338.354 | 13835.596 | NM_001294 | 1955.41   | 2115.342  |
| AF113678  | 941.03    | 799.128   | AF085960  | 825.456   | 808.195   | NM_014241 | 4384.93   | 5200.642  |
| AL137313  | 30551.348 | 22402.693 | AF087976  | 746.138   | 488.914   | AF302786  | 882.547   | 887.713   |
| AB002363  | 6798.252  | 4895.111  | AF085993  | 487.694   | 431.427   | AL122083  | 677.218   | 736.392   |
| NM_005284 | 1720.347  | 1799.097  | AK021519  | 2505.581  | 2453.017  | NM_00505Z | 1985.634  | 1613.519  |
| AF086351  | 3025.069  | 3068.975  | NM_014254 | 5627.237  | 5585.415  | AF319476  | 832.833   | 831.304   |
| D83199    | 19064.318 | 21582.68  | AF086036  | 2072.123  | 2558.847  | AK001913  | 1948.283  | 2368.003  |
| NM_01909E | 7005.146  | 6588.355  | AF086010  | 1114.836  | 1498.787  | NM_017737 | 614.683   | 634.49    |
| AK022212  | 26598.471 | 25291.922 | U09197    | 4585.393  | 4141.892  | NM_00429Z | 618.626   | 589.918   |
| X64974    | 3545.967  | 4134.891  | U66050    | 493.902   | 436.98    | NM_015484 | 2816.554  | 2811.571  |
| NM_000834 | 8520.458  | 11163.802 | Z36800    | 883.232   | 913.509   | NM_01804E | 953.183   | 1419.736  |
| NM_00648E | 13130.233 | 17082.111 | U15553    | 8405.306  | 6977.991  | NM_01331E | 965.246   | 1159.231  |
| NM_01245E | 2572.455  | 3916.223  | Z36829    | 1383.02   | 1386.081  | M20701    | 6702.001  | 6755.522  |
| AL137268  | 2872.889  | 2823.712  | AK024734  | 5811.312  | 4358.393  | NM_00291Z | 644.371   | 835.833   |
| AK024109  | 2048.496  | 2408.157  | NM_017741 | 2681.789  | 1915.066  | NM_013284 | 1647.763  | 1518.738  |
| AF088048  | 1553.094  | 1728.532  | AL049332  | 769.37    | 429.336   | NM_00673E | 1223.302  | 995.507   |
| AK001143  | 2311.032  | 1744.134  | AK000144  | 3194.475  | 3240.055  | NM_013274 | 2435.968  | 2286.907  |
| AK001701  | 3607.996  | 2885.094  | AK022275  | 890.686   | 853.4     | AL157500  | 340.29    | 217.024   |
| AB007978  | 468.539   | 314.588   | AK000942  | 1556.002  | 1677.995  | AK024955  | 9077.331  | 8669.11   |
| AF217970  | 923.812   | 826.321   | NM_01634E | 653.231   | 934.563   | NM_01658C | 592.073   | 617.233   |
| AF086297  | 677.198   | 620.033   | AL117533  | 6416.18   | 13299.746 | AF169693  | 383.945   | 406.652   |
| AK025455  | 3311.029  | 2952.112  | AK026036  | 1865.514  | 1536.058  | L23206    | 2313.912  | 2251.539  |
| AK026799  | 1602.331  | 1176.961  | AK023422  | 4209.676  | 4672.163  | NM_01219Z | 3164.802  | 3152.616  |
| NM_01486C | 835.316   | 1230.509  | AK022796  | 5335.428  | 5560.32   | NM_00629Z | 1246.092  | 1487.99   |



|            |           |           |           |           |           |           |           |           |
|------------|-----------|-----------|-----------|-----------|-----------|-----------|-----------|-----------|
| AK022549   | 2077.288  | 1639.229  | AK095193  | 3348.888  | 4030.322  | NM_007225 | 1952.781  | 1862.389  |
| NM_018157  | 1141.255  | 1492.867  | AK025081  | 3075.55   | 3156.832  | AB011105  | 626.142   | 593.925   |
| Z70714     | 3409.407  | 3944.328  | AL122088  | 3237.618  | 2527.438  | NM_004814 | 2703.619  | 2163.676  |
| AK021640   | 3619.798  | 3972.006  | AF116633  | 1083.973  | 1230.368  | D86976    | 5203.912  | 4204.516  |
| NM_016565  | 33703.582 | 40816.148 | AF119912  | 1551.159  | 1769.04   | NM_004057 | 803.27    | 772.984   |
| CY3Cy5     | 1654.819  | 211.319   | AL137518  | 3349.268  | 3864.74   | NM_018971 | 368.449   | 262.902   |
| BF310427   | 1129.044  | 1408.495  | AK022556  | 697.317   | 506.547   | K03175    | 358.641   | 449.197   |
| AA045192   | 503.418   | 544.05    | AK023437  | 5298.131  | 4669.755  | NM_003265 | 345.029   | 473.168   |
| H45617     | 427.445   | 507.431   | AK023822  | 704.185   | 627.308   | NM_003015 | 482.822   | 338.171   |
| M92642     | 363.965   | 809.738   | AK024147  | 1066.729  | 722.358   | NM_003711 | 974.369   | 1080.469  |
| AA464532   | 460.528   | 435.31    | AK022897  | 1188.455  | 1236.857  | NM_006496 | 5293.028  | 6362.973  |
| H-U 44385  | 13556.408 | 12061.891 | AK023556  | 679.696   | 404.21    | NM_004826 | 545.797   | 455.975   |
| ID 1654970 | 5734.422  | 5068.286  | AK023898  | 9134.866  | 8831.805  | NM_013314 | 322.139   | 336.834   |
| ID 2531132 | 7389.339  | 6570.834  | NM_019040 | 12915.475 | 14462.85  | NM_002072 | 1575.737  | 1353.347  |
| BF125928   | 16800.459 | 12082.934 | NM_005978 | 2987.455  | 3469.058  | NM_003182 | 432.455   | 374.702   |
| BG571026   | 1177.202  | 1062.276  | Y16711    | 991.008   | 1323.573  | BE904126  | 9924.194  | 8707.07   |
| AA489017   | 5579.761  | 4140.457  | AJ272179  | 3197.281  | 3051.053  | AF272380  | 9019.284  | 7906.491  |
| NM_012245  | 11645.268 | 7048.954  | AJ007015  | 5380.017  | 4672.598  | NM_004431 | 2465.072  | 2498.965  |
| SR10       | 23959.141 | 4739.82   | AL049317  | 3450.689  | 3546.04   | NM_002012 | 640.369   | 496.92    |
| NM_017450  | 1544.794  | 1608.752  | AL050090  | 1540.993  | 1857.36   | NM_002070 | 22930.428 | 18726.498 |
| NM_002023  | 1467.766  | 1813.208  | AF086309  | 1905.179  | 1915.935  | AF227969  | 1407.498  | 1368.272  |
| NM_002839  | 534.294   | 673.752   | AF238870  | 3683.096  | 4001.338  | AF116657  | 241.979   | 115.038   |
| NM_001616  | 598.323   | 714.534   | AK026279  | 4862.305  | 7110.339  | NM_004102 | 294.874   | 251.118   |
| NM_005904  | 443.055   | 550.212   | AF130094  | 14256.266 | 15026.933 | NM_003944 | 8784.16   | 7628.359  |
| NM_005273  | 14455.628 | 15385.753 | AK026673  | 3615.847  | 3481.366  | NM_002893 | 343.371   | 371.919   |
| NM_000524  | 707.849   | 836.158   | NM_005452 | 6146.099  | 4974.36   | NM_002393 | 1781.964  | 1534.63   |
| NM_006576  | 1053.719  | 1740.588  | AF170935  | 17307.115 | 20851.094 | NM_002666 | 3689.373  | 4281.673  |
| NM_018645  | 1261.409  | 1951.143  | AK025218  | 2401.42   | 2252.677  | AB014600  | 1384.662  | 1203.048  |
| AB035266   | 1624.854  | 1575.56   | AJ227899  | 2970.709  | 2933.532  | NM_018312 | 1226.141  | 1658.641  |
| NM_003744  | 2515.128  | 2298.508  | AL359607  | 3937.687  | 4499.203  | X98259    | 504.099   | 685.655   |
| NM_006378  | 15331.925 | 9318.398  | AF161371  | 11329.768 | 9533.386  | NM_014792 | 435.603   | 500.448   |
| NM_018132  | 3190.974  | 3491.555  | AK022464  | 2517.83   | 2214.583  | X98260    | 2822.189  | 2126.671  |
| NM_003061  | 1475.51   | 1323.563  | AF086230  | 3597.882  | 3421.103  | NM_007217 | 5828.893  | 5631.929  |
| NM_018207  | 1842.623  | 1315.329  | AK023408  | 7179.781  | 6158.832  | NM_014777 | 2464.323  | 2589.94   |
| NM_006531  | 963.918   | 813.404   | U84509    | 5116.075  | 5743.523  | NM_001102 | 3174.764  | 3126.59   |
| NM_005423  | 250.748   | 142.907   | AK002036  | 6363.927  | 6010.13   | NM_003803 | 536.114   | 731.653   |
| AF070525   | 9855.99   | 10373.265 | AK025775  | 7740.956  | 9381.537  | AK024778  | 579.696   | 428.811   |
| NM_001177  | 6871.377  | 4021.235  | AB046791  | 3321.142  | 3734.745  | AK021608  | 1008.335  | 1248.896  |
| NM_014447  | 1407.969  | 1596.251  | AF043469  | 1520.03   | 3393.798  | NM_004297 | 433.043   | 440.007   |
| NM_006691  | 899.469   | 1004.022  | AL109671  | 3523.737  | 3293.02   | NM_006044 | 3769.604  | 4527.75   |
| NM_001505  | 462.681   | 1052.087  | NM_012375 | 694.973   | 765.489   | AK025498  | 1391.11   | 1720.337  |
| NM_004666  | 1057.535  | 1865.216  | AK022008  | 2467.139  | 2643.252  | NM_001395 | 2186.267  | 2167.408  |
| NM_003614  | 448.531   | 354.887   | NM_018186 | 2423.603  | 4469.021  | NM_002068 | 7602.432  | 5499.397  |
| NM_014257  | 1718.227  | 2007.838  | AJ132194  | 465.201   | 496.802   | NM_013338 | 1217.964  | 1258.68   |
| NM_001140  | 308.915   | 336.123   | AL080188  | 4794.537  | 5387.424  | NM_014671 | 2041.752  | 1931.191  |
| NM_004843  | 2112.969  | 2052.573  | T99941    | 6221.29   | 5954.425  | NM_005656 | 541.511   | 489.469   |
| AK022845   | 1286.046  | 857.748   | AF113678  | 7266.79   | 5944.526  | NM_006012 | 3084.966  | 3682.465  |
| NM_003004  | 789.209   | 1277.699  | AL137313  | 59086.207 | 58205.555 | NM_002151 | 1207.268  | 1844.502  |
| S77835     | 585.222   | 503.871   | Z83951    | 1660.662  | 1976.115  | NM_014886 | 1054.172  | 1126.474  |
| NM_002985  | 479.599   | 501.814   | AL833529  | 263.234   | 832.135   | AF173935  | 794.265   | 1201.542  |
| AB018347   | 3057.017  | 2551.825  | AB002363  | 8657.75   | 8770.66   | AK025322  | 3962.02   | 4009.866  |
| AB033073   | 562.662   | 512.447   | NM_005284 | 3619.608  | 3417.77   | NM_017887 | 2933.04   | 3911.545  |
| NM_003284  | 491.569   | 264.125   | AF086351  | 2716.658  | 3246.344  | NM_000526 | 664.382   | 1200.834  |

|            |           |           |            |           |           |           |           |           |
|------------|-----------|-----------|------------|-----------|-----------|-----------|-----------|-----------|
| NM_000319  | 3571.315  | 2919.797  | D83199     | 15302.759 | 17325.908 | AF007152  | 550.799   | 1014.675  |
| AK001379   | 1067.949  | 804.785   | AK025957   | 679.747   | 1117.342  | NM_017575 | 451.169   | 473.843   |
| NM_007072  | 1278.16   | 1273.979  | Y16708     | 1641.809  | 1744.082  | AL122100  | 324.638   | 482.695   |
| NM_012320  | 1901.438  | 2031.726  | AL157453   | 4539.303  | 4379.569  | NM_005310 | 572.691   | 533.953   |
| NM_018208  | 4155.517  | 4901.229  | NM_019098  | 4094.094  | 10265.722 | NM_014423 | 3249.081  | 3927.274  |
| NM_015929  | 5088.869  | 6289.917  | AK022212   | 53446.27  | 51644.859 | NM_018083 | 542.724   | 622.771   |
| U90653     | 4946.575  | 5656.552  | X64974     | 3396.118  | 7110.154  | AL110188  | 3186.325  | 3134.24   |
| NM_000196  | 792.895   | 857.036   | NM_000834  | 4600.729  | 10142.946 | D70834    | 10710.231 | 9748.104  |
| NM_006745  | 46663.953 | 43160.57  | NM_006485  | 55877.719 | 56293     | NM_000970 | 48928.934 | 59462.52  |
| NM_000275  | 1055.366  | 1775.435  | NM_012459  | 3656.396  | 4086.888  | AK000102  | 588.199   | 628.045   |
| AK000037   | 753.266   | 888.857   | NM_012360  | 970.274   | 1026.083  | AB040916  | 890.917   | 836.906   |
| NM_014760  | 2916.845  | 4197.285  | AL137268   | 7640.776  | 7708.134  | NM_005587 | 779.945   | 794.068   |
| NM_018398  | 2021.885  | 3768.066  | AK001130   | 842.484   | 797.346   | NM_005195 | 3769      | 3083.666  |
| NM_002560  | 6321      | 5434.772  | AK022398   | 1698.5    | 1572.539  | NM_005481 | 1014.453  | 674.366   |
| NM_014404  | 739.261   | 826.004   | AK024109   | 4161.429  | 4894.665  | NM_004715 | 1767.186  | 1882.414  |
| NM_018713  | 449.485   | 349.151   | AF088048   | 1729.463  | 1656.746  | L40392    | 915.717   | 995.318   |
| NM_015947  | 5048.193  | 4789.236  | AK001143   | 2982.457  | 2989.667  | NM_001007 | 50944.773 | 64150.066 |
| NM_002042  | 2473.432  | 2713.084  | AK001701   | 4363.33   | 3887.948  | NM_003017 | 2547.429  | 2938.41   |
| AB028944   | 656.778   | 512.884   | AK022205   | 1309.248  | 1002.324  | NM_020366 | 1312.05   | 1931.056  |
| AJ006268   | 1009.526  | 836.478   | AB007978   | 1052.245  | 913.863   | AF086497  | 605.573   | 677.219   |
| M74089     | 5881.151  | 4458.19   | AF217970   | 1360.177  | 1225.114  | NM_020141 | 3404.381  | 2986.209  |
| AF190864   | 5537.996  | 3085.225  | AF086297   | 3734.751  | 3921.727  | NM_006482 | 509.545   | 488.127   |
| NM_000025  | 10634.39  | 7619.108  | AK025455   | 3953.468  | 3978.44   | NM_003635 | 566.226   | 547.323   |
| D38521     | 2468.541  | 3097.927  | AK026799   | 6846.403  | 5198.245  | NM_000662 | 1673.849  | 2214.311  |
| NM_000403  | 4114.405  | 5471.931  | NM_014860  | 1292.187  | 1326.47   | NM_000292 | 832.18    | 922.382   |
| AB033097   | 1405.424  | 1746.786  | AK022549   | 2189.712  | 2199.344  | NM_003688 | 21535.066 | 15601.791 |
| NM_000135  | 1139.171  | 1583.892  | NM_018157  | 1307.604  | 1137.855  | NM_016173 | 377.579   | 198.259   |
| AJ223948   | 4113.381  | 6539.309  | Z70714     | 4278.876  | 4251.032  | NM_002875 | 3227.374  | 3600.862  |
| NM_016218  | 1357.566  | 1575.484  | AK021640   | 12630.544 | 10972.756 | NM_004427 | 5138.355  | 5073.295  |
| AK022947   | 2617.821  | 3455.727  | NM_016565  | 58415.059 | 55680.82  | U90549    | 2440.039  | 3206.585  |
| AL050029   | 2581.986  | 3000.845  | CY3Cy5     | 3262.51   | 119.722   | NM_013240 | 3114.126  | 3041.618  |
| AL049966   | 465.596   | 373.616   | BF310427   | 2029.492  | 1497.218  | NM_015874 | 11445.075 | 9861.087  |
| NM_005204  | 3551.494  | 3168.792  | N94424     | 875.606   | 705.081   | NM_004965 | 38093.242 | 35057.844 |
| NM_016203  | 1989.156  | 1802.653  | AA045192   | 1695.438  | 1357.275  | AF312393  | 18904.936 | 16212.833 |
| NM_002759  | 3138.491  | 3522.903  | H45617     | 487.505   | 448.047   | AF272898  | 4628.672  | 4900.27   |
| NM_007271  | 1898.331  | 1770.388  | M92642     | 1153.01   | 1171.355  | AB037817  | 501.25    | 380.418   |
| NM_006255  | 5491.759  | 5171.914  | AA464532   | 631.695   | 827.264   | AB032951  | 3995.95   | 4173.396  |
| AB037718   | 3457.2    | 2159.813  | H-U 44385  | 11789.081 | 14826.37  | NM_003417 | 788.321   | 1325.418  |
| NM_003659  | 4792.274  | 3384.055  | ID 1654970 | 4836.721  | 7144.471  | NM_005149 | 6281.938  | 11227.685 |
| AB029021   | 3467.313  | 3651.984  | ID 2531132 | 5838.898  | 9856.214  | AK022223  | 341.927   | 276.978   |
| Z36789     | 3623.677  | 4307.569  | AA485665   | 429.024   | 762.182   | NM_005887 | 2187.206  | 2667.116  |
| J02874     | 570.021   | 933.077   | BF125928   | 12505.402 | 15150.042 | AK024921  | 438.259   | 425.799   |
| BF310427   | 760.843   | 1221.005  | BG571026   | 1463.732  | 2440.369  | AK026103  | 1168.337  | 1265.423  |
| AA045192   | 458.568   | 706.704   | AA489017   | 3520.435  | 4329.542  | NM_016353 | 8192.861  | 7100.931  |
| AA464532   | 397.215   | 330.867   | NM_012245  | 16906.955 | 16270.594 | AK022567  | 399.677   | 421.415   |
| H-U 44385  | 13260.162 | 12603.897 | NM_133263  | 1130.086  | 1488.309  | AL080280  | 2240.207  | 2744.993  |
| ID 1654970 | 5269.736  | 4578.555  | SR2        | 57391.414 | 46304.176 | AB028947  | 865.25    | 1273.28   |
| ID 2531132 | 6545.192  | 4977.221  | SR4        | 13974.47  | 9676.351  | AF035314  | 549.462   | 545.596   |
| BF125928   | 16215.25  | 11494.173 | SR6        | 2418.117  | 1237.151  | NM_018036 | 526.413   | 603.726   |
| NM_012245  | 10686.25  | 7497.026  | SR8        | 8831.109  | 13597.807 | AF052087  | 372.507   | 398.872   |
| NM_133263  | 858.17    | 357.842   | SR10       | 30059.895 | 4281.405  | AF007143  | 945.012   | 1101.144  |
| AF125392   | 852.062   | 1209.126  | CY3Cy5     | 2047.25   | 96.721    | AF147417  | 442.623   | 538.836   |
| NM_003284  | 517.562   | 636.091   | NM_017450  | 1593.63   | 1470.568  | AK023656  | 473.534   | 628.196   |

|           |           |           |           |           |           |           |          |           |
|-----------|-----------|-----------|-----------|-----------|-----------|-----------|----------|-----------|
| NM_018152 | 396.101   | 425.013   | NM_002023 | 1109.19   | 1303.831  | AF086511  | 2341.937 | 5280.072  |
| NM_000319 | 4507.658  | 6493.139  | NM_002839 | 1442.715  | 1226.454  | AK022989  | 2828.507 | 7707.631  |
| NM_012461 | 4896.264  | 6168.842  | AF190500  | 1142.885  | 935.478   | AK021619  | 386.291  | 461.818   |
| AK001379  | 1493.705  | 2244.529  | NM_001616 | 603.159   | 903.986   | AK025872  | 328.023  | 578.613   |
| NM_017450 | 1336.82   | 1870.505  | NM_005273 | 13108.144 | 13551.38  | AF131762  | 9045.822 | 13940.736 |
| NM_002023 | 941.472   | 921.654   | NM_000524 | 539.349   | 716.925   | AY007089  | 692.209  | 975.977   |
| NM_005904 | 1025.695  | 1508.051  | NM_006576 | 1596.227  | 1702.313  | AK021816  | 2137.939 | 2506.668  |
| NM_005273 | 13316.452 | 12132.92  | NM_018645 | 727.781   | 848.285   | D43770    | 4820.918 | 5101.721  |
| NM_000524 | 349.848   | 529.849   | AB035266  | 5696.402  | 5920.172  | AF085960  | 516.108  | 378.941   |
| NM_006576 | 797.58    | 956.221   | NM_003744 | 3502.76   | 5388.382  | AK021519  | 549.049  | 640.717   |
| NM_018645 | 943.977   | 723.511   | NM_006378 | 12738.376 | 18119.771 | NM_014254 | 2692.156 | 2843.734  |
| AB035266  | 1615.501  | 1515.92   | NM_018132 | 2880.72   | 3013.989  | AF086036  | 428.271  | 576.78    |
| NM_018132 | 1841.426  | 2069.406  | NM_003061 | 1990.976  | 2100.563  | AF086010  | 583.307  | 595.48    |
| NM_000345 | 3498.64   | 2524.169  | NM_018207 | 2593.693  | 2924.081  | U09197    | 988.051  | 1319.17   |
| NM_001862 | 43248.227 | 22022.586 | NM_000345 | 15208.329 | 20075.467 | Z36800    | 279.58   | 263.679   |
| NM_006531 | 846.281   | 748.195   | NM_006531 | 2813.978  | 2732.28   | U15553    | 3093.101 | 3322.226  |
| M74089    | 5530.077  | 5017.801  | AB029021  | 9276.268  | 8362.817  | Z36829    | 558.238  | 824.017   |
| AF190864  | 5691.937  | 4248.957  | NM_002101 | 35151.242 | 22758.504 | AK024734  | 3924.213 | 9101.973  |
| NM_002779 | 2570.392  | 4840.793  | Z36789    | 2200.789  | 1499.141  | AK000144  | 723.644  | 979.122   |
| L40397    | 18413.723 | 22687.197 | J02874    | 1687.439  | 1119.837  | AL117533  | 1854.367 | 1068.108  |
| NM_020198 | 6880.783  | 7581.392  | AF070525  | 11195.806 | 12076.861 | AK026036  | 385.376  | 542.166   |
| AA098879  | 1156.802  | 1638.288  | NM_001177 | 4322.202  | 7457.953  | AK023422  | 373.749  | 556.898   |
| NM_014447 | 1376.704  | 1812.275  | NM_014447 | 1578.002  | 1306.279  | AK022796  | 792.437  | 1231.059  |
| NM_006691 | 996.534   | 1327.505  | NM_002356 | 539.648   | 341.369   | AK095193  | 766.956  | 956.988   |
| NM_001505 | 1288.19   | 2315.252  | NM_006691 | 1996.637  | 1458.484  | AK025081  | 505.759  | 429.49    |
| NM_003710 | 2488.644  | 2234.146  | NM_001505 | 966.318   | 1056.001  | AL122088  | 1125.766 | 1383.427  |
| Z83805    | 983.19    | 1136.736  | NM_003710 | 2232.065  | 2714.608  | AF116633  | 215.733  | 251.508   |
| NM_004666 | 2056.664  | 3457.791  | Z83805    | 1025.318  | 801.247   | AF119912  | 369.515  | 408.414   |
| NM_003614 | 362.26    | 514.709   | NM_004666 | 955.142   | 1170.054  | AL137518  | 680.606  | 886.058   |
| NM_014257 | 1692.942  | 1195.459  | NM_003614 | 1521.364  | 1523.712  | AK023437  | 1047.453 | 919.707   |
| NM_004843 | 1977.353  | 1261.764  | NM_014257 | 5116.903  | 5546.278  | AK024147  | 365.151  | 370.246   |
| AK022845  | 1362.355  | 1025.412  | NM_001140 | 479.462   | 707.138   | AK022897  | 674.05   | 702.256   |
| AB018347  | 4333.356  | 5024.901  | NM_004843 | 2205.513  | 2739.249  | AK023556  | 310.666  | 315.775   |
| AB033073  | 466.606   | 269.045   | AK022845  | 1076.422  | 1902.612  | AK023898  | 2959.767 | 4189.226  |
| NM_005813 | 1257.323  | 1333.781  | S77835    | 533.757   | 792.311   | NM_019040 | 3819.515 | 3862.662  |
| AB037718  | 3231.972  | 3025.487  | AB018347  | 10952.536 | 19340.701 | NM_005978 | 898.578  | 830.236   |
| AL389994  | 1910.604  | 5142.345  | NM_003284 | 1598.813  | 1504.243  | Y16711    | 714.779  | 796.64    |
| NM_003909 | 5400.198  | 11671.52  | NM_018152 | 940.539   | 496.323   | AJ272179  | 905.35   | 1210.179  |
| NM_001277 | 3321.249  | 5306.216  | NM_000319 | 3539.574  | 2459.76   | AJ007015  | 1630.996 | 1329.887  |
| NM_003659 | 6448.043  | 8874.354  | NM_012461 | 4957.687  | 2517.299  | AL049317  | 529.625  | 945.956   |
| NM_007072 | 1435.464  | 1984.326  | AK001379  | 2246.144  | 857.616   | AL050090  | 829.43   | 893.031   |
| NM_012320 | 2549.196  | 3111.153  | NM_007072 | 3826.378  | 3044.649  | AF086309  | 477.526  | 653.832   |
| NM_018208 | 3857.654  | 4096.618  | NM_012320 | 6588.71   | 4912.858  | AF238870  | 607.544  | 666.217   |
| NM_015929 | 4627.902  | 5488.286  | NM_018208 | 4243.21   | 3996.494  | AK026279  | 2275.261 | 2153.028  |
| U90653    | 5025.33   | 4928.719  | NM_015929 | 5993.313  | 5255.81   | AF130094  | 5525.057 | 6878.209  |
| NM_000196 | 1525.413  | 3224.075  | U90653    | 5265.961  | 4392.92   | AK026673  | 926.255  | 1157.74   |
| NM_018339 | 6763.986  | 6110.149  | NM_000196 | 786.653   | 636.548   | NM_005452 | 1604.368 | 1589.944  |
| NM_006745 | 46674.824 | 40521.234 | NM_018339 | 7577.068  | 6191.055  | AF170935  | 7837.051 | 11117.185 |
| NM_000275 | 783.138   | 1075.238  | NM_006745 | 41966.75  | 43093.73  | AK025218  | 710.33   | 1125.954  |
| AK000037  | 1088.681  | 1232.736  | NM_000275 | 1051.734  | 1226.565  | AJ227899  | 1029.208 | 1092.36   |
| NM_014760 | 2963.697  | 2644.703  | AK000037  | 1527.932  | 1261.971  | AL359607  | 717.872  | 683.867   |
| NM_002560 | 5366.211  | 3943.694  | NM_014760 | 3178.378  | 4104.511  | AF161371  | 4804.648 | 5705.886  |
| NM_014404 | 1162.739  | 755.572   | NM_018398 | 5404.882  | 6439.119  | AK022464  | 541.448  | 918.813   |

|            |           |           |            |           |           |           |           |           |
|------------|-----------|-----------|------------|-----------|-----------|-----------|-----------|-----------|
| NM_015947  | 4929.21   | 3955.917  | NM_002560  | 13714.906 | 14242.903 | AF086230  | 968.285   | 1579.717  |
| NM_002042  | 1539.671  | 845.026   | NM_014404  | 2713.139  | 2874.887  | AK023408  | 3070.906  | 4571.524  |
| AB028944   | 484.973   | 375.927   | NM_018713  | 1221.744  | 1250.998  | U84509    | 981.949   | 971.027   |
| AJ006268   | 1021.863  | 995.03    | NM_015947  | 6200.343  | 7323.687  | AK002036  | 1626.167  | 2196.53   |
| NM_012245  | 10089.07  | 6991.433  | AB028944   | 1174.978  | 1735.534  | AK025775  | 1753.89   | 2142.898  |
| NM_133263  | 1135.362  | 1054.669  | AJ006268   | 1018.9    | 1128.828  | AB046791  | 745.558   | 758.387   |
| NM_000025  | 12775.619 | 10555.411 | M74089     | 7401.382  | 5500.398  | AF043469  | 1045.761  | 613.604   |
| D38521     | 2593.286  | 2662.597  | AF190864   | 5753.706  | 5194.239  | AL109671  | 424.614   | 525.178   |
| NM_000403  | 4250.292  | 4245.863  | NM_002779  | 3770.885  | 2906.813  | NM_012375 | 319.034   | 299.809   |
| NM_018127  | 14382.856 | 14718.542 | L40397     | 21113.289 | 14288.026 | AK022008  | 590.923   | 859.645   |
| AB020677   | 2480.896  | 2292.016  | NM_020198  | 11629.083 | 6528.932  | NM_018186 | 1175.591  | 956.04    |
| AB033097   | 1472.431  | 1183.153  | AA098879   | 826.14    | 411.815   | AL080188  | 2269.771  | 3243.353  |
| NM_000135  | 1335.442  | 1199.712  | NM_000025  | 37125.316 | 30910.475 | T99941    | 2195.641  | 3004.841  |
| AJ223948   | 5471.678  | 6691.675  | D38521     | 2601.911  | 2115.546  | AF113678  | 1437.731  | 2208.399  |
| NM_016218  | 1089.45   | 1369.889  | NM_000403  | 8896.748  | 7193.852  | AL137313  | 46235.438 | 65931.453 |
| AK022947   | 2131.314  | 1931.225  | NM_018127  | 14642.209 | 13271.381 | Z83951    | 270.286   | 255.459   |
| AL049966   | 673.361   | 619.189   | AB020677   | 6706.479  | 5845.104  | AB002363  | 1862.871  | 1585.961  |
| NM_005204  | 3394.317  | 2435.771  | AB033097   | 3112.109  | 2895.638  | NM_005284 | 1222.142  | 1360.742  |
| NM_007271  | 1922.995  | 1021.372  | NM_000135  | 1728.468  | 1695.929  | AF086351  | 1014.731  | 633.308   |
| NM_006255  | 4985.233  | 3951.614  | AJ223948   | 5811.839  | 5553.975  | D83199    | 10899.177 | 11536.242 |
| BE392143   | 3634.848  | 2551.63   | NM_016218  | 1122.358  | 1200.717  | AK025957  | 363.239   | 950.835   |
| NM_018132  | 1853.06   | 2180.029  | AK022947   | 2237.64   | 3474.178  | Y16708    | 556.708   | 682.461   |
| NM_003061  | 1642.313  | 1329.653  | AL050029   | 2683.514  | 3157.56   | AL157453  | 1982.492  | 2724.357  |
| NM_018207  | 2004.967  | 2313.49   | AL049966   | 726.226   | 604.258   | NM_019098 | 3429.17   | 1256.663  |
| NM_000345  | 3805.555  | 3805.542  | NM_005204  | 3403.188  | 3375.201  | AK022212  | 18562.619 | 21270.5   |
| NM_001862  | 51169.758 | 37757.32  | NM_016203  | 1678.695  | 1930.518  | X64974    | 2357.474  | 1233.719  |
| NM_006531  | 982.533   | 1101.931  | NM_002759  | 4849.508  | 3419.809  | NM_000834 | 4558.56   | 1945.084  |
| AB029021   | 4072.387  | 4378.783  | NM_006255  | 5839.352  | 6022.021  | NM_006485 | 21188.17  | 18784.162 |
| NM_002101  | 40868.035 | 29705.355 | BE392143   | 4333.2    | 4212.609  | NM_012455 | 1684.672  | 1808.128  |
| Z36789     | 3500.304  | 3231.627  | NM_005813  | 1850.721  | 1309.366  | NM_012360 | 281.671   | 359.648   |
| J02874     | 894.738   | 1438.148  | AB037718   | 6408.376  | 4517.786  | AL137268  | 1639.152  | 1603.93   |
| BF310427   | 1033.363  | 792.484   | AL389994   | 1438.681  | 853.961   | AK022398  | 391.796   | 464.302   |
| N94424     | 289.365   | 435.138   | NM_003909  | 5179.475  | 3226.918  | AK024109  | 1406.122  | 2046.671  |
| AA045192   | 462.742   | 531.012   | NM_001277  | 6723.614  | 4820.063  | AF088048  | 387.983   | 518.591   |
| H45617     | 320.792   | 250.127   | NM_003659  | 7731.611  | 3965.309  | AK001143  | 1078.978  | 647.071   |
| AA464532   | 281.224   | 294.184   | AB029021   | 17010.355 | 16470.525 | AK001701  | 1413.699  | 1436.448  |
| H-U 44385  | 13278.59  | 8302.472  | NM_002101  | 33009.086 | 29186.426 | AK022205  | 307.983   | 203.956   |
| ID 1654970 | 5201.978  | 3015.444  | NM_005423  | 547.366   | 453.453   | AB007978  | 329.021   | 452.459   |
| ID 2531132 | 6156.081  | 4005.821  | Z36789     | 1841.515  | 2093.062  | AF217970  | 522.22    | 590.104   |
| BF125928   | 15139.81  | 7729.172  | J02874     | 1797.318  | 1619.484  | AK025455  | 1972.449  | 2166.402  |
| BG571026   | 1018.597  | 675.429   | BF310427   | 1441.79   | 1391.071  | AK026799  | 561.038   | 349.77    |
| AA489017   | 5194.438  | 3103.962  | N94424     | 882.581   | 589.146   | NM_014860 | 365.921   | 200.615   |
| AK022845   | 1275.005  | 840.959   | AA045192   | 1333.173  | 1066.227  | AK022549  | 728.938   | 690.85    |
| S77835     | 453.22    | 436.59    | H45617     | 282.039   | 668.522   | NM_018157 | 441.459   | 414.444   |
| NM_002985  | 389.256   | 413.75    | M92642     | 941.333   | 1131.458  | Z70714    | 2392.141  | 3261.209  |
| AB018347   | 3100.801  | 2997.313  | H-U 44385  | 12340.775 | 14044.049 | AK021640  | 4759.382  | 5975.164  |
| AB033073   | 603.976   | 427.531   | ID 1654970 | 4676.106  | 5039.496  | NM_016565 | 39838.281 | 55243.992 |
| NM_003284  | 591.262   | 661.503   | ID 2531132 | 5107.458  | 5229.291  | CY3Cy5    | 441.095   | 131.795   |
| NM_018152  | 384.531   | 483.289   | ID 4365538 | 565.498   | 371.935   | BF310427  | 549.535   | 540.544   |
| NM_000319  | 4147.068  | 5949.743  | BF125928   | 12464.715 | 11092.035 | N94424    | 213.211   | 222.496   |
| NM_012461  | 5270.955  | 5937.88   | BG571026   | 1506.768  | 1317.765  | AA045192  | 360.636   | 357.3     |
| AK001379   | 1587.311  | 1794.85   | AA489017   | 3556.698  | 3206.828  | H45617    | 151.987   | 103.287   |
| NM_017450  | 1530.196  | 1479.349  | NM_012245  | 13396.012 | 9956.477  | M92642    | 344.897   | 483.608   |

|           |           |           |           |           |           |            |           |           |
|-----------|-----------|-----------|-----------|-----------|-----------|------------|-----------|-----------|
| NM_002023 | 842.187   | 871.322   | NM_133263 | 1284.319  | 952.921   | AA464532   | 149.569   | 136.92    |
| NM_002839 | 421.886   | 464.964   | NM_003284 | 3675.497  | 3919.649  | H-U 44385  | 5570.583  | 4154.311  |
| NM_001616 | 545.526   | 458.886   | NM_018152 | 923.517   | 824.195   | ID 1654970 | 2039.299  | 1939.485  |
| NM_005904 | 332.637   | 296.47    | NM_000319 | 2845.732  | 2871.741  | ID 2531132 | 2522.736  | 1847.121  |
| NM_005273 | 13786.652 | 8853.385  | NM_003257 | 372.869   | 342.527   | BF125928   | 5391.504  | 4168.51   |
| NM_000524 | 673.56    | 643.032   | NM_012461 | 4348.763  | 3901.58   | BG571026   | 727.821   | 796.084   |
| AB035266  | 1275.688  | 894.271   | AK001379  | 1879.135  | 1280.776  | AA489017   | 1556.59   | 1103.651  |
| NM_003744 | 2260.376  | 1395.627  | NM_017450 | 1719.551  | 1474.076  | NM_012245  | 5212.593  | 3600.708  |
| NM_006378 | 13451.627 | 6357.273  | NM_002023 | 1327.802  | 1222.991  | NM_133263  | 625.162   | 350.154   |
| NM_014404 | 760.77    | 998.582   | NM_002839 | 1184.42   | 891.039   | SR2        | 28674     | 17134.611 |
| NM_018713 | 431.104   | 305.64    | AF190500  | 566.948   | 763.295   | SR4        | 5292.757  | 3543.683  |
| NM_015947 | 5127.878  | 4671.77   | NM_001616 | 495.309   | 664.367   | SR6        | 937.147   | 686.108   |
| NM_002042 | 2219.863  | 1688.446  | NM_005904 | 353.608   | 595.94    | SR8        | 3294.865  | 5421.74   |
| AB028944  | 608.255   | 585.672   | NM_005273 | 12290.123 | 12492.873 | SR10       | 11350.558 | 1875.15   |
| AJ006268  | 1024.06   | 991.671   | NM_000524 | 462.557   | 673.262   | CY3Cy5     | 290.947   | 116.634   |
| M74089    | 6222.979  | 6823.092  | NM_006576 | 1618.815  | 1774.624  | NM_017450  | 614.026   | 564.09    |
| AF190864  | 6842.036  | 5607.801  | NM_018645 | 1391.505  | 1426.735  | NM_002023  | 774.779   | 936.275   |
| NM_002779 | 2787.104  | 4355.698  | AB035266  | 4197.225  | 3842.893  | NM_002839  | 307.647   | 281.799   |
| AA098879  | 472.348   | 728.951   | NM_003744 | 2533.523  | 2131.232  | AF190500   | 198.531   | 160.465   |
| AF070525  | 10420.555 | 11839.289 | NM_006378 | 12602.835 | 11449.143 | NM_001616  | 186.735   | 128.162   |
| NM_001177 | 6810.739  | 4408.415  | NM_018132 | 2436.281  | 1759.257  | NM_005273  | 5470.542  | 4160.141  |
| NM_014447 | 1330.119  | 1623.557  | NM_003061 | 1528.23   | 1413.877  | NM_000524  | 221.024   | 161.829   |
| NM_006691 | 834.268   | 743.373   | NM_018207 | 2041.873  | 1628.471  | NM_006576  | 526.589   | 510.691   |
| NM_003710 | 2295.254  | 1492.189  | NM_000345 | 12267.509 | 8404.935  | NM_018645  | 334.039   | 170.982   |
| Z83805    | 473.421   | 312.051   | NM_001862 | 49231.879 | 30671.744 | AB035266   | 1409.428  | 1032.763  |
| NM_014257 | 1502.698  | 787.806   | NM_006531 | 2454.786  | 1477.669  | NM_003744  | 839.587   | 644.934   |
| NM_004843 | 1674.908  | 1095.876  | M74089    | 7419.503  | 7363.608  | NM_006378  | 5254.171  | 3696.057  |
| NM_005204 | 3338.785  | 3939.704  | AF190864  | 5465.347  | 7045.681  | NM_018132  | 974.207   | 777.389   |
| NM_016203 | 1997.51   | 1191.709  | NM_002779 | 5334.559  | 4774.308  | NM_003061  | 687.541   | 685.444   |
| NM_002759 | 2998.437  | 2892.866  | L40397    | 23208.334 | 22933.682 | NM_018207  | 961.728   | 650.756   |
| NM_007271 | 1834.983  | 1649.776  | NM_020198 | 15728.635 | 14428.897 | NM_000345  | 3758.816  | 2079.033  |
| NM_006255 | 5856.813  | 6229.411  | AA098879  | 981.222   | 1118.273  | NM_001862  | 22339.539 | 13162.236 |
| BE392143  | 4592.116  | 4348.088  | AF070525  | 11901.277 | 10460.198 | NM_006531  | 999.97    | 932.362   |
| NM_005813 | 1355.711  | 1662.434  | NM_001177 | 4313.951  | 6704.243  | AB029021   | 2683.406  | 1379.674  |
| AB037718  | 4205.452  | 4811.141  | NM_014447 | 1502.276  | 1266.362  | NM_002101  | 15784.347 | 8095.173  |
| AL389994  | 1211.309  | 1743.073  | NM_006691 | 1392.295  | 1353.952  | Z36789     | 900.718   | 491.015   |
| NM_001277 | 4059.529  | 7884.029  | NM_001505 | 626.96    | 740.312   | J02874     | 414.622   | 250.331   |
| NM_012320 | 2167.844  | 3299.12   | NM_003710 | 2206.888  | 2577.111  | AF070525   | 3512.386  | 3094.74   |
| NM_018208 | 3368.815  | 2609.135  | Z83805    | 1089.848  | 983.533   | NM_001177  | 2621.113  | 1398.893  |
| NM_015929 | 4525.229  | 4673.833  | NM_004666 | 1143.49   | 1257.64   | NM_014447  | 433.483   | 552.725   |
| U90653    | 6353.996  | 7024.396  | NM_003614 | 1186.843  | 1119.217  | NM_006691  | 462.373   | 552.458   |
| NM_000196 | 566.521   | 714.105   | NM_014257 | 4843.723  | 4092.406  | NM_001505  | 288.377   | 238.174   |
| NM_018339 | 6473.175  | 5213.07   | NM_001140 | 999.297   | 1137.466  | NM_003710  | 1166.819  | 819.984   |
| NM_006745 | 44843.051 | 31330.625 | NM_004843 | 2084.715  | 1914.889  | Z83805     | 243.164   | 304.163   |
| NM_000275 | 912.314   | 573.769   | AK022845  | 1156.95   | 1430.219  | NM_004666  | 403.809   | 680.316   |
| AK000037  | 742.166   | 398.734   | NM_003004 | 452.423   | 318.801   | NM_003614  | 376.135   | 252.975   |
| NM_014760 | 2594.897  | 1471.476  | S77835    | 556.594   | 414.592   | NM_014257  | 1039.691  | 1005.202  |
| NM_018398 | 743.934   | 619.795   | NM_002985 | 586.688   | 472.116   | NM_004843  | 902.407   | 645.733   |
| NM_002560 | 4315.008  | 2728.585  | AB018347  | 8227.174  | 5204.241  | AK022845   | 485.889   | 274.615   |
| NM_000787 | 978.273   | 1208.822  | AB033073  | 4513.327  | 2098.744  | S77835     | 360.844   | 538.819   |
| U57962    | 2765.643  | 2255.983  | NM_005813 | 1972.209  | 1844.737  | NM_002985  | 327.625   | 342.825   |
| NM_016176 | 10434.098 | 7856.054  | AB037718  | 11163.91  | 10356.576 | AB018347   | 2181.54   | 1734.049  |
| NM_017895 | 4122.063  | 3560.585  | AL389994  | 1112.627  | 1079.519  | AB033073   | 1257.049  | 792.425   |

|           |           |           |           |           |           |           |           |           |
|-----------|-----------|-----------|-----------|-----------|-----------|-----------|-----------|-----------|
| NM_00461C | 1327.529  | 1380.455  | NM_003909 | 5329.872  | 5489.081  | NM_003284 | 547.264   | 528.518   |
| NM_001612 | 2134.501  | 2531.807  | NM_001277 | 10745.338 | 12046.89  | NM_018152 | 288.254   | 215       |
| AK027002  | 2109.19   | 2304.528  | NM_003659 | 8525.601  | 7519.623  | NM_000319 | 1259.205  | 803.609   |
| AB025254  | 1563.66   | 2653.608  | NM_007072 | 2689.565  | 2175.048  | NM_012461 | 1993.045  | 989.195   |
| NM_004081 | 758.997   | 851.934   | NM_01232C | 3492.067  | 3026.558  | AK001379  | 641.181   | 371.597   |
| D38521    | 2394.173  | 2449.043  | NM_01820E | 3718.701  | 4362.046  | NM_007072 | 582.584   | 626.471   |
| NM_000403 | 3640.292  | 4138.396  | NM_015929 | 5525.066  | 5432.518  | NM_01232C | 1303.278  | 1051.355  |
| NM_018127 | 12903.108 | 11313.005 | U90653    | 5065.621  | 4827.116  | NM_01820E | 1501.372  | 1073.328  |
| AB020677  | 2544.784  | 2699.575  | NM_000196 | 561.005   | 676.929   | NM_015929 | 1946.211  | 2057.032  |
| AB033097  | 1360.222  | 1405.449  | NM_018339 | 7824.024  | 8363.033  | U90653    | 2365.152  | 2293.372  |
| NM_000135 | 1261.925  | 903.299   | NM_006745 | 43310.453 | 46897.277 | NM_000196 | 403.3     | 326.433   |
| AJ223948  | 4458.3    | 3279.157  | NM_000275 | 1205.641  | 1121.929  | NM_018339 | 3311.313  | 3332.156  |
| NM_01621E | 977.006   | 691.064   | AK000037  | 1659.158  | 1089.941  | NM_006745 | 17201.945 | 13735.751 |
| AK022947  | 2181.03   | 1359.309  | NM_01476C | 3245.806  | 2796.395  | NM_000275 | 398.723   | 618.606   |
| AL050029  | 2476.954  | 1432      | NM_01839E | 1951.446  | 1826.114  | AK000037  | 530.705   | 313.194   |
| AL049966  | 417.326   | 378.874   | NM_00256C | 17979.344 | 17286.512 | NM_01476C | 995.453   | 943.256   |
| AB040976  | 4635.972  | 2980.633  | NM_014404 | 2907.57   | 2391.796  | NM_01839E | 1088.373  | 1362.534  |
| NM_018641 | 6075.733  | 3389.102  | NM_018713 | 1071.567  | 1152.033  | NM_00256C | 5213.566  | 3857.475  |
| U49089    | 871.609   | 579.089   | NM_015947 | 5986.431  | 5728.498  | NM_014404 | 621.763   | 858.54    |
| NM_002221 | 1931.248  | 2101.018  | NM_002042 | 32720.369 | 24423.061 | NM_018713 | 356.006   | 265.8     |
| NM_002371 | 2729.187  | 1809.305  | AB028944  | 647.533   | 597.609   | NM_015947 | 2494.471  | 2468.865  |
| NM_002562 | 870.59    | 2612.02   | AJ006268  | 1011.241  | 566.789   | NM_002042 | 11359.086 | 7510.044  |
| AK024502  | 5935.392  | 15385.551 | NM_012245 | 17814.832 | 23478.445 | AB028944  | 284.572   | 220.176   |
| NM_001124 | 1458.418  | 1256.331  | NM_133263 | 1519.434  | 1500.813  | AJ006268  | 396.15    | 326.367   |
| NM_00458E | 3302.294  | 2477.374  | NM_000025 | 26382.242 | 24480.092 | M74089    | 3179.171  | 2981.401  |
| NM_004844 | 5285.476  | 3994.446  | D38521    | 2804.393  | 2093.468  | AF190864  | 3342.895  | 1789.714  |
| NM_000051 | 2566.49   | 2102.813  | NM_000403 | 7648.198  | 8430.376  | NM_002779 | 1240.645  | 775.452   |
| NM_00418C | 4470.56   | 4804.473  | NM_018127 | 14734.375 | 17040.607 | L40397    | 9572.166  | 5036.927  |
| AL117485  | 4680.276  | 4432.384  | AB020677  | 7033.222  | 7851.907  | NM_02019E | 4056.334  | 2073.528  |
| NM_00350E | 668.993   | 375.742   | AB033097  | 3251.86   | 3620.106  | AA098879  | 273.293   | 173.537   |
| NM_007191 | 608.349   | 619.653   | NM_000135 | 1762.328  | 1718.686  | NM_000025 | 7552.869  | 6594.557  |
| AL109667  | 517.511   | 335.99    | AJ223948  | 5536.131  | 4987.692  | D38521    | 686.844   | 690.753   |
| NM_00084C | 456.947   | 203.442   | NM_01621E | 1212.958  | 852.447   | NM_000403 | 2187.301  | 1745.215  |
| AF034102  | 29803.027 | 20352.795 | AK022947  | 2231.62   | 1793.609  | NM_018127 | 6429.122  | 5509.137  |
| AJ008142  | 7898.691  | 5175.157  | AL050029  | 2364.817  | 2310.609  | AB020677  | 1766.934  | 1674.199  |
| AL035289  | 366.046   | 661.533   | AL049966  | 495.588   | 587.555   | AB033097  | 1016.215  | 1083.299  |
| NM_001343 | 3780.744  | 2946.006  | NM_005204 | 3398.162  | 2919.993  | NM_000135 | 474.143   | 383.911   |
| NM_007275 | 8101.98   | 6528.352  | NM_016203 | 1574.141  | 1661.052  | AJ223948  | 1861.217  | 2236.74   |
| NM_019025 | 17932.295 | 11616.454 | NM_002759 | 5270.374  | 2511.741  | NM_01621E | 337.238   | 403.785   |
| NM_018461 | 4411.702  | 3879.792  | NM_007271 | 2247.063  | 1271.322  | AK022947  | 784.989   | 747.384   |
| AF235023  | 7903.262  | 10502.17  | NM_006255 | 5207.773  | 3758.149  | AL050029  | 874.336   | 776.079   |
| NM_00691C | 4887.472  | 4331.12   | BE392143  | 4490.86   | 2433.204  | AL049966  | 202.944   | 145.578   |
| AF162667  | 2211.267  | 1082.111  | NM_018132 | 2682.656  | 2631.432  | NM_005204 | 1883.912  | 1493.16   |
| AB046847  | 3518.995  | 1959.504  | NM_003061 | 1654.614  | 1961.882  | NM_016203 | 812.44    | 501.786   |
| NM_000447 | 932.055   | 867.15    | NM_018207 | 2327.128  | 2394.683  | NM_002759 | 1436.578  | 1327.47   |
| NM_006354 | 4322.83   | 2543.671  | NM_000345 | 24099.203 | 24731.455 | NM_007271 | 1022.766  | 1074.702  |
| AF303378  | 3453.167  | 3414.325  | NM_001862 | 53810.039 | 56472.676 | NM_006255 | 2130.913  | 1925.12   |
| NM_016037 | 12618.168 | 15632.445 | NM_006531 | 4424.379  | 3939.452  | BE392143  | 1665.123  | 1283.743  |
| NM_015965 | 392.211   | 423.345   | AB029021  | 12922.382 | 12210.073 | NM_005813 | 552.359   | 861.037   |
| NM_000417 | 3276.743  | 4046.184  | NM_002101 | 33037.773 | 29429.895 | AB037718  | 2613.808  | 1500.866  |
| NM_018235 | 14827.991 | 10637.633 | Z36789    | 1790.945  | 2422.926  | AL389994  | 497.642   | 428.057   |
| NM_012104 | 3111.727  | 3300.653  | J02874    | 2166.103  | 2265.128  | NM_003909 | 2658.41   | 1506.801  |
| NM_006144 | 26295.104 | 24335.414 | BF310427  | 1713.645  | 1746.593  | NM_001277 | 2801.996  | 1796.92   |

|           |           |           |            |           |           |            |           |           |
|-----------|-----------|-----------|------------|-----------|-----------|------------|-----------|-----------|
| AL136549  | 11989.167 | 7538.758  | N94424     | 982.451   | 1276.939  | NM_00365E  | 2843.1    | 1766.977  |
| NM_01216E | 1386.534  | 822.076   | AA045192   | 1313.564  | 1434.994  | AB029021   | 2540.551  | 1920.123  |
| NM_00703E | 718.76    | 756.516   | H45617     | 250.834   | 543.193   | NM_002101  | 14640.435 | 12516.743 |
| AF311324  | 9373.684  | 18522.928 | M92642     | 1169.544  | 954.359   | NM_00542E  | 118.242   | 128.717   |
| AF124433  | 763.151   | 755.942   | H-U 44385  | 12887.237 | 11141.509 | Z36789     | 917.818   | 919.912   |
| AL162049  | 1136.51   | 716.222   | ID 1654970 | 5015.955  | 5773.068  | J02874     | 584.263   | 602.969   |
| NM_00503E | 1986.697  | 2951.569  | ID 2531132 | 5239.606  | 6202.226  | BF310427   | 611.216   | 406.928   |
| NM_00416C | 5699.699  | 6811.087  | ID 4365538 | 647.731   | 487.548   | N94424     | 294.064   | 304.578   |
| AL109677  | 1257.101  | 1461.465  | BF125928   | 11946.602 | 8117.286  | AA045192   | 498.966   | 421.012   |
| NM_003941 | 30626.391 | 20761.584 | BG571026   | 1550.501  | 1101.691  | H45617     | 447.713   | 566.547   |
| AF177909  | 883.012   | 999.468   | AA489017   | 3645.641  | 2240.299  | M92642     | 430.641   | 319.519   |
| NM_002664 | 1492.114  | 972.231   | AK022845   | 1399.86   | 1836.707  | H-U 44385  | 5597.925  | 4405.085  |
| AB018271  | 1189.04   | 1252.011  | S77835     | 440.628   | 496.553   | ID 1654970 | 2178.882  | 1297.132  |
| AL137665  | 2364.605  | 1555.856  | NM_00298E  | 669.164   | 712.234   | ID 2531132 | 2386.267  | 1872.44   |
| NM_016434 | 796.179   | 550.711   | AB018347   | 12388.65  | 11551.508 | BF125928   | 5462.653  | 4035.815  |
| U36561    | 53457.633 | 68805.313 | AB033073   | 7089.431  | 6353.35   | BG571026   | 660.541   | 551.259   |
| NM_005634 | 2074.012  | 1794.447  | NM_003284  | 2516.829  | 2182.283  | AA489017   | 1473.675  | 1181.769  |
| NM_017757 | 3013.304  | 3406.888  | NM_01815E  | 856.544   | 790.925   | NM_01224E  | 5403.497  | 3977.189  |
| NM_00214E | 5732.42   | 4238.376  | NM_00031E  | 2944.83   | 2880.118  | NM_13326E  | 636.447   | 320.313   |
| AB007892  | 1530.544  | 1441.836  | NM_012461  | 4897.515  | 4565.609  | NM_003284  | 514.461   | 433.93    |
| AB037748  | 1057.234  | 1078.116  | AK001379   | 1979.049  | 1230.555  | NM_01815E  | 241.895   | 219.144   |
| AB002306  | 3178.354  | 2694.93   | NM_01745C  | 1985.465  | 1743.531  | NM_00031E  | 1093.885  | 1231.674  |
| NM_00130C | 4320.827  | 3837.259  | NM_00202E  | 1152.751  | 1323.339  | NM_012461  | 1882.713  | 2259.269  |
| NM_01247E | 836.984   | 690.132   | NM_00283E  | 1209.207  | 921.685   | AK001379   | 516.351   | 692.268   |
| NM_018187 | 9144.014  | 8814.615  | AF190500   | 846.473   | 828.59    | NM_01745C  | 636.911   | 655.513   |
| BC019932  | 2104.678  | 1268.801  | NM_00161E  | 537.344   | 755.548   | NM_00202E  | 470.075   | 271.13    |
| AF114818  | 3014.714  | 2276.447  | NM_005904  | 430.581   | 598.666   | NM_00283E  | 339.871   | 273.072   |
| AK025106  | 2450.748  | 3052.073  | NM_00527E  | 13973.781 | 13936.299 | NM_00161E  | 225.877   | 204.062   |
| NM_020144 | 2025.676  | 2196.818  | NM_000524  | 601.079   | 933.479   | NM_00527E  | 5945.896  | 4344.892  |
| NM_00390E | 46918.941 | 48572.23  | NM_00657E  | 2007.344  | 2313.603  | NM_000524  | 215.716   | 177.917   |
| BE893142  | 1973.794  | 1793.909  | NM_01864E  | 717.153   | 689.933   | NM_00657E  | 480.815   | 389.123   |
| NM_00310E | 5528.059  | 4703.739  | AB035266   | 4740.497  | 3247.084  | NM_01864E  | 284.404   | 312.888   |
| NM_01534C | 4800.619  | 3718.774  | NM_003744  | 2770.956  | 1857.054  | AB035266   | 1683.26   | 1087.302  |
| NM_006451 | 4498.264  | 3884.351  | NM_00637E  | 10806.046 | 7679.14   | NM_003744  | 912.262   | 854.486   |
| NM_002094 | 2203.869  | 1615.375  | NM_014404  | 6301.397  | 6183.638  | NM_00637E  | 6262.451  | 3543.914  |
| NM_002937 | 1520.945  | 1228.534  | NM_01871E  | 1488.932  | 1984.606  | NM_01813E  | 849.849   | 976.699   |
| NM_003191 | 3160.751  | 2378.123  | NM_015947  | 7086.292  | 6852.173  | NM_003061  | 744.493   | 442.25    |
| AL137476  | 2260.091  | 2491.878  | NM_00204E  | 28327.283 | 31194.578 | NM_018207  | 894.216   | 601.229   |
| AF052174  | 2364.838  | 3541.739  | AB028944   | 1068.389  | 875.858   | NM_00034E  | 3343.523  | 1519.821  |
| AF070590  | 923.392   | 842.285   | AJ006268   | 1033.339  | 1047.696  | NM_00186E  | 20494.992 | 12590.506 |
| NM_000761 | 25059.52  | 18022.363 | M74089     | 7662.402  | 5954.27   | NM_006531  | 850.101   | 454.703   |
| NM_02014E | 1716.766  | 1077.945  | AF190864   | 5747.643  | 6029.478  | M74089     | 2477.969  | 2667.319  |
| NM_000774 | 2482.059  | 1378.351  | NM_00277E  | 3739.317  | 3835.881  | AF190864   | 2602.527  | 1798.134  |
| NM_00694E | 7219.608  | 6222.927  | L40397     | 23264.938 | 24561.703 | NM_00277E  | 995.63    | 1027.765  |
| NM_006741 | 3297.972  | 3225.519  | NM_02019E  | 14097.536 | 14670.184 | L40397     | 8418.114  | 8655.161  |
| NM_01416E | 9700.244  | 10005.265 | AA098879   | 755.373   | 1026.499  | NM_02019E  | 4061.764  | 3883.197  |
| AL117606  | 4833.259  | 5639.405  | AF070525   | 11617.323 | 10901.658 | AA098879   | 359.08    | 545.876   |
| NM_01233C | 1857.685  | 1931.755  | NM_001177  | 4272.422  | 7778.869  | NM_014447  | 680.419   | 1100.48   |
| AF294278  | 1633.504  | 3402.498  | NM_014447  | 1691.139  | 1568.334  | NM_00235E  | 184.028   | 156.235   |
| NM_018211 | 3142.061  | 3214.096  | NM_006691  | 1487      | 1461.028  | NM_006691  | 432.739   | 379.527   |
| NM_01452C | 2868.983  | 2763.647  | NM_00150E  | 790.282   | 892.202   | NM_00150E  | 314.226   | 243.641   |
| NM_00261E | 3317.161  | 2501.917  | NM_00371C  | 2462.184  | 2910.474  | NM_00371C  | 1075.637  | 895.674   |
| AK025712  | 8082.552  | 4375.528  | Z83805     | 1039.083  | 965.287   | Z83805     | 275.943   | 124.97    |

|           |           |           |           |           |           |           |           |           |
|-----------|-----------|-----------|-----------|-----------|-----------|-----------|-----------|-----------|
| AK026375  | 3794.761  | 4399.276  | NM_004666 | 1702.31   | 1759.95   | NM_004666 | 694.648   | 726.711   |
| NM_01471C | 905.851   | 570.668   | NM_003614 | 1728.454  | 1887.368  | NM_003614 | 325.393   | 257.456   |
| U85992    | 1365.736  | 1328.965  | NM_014257 | 5235.448  | 6701.938  | NM_014257 | 1202.11   | 883.76    |
| AL110152  | 557.717   | 623.207   | NM_004843 | 1750.019  | 1323.866  | NM_004843 | 805.684   | 547.943   |
| AF131745  | 3598.034  | 3467.933  | NM_005204 | 3964.145  | 4651.55   | AK022845  | 548.21    | 461.595   |
| AL117565  | 2230.441  | 2104.544  | NM_016203 | 1479.977  | 2223.668  | S77835    | 205.722   | 192.596   |
| AF086232  | 453.598   | 346.977   | NM_002759 | 5086.199  | 3468.914  | NM_002985 | 207.867   | 172.425   |
| NM_00510E | 1685.791  | 1919.481  | NM_007271 | 2622.722  | 2490.451  | AB018347  | 1906.745  | 1337.187  |
| AK022292  | 3606.929  | 3036.276  | NM_006255 | 5987.814  | 5635.874  | AB033073  | 922.46    | 538.347   |
| AB051436  | 3510.655  | 2697.659  | BE392143  | 5702.847  | 5459.7    | NM_005813 | 465.535   | 484.219   |
| AK026482  | 7002.292  | 3991.647  | NM_005813 | 1799.883  | 1812.09   | AB037718  | 2455.573  | 2682.693  |
| AL137473  | 3063.805  | 2185.173  | AB037718  | 8973.213  | 7185.737  | AL389994  | 412.689   | 495.375   |
| AJ001873  | 1019.188  | 686.114   | AL389994  | 1272.379  | 1236.424  | NM_003909 | 1747.354  | 1724.271  |
| AK022604  | 2329.778  | 3101.437  | NM_003909 | 5037.794  | 5191.315  | NM_001277 | 2779.597  | 3265.085  |
| U66048    | 798.195   | 875.375   | NM_001277 | 8565.131  | 10189.862 | NM_003659 | 3497.572  | 3381.815  |
| AK023401  | 2954.491  | 3249.668  | NM_003659 | 8671.542  | 9738.606  | NM_007072 | 1028.747  | 1021.943  |
| AL137513  | 745.334   | 577.471   | NM_007072 | 2511.757  | 2175.425  | NM_01232C | 1424.42   | 1269.479  |
| AF088001  | 434.589   | 462.993   | NM_01232C | 3774.216  | 3691.544  | NM_01820E | 2153.393  | 1998.187  |
| NM_018067 | 6169.123  | 4628.032  | NM_01820E | 3701.16   | 4349.06   | NM_01592E | 2575.622  | 2432.72   |
| NM_01895E | 14114.433 | 7805.009  | NM_01592E | 6204.781  | 5690.146  | U90653    | 2777.245  | 2620.688  |
| NM_014787 | 2278.59   | 1642.195  | U90653    | 5318.669  | 6125.039  | NM_00019E | 260.369   | 283.318   |
| AL122109  | 617.181   | 559.182   | NM_00019E | 668.709   | 737.18    | NM_01833E | 3175.729  | 3125.493  |
| AF074988  | 1338.124  | 929.465   | NM_01833E | 8018.92   | 7455.815  | NM_00674E | 16272.275 | 12700.692 |
| AK024946  | 806.774   | 790.613   | NM_00674E | 42598.168 | 44561.238 | NM_00027E | 357.228   | 270.196   |
| AK001432  | 600.008   | 1474.153  | NM_00027E | 1274.374  | 1318.867  | AK000037  | 451.753   | 325.763   |
| AL133568  | 5538.853  | 7189.954  | AK000037  | 1420.388  | 1186.996  | NM_01476C | 1113.374  | 1058.817  |
| AF009265  | 2356.177  | 2350.806  | NM_01476C | 2983.119  | 2183.268  | NM_01839E | 863.212   | 1044.478  |
| AF009309  | 590.044   | 471.768   | NM_01839E | 1333.107  | 1076.892  | NM_00256C | 5381.147  | 3605.533  |
| AF056425  | 867.799   | 1395.239  | NM_00256C | 14492.186 | 10059.983 | NM_014404 | 897.814   | 803.596   |
| AK021630  | 1087.87   | 1706.294  | NM_000787 | 1678.733  | 2677.859  | NM_018713 | 295.568   | 266.875   |
| AK021831  | 1019.986  | 723.917   | U57962    | 4387.405  | 7274.508  | NM_015947 | 2091.24   | 1476.67   |
| AK025650  | 1256.749  | 1185.63   | NM_01617E | 7858.937  | 8938.399  | NM_002042 | 9574.407  | 5179.658  |
| AK026401  | 843.979   | 1111.713  | NM_005574 | 2284.261  | 2330.427  | AB028944  | 273.913   | 300.775   |
| U73530    | 300.911   | 750.227   | NM_01789E | 10448.545 | 10239.304 | AJ006268  | 514.641   | 552.941   |
| AF086158  | 7959.889  | 11152.703 | NM_00461C | 5449.862  | 5630.679  | NM_01224E | 4186.75   | 4382.102  |
| AF086050  | 5241.162  | 5245.888  | NM_001612 | 2782.087  | 2490.103  | NM_133263 | 412.458   | 493.903   |
| AF147375  | 1074.009  | 906.557   | AK027002  | 3402.199  | 3519.712  | NM_00002E | 7776.117  | 6633.797  |
| X51524    | 2834.113  | 3136.735  | AB025254  | 3794.288  | 3763.228  | D38521    | 922.154   | 976.802   |
| AK021516  | 1314.322  | 1430.602  | NM_004081 | 2748.544  | 2839.778  | NM_018127 | 6962.688  | 6396.101  |
| Z70699    | 766.561   | 1200.324  | NM_00002E | 27191.584 | 26806.619 | AB020677  | 1783.194  | 2051.307  |
| AK023429  | 467.09    | 957.638   | D38521    | 2902.152  | 2521.458  | AB033097  | 1039.409  | 1006.252  |
| AK022276  | 633.498   | 428.811   | NM_000403 | 8505.987  | 8805.18   | NM_00013E | 666.359   | 617.622   |
| AK023774  | 982.265   | 921.92    | NM_018127 | 14862.928 | 15051.93  | AJ223948  | 2140.12   | 2408.099  |
| AL049377  | 401.967   | 252.846   | AB020677  | 5788.586  | 5806.521  | NM_01621E | 458.299   | 502.724   |
| NM_003544 | 50456.184 | 66674.805 | AB033097  | 2777.942  | 3161.201  | AK022947  | 1174.648  | 843.657   |
| U17640    | 391.496   | 307.087   | NM_00013E | 1996.798  | 1944.535  | AL050029  | 1234.391  | 886.859   |
| AK001187  | 1535.121  | 1385.826  | AJ223948  | 6447.488  | 5599.57   | AL049966  | 181.664   | 172.734   |
| NM_00352E | 5895.89   | 6440.846  | NM_01621E | 1257.653  | 1344.624  | NM_005204 | 1776.07   | 1559.841  |
| AF056436  | 2365.332  | 2375.632  | AK022947  | 1999.059  | 2022.62   | NM_016203 | 717.828   | 471.794   |
| AB023191  | 1122.605  | 1353.421  | AL050029  | 2347.53   | 1975.86   | NM_00275E | 1351.737  | 1200.665  |
| AK027212  | 6370.008  | 5213.09   | AL049966  | 572.095   | 347.17    | NM_007271 | 971.211   | 987.504   |
| X56197    | 955.342   | 719.102   | NM_004063 | 647.915   | 1019.901  | NM_00625E | 1979.874  | 1613.765  |
| NM_00519E | 1513.109  | 1172.016  | AB040976  | 10155.778 | 20440.777 | BE392143  | 1477.843  | 815.957   |



|           |           |           |           |           |           |            |           |           |
|-----------|-----------|-----------|-----------|-----------|-----------|------------|-----------|-----------|
| U90905    | 657.956   | 546.472   | NM_007361 | 990.95    | 188.339   | NM_018132  | 987.402   | 1555.331  |
| AF161422  | 2467.705  | 1755.25   | NM_018641 | 4318.785  | 7138.223  | NM_003061  | 503.837   | 672.767   |
| AL137384  | 989.139   | 433.894   | U49089    | 1216.562  | 1549.843  | NM_018207  | 1062.738  | 982.102   |
| AF070619  | 828.527   | 642.04    | NM_002221 | 4869.543  | 5221.447  | NM_000345  | 3644.773  | 3162.903  |
| NM_020153 | 1822.18   | 399.153   | NM_002371 | 1682.056  | 3503.257  | NM_001862  | 23226.578 | 21015.904 |
| NM_005321 | 2676.856  | 2426.902  | NM_002562 | 819.306   | 799.553   | NM_006531  | 1134.261  | 1216.757  |
| AF073520  | 1518.252  | 895.396   | AK024502  | 3704.193  | 3570.788  | AB029021   | 3117.719  | 2841.537  |
| NM_014015 | 5419.654  | 3192.916  | NM_001124 | 1283.277  | 1993.954  | NM_002101  | 15758.18  | 12754.326 |
| AK026839  | 1141.983  | 1102.163  | NM_004586 | 3456.75   | 3184.855  | NM_005423  | 210.541   | 234.934   |
| AK024973  | 309.049   | 113.117   | NM_004844 | 6775.526  | 7767.091  | Z36789     | 1205.603  | 1221.657  |
| AJ008123  | 2335.347  | 1667.909  | NM_013447 | 964.557   | 959.823   | BF310427   | 2671.791  | 2718.83   |
| AJ008156  | 1392.896  | 1664.371  | NM_000051 | 6643.828  | 7296.796  | N94424     | 1283.604  | 1306.836  |
| AF161437  | 3302.671  | 1852.556  | NM_005709 | 706.891   | 997.617   | AA045192   | 442.313   | 362.754   |
| AK001039  | 2346.422  | 2065.715  | NM_004180 | 4471.11   | 4139.861  | M92642     | 383.111   | 395.042   |
| AK026465  | 741.023   | 827.953   | AF302109  | 1548.833  | 1512.021  | H-U 44385  | 4891.249  | 3560.564  |
| AK024321  | 427.49    | 453.115   | AL117485  | 12454.185 | 11184.665 | ID 1654970 | 1976.327  | 1542.948  |
| U52834    | 601.301   | 707.871   | NM_003505 | 849.358   | 722.733   | ID 2531132 | 2184.888  | 1840.214  |
| NM_003532 | 454.316   | 340.868   | NM_007191 | 1885.15   | 2006.726  | BF125928   | 5198.28   | 3346.465  |
| NM_017869 | 4944.457  | 3664.462  | AL109667  | 1155.135  | 1374.374  | BG571026   | 618.971   | 510.426   |
| AF075100  | 489.609   | 412.182   | NM_000840 | 1281.493  | 978.082   | AA489017   | 1462.004  | 982.426   |
| AF203447  | 5555.56   | 3807.871  | AJ008142  | 29418.469 | 41071.77  | AK022845   | 662.744   | 480.711   |
| NM_018502 | 1465.653  | 898.729   | AL035289  | 424.392   | 837.583   | S77835     | 211.281   | 229.095   |
| AL080066  | 8290.826  | 5525.917  | NM_001343 | 3652.697  | 3788.814  | NM_002985  | 229.045   | 252.291   |
| AJ227870  | 1077.089  | 973.897   | NM_007275 | 15397.18  | 14928.066 | AB018347   | 2053.493  | 2521.948  |
| AL137620  | 694.998   | 969.312   | NM_019025 | 49924.336 | 46379.781 | AB033073   | 1303.646  | 1648.749  |
| NM_005294 | 968.958   | 607.512   | NM_018461 | 5182.351  | 5540.748  | NM_003284  | 691.768   | 687.064   |
| AK026879  | 337.422   | 319.541   | AF235023  | 8208.923  | 6544.469  | NM_018152  | 309.887   | 225.62    |
| AF085826  | 1124.066  | 1032.498  | NM_006910 | 5741.565  | 5452.716  | NM_000319  | 1536.458  | 1290.757  |
| AK024362  | 940.193   | 647.603   | AF162667  | 2573.051  | 2490.846  | NM_012461  | 2230.679  | 2122.17   |
| AF118068  | 2672.99   | 1410.431  | AB046847  | 5801.673  | 5256.278  | NM_017450  | 1099.999  | 1158.23   |
| NM_004164 | 545.766   | 709.38    | NM_000447 | 2358.421  | 2171.956  | NM_002023  | 489.524   | 491.505   |
| NM_019018 | 2637.026  | 1925.78   | NM_006354 | 4452.396  | 4320.104  | NM_002839  | 462.634   | 375.696   |
| M87931    | 990.678   | 1178.139  | AF303378  | 8338.923  | 7586.229  | AF190500   | 236.838   | 223.828   |
| CY3Cy5    | 2989.86   | 168.395   | NM_016037 | 17926.578 | 11757.923 | NM_005273  | 5257.532  | 3632.867  |
| BE790116  | 763.968   | 400.766   | NM_015965 | 479       | 448.062   | NM_006576  | 632.735   | 576.971   |
| AI922341  | 611.129   | 1524.075  | NM_000417 | 3733.53   | 3039.23   | NM_018645  | 267.161   | 158.032   |
| M12824    | 4249.268  | 3039.687  | NM_020356 | 1256.226  | 1488.27   | AB035266   | 1175.513  | 738.403   |
| W60100    | 4955.587  | 6373.996  | NM_018235 | 51468.973 | 55663.363 | NM_003744  | 1041.794  | 721.338   |
| U72508    | 535.656   | 566.285   | NM_006144 | 42583.004 | 35183.047 | NM_006378  | 6050.973  | 3102.066  |
| AA457153  | 4016.439  | 3703.301  | AL136549  | 13564.554 | 15965.164 | NM_014404  | 1424.557  | 3248.245  |
| AA283122  | 725.548   | 669.955   | NM_012168 | 2118.911  | 2351.292  | NM_018713  | 296.882   | 358.559   |
| AA868504  | 2270.425  | 3256.098  | NM_007038 | 2978.321  | 3238.249  | NM_015947  | 2334.403  | 2911.331  |
| AA877845  | 5718.269  | 5277.131  | AF311324  | 7770.526  | 5537.649  | NM_002042  | 13235.997 | 14414.593 |
| AA664241  | 20501.291 | 16959.33  | AF124433  | 803.488   | 813.37    | AB028944   | 268.011   | 465.224   |
| NM_000588 | 14689.323 | 10669.262 | AK001647  | 670.825   | 725.1     | AJ006268   | 401.254   | 406.252   |
| SR5       | 8893.117  | 6434.108  | NM_001461 | 485.06    | 537.513   | M74089     | 3173.44   | 6552.46   |
| SR7       | 7660.031  | 42115.078 | AF061556  | 1376.883  | 1628.522  | AF190864   | 3115.333  | 2599.725  |
| SR9       | 21564.297 | 3389.267  | AL162049  | 1368.563  | 1492.867  | NM_002779  | 1539.8    | 1713.138  |
| CY3Cy5    | 5106.875  | 248.667   | NM_005032 | 1283.345  | 1448.059  | L40397     | 10279.542 | 11276.41  |
| NM_005810 | 3250.115  | 1260.977  | NM_004160 | 7620.476  | 8937.438  | NM_020198  | 5743.818  | 6349.388  |
| M28170    | 1620.872  | 1115.055  | AL109677  | 1707.133  | 1841.491  | AA098879   | 334.438   | 386.566   |
| NM_005849 | 1261.313  | 1917.576  | NM_003941 | 46344.926 | 51260.117 | AF070525   | 4524.029  | 5047.515  |
| AK026223  | 1754.619  | 2498.166  | AF177909  | 2100.216  | 2277.185  | NM_001177  | 3930.72   | 3575.336  |

|           |           |           |           |           |           |           |           |           |
|-----------|-----------|-----------|-----------|-----------|-----------|-----------|-----------|-----------|
| NM_000874 | 7576.841  | 7737.421  | NM_002664 | 2072.76   | 2076.952  | NM_014447 | 517.811   | 514.515   |
| NM_005854 | 508.714   | 454.02    | AB018271  | 1996.713  | 2343.034  | NM_006691 | 557.747   | 619.895   |
| AB007863  | 9955.288  | 7825.068  | AL137665  | 4628.619  | 3750.631  | NM_001505 | 355.076   | 295.224   |
| AK024456  | 6246.331  | 5883.695  | NM_016434 | 1369.366  | 1493.728  | NM_003710 | 1120.335  | 896.566   |
| NM_017789 | 660.22    | 532.757   | U36561    | 64005.82  | 62536.492 | Z83805    | 307.293   | 346.708   |
| D31887    | 4730.939  | 4185.362  | NM_005634 | 2642.952  | 3090.779  | NM_004666 | 395.249   | 500.603   |
| NM_002313 | 4284.227  | 3112.91   | NM_017757 | 4909.414  | 7127.061  | NM_003614 | 382.611   | 205.639   |
| NM_004459 | 2229.639  | 1898.118  | AB007892  | 1636.259  | 1755.586  | NM_014257 | 1080.72   | 634.67    |
| NM_005503 | 1918.302  | 1496.268  | AB037748  | 817.904   | 951.133   | NM_004843 | 763.046   | 578.27    |
| NM_001502 | 1750.314  | 1416.408  | AB002306  | 1888.057  | 2326.813  | NM_016203 | 833.284   | 952.993   |
| NM_005721 | 1258.602  | 1343.866  | NM_012472 | 789.583   | 999.768   | NM_002759 | 1509.622  | 2629.644  |
| AF284223  | 1599.892  | 1826.744  | NM_018187 | 7322.556  | 10666.531 | NM_007271 | 967.544   | 1595.065  |
| BE743838  | 8735.439  | 7183.628  | NM_003016 | 23463.889 | 30943.314 | NM_006255 | 2250.47   | 3357.084  |
| AF273046  | 2154.812  | 1528.203  | NM_005463 | 26870.479 | 27059.246 | BE392143  | 1657.518  | 1943.227  |
| NM_001081 | 2692.021  | 2332.18   | NM_001325 | 2503.339  | 2440.792  | NM_005813 | 623.617   | 983.335   |
| NM_002483 | 2286.834  | 1953.964  | NM_018282 | 18277.535 | 17335.352 | AB037718  | 3055.826  | 3511.603  |
| BF002026  | 2069.063  | 2264.55   | BC019932  | 2605.407  | 2487.419  | AL389994  | 561.054   | 1244.404  |
| NM_004171 | 422.908   | 314.876   | AF114818  | 3169.646  | 3744.945  | NM_003909 | 2516.472  | 2952.529  |
| NM_014037 | 4401.859  | 1932.891  | AK025106  | 2442.726  | 2660.78   | NM_001277 | 3791.209  | 5146.922  |
| NM_004866 | 19944.986 | 11926.563 | NM_020144 | 2493.487  | 2488.273  | NM_003659 | 3889.732  | 4088.698  |
| NM_018688 | 3432.403  | 2886.45   | NM_003908 | 54664.473 | 55897.402 | NM_007072 | 837.689   | 896.712   |
| AK056652  | 8685.434  | 7435.39   | BE893142  | 2494.906  | 1928.836  | NM_012320 | 1544.659  | 1249.732  |
| AL137438  | 1013.7    | 1223.349  | NM_003103 | 5717.803  | 5166.958  | NM_018208 | 1143.227  | 823.833   |
| NM_017957 | 2354.598  | 2342.014  | NM_015340 | 5483.751  | 4482.558  | NM_015929 | 3009.534  | 2908.329  |
| NM_003024 | 2520.712  | 2597.424  | NM_006451 | 5126.834  | 4325.456  | U90653    | 3107.711  | 2724.17   |
| NM_013248 | 7280.186  | 8022.513  | NM_002094 | 2495.172  | 1488.057  | NM_000196 | 415.817   | 373.628   |
| NM_000034 | 63484.504 | 70498.797 | NM_002937 | 1451.616  | 1211.017  | NM_018339 | 3476.266  | 3464.949  |
| AK022230  | 4581.019  | 4618.258  | NM_003191 | 6102.554  | 3662.535  | NM_006745 | 22330.225 | 18772.773 |
| AK022147  | 10561.319 | 11901.229 | AL137476  | 25331.992 | 25229.443 | NM_000275 | 423.425   | 310.913   |
| L25664    | 1798.466  | 1566.933  | AF052174  | 3691.246  | 3711.802  | AK000037  | 330.696   | 277.584   |
| NM_014940 | 3513.511  | 3601.264  | AF070590  | 1111.023  | 1320.716  | NM_014760 | 1141.805  | 791.2     |
| NM_005783 | 679.037   | 695.327   | NM_004709 | 493.653   | 1099.022  | NM_018398 | 537.525   | 398.095   |
| NM_006900 | 1139.802  | 809.392   | NM_020142 | 2958.919  | 3241.157  | NM_002560 | 5643.641  | 3419.457  |
| AJ289111  | 9580.746  | 11491.694 | NM_000774 | 4684.449  | 4629.345  | U57962    | 1611.333  | 2090.011  |
| NM_016356 | 1971.635  | 1366.149  | NM_017781 | 43015.953 | 46643.492 | NM_016176 | 3575.35   | 4862.899  |
| NM_006406 | 5755.043  | 5529.249  | NM_006004 | 56953.715 | 57116.961 | NM_005574 | 252.114   | 413.03    |
| AF216292  | 24637.984 | 15950.113 | NM_004894 | 36533.648 | 33586.816 | NM_017895 | 2656.241  | 2938.598  |
| NM_005894 | 435.963   | 282.22    | AB028960  | 804.649   | 826.351   | NM_004610 | 1144.267  | 1265.257  |
| NM_014584 | 10575.953 | 9428.321  | NM_005648 | 46522.043 | 45946.504 | NM_001612 | 902.696   | 1413.341  |
| M30627    | 452.497   | 401.879   | NM_006943 | 7916.012  | 8054.535  | AK027002  | 1501.064  | 1535.604  |
| NM_016649 | 4617.731  | 1954.43   | NM_006741 | 7606.201  | 7175.704  | AB025254  | 1098.053  | 1555.32   |
| AK090536  | 20794.65  | 12983.58  | NM_014166 | 8959.845  | 8890.517  | NM_004081 | 843.721   | 1457.74   |
| D63477    | 1243.953  | 886.381   | AL117606  | 5678.223  | 6898.415  | NM_000025 | 9382.44   | 8197.112  |
| NM_020243 | 42622.449 | 27878.664 | NM_012330 | 1899.534  | 1622.922  | D38521    | 1012.209  | 1042.744  |
| NM_014051 | 17824.793 | 17872.215 | AF294278  | 6250.621  | 6223.056  | NM_000403 | 2636.83   | 2449.762  |
| AK025398  | 3646.182  | 4328.396  | NM_018211 | 4655.319  | 3767.047  | NM_018127 | 7068.668  | 7144.59   |
| AK023056  | 1878.638  | 1674.312  | NM_014520 | 4130.293  | 3628.322  | AB020677  | 2313.032  | 2119.016  |
| NM_017888 | 2572.087  | 2490.264  | NM_002616 | 3793.142  | 3017.635  | AB033097  | 1066.341  | 973.417   |
| NM_004915 | 6531.563  | 4081.591  | AK025712  | 11245.379 | 6907.86   | NM_000135 | 707.094   | 597.08    |
| AV708752  | 3061.528  | 2686.329  | AF052497  | 576.477   | 636.567   | AJ223948  | 1974.845  | 1769.895  |
| AF119885  | 2108.308  | 1869.973  | AK026375  | 4100.163  | 4752.775  | NM_016218 | 339.131   | 261.562   |
| NM_004996 | 3533.283  | 3280.111  | NM_014710 | 1054.19   | 1291.483  | AK022947  | 789.192   | 606.276   |
| NM_005971 | 4467.193  | 3976.684  | U85992    | 1087.477  | 1661.912  | AL050029  | 916.928   | 747.156   |

|           |           |           |           |           |           |           |           |           |
|-----------|-----------|-----------|-----------|-----------|-----------|-----------|-----------|-----------|
| NM_01743E | 1757.478  | 1314.67   | AL110152  | 1513.235  | 2213.458  | NM_00406E | 356.502   | 484.219   |
| NM_01338E | 4215.277  | 3802.048  | NM_00479E | 396.739   | 1032.437  | AB040976  | 3969      | 3658.201  |
| AK026680  | 6662.323  | 3611.007  | AF131745  | 2872.662  | 2964.597  | NM_007361 | 124.599   | 794.7     |
| NM_01243E | 50587.352 | 37794.402 | AL117565  | 3836.46   | 3902.31   | NM_018641 | 2857.603  | 2569.228  |
| AK001299  | 21647.807 | 14109.271 | AF147305  | 811.623   | 613.187   | U49089    | 550.194   | 347.869   |
| AB014559  | 7848.301  | 6129.323  | AK022109  | 4362.073  | 4460.797  | NM_002221 | 1286.061  | 1609.878  |
| NM_01648E | 11840.305 | 11310.65  | AK022103  | 1171.665  | 1156.153  | NM_002371 | 1356.954  | 1073.773  |
| NM_00503E | 12789.184 | 15183.724 | NM_00703C | 634.371   | 947.591   | NM_00256E | 1279.38   | 856.823   |
| NM_01593E | 63648.602 | 77987.492 | AK022111  | 839.987   | 373.205   | AK024502  | 1436.784  | 1870.816  |
| NM_01794E | 2573.213  | 2693.719  | AK021527  | 839.204   | 708.652   | NM_001124 | 1001.836  | 822.467   |
| AK022169  | 1416.636  | 1497.241  | AF143882  | 1306.58   | 1148.251  | NM_00458E | 1122.459  | 1477.097  |
| AF015592  | 5801.503  | 6191.503  | U00953    | 1703.052  | 1648.419  | NM_004844 | 2478.384  | 2870.685  |
| AK026795  | 3821.908  | 3649.147  | AF086176  | 2037.774  | 2555.788  | NM_013447 | 251       | 316.033   |
| NM_016617 | 18783.906 | 17248.623 | AF086232  | 713.654   | 566.27    | NM_000051 | 2585.807  | 2797.22   |
| NM_002027 | 13574.836 | 14450.137 | NM_01774E | 1384.728  | 1437.552  | NM_00570E | 311.113   | 592.223   |
| AL162078  | 1955.03   | 2085.684  | NM_00510E | 3232.649  | 3098.719  | NM_00418C | 2126.55   | 2497.696  |
| NM_00091E | 1574.523  | 1286.881  | AK022292  | 8537.333  | 8381.909  | NM_00478E | 19063.32  | 18186.643 |
| NM_01338E | 9047.574  | 6949.758  | AK024173  | 534.372   | 454.235   | AF302109  | 524.882   | 690.922   |
| AB002314  | 985.404   | 908.891   | AB051436  | 3241.944  | 2721.018  | AL117485  | 4368.997  | 3212.623  |
| NM_01404E | 10866.46  | 13465.741 | AK026482  | 29364.504 | 20912.01  | NM_00350E | 383.809   | 495.651   |
| NM_01462E | 1502.098  | 1200.205  | AL137473  | 3376.987  | 2384.327  | NM_007191 | 887.113   | 832.121   |
| AB011114  | 58456.301 | 51966.633 | AJ001873  | 9247.913  | 7141.269  | AL109667  | 511.044   | 373.525   |
| D11466    | 22265.49  | 20533.188 | AB026054  | 813.07    | 888.781   | NM_00084C | 438.543   | 259.554   |
| NM_01405E | 38692.91  | 30032.211 | AK022604  | 2801.527  | 3272.005  | AF034102  | 12354.746 | 16500.176 |
| D31885    | 29718.693 | 30759.217 | U66048    | 2249.038  | 2864.413  | AJ008142  | 8970.525  | 10152.457 |
| BE743838  | 9511.694  | 7419.247  | AK023401  | 9670.5    | 9304.038  | AL035289  | 274.805   | 424.006   |
| NM_00248E | 2299.15   | 2741.473  | AK001865  | 1905.352  | 2033.913  | NM_00134E | 1441.452  | 1615.774  |
| BF002026  | 2394.134  | 2044.769  | AK024035  | 28956.889 | 26921.086 | NM_00727E | 4193.142  | 4443.008  |
| BE790116  | 1228.242  | 558.167   | AF085869  | 1809.517  | 2587.563  | NM_01902E | 13602.239 | 12102.924 |
| AI922341  | 1012.013  | 1351.566  | AL050079  | 2922.777  | 3248.254  | NM_018461 | 2215.834  | 2303.989  |
| M12824    | 4405.243  | 3308.066  | AL080233  | 5239.725  | 4967.874  | AF235023  | 2816.127  | 3338.685  |
| W60100    | 4098.292  | 6080.161  | AL117591  | 1415.702  | 1443.228  | NM_00691C | 2701.136  | 2901.825  |
| AA457153  | 3637.204  | 3854.911  | AL050132  | 588.309   | 721.009   | AF162667  | 926.157   | 850.271   |
| AA283122  | 858.748   | 1261.928  | AL117663  | 3712.272  | 4844.51   | AB046847  | 2269.8    | 2153.299  |
| AA868504  | 2116.965  | 2840.083  | NM_01429E | 7631.734  | 8431.57   | NM_000447 | 773.292   | 723.247   |
| AA877845  | 3389.864  | 2670.588  | AK024432  | 3996.315  | 4138.021  | NM_006354 | 1885.394  | 2137.303  |
| AA664241  | 20466.449 | 14520.746 | AL137513  | 1166.461  | 1305.93   | AF303378  | 3458.851  | 3494.986  |
| NM_00058E | 16081.742 | 15058.399 | AF088001  | 829.896   | 1051.29   | NM_016037 | 5727.709  | 6851.919  |
| AK026281  | 1007.338  | 1109.124  | NM_018067 | 7577.211  | 7311.411  | NM_00004E | 3580.135  | 4362.072  |
| NM_00640E | 7591.639  | 8177.311  | NM_01895E | 25678.484 | 25455.656 | NM_01596E | 175.42    | 216.722   |
| NM_00095E | 2048.162  | 1126.992  | NM_014787 | 2319.053  | 1975.182  | NM_000417 | 1749.794  | 2718.134  |
| NM_005894 | 1072.37   | 1044.167  | AL122109  | 1399.475  | 1050.071  | NM_02035E | 531.479   | 313.194   |
| NM_014584 | 13212.757 | 11768.415 | AF074988  | 1724.087  | 1333.588  | AF152527  | 190.104   | 92.736    |
| M30627    | 492.251   | 648.416   | AK024946  | 1581.562  | 743.223   | NM_01823E | 12787.994 | 14511.779 |
| NM_00581C | 4484.86   | 4071.58   | AK001432  | 5530.714  | 8240.325  | NM_002424 | 282.239   | 557.181   |
| M28170    | 3045.206  | 2958.841  | AL133568  | 7439.375  | 10201.119 | NM_012104 | 4697.112  | 8911.258  |
| NM_00155E | 598.536   | 639.954   | AF009265  | 2788.748  | 3788.959  | NM_006144 | 14636.577 | 24364.793 |
| AK026223  | 1252.351  | 1626.097  | AF009309  | 13385.31  | 15313.235 | AL136549  | 4970.768  | 5547.156  |
| NM_000874 | 8264.528  | 9234.152  | NM_00236C | 6807.411  | 6828.992  | NM_01216E | 825.465   | 966.768   |
| NM_005854 | 739.774   | 963.055   | AK001945  | 2092.125  | 2996.197  | NM_00703E | 995.551   | 1104.656  |
| AB007863  | 11232.025 | 9166.455  | AK021541  | 647.517   | 649.419   | AF311324  | 3254.222  | 4176.705  |
| AK024456  | 6133.826  | 5833.324  | AK021766  | 635.363   | 597.425   | AF124433  | 504.739   | 468.422   |
| NM_01778E | 511.86    | 612.049   | AK001147  | 912.416   | 969.419   | AK001647  | 290.932   | 197.65    |

|           |           |           |           |           |           |           |           |           |
|-----------|-----------|-----------|-----------|-----------|-----------|-----------|-----------|-----------|
| D31887    | 4653.15   | 4308.31   | AK021630  | 1325.325  | 1489.319  | NM_001461 | 267.275   | 235.63    |
| NM_002313 | 3575.623  | 2566.422  | AK021831  | 1554.826  | 1996.432  | AF061556  | 659.029   | 491.724   |
| NM_004459 | 1696.536  | 1892.051  | AK025650  | 5522.222  | 5362.731  | AL162049  | 556.92    | 533.012   |
| NM_005503 | 2194.002  | 1646.547  | AK026401  | 2810.799  | 2594.39   | NM_001823 | 104.514   | 74.672    |
| NM_001502 | 1736.505  | 1313.857  | AK026773  | 2211.895  | 2039.168  | NM_005032 | 645.799   | 854.554   |
| NM_005721 | 1509.521  | 1491.016  | U73530    | 1557.784  | 3529.615  | NM_004160 | 2886.418  | 3519.187  |
| AF284223  | 1617.376  | 1762.261  | AF086158  | 7224.976  | 12067.52  | AL109677  | 595.842   | 783.001   |
| AF176012  | 718.947   | 710.507   | AF086050  | 6412.342  | 8114.711  | NM_003941 | 23493.988 | 15483.992 |
| NM_005971 | 5085.047  | 3080.004  | AF147375  | 3198.026  | 3498.033  | AF177909  | 842.087   | 1019.648  |
| NM_017435 | 2036.555  | 2161.894  | X51524    | 30070.336 | 31045.824 | NM_002664 | 833.405   | 962.436   |
| NM_018018 | 1033.406  | 800.899   | NM_006898 | 2750.263  | 2846.793  | AB018271  | 579.869   | 507.3     |
| NM_013386 | 4668.438  | 4525.44   | AK023429  | 875.823   | 1156.213  | AL137665  | 1999.484  | 1617.907  |
| NM_006517 | 574.349   | 797.939   | AK022276  | 1247.359  | 1138.977  | NM_016434 | 510.112   | 472.054   |
| NM_004171 | 648.472   | 1024.764  | AK026881  | 672.17    | 588.991   | U36561    | 45791.043 | 74935.828 |
| NM_014037 | 6608.577  | 7008.383  | AL133653  | 658.701   | 566.92    | NM_005634 | 921.279   | 1455.148  |
| NM_004866 | 24837.691 | 24410.029 | AK023774  | 1086.159  | 901.527   | NM_017757 | 1825.327  | 3906.722  |
| NM_018688 | 4650.696  | 4896.653  | AL049377  | 1322.614  | 1212.046  | NM_002146 | 9727.589  | 12958.712 |
| AK056652  | 10549.745 | 12759.834 | U17640    | 903.951   | 1061.662  | AB007892  | 599.627   | 1105.891  |
| AL137438  | 779.029   | 981.872   | AK001187  | 3619.922  | 4470.663  | AB037748  | 327.609   | 761.009   |
| NM_017957 | 2176.771  | 2055.307  | NM_003529 | 21858.65  | 20121.102 | AB002306  | 1000.771  | 1345.743  |
| NM_003024 | 2066.874  | 1838.297  | AF161422  | 2885.484  | 2770.958  | NM_001300 | 2458.929  | 3532.29   |
| NM_013248 | 6762.428  | 7401.508  | AL137384  | 2431.491  | 1175.504  | NM_012472 | 462.536   | 525.907   |
| NM_000034 | 61544.676 | 66524.625 | AF070619  | 2257.685  | 2271.481  | NM_018187 | 4203.753  | 6113.944  |
| AK022230  | 3873.429  | 3892.199  | NM_020153 | 1067.761  | 3042.153  | AY008271  | 113.268   | 334.231   |
| AK022147  | 9814.045  | 10731.729 | NM_005321 | 4987.251  | 6585.232  | NM_003016 | 14614.116 | 13728.174 |
| L25664    | 1568.344  | 1837.068  | AF073520  | 3345.27   | 3616.277  | NM_005463 | 9933.003  | 11897.197 |
| NM_014940 | 3324.351  | 3305.793  | AF143885  | 653.917   | 574.954   | NM_001325 | 1160.834  | 1403.647  |
| NM_005783 | 561.876   | 653.718   | NM_014015 | 14317.94  | 14750.012 | NM_018282 | 8534.231  | 6931.483  |
| NM_006900 | 1038.218  | 820.056   | AK026839  | 1383.259  | 1704.104  | BC019932  | 930.446   | 821.865   |
| AJ289111  | 9017.75   | 11697.952 | Z34278    | 368.506   | 525.441   | AF114818  | 1729.65   | 1642.031  |
| NM_016356 | 2245.31   | 1832.008  | AK024973  | 865.4     | 529.75    | AK025106  | 1054.962  | 1408.857  |
| NM_014043 | 11792.817 | 7799.145  | AJ008123  | 6794.859  | 5970.763  | NM_020144 | 996.65    | 1192.151  |
| NM_014622 | 1586.473  | 1117.181  | AJ008156  | 1830.021  | 1237.06   | NM_003908 | 33226.164 | 29699.682 |
| AB011114  | 57557.25  | 46267.938 | AF147321  | 674       | 492.562   | BE893142  | 1040.924  | 1035.284  |
| D11466    | 25870.045 | 20609.541 | AF161437  | 5401.728  | 4039.777  | NM_003103 | 2357.056  | 2523.296  |
| NM_014056 | 46077.949 | 36805.211 | AK026465  | 2145.441  | 2485.597  | NM_015340 | 2258.082  | 1556.273  |
| D31885    | 36121.848 | 36223.07  | AK024321  | 1102.707  | 1329.586  | NM_006451 | 2022.305  | 1643.38   |
| NM_016649 | 5239.747  | 5728.918  | AK001582  | 583.996   | 785.824   | NM_002094 | 806.884   | 1005.615  |
| AK090536  | 24045.516 | 29866.461 | AF075100  | 905.364   | 950.324   | NM_002937 | 673.362   | 443.76    |
| D63477    | 1532.367  | 1542.741  | AF203447  | 11554.767 | 12011.977 | NM_003191 | 2396.459  | 1705.256  |
| NM_020243 | 47644.848 | 46172.934 | NM_018502 | 2447.264  | 3005.112  | AL137476  | 4535.483  | 6100.33   |
| NM_014051 | 18423.572 | 23628.684 | AL080066  | 11704.69  | 10750.542 | AF052174  | 1072.469  | 2246.655  |
| AK025398  | 3315.459  | 4230.47   | AJ227870  | 937.423   | 1424.808  | AF070590  | 527.05    | 981.598   |
| AK023056  | 1776.465  | 1304.349  | AL137620  | 1152.879  | 1391.684  | NM_000761 | 30594.883 | 31019.645 |
| NM_001120 | 54369.309 | 53991.582 | NM_005294 | 3624.758  | 3709.217  | NM_020142 | 1569.298  | 1518.256  |
| NM_017888 | 2487.121  | 2556.731  | AK026879  | 522.074   | 465.91    | NM_000774 | 2580.85   | 2583.737  |
| NM_004915 | 6605.495  | 4297.501  | AF085826  | 895.199   | 1203.251  | NM_017781 | 24291.805 | 24270.307 |
| AK022207  | 796.551   | 833.363   | AK024362  | 638.017   | 805.064   | NM_006004 | 41100.938 | 48086.969 |
| AV708752  | 3682.716  | 3273.012  | AF118068  | 1690.555  | 3167.589  | NM_004894 | 19094.807 | 23179.205 |
| AF119885  | 2333.423  | 2176.252  | NM_004164 | 490.536   | 488.202   | AB028960  | 344.772   | 185.581   |
| NM_004996 | 4084.728  | 3603.633  | NM_019018 | 3593.116  | 3296.32   | NM_005648 | 28649.906 | 26332.555 |
| NM_000588 | 16206.784 | 7679.033  | M87931    | 1483.319  | 1009.116  | AK000689  | 185.927   | 101.461   |
| AK026281  | 1264.868  | 1191.718  | CY3Cy5    | 1354.424  | 152.575   | NM_006943 | 4039.84   | 3841.443  |

|           |           |           |           |           |           |           |           |          |
|-----------|-----------|-----------|-----------|-----------|-----------|-----------|-----------|----------|
| AK026680  | 8808.943  | 8585.311  | BE790116  | 389.374   | 422.259   | NM_006741 | 4125.123  | 4521.112 |
| NM_012436 | 56181.117 | 61167.539 | AI922341  | 614.687   | 481.372   | NM_014166 | 4327.438  | 4582.695 |
| AK001299  | 30321.447 | 28501.857 | M12824    | 1973.605  | 1221.83   | AL117606  | 3489.157  | 2382.688 |
| AB014559  | 12849.495 | 11294.415 | W60100    | 3500.864  | 1119.645  | NM_01233C | 946.209   | 965.704  |
| NM_016489 | 12436.342 | 13701.27  | AA457153  | 1599.135  | 1428.402  | AF294278  | 2317.029  | 2158.255 |
| NM_005033 | 10078.556 | 9848.089  | AA283122  | 895.487   | 526.112   | NM_018211 | 1695.016  | 1360.312 |
| NM_015932 | 63429.18  | 68329.516 | AA868504  | 1247.992  | 908.036   | NM_01452C | 1768.076  | 1364.032 |
| NM_017949 | 1256.06   | 1396.999  | AA877845  | 3449.333  | 3643.736  | AL117508  | 146.468   | 228.758  |
| AK022169  | 1465.159  | 1559.772  | AA664241  | 15051.742 | 16569.607 | NM_002616 | 1583.66   | 1407.861 |
| AF015592  | 3110.202  | 3594.359  | NM_000588 | 10753.138 | 11902.688 | AK025712  | 4751.607  | 2922.711 |
| AK026795  | 3594.07   | 3678.883  | SR5       | 5010.495  | 5020.436  | AF052497  | 237.554   | 201.839  |
| NM_016399 | 6723.719  | 6542.546  | SR7       | 3873.965  | 31251.354 | AK026375  | 2152.423  | 2830.266 |
| NM_016617 | 17173.893 | 18019.334 | SR9       | 12726.491 | 2541.356  | NM_01471C | 547.473   | 639.129  |
| NM_002027 | 13550.782 | 15568.476 | CY3Cy5    | 1948.069  | 147.236   | U85992    | 543.379   | 1227.812 |
| AL162078  | 1953.271  | 2540.815  | NM_00581C | 2501.564  | 1749.502  | AL110152  | 391.756   | 483.643  |
| NM_000919 | 1150.333  | 1168.603  | M28170    | 1587.32   | 1168.193  | NM_004795 | 115.048   | 256.632  |
| NM_013382 | 9787.809  | 7180.781  | AK026223  | 613.762   | 448.483   | AF131745  | 1708.765  | 2099.911 |
| AB002314  | 1166.442  | 831.712   | NM_000874 | 6152.705  | 2424.293  | AL117565  | 1903.978  | 2704.411 |
| NM_005503 | 1683.004  | 945.07    | AB007863  | 7525.619  | 6317.743  | AF147305  | 385.165   | 589.232  |
| NM_001502 | 1264.886  | 785.997   | AK024456  | 3620.355  | 2329.369  | AK022109  | 1795.257  | 2449.148 |
| NM_005721 | 1206.065  | 888.931   | NM_017789 | 401.944   | 358.098   | AK022103  | 532.156   | 627.783  |
| AF284223  | 1468.655  | 1851.581  | D31887    | 2247.229  | 1852.626  | NM_00703C | 418.633   | 401.849  |
| AF176012  | 1163.837  | 1376.142  | NM_002313 | 1958.88   | 2340.652  | AK021527  | 291.228   | 256.933  |
| BE743838  | 10846.2   | 13175.644 | NM_004459 | 956.879   | 793.859   | AF143882  | 465.642   | 443.187  |
| AF273046  | 2662.163  | 3790.884  | NM_005503 | 758.885   | 984.136   | U00953    | 207.731   | 252.03   |
| NM_001081 | 4659.637  | 7338.773  | NM_001502 | 1248.422  | 1410.477  | AF086176  | 871.109   | 821.009  |
| NM_002483 | 2917.152  | 3958.647  | NM_005721 | 688.739   | 780.329   | AF086232  | 351.027   | 210.374  |
| BF002026  | 2830.06   | 3323.932  | AF284223  | 1033.464  | 938.815   | NM_017742 | 678.01    | 852.077  |
| AI922341  | 636.66    | 809.184   | BE743838  | 4197.653  | 5298.885  | NM_005108 | 1154.221  | 1332.038 |
| M12824    | 3699.163  | 3379.645  | AF273046  | 2139.719  | 1940.778  | AK022292  | 3083.643  | 3300.123 |
| W60100    | 4031.182  | 6288.053  | NM_001081 | 1150.672  | 1549.552  | AB051436  | 1857.864  | 1497.287 |
| U72508    | 516.798   | 1208.87   | NM_002483 | 1444.029  | 1483.993  | AK026482  | 13481.341 | 8726.216 |
| AA457153  | 4265.881  | 5929.353  | BF002026  | 1364.375  | 1522.285  | AL137473  | 1411.348  | 1149.681 |
| AA283122  | 1000.658  | 1260.44   | NM_004171 | 694.103   | 511.926   | AJ001873  | 2336.156  | 2013.096 |
| AA868504  | 2224.359  | 2886.55   | NM_014037 | 3440.721  | 2423.515  | AB026054  | 226.366   | 284.978  |
| AA877845  | 5162.787  | 4714.948  | NM_004866 | 10390.885 | 7531.606  | AK022604  | 1244.176  | 3247.715 |
| AA664241  | 19316.768 | 15267.692 | NM_018688 | 1677.105  | 1303.74   | U66048    | 819.407   | 1729.579 |
| AI016456  | 348.491   | 290.698   | AK056652  | 3622.376  | 3015.55   | AL080095  | 173.36    | 250.13   |
| NM_01494C | 2963.22   | 2256.544  | AL137438  | 563.622   | 370.693   | AK023401  | 3713.096  | 5334.237 |
| NM_005783 | 487.541   | 379.198   | NM_017957 | 1802.792  | 1322.114  | AK001865  | 431.945   | 663.758  |
| NM_00690C | 937.001   | 857.503   | NM_003024 | 1333.472  | 749.824   | AK024035  | 8079.159  | 9330.641 |
| AJ289111  | 9820.467  | 13343.11  | NM_013248 | 3139.003  | 2486.179  | AL050079  | 1280.599  | 1897.322 |
| NM_016356 | 3465.802  | 3317.351  | NM_000034 | 59858.91  | 70599.461 | AL080233  | 1743.875  | 2008.661 |
| NM_006406 | 9286.356  | 17223.227 | AK022230  | 3178.919  | 2590.369  | AL117591  | 626.833   | 587.821  |
| AF216292  | 33444.023 | 31229.828 | AK022147  | 7348.701  | 6247.216  | AL117663  | 1831.122  | 1818.014 |
| NM_005894 | 980.545   | 1217.966  | L25664    | 1586.497  | 2066.816  | NM_014293 | 1618.905  | 1906.381 |
| NM_014584 | 12743.737 | 15933.172 | NM_01494C | 2106.094  | 1164.22   | AK024432  | 1568.257  | 1875.434 |
| M30627    | 1033.724  | 1706.053  | NM_005783 | 343.003   | 267.362   | AL137513  | 459.14    | 708.771  |
| NM_00581C | 3701.89   | 4766.3    | NM_00690C | 1350.45   | 1561.952  | AF088001  | 339.891   | 451.829  |
| M28170    | 2558.401  | 4247.554  | AJ289111  | 7598.7    | 5427.365  | NM_018067 | 2886.594  | 3138.299 |
| AK026223  | 1088.518  | 1390.84   | NM_016356 | 4594.172  | 5831.003  | NM_018956 | 9111.075  | 6857.686 |
| NM_000874 | 7998.459  | 9283.991  | NM_006406 | 4034.543  | 4347.012  | NM_014787 | 1046.055  | 1014.935 |
| NM_005854 | 803.203   | 488.136   | AF216292  | 10135.489 | 18419.607 | AL122109  | 493.56    | 354.556  |

|           |           |           |           |           |           |            |          |           |
|-----------|-----------|-----------|-----------|-----------|-----------|------------|----------|-----------|
| AB007863  | 15812.711 | 22811.662 | NM_014584 | 5504.131  | 6441.513  | AF074988   | 762.11   | 515.455   |
| AK024456  | 7231.117  | 13875.843 | M30627    | 389.339   | 460.798   | AK024946   | 412.88   | 540.775   |
| NM_017789 | 605.544   | 614.194   | NM_016649 | 2920.833  | 2339.116  | AK001432   | 955.344  | 2376.261  |
| D31887    | 4996.214  | 4576.418  | AK090536  | 14059.783 | 8070.188  | AL133568   | 2242.68  | 5332.943  |
| NM_002313 | 3500.55   | 2636.681  | D63477    | 552.556   | 366.615   | AF009265   | 1319.286 | 2380.648  |
| NM_004459 | 1894.139  | 1850.204  | NM_020243 | 21785.801 | 14519.601 | AF009309   | 2427.562 | 4154.407  |
| NM_004915 | 6767.601  | 2863.777  | NM_014051 | 11126.127 | 6383.061  | AF054830   | 278.591  | 431.413   |
| AK022207  | 608.799   | 478.29    | AK025398  | 1569.31   | 1180.195  | NM_002360  | 818.809  | 1338.355  |
| AV708752  | 3978.816  | 2362.167  | AK023056  | 1125.791  | 763.29    | AF090893   | 330.67   | 477.501   |
| AF119885  | 2667.55   | 2000.278  | NM_001120 | 36526.469 | 23886.15  | NM_018033  | 2961.206 | 3195.125  |
| NM_004996 | 5154.994  | 6765.925  | NM_017888 | 1702.963  | 1386.113  | AK001945   | 530.604  | 561.081   |
| NM_005971 | 5787.688  | 5520.674  | NM_004915 | 3200.731  | 4798.685  | AK021541   | 238.692  | 366.079   |
| NM_017435 | 2002.534  | 2346.398  | AK022207  | 668.123   | 765.969   | AK021766   | 235.704  | 495.778   |
| NM_013386 | 4523.246  | 5011.795  | AV708752  | 2905.007  | 3241.685  | AK001147   | 225.34   | 420.521   |
| NM_004171 | 1036.89   | 780.474   | AF119885  | 1749.424  | 2351.717  | AK021630   | 516.141  | 506.815   |
| NM_014037 | 4476.538  | 5419.368  | NM_004996 | 2390.659  | 3116.983  | AK021831   | 685.46   | 931.191   |
| NM_004866 | 21360.432 | 27548.098 | NM_005971 | 2274.55   | 3379.673  | AK025650   | 1716.136 | 1528.853  |
| NM_018688 | 3465.252  | 4391.653  | NM_017435 | 793.902   | 1769.444  | AK026401   | 765.149  | 833.609   |
| AK056652  | 8862.55   | 8883.63   | NM_013386 | 2079.373  | 2728.459  | AK026773   | 662.695  | 789.924   |
| AL137438  | 867.527   | 1285.24   | AK026680  | 3424.21   | 3275.433  | AK026452   | 194.291  | 137.535   |
| NM_017957 | 2713.925  | 3490.157  | NM_012436 | 49353.91  | 41758.699 | U73530     | 207.209  | 667.518   |
| NM_003024 | 2235.854  | 3258.894  | AK001299  | 10833.438 | 9223.667  | AF086158   | 3151.618 | 5158.146  |
| NM_013248 | 7510.831  | 9788.631  | AB014559  | 5748.031  | 3861.052  | AF086050   | 2711.586 | 3688.417  |
| NM_000034 | 63458.184 | 70317.711 | NM_016489 | 6025.038  | 3771.859  | AF147375   | 1192.859 | 2235.013  |
| AK022230  | 4731.643  | 4677.121  | NM_005033 | 6190.315  | 4014.298  | X51524     | 5920.547 | 7373.231  |
| AK022147  | 10478.621 | 11763.598 | NM_015932 | 57714.23  | 55744.563 | AK025759   | 1705.848 | 2639.012  |
| L25664    | 1968.127  | 1785.979  | NM_017949 | 835.536   | 567.867   | Z70699     | 367.181  | 465.141   |
| NM_002027 | 15148.131 | 8409.668  | AK022169  | 848.112   | 709.949   | NM_006896  | 1060.138 | 1397.319  |
| AL162078  | 2594.489  | 1681.167  | AF015592  | 3114.267  | 1889.695  | unknown (S | 238.457  | 125.44    |
| NM_000919 | 1184.478  | 791.91    | AK026795  | 2372.066  | 1706.858  | AK023429   | 441.789  | 834.256   |
| NM_013382 | 9050.649  | 6003.204  | NM_016399 | 3362.215  | 3056.994  | AK022276   | 529.215  | 672.998   |
| AB002314  | 1422.86   | 1278.884  | NM_016617 | 8592.948  | 8563.807  | AL133653   | 300.503  | 165.434   |
| NM_014043 | 14180.659 | 15491.607 | NM_002027 | 7125.401  | 6052.902  | AK023774   | 439.06   | 351.927   |
| NM_014622 | 2015.682  | 2062.03   | AL162078  | 2047.181  | 2130.645  | AL049377   | 522.267  | 395.236   |
| AB011114  | 58167.516 | 61464.652 | NM_000919 | 677.419   | 744.389   | AK001187   | 983.252  | 1407.347  |
| D11466    | 25584.199 | 28695.721 | NM_013382 | 8966.403  | 10596.649 | NM_003529  | 9697.41  | 17601.164 |
| NM_014056 | 43945.887 | 45644.281 | AB002314  | 794.075   | 1041.869  | AF086284   | 52.995   | 972.462   |
| D31885    | 31271.764 | 41373.105 | NM_014622 | 828.067   | 1501.693  | AF056436   | 1522.111 | 2204.516  |
| NM_016649 | 4254.066  | 5317.594  | AB011114  | 41118.496 | 50319.719 | NM_005199  | 6855.538 | 9228.61   |
| AK090536  | 20041.021 | 30841.268 | D11466    | 12266.783 | 16850.563 | U90905     | 559.685  | 1011.488  |
| D63477    | 1227.487  | 1685.36   | NM_014056 | 20801.508 | 23904.6   | AF161422   | 1504.25  | 2283.233  |
| NM_020243 | 48777.266 | 58690.098 | D31885    | 19756.813 | 25011.654 | AL137384   | 850      | 472.721   |
| NM_014051 | 17390.807 | 24386.174 | BE743838  | 4862.102  | 3927.132  | AF070619   | 785.676  | 1267.476  |
| AK025398  | 3398.494  | 4410.32   | AF273046  | 1754.692  | 1263.369  | NM_020153  | 1266.475 | 674.472   |
| AK023056  | 1918.152  | 1890.741  | NM_001081 | 1406.887  | 1225.759  | NM_005321  | 2125.805 | 2056.266  |
| NM_001120 | 57440.363 | 58770.191 | NM_002483 | 1292.73   | 694.127   | AF073520   | 1391.316 | 1711.204  |
| NM_017888 | 2962.596  | 2704.501  | BF002026  | 1273.273  | 1006.597  | AF143885   | 229.696  | 363.988   |
| NM_003150 | 7781.522  | 3747.778  | AI922341  | 475.388   | 333.089   | NM_014015  | 6469.847 | 5932.239  |
| NM_014784 | 4884.183  | 2164.773  | M12824    | 2105.196  | 1544.516  | AK026839   | 1359.883 | 1380.86   |
| AK026383  | 3620.391  | 2434.458  | W60100    | 4068.858  | 1742.679  | Z34278     | 201.675  | 403.81    |
| AK023821  | 1193.378  | 1290.197  | M24898    | 407.207   | 415.834   | AK024973   | 189.844  | 300.015   |
| AB014594  | 7107.969  | 5270.563  | AA457153  | 1958.892  | 1829.15   | AJ008123   | 2442.613 | 2277.947  |
| M94547    | 3568.038  | 4829.299  | AA283122  | 1259.013  | 973.864   | AJ008156   | 736.608  | 811.626   |

|           |           |           |           |           |           |           |           |           |
|-----------|-----------|-----------|-----------|-----------|-----------|-----------|-----------|-----------|
| NM_005087 | 10904.833 | 9231.916  | AA868504  | 1617.115  | 1209.827  | AF147321  | 243.617   | 207.974   |
| NM_01209E | 1848.666  | 1765.559  | AA877845  | 4596.664  | 5054.251  | AF161437  | 2531.308  | 1855.896  |
| NM_01809E | 5170.458  | 7129.581  | AA664241  | 25025.154 | 25096.938 | AK024321  | 393.723   | 563.507   |
| AB023164  | 4491.336  | 5032.284  | AK026281  | 1216.558  | 1305.208  | U52834    | 635.182   | 685.841   |
| AK026281  | 1261.964  | 1781.498  | NM_00640E | 4427.813  | 2864.731  | NM_01786E | 4468.287  | 5349.903  |
| U23862    | 523.68    | 1256.557  | AF216292  | 10537.64  | 10048.369 | AF075100  | 419.718   | 319.98    |
| AK026680  | 6805.133  | 7494.389  | NM_014584 | 6517.081  | 3788.859  | AF203447  | 5457.811  | 6644.034  |
| NM_01243E | 52891.613 | 58196.824 | M30627    | 328.348   | 269.083   | NM_01850E | 1061.723  | 992.975   |
| AK001299  | 28630.924 | 27837.883 | NM_00581C | 2356.962  | 1779.135  | AL080066  | 4709.193  | 5975.082  |
| AB014559  | 13941.486 | 13747.515 | M28170    | 2117.088  | 1680.276  | AJ227870  | 520.376   | 670.057   |
| NM_01648E | 12917.296 | 13113.927 | AK026223  | 563.35    | 356.517   | AL137620  | 438.546   | 544.612   |
| NM_00503E | 8782.053  | 9819.76   | NM_000874 | 5444.232  | 2276.885  | NM_005294 | 1656.582  | 1456.92   |
| NM_01593E | 58409.426 | 65057.648 | NM_005854 | 486.867   | 638.201   | AF085826  | 520.339   | 237.475   |
| NM_01794E | 1855.083  | 2089.236  | AB007863  | 11716.598 | 11892.91  | AK024362  | 336.911   | 177.945   |
| AK022169  | 1519.969  | 1744.673  | AK024456  | 4176.047  | 4283.438  | AF118068  | 1321.456  | 425.356   |
| AF015592  | 6286.757  | 8407.84   | NM_01778E | 591.417   | 737.926   | NM_01901E | 1847.282  | 1468.755  |
| AK026795  | 4312.959  | 4595.825  | D31887    | 2478.262  | 2607.482  | M87931    | 590.412   | 456.828   |
| NM_01639E | 7789.5    | 7166.25   | NM_00231E | 2285.219  | 3210.688  | CY3Cy5    | 453.525   | 152.352   |
| NM_016617 | 20851.232 | 18544.979 | NM_00445E | 1226.385  | 1605.391  | BE790116  | 331.458   | 304.22    |
| NM_00233E | 8046.303  | 4909.219  | NM_00550E | 906.927   | 1689.93   | AI922341  | 269.888   | 178.388   |
| AL117666  | 1168.831  | 576.018   | NM_00150E | 1910.878  | 3030.001  | M12824    | 831.471   | 676.56    |
| Y17865    | 744.859   | 448.943   | NM_005721 | 710.073   | 908.106   | W60100    | 1069.612  | 1653.219  |
| NM_00582E | 8078.604  | 6021.615  | AF284223  | 1096.118  | 1335.65   | AA457153  | 1049.809  | 840.697   |
| NM_00275E | 5736.498  | 4477.321  | AF176012  | 366.039   | 700.076   | AA283122  | 270.991   | 278.077   |
| U79299    | 801.057   | 735.189   | NM_005971 | 2327.261  | 2447.499  | AA868504  | 397.518   | 314.632   |
| AJ000414  | 635.713   | 906.538   | NM_01743E | 857.85    | 909.562   | AA877845  | 1557.519  | 1083.205  |
| AK025674  | 9962.843  | 8982.239  | NM_01338E | 2298.358  | 1707.832  | AA664241  | 7083.394  | 5230.932  |
| AF007194  | 4472.056  | 4354.598  | NM_004171 | 560.685   | 409.11    | NM_00058E | 5964.625  | 3837.648  |
| Z25424    | 2983.775  | 4109.75   | NM_014037 | 3381.049  | 2354.712  | SR1       | 40409.203 | 40587.043 |
| U79458    | 8672.463  | 11195.488 | NM_00486E | 10285.938 | 6596.982  | SR3       | 18284.32  | 11637.044 |
| NM_01492C | 1055.69   | 957.247   | NM_01868E | 1762.43   | 1467.25   | SR5       | 2224.455  | 1766.5    |
| NM_002961 | 5183.644  | 12245.835 | AK056652  | 3686.935  | 3450.757  | SR7       | 1762.067  | 12549.779 |
| NM_01829E | 1101.323  | 1187.107  | AL137438  | 537.592   | 525.739   | SR9       | 6169.215  | 1002.213  |
| NM_00067E | 2937.658  | 2542.292  | NM_017957 | 2761.599  | 2557.279  | CY3Cy5    | 620.346   | 128.828   |
| AF064770  | 1410.224  | 1386.924  | NM_003024 | 1600.719  | 1668.37   | NM_00581C | 1052.553  | 839.023   |
| NM_00576E | 1177.788  | 1278.135  | NM_01324E | 3410.037  | 3160.453  | M28170    | 1116.884  | 720.019   |
| NM_004127 | 58143.273 | 65541.945 | NM_000034 | 58452.133 | 71227.836 | NM_00155E | 137.35    | 252.133   |
| NM_013324 | 9290.603  | 12028.552 | AK022230  | 3731.418  | 4450.913  | AK026223  | 345.038   | 288.495   |
| AL133022  | 1709.549  | 2801.356  | AK022147  | 9179.143  | 9905.101  | NM_000874 | 2183.925  | 1768.913  |
| NM_00395E | 8447.959  | 9139.854  | L25664    | 2593.892  | 4068.035  | NM_005854 | 273.892   | 175.054   |
| NM_006301 | 1348.922  | 1789.504  | NM_01494C | 2736.085  | 2645.729  | AB007863  | 3248.743  | 2187.103  |
| AF222694  | 493.292   | 508.203   | NM_00578E | 431.664   | 433.498   | AK024456  | 1840.803  | 1593.266  |
| AL049925  | 3707.864  | 2364.224  | NM_00690C | 1369.409  | 2183.744  | NM_01778E | 194.21    | 272.117   |
| NM_01221E | 553.656   | 385.226   | AJ289111  | 7260.959  | 6841.332  | D31887    | 1230.126  | 1007.037  |
| X72887    | 2355.343  | 1648.421  | NM_01635E | 4977.604  | 8059.131  | NM_00231E | 877.91    | 551.711   |
| NM_00452E | 1727.508  | 1810.767  | NM_01404E | 7560.472  | 7603.262  | NM_00445E | 346.299   | 352.661   |
| NM_000127 | 3210.67   | 2360.215  | NM_01462E | 901.466   | 972.189   | NM_00550E | 484.073   | 298.075   |
| Y10483    | 15882.142 | 13436.01  | AB011114  | 39784.723 | 29882.105 | NM_00150E | 477.871   | 428.166   |
| NM_006784 | 1708.91   | 1537.632  | D11466    | 12592.139 | 9745.78   | NM_005721 | 446.811   | 414.869   |
| NM_01787E | 3409.559  | 2659      | NM_01405E | 23442.98  | 15359.524 | AF284223  | 369.943   | 483.617   |
| NM_001087 | 40014.875 | 35065.332 | D31885    | 17602.941 | 14025.876 | AF176012  | 206.784   | 160.331   |
| AK025352  | 905.535   | 1013.116  | NM_01664E | 2409.849  | 1649.493  | BE743838  | 1828.593  | 1545.195  |
| NM_003721 | 7201.348  | 6495.288  | AK090536  | 11770.823 | 6982.785  | AF273046  | 686.55    | 479.318   |

|           |           |           |           |           |           |           |           |           |
|-----------|-----------|-----------|-----------|-----------|-----------|-----------|-----------|-----------|
| NM_004724 | 2789.2    | 3068.988  | D63477    | 593.064   | 356.944   | NM_001081 | 685.247   | 469.987   |
| NM_001431 | 11345.725 | 10301.057 | NM_020243 | 19803.484 | 15191.398 | NM_002483 | 726.934   | 869.005   |
| NM_000381 | 1155.161  | 1104.84   | NM_014051 | 9722.862  | 5654.857  | BF002026  | 590.397   | 699.479   |
| NM_000427 | 4146.074  | 6019.814  | AK025398  | 1730.096  | 1918.05   | NM_004171 | 219.949   | 290.185   |
| NM_014924 | 4196.31   | 4849.274  | AK023056  | 1145.185  | 1285.331  | NM_014037 | 1380.999  | 972.4     |
| NM_006946 | 2192.704  | 2877.76   | NM_001120 | 35851.262 | 37208.07  | NM_004866 | 6015.286  | 4955.219  |
| NM_000174 | 55922.469 | 59845.5   | NM_017886 | 1736.698  | 3028.468  | NM_018686 | 969.549   | 794.654   |
| NM_002506 | 3383.533  | 5141.129  | NM_004915 | 4159.179  | 8421.975  | AK056652  | 2078.817  | 1661.797  |
| NM_014343 | 6877.436  | 8986.454  | AK022207  | 855.601   | 1418.52   | AL137438  | 230.507   | 171.469   |
| D25303    | 1477.163  | 1853.07   | AV708752  | 2778.334  | 3983.276  | NM_017957 | 670.23    | 529.458   |
| AB043007  | 51318.625 | 34637.613 | AF119885  | 1587.345  | 2919.295  | NM_003024 | 523.242   | 456.197   |
| NM_004861 | 2308.294  | 1338.559  | NM_004996 | 2213.504  | 3715.211  | NM_013246 | 1422.11   | 1258.314  |
| NM_016161 | 1397.701  | 924.406   | NM_000586 | 12693.293 | 15314.896 | NM_000034 | 39114.914 | 45743.156 |
| AF022913  | 5256.554  | 4857.936  | AK026281  | 909.543   | 617.738   | AK022230  | 1104.745  | 1109.555  |
| NM_000026 | 2598.001  | 2620.207  | AK026680  | 3508.391  | 3006.323  | AK022147  | 2583.794  | 2930.497  |
| NM_001382 | 10433.68  | 8551.512  | NM_012436 | 49447.844 | 39787.379 | L25664    | 552.666   | 490.564   |
| M93718    | 14996.959 | 10543.029 | AK001299  | 12369.566 | 10256.182 | NM_014940 | 836.504   | 676.962   |
| NM_005386 | 1467.907  | 1746.995  | AB014559  | 7803.446  | 6315.622  | NM_005783 | 222.829   | 190.714   |
| AK023807  | 16702.088 | 18835.895 | NM_016489 | 5678.757  | 4236.669  | NM_006900 | 553.96    | 279.882   |
| NM_018186 | 9708.024  | 10285.021 | NM_005033 | 6227.231  | 4868.984  | AJ289111  | 2447.29   | 2782.516  |
| AK024273  | 4025.97   | 5172.78   | NM_015932 | 55366.852 | 64243.844 | NM_016356 | 1257.907  | 1042.126  |
| D28476    | 12904.466 | 14511.104 | NM_017949 | 1046.589  | 998.235   | NM_006406 | 1560.889  | 1504.618  |
| NM_016263 | 5854.851  | 6254.48   | AK022169  | 1047.896  | 1107.649  | AF216292  | 5684.426  | 3459.129  |
| NM_003335 | 17000.311 | 19361.697 | AF015592  | 3448.572  | 3300.596  | NM_005894 | 314.562   | 122.44    |
| AB002376  | 6780.525  | 9318.168  | AK026795  | 2382.505  | 2697.823  | NM_014584 | 2113.385  | 2059.529  |
| NM_018249 | 1302.91   | 1446.585  | NM_016399 | 3605.632  | 5656.771  | NM_016646 | 1140.186  | 1017.303  |
| NM_005556 | 3847.796  | 4756.478  | NM_016617 | 9954.326  | 13260.99  | AK090536  | 5035.407  | 4825.817  |
| NM_016631 | 2545.062  | 3099.357  | NM_002027 | 7612.611  | 10821.579 | D63477    | 230.666   | 235.681   |
| AF064839  | 56781.172 | 63198.176 | AL162078  | 2552.615  | 3671.43   | NM_020243 | 12673.682 | 9090.241  |
| NM_005436 | 17949.596 | 17264.73  | NM_000919 | 752.023   | 1196.342  | NM_014051 | 4619.772  | 4671.331  |
| AB037810  | 7114.6    | 7429.33   | NM_013382 | 9994.061  | 18128.363 | AK025398  | 848.073   | 937.428   |
| NM_006593 | 1215.307  | 856.789   | AB002314  | 966.426   | 1543.469  | AK023056  | 417.205   | 293.589   |
| NM_000376 | 2963.337  | 2927.53   | NM_005503 | 897.108   | 1816.439  | NM_001120 | 16889.775 | 13769.8   |
| NM_000475 | 10881.71  | 10914.946 | NM_001502 | 1533.147  | 2680.075  | NM_017886 | 664.884   | 479.486   |
| M61872    | 17530.916 | 15131.585 | NM_005721 | 615.895   | 618.656   | NM_004915 | 1609.328  | 1012.898  |
| AK027089  | 1314.028  | 839.775   | AF284223  | 1295.084  | 996.251   | AK022207  | 285.379   | 252.546   |
| X59845    | 1578.563  | 1775.91   | BE743838  | 4539.457  | 3182.198  | AV708752  | 1287.199  | 813.234   |
| NM_006284 | 24872.223 | 25848.389 | AF273046  | 1945.358  | 966       | AF119885  | 829.123   | 761.381   |
| U18909    | 1832.546  | 1650.987  | NM_001081 | 1393.722  | 1067.816  | NM_004996 | 1113.732  | 948.493   |
| NM_003486 | 3669.169  | 3695.827  | NM_002483 | 1464.517  | 1236.328  | NM_005971 | 1106.051  | 833.858   |
| NM_016586 | 18431.951 | 16369.361 | BF002026  | 1388.618  | 1148.037  | NM_017435 | 419.795   | 352.272   |
| NM_003597 | 983.74    | 837.716   | BE790116  | 596.872   | 653.637   | NM_013386 | 977.61    | 1065.767  |
| NM_002566 | 50108.246 | 42941.391 | AI922341  | 792.242   | 631.849   | AK026680  | 1669.28   | 1146.171  |
| NM_006561 | 7978.772  | 5612.387  | M12824    | 2235.504  | 2369.767  | NM_012436 | 21986.359 | 13813.896 |
| NM_017521 | 1528.997  | 2128.479  | W60100    | 4081.358  | 2329.76   | AK001299  | 6479.678  | 4253.147  |
| AK025200  | 7085.159  | 6355.141  | M24898    | 840.967   | 993.714   | AB014559  | 3268.043  | 2316.119  |
| NM_001383 | 11011.517 | 14115.215 | U72508    | 435.946   | 676.264   | NM_016486 | 3459.949  | 2865.697  |
| NM_006013 | 37203.465 | 23879.727 | AA457153  | 2279.58   | 3255.162  | NM_005033 | 2969.01   | 2703.585  |
| NM_014046 | 16890.918 | 17340.396 | AA283122  | 1163.996  | 1821.368  | NM_015932 | 37888.863 | 44466.984 |
| L34071    | 6257.636  | 6109.34   | AA868504  | 1333.81   | 1959.372  | NM_017946 | 437.372   | 374.954   |
| AK025201  | 13288.5   | 13280.836 | AA877845  | 3399.586  | 6829.675  | AK022169  | 432.772   | 480.103   |
| AK021927  | 645.438   | 483.968   | AA664241  | 23106.092 | 36085.563 | AF015592  | 1334.175  | 1161.544  |
| AK022995  | 4880.94   | 3237.853  | AI016456  | 317.942   | 490.048   | AK026795  | 1068.289  | 950.825   |



|           |           |           |           |           |           |           |           |           |
|-----------|-----------|-----------|-----------|-----------|-----------|-----------|-----------|-----------|
| NM_00606E | 16398.02  | 11020.258 | NM_01494C | 2863.493  | 1992.112  | NM_01639E | 1511.483  | 1510.693  |
| NM_00516E | 8251.949  | 6469.541  | NM_00578C | 579.039   | 1237.25   | NM_016617 | 4424.188  | 3813.332  |
| NM_00513E | 36762.055 | 25330.15  | NM_00690C | 1190.421  | 863.949   | NM_002027 | 3332.994  | 3340.347  |
| NM_00211E | 19351.732 | 17309.793 | AJ289111  | 7847.371  | 3606.771  | AL162078  | 604.127   | 510.012   |
| AK023162  | 3737.845  | 3908.154  | NM_01635E | 2623.065  | 2591.117  | NM_00091E | 316.229   | 257.114   |
| NM_00639E | 13030.363 | 14170.707 | NM_00640E | 4214.505  | 2376.157  | NM_01338E | 3690.771  | 2910.278  |
| NM_01864E | 4116.702  | 5154.123  | AF216292  | 10137.867 | 9016.244  | AB002314  | 313.291   | 234.098   |
| NM_01826E | 718.659   | 641.875   | NM_014584 | 6410.057  | 3669.797  | NM_01404E | 2559.896  | 2385.209  |
| NM_01344E | 2718.635  | 2786.204  | M30627    | 493.345   | 272.919   | NM_01462E | 386.277   | 385.959   |
| NM_004537 | 1754.911  | 2066.715  | NM_00581C | 2956.695  | 2597.447  | AB011114  | 22106.096 | 15977.829 |
| AL390134  | 14041.909 | 12345.89  | M28170    | 3013.005  | 3263.016  | D11466    | 6300.329  | 5149.438  |
| NM_02022E | 5185.817  | 6036.532  | NM_00155E | 376.86    | 342.335   | NM_01405E | 10913.615 | 9608.907  |
| NM_01786E | 5138.707  | 7737.442  | AK026223  | 971.568   | 1088.002  | D31885    | 7713.13   | 9381.597  |
| NM_003427 | 3815.526  | 4003.425  | NM_000874 | 5790.829  | 4968.445  | BE743838  | 1956.891  | 1739.65   |
| NM_00592C | 2022.623  | 1706.837  | NM_005854 | 647.586   | 870.269   | AF273046  | 655.476   | 500.69    |
| Y09321    | 1048.925  | 1196.575  | AB007863  | 13838.083 | 18666.578 | NM_001081 | 739.875   | 618.383   |
| AK001499  | 4472.345  | 4065.833  | AK024456  | 3661.079  | 5300.317  | NM_00248E | 718.093   | 796.734   |
| AK026852  | 2688.795  | 2284.077  | NM_01778E | 562.462   | 898.147   | BF002026  | 586.309   | 535.698   |
| AK021629  | 2065.787  | 1863.05   | NM_00231E | 1843.015  | 3622.405  | BE790116  | 322.653   | 297.283   |
| AL110257  | 66405.102 | 60764.902 | NM_00445E | 882.847   | 1133.739  | AI922341  | 190.712   | 226.462   |
| AB013384  | 2905.095  | 2707.049  | NM_00491E | 2468.551  | 3496.196  | M12824    | 996.983   | 808.172   |
| AK024824  | 1047.225  | 1028.595  | AK022207  | 553.618   | 636.702   | W60100    | 1003.932  | 1507.32   |
| AK024270  | 3475.751  | 3026.176  | AV708752  | 2553.033  | 2167.797  | U72508    | 204.667   | 90.183    |
| AK025569  | 9082.49   | 8835.392  | AF119885  | 2027.589  | 1829.414  | AA457153  | 883.403   | 803.678   |
| AK023060  | 2503.824  | 2438.262  | NM_00499E | 2526.366  | 2308.639  | AA283122  | 363.119   | 264.756   |
| NM_01487C | 1757.968  | 1689.991  | NM_005971 | 1970.98   | 1719.017  | AA868504  | 445.161   | 425.7     |
| AK021917  | 914.667   | 864.393   | NM_01743E | 780.81    | 777.816   | AA877845  | 1634.815  | 1285.605  |
| AF052146  | 46091.148 | 43701.813 | NM_01338E | 2210.786  | 1622.991  | AA664241  | 7003.705  | 5480.918  |
| NM_00487C | 14244.406 | 17069.16  | NM_004171 | 743.435   | 498.752   | NM_00058E | 5274.654  | 5548.079  |
| AF143872  | 13298.792 | 15339.479 | NM_014037 | 4820.052  | 3858.284  | AK026281  | 481.67    | 416.106   |
| AK025686  | 4194.208  | 3720.666  | NM_00486E | 11657.362 | 10577.846 | NM_00640E | 1712.492  | 1889.308  |
| AF143326  | 4214.478  | 4059.367  | NM_01868E | 1652.466  | 1890.184  | AF216292  | 5944.215  | 3982.318  |
| AL049229  | 7069.788  | 8078.851  | AK056652  | 4004.996  | 5347.747  | NM_005894 | 202.05    | 161.251   |
| NM_01830E | 32177.83  | 30649.678 | AL137438  | 709.073   | 981.272   | NM_014584 | 2679.846  | 2743.737  |
| AK026146  | 4834.459  | 6311.727  | NM_017957 | 3302.422  | 4946.906  | M30627    | 211.807   | 121.05    |
| AK023152  | 6930.648  | 7452.938  | NM_003024 | 1239.292  | 2083.201  | NM_00581C | 906.634   | 1028.182  |
| AK000155  | 4738.487  | 3883.542  | NM_01324E | 3115.078  | 5044.16   | M28170    | 1168.563  | 754.887   |
| AL389937  | 5687.681  | 5001.721  | AK022230  | 3918.193  | 7185.052  | AK026223  | 338.885   | 262.293   |
| AK022628  | 64983.352 | 49447.77  | AK022147  | 9816.277  | 16550.402 | NM_000874 | 2327.019  | 1852.062  |
| AK021737  | 8115.438  | 3907.58   | L25664    | 1664.886  | 3641.956  | NM_005854 | 285.007   | 211.143   |
| AL357454  | 1052.579  | 1066.801  | NM_002027 | 8649.123  | 7548.832  | AB007863  | 3873.545  | 3031.004  |
| AK026295  | 19677.809 | 14744.043 | AL162078  | 1467.792  | 1000.303  | AK024456  | 1715.821  | 1880.941  |
| AK022346  | 674.066   | 761.797   | NM_00091E | 727.737   | 583.822   | NM_01778E | 311.087   | 122.633   |
| AK025007  | 5268.36   | 3887.999  | NM_01338E | 6286.836  | 6661.312  | D31887    | 1107.156  | 941.134   |
| NM_01648E | 6727.858  | 4092.91   | AB002314  | 620.658   | 595.487   | NM_00231E | 773.07    | 608.596   |
| AK026490  | 56141.395 | 51078.258 | NM_01404E | 6498.759  | 4592.896  | NM_00445E | 511.724   | 1357.278  |
| AJ227861  | 3041.302  | 2973.243  | NM_01462E | 826.256   | 659.608   | NM_00550E | 531.388   | 889.228   |
| AJ001020  | 1141.311  | 1018.484  | AB011114  | 39678.277 | 26350.756 | NM_00150E | 509.476   | 577.662   |
| NM_00555E | 469.385   | 414.035   | D11466    | 13374.116 | 9499.962  | NM_005721 | 347.227   | 378.421   |
| AJ001875  | 3070.288  | 3389.463  | NM_01405E | 21277.055 | 16123.722 | AF284223  | 391.333   | 327.013   |
| Y10507    | 773.234   | 1019.168  | D31885    | 17814.219 | 14106.116 | AF176012  | 242.458   | 345.458   |
| L77562    | 685.922   | 894.739   | NM_01664E | 2329.215  | 1857.607  | NM_005971 | 1247.816  | 997.843   |
| L13433    | 3225.562  | 2723.511  | AK090536  | 11731.003 | 7422.255  | NM_01743E | 452.629   | 343.176   |

|           |           |           |           |           |           |           |           |           |
|-----------|-----------|-----------|-----------|-----------|-----------|-----------|-----------|-----------|
| NM_00722C | 2425.449  | 3478.597  | D63477    | 554.448   | 541.121   | NM_01338E | 1026.752  | 902.646   |
| NM_01777F | 4087.282  | 4080.304  | NM_020243 | 19892.484 | 19486.301 | NM_006517 | 169.706   | 184.579   |
| AL109722  | 1051.712  | 1052.255  | NM_014051 | 9907.168  | 9052.646  | NM_004171 | 319.758   | 183.513   |
| AK022298  | 5906.03   | 7028.12   | AK025398  | 1804.747  | 2795.693  | NM_014037 | 1532.025  | 1309.814  |
| AJ277441  | 28744.789 | 23905.789 | AK023056  | 1183.97   | 1736.115  | NM_00486E | 5244.913  | 5117.132  |
| AK024242  | 26125.611 | 27386.447 | NM_001120 | 34843.113 | 47398.781 | NM_01868E | 860.655   | 565.548   |
| AK024559  | 1823.216  | 2440.381  | NM_01788E | 1332.561  | 2689.953  | AK056652  | 1649.257  | 1348.284  |
| AK024851  | 873.58    | 1030.148  | NM_003150 | 3202.171  | 2945.992  | AL137438  | 232.496   | 172.382   |
| AK024577  | 1588.452  | 1600.359  | NM_014784 | 2239.067  | 1874.496  | NM_017957 | 868.697   | 761.396   |
| AL359943  | 62856.977 | 66431.75  | AK026383  | 1747.107  | 1827.034  | NM_003024 | 478.806   | 400.005   |
| NM_000534 | 4282.958  | 4955.041  | AK023821  | 649.987   | 482.022   | NM_01324E | 1332.19   | 1468.947  |
| NM_00536E | 3081.751  | 2479.11   | AB014594  | 3498.608  | 3176.032  | NM_000034 | 37587.145 | 50261.641 |
| L10140    | 754.21    | 1089.744  | M94547    | 1094.123  | 821.96    | AK022230  | 1097.207  | 1017.467  |
| AL133447  | 3687.757  | 4217.296  | NM_005087 | 4418.444  | 3945.189  | AK022147  | 2660.888  | 3147.281  |
| AB037853  | 36252.41  | 37912.563 | NM_01209E | 1043.878  | 829.819   | L25664    | 611.607   | 601.725   |
| D28450    | 65046.766 | 67319.32  | NM_01809E | 3149.6    | 1589.809  | NM_01494C | 884.782   | 837.75    |
| AK056222  | 4404.841  | 3859.958  | AB023164  | 2429.53   | 2332.171  | NM_00578E | 238.991   | 195.748   |
| AK002028  | 55308.914 | 57747.207 | AK026281  | 1106.295  | 824.713   | NM_00690C | 508.902   | 427.608   |
| AL050127  | 2625.594  | 3035.615  | AK026680  | 3947.612  | 3475.241  | AJ289111  | 2538.379  | 3883.713  |
| AK024805  | 12143.499 | 11408.983 | NM_01243E | 52328.113 | 55834.98  | NM_01635E | 1382.309  | 1375.493  |
| AK001423  | 2874.433  | 3339.488  | AK001299  | 15784.575 | 18039.455 | NM_01404E | 2853.137  | 2598.555  |
| AK024090  | 24264.324 | 9901.771  | AB014559  | 9741.952  | 11228.035 | NM_01462E | 376.918   | 347.263   |
| AL133574  | 1203.828  | 1003.716  | NM_01648E | 5909.77   | 7235.162  | AB011114  | 22308.818 | 17433.529 |
| AK021936  | 2948.428  | 5311.099  | NM_00503E | 6200.1    | 6451.209  | D11466    | 6329.088  | 5061.984  |
| AF147339  | 32428.09  | 27062.631 | NM_01593E | 56147.242 | 68452.086 | NM_01405E | 11035.568 | 9372.839  |
| AL390181  | 50311.992 | 43188.863 | NM_01794E | 1039.936  | 1595.415  | D31885    | 7565.564  | 8196.473  |
| NM_017914 | 27540.018 | 25307.318 | AK022169  | 1027.285  | 1985.615  | NM_01664E | 1234.079  | 1221.575  |
| NM_00635C | 509.956   | 842.378   | AF015592  | 3551.731  | 5301.535  | AK090536  | 4997.255  | 6281.144  |
| AK024953  | 13271.819 | 19261.17  | AK026795  | 2669.572  | 4355.683  | D63477    | 320.213   | 316.095   |
| AK024276  | 4396.548  | 4032.927  | NM_01639E | 3644.774  | 6029.607  | NM_02024E | 12637.582 | 10785.979 |
| S83374    | 4202.843  | 3621.944  | NM_016617 | 9611.347  | 17334.16  | NM_014051 | 4524.664  | 5523.257  |
| AK025784  | 43255.578 | 38238.375 | NM_00233E | 5083.913  | 4556.091  | AK025398  | 760.104   | 807.302   |
| U07199    | 4723.795  | 4459.027  | AL117666  | 613.336   | 564.73    | AK027082  | 103.671   | 218.304   |
| AK023713  | 1946.351  | 2351.16   | Y17865    | 712.554   | 480.223   | NM_001120 | 16601.217 | 14042.332 |
| X81445    | 1067.705  | 1312.858  | NM_00582E | 10803.025 | 8765.465  | NM_01788E | 678.928   | 587.904   |
| U95091    | 2429.045  | 2975.428  | NM_00275E | 2238.884  | 1857.189  | NM_00491E | 1665.537  | 1182.859  |
| NM_01790C | 43302.422 | 41459.703 | AJ000414  | 276.551   | 186.808   | AK022207  | 325.715   | 321.702   |
| S50182    | 2147.314  | 2939.678  | AK025674  | 6483.968  | 6082.276  | AV708752  | 1209.169  | 669.493   |
| AL360145  | 1835.834  | 1886.166  | AF007194  | 4806.379  | 3406.125  | AF119885  | 1013.805  | 733.786   |
| Y12016    | 2051.778  | 2485.169  | NM_01906E | 1062.244  | 833.624   | NM_00499E | 1066.805  | 1244.822  |
| S75763    | 69121.594 | 67037.484 | NM_004761 | 2252.433  | 1650.79   | NM_00058E | 5912.534  | 4355.377  |
| NM_00117E | 3062.111  | 1503.139  | Z25424    | 1850.011  | 1460.293  | AK026281  | 395.281   | 343.432   |
| AK023696  | 5911.866  | 2739.22   | U79458    | 4185.094  | 3511.357  | U23862    | 211.937   | 77.311    |
| NM_000704 | 2348.274  | 2321.439  | NM_002961 | 4819.591  | 2165.596  | AK026680  | 1924.443  | 1479.002  |
| NM_015987 | 1398.763  | 1844.775  | NM_01829E | 569.669   | 655.526   | NM_01243E | 28537.635 | 21304.363 |
| NM_01960E | 2908.439  | 3333.027  | NM_00067E | 2039.488  | 2671.553  | AK001299  | 6819.982  | 5121.681  |
| NM_01536E | 1288.511  | 1586.757  | AF064770  | 611.21    | 1047.795  | AB014559  | 3447.027  | 2812.435  |
| Z49090    | 4025.149  | 3802.76   | NM_00576E | 699.171   | 1067.326  | NM_01648E | 3148.495  | 3068.613  |
| AK021592  | 5824.751  | 4744.005  | NM_004127 | 49431.598 | 67143.625 | NM_00503E | 2751.054  | 2872.903  |
| AK025467  | 5092.793  | 5689.394  | NM_013324 | 4106.647  | 6486.119  | NM_01593E | 38479.07  | 44892.402 |
| AK026593  | 17184.625 | 21017.785 | AL133022  | 1003.053  | 1080.272  | NM_01794E | 290.849   | 342.822   |
| L37700    | 1938.45   | 1737.643  | NM_00395E | 2434.836  | 5455.391  | AK022169  | 477.067   | 393.777   |
| NM_01766E | 5973.194  | 7272.146  | NM_006301 | 881.425   | 1607.849  | AF015592  | 1221.914  | 1586.907  |

|           |           |           |           |           |           |           |          |          |
|-----------|-----------|-----------|-----------|-----------|-----------|-----------|----------|----------|
| AF052106  | 4097.789  | 4016.852  | AL049925  | 1682.856  | 1428.915  | AK026795  | 996.519  | 1198.091 |
| AK000441  | 1781.69   | 2842.217  | NM_012219 | 372.822   | 418.917   | NM_016395 | 1664.961 | 1653.834 |
| AK022391  | 2115.536  | 2351.551  | X72887    | 1514.08   | 659.65    | NM_016617 | 4520.709 | 4279.949 |
| NM_016167 | 2629.109  | 2882.239  | NM_004529 | 1089.537  | 723.617   | NM_002027 | 3338.558 | 3765.073 |
| NM_016125 | 1746.13   | 2066.014  | NM_000127 | 1448.833  | 1445.247  | AL162078  | 809.273  | 856.709  |
| CY3Cy5    | 4710.076  | 200.691   | Y10483    | 9193.997  | 6274.563  | NM_000915 | 320.282  | 308.56   |
| R72122    | 3726.304  | 3692.626  | NM_006784 | 1068.808  | 755.05    | NM_013382 | 4778.485 | 3066.572 |
| Z35309    | 1857.704  | 1734.394  | NM_017876 | 2166.54   | 1655.222  | AB002314  | 423.51   | 262.862  |
| X04571    | 1042.181  | 1370.085  | NM_001087 | 39679.105 | 29672.012 | NM_005503 | 517.661  | 444.007  |
| AA700005  | 763.742   | 798.875   | AK025352  | 422.541   | 353.265   | NM_001502 | 553.062  | 515.853  |
| AA292025  | 1082.761  | 1006.852  | NM_003721 | 3772.984  | 2943.019  | NM_005721 | 372.354  | 325.452  |
| AA437226  | 1943.814  | 1060.733  | NM_004724 | 1430.515  | 1099.855  | AF284223  | 466.892  | 570.997  |
| D10353/NM | 2167.107  | 1408.24   | NM_001431 | 4340.064  | 4742.379  | BE743838  | 2203.549 | 2200.42  |
| M15042    | 4836.792  | 3259.213  | NM_000427 | 1485.928  | 1543.608  | AF273046  | 862.284  | 889.16   |
| U49928    | 4469.172  | 3231.141  | NM_014924 | 970.39    | 1330.427  | NM_001081 | 670.99   | 579.861  |
| AK096645  | 16746.648 | 11031.273 | NM_006946 | 427.287   | 944.264   | NM_002483 | 757.795  | 948.167  |
| AK092859  | 416.09    | 312.832   | NM_000174 | 43660.66  | 65582.063 | BF002026  | 718.756  | 702.66   |
| NM_019884 | 4717.472  | 3052.103  | NM_002508 | 1814.706  | 2681.18   | BE790116  | 287.419  | 177.986  |
| SR2       | 59804.891 | 49906.363 | NM_014343 | 3350.486  | 6624.758  | AI922341  | 273.514  | 184.621  |
| SR4       | 17220.799 | 14119.893 | D25303    | 999.837   | 2054.085  | M12824    | 792.613  | 736.745  |
| SR6       | 2415.784  | 2036.314  | AB043007  | 18721.113 | 18726.641 | W60100    | 953.248  | 1545.96  |
| SR8       | 9150.561  | 21884.906 | NM_004861 | 934.973   | 581.086   | M24898    | 184.079  | 285.557  |
| SR10      | 33985.02  | 8732.061  | NM_016161 | 426.619   | 436.756   | AA457153  | 937.988  | 963.423  |
| CY3Cy5    | 3827.504  | 206.943   | AF022913  | 3156.395  | 1841.427  | AA283122  | 287.055  | 613.219  |
| NM_005291 | 5614.868  | 3715.521  | NM_000028 | 1409.215  | 619.264   | AA868504  | 517.311  | 375.59   |
| AF253316  | 697.639   | 743.84    | NM_001382 | 5655.782  | 4490.142  | AA877845  | 1510.889 | 1193.78  |
| NM_005855 | 2751.505  | 3115.194  | M93718    | 6009.107  | 6672.661  | AA664241  | 8142.125 | 8679.395 |
| NM_002923 | 3772.032  | 2575.278  | NM_005386 | 966.039   | 658.586   | NM_014940 | 855.008  | 769.054  |
| NM_006794 | 569.968   | 445.188   | AK023807  | 7018.99   | 5440.48   | NM_005783 | 288.391  | 118.036  |
| NM_018653 | 806.766   | 612.623   | NM_018188 | 5870.649  | 4711.162  | NM_006900 | 604.053  | 323.746  |
| NM_005388 | 5170.512  | 4566.461  | AK024273  | 1577.776  | 1358.721  | AJ289111  | 2405.704 | 2998.666 |
| NM_007232 | 9911.372  | 6344.187  | X59417    | 30249.779 | 19090.002 | NM_016356 | 1642.612 | 1306.072 |
| NM_003027 | 963.094   | 686.678   | NM_005659 | 31755.664 | 24257.049 | NM_006406 | 1795.982 | 2210.177 |
| NM_002717 | 7148.729  | 6740.112  | D28476    | 5669.114  | 5425.948  | AF216292  | 6587.148 | 4934.762 |
| NM_003025 | 4762.002  | 3521.854  | NM_016263 | 2234.809  | 2751.567  | NM_005894 | 301.342  | 111.027  |
| NM_020179 | 7126.201  | 3623.146  | NM_003335 | 17680.865 | 17112.559 | NM_014584 | 2643.231 | 2878.549 |
| NM_004306 | 31501.689 | 16692.107 | AB002376  | 3178.73   | 3203.404  | NM_005810 | 1121.382 | 1261.81  |
| NM_006786 | 1788.704  | 984.124   | NM_018249 | 408.883   | 491.724   | M28170    | 1293.06  | 1033.344 |
| NM_006205 | 3046.985  | 2913.997  | NM_005558 | 981.419   | 1173.955  | AK026223  | 339.158  | 369.447  |
| NM_004034 | 1846.722  | 1421.859  | NM_016631 | 806.57    | 1102.777  | NM_000874 | 1892.082 | 1765.657 |
| NM_000130 | 2449.98   | 1311.008  | AK022730  | 959.51    | 1503.862  | NM_005854 | 271.472  | 150.143  |
| AI492087  | 1703.27   | 1358.986  | NM_002256 | 11168.239 | 16725.449 | AB007863  | 4254.019 | 3359.215 |
| NM_004193 | 2478.686  | 1613.14   | NM_005439 | 7686.584  | 15280.628 | AK024456  | 1754.161 | 1853.308 |
| NM_002803 | 17144.732 | 14987.119 | AB037810  | 4291.328  | 8494.528  | NM_017789 | 233.954  | 259.838  |
| NM_005508 | 7527.132  | 6127.497  | NM_000376 | 2531.896  | 1713.044  | D31887    | 1114.335 | 1027.82  |
| NM_006788 | 1157.494  | 1216.333  | NM_000475 | 5118.493  | 3271.635  | NM_002313 | 793.488  | 748.205  |
| AK025039  | 475.746   | 370.154   | M61872    | 8820.975  | 6055.955  | NM_004459 | 519.78   | 823.703  |
| NM_016568 | 1010.394  | 801.935   | X59845    | 935.972   | 732.444   | NM_004915 | 2087.505 | 1336.585 |
| AB033102  | 7393.551  | 6149.627  | NM_006284 | 11305.093 | 8435.317  | AK022207  | 304.779  | 274.082  |
| NM_014774 | 5522.934  | 4829.919  | U18909    | 1254.505  | 865.762   | AV708752  | 1328.753 | 961.404  |
| NM_014143 | 12473.742 | 9175.512  | NM_003489 | 1948.313  | 1494.179  | AF119885  | 922.796  | 743.115  |
| M55646    | 5843.887  | 3529.762  | NM_016589 | 8353.587  | 6134.557  | NM_004996 | 1336.959 | 1294.175 |
| NM_006112 | 23062.887 | 17483.781 | NM_002568 | 22590.398 | 18951.195 | NM_005971 | 1336.573 | 1198.004 |

|           |           |           |           |           |           |           |           |           |
|-----------|-----------|-----------|-----------|-----------|-----------|-----------|-----------|-----------|
| M12807    | 1001.53   | 621.626   | NM_006561 | 2974.917  | 3741.591  | NM_01743E | 417.988   | 488.241   |
| NM_00176E | 3861.156  | 4187.198  | NM_017521 | 643.268   | 621.768   | NM_01338E | 1032.257  | 1531.989  |
| NM_003361 | 1959.264  | 1490.303  | AK025200  | 3357.725  | 5194.811  | NM_006517 | 141.925   | 241.55    |
| NM_01209E | 1980.556  | 1375.916  | NM_00138E | 4516.21   | 6485.127  | NM_004171 | 285.844   | 219.939   |
| NM_018684 | 12825.81  | 7733.241  | NM_00500E | 6881.062  | 11092.223 | NM_014037 | 1804.856  | 2049.018  |
| NM_01798E | 1130.577  | 927.115   | NM_016304 | 12998.195 | 23429.68  | NM_00486E | 5037.522  | 5767.609  |
| AF116909  | 1634.399  | 1304.705  | NM_01404E | 7150.251  | 12469.061 | NM_01868E | 841.815   | 647.308   |
| BE906724  | 970.097   | 715.945   | L34071    | 2976.431  | 7248.512  | AK056652  | 1880.111  | 1688.981  |
| NM_00228E | 2536.685  | 1489.262  | AK025201  | 6308.618  | 5460.472  | NM_017957 | 803.808   | 877.526   |
| AJ276095  | 12674.193 | 9690.629  | AK022995  | 2395.694  | 1915.023  | NM_003024 | 508.812   | 456.987   |
| NM_00481E | 3147.473  | 2012.79   | NM_00606E | 10248.797 | 7075.37   | NM_01324E | 1508.796  | 1402.084  |
| NM_007184 | 2667.399  | 1720.219  | AV718258  | 323.573   | 218.454   | NM_000034 | 39939.863 | 59966.957 |
| AF231916  | 868.571   | 887.545   | NM_00516E | 3524.184  | 3281.96   | AK022230  | 1157.514  | 1147.422  |
| NM_003501 | 4561.979  | 4139.475  | NM_00513E | 18557.973 | 14811.942 | AK022147  | 2749.901  | 3523.808  |
| AK022654  | 7990.759  | 6993.247  | NM_00211E | 19143.943 | 17481.23  | L25664    | 775.086   | 896.579   |
| BC002905  | 7610.757  | 5521.387  | AK023162  | 1773.639  | 1848.672  | NM_002027 | 4180.064  | 3786.796  |
| NM_018091 | 13365.497 | 10338.75  | NM_00639E | 4743.525  | 5145.662  | AL162078  | 898.358   | 598.465   |
| NM_001108 | 9474.321  | 12764.479 | NM_01864E | 2030.534  | 1942.593  | NM_00091E | 366.927   | 272.908   |
| NM_01663E | 17382.652 | 14241.93  | NM_01826E | 366.363   | 413.827   | NM_01338E | 4159.648  | 3396.217  |
| NM_014291 | 7327.381  | 4999.877  | NM_01344E | 1494.988  | 1702.566  | AB002314  | 367.715   | 491.815   |
| NM_014631 | 570.073   | 675.226   | NM_004537 | 734.412   | 528.725   | NM_01404E | 3034.712  | 3203.082  |
| NM_00108E | 1999.266  | 1449.062  | AL390134  | 4113.173  | 8776.523  | NM_01462E | 464.028   | 327.272   |
| NM_00012E | 2939.614  | 1809.788  | NM_02022E | 2246.153  | 3291.655  | AB011114  | 27253.805 | 21428.631 |
| AF172327  | 50470.723 | 39287.09  | NM_01786E | 1767.197  | 2769.104  | D11466    | 8081.201  | 8269.583  |
| NM_00167E | 2885.109  | 2007.705  | NM_003427 | 1578.06   | 1946.301  | NM_01405E | 12450.535 | 10893.694 |
| NM_00167E | 15996.816 | 8833.803  | NM_00592E | 917.252   | 1674.073  | D31885    | 8817.568  | 10670.818 |
| NM_00404E | 65086.965 | 65398.191 | Y09321    | 501.795   | 1093.755  | NM_01664E | 1354.839  | 1559.249  |
| NM_00498E | 755.932   | 586.98    | AK001499  | 3967.469  | 2011.187  | AK090536  | 5699.475  | 7911.958  |
| U09384    | 1283.494  | 1007.504  | AK026852  | 1694.856  | 1223.917  | D63477    | 345.728   | 352.888   |
| NM_00686E | 8766.99   | 6151.05   | AK021629  | 1365.251  | 889.276   | NM_014051 | 4536.37   | 6234.418  |
| NM_00428E | 1286.496  | 844.508   | AL110257  | 47297.598 | 27914.535 | AK025398  | 830.803   | 868.963   |
| NM_00416E | 3804.971  | 4630.277  | AB013384  | 1538.119  | 1148.116  | AK023056  | 361.743   | 253.335   |
| AK026308  | 936.774   | 795.701   | AK024824  | 1115.789  | 963.806   | NM_00112E | 17553.91  | 15107.67  |
| NM_013337 | 2142.553  | 1676.606  | AK024270  | 2211.368  | 1749.457  | NM_01788E | 708.585   | 874.599   |
| NM_00689E | 10278.758 | 11171.559 | AK025569  | 4720.377  | 3453.404  | NM_00315E | 1856.714  | 1260.369  |
| NM_01220E | 3774.097  | 3921.276  | AK023060  | 1522.537  | 1190.427  | NM_014784 | 1238.42   | 857.91    |
| NM_001724 | 3097.476  | 4207.59   | NM_01487E | 795.707   | 660.528   | AK026383  | 1255.475  | 1060.154  |
| NM_00015E | 1689      | 1204.661  | AK021917  | 891.902   | 815.57    | AK023821  | 377.82    | 487.878   |
| AB023152  | 1577.118  | 1363.559  | AF052146  | 46096.48  | 37730.844 | AB014594  | 1614.318  | 1423      |
| NM_00621E | 3422.97   | 2381.636  | NM_00487E | 6126.483  | 6374.711  | M94547    | 401.586   | 459.497   |
| AK022872  | 3881.077  | 3861.184  | AF143872  | 12360.131 | 10620.544 | NM_005087 | 2435.597  | 1966.407  |
| AK024272  | 9229.661  | 6806.371  | AK025686  | 1609.865  | 1799.083  | NM_01209E | 548.544   | 453.602   |
| NM_016381 | 2306.672  | 1990.401  | AF143326  | 2608.48   | 4071.712  | NM_01809E | 1306.015  | 1784.379  |
| NM_01804E | 1448.105  | 1359.516  | AL049229  | 3589.789  | 4315.883  | AB023164  | 1349.878  | 1358.191  |
| BE741525  | 1033.941  | 1087.712  | AK026146  | 3565.802  | 5904.21   | AK026281  | 485.963   | 396.175   |
| BF030555  | 6663.26   | 3796.905  | AK023152  | 3201.207  | 4641.78   | AK026680  | 2456.313  | 2541.789  |
| NM_01243E | 11761.604 | 5104.088  | AK000155  | 1528.408  | 3066.524  | NM_01243E | 36295.629 | 40417.039 |
| NM_00560E | 4013.283  | 2109.437  | AL389937  | 4626.153  | 8033.812  | AB014559  | 4104.203  | 4014.142  |
| NM_00257E | 4099.641  | 2727.198  | AK022628  | 52419.168 | 34383.871 | NM_01648E | 3316.034  | 3799.387  |
| NM_00358E | 3997.997  | 3029.228  | AK021737  | 6179.239  | 4515.92   | NM_00503E | 2918.101  | 3981.757  |
| AF057354  | 696.018   | 555.566   | AL357454  | 694.865   | 442.138   | NM_01593E | 35910.516 | 47895.199 |
| M14200    | 59375.617 | 61254.598 | AK026295  | 9020.615  | 6065.683  | NM_01794E | 423.501   | 596.709   |
| NM_00028E | 4100.173  | 3254.008  | AK025007  | 3137.305  | 2394.828  | AK022169  | 499.042   | 612.51    |

|           |           |           |           |           |           |           |           |           |
|-----------|-----------|-----------|-----------|-----------|-----------|-----------|-----------|-----------|
| NM_000532 | 23563.668 | 22306.861 | NM_016486 | 3870.077  | 3397.357  | AF015592  | 1526.629  | 1652.092  |
| NM_016341 | 1028.177  | 825.579   | AL117601  | 378.597   | 352.724   | AK026795  | 1008.218  | 1338.287  |
| AI492087  | 2348.023  | 2297.153  | AK026490  | 36418.824 | 24308.162 | NM_016395 | 1541.304  | 1815.629  |
| R72122    | 3495.498  | 3517.236  | AJ227861  | 2023.662  | 1644.901  | NM_016617 | 4738.753  | 5006.958  |
| Z35309    | 1176.008  | 982.651   | AJ001020  | 771.867   | 456.671   | NM_002335 | 1699.199  | 1258.313  |
| AA700005  | 736.962   | 693.95    | AJ001875  | 2257.75   | 2068.229  | AL117666  | 340.479   | 283.476   |
| AA292025  | 861.622   | 846.434   | X64985    | 859.418   | 945.938   | Y17865    | 414.387   | 460.376   |
| AA437226  | 2281.025  | 1187.328  | Y10507    | 334.506   | 396.949   | NM_005825 | 6418.865  | 5730.783  |
| XM_056359 | 1727.905  | 1161.021  | L77562    | 265.761   | 380.505   | NM_002755 | 1392.957  | 1298.55   |
| D10353/NM | 2180.791  | 1718.815  | NM_007220 | 936.168   | 1269.02   | AJ000414  | 229.628   | 130.297   |
| M15042    | 3496.447  | 2900.502  | NM_017777 | 1608.943  | 2665.979  | AK025674  | 3234.946  | 3316.256  |
| U49928    | 3918.206  | 2180.039  | AL109722  | 383.564   | 924.254   | AF007194  | 2462.41   | 2468.063  |
| AK096645  | 18697.41  | 10176.864 | AK021989  | 590.533   | 411.755   | NM_019065 | 583.141   | 559.87    |
| AK092859  | 390.262   | 285.871   | AK022298  | 3838.517  | 3017.831  | NM_004761 | 1351.062  | 1473.401  |
| NM_019884 | 4780.131  | 3192.22   | AJ277441  | 25257.676 | 22760.623 | Z25424    | 971.637   | 1044.457  |
| NM_018291 | 3916.06   | 5339.887  | NM_006057 | 1260.56   | 1135.36   | U79458    | 2493.976  | 3208.118  |
| NM_005530 | 5450.477  | 4304.07   | AK024242  | 13713.182 | 16660.424 | NM_014920 | 326.333   | 418.529   |
| NM_002283 | 3220.514  | 2702.251  | AK024559  | 492.354   | 978.719   | NM_002961 | 1321.364  | 2884.237  |
| AJ276095  | 15899.209 | 14779.707 | AK024851  | 741.334   | 1106.619  | NM_018295 | 354.321   | 370.495   |
| NM_004815 | 4612.185  | 3420.694  | AK024943  | 778.914   | 990.594   | NM_000675 | 1103.918  | 1367.824  |
| NM_007184 | 3760.221  | 3102.606  | AK024995  | 621.78    | 1095.786  | AF064770  | 384.721   | 346.034   |
| NM_005291 | 7761.877  | 6692.679  | AL359943  | 50345.707 | 31793.186 | NM_005765 | 292.927   | 290.184   |
| NM_005855 | 401.513   | 623.682   | NM_000534 | 3171.761  | 2163.303  | NM_004127 | 27405.451 | 22975.006 |
| NM_002923 | 2489.376  | 2163.384  | NM_005365 | 1580.628  | 1329.246  | NM_013324 | 1516.491  | 1606.718  |
| NM_018653 | 817.169   | 581.576   | L10140    | 688.836   | 637.424   | AL133022  | 348.981   | 397.436   |
| NM_005385 | 5392.255  | 5833.154  | AL133447  | 1946.512  | 1631.637  | NM_003953 | 1336.531  | 1306.928  |
| NM_007232 | 12937.667 | 10952.657 | AB037853  | 23359.443 | 21646.389 | NM_006301 | 370.324   | 455.875   |
| NM_002717 | 4142.387  | 2587.337  | D28450    | 57293.363 | 48137.313 | AL049925  | 969.536   | 900.039   |
| NM_003025 | 4484.363  | 2134.224  | AK056222  | 2488.145  | 1987.079  | NM_012215 | 328.341   | 293.159   |
| NM_020175 | 8193.595  | 5689.299  | AK002028  | 35249.211 | 41171.938 | X72887    | 665.941   | 753.765   |
| NM_004305 | 30236.719 | 26670.195 | AL050127  | 2076.177  | 2881.408  | NM_004525 | 462.616   | 524.941   |
| NM_006785 | 1499.13   | 1578.891  | AK024805  | 7937.718  | 14833.394 | NM_000127 | 1143.78   | 914.268   |
| NM_006205 | 2456.953  | 2400.704  | AK001423  | 1680.029  | 3461.364  | Y10483    | 5378.148  | 4715.738  |
| NM_006860 | 8731.198  | 10076.135 | AK024090  | 14905.934 | 10818.396 | NM_006784 | 466.941   | 310.606   |
| NM_004794 | 15415.819 | 17309.322 | AL133574  | 2411.435  | 1462.161  | NM_017875 | 1335.578  | 996.639   |
| NM_004283 | 1516.51   | 1484.965  | AK021936  | 1899.591  | 1108.416  | NM_001087 | 21598.652 | 19328.838 |
| NM_004163 | 5289.388  | 5575.732  | AF147339  | 34088.539 | 27060.674 | AK025352  | 384.083   | 313.19    |
| AK026308  | 1568.832  | 1270.72   | AL390181  | 34639.117 | 20512.711 | NM_003721 | 2651.663  | 3013.592  |
| NM_013337 | 3233.045  | 2789.279  | NM_017914 | 27051.945 | 19580.199 | NM_004724 | 906.548   | 1385.282  |
| NM_004193 | 4082.226  | 3812.829  | AK024953  | 9964.887  | 5953.316  | NM_001431 | 3360.766  | 3816.555  |
| NM_002803 | 19186.127 | 18334.426 | AK024276  | 3920.565  | 2565.643  | NM_000427 | 674.42    | 962.093   |
| NM_005505 | 7305.506  | 5411.035  | S83374    | 2704.415  | 2373.92   | NM_014924 | 458.641   | 549.399   |
| NM_006785 | 780.243   | 935.029   | AK025784  | 22810.141 | 20750.334 | NM_006945 | 280.271   | 468.949   |
| AK025039  | 392.113   | 447.058   | U07199    | 2672.982  | 2857.244  | NM_000174 | 18159.031 | 13919.585 |
| NM_016565 | 1855.387  | 1822.928  | AK023713  | 1016.504  | 1114.825  | NM_002505 | 642.58    | 665.244   |
| NM_014774 | 4276.019  | 2861.938  | X81445    | 812.826   | 1102.44   | NM_014343 | 1293.643  | 1433.069  |
| NM_014143 | 9447.432  | 3762.744  | U95091    | 1305.636  | 1861.365  | D25303    | 374.444   | 481.26    |
| M55646    | 6076.531  | 2028.223  | NM_017900 | 26966.086 | 31402.701 | AB043007  | 8775.373  | 6636.249  |
| NM_006112 | 16594.785 | 6455.344  | S50182    | 1224.95   | 1466.464  | NM_004861 | 703.92    | 517.84    |
| M12807    | 665.215   | 536.127   | AL360145  | 1487.022  | 1786.624  | NM_016161 | 324.967   | 268.261   |
| NM_001765 | 5669.858  | 8787.974  | Y12016    | 1136.68   | 1732.393  | AF022913  | 1550.465  | 1305.762  |
| NM_003361 | 1037.672  | 931.792   | NM_001178 | 1890.898  | 1496.36   | NM_000025 | 785.404   | 880.424   |
| NM_012095 | 2024.169  | 2265.074  | AK023696  | 4613.343  | 3263.243  | NM_001382 | 2658.418  | 2342.593  |

|           |           |           |           |           |           |           |           |           |
|-----------|-----------|-----------|-----------|-----------|-----------|-----------|-----------|-----------|
| NM_018684 | 14232.531 | 13328.233 | AF116613  | 322.529   | 252.668   | M93718    | 4493.766  | 2824.407  |
| NM_017983 | 1065.981  | 1293.915  | NM_000704 | 1600.222  | 899.974   | NM_005386 | 473.836   | 432.788   |
| AF057354  | 778.472   | 1163.447  | NM_015987 | 698.625   | 474.472   | AK023807  | 2091.33   | 1994.748  |
| AF169351  | 7089.483  | 5787.271  | NM_019605 | 1870.973  | 1449.344  | NM_018186 | 3248.989  | 3154.309  |
| M14200    | 60545.117 | 62139.75  | NM_015369 | 605.626   | 591.591   | AK024273  | 1151.019  | 1308.342  |
| NM_000282 | 6218.266  | 4992.644  | Z49090    | 5309.953  | 4359.083  | X59417    | 17530.156 | 18551.723 |
| NM_000532 | 33216.781 | 30518.555 | AK021592  | 5860.106  | 5175.133  | NM_005656 | 16992.584 | 15687.036 |
| NM_016341 | 1387.517  | 1627.587  | AK025467  | 2595.352  | 2380.243  | D28476    | 3509.969  | 4530.296  |
| AF231916  | 2560.571  | 2174.336  | AK026593  | 9389.063  | 7664.09   | NM_016263 | 1732.453  | 1580.637  |
| NM_003501 | 5552.15   | 5532.035  | L37700    | 892.417   | 937.733   | NM_003335 | 7523.165  | 9197.203  |
| AK022654  | 11831.846 | 8665.82   | NM_017665 | 3120.348  | 2795.329  | AB002376  | 1659.244  | 1885.085  |
| BC002905  | 7499.047  | 5484.906  | AB007966  | 469.9     | 549.714   | NM_005556 | 514.5     | 651.806   |
| NM_018091 | 11715.436 | 9071.712  | AB007976  | 343.439   | 297.62    | NM_016631 | 396.797   | 517.339   |
| NM_001108 | 9232.822  | 12374.949 | AK024819  | 841.778   | 859.227   | AB015617  | 4659.937  | 6663.531  |
| NM_016630 | 19029.084 | 18708.703 | AF052106  | 2365.218  | 3668.009  | AK022730  | 589.87    | 448.019   |
| NM_014291 | 8212.663  | 4348.681  | AK000441  | 1160.948  | 1185.525  | NM_005436 | 3597.3    | 3540.413  |
| NM_001086 | 2047.033  | 1053.669  | AK022391  | 1730.129  | 3341.192  | AB037810  | 1807.549  | 1932.283  |
| NM_000120 | 2254.937  | 751.746   | NM_016125 | 996.657   | 1784.908  | NM_006593 | 320.86    | 136.589   |
| AF172327  | 43618.215 | 22096.369 | CY3Cy5    | 1852.529  | 117.668   | NM_000376 | 1432.719  | 1288.255  |
| NM_001676 | 2331.159  | 1239.127  | R72122    | 1949.224  | 1346.925  | NM_000475 | 2770.053  | 2787.912  |
| NM_000220 | 1801.803  | 1679.964  | Z35309    | 973.173   | 694.234   | M61872    | 4682.266  | 3374.567  |
| NM_001679 | 19592.32  | 15802.723 | AA700005  | 670.949   | 535.717   | NM_016153 | 238.561   | 185.454   |
| NM_004046 | 65333.656 | 68801.625 | AA292025  | 666.236   | 722.392   | AK027089  | 284.168   | 261.874   |
| NM_004983 | 1182.704  | 1379.557  | AA437226  | 937.961   | 1162.597  | X59845    | 420.743   | 329.048   |
| U09384    | 478.648   | 486.807   | R36143    | 297.345   | 224.488   | NM_006284 | 5999.02   | 5877.138  |
| NM_019884 | 6506.968  | 5602.215  | XM_056359 | 395.728   | 623.476   | U18909    | 640.718   | 767.216   |
| NM_018291 | 5905.881  | 6082.867  | D10353/NM | 3275.031  | 2756.335  | NM_003486 | 1029.039  | 1252.251  |
| NM_005530 | 8645.284  | 8214.738  | M15042    | 2818.649  | 2375.276  | NM_016586 | 4371.274  | 4919.407  |
| NM_006896 | 13749.305 | 13464.333 | AK056843  | 1063.021  | 1225.428  | NM_003597 | 253.916   | 229.274   |
| NM_012200 | 4563.381  | 4639.202  | U49928    | 4412.112  | 4948.264  | NM_002566 | 10459.457 | 11588.629 |
| NM_001724 | 4068.863  | 4237.568  | AK096645  | 16108.653 | 15930.159 | NM_006561 | 2090.264  | 1874.272  |
| NM_000150 | 2390.977  | 1789.818  | NM_019884 | 4372.34   | 5495.159  | NM_017521 | 454.107   | 569.718   |
| AB023152  | 1382.426  | 1351.666  | SR2       | 56606.027 | 49816.906 | AK025200  | 2012.165  | 1915.659  |
| NM_006212 | 3433.855  | 2397.708  | SR4       | 11088.378 | 10597.333 | NM_001383 | 2440.86   | 3298.354  |
| AK022872  | 3242.614  | 3917.822  | SR6       | 2255.489  | 1730.176  | NM_001026 | 39947.305 | 53601.039 |
| AK024272  | 10755.973 | 8887.09   | SR8       | 7915.527  | 20566.34  | NM_005006 | 3604.755  | 4858.289  |
| NM_016381 | 2980.484  | 1709.854  | SR10      | 27160.203 | 8044.332  | NM_014046 | 3849.61   | 4093.646  |
| AL591715  | 828.807   | 505.892   | CY3Cy5    | 4119.617  | 143.908   | L34071    | 1709.58   | 1744.491  |
| BE741525  | 1151.456  | 1162.438  | NM_005291 | 16091.453 | 10585.895 | AK025201  | 3085.384  | 2842.18   |
| BF030555  | 8435.304  | 3927.575  | AF253316  | 396.143   | 348.386   | AK021927  | 355.125   | 445.42    |
| NM_012433 | 13412.284 | 7182.813  | NM_002923 | 1631.459  | 1305.016  | AK022995  | 1350.167  | 1144.983  |
| NM_005605 | 3808.164  | 3261.854  | NM_006794 | 957.503   | 543.275   | NM_006066 | 5571.458  | 4604.859  |
| NM_002576 | 2836.349  | 3166.71   | NM_018653 | 693.742   | 499.028   | AV718258  | 273.139   | 519.85    |
| NM_003582 | 3207.332  | 3568.135  | NM_005386 | 5212.562  | 3862.538  | NM_005165 | 2196.141  | 1789.844  |
| NM_020179 | 10991.459 | 8345.313  | NM_007232 | 20524.777 | 16285.463 | NM_005136 | 9888.774  | 8969.03   |
| NM_004306 | 34711.555 | 29465.158 | NM_003027 | 688.977   | 692.85    | NM_002115 | 7898.485  | 9811.865  |
| NM_001153 | 778.228   | 1300      | NM_002717 | 4919.525  | 4137.108  | AK023162  | 873.729   | 1191.338  |
| NM_006786 | 2314.569  | 1695.113  | NM_014486 | 993.768   | 1288.962  | NM_006396 | 3502.668  | 3766.095  |
| NM_006205 | 3643.071  | 3620.827  | NM_003025 | 5849.191  | 7045.927  | NM_018646 | 1344.661  | 1749.658  |
| NM_004034 | 2772.741  | 2464.637  | NM_020179 | 4757.445  | 5555.632  | NM_018263 | 156.015   | 385.851   |
| NM_000130 | 3689.113  | 2952.48   | NM_004306 | 24514.814 | 26724.986 | NM_013446 | 748.173   | 1064.721  |
| AF193756  | 812.77    | 717.403   | NM_006786 | 907.211   | 1064.437  | NM_004537 | 300.171   | 578.187   |
| NM_004183 | 1367.22   | 1484.853  | NM_006205 | 2072.708  | 2336.834  | AL390134  | 3467.09   | 3323.688  |

|           |           |           |           |           |           |           |           |           |
|-----------|-----------|-----------|-----------|-----------|-----------|-----------|-----------|-----------|
| AI492087  | 2263.725  | 2455.187  | NM_004034 | 2346.921  | 2863.627  | NM_020226 | 1506.49   | 2092.653  |
| R72122    | 3578.67   | 3310.347  | NM_000130 | 3256.227  | 3822.917  | NM_017865 | 1265.932  | 1462.521  |
| Z35309    | 1320.278  | 1462.633  | AI492087  | 1355.521  | 1803.877  | NM_003427 | 872.007   | 873.302   |
| AA292025  | 911.136   | 1066.495  | NM_004193 | 1595.408  | 1230.995  | NM_005920 | 692.656   | 616.841   |
| U49928    | 4673.656  | 3937.779  | NM_002803 | 12021.968 | 8076.572  | Y09321    | 267.092   | 350.075   |
| AK096645  | 20394.533 | 23190.453 | NM_005508 | 4390.857  | 2993.368  | AK001499  | 1391.741  | 1465.831  |
| AK092859  | 1689.037  | 3124.593  | NM_006788 | 898.006   | 681.843   | AK023568  | 274.857   | 425.121   |
| M12807    | 920.519   | 494.723   | NM_016568 | 1201.03   | 739.752   | AK026852  | 933.856   | 767.841   |
| NM_001765 | 7045.574  | 12492.63  | AB033102  | 9377.941  | 7594.046  | AK021629  | 644.071   | 761.511   |
| NM_003361 | 1536.461  | 1220.401  | NM_014774 | 4915.055  | 3814.644  | AL110257  | 28793.947 | 22564.371 |
| NM_012099 | 2088.288  | 2021.324  | NM_014143 | 7546.859  | 7625.376  | AB013384  | 893.198   | 968.273   |
| NM_018684 | 16441.289 | 16715.063 | M55646    | 14121.537 | 13779.57  | AK024824  | 650.936   | 694.088   |
| NM_017983 | 1430.356  | 1914.46   | NM_006112 | 18414.91  | 21934.045 | AK024270  | 872.087   | 1026.535  |
| AF116909  | 1443.912  | 1694.368  | M12807    | 651.91    | 813.128   | AK025569  | 1498.656  | 2167.848  |
| BE906724  | 1712.211  | 1498.162  | NM_001765 | 10571.847 | 6200.033  | AK023060  | 579.543   | 657.32    |
| NM_002283 | 3504.09   | 2544.287  | NM_003361 | 1131.153  | 1207.8    | NM_014870 | 432.217   | 466.103   |
| AJ276095  | 16422.537 | 15350.984 | NM_012099 | 2248.77   | 2255.103  | AK021917  | 298.391   | 570.025   |
| NM_004819 | 4912.604  | 4034.957  | NM_018684 | 12112.942 | 13687.367 | AF052146  | 7827.163  | 10282.61  |
| NM_002923 | 3904.062  | 3949.702  | NM_017983 | 1187.096  | 1046.041  | NM_004870 | 3202.493  | 4884.983  |
| NM_018653 | 1233.426  | 1229.342  | AF116909  | 797.524   | 982.594   | AF143872  | 5265.223  | 7712.134  |
| NM_005388 | 4985.859  | 7803.041  | BE906724  | 866.679   | 948.976   | AK025686  | 595.077   | 665.077   |
| NM_007232 | 13553.083 | 15628.322 | NM_002283 | 3742.211  | 4989.191  | AF143326  | 1129.896  | 1559.208  |
| NM_003025 | 5028.006  | 4873.154  | AJ276095  | 8735.525  | 10918.646 | AL049229  | 1849.239  | 2238.458  |
| NM_001679 | 22450.064 | 20415.902 | NM_004819 | 2055.509  | 2972.695  | NM_018306 | 24141.514 | 21441.057 |
| NM_004046 | 61837.059 | 66336.648 | NM_007184 | 1612.935  | 2321.423  | AK026146  | 2181.971  | 2448.696  |
| U09384    | 717.255   | 716.51    | AF231916  | 2723.242  | 1971.699  | AK023152  | 1599.209  | 1718.349  |
| NM_006860 | 10744.035 | 9931.549  | NM_003501 | 4689.858  | 3171.646  | AK000155  | 1465.413  | 1393.595  |
| NM_004794 | 17428.377 | 18740.559 | AK022654  | 26171.645 | 18409.377 | AL389937  | 2598.986  | 2765.701  |
| NM_004283 | 1984.236  | 2288.614  | BC002905  | 6233.957  | 3798.36   | AK022628  | 30154.264 | 20739.385 |
| NM_004163 | 4911.835  | 4922.082  | NM_018091 | 10060.321 | 6026.005  | AK021737  | 3421.264  | 3145.925  |
| AK026308  | 1601.917  | 1593.28   | NM_001108 | 12680.687 | 4755.966  | AL357454  | 465.343   | 703.365   |
| NM_018485 | 2396.971  | 1059.168  | NM_001637 | 491.679   | 490.317   | AK026295  | 5254.993  | 4044.742  |
| NM_006788 | 966.562   | 1452.985  | NM_016630 | 13804.206 | 10273.904 | AK022346  | 264.171   | 255.082   |
| AK025039  | 604.864   | 1518.41   | NM_014291 | 5664.851  | 5093.5    | AK025007  | 1547.823  | 1720.093  |
| NM_016568 | 1024.614  | 1657.547  | NM_014631 | 501.204   | 482.195   | NM_016486 | 2587.068  | 2252.494  |
| M55646    | 7508.106  | 5327.157  | NM_001089 | 2350.564  | 2622.969  | AL117601  | 301.614   | 203.564   |
| NM_006112 | 19695.205 | 16469.545 | NM_000120 | 1787.256  | 2482.962  | AK026490  | 19221.893 | 18231.088 |
| BE741525  | 1499.624  | 1602.809  | AF172327  | 30387.031 | 39369.953 | AJ227861  | 845.772   | 909.161   |
| BF030555  | 12236.229 | 9758.583  | NM_001676 | 4086.678  | 5398.898  | AJ001020  | 403.874   | 428.733   |
| NM_012433 | 18331.979 | 11807.753 | NM_004519 | 416.761   | 666.274   | AJ001875  | 871.753   | 1228.589  |
| NM_005605 | 5402.83   | 5684.605  | NM_001679 | 15104.769 | 18921.816 | Y10507    | 191.419   | 267.145   |
| NM_002576 | 3705.141  | 3577.915  | U09384    | 446.207   | 941.701   | L77562    | 159.25    | 294.12    |
| NM_003582 | 4082.855  | 4413.908  | NM_006860 | 6311.127  | 6511.9    | Y16183    | 183.438   | 162.172   |
| AF057354  | 1312.38   | 1185.715  | NM_004283 | 2301.967  | 3289.453  | L13433    | 932.368   | 876.246   |
| AF169351  | 9203.377  | 10010.533 | NM_004163 | 13070.189 | 13483.383 | NM_007220 | 527.035   | 474.521   |
| NM_000282 | 7133.92   | 8579.13   | AK026308  | 1736.97   | 2094.099  | NM_017777 | 1070.896  | 861.632   |
| NM_000532 | 35982.031 | 50922.227 | NM_013337 | 1497.816  | 2367.688  | AL109722  | 285.871   | 353.997   |
| BC002905  | 7455.902  | 8458.342  | NM_006899 | 5957.57   | 3802.948  | AK021989  | 240.813   | 209.852   |
| NM_018091 | 11810.514 | 16959.035 | NM_012200 | 2637.898  | 1842.435  | AK023844  | 308.285   | 87.05     |
| NM_001108 | 8924.079  | 20295.521 | NM_001724 | 2771.411  | 1595.133  | AK022298  | 1592.723  | 2240.718  |
| NM_016630 | 15531.71  | 23482.402 | NM_000150 | 2241.404  | 1534.309  | AJ277441  | 6714.456  | 8981.747  |
| NM_014291 | 7478.738  | 8607.027  | AB023152  | 1093.689  | 584.115   | AK022760  | 170.609   | 335.242   |
| AF172327  | 45175.73  | 36043.723 | NM_006212 | 2518.841  | 2043.49   | NM_006057 | 523.058   | 747.951   |

|           |           |           |           |           |           |           |           |           |
|-----------|-----------|-----------|-----------|-----------|-----------|-----------|-----------|-----------|
| NM_001676 | 2865.144  | 2124.834  | AK022872  | 3542.472  | 1837.634  | AK024242  | 7210.567  | 8854.479  |
| AB018338  | 14260.601 | 12029.854 | AK024272  | 8721.192  | 5865.822  | AK024559  | 565.361   | 796.985   |
| D80010    | 4478.595  | 4790.565  | NM_016381 | 1721.816  | 1460.705  | AK024851  | 393.764   | 484.174   |
| NM_004923 | 1882.586  | 1333.501  | AL591715  | 675.102   | 546.209   | AK024943  | 392.542   | 449.343   |
| NM_003971 | 3133.301  | 2933.299  | NM_018042 | 5220.886  | 7959.193  | AK024410  | 257.039   | 224.039   |
| AK026973  | 1417.318  | 2162.755  | BE741525  | 1067.383  | 1595.974  | AK024577  | 444.681   | 437.334   |
| NM_005822 | 1177.575  | 1426.678  | BF030555  | 19391.693 | 23428.324 | AL359943  | 27909.127 | 22086.42  |
| U81002    | 11890.36  | 13811.918 | NM_012433 | 14473.915 | 14001.277 | NM_000534 | 1311.125  | 1539.993  |
| NM_016295 | 21272.715 | 30145.271 | NM_002576 | 1781.587  | 2642.128  | NM_005365 | 644.324   | 532.758   |
| L38517    | 2937.273  | 3445.257  | NM_003582 | 3476.823  | 3350.657  | L10140    | 233.572   | 270.678   |
| NM_018291 | 6892.399  | 9706.577  | M14200    | 66674.953 | 65137.016 | AL133447  | 779.068   | 942.877   |
| AB023152  | 1340.152  | 2737.005  | NM_000282 | 5120.464  | 5385.161  | AB037853  | 8855.052  | 8336.182  |
| NM_006212 | 2829.464  | 3665.852  | NM_000532 | 22061.654 | 25575.686 | D28450    | 41940.934 | 53899.184 |
| AK022872  | 3792.754  | 6238.435  | NM_016341 | 1124.658  | 1379.963  | AK056222  | 936.841   | 1509.19   |
| AK024272  | 8848.26   | 13030.729 | NM_004034 | 2282.661  | 1841.708  | AK002028  | 19354.174 | 22358.984 |
| NM_018042 | 1717.482  | 1340.441  | NM_000130 | 3175.553  | 2700.1    | AL050127  | 982.858   | 1561.22   |
| NM_014944 | 7840.735  | 7364.283  | AI492087  | 1576.446  | 1071.606  | AK024805  | 3850.918  | 3996.685  |
| AF200348  | 7214.287  | 6881.411  | R72122    | 2318.339  | 1511.281  | AK001423  | 941.185   | 1130.503  |
| Y11710    | 1166.059  | 879.591   | Z35309    | 1136.904  | 996.708   | AK024090  | 6102.667  | 5150.45   |
| NM_002650 | 2987.884  | 3674.464  | AA700005  | 747.267   | 591.545   | AL133574  | 626.686   | 769.599   |
| NM_003260 | 11709.262 | 10410.686 | AA292025  | 670.801   | 806.716   | AK021936  | 718.928   | 818.26    |
| AK024071  | 3334.26   | 3776.21   | AA437226  | 1004.229  | 1429.986  | AF147339  | 16882.791 | 15582.438 |
| AF056490  | 2689.091  | 3522.997  | XM_056359 | 1711.189  | 2552.346  | AL390181  | 16087.643 | 15535.822 |
| NM_005539 | 3311.046  | 3616.892  | D10353/NM | 2427.668  | 3344.049  | NM_017914 | 8654.271  | 9188.991  |
| BF341504  | 1727.705  | 1809.329  | M15042    | 2843.256  | 3603.845  | AK024953  | 3217.664  | 6364.258  |
| AB002319  | 2434.09   | 1758.201  | AK056843  | 1227.781  | 1380.326  | AK024276  | 1293.621  | 1636.238  |
| AF039942  | 6239.958  | 3937.314  | U49928    | 7053.265  | 8593.797  | S83374    | 995.602   | 1390.011  |
| J04621    | 1342.313  | 1481.04   | AK096645  | 20337.875 | 22744.176 | AK025784  | 13386.103 | 18025.668 |
| NM_000718 | 3641.504  | 3036.971  | AK092859  | 698.524   | 939.266   | U07199    | 1246.187  | 1649.408  |
| NM_000161 | 6100.433  | 5633.01   | NM_019884 | 3782.888  | 4299.144  | AK023713  | 462.603   | 926.732   |
| NM_002634 | 32025.467 | 27369.205 | NM_018291 | 4906.543  | 5037.186  | X81445    | 430.17    | 493.013   |
| NM_017749 | 4876.161  | 3927.105  | NM_005530 | 4717.327  | 5259.365  | U95091    | 784.42    | 1125.336  |
| NM_007111 | 13537.698 | 11677.48  | AF116909  | 1045.419  | 744.323   | NM_017900 | 14984.619 | 18687.152 |
| NM_002048 | 1137.561  | 1565.428  | BE906724  | 561.146   | 669.729   | S50182    | 515.299   | 1079.147  |
| NM_004702 | 2258.232  | 2817.505  | NM_002283 | 4236.611  | 3212.108  | AL360145  | 540.35    | 674.174   |
| NM_007109 | 4573.988  | 5942.999  | AJ276095  | 10319.212 | 7736.816  | Y12016    | 686.389   | 947.15    |
| AK023404  | 1331.63   | 1153.404  | NM_004819 | 2490.05   | 2114.096  | NM_001178 | 948.778   | 539.59    |
| NM_013239 | 3060.073  | 2942.173  | NM_007184 | 2031.541  | 1755.665  | AK023696  | 1856.551  | 1546.735  |
| NM_001789 | 4443.24   | 3740.175  | NM_005291 | 18539.162 | 15465.342 | NM_000704 | 731.623   | 725.411   |
| NM_016004 | 7145.619  | 5491.395  | AF253316  | 605.203   | 503.969   | NM_015987 | 324.354   | 231.625   |
| S70385    | 8440.585  | 7103.297  | NM_002923 | 1620.971  | 1979.901  | NM_019605 | 676.104   | 509.737   |
| NM_001941 | 876.31    | 1244.248  | NM_006794 | 795.522   | 771.632   | NM_015369 | 258.904   | 210.298   |
| NM_004086 | 10046.562 | 7987.9    | NM_018653 | 580.253   | 923.32    | Z49090    | 2636.979  | 2681.399  |
| AL050199  | 1730.82   | 1584.023  | NM_002717 | 5548.023  | 5047.64   | AK021592  | 2820.708  | 3445.757  |
| NM_001086 | 3060.019  | 3314.196  | NM_014486 | 1664.649  | 1770.783  | AK025467  | 1466.724  | 2042.593  |
| NM_014670 | 1643.33   | 2029.437  | NM_003025 | 7544.431  | 9663.938  | AF147309  | 351.887   | 251.789   |
| NM_019048 | 10003.462 | 11240.429 | U52051    | 783.921   | 974.585   | AK026593  | 4159.597  | 8438.169  |
| NM_001040 | 3873.833  | 3788.204  | NM_020179 | 5522.621  | 7293.967  | L37700    | 526.691   | 767.14    |
| AF279698  | 3620.834  | 3181.707  | NM_004306 | 32127.881 | 39415.457 | NM_017665 | 1673.407  | 2577.509  |
| NM_019849 | 2449.895  | 2065.855  | NM_006786 | 1280.551  | 1725.074  | AB007976  | 147.649   | 328.492   |
| NM_007317 | 6414.161  | 8700.244  | NM_006205 | 1918.229  | 2206.85   | AK024819  | 318.365   | 383.422   |
| AB037826  | 532.587   | 1737.112  | NM_006860 | 6832.603  | 4919.181  | AF052106  | 1247.489  | 1770.232  |
| AK021466  | 2070.11   | 2011.33   | NM_004794 | 12379.957 | 8986.298  | AK000441  | 377.738   | 796.812   |



|           |           |           |           |           |           |           |           |           |
|-----------|-----------|-----------|-----------|-----------|-----------|-----------|-----------|-----------|
| NM_00495E | 860.996   | 692.297   | NM_004283 | 950.788   | 931.68    | AK022391  | 703.716   | 974.775   |
| AK026022  | 42362.938 | 37036.602 | NM_004163 | 11982.819 | 7910.4    | NM_01612E | 447.369   | 567.468   |
| NM_00319E | 1969.761  | 2252.786  | AK026308  | 1838.854  | 1644.313  | CY3Cy5    | 613.878   | 144.879   |
| NM_00307C | 4628.433  | 3773.068  | NM_013337 | 1731.013  | 1648.23   | R72122    | 989.502   | 564.872   |
| AL122101  | 2366.034  | 2759.064  | NM_004193 | 1779.215  | 1711.976  | Z35309    | 340.996   | 334.763   |
| NM_00478C | 1352.938  | 1809.594  | NM_002803 | 12918.113 | 11451.531 | AA437226  | 656.31    | 316.492   |
| NM_01621E | 4812.31   | 5790.77   | NM_00550E | 3856.6    | 4406.261  | D10353/NM | 1117.741  | 918.253   |
| AK001649  | 1255.989  | 1512.651  | NM_01848E | 5327.027  | 4282.897  | M15042    | 1504.318  | 1332.389  |
| NM_01663E | 14161.97  | 11473.822 | NM_00678E | 1110.349  | 1117.892  | U49928    | 2068.768  | 1681.961  |
| AB018274  | 12362.219 | 11108.433 | AK025039  | 877.16    | 732.435   | AK096645  | 7820.037  | 7233.655  |
| NM_005871 | 11808.794 | 10713.742 | NM_014774 | 5955.367  | 5863.235  | AK092859  | 309.998   | 366.283   |
| NM_007042 | 2916.969  | 3122.807  | NM_014143 | 9511.342  | 10357.281 | NM_019884 | 1452.899  | 1404.257  |
| NM_016333 | 11655.458 | 10941.017 | M55646    | 27695.229 | 24994.273 | SR2       | 24830.518 | 22053.402 |
| BE875028  | 2971.918  | 3626.952  | NM_006112 | 19478.191 | 19868.143 | SR4       | 3705.658  | 3258.283  |
| AK000511  | 4014.986  | 5435.787  | M12807    | 938.54    | 574.747   | SR6       | 623.011   | 594.206   |
| AF121255  | 2164.895  | 3176.953  | NM_00176E | 11018.52  | 6537.182  | SR8       | 3064.229  | 11362.999 |
| NM_005494 | 6203.579  | 5856.845  | NM_003361 | 1668.848  | 1798.336  | SR10      | 14993.828 | 8266.94   |
| NM_01794E | 1345.229  | 1543.005  | NM_01209E | 2762.801  | 2584.876  | CY3Cy5    | 1085.36   | 125.459   |
| NM_004953 | 3607.874  | 4667.974  | NM_018684 | 13117.501 | 16070.785 | NM_005291 | 5343.656  | 3111.391  |
| NM_00552E | 5097.774  | 4380.068  | NM_017983 | 975.423   | 947.059   | NM_002923 | 961.157   | 374.703   |
| AK022842  | 1788.366  | 1254.21   | AF057354  | 581.841   | 587.205   | NM_00538E | 1730.569  | 1653.475  |
| NM_00700E | 32422.066 | 26703.314 | AF169351  | 8130.39   | 6251.922  | NM_007232 | 5624.113  | 5132.717  |
| NM_01775E | 15649.982 | 13161.114 | M14200    | 56658.906 | 45434.656 | NM_002717 | 2117.719  | 2371.644  |
| NM_005793 | 9452.244  | 9216.695  | NM_000282 | 4961.119  | 3854.68   | NM_00302E | 2468.08   | 2353.95   |
| U77088    | 1737.535  | 1182.794  | NM_000532 | 20980.783 | 17052.357 | NM_02017E | 2163.208  | 1730.992  |
| NM_006721 | 17705.16  | 19940.396 | NM_016341 | 1044.636  | 1049.432  | NM_00430E | 8302.765  | 6785.642  |
| NM_016282 | 6428.582  | 8137.262  | AF231916  | 3334.654  | 3143.957  | AI492087  | 741.908   | 1253.493  |
| NM_00276E | 9510.736  | 9950.501  | NM_003501 | 4673.078  | 4751.789  | NM_004193 | 805.053   | 383.773   |
| NM_00190E | 2765.374  | 3290.669  | AK022654  | 23960.713 | 34632.633 | NM_002803 | 5774.445  | 3721.043  |
| AF292100  | 4250.214  | 3805.975  | BC002905  | 6798.175  | 13467.26  | NM_00550E | 2149.558  | 1375.019  |
| NM_003434 | 60707.402 | 64797.023 | NM_018091 | 10500.87  | 14105.308 | NM_00678E | 283.696   | 148.569   |
| NM_018181 | 906.902   | 899.568   | NM_001108 | 13168.743 | 9036.51   | NM_01656E | 359.546   | 326.482   |
| AF024698  | 58485.793 | 60092.508 | NM_014631 | 692.732   | 723.05    | AB033102  | 2759.237  | 2342.826  |
| BE904617  | 6315.1    | 6319.924  | NM_00108E | 4253.652  | 5419.9    | NM_014774 | 1532.267  | 1813.287  |
| AK024495  | 1010.688  | 1050.238  | NM_00012C | 2602.282  | 2788.485  | NM_014143 | 4235.921  | 3789.406  |
| AF024694  | 2514.514  | 2179.155  | AF172327  | 35134.852 | 34091.852 | M55646    | 4108.599  | 4113.689  |
| AF091081  | 9385.589  | 11744.15  | NM_00167E | 4769.251  | 5158.344  | NM_006112 | 8098.668  | 8129.058  |
| AK001758  | 4614.149  | 3811.365  | NM_00167E | 14622.253 | 17104.904 | NM_00176E | 2364.918  | 3889.705  |
| AF086325  | 1107.785  | 979.135   | U09384    | 442.211   | 897.192   | NM_003361 | 403.896   | 349.065   |
| NM_00492E | 886.443   | 882.171   | NM_019884 | 3573.09   | 2924.8    | NM_01209E | 936.425   | 987.187   |
| AF147401  | 1064.264  | 1158.745  | NM_018291 | 4706.439  | 3627.253  | NM_018684 | 3021.652  | 2233.461  |
| AF075022  | 1396.668  | 1001.111  | NM_00553C | 4482.295  | 5157.029  | NM_00481E | 1348.777  | 1868.109  |
| AF075060  | 3421.464  | 3924.049  | NM_00689E | 6324.094  | 6058.941  | NM_007184 | 1023.661  | 1316.084  |
| AF147436  | 832.45    | 874.127   | NM_01220C | 2805.94   | 2906.519  | AF231916  | 700.581   | 323.855   |
| AK021441  | 2244.317  | 2660.358  | NM_001724 | 2692.286  | 2724.309  | NM_003501 | 2063.259  | 1209.891  |
| AK026018  | 615.316   | 1391.429  | NM_00015C | 2937.864  | 4129.6    | AK022654  | 6679.25   | 3804.519  |
| AF085846  | 5123.593  | 5662.12   | AB023152  | 1199.697  | 1254.925  | BC002905  | 2435.865  | 1383.943  |
| AK023901  | 5388.591  | 5126.586  | NM_006212 | 3236.552  | 3423.677  | NM_018091 | 4778.93   | 3243.696  |
| AL109705  | 1571.524  | 2175.705  | AK022872  | 3993.555  | 4061.07   | NM_00110E | 3535.926  | 4422.827  |
| AF147392  | 742.206   | 894.282   | AK024272  | 10886.189 | 11470.344 | NM_01663C | 6323.884  | 5785.093  |
| AF088057  | 3989.064  | 4629.91   | NM_016381 | 1944.14   | 2136.65   | NM_014291 | 2411.453  | 1856.528  |
| AF086255  | 9865.598  | 9727.679  | NM_018042 | 2585.076  | 3060.243  | NM_00108E | 852.601   | 925.06    |
| AK022660  | 950.732   | 1004.073  | BE741525  | 1034.17   | 954.355   | NM_00012C | 991.681   | 607.111   |

|           |           |           |           |           |           |           |           |           |
|-----------|-----------|-----------|-----------|-----------|-----------|-----------|-----------|-----------|
| AF088051  | 665.209   | 671.599   | BF030555  | 14841.002 | 16832.869 | AF172327  | 18968.779 | 22557.172 |
| AK023883  | 510.528   | 636.945   | NM_012433 | 12031.95  | 11590.716 | NM_001676 | 1538.152  | 968.801   |
| AF086366  | 1023.415  | 1833.991  | NM_002576 | 1581.868  | 2314.296  | NM_001679 | 5725.837  | 5345.563  |
| AF086360  | 2106.761  | 2358.723  | NM_003582 | 3128.659  | 3380.376  | NM_006860 | 1329.109  | 1139.979  |
| AF086436  | 1312.255  | 1769.19   | NM_020179 | 5124.548  | 4625.063  | NM_004794 | 2168.512  | 2527.622  |
| AF087993  | 3684.859  | 4297.724  | NM_004306 | 26517.963 | 23058.498 | NM_006895 | 3195.847  | 1663.49   |
| AF035282  | 1366.953  | 1256.805  | NM_006786 | 1066.807  | 1240.703  | NM_012200 | 1214.8    | 936.539   |
| AK021966  | 4906.069  | 4718.862  | AI492087  | 1634.855  | 1443.902  | NM_001724 | 1328.075  | 1147.063  |
| AB018292  | 4142.016  | 4136.758  | R72122    | 2543.888  | 2508.396  | NM_000150 | 888.621   | 474.82    |
| AF147302  | 1361.15   | 1523.439  | Z35309    | 1270.359  | 1559.187  | AB023152  | 412.208   | 274.325   |
| AF085929  | 1219.897  | 1386.548  | AA700005  | 717.664   | 668.868   | NM_006212 | 1237.432  | 751.573   |
| AK001126  | 1699.258  | 1698.551  | AA292025  | 999.563   | 796.662   | AK022872  | 1338.954  | 1113.542  |
| AF085976  | 6684.739  | 6287.761  | D10353/NM | 3162.251  | 3504.461  | AK024272  | 2839.612  | 2924.586  |
| AL133025  | 1154.668  | 1624.778  | M15042    | 2676.114  | 2701.378  | NM_016381 | 900.581   | 831.482   |
| AL137402  | 14313.373 | 15016.577 | AK056843  | 1055.344  | 1073.746  | NM_018042 | 784.875   | 799.284   |
| AL137617  | 1636.162  | 2197.517  | U49928    | 5412.951  | 6062.007  | BE741525  | 456.483   | 557.89    |
| AL359568  | 31456.275 | 30085.475 | AK096645  | 17150.432 | 20682.586 | BF030555  | 6884.717  | 5601.023  |
| AL133564  | 4515.084  | 4958.569  | AK092859  | 717.691   | 884.066   | NM_012433 | 5246.375  | 3477.864  |
| AL137428  | 1853.383  | 2249.292  | M12807    | 368.301   | 395.972   | NM_002576 | 446.829   | 444.403   |
| AL157462  | 1965.736  | 2247.713  | NM_001765 | 9641.261  | 4155.491  | NM_003582 | 617.775   | 611.44    |
| AL359602  | 5841.667  | 5516.808  | NM_003361 | 1532.096  | 1137.241  | AF169351  | 1748.937  | 1714.336  |
| NM_018190 | 57334.66  | 59960.289 | NM_012099 | 2726.464  | 2064.21   | M14200    | 21736.008 | 22646.096 |
| AF086054  | 1332.436  | 1605.526  | NM_018684 | 14318.632 | 13729.457 | NM_000532 | 4803.395  | 8085.638  |
| AK022259  | 42758.41  | 42330.188 | AF116909  | 1064.229  | 1117.432  | NM_004034 | 1112.197  | 627.418   |
| AK022461  | 649.765   | 765.992   | BE906724  | 962.046   | 832.255   | NM_000130 | 1268.394  | 569.403   |
| NM_016010 | 4803.583  | 5939.936  | NM_002283 | 3884.109  | 3198.496  | AI492087  | 734.576   | 612.628   |
| AF070647  | 46791.668 | 45518.824 | AJ276095  | 9493.547  | 7262.068  | R72122    | 1047.806  | 825.025   |
| AF116649  | 776.56    | 945.349   | NM_004819 | 2598.428  | 2089.206  | Z35309    | 433.472   | 271.37    |
| AF174394  | 1922.879  | 2347.339  | NM_007184 | 2034.586  | 1971.322  | AA292025  | 359.58    | 349.574   |
| AK021876  | 8388.917  | 9583.189  | NM_005291 | 24337.369 | 18347.816 | AA437226  | 534.25    | 348.489   |
| AK022017  | 1317.046  | 1521.611  | AF253316  | 614.072   | 564.44    | D10353/NM | 1331.046  | 1265.164  |
| AK022160  | 2310.697  | 2452.583  | NM_002923 | 1939.677  | 1948.949  | M15042    | 1041.517  | 1201.755  |
| AK022295  | 1050.996  | 1151.932  | NM_006794 | 1110.566  | 1159.453  | AK056843  | 328.766   | 258.647   |
| AK021935  | 3682.256  | 5665.572  | NM_007232 | 26162.09  | 27793.924 | U49928    | 1834.772  | 1520.7    |
| AK022337  | 1411.013  | 1678.233  | NM_003027 | 500.039   | 913.873   | AK096645  | 6121.844  | 6424.691  |
| AK026847  | 1910.859  | 3011.429  | NM_002717 | 4690.092  | 4202.92   | NM_019884 | 931.46    | 2020.482  |
| AL359560  | 557.522   | 1030.176  | NM_003025 | 6498.364  | 7816.27   | AF116909  | 288.602   | 254.67    |
| AK026891  | 1355.269  | 1289.054  | NM_001679 | 14945.936 | 13316.605 | BE906724  | 368.407   | 190.804   |
| M90355    | 58958.18  | 64222.422 | NM_004046 | 65323.832 | 59749     | NM_002283 | 1551.873  | 993.097   |
| AK022495  | 8650.104  | 8335.627  | NM_004983 | 1080.364  | 652.791   | AJ276095  | 4621.07   | 3525.364  |
| AK021632  | 1164.304  | 1208.206  | U09384    | 580.458   | 702.488   | NM_004819 | 1319.331  | 902.207   |
| AK023143  | 517.395   | 917.584   | NM_006860 | 6781.377  | 5114.496  | NM_007184 | 1088.418  | 699.741   |
| AK026373  | 30196.787 | 26196.842 | NM_004794 | 13624.328 | 11258.403 | NM_005291 | 6578.526  | 5379.104  |
| AK021581  | 6981.613  | 10751.32  | NM_004283 | 865.813   | 947.655   | NM_002923 | 721.41    | 547.578   |
| AK021744  | 1183.802  | 1471.784  | NM_004163 | 11252.478 | 7793.081  | NM_005388 | 2133.015  | 2743.204  |
| NM_018430 | 20773.234 | 25089.639 | AK026308  | 1738.595  | 1114.042  | NM_007232 | 7905.466  | 8210.008  |
| AL110200  | 2228.52   | 4783.197  | NM_013337 | 1721.8    | 1464.292  | NM_002717 | 1614.969  | 1921.822  |
| AK022308  | 1741.871  | 3420.616  | NM_004193 | 1739.452  | 1501.197  | NM_003025 | 2305.99   | 1773.767  |
| AL133640  | 2033.392  | 2316.177  | NM_002803 | 14261.423 | 11851.927 | NM_020179 | 1397.49   | 1148.739  |
| AJ012502  | 15171.021 | 18229.918 | NM_005508 | 4096.284  | 4379.162  | NM_004306 | 7693.686  | 8394.287  |
| AK024170  | 709.385   | 1343.875  | NM_018485 | 795.02    | 732.595   | NM_006860 | 2924.532  | 1995.729  |
| AK021722  | 1307.912  | 2853.073  | NM_006788 | 933.48    | 984.139   | NM_004794 | 5729.127  | 4033.749  |
| NM_000681 | 146.844   | 949.025   | NM_016568 | 1500.175  | 1041.525  | NM_004283 | 438.721   | 366.967   |

|           |           |           |           |           |           |           |           |           |
|-----------|-----------|-----------|-----------|-----------|-----------|-----------|-----------|-----------|
| AF147445  | 2028.124  | 2316.277  | AB033102  | 11233.801 | 10461.854 | NM_004163 | 3283.009  | 2161.678  |
| Y10508    | 9915.352  | 9947.921  | NM_014774 | 5180.678  | 4594.898  | AK026308  | 781.464   | 574.182   |
| NM_005182 | 60478.918 | 63215.391 | NM_014143 | 8151.017  | 8079.754  | NM_013337 | 886.782   | 875.382   |
| D17074    | 1973.036  | 1972.288  | M55646    | 28730.988 | 27937.277 | NM_004193 | 884.606   | 587.145   |
| AF039944  | 8065.75   | 8276.654  | NM_006112 | 18851.793 | 22932.717 | NM_002803 | 5903.578  | 5953.777  |
| AL133618  | 1661.901  | 2119.612  | BE741525  | 1068.092  | 827.234   | NM_005508 | 1929.595  | 1603.681  |
| AF230314  | 543.296   | 1070.081  | BF030555  | 17998.031 | 15363.758 | NM_006788 | 452.547   | 436.444   |
| AK001086  | 1426.579  | 1376.67   | NM_012433 | 13108.981 | 9284.332  | NM_016568 | 435.872   | 380.987   |
| AJ131610  | 4413.715  | 4811.333  | NM_005605 | 5060.354  | 4462.324  | AB033102  | 3025.91   | 3201.357  |
| AF119872  | 9521.673  | 10309.409 | NM_002576 | 1643.244  | 1476.722  | NM_014774 | 1286.848  | 1606.566  |
| X99687    | 1418.01   | 1912.301  | NM_003582 | 2953.607  | 2052.885  | NM_014143 | 3977.186  | 3586.164  |
| AK023255  | 64652.027 | 69162.102 | AF057354  | 657.674   | 641.169   | M12807    | 457.162   | 412.108   |
| AK024185  | 1440.766  | 2024.611  | AF169351  | 9440.735  | 7897.856  | NM_001765 | 1483.351  | 2910.087  |
| NM_015417 | 846.499   | 1285.368  | NM_000282 | 4398.643  | 3905.829  | NM_003361 | 775.327   | 1440.412  |
| AK026101  | 5187.158  | 4982.451  | NM_000532 | 19790.531 | 15237.657 | NM_012095 | 596.238   | 679.68    |
| AK022194  | 23655.977 | 25351.758 | NM_016341 | 1030.817  | 816.996   | AF057354  | 323.454   | 227.227   |
| AF085963  | 1915.192  | 2814.6    | AF231916  | 3580.24   | 3063.84   | AF169351  | 3843.658  | 2154.03   |
| AF131851  | 959.14    | 1250.564  | NM_003501 | 4373.079  | 4101.414  | M14200    | 35258.563 | 19633.299 |
| AK021436  | 1078.918  | 1165.779  | NM_018091 | 8410.663  | 9729.75   | NM_000282 | 2525.728  | 1638.705  |
| U58664    | 1460.463  | 996.965   | NM_001108 | 10816.205 | 6425.129  | NM_000532 | 12323.401 | 8862.019  |
| AF085937  | 833.088   | 1177.484  | NM_001637 | 540.679   | 696.196   | NM_016341 | 502.608   | 239.236   |
| AL137569  | 1867.947  | 1971.619  | NM_016630 | 13948.374 | 10304.505 | AF231916  | 1237.143  | 1046.938  |
| AK021920  | 2969.133  | 3766.914  | NM_014291 | 6343.768  | 6640.693  | NM_003501 | 2462.839  | 2200.086  |
| NM_003378 | 20925.834 | 22024.67  | NM_014631 | 632.997   | 703.6     | AK022654  | 7463.678  | 6730.122  |
| AL110194  | 14772.264 | 15648.282 | NM_001089 | 2928.27   | 3493.758  | BC002905  | 2034.447  | 1763.693  |
| AF138860  | 1513.601  | 2070.006  | NM_000120 | 2509.545  | 3331.496  | NM_018091 | 4667.563  | 4753.554  |
| NM_006687 | 2370.717  | 2832.853  | AF172327  | 33587.328 | 38494.309 | NM_001108 | 3575.426  | 7177.423  |
| NM_013301 | 879.406   | 591.632   | NM_001676 | 6100.776  | 8211.191  | NM_016630 | 6782.911  | 7032.963  |
| NM_017673 | 966.162   | 1553.844  | AB018338  | 18190.686 | 19769.824 | NM_014291 | 2738.419  | 2526.515  |
| AB046857  | 1253.224  | 1661.873  | D80010    | 2775.807  | 2316.344  | NM_014631 | 224.955   | 230.248   |
| AK024408  | 8656.46   | 9999.825  | NM_004923 | 954.403   | 1057.184  | NM_001089 | 1164.216  | 998.031   |
| AF270490  | 1231.429  | 1497.747  | NM_003971 | 1520.195  | 1454.676  | NM_000120 | 1406.07   | 1044.42   |
| L19364    | 3541.442  | 5773.438  | AK026973  | 1191.537  | 519.357   | AF172327  | 16331.028 | 15568.688 |
| NM_005390 | 2137.322  | 2270.64   | NM_005822 | 897.881   | 758.992   | NM_001676 | 1890.446  | 1309.292  |
| CY3Cy5    | 3469.942  | 192.69    | U81002    | 5531.418  | 4305.463  | NM_001679 | 5104.541  | 4478.702  |
| Z48054    | 1155.88   | 1215.794  | NM_016299 | 14915.953 | 10902.774 | NM_004046 | 61227.734 | 79339.797 |
| H90415    | 2029.446  | 1811.597  | L38517    | 4777.022  | 3924.091  | NM_019884 | 2148.662  | 1213.214  |
| AA676470  | 6265.249  | 4566.161  | NM_018291 | 4331.443  | 3515.094  | NM_018291 | 2944.234  | 1940.309  |
| M38258    | 620.957   | 432.177   | NM_005530 | 4792.377  | 3546.764  | NM_005530 | 3097.733  | 2276.466  |
| AA457155  | 4144.46   | 3791.598  | NM_006899 | 6045.108  | 5110.344  | NM_006899 | 3798.27   | 3370.763  |
| BM014365  | 819.2     | 667.792   | NM_012200 | 2722.241  | 2396.595  | NM_012200 | 1344.893  | 1510.099  |
| H91842    | 447.633   | 285.298   | NM_001724 | 2284.903  | 2189.034  | NM_001724 | 1104.632  | 1563.346  |
| U78045    | 464.823   | 312.812   | NM_000150 | 2201.892  | 2203.15   | NM_000150 | 1500.293  | 993.007   |
| AA878561  | 47692.012 | 59961.758 | AB023152  | 970.309   | 743.182   | AB023152  | 260.752   | 621.431   |
| AI538525  | 696.648   | 427.32    | NM_006212 | 2339.714  | 2275.586  | NM_006212 | 1369.657  | 1458.716  |
| NM_000941 | 1361.155  | 1026.774  | AK022872  | 3317.851  | 2698.305  | AK022872  | 1533.125  | 2239.109  |
| SR1       | 53876.984 | 63029.91  | AK024272  | 9770.281  | 7672.868  | AK024272  | 3163.328  | 3815.273  |
| SR3       | 42518.645 | 22979.385 | NM_016381 | 1723.671  | 1815.947  | NM_016381 | 864.986   | 879.239   |
| SR5       | 5524.298  | 3666.168  | AL591715  | 764.769   | 745.421   | AL591715  | 232.893   | 394.241   |
| SR7       | 5282.464  | 28413.92  | NM_018042 | 4509.748  | 5323.285  | BF030555  | 8327.982  | 7403.256  |
| SR9       | 16313.954 | 1791.172  | NM_014944 | 6216.296  | 6564.491  | NM_012433 | 5100.937  | 3738.638  |
| CY3Cy5    | 2566.082  | 179.578   | AF200348  | 3366.503  | 3636.762  | NM_005605 | 2197.545  | 1782.783  |
| U62858    | 574.276   | 435.722   | Y11710    | 725.115   | 559.676   | NM_002576 | 678.601   | 566.583   |

|           |           |           |           |           |           |           |           |           |
|-----------|-----------|-----------|-----------|-----------|-----------|-----------|-----------|-----------|
| NM_001781 | 1980.188  | 2005.32   | NM_002650 | 1391.445  | 1161.897  | NM_003582 | 1221.575  | 1367.728  |
| NM_014432 | 1045.519  | 1110.466  | NM_003260 | 13494.396 | 20929.127 | NM_020179 | 3499.451  | 1838.74   |
| NM_001558 | 1182.312  | 478.082   | AK024071  | 1121.08   | 1740.101  | NM_004306 | 16207.709 | 10897.236 |
| U96173    | 1443.021  | 1229.888  | AF056490  | 1537.748  | 1444.378  | NM_006786 | 744.955   | 568.798   |
| NM_018941 | 1746.503  | 968.1     | NM_005539 | 988.865   | 943.705   | NM_006205 | 748.642   | 594.632   |
| NM_020241 | 649.989   | 628.698   | NM_005541 | 1427.87   | 1115.991  | NM_004034 | 1400.918  | 946.685   |
| NM_001980 | 1176.538  | 1064.76   | AB002319  | 1265.813  | 1292.497  | NM_000130 | 1866.071  | 1351.773  |
| NM_012471 | 480.967   | 235.394   | AF039942  | 3160.593  | 3640.774  | AI492087  | 763.65    | 1167.09   |
| NM_001321 | 1780.769  | 1012.97   | NM_004421 | 1258.991  | 1958.743  | R72122    | 1154.171  | 1587.945  |
| AB018264  | 1737.726  | 1158.282  | AB046863  | 8108.876  | 10297.145 | Z35309    | 431.781   | 551.202   |
| NM_006911 | 1309.239  | 1153.909  | M62403    | 8915.535  | 8474.468  | AA292025  | 349.217   | 372.924   |
| U92544    | 761.661   | 486.495   | NM_017883 | 2610.489  | 2595.921  | AA437226  | 666.979   | 353.388   |
| NM_019644 | 342.858   | 188.996   | AK025131  | 3958.076  | 4997.166  | D10353/NM | 1436.917  | 1269.906  |
| NM_006791 | 2565.436  | 1193.339  | NM_000754 | 15402.689 | 14449.966 | AK056843  | 431.789   | 384.893   |
| AJ278348  | 14455.547 | 7606.801  | NM_014619 | 1137.731  | 1004.701  | U49928    | 2173.018  | 2072.671  |
| AK023106  | 945.464   | 1187.175  | NM_005629 | 9308.513  | 9582.887  | AK096645  | 6965.004  | 8279.488  |
| NM_016730 | 4766.88   | 3403.176  | J04621    | 724.012   | 941.745   | AK092859  | 275.31    | 175.64    |
| AL035297  | 1240.894  | 999.3     | NM_000718 | 1871.177  | 2579.947  | M12807    | 386.848   | 304.502   |
| NM_004408 | 1058.179  | 1299.208  | NM_000161 | 7001.395  | 7129.675  | NM_001765 | 3038.583  | 3509.846  |
| AJ131244  | 1137.623  | 886.39    | NM_002634 | 20136.225 | 19970.555 | NM_003361 | 568.883   | 346.379   |
| NM_002532 | 3256.706  | 3034.201  | NM_017749 | 2727.612  | 2982.036  | NM_012099 | 1460.045  | 980.652   |
| NM_012388 | 2120.692  | 2238.933  | NM_001445 | 1106.759  | 427.263   | NM_018684 | 7998.372  | 5147.146  |
| NM_001671 | 1037.441  | 835.905   | NM_002006 | 21072.813 | 15655.479 | NM_017983 | 484.432   | 322.722   |
| NM_019843 | 2043.876  | 1574.056  | NM_007111 | 6194.766  | 6011.801  | AF116909  | 569.009   | 414.957   |
| NM_016192 | 3173.792  | 2487.444  | NM_004702 | 1399.16   | 963.023   | BE906724  | 435.706   | 317.078   |
| BE878426  | 51791.926 | 49631.109 | NM_007109 | 2104.485  | 1649.021  | NM_002283 | 1773.297  | 1571.215  |
| NM_001745 | 14741.404 | 12967.685 | AK023404  | 1987.934  | 1813.982  | AJ276095  | 4409.389  | 4668.301  |
| NM_003825 | 5845.215  | 5410.968  | NM_013239 | 1512.891  | 1295.688  | NM_004819 | 1304.692  | 1217.507  |
| AK025006  | 12600.572 | 9336.218  | NM_001789 | 2497.276  | 1896.927  | NM_007184 | 1175.703  | 1661.431  |
| AF218014  | 5876.528  | 2830.84   | NM_016004 | 4695.798  | 4004.133  | NM_005291 | 7388.698  | 8917.364  |
| NM_006678 | 1304.063  | 833.369   | NM_002655 | 1038.654  | 1491.247  | NM_002923 | 810.323   | 799.94    |
| AY007729  | 15219.749 | 9022.173  | AB028955  | 11569.651 | 11101.697 | NM_006794 | 186.322   | 196.213   |
| NM_014424 | 493.563   | 297.777   | U66879    | 8431.365  | 8859.543  | NM_001679 | 8668.577  | 4828.358  |
| AF159092  | 1617.321  | 1016.845  | NM_016022 | 4188.793  | 4049.031  | NM_004046 | 55589.41  | 57788.633 |
| BC007318  | 7974.667  | 4441.183  | NM_004874 | 2365.079  | 1815.21   | NM_004983 | 394.098   | 260.136   |
| M36693    | 2005.992  | 1386.52   | NM_014204 | 1166.236  | 1114.719  | U09384    | 475.157   | 168.049   |
| NM_016292 | 5938.129  | 2794.795  | S70385    | 6521.248  | 7315.201  | NM_006860 | 3497.166  | 2937.741  |
| NM_002601 | 6824.486  | 3917.505  | M34671    | 8106.841  | 7490.87   | NM_004794 | 6408.775  | 7219.187  |
| NM_005898 | 7887.701  | 6538.847  | NM_018509 | 6922.739  | 8117.756  | NM_004283 | 450.82    | 458.438   |
| NM_002889 | 9092.242  | 6867.923  | NM_004086 | 6634.651  | 11850.306 | NM_004163 | 2896.261  | 3510.019  |
| AF078866  | 3700.304  | 4187.874  | AL050199  | 941.463   | 1122.178  | AK026308  | 514.757   | 612.29    |
| BF311880  | 720.211   | 747.255   | AF176706  | 1455.993  | 1593.827  | NM_013337 | 862.993   | 961.021   |
| NM_016075 | 617.403   | 813.665   | NM_001086 | 1918.325  | 1763.162  | NM_004193 | 765.357   | 830.723   |
| NM_001360 | 26439.154 | 15819.099 | NM_014670 | 2366.719  | 2503.616  | NM_002803 | 5674.654  | 7475.108  |
| AK026656  | 1328.612  | 997.739   | NM_019048 | 6277.634  | 6787.233  | NM_005508 | 2324.839  | 2349.243  |
| AJ276207  | 10497.812 | 9231.104  | NM_001040 | 2645.093  | 2775.635  | NM_016568 | 368.527   | 420.737   |
| AB011131  | 8939.867  | 5517.798  | AF279698  | 3108.105  | 4054.146  | AB033102  | 3625.304  | 3568.582  |
| NM_000751 | 3240.749  | 1637.976  | NM_019849 | 1921.57   | 1838.793  | NM_014774 | 1450.531  | 1734.638  |
| NM_014849 | 4011.596  | 2435.364  | AB032996  | 39686.461 | 30472.066 | NM_006112 | 6460.071  | 6936.378  |
| NM_001042 | 4321.704  | 2325.811  | AB040881  | 3771.743  | 2728.274  | BE741525  | 683.523   | 423.675   |
| NM_012229 | 3385.638  | 2482.521  | AY007121  | 1070.819  | 1125.351  | BF030555  | 10100.026 | 5382.853  |
| NM_005071 | 429.688   | 304.728   | NM_003372 | 14958.049 | 10519.996 | NM_012433 | 6934.923  | 2940.692  |
| AB023147  | 2921.443  | 1783.205  | NM_007317 | 5076.916  | 4480.664  | NM_005605 | 3140.278  | 2074.658  |

|           |           |           |           |           |           |           |           |           |
|-----------|-----------|-----------|-----------|-----------|-----------|-----------|-----------|-----------|
| NM_016615 | 1908.702  | 1120.343  | AB037826  | 862.783   | 268.026   | NM_002576 | 1517.912  | 852.543   |
| NM_005630 | 1193      | 825.015   | AK021466  | 1643.165  | 1605.81   | NM_003582 | 1951.366  | 1468.7    |
| NM_012201 | 3455.592  | 2922.616  | NM_006443 | 11966.773 | 14812.643 | AF057354  | 293.855   | 384.771   |
| AB046774  | 720.814   | 1161.139  | NM_004959 | 792.77    | 575.957   | AF169351  | 3962.729  | 3478.391  |
| AK022385  | 8890.419  | 8066.901  | AK026022  | 31576.936 | 27565.232 | NM_000282 | 2436.153  | 2860.365  |
| NM_002775 | 597.682   | 239.789   | NM_003199 | 1540.462  | 1124.817  | NM_000532 | 10225.549 | 11525.596 |
| AK024584  | 3211.817  | 2456.811  | NM_002938 | 6966.666  | 5498      | NM_016341 | 403.795   | 742.58    |
| NM_003504 | 9814.56   | 9965.463  | AK023652  | 8168.458  | 7485.069  | AF231916  | 1180.203  | 1272.011  |
| NM_013298 | 3695.728  | 3489.972  | AF099032  | 1630.7    | 1340.265  | NM_003501 | 2393.946  | 2558.302  |
| NM_007267 | 2513.404  | 1776.923  | NM_003070 | 2823.732  | 3351.185  | AK022654  | 8164.046  | 8758.847  |
| AK022830  | 681.99    | 201.702   | AL122101  | 3071.551  | 4248.94   | BC002905  | 2416.751  | 2291.185  |
| Z36816    | 2952.858  | 2831.924  | NM_004780 | 642.729   | 723.789   | NM_018091 | 5015.111  | 5073.994  |
| NM_005865 | 2643.014  | 1978.075  | NM_016216 | 3432.429  | 2934.672  | NM_001108 | 3829.976  | 7229.429  |
| NM_006413 | 11883.506 | 11466.021 | AK001649  | 1036.192  | 599.471   | NM_016630 | 7011.577  | 8175.581  |
| NM_017684 | 937.763   | 919.337   | NM_016638 | 7359.73   | 6983.282  | NM_014291 | 3178.885  | 3122.614  |
| AK025542  | 1251.755  | 889.979   | AB018274  | 5901.474  | 6381.659  | NM_014631 | 363.016   | 244.592   |
| AF207547  | 425.529   | 168.506   | NM_005871 | 7625.653  | 6119.847  | AF172327  | 11780.628 | 12784.871 |
| NM_002768 | 6338.043  | 3717.854  | NM_007042 | 2317.83   | 1731.725  | NM_001676 | 1816.703  | 1688.584  |
| NM_003691 | 4452.792  | 1999.182  | NM_016333 | 8723.418  | 5524.299  | AB018338  | 8905.492  | 4844.425  |
| NM_002950 | 20304.891 | 11289.886 | BE875028  | 2232.001  | 1697.543  | D80010    | 1405.919  | 977.216   |
| NM_002318 | 1368.533  | 819.137   | AK000511  | 3096.081  | 2256.254  | NM_004923 | 534.351   | 347.887   |
| NM_001433 | 440.491   | 283.28    | AF121255  | 1889.083  | 1633.973  | NM_003971 | 791.937   | 308.78    |
| NM_003134 | 50170.617 | 44821.074 | NM_005494 | 3343.805  | 3023.832  | AK026973  | 486.02    | 424.773   |
| NM_004314 | 2993.817  | 1831.399  | NM_017946 | 686.106   | 638.918   | NM_005822 | 414.409   | 302.041   |
| NM_018247 | 6274.749  | 4690.005  | NM_004953 | 2365.228  | 2361.174  | U81002    | 3090.966  | 2732.292  |
| NM_017979 | 4006.593  | 2214.408  | AL049682  | 1198.689  | 1148.148  | NM_016298 | 7290.977  | 7427.244  |
| NM_006791 | 2047.173  | 1385.326  | NM_005528 | 4260.388  | 5081.535  | L38517    | 1857.641  | 1933.22   |
| AJ278348  | 12050.98  | 11548.171 | AK022842  | 1350.809  | 1779.356  | NM_018291 | 2332.174  | 2915.24   |
| L07738    | 390.842   | 261.354   | NM_007006 | 21383.559 | 26545.299 | NM_005530 | 2687.678  | 2723.055  |
| Z48054    | 1805.41   | 2112.261  | AL137346  | 549.064   | 861.26    | NM_006898 | 3974.721  | 3886.538  |
| H90415    | 2085.93   | 1947.935  | NM_017756 | 37017.75  | 35736.703 | NM_012200 | 1357.863  | 1578.396  |
| AA676470  | 4835.352  | 4769.534  | NM_005793 | 4984.336  | 4541.9    | NM_001724 | 1122.537  | 1438.448  |
| M38258    | 749.463   | 552.351   | NM_004901 | 2007.617  | 1852.194  | NM_000150 | 1716.725  | 1443.115  |
| AA457155  | 4317.976  | 3325.866  | U77088    | 783.341   | 932.01    | AB023152  | 359.861   | 458.488   |
| BM014365  | 958.753   | 624.28    | NM_006721 | 9571.926  | 9381.232  | NM_006212 | 1488.836  | 1268.019  |
| H91842    | 329.395   | 165.134   | NM_016282 | 5271.695  | 4622.325  | AK022872  | 1429.614  | 1657.166  |
| U78045    | 451.009   | 316.716   | NM_002765 | 5594.251  | 5273.584  | AK024272  | 3845.935  | 4883.763  |
| AA878561  | 55484.906 | 59074.375 | NM_001905 | 1635.629  | 2613.063  | NM_016381 | 1040.28   | 1034.792  |
| AI538525  | 671.261   | 442.055   | AF292100  | 4038.22   | 6849.353  | NM_018042 | 1215.071  | 1301.001  |
| NM_000941 | 1479.649  | 927.808   | NM_003434 | 49932.684 | 50326.719 | NM_014944 | 3196.834  | 1711.569  |
| AF222980  | 561.477   | 393.495   | AF024698  | 59405.281 | 58846.336 | AF200348  | 2635.05   | 1172.84   |
| AK026758  | 2909.98   | 1240.646  | BE904617  | 12643.665 | 11730.616 | NM_002650 | 788.553   | 703.782   |
| NM_014424 | 425.958   | 356.308   | AK024495  | 1150.306  | 1331.385  | NM_003260 | 8611.313  | 4377.974  |
| AF159092  | 1036.361  | 944.384   | AF024694  | 2161.167  | 1959.3    | AK024071  | 935.818   | 861.642   |
| BC007318  | 4050.934  | 3435.191  | AF091081  | 5819.179  | 4482.348  | AF056490  | 830.712   | 858.802   |
| M36693    | 1327.004  | 1833.212  | AK001758  | 2804.912  | 2522.376  | NM_005538 | 531.691   | 556.061   |
| NM_016292 | 5275.107  | 4889.506  | AF086325  | 2061.056  | 2482.63   | NM_005541 | 653.605   | 578.216   |
| NM_002601 | 6872.529  | 6382.206  | NM_004928 | 752.778   | 843.464   | AB002319  | 925.467   | 1074.837  |
| U62858    | 901.324   | 986.574   | AF147401  | 1321.225  | 1310.896  | AF039942  | 2255.297  | 1717.118  |
| NM_001781 | 3151.361  | 2897.602  | AJ001904  | 1869.897  | 1810.647  | NM_004421 | 990.028   | 1036.666  |
| NM_014432 | 1636.708  | 1694.235  | AF075022  | 2251.419  | 2834.878  | AB046863  | 5086.976  | 4811.542  |
| NM_001558 | 1509.341  | 539.506   | AF075060  | 3990.405  | 2242.924  | M62403    | 3678.512  | 2936.605  |
| NM_002530 | 518.061   | 679.13    | AB002438  | 416.447   | 672.254   | NM_017883 | 1231.595  | 1253.473  |

|           |           |           |           |           |           |           |           |           |
|-----------|-----------|-----------|-----------|-----------|-----------|-----------|-----------|-----------|
| U96173    | 1448.591  | 1110.102  | AF147436  | 1119.458  | 1365.035  | AK025131  | 1369.932  | 1595.79   |
| NM_018941 | 1315.764  | 660.712   | AK021441  | 1216.497  | 1578.926  | NM_000754 | 8958.452  | 10070.775 |
| NM_020241 | 897.253   | 498.669   | AF085846  | 4227.257  | 6342.079  | NM_005629 | 4714.388  | 4909.417  |
| NM_001980 | 1381.811  | 837.056   | AK023901  | 7968.562  | 8979.821  | NM_000718 | 1218.26   | 1021.106  |
| NM_012471 | 765.743   | 340.264   | AL109705  | 1006.949  | 1218.372  | NM_000161 | 2937.017  | 3415.729  |
| NM_001321 | 1998.63   | 1202.882  | AF147392  | 648.801   | 727.446   | NM_002634 | 7914.725  | 5357.723  |
| AB018264  | 1659.608  | 859.756   | AF088057  | 5503.428  | 4985.708  | NM_017749 | 1452.468  | 850.268   |
| NM_006911 | 1323.783  | 571.366   | AF086255  | 11243.877 | 16629.359 | NM_001972 | 250.193   | 229.517   |
| U92544    | 837.058   | 391.207   | AF088051  | 1046.806  | 896.899   | NM_001445 | 536.284   | 511.413   |
| NM_012229 | 3903.809  | 3842.034  | AF086366  | 466.282   | 413.425   | NM_002006 | 12401.584 | 11221.935 |
| NM_005071 | 526.426   | 453.683   | AF086360  | 2721.084  | 2449.539  | NM_007111 | 4666.78   | 3506.896  |
| AB023147  | 2986.998  | 2541.415  | AF087993  | 2602.192  | 2599.029  | NM_002048 | 425.797   | 420.007   |
| NM_016615 | 2087.077  | 2220.389  | AF035282  | 1352.888  | 1287.386  | NM_004702 | 723.913   | 891.39    |
| NM_005630 | 1284.017  | 1305.914  | AK021966  | 3940.41   | 5343.461  | NM_007109 | 1110.43   | 1356.439  |
| AK023106  | 1877.23   | 1551.991  | AF085971  | 1527.129  | 1452.137  | AK023404  | 1324.836  | 1130.677  |
| NM_016730 | 8290.032  | 7109.29   | AF147302  | 2630.735  | 2092.878  | NM_013239 | 773.806   | 1115.944  |
| AL035297  | 1659.909  | 1187.486  | AF085929  | 3060.533  | 3135.196  | NM_001789 | 1255.436  | 1470.494  |
| NM_004408 | 1423.763  | 1257.688  | AK001126  | 3041.048  | 2712.263  | NM_016004 | 2706.293  | 2849.21   |
| AJ131244  | 1323.578  | 1442.077  | AF085976  | 7022.474  | 6685.775  | NM_002655 | 867.085   | 950.969   |
| NM_002532 | 4382.397  | 3727.825  | AF075104  | 5658.422  | 7226.403  | AB028955  | 4503.39   | 4581.488  |
| NM_012388 | 3616.692  | 3655.017  | AK021724  | 658.925   | 731.56    | U66879    | 4333.231  | 3588.451  |
| NM_016651 | 699.489   | 896.509   | AL133025  | 1193.085  | 1474.009  | NM_016022 | 2417.561  | 2085.035  |
| NM_001671 | 928.239   | 622.102   | AL137402  | 10516.069 | 18448.539 | NM_004874 | 1343.049  | 1278.175  |
| NM_019843 | 1989.259  | 1711.359  | AL137617  | 3647.156  | 5684.12   | NM_014204 | 574.158   | 579.747   |
| NM_016192 | 2845.505  | 1917.72   | AL359568  | 25615.619 | 37778.77  | S70385    | 4114.452  | 2855.803  |
| BE878426  | 59990.328 | 47954.066 | AL133564  | 10144.826 | 15995.651 | M34671    | 4435.976  | 4743.627  |
| NM_001745 | 15258.242 | 10480.035 | AL137428  | 1570.4    | 1882.683  | NM_018509 | 3905.602  | 3882.839  |
| NM_003825 | 5831.562  | 5240.944  | AL157462  | 1628.013  | 2649.438  | NM_004086 | 4034.348  | 3980.161  |
| AK025006  | 14154.785 | 9768.321  | AL359602  | 8118.255  | 7685.716  | AL050199  | 408.709   | 314.106   |
| AF218014  | 6580.366  | 3079.57   | NM_018190 | 38740.219 | 45579.711 | AF176706  | 872.638   | 787.426   |
| NM_006678 | 1179.435  | 841.099   | AF086054  | 729.019   | 679.108   | NM_001086 | 1133.023  | 1349.321  |
| AY007729  | 15938.475 | 7624.129  | AK022259  | 50849.672 | 45825.477 | NM_014670 | 1534.136  | 1755.582  |
| NM_001433 | 533.589   | 708.741   | AK022461  | 872.097   | 1172.995  | NM_019048 | 3002.732  | 3495.261  |
| NM_003134 | 55125.547 | 58712.32  | NM_016010 | 4091.931  | 6040.239  | NM_001040 | 1034.676  | 1298.897  |
| NM_004314 | 3293.046  | 3281.864  | AK023783  | 708.283   | 686.744   | AF279698  | 1314.035  | 1558.47   |
| NM_018247 | 6002.142  | 7852.287  | AF070647  | 31011.436 | 28741.629 | NM_019849 | 900.97    | 940.744   |
| NM_017979 | 4822.703  | 4450.926  | AF116649  | 1654.213  | 1402.966  | NM_000049 | 245.053   | 214.223   |
| NM_005899 | 13691.949 | 10347.167 | AF174394  | 2935.713  | 2929.988  | AB032996  | 16058.655 | 16369.955 |
| NM_002889 | 17408.113 | 13598.132 | AF083121  | 882.52    | 1032.991  | AB040881  | 2792.801  | 2819.153  |
| AF078866  | 6405.007  | 5683.03   | AF144054  | 677.483   | 671.069   | AY007121  | 1118.482  | 1032.846  |
| BF311880  | 1498.178  | 1400.84   | AK025924  | 763.209   | 1380.868  | NM_003372 | 6743.476  | 9688.882  |
| NM_016075 | 940.648   | 1030.673  | AK021876  | 18824.844 | 26518.25  | NM_007317 | 3126.517  | 3396.537  |
| NM_001360 | 26595.336 | 14012.171 | AK022017  | 1115.072  | 2363.255  | AB037826  | 196.718   | 1043.319  |
| AK026656  | 2160.22   | 1667.32   | AK022160  | 4021.062  | 5631.656  | AK021466  | 1565.424  | 1802.218  |
| AJ276207  | 11523.101 | 8296.71   | AK022295  | 1103.251  | 1886.648  | Z36796    | 56396.488 | 41295.102 |
| AB011131  | 7671.045  | 3784.006  | AK021935  | 2760.371  | 3342.188  | NM_006443 | 9293.892  | 8808.972  |
| NM_000749 | 1262.868  | 974.008   | AK022187  | 7405.47   | 10616.405 | NM_004959 | 396.316   | 177.602   |
| NM_000751 | 2478.453  | 1458.725  | AK022337  | 1701.059  | 2623.572  | AK026022  | 16156.942 | 10717.662 |
| NM_014849 | 4146.072  | 2451.437  | AK026847  | 955.239   | 866.638   | NM_003199 | 719.701   | 425.114   |
| NM_001042 | 4743.977  | 2873.83   | AK023048  | 1002.75   | 937.61    | NM_002938 | 3926.859  | 2598.184  |
| NM_000941 | 1233.344  | 1078.83   | AK026891  | 2348.448  | 1748.074  | AK023652  | 3160.954  | 2705.969  |
| AF222980  | 691.7     | 876.863   | AK025573  | 806.496   | 1031.522  | AF099032  | 698.655   | 770.925   |
| AK026758  | 2981.312  | 2645.75   | AK024595  | 926.783   | 1220.252  | NM_003070 | 1844.382  | 1675.323  |

|           |           |           |           |           |           |           |           |           |
|-----------|-----------|-----------|-----------|-----------|-----------|-----------|-----------|-----------|
| NM_012201 | 4803.694  | 3253.849  | AL137562  | 5326.501  | 5276.098  | AL122101  | 1839.775  | 2111.186  |
| AB046774  | 1655.267  | 1729.395  | M90355    | 60755.102 | 56646.078 | NM_00478C | 297.093   | 289.112   |
| AK022385  | 11650.083 | 10389.977 | AK022495  | 5073.178  | 4482.718  | NM_01621E | 2221.932  | 2778.527  |
| NM_002775 | 759.975   | 534.656   | AK021632  | 1185.93   | 961.607   | AK001649  | 403.209   | 621.297   |
| AK024584  | 5031.644  | 3262.214  | AK023143  | 444.113   | 568.594   | NM_01663E | 4656.114  | 4522.512  |
| NM_003504 | 11087.364 | 11987.953 | AK026373  | 15734.467 | 16708.639 | AB018274  | 3154.578  | 3179.457  |
| NM_01329E | 3789.358  | 4771.216  | AK021581  | 5640.422  | 6642.922  | NM_005871 | 4074.325  | 3668.654  |
| NM_007267 | 3516.687  | 2874.708  | AK021744  | 1289.535  | 1086.416  | NM_007042 | 1177.055  | 1135.942  |
| AK022830  | 933.433   | 485.705   | NM_01843C | 19096.545 | 14695.696 | NM_016333 | 5840.134  | 6179.302  |
| Z36816    | 2977.985  | 2385.481  | AL110200  | 1136.402  | 1009.561  | BE875028  | 1648.503  | 1756.618  |
| NM_00586E | 2885.399  | 1854.187  | AK022308  | 1009.546  | 732.449   | AK000511  | 2052.542  | 2333.46   |
| NM_006413 | 11280.343 | 8887.856  | NM_003667 | 521.259   | 694.827   | AF121255  | 1169.885  | 2061.563  |
| NM_017684 | 458.047   | 417.025   | AL133640  | 2130.691  | 3025.648  | NM_005494 | 2337.697  | 2642.682  |
| AK025542  | 1173.7    | 1007.37   | AJ012502  | 10893.827 | 10278.128 | NM_01794E | 499.936   | 685.224   |
| AF207547  | 467.12    | 234.516   | AK021722  | 1829.964  | 902.15    | NM_004953 | 1357.024  | 1516.462  |
| NM_00276E | 6681.82   | 3915.047  | NM_000681 | 664.577   | 739.226   | AL049682  | 751.994   | 568.617   |
| NM_003691 | 4003.381  | 2920.661  | AF147445  | 2716.922  | 2998.569  | AK022842  | 615.914   | 264.638   |
| NM_00295C | 20210.408 | 10421.751 | Y10508    | 14338.915 | 10761.329 | NM_00700E | 11404.746 | 6891.858  |
| NM_00231E | 1198.728  | 980.405   | NM_005182 | 64211.402 | 63911.703 | NM_01775E | 14833.18  | 9624.578  |
| NM_001321 | 1842.39   | 2104.795  | D17074    | 1302.201  | 2115.49   | NM_005793 | 2462.284  | 1952.866  |
| AB018264  | 2237.329  | 2375.924  | AF039944  | 6195.666  | 9406.331  | NM_004901 | 977.282   | 649.324   |
| NM_006911 | 1092.758  | 1096.346  | AJ276252  | 1281.821  | 2134.627  | U77088    | 599.36    | 522.393   |
| U92544    | 1011.962  | 984.795   | AK021716  | 9196.529  | 13700.189 | NM_006721 | 6046.25   | 6469.127  |
| NM_006791 | 2872.563  | 1882.51   | AK025035  | 10594.33  | 12420.725 | NM_016282 | 2491.229  | 3057.292  |
| AJ278348  | 15028.592 | 14908.965 | AK002085  | 8261.189  | 9980.987  | NM_00276E | 3750.547  | 4973.858  |
| NM_015872 | 1972.877  | 1727.917  | AF086200  | 465.963   | 956.899   | NM_00190E | 850.534   | 1124.124  |
| L07738    | 382.317   | 448.487   | AL133618  | 7048.639  | 11518.136 | AF292100  | 2143.088  | 2785.463  |
| Z48054    | 2590.262  | 3310.771  | AF230314  | 710.539   | 585.808   | NM_003434 | 35041.531 | 45520.902 |
| H90415    | 2012.49   | 2266.296  | AK001086  | 727.773   | 1385.162  | AF024698  | 49593.227 | 64525.133 |
| AA676470  | 6366.644  | 4469.301  | AJ131610  | 4174.976  | 5025.188  | BE904617  | 11774.393 | 12828.124 |
| M38258    | 655.675   | 519.584   | AF119872  | 6178.818  | 6412.56   | AK024495  | 726.963   | 843.776   |
| AA457155  | 2758.488  | 2127.538  | AK023255  | 49755.953 | 36604.238 | AF024694  | 1416.619  | 1746.921  |
| BM014365  | 720.68    | 655.384   | NM_002622 | 44195.133 | 34249.664 | AF091081  | 5722.389  | 7596.396  |
| U78045    | 461.95    | 466.837   | AK024185  | 1835.375  | 1893.232  | AK001758  | 2494.524  | 3080.231  |
| AA878561  | 51604.523 | 60314.73  | NM_015417 | 979.278   | 1096.652  | AF086325  | 794.827   | 1004.657  |
| AI538525  | 649.332   | 390.503   | AK026101  | 4732.856  | 5085.979  | AF147401  | 572.688   | 360.51    |
| NM_00382E | 5672.089  | 11619.698 | AK022194  | 29634.031 | 29349.578 | AJ001904  | 584.729   | 297.843   |
| AK025006  | 12873.149 | 18663.098 | AF085963  | 2218.552  | 1637.582  | AF075022  | 885.819   | 484.887   |
| AF218014  | 6276.766  | 5793.292  | AF131851  | 834.027   | 970.434   | AF075060  | 1513.54   | 1172.353  |
| NM_00667E | 1341.789  | 1465.527  | AK021436  | 1905.487  | 2012.397  | AK021441  | 853.535   | 866.314   |
| AY007729  | 20849.41  | 16240.98  | U58664    | 1683.888  | 1736.647  | AK026018  | 239.578   | 289.463   |
| NM_014424 | 508.774   | 383.663   | AF085937  | 599.541   | 1037.232  | AF085846  | 1732.344  | 2697.573  |
| AF159092  | 1175.693  | 1317.46   | AL137569  | 6602.439  | 9742.753  | AK023901  | 3143.739  | 3719.598  |
| BC007318  | 8663.571  | 7908.352  | AK021920  | 5027.026  | 5797.247  | AL109705  | 652.263   | 723.72    |
| M36693    | 2056.791  | 2080.691  | AL049415  | 2554.277  | 3499.554  | AF147392  | 400.651   | 700.934   |
| NM_016292 | 6104.358  | 5006.327  | AK022375  | 1465.642  | 1444.496  | AF088057  | 2692.479  | 4278.241  |
| NM_002601 | 7250.85   | 5460.548  | AI065056  | 584.472   | 834.099   | AF086255  | 7439.121  | 7267.983  |
| U62858    | 1233.713  | 995.677   | NM_00337E | 53953.813 | 56219.422 | AK022660  | 319.041   | 566.438   |
| NM_001781 | 3017.036  | 3565.185  | AL110194  | 11172.785 | 10133.842 | AF088051  | 871.323   | 910.772   |
| NM_014432 | 1236.709  | 1273.349  | AF138860  | 1939.577  | 1758.217  | AF086260  | 603.289   | 862.368   |
| NM_00155E | 1402.073  | 593.091   | NM_006687 | 2053.881  | 2636.845  | AF086366  | 471.782   | 530.974   |
| U96173    | 1454.205  | 1278.464  | NM_013301 | 622.627   | 611.611   | AF086360  | 3228.157  | 4009.377  |
| NM_018941 | 1103.062  | 1107.359  | NM_017673 | 1011.497  | 989.344   | AF086436  | 531.811   | 788.133   |

|           |           |           |           |           |           |           |           |           |
|-----------|-----------|-----------|-----------|-----------|-----------|-----------|-----------|-----------|
| NM_020241 | 805.456   | 519.729   | AB046857  | 886.669   | 818.963   | AF087993  | 1891.425  | 2511.947  |
| NM_001980 | 996.636   | 749.935   | AK024408  | 13729.342 | 10022.536 | AF035282  | 379.614   | 612.336   |
| NM_000751 | 3356.447  | 4733.93   | AF086307  | 17167.221 | 15844.708 | AK021966  | 1723.855  | 1987.892  |
| NM_014849 | 3265.481  | 3909.975  | L19364    | 2575.853  | 2234.351  | AB018292  | 3856.767  | 4069.659  |
| NM_001042 | 4297.385  | 3853.009  | NM_005390 | 3406.766  | 3640.354  | AF085971  | 747.176   | 462.016   |
| NM_012229 | 3348.511  | 3043.278  | CY3Cy5    | 5272.532  | 147.725   | AF147302  | 1303.378  | 824.366   |
| NM_005071 | 672.872   | 1032.424  | L07738    | 998.478   | 964.841   | AF085929  | 1026.436  | 850.266   |
| AB023147  | 3020.429  | 3233.717  | Z48054    | 930.568   | 1293.862  | AK001126  | 1222.645  | 817.531   |
| NM_016615 | 2093.805  | 1642.144  | H90415    | 2888.639  | 3945.988  | AF085976  | 2429.609  | 2037.763  |
| NM_005630 | 1134.101  | 1203.368  | AA676470  | 19700.414 | 22265.922 | AF075104  | 2763.257  | 2404.597  |
| AK023106  | 1491.081  | 1722.431  | M38258    | 1161.035  | 1149.149  | AL133025  | 466.023   | 824.774   |
| NM_016730 | 5233.601  | 4725.26   | AA457155  | 27839.498 | 30718.898 | AL137402  | 5678.261  | 7083.056  |
| AL035297  | 1772.188  | 1471.175  | BM014365  | 1484.289  | 2074.224  | AL137617  | 1215.385  | 1493.37   |
| NM_004408 | 1485.942  | 1615.49   | H91842    | 620.469   | 648.892   | AL359568  | 13675.663 | 18312.305 |
| AJ131244  | 1296.662  | 1346.151  | U78045    | 1946.676  | 1922.35   | AL133564  | 4778.796  | 6962.778  |
| NM_002532 | 3502.62   | 3555.304  | AA878561  | 60641.547 | 57305.176 | AL137428  | 773.519   | 891.047   |
| NM_012388 | 2437.568  | 2399.491  | BF688309  | 1202.483  | 1010.201  | AL157462  | 706.757   | 905.945   |
| NM_001671 | 973.7     | 807.966   | AI538525  | 829.493   | 914.548   | AL359602  | 3331.677  | 3539.063  |
| NM_019843 | 2456.442  | 1461.57   | NM_000623 | 518.902   | 505.75    | NM_018190 | 22803.672 | 24332.961 |
| NM_016192 | 2699.521  | 2276.447  | NM_000941 | 1428.167  | 1539.328  | AF086054  | 511.819   | 597.576   |
| BE878426  | 54686.359 | 50816.027 | SR1       | 59683.871 | 55516.867 | AF086089  | 343.953   | 404.546   |
| NM_001745 | 14485.165 | 10521.089 | SR3       | 56297.613 | 37971.375 | AK022461  | 372.037   | 439.28    |
| AK025542  | 1770.47   | 2541.688  | SR5       | 9135.832  | 6211.49   | NM_016010 | 2374.612  | 2873.123  |
| AF207547  | 624.026   | 654.331   | SR7       | 5625.456  | 34299.102 | AF070647  | 15488.64  | 9509.259  |
| NM_002768 | 6374.866  | 7454.039  | SR9       | 20882.539 | 2697.397  | AF116649  | 479.509   | 353.501   |
| NM_003691 | 3847.696  | 4562.236  | CY3Cy5    | 5133.85   | 145.569   | AF174394  | 987.833   | 853.301   |
| NM_002950 | 19367.729 | 18275.711 | U62858    | 1147.421  | 1519.645  | AK021876  | 6154.505  | 7333.818  |
| NM_002318 | 1513.325  | 1993.138  | NM_001781 | 2299.044  | 3377.025  | AK022017  | 825.65    | 1255.004  |
| NM_003134 | 52310.691 | 57763.816 | NM_014432 | 1694.933  | 1537.653  | AK022160  | 1471.945  | 3307.995  |
| NM_004314 | 3582.745  | 3242.885  | NM_001558 | 2495.226  | 2536.39   | AK022295  | 412.921   | 403.615   |
| NM_018247 | 6910.549  | 8512.821  | NM_002530 | 596.237   | 973.247   | AK021935  | 1186.83   | 1558.624  |
| NM_017979 | 5720.112  | 5583.774  | U96173    | 2736.559  | 2691.281  | AK022048  | 438.154   | 886.324   |
| NM_005898 | 14259.939 | 11810.468 | NM_018941 | 2072.95   | 2073.053  | AK022187  | 6819.991  | 10106.155 |
| NM_002889 | 22113.436 | 18379.203 | NM_020241 | 1474.99   | 1343.272  | AK022337  | 655.863   | 834.937   |
| AF078866  | 7183.474  | 7359.979  | BE730585  | 1063.999  | 846.179   | AK026847  | 770.725   | 1046.378  |
| BF311880  | 1738.494  | 1271.224  | NM_001980 | 1171.23   | 1336.69   | AK023048  | 527.706   | 780.783   |
| NM_016075 | 700.78    | 683.292   | NM_005954 | 496.658   | 588.81    | AK026891  | 1117.896  | 1380.69   |
| NM_001360 | 21908.451 | 13876.019 | NM_012471 | 769.765   | 496.998   | AL137562  | 2230.971  | 1669.291  |
| AK026656  | 2044.576  | 1673.62   | NM_001321 | 6219.934  | 5754.543  | M90355    | 38412.188 | 24442.945 |
| AJ276207  | 10815.971 | 8347.115  | AB018264  | 6581.299  | 7035.578  | AK022495  | 2399.367  | 1212.475  |
| AB011131  | 9091.474  | 4617.723  | NM_006911 | 836.702   | 712.624   | AK021632  | 261.988   | 417.548   |
| AF164794  | 10364.55  | 11809.641 | U92544    | 2846.712  | 3407.061  | AK023143  | 202.272   | 159.756   |
| NM_001173 | 1408.12   | 1638.463  | NM_019644 | 591.669   | 341.612   | AK026373  | 9476.942  | 7129.489  |
| AB020656  | 1714.192  | 2817.248  | NM_006791 | 2208.146  | 2575.867  | AK021581  | 2382.125  | 3484.444  |
| AK023648  | 1972.985  | 2261.992  | AJ278348  | 16536.283 | 14311.08  | NM_018430 | 10471.338 | 13352.525 |
| NM_000412 | 1194.112  | 1797.053  | AI285199  | 3115.469  | 2426.204  | AL110200  | 786.38    | 1013.825  |
| AF077033  | 2492.405  | 4294.174  | AK023106  | 1246.282  | 1448.476  | AL133640  | 960.953   | 1150.262  |
| NM_017788 | 481.084   | 416.526   | NM_016730 | 36853.332 | 42748.695 | AJ012502  | 5739.866  | 4276.686  |
| NM_004991 | 551.357   | 675.584   | AL035297  | 2078.889  | 2376.425  | AK021722  | 362.049   | 399.728   |
| AF222980  | 846.94    | 938.596   | AJ131244  | 1759.357  | 1865.942  | AF147445  | 846.793   | 843.287   |
| AK026758  | 3380.348  | 3064.958  | NM_002532 | 3949.066  | 5124.956  | Y10508    | 4488.998  | 4127.08   |
| NM_012201 | 5776.371  | 5294.149  | NM_012388 | 4489.365  | 4061.501  | NM_005182 | 43210.66  | 37873.934 |
| AB046774  | 2060.942  | 2151.604  | NM_016651 | 1445.505  | 1327.554  | D17074    | 716.38    | 1004.801  |



|           |           |           |           |           |           |           |           |           |
|-----------|-----------|-----------|-----------|-----------|-----------|-----------|-----------|-----------|
| AK022385  | 19294.031 | 35256.965 | NM_001671 | 1047.13   | 1797.873  | AF039944  | 3862.115  | 4506.569  |
| NM_002775 | 810.558   | 668.648   | NM_019843 | 4449.781  | 5423.766  | AJ276252  | 633.676   | 841.62    |
| AK024584  | 4858.989  | 3235.672  | NM_016192 | 5098.686  | 5697.596  | AK021716  | 3457.258  | 3858.821  |
| NM_003504 | 8782.457  | 8434.854  | BE878426  | 55413.449 | 52578.813 | AK025035  | 5765.979  | 7286.639  |
| NM_013298 | 3523.287  | 3606.039  | NM_001745 | 17148.98  | 15449.891 | AK002085  | 4441.619  | 5849.493  |
| NM_007267 | 3577.671  | 2847.912  | NM_003825 | 7272.8    | 8415.133  | AL133618  | 2169.788  | 2481.364  |
| AK022830  | 544.785   | 376.68    | AK025006  | 17145.289 | 13859.908 | AF230314  | 365.737   | 503.749   |
| Z36816    | 2416.875  | 2024.352  | AF218014  | 9862.872  | 8940.076  | AF119872  | 5101.018  | 8628.575  |
| NM_005865 | 2870.527  | 1953.37   | NM_006678 | 3990.841  | 4107.824  | X99687    | 437.585   | 593.391   |
| NM_006413 | 8972.715  | 8920.75   | AY007729  | 41186.781 | 46235.918 | AK023255  | 29494.045 | 30334.199 |
| NM_017684 | 704.158   | 645.641   | AF159092  | 2279.917  | 1862.232  | NM_002622 | 19672.875 | 20355.701 |
| NM_000216 | 682.476   | 774.018   | BC007318  | 10549.564 | 8108.498  | AK024185  | 1029.432  | 1284.88   |
| AF135960  | 823.04    | 992.524   | M36693    | 2484.392  | 2201.405  | NM_015417 | 496.678   | 795.901   |
| NM_014216 | 11160.197 | 13167.118 | NM_016292 | 7988.158  | 7708.89   | AK026101  | 2282.845  | 1616.137  |
| NM_003010 | 1811.087  | 2808.102  | NM_002601 | 7060.125  | 4723.625  | AK022194  | 9143.386  | 6204.207  |
| NM_006871 | 487.803   | 485.621   | NM_005898 | 10221.678 | 13084.117 | AF085963  | 905.2     | 478.298   |
| NM_019074 | 3398.492  | 3816.872  | NM_002889 | 35993.828 | 44966.113 | AF131851  | 337.281   | 242.165   |
| NM_018494 | 10266.481 | 10245.278 | NM_000078 | 374.328   | 390.804   | AK021436  | 1002.12   | 655.428   |
| AK000006  | 670.845   | 580.674   | AB011131  | 16872.248 | 17581.859 | U58664    | 437.615   | 375.859   |
| NM_001115 | 1254.96   | 1052.048  | NM_000749 | 703.817   | 822.442   | AL137569  | 1407.527  | 1633.676  |
| NM_014921 | 1764.816  | 1528.676  | NM_000751 | 8115.752  | 8483.568  | AK021920  | 2426.072  | 2522.098  |
| NM_016581 | 46607.039 | 40245.695 | NM_014849 | 7482.22   | 7134.312  | AL049415  | 1347.333  | 1042.622  |
| NM_013255 | 2370.068  | 2649.422  | NM_001042 | 5988.723  | 6008.046  | AK022375  | 782.149   | 861.958   |
| NM_007183 | 589.547   | 823.147   | NM_012229 | 3563.211  | 3201.108  | NM_003378 | 34667.859 | 37375.863 |
| AJ238243  | 9150.417  | 12712.134 | NM_005071 | 644.687   | 771.308   | AL110194  | 6660.959  | 7541.943  |
| J05046    | 11141.439 | 9277.675  | AB023147  | 3774.351  | 3491.996  | AF138860  | 1065.748  | 1172.09   |
| NM_012318 | 3519.151  | 3422.01   | NM_016615 | 12666.594 | 10428.052 | AB046857  | 442.08    | 753.393   |
| NM_002751 | 2285.018  | 2943.904  | NM_005630 | 1759.133  | 1173.203  | AK024408  | 6873.718  | 8780.007  |
| NM_004291 | 802.707   | 448.872   | NM_012201 | 2915.827  | 3756.95   | AF086307  | 8822.265  | 11519.955 |
| NM_003816 | 5161.103  | 5290.911  | AB046774  | 1257.807  | 1565.596  | L19364    | 1857.786  | 2079.79   |
| NM_004912 | 2917.785  | 2661.983  | AK024584  | 7744.186  | 5360.584  | NM_005390 | 1884.235  | 1839.278  |
| U79304    | 12379.87  | 7869.706  | NM_007267 | 3730.873  | 5608.335  | CY3Cy5    | 1572.545  | 116.156   |
| NM_016267 | 1573.614  | 1176.019  | NM_006413 | 16963.426 | 15368.311 | L07738    | 324.342   | 272.037   |
| NM_004671 | 4209.777  | 3124.645  | NM_017684 | 685.794   | 746.274   | Z48054    | 661.905   | 654.231   |
| NM_005180 | 8934.461  | 9864.393  | AK025542  | 7447.592  | 5726.734  | H90415    | 1121.487  | 1241.893  |
| NM_006526 | 4059.736  | 5466.631  | AF207547  | 997.434   | 1080.813  | AA676470  | 5211.928  | 4642.415  |
| NM_007045 | 2407.112  | 3148.43   | NM_002768 | 7588.217  | 8345.125  | AA457155  | 3998.135  | 2928.931  |
| NM_003627 | 4083.132  | 5115.915  | NM_003691 | 4237.882  | 5088.295  | U78045    | 446.103   | 329.189   |
| NM_012145 | 31286.492 | 31016.068 | NM_002950 | 21222.66  | 32240.223 | AA878561  | 48047.664 | 55577.66  |
| AF305779  | 1084.737  | 1339.043  | NM_002318 | 3654.419  | 3816.573  | AI538525  | 282.001   | 273.301   |
| AF225416  | 10062.365 | 13032.193 | NM_001433 | 681.309   | 472.611   | NM_000623 | 431.059   | 545.991   |
| NM_016231 | 3753.44   | 3684.793  | NM_003134 | 56716.285 | 51908.352 | NM_000941 | 787.41    | 640.19    |
| NM_002093 | 4763.833  | 5015.307  | NM_004314 | 4173.805  | 3186.531  | SR1       | 61702.984 | 75099.664 |
| AB042555  | 8059.356  | 7741.21   | NM_018247 | 10516.502 | 6780.889  | SR3       | 28634.002 | 23077.174 |
| NM_017763 | 699.946   | 1344.26   | NM_017979 | 11532.598 | 10108.752 | SR5       | 3816.344  | 3962.013  |
| NM_013975 | 3517.164  | 4003.177  | NM_019644 | 308.423   | 639.766   | SR7       | 3037.607  | 22214.998 |
| NM_003843 | 3761.604  | 3861.135  | NM_006791 | 1751.475  | 2842.029  | SR9       | 8908.193  | 1676.027  |
| NM_012216 | 2034.318  | 1995.604  | AJ278348  | 12864.586 | 13176.312 | CY3Cy5    | 1251.797  | 86.335    |
| X73502    | 975.16    | 944.946   | AI285199  | 2923.056  | 2391.845  | U62858    | 688.767   | 539.9     |
| NM_020445 | 29297.842 | 21723.41  | M38258    | 1012.492  | 906.145   | NM_001781 | 1420.78   | 1220.649  |
| NM_016376 | 7602.78   | 6269.124  | AA457155  | 26625.93  | 25216.74  | NM_014432 | 781.35    | 723.521   |
| AB046848  | 1826.487  | 1909.078  | BM014365  | 980.096   | 690.59    | NM_001558 | 820.743   | 440.268   |
| AL133057  | 3489.913  | 3109.74   | H91842    | 500.763   | 506.042   | U96173    | 797.306   | 711.647   |

|           |           |           |           |           |           |           |           |           |
|-----------|-----------|-----------|-----------|-----------|-----------|-----------|-----------|-----------|
| U04845    | 4945.723  | 4142.145  | U78045    | 2044.638  | 1895.79   | NM_018941 | 679.425   | 603.637   |
| NM_018103 | 4639.518  | 3664.11   | AA878561  | 61356.578 | 59689.23  | NM_020241 | 840.572   | 748.434   |
| AK026302  | 9922.701  | 12319.593 | BF688309  | 1132.498  | 1230.264  | NM_001980 | 512.103   | 470.547   |
| NM_012214 | 8275.82   | 7234.162  | AI538525  | 1154.092  | 1044.558  | NM_012471 | 441.415   | 689.151   |
| AF049656  | 15723.173 | 18021.947 | NM_000623 | 561.723   | 432.225   | NM_001321 | 1754.726  | 1077.299  |
| NM_000312 | 690.137   | 1324.5    | NM_000941 | 1334.758  | 1503.381  | AB018264  | 1721.17   | 1381.8    |
| AC009729  | 405.395   | 559.933   | AF222980  | 1374.913  | 892.395   | NM_006911 | 732.437   | 445.151   |
| NM_016598 | 5764.043  | 5338.475  | AK026758  | 5357.553  | 3963.719  | U92544    | 1380.022  | 944.299   |
| BE874867  | 21718.365 | 18328.117 | NM_014424 | 630.467   | 895.214   | NM_006791 | 1117.181  | 804.2     |
| AL136719  | 4527.793  | 6353.898  | AF159092  | 1423.432  | 2215.258  | AJ278348  | 9517.469  | 8631.412  |
| NM_014109 | 9593.906  | 14076.668 | BC007318  | 7648.903  | 7375.642  | AI285199  | 360.564   | 265.908   |
| NM_012160 | 1481.283  | 1824.701  | M36693    | 2147.483  | 2212.054  | AK023106  | 612.15    | 691.53    |
| NM_006357 | 48380.422 | 39776.082 | NM_016292 | 7890.448  | 7990.935  | NM_016730 | 16581.246 | 14837.624 |
| NM_014248 | 43011.117 | 44119.867 | NM_002601 | 7483.187  | 5821.429  | AL035297  | 1034.616  | 729.269   |
| AK027070  | 1089.896  | 1560.537  | U62858    | 1367.628  | 1665.096  | NM_004408 | 1012.058  | 958.932   |
| AF129533  | 300.813   | 791.236   | NM_001558 | 1868.529  | 2633.562  | AJ131244  | 800.982   | 707.309   |
| NM_003341 | 7346.979  | 11569.326 | NM_006953 | 432.13    | 497.967   | NM_002532 | 1825.794  | 1491.04   |
| NM_017785 | 1045.031  | 1616.305  | NM_002530 | 544.167   | 636.057   | NM_012388 | 1904.823  | 1646.4    |
| NM_006249 | 3051.473  | 2198.134  | U96173    | 2046.132  | 2110.925  | NM_016651 | 323.832   | 248.584   |
| NM_018318 | 1771.25   | 1819.874  | NM_018941 | 1715.585  | 1343.574  | NM_001671 | 563.044   | 319.93    |
| AB020640  | 1687.092  | 1374.998  | NM_020241 | 1323.705  | 1257.941  | NM_019843 | 1383.478  | 1510.331  |
| D29954    | 11310.558 | 8834.352  | BE730585  | 611.715   | 838.182   | NM_016192 | 1664.351  | 1350.797  |
| AF007131  | 5487.39   | 3533.379  | NM_001980 | 1435.433  | 1459.266  | BE878426  | 49806.949 | 58070.723 |
| NM_006839 | 2083.339  | 2055.083  | NM_012471 | 434.681   | 622.146   | NM_001745 | 6899.497  | 6238.533  |
| NM_000223 | 613.403   | 968.638   | NM_001321 | 5950.293  | 4748.598  | NM_003825 | 2209.563  | 2495.599  |
| NM_005851 | 1956.807  | 1917.655  | AB018264  | 6844.755  | 6088.732  | AK025006  | 5834.852  | 6914.227  |
| AF119256  | 981.164   | 1048.17   | NM_006911 | 940.577   | 921.182   | AF218014  | 4506.941  | 3786.334  |
| X74497    | 432.714   | 717.763   | U92544    | 2847.548  | 3329.811  | NM_006678 | 1700.53   | 1596.283  |
| NM_012210 | 783.839   | 1113.289  | NM_012229 | 3300.309  | 3620.496  | AY007729  | 18215.73  | 12348.205 |
| U10072    | 1419.475  | 2187.883  | NM_005071 | 741.543   | 1161.198  | AF159092  | 1046.405  | 797.979   |
| AF222749  | 13790.104 | 16544.955 | AB023147  | 2664.468  | 3927.993  | BC007318  | 3223.692  | 2966.226  |
| NM_007146 | 3303.019  | 4548.821  | NM_016615 | 9958.007  | 9128.212  | M36693    | 973.222   | 812.713   |
| NM_002229 | 614.206   | 1301.645  | NM_005630 | 1269.407  | 830.18    | NM_016292 | 3921.725  | 3134.716  |
| S69027    | 3224.191  | 4262.136  | AK023106  | 1305.851  | 1271.86   | NM_002601 | 1947.312  | 1306.447  |
| NM_012119 | 1642.018  | 1779.576  | NM_016730 | 40485.105 | 42208.938 | NM_005898 | 4367.135  | 3254.447  |
| X99631    | 13251.831 | 15527.521 | AL035297  | 2147.956  | 2723.658  | NM_002888 | 16263.226 | 14565.253 |
| NM_001730 | 1926.269  | 2611.975  | NM_004408 | 3446.36   | 3284.479  | AF078866  | 1645.871  | 1910.032  |
| AK026290  | 373.773   | 297.535   | AJ131244  | 1887.066  | 1376.399  | NM_001360 | 10345.289 | 6344.953  |
| AB014589  | 2895.855  | 3585.417  | NM_002532 | 4828.772  | 3692.585  | AK026656  | 2074.395  | 1839.478  |
| AF248649  | 794.004   | 1085.11   | NM_012388 | 6228.661  | 5431.606  | AJ276207  | 5667.107  | 4949.855  |
| U37146    | 7722.985  | 10900.762 | NM_016651 | 1651.433  | 1346.227  | AB011131  | 4489.667  | 3607.459  |
| NM_012086 | 4542.632  | 8894.644  | NM_001671 | 1040.485  | 1094.67   | NM_000749 | 364.722   | 327.666   |
| NM_000991 | 54983.125 | 60925.199 | NM_019843 | 4569.076  | 3987.938  | NM_000751 | 2030.671  | 1794.692  |
| NM_016034 | 19870.168 | 10684.02  | NM_016192 | 3449.41   | 3396.455  | NM_014849 | 2308.539  | 2266.021  |
| X69150    | 41335.215 | 47018.457 | BE878426  | 54751.59  | 47467.629 | NM_001042 | 2133.424  | 1804.477  |
| NM_001025 | 56949.676 | 64972.07  | NM_001745 | 16749.248 | 13850.561 | NM_012229 | 1489.486  | 1227.362  |
| NM_016067 | 43993.531 | 49118.043 | NM_003825 | 6515.691  | 6662.953  | NM_005071 | 514.908   | 601.295   |
| NM_018285 | 6424.967  | 6459.415  | AK025006  | 16467.803 | 12676.128 | AB023147  | 1758.228  | 1469.268  |
| AK022393  | 4227.793  | 4230.911  | AF218014  | 9003.135  | 8852.979  | NM_016615 | 2199.626  | 1928.095  |
| AK026654  | 1199.976  | 1449.512  | NM_006678 | 4192.553  | 3427.63   | NM_005630 | 600.016   | 559.974   |
| AK025496  | 3683.966  | 4576.777  | AY007729  | 39939.176 | 43365.09  | NM_012201 | 1480.432  | 1538.911  |
| NM_001966 | 587.365   | 1015.108  | NM_001433 | 672.656   | 524.052   | AB046774  | 664.932   | 574.951   |
| NM_016138 | 2541.82   | 3800.604  | NM_003134 | 57275.238 | 51932.605 | AK024584  | 2970.683  | 2963.473  |

|           |           |           |           |           |           |           |           |           |
|-----------|-----------|-----------|-----------|-----------|-----------|-----------|-----------|-----------|
| Z36833    | 55876.453 | 62812.418 | NM_004314 | 3661.406  | 4281.584  | NM_003504 | 5539.658  | 5204.333  |
| NM_01435E | 1857.7    | 2372.673  | NM_018247 | 10709.488 | 7580.304  | NM_01329E | 1519.295  | 1550.281  |
| M21191    | 38202.953 | 34039.48  | NM_01797E | 9180.895  | 8417.978  | NM_007267 | 1177.624  | 923.228   |
| AF072810  | 1173.918  | 1803.642  | NM_00589E | 11010.029 | 10425.046 | Z36816    | 2181.43   | 2965.229  |
| L19778    | 983.685   | 1791.903  | NM_00288E | 40938.609 | 41532.859 | NM_00586E | 2065.35   | 1613.716  |
| AF174482  | 2720.156  | 4947.267  | AF078866  | 4435.249  | 3477.346  | NM_00641E | 5516.763  | 5507.953  |
| NM_00352E | 408.728   | 189.671   | BF311880  | 3357.995  | 7783.938  | AK025542  | 723.961   | 697.435   |
| NM_01776E | 837.151   | 668.337   | NM_01607E | 587.451   | 540.29    | NM_00276E | 3026.023  | 2578.964  |
| D85131    | 17880.326 | 13652.909 | NM_00136E | 15449.181 | 18741.547 | NM_003691 | 1610.597  | 961.042   |
| NM_00495E | 216.57    | 592.14    | AK026656  | 5883.34   | 6023.292  | NM_00295C | 8567.812  | 6535.472  |
| D30612    | 3575.337  | 5618.941  | AJ276207  | 9916.888  | 9858.407  | NM_00231E | 1218.792  | 864.263   |
| U52097    | 13104.777 | 9379.511  | AB011131  | 16237.409 | 14366.308 | NM_00143E | 325.133   | 416.025   |
| NM_00341E | 2133.998  | 2375.682  | NM_00074E | 613.007   | 713.564   | NM_003134 | 43169.047 | 34700.504 |
| NM_017594 | 590.785   | 807.946   | NM_000751 | 8837.046  | 7315.003  | NM_004314 | 1997.287  | 1889.086  |
| AK027237  | 702.264   | 1022.065  | NM_01484E | 8939.82   | 7126.874  | NM_018247 | 4051.147  | 5281.441  |
| AK027104  | 1668.722  | 2116.108  | NM_00104E | 5390.708  | 4614.272  | NM_01797E | 619.674   | 603.315   |
| AL133090  | 31886.846 | 33910.145 | NM_020041 | 865.368   | 381.228   | NM_006791 | 746.678   | 507.403   |
| AF085867  | 7598.624  | 11424.944 | NM_00062E | 437.461   | 557.021   | AJ278348  | 6463.593  | 6719.248  |
| AK026158  | 766.72    | 1291.788  | NM_000941 | 1131      | 1300.25   | L07738    | 294.496   | 226.699   |
| AF086510  | 4562.359  | 6267.542  | AF222980  | 1329.115  | 970.537   | Z48054    | 574.708   | 609.091   |
| Z36779    | 2096.266  | 3048.057  | AK026758  | 4497.064  | 4477.943  | H90415    | 841.732   | 1051.689  |
| NM_01842E | 397.17    | 621.815   | NM_012201 | 3271.019  | 3242.826  | AA676470  | 4890.634  | 4127.248  |
| NM_00281E | 1676.324  | 2632.854  | AB046774  | 1413.42   | 1296.523  | M38258    | 514.757   | 639.815   |
| NM_01751E | 412.887   | 668.455   | AK022385  | 26767.158 | 25904.867 | AA457155  | 4811.583  | 4494.103  |
| NM_01782E | 8216.595  | 8816.624  | NM_00277E | 777.321   | 1310.154  | BM014365  | 401.657   | 432.344   |
| AK026844  | 2677.938  | 1841.55   | AK024584  | 7682.944  | 3915.513  | U78045    | 483.883   | 375.05    |
| AK026735  | 2277.989  | 1668.471  | NM_003504 | 12088.731 | 10585.316 | AA878561  | 47652.234 | 47343.793 |
| AK027056  | 1821.833  | 1114.963  | NM_01329E | 4711.434  | 4733.066  | AI538525  | 346.872   | 434.565   |
| AK024294  | 1618.766  | 2442.284  | NM_007267 | 2749.628  | 3131.362  | NM_000941 | 1037.284  | 1165.849  |
| AL110126  | 2609.101  | 6763.796  | Z36816    | 3452.456  | 7059.688  | AF222980  | 473.844   | 693.848   |
| AF052172  | 8013.009  | 9447.116  | NM_00586E | 7513.194  | 7416.954  | AK026758  | 314.339   | 172.499   |
| AB014573  | 3881.3    | 3678.354  | NM_00641E | 14150.577 | 11979.983 | NM_014424 | 219.298   | 155.14    |
| AK091109  | 33865.586 | 36844.938 | NM_017684 | 673.022   | 806.391   | AF159092  | 530.359   | 344.085   |
| AF032897  | 326.327   | 661.878   | AK025542  | 6866.572  | 8780.089  | BC007318  | 3767.751  | 3383.964  |
| NM_014967 | 1936.188  | 2903.458  | AF207547  | 1298.52   | 1485.946  | M36693    | 989.816   | 988.965   |
| AK022915  | 6618.102  | 9898.806  | NM_00276E | 7624.624  | 8002.545  | NM_01629E | 3585.215  | 2908.855  |
| AK021736  | 862.376   | 963.846   | NM_00295C | 18153.834 | 16942.15  | NM_002601 | 3244.903  | 2767.879  |
| AF131834  | 1012.291  | 1359.277  | NM_00231E | 3450.201  | 3247.115  | U62858    | 875.442   | 775.152   |
| AL355711  | 1539.701  | 1878.348  | NM_012471 | 591.729   | 604.468   | NM_001781 | 1170.7    | 1018.866  |
| AK025851  | 2038.596  | 3335.739  | NM_001321 | 4797.326  | 5170.899  | AF035121  | 179.069   | 254.911   |
| AJ011409  | 16565.703 | 21335.629 | AB018264  | 6174.268  | 6387.095  | NM_01443E | 818.296   | 658.173   |
| AJ227906  | 1585.531  | 1645.247  | NM_006911 | 761.042   | 920.994   | NM_00155E | 962.629   | 541.256   |
| AJ011598  | 475.279   | 549.326   | U92544    | 3619.964  | 4261.873  | U96173    | 668.941   | 850.55    |
| AJ001906  | 392.913   | 515.228   | NM_019644 | 657.042   | 352.935   | NM_018941 | 791.693   | 761.528   |
| U17633    | 681.599   | 658.632   | NM_006791 | 2064.365  | 2641.808  | NM_020241 | 693.98    | 882.845   |
| D16877    | 1842.572  | 1910.517  | AJ278348  | 13881.047 | 11820.064 | BE730585  | 319.725   | 290.634   |
| L19363    | 292.193   | 412.093   | AI285199  | 2756.518  | 2023.72   | NM_00198C | 736.886   | 666.257   |
| AL049992  | 282.649   | 635.364   | L07738    | 1265.32   | 695.694   | NM_001321 | 1786.977  | 1318.666  |
| AL109781  | 1833.449  | 1510.119  | Z48054    | 1045.537  | 1602.695  | U92544    | 687.632   | 393.299   |
| AK021895  | 541.361   | 893.219   | H90415    | 4113      | 4459.054  | NM_01222E | 730.623   | 602.063   |
| AK000036  | 6452.116  | 8980.288  | AA676470  | 19180.783 | 26696.492 | NM_005071 | 206.915   | 123.554   |
| AK000769  | 738.702   | 784.447   | M38258    | 551.917   | 586.325   | AB023147  | 1533.276  | 1148.94   |
| AK024520  | 6220.138  | 11904.085 | AI538525  | 1007.208  | 881.153   | NM_01661E | 2494.113  | 2039.68   |

|           |           |           |           |           |           |           |           |           |
|-----------|-----------|-----------|-----------|-----------|-----------|-----------|-----------|-----------|
| AK024542  | 4077.04   | 3738.894  | NM_003825 | 6084.896  | 7340.966  | NM_00563C | 678.524   | 580.371   |
| AK024915  | 378.705   | 267.787   | AK025006  | 15401.628 | 13299.33  | AK023106  | 776.408   | 651.5     |
| AB050477  | 3439.838  | 5968.672  | AF218014  | 10078.143 | 10932.215 | NM_01673C | 14777.399 | 12340.86  |
| AK000152  | 475.977   | 685.332   | NM_006678 | 5413.813  | 5577.408  | AL035297  | 974.287   | 633.751   |
| AK024300  | 720.745   | 793.138   | AY007729  | 45429.23  | 47212.43  | NM_00440E | 1167.974  | 1091.506  |
| L09092    | 712.977   | 934.505   | NM_014424 | 452.647   | 643.705   | AJ131244  | 643.18    | 764.967   |
| NM_012132 | 1435.565  | 2363.092  | AF159092  | 1648.619  | 2007.915  | NM_002532 | 1832.741  | 1830.872  |
| NM_01212E | 1092.807  | 1752.466  | BC007318  | 9401.322  | 8139.038  | NM_01238E | 1852.644  | 1803.246  |
| AK025716  | 929.835   | 1704.003  | M36693    | 2297.228  | 2140.063  | NM_016651 | 430.954   | 344.491   |
| AK023270  | 1164.273  | 973.642   | NM_016292 | 6507.566  | 7725.836  | NM_001671 | 681.935   | 385.377   |
| AF085979  | 25400.797 | 21662.152 | NM_002601 | 7338.456  | 5578.616  | NM_019843 | 1389.087  | 1200.749  |
| AK023112  | 2174.615  | 2194.822  | U62858    | 1430.58   | 1674.363  | NM_016192 | 2211.569  | 1873.334  |
| NM_01780E | 25375.725 | 17742.191 | NM_000877 | 500.41    | 489.824   | BE878426  | 48204.426 | 53168.633 |
| AK001937  | 35349.93  | 34119.75  | NM_001781 | 2772.769  | 3699.802  | NM_00174E | 7043.508  | 6718.92   |
| AK021988  | 4677.809  | 6100.544  | AF035121  | 781.361   | 684.872   | NM_00382E | 1503.492  | 1325.011  |
| AF086494  | 26805.77  | 26956.729 | NM_014432 | 3029.963  | 2939.233  | AK025006  | 3265.098  | 2922.75   |
| BI769977  | 702.007   | 1119.956  | NM_00155E | 1950.644  | 2491.19   | NM_00667E | 1601.793  | 1320.709  |
| AL137567  | 976.443   | 1249.84   | U96173    | 3448.847  | 3944.016  | AY007729  | 8004.634  | 6449.274  |
| AK024913  | 2452.816  | 2747.581  | NM_018941 | 2334.495  | 2306.084  | NM_003134 | 45145.66  | 34159.41  |
| AB007961  | 1461.925  | 2005.24   | BE730585  | 814.291   | 588.45    | NM_004314 | 1369.195  | 1081.632  |
| NM_005547 | 2577.399  | 4806.68   | NM_00198C | 1425.708  | 1604.745  | NM_018247 | 2952.673  | 3501.978  |
| AF086318  | 4057.132  | 3658.874  | NM_00074E | 1162.125  | 739.234   | NM_01797E | 2199.781  | 1846.259  |
| AF088012  | 840.039   | 812.215   | NM_000751 | 7199.188  | 8249.309  | NM_00589E | 5029.687  | 3656.267  |
| NM_018121 | 1288.484  | 1865.619  | NM_01484E | 8389.782  | 8537.045  | NM_00288E | 19899.947 | 15126.022 |
| AK026708  | 2677.494  | 3939.408  | NM_001042 | 5744.424  | 6603.843  | AF078866  | 1772.22   | 1596.611  |
| NM_017903 | 4709.281  | 5452.522  | NM_01222E | 3401.082  | 3222.687  | BF311880  | 6443.004  | 2149.727  |
| NM_018074 | 1630.322  | 2205.228  | NM_005071 | 1087.684  | 1147.879  | NM_00007E | 896.967   | 973.593   |
| NM_00090E | 3082.119  | 4930.732  | AB023147  | 3618.539  | 3764.646  | NM_00136C | 10631.063 | 8348.63   |
| U31737    | 450.601   | 526.409   | NM_01661E | 12026.749 | 10954.025 | AK026656  | 3253.697  | 2213.107  |
| AK024828  | 921.461   | 1857.846  | NM_00563C | 1623.43   | 1240.509  | AJ276207  | 6930.153  | 6907.646  |
| AF009315  | 925.012   | 1331.451  | AK023106  | 1993.234  | 1731.025  | AB011131  | 5841.838  | 4610.275  |
| NM_019013 | 1075.563  | 1459.054  | NM_01673C | 49216.824 | 49698.469 | NM_000751 | 1524.301  | 1464.647  |
| L37711    | 475.636   | 723.102   | AL035297  | 2287.298  | 2331.86   | NM_01484E | 2336.001  | 1769.228  |
| S70313    | 7789.221  | 8850.729  | NM_00440E | 4351.588  | 5210.266  | NM_000941 | 575.308   | 745.726   |
| AJ272196  | 13290.119 | 12956.276 | AJ131244  | 1388.127  | 1712.978  | AF222980  | 403.304   | 462.747   |
| X58162    | 1941.105  | 1961.282  | NM_002532 | 4331.03   | 4218.134  | AK026758  | 1560.211  | 993.913   |
| AK022825  | 393.61    | 283.542   | NM_01238E | 5385.447  | 4869.445  | NM_012201 | 1567.57   | 1332.032  |
| CY3Cy5    | 2284.463  | 175.62    | NM_016651 | 1172.208  | 1366.672  | AK022385  | 13199.154 | 11512.436 |
| N46828    | 791.771   | 834.494   | NM_001671 | 893.861   | 1904.519  | NM_00277E | 456.861   | 259.203   |
| BI908302  | 4078.182  | 3900.212  | NM_019843 | 5461.278  | 6933.833  | AK024584  | 2942.675  | 2360.463  |
| AA460969  | 3225.029  | 3009.229  | NM_016192 | 5317.899  | 5452.784  | NM_003504 | 6182.675  | 6428.088  |
| BG695859  | 726.622   | 597.233   | BE878426  | 52153.867 | 48224.207 | NM_01329E | 2131.21   | 2564.465  |
| M85079    | 1115.776  | 842.067   | NM_00174E | 16129.326 | 13202.883 | NM_007267 | 1979.706  | 2837.016  |
| AA457671  | 9814.238  | 6599.563  | AK025542  | 8922.959  | 10798.522 | Z36816    | 1025.531  | 1157.308  |
| X07437    | 1417.872  | 1011.682  | AF207547  | 1303.875  | 1661.448  | NM_00586E | 2909.653  | 2202.988  |
| NM_000641 | 1129.138  | 784.054   | NM_00276E | 7286.765  | 8385.571  | NM_006413 | 7194.043  | 8133.506  |
| AE006466  | 1969.228  | 1032.253  | NM_003691 | 4027.062  | 4919.563  | NM_017684 | 368.289   | 358.263   |
| BC002396  | 3611.071  | 2701.094  | NM_00295C | 18940.424 | 19712.768 | AK025542  | 1003.076  | 917.118   |
| NM_02209E | 1099.05   | 810.815   | NM_00231E | 3376.081  | 4135.604  | NM_00276E | 3006.464  | 2329.901  |
| SR2       | 45481.961 | 28107     | NM_001433 | 499.882   | 705.637   | NM_00295C | 8642.459  | 9404.646  |
| SR4       | 12502.393 | 8592.661  | NM_003134 | 56198.309 | 47499.129 | NM_00231E | 601.522   | 414.354   |
| SR6       | 1893.818  | 1074.477  | NM_004314 | 4829.87   | 6078.804  | NM_005954 | 3759.48   | 2856.846  |
| SR8       | 6637.801  | 11777.291 | NM_018247 | 12181.047 | 7893.034  | NM_001321 | 1366.275  | 838.677   |

|           |           |           |           |           |           |           |           |           |
|-----------|-----------|-----------|-----------|-----------|-----------|-----------|-----------|-----------|
| SR10      | 22259.021 | 5149.935  | NM_017979 | 13449.168 | 13922.125 | AB018264  | 1289.283  | 1173.844  |
| CY3Cy5    | 945.237   | 159.322   | NM_005898 | 12733.02  | 18049.322 | NM_006911 | 377.782   | 318.854   |
| NM_02037C | 797.215   | 1011.466  | NM_002889 | 50180.164 | 50816.219 | U92544    | 1069.993  | 692.324   |
| NM_004767 | 635.36    | 655.893   | AF078866  | 4922.034  | 4259.919  | NM_006791 | 1151.144  | 703.394   |
| BF310159  | 8171.845  | 14334.201 | BF311880  | 3964.519  | 11876.849 | AJ278348  | 8213.88   | 8404.018  |
| NM_01898E | 1870.287  | 2407.988  | NM_00007E | 368.491   | 383.405   | AI285199  | 596.459   | 505.197   |
| U27655    | 1109.626  | 1201.622  | NM_016075 | 692.597   | 614.93    | L07738    | 313.409   | 283.184   |
| NM_00336C | 1436.639  | 1118.124  | NM_00136C | 15475.06  | 21920.941 | Z48054    | 864.007   | 1061.964  |
| Z21965    | 6273.98   | 4814.885  | AK026656  | 7180.222  | 6714.063  | H90415    | 1065.309  | 1216.089  |
| NM_012427 | 613.77    | 513.53    | AJ276207  | 11288.436 | 9840.881  | AA676470  | 6325.936  | 5199.962  |
| AF131857  | 7302.278  | 5521.503  | AB011131  | 17621.234 | 14054.674 | M38258    | 362.099   | 274.091   |
| NM_00085Z | 28040.447 | 14958.23  | AF164794  | 11477.469 | 13752.662 | AA457155  | 5910.694  | 4514.519  |
| NM_00039E | 380.522   | 270.651   | NM_001173 | 2027.2    | 2758.542  | BM014365  | 227.455   | 364.246   |
| AW797282  | 487.234   | 256.157   | AB020656  | 1799.355  | 1673.174  | NM_00382E | 2961.313  | 4266.742  |
| L09070    | 1789.234  | 1118.418  | AK023648  | 8328.893  | 9320.79   | AK025006  | 4350.195  | 4516.82   |
| NM_00006Z | 13513.825 | 10914.203 | NM_00041Z | 2310.448  | 2374.463  | AF218014  | 3812.556  | 2914.004  |
| NM_00959C | 4721.34   | 4068.628  | AF077033  | 4522.14   | 3078.521  | NM_00667E | 1513.652  | 1358.203  |
| AL133037  | 1314.703  | 1025.533  | D50406    | 628.116   | 608.074   | AY007729  | 14392.65  | 9563.468  |
| NM_02035C | 3117.35   | 2245.781  | NM_01778E | 319.71    | 510.913   | NM_014424 | 678.465   | 730.568   |
| NM_00035C | 746.124   | 359.024   | NM_004991 | 1970.217  | 1889.619  | AF159092  | 1067.793  | 821.906   |
| X91103    | 1662.476  | 995.531   | AF222980  | 1970.589  | 1568.187  | BC007318  | 3949.729  | 4020.267  |
| AA419164  | 1186.96   | 1134.312  | AK026758  | 6000.014  | 7317.455  | M36693    | 1019      | 1174.802  |
| AL117235  | 471.693   | 323.893   | NM_012201 | 3681.394  | 5112.161  | NM_01629Z | 3711.199  | 2777.558  |
| NM_01482Z | 2443.268  | 2188.611  | AB046774  | 1798.497  | 1705.184  | NM_002601 | 3146.104  | 2836.241  |
| NM_00529E | 1237      | 1369.893  | AK022385  | 38847.086 | 45084.203 | U62858    | 699.449   | 733.977   |
| NM_001337 | 473.745   | 597.214   | NM_002775 | 1078.98   | 1722.444  | NM_001781 | 1534.93   | 1354.436  |
| NM_003611 | 1205.023  | 1092.746  | AK024584  | 7673.443  | 4870.005  | NM_01443Z | 835.93    | 1109.241  |
| AB014538  | 856.718   | 788.369   | NM_003504 | 12762.338 | 12610.699 | NM_00155E | 950.678   | 548.016   |
| AK025118  | 3934.787  | 3550.13   | NM_01329E | 5278.92   | 6000.841  | U96173    | 788.104   | 656.391   |
| NM_000727 | 672.426   | 607.111   | NM_007267 | 3329.683  | 4579.036  | NM_018941 | 526.609   | 629.535   |
| NM_00538E | 4123.485  | 3027.871  | AK022830  | 413.517   | 939.635   | NM_020241 | 492.043   | 506.031   |
| NM_01898E | 1926.024  | 857.605   | Z36816    | 2579.694  | 2128.228  | NM_00198C | 621.573   | 425.979   |
| NM_006074 | 10857.141 | 5684.154  | NM_00586E | 8285.571  | 8517.469  | NM_000751 | 2154.23   | 1675.83   |
| AF208232  | 10506.456 | 5755.342  | NM_00641Z | 15112.611 | 12235.409 | NM_01484E | 1804.222  | 2053.166  |
| NM_00298E | 2891.432  | 1894.609  | NM_00021E | 1467.247  | 1745.998  | NM_00104Z | 2412.83   | 1944.033  |
| NM_00418E | 444.752   | 326.254   | NM_00301C | 1953.286  | 1935.412  | NM_01222E | 1892.926  | 1692.281  |
| NM_01625E | 6236.489  | 4294.974  | NM_006871 | 885.64    | 1169.169  | AB023147  | 1444.678  | 1667.137  |
| AF203032  | 1206.641  | 978.482   | NM_019074 | 6273.768  | 6248.837  | NM_01661E | 2614.944  | 2536.615  |
| AB014542  | 4083.067  | 2445.4    | NM_018494 | 42501.949 | 42315.715 | NM_00563C | 556.802   | 346.177   |
| NM_01464C | 1402.865  | 950.388   | AK000006  | 614.257   | 731.524   | AK023106  | 823.655   | 971.582   |
| Y10518    | 9774.24   | 5987.832  | NM_001115 | 3206.962  | 3059.528  | NM_01673C | 18890.064 | 17413.986 |
| AF155135  | 7737.831  | 4682.299  | NM_014921 | 1035.263  | 1418.129  | AL035297  | 966.296   | 698.65    |
| NM_01479C | 1114.085  | 766.914   | NM_016581 | 59427.727 | 57012.457 | NM_00440E | 1665.329  | 1837.979  |
| NM_003571 | 2332.474  | 1412.912  | NM_01325E | 1457.62   | 1471.854  | NM_00253Z | 1554.646  | 1824.063  |
| AB032965  | 10393.83  | 6226.923  | NM_00718Z | 573.88    | 781.015   | NM_01238E | 1928.964  | 2353.808  |
| AF133424  | 1552.473  | 1082.438  | AJ238243  | 24967.92  | 22254.816 | NM_016651 | 316.881   | 358.891   |
| NM_00500Z | 21144.17  | 15921.9   | J05046    | 30732.59  | 34650.617 | NM_001671 | 485.665   | 331.839   |
| AF084560  | 2934.236  | 1880.178  | NM_01231E | 2775.883  | 2664.497  | NM_01984Z | 1301.752  | 1221.511  |
| NM_00003Z | 1904.044  | 1546.705  | NM_002751 | 5042.623  | 5313.014  | NM_01619Z | 1802.524  | 1612.696  |
| NM_00208Z | 1130.719  | 979.275   | NM_004291 | 3823.194  | 3734.103  | BE878426  | 42737.137 | 62143.371 |
| NM_00203E | 5154.591  | 5030.013  | NM_00381E | 7534.713  | 9157.271  | NM_00174E | 5940.232  | 6959.49   |
| NM_01490C | 714.546   | 659.087   | AK022635  | 679.462   | 950.345   | AK025542  | 1245.507  | 1159.863  |
| BF342908  | 594.391   | 522.055   | NM_00491Z | 3677.124  | 3340.195  | AF207547  | 482.617   | 687.519   |

|           |           |           |           |           |           |           |           |           |
|-----------|-----------|-----------|-----------|-----------|-----------|-----------|-----------|-----------|
| AF118073  | 553.516   | 390.013   | U79304    | 23124.695 | 22754.885 | NM_00276E | 3249.778  | 3244.813  |
| AK023510  | 4080.333  | 3837.448  | NM_016267 | 9611.277  | 8798.058  | NM_003691 | 1169.84   | 794.062   |
| NM_00434E | 1103.824  | 821.705   | NM_004671 | 15086.509 | 14675.425 | NM_00295C | 9502.104  | 7050.89   |
| NM_00070Z | 29496.609 | 18636.984 | NM_00518C | 11522.935 | 15993.866 | NM_00231E | 987.821   | 902.565   |
| X71490    | 6324.106  | 4717.652  | U35622    | 307.53    | 942.932   | NM_00313A | 47072.047 | 38921.871 |
| AF257081  | 493.922   | 374.833   | NM_00704E | 1784.661  | 2490.445  | NM_00431A | 1791.164  | 1627.396  |
| NM_00168E | 22074.844 | 16332.683 | NM_003627 | 3724.065  | 3421.562  | NM_018247 | 3086.666  | 3796.88   |
| NM_003631 | 426.24    | 305.122   | NM_01214E | 23314.754 | 23217.039 | NM_01797E | 2551.631  | 2478.626  |
| NM_00223Z | 860.597   | 449.472   | AF305779  | 885.769   | 1013.913  | NM_00589E | 6312.116  | 4973.628  |
| NM_01610E | 3965.237  | 3482.381  | AF225416  | 10940.801 | 8410.62   | NM_00288E | 23104.051 | 19243.277 |
| NM_01457C | 4547.939  | 3023.169  | NM_016231 | 2384.924  | 2018.66   | AF078866  | 1759.827  | 2191.073  |
| NM_014747 | 3386.374  | 3132.469  | NM_00209Z | 5577.913  | 3985.111  | BF311880  | 7354.246  | 2488.399  |
| Y19240    | 3486.515  | 2107.573  | AB042555  | 12257.592 | 11750.269 | NM_01607E | 296.431   | 223.668   |
| AF091029  | 2130.591  | 1273.721  | NM_00172E | 1109.449  | 918.122   | NM_00136C | 10672.055 | 7924.652  |
| X97074    | 4473.273  | 2587      | NM_01776Z | 845.574   | 843.21    | AK026656  | 2532.812  | 3826.242  |
| NM_00413E | 3588.288  | 2252.48   | NM_01397E | 3693.549  | 3418.663  | AJ276207  | 7455.191  | 13435.076 |
| NM_00020Z | 264.834   | 277.9     | NM_01221E | 1415.004  | 1327.124  | AB011131  | 5306.833  | 5351.695  |
| NM_01344Z | 1909.011  | 1372.431  | X73502    | 2668.828  | 2446.566  | AF164794  | 2948.079  | 2754.902  |
| NM_00092E | 10217.739 | 9810.841  | NM_02044E | 53410.688 | 48340.758 | NM_00117Z | 696.154   | 528.23    |
| NM_00046E | 2073.368  | 2371.12   | NM_01637E | 13273.967 | 14807.475 | AB020656  | 1187.138  | 1274.02   |
| NM_00012Z | 5029.135  | 5891.265  | AB046848  | 8767.102  | 8131.39   | AK023648  | 2679.389  | 2113.029  |
| AL137501  | 635.434   | 641.783   | AL133057  | 5531.118  | 5856.637  | NM_00041Z | 475.132   | 311.712   |
| BE858979  | 440.386   | 401.967   | U04845    | 7479.207  | 7494.658  | AF077033  | 1543.505  | 1488.164  |
| NM_00012Z | 2782.658  | 1895.482  | NM_01810Z | 6444.891  | 5521.504  | D50406    | 475.226   | 469.742   |
| NM_00671Z | 44660.219 | 36539.695 | AK026302  | 10089.318 | 9861.972  | AF222980  | 347.216   | 430.641   |
| NM_00624C | 556.984   | 428.82    | NM_01221A | 9649.594  | 12395.683 | AK026758  | 1886.305  | 1643.041  |
| NM_00702E | 3919.012  | 2195.196  | AF049656  | 25881.939 | 26354.08  | NM_012201 | 2093.194  | 1695.661  |
| M37712    | 12966.559 | 5958.258  | NM_00031Z | 1807.407  | 1497.973  | AB046774  | 498.439   | 1016.706  |
| NM_00264E | 398.476   | 304.767   | NM_00396Z | 1048.256  | 1003.535  | AK022385  | 14060.908 | 12030.199 |
| AF070670  | 2880.358  | 1657.58   | AC009729  | 932.517   | 489.911   | NM_00277E | 592.602   | 481.498   |
| NM_01615E | 4200.172  | 2693.84   | NM_01659E | 4179.877  | 4223.286  | AK024584  | 2945.411  | 1978.81   |
| NM_01652E | 1573.067  | 1053.835  | BE874867  | 43184.34  | 48686.086 | NM_003504 | 5478.421  | 5692.731  |
| NM_015974 | 2896.843  | 1921.9    | AL136719  | 5209.234  | 3936.995  | NM_01329E | 1920.859  | 2371.971  |
| NM_014384 | 4225.925  | 3307.754  | NM_01410E | 9664.217  | 7171.93   | NM_007267 | 1217.919  | 944.573   |
| NM_00257Z | 6180.222  | 4327.42   | NM_01216C | 1550.272  | 1407.031  | AK022830  | 293.786   | 240.415   |
| AL133037  | 1133.481  | 1012.685  | NM_006357 | 56103.789 | 51894.52  | Z36816    | 1328.469  | 1397.977  |
| NM_02035C | 2809.024  | 3139.658  | NM_01424E | 55552.957 | 54554.543 | NM_00586E | 3027.238  | 4245.214  |
| NM_00035C | 901.577   | 640.004   | AK027070  | 1000.638  | 1281.356  | NM_00641Z | 5938.582  | 9118.757  |
| X91103    | 2301.879  | 1675.67   | AF129533  | 596.643   | 551.547   | NM_017684 | 334.732   | 257.86    |
| AA419164  | 1063.489  | 844.298   | NM_003341 | 7965.338  | 7736.732  | NM_00021E | 339.027   | 311.122   |
| L35251    | 2519.526  | 2690.315  | NM_01778E | 2368.964  | 2212.737  | AF135960  | 384.289   | 254.309   |
| BE910395  | 985.6     | 613.625   | NM_00624E | 5496.831  | 4599.287  | NM_01421E | 9989.896  | 8189.959  |
| N46828    | 650.469   | 526.39    | NM_01831E | 1882.22   | 1711.948  | NM_00301C | 366.384   | 281.922   |
| BI908302  | 4355.307  | 3272.11   | AB020640  | 4610.764  | 4634.234  | NM_019074 | 1842.085  | 1787.335  |
| AA460969  | 3033.011  | 2691.021  | D29954    | 14358.154 | 12701.995 | NM_018494 | 10922.635 | 9795.857  |
| BG695859  | 514.08    | 508.55    | AF007131  | 4785.741  | 6161.238  | AK000006  | 422.52    | 528.314   |
| M85079    | 1216.559  | 767.838   | NM_00683E | 2705.631  | 2432.265  | NM_001115 | 583.477   | 674.807   |
| AA457671  | 9104.051  | 6599.983  | NM_00022Z | 2437.439  | 2288.569  | NM_014921 | 1059.899  | 1028.633  |
| X07437    | 1595.682  | 1096.882  | NM_005851 | 1086.272  | 950.261   | NM_016581 | 34568.207 | 29676.559 |
| NM_000641 | 1041.388  | 683.807   | AF119256  | 1673.084  | 1839.164  | NM_01325E | 818.988   | 740.138   |
| AE006466  | 2046.763  | 1258.201  | X74497    | 1234.298  | 1174.978  | NM_00718Z | 229.125   | 390.007   |
| BC008737  | 34382.184 | 19503.316 | NM_01221C | 1393.325  | 1680.43   | AJ238243  | 5323.909  | 7869.891  |
| BC011655  | 6206.445  | 3268.031  | U10072    | 1556.748  | 1730.636  | J05046    | 8800.229  | 8462.339  |

|           |           |           |           |           |           |           |           |           |
|-----------|-----------|-----------|-----------|-----------|-----------|-----------|-----------|-----------|
| BC002396  | 3592.772  | 2538.241  | AF222749  | 19001.475 | 20685.092 | NM_01231E | 1745.694  | 1304.427  |
| NM_02209E | 1211.551  | 926.787   | NM_00341C | 7802.916  | 6347.151  | NM_002751 | 2465.313  | 2395.447  |
| AF112219  | 20308.629 | 12606.856 | NM_00714E | 3096.095  | 2537.643  | NM_004291 | 1676.45   | 1880.707  |
| NM_01464C | 1021.504  | 715.67    | NM_00222E | 960.971   | 859.985   | NM_00381E | 1694.961  | 2361.527  |
| Y10518    | 10169.74  | 8423.727  | S69027    | 3257.02   | 2920.336  | NM_00491E | 1709.108  | 2240.372  |
| AF155135  | 7374.175  | 4680.458  | NM_012119 | 2994.75   | 2906.652  | U79304    | 8367.831  | 8714.036  |
| NM_01479C | 1097.542  | 803.127   | X99631    | 19619.334 | 15642.873 | NM_016267 | 1939.041  | 2022.548  |
| NM_003571 | 2644.447  | 2073.558  | NM_00173C | 2036.621  | 1686.938  | NM_004671 | 3833.522  | 5437.961  |
| AB032965  | 12198.081 | 9558.753  | AB014589  | 3270.333  | 2610.41   | NM_00518C | 3437.6    | 2863.102  |
| NM_02037C | 1002.953  | 916.667   | AF248649  | 934.429   | 840.025   | NM_00652E | 1123.311  | 995.339   |
| NM_004767 | 324.084   | 375.006   | U37146    | 13899.765 | 14824.119 | NM_00704E | 1103.001  | 640.824   |
| BF310159  | 6503.581  | 6180.186  | NM_01208E | 3084.338  | 3333.633  | NM_003627 | 1206.819  | 889.789   |
| NM_01898E | 1895.822  | 1519.998  | AB040431  | 601.562   | 512.123   | NM_01214E | 11298.971 | 11256.03  |
| AB044934  | 397.497   | 488.544   | NM_000991 | 58308.039 | 56033.344 | AF305779  | 461.725   | 457.69    |
| U27655    | 937.601   | 756.139   | NM_016034 | 16868.293 | 20736.525 | AF225416  | 4169.52   | 5314.247  |
| NM_00336C | 1315.091  | 953.676   | X69150    | 57695.883 | 51911.082 | NM_016231 | 1401.793  | 1198.36   |
| Z21965    | 6235.069  | 4702.182  | NM_00102E | 60366.746 | 64348.855 | NM_00209E | 2119.552  | 2280.148  |
| NM_012427 | 481.418   | 305.201   | NM_016067 | 36493.148 | 32851.992 | AB042555  | 6151.531  | 5267.246  |
| AF131857  | 4295.189  | 3821.299  | NM_01828E | 5477.974  | 5478.323  | NM_01776E | 473.244   | 533.167   |
| NM_00085E | 26701.799 | 15925.016 | AK022393  | 4788.717  | 4571.641  | NM_01397E | 1718.379  | 1718.688  |
| NM_00039E | 395.407   | 360.367   | AK026654  | 1196.911  | 1367.281  | NM_00384E | 2167.871  | 2441.969  |
| AW797282  | 634.768   | 569.854   | AB020643  | 413.526   | 635.531   | NM_01221E | 1170.663  | 1111.053  |
| NM_00240E | 332.34    | 217.891   | AK025496  | 5993.081  | 8687.981  | X73502    | 907.406   | 1141.523  |
| L09070    | 1615.174  | 734.502   | NM_00520E | 59752.926 | 61174.145 | NM_02044E | 37101.617 | 42572.527 |
| NM_00006E | 12786.046 | 8781.076  | NM_00196E | 1214.392  | 968.381   | NM_01637E | 7644.288  | 7666.724  |
| NM_00959C | 4838.446  | 3504.256  | NM_01613E | 2580.082  | 2415.049  | AB046848  | 2116.102  | 2561.632  |
| NM_01610E | 2860.394  | 2919.259  | Z36833    | 56202.465 | 55378.59  | AL133057  | 2786.892  | 3122.93   |
| NM_01457C | 2691.9    | 2009.236  | AW963246  | 385.719   | 458.682   | U04845    | 4059.035  | 4439.49   |
| NM_014747 | 3296.918  | 2962.32   | NM_01435E | 1721.422  | 1757.194  | NM_01810E | 2611.566  | 3513.264  |
| Y19240    | 4592.887  | 3744.836  | M21191    | 23373.508 | 24769.951 | AK026302  | 4874.514  | 4330.917  |
| AF091029  | 2718.219  | 2148.408  | AF072810  | 1011.704  | 1137.531  | NM_012214 | 5383.883  | 2698.001  |
| X97074    | 7776.856  | 5756.601  | L19778    | 943.847   | 848.683   | AF049656  | 8949.484  | 6039.103  |
| AL117235  | 368.073   | 364.475   | AF174482  | 6556.239  | 7439.078  | NM_00031E | 970.261   | 1134.843  |
| NM_01482E | 2431.198  | 2539.152  | NM_00352E | 1343.549  | 1500.504  | NM_00396E | 467.012   | 365.36    |
| NM_00529E | 1169.219  | 1665.831  | NM_01776E | 1404.936  | 892.873   | NM_01659E | 2160.885  | 1761.829  |
| NM_001337 | 448.559   | 378.528   | D85131    | 10983.743 | 13190.406 | BE874867  | 30199.268 | 16923.125 |
| NM_003611 | 1293.499  | 1093.401  | NM_00495E | 1019.326  | 1141.854  | AL136719  | 1859.282  | 2257.065  |
| AB014538  | 1003.655  | 1002.834  | D30612    | 3660.035  | 3331.456  | NM_01410E | 4018.319  | 5245.903  |
| NM_00620E | 227.371   | 263.469   | NM_00216E | 850.54    | 644.768   | NM_01216C | 938.224   | 677.517   |
| AK025118  | 3913.624  | 3149.425  | U52097    | 22994.867 | 21327.035 | NM_006357 | 44924.383 | 35815.375 |
| NM_000727 | 558.715   | 376.504   | NM_00341E | 2600.562  | 3475.112  | NM_01424E | 51912.074 | 42864.371 |
| NM_002621 | 249.565   | 207.534   | NM_018484 | 695.877   | 571.823   | AK027070  | 605.493   | 529.9     |
| NM_00538E | 4397.513  | 3161.457  | NM_017594 | 1160.582  | 1330.776  | AF129533  | 295.785   | 178.534   |
| NM_01898E | 1520.182  | 946.426   | AK027237  | 939.159   | 970.159   | NM_003341 | 4675.402  | 4214.326  |
| NM_006074 | 10730.364 | 6137.856  | AK027104  | 2461.81   | 2182.359  | NM_01778E | 1215.837  | 2077.921  |
| AF208232  | 10270.354 | 6478.839  | AL133090  | 25901.264 | 24065.926 | NM_00624E | 2191.738  | 2278.284  |
| NM_00298E | 2476.965  | 1412.298  | AF085867  | 8255.732  | 6548.664  | NM_01831E | 706.904   | 950.151   |
| NM_00418E | 628.687   | 518.892   | AK026158  | 692.123   | 589.907   | AB020640  | 1748.488  | 1764.535  |
| NM_01625E | 6317.354  | 3999.102  | AF086510  | 5438.741  | 4412.835  | D29954    | 6462.832  | 6636.863  |
| AF203032  | 1352.588  | 1089.312  | Z36779    | 3537.939  | 3564.699  | AF007131  | 2885.554  | 2100.056  |
| AB014542  | 3891.056  | 2335.218  | NM_01842E | 814.108   | 2575.306  | NM_00683E | 1123.38   | 1140.903  |
| AF070670  | 2109.137  | 1555.036  | NM_00281E | 2419.269  | 2112.707  | NM_00022E | 453.673   | 477.883   |
| NM_01615E | 2360.465  | 1475.091  | NM_01751E | 816.778   | 704.335   | NM_005851 | 814.713   | 942.292   |

|           |           |           |           |           |           |           |           |           |
|-----------|-----------|-----------|-----------|-----------|-----------|-----------|-----------|-----------|
| NM_01652E | 1594.531  | 1083.335  | AK025288  | 392.346   | 489.471   | AF119256  | 1219.281  | 1367.349  |
| NM_015974 | 3448.928  | 2209.192  | NM_017822 | 8663.19   | 7421.572  | X74497    | 471.019   | 607.005   |
| NM_014384 | 4754.854  | 5012.86   | AK026844  | 7475.44   | 7344.326  | NM_01221C | 463.465   | 345.41    |
| NM_002573 | 8167.938  | 7924.056  | AK026735  | 5273.41   | 4181.809  | U10072    | 688.577   | 530.104   |
| AF133424  | 1424.326  | 1290.531  | AL110104  | 36152.043 | 42272.164 | AF222749  | 8182.057  | 6436.486  |
| NM_005003 | 21026.779 | 18350.172 | AF240633  | 2235.927  | 2095.527  | NM_00341C | 3708.62   | 3985.518  |
| AF084560  | 2723.788  | 2347.891  | AK027056  | 4811.33   | 4232.45   | NM_00714E | 1449.526  | 1408.953  |
| NM_01571E | 380.809   | 304.519   | AK024294  | 2236.836  | 2314.647  | NM_00222E | 532.971   | 609.408   |
| NM_000032 | 1975.395  | 2099.843  | AL110126  | 1312.875  | 1590.46   | S69027    | 2074.607  | 1967.229  |
| NM_002083 | 1364.272  | 1178.003  | AF052172  | 24906.604 | 24160.379 | NM_012119 | 845.357   | 717.728   |
| NM_00203E | 5233.229  | 4085.477  | AB014573  | 8250.498  | 9256.634  | X99631    | 11642.788 | 12351.9   |
| NM_01490C | 596.415   | 545.798   | AK025418  | 879.485   | 616.224   | NM_00173C | 1140.631  | 1067.568  |
| BF342908  | 350.052   | 290.975   | AK091109  | 30506.541 | 33126.512 | AB014589  | 1828.265  | 1528.388  |
| AF118073  | 509.519   | 513.066   | AF032897  | 725.3     | 533.303   | AF248649  | 568.367   | 779.584   |
| AK023510  | 3952.563  | 3577.273  | NM_014967 | 3224.619  | 3064.584  | U37146    | 8744.726  | 8262.465  |
| NM_00434E | 1085.891  | 877.709   | AK022915  | 5841.742  | 4503.091  | NM_01208E | 1620.576  | 1807.025  |
| NM_000702 | 26296.506 | 19340.381 | AK021736  | 541.526   | 598.246   | NM_000991 | 47002.234 | 66734.82  |
| X71490    | 5954.908  | 4851.48   | AF131834  | 865.51    | 1113.695  | NM_016034 | 11795.295 | 9954.18   |
| AF257081  | 658.566   | 640.543   | AL355711  | 2911.207  | 2980.677  | X69150    | 45424.086 | 62196.684 |
| NM_00168E | 18378.031 | 10889.782 | AK025851  | 2995.684  | 2206.798  | NM_00102E | 47374.172 | 68633.805 |
| NM_003631 | 281.394   | 364.153   | AJ011409  | 17078.602 | 14211.383 | NM_016067 | 18335.539 | 21264.965 |
| NM_002232 | 846.708   | 335.824   | AJ227906  | 6146.854  | 6206.41   | NM_01828E | 3230.456  | 3564.091  |
| NM_02209E | 563.968   | 341.315   | V00541    | 863.077   | 988.13    | AK022393  | 2456.127  | 2225.906  |
| AF112219  | 21136.877 | 18815.244 | AJ011598  | 550.009   | 728.666   | AK026654  | 660.81    | 681.368   |
| NM_000521 | 316.443   | 274.723   | AJ001906  | 748.142   | 739.872   | AK025496  | 2677.885  | 2175.001  |
| NM_00413E | 3357.912  | 3297.774  | U17633    | 1077.78   | 1226.347  | NM_00520E | 51558.816 | 41433.352 |
| NM_013443 | 1897.01   | 1543.23   | L10404    | 2308.56   | 1586.007  | NM_00196E | 667.958   | 594.062   |
| NM_00092E | 10124.489 | 10421.562 | AF283776  | 8725.733  | 7165.154  | NM_01613E | 1310.472  | 1733.95   |
| NM_00046E | 1892.765  | 1821.777  | L10123    | 51981.188 | 51399.277 | Z36833    | 47168.879 | 43566.57  |
| NM_000123 | 4957.347  | 5366.97   | AF071507  | 717.358   | 393.622   | NM_01435E | 1139.565  | 1342.263  |
| AL137501  | 569.075   | 519.699   | D16877    | 4746.43   | 4498.362  | M21191    | 14919.963 | 14589.337 |
| BE858979  | 472.693   | 349.34    | L19363    | 1121.604  | 1127.429  | AF072810  | 667.508   | 582.358   |
| NM_000122 | 2824.596  | 2166.634  | AL109781  | 4384      | 3742.001  | L19778    | 590.628   | 522.867   |
| NM_006712 | 43227.387 | 28839.762 | AK021895  | 4495.301  | 4119.192  | AF174482  | 4130.506  | 3899.838  |
| NM_00624C | 784.153   | 789.279   | AK000036  | 6529.133  | 6398.673  | NM_00352E | 1283.175  | 1495.391  |
| NM_00702E | 5454.643  | 6992.323  | AK000769  | 741.019   | 740.87    | NM_01776E | 514.991   | 1018.109  |
| M37712    | 12292.116 | 5348.737  | AK000924  | 1500.883  | 1222.082  | D85131    | 6777.401  | 5784.245  |
| NM_00264E | 550.006   | 482.967   | AK022252  | 765.415   | 681.993   | NM_00495E | 490.367   | 538.417   |
| AW797282  | 565.667   | 408.111   | AK000114  | 2601.875  | 2463.241  | D30612    | 1592.343  | 1614.776  |
| L09070    | 633.326   | 460.421   | AK000952  | 12034.48  | 10364.957 | NM_002163 | 325.124   | 317.03    |
| NM_000062 | 11647.821 | 11523.96  | AK024520  | 5341.384  | 4986.065  | U52097    | 8376.163  | 11334.478 |
| NM_00959C | 5042.759  | 5559.182  | AK024592  | 4357.689  | 3465.706  | NM_00341E | 1564.04   | 1695.311  |
| AL133037  | 1175.448  | 1462.753  | AK024904  | 2802.446  | 2447.312  | NM_017594 | 649.222   | 701.29    |
| NM_02035C | 2827.508  | 3593.962  | AK025030  | 3111.792  | 2482.679  | AK027237  | 378.772   | 481.963   |
| NM_00035C | 1141.494  | 898.616   | AK024542  | 5892.17   | 6415.908  | AK027104  | 1304.791  | 946.285   |
| X91103    | 2393.688  | 1781.92   | AK024915  | 932.728   | 876.79    | AL133090  | 16905.416 | 16065.362 |
| AA419164  | 1016.206  | 952.283   | AK025064  | 499.201   | 526.348   | AF085867  | 3879.242  | 4617.131  |
| L35251    | 2526.473  | 2238.702  | AB050477  | 3738.143  | 3725.855  | AK026158  | 305.817   | 328.61    |
| BE910395  | 617.828   | 525.866   | AK000152  | 1380.225  | 1056.579  | AF086510  | 2440.417  | 2649.531  |
| N46828    | 571.991   | 392.095   | AK024300  | 3065.235  | 2913.278  | Z36779    | 1427.167  | 1273.431  |
| BI908302  | 3626.519  | 2842.182  | L09092    | 967.708   | 1049.969  | NM_018422 | 254.499   | 392.935   |
| AA460969  | 2646.89   | 2517.157  | NM_012132 | 1801.826  | 1484.845  | NM_00281E | 774.398   | 1225.949  |
| BG695859  | 499.963   | 313.013   | NM_012129 | 1855.747  | 1764.261  | NM_017822 | 4003.338  | 5867.239  |



|           |           |           |           |           |           |           |           |           |
|-----------|-----------|-----------|-----------|-----------|-----------|-----------|-----------|-----------|
| M85079    | 1201.797  | 815.816   | AK024881  | 986.356   | 779.064   | AK024294  | 933.136   | 1111.519  |
| AA457671  | 8830.988  | 6254.613  | AK025716  | 1187.581  | 1101.994  | AL110126  | 2407.9    | 2067.342  |
| X07437    | 1661.241  | 1107.417  | AF086202  | 16485.559 | 13979.347 | AF052172  | 8909.702  | 9933.504  |
| NM_000641 | 1137.563  | 917.036   | AK022352  | 432.77    | 427.04    | AB014573  | 5070.397  | 7931.416  |
| AE006466  | 2970.734  | 3563.638  | AK023270  | 7803.301  | 7605.129  | AK025418  | 556.618   | 612.289   |
| BC008737  | 34647.637 | 21896.801 | AF085979  | 14004.737 | 18750.609 | AK091109  | 16792.418 | 15975.555 |
| BC011655  | 5650.76   | 3067.986  | AK023112  | 2799.248  | 2803.419  | NM_014967 | 1286.421  | 1206.618  |
| BC002396  | 3171.246  | 2495.848  | NM_017806 | 36687.199 | 37416.285 | AK022915  | 3561.59   | 3825.561  |
| AF208232  | 9049.913  | 8119.323  | AK001937  | 62346.613 | 57597.23  | AF131834  | 672.287   | 634.02    |
| NM_002988 | 2520.769  | 2325.513  | AL365517  | 1724.993  | 1650.758  | AL355711  | 1110.505  | 1070.189  |
| NM_004186 | 274.733   | 332.266   | AK021988  | 11938.683 | 11867.641 | AK025851  | 1216.724  | 1316.759  |
| NM_016258 | 4749.23   | 5008.243  | AF086494  | 28230.799 | 23571.785 | AJ011409  | 10201.682 | 11026.969 |
| AF203032  | 1309.624  | 2016.701  | BI769977  | 1268.534  | 1174.969  | AJ227906  | 1600.444  | 1243.775  |
| AB014542  | 4584.605  | 5487.239  | AL137567  | 1732.407  | 2120.93   | AJ011598  | 346.301   | 212.435   |
| NM_014640 | 1381.812  | 1449.968  | AK024913  | 2540.74   | 2346.73   | AJ001906  | 219.547   | 279.831   |
| Y10518    | 11097.817 | 10302.936 | AB007961  | 3589.896  | 3335.309  | U17633    | 355.326   | 642.905   |
| AF155135  | 7996.902  | 7586.537  | NM_005547 | 4264.856  | 4302.106  | L10123    | 21602.096 | 28130.053 |
| NM_014790 | 849.109   | 783.778   | AF119862  | 12737.321 | 11628.087 | D16877    | 1623.247  | 1862.786  |
| NM_003571 | 2632.524  | 2492.788  | U17628    | 1617.683  | 1356.191  | AK021895  | 864.002   | 926.523   |
| AB032965  | 13476.957 | 10997.488 | AF119867  | 7522.574  | 7413.961  | AK022252  | 370.897   | 565.209   |
| NM_020370 | 919.701   | 1093.951  | AL357205  | 9102.521  | 12202.251 | AK000114  | 1381.627  | 1918.004  |
| NM_004767 | 377.6     | 462.327   | AF124819  | 1018.925  | 736.079   | AK024592  | 1089.752  | 1431.519  |
| BF310159  | 5979.771  | 5813.414  | D17091    | 1972.412  | 1690.657  | AK024904  | 1189.029  | 1280.103  |
| NM_018986 | 1577.143  | 1553.833  | AL133074  | 2161.299  | 2236.305  | AK025030  | 1083.857  | 1357.179  |
| AB044934  | 268.113   | 213.972   | AF086318  | 19723.928 | 19737.865 | AK024542  | 2770.01   | 2588.134  |
| U27655    | 1142.796  | 1133.644  | AF088012  | 880.228   | 758.392   | AB050477  | 1988.167  | 2094.381  |
| NM_003360 | 1426.96   | 1353.922  | NM_018121 | 1523.147  | 1385.263  | AK000152  | 575.717   | 688.593   |
| Z21965    | 6940.133  | 4672.144  | NM_014191 | 447.507   | 800.098   | AK024300  | 743.606   | 1050.287  |
| NM_012427 | 676.416   | 523.833   | AK026708  | 9777.291  | 10272.618 | L09092    | 511.032   | 493.72    |
| AF131857  | 6661.957  | 6393.148  | NM_017903 | 5151.982  | 6099.649  | NM_012132 | 334.61    | 512.818   |
| NM_000852 | 26755.303 | 16051.345 | NM_018074 | 2007.112  | 2261.076  | NM_012128 | 954.657   | 1155.846  |
| NM_000398 | 336.011   | 326.715   | NM_000909 | 4902.563  | 5385.483  | AK024881  | 368.88    | 345.762   |
| AF257081  | 557.903   | 588.335   | U31737    | 619.917   | 670.221   | AF086202  | 11087.19  | 12706.445 |
| NM_001688 | 15385.067 | 15481.137 | AK024828  | 1700.209  | 1421.917  | AK022352  | 224.83    | 284.161   |
| NM_002232 | 888.158   | 666.28    | AF009315  | 2665.55   | 2379.427  | AK023270  | 1390.325  | 1340.227  |
| NM_016106 | 3881.831  | 5372.59   | NM_019013 | 1420.449  | 842.33    | AF085979  | 13033.568 | 15421.494 |
| NM_014570 | 4241.115  | 5135.1    | NM_006783 | 1182.597  | 893.45    | AK023112  | 1225.976  | 1677.117  |
| NM_014747 | 3375.955  | 4661.964  | L37711    | 959.594   | 2229.664  | NM_017806 | 19770.52  | 16062.195 |
| Y19240    | 4050.271  | 4792.944  | S70313    | 8553.121  | 8745.659  | AK023447  | 237.64    | 1009.014  |
| AF091029  | 2660.791  | 2834.906  | AK021607  | 2285.768  | 2128.056  | AK001937  | 38234.277 | 39140.258 |
| X97074    | 7031.435  | 6253.596  | AK025860  | 1363.652  | 1356.116  | AL365517  | 688.901   | 1220.93   |
| AL117235  | 531.006   | 560.818   | L09268    | 788.329   | 532.184   | AK021988  | 4306.974  | 4632.26   |
| NM_014822 | 2557.324  | 2769.052  | NM_020186 | 6730.31   | 7801.304  | AF086494  | 17261.789 | 17656.986 |
| NM_005296 | 1267.155  | 1324.475  | AK022424  | 662.58    | 556.197   | BI769977  | 815.007   | 1043.427  |
| NM_001337 | 412.744   | 415.735   | AF090947  | 3732.786  | 3115.756  | AL137567  | 561.914   | 612.434   |
| NM_003611 | 1434.172  | 1350.127  | NM_005047 | 2536.297  | 1791.184  | AK024913  | 860.622   | 853.603   |
| AB014538  | 838.088   | 974.017   | AJ272196  | 11898.75  | 12708.49  | AB007961  | 1177.251  | 1476.276  |
| NM_006208 | 370.665   | 224.68    | X58162    | 6145.567  | 10319.877 | NM_005547 | 1273.646  | 2031.769  |
| AK025118  | 3574.589  | 3347.841  | AK022825  | 1302.838  | 1187.117  | AF119862  | 7805.302  | 9379.333  |
| NM_000727 | 711.341   | 585.43    | M85079    | 1573.725  | 3299.026  | U17628    | 913.347   | 1415.13   |
| NM_002621 | 342.914   | 268.362   | AE006466  | 4644.278  | 3953.044  | AF119867  | 2732.401  | 3397.305  |
| NM_005388 | 4954.713  | 3889.138  | BC008737  | 43377.297 | 49245.488 | AL357205  | 4552.523  | 9264.419  |
| NM_018988 | 1762.209  | 1101.031  | BC011655  | 3691.497  | 6035.231  | AF124819  | 699.165   | 1084.649  |

|           |           |           |           |           |           |           |           |          |
|-----------|-----------|-----------|-----------|-----------|-----------|-----------|-----------|----------|
| NM_006074 | 10496.79  | 6347.039  | BC002396  | 4326.926  | 3961.724  | D17091    | 1191.929  | 1332.787 |
| NM_006712 | 43806.508 | 42885.633 | NM_022095 | 1196.686  | 1297.97   | AL133074  | 1374.209  | 1358.976 |
| NM_006240 | 607.851   | 536.927   | SR2       | 60648.805 | 50812.609 | AF086318  | 5503.25   | 4730.963 |
| NM_007026 | 3683.572  | 3342.509  | SR4       | 16998.184 | 11324.351 | AF088012  | 388.408   | 418.511  |
| M37712    | 13148.846 | 8460.009  | SR6       | 2751.325  | 1642.616  | NM_018121 | 473.812   | 731.876  |
| NM_002648 | 623.781   | 765.775   | SR8       | 9341.858  | 17169.506 | NM_014191 | 408.414   | 412.616  |
| AF070670  | 2703.242  | 3465.267  | SR10      | 31672.707 | 6055.252  | AK026708  | 2708.091  | 2653.591 |
| NM_016156 | 4388.076  | 5315.037  | CY3Cy5    | 3120.75   | 90.518    | NM_017903 | 2132.19   | 2188.872 |
| NM_016528 | 1817.004  | 2276.095  | Z21965    | 21012.982 | 27220.543 | NM_018074 | 2058.945  | 3909.329 |
| NM_015974 | 3324.064  | 3535.815  | AF131857  | 7326.97   | 6726.858  | NM_000909 | 2477.106  | 3849.912 |
| NM_014384 | 4284.796  | 5536.107  | NM_000852 | 19878.076 | 21846.707 | U31737    | 316.317   | 296.861  |
| NM_002573 | 8194.37   | 8766.771  | NM_000399 | 887.808   | 894.98    | AK024828  | 948.003   | 1196.315 |
| AF133424  | 1484.667  | 1177.422  | AW797282  | 795.324   | 703.326   | AF009315  | 826.186   | 953.28   |
| NM_005003 | 22229.055 | 21700.586 | NM_002402 | 339.454   | 667.884   | NM_019013 | 508.836   | 621.858  |
| AF084560  | 2999.642  | 2489.567  | L09070    | 1596.661  | 2242.246  | NM_006783 | 275.375   | 428.538  |
| NM_015715 | 340.309   | 370.376   | NM_000062 | 14089.682 | 11519.492 | S70313    | 4634.772  | 6328.856 |
| NM_000032 | 2314.423  | 2096.343  | NM_009590 | 6540.618  | 6302.589  | AK021607  | 1532.103  | 1571.729 |
| NM_002083 | 1444.379  | 1431.337  | AL133037  | 2279.618  | 1516.49   | AK025860  | 882.431   | 713.132  |
| NM_002035 | 5246.895  | 5870.746  | NM_020350 | 5274.201  | 2287.995  | NM_020186 | 4127.237  | 4937.19  |
| NM_014900 | 792.229   | 643.534   | NM_000350 | 1967.858  | 1589.919  | AF090947  | 1365.876  | 1923.025 |
| BF342908  | 863.145   | 702.325   | X91103    | 5789.389  | 4724.177  | NM_005047 | 1230.868  | 1488.983 |
| AF118073  | 651.918   | 753.522   | AA419164  | 1143.36   | 736.526   | AJ272196  | 6299.933  | 6198.936 |
| AK023510  | 4333.188  | 3857.284  | AL117235  | 674.896   | 745.776   | X58162    | 7629.56   | 3576.369 |
| NM_004345 | 1059.361  | 1096.328  | AB014538  | 2542.947  | 2779.62   | AK022825  | 650.007   | 877.22   |
| NM_000702 | 27905.77  | 21771.551 | NM_006209 | 906.379   | 942.262   | CY3Cy5    | 1392.111  | 161.177  |
| X71490    | 6311.654  | 5396.563  | AK025118  | 4990.307  | 4950.391  | N46828    | 1026.451  | 817.872  |
| NM_014273 | 11481.422 | 8976.439  | NM_000727 | 1567.099  | 1435.728  | BI908302  | 6152.813  | 4386.797 |
| AF039442  | 1095.505  | 1342.818  | NM_002621 | 720.494   | 374.513   | AA460969  | 1565.205  | 1179.221 |
| NM_005671 | 1929.24   | 5447.667  | NM_005385 | 8952.585  | 10352.333 | AA457671  | 5434.324  | 4028.804 |
| NM_017409 | 3857.328  | 7441.785  | NM_018985 | 2154.917  | 2285.964  | X07437    | 1767.374  | 1325.348 |
| NM_019625 | 1660.625  | 2197.478  | NM_006074 | 22776.078 | 24519.209 | NM_000641 | 939.163   | 627.61   |
| NM_006729 | 2879.666  | 3945.555  | AF208232  | 11933.155 | 14301.865 | AE006466  | 1675.848  | 1598.084 |
| NM_006071 | 992.803   | 1324.746  | NM_002988 | 8959.238  | 9231.806  | BC002396  | 1957.184  | 1626.478 |
| NM_012236 | 5224.532  | 6710.217  | NM_004186 | 1695.115  | 1747.375  | NM_022095 | 631.4     | 477.588  |
| AF112219  | 23055.98  | 25762.416 | NM_016258 | 6677.441  | 7113.414  | SR2       | 41314.777 | 33459.59 |
| NM_000521 | 355.922   | 587.441   | AF203032  | 4466.107  | 4630.288  | SR4       | 7455.125  | 5224.529 |
| NM_004135 | 3448.433  | 3825.453  | AB014542  | 11097.229 | 7582.956  | SR6       | 1200.266  | 782.717  |
| NM_000203 | 355.783   | 545.285   | NM_014640 | 1390.668  | 1630.247  | SR8       | 4832.708  | 9658.021 |
| NM_013443 | 1892.76   | 1759.797  | Y10518    | 42719.02  | 42144.406 | SR10      | 14886.977 | 3603.918 |
| NM_000925 | 10132.33  | 10373.869 | AF155135  | 13045.411 | 10978.232 | CY3Cy5    | 989.157   | 124.661  |
| NM_000465 | 1704.731  | 2168.155  | NM_014790 | 1323.13   | 950.392   | NM_020370 | 496.07    | 620.428  |
| NM_000123 | 5177.736  | 6574.731  | NM_003571 | 6191.917  | 4382.798  | NM_004767 | 826.952   | 864.88   |
| AL137501  | 895.062   | 830.439   | AB032965  | 37529.078 | 28947.934 | BF310159  | 4688.048  | 4198.364 |
| BE858979  | 349.265   | 337.978   | AF133424  | 5211.59   | 5416.825  | NM_018986 | 852.464   | 827.325  |
| NM_000122 | 2456.372  | 2255.722  | NM_015715 | 882.699   | 822.319   | U27655    | 1080.279  | 1256.013 |
| U87223    | 365.861   | 424.62    | NM_000032 | 6507.729  | 6468.978  | NM_003360 | 1476.602  | 1429.914 |
| X91348    | 8577.521  | 7590.261  | NM_002083 | 4784.573  | 4388.85   | Z21965    | 9659.622  | 8493.232 |
| Z36505    | 3007.756  | 2577.109  | NM_002035 | 7021.412  | 7382.781  | NM_012427 | 2428.016  | 2615.62  |
| NM_001854 | 1048.462  | 772.474   | NM_014900 | 1373.146  | 1523.615  | AF131857  | 2860.283  | 2657.229 |
| NM_017913 | 1948.106  | 2365.606  | BF342908  | 3130.131  | 3068.108  | NM_000852 | 11000.954 | 8191.497 |
| AK024799  | 10027.313 | 13601.015 | AF118073  | 476.581   | 785.034   | L09070    | 1310.365  | 871.959  |
| NM_000924 | 5341.761  | 6787.43   | AK023510  | 5763.342  | 5840.46   | NM_000062 | 6706.938  | 6072.964 |
| NM_003330 | 11273.445 | 15117.923 | NM_004345 | 3128.124  | 3482.663  | NM_009590 | 3249.331  | 2735.543 |

|           |           |           |           |           |           |           |           |           |
|-----------|-----------|-----------|-----------|-----------|-----------|-----------|-----------|-----------|
| NM_002481 | 308.304   | 459.425   | NM_000702 | 36899.914 | 37199.465 | AL133037  | 824.711   | 699.237   |
| NM_003647 | 1337.232  | 1703.335  | X71490    | 13164.212 | 13972.402 | NM_02035C | 1672.486  | 1428.612  |
| NM_001695 | 10740.693 | 16747.072 | AF257081  | 2457.086  | 2655.516  | NM_00035C | 1156.381  | 533.453   |
| NM_018351 | 732.741   | 709.35    | NM_006528 | 384.817   | 1200.997  | X91103    | 2620.222  | 1608.059  |
| AK023019  | 850.732   | 1283.266  | NM_001688 | 28828.598 | 27033.031 | AA419164  | 538.673   | 296.595   |
| NM_147171 | 3245.793  | 3382.501  | NM_000219 | 848.657   | 703.18    | AL117235  | 313.111   | 301.775   |
| AF238083  | 2070.193  | 1476.481  | NM_002232 | 874.408   | 1337.714  | NM_014822 | 1611.406  | 1655.169  |
| NM_002962 | 602.058   | 1063.916  | NM_016106 | 6259.422  | 4755.326  | NM_005296 | 829.76    | 964.592   |
| NM_016388 | 2075.913  | 3216.719  | NM_014570 | 6885.823  | 5085.751  | NM_001337 | 328.843   | 308.645   |
| AB046783  | 2839.507  | 2480.136  | NM_014747 | 6327.728  | 5490.821  | NM_003611 | 1541.402  | 1608.583  |
| NM_000845 | 756.63    | 562.916   | Y19240    | 5410.285  | 3754.883  | AB014538  | 1621.02   | 1423.871  |
| NM_014965 | 2100.791  | 1653.559  | AF091029  | 7882.644  | 5589.471  | NM_006205 | 356.745   | 317.173   |
| NM_004882 | 7305.231  | 5987.206  | X97074    | 18920.865 | 14106.583 | AK025118  | 2575.912  | 2320.258  |
| AL390148  | 7895.214  | 6152.16   | NM_004135 | 2900.555  | 2874.946  | NM_000727 | 761.214   | 529.271   |
| AK024055  | 972.252   | 818.408   | NM_000203 | 450.504   | 571.421   | NM_002621 | 313.453   | 372.763   |
| U10485    | 802.843   | 950.685   | NM_013443 | 2351.286  | 2114.599  | NM_005385 | 3985.383  | 3382.252  |
| AK025326  | 2831.362  | 2561.962  | NM_000925 | 13161.048 | 11657.163 | NM_018985 | 1058.799  | 576.003   |
| NM_013376 | 1118.492  | 1094.426  | NM_000465 | 2124.22   | 2024.45   | NM_006074 | 9489.473  | 6171.788  |
| NM_017964 | 1143.674  | 1521.321  | NM_000123 | 7264.113  | 7206.328  | AF208232  | 6811.001  | 5203.575  |
| NM_016272 | 315.092   | 703.08    | AL137501  | 1101.841  | 1253.552  | NM_002988 | 3472.731  | 2757.634  |
| NM_004083 | 6327.242  | 11661.131 | BE858979  | 1470.483  | 1388.076  | NM_004186 | 517.299   | 598.4     |
| NM_016039 | 7584.569  | 9165.117  | NM_000122 | 3192.885  | 2602.225  | NM_016258 | 3338.971  | 2083.223  |
| NM_001184 | 2981.695  | 4844.728  | NM_006712 | 67884.234 | 65811.68  | AF203032  | 1599.822  | 1086.644  |
| NM_016238 | 4118.811  | 7265.958  | NM_006240 | 2722.391  | 3083.105  | AB014542  | 4626.599  | 3790.933  |
| NM_001758 | 566.815   | 697.146   | NM_007026 | 4599.553  | 5562.981  | NM_014640 | 693.579   | 453.712   |
| BE546276  | 515.165   | 770.506   | M37712    | 16333.479 | 14657.109 | Y10518    | 16313.11  | 11242.428 |
| NM_004725 | 15107.336 | 19430.566 | NM_002648 | 802.794   | 1193.173  | AF155135  | 5383.923  | 4355.207  |
| NM_015997 | 2342.18   | 3207.493  | AF070670  | 5822.677  | 5012.559  | NM_014790 | 629.222   | 369.379   |
| NM_001167 | 3491.673  | 3816.543  | NM_016156 | 5898.554  | 5327.327  | NM_003571 | 2108.819  | 1522.094  |
| NM_012115 | 2908.389  | 3718.01   | NM_016528 | 2132.253  | 1518.136  | AB032965  | 13409.292 | 7242.696  |
| NM_004933 | 6801.554  | 7286.966  | NM_015974 | 3302.96   | 3291.916  | AF133424  | 1479.44   | 1264.863  |
| M96577    | 8953.866  | 10588.643 | NM_014384 | 4311.938  | 4038.064  | NM_005003 | 11050.2   | 10495.049 |
| NM_013258 | 2836.193  | 3025.374  | NM_002573 | 7910.561  | 4845.73   | AF084560  | 3711.484  | 3848.322  |
| NM_003842 | 3310.842  | 3205.763  | AL133037  | 2093.385  | 2017.598  | NM_015715 | 442.958   | 457.215   |
| L11238    | 10565.405 | 9449.791  | NM_020350 | 5077.11   | 2720.807  | NM_000032 | 2648.505  | 2767.433  |
| AK025684  | 965.87    | 861.159   | NM_000350 | 3540.529  | 3198.835  | NM_002083 | 1901.236  | 1797.659  |
| NM_012205 | 2283.925  | 2152.38   | AA419164  | 1299.057  | 1242.277  | NM_002035 | 2893.301  | 2876.013  |
| K02046    | 3429.795  | 3737.851  | L35251    | 3461.419  | 3625.503  | NM_014900 | 588.439   | 337.547   |
| AL110151  | 7120.599  | 10102.79  | BE910395  | 1363.281  | 1030.985  | BF342908  | 1310.323  | 1290.773  |
| NM_004995 | 2024.67   | 3208.778  | N46828    | 1637.333  | 1498.474  | AF118073  | 426.486   | 448.371   |
| NM_000386 | 6698.854  | 9974.205  | BI908302  | 12235.688 | 13626.159 | AK023510  | 2451.472  | 2554.669  |
| NM_007231 | 553.82    | 984.939   | AA460969  | 3157.953  | 3499.425  | NM_004345 | 1120.86   | 1025.695  |
| NM_005271 | 9617.869  | 16419.688 | BG695859  | 698.519   | 1126.355  | NM_000702 | 17460.457 | 15269.061 |
| NM_015654 | 8061.603  | 11537.558 | M85079    | 4773.429  | 5923.646  | X71490    | 5645.059  | 5379.478  |
| NM_012244 | 2644.133  | 4127.124  | AA457671  | 9593.999  | 11468.168 | AF257081  | 843.034   | 746.417   |
| NM_004341 | 1214.788  | 1814.303  | X07437    | 4227.743  | 3944.925  | NM_001688 | 9362.074  | 9010.801  |
| AB082521  | 4433.654  | 4931.749  | NM_000641 | 1723.864  | 1723.246  | NM_000219 | 258.341   | 375.177   |
| AL050182  | 854.771   | 1177.833  | AE006466  | 4456.028  | 3937.781  | NM_002232 | 595.504   | 213.513   |
| NM_020040 | 1232.155  | 1576.012  | BC011655  | 4262.845  | 6710.44   | NM_016106 | 2489.23   | 2377.736  |
| NM_002374 | 920.245   | 1097.041  | BC002396  | 4155.901  | 4027.746  | NM_014570 | 2861.435  | 2376.146  |
| AK026940  | 3114.061  | 2491.661  | NM_022095 | 1232.655  | 1271.691  | NM_014747 | 2599.961  | 2213.641  |
| AF155117  | 3415.432  | 3041.96   | AF112219  | 25709.209 | 20929.035 | Y19240    | 2162.404  | 1688.776  |
| AB014527  | 686.613   | 576.656   | NM_014640 | 1316.468  | 1293.48   | AF091029  | 3318.517  | 2190.87   |

|           |           |           |           |           |           |           |           |           |
|-----------|-----------|-----------|-----------|-----------|-----------|-----------|-----------|-----------|
| NM_004411 | 2115.642  | 1957.936  | Y10518    | 53245.254 | 58044.629 | X97074    | 8583.498  | 4633.953  |
| NM_01593E | 5828.039  | 5387.816  | AF155135  | 15983.129 | 14082.969 | NM_00262E | 272.315   | 207.896   |
| NM_00074C | 665.596   | 829.511   | NM_01479C | 1435.626  | 1441.614  | NM_00413E | 1377.881  | 1477.979  |
| NM_01784E | 3023.481  | 1614.331  | NM_003571 | 7358.554  | 6742.468  | NM_00020E | 379.623   | 138.936   |
| AK025985  | 980.478   | 2274.168  | AB032965  | 50621.289 | 53245.672 | NM_01344E | 1481.771  | 910.879   |
| NM_01325E | 1683.682  | 1914.579  | NM_02037C | 1312.713  | 703.582   | NM_00092E | 5632.274  | 6136.182  |
| NM_00414E | 952.178   | 824.421   | NM_004767 | 892.78    | 796.796   | NM_00046E | 913.454   | 1357.8    |
| X66087    | 817       | 867.084   | BF310159  | 7095.373  | 7340.777  | NM_00012E | 3361.101  | 4119.351  |
| NM_01632E | 3761.625  | 4242.435  | NM_00031E | 4086.553  | 7606.106  | AL137501  | 472.216   | 465.996   |
| NM_01754A | 12346.501 | 15167.922 | NM_01898E | 1518.34   | 2094.436  | BE858979  | 649.366   | 448.758   |
| NM_00315E | 1178.009  | 1713.305  | AB044934  | 340.548   | 730.858   | NM_00012E | 1349.796  | 1095.658  |
| NM_01628E | 1852.092  | 3434.729  | U27655    | 2492.089  | 1947.072  | NM_00671E | 53748.625 | 57683.98  |
| NM_014707 | 886.425   | 2039.955  | NM_00336C | 1859.196  | 1707.102  | NM_00624C | 533.888   | 328.031   |
| AF025771  | 1326.438  | 2166.479  | Z21965    | 23467.906 | 23681.703 | NM_00702E | 2296.084  | 1704.744  |
| NM_01821E | 1287.992  | 2254.411  | NM_012427 | 1008.005  | 1079.575  | M37712    | 8583.15   | 4655.68   |
| AB033110  | 595.321   | 972.229   | NM_00085E | 20906.238 | 22952.674 | NM_00264E | 376.932   | 360.431   |
| NM_00508E | 7691.851  | 13113.099 | NM_00039E | 758.664   | 800.734   | AF070670  | 979.509   | 822.735   |
| NM_007187 | 12938.68  | 17088.527 | AW797282  | 924.052   | 964.158   | NM_01615E | 2810.483  | 2260.647  |
| NM_01898E | 14030.662 | 15944.136 | NM_00240E | 493.385   | 640.35    | NM_01652E | 1049.09   | 1173.385  |
| NM_00309E | 8032.011  | 11845.651 | L09070    | 1955.081  | 2041.657  | NM_01597A | 1690.938  | 1074.991  |
| NM_00727E | 3881.25   | 4056.327  | NM_00006E | 15308.945 | 10840.839 | NM_01438A | 2335.597  | 1792.031  |
| BE390833  | 18964.91  | 15917.986 | NM_00959C | 6515.307  | 4800.896  | NM_00257E | 3454.574  | 2476.949  |
| NM_00473C | 8121.141  | 8637.574  | NM_01610E | 5445.257  | 4349.793  | AL133037  | 904.245   | 910.072   |
| NM_000801 | 4904.233  | 5326.136  | NM_01457C | 5905.732  | 4627.648  | NM_02035C | 1454.181  | 1977.143  |
| NM_00611E | 10004.808 | 6340.024  | NM_014747 | 7221.881  | 6477.599  | NM_00035C | 1095.729  | 900.525   |
| NM_005801 | 3945.874  | 3682.772  | Y19240    | 4352.234  | 4609.644  | X91103    | 2751.837  | 2810.556  |
| NM_01819E | 2855.027  | 2698.511  | AF091029  | 7694.531  | 7423.119  | AA419164  | 544.851   | 540.305   |
| NM_00153E | 22165.273 | 16965.369 | X97074    | 26414.107 | 24584.652 | L35251    | 1432.775  | 1882.759  |
| NM_012267 | 406.466   | 404.562   | NM_01482E | 1855.595  | 1487.645  | BE910395  | 627.793   | 850.844   |
| AK027232  | 8048.441  | 11742.379 | NM_00529E | 1144.778  | 1274.267  | N46828    | 743.659   | 506.586   |
| NM_01220A | 387.708   | 668.338   | NM_001337 | 1111.88   | 310.467   | BI908302  | 4549.215  | 3288.786  |
| NM_00361E | 908.896   | 1276.581  | NM_003611 | 2760.983  | 3262.812  | AA460969  | 1494.56   | 1313.239  |
| NM_00002E | 42191.746 | 48664.313 | AB014538  | 1500.748  | 1599.931  | BG695859  | 436.963   | 362.677   |
| NM_01657E | 6511.896  | 9517.332  | NM_00620E | 694.595   | 1027.78   | M85079    | 2467.136  | 2062.592  |
| NM_00421E | 1174.481  | 1656.027  | AK025118  | 5020.989  | 5726.856  | AA457671  | 5051.81   | 3956.329  |
| NM_00192E | 48598.402 | 65778.516 | NM_000727 | 1633.158  | 1364.987  | X07437    | 1765.249  | 1556.578  |
| NM_00090E | 1582.155  | 2472.1    | NM_00538E | 11173.025 | 14854.027 | NM_000641 | 1108.099  | 1360.059  |
| NM_00048C | 6052.648  | 11423.391 | NM_01898E | 2158.177  | 2504.369  | AE006466  | 552.578   | 429.887   |
| AF254084  | 40537.426 | 59992.422 | NM_00607A | 20087.9   | 20155.658 | BC008737  | 17826.504 | 15035.941 |
| AK022648  | 446.967   | 494.983   | AF208232  | 11713.065 | 12638.898 | BC011655  | 2832.119  | 1997.838  |
| AK022976  | 1117.99   | 1448.439  | NM_00298E | 7665.743  | 6547.639  | BC002396  | 2159.843  | 1996.08   |
| AB048791  | 5478      | 7271.988  | NM_00418E | 1930.291  | 1113.645  | NM_02209E | 522.818   | 417.642   |
| NM_003107 | 14104.226 | 13208.271 | NM_01625E | 6576.819  | 5719.398  | AF112219  | 13261.293 | 11811.979 |
| NM_00687A | 3232.757  | 4441.766  | AF203032  | 4820.626  | 3831.614  | NM_000521 | 241.481   | 170.688   |
| AB046777  | 3735.153  | 3811.497  | AB014542  | 10661.587 | 5098.746  | NM_01464C | 692.833   | 475.757   |
| AJ251844  | 1519.312  | 1214.762  | AF070670  | 6914.243  | 5993.768  | Y10518    | 21839.406 | 20533.557 |
| D16815    | 1089.913  | 1210.762  | NM_01615E | 4763.828  | 5339.586  | AF155135  | 5937.605  | 6472.355  |
| NM_00188C | 2888.611  | 2677.586  | NM_01652E | 1986.951  | 2532.339  | NM_01479C | 629.391   | 594.725   |
| AB028943  | 1093.021  | 911.791   | NM_01597A | 3284.395  | 3783.231  | NM_003571 | 2981.261  | 2870.584  |
| NM_00619A | 1460.987  | 976.991   | NM_01438A | 3781.837  | 4869.237  | AB032965  | 19211.932 | 19651.293 |
| AK001603  | 3009.477  | 2451.224  | NM_00257E | 7063.11   | 6104.328  | NM_02037C | 784.628   | 761.373   |
| U71601    | 1869.994  | 1522.097  | AF133424  | 4248.408  | 3787.109  | NM_004767 | 378.342   | 364.483   |
| AF042838  | 1015.504  | 1541.981  | NM_00500E | 16436.295 | 13329.229 | BF310159  | 4529.068  | 4312.845  |

|           |           |           |           |           |           |           |           |           |
|-----------|-----------|-----------|-----------|-----------|-----------|-----------|-----------|-----------|
| AL137511  | 372.003   | 391.184   | AF084560  | 7593.155  | 7214.446  | U27655    | 686.98    | 717.987   |
| AF075062  | 5635.75   | 7704.292  | NM_000032 | 4977.909  | 5543.402  | Z21965    | 2220.908  | 1572.454  |
| NM_00418E | 628.373   | 821.72    | NM_002083 | 4178.726  | 3646.953  | AF131857  | 1728.784  | 1699.533  |
| AF147381  | 7733.181  | 11780.164 | NM_002035 | 6592.441  | 6617.73   | NM_000852 | 10859.998 | 9153.607  |
| AB002452  | 407.631   | 782.332   | NM_014900 | 1359.558  | 1382.113  | NM_00039E | 344.559   | 389.493   |
| AK027101  | 11565.448 | 17535.027 | BF342908  | 2997.295  | 3085.728  | AW797282  | 448.003   | 269.724   |
| AF010236  | 553.872   | 1068.889  | AF118073  | 750.406   | 710.573   | L09070    | 1749.239  | 1840.065  |
| AF088075  | 1025.63   | 1622.798  | AK023510  | 5644.468  | 4856.726  | NM_009590 | 3173.042  | 2297.217  |
| AK026376  | 3985.501  | 4648.631  | NM_004345 | 2350.72   | 2781.026  | NM_01610E | 2269.179  | 2474.113  |
| AF088061  | 2260.725  | 2947.945  | NM_000702 | 33245.961 | 34538.875 | NM_014570 | 2981.574  | 3559.746  |
| AF086425  | 198.179   | 349.208   | X71490    | 11158.718 | 11337.839 | NM_014747 | 2938.521  | 3623.308  |
| AF086286  | 1721.833  | 1744.391  | AF257081  | 1668      | 1781.646  | Y19240    | 2470.021  | 2573.826  |
| AF086376  | 1476.145  | 1222.955  | NM_00168E | 28863.092 | 18666.283 | AF091029  | 4145.778  | 4871.208  |
| AF086410  | 762.37    | 759.159   | NM_003631 | 570.376   | 320.578   | X97074    | 12460.823 | 13140.102 |
| AF086455  | 652.385   | 516.883   | NM_000219 | 690.071   | 493.211   | NM_014822 | 976.025   | 980.593   |
| AK022997  | 7164.341  | 7304.952  | NM_002232 | 655.012   | 803.046   | NM_003611 | 373.19    | 331.602   |
| NM_017617 | 2295.303  | 1879.1    | NM_022095 | 1343.546  | 1235.197  | AK025118  | 1488.907  | 1171.029  |
| AF131830  | 881.004   | 721.674   | AF112219  | 24393.916 | 25185.344 | NM_000727 | 385.353   | 342.891   |
| NM_014811 | 253.967   | 200.624   | NM_000521 | 731.8     | 662.807   | NM_00538E | 1525.246  | 1188.459  |
| AF147426  | 1493.099  | 2561.936  | NM_013443 | 2405.583  | 2716.964  | NM_01898E | 1101.975  | 778.954   |
| BC019667  | 9421.738  | 10968.257 | NM_000925 | 13750.5   | 10716.617 | NM_006074 | 8607.471  | 7044.272  |
| AK026026  | 2612.433  | 3395.734  | NM_000465 | 2417.438  | 2396.875  | AF208232  | 6430.439  | 5081.815  |
| AF085941  | 13048.764 | 18160.061 | NM_000123 | 6725.95   | 7352.499  | NM_00298E | 3597.37   | 2963.42   |
| Z69892    | 5491.422  | 7695.725  | AL137501  | 1414.086  | 1422.971  | NM_00418E | 583.608   | 491.785   |
| AK023590  | 562.895   | 712.282   | BE858979  | 1472.805  | 1208.379  | AF203032  | 1766.132  | 1760.608  |
| AF087961  | 529.506   | 870.249   | NM_000122 | 3478.618  | 2832.814  | AB014542  | 4335.721  | 2554.97   |
| AL137309  | 1707.587  | 3124.594  | NM_006712 | 67754.781 | 68429.719 | AF070670  | 2749.649  | 2220.419  |
| AL137475  | 762.559   | 1608.816  | NM_006240 | 3193.975  | 2596.012  | NM_01615E | 2503.431  | 2932.006  |
| AL161956  | 4209.988  | 9494.782  | NM_00702E | 4924.955  | 4081.687  | NM_01652E | 1292.278  | 2277.409  |
| AL390176  | 2423.378  | 4526.109  | M37712    | 16542.586 | 10163.831 | NM_015974 | 1863.687  | 2715.393  |
| AL137356  | 630.359   | 1030.037  | NM_00264E | 856.69    | 681.588   | NM_014384 | 2519.399  | 3057.759  |
| AL137547  | 984.899   | 1341.823  | AW797282  | 849.657   | 861.762   | NM_002573 | 3491.127  | 3904.625  |
| AK021994  | 1041.338  | 1218.312  | L09070    | 1711.151  | 2140.99   | AF133424  | 1672.346  | 1879.943  |
| Z70763    | 698.976   | 1031.451  | NM_000062 | 12617.986 | 10944.69  | NM_005003 | 3788.673  | 3636.771  |
| AK023802  | 6589.237  | 8519.846  | NM_009590 | 6525.867  | 7070.813  | AF084560  | 1674.99   | 2139.146  |
| AF086103  | 453.597   | 375.505   | AL133037  | 2306.587  | 2029.341  | NM_01571E | 1406.89   | 1678.26   |
| AL080135  | 414.425   | 385.69    | NM_020350 | 4465.555  | 2788.733  | NM_000032 | 639.512   | 610.342   |
| AK023158  | 1273.653  | 1198.997  | BE910395  | 1003.193  | 935.12    | NM_002083 | 542.172   | 582.644   |
| AK000580  | 329.24    | 506.018   | N46828    | 1823.983  | 1695.021  | NM_00203E | 791.077   | 695.371   |
| AF085852  | 2250.937  | 2239.412  | BI908302  | 10390.709 | 9989.951  | NM_014900 | 228.09    | 215.433   |
| AK023952  | 1060.546  | 1787.736  | AA460969  | 3569.688  | 3325.937  | BF342908  | 354.938   | 275.68    |
| AK000787  | 765.482   | 1224.228  | BG695859  | 854.855   | 1413.312  | AK023510  | 2062.9    | 1783.155  |
| AF090885  | 16038.537 | 20355.199 | M85079    | 3971.994  | 4599.23   | NM_00434E | 807.255   | 708.338   |
| NM_01664E | 517.911   | 1022.077  | AA457671  | 10156.692 | 12373.156 | NM_000702 | 11187.098 | 8582.271  |
| NM_014082 | 1159.359  | 1882.708  | X07437    | 4428.817  | 4872.597  | X71490    | 5645.655  | 5275.387  |
| AF161366  | 419.214   | 637.318   | NM_000641 | 2316.237  | 2022.416  | AF257081  | 828.548   | 652.477   |
| AK022197  | 787.31    | 1627.691  | AE006466  | 4975.484  | 3889.047  | NM_00168E | 13143.738 | 12271.44  |
| AK021970  | 541.111   | 769.393   | BC008737  | 41561.395 | 33610.336 | NM_003631 | 230.437   | 182.383   |
| AK022066  | 43898.457 | 57437.355 | BC011655  | 4260.487  | 6118.713  | NM_002232 | 514.038   | 182.09    |
| AK022224  | 1208.503  | 2060.737  | BC002396  | 4594.967  | 2997.796  | NM_02209E | 549.006   | 387.139   |
| AK022359  | 672.422   | 869.88    | AF208232  | 11006.437 | 11776.866 | AF112219  | 14724.687 | 16767.76  |
| AK022000  | 806.267   | 902.553   | NM_00298E | 8513.004  | 8899.028  | NM_000521 | 278.218   | 400.315   |
| AK022129  | 1381.418  | 1553.7    | NM_00418E | 2211.442  | 2328.965  | NM_00262E | 1478.391  | 1505.961  |

|           |           |           |           |           |           |           |           |           |
|-----------|-----------|-----------|-----------|-----------|-----------|-----------|-----------|-----------|
| AK022263  | 1870.542  | 2572.649  | NM_016258 | 5414.686  | 6441.789  | NM_004135 | 1224.341  | 1419.39   |
| AK022384  | 659.682   | 761.639   | AF203032  | 6477.919  | 6453.077  | NM_013443 | 369.038   | 200.978   |
| AK027097  | 504.409   | 662.625   | AB014542  | 12406.808 | 10864.663 | NM_000925 | 1599.944  | 2075.887  |
| AK027198  | 524.876   | 591.493   | NM_014640 | 1799.31   | 2032.829  | NM_000465 | 346.962   | 382.756   |
| AK000257  | 794.535   | 1235.163  | NM_020370 | 1426.357  | 823.167   | NM_000123 | 873.846   | 838.654   |
| NM_006160 | 2828.379  | 4484.593  | NM_004767 | 1156.789  | 1350.715  | BE858979  | 737.152   | 704.655   |
| NM_000529 | 454.693   | 284.773   | BF310159  | 7837.843  | 7153.641  | NM_000122 | 1231.071  | 1082.735  |
| AL110159  | 395       | 846.213   | NM_018986 | 1685.306  | 1791.117  | NM_006712 | 56508.395 | 58983.719 |
| AF009259  | 515.175   | 877.18    | U27655    | 2742.593  | 2730.344  | NM_006240 | 1077.191  | 728.001   |
| AF009260  | 1141.449  | 3519.18   | NM_003360 | 2549.615  | 2809.455  | NM_007026 | 2626.584  | 1593.614  |
| NM_003079 | 2517.037  | 5888.731  | Z21965    | 27828.805 | 27366.721 | M37712    | 8985.516  | 4155.387  |
| NM_017902 | 3631.129  | 5583.053  | NM_012427 | 1027.427  | 972.817   | NM_002648 | 441.78    | 360.534   |
| AK021981  | 428.228   | 484.348   | AF131857  | 8095.17   | 5524.215  | AW797282  | 473.252   | 539.923   |
| AL359567  | 759.245   | 963.227   | NM_000852 | 21724.885 | 18586.803 | NM_002402 | 423.704   | 319.317   |
| NM_017726 | 1233.536  | 1491.728  | NM_000399 | 947.55    | 746.407   | L09070    | 1411.439  | 1643.683  |
| AL049325  | 6092.302  | 5821.938  | AF257081  | 2610.309  | 2720.727  | NM_000062 | 6775.836  | 12860.48  |
| AK024154  | 5110.558  | 6680.396  | NM_001688 | 24451.76  | 21747.119 | NM_009590 | 4021.208  | 4473.575  |
| AF086341  | 788.224   | 1256.416  | NM_000219 | 596.004   | 919.779   | AL133037  | 884.648   | 1121.749  |
| AK026672  | 1319.539  | 2015.799  | NM_002232 | 952.16    | 1064.779  | NM_020350 | 1224.033  | 1469.209  |
| S83282    | 52713.766 | 82117.719 | NM_016106 | 6463.006  | 4995.173  | NM_000350 | 787.094   | 574.607   |
| AK024164  | 20078.34  | 34321.215 | NM_014570 | 5720.628  | 4479.631  | X91103    | 1997.08   | 2267.629  |
| AF052130  | 11814.599 | 36460.723 | AF091029  | 5907.025  | 6525.162  | L35251    | 480.185   | 456.922   |
| AF130090  | 18468.363 | 38649.227 | X97074    | 23459.645 | 22926.084 | BE910395  | 211.851   | 224.274   |
| AL096727  | 1530.837  | 3273.162  | AL117235  | 729.285   | 882.671   | N46828    | 953.078   | 779.989   |
| AL080110  | 10284.59  | 18644.383 | NM_014822 | 3624.633  | 3254.572  | BI908302  | 1630.715  | 1904.019  |
| NM_020425 | 2233.345  | 4447.013  | NM_005296 | 1915.415  | 1653.135  | M85079    | 530.567   | 255.865   |
| AK024076  | 1865.589  | 3694.278  | NM_001337 | 810.379   | 534.543   | AA457671  | 2319.096  | 1702.422  |
| M87940    | 1483.272  | 1917.39   | NM_003611 | 2644.456  | 3668.76   | X07437    | 1392.784  | 1208.33   |
| L77588    | 1293.474  | 2267.122  | AB014538  | 1381.834  | 1586.226  | NM_000641 | 930.223   | 653.225   |
| AF086304  | 17565.898 | 34121.238 | NM_006209 | 829.679   | 697.669   | AE006466  | 1787.317  | 1242.049  |
| AB032976  | 1442.074  | 2145.482  | AK025118  | 5028.188  | 4946.246  | BC008737  | 24147.646 | 15995.256 |
| AF301222  | 19102.543 | 23798.861 | NM_000727 | 1666.26   | 1285.826  | BC011655  | 2850.643  | 1744.354  |
| AF215981  | 2498.166  | 2459.519  | NM_005385 | 10833.045 | 7654.403  | BC002396  | 1801.022  | 1397.088  |
| NM_000732 | 47137.867 | 53833.688 | NM_018985 | 2175.435  | 1761.137  | NM_016258 | 2976.29   | 2930.55   |
| AF130044  | 686.366   | 543.668   | NM_006074 | 21624.756 | 17684.246 | AF203032  | 1773.661  | 2041.705  |
| AF087980  | 2247.015  | 1977.826  | NM_006712 | 59964.797 | 55530.27  | AB014542  | 4892.048  | 4546.11   |
| NM_013939 | 486.372   | 878.679   | NM_006240 | 5390.336  | 5423.066  | NM_014640 | 692.651   | 697.869   |
| AB038651  | 4503.865  | 3991.875  | NM_007026 | 4622.058  | 6145.852  | Y10518    | 16005.447 | 16666.309 |
| AL359603  | 1457.69   | 2914.689  | M37712    | 15448.135 | 11417.275 | AF155135  | 4752.689  | 5374.298  |
| X84838    | 565.849   | 1204.094  | NM_002648 | 1136.701  | 1075.433  | NM_014790 | 420.176   | 423.824   |
| NM_013940 | 1049.628  | 2258.529  | AF070670  | 6055.122  | 5955.085  | NM_003571 | 1197.736  | 937.259   |
| AL117643  | 1797.488  | 3646.206  | NM_016156 | 4517.156  | 3941.2    | AB032965  | 10429.189 | 7898.931  |
| AF069135  | 2437.927  | 4203.653  | NM_016528 | 1794.771  | 1566.983  | NM_004767 | 375.133   | 275.008   |
| AK026524  | 1352.118  | 2073.323  | NM_015974 | 2797.163  | 3050.351  | BF310159  | 1574.797  | 1477.333  |
| AB011157  | 6070.112  | 11800.307 | NM_014384 | 3427.004  | 4668.172  | U27655    | 864.077   | 687.025   |
| U17632    | 640.268   | 755.79    | NM_005003 | 18283.809 | 20138.641 | NM_003360 | 1125.278  | 842.756   |
| AK026764  | 1689.308  | 3772.018  | AF084560  | 8236.58   | 8891.657  | Z21965    | 8673.624  | 7422.174  |
| AF113700  | 2113.64   | 5002.26   | NM_000032 | 5254.55   | 6052.768  | NM_012427 | 491.627   | 376.204   |
| NM_017835 | 14255.585 | 23919.311 | NM_002083 | 4287.957  | 3698.193  | AF131857  | 3221.984  | 2735.889  |
| NM_018347 | 1861.659  | 2893.909  | NM_002035 | 6598.422  | 6890.434  | NM_000852 | 10904.434 | 8344.501  |
| AK024986  | 524.455   | 704.667   | NM_014900 | 1259.12   | 1423.488  | NM_000399 | 445.573   | 212.848   |
| AK026730  | 1090.602  | 1591.975  | BF342908  | 3042.122  | 2699.646  | AF257081  | 926.227   | 933.337   |
| AK024739  | 1745.543  | 2098.673  | AF118073  | 557.082   | 796.184   | NM_001688 | 11536.404 | 14029.805 |

|           |           |           |           |           |           |           |           |           |
|-----------|-----------|-----------|-----------|-----------|-----------|-----------|-----------|-----------|
| AK098681  | 703.053   | 894.675   | AK023510  | 5206.624  | 4222.999  | NM_000219 | 256.135   | 240.193   |
| AK026772  | 431.69    | 480.199   | NM_004345 | 2671.593  | 2518.115  | NM_002232 | 751.356   | 492.827   |
| NM_014260 | 10206.953 | 10995.718 | NM_000702 | 35022.785 | 28448.783 | NM_016106 | 2860.761  | 3778.49   |
| AK026458  | 796.023   | 821.497   | X71490    | 10551.464 | 9883.796  | NM_014570 | 2310.104  | 2867.237  |
| AK022266  | 290.773   | 174.329   | NM_014273 | 22656.15  | 22237.191 | NM_014747 | 2536.536  | 4189.143  |
| CY3Cy5    | 4401.028  | 187.388   | AF039442  | 1268.763  | 1101.687  | Y19240    | 1972.372  | 2276.74   |
| M23254    | 567.597   | 399.57    | NM_004680 | 1098.224  | 1451.804  | AF091029  | 2328.993  | 3094.698  |
| BE618539  | 900.22    | 853.744   | AF104260  | 1180.447  | 1502.267  | X97074    | 12916.659 | 12657.503 |
| R28062    | 2849.411  | 3183.338  | NM_005671 | 4924.212  | 2571.669  | NM_014822 | 1140.237  | 1420.435  |
| U38545    | 2770.672  | 1917.129  | NM_017409 | 5662.639  | 5019.251  | NM_005296 | 481.439   | 348.928   |
| AI627464  | 945.421   | 1453.491  | NM_019625 | 5539.044  | 5848.239  | NM_006209 | 297.969   | 251.225   |
| BI756258  | 4111.684  | 3799.476  | NM_006729 | 4278.729  | 3216.944  | AK025118  | 2668.159  | 2130.077  |
| J04599    | 857.315   | 543.374   | NM_006071 | 1198.106  | 1278.073  | NM_000727 | 892.048   | 455.81    |
| AA608557  | 7962.955  | 7785.073  | NM_012236 | 11784.853 | 12027.758 | NM_005385 | 3834.714  | 2634.193  |
| AL050095  | 3324.534  | 3448.594  | AF112219  | 23394.135 | 24816.754 | NM_018985 | 1079.225  | 553.627   |
| NM_000495 | 1158.488  | 1358.639  | NM_000203 | 673.932   | 852.848   | NM_006074 | 8891.483  | 4557.67   |
| NM_000664 | 1581.617  | 1430.828  | NM_013443 | 2224.442  | 2793.097  | NM_006712 | 48607.793 | 69389.313 |
| SR5       | 10836.847 | 13228.189 | NM_000925 | 13225.355 | 12188.837 | NM_006240 | 1314.152  | 1772.515  |
| SR7       | 8553.352  | 63786.691 | NM_000465 | 2422.771  | 2366.431  | NM_007026 | 2344.435  | 2407.03   |
| SR9       | 26133.717 | 5541.801  | NM_000123 | 7334.094  | 7751.333  | M37712    | 6808.452  | 4923.339  |
| CY3Cy5    | 7238.229  | 320.399   | AL137501  | 1260.278  | 931.689   | NM_002645 | 443.39    | 406.174   |
| NM_014805 | 2406.936  | 1151.91   | BE858979  | 1524.211  | 1155.734  | AF070670  | 3174.182  | 3211.089  |
| NM_000416 | 7553.588  | 5773.663  | NM_000122 | 3312.039  | 2430.703  | NM_016156 | 1819.2    | 1624.295  |
| NM_002965 | 1685.515  | 2899.538  | U87223    | 1208.366  | 1008.847  | NM_016525 | 688.501   | 858.146   |
| AB007883  | 1505.635  | 1276.962  | X91348    | 29796.078 | 30305.014 | NM_015974 | 1325.09   | 1387.512  |
| AK093780  | 10167.543 | 9166.402  | Z36505    | 3137.015  | 3553.715  | NM_014384 | 1737.427  | 1803.21   |
| AY009397  | 49652.598 | 40572.797 | NM_001854 | 2319.025  | 2610.989  | NM_002573 | 2642.911  | 2427.334  |
| NM_007037 | 8592.368  | 7358.797  | NM_017913 | 2613.512  | 2311.614  | AF133424  | 1373.072  | 1255.661  |
| NM_005492 | 602.653   | 683.97    | NM_002755 | 14869.33  | 15010.71  | NM_005003 | 6688.457  | 6056.38   |
| AF038196  | 4220.184  | 3485.505  | AK024799  | 48318.707 | 52058.738 | AF084560  | 1653.213  | 1379.963  |
| NM_004859 | 6481.1    | 5328.678  | NM_000924 | 6422.831  | 7061.723  | NM_002083 | 330.87    | 198.972   |
| NM_005014 | 1293.189  | 1348.847  | NM_003330 | 13127.016 | 11259.534 | NM_002035 | 581.754   | 632.502   |
| NM_000070 | 1465.816  | 1736.891  | NM_018351 | 1479.148  | 1909.459  | NM_014900 | 711.11    | 565.622   |
| NM_001202 | 2408.359  | 3680.468  | AK023019  | 1834.742  | 1940.306  | BF342908  | 1693.877  | 1482.381  |
| NM_003289 | 37434.5   | 38328.762 | NM_147171 | 6093.275  | 3744.381  | AF118073  | 355.082   | 247.352   |
| NM_006323 | 16196.817 | 8801.957  | AF238083  | 12391.209 | 14630.729 | AK023510  | 2988.117  | 2246.004  |
| NM_016466 | 4309.032  | 3242.44   | NM_002962 | 1320.314  | 790.4     | NM_004345 | 1322.328  | 1090.79   |
| NM_001493 | 11426.714 | 13750.455 | NM_016385 | 5165.394  | 4085.34   | NM_000702 | 20698.674 | 14090.681 |
| NM_014841 | 849.807   | 588.726   | AB046783  | 3011.878  | 3536.371  | X71490    | 5767.29   | 3215.59   |
| NM_014426 | 17162.176 | 12221.885 | NM_000845 | 1742.638  | 1798.827  | NM_014273 | 8577.013  | 8481.085  |
| NM_006816 | 22269.121 | 18494.758 | NM_014965 | 5952.435  | 6089.951  | AF039442  | 731.752   | 887.872   |
| AK026518  | 58148.781 | 53328.414 | NM_004882 | 31275.699 | 28314.217 | NM_004680 | 609.659   | 894.838   |
| NM_000255 | 18619.281 | 18168.273 | AL390148  | 19303.172 | 17214.889 | AF104260  | 260.383   | 287.506   |
| AB033055  | 9237.658  | 8447.409  | AK024055  | 1885.2    | 1289.094  | NM_005671 | 1276.42   | 3514.212  |
| AF311287  | 5099.303  | 5481.363  | U10485    | 922.512   | 818.596   | NM_017409 | 2682.155  | 3421.969  |
| NM_003095 | 1760.93   | 1625.669  | AK025326  | 18730.563 | 18351.949 | NM_019625 | 2437.064  | 2670.725  |
| NM_014781 | 3406.031  | 4283.828  | NM_013376 | 1616.398  | 1314.912  | NM_006729 | 1843.131  | 2212.149  |
| X87896    | 821.158   | 1134.082  | NM_017964 | 1458.631  | 1512.526  | NM_012236 | 3028.399  | 3200.122  |
| M88310    | 2194.544  | 2489.398  | NM_016272 | 430.888   | 845.853   | AF112219  | 7705.203  | 9422.66   |
| NM_000042 | 1612.672  | 2171.538  | NM_016425 | 3938.094  | 3018.195  | NM_000521 | 351.589   | 437.243   |
| AF035787  | 1028.421  | 1200.676  | NM_004083 | 6634.064  | 5736.068  | NM_004135 | 304.627   | 335.979   |
| NM_016335 | 913.34    | 508.926   | NM_016039 | 12044.543 | 11363.368 | NM_000925 | 716.891   | 732.024   |
| NM_003165 | 7933.243  | 3594.479  | NM_001184 | 4218.729  | 3123.252  | NM_000123 | 3579.104  | 3745.719  |

|           |           |           |           |           |           |           |           |           |
|-----------|-----------|-----------|-----------|-----------|-----------|-----------|-----------|-----------|
| NM_00390E | 7189.645  | 4468.966  | NM_01553C | 9652.494  | 10190.091 | AL137501  | 623.522   | 418.877   |
| AL359590  | 49316.027 | 37572.961 | NM_01623E | 5684.407  | 4722.229  | BE858979  | 757.627   | 454.922   |
| NM_002861 | 11466.437 | 6871.62   | BE546276  | 1213.021  | 1317.099  | NM_00012Z | 1650.269  | 940.384   |
| NM_00308C | 4661.609  | 3334.615  | NM_00472E | 21133.109 | 16644.615 | U87223    | 577.558   | 615.098   |
| NM_01326E | 539.22    | 1490.782  | NM_015997 | 6418.182  | 6979.62   | X91348    | 10377.599 | 11094.762 |
| NM_00264E | 3232.367  | 2572.149  | NM_001167 | 8272.923  | 8872.468  | Z36505    | 1662.302  | 1984.763  |
| AB033027  | 2635.286  | 2188.865  | NM_012115 | 6522.443  | 6068.24   | NM_001854 | 910.227   | 1024.409  |
| AK021805  | 14203.634 | 13220.193 | NM_00493Z | 29508.365 | 38100.18  | NM_01791Z | 1532.476  | 3829.546  |
| AB014550  | 6181.507  | 5860.619  | M96577    | 15427.889 | 20290.961 | NM_00275E | 8440.854  | 15789.408 |
| AF320294  | 4713.69   | 4320.838  | NM_01325E | 19897.861 | 28120.291 | NM_00333C | 5903.589  | 8499.978  |
| AF161436  | 7669.204  | 8001.065  | NM_00384Z | 3834.487  | 3880.206  | NM_003647 | 418.125   | 375.791   |
| NM_02040Z | 2512.327  | 2964.848  | L11238    | 13789.769 | 12750.661 | NM_00169E | 24390.09  | 15855.512 |
| NM_00429E | 2555.977  | 2617.473  | AK025684  | 1485.94   | 1252.959  | NM_018351 | 516.904   | 481.706   |
| NM_001171 | 1230.879  | 1406.484  | NM_01220E | 8927.224  | 8668.323  | NM_147171 | 285.34    | 325.871   |
| NM_00225C | 6723.354  | 8830.888  | K02046    | 4987.447  | 3569.865  | AF238083  | 1953.13   | 1755.648  |
| S81591    | 559.097   | 470.209   | AL110151  | 11400.911 | 9888.802  | NM_01638E | 347.064   | 316.021   |
| NM_00647E | 4109.592  | 1679.829  | NM_002217 | 416.471   | 1168.93   | AB046783  | 1258.744  | 1066.764  |
| AF132734  | 24440.148 | 10588.063 | NM_00499E | 4362.389  | 5029.423  | NM_00084E | 700.618   | 521.362   |
| NM_01837E | 3655.855  | 1590.485  | AK023320  | 710.522   | 665.873   | NM_01496E | 2678.761  | 1982.182  |
| NM_01640Z | 40730     | 19539.061 | NM_00038E | 9662.673  | 12271.36  | NM_00488Z | 11885.569 | 8129.405  |
| NM_01560Z | 2338.114  | 1715.714  | NM_001190 | 5293.695  | 5625.792  | AL390148  | 8068.486  | 6615.123  |
| NM_001921 | 13033.52  | 9514.132  | NM_005271 | 12669.549 | 12883.019 | AK024055  | 673.772   | 597.863   |
| NM_00623C | 18055.117 | 10427.826 | NM_015654 | 10376.526 | 10539.67  | U10485    | 502.676   | 590.895   |
| NM_01469E | 3546.333  | 2742.498  | NM_012244 | 3124.357  | 3807.792  | AK025326  | 6329.177  | 6595.854  |
| NM_01340C | 15882.272 | 13209.965 | NM_004341 | 1746.588  | 2016.391  | NM_01337E | 661.512   | 981.239   |
| AK026257  | 4991.364  | 4454.657  | AB082521  | 9161.071  | 10039.237 | NM_017964 | 532.946   | 452.503   |
| AK023836  | 7442.675  | 9486.411  | AL050182  | 3031.559  | 2680.16   | NM_01642E | 1769.758  | 2131.571  |
| NM_01810E | 6467.446  | 6297.181  | NM_02004C | 1799.104  | 1874.231  | NM_001184 | 1731.727  | 2872.854  |
| AJ299442  | 8960.112  | 10563.047 | NM_002374 | 4397.038  | 5393.596  | NM_01553C | 5121.916  | 5621.978  |
| NM_00012E | 4222.988  | 5131.233  | AK026940  | 3638.865  | 4199.311  | NM_01623E | 1525.244  | 2187.106  |
| NM_000187 | 812.036   | 1084.08   | AF155117  | 5280.778  | 6426.034  | NM_00175E | 361.392   | 270.02    |
| NM_01446E | 1543.773  | 2067.653  | AB014527  | 724.457   | 876.486   | BE546276  | 514.913   | 512.926   |
| D87292    | 1735.052  | 2818.834  | NM_004411 | 2316.021  | 2141.09   | NM_00472E | 5762.276  | 6174.085  |
| NM_00549E | 1652.307  | 1851.713  | NM_01593E | 5173.784  | 6077.012  | NM_015997 | 635.002   | 805.29    |
| NM_00120Z | 2354.46   | 1301.251  | NM_00074C | 1344.1    | 1237.293  | NM_001167 | 1283.108  | 1038.913  |
| U34249    | 748.247   | 286.915   | NM_01784Z | 1961.283  | 2599.921  | NM_012115 | 696.02    | 939.565   |
| NM_00328E | 46626.488 | 26275.094 | AK025985  | 46064.906 | 53787.68  | NM_00493Z | 1442.18   | 1634.701  |
| BE618539  | 899.111   | 710.488   | NM_01325E | 3246.61   | 2947.305  | M96577    | 3948.468  | 3186.92   |
| R28062    | 2933.797  | 2163.841  | NM_00414Z | 2188.96   | 2401.754  | NM_01325E | 5222.403  | 4611.747  |
| AI627464  | 816.322   | 706.486   | X66087    | 1294.132  | 1395.838  | NM_00384Z | 1837.774  | 1325.698  |
| BI756258  | 6078.872  | 5398.537  | NM_01632E | 12751.08  | 20381.932 | L11238    | 6939.313  | 5259.098  |
| AI342225  | 60303.82  | 64418.109 | NM_017544 | 24441.027 | 27792.068 | AK025684  | 611.731   | 440.657   |
| AA634103  | 64257.063 | 78016.438 | NM_00315Z | 1403.667  | 1373.412  | NM_01220E | 4055.392  | 3439.65   |
| J04599    | 1646.137  | 1483.912  | NM_01628E | 2267.228  | 1907.243  | K02046    | 1957.762  | 1622.881  |
| AA608557  | 10100.279 | 13997.929 | NM_014707 | 1809.008  | 1090.942  | AL110151  | 4631.509  | 6410.75   |
| AL050095  | 3848.852  | 5035.38   | AF025771  | 1728.384  | 1680.682  | NM_00499E | 2295.986  | 2403.079  |
| NM_000664 | 1465.762  | 2164.612  | NM_01821E | 1448.57   | 1174.805  | NM_00038E | 5400.553  | 4885.171  |
| AF075085  | 64119.23  | 68635.68  | AB033110  | 804.193   | 691.793   | NM_001190 | 2975.037  | 3249.956  |
| NM_00589Z | 2016.207  | 2312.485  | NM_00508Z | 15845.694 | 15535.75  | NM_005271 | 4927.618  | 8118.445  |
| NM_00004Z | 2698.031  | 1024.561  | NM_007187 | 17358.361 | 16976.271 | NM_015654 | 3671.034  | 3989.491  |
| AF035787  | 1101.087  | 736.49    | NM_00182E | 513.235   | 787.56    | NM_012244 | 1298.198  | 1370.156  |
| NM_01480E | 2693.178  | 1961.888  | NM_00309E | 11635.462 | 11210.112 | AB082521  | 947.086   | 909.535   |
| NM_00041E | 7639.109  | 6618.811  | NM_00727E | 4612.914  | 4150.987  | NM_02004C | 122.37    | 579.68    |



|           |           |           |           |           |           |           |           |           |
|-----------|-----------|-----------|-----------|-----------|-----------|-----------|-----------|-----------|
| NM_002965 | 1820.453  | 3039.214  | BE390833  | 17307.643 | 15278.832 | AK026940  | 1011.561  | 836.916   |
| AB007883  | 1614.828  | 1347.351  | NM_004730 | 11146.412 | 9477.697  | AF155117  | 2218.904  | 1860.969  |
| NM_005492 | 878.708   | 1346.32   | NM_000801 | 3824.922  | 4078.384  | AB014527  | 341.355   | 283.572   |
| AF038196  | 5986.098  | 5807.026  | NM_006115 | 29435.301 | 28441.877 | NM_004411 | 1222.306  | 894.272   |
| NM_004859 | 8255.996  | 8255.191  | NM_005801 | 5098.985  | 4401.231  | NM_015938 | 3254.597  | 1879.193  |
| NM_005014 | 1484.978  | 1907.515  | NM_018198 | 2948.438  | 2398.195  | NM_000740 | 594.866   | 552.869   |
| NM_000070 | 1098.784  | 900.506   | NM_001539 | 24667.225 | 23264.506 | NM_017843 | 1606.961  | 699.025   |
| NM_002250 | 8791.528  | 3878.098  | NM_012267 | 607.982   | 298.778   | AK025985  | 2254.665  | 7175.917  |
| S81591    | 1042.55   | 251.858   | AK027232  | 27934.281 | 25078.074 | NM_013256 | 1230.203  | 1228.527  |
| NM_006323 | 14436.116 | 10817.67  | NM_012204 | 403.006   | 962.838   | NM_004143 | 766.304   | 790.473   |
| NM_016466 | 3947.164  | 3424.992  | AK091117  | 821.099   | 404.91    | X66087    | 477.594   | 465.545   |
| NM_001493 | 11232.804 | 9558.09   | NM_003613 | 1884.911  | 3454.714  | NM_016328 | 3976.844  | 4501.362  |
| NM_014841 | 1054.857  | 990.841   | NM_000022 | 41887.008 | 42795.613 | NM_017544 | 11351.663 | 13874.336 |
| NM_014426 | 20955.99  | 19167.055 | NM_016576 | 5597.755  | 5244.064  | NM_003153 | 588.352   | 725.857   |
| NM_006816 | 30570.449 | 31536.633 | NM_004213 | 1508.442  | 1719.466  | NM_016285 | 1005.918  | 1208.651  |
| AB033055  | 8387.092  | 11075.846 | NM_001929 | 65749.594 | 61251.711 | NM_014707 | 616.432   | 1161.059  |
| AF311287  | 4034.738  | 4473.224  | NM_000906 | 2574.659  | 3110.282  | AF025771  | 799.866   | 1156.602  |
| NM_003098 | 1792.684  | 1921.925  | NM_000480 | 5033.35   | 6211.398  | NM_018215 | 428.808   | 552.748   |
| NM_014781 | 3757.64   | 6097.529  | AF254084  | 36529.004 | 37119.922 | AB033110  | 3057.5    | 3672.009  |
| BU629989  | 839.754   | 1199.338  | AK022648  | 557.741   | 633.208   | NM_005083 | 9486.376  | 9648.357  |
| X87896    | 901.076   | 1092.29   | NM_003107 | 12359.255 | 17643.496 | NM_007187 | 4380.96   | 4155.099  |
| M88310    | 1852.348  | 2831.317  | NM_006874 | 6390.816  | 4131.881  | NM_018983 | 2635.008  | 3154.053  |
| NM_018446 | 9679.134  | 4037.16   | AB046777  | 4523.967  | 4145.799  | NM_003096 | 3131.697  | 4686.077  |
| NM_000187 | 967.494   | 832.096   | AJ251844  | 7160.186  | 7189.139  | NM_007279 | 1154.833  | 1300.484  |
| NM_014465 | 1877.017  | 1239.903  | D16815    | 1940.276  | 1638.366  | BE390833  | 4282.556  | 3448.79   |
| D87292    | 2039.009  | 1686.551  | NM_001880 | 3530.776  | 3045.752  | NM_004730 | 4337.188  | 4988.502  |
| NM_005498 | 1328.155  | 1129.442  | AB028943  | 3309.27   | 3174.628  | NM_000801 | 2243.544  | 1645.573  |
| NM_016335 | 1067.783  | 991.812   | NM_006194 | 1875.307  | 1713.217  | NM_006115 | 12049.898 | 10390.126 |
| NM_003165 | 6017.338  | 4074.883  | AK001603  | 9487.455  | 9915.804  | NM_005801 | 2529.182  | 2304.481  |
| NM_003906 | 5382.523  | 4108.337  | U71601    | 2061.469  | 1719.358  | AK027232  | 8527.051  | 11708.72  |
| AL359590  | 43929.879 | 33890.215 | AF042838  | 1595.077  | 1569.818  | NM_012204 | 311.307   | 424.307   |
| NM_002861 | 10922.668 | 8291.795  | AL137511  | 579.008   | 1011.106  | NM_004342 | 627.957   | 759.406   |
| NM_003080 | 4923.289  | 4855.519  | AF075031  | 697.699   | 862.472   | NM_003613 | 610.126   | 1081.985  |
| NM_013268 | 690.778   | 1935.425  | AF075062  | 14392.91  | 15502.98  | NM_000022 | 29609.67  | 23092.68  |
| NM_002645 | 3439.901  | 3622.761  | NM_004188 | 1155.344  | 1162.892  | NM_016576 | 2606.489  | 3207.434  |
| AB033027  | 2409.784  | 3128.037  | AF147381  | 7302.094  | 7160.627  | NM_004213 | 920.274   | 1211.054  |
| AK021805  | 12610.254 | 13671.855 | AB002452  | 901.555   | 1081.364  | NM_001929 | 45804.535 | 47791.551 |
| AB014550  | 4972.3    | 5340.507  | AK027101  | 29278.518 | 29878.346 | NM_000480 | 3370.906  | 5847.896  |
| AF320294  | 3567.447  | 3859.855  | AF010236  | 654.946   | 713.689   | AF254084  | 22554.881 | 24798.176 |
| AF161436  | 5694.26   | 7070.681  | AF088075  | 1419.53   | 1464.951  | AK022976  | 824.046   | 847.838   |
| NM_020402 | 1873.03   | 2367.593  | AK026376  | 3683.089  | 4924.147  | AB048791  | 2780.716  | 3658.938  |
| NM_004299 | 3145.553  | 3090.068  | AF088061  | 3153.75   | 2934.257  | NM_003107 | 7471.453  | 6810.842  |
| NM_001171 | 734.513   | 608.301   | AF086286  | 2711.887  | 3065.31   | NM_006874 | 1904.334  | 2129.211  |
| NM_000498 | 922.712   | 383.238   | AF086376  | 2755.164  | 2765.107  | AB046777  | 1759.872  | 1946.56   |
| NM_000664 | 2131.76   | 1008.716  | AF086410  | 1225.685  | 1203.221  | AJ251844  | 2508.344  | 2308.84   |
| AF075085  | 63626.652 | 55764.656 | AF086455  | 1088.978  | 677.017   | D16815    | 733.433   | 997.774   |
| NM_005892 | 1603.648  | 1093.637  | AK022997  | 8563.772  | 7733.109  | NM_001880 | 1948.07   | 1427.308  |
| NM_006478 | 3351.742  | 2328.757  | NM_017617 | 5663.172  | 4028.446  | AB028943  | 1772.768  | 1564.287  |
| AF132734  | 20132.215 | 15800.456 | AF131830  | 1711.439  | 1558.542  | NM_006194 | 1136.143  | 1093.234  |
| NM_018379 | 2736.169  | 1642.656  | NM_014811 | 1124.709  | 641.481   | AK001603  | 5268.399  | 8930.239  |
| NM_015603 | 1991.293  | 1892.833  | AF147426  | 1683.392  | 1811.085  | U71601    | 1157.85   | 985.147   |
| NM_001921 | 11910.925 | 11559.5   | BC019667  | 55400.793 | 55515.383 | AF042838  | 686.186   | 678.033   |
| NM_006230 | 18370.773 | 14267.504 | AK026026  | 8925.154  | 9214.278  | AL137511  | 277.886   | 297.2     |

|          |           |           |          |           |           |           |           |           |
|----------|-----------|-----------|----------|-----------|-----------|-----------|-----------|-----------|
| NM_01469 | 4521.056  | 4717.855  | AF085941 | 13139.39  | 14489.011 | X91221    | 241.261   | 328.193   |
| NM_01340 | 12192.877 | 13411.961 | Z69892   | 7128.366  | 8320.435  | AF075031  | 477.644   | 574.007   |
| AK026257 | 4046.542  | 4891.123  | AK023590 | 1128.279  | 1201.775  | AF075062  | 3532.019  | 4133.896  |
| AK023836 | 5624.873  | 7005.346  | AF087961 | 1408.272  | 1314.714  | NM_00418  | 527.613   | 562.225   |
| NM_01810 | 5134.796  | 6199.923  | AL137309 | 2109.17   | 2424.558  | AF147381  | 3144.074  | 4279.325  |
| AJ299442 | 7436.914  | 9376.948  | AL137475 | 1232.734  | 1195.451  | AB002452  | 358.116   | 824.109   |
| NM_00012 | 2042.674  | 2882.294  | AL161956 | 4401.542  | 4282.65   | AK027101  | 11132.006 | 15001.711 |
| NM_00376 | 12869.46  | 14783.533 | AL390176 | 3072.713  | 2570.914  | AF010236  | 324.789   | 633.771   |
| NM_00485 | 7556.19   | 3290.783  | AL137356 | 1464.285  | 1426.179  | AF088075  | 638.919   | 825.708   |
| NM_01635 | 1039.158  | 877.108   | AL137547 | 2759.482  | 4640.847  | AK026376  | 1431.729  | 1970.674  |
| NM_00501 | 1223.803  | 1051.71   | AK021994 | 1947.4    | 1785.292  | AF088061  | 1535.444  | 2163.87   |
| NM_00007 | 1024.788  | 663.92    | Z70763   | 894.269   | 860.763   | AF086286  | 1398.453  | 1148.729  |
| NM_00120 | 1496.36   | 1384.907  | AK023802 | 13312.55  | 13330.268 | AF086376  | 1415.829  | 1290.082  |
| BE618539 | 734.694   | 544.178   | AF086103 | 1179.561  | 1078.354  | AF086410  | 591.945   | 488.116   |
| R28062   | 2464.246  | 2951.815  | AL080135 | 1007.804  | 980.792   | AF086455  | 407.122   | 647.649   |
| AI627464 | 945.756   | 838.581   | AK023158 | 1437.356  | 1512.963  | AK022997  | 6072.069  | 6021.289  |
| BI756258 | 4750.309  | 4293.265  | AF085852 | 4326.843  | 3072.17   | NM_017617 | 2217.678  | 2256.26   |
| AI342225 | 51206.098 | 55329.824 | AK023952 | 1883.592  | 1968.197  | AF131830  | 939.052   | 789.577   |
| AA634103 | 61889.957 | 68145.602 | AK000787 | 3550.071  | 3909.177  | AF147426  | 1125.12   | 1063.14   |
| J04599   | 942.16    | 1305.69   | AF090885 | 15943.404 | 14892.652 | BC019667  | 11796.742 | 11177.379 |
| AF110020 | 905.338   | 1712.55   | AF161342 | 737.913   | 984.506   | AK026026  | 2503.983  | 3153.42   |
| AA608557 | 7782.019  | 10447.693 | NM_01664 | 629.933   | 829.072   | AF085941  | 9000.217  | 10838.484 |
| AL050095 | 2480.126  | 3552.519  | NM_01408 | 2553.416  | 2851.615  | Z69892    | 3853.238  | 4483.396  |
| NM_00309 | 2243.1    | 2540.566  | AF100636 | 957.666   | 1090.532  | AK023590  | 507.808   | 679.145   |
| NM_01478 | 4270.739  | 3405.277  | AK022197 | 2275.34   | 2460.967  | AF087961  | 644.147   | 646.211   |
| BU629989 | 848.799   | 761.53    | AK021970 | 846.69    | 897.58    | AL137309  | 1416.709  | 1724.108  |
| X87896   | 834.039   | 715.711   | AK022066 | 64525.93  | 59930.484 | AL137475  | 606.62    | 804.817   |
| M88310   | 2395.893  | 1845.573  | AK022224 | 2089.545  | 2150.272  | AL161956  | 2602.866  | 3140.261  |
| NM_00004 | 2076.272  | 1587.511  | AK022359 | 835.946   | 1282.529  | AL390176  | 1367.152  | 1469.436  |
| NM_01480 | 2572.74   | 3170.938  | AK022000 | 2883.646  | 2924.796  | AL137356  | 765.582   | 651.084   |
| NM_00041 | 8484.445  | 9529.157  | AK022129 | 5023.277  | 5315.156  | AL137547  | 728.175   | 1041.889  |
| NM_00296 | 1539.714  | 4147.827  | AK022263 | 6243.344  | 6093.305  | AK021994  | 803.611   | 1036.038  |
| AB007883 | 1460.797  | 1398.959  | AK022384 | 1437.555  | 1521.167  | Z70763    | 485.053   | 836.974   |
| AY009397 | 48777.16  | 51874.473 | AK027097 | 1754.203  | 1790.574  | AK023802  | 4920.169  | 6125.208  |
| NM_00703 | 7658.47   | 8846.84   | AK024613 | 502.406   | 831.285   | AF086103  | 559.013   | 572.308   |
| NM_00164 | 399.11    | 648.831   | AL117437 | 742.598   | 884.999   | AL080135  | 426.341   | 438.074   |
| NM_00549 | 544.485   | 1359.553  | AK027198 | 2700.26   | 2286.844  | AK023158  | 725.106   | 732.983   |
| AF038196 | 4716.551  | 5231.656  | AK000257 | 1392.297  | 1442.485  | AF085852  | 1394.662  | 964.795   |
| AF320294 | 3716.37   | 1430.582  | NM_00616 | 15229.891 | 17608.979 | AK023952  | 806.077   | 909.642   |
| AF161436 | 8477.46   | 8391.936  | NM_00052 | 2014.7    | 2288.598  | AK000787  | 987.588   | 1211.006  |
| NM_02040 | 3220.982  | 2824.694  | AL110159 | 706.872   | 562.773   | AF090885  | 9452.988  | 12454.11  |
| NM_00429 | 2769.795  | 2224.104  | AF009259 | 1544.63   | 1988.39   | AF161342  | 499.97    | 441.5     |
| NM_00117 | 837.54    | 1077.878  | AF009260 | 2418.794  | 2267.17   | NM_01408  | 1301.732  | 2061.992  |
| NM_00225 | 6397.082  | 5756.56   | NM_00307 | 2363.406  | 2263.793  | AF100636  | 356.272   | 1028.821  |
| NM_00632 | 14982.363 | 16597.516 | NM_01790 | 4145.165  | 4495.968  | AK022197  | 1347.948  | 1618.479  |
| NM_01646 | 3708.405  | 5111.254  | unknown  | 2095.884  | 2467.825  | AF090940  | 259.586   | 298.796   |
| NM_00149 | 10799.338 | 12013.276 | unknown  | 1309.317  | 1788.992  | AK021970  | 517.013   | 830.578   |
| NM_01484 | 884.829   | 585.328   | AK021981 | 751.783   | 766.525   | AK022224  | 1010.991  | 1250.197  |
| NM_00681 | 20562.973 | 24149.34  | AL359567 | 2146.115  | 1957.471  | AK022359  | 1083.577  | 1190.07   |
| AK026518 | 55877.344 | 63280.277 | AK026716 | 813.838   | 664.36    | AK022000  | 809.221   | 1006.526  |
| NM_00025 | 16347.107 | 20150.996 | AL049325 | 15916.15  | 12909.76  | AK022129  | 1607.603  | 1986.84   |
| AB033055 | 6926.53   | 8515.725  | AK024154 | 16047.515 | 15667.386 | AK022263  | 2122.858  | 2198.453  |
| AF311287 | 3460.818  | 4243.902  | AF086341 | 1574.107  | 1730.171  | AK022384  | 545.453   | 434.059   |

|           |           |           |           |           |           |           |           |           |
|-----------|-----------|-----------|-----------|-----------|-----------|-----------|-----------|-----------|
| AJ299442  | 6322.567  | 3032.139  | AK026672  | 2661.514  | 2710.139  | AK027097  | 559.962   | 798.008   |
| NM_000129 | 3532.437  | 2678.132  | S83282    | 62611.68  | 56499.039 | AK024613  | 291.056   | 441.642   |
| NM_003762 | 11417.133 | 9091.3    | AK024164  | 59905.172 | 57378.137 | AL117437  | 431.311   | 428.449   |
| NM_018446 | 7061.644  | 6020.101  | AF052130  | 13696.548 | 16374.442 | AK027198  | 1026.952  | 1006.799  |
| NM_000187 | 1059.811  | 756.823   | AF130090  | 21397.162 | 33178.867 | AL162077  | 349.346   | 437.229   |
| NM_014465 | 1816.576  | 1928.316  | AL096727  | 2915.641  | 3243.424  | AK000257  | 567.331   | 658.24    |
| NM_005498 | 2269.731  | 2550.546  | AL080110  | 11863.485 | 12322.628 | NM_006160 | 6964.197  | 6469.606  |
| NM_016335 | 1095.393  | 1236.47   | NM_020425 | 1610.6    | 2271.502  | NM_000529 | 731.978   | 844.911   |
| NM_003165 | 7151.794  | 6776.863  | AK024076  | 2943.497  | 3207.861  | AL110159  | 363.125   | 274.326   |
| NM_003906 | 6732.756  | 7263.947  | M87940    | 2177.416  | 2283.901  | AF009259  | 622.776   | 821.55    |
| AL359590  | 49100.973 | 50599.293 | L77588    | 3312.25   | 4658.986  | AF009260  | 1124.647  | 1558.416  |
| NM_002861 | 10384.898 | 10489.234 | AB032976  | 2088.603  | 2593.511  | NM_003079 | 1441.209  | 1910.964  |
| NM_003080 | 4250.237  | 4387.56   | AF301222  | 22690.479 | 24151.689 | AL359567  | 926.946   | 724.603   |
| NM_013268 | 676.157   | 1913.435  | AJ131606  | 744.436   | 1820.336  | NM_017726 | 2807.84   | 2861.011  |
| NM_002645 | 3058.397  | 2787.307  | AF215981  | 15273.443 | 16405.848 | AK026716  | 413.57    | 779.374   |
| AB033027  | 1976.603  | 2428.038  | AF130044  | 2543.377  | 1898.648  | AL049325  | 6136.652  | 4607.652  |
| AK021805  | 10833.522 | 10814.634 | AF116709  | 565.129   | 405.655   | AK024154  | 6780.373  | 7990.878  |
| AB014550  | 4047.785  | 5650.355  | AF087980  | 2657.422  | 1960.633  | AF086341  | 727.456   | 810.453   |
| NM_006826 | 24682.025 | 10653.784 | NM_013939 | 1566.028  | 2045.166  | AK026672  | 892.592   | 1296.53   |
| AB007973  | 12041.054 | 8530.652  | AB038651  | 4144.04   | 6629.41   | S83282    | 47458.461 | 62963.996 |
| NM_002999 | 687.201   | 402.315   | AL359603  | 1401.072  | 1584.205  | AK024164  | 31653.029 | 40854.957 |
| M96843    | 6481.533  | 7597.52   | X84838    | 863.265   | 1251.654  | AF052130  | 6917.9    | 12115.108 |
| NM_017791 | 1456.882  | 1440.79   | NM_013940 | 1313.994  | 1474.104  | AF130090  | 13808.375 | 16461.633 |
| NM_005882 | 13172.727 | 10516.998 | AL117643  | 3096.758  | 3766.052  | AL096727  | 1336.126  | 1721.532  |
| BC012304  | 8416.997  | 9315.527  | AF069135  | 12230.67  | 12568.864 | AL080110  | 6337.316  | 12424.813 |
| AB046815  | 4594.671  | 4698.175  | AK026524  | 1247.609  | 1315.345  | NM_020425 | 1196.435  | 2020.021  |
| AF075085  | 60611.293 | 64787.484 | AB011157  | 8904.869  | 7726.704  | AK024076  | 1687.953  | 2369.736  |
| NM_005892 | 2020.167  | 1596.617  | U17632    | 2055.213  | 1715.619  | M87940    | 913.794   | 1297.401  |
| NM_006478 | 3741.019  | 4336.34   | AK026764  | 2970.663  | 1948.647  | AK022971  | 984.822   | 1364.168  |
| AF132734  | 24599.658 | 28417.264 | AF113700  | 3946.373  | 4941.775  | L77588    | 1682.019  | 1941.552  |
| NM_018379 | 3506.168  | 3680.313  | NM_017835 | 21889.109 | 25312.99  | AF086304  | 9509.509  | 11294.79  |
| NM_016403 | 43520.434 | 43930.406 | NM_018347 | 4250.029  | 4235.876  | U61094    | 504.476   | 1119.835  |
| NM_015603 | 2349.966  | 2252.714  | AF086223  | 644.615   | 694.378   | AB032976  | 1174.944  | 1278.329  |
| NM_001921 | 12721.553 | 14420.485 | AK024986  | 822.747   | 480.666   | AF301222  | 12478.175 | 13859.538 |
| NM_006230 | 19333.846 | 17761.137 | AK026730  | 1177.775  | 1168.128  | AF215981  | 5898.839  | 6005.901  |
| NM_014699 | 4888.652  | 4657.133  | AK024739  | 2761      | 2635.917  | NM_000732 | 38567.109 | 38105.105 |
| NM_013400 | 15629.711 | 19147.508 | AK098681  | 2926.492  | 2642.859  | AF130044  | 909.19    | 1405.021  |
| AK026257  | 4304.964  | 5745.85   | AK026772  | 899.599   | 641.349   | AF116709  | 348.834   | 447.808   |
| AK023836  | 6564.595  | 8166.735  | NM_014260 | 12562.047 | 11891.41  | AF087980  | 1374.034  | 1198.599  |
| NM_018109 | 5409.528  | 5125.278  | AK026458  | 1308.792  | 744.813   | NM_013939 | 556.208   | 493.535   |
| NM_005076 | 9049.054  | 7573.818  | AK022266  | 632.474   | 438.333   | AB038651  | 2565.127  | 1981.673  |
| AF253321  | 1756.527  | 1236.264  | CY3Cy5    | 2206.902  | 163.877   | AL359603  | 543.584   | 819.145   |
| AB051390  | 2833.817  | 1569.867  | R28062    | 1766.528  | 1310.669  | AL117643  | 1198.057  | 1083.538  |
| U80735    | 6601.512  | 7828.552  | BI756258  | 2948.186  | 2092.123  | AF069135  | 3802.837  | 5848.698  |
| NM_017850 | 3407.342  | 3540.327  | AI342225  | 54301.285 | 40129.008 | AK026524  | 1269.523  | 1787.499  |
| NM_016522 | 1082.125  | 759.253   | AA608557  | 4265.738  | 3676.146  | AB011157  | 3602.196  | 5301.156  |
| NM_002224 | 3861.313  | 3829.74   | AL050095  | 2138.085  | 2182.372  | U17632    | 849.521   | 867.871   |
| X07979    | 37679.223 | 31256.467 | NM_000498 | 536.594   | 525.422   | AK026764  | 968.024   | 1412.711  |
| NM_003874 | 2902.336  | 2188.732  | NM_000664 | 654.992   | 900.659   | AF113700  | 1253.749  | 1393.905  |
| NM_000082 | 2981.83   | 2764.351  | SR1       | 64930.73  | 69909.031 | NM_017835 | 8782.9    | 9091.735  |
| L13857    | 1797.012  | 1818.766  | SR3       | 44193.039 | 36688.527 | NM_018347 | 1835.019  | 1622.619  |
| NM_018098 | 11365.551 | 12841.079 | SR5       | 6236.512  | 6359.431  | AK024986  | 519.097   | 457.623   |
| AF286164  | 4732.841  | 6154.646  | SR7       | 4432.599  | 39701.098 | AK026730  | 605.907   | 630.728   |

|           |           |           |           |           |           |           |           |           |
|-----------|-----------|-----------|-----------|-----------|-----------|-----------|-----------|-----------|
| AF146277  | 11259.563 | 12157.181 | SR9       | 15987.139 | 3152.803  | AK024739  | 1448.028  | 1334.951  |
| AF055033  | 4793.854  | 4704.174  | CY3Cy5    | 3857.469  | 203.999   | AK098681  | 706.992   | 940.906   |
| NM_01770C | 1271.118  | 1339.308  | NM_01480E | 1700.917  | 1412.76   | AK026772  | 306.186   | 582.232   |
| M37191    | 9168.079  | 12094.3   | AB006627  | 630.811   | 383.098   | NM_01426C | 6989.859  | 10887.508 |
| NM_00524E | 974.73    | 1189.544  | NM_00041E | 4804.014  | 2998.609  | AK026458  | 567.474   | 656.453   |
| NM_00302C | 1841.742  | 1939.883  | NM_00296E | 1711.7    | 682.039   | AK022266  | 412.863   | 348.881   |
| NM_001114 | 2216.563  | 2735.733  | AB007883  | 2021.67   | 1025.268  | CY3Cy5    | 1061.23   | 133.312   |
| X82240    | 3599.638  | 4238.11   | AK093780  | 6779.876  | 4592.406  | R28062    | 926.293   | 488.632   |
| NM_01399E | 13148.011 | 6657.87   | NM_007037 | 8961.776  | 8126.593  | BI756258  | 1485.854  | 1072.833  |
| NM_00445E | 774.379   | 502.829   | AF038196  | 1368.839  | 1908.358  | AF110020  | 485.622   | 352.551   |
| NM_00601C | 33819.715 | 38063.945 | NM_00485E | 5230.384  | 5505.309  | AA608557  | 2442.713  | 2887.963  |
| K03191    | 3911.448  | 4140.352  | NM_01635E | 625.407   | 565.623   | AL050095  | 1545.248  | 1570.266  |
| NM_00507E | 21220.539 | 21305.859 | NM_005014 | 623.147   | 672.256   | NM_000664 | 454.358   | 356.135   |
| NM_00519E | 54814.574 | 58684.086 | NM_006944 | 539.372   | 771.616   | SR5       | 3718.347  | 3150.825  |
| NM_00458E | 2843.348  | 3420.043  | NM_00007C | 1813.312  | 2261.858  | SR7       | 2683.19   | 20236.303 |
| NM_01503E | 4420.258  | 4019.354  | NM_00120E | 919.26    | 1311.165  | SR9       | 8538.623  | 1150.473  |
| AK022956  | 5019.41   | 5776.961  | NM_00328E | 30088.939 | 41312.691 | CY3Cy5    | 1679.446  | 114.918   |
| AK023121  | 1376.379  | 1329.777  | NM_00632E | 8766.307  | 5048.837  | NM_01480E | 1054.068  | 741.182   |
| NM_01410A | 33613.492 | 31912.842 | NM_01646E | 1981.877  | 1483.714  | AB006627  | 297.411   | 241.5     |
| NM_00239E | 3363.653  | 3812.388  | NM_00149E | 5917.549  | 3942.18   | NM_00041E | 2727.417  | 1676.79   |
| NM_00274E | 55403.703 | 61348.867 | NM_014841 | 597.014   | 517.125   | AB007883  | 638.803   | 511.804   |
| NM_01821E | 10190.42  | 13731.916 | NM_01442E | 9298.148  | 7289.193  | AK093780  | 4675.102  | 3584.732  |
| NM_00339C | 4028.075  | 4343.498  | NM_00681E | 20974.064 | 16441.361 | AY009397  | 41873.508 | 31376.967 |
| AL137747  | 3512.646  | 3247.35   | AK026518  | 44597.922 | 29175.623 | NM_007037 | 6586.48   | 8114.18   |
| NM_01475E | 7354.267  | 9248.407  | NM_00025E | 10571.833 | 7244.528  | AF038196  | 1507.664  | 1398.453  |
| AF077188  | 12844.06  | 14725.344 | AB033055  | 4800.134  | 3628.88   | NM_00485E | 3752.389  | 2963.219  |
| NM_01244E | 15270.44  | 16741.313 | AF311287  | 2262.167  | 2021.297  | NM_01635E | 481.572   | 435.546   |
| NM_01833E | 900.658   | 1421.802  | NM_00309E | 838.899   | 637.054   | NM_005014 | 479.762   | 317.013   |
| NM_01868E | 56069.695 | 61201.492 | NM_014781 | 2494.79   | 1974.375  | NM_006944 | 388.856   | 414.53    |
| NM_006984 | 1752.583  | 2251.826  | BU629989  | 440.291   | 598.416   | NM_00007C | 969.635   | 810.89    |
| NM_018214 | 3150.666  | 3362.812  | X87896    | 714.076   | 802.24    | NM_00120E | 713.254   | 686.814   |
| AL133644  | 8344.311  | 7332.51   | M88310    | 1309.164  | 2162.088  | NM_00328E | 18827.566 | 15500.451 |
| NM_00270E | 4913.078  | 2130.525  | NM_00004E | 1139.662  | 1801.819  | NM_00632E | 4505.846  | 3138.662  |
| NM_01902E | 66651.711 | 65758.492 | AF035787  | 583.278   | 793.542   | NM_01646E | 1168.497  | 798.925   |
| NM_00442C | 2915.68   | 1774.633  | NM_01633E | 755.92    | 599.569   | NM_00149E | 4082.749  | 2592.467  |
| NM_00297C | 1716.523  | 1651.9    | NM_00316E | 3147.235  | 2214.91   | NM_014841 | 255.759   | 454.226   |
| NM_00549E | 19831.494 | 20904.346 | NM_00390E | 4980.564  | 2856.253  | NM_01442E | 5196.103  | 3406.292  |
| NM_01327C | 744.311   | 661.047   | AL359590  | 25787.445 | 13549.404 | NM_00681E | 9835.213  | 7427.369  |
| NM_01538E | 15957.552 | 17549.73  | NM_002861 | 5599.127  | 4197.772  | AK026518  | 26353.883 | 19290.34  |
| NM_00173E | 3604.996  | 2046.986  | NM_00308C | 3445.179  | 2529.342  | NM_00025E | 8811.976  | 8262.678  |
| NM_00506E | 1739.918  | 2357.255  | NM_01326E | 875.647   | 258.442   | NM_00309E | 576.973   | 547.453   |
| NM_01782E | 22964.738 | 26467.125 | NM_00264E | 2186.872  | 1638.225  | NM_014781 | 1277.524  | 1260.366  |
| NM_01403E | 5454.445  | 6499.534  | AB033027  | 1474.025  | 1139.87   | X87896    | 318.255   | 355.157   |
| NM_02012E | 28330.729 | 32074.887 | AK021805  | 7646.268  | 7153.504  | M88310    | 1082.897  | 996.414   |
| NM_01343E | 10344.666 | 9761.975  | AB014550  | 2705.72   | 2448.098  | NM_00004E | 884.757   | 800.999   |
| AB020716  | 1296.721  | 1326.851  | AF320294  | 2550.439  | 2524.271  | AF035787  | 323.615   | 324.569   |
| NM_00229E | 64415.242 | 73338.422 | AF161436  | 4459.435  | 4814.609  | NM_01633E | 469.328   | 501.239   |
| AK027130  | 2547.926  | 3330.716  | NM_02040E | 2317.877  | 2562.123  | NM_00316E | 2220.755  | 1291.091  |
| NM_00547E | 32863.398 | 39412.367 | NM_00429E | 1116.102  | 1725.793  | NM_00390E | 3008.574  | 1559.1    |
| NM_00573C | 38285.539 | 40357.988 | NM_001171 | 848.474   | 764.035   | AL359590  | 15517.128 | 11564.947 |
| NM_00539E | 3586.712  | 2860.032  | NM_00225C | 3745.405  | 4334.009  | NM_002861 | 3568.853  | 2202.386  |
| AL133572  | 9746.716  | 4120.6    | NM_00647E | 1466.951  | 1237.414  | NM_00308C | 1663.087  | 1173.821  |
| AK022500  | 4489.426  | 2665.238  | AF132734  | 10252.76  | 5900.11   | NM_00264E | 784.611   | 700.345   |

|           |           |           |           |           |           |           |           |           |
|-----------|-----------|-----------|-----------|-----------|-----------|-----------|-----------|-----------|
| BC021298  | 1629.456  | 1762.012  | NM_018379 | 1143.033  | 951.436   | AB033027  | 772.201   | 751.616   |
| U52096    | 10099.49  | 7032.208  | NM_016403 | 21315.09  | 11127.304 | AK021805  | 4153.308  | 3977.2    |
| AB013897  | 2681.988  | 2164.976  | NM_015603 | 1198.554  | 731.168   | AB014550  | 1429.58   | 1554.545  |
| NM_005526 | 42623.508 | 39301.594 | NM_001921 | 7337.586  | 4860.04   | AF320294  | 1546.272  | 1516.664  |
| AK001669  | 1969.357  | 1716.951  | NM_006230 | 7674.008  | 6394.237  | AF161436  | 2775.874  | 2344.627  |
| NM_006195 | 596.091   | 1415.288  | NM_014699 | 4335.393  | 2956.439  | NM_020402 | 1138      | 1011.385  |
| NM_006190 | 21088.963 | 19955.592 | NM_013400 | 10206.574 | 7140.284  | NM_004295 | 796.962   | 679.41    |
| NM_006365 | 8704.365  | 10180.788 | AK026257  | 2795.012  | 2087.085  | NM_001171 | 499.33    | 616.489   |
| NM_001615 | 4695.869  | 5343.602  | AK023836  | 4569.741  | 4598.74   | NM_002250 | 3478.085  | 3480.076  |
| BC000401  | 27582.568 | 35212.602 | NM_018109 | 3026.702  | 2512.092  | NM_006475 | 1368.272  | 824.592   |
| NM_006425 | 11252.221 | 15586.444 | AJ299442  | 4060.665  | 4117.304  | AF132734  | 7349.614  | 4410.816  |
| BF344046  | 1290.447  | 1979.8    | NM_000129 | 2026.92   | 2257.848  | NM_018375 | 1076.283  | 562.955   |
| AF432218  | 21926.229 | 24056.205 | NM_003762 | 4634.763  | 6554.492  | NM_016403 | 13500.936 | 7962.252  |
| NM_004285 | 4872.343  | 6587.412  | NM_018445 | 3223.132  | 4843.624  | NM_015603 | 761.169   | 402.825   |
| AK025082  | 5052.51   | 2978.452  | NM_000187 | 481.706   | 822.022   | NM_001921 | 4158.29   | 3066.681  |
| AF086535  | 1428.804  | 1017.88   | NM_014465 | 1039.521  | 2200.117  | NM_006230 | 4789.581  | 2930.792  |
| AB040901  | 1878.291  | 929.426   | D87292    | 989.965   | 1342.339  | NM_014695 | 1571.005  | 1095.097  |
| AL137406  | 7845.211  | 5198.503  | NM_005495 | 1187.541  | 2227.959  | NM_013400 | 5237.836  | 4603.616  |
| NM_012253 | 13950.203 | 9950.938  | NM_001202 | 1130.316  | 795.758   | AK026257  | 1321.799  | 956.698   |
| NM_006875 | 4051.622  | 2931.642  | NM_003289 | 23169.682 | 14462.888 | AK023836  | 2224.633  | 1705.216  |
| NM_000293 | 2407.542  | 1591.965  | M23254    | 484.531   | 344.542   | NM_018105 | 1607.289  | 1742.718  |
| NM_003745 | 1911.526  | 1935.273  | BE618539  | 850.1     | 360.061   | AJ299442  | 2435.717  | 2513.475  |
| AF153821  | 1349.037  | 1305.621  | R28062    | 1868.422  | 1705.566  | NM_000125 | 1483.445  | 1185.698  |
| NM_013370 | 3264.266  | 3799.17   | AI627464  | 470.578   | 415.473   | NM_003762 | 3362.518  | 3192.215  |
| NM_001374 | 946.61    | 1421.267  | BI756258  | 2734.772  | 2549.104  | NM_018445 | 2682.244  | 2214.953  |
| NM_003310 | 11777.246 | 12182.642 | AI342225  | 53675.098 | 47604.512 | NM_000187 | 381.256   | 267.688   |
| AK024461  | 3135.18   | 3507.709  | AA634103  | 56948.719 | 67844.758 | NM_014465 | 583.799   | 551.1     |
| NM_017635 | 5511.66   | 6700.969  | J04599    | 498.608   | 713.251   | D87292    | 468.893   | 627.617   |
| X62534    | 5379.024  | 8218.392  | AF110020  | 352.395   | 966.04    | NM_005495 | 982.673   | 868.44    |
| AF027147  | 46046.516 | 46131.785 | AA608557  | 3759.913  | 3719.517  | NM_001202 | 577.46    | 390.932   |
| M62399    | 10186.88  | 13543.018 | AL050095  | 2432.241  | 2655.981  | NM_003285 | 13372.788 | 9465.68   |
| NM_002357 | 1226.656  | 1420.202  | NM_000495 | 526.221   | 600.674   | R28062    | 1114.724  | 790.495   |
| U71600    | 3277.438  | 4717.352  | NM_000664 | 623.159   | 1388.139  | BI756258  | 1383.745  | 958.528   |
| NM_004472 | 3392.842  | 2215.445  | AF075085  | 49245.988 | 55145.223 | AI342225  | 35636.176 | 25182.238 |
| AB037862  | 2250.501  | 2830.636  | NM_005892 | 1594.858  | 2494.698  | AA634103  | 56330.66  | 82654.547 |
| AK023887  | 1426.697  | 842.681   | NM_000042 | 1168.182  | 872.091   | AF110020  | 403.264   | 142.008   |
| AF088022  | 15004.866 | 7872.465  | AF035787  | 607.644   | 374.475   | AA608557  | 2292.168  | 2442.601  |
| AK026537  | 3682.121  | 3393.918  | NM_014805 | 1977.169  | 1290.527  | AL050095  | 1645.66   | 1376.161  |
| NM_015485 | 6375.841  | 4879.714  | AB006627  | 812.625   | 575.001   | NM_000495 | 420.707   | 425.376   |
| NM_002665 | 13177.019 | 15559.403 | NM_000415 | 5379.816  | 3853.59   | NM_000664 | 529.063   | 592.405   |
| AF202145  | 7660.646  | 6284.975  | NM_002965 | 1829.645  | 767.758   | AF075085  | 37378.551 | 26995.602 |
| AK026155  | 2537.173  | 3214.683  | AB007883  | 2128.479  | 1397.278  | NM_005892 | 881.684   | 1122.292  |
| NM_018052 | 45087.973 | 36966.461 | AK093780  | 5679.686  | 5484.51   | NM_000042 | 936.891   | 640.055   |
| AF143322  | 1196.748  | 1636.692  | AY009397  | 53467.855 | 63556.047 | NM_014805 | 876.187   | 1045.321  |
| AK022386  | 7794.875  | 9789.906  | NM_007037 | 11182.106 | 10806.74  | NM_000415 | 2491.984  | 2458.704  |
| NM_002767 | 13776.812 | 19143.641 | AF038196  | 1747.388  | 2932.831  | NM_002965 | 497.441   | 1119.105  |
| AF131846  | 13458.062 | 16532.691 | NM_004859 | 5918.759  | 8077.406  | AB007883  | 1034.274  | 1015.615  |
| AF088069  | 5286.501  | 7775.127  | NM_016352 | 752.514   | 1106.608  | AK093780  | 3840.487  | 3858.977  |
| AF086551  | 1168.393  | 1438.007  | NM_005014 | 657.304   | 1214.16   | AY009397  | 37743.988 | 31172.807 |
| NM_013393 | 10137.515 | 12956.533 | NM_006944 | 800.626   | 830.881   | NM_007037 | 4934.495  | 5265.796  |
| AK025072  | 3520.801  | 1854.887  | NM_000070 | 1482.303  | 1671.173  | AF038196  | 1327.676  | 1340.599  |
| L10378    | 21033.986 | 17317.305 | NM_002250 | 3608.443  | 2429.669  | NM_004855 | 4094.196  | 4159.978  |
| AK022179  | 1542.344  | 1468.384  | NM_006323 | 8900.957  | 6127.796  | NM_016352 | 526.103   | 466.304   |

|           |           |           |           |           |           |           |           |           |
|-----------|-----------|-----------|-----------|-----------|-----------|-----------|-----------|-----------|
| AJ227860  | 3186.875  | 1874.682  | NM_016466 | 2513.194  | 1612.455  | NM_005014 | 403.416   | 484.849   |
| AL157448  | 884.401   | 925.639   | NM_001493 | 7114.132  | 5964.173  | NM_006944 | 333.534   | 399.44    |
| AF026942  | 3362.847  | 3493.702  | NM_014841 | 645.414   | 502.217   | NM_00007C | 759.197   | 927.96    |
| AJ276429  | 2006.589  | 1785.692  | NM_014426 | 7133.56   | 9900.554  | NM_00225C | 3275.499  | 2074.372  |
| AL117657  | 1762.411  | 1622.183  | NM_006816 | 20027.629 | 20245.559 | NM_006323 | 5140.073  | 4384.638  |
| AK023589  | 2674.87   | 2567.668  | AK026518  | 46299.727 | 36822.125 | NM_016466 | 1293.708  | 1242.881  |
| AK023998  | 4581.533  | 5667.396  | NM_000258 | 12550.074 | 12484.352 | NM_001493 | 4010.91   | 3659.629  |
| U84507    | 1798.93   | 1593.323  | AB033055  | 5107.151  | 5680.844  | NM_014841 | 455.531   | 415.397   |
| X65706    | 909.077   | 887.234   | AF311287  | 2263.799  | 2839.291  | NM_014426 | 4796.961  | 4315.605  |
| U43604    | 997.553   | 2127.707  | NM_003098 | 703.011   | 1644.941  | NM_006816 | 9878.952  | 10344.85  |
| AK000872  | 2487.075  | 3329.874  | NM_014781 | 2138.488  | 3317.48   | AK026518  | 24605.359 | 22282.984 |
| AK027147  | 14198.017 | 16554.42  | BU629989  | 511.352   | 841.845   | NM_000258 | 6554.965  | 6309.886  |
| AK026084  | 1790.049  | 1432.786  | X87896    | 694.249   | 747.029   | AB033055  | 3117.837  | 3053.246  |
| AK022415  | 35614.035 | 19949.861 | M88310    | 1241.12   | 1945.552  | AF311287  | 1965.176  | 1778.268  |
| AL137368  | 2367.495  | 2023.03   | NM_018446 | 3845.632  | 2642.831  | NM_003098 | 531.433   | 656.491   |
| AK021932  | 1683.786  | 1540.934  | NM_014465 | 1140.542  | 941.793   | NM_014781 | 1282.189  | 1848.932  |
| AK026787  | 2876.825  | 2069.118  | D87292    | 1089.616  | 560.785   | X87896    | 443.478   | 385.118   |
| AK023542  | 1422.223  | 1077.217  | NM_005498 | 1038.316  | 958.412   | M88310    | 799.863   | 791.911   |
| AK000203  | 1154.682  | 1143.089  | NM_016335 | 910.891   | 573.038   | NM_018446 | 2481.053  | 1731.315  |
| AK021845  | 3915.714  | 3212.075  | NM_003165 | 4519.669  | 3862.003  | NM_000187 | 305.957   | 187.308   |
| NM_018592 | 4231.759  | 3902.856  | NM_003906 | 8051.96   | 5816.758  | NM_014465 | 769.537   | 607.168   |
| NM_018503 | 17286.063 | 16884.051 | AL359590  | 31544.375 | 22627.951 | D87292    | 669.518   | 823.432   |
| NM_018512 | 7394.807  | 6505.376  | NM_002861 | 6903.865  | 6637.764  | NM_005498 | 679.178   | 656.592   |
| AK022412  | 10246.729 | 11145.13  | NM_00308C | 3127.462  | 3220.87   | NM_016335 | 625.965   | 740.007   |
| AK023073  | 5249.756  | 5915.321  | NM_013268 | 895.586   | 383.49    | NM_003165 | 2527.563  | 2031.037  |
| AK022438  | 2043.626  | 1917.129  | NM_002645 | 1919.635  | 1800.273  | NM_003906 | 4556.937  | 3341      |
| AK023764  | 1537.255  | 2801.497  | AB033027  | 1715.666  | 1794.386  | AL359590  | 20301.146 | 17747.672 |
| AK024082  | 382.214   | 1260.52   | AK021805  | 10729.315 | 12405.483 | NM_002861 | 4242.969  | 3393.461  |
| AK025062  | 3668.843  | 3288.515  | AB014550  | 2811.727  | 3557.012  | NM_00308C | 1857.745  | 1716.046  |
| AK023412  | 2650.745  | 3082.586  | AF320294  | 3411.545  | 5085.531  | NM_013268 | 271.525   | 777.145   |
| NM_014617 | 73604.945 | 65925.469 | AF161436  | 4831.56   | 6652.115  | NM_002645 | 870.333   | 1252.016  |
| AK074682  | 7650.007  | 7647.958  | NM_020402 | 2604.97   | 3461.93   | AB033027  | 689.794   | 920.162   |
| X74605    | 1163.901  | 1103.254  | NM_004299 | 1046.123  | 1753.717  | AK021805  | 5520.742  | 5088.1    |
| AK024513  | 1223.212  | 889.089   | NM_001171 | 947.077   | 2662.023  | AB014550  | 1811.229  | 2112.548  |
| AJ009640  | 2539.67   | 2575.744  | NM_000664 | 1041.236  | 508.365   | AF320294  | 2217.901  | 1996.289  |
| Y11163    | 1911.598  | 2161.156  | AF075085  | 48652.371 | 29288.238 | AF161436  | 2873.628  | 3537.075  |
| AK022026  | 950.89    | 1008.948  | NM_005892 | 1017.802  | 880.069   | NM_020402 | 1321.988  | 1420.778  |
| AF147340  | 1216.678  | 1606.544  | NM_006478 | 1474.528  | 1483.507  | NM_004299 | 881.96    | 812.546   |
| AF035308  | 6479.275  | 5350.406  | AF132734  | 10548.102 | 8000.711  | NM_001171 | 488.002   | 744.656   |
| NM_014054 | 7380.805  | 6438.257  | NM_018379 | 1286.57   | 1139.896  | NM_000664 | 526.409   | 374.183   |
| AK021840  | 65651.617 | 66191.688 | NM_016403 | 21987.057 | 14491.181 | AF075085  | 41018.816 | 29359.432 |
| AK022228  | 2969.428  | 3954.063  | NM_015603 | 1226.466  | 999.33    | NM_005892 | 916.746   | 792.595   |
| AF086480  | 1506.048  | 1230.594  | NM_001921 | 6577.916  | 4937.397  | NM_006478 | 1441.073  | 1005.614  |
| AK022122  | 1606.728  | 1260.78   | NM_00623C | 6159.887  | 7910.625  | AF132734  | 8531.967  | 7014.502  |
| AK000806  | 45626.926 | 30918.252 | NM_014699 | 5964.101  | 6334.012  | NM_018379 | 764.075   | 564.207   |
| NM_016471 | 11592.965 | 11997.284 | NM_01340C | 9006.307  | 10857.652 | NM_016403 | 15139.51  | 11654.585 |
| NM_001145 | 2341.28   | 3056.122  | AK026257  | 2473.948  | 2626.909  | NM_015603 | 804.404   | 563.203   |
| NM_005364 | 14421.176 | 12028.06  | AK023836  | 5040.416  | 6088.955  | NM_001921 | 4094.858  | 3965.339  |
| AK023482  | 7427.829  | 6118.838  | NM_018109 | 3275.789  | 3764.399  | NM_00623C | 4386.309  | 3538.371  |
| AK022798  | 1340.366  | 1138.74   | AJ299442  | 4586.696  | 7785.386  | NM_014699 | 2696.854  | 2655.554  |
| AL157423  | 1038.603  | 1094.654  | NM_000129 | 2216.728  | 3216.822  | NM_01340C | 6513.789  | 7977.213  |
| AK023115  | 1296.405  | 1785.097  | NM_003762 | 5160.92   | 11558.79  | AK026257  | 1466.463  | 1458.894  |
| AK023176  | 2169.947  | 2885.368  | NM_004859 | 4241.22   | 3091.373  | AK023836  | 2757.403  | 2746.73   |

|           |           |           |           |           |           |           |           |           |
|-----------|-----------|-----------|-----------|-----------|-----------|-----------|-----------|-----------|
| AL161991  | 34944.563 | 40881.473 | NM_005014 | 754.651   | 458.609   | NM_01810E | 1800.618  | 1359.334  |
| D17032    | 45324.371 | 41996.488 | NM_00007C | 1252.761  | 949.204   | AJ299442  | 3001.499  | 3651.706  |
| AL137292  | 599.689   | 720.393   | NM_001202 | 1072.665  | 670.145   | NM_00012E | 1466.549  | 1464.478  |
| NM_017941 | 3086.407  | 3724.106  | NM_00328E | 25288.797 | 20139.342 | NM_00376E | 3223.668  | 2898.242  |
| AF301016  | 1850.947  | 1726.464  | M23254    | 410.198   | 505.348   | NM_00485E | 2942.688  | 1877.328  |
| BE900527  | 1836.686  | 2773.709  | BE618539  | 709.47    | 709.706   | NM_01635E | 369.173   | 163.589   |
| D28384    | 76092.594 | 66169.445 | R28062    | 1582.546  | 1937.412  | NM_005014 | 437.159   | 480.077   |
| AF118079  | 52045.914 | 57419.988 | AI627464  | 398.819   | 780.632   | NM_006944 | 294.891   | 329.207   |
| AL365413  | 3750.522  | 3077.783  | BI756258  | 2905.53   | 3738.97   | NM_00007C | 855.648   | 728.844   |
| NM_00525E | 5674.84   | 4930.171  | J04599    | 699.939   | 877.561   | NM_00120E | 739.719   | 710.979   |
| NM_00044C | 5015.245  | 2991.817  | AF110020  | 433.402   | 1296.785  | NM_00328E | 14238.614 | 14146.345 |
| NM_001297 | 6227.844  | 4004.847  | AA608557  | 4168.207  | 4953.279  | BE618539  | 317.449   | 339.924   |
| NM_00440E | 17252.621 | 9566.973  | AL050095  | 2809.025  | 5870.539  | R28062    | 1020.04   | 1016.425  |
| X64993    | 3300.035  | 2132.201  | NM_00309E | 864.239   | 615.955   | BI756258  | 1296.578  | 1520.781  |
| NM_004434 | 25387.268 | 18944.764 | NM_014781 | 2922.032  | 1586.496  | AF110020  | 411.793   | 458.66    |
| NM_00626E | 473.617   | 1459.406  | BU629989  | 576.942   | 320.465   | AA608557  | 2611.839  | 3183.745  |
| NM_01623C | 5896.096  | 6963.192  | X87896    | 568.612   | 335.811   | AL050095  | 1519.755  | 1544.76   |
| NM_00108E | 1169.171  | 915.231   | M88310    | 1533.394  | 1244.462  | NM_00309E | 601.836   | 549.171   |
| AK023966  | 8681.6    | 7507.424  | NM_00004E | 1224.353  | 911.929   | NM_014781 | 1318.203  | 1034.327  |
| AK025702  | 4789.37   | 4844.347  | AF035787  | 551.842   | 482.077   | X87896    | 538.763   | 570.826   |
| NM_01895E | 1014.652  | 812.146   | NM_01480E | 1680.618  | 1407.613  | M88310    | 1120.039  | 1247.263  |
| AL050200  | 1131.939  | 1001.644  | AB006627  | 622.336   | 602.223   | NM_00004E | 722.119   | 745.056   |
| NM_002367 | 1051.499  | 887.017   | NM_00041E | 3621.27   | 4080.485  | AF035787  | 321.256   | 331.136   |
| AK022038  | 2771.431  | 2448.122  | NM_00296E | 1776.393  | 912.92    | NM_01480E | 886.349   | 1263.848  |
| AK025119  | 1135.933  | 1517.917  | AB007883  | 2354.573  | 2672.763  | AB006627  | 364.996   | 513.509   |
| AJ224170  | 966.977   | 1143.474  | NM_007037 | 10295.553 | 19425.879 | NM_00041E | 2326.606  | 2790.226  |
| AF085866  | 2583.702  | 2841.439  | NM_00164E | 429.196   | 1204.137  | NM_00296E | 519.172   | 1901.99   |
| NM_00610E | 589.975   | 1620.312  | NM_00549E | 471.736   | 783.738   | AB007883  | 1051.312  | 1300.368  |
| CY3Cy5    | 3814.806  | 144.398   | AF038196  | 1849.025  | 6042.208  | AK093780  | 4037.914  | 5214.929  |
| AA397813  | 66383.688 | 71596.813 | AF320294  | 1784.667  | 1423.374  | NM_007037 | 7092.108  | 9437.338  |
| W47350    | 3086.053  | 3449.919  | AF161436  | 4743.702  | 2807.401  | AF038196  | 1736.766  | 2860.79   |
| W68291    | 6447.818  | 6013.073  | NM_02040E | 2388.625  | 1599.097  | AF320294  | 1712.522  | 1097.636  |
| N64384    | 890.297   | 316.169   | NM_00429E | 1399.298  | 1156.967  | AF161436  | 3206.229  | 2144.974  |
| H-U 05770 | 8377.979  | 8037.705  | NM_001171 | 831.355   | 403.022   | NM_02040E | 1263.896  | 1226.997  |
| H-M 65199 | 2743.442  | 2729.691  | NM_00225C | 4422.019  | 2953.18   | NM_00429E | 888.191   | 655.533   |
| H-M 32315 | 1041.003  | 939.16    | NM_00632E | 6987.406  | 7846.089  | NM_001171 | 533.716   | 746.862   |
| H-V00536M | 1281.873  | 1397.066  | NM_01646E | 1708.306  | 1842.228  | NM_00225C | 3723.065  | 3347.193  |
| H-D85429M | 37728.203 | 47049.266 | NM_00149E | 5778.106  | 5574.047  | NM_00632E | 4650.743  | 5093.315  |
| BF439832  | 1179.968  | 1469.04   | NM_014841 | 602.109   | 980.74    | NM_01646E | 1032.981  | 1448.723  |
| NM_01753E | 1900.841  | 1645.647  | NM_01442E | 6713.851  | 11284.55  | NM_00149E | 3700.285  | 3887.427  |
| SR2       | 66375.953 | 62751.41  | NM_00681E | 9669.907  | 13578.07  | NM_01442E | 5867.962  | 5449.962  |
| SR4       | 18861.426 | 18333.828 | AK026518  | 35969.633 | 50634.176 | AK026518  | 27929.504 | 27863.82  |
| SR6       | 3307.186  | 2713.979  | NM_00025E | 9190.345  | 13498.975 | NM_00025E | 6421.257  | 4647.858  |
| SR8       | 10773.342 | 35242.418 | AB033055  | 4412.523  | 5192.595  | AB033055  | 2874.779  | 2592.519  |
| SR10      | 38065.266 | 13446.375 | AF311287  | 2149.974  | 3115.024  | AF311287  | 1602.994  | 1385.072  |
| CY3Cy5    | 3479.017  | 811.622   | AJ299442  | 4577.899  | 3661.134  | AJ299442  | 2881.857  | 2274.746  |
| NM_004447 | 9380.416  | 9506.081  | NM_00012E | 2150.468  | 1510.001  | NM_00012E | 1453.285  | 1090.402  |
| NM_001204 | 1536.335  | 1647.194  | NM_00376E | 6268.603  | 4650.344  | NM_00376E | 3997.418  | 3067.963  |
| NM_012116 | 2588.894  | 2064.169  | NM_01844E | 4995.315  | 4088.309  | NM_01844E | 2778.385  | 2680.605  |
| NM_00002C | 1686.863  | 1118.022  | NM_000187 | 657.799   | 441.381   | NM_000187 | 366.061   | 290.545   |
| NM_00244E | 5325.871  | 5825.898  | NM_01446E | 1452.154  | 1275.218  | NM_01446E | 924.448   | 697.597   |
| AB033091  | 4176.545  | 4207.682  | D87292    | 1257.564  | 869.955   | D87292    | 582.728   | 822.563   |
| NM_004557 | 1528.355  | 1461.499  | NM_00549E | 1559.078  | 1417.313  | NM_00549E | 825.449   | 983.885   |

|           |           |           |           |           |           |           |           |           |
|-----------|-----------|-----------|-----------|-----------|-----------|-----------|-----------|-----------|
| NM_014757 | 19813.934 | 18167.232 | NM_016335 | 1669.056  | 1287.714  | NM_016335 | 762.555   | 1050.994  |
| NM_001584 | 3762.88   | 3697.913  | NM_003165 | 3694.746  | 4431.17   | NM_003165 | 2728.043  | 2829.111  |
| NM_012259 | 7111.204  | 7085.887  | NM_003906 | 6396.441  | 6908.268  | NM_003906 | 4488.675  | 4829.99   |
| AF272357  | 979.551   | 976.621   | AL359590  | 26900.027 | 27916.455 | AL359590  | 18638.695 | 19601.855 |
| NM_016372 | 8861.898  | 7451.444  | NM_002861 | 4832.805  | 6561.975  | NM_002861 | 4488.6    | 4413.332  |
| AB020705  | 2904.162  | 3860.181  | NM_003080 | 2826.54   | 4437.789  | NM_003080 | 1943.216  | 1865.264  |
| NM_014333 | 1571.066  | 1952.717  | NM_013268 | 738.607   | 505.759   | NM_013268 | 214.11    | 1102.741  |
| NM_002980 | 1552.229  | 1480.081  | NM_002645 | 1440.375  | 2122.808  | NM_002645 | 1133.779  | 1498.226  |
| NM_007102 | 43640.039 | 41760.113 | AB033027  | 1394.436  | 2347.519  | AB033027  | 1055.519  | 1171.329  |
| BG491613  | 20259.045 | 22451.965 | AK021805  | 7272.643  | 12836.91  | AK021805  | 4759.915  | 3387.601  |
| NM_004251 | 6612.042  | 6921.754  | AB014550  | 2501.096  | 4585.322  | AB014550  | 1509.806  | 2302.571  |
| U53532    | 3785.407  | 3658.9    | NM_006826 | 16424.18  | 9146.337  | NM_006826 | 9260.535  | 6067.132  |
| AL096732  | 1380.933  | 1345.812  | AB007973  | 8321.617  | 4852.95   | AB007973  | 5954.035  | 4859.581  |
| AJ132084  | 801.371   | 612.855   | M96843    | 7328.403  | 3580.624  | M96843    | 2907.416  | 3661.094  |
| NM_005719 | 67962.914 | 67038.727 | NM_017791 | 1628.345  | 1096.068  | NM_017791 | 837.965   | 1093.849  |
| NM_006093 | 4239.446  | 4026.656  | NM_005882 | 9229.418  | 6406.542  | NM_005882 | 3625.48   | 3947.851  |
| NM_006664 | 2630.102  | 1916.12   | BC012304  | 7768.411  | 4407.849  | BC012304  | 2744.956  | 3484.817  |
| NM_002728 | 708.481   | 716.697   | AB046815  | 3333.318  | 2260.436  | AB046815  | 1515.088  | 2098.77   |
| NM_000450 | 674.782   | 959.633   | AF075085  | 55402.145 | 46659.094 | AF075085  | 40140.434 | 35629.117 |
| NM_004513 | 5242.693  | 4909.806  | NM_005892 | 2154.504  | 1766.326  | NM_005892 | 916.726   | 822.696   |
| NM_001708 | 44166.809 | 44720.328 | NM_006478 | 2260.684  | 2321.485  | NM_006478 | 1388.875  | 1331.359  |
| NM_017735 | 2766.654  | 3434.818  | AF132734  | 13258.179 | 13328.716 | AF132734  | 7888.053  | 8397.835  |
| AB033044  | 2961.382  | 2422.76   | NM_018379 | 1371.781  | 1730.138  | NM_018379 | 1119.984  | 1137.923  |
| AB014564  | 2411.838  | 3360.399  | NM_016403 | 19299.957 | 19991.191 | NM_016403 | 16599.4   | 15439.924 |
| NM_020230 | 7743.26   | 9351.307  | NM_015603 | 968.819   | 1334.055  | NM_015603 | 1010.388  | 933.748   |
| NM_006762 | 52853.348 | 53273.09  | NM_001921 | 5679.952  | 6462.13   | AK021788  | 350.021   | 440.311   |
| NM_006352 | 2040.8    | 1891.056  | NM_006230 | 6317.4    | 10893.274 | NM_001921 | 4937.118  | 5545.236  |
| NM_016430 | 962.351   | 824.844   | NM_014699 | 2776.505  | 4258.132  | NM_006230 | 5379.222  | 5408.294  |
| NM_003742 | 4740.643  | 3739.287  | NM_013400 | 7510.422  | 13727.253 | NM_014699 | 3256.721  | 3630.702  |
| NM_005094 | 4616.564  | 4322.784  | AK026257  | 2308.291  | 3805.583  | NM_013400 | 3902.125  | 4468.286  |
| BE382905  | 646.735   | 770.335   | AK023836  | 3455.923  | 5116.434  | AK026257  | 1377.463  | 1316.748  |
| NM_002152 | 5480.263  | 5349.135  | NM_018109 | 2496.165  | 4052.725  | AK023836  | 3138.051  | 5636.942  |
| NM_001701 | 562.835   | 851.628   | NM_005076 | 10386.972 | 8422.37   | NM_018109 | 1579.923  | 1059.349  |
| AK022558  | 7327.446  | 8349.096  | AF253321  | 1344.226  | 803.088   | NM_005076 | 6418.506  | 4103.295  |
| NM_006476 | 67920.391 | 68746.68  | U80735    | 3927.013  | 2647.267  | AF253321  | 931.75    | 638.996   |
| AK023787  | 2206.53   | 2031.966  | NM_017850 | 3027.801  | 1801.189  | U80735    | 2517.757  | 2836.056  |
| NM_002133 | 1187.213  | 1666.965  | NM_016522 | 1241.963  | 954.043   | NM_017850 | 1419.161  | 1727.103  |
| AF086489  | 530.722   | 709.387   | NM_002224 | 2744.109  | 2086.723  | NM_016522 | 723.167   | 830.29    |
| NM_007177 | 5193.1    | 4626.896  | X07979    | 35232.328 | 26453.287 | NM_002224 | 1902.252  | 1832.65   |
| NM_006078 | 6882.065  | 7428.425  | NM_003874 | 1612.573  | 1560.029  | X07979    | 13902.639 | 12199.93  |
| NM_000824 | 3745.988  | 4474.879  | NM_000082 | 2139.244  | 1878.844  | NM_003874 | 1023.771  | 933.188   |
| NM_000482 | 951.455   | 867.54    | L13857    | 1781.565  | 1494.775  | NM_000082 | 680.871   | 984.71    |
| NM_001091 | 877.776   | 756.876   | NM_018098 | 8562.416  | 6652.786  | L13857    | 699.98    | 647.574   |
| AK023915  | 6347.869  | 6053.836  | AF286164  | 1093.093  | 1092.469  | NM_018098 | 3611.663  | 4291.537  |
| AB051453  | 3001.116  | 2355.046  | AF146277  | 5543.435  | 6857.944  | AF286164  | 874.154   | 980.226   |
| AK026842  | 2584.426  | 2767.824  | AF055033  | 8178.234  | 9195.839  | AF146277  | 4982.403  | 4957.336  |
| NM_002395 | 831.666   | 755.187   | NM_017700 | 881.525   | 1134.099  | AF055033  | 12324.098 | 14006.125 |
| AB023203  | 2590.076  | 3656.744  | M37191    | 8117.188  | 9292.359  | NM_017700 | 780.013   | 1078.238  |
| NM_014963 | 4153.013  | 4487.888  | NM_003020 | 710.896   | 854.459   | M37191    | 6469.557  | 8287.955  |
| NM_004259 | 2605.261  | 2166.336  | NM_003404 | 36036.52  | 35137.301 | NM_003020 | 475.562   | 484.584   |
| NM_016271 | 5341.965  | 4248.215  | NM_001114 | 1048.546  | 1595.27   | NM_001114 | 1224.909  | 2237.431  |
| NM_016619 | 4017.71   | 3800.207  | X82240    | 2499.07   | 1976.421  | X82240    | 1259.32   | 1206.762  |
| NM_014481 | 2761.048  | 2792.97   | NM_013995 | 8156.772  | 5361.426  | NM_013995 | 3615.078  | 3491.909  |



|           |           |           |           |           |           |           |           |           |
|-----------|-----------|-----------|-----------|-----------|-----------|-----------|-----------|-----------|
| U22172    | 1408.906  | 1142.044  | NM_006010 | 19360.672 | 11728.715 | NM_00445E | 515.65    | 332.685   |
| AB032960  | 2181.549  | 2552.813  | K03191    | 2459.996  | 1708.681  | K03191    | 1233.926  | 1365.196  |
| NM_014264 | 12662.446 | 11596.65  | NM_005079 | 13212.917 | 9792.578  | NM_005079 | 5867.758  | 12142.19  |
| AF020089  | 1272.841  | 1320.867  | NM_005192 | 39190.023 | 22640.066 | NM_005192 | 22572.545 | 28440.656 |
| NM_006257 | 7320      | 7568.037  | NM_004585 | 2715.946  | 1782.348  | NM_015032 | 1840.954  | 2235.813  |
| NM_016281 | 9655.938  | 8737.334  | NM_015032 | 4016.511  | 2154.373  | AK022956  | 1350.882  | 2032.616  |
| NM_004734 | 26342.055 | 23652.09  | AK022956  | 3902.337  | 2982.8    | AK023121  | 390.927   | 642.129   |
| AK024793  | 2168.715  | 2603.406  | AK023121  | 979.325   | 1013.031  | NM_014104 | 14996.989 | 16972.26  |
| AF208291  | 1103.056  | 921.396   | NM_014104 | 38880.078 | 33637.293 | NM_002392 | 981.399   | 1548.375  |
| NM_000019 | 61898.742 | 62028.43  | NM_002392 | 1802.255  | 1510.328  | NM_002749 | 38496.082 | 46734.895 |
| NM_007102 | 50300.621 | 48213.645 | NM_002749 | 52574.777 | 59011.867 | NM_018216 | 3880.492  | 4692.397  |
| BG491613  | 22776.168 | 23809.594 | NM_018216 | 5078.553  | 4825.562  | NM_003390 | 1478.842  | 1597.699  |
| AA397813  | 61686.539 | 58215.227 | NM_003390 | 1572.426  | 2157.435  | AL137747  | 2049.329  | 2263.526  |
| W47350    | 2749.678  | 3256.067  | AL137747  | 2166.695  | 2263.376  | NM_014755 | 3174.855  | 4453.956  |
| W68291    | 6932.518  | 6829.048  | NM_014755 | 3995.335  | 4514.813  | AF077188  | 5794.819  | 7621.509  |
| N64384    | 1194.172  | 894.013   | AF077188  | 6951.855  | 7099.154  | NM_012446 | 4936.726  | 6731.674  |
| H-X 53655 | 836.659   | 244.35    | NM_012446 | 5097.356  | 7067.272  | NM_018338 | 514.197   | 507.743   |
| H-U 05770 | 7832.585  | 8216.8    | NM_018685 | 34530.715 | 52203.066 | NM_018685 | 30856     | 33257.613 |
| H-M 65199 | 3376.139  | 3535.083  | NM_006984 | 1629.055  | 1502.775  | NM_006984 | 1699.567  | 2630.978  |
| H-M 32315 | 1019.939  | 799.391   | AF231919  | 722.394   | 1055.889  | NM_018214 | 586.086   | 367.491   |
| BF439832  | 1988.456  | 1806.83   | NM_018214 | 1073.566  | 2253.803  | AL133644  | 5888.54   | 4065.63   |
| BG819162  | 743.27    | 812.843   | Y11718    | 422.183   | 1070.782  | NM_002706 | 1460.181  | 1106.771  |
| NM_017532 | 2883.488  | 3627.347  | AL133644  | 10113.721 | 8348.722  | NM_004420 | 930.155   | 608.146   |
| M38449    | 8599.434  | 9737.011  | NM_002706 | 2641.981  | 2051.194  | NM_002970 | 702.717   | 728.37    |
| AB033044  | 2597.841  | 2589.019  | NM_019023 | 54510.594 | 56523.281 | NM_005499 | 6435.967  | 7424.706  |
| AB014564  | 966.055   | 1487.674  | NM_004420 | 1025.204  | 1207.706  | NM_015387 | 4052.034  | 5147.633  |
| NM_020230 | 6751.918  | 8182.144  | NM_002970 | 1092.311  | 1422.08   | NM_001733 | 1727.337  | 1401.372  |
| NM_006762 | 52294.309 | 55513.043 | NM_005499 | 15048.115 | 10076.605 | NM_017825 | 9629.113  | 12273.298 |
| NM_006352 | 2288.683  | 1936.315  | NM_013270 | 457.281   | 327.41    | NM_014035 | 2662.382  | 3246.988  |
| NM_016430 | 993.682   | 1618.706  | NM_015387 | 7781.929  | 6454.004  | NM_020122 | 10668.794 | 12565.246 |
| NM_004447 | 8474.9    | 8575.804  | NM_001733 | 3182.742  | 2669.713  | NM_013432 | 5445.278  | 6361.995  |
| NM_001204 | 1698.925  | 1597.629  | NM_005065 | 871.392   | 666.911   | AB020716  | 437.471   | 395.456   |
| BF131321  | 627.088   | 725.339   | NM_017825 | 11809.135 | 12519.302 | NM_002298 | 44401.18  | 66397.805 |
| NM_012116 | 2112.779  | 1920.862  | NM_014035 | 2770.814  | 2715.107  | AK027130  | 634.814   | 383.124   |
| NM_000020 | 1938.535  | 1556.468  | NM_020122 | 11518.164 | 11773.542 | NM_005479 | 11957.79  | 10055.644 |
| NM_002442 | 4826.001  | 4871.46   | NM_013432 | 6244.772  | 8902.937  | NM_005730 | 21823.461 | 17048.125 |
| AB033091  | 4704.905  | 5075.737  | AB020716  | 378.709   | 1500.331  | NM_005392 | 1150.194  | 645.032   |
| NM_001584 | 4687.501  | 5220.776  | NM_002298 | 56413.648 | 63472.5   | AL133572  | 2734.585  | 1961.115  |
| NM_012259 | 22004.139 | 22406.297 | AK027130  | 784.683   | 1248.81   | AK022500  | 990.059   | 659.066   |
| AF272357  | 1620.734  | 1395.128  | NM_005479 | 16304.355 | 27919.641 | U52096    | 2505.546  | 3229.834  |
| NM_016372 | 12616.28  | 12682.471 | NM_005730 | 40167.383 | 58757.918 | AB013897  | 1142.961  | 1299.732  |
| AB020705  | 3109.844  | 4609.518  | NM_005392 | 2014.808  | 1289.798  | NM_006190 | 7255.127  | 9173.207  |
| NM_014333 | 1634.798  | 2302.111  | AL133572  | 5665.943  | 3614.449  | NM_006368 | 2513.711  | 3356.124  |
| NM_002980 | 1048.571  | 797.408   | AK022500  | 2917.276  | 2064.902  | NM_004133 | 325.705   | 556.623   |
| NM_005953 | 43259.508 | 38896.59  | BC021298  | 960.902   | 663.166   | NM_001618 | 2929.102  | 3340.902  |
| U53532    | 3735.99   | 3943.289  | U52096    | 6288.647  | 3922.092  | BC000401  | 8925.816  | 10642.787 |
| AB006423  | 600.715   | 824.736   | AB013897  | 1509.588  | 1170.88   | NM_006425 | 3108.497  | 3844.299  |
| AJ132084  | 371.007   | 884.646   | NM_005526 | 28175.363 | 22441.523 | BF344046  | 731.831   | 1597.658  |
| NM_005719 | 63422.254 | 64408.516 | AK001669  | 2407.834  | 1705.891  | AF432218  | 6054.178  | 4200.324  |
| NM_002728 | 724.579   | 767.484   | NM_006195 | 882.561   | 488.824   | NM_004286 | 1565.11   | 987.045   |
| NM_000450 | 588.678   | 1072.596  | NM_006190 | 13973.941 | 11018.836 | AK025082  | 1410.945  | 877.525   |
| NM_000448 | 742.615   | 990.508   | NM_006368 | 4744.181  | 3598.729  | AF086535  | 507.033   | 543.916   |
| AF208291  | 1520.234  | 1165.777  | NM_004133 | 611.125   | 459.921   | AL137406  | 849.489   | 435.529   |

|           |           |           |           |           |           |           |           |           |
|-----------|-----------|-----------|-----------|-----------|-----------|-----------|-----------|-----------|
| NM_004877 | 61310.133 | 58982.59  | NM_001618 | 2891.328  | 3154.07   | NM_006876 | 875.58    | 1494.73   |
| NM_005094 | 4982.46   | 4355.334  | BC000401  | 9643.779  | 10864.091 | NM_000293 | 718.895   | 461.412   |
| BE382905  | 1437.516  | 1464.451  | NM_006425 | 4654.254  | 11858.002 | AF153821  | 521.66    | 784.445   |
| NM_002152 | 4892.011  | 5326.127  | BF344046  | 1098.263  | 1417.432  | NM_013370 | 1244.719  | 1746.313  |
| NM_001701 | 711.644   | 803.738   | AF432218  | 7934.11   | 20877.885 | NM_001374 | 342.94    | 529.693   |
| AK022558  | 6656.556  | 6235.862  | NM_004286 | 2330.109  | 3747.014  | NM_003310 | 3986.688  | 4479.375  |
| NM_006476 | 63257.488 | 60344.672 | AK025082  | 2825.145  | 2351.857  | AK024461  | 1483.794  | 1812.168  |
| AK023787  | 2314.333  | 1783.921  | AF086535  | 1137.87   | 660.406   | NM_017635 | 1571.56   | 2245.451  |
| NM_017532 | 3953.395  | 3945.963  | AB040901  | 1081.389  | 906.707   | X62534    | 1727.073  | 2730.796  |
| M38449    | 10149.969 | 10139.282 | AL137406  | 5758.119  | 3839.031  | AF027147  | 20351.213 | 20885.977 |
| AK023915  | 7790.157  | 7030.678  | NM_012253 | 8075.748  | 5889.458  | M62399    | 3638.753  | 6599.001  |
| AB051453  | 3396.537  | 3115.732  | NM_006876 | 2469.042  | 1608.763  | NM_002357 | 492.527   | 359.149   |
| AK026842  | 3183.241  | 2849.326  | NM_000293 | 1412.958  | 923.517   | U71600    | 1206.667  | 1329.461  |
| NM_002395 | 1329.947  | 1484.786  | NM_003748 | 1052.696  | 878.168   | NM_004472 | 792.507   | 278.875   |
| NM_014963 | 4081.217  | 3727.97   | AF153821  | 1040.518  | 955.031   | AB037862  | 1001.857  | 710.463   |
| NM_004259 | 3359.47   | 2416.157  | NM_013370 | 1888.066  | 1981.099  | AK023887  | 639.456   | 436.664   |
| NM_016271 | 5591.497  | 5430.317  | NM_001374 | 673.234   | 622.765   | AF088022  | 3990.833  | 2518.009  |
| NM_016619 | 3561.487  | 3646.221  | NM_003310 | 4844.861  | 5880.667  | AK026537  | 537.967   | 438.115   |
| NM_014481 | 2473.49   | 3624.882  | AK024461  | 1546.057  | 2123.772  | NM_015485 | 2022.433  | 799.615   |
| U22172    | 1974.184  | 2230.66   | NM_017635 | 2120.129  | 3490.772  | NM_002666 | 5211.734  | 6125.283  |
| AB032960  | 3598.949  | 3979.161  | X62534    | 2334.997  | 4167.598  | AF202145  | 2437.078  | 2408.008  |
| NM_014264 | 15042.324 | 17049.916 | AF027147  | 22663.686 | 28009.219 | AK026155  | 965.866   | 1068.44   |
| AF020089  | 1810.536  | 1999.468  | M62399    | 4611.334  | 5962.055  | NM_018052 | 29203.445 | 29883.592 |
| NM_006257 | 9212.967  | 9049.745  | NM_002357 | 591.197   | 1044.407  | AF143322  | 328.719   | 680.626   |
| NM_016281 | 11120.228 | 10762.928 | U71600    | 2503.847  | 6702.21   | AK022386  | 4075.931  | 5429.244  |
| NM_004734 | 25792.361 | 25368.986 | NM_004472 | 1435.146  | 6042.379  | NM_002767 | 3731.972  | 5237.883  |
| AK024793  | 2372.772  | 2484.336  | AB037862  | 1047.129  | 2208.29   | AF131846  | 12572.051 | 23705.949 |
| NM_012259 | 30093.902 | 29247.881 | AF086285  | 604.951   | 329.147   | AF088069  | 2336.108  | 2047.922  |
| AF272357  | 1575.125  | 1438.405  | AK023887  | 1024.857  | 713.43    | AF086551  | 519.302   | 434.232   |
| NM_016372 | 19709.689 | 17628.502 | AF088022  | 10278.372 | 5992.224  | NM_013393 | 3904.587  | 3415.826  |
| AB020705  | 3703.587  | 4126.641  | AK026537  | 2603.497  | 1673.97   | AK025072  | 1591.989  | 1490.677  |
| NM_014333 | 1863.809  | 1906.175  | NM_015485 | 4848.753  | 3682.22   | AK022410  | 300.88    | 431.471   |
| NM_002980 | 1622.884  | 1891.81   | NM_002666 | 7425.419  | 7447.525  | L10378    | 6885.068  | 4502.665  |
| NM_015886 | 569.436   | 714.011   | AF202145  | 2903.521  | 3987.19   | AJ227860  | 1299.23   | 539.958   |
| NM_004262 | 961.435   | 761.075   | AK026155  | 1188.44   | 1396.963  | AL157448  | 746.037   | 566.587   |
| NM_007102 | 52397.141 | 54006.379 | NM_018052 | 29107.551 | 28731.855 | AF026942  | 1541.246  | 3631.279  |
| BG491613  | 23178.867 | 25611.537 | AK022386  | 3710.893  | 5069.554  | AJ276429  | 1047.197  | 1563.382  |
| AA397813  | 57012.188 | 58076.074 | NM_002767 | 5383.276  | 6275.287  | AL117657  | 505.543   | 911.554   |
| W47350    | 2397.164  | 3242.063  | AF131846  | 14297.31  | 18935.762 | AK023589  | 600.701   | 687.935   |
| W68291    | 4561.024  | 4949.757  | AF088069  | 3261.342  | 6443.249  | AK021590  | 1370.869  | 1497.867  |
| N64384    | 1374.804  | 1693.436  | AF086551  | 1113.682  | 3124.189  | AB002441  | 404.568   | 406.939   |
| H-X 53655 | 1296.194  | 1783.383  | NM_013393 | 5630.901  | 6846.28   | AK023998  | 1210.783  | 1502.457  |
| H-U 05770 | 9070.876  | 9826.51   | AK025072  | 2991.469  | 3062.147  | AK021643  | 353.281   | 358.215   |
| H-M 65199 | 4513.803  | 4416.157  | AK022410  | 546.965   | 337.852   | Z11802    | 238.29    | 462.989   |
| H-M 32315 | 696.032   | 1120.702  | L10378    | 16889.039 | 9270.774  | U54734    | 247.451   | 692.459   |
| H-V00536M | 1461.105  | 1717.274  | AK022179  | 879.966   | 446.158   | U84507    | 651.933   | 1277.169  |
| H-D85429M | 43634.625 | 51474.855 | AJ227860  | 1396.58   | 1878.13   | AK000872  | 933.521   | 608.555   |
| BF439832  | 1786.88   | 2065.209  | AL157448  | 1170.115  | 966.159   | AK027147  | 6306.634  | 4747.926  |
| BG819162  | 474.97    | 879.12    | AF026942  | 2762.138  | 2380.617  | AK022415  | 20890.121 | 6514.013  |
| NM_002728 | 1049.566  | 1036.259  | AJ276429  | 1566.147  | 1214.863  | AL137368  | 917.157   | 794.348   |
| NM_000450 | 1036.33   | 1096.647  | AL117657  | 830.962   | 722.548   | AK021932  | 847.852   | 439.849   |
| NM_000448 | 642.612   | 590.589   | AK023589  | 961.321   | 784.678   | AK026787  | 1987.451  | 1271.009  |
| NM_004513 | 6688.269  | 7235.176  | AK021590  | 2866.053  | 2379.907  | AK023542  | 812.39    | 644.81    |

|           |           |           |           |           |           |           |           |           |
|-----------|-----------|-----------|-----------|-----------|-----------|-----------|-----------|-----------|
| NM_00170E | 45648.156 | 47024.746 | AB002441  | 607.321   | 553.443   | AK000203  | 489.611   | 317.789   |
| NM_01773E | 3098.756  | 3802.05   | AK023998  | 2367.135  | 1854.666  | AK021845  | 4574.649  | 5498.843  |
| AB033044  | 3703.603  | 3372.135  | U84507    | 687.26    | 728.564   | NM_01859Z | 1914.478  | 3270.262  |
| AB014564  | 1195.023  | 1364.336  | AK000872  | 1647.441  | 1963.83   | NM_01850Z | 10383.427 | 11195.215 |
| NM_02023C | 7759.363  | 8578.233  | AK027147  | 11481.552 | 14733.762 | NM_01644C | 6605.48   | 7499.104  |
| NM_00676Z | 52392.918 | 55429.41  | AK026084  | 793.261   | 625.7     | AL049670  | 2748.068  | 3758.968  |
| NM_00635Z | 1754.159  | 1989.101  | AK022415  | 20202.891 | 17628.631 | NM_01851Z | 4278.16   | 4496.566  |
| NM_01643C | 1072.241  | 1495.435  | AL137368  | 1572.366  | 1201.953  | AK022412  | 3953.047  | 5999.38   |
| NM_004447 | 7476.283  | 8428.591  | AK021932  | 1605.642  | 1183.984  | AK023073  | 8062.667  | 10094.975 |
| NM_001204 | 1157.552  | 1254.758  | AK026787  | 4271.337  | 3077.959  | AK023697  | 372.175   | 589.231   |
| NM_012116 | 1438.801  | 1435.701  | AK023542  | 1437.639  | 968.728   | AK023922  | 451.409   | 441.014   |
| NM_00002C | 1631.836  | 1504.638  | AK000203  | 975.096   | 511.065   | AK022438  | 910.272   | 818.419   |
| NM_00244Z | 5301.2    | 5805.583  | AK021845  | 8736.169  | 8125.832  | AK023764  | 590.342   | 532.567   |
| AB033091  | 5120.883  | 6383.93   | NM_01859Z | 2920.561  | 2069.696  | AK025062  | 1514.792  | 1411.291  |
| NM_004557 | 3436.835  | 3151.507  | NM_01850Z | 24052.211 | 21438.16  | Z27405    | 11870.231 | 8838.342  |
| NM_014757 | 25557.691 | 27186.117 | NM_01644C | 15838.682 | 15117.075 | AK023412  | 840.1     | 733.899   |
| NM_01789Z | 1026.504  | 708.454   | AL049670  | 6103.192  | 3668.537  | NM_014617 | 29194.559 | 28240.824 |
| NM_001584 | 4604.553  | 5776.4    | NM_01851Z | 9208.548  | 9300.566  | AK074682  | 3076.011  | 2344.938  |
| NM_00080E | 506.797   | 930.344   | AK022412  | 4267.994  | 3916.914  | AK024513  | 706.896   | 857.352   |
| NM_000824 | 4654.902  | 5719.864  | AK023073  | 5731.287  | 6917.198  | BC036692  | 541.819   | 696.183   |
| NM_014264 | 13352.345 | 13783.823 | AK023922  | 502.508   | 1009.596  | AJ009640  | 976.93    | 1670.419  |
| AF020089  | 1381.87   | 1279.524  | AK022438  | 1621.639  | 2635.13   | Y11163    | 409.863   | 858.202   |
| NM_006257 | 8513.554  | 6881.766  | AK023764  | 866.838   | 1306.987  | AF147340  | 335.147   | 491.863   |
| NM_016281 | 11218.064 | 9627.005  | AK024082  | 676.511   | 1043.338  | AF035308  | 3280.542  | 3070.796  |
| NM_004734 | 28059.426 | 25922.971 | AK025062  | 2914.181  | 2638.814  | NM_014054 | 2152.002  | 3232.079  |
| AK024793  | 2713.758  | 2246.459  | Z27405    | 25698.463 | 18650.266 | AK021840  | 37811.707 | 24037.273 |
| AF208291  | 1398.074  | 1046.937  | AK023412  | 1711.299  | 1179.81   | AK022228  | 1564.073  | 1289.066  |
| BE382905  | 1063.098  | 896.673   | NM_014617 | 44024.617 | 24895.211 | AF086480  | 1242.668  | 866.743   |
| NM_00215Z | 7658.528  | 8233.463  | AK074682  | 4773.233  | 3186.597  | AK022122  | 543.518   | 361.236   |
| AK022558  | 6166.114  | 5972.634  | X74605    | 1111.914  | 1067.997  | AK000806  | 31146.324 | 24688.143 |
| NM_00174Z | 51979.68  | 47039.754 | AK024513  | 1243.503  | 1105.82   | NM_016471 | 4073.562  | 3632.962  |
| NM_00371Z | 4780.806  | 3630.819  | BC036692  | 1190.859  | 952.926   | NM_001145 | 909.956   | 760.995   |
| M38449    | 9913.492  | 9346.987  | AJ009640  | 2294.967  | 1811.151  | NM_005364 | 5938.354  | 6176.574  |
| AK023915  | 6528.046  | 6572.906  | Y11163    | 1172.645  | 889.856   | AK023482  | 3661.486  | 5117.314  |
| AK026842  | 2869.403  | 3061.083  | AF035308  | 6813.798  | 11419.556 | AK022798  | 610.328   | 919.852   |
| NM_00239E | 1147.451  | 1218.087  | NM_014054 | 3302.413  | 3398.147  | AL157423  | 464.646   | 794.737   |
| NM_00425E | 3872.253  | 2867.969  | AK022228  | 2198.716  | 5411.398  | AK023115  | 297.117   | 497.346   |
| NM_016271 | 6688.773  | 6941.491  | AK022031  | 490.073   | 1147.785  | AK023176  | 632.814   | 925.084   |
| NM_01661E | 5109.756  | 5831.816  | AF086480  | 1968.682  | 3472.677  | AL161991  | 10289.143 | 12872.981 |
| NM_014481 | 3917.713  | 4390.497  | AK022122  | 1218.752  | 2331.03   | D17032    | 14189.015 | 14732.86  |
| U22172    | 3054.266  | 2840.759  | AK000806  | 49429.668 | 47484.242 | AL137292  | 259.538   | 316.071   |
| AB032960  | 3570.721  | 4983.07   | NM_016471 | 8320.846  | 7994.75   | NM_017941 | 1757.348  | 2555.556  |
| NM_00234Z | 1423.635  | 1608.055  | NM_001145 | 1286.204  | 654.175   | AF301016  | 690.618   | 748.283   |
| D13631    | 22420.297 | 27771.186 | NM_005364 | 9456.306  | 7240.72   | BE900527  | 1216.756  | 972.833   |
| NM_00371Z | 5843.987  | 5541.135  | AK023482  | 6357.042  | 3498.897  | D28384    | 52586.625 | 50065.711 |
| NM_002184 | 2489.401  | 2571.659  | AK022798  | 1161.823  | 929.031   | AF118079  | 33065.633 | 30076.885 |
| NM_01488Z | 4940.551  | 6417.142  | AL157423  | 805.427   | 591.677   | AF277572  | 609.759   | 336.508   |
| NM_01780E | 7434.147  | 9200.983  | AK023115  | 749.485   | 457.822   | AL365413  | 1997.331  | 1758.836  |
| U56387    | 1947.67   | 2091.447  | AL161991  | 15375.817 | 13957.077 | NM_00525E | 3520.918  | 2752.42   |
| NM_003657 | 1406.831  | 1490.198  | D17032    | 24891.301 | 35888.242 | NM_00044C | 2231.868  | 1887.736  |
| NM_004397 | 1487.992  | 1045.955  | NM_017941 | 1790.554  | 2294.563  | NM_001297 | 2993.399  | 1924.821  |
| NM_00318E | 11538.617 | 10023.996 | AF301016  | 1108.148  | 1508.721  | NM_00440Z | 6118.108  | 2041.828  |
| NM_02023E | 5669.313  | 3700.437  | BE900527  | 1314.308  | 2555.863  | X64993    | 697.142   | 295.83    |

|           |           |           |             |           |           |             |           |           |
|-----------|-----------|-----------|-------------|-----------|-----------|-------------|-----------|-----------|
| D49356    | 1149.954  | 612.537   | AF118079    | 40553.91  | 55844.469 | NM_004434   | 7732.012  | 2978.884  |
| NM_018579 | 2652.708  | 2519.578  | AF277572    | 734.325   | 1700.632  | NM_016230   | 2198.586  | 3636.589  |
| NM_006201 | 5707.33   | 4866.26   | AL365413    | 3320.004  | 5405.9    | NM_001083   | 908.56    | 1009.193  |
| NM_007110 | 2278.059  | 2191.215  | NM_005258   | 6532.274  | 14874.861 | AK023966    | 4793.385  | 5325.606  |
| U50383    | 13366.499 | 12490.686 | NM_000440   | 4764.679  | 3572.931  | AK025702    | 2061.915  | 4290.652  |
| AK025085  | 11085.026 | 12032.419 | NM_001297   | 2760.57   | 3180.944  | NM_018958   | 436.864   | 1047.786  |
| NM_006290 | 16721.537 | 21142.566 | NM_004403   | 4326.807  | 7004.538  | AK022038    | 977.115   | 968.538   |
| AK022290  | 1763.334  | 1767.05   | X64993      | 745.91    | 1309.55   | AF085866    | 2693.96   | 2407.282  |
| NM_003680 | 56796.813 | 59093.445 | NM_004434   | 4806.317  | 9489.595  | CY3Cy5      | 597.753   | 115.519   |
| AF118124  | 11240.882 | 11068.003 | NM_016230   | 5555.288  | 2584.97   | AA397813    | 45386.496 | 34557.379 |
| NM_004849 | 16190.006 | 18420.352 | NM_001083   | 1756.96   | 1594.016  | W47350      | 1030.58   | 1069.889  |
| NM_007058 | 12276.869 | 10383.89  | AK023966    | 8686.734  | 6327.953  | W68291      | 2180.308  | 2471.399  |
| NM_000396 | 891.97    | 1157.758  | AK025702    | 5453.857  | 3860.596  | N64384      | 594.085   | 399.796   |
| NM_007014 | 1809.301  | 2227.007  | NM_018958   | 1458.056  | 1265.795  | H-X 53655 I | 432.023   | 525.899   |
| AL096740  | 1825.646  | 1256.37   | AK022038    | 1876.484  | 1955.667  | H-U 05770 I | 3004.128  | 2646.813  |
| AF191545  | 5033.086  | 4668.814  | AK025119    | 784.941   | 379.783   | H-M 65199   | 2320.354  | 2063.26   |
| NM_014554 | 3302.081  | 2798.199  | AJ224170    | 790.196   | 1561.294  | H-M 32315   | 579.089   | 448.73    |
| AK023968  | 4741.002  | 4565.082  | AF085866    | 4405.39   | 8181.379  | H-V00536M   | 561.239   | 531.749   |
| NM_004652 | 1429.673  | 1335.525  | NM_006106   | 459.99    | 1874.406  | H-D85429M   | 15329.795 | 15482.98  |
| AK025425  | 49461.766 | 53588.734 | CY3Cy5      | 2006.046  | 98.191    | BF439832    | 584.601   | 714.602   |
| AK025974  | 17057.316 | 17582.826 | AA397813    | 61778.676 | 56984.477 | BG819162    | 517.316   | 645.441   |
| NM_005781 | 4838.349  | 4457.02   | W47350      | 3109.947  | 1695.352  | NM_017532   | 2864.944  | 3210.111  |
| AF242522  | 13177.503 | 14458.223 | AI160964    | 409.814   | 681.376   | SR6         | 1021.142  | 1570.717  |
| NM_004024 | 5938.487  | 4855.269  | W68291      | 5688.777  | 5241.59   | SR8         | 4422.291  | 18827.322 |
| X52345    | 20649.35  | 16458.543 | N64384      | 1385.321  | 2226.042  | SR10        | 15407.758 | 7231.624  |
| NM_006965 | 7732.445  | 5769.196  | H-X 53655 I | 872.133   | 651.081   | CY3Cy5      | 1352.55   | 162.24    |
| AF027142  | 54542.148 | 50595.113 | H-U 05770 I | 5825.339  | 4768.673  | NM_004447   | 2808.647  | 2362.905  |
| S67970    | 867.462   | 938.432   | H-M 65199   | 4649.244  | 4065.209  | NM_001204   | 568.532   | 475.817   |
| AF221520  | 3019.543  | 2905.863  | H-M 32315   | 1002.814  | 1028.129  | BF131321    | 336.854   | 224.604   |
| NM_006941 | 28092.838 | 23050.533 | H-V00536M   | 2613.837  | 2588.166  | NM_012116   | 622.843   | 632.114   |
| NM_005360 | 1720.026  | 1748.54   | H-D85429M   | 22474.527 | 25369.494 | NM_000020   | 902.693   | 724.001   |
| NM_004349 | 7299.084  | 4859.266  | BF439832    | 1378.57   | 923.379   | NM_002442   | 2034.461  | 2505.892  |
| NM_002092 | 18491.313 | 20954.006 | BG819162    | 719.752   | 811.767   | AB033091    | 2271.538  | 2029.654  |
| NM_018077 | 4228.565  | 4079.967  | NM_017532   | 3904.692  | 4190.413  | NM_004557   | 1359.805  | 1299.695  |
| NM_016839 | 12321.007 | 10827.96  | SR2         | 58965.367 | 57613.922 | NM_014757   | 9681.877  | 11667.229 |
| NM_005968 | 54117.207 | 52148.566 | SR4         | 12715.303 | 7936.635  | NM_017893   | 384.529   | 238.226   |
| AK021416  | 4016.492  | 3252.574  | SR6         | 2317.565  | 1115.938  | NM_001584   | 2242.652  | 2152.11   |
| NM_018471 | 21993.227 | 22372.854 | SR8         | 8179.242  | 14599.75  | NM_012259   | 17663.426 | 18122.666 |
| NM_003819 | 7936.165  | 5989.196  | SR10        | 27505.971 | 5874.622  | AF272357    | 634.574   | 530.935   |
| NM_006560 | 9506.725  | 8104.085  | CY3Cy5      | 3439.163  | 162.004   | NM_016372   | 10554.958 | 11640.744 |
| NM_016183 | 4053.979  | 4806.645  | NM_004447   | 4549.4    | 4410.351  | AB020705    | 1151.04   | 1520.99   |
| NM_004872 | 8087.302  | 8288.996  | NM_001204   | 1338.901  | 1248.17   | NM_014333   | 691.402   | 803.636   |
| NM_001958 | 44075.484 | 42759.371 | BF131321    | 867.472   | 594.479   | NM_002980   | 478.572   | 475.94    |
| NM_001960 | 61882.32  | 61111.676 | NM_012116   | 1820.845  | 1678.421  | NM_007102   | 40455.836 | 47020.625 |
| NM_018122 | 6046.778  | 8151.025  | NM_000020   | 2632.268  | 3112.531  | BG491613    | 7922.154  | 13544.323 |
| AF035318  | 1973.309  | 1267.393  | NM_002442   | 3552.962  | 4235.095  | NM_004251   | 2326.491  | 1867.082  |
| NM_015456 | 8021.431  | 7703.019  | AB033091    | 6682.743  | 5912.449  | BF337921    | 495.815   | 459.634   |
| AK025056  | 1842.019  | 1981.82   | NM_004557   | 3870.004  | 4355.738  | U53532      | 1069.802  | 936.359   |
| AF140710  | 5815.2    | 4359.16   | NM_014757   | 19813.697 | 20407.906 | NM_012484   | 5153.905  | 5276.502  |
| NM_012088 | 14411.968 | 15204.631 | NM_017893   | 708.632   | 1405.925  | AL096732    | 417.806   | 265.298   |
| NM_017947 | 1172.843  | 1521.684  | NM_001584   | 3595.708  | 4582.908  | NM_005719   | 44713.203 | 48344.832 |
| NM_002494 | 6801.838  | 5406.486  | NM_012259   | 40127.949 | 38244.168 | NM_003462   | 5748.274  | 8770.11   |
| M58510    | 9809.391  | 11164.215 | AF272357    | 1761.68   | 2225.894  | NM_006093   | 2281.486  | 2089.857  |

|           |           |           |             |           |           |           |           |           |
|-----------|-----------|-----------|-------------|-----------|-----------|-----------|-----------|-----------|
| BE396003  | 1824.735  | 1856.536  | NM_016372   | 27852.174 | 32669.223 | NM_000135 | 594.327   | 568.621   |
| AK023300  | 1578.942  | 1455.039  | AB020705    | 2897.845  | 1949.75   | NM_006664 | 1670.984  | 1645.792  |
| NM_018082 | 1698.557  | 1572.365  | NM_014333   | 1121.119  | 1169.691  | NM_002728 | 572.826   | 611.507   |
| NM_003904 | 9351.356  | 7036.215  | NM_002980   | 1298.131  | 985.909   | NM_000450 | 371.343   | 421.313   |
| NM_006234 | 41056.91  | 46131.367 | BG491613    | 16007.473 | 14156.323 | NM_004513 | 4010.355  | 5094.643  |
| AB028987  | 6580.731  | 7411.587  | NM_005719   | 62827.879 | 60713.328 | NM_001708 | 18251.305 | 20520.646 |
| NM_003594 | 2232.606  | 2187.354  | NM_002728   | 1023.868  | 870.141   | NM_017735 | 1321.679  | 1698.693  |
| NM_005521 | 10011.918 | 10876.326 | NM_000450   | 780.561   | 832.918   | AB033044  | 1379.915  | 1675.027  |
| AF164438  | 10345.271 | 9273.163  | NM_000448   | 792.329   | 853.852   | AB014564  | 478.641   | 734.624   |
| AK022284  | 2398.444  | 2632.755  | NM_004513   | 8642.606  | 10046.687 | NM_020230 | 2451.161  | 2984.946  |
| AB040893  | 4343.749  | 3886.72   | NM_001708   | 35458.758 | 56410.434 | NM_006762 | 24233.492 | 35196.93  |
| AK025844  | 948.896   | 1086.513  | NM_017735   | 3417.658  | 3440.031  | NM_006352 | 761.32    | 923.653   |
| AL137727  | 3455.444  | 3054.358  | AB033044    | 3169.647  | 3225.953  | NM_016430 | 395.6     | 801.974   |
| L17327    | 1556.267  | 2210.305  | AB014564    | 901.136   | 616.859   | NM_003742 | 1752.09   | 1132.405  |
| AF074986  | 1689.498  | 1110.798  | NM_020230   | 3993.952  | 3681.582  | NM_005094 | 1578.822  | 1378.634  |
| AL049240  | 2987.767  | 2669.482  | NM_006762   | 43378.301 | 43311.102 | BE382905  | 371.531   | 321.727   |
| U80773    | 1786.667  | 1719.035  | NM_016430   | 1352.109  | 1487.159  | NM_002152 | 3165.664  | 2448.67   |
| AK021745  | 1846.516  | 2038.078  | BE382905    | 751.236   | 735.368   | AK022558  | 2000.764  | 2085.726  |
| L38937    | 10025.532 | 8157.806  | NM_002152   | 9765.729  | 9954.947  | AK023787  | 919.303   | 826.777   |
| U90907    | 3743.957  | 3870.011  | NM_001701   | 837.975   | 1113.413  | NM_002133 | 756.229   | 648.289   |
| AK024327  | 2239.612  | 2077.784  | AK022558    | 7218.539  | 9931.715  | NM_015697 | 1543.371  | 2080.746  |
| AK024395  | 411.463   | 868.655   | NM_000809   | 820.067   | 1146.547  | NM_032943 | 1987.63   | 2358.708  |
| AK000801  | 8725.312  | 8892.931  | NM_000824   | 5113.106  | 4278.783  | NM_007177 | 3942.477  | 3959.39   |
| D85433    | 10194.18  | 10142.667 | AK023915    | 5175.547  | 4177.167  | AL359592  | 475.176   | 701.581   |
| AF086184  | 13679.385 | 13438.159 | AK026842    | 2181.065  | 2500.183  | NM_006078 | 3553.246  | 4090.017  |
| NM_018275 | 6328.258  | 5865.172  | NM_002395   | 1654.698  | 2362.88   | NM_000824 | 1380.595  | 2053.651  |
| AL049266  | 11833.765 | 14737.59  | AB023203    | 678.807   | 348.763   | NM_000482 | 377.896   | 602.588   |
| AF088045  | 1757.235  | 1651.272  | NM_004259   | 2090.159  | 2915.409  | NM_016274 | 5363.658  | 6940.226  |
| AF007149  | 2296.771  | 2745.05   | NM_016271   | 6333.232  | 6404.604  | NM_014946 | 255.994   | 450.248   |
| NM_014705 | 716.773   | 894.737   | NM_016619   | 3037.096  | 3814.004  | AK022750  | 2034.858  | 3134.06   |
| AK001469  | 3876.643  | 4943.559  | NM_014481   | 1930.955  | 1459.746  | NM_001091 | 386.612   | 208.099   |
| AK021627  | 2281.757  | 2078.581  | U22172      | 2385.549  | 3679.976  | AK023915  | 2785.654  | 1968.61   |
| NM_019596 | 1146.832  | 749.139   | AB032960    | 2072.823  | 2322.947  | AB051453  | 1055.212  | 708.817   |
| AF085859  | 2051.601  | 2289.764  | NM_014264   | 9867.99   | 12484.433 | AK026842  | 1044.882  | 821.125   |
| AL049975  | 599.281   | 900.646   | AF020089    | 1975.137  | 2236.167  | NM_002395 | 462.803   | 246.674   |
| AL117464  | 4347.725  | 3874.886  | NM_006257   | 5281.885  | 7515.475  | AB023203  | 1281.233  | 1390.59   |
| AL080160  | 1345.552  | 640.358   | NM_016281   | 13159.935 | 16599.99  | NM_004259 | 986.767   | 883.001   |
| L23849    | 1031.802  | 1262.146  | NM_004734   | 22621.256 | 29287.664 | NM_016271 | 1851.857  | 1750.243  |
| AL157477  | 3882.516  | 4097.168  | AK024793    | 2583.978  | 2334.379  | NM_016619 | 1103.928  | 998.295   |
| AB002318  | 3463.316  | 2465.389  | AF208291    | 1405.469  | 1300.976  | NM_014481 | 861.525   | 1057.25   |
| AL357535  | 2016.768  | 2115.414  | NM_000276   | 968.705   | 954.658   | U22172    | 1047.668  | 1011.706  |
| AL049951  | 4178.753  | 3968.619  | BG491613    | 16605.898 | 14637.409 | AB032960  | 907.187   | 1040.933  |
| AK022936  | 8326.491  | 10371.458 | AA397813    | 61752.727 | 57213.059 | NM_014264 | 5267.276  | 5786.919  |
| AK024385  | 3168.335  | 3315.249  | W47350      | 2826.14   | 1752.575  | AF020089  | 1000.249  | 1099.774  |
| NM_017709 | 2816.927  | 2582.806  | AI160964    | 425.031   | 861.535   | NM_006257 | 2873.841  | 2684.316  |
| AF049615  | 932.555   | 965.351   | W68291      | 6545.16   | 8850.525  | NM_016281 | 4985.767  | 4614.213  |
| NM_014358 | 42696.07  | 38387.137 | N64384      | 1579.898  | 2140.381  | NM_004734 | 10309.188 | 11200.311 |
| AF009282  | 8493.169  | 7332.89   | H-X 53655 I | 737.397   | 813.963   | AK024793  | 968.014   | 1160      |
| AF024704  | 11363.374 | 9511.264  | H-U 05770 I | 5277.107  | 6465.548  | AF208291  | 709.302   | 852.738   |
| AF056431  | 1849.474  | 1751.987  | H-M 65199   | 4445.763  | 4171.334  | L10284    | 30643.35  | 37687.098 |
| AF009293  | 1460.698  | 1329.232  | H-M 32315   | 654.546   | 935.896   | NM_000276 | 845.147   | 1052.184  |
| NM_004158 | 63926.691 | 56757.465 | H-V00536M   | 1385.427  | 2034.267  | NM_000019 | 51094.668 | 72947.133 |
| AK002210  | 9257.042  | 7691.481  | BF439832    | 1269.574  | 1094.72   | NM_007102 | 31234.203 | 21410.223 |

|           |           |           |           |           |           |             |           |           |
|-----------|-----------|-----------|-----------|-----------|-----------|-------------|-----------|-----------|
| AK021677  | 1700.659  | 1274.848  | BG819162  | 685.116   | 720       | BG491613    | 7079.778  | 7501.715  |
| AK001057  | 1405.775  | 1227.465  | NM_017532 | 2610.453  | 2479.733  | AA397813    | 43363.465 | 45856.188 |
| AK021471  | 1707.469  | 1533.543  | M38449    | 3961.973  | 3996.24   | W47350      | 1087.765  | 1389.41   |
| AK021709  | 1574.347  | 1459.456  | AB033044  | 2079.045  | 1373.629  | W68291      | 2224.924  | 2213.173  |
| AK025109  | 4075.189  | 3774.509  | AB014564  | 701.769   | 433.376   | N64384      | 596.932   | 494.356   |
| AK026057  | 3512.419  | 3313.696  | NM_020230 | 3612.178  | 2763.74   | H-X 53655 I | 416.862   | 378.331   |
| AK026267  | 2061.632  | 2239.602  | NM_006352 | 1213.254  | 1452.97   | H-U 05770 I | 3175.721  | 3531.377  |
| AJ008117  | 18795.807 | 13629.415 | NM_016430 | 1392.324  | 1663.211  | H-M 65199   | 2048.901  | 2402.061  |
| AJ008147  | 34170.691 | 26261.719 | NM_004447 | 8857.049  | 12771.429 | H-M 32315   | 516.442   | 662.542   |
| AK024369  | 2120.213  | 2010.116  | NM_001204 | 2118.387  | 1789.176  | H-V00536M   | 740.408   | 663.046   |
| AL049244  | 1095.809  | 736.991   | BF131321  | 998.259   | 1146.577  | H-D85429M   | 15793.667 | 16472.434 |
| L43345    | 2810.406  | 2768.135  | NM_016540 | 483.205   | 660.821   | BF439832    | 488.064   | 807.879   |
| AF180297  | 4711.583  | 3710.218  | NM_012116 | 2134.532  | 2967.471  | BG819162    | 555.752   | 536.054   |
| AK023245  | 3235.709  | 2660.202  | NM_000020 | 3010.075  | 3986.529  | NM_017532   | 2404.186  | 2613.96   |
| AF086224  | 964.544   | 931.521   | NM_002442 | 3215.543  | 2999.706  | M38449      | 366.458   | 647.661   |
| S56365    | 64865.348 | 57827.809 | AB033091  | 6846.369  | 7644.92   | AB033044    | 1280.045  | 1224.084  |
| AK023607  | 2052.625  | 1908.189  | NM_004557 | 3367.825  | 3091.929  | AB014564    | 361.42    | 485.573   |
| AL049997  | 22402.525 | 24131.576 | NM_017893 | 640.294   | 793.318   | NM_020230   | 2424.09   | 1893.287  |
| AK024118  | 2111.51   | 2663.954  | NM_001584 | 2513.691  | 2292.18   | NM_006762   | 24439.098 | 20191.465 |
| X89657    | 1459.319  | 1631.741  | NM_012259 | 25298.654 | 25620.164 | NM_016430   | 559.979   | 788.57    |
| AK024509  | 2334.517  | 2297.324  | AF272357  | 658.951   | 822.16    | NM_004447   | 2788.458  | 3347.799  |
| AL050185  | 1151.477  | 1417.113  | NM_016372 | 14296.81  | 14985.046 | NM_001204   | 610.566   | 1230.373  |
| NM_017847 | 7003.067  | 5695.068  | AB020705  | 1933.985  | 1528.701  | NM_012116   | 673.873   | 601.932   |
| AL049675  | 3702.242  | 3373.751  | NM_014333 | 931.244   | 864.202   | NM_000020   | 1287.895  | 1472.384  |
| AK021549  | 1322.607  | 2127.886  | NM_002980 | 1081.773  | 583.107   | NM_002442   | 2191.229  | 2748.872  |
| NM_003537 | 15128.993 | 17460.434 | NM_002728 | 327.277   | 814.563   | AB033091    | 2979.849  | 2929.718  |
| AF056419  | 30875.4   | 26591.355 | NM_000450 | 449.94    | 592.061   | NM_004557   | 1863.111  | 1662.331  |
| AF074983  | 2285.878  | 2035.407  | NM_004513 | 5696.985  | 4981.91   | NM_014757   | 10682.794 | 13594.305 |
| AK021862  | 1356.852  | 1251.03   | NM_001708 | 19567.748 | 19484.811 | NM_017893   | 270.699   | 416.222   |
| AK024177  | 2153.895  | 1946.713  | NM_017735 | 2693.692  | 2316.843  | NM_001584   | 2033.133  | 2647.432  |
| AK024827  | 9598.836  | 9297.769  | AF208291  | 1026.101  | 766.066   | NM_012259   | 13294.816 | 17602.852 |
| K01564    | 2239.063  | 2490.89   | BE382905  | 861.581   | 785.071   | NM_016372   | 911.532   | 1243.975  |
| AB023175  | 20830.887 | 19962.768 | NM_001701 | 562.512   | 510.135   | NM_000482   | 407.732   | 483.866   |
| AL359563  | 3018.698  | 3685.74   | AK022558  | 4535.464  | 5714.641  | NM_016274   | 5270.621  | 4971.246  |
| NM_014477 | 1275.552  | 1008.252  | NM_000809 | 354.871   | 706.849   | NM_014251   | 522.611   | 476.963   |
| L40521    | 1759.097  | 2459.496  | NM_000824 | 3003.729  | 2308.805  | AK022750    | 2016.293  | 2205.85   |
| AF086478  | 9890.204  | 14231.866 | NM_017532 | 2872.843  | 4133.528  | NM_004251   | 2914.375  | 3801.437  |
| AF086022  | 702.711   | 1067.009  | M38449    | 5526.562  | 4204.623  | BF337921    | 601.513   | 993.842   |
| AK021514  | 67842.336 | 61298.16  | AK026842  | 2223.105  | 2097.154  | U53532      | 1182.612  | 1636.149  |
| AJ008134  | 2131.599  | 2238.792  | NM_002395 | 1471.942  | 1148.325  | NM_012484   | 5818.951  | 7852.373  |
| S71486    | 3678.739  | 4591.315  | NM_004259 | 2149.874  | 2439.099  | AL096732    | 774.037   | 781.994   |
| L33808    | 13485.994 | 12940.118 | NM_016271 | 6409.343  | 5132.254  | NM_005719   | 43861.418 | 53816.262 |
| D31886    | 6600.647  | 6984.99   | NM_016619 | 2199.565  | 1763.836  | NM_003462   | 7930.677  | 13884.839 |
| U92024    | 762.985   | 1566.127  | NM_014481 | 1556.102  | 1260.408  | NM_006093   | 2755.904  | 2806.03   |
| X93500    | 3257.813  | 2229.812  | U22172    | 2478.312  | 2302.517  | NM_000139   | 667.629   | 786.098   |
| U79271    | 1814.474  | 1758.719  | AB032960  | 2110.951  | 1946.457  | NM_006664   | 659.949   | 639.406   |
| NM_01988E | 1457.482  | 1094.435  | NM_014264 | 9076.425  | 7768.591  | NM_002728   | 338.556   | 733.565   |
| AK024609  | 9862.829  | 10634.638 | AF020089  | 1642.643  | 1480.98   | NM_000450   | 295.501   | 484.115   |
| NM_018120 | 14019.456 | 13049.265 | NM_006257 | 3700.7    | 3693.852  | NM_004513   | 2039.319  | 2967.835  |
| AK026874  | 1516.603  | 1729.951  | NM_016281 | 9178.993  | 6219.516  | NM_001708   | 8798.361  | 12592.934 |
| AK024178  | 1114.022  | 803.659   | NM_004734 | 27049.439 | 24817.695 | AF208291    | 574.909   | 251.554   |
| D17217    | 4181.813  | 4546.731  | AK024793  | 2565.696  | 2805.555  | L10284      | 31158.996 | 25714.701 |
| AF088033  | 2794.424  | 2792.071  | NM_012259 | 26452.977 | 22220.895 | NM_000276   | 503.919   | 741.404   |

|           |           |           |             |           |           |             |           |           |
|-----------|-----------|-----------|-------------|-----------|-----------|-------------|-----------|-----------|
| NM_020422 | 6248.898  | 6233.747  | AF272357    | 978.723   | 753.155   | NM_000019   | 46938.793 | 66326.102 |
| AK023628  | 1051.547  | 1660.99   | NM_016372   | 15468.311 | 13314.86  | NM_003742   | 1673.252  | 1585.708  |
| AY007156  | 2725.948  | 2751.252  | AB020705    | 2608.58   | 2646.976  | NM_005094   | 1475.36   | 1812.979  |
| AF086408  | 60981.863 | 56917.313 | NM_014333   | 1167.688  | 699.374   | AK022558    | 1905.766  | 2148.431  |
| AK023979  | 4074.746  | 4885.906  | NM_002980   | 1110.898  | 932.109   | NM_006476   | 44533.305 | 55773.273 |
| CY3Cy5    | 11596.538 | 347.594   | BG491613    | 17566.611 | 19102.18  | AK023787    | 1003.603  | 1052.471  |
| U13738    | 2396.644  | 2086.067  | AA397813    | 56197.328 | 57171.461 | NM_002133   | 995.097   | 1418.01   |
| AF068236  | 30514.545 | 24101.367 | W47350      | 2646.782  | 1986.439  | NM_015697   | 1579.975  | 2612.026  |
| H94487    | 1321.301  | 1251.811  | W68291      | 3184.719  | 2717.219  | NM_032943   | 544.468   | 676.231   |
| BG681747  | 43012.148 | 24911.34  | N64384      | 864.41    | 993.879   | NM_007177   | 2232.269  | 3094.093  |
| H63077    | 44028.398 | 37431.914 | H-X 53655 I | 854.197   | 857.833   | AB018258    | 327.239   | 490.542   |
| AA679352  | 24037.502 | 17427.732 | H-U 05770 I | 5802.301  | 5355.122  | NM_006078   | 2205.672  | 3115.879  |
| X04503    | 1386.198  | 1180.267  | H-M 65199   | 6262.338  | 5548.431  | NM_000824   | 538.269   | 1156.23   |
| D45917    | 1143.133  | 886.723   | H-M 32315   | 1073.062  | 716.74    | NM_017532   | 1790.427  | 1399.584  |
| AA430552  | 1492.125  | 2378.721  | H-V00536M   | 930.73    | 1053.391  | M38449      | 2776.429  | 1610.93   |
| X66142    | 5005.195  | 4561.117  | H-D85429M   | 21252.318 | 18821.576 | NM_001091   | 481.714   | 688.222   |
| SR9       | 24373.65  | 3625.613  | BF439832    | 1113.624  | 761.971   | NM_002395   | 602.954   | 360.649   |
| CY3Cy5    | 12328.746 | 596.815   | BG819162    | 760.77    | 838.925   | AB023203    | 862.508   | 1121.875  |
| AF312769  | 1420.878  | 1532.003  | NM_002728   | 795.035   | 1074.605  | NM_014963   | 604.212   | 677.583   |
| NM_006203 | 12536.271 | 10566.902 | NM_004513   | 6139.658  | 4062.796  | NM_004255   | 720.594   | 709.905   |
| AF309553  | 6210.452  | 5648.919  | NM_001708   | 25887.059 | 18782.23  | NM_016271   | 2558.586  | 2650.333  |
| NM_003605 | 1645.327  | 1548.804  | NM_017735   | 2848.235  | 2315.506  | NM_016619   | 1442.288  | 1546.18   |
| NM_006139 | 10800.467 | 7140.988  | AB033044    | 3511.488  | 3549.419  | U22172      | 734.964   | 986.562   |
| NM_000100 | 49388.898 | 38848.023 | AB014564    | 795.86    | 965.632   | NM_014264   | 4562.695  | 6634.382  |
| NM_006896 | 2647.182  | 3164.14   | NM_020230   | 5259.399  | 5781.629  | AF020089    | 730.216   | 1495.897  |
| NM_001130 | 53509.984 | 56953.215 | NM_006352   | 1386.272  | 1576.349  | NM_006257   | 2084.732  | 2924.628  |
| NM_002975 | 3633.738  | 4673.173  | NM_016430   | 1094.9    | 1762.425  | NM_016281   | 3576.501  | 5900.796  |
| AK023511  | 9487.726  | 10064.932 | NM_004447   | 5722.56   | 5550.299  | NM_004734   | 5622.953  | 7293.251  |
| NM_014375 | 9104.511  | 5803.041  | NM_001204   | 1946.586  | 2096.993  | AK024793    | 268.673   | 397.399   |
| NM_017812 | 19217.01  | 16251.153 | BF131321    | 583.599   | 989.826   | NM_012255   | 12193.34  | 9687.245  |
| AF204173  | 564.367   | 654.734   | NM_012116   | 1069.134  | 1265.867  | AF272357    | 599.469   | 325.312   |
| J03260    | 1233.484  | 1000.532  | NM_000020   | 1781.516  | 2014.316  | NM_016372   | 7631      | 5480.296  |
| AB014514  | 2905.659  | 2336.074  | NM_002442   | 3582.306  | 3028.865  | AB020705    | 942.694   | 661.182   |
| NM_002865 | 5380.585  | 4494.766  | AB033091    | 6345.535  | 3989.365  | NM_014333   | 497.383   | 395.755   |
| NM_003566 | 1418.569  | 953.452   | NM_004557   | 4274.717  | 4055.334  | NM_002980   | 337.671   | 284.394   |
| NM_002387 | 3340.727  | 3206.686  | NM_014757   | 19601.479 | 13603.394 | NM_007102   | 34138.25  | 21618.035 |
| NM_000069 | 646.269   | 773.444   | NM_017893   | 926.042   | 724.12    | BG491613    | 7612.22   | 7105.25   |
| AB023217  | 961.327   | 1138.737  | NM_001584   | 3290.825  | 2797.416  | AA397813    | 43744.426 | 45585.418 |
| J02639    | 2169.218  | 1861.427  | NM_000809   | 487.381   | 584.425   | W47350      | 1024.931  | 1151.419  |
| NM_007263 | 14021.706 | 9974.035  | NM_005953   | 29543.564 | 37218.59  | W68291      | 2076.164  | 2590.252  |
| AF206020  | 845.007   | 736.152   | AL096732    | 1161.16   | 4943.51   | H-X 53655 I | 500.842   | 524.724   |
| NM_002150 | 2793.074  | 3603.716  | NM_014264   | 10851.563 | 12855.699 | H-U 05770 I | 1913.913  | 2431.549  |
| NM_004595 | 14747.018 | 17576.285 | AF020089    | 1249.212  | 983.943   | H-M 65199   | 1859.924  | 3020.028  |
| NM_020178 | 549.236   | 964.112   | NM_006257   | 4370.955  | 3586.554  | H-M 32315   | 382.741   | 847.93    |
| NM_002264 | 1864.008  | 1791.724  | NM_016281   | 8836.931  | 5356.068  | H-V00536M   | 480.721   | 681.271   |
| NM_014754 | 24512.592 | 19808.066 | NM_004734   | 20629.348 | 17782.631 | H-D85429M   | 12212.12  | 16588.936 |
| AF050146  | 3207.273  | 2719.437  | AK024793    | 2789.617  | 3116.906  | NM_002728   | 256.273   | 276.547   |
| NM_000116 | 5024.393  | 2787.713  | AF208291    | 1439.272  | 1393.346  | NM_004513   | 2727.546  | 1829.865  |
| NM_006698 | 9072.055  | 8337.942  | NM_005094   | 861.369   | 4087.816  | NM_001708   | 12909.991 | 8529.749  |
| NM_006804 | 9868.4    | 9824.469  | BE382905    | 719.339   | 597.893   | NM_017735   | 958.935   | 748.266   |
| NM_003051 | 2147.198  | 2698.262  | NM_002152   | 2258.095  | 135.376   | AB033044    | 1630.977  | 1792.464  |
| NM_145342 | 5793.809  | 4556.207  | NM_001701   | 3081.238  | 1161.861  | NM_020230   | 2598.933  | 1454.251  |
| AJ278917  | 3737.704  | 2815.853  | AK022558    | 4516.991  | 8297.531  | NM_006762   | 24535.396 | 13397.688 |

|           |           |           |           |           |           |           |           |           |
|-----------|-----------|-----------|-----------|-----------|-----------|-----------|-----------|-----------|
| AK025641  | 18413.193 | 14916.802 | AK026842  | 2520.326  | 2394.099  | NM_006352 | 492.705   | 266.612   |
| AK025886  | 1554.296  | 998.004   | NM_002395 | 826.052   | 1214.548  | NM_016430 | 508.331   | 452.461   |
| NM_003058 | 623.945   | 444.298   | NM_004259 | 3824.769  | 3587.853  | NM_004447 | 2464.64   | 2601.489  |
| NM_001720 | 2620.436  | 2419.212  | NM_016271 | 8826.317  | 10088.171 | NM_001204 | 561.599   | 630.162   |
| NM_018390 | 7097.92   | 7631.476  | NM_014481 | 2581.82   | 11638.278 | BF131321  | 657.546   | 938.401   |
| AB037724  | 6131.435  | 5163.353  | U22172    | 5341.491  | 5930.452  | NM_012116 | 695.762   | 796.464   |
| AK025086  | 1507.925  | 1384.525  | AB032960  | 3120.383  | 2914.559  | NM_000020 | 235.35    | 351.263   |
| AK026151  | 3300.969  | 2839.73   | NM_017675 | 1050.825  | 808.745   | NM_002442 | 1579.306  | 2340.462  |
| NM_014140 | 3960.689  | 4144.848  | NM_015991 | 982.192   | 741.768   | AB033091  | 1929.279  | 2677.02   |
| NM_002916 | 6927.805  | 7612.051  | BF246606  | 568.238   | 552.101   | NM_004557 | 973.837   | 1336.628  |
| M20700    | 7584.555  | 6527.819  | NM_002342 | 888.411   | 840.648   | NM_014757 | 8816.955  | 11812.176 |
| NM_001034 | 19130.707 | 22670.703 | NM_002184 | 2602.172  | 2388.517  | NM_001584 | 833.239   | 1201.777  |
| NM_002689 | 2426.927  | 3068.138  | NM_014883 | 4937.38   | 4935.398  | NM_000809 | 405.352   | 779.073   |
| NM_017686 | 2762.416  | 2871.504  | NM_003657 | 1203.028  | 909.662   | AL359592  | 391.892   | 245.377   |
| AL096734  | 808.303   | 583.947   | NM_000588 | 595.441   | 619.847   | NM_006078 | 3307.765  | 5207.353  |
| AK000800  | 3141.528  | 2990.301  | AL049296  | 4855.659  | 4354.436  | NM_000824 | 1148.123  | 1003.681  |
| NM_018154 | 6471.867  | 8163.148  | NM_014471 | 52580.027 | 44434.555 | NM_000482 | 409.834   | 340.284   |
| BC006287  | 5099.523  | 5567.152  | NM_004397 | 2786.926  | 3122.25   | NM_016274 | 6230.057  | 6347.955  |
| AB023198  | 4410.153  | 3968.358  | NM_003189 | 7726.909  | 8423.124  | NM_014251 | 651.109   | 421.748   |
| AF304163  | 23437.926 | 22472.244 | NM_020238 | 4717.048  | 3330.126  | AK022750  | 2838.181  | 3550.252  |
| NM_005231 | 5896.389  | 4519.649  | D49356    | 753.084   | 996.776   | NM_004251 | 3120.727  | 3100.868  |
| AF064729  | 1503.889  | 1584.085  | NM_018579 | 1988.715  | 2081.021  | U53532    | 1428.897  | 2636.354  |
| NM_005412 | 19872.016 | 19428.254 | NM_006201 | 3758.34   | 3587.383  | NM_012484 | 5222.108  | 7885.383  |
| NM_012113 | 2356.568  | 1859.749  | NM_007110 | 2137.07   | 2014.002  | NM_005719 | 44338.453 | 61044.371 |
| NM_002725 | 834.254   | 1111.588  | U50383    | 10768.323 | 9880.781  | NM_006093 | 1146.418  | 1561.098  |
| NM_014375 | 9252.118  | 8349.544  | AK025085  | 7480.907  | 6834.725  | NM_000139 | 544.87    | 933.668   |
| NM_017812 | 17235.74  | 19601.852 | NM_006290 | 11053.729 | 9482.978  | NM_006664 | 776.73    | 1440.703  |
| AF204173  | 497.236   | 915.935   | AK022290  | 1347.76   | 947.604   | NM_014264 | 4148.473  | 2352.925  |
| J03260    | 1104.829  | 1162.156  | NM_003680 | 51999.938 | 55145.422 | AF020089  | 649.785   | 362.123   |
| U13738    | 2941.31   | 2702.959  | AF118124  | 6621.471  | 7789.961  | NM_006257 | 1966.22   | 1060.25   |
| AF068236  | 32734.357 | 26448.545 | NM_004849 | 16753.123 | 16827.752 | NM_016281 | 3598.441  | 1954.896  |
| H94487    | 1060.124  | 743.207   | AL137527  | 8615.41   | 9397.882  | NM_004734 | 8379.967  | 5441.343  |
| BG681747  | 36899.18  | 20356.07  | AK026068  | 890.246   | 1049.518  | AK024793  | 842.565   | 529.425   |
| H63077    | 46520.148 | 51693.648 | J04974    | 33356.719 | 35856.051 | AF208291  | 608.486   | 475.932   |
| AA679352  | 26757.465 | 33952.156 | NM_007058 | 8642.054  | 7488.337  | L10284    | 31690.162 | 26952.127 |
| X04503    | 1289.313  | 1525.169  | NM_001528 | 4217.956  | 3728.653  | NM_000276 | 1457.75   | 978.427   |
| D45917    | 1634.988  | 1953.047  | NM_007014 | 2082.712  | 1759.211  | NM_000019 | 45384.422 | 53184.449 |
| X52001    | 3263.874  | 3095.739  | AL096740  | 1702.09   | 1564.706  | AK023701  | 388.256   | 301.049   |
| BI823872  | 25919.838 | 35009.594 | AF191545  | 4880.779  | 3743.571  | NM_003742 | 1593.826  | 1130.922  |
| AA430552  | 1532.523  | 2299.689  | NM_014554 | 3604.827  | 3618.325  | NM_005094 | 1333.213  | 1547.862  |
| X66142    | 4944.979  | 4086.665  | AK023968  | 3643.96   | 3389.32   | BE382905  | 482.259   | 712.074   |
| R45054    | 1901.757  | 1313.433  | NM_004652 | 1409.37   | 1243.128  | NM_002152 | 3452.022  | 3826.083  |
| NM_000905 | 9087.533  | 6443.457  | AK025425  | 36048.141 | 33619.926 | AK022558  | 1382.583  | 1459.431  |
| AL117398  | 5463.992  | 3750.246  | AK025974  | 13949.423 | 15372.22  | NM_006476 | 41804.094 | 41947.785 |
| AY007158  | 55236.832 | 52618.074 | NM_005781 | 4788.734  | 5235.159  | AK023787  | 994.195   | 1277.57   |
| M58050    | 6158.896  | 5825.511  | NM_001747 | 13657.995 | 12016.619 | NM_002133 | 680.87    | 1066.527  |
| NM_007263 | 10901.945 | 10760.391 | NM_001148 | 6194.486  | 13746.125 | NM_015697 | 1567.548  | 2620.836  |
| AF206020  | 999.029   | 781.827   | AF242522  | 6810.528  | 6408.152  | AF086489  | 347.626   | 807.182   |
| AF312769  | 2320.098  | 1920.288  | NM_004024 | 4995.244  | 5003.313  | NM_032943 | 395.891   | 702.643   |
| NM_006203 | 9377.16   | 8433.541  | X52345    | 18402.1   | 17868.721 | NM_007177 | 1385.363  | 1643.507  |
| AF309553  | 7053.529  | 9355.891  | NM_006965 | 4794.403  | 5036.504  | NM_000737 | 1266.286  | 632.317   |
| NM_003605 | 1699.655  | 2225.89   | AF027142  | 58474.449 | 51018.227 | AL079273  | 1785.353  | 1064.573  |
| NM_006139 | 14095.2   | 11589.737 | AF221520  | 2750.745  | 2321.966  | AK026129  | 1563.57   | 986.849   |



|           |           |           |           |           |           |           |           |           |
|-----------|-----------|-----------|-----------|-----------|-----------|-----------|-----------|-----------|
| NM_00010C | 51156.727 | 56312.043 | NM_006941 | 36445.93  | 35664.293 | AK024200  | 458.887   | 428.942   |
| NM_00190C | 62824.125 | 67149.438 | AB037852  | 742.188   | 807.654   | NM_003713 | 5999.603  | 1629.231  |
| NM_003993 | 3397.208  | 4067.005  | NM_00536C | 1424.183  | 1552.78   | M38449    | 3246.201  | 1760.448  |
| NM_018961 | 6471.858  | 5554.957  | NM_004349 | 4072.409  | 5973.234  | NM_001091 | 584.67    | 469.239   |
| NM_00558E | 2782.174  | 2779.883  | NM_016839 | 18260.195 | 19867.055 | AK023915  | 3384.851  | 3660.833  |
| NM_00689E | 2955.538  | 3444.417  | NM_00596E | 61718.578 | 57461.867 | AB051453  | 1153.316  | 1241.439  |
| NM_00113C | 57128.004 | 55905.949 | AK021416  | 3138.362  | 2862.356  | AK026842  | 1087.84   | 1072.406  |
| NM_00297E | 3852.421  | 3280.388  | NM_018471 | 12890.282 | 11624.609 | AB023203  | 761.199   | 887.525   |
| AK023511  | 10132.986 | 7760.99   | NM_003819 | 2545.326  | 3645.402  | NM_014963 | 1203.469  | 1318.733  |
| NM_01455E | 5401.225  | 4242.086  | NM_00656C | 4094.665  | 4931.595  | NM_00425E | 776.14    | 812.215   |
| NM_00161E | 65058.656 | 64222.238 | NM_016183 | 3536.533  | 3472.401  | NM_016271 | 1208.639  | 1335.514  |
| AK025886  | 1103.175  | 817.236   | NM_004872 | 3913.505  | 4455.238  | NM_01661E | 913.238   | 1323.998  |
| AB014514  | 3055.082  | 2657.151  | NM_00195E | 55422.758 | 52771.461 | NM_014481 | 736.379   | 1248.78   |
| NM_00286E | 6558.715  | 9065.298  | NM_015904 | 6917.127  | 5936.049  | U22172    | 353.299   | 303.264   |
| NM_00356E | 1626.115  | 1508.746  | NM_00196C | 52027.297 | 53121.07  | AB032960  | 655.782   | 709.02    |
| NM_00715E | 29442.541 | 29761.787 | NM_018122 | 3310.285  | 2607.224  | NM_015991 | 416.786   | 350.4     |
| NM_003731 | 15433.283 | 13981.958 | AF035318  | 1503.887  | 1974.374  | NM_005562 | 592.798   | 396.966   |
| NM_00544E | 4264.221  | 4348.504  | NM_01545E | 6486.398  | 8105.21   | NM_012417 | 1372.679  | 896.37    |
| NM_013292 | 3566.028  | 2939.319  | AK025056  | 1816.282  | 1815.434  | NM_00296E | 376.481   | 641.31    |
| NM_002387 | 3270.928  | 2501.895  | AF140710  | 9024.427  | 9160.99   | NM_002342 | 480.809   | 867.454   |
| NM_00006E | 720.562   | 897.167   | NM_01208E | 17231.334 | 16177.394 | D13631    | 3333.493  | 5517.358  |
| AB023217  | 876.478   | 1174.746  | NM_017947 | 1642.9    | 1397.788  | NM_003712 | 1452.854  | 1178.008  |
| L08902    | 557.663   | 277.075   | NM_002494 | 7386.018  | 8663.618  | NM_002184 | 717.099   | 952.551   |
| J02639    | 2507.878  | 2016.385  | M58510    | 12221.104 | 11523.289 | NM_014883 | 1423.682  | 1995.734  |
| NM_005231 | 4654.67   | 5055.102  | NM_000782 | 1148.448  | 1274.791  | NM_01780E | 2595.951  | 3736.984  |
| AF064729  | 2061.711  | 1950.289  | BE396003  | 1680.713  | 1755.594  | NM_003657 | 651.269   | 463.913   |
| NM_005412 | 16605.678 | 20120.342 | AK023300  | 3278.643  | 2631.18   | AL049296  | 2119.912  | 1190.768  |
| NM_012113 | 1643.027  | 2005.958  | NM_018082 | 2085.533  | 2656.358  | NM_014471 | 13597.821 | 10168.752 |
| NM_00215C | 2920.904  | 2396.556  | NM_003904 | 4767.875  | 5599.998  | NM_004397 | 878.229   | 464.726   |
| NM_00459E | 14637.721 | 14699.944 | NM_006234 | 28338.025 | 26337.49  | NM_00318E | 3751.499  | 2361.32   |
| NM_02017E | 657.46    | 574.93    | AK026387  | 813.508   | 795.232   | NM_02023E | 2231.474  | 3164.689  |
| NM_002264 | 2256.143  | 2150.825  | AB028987  | 4699.929  | 4874.603  | NM_01857E | 1017.572  | 1104.664  |
| NM_014754 | 26067.732 | 24958.891 | NM_003594 | 1667.086  | 1621.801  | NM_006201 | 1762.685  | 1094.703  |
| D49387    | 527.335   | 857.791   | AK022284  | 2866.113  | 3364.184  | NM_00711C | 1092.679  | 723.423   |
| AF050146  | 4354.601  | 3578.949  | AF060937  | 796.008   | 666.107   | NM_00125E | 12624.471 | 24954.316 |
| NM_000116 | 6354.564  | 4464.859  | AB040893  | 3077.11   | 3476.594  | U50383    | 6021.718  | 4755.227  |
| NM_00669E | 9597.989  | 10349.125 | AK025844  | 2652.638  | 3226.732  | AK025085  | 3841.64   | 4532.977  |
| NM_006804 | 12471.305 | 12446.593 | AL137727  | 2555.849  | 3001.81   | NM_00629C | 2641.049  | 2011.136  |
| NM_01596E | 13614.787 | 13449.623 | L17327    | 2084.584  | 1321.731  | NM_00368C | 26435.154 | 18905.805 |
| NM_003051 | 2699.361  | 2300.719  | AF074986  | 1550.299  | 1425.911  | AF118124  | 899.59    | 1686.779  |
| NM_145342 | 6587.673  | 4637.324  | AL049240  | 4360.301  | 3940.048  | NM_00484E | 2439.159  | 2770.741  |
| AJ278917  | 5281.901  | 3551.257  | U80773    | 1830.866  | 1933.014  | AL137527  | 676.953   | 939.357   |
| AK025641  | 21977.264 | 19684.213 | AK021745  | 2915.891  | 2600.812  | J04974    | 5427.057  | 4971.849  |
| NM_00062C | 509.312   | 1049.869  | L38937    | 9374.629  | 9769.446  | NM_00705E | 3782.922  | 2488.185  |
| NM_00090E | 9421.637  | 7903.288  | U90907    | 2540.543  | 2541.797  | NM_00152E | 1558.483  | 933.906   |
| AL117398  | 5077.467  | 4693.398  | AK024327  | 2048.842  | 2185.109  | NM_007014 | 542.489   | 438.384   |
| AY007158  | 57798.551 | 58488.633 | AK021700  | 1803.506  | 1928.345  | AL096740  | 709.733   | 549.11    |
| NM_00172C | 982.452   | 712.397   | AF147327  | 1431.782  | 1142.694  | AF191545  | 1780.181  | 1621.661  |
| NM_01839C | 7759.47   | 7494.839  | AK000801  | 6527.869  | 6181.547  | NM_014554 | 1094.865  | 971.58    |
| AB037724  | 7099.19   | 6244.203  | D85433    | 6492.772  | 6127.097  | AK023968  | 1639.842  | 929.716   |
| AK025086  | 1925.306  | 1725.78   | AF086184  | 7463.737  | 7619.954  | NM_004652 | 384.686   | 258.982   |
| AK026151  | 3499.269  | 3387.144  | NM_01827E | 2466.665  | 3058.49   | AK025425  | 17457.965 | 12244.143 |
| NM_01414C | 3850.81   | 4783.97   | AL049266  | 8129.325  | 8336.825  | AK025974  | 12182.229 | 10705.125 |

|           |           |           |            |           |           |           |           |           |
|-----------|-----------|-----------|------------|-----------|-----------|-----------|-----------|-----------|
| NM_002916 | 8212.938  | 9728.442  | AF007149   | 1596.62   | 1374.014  | BC036740  | 1748.637  | 1280.583  |
| M20700    | 8900.627  | 8471.26   | NM_014705  | 731.263   | 1146.645  | NM_001747 | 2672.048  | 3212.805  |
| NM_001034 | 20332.447 | 26921.9   | AK001469   | 2604.834  | 2787.462  | NM_001148 | 2293.174  | 894.341   |
| NM_002689 | 3051.723  | 4235.929  | AK021627   | 2529.615  | 3759.52   | AF242522  | 445.114   | 490.346   |
| NM_017686 | 3068.552  | 3966.151  | NM_019596  | 636.794   | 581.846   | AJ008152  | 731.852   | 934.081   |
| AL096734  | 838.292   | 943.332   | AF085859   | 2964.917  | 2663.977  | NM_004024 | 2677.275  | 1319.792  |
| AK000800  | 3209.025  | 2634.653  | AF085888   | 393.338   | 623.444   | X52345    | 7105.034  | 3782.121  |
| NM_018154 | 6758.098  | 6477.283  | AK026307   | 2154.01   | 2063.574  | NM_006965 | 2405.295  | 1276.869  |
| NM_005355 | 572.375   | 544.41    | AL049260   | 711.932   | 660.338   | AF027142  | 36040.805 | 24665.432 |
| BC006287  | 5700.804  | 5201.499  | AL049975   | 874.383   | 1256.45   | AF221520  | 1190.245  | 745.066   |
| AB023198  | 5270.571  | 5253.622  | AL080067   | 2052.849  | 2222.334  | NM_006941 | 14639.781 | 11110.208 |
| AF304163  | 26689.221 | 27469.314 | AL117464   | 7408.903  | 6064.314  | NM_005360 | 710.811   | 430.35    |
| NM_006896 | 3183.365  | 4081.949  | AL080160   | 1732.748  | 1651.875  | NM_004349 | 2505.598  | 894.629   |
| NM_001130 | 58476.75  | 61014.547 | L23849     | 938.805   | 1193.115  | NM_002092 | 5984.435  | 3442.899  |
| NM_002975 | 3961.659  | 4276.333  | AL157477   | 3394.877  | 3485.849  | NM_018077 | 1222.177  | 567.223   |
| AK023511  | 8222.026  | 9057.604  | AK022083   | 523.443   | 909.45    | NM_016839 | 8796.587  | 5745.16   |
| NM_014556 | 4919.991  | 5030.772  | AB002318   | 1856.947  | 2062.414  | NM_005968 | 44107.059 | 38449.973 |
| NM_001615 | 66317.648 | 72028.82  | AL049951   | 1590.37   | 2693.14   | AK021416  | 1720.204  | 3445.661  |
| NM_002725 | 684.455   | 613.834   | AK023725   | 3650.162  | 3184.234  | NM_018471 | 7870.903  | 11444.804 |
| NM_014375 | 11068.71  | 7983.535  | AK022936   | 5120.816  | 4873.381  | NM_003819 | 1844.191  | 926.247   |
| NM_017812 | 17578.605 | 17266.221 | AK024385   | 8355.992  | 9672.764  | NM_006560 | 1816.982  | 1270.175  |
| AF204173  | 731.427   | 634.253   | NM_017709  | 3744.35   | 5804.579  | NM_004872 | 776.593   | 476.576   |
| J03260    | 1249.756  | 942.576   | AF049615   | 1055.559  | 1129.332  | NM_001958 | 13218.595 | 9578.017  |
| U13738    | 2110.309  | 2266.103  | NM_014358  | 31620.477 | 30099.775 | NM_004757 | 1266.714  | 1707.68   |
| AF068236  | 27786.535 | 27006.205 | AF009282   | 9560.051  | 7370.313  | NM_001960 | 4574.306  | 4463.54   |
| H94487    | 859.728   | 825.981   | AF024704   | 13905.839 | 13003.989 | NM_018122 | 819.407   | 904.355   |
| BG681747  | 42266.258 | 26990.178 | AF056431   | 2035.405  | 2449.223  | AF035318  | 848.651   | 525.075   |
| H63077    | 46886.559 | 49565.086 | NM_016412  | 1896.758  | 1757.609  | NM_015456 | 3193.823  | 1942.271  |
| AA679352  | 28128.547 | 28072.381 | AF009293   | 1663.195  | 2088.873  | AK025056  | 590.64    | 637.163   |
| AA437291  | 599.716   | 740.525   | NM_004158  | 64006.824 | 51206.355 | AF140710  | 2689.087  | 1688.361  |
| X04503    | 1756.738  | 1853.771  | AF056444   | 12261.388 | 12254.628 | NM_012088 | 6007.758  | 4089.236  |
| D45917    | 1461.516  | 1713.302  | AK000989   | 3895.297  | 4085.883  | NM_017947 | 380.04    | 238.623   |
| X52001    | 2147.841  | 1698.81   | AK002210   | 7890.381  | 6516.363  | NM_002494 | 3297.572  | 1937.561  |
| BI823872  | 25380.037 | 22108.445 | AK021677   | 1880.536  | 1506.363  | M58510    | 5436.444  | 2596.851  |
| AA430552  | 2248.618  | 2090.522  | AK001057   | 985.148   | 1024.948  | BE396003  | 855.323   | 518.999   |
| X66142    | 5021.585  | 3649.827  | AK001808   | 962.576   | 1233.989  | AK023300  | 1232.668  | 1179.245  |
| R45054    | 2367.898  | 2093.355  | AK021471   | 775.335   | 1132.698  | NM_018082 | 806.984   | 413.593   |
| NM_002387 | 3156.286  | 2998.704  | AK021709   | 1581.281  | 1682.923  | NM_003904 | 2846.972  | 2773.975  |
| L08902    | 528.507   | 438.98    | AK025109   | 1765.363  | 1654.495  | NM_006234 | 14530.122 | 11054.519 |
| J02639    | 1513.032  | 2232.71   | AK026057   | 920.197   | 909.991   | AB028987  | 1157.425  | 819.097   |
| M58050    | 6925.709  | 5250.838  | AK026713   | 1010.562  | 979.88    | AF164438  | 2282.154  | 1943.383  |
| NM_007263 | 11449.499 | 9727.548  | AJ008117   | 17238.736 | 19165.859 | AB040893  | 679.697   | 964.759   |
| AF206020  | 930.816   | 705.115   | AJ008147   | 34574.961 | 38046.914 | AL137727  | 1218.581  | 712.514   |
| AF312769  | 2364.406  | 2164.855  | AK024369   | 2608.644  | 1912.36   | L17327    | 616.717   | 620.71    |
| NM_006203 | 10589.438 | 10325.438 | AL049244   | 621.205   | 717.095   | AF074986  | 525.519   | 356.625   |
| AF309553  | 6786.237  | 8353.364  | L43345     | 2144.777  | 1617.4    | AL049240  | 1039.099  | 880.217   |
| NM_003605 | 1418.918  | 2018.479  | AF180297   | 7687.927  | 6216.288  | U80773    | 999.481   | 727.29    |
| NM_006139 | 12279.979 | 10333.389 | AK023245   | 2811.594  | 2493.104  | AK021745  | 1210.756  | 888.402   |
| NM_000100 | 53023.023 | 44555.156 | AF147303   | 1754.159  | 1994.347  | L38937    | 4259.688  | 2704.684  |
| NM_001900 | 65490.16  | 66839.117 | AF086224   | 1143.841  | 1511.104  | U90907    | 1010.449  | 987.76    |
| NM_003993 | 3132.655  | 3184.21   | AK023607   | 1899.403  | 1758.398  | AK024327  | 590.159   | 302.051   |
| NM_018961 | 5961.478  | 4666.842  | unknown (9 | 617.835   | 797.018   | AK000801  | 3193.525  | 3602.27   |
| NM_005586 | 3072.324  | 2560.983  | unknown (9 | 486.825   | 731.174   | D85433    | 4328.775  | 5727.669  |

|           |           |           |           |           |           |           |           |           |
|-----------|-----------|-----------|-----------|-----------|-----------|-----------|-----------|-----------|
| NM_003051 | 2257.465  | 3482.257  | AK024118  | 1360.008  | 1612.238  | AF086184  | 4972.475  | 3406.923  |
| NM_001133 | 4159.548  | 7394.871  | X89657    | 923.963   | 733.503   | NM_018275 | 1811.724  | 1090.947  |
| NM_145342 | 7488.509  | 6595.64   | AK024509  | 2817.335  | 3113.078  | AL049266  | 2363.87   | 1859.283  |
| AJ278917  | 3511.076  | 2992.936  | AL050185  | 689.972   | 566.523   | AK021560  | 287.346   | 355.588   |
| AK025641  | 20551.605 | 21032.602 | NM_017847 | 4923.033  | 6459.745  | AK021627  | 985.441   | 709.821   |
| AK025886  | 1361.047  | 1056.581  | AL049675  | 2729.525  | 3690.645  | AF085859  | 1074.259  | 773.394   |
| NM_003058 | 508.218   | 896.384   | NM_003537 | 30177.246 | 21011.25  | AK026307  | 689.945   | 346.818   |
| AB014514  | 2740.131  | 2809.526  | AF056419  | 40794.82  | 37958.988 | AF075047  | 425.149   | 466.215   |
| NM_002865 | 6136.161  | 8810.995  | AF074983  | 1815.623  | 1679.211  | AF147403  | 673.599   | 347.954   |
| NM_003566 | 1690.9    | 1288.586  | AK021862  | 782.291   | 1087.628  | AL049975  | 512.572   | 369.645   |
| NM_007158 | 25944.207 | 25926.857 | AK024177  | 2645.169  | 2483.665  | AL080067  | 591.648   | 377.902   |
| NM_003731 | 12081.691 | 12827.108 | AK021952  | 1403.774  | 1260.062  | AL117464  | 2489.551  | 2287.822  |
| NM_005446 | 3140.839  | 3159.732  | K01564    | 1825.066  | 1850.463  | AL080160  | 701.878   | 710.378   |
| NM_013292 | 2876.723  | 2874.375  | AB023175  | 9385.047  | 9994.693  | AB002318  | 809.64    | 701.265   |
| AK000800  | 3175.988  | 2796.328  | AL359563  | 1863.899  | 1742.566  | AL357535  | 1094.086  | 901.656   |
| NM_018154 | 5821.669  | 8503.737  | AL109791  | 845.236   | 970.52    | NM_017708 | 1021.14   | 748.019   |
| NM_005358 | 298.861   | 871.143   | L40521    | 845.321   | 986.853   | AF049615  | 673.929   | 568.769   |
| BC006287  | 4592.702  | 5569.917  | AJ008134  | 8973.346  | 10914.523 | NM_014358 | 15839.217 | 10079.196 |
| AB023198  | 4999.577  | 5015.602  | S71486    | 2616.122  | 2781.153  | AF009282  | 3732.684  | 3666.383  |
| AF304163  | 23004.953 | 26127.303 | L33808    | 33972.531 | 36062.457 | AF024704  | 4448.212  | 2491.458  |
| NM_005231 | 5590.809  | 4801.091  | D31886    | 5167.888  | 4291.874  | AF056431  | 662.404   | 612.45    |
| AF064729  | 2441.057  | 2301.111  | U92024    | 1010.268  | 1239.549  | NM_016412 | 720.098   | 374.763   |
| NM_005412 | 20279.494 | 22857.793 | AK023330  | 8125.974  | 6814.545  | AF009293  | 1089.071  | 586.788   |
| NM_002150 | 2666.453  | 2443.007  | AF075071  | 3084.258  | 2417.9    | NM_004158 | 53767.715 | 55960.066 |
| NM_004595 | 14395.662 | 17811.102 | X93500    | 3134.232  | 2771.063  | AF056444  | 3594.647  | 1974.719  |
| NM_020178 | 805.278   | 963.55    | AK026597  | 906.873   | 1037.944  | AK000989  | 2672.424  | 2579.108  |
| NM_002264 | 2074.023  | 2086.146  | U79271    | 2442.511  | 3043.396  | AK002210  | 3484.832  | 2371.037  |
| NM_014754 | 25286.182 | 25506.25  | NM_019888 | 1531.487  | 1370.395  | AK021677  | 877.287   | 628.669   |
| D49387    | 712.376   | 754.946   | AK024609  | 7832.866  | 7309.858  | AK001057  | 603.393   | 666.9     |
| AF050146  | 4455.634  | 3622.938  | AK023660  | 1292.486  | 1174.566  | AK021471  | 438.004   | 290.153   |
| NM_000116 | 6445.57   | 4570.071  | NM_018120 | 10302.121 | 9836.832  | AK026057  | 1558.709  | 1115.313  |
| NM_006698 | 10584.756 | 9327.879  | AK027209  | 694.327   | 705.843   | AJ008117  | 6404.808  | 3776.338  |
| NM_006804 | 10068.609 | 11838.654 | AK026874  | 2070.92   | 1568.223  | AJ008147  | 15403.026 | 9476.951  |
| NM_015968 | 10207.74  | 10121.769 | AK024178  | 836.674   | 1016.558  | AK024369  | 926.23    | 613.92    |
| NM_004517 | 6809.319  | 3735.696  | AY007156  | 1932.521  | 1717.078  | L43345    | 800.916   | 397.056   |
| AI017418  | 779.599   | 1002.44   | AF086408  | 52041.902 | 46773.625 | AF180297  | 2569.249  | 1671.513  |
| NM_000679 | 815.446   | 1019.368  | AK023979  | 4597.542  | 4189.031  | AK023245  | 1183.735  | 502.608   |
| AF218006  | 26191.523 | 22451.852 | CY3Cy5    | 14024.018 | 693.896   | AF147303  | 705.28    | 489       |
| AK026935  | 10021.913 | 8508.133  | U13738    | 2326.659  | 2018.125  | S56365    | 49050.105 | 65157.703 |
| NM_020162 | 6507.125  | 5875.043  | AF068236  | 61962.336 | 59940.871 | AF186017  | 391.208   | 302.937   |
| AK027124  | 39740.371 | 35993.266 | H94487    | 6073.541  | 5212.446  | AK023607  | 508.178   | 307.186   |
| M31212    | 60117.031 | 64256.59  | BG681747  | 28001.645 | 44521.406 | NM_017847 | 2758.207  | 1881.478  |
| AY007158  | 57353.852 | 59826.254 | H63077    | 40554.207 | 40752.598 | AL049675  | 1883.856  | 1926.877  |
| NM_001720 | 1051.38   | 808.777   | AA679352  | 18667.279 | 19545.59  | NM_003537 | 8937.063  | 8677.141  |
| NM_018390 | 7001.525  | 7772.772  | X04503    | 3922.535  | 3175.05   | AF056419  | 19598.564 | 14373.51  |
| AB037724  | 7752.632  | 6506.587  | D45917    | 3139.468  | 2323.268  | AF074983  | 943.434   | 606.914   |
| AK025086  | 1834.742  | 2020.928  | X52001    | 6468.255  | 6487.253  | AK021862  | 549.194   | 370.57    |
| AK026151  | 4752.015  | 4592.893  | BI823872  | 15669.88  | 16930.354 | AK024177  | 1189.944  | 1200.595  |
| NM_014140 | 4908.677  | 5840.724  | AA430552  | 5663.439  | 4960.167  | AK024827  | 5246.377  | 3904.862  |
| NM_002916 | 8400.397  | 9503.352  | X66142    | 3861.627  | 3984.335  | K01564    | 875.691   | 755.161   |
| M20700    | 9578.005  | 8719.101  | R45054    | 2006.905  | 1669.118  | AB023175  | 9014.343  | 8803.575  |
| NM_001034 | 22587.422 | 23462.598 | NM_000620 | 711.837   | 889.106   | AL359563  | 1237.68   | 1778.454  |
| NM_002688 | 2747.473  | 2902.852  | NM_000905 | 8107.083  | 7164.88   | NM_005304 | 354.422   | 265.294   |

|           |           |           |           |           |           |           |           |           |
|-----------|-----------|-----------|-----------|-----------|-----------|-----------|-----------|-----------|
| NM_01768E | 2428.054  | 2984.979  | SR5       | 10906.487 | 8253.498  | AF086478  | 1302.271  | 2199.802  |
| AL096734  | 611.706   | 505.936   | SR7       | 7679.766  | 42977.992 | AK021514  | 19904.666 | 17369.07  |
| NM_01664E | 9302.709  | 9049.632  | SR9       | 25087.76  | 3339.618  | AJ008134  | 2728.076  | 2612.693  |
| L14723    | 7681.312  | 7432.261  | CY3Cy5    | 14772.126 | 560.569   | S71486    | 1249.533  | 1298.196  |
| AK024462  | 8952.754  | 8149.416  | AF312769  | 4350.695  | 4876.513  | L33808    | 15065.632 | 12295.136 |
| NM_005711 | 589.67    | 607.414   | AB020668  | 1475.88   | 1846.132  | D31886    | 1959.582  | 1431.129  |
| NM_019601 | 845.154   | 835.279   | NM_006203 | 62902.094 | 60935.234 | U92024    | 449.994   | 172.534   |
| NM_00220E | 2094.579  | 1802.258  | NM_013261 | 656.494   | 539.865   | AK023330  | 2915.199  | 1954.643  |
| NM_007074 | 592.637   | 778.746   | AF309553  | 5464.955  | 4301.43   | AF075071  | 1441.392  | 1345.291  |
| NM_00381E | 2895.13   | 2789.799  | NM_00360E | 1599.98   | 1439.296  | AF147428  | 676.568   | 719.94    |
| NM_00143C | 1794.417  | 1346.715  | NM_00613E | 8637.961  | 9333.801  | X93500    | 1377.224  | 1289.638  |
| U17989    | 2005.219  | 2335.709  | NM_00010C | 37715.406 | 35678.512 | U79271    | 1027.848  | 972.936   |
| U62325    | 979.979   | 982.12    | NM_00399E | 2737.22   | 2367.917  | NM_01988E | 830.255   | 357.406   |
| AL137595  | 694.492   | 724.728   | NM_018961 | 4880.672  | 5875.639  | AK024609  | 4404.727  | 2817.951  |
| NM_01802E | 1486.011  | 1422.138  | NM_00558E | 2948.53   | 3376.155  | AK023660  | 366.884   | 152.967   |
| AF249267  | 43717.02  | 42903.551 | NM_01224E | 880.669   | 750.493   | NM_01812C | 7159.704  | 6726.591  |
| NM_004113 | 649.097   | 760.122   | NM_00689E | 2961.174  | 2238.74   | AK026874  | 1231.454  | 914.731   |
| X84939    | 4063.38   | 4061.54   | NM_00113C | 64006.254 | 62268.852 | AY007156  | 481.575   | 380.415   |
| NM_01832C | 14566.706 | 13773.604 | NM_00297E | 4435.615  | 4251.4    | AF086408  | 34444.039 | 35882.801 |
| NM_00206E | 3334.199  | 3506.973  | AK023511  | 6973.077  | 6037.316  | AK023979  | 1808.805  | 2465.503  |
| NM_01605E | 20677.775 | 14643.276 | NM_00272E | 1361.069  | 1715.992  | CY3Cy5    | 5272.516  | 247.008   |
| AF188492  | 656.928   | 833.887   | NM_01437E | 37502.445 | 48299.363 | U13738    | 912.34    | 1082.003  |
| M65066    | 11536.728 | 11046.188 | NM_01781E | 24049.488 | 22212.721 | H94487    | 1489.473  | 1458.776  |
| NM_016951 | 1986.124  | 2221.889  | AF204173  | 639.931   | 691.792   | BG681747  | 23224.133 | 14755.875 |
| NM_00609E | 4245.083  | 4753.504  | J03260    | 1854.49   | 2155.889  | H63077    | 22823.309 | 19240.961 |
| AF272379  | 3483.511  | 3953.55   | AB014514  | 4144.189  | 4471.595  | AA679352  | 11734.991 | 8891.644  |
| NM_01232E | 2198.644  | 2605.758  | NM_00286E | 5267.823  | 5022.606  | X04503    | 2448.731  | 1547.247  |
| NM_00308E | 11872.207 | 10846.63  | NM_00356E | 1607.578  | 1054.334  | D45917    | 538.981   | 472.201   |
| NM_016084 | 16513.785 | 15990.384 | NM_003731 | 11580.289 | 9807.009  | X52001    | 1245.609  | 995.785   |
| AF095289  | 33900.02  | 38211.805 | NM_00544E | 4424.248  | 3674.061  | BI823872  | 8761.875  | 7008.286  |
| NM_005537 | 5737.699  | 5886.697  | NM_01329E | 3326.54   | 3432.876  | AA430552  | 2560.332  | 2370.167  |
| NM_01900E | 2959.807  | 3026.413  | NM_002387 | 2246.755  | 2026.244  | X66142    | 2172.886  | 1848.026  |
| NM_01593E | 3455.553  | 3419.357  | NM_00006E | 1106.087  | 883.17    | NM_00591E | 348.532   | 749.223   |
| AF182412  | 834.806   | 1324.372  | AB023217  | 897.235   | 1084.075  | R45054    | 857.822   | 1082.302  |
| AK027200  | 2339.399  | 1911.632  | L08902    | 790.997   | 839.086   | NM_00090E | 4664.974  | 3740.159  |
| S78372    | 420.649   | 1013.51   | J02639    | 2446.5    | 2231.534  | SR5       | 4192.128  | 3874.07   |
| U03106    | 2484.864  | 2624.258  | NM_00726E | 8141.479  | 8423.51   | SR7       | 3519.06   | 27307.77  |
| NM_00007E | 17594.539 | 23212.744 | AF206020  | 3969.739  | 3320.518  | SR9       | 11281.903 | 2044.5    |
| M73239    | 576.719   | 842.441   | NM_01441C | 1322.27   | 1389.65   | CY3Cy5    | 5408.225  | 269.738   |
| NM_00494E | 6612.624  | 6215.472  | AF305835  | 673.339   | 674.213   | AF312769  | 1105.862  | 1050.076  |
| NM_02024E | 4774.744  | 5285.812  | NM_00215C | 11462.779 | 10601.237 | AF309553  | 2703.541  | 2611.239  |
| NM_00178E | 28633.813 | 33597.863 | NM_00459E | 17263.482 | 18668.412 | NM_00360E | 885.105   | 747.914   |
| NM_00717E | 52703.84  | 56294.289 | NM_02017E | 725.388   | 875.481   | NM_00613E | 5608.39   | 4498.272  |
| NM_01768E | 630.101   | 775.379   | NM_002264 | 1722.97   | 1934.416  | NM_00399E | 1454.958  | 1380.389  |
| NM_00220E | 8623.651  | 7618.399  | NM_014754 | 21524.646 | 21194.633 | NM_018961 | 2388.504  | 2189.22   |
| NM_002291 | 944.391   | 1247.552  | D49387    | 1093.898  | 780.267   | NM_00558E | 1403.209  | 1362.841  |
| AK024961  | 3606.299  | 4112.296  | AF050146  | 5406.834  | 5023.242  | NM_00689E | 1453.237  | 1874.104  |
| NM_01606E | 6709.75   | 7803.556  | NM_000116 | 3803.33   | 4624.532  | NM_00113C | 56001.418 | 58827.887 |
| NM_01425E | 1091.578  | 1192.604  | NM_00669E | 9899.88   | 9080.549  | NM_00297E | 1549.678  | 1656.447  |
| NM_015967 | 4076.505  | 2813.048  | NM_006804 | 13740.935 | 11279.018 | AK023511  | 3634.518  | 3188.722  |
| NM_012237 | 554.949   | 768.252   | NM_01596E | 11101.665 | 10905.899 | NM_00272E | 1044.179  | 835.874   |
| NM_00359E | 448.312   | 741.693   | NM_003051 | 6534.162  | 7480.365  | NM_01437E | 7247.554  | 5657.021  |
| NM_00240E | 3792.647  | 3432.254  | NM_14534E | 8715.599  | 8105.003  | NM_01781E | 10538.763 | 11578.852 |

|           |           |           |           |           |           |           |           |          |
|-----------|-----------|-----------|-----------|-----------|-----------|-----------|-----------|----------|
| NM_004994 | 26947.045 | 28636.914 | AJ278917  | 17941.863 | 12604.31  | AF204173  | 288.914   | 167.581  |
| NM_006610 | 3954.977  | 3462.062  | AK025886  | 1164.369  | 1284.056  | J03260    | 965.289   | 812.162  |
| NM_001333 | 3027.792  | 4222.547  | NM_001720 | 3163.887  | 3139.462  | AB014514  | 1241.391  | 1186.685 |
| NM_018017 | 6048.131  | 7536.855  | NM_018390 | 4012.61   | 4595.093  | NM_002865 | 2566.609  | 2893.209 |
| AK001296  | 8254.111  | 10467.058 | AB037724  | 6522.75   | 5578.136  | NM_003566 | 722.509   | 599.301  |
| AK000173  | 1183.179  | 1211.705  | AK025086  | 1794.476  | 1456.437  | NM_004245 | 197.625   | 273.615  |
| NM_018365 | 2104.483  | 3160.4    | AK026151  | 6011.21   | 5561.185  | NM_003731 | 6590.102  | 5147.279 |
| NM_006586 | 10696.518 | 9455.137  | NM_014140 | 3490.693  | 2756.632  | NM_005446 | 2598.37   | 2023.682 |
| AJ272180  | 2146.548  | 2254.732  | NM_002916 | 5833.554  | 4754.962  | NM_013292 | 2078.92   | 1692.169 |
| AK025709  | 1510.196  | 1487.15   | M20700    | 6688.002  | 5853.991  | NM_002387 | 1413.983  | 1017.224 |
| NM_019016 | 6952.109  | 6008.516  | NM_001034 | 18058.695 | 13501.752 | NM_000065 | 524.231   | 500.87   |
| NM_012261 | 10932.36  | 16517.969 | NM_002689 | 1956.124  | 1866.638  | AB023217  | 464.713   | 532.488  |
| NM_015556 | 4916.736  | 6204.227  | NM_017686 | 3041.972  | 2185.248  | J02639    | 997.74    | 761.753  |
| D70833    | 66291.102 | 65180.176 | AL096734  | 771.799   | 784.001   | NM_007263 | 5213.393  | 4317.41  |
| NM_016621 | 2370.126  | 2082.52   | AK000800  | 2554.097  | 3646.933  | AF206020  | 1335.555  | 1072.21  |
| AB046808  | 4278.509  | 3725.348  | NM_018154 | 5111.188  | 4749.305  | NM_014410 | 448.16    | 651.396  |
| AK026265  | 1840.983  | 1482.933  | BC006287  | 5704.557  | 3899.849  | NM_002150 | 3014.9    | 3656.455 |
| AF015313  | 693.505   | 675.243   | AB023198  | 3779.205  | 3528.394  | NM_004595 | 4314.918  | 5529.861 |
| NM_006466 | 1608.304  | 1627.356  | NM_005231 | 4243.209  | 4027.931  | NM_020178 | 306.133   | 289.605  |
| NM_005681 | 2257.56   | 2350.28   | AF064729  | 3200.885  | 2135.135  | NM_002264 | 558.122   | 563.619  |
| NM_015156 | 6148.574  | 8785.194  | NM_005412 | 17748.367 | 12511.59  | NM_014754 | 11552.697 | 9341.984 |
| NM_012384 | 4321.289  | 5270.433  | NM_012113 | 2333.335  | 2392.611  | D49387    | 531.272   | 561.196  |
| NM_004653 | 4568.664  | 5108.1    | NM_002725 | 1189.601  | 1560.563  | AF050146  | 3212.04   | 3432.668 |
| AF233453  | 3351.167  | 4208.894  | NM_014375 | 23252.734 | 32724.242 | NM_000116 | 2731.187  | 2014.503 |
| D87454    | 10283.376 | 13716.094 | NM_017812 | 20262.529 | 19690.752 | NM_006698 | 5046.652  | 5121.245 |
| NM_007020 | 3398.981  | 3533.097  | AF204173  | 719.024   | 691.451   | NM_006804 | 4538.329  | 4533.587 |
| NM_000713 | 4614.591  | 4867.242  | J03260    | 1527.875  | 1699.851  | NM_015965 | 5660.007  | 5008.338 |
| NM_016055 | 1536.12   | 1911.963  | U13738    | 1322.361  | 1333.128  | NM_003051 | 1969.416  | 1673.171 |
| NM_013291 | 8168.788  | 7838.488  | AF068236  | 54150.941 | 55994.938 | NM_145342 | 2337.251  | 2153.784 |
| NM_002936 | 15112.219 | 12609.031 | H94487    | 3814.186  | 3372.785  | AJ278917  | 4033.585  | 3349.994 |
| NM_014161 | 3327.953  | 4446.841  | BG681747  | 21125.631 | 34183.039 | AK025886  | 1089.735  | 633.614  |
| BF312817  | 1989.822  | 2083.538  | H63077    | 33753.668 | 33593.23  | NM_003058 | 346.289   | 392.651  |
| NM_003492 | 2673.261  | 2545.572  | AA679352  | 16624.332 | 16139.879 | NM_001720 | 519.361   | 397.401  |
| NM_003780 | 35175.477 | 33598.133 | X04503    | 2552.027  | 2124.278  | NM_018390 | 2405.744  | 2076.931 |
| NM_000195 | 13896.788 | 12354.907 | D45917    | 2282.191  | 2322.976  | AB037724  | 1689.189  | 1193.333 |
| NM_003778 | 61239.699 | 61681.824 | X52001    | 3948.729  | 4335.021  | AK025086  | 989.198   | 823.622  |
| AK023263  | 5705.287  | 7357.793  | BI823872  | 13637.861 | 13897.709 | AK026151  | 3581.264  | 3168.719 |
| NM_004622 | 3457.59   | 5758.384  | AA430552  | 4357.547  | 3421.277  | NM_014140 | 1991.437  | 2032.185 |
| AK021445  | 2259.389  | 1715.172  | X66142    | 4233.13   | 4057.54   | NM_002916 | 3278.302  | 3725.001 |
| NM_017934 | 5228.216  | 5020.966  | R45054    | 1987.133  | 2008.517  | M20700    | 4062.692  | 4052.951 |
| NM_014168 | 37358.184 | 39570.426 | NM_000620 | 521.061   | 503.321   | NM_001034 | 8196.057  | 9104.68  |
| AF211971  | 4754.573  | 4206.337  | NM_000905 | 9273.088  | 7914.01   | NM_002689 | 1042.575  | 939.405  |
| NM_002931 | 2776.077  | 2577.579  | AL117398  | 5587.944  | 6394.172  | NM_017686 | 1496.677  | 1299.564 |
| NM_013448 | 26643.74  | 24040.381 | AY007158  | 62529.539 | 62901.465 | AL096734  | 296.438   | 209.833  |
| X65232    | 35712.277 | 26118.18  | M58050    | 4106.293  | 6897.147  | AK000800  | 1304.62   | 1038.521 |
| U12767    | 459.9     | 428.361   | NM_007263 | 6323.913  | 7470.332  | NM_018154 | 1155.057  | 1403.53  |
| U17630    | 730.243   | 741.219   | AF206020  | 3166.742  | 2529.849  | BC006287  | 2058.244  | 2348.432 |
| M33782    | 1017.704  | 1155.598  | NM_014410 | 1266.361  | 1148.566  | AB023198  | 1272.121  | 1128.334 |
| NM_002196 | 514.853   | 960.26    | AF312769  | 3691.74   | 3079.624  | NM_005231 | 3003.201  | 2266.938 |
| NM_017755 | 9313.504  | 10405.92  | AB020668  | 712.092   | 1020.153  | AF064729  | 1399.919  | 1182.844 |
| AF085968  | 980.899   | 930.777   | NM_006203 | 39405.059 | 44962.219 | NM_005412 | 8777.788  | 8906.822 |
| AK023665  | 672.402   | 823.66    | AF309553  | 4757.016  | 3835.222  | NM_012113 | 941.492   | 1300.089 |
| AB011136  | 1774.355  | 1458.38   | NM_003605 | 1602.472  | 1552.911  | NM_014375 | 6701.638  | 5687.195 |

|           |           |           |           |           |           |           |           |           |
|-----------|-----------|-----------|-----------|-----------|-----------|-----------|-----------|-----------|
| AF085898  | 4539.916  | 3706.195  | NM_006139 | 8212.41   | 8906.43   | NM_017812 | 8576.872  | 9523.279  |
| AL161960  | 2156.962  | 2333.009  | NM_000100 | 33411.77  | 36527.609 | AF204173  | 326.493   | 326.325   |
| AL049964  | 2126.802  | 2199.122  | NM_001900 | 64199.023 | 57983.449 | J03260    | 1167.844  | 874.766   |
| AK023269  | 2892.545  | 2958.807  | NM_003993 | 2627.711  | 2303.838  | U13738    | 901.146   | 1214.118  |
| AF070564  | 2791.81   | 2532.72   | NM_018961 | 4608.442  | 4872.197  | AF068236  | 28285.885 | 24317.627 |
| AK021439  | 13895.606 | 11961.814 | NM_005586 | 2689.516  | 2796.455  | H94487    | 844.359   | 799.78    |
| AF052099  | 1822.665  | 1545.828  | NM_012242 | 561.844   | 653.865   | H63077    | 22047.99  | 22993.422 |
| AL110111  | 1785.138  | 1389.17   | NM_006896 | 3021.808  | 2269.614  | AA679352  | 11016.719 | 8220.624  |
| AF070543  | 1634.181  | 1648.657  | NM_001130 | 57783.711 | 59022.953 | X04503    | 2372.797  | 2051.955  |
| AF086509  | 212.767   | 1130.221  | NM_002975 | 5637.85   | 4254.639  | D45917    | 907.68    | 1159.043  |
| NM_014778 | 5302.419  | 6285.174  | AK023511  | 8556.283  | 9470.927  | X52001    | 776.161   | 597.554   |
| AK001171  | 13887.347 | 14497.504 | AK025886  | 1004.162  | 1626.278  | BI823872  | 5708.117  | 4917.016  |
| AK026273  | 6191.993  | 6690.592  | AB014514  | 2926.415  | 2879.381  | AA430552  | 1129.252  | 1042.681  |
| AF055007  | 1000.716  | 1245.912  | NM_002865 | 4373.302  | 4083.614  | X66142    | 1414.41   | 1157.496  |
| NM_012337 | 1871.179  | 2376.314  | NM_003566 | 1458.194  | 846.053   | R45054    | 765.308   | 665.491   |
| AL389879  | 3727.108  | 4391.268  | NM_007159 | 22501.918 | 19216.791 | NM_000905 | 4508.639  | 3357.281  |
| AK022869  | 3338.928  | 3499.171  | NM_003731 | 11636.765 | 9705.528  | M58050    | 2033.268  | 1773.883  |
| NM_016111 | 11063.435 | 8919.923  | NM_005446 | 4186.82   | 3476.32   | NM_007263 | 3511.2    | 3685.105  |
| AF085958  | 61526.949 | 56064.156 | NM_013292 | 3197.816  | 2753.367  | AF206020  | 1126.575  | 1227.85   |
| AF086021  | 3924.453  | 3478.25   | NM_002387 | 2269.917  | 1966.818  | NM_014410 | 561.073   | 631.58    |
| AL117655  | 514.2     | 740.872   | NM_000069 | 1353.26   | 1063.084  | AF305835  | 256.183   | 306.581   |
| AK024472  | 2956.506  | 3716.74   | L08902    | 1588.944  | 1831.088  | AF312769  | 1219.856  | 1035.661  |
| NM_017976 | 6208.509  | 4351.613  | J02639    | 2695.696  | 3444.396  | AB020668  | 528.416   | 546.993   |
| U06700    | 954.739   | 949.9     | NM_005231 | 5529.355  | 5060.767  | AF309553  | 2569.446  | 2138.113  |
| U63828    | 2154.417  | 1869.683  | AF064729  | 3404.826  | 3466.068  | NM_003605 | 523.992   | 673.01    |
| Z36828    | 7008.09   | 7032.344  | NM_012113 | 2436.761  | 2692.124  | NM_006139 | 3382.005  | 2807.669  |
| AF086121  | 21538.813 | 28993.521 | NM_002150 | 9698.052  | 7456.388  | NM_003993 | 1153.574  | 1075.155  |
| AF086140  | 1111.81   | 1593.123  | NM_004595 | 12240.632 | 9639.329  | NM_018961 | 1593.016  | 1595.634  |
| AB033100  | 20338.404 | 21108.912 | NM_020178 | 590.891   | 725.101   | NM_005586 | 1110.786  | 961.72    |
| AL390138  | 1155.567  | 1190.16   | NM_002264 | 1345.141  | 1069.664  | NM_012242 | 412.071   | 411.146   |
| AL137290  | 3390.151  | 2955.591  | NM_014754 | 17614.764 | 18679.162 | NM_006896 | 1543.173  | 1723.409  |
| AK024180  | 777.682   | 708.296   | D49387    | 969.976   | 1186.034  | NM_001130 | 56234.309 | 46973.563 |
| AK023458  | 1372.139  | 1196.314  | AF050146  | 6806.353  | 5924.905  | NM_002975 | 1956.541  | 1667.126  |
| AK021606  | 657.028   | 577.335   | NM_000116 | 4588.408  | 5393.431  | AK023511  | 4538.727  | 4046.732  |
| NM_014124 | 23362.355 | 18934.672 | NM_006698 | 10097.075 | 10792.947 | AK025886  | 723.06    | 550.581   |
| AK001551  | 1698.151  | 1798.269  | NM_006804 | 18253.566 | 13181.773 | AB014514  | 1259.843  | 1295.606  |
| AK001825  | 1536.903  | 1806.231  | NM_015969 | 11137.295 | 10198.25  | NM_002865 | 2489.289  | 2280.689  |
| AK024714  | 747.5     | 707.727   | NM_003051 | 5320.75   | 4770.493  | NM_003566 | 333.648   | 358.338   |
| AK022363  | 728.68    | 991.229   | NM_145342 | 9778.793  | 9974.671  | NM_007159 | 10087.697 | 11272.556 |
| AK022485  | 799.258   | 792.539   | AJ278917  | 17761.928 | 19941.635 | NM_003731 | 5047.919  | 4453.225  |
| AK023395  | 1398.037  | 1154.018  | AK025641  | 41903.406 | 41492.063 | NM_005446 | 1951.205  | 1863.15   |
| AK023818  | 3814.306  | 3121.158  | NM_000620 | 561.347   | 589.7     | NM_013292 | 1949.753  | 1493.342  |
| AK023895  | 1118.08   | 1547.974  | AY007158  | 61518.582 | 57515.555 | NM_002387 | 1469.563  | 1170.476  |
| AK024206  | 6535.068  | 6035.39   | NM_001720 | 2617.229  | 2596.054  | NM_000069 | 485.766   | 496.918   |
| AK023602  | 1442.971  | 1955.232  | NM_018390 | 3645.813  | 3628.169  | AB023217  | 554.248   | 365.559   |
| NM_018097 | 50856.055 | 51763.211 | AB037724  | 8202.462  | 7277.636  | AF064729  | 929.583   | 991.682   |
| AF130043  | 581.833   | 715.436   | AK025086  | 2337.534  | 2159.261  | NM_005412 | 3022.358  | 3056.48   |
| Y11167    | 2248.036  | 1873.486  | AK026151  | 9210.976  | 8839.676  | NM_012113 | 826.934   | 1048.824  |
| AK026813  | 832.31    | 819.795   | NM_014140 | 4695.19   | 4195.727  | NM_002150 | 2453.337  | 1925.871  |
| AK027225  | 937.795   | 696.77    | NM_002916 | 6770.075  | 6362.588  | NM_014754 | 12959.615 | 16715.617 |
| AK023083  | 2523.424  | 2508.203  | M20700    | 7612.624  | 6917.705  | NM_006415 | 1018.336  | 1619.694  |
| AF130093  | 690.473   | 675.611   | NM_001034 | 18995.635 | 15223.506 | AF050146  | 1478.875  | 1314.591  |
| AF116622  | 705.432   | 583.794   | NM_002689 | 1988.478  | 1592.225  | NM_000116 | 1356.427  | 960.966   |

|             |           |           |           |           |           |           |           |           |
|-------------|-----------|-----------|-----------|-----------|-----------|-----------|-----------|-----------|
| AF217967    | 1189.224  | 1199.261  | NM_017686 | 2574.906  | 2248.82   | NM_00669E | 3269.499  | 3146.708  |
| NM_01815C   | 8816.303  | 10951.005 | AL096734  | 740.109   | 812.792   | NM_006804 | 4910.479  | 7242.843  |
| NM_01791E   | 16300.284 | 21538.111 | AK000800  | 2290.128  | 2379.016  | NM_003051 | 2419.735  | 2704.051  |
| NM_01785E   | 58001.34  | 55768.469 | NM_018154 | 5129.244  | 3772.791  | NM_14534E | 3954.684  | 3281.768  |
| AB007954    | 1938.682  | 1813.706  | NM_00535E | 494.573   | 571.009   | AJ278917  | 6012.655  | 5260.486  |
| AK026494    | 2148.271  | 1885.751  | BC006287  | 5855.466  | 4705.632  | NM_00090E | 4276.209  | 4248.762  |
| AK023508    | 1540.193  | 1239.163  | AB023198  | 4336.676  | 4043.583  | AL117398  | 1985.323  | 1793.341  |
| AK025840    | 3103.867  | 3601.896  | AF304163  | 17111.531 | 15433.673 | NM_00172C | 490.479   | 302.373   |
| NM_00418E   | 1338.74   | 1486.638  | NM_00689E | 4025.064  | 2873.276  | NM_01839C | 1529.146  | 1223.206  |
| U84510      | 3584.145  | 3570.986  | NM_00272E | 1396.58   | 1642.967  | AK025086  | 1343.163  | 2468.416  |
| S83198      | 9823.945  | 9375.563  | NM_01437E | 32304.43  | 43792.559 | AK026151  | 2417.216  | 2779.27   |
| AF052119    | 17822.826 | 16461.402 | NM_01781E | 23014.414 | 21997.01  | NM_01414C | 875.55    | 855.004   |
| X94290      | 2128.765  | 2231.033  | AF204173  | 590.424   | 589.701   | NM_00291E | 1878.176  | 2422.208  |
| AK026685    | 11855.65  | 10137.405 | J03260    | 2229.412  | 2292.467  | M20700    | 2401.747  | 2520.685  |
| AF090927    | 23398.268 | 21253.035 | U13738    | 2403.234  | 1989.872  | NM_001034 | 6753.416  | 8903.904  |
| AL137642    | 1470.989  | 1436.714  | AF068236  | 62393.004 | 56249.293 | NM_00268E | 938.642   | 940.255   |
| AL133619    | 9669.094  | 7240.234  | H94487    | 5967.794  | 5460.4    | AK000800  | 1809.603  | 1620.994  |
| AK025902    | 4149.09   | 4518.862  | BG681747  | 24661.15  | 39575.418 | NM_018154 | 2439.45   | 3531.035  |
| NM_005181   | 1608.413  | 1813.885  | H63077    | 38558.172 | 35848.754 | NM_00535E | 450.905   | 393.292   |
| AF026945    | 588.322   | 784.786   | AA679352  | 18505.98  | 20137.756 | BC006287  | 2754.067  | 2772.582  |
| AF143676    | 5559.885  | 7001.987  | AA437291  | 558.271   | 476.216   | AB023198  | 1776.213  | 2138.076  |
| U66044      | 6429.934  | 8536.404  | X04503    | 3612.421  | 3159.65   | NM_00689E | 741.547   | 752.723   |
| NM_005247   | 25473.877 | 28515.555 | D45917    | 2845.793  | 1946.138  | NM_00113C | 53447.453 | 43193.844 |
| NM_00528E   | 1329.417  | 994.189   | X52001    | 5135.817  | 5030.776  | NM_00297E | 1721.862  | 1825.061  |
| AL122089    | 4136.868  | 2988.837  | BI823872  | 15602.815 | 16333.664 | AK023511  | 3141.143  | 3144.594  |
| AA203665    | 1422.102  | 1648.666  | AA430552  | 6679.022  | 7160.004  | NM_01455E | 1625.791  | 1860.047  |
| U95646      | 1074.153  | 1146.48   | X66142    | 4525.22   | 4748.114  | NM_01437E | 3481.68   | 2625.473  |
| Y16705      | 1664.289  | 1359.753  | NM_00591E | 436.583   | 535.59    | NM_01781E | 8276.705  | 9260.428  |
| AF279775    | 4275.354  | 4358.617  | R45054    | 2516.831  | 2226.075  | U13738    | 388.289   | 353.65    |
| NM_00091E   | 25665.732 | 27038.627 | NM_002387 | 2507.885  | 2042.086  | AF068236  | 28143.564 | 29602.572 |
| NM_00234E   | 1386.556  | 1290.412  | NM_00006E | 1482.198  | 1652.158  | H94487    | 748.112   | 723.658   |
| U57971      | 944.338   | 995.252   | AB023217  | 830.771   | 1071.111  | BG681747  | 13387.769 | 10155.503 |
| X89673      | 954.951   | 902.587   | M58050    | 5091.524  | 7309.828  | H63077    | 17149.039 | 18956.627 |
| AK024593    | 1072.95   | 1126.774  | NM_00726E | 6578.274  | 6856.995  | AA679352  | 7089.19   | 6211.581  |
| Z83934      | 1421.192  | 1628.455  | AF206020  | 3575.441  | 3391.129  | AA437291  | 419.353   | 487.219   |
| NM_01835E   | 7361.564  | 9418.784  | NM_01441C | 1486.691  | 1189.419  | X04503    | 2605.838  | 2457.905  |
| AK022020    | 2721.751  | 2190.932  | AF312769  | 4794.392  | 4904.856  | D45917    | 820.835   | 969.49    |
| U17634      | 537.717   | 854.025   | AB020668  | 1727.362  | 1673.977  | X52001    | 1917.811  | 1888.145  |
| AK000263    | 11318.792 | 11123.272 | NM_00620E | 60413.871 | 57501.313 | BI823872  | 9775.261  | 8910.761  |
| NM_017447   | 2394.831  | 2501.321  | AF309553  | 5391.616  | 4773.597  | AA430552  | 2512.995  | 2637.762  |
| AL049452    | 1026.601  | 915.343   | NM_00360E | 1364.839  | 1649.219  | X66142    | 2341.706  | 1973.296  |
| NM_01662E   | 2152.622  | 2216.094  | NM_00613E | 8693.959  | 10314.716 | NM_00591E | 185.628   | 118.637   |
| AK026976    | 1883.976  | 2353.986  | NM_00010C | 36954.906 | 39984.996 | R45054    | 849.406   | 883.317   |
| AF070559    | 8743.122  | 8878.762  | NM_00190C | 67343.898 | 60760.047 | NM_002387 | 610.007   | 667.538   |
| D42043      | 8917.881  | 9482.731  | NM_00399E | 3278.156  | 3311.586  | NM_00006E | 666.302   | 632.546   |
| CY3Cy5      | 2609.161  | 181.929   | NM_018961 | 5351.894  | 6707.31   | AB023217  | 388.278   | 548.999   |
| BG744154    | 18732.223 | 18732.211 | NM_00558E | 2846.764  | 3779.38   | L08902    | 391.037   | 364.127   |
| Z11694      | 5478.751  | 4474.989  | NM_01224E | 913.61    | 670.63    | M58050    | 1740.02   | 1947.663  |
| Z26317      | 2434.093  | 1984.86   | NM_003051 | 6168.573  | 6294.735  | NM_00726E | 1472.565  | 1451.519  |
| X16983      | 18298.42  | 9607.135  | NM_14534E | 9128.75   | 11534.903 | AF206020  | 711.858   | 734.529   |
| X56160      | 1596.402  | 1382.017  | AJ278917  | 19785.109 | 20871.66  | NM_01441C | 371.872   | 442.401   |
| BG679991    | 1104.448  | 1362.834  | AK025886  | 1031.632  | 1671.588  | AF312769  | 251.029   | 250.699   |
| H-Y 00097 I | 8794.618  | 8536.229  | AB014514  | 3666.001  | 3434.363  | NM_00620E | 7761.4    | 7799.627  |

|             |           |           |           |           |           |           |           |           |
|-------------|-----------|-----------|-----------|-----------|-----------|-----------|-----------|-----------|
| H-Y 00711 I | 64964.863 | 70454.617 | NM_002865 | 4340.984  | 4322.357  | AF309553  | 2195.247  | 2412.391  |
| H-X 16707 I | 1610.511  | 1039.285  | NM_003566 | 1635.984  | 1126.966  | NM_003605 | 404.629   | 764.841   |
| AL038354    | 43505.164 | 36560.926 | NM_007159 | 27987.139 | 27025.59  | NM_006139 | 4855.214  | 4419.221  |
| NM_021976   | 4342.511  | 6153.487  | NM_003731 | 14713.346 | 17019.426 | NM_000100 | 25332.115 | 20651.061 |
| SR2         | 59592.223 | 54931.438 | NM_005446 | 5280.161  | 5028.164  | NM_001900 | 53900.016 | 56721.527 |
| SR4         | 17964.938 | 14150.587 | NM_013292 | 3531.179  | 3445.775  | NM_003993 | 1620.364  | 1418.584  |
| SR6         | 2512.427  | 1373.288  | AK000800  | 2289.815  | 2474.99   | NM_018961 | 2930.032  | 2401.397  |
| SR8         | 9857.439  | 17729.588 | NM_018154 | 6298.84   | 6567.846  | NM_005586 | 1578.906  | 1491.76   |
| SR10        | 36576.059 | 7583.701  | AB023198  | 3916.781  | 4304.353  | NM_003051 | 2470.269  | 3307.144  |
| CY3Cy5      | 1284.399  | 160.118   | AF304163  | 15805.928 | 15907.146 | NM_145342 | 2883.929  | 3094.112  |
| NM_001284   | 48166.59  | 31135.643 | NM_005231 | 4913.353  | 6569.401  | AJ278917  | 4914.974  | 5335.071  |
| NM_003242   | 8076.157  | 4547.009  | AF064729  | 2852.672  | 3220.551  | AK025641  | 8888.318  | 11277.715 |
| U31099      | 553.459   | 486.203   | NM_005412 | 15941.871 | 12880.253 | AK025886  | 281.873   | 140.883   |
| NM_001105   | 3181.531  | 2158.338  | NM_012113 | 2067.608  | 1972.906  | AB014514  | 1045.116  | 913.925   |
| NM_005585   | 1121.817  | 1312.137  | NM_002150 | 15196.618 | 11937.359 | NM_002865 | 2029.269  | 2110.843  |
| NM_002075   | 1493.867  | 1438.09   | NM_004595 | 14439.684 | 13616.658 | NM_003566 | 646.772   | 514.991   |
| Y08756      | 5035.114  | 3975.269  | NM_020178 | 670.797   | 683.909   | NM_007159 | 14744.871 | 14025.167 |
| NM_005563   | 25757.047 | 21844.014 | NM_002264 | 1345.699  | 1277.82   | NM_003731 | 7011.032  | 5738.609  |
| NM_005102   | 1636.991  | 1358.314  | NM_014754 | 18004.674 | 17377.854 | NM_005446 | 2512.18   | 1820.93   |
| NM_004518   | 596.381   | 653.112   | D49387    | 1007.714  | 1303.275  | NM_013292 | 1781.98   | 1488.247  |
| NM_006501   | 1577.366  | 931.782   | AF050146  | 7326.748  | 7274.425  | AK000800  | 1149.942  | 1115.423  |
| NM_002719   | 12527.048 | 17931.322 | NM_000116 | 5755.727  | 7194.464  | NM_018154 | 1360.607  | 1956.76   |
| AB035356    | 537.836   | 668.313   | NM_006698 | 13747.237 | 14234.156 | BC006287  | 1771.027  | 2271.812  |
| AV752086    | 1053.312  | 1431.507  | NM_006804 | 25443.793 | 33883.977 | AB023198  | 1481.244  | 2010.389  |
| NM_016102   | 3032.86   | 2824.493  | NM_015969 | 12326.919 | 14271.999 | AF304163  | 3853.874  | 4165.746  |
| NM_004376   | 5457.303  | 4724.342  | NM_004517 | 2672.232  | 4456.69   | NM_005231 | 1106.444  | 940.018   |
| NM_000272   | 1632.495  | 1267.292  | NM_004752 | 54.554    | 1800.651  | NM_005412 | 3351.33   | 3741.54   |
| NM_005603   | 13453.479 | 6532.615  | NM_020162 | 5574.382  | 5707.981  | NM_002150 | 1269.768  | 982.888   |
| AB011100    | 2784.117  | 2010.011  | AK027124  | 58905.254 | 54229.184 | NM_004595 | 3534.019  | 3095.441  |
| U61741      | 1272.638  | 976.379   | M31212    | 51460.773 | 48438.781 | NM_002264 | 360.97    | 455.271   |
| NM_012402   | 8047.651  | 5652.349  | AL117398  | 4522.571  | 4488.856  | NM_014754 | 8342.291  | 7235.178  |
| M76676      | 3631.507  | 2706.915  | AY007158  | 62061.867 | 55930.508 | D49387    | 465.01    | 381.207   |
| AL137690    | 780.21    | 508.652   | NM_001720 | 5045.269  | 4485.425  | AF050146  | 2356.035  | 1903.847  |
| Z83804      | 2507.238  | 2356.216  | NM_018390 | 4533.88   | 5613.471  | NM_000116 | 2565.088  | 1851.951  |
| NM_004386   | 1429.671  | 1139.751  | AB037724  | 9065.282  | 8066.557  | NM_006698 | 5135.154  | 5220.709  |
| U67784      | 1094.921  | 976.752   | AK025086  | 2097.802  | 2131.628  | NM_006804 | 6042.848  | 5148.121  |
| NM_007366   | 1613.507  | 1279.221  | AK026151  | 8973.137  | 9034.336  | NM_015969 | 5919.449  | 4860.565  |
| NM_000592   | 904.145   | 817.046   | NM_014140 | 4249.823  | 3745.033  | NM_004517 | 2023.482  | 1523.298  |
| NM_016584   | 5667.873  | 4604.396  | NM_002916 | 7246.756  | 5749.163  | NM_000679 | 1200.537  | 1499.469  |
| NM_001815   | 1240.809  | 941.652   | M20700    | 8118.128  | 7753.836  | AF218006  | 12687.893 | 11003.916 |
| NM_000064   | 5398.894  | 4744.999  | NM_001034 | 22023.422 | 19268.318 | AK026935  | 6338.253  | 6767.308  |
| NM_006725   | 6828.375  | 5541.644  | NM_002689 | 2436.953  | 2315.91   | NM_020162 | 701.458   | 955.334   |
| NM_003326   | 1522.929  | 1511.737  | NM_017686 | 3192.824  | 3097.105  | AK027124  | 4134.107  | 3515.547  |
| NM_004568   | 53114.156 | 52411.012 | AL096734  | 968.699   | 947.111   | M31212    | 10661.145 | 12595.251 |
| NM_000202   | 2456.401  | 1931.407  | NM_016645 | 7490.918  | 7788.882  | AL117398  | 1799.422  | 1810.137  |
| NM_005496   | 15179.184 | 13792.564 | L14723    | 26693.238 | 31149.414 | AY007158  | 38733.148 | 26686.51  |
| NM_004817   | 1433.626  | 713.737   | AK024462  | 22295.613 | 29412.146 | NM_001720 | 244.484   | 171.479   |
| NM_018975   | 23721.016 | 13609.878 | NM_002206 | 1719.3    | 2206.199  | NM_018390 | 1320.619  | 825.017   |
| AB023215    | 7727.863  | 3766.404  | NM_007074 | 1013.696  | 800.444   | AB037724  | 3009.995  | 2118.432  |
| NM_018073   | 3851.736  | 2947.343  | NM_002230 | 952.445   | 963.627   | AK025086  | 733.638   | 697.797   |
| AL137529    | 5653.188  | 3631.574  | NM_003815 | 5971.94   | 5004.024  | AK026151  | 3476.366  | 3125.681  |
| NM_012332   | 1167.586  | 978.503   | NM_001430 | 1799.203  | 2673.67   | NM_014140 | 1992.642  | 2793.685  |
| AK026648    | 2396.835  | 1886.807  | AB010098  | 1688.054  | 2045.84   | NM_002916 | 3169.909  | 3458.954  |



|             |           |           |           |           |           |           |           |           |
|-------------|-----------|-----------|-----------|-----------|-----------|-----------|-----------|-----------|
| NM_000497   | 1521.845  | 1197.681  | U17989    | 2314.415  | 2950.985  | M20700    | 4146.198  | 5059.54   |
| NM_017421   | 2044.683  | 1493.108  | U62325    | 1007.838  | 1263.546  | NM_001034 | 9896.608  | 12586.203 |
| AK025977    | 18973.094 | 16866.715 | AL137595  | 563.81    | 829.06    | NM_002685 | 1192.409  | 1170.229  |
| AK023130    | 9585.826  | 9418.136  | NM_018028 | 1378.984  | 1211.216  | NM_017685 | 1215.378  | 1274.941  |
| NM_000273   | 871.118   | 803.011   | AF249267  | 53936.332 | 51982.09  | AL096734  | 312.391   | 319.796   |
| NM_002895   | 9445.04   | 7463.996  | NM_004113 | 842.494   | 776.475   | NM_016645 | 3070.155  | 4867.992  |
| NM_000485   | 817.1     | 712.693   | X84939    | 4219.081  | 3865.04   | L14723    | 6278.537  | 7400.606  |
| BE876237    | 899.674   | 1032.559  | NM_018320 | 40370.199 | 35601.418 | AK024462  | 7581.11   | 8604.444  |
| NM_005397   | 1915.061  | 1325.254  | NM_002069 | 2816.545  | 2996.717  | NM_002205 | 338.11    | 471.573   |
| NM_000805   | 4664.064  | 3890.564  | NM_016055 | 13520.193 | 14327.167 | NM_003815 | 397.383   | 394.771   |
| NM_006320   | 2420.292  | 2012.859  | M65066    | 11065.577 | 10549.085 | AF249267  | 25586.49  | 22678.006 |
| AB014511    | 4955.007  | 4381.356  | NM_016951 | 1807.524  | 1813.264  | NM_004113 | 1296.002  | 2980.411  |
| NM_014252   | 9732.534  | 8419.398  | NM_013251 | 1512.554  | 1208.827  | X84939    | 2241.021  | 2535.645  |
| NM_001662   | 18328.674 | 10083.984 | NM_006095 | 3986.816  | 3987.384  | NM_018320 | 7949.105  | 7966.832  |
| NM_016131   | 11777.912 | 7687.812  | AF272379  | 3851.689  | 4045.976  | NM_002065 | 1710.055  | 1780.02   |
| NM_006822   | 2688.923  | 1711.896  | NM_012325 | 1536.87   | 2195.448  | NM_016055 | 9740.183  | 6794.223  |
| NM_012142   | 10640.829 | 7040.519  | NM_003085 | 34496.527 | 39906.48  | M65066    | 6168.128  | 5408.892  |
| NM_016425   | 2551.435  | 1796.676  | NM_016084 | 11726.414 | 13426.091 | NM_016951 | 894.85    | 876.695   |
| NM_018264   | 1864.024  | 1726.28   | AF095289  | 30267.576 | 35629.023 | NM_013251 | 472.969   | 630.776   |
| AB028998    | 685.617   | 756.341   | NM_005537 | 5305.252  | 4871.539  | NM_006095 | 569.222   | 882.092   |
| NM_000153   | 937.561   | 532.505   | NM_019003 | 3085.016  | 2605.898  | AF272379  | 1227.477  | 1582.351  |
| NM_002033   | 3092.167  | 2742.255  | NM_015935 | 5598.303  | 5547.997  | NM_012325 | 623.235   | 657.836   |
| AK091794    | 821.385   | 666.036   | AF182412  | 1509.632  | 1725.064  | NM_003085 | 8830.13   | 10468.176 |
| NM_004111   | 2604.873  | 2553.845  | AK027200  | 1578.502  | 2216.54   | NM_016084 | 4164.618  | 4174.65   |
| AF085966    | 5749.322  | 5735.8    | S78372    | 849.048   | 660.898   | AF095289  | 5261.306  | 8093.585  |
| NM_005315   | 4831.284  | 5097.152  | U03106    | 6001.94   | 6910.327  | NM_005537 | 707.544   | 1018.634  |
| NM_016315   | 3923.136  | 4515.058  | NM_000075 | 17538.953 | 15153.349 | NM_015935 | 821.105   | 803.454   |
| NM_003365   | 7763.711  | 7938.412  | NM_006845 | 20344.23  | 18114.713 | U03106    | 882.714   | 1026.927  |
| NM_000057   | 3145.838  | 3867.016  | NM_014885 | 1327.661  | 846.803   | NM_014885 | 840.999   | 1148.044  |
| NM_018343   | 7075.598  | 6504.779  | M73239    | 482.23    | 397.057   | M73239    | 1318.949  | 2034.065  |
| AK095793    | 1151.309  | 1061.21   | NM_004945 | 3993.477  | 4541.313  | NM_004945 | 2987.454  | 3750.935  |
| NM_003177   | 4613.938  | 5169.749  | NM_020242 | 3745.918  | 3008.511  | NM_020242 | 1767.239  | 2112.717  |
| NM_017715   | 2179.928  | 1928.278  | NM_001785 | 34460.957 | 27867.656 | NM_001785 | 13588.075 | 19708.545 |
| AF064078    | 702.007   | 670.76    | NM_007175 | 62362.824 | 58131.801 | NM_007175 | 38307.215 | 42234.762 |
| AL049688    | 1404.646  | 1263.839  | NM_017682 | 846.1     | 691.54    | NM_017682 | 658.757   | 571.706   |
| NM_002737   | 6145.276  | 3901.585  | NM_002205 | 11183.601 | 12145.741 | NM_002205 | 7096.648  | 6613.088  |
| Z25427      | 4345.21   | 3515.097  | NM_002291 | 1499.312  | 1249.929  | NM_002291 | 422.091   | 388.46    |
| NM_004672   | 11795.119 | 8862.03   | AL137477  | 9256.061  | 8157.052  | AL137477  | 3722.627  | 3301.042  |
| NM_001353   | 2806.087  | 2371.624  | AF284580  | 1045.449  | 1075.152  | AF284580  | 528.678   | 709.895   |
| NM_006214   | 3096.773  | 2058.996  | AK024961  | 2636.321  | 2205.076  | AK024961  | 1071.36   | 1078.354  |
| AJ010228    | 4985.592  | 3389.041  | NM_016065 | 4443.007  | 5664.416  | NM_016065 | 2539.184  | 2759.358  |
| NM_005195   | 5148.695  | 2409.281  | NM_014255 | 1246.374  | 1174.034  | NM_014255 | 518.574   | 558.896   |
| NM_006845   | 68416.938 | 65775.922 | NM_015967 | 2045.492  | 2672.714  | NM_015967 | 606.649   | 468.972   |
| NM_005603   | 15653.217 | 11009.155 | NM_012237 | 441.891   | 845.437   | NM_002405 | 1139.93   | 1031.366  |
| NM_001061   | 576.336   | 489.279   | NM_002405 | 5089.333  | 6698.268  | NM_004994 | 3476.911  | 2800.122  |
| BG744154    | 19467.441 | 24760.418 | NM_004994 | 20984.143 | 22180.773 | NM_001333 | 506.068   | 390.103   |
| Z11694      | 5584.47   | 5421.406  | NM_006610 | 8088.603  | 8463.426  | NM_003791 | 1376.599  | 1354.751  |
| Z26317      | 2430.986  | 2026.047  | NM_001333 | 2576.415  | 1664.267  | NM_018017 | 5019.377  | 5608.353  |
| X16983      | 17447.42  | 9981.369  | NM_003791 | 7434.504  | 6139.074  | AK001296  | 6016.142  | 5651.705  |
| X56160      | 1664.075  | 1649.595  | NM_018017 | 8428.31   | 8266.793  | AK000173  | 526.642   | 427.59    |
| BG679991    | 1149.334  | 2489.255  | AK001296  | 11454.479 | 11321.665 | NM_018365 | 1340.08   | 1846.312  |
| H-Y 00097 I | 8051.471  | 9948.041  | AK000173  | 749.117   | 1206.686  | NM_006585 | 11418.531 | 11188.853 |
| H-Y 00711 I | 64981.023 | 74232.547 | NM_018365 | 2528.166  | 1808.648  | AJ272180  | 1084.859  | 1463.167  |

|             |           |           |           |           |           |           |           |           |
|-------------|-----------|-----------|-----------|-----------|-----------|-----------|-----------|-----------|
| H-X 16707 I | 1406.315  | 1324.476  | NM_006586 | 20849.152 | 22720.623 | AK025709  | 1096.638  | 1346.989  |
| AL038354    | 39810.121 | 38782.891 | AJ272180  | 2626.411  | 2160.839  | NM_019016 | 7316.803  | 6752.296  |
| NM_021976   | 3211.336  | 2498.32   | AK025709  | 1672.954  | 1409.488  | NM_012261 | 4151.636  | 4404.264  |
| NM_005718   | 7952.167  | 5678.766  | NM_019016 | 23217.641 | 23506.518 | NM_015556 | 2313.881  | 2783.34   |
| NM_005496   | 16339.608 | 15851.03  | NM_012261 | 11229.245 | 9560.378  | NM_018416 | 732.079   | 598.14    |
| NM_002858   | 7410.915  | 7590.027  | NM_015556 | 4659.045  | 3688.66   | NM_004606 | 1502.447  | 1416.764  |
| NM_004817   | 1760.898  | 1383.145  | NM_018416 | 2039.125  | 2111.237  | D70833    | 52041.52  | 55452.148 |
| NM_018975   | 25257.816 | 22434.9   | NM_004606 | 4622.128  | 4948.513  | NM_016621 | 826.663   | 929.121   |
| AB023215    | 9529.002  | 8499.14   | D70833    | 73038.563 | 60903.852 | AB046808  | 1121.735  | 1018.685  |
| NM_001284   | 49564.305 | 51600.609 | NM_016621 | 1963.434  | 1929.529  | NM_004653 | 943.172   | 654.505   |
| NM_003242   | 9384.428  | 6997.833  | AB046808  | 2489.449  | 2437.094  | NM_007020 | 1515.362  | 1735.302  |
| U31099      | 677.708   | 576.108   | AK026265  | 1129.918  | 1429.364  | NM_013291 | 4224.744  | 4777.25   |
| NM_001105   | 2700.792  | 2966.129  | AK027179  | 922.456   | 938.599   | NM_002936 | 6624.145  | 5286.247  |
| NM_005585   | 1359.548  | 1627.928  | AF015313  | 537.231   | 894.023   | NM_014161 | 1793.659  | 1807.922  |
| NM_002075   | 1524.093  | 1558.439  | NM_006466 | 1264.602  | 1100.274  | BF312817  | 2122.546  | 2466.473  |
| Y08756      | 4664.66   | 4343.794  | NM_005681 | 2404.313  | 2076.801  | NM_000196 | 4819.193  | 5255.02   |
| NM_005563   | 25136.012 | 25406.684 | NM_015156 | 5086.114  | 4313.504  | NM_003778 | 52482.438 | 61561.648 |
| AY007090    | 347.912   | 1082.388  | NM_012384 | 3943.992  | 3413.816  | AK021445  | 403.478   | 523.512   |
| NM_005102   | 1487.63   | 1876.152  | NM_004653 | 2957.322  | 2795.9    | NM_017934 | 1975.914  | 1661.952  |
| NM_004518   | 699.236   | 444.398   | AF233453  | 2721.187  | 2193.34   | NM_014166 | 30682.143 | 24813.512 |
| NM_006501   | 844.984   | 858.925   | D87454    | 7476.059  | 7059.444  | AF211971  | 1774.352  | 1384.974  |
| NM_002719   | 10113.748 | 9312.176  | NM_007020 | 2069.281  | 2236.411  | U12767    | 446.524   | 410.845   |
| AB035356    | 681.906   | 477.665   | NM_000713 | 6731.631  | 7595.894  | U17630    | 580.09    | 589.883   |
| AV752086    | 803.065   | 589.976   | NM_016055 | 4810.907  | 5223.483  | M33782    | 511.351   | 439.76    |
| NM_016102   | 2712.24   | 1846.877  | NM_013291 | 6359.367  | 6024.054  | NM_002196 | 404.168   | 362.771   |
| NM_004376   | 4651.826  | 3501.563  | NM_002936 | 10499.039 | 10658.766 | NM_017755 | 4451.551  | 4547.877  |
| NM_000272   | 1478.349  | 1043.976  | NM_014161 | 2326.489  | 2533.277  | AK022551  | 543.293   | 446.348   |
| NM_014252   | 8975.196  | 10306.383 | BF312817  | 3172.499  | 3368.638  | AF085968  | 843.606   | 1131.452  |
| NM_001662   | 18852.08  | 16014.709 | AF086491  | 8478.498  | 8166.209  | AL049964  | 645.892   | 684.477   |
| NM_016131   | 12201.547 | 10500.606 | NM_014856 | 986.234   | 1137.28   | AK023269  | 862.216   | 949.316   |
| NM_006822   | 3295.392  | 2547.628  | AK021611  | 871.327   | 1670.97   | AF070564  | 2440.688  | 2078.179  |
| NM_012142   | 11694.572 | 12628.103 | NM_003492 | 1849.399  | 1882.072  | AK021439  | 14314.027 | 6163.003  |
| NM_016429   | 3578.132  | 3632.313  | NM_003780 | 42576.211 | 39529.406 | AF052099  | 1155.842  | 1353.256  |
| AB011100    | 2967.816  | 2832.93   | NM_000196 | 19807.287 | 19870.256 | AF070543  | 880.107   | 906.676   |
| U61741      | 1543.55   | 1372.63   | NM_003778 | 63943.285 | 61157.34  | AF086509  | 328.812   | 273.745   |
| NM_012402   | 8278.796  | 7270.087  | NM_001041 | 543.761   | 696.474   | NM_014778 | 2711.796  | 2434.052  |
| M76676      | 3951.909  | 3485.116  | NM_014166 | 50199.555 | 45118.719 | AK001171  | 10167.724 | 10039.505 |
| AL137690    | 840.278   | 730.693   | AF211971  | 4286.944  | 2620.77   | AK026273  | 2802.714  | 2608.199  |
| Z83804      | 2014.055  | 2717.779  | NM_002931 | 2308.226  | 2529.785  | NM_020250 | 4170.421  | 4816.29   |
| NM_004386   | 1443.367  | 1672.444  | NM_013448 | 56974.801 | 55456.75  | AF055007  | 918.807   | 1195.625  |
| U67784      | 1180.968  | 1626.957  | X65232    | 37805.516 | 44531.637 | AL389879  | 2433.496  | 2786.615  |
| NM_007366   | 1564.864  | 2358.135  | U12767    | 564.366   | 506.58    | AK022869  | 387.94    | 284.448   |
| NM_000592   | 893.365   | 1020.121  | U17630    | 855.852   | 1122.008  | AK021906  | 622.41    | 641.001   |
| NM_016584   | 2746.82   | 3015.582  | M33782    | 662.381   | 897.108   | AF086021  | 2108.73   | 1947.23   |
| NM_001815   | 876.656   | 604.945   | NM_002196 | 2422.626  | 2393.814  | U63828    | 629.911   | 478.776   |
| NM_000064   | 4153.898  | 3606.33   | NM_017755 | 9923.181  | 7983.629  | Z36828    | 3989.2    | 4428.238  |
| NM_006725   | 6577.127  | 4350.2    | NM_015696 | 666.968   | 757.204   | AF086121  | 10188.721 | 10346.731 |
| NM_003326   | 1547.134  | 954.953   | AK022551  | 2020.636  | 2623.225  | AF086140  | 635.01    | 681.238   |
| NM_004568   | 56066.883 | 33013.703 | AF085968  | 3107.322  | 2869.135  | AB033100  | 6261.155  | 5257.267  |
| NM_000202   | 2057.877  | 1632.483  | AK023665  | 619.912   | 982.77    | AL390138  | 440.399   | 396.587   |
| Z25427      | 4076.083  | 4704.277  | AB011136  | 2744.039  | 2833.381  | AL137290  | 563.012   | 357.434   |
| NM_004672   | 12539.952 | 14061.121 | AF085898  | 11165.363 | 12355.355 | NM_014124 | 26725.041 | 25190.447 |
| NM_001353   | 3740.728  | 3323      | AL442094  | 983.817   | 888.832   | AK023818  | 1204.45   | 1298.356  |

|           |           |           |           |           |           |           |           |           |
|-----------|-----------|-----------|-----------|-----------|-----------|-----------|-----------|-----------|
| NM_006214 | 3520.209  | 3139.886  | AL161960  | 2553.713  | 3276.287  | AK024139  | 400.616   | 358.695   |
| AJ010228  | 6755.102  | 5995.703  | AK023269  | 3598.448  | 4298.168  | AK023895  | 747.631   | 907.045   |
| NM_005198 | 5896.033  | 5721.359  | AF070564  | 9254.118  | 9325.81   | AK024206  | 4519.965  | 4105.841  |
| NM_018073 | 4146.952  | 4319.712  | AK021439  | 22362.191 | 35694.512 | NM_006262 | 780.578   | 550.48    |
| AL137529  | 5677.402  | 5535.506  | AF052099  | 2994.251  | 2897.778  | AK026598  | 708.224   | 648.032   |
| NM_012332 | 1437.794  | 1451.793  | AL110111  | 3846.551  | 3146.053  | NM_018097 | 11295.926 | 10003.76  |
| AK026648  | 2172.176  | 2313.809  | AF070543  | 1760.16   | 1426.49   | AF116622  | 1571.133  | 1976.353  |
| NM_000497 | 1585.04   | 1658.213  | AF086525  | 742.427   | 803.115   | AF217967  | 607.982   | 851.982   |
| NM_017421 | 1957.739  | 1884.748  | AF086509  | 384.407   | 776.839   | NM_018150 | 3634.652  | 3478.672  |
| AK025977  | 22216.586 | 22670.893 | NM_014778 | 6536.498  | 5846.968  | NM_017918 | 5369.541  | 4623.44   |
| AK023130  | 9801.582  | 11399.265 | AK001171  | 19825.641 | 18153.65  | NM_017855 | 23240.467 | 24868.184 |
| NM_000273 | 803.384   | 900.81    | AK026273  | 22047.799 | 22491.666 | AB007954  | 727.49    | 743.926   |
| NM_002898 | 8982.264  | 8815.65   | NM_020250 | 25085.219 | 25056.926 | AK026494  | 1946.058  | 1916.332  |
| NM_000488 | 674.337   | 896.68    | AF055007  | 975.536   | 1199.335  | AK022067  | 339.198   | 563.819   |
| BE876237  | 1162.442  | 1216.149  | NM_012337 | 1617.839  | 2006.777  | AK023508  | 977.342   | 875.982   |
| NM_005397 | 1878.094  | 999.83    | AL389879  | 11963.613 | 11993.686 | AK025840  | 1553.106  | 1725.409  |
| NM_000808 | 5294.664  | 3867.496  | AK022869  | 2868.661  | 3322.009  | BC024009  | 1707.454  | 1364.207  |
| NM_006320 | 2244.675  | 1749.6    | NM_016111 | 25383.309 | 29470.984 | AF128543  | 2399.807  | 1899.157  |
| AB014511  | 4637.937  | 2887.263  | AF085958  | 69802.258 | 61725.938 | NM_004188 | 608.12    | 539.214   |
| NM_021978 | 3395.182  | 3938.579  | AF086021  | 4880.558  | 5033.715  | U84510    | 2515.413  | 1956.396  |
| NM_005718 | 10085.104 | 10785.254 | U06700    | 2631.179  | 3370.526  | S83198    | 5149.164  | 3999.702  |
| NM_018264 | 1562.177  | 2424.801  | U63828    | 4071.875  | 4742.12   | AF052119  | 1614.719  | 1673.101  |
| NM_014580 | 496.231   | 437.56    | Z36794    | 7264.583  | 7129.89   | AK026685  | 4117.157  | 3847.365  |
| AB028998  | 747.845   | 894.623   | Z36828    | 17028.922 | 15064.614 | AF090927  | 13371.764 | 13746.062 |
| NM_000153 | 995.223   | 961.165   | AF086121  | 17836.16  | 14876.949 | AK025902  | 1153.06   | 1172.596  |
| NM_002033 | 3315.157  | 3233.867  | AF086140  | 1850.32   | 1565.791  | NM_005181 | 609.034   | 633.566   |
| AK091794  | 706.422   | 749.67    | AK026915  | 2847.403  | 3135.294  | AF143676  | 877.83    | 763.171   |
| NM_004111 | 3001.522  | 3346.531  | AL110259  | 5345.569  | 6005.712  | U66044    | 1624.34   | 1436.707  |
| AF085966  | 5350.333  | 7279.885  | AB033100  | 20632.182 | 20302.348 | NM_005247 | 8305.391  | 6967.338  |
| NM_005318 | 4702.375  | 4946.741  | AL390138  | 2848.059  | 4458.813  | NM_005283 | 1024.46   | 1341.1    |
| NM_016318 | 4028.87   | 4657.73   | AL137290  | 8409.98   | 8878.361  | AL122089  | 499.152   | 524.732   |
| NM_003368 | 7369.84   | 7605.78   | AK024180  | 1024.091  | 739.125   | AA203665  | 1438.85   | 1181.838  |
| NM_000057 | 3077.976  | 3483.207  | AK023458  | 1956.657  | 2833.427  | U95646    | 850.357   | 784.893   |
| NM_018343 | 6435.461  | 5388.626  | AK021606  | 1443.728  | 1225.031  | Y16705    | 1837.114  | 1722.189  |
| AK095793  | 734.055   | 785.069   | NM_014124 | 59627.484 | 50826.23  | AF279775  | 4616.866  | 5346.659  |
| NM_003177 | 4519.914  | 4627.668  | AF119888  | 1182.074  | 1139.212  | NM_001821 | 1618.301  | 926.208   |
| NM_017718 | 1902.308  | 1757.037  | AK001551  | 5142.716  | 5895.784  | X64978    | 4927.198  | 3142.242  |
| AL049688  | 1643.118  | 1110.358  | AK024714  | 1271.257  | 1378.907  | NM_000912 | 21749.639 | 19503.615 |
| NM_002737 | 5865.985  | 2821.787  | AK022363  | 3047.41   | 3814.551  | NM_002345 | 557.983   | 422.518   |
| NM_002718 | 10513.261 | 20003.512 | AK022485  | 1989.977  | 2905.409  | U57971    | 565.659   | 366.396   |
| AB035356  | 686.016   | 1228.776  | AK023395  | 3173.687  | 9163.356  | AK024593  | 665.578   | 424.925   |
| AV752086  | 887.354   | 926.902   | AK023818  | 9851.718  | 9750.976  | NM_018358 | 1801.374  | 1958.502  |
| NM_016102 | 3650.815  | 4252.185  | AK024139  | 1120.039  | 1079.066  | AK022020  | 664.254   | 696.258   |
| NM_004378 | 5112.138  | 7252.189  | AK023522  | 887.563   | 1039.56   | AF147399  | 554.05    | 542.208   |
| NM_000272 | 1601.095  | 1999.797  | AK023895  | 1430.134  | 1343.893  | AK000263  | 4824.409  | 4222.322  |
| NM_006848 | 64979.359 | 71426.18  | AK024206  | 21049.148 | 18175.248 | Y13895    | 274.143   | 193.09    |
| NM_005603 | 17005.889 | 15642.254 | NM_006262 | 4327.305  | 4203.326  | NM_017447 | 982.495   | 917.57    |
| NM_001061 | 660.551   | 849.621   | AK026598  | 3861.304  | 3621.5    | AL049452  | 783.478   | 802.415   |
| BG744154  | 20509.373 | 27553.678 | AK023602  | 2075.322  | 2148.77   | AK026976  | 678.587   | 845.793   |
| Z11694    | 6592.11   | 7313.256  | NM_018097 | 36576.063 | 37455.715 | AF070559  | 2768.642  | 3452.55   |
| Z26317    | 2507.991  | 2539.422  | AF130043  | 861.438   | 1053.09   | D42043    | 5487.157  | 6079.802  |
| X16983    | 18141.305 | 11646.644 | Y11167    | 2003.524  | 2332.341  | CY3Cy5    | 990.521   | 106.085   |
| X56160    | 1501.508  | 1568.831  | AK026813  | 1820.09   | 1949.884  | BG744154  | 7794.412  | 8891.293  |

|             |           |           |           |           |           |             |           |           |
|-------------|-----------|-----------|-----------|-----------|-----------|-------------|-----------|-----------|
| BG679991    | 858.267   | 1321.72   | AK027225  | 1648.284  | 1707.974  | Z11694      | 2626.186  | 2889.818  |
| H-Y 00097 I | 7749.359  | 8037.659  | AK023083  | 3164.912  | 3354.815  | BF983177    | 283.116   | 231.772   |
| H-Y 00711 I | 62246.219 | 64283.289 | AF130093  | 1082.88   | 1589.232  | Z26317      | 699.802   | 896.315   |
| H-X 16707 I | 1099.857  | 833.307   | AF116622  | 1749.776  | 1892.916  | X16983      | 11399.361 | 8472.362  |
| AL038354    | 37052.695 | 27986.154 | NM_005325 | 893.239   | 792.94    | X56160      | 1793.659  | 2772.899  |
| NM_000064   | 4860.559  | 6232.105  | AF217967  | 1480.019  | 1801.41   | BG679991    | 516.862   | 798.406   |
| NM_006725   | 6335.123  | 6667.03   | NM_017855 | 57076.762 | 54262.367 | H-Y 00097 I | 3283.923  | 3398.592  |
| NM_003326   | 1588.738  | 2251.098  | AB007954  | 3841.289  | 4069.551  | H-M 59964   | 1151.778  | 1182.245  |
| NM_005496   | 17531.447 | 25199.016 | AK026494  | 5597.747  | 6314.17   | H-Y 00711 I | 61183.969 | 68763.445 |
| NM_002858   | 7048.292  | 9556.771  | AK022067  | 1952.878  | 2009.233  | H-X 16707 I | 1201.774  | 975.955   |
| NM_004817   | 1933.8    | 1708.949  | AK023508  | 2895.439  | 3526.565  | AL038354    | 23348.166 | 16730.24  |
| NM_018975   | 27745.766 | 26457.455 | AK025840  | 4251.553  | 3822.907  | R14607      | 644.742   | 528.791   |
| AB023215    | 10880.117 | 10529.445 | BC024009  | 10354.975 | 9980.121  | NM_021976   | 1422.443  | 915.203   |
| NM_001284   | 49639.844 | 50530.094 | AF128543  | 15441.54  | 15915.396 | SR2         | 43844.84  | 31061.83  |
| NM_003242   | 11954.253 | 9630.88   | NM_004189 | 1585.999  | 1573.351  | SR4         | 6627.147  | 5033.61   |
| U31099      | 883.419   | 869.455   | U84510    | 8829.46   | 9374.848  | SR6         | 1046.71   | 756.447   |
| NM_005585   | 1356.054  | 1511.409  | X94290    | 3272.823  | 3917.194  | SR8         | 4828.909  | 10587.328 |
| NM_002075   | 1581.026  | 1448.5    | AK026685  | 45329.574 | 48581.035 | SR10        | 17709.637 | 5047.419  |
| Y08756      | 3738.745  | 3558.452  | AF090927  | 40973.723 | 41458.824 | CY3Cy5      | 590.716   | 81.235    |
| NM_005563   | 23342.311 | 22965.197 | AL137642  | 1805.885  | 2030.003  | NM_001284   | 26982.918 | 24295.357 |
| NM_005102   | 1321.58   | 1186.863  | AL133619  | 8433.432  | 9455.229  | NM_003242   | 11483.063 | 9081.535  |
| NM_006501   | 1008.941  | 614.251   | AK025902  | 6897.643  | 6513.652  | U31099      | 339.19    | 416.821   |
| NM_005397   | 1855.654  | 2386.415  | AL353949  | 794.329   | 578.648   | NM_001105   | 2030.795  | 1913.675  |
| NM_000806   | 4399.37   | 5148.714  | NM_005181 | 2590.44   | 3305.606  | NM_005585   | 551.616   | 521.631   |
| NM_001662   | 20639.133 | 20201.145 | AF026945  | 1056.587  | 1436.591  | NM_002075   | 1634.168  | 1790.383  |
| NM_016131   | 13362.415 | 12874.75  | NM_005247 | 55573.383 | 57450.805 | Y08756      | 4343.8    | 4455.454  |
| NM_006822   | 3492.324  | 3518.146  | NM_005283 | 4803.332  | 5415.243  | NM_005563   | 12658.258 | 15601.883 |
| NM_016429   | 3973.05   | 4509.704  | AL122089  | 6333.557  | 7973.456  | AY007090    | 2929.379  | 2926.843  |
| AB011100    | 3110.239  | 4076.433  | AA203665  | 16385.137 | 17357.211 | NM_005102   | 765.594   | 635.584   |
| U61741      | 1055.333  | 1479.731  | U95646    | 1267.105  | 1616.787  | NM_004518   | 659.972   | 367.656   |
| NM_012402   | 7246.269  | 7469.836  | Y16705    | 4982.315  | 5190.502  | NM_006501   | 408.659   | 267.963   |
| NM_003857   | 567.701   | 517.597   | AF279775  | 13351.287 | 14513.521 | NM_002719   | 4730.362  | 4220.773  |
| AL137690    | 566.994   | 745.741   | NM_001821 | 9055.965  | 12736.854 | AV752086    | 588.248   | 752.661   |
| Z83804      | 2105.562  | 2428.051  | NM_005647 | 2446.847  | 2796.488  | NM_016102   | 3321.692  | 2715.108  |
| NM_004386   | 1145.297  | 1392.939  | X64978    | 24509.348 | 29253.641 | NM_004376   | 1686.838  | 1480.883  |
| U67784      | 1051.77   | 1038.685  | NM_000912 | 57697.188 | 56782.18  | NM_000272   | 722.886   | 601.547   |
| NM_007366   | 1359.025  | 912.972   | U57971    | 3039.555  | 4918.148  | NM_005603   | 13960.98  | 9036.716  |
| NM_000592   | 809.042   | 699.321   | AK024593  | 6015.682  | 6839.899  | NM_012402   | 3684.699  | 3479.508  |
| NM_016584   | 5224.336  | 4126.799  | Z83934    | 2534.728  | 2380.613  | M76676      | 2063.885  | 2097.205  |
| NM_001815   | 766.658   | 564.599   | NM_018359 | 7596.521  | 6758.39   | NM_003857   | 385.505   | 635.305   |
| NM_003177   | 4688.811  | 6151.121  | AK022020  | 2736.878  | 2565.846  | AL137690    | 447.025   | 618.926   |
| NM_017719   | 2157.539  | 1740.485  | AK000263  | 15734.798 | 15514.44  | Z83804      | 1294.982  | 1277.307  |
| AF064078    | 768.106   | 1115.38   | Y13895    | 707.547   | 802.977   | NM_004386   | 985.254   | 1082.162  |
| NM_002737   | 7352.061  | 7922.62   | NM_017447 | 2251.128  | 2623.297  | U67784      | 645.244   | 1018.808  |
| Z25427      | 7217.588  | 7117.991  | AL049452  | 859.205   | 1628.114  | NM_007366   | 890.725   | 1179.729  |
| NM_004672   | 15143.173 | 17606.232 | NM_016622 | 4603.739  | 4508.745  | NM_000592   | 531.443   | 537.201   |
| NM_001353   | 4455.416  | 4312.285  | AK026976  | 2209.295  | 2530.872  | NM_016584   | 5883.466  | 5925.795  |
| NM_005198   | 6912.068  | 7152.356  | AF070559  | 7529.208  | 7382.54   | NM_001815   | 1132.034  | 1073.724  |
| AL137529    | 5881.347  | 6747.143  | D42043    | 19546.533 | 18613.063 | NM_000064   | 3146.106  | 2550.15   |
| NM_012332   | 1538.962  | 1620.48   | CY3Cy5    | 2922.901  | 151.842   | NM_006725   | 4293.685  | 3343.725  |
| NM_000497   | 1350.384  | 1353.148  | BG744154  | 17485.064 | 17152.6   | NM_003326   | 868.256   | 810.57    |
| NM_017421   | 2332.649  | 2132.764  | Z11694    | 5782.338  | 5615.65   | NM_004568   | 34290.703 | 23620.113 |
| AK025977    | 19543.732 | 20689.277 | BF983177  | 511.806   | 1042.512  | NM_000202   | 1020.282  | 707.902   |

|           |           |           |             |           |           |             |           |           |
|-----------|-----------|-----------|-------------|-----------|-----------|-------------|-----------|-----------|
| AK023130  | 8271.781  | 10552.861 | Z26317      | 1729.767  | 2371.403  | NM_005496   | 7585.782  | 6118.188  |
| NM_000273 | 734.873   | 611.902   | X16983      | 23540.52  | 43211.195 | NM_016608   | 599.09    | 454.725   |
| NM_002896 | 9537.414  | 6327.709  | X56160      | 4060.631  | 5839.748  | NM_004817   | 787.407   | 404.868   |
| BE876237  | 702.743   | 739.361   | BG679991    | 1315.321  | 988.618   | NM_018975   | 14018.331 | 7473.015  |
| NM_015912 | 1055.611  | 1108.811  | H-Y 00097 I | 6880.675  | 7490.838  | AB023215    | 4869.801  | 2944.307  |
| NM_000460 | 1411.54   | 1651.77   | H-Y 00711 I | 67484.898 | 71359.141 | AK026648    | 979.183   | 868.649   |
| AB002339  | 1627.572  | 1841      | H-X 16707 I | 1956.898  | 2049.881  | NM_000497   | 946.911   | 999.964   |
| AB018322  | 3242.348  | 3882.87   | AL038354    | 35457.891 | 33200.699 | NM_017421   | 920.544   | 727.625   |
| NM_007068 | 8772.633  | 9803.713  | R14607      | 1527.946  | 1631.234  | AK025977    | 13392.92  | 13519.331 |
| AB028998  | 864.562   | 1148.703  | NM_021976   | 2537.097  | 2040.991  | AK023130    | 4007.036  | 5451.268  |
| NM_002033 | 2498.583  | 2646.336  | CY3Cy5      | 1500.11   | 118.387   | NM_000273   | 764.14    | 1023.815  |
| AK091794  | 799.433   | 926.031   | NM_001284   | 41610.785 | 45573.426 | NM_002896   | 5871.602  | 5252.43   |
| NM_004111 | 2608.294  | 3935.814  | NM_003242   | 13179.002 | 17549.541 | AB017913    | 1849.384  | 1727.213  |
| AF085966  | 5453.691  | 7440.463  | NM_002849   | 765.109   | 906.915   | NM_005397   | 1055.431  | 608.806   |
| NM_005316 | 4163.068  | 5015.473  | U31099      | 877.364   | 1296.408  | NM_000806   | 3169.173  | 2784.198  |
| NM_016316 | 3846.703  | 5234.97   | NM_001105   | 4613.828  | 4334.333  | NM_006320   | 1003.922  | 977.901   |
| NM_003366 | 7242.802  | 6616.288  | NM_005585   | 1237.059  | 1352.25   | AB014511    | 2141.656  | 1669.299  |
| NM_000057 | 2783.878  | 3003.588  | NM_002075   | 3998.646  | 4740.472  | NM_014252   | 4185.129  | 3583.832  |
| NM_018343 | 6444.918  | 4095.76   | Y08756      | 12240.61  | 14296.387 | NM_001662   | 8426.9    | 5431.716  |
| AF114264  | 35006.355 | 1180.937  | NM_005563   | 21379.715 | 25625.971 | NM_016131   | 6298.282  | 4658.613  |
| NM_017514 | 667.249   | 569.403   | AY007090    | 2563.884  | 2887.579  | NM_006822   | 1621.443  | 945.093   |
| AB023210  | 1550.983  | 2766.424  | NM_006439   | 990.04    | 824.327   | NM_012142   | 5645.83   | 4291.448  |
| AB037786  | 1916.949  | 3232.201  | NM_005102   | 1254.377  | 1344.462  | NM_016429   | 1180.089  | 742.722   |
| AB037735  | 1572.33   | 2044.386  | NM_004518   | 1017.913  | 1762.775  | NM_000153   | 412.466   | 392.726   |
| AB000509  | 6015.771  | 6177.337  | NM_006501   | 771.007   | 819.139   | NM_002033   | 1520.992  | 1530.899  |
| NM_004378 | 938.5     | 1131.401  | NM_002719   | 11051.417 | 9521.958  | AK091794    | 429.597   | 383.997   |
| AJ238899  | 1070.761  | 1101.443  | AB035356    | 648.767   | 699.357   | NM_004111   | 1587.809  | 1635.452  |
| NM_018037 | 1344.191  | 1889.167  | AV752086    | 1661.629  | 1567.375  | AF085966    | 3002.2    | 3957.792  |
| NM_001110 | 6192.727  | 6496.662  | NM_016102   | 7246.804  | 7722.702  | NM_005316   | 2157.377  | 2828.023  |
| NM_003222 | 1713.579  | 1957.182  | AB011100    | 2867.864  | 4065.591  | NM_016316   | 2270.869  | 2191.244  |
| NM_000841 | 5651.937  | 5680.327  | U61741      | 1150.048  | 1263.943  | NM_003366   | 4636.773  | 3978.919  |
| NM_001245 | 2157.218  | 1445.356  | NM_012402   | 5341.007  | 6122.807  | NM_003177   | 1998.288  | 1811.541  |
| AJ008139  | 4384.519  | 3253.642  | M76676      | 2974.35   | 3400.002  | NM_017719   | 1005.826  | 682.759   |
| NM_004326 | 3492.619  | 3424.672  | NM_003857   | 628.564   | 634.047   | AL049688    | 876.772   | 667.845   |
| NM_000882 | 681.622   | 753.622   | AL137690    | 493.521   | 614.376   | NM_002737   | 3215.962  | 1843.629  |
| AK001581  | 6574.62   | 7218.876  | Z83804      | 2442.381  | 1961.544  | Z25427      | 1616.324  | 1119.76   |
| NM_005862 | 3478.09   | 3542.71   | NM_004386   | 1601.836  | 1941.896  | NM_004672   | 6763.215  | 5942.194  |
| NM_000548 | 3787.802  | 4334.313  | U67784      | 1259.556  | 1752.278  | NM_001353   | 2508.584  | 1973.661  |
| NM_005020 | 21836.789 | 20787.955 | NM_007366   | 1796.868  | 2829.356  | NM_006214   | 1667.078  | 1019.385  |
| NM_014077 | 9063.656  | 10724.799 | NM_000592   | 906.427   | 1015.13   | AJ010228    | 2656.189  | 1932.023  |
| NM_018412 | 1422.634  | 2349.183  | NM_016584   | 14253.578 | 13655.56  | NM_005198   | 2851.044  | 1563.344  |
| NM_012329 | 4924.178  | 4734.819  | NM_001815   | 1844.501  | 1891.327  | BG744154    | 8510.422  | 10837.395 |
| M14087    | 14195.847 | 20719.869 | NM_000064   | 8534.757  | 7270.66   | Z11694      | 3049.7    | 3940.534  |
| NM_000885 | 12478.296 | 5462.605  | NM_006725   | 6974.69   | 7240.12   | BF983177    | 319.066   | 296.874   |
| NM_017582 | 19863.949 | 22229.803 | NM_003326   | 1937.564  | 1534.681  | Z26317      | 730.096   | 889.783   |
| NM_015239 | 4036.762  | 4428.133  | NM_004568   | 48879.836 | 44070.266 | X16983      | 10920.266 | 8180.05   |
| AK026962  | 1599.54   | 1774.737  | NM_018975   | 17925.938 | 25603.617 | X56160      | 1631.348  | 1803.039  |
| NM_006796 | 691.191   | 841.804   | AB023215    | 11593.088 | 9979.424  | BG679991    | 570.058   | 1009.094  |
| X04366    | 3007.026  | 3383.571  | AK021426    | 1144.309  | 581.384   | H-Y 00097 I | 3794.938  | 3726.012  |
| NM_000666 | 2996.651  | 3718.432  | NM_018073   | 3217.952  | 3345.817  | H-Y 00711 I | 56250.398 | 63733.488 |
| AB046814  | 1138.164  | 1950.288  | AL137529    | 4645.044  | 5288.923  | H-X 16707 I | 935.059   | 699.298   |
| NM_017778 | 759.108   | 998.571   | NM_012332   | 1688.996  | 1939.997  | AL038354    | 22910.156 | 17259.916 |
| NM_017664 | 4332.831  | 5596.697  | AK026648    | 1364.087  | 1228.924  | R14607      | 644.707   | 635.717   |

|           |           |           |           |           |           |           |           |           |
|-----------|-----------|-----------|-----------|-----------|-----------|-----------|-----------|-----------|
| AK025523  | 605.813   | 941.419   | NM_000497 | 1238.916  | 1450.848  | NM_021976 | 1624.538  | 1224.677  |
| NM_007059 | 10405.31  | 15391.339 | NM_017421 | 1307.41   | 1533.011  | NM_005718 | 3573.558  | 2266.927  |
| NM_006870 | 28467.033 | 28293.568 | AK025977  | 37209.441 | 34317.941 | NM_004817 | 607.674   | 684.651   |
| NM_007359 | 9216.882  | 8449.769  | AK023130  | 6677.601  | 6195.895  | NM_018975 | 13057.721 | 14222.836 |
| AF303888  | 13520.26  | 11376.428 | NM_000273 | 1173.629  | 1395.282  | AB023215  | 5410.518  | 5570.623  |
| NM_000077 | 807.598   | 769.972   | NM_002899 | 12458.441 | 14137.313 | NM_001284 | 28723.572 | 30759.16  |
| NM_007084 | 1252.322  | 962.411   | NM_000486 | 1219.855  | 1451.294  | NM_003242 | 12411.866 | 11431.731 |
| M97191    | 19099.59  | 15582.002 | BE876237  | 1087.774  | 1145.781  | NM_001105 | 1629.47   | 1353.277  |
| AK023015  | 16194.536 | 18971     | NM_005397 | 1131.957  | 1610.251  | NM_005585 | 596.523   | 765       |
| NM_003457 | 15277.619 | 14358.41  | NM_000806 | 9493.788  | 9682.604  | NM_002075 | 1571.296  | 1340.922  |
| NM_012391 | 1406.243  | 1737.1    | NM_006320 | 1751.969  | 1676.77   | Y08756    | 4545.734  | 3643.938  |
| NM_005254 | 2931.818  | 4280.038  | AB014511  | 3823.2    | 3684.111  | NM_005563 | 12393.036 | 10494.453 |
| NM_005611 | 1213.42   | 1197.976  | NM_014252 | 9325.813  | 8631.104  | AY007090  | 695.838   | 214.93    |
| AF141655  | 1299.63   | 1308.711  | NM_001662 | 13253.045 | 17443.736 | NM_005102 | 672.754   | 648.633   |
| NM_007345 | 1180.963  | 1616.346  | NM_006822 | 2751.623  | 3598.367  | NM_004518 | 566.961   | 454.1     |
| NM_004830 | 1910.51   | 1931.375  | NM_012142 | 10921.338 | 8731.996  | NM_002719 | 4103.004  | 3911.37   |
| NM_007007 | 12782.121 | 10757.686 | NM_016429 | 2801.34   | 1726.948  | AV752086  | 577.258   | 390.101   |
| NM_006386 | 897.996   | 1027.342  | NM_018264 | 1487.966  | 1627.472  | NM_016102 | 3171.524  | 2226.909  |
| NM_006559 | 25187.861 | 22419.307 | NM_014580 | 1147.63   | 1115.093  | NM_004376 | 1573.97   | 1385.94   |
| NM_004501 | 40447.238 | 30685.4   | AB028998  | 508.894   | 682.081   | NM_000272 | 621.615   | 359.437   |
| NM_004966 | 18381.436 | 18404.523 | NM_000153 | 539.6     | 791.771   | NM_016131 | 5645.447  | 6137.165  |
| NM_006700 | 1824.358  | 1769.856  | NM_002033 | 2375.485  | 2502.285  | NM_006822 | 1604.272  | 1320.247  |
| NM_006445 | 15271.372 | 13969.479 | AK091794  | 752.092   | 958.987   | NM_012142 | 5695.368  | 8505.386  |
| NM_012109 | 8589.367  | 7219.23   | NM_004111 | 3617.409  | 3449.426  | NM_016429 | 1195.826  | 1478.447  |
| AF019633  | 3425.389  | 3151.073  | AF085966  | 5344.468  | 4454.576  | AB011100  | 1440.363  | 1760.744  |
| AB002361  | 3353.213  | 3537.661  | NM_005316 | 4015.409  | 3374.754  | U61741    | 681.662   | 806.333   |
| NM_018060 | 7380.075  | 7096.502  | NM_016316 | 3946.103  | 3862.792  | NM_012402 | 3175.209  | 3216.885  |
| NM_014239 | 4427.96   | 4934.768  | NM_003369 | 9987.689  | 10841.082 | M76676    | 1920.473  | 1813.548  |
| NM_017662 | 3980.351  | 3854.053  | NM_000057 | 3146.422  | 2395.206  | NM_003857 | 402.184   | 329.776   |
| U88837    | 1539.619  | 1154.116  | NM_018343 | 4688.156  | 5106.592  | AL137690  | 809.784   | 758.424   |
| NM_017446 | 34161.91  | 26481.42  | AK095793  | 1598.141  | 1143.616  | Z83804    | 1404.372  | 1262.42   |
| AK001478  | 4311.61   | 2991.905  | NM_003177 | 4493.414  | 2661.35   | NM_004386 | 1012.242  | 665.281   |
| AK025697  | 8988.189  | 7818.919  | NM_017719 | 1881.436  | 1528.834  | U67784    | 4360.184  | 3267.778  |
| AK021734  | 680.403   | 739.901   | AF064078  | 923.75    | 826.58    | NM_007366 | 817.065   | 752.746   |
| AF075028  | 262.585   | 680.653   | AL049688  | 2053.162  | 1444.783  | NM_000592 | 733.307   | 504.682   |
| D00265    | 38584.828 | 47020.32  | NM_002737 | 6434.642  | 5392.635  | NM_016584 | 4497.503  | 3482.309  |
| NM_000779 | 853.847   | 701.314   | Z25427    | 4002.465  | 3590.15   | NM_001815 | 699.739   | 617.684   |
| NM_004552 | 52435.859 | 53155.629 | NM_004672 | 10969.944 | 10837.134 | NM_000064 | 2959.118  | 2468.383  |
| NM_000143 | 3282.279  | 4149.945  | NM_001353 | 4897.458  | 4768.818  | NM_006725 | 3536.317  | 2647.641  |
| AF317889  | 808.44    | 939.83    | NM_006214 | 2586.461  | 3195.836  | NM_003326 | 807.542   | 600.051   |
| AL137294  | 3795.689  | 4376.53   | AJ010228  | 6467.003  | 5826.615  | NM_004568 | 30415.582 | 18544.41  |
| NM_003743 | 1482.246  | 1648.395  | NM_005198 | 4304.892  | 5176.433  | NM_000202 | 859.146   | 627.156   |
| AB037797  | 849.879   | 1026.376  | NM_006848 | 64141.629 | 62103.941 | NM_001353 | 1705.595  | 1843.265  |
| NM_001520 | 2045.226  | 2264.138  | NM_005603 | 58224.613 | 52610.852 | NM_006214 | 1844.88   | 1569.972  |
| AL050367  | 780.302   | 772.299   | NM_001061 | 752.415   | 865.729   | AJ010228  | 3085.995  | 3409.071  |
| NM_017870 | 634.526   | 587.599   | AI075338  | 592.908   | 848.235   | NM_005198 | 3484.629  | 3373.222  |
| AL133633  | 2355.138  | 2723.607  | BG744154  | 17028.613 | 14063.211 | NM_018073 | 1576.624  | 2088.163  |
| AK026817  | 1019.377  | 1136.429  | Z11694    | 5229.749  | 4881.191  | AL137529  | 3562.272  | 5285.809  |
| AL157442  | 18475.816 | 15429.455 | BF983177  | 559.319   | 781.945   | NM_012332 | 934.132   | 1293.143  |
| AB011148  | 1801.764  | 2146.041  | Z26317    | 1831.875  | 1478.015  | AK026648  | 1086.047  | 933.334   |
| AL389938  | 21304.053 | 14945.576 | X16983    | 15464.749 | 21846.615 | NM_000497 | 792.555   | 794.761   |
| NM_001949 | 35717.5   | 28890.928 | X56160    | 2944.13   | 3177.744  | NM_017421 | 956.109   | 661.713   |
| NM_003507 | 1094.776  | 1285.284  | BG679991  | 1195.428  | 917.208   | AK025977  | 14809.054 | 13049.401 |

|           |           |           |             |           |           |             |           |           |
|-----------|-----------|-----------|-------------|-----------|-----------|-------------|-----------|-----------|
| AK026591  | 1358.107  | 1412.368  | H-Y 00097 I | 6710.19   | 7239.37   | AK023130    | 3928.673  | 3798.194  |
| AK001889  | 2438.14   | 3090.949  | H-Y 00711 I | 63033.277 | 62651.512 | NM_000273   | 686.294   | 443.358   |
| AK025726  | 2294.736  | 3377.683  | H-X 16707 I | 1679.847  | 1992.714  | NM_002895   | 5465.703  | 5013.295  |
| AJ227869  | 4544.18   | 4203.376  | AL038354    | 36448.309 | 37756.254 | NM_000486   | 429.633   | 744.137   |
| AK026189  | 567.888   | 701.291   | R14607      | 1800.869  | 1698.868  | BE876237    | 545.222   | 600.032   |
| AL117613  | 5142.019  | 5378.254  | W84867      | 543.711   | 668.248   | NM_005397   | 661.192   | 405.798   |
| AL137753  | 5023.411  | 5926.552  | NM_021976   | 2477.837  | 2270.208  | NM_000806   | 3712.814  | 2699.634  |
| AL110262  | 12036.103 | 11425.888 | NM_005718   | 7888.07   | 12753.633 | NM_006320   | 1096.13   | 626.525   |
| AK025627  | 11719.938 | 11548.977 | NM_005496   | 17739.264 | 11015.111 | AB014511    | 1968.654  | 1359.105  |
| AF216077  | 2909.46   | 2388.471  | NM_016608   | 1333.844  | 1533.729  | NM_021976   | 1256.336  | 988.606   |
| AK021612  | 8958.24   | 7046.552  | NM_002858   | 6556.212  | 4957.95   | NM_005718   | 3949.562  | 4398.78   |
| AF088031  | 957.26    | 981.685   | NM_004817   | 1110.505  | 1537.709  | NM_018264   | 1082.558  | 1432.949  |
| AK002025  | 56818.215 | 55331.523 | NM_018975   | 18200.738 | 22961.938 | NM_014580   | 1290.756  | 1747.261  |
| AK026299  | 2459.562  | 2288.315  | AB023215    | 15800.262 | 16252.93  | AB028998    | 409.077   | 420.586   |
| NM_017794 | 1544.76   | 1441.168  | NM_001284   | 41290.723 | 40217.688 | NM_000153   | 593.984   | 640.17    |
| AK025170  | 1539.833  | 974.593   | NM_003242   | 12441.831 | 14432.283 | NM_002033   | 675.728   | 658.144   |
| AB033031  | 1748.061  | 1854.144  | NM_002849   | 425.667   | 705.545   | AK091794    | 641.718   | 820.564   |
| AF085872  | 6174.792  | 5466.729  | U31099      | 479.294   | 648.376   | NM_004111   | 1791.364  | 1614.359  |
| AK022538  | 10467.966 | 9595.369  | NM_001105   | 3713.148  | 3048.97   | AF085966    | 3136.202  | 3083.723  |
| AK022342  | 831.012   | 835.587   | NM_005585   | 1011.958  | 1623.281  | NM_005316   | 2067.791  | 2134.234  |
| AF147420  | 1098.016  | 1155.141  | NM_002075   | 3990.668  | 6530.894  | NM_016316   | 2230.338  | 1815.622  |
| AL049312  | 1495.384  | 1396.471  | Y08756      | 14627.118 | 21623.363 | NM_003366   | 4705.709  | 4057.538  |
| AL050072  | 1785.862  | 2190.897  | NM_005563   | 20979.066 | 21345.674 | NM_000057   | 1409.714  | 1685.678  |
| AL117590  | 856.981   | 994.962   | AY007090    | 933.886   | 1003.257  | NM_018343   | 3177.56   | 2521.976  |
| AL049357  | 4427.115  | 2934.145  | NM_002719   | 9139.649  | 8109.335  | AK095793    | 1043.527  | 1737.46   |
| AL110223  | 700.174   | 555.882   | AB035356    | 586.75    | 583.574   | NM_003177   | 1684.971  | 1655.727  |
| AK027180  | 3484.681  | 2971.46   | AV752086    | 1204.522  | 1415.715  | NM_017719   | 963.441   | 711.801   |
| NM_004544 | 16642.695 | 17441.455 | NM_016102   | 6177.769  | 7135.852  | AF064078    | 502.043   | 419.711   |
| AF086041  | 872.491   | 657.419   | NM_004376   | 4336.114  | 3634.942  | AL049688    | 757.699   | 458.297   |
| Y15167    | 1241.207  | 1226.673  | NM_000272   | 1167.006  | 1052.808  | NM_002737   | 2766.899  | 1413.855  |
| AL133080  | 3068.202  | 2510.544  | NM_014252   | 8975.23   | 8651.967  | NM_002719   | 4472.355  | 4882.946  |
| NM_017792 | 7095.083  | 6453.868  | NM_001662   | 11781.863 | 12628.682 | AV752086    | 563.521   | 664.67    |
| AK025213  | 8381.837  | 8259.432  | NM_016131   | 10008.267 | 9593.661  | NM_016102   | 3648.44   | 4021.3    |
| NM_014949 | 2534.053  | 2234.297  | NM_006822   | 2463.442  | 3560.588  | NM_004376   | 1275.351  | 1920.992  |
| AL080221  | 1131.533  | 1169.742  | NM_012142   | 11378.595 | 9930.025  | NM_000272   | 667.232   | 903.948   |
| AL137370  | 1459.783  | 1243.118  | NM_016429   | 2390.495  | 2320.967  | NM_006848   | 55305.152 | 67074.234 |
| AF009262  | 15394.46  | 16247.774 | AB011100    | 2547.326  | 2374.002  | NM_005603   | 20061.826 | 19907.348 |
| AF009306  | 585.376   | 819.799   | U61741      | 1039.372  | 1111.284  | NM_001061   | 418.181   | 598.286   |
| AF050198  | 1970.096  | 2226.965  | NM_012402   | 5806.809  | 6568.151  | BG744154    | 9222.933  | 9733.657  |
| AK024346  | 2377.256  | 2401.27   | M76676      | 3360.306  | 3592.571  | Z11694      | 2738.01   | 3023.601  |
| AF056422  | 658.893   | 723.579   | NM_003857   | 506.086   | 963.062   | BF983177    | 2444.608  | 1642.663  |
| AF090892  | 838.591   | 826.325   | AL137690    | 1255.202  | 2181.76   | Z26317      | 908.063   | 810.419   |
| AK001089  | 959.315   | 1000.04   | Z83804      | 2375.368  | 3887.511  | X16983      | 11694.315 | 6535.47   |
| AK001919  | 988.636   | 945.648   | NM_004386   | 1826.706  | 2325.404  | X56160      | 1978.93   | 1726.62   |
| AK021535  | 1178.75   | 1027.453  | U67784      | 1354.915  | 1550.3    | BG679991    | 446.957   | 784.321   |
| AK021753  | 1796.092  | 1723.107  | NM_006725   | 6166.19   | 6561.69   | H-Y 00097 I | 3318.621  | 3188.175  |
| AK001139  | 2012.21   | 1476.187  | NM_003326   | 1630.73   | 1163.92   | H-Y 00711 I | 55497.324 | 63896.938 |
| AK002090  | 967.844   | 1147.411  | NM_004568   | 46204.801 | 35131.449 | H-X 16707 I | 862.066   | 714.231   |
| AK021822  | 702.144   | 662.073   | NM_000202   | 1720.837  | 1255.786  | AL038354    | 20686.889 | 14828.225 |
| AK025246  | 6391.023  | 5721.286  | Z25427      | 3676.548  | 3916.618  | R14607      | 627.363   | 444.294   |
| AK025847  | 2754.618  | 1990.761  | NM_004672   | 10412.864 | 10211.979 | NM_000064   | 2723.081  | 2285.494  |
| AK026442  | 391.251   | 568.714   | NM_001353   | 7216.508  | 8235.853  | NM_006725   | 3558.917  | 2933.639  |
| AK000944  | 355.145   | 408.136   | NM_006214   | 2458.388  | 2997.082  | NM_003326   | 770.062   | 1036.857  |

|           |           |           |           |           |           |           |           |           |
|-----------|-----------|-----------|-----------|-----------|-----------|-----------|-----------|-----------|
| NM_014174 | 38126.816 | 43180.105 | AJ010228  | 7052.546  | 6553.86   | NM_00456E | 32127.123 | 31374.166 |
| AF147337  | 3930.851  | 3668.194  | NM_00519E | 5915.936  | 6834.169  | NM_00020Z | 919.557   | 1238.892  |
| AK025203  | 51987.164 | 50353.156 | AK021426  | 497.491   | 728.056   | NM_00549E | 7500.265  | 9772.359  |
| AK026981  | 3411.958  | 2995.354  | NM_01807Z | 3636.917  | 3115.297  | NM_00285E | 3016.248  | 4356.943  |
| NM_006394 | 412.872   | 427.021   | AL137529  | 4502.842  | 4870.415  | NM_004817 | 914.95    | 652.761   |
| AL133656  | 2307.757  | 1889.098  | NM_01233Z | 1698.196  | 1849.495  | NM_01897E | 13751.227 | 11530.272 |
| AL050037  | 15683.706 | 14976.905 | AK026648  | 1381.387  | 1510.169  | AB023215  | 6687.098  | 5737.963  |
| NM_001417 | 36283.586 | 31192.777 | NM_000497 | 1402.336  | 1749.08   | NM_001284 | 25920.584 | 22936.301 |
| AK022236  | 5640.817  | 7974.788  | NM_017421 | 1501.382  | 2873.22   | NM_00324Z | 10805.235 | 6656.714  |
| AK000073  | 706.552   | 1691.48   | AK025977  | 32430.598 | 39907.012 | NM_00110E | 1974.24   | 1506.696  |
| AK000618  | 712.548   | 973.796   | AK023130  | 7032.993  | 6718.775  | NM_00558E | 596.521   | 485.582   |
| AL390180  | 604.363   | 718.667   | NM_00027Z | 1377.132  | 1477.847  | NM_00207E | 1507.705  | 1750.968  |
| X60484    | 930.079   | 1158.623  | NM_00289E | 8399.365  | 9946.182  | Y08756    | 4398.743  | 3652.335  |
| AF055019  | 1478.803  | 1695.129  | NM_00048E | 2428.347  | 2374.171  | NM_00556E | 11889.275 | 10874.409 |
| NM_00352E | 8899.426  | 9487.536  | BE876237  | 980.739   | 1164.499  | NM_00510Z | 641.959   | 399.881   |
| AK000229  | 894.842   | 1060.56   | NM_005397 | 950.261   | 1490.481  | NM_00451E | 552.41    | 345.059   |
| AF056432  | 5087.375  | 6495.924  | NM_00080E | 9214.479  | 7544.476  | NM_006501 | 342.764   | 326.38    |
| AK001987  | 28091.754 | 28543.076 | NM_00632C | 1821.035  | 1222.528  | NM_005397 | 683.76    | 317.287   |
| NM_01333Z | 2948.067  | 3714.761  | AB014511  | 4002.458  | 2153.818  | NM_00080E | 3177.608  | 3113.609  |
| X56199    | 1268.608  | 1366.355  | NM_02197E | 2465.288  | 2520.839  | NM_00632C | 821.492   | 751.751   |
| NM_00519E | 3123.642  | 3357.315  | NM_00571E | 6227.502  | 5710.403  | AB014511  | 2106.301  | 1919.256  |
| AL162006  | 668.899   | 725.907   | NM_018264 | 2211.949  | 1761.28   | NM_01425Z | 3758.309  | 5288.136  |
| NM_017971 | 19586.514 | 17360.959 | NM_01458C | 1367.229  | 1418.563  | NM_00166Z | 7385.203  | 6987.811  |
| AF090097  | 1002.172  | 985.638   | AB028998  | 435.345   | 436.27    | NM_016131 | 6564.162  | 8175.058  |
| AF054998  | 596.4     | 510.135   | NM_00015Z | 831.402   | 739.913   | NM_00682Z | 1749.784  | 1480.166  |
| AF116620  | 11622.418 | 13672.091 | NM_00203Z | 2526.81   | 2761.261  | NM_01214Z | 6296.209  | 7726.319  |
| AF293335  | 32681.553 | 29959.314 | AK091794  | 863.627   | 1042.651  | NM_01642E | 1463.231  | 1243.434  |
| AL080065  | 1022.458  | 683.983   | NM_004111 | 3897.196  | 3682.53   | AB011100  | 1437.057  | 1437.849  |
| AK024431  | 16344.136 | 13446.364 | AF085966  | 5525.795  | 4559.886  | U61741    | 704.625   | 550.251   |
| AF116635  | 665.978   | 601.71    | NM_00531E | 5432.807  | 4830.587  | NM_01240Z | 3732.186  | 2885.996  |
| X96644    | 9452.685  | 8215.042  | NM_01631E | 3316.15   | 4136.72   | M76676    | 1698.62   | 1766.452  |
| Z34281    | 21949.666 | 23486.256 | NM_00336E | 8802.757  | 8641.115  | NM_003857 | 328.946   | 401.943   |
| NM_01867E | 38461.781 | 44875.328 | NM_000057 | 3183.722  | 2335.918  | AL137690  | 490.77    | 783.333   |
| AJ008122  | 18679.477 | 20001.824 | NM_01834Z | 5353.499  | 5359.654  | Z83804    | 1235.909  | 1363.308  |
| AK026667  | 601.343   | 784.962   | NM_003177 | 4948.629  | 2894.971  | NM_00438E | 965.284   | 677.908   |
| AF113211  | 1191.275  | 1089.737  | NM_01771E | 2026.358  | 1469.661  | U67784    | 869.758   | 1042.158  |
| AL117568  | 3965.027  | 4734.513  | AF064078  | 838.144   | 608.835   | NM_00736E | 639.115   | 393.271   |
| NM_00084E | 655.282   | 791.387   | AL049688  | 1876.464  | 1058.229  | NM_00059Z | 451.219   | 494.225   |
| S71805    | 2459.635  | 1956.046  | NM_002737 | 5556.299  | 3305.08   | NM_016584 | 4612.714  | 3019.458  |
| NM_018391 | 2191.366  | 2399.09   | NM_00271E | 9839.435  | 9826.835  | NM_00181E | 694.34    | 479.758   |
| U90917    | 922.138   | 701.605   | AB035356  | 482.875   | 749.093   | AK095793  | 664.909   | 783.398   |
| AK022140  | 3638.853  | 3416.743  | AV752086  | 1347.244  | 1444.287  | NM_003177 | 1674.582  | 2061.444  |
| AK023372  | 18457.949 | 15175.591 | NM_01610Z | 8513.426  | 9450.352  | NM_01771E | 577.544   | 591.922   |
| AF086527  | 634.082   | 750.941   | NM_00437E | 4371.769  | 4171.271  | AF064078  | 482.139   | 457.033   |
| U21072    | 1893.695  | 2142.633  | NM_00027Z | 1270.275  | 1347.043  | AL049688  | 975.137   | 922.383   |
| AK024377  | 685.652   | 758.376   | NM_00684E | 62671.313 | 57286.082 | NM_002737 | 3131.006  | 2720.46   |
| AK023557  | 2328.161  | 2482.027  | NM_00560Z | 50454     | 48544.84  | Z25427    | 2066.97   | 2089.157  |
| AK027107  | 670.868   | 669.588   | NM_001061 | 1121.621  | 1215.707  | NM_00467Z | 6842.41   | 10637.939 |
| AB040887  | 4139.964  | 4666.947  | BG744154  | 17887.094 | 15596.928 | NM_00135E | 2243.445  | 3000.255  |
| AK025196  | 1943.737  | 1779.44   | Z11694    | 5969.93   | 6113.288  | NM_006214 | 1644.31   | 1565.702  |
| AJ227879  | 918.773   | 1312.284  | BF983177  | 527.397   | 846.168   | AJ010228  | 3428.965  | 4805.751  |
| AK024800  | 1234.439  | 2238.023  | Z26317    | 1979.315  | 1736.443  | NM_00519E | 3200.327  | 3321.385  |
| AK000401  | 2078.708  | 2661.634  | X16983    | 21056.406 | 28932.01  | AK021426  | 420.368   | 568.255   |



|           |           |           |             |           |           |           |           |           |
|-----------|-----------|-----------|-------------|-----------|-----------|-----------|-----------|-----------|
| AF305068  | 933.371   | 960.155   | X56160      | 3274.581  | 3454.274  | NM_018073 | 1740.788  | 1885.32   |
| AF531295  | 3018.831  | 2834.103  | BG679991    | 2081.727  | 1652.392  | AL137529  | 3923.463  | 3883.436  |
| CY3Cy5    | 7202.879  | 307.505   | H-Y 00097 I | 7384.923  | 6786.188  | NM_012332 | 725.78    | 798.407   |
| BF974315  | 8639.594  | 4727.547  | H-Y 00711 I | 62758.23  | 62750.848 | AK026648  | 924.809   | 1052.332  |
| T74985    | 1299.719  | 923.45    | H-X 16707 I | 2489.83   | 1743.176  | NM_000497 | 894.597   | 948.166   |
| AI652705  | 5725.522  | 4971.418  | AL038354    | 33795.566 | 22978.891 | NM_017421 | 1045.328  | 822.698   |
| M80583    | 1246.969  | 2760.491  | R14607      | 1520.491  | 1150.307  | AK025977  | 12360.282 | 12395.937 |
| AW009565  | 7240.257  | 8415.498  | NM_000064   | 18674.99  | 18423.084 | AK023130  | 3777.841  | 3913.262  |
| AI570478  | 2088.016  | 2210.422  | NM_006725   | 11437.813 | 13980.542 | NM_000273 | 947.139   | 982.473   |
| X07767    | 11014.152 | 12311.806 | NM_003326   | 2390.475  | 2544.722  | NM_002895 | 4864.506  | 3541.216  |
| AF252284  | 3363.75   | 3252.348  | NM_004568   | 46912.445 | 48945.945 | NM_000486 | 505.985   | 622.701   |
| SR1       | 65996.594 | 65212.09  | NM_000202   | 2128.876  | 2187.284  | BE876237  | 569.804   | 460.538   |
| SR3       | 60720.203 | 61416.777 | NM_005496   | 21152.125 | 12439.905 | NM_014750 | 3868.96   | 4467.059  |
| SR5       | 11501.646 | 11921.925 | NM_016608   | 1964.241  | 2154.333  | NM_015912 | 789.292   | 615.783   |
| SR7       | 7492.934  | 58962.473 | NM_002858   | 7787.375  | 6611.896  | NM_000460 | 834.588   | 730.216   |
| SR9       | 27330.172 | 5934.17   | NM_004817   | 1378.703  | 1834.734  | AB002339  | 770.789   | 694.83    |
| CY3Cy5    | 11606.237 | 705.099   | NM_018975   | 18835.676 | 26351.152 | NM_005104 | 5342.932  | 4802.08   |
| NM_016511 | 14924.991 | 11978.957 | AB023215    | 13877.773 | 15172.552 | NM_006888 | 14870.665 | 18453.971 |
| NM_003559 | 2519.265  | 2363.355  | NM_001284   | 41965.367 | 40804.656 | AL137423  | 2493.975  | 3560.247  |
| NM_002185 | 1437.718  | 1766.934  | NM_003242   | 15351.602 | 19688.188 | AB018322  | 1221.792  | 1366.452  |
| NM_014751 | 3213.405  | 3452.123  | NM_002849   | 883.886   | 826.831   | NM_007068 | 18905.346 | 22020.127 |
| NM_002347 | 19766.576 | 17782.406 | U31099      | 1658.679  | 1532.438  | NM_005718 | 4394.955  | 4872.525  |
| AB046807  | 3132.625  | 3630.429  | NM_001105   | 3658.363  | 3584.407  | NM_018264 | 815.043   | 1371.383  |
| NM_003508 | 1288.065  | 1498.849  | NM_005585   | 1051.535  | 1017.645  | NM_014580 | 1127.974  | 1201.247  |
| M33197    | 66709.484 | 77429.602 | NM_002075   | 3902.357  | 3773.96   | AB028998  | 457.431   | 539.768   |
| NM_014623 | 10775.246 | 11873.2   | Y08756      | 15098.569 | 12744.275 | NM_000153 | 748.855   | 559.532   |
| NM_007244 | 4009.098  | 4196.238  | NM_005563   | 21031.199 | 14680.832 | NM_002033 | 1745.933  | 1312.746  |
| M30629    | 4802.368  | 4268.377  | AY007090    | 978.019   | 806.179   | AK091794  | 533.988   | 506.918   |
| AF193873  | 1480.22   | 1512.925  | NM_006439   | 497.453   | 356.588   | NM_004111 | 1511.003  | 1629.979  |
| NM_002628 | 1322.348  | 1642.943  | NM_005102   | 1052.188  | 667.345   | AF085966  | 3091.142  | 3036.658  |
| AA190729  | 3817.779  | 4619.271  | NM_004518   | 862.551   | 1319.917  | NM_005316 | 2188.06   | 2109.573  |
| NM_004170 | 646.38    | 826.237   | NM_006501   | 730.951   | 618.019   | NM_016316 | 1965.438  | 1658.736  |
| M33197    | 66618.531 | 71347.047 | NM_005397   | 1099.728  | 2371.956  | NM_003369 | 4735.821  | 3656.471  |
| NM_015717 | 2632.511  | 1982.814  | NM_000806   | 22143.203 | 30709.154 | NM_000057 | 1398.567  | 1098.405  |
| NM_015925 | 1007.678  | 1003.257  | NM_006320   | 1679.114  | 2047.249  | NM_018343 | 2643.554  | 1666.264  |
| NM_003665 | 1471.837  | 1142.89   | AB014511    | 5006.586  | 5340.85   | X15880    | 51574.215 | 61944.141 |
| AF220217  | 1870.016  | 1437.936  | NM_014252   | 11267.686 | 11616.993 | AF114264  | 1978.932  | 2320.414  |
| NM_013323 | 8672.578  | 7582.936  | NM_001662   | 14518.161 | 18343.643 | NM_018972 | 1597.172  | 2091.191  |
| AF016903  | 9701.097  | 9077.551  | NM_016131   | 11237.179 | 12360.64  | AB037828  | 818.794   | 1019.772  |
| NM_015675 | 1947.364  | 2494.765  | NM_006822   | 2486.904  | 3708.064  | AB023210  | 532.045   | 914.498   |
| AK022267  | 681.183   | 1005.08   | NM_012142   | 12289.536 | 12612.549 | AB037786  | 1459.915  | 1729.196  |
| NM_016040 | 3890.426  | 3740.369  | NM_016429   | 2459.632  | 3098.342  | NM_003648 | 5362.439  | 5962.18   |
| M33197    | 66542.016 | 68244.367 | AB011100    | 2923.477  | 2926.464  | AB037735  | 556.318   | 1134.991  |
| AF031136  | 21391.754 | 19924.873 | U61741      | 1170.893  | 1175.447  | AK002177  | 1531.367  | 2044.785  |
| U90878    | 1123.713  | 1464.083  | NM_012402   | 6010.722  | 7564.292  | AK024429  | 1804.798  | 1586.52   |
| NM_006597 | 51677.883 | 60124.242 | M76676      | 3829.306  | 4129.718  | NM_003496 | 53044.949 | 64210.883 |
| NM_012483 | 9726.027  | 9393.995  | NM_003857   | 722.924   | 782.212   | AB000509  | 2947.204  | 2881.223  |
| NM_003498 | 6795.695  | 6694.716  | AL137690    | 951.605   | 839.401   | NM_004378 | 658.505   | 471.797   |
| AB023420  | 16143.318 | 18084.756 | Z83804      | 2687.123  | 1889.449  | AJ238899  | 523.31    | 680.046   |
| NM_007342 | 9467.25   | 10390.306 | NM_004386   | 2033.077  | 1690.675  | NM_018037 | 794.901   | 833.78    |
| NM_005672 | 842.69    | 835.746   | U67784      | 1453.364  | 1174.848  | NM_001110 | 3073.899  | 2515.102  |
| D25217    | 3223.012  | 2527.173  | NM_007366   | 1775.645  | 1309.028  | NM_003222 | 816.272   | 675.503   |
| NM_006351 | 10419.002 | 9083.436  | NM_000592   | 831.88    | 489.205   | NM_000841 | 3847.152  | 3022.268  |

|           |           |           |           |           |           |           |           |           |
|-----------|-----------|-----------|-----------|-----------|-----------|-----------|-----------|-----------|
| M33197    | 66536.164 | 66311.969 | NM_016584 | 15188.616 | 10888.551 | NM_001245 | 1213.457  | 799.854   |
| NM_004683 | 3812.205  | 2825.111  | NM_001815 | 1561.568  | 1033.066  | NM_003672 | 8336.697  | 10883.176 |
| AK023226  | 3340.398  | 3178.113  | AK095793  | 1599.71   | 1366.15   | NM_002574 | 54749.711 | 68443.43  |
| M33197    | 70223.688 | 63220.219 | NM_003177 | 5405.796  | 6246.303  | AJ008139  | 2132.894  | 1821.401  |
| NM_018066 | 12683.001 | 11065.479 | NM_017719 | 2300.807  | 3367.781  | NM_004326 | 1604.543  | 1555.439  |
| NM_006931 | 9167.534  | 9613.358  | AF064078  | 1389.332  | 1779.949  | NM_000882 | 443.363   | 670.171   |
| NM_020344 | 8351.1    | 7411.825  | AL049688  | 3189.798  | 3170.223  | NM_004577 | 2528.187  | 3463.713  |
| AF119868  | 718.481   | 677.851   | NM_002737 | 10224.435 | 12444.084 | AF007157  | 10338.193 | 11511.608 |
| NM_005050 | 7456.863  | 6101.795  | Z25427    | 5679.899  | 6369.95   | D38553    | 4327.412  | 6300.598  |
| NM_018976 | 15852.59  | 23691.535 | NM_004672 | 14481.793 | 14962.859 | NM_006170 | 4042.389  | 4657.672  |
| NM_003355 | 10635.973 | 8809.029  | NM_001353 | 6950.561  | 7904.16   | NM_014296 | 3645.912  | 3804.151  |
| NM_005074 | 1924.143  | 2331.09   | NM_006214 | 2947.036  | 3525.817  | AK001581  | 3130.484  | 5517.285  |
| NM_004555 | 4542.147  | 3308.993  | AJ010228  | 8753.71   | 9706.29   | NM_005862 | 2231.073  | 3562.793  |
| AL079296  | 1123.323  | 728.376   | NM_005198 | 5786.91   | 9578.798  | NM_000548 | 3624.869  | 3682.738  |
| NM_014770 | 2222.187  | 1509.005  | NM_018073 | 4035.6    | 4040.022  | NM_014077 | 3042.35   | 3846.447  |
| M33197    | 70218.953 | 63610.422 | AL137529  | 5662.822  | 5778.672  | NM_018412 | 756.103   | 1082.311  |
| AK023103  | 6546.383  | 4780.859  | NM_012332 | 1632.467  | 1551.156  | NM_012325 | 3941.549  | 3492.653  |
| NM_017855 | 5830.514  | 7142.373  | AK026648  | 1789.627  | 1509.21   | M14087    | 6684.835  | 8622.691  |
| NM_019055 | 64048.719 | 61758.832 | NM_000497 | 1592.623  | 1509.342  | NM_000885 | 6726.397  | 3187.482  |
| NM_013347 | 1179.786  | 1310.376  | NM_017421 | 1602.99   | 1548.744  | M59040    | 765.202   | 612.986   |
| D80008    | 3313.582  | 4033.981  | AK025977  | 37895.074 | 34949.965 | NM_017582 | 9344.988  | 10672.462 |
| X56789    | 928.092   | 1161.34   | AK023130  | 7869.367  | 5592.184  | NM_015235 | 1437.462  | 1607.871  |
| AK001069  | 25260.355 | 23051.297 | NM_000273 | 1299.328  | 1197.224  | AK026962  | 1181.174  | 1464.506  |
| M33197    | 66276.188 | 67490.813 | NM_002899 | 11995.097 | 9131.659  | NM_006795 | 337.279   | 487.578   |
| NM_000355 | 7001.252  | 6923.303  | NM_000486 | 838.665   | 650.061   | X04366    | 1438.232  | 1935.961  |
| NM_006395 | 1418.012  | 1355.574  | BE876237  | 1087.659  | 758.599   | NM_000505 | 35132.152 | 36830.395 |
| NM_014306 | 10423.921 | 10675.869 | NM_014750 | 10256.525 | 10643.76  | NM_000666 | 1324.728  | 1629.272  |
| NM_001084 | 2934.08   | 2961.601  | NM_015912 | 1776.366  | 2268.671  | NM_003481 | 2404.19   | 3269.303  |
| NM_018622 | 11757.816 | 12896.936 | NM_000460 | 2419.539  | 2559.127  | AB046814  | 488.353   | 768.664   |
| M33197    | 66136.43  | 63898.211 | AB002339  | 2177.644  | 2557.89   | NM_017664 | 2861.671  | 3626.813  |
| NM_016465 | 50339.633 | 46325.66  | NM_005104 | 15341.31  | 16694.102 | NM_006870 | 16829.375 | 14835.768 |
| AF193873  | 1842.449  | 1101.728  | NM_006888 | 32988.25  | 35765.535 | NM_007355 | 4406.546  | 4389.572  |
| NM_002625 | 1236.813  | 808.89    | AL137423  | 6605.158  | 7235.178  | NM_013327 | 264.473   | 325.554   |
| AA190729  | 3151.571  | 2888.286  | AB018322  | 2571.02   | 2607.255  | AF303888  | 5927.816  | 5530.633  |
| BF974315  | 6665.917  | 3433.966  | NM_007065 | 50647.152 | 52939.008 | NM_000077 | 523.545   | 541.373   |
| T74985    | 1224.192  | 1317.567  | NM_005715 | 7656.5    | 7894.395  | AF176646  | 335.628   | 281.878   |
| AI652705  | 4956.918  | 4892.463  | NM_018264 | 2012.878  | 1989.692  | NM_007084 | 823.901   | 990.95    |
| AA446028  | 791.441   | 501.199   | NM_014580 | 1776.129  | 2027.912  | M97191    | 15826.4   | 16128.728 |
| M80583    | 970.708   | 2499.701  | AB028998  | 549.859   | 665.594   | AK023015  | 8696.971  | 10240.508 |
| AW009565  | 5508.307  | 6369.831  | NM_000153 | 1038.767  | 1354.27   | NM_003457 | 12739.131 | 12449.658 |
| AI570478  | 1462.417  | 1559.405  | NM_002033 | 1963.364  | 2042.362  | NM_012391 | 1427.389  | 1984.648  |
| X07767    | 8193.965  | 9144.857  | AK091794  | 1091.3    | 828.37    | NM_005254 | 1904.53   | 2103.443  |
| AF252284  | 3477.25   | 3795.437  | NM_004111 | 4101.866  | 3406.98   | NM_005611 | 486.967   | 874.679   |
| AL050139  | 9517.219  | 10853.387 | AF085966  | 6004.663  | 4501.157  | AF141655  | 1566.624  | 1367.596  |
| U90878    | 1003.766  | 1311.587  | NM_005316 | 4501.703  | 3133.378  | NM_007345 | 589.46    | 938.026   |
| NM_006597 | 55433.742 | 40873.645 | NM_016316 | 3970.496  | 3630.429  | NM_007007 | 7372.51   | 6825.271  |
| NM_012483 | 8038.433  | 5902.329  | NM_003369 | 10036.842 | 7588.263  | NM_006386 | 874.288   | 1232.751  |
| NM_003495 | 6064.855  | 4048.595  | NM_000057 | 3285.984  | 1625.662  | NM_006555 | 12905.108 | 13738.087 |
| AB023420  | 12885.294 | 11421.11  | NM_018343 | 4381.355  | 3423.716  | AF019633  | 2044.177  | 1344.061  |
| M33197    | 66231.516 | 71140.484 | X15880    | 60993.914 | 60197.461 | AB002361  | 3882.106  | 2993.947  |
| NM_007264 | 14314.696 | 9780.34   | AL137461  | 601.325   | 752.653   | NM_018060 | 2957.276  | 2833.543  |
| NM_016511 | 6863.435  | 5891.663  | AF114264  | 12120.649 | 12202.147 | NM_014235 | 2155.103  | 1885.207  |
| NM_003555 | 1524.99   | 1581.124  | NM_005545 | 550.708   | 718.975   | NM_017662 | 2319.701  | 1630.331  |

|           |           |           |           |           |           |           |           |           |
|-----------|-----------|-----------|-----------|-----------|-----------|-----------|-----------|-----------|
| NM_002185 | 1429.718  | 2145.814  | NM_017514 | 652.625   | 946.279   | U88837    | 740.254   | 651.382   |
| M55337    | 773.187   | 690.076   | NM_018972 | 3345.845  | 3308.893  | NM_017446 | 18571.508 | 13082.962 |
| M33197    | 70657.445 | 63503.742 | AB037828  | 1840.267  | 1933.549  | AK001478  | 2092.616  | 1793.557  |
| NM_013229 | 1281.151  | 1662.024  | AB023210  | 1010.34   | 1003.667  | AK025697  | 3833.768  | 3600.913  |
| NM_016533 | 37874.609 | 35951.473 | AB037786  | 2895.311  | 2938.38   | AK021734  | 1250.692  | 1522.931  |
| NM_014751 | 3317.717  | 3277.826  | NM_003648 | 8603.525  | 10750.597 | BF245026  | 329.523   | 478.52    |
| NM_002347 | 18606.535 | 18982.254 | AB037735  | 730.047   | 1235.929  | D00265    | 21506.469 | 26955.227 |
| AB046807  | 3137.07   | 3252.194  | AK002177  | 3435.632  | 2972.164  | NM_004552 | 34487.402 | 29794.334 |
| NM_003508 | 598.669   | 1208.565  | AK024429  | 3786.979  | 3648.026  | NM_000143 | 2430.661  | 2889.476  |
| M33197    | 66658.625 | 71993.195 | AB000509  | 5699.502  | 5124.916  | AF317889  | 413.393   | 449.245   |
| NM_014623 | 12745.833 | 16513.297 | AB018314  | 2041.305  | 2116.734  | AL137294  | 1935.259  | 2772.201  |
| NM_007244 | 3755.47   | 4812.134  | NM_004378 | 1379.762  | 1251.509  | NM_003743 | 990.993   | 1300.73   |
| M30629    | 2987.778  | 3430.352  | AJ238899  | 1231.861  | 931.843   | NM_017870 | 775.052   | 617.218   |
| M33197    | 66310.258 | 64065.254 | NM_018037 | 1244.938  | 1423.811  | AL133633  | 961.428   | 1033.164  |
| NM_018976 | 17224.963 | 22071.834 | NM_001110 | 4434.36   | 4044.353  | AK026817  | 760.821   | 876.628   |
| NM_003355 | 10308.693 | 6072.213  | NM_003222 | 1092.751  | 1243.017  | AL157442  | 10007.151 | 7804.545  |
| NM_005074 | 1318.85   | 1030.1    | NM_000841 | 9065.09   | 6999.501  | AB011148  | 1303.631  | 938.523   |
| NM_018057 | 1449.644  | 908.27    | NM_016563 | 2508.059  | 1526.308  | AL389938  | 25214.396 | 16242.914 |
| M33197    | 66177.656 | 64894.172 | NM_001245 | 2061.753  | 1384.488  | NM_001949 | 15997.842 | 12977.58  |
| NM_015717 | 997.193   | 1044.044  | NM_003672 | 17922.266 | 13595.45  | NM_003507 | 412.758   | 435.786   |
| NM_003665 | 936.108   | 950.017   | NM_002574 | 63449.672 | 59508.406 | AK026591  | 710.304   | 790.034   |
| AF220217  | 1375.547  | 1490.561  | AJ008139  | 5716.113  | 6229.898  | AK001889  | 1592.556  | 1830.859  |
| NM_013323 | 4989.538  | 5880.878  | NM_004326 | 5559.78   | 5547.742  | AK025726  | 1129.739  | 1435.147  |
| NM_017426 | 5695.625  | 6422.235  | NM_000882 | 1105.784  | 775.565   | AJ227869  | 2320.824  | 2107.188  |
| M33197    | 3985.681  | 4657.479  | NM_004577 | 5819.908  | 4622.096  | AL117613  | 4801.343  | 6127.863  |
| NM_000853 | 4169.627  | 4892.78   | AF007157  | 24323.891 | 25416.176 | AL137753  | 3374.063  | 4581.547  |
| NM_000846 | 1106.886  | 1483.32   | D38553    | 7845.605  | 7019.695  | AL110262  | 7798.01   | 11434.271 |
| AF016903  | 23205.014 | 21638.521 | NM_006170 | 5180.083  | 6326.264  | AK025627  | 13139.34  | 17651.055 |
| NM_016040 | 4463.003  | 3874.332  | NM_014298 | 4314.549  | 4546.895  | AF086238  | 645.469   | 658.053   |
| AF031136  | 26018.41  | 27135.277 | AK001581  | 5028.075  | 5207.952  | AK021612  | 12064.275 | 7565.714  |
| NM_015983 | 4158.427  | 3541.783  | NM_005862 | 4846.339  | 4230.73   | AF088031  | 760.112   | 795.572   |
| NM_018622 | 11770.935 | 14525.479 | NM_000548 | 5973.387  | 5353.174  | AF086240  | 434.695   | 517.354   |
| M33197    | 66652.727 | 71753.938 | AB002297  | 4794.639  | 4654.977  | AK002025  | 36677.996 | 28674.561 |
| NM_005867 | 13440.318 | 13532.576 | NM_005020 | 37799.625 | 35233.102 | AK026299  | 1071.852  | 844.042   |
| AK026031  | 14232.261 | 9797.508  | NM_014077 | 6076.205  | 4720.398  | NM_017794 | 867.926   | 846.405   |
| NM_016468 | 46854.586 | 31519.287 | NM_018412 | 1302.587  | 846.013   | AK025170  | 1918.671  | 1469.463  |
| NM_007342 | 8205.91   | 6902.896  | NM_012329 | 6134.154  | 5314.195  | AB033031  | 612.886   | 1015.499  |
| NM_005672 | 898.589   | 1154.606  | M14087    | 28350.225 | 15666.892 | AF085872  | 7422.012  | 7733.414  |
| D25217    | 3267.566  | 2765.088  | AJ272324  | 1316.397  | 993.655   | AK022538  | 8614.274  | 9871.597  |
| NM_006351 | 11858.369 | 12326.759 | NM_000885 | 7923.503  | 9455.24   | AL360257  | 1033.726  | 1330.354  |
| M33197    | 63771.789 | 64858.094 | M59040    | 1898.981  | 1162.592  | AK022342  | 534.44    | 905.078   |
| NM_004683 | 1915.816  | 2683.406  | NM_017582 | 17453.711 | 17853.082 | AF147420  | 1072.978  | 903.606   |
| AK023226  | 2736.391  | 3562.586  | NM_015239 | 3629.629  | 3819.831  | AL049312  | 1774.368  | 1782.292  |
| AK025263  | 1902.594  | 1602.025  | AK026962  | 2320.552  | 2485.129  | AL050072  | 2669.476  | 2772.824  |
| M33197    | 66675.039 | 70152.242 | NM_006799 | 1020.206  | 1073.74   | AL117590  | 414.971   | 686.509   |
| NM_001467 | 1427.976  | 932.98    | X04366    | 2754.292  | 2655.202  | AL049357  | 3478.774  | 3271.051  |
| NM_018066 | 25456.268 | 24825.363 | NM_000505 | 55769.715 | 56253.715 | AL110223  | 376.707   | 260.009   |
| AF252284  | 3826.123  | 2559.04   | NM_018656 | 587.904   | 1050.475  | AK027180  | 1541.697  | 1976.529  |
| M33197    | 17316.795 | 14452.527 | NM_000666 | 2446.07   | 2660.083  | NM_004544 | 7916.341  | 7510.266  |
| AL050139  | 6320.327  | 5793.561  | NM_003481 | 4473.067  | 3249.884  | AF086041  | 565.642   | 776.187   |
| NM_004558 | 3947.423  | 3000.9    | AB046814  | 1250.492  | 796.19    | Y15167    | 751.767   | 660.614   |
| AL079296  | 1547.302  | 1519.454  | NM_017778 | 785.016   | 325.283   | AL133080  | 1130.272  | 955.118   |
| NM_014770 | 2940.414  | 3278.211  | NM_017664 | 4402.557  | 4121.977  | NM_017792 | 3409.25   | 3859.839  |

|           |           |           |           |           |           |            |           |           |
|-----------|-----------|-----------|-----------|-----------|-----------|------------|-----------|-----------|
| AB037737  | 2756.693  | 2079.403  | AK025523  | 689.565   | 770.273   | AK025213   | 4077.571  | 4581.555  |
| M33197    | 70407.836 | 63653.371 | NM_007059 | 13392.594 | 7714.339  | NM_014945  | 1202.388  | 948.11    |
| AK023103  | 6410.815  | 7578.454  | NM_006870 | 23795.842 | 22286.246 | AL080221   | 661.299   | 529.379   |
| NM_017858 | 5475.268  | 7876.894  | NM_007359 | 9197.005  | 7581.354  | AL137370   | 487.167   | 441.291   |
| NM_019059 | 65522.16  | 62274.242 | L13283    | 739.38    | 520.362   | AF009262   | 8470.395  | 10366.444 |
| NM_013347 | 912.118   | 890.308   | AF303888  | 12319.149 | 8123.662  | AF009306   | 577.034   | 598.356   |
| D80008    | 4071.154  | 4522.831  | NM_000077 | 1033.532  | 861.752   | AF050198   | 680.241   | 1052.372  |
| X56789    | 1588.285  | 1606.492  | AF176646  | 655.272   | 373.962   | AK024346   | 1329.994  | 1476.895  |
| AK001069  | 49951.25  | 51951.109 | NM_007084 | 1859.052  | 2047.013  | AF056422   | 819.048   | 974.037   |
| M33197    | 66468.18  | 65564.539 | M97191    | 50721.414 | 49527.828 | AF090892   | 762.647   | 816.707   |
| NM_000359 | 10555.438 | 9594.756  | AK023015  | 13494.039 | 14303.694 | AK001089   | 796.092   | 930.27    |
| NM_006395 | 1502.723  | 1898.161  | NM_003457 | 19194.434 | 21540.516 | AK001919   | 832.096   | 1073.448  |
| NM_014306 | 12935.451 | 14150.088 | NM_012391 | 2116.032  | 2154.39   | AK021535   | 998.563   | 808.089   |
| NM_001084 | 3434.623  | 4034.352  | NM_005254 | 2777.734  | 3403.276  | AK021753   | 2503.991  | 2385.731  |
| M33197    | 66635.695 | 70077.555 | NM_005611 | 1370.151  | 1571.467  | AK001139   | 2684.066  | 2192.385  |
| NM_014623 | 10657.351 | 9268.357  | AF141655  | 2521.814  | 2757.463  | AK002090   | 615.534   | 817.63    |
| NM_007244 | 5114.059  | 4291.961  | NM_007345 | 965.121   | 964.175   | AK021618   | 322.025   | 342.548   |
| M30629    | 5348.142  | 4139.737  | NM_007007 | 8416.99   | 11285.171 | AK021822   | 639.171   | 646.306   |
| AF193873  | 2032.852  | 1749.507  | NM_006386 | 1423.379  | 1588.058  | AK026399   | 1378.956  | 1205.041  |
| NM_002628 | 1534.28   | 1809.975  | NM_006559 | 21311.682 | 19559.313 | AK025246   | 4726.668  | 4294.339  |
| M23575    | 1031.191  | 811.298   | NM_004501 | 40150.945 | 37117.051 | AK025847   | 2369.535  | 2676.026  |
| AA190729  | 5054.59   | 6093.718  | NM_004966 | 16126.393 | 13460.383 | NM_014174  | 20101.959 | 23007.502 |
| BF974315  | 8147.143  | 5638.657  | NM_006700 | 1696.18   | 1543.763  | AF147337   | 1628.599  | 1996.461  |
| T74985    | 1304.154  | 2379.503  | NM_006445 | 12801.591 | 10538.223 | AK025203   | 42840.207 | 45817.895 |
| AI652705  | 4452.292  | 5473.143  | NM_012109 | 13271.016 | 10297.385 | AK026981   | 1811.765  | 2030.668  |
| AA446028  | 712.012   | 1026.926  | AF019633  | 3592.063  | 2951.062  | NM_006394  | 351.938   | 350.213   |
| M80583    | 1430.964  | 2418.913  | AB002361  | 10468.623 | 7796.155  | AK023819   | 435.658   | 569.563   |
| AW009565  | 6995.464  | 8034.23   | NM_018060 | 7654.281  | 4432.364  | AL133656   | 1616.282  | 1804.567  |
| AI570478  | 1586.585  | 1446.725  | NM_014239 | 3610.83   | 2608.267  | AL050037   | 8649.786  | 10313.918 |
| X07767    | 7951.759  | 8825.806  | NM_017662 | 4455.14   | 2504.875  | NM_001417  | 18493.463 | 20109.883 |
| AF016903  | 18398.693 | 12122.807 | U88837    | 1348.477  | 1052.664  | unknown (S | 1798.697  | 1753.839  |
| NM_015675 | 2718.269  | 2380.405  | NM_017446 | 29020.855 | 15953.258 | AK022236   | 4443.96   | 3780.235  |
| AK022267  | 727.374   | 741.174   | AK001478  | 3497.426  | 7783.712  | AK000073   | 694.552   | 443.303   |
| NM_016040 | 4402.982  | 2989.642  | AK025697  | 8110.332  | 9046.509  | AK000618   | 560.276   | 435.215   |
| M33197    | 66586.945 | 68498.805 | AK021734  | 1411.224  | 1584.69   | AK024773   | 651.838   | 531.265   |
| AF031136  | 38977.867 | 30691.102 | AF075028  | 532.153   | 836.705   | AL390180   | 589.662   | 466.469   |
| U90878    | 1590.787  | 1210.616  | BF245026  | 995.42    | 608.856   | X60484     | 960.245   | 1296.8    |
| NM_006597 | 57712.359 | 54672.371 | D00265    | 37636.949 | 31258.473 | AF056427   | 261.161   | 703.577   |
| NM_012483 | 7385.091  | 7463.289  | NM_000779 | 1268.424  | 1256.402  | AF055019   | 1291.393  | 1781.834  |
| NM_003498 | 6116.571  | 6151.604  | NM_004552 | 40930.766 | 48387.254 | NM_003525  | 4438.707  | 2927.327  |
| AB023420  | 16558.857 | 19886.576 | NM_000143 | 2736.446  | 3290.314  | AK000229   | 556.437   | 578.935   |
| M33197    | 69207.906 | 63457.727 | AF317889  | 730.869   | 818.038   | AF056432   | 2184.917  | 3748.797  |
| NM_007264 | 15458.902 | 14447.999 | AL137294  | 4367.701  | 4661.673  | AK001987   | 22367.719 | 26064.094 |
| NM_016511 | 12809.689 | 12393.745 | NM_003743 | 1972.665  | 1796.758  | NM_013332  | 1151.843  | 1524.806  |
| NM_003559 | 2389.055  | 2837.819  | AB037797  | 876.431   | 948.174   | X56199     | 1922.36   | 2108.85   |
| NM_002185 | 1430.052  | 2656.808  | NM_001520 | 1914.931  | 1676.067  | NM_005193  | 2776.893  | 3556.621  |
| M55337    | 887.316   | 808.904   | AL050367  | 1008.865  | 792.433   | AL162006   | 424.276   | 825.675   |
| M33197    | 70484.391 | 63545.355 | NM_017870 | 1893.06   | 1593.401  | NM_017971  | 31301.1   | 22866.982 |
| NM_013229 | 1594.171  | 1542.434  | AL133633  | 2139.005  | 1822.273  | AF090097   | 581.671   | 521.852   |
| NM_016533 | 45276.758 | 41731.867 | AK026817  | 1888.191  | 1036.688  | AF054998   | 436.278   | 717.763   |
| NM_014751 | 3225.803  | 3455.613  | AL157442  | 20785.457 | 15103.584 | AF116620   | 6939.312  | 12400.125 |
| NM_002347 | 16862.641 | 17077.398 | AB011148  | 2111.184  | 1545.657  | AF293335   | 38620.676 | 42001.262 |
| AB046807  | 2309.625  | 2608.936  | AL389938  | 45208.602 | 33003.75  | AL080065   | 1522.448  | 1340.175  |

|           |           |           |           |           |           |           |           |           |
|-----------|-----------|-----------|-----------|-----------|-----------|-----------|-----------|-----------|
| NM_018066 | 34589.25  | 35280.668 | NM_001949 | 27735.592 | 16363.197 | AK024431  | 9209.974  | 8238.428  |
| NM_006931 | 11159.479 | 9068.525  | NM_003507 | 1314.686  | 1627.105  | AF116635  | 255.23    | 368.229   |
| NM_020344 | 9588.818  | 7138.63   | AK026591  | 1339.342  | 2079.47   | X96644    | 6370.209  | 4110.874  |
| AF119868  | 892.877   | 854.912   | AK001889  | 2260.4    | 2810.394  | Z34281    | 18310.111 | 13787.862 |
| NM_005050 | 8699.262  | 6069.242  | AK025726  | 7135.771  | 8446.746  | NM_018678 | 54759.859 | 57961.625 |
| M33197    | 66265.523 | 66337.25  | AJ227869  | 3420.019  | 4566.805  | AJ008122  | 25412.234 | 19823.719 |
| NM_018976 | 18304.809 | 22003.326 | AK026189  | 690.465   | 885.673   | NM_006220 | 786.149   | 715.212   |
| NM_003355 | 11636.563 | 7647.295  | AK026790  | 762.342   | 795.746   | AK022667  | 26135.555 | 20293.268 |
| NM_005074 | 1516.157  | 1586.104  | AL117613  | 6198.94   | 7089.012  | AK026667  | 394.445   | 495.908   |
| NM_018057 | 1695.402  | 1776.166  | AL137753  | 5916.747  | 6641.83   | AF113211  | 1208.902  | 1106.344  |
| M33197    | 66237.531 | 67296.414 | AK021785  | 861.106   | 752.797   | AL117568  | 1282.382  | 1646.891  |
| NM_015717 | 1671.905  | 1735.677  | AL110262  | 16180.4   | 17794.713 | NM_000843 | 490.855   | 719.434   |
| NM_015925 | 1047.823  | 1292.645  | AK025627  | 28516.654 | 30938.916 | S71805    | 801.125   | 657.604   |
| NM_003665 | 1708.101  | 1576.928  | AF216077  | 5638.679  | 6125.396  | NM_018391 | 754.742   | 1046.282  |
| AF220217  | 1552.1    | 1439.758  | AF086238  | 1679.931  | 1615.418  | U90917    | 405.619   | 663.068   |
| NM_013323 | 10422.773 | 9835.011  | AK021612  | 18035.668 | 21951.914 | AK022140  | 1880.648  | 1984.054  |
| NM_017426 | 5982.841  | 6292.105  | AF147342  | 887.15    | 780.286   | AK023372  | 14928.472 | 16006.876 |
| M33197    | 3031.86   | 3082.162  | AF088031  | 936.099   | 977.651   | AF086527  | 448.676   | 744.871   |
| NM_000853 | 2902.874  | 2679.436  | AK002025  | 54339.668 | 42659.336 | U21072    | 1472.604  | 1970.14   |
| M33197    | 66355.172 | 66528.438 | AK026299  | 1946.947  | 1422.442  | AK023557  | 1084.159  | 1591.07   |
| NM_000935 | 740.092   | 498.762   | NM_017794 | 1467.869  | 1133.566  | U17625    | 253.292   | 282.2     |
| NM_000359 | 10784.808 | 8420.01   | AK025170  | 2135.031  | 2063.208  | AB040887  | 2562.94   | 2891.325  |
| NM_006395 | 1269.717  | 1351.423  | AB033031  | 1660.968  | 1945.019  | AK025196  | 5286.616  | 3928.416  |
| NM_014306 | 11866.841 | 9488.007  | AF085872  | 30661.346 | 26829.867 | AK024800  | 623.833   | 480.333   |
| NM_001084 | 4085.25   | 3493.55   | AK022538  | 28703.168 | 32986.207 | AK000401  | 1353.654  | 951.619   |
| NM_015983 | 3186.403  | 3309.469  | AL360257  | 2381.375  | 2349.864  | AF305068  | 814.605   | 699.506   |
| NM_018622 | 12717.687 | 12240.138 | AK022342  | 1978.709  | 1901.299  | D17231    | 36111.156 | 28136.801 |
| M33197    | 66640.93  | 66518.18  | AF147420  | 3162.206  | 3578.334  | AF531295  | 1560.045  | 1311.955  |
| NM_005867 | 15379.273 | 16524.697 | AL049312  | 3392.385  | 3842.506  | CY3Cy5    | 1573.628  | 146.902   |
| AK026031  | 17631.342 | 12039.101 | AL050072  | 6138.517  | 8904.431  | BF974315  | 2340.422  | 768.399   |
| NM_016468 | 49698.246 | 42453.383 | AL117590  | 1410.863  | 1849.755  | AI652705  | 2292.519  | 5425.482  |
| NM_007342 | 8841.58   | 10116.493 | AL049357  | 8125.118  | 14411.74  | M80583    | 471.94    | 672.937   |
| NM_005672 | 1026.364  | 1276.01   | AL050129  | 681.076   | 464.073   | AW009565  | 2437.122  | 2579.909  |
| D25217    | 4045.503  | 3622.398  | AL110223  | 527.975   | 739.805   | AI570478  | 496.086   | 539.503   |
| NM_006351 | 12533.593 | 12819.018 | AL117659  | 461.616   | 673.113   | X07767    | 2683.569  | 3549.877  |
| M33197    | 66594.688 | 65985.82  | AK027180  | 3218.03   | 2931.425  | AF252284  | 1568.534  | 703.594   |
| NM_004683 | 4298.218  | 4915.739  | NM_004544 | 14289.899 | 12304.932 | SR1       | 55212.617 | 46264.156 |
| AK023226  | 2567.191  | 2670.812  | AF086041  | 1087.423  | 1111.973  | SR3       | 33317.18  | 16565.711 |
| AK025263  | 1395.469  | 1188.878  | Y15167    | 997.459   | 1232.765  | SR5       | 4591.603  | 3049.749  |
| M33197    | 66207.102 | 68810.992 | AL133080  | 2060.312  | 1984.324  | SR7       | 3603.273  | 20426.957 |
| NM_001467 | 1102.166  | 917.322   | NM_017792 | 6514.4    | 5366.921  | SR9       | 10087.366 | 1158.965  |
| NM_004688 | 14065.577 | 15409.192 | AK025213  | 8591.657  | 6404.426  | CY3Cy5    | 1741.003  | 147.067   |
| AB037725  | 1871.936  | 1204.897  | NM_014949 | 2286.44   | 1864.417  | M33197    | 70173.313 | 63086.348 |
| M33197    | 65250.262 | 62370.484 | AL080221  | 1019.484  | 802.572   | NM_007264 | 10056.469 | 4911.006  |
| NM_017718 | 3310.978  | 2654.537  | AL137370  | 1001.692  | 1399.451  | NM_016511 | 6528.592  | 6562.937  |
| NM_004860 | 5541.561  | 5216.632  | AF009262  | 13578.159 | 13994.421 | NM_003555 | 1756.791  | 2380.591  |
| AF217190  | 16429.854 | 14255.275 | AF009306  | 769.268   | 890.247   | NM_002185 | 698.7     | 648.424   |
| AB028981  | 38348.82  | 31356.781 | AF050198  | 2735.97   | 2634.948  | M55337    | 448.821   | 227.311   |
| NM_006800 | 4294.66   | 4527.784  | AK024346  | 2488.975  | 2894.01   | NM_016533 | 29073.92  | 25135.395 |
| NM_002476 | 1215.899  | 1805.762  | AF056422  | 1928.454  | 1930.783  | NM_014751 | 3917.044  | 4336.029  |
| NM_002729 | 9643.3    | 10244.769 | AF090892  | 1236.976  | 1171.217  | NM_002347 | 11351.535 | 11144.865 |
| M33197    | 18505.813 | 21306.088 | AK001089  | 1429.481  | 2329.561  | AB046807  | 1525.09   | 1446.37   |
| AL050139  | 12547.899 | 13332.692 | AK001919  | 1059.587  | 1769.057  | M33197    | 59819.285 | 32353.203 |

|           |           |           |           |           |           |           |           |           |
|-----------|-----------|-----------|-----------|-----------|-----------|-----------|-----------|-----------|
| NM_002593 | 1018.384  | 1141.851  | AK021535  | 1279.168  | 1673.08   | NM_014623 | 3514.306  | 1942.589  |
| NM_004558 | 3781.802  | 4183.593  | AK021753  | 4925.408  | 5374.396  | NM_007244 | 3726.656  | 2258.179  |
| AL079296  | 1853.947  | 2229.881  | AK001139  | 5163.691  | 7465.926  | M30629    | 3446.206  | 2085.477  |
| NM_014770 | 4041.945  | 4045.752  | AK002090  | 1371.678  | 1414.612  | AF193873  | 3230.686  | 1004.514  |
| AB037737  | 1138.386  | 1390.989  | AK021618  | 545.842   | 479.559   | NM_002628 | 975.979   | 584.883   |
| M33197    | 66191.188 | 63085.141 | AK021822  | 1118.671  | 1024.279  | AA190729  | 1384.442  | 891.096   |
| AK023103  | 5491.521  | 6025.93   | AK025246  | 9181.103  | 8431.535  | NM_004170 | 448.404   | 379.788   |
| NM_017858 | 5296.307  | 7015.587  | AK025847  | 3918.592  | 3298.016  | NM_018057 | 867.962   | 483.863   |
| NM_019058 | 65022.672 | 63040.699 | AK026442  | 883.972   | 332.302   | M33197    | 62327.348 | 69050.641 |
| D80008    | 3475.789  | 3729.653  | NM_014174 | 29126.232 | 34421.426 | NM_015717 | 597.893   | 355.252   |
| X56789    | 1150.396  | 1377.641  | AF147337  | 7518.309  | 6981.64   | NM_003665 | 549.421   | 396.938   |
| AK001069  | 45083.719 | 45046.051 | AK025203  | 58059.516 | 56558.043 | AF220217  | 624.452   | 409.384   |
| NM_004132 | 5536.873  | 5777.501  | AK026981  | 5460.074  | 5891.348  | NM_013323 | 5424.081  | 4432.2    |
| NM_014844 | 4874.249  | 3728.027  | NM_006394 | 1454.713  | 1469.99   | M33197    | 1881.689  | 1912.797  |
| M33197    | 62010.734 | 66923.664 | AK023819  | 2273.243  | 2041.132  | NM_000853 | 1622.998  | 2258.488  |
| NM_018492 | 11847.173 | 16616.334 | AL359558  | 421.604   | 927.093   | AF016903  | 14899.234 | 14769.986 |
| NM_001346 | 3351.055  | 3103.75   | AL133656  | 4000.379  | 4875.937  | NM_015675 | 2110.243  | 2025.675  |
| NM_003148 | 2428.217  | 3388.967  | AL050037  | 13195.195 | 17694.797 | NM_016040 | 1231.215  | 627.319   |
| NM_003377 | 24776.186 | 31914.176 | NM_001417 | 32441.467 | 44227.012 | M33197    | 54237.477 | 35433.379 |
| NM_002220 | 12331.016 | 12967.759 | AK000618  | 1532.968  | 1456.976  | AF031136  | 33499.641 | 16175.395 |
| AB033034  | 9664.615  | 11131.137 | AK024773  | 1166.428  | 968.323   | NM_006597 | 27853.453 | 13082.029 |
| D38169    | 3048.816  | 3223.487  | AL390180  | 1200.227  | 795.031   | NM_012483 | 5405.402  | 3284.486  |
| AJ293294  | 6937.221  | 7249.75   | X60484    | 1454.243  | 1797.247  | NM_003498 | 3016.243  | 1552.748  |
| NM_018171 | 3670.028  | 4685.594  | AF055019  | 2143.307  | 2047.223  | AB023420  | 6542.392  | 3745.349  |
| NM_002447 | 10757.879 | 12732.962 | NM_003525 | 7445.768  | 7140.653  | NM_007342 | 2545.203  | 1795.162  |
| NM_014145 | 27518.891 | 28996.5   | AK000229  | 1427.268  | 1684.261  | D25217    | 1334.578  | 743.492   |
| NM_014141 | 2688.028  | 2520.581  | AF056432  | 5287.376  | 5188.412  | NM_006351 | 4353.763  | 2303.876  |
| NM_002223 | 2807.199  | 2731.058  | AK001987  | 47556.215 | 45479.191 | M33197    | 56855.074 | 37579.691 |
| M33197    | 64198.824 | 64288.418 | NM_013332 | 3074.023  | 2368.198  | NM_004683 | 2595.572  | 1674.161  |
| NM_005490 | 13767.045 | 13038.573 | X56199    | 5226.887  | 5035.81   | AK023226  | 1147.422  | 992.495   |
| NM_003151 | 5644.324  | 6850.87   | NM_005193 | 7039.865  | 7276.077  | NM_018066 | 15385.091 | 16846.672 |
| NM_006811 | 15063.08  | 14130.664 | AL162006  | 900.073   | 977.452   | NM_006931 | 4577.731  | 4346.147  |
| NM_005601 | 4181.878  | 4142.758  | NM_017971 | 43079.25  | 52057.766 | NM_020344 | 3896.104  | 3413.628  |
| NM_016151 | 11260.976 | 12353.113 | AF090097  | 2059.065  | 1878.939  | AF119868  | 402.206   | 682.221   |
| NM_004324 | 3006.136  | 3464.095  | AF054998  | 994.046   | 1039.911  | NM_005050 | 3260.88   | 3757.566  |
| NM_005614 | 33859.641 | 33830.906 | AF116620  | 15366.866 | 11805.551 | M33197    | 60445.953 | 53910.418 |
| AK026270  | 3158.463  | 1810.615  | AF293335  | 55898.727 | 52485.523 | NM_018976 | 6232.459  | 3578.199  |
| NM_004556 | 4393.498  | 4624.827  | AL080065  | 1063.259  | 1294.968  | NM_003355 | 3627.097  | 1486.588  |
| D90075    | 1864.746  | 2040.03   | AK024431  | 14622.723 | 15017.236 | NM_005074 | 699.126   | 545.929   |
| M33197    | 66359.695 | 68033.117 | AF116635  | 523.539   | 630.146   | NM_004558 | 2283.197  | 1410.845  |
| NM_014857 | 1231.931  | 1711.135  | X96644    | 6239.926  | 9413.504  | NM_014770 | 1608.302  | 557.904   |
| AK023827  | 1795.594  | 1787.805  | AJ008122  | 32210.42  | 40762.656 | M33197    | 65486.855 | 67333.914 |
| AK021702  | 6866.556  | 10151.575 | NM_006220 | 1316.335  | 1309.527  | AK023103  | 2138.591  | 1389.674  |
| NM_003885 | 4511.416  | 5039.507  | AK022667  | 41899.441 | 33685.898 | NM_017858 | 1955.066  | 2144.512  |
| NM_003936 | 3914.404  | 4713.677  | AK026667  | 740.049   | 776.729   | NM_019058 | 31991.143 | 24749.402 |
| M33197    | 62024.031 | 65622.242 | AF113211  | 2926.308  | 2641.182  | D80008    | 1093.495  | 1993.34   |
| NM_002688 | 2280.865  | 2752.427  | AL117568  | 3914.701  | 3498.697  | AK001069  | 35999.883 | 45369.391 |
| NM_020368 | 797.776   | 1044.79   | NM_000843 | 1203.647  | 1374.675  | M33197    | 61042.715 | 72333.93  |
| NM_004415 | 2757.94   | 2801.264  | S71805    | 1387.497  | 1989.015  | NM_000358 | 6516.006  | 3765.785  |
| NM_007278 | 38073.117 | 38722.156 | NM_018391 | 1903.867  | 2150.121  | NM_006395 | 856.471   | 1404.768  |
| NM_005218 | 34142.926 | 26061.775 | U90917    | 1415.121  | 1219.423  | NM_014306 | 3916.571  | 3535.413  |
| NM_004723 | 7157.95   | 7861.699  | AK022140  | 7657.969  | 7377.729  | NM_001084 | 1513.71   | 762.194   |
| M33197    | 60670.941 | 62377.77  | AK023372  | 33410.98  | 36480.371 | NM_015983 | 2893.775  | 1589.353  |

|           |           |           |           |           |           |           |           |           |
|-----------|-----------|-----------|-----------|-----------|-----------|-----------|-----------|-----------|
| NM_018413 | 31455.508 | 43361.695 | AF086527  | 921.283   | 684.684   | NM_018622 | 4267.088  | 2023.153  |
| AB018299  | 11977.537 | 12562.922 | U21072    | 2431.549  | 2791.97   | M33197    | 59968.742 | 45000.332 |
| NM_005245 | 12983.932 | 17312.5   | AK024377  | 1756.235  | 3136.703  | NM_005867 | 5167.753  | 2898.195  |
| M33197    | 66651.375 | 67083.836 | AK025621  | 170.051   | 1192.173  | AK026031  | 11083.282 | 4887.638  |
| NM_016219 | 18623.863 | 16832.672 | AK023557  | 2542.333  | 1871.181  | NM_016465 | 22706.865 | 8347.659  |
| NM_004751 | 2182.095  | 1873.154  | AK027107  | 1149.287  | 673.965   | AF193873  | 1498.589  | 611.02    |
| AK025605  | 7414.753  | 7619.004  | U17625    | 501.633   | 386.745   | NM_002625 | 693.087   | 480.893   |
| NM_003783 | 1275.932  | 1366.472  | AB040887  | 4895.975  | 3976.976  | AA190729  | 1420.234  | 864.801   |
| NM_007000 | 7357.388  | 6522.729  | AK025196  | 9309.094  | 9370.641  | BF974315  | 2446.776  | 949.482   |
| M23161    | 7980.554  | 8372.352  | AF305068  | 1519.35   | 1286.464  | AI652705  | 2356.311  | 2067.086  |
| NM_006100 | 1475.647  | 2165.695  | D17231    | 46162.797 | 44255.813 | AW009565  | 2607.534  | 3313.732  |
| NM_003197 | 15031.279 | 19468.615 | AF531295  | 2709.622  | 2462.971  | AI570478  | 464.219   | 359.961   |
| AF176705  | 9766.189  | 9461.658  | CY3Cy5    | 2240.203  | 192.346   | X07767    | 3002.986  | 2140.51   |
| D29012    | 42840.688 | 50831.355 | BF974315  | 2043.474  | 2238.794  | AF252284  | 1967.641  | 951.788   |
| NM_017414 | 6606.25   | 11528.34  | T74985    | 444.956   | 370.933   | M33197    | 10055.975 | 5294.306  |
| NM_012179 | 43160.75  | 47428.91  | AI652705  | 3946.12   | 2209.284  | AL050139  | 6212.808  | 2804.586  |
| NM_002793 | 18355.896 | 19895.092 | AA446028  | 401.369   | 425.035   | NM_006597 | 26621.885 | 13487.026 |
| NM_004785 | 4471.771  | 5183.912  | M80583    | 872.63    | 522.111   | NM_012483 | 4109.167  | 2711.945  |
| M33197    | 64269.914 | 64553.691 | AW009565  | 3955.825  | 2416.468  | NM_003495 | 2605.14   | 1456.787  |
| AL442083  | 5495.425  | 5145.485  | AI570478  | 686.024   | 1119.745  | AB023420  | 5883.746  | 3463.578  |
| D63487    | 4183.88   | 3905.837  | X07767    | 4767.462  | 3625.41   | NM_016511 | 8213.419  | 7154.691  |
| AK097791  | 4995.731  | 4570.65   | AF252284  | 2044.293  | 1674.317  | NM_003555 | 1140.225  | 1928.301  |
| AK022705  | 3165.994  | 4497.609  | SR5       | 4373.376  | 6487.39   | M33197    | 64465.734 | 69133.172 |
| NM_016404 | 8666.795  | 10089.228 | SR7       | 3987.619  | 33391.047 | NM_013225 | 575.471   | 331.742   |
| L03426    | 6864.704  | 7704.986  | SR9       | 15121.411 | 4513.908  | NM_016533 | 33133.395 | 24136.955 |
| M33197    | 63509.617 | 65245.742 | CY3Cy5    | 3232.725  | 244.597   | NM_014751 | 4481.86   | 3018.706  |
| NM_020163 | 2284.529  | 2248.219  | NM_016511 | 7651.349  | 4291.441  | NM_002347 | 11892.888 | 5304.734  |
| NM_006605 | 1279.588  | 1050.093  | NM_003555 | 1595.155  | 1187.447  | M33197    | 62419.957 | 47634.57  |
| NM_000457 | 1835.769  | 900.613   | NM_002185 | 1214.3    | 650.865   | NM_014623 | 5151.406  | 3557.167  |
| M34356    | 3977.006  | 2833.262  | NM_016533 | 38104.898 | 23069.113 | NM_007244 | 5382.921  | 3661.886  |
| AJ133115  | 5771.937  | 4774.947  | NM_014751 | 6514.424  | 7943.194  | M30629    | 3994.004  | 2966.94   |
| X51630    | 12397.461 | 11258.397 | NM_002347 | 16694.275 | 16829.434 | M33197    | 59657.617 | 67101.133 |
| NM_005055 | 5191.331  | 5086.892  | AB046807  | 1496.753  | 1505.795  | NM_018975 | 6031.581  | 4447.942  |
| NM_001965 | 767.206   | 619.599   | M33197    | 70159     | 66913.508 | NM_003355 | 3466.646  | 1679.223  |
| AF208502  | 22390.646 | 18890.137 | NM_014623 | 5433.261  | 6611.707  | NM_005074 | 650.382   | 609.568   |
| M33197    | 63086.324 | 63915.664 | NM_007244 | 2222.758  | 4243.898  | NM_004170 | 722.848   | 701.588   |
| AF264750  | 40189.367 | 44224.602 | M30629    | 1473.452  | 3065.002  | NM_018057 | 1799.816  | 1297.474  |
| NM_006980 | 3918.578  | 4561.569  | AF193873  | 731.963   | 1484.466  | M33197    | 58916.039 | 69747.305 |
| AK023904  | 4877.795  | 4245.153  | NM_002625 | 427.366   | 1729.494  | NM_015717 | 1160.994  | 1287.923  |
| NM_017955 | 8090.502  | 8500.571  | AA190729  | 1710.706  | 2504.133  | NM_015925 | 883.203   | 1044.356  |
| NM_016495 | 4647.886  | 4919.597  | NM_004170 | 605.798   | 462.391   | NM_003665 | 787.01    | 1197.185  |
| NM_014305 | 6675.966  | 6449.077  | M33197    | 62792.887 | 67044.344 | NM_013323 | 5841.848  | 6504.197  |
| M33197    | 59474.547 | 58649.637 | NM_015717 | 826.041   | 955.218   | NM_017425 | 1590.281  | 1052.646  |
| NM_004094 | 2966.445  | 3452.548  | NM_015925 | 445.277   | 462.787   | M33197    | 1824.862  | 806.59    |
| NM_020235 | 4408.31   | 5899.919  | NM_003665 | 839.572   | 729.154   | NM_000853 | 2265.173  | 975.617   |
| AK027059  | 12089.813 | 13607.484 | AF220217  | 695.634   | 599.88    | AK022267  | 543.799   | 287.026   |
| AF151109  | 18010.547 | 19464.777 | NM_013323 | 8234.888  | 5717.314  | NM_016040 | 1888.657  | 1316.087  |
| NM_015414 | 66637.227 | 68245.484 | M33197    | 1708.293  | 969.732   | M33197    | 65593.594 | 66472.227 |
| L34070    | 2817.032  | 3710.934  | NM_000853 | 1790.317  | 1995.387  | AF031136  | 43993.441 | 32609.34  |
| AF038182  | 2501.128  | 1489.126  | AF016903  | 23098.354 | 14701.075 | NM_015983 | 2126.446  | 1387.654  |
| NM_016475 | 10466.666 | 6085.162  | NM_015675 | 3273.271  | 2417.335  | NM_018622 | 4034.755  | 2316.814  |
| AF086472  | 1390.654  | 1310.088  | NM_016040 | 1935.989  | 2857.457  | M33197    | 55898     | 56229.559 |
| NM_001865 | 62536.512 | 57117.203 | AF031136  | 24040.975 | 37084.043 | NM_005867 | 4958.378  | 3359.643  |

|           |           |           |           |           |           |           |           |           |
|-----------|-----------|-----------|-----------|-----------|-----------|-----------|-----------|-----------|
| NM_006441 | 15769.479 | 17558.883 | U90878    | 528.901   | 564.163   | AK026031  | 7268.728  | 4228.46   |
| NM_00191E | 4499.147  | 4930.646  | NM_006597 | 22324.871 | 35719.879 | NM_01646E | 22504.871 | 11383.485 |
| NM_01824E | 6842.565  | 6117.92   | NM_01248E | 2455.103  | 4429.077  | NM_00734E | 3701.351  | 3305.342  |
| M33197    | 66648.93  | 68187.977 | NM_00349E | 2549.672  | 4634.259  | D25217    | 1699.636  | 1303.59   |
| AF252390  | 1219.736  | 1586.342  | AB023420  | 7351.616  | 10489.435 | NM_006351 | 5296.402  | 4920.679  |
| NM_012117 | 25634.254 | 20875.82  | NM_00734E | 3981.18   | 2991.251  | M33197    | 56894.996 | 67334.883 |
| D17130    | 66693.828 | 69474.039 | NM_00567E | 457.389   | 476.232   | NM_00468E | 2661.256  | 3116.851  |
| X76302    | 16779.857 | 16597.449 | D25217    | 1342.819  | 1086.595  | AK02322E  | 1084.392  | 1031.443  |
| AK02627E  | 1648.941  | 1870.112  | NM_006351 | 6596.629  | 3395.89   | M33197    | 53808.531 | 42621.555 |
| M33197    | 66597.969 | 66915.672 | M33197    | 58409.914 | 43186.133 | NM_001467 | 1623.989  | 355.388   |
| X52354    | 2312.383  | 2584.539  | NM_00468E | 2939.05   | 1667.897  | NM_01806E | 23614.596 | 28135.68  |
| NM_00541E | 1290.33   | 1170.576  | AK02322E  | 1636.443  | 1226.826  | NM_006931 | 6302.421  | 10180.435 |
| NM_00231E | 2687.133  | 2842.801  | AK02526E  | 563.597   | 1456.553  | NM_02034E | 5215.899  | 9827.895  |
| AK024191  | 1931.414  | 1919.506  | M33197    | 64196.977 | 52864.832 | AF11986E  | 803.138   | 1225.565  |
| D83781    | 2683.156  | 1875.112  | NM_01806E | 24686.064 | 14387.314 | NM_00505C | 3425.559  | 5081.046  |
| AL832699  | 3799.531  | 3485.597  | NM_02034E | 8062.781  | 11192.874 | AF25228E  | 1797.298  | 816.903   |
| NM_012191 | 1067.536  | 881.179   | AF11986E  | 4904.909  | 4085.229  | M33197    | 8494.496  | 4467.285  |
| M33197    | 66571.156 | 66695.742 | M33197    | 63356.309 | 70055.25  | AL050139  | 4832.743  | 2845.847  |
| AK000757  | 11797.78  | 14001.317 | NM_01897E | 8764.921  | 13198.393 | NM_00455E | 4554.107  | 4301.751  |
| AL359577  | 3605.862  | 3775.103  | NM_00335E | 2225.863  | 5993.353  | AL07929E  | 1281.93   | 881.703   |
| NM_01813E | 4216.409  | 4248.214  | NM_00507E | 1020.71   | 1758.095  | NM_01477C | 2785.986  | 2012.25   |
| NM_01480E | 9207.843  | 7203.808  | NM_00455E | 3118.533  | 1967.006  | M33197    | 65715.102 | 69172.563 |
| AF052120  | 2781.287  | 3979.241  | AL07929E  | 523.31    | 378.321   | AK02310E  | 2089.138  | 1706.455  |
| NM_014871 | 3937.711  | 4383.928  | NM_01477C | 1563.162  | 1346.465  | NM_01785E | 2114.345  | 1966.462  |
| AK02675E  | 1749.418  | 2312.997  | M33197    | 70529.813 | 67098.469 | NM_01905E | 29347.996 | 13329.221 |
| M33197    | 64560.086 | 67233.531 | AK02310E  | 3075.22   | 2171.282  | D8000E    | 1765.432  | 1145.514  |
| AL137552  | 1700.965  | 2022.39   | NM_01785E | 3751.641  | 2023.298  | X56789    | 1385.157  | 1352.318  |
| AK02579E  | 7178.646  | 11135.754 | NM_01905E | 35185.625 | 22963.939 | AK001069  | 44734.758 | 42173.531 |
| NM_003541 | 1375.649  | 1014.411  | D8000E    | 1722.263  | 1136.487  | NM_00093E | 657.989   | 615.12    |
| AF131835  | 1353.23   | 1249.141  | X56789    | 765.899   | 703.099   | NM_00035E | 11581.211 | 12699.907 |
| AK02452E  | 2466.861  | 2258.829  | AK001069  | 43624.172 | 21237.49  | NM_00639E | 1514.36   | 1735.291  |
| NM_00719E | 14227.84  | 13305.577 | NM_00035E | 12550.424 | 23252.098 | NM_01430E | 5936.121  | 9245.33   |
| M33197    | 66722     | 69591.141 | NM_00639E | 1337.268  | 2490.442  | NM_00108E | 2454.403  | 4452.925  |
| AK023220  | 3152.656  | 2828.22   | NM_01430E | 7530.329  | 12982.944 | M33197    | 63373.656 | 59959.871 |
| M33197    | 64190.418 | 63440.148 | NM_00108E | 2225.475  | 2162.158  | NM_01462E | 4387.706  | 2772.93   |
| AK024981  | 32175.461 | 22644.293 | NM_01598E | 1167.076  | 2216.568  | NM_00724E | 3221.81   | 2087.86   |
| AK02724E  | 2299.882  | 1792.892  | NM_01862E | 6209.772  | 18318.102 | M30629    | 3166.969  | 2137.756  |
| U80766    | 4675.44   | 4416.033  | M33197    | 62843.012 | 69188.117 | AF19387E  | 2782.001  | 1256.025  |
| AK001638  | 2062.149  | 2132.068  | NM_005867 | 5478.398  | 8079.224  | NM_00262E | 1436.008  | 1055.58   |
| AF16138E  | 13349.614 | 8058.053  | AK026031  | 7804.727  | 12523.995 | AA190729  | 1656.129  | 2065.763  |
| AL365369  | 6030.943  | 4259.856  | NM_01646E | 20657.689 | 30281.975 | BF97431E  | 2394.591  | 1429.81   |
| AK02545E  | 4881.562  | 3977.912  | AF19387E  | 946.686   | 620.998   | AI65270E  | 2716.959  | 1995.349  |
| M33197    | 66704.75  | 69581.078 | NM_00262E | 766.099   | 573.944   | M80583    | 603.603   | 828.32    |
| X05826    | 15691.918 | 15327.151 | AA190729  | 2241.855  | 1385.709  | AI57047E  | 743.702   | 1006.859  |
| AJ00187E  | 2376.38   | 2238.044  | BF97431E  | 2136.445  | 2238.204  | X07767    | 4025.598  | 5507.159  |
| AJ22788E  | 898.916   | 803.196   | T74985    | 709.953   | 868.138   | AF01690E  | 15291.14  | 9347.964  |
| M33197    | 66539.086 | 66237.656 | AI65270E  | 3961.475  | 1859.659  | NM_01567E | 1704.325  | 1033.245  |
| L77559    | 849.806   | 1083.882  | M80583    | 536.635   | 318.095   | NM_01604C | 1891.152  | 724.47    |
| NM_00559E | 2211.345  | 2125.177  | AI57047E  | 1145.604  | 3163.071  | M33197    | 63153.602 | 48519.41  |
| Y10515    | 1010.032  | 989.869   | AF25228E  | 2067.562  | 3960.22   | AF03113E  | 34534.895 | 17864.43  |
| M8794E    | 760.729   | 671.203   | M33197    | 8931.999  | 10452.955 | U90878    | 610.749   | 527.979   |
| AK02363E  | 8014.279  | 8410.564  | AL050139  | 5253.708  | 9239.344  | NM_006597 | 34206.285 | 25930.08  |
| D2527E    | 1236.753  | 929.052   | U90878    | 320.432   | 417.336   | NM_01248E | 7206.185  | 8584.69   |



|            |           |           |           |           |           |           |           |           |
|------------|-----------|-----------|-----------|-----------|-----------|-----------|-----------|-----------|
| M33197     | 66578.883 | 65646.586 | NM_006597 | 33177.074 | 21651.123 | NM_00349E | 3106.044  | 3473.765  |
| NM_02016E  | 1682.704  | 1516.492  | NM_012483 | 6007.144  | 3907.571  | AB023420  | 6942.173  | 7337.766  |
| AB037771   | 1010.103  | 1108.372  | NM_00349E | 3380.457  | 2514.57   | M33197    | 66936.328 | 69227.477 |
| AK025931   | 47237.207 | 31357.109 | AB023420  | 8651.295  | 5225.406  | NM_007264 | 12608.825 | 8791.966  |
| M33197     | 1520.686  | 1402.423  | M33197    | 64392.473 | 64293.449 | NM_016511 | 8244.504  | 8686.743  |
| M33197     | 63016.465 | 58444.266 | NM_007264 | 17030.754 | 9922.566  | NM_00355E | 1533.6    | 1453.719  |
| AK001083   | 3853.695  | 3956.315  | NM_016511 | 12380.744 | 8819.703  | M55337    | 797.496   | 672.126   |
| AK000185   | 1652.059  | 1890.891  | NM_00355E | 2055.713  | 1428.665  | M33197    | 62360.223 | 69806.672 |
| NM_017962  | 1072.813  | 1279.454  | NM_00218E | 776.922   | 388.088   | NM_01322E | 714.839   | 1302.414  |
| AK027227   | 945.308   | 1184.833  | NM_016533 | 57341.676 | 64239.32  | NM_01653E | 52421.055 | 60786.254 |
| NM_017834  | 1223.761  | 1334.178  | NM_014751 | 15251.02  | 29280.863 | NM_014751 | 10063.403 | 14693.375 |
| AK000865   | 1862.403  | 2332.864  | AB046807  | 1554.509  | 2254.207  | NM_002347 | 18752.564 | 17163.984 |
| M33197     | 66359.648 | 63813.457 | M33197    | 63317.434 | 71870.625 | AB046807  | 1717.704  | 1640.176  |
| AK024558   | 1102.792  | 1256.875  | NM_014623 | 5926.8    | 7511.334  | NM_01806E | 14533.024 | 8161.645  |
| AK024779   | 993.668   | 1192.683  | NM_007244 | 4078.134  | 5650.971  | NM_006931 | 4639.481  | 2188.125  |
| AK024406   | 1532.325  | 1599.934  | M30629    | 3417.635  | 5701.155  | NM_020344 | 3722.657  | 2026.665  |
| AK024568   | 4071.274  | 3686.724  | M33197    | 66538.438 | 67033.422 | AF119868  | 698.3     | 484.362   |
| NM_018381  | 1244.038  | 931.987   | NM_01897E | 11876.139 | 5690.022  | NM_00505C | 3455.478  | 2272.372  |
| M33197     | 66704.586 | 69775.906 | NM_00335E | 3553.134  | 3438.923  | M33197    | 60234.09  | 67342.031 |
| AK026277   | 25240.092 | 17929.135 | NM_005074 | 956.781   | 834.864   | NM_01897E | 9235.619  | 22492.582 |
| U10509     | 2230.832  | 2468.313  | NM_00417C | 1153.76   | 854.914   | NM_00335E | 4596.185  | 3741.062  |
| NM_00716E  | 22752.941 | 23212.039 | NM_018057 | 2590.58   | 1696.244  | NM_005074 | 1108.361  | 1621.292  |
| NM_01401E  | 10842.515 | 14577.766 | M33197    | 67929.984 | 66457.289 | NM_00417C | 875.889   | 1507.447  |
| AF085956   | 7099.124  | 8404.592  | NM_015717 | 1678.507  | 1397.378  | NM_018057 | 1661.609  | 1235.196  |
| NM_01911E  | 4062.968  | 3919.369  | NM_01592E | 664.434   | 584.778   | M33197    | 61732.469 | 67335.039 |
| AF147318   | 1771.499  | 1634.961  | NM_00366E | 730.651   | 494.751   | NM_015717 | 1139.229  | 2002.902  |
| unknown (S | 1925.799  | 2123.082  | AF220217  | 571.684   | 527.423   | NM_01592E | 850.689   | 857.046   |
| M33197     | 63081     | 65015.391 | NM_013323 | 7707.714  | 6024.283  | NM_00366E | 696.955   | 712.502   |
| AL137556   | 2186.081  | 1927.72   | NM_01742E | 3120.739  | 5097.354  | AF220217  | 469.734   | 635.254   |
| NM_01469E  | 5038.342  | 4878.275  | M33197    | 2827.359  | 4731.82   | NM_01332E | 7336.756  | 12692.585 |
| AL359055   | 2433.827  | 2983.694  | NM_00085E | 4928.61   | 7631.738  | NM_014937 | 1174.163  | 3418.814  |
| NM_01490E  | 6490.145  | 6755.761  | AF016903  | 16063.695 | 24978.883 | NM_01742E | 2353.703  | 4453.472  |
| AF086125   | 1571.766  | 1141.009  | NM_01567E | 1158.009  | 2238.66   | M33197    | 2682.64   | 3555.37   |
| AK023547   | 991.588   | 882.419   | NM_01604C | 1344.02   | 2381.056  | NM_00085E | 3706.358  | 6007.892  |
| U67847     | 2850.727  | 2179.87   | AF031136  | 47890.844 | 57454.891 | NM_00084E | 939.937   | 1124.932  |
| AL137321   | 7667.451  | 7731.526  | NM_01598E | 2086.95   | 1329.213  | M33197    | 62492.27  | 58649.867 |
| M33197     | 66632.555 | 67968.836 | NM_01862E | 6258.163  | 4087.789  | NM_00035E | 6223.647  | 2176.593  |
| AK024207   | 13955.712 | 11702.619 | M33197    | 59538.734 | 51824.355 | NM_00639E | 947.432   | 402.707   |
| AK021843   | 1690.926  | 1712.202  | NM_005867 | 6688.862  | 4130.268  | NM_01430E | 5110.768  | 3400.296  |
| AF075025   | 3038.912  | 2781.672  | AK026031  | 8551.171  | 5449.209  | NM_001084 | 2276.633  | 1423.162  |
| AF088008   | 3180.745  | 2746.739  | NM_01646E | 24180.58  | 14224.178 | NM_01598E | 3585.323  | 3395.518  |
| AK023528   | 948.618   | 929.98    | NM_00734E | 3880.988  | 3078.979  | NM_01862E | 5558.147  | 5758.051  |
| AK023043   | 2713.969  | 3327.712  | NM_00567E | 415.819   | 382.812   | M33197    | 60776.008 | 69285.484 |
| M33197     | 66410.742 | 70821.555 | D25217    | 1696.571  | 1064.368  | NM_005867 | 6836.693  | 8284.268  |
| AF147349   | 20367.068 | 22518.98  | NM_006351 | 6431.958  | 3216.326  | AK026031  | 11245.636 | 12305.78  |
| AL050346   | 27323.199 | 25267.078 | M33197    | 56150.434 | 36060.969 | NM_01646E | 26084.566 | 29019.617 |
| AK001520   | 10219.91  | 9587.56   | NM_00468E | 2830.644  | 1458.412  | NM_00734E | 2897.776  | 3458.499  |
| AK021731   | 940.591   | 1222.571  | AK023226  | 1809.754  | 2644.177  | D25217    | 1575.231  | 2330.532  |
| D90070     | 11583.358 | 15672.328 | M33197    | 57873.109 | 56372.039 | NM_006351 | 4903.312  | 4674.706  |
| M33197     | 66545.789 | 64742.953 | NM_001467 | 730.036   | 1127.637  | M33197    | 55058.719 | 53769.645 |
| AF086179   | 1779.213  | 2375.696  | NM_01806E | 23482.135 | 32971.727 | NM_00468E | 3870.08   | 6155.485  |
| AK025807   | 5053.197  | 4855.133  | NM_006931 | 3951.907  | 7466.093  | AK023226  | 1420.754  | 2235.051  |
| M33197     | 59719.395 | 65156.855 | NM_020344 | 2383.144  | 3613.411  | AK025263  | 733.547   | 730.225   |

|           |           |           |           |           |           |           |           |           |
|-----------|-----------|-----------|-----------|-----------|-----------|-----------|-----------|-----------|
| AK025266  | 4176.195  | 3818.147  | AF252284  | 2365.565  | 1482.131  | M33197    | 60507.48  | 68266.219 |
| AK001843  | 4241.774  | 3714.853  | M33197    | 9816.593  | 4431.104  | NM_001467 | 588.949   | 628.287   |
| AK000548  | 54889.492 | 56514.777 | AL050139  | 6028.231  | 3252.596  | NM_00468E | 6093.001  | 4141.57   |
| NM_00392C | 23768.289 | 18720.193 | NM_00455E | 5870.054  | 2526.228  | AB037725  | 419.048   | 188.203   |
| NM_004787 | 14081.609 | 11274.034 | AL079296  | 986.204   | 472.316   | M33197    | 61761.102 | 27661.643 |
| AF087984  | 10375.154 | 9491.154  | NM_01477C | 2826.752  | 1871.849  | NM_01771E | 1360.348  | 693.517   |
| AF009302  | 2617.761  | 2495.386  | M33197    | 67897.57  | 67181.391 | NM_00486C | 2691.642  | 1766.314  |
| M33197    | 66039.75  | 71684.734 | AK023103  | 2241.302  | 2005.551  | AF217190  | 6978.381  | 4579.015  |
| AK022273  | 1504.866  | 1355.404  | NM_01785E | 2828.067  | 2186.636  | AB028981  | 35751.465 | 26956.451 |
| AK024271  | 2121.609  | 1641.696  | NM_01905E | 34676.355 | 31985.156 | NM_00680C | 5510.697  | 6034.947  |
| AK021650  | 3650.588  | 2872.415  | D80008    | 1682.63   | 1213.047  | NM_00247E | 1008.498  | 1164.146  |
| AL050210  | 4399.579  | 3369.013  | X56789    | 1061.577  | 910.303   | NM_00272E | 4677.786  | 5616.895  |
| L37699    | 2267.092  | 2303.082  | AK001069  | 49556.539 | 48720.082 | M33197    | 11172.174 | 12250.943 |
| M33197    | 66333.023 | 68108.922 | NM_00035E | 3890.501  | 6099.397  | AL050139  | 5575.502  | 5353.015  |
| AL050173  | 1904.144  | 2143.388  | NM_01430E | 4806.313  | 6013.151  | NM_00455E | 4039.259  | 4643.802  |
| D80002    | 2060.525  | 1866.213  | NM_001084 | 2001.411  | 2740.574  | AL079296  | 938.013   | 1509.812  |
| U17637    | 1330.272  | 1631.96   | M33197    | 64126.063 | 59997.512 | NM_01477C | 2623.276  | 2244.111  |
| AF207831  | 896.481   | 1146.086  | NM_01462E | 6947.579  | 3612.437  | AK023103  | 2783.972  | 5063.476  |
| M33197    | 65322.918 | 65063.414 | NM_007244 | 4154.455  | 2199.789  | NM_01785E | 2366.727  | 4223.793  |
| NM_01827E | 4289.628  | 4470.7    | M30629    | 4235.487  | 2085.04   | NM_01905E | 45873.516 | 50710.105 |
| CY3Cy5    | 7456.801  | 273.327   | AF193873  | 1086.721  | 731.18    | D80008    | 1676.207  | 3389.954  |
| AI886795  | 6915.062  | 7602.832  | NM_00262E | 1511.516  | 873.064   | X56789    | 1098.891  | 1419.039  |
| D10495    | 1795.265  | 1296.509  | M23575    | 578.109   | 345.963   | AK001069  | 51635.73  | 56422.766 |
| BF344679  | 1735.755  | 1584.436  | AA190729  | 3251.544  | 1840.639  | NM_00413E | 2219.755  | 557.432   |
| M36634    | 840.139   | 815.912   | BF974315  | 2848.674  | 2846.093  | NM_014844 | 2672.87   | 684.947   |
| M14156    | 1914.751  | 1482.776  | T74985    | 791.991   | 1173.572  | M33197    | 65524.172 | 43540.121 |
| AK094237  | 2922.929  | 3674.222  | AI652705  | 3524.618  | 2343.257  | NM_01849E | 4719.579  | 3760.607  |
| L07592    | 917.985   | 976.251   | M80583    | 777.328   | 632.407   | NM_00134E | 2654.007  | 2319.54   |
| NM_006981 | 1352.593  | 1885.281  | X07767    | 4279.885  | 4788.755  | NM_00314E | 3072.002  | 2953.915  |
| SR2       | 65561.828 | 62589.996 | AF016903  | 16584.398 | 9102.572  | NM_003377 | 10611.85  | 12752.518 |
| SR4       | 21781.395 | 23617.971 | NM_01567E | 2267.261  | 1570.168  | NM_00222C | 7279.214  | 6353.299  |
| SR6       | 3275.688  | 3215.347  | AK022267  | 645.009   | 492.004   | AB033034  | 3211.453  | 3200.869  |
| SR8       | 11084.549 | 37924.895 | NM_01604C | 2023.146  | 1414.916  | D38169    | 2588.729  | 2002.338  |
| SR10      | 43164.309 | 17156.428 | M33197    | 67824.219 | 41799.699 | AJ293294  | 2208.436  | 2707.533  |
| CY3Cy5    | 9075.048  | 356.288   | AF031136  | 48487.91  | 15206.86  | NM_018171 | 1022.228  | 1776.656  |
| NM_00736E | 1426.679  | 1530.844  | U90878    | 545.517   | 529.586   | NM_002447 | 7161.533  | 8840.907  |
| NM_01477E | 3074.392  | 2666.013  | NM_006597 | 33238.16  | 17192.174 | NM_01414E | 11038.365 | 12096.674 |
| NM_00648C | 10494.313 | 8844.402  | NM_01248E | 12610.912 | 6536.765  | NM_00222E | 3908.276  | 4776.959  |
| NM_00722E | 36275.109 | 29589.65  | NM_00349E | 5248.776  | 4171.421  | NM_00549C | 10339.235 | 11869.442 |
| NM_00014E | 975.571   | 1082.114  | AB023420  | 11301.523 | 9101.366  | NM_003151 | 3841.693  | 7010.235  |
| AF030107  | 1346.439  | 1198.796  | NM_016511 | 8944.369  | 5430.312  | NM_006811 | 6721.026  | 10010.546 |
| M33197    | 67268.367 | 63900.266 | NM_00355E | 1766.039  | 1433.291  | NM_005601 | 2579.412  | 4686.807  |
| NM_01896E | 1207.748  | 1215.956  | NM_00218E | 884.882   | 565.476   | NM_016151 | 13625.335 | 18405.584 |
| AB058740  | 9117.823  | 8404.499  | M55337    | 567.054   | 1389.894  | NM_004324 | 1547.922  | 2271.25   |
| NM_00188E | 1196.098  | 1154.294  | M33197    | 64914.918 | 66663.938 | NM_005614 | 16765.105 | 22679.121 |
| M33197    | 67021.594 | 69604.211 | NM_01322E | 1340.472  | 2090.912  | AK026270  | 1101.234  | 210.797   |
| NM_00181E | 1548.137  | 2422.839  | NM_01653E | 31680.406 | 35848.32  | NM_00455E | 1563.049  | 540.048   |
| NM_01693E | 1860.441  | 2283.459  | NM_014751 | 2019.599  | 3038.187  | D90075    | 822.281   | 428.05    |
| NM_00199E | 1674.033  | 1707.928  | NM_002347 | 16111.947 | 22341.475 | M33197    | 60543.027 | 55158.191 |
| R61452    | 2230.539  | 2628.133  | AB046807  | 1555.361  | 2607.257  | AK023827  | 2112.498  | 2047.827  |
| NM_01245E | 9557.903  | 10097.669 | NM_01806E | 20606.438 | 10803.111 | AK021702  | 2392.028  | 3770.578  |
| M33197    | 67115.438 | 66205.953 | NM_006931 | 6674.393  | 3335.856  | NM_00388E | 1904.746  | 1698.915  |
| NM_00171E | 759.921   | 1175.577  | NM_020344 | 6669.43   | 3702.365  | NM_00393E | 1095.073  | 2491.602  |

|           |           |           |           |           |           |           |           |           |
|-----------|-----------|-----------|-----------|-----------|-----------|-----------|-----------|-----------|
| NM_006564 | 3735.131  | 3600.582  | AF119868  | 350.528   | 247.378   | M33197    | 54940.949 | 66600.258 |
| NM_004802 | 1717.563  | 1662.51   | NM_005050 | 4378.348  | 1480.122  | NM_00268E | 881.344   | 1164.478  |
| M33197    | 59910.723 | 62596.836 | M33197    | 58254.195 | 52322.426 | NM_00441E | 4054.424  | 3341.554  |
| NM_000074 | 5919.544  | 4694.297  | NM_01897E | 13661.969 | 5597.911  | NM_00727E | 19375.143 | 29796.523 |
| BF434335  | 32377.939 | 28931.602 | NM_00335E | 5017.908  | 4379.268  | NM_00472E | 2682.014  | 2850.98   |
| M57627    | 1758.37   | 1730.398  | NM_005074 | 1998.445  | 1856.139  | M33197    | 57531.371 | 66330.094 |
| NM_00299E | 1693.495  | 1552.788  | NM_018057 | 2685.121  | 2549.677  | NM_01841E | 14880.442 | 32445.033 |
| AK026946  | 2115.189  | 2449.907  | M33197    | 63274.234 | 67616.766 | AB018299  | 19515.752 | 30611.313 |
| AF086129  | 1984.066  | 2515.384  | NM_015717 | 1447.496  | 1068.506  | NM_00524E | 7043.87   | 11953.975 |
| NM_01445E | 6449.208  | 5804.35   | NM_01592E | 682.117   | 541.338   | M33197    | 60661.988 | 75879.344 |
| AF235049  | 4608.711  | 5558.583  | NM_00366E | 953.796   | 900.412   | NM_01621E | 10320.848 | 20731.186 |
| NM_005164 | 943.047   | 1367.013  | AF220217  | 761.629   | 706.262   | NM_004751 | 1583.925  | 2046.906  |
| NM_00199E | 2193.543  | 2159.295  | NM_01332E | 10103.579 | 13710.357 | AK025605  | 4177.594  | 7661.893  |
| NM_00018E | 12509.374 | 12455.831 | NM_01742E | 2728.5    | 5309.602  | NM_00700C | 3820.527  | 1254.405  |
| AY004175  | 2351.698  | 2211.893  | M33197    | 2187.321  | 2893.801  | M23161    | 4419.121  | 2985.311  |
| M33197    | 66528.992 | 63069.352 | NM_00085E | 1919.418  | 3939.164  | NM_00610C | 481.181   | 603.76    |
| NM_012327 | 3042.558  | 3332.325  | M33197    | 58815.465 | 54994.492 | NM_003197 | 5339.433  | 9374.967  |
| NM_000904 | 7766.829  | 7349.264  | NM_00035E | 5330.649  | 2001.806  | AF176705  | 3085.945  | 2640.178  |
| NM_01604E | 9443.795  | 9822.683  | NM_00639E | 735.527   | 278.826   | D29012    | 13094.653 | 14371.525 |
| NM_00037E | 12063.217 | 9715.881  | NM_01430E | 6409.859  | 2986.575  | NM_017414 | 2229.883  | 4758.523  |
| NM_01884E | 3538.555  | 3703.042  | NM_001084 | 2445.549  | 1298.437  | NM_01217E | 17068.486 | 23333.826 |
| AJ000096  | 1214.638  | 1125.628  | NM_01598E | 3466.51   | 1631.76   | NM_00279E | 4398.609  | 5571.484  |
| AF279890  | 1701.731  | 1404.126  | NM_01862E | 7209.926  | 3628.165  | NM_00478E | 1647.789  | 1650.698  |
| NM_00223E | 2037.028  | 1816.075  | M33197    | 61004.707 | 57352.043 | M33197    | 61194.465 | 73749.445 |
| NM_01206E | 1551.482  | 1583.89   | NM_005867 | 10138.089 | 7104.525  | AL442083  | 4417.872  | 5464.222  |
| NM_016601 | 1212.371  | 1267.745  | AK026031  | 20275.949 | 15716.635 | D63487    | 3309.438  | 3931.806  |
| NM_00681E | 44727.906 | 48119.605 | NM_01646E | 26056.912 | 22965.67  | AK097791  | 6239.529  | 8096.671  |
| NM_00166E | 6454.38   | 6743.425  | NM_00734E | 4963.288  | 6081.308  | AK022705  | 1931.105  | 2041.563  |
| NM_00421E | 20113.174 | 22436.91  | NM_00567E | 671.406   | 776.28    | NM_016404 | 3950.22   | 4302.357  |
| NM_01653C | 14160.245 | 15338.467 | D25217    | 1939.324  | 1561.3    | L03426    | 2421.244  | 3394.119  |
| NM_014804 | 2782.301  | 3944.68   | NM_006351 | 6419.178  | 4386.6    | NM_02016E | 1350.183  | 1952.908  |
| L40520    | 4253.623  | 3899.3    | M33197    | 61788.816 | 50081.996 | NM_00660E | 1041.39   | 2242.697  |
| NM_00263E | 23392.877 | 19370.367 | NM_00468E | 3822.814  | 3324.778  | NM_000457 | 1299.299  | 1910.134  |
| M33197    | 62352.07  | 60673.273 | AK02322E  | 1512.986  | 1710.561  | M34356    | 2636.295  | 4417.887  |
| NM_00287E | 5656.082  | 5612.652  | AK025263  | 572.203   | 1250.625  | AJ133115  | 3238.326  | 4918.446  |
| NM_01772E | 2385.897  | 2133.691  | M33197    | 60231.828 | 63548.191 | X51630    | 5823.658  | 3023.193  |
| AK022922  | 3109.06   | 3431.379  | NM_001467 | 985.37    | 1726.599  | NM_00505E | 2292.446  | 2025.527  |
| NM_00646E | 7396.01   | 6664.963  | NM_00468E | 11987.257 | 3306.256  | AF208502  | 10387.251 | 5847.778  |
| NM_00040C | 30163.445 | 25309.811 | AB037725  | 536.416   | 231.08    | M33197    | 52062.891 | 45530.418 |
| M33197    | 59893.504 | 60724.258 | M33197    | 53516.852 | 27302.697 | AF264750  | 15337.927 | 15897.479 |
| NM_00261E | 5645.74   | 4884.399  | NM_01771E | 1824.328  | 817.316   | NM_00698C | 1127.693  | 1546.382  |
| NM_00441E | 3987.78   | 3570.906  | NM_00486C | 3302.279  | 3410.649  | AK023904  | 2350.75   | 2426.652  |
| NM_01865C | 2317.873  | 2665.408  | AF217190  | 10845.269 | 5071.313  | NM_01795E | 5280.161  | 5850.585  |
| AK026945  | 24452.441 | 38739.754 | AB028981  | 46700.102 | 23220.25  | NM_01649E | 2062.822  | 1949.781  |
| NM_01436E | 1342.493  | 1235.865  | NM_00680C | 5399.651  | 3180.233  | NM_01430E | 2805.537  | 2482.334  |
| M33197    | 66577.25  | 70073.117 | NM_00272E | 6123.781  | 4928.405  | M33197    | 47644.684 | 40653.359 |
| NM_00139E | 29306.08  | 31685.814 | M33197    | 15223.7   | 10087.799 | NM_004094 | 1588.403  | 1716.568  |
| AB050049  | 7091.332  | 7142.459  | AL050139  | 7853.106  | 9266.467  | NM_02023E | 2289.52   | 1804.663  |
| J05125    | 1214.305  | 1186.473  | NM_00455E | 8445.479  | 7652.573  | AK027059  | 5224.92   | 4223.338  |
| NM_00017E | 14800.624 | 7804.56   | AL079296  | 1139.259  | 1141.678  | AF151109  | 6557.784  | 4725.127  |
| NM_01572E | 9768.61   | 8691.851  | NM_01477C | 3300.01   | 3802.359  | L34070    | 3217.192  | 2605.859  |
| R61452    | 1655.41   | 1707.2    | AK023103  | 2445.862  | 2925.421  | AF038182  | 1273.055  | 2664.635  |
| R19938    | 11869.092 | 13126.702 | NM_01785E | 3181.826  | 3372.535  | NM_01647E | 4502.053  | 7998.847  |

|           |           |           |           |           |           |           |           |           |
|-----------|-----------|-----------|-----------|-----------|-----------|-----------|-----------|-----------|
| N94487    | 6352.96   | 4840.34   | NM_019059 | 33445.992 | 47873.254 | AF086472  | 1031.666  | 1442.298  |
| AI886795  | 6586.75   | 5470.4    | D80008    | 2097.495  | 2282      | NM_014917 | 1427.118  | 1249.51   |
| D10495    | 1537.695  | 1243.344  | X56789    | 1153.37   | 2186.634  | M33197    | 978.288   | 848.135   |
| BF344679  | 1366.997  | 1527.134  | AK001069  | 57230.117 | 63063.934 | NM_001865 | 45084.582 | 19911.838 |
| M36634    | 822.224   | 1465.025  | NM_004132 | 2930.313  | 1103.385  | NM_006441 | 7299.651  | 5018.287  |
| M14156    | 1788.46   | 1494.526  | NM_014844 | 3082.454  | 1598.829  | NM_001918 | 1607.88   | 1407.471  |
| U87939    | 923.037   | 978.743   | M33197    | 58042.277 | 59704.746 | NM_018245 | 3071.519  | 3787.443  |
| U86961    | 1447.331  | 1645.248  | NM_018492 | 8192.849  | 3436.852  | M33197    | 63076.184 | 69683.586 |
| NM_006981 | 1708.933  | 2211.84   | NM_001346 | 3553.716  | 1558.036  | NM_012117 | 10897.846 | 11912.421 |
| M33197    | 66909.289 | 64848.688 | NM_003149 | 2880.181  | 1723.953  | D17130    | 60782.605 | 70860.023 |
| AK027244  | 1508.446  | 1657.092  | NM_003377 | 15073.784 | 7878.431  | X76302    | 7437.57   | 10486.835 |
| NM_018449 | 5238.959  | 7272.292  | NM_002220 | 8742.965  | 7373.906  | AK026276  | 1032.385  | 1093.482  |
| AF086129  | 1104.099  | 882.199   | AB033034  | 4696.243  | 5777.638  | X52354    | 1063.676  | 877.985   |
| NM_014458 | 4564.802  | 4324.567  | D38169    | 4793.388  | 4999.829  | NM_002315 | 1449.978  | 1878.201  |
| AF235049  | 5463.527  | 5888.3    | AJ293294  | 2649.486  | 2777.468  | AK024191  | 1110.852  | 837.322   |
| M33197    | 61710.449 | 64320.957 | NM_018171 | 1624.229  | 1178.261  | D83781    | 1606.958  | 2667.172  |
| NM_007369 | 2130.002  | 1901.594  | NM_002447 | 13009.676 | 8333.019  | AL832699  | 2481.134  | 6113.276  |
| NM_014776 | 2908.033  | 2971.048  | NM_014145 | 13359.834 | 9785.822  | NM_012191 | 1288.3    | 1334.053  |
| NM_006480 | 14572.882 | 12729.761 | NM_002223 | 3335.864  | 2717.241  | AK000757  | 5270.453  | 5510.223  |
| NM_007223 | 39780.059 | 37765.863 | NM_005601 | 3250.756  | 4157.494  | AL359577  | 1514.177  | 843.333   |
| NM_000145 | 1363.783  | 1107.28   | NM_016151 | 23370.4   | 27741.846 | NM_018139 | 1293.766  | 966.625   |
| AF030107  | 1611.736  | 1347.941  | NM_004324 | 1721.226  | 665.897   | NM_014805 | 3812.315  | 4210.68   |
| NM_000871 | 752.043   | 935.079   | NM_005614 | 22183.543 | 6802.375  | AF052120  | 1370.07   | 1455.774  |
| M33197    | 63170.016 | 65946.617 | AK026270  | 780.858   | 743.144   | NM_014871 | 1409.502  | 1419.824  |
| NM_018968 | 1071.198  | 1149.468  | NM_004556 | 2328.076  | 1141.889  | M33197    | 54931.445 | 65144.441 |
| AF086924  | 32626.357 | 33702.598 | D90075    | 735.09    | 436.85    | AL137552  | 1580.538  | 2389.63   |
| NM_000264 | 974.804   | 789.637   | M33197    | 60248.055 | 33395.473 | AK025794  | 2963.45   | 8022.439  |
| AB058740  | 5845.951  | 5924.519  | AK023827  | 1987.714  | 1155.745  | NM_003541 | 947.961   | 883.035   |
| NM_003385 | 2158.067  | 1637.354  | AK021702  | 5109.002  | 5836.689  | AF131835  | 1366.135  | 3461.709  |
| NM_001888 | 1348.147  | 1987.041  | NM_003885 | 2724.902  | 4997.93   | NM_014958 | 557.709   | 824.895   |
| M33197    | 64437.539 | 66824.172 | NM_003936 | 2780.166  | 2237.777  | M33197    | 56645.555 | 63274.098 |
| NM_001154 | 17084.98  | 23156.688 | M33197    | 56118.98  | 62091.836 | AK023220  | 714.744   | 944.171   |
| NM_001819 | 1096.689  | 1345.228  | NM_002688 | 1889.259  | 1703      | M33197    | 57295.688 | 72106.078 |
| NM_016938 | 894.057   | 892.82    | NM_004415 | 3868.009  | 5259.49   | AK024981  | 16931.625 | 27689.887 |
| M33197    | 64036.844 | 61233.578 | NM_007278 | 23010.818 | 20301.781 | AK027246  | 1124.472  | 2152.332  |
| NM_006815 | 35217.508 | 34304.965 | NM_018413 | 25068.76  | 31904.408 | U80766    | 4574.208  | 8900.071  |
| NM_001663 | 6346.888  | 5621.694  | NM_005245 | 11119.925 | 16652.178 | AK001638  | 1862.402  | 2314.957  |
| NM_004218 | 21870.848 | 20366.805 | M33197    | 56641.957 | 32670.178 | AF161386  | 7505.769  | 5562.598  |
| NM_016530 | 13531.924 | 12053.235 | NM_016219 | 11554.889 | 3941.218  | AK025454  | 3013.799  | 1955.172  |
| NM_014804 | 2062.763  | 1779.983  | NM_004751 | 1238.297  | 524.027   | M33197    | 63732.328 | 53168.746 |
| NM_012455 | 7966.979  | 7107.623  | AK025605  | 5008.053  | 2160.563  | X05826    | 6416.634  | 4237.766  |
| NM_002806 | 13187.979 | 15065.414 | NM_003783 | 549.419   | 233.184   | AJ001872  | 2017.676  | 2439.632  |
| M33197    | 68640.555 | 63096.441 | NM_007000 | 5200.661  | 2371.936  | AJ227882  | 548.182   | 843.138   |
| NM_001716 | 933.523   | 996.658   | M23161    | 5277.773  | 2502.474  | M33197    | 61017.313 | 73257.914 |
| NM_006564 | 4063.765  | 4508.456  | NM_003197 | 8854.83   | 7327.873  | AK023636  | 2122.915  | 3635.523  |
| NM_004802 | 1789.086  | 1547.779  | AF176705  | 7171.766  | 8646.288  | M33197    | 40246.184 | 35620.023 |
| M33197    | 64657.32  | 62259.422 | D29012    | 26413.805 | 23921.982 | NM_020168 | 476.764   | 475.257   |
| NM_000074 | 5444.573  | 4755.978  | NM_017414 | 6231.497  | 4532.716  | AB037771  | 776.706   | 1651.479  |
| BF434335  | 26654.945 | 24664.059 | NM_012179 | 28681.586 | 26000.611 | AK025931  | 40778.504 | 51566.793 |
| M57627    | 1037.448  | 754.916   | NM_002793 | 11192.465 | 12528.17  | M33197    | 925.338   | 1639.613  |
| AK026946  | 2143.673  | 2001.911  | NM_004788 | 3116.156  | 4191.678  | AK021972  | 1480.328  | 1357.099  |
| M33197    | 64966.902 | 64663.855 | M33197    | 54688.844 | 61876.957 | M33197    | 57860.453 | 64487.668 |
| NM_003192 | 4490.734  | 4976.784  | AL442083  | 4858.306  | 6770.463  | AK001083  | 1991.146  | 3414.679  |

|           |           |           |           |           |           |            |           |           |
|-----------|-----------|-----------|-----------|-----------|-----------|------------|-----------|-----------|
| NM_00282E | 8833.448  | 8400.256  | D63487    | 3641.48   | 4969.783  | AK000185   | 1955.519  | 2671.808  |
| NM_01436E | 3010.671  | 3336.526  | AK097791  | 5881.065  | 7147.917  | NM_01796E  | 1082.704  | 1078.389  |
| M33197    | 63545.34  | 63627.699 | NM_020367 | 738.539   | 1135.07   | AK027227   | 659.625   | 796.217   |
| NM_00139E | 30771.158 | 28233.857 | NM_02016E | 2447.55   | 2919.379  | NM_017834  | 791.776   | 1388.179  |
| AB050049  | 6386.506  | 6357.463  | NM_000457 | 778.024   | 305.565   | AK000865   | 1101.82   | 1824.219  |
| J05125    | 989.785   | 1031.957  | M34356    | 2313.346  | 1045.728  | M33197     | 61170.285 | 72001.703 |
| NM_005164 | 761.014   | 857.308   | AJ133115  | 4025.17   | 2288.372  | AK024779   | 1076.586  | 1292.661  |
| NM_00199E | 2316.134  | 2042.5    | X51630    | 7415.631  | 3596.606  | AK024406   | 985.347   | 1379.996  |
| NM_00018E | 11718.24  | 12471.169 | NM_00505E | 3736.147  | 2412.793  | AK024568   | 4028.75   | 5636.27   |
| AY004175  | 2305.646  | 2003.516  | AF208502  | 15226.602 | 12812.74  | AK024994   | 875.41    | 1331.766  |
| M33197    | 64326.652 | 65581.992 | M33197    | 58223.801 | 61064.082 | NM_018381  | 1034.06   | 1192.45   |
| NM_012327 | 3060.066  | 3650.218  | AF264750  | 30148.783 | 27891.643 | M33197     | 57101.934 | 66545.602 |
| NM_000904 | 7784.544  | 8841.093  | NM_00698C | 2898.496  | 2696.903  | AK026277   | 15065.066 | 9150.812  |
| NM_01604E | 9430.414  | 10235.713 | AK023904  | 5143.926  | 5763.201  | U10509     | 1558.617  | 668.719   |
| NM_00037E | 11702.862 | 10326.649 | NM_01795E | 12469.228 | 14069.71  | NM_00716E  | 31279.416 | 14503.175 |
| NM_01884E | 2499.292  | 3019.259  | NM_01649E | 2825.099  | 2954.738  | NM_01401E  | 5212.754  | 3388.301  |
| AJ000096  | 1411.421  | 1807.631  | NM_01430E | 3321.943  | 3798.843  | AF085956   | 3052.85   | 3638.164  |
| M33197    | 59552.754 | 60627.336 | M33197    | 49820.223 | 35118.004 | NM_01911E  | 1522.089  | 2298.732  |
| M16796    | 1506.253  | 1454.655  | NM_004094 | 1525.568  | 1431.128  | AF147318   | 1365.491  | 1973.236  |
| AF279890  | 1864.125  | 1643.94   | NM_02023E | 3163.858  | 2063.432  | unknown (S | 1206.336  | 1291.734  |
| NM_00223E | 1649.192  | 1318.538  | AK027059  | 6079.269  | 6801.391  | M33197     | 54762.012 | 64336.258 |
| NM_01206E | 1298.39   | 1668.597  | AF151109  | 9535.607  | 10391.807 | AL137556   | 1233.996  | 1981.072  |
| NM_00168E | 65510.355 | 64010.102 | NM_015414 | 58175.887 | 65877.367 | NM_01469E  | 3947.414  | 5604.399  |
| NM_016601 | 1046.99   | 1281.905  | L34070    | 4297.696  | 5072.955  | AL359055   | 709.693   | 1605.132  |
| NM_01790E | 6843.676  | 8539.061  | AF038182  | 1110.179  | 558.914   | NM_01490E  | 792.853   | 891.909   |
| NM_006981 | 1731.131  | 1993.619  | NM_01647E | 5441.236  | 1971.026  | AF086125   | 1974.432  | 1081.713  |
| M33197    | 65767.82  | 66227.805 | AF086472  | 915.965   | 367.626   | AL079279   | 1305.356  | 1204.74   |
| AK027244  | 1542.549  | 1622.267  | NM_00186E | 59432.227 | 58081.773 | U67847     | 1882.198  | 1167.141  |
| L40520    | 4211.958  | 3751.673  | NM_006441 | 11766.939 | 9467.248  | AL137321   | 4271.145  | 2091.729  |
| NM_00263E | 23628.615 | 19282.846 | NM_00191E | 1995.037  | 1358.066  | M33197     | 58928.141 | 38153.043 |
| M33197    | 63316.547 | 63735.121 | NM_01824E | 5594.402  | 4442.991  | AK024207   | 3131.799  | 1619.196  |
| NM_00287E | 5999.733  | 5774.205  | M33197    | 66278.047 | 62346.52  | AK021843   | 803.744   | 578.613   |
| NM_01772E | 2251.702  | 2235.805  | AF252390  | 749.609   | 776.712   | AF075025   | 2026.006  | 1819.165  |
| AK022922  | 2970.218  | 3922.249  | NM_012117 | 13341.666 | 8597.231  | AF116623   | 960.566   | 935.76    |
| NM_00646E | 7846.077  | 8154.362  | D17130    | 65041.555 | 52908.281 | AF088008   | 1646.759  | 2691.791  |
| AK024750  | 4741.641  | 3520.089  | X76302    | 7502.456  | 5975.597  | AK023528   | 926.544   | 1378.966  |
| NM_00040C | 22358.42  | 19903.992 | AK02627E  | 690.956   | 449.414   | AK023043   | 1492.935  | 2976.321  |
| M33197    | 60209.281 | 61242.289 | M33197    | 66797.391 | 67196.945 | M33197     | 57490.523 | 70520.109 |
| NM_00261E | 8319.35   | 8699.194  | X52354    | 1100.95   | 1512.453  | AF147349   | 9239.21   | 12709.756 |
| NM_00441E | 3912.342  | 4293.013  | NM_00231E | 1070.429  | 1304.693  | AL050346   | 22316.346 | 21981.518 |
| U47635    | 10486.197 | 12680.441 | AK024191  | 777.385   | 1224.031  | AK001520   | 3507.022  | 5954.082  |
| NM_01865C | 2362.179  | 2723.941  | D83781    | 1790.748  | 654.424   | AK021731   | 603.411   | 1145.54   |
| AK026945  | 18446.594 | 30792.131 | AL832699  | 3894.214  | 1989.479  | D90070     | 3268.978  | 5885.509  |
| NM_00188E | 1297.71   | 767.867   | NM_012191 | 1675.85   | 2286.258  | Y12235     | 1483.184  | 1759.678  |
| M33197    | 65480.156 | 64815.113 | AK000757  | 10176.887 | 13864.06  | M33197     | 45399.102 | 45003.484 |
| NM_001154 | 17890.957 | 23716.801 | AL359577  | 2685.914  | 3152.756  | AF086179   | 593.986   | 569.769   |
| NM_00181E | 920.693   | 806.884   | NM_01813E | 1768.883  | 1768.161  | AK025807   | 696.313   | 842.116   |
| NM_00017E | 15609.619 | 7335.747  | NM_01480E | 3474.421  | 4092.178  | M33197     | 55641.949 | 64926.387 |
| NM_01572E | 9165.126  | 8598.816  | AF052120  | 1703.477  | 1077.655  | AK025266   | 2883.265  | 1937.111  |
| R61452    | 1411.886  | 1766.463  | NM_014871 | 1327.965  | 1678      | AK001843   | 2646.802  | 2165.263  |
| R19938    | 11320.103 | 12866.086 | AK026754  | 504.137   | 418.138   | AK000548   | 42941.215 | 28697.156 |
| N94487    | 5474.634  | 4917.584  | M33197    | 58342.91  | 62272.797 | NM_00392C  | 12419.666 | 8129.682  |
| AI886795  | 6687.379  | 5847.02   | AL137552  | 1696.599  | 1529.778  | NM_004787  | 10200.159 | 4847.259  |

|           |           |           |            |           |           |           |           |           |
|-----------|-----------|-----------|------------|-----------|-----------|-----------|-----------|-----------|
| D10495    | 1184.794  | 1319.547  | AK025794   | 6384.339  | 3919.845  | AF087984  | 3601.914  | 2391.241  |
| BF344679  | 1333.118  | 1398.119  | AK024522   | 1145.773  | 1377.254  | AF009302  | 1165.558  | 579.767   |
| M36634    | 779.914   | 934.837   | NM_007198  | 5429.087  | 5639.294  | M33197    | 59151.508 | 66562.414 |
| M14156    | 2151.238  | 1524.483  | M33197     | 59581.801 | 63283.32  | AK022273  | 1885.722  | 2753.722  |
| U87939    | 3256.6    | 2346.545  | AK023220   | 1170.078  | 2486.507  | NM_015882 | 1311.482  | 1673.198  |
| U86961    | 2735.67   | 2055.118  | AK024566   | 784.765   | 1557.74   | AK024271  | 1759.676  | 2538.95   |
| AK094237  | 3119.756  | 3047.516  | M33197     | 56230.684 | 30701.781 | AK021650  | 7900.139  | 12364.581 |
| L07592    | 1169.947  | 1179.785  | AK024981   | 23201.139 | 5858.856  | AL050210  | 2244.297  | 2864.924  |
| BF434335  | 28924.012 | 20672.559 | AK027246   | 1858.11   | 767.484   | L37699    | 1766.254  | 3212.795  |
| NM_002993 | 1812.898  | 1544.058  | U80766     | 7312.574  | 11234.613 | M33197    | 56617.488 | 68643.688 |
| AK026946  | 2414.231  | 2094.716  | AK001638   | 2404.803  | 5404.635  | AL050173  | 1467.063  | 2611.338  |
| M33197    | 60704.938 | 62499.707 | AF161386   | 7611.232  | 14747.418 | U17637    | 3817.148  | 5593.99   |
| NM_003192 | 5747.643  | 4671.017  | AK025454   | 4944.144  | 7808.581  | AF131853  | 2628.761  | 3665.47   |
| NM_018449 | 5484.276  | 5514.24   | M33197     | 64735.523 | 67392.008 | M33197    | 44611.563 | 36479.684 |
| AF086129  | 1083.446  | 787.399   | X05826     | 10897.601 | 15731.133 | NM_018272 | 2813.824  | 4368.768  |
| NM_014458 | 4667.938  | 4176.347  | Y11608     | 798.553   | 818.351   | CY3Cy5    | 1169.602  | 93.743    |
| AF235049  | 4536.396  | 4250.856  | AJ001872   | 3681.011  | 1708.44   | R19938    | 4793.098  | 2934.013  |
| NM_007369 | 2574.876  | 1847.235  | M33197     | 61317.426 | 66305.961 | N94487    | 3430.049  | 1659.813  |
| NM_014776 | 3355.167  | 3174.22   | NM_005598  | 2629.017  | 4517.119  | AI886795  | 2646.233  | 1186.877  |
| NM_006480 | 14749.13  | 12820.594 | Y10515     | 1071.509  | 1606.521  | BF344679  | 2237.082  | 2968.064  |
| NM_007223 | 45456.359 | 42488.789 | M87942     | 610.699   | 1035.674  | M36634    | 1705.897  | 2356.628  |
| NM_000145 | 1013.531  | 1039.456  | AK023636   | 4484.882  | 7783.689  | M14156    | 4028.638  | 1987.063  |
| AF030107  | 1902.556  | 1595.249  | D25272     | 1767.656  | 4073.384  | U86961    | 663.647   | 283.432   |
| M33197    | 64974.293 | 67740.555 | M33197     | 63124.25  | 68649.531 | AK094237  | 846.736   | 382.71    |
| NM_018968 | 1096.414  | 1094.326  | NM_020168  | 1933.215  | 4098.336  | SR8       | 423.536   | 1269.397  |
| AF086924  | 38336.066 | 36822.305 | AB037771   | 690.66    | 355.422   | SR10      | 2336.026  | 502.096   |
| NM_000264 | 1213.956  | 953.186   | AK025931   | 38260.453 | 16759.299 | CY3Cy5    | 1839.099  | 165.521   |
| AB058740  | 6507.189  | 4814.998  | M33197     | 2184.55   | 2677.79   | M33197    | 64390.203 | 52097.672 |
| AF279890  | 1098.609  | 652.189   | AK021972   | 1004.867  | 2346.4    | NM_007369 | 642.353   | 351.135   |
| NM_002236 | 1374.084  | 970.186   | M33197     | 57781.918 | 61235.102 | NM_014776 | 1758.154  | 813.759   |
| NM_012069 | 1821.999  | 1994.423  | AK001083   | 1885.569  | 857.785   | NM_006480 | 16029.596 | 11884.369 |
| NM_001689 | 64860.57  | 56948.398 | AK000185   | 1360.322  | 690.373   | NM_007223 | 34020.813 | 27952.791 |
| NM_016601 | 1385.434  | 1341.803  | NM_017962  | 893.037   | 604.261   | NM_000145 | 780.986   | 900.283   |
| NM_017905 | 9416.622  | 9184.229  | NM_017834  | 687.252   | 944.44    | AF030107  | 1466.187  | 736.307   |
| M33197    | 62220.539 | 60999.109 | AK000865   | 1054.891  | 1074.73   | NM_000871 | 545.036   | 362.309   |
| NM_006815 | 40952.371 | 35503.84  | M33197     | 63458.105 | 70695.148 | M33197    | 63030.785 | 59910.754 |
| NM_001663 | 7496.074  | 6931.934  | AK024779   | 1362.728  | 2622.315  | NM_018968 | 823.01    | 537.715   |
| NM_004218 | 23254.344 | 24133.977 | AK024406   | 1259.819  | 2478.057  | AF086924  | 36837.129 | 18240.586 |
| NM_016530 | 15590.937 | 16115.873 | AK024568   | 11432.498 | 20269.551 | NM_000264 | 617.241   | 451.704   |
| NM_014804 | 2560.28   | 2110.495  | NM_018381  | 762.501   | 462.471   | AB058740  | 3788.412  | 2837.446  |
| NM_002806 | 15110.558 | 17888.6   | AK022769   | 403.047   | 1373.138  | NM_003385 | 2232.645  | 1395.669  |
| M33197    | 66037.57  | 61679.531 | M33197     | 63631.539 | 76509.211 | M33197    | 47057.438 | 27905.525 |
| NM_001716 | 1131.544  | 1281.159  | AK026277   | 14598.249 | 22936.115 | NM_001154 | 1235.098  | 767.704   |
| NM_002030 | 716.12    | 387.65    | U10509     | 2209.947  | 2893.442  | NM_000175 | 1250.806  | 478.06    |
| NM_006564 | 3200.401  | 3279.808  | NM_007165  | 39438.691 | 41327.543 | NM_015725 | 916.711   | 647.134   |
| NM_004802 | 1744.61   | 1947.765  | NM_014018  | 10777.098 | 10117.083 | R61452    | 434.551   | 616       |
| M33197    | 62359     | 62666.836 | AF085956   | 4997.943  | 5578.317  | NM_012455 | 3738.557  | 2630.391  |
| NM_000074 | 5483.429  | 4384.742  | NM_019116  | 2407.638  | 4217.55   | NM_002806 | 5586.965  | 3223.318  |
| M33197    | 61495.406 | 57231.949 | AF147318   | 2205.779  | 1188.87   | M33197    | 63849.301 | 52570.082 |
| NM_002613 | 6478.376  | 5321.035  | unknown (S | 660.853   | 430.097   | NM_001716 | 551.604   | 385.589   |
| NM_004419 | 4530.604  | 3233.495  | M33197     | 58323.828 | 62995.813 | NM_002030 | 500.898   | 461.809   |
| U47635    | 12439.674 | 11879.622 | AL137556   | 2161.32   | 4345.754  | NM_006564 | 3283.701  | 1881.759  |
| NM_018650 | 2786.799  | 2721.687  | NM_014696  | 4080.044  | 7818.838  | NM_004802 | 1210.543  | 650.739   |

|           |           |           |           |           |           |           |           |           |
|-----------|-----------|-----------|-----------|-----------|-----------|-----------|-----------|-----------|
| AK026945  | 25093.402 | 32745.271 | AL359055  | 2784.695  | 6101.113  | M33197    | 56760.012 | 61250.16  |
| NM_00282E | 10503.196 | 8514.664  | NM_01490E | 4330.911  | 7910.516  | NM_000074 | 5136.204  | 4204.051  |
| NM_01436E | 1257.965  | 1197.163  | AF086125  | 2214.08   | 2429.854  | BF434335  | 13799.008 | 10388.078 |
| M33197    | 63639.469 | 62224.031 | AL079279  | 1514.219  | 2146.623  | M33197    | 53706.66  | 45409.43  |
| NM_00139E | 31219.975 | 25808.285 | AK023547  | 965.068   | 1524.884  | NM_00319Z | 958.576   | 539.805   |
| AB050049  | 6952.305  | 6316.302  | U67847    | 2774.803  | 5060.238  | AF235049  | 469.869   | 597.217   |
| J05125    | 1258.828  | 1881.718  | AL137321  | 7381.808  | 10541.768 | NM_005164 | 461.93    | 207.095   |
| NM_00199E | 3032.52   | 3017.955  | M33197    | 66800.469 | 66470.844 | NM_00199E | 1198.772  | 540.477   |
| NM_00018E | 12639.641 | 14203.62  | AK024207  | 4494.375  | 4963.203  | NM_00018E | 5551.327  | 2941.821  |
| AY004175  | 2722.946  | 2653.99   | AK021843  | 1667.136  | 2427.448  | AY004175  | 1395.61   | 838.426   |
| M33197    | 64840.004 | 66274.656 | AF075025  | 2581.376  | 2978.791  | M33197    | 60209.695 | 61458.953 |
| NM_012327 | 2980.031  | 3446.132  | AF116623  | 731.943   | 1323.189  | NM_012327 | 2097.859  | 1939.661  |
| NM_000904 | 8312.584  | 8788.751  | AF088008  | 2652.644  | 2451.371  | NM_000904 | 4267.157  | 3328.535  |
| NM_01604E | 10256.962 | 11865.302 | AK023528  | 703.112   | 508.229   | NM_01604E | 4407.312  | 2997.403  |
| NM_00037E | 11525.44  | 9679.94   | AK023043  | 1990.501  | 960.083   | NM_00037E | 6944.821  | 3053.777  |
| NM_01884E | 2421.154  | 2401.669  | M33197    | 58755.66  | 58136.469 | NM_00026E | 1021.307  | 722.601   |
| AJ000096  | 1066.916  | 1030.131  | AF147349  | 11117.806 | 12268.816 | NM_01884E | 3256.677  | 2526.487  |
| M33197    | 63736.922 | 66210.672 | AL050346  | 26453.979 | 33656.102 | AJ000096  | 522.668   | 489.066   |
| M16796    | 978.716   | 1142.798  | AK001520  | 6214.68   | 8575.604  | AF279890  | 1221.056  | 1041.499  |
| AF015910  | 25999.504 | 19858.363 | AK021731  | 543.353   | 960.406   | NM_01206E | 1242.383  | 607.766   |
| BC009993  | 4623.398  | 3384.785  | D90070    | 9593.571  | 12236.236 | NM_01790E | 1029.671  | 501.892   |
| M33197    | 66847.945 | 68217.563 | Y12235    | 729.869   | 2217.369  | M33197    | 55347.938 | 58061.656 |
| NM_016824 | 5984.166  | 2853.219  | M33197    | 58501.531 | 61335.285 | NM_00681E | 1239.241  | 1404.524  |
| NM_003031 | 7728.61   | 7553.608  | AF086179  | 1756.118  | 2784.661  | NM_00421E | 1176.246  | 1174.914  |
| NM_00717C | 1543.469  | 1898.906  | AK025807  | 2777.892  | 5476.314  | NM_01653C | 1625.795  | 1430.349  |
| NM_00300E | 1604.517  | 1485.051  | M33197    | 57078.66  | 67153.727 | L40520    | 2209.187  | 1048.796  |
| M33197    | 67041.125 | 65815.102 | AK025266  | 6056.283  | 9971.775  | NM_00263E | 11367.676 | 5339.571  |
| AK027244  | 1958.902  | 1866.956  | AK001843  | 5180.655  | 6714.397  | M33197    | 57938.398 | 47287.352 |
| L40520    | 5493.333  | 5310.821  | AK000548  | 56458.352 | 61674.301 | NM_00287E | 3744.808  | 2400.083  |
| NM_00263E | 25530.066 | 23525.455 | NM_00392C | 25310.35  | 38923.113 | AK022922  | 1229.923  | 789.371   |
| M33197    | 64133.133 | 60736.168 | NM_004787 | 31327.402 | 43573.117 | NM_00646Z | 3449.991  | 4428.967  |
| NM_00287E | 6208.859  | 6562.397  | AF087984  | 6644.413  | 10806.75  | NM_00040C | 12775.396 | 13619.855 |
| NM_01772E | 2077.662  | 2245.19   | AF009302  | 1177.497  | 3097.081  | M33197    | 57343.387 | 60807.406 |
| AK022922  | 3102.716  | 3220.477  | M33197    | 55650.992 | 65747.102 | U47635    | 785.388   | 489.491   |
| NM_00646Z | 6492.626  | 6946.75   | AK022273  | 4982.957  | 4707.344  | AK026945  | 2076.62   | 1891.307  |
| AK024750  | 4470.034  | 4120.369  | NM_01588Z | 1325.266  | 1828.699  | NM_00282E | 1839.465  | 2141.845  |
| NM_00040C | 31163.352 | 27433.031 | AK027161  | 1536.588  | 1225.76   | M33197    | 56289.746 | 55099.039 |
| NM_01588E | 5002.532  | 4534.125  | AK024271  | 1201.71   | 775.83    | NM_00139E | 3901.483  | 2709.118  |
| NM_01588E | 66085.094 | 63824.656 | AK021650  | 6582.716  | 4028.697  | AB050049  | 1182.59   | 1126.56   |
| M33197    | 62922.258 | 60739.43  | AL050210  | 2239.919  | 2843.728  | J05125    | 818.235   | 660.662   |
| NM_00427E | 4790.576  | 4040.501  | D80002    | 2050.386  | 3473.465  | NM_00199E | 339.974   | 275.917   |
| NM_00233Z | 18757.766 | 18640.836 | U17637    | 5081.98   | 10150.938 | NM_00017E | 7650.621  | 2359.24   |
| NM_00285E | 3377.943  | 2277.57   | AF207831  | 895.508   | 1615.593  | NM_01572E | 6185.682  | 4214.631  |
| NM_00524E | 2546.482  | 2402.964  | AK023174  | 624.158   | 1735.213  | R61452    | 730.435   | 608.723   |
| NM_017651 | 1507.255  | 1832.75   | NM_00354E | 1279.641  | 2773.436  | R19938    | 6030.091  | 3575.193  |
| AF161339  | 10450.421 | 13679.395 | M33197    | 53553.82  | 62533.77  | N94487    | 4369.913  | 2892.379  |
| M33197    | 61777.688 | 60788.5   | NM_01827Z | 9387.632  | 16022.113 | AI886795  | 2775.638  | 1621.596  |
| AL137662  | 1472.22   | 1114.583  | CY3Cy5    | 4012.043  | 150.53    | D10495    | 685.692   | 369.373   |
| AK000354  | 5426.474  | 5950.895  | R19938    | 9468.907  | 7387.365  | BF344679  | 1004.543  | 1509.37   |
| AL161984  | 1044.106  | 1024.693  | N94487    | 9248.128  | 8163.997  | M14156    | 3819.976  | 4381.859  |
| NM_01488Z | 2191.383  | 2421.534  | AI886795  | 5126.332  | 5339.063  | U86961    | 443.097   | 514.35    |
| NM_00083E | 1161.222  | 1573.938  | D10495    | 913.696   | 1019.504  | AK094237  | 535.282   | 487.525   |
| M33197    | 63572.063 | 64559.855 | BF344679  | 2150.692  | 2254.087  | NM_006981 | 432.216   | 386.344   |

|           |           |           |           |           |           |           |           |           |
|-----------|-----------|-----------|-----------|-----------|-----------|-----------|-----------|-----------|
| NM_00151C | 1391.458  | 1554.382  | M36634    | 1170.952  | 1202.674  | M33197    | 62597.887 | 63224.082 |
| AK024474  | 6009.865  | 6202.903  | M14156    | 4943.146  | 7574.961  | NM_01844C | 3185.569  | 2051.701  |
| NM_006862 | 993.786   | 1048.054  | U87939    | 877.797   | 745.716   | AF086129  | 789.805   | 418.045   |
| NM_017901 | 1965.816  | 2308.437  | U86961    | 1273.14   | 1197.276  | D79994    | 1233.198  | 836.743   |
| NM_004272 | 5388.833  | 4827.321  | AK094237  | 1475.304  | 1835.323  | NM_01445E | 3700.465  | 1840.99   |
| NM_01758E | 1918.505  | 1928.281  | L07592    | 504.282   | 526.535   | L10333    | 3476.021  | 2780.188  |
| AK023582  | 1763.57   | 1506.429  | NM_006981 | 965.111   | 973.901   | AF235049  | 2522.853  | 1461.9    |
| NM_00035E | 1577.808  | 1890.459  | SR6       | 2226.423  | 1727.414  | M33197    | 62719.102 | 61145.172 |
| NM_00193C | 20599.059 | 20504.012 | SR8       | 8230.873  | 20411.91  | NM_00736E | 1328.134  | 874.683   |
| AK025270  | 1787.292  | 1690.305  | SR10      | 30348.311 | 8242.906  | NM_01477E | 1937.691  | 1364.318  |
| NM_001564 | 5180.893  | 4807.88   | CY3Cy5    | 5633.342  | 231.899   | NM_00648C | 17878.404 | 14231.396 |
| M33197    | 63623.941 | 63144.457 | NM_00736E | 1839.55   | 1696.333  | NM_00722E | 30084.951 | 13938.263 |
| AF263537  | 5097.558  | 6704.009  | NM_01477E | 3735.422  | 3249.085  | AF030107  | 709.088   | 351.149   |
| NM_01589E | 16378.927 | 18151.785 | NM_00648C | 45345.402 | 42650.539 | M33197    | 57517.898 | 59590.004 |
| NM_00018E | 1970.826  | 2095.23   | NM_00722E | 36087.289 | 41129.859 | AB058740  | 1162.925  | 826.261   |
| AL050050  | 2959.252  | 2093.987  | NM_00014E | 1128.155  | 1366.159  | M33197    | 61284.152 | 64042.473 |
| NM_00469C | 2043.193  | 2181.19   | AF030107  | 1751.503  | 1696.802  | NM_001154 | 3470.25   | 3421.304  |
| NM_00122E | 6405.506  | 5956.488  | NM_000871 | 1043.968  | 1228.363  | M33197    | 56508.59  | 58532.895 |
| NM_016561 | 37477.758 | 39220.891 | M33197    | 64233.281 | 59916.785 | NM_00681E | 17309.119 | 11039.805 |
| NM_00122E | 3172.605  | 5596.958  | NM_01896E | 1057.163  | 1164.292  | NM_00166E | 4686.366  | 3657.214  |
| NM_01424E | 30071.367 | 33066.16  | AF086924  | 55176.328 | 55578.934 | NM_00421E | 10121.907 | 8214.124  |
| M33197    | 62992.672 | 64111.168 | NM_000264 | 672.631   | 1157.413  | NM_01653C | 4793.636  | 2731.422  |
| AB046822  | 1877.901  | 1889.43   | AB058740  | 7299.115  | 8960.771  | NM_014804 | 881.076   | 521.02    |
| M33197    | 2933.609  | 3377.222  | NM_00338E | 737.634   | 597.559   | NM_01245E | 4249.795  | 3095.395  |
| AK024809  | 649.972   | 574.005   | NM_00188E | 603.744   | 1011.859  | NM_00280E | 6365.244  | 7154.126  |
| NM_00030E | 3447.203  | 4513.359  | M33197    | 66093.383 | 64134.922 | NM_000074 | 1710.748  | 1410.99   |
| X69636    | 2381.744  | 1745.37   | NM_001154 | 10344.01  | 10785.94  | BF434335  | 8464.041  | 6523.44   |
| M33197    | 64707.91  | 65553.477 | NM_00181E | 2421.19   | 3030.157  | M57627    | 1427.74   | 2420.144  |
| NM_00417E | 13195.01  | 13640.028 | NM_00199E | 1518.883  | 1669.124  | M33197    | 44179.883 | 41720.965 |
| NM_013974 | 3259.662  | 2682.474  | NM_00017E | 5881.739  | 12525.741 | NM_00319E | 438.14    | 568.703   |
| NM_017547 | 5258.026  | 6692.256  | NM_01572E | 6743.017  | 8056.38   | NM_00282E | 4209.491  | 2843.71   |
| NM_00398E | 7960.54   | 8135.8    | R61452    | 1475.513  | 1159.095  | NM_01436E | 643.869   | 467.436   |
| AK023708  | 1833.772  | 2212.83   | NM_01245E | 6360.033  | 6103.454  | M33197    | 53405.246 | 57266.098 |
| NM_00210E | 920.789   | 948.301   | M33197    | 66296.219 | 70210.492 | NM_00139E | 12754.838 | 6238.992  |
| M33197    | 61898.043 | 65858.789 | NM_00171E | 1176.515  | 1188.519  | AB050049  | 4041.398  | 3249.073  |
| NM_018464 | 44620.336 | 56510.641 | NM_00203C | 1382.173  | 1056.115  | J05125    | 1090.554  | 719.933   |
| D43948    | 4976.084  | 3964.064  | NM_00607E | 744.87    | 677.21    | NM_005164 | 457.25    | 363.726   |
| NM_01231C | 8235.493  | 8425.649  | NM_006564 | 6010.042  | 6756.269  | NM_00199E | 1464.908  | 944.989   |
| BF382116  | 7240.882  | 7572.87   | NM_00480E | 2149.787  | 2058.219  | AY004175  | 1604.671  | 773.39    |
| NM_00319E | 10834.298 | 10936.694 | M33197    | 59229.215 | 62684.07  | M33197    | 55076.359 | 60279.613 |
| AK055825  | 63534.691 | 67248.844 | NM_000074 | 7840.366  | 8646.489  | NM_000904 | 2873.127  | 5535.088  |
| AF113216  | 1867.097  | 1716.932  | M57627    | 2354.116  | 2187.751  | NM_00037E | 3598.07   | 4277.974  |
| NM_005197 | 9502.76   | 9264.265  | NM_00299E | 1127.366  | 1747.956  | NM_00026E | 867.209   | 1451.07   |
| AL137421  | 55064.266 | 44925.758 | AK026946  | 1361.495  | 1716.678  | NM_01884E | 1294.969  | 1286.062  |
| M33197    | 66597.813 | 66920.703 | M33197    | 57073.793 | 62472.91  | M33197    | 53313.707 | 58246.09  |
| NM_007241 | 2361.956  | 2712.716  | NM_00319E | 3458.832  | 3858.18   | M16796    | 1094.65   | 1678.175  |
| NM_000124 | 845.803   | 1173.976  | NM_01844E | 4581.374  | 4303.027  | AF279890  | 963.088   | 1251.345  |
| NM_01799E | 7448.437  | 7467.532  | AF086129  | 1219.234  | 1443.713  | NM_01206E | 591.108   | 549.841   |
| NM_014517 | 3420.767  | 2857.36   | NM_01445E | 8861.389  | 8905.604  | NM_00168E | 21803.115 | 25467.273 |
| NM_00546E | 3650.268  | 3458.465  | AF235049  | 6154.839  | 6740.345  | NM_016601 | 1617.404  | 1509.588  |
| NM_00426E | 8561.738  | 11296.329 | NM_005164 | 747.24    | 829.745   | NM_01790E | 1061.376  | 970.499   |
| NM_00340E | 1561.943  | 2194.399  | NM_00199E | 1626.185  | 1823.608  | NM_006981 | 843.531   | 388.901   |
| M33197    | 67170.117 | 65678.352 | NM_00018E | 9578.792  | 8822.99   | M33197    | 60342.832 | 58568.93  |



|           |           |           |           |           |           |           |           |           |
|-----------|-----------|-----------|-----------|-----------|-----------|-----------|-----------|-----------|
| D31765    | 2211.494  | 2055.297  | AY004175  | 2014.557  | 2405.605  | AK027244  | 540.152   | 381.045   |
| NM_006107 | 14845.197 | 10853.856 | M33197    | 64622.25  | 61520.023 | L40520    | 2449.475  | 1641.976  |
| NM_004175 | 814.97    | 1372.701  | NM_012327 | 5341.41   | 5107.011  | NM_002633 | 10686.299 | 6293.834  |
| AF288288  | 14380.271 | 13602.406 | NM_000904 | 6838.666  | 8247.329  | M33197    | 55104.32  | 54876.18  |
| NM_017646 | 5757.266  | 6730.541  | NM_016048 | 8564.84   | 8486.419  | NM_002412 | 547.751   | 1037.585  |
| AL050368  | 1958.624  | 2444.518  | NM_000375 | 9007.967  | 11115.637 | AK022922  | 790.335   | 967.875   |
| NM_003092 | 30716.605 | 41630.148 | NM_018849 | 3493.258  | 4188.293  | NM_006462 | 906.166   | 1143.369  |
| M33197    | 60331.609 | 62357.832 | AJ000096  | 872.707   | 934.18    | AK024750  | 1367.464  | 858.734   |
| NM_005861 | 1534.999  | 2063.976  | NM_002236 | 5048.29   | 6830.788  | NM_000400 | 10193.829 | 10879.564 |
| NM_018848 | 3647.622  | 3752.447  | NM_012069 | 4887.505  | 5029.825  | M33197    | 54599.641 | 60260.461 |
| NM_003760 | 1972.005  | 2051.871  | NM_001689 | 58697.465 | 54573.41  | NM_002613 | 1000.136  | 586.136   |
| AB037759  | 1710.707  | 1548.25   | NM_016601 | 1457.156  | 1915.086  | NM_004419 | 2142.729  | 1734.692  |
| AK025998  | 3779.766  | 3679.214  | NM_017905 | 14516.924 | 14693.865 | U47635    | 761.423   | 666.227   |
| AL080080  | 15210.788 | 16371.037 | NM_006815 | 22075.539 | 23167.459 | AK026945  | 2327.945  | 3185.312  |
| NM_018482 | 2165.928  | 2021.344  | NM_001663 | 4384.799  | 5275.77   | NM_001888 | 1033.176  | 492.433   |
| NM_017880 | 3028.253  | 2905.194  | NM_004218 | 16514.668 | 16256.417 | M33197    | 59917.121 | 60991.207 |
| AF090945  | 4437.604  | 3782.231  | NM_016530 | 8348.041  | 9780.566  | NM_001154 | 6515.579  | 5056.689  |
| M33197    | 65672.773 | 66301.297 | NM_014804 | 1182.963  | 1870.882  | NM_001819 | 692.095   | 282.298   |
| NM_001161 | 10543.593 | 10486.239 | L40520    | 2845.688  | 2800.913  | NM_016938 | 1597.865  | 1590.937  |
| NM_004044 | 11298.59  | 12663.767 | NM_002633 | 14796.268 | 15644.376 | NM_001993 | 479.051   | 453.887   |
| NM_000221 | 14515.509 | 11901.866 | NM_002878 | 8712.97   | 12045.434 | BF575833  | 784.741   | 1148.406  |
| H75678    | 2133.682  | 2824.905  | NM_017723 | 1236.807  | 1166.332  | NM_000175 | 7629.796  | 3661.076  |
| NM_002535 | 1272.121  | 1728.478  | AK022922  | 2517.23   | 1907.339  | NM_015725 | 4815.845  | 3085.764  |
| NM_006452 | 27145.072 | 28527.848 | NM_006462 | 4055.857  | 4286.517  | R61452    | 632.366   | 625.127   |
| AB002359  | 2409.709  | 2543.122  | NM_000400 | 33838.434 | 39973.352 | R19938    | 5282.814  | 4364.673  |
| M33197    | 6846.923  | 7853.341  | M33197    | 58691.203 | 62458.473 | N94487    | 2698.386  | 2352.418  |
| AB007864  | 1283.14   | 1106.747  | NM_002613 | 6937.332  | 7086.409  | AI886795  | 1878.58   | 1541.261  |
| NM_002198 | 6580.911  | 8620.63   | NM_004419 | 6140.583  | 6243.203  | D10495    | 710.731   | 965.106   |
| AF024693  | 851.657   | 1090.284  | U47635    | 7550.389  | 6208.774  | BF344679  | 1110.766  | 1136.668  |
| AK025905  | 2347.694  | 2638.271  | NM_018650 | 2427.574  | 2601.488  | M36634    | 876.254   | 1227.759  |
| AL121733  | 2613.905  | 3026.71   | AK026945  | 13216.265 | 11046.355 | M14156    | 1578.677  | 1203.936  |
| M33197    | 60593.934 | 58909.641 | M33197    | 64920.93  | 62145.293 | U86961    | 453.542   | 505.953   |
| NM_017532 | 674.374   | 1125.578  | NM_001398 | 21447.355 | 24142.842 | AK094237  | 362.921   | 445.049   |
| NM_014480 | 1758.203  | 1696.052  | AB050049  | 5035.24   | 5092.682  | L07592    | 949.093   | 716.273   |
| NM_005938 | 695.423   | 733.425   | J05125    | 1116.318  | 1174.479  | BF434335  | 24100.875 | 26334.256 |
| NM_014169 | 11307.109 | 11977.438 | NM_000175 | 5571.073  | 8974.88   | M57627    | 592.31    | 496.778   |
| NM_004964 | 37896.945 | 42468.27  | NM_015725 | 9061.94   | 8855.998  | NM_002993 | 1126.627  | 684.645   |
| AL117497  | 1680.109  | 1340.141  | R61452    | 2057.028  | 1869.279  | AK026946  | 1055.522  | 643.533   |
| AK023612  | 1440.335  | 1011.546  | R19938    | 11736.219 | 11341.025 | M33197    | 62867.242 | 55581.227 |
| M33197    | 66559.039 | 68845.555 | AI886795  | 4845.996  | 7022.854  | NM_003192 | 1829.321  | 1034.914  |
| AF147360  | 1204.51   | 1185.382  | D10495    | 805.222   | 902.886   | NM_018449 | 3307.126  | 2188.386  |
| AL137269  | 15982.519 | 18856.24  | BF344679  | 1112.922  | 1283.838  | AF086129  | 963.89    | 645.437   |
| AK021983  | 3309.83   | 3869.885  | M36634    | 844.733   | 788.758   | NM_014458 | 2832.564  | 3052.301  |
| Y11681    | 16377.876 | 16457     | M14156    | 3634.94   | 4572.517  | AF235049  | 1580.393  | 1850.377  |
| AL110135  | 18199.902 | 14918.144 | U87939    | 725.441   | 903.9     | M33197    | 57423.832 | 61629.527 |
| NM_006993 | 27422.881 | 31328.199 | U86961    | 1103.068  | 1138.54   | NM_007369 | 738.143   | 732.954   |
| NM_002336 | 1020.672  | 1021.45   | AK094237  | 1695.262  | 1683.108  | NM_014776 | 1159.272  | 1477.34   |
| M33197    | 67182.898 | 65115.953 | L07592    | 393.215   | 518.667   | NM_006480 | 7472.857  | 9912.652  |
| AF086429  | 915.011   | 1034.081  | NM_006981 | 1139.389  | 1119.159  | NM_007223 | 13278.816 | 14203.92  |
| AF086302  | 3075.894  | 2652.116  | M33197    | 65705.789 | 63675.973 | NM_000145 | 650.119   | 611.001   |
| AF086439  | 942.304   | 1077.146  | AK027244  | 1043.796  | 1638.517  | M33197    | 58793.148 | 60851.926 |
| M33197    | 66541.453 | 71881.914 | NM_018449 | 3877.657  | 3802.085  | AF086924  | 19562.818 | 17062.676 |
| AF038171  | 1229.843  | 1610.209  | AF086129  | 869.359   | 765.15    | AB058740  | 1006.206  | 781.001   |

|           |           |           |           |           |           |           |           |           |
|-----------|-----------|-----------|-----------|-----------|-----------|-----------|-----------|-----------|
| AF052160  | 939.525   | 1085.337  | NM_014458 | 6346.14   | 6228.852  | AF279890  | 2386.725  | 2704.155  |
| AK026512  | 1399.039  | 1514.223  | AF235049  | 10948.921 | 12208.673 | NM_002236 | 2115.621  | 2572.644  |
| M33197    | 61216.418 | 61046.961 | M33197    | 65216.086 | 65554.586 | NM_012069 | 2144.3    | 1740.975  |
| AF144233  | 3286.749  | 2363.881  | NM_007369 | 1744.074  | 2365.759  | NM_001689 | 51686.137 | 31295.723 |
| AF085975  | 1824.643  | 1840.751  | NM_014776 | 4292.754  | 4616.117  | NM_016601 | 1087.493  | 1049.244  |
| AF075103  | 1923.192  | 2238.945  | NM_006480 | 30556.109 | 33691.828 | NM_017905 | 8292.629  | 5894.669  |
| AF085943  | 1092.236  | 1057.889  | NM_007223 | 35145.777 | 42392.961 | M33197    | 55259.898 | 53633.652 |
| M33197    | 63387.801 | 60477.27  | NM_000145 | 728.031   | 824.293   | NM_006815 | 13483.68  | 14190.226 |
| AL137390  | 3759.313  | 4843.978  | AF030107  | 1371.441  | 1203.097  | NM_001663 | 1943.759  | 2685.979  |
| AL137611  | 6062.53   | 6487.182  | NM_000871 | 610.649   | 571.407   | NM_004218 | 6725.154  | 10176.895 |
| AL359566  | 31548.25  | 30039.168 | M33197    | 63074.68  | 62550.754 | NM_016530 | 3607.363  | 5564.728  |
| AL133110  | 656.286   | 669.635   | NM_018968 | 812.524   | 772.699   | NM_014804 | 600.863   | 905.116   |
| AL137427  | 3039.171  | 3065.438  | AF086924  | 40559.441 | 46304.93  | NM_012455 | 1585.014  | 2796.974  |
| AL157460  | 3563.688  | 4041.088  | NM_000264 | 618.202   | 710.954   | NM_002806 | 2842.054  | 4432.87   |
| AL359595  | 790.487   | 759.145   | AB058740  | 6511.729  | 5885.731  | M33197    | 60609.34  | 63456.684 |
| M33197    | 60541.234 | 62142.203 | NM_003385 | 680.442   | 825.498   | NM_006564 | 1160.931  | 1153.717  |
| AK026718  | 2641.56   | 3091.409  | NM_001888 | 685.381   | 1005.104  | M33197    | 59604.801 | 63141.129 |
| AF085899  | 1952.935  | 1898.517  | M33197    | 61630.383 | 66815.477 | NM_000074 | 887.849   | 704.475   |
| AK022035  | 5949.791  | 7152.687  | NM_001154 | 10441.125 | 10431.593 | NM_020393 | 1312.095  | 624.622   |
| M33197    | 62295.309 | 64837.145 | NM_001819 | 1973.423  | 2035.608  | M33197    | 56047.883 | 63210.98  |
| NM_004337 | 3517.498  | 4159.91   | NM_016938 | 637.789   | 803.773   | NM_002613 | 4657.271  | 8824.978  |
| AK022141  | 1074.862  | 894.185   | NM_006815 | 20541.447 | 21984.096 | NM_004419 | 3836.734  | 3005.327  |
| AK023942  | 32957.809 | 26358.855 | NM_001663 | 4179.237  | 5622.351  | U47635    | 2726.024  | 2214.716  |
| M33197    | 66821.039 | 64247.965 | NM_004218 | 17320.635 | 16802.264 | NM_018650 | 893.065   | 623.212   |
| AK027207  | 1597.231  | 1800.481  | NM_016530 | 10522.655 | 10998.448 | AK026945  | 7850.016  | 6441.945  |
| AJ227892  | 2910.484  | 3243.016  | NM_014804 | 1801.258  | 2264.667  | NM_002828 | 2136.429  | 1030.308  |
| M33197    | 62138.918 | 58435.922 | NM_012455 | 9495.827  | 9664.308  | M33197    | 59728.207 | 62492.285 |
| AK022013  | 1544.938  | 1514.433  | NM_002806 | 11744.274 | 11242.5   | NM_001398 | 5112.929  | 5331.652  |
| AK022155  | 2778.009  | 2776.759  | NM_001716 | 978.181   | 1014.182  | J05125    | 876.197   | 1675.947  |
| AK022288  | 1283.399  | 1393.689  | NM_006564 | 3416.359  | 3366.82   | NM_001995 | 1265.249  | 1353.103  |
| AK021916  | 802.564   | 860.15    | NM_004802 | 1463.808  | 1601.611  | NM_000183 | 683.47    | 721.411   |
| AK024201  | 1062.726  | 923.039   | M33197    | 63028.488 | 65694.266 | NM_000904 | 1252.908  | 1712.299  |
| M33197    | 63079.145 | 63016.238 | NM_000074 | 4938.543  | 5891.211  | NM_016048 | 739.887   | 763.861   |
| AK021589  | 677.222   | 840.064   | BF434335  | 26369.096 | 26309.918 | NM_000375 | 3869.926  | 3534.405  |
| D17152    | 17023.527 | 16493.195 | M57627    | 1172.825  | 998.424   | NM_018849 | 1519.183  | 1425.651  |
| AK024464  | 17022.76  | 14178.464 | NM_002993 | 1380.936  | 2070.953  | M33197    | 50476.945 | 48402.613 |
| AK023638  | 948.306   | 982.122   | AK026946  | 1215.166  | 1564.173  | M16796    | 757.222   | 974.764   |
| M33197    | 1544.533  | 2301.996  | M33197    | 62900.961 | 64242.445 | AF015910  | 50709.523 | 48691.09  |
| AK025423  | 4763.425  | 4825.291  | NM_003192 | 3093.815  | 4378.17   | BC009993  | 3470.13   | 4416.813  |
| M33197    | 61197.813 | 58677.594 | NM_014369 | 632.407   | 1223.378  | M33197    | 56442.473 | 60968.707 |
| AL049846  | 1304.906  | 1366.164  | M33197    | 62710.051 | 68231.078 | NM_016824 | 2038.489  | 982.77    |
| AK024161  | 1795.996  | 1758.571  | NM_001398 | 26171.854 | 36094.723 | NM_003031 | 3379.649  | 3586.28   |
| AK021682  | 16236.65  | 13857.737 | AB050049  | 5927.251  | 6177.975  | L40520    | 1131.67   | 1994.255  |
| AJ012500  | 2673.865  | 2153.001  | J05125    | 1354.919  | 1374.38   | NM_006680 | 689.177   | 1054.183  |
| AF085833  | 1060.539  | 895.761   | NM_005164 | 745.956   | 869.053   | NM_002633 | 2597.351  | 3208.888  |
| U00944    | 916.589   | 1235.018  | NM_001995 | 2059.043  | 2610.967  | M33197    | 42794.504 | 40952.895 |
| BC035058  | 6327.085  | 6590.261  | AY004175  | 2049.09   | 2309.973  | NM_002878 | 837.269   | 684.039   |
| X57566    | 8353.962  | 10438.841 | M33197    | 60140.188 | 62289.574 | NM_017723 | 838.103   | 1025.247  |
| M33197    | 67090.555 | 69239.93  | NM_012327 | 3418.88   | 2987.831  | AK022922  | 775.716   | 1013.445  |
| NM_018616 | 17067.729 | 19827.201 | NM_000904 | 4979.916  | 4555.302  | NM_006462 | 864.792   | 751.197   |
| AK023809  | 2976.696  | 3399.226  | NM_016048 | 6387.089  | 5406.614  | AK024750  | 1744.415  | 1115.422  |
| AL137590  | 2562.294  | 2333.836  | NM_000375 | 6259.765  | 6625.795  | NM_000400 | 12236.857 | 13962.115 |
| M87943    | 66614.227 | 69768.008 | NM_018849 | 2784.833  | 3249.335  | NM_015885 | 2216.764  | 2053.895  |

|           |           |           |           |           |           |           |           |           |
|-----------|-----------|-----------|-----------|-----------|-----------|-----------|-----------|-----------|
| AL360137  | 2622.731  | 2688.175  | M33197    | 57802.918 | 62796.457 | AK027157  | 542.64    | 628.448   |
| U28131    | 63446.016 | 60261.141 | AF279890  | 6152.575  | 7432.435  | NM_015888 | 57739.211 | 59948.129 |
| AY007106  | 5554.589  | 6373.796  | NM_002236 | 5900.1    | 7191.559  | M33197    | 63367.891 | 62550.375 |
| M33197    | 66217.539 | 68455.281 | NM_012069 | 5351.881  | 5591.051  | NM_004276 | 1565.464  | 1357.057  |
| NM_006088 | 50188.363 | 48519.098 | NM_001689 | 55714.691 | 60457.785 | NM_002332 | 6374.37   | 5153.477  |
| AF130086  | 4352.011  | 4166.087  | NM_016601 | 2256.866  | 3089.217  | NM_005246 | 1081.15   | 1158.459  |
| AK023858  | 11521.015 | 9973.686  | NM_017905 | 14012.539 | 16749.002 | M33197    | 59370.352 | 63397.727 |
| M33197    | 63727.359 | 62469.605 | NM_006981 | 900.522   | 954.574   | M33197    | 57626.363 | 63197.531 |
| AF250920  | 3142.918  | 4009.816  | M33197    | 64646.195 | 63522     | NM_001510 | 731.664   | 864.863   |
| NM_017733 | 5798.094  | 5931.318  | AK027244  | 976.21    | 1236.104  | AK024474  | 2791.101  | 3839.234  |
| NM_014042 | 22024.17  | 23936.881 | L40520    | 4470.728  | 4016.274  | NM_017901 | 413.564   | 720.432   |
| M33197    | 61729.145 | 63699.023 | NM_002633 | 17251.008 | 19142.258 | NM_004272 | 1215.099  | 1114.898  |
| AK025416  | 847.116   | 1054.67   | NM_002878 | 6198.031  | 5310.785  | NM_017588 | 909.683   | 776.202   |
| AK022165  | 1143.542  | 958.184   | NM_017723 | 1616.76   | 1778.66   | NM_000358 | 1088.893  | 1012.629  |
| AF090883  | 949.89    | 882.79    | AK022922  | 2149.303  | 1534.177  | NM_001930 | 8179.138  | 5380.325  |
| U23860    | 1358.316  | 1497.597  | NM_006462 | 3319.833  | 4118.1    | AK025270  | 850.717   | 769.822   |
| M33197    | 59550.973 | 61926.699 | AK024750  | 8313.456  | 9699.481  | NM_001564 | 1475.088  | 777.832   |
| AL049263  | 1272.526  | 1265.008  | NM_000400 | 52567.5   | 58519.848 | M33197    | 53987.121 | 46878.77  |
| AK022372  | 4157.531  | 5380.819  | M33197    | 63150.586 | 62062.105 | AF263537  | 2462.692  | 2265.808  |
| AJ227863  | 1080.052  | 999.092   | NM_002613 | 7091.775  | 6455.697  | NM_015895 | 887.22    | 1025.188  |
| NM_003520 | 996.523   | 877.363   | NM_004419 | 8253.428  | 9552.053  | NM_000188 | 1010.446  | 800.873   |
| M33197    | 60666.805 | 61290.273 | U47635    | 7933.328  | 9190.007  | AL050050  | 1079.488  | 1425.338  |
| AL137658  | 32020.684 | 24931.74  | NM_018650 | 3554.213  | 4249.291  | NM_005256 | 458.167   | 984.422   |
| D16888    | 1021.162  | 1056.792  | AK026945  | 15398.436 | 16429.352 | M33197    | 59969.156 | 65346.207 |
| AF068298  | 7447.301  | 7322.967  | NM_001888 | 696.491   | 875.926   | NM_013374 | 12786.708 | 12641.169 |
| Z70770    | 2619.315  | 2322.863  | M33197    | 62707.387 | 63179.508 | NM_003252 | 2331.661  | 1983.703  |
| AJ227900  | 4880.774  | 5446.045  | NM_001154 | 14343.262 | 11839.325 | NM_001228 | 1117.202  | 1111.684  |
| AK023242  | 1143.869  | 1263.257  | NM_001819 | 2157.949  | 1561.156  | NM_016561 | 3746.493  | 3463.008  |
| M33197    | 62279.594 | 63561.027 | NM_016938 | 985.993   | 922.864   | NM_001225 | 468.103   | 1000.583  |
| CY3Cy5    | 11637.96  | 537.21    | NM_001993 | 1047.744  | 1178.588  | NM_014245 | 11226.422 | 15004.417 |
| Y10802    | 1204.35   | 1722.642  | NM_000175 | 5619.403  | 11814.872 | M33197    | 57585.453 | 62161.367 |
| AI417775  | 649.868   | 1121.105  | NM_015725 | 7310.505  | 8588.806  | AL110226  | 52861.395 | 57275.605 |
| BG618320  | 1249.132  | 1494.79   | R61452    | 1210.266  | 1175.625  | AB046822  | 468.319   | 819.911   |
| Y00787    | 1119.435  | 1124.869  | R19938    | 8634.118  | 7000.212  | M33197    | 1014.417  | 1156.797  |
| NM_007276 | 4334.356  | 3101.13   | AI886795  | 3193.294  | 3967.322  | L09097    | 1952.357  | 2797.968  |
| N34462    | 1129.981  | 1200.175  | D10495    | 981.719   | 1448.449  | AK024809  | 1042.468  | 987.914   |
| AI658778  | 2147.36   | 1946.529  | BF344679  | 769.627   | 951.856   | NM_000308 | 1274.939  | 1128.442  |
| L19067    | 6871.489  | 7582.018  | M36634    | 1663.583  | 1781.083  | X69636    | 731.863   | 453.295   |
| Z48482    | 767.103   | 516.628   | M14156    | 4239.005  | 6170.736  | M33197    | 53254.309 | 53688.695 |
| BI823365  | 3518.992  | 3714.894  | U87939    | 1285.375  | 1185.36   | NM_004173 | 3816.139  | 4433.52   |
| X06318    | 6974.548  | 7181.019  | U86961    | 1131.718  | 1459.546  | NM_013974 | 945.165   | 979.572   |
| AL834159  | 3352.957  | 2926.768  | NM_005191 | 551.175   | 610.182   | NM_017547 | 1300.787  | 1763.638  |
| NM_000164 | 6495.079  | 4909.631  | AK094237  | 2199.427  | 2498.316  | NM_003983 | 3393.108  | 5708.688  |
| SR5       | 8621.495  | 7950.253  | L07592    | 1094.678  | 948.56    | AK023708  | 1224.611  | 1442.542  |
| SR7       | 7128.306  | 47124.328 | BF434335  | 24415.328 | 20107.49  | M33197    | 53749.945 | 62501.238 |
| SR9       | 23207.588 | 4046.382  | NM_002993 | 1033.337  | 1386.523  | NM_018464 | 5728.486  | 6592.625  |
| CY3Cy5    | 8578.338  | 350.773   | AK026946  | 1604.253  | 1360.821  | D43948    | 475.732   | 353.672   |
| NM_003682 | 893.588   | 923.134   | M33197    | 63095.082 | 61668.035 | NM_012310 | 1565.577  | 1521.948  |
| NM_006314 | 3037.822  | 2540.401  | NM_003192 | 4035.3    | 5001.15   | BF382116  | 1800.733  | 1211.706  |
| NM_000797 | 1186.846  | 1553.448  | NM_018449 | 5309.94   | 5481.364  | NM_003193 | 3244.397  | 3330.885  |
| NM_014927 | 3003.839  | 3003.633  | AF086129  | 1284.808  | 1713.702  | M33197    | 48407.5   | 55143.91  |
| NM_016293 | 10376.162 | 12328.693 | NM_014458 | 5374.889  | 5948.555  | NM_007241 | 1396.351  | 1198.63   |
| AL080148  | 1545.887  | 1426.814  | AF235049  | 3886.907  | 3731.147  | NM_014517 | 727.419   | 509.768   |

|           |           |           |           |           |           |           |           |           |
|-----------|-----------|-----------|-----------|-----------|-----------|-----------|-----------|-----------|
| NM_006731 | 1150.723  | 1341.222  | M33197    | 63965.949 | 64677.52  | NM_005466 | 637.888   | 501.694   |
| NM_014061 | 1007.269  | 890.678   | NM_007369 | 1270.221  | 1202.211  | NM_003409 | 654.739   | 881.746   |
| NM_002479 | 923.773   | 905.592   | NM_014776 | 1958.926  | 1874.833  | M33197    | 56070.715 | 56836.309 |
| NM_000348 | 1113.928  | 1266.053  | NM_006480 | 25223.605 | 24749.078 | D31765    | 1338.568  | 2014.429  |
| NM_000724 | 3711.051  | 3631.76   | NM_007223 | 42452.488 | 44875.16  | NM_006107 | 2380.727  | 1539.613  |
| NM_002557 | 6061.081  | 4271.306  | NM_000145 | 936.707   | 973.324   | NM_004175 | 564.333   | 1157.118  |
| NM_005662 | 56624.086 | 60037.898 | AF030107  | 2059.902  | 2357.402  | AF288288  | 5695.005  | 7735.836  |
| NM_003060 | 783.466   | 555.348   | NM_000871 | 1204.736  | 1757.923  | NM_017646 | 1943.17   | 1982.661  |
| AK021489  | 32000.734 | 32813.84  | M33197    | 62335.746 | 59188.871 | AL050368  | 620.82    | 570.061   |
| NM_003895 | 874.169   | 636.814   | NM_018968 | 2126.51   | 3440.088  | NM_003092 | 9130.677  | 12445.778 |
| NM_004317 | 10085.881 | 10673.525 | NM_000264 | 1184.786  | 1341.347  | M33197    | 54703.094 | 60133.398 |
| NM_014645 | 3125.133  | 3504.896  | AB058740  | 11922.92  | 13249.102 | NM_005861 | 667.475   | 833.843   |
| NM_014708 | 3123.817  | 3245.078  | NM_003385 | 943.138   | 1371.356  | NM_003760 | 680.534   | 739.324   |
| NM_003693 | 1003.178  | 1724.89   | AF279890  | 1561.878  | 1622.886  | NM_017880 | 679.558   | 871.075   |
| NM_000356 | 16663.121 | 17670.063 | NM_002236 | 2014.687  | 1892.89   | AF090945  | 1301.933  | 790.852   |
| NM_018134 | 27220.568 | 19048.645 | NM_012069 | 3756.175  | 2822.671  | M33197    | 35155.512 | 24268.465 |
| NM_013247 | 8242.471  | 10353.346 | NM_001689 | 60259.887 | 52805.656 | NM_001161 | 1806.019  | 1195.571  |
| NM_006770 | 1357.781  | 1427.419  | NM_016601 | 1542.83   | 2467.404  | NM_004044 | 1102.089  | 874.23    |
| NM_004703 | 2901.296  | 2975.874  | NM_017905 | 20776.764 | 19689.436 | NM_000221 | 4657.717  | 3460.083  |
| NM_001512 | 1233.235  | 753.333   | M33197    | 62376.09  | 60423.531 | H75678    | 596.378   | 1132.511  |
| NM_014706 | 7335.053  | 8474.36   | NM_006815 | 29923.07  | 32905.895 | NM_002535 | 636.969   | 943.679   |
| NM_014007 | 1270.624  | 1133.277  | NM_001663 | 5528.304  | 6049.245  | NM_006452 | 4219.176  | 5762.625  |
| AB033006  | 3539.868  | 2483.117  | NM_004218 | 15089.996 | 14558.605 | AB002359  | 987.221   | 1686.121  |
| AF020314  | 1562.367  | 1855.686  | NM_016530 | 8003.324  | 9003.019  | M33197    | 1407.494  | 1622.598  |
| NM_016332 | 6365.849  | 4843.015  | NM_014804 | 1164.387  | 1297.516  | NM_002198 | 1359.188  | 1753.946  |
| NM_006457 | 2842.305  | 3536.184  | NM_012455 | 5909.265  | 5450.566  | AK025905  | 861.979   | 678.942   |
| AF000381  | 5530.317  | 5355.32   | NM_002806 | 10174.184 | 7521.183  | M33197    | 48624.996 | 47817.164 |
| NM_012105 | 5644.109  | 4246.877  | M33197    | 66471.391 | 63088.523 | NM_014165 | 3420.459  | 2859.318  |
| NM_002004 | 1394.854  | 1673.777  | NM_001716 | 875.293   | 1140.164  | NM_004964 | 10859.836 | 10823.712 |
| NM_005121 | 1557.169  | 1141.404  | NM_006564 | 6618.56   | 6377.175  | AF075016  | 683.885   | 615.948   |
| NM_001643 | 38806.75  | 35374.781 | NM_004802 | 3549.87   | 3843.933  | M33197    | 58353.863 | 51934.223 |
| NM_020221 | 918.028   | 889.129   | NM_002983 | 679.024   | 601.737   | AL137269  | 4089.876  | 5358.847  |
| NM_000747 | 1947.023  | 1862.973  | NM_000074 | 12841.656 | 11649.186 | AK021983  | 1122.402  | 1649.115  |
| NM_005415 | 3564.943  | 3325.075  | NM_020393 | 709.619   | 773.096   | Y11681    | 3074.038  | 4024.321  |
| AJ275973  | 16256.711 | 12402.618 | M33197    | 60377.719 | 54132.43  | AL110135  | 11039.275 | 16462.613 |
| NM_006493 | 4401.294  | 3334.116  | NM_002613 | 4545.586  | 2726.588  | NM_006993 | 7715.063  | 5536.266  |
| U76362    | 1556.049  | 1109.466  | NM_004419 | 5706.496  | 4027.378  | NM_002336 | 2836.478  | 3587.325  |
| NM_014228 | 2448.613  | 1687.463  | U47635    | 7998.458  | 4696.04   | M33197    | 60286.199 | 62488.719 |
| AL832292  | 6033.371  | 2504.815  | NM_018650 | 3664.526  | 2312.278  | AF086429  | 531.094   | 471.44    |
| NM_003045 | 7388.424  | 9840.358  | AK026945  | 19680.59  | 12304.974 | AF086302  | 764.265   | 1113.262  |
| NM_002618 | 2418.591  | 2075.611  | NM_002828 | 7106.035  | 6216.778  | M33197    | 55943.582 | 60451.832 |
| L27479    | 1048.592  | 1148.581  | M33197    | 61287.543 | 56999.898 | AF052160  | 782.883   | 1288.201  |
| NM_002193 | 857.871   | 824.899   | NM_001398 | 21171.252 | 17477.779 | AK026512  | 643.782   | 797.038   |
| NM_001388 | 6389.298  | 6177.208  | AB050049  | 4925.356  | 4246.906  | M33197    | 45619.59  | 32309.896 |
| Z36821    | 6503.082  | 5633.711  | J05125    | 2495.932  | 2176.98   | AF144233  | 1495.843  | 1579.574  |
| AF289485  | 5509.869  | 6086.33   | NM_001995 | 1607.506  | 1212.074  | AF085975  | 705.772   | 751.834   |
| AF130092  | 1301.797  | 1236.564  | NM_000183 | 8735.573  | 6181.037  | AF085943  | 538.277   | 900.318   |
| NM_016095 | 7806.165  | 6892.906  | AY004175  | 1880.914  | 1557.307  | M33197    | 58063.961 | 65608.563 |
| AK024794  | 2091.081  | 1746.815  | M33197    | 63245.422 | 60542.008 | AL137390  | 972.885   | 1310.132  |
| NM_019853 | 11089.096 | 9233.899  | NM_012327 | 5480.594  | 3882.872  | AL137611  | 1219.104  | 1258.408  |
| NM_017992 | 3938.393  | 4116.475  | NM_000904 | 5857.575  | 4560.958  | AL359566  | 11843.388 | 12867.985 |
| AK023061  | 622.766   | 684.516   | NM_016048 | 8244.403  | 5637.735  | AL133110  | 490.03    | 526.771   |
| NM_007255 | 1790.357  | 1099.948  | NM_000375 | 10617.929 | 10213.802 | AL137427  | 2372.753  | 3391.346  |

|           |           |           |           |           |           |            |           |           |
|-----------|-----------|-----------|-----------|-----------|-----------|------------|-----------|-----------|
| NM_00366E | 10768.854 | 6849.177  | NM_018849 | 5942.59   | 5269.256  | AL157460   | 1169.063  | 1785.604  |
| NM_013384 | 68401.031 | 60393.387 | AJ000096  | 655.876   | 648.947   | M33197     | 51509.434 | 56059.645 |
| NM_001187 | 2808.056  | 1678.455  | M33197    | 62154.977 | 58429.551 | AJ245600   | 1270.864  | 2169.805  |
| NM_018241 | 5796.611  | 4032.962  | AF015910  | 58884.953 | 49318.559 | AK022035   | 2383.539  | 2536.183  |
| NM_005834 | 11070.554 | 11055.448 | BC009993  | 2768.186  | 2143.177  | M33197     | 56095.172 | 61995.098 |
| NM_000724 | 4020.393  | 5028.795  | M33197    | 62975.328 | 57299.066 | NM_004337  | 768.602   | 882.033   |
| NM_002557 | 6586.3    | 6014.711  | NM_016824 | 2526.672  | 2429.354  | M33197     | 55100.09  | 42741.832 |
| BI762229  | 24899.797 | 29392.416 | NM_003031 | 8097.265  | 4552.021  | AF143323   | 702       | 1016.199  |
| BG618320  | 1091.502  | 1204.569  | NM_00300E | 2033.85   | 1641.16   | M33197     | 59429.637 | 54487.055 |
| Y00787    | 911.252   | 653.613   | M33197    | 63613.527 | 62397.563 | AK022013   | 697.506   | 476.819   |
| NM_00727E | 4560.791  | 3177.867  | AK027244  | 1009.204  | 860.355   | AK022155   | 2442.882  | 2516.361  |
| N34462    | 1073.596  | 935.764   | L40520    | 2815.496  | 1972.412  | AK021916   | 1053.838  | 1847.479  |
| AI658778  | 2170.965  | 1942.478  | NM_002633 | 13934.312 | 12346.874 | M33197     | 55479.906 | 58557.105 |
| L19067    | 6484.648  | 6297.793  | M33197    | 60883.145 | 57371.105 | AK021589   | 395.623   | 549.058   |
| NM_016217 | 14130.899 | 10566.351 | NM_00287E | 11105.238 | 9943.702  | D17152     | 7149.552  | 7856.86   |
| AK025971  | 5154.228  | 4481.947  | NM_017723 | 3280.74   | 3182.189  | AK025423   | 1218.421  | 1175.752  |
| NM_014007 | 1194.462  | 1608.675  | AK022922  | 3713.856  | 3124.306  | AK024194   | 1226.004  | 1204.448  |
| AB033006  | 3428.271  | 3070.567  | NM_006462 | 6832.641  | 7382.823  | AL050022   | 1600.409  | 295.944   |
| AF020314  | 1292.774  | 2090.383  | AK024750  | 12754.442 | 14260.163 | unknown (S | 924.07    | 739.619   |
| NM_016332 | 5236.825  | 4814.286  | NM_00040C | 52312.184 | 58139.844 | M33197     | 48391.297 | 57143.316 |
| NM_006457 | 2810.729  | 3122.314  | NM_01588E | 3839.928  | 2691.635  | AK021682   | 5829.318  | 6062.962  |
| NM_003682 | 866.935   | 855.599   | NM_01588E | 62340.152 | 54635.004 | BC035058   | 1236.622  | 1502.396  |
| NM_000207 | 638.877   | 854.433   | M33197    | 63906.566 | 61620.344 | X57566     | 2013.064  | 2756.975  |
| NM_006314 | 4171.243  | 3556.023  | NM_00427E | 4582.849  | 4986.432  | M33197     | 58611.109 | 62801.824 |
| NM_001782 | 1753.525  | 2148.147  | NM_00524E | 2778.372  | 2208.66   | NM_01861E  | 4358.8    | 5351.065  |
| NM_000797 | 1855.069  | 1768.772  | NM_017651 | 1165.125  | 1152.328  | M87943     | 57515.551 | 60814.758 |
| NM_016293 | 10133.017 | 11555.669 | AF161339  | 6177.606  | 5262.098  | AL360137   | 932.802   | 993.534   |
| AL080148  | 1200.948  | 832.972   | M33197    | 65865.484 | 63043.223 | U28131     | 53194.402 | 53847.422 |
| NM_014061 | 849.971   | 1079.312  | AK000354  | 3044.798  | 2443.392  | M33197     | 57394.836 | 63032.883 |
| NM_00034E | 1371.821  | 1169.176  | NM_014882 | 2185.293  | 2342.594  | NM_00608E  | 10522.354 | 10240.338 |
| NM_00505E | 1098.07   | 1017.185  | NM_00083E | 932.149   | 1136.482  | AF130086   | 827.208   | 1049.278  |
| NM_00495C | 1830.071  | 1238.184  | M33197    | 63836.855 | 67105.977 | AK023858   | 6142.301  | 8825.921  |
| NM_006493 | 5637.823  | 6351.451  | NM_00151C | 2786.785  | 3031.621  | M33197     | 53387.297 | 55256.227 |
| U76362    | 2106.049  | 2060.915  | AK024474  | 9623.096  | 10150.121 | AF250920   | 681.265   | 687.151   |
| NM_01422E | 1096.685  | 1046.289  | NM_017901 | 2233.07   | 1981.287  | NM_017733  | 1312.522  | 1493.969  |
| AL832292  | 6115.498  | 2572.025  | NM_004272 | 3274.672  | 3240.428  | NM_014042  | 6601.933  | 7200.354  |
| NM_00304E | 6196.179  | 6421.507  | NM_01758E | 2050.843  | 1773.593  | M33197     | 58300.199 | 58777.051 |
| NM_004317 | 10134.228 | 9632.365  | AK023582  | 1356.475  | 1145.034  | AK022165   | 404.56    | 799.878   |
| NM_01464E | 3482.145  | 3536.466  | NM_00035E | 1605.078  | 1257.196  | M33197     | 47884.676 | 45057.676 |
| NM_01470E | 3626.217  | 3031.406  | NM_00193C | 14066.925 | 10471.198 | AK022372   | 2048.191  | 2385.008  |
| NM_003693 | 772.577   | 838.313   | AK025270  | 1591.697  | 1085.015  | M33197     | 49882.594 | 54887.25  |
| NM_00035E | 18681.855 | 14907.307 | NM_001564 | 3659.488  | 2521.999  | AL137658   | 9068.799  | 10114.974 |
| NM_018134 | 26323.033 | 19156.025 | M33197    | 63157.797 | 60391.34  | AF068298   | 1421.663  | 1387.843  |
| NM_00677C | 1048.045  | 1321.272  | NM_00467E | 1342.424  | 1303.988  | Z70770     | 1018.696  | 1240.664  |
| BE394704  | 621.182   | 798.266   | NM_00018E | 929.832   | 735.576   | AJ227900   | 1248.397  | 1282.906  |
| NM_004703 | 3341.636  | 5029.274  | AL050050  | 1361.286  | 757.378   | M33197     | 55710.559 | 61722.184 |
| NM_001512 | 1079.592  | 1158.49   | NM_00469C | 1170.759  | 905.157   | CY3Cy5     | 3390.569  | 148.46    |
| AJ001348  | 594.96    | 374.559   | M33197    | 64486.051 | 66951.078 | BI762229   | 3690.636  | 2603.435  |
| NM_00725E | 3134.916  | 2129.01   | NM_013374 | 30885.016 | 30214.262 | BG618320   | 515.94    | 262.777   |
| NM_00366E | 12319.023 | 13239.988 | NM_003252 | 7384.771  | 7333.778  | NM_00727E  | 1445.285  | 781.913   |
| NM_013384 | 65234.184 | 58534.875 | NM_00122E | 3623.388  | 3233.57   | N34462     | 522.479   | 535.331   |
| NM_001187 | 4411.771  | 4865.865  | NM_016561 | 22465.182 | 20922.197 | AI658778   | 409.411   | 438.741   |
| NM_018241 | 5670.915  | 4966.704  | NM_00122E | 3198.973  | 1988.868  | L19067     | 2138.313  | 2203.026  |

|           |           |           |           |           |           |           |          |          |
|-----------|-----------|-----------|-----------|-----------|-----------|-----------|----------|----------|
| NM_005834 | 9453.879  | 8384.307  | NM_014245 | 31105.688 | 32897.238 | BI823365  | 987.37   | 703.856  |
| S82470    | 4709.458  | 3641.742  | AB046822  | 1107.093  | 945.623   | X06318    | 3181.728 | 2638.891 |
| AB020695  | 2351.443  | 2019.464  | M33197    | 1980.248  | 1533.759  | AL834159  | 546.445  | 483.87   |
| AB028982  | 962.589   | 826.978   | NM_000308 | 3257.706  | 1550.943  | NM_000164 | 4635.458 | 1629.798 |
| NM_002004 | 1751.549  | 1853.685  | X69636    | 2053.779  | 1621.797  | SR3       | 8682.824 | 6783.134 |
| NM_020221 | 1058.165  | 1390.882  | NM_004173 | 10247.009 | 9105.546  | SR5       | 1118.517 | 1049.518 |
| NM_000747 | 2008.047  | 3721.604  | NM_013974 | 3864.599  | 3842.756  | SR7       | 278.682  | 3268.625 |
| AJ275973  | 17014.518 | 13056.786 | NM_017547 | 2414.947  | 2048.168  | SR9       | 4196.303 | 718.783  |
| AL834159  | 2887.487  | 2780.094  | NM_003983 | 4243.562  | 3294.96   | CY3Cy5    | 3490.532 | 210.173  |
| NM_000164 | 8793.222  | 5906.811  | AK023708  | 907.287   | 763.012   | NM_003682 | 571.113  | 980.151  |
| NM_016217 | 12340.866 | 10375.765 | M33197    | 59062.27  | 60698.816 | NM_006314 | 1913.386 | 1223.798 |
| AK025971  | 4347.903  | 3759.954  | NM_018464 | 30904.455 | 21147.143 | NM_000797 | 478.843  | 492.894  |
| NM_002618 | 2725.977  | 2558.389  | D43948    | 3354.808  | 2384.155  | NM_016293 | 1281.241 | 1193.664 |
| L27479    | 1094.903  | 1236.661  | NM_012310 | 9165.593  | 7564.476  | AL080148  | 1710.082 | 1480.74  |
| NM_002193 | 1035.747  | 1035.832  | BF382116  | 2886.953  | 3838.972  | NM_006731 | 385.047  | 389.663  |
| NM_001388 | 7624.322  | 6372.512  | AK055825  | 65197.277 | 75744.07  | NM_002557 | 2062.792 | 1549.975 |
| X76770    | 3991.586  | 5229.114  | AF113216  | 943.847   | 848.857   | NM_005662 | 8507.905 | 8549.234 |
| AB037808  | 2363.322  | 2173.97   | NM_005197 | 6439.412  | 2322.428  | AK021489  | 3298.025 | 2676.36  |
| NM_016038 | 5078.806  | 5548.929  | AL137421  | 41231.859 | 24607.459 | NM_004525 | 280.159  | 364.756  |
| AF090911  | 711.288   | 575.229   | M33197    | 62425.621 | 53798.906 | NM_004317 | 654.116  | 519.18   |
| Z36821    | 7849.048  | 5817.917  | NM_007241 | 1815.46   | 1104.67   | NM_014645 | 554.341  | 467.827  |
| AF289485  | 5929.018  | 6319.777  | NM_000124 | 954.666   | 531.443   | NM_014708 | 247.445  | 217.087  |
| AK024794  | 2220.347  | 3021.09   | NM_017996 | 5298.328  | 3400.085  | NM_000356 | 4693.194 | 3280.55  |
| NM_005400 | 1190.824  | 1053.156  | NM_014517 | 1865.112  | 1621.829  | NM_018134 | 4446.192 | 1046.904 |
| AK023061  | 885.74    | 903.389   | NM_005466 | 2155.545  | 1439.984  | NM_013247 | 1701.189 | 2139.546 |
| NM_014061 | 806.001   | 930.164   | NM_003409 | 1037.353  | 880.69    | NM_006770 | 927.262  | 699.746  |
| BC034395  | 508.506   | 570.675   | D31765    | 1076.826  | 908.266   | NM_004703 | 1787.836 | 2226.666 |
| NM_002479 | 787.464   | 918.765   | NM_006107 | 5590.331  | 4092.672  | NM_014706 | 2851.897 | 2828.074 |
| NM_000348 | 1222.391  | 1046.496  | NM_004175 | 968.895   | 541.557   | AB033006  | 599.75   | 829.627  |
| NM_005059 | 1063.999  | 830.676   | AF288288  | 15296.143 | 12020.859 | AF020314  | 221.268  | 534.882  |
| NM_004950 | 1517.404  | 1221.869  | NM_017646 | 5463.993  | 3768.688  | NM_016332 | 1289.935 | 1085.689 |
| NM_000724 | 3448.46   | 3485.909  | AL050368  | 826.734   | 614.686   | NM_006457 | 1057.286 | 1419.953 |
| NM_002557 | 6416.485  | 4701.358  | NM_003092 | 22982.861 | 14874.463 | AF000381  | 1206.3   | 582.392  |
| BI762229  | 22622.156 | 23170.467 | M33197    | 62630.211 | 60151.328 | NM_012105 | 2025.255 | 1066.053 |
| BG618320  | 1397.579  | 1016.952  | NM_005861 | 3818.294  | 3467.676  | S82470    | 1288.255 | 842.815  |
| Y00787    | 855.116   | 689.106   | NM_018848 | 2876.678  | 2739.786  | AB020695  | 290.355  | 215.128  |
| NM_007276 | 4122.884  | 2808.407  | NM_003760 | 4120.429  | 4827.264  | NM_001643 | 8556.075 | 6093.019 |
| L19067    | 7187.161  | 7165.511  | AL080080  | 9669.823  | 8663.564  | NM_020221 | 239.131  | 494.833  |
| Z48482    | 1448.686  | 1678.737  | NM_018482 | 1081.9    | 940.925   | NM_005415 | 654.087  | 800.008  |
| W60413    | 1278.658  | 1168.056  | NM_017880 | 2433.174  | 1501.965  | AJ275973  | 1699.083 | 1927.742 |
| BI823365  | 3416.502  | 4178.612  | AF090945  | 4749.068  | 3507.577  | NM_006493 | 883.981  | 1065.314 |
| X06318    | 6228.993  | 6125.211  | M33197    | 63648.16  | 62165.102 | U76362    | 1016.592 | 811.1    |
| NM_004703 | 4147.666  | 3960.773  | NM_001161 | 7149.298  | 6628.812  | AF040248  | 279.372  | 294.492  |
| NM_001512 | 1622.136  | 937.857   | NM_004044 | 9322.308  | 6567.873  | AL832292  | 1368.277 | 720.489  |
| NM_014706 | 8247.154  | 9303.939  | NM_000221 | 18506.982 | 16265.807 | NM_003045 | 2011.258 | 1855.837 |
| AJ001348  | 639.365   | 743.026   | H75678    | 1529.651  | 914.946   | NM_002618 | 669.554  | 516.365  |
| NM_014007 | 1069.192  | 1873.973  | M33197    | 4176.797  | 3811.874  | NM_002193 | 368.757  | 197.014  |
| AB033006  | 3649.546  | 3490.635  | AB007864  | 1014.303  | 997.861   | NM_001388 | 2031.415 | 1350.873 |
| AF020314  | 1537.764  | 2561.074  | NM_002198 | 3182.027  | 2923.653  | X76770    | 818.258  | 782.804  |
| NM_016332 | 7433.413  | 7514.458  | AF024693  | 520.668   | 602.737   | AB037808  | 546.985  | 354.724  |
| NM_006457 | 3146.958  | 3929.809  | AK025905  | 1341.945  | 1385.585  | NM_016038 | 944.577  | 801.007  |
| NM_003682 | 1068.5    | 933.911   | AL121733  | 2126.324  | 2071.63   | Z36821    | 1550.825 | 1186.066 |
| NM_006314 | 4779.826  | 4271.537  | BE958072  | 1697.566  | 1432.207  | AF289485  | 465.728  | 399.577  |

|           |           |           |           |           |           |           |           |           |
|-----------|-----------|-----------|-----------|-----------|-----------|-----------|-----------|-----------|
| NM_001782 | 1994.413  | 2243.862  | M33197    | 59987.512 | 56251.293 | NM_016095 | 1078.076  | 654.803   |
| NM_000797 | 1207.557  | 1314.859  | NM_017532 | 1009.021  | 941.361   | AK024794  | 521.467   | 496.974   |
| NM_016293 | 8078.199  | 8802.738  | NM_014480 | 1948.202  | 2982.154  | NM_019853 | 539.009   | 369.469   |
| AL080148  | 548.807   | 317.103   | NM_014169 | 7592.911  | 7129.925  | NM_017992 | 209.754   | 364.444   |
| NM_020134 | 655.174   | 1032.992  | NM_004964 | 27560.326 | 26141.232 | NM_003665 | 645.603   | 616.62    |
| NM_020221 | 1264.184  | 1064.125  | AL117497  | 1884.405  | 1794.739  | NM_013384 | 38241.293 | 34660.621 |
| NM_000747 | 2230.471  | 2237.943  | AK023612  | 771.439   | 661.568   | NM_001187 | 1196.003  | 1152.913  |
| NM_005415 | 4420.899  | 4251.059  | AF147437  | 1460.799  | 1633.82   | NM_018241 | 1204.064  | 1027.301  |
| AJ275973  | 17711.781 | 15492.083 | M33197    | 63120.113 | 62594.801 | NM_005834 | 1333.003  | 1177.148  |
| NM_006493 | 5152.021  | 4931.138  | AF147360  | 771.703   | 783.57    | NM_000724 | 810.391   | 625.671   |
| U76362    | 2462.785  | 2342.864  | AL137269  | 7456.414  | 6399.644  | NM_002557 | 1455.314  | 848.932   |
| AF040248  | 462.106   | 971.886   | AK021983  | 1984.16   | 1819.736  | Y10802    | 169.846   | 154.404   |
| NM_014225 | 3517.509  | 3228.981  | Y11681    | 10109.957 | 10182.977 | BI762229  | 2335.454  | 1900.084  |
| AL832292  | 6041.652  | 3089.183  | AL110135  | 32021.563 | 21539.992 | Y00787    | 285.957   | 169.523   |
| NM_003045 | 8527.768  | 8576.65   | NM_006993 | 10340.974 | 15722.025 | NM_007275 | 862.889   | 463.428   |
| NM_005662 | 52991.973 | 52917.887 | M33197    | 65606.617 | 63161.836 | AI658778  | 400.654   | 346.38    |
| NM_003060 | 852.013   | 659.306   | AF086429  | 4769.852  | 4240.031  | L19067    | 1480.84   | 1304.265  |
| AK021489  | 37568.211 | 33808.051 | NM_019060 | 1670.356  | 2176.47   | BI823365  | 260.815   | 443.242   |
| NM_003895 | 1351.833  | 1229.789  | AF086302  | 3078.128  | 3980.451  | X06318    | 775.604   | 602.486   |
| NM_004317 | 13625.631 | 12157.091 | AF086439  | 6645.067  | 6953.991  | AL834159  | 878.041   | 780.357   |
| NM_014645 | 3081.824  | 3128.557  | M33197    | 63137.93  | 65000.793 | NM_000164 | 5541.454  | 1750.45   |
| NM_014705 | 3415.388  | 2956.751  | AF038171  | 1051.702  | 996.233   | NM_016217 | 2042.813  | 1736.462  |
| NM_003693 | 780.097   | 660.964   | AF052160  | 954.225   | 1345.563  | AK025971  | 954.1     | 891.22    |
| NM_000355 | 16913.025 | 14224.61  | AK026512  | 1814.945  | 2184.702  | AB033006  | 953.219   | 606.207   |
| NM_018134 | 9817.943  | 6825.866  | M33197    | 60295.266 | 62517.883 | AF020314  | 433.983   | 489.623   |
| NM_013247 | 9085.487  | 11329.622 | AF085969  | 604.38    | 836.389   | NM_016332 | 2085.863  | 1721.722  |
| BE394704  | 1276.347  | 1064.742  | AF144233  | 4739.165  | 4797.592  | NM_006457 | 726.396   | 1274.89   |
| AK024794  | 2571.411  | 2724.848  | AK022986  | 1341.603  | 1171.958  | NM_006314 | 876.216   | 587.681   |
| NM_019853 | 13417.374 | 12881.408 | AF085975  | 3484.645  | 3330.203  | NM_016293 | 2066.808  | 1780.61   |
| NM_017992 | 4781.9    | 5320.049  | AF075103  | 1467.551  | 900.294   | AL080148  | 672.674   | 629.87    |
| NM_005400 | 722.761   | 465.277   | M33197    | 66354.18  | 67275.094 | NM_002475 | 493.531   | 410.091   |
| AK023061  | 992.554   | 1097.28   | AL137390  | 2111.492  | 2271.907  | NM_000345 | 340.649   | 401.535   |
| NM_007255 | 2756.322  | 2122.373  | AL137611  | 6142.484  | 6392.223  | NM_005055 | 207.02    | 357.199   |
| NM_003665 | 13321.479 | 14167.042 | AL359566  | 22781.039 | 33193.43  | NM_004950 | 1357.513  | 1049.998  |
| NM_013384 | 61900.574 | 56845.066 | AL137427  | 3677.771  | 4076.42   | NM_006493 | 1024.761  | 688.189   |
| NM_018241 | 6624.788  | 6073.87   | AL157460  | 2917.073  | 3060.772  | U76362    | 1361.108  | 1113.946  |
| NM_005834 | 10129.955 | 9777.97   | M33197    | 56521.57  | 58340.926 | AF040248  | 243.324   | 328.901   |
| AF000381  | 5918.695  | 5224.548  | AK026718  | 2198.799  | 2945.448  | AL832292  | 868.564   | 598.899   |
| NM_012105 | 6415.105  | 4539.63   | AF085899  | 1284.631  | 1521.363  | NM_003045 | 2707.212  | 2715.889  |
| S82470    | 4694.814  | 3738.174  | AK022035  | 13561.015 | 15430.866 | NM_005662 | 10014.142 | 9243.966  |
| AB020695  | 2198.706  | 2402.529  | AK022141  | 2427.062  | 2970.294  | AK021489  | 1736.618  | 1455.139  |
| AB028982  | 601.392   | 874.131   | M33197    | 61835.352 | 60708.164 | NM_004317 | 3475.966  | 4207.191  |
| NM_002004 | 1662.695  | 1805.069  | AK022046  | 554.54    | 775.439   | NM_014645 | 726.367   | 730.407   |
| NM_005121 | 1430.169  | 1556.911  | AK027207  | 1771.379  | 1722.307  | NM_003693 | 456.264   | 360.488   |
| NM_001643 | 43037.121 | 40433.27  | AJ227892  | 2313.446  | 2414.87   | NM_000355 | 8261.152  | 8504.273  |
| NM_019095 | 4206.605  | 5744.448  | M33197    | 62284.191 | 57265.688 | NM_018134 | 8039.212  | 2645.736  |
| NM_014725 | 966.397   | 1412.59   | AK022013  | 1075.401  | 1089.388  | NM_013247 | 2287.235  | 3079.252  |
| NM_006892 | 4086.281  | 4477.853  | AK022155  | 3070.571  | 3319.52   | NM_006770 | 234.779   | 238.834   |
| NM_019117 | 1704.627  | 1877.743  | AK022288  | 1271.014  | 1165.951  | NM_004703 | 782.603   | 821.762   |
| NM_018305 | 4283.457  | 4209.451  | AK021916  | 694.133   | 645.552   | NM_014705 | 1600.38   | 2129.932  |
| NM_017655 | 2649.42   | 2311.133  | AK022331  | 938.582   | 1257.732  | AJ001348  | 713.245   | 733.685   |
| NM_018675 | 6575.633  | 6789.378  | M33197    | 61756.996 | 59724.918 | NM_007255 | 531.54    | 419.825   |
| NM_016643 | 896.365   | 1052.926  | AL359626  | 594.564   | 1047.079  | NM_003665 | 1430.057  | 970.191   |

|           |           |           |           |           |           |           |           |           |
|-----------|-----------|-----------|-----------|-----------|-----------|-----------|-----------|-----------|
| NM_00258C | 1049.368  | 1592.61   | AK026878  | 3007.993  | 3015.568  | NM_013384 | 28367.15  | 23925.166 |
| NM_016217 | 13694.221 | 14269.883 | AK021589  | 1038.468  | 1250.35   | NM_001187 | 507.378   | 431.132   |
| AK025971  | 5888.612  | 5608.428  | D17152    | 14969.58  | 20167.166 | NM_018241 | 1468.599  | 1591.084  |
| NM_00261E | 3115.57   | 2430.186  | M33197    | 1252.914  | 740.555   | NM_005834 | 1384.749  | 1482.796  |
| L27479    | 1024.21   | 1036.576  | AK025423  | 2376.437  | 2045.206  | AF000381  | 2903.114  | 2159.174  |
| NM_002193 | 1341.261  | 1189.744  | unknown ( | 111.848   | 3267.425  | AB028982  | 430.545   | 455.773   |
| NM_00138E | 6283.639  | 5009.64   | M33197    | 61141.789 | 61484.258 | NM_002004 | 1034.019  | 1373.345  |
| X76770    | 4485.33   | 4251.887  | AL080134  | 4261.449  | 4558.972  | NM_020221 | 592.74    | 756.327   |
| AB037808  | 2373.833  | 1935.215  | AJ012500  | 6669.641  | 7452.444  | NM_000747 | 603.604   | 828.439   |
| NM_01603E | 4843.362  | 5998.762  | AF085833  | 779.021   | 899.409   | NM_00541E | 936.177   | 1198.547  |
| AF090911  | 410.869   | 833.715   | L19368    | 719.995   | 687.842   | AJ275973  | 3234.315  | 4450.952  |
| Z36821    | 9311.289  | 8433.101  | U00944    | 1022.721  | 1027.85   | AL834159  | 1015.282  | 867.424   |
| AF289485  | 6683.866  | 8383.544  | BC035058  | 5403.848  | 4041.341  | NM_000164 | 12844.273 | 3952.476  |
| AF130092  | 970.784   | 1024.784  | X57566    | 6358.398  | 3824.804  | NM_016217 | 20796.455 | 18575.055 |
| NM_01609E | 9215.949  | 7952.005  | M33197    | 61850.188 | 58325.645 | AK025971  | 1623.54   | 1323.447  |
| AF300612  | 51580.715 | 49753.648 | NM_01861E | 10947.676 | 10487.351 | NM_00261E | 1600.245  | 1445.565  |
| AB014557  | 912.896   | 1053.16   | AK023809  | 1942.019  | 1662.846  | NM_002193 | 598.927   | 417.804   |
| NM_00557E | 4880.633  | 3422.18   | M87943    | 60971.199 | 58751.141 | NM_01603E | 1460.418  | 1717.865  |
| NM_002953 | 9282.187  | 10179.372 | AL360137  | 1138.844  | 1206.207  | Z36821    | 3708.896  | 3248.228  |
| NM_002187 | 1338.462  | 1338.25   | U28131    | 62919.547 | 62692.027 | AF289485  | 1023.296  | 1133.474  |
| NM_01424E | 4458.862  | 5125.059  | AY007106  | 2217.524  | 3337.226  | NM_019853 | 4689.125  | 5122.091  |
| NM_01485E | 1398.379  | 1403.986  | M33197    | 62985.293 | 62435.414 | NM_017992 | 1097.6    | 1516.567  |
| AF311912  | 450.842   | 793.254   | AL049299  | 1989.445  | 2706.814  | BC034395  | 261.843   | 161.147   |
| NM_001116 | 700.162   | 553.188   | NM_00608E | 60878.332 | 59149.254 | NM_00247E | 466.582   | 437.3     |
| BC035395  | 13467.063 | 12447.437 | NM_01826E | 1187.838  | 1232.199  | NM_00034E | 1109.947  | 933.424   |
| NM_001703 | 14979.001 | 14678.085 | AF130086  | 11750.425 | 12687.918 | NM_00505E | 424.764   | 274.736   |
| NM_02012E | 4994.622  | 4269.351  | AK023858  | 26175.115 | 32178.27  | NM_00495C | 767.39    | 736.823   |
| NM_013982 | 3518.988  | 3871.089  | M33197    | 56681.449 | 57532.707 | NM_000724 | 1675.161  | 1922.351  |
| NM_00504E | 3324.031  | 3207.589  | AF250920  | 3489.717  | 4144.964  | NM_002557 | 3340.682  | 2263.22   |
| NM_003882 | 701.439   | 951.878   | NM_017733 | 4221.101  | 5972.172  | AI417775  | 291.284   | 294.625   |
| NM_00463C | 10049.6   | 8430.367  | NM_014042 | 21577.871 | 23956.176 | BI762229  | 5688.954  | 6153.29   |
| AK023001  | 2926.583  | 2449.777  | M33197    | 61976.629 | 61146.559 | BG618320  | 800.547   | 814.967   |
| NM_01482E | 15079.359 | 15011.739 | AK025416  | 538.037   | 529.134   | L19067    | 788.252   | 1099.61   |
| AF201947  | 1519.597  | 2388.332  | AK022165  | 818.028   | 506.959   | Z48482    | 613.615   | 573.647   |
| U01147    | 2177.624  | 2545.114  | M33197    | 63190.961 | 61927.742 | W60413    | 373.625   | 620.565   |
| NM_00404C | 3469.051  | 4137.69   | AK022372  | 2591.283  | 2811.148  | BI823365  | 1061.298  | 1408.427  |
| NM_006116 | 1267.16   | 1382.388  | NM_00352C | 822.527   | 849.027   | X06318    | 970.332   | 1598.234  |
| NM_003587 | 5802.669  | 5056.237  | AL137380  | 638.715   | 704.125   | NM_004703 | 677.964   | 657.449   |
| X90978    | 1435.094  | 1303.788  | M33197    | 61259.391 | 62588.375 | NM_001512 | 368.845   | 279.219   |
| BF219403  | 24108.656 | 21660.902 | AL137658  | 33106.648 | 40965.656 | NM_01470E | 1401.339  | 1253.85   |
| NM_016119 | 5539.063  | 7140.932  | D16888    | 3444.177  | 4286.763  | NM_014007 | 510.352   | 474.416   |
| NM_001324 | 8112.699  | 9498.942  | U79277    | 1443.058  | 1560.306  | AB033006  | 1136.551  | 1062.952  |
| AB037795  | 2370.165  | 3128.944  | AF068298  | 5784.774  | 8120.995  | NM_006457 | 763.724   | 1144.191  |
| D43949    | 2916.124  | 2937.179  | Z70770    | 5584.625  | 7310.751  | NM_000207 | 464.455   | 560.706   |
| AK022975  | 947.269   | 1013.436  | AJ227900  | 7813.288  | 10296.82  | NM_002531 | 409.697   | 447.666   |
| NM_015344 | 5517.563  | 5755.504  | AK023242  | 1796.577  | 1673.517  | NM_006314 | 1655.809  | 1687.091  |
| NM_00428E | 2397.232  | 2447.653  | M33197    | 62726.918 | 65969.797 | NM_001782 | 544.088   | 919.8     |
| AL122055  | 4022.687  | 4141.159  | AK024101  | 1074.737  | 1098.713  | NM_000797 | 1732.727  | 2544.02   |
| NM_005132 | 25520.549 | 26493.309 | CY3Cy5    | 8757.989  | 323.136   | NM_014927 | 135.559   | 214.951   |
| X07695    | 771.959   | 585.257   | Y10802    | 865.956   | 659.701   | NM_016293 | 4476.584  | 6730.684  |
| D87458    | 1027.598  | 956.75    | BG618320  | 8143.669  | 7466.108  | AL080148  | 1400.157  | 1657.471  |
| AK021750  | 3070.838  | 2905      | Y00787    | 2198.714  | 2999.003  | NM_018487 | 238.406   | 205.366   |
| NM_00362E | 2261.882  | 1820.783  | NM_00727E | 3918.607  | 4368.334  | NM_020221 | 461.72    | 533.411   |



|           |           |           |           |           |           |           |           |           |
|-----------|-----------|-----------|-----------|-----------|-----------|-----------|-----------|-----------|
| NM_006932 | 663.513   | 1086.981  | N34462    | 3330.849  | 3540.097  | NM_000747 | 635.361   | 878.008   |
| AK023594  | 6954.349  | 9289.258  | AI658778  | 1881.976  | 1913.465  | NM_005415 | 665.05    | 876.706   |
| AB046782  | 2764.07   | 2994.251  | L19067    | 6218.467  | 5390.144  | AJ275973  | 5620.397  | 5647.321  |
| NM_004190 | 24905.867 | 24444.713 | Z48482    | 900.629   | 1023.102  | NM_006493 | 819.196   | 824.761   |
| NM_014275 | 5541.689  | 5119.096  | W60413    | 1570.846  | 1751.422  | U76362    | 945.007   | 968.558   |
| NM_000409 | 1928.905  | 2025.287  | BI823365  | 3397.83   | 4681.034  | AF040248  | 486.376   | 748.373   |
| AF208005  | 1321.668  | 1796.6    | X06318    | 4720.867  | 5857.511  | AL832292  | 1163.51   | 853.772   |
| NM_020474 | 12726.532 | 15433.22  | AL834159  | 3902.646  | 4399.42   | NM_003045 | 3031.128  | 3506.848  |
| NM_002643 | 4600.796  | 5604.246  | NM_000164 | 19662.207 | 53895.461 | NM_014708 | 1509.207  | 1949.615  |
| NM_017807 | 6673.001  | 5458.327  | SR9       | 23824.967 | 3020.93   | NM_003693 | 738.665   | 1049.914  |
| NM_014746 | 1911.903  | 1941.291  | CY3Cy5    | 8410.438  | 298.32    | AK024794  | 623.588   | 441.168   |
| NM_000462 | 11771.52  | 12568.968 | NM_003682 | 1692.577  | 1819.684  | NM_019853 | 1024.691  | 1128.158  |
| NM_003336 | 12421.612 | 13304.251 | NM_000207 | 1006.463  | 1197.399  | NM_017992 | 864.1     | 841.126   |
| NM_005805 | 25902.379 | 26870.805 | NM_002531 | 1288.708  | 1348.403  | NM_007255 | 2122.516  | 1216.487  |
| NM_003900 | 3173.763  | 2847.718  | NM_006314 | 9213.643  | 9725.04   | NM_003668 | 1997.22   | 1856.866  |
| NM_003337 | 3731.028  | 3845.07   | NM_001782 | 1880.24   | 1437.483  | NM_001187 | 862.004   | 749.723   |
| AF298152  | 3089.439  | 1863.645  | NM_016293 | 17103.6   | 16868.516 | NM_018241 | 2155.74   | 2530.681  |
| AF117233  | 9707.567  | 8289.797  | AF217525  | 723.625   | 798.697   | NM_005834 | 2603.375  | 3107.562  |
| NM_001723 | 1911.007  | 1854.299  | AL080148  | 5999.771  | 6241.241  | NM_018075 | 878.075   | 1000.376  |
| NM_016018 | 3522.643  | 2923.391  | NM_006731 | 920       | 1052.901  | NM_012105 | 2157.339  | 1343.667  |
| NM_006530 | 19908.807 | 27885.775 | NM_018487 | 688.134   | 1019.729  | S82470    | 811.876   | 733.663   |
| AB033024  | 1505.273  | 1053.497  | NM_020134 | 1002.353  | 1040.557  | AB020695  | 721.577   | 734.527   |
| NM_018942 | 1911.645  | 1479.123  | NM_014061 | 914.126   | 1089.259  | AB028982  | 582.695   | 506.649   |
| NM_005531 | 17258.9   | 18434.436 | BC034395  | 736.65    | 923.846   | NM_002004 | 953.665   | 1310.766  |
| NM_006977 | 2071.848  | 1867.97   | NM_002479 | 1753.402  | 1850.592  | NM_019096 | 2029.558  | 1816.524  |
| AF217226  | 5087.293  | 3394.858  | NM_000348 | 3497.424  | 3928.433  | NM_014725 | 977.671   | 787.491   |
| NM_005522 | 1626.449  | 2083.712  | NM_000724 | 4464.318  | 4818.647  | NM_006892 | 1153.697  | 965.74    |
| NM_005760 | 6616.379  | 6856.464  | NM_002557 | 5416.045  | 7279.282  | NM_019117 | 1059.204  | 1028.517  |
| NM_007265 | 4792.96   | 4602.536  | NM_005662 | 40076.926 | 41765.355 | NM_018309 | 1533.065  | 1489.988  |
| AK023639  | 9563.525  | 9420.382  | NM_003060 | 338.399   | 764.742   | NM_017658 | 4126.018  | 3509.803  |
| AL137700  | 1770.784  | 1501.779  | AK021489  | 25863.334 | 28816.682 | NM_018679 | 7615.125  | 6196.338  |
| NM_004904 | 1449.945  | 1429.59   | NM_004525 | 1363.297  | 1309.464  | AK025971  | 448.855   | 431.263   |
| NM_003083 | 2290.951  | 2037.481  | NM_003895 | 1191.755  | 1307.234  | NM_002193 | 474.662   | 348.412   |
| NM_006789 | 1706.138  | 2030.578  | NM_004317 | 8655.589  | 7375.799  | NM_001388 | 1791.642  | 1495.783  |
| NM_000982 | 3038.2    | 2918.216  | NM_014645 | 4983.251  | 5066.783  | X76770    | 1154.324  | 1264.903  |
| NM_001024 | 60567.637 | 60334.922 | NM_003693 | 1471.373  | 1399.137  | AB037808  | 640.079   | 575.245   |
| NM_016093 | 60217.762 | 60496.547 | NM_000356 | 29815.645 | 32637.311 | Z36821    | 1983.502  | 2042.819  |
| AL110170  | 28035.975 | 39180.102 | NM_018134 | 39766.352 | 56699.762 | AF289485  | 1780.272  | 2270.93   |
| AK021747  | 1470.154  | 1614.591  | NM_013247 | 9428.427  | 6801.7    | AB014557  | 554.319   | 599.541   |
| AK025640  | 8439.573  | 9772.425  | NM_006770 | 4624.503  | 4460.874  | NM_005578 | 2088.748  | 1237.073  |
| AF131772  | 1513.809  | 1088.664  | BE394704  | 596.939   | 365.499   | NM_003653 | 3144.987  | 2577.015  |
| AL137685  | 1153.713  | 1182.372  | NM_004703 | 4736.431  | 4893.525  | NM_018457 | 9417.841  | 6714.181  |
| NM_019101 | 1276.44   | 1075.896  | NM_001512 | 1318.177  | 1584.363  | NM_002953 | 2826.934  | 2231.495  |
| NM_000920 | 2671.246  | 2645.241  | NM_014706 | 8362.572  | 8907.706  | BC035395  | 431.062   | 521.223   |
| NM_020375 | 9042.003  | 9275.82   | AK023172  | 295.362   | 682.076   | NM_001703 | 1742.09   | 976.911   |
| NM_016049 | 13246.617 | 9884.909  | AJ001348  | 1040.919  | 1159.359  | NM_020126 | 744.886   | 452.449   |
| NM_013311 | 12335.811 | 9009.394  | NM_014007 | 1546.993  | 1438.215  | NM_013982 | 571.75    | 577.666   |
| NM_000291 | 68313.609 | 72380.563 | AB033006  | 5936.813  | 6181.288  | NM_005049 | 1000.159  | 1033.303  |
| NM_018081 | 4973.903  | 4492.394  | AF020314  | 2164.814  | 2175.906  | NM_014826 | 5786.817  | 5846.637  |
| NM_014649 | 4252.168  | 4692.143  | AF000381  | 7200.019  | 7384.601  | U01147    | 700.45    | 745.009   |
| AL117488  | 2776.628  | 1675.963  | NM_012105 | 2278.451  | 3792.348  | NM_004040 | 2883.215  | 2561.58   |
| NM_012240 | 2159.355  | 2477.246  | S82470    | 3205.485  | 4196.141  | X90978    | 312.47    | 289.837   |
| NM_019005 | 8419.99   | 7829.818  | AB020695  | 1975.284  | 1546.422  | BF219403  | 22696.902 | 19592.883 |

|           |           |           |           |           |           |           |           |           |
|-----------|-----------|-----------|-----------|-----------|-----------|-----------|-----------|-----------|
| NM_004739 | 9241.421  | 6892.481  | AB028982  | 1935.106  | 1910.691  | NM_016119 | 746.997   | 768.157   |
| AV752216  | 951.489   | 1194.744  | NM_002004 | 2029.436  | 2068.349  | AK075450  | 2566.946  | 2141.684  |
| NM_005341 | 1836.312  | 1196.415  | NM_005121 | 1259.768  | 1385.704  | AF178983  | 2281.151  | 1866.939  |
| AF181999  | 1474.148  | 1507.089  | NM_001643 | 27957.408 | 26799.748 | NM_001324 | 1874.02   | 1756.906  |
| NM_018682 | 8827.39   | 7879.349  | NM_020221 | 1953.446  | 2001.014  | D43949    | 668.45    | 496.178   |
| NM_006545 | 9957.652  | 9728.522  | NM_000747 | 1763.131  | 2144.075  | AF111849  | 14887.053 | 11805.257 |
| NM_016534 | 2802.487  | 3336.864  | NM_005415 | 2902.322  | 3131.625  | NM_015344 | 527.33    | 421.946   |
| AK024240  | 653.995   | 622.363   | AL137708  | 205.131   | 394.454   | AL122055  | 319.525   | 376.351   |
| NM_016456 | 49278.16  | 46134.559 | AJ275973  | 16354.981 | 17695.826 | NM_005132 | 2300.776  | 1920.712  |
| AK022677  | 3409.327  | 3918.718  | NM_006493 | 4487.552  | 4986.204  | D87458    | 910.613   | 1139.49   |
| AL137645  | 5339.458  | 4016.36   | U76362    | 4330.873  | 4892.199  | AK021750  | 1099.898  | 1073.54   |
| AK026141  | 1433.591  | 1596.262  | NM_002618 | 2586.445  | 2765.533  | NM_003626 | 709.542   | 578.169   |
| AK022894  | 2913.563  | 2524.697  | L27479    | 782.561   | 941.16    | NM_006932 | 333.396   | 439.508   |
| AF217993  | 5392.949  | 4319.241  | NM_002193 | 2172.237  | 2219.996  | AK023594  | 1317.712  | 1531.279  |
| AF131823  | 1078.567  | 874.06    | NM_001388 | 11254.199 | 11007.849 | AB010099  | 11106.255 | 13095.073 |
| AK026324  | 8449.122  | 7189.052  | X76770    | 4737.725  | 3942.447  | AB039920  | 3660.125  | 3507.41   |
| AK025253  | 1425.83   | 1222.384  | AB037808  | 2243.532  | 2345.662  | AB046782  | 1179.421  | 1452.761  |
| AK025004  | 951.857   | 1062.813  | NM_016038 | 3604.986  | 3771.483  | NM_004190 | 12722.076 | 12036.779 |
| AL136818  | 1845.613  | 2264.87   | Z36821    | 9157.208  | 12116.077 | NM_014275 | 815.566   | 715.641   |
| AF146798  | 797.632   | 999.417   | AF289485  | 4823.668  | 5343.654  | NM_000409 | 1360.499  | 1133.498  |
| AK022049  | 585.027   | 1277.354  | AF130092  | 3123.56   | 4248.588  | AF208005  | 257.897   | 288.316   |
| AF086517  | 1788.552  | 1705.696  | NM_016095 | 6231.819  | 6863.244  | NM_002231 | 3340.363  | 3699.264  |
| AK025740  | 12682.142 | 14096.797 | AK024794  | 1446.932  | 2033.74   | NM_017807 | 1835.356  | 1208.432  |
| AK000311  | 6427.155  | 8376.878  | NM_019853 | 10174.773 | 8667.481  | NM_003337 | 312.302   | 454.378   |
| AK025346  | 58304.941 | 58093.531 | NM_017992 | 3909.719  | 3850.721  | AF298152  | 760.477   | 689.433   |
| AK022583  | 4248.122  | 3964.537  | AK023061  | 748.002   | 736.948   | AF117233  | 3669.778  | 3103.167  |
| AL137534  | 62494.34  | 56313.32  | NM_007255 | 2602.301  | 3364.021  | NM_001723 | 718.377   | 918.207   |
| AF052121  | 2531.864  | 2219.554  | NM_003668 | 8321.238  | 9361.764  | NM_016018 | 734.374   | 988.235   |
| AL359062  | 1772.789  | 1856.605  | NM_005834 | 6630.87   | 11260.85  | AK024707  | 606.4     | 805.2     |
| AK026869  | 1553.156  | 1319.995  | NM_000724 | 3703.947  | 3394.867  | NM_014255 | 186.186   | 510.796   |
| NM_019095 | 54870.371 | 54734.5   | NM_002557 | 6521.796  | 7500.899  | AK022909  | 1210.47   | 1407.855  |
| Y12020    | 18515.514 | 16890.09  | Y10802    | 723.551   | 370.165   | NM_006530 | 6058.583  | 7270.628  |
| AJ001905  | 812.298   | 484.118   | AI417775  | 838.611   | 976.814   | AB033024  | 974.534   | 1056.723  |
| U17635    | 1115.584  | 1289.377  | BI762229  | 17223.328 | 15555.672 | NM_018942 | 870.625   | 719.552   |
| AL049930  | 525.912   | 795.69    | AA131406  | 592.718   | 482.379   | NM_005531 | 3563.007  | 3285.038  |
| L33807    | 2125.313  | 2598.545  | BG618320  | 9790.048  | 9453.422  | NM_006977 | 498.144   | 597.283   |
| U80774    | 564.752   | 2080.926  | Y00787    | 2879.723  | 3260.38   | NM_005760 | 2482.703  | 2010.389  |
| AB007975  | 1017.351  | 865.435   | NM_007276 | 3739.866  | 4758.666  | NM_007265 | 342.257   | 410.598   |
| AK021821  | 810.566   | 609.505   | N34462    | 3595.638  | 4171.544  | NM_003083 | 327.599   | 593.103   |
| AL049328  | 1613.416  | 1760.619  | AI658778  | 2145.301  | 2508.765  | NM_000982 | 1332.616  | 1399.318  |
| AK000030  | 1104.892  | 1008.23   | L19067    | 6583.231  | 6425.591  | AK026491  | 2406.767  | 2398.08   |
| NM_017932 | 589.903   | 467.386   | Z48482    | 974.426   | 1173.76   | NM_001015 | 46667.246 | 51343.16  |
| AK000910  | 1770.879  | 1266.921  | W60413    | 1971.37   | 2186.807  | AL110170  | 1786.786  | 2050.715  |
| AF252280  | 10116.153 | 9786.311  | BI823365  | 3847.265  | 4361.385  | AK021747  | 1163.99   | 1083.146  |
| AK000107  | 990.531   | 931.384   | X06318    | 5356.404  | 6268.281  | AK025640  | 2771.192  | 2225.928  |
| AK024518  | 17671.895 | 17212.135 | AL834159  | 5298.169  | 6089.878  | NM_000920 | 1065.037  | 706.905   |
| AK025017  | 2027.407  | 2356.501  | NM_000164 | 31691.697 | 57769.285 | NM_020375 | 1385.294  | 1818.015  |
| AK024914  | 1519.076  | 1267.669  | AK025971  | 5349.497  | 7336.011  | NM_016049 | 694.748   | 624.05    |
| BC030949  | 3127.64   | 4525.337  | NM_014007 | 1078.064  | 1063.767  | NM_013311 | 711.719   | 600.494   |
| AF116615  | 1652.398  | 1262.793  | AB033006  | 5917.042  | 6247.168  | NM_018081 | 629.313   | 598.771   |
| U17636    | 63322.316 | 55773.113 | AF020314  | 2050.652  | 1859.618  | NM_014649 | 611.064   | 825.377   |
| NM_018546 | 4707.617  | 4269.318  | NM_016332 | 7572.222  | 7789.692  | NM_012240 | 706.847   | 692.271   |
| U52699    | 23614.246 | 19058.744 | AK023936  | 323.121   | 627.903   | NM_019005 | 594.161   | 640.28    |

|           |           |           |           |           |           |            |           |           |
|-----------|-----------|-----------|-----------|-----------|-----------|------------|-----------|-----------|
| S71613    | 1091.759  | 1450.828  | NM_006457 | 2639.563  | 2650.37   | NM_004739  | 396.796   | 572.233   |
| AJ011910  | 15964.12  | 15186.501 | NM_003682 | 977.804   | 1280.92   | NM_005341  | 858.844   | 1051.674  |
| AK024378  | 1087.527  | 901.171   | NM_000207 | 1171.764  | 1253.162  | AF181999   | 710.745   | 746.036   |
| NM_014026 | 7571.112  | 7523.387  | NM_002531 | 1074.867  | 1141.5    | NM_001934  | 1826.695  | 1615.318  |
| D61703    | 3075.166  | 3515.452  | NM_006314 | 12243.881 | 14428.543 | AB011090   | 715.263   | 957.613   |
| AF086198  | 14800.406 | 14505.083 | NM_001782 | 2663.293  | 2743.169  | NM_018682  | 3317.263  | 2980.292  |
| AL137382  | 25788.525 | 24669.852 | NM_000797 | 5755.246  | 7058.482  | NM_006545  | 27191.82  | 23034.969 |
| NM_014450 | 17975.271 | 19529.506 | NM_016293 | 16741.807 | 20062.227 | NM_016534  | 725.151   | 522.139   |
| NM_017991 | 1825.198  | 2074.557  | AF217525  | 924.779   | 760.655   | AK024240   | 444.61    | 374.282   |
| L37198    | 1900.567  | 1499.555  | AL080148  | 7490.62   | 8332.381  | NM_016456  | 23540.002 | 21351.109 |
| U67822    | 909.863   | 1454.81   | NM_006731 | 1337.121  | 1226.928  | AK022677   | 1707.071  | 2195.259  |
| AK025431  | 2567.848  | 3362.538  | NM_018487 | 906.127   | 1474.126  | AL137645   | 6486.831  | 4432.727  |
| AK023662  | 1024.234  | 1462.53   | NM_020134 | 1495.415  | 2184.114  | AF217993   | 444.767   | 792.683   |
| AF086274  | 54449.328 | 49262.617 | NM_014061 | 1871.228  | 1958.209  | AK024267   | 350.596   | 503.177   |
| AK023682  | 1540.736  | 1344.83   | BC034395  | 1584.577  | 1624.678  | AK026324   | 589.865   | 669.574   |
| AK024024  | 6105.396  | 6459.26   | NM_002479 | 2629.788  | 2518.236  | AK021971   | 233.415   | 621.003   |
| AF000991  | 558.522   | 973.028   | NM_000348 | 5323.712  | 5015.228  | AK025004   | 319.281   | 430.891   |
| AK000685  | 17060.08  | 11840.922 | NM_005059 | 900.924   | 1166.368  | AF146798   | 909.827   | 842.057   |
| D28381    | 23176.916 | 17075.703 | NM_004950 | 3616.689  | 4626.157  | AK022049   | 289.442   | 275.227   |
| BE706519  | 482.432   | 811.524   | NM_006493 | 4750.417  | 5488.231  | AF086517   | 3599.258  | 3509.272  |
| AF130064  | 50234.434 | 48527.316 | U76362    | 4624.51   | 4983.15   | AK025740   | 2471.02   | 2122.598  |
| AK024155  | 20740.352 | 18892.947 | AF040248  | 851.176   | 958.538   | AK000311   | 1198.26   | 1470.054  |
| AL359334  | 9391.606  | 8035.535  | NM_014228 | 1086.088  | 1203.911  | AL137534   | 53308.863 | 58710.133 |
| AK027095  | 2905.285  | 3263.628  | AL832292  | 3830.72   | 6263.544  | AF052121   | 6129.471  | 4758.17   |
| NM_019847 | 2913.548  | 3102.351  | NM_003045 | 10792.799 | 12220.196 | AL359062   | 1150.922  | 986.762   |
| D17093    | 21564.982 | 32074.492 | NM_005662 | 45495.195 | 44424.996 | AK026869   | 1623.919  | 1370.49   |
| AK022784  | 1071.334  | 1377.854  | NM_003060 | 638.665   | 460.138   | AK022192   | 321.157   | 283.058   |
| AL117521  | 4318.045  | 5679.861  | AK021489  | 26730.266 | 27730.969 | NM_019095  | 13945.068 | 16463.246 |
| NM_000731 | 1241.439  | 1090.57   | NM_004525 | 663.737   | 660.901   | Y12020     | 13277.523 | 12931.932 |
| AK021913  | 4855.605  | 6361.946  | NM_003895 | 884.504   | 1133.301  | V00539     | 598.339   | 238.746   |
| AL137489  | 37389.18  | 34639.73  | NM_004317 | 8162.076  | 8279.132  | D55638     | 501.741   | 357.735   |
| AF009311  | 2801.051  | 2371.956  | NM_014645 | 4781.219  | 5978.002  | D55644     | 894.14    | 1334.655  |
| S73397    | 2202.126  | 2754.007  | NM_014708 | 5139.606  | 6330.683  | AK021821   | 534.286   | 775.694   |
| AK023939  | 1049.317  | 1375.561  | NM_003693 | 1413.198  | 1591.223  | AK000030   | 233.576   | 279.132   |
| AL050219  | 795.318   | 742.613   | NM_000356 | 34576.887 | 39835.172 | AK024518   | 2826.752  | 2653.114  |
| AL359652  | 1612.464  | 2705.765  | NM_018134 | 47370.219 | 57002.066 | AK025017   | 768.435   | 427.275   |
| AK022423  | 1140.838  | 1671.028  | NM_013247 | 9758.661  | 7722.331  | AK024914   | 1113.896  | 829.715   |
| AF088021  | 7729.592  | 10813.006 | NM_006770 | 5825.177  | 5940.46   | BC030949   | 701.685   | 622.024   |
| BF509267  | 2732.957  | 4410.27   | BE394704  | 698.657   | 754.795   | AF116615   | 954.43    | 604.019   |
| AK026728  | 1433.889  | 2211.323  | NM_004703 | 6256.534  | 7027.341  | U17636     | 40876.465 | 35522.418 |
| NM_002959 | 12474.675 | 12388.974 | NM_001512 | 1986.768  | 2542.647  | NM_018546  | 5027.238  | 5995.471  |
| AK000899  | 13649.813 | 15888.973 | NM_014706 | 10655.437 | 11254.53  | U52699     | 13649.239 | 16580.01  |
| CY3Cy5    | 6991.141  | 237.839   | AK023172  | 671.235   | 981.654   | S71613     | 851.515   | 1036.427  |
| AW300857  | 8647.624  | 7327.966  | AF139768  | 802.882   | 814.648   | AJ011910   | 24942.537 | 22463.881 |
| H85962    | 19519.756 | 17680.078 | AJ001348  | 1512.145  | 1347.246  | AK024378   | 832.697   | 789.559   |
| BG742446  | 968.95    | 1018.587  | NM_007255 | 2347.245  | 3669.229  | NM_014026  | 2192.07   | 2451.41   |
| AA864554  | 1566.376  | 2549.575  | NM_003668 | 6778.211  | 8572.801  | D61703     | 3227.697  | 3889.977  |
| X66945    | 3129.06   | 2488.036  | NM_013384 | 57532.219 | 54286.016 | unknown (S | 936.268   | 646.357   |
| X12830    | 1658.61   | 1561.436  | NM_001187 | 1911.338  | 2272.958  | AF086198   | 4898.066  | 4623.248  |
| K01904    | 7826.932  | 5260.664  | NM_018241 | 4083.508  | 3867.693  | AL137382   | 32173.213 | 31963.539 |
| BE538886  | 745.629   | 712.818   | NM_005834 | 6635.369  | 6805.61   | AK024599   | 683.786   | 641.825   |
| NM_002226 | 6848.641  | 4956.83   | AF000381  | 10062.126 | 12652.761 | NM_014450  | 1248.958  | 1298.2    |
| M57650    | 2505.843  | 2424.799  | NM_012105 | 3534.05   | 6614.448  | NM_017991  | 1033.041  | 759.668   |

|           |           |           |           |           |           |           |           |           |
|-----------|-----------|-----------|-----------|-----------|-----------|-----------|-----------|-----------|
| BC023978  | 724.801   | 762.41    | S82470    | 2746.93   | 3192.938  | L37198    | 1743.704  | 1963.533  |
| M21302    | 1528.578  | 1126.503  | AB020695  | 1978.839  | 1718.728  | U67822    | 520.54    | 444.885   |
| NM_01634E | 2197.162  | 2149.185  | AB028982  | 1985.746  | 2094.081  | AK021921  | 626.396   | 583.821   |
| SR2       | 64525.359 | 60626.711 | NM_002004 | 1827.664  | 1881.542  | AK025431  | 1129.258  | 1253.67   |
| SR4       | 18087.797 | 19192.723 | NM_005121 | 1362.416  | 1424.664  | AF086274  | 13784.48  | 15735.727 |
| SR6       | 3039.429  | 3306.899  | NM_001643 | 29968.896 | 30160.713 | AK023682  | 889.303   | 1121.225  |
| SR8       | 9840.962  | 27783.412 | NM_020221 | 2703.015  | 2239.596  | AK024024  | 2886.63   | 2558.212  |
| SR10      | 35252.285 | 11640.701 | NM_000747 | 2279.381  | 2445.203  | AK000685  | 6769.735  | 5135.427  |
| CY3Cy5    | 5057.991  | 180.354   | NM_005415 | 4014.379  | 4565.087  | D28381    | 8770.012  | 9554.416  |
| NM_00152E | 37420.27  | 34494.059 | AL137708  | 506.199   | 496.055   | AF130064  | 6920.682  | 6291.426  |
| NM_00605E | 4424.388  | 4356.841  | AJ275973  | 18762.9   | 22381.504 | AK025184  | 1381.446  | 1109.477  |
| NM_00429E | 622.006   | 561.05    | AL834159  | 2509.526  | 2375.414  | D16988    | 8412.725  | 10552.94  |
| NM_018841 | 965.523   | 777.536   | NM_000164 | 12413.342 | 30267.252 | AK001959  | 912.962   | 818.716   |
| NM_00522E | 889.763   | 994.185   | NM_016217 | 47525.363 | 47088.461 | AL157452  | 430.471   | 277.831   |
| AL133105  | 2721.411  | 2914.359  | AK025971  | 5361.92   | 5064.595  | AK024155  | 7979.127  | 6107.091  |
| AK022859  | 1510.466  | 1478.153  | NM_00261E | 4125.944  | 4688.092  | AL359334  | 1982.496  | 368.256   |
| NM_014864 | 7070.653  | 8211.986  | L27479    | 1042.419  | 937.513   | AK027095  | 816.758   | 841.378   |
| NM_00372E | 6814.195  | 6282.356  | NM_002193 | 1997.214  | 1828.2    | AF062097  | 384.481   | 216.594   |
| NM_014352 | 4154.771  | 4382.681  | NM_00138E | 8116.414  | 9476.519  | NM_019847 | 1060.672  | 1139.507  |
| NM_012481 | 1220.724  | 1324.499  | X76770    | 4247.313  | 4365.387  | D17093    | 10711.374 | 12557.982 |
| L09102    | 9412.277  | 7867.272  | AB037808  | 2202.85   | 2662.698  | AK022784  | 366.971   | 285.451   |
| NM_016247 | 2588.963  | 2354.792  | NM_01603E | 3179.899  | 3579.689  | AL117521  | 3516.013  | 4412.383  |
| NM_001157 | 897.721   | 1098.986  | AF090911  | 941.067   | 1250.568  | AK021913  | 5616.607  | 6028.475  |
| NM_012282 | 1797.487  | 1365.848  | Z36821    | 9255.378  | 12439.434 | AL137489  | 7222.392  | 6162.815  |
| NM_003323 | 22890.396 | 18785.287 | AF289485  | 4633.355  | 4916.383  | AF009311  | 1981.667  | 1734.106  |
| BG685310  | 2124.083  | 2424.831  | AF130092  | 1391.082  | 2039.264  | S73397    | 866.083   | 1190.231  |
| NM_01866E | 6537.662  | 6921.263  | NM_01609E | 6609.322  | 7011.229  | AK023939  | 661.803   | 854.401   |
| NM_004227 | 1531.058  | 1167.274  | AK024794  | 1588.906  | 2042.494  | AL050219  | 925.084   | 1012.598  |
| NM_005282 | 2005.597  | 1876.017  | NM_019853 | 11087.492 | 9753.179  | AK024433  | 869.989   | 1585.363  |
| NM_00173E | 756.536   | 984.009   | NM_017992 | 4485.713  | 3702.238  | AL359652  | 496.614   | 575.635   |
| AB028949  | 1810.329  | 1783.241  | NM_00540C | 533.43    | 940.14    | AF088021  | 809.332   | 592.942   |
| AL137580  | 972.586   | 907.707   | AK023061  | 758.095   | 608.046   | NM_00245E | 675.87    | 775.725   |
| NM_004101 | 1079.875  | 1241.896  | NM_014061 | 788.087   | 670.263   | NM_00295E | 2869.157  | 2182.742  |
| NM_00299E | 27562.1   | 24588.152 | NM_00247E | 1066.46   | 1503.861  | AK000899  | 3207.159  | 3115.425  |
| AB033114  | 708.97    | 790.162   | NM_00034E | 3374.698  | 3401.135  | CY3Cy5    | 4104.649  | 192.858   |
| NM_01597E | 1768.971  | 1893.899  | NM_00505E | 850.167   | 1250.248  | AW300857  | 7842.835  | 8240.8    |
| NM_00381C | 3986.538  | 4208.519  | NM_00495C | 2482.549  | 2263.076  | H85962    | 14234.938 | 14037.337 |
| NM_005212 | 5269.603  | 4639.307  | NM_000724 | 4832.275  | 3790.888  | BG742446  | 660.132   | 741.161   |
| NM_00641E | 1649.722  | 1212.935  | NM_000553 | 600.589   | 632.198   | AA864554  | 737.221   | 1482.611  |
| AB020676  | 468.882   | 484.121   | NM_002557 | 6461.445  | 5772.52   | X66945    | 1744.772  | 1590.886  |
| AK024715  | 630.97    | 791.679   | BE728156  | 1108.426  | 865.796   | U00482    | 797.189   | 525.409   |
| U90942    | 47410.313 | 49815.609 | Y10802    | 1223.349  | 566.439   | K01904    | 4436.067  | 2742.184  |
| NM_01836C | 2410.856  | 2180.856  | BI762229  | 16106.097 | 11583.144 | BE538886  | 669.779   | 731.152   |
| AL365415  | 1927.673  | 1552.29   | BG618320  | 7816.895  | 6132.477  | M57650    | 2822.878  | 2046.347  |
| L29147    | 8419.132  | 7486.044  | Y00787    | 1876.631  | 1612.622  | BC023978  | 895.769   | 1025.232  |
| NM_02022E | 2658.129  | 2142.896  | NM_00727E | 3565.703  | 2920.04   | M21302    | 1299.767  | 1194.652  |
| AK024685  | 3077.597  | 2756.317  | N34462    | 3642.718  | 2963.224  | NM_01634E | 1496.251  | 1128.984  |
| NM_00367E | 17815.609 | 13966.213 | AI658778  | 2345.612  | 2380.81   | SR2       | 46604.996 | 39956.914 |
| AF113007  | 1450.371  | 1772.113  | L19067    | 6246.007  | 4587.735  | SR4       | 8866.271  | 7616.088  |
| NM_00068E | 5482.094  | 5255.793  | Z48482    | 1095.55   | 861.034   | SR6       | 1631.525  | 1020.604  |
| D82061    | 3666.088  | 2778.918  | W60413    | 1742.31   | 1159.538  | SR8       | 4961.25   | 12518.948 |
| AJ293009  | 4714.629  | 4037.345  | BI823365  | 3709.458  | 2313.691  | SR10      | 18998.982 | 4562.547  |
| NM_000374 | 2535.543  | 2347.965  | X06318    | 5557.454  | 3902.159  | CY3Cy5    | 2391.748  | 127.285   |

|           |           |           |           |           |           |           |           |           |
|-----------|-----------|-----------|-----------|-----------|-----------|-----------|-----------|-----------|
| NM_000502 | 4364.416  | 3668.012  | NM_004703 | 3143.854  | 1967.634  | NM_001525 | 22382.207 | 24554.27  |
| NM_001359 | 26522.729 | 24628.584 | NM_001512 | 1400.883  | 1032.64   | NM_006055 | 2011.149  | 2354.944  |
| NM_004975 | 1287.126  | 780.901   | NM_014706 | 6345.517  | 5045.454  | NM_004296 | 527.025   | 634.706   |
| NM_002245 | 4110.858  | 3128.453  | AF139768  | 1500.036  | 1050.114  | NM_005048 | 623.027   | 667.282   |
| D87445    | 8850.52   | 8636.398  | AJ001348  | 1213.007  | 812.379   | NM_018841 | 598.347   | 610.371   |
| NM_000238 | 3315.914  | 3051.947  | NM_014007 | 1239.314  | 840.577   | AL133105  | 2052.707  | 2020.812  |
| NM_002247 | 1521.724  | 1242.777  | AB033006  | 6716.299  | 4793.564  | AK022859  | 1440.49   | 1400.022  |
| NM_004980 | 19896.838 | 18544.328 | AF020314  | 2023.562  | 1213.738  | NM_000214 | 411.188   | 686.677   |
| AB011094  | 20690.994 | 21387.061 | NM_016332 | 5522.021  | 4123.72   | NM_003728 | 7222.299  | 5724.529  |
| NM_003224 | 3010.604  | 3250.174  | NM_006457 | 2223.492  | 1642.804  | NM_014352 | 3375.443  | 3119.314  |
| NM_001658 | 60399.426 | 60177.523 | NM_003682 | 908.766   | 760.547   | NM_012481 | 826.385   | 531.962   |
| AK021761  | 6618.927  | 7639.25   | NM_000207 | 837.234   | 634.481   | L09102    | 6978.685  | 6157.703  |
| AK024536  | 827.016   | 595.678   | NM_002531 | 934.829   | 709.046   | NM_016247 | 1825.912  | 1415.947  |
| NM_001483 | 5198.555  | 6122.731  | NM_006314 | 8635.967  | 6556.331  | NM_012282 | 833.809   | 637.547   |
| NM_018973 | 10521.801 | 6348.711  | NM_001782 | 1770.545  | 1128.219  | NM_003323 | 11968.266 | 8314.062  |
| NM_002591 | 3309.452  | 3390.552  | NM_000797 | 6308.637  | 5206.05   | BG685310  | 1132.28   | 716.383   |
| NM_020216 | 7979.789  | 6386.073  | NM_016293 | 18148.254 | 15886.053 | NM_018668 | 4279.17   | 5753.549  |
| AK021860  | 1365.463  | 1247.158  | AF217525  | 885.629   | 595.62    | NM_004227 | 991.525   | 850.805   |
| NM_016457 | 2365.588  | 3020.801  | AL080148  | 5621.643  | 3990.745  | NM_005282 | 1420.289  | 1685.822  |
| NM_005057 | 1582.422  | 1779.329  | NM_006731 | 1088.042  | 829.459   | NM_001736 | 395.009   | 536.872   |
| AB046842  | 2235.352  | 1664.953  | NM_018487 | 828.07    | 785.409   | AB028949  | 874.237   | 921.289   |
| NM_004850 | 1843.729  | 1624.703  | NM_020134 | 857.213   | 780.618   | AL137580  | 406.659   | 637.908   |
| NM_002822 | 6911.309  | 7588.641  | NM_020221 | 1928.196  | 1354.013  | NM_004101 | 585.118   | 912.252   |
| BF306955  | 1153.032  | 1142.414  | NM_000747 | 1824.551  | 1662.782  | NM_002995 | 16713.309 | 15813.239 |
| NM_001394 | 11120.878 | 11373.536 | NM_005415 | 2746.345  | 1883.865  | AB033114  | 489.35    | 722.446   |
| NM_018441 | 13827.596 | 13084.894 | AJ275973  | 17748.102 | 14960.879 | NM_015978 | 1295.113  | 1334.357  |
| BE733234  | 1187.599  | 1095.191  | NM_006493 | 4964.855  | 3941.039  | NM_003810 | 2686.246  | 3107.86   |
| NM_001157 | 988.285   | 1628.058  | U76362    | 6689.6    | 5611.301  | NM_004908 | 800.024   | 1184.976  |
| NM_012282 | 1379.36   | 1959.347  | AF040248  | 986.843   | 732.284   | NM_016171 | 57967.32  | 69133.992 |
| NM_003323 | 24143.055 | 23045.031 | NM_014228 | 1419.467  | 706.485   | NM_014443 | 2539.229  | 1732.54   |
| BG685310  | 2081.566  | 3006.908  | AL832292  | 3036.49   | 3726.404  | NM_005212 | 2583.097  | 2656.324  |
| H85962    | 21225.582 | 22404.178 | NM_003045 | 9321.517  | 7072.743  | NM_006419 | 967.807   | 772.383   |
| BG742446  | 1233.936  | 1243.514  | NM_005662 | 44950.238 | 33238.98  | AK024715  | 591.289   | 500.587   |
| AA864554  | 1291.491  | 2454.893  | AK021489  | 26214.67  | 19591.775 | U90942    | 38351.75  | 29549.539 |
| X66945    | 2789.038  | 2176.571  | NM_004525 | 467.742   | 455.059   | NM_014942 | 587.697   | 395.473   |
| X12830    | 1629.389  | 1614.667  | NM_003895 | 740.003   | 812.574   | NM_018360 | 1333.664  | 826.718   |
| U00482    | 698.631   | 581.273   | NM_004317 | 7642.456  | 5875.874  | AL365415  | 890.897   | 541.552   |
| K01904    | 7680.108  | 5230.582  | NM_014645 | 5338.576  | 4420.354  | L29147    | 7722.119  | 4574.849  |
| BE538886  | 953.888   | 1067.275  | NM_014708 | 4978.517  | 4462.305  | NM_020228 | 4458.253  | 4317.697  |
| NM_002228 | 6367.874  | 4140.791  | NM_003693 | 1324.649  | 1166.818  | AK024685  | 1666.345  | 1577.106  |
| M57650    | 2215.856  | 1932.468  | NM_000356 | 34859.66  | 22630.598 | NM_003676 | 9904.811  | 10212.574 |
| M21302    | 1425.082  | 1539.568  | NM_018134 | 41098.953 | 51073.004 | AF113007  | 920.12    | 1176.93   |
| NM_016346 | 1959.68   | 2125.506  | NM_013247 | 9154.81   | 4867.488  | NM_000688 | 2195.972  | 2185.62   |
| AK024865  | 4777.125  | 5141.962  | NM_006770 | 4228.424  | 3199.018  | U39573    | 519.006   | 615.289   |
| NM_007210 | 1485.685  | 2001.894  | AK024794  | 1715.495  | 1317.258  | D82061    | 2645.66   | 2741.386  |
| NM_018360 | 2201.316  | 2446.67   | NM_019853 | 8828.473  | 4443.446  | AJ293009  | 2210.19   | 2539.287  |
| NM_006055 | 5219.124  | 5754.162  | NM_017992 | 3317.353  | 2068.115  | NM_000374 | 3308.312  | 3743.719  |
| NM_004296 | 520.097   | 868.66    | AK023061  | 615.804   | 498.866   | NM_000502 | 7996.423  | 5385.731  |
| NM_005048 | 769.604   | 955.681   | NM_007255 | 3269.05   | 3265.336  | NM_001359 | 19603.346 | 19826.605 |
| NM_005972 | 754.655   | 973.739   | NM_003668 | 9892.591  | 7892.217  | NM_004975 | 2514.969  | 1490.176  |
| NM_005226 | 1113.481  | 1024.312  | NM_013384 | 62628.363 | 48373.105 | NM_002245 | 2411.908  | 1673.056  |
| AL133105  | 2822.039  | 3438.671  | NM_001187 | 2342.451  | 1481.551  | D87445    | 4714.57   | 4437.239  |
| AK022859  | 1640.204  | 1496.195  | NM_018241 | 4811.309  | 3285.429  | NM_000238 | 2256.241  | 1755.776  |

|           |           |           |           |           |           |           |           |           |
|-----------|-----------|-----------|-----------|-----------|-----------|-----------|-----------|-----------|
| NM_000214 | 716.537   | 605.283   | NM_005834 | 6317.343  | 5959.096  | NM_002247 | 612.406   | 490.82    |
| NM_014864 | 7435.566  | 8460.851  | AF000381  | 10171.351 | 11398.158 | NM_004980 | 14171.021 | 14682.124 |
| NM_003728 | 5870.381  | 5846.293  | NM_018075 | 643.321   | 260.344   | AB011094  | 13204.847 | 10965.969 |
| NM_014352 | 3427.167  | 4128.135  | NM_012105 | 4455.909  | 5707.563  | NM_003224 | 1271.609  | 852.566   |
| NM_012481 | 1342.586  | 1699.965  | S82470    | 3260.289  | 2325.476  | NM_001658 | 53419.258 | 47578.344 |
| L09102    | 8352.181  | 9101.393  | AB020695  | 2244.778  | 1518.639  | NM_006827 | 18657.123 | 11863.222 |
| NM_016247 | 2136.391  | 2103.973  | AB028982  | 2345.425  | 2655.768  | AK021761  | 3303.947  | 2843.917  |
| NM_003224 | 2103.806  | 2676.822  | NM_002004 | 2281.102  | 2615.324  | AK024536  | 604.037   | 474.854   |
| NM_001658 | 62847.66  | 58169.855 | NM_005121 | 1758.361  | 1589.235  | NM_001483 | 2105.76   | 2272.415  |
| NM_006827 | 34447.801 | 36807.316 | NM_001643 | 33920.363 | 34774.168 | NM_018973 | 5270.038  | 2452.243  |
| AK021761  | 6511.476  | 8819.383  | NM_019096 | 3094.544  | 2781.098  | NM_002591 | 8149.992  | 7872.41   |
| NM_004227 | 2067.736  | 1623.031  | NM_014725 | 1689.923  | 1676.204  | NM_020216 | 4919.333  | 4748.674  |
| NM_005282 | 2246.921  | 2126.376  | NM_006892 | 2736.537  | 2520.131  | AK021860  | 895.763   | 1034.444  |
| NM_001736 | 700.907   | 1006.168  | NM_017658 | 8359.319  | 7735.18   | NM_016457 | 1108.4    | 1478.643  |
| AB028949  | 2207.343  | 2123.908  | NM_018679 | 24578.961 | 23882.404 | NM_005057 | 1151.679  | 965.601   |
| NM_002995 | 36517.816 | 38497.875 | NM_002580 | 1149.309  | 774.993   | AF143321  | 821.977   | 650.17    |
| AB033114  | 952.612   | 968.275   | NM_006779 | 8813.859  | 8677.601  | AB046842  | 1291.08   | 959.878   |
| NM_015978 | 2155.493  | 1987.028  | NM_016217 | 50097.918 | 48253.785 | NM_004850 | 1111.449  | 922.828   |
| NM_003810 | 4714.799  | 5447.06   | AK025971  | 5977.833  | 6250.687  | NM_002822 | 3666.961  | 4230.899  |
| NM_004908 | 790.561   | 1031.122  | NM_002618 | 4095.304  | 3795.617  | BF306955  | 1811.481  | 1318.026  |
| NM_014443 | 2650.113  | 1896.776  | L27479    | 1144.794  | 1391.275  | NM_001394 | 4703.868  | 4094.821  |
| NM_005212 | 5297      | 4664.598  | NM_002193 | 2463.647  | 2327.673  | NM_018441 | 8696.296  | 7155.719  |
| NM_006419 | 1442.241  | 1505.312  | NM_001388 | 10264.734 | 9630.287  | NM_000778 | 7495.335  | 5510.623  |
| AB020676  | 783.821   | 799.203   | X76770    | 4765.532  | 3859.303  | NM_001609 | 1107.372  | 692.989   |
| AK024715  | 811.882   | 851.857   | AB037808  | 2248.875  | 2226.579  | BE733234  | 689.31    | 521.442   |
| BF306955  | 866.54    | 807.69    | NM_016038 | 3811.241  | 2943.84   | NM_001157 | 379.377   | 620.937   |
| NM_001394 | 8383.316  | 9784.949  | Z36821    | 11472.232 | 9142.939  | NM_012282 | 638.11    | 758.252   |
| NM_018441 | 12392.783 | 12040.141 | AF289485  | 5318.682  | 4143.054  | NM_003323 | 12559.584 | 11778.105 |
| NM_000778 | 14483.307 | 16542.34  | AF130092  | 1319.136  | 895.062   | BG685310  | 1036.845  | 1020.424  |
| NM_001609 | 2340.352  | 2217.881  | NM_016095 | 6649.763  | 5577.202  | AW300857  | 8033.688  | 8169.892  |
| NM_020228 | 2588.304  | 2783.311  | AF300612  | 55284.18  | 51300.992 | H85962    | 13577.466 | 13994.177 |
| AK024685  | 3456.75   | 2891.95   | AB014557  | 1456.368  | 1039.162  | BG742446  | 818.562   | 955.951   |
| NM_003676 | 18508.061 | 16530.221 | NM_005578 | 7485.578  | 3460.192  | AA864554  | 743.576   | 1570.23   |
| AF113007  | 1428.655  | 1766.598  | NM_003653 | 16255.822 | 11001.404 | X66945    | 1873.445  | 2140.471  |
| NM_000688 | 5068.937  | 5053.981  | NM_018457 | 22749.551 | 19312.686 | X12830    | 1393.714  | 1520.109  |
| D82061    | 5048.238  | 3730.598  | NM_002953 | 6254.667  | 5429.28   | U00482    | 651.018   | 681.233   |
| AJ293009  | 5634.048  | 5647.786  | NM_002187 | 2727.879  | 2598.044  | K01904    | 4125.079  | 2695.555  |
| NM_000374 | 3221.614  | 3478.906  | NM_014246 | 6178.149  | 4825.002  | BE538886  | 2058.469  | 1432.26   |
| NM_000502 | 5578.701  | 4984.189  | NM_014859 | 1586.625  | 1381.842  | NM_002228 | 3149.718  | 1652.838  |
| NM_001696 | 27768.938 | 26413.758 | AF311912  | 660.653   | 656.775   | M57650    | 2640.49   | 2412.8    |
| NM_004975 | 1235.21   | 979.806   | NM_001116 | 1062.982  | 812.513   | BC023978  | 697.405   | 715.056   |
| NM_002245 | 4193.317  | 3153.111  | BC035395  | 9782.61   | 7225.054  | M21302    | 1353.182  | 981.32    |
| D87445    | 9652.556  | 9786.593  | NM_001703 | 17670.096 | 13596.203 | NM_016346 | 1379.334  | 1100.203  |
| NM_000238 | 3109.156  | 2284.005  | NM_020126 | 4304.758  | 3464.274  | AK024865  | 2483.674  | 1452.783  |
| NM_002247 | 1106.925  | 1018.896  | NM_013982 | 2897.719  | 2345.389  | NM_007210 | 902.133   | 643.725   |
| NM_004980 | 12532.175 | 13276.734 | NM_005049 | 2924.582  | 1984.213  | U90942    | 33370.223 | 32824.902 |
| NM_016346 | 914.948   | 1112.542  | NM_003882 | 928.635   | 417.551   | NM_014942 | 450.148   | 484.572   |
| AK024865  | 5386.571  | 5084.033  | NM_004630 | 11684.602 | 9211.908  | NM_018360 | 1331.584  | 1373.519  |
| NM_007210 | 1796.209  | 2048.545  | AK023001  | 16448.455 | 11242.671 | AL365415  | 1136.587  | 767.708   |
| NM_001483 | 4715.351  | 6050.919  | NM_014826 | 12503.477 | 9051.927  | L29147    | 12273.468 | 12109.693 |
| NM_018973 | 11277.126 | 6067.324  | AF201947  | 2022.047  | 974.576   | NM_001525 | 18147.523 | 19954.307 |
| NM_002591 | 5050.834  | 4502.634  | U01147    | 1762.006  | 1357.189  | NM_006055 | 2106.472  | 2264.685  |
| NM_020216 | 9933.167  | 8605.595  | NM_004040 | 12437.254 | 8529.463  | NM_005048 | 549.099   | 684.514   |

|           |           |           |           |           |           |           |           |           |
|-----------|-----------|-----------|-----------|-----------|-----------|-----------|-----------|-----------|
| AK021860  | 1715.325  | 1429.455  | NM_003587 | 27679.395 | 22597.852 | NM_018841 | 905.036   | 766.517   |
| AB046816  | 1403.224  | 1514.508  | X90978    | 1613.82   | 1011.708  | NM_005226 | 623.399   | 623.023   |
| AL137266  | 5443.667  | 4765.742  | BF219403  | 30036.133 | 25764.818 | AL133105  | 2034.966  | 2584.88   |
| NM_016457 | 2928.756  | 3407.845  | NM_016119 | 4329.257  | 2662.543  | AK022859  | 1478.33   | 1531.101  |
| NM_005057 | 2407.246  | 2020.355  | AK075450  | 6428.486  | 5164.868  | NM_014864 | 3291.78   | 4412.37   |
| AF143321  | 1065.04   | 993.308   | AF178983  | 8882.921  | 6975.203  | NM_003728 | 5186.367  | 4672.726  |
| AB046842  | 2063.247  | 1931.222  | NM_001324 | 5623.25   | 4151.149  | NM_014352 | 2540.219  | 2450.015  |
| NM_004850 | 1951.005  | 1859.299  | AK022975  | 1870.804  | 1320.144  | NM_012481 | 805.067   | 494.028   |
| NM_002822 | 6146.915  | 6541.578  | NM_015344 | 4663.528  | 3373.118  | L09102    | 5510.051  | 4615.079  |
| NM_014352 | 2161.855  | 2311.741  | NM_004288 | 1759.956  | 1339.861  | NM_016247 | 1884.783  | 1097.997  |
| NM_012481 | 799.076   | 1086.835  | AL122055  | 4822.411  | 3234.045  | AB011094  | 12239.614 | 13982.222 |
| L09102    | 4482.229  | 4341.22   | NM_005132 | 17717.738 | 13076.77  | NM_003224 | 1322      | 1269.867  |
| NM_016247 | 3078.191  | 3769.89   | X07695    | 1052.296  | 774.86    | NM_001658 | 52899.477 | 60674.031 |
| NM_001157 | 914.765   | 1268.04   | D87458    | 3134.558  | 2407.472  | AK021761  | 4140.953  | 5329.852  |
| NM_012282 | 1326.611  | 1644.078  | NM_001399 | 611.191   | 430.792   | AK024536  | 978.097   | 1242.321  |
| NM_006710 | 651.828   | 549.527   | AK021750  | 5301.351  | 3033.4    | NM_018668 | 3929.466  | 5238.818  |
| NM_003323 | 23594.297 | 22033.453 | NM_003626 | 1776.356  | 1325.441  | NM_004227 | 1187.951  | 882.816   |
| BG685310  | 2548.558  | 2576.376  | NM_006932 | 649.593   | 461.503   | NM_005282 | 1825.702  | 2640.64   |
| AW300857  | 9889.195  | 10201.096 | AK023594  | 5812.803  | 4658.441  | NM_001736 | 660.804   | 1181.134  |
| H85962    | 26028.662 | 24944.51  | AB032989  | 684.168   | 544.508   | AB028949  | 1187.809  | 1560.762  |
| BG742446  | 1675.195  | 1678.502  | AB010099  | 21333.113 | 17838.467 | AL137580  | 856.791   | 1415.467  |
| AA864554  | 1606.769  | 3330.552  | NM_004190 | 20638.451 | 15600.166 | NM_004101 | 1029.316  | 1287.063  |
| X66945    | 3079.996  | 3105.615  | NM_014275 | 4959.312  | 4624.36   | NM_002995 | 20709.434 | 21585.574 |
| X12830    | 1455.188  | 1372.323  | NM_000409 | 3112.506  | 3116.63   | AB033114  | 650.012   | 1041.022  |
| U00482    | 859.175   | 1018.201  | AF208005  | 1507.751  | 1480.43   | NM_015978 | 1646.82   | 1634.52   |
| K01904    | 8583.111  | 5314.726  | NM_002231 | 13614.979 | 14962.068 | NM_003810 | 2374.749  | 2923.565  |
| BE538886  | 853.327   | 850.884   | NM_020474 | 12949.187 | 9662.857  | NM_014443 | 1990.798  | 1050.507  |
| NM_002228 | 6539.494  | 4256.343  | NM_000462 | 13447.178 | 16395.918 | NM_005212 | 3202.4    | 2428.633  |
| M57650    | 2095.022  | 1939.028  | NM_003336 | 9953.495  | 9342.564  | NM_006419 | 906.169   | 766.366   |
| BC023978  | 552.225   | 547.529   | NM_005805 | 35332.605 | 39765.082 | AK024715  | 473.852   | 404.433   |
| M21302    | 1154.272  | 1368.872  | NM_004181 | 753.467   | 668.494   | BF306955  | 1722.081  | 1928.975  |
| NM_005212 | 4471.68   | 4629.278  | NM_003900 | 3336.086  | 3903.122  | NM_001394 | 4731.702  | 5841.911  |
| NM_006419 | 1818.038  | 1349.18   | NM_003337 | 4197.102  | 4946.067  | NM_001609 | 1128.956  | 1087.79   |
| AB020676  | 545.504   | 788.437   | AF298152  | 5920.12   | 5865.924  | BE733234  | 615.564   | 718.658   |
| AK024715  | 814.049   | 1260.136  | AF117233  | 8761.275  | 10261.603 | NM_020228 | 4132.365  | 4989.085  |
| U90942    | 50032.961 | 51532.035 | NM_015848 | 2822.803  | 3060.514  | AK024685  | 1903.478  | 2490.011  |
| NM_018360 | 2789.26   | 2053.152  | NM_001723 | 1672.038  | 1463.229  | NM_003676 | 5645.43   | 8579.237  |
| AL365415  | 2005.073  | 1437.847  | NM_016018 | 2710.804  | 2732.844  | AF113007  | 832.013   | 1768.287  |
| L29147    | 13844.737 | 15336.83  | M94362    | 15157.04  | 16617.393 | NM_000688 | 2424.037  | 3498.965  |
| NM_006055 | 5313.298  | 6080.457  | AK024707  | 2285.636  | 1504.551  | U39573    | 817.014   | 1155.033  |
| NM_004296 | 843.544   | 1095.252  | NM_014255 | 6487.117  | 5816.424  | D82061    | 2602.303  | 3406.963  |
| NM_005048 | 677.35    | 1085.892  | AK022909  | 3205.184  | 3110.115  | AJ293009  | 2754.527  | 3627.256  |
| NM_018841 | 1077.256  | 807.138   | NM_006530 | 20602.537 | 19826.41  | NM_000374 | 2147.062  | 2414.775  |
| NM_005226 | 1171.769  | 986.568   | AB033024  | 2112.184  | 1614.994  | NM_000502 | 7020.727  | 4517.518  |
| AL133105  | 3404.041  | 3424.91   | NM_018942 | 2851.978  | 3231.11   | NM_001359 | 17957.908 | 17246.08  |
| AK022859  | 1354.239  | 1265.113  | NM_005531 | 13974.748 | 12927.94  | NM_001696 | 15819.777 | 15510.061 |
| NM_014864 | 6638.843  | 7703.439  | NM_006977 | 1675.728  | 1748.69   | NM_004975 | 2343.436  | 799.578   |
| NM_003728 | 5059.866  | 4632.044  | AF217226  | 11943.142 | 10867.086 | NM_002245 | 2002.762  | 1293.617  |
| NM_004975 | 2490.282  | 2393.621  | AL359578  | 615.411   | 519.792   | D87445    | 4103.936  | 3487.902  |
| NM_002245 | 4077.639  | 3098.112  | NM_005522 | 1638.873  | 1286.133  | NM_000238 | 2104.775  | 1935.439  |
| D87445    | 10039.067 | 9848.899  | NM_005760 | 15392.541 | 17839.227 | NM_004980 | 11436.569 | 8886.003  |
| NM_000238 | 2676.084  | 2079.742  | NM_007265 | 4205.893  | 4305.45   | NM_016346 | 1600.146  | 1435.496  |
| NM_002247 | 1245.313  | 1104.129  | AK023639  | 7340.981  | 6936.793  | AK024865  | 2690.051  | 2022.291  |

|           |           |           |           |           |           |           |           |           |
|-----------|-----------|-----------|-----------|-----------|-----------|-----------|-----------|-----------|
| NM_00498C | 15677.557 | 16880.65  | AL122118  | 488.592   | 954.223   | NM_00721C | 722.086   | 1128.46   |
| AB011094  | 19754.785 | 19907.336 | AL137700  | 1346.118  | 1589.551  | NM_001483 | 2703.476  | 3748.499  |
| NM_003224 | 2719.207  | 2956.568  | NM_004904 | 1563.459  | 1646.616  | NM_018973 | 5742.492  | 3440.093  |
| NM_00165E | 61365.086 | 56918.883 | NM_003083 | 3359.505  | 4575.262  | NM_002591 | 6722.872  | 6786.69   |
| NM_006827 | 39280.461 | 33433.215 | NM_006789 | 2904.125  | 3341.854  | NM_02021E | 5227.789  | 4650.665  |
| AK021761  | 7997.175  | 8437.734  | NM_000982 | 2945.767  | 3741.084  | AK021860  | 1212.447  | 1223.671  |
| AK024536  | 932.91    | 1303.69   | NM_001024 | 62709.457 | 57824.453 | AL137266  | 2153.685  | 2099.743  |
| NM_004227 | 2496.294  | 2462.378  | AK026367  | 20160.301 | 23266.846 | NM_016457 | 1161.765  | 1300.095  |
| NM_005282 | 2571.774  | 2776.862  | AK026491  | 7184.141  | 8667.945  | NM_005057 | 1010.829  | 854.635   |
| NM_00173E | 979.38    | 1151.589  | AK021747  | 2167.445  | 2175.782  | AB046842  | 1063.344  | 778.142   |
| AB028949  | 2323.479  | 2486.943  | AK025640  | 12888     | 12506.084 | NM_00485C | 1215.208  | 1053.698  |
| AL137580  | 1130.422  | 1025.678  | AF131772  | 530.305   | 897.412   | NM_002822 | 3687.701  | 2845.082  |
| NM_004101 | 1494.733  | 1678.423  | NM_019101 | 1770.564  | 1807.042  | NM_014352 | 1607.898  | 1916.539  |
| NM_00299E | 34249.371 | 28288.752 | NM_00092C | 2391.827  | 2304.101  | U68488    | 222.31    | 474.984   |
| AB033114  | 674.55    | 1069.51   | NM_02037E | 7846.671  | 6589.35   | NM_016247 | 1760.097  | 2062.992  |
| NM_01597E | 2119.823  | 1958.343  | NM_016049 | 7504.853  | 9617.301  | NM_001157 | 361.758   | 807.673   |
| NM_00381C | 4208.22   | 3824.133  | NM_013311 | 6751.203  | 9516.735  | NM_012282 | 600.56    | 849.174   |
| NM_016171 | 66587.539 | 63532.711 | NM_000291 | 65386.75  | 60011.102 | NM_003323 | 12873.109 | 12762.183 |
| NM_014443 | 2227.748  | 1504.929  | NM_018081 | 4985.439  | 5036.256  | BG685310  | 1033.242  | 1201.512  |
| NM_016457 | 2989.333  | 4093.636  | NM_014649 | 2912.948  | 4191.527  | AW300857  | 7914.604  | 7489.994  |
| NM_005057 | 2560.368  | 2887.854  | AL117488  | 1793.639  | 2154.242  | H85962    | 16084.37  | 17559.957 |
| AB046842  | 2436.292  | 2960.992  | NM_01224C | 2575.215  | 2600.179  | BG742446  | 837.005   | 1312.332  |
| NM_00485C | 2039.385  | 2124.943  | NM_01900E | 11746.564 | 12876.477 | AA864554  | 788.374   | 1837.335  |
| NM_002822 | 7669.432  | 9282.176  | NM_004739 | 13555.867 | 16248.991 | X66945    | 1916.999  | 1818.15   |
| BF306955  | 1299.295  | 1304.735  | AV752216  | 1281.417  | 1258.955  | X12830    | 1389.565  | 1304.2    |
| NM_001394 | 12947.347 | 14413.949 | NM_005341 | 4262.479  | 4703.774  | U00482    | 593.062   | 542.622   |
| NM_018441 | 15710.022 | 16212.034 | AB011090  | 1982.991  | 1932.956  | K01904    | 4353.435  | 2684.29   |
| NM_00077E | 19868.482 | 25986.42  | NM_000209 | 777.449   | 775.07    | BE538886  | 509.368   | 355.753   |
| NM_00160E | 3049.574  | 3121.52   | NM_00654E | 46248.352 | 44401.195 | NM_00222E | 2856.992  | 1286.204  |
| BE733234  | 1737.665  | 2056.913  | NM_016534 | 2525.167  | 2478.634  | M57650    | 2395.038  | 1830.875  |
| NM_02022E | 3153.978  | 3234.161  | AB021923  | 1369.039  | 1560.16   | BC023978  | 659.265   | 459.708   |
| AK024685  | 4303.726  | 3830.463  | AK024240  | 690.361   | 633.864   | M21302    | 1573.103  | 944.31    |
| NM_00367E | 22242.279 | 17141.131 | NM_01645E | 50692.422 | 44984.43  | NM_005212 | 2284.97   | 2471.105  |
| AF113007  | 2081.752  | 2567.145  | AK022677  | 4481.424  | 4225.255  | AK024715  | 616.213   | 768.571   |
| NM_00068E | 6789.895  | 6708.946  | AF035288  | 400.856   | 687.877   | U90942    | 43680.602 | 49133.176 |
| U39573    | 751.428   | 1016.075  | AL137645  | 30388.066 | 38044.02  | NM_014942 | 670.008   | 780.426   |
| D82061    | 5113.455  | 3763.87   | AK026141  | 1715.283  | 2214.143  | NM_01836C | 1354.233  | 1230.385  |
| AJ293009  | 5988.039  | 5624.515  | AK022894  | 2350.237  | 2420.065  | AL365415  | 1166.638  | 893.173   |
| NM_000374 | 3120.769  | 2922.383  | AF217993  | 4368.216  | 5055.236  | L29147    | 14017.357 | 14499.047 |
| NM_000502 | 6496.595  | 4679.288  | AF131823  | 936.721   | 1127.348  | NM_00152E | 23634.256 | 24942.691 |
| NM_00135E | 27988.465 | 23194.408 | AK026324  | 9952.002  | 11369.089 | NM_00605E | 2577.477  | 3067.532  |
| NM_00517E | 62108.844 | 54961.586 | AK025253  | 2437.37   | 2276.915  | NM_00429E | 559.435   | 577.04    |
| NM_00169E | 25874.635 | 24585.662 | AF131777  | 590.35    | 631.121   | NM_00504E | 868.14    | 819.543   |
| AF190900  | 16049.78  | 15376.46  | AK025004  | 1195.132  | 1205.103  | NM_018841 | 760.473   | 609.35    |
| NM_020404 | 3708.436  | 3868.907  | AL136818  | 4312.824  | 4426.726  | NM_00522E | 721.298   | 611.661   |
| BE972401  | 7830.375  | 8150.052  | AF146798  | 3550.272  | 3431.043  | AL133105  | 1661.97   | 1823.697  |
| U56725    | 710.702   | 1087.599  | AK022049  | 909.55    | 764.378   | AK022859  | 1377.982  | 1034.924  |
| NM_01742E | 3673.58   | 4502.738  | AF086517  | 10118.695 | 10563.284 | NM_014864 | 3180.878  | 2934.591  |
| AB007922  | 1254.827  | 839.672   | AK025740  | 20371.838 | 22030.213 | NM_00372E | 6074.797  | 4071.562  |
| NM_015982 | 6926.746  | 6491.75   | AK000311  | 5298.785  | 5027.174  | NM_00497E | 1391.487  | 881.36    |
| NM_00374E | 51003.543 | 56815.324 | AK025346  | 59166.027 | 53665.75  | D87445    | 3320.664  | 3619.647  |
| NM_00721C | 2279.873  | 2827.139  | AK022583  | 7091.581  | 7312.501  | NM_00023E | 2793      | 2629.8    |
| NM_001483 | 6005.173  | 6362.188  | AL137534  | 62770.699 | 56823.672 | NM_002247 | 599.802   | 557.48    |



|           |           |           |           |           |           |           |           |           |
|-----------|-----------|-----------|-----------|-----------|-----------|-----------|-----------|-----------|
| NM_018973 | 11666.672 | 6710.821  | AF052121  | 15691.205 | 16341.627 | NM_00498C | 18306.393 | 22789.352 |
| NM_002591 | 5384.432  | 4585.57   | AL359062  | 7225.92   | 7450.999  | AB011094  | 14449.046 | 17949.066 |
| NM_020216 | 9838.107  | 8749.845  | AK026869  | 3383.5    | 3607.146  | NM_003224 | 1381.714  | 1501.571  |
| AK021860  | 2146.338  | 1709.202  | AK022192  | 771.871   | 828.526   | NM_00165E | 52005.633 | 58560.086 |
| AB046816  | 1285.503  | 1452.718  | NM_019099 | 58979.402 | 54871.156 | NM_006827 | 23686.068 | 20686.363 |
| AL137266  | 4462.91   | 4571.905  | Y12020    | 51838.816 | 50981.098 | AK021761  | 4375.226  | 5814.033  |
| NM_01428E | 22000.828 | 19903.75  | AJ011597  | 897.97    | 1048.382  | AK024536  | 1240.455  | 1235.101  |
| AF035300  | 1723.277  | 2281.778  | AJ001905  | 1407.091  | 1270.914  | NM_01866E | 3864.651  | 4622.365  |
| NM_017703 | 12901.377 | 12976.803 | U17635    | 1681.775  | 1829.375  | NM_004227 | 968.129   | 725.492   |
| NM_00405E | 1411.559  | 1937.15   | AL049930  | 846.767   | 1142.874  | NM_005282 | 1390.075  | 1504.48   |
| NM_01472E | 22899.936 | 26218.26  | Z83946    | 1082.181  | 952.55    | NM_00173E | 458.247   | 540.678   |
| NM_00161E | 1850.097  | 1818.098  | D55638    | 575.77    | 839.249   | AB028949  | 713.689   | 663.695   |
| NM_00659E | 2152.964  | 1869.353  | L23870    | 912.054   | 832.435   | AL137580  | 334.992   | 329.487   |
| NM_004463 | 823.32    | 583.229   | D55644    | 690.812   | 860.755   | NM_004101 | 506.641   | 443.344   |
| NM_00593E | 1570.691  | 956.053   | Z97017    | 1706.224  | 1806.064  | NM_00299E | 16688.168 | 15786.812 |
| U43586    | 1496.03   | 1061.631  | D16951    | 1470.196  | 1325.547  | NM_01597E | 1342.604  | 1035.161  |
| NM_006271 | 6010.453  | 4969.992  | L19362    | 1175.786  | 1398.268  | NM_00381C | 1902.977  | 2037.81   |
| NM_018647 | 1886.733  | 2346.461  | L33807    | 2298.388  | 2573.299  | NM_016171 | 58804.227 | 66757.445 |
| NM_00302E | 1131.061  | 1177.984  | AB007975  | 1353.616  | 1860.177  | NM_014443 | 2163.66   | 951.77    |
| NM_000721 | 65227.543 | 64437.293 | AK024152  | 556.946   | 888.06    | NM_005057 | 879.67    | 1155.704  |
| NM_003933 | 4117.575  | 3052.281  | AK021821  | 570.1     | 878.481   | AB046842  | 1376.465  | 1295.07   |
| NM_01864C | 629.793   | 610.475   | AL049328  | 1019.838  | 1296.215  | NM_00485C | 1270.354  | 1571.799  |
| NM_00509E | 4344.68   | 3163.56   | AK021415  | 250.893   | 711.986   | NM_002822 | 3062.609  | 4610.777  |
| NM_00005E | 9707.848  | 6840.484  | AK000030  | 1424      | 1509.971  | BF306955  | 2383.268  | 2984.136  |
| NM_003163 | 3430.17   | 3165.151  | NM_017932 | 934.749   | 854.192   | NM_001394 | 5309.646  | 6190.596  |
| NM_019057 | 3606.611  | 3611.988  | AK000910  | 3342.44   | 4036.207  | NM_018441 | 4023.305  | 4378.091  |
| NM_002677 | 846.3     | 864.189   | AF252280  | 9309.877  | 10346.356 | NM_00077E | 7740.629  | 9034.868  |
| NM_01620E | 3317.945  | 2305.608  | AK000107  | 540.904   | 968.321   | NM_00160E | 1374.485  | 1602.32   |
| NM_00575E | 3910.305  | 3560.421  | AK000951  | 775.808   | 580.667   | BE733234  | 865.827   | 1059.144  |
| AF149724  | 2010.744  | 2136.376  | AK024518  | 21069.113 | 24739.248 | NM_02022E | 4533.122  | 5160.128  |
| NM_006367 | 17388.717 | 25131.973 | AK024586  | 1053.461  | 1280.894  | AK024685  | 1563.541  | 1509.326  |
| NM_006732 | 21903.049 | 27800.73  | AK024616  | 863.155   | 707.135   | NM_00367E | 9408.324  | 9132.162  |
| NM_004354 | 6140.033  | 8633.631  | AK024914  | 4344.468  | 5981.156  | AF113007  | 656.144   | 1054.222  |
| NM_00161C | 4629.72   | 5178.093  | BC030949  | 3661.768  | 2995.017  | NM_00068E | 1829.533  | 1981.71   |
| NM_001241 | 1694.253  | 1606.416  | AF116615  | 1887.001  | 2756.37   | U39573    | 269.326   | 355.266   |
| AF217504  | 2712.315  | 2764.675  | U17636    | 65245.895 | 57769.422 | D82061    | 2387.801  | 2337.714  |
| AK027102  | 4586.146  | 4142      | NM_01854E | 8287.012  | 9404.754  | AJ293009  | 2357.022  | 2179.078  |
| AL109714  | 1373.761  | 1157.695  | U52699    | 26569.293 | 29804.092 | NM_000374 | 1841.138  | 1434.525  |
| NM_004632 | 3453.126  | 3225.787  | S71613    | 1236.509  | 1292.051  | NM_000502 | 6552.447  | 3537.322  |
| NM_00380E | 5301.567  | 6035.272  | AJ011910  | 23442.125 | 28481.42  | NM_00135E | 15930.458 | 13036.41  |
| NM_01988E | 6678.992  | 5542.533  | AK024378  | 862.366   | 1536.948  | NM_00517E | 40048.227 | 28522.918 |
| NM_00327E | 54227.488 | 54479.676 | NM_01402E | 4819.32   | 5220.255  | NM_00169E | 13128.444 | 8767.474  |
| AK021957  | 61163.609 | 62106.773 | D61703    | 3372.187  | 3855.109  | AF190900  | 1404.152  | 1831.677  |
| NM_016623 | 17890.643 | 24755.092 | NM_018012 | 441.119   | 669.555   | NM_020404 | 4015.784  | 4789.673  |
| NM_004771 | 4144.533  | 3743.42   | AK024928  | 806.239   | 756.953   | BE972401  | 6118.404  | 7004.874  |
| NM_002104 | 1655.316  | 1969.996  | NM_01445C | 13892.625 | 14987.547 | NM_01742E | 1504.016  | 2255.296  |
| NM_005504 | 7173.724  | 7362.308  | NM_017991 | 2547.326  | 2588.658  | AB007922  | 816.301   | 884.691   |
| AF234654  | 1703.837  | 2032.684  | L37198    | 3566.6    | 3185.608  | NM_015982 | 4200.159  | 4589.096  |
| NM_000110 | 4096.594  | 5223.519  | U67822    | 1399.578  | 1302.702  | NM_00374E | 26107.582 | 29611.986 |
| NM_017832 | 1677.295  | 1657.471  | AK021921  | 1725.977  | 1780.086  | NM_00291C | 23828.857 | 22110.754 |
| NM_001713 | 4348.912  | 4246.572  | AK025431  | 2877.596  | 2790.401  | AC096970  | 14641.118 | 15687.731 |
| NM_00237E | 14142.968 | 16650.771 | AK023662  | 1178.869  | 1124.38   | AK024865  | 1895.59   | 1905.87   |
| NM_001813 | 5275.271  | 6328.192  | AF086274  | 49544.902 | 48670.656 | NM_00721C | 952.646   | 1303.541  |

|           |           |           |           |           |           |           |           |           |
|-----------|-----------|-----------|-----------|-----------|-----------|-----------|-----------|-----------|
| AF055016  | 4448.405  | 4123.79   | AK023682  | 1875.969  | 2145.603  | NM_001483 | 2781.891  | 3386.109  |
| NM_007234 | 31722.938 | 26332.385 | AK024024  | 5784.811  | 6322.442  | NM_018973 | 5483.397  | 2820.942  |
| NM_014567 | 4081.129  | 3138.619  | AK000685  | 5053.444  | 10303.865 | NM_002591 | 7717.126  | 7314.881  |
| NM_017842 | 5046.984  | 4312.616  | D28381    | 11600.955 | 15696.418 | NM_020216 | 4835.702  | 4061.701  |
| AB037809  | 2442.508  | 2168.792  | AK023543  | 294.718   | 634.336   | AK021860  | 955.271   | 811.862   |
| AB011129  | 1625.45   | 1586.723  | BE706519  | 1094.87   | 1414.184  | AK000119  | 3180.953  | 6030.244  |
| NM_014391 | 8883.77   | 7789.491  | AF130064  | 28638.756 | 32577.881 | AL137266  | 1932.61   | 1247.398  |
| NM_004270 | 4480.75   | 3986.219  | U17624    | 995.504   | 1438.603  | AL137311  | 978.997   | 1926.398  |
| NM_001537 | 5868.5    | 8981.938  | D16988    | 54503.156 | 54084.066 | NM_014288 | 7749.183  | 7981.186  |
| U80743    | 2803.644  | 3367.873  | AK001959  | 10732.714 | 11545.519 | AF035300  | 863.15    | 1041.753  |
| NM_001352 | 5238.055  | 5647.41   | U36217    | 2826.991  | 3011.835  | NM_017703 | 6181.176  | 7838.625  |
| D15050    | 2746.45   | 2267.374  | AL359334  | 4165      | 15773.393 | NM_015320 | 3184.566  | 4302.856  |
| NM_006527 | 13092.428 | 14622.855 | AK027095  | 3295.015  | 3477.95   | NM_004055 | 984.017   | 1133.11   |
| NM_007363 | 19390.898 | 18549.354 | AF062097  | 1112.646  | 1008.882  | NM_014726 | 14013.4   | 14461.86  |
| NM_003093 | 58717.113 | 58728.32  | NM_019847 | 2107.634  | 2720.332  | AJ297349  | 886.286   | 943.216   |
| U05589    | 2381.926  | 1821.32   | D17093    | 21927.553 | 22700.113 | NM_005828 | 2774.024  | 3361.256  |
| NM_014473 | 25149.994 | 29521.121 | AK022784  | 827.663   | 871.88    | NM_001619 | 1208.061  | 1110.257  |
| NM_001762 | 8850.165  | 10808.847 | AL117521  | 5428.174  | 5346.371  | NM_006599 | 2108.545  | 2635.563  |
| NM_016306 | 23926.967 | 19916.477 | NM_000731 | 669.322   | 638.535   | NM_004463 | 693.274   | 580.394   |
| NM_003755 | 842.524   | 1042.668  | AK021913  | 13220.929 | 13996.423 | NM_005936 | 1203.765  | 803.812   |
| BE258640  | 17497.943 | 19234.488 | AL137489  | 21967.695 | 31421.354 | U43586    | 839.273   | 607.841   |
| NM_003314 | 10960.272 | 10175.958 | AF009311  | 6691.064  | 8618.466  | NM_006271 | 4243.883  | 3719.982  |
| AL355730  | 516.141   | 590.694   | S73397    | 1589.654  | 1897.151  | NM_018647 | 807.619   | 933.154   |
| U79273    | 2757.739  | 3225.388  | AK023939  | 892.283   | 1272.84   | NM_003026 | 476.623   | 362.495   |
| AK022050  | 1243.505  | 1151.567  | AL050219  | 1215.465  | 1578.455  | NM_000721 | 49388.727 | 42557.637 |
| NM_002512 | 66302.523 | 63448.043 | AK024433  | 2378.778  | 2378.623  | NM_003933 | 1954.677  | 1642.266  |
| AL365411  | 4308.209  | 5723.347  | U82321    | 1640.7    | 1546.962  | NM_005095 | 1911.675  | 1162.008  |
| AF254082  | 46654.887 | 40865.051 | AL050376  | 1072.142  | 744.64    | NM_000055 | 5566.638  | 3670.28   |
| AF205718  | 6229.513  | 5053.173  | AL359652  | 3274.666  | 3450.187  | NM_003163 | 5832.41   | 3980.052  |
| AY004252  | 1034.424  | 1094.252  | AK022423  | 2082.093  | 2171.973  | NM_019057 | 1138.761  | 1302.55   |
| NM_006261 | 3964.05   | 4378.945  | AF088021  | 14040.639 | 15372.51  | NM_016205 | 726.464   | 680.977   |
| AK001814  | 5017.805  | 5227.704  | BF509267  | 9561.062  | 9618.623  | NM_005759 | 1456.209  | 1241.753  |
| NM_007222 | 1961.874  | 1446.252  | NM_002455 | 10895.849 | 10145.593 | AF149724  | 1537.473  | 2440.264  |
| NM_003435 | 3631.858  | 3340.958  | NM_002959 | 12922.121 | 11857.041 | BC020745  | 775.601   | 582.344   |
| NM_016291 | 8680.591  | 5884.467  | AB046773  | 897.353   | 683.244   | NM_006367 | 7065.833  | 9912.412  |
| NM_005937 | 57586.844 | 50985.098 | AK000899  | 26916.477 | 27897.746 | NM_006732 | 19067.879 | 21479.418 |
| AK022880  | 1799.009  | 1447.664  | CY3Cy5    | 6704.417  | 235.792   | NM_004354 | 3059.878  | 2737.661  |
| NM_003601 | 24775.598 | 31856.441 | AW300857  | 13197.803 | 15238.907 | NM_004661 | 1790.742  | 1785.1    |
| AK001228  | 3953.457  | 4664.38   | H85962    | 22409.656 | 27484.846 | NM_001610 | 2583.662  | 2600.145  |
| AK026778  | 2788.513  | 2378.864  | BG742446  | 2083.853  | 2361.907  | NM_001241 | 795.168   | 1266.414  |
| AF074987  | 3413.267  | 3598.656  | AA864554  | 2557.164  | 1296.513  | AF217504  | 926.527   | 1171.077  |
| AK001058  | 36378.516 | 32773.535 | X66945    | 4471.699  | 3928.333  | AK027102  | 2933.973  | 3180.013  |
| AK026239  | 5674.396  | 4963.359  | AI160703  | 754.317   | 609.721   | AL109714  | 636.803   | 692.825   |
| AF086283  | 1345.979  | 1345.275  | X12830    | 2855.456  | 2881.642  | NM_004632 | 1717.113  | 1475.366  |
| AF086281  | 2647.66   | 2691.407  | U00482    | 1267.104  | 1414.263  | NM_017919 | 3293.909  | 3611.369  |
| AF086393  | 1354.213  | 1109.098  | K01904    | 5878.793  | 7678.656  | NM_014456 | 2548.912  | 2955.414  |
| AF086453  | 876.684   | 582.772   | BE538886  | 1326.821  | 1223.594  | NM_004740 | 11267.392 | 11457.522 |
| AF070621  | 11417.778 | 10043.782 | NM_002228 | 7104.968  | 2989.956  | NM_003805 | 2584.309  | 2474.506  |
| NM_020240 | 8086.953  | 7266.764  | M57650    | 5853.605  | 7942.531  | NM_019886 | 3585.427  | 3332.952  |
| AK023678  | 8368.005  | 5363.871  | BC023978  | 1043.875  | 1341.228  | NM_003278 | 48222.898 | 39960.969 |
| AF052090  | 6066.744  | 5251.374  | M21302    | 3746.271  | 3919.798  | NM_000426 | 490.847   | 285.292   |
| AK023718  | 8103.191  | 11590.994 | NM_016346 | 3465.599  | 2980.532  | AK021957  | 54019.891 | 42611.051 |
| AF075089  | 1272.817  | 1798.372  | SR2       | 62728.938 | 52623.117 | NM_016623 | 8344.483  | 12317.069 |

|            |           |           |           |           |           |           |           |           |
|------------|-----------|-----------|-----------|-----------|-----------|-----------|-----------|-----------|
| AF086007   | 24548.217 | 30811.336 | SR4       | 17188.941 | 10732.121 | NM_001334 | 493.015   | 635.572   |
| AK000803   | 4264.227  | 6627.292  | SR6       | 2946.079  | 1794.874  | NM_004771 | 1632.916  | 2000.198  |
| AK022374   | 1383.02   | 1397.921  | SR8       | 10404.711 | 21614.906 | AL365514  | 943.629   | 793.974   |
| AF085926   | 14484.613 | 13546.637 | SR10      | 33556.039 | 8135.758  | NM_018295 | 768.348   | 833.346   |
| AL137307   | 6528.695  | 5598.104  | CY3Cy5    | 3186.933  | 173.649   | NM_002104 | 739.498   | 1211.273  |
| AL137468   | 8345.548  | 8808.062  | NM_001525 | 32054.221 | 32712.018 | NM_005504 | 3197.825  | 3100.178  |
| AL162007   | 30374.686 | 32872.871 | NM_006055 | 3802.131  | 4502.299  | AF234654  | 1161.818  | 1355.779  |
| AL390137   | 18492.029 | 14576.875 | NM_004296 | 1122.402  | 1142.452  | NM_000110 | 1643.46   | 2077.909  |
| AL162045   | 1589.727  | 1660.351  | NM_005048 | 1805.473  | 1837.229  | NM_016002 | 14610.627 | 18739.475 |
| AK022437   | 24439.426 | 21226.775 | NM_005972 | 614.849   | 1041.079  | NM_014545 | 1066.408  | 1293.698  |
| AB042410   | 883.208   | 906.201   | NM_018841 | 1372.024  | 1360.216  | NM_000531 | 482.908   | 759.638   |
| AF116682   | 58940.652 | 51217.652 | NM_005226 | 1102.328  | 1122.116  | NM_017832 | 993.327   | 1043.609  |
| AL137259   | 5542.134  | 4608.74   | AL133105  | 3587.46   | 3673.658  | NM_001713 | 2404.224  | 2469.586  |
| AL122107   | 3316.264  | 2729.401  | AK022859  | 2668.709  | 2680.586  | NM_015367 | 7016.645  | 8664.206  |
| AF075021   | 880.573   | 961.584   | NM_000214 | 811.641   | 1149.558  | NM_014495 | 2078.841  | 2624.745  |
| AK025140   | 8771.559  | 9233.817  | NM_014864 | 9340.077  | 11679.259 | NM_002375 | 6302.34   | 7066.279  |
| AK023394   | 1361.789  | 2112.745  | NM_003728 | 22003.904 | 37249.504 | NM_001813 | 2536.89   | 2193.825  |
| AF161340   | 6850.756  | 10037.948 | NM_014352 | 7579.672  | 9360.747  | AF055016  | 2378.052  | 1402.059  |
| AF242771   | 1095.577  | 766.662   | NM_012481 | 1592.032  | 1385.412  | NM_007234 | 17257.623 | 13903.816 |
| NM_018562  | 19636.166 | 18932.049 | L09102    | 21708.969 | 21691.584 | Y16704    | 60607.488 | 43602.734 |
| AF098666   | 1034.968  | 852.552   | U68488    | 1807.125  | 1583.051  | NM_014567 | 3336.19   | 2383.212  |
| AF290544   | 956.137   | 941.842   | NM_000675 | 1517.136  | 1353.277  | NM_017842 | 2799.598  | 1502.408  |
| NM_014134  | 1083.465  | 747.937   | NM_016247 | 4452.615  | 3592.335  | AB037809  | 1012.848  | 1120.772  |
| AK021969   | 2768.595  | 2661.269  | NM_001157 | 1570.786  | 1438.091  | AB011129  | 720.516   | 662.102   |
| AK022065   | 2153.878  | 2535.348  | NM_012282 | 2391.712  | 2383.363  | NM_014391 | 1235.143  | 1302.764  |
| AK022221   | 4075.212  | 3268.654  | NM_006710 | 911.097   | 875.802   | NM_004270 | 1469.21   | 1810.442  |
| AK022356   | 1539.481  | 886.18    | NM_003323 | 16645.652 | 18082.092 | NM_012082 | 481.881   | 690.149   |
| AK021998   | 2942.353  | 3593.606  | NM_018668 | 8780.68   | 8558.545  | NM_001537 | 1797.144  | 3220.348  |
| AK022126   | 2650.498  | 2648.255  | NM_001736 | 741.015   | 842.565   | U80743    | 893       | 1078.945  |
| AK022256   | 1202.812  | 674.762   | AB028949  | 1498.291  | 1584.322  | NM_001352 | 1068.132  | 940.443   |
| AK022383   | 4104.63   | 3292.043  | AL137580  | 1168.512  | 1197.207  | D15050    | 783.148   | 363.38    |
| AK027041   | 3222.621  | 3564.49   | NM_004101 | 1476.47   | 1292.083  | NM_006527 | 6137.904  | 7759.699  |
| AK024332   | 1126.287  | 1051.207  | NM_002995 | 49480.879 | 48509.277 | NM_006627 | 1535.572  | 1577.012  |
| NM_005355  | 22239.564 | 15596.363 | AB033114  | 683.022   | 875.203   | NM_007363 | 4221.291  | 5974.837  |
| AK027195   | 597.135   | 588.231   | NM_015978 | 3162.259  | 3752.195  | NM_003093 | 44177.984 | 51268.09  |
| AK000937   | 870.384   | 879.146   | NM_003810 | 6179.521  | 4118.084  | U05589    | 972.96    | 933.853   |
| AF035306   | 1787.729  | 2272.237  | NM_014443 | 5839.932  | 5602.488  | NM_014473 | 15328.824 | 17974.77  |
| AK091662   | 2178.95   | 1869.022  | NM_005212 | 6429.902  | 10452.069 | NM_003095 | 60143.188 | 72789.102 |
| NM_003954  | 1304.934  | 1848.31   | M14584    | 850.84    | 1015.125  | NM_016385 | 1138.757  | 1422.023  |
| NM_016345  | 1692.105  | 1946.315  | NM_006419 | 1678.803  | 1918.971  | NM_002295 | 58266.762 | 68413.742 |
| AK022003   | 940.276   | 1100.11   | AF035035  | 1831.227  | 1510.838  | NM_001762 | 5217.407  | 4818.845  |
| AK023877   | 1465.471  | 1562.638  | AB020676  | 4464.849  | 3653.811  | NM_016306 | 12138.646 | 10047.488 |
| unknown (S | 3837.693  | 3708.504  | AK024715  | 2258.131  | 2293.773  | NM_013235 | 4957.969  | 1928.339  |
| AK024213   | 45921.816 | 35219.105 | U90942    | 59084.996 | 61950.402 | BE258640  | 9786.605  | 10406.108 |
| AK022184   | 1293.585  | 1256.244  | NM_014942 | 2085.389  | 2260.64   | NM_003314 | 5089.724  | 3322.248  |
| AB007959   | 1235.643  | 1016.322  | AK022489  | 1431.622  | 1639.02   | U79273    | 656.176   | 497.801   |
| Y10516     | 5889.704  | 8351.887  | AL365415  | 1392.625  | 1580.087  | AK022050  | 712.572   | 799.298   |
| AF056451   | 1234.775  | 1502.568  | NM_020225 | 8455.121  | 9148.136  | NM_002512 | 39115.285 | 38637.086 |
| AF015039   | 5885.347  | 6512.2    | AK024685  | 3077.959  | 4811.056  | AL365411  | 2230.239  | 2854.029  |
| U50528     | 1921.372  | 1847.485  | AF113007  | 1709.706  | 1668.266  | NM_016066 | 2470.268  | 3164.018  |
| AL117549   | 3207.635  | 3894.987  | NM_000685 | 3402.363  | 3190.772  | NM_001245 | 1384.444  | 1509.324  |
| NM_005222  | 15100.9   | 13592.311 | U39573    | 1174.224  | 1286.719  | AK024677  | 567.559   | 527.577   |
| BC024308   | 24601.303 | 21338.236 | D82061    | 5454.071  | 5025.313  | NM_000036 | 1262.236  | 1042.908  |

|           |           |           |           |           |           |           |           |           |
|-----------|-----------|-----------|-----------|-----------|-----------|-----------|-----------|-----------|
| NM_00053E | 4975.884  | 4402.302  | AJ293009  | 6114.539  | 5155.642  | AF254082  | 26302.994 | 28344.354 |
| AK001838  | 62067.227 | 60138.137 | NM_000374 | 4859.985  | 5313.771  | AF205718  | 2810.298  | 3530.844  |
| NM_01829E | 2049.604  | 2190.215  | NM_000502 | 11392.944 | 25310.047 | AY004252  | 471.339   | 618.452   |
| AF070574  | 1021.568  | 968.891   | NM_001359 | 29175.162 | 31399.088 | NM_006261 | 1667.479  | 2108.894  |
| AF086262  | 4898.392  | 6441.986  | NM_001696 | 26420.408 | 25300.588 | AK027045  | 1332.904  | 1163.742  |
| AF086292  | 8188.842  | 6650.646  | NM_004975 | 7374.684  | 6181.622  | AF169796  | 2533.978  | 3639.763  |
| AK023769  | 1297.61   | 1130.22   | NM_002245 | 2791.867  | 3171.142  | AK001814  | 2901.526  | 2910.399  |
| AK024342  | 21185.6   | 17922.525 | D87445    | 9179.448  | 7448.559  | NM_007222 | 672.713   | 585.823   |
| AL137712  | 7742.881  | 6114.421  | NM_000238 | 2986.264  | 3119.865  | NM_003435 | 2067.585  | 1319.387  |
| L77599    | 55281.523 | 43724.402 | NM_004980 | 30561.924 | 25855.775 | NM_016291 | 4906.723  | 2339.099  |
| AK021673  | 36006.434 | 30905.766 | AB011094  | 19724.676 | 16608.582 | NM_005937 | 47185.883 | 31270.896 |
| NM_01844E | 12082.883 | 10760.006 | AK021761  | 6749.41   | 7035.25   | AK001503  | 2092.701  | 1811.172  |
| AK022743  | 11233.335 | 8771.562  | NM_001483 | 3557.703  | 3435.462  | AK022880  | 1669.131  | 1791.262  |
| NM_014627 | 4230.795  | 5036.793  | NM_018973 | 4693.046  | 7882.774  | NM_003601 | 5425.041  | 6706.653  |
| NM_01393E | 15163.063 | 17208.977 | NM_002591 | 18465.834 | 17178.789 | AF074987  | 1110.369  | 1277.753  |
| NM_01398E | 58085.004 | 60410.285 | NM_020216 | 6857.642  | 8382.911  | AK001058  | 16137.241 | 16146.688 |
| U55055    | 1342.022  | 2528.254  | AK021860  | 2537.237  | 3637.355  | AK026239  | 1239.655  | 1605.3    |
| AK022186  | 1360.196  | 1636.22   | AL137266  | 4548.136  | 4168.186  | AF086283  | 1279.16   | 1434.304  |
| AB018319  | 2307.516  | 2417.4    | NM_016457 | 2264.548  | 2192.172  | AF088047  | 702.714   | 787.357   |
| AK001101  | 3451.774  | 2413.6    | NM_005057 | 2020.759  | 1723.284  | AF086281  | 1979.823  | 2128.682  |
| BM973473  | 2493.769  | 2662.648  | AF143321  | 1839.76   | 1216.682  | AF086372  | 819.816   | 1655.225  |
| AK021637  | 2395.106  | 2112.794  | AB046842  | 1860.643  | 1804.571  | AF086393  | 716.012   | 701.898   |
| AK021658  | 1388.677  | 1375.825  | NM_004850 | 2062.908  | 1360.317  | AF086453  | 620.309   | 545.698   |
| U17631    | 1770.15   | 1676.652  | NM_002822 | 6595.84   | 4283.434  | AF070621  | 5626.192  | 5248.479  |
| AL137723  | 2248.115  | 2547.904  | BF306955  | 2655.311  | 2018.92   | NM_020240 | 3215.564  | 2777.288  |
| AK024046  | 3651.679  | 3707.301  | NM_001394 | 8478.563  | 8604.299  | AK023678  | 8160.541  | 4654.446  |
| NM_017931 | 4231.614  | 4347.986  | NM_001609 | 2096.185  | 1318.336  | AF052090  | 3784.251  | 2260.126  |
| AK022793  | 3455.94   | 4160.695  | BE733234  | 1205.003  | 601.36    | AK023718  | 1783.348  | 1854.961  |
| AJ227910  | 4043.777  | 3307.934  | NM_001157 | 872.065   | 822.779   | AF075089  | 2657.048  | 2523.647  |
| AF001893  | 1935.289  | 1440.578  | NM_012282 | 1373.79   | 1572.886  | AF086007  | 49238.535 | 54839.398 |
| X04236    | 16148.264 | 12357.153 | NM_006710 | 680.422   | 959.578   | AK000803  | 731.173   | 1004.961  |
| AK093746  | 17333.178 | 10494.812 | NM_003323 | 17884.193 | 21862.568 | AF085926  | 8848.35   | 7856.702  |
| AK021945  | 10680.312 | 8745.151  | BG685310  | 2055.324  | 1945.664  | AL137307  | 2027.606  | 2550.737  |
| L23545    | 1475.807  | 1182.499  | AW300857  | 16444.102 | 14777.229 | AL137468  | 3833.306  | 4119.978  |
| CY3Cy5    | 9710.591  | 496.516   | H85962    | 31572.68  | 27656     | AL390137  | 17566.572 | 16848.283 |
| U13022    | 1987.165  | 1497.556  | BG742446  | 2862.512  | 2248.602  | AL137542  | 535.193   | 506.659   |
| R23251    | 23895.836 | 19036.588 | AA864554  | 2437.026  | 1101.008  | AL162045  | 707.783   | 954.216   |
| AA702640  | 1268.615  | 1638.566  | X66945    | 4060.067  | 4318.258  | AK022437  | 15405.558 | 21003.807 |
| T68583    | 2668.487  | 1883.625  | X12830    | 3108.817  | 2455.609  | AB042410  | 692.91    | 859.656   |
| AA481944  | 6168.836  | 4792.272  | U00482    | 1800.819  | 1211.878  | AF086102  | 1317.539  | 948.213   |
| M31158    | 2231.237  | 1631.694  | K01904    | 5470.649  | 6068.57   | AF116682  | 38252.742 | 34635.461 |
| H00742    | 1829.435  | 1668.899  | BE538886  | 1341.202  | 1297.415  | AL122107  | 3663.392  | 3234.204  |
| D42108    | 1217.763  | 1440.655  | NM_002228 | 6670.025  | 2002.422  | AF075021  | 832.947   | 662.225   |
| BG700922  | 2765.343  | 3200.807  | M57650    | 5088.751  | 5008.669  | AK025140  | 5885.686  | 4966.699  |
| AI366068  | 1766.594  | 2438.906  | BC023978  | 1321.747  | 790.899   | AK023394  | 453.786   | 654.408   |
| N57553    | 1037.087  | 1459.755  | M21302    | 3890.901  | 2921.688  | AF090093  | 9826.798  | 9446.108  |
| AF080158  | 4019.348  | 3700.347  | NM_016346 | 3148.328  | 2241.35   | AF161340  | 1005.933  | 978.903   |
| BM664556  | 1912.658  | 2584.236  | AK024865  | 3115.115  | 1326.804  | AF242771  | 469.309   | 645.863   |
| SR5       | 9485.375  | 9854.004  | NM_007210 | 2048.312  | 434.628   | NM_018562 | 2500.51   | 2404.048  |
| SR7       | 7535.478  | 55921.516 | NM_018360 | 3147.421  | 3864.416  | AF098666  | 713.41    | 647.865   |
| SR9       | 27929.623 | 6007.264  | AL365415  | 1710.356  | 1920.711  | AK021969  | 1108.332  | 1200.708  |
| CY3Cy5    | 15644.855 | 1044.156  | L29147    | 34794.039 | 32932.539 | AK022065  | 1767.795  | 1872.502  |
| M33197    | 67500.633 | 64366.313 | NM_001525 | 36571.484 | 26877.955 | AK022221  | 2417.78   | 2349.692  |

|           |           |           |           |           |           |           |           |           |
|-----------|-----------|-----------|-----------|-----------|-----------|-----------|-----------|-----------|
| NM_007024 | 6320.902  | 5224.89   | NM_006055 | 4908.484  | 3622.567  | AK022356  | 898.44    | 1011.43   |
| NM_013231 | 2361.91   | 2164.667  | NM_004296 | 1058.354  | 849.262   | AK021998  | 1636.223  | 1513.566  |
| NM_012106 | 7056.458  | 6532.877  | NM_005048 | 1322.893  | 1543.888  | AK022126  | 1544.868  | 1745.813  |
| NM_006254 | 1671.048  | 1463.52   | NM_005972 | 692.806   | 564.068   | AK022256  | 280.577   | 754.911   |
| X95425    | 962.283   | 913.266   | NM_018841 | 1321.2    | 1143.268  | AK022383  | 1925.013  | 2206.694  |
| NM_004422 | 4429.701  | 3567.371  | NM_005226 | 1516.115  | 1418.923  | AK027041  | 2443.865  | 2585.474  |
| NM_016562 | 1546.51   | 1013.274  | AL133105  | 2824.985  | 2890.039  | AK000937  | 795.933   | 593.899   |
| M33197    | 67152.297 | 65504.742 | AK022859  | 2247.664  | 3900.485  | AF035306  | 423.433   | 618.67    |
| AY009399  | 42009.141 | 31316.09  | NM_014464 | 843.731   | 1024.252  | AK091662  | 442.846   | 709.304   |
| NM_004895 | 4300.071  | 3613.147  | NM_000214 | 976.115   | 937.074   | AK023877  | 530.042   | 699.926   |
| U59748    | 1408.451  | 1362.167  | NM_014864 | 7437.534  | 3700.984  | unknown ( | 924.47    | 890.374   |
| L32537    | 659.284   | 1058.639  | NM_003728 | 18883.732 | 10458.727 | AK024213  | 23847.484 | 20703.215 |
| NM_014303 | 10625.83  | 9991.71   | NM_014352 | 6226.179  | 3228.942  | AK025093  | 709.681   | 870.909   |
| NM_003118 | 2800.683  | 2462.181  | NM_012481 | 1216.727  | 652.158   | AK022184  | 1743.919  | 2000.38   |
| L02922    | 16834.641 | 16835.66  | L09102    | 20624.518 | 8977.667  | AB007959  | 1254.687  | 821.707   |
| NM_001797 | 1089.731  | 1065.46   | NM_016247 | 3879.256  | 4952.745  | AK024360  | 576.469   | 800.262   |
| NM_003154 | 1518.759  | 1666.194  | AB011094  | 21105.932 | 30897.777 | Y10516    | 222.774   | 751.182   |
| AK023459  | 8121.544  | 7598.662  | NM_003224 | 2242.858  | 3489.235  | AF015039  | 3217.389  | 2495.235  |
| NM_012139 | 7238.297  | 6427.449  | AK021761  | 7806.316  | 8057.412  | U50528    | 874.859   | 693.479   |
| AF121856  | 6880.169  | 9756.271  | AK024536  | 2264.931  | 1881.518  | AB020632  | 616.529   | 810.506   |
| NM_006421 | 5066.321  | 5676.528  | NM_018668 | 9840.861  | 6397.399  | NM_018614 | 13585.524 | 12861.42  |
| NM_017457 | 26005.662 | 24686.1   | NM_004227 | 1430.482  | 1185.545  | AL117549  | 707.921   | 631.788   |
| NM_003765 | 13571.789 | 14076.776 | NM_005282 | 2764.821  | 2012.197  | NM_005222 | 4829.688  | 4798.783  |
| NM_005868 | 1497.45   | 1108.285  | NM_001736 | 724.007   | 823.277   | BC024308  | 3318.948  | 2871.046  |
| M33197    | 67477.625 | 68655.758 | AB028949  | 1743.801  | 2834.466  | NM_000538 | 1509.167  | 1702.132  |
| NM_018202 | 26218.031 | 26083.633 | AL137580  | 1075.34   | 631.412   | AK001838  | 57020.852 | 60898.797 |
| AB023197  | 6577.633  | 6572.716  | NM_004101 | 1052.147  | 801.94    | NM_018295 | 1210.353  | 1821.695  |
| NM_022173 | 7254.077  | 7279.096  | NM_002995 | 22251.729 | 13263.729 | AF086262  | 1707.128  | 1685.175  |
| AB040970  | 5482.74   | 5159.986  | NM_015978 | 1948.309  | 2033.882  | AF086292  | 8564.051  | 8929.973  |
| NM_018330 | 4569.272  | 4443.871  | NM_003810 | 4397.389  | 3226.383  | AK023769  | 518.501   | 636.449   |
| AB023222  | 1049.234  | 1380.245  | NM_004908 | 1801.717  | 1786.89   | AK024342  | 11000.041 | 10885.732 |
| AB033088  | 1141.777  | 1157.703  | NM_014443 | 5359.169  | 1417.973  | AL137712  | 3977.005  | 4365.902  |
| M33197    | 67077.859 | 73353.898 | NM_005212 | 5564.534  | 1999.832  | L77599    | 43408.676 | 40775.727 |
| U50342    | 3644.234  | 3997.404  | NM_006419 | 3455.918  | 1511.861  | AK021673  | 17933.967 | 16947.023 |
| NM_000295 | 1119.148  | 1140.705  | AF035035  | 1248.915  | 864.995   | AB014543  | 1578.939  | 1320.474  |
| AF103795  | 798.425   | 1206.927  | AB020676  | 575.196   | 906.302   | NM_018445 | 5492.042  | 5556.899  |
| U80018    | 1170.031  | 818.706   | AK024715  | 1098.377  | 1534.36   | AK022743  | 10417.831 | 11515.151 |
| NM_000717 | 2021.489  | 1482.806  | BF306955  | 3250.361  | 4296.666  | NM_014627 | 609.079   | 447.093   |
| M33197    | 67581.289 | 69281.281 | NM_001394 | 8182.764  | 8431.302  | NM_013938 | 2397.584  | 1917.29   |
| NM_004845 | 3298.733  | 3799.612  | NM_001609 | 2253.952  | 2893.02   | NM_013986 | 51282.738 | 49698.719 |
| NM_007107 | 21820.623 | 28518.758 | BE733234  | 1592.821  | 1207.191  | U55055    | 556.62    | 676.487   |
| NM_000047 | 6334.943  | 5974.531  | NM_020228 | 13424.492 | 13912.025 | AB018319  | 849.436   | 721.721   |
| NM_006319 | 7403.927  | 6941.286  | AK024685  | 4742.502  | 5724.599  | AK001101  | 1165.583  | 794.09    |
| NM_018226 | 5861.282  | 6195.915  | NM_003676 | 17396.072 | 23836.404 | BM973473  | 766.359   | 925.738   |
| NM_004605 | 594.251   | 1541.875  | AF113007  | 1951.757  | 2023.148  | AK021637  | 840.687   | 846.233   |
| Z36813    | 6485.035  | 5435.609  | NM_000688 | 3772.839  | 3214.368  | U17631    | 704.845   | 700.372   |
| NM_006660 | 8342.795  | 10877.639 | U39573    | 1233      | 663.648   | AL137723  | 639.896   | 729.067   |
| M33197    | 19018.686 | 21777.514 | D82061    | 4986.323  | 3019.699  | AK000774  | 1526.011  | 1660.17   |
| NM_004045 | 13155.54  | 14521.332 | AJ293009  | 4530.256  | 3401.036  | AK024046  | 1336.964  | 1575.534  |
| NM_001891 | 1762.047  | 1851.875  | NM_000374 | 2883.447  | 2393.157  | NM_017931 | 2378.13   | 2628.896  |
| NM_001440 | 55758.859 | 49089.457 | NM_000502 | 4562.91   | 3964.781  | AK022793  | 876.637   | 921.944   |
| NM_016618 | 3005.473  | 2255.421  | NM_001696 | 24581.629 | 19686.756 | AJ227910  | 1535.075  | 1568.841  |
| AB014568  | 31302.139 | 26727.504 | NM_004975 | 7065.761  | 5763.346  | AF001893  | 1017.21   | 821.629   |

|           |           |           |           |           |           |           |           |           |
|-----------|-----------|-----------|-----------|-----------|-----------|-----------|-----------|-----------|
| NM_01224E | 4605.952  | 4964.181  | NM_00224E | 3294.026  | 3895.236  | X04236    | 10654.104 | 8818.185  |
| AK022546  | 9238.877  | 10236.319 | D87445    | 9464.003  | 12041.036 | AK093746  | 11453.114 | 15181.029 |
| NM_014067 | 6985.381  | 7174.607  | NM_00023E | 4072.618  | 6091.96   | D16875    | 472.351   | 264.476   |
| NM_002914 | 13284.547 | 13968.756 | NM_002247 | 1125.861  | 1916.214  | AK027171  | 1224.972  | 1352.645  |
| NM_02038E | 2822.257  | 2468.024  | NM_00498C | 30631.961 | 45548.367 | AK021945  | 6382.044  | 5288.506  |
| NM_006541 | 2852.706  | 3256.409  | NM_01634E | 3503.624  | 3043.651  | L23545    | 861.253   | 687.908   |
| M33197    | 67702.203 | 74690.25  | AK024865  | 3825.448  | 3089.768  | CY3Cy5    | 4640.068  | 235.64    |
| NM_00570E | 4755.765  | 4383.707  | NM_00721C | 2151.921  | 1483.124  | U13022    | 1491.056  | 1412.648  |
| NM_00432E | 3816.731  | 4129.884  | NM_00148E | 5261.637  | 3437.802  | R23251    | 15716.881 | 10961.764 |
| NM_004581 | 7239.211  | 8265.961  | NM_01897E | 5572.334  | 5207.155  | AA702640  | 643.404   | 1119.305  |
| NM_006817 | 17733.063 | 22586.762 | AL049334  | 1255.988  | 1914.825  | T68583    | 2334.917  | 2125.114  |
| NM_015921 | 46210.34  | 47621.934 | NM_02021E | 6846.095  | 12823.157 | AA481944  | 18324.662 | 16383.986 |
| AB040900  | 22125.338 | 24361.141 | AK021860  | 1974.801  | 2123.947  | M31158    | 1108.135  | 1219.119  |
| NM_00148E | 1401.331  | 1537.696  | AL137266  | 4102.107  | 5888.872  | H00742    | 1523.8    | 1056.058  |
| NM_001797 | 2041.239  | 1459.418  | NM_016457 | 2532.083  | 2537.73   | D42108    | 896.336   | 1459.211  |
| NM_003154 | 1797.284  | 1267.866  | NM_005057 | 2339.39   | 1982.747  | BG700922  | 1699.4    | 2527.669  |
| NM_00423E | 969.183   | 656.499   | AF143321  | 1962.863  | 2541.287  | AI366068  | 1541.377  | 2401.023  |
| AK023459  | 8637.753  | 6979.575  | AB046842  | 2477.194  | 3741.539  | N57553    | 1752.389  | 3164.622  |
| U13022    | 2820.876  | 3168.872  | NM_00485C | 1994.318  | 3342.254  | AF080158  | 2755.115  | 3424.177  |
| AA702640  | 3912.747  | 4521.386  | NM_00282E | 7970.834  | 9967.725  | SR3       | 32984.316 | 23639.67  |
| T68583    | 3413.621  | 3352.257  | NM_01435E | 7701.984  | 5149.442  | SR5       | 3764.075  | 3913.882  |
| AA481944  | 18228.754 | 18447.791 | NM_012481 | 1124.674  | 1053.836  | SR7       | 2874.303  | 19957.797 |
| AF038440  | 1360.436  | 915.723   | L09102    | 24733.869 | 19571.529 | SR9       | 9925.731  | 1392.133  |
| M31158    | 2693.499  | 2679.789  | U68488    | 715.371   | 569.784   | CY3Cy5    | 7668.484  | 699.877   |
| H00742    | 3263.993  | 2917.951  | NM_016247 | 8180.269  | 6225.978  | NM_013231 | 2037.03   | 2703.678  |
| D42108    | 1198.882  | 1506.207  | NM_001157 | 1427.67   | 942.284   | NM_01210E | 4711.753  | 4657.518  |
| BG700922  | 2941.604  | 3622.637  | NM_01228E | 1831.102  | 2288.274  | NM_006254 | 702.794   | 530.116   |
| AI366068  | 1701.621  | 2517.445  | NM_00671C | 698.519   | 542.393   | X95425    | 1069.026  | 955.785   |
| N57553    | 898.631   | 1196.85   | NM_00332E | 20252.943 | 14011.612 | NM_00442E | 2529.412  | 1969.882  |
| AF080158  | 3750.287  | 3276.121  | BG685310  | 2412.922  | 2119.942  | NM_01656E | 890.553   | 734.488   |
| BM664556  | 1443.33   | 1693.965  | H85962    | 13906.619 | 21717.994 | NM_00489E | 5002.394  | 6439.924  |
| M33197    | 67391.539 | 68921.367 | BG742446  | 1025.547  | 1518.472  | U59748    | 634.587   | 1273.708  |
| NM_01654E | 7244.117  | 8668.315  | AA864554  | 2169.926  | 1877.271  | L32537    | 463.879   | 1601.252  |
| NM_00029E | 1081.954  | 937.038   | X66945    | 3497.904  | 7121.178  | NM_01430E | 18962.658 | 17402.029 |
| AF103795  | 1257.883  | 1191.394  | AI160703  | 1051.444  | 1292.51   | NM_01486E | 561.807   | 1141.988  |
| NM_00621E | 825.334   | 924.001   | K01904    | 5985.676  | 9743.573  | M33197    | 73166.211 | 67386.117 |
| NM_007024 | 7957.033  | 8253.873  | BE538886  | 1274.945  | 1842.448  | M95610    | 6685.136  | 9002.008  |
| NM_013231 | 4460.187  | 4784.936  | NM_00222E | 8378.333  | 3968.452  | L02922    | 9042.324  | 6904.494  |
| NM_01210E | 10181.155 | 10383.811 | M57650    | 4358.313  | 5760.84   | NM_001797 | 1413.232  | 1115.325  |
| NM_006254 | 1844.807  | 2081.094  | BC023978  | 1292.215  | 1678.431  | NM_003154 | 1763.183  | 1352.422  |
| X95425    | 1646.629  | 1377.92   | M21302    | 3010.271  | 4679.707  | AK023459  | 3290.135  | 2145.317  |
| NM_00442E | 5482.576  | 5979.78   | NM_00521E | 6453.52   | 4843.81   | NM_01213E | 5323.779  | 3995.772  |
| NM_01656E | 1559.508  | 1817.075  | M14584    | 863.746   | 678.107   | AF121856  | 3629.024  | 3532.987  |
| M33197    | 66722.422 | 67367.445 | NM_00641E | 1429.151  | 1028.742  | NM_006421 | 2777.864  | 1490.424  |
| AY009399  | 30509.988 | 26918.885 | AB020676  | 730.729   | 546.805   | NM_017457 | 16545.225 | 6808.385  |
| NM_00489E | 4413.219  | 3960.241  | AK024715  | 862.428   | 756.26    | NM_00376E | 6799.457  | 3210.553  |
| U59748    | 1070.374  | 1143.667  | U90942    | 66519.742 | 67419.727 | M33197    | 63426.32  | 61510.82  |
| NM_01430E | 10219.864 | 9116.981  | NM_01494E | 1109.368  | 812.768   | NM_01820E | 13365.7   | 16168.78  |
| M33197    | 67320.977 | 72122.516 | NM_01836C | 3550.424  | 2263.423  | AB023197  | 3387.582  | 3533.339  |
| M95610    | 16073.779 | 16640.977 | AL365415  | 1634.063  | 1956.497  | NM_02217E | 4281.918  | 4825.779  |
| NM_00311E | 3139.425  | 2809.222  | NM_00152E | 33231.055 | 43004.82  | AB040970  | 4110.251  | 5210.227  |
| L02922    | 18362.34  | 19158.232 | NM_00605E | 4069.548  | 6054.683  | NM_01833C | 3325.425  | 4981.478  |
| M33197    | 25280.93  | 24939.098 | NM_00429E | 927.208   | 1336.576  | AB023222  | 965.859   | 1101.325  |

|           |           |           |           |           |           |           |           |           |
|-----------|-----------|-----------|-----------|-----------|-----------|-----------|-----------|-----------|
| NM_00404E | 14283.202 | 14218.776 | NM_00504E | 1289.688  | 1530.291  | M33197    | 58403.504 | 52567.129 |
| NM_001891 | 2233.624  | 1909.905  | NM_005972 | 782.54    | 1091.962  | U50342    | 5358.333  | 5154.576  |
| NM_01213E | 8237.138  | 8530.282  | NM_001060 | 1121.68   | 1501.832  | U80018    | 1075.468  | 1139.253  |
| NM_006421 | 6709.071  | 8358.598  | NM_00522E | 1076.25   | 2034.699  | NM_000717 | 1128.036  | 697.724   |
| NM_00376E | 13146.016 | 14943.842 | AL133105  | 4882.357  | 6452.143  | M33197    | 87626.805 | 66350.477 |
| NM_00586E | 977.257   | 1394.716  | AK022859  | 2480.943  | 4322.313  | NM_00484E | 4781.14   | 2648.552  |
| M33197    | 66868.57  | 66336.125 | NM_014864 | 7073.253  | 6804.669  | NM_007107 | 10462.939 | 4736.898  |
| NM_01820E | 21015.953 | 21363.789 | NM_00372E | 14241.402 | 23806.309 | NM_000047 | 10218.504 | 3498.674  |
| AB023197  | 5001.161  | 4901.878  | NM_00497E | 11185.098 | 8092.24   | NM_00631E | 3152.167  | 2169.564  |
| NM_02217E | 5377.603  | 5370.687  | NM_00224E | 2572.154  | 2622.886  | NM_01822E | 2963.045  | 2576.023  |
| AB040970  | 4987.567  | 4433.207  | D87445    | 10620.572 | 9413.845  | Z36813    | 3365.759  | 3426.887  |
| NM_01833C | 5328.796  | 4899.905  | NM_00023E | 3712.678  | 4466.821  | NM_00666C | 6116.307  | 11060.128 |
| AB023222  | 1139.046  | 1418.787  | NM_002247 | 1219.556  | 1114.971  | NM_00148E | 606.096   | 1675.51   |
| AB033088  | 1367.637  | 1321.075  | NM_00498C | 35695.004 | 31871.301 | NM_00668E | 54006.691 | 51957.488 |
| M33197    | 67603.445 | 71060.875 | AB011094  | 26215.887 | 26210.857 | M33197    | 12224.019 | 10850.788 |
| U50342    | 3880.331  | 4624.256  | NM_003224 | 2577.355  | 2751.826  | NM_00404E | 4449.443  | 2940.308  |
| NM_015921 | 53525.137 | 45692.832 | NM_00165E | 63072.492 | 59358.012 | NM_001891 | 1235.877  | 1036.471  |
| AB040900  | 29889.221 | 24533.354 | NM_006827 | 33307.332 | 24895.096 | NM_00144C | 42425.555 | 21249.645 |
| NM_00108C | 1023.034  | 1477.833  | AK021761  | 8339.894  | 12284.176 | NM_01661E | 1456.232  | 830.857   |
| NM_00148E | 1355.258  | 1593.98   | AK024536  | 1669.465  | 2615.178  | AB014568  | 26525.07  | 13152.038 |
| U80018    | 1062.119  | 1410.266  | NM_01866E | 5873.157  | 7772.929  | NM_01224E | 4051.799  | 1825.079  |
| NM_000717 | 1578.706  | 1787.737  | NM_004227 | 1526.793  | 2799.506  | AK022546  | 5176.888  | 2083.261  |
| NM_00484E | 3593.06   | 4069.693  | NM_00528E | 2233.95   | 3183.154  | NM_014067 | 6845.917  | 2943.632  |
| NM_000047 | 4236.478  | 3811.822  | NM_00173E | 722.75    | 1415.031  | NM_002914 | 6225.355  | 4313.527  |
| NM_00631E | 6091.678  | 5494.804  | AB028949  | 1955.049  | 2624.735  | NM_02038E | 2204.804  | 2724.256  |
| NM_01822E | 5636.229  | 5771.899  | AL137580  | 1846.767  | 2263.45   | NM_006541 | 834.019   | 863.217   |
| Z36813    | 5720.396  | 5242.522  | NM_004101 | 1442.358  | 2154.48   | NM_00432E | 2131.685  | 2661.538  |
| NM_00666C | 9400.403  | 11747.754 | NM_00299E | 45529.492 | 50686.094 | NM_004581 | 4713.958  | 7337.135  |
| NM_00055E | 1082.39   | 1452.599  | AB033114  | 798.427   | 1277.68   | NM_006817 | 4765.732  | 4853.918  |
| AF080158  | 4017.686  | 3390.538  | NM_01597E | 4205.763  | 6318.28   | NM_00710E | 10201.618 | 11553.604 |
| BM664556  | 1653.135  | 1475.656  | NM_00381C | 7793.77   | 6915.558  | NM_015921 | 29531.072 | 32689.836 |
| M33197    | 67478.086 | 65797.945 | NM_00490E | 813.035   | 1165.189  | AB040900  | 6678.743  | 4073.162  |
| NM_01654E | 8020.958  | 8807.292  | NM_016171 | 65803.203 | 64969.707 | NM_001797 | 1800.388  | 941.607   |
| NM_00144C | 53438.477 | 51875.375 | NM_01444E | 4313.967  | 5318.072  | NM_003154 | 1661.424  | 725.948   |
| NM_001201 | 756.166   | 901.279   | NM_016457 | 1911.055  | 1311.686  | AK023459  | 4674.467  | 2812.331  |
| NM_01661E | 2498.806  | 2269.905  | NM_005057 | 1670.452  | 1004.12   | U13022    | 1453.132  | 717.998   |
| AB014568  | 25495.348 | 24264.857 | AF143321  | 1914.581  | 1402.456  | R23251    | 17224.498 | 7269.647  |
| AK022238  | 1328.537  | 1618.212  | AB046842  | 2092.508  | 1964.456  | AA702640  | 669.095   | 269.777   |
| NM_01224E | 4718.115  | 4766.85   | NM_00485C | 2522.016  | 1796.739  | T68583    | 2629.825  | 838.482   |
| AK022546  | 7067.896  | 7426.903  | NM_00282E | 7099.885  | 3674.392  | AA481944  | 17021.434 | 14952.262 |
| NM_014067 | 8008.953  | 7875.505  | BF306955  | 3766.325  | 2908.94   | M31158    | 1032.862  | 615.617   |
| NM_002914 | 11439.781 | 11822.257 | NM_001394 | 9618.929  | 6058.203  | D42108    | 1520.063  | 1626.512  |
| NM_02038E | 2155.368  | 2304.709  | NM_018441 | 18195.143 | 15199.494 | BG700922  | 1707.431  | 1903.087  |
| NM_00570E | 5870.179  | 4976.831  | NM_00077E | 14289.229 | 8883.86   | AI366068  | 2539.512  | 3979.944  |
| NM_00432E | 3747.86   | 3359.058  | NM_00160E | 2243.518  | 1797.74   | BG565837  | 1084.205  | 1216.551  |
| NM_004581 | 7949.821  | 10205.372 | BE733234  | 1233.611  | 1599.815  | N57553    | 1378.604  | 692.469   |
| NM_006817 | 19902.836 | 29343.02  | NM_02022E | 4375.942  | 6228.817  | AF080158  | 1380.414  | 551.975   |
| M33197    | 67574.906 | 69452.313 | AK024685  | 2554.006  | 4476.171  | BM664556  | 921.752   | 847.648   |
| M95610    | 22264.785 | 20954.799 | NM_00367E | 11807.458 | 17246.756 | NM_00029E | 686.977   | 452.373   |
| NM_003118 | 3495.52   | 3188.876  | AF113007  | 1754.038  | 2091.256  | M33197    | 76078.148 | 67112.758 |
| L02922    | 19981.547 | 20427.814 | NM_00068E | 4171.778  | 5522.083  | NM_007024 | 4709.5    | 2631.144  |
| NM_001797 | 1369.085  | 895.946   | U39573    | 1887.442  | 2489.771  | NM_013231 | 2028.098  | 900.529   |
| NM_003154 | 1793.228  | 1530.392  | D82061    | 4257.563  | 7130.874  | NM_01210E | 4070.83   | 1933.408  |

|           |           |           |           |           |           |           |           |           |
|-----------|-----------|-----------|-----------|-----------|-----------|-----------|-----------|-----------|
| AK023459  | 8594.28   | 8075.824  | AJ293009  | 4692.975  | 6828.37   | NM_006254 | 1177.158  | 883.4     |
| U13022    | 2123.058  | 2557.995  | NM_000374 | 4938.92   | 7290.315  | X95425    | 1903.797  | 3522.527  |
| R23251    | 25616.068 | 25706.389 | NM_000502 | 10213.531 | 20445.959 | NM_004422 | 2698.749  | 2895.149  |
| BG763477  | 774.139   | 1041.275  | NM_001696 | 25292.17  | 35269.941 | NM_016562 | 725.565   | 906.893   |
| AA702640  | 1429.689  | 1883.379  | AF190900  | 10151.776 | 8870.832  | M33197    | 63626.508 | 67843.055 |
| T68583    | 2869.97   | 2734.693  | NM_020404 | 27591.199 | 21707.424 | AY009399  | 23763.211 | 28722.408 |
| AA481944  | 13317.465 | 12663.551 | BE972401  | 14778.967 | 10555.576 | NM_004895 | 7703.397  | 12698.147 |
| AF038440  | 905.772   | 810.442   | NM_017425 | 3108.41   | 1975.556  | U59748    | 2254.439  | 3167.242  |
| D42108    | 1447.74   | 1653.113  | AB007922  | 1378.512  | 771.049   | NM_014303 | 13591.739 | 4664.63   |
| BG700922  | 2946.447  | 4182.522  | NM_015982 | 10764.354 | 6154.076  | L02922    | 6163.665  | 9262.322  |
| AI366068  | 2040.068  | 3425.623  | NM_003746 | 39268.965 | 26144.893 | M33197    | 17726.645 | 12556.92  |
| N57553    | 1420.282  | 1398.647  | NM_002910 | 60601.297 | 60790.379 | NM_004045 | 6460.728  | 5585.34   |
| AB040970  | 5393.879  | 4660.521  | AC096970  | 43321.242 | 35436.383 | NM_001891 | 2120.684  | 1188.867  |
| NM_018330 | 4869.902  | 4285.853  | AK024865  | 4444.721  | 2238.036  | NM_012135 | 4826.386  | 2819.263  |
| AB023222  | 1366.216  | 1533.151  | NM_007210 | 1234.682  | 1300.824  | AF121856  | 3701.471  | 3044.677  |
| AB033088  | 1714.983  | 2037.656  | NM_001483 | 4539.203  | 5518.577  | NM_006421 | 3139.408  | 3188.54   |
| M33197    | 66852.406 | 66539.305 | NM_006581 | 1076.672  | 1016.759  | NM_017457 | 19487.811 | 24043.658 |
| U50342    | 5142.858  | 5527.928  | NM_018973 | 5263.235  | 9723.701  | NM_003765 | 7779.877  | 15392.178 |
| NM_000295 | 1190.639  | 1314.467  | NM_002591 | 18488.234 | 22816.316 | NM_005865 | 1297.551  | 1013.466  |
| AF026932  | 880.174   | 738.934   | NM_020216 | 6896.816  | 2519.042  | M33197    | 64393.883 | 48742.129 |
| AF103795  | 1009.956  | 1311.585  | AK021860  | 1232.564  | 429.283   | NM_018202 | 14116.211 | 10206.121 |
| NM_006215 | 1240.325  | 742.96    | AL137266  | 4804.576  | 7587.915  | AB023197  | 3149.049  | 1894.466  |
| M33197    | 66912.531 | 72109.633 | U95031    | 561.43    | 486.982   | NM_022173 | 4784.956  | 3375.611  |
| NM_007024 | 6459.925  | 8204.991  | NM_014285 | 11095.96  | 10867.808 | AB040970  | 3137.119  | 2126.27   |
| NM_013231 | 2915.402  | 3304.799  | AF035300  | 1176.896  | 1115.654  | NM_018330 | 2213.908  | 1294.297  |
| NM_012106 | 8424.097  | 8554.014  | NM_017703 | 10609.207 | 7550.457  | NM_015921 | 33678.953 | 25382.857 |
| NM_006254 | 1458.987  | 1498.216  | NM_015320 | 9340.508  | 5607.408  | AB040900  | 3716.46   | 3279.695  |
| X95425    | 931.599   | 805.801   | NM_004055 | 3675.544  | 1999.449  | NM_001080 | 518.742   | 423.039   |
| NM_004422 | 3749.118  | 4039.453  | NM_014726 | 18249.232 | 10129.884 | NM_001482 | 959.061   | 723.195   |
| NM_016562 | 1528.878  | 1503.861  | AJ297349  | 2223.656  | 1174.835  | U80018    | 832.417   | 718.194   |
| M33197    | 66610.898 | 67704.961 | NM_005825 | 7906.57   | 4169.235  | NM_000717 | 1029.604  | 692.066   |
| AY009399  | 28412.971 | 24181.748 | NM_001619 | 3220.525  | 2032.765  | M33197    | 71922.867 | 66589.602 |
| NM_004895 | 5048.041  | 4778.309  | NM_013377 | 1609.477  | 266.435   | NM_004845 | 3067.287  | 1865.368  |
| U59748    | 1146.732  | 1659.364  | NM_006599 | 4673.832  | 4317.194  | NM_007107 | 8948.193  | 6374.494  |
| L32537    | 845.774   | 1147.369  | NM_005936 | 1808.068  | 1784.224  | NM_000047 | 10035.928 | 5961.82   |
| NM_014303 | 15551.595 | 15410.868 | U43586    | 2066.53   | 1155.496  | NM_006315 | 3067.804  | 1837.765  |
| NM_006660 | 8078.608  | 10101.548 | NM_006271 | 6533.699  | 2796.409  | NM_018226 | 2999.584  | 1800.853  |
| NM_001486 | 753.607   | 976.084   | NM_018647 | 1677.195  | 755.244   | Z36813    | 3873.401  | 3335.391  |
| NM_004727 | 1078.526  | 1352.179  | NM_003026 | 880.919   | 847.288   | NM_006660 | 4981.928  | 4063.68   |
| NM_006685 | 54295.043 | 52425.84  | NM_000721 | 58505.047 | 48377.004 | NM_004727 | 2554.376  | 3192.301  |
| M33197    | 20103.121 | 21747.93  | NM_003933 | 3956.859  | 2659.798  | AF080158  | 2632.264  | 1690.234  |
| NM_004045 | 12406.231 | 14094.398 | NM_005095 | 3748.758  | 2246.968  | BM664556  | 1234.803  | 1062.468  |
| NM_001891 | 1463.894  | 1536.123  | NM_000055 | 6704.393  | 2684.519  | M33197    | 66401.711 | 67456.266 |
| NM_012135 | 7373.096  | 8168.658  | NM_019057 | 2740.339  | 3185.781  | NM_016545 | 4803.22   | 3145.483  |
| AF121856  | 7094.468  | 10812.45  | NM_002677 | 1281.614  | 1089.61   | NM_001440 | 36912.66  | 24904.969 |
| NM_006421 | 4620.512  | 6045.705  | NM_016205 | 3027.258  | 2986.911  | NM_016615 | 950.372   | 430.051   |
| NM_017457 | 27436.854 | 26485.574 | NM_005759 | 3614.437  | 3745.746  | AB014568  | 16534.939 | 12014.958 |
| NM_003765 | 16758.998 | 18770.107 | AF149724  | 2597.628  | 2536.439  | NM_012245 | 3552.978  | 1932.795  |
| NM_005865 | 1387.075  | 891.483   | BC020745  | 1252.741  | 1247.717  | AK022546  | 4810.841  | 2945.673  |
| M33197    | 67163.773 | 67697.898 | NM_006367 | 17287.865 | 13646.253 | NM_014067 | 7194.739  | 4381.546  |
| NM_018202 | 21433.594 | 24809.553 | NM_006732 | 44652.75  | 35845.891 | NM_002914 | 6783.035  | 5245.688  |
| AB023197  | 5507.841  | 6161.751  | NM_004354 | 5525.941  | 4004.77   | NM_020385 | 1764.354  | 1083.695  |
| NM_022173 | 6284.362  | 7476.364  | NM_004661 | 4405.521  | 2517.918  | NM_006541 | 1213.448  | 1241.19   |



|           |           |           |           |           |           |           |           |           |
|-----------|-----------|-----------|-----------|-----------|-----------|-----------|-----------|-----------|
| M33197    | 67598.641 | 70064.875 | NM_002009 | 1377.573  | 962.568   | NM_00432E | 2128.695  | 1408.97   |
| NM_00570E | 5016.298  | 4100.65   | NM_001610 | 3548.98   | 2236.649  | NM_004581 | 5836.323  | 6686.789  |
| NM_00432E | 3821.494  | 3484.81   | NM_001241 | 1366.654  | 839.149   | NM_006817 | 10595.563 | 14518.003 |
| NM_004581 | 8563.124  | 9472.477  | AF217504  | 2920.569  | 1680.406  | M33197    | 67932.297 | 67822.891 |
| NM_006817 | 21234.168 | 23043.66  | AK027102  | 6063.728  | 4139.415  | M95610    | 15888.075 | 11270.526 |
| NM_00710E | 32037.828 | 30335.486 | AL109714  | 1350.224  | 650.804   | NM_00311E | 3752.233  | 2789.172  |
| NM_015921 | 47812.84  | 43577.414 | NM_004632 | 2971.606  | 2002.477  | L02922    | 13549.172 | 12357.644 |
| AB040900  | 22131.023 | 23893.01  | NM_017919 | 7301.993  | 5149.318  | NM_001797 | 2187.794  | 2200.058  |
| NM_001080 | 888.576   | 884.202   | NM_01445E | 4005.796  | 3517.44   | NM_003154 | 1753.537  | 1614.136  |
| NM_001482 | 1247.467  | 1423.648  | NM_004740 | 21546.129 | 17349.184 | AK023459  | 3857.281  | 3618.948  |
| U80018    | 1262.084  | 946.851   | NM_00380E | 5177.333  | 4282.992  | U13022    | 818.206   | 749.09    |
| NM_000717 | 3985.15   | 3280.961  | NM_01988E | 6410.01   | 4870.145  | R23251    | 13918.966 | 7866.82   |
| M33197    | 67295.789 | 69935.406 | NM_00327E | 58274.121 | 58242.297 | AA702640  | 692.024   | 646.666   |
| NM_00484E | 3238.683  | 4292.13   | NM_00042E | 644.212   | 500.656   | T68583    | 2529.677  | 1836.209  |
| NM_007107 | 21192.537 | 30528.234 | AK021957  | 60500.273 | 29151.783 | AA481944  | 24503.193 | 14842.175 |
| NM_000047 | 7907.339  | 7505.427  | NM_016623 | 15964.636 | 18829.895 | AF038440  | 631.863   | 640.379   |
| NM_00631E | 7966.215  | 7485.702  | NM_001334 | 6731.251  | 6341.577  | M31158    | 909.342   | 656.258   |
| NM_01822E | 6302.808  | 6161.265  | NM_004771 | 2272.478  | 2929.02   | D42108    | 1389.606  | 1428.979  |
| Z36813    | 6306.595  | 7225.836  | AL365514  | 1621.887  | 1747.94   | BG700922  | 1930.063  | 2158.647  |
| AB018327  | 3579.842  | 3021.986  | NM_01829E | 1591.39   | 2451.526  | AI366068  | 1833.28   | 2612.975  |
| AF303889  | 1574.177  | 1201.081  | NM_002104 | 2836.644  | 3076.722  | N57553    | 803.616   | 817.605   |
| M33197    | 67637.5   | 70376.781 | NM_005504 | 9645.229  | 8672.001  | AB040970  | 3496.851  | 2846.56   |
| AK022649  | 9261.249  | 8562.936  | AF234654  | 3702.281  | 2509.863  | NM_018330 | 3055.495  | 2386.095  |
| NM_016507 | 7185.807  | 6778.01   | NM_000110 | 4406.931  | 3300.143  | AB023222  | 738.506   | 752.31    |
| NM_002024 | 8079.297  | 7214.628  | NM_016002 | 32791.746 | 27092.99  | AB033088  | 825.901   | 503.669   |
| NM_002743 | 22069.717 | 21773.053 | NM_01454E | 2707.845  | 2625.753  | M33197    | 68066.945 | 63291.727 |
| AF173358  | 16479.027 | 16738.51  | NM_000531 | 900.076   | 1142.395  | U50342    | 3371.356  | 3097.834  |
| NM_01636E | 2762.455  | 3331.802  | NM_017832 | 1808.778  | 1766.468  | NM_00029E | 1245.918  | 803.065   |
| NM_01654E | 8177.745  | 8521.183  | NM_001713 | 6056.837  | 5624.025  | NM_013231 | 3886.903  | 3536.201  |
| NM_001440 | 52625.785 | 53984.793 | NM_015367 | 10551.201 | 9877.369  | NM_01210E | 3499.131  | 2533.096  |
| NM_001201 | 1167.064  | 1044.461  | NM_01449E | 4988.091  | 4226.18   | X95425    | 2026.925  | 2194.391  |
| NM_01661E | 2806.413  | 3154.888  | NM_00237E | 17378.336 | 16919.461 | NM_004422 | 2781.699  | 2172.695  |
| AB014568  | 25665.395 | 26362.953 | NM_001813 | 4362.852  | 4054.049  | NM_016562 | 1321.806  | 1693.635  |
| AK022238  | 1202.143  | 1541.562  | AF055016  | 2711.175  | 3809.756  | M33197    | 68831.039 | 67499.359 |
| NM_01224E | 6036.122  | 6051.351  | NM_007234 | 24285.09  | 21458.738 | AY009399  | 17020.447 | 14867.726 |
| AK022546  | 9729.413  | 10043.964 | Y16704    | 58018.852 | 62277.609 | U59748    | 2839.598  | 3947.359  |
| NM_014067 | 11986.836 | 11526.45  | NM_014567 | 3358.239  | 2051.603  | L32537    | 1089.215  | 1337.329  |
| NM_002914 | 15293.683 | 14507.146 | NM_017842 | 3258.19   | 1853.079  | NM_014303 | 41005.242 | 19625.08  |
| NM_02038E | 2656.705  | 2583.91   | AB037809  | 2927.097  | 3428.526  | NM_006660 | 5196.953  | 5455.858  |
| NM_014877 | 475.264   | 1097.821  | AB011129  | 2446.618  | 3130.195  | NM_00668E | 53345.434 | 37258.445 |
| NM_006541 | 1642.962  | 2295.888  | NM_014391 | 15136.012 | 17267.113 | M33197    | 16597.738 | 13638.674 |
| NM_01817E | 1686.242  | 1352.83   | NM_004270 | 2542.469  | 3145.29   | NM_00404E | 5391.381  | 4290.718  |
| NM_006197 | 8943.43   | 6041.951  | NM_012082 | 604.888   | 1110.169  | NM_001891 | 1337.54   | 1098.591  |
| NM_014181 | 4476.506  | 4145.896  | NM_001537 | 6143.506  | 6407.108  | NM_01213E | 5027.18   | 4091.763  |
| M29273    | 2992.427  | 3322.429  | U80743    | 2270.047  | 2634.535  | AF121856  | 3586.514  | 4243.321  |
| M33197    | 67539.344 | 66113     | NM_001352 | 5327.763  | 6618.434  | NM_006421 | 2898.915  | 3439.685  |
| NM_004854 | 4395.18   | 4666.795  | D15050    | 2478.52   | 1403.783  | NM_017457 | 13783.961 | 9623.107  |
| AJ245418  | 21308.275 | 17786.863 | NM_006527 | 13296.036 | 10800.988 | NM_00376E | 6375.544  | 5686.511  |
| NM_006377 | 7458.29   | 9981.425  | NM_006627 | 3497.125  | 2580.881  | NM_018202 | 12019.286 | 13465.748 |
| AK026427  | 1888.411  | 2125.019  | NM_007363 | 15416.27  | 12475.146 | AB023197  | 3058.909  | 3298.357  |
| AF244129  | 6905.232  | 4564.684  | NM_003093 | 55121.027 | 55503.488 | NM_022173 | 5095.16   | 5378.409  |
| NM_018362 | 6496.587  | 5236.86   | U05589    | 1700.29   | 1679      | M33197    | 62143.723 | 69848.188 |
| M33197    | 66812.797 | 63340.555 | NM_014473 | 24127.041 | 27132.301 | NM_00570E | 3535.61   | 3334.431  |

|           |           |           |           |           |           |           |           |           |
|-----------|-----------|-----------|-----------|-----------|-----------|-----------|-----------|-----------|
| NM_00475E | 3144.325  | 4612.558  | NM_00309E | 64132.234 | 68719.477 | NM_00432E | 2339.938  | 2226.142  |
| NM_00218E | 6452.17   | 5254.277  | NM_01638E | 2423.624  | 2687.688  | NM_004581 | 4812.044  | 5394.58   |
| NM_00618E | 1795.361  | 1751.897  | NM_00229E | 63039.742 | 62785.508 | NM_006817 | 11138.944 | 12017.295 |
| AL137543  | 12602.881 | 13494.008 | NM_00176E | 12519.022 | 11145.483 | NM_00710E | 15814.175 | 15987.031 |
| NM_004444 | 12197.269 | 12056.112 | NM_01630E | 20740.27  | 22731.361 | NM_015921 | 30342.688 | 25051.734 |
| M33197    | 2203.32   | 2819.426  | NM_00375E | 998.507   | 742.017   | AB040900  | 5998.481  | 5837.173  |
| NM_001957 | 4905.359  | 5217.236  | NM_01323E | 6344.28   | 8277.864  | NM_00148E | 910.05    | 608.841   |
| AK024533  | 15593.787 | 13984.403 | BE258640  | 17340.598 | 11364.719 | NM_000717 | 1081.969  | 811.316   |
| NM_00273E | 27013.863 | 28625.871 | NM_003314 | 8224.45   | 4049.601  | M33197    | 62537.035 | 68573.602 |
| NM_00424E | 4914.101  | 5297.583  | AL355730  | 778.958   | 1209.842  | NM_00484E | 3530.567  | 3851.199  |
| NM_00228E | 2553.844  | 2260.073  | U79273    | 1509.606  | 2396.305  | NM_007107 | 8636.395  | 8737.674  |
| NM_006694 | 42612.293 | 30462.689 | AK022050  | 9033.075  | 9452.115  | NM_000047 | 9964.767  | 9107.438  |
| NM_005207 | 4297.026  | 3630.641  | NM_00251E | 50002.785 | 53849.793 | NM_00631E | 2513.066  | 3185.76   |
| NM_014467 | 1170.643  | 1091.44   | NM_00124E | 1306.079  | 1596.133  | NM_01822E | 2836.048  | 3627.925  |
| NM_003087 | 5952.445  | 5187.85   | AL365411  | 3808.515  | 4235.309  | Z36813    | 4105.813  | 4625.759  |
| NM_00163C | 3461.231  | 3919.209  | M24470    | 1192.28   | 1365.14   | AB018327  | 2221.29   | 1953.486  |
| M33197    | 67505.648 | 68786.367 | NM_01606E | 7267.116  | 6053.935  | AF303889  | 634.444   | 576.485   |
| NM_002031 | 2457.624  | 2955.593  | NM_00124E | 2739.918  | 3833.807  | M33197    | 60904.754 | 69258.984 |
| AF305081  | 6886.304  | 7192.094  | AK024677  | 722.437   | 1116.928  | AK022649  | 5777.224  | 4676.764  |
| NM_00471E | 12792.141 | 11189.432 | NM_00003E | 1858.714  | 2430.215  | NM_016507 | 5417.293  | 5172.864  |
| AF118078  | 4019.761  | 4217.594  | AF254082  | 39721.191 | 39489.289 | NM_002024 | 6412.363  | 5403.299  |
| NM_02016E | 1019.644  | 1453.349  | AF205718  | 9838.377  | 11940.903 | NM_00274E | 11859.811 | 11356.553 |
| AL157428  | 1632.627  | 1950.529  | AY004252  | 1298.384  | 951.426   | AF173358  | 13395.893 | 12802.493 |
| M33197    | 67584.75  | 68548.914 | NM_006261 | 4495.967  | 4714.577  | NM_01636E | 2715.572  | 2488.945  |
| BE904175  | 717.212   | 903.31    | AK027045  | 2570.722  | 2706.565  | NM_01654E | 3161.528  | 2610.125  |
| NM_00585E | 5084.211  | 6117.638  | AF169796  | 4728.041  | 5135.781  | NM_00144E | 30411.904 | 23371.906 |
| AK025163  | 2507.729  | 2534.393  | AK026157  | 828.729   | 466.942   | NM_001201 | 674.749   | 456.992   |
| NM_014931 | 16012.723 | 13631.428 | AK001814  | 5755.099  | 5235.958  | NM_01661E | 1615.997  | 1331.255  |
| NM_014487 | 15682.532 | 14115.548 | NM_016291 | 7114.859  | 8379.051  | AB014568  | 29247.02  | 27207.498 |
| NM_01807C | 10592.216 | 10770.718 | NM_005937 | 50435.742 | 40729.445 | AK022546  | 4501.092  | 4714.031  |
| AL162052  | 2341.059  | 2511.291  | AK023259  | 677.288   | 866.046   | NM_014067 | 5923.542  | 5843.476  |
| AK025941  | 2122.613  | 2277.698  | AK001503  | 12931.975 | 16722.035 | NM_002914 | 5264.134  | 7048.896  |
| M33197    | 64582.23  | 64580.289 | AK022880  | 4672.003  | 4893.808  | NM_02038E | 1862.992  | 1609.418  |
| NM_00284E | 1116.28   | 933.427   | NM_003601 | 24907.564 | 21012.066 | NM_006541 | 2635.03   | 2874.352  |
| NM_015914 | 3283.316  | 2583.358  | AF086375  | 573.731   | 497.893   | NM_01817E | 1154.34   | 1091.029  |
| AF059531  | 9538.923  | 8340.445  | AK001228  | 3597.627  | 3228.434  | NM_006197 | 4804.16   | 2872.99   |
| NM_002707 | 19428.521 | 18699.77  | AK026778  | 2231.244  | 2586.831  | NM_014181 | 2428.827  | 2282.099  |
| AF029777  | 2168.177  | 2001.842  | AF074987  | 3651.907  | 2975.058  | M29273    | 1662.748  | 1315.485  |
| NM_00335E | 2522.441  | 2928.023  | AK001058  | 43256.285 | 42859.945 | M33197    | 61069.063 | 68701.93  |
| AK026884  | 22935.271 | 23111.039 | AK026239  | 4721.399  | 6880.532  | NM_004854 | 3210.06   | 3429.522  |
| NM_002594 | 4836.968  | 4321.909  | AF086283  | 1394.935  | 1698.124  | AJ245418  | 13747.302 | 13719.461 |
| NM_00115E | 1292.333  | 1423.65   | AF088047  | 610.225   | 517.176   | NM_006377 | 4341.746  | 4674.29   |
| NM_031407 | 6394.26   | 8117.464  | AF086281  | 2516.704  | 2860.132  | AK026427  | 976.819   | 1280.617  |
| M33197    | 60514.117 | 65503.574 | AF086372  | 926.794   | 784.14    | AF244129  | 3454.153  | 2146.85   |
| AK000410  | 63455.359 | 64507.551 | AF086393  | 2004.242  | 2195.677  | NM_01836E | 2936.141  | 2274.709  |
| NM_02019E | 3743.054  | 4342.924  | AK023678  | 8927.003  | 7725.985  | M33197    | 66247.75  | 67876.992 |
| D86982    | 1089.455  | 1199.396  | AF052090  | 3936.188  | 2767.219  | NM_00475E | 1557.345  | 1772.587  |
| NM_00561E | 1642.22   | 1706.184  | AK023718  | 7652.867  | 8069.74   | AL137543  | 4272.167  | 5437.303  |
| AL080156  | 2356.943  | 2713.469  | AF075089  | 15480.722 | 12473.091 | NM_004444 | 7766.718  | 10028.913 |
| M33197    | 66995.984 | 70845.563 | AF241255  | 1290.845  | 1523.032  | NM_00273E | 12574.504 | 17051.109 |
| NM_00673E | 3232.594  | 3708.779  | AF086007  | 61970.91  | 66512.938 | NM_00424E | 4843.319  | 5561.165  |
| NM_01626C | 3189.646  | 2506.239  | AK000803  | 3770.736  | 3928.734  | NM_00228E | 1694.62   | 1857.455  |
| NM_00289E | 2103.448  | 2313.327  | AK022374  | 2339.066  | 2481.131  | NM_006694 | 22369.369 | 21140.945 |

|           |           |           |           |           |           |           |           |           |
|-----------|-----------|-----------|-----------|-----------|-----------|-----------|-----------|-----------|
| NM_013351 | 27700.447 | 25887.369 | AF085926  | 50488.125 | 49000.633 | NM_005207 | 2303.128  | 2177.926  |
| NM_012340 | 4571.415  | 3782.802  | AF085948  | 604.611   | 501.53    | NM_003087 | 3521.286  | 3503.049  |
| NM_006022 | 2376.891  | 2913.681  | AL137307  | 5224.058  | 5244.895  | NM_001630 | 2481.117  | 2014.366  |
| AK025110  | 2064.652  | 2310.355  | AL137468  | 8173.191  | 8781.689  | M33197    | 67271.281 | 67543.117 |
| X52339    | 53705.586 | 48565.586 | AL162007  | 34071.309 | 40197.188 | AF305081  | 3424.474  | 4464.935  |
| M33197    | 57969.199 | 63690.813 | AL390137  | 28120.846 | 28904.057 | NM_004712 | 7592.121  | 6801.376  |
| AB046830  | 6452.498  | 6716.237  | AL137340  | 712.249   | 1104.679  | AF118078  | 1860.021  | 2132.47   |
| NM_007122 | 6979.719  | 7711.7    | AL137542  | 717.503   | 1336.337  | AL157428  | 1035.658  | 1153.435  |
| NM_001488 | 3043.775  | 3393.404  | AL162045  | 1266.041  | 1398.165  | M33197    | 62031.918 | 66629.719 |
| NM_016202 | 19387.725 | 16012.827 | AK022437  | 23828.561 | 22112.914 | NM_014931 | 3745.871  | 4304.129  |
| NM_012476 | 1178.223  | 1362.71   | AB042410  | 1068.87   | 1166.707  | NM_014487 | 5570.673  | 6894.106  |
| NM_016604 | 1787.674  | 2373.264  | AF086102  | 1917.666  | 1917.827  | NM_002484 | 2804.324  | 4369.839  |
| M33197    | 67005.258 | 69333.102 | AF075021  | 929.639   | 1006.087  | AL162052  | 1099.795  | 1541.099  |
| NM_006276 | 2404.352  | 3343.276  | AK025140  | 8594.202  | 3897.29   | AK025941  | 1408.963  | 1277.197  |
| NM_003407 | 2873.476  | 3763.345  | AK023394  | 1342.115  | 1908.296  | M33197    | 62159.559 | 67820.313 |
| NM_007209 | 57153.367 | 61193.027 | AF090093  | 21280.268 | 23939.266 | NM_015914 | 1747.186  | 1790.535  |
| NM_003729 | 3741.376  | 4023.908  | AF161340  | 7395.862  | 9533.126  | AF059531  | 5257.009  | 4799.452  |
| L05096    | 36386.797 | 35670.785 | AF242771  | 2574.695  | 2886.199  | NM_002707 | 8083.682  | 8191.999  |
| BC015899  | 15395.95  | 16060.61  | NM_018562 | 16339.794 | 22502.945 | AF029777  | 1297.111  | 1190.932  |
| NM_017986 | 13927.945 | 11249.288 | AF098666  | 1529.88   | 1828.928  | NM_003352 | 1392.548  | 1746.834  |
| AK023629  | 1535.14   | 1253.884  | AF161365  | 1252.005  | 1514.361  | AK026884  | 15768.129 | 17755.066 |
| AK024846  | 6914.106  | 6383.142  | AF290544  | 1032.528  | 972.678   | NM_002594 | 3239.555  | 5153.162  |
| AK001451  | 14192.406 | 13448.323 | AK021969  | 2017.124  | 2511.633  | NM_001159 | 980.719   | 1420.383  |
| M33197    | 59868.656 | 54970.625 | AK022065  | 2332.752  | 3088.788  | NM_031407 | 3170.105  | 5215.655  |
| NM_007180 | 1864.023  | 2043.128  | AK022221  | 14011.913 | 13133.396 | M33197    | 58200.605 | 65484.543 |
| NM_005609 | 836.36    | 878.544   | AK022356  | 2375.636  | 2381.186  | AK000410  | 54422.738 | 53758.262 |
| NM_005476 | 6617.91   | 5473.533  | AK021998  | 3452.856  | 2930.948  | NM_020193 | 1207.232  | 1269.243  |
| NM_005660 | 4523.315  | 4401.965  | AK022126  | 2754.639  | 3017.661  | D87440    | 1654.928  | 2002.506  |
| AK023902  | 2583.113  | 2625.243  | AK022256  | 915.306   | 1382.605  | AK000332  | 3481.908  | 4578.8    |
| NM_000401 | 1093.665  | 1018.906  | AK022383  | 5682.043  | 4561.292  | NM_016260 | 1806.265  | 1347.363  |
| NM_005223 | 1493.461  | 1025.596  | AK027041  | 3773.964  | 2864.245  | NM_002895 | 1120.599  | 1164.58   |
| AB011173  | 14498.861 | 12475.052 | NM_005355 | 39077.625 | 39800.457 | NM_013351 | 13510.217 | 15096.778 |
| AB023195  | 3358.349  | 2941.871  | AK027195  | 1118.745  | 1485.938  | NM_012340 | 4093.304  | 4359.738  |
| U43431    | 1996.514  | 1855.712  | AK000937  | 1206.022  | 1168.623  | NM_006022 | 1467.125  | 1646.844  |
| AK021563  | 1697.09   | 1466.905  | AF035306  | 2945.313  | 3615.762  | AK025110  | 1449.548  | 1411.563  |
| AB006622  | 2301.079  | 1506.609  | AK091662  | 1108.885  | 1212.896  | X52339    | 46449.918 | 35294.582 |
| M33197    | 67187.578 | 63988.879 | AB038318  | 527.245   | 830.128   | M33197    | 57024.988 | 65092.285 |
| AK097041  | 9539.93   | 9088.529  | NM_003954 | 1552.438  | 1663.195  | AB046830  | 3369.042  | 4530.919  |
| AF068744  | 37455.922 | 37550.172 | NM_016348 | 1975.695  | 3192.411  | NM_007122 | 3240.688  | 4532.617  |
| NM_004497 | 792.937   | 659.212   | AK022003  | 620.622   | 859.035   | NM_001488 | 1225.499  | 1648.727  |
| AK000762  | 5371.626  | 5177.514  | AK023877  | 1351.104  | 1482.955  | NM_016202 | 10109.272 | 10566.729 |
| NM_004571 | 1342.815  | 1358.301  | AK023640  | 922.731   | 664.862   | M33197    | 58624.879 | 62332.043 |
| AJ345030  | 6962.111  | 6357.217  | AK024213  | 42660.195 | 39078.301 | NM_007209 | 40703.82  | 38900.105 |
| AK023631  | 2666.073  | 1850.688  | AK025093  | 1047.392  | 1074.886  | NM_003729 | 571.725   | 762.559   |
| AK023472  | 21829.711 | 17730.814 | AK022184  | 2237.021  | 2000.335  | BC015899  | 4791.218  | 5701.774  |
| AK021796  | 764.113   | 1047.969  | AB007959  | 1708.834  | 1355.476  | NM_017986 | 11723.566 | 10756.079 |
| AL109729  | 1473.969  | 957.695   | AK026002  | 414.71    | 583.57    | AK023629  | 865.451   | 773.116   |
| AF007146  | 883.392   | 449.29    | AK024153  | 2329.059  | 2351.678  | AK024846  | 3952.34   | 4018.871  |
| M33197    | 64554.617 | 60483.727 | Y10516    | 6686.889  | 7462.696  | AK001451  | 8123.391  | 7953.294  |
| S79912    | 8352.344  | 7734.922  | AF056451  | 2760.8    | 2874.707  | M33197    | 52703.191 | 47375.383 |
| AL110283  | 1550.171  | 1057.825  | AF015039  | 7018.378  | 9563.028  | NM_007180 | 1531.612  | 1551.987  |
| AK026892  | 3759.858  | 4587.216  | U50528    | 3271.579  | 3877.408  | NM_005476 | 3947.604  | 3523.222  |
| S83275    | 36356.988 | 31502.262 | AB020632  | 5006.777  | 5728.883  | NM_005660 | 2831.405  | 2942.894  |

|           |           |           |           |           |           |           |           |           |
|-----------|-----------|-----------|-----------|-----------|-----------|-----------|-----------|-----------|
| AL117427  | 13037.473 | 12115.658 | NM_018614 | 62162.223 | 59398.898 | AK023902  | 1620.366  | 1536.801  |
| M33197    | 66450.516 | 63335.996 | AL117549  | 3523.775  | 4328.338  | NM_000401 | 529.357   | 427.631   |
| AF052118  | 27014.105 | 27295.24  | NM_005222 | 29519.32  | 33208.414 | AB011173  | 5398.78   | 4914.919  |
| AK025166  | 6311.965  | 6874.989  | BC024308  | 19874.287 | 25522.723 | AB023195  | 1128.641  | 1342.377  |
| AL359586  | 1829.108  | 805.65    | NM_000538 | 4562.111  | 7737.013  | M33197    | 39681.609 | 36495.352 |
| AF147421  | 1064.262  | 569.887   | AK001838  | 66156.695 | 66647.852 | AK097041  | 1672.986  | 1659.387  |
| AF035290  | 2178.952  | 2130.492  | NM_018295 | 2944.626  | 4495.27   | AF068744  | 8268.062  | 9247.096  |
| AK023216  | 1639.31   | 1501.074  | AF070574  | 1061.346  | 1274.806  | AK000762  | 884.849   | 777.667   |
| M33197    | 63214.52  | 60671.547 | AF086262  | 3581.738  | 3753.796  | AJ345030  | 3996.915  | 3741.133  |
| AF086547  | 1601.169  | 1363.398  | AF086292  | 11875.811 | 11909.653 | AK023631  | 1215.667  | 784.909   |
| AK023288  | 2557.084  | 3320.097  | AK023769  | 934.654   | 1252.329  | AK023472  | 12100.861 | 10717.953 |
| AK022198  | 2164.677  | 1952.581  | AK024342  | 29736.953 | 32037.709 | AL109729  | 1033.105  | 795.551   |
| M33197    | 67182.258 | 68513.234 | AL137712  | 15019.804 | 12761.025 | M33197    | 59956.121 | 59369.684 |
| AK022428  | 2079.702  | 1639.195  | L77599    | 60656.391 | 56112.91  | S79912    | 25011.496 | 21857.41  |
| AK000788  | 1404.545  | 820.6     | AK021673  | 33580.91  | 28157.393 | AL110283  | 920.535   | 627.116   |
| AK023457  | 1326.047  | 1699.352  | AB014543  | 2464.906  | 2396.614  | AK026892  | 1877.998  | 2585.322  |
| AK025089  | 11234.48  | 9873.453  | NM_018445 | 9988.113  | 7447.12   | S83275    | 18878.645 | 18937.043 |
| M33197    | 66213.867 | 65741.438 | AK022743  | 10780.973 | 8423.292  | AL117427  | 7069.933  | 6564.396  |
| AF085996  | 1301.686  | 1231.363  | NM_014627 | 4527.983  | 4856.081  | M33197    | 60346.758 | 67447.031 |
| AK001279  | 3992.209  | 4328.462  | NM_013938 | 26615.111 | 32582.398 | AF052118  | 11861.023 | 14135.58  |
| AK001567  | 2576.481  | 2569.048  | NM_013986 | 61371.695 | 61294.168 | AK025166  | 2796.242  | 3954.499  |
| M33197    | 65321.93  | 62876.828 | U55055    | 1372.436  | 1497.014  | AF035290  | 867.832   | 768.914   |
| U52839    | 3090.943  | 3186.801  | AK022186  | 905.133   | 986.537   | AK023216  | 449.305   | 582.648   |
| U42379    | 850.329   | 872.46    | AB018319  | 3399.184  | 2873.043  | M33197    | 59561.191 | 60318.695 |
| M33197    | 60871.363 | 61876.473 | AK001101  | 4234.192  | 4760.054  | AK022198  | 897.692   | 859.723   |
| AK026984  | 51841.105 | 54022.043 | BM973473  | 2056.553  | 2646.322  | M33197    | 60389.371 | 66695.602 |
| NM_013391 | 1387.347  | 818.04    | AK021637  | 6187.777  | 6870.854  | AK022428  | 971.259   | 822.768   |
| M33197    | 67403.406 | 67542.219 | AK021658  | 2128.878  | 3198.994  | AK023457  | 1209.848  | 1091.593  |
| AL157466  | 5127.616  | 5955.352  | D61705    | 850.007   | 924.828   | AK025089  | 7711.906  | 8373.899  |
| AL389981  | 1071.406  | 1000.175  | U17631    | 2642.691  | 2543.191  | M33197    | 66304.039 | 67530.367 |
| AK024336  | 3464.517  | 2857.85   | AL137723  | 2319.743  | 2121.539  | AF085996  | 1792.516  | 1368.326  |
| AK023862  | 959.556   | 1022.258  | AK024046  | 3204.443  | 3163.011  | AK001279  | 1699.455  | 2144.038  |
| NM_018621 | 1402.265  | 1365.608  | NM_017931 | 5092.364  | 5397.729  | AF086407  | 591.71    | 833.127   |
| AK022016  | 1214.431  | 1082.854  | AK022793  | 2681.884  | 2342.049  | AK001567  | 962.052   | 1228.819  |
| M33197    | 63275.117 | 62134.938 | AJ227910  | 2424.044  | 2065.002  | M33197    | 55659.598 | 48192.613 |
| NM_018603 | 612.112   | 1010.77   | AF001893  | 1554.787  | 1302.958  | U52839    | 1110.965  | 924.727   |
| AK022118  | 2761.898  | 3054.213  | X04236    | 11479.222 | 13360.677 | M33197    | 56537.047 | 64635.371 |
| AK026453  | 11608.865 | 11611.181 | AK093746  | 29156.246 | 27211.529 | AK026984  | 12511.399 | 16557.092 |
| AK025673  | 1285.479  | 1219.589  | D16875    | 721.173   | 1281.442  | AK022088  | 1009.884  | 1348.752  |
| BF476109  | 984.891   | 1125.062  | AK027171  | 2603.886  | 2121.778  | M33197    | 67136.859 | 67658.359 |
| M33197    | 61752.859 | 63030.063 | AK021945  | 7620.217  | 7276.503  | AL157466  | 3791.655  | 3770.222  |
| AK022431  | 1580.048  | 1759.055  | L23545    | 1149.751  | 953.34    | AL389981  | 660.225   | 858.931   |
| AK023305  | 47363.227 | 40360.617 | CY3Cy5    | 6111.353  | 255.615   | AK024336  | 2159.743  | 2055.487  |
| AK023763  | 3211.832  | 2711.826  | U13022    | 3230.221  | 2420.405  | NM_018621 | 918.545   | 1099.071  |
| AK023967  | 567.142   | 1127.682  | R23251    | 22521.447 | 39460.699 | M33197    | 70531.867 | 67198.68  |
| AK022729  | 2159.753  | 1978.237  | BG763477  | 563.839   | 956.784   | AK022118  | 1662.703  | 2061.145  |
| NM_006168 | 11988.376 | 8628.236  | AA702640  | 1621.726  | 2396.583  | AK026453  | 5527.338  | 7017.915  |
| AL050374  | 1940.882  | 1508.241  | T68583    | 3338.524  | 4312.95   | M33197    | 60868.277 | 60616.922 |
| M33197    | 66876.383 | 62337.203 | AA481944  | 18667.781 | 14967.26  | AK023305  | 34253.289 | 38713.313 |
| M28639    | 8691.894  | 7493.205  | AF038440  | 956.53    | 1296.898  | AK023763  | 1366.064  | 1588.32   |
| AL122073  | 43611.066 | 30859.063 | M31158    | 1922.342  | 2332.928  | AK022729  | 2387.894  | 2995.619  |
| AF116655  | 11254.794 | 8501.226  | H00742    | 2777.175  | 3959.893  | NM_006168 | 8732.552  | 8977.434  |
| AJ243222  | 2269.775  | 1905.48   | D42108    | 1965.848  | 514.193   | AL050374  | 2633.94   | 2052.806  |

|           |           |           |           |           |           |             |           |           |
|-----------|-----------|-----------|-----------|-----------|-----------|-------------|-----------|-----------|
| AK026132  | 5477.767  | 5796.211  | BG700922  | 2748.802  | 984.522   | M33197      | 59493.223 | 65398.938 |
| Y11162    | 1506.596  | 1040.516  | AI366068  | 1707.808  | 818.598   | M28639      | 5261.515  | 5210.714  |
| M33197    | 63222.965 | 60567.691 | N57553    | 1220.707  | 1154.081  | AL122073    | 20437.107 | 15926.146 |
| AF070584  | 3870.968  | 3601.453  | AF080158  | 2981.318  | 4337.758  | AF116655    | 5522.436  | 5178.359  |
| AF165185  | 1865.416  | 1453.188  | BM664556  | 1755.83   | 1925.416  | AJ243222    | 1642.041  | 1721.42   |
| AF075006  | 2048.522  | 2268      | SR5       | 9031.236  | 13460.656 | AK026132    | 2854.603  | 3592.785  |
| M33197    | 61505.836 | 58221.777 | SR7       | 6347.938  | 50180.652 | M33197      | 59752.211 | 67725.297 |
| AK000903  | 52002.574 | 58761.328 | SR9       | 23646.902 | 3587.929  | AF070584    | 1516.532  | 1879.604  |
| AK023938  | 2038.742  | 2157.09   | CY3Cy5    | 8282.167  | 360.233   | M33197      | 59441.629 | 67181.141 |
| AL110169  | 1984.064  | 1866.603  | NM_013231 | 4410.542  | 6409.953  | AK000903    | 21856.4   | 34198.926 |
| L13743    | 1549.627  | 710.023   | NM_012106 | 8015.653  | 14212.307 | L13743      | 2406.11   | 2603.119  |
| Z11849    | 8687.754  | 7759.347  | NM_006254 | 1436.877  | 2428.819  | U84519      | 1794.766  | 1419.166  |
| AJ002788  | 3368.325  | 2969.957  | X95425    | 1865.467  | 2516.746  | Z11849      | 7730.609  | 7463.662  |
| U84527    | 876.359   | 836.685   | NM_004422 | 4258.637  | 5043.149  | AJ002788    | 2219.778  | 2181.083  |
| M33197    | 66711.391 | 64399.773 | NM_016562 | 1956.489  | 2119.501  | M33197      | 60591.699 | 64913.035 |
| AF052103  | 1597.055  | 1520.582  | M33197    | 65932.281 | 63260.465 | AF052103    | 1386.297  | 1390.06   |
| AF075050  | 2514.906  | 2016.863  | NM_004895 | 7738.504  | 7989.041  | AF075050    | 1002.772  | 686.639   |
| AK024842  | 1886.323  | 2027.159  | U59748    | 2749.178  | 1675.221  | AK024842    | 991.042   | 623.842   |
| AK022962  | 779.961   | 1065.164  | L32537    | 1003.452  | 493.9     | NM_018382   | 1310.556  | 1482.691  |
| NM_018382 | 1871.494  | 1612.045  | NM_014303 | 12959.976 | 12763.884 | BC022303    | 1641.115  | 1875.811  |
| BC022303  | 4287.018  | 5311.833  | L02922    | 20206.754 | 24599.24  | M33197      | 59651.844 | 66405.141 |
| M33197    | 61568.246 | 62926.656 | NM_001797 | 1648.324  | 3347.41   | D17203      | 60166.348 | 62283.688 |
| NM_005285 | 3603.731  | 3279.829  | NM_003154 | 2213.789  | 2605.812  | NM_006495   | 2223.448  | 2919.355  |
| AK022101  | 2379.755  | 2376.769  | NM_004235 | 1073.728  | 1355.325  | M33197      | 62530.527 | 70350.5   |
| NM_003251 | 3030.119  | 1931.769  | AK023459  | 4329.587  | 6116.325  | AY007143    | 6585.665  | 12783.955 |
| AF086203  | 867.704   | 951.108   | BI762154  | 534.898   | 901.852   | L15557      | 633.726   | 1399.717  |
| AB046772  | 1892.415  | 2155.449  | NM_012139 | 11365.808 | 17115.607 | M33197      | 62466.625 | 67842.563 |
| M33197    | 67118.281 | 63615.133 | AF121856  | 10284.037 | 9123.76   | NM_001563   | 6436.94   | 6863.818  |
| AL442080  | 2387.027  | 2364.305  | NM_006421 | 4653.214  | 4749.029  | NM_000266   | 1433.234  | 698.421   |
| AY007143  | 15539.197 | 10943.425 | NM_017457 | 18200.676 | 21691.045 | X89666      | 2383.135  | 2815.819  |
| L15557    | 1807.119  | 998.826   | NM_003765 | 14479.902 | 11642.606 | NM_017425   | 462.993   | 514.981   |
| M33197    | 64391.543 | 62975.32  | NM_005865 | 1017.685  | 801.298   | NM_003104   | 7150.699  | 8797.987  |
| NM_001563 | 8351.024  | 5771.297  | NM_018202 | 19147.432 | 17177.537 | NM_014581   | 1737.637  | 1627.294  |
| NM_000266 | 1221.803  | 918.15    | AB023197  | 5104.767  | 3187.462  | M33197      | 63202.879 | 67193.297 |
| X89666    | 2963.654  | 2668.085  | NM_022173 | 6966.809  | 4005.892  | AK024448    | 4793.615  | 5027.09   |
| NM_017425 | 838.222   | 724.15    | AB040970  | 5987.177  | 3013.885  | NM_014406   | 2648.779  | 3242.566  |
| NM_003104 | 10366.572 | 10956.453 | NM_018330 | 5242.459  | 2603.573  | Z11801      | 948.117   | 1289.015  |
| NM_014581 | 1887.267  | 1434.984  | AB023222  | 1421.206  | 980.984   | S68954      | 5113.679  | 5658.588  |
| M33197    | 64441.43  | 61023.828 | M33197    | 65500.816 | 70192.25  | S81335      | 2257.101  | 2277.806  |
| AK024448  | 6017.64   | 5291.965  | U50342    | 3769.919  | 4272.232  | AF052109    | 1418.145  | 1913.448  |
| NM_014406 | 3815.554  | 3645.489  | NM_000295 | 959.046   | 1439.655  | M33197      | 32232.885 | 35545.684 |
| Z11801    | 1184.068  | 759.87    | AF103795  | 1072.9    | 1214.892  | NM_003353   | 5912.324  | 6296.935  |
| AK027253  | 626.648   | 867.675   | NM_006215 | 572.623   | 789.584   | X82127      | 6491.83   | 7839.518  |
| S68954    | 13618.635 | 11083.55  | U80018    | 946.187   | 868.59    | AL122044    | 1295.525  | 1281.638  |
| S81335    | 2770.807  | 3003.904  | NM_000717 | 1669.633  | 1311.191  | M33197      | 58069.613 | 67616.477 |
| NM_003353 | 51736.109 | 45485.91  | M33197    | 66297.195 | 70085.898 | CY3Cy5      | 3374.334  | 202.633   |
| X82127    | 38385.941 | 26634.754 | NM_004845 | 3656.325  | 3488.101  | AA115473    | 3115.297  | 3074.513  |
| AL122044  | 4294.304  | 2715.576  | NM_007107 | 16257.233 | 16892.676 | AA872397    | 1399.524  | 1288.951  |
| NM_018296 | 2297.91   | 1492.588  | NM_000047 | 13833.791 | 17840.852 | AA709414    | 910.724   | 1226.878  |
| M33197    | 62613.09  | 61407.063 | NM_006319 | 4248.768  | 4068.91   | D12676      | 924.083   | 1169.848  |
| AF070578  | 1881.041  | 1513.228  | NM_018226 | 3531.03   | 3918.052  | NM_000935   | 12219.402 | 8734.008  |
| CY3Cy5    | 7451.526  | 329.458   | Z36813    | 5357.405  | 3352.221  | NM_004295   | 10462.014 | 7905.037  |
| AA418907  | 1966.772  | 2084.04   | NM_006660 | 7140.88   | 5933.737  | H-X 02812 I | 707.306   | 903.826   |

|            |           |           |           |           |           |           |           |           |
|------------|-----------|-----------|-----------|-----------|-----------|-----------|-----------|-----------|
| AA115473   | 6520.348  | 5252.207  | NM_001486 | 1249.244  | 1033.077  | U75898    | 1147.42   | 1276.031  |
| AA872397   | 2383.763  | 2000.314  | NM_004727 | 954.676   | 1278.196  | SR2       | 33755.797 | 31227.135 |
| AA709414   | 1454.892  | 1374.116  | NM_000559 | 850.914   | 1109.475  | SR4       | 1852.693  | 1574.566  |
| D12676     | 3840.577  | 3260.764  | M33197    | 19043.998 | 21243.189 | SR6       | 869.875   | 780.655   |
| NM_000939  | 27001.609 | 25811.648 | NM_004045 | 8453.155  | 8556.108  | SR8       | 2942.079  | 8637.962  |
| NM_004295  | 9240.484  | 8609.302  | NM_001891 | 1846.127  | 2244.366  | SR10      | 15276.351 | 4485.736  |
| H-X 028121 | 2394.52   | 2234.778  | NM_001440 | 41180.004 | 42576.176 | CY3Cy5    | 3859.246  | 337.347   |
| U75898     | 962.512   | 1194.162  | NM_001201 | 581.075   | 757.416   | NM_001203 | 1942.876  | 1958.414  |
| SR2        | 55479.574 | 55463.961 | NM_016618 | 2244.453  | 2036.469  | NM_004799 | 5956.162  | 4880.297  |
| SR4        | 16286.486 | 16476.9   | AB014568  | 22563.031 | 30353.623 | NM_014047 | 7583.588  | 7055.68   |
| SR6        | 2413.68   | 2549.598  | NM_012249 | 3703.907  | 3762.695  | AK022901  | 949.7     | 1020.23   |
| SR8        | 9119.413  | 32424.99  | AK022546  | 8166.932  | 11477.697 | M33197    | 59225.82  | 54831.449 |
| SR10       | 36666.797 | 15645.627 | NM_014067 | 8150.091  | 8624.276  | AF037332  | 714.938   | 413.691   |
| CY3Cy5     | 7093.202  | 457.099   | NM_002914 | 9941.356  | 9150.019  | AB040912  | 1651.371  | 1975.657  |
| NM_004799  | 8656.132  | 5684.292  | NM_020385 | 3185.73   | 3374.051  | NM_006243 | 1254.694  | 1199.627  |
| NM_006733  | 1318.489  | 1589.327  | NM_004328 | 2480.717  | 2949.218  | M33197    | 57784.641 | 55841.129 |
| NM_014047  | 25821.018 | 24211.367 | NM_004581 | 6663.476  | 7382.014  | AJ011129  | 2309.08   | 1623.694  |
| AK022901   | 1580.917  | 1434.375  | NM_006817 | 12165.256 | 15076.146 | AF282874  | 948.858   | 744.926   |
| M33197     | 67293.156 | 67280.055 | NM_015921 | 34302.879 | 43998.32  | NM_006387 | 2404.662  | 2619.717  |
| AF037332   | 8847.998  | 7466.296  | AB040900  | 9130.758  | 13051.868 | NM_005646 | 876.094   | 806.608   |
| NM_006052  | 1455.339  | 1706.641  | NM_001080 | 810.203   | 783.471   | AK022817  | 1036.749  | 720.017   |
| AB040912   | 2432.77   | 2934.839  | NM_001482 | 453.772   | 934.631   | M33197    | 64378.199 | 65839.969 |
| NM_006243  | 5892.859  | 6568.733  | NM_001797 | 1049.911  | 1379.913  | AB037831  | 1298.093  | 1357.803  |
| M33197     | 66300.828 | 63413.926 | NM_003154 | 1341.858  | 1359.433  | NM_012103 | 9615.797  | 10413.513 |
| AJ011129   | 5265.495  | 4752.109  | AK023459  | 5062.649  | 10154.026 | AL122077  | 4079.839  | 4685.828  |
| AF282874   | 975.635   | 1022.671  | BI762154  | 536.889   | 779.459   | NM_014632 | 666.049   | 674.241   |
| NM_006387  | 7580.667  | 9103.846  | U13022    | 2585.878  | 2194.635  | NM_006422 | 471.37    | 956.682   |
| NM_005646  | 3086.775  | 2612.23   | AA702640  | 1686.759  | 1044.18   | M33197    | 61439.742 | 63256.902 |
| NM_006639  | 890.599   | 966.955   | T68583    | 2494.554  | 2393.116  | NM_007259 | 548.931   | 475.807   |
| BI767871   | 1691.898  | 2023.807  | AA481944  | 20150.432 | 17329.234 | AK075081  | 915.715   | 884.36    |
| AK022817   | 3083.148  | 2559.927  | AF038440  | 1014.674  | 328.336   | NM_000895 | 4864.481  | 3875.757  |
| M33197     | 67260.391 | 68739.211 | M31158    | 1917.217  | 1221.031  | NM_003820 | 11687.494 | 8311.195  |
| AB037831   | 2002.828  | 1950.981  | D42108    | 2346.649  | 2084.392  | NM_015915 | 587.772   | 550.245   |
| NM_012103  | 19750.793 | 15906.287 | BG700922  | 2584.529  | 2182.81   | M33197    | 64210.117 | 57935.273 |
| AL122077   | 8493.877  | 8101.375  | AI366068  | 1855.908  | 1721.672  | NM_016518 | 4625.3    | 4330.166  |
| NM_014632  | 984.204   | 853.618   | N57553    | 940.664   | 1276.697  | NM_006185 | 2434.466  | 1753.666  |
| NM_006422  | 1688.885  | 1803.604  | AF080158  | 2631.789  | 4344.048  | NM_014800 | 2999.686  | 2831.282  |
| NM_016946  | 2112.37   | 2230.714  | BM664556  | 1644.614  | 2022.152  | AF147311  | 1083.869  | 1068.804  |
| M33197     | 67246.586 | 70586.578 | NM_000295 | 799.243   | 659.855   | NM_002131 | 8886.883  | 8000.759  |
| NM_007259  | 2948.983  | 3141.651  | AF103795  | 955.001   | 512.901   | NM_017927 | 939.443   | 840.719   |
| NM_018402  | 891.546   | 1998.25   | NM_007024 | 7192.21   | 7255.621  | NM_020151 | 8021.878  | 9162.454  |
| NM_018009  | 336.219   | 1075.626  | NM_013231 | 3594.988  | 3095.101  | NM_005891 | 25692.332 | 19288.916 |
| AK075081   | 2702.79   | 2710.185  | NM_012106 | 5042.452  | 4477.519  | NM_001645 | 969.673   | 1200.036  |
| NM_000895  | 13183.248 | 13915.986 | NM_006254 | 1142.348  | 1026.734  | NM_003956 | 1600.639  | 2215.019  |
| NM_003820  | 14878.302 | 12954.477 | X95425    | 2363.825  | 2199.704  | M33197    | 58250.195 | 65994.719 |
| NM_015915  | 2345.247  | 2073.598  | NM_004422 | 4062.488  | 2390.475  | NM_003500 | 4382.436  | 6238.284  |
| M33197     | 67236.406 | 70499.141 | NM_016562 | 1875.29   | 840.247   | NM_014317 | 2015.952  | 3332.836  |
| NM_016518  | 11780.803 | 11042.166 | M33197    | 69983.883 | 64274.34  | L09234    | 7506.996  | 9577.76   |
| NM_006185  | 12742.425 | 11652.519 | AY009399  | 24230.895 | 26745.66  | NM_000059 | 750.291   | 725.273   |
| NM_014800  | 10265.647 | 9460.348  | NM_004895 | 12491.16  | 11628.365 | AK026740  | 603.784   | 923.754   |
| NM_017927  | 3345.344  | 4663.868  | U59748    | 1745.355  | 1958.553  | NM_017881 | 3205.702  | 1661.286  |
| NM_020151  | 17381.152 | 20761.434 | L32537    | 1019.58   | 1000.035  | M33197    | 58411.488 | 61908.02  |
| NM_005891  | 54530.738 | 49775.41  | NM_014303 | 10881.709 | 21898.178 | NM_017634 | 5019.577  | 8491.383  |

|             |           |           |           |           |           |           |           |           |
|-------------|-----------|-----------|-----------|-----------|-----------|-----------|-----------|-----------|
| NM_00164E   | 1247.463  | 1501.139  | M33197    | 66312.922 | 70350.641 | AJ300465  | 1152.969  | 952.355   |
| NM_00350C   | 6647.338  | 6661.133  | M33197    | 15118.074 | 8706.849  | X86400    | 516.621   | 577.077   |
| NM_014317   | 6498.47   | 6897.983  | NM_00404E | 10485.356 | 8976.147  | NM_00081C | 2050.389  | 2276.152  |
| L09234      | 18580.727 | 19371.096 | NM_001891 | 1664.7    | 1052.972  | AF069307  | 1256.599  | 1231.559  |
| NM_00005E   | 2568.351  | 3300.428  | NM_01213E | 7269.668  | 5917.758  | M33197    | 57859.594 | 62808.262 |
| NM_017881   | 8071.765  | 6000.812  | AF121856  | 7761.44   | 4573.414  | U92978    | 1817.546  | 1802.538  |
| M33197      | 67236.523 | 72718.234 | NM_006421 | 4394.72   | 3465.785  | NM_01338E | 1106.162  | 1118.698  |
| NM_017634   | 9721.325  | 11664.998 | NM_017457 | 15659.892 | 10103.507 | NM_00367E | 748.184   | 1453.682  |
| NM_00081E   | 681.948   | 1014.797  | NM_00376E | 12850.754 | 6609.593  | NM_00532E | 11846.568 | 14944.676 |
| NM_01889E   | 879.703   | 647.264   | NM_00586E | 861.038   | 699.604   | NM_01406E | 892.018   | 1096.863  |
| AJ300465    | 2169.669  | 1739.648  | M33197    | 42170.496 | 32622.83  | AB035130  | 1207.993  | 1457.381  |
| X86400      | 1847.327  | 1891.487  | NM_01820E | 17695.203 | 17797.117 | NM_00335E | 1042.839  | 1270.789  |
| NM_00081C   | 1928.361  | 1565.425  | AB023197  | 4819.753  | 4418.095  | M33197    | 43841.508 | 50442.84  |
| AF069307    | 4860.466  | 5120.201  | NM_02217E | 6905.018  | 7498.119  | AF119917  | 1970.178  | 1709.273  |
| M33197      | 67303.328 | 70732.586 | AB040970  | 5026.225  | 5772.729  | NM_01791E | 694.848   | 681.562   |
| U92978      | 4094.195  | 4552.288  | NM_01833C | 4148.312  | 4484.875  | NM_00357E | 1250.146  | 1331.084  |
| NM_00573E   | 1805.412  | 2077.333  | AB023222  | 1198.05   | 1419.195  | AL049283  | 802.561   | 681.385   |
| NM_01448E   | 1260.784  | 1394.457  | AB033088  | 1995.164  | 2531.737  | M33197    | 57154.516 | 60436.238 |
| NM_01338E   | 3756.166  | 4504.733  | M33197    | 65305.805 | 70111.422 | NM_002401 | 9722.174  | 7746.122  |
| AB014567    | 691.561   | 1526.62   | U50342    | 1967.334  | 2851.26   | NM_001274 | 1219.459  | 1367.375  |
| NM_00532E   | 18709.746 | 19239.537 | NM_015921 | 36802.621 | 30146.115 | AB014530  | 1762.147  | 2360.752  |
| NM_00728E   | 691.471   | 557.378   | AB040900  | 19133.387 | 17002.234 | M33197    | 58990.145 | 63777.84  |
| NM_01406E   | 2058.892  | 1884.097  | NM_00108C | 1049.143  | 600.597   | NM_00598E | 1481.325  | 1394.4    |
| NM_00335E   | 1516.427  | 1427.888  | NM_00148E | 1046.567  | 1292.165  | AB014607  | 1901.383  | 1497.842  |
| M33197      | 54661.754 | 52153.777 | U80018    | 811.71    | 1017.327  | NM_00638E | 3826.323  | 3921.916  |
| AF119917    | 931.482   | 841.661   | NM_000717 | 1643.406  | 1400.667  | NM_00564E | 1559.841  | 1449.632  |
| NM_01791E   | 3303.487  | 3703.706  | M33197    | 66324.398 | 74451.922 | BI767871  | 2125.956  | 1333.952  |
| NM_00357E   | 3539.097  | 2931.18   | NM_00484E | 6079.441  | 3651.428  | AA418907  | 599.091   | 632.794   |
| AL049283    | 1396.967  | 1887.086  | NM_007107 | 13576.602 | 7131.408  | AA115473  | 3105.505  | 3361.092  |
| M33197      | 59944.543 | 60178.922 | NM_000047 | 14905.969 | 9753.24   | AA872397  | 1012.569  | 1041.937  |
| NM_002401   | 41024.289 | 32828.238 | M68874    | 321.528   | 666.039   | AA709414  | 524.042   | 447.603   |
| NM_001274   | 7730.41   | 6732.069  | NM_00631E | 4038.189  | 4291.838  | NM_00093E | 13382.096 | 10705.189 |
| NM_00391E   | 1918.499  | 1829.868  | NM_01822E | 3154.655  | 3760.447  | NM_00429E | 10505.665 | 8057.465  |
| NM_002227   | 5527.147  | 4553.666  | Z36813    | 4923.269  | 6401.796  | U75898    | 634.003   | 578.801   |
| NM_00719E   | 1636.446  | 2027.382  | NM_00666C | 6136.087  | 7633.113  | M33197    | 559.8     | 1151.501  |
| AB002301    | 1246.29   | 1620.224  | NM_00148E | 924.933   | 879.425   | AB011146  | 1521.682  | 1986.661  |
| AB014530    | 8268.256  | 9998.852  | NM_004727 | 669.196   | 1030.499  | NM_00618E | 12492.333 | 11879.087 |
| M33197      | 61082.934 | 63905.465 | AF080158  | 3095.554  | 4525.521  | NM_01480C | 3468.386  | 2522.597  |
| NM_00598E   | 3409.904  | 3420.451  | BM664556  | 2030.261  | 1527.905  | AF147311  | 1896.325  | 2370.831  |
| AB014607    | 4278.495  | 3639.225  | NM_01654E | 5970.24   | 7746.509  | NM_002131 | 17227.689 | 12812.903 |
| AF134401    | 1140.295  | 1349.301  | NM_00144C | 45066.453 | 41846.5   | NM_017927 | 1560.856  | 1436.447  |
| NM_00638E   | 8144.925  | 8548.128  | NM_001201 | 693.754   | 619.391   | M33197    | 49793.922 | 50487.313 |
| NM_00564E   | 3446.36   | 2923.844  | NM_01661E | 2449.842  | 1783.769  | NM_00120E | 1313.843  | 1309.952  |
| NM_00663E   | 719.43    | 849.923   | AB014568  | 29559.799 | 27632.426 | NM_00479E | 804.666   | 550.072   |
| BI767871    | 1162.162  | 1000.065  | AK022238  | 1153.001  | 1266.796  | NM_014047 | 5563.427  | 3986.837  |
| AA115473    | 5672.545  | 4734.097  | NM_01224E | 4590.365  | 1902.689  | AK022901  | 471.312   | 398.974   |
| AA872397    | 2348.91   | 2028.017  | AK022546  | 7361.03   | 5505.524  | M33197    | 57957.031 | 59403.59  |
| M24283      | 640.292   | 965.379   | NM_014067 | 11496.36  | 9794.276  | AF037332  | 1237.077  | 851.152   |
| AA709414    | 1390.356  | 1157.202  | NM_002914 | 10179.91  | 10268.033 | AB040912  | 821.579   | 858.473   |
| D12676      | 3108.361  | 2157.657  | NM_02038E | 1698.027  | 1915.575  | NM_00624E | 1870.987  | 2537.618  |
| NM_00093E   | 27569.025 | 28519.035 | NM_006541 | 1187.194  | 1361.31   | M33197    | 58285.133 | 62855.918 |
| NM_00429E   | 13725.45  | 15507.283 | NM_00570E | 2910.665  | 4588.212  | AJ011129  | 2631.433  | 2640.305  |
| H-X 02812 I | 3249.101  | 3718.019  | NM_00432E | 1766.883  | 2971.528  | M33197    | 58058.02  | 61426.5   |

|           |           |           |           |           |           |           |           |           |
|-----------|-----------|-----------|-----------|-----------|-----------|-----------|-----------|-----------|
| U75898    | 2116.697  | 1675.017  | NM_004581 | 4656.733  | 6335.296  | U92978    | 4516.338  | 3981.77   |
| M29039    | 1478.563  | 1299.753  | NM_006817 | 9033.379  | 11628.455 | NM_01338E | 1503.43   | 1307.134  |
| M59815    | 928.131   | 908.879   | L02922    | 24859.607 | 23053.715 | NM_018034 | 2093.698  | 1414.893  |
| M33197    | 1366.856  | 1328.436  | NM_001797 | 2202.455  | 2466.572  | M33197    | 63305.898 | 60973.957 |
| AB011146  | 2486.887  | 3106.114  | NM_003154 | 1913.162  | 1344.491  | NM_01210E | 2300.582  | 1557.635  |
| NM_00618E | 13946.381 | 13477.322 | AK023459  | 5250.911  | 6873.037  | AL122077  | 1141.369  | 976.551   |
| NM_01480C | 9887.075  | 8631.69   | BI762154  | 1120.961  | 839.672   | NM_01694E | 270.033   | 219.685   |
| NM_001557 | 812.969   | 789.841   | U13022    | 2052.586  | 1026.62   | M33197    | 58226.102 | 61552.746 |
| AF147311  | 4877.011  | 3595.991  | R23251    | 18123.65  | 13617.165 | NM_00725E | 775.315   | 799.186   |
| NM_002131 | 45375.379 | 40474.371 | AA702640  | 1595.782  | 1328.962  | NM_01840E | 1218.291  | 1173.18   |
| NM_017927 | 2443.143  | 2179.032  | T68583    | 3274.413  | 3792.572  | NM_01800E | 657.372   | 468.984   |
| M33197    | 67024.078 | 71419.93  | AA481944  | 26442.129 | 26050.484 | AK075081  | 1010.66   | 1532.497  |
| NM_00120E | 4220.156  | 4070.393  | AF038440  | 503.687   | 911.294   | NM_00089E | 5719.623  | 7437.368  |
| NM_00479E | 8986.407  | 6352.914  | M31158    | 1296.381  | 1896.65   | NM_00382C | 6871.109  | 6665.021  |
| NM_00673E | 1521.665  | 1720.135  | D42108    | 1163.309  | 1636.675  | NM_01591E | 1064.615  | 1063.763  |
| NM_014047 | 26798.068 | 27774.021 | BG700922  | 2175.154  | 2715.333  | M33197    | 62629.484 | 64848.953 |
| M33197    | 63320.508 | 65205.219 | AI366068  | 2259.51   | 2715.935  | NM_01651E | 5587.272  | 7009.705  |
| AF037332  | 9914.612  | 10699.433 | BG565837  | 728.64    | 884.826   | AB002301  | 1074.199  | 1019.083  |
| NM_00605E | 2602.262  | 2553.006  | N57553    | 601.902   | 1079.235  | AB014530  | 8010.35   | 7157.033  |
| AB040912  | 3420.933  | 4971.437  | AB040970  | 5849.402  | 4225.625  | M33197    | 57849.699 | 60393.703 |
| NM_00624E | 7018.344  | 8935.508  | NM_01833C | 4842.236  | 2374.497  | NM_00598E | 1042.511  | 759.019   |
| M33197    | 67236.406 | 72669.023 | AB023222  | 1221.543  | 815.27    | AB014607  | 2704.032  | 1776.303  |
| AJ011129  | 5811.747  | 5809.828  | AB033088  | 1398.741  | 2655.443  | AF134401  | 377.75    | 554.863   |
| AF282874  | 990.408   | 916.478   | M33197    | 65251.625 | 66437.328 | NM_020151 | 3024.588  | 2920.274  |
| M33197    | 61437.977 | 61980.297 | U50342    | 4802.947  | 5081.183  | NM_005891 | 32269.162 | 21005.955 |
| U92978    | 3543.532  | 3263.447  | NM_00029E | 1247.107  | 978.379   | NM_00164E | 741.898   | 613.478   |
| NM_00573E | 1263.675  | 1290.837  | AF103795  | 1022.755  | 784.195   | NM_00395E | 1041.852  | 772.574   |
| NM_01338E | 3401.552  | 2957.44   | NM_00621E | 996.517   | 575.788   | M33197    | 57089.199 | 61161.355 |
| AB014567  | 886.215   | 923.638   | NM_006254 | 963.053   | 1339.205  | NM_00350C | 2028.776  | 1650.111  |
| AK022817  | 1920.267  | 1785.27   | X95425    | 1824.542  | 2662.091  | NM_014317 | 1513.511  | 1958.071  |
| NM_018034 | 7332.855  | 5819.455  | NM_00442E | 3262.753  | 5328.058  | L09234    | 6437.846  | 6646.049  |
| M33197    | 64706.453 | 66219.953 | NM_01656E | 1314.12   | 1555.49   | NM_00005E | 895.819   | 1034.893  |
| AB037831  | 2586.677  | 2689.501  | M33197    | 66344.164 | 69221.609 | NM_017881 | 1838.801  | 1103.304  |
| NM_01210E | 26844.123 | 31555.281 | AY009399  | 19568.316 | 26600.799 | M33197    | 55986.637 | 62456.184 |
| NM_01463E | 2473.865  | 2456.87   | NM_00489E | 6453.919  | 8692.116  | NM_017634 | 5131.635  | 7513.294  |
| NM_01694E | 2205.327  | 2470.727  | U59748    | 1107.002  | 1809.926  | NM_00081E | 481.211   | 639.209   |
| NM_01840E | 1324.61   | 1916.111  | NM_01430E | 7655.442  | 15419.767 | AJ300465  | 669.749   | 603.901   |
| NM_01800E | 1008.108  | 945.145   | NM_00666C | 6656.989  | 4963.506  | NM_00081C | 1069.09   | 1028.108  |
| AK075081  | 2052.398  | 2926.275  | NM_004727 | 963.008   | 1352.266  | AF069307  | 912.243   | 831.371   |
| NM_00089E | 13498.177 | 18622.271 | NM_00055E | 776.191   | 1378.72   | NM_006917 | 1662.942  | 1111.253  |
| NM_00382C | 16271.934 | 15543.929 | NM_00668E | 65948.453 | 65678.07  | M33197    | 561.408   | 634.486   |
| NM_01591E | 2509.989  | 2787.347  | M33197    | 20263.756 | 13295.071 | AB011146  | 1550.457  | 1183.841  |
| M33197    | 67019.898 | 69263.992 | NM_00404E | 10115.535 | 6256.47   | NM_00532E | 6570.359  | 5836.26   |
| NM_01651E | 8189.033  | 8610.404  | NM_001891 | 1842.544  | 1294.985  | NM_01406E | 599.46    | 456.016   |
| AB002301  | 1480.453  | 1510.449  | NM_01213E | 8020.994  | 6971.812  | AB035130  | 1137.278  | 951.125   |
| AB014530  | 9897.085  | 8859.158  | AF121856  | 7238.555  | 5498.089  | NM_00335E | 488.707   | 464.532   |
| M33197    | 59010.953 | 65207.609 | NM_006421 | 3737.17   | 6526.866  | M33197    | 52033.313 | 42001.008 |
| NM_00598E | 3022.627  | 2756.696  | NM_017457 | 12858.653 | 21669.475 | NM_01791E | 1061.235  | 1469.573  |
| AB014607  | 4232.066  | 3611.96   | NM_00376E | 7921.087  | 9448.675  | NM_00357E | 1060.894  | 970.221   |
| AF134401  | 1621.696  | 1404.802  | NM_00586E | 676.781   | 929.144   | AL049283  | 368.699   | 419.17    |
| NM_020151 | 11756.91  | 12247.668 | M33197    | 60104.352 | 60907.043 | M33197    | 52854.883 | 51633.039 |
| NM_005891 | 53983.266 | 55404.934 | NM_01820E | 12498.685 | 15554.877 | NM_002401 | 7662.83   | 6942.045  |
| NM_00164E | 1609.442  | 1601.546  | AB023197  | 3180.755  | 4065.405  | NM_001274 | 1123.328  | 1331.292  |



|             |           |           |           |           |           |           |           |           |
|-------------|-----------|-----------|-----------|-----------|-----------|-----------|-----------|-----------|
| NM_00395E   | 4046.999  | 4043.363  | NM_022173 | 3800.548  | 4505.307  | NM_003913 | 781.619   | 998.868   |
| NM_014317   | 5502.321  | 8318.489  | M33197    | 66427.648 | 71997.555 | NM_002227 | 989.708   | 868.989   |
| AK026740    | 1270.84   | 1851.243  | NM_005705 | 3797.508  | 6077.667  | NM_006243 | 4727.546  | 4222.181  |
| M33197      | 59178.926 | 60866.75  | NM_00432E | 2325.628  | 2983.093  | NM_007252 | 878.371   | 867.676   |
| NM_017634   | 10809.759 | 14213.384 | NM_004581 | 6826.435  | 6540.389  | M33197    | 58753.688 | 60167.984 |
| NM_000813   | 1884.571  | 1397.613  | NM_006817 | 16548.904 | 16881.891 | AJ011129  | 1723.351  | 1135.256  |
| NM_01889E   | 938.832   | 1291.015  | NM_00710E | 23396.266 | 22052.773 | NM_006387 | 3080.866  | 3349.984  |
| AJ300465    | 1848.143  | 1615.308  | NM_015921 | 39988.629 | 33592.848 | NM_00564E | 1000.396  | 724.147   |
| X86400      | 1591.103  | 2260.774  | AB040900  | 19868.939 | 14351.847 | BI767871  | 1625.748  | 825.459   |
| NM_00081C   | 1563.166  | 1850.32   | NM_00108C | 729.507   | 721.013   | AA418907  | 473.164   | 409.861   |
| AF069307    | 3345.703  | 3443.088  | NM_001482 | 1336.488  | 437.829   | AA115473  | 2376.644  | 1877.253  |
| M33197      | 1352.183  | 1731.576  | U80018    | 591.074   | 744.118   | AA872397  | 1538.133  | 1795.624  |
| AB011146    | 3223.583  | 3641.308  | NM_000717 | 1712.891  | 1328.439  | AA709414  | 800.118   | 613.144   |
| NM_00532E   | 19581.291 | 19936.232 | M33197    | 66209.492 | 73225.453 | D12676    | 593.008   | 516.541   |
| NM_01406E   | 2452.104  | 2453.91   | NM_00484E | 3174.806  | 4088.309  | NM_00093E | 10133.873 | 10509.77  |
| NM_00357E   | 3987.69   | 3890.195  | NM_007107 | 9990.015  | 12284.384 | NM_00429E | 3306.778  | 3351.397  |
| AL049283    | 2768.907  | 2773.676  | NM_000047 | 3412.785  | 3939.669  | AK075081  | 5063.777  | 5713.618  |
| M33197      | 58695.105 | 57660.074 | NM_00631E | 2914.85   | 3729.492  | NM_00089E | 8204.663  | 6416.118  |
| NM_002401   | 42115.078 | 46872.492 | NM_01822E | 2226.229  | 3600.322  | NM_00382C | 32165.184 | 23750.385 |
| NM_001274   | 8324.768  | 8549.057  | Z36813    | 3366.067  | 4053.359  | NM_01591E | 2430.873  | 1679.349  |
| NM_003913   | 1769.234  | 2119.064  | AB018327  | 2148.047  | 2295.981  | M33197    | 61231.363 | 50338.383 |
| NM_002227   | 4670.747  | 5174.596  | AF303889  | 813.646   | 1278.369  | NM_01651E | 5210.777  | 4518.729  |
| NM_00719E   | 1315.698  | 1493.798  | M33197    | 61598.859 | 59971.801 | NM_00618E | 8555.88   | 8509.789  |
| NM_006243   | 6876.47   | 7194.029  | AK022649  | 6050.723  | 6267.59   | NM_01480C | 1373.441  | 952.087   |
| M33197      | 62983.93  | 64885.492 | NM_016507 | 6810.495  | 6847.026  | AF147311  | 1825.626  | 1615.929  |
| AJ011129    | 5127.178  | 4292.344  | NM_002024 | 8212.943  | 5859.359  | NM_002131 | 21947.336 | 17515.039 |
| AF282874    | 988.425   | 891.898   | NM_002743 | 16980.982 | 15546.355 | NM_017927 | 1640.25   | 1462.783  |
| NM_006387   | 7408.592  | 7867.35   | AF173358  | 21407.842 | 17590.074 | M33197    | 66589.883 | 64063.555 |
| NM_00564E   | 3268.922  | 2299.001  | NM_01636E | 9213.325  | 11559.576 | NM_001203 | 3028.805  | 3248.742  |
| NM_00663E   | 843.688   | 829.911   | M33197    | 62896.289 | 50391.402 | NM_00479E | 4831.324  | 4199.186  |
| AA709414    | 1465.76   | 1242.909  | NM_01654E | 4645.951  | 2735.708  | NM_006733 | 445.178   | 566.86    |
| D12676      | 3202.651  | 2418.684  | NM_00144C | 37879.906 | 23544.85  | NM_014047 | 7243.428  | 5803.394  |
| NM_00093E   | 25152.779 | 24919.691 | NM_001201 | 669.279   | 464.641   | M33197    | 60209.043 | 61258.93  |
| NM_00429E   | 13476.771 | 15982.354 | NM_01661E | 1887.335  | 1551.768  | AF037332  | 1668.064  | 1933.205  |
| H-X 02812 I | 2740.992  | 2979.217  | AB014568  | 29227.383 | 21932.953 | NM_006052 | 809.435   | 966.753   |
| U75898      | 2347.347  | 2249.82   | NM_01224E | 2045.244  | 2726.018  | AB040912  | 752.117   | 842.328   |
| M29039      | 1299.571  | 1335.457  | AK022546  | 3872.302  | 4799.17   | NM_000813 | 1378.137  | 1268.911  |
| M59815      | 978.004   | 1194.314  | NM_014067 | 1511.784  | 2393.206  | NM_01889E | 1699.792  | 1430.176  |
| M33210      | 1229.91   | 837.944   | NM_002914 | 6127.561  | 6564.773  | AJ300465  | 5005.104  | 3069.755  |
| AK075081    | 2971.823  | 2783.251  | NM_02038E | 1302.404  | 2121.663  | NM_00081C | 714.136   | 708.911   |
| NM_00089E   | 14008.656 | 14948.915 | NM_006541 | 1028.079  | 1211.58   | AF069307  | 2000.074  | 1992.699  |
| NM_00382C   | 16642.824 | 13320.911 | NM_01817E | 1280.945  | 1901.211  | M33197    | 58219.332 | 60789.797 |
| NM_01591E   | 2934.979  | 2278.531  | NM_006197 | 7436.879  | 3560.255  | U92978    | 2103.265  | 2799.298  |
| M33197      | 67343.273 | 68811.156 | NM_014181 | 2573.557  | 2025.616  | NM_01338E | 2241.329  | 2033.636  |
| NM_01651E   | 12175.847 | 11520.248 | M29273    | 2206.095  | 2081.185  | AK022817  | 1217.195  | 2143.033  |
| NM_00618E   | 13268.825 | 12068.842 | M33197    | 62209.582 | 59770.199 | NM_018034 | 2787.579  | 2597.096  |
| NM_01480C   | 9493.097  | 7675.431  | NM_004854 | 3772.339  | 2847.328  | M33197    | 60168.43  | 60927.359 |
| NM_001557   | 1273.739  | 1153.689  | AJ245418  | 18781.717 | 16620.682 | AB037831  | 1166.647  | 1280.055  |
| AF147311    | 4972.786  | 5228.387  | NM_006377 | 5574.62   | 4312.701  | NM_012103 | 7297.652  | 5445.815  |
| NM_00479E   | 9042.606  | 6611.925  | AK026427  | 1639.65   | 1663.178  | AL122077  | 2762.645  | 2215.316  |
| NM_006733   | 1291.792  | 1274.808  | AF244129  | 3606.966  | 6811.917  | M33197    | 55855.281 | 61539.141 |
| NM_014047   | 25198.785 | 24812.938 | NM_00243E | 6972.985  | 2898.891  | NM_00725E | 964.439   | 1205.468  |
| AK022901    | 1979.755  | 1673.614  | NM_018362 | 4365.849  | 2096.592  | NM_018402 | 483.219   | 382.778   |

|           |           |           |           |           |           |           |           |           |
|-----------|-----------|-----------|-----------|-----------|-----------|-----------|-----------|-----------|
| M33197    | 67228.828 | 69523.086 | M33197    | 63082.527 | 62527.402 | M33197    | 57487.324 | 58341.074 |
| AF037332  | 9457.73   | 11460.605 | NM_004755 | 2565.963  | 1451.927  | NM_002401 | 52434.625 | 47842.676 |
| NM_014571 | 728.639   | 1389.044  | NM_002186 | 3369.893  | 4143.345  | NM_001274 | 3920.966  | 4039.958  |
| NM_006052 | 1742.939  | 2313.017  | NM_006182 | 681.931   | 932.448   | NM_002227 | 2312.029  | 2451.617  |
| AB040912  | 2837.987  | 3435.679  | AL137543  | 5900.044  | 7683.814  | NM_007195 | 1259.697  | 1269.243  |
| NM_003871 | 466.368   | 852.825   | NM_004444 | 3490.18   | 4700.204  | AB002301  | 1935.851  | 3045.044  |
| NM_000813 | 1021.49   | 976.649   | M33197    | 1019.119  | 1079.961  | M33197    | 57790.559 | 59839.27  |
| NM_018896 | 794.419   | 1096.241  | NM_001957 | 2563.646  | 2374.268  | NM_005985 | 1348.637  | 1116.189  |
| AJ300465  | 2177.2    | 1034.102  | AK024533  | 6602.461  | 7583.082  | AB014607  | 3533.728  | 2936.949  |
| X86400    | 2005.168  | 2058.68   | NM_002736 | 12013.892 | 10924.989 | AF134401  | 589.42    | 332.031   |
| NM_000810 | 2437.45   | 2429.997  | NM_004246 | 3925.616  | 4319.777  | NM_020151 | 1536.14   | 1664.582  |
| AF069307  | 5668.133  | 5666.187  | NM_004961 | 804.092   | 1016.936  | NM_005891 | 15072.418 | 8863.246  |
| M33197    | 63814.668 | 61033.219 | NM_002285 | 2544.031  | 1403.583  | NM_001645 | 747.827   | 668.255   |
| U92978    | 3975.735  | 4001.025  | NM_006694 | 23711.654 | 30116.896 | NM_003956 | 1068.466  | 758.2     |
| NM_005735 | 1339.989  | 1557.473  | NM_005207 | 2122.915  | 2193.016  | M33197    | 58189.414 | 60893.98  |
| NM_014485 | 871.71    | 1498.736  | NM_014467 | 692.355   | 562.463   | NM_003500 | 2703.432  | 2795.546  |
| AB014567  | 978.806   | 1363.919  | NM_003087 | 3156.552  | 2442.155  | NM_014317 | 784.959   | 634.848   |
| NM_018034 | 6715.197  | 6072.931  | NM_001630 | 2441.665  | 2311.215  | L09234    | 4088.406  | 5252.211  |
| M33197    | 64095.848 | 60566.887 | M33197    | 66366.672 | 65984.156 | NM_000055 | 582.412   | 1208.907  |
| AB037831  | 2073.121  | 1950.6    | NM_002031 | 1862.764  | 1304.981  | NM_017881 | 3904.672  | 4992.445  |
| NM_012103 | 21982.348 | 20250.855 | AF305081  | 6888.085  | 6124.041  | M33197    | 56410.586 | 59067.672 |
| AL122077  | 9714.908  | 9043.296  | NM_004712 | 12532.578 | 7004.366  | NM_017634 | 2930.692  | 3112.878  |
| NM_006422 | 3541.994  | 4112.093  | AF118078  | 2972.954  | 1806.876  | NM_017743 | 1832.826  | 1658.264  |
| NM_016946 | 2242.349  | 3073.005  | AL157428  | 1108.88   | 982.84    | NM_000300 | 8984.967  | 8436.936  |
| M33197    | 62201.316 | 65448.527 | M33197    | 66416.242 | 65894.352 | M33197    | 66947.906 | 65572.195 |
| NM_007255 | 2542.901  | 4225.769  | NM_005855 | 3157.976  | 2945.628  | AV756917  | 1457.021  | 1575.428  |
| NM_018402 | 918.737   | 1755.207  | AK025163  | 1062.539  | 1299.854  | NM_018380 | 11961.68  | 16162.399 |
| NM_018005 | 749.315   | 875.444   | NM_014931 | 7160.182  | 10507.658 | AK001442  | 2316.01   | 2818.125  |
| M33197    | 58915.434 | 60959.859 | NM_014487 | 7864.561  | 14539.181 | NM_019035 | 484.112   | 455.746   |
| NM_002401 | 40477.973 | 32313.277 | NM_018070 | 5353.41   | 6591.998  | M33197    | 1346.659  | 1185.932  |
| NM_001274 | 7513.92   | 7121.499  | NM_002484 | 7490.084  | 7500.94   | AB011146  | 1645.06   | 1923.478  |
| NM_002227 | 7223.887  | 5682.289  | M33197    | 61158.395 | 61571.648 | NM_005326 | 5943.574  | 5672.501  |
| NM_007195 | 1439.597  | 1358.486  | NM_018240 | 61963.109 | 61014.07  | AB035130  | 1102.233  | 1122.569  |
| AB002301  | 1003.487  | 1221.778  | AL162052  | 1291.118  | 1773.231  | M33197    | 30748.475 | 32322.771 |
| AB014530  | 10792.852 | 9143.462  | AK025941  | 1437.868  | 2401.396  | NM_003575 | 1230.903  | 975.134   |
| M33197    | 63553.871 | 64026.898 | M33197    | 58262.168 | 62877.086 | AL049283  | 580.999   | 370.062   |
| NM_005985 | 4702.451  | 4480.422  | NM_015914 | 1919.07   | 1737.607  | NM_002214 | 1299.503  | 964.887   |
| AB014607  | 6282.477  | 4791.336  | AF059531  | 7289.42   | 4953.17   | M33197    | 59460.727 | 61027.473 |
| AF134401  | 1766.61   | 1684.598  | NM_002707 | 10816.748 | 9520.934  | X99659    | 37685.719 | 31802.59  |
| NM_020151 | 12342.962 | 12061.296 | AF029777  | 1596.067  | 1249.645  | X99662    | 1835.763  | 1856.714  |
| NM_005891 | 55917.121 | 50602.758 | NM_003352 | 2704.146  | 1309.046  | NM_003473 | 25221.096 | 23096.412 |
| NM_001645 | 1430.661  | 1398.591  | AK026884  | 26439.568 | 11888.378 | NM_014325 | 797.827   | 1064.729  |
| NM_003956 | 2997.566  | 2511.021  | S82198    | 1515.142  | 671.749   | M33197    | 59595.016 | 58824.727 |
| M33197    | 62080.75  | 66454.492 | NM_002594 | 3971.85   | 3122.74   | NM_006016 | 30825.305 | 34216.605 |
| NM_003500 | 10544.938 | 12779.254 | NM_001159 | 1253.987  | 1130.663  | NM_001242 | 937.654   | 957.971   |
| NM_000055 | 3048.636  | 3881.646  | NM_031407 | 5204.046  | 3916.278  | NM_001882 | 468.812   | 362.725   |
| AK026740  | 1268.141  | 1363.063  | M33197    | 59569.652 | 63829.07  | NM_014891 | 3953.887  | 4167.857  |
| NM_017881 | 7528.902  | 7971.121  | AK000410  | 30318.855 | 36288.613 | NM_013392 | 2611.554  | 2711.307  |
| M33197    | 60334.984 | 64490.188 | NM_020193 | 2186.376  | 2352.963  | M33197    | 58550.934 | 63035.688 |
| NM_017634 | 10978.961 | 13791.906 | D86982    | 514.919   | 680.519   | AF052692  | 921.37    | 699.412   |
| NM_017743 | 3676.203  | 3190.988  | NM_005615 | 704.982   | 1056.623  | NM_005225 | 1929.764  | 3468.615  |
| NM_018380 | 16170.775 | 14967.336 | D87440    | 3510.624  | 4515.513  | NM_000175 | 1072.734  | 1964.196  |
| AK001442  | 2450.252  | 2413.223  | AK000332  | 6356.938  | 7138.313  | AF062739  | 819.763   | 766.639   |

|           |           |           |           |           |           |           |           |           |
|-----------|-----------|-----------|-----------|-----------|-----------|-----------|-----------|-----------|
| NM_01207C | 1465.002  | 1533.257  | AL080156  | 1507.871  | 1131.615  | M33197    | 60393.457 | 56621.285 |
| NM_01903E | 1123.019  | 954.645   | M33197    | 60564.285 | 65872.906 | NM_00195C | 1937.186  | 1528.211  |
| AF183423  | 8394.38   | 9307.786  | NM_00673E | 1989.808  | 1734.128  | NM_018117 | 1317.877  | 1071.834  |
| M33197    | 1608.688  | 1525.474  | NM_01626C | 2141.706  | 1202.475  | NM_00628E | 941.698   | 1035.567  |
| AB011146  | 3725.564  | 3976.645  | NM_00289E | 1415.135  | 873.61    | M33197    | 57409.254 | 57115.48  |
| NM_00532E | 16980.645 | 17225.842 | NM_013351 | 20208.363 | 14061.271 | NM_004331 | 9421.514  | 8244.764  |
| NM_00728E | 860.386   | 462.376   | NM_01234C | 5258.333  | 3472.382  | NM_01599E | 731.392   | 650.298   |
| NM_01406E | 2726.272  | 2188.952  | NM_00602E | 2848.095  | 1749.239  | NM_01570E | 5132.794  | 6666.407  |
| AB035130  | 4397.561  | 4634.022  | AK025110  | 2213.133  | 1549.524  | AB018337  | 472.255   | 764.789   |
| NM_00335E | 3168.807  | 3030.002  | X52339    | 54347.793 | 49026.785 | AK025273  | 1241.888  | 1296.863  |
| M33197    | 54648.266 | 55620.594 | M33197    | 59316.43  | 59958.727 | M33197    | 55458.902 | 54982.41  |
| AF119917  | 751.919   | 1108.612  | AB046830  | 5679.194  | 3749.752  | NM_001794 | 1183.221  | 1523.762  |
| NM_01791E | 3423.8    | 5214.621  | NM_00712E | 3722.199  | 3269.463  | NM_00220E | 1437.733  | 1411.764  |
| AL050097  | 728.807   | 1181.744  | NM_00148E | 1655.82   | 1375.864  | M33197    | 56471.793 | 59136.727 |
| NM_00357E | 2840.413  | 2667.206  | NM_01620E | 8728.254  | 10387.142 | NM_000131 | 1324.307  | 1999.551  |
| AL049283  | 1763.589  | 1697.122  | NM_01247E | 578.23    | 716.639   | NM_00183E | 485.871   | 1128.407  |
| AF005258  | 1386.105  | 1031.673  | NM_016604 | 1254.198  | 1280.769  | NM_001911 | 10138.816 | 24681.066 |
| M33197    | 67328.734 | 66047.656 | M33197    | 60434.82  | 63513.773 | NM_000537 | 927.259   | 813.748   |
| X99659    | 53782.449 | 47008.828 | NM_00627E | 1996.973  | 2177.839  | NM_00650E | 597.967   | 382.663   |
| NM_01541E | 5729.951  | 6596.401  | NM_003407 | 1613.902  | 1638.545  | M33197    | 760.007   | 725.779   |
| NM_002731 | 2993.41   | 3469.522  | NM_00720E | 60766.367 | 61003.188 | U68382    | 399.264   | 618.32    |
| NM_00389E | 7377.688  | 7475.094  | NM_00372E | 1593.143  | 1884.301  | NM_00396E | 1634.576  | 1725.182  |
| X99662    | 3569.667  | 3774.15   | L05096    | 17028.525 | 13921.404 | NM_004651 | 2280.503  | 2072.36   |
| NM_00347E | 48251.836 | 45294.77  | BC015899  | 5446.775  | 5245.593  | M33197    | 58004.598 | 61295.75  |
| NM_01432E | 4494.052  | 4517.805  | NM_01798E | 10779.718 | 11092.334 | NM_01756E | 3669.239  | 4617.936  |
| M33197    | 63212.707 | 60811.973 | AK023629  | 1190.873  | 1627.711  | NM_00145E | 652.108   | 942.027   |
| NM_01775E | 858.923   | 747.271   | AK024846  | 5351.608  | 4043.819  | Y13871    | 3323.878  | 3620.184  |
| NM_00601E | 66866.648 | 65635.391 | AK001451  | 10287.795 | 6363.51   | AL137725  | 10534.062 | 3615.27   |
| NM_00124E | 6087.458  | 6303.53   | M33197    | 53283.23  | 34143.047 | AJ008151  | 11700.265 | 11823.93  |
| NM_00188E | 1381.746  | 1280.651  | NM_00718C | 1408.008  | 1110.576  | AK024149  | 1411.178  | 1495.506  |
| NM_014891 | 19547.809 | 20043.973 | NM_00560E | 911.8     | 506.073   | M33197    | 59305.785 | 59271.668 |
| NM_01339E | 12868.671 | 12428.671 | NM_00547E | 5376.437  | 3937.18   | NM_004091 | 1180.858  | 1282.252  |
| M33197    | 61514.832 | 63077.875 | NM_00566C | 5697.437  | 6139.807  | X74070    | 57973.188 | 59156.453 |
| NM_00323E | 1036.834  | 771.591   | AK023902  | 2818.512  | 1192.311  | NM_00633E | 2908.27   | 3043.8    |
| NM_00345E | 930.68    | 900.769   | NM_000401 | 992.314   | 634.711   | M33197    | 56279.035 | 60001.629 |
| AF052692  | 1720.397  | 1703.571  | NM_00522E | 710.898   | 680.794   | NM_00289E | 2968.017  | 2782.141  |
| NM_00522E | 1181.246  | 1148.035  | AB011173  | 5044.812  | 6408.005  | AK022749  | 6212.837  | 4203.625  |
| NM_002354 | 1709.185  | 1550.145  | AB023195  | 1273.215  | 1709.238  | BF031409  | 3398.812  | 3360.763  |
| NM_00521E | 1164.532  | 1031.83   | U43431    | 932.204   | 899.496   | NM_00704E | 1576.118  | 2276.736  |
| NM_00660E | 3941.319  | 3689.972  | AK021563  | 1131.186  | 768.759   | U94388    | 553.699   | 894.175   |
| M33197    | 66530.375 | 69041.875 | AB006622  | 1267.389  | 2761.231  | NM_01232E | 6027.628  | 8311.254  |
| AL079314  | 2546.553  | 2785.931  | M33197    | 63294.574 | 62283.395 | M33197    | 59065.578 | 62990.438 |
| NM_00126C | 2411.911  | 2891.182  | AK097041  | 2538.8    | 2596.151  | NM_00488E | 24442.992 | 24669.588 |
| NM_00195C | 8832.336  | 7626.234  | AF068744  | 17074.004 | 14477.769 | NM_00210E | 1795.879  | 1766.596  |
| AK026364  | 1958.023  | 1922.54   | AK000762  | 3194.547  | 1956.84   | NM_000984 | 54368.977 | 53543.738 |
| NM_018117 | 982.981   | 699.653   | AJ345030  | 6021.543  | 5290.654  | NM_00245E | 1526.472  | 1544.235  |
| NM_00699E | 1668.461  | 1673.973  | AK023631  | 2149.447  | 4154.416  | AK026721  | 1192.361  | 1631.571  |
| NM_00628E | 2928.742  | 3237.379  | AK023472  | 18383.047 | 17987.391 | AK023027  | 4046.496  | 4386.786  |
| M33197    | 62672.891 | 63316.586 | AL109729  | 1163.771  | 863.195   | AB002348  | 40577.805 | 39418.359 |
| NM_004331 | 27765.322 | 32240.461 | AF007146  | 218.659   | 674.352   | M33197    | 34855.098 | 39800.324 |
| NM_01599E | 2552.897  | 2276.599  | M33197    | 61364.715 | 55357.816 | AK027033  | 563.398   | 594.847   |
| NM_01570E | 14619.839 | 14687.902 | S79912    | 41560.324 | 40871.27  | NM_00010E | 1034.572  | 1118.621  |
| AB018337  | 3035.507  | 3107.567  | AL110283  | 1255.662  | 513.955   | NM_00300C | 10622.202 | 13579.265 |

|           |           |           |           |           |           |           |           |           |
|-----------|-----------|-----------|-----------|-----------|-----------|-----------|-----------|-----------|
| NM_01448  | 3403.063  | 3285.135  | AK026892  | 4488.205  | 1919.941  | NM_00249  | 15503.486 | 13561.788 |
| AK025273  | 5599.168  | 7362.398  | S83275    | 38034.504 | 28357.986 | M33197    | 60241.02  | 58441.457 |
| M33197    | 64546.941 | 61900.855 | AL117427  | 8578.551  | 6928.992  | NM_016284 | 991.426   | 1011.639  |
| NM_001794 | 1577.645  | 1892.608  | M33197    | 60805.055 | 57497.512 | NM_01459  | 2061.287  | 1757.093  |
| NM_00220  | 2850.705  | 3234.394  | AF052118  | 16742.422 | 14588.545 | NM_00683  | 5478.775  | 7420.652  |
| M33197    | 63495.41  | 64954.301 | AK025166  | 5715.603  | 3790.158  | NM_012257 | 909.526   | 1043.329  |
| NM_000131 | 1432.303  | 837.432   | AL359586  | 774.725   | 1414.683  | U37690    | 15926.133 | 17710.775 |
| NM_001911 | 25954.57  | 36495.34  | AF147421  | 692.018   | 659.956   | AB029012  | 2677.343  | 2930.163  |
| NM_00650  | 2172.588  | 2231.346  | AF035290  | 2731.817  | 4161.304  | M33197    | 60084.066 | 59828.82  |
| AB002321  | 1198.084  | 1344.352  | AK023216  | 1072.337  | 1162.426  | AF060936  | 1727.853  | 1635.808  |
| NM_00251  | 922.365   | 730.521   | M33197    | 61334.613 | 58122.191 | AL050088  | 5686.531  | 6972.726  |
| M33197    | 1321.587  | 1658.547  | AK023288  | 1181.742  | 558.876   | AK024939  | 1995.54   | 2221.506  |
| AB020698  | 569.714   | 1129.642  | AK022198  | 1364.213  | 674.195   | AK001561  | 2881.117  | 3780.566  |
| U68382    | 1234.758  | 814.771   | M33197    | 61318.266 | 61984.012 | AB007880  | 1664.746  | 2288.431  |
| NM_00396  | 2818.506  | 2796.147  | AK022428  | 2326.915  | 2398.741  | M33197    | 59096.301 | 54561.484 |
| NM_004651 | 5602.029  | 6230.537  | AK000788  | 1305.325  | 1069.861  | AF147356  | 2599.245  | 2685.928  |
| M33197    | 63541.766 | 63840.09  | AK023457  | 1885.708  | 1408.669  | NM_01884  | 1582.345  | 2143.699  |
| NM_01756  | 12335.442 | 11275.086 | AK025089  | 9172.156  | 9607.11   | AK024275  | 507.83    | 579.576   |
| NM_00145  | 1940.537  | 1670.715  | AK023298  | 658.587   | 285.087   | AL049461  | 1613.461  | 893.216   |
| NM_00290  | 1786.867  | 2094.996  | M33197    | 60498.984 | 59815.762 | M33197    | 58773.098 | 60480.777 |
| AK024480  | 989.237   | 1042.097  | AF085996  | 2778.61   | 1001.747  | AL109782  | 3368.021  | 3952.415  |
| Y13871    | 7899.867  | 7981.175  | AK001279  | 4431.895  | 1727.707  | AF086225  | 1392.3    | 1935.133  |
| AL137725  | 10427.013 | 7487.497  | AF086407  | 1291.29   | 1271.848  | NM_005844 | 3412.387  | 4362.911  |
| M33197    | 63205.539 | 64123.813 | AK001567  | 1773.732  | 1382.74   | AK024941  | 620.935   | 668.338   |
| AJ008151  | 11014.061 | 11862.898 | AL109707  | 826.22    | 400.241   | M33197    | 46873.406 | 43713.68  |
| AK024149  | 1858.12   | 1775.354  | M33197    | 59752.574 | 54065.398 | AK025489  | 938.749   | 1185.104  |
| AK023094  | 1581.401  | 1676.613  | U52839    | 1228.738  | 1227.696  | AB075853  | 874.289   | 861.74    |
| M33197    | 62735.906 | 60886.762 | M33197    | 57309.043 | 54336.684 | AL390152  | 2828.498  | 2878.32   |
| NM_004091 | 1486.19   | 1202.531  | AK026984  | 27654.682 | 40437.617 | M33197    | 57611.402 | 59386.586 |
| X74070    | 64693.52  | 62086.477 | AK022088  | 1173.824  | 1314.646  | NM_01812  | 1036.788  | 1198.567  |
| AF027219  | 1611.063  | 1620.868  | NM_013391 | 1315.905  | 1462.52   | AK024506  | 1895.688  | 1934.784  |
| BC022846  | 1851.482  | 1994.365  | M33197    | 65340.727 | 65126.125 | AF086326  | 1503.22   | 1445.42   |
| NM_00633  | 10220.386 | 10808.578 | AL157466  | 5367.6    | 5187.504  | M33197    | 56772.891 | 57764.941 |
| M33197    | 63541.426 | 63033.883 | AL389981  | 1003.155  | 977.023   | AL049937  | 443.854   | 625.663   |
| NM_00289  | 5578.797  | 5623.523  | AK024336  | 2927.688  | 2401.668  | AL080057  | 605.257   | 563.357   |
| AK022749  | 7264.795  | 7410.697  | AK023862  | 755.007   | 597.945   | AL117528  | 947.603   | 913.641   |
| BF031409  | 10204.839 | 10708.313 | NM_018621 | 1598.474  | 1525.897  | M33197    | 59850.949 | 61692.172 |
| NM_00704  | 5873.06   | 7893.366  | AK022016  | 1740.545  | 1537.18   | AK025948  | 759.499   | 976.708   |
| BE378791  | 1256.392  | 1147.427  | AK021628  | 1154.984  | 138.657   | AL353948  | 18429.826 | 17179.141 |
| U94388    | 2033.379  | 2441.599  | M33197    | 64684.266 | 58911.762 | AL122043  | 539.104   | 387.101   |
| NM_01232  | 9060.356  | 7354.827  | NM_01860  | 729.673   | 973.952   | M33197    | 59125.602 | 58996.008 |
| M33197    | 61715.398 | 61826.188 | AK022118  | 3293.707  | 2952.775  | AK025869  | 6172.323  | 5953.087  |
| NM_00488  | 52684.137 | 56695.688 | AK026453  | 7774.472  | 7843.339  | M33197    | 69406.789 | 65457.215 |
| AK025314  | 1363.765  | 1603.72   | AK025673  | 784.484   | 773.7     | AF009291  | 719.823   | 625.806   |
| NM_00210  | 4620.931  | 4673.893  | M33197    | 60522.926 | 57671.145 | M33197    | 68132.719 | 65337.254 |
| NM_000984 | 67324.234 | 66535.078 | AK023305  | 44877.383 | 53142.465 | NM_01805  | 1994.111  | 1738.873  |
| NM_00245  | 3679.734  | 3351.763  | AK023763  | 24866.133 | 21562.328 | AK002199  | 1707.137  | 1508.933  |
| AK000780  | 29664.684 | 33976.332 | AK022729  | 2563.303  | 3115.509  | AK021662  | 1369.487  | 1598.277  |
| AK026721  | 5806.819  | 4849.199  | NM_00616  | 11899.304 | 10026.829 | AK001038  | 668.913   | 809.819   |
| AK023027  | 3489.346  | 3010.789  | AL050374  | 2931.09   | 2944.3    | AK001802  | 890.707   | 879.196   |
| AK025598  | 1832.693  | 1821.728  | M33197    | 59096.457 | 59866.43  | AK021469  | 856.026   | 1273.873  |
| AB002348  | 53362.816 | 42761.34  | M28639    | 7416.226  | 7317.309  | AK021706  | 1519.519  | 1792.622  |
| M33197    | 60241.063 | 58063.25  | AL122073  | 26437.967 | 24115.592 | M33197    | 64623.285 | 65525.324 |

|           |           |           |           |           |           |           |           |           |
|-----------|-----------|-----------|-----------|-----------|-----------|-----------|-----------|-----------|
| NM_005006 | 6350.841  | 8456.054  | AF116655  | 6728.182  | 7620.724  | AK026259  | 24138.338 | 23442.52  |
| AK027033  | 2667.765  | 2321.614  | AJ243222  | 2721.368  | 2670.846  | AJ008115  | 16512.191 | 18223.779 |
| NM_000106 | 1451.903  | 1631.631  | AK026132  | 5110.442  | 1853.061  | M33197    | 55474.992 | 48125.926 |
| NM_003000 | 30686.623 | 33029.137 | Y11162    | 1375.89   | 1052.302  | AK026212  | 771.256   | 872.58    |
| NM_002495 | 31749.311 | 27805.902 | M33197    | 59666.266 | 59052.617 | AF086222  | 1164.943  | 973.251   |
| M33197    | 62553.207 | 67962.078 | AF070584  | 3077.547  | 3380.292  | AF086415  | 3239.898  | 2410.577  |
| NM_016284 | 3591.143  | 3463.513  | AF075006  | 951.728   | 799.147   | M33197    | 56434.672 | 54997.203 |
| NM_014593 | 4825.146  | 3921.057  | M33197    | 58946.637 | 57209.324 | AK024470  | 1184.827  | 1054.844  |
| NM_006833 | 22557.07  | 26549.938 | AK000903  | 31748.57  | 17186.314 | NM_004226 | 2029.372  | 1592.589  |
| NM_012257 | 3292.747  | 3037.133  | AK023938  | 1270.586  | 1774.375  | NM_006432 | 7718.719  | 9327.439  |
| U37690    | 42494.234 | 34821.09  | AL110169  | 1042.391  | 1577.984  | NM_003535 | 6353.219  | 6592.655  |
| NM_005120 | 2610.616  | 2137.414  | L13743    | 2538.946  | 3516.94   | AK026768  | 947.291   | 817.821   |
| AB029012  | 12121.364 | 9987.807  | U84519    | 1413.727  | 1514.781  | M33197    | 57427.645 | 54075.172 |
| M33197    | 67239.023 | 66773.188 | Z11849    | 9911.906  | 7883.261  | AK000852  | 13316.436 | 13792.837 |
| NM_006295 | 643.382   | 1053.712  | AJ002788  | 4083.385  | 2346.203  | AF251188  | 2028.771  | 2306.457  |
| AF060936  | 6336.317  | 5836.062  | M33197    | 60575.984 | 64392.547 | AK026418  | 2389.283  | 2756.225  |
| NM_018167 | 1297.971  | 1265.316  | AF052103  | 3069.499  | 2962.218  | AF086194  | 16969.113 | 18280.225 |
| AL050088  | 9529.33   | 10620.82  | AF075050  | 2536.272  | 2742.903  | AK026811  | 3141.43   | 2396.971  |
| AK024939  | 12539.281 | 12391.033 | AK024842  | 2116.542  | 898.705   | M33197    | 58361.289 | 57642.086 |
| AK001561  | 3291.462  | 2235.763  | AK022962  | 1126.881  | 1011.683  | AK023633  | 1035.133  | 980.847   |
| AB007880  | 4771.11   | 4493.239  | NM_018382 | 2616.176  | 2156.803  | NM_005372 | 439.755   | 364.795   |
| AK024950  | 1512.05   | 1368.483  | BC022303  | 3080.898  | 3758.669  | NM_006175 | 691.559   | 649.668   |
| M33197    | 67334.172 | 66713.859 | M33197    | 60629.793 | 58273.754 | AL360165  | 1274.406  | 977.225   |
| AF147356  | 9330.561  | 7076.555  | D17203    | 62133.609 | 58897.172 | M33197    | 60308.816 | 58403.664 |
| NM_018843 | 4972.337  | 6301.876  | NM_006495 | 3026.965  | 3553.965  | AJ008132  | 1656.094  | 1472.803  |
| AL049461  | 4943.983  | 2958.86   | NM_005288 | 682.219   | 763.689   | NM_005281 | 989.833   | 862.724   |
| M33197    | 66821.672 | 64242.473 | AK022101  | 515.381   | 684.034   | NM_005545 | 509.264   | 681.886   |
| AL109782  | 12052.172 | 12468.023 | NM_003251 | 771.911   | 684.533   | M33197    | 56958.113 | 59137.902 |
| AF086225  | 2672.683  | 3210.011  | AB046772  | 1562.438  | 1497.618  | S81242    | 39268.594 | 27902.658 |
| NM_005844 | 8047.415  | 6157.224  | M33197    | 63864.746 | 63862.578 | AF075072  | 764.168   | 785.506   |
| AK024941  | 5073.395  | 4494.675  | AL442080  | 2389.063  | 2870.312  | M33197    | 58332.27  | 61759.395 |
| M33197    | 59280.281 | 54554.195 | AY007143  | 15435.841 | 22852.887 | NM_002505 | 2004.239  | 2274.117  |
| AK025489  | 1957.931  | 1731.623  | L15557    | 1760.004  | 3389.14   | U38442    | 3543.921  | 3818.002  |
| AL390152  | 4378.152  | 3638.322  | M33197    | 64515.238 | 62312.676 | AF110136  | 938.355   | 399.487   |
| M33197    | 58314.699 | 56565.82  | NM_001563 | 10330.199 | 13048.449 | AK026706  | 1402.282  | 1462.512  |
| NM_018126 | 3487.33   | 3817.381  | NM_000266 | 1261.24   | 2078.26   | AB007936  | 33468.086 | 34881.781 |
| AK024506  | 7228.371  | 8187.04   | X89666    | 3977.047  | 4281.202  | D28391    | 18061.816 | 19457.402 |
| NM_014175 | 4238.15   | 3958.621  | NM_017425 | 573.048   | 1213.98   | M33197    | 45292.914 | 51048.238 |
| AF086326  | 5810.883  | 6035.52   | NM_003104 | 12272.004 | 13268.159 | AJ227896  | 5058.003  | 3618.332  |
| M33197    | 65269.379 | 62745.238 | NM_014581 | 2926.769  | 2588.73   | L32841    | 947.151   | 1090.92   |
| AL080057  | 765.243   | 910.087   | NM_000898 | 870.902   | 661.902   | M33197    | 40305.418 | 39945.199 |
| AL117528  | 1086.397  | 973.322   | M33197    | 60627.91  | 58895.453 | CY3Cy5    | 4820.739  | 250.072   |
| M33197    | 62560.078 | 60158.141 | AK024448  | 7752.723  | 3113.456  | AI298534  | 304.648   | 589.123   |
| AK025948  | 1961.673  | 1752.624  | NM_014406 | 4639.457  | 2728.111  | R71691    | 921.997   | 727.181   |
| AL353948  | 9805.134  | 8852.05   | Z11801    | 1415.388  | 1280.89   | AW167715  | 640.261   | 384.978   |
| AL122043  | 1143.649  | 1005.257  | AK027253  | 822.219   | 930.33    | AA424735  | 1124.16   | 1205.852  |
| M33197    | 62692.258 | 61364.863 | S68954    | 7337.125  | 7960.001  | U78294    | 3644.047  | 3747.144  |
| AK025869  | 9511.858  | 10373.546 | S81335    | 1864.508  | 1623.008  | BI760394  | 2331.792  | 2300.189  |
| M33197    | 75419.867 | 62969.094 | AF052109  | 1482.348  | 1597.851  | AA555216  | 473.686   | 729.505   |
| AF056430  | 925.639   | 813.75    | M33197    | 54432.887 | 39831.313 | U09117    | 7808.85   | 10135.626 |
| AF009291  | 1290.08   | 1364.839  | NM_003353 | 14500.284 | 11820.815 | H66070    | 1888.122  | 3348.529  |
| M33197    | 66952.453 | 62579.367 | X82127    | 11148.467 | 5949.104  | AA164741  | 6891.098  | 8882.398  |
| NM_018055 | 2036.377  | 1784.099  | AL122044  | 2902.163  | 3544.777  | AI189375  | 1086.904  | 1023.375  |

|           |           |           |             |           |           |           |           |           |
|-----------|-----------|-----------|-------------|-----------|-----------|-----------|-----------|-----------|
| AK002199  | 1956.308  | 1701.24   | NM_018296   | 2025.913  | 2055.046  | AI978885  | 287.225   | 338.342   |
| AK021662  | 1675.068  | 1985.467  | NM_005752   | 1134.651  | 1330.921  | AK054960  | 3479.641  | 3153.841  |
| AK001038  | 1284.131  | 1762.078  | M33197      | 59116.652 | 62180.398 | L15344    | 711.332   | 644.083   |
| AK001802  | 1280.104  | 1401.694  | AF070578    | 1314.595  | 2167.773  | SR1       | 51294.441 | 63332.016 |
| AK021469  | 1804.448  | 1956.323  | CY3Cy5      | 3908.947  | 150.413   | SR3       | 14210.646 | 13099.217 |
| AK021706  | 1157.208  | 1037.744  | AA418907    | 886.574   | 637.909   | SR5       | 1913.335  | 1559.579  |
| M33197    | 65488.332 | 61590.688 | AA115473    | 3418.041  | 3270.574  | SR7       | 1259.805  | 13421.299 |
| AK025161  | 1036.792  | 1226.05   | AA872397    | 2820.185  | 2751.619  | SR9       | 4680.221  | 614.538   |
| AK026259  | 23858.018 | 21529.611 | AA709414    | 1009.347  | 844.28    | CY3Cy5    | 3503.024  | 159.906   |
| AJ008115  | 33491.531 | 23631.717 | D12676      | 2139.755  | 2174.098  | NM_006453 | 711.61    | 604.05    |
| AF083125  | 1809.981  | 1862.906  | NM_000939   | 18022.143 | 18273.375 | NM_018096 | 291.738   | 185.509   |
| M33197    | 67317.625 | 68521.648 | NM_004295   | 16110.325 | 16890.268 | AL390078  | 459.077   | 394.289   |
| AK022970  | 1717.259  | 1493.799  | H-X 02812 I | 1179.757  | 1496.558  | NM_004036 | 964.387   | 881.24    |
| AK026212  | 3366.93   | 3786.942  | U75898      | 1425.669  | 1637.977  | NM_015986 | 2154.118  | 2479.175  |
| AF086222  | 2823.974  | 2600.102  | M29039      | 599.083   | 715.795   | NM_006546 | 434.76    | 309.813   |
| AF143866  | 1620.67   | 1130.863  | M59815      | 562.756   | 646.31    | NM_014959 | 632.078   | 796.364   |
| AF086415  | 3713.743  | 3771.007  | NM_006917   | 738.802   | 796.73    | NM_003992 | 1459.33   | 1735.703  |
| M33197    | 63962.695 | 63347.035 | SR2         | 42793.434 | 42040.586 | AF279265  | 750.893   | 862.965   |
| AK024470  | 1702.132  | 1780.24   | SR4         | 9320.227  | 9385.721  | NM_005213 | 1647.254  | 1212.904  |
| NM_004226 | 9278.76   | 7798.785  | SR6         | 1963.734  | 1517.528  | AB040914  | 710.836   | 280.882   |
| AK023400  | 601.922   | 754.46    | SR8         | 8216.032  | 24068.742 | NM_002997 | 562.956   | 462.318   |
| NM_006432 | 32627.861 | 23034.471 | SR10        | 27392.141 | 9371.497  | NM_002379 | 7005.136  | 6358.772  |
| AK023897  | 2061.159  | 1692.679  | CY3Cy5      | 6753.753  | 529.928   | AB007929  | 1958.563  | 2164.034  |
| AF025441  | 6678.117  | 7348.512  | NM_001203   | 2987.161  | 3014.365  | NM_004579 | 1507.293  | 1670.531  |
| U62823    | 4272.705  | 5954.895  | NM_004799   | 11830.812 | 9672.369  | AA203126  | 895.767   | 1177.335  |
| NM_003535 | 28135.361 | 32647.914 | NM_006733   | 1202.089  | 888.698   | L12347    | 1134.26   | 970.331   |
| AK026768  | 4894.734  | 4840.978  | NM_014047   | 15588.551 | 15130.847 | NM_001622 | 514.152   | 512.672   |
| M33197    | 67092.969 | 65083.512 | AK022901    | 1331.618  | 1365.755  | Z36788    | 365.452   | 106.297   |
| AK000852  | 19851.596 | 18192.916 | M33197      | 64904.484 | 62819.242 | NM_018477 | 931.895   | 784.622   |
| AF251188  | 5257.762  | 6733.282  | AF037332    | 3506.746  | 3850.714  | U20536    | 768.609   | 525.422   |
| AK026418  | 6858.315  | 6831.346  | NM_006052   | 616.316   | 746.63    | NM_004853 | 3553.074  | 3498.031  |
| AK026811  | 4732.533  | 4898.896  | AB040912    | 3765.95   | 3239.19   | NM_001494 | 6735.229  | 8238.2    |
| M33197    | 67220.203 | 65697.477 | NM_006243   | 4143.651  | 4328.409  | NM_017707 | 289.734   | 310.452   |
| AK023633  | 2805.086  | 2184.227  | NM_007252   | 469.046   | 457.851   | NM_004206 | 450.355   | 474.17    |
| NM_006179 | 1628.864  | 1518.649  | M33197      | 58754.395 | 60914.5   | NM_004603 | 7207.096  | 8255.093  |
| AL360165  | 4650.24   | 3345.683  | AJ011129    | 2993.421  | 4033.295  | AK022849  | 1326.787  | 1565.421  |
| M33197    | 67225.648 | 63940.301 | NM_001039   | 1002.868  | 1161.471  | AF040964  | 5024.388  | 6398.594  |
| AJ008132  | 12103.138 | 8802.898  | NM_006387   | 6258.992  | 6937.544  | NM_001939 | 324.254   | 741.712   |
| NM_005281 | 4764.362  | 3708.972  | NM_005646   | 3124.044  | 3291.438  | NM_003279 | 3091.63   | 3253.197  |
| NM_005549 | 1845.952  | 1439.046  | NM_006639   | 1223.728  | 1287.249  | AB014599  | 316.756   | 254.511   |
| M33197    | 61538.211 | 61943.957 | BI767871    | 2456.13   | 3550.863  | AF264014  | 1469.353  | 1492.758  |
| U12129    | 4333.371  | 3629.382  | AK022817    | 1684.565  | 1769.385  | NM_001831 | 186.377   | 144.811   |
| S81242    | 59770.055 | 58373.512 | M33197      | 62671.887 | 66967.289 | NM_000137 | 1419.677  | 1499.197  |
| AF230801  | 1958.086  | 1684.232  | AB037831    | 1665.551  | 1540.526  | NM_012102 | 2994.941  | 2252.119  |
| AF075072  | 2844.133  | 2092.249  | NM_012103   | 13354.704 | 13474.86  | NM_005017 | 16590.703 | 16033.65  |
| AK025806  | 1382.443  | 1065.998  | AL122077    | 8064.384  | 8344.112  | AF163572  | 5254.084  | 4984.11   |
| AF110136  | 1097.757  | 808.039   | NM_014632   | 759.241   | 964.524   | NM_000897 | 1442.377  | 1512.097  |
| AK026706  | 2728.557  | 2533.75   | NM_006422   | 1122.335  | 1499.059  | NM_000487 | 633.186   | 608.826   |
| AB007936  | 43598.051 | 42554.965 | NM_016946   | 947.356   | 1174.005  | NM_006411 | 11032.704 | 12108.651 |
| D28391    | 46232.512 | 40828.875 | M33197      | 61935.543 | 65415.828 | NM_014182 | 1157.744  | 1573.85   |
| M33197    | 60540.789 | 60230.91  | NM_007259   | 1388.396  | 1166.01   | NM_000492 | 5173.766  | 6125.594  |
| AJ227885  | 777.439   | 633.358   | NM_018402   | 983.231   | 685.708   | NM_012089 | 322.864   | 380.896   |
| AJ227896  | 2634.118  | 2341.954  | NM_018009   | 468.404   | 600.022   | NM_001170 | 755.175   | 595.326   |

|           |           |           |           |           |           |           |           |           |
|-----------|-----------|-----------|-----------|-----------|-----------|-----------|-----------|-----------|
| L32841    | 3942.938  | 3296.191  | AK075081  | 2721.621  | 3051.059  | NM_00469€ | 267.586   | 183.641   |
| M33197    | 62346.223 | 57108.848 | NM_00089€ | 7171.554  | 8397.668  | NM_01434€ | 671.106   | 778.442   |
| AF131770  | 2511.841  | 2279.664  | NM_00382€ | 14969.54  | 18577.303 | Z50169    | 243.809   | 133.045   |
| CY3Cy5    | 8831.929  | 308.405   | NM_01591€ | 1690.272  | 2211.301  | NM_00177€ | 490.157   | 684.343   |
| AI298534  | 985.11    | 752.316   | M33197    | 55845.004 | 65402.191 | Z70704    | 1137.394  | 1101.567  |
| R71691    | 1507.853  | 1739.753  | NM_01651€ | 8212.034  | 9463.143  | NM_01436€ | 1056.82   | 1441.508  |
| AW167715  | 882.954   | 590.467   | NM_00618€ | 15771.989 | 18660.783 | NM_00055€ | 2536.168  | 2627.188  |
| AA424735  | 3156.94   | 4271.614  | NM_01480€ | 4838.25   | 6934.676  | NM_00323€ | 544.068   | 415.643   |
| U78294    | 6317.811  | 6811.458  | NM_00155€ | 942.04    | 1481.2    | NM_00137€ | 1393.871  | 1137.203  |
| BI760394  | 8116.294  | 7264.1    | AF147311  | 3579.956  | 5286.634  | NM_00231€ | 847.08    | 506.408   |
| AA555216  | 619.256   | 770.103   | NM_002131 | 26646.277 | 38737.273 | M20699    | 1129.578  | 1347.83   |
| U09117    | 6019.04   | 6078.63   | NM_01792€ | 3842.445  | 3944.969  | NM_00477€ | 2683.898  | 2544.819  |
| M18468    | 777.909   | 998.909   | NM_020151 | 10545.933 | 10938.787 | NM_01693€ | 1536.208  | 1844.318  |
| H66070    | 1469.166  | 2457.727  | NM_005891 | 33769.594 | 37973.441 | NM_00269€ | 1806.961  | 1630.032  |
| AK054960  | 11795.959 | 19314.279 | NM_00164€ | 1952.444  | 1416.306  | NM_01232€ | 1175.588  | 949.192   |
| L15344    | 3419.048  | 5511.187  | NM_00395€ | 2920.649  | 2553.436  | NM_01650€ | 323.764   | 659.816   |
| SR5       | 8972.098  | 13016.164 | M33197    | 62334.797 | 63156.324 | NM_00645€ | 2335.711  | 2056.749  |
| SR9       | 23795.197 | 4123.143  | NM_00350€ | 6114.598  | 5564.441  | AK026062  | 974.977   | 810.315   |
| CY3Cy5    | 7623.704  | 364.596   | NM_014317 | 3741.873  | 3084.325  | AL050082  | 573.469   | 654.125   |
|           | 953.091   | 466.625   | L09234    | 11310.31  | 10863.231 | NM_00662€ | 33634.234 | 33574.355 |
| NM_01458€ | 8994.859  | 10125.749 | NM_00005€ | 2522.762  | 1441.347  | NM_01658€ | 11213.571 | 8725.694  |
| NM_01436€ | 15411.806 | 15107.493 | AK026740  | 561.711   | 809.028   | NM_00313€ | 2187.99   | 2307.415  |
| NM_00092€ | 714.602   | 815.913   | NM_017881 | 4216.592  | 5214.048  | L12347    | 1137.69   | 1000.475  |
| NM_00645€ | 1761.444  | 1893.276  | M33197    | 61254.145 | 65078.555 | NM_00162€ | 714.112   | 837.094   |
| NM_01809€ | 2462.646  | 1503.012  | NM_017634 | 8855.285  | 8450.811  | Z36788    | 344.647   | 345.155   |
| AL390078  | 981.068   | 959.369   | NM_00081€ | 933.029   | 1005.261  | NM_01847€ | 1036.825  | 1093.911  |
| NM_00403€ | 2420.63   | 2108.851  | NM_01889€ | 1182.779  | 1161.902  | U20536    | 905.331   | 859.36    |
| NM_01598€ | 4980.123  | 4648.25   | AJ300465  | 2005.282  | 2955.345  | AI298534  | 368.131   | 395.039   |
| NM_00654€ | 1524.595  | 1113.175  | X86400    | 989.5     | 1126.749  | AA424735  | 760.51    | 574.757   |
| NM_01495€ | 2413.862  | 2153.357  | NM_00081€ | 2393.35   | 3091.558  | U78294    | 1505.916  | 1524.268  |
| NM_00399€ | 5095.682  | 4367.973  | AF069307  | 2562.195  | 3137.035  | BI760394  | 1315.268  | 1303.234  |
| AF279265  | 4505.518  | 3067.632  | M33197    | 65795.57  | 71201.281 | U09117    | 1891.828  | 1761.624  |
| NM_00521€ | 4115.95   | 2921.234  | U92978    | 3479.354  | 3962.183  | H66070    | 523.813   | 580.49    |
| AB040914  | 1287.093  | 1362.221  | NM_00573€ | 665.13    | 923.759   | AA164741  | 1087.113  | 1031.531  |
| L12347    | 1700.014  | 2247.976  | NM_01338€ | 7254.147  | 9239.089  | AI189375  | 214.807   | 127.703   |
| NM_01847€ | 10415.877 | 9412.998  | AB014567  | 657.47    | 905.599   | AI978885  | 543.185   | 631.436   |
| U20536    | 3263.742  | 3848.674  | NM_01406€ | 1520.128  | 1088.234  | NM_00166€ | 7518.873  | 5048.586  |
| NM_00485€ | 12259.172 | 10218.214 | AB035130  | 2222.844  | 1842.528  | NM_00187€ | 717.6     | 685.616   |
| NM_00149€ | 18328.424 | 19451.58  | NM_00335€ | 1223.896  | 1174.009  | AF264014  | 3749.791  | 4098.747  |
| NM_01770€ | 1028.722  | 784.038   | M33197    | 51444.48  | 49084.68  | L09098    | 282.052   | 247.722   |
| NM_00420€ | 5319.82   | 4614.985  | NM_01791€ | 2093.32   | 1820.145  | NM_01458€ | 911.386   | 732.891   |
| NM_00460€ | 11797.211 | 10162.004 | NM_00357€ | 1741.29   | 2367.615  | NM_01436€ | 860.335   | 937.163   |
| AK022849  | 3566.723  | 3581.594  | AL049283  | 1292.277  | 1353.654  | NM_00092€ | 343.859   | 268.945   |
| AF040964  | 9844.354  | 9829.049  | M33197    | 53935.871 | 58199.41  | NM_00645€ | 986.016   | 860.046   |
| NM_00193€ | 4440.909  | 4495.66   | NM_002401 | 36887.613 | 43051.887 | NM_01809€ | 699.12    | 584.625   |
| NM_00327€ | 3420.267  | 2877.157  | NM_00127€ | 3176.898  | 3803.314  | NM_00403€ | 550.238   | 402.695   |
| AB014599  | 5439.318  | 4172.934  | NM_00391€ | 1018.273  | 1124.479  | NM_01598€ | 842.797   | 917.52    |
| NM_00439€ | 664.877   | 1084.305  | NM_00222€ | 3880.654  | 2960.634  | NM_01495€ | 399.78    | 327.886   |
| AB018345  | 714.703   | 1159.848  | NM_00719€ | 1900.049  | 2068.597  | NM_00399€ | 773.275   | 556.073   |
| NM_001831 | 890.617   | 753.614   | AB002301  | 682.349   | 1038.521  | AF279265  | 543.614   | 375.143   |
| NM_000137 | 4024.541  | 4315.25   | AB014530  | 7121.283  | 8172.262  | NM_00521€ | 390.141   | 372.695   |
| NM_01210€ | 3809.931  | 3442.254  | M33197    | 62083.703 | 62213.859 | NM_00299€ | 930.943   | 945.099   |
| NM_00501€ | 17410.988 | 14793.226 | NM_00598€ | 3213.009  | 4809.29   | NM_00237€ | 3519.292  | 2766.518  |

|           |           |           |             |           |           |           |           |           |
|-----------|-----------|-----------|-------------|-----------|-----------|-----------|-----------|-----------|
| AF163572  | 7438.427  | 6079.559  | AB014607    | 4617.481  | 5088.084  | AB007929  | 316.697   | 273.986   |
| NM_000897 | 1745.956  | 1434.232  | AF134401    | 969.641   | 1116.795  | NM_004579 | 354.522   | 383.509   |
| NM_000487 | 1138.639  | 1089.23   | NM_006387   | 4612.375  | 3557.28   | AA203126  | 674.743   | 644.743   |
| NM_000492 | 14805.422 | 15372.641 | NM_006639   | 847.557   | 712.513   | Z50169    | 475.301   | 416.912   |
| NM_012089 | 1762.678  | 1959.025  | BI767871    | 1396.312  | 1678.999  | AB043997  | 693.617   | 463.385   |
| NM_001170 | 5112.47   | 4781.293  | AA418907    | 509.709   | 528.697   | NM_004853 | 583.189   | 645.424   |
| NM_004696 | 1103.332  | 1227.607  | AA115473    | 2498.436  | 3216.831  | NM_001494 | 4574.183  | 4628.375  |
| AB043997  | 1365.096  | 1460.581  | AA872397    | 1730.907  | 1822.456  | NM_017707 | 398.018   | 437.041   |
| NM_001773 | 731.367   | 852.213   | AA709414    | 770.178   | 961.952   | NM_004206 | 1276.745  | 1169.762  |
| Z70704    | 724.716   | 822.477   | D12676      | 1422.039  | 1397.328  | NM_015888 | 520.895   | 749.059   |
| NM_014363 | 1727.323  | 1894.929  | NM_000939   | 17307.611 | 18116.82  | NM_004603 | 3838.432  | 3697.656  |
| NM_000557 | 2201.732  | 1918.415  | NM_004295   | 8527.324  | 9211.396  | AK022849  | 537.645   | 473.342   |
| NM_003239 | 880.775   | 911.521   | H-X 02812 I | 986.911   | 1116.79   | AF040964  | 1071.644  | 1019.466  |
| NM_001375 | 6706.72   | 5769.555  | U75898      | 1497.686  | 2078.421  | NM_001939 | 679.827   | 832.467   |
| NM_002312 | 3483.913  | 2802.428  | M29039      | 449.293   | 485.511   | NM_003279 | 2330.722  | 2116.909  |
| NM_016937 | 3463.628  | 3426.594  | M33197      | 809.469   | 1153.797  | AB014599  | 538.987   | 402.298   |
| NM_002690 | 12473.841 | 12792.862 | AB011146    | 2086.156  | 2270.177  | AW407841  | 397.874   | 356.523   |
| NM_012328 | 5206.042  | 5115.69   | NM_006185   | 17405.85  | 14885.458 | AL050082  | 886.151   | 1304.469  |
| NM_007341 | 1038.202  | 674.95    | NM_014800   | 5218.959  | 4779.3    | NM_006623 | 31310.736 | 25213.854 |
| NM_016508 | 2454.019  | 3214.664  | NM_001557   | 704.401   | 797.643   | NM_016588 | 21078.201 | 17436.592 |
| NM_006456 | 6305.506  | 5885.813  | AF147311    | 3601.562  | 3525.054  | NM_003135 | 4182.139  | 4007.215  |
| AK026062  | 7303.681  | 6567.823  | NM_002131   | 26512.719 | 22357.4   | NM_000137 | 1900.599  | 1636.587  |
| AF047002  | 49319.34  | 52948.445 | NM_017927   | 2743.941  | 2341.781  | NM_012102 | 1501.11   | 832.063   |
| NM_003135 | 12946.316 | 14736.534 | M33197      | 65672.805 | 74546.039 | NM_005017 | 2429.412  | 2105.094  |
| L12347    | 998.412   | 834.901   | NM_001203   | 2899.912  | 2467.452  | AF163572  | 1934.353  | 2118.974  |
| NM_001622 | 909.198   | 998.607   | NM_004799   | 7314.142  | 6866.893  | NM_000897 | 678.295   | 606.375   |
| Z36788    | 398.251   | 602.784   | NM_014047   | 9594.586  | 10252.58  | NM_000487 | 273.002   | 247.591   |
| NM_018477 | 6582.593  | 4983.654  | M33197      | 63323.035 | 63370.063 | NM_006411 | 5949.456  | 5236.339  |
| U20536    | 1955.445  | 2087.529  | AF037332    | 2677.587  | 3222.076  | NM_014182 | 499.919   | 321.684   |
| AI298534  | 1076.142  | 566.019   | NM_006052   | 678.048   | 735.665   | NM_000492 | 1610.376  | 1390.354  |
| R71691    | 1095.039  | 1010.009  | AB040912    | 5428.836  | 5258.597  | NM_012089 | 150.547   | 180.944   |
| AA424735  | 2704.063  | 3379.433  | NM_003871   | 662.471   | 771.426   | NM_001170 | 1085.255  | 1059.919  |
| BI760394  | 7169.858  | 5299.754  | NM_006243   | 4285.61   | 4793.036  | AK054960  | 1052.878  | 782.393   |
| AA555216  | 1289.607  | 1164.986  | M33197      | 63064.914 | 64453.801 | L15344    | 1166.351  | 1030.206  |
| U09117    | 3043.197  | 4673.854  | AJ011129    | 4373.451  | 5313.109  | NM_014470 | 331.514   | 659.111   |
| M21054    | 643.432   | 571.546   | AF282874    | 444.86    | 1049.492  | NM_001665 | 13747.447 | 10083.599 |
| M18468    | 654.28    | 404.269   | M33197      | 61709.137 | 63777.984 | Z70704    | 396.329   | 629.213   |
| H66070    | 1896.704  | 2592.46   | U92978      | 4143.157  | 3152.92   | NM_000557 | 823.348   | 566.041   |
| AA164741  | 12780.843 | 12898.785 | NM_005738   | 622.177   | 623.754   | NM_001375 | 939.694   | 732.841   |
| AI978885  | 1087.933  | 1236.394  | NM_014488   | 613.326   | 662.37    | M20699    | 391.711   | 425.638   |
| AK054960  | 15488.995 | 15511.795 | NM_013389   | 5984.81   | 4562.6    | NM_004774 | 1247.546  | 1195.688  |
| L15344    | 4948.482  | 4272.109  | AK022817    | 1604.822  | 1636.568  | NM_016937 | 617.495   | 704.615   |
| NM_001665 | 33342.828 | 31884.039 | NM_018034   | 4065.741  | 4980.562  | NM_002690 | 1335.535  | 1338.536  |
| NM_001879 | 705.925   | 1044.13   | M33197      | 61737.125 | 60808.719 | NM_012328 | 611.67    | 647.583   |
| AF264014  | 6790.049  | 6594.116  | AB037831    | 922.086   | 1251.698  | NM_016508 | 667.614   | 724.735   |
| NM_001831 | 1626.206  | 1047.812  | NM_012103   | 8785.608  | 10329.967 | NM_006456 | 1815.17   | 1732.441  |
| NM_014586 | 5963.75   | 6759.843  | AL122077    | 1348.309  | 1292.979  | AK026062  | 771.626   | 689.859   |
| NM_014366 | 11212.74  | 11622.778 | NM_014632   | 498.681   | 699.982   | AF047002  | 12156.5   | 12163.312 |
| NM_006453 | 1947.811  | 1974.743  | NM_006422   | 905.592   | 1092.152  | NM_002379 | 8020.59   | 9316.14   |
| NM_018096 | 1669.23   | 1364.305  | BE789195    | 907.414   | 1328.285  | L12347    | 1011.753  | 1121.354  |
| NM_004036 | 1446.191  | 1239.945  | NM_016946   | 919.399   | 1013.957  | NM_001622 | 686.329   | 502.145   |
| NM_015986 | 3633.948  | 3679.827  | M33197      | 61564.805 | 66148.563 | Z36788    | 263.533   | 171.642   |
| NM_006546 | 957.883   | 1175.705  | NM_007259   | 1434.08   | 1516.009  | NM_018477 | 478.893   | 390.994   |



|           |           |           |           |           |           |           |           |           |
|-----------|-----------|-----------|-----------|-----------|-----------|-----------|-----------|-----------|
| NM_014959 | 1665.367  | 1261.935  | NM_018402 | 995.736   | 883.908   | U78294    | 313.32    | 292.2     |
| NM_003992 | 3586.073  | 3281.719  | AK075081  | 4541.096  | 4341.437  | BI760394  | 930.676   | 691.123   |
| AF279265  | 4390.185  | 3549.622  | NM_000895 | 9007.532  | 10538.329 | U09117    | 1214.341  | 1222.246  |
| NM_005213 | 4030.211  | 3152.418  | NM_003820 | 19731.43  | 23296.957 | H66070    | 706.064   | 337.243   |
| AB040914  | 1062.071  | 1024.01   | NM_015915 | 2276.374  | 2435.845  | AA164741  | 1367.927  | 1141.209  |
| NM_002997 | 4487.833  | 4669.083  | M33197    | 65180.801 | 69510.898 | AI189375  | 542.192   | 239.999   |
| NM_004579 | 7214.522  | 7412.624  | NM_016518 | 7194.125  | 6843.117  | AI978885  | 353.463   | 231.02    |
| AA203126  | 3170.492  | 3318.136  | AB002301  | 732.167   | 714.401   | AB014599  | 851.201   | 602.865   |
| AB043997  | 1238.62   | 1436.371  | AB014530  | 10711.031 | 8288.094  | AW407841  | 766.134   | 686.39    |
| NM_004853 | 8096.186  | 8005.276  | M33197    | 60157.379 | 63402.305 | NM_001879 | 650.296   | 511.183   |
| NM_001494 | 13281.533 | 16254.241 | NM_005989 | 4133.816  | 4502.653  | AF264014  | 2127.592  | 2226.247  |
| NM_017707 | 986.742   | 830.884   | AB014607  | 5740.38   | 3825.168  | NM_004155 | 180.55    | 71.359    |
| NM_004206 | 4348.936  | 4226.109  | AF134401  | 1098.561  | 1088.531  | NM_014586 | 2911.257  | 2320.323  |
| NM_004603 | 6483.69   | 6521.158  | NM_020151 | 9806.708  | 8899.353  | NM_014366 | 555.326   | 589.612   |
| AK022849  | 2463.092  | 2496.592  | NM_005891 | 29346.252 | 46414.863 | NM_006453 | 677.923   | 735.043   |
| AF040964  | 5545.52   | 6412.71   | NM_001645 | 1125.157  | 1571.21   | NM_004036 | 376.112   | 357.117   |
| NM_001939 | 3951.694  | 4215.413  | NM_003956 | 1508.41   | 1908.787  | NM_015986 | 623.166   | 714.548   |
| NM_003279 | 3151.161  | 3230.534  | M33197    | 62094.148 | 67544.641 | NM_006546 | 453.648   | 385.041   |
| AB014599  | 6082.464  | 6930.134  | NM_003500 | 4353.553  | 4204.934  | NM_014959 | 582.103   | 529.27    |
| NM_004393 | 933.534   | 1117.513  | NM_014317 | 2869.926  | 2654.48   | NM_003992 | 1120.276  | 997.665   |
| AW407841  | 1316.34   | 1771.673  | L09234    | 9787.277  | 11378.067 | AF279265  | 609.627   | 331.053   |
| AL050082  | 3319.245  | 4570.007  | NM_000059 | 2821.954  | 2271.28   | NM_005213 | 902.541   | 537.026   |
| NM_006623 | 53343.711 | 59789.82  | AK026740  | 840.747   | 939.824   | NM_014342 | 1200.118  | 1320.853  |
| NM_016586 | 47982.891 | 48180.328 | NM_017881 | 4475.049  | 5802.963  | AB043997  | 202.029   | 506.411   |
| NM_003135 | 13640.883 | 12447.262 | M33197    | 58764.301 | 66145.961 | NM_004853 | 424.759   | 358.603   |
| NM_000137 | 4080.981  | 4071.895  | NM_017634 | 10148.477 | 8112.896  | NM_001494 | 318.345   | 492.368   |
| NM_012102 | 2159.713  | 1868.217  | NM_000813 | 1000.392  | 844.862   | NM_004206 | 715.201   | 580.572   |
| NM_005017 | 13971.954 | 16152.263 | NM_018896 | 1241.221  | 1227.213  | NM_004603 | 4965.05   | 5593.275  |
| AF163572  | 8857.922  | 9195.398  | AJ300465  | 3009.914  | 3175.477  | AK022849  | 1102.845  | 1487.825  |
| NM_000897 | 1255.749  | 1094.332  | NM_000810 | 1838.977  | 2208.806  | AF040964  | 2972.871  | 2560.241  |
| NM_000487 | 736.741   | 969.636   | AF069307  | 2155.251  | 2444.283  | NM_001939 | 2580.796  | 2044.652  |
| NM_006411 | 19025.553 | 18075.83  | M33197    | 943.863   | 792.825   | NM_012328 | 774.151   | 547.309   |
| NM_014182 | 3575.882  | 3601.276  | AB011146  | 2698.96   | 1954.942  | NM_007341 | 406.196   | 380.277   |
| AB040884  | 571.576   | 452.053   | NM_005326 | 8484.243  | 8833.5    | NM_016508 | 728.769   | 995.444   |
| NM_000492 | 14740.33  | 15220.431 | NM_014069 | 1024.201  | 819.936   | NM_006456 | 3024.475  | 2583.907  |
| NM_012089 | 1752.972  | 1853.876  | AB035130  | 1675.115  | 1535.16   | AK026062  | 1935.91   | 1964.643  |
| AK024382  | 265.218   | 531.632   | NM_003359 | 704.79    | 771.367   | AF047002  | 16761.439 | 14914.52  |
| NM_014342 | 3563.327  | 5241.871  | M33197    | 50100.285 | 48481.359 | NM_016586 | 19264.568 | 15236.665 |
| AK054960  | 13058.862 | 13799.018 | AF119917  | 471.226   | 535.691   | NM_000137 | 388.269   | 223.326   |
| L15344    | 4153.967  | 4599.585  | NM_017915 | 2578.334  | 2093.509  | NM_012102 | 613.582   | 396.329   |
| NM_014470 | 962.931   | 1237.725  | NM_003579 | 2276.167  | 2624.001  | NM_005017 | 2575.383  | 1569.711  |
| NM_001665 | 32648.598 | 28919.939 | AL049283  | 1397.13   | 1088.083  | AF163572  | 2691.978  | 2059.965  |
| AF097645  | 602.878   | 579.774   | NM_002401 | 44060.945 | 44286.211 | NM_000897 | 620.814   | 619.383   |
| NM_001773 | 758.696   | 447.639   | NM_001274 | 3745.72   | 3866.041  | NM_006411 | 8958.134  | 10521.228 |
| Z70704    | 1631.098  | 1594.26   | NM_003913 | 1192.879  | 1426.164  | NM_014182 | 1366.349  | 1296.661  |
| NM_014363 | 2825.124  | 2665.517  | NM_002227 | 4458.86   | 3401.808  | NM_000492 | 5112.94   | 4834.792  |
| NM_000557 | 1837.472  | 1571.936  | NM_007199 | 1822.685  | 2155.333  | NM_012089 | 494.812   | 567.77    |
| NM_003239 | 730.373   | 847.931   | NM_006243 | 4084.184  | 2858.951  | AJ272057  | 2689.901  | 1888.546  |
| NM_001375 | 5554.396  | 5851.138  | M33197    | 57442.328 | 58963.563 | NM_004402 | 277.671   | 359.172   |
| NM_002312 | 2884.243  | 2072.726  | AJ011129  | 3823.324  | 3422.77   | AK024216  | 11648.28  | 10405.218 |
| M20699    | 3792.014  | 3121.599  | NM_006387 | 4369.233  | 3862.175  | Y16752    | 2283.285  | 1841.887  |
| NM_004774 | 5684.653  | 5351.588  | NM_005646 | 1402.695  | 1211.449  | NM_014694 | 749.9     | 665.614   |
| NM_016937 | 3126.217  | 2780.892  | BI767871  | 553.734   | 784.049   | NM_020156 | 1105.095  | 1470.516  |

|           |           |           |             |           |           |           |           |           |
|-----------|-----------|-----------|-------------|-----------|-----------|-----------|-----------|-----------|
| NM_00269C | 13064.507 | 10886.715 | AA115473    | 2313.506  | 2591.215  | AF355402  | 709.462   | 915.328   |
| NM_01232E | 5326.708  | 5089.854  | AA872397    | 1794.006  | 1844.028  | NM_00166E | 9353.963  | 10548.909 |
| NM_00645E | 10466.529 | 11403.877 | M24283      | 508.537   | 599.971   | Z70704    | 453.707   | 312.511   |
| AK026062  | 7827.31   | 7188.031  | AA709414    | 675.26    | 968.569   | NM_01436E | 902.46    | 666.565   |
| AF047002  | 51154.512 | 52385.309 | D12676      | 2061.543  | 1858.067  | NM_000557 | 698.412   | 322.852   |
| AB040914  | 928.383   | 932.233   | NM_00093E   | 17753.359 | 15364.47  | NM_00137E | 1926.504  | 1953.121  |
| NM_002997 | 3145.64   | 3429.662  | H-X 02812 I | 1207.279  | 1470.275  | M20699    | 1348.583  | 1181.32   |
| NM_00237E | 20661.443 | 20394.414 | U75898      | 1910.08   | 1891.601  | NM_004774 | 3760.117  | 3183.687  |
| AB007929  | 5262.202  | 5028.002  | M59815      | 579.306   | 907.764   | NM_016937 | 2007.485  | 2335.089  |
| NM_00457E | 6721.353  | 6413.252  | AK075081    | 1923.785  | 1568.799  | NM_00269C | 5398.324  | 4354.083  |
| AA203126  | 2576.914  | 2817.662  | NM_00089E   | 6997.7    | 5166.256  | NM_01823E | 1478.979  | 1683.818  |
| L12347    | 1321.296  | 1613.099  | NM_00382C   | 23255.32  | 16800.178 | U88892    | 395.876   | 371.383   |
| NM_00162E | 1777.263  | 1360.874  | NM_01591E   | 2381.718  | 1958.991  | AK023755  | 469.184   | 708.624   |
| Z36788    | 992.198   | 402.205   | M33197      | 62990.625 | 60057.43  | NM_00572E | 941.766   | 1071.119  |
| NM_018477 | 10116.105 | 7360.296  | NM_01651E   | 8535.918  | 6625.484  | NM_012211 | 464.442   | 398.5     |
| U20536    | 2592.583  | 2085.037  | NM_00618E   | 10622.123 | 8909.291  | AB040877  | 1372.896  | 1129.849  |
| R71691    | 1140.395  | 1196.833  | NM_01480C   | 3313.02   | 3848.335  | AB040927  | 322.926   | 304.217   |
| AA424735  | 1958.444  | 2436.594  | AF147311    | 1728.619  | 1823.191  | AK026737  | 1228.716  | 876.046   |
| U78294    | 3960.266  | 3635.671  | NM_002131   | 17945.973 | 20608.9   | NM_00021C | 822.054   | 869.134   |
| BI760394  | 6388.898  | 5368.775  | NM_017927   | 1269.079  | 1277.56   | NM_00628E | 1859.241  | 2418.458  |
| AA555216  | 645.478   | 654.579   | M33197      | 66278.422 | 64443.141 | NM_019067 | 1311.335  | 1900.119  |
| U09117    | 5486.211  | 4515.915  | NM_00120E   | 2680.301  | 2432.302  | NM_00177E | 821.923   | 581.579   |
| M18468    | 1394.818  | 1612.945  | NM_00479E   | 9463.697  | 7501.867  | AB011087  | 384.921   | 335.052   |
| AA164741  | 15736.993 | 15937.576 | NM_00673E   | 733.679   | 608.942   | AF161341  | 352.899   | 197.948   |
| AI978885  | 1665.663  | 1183.07   | NM_014047   | 12874.182 | 11478.044 | AJ249902  | 763.151   | 675.926   |
| AB014599  | 5411.682  | 5261.486  | AK022901    | 1047.06   | 1088.472  | NM_004384 | 619.973   | 747.469   |
| NM_00439E | 915.412   | 1076.148  | M33197      | 65861.953 | 67706.227 | L05500    | 4052.479  | 3882.969  |
| AB018345  | 1059.497  | 1093.433  | AF037332    | 3892.406  | 5179.565  | NM_01230E | 12131.935 | 9857.855  |
| AW407841  | 1877.162  | 1527.313  | NM_014571   | 767.66    | 1230.593  | AF222903  | 1498.778  | 1269.175  |
| NM_00187E | 1771.134  | 2229.161  | NM_00605E   | 960.987   | 938.518   | NM_00622E | 1530.253  | 1650.97   |
| AF264014  | 11272.63  | 10885.256 | AB040912    | 7407.985  | 7564.013  | L10374    | 6061.766  | 4741.142  |
| NM_01458E | 6571.967  | 6949.635  | NM_003871   | 528.037   | 706.571   | AB016902  | 1063.598  | 965.736   |
| NM_01436E | 11332.537 | 9992.395  | NM_00081E   | 555.966   | 509.662   | AF272378  | 17810.295 | 18503.348 |
| NM_00092E | 667.944   | 796.04    | NM_01889E   | 770.644   | 677.844   | NM_00024E | 1008.912  | 1030.177  |
| NM_00645E | 2250.902  | 2195.953  | AJ300465    | 1566.014  | 1784.544  | NM_00586C | 2857.671  | 3062.024  |
| NM_01809E | 1772.585  | 1124.687  | X86400      | 1450.172  | 1131.555  | AF095288  | 8446.697  | 9055.252  |
| AL390078  | 544.564   | 562.347   | NM_00081C   | 1652.827  | 1641.82   | AF130114  | 211.496   | 397.228   |
| NM_00403E | 1477.705  | 1741.037  | AF069307    | 2636.393  | 2539.035  | AK026271  | 5871.163  | 5757.375  |
| NM_01598E | 3571.51   | 3216.422  | M33197      | 60989.117 | 58582.188 | NM_00179E | 3610.284  | 4503.442  |
| NM_00654E | 1354.734  | 1327.499  | U92978      | 2411.876  | 2040.491  | AF090895  | 609.833   | 676.815   |
| NM_01495E | 2194.361  | 2133.949  | NM_00573E   | 790.017   | 953.48    | NM_00561C | 1054.551  | 911.536   |
| NM_00399E | 4062.398  | 5020.465  | NM_01338E   | 2318.95   | 2842.837  | AL133651  | 401.247   | 510.783   |
| AF279265  | 4431.824  | 3665.714  | AB014567    | 1189.015  | 869.688   | AB014532  | 1686.854  | 1171.48   |
| NM_001170 | 4760.338  | 4320.21   | AK022817    | 1741.854  | 1668.093  | NM_00347E | 1836.055  | 1981.739  |
| AL137716  | 779.556   | 733.341   | NM_018034   | 3928.051  | 3544.309  | BE275227  | 123.03    | 595.93    |
| NM_00469E | 1221.885  | 1234.302  | M33197      | 60669.668 | 60390.129 | NM_016237 | 1716.678  | 1298.663  |
| NM_01434E | 4364.061  | 5907.772  | AB037831    | 1492.271  | 1478.867  | NM_004924 | 1804.947  | 2109.064  |
| Z50169    | 313.058   | 581.41    | NM_01210E   | 9643.368  | 10488.852 | NM_00179E | 1940.987  | 2453.55   |
| AB043997  | 931.654   | 800.468   | AL122077    | 9285.976  | 8444.495  | NM_001211 | 1777.659  | 1593.057  |
| NM_00485E | 10448.846 | 9662.942  | NM_01463E   | 891.578   | 1261.401  | AB033050  | 931.58    | 751.391   |
| NM_001494 | 18253.963 | 23249.98  | NM_00642E   | 1017.486  | 1400.617  | NM_00435E | 5676.763  | 5759.888  |
| NM_017707 | 1196.107  | 1273.992  | BE789195    | 1398.78   | 2516.471  | NM_00185E | 209.661   | 508.325   |
| NM_00420E | 4228.873  | 4523.093  | NM_01694E   | 985.639   | 990.813   | BC015022  | 1752.552  | 2162.802  |

|           |           |           |           |           |           |           |           |           |
|-----------|-----------|-----------|-----------|-----------|-----------|-----------|-----------|-----------|
| NM_004603 | 6215.183  | 6719.959  | M33197    | 63218.727 | 65142.215 | NM_006697 | 3413.949  | 2326.733  |
| AK022849  | 2648.428  | 3485.822  | NM_007259 | 1603.147  | 2017.967  | AK025707  | 532.891   | 568.776   |
| AF040964  | 8562.723  | 11139.12  | NM_018402 | 1302.792  | 1297.305  | NM_002406 | 30550.027 | 35764.105 |
| NM_001939 | 5376.083  | 4731.721  | NM_018009 | 585.759   | 698.513   | U87169    | 752.657   | 678.814   |
| NM_012328 | 5081.547  | 4768.35   | M33197    | 59202.586 | 55886.859 | NM_002073 | 631.513   | 825.144   |
| NM_007341 | 993.143   | 633.778   | NM_002401 | 42719.031 | 31581.486 | NM_006043 | 559.578   | 765.232   |
| NM_016508 | 2505.538  | 3998.115  | NM_001274 | 4795.692  | 2986.792  | NM_001935 | 13422.669 | 14026.881 |
| NM_006456 | 8969.669  | 8234.016  | NM_003913 | 929.792   | 1143.702  | NM_001745 | 219.798   | 382.117   |
| AK026062  | 7283.739  | 6237.002  | NM_002227 | 4826.382  | 2601.866  | NM_003291 | 2039.165  | 2233.105  |
| AF047002  | 51458.516 | 53398.473 | NM_007199 | 680.579   | 560.626   | AK022950  | 668.766   | 792.555   |
| AL050082  | 4282.226  | 3829.235  | AB014530  | 4223.843  | 4820.424  | S75755    | 353.109   | 236.214   |
| NM_006623 | 52431.648 | 56429.055 | AB014607  | 2843.13   | 2694.614  | AB014576  | 5136.17   | 5003.532  |
| NM_016588 | 45250.176 | 49301.844 | AF134401  | 1120.623  | 874.694   | AF174601  | 1041.707  | 1081.065  |
| NM_003135 | 10157.653 | 9058.223  | NM_020151 | 7395.937  | 6124.455  | NM_014700 | 611.636   | 465.113   |
| NM_000137 | 3025.898  | 3668.809  | NM_005891 | 26258.811 | 29312.379 | NM_014714 | 466.692   | 637.216   |
| NM_012102 | 4235.097  | 3801.487  | NM_001645 | 779.166   | 740.484   | NM_005687 | 3963.232  | 4078.888  |
| NM_005017 | 17822.879 | 20849.102 | NM_003956 | 1721.204  | 1383.586  | NM_017652 | 2290.142  | 1698.068  |
| AF163572  | 7258.373  | 6094.531  | M33197    | 63541.023 | 62539.289 | X59268    | 778.151   | 708.152   |
| NM_000897 | 1691.785  | 1428.862  | NM_003500 | 5473.234  | 4930.782  | D70832    | 14106.595 | 12149.207 |
| NM_006411 | 19432.582 | 21123.67  | NM_014317 | 3673.688  | 4074.756  | NM_001425 | 1024.89   | 993.656   |
| NM_014182 | 4253.539  | 5694.184  | L09234    | 10681.542 | 12213.621 | M61870    | 403.969   | 598.71    |
| AB040884  | 724.835   | 1060.097  | NM_000059 | 3218.055  | 3025.824  | AK026980  | 695.331   | 799.5     |
| NM_000492 | 15650.26  | 15348.194 | AK026740  | 1181.165  | 1135.11   | AJ277915  | 422.657   | 434.983   |
| NM_012089 | 1932.664  | 1837.466  | NM_017881 | 4868.634  | 7743.827  | NM_020368 | 499.922   | 370.781   |
| AJ272057  | 12039.995 | 12483.604 | NM_017634 | 8812.771  | 8912.863  | AF024708  | 2138.947  | 2063.515  |
| NM_004402 | 1254.447  | 1281.97   | NM_017743 | 1472.17   | 999.949   | NM_017566 | 1537.051  | 1531.982  |
| AK024216  | 30365.799 | 31187.455 | NM_000300 | 4681.433  | 3419.084  | NM_006582 | 440.214   | 397.777   |
| Y16752    | 4096.13   | 2927.349  | M33197    | 61564.602 | 56452.613 | NM_018078 | 721.478   | 659.238   |
| NM_014694 | 1224.066  | 1099.543  | AV756917  | 2922.805  | 3000.42   | NM_016050 | 230.957   | 219.93    |
| NM_020156 | 4810.051  | 3976.022  | NM_018380 | 11529.179 | 8675.019  | AK026912  | 1154.76   | 1002.45   |
| NM_014830 | 4366.959  | 3056.903  | AK001442  | 2029.854  | 1467.763  | AK023531  | 2733.649  | 2657.388  |
| AF355402  | 3574.705  | 3689.641  | NM_012070 | 734.256   | 370.332   | AB011128  | 872.658   | 960.186   |
| AK000407  | 6238.514  | 4528.196  | AB011146  | 2254.203  | 1835.32   | AK025074  | 378.189   | 434.072   |
| NM_001665 | 24939.74  | 21621.748 | NM_005326 | 13781.23  | 11974.047 | NM_000303 | 1788.38   | 1995.179  |
| NM_001773 | 821.481   | 224.21    | NM_014069 | 1575.774  | 1388.105  | NM_004130 | 422.431   | 679.254   |
| Z70704    | 1035.42   | 856.936   | AB035130  | 3111.888  | 3855.868  | AF067972  | 4739.417  | 5093.474  |
| NM_014363 | 2241.57   | 2434.662  | NM_003359 | 1170.149  | 1207.917  | NM_004958 | 319.661   | 176.951   |
| NM_000557 | 2131.122  | 1840.458  | M33197    | 42952.797 | 47498.855 | D87076    | 195.204   | 157.203   |
| NM_003239 | 686.229   | 755.656   | AF119917  | 1086.392  | 899.318   | NM_014145 | 349.71    | 326.507   |
| NM_001375 | 7655.604  | 6822.567  | AK021834  | 877.295   | 619.167   | AB020635  | 837.8     | 610.105   |
| NM_002312 | 2880.896  | 2356.82   | NM_017915 | 2767.466  | 2448.119  | NM_006515 | 533.624   | 702.504   |
| M20699    | 3786.912  | 4781.175  | AL050097  | 1098.414  | 1070.001  | NM_005224 | 301.652   | 519.943   |
| NM_002690 | 12681.658 | 11528.307 | AL049283  | 1290.847  | 1622.365  | NM_012144 | 869.037   | 1246.932  |
| AB033086  | 927.542   | 935.163   | AF005258  | 1163.222  | 833.409   | X65231    | 38791.125 | 35124.66  |
| NM_018239 | 5269.39   | 4576.434  | M33197    | 58535.867 | 49239.188 | NM_002908 | 574.9     | 712.242   |
| U88892    | 1032.639  | 612.6     | X99659    | 45661.059 | 44742.73  | NM_005378 | 7190.698  | 6667.146  |
| AK023755  | 1142.273  | 1470.356  | NM_015416 | 2783.024  | 1973.734  | AF000672  | 562.454   | 833.974   |
| NM_005725 | 3298.642  | 2585.017  | NM_002731 | 1735.477  | 1863.645  | AK022850  | 293.618   | 331.772   |
| NM_012211 | 987.009   | 711.763   | X99662    | 1479.827  | 1696.69   | AL137498  | 435.796   | 235.205   |
| AB040877  | 1777.997  | 1324.611  | NM_003473 | 32641.379 | 40239.117 | AK024289  | 423.436   | 466.032   |
| AB040927  | 643.165   | 1118.902  | NM_014325 | 1989.562  | 1372.198  | S66168    | 1875.535  | 2035.08   |
| AK026737  | 1155.457  | 865.494   | M33197    | 61114.082 | 61816.996 | AF131837  | 326.759   | 183.84    |
| NM_000210 | 4861.932  | 5187.49   | NM_006016 | 61033.887 | 59557.938 | NM_003851 | 3807.341  | 3298.817  |

|           |           |           |           |           |           |           |           |           |
|-----------|-----------|-----------|-----------|-----------|-----------|-----------|-----------|-----------|
| NM_00628E | 5326.171  | 4973.09   | NM_00124E | 5029.586  | 4043.796  | AK024150  | 985.486   | 879.543   |
| NM_019067 | 4550.449  | 5074.47   | NM_00188E | 1790.581  | 1254.582  | AF070536  | 1564.134  | 1067.527  |
| AF251025  | 1561.725  | 1284.113  | NM_014891 | 10478.168 | 10368.905 | U79300    | 820.533   | 471.385   |
| NM_015677 | 5387.833  | 6445.4    | NM_01339E | 12877.948 | 13041.387 | AK025151  | 4730.084  | 4095.653  |
| NM_00177E | 6429.571  | 5187.682  | M33197    | 61904.621 | 65093.055 | AK025550  | 1345.367  | 1317.278  |
| AB011087  | 898.323   | 844.755   | NM_00217E | 1016.695  | 1106.515  | AF086543  | 1823.371  | 2731.296  |
| AF161341  | 2798.07   | 2362.385  | NM_00323E | 2412.191  | 3825.021  | AK002098  | 1129.416  | 2871.776  |
| AJ249902  | 1498.474  | 1149.036  | NM_00345E | 1546.167  | 1392.274  | AK025156  | 881.995   | 881.184   |
| NM_00438A | 2892.983  | 2836.875  | AF052692  | 1878.226  | 2387.725  | AF075106  | 406.534   | 463.81    |
| L05500    | 11858.148 | 12363.268 | NM_00282E | 703.651   | 1103.076  | AK023339  | 485.107   | 580.443   |
| AB016902  | 1581.896  | 1583.39   | NM_00522E | 815.9     | 572.538   | AF086008  | 1163.868  | 1237.638  |
| AF272378  | 25848.656 | 24200.576 | NM_00235A | 1039.017  | 803.188   | AF087970  | 691.859   | 415.408   |
| NM_00024E | 4344.284  | 4505.211  | NM_00017E | 1301.742  | 480.394   | AF086029  | 709.102   | 967.35    |
| NM_00586E | 8536.181  | 7439.808  | AF062739  | 1119.228  | 937.9     | U05597    | 349.447   | 411.337   |
| AF095288  | 30755.447 | 32817.777 | NM_00660E | 2032.346  | 1641.784  | U73799    | 573.851   | 479.3     |
| AK025116  | 590.003   | 512.016   | M33197    | 62750.465 | 55827.051 | Z36826    | 609.557   | 449.152   |
| AK026271  | 21754.428 | 22744.119 | AL079314  | 1039.88   | 1083.435  | AK021668  | 22804.162 | 28221.514 |
| NM_00179E | 10955.409 | 10834.219 | NM_00126E | 1248.194  | 902.405   | AF086148  | 15651.474 | 13701.882 |
| AF090895  | 924.999   | 1001.959  | NM_00195E | 3245.525  | 3378.344  | AJ245433  | 401.345   | 664.867   |
| NM_00561E | 6258.123  | 5177.834  | AK026364  | 945.017   | 1186.591  | AK021942  | 535.888   | 1108.56   |
| AL133651  | 2174.011  | 2458.486  | NM_00628E | 1137.003  | 1153.497  | AF090902  | 925.919   | 725.146   |
| AB014532  | 4651.993  | 3833.227  | M33197    | 59728.699 | 60734.559 | AF119887  | 10529.437 | 12404.36  |
| NM_00347E | 2791.277  | 3392.807  | NM_004331 | 13064.798 | 17533.758 | AK091038  | 533.756   | 784.756   |
| NM_016237 | 5683.882  | 3556.23   | NM_01599E | 958.073   | 1166.035  | AK024193  | 1253.206  | 1737.59   |
| NM_00492A | 2708.914  | 3242.383  | NM_01570E | 9753.661  | 8162.876  | NM_01857E | 794.777   | 520.1     |
| NM_00179E | 5439.673  | 6247.643  | AB018337  | 1560.547  | 1407.494  | NM_01854E | 399.651   | 487.332   |
| NM_001211 | 4696.421  | 4557.326  | NM_01448E | 1713.766  | 2296.844  | AK024438  | 9805.66   | 9647.708  |
| AB033050  | 2347.605  | 2044.708  | AK025273  | 4308.602  | 4662.262  | AK022482  | 691.489   | 772.12    |
| NM_00435E | 14708.505 | 12992.305 | M33197    | 61715.777 | 60589.176 | AK023382  | 189.821   | 356.953   |
| NM_006697 | 11862.047 | 11691.042 | NM_00179A | 2002.726  | 2134.817  | AK022803  | 690.304   | 538.263   |
| M19182    | 1033.641  | 1265.276  | NM_00220E | 4244.455  | 5266.379  | AK023517  | 817.904   | 1329.758  |
| AK025707  | 2882.092  | 2521.907  | M33197    | 62395.152 | 57234.445 | AK023869  | 2609.35   | 3425.992  |
| NM_00240E | 48390.383 | 46633.68  | NM_000131 | 1067.477  | 621.003   | AK026402  | 500.173   | 805.088   |
| NM_003291 | 5437.521  | 5555.683  | NM_00183E | 911.983   | 586.098   | M11948    | 51563.926 | 56470.418 |
| AK022950  | 2369.146  | 1699.061  | NM_001911 | 27183.516 | 8102.54   | NM_00522E | 1406.02   | 1167.012  |
| S75755    | 2610.519  | 2267.555  | NM_000537 | 793.817   | 625.058   | AK000208  | 535.719   | 518.909   |
| AF176518  | 405.712   | 898.991   | NM_00650E | 2191.639  | 1643.713  | AK000470  | 390.139   | 213.958   |
| AB014576  | 9252.201  | 8130.147  | M33197    | 1802.915  | 1756.895  | AK026366  | 41049.441 | 35665.938 |
| NM_01904A | 2926.201  | 3201.23   | U68382    | 711.681   | 630.3     | AK024229  | 3335.487  | 1635.734  |
| AF174601  | 2668.107  | 2749.515  | NM_00396E | 1424.073  | 1376.658  | AK021467  | 1143.197  | 809.404   |
| AF279865  | 974.043   | 1043.688  | NM_004651 | 3195.989  | 1968.995  | NM_020371 | 638.797   | 739.905   |
| NM_01470E | 1014.852  | 977.232   | M33197    | 59182.566 | 59093.852 | U21556    | 2643.454  | 3254.831  |
| NM_01471A | 1056.412  | 1075.653  | NM_01756E | 8914.368  | 7527.158  | NM_01766E | 1150.27   | 1628.288  |
| NM_01765E | 5832.538  | 4776.151  | NM_00145E | 900.488   | 1454.053  | AF147379  | 17772.918 | 16661.084 |
| X59268    | 8411.331  | 8401.52   | NM_00290E | 1310.109  | 1452.642  | X98415    | 15757.98  | 13013.328 |
| D70832    | 56746.16  | 50125.848 | AK024480  | 1677.983  | 1245.526  | AK024205  | 1521.051  | 1895.328  |
| NM_00142E | 5353.821  | 4614.271  | Y13871    | 16766.996 | 16311.008 | AF086034  | 10974.307 | 19749.75  |
| AJ277915  | 683.69    | 665.294   | AL137725  | 6991.939  | 19168.248 | AK000174  | 797.466   | 733.429   |
| NM_02036E | 4112.485  | 4748.424  | M33197    | 62212.289 | 63718.781 | AF130071  | 901.17    | 1027.267  |
| AF024708  | 14192.477 | 17610.617 | AJ008151  | 14591.909 | 18852.494 | AL390170  | 638.209   | 763.4     |
| NM_01756E | 5189.507  | 5203.043  | AK024149  | 849.371   | 639.958   | AK022887  | 721.376   | 1149.609  |
| NM_00658E | 1192.843  | 2131.415  | AK02309A  | 817.907   | 535.841   | AK000745  | 14904.883 | 17331.674 |
| AB033019  | 3874.722  | 3200.025  | M33197    | 60451.469 | 49606.48  | NM_00529E | 404.023   | 650.208   |

|           |           |           |           |           |           |           |           |           |
|-----------|-----------|-----------|-----------|-----------|-----------|-----------|-----------|-----------|
| NM_014764 | 6815.467  | 5894.903  | NM_004091 | 1501.245  | 856.602   | NM_015901 | 791.867   | 1032.431  |
| NM_018078 | 1454.427  | 1692.504  | X74070    | 61599.309 | 57744.332 | Z83935    | 948.875   | 814.091   |
| NM_016050 | 659.228   | 814.991   | AF027219  | 807.306   | 516.287   | AF093744  | 345.891   | 380.29    |
| NM_007080 | 19798.164 | 18901.313 | NM_006333 | 4819.361  | 3640.946  | NM_018687 | 2562.089  | 1673.111  |
| AK026912  | 2976.027  | 2823.126  | M33197    | 59383.379 | 52759.98  | NM_020524 | 118.363   | 743.95    |
| X78712    | 1171.203  | 2238.928  | NM_002898 | 3891.566  | 2617.609  | X64977    | 50.238    | 593.556   |
| NM_001497 | 813.789   | 1221.413  | AK022749  | 4382.045  | 3819.546  | NM_002602 | 941.585   | 459.634   |
| NM_004130 | 4582.923  | 6521.324  | BF031409  | 4641.022  | 3450.591  | NM_016230 | 185.694   | 388.587   |
| NM_004958 | 773.753   | 1206.834  | NM_007043 | 3160.241  | 2574.602  | NM_003383 | 230.887   | 283.437   |
| D87076    | 799.468   | 864.326   | U94388    | 953.367   | 1035.946  | D17271    | 431.739   | 780.432   |
| NM_014140 | 837.726   | 629.862   | NM_012322 | 9788.639  | 12979.986 | AK026658  | 486.943   | 570.699   |
| AB020635  | 1556.697  | 1334.603  | M33197    | 61203.328 | 59660.281 | AF282264  | 7674.426  | 8184.517  |
| NM_006515 | 905.401   | 985.359   | NM_004889 | 46673.574 | 55179.523 | AF086322  | 1956.805  | 2644.706  |
| NM_005224 | 936.429   | 845.694   | AK025314  | 2024.419  | 1735.028  | Z70717    | 1016.994  | 1051.414  |
| NM_012144 | 626.903   | 1027.392  | NM_002109 | 3037.747  | 3305.099  | AK024736  | 880.227   | 873.317   |
| X65231    | 48049.406 | 47170.813 | NM_000984 | 62778.09  | 64338.652 | X79308    | 1355.555  | 1018.595  |
| NM_002908 | 1819.733  | 1888.264  | NM_002453 | 3414.738  | 4483.225  | AF086476  | 419.751   | 265.785   |
| AF205632  | 1235.909  | 1386.213  | AK000780  | 36307.598 | 49568.488 | NM_017660 | 3307.315  | 3437.209  |
| AF000672  | 1331.238  | 1695.834  | AK026721  | 1599.282  | 781.746   | AB011151  | 4663.901  | 3919.63   |
| NM_003851 | 7140.934  | 9527.555  | AK023027  | 2096.63   | 1010.206  | U92995    | 3927.034  | 3530.7    |
| AF070536  | 1158.043  | 1247.557  | AK025598  | 786.778   | 284.012   | CY3Cy5    | 1922.941  | 126.097   |
| AK025151  | 7893.253  | 6292.148  | AB002348  | 44171.512 | 28937.08  | X00588    | 442.617   | 352.039   |
| AK025550  | 3113.214  | 3453.868  | M33197    | 49221.418 | 28640.107 | AI359037  | 14886.743 | 16829.461 |
| AF088076  | 21597.373 | 20581.957 | NM_005006 | 2672.983  | 1400.178  | X15998    | 700.716   | 619.328   |
| AK002098  | 2837.644  | 4070.34   | AK027033  | 624.148   | 772.045   | X17519    | 3973.717  | 7894.078  |
| AK025156  | 29158.473 | 29693.041 | NM_000106 | 940.778   | 747.573   | NM_001883 | 719.363   | 778.422   |
| AK022116  | 2818.632  | 2362.262  | NM_003000 | 17567.092 | 10273.775 | NM_004628 | 688.135   | 783.929   |
| AF026526  | 2090.624  | 2967.839  | NM_002495 | 16824.359 | 12699.96  | H-M 69043 | 1150.682  | 1883.52   |
| AF087970  | 636.355   | 1035.436  | M33197    | 61094.352 | 51934.793 | AF077374  | 603.523   | 770.267   |
| AF086029  | 754.402   | 951.923   | NM_016284 | 1365.904  | 1335.914  | NM_016134 | 279.698   | 487.129   |
| U05597    | 597.603   | 623.161   | NM_014593 | 2391.52   | 2051.416  | SR2       | 44778.566 | 45147.602 |
| AK021668  | 34921.266 | 30653.406 | NM_006833 | 11307.824 | 9891.613  | SR4       | 8384.141  | 7891.792  |
| AF086148  | 25002.111 | 21213.113 | NM_012257 | 1193.627  | 1668.653  | SR6       | 1422.954  | 1277.429  |
| NM_018363 | 1737.7    | 994.902   | U37690    | 25814.385 | 34170.301 | SR8       | 4985.442  | 13512.884 |
| AJ245433  | 8603.353  | 5823.899  | NM_005120 | 1424.554  | 1591.629  | SR10      | 18416.523 | 5205.054  |
| AK021942  | 43047.883 | 34504.344 | AB029012  | 11321.833 | 14223.432 | CY3Cy5    | 1631.913  | 146.508   |
| NM_014127 | 1474.41   | 1369.548  | M33197    | 65733.203 | 65001     | NM_000612 | 3227.247  | 3465.125  |
| AL360187  | 1389.299  | 925.524   | NM_006299 | 1123.129  | 1596.925  | NM_004257 | 4071.636  | 4165.553  |
| AK021878  | 1041.36   | 1363.095  | AF060936  | 10779.74  | 13997.895 | NM_002844 | 1004.557  | 1898.314  |
| AK021817  | 2369.794  | 1826.553  | NM_005568 | 1121.179  | 1448.045  | NM_000683 | 1001.592  | 957.448   |
| AL080103  | 1054.05   | 1016.778  | NM_018167 | 912.456   | 1146.284  | NM_003620 | 678.643   | 1175.259  |
| AK023217  | 3169.013  | 2191.644  | AL050088  | 5100.589  | 6463.3    | NM_005901 | 3878.95   | 5353.887  |
| AF090902  | 4022.156  | 3503.441  | AK024939  | 4788.164  | 5362.533  | NM_002362 | 680.13    | 607.027   |
| AF119887  | 4129.488  | 3469.008  | AK001561  | 4073      | 4341.235  | NM_004790 | 1293.421  | 898.005   |
| AK091038  | 676.563   | 776.408   | AB007880  | 3504.291  | 4483.678  | NM_001842 | 4334.76   | 5027.227  |
| AK024193  | 2258.905  | 2465.693  | AK024950  | 1663.296  | 1382.063  | AL080170  | 1396.014  | 1668.17   |
| AK024438  | 6784.3    | 4301.455  | M33197    | 66535.352 | 63064.691 | AB039903  | 2738.366  | 2619.427  |
| AK022482  | 719.467   | 885.589   | AF147356  | 3467.816  | 2489.578  | NM_000542 | 15878.33  | 12356.698 |
| AK022803  | 1075.923  | 1075.096  | NM_018843 | 2737.716  | 1831.069  | NM_006851 | 849.142   | 712.318   |
| AK023517  | 2424.339  | 1929.261  | AL049461  | 985.653   | 1649.851  | AK001560  | 458.634   | 359.678   |
| AK023869  | 5609.222  | 4463.417  | M33197    | 60181.84  | 57947.113 | AB001328  | 381.976   | 278.404   |
| NM_017728 | 1618.688  | 1217.471  | AL109782  | 6768.769  | 7227.173  | H99588    | 481.004   | 616.978   |
| U80772    | 1543.429  | 1178.59   | AF086225  | 1469.945  | 1021.14   | AK022600  | 1060.171  | 1626.229  |

|           |           |           |           |           |           |           |           |           |
|-----------|-----------|-----------|-----------|-----------|-----------|-----------|-----------|-----------|
| NM_00618C | 981.324   | 831.155   | NM_005844 | 9788.016  | 11313.926 | AK023142  | 348.594   | 407.544   |
| AJ272177  | 814.515   | 818.353   | AK024941  | 2796.995  | 3575.139  | U61740    | 3757.792  | 3258.283  |
| AK026402  | 35562.094 | 29632.289 | AF056434  | 1087.974  | 1732.389  | NM_00640C | 48698.926 | 54306.551 |
| AF111846  | 2627.375  | 1840.559  | AF086199  | 950.715   | 1071.35   | AB049054  | 1036.911  | 1122.331  |
| M11948    | 58486.371 | 55603.688 | M33197    | 57493.188 | 55506.09  | NM_013227 | 302.973   | 453.804   |
| Z36850    | 638.35    | 539.491   | AK025489  | 2917.57   | 3446.789  | AF027205  | 3531.115  | 3109.906  |
| AK024618  | 1737.083  | 2033.891  | AB075853  | 570.74    | 901.02    | AF075012  | 266.814   | 281.202   |
| AL049969  | 1251.599  | 1205.73   | AL390152  | 6702.352  | 9508.663  | NM_00157C | 361.641   | 500.043   |
| NM_00522C | 1154.763  | 727.231   | M33197    | 61482.031 | 63121.004 | NM_00058C | 1209.388  | 1312.238  |
| AK026366  | 53806.688 | 48526.18  | NM_01812C | 1876.291  | 1866.07   | NM_01654C | 4764.76   | 7270.479  |
| AK024229  | 20827.293 | 13968.1   | AK024506  | 6033.226  | 6550.05   | AF309653  | 613.071   | 668.633   |
| AK021824  | 844.34    | 867.169   | NM_01417C | 1557.093  | 3212.575  | NM_00262C | 4600.455  | 4026.144  |
| AK021467  | 1824.402  | 1335.594  | AF086326  | 3808.409  | 4948.936  | S79267    | 1228.282  | 999.996   |
| NM_020371 | 1667.259  | 1358.678  | M33197    | 60843.559 | 54092.848 | NM_00181C | 449.789   | 468.531   |
| AK022498  | 2577.097  | 2137.842  | AL117528  | 711.076   | 937.843   | NM_003784 | 33571.898 | 32869.578 |
| U84506    | 1725.578  | 1015.386  | M33197    | 59107.723 | 62737.719 | NM_00019C | 23674.357 | 19804.344 |
| U21556    | 55850.75  | 50001.113 | AK025948  | 855.527   | 843.388   | NM_00544C | 6119.389  | 3662.729  |
| AB002344  | 3600.625  | 2806.956  | AJ238555  | 777.657   | 785.544   | NM_01489C | 1170.662  | 920.732   |
| BF210352  | 1589.094  | 1531.372  | AL353948  | 24775.098 | 32756.742 | NM_00363C | 3683.33   | 3069.458  |
| NM_00682C | 4615.981  | 3384.039  | AL122043  | 958.17    | 1604.211  | NM_00004C | 1307.873  | 1007.695  |
| NM_01766C | 15209.896 | 11455.365 | M33197    | 60216.598 | 58043.395 | NM_00321C | 735.49    | 636.838   |
| AF147379  | 52669.707 | 43579.594 | AK025869  | 5654.972  | 8259.518  | NM_00670C | 1924.8    | 1566.514  |
| X98415    | 59835.98  | 53594.977 | M33197    | 65253.543 | 63834.328 | NM_00491C | 279.268   | 300.039   |
| AK024205  | 1953.746  | 1467.78   | AF056430  | 1440.522  | 1733.742  | AB013452  | 320.504   | 603.864   |
| AF086034  | 20549.719 | 25929.094 | NM_01490C | 614.323   | 804.232   | M93107    | 1926.243  | 2025.541  |
| AK000174  | 1549.53   | 969.406   | AF009291  | 1184.117  | 1584.099  | BC001479  | 2837.511  | 2955.433  |
| AF130071  | 836.224   | 310.337   | M33197    | 72493.141 | 63759.227 | NM_002461 | 13105.564 | 13439.498 |
| AL390170  | 1160.307  | 1028.662  | NM_01805C | 1537.959  | 850.36    | AB032986  | 21294.568 | 21394.566 |
| AK022887  | 1028.391  | 1274.498  | AK002199  | 1144.711  | 943.846   | NM_01752C | 12402.108 | 13057.895 |
| AK000745  | 11592.568 | 8427.078  | AK021662  | 1839.104  | 1244.339  | NM_01603C | 1988.121  | 2219.663  |
| NM_015901 | 894.94    | 441.848   | AK001038  | 664.33    | 678.348   | NM_014324 | 48426.191 | 60454.195 |
| AF093744  | 3010.264  | 2786.061  | AK001802  | 1421.598  | 807.796   | NM_001687 | 10168.9   | 12103.128 |
| NM_018687 | 14304.09  | 12447.547 | AK021469  | 871.244   | 1191.764  | AK026374  | 454.536   | 659.48    |
| Y16702    | 407.325   | 936.457   | AK021706  | 2841.851  | 3122.36   | NM_00116C | 1235.875  | 1847.684  |
| M57417    | 29666.32  | 23067.252 | M33197    | 61811.277 | 60263.359 | AK024648  | 2307.748  | 2376.212  |
| NM_020524 | 4753.298  | 3162.807  | AK025161  | 678.429   | 643.355   | NM_00071C | 492.372   | 547.668   |
| NM_00199C | 2791.444  | 1840.655  | AK025387  | 1127.734  | 1200.566  | NM_00345C | 6216.012  | 6071.896  |
| X64977    | 3798.741  | 3264.47   | AK026259  | 23538.313 | 32323.451 | NM_000171 | 453.517   | 621.503   |
| AF064851  | 1609.339  | 1980.587  | AJ008115  | 33048.73  | 45218.172 | AL354615  | 1231.162  | 1338.43   |
| NM_00260C | 17228.479 | 15479.153 | AF083125  | 1832.997  | 1789.258  | NM_01334C | 22780.045 | 18478.24  |
| NM_01623C | 1069.875  | 1205.304  | U72851    | 991.09    | 2421.089  | NM_00370C | 2409.085  | 2226.558  |
| NM_00338C | 4704.001  | 4122.223  | M33197    | 65617.852 | 66904.375 | NM_006861 | 1148.88   | 1210.141  |
| X91648    | 1012.084  | 624.89    | AK022970  | 956.334   | 979.425   | NM_00582C | 2262.015  | 1539.874  |
| AF282264  | 12170.177 | 10608.073 | AK026212  | 2191.276  | 2512.509  | NM_00046C | 1582.627  | 1105.65   |
| AF086322  | 3609.551  | 3419.034  | AF086222  | 1811.505  | 3487.602  | NM_015544 | 2562.137  | 880.119   |
| Z70717    | 1660.048  | 1318.431  | AF086415  | 2476.633  | 1676.194  | NM_01590C | 16257.67  | 13357.815 |
| AK024736  | 905.11    | 819.804   | M33197    | 60704.539 | 57534.16  | AB040672  | 409.799   | 379.418   |
| X79308    | 1222.894  | 1263.741  | AK024470  | 1635.371  | 1801.364  | NM_00219C | 514.061   | 254.21    |
| AF086476  | 524.556   | 540.356   | NM_00422C | 6065.682  | 6623.941  | NM_005491 | 4534.379  | 5539.018  |
| NM_01766C | 8325.439  | 8007.826  | AK023400  | 631.731   | 994.632   | NM_00386C | 1724.019  | 2270.347  |
| AB011151  | 2856.814  | 2568.119  | NM_00643C | 21376.682 | 28153.963 | AK025599  | 1136.33   | 1513.509  |
| U92995    | 6953.211  | 5650.878  | AK023897  | 1436.969  | 1708.555  | X63417    | 449.396   | 369.522   |
| Z70769    | 994.875   | 779.812   | AF025441  | 3562.036  | 2970.394  | S94539    | 9846.356  | 10479.79  |

|           |           |           |           |           |           |           |           |           |
|-----------|-----------|-----------|-----------|-----------|-----------|-----------|-----------|-----------|
| NM_00710E | 2556.724  | 2898.189  | U62823    | 4194.898  | 3451.469  | NM_00640Z | 608.343   | 1131.916  |
| AL137555  | 2780.506  | 1979.351  | NM_00353E | 30492.654 | 25306.871 | NM_00578E | 1205.697  | 1564.286  |
| AL133017  | 1718.02   | 2100.638  | M33197    | 62335.648 | 58311.883 | NM_01824E | 2913.304  | 4744.329  |
| CY3Cy5    | 4321.987  | 226.938   | AK000852  | 22308.412 | 32848.086 | AK001695  | 3477.96   | 5511.092  |
| X00588    | 872.59    | 998.652   | AF251188  | 5317.616  | 6535.312  | NM_01788E | 1521.804  | 1779.373  |
| AI359037  | 37968.094 | 49303.777 | AK026418  | 4468.668  | 3546.571  | NM_00625Z | 1307.725  | 1487.719  |
| X15998    | 599.244   | 999.879   | AF086194  | 27475.99  | 15410.593 | NM_001721 | 461.476   | 517.015   |
| M76482    | 351.924   | 580.739   | AK026811  | 3799.278  | 2244.801  | NM_014397 | 1433.383  | 1521.442  |
| X17519    | 11278.051 | 15262.084 | M33197    | 63114.531 | 60433.922 | AB023182  | 1899.247  | 2111.221  |
| NM_00188Z | 868.122   | 582.863   | AK023633  | 1987.741  | 2355.998  | NM_003607 | 1767.78   | 2018.82   |
| NM_00462E | 2222.483  | 2249.474  | NM_00617E | 921.194   | 1067.94   | NM_00657E | 2722.054  | 2413.698  |
| L31785    | 974.105   | 1153.37   | AL360165  | 2083.854  | 2339.605  | NM_013254 | 1733.888  | 2272.725  |
| H-M 69043 | 4758.159  | 4933.796  | M33197    | 63822.75  | 61979.184 | NM_000437 | 10932.753 | 9554.918  |
| AF077374  | 2108.531  | 1719.031  | AJ008132  | 6620.096  | 6223.458  | AB046819  | 4302.413  | 3792.674  |
| U43901    | 1024.352  | 696.288   | NM_005281 | 4134.408  | 5038.714  | NM_00609C | 3678.427  | 3361.786  |
| X59065    | 713.848   | 657.315   | NM_00554E | 3570.118  | 2786.366  | NM_00290C | 4152.307  | 3809.673  |
| M59828    | 7138.047  | 6118.962  | M33197    | 61233.391 | 58195.719 | AB001328  | 246.269   | 172.222   |
| NM_016134 | 2201.178  | 2070.11   | U12129    | 3501.716  | 3734.486  | H99588    | 347.322   | 500.203   |
| SR2       | 47701.969 | 34918.254 | S81242    | 57207.91  | 57237.66  | X00588    | 501.273   | 506.283   |
| SR4       | 14850.679 | 12642.482 | M33197    | 65601.5   | 65601.141 | AI359037  | 9218.909  | 12698.712 |
| SR8       | 8097.551  | 23896.434 | NM_00250E | 4114.582  | 3437.354  | X15998    | 834.522   | 945.26    |
| CY3Cy5    | 3129.306  | 192.96    | U38442    | 7154.22   | 3953.166  | X17519    | 2435.174  | 7426.335  |
| NM_00061Z | 7818.741  | 8079.936  | AF110136  | 1351.337  | 970.334   | NM_00188Z | 785.376   | 1136.511  |
| NM_004257 | 14440.612 | 13474.761 | AB007936  | 30629.949 | 22138.471 | NM_00462E | 1024.55   | 1451.727  |
| NM_002844 | 4660.392  | 8009.135  | D28391    | 23424.166 | 19275.971 | L31785    | 537.379   | 651.991   |
| NM_00068Z | 1794.121  | 1872.121  | M33197    | 53582.031 | 45440.285 | H-M 69043 | 1568.539  | 2386.894  |
| NM_00362E | 2545.852  | 2337.76   | D86961    | 1253.743  | 781.453   | AF077374  | 758.903   | 866.28    |
| NM_005901 | 16323.567 | 15943.308 | AJ227896  | 5651.813  | 5913.397  | U43901    | 646.089   | 1240.481  |
| NM_00424E | 1193.18   | 1203.207  | L32841    | 1859.971  | 2472.659  | X59065    | 544.232   | 447.328   |
| NM_00095E | 647.412   | 830.688   | M33197    | 59318.457 | 55491.891 | M59828    | 5995.573  | 7733.152  |
| NM_00236Z | 1439.254  | 1268.577  | AF131770  | 2727.335  | 2456.201  | NM_016134 | 465.079   | 625.465   |
| NM_00184Z | 4419.156  | 2903.811  | CY3Cy5    | 7112.313  | 262.075   | NM_00544E | 577.976   | 602.158   |
| AB017169  | 1397.714  | 1330.428  | AI298534  | 917.689   | 962.291   | NM_01489E | 196.342   | 175.919   |
| AL080170  | 2058.612  | 2254.194  | R71691    | 744.521   | 973.528   | NM_00363C | 1353.331  | 1504.075  |
| AB039903  | 3771.997  | 2890.666  | AW167715  | 840.916   | 508.039   | NM_00004E | 699.644   | 709.134   |
| NM_00054Z | 10592.522 | 7127.267  | AA424735  | 2448.143  | 2336.341  | NM_00321E | 453.746   | 561.289   |
| AK001560  | 841.781   | 596.173   | U78294    | 4447.435  | 4947.126  | NM_00670E | 1583.389  | 1611.659  |
| H99588    | 731.46    | 1307.691  | BI760394  | 7506.812  | 8079.062  | NM_00061Z | 1104.299  | 898.97    |
| AK022600  | 7782.562  | 9150.366  | AA555216  | 814.868   | 662.852   | NM_004257 | 3916.422  | 4477.735  |
| AK023142  | 3025.402  | 3400.962  | U09117    | 20114.086 | 26238.27  | NM_00068Z | 529.631   | 481.807   |
| U61740    | 13493.287 | 13680.653 | M18468    | 610.305   | 705.595   | NM_00362E | 517.311   | 649.389   |
| NM_00640E | 56243.098 | 63047.504 | H66070    | 3418.09   | 2455.165  | NM_005901 | 2580.999  | 3594.74   |
| AB049054  | 4470.683  | 4207.608  | AA164741  | 7521.972  | 8986.781  | NM_00424E | 568.732   | 665.39    |
| NM_015071 | 2007.828  | 1876.236  | AI189375  | 576.029   | 782.523   | NM_00131Z | 1112.452  | 1498.856  |
| NM_013227 | 1730.072  | 2327.657  | AI978885  | 2894.145  | 2949.5    | NM_00236Z | 209.451   | 252.658   |
| Z83803    | 983.422   | 1441.953  | AK054960  | 17983.881 | 20712.395 | NM_00479E | 696.783   | 1238.843  |
| AF027205  | 41022.992 | 42824.289 | L15344    | 3052.125  | 4052.543  | NM_00043E | 6930.832  | 7297.42   |
| AF309653  | 1985.726  | 1623.147  | SR5       | 9438.127  | 7778.399  | NM_00184Z | 13707.126 | 16733.574 |
| NM_00262C | 12206.202 | 11136.198 | SR7       | 6453.996  | 43540.828 | AB017169  | 725.805   | 602.038   |
| S79267    | 1364.578  | 1118.929  | SR9       | 21334.441 | 3276.028  | AL080170  | 1297.448  | 1359.985  |
| NM_00181E | 841.997   | 969.112   | CY3Cy5    | 8080.265  | 345.717   | NM_01462E | 156.014   | 409.854   |
| NM_00019E | 17828.658 | 16745.111 | NM_01458E | 5992.726  | 6050.781  | NM_00370E | 163.068   | 219.783   |
| NM_00363C | 6555.1    | 6442.66   | NM_01436E | 10496.568 | 10906.312 | NM_00582E | 854.83    | 682.032   |

|           |           |           |           |           |           |           |           |           |
|-----------|-----------|-----------|-----------|-----------|-----------|-----------|-----------|-----------|
| NM_00004E | 2146.794  | 1964.063  | NM_000923 | 911.981   | 864.663   | NM_00046E | 373.249   | 568.83    |
| NM_00321E | 1357.214  | 1124.204  | NM_006453 | 1157.114  | 1560.843  | NM_015544 | 526.449   | 300.589   |
| NM_00670E | 1823.635  | 1945.567  | NM_01809E | 881.654   | 1344.108  | NM_01590E | 11207.347 | 13004.981 |
| NM_00491C | 2050.074  | 2094.764  | AL390078  | 713.502   | 949.137   | AK022600  | 3876.59   | 4335.756  |
| AB013452  | 1382.945  | 1335.156  | NM_00403E | 1528.189  | 1635.468  | AK023142  | 502.489   | 716.577   |
| M93107    | 6643.591  | 7242.297  | NM_01598E | 4204.992  | 4377.372  | U61740    | 1269.301  | 1407.88   |
| BC001479  | 8229.639  | 8729.837  | NM_00654E | 761.175   | 965.323   | NM_00640E | 43236.313 | 50405.262 |
| NM_002461 | 34166.625 | 35137.727 | NM_01495E | 2600.371  | 2316.55   | AB049054  | 606.669   | 590.672   |
| NM_005771 | 839.712   | 866.756   | NM_003992 | 2569      | 3485.52   | NM_015071 | 337.71    | 433.85    |
| NM_016032 | 12500.387 | 11150.622 | AF279265  | 3062.146  | 4495.576  | NM_013227 | 1337.853  | 1712.427  |
| NM_001687 | 28347.631 | 25334.34  | NM_005213 | 2461.313  | 3126.977  | Z83803    | 367.491   | 340.4     |
| AK024648  | 7583.803  | 5492.432  | AB040914  | 744.695   | 1027.386  | AF027205  | 21465.859 | 18822.174 |
| NM_00071E | 1052.747  | 1006.802  | NM_002997 | 1383.946  | 1211.891  | AF075012  | 655.784   | 468.268   |
| NM_00345E | 7045.449  | 6405.791  | NM_00237E | 17573.906 | 19829.912 | NM_00157C | 847.533   | 874.093   |
| AB032526  | 1188.427  | 1182.599  | AB007929  | 5724.152  | 7180.328  | NM_01565E | 378.778   | 334.064   |
| NM_000171 | 858.173   | 392.138   | NM_001622 | 3022.525  | 4068.953  | AF309653  | 1854.627  | 2175.55   |
| NM_006861 | 2474.626  | 1604.12   | Z36788    | 1528.165  | 1843.739  | NM_00262C | 11218.889 | 9353.577  |
| NM_00582E | 5760.348  | 5415.306  | NM_018477 | 6121.782  | 7700.598  | S79267    | 1081.816  | 866.679   |
| NM_01590E | 23954.707 | 23526.352 | U20536    | 2014.29   | 1828.7    | NM_00019E | 18043.949 | 15163.035 |
| NM_00089E | 1122.023  | 1044.994  | NM_004853 | 7331.539  | 7977.631  | NM_000437 | 4197.308  | 4134.387  |
| AB040672  | 1269.414  | 1539.069  | NM_001494 | 13265.919 | 13903.579 | AB046819  | 1170.821  | 1197.963  |
| NM_002192 | 1453.361  | 1287.558  | NM_017707 | 673.37    | 1036.344  | NM_00609C | 901.188   | 1078.474  |
| NM_005491 | 11881.445 | 10498.507 | NM_00420E | 3831.305  | 4018.033  | NM_00290C | 1501.347  | 1503.86   |
| NM_00386E | 1917.72   | 2029.243  | NM_004603 | 11280.352 | 11704.567 | NM_00491C | 777.858   | 655.277   |
| AK025599  | 6392.37   | 6958.785  | AK022849  | 2424.795  | 2571.485  | M93107    | 1847.975  | 2091.776  |
| S94539    | 21669.156 | 23103.738 | AF040964  | 7031.151  | 6424.745  | BC001479  | 3314.711  | 4001.123  |
| NM_006402 | 1952.74   | 3103.562  | NM_00193E | 3467.703  | 4066.691  | NM_002461 | 16897.76  | 16948.795 |
| NM_01824E | 8175.697  | 7048.073  | NM_00327E | 14315.473 | 14982.965 | AB032986  | 27493.943 | 29038.412 |
| AK001695  | 7547.837  | 8444.077  | AB014599  | 3940.615  | 3224.263  | NM_01752E | 23878.281 | 30084.889 |
| NM_01788E | 1863.207  | 1404.533  | NM_004393 | 563.973   | 643.548   | NM_016032 | 12040.059 | 10709.486 |
| NM_006252 | 1806.27   | 1574.144  | AB018345  | 860.414   | 550.271   | NM_014324 | 45009.656 | 57141.512 |
| NM_001721 | 1521.074  | 1687.405  | AW407841  | 1046.628  | 1102.77   | NM_001687 | 11586.982 | 9992      |
| NM_014397 | 3257.24   | 2804.146  | U15197    | 871.048   | 611.443   | AK026374  | 913.535   | 1151.155  |
| AB023182  | 3409.794  | 3433.252  | NM_00415E | 516.687   | 583.897   | NM_00071E | 328.148   | 419.467   |
| NM_003607 | 3217.039  | 3228.532  | NM_001831 | 691.994   | 962.372   | NM_00345E | 6660.393  | 5316.174  |
| NM_013254 | 3389.258  | 3131.493  | NM_000137 | 4339.271  | 5442.698  | AL354615  | 1261.102  | 1117.269  |
| NM_000437 | 15455.165 | 12663.442 | NM_012102 | 4831.015  | 8382.66   | NM_01334E | 26431.125 | 20779.82  |
| NM_00609C | 5012.355  | 5373.619  | NM_005017 | 40951.496 | 49426.961 | AJ010482  | 383.063   | 561.264   |
| NM_00290C | 3706.445  | 3186.588  | AF163572  | 14901.657 | 15927.125 | AB040672  | 672.365   | 513.939   |
| NM_006851 | 1401.061  | 1616.765  | NM_000897 | 3141.433  | 3498.741  | NM_002192 | 612.487   | 483.072   |
| AB001328  | 653.038   | 701.133   | NM_000487 | 1051.352  | 1122.226  | NM_005491 | 4203.509  | 3382.895  |
| H99588    | 877.529   | 1422.454  | NM_006411 | 26008.387 | 28358.859 | NM_00386E | 1305.512  | 1514.928  |
| X15998    | 811.106   | 748.778   | NM_014182 | 2812.612  | 3230.715  | AK025599  | 1118.246  | 1780.963  |
| NM_001883 | 1640.916  | 1079.347  | AB040884  | 412.806   | 681.052   | S94539    | 38097.418 | 34585.102 |
| NM_00462E | 3516.585  | 3616.484  | NM_000492 | 9656.24   | 9495.429  | NM_00578E | 904.788   | 858.09    |
| L31785    | 2070.048  | 2248.704  | NM_01208E | 773.314   | 977.945   | NM_01824E | 3521.053  | 2904.56   |
| H-M 69043 | 3893.865  | 5067.174  | NM_001170 | 5777.533  | 5416.938  | AK001695  | 3623.546  | 4297.015  |
| AF077374  | 2207.78   | 1650.879  | AL137716  | 1305.4    | 956.61    | NM_01788E | 2320.943  | 1869.368  |
| U43901    | 1502.461  | 1381.687  | NM_00469E | 1904.434  | 2001.352  | NM_006252 | 1525.657  | 1650.277  |
| M59828    | 6761.594  | 4254.685  | NM_014342 | 3416.715  | 3326.749  | NM_001721 | 402.64    | 311.41    |
| NM_00544E | 12040.265 | 10035.914 | AB043997  | 1517.289  | 1482.369  | NM_014397 | 1158.598  | 1067.045  |
| NM_01489E | 2575.628  | 2745.148  | AF097645  | 531.038   | 729.93    | AB023182  | 1793.896  | 1419.884  |
| NM_00363C | 5988.738  | 7489.75   | NM_001773 | 2614.392  | 2865.56   | NM_003607 | 1747.528  | 1611.891  |



|           |           |           |           |           |           |           |           |           |
|-----------|-----------|-----------|-----------|-----------|-----------|-----------|-----------|-----------|
| NM_00004E | 1728.091  | 2126.703  | Z70704    | 3100.374  | 3594.326  | AL080170  | 222.668   | 278.743   |
| NM_00321E | 1176.08   | 1191.114  | NM_014363 | 2939.714  | 3114.576  | AB039903  | 525.396   | 419.976   |
| NM_000683 | 1867.198  | 1458.504  | NM_000557 | 7217.45   | 8470.952  | NM_000542 | 3383.505  | 3609.698  |
| NM_00424E | 1683.956  | 949.026   | NM_003239 | 1575.49   | 1716.591  | NM_006851 | 354.458   | 395.311   |
| NM_00095E | 1308.212  | 1302.948  | NM_00137E | 6195.5    | 6795.184  | H99588    | 425.235   | 602.1     |
| NM_001313 | 1452.202  | 1523.074  | NM_002312 | 3182.845  | 3418.816  | AI359037  | 18698.895 | 23662.113 |
| NM_00043E | 1355.751  | 1176.733  | M20699    | 2864.058  | 3290.024  | X15998    | 2386.148  | 1435.296  |
| NM_001842 | 3328.205  | 3061.66   | NM_004774 | 7876.871  | 7705.679  | M76482    | 190.372   | 131.967   |
| AL080170  | 2089.252  | 2122.365  | NM_016937 | 6410.528  | 6342.992  | X17519    | 5089.061  | 8093.465  |
| AB039903  | 4553.188  | 3671.826  | NM_00269C | 8692.168  | 8034.252  | NM_001883 | 1574.834  | 1079.699  |
| NM_000542 | 13143.916 | 8807.146  | NM_01232E | 3422.184  | 3273.828  | NM_00462E | 824.359   | 1042.741  |
| NM_00370E | 2836.862  | 3497.561  | NM_007341 | 735.262   | 742.501   | L31785    | 364.51    | 774.737   |
| NM_006861 | 2175.594  | 2435.797  | NM_01650E | 2399.615  | 1776.299  | H-M 69043 | 1989.99   | 2924.444  |
| NM_00582E | 4837.46   | 4767.042  | NM_00645E | 7389.771  | 5272.739  | AF077374  | 876.574   | 517.855   |
| NM_00046E | 2603.669  | 2731.975  | AK026062  | 2315.822  | 2808.421  | U43901    | 370.837   | 396.928   |
| NM_015544 | 7686.005  | 3768.701  | AF047002  | 34136.047 | 45106.18  | X59065    | 426.225   | 377.046   |
| AK022600  | 12735.459 | 13523.331 | AL050082  | 4373.379  | 4522.107  | M59828    | 5386.507  | 4440.042  |
| Z83803    | 1019.644  | 1211.052  | NM_006623 | 58433.27  | 57369.742 | AF309653  | 402.057   | 291.69    |
| AF027205  | 35486.426 | 32365.152 | NM_01658E | 38174.426 | 49799.313 | NM_00262C | 2526.886  | 3730.876  |
| NM_00058E | 2478.947  | 1801.687  | NM_00313E | 9814.63   | 10901.211 | S79267    | 647.864   | 806.515   |
| NM_01654E | 10672.081 | 11607.488 | L12347    | 6752.665  | 7671.39   | NM_003784 | 15998.782 | 12582.806 |
| AF309653  | 847.029   | 564.764   | NM_001622 | 2960.792  | 3066.675  | NM_00019E | 4396.718  | 3337.156  |
| NM_00262C | 10238.417 | 7712.732  | Z36788    | 1494.819  | 1533.416  | NM_00544E | 874.269   | 556.223   |
| S79267    | 1161.173  | 1038.319  | NM_018477 | 5240.744  | 6329.38   | NM_00363C | 1064.255  | 1738.127  |
| NM_003784 | 52556.113 | 46405.645 | U20536    | 1878.502  | 1785.569  | NM_00004E | 185.275   | 606.828   |
| NM_00019E | 14267.54  | 12909.545 | AI298534  | 1095.219  | 1014.092  | NM_00670E | 1549.889  | 1990.56   |
| NM_00657E | 3200.322  | 2628.365  | R71691    | 1080.422  | 1013.568  | NM_000612 | 5119.263  | 5974.545  |
| NM_013254 | 2795.226  | 4981.713  | AW167715  | 910.254   | 820.909   | NM_004257 | 5721.538  | 5817.317  |
| NM_000437 | 15062.152 | 17080.035 | AA424735  | 2388.051  | 1967.687  | NM_002844 | 913.534   | 1150.053  |
| AB046819  | 6508.052  | 7239.502  | U78294    | 4709.774  | 5133.501  | NM_000683 | 3004.308  | 2316.027  |
| NM_00609C | 7999.221  | 8724.248  | AA171613  | 603.164   | 635.284   | NM_00362E | 1519.426  | 1220.611  |
| NM_00491C | 3295.335  | 3146.58   | BI760394  | 6967.31   | 7389.61   | NM_005901 | 4441.669  | 3591.454  |
| AB013452  | 1485.539  | 1203.493  | AA555216  | 532.547   | 636.217   | NM_00424E | 805.145   | 791.482   |
| NM_01752E | 41243.422 | 43882.992 | U09117    | 21749.412 | 22148.576 | NM_00095E | 894.004   | 1457.596  |
| NM_016032 | 13027.106 | 11783.974 | M21054    | 533.381   | 512.758   | NM_001313 | 1118.37   | 2293.764  |
| NM_001169 | 2479.525  | 2334.02   | M18468    | 499.028   | 331.66    | NM_01906E | 939.358   | 942.128   |
| AK024648  | 7007.432  | 6989.267  | H66070    | 2423.407  | 1772.267  | NM_002362 | 452.879   | 429.807   |
| NM_00071E | 698.909   | 436.329   | AA164741  | 6617.48   | 6613.703  | NM_00479E | 384.734   | 374.989   |
| NM_00345E | 7016.132  | 5163.608  | AI978885  | 1521.249  | 1556.516  | NM_00043E | 2374.969  | 1755.635  |
| NM_000171 | 949.662   | 1041.283  | AK054960  | 14360.086 | 16131.388 | NM_001842 | 4441.937  | 4938.819  |
| AL354615  | 2050.105  | 1247.132  | L15344    | 2555.168  | 2834.123  | NM_00071E | 561.352   | 712.158   |
| NM_01334E | 36882.609 | 33332.27  | NM_01447C | 873.279   | 602.504   | NM_00345E | 1651.115  | 2017.085  |
| AJ010482  | 2926.546  | 3083.584  | NM_00166E | 18749.951 | 22279.904 | AL354615  | 383.49    | 313.703   |
| NM_00089E | 1428.183  | 1878.195  | NM_00187E | 1599.157  | 1329.816  | NM_01334E | 6383.094  | 4345.275  |
| S94539    | 31237.996 | 32409.389 | AF264014  | 8085.744  | 7409.354  | NM_00370E | 558.096   | 463.9     |
| NM_00578E | 1803.807  | 2124.715  | NM_01458E | 5513.07   | 5027.178  | NM_006861 | 354.451   | 558.077   |
| NM_01824E | 7924.818  | 8054.616  | NM_01436E | 8343.22   | 7932.887  | NM_00582E | 740.836   | 894.773   |
| AK001695  | 5216.663  | 7405.336  | NM_000923 | 752.332   | 753.743   | NM_015544 | 1422.872  | 685.608   |
| NM_01788E | 1862.195  | 2290.925  | NM_006453 | 1526.043  | 1848.168  | NM_01590E | 12443.307 | 14002.341 |
| NM_006252 | 1801.388  | 1394.842  | NM_01809E | 1720.217  | 2281.284  | AK022600  | 7083.895  | 8563.073  |
| NM_001721 | 1557.928  | 1274.14   | AL390078  | 945.78    | 1111.934  | AK023142  | 1909.248  | 2045.681  |
| NM_014397 | 2648.04   | 1965.202  | NM_00403E | 2206.417  | 2360.064  | U61740    | 2144.938  | 1595.829  |
| AB023182  | 2079.354  | 1935.476  | NM_01598E | 4939.799  | 4346.318  | NM_00640E | 48215.801 | 53149.094 |

|           |           |           |           |           |           |           |           |           |
|-----------|-----------|-----------|-----------|-----------|-----------|-----------|-----------|-----------|
| AL080170  | 1893.794  | 2099.291  | NM_006546 | 853.025   | 1091.454  | AB049054  | 2238.957  | 1879.399  |
| AB039903  | 4206.481  | 4875.532  | NM_014959 | 2954.412  | 3020.784  | NM_015071 | 1283.309  | 1075.078  |
| NM_000542 | 17246.115 | 16632.361 | NM_003992 | 2516.903  | 2994.833  | NM_013227 | 1471.073  | 1485.343  |
| NM_006851 | 1643.203  | 1813.083  | AF279265  | 3235.029  | 3869.011  | AF027205  | 21527.594 | 20911.633 |
| AK001560  | 1087.188  | 849.288   | NM_005213 | 1567.223  | 2273.571  | AF075012  | 1193.558  | 1484.816  |
| H99588    | 1063.873  | 1305.361  | AB040914  | 771.529   | 965.686   | NM_00157C | 969.599   | 927.252   |
| BI754285  | 1214.563  | 1471.08   | NM_002997 | 3307.11   | 3806.106  | NM_01565E | 384.309   | 323.404   |
| X15998    | 1003.591  | 633.7     | NM_002379 | 16489.41  | 17122.947 | NM_00058E | 1712.059  | 1288.768  |
| X17519    | 16238.871 | 24817.424 | AB007929  | 4577.859  | 4921.609  | NM_01654E | 5281.602  | 4575.817  |
| NM_001883 | 1269.395  | 903.376   | NM_004579 | 4415.312  | 4497.874  | NM_01788E | 290.103   | 168.306   |
| NM_00462E | 2042.462  | 2027.018  | AA203126  | 3213.658  | 2635.401  | NM_006252 | 819.046   | 644.385   |
| L31785    | 1121.146  | 1830.885  | Z50169    | 472.353   | 549.276   | NM_014397 | 467.506   | 681.122   |
| H-M 69043 | 4604.775  | 6223.755  | AB043997  | 1209.287  | 1169.553  | NM_003607 | 320.461   | 341.726   |
| U43901    | 1263.735  | 1027.383  | NM_004853 | 7582.551  | 8144.833  | NM_00657E | 386.044   | 651.361   |
| AF309653  | 1836.575  | 1841.972  | NM_001494 | 14178.816 | 13537.241 | NM_013254 | 177.72    | 274.085   |
| NM_00262C | 10081.756 | 8512.886  | NM_017707 | 726.694   | 1114.952  | NM_000437 | 3038.491  | 4461.204  |
| NM_00181E | 585.119   | 1082.505  | NM_00420E | 5379.914  | 6079.25   | AB046819  | 1076.129  | 982.694   |
| NM_003784 | 51817.031 | 50510.051 | NM_004603 | 14857.709 | 13452.453 | NM_00290C | 1605.028  | 1789.172  |
| NM_00019E | 22902.672 | 22326.219 | AK022849  | 2645.438  | 2208.032  | NM_00491C | 1302.822  | 1401.691  |
| NM_00544E | 11588.905 | 10411.318 | AF040964  | 6402.489  | 6835.422  | AB013452  | 992.901   | 908.278   |
| NM_01489E | 2318.385  | 2954.747  | NM_001939 | 1294.687  | 1184.545  | M93107    | 1341.486  | 1119.609  |
| NM_00321E | 1364.197  | 1214.959  | NM_003279 | 11308.852 | 10165.038 | BC001479  | 5842.293  | 3928.338  |
| NM_00670E | 2821.088  | 2509.892  | AB014599  | 3745.405  | 2953.579  | NM_002461 | 21853.098 | 17618.541 |
| NM_004257 | 13991.364 | 14858.315 | NM_004393 | 688.629   | 686.271   | NM_005771 | 711.918   | 629.365   |
| NM_002844 | 5766.899  | 10200.85  | AB018345  | 970.148   | 675.921   | AB032986  | 35104.75  | 31740.83  |
| NM_000683 | 1585.196  | 1743.439  | NM_005832 | 717.908   | 722.737   | NM_01752E | 16164.743 | 15729.43  |
| NM_005901 | 14162.912 | 15867.28  | AW407841  | 1910.353  | 1449.955  | NM_016032 | 11234.683 | 9882.043  |
| NM_00424E | 1476.72   | 1338.125  | AL050082  | 4074.365  | 3215.901  | NM_014324 | 43140.438 | 53304.004 |
| NM_00095E | 974.33    | 532.127   | NM_006623 | 59693.367 | 59900.277 | NM_001687 | 9562.074  | 10623.807 |
| NM_001313 | 661.417   | 1003.26   | NM_01658E | 34065.324 | 38137.25  | AK026374  | 1088.246  | 1305.898  |
| NM_01906E | 711.197   | 1205.003  | NM_00313E | 7575.895  | 7210.02   | NM_00116E | 1339.845  | 1414.134  |
| NM_002362 | 1321.772  | 1126.93   | NM_000137 | 4292.458  | 4337.795  | AK024648  | 2355.36   | 1786.764  |
| NM_00043E | 2676.226  | 2385.761  | NM_012102 | 2729.546  | 4778.974  | AB037761  | 1228.924  | 1307.086  |
| NM_001842 | 6208.463  | 4518.961  | NM_005017 | 34421.863 | 38770.84  | NM_01400E | 6240.978  | 5464.711  |
| NM_00071E | 576.982   | 900.166   | AF163572  | 15365.016 | 18229.355 | NM_012062 | 1524.748  | 1529.498  |
| NM_00345E | 5675.311  | 4806.3    | NM_000897 | 4282.933  | 4376.702  | AJ010482  | 680.12    | 732.772   |
| NM_000171 | 1287.054  | 1272.251  | NM_000487 | 1477.169  | 1371.652  | NM_00089E | 779.358   | 674.157   |
| AL354615  | 2012.876  | 2954.019  | NM_006411 | 27540.328 | 27897.428 | AB040672  | 1892.184  | 1485.389  |
| NM_01334E | 48368.047 | 45870.289 | NM_014182 | 2995.236  | 3031.146  | NM_002192 | 1951.842  | 1447.028  |
| NM_00370E | 3136.388  | 4452.051  | NM_000492 | 10105.762 | 10322.105 | NM_005491 | 5429.08   | 4303.841  |
| NM_006861 | 2483.68   | 2297.123  | NM_01208E | 724.953   | 771.227   | NM_00386E | 2577.121  | 1940.679  |
| NM_015544 | 6432.943  | 3379.03   | AK024382  | 235.821   | 561.262   | AK025599  | 2482.895  | 2718.765  |
| AK023142  | 3199.299  | 4046.971  | NM_001170 | 4890.957  | 5988.747  | X63417    | 779.531   | 1296.643  |
| U61740    | 14016.526 | 14129.729 | AL137716  | 1214.693  | 1393.635  | S94539    | 30637.768 | 27937.949 |
| NM_00640E | 56229.762 | 57170.68  | NM_00469E | 1559.975  | 1435.122  | NM_006402 | 600.041   | 736.826   |
| AB049054  | 4033.344  | 3359.736  | NM_014342 | 4297.712  | 3050.178  | NM_00578E | 1221.689  | 1276.163  |
| NM_015071 | 2365.739  | 2046.822  | AK054960  | 12473.805 | 11280.886 | NM_01824E | 3164.919  | 2674.663  |
| NM_013227 | 1455.572  | 1469.278  | L15344    | 2537.794  | 2399.165  | AK001695  | 3260.027  | 3612.938  |
| Z83803    | 902.002   | 771.232   | NM_01447C | 788.369   | 871.796   | AB031547  | 567.875   | 488.858   |
| AF027205  | 39314.852 | 34676.535 | NM_00166E | 19763.283 | 24554.16  | NM_01615C | 356.361   | 273.933   |
| AF075012  | 1182.616  | 1444.477  | AF097645  | 636.294   | 507.474   | U57058    | 340.669   | 370.446   |
| NM_00157C | 1501.011  | 1322.073  | NM_001773 | 1217.196  | 1396.366  | AL137452  | 933.741   | 1127.175  |
| NM_01565E | 1095.292  | 971.115   | Z70704    | 2446.131  | 2068.721  | NM_004312 | 38703.133 | 39348.074 |

|           |           |           |           |           |           |           |           |           |
|-----------|-----------|-----------|-----------|-----------|-----------|-----------|-----------|-----------|
| NM_00058E | 3443.073  | 2690.764  | NM_014363 | 2723.86   | 2088.303  | NM_001347 | 2497.559  | 2387.635  |
| NM_01654E | 12909.337 | 10598.278 | NM_000557 | 5965.322  | 5768.626  | AK024549  | 10322.314 | 7105.133  |
| NM_01788E | 1890.843  | 2175.049  | NM_003239 | 1324.412  | 1234.688  | NM_00633E | 8901.22   | 9868.658  |
| NM_001721 | 885.572   | 879.135   | NM_00137E | 6421.022  | 5697.806  | NM_00257C | 421.932   | 378.206   |
| NM_014397 | 2097.889  | 2190.25   | NM_002312 | 2606.195  | 3337.108  | NM_00318E | 1200.496  | 1173.911  |
| AB023182  | 3223.067  | 3979.495  | M20699    | 3595.134  | 3595.267  | NM_019851 | 1760.655  | 1637.141  |
| NM_003607 | 5304.384  | 6858.22   | NM_004774 | 10046.55  | 8627.729  | NM_00323E | 238.958   | 377.829   |
| NM_00657E | 4125.082  | 3050.369  | NM_016937 | 5140.123  | 5143.496  | NM_018367 | 363.297   | 181.174   |
| NM_00609C | 6891.996  | 8093.437  | NM_00269C | 8843.845  | 9448.229  | NM_00136E | 2226.191  | 1905.875  |
| NM_00290C | 4260.795  | 5114.771  | NM_01232E | 2998.726  | 3790.149  | NM_01409E | 2518.185  | 2404.462  |
| NM_00491C | 2780.142  | 2674.068  | NM_007341 | 381.16    | 801.254   | NM_00570E | 779.47    | 677.594   |
| AB013452  | 1443.396  | 1665.211  | NM_01650E | 1781.256  | 1334.271  | NM_00490E | 335.78    | 268.322   |
| M93107    | 7301.031  | 8053.839  | NM_00645E | 14731.036 | 12032.825 | NM_012447 | 4644.58   | 4415.637  |
| BC001479  | 8091.032  | 9649.699  | AK026062  | 4003.508  | 4686.91   | NM_00636E | 760.341   | 586.339   |
| NM_002461 | 30998.619 | 29331.092 | AF047002  | 32380.139 | 35917.422 | AK027013  | 7614.982  | 8750.709  |
| NM_005771 | 1389.374  | 1392.499  | AB040914  | 1278.113  | 1277.181  | NM_001344 | 23608.859 | 21343.592 |
| AB032986  | 53742.891 | 50707.262 | NM_002997 | 4493.414  | 4080.555  | NM_018294 | 4349.47   | 4595.736  |
| NM_01752E | 42339.668 | 41015.477 | NM_00237E | 19304.748 | 16383.959 | AF151802  | 1246.69   | 1442.328  |
| NM_01603E | 11342.671 | 9139.16   | AB007929  | 3369.831  | 3121.391  | AB006746  | 1453.083  | 1273.901  |
| NM_014324 | 53553.777 | 55960.645 | NM_00457E | 4402.396  | 5489.356  | NM_00649E | 1094.857  | 810.564   |
| NM_001687 | 27835.551 | 27204.506 | AA203126  | 2923.179  | 3047.703  | AB023233  | 1109.638  | 806.682   |
| AK026374  | 1498.449  | 2023.484  | L12347    | 3610.763  | 4812.701  | NM_00436E | 848.463   | 763.665   |
| NM_001169 | 1944.147  | 1749.211  | NM_00162E | 1780.627  | 2545.323  | NM_00437C | 424.428   | 502.649   |
| AK024648  | 7791.769  | 8416.804  | Z36788    | 920.018   | 1040.939  | NM_01813C | 1395.61   | 1957.545  |
| AB037761  | 22187.93  | 24162.975 | NM_018477 | 4972.299  | 6844.207  | AB006630  | 462.686   | 465.454   |
| NM_01400E | 44745.977 | 43387.828 | U20536    | 1623.645  | 1663.873  | NM_01615E | 502.327   | 328.303   |
| NM_014731 | 2577.14   | 2900.225  | AI298534  | 773.438   | 760.364   | NM_005101 | 8248.653  | 6219.338  |
| AF035191  | 25421.424 | 23679.473 | R71691    | 893.222   | 1257.093  | AF130060  | 27073.949 | 25434.621 |
| NM_00405E | 1149.133  | 1056.063  | AW167715  | 831.73    | 489.075   | NM_007057 | 13680.642 | 13526.233 |
| NM_01206E | 17564.67  | 16126.233 | AA424735  | 2453.955  | 2098.293  | NM_000177 | 1280.229  | 1166.109  |
| AK026717  | 951.095   | 631.409   | U78294    | 5800.045  | 5796.441  | NM_003387 | 5122.138  | 4986.236  |
| AJ010482  | 2754.805  | 3515.339  | BI760394  | 6660.782  | 8040.226  | U60665    | 352.831   | 185.183   |
| NM_00219E | 2040.022  | 1866.576  | AA555216  | 895.043   | 1002.406  | NM_005507 | 29532.297 | 20200.438 |
| NM_005491 | 12836.15  | 12557.742 | U09117    | 13189.545 | 14720.722 | AL080133  | 1028.914  | 864.519   |
| NM_00386E | 1468.863  | 1830.982  | M21054    | 391.688   | 971.582   | AY014403  | 678.049   | 460.344   |
| AK025599  | 3102.439  | 3229.41   | M18468    | 670.766   | 623.901   | NM_00691E | 4547.684  | 4099.774  |
| X63417    | 2580.658  | 3075.149  | H66070    | 1228.275  | 563.787   | X12534    | 2205.805  | 2230.583  |
| S94539    | 32801.16  | 25801.012 | AA164741  | 5622.613  | 5067.893  | X65665    | 747.036   | 639.976   |
| NM_00640E | 2389.598  | 2636.524  | AI189375  | 841.316   | 1087.545  | AF205600  | 299.095   | 122.844   |
| NM_00578E | 2741.981  | 2879.686  | AI978885  | 1754.513  | 1844.523  | NM_00214C | 3807.965  | 2333.201  |
| NM_01824E | 8764.55   | 11607.981 | AB014599  | 4232.189  | 3028.117  | NM_02014E | 830.34    | 910.65    |
| AK001695  | 8235.858  | 12838.909 | NM_00439E | 1039.876  | 610.779   | NM_01246E | 1560.174  | 1299.349  |
| NM_00397C | 2281.207  | 2593.82   | AB018345  | 1053.29   | 772.68    | NM_005131 | 1922.613  | 2512.726  |
| AK022496  | 1214.67   | 1383.34   | NM_00583E | 1060.688  | 1031.562  | NM_00705E | 1396.449  | 1116.366  |
| AB042636  | 838.527   | 992.348   | AW407841  | 774.412   | 1106.501  | AF083383  | 2114.953  | 1956.636  |
| AB033035  | 767.333   | 1048.006  | NM_00187E | 1502.962  | 1477.091  | NM_00692E | 3060.585  | 1380.614  |
| NM_00288E | 3888.387  | 3705.223  | AF264014  | 4902.615  | 4897.348  | NM_00489C | 41856.539 | 34637.551 |
| NM_000141 | 463.869   | 854.564   | NM_001831 | 601.523   | 1043.242  | AK023181  | 416.053   | 525.555   |
| NM_01615C | 1206.339  | 1509.87   | NM_01458E | 5682.336  | 5995.941  | NM_004294 | 629.565   | 719.535   |
| U57058    | 826.054   | 1206.224  | NM_01436E | 9270.208  | 10043.548 | NM_005051 | 7634.542  | 6376.157  |
| AL137452  | 1804.51   | 2297.101  | NM_00092E | 641.806   | 845.043   | NM_00196E | 13620.832 | 10206.157 |
| NM_001347 | 4748.901  | 5960.534  | NM_00645E | 1165.58   | 1643.333  | D17259    | 50388.324 | 61047.738 |
| AK024549  | 11794.416 | 11893.844 | NM_01809E | 1111.867  | 1689.825  | AF264627  | 16654.367 | 15736.018 |

|           |           |           |           |           |           |           |           |           |
|-----------|-----------|-----------|-----------|-----------|-----------|-----------|-----------|-----------|
| NM_00633E | 4351.251  | 3539.333  | AL390078  | 654.648   | 857.517   | NM_01814Z | 1307.729  | 1050.604  |
| NM_007164 | 2329.927  | 1726.334  | NM_004036 | 1548.954  | 2127.491  | NM_01765Z | 965.506   | 1205.875  |
| NM_000261 | 1083.965  | 1292.032  | NM_015986 | 4866.56   | 4882.006  | AL109695  | 3923.401  | 2701.315  |
| NM_00260E | 1593.417  | 1750.378  | NM_00654E | 911.928   | 1109.615  | NM_00216E | 646.271   | 357.184   |
| NM_00257C | 2564.695  | 2700.417  | NM_014959 | 2924.499  | 3432.949  | BE870547  | 305.908   | 120.01    |
| NM_00318Z | 4438.17   | 5083.605  | NM_00399Z | 2068.03   | 2549.161  | NM_00249Z | 8673.38   | 5307.677  |
| NM_001657 | 1067.693  | 1551.554  | AF279265  | 2654.47   | 2423.732  | NM_00564Z | 2821.125  | 1624.573  |
| NM_00358E | 688.117   | 1055.217  | NM_00521Z | 2872.435  | 3052.753  | NM_01810E | 907.917   | 654.354   |
| NM_019851 | 3211.008  | 3045.322  | AK024382  | 725.615   | 607.46    | AK023452  | 641.284   | 407.542   |
| NM_01409E | 11217.886 | 13584.148 | NM_001170 | 8916.122  | 9403.65   | NM_00033Z | 489.45    | 379.953   |
| NM_00570E | 2678.179  | 2916.562  | AL137716  | 1598.429  | 1475.713  | AK022215  | 955.89    | 813.656   |
| NM_001261 | 4829.962  | 4743.01   | NM_00469E | 2252.667  | 2302.49   | NM_001527 | 3874.46   | 3530.838  |
| NM_001977 | 1966.132  | 3337.441  | NM_01434Z | 5488.604  | 4603.678  | AK025269  | 4463.565  | 3687.387  |
| AK026854  | 2711.515  | 2626.828  | Z50169    | 871.477   | 845.202   | NM_00143E | 626.944   | 349.563   |
| NM_00126E | 3943.245  | 5237.099  | AB043997  | 1604.104  | 1377.082  | AB040971  | 652.309   | 776.317   |
| NM_00250E | 1021.899  | 1383.935  | NM_00485Z | 7973.591  | 9060.479  | NM_00656Z | 2699.462  | 3089.545  |
| NM_00490E | 9128.571  | 7520.927  | NM_001494 | 12978.862 | 13933.89  | AK024254  | 233.841   | 187.944   |
| X98261    | 1249.251  | 1149.008  | NM_017707 | 663.159   | 876.665   | NM_01845E | 574.688   | 653.548   |
| NM_012447 | 10725.654 | 11931.324 | NM_00420E | 3848.33   | 3774.566  | NM_019021 | 324.473   | 251.206   |
| AK027013  | 22564.678 | 32811.625 | NM_00460Z | 9493      | 10438.88  | AL049274  | 588.431   | 367.095   |
| NM_001344 | 54406.125 | 58607.109 | AK022849  | 2440.78   | 2655.4    | AK026883  | 1541.191  | 1092.225  |
| NM_018294 | 6175.003  | 5388.222  | AF040964  | 8194.277  | 8705.448  | NM_01435C | 8144.222  | 6432.141  |
| NM_00433C | 7170.682  | 6917.609  | NM_001939 | 3960.241  | 3987.376  | U00925    | 2731.871  | 2555.476  |
| AF151802  | 6281.566  | 5635.129  | NM_003279 | 13962.6   | 13961.58  | AL390185  | 1984.686  | 1762.773  |
| AB006746  | 2943.294  | 2539.914  | NM_01232E | 3591.342  | 4433.313  | AF086235  | 6652.739  | 5635.892  |
| NM_00649E | 2122.095  | 2438.625  | NM_007341 | 1069.381  | 1236.457  | AF143886  | 1039.229  | 802.54    |
| AB023233  | 2832.061  | 2954.146  | NM_00645E | 19261.842 | 17544.033 | AK025975  | 2317.174  | 1105.006  |
| NM_00436E | 677.989   | 816.022   | AK026062  | 4984.121  | 6875.233  | AK025583  | 37504.77  | 32252.631 |
| NM_00437C | 818.878   | 905.779   | AF047002  | 39199.871 | 45503.367 | NM_014664 | 1506.189  | 2260.368  |
| AB006630  | 1972.714  | 2057.948  | AL050082  | 5532.66   | 4667.248  | AL109788  | 536.532   | 1138.717  |
| NM_01615E | 1724.213  | 2231.823  | NM_00662Z | 65267.297 | 54232.066 | NM_01495Z | 34798.824 | 35069.402 |
| NM_001224 | 9909.915  | 10953.119 | NM_01658E | 33806.063 | 39353.285 | AK025068  | 590.202   | 633.886   |
| NM_017811 | 16123.139 | 16172     | NM_00313E | 6949.44   | 6588.979  | AL137566  | 743.814   | 455.638   |
| AK023284  | 1561.447  | 1854.725  | NM_000137 | 4271.933  | 4683.997  | AF087962  | 615.949   | 501.913   |
| AF106069  | 1002.496  | 1426.769  | NM_01210Z | 4327.839  | 6968.73   | AL117580  | 944.453   | 321.772   |
| NM_005101 | 23505.107 | 24545.086 | NM_005017 | 26520.781 | 28991.287 | AL110190  | 1221.191  | 982.393   |
| AF130060  | 10651.736 | 9281.042  | AF163572  | 11613.015 | 10859.976 | AJ001893  | 867.941   | 767.793   |
| NM_007057 | 26048.48  | 19801.82  | NM_000897 | 2437.257  | 2888.691  | NM_01481E | 3277.027  | 3197.904  |
| NM_000177 | 2909.786  | 2403.451  | NM_000487 | 1215.745  | 1300.12   | AB032988  | 971.142   | 930.354   |
| NM_003387 | 9751.573  | 10245.789 | NM_006411 | 23088.836 | 27850.893 | AB037859  | 48413.523 | 55898.285 |
| U60665    | 1473.503  | 1755.334  | NM_01418Z | 3353.393  | 2811.248  | AL049233  | 1465.417  | 2351.24   |
| NM_005507 | 42297.461 | 39947.563 | AB040884  | 867.992   | 694.118   | NM_01769E | 1716.441  | 3203.56   |
| AL080133  | 4494.207  | 5022.708  | NM_00049Z | 10827.744 | 12473.784 | AL050166  | 953.032   | 1196.738  |
| AY014403  | 955.068   | 744.146   | NM_01208E | 713.205   | 631.356   | AK026705  | 535.409   | 447.453   |
| NM_00691Z | 3869.531  | 3772.821  | AJ272057  | 9214.478  | 11045.456 | NM_00360Z | 529.529   | 250.466   |
| X12534    | 2543.808  | 2628.664  | NM_00440Z | 1378.576  | 1178.634  | AF009258  | 4726.667  | 3781.138  |
| NM_01432Z | 2968.461  | 3494.428  | Y16752    | 8654.425  | 9674.648  | AK001906  | 795.119   | 515.041   |
| NM_00216E | 589.712   | 1106.328  | NM_014694 | 1144.548  | 1258.68   | AK021746  | 796.517   | 560.684   |
| AK026231  | 1770.863  | 2753.754  | NM_02015E | 3996.135  | 3755.293  | AK001136  | 417.399   | 378.957   |
| NM_00214C | 18964.008 | 19716.703 | NM_01483C | 2065.718  | 2948.879  | AK021810  | 540.162   | 481.082   |
| NM_02014Z | 5741.309  | 5632.021  | AF355402  | 2343.966  | 2492.582  | AK025214  | 2551.242  | 2951.725  |
| NM_01246E | 4360.805  | 3873.301  | AK000407  | 4141.291  | 3932.589  | AK025846  | 1055.948  | 1644.442  |
| NM_005131 | 6613.882  | 6546.854  | NM_01447C | 802.247   | 662.802   | AK026805  | 2055.453  | 2893.821  |

|           |           |           |           |           |           |           |           |           |
|-----------|-----------|-----------|-----------|-----------|-----------|-----------|-----------|-----------|
| NM_007056 | 4055.646  | 3433.659  | NM_001665 | 14223.597 | 16618.352 | AL389983  | 1086.178  | 851.817   |
| AF083383  | 5209.2    | 5127.083  | NM_001773 | 2335.007  | 2526.31   | AK000995  | 288.237   | 391.53    |
| NM_006925 | 7827.423  | 4612.878  | Z70704    | 2254.71   | 2148.592  | U00959    | 901.434   | 813.471   |
| NM_004890 | 45078.406 | 46182.988 | NM_014363 | 2444.077  | 2189.9    | NM_014578 | 4097.675  | 4465.432  |
| AK023181  | 5316.479  | 6668.864  | NM_000557 | 5982.585  | 5604.642  | AF086267  | 404.176   | 348.837   |
| NM_004294 | 2325.591  | 3168.907  | NM_003239 | 1386.98   | 899.94    | NM_012183 | 671.901   | 745.566   |
| NM_005051 | 18257.01  | 21878.076 | NM_001375 | 6911.475  | 5765.76   | NM_018225 | 1659.27   | 1970.018  |
| NM_001968 | 28865.006 | 31874.061 | NM_002312 | 2398.862  | 3131.684  | AK022577  | 357.485   | 303.545   |
| D17259    | 48598.344 | 54958.137 | M20699    | 3176.524  | 2990.135  | AF091526  | 1090.673  | 1521.335  |
| AF264627  | 16192.234 | 17659.113 | NM_004774 | 10784.543 | 10016.319 | M60749    | 398.855   | 318.739   |
| NM_018142 | 7628.204  | 7987.379  | NM_016937 | 7768.453  | 5436.626  | NM_003523 | 1389.585  | 1583.596  |
| NM_017653 | 5328.264  | 6369.011  | NM_002690 | 6258.782  | 6197.669  | AK056351  | 13081.682 | 9220.251  |
| AL109695  | 18817.803 | 13588.546 | AB033086  | 504.906   | 478.142   | AF131738  | 5969.743  | 3624.669  |
| NM_002168 | 3657.029  | 4198.572  | NM_018239 | 4508.836  | 4349.406  | AK024825  | 537.345   | 399.256   |
| NM_016229 | 3044.772  | 2588.437  | U88892    | 2079.284  | 2073.541  | AF086317  | 1715.186  | 1297.612  |
| NM_018244 | 3586.622  | 4035.096  | AK023755  | 1927.224  | 1601.6    | U16850    | 1035.36   | 1442.814  |
| NM_002492 | 29241.459 | 29597.092 | NM_005725 | 2832.173  | 2739.097  | Z36806    | 521.895   | 482.834   |
| AB046855  | 1324.672  | 1281.314  | NM_012211 | 1980.147  | 1779.08   | NM_018618 | 466.42    | 644.967   |
| NM_005642 | 9143.897  | 4849.603  | AB040877  | 3120.74   | 3683.056  | AJ008121  | 17397.865 | 16661.762 |
| NM_018105 | 3224.747  | 2414.936  | AB040927  | 540.652   | 576.849   | AJ008153  | 983.523   | 1387.083  |
| AK023452  | 3377.744  | 2765.824  | AK026737  | 2157.195  | 2279.243  | AK023739  | 1551.839  | 1838.014  |
| AF155065  | 540.693   | 496.082   | NM_000210 | 4870.81   | 4076.756  | NM_005830 | 5573.284  | 5415.877  |
| NM_000332 | 1086.289  | 1128.341  | AF251025  | 747.148   | 1007.829  | AL389876  | 389.217   | 214.731   |
| AK022215  | 9764.838  | 11094.771 | NM_015677 | 5191.121  | 5388.627  | AK022120  | 694.996   | 577.942   |
| NM_001527 | 11192.949 | 13942.131 | NM_001772 | 7491.896  | 6567.593  | BF037206  | 641.568   | 492.564   |
| AK025269  | 5059.89   | 4796.85   | AB011087  | 711.033   | 971.767   | AK021474  | 1334.037  | 864.318   |
| NM_001438 | 666.976   | 747.398   | AF161341  | 5773.798  | 4871.058  | AL049466  | 6812.153  | 6338.757  |
| AB040971  | 1266.003  | 1086.094  | AJ249902  | 1445.203  | 1661.458  | AB037802  | 451.739   | 555.097   |
| NM_006562 | 2974.432  | 2936.209  | NM_004384 | 2153.643  | 2158.27   | AL137450  | 490.394   | 531.729   |
| NM_018456 | 3176.141  | 3424.854  | L05500    | 11204.423 | 9013.777  | AK023058  | 187.668   | 223.602   |
| AK026697  | 782.468   | 723.223   | NM_012306 | 33313.785 | 27217.715 | NM_012064 | 2937.318  | 2578.69   |
| NM_019021 | 3044.055  | 2506.367  | AF222903  | 2878.463  | 2254.013  | AK092508  | 2247.669  | 1673.465  |
| NM_004717 | 689.371   | 512.973   | NM_006226 | 2034.701  | 1739.027  | AK027111  | 39145.281 | 42883.387 |
| AL137304  | 3806.625  | 3064.154  | L10374    | 14491.418 | 10604.208 |           |           |           |
| AL049274  | 757.669   | 659.737   | AB016902  | 3559.2    | 3710.212  |           |           |           |
| NM_018279 | 4686.791  | 4407.751  | AF272378  | 36596.512 | 33711.438 |           |           |           |
| AK026883  | 2547.748  | 1731.312  | NM_000249 | 4422.455  | 4805.591  |           |           |           |
| NM_014350 | 18632.838 | 12381.766 | NM_014310 | 645.357   | 1050.335  |           |           |           |
| U00925    | 10986.02  | 8955.376  | NM_005860 | 11034.248 | 10879.783 |           |           |           |
| AL390185  | 2222.136  | 1542.357  | AF095288  | 28434.713 | 28533.271 |           |           |           |
| AF086235  | 8976.269  | 7572.235  | AK026271  | 19258.662 | 19002.703 |           |           |           |
| AF143886  | 2514.526  | 1756.185  | NM_001799 | 10185.01  | 8478.876  |           |           |           |
| AK025583  | 55440.246 | 49309.512 | NM_005610 | 4898.847  | 4333.886  |           |           |           |
| NM_014664 | 3278.921  | 3815.933  | AL133651  | 1684.837  | 2032.479  |           |           |           |
| AL109788  | 467.431   | 1089.349  | AB014532  | 5163.02   | 5860.162  |           |           |           |
| NM_014952 | 20310.193 | 20280.607 | NM_003478 | 3453.661  | 3017.643  |           |           |           |
| AK025068  | 2951.482  | 3160.11   | NM_016237 | 2200.458  | 3815.328  |           |           |           |
| AK026720  | 2909.846  | 2267.748  | NM_004924 | 3418.634  | 3071.467  |           |           |           |
| AL137566  | 3218.193  | 2111.992  | NM_001798 | 6312.511  | 6175.862  |           |           |           |
| AF087962  | 3524.138  | 4846.602  | NM_001211 | 7128.287  | 6387.523  |           |           |           |
| AL117580  | 5998.238  | 4849.245  | NM_006505 | 488.644   | 643.511   |           |           |           |
| AL110190  | 2820.617  | 1650.633  | AB033050  | 2352.268  | 1883.495  |           |           |           |
| AJ001893  | 2106.4    | 1919.281  | NM_004356 | 9236.88   | 8087.51   |           |           |           |

|           |           |           |           |           |           |
|-----------|-----------|-----------|-----------|-----------|-----------|
| NM_014819 | 9898.502  | 9785.423  | NM_001855 | 643.646   | 447.87    |
| AF086040  | 821.876   | 912.65    | BC015022  | 1732.342  | 1320.635  |
| AK023559  | 3865.574  | 4091.093  | NM_006697 | 10496.162 | 11269.534 |
| AB037859  | 48121.238 | 47052.82  | M19182    | 1016.074  | 1426.28   |
| AL049233  | 1240.456  | 1571.14   | AK025707  | 2848.955  | 2730.479  |
| NM_017696 | 1647.531  | 2340.79   | NM_002406 | 58675.023 | 55171.344 |
| AL050166  | 5851.554  | 6480.395  | U87169    | 3063.39   | 2466.532  |
| AK026705  | 1163.26   | 1019.782  | NM_002073 | 1455.754  | 1660.807  |
| NM_003602 | 715.209   | 411.294   | AF117222  | 479.959   | 763.552   |
| AF009258  | 38548.344 | 29233.434 | NM_001935 | 36594.156 | 40680.555 |
| AF009305  | 1664.17   | 931.873   | NM_001749 | 790.977   | 1037.722  |
| NM_006193 | 687.408   | 605.904   | AF090327  | 722.385   | 845.077   |
| AF009270  | 1255.248  | 1043.994  | NM_003291 | 3144.023  | 3078.57   |
| AF009318  | 872.853   | 354.744   | AK022950  | 1963.263  | 1655.455  |
| AF056421  | 964.627   | 715.239   | S75755    | 2339.816  | 3047.833  |
| AF090889  | 1118.383  | 1006.128  | AF176518  | 817.662   | 837.228   |
| AK001085  | 1005.549  | 791.252   | AB014576  | 12620.135 | 14390.464 |
| AK001906  | 1994.129  | 1766.636  | NM_019044 | 5583.332  | 5542.555  |
| AK021528  | 1508.678  | 1163.36   | AK000145  | 857.818   | 818.065   |
| AK021746  | 3075.777  | 2533.245  | AF174601  | 3951.25   | 3871.634  |
| AK001136  | 1474.53   | 1300.262  | AF279865  | 1199.37   | 985.669   |
| AK002066  | 814.695   | 1007.542  | NM_014700 | 1105.359  | 1076.211  |
| AK021810  | 1441.722  | 1123.339  | NM_014714 | 1066.868  | 735.043   |
| AK025190  | 1011.577  | 501.566   | NM_005687 | 6831.985  | 4212.341  |
| AK025595  | 600.937   | 668.728   | NM_005983 | 5311.472  | 3503.051  |
| AK026743  | 892.418   | 950.103   | NM_017652 | 10314.939 | 12752.735 |
| AK025214  | 996.541   | 1426.542  | X59268    | 7191.032  | 7151.859  |
| AK025846  | 1051.76   | 1422.482  | D70832    | 62413.105 | 51005.754 |
| AK026440  | 734.872   | 939.949   | NM_001429 | 6539.924  | 6571.943  |
| AK026805  | 2058.986  | 2293.592  | M61870    | 1712.736  | 1734.409  |
| AL389983  | 11728.52  | 10320.673 | AK026980  | 2036.464  | 1885.038  |
| AJ008159  | 587.753   | 849.731   | NM_020368 | 2229.726  | 2380.273  |
| AK000995  | 1272.601  | 1147.018  | AF024708  | 10756.51  | 10886.081 |
| U00959    | 1504.944  | 1506.03   | NM_006467 | 3291.724  | 3427.01   |
| NM_014578 | 28581.682 | 27451.291 | NM_017566 | 3442.871  | 3931.473  |
| AF147306  | 5259.681  | 4260.402  | NM_006582 | 994.09    | 990.278   |
| AF086267  | 2366.476  | 1652.461  | AB033019  | 5035.784  | 5302.042  |
| X74606    | 1275.806  | 1163.229  | NM_006162 | 456.907   | 512.734   |
| NM_012183 | 1846.225  | 1991.504  | NM_014764 | 5476.584  | 5336.287  |
| AK026785  | 2110.587  | 1999.844  | NM_016050 | 689.676   | 476.953   |
| AK022994  | 785.924   | 331.992   | NM_007080 | 20681.68  | 18541.619 |
| NM_018225 | 18336.729 | 21649.002 | AK026912  | 2645.815  | 1765.153  |
| AK025534  | 1008.405  | 1472.806  | AK023531  | 4794.856  | 3761.527  |
| AK022577  | 895.949   | 1195.643  | AB011128  | 8868.31   | 9223.233  |
| AF091526  | 1360.875  | 865.557   | X78712    | 1134.683  | 1303.414  |
| M60749    | 4601.712  | 4473.031  | NM_001497 | 1021.974  | 654.56    |
| NM_003523 | 9012.5    | 7573.726  | NM_004130 | 4149.735  | 3471.737  |
| X01448    | 1306.593  | 1103.971  | NM_006348 | 838.962   | 680.49    |
| NM_016503 | 11207.842 | 10125.526 | AF067972  | 13842.297 | 15646.858 |
| AK056351  | 43690.125 | 29296.818 | NM_004958 | 846.954   | 700.574   |
| NM_014690 | 7277.6    | 6561.962  | D87076    | 626.23    | 780.948   |
| NM_017698 | 2771.405  | 2525.343  | NM_014149 | 830.34    | 1291.693  |
| AF131738  | 34524.941 | 24478.822 | AB020635  | 1414.086  | 1534.773  |

|           |           |           |           |           |           |
|-----------|-----------|-----------|-----------|-----------|-----------|
| AK021666  | 2282.774  | 1376.989  | NM_006515 | 934.496   | 1312.838  |
| AK024825  | 4217.685  | 4319.882  | X65231    | 50196     | 50526.387 |
| AF086317  | 8512.684  | 7117.229  | NM_002908 | 1469.832  | 1000.424  |
| U16850    | 8579.604  | 9103.896  | AF205632  | 2361.257  | 1527.245  |
| AL390178  | 1324.305  | 1172.841  | NM_005378 | 23803.795 | 18080.156 |
| Z36806    | 2379.193  | 2373.433  | AK002195  | 562.357   | 522.385   |
| AJ008121  | 23100.682 | 27149.006 | AF086128  | 490.046   | 709.938   |
| AJ008153  | 1191.654  | 1517      | AK022850  | 3324.119  | 3812.443  |
| AK023739  | 2094.866  | 2469.984  | NM_016490 | 1758.32   | 2323.376  |
| NM_005830 | 11366.275 | 16519.244 | AF038193  | 838.505   | 773.801   |
| NM_001507 | 1392.66   | 1447.594  | AL137498  | 3284.223  | 3557.648  |
| X92108    | 396.716   | 389.501   | AK024289  | 635.743   | 619.014   |
| AL389876  | 729.581   | 356.388   | S66168    | 1657.276  | 2477.871  |
| AK022120  | 1513.625  | 1277.775  | NM_003851 | 12372.45  | 10930.827 |
| U92015    | 385.162   | 691.961   | AK024150  | 1812.096  | 2271.313  |
| Z70762    | 1072.949  | 1027.104  | AF070536  | 2705.574  | 2825.555  |
| BF037206  | 1754.99   | 1485.246  | AK022297  | 639.153   | 819.931   |
| AK021474  | 9516.338  | 6816.723  | U79300    | 1122.068  | 932.999   |
| AW511510  | 1245.249  | 928.891   | AK025151  | 14281.094 | 14521.766 |
| U52827    | 1034.776  | 1021.117  | AK025550  | 3823.405  | 2922.523  |
| AL049466  | 15581.32  | 15768.7   | AF088076  | 21806.068 | 19398.803 |
| AB037802  | 3840.848  | 3409.784  | AF086543  | 2439.014  | 2145.427  |
| AL137450  | 2330.296  | 2215.747  | AB046797  | 967.768   | 701.51    |
| AK023058  | 803.252   | 503.119   | AK002098  | 4401.92   | 1346.061  |
| NM_012064 | 2301.937  | 2427.569  | AK025156  | 29041.637 | 30140.352 |
| AK001460  | 1050.433  | 1329.383  | AK022116  | 8830.651  | 8469.989  |
| AK092508  | 1639.094  | 1419.616  | AF026526  | 3778.345  | 3080.294  |
| AK027111  | 52327.758 | 52130.57  | AK026207  | 9769.886  | 9505.03   |
| NM_003518 | 843.479   | 1137.764  | NM_020181 | 932.435   | 499.79    |
|           |           |           | AK024984  | 14072.318 | 14181.106 |
|           |           |           | AF085955  | 1484.521  | 1240.652  |
|           |           |           | AF075106  | 4758.691  | 4886.349  |
|           |           |           | AK023339  | 4223.289  | 4570.42   |
|           |           |           | AF086008  | 1505.838  | 1931.284  |
|           |           |           | AF087970  | 1013.769  | 857.277   |
|           |           |           | AF086029  | 1171.621  | 1104.188  |
|           |           |           | AF075115  | 333.843   | 581.477   |
|           |           |           | U05597    | 697.001   | 595.686   |
|           |           |           | U50524    | 449.444   | 680.838   |
|           |           |           | U10515    | 1227.749  | 512.243   |
|           |           |           | U52050    | 615.993   | 460.904   |
|           |           |           | U73799    | 515.071   | 877.122   |
|           |           |           | AK021668  | 34024.156 | 29289.02  |
|           |           |           | AF086148  | 23574.855 | 22386.582 |
|           |           |           | NM_018363 | 1418.121  | 1118.565  |
|           |           |           | AJ245433  | 17067.984 | 18109.371 |
|           |           |           | AK021942  | 35444.328 | 38386.199 |
|           |           |           | NM_014127 | 1584.105  | 1318.308  |
|           |           |           | AL360187  | 2053.223  | 2104.172  |
|           |           |           | AK021878  | 1061.95   | 804.821   |
|           |           |           | AK021817  | 1071.993  | 1174.777  |
|           |           |           | AL080103  | 633.41    | 1162.044  |
|           |           |           | AK023217  | 1580.384  | 2044.002  |

|                  |           |           |
|------------------|-----------|-----------|
| <b>AK021883</b>  | 34.404    | 875.517   |
| <b>AF090902</b>  | 2763.565  | 2657.492  |
| <b>AF119887</b>  | 8076.555  | 10328.557 |
| <b>AK091038</b>  | 688.735   | 919.443   |
| <b>AK024193</b>  | 2147.885  | 2245.043  |
| <b>AK024438</b>  | 15318.34  | 17168.838 |
| <b>AF161337</b>  | 934.253   | 466.115   |
| <b>AK022482</b>  | 1179.731  | 1367.878  |
| <b>AK023811</b>  | 594.694   | 667.199   |
| <b>AK024135</b>  | 1244.667  | 1200.65   |
| <b>AK022803</b>  | 3834.464  | 3439.115  |
| <b>AK023517</b>  | 2859.793  | 2103.294  |
| <b>AK023869</b>  | 6151.709  | 4614.203  |
| <b>NM_017728</b> | 1452.048  | 2149.175  |
| <b>U80772</b>    | 898.647   | 1159.136  |
| <b>NM_006189</b> | 1144.642  | 1110.728  |
| <b>AJ272177</b>  | 1591.255  | 1707.932  |
| <b>AK026402</b>  | 29582.795 | 28051.354 |
| <b>AF111846</b>  | 1894.331  | 1794.751  |
| <b>M11948</b>    | 64265.238 | 53376.617 |
| <b>AK024618</b>  | 1891.43   | 1642.626  |
| <b>AL049969</b>  | 919.536   | 799.289   |
| <b>NM_005220</b> | 1185.61   | 1660.125  |
| <b>NM_018619</b> | 337.558   | 592.376   |
| <b>AK000470</b>  | 977.136   | 959.829   |
| <b>AK026366</b>  | 60204.543 | 49710.531 |
| <b>AK024229</b>  | 23093.07  | 19874.428 |
| <b>AK021467</b>  | 5732.916  | 3823.956  |
| <b>NM_020371</b> | 1253.231  | 1443.678  |
| <b>AK022498</b>  | 2402.479  | 2032.08   |
| <b>U84506</b>    | 3795.776  | 3360.72   |
| <b>U21556</b>    | 64329.926 | 52295.004 |
| <b>AB002444</b>  | 1573.275  | 854.533   |
| <b>AB002344</b>  | 5525.536  | 3126.792  |
| <b>BF210352</b>  | 1590.899  | 1289.506  |
| <b>NM_006829</b> | 2989.44   | 2173.68   |
| <b>NM_017669</b> | 11623.604 | 9044.042  |
| <b>AF147379</b>  | 39650.895 | 36927.645 |
| <b>AK023760</b>  | 4541.126  | 5105.104  |
| <b>X98415</b>    | 59393.301 | 44689.117 |
| <b>AK024205</b>  | 2586.589  | 2513.623  |
| <b>AF086034</b>  | 18336.521 | 9436.082  |
| <b>AF130071</b>  | 1339.355  | 1211.768  |
| <b>AL390170</b>  | 914.912   | 749.969   |
| <b>AK022887</b>  | 1438.877  | 1229.525  |
| <b>AK000745</b>  | 14979.792 | 13034.014 |
| <b>NM_005299</b> | 1111.199  | 970.844   |
| <b>NM_015901</b> | 1604.596  | 1129.964  |
| <b>Z83935</b>    | 1512.463  | 1249.491  |
| <b>NM_006365</b> | 809.285   | 479.809   |
| <b>AF093744</b>  | 2922.136  | 1849.653  |
| <b>NM_018687</b> | 18207.729 | 11177.414 |
| <b>M57417</b>    | 45343.105 | 48619.285 |



|                  |           |           |
|------------------|-----------|-----------|
| <b>NM_020524</b> | 12478.817 | 10293.589 |
| <b>NM_001999</b> | 1953.982  | 2950.711  |
| <b>X64977</b>    | 1205.289  | 2115.258  |
| <b>AF064851</b>  | 1676.985  | 1210.853  |
| <b>NM_002602</b> | 7288.549  | 14121.874 |
| <b>NM_016239</b> | 1124.128  | 1259.919  |
| <b>NM_003383</b> | 4171.869  | 3411.027  |
| <b>D17271</b>    | 6160.369  | 6484.362  |
| <b>X91648</b>    | 1228.378  | 1055.413  |
| <b>AF282264</b>  | 7546.548  | 6465.155  |
| <b>AF086322</b>  | 2447.61   | 2144.59   |
| <b>Z70717</b>    | 1480.267  | 1121.367  |
| <b>AK024736</b>  | 1072.923  | 923.191   |
| <b>X79308</b>    | 1444.648  | 1109.846  |
| <b>AF086476</b>  | 1016.304  | 565.729   |
| <b>NM_017660</b> | 6289.496  | 5256.828  |
| <b>AB011151</b>  | 6104.411  | 5338.899  |
| <b>U92995</b>    | 5921.114  | 4497.458  |
| <b>Z70769</b>    | 1047.901  | 863.217   |
| <b>AL137555</b>  | 3189.33   | 3141.206  |
| <b>AL133017</b>  | 1914.939  | 1784.567  |
| <b>CY3Cy5</b>    | 6736.654  | 574.195   |
| <b>X00588</b>    | 1435.162  | 1484.54   |
| <b>AI359037</b>  | 37749.633 | 38946.496 |
| <b>BI754285</b>  | 837.628   | 743.531   |
| <b>X15998</b>    | 4787.617  | 5644.389  |
| <b>M76482</b>    | 724.135   | 967.693   |
| <b>X17519</b>    | 25887.012 | 15166.929 |
| <b>NM_001883</b> | 4011.183  | 4685.404  |
| <b>NM_004628</b> | 2428.491  | 2673.929  |
| <b>L31785</b>    | 1786.99   | 1344.174  |
| <b>H-M 69043</b> | 4576.079  | 3171.065  |
| <b>AF077374</b>  | 1647.318  | 1394.408  |
| <b>U43901</b>    | 684.203   | 1050.62   |
| <b>X59065</b>    | 1083.415  | 817.067   |
| <b>M59828</b>    | 8462.863  | 9008.802  |
| <b>NM_016134</b> | 853.5     | 599.066   |
| <b>SR2</b>       | 56477.633 | 52380.578 |
| <b>SR4</b>       | 16046.128 | 14321.902 |
| <b>SR6</b>       | 2649.993  | 1830.768  |
| <b>SR8</b>       | 9830.215  | 19146.141 |
| <b>SR10</b>      | 32116.074 | 7757.057  |
| <b>CY3Cy5</b>    | 3705.362  | 101.732   |
| <b>NM_000612</b> | 10980.574 | 11423.059 |
| <b>NM_004257</b> | 13365.081 | 13190.959 |
| <b>NM_002844</b> | 6051.416  | 5473.883  |
| <b>NM_000683</b> | 4954.7    | 5994.512  |
| <b>NM_003629</b> | 2908.829  | 3590.938  |
| <b>NM_005901</b> | 13774.97  | 14889.998 |
| <b>NM_004248</b> | 2001.937  | 2775.448  |
| <b>NM_000959</b> | 560.353   | 869.346   |
| <b>NM_001313</b> | 2181.132  | 2720.361  |
| <b>NM_002362</b> | 1044.936  | 1216.198  |

|                  |           |           |
|------------------|-----------|-----------|
| <b>NM_004796</b> | 958.958   | 838.496   |
| <b>NM_000435</b> | 13707.501 | 13740.715 |
| <b>NM_001842</b> | 30482.471 | 29167.35  |
| <b>AB017169</b>  | 985.043   | 909.704   |
| <b>AL080170</b>  | 1930.904  | 2201.094  |
| <b>AB039903</b>  | 5052.671  | 4517.498  |
| <b>NM_000542</b> | 21162.699 | 24922.668 |
| <b>NM_014625</b> | 1689.36   | 1917.622  |
| <b>NM_006851</b> | 1571.476  | 1658.066  |
| <b>AK001560</b>  | 1346.464  | 1473.384  |
| <b>AB001328</b>  | 850.2     | 951.997   |
| <b>NM_000948</b> | 549.225   | 669.864   |
| <b>H99588</b>    | 1207.778  | 682.339   |
| <b>AK022600</b>  | 6667.2    | 8090.174  |
| <b>AK023142</b>  | 3378.637  | 3252.781  |
| <b>U61740</b>    | 11507.112 | 12285.617 |
| <b>NM_006409</b> | 54377.512 | 52722.336 |
| <b>AB049054</b>  | 3762.141  | 5963.562  |
| <b>NM_015071</b> | 2780.565  | 3165.873  |
| <b>NM_013227</b> | 2695.463  | 3008.451  |
| <b>Z83803</b>    | 819.166   | 1106.521  |
| <b>AF027205</b>  | 40217.516 | 44505.383 |
| <b>AF075012</b>  | 2745.577  | 3547.307  |
| <b>NM_001570</b> | 2181.13   | 2443.743  |
| <b>NM_015658</b> | 1159.599  | 1126.861  |
| <b>NM_000589</b> | 2196.996  | 1973.1    |
| <b>NM_016546</b> | 11470.265 | 10994.671 |
| <b>AF309653</b>  | 1812.33   | 1912.892  |
| <b>NM_002620</b> | 17795.863 | 14930.942 |
| <b>S79267</b>    | 1536.284  | 1391.064  |
| <b>NM_001816</b> | 1074.688  | 755.522   |
| <b>NM_003784</b> | 55012.945 | 51273.582 |
| <b>NM_000195</b> | 38772.805 | 42917.688 |
| <b>NM_005445</b> | 13685.501 | 13223.799 |
| <b>NM_014899</b> | 2913.556  | 3578.458  |
| <b>NM_003630</b> | 6397.027  | 6114.812  |
| <b>NM_000046</b> | 2503.244  | 2444.521  |
| <b>NM_003219</b> | 1212.544  | 1051.006  |
| <b>NM_006709</b> | 2435.809  | 1993.033  |
| <b>NM_004910</b> | 1638.221  | 2318.203  |
| <b>AB013452</b>  | 1246.88   | 1396.81   |
| <b>M93107</b>    | 5778.966  | 7001.766  |
| <b>BC001479</b>  | 12490.74  | 13710.374 |
| <b>NM_002461</b> | 26294.041 | 31986.857 |
| <b>NM_005771</b> | 955.789   | 1258.299  |
| <b>AB032986</b>  | 49909.977 | 51270.313 |
| <b>NM_017528</b> | 34327.766 | 41252.531 |
| <b>NM_016032</b> | 13862.971 | 15874.881 |
| <b>NM_014324</b> | 48486.527 | 49027.973 |
| <b>NM_001687</b> | 20976.07  | 24193.695 |
| <b>AK026374</b>  | 2275.586  | 2060.271  |
| <b>NM_001169</b> | 2611.764  | 2331.367  |
| <b>AK024648</b>  | 4562.101  | 6396.732  |

|                  |           |           |
|------------------|-----------|-----------|
| <b>NM_000719</b> | 459.897   | 532.298   |
| <b>NM_003459</b> | 7748.824  | 8547.123  |
| <b>AB032526</b>  | 535.403   | 715.749   |
| <b>NM_000171</b> | 1192.793  | 1096.955  |
| <b>AL354615</b>  | 3074.899  | 2975.643  |
| <b>NM_013349</b> | 50932.074 | 51602.273 |
| <b>NM_003705</b> | 3907.634  | 4248.403  |
| <b>NM_006861</b> | 2210.583  | 2657.018  |
| <b>NM_005829</b> | 4890.904  | 4927.334  |
| <b>NM_000466</b> | 2604.648  | 2374.775  |
| <b>NM_015544</b> | 1810.058  | 4146.814  |
| <b>NM_015908</b> | 23039.178 | 18361.332 |
| <b>NM_000896</b> | 1564.829  | 2145.412  |
| <b>AB040672</b>  | 3782.969  | 4154.551  |
| <b>NM_002192</b> | 2504.727  | 2726.64   |
| <b>NM_005491</b> | 10021.842 | 10291.979 |
| <b>NM_003869</b> | 3169.703  | 3464.665  |
| <b>AK025599</b>  | 4130.839  | 6692.66   |
| <b>X63417</b>    | 2902.095  | 2927.02   |
| <b>S94539</b>    | 54259.754 | 53914.754 |
| <b>NM_006402</b> | 1840.475  | 1318.95   |
| <b>NM_005785</b> | 1454.956  | 1348.105  |
| <b>NM_018248</b> | 6043.981  | 5944.677  |
| <b>AK001695</b>  | 7784.288  | 4640.283  |
| <b>NM_017886</b> | 2724.251  | 1930.323  |
| <b>NM_006252</b> | 1557.123  | 1384.108  |
| <b>NM_001721</b> | 1019.386  | 866.785   |
| <b>NM_014397</b> | 2060.785  | 2112.178  |
| <b>AB023182</b>  | 4298.543  | 3540.545  |
| <b>NM_003607</b> | 5189.435  | 3175.791  |
| <b>NM_006575</b> | 3675.78   | 3297.507  |
| <b>NM_013254</b> | 3788.065  | 3373.419  |
| <b>NM_000437</b> | 16585.332 | 15018.28  |
| <b>AB046819</b>  | 7219.664  | 6827.044  |
| <b>NM_006090</b> | 6339.478  | 6603.375  |
| <b>NM_002900</b> | 6138.019  | 5166.666  |
| <b>NM_006851</b> | 1209.053  | 1376.98   |
| <b>AK001560</b>  | 1018.695  | 1482.838  |
| <b>AB001328</b>  | 991.021   | 966.38    |
| <b>NM_000948</b> | 481.466   | 605.119   |
| <b>H99588</b>    | 1270.769  | 1178.684  |
| <b>X00588</b>    | 1528.768  | 1725.106  |
| <b>AI359037</b>  | 33721.07  | 31504.656 |
| <b>BI754285</b>  | 519.012   | 549.214   |
| <b>X15998</b>    | 3606.962  | 3423.007  |
| <b>X17519</b>    | 19816.172 | 8924.856  |
| <b>NM_001883</b> | 2900.043  | 2496.173  |
| <b>NM_004628</b> | 1987.531  | 1407.342  |
| <b>L31785</b>    | 1491.321  | 583.535   |
| <b>H-M 69043</b> | 3182.878  | 1723.152  |
| <b>AF077374</b>  | 1254.161  | 946.503   |
| <b>U43901</b>    | 886.847   | 1141.734  |
| <b>X59065</b>    | 818.445   | 870.547   |

|                  |           |           |
|------------------|-----------|-----------|
| <b>M59828</b>    | 8416.896  | 8259.889  |
| <b>NM_016134</b> | 847.593   | 754.422   |
| <b>AJ010482</b>  | 2504.967  | 2252.244  |
| <b>NM_005445</b> | 11524.016 | 7855.511  |
| <b>NM_014899</b> | 3923.25   | 3911.641  |
| <b>NM_003630</b> | 5755.371  | 6053.83   |
| <b>NM_000046</b> | 1947.74   | 2335.542  |
| <b>NM_003219</b> | 1479.373  | 1743.391  |
| <b>NM_006709</b> | 3336.95   | 3176.278  |
| <b>NM_000612</b> | 10067.816 | 9371.081  |
| <b>NM_004257</b> | 14500.326 | 13606.203 |
| <b>NM_002844</b> | 5836.003  | 3687.545  |
| <b>NM_000683</b> | 3568.088  | 3447.704  |
| <b>NM_003629</b> | 1709.203  | 2321.113  |
| <b>NM_005901</b> | 10399.079 | 9634.234  |
| <b>NM_004248</b> | 1610.974  | 1485.244  |
| <b>NM_001313</b> | 875.291   | 623.288   |
| <b>NM_002362</b> | 758.978   | 603.413   |
| <b>NM_004796</b> | 781.492   | 548.231   |
| <b>NM_000435</b> | 5701.882  | 5144.128  |
| <b>NM_001842</b> | 28232.355 | 24150.279 |
| <b>AB017169</b>  | 710.566   | 919.335   |
| <b>AL080170</b>  | 2442.093  | 2152.216  |
| <b>AB039903</b>  | 4465.367  | 5842.115  |
| <b>NM_000542</b> | 13974.96  | 19567.051 |
| <b>NM_003705</b> | 4214.947  | 4433.901  |
| <b>NM_006861</b> | 1572.443  | 1859.572  |
| <b>NM_005829</b> | 4917.045  | 5350.354  |
| <b>NM_000466</b> | 3318.501  | 3584.233  |
| <b>NM_015544</b> | 2501.114  | 6359.148  |
| <b>NM_015908</b> | 28205.297 | 28532.08  |
| <b>AK022600</b>  | 12035.68  | 13358.598 |
| <b>AK023142</b>  | 3306.306  | 3429.616  |
| <b>U61740</b>    | 9351.011  | 10837.004 |
| <b>NM_006409</b> | 52239.699 | 49254.461 |
| <b>AB049054</b>  | 2929.43   | 3300.448  |
| <b>NM_015071</b> | 1980.244  | 2116.165  |
| <b>NM_013227</b> | 1768.035  | 2085.483  |
| <b>Z83803</b>    | 738.132   | 567.952   |
| <b>AF027205</b>  | 30093.395 | 23350.93  |
| <b>AF075012</b>  | 1164.48   | 899.689   |
| <b>NM_001570</b> | 957.511   | 1007.168  |
| <b>NM_015658</b> | 677.788   | 825.735   |
| <b>NM_000589</b> | 2345.56   | 1773.608  |
| <b>NM_016546</b> | 11474.988 | 11722.712 |
| <b>AF309653</b>  | 3048.854  | 3543.112  |
| <b>NM_002620</b> | 14394.135 | 18055.734 |
| <b>S79267</b>    | 1412.047  | 2091.409  |
| <b>NM_006575</b> | 3799.026  | 4828.935  |
| <b>NM_013254</b> | 4702.921  | 3269.388  |
| <b>NM_000437</b> | 13512.842 | 13001.465 |
| <b>AB046819</b>  | 9459.182  | 9998.193  |
| <b>NM_006090</b> | 5591.63   | 6364.515  |

|                  |           |           |
|------------------|-----------|-----------|
| <b>NM_002900</b> | 8074.541  | 11982.861 |
| <b>NM_004910</b> | 2439.329  | 3576.503  |
| <b>AB013452</b>  | 1982.194  | 2313.811  |
| <b>M93107</b>    | 5911.577  | 7641.677  |
| <b>BC001479</b>  | 9741.659  | 14139.334 |
| <b>NM_002461</b> | 27839.211 | 38478.117 |
| <b>NM_005771</b> | 834.926   | 1171.397  |
| <b>AB032986</b>  | 49856.961 | 51246.977 |
| <b>NM_017528</b> | 36725.594 | 43292.441 |
| <b>NM_016032</b> | 9872.652  | 9806.352  |
| <b>NM_014324</b> | 48651.469 | 44221.098 |
| <b>NM_001687</b> | 18399.732 | 20758.703 |
| <b>AK026374</b>  | 2378.243  | 2528.759  |
| <b>NM_001169</b> | 1989.841  | 1938.264  |
| <b>AK024648</b>  | 4960.482  | 7102.964  |
| <b>NM_000719</b> | 750.578   | 697.203   |
| <b>NM_003459</b> | 6134.403  | 8016.055  |
| <b>NM_000171</b> | 638.933   | 1139.649  |
| <b>NM_016134</b> | 473.94    | 599.532   |
| <b>AJ010482</b>  | 1629.677  | 1749.78   |
| <b>NM_000896</b> | 2075.313  | 2017.503  |
| <b>AB040672</b>  | 2058.463  | 2833.297  |
| <b>NM_002192</b> | 3156.33   | 3158.635  |
| <b>NM_005491</b> | 9908.615  | 11419.703 |
| <b>NM_003869</b> | 3212.342  | 4103.491  |
| <b>S94539</b>    | 51705.152 | 48563.004 |
| <b>NM_006402</b> | 2083.14   | 1659.809  |
| <b>NM_005785</b> | 2163.994  | 1962.713  |
| <b>NM_018248</b> | 6754.974  | 6662.05   |
| <b>AK001695</b>  | 6254.521  | 4830.017  |
| <b>NM_017886</b> | 2427.552  | 2672.223  |
| <b>NM_006252</b> | 1320.843  | 1835.299  |
| <b>NM_001721</b> | 753.179   | 1041.047  |
| <b>NM_014397</b> | 2516.85   | 3258.698  |
| <b>AB023182</b>  | 3035.833  | 3467.636  |
| <b>NM_003607</b> | 3410.036  | 2409.697  |
| <b>AB017169</b>  | 854.992   | 940.784   |
| <b>AL080170</b>  | 1941.507  | 1982.316  |
| <b>AB039903</b>  | 3891.812  | 3533.672  |
| <b>NM_000542</b> | 22211.037 | 22017.842 |
| <b>NM_006851</b> | 1033.806  | 1238.563  |
| <b>AK001560</b>  | 1016.779  | 1008.115  |
| <b>AB001328</b>  | 892.225   | 808.143   |
| <b>NM_000948</b> | 686.545   | 651.498   |
| <b>BI754285</b>  | 745.756   | 409.858   |
| <b>X15998</b>    | 3967.602  | 5181.09   |
| <b>M76482</b>    | 481.67    | 592.259   |
| <b>X17519</b>    | 23936.488 | 12572.518 |
| <b>NM_001883</b> | 2018.452  | 2161.275  |
| <b>NM_004628</b> | 2265.856  | 1776.677  |
| <b>L31785</b>    | 2036.953  | 1543.699  |
| <b>H-M 69043</b> | 3377.256  | 3493.323  |
| <b>AF077374</b>  | 1218.634  | 1323.428  |

|                  |           |           |
|------------------|-----------|-----------|
| <b>U43901</b>    | 914.451   | 1065.657  |
| <b>X59065</b>    | 737.143   | 849.704   |
| <b>M59828</b>    | 4975.712  | 3901.435  |
| <b>AF309653</b>  | 2269.896  | 3260.026  |
| <b>NM_002620</b> | 12189.701 | 12135.287 |
| <b>S79267</b>    | 1756.066  | 1709.807  |
| <b>NM_001816</b> | 533.957   | 602.434   |
| <b>NM_003784</b> | 46004.523 | 38694.012 |
| <b>NM_000195</b> | 34866.289 | 31688.365 |
| <b>NM_005445</b> | 10169.51  | 6388.698  |
| <b>NM_014899</b> | 3335.219  | 3230.072  |
| <b>NM_003630</b> | 5857.712  | 5275.27   |
| <b>NM_000046</b> | 1843.657  | 2639.624  |
| <b>NM_003219</b> | 1433.483  | 1978.609  |
| <b>NM_006709</b> | 3702.992  | 5079.428  |
| <b>NM_000612</b> | 10764.142 | 10978.663 |
| <b>NM_004257</b> | 9687.794  | 9161.741  |
| <b>NM_002844</b> | 4720.43   | 2897.71   |
| <b>NM_000683</b> | 2253.131  | 2054.446  |
| <b>NM_003629</b> | 2854.233  | 2935.469  |
| <b>NM_005901</b> | 7909.906  | 8465.797  |
| <b>NM_004248</b> | 1791.325  | 1818.74   |
| <b>NM_000959</b> | 438.606   | 344.766   |
| <b>NM_001313</b> | 626.05    | 976.022   |
| <b>NM_019066</b> | 622.408   | 836.573   |
| <b>NM_002362</b> | 1354.491  | 1754.687  |
| <b>NM_000435</b> | 3164.079  | 2695.593  |
| <b>NM_001842</b> | 16064.691 | 9720.215  |
| <b>NM_000719</b> | 726.072   | 1086.797  |
| <b>NM_003459</b> | 10282.839 | 10915.456 |
| <b>NM_000171</b> | 809.407   | 1001.581  |
| <b>AL354615</b>  | 1851.649  | 1771.675  |
| <b>NM_013349</b> | 40656.109 | 38622.461 |
| <b>NM_003705</b> | 2951.368  | 3170.125  |
| <b>NM_006861</b> | 1759.835  | 1763.088  |
| <b>NM_005829</b> | 3651.811  | 3428.943  |
| <b>NM_000466</b> | 3376.877  | 4823.402  |
| <b>NM_015544</b> | 2145.816  | 6743.675  |
| <b>NM_015908</b> | 22718.133 | 25444.953 |
| <b>AK022600</b>  | 10955.093 | 10534.621 |
| <b>AK023142</b>  | 2823.727  | 2108.345  |
| <b>U61740</b>    | 10287.387 | 10236.173 |
| <b>NM_006409</b> | 51395.895 | 47421.008 |
| <b>AB049054</b>  | 2989.442  | 2991.113  |
| <b>NM_015071</b> | 1598.134  | 1476.048  |
| <b>NM_013227</b> | 1535.808  | 1258.876  |
| <b>Z83803</b>    | 916.603   | 984.445   |
| <b>AF027205</b>  | 27559.742 | 35175.43  |
| <b>AF075012</b>  | 1835.667  | 2541.348  |
| <b>NM_001570</b> | 1483.487  | 2174.585  |
| <b>NM_015658</b> | 872.539   | 851.994   |
| <b>NM_000589</b> | 2921.761  | 2095.531  |
| <b>NM_016546</b> | 11990.913 | 7150.827  |

|                  |           |           |
|------------------|-----------|-----------|
| <b>NM_017886</b> | 3783.473  | 5854.407  |
| <b>NM_006252</b> | 2535.014  | 3134.191  |
| <b>NM_014397</b> | 1306.527  | 1729.065  |
| <b>AB023182</b>  | 3022.885  | 2977.511  |
| <b>NM_003607</b> | 4035.143  | 2624.85   |
| <b>NM_006575</b> | 3119.444  | 3532.02   |
| <b>NM_013254</b> | 3546.117  | 2304.675  |
| <b>NM_000437</b> | 11259.744 | 11314.256 |
| <b>AB046819</b>  | 6892.041  | 7630.744  |
| <b>NM_006090</b> | 4476.256  | 5811.323  |
| <b>NM_002900</b> | 7204.491  | 7527.947  |
| <b>NM_004910</b> | 1704.555  | 1755.385  |
| <b>AB013452</b>  | 1261.883  | 1224.365  |
| <b>M93107</b>    | 4111.465  | 4982.347  |
| <b>BC001479</b>  | 7392.583  | 6308.192  |
| <b>NM_002461</b> | 26853.398 | 28384.955 |
| <b>NM_005771</b> | 677.045   | 691.201   |
| <b>AB032986</b>  | 47418.949 | 47460     |
| <b>NM_017528</b> | 29869.748 | 34226.168 |
| <b>NM_016032</b> | 8407.294  | 12298.53  |
| <b>NM_014324</b> | 48871.781 | 45797.449 |
| <b>NM_001687</b> | 20131.273 | 28367.197 |
| <b>AK026374</b>  | 2662.971  | 2449.028  |
| <b>NM_001169</b> | 2324.336  | 2239.515  |
| <b>AK024648</b>  | 5095.858  | 4769.965  |
| <b>NM_000795</b> | 855.035   | 1050.452  |
| <b>AB037761</b>  | 19241.76  | 20715.896 |
| <b>NM_014008</b> | 48928.73  | 44174.914 |
| <b>NM_014731</b> | 2305.935  | 3482.727  |
| <b>AF035191</b>  | 17686.59  | 16156.182 |
| <b>NM_004058</b> | 1302.148  | 1294.342  |
| <b>NM_004527</b> | 1521.233  | 1510.792  |
| <b>NM_012062</b> | 10879.1   | 11507.871 |
| <b>AK026717</b>  | 639.992   | 769.555   |
| <b>AJ010482</b>  | 1808.935  | 1925.666  |
| <b>NM_000896</b> | 1684.08   | 1731.153  |
| <b>AB040672</b>  | 3211.372  | 2474.79   |
| <b>NM_002192</b> | 2123.958  | 1953.675  |
| <b>NM_005491</b> | 8182.623  | 7137.585  |
| <b>NM_003869</b> | 3267.123  | 2695.555  |
| <b>AK025599</b>  | 3878.329  | 3788.016  |
| <b>X63417</b>    | 1957.101  | 2003.273  |
| <b>S94539</b>    | 36128.543 | 40672.043 |
| <b>S45570</b>    | 311.227   | 604.956   |
| <b>NM_006402</b> | 2425.757  | 1874.912  |
| <b>NM_005785</b> | 1980.733  | 1783.131  |
| <b>NM_018248</b> | 7268.268  | 6150.783  |
| <b>AK001695</b>  | 8133.915  | 4642.041  |
| <b>AB040898</b>  | 1005.893  | 900.46    |
| <b>AB031547</b>  | 1625.86   | 1291.98   |
| <b>NM_003970</b> | 2293.454  | 1470.521  |
| <b>AK022496</b>  | 938.312   | 1210.725  |
| <b>AB042636</b>  | 1375.466  | 1655.438  |

|                  |           |           |
|------------------|-----------|-----------|
| <b>NM_002883</b> | 2860.09   | 3274.175  |
| <b>NM_019012</b> | 957.186   | 741.298   |
| <b>NM_000141</b> | 573.742   | 568.485   |
| <b>NM_016150</b> | 1943.336  | 2051.652  |
| <b>U57058</b>    | 1440.516  | 889.134   |
| <b>AL137452</b>  | 1709.087  | 1451.697  |
| <b>NM_004312</b> | 49030.473 | 43020.543 |
| <b>NM_001347</b> | 4143.911  | 3814.583  |
| <b>AK024549</b>  | 15345.622 | 13129.096 |
| <b>NM_006338</b> | 9605.115  | 9386.518  |
| <b>NM_007164</b> | 5085.358  | 4699.33   |
| <b>NM_000261</b> | 1371.276  | 1347.711  |
| <b>NM_002606</b> | 1682.575  | 1512.877  |
| <b>NM_002570</b> | 2779.275  | 2822.838  |
| <b>NM_003183</b> | 2873.004  | 2586.137  |
| <b>NM_003585</b> | 540.118   | 800.882   |
| <b>NM_019851</b> | 1798.204  | 2299.019  |
| <b>NM_003238</b> | 776.312   | 368.903   |
| <b>NM_018367</b> | 1113.794  | 667.27    |
| <b>NM_001363</b> | 7505.996  | 5659.795  |
| <b>NM_014096</b> | 9329.95   | 7654.108  |
| <b>NM_005706</b> | 4115.878  | 3411.982  |
| <b>NM_001261</b> | 5197.11   | 4710.815  |
| <b>NM_001977</b> | 2795.023  | 1217.896  |
| <b>NM_007219</b> | 1973.394  | 1684.016  |
| <b>AK026854</b>  | 1172.429  | 1143.878  |
| <b>NM_001269</b> | 3735.925  | 3683.007  |
| <b>X98261</b>    | 609.212   | 312.164   |
| <b>NM_012447</b> | 8837.067  | 7736.868  |
| <b>NM_006366</b> | 1511.266  | 1073.649  |
| <b>AK027013</b>  | 28895.031 | 19984.645 |
| <b>NM_001344</b> | 27538.664 | 26361.619 |
| <b>NM_018294</b> | 4720.654  | 3713.661  |
| <b>AL389934</b>  | 2810.182  | 2344.485  |
| <b>NM_004330</b> | 7126.369  | 5380.131  |
| <b>AF151802</b>  | 6151.914  | 5689.557  |
| <b>AB006746</b>  | 2265.212  | 1844.363  |
| <b>NM_006498</b> | 1395.418  | 1418.559  |
| <b>AB023233</b>  | 2383.128  | 2176.122  |
| <b>NM_004369</b> | 1184.945  | 918.906   |
| <b>NM_004370</b> | 585.536   | 584.384   |
| <b>NM_018130</b> | 6585.864  | 4907.652  |
| <b>AF085878</b>  | 1410.525  | 913.804   |
| <b>AB006630</b>  | 1776.232  | 745.652   |
| <b>NM_016155</b> | 2248.636  | 1545.292  |
| <b>NM_001224</b> | 14315.908 | 10300.788 |
| <b>NM_017811</b> | 10354.853 | 7490.267  |
| <b>NM_001569</b> | 1435.821  | 714.67    |
| <b>AK023284</b>  | 914.67    | 857.626   |
| <b>NM_005101</b> | 16246.131 | 18204.131 |
| <b>AF130060</b>  | 15721.446 | 13459.149 |
| <b>NM_007057</b> | 16688.576 | 13373.183 |
| <b>NM_000177</b> | 1750.414  | 2179.89   |



|                  |           |           |
|------------------|-----------|-----------|
| <b>NM_003387</b> | 8798.919  | 8940.658  |
| <b>U60665</b>    | 1540.757  | 1370.051  |
| <b>NM_005507</b> | 58786.047 | 56099.633 |
| <b>AL080133</b>  | 3615.585  | 2991.552  |
| <b>AY014403</b>  | 998.2     | 1380.514  |
| <b>NM_006912</b> | 4994.42   | 4468.721  |
| <b>X12534</b>    | 2120.921  | 2923.268  |
| <b>NM_003112</b> | 2385.754  | 726.613   |
| <b>NM_014323</b> | 3998.159  | 2399.557  |
| <b>NM_003205</b> | 1990.53   | 1273.994  |
| <b>AB002324</b>  | 1761.574  | 879.006   |
| <b>AK026231</b>  | 1295.724  | 1573.588  |
| <b>NM_002140</b> | 18783.576 | 16569.957 |
| <b>NM_020143</b> | 3449.963  | 3159.365  |
| <b>NM_012469</b> | 2612.917  | 1992.327  |
| <b>NM_005131</b> | 4850.203  | 3197.538  |
| <b>NM_007056</b> | 2592.12   | 3074.855  |
| <b>AF083383</b>  | 3704.14   | 3319.266  |
| <b>NM_006925</b> | 3410.148  | 5460.417  |
| <b>NM_004890</b> | 39583.719 | 35291.059 |
| <b>AK023181</b>  | 5305.371  | 5003.296  |
| <b>NM_004294</b> | 3385.377  | 2099.789  |
| <b>NM_005051</b> | 16742.99  | 14915.241 |
| <b>NM_001968</b> | 24845.453 | 22496.08  |
| <b>D17259</b>    | 49876.227 | 51212.449 |
| <b>AF264627</b>  | 17853.086 | 18324.904 |
| <b>AL133053</b>  | 1647.854  | 1301.233  |
| <b>NM_018142</b> | 7317.714  | 10180.453 |
| <b>NM_017653</b> | 4643.912  | 4557.715  |
| <b>AL109695</b>  | 27435.686 | 31722.066 |
| <b>NM_002168</b> | 3663.708  | 3999.727  |
| <b>NM_004453</b> | 707.241   | 497.541   |
| <b>NM_016229</b> | 3097.029  | 2484.89   |
| <b>NM_018244</b> | 2000.687  | 2127.595  |
| <b>NM_002492</b> | 33939.563 | 30608.199 |
| <b>AB046855</b>  | 827.893   | 526.079   |
| <b>NM_005642</b> | 2713.224  | 1756.117  |
| <b>NM_018105</b> | 2405.003  | 836.97    |
| <b>AK023452</b>  | 3044.617  | 2435.744  |
| <b>NM_000332</b> | 1128.219  | 881.618   |
| <b>AK022215</b>  | 9047.782  | 7913.703  |
| <b>U90305</b>    | 435.773   | 511.52    |
| <b>NM_001527</b> | 12590.914 | 8878.548  |
| <b>AK025269</b>  | 4160.142  | 2918.167  |
| <b>NM_001438</b> | 715.693   | 965.526   |
| <b>AB040971</b>  | 955.74    | 1162.944  |
| <b>NM_006562</b> | 2968.718  | 2672.425  |
| <b>AK024254</b>  | 1302.658  | 1805.951  |
| <b>NM_018456</b> | 2822.288  | 3076.283  |
| <b>AK026697</b>  | 842.232   | 1201.379  |
| <b>NM_019021</b> | 2036.298  | 3069.418  |
| <b>NM_004717</b> | 693.05    | 739.239   |
| <b>AK002183</b>  | 831.17    | 908.081   |

|                  |           |           |
|------------------|-----------|-----------|
| <b>NM_018996</b> | 2064.261  | 2212.833  |
| <b>AL137304</b>  | 2492.342  | 2593.702  |
| <b>AL049274</b>  | 1010.038  | 827.521   |
| <b>NM_018279</b> | 3962.44   | 2474.284  |
| <b>AK026883</b>  | 1576.649  | 901.158   |
| <b>NM_014350</b> | 8441.086  | 5735.572  |
| <b>U00925</b>    | 7035.437  | 5646.92   |
| <b>AL390185</b>  | 2908.376  | 2391.41   |
| <b>AF086235</b>  | 7450.446  | 6599.999  |
| <b>AF143886</b>  | 2160.672  | 2317.716  |
| <b>AK025975</b>  | 1046.474  | 1887.049  |
| <b>AK025583</b>  | 52079.949 | 42571.375 |
| <b>NM_014664</b> | 2295.256  | 2541.718  |
| <b>AL109788</b>  | 669.228   | 419.314   |
| <b>NM_014952</b> | 29894.975 | 27412.234 |
| <b>AB037765</b>  | 960.502   | 1125.939  |
| <b>AK025068</b>  | 3613.217  | 3723.376  |
| <b>AK026720</b>  | 2323.229  | 3092.143  |
| <b>AL137566</b>  | 4751.083  | 6018.713  |
| <b>AF087962</b>  | 5625.582  | 4472.126  |
| <b>AL050197</b>  | 4820.093  | 4798.828  |
| <b>AF085870</b>  | 20208.521 | 22299.105 |
| <b>AL050063</b>  | 1356.646  | 278.231   |
| <b>AL080217</b>  | 1426.028  | 279.651   |
| <b>AL117580</b>  | 22401.41  | 25458.574 |
| <b>AL110190</b>  | 972.163   | 651.117   |
| <b>AL117656</b>  | 1295.605  | 850.652   |
| <b>AJ001893</b>  | 1924.556  | 1680.669  |
| <b>NM_014819</b> | 9959.539  | 9492.822  |
| <b>NM_017609</b> | 1368.61   | 750.893   |
| <b>AF086040</b>  | 1361.368  | 994.637   |
| <b>AB032988</b>  | 2622.979  | 2938.091  |
| <b>AK023559</b>  | 5597.782  | 5521.192  |
| <b>AB037859</b>  | 53383.09  | 44605.215 |
| <b>AL049233</b>  | 1932.559  | 1320.505  |
| <b>NM_017696</b> | 2440.885  | 2078.979  |
| <b>AL050166</b>  | 5644.574  | 4576.178  |
| <b>AK026705</b>  | 2257.293  | 3179.047  |
| <b>NM_003602</b> | 1192.119  | 1900.014  |
| <b>AF009258</b>  | 17167.715 | 21244.117 |
| <b>AF009305</b>  | 3059.778  | 3841.165  |
| <b>NM_006193</b> | 821.221   | 994.778   |
| <b>AF009270</b>  | 1295.854  | 1831.687  |
| <b>AF009318</b>  | 1610.584  | 1611.799  |
| <b>AF056421</b>  | 1620.712  | 2542.731  |
| <b>AF090889</b>  | 201.262   | 681.005   |
| <b>AK001085</b>  | 2509.06   | 1706.632  |
| <b>AK001906</b>  | 4709.588  | 2266.668  |
| <b>AK021528</b>  | 1175.417  | 1283.003  |
| <b>AK021746</b>  | 1895.908  | 1342.55   |
| <b>AK021617</b>  | 1286.219  | 1268.867  |
| <b>AK021810</b>  | 1367.418  | 1912.406  |
| <b>AK025190</b>  | 240.219   | 526.851   |

|                  |           |           |
|------------------|-----------|-----------|
| <b>AK025846</b>  | 936.599   | 915.517   |
| <b>AK026805</b>  | 2414.288  | 2182.775  |
| <b>AL389983</b>  | 5202.842  | 7702.048  |
| <b>AJ008159</b>  | 538.14    | 687.009   |
| <b>AK000995</b>  | 926.912   | 1276.758  |
| <b>U00959</b>    | 1603.703  | 1696.438  |
| <b>NM_014578</b> | 20602.744 | 22866.598 |
| <b>AF147306</b>  | 3423.266  | 4191.769  |
| <b>AF086267</b>  | 2026.487  | 2128.351  |
| <b>X74606</b>    | 571.076   | 587.779   |
| <b>NM_012183</b> | 2392.635  | 2517      |
| <b>AK026785</b>  | 1006.832  | 1039.922  |
| <b>AK022577</b>  | 605.337   | 474.865   |
| <b>AF091526</b>  | 1050.758  | 970.971   |
| <b>M60749</b>    | 1678.58   | 2612.096  |
| <b>NM_003523</b> | 7791.877  | 10634.007 |
| <b>X01448</b>    | 1030.848  | 971.855   |
| <b>NM_016503</b> | 8603.16   | 8027.102  |
| <b>AK056351</b>  | 32204.264 | 29429.42  |
| <b>NM_014690</b> | 5927.971  | 5674.932  |
| <b>NM_017698</b> | 2592.217  | 2287.266  |
| <b>AF086490</b>  | 900.702   | 941.263   |
| <b>AF131738</b>  | 23006.33  | 27862.41  |
| <b>AK021666</b>  | 3960.997  | 1395.994  |
| <b>AK024081</b>  | 1631.932  | 1155.814  |
| <b>AK024825</b>  | 1024.987  | 750.673   |
| <b>AF086317</b>  | 5417.411  | 7351.702  |
| <b>U16850</b>    | 8208.697  | 8558.169  |
| <b>AL390178</b>  | 3182.8    | 1854.031  |
| <b>NM_005383</b> | 363.518   | 599.174   |
| <b>AF147326</b>  | 136.369   | 802.168   |
| <b>NM_018618</b> | 1524.343  | 1416.652  |
| <b>AJ008121</b>  | 28557.105 | 27601.191 |
| <b>AJ008153</b>  | 1348.735  | 1342.707  |
| <b>AK023739</b>  | 2308.485  | 1907.367  |
| <b>NM_005830</b> | 11586.803 | 8097.571  |
| <b>NM_001507</b> | 959.587   | 1423.067  |
| <b>X92108</b>    | 644.678   | 381.921   |
| <b>AL389876</b>  | 578.609   | 566.168   |
| <b>AK022120</b>  | 2301.335  | 2917.187  |
| <b>Z70762</b>    | 758.09    | 694.631   |
| <b>D17099</b>    | 815.305   | 494.019   |
| <b>BF037206</b>  | 2329.906  | 2623.887  |
| <b>AK021474</b>  | 21785.137 | 27364.84  |
| <b>U52827</b>    | 1270.783  | 1296.116  |
| <b>AL049466</b>  | 17287.344 | 18928.48  |
| <b>AB037802</b>  | 3445.395  | 5429.097  |
| <b>U17623</b>    | 1399.885  | 664.745   |
| <b>AL137450</b>  | 3831.575  | 3444.936  |
| <b>AK023058</b>  | 2195.131  | 2164.78   |
| <b>NM_012064</b> | 5757.925  | 5583.253  |
| <b>AK001460</b>  | 1298.964  | 1249.205  |
| <b>AK092508</b>  | 1353.416  | 1328.866  |

|                  |           |          |
|------------------|-----------|----------|
| <b>AK027111</b>  | 54098.715 | 49411.27 |
| <b>NM_00351E</b> | 511.943   | 980.271  |

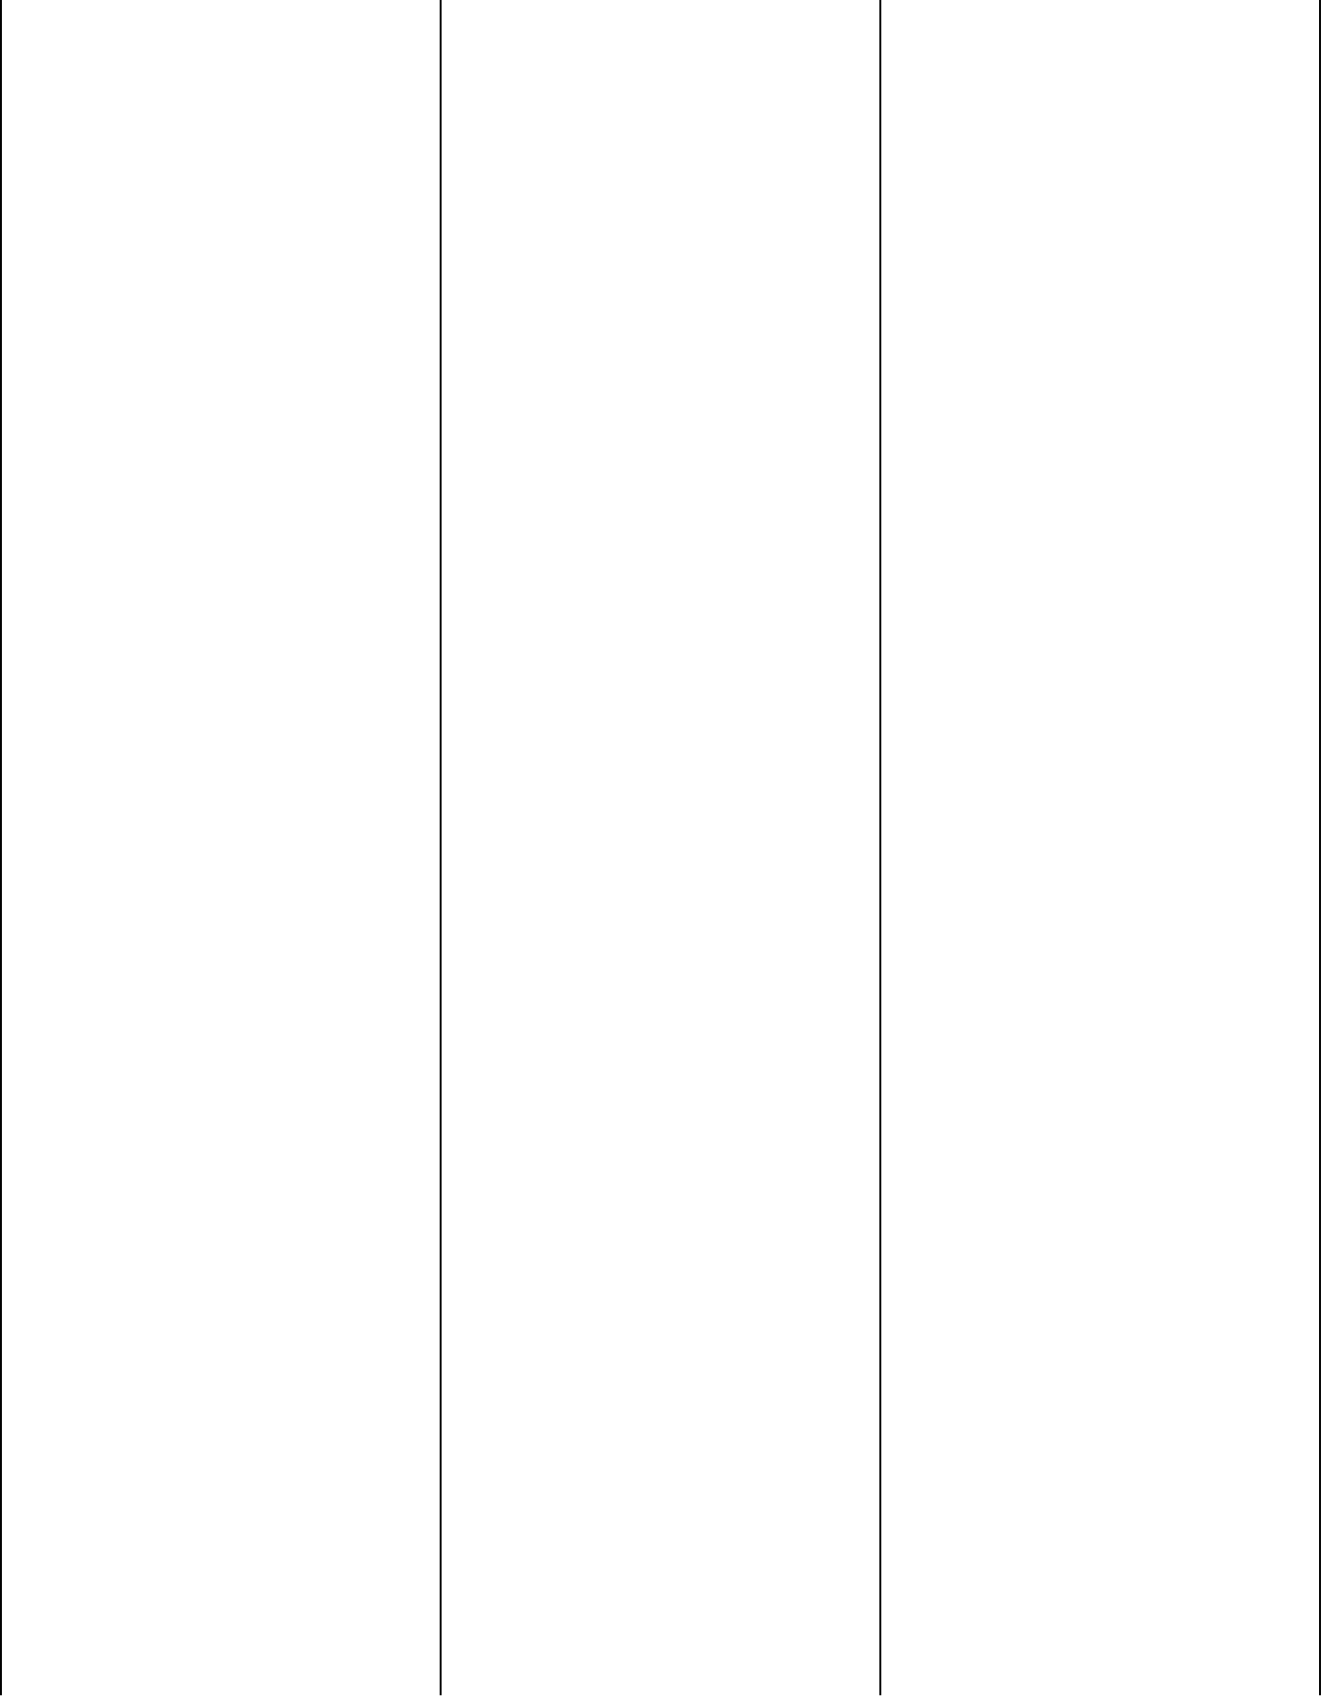























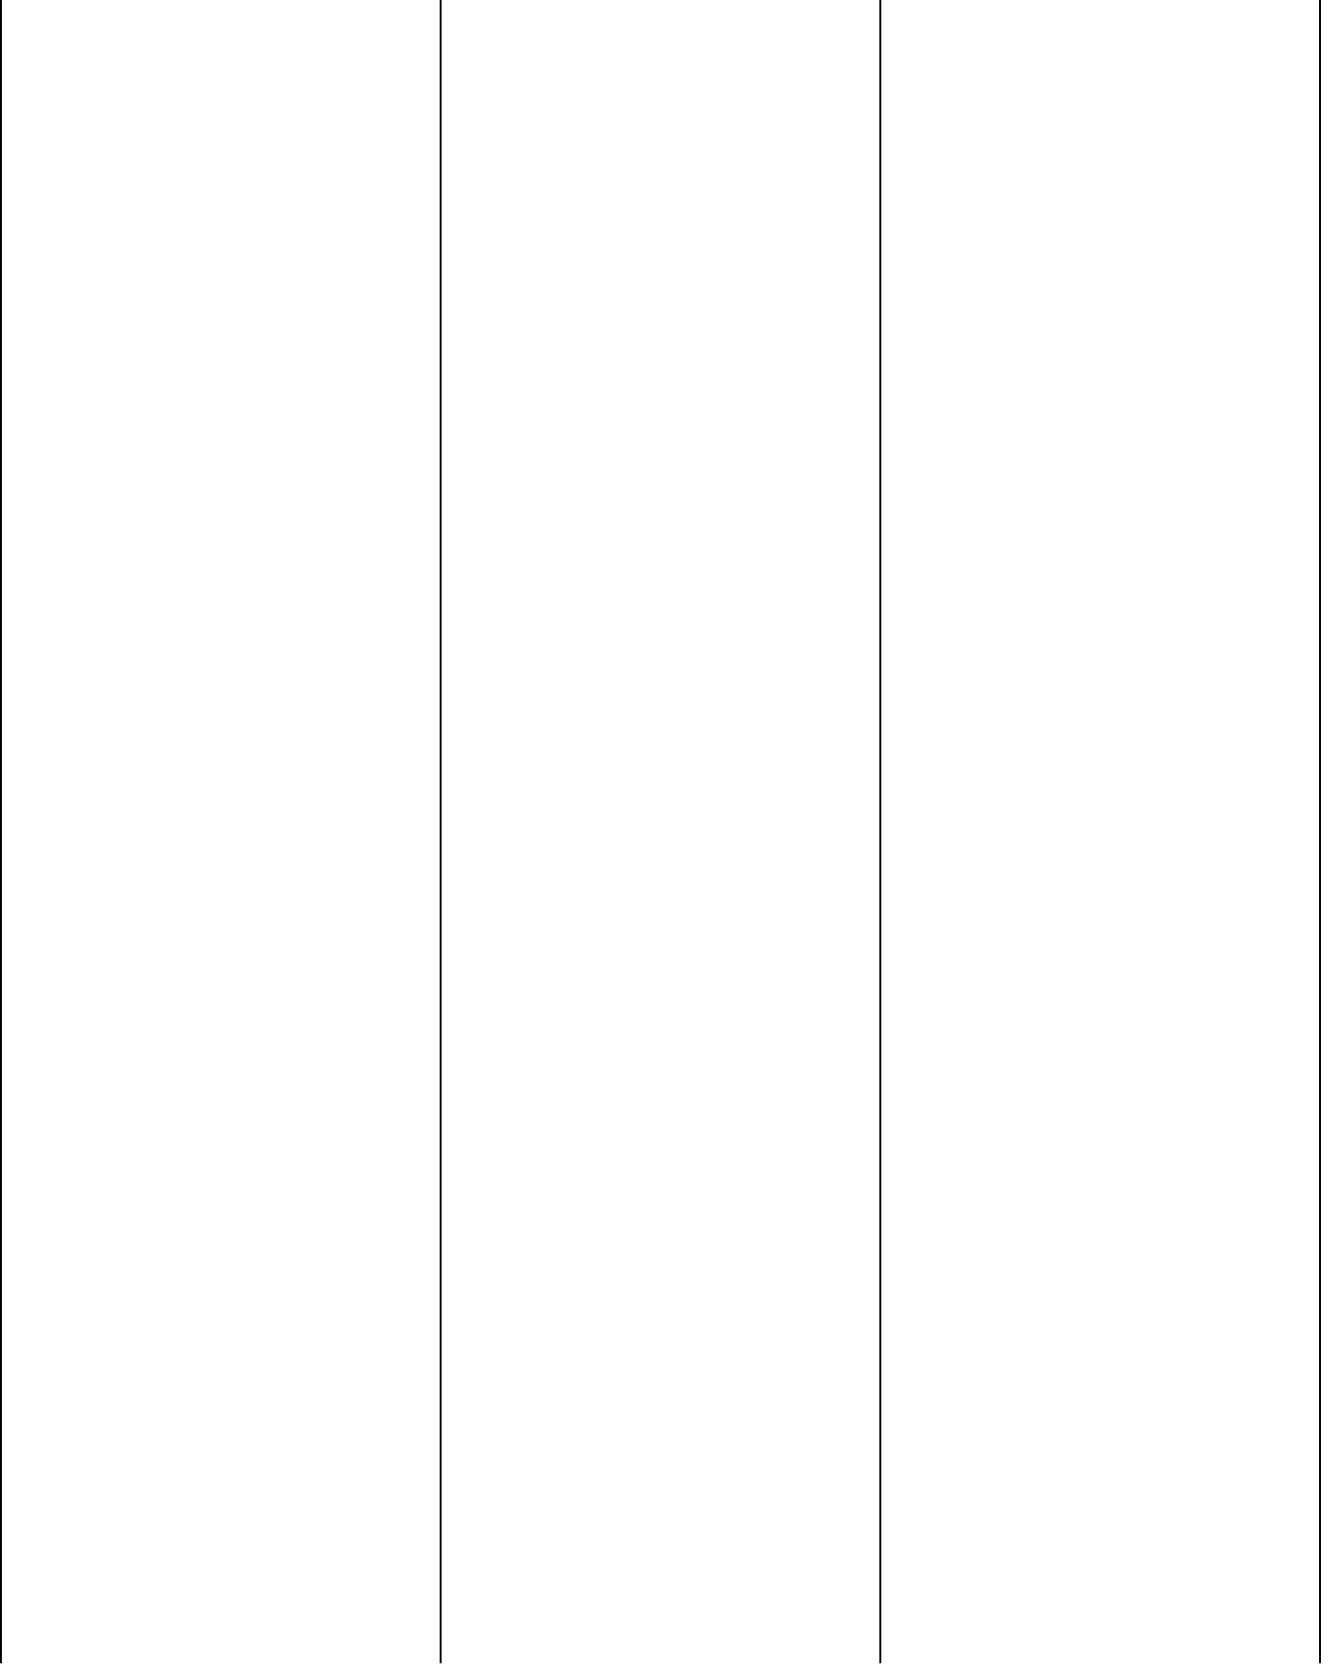



| <i>Replicate 1<br/>2uM TPEN control</i> |           |           | <i>Replicate 1<br/>control      2uM TPEN</i> |           |           | <i>Replicate 2<br/>2uM TPEN control</i> |           |           |
|-----------------------------------------|-----------|-----------|----------------------------------------------|-----------|-----------|-----------------------------------------|-----------|-----------|
| ID                                      | AMPCH1    | AMPCH2    | ID                                           | AMPCH1    | AMPCH2    | ID                                      | AMPCH1    | AMPCH2    |
| CY3Cy5                                  | 21987.744 | 1804.914  | CY3Cy5                                       | 9309.867  | 792.936   | CY3Cy5                                  | 10634.688 | 495.899   |
| NM_000041                               | 14060.475 | 13414.86  | NM_000041                                    | 26440.188 | 24510.604 | NM_000041                               | 25064.561 | 29118.115 |
| W69211                                  | 248.596   | 370.556   | AA449931                                     | 3050.228  | 1511.012  | W69211                                  | 1181.826  | 1487.422  |
| AA449931                                | 875.388   | 807.691   | AA877347                                     | 27673.127 | 15380.13  | AA449931                                | 6828.586  | 7682.261  |
| AA877347                                | 26805.629 | 23608.258 | BI755551                                     | 1340.964  | 411.483   | AA877347                                | 37652.977 | 44624.211 |
| S57235                                  | 8556.314  | 7414.568  | S57235                                       | 10329.06  | 5880.127  | R54049                                  | 623.526   | 640.066   |
| AI376272                                | 1819.162  | 1784.414  | AI376272                                     | 2055.303  | 1354.845  | BI755551                                | 304.294   | 579.636   |
| BF242229                                | 1238.958  | 1207.923  | BF242229                                     | 2098.643  | 1449.232  | S57235                                  | 8903.837  | 9293.032  |
| X75756                                  | 3417.839  | 3490.523  | X75756                                       | 19925.861 | 11699.966 | AI376272                                | 2848.159  | 3551.178  |
| AI754623                                | 4594.841  | 4061.812  | AI754623                                     | 2985.146  | 2113.551  | BF242229                                | 909.887   | 1255.358  |
| AA401326                                | 10276.552 | 10948.599 | AA401326                                     | 8468.068  | 7614.526  | X75756                                  | 30434.266 | 38001.188 |
| N55461                                  | 1315.13   | 1650.516  | N55461                                       | 1318.44   | 1151.214  | AI754623                                | 3907.612  | 3901.964  |
| AA504482                                | 4386.317  | 5555.245  | AA504482                                     | 6512.562  | 6271.719  | AA401326                                | 11946.356 | 13822.61  |
| BI602175                                | 356.963   | 486.41    | BI602175                                     | 984.46    | 991.202   | N55461                                  | 1470.665  | 1987.376  |
| NM_006003                               | 22561.539 | 26870.238 | SR5                                          | 11452.687 | 11331.536 | AA504482                                | 8651.983  | 10612.6   |
| NM_006555                               | 7642.719  | 7482.364  | SR7                                          | 9913.765  | 43977.734 | BI602175                                | 1085.995  | 1495.623  |
| SR5                                     | 9677.255  | 9415.457  | SR9                                          | 33420.363 | 5907.941  | NM_006003                               | 31220.359 | 44231.328 |
| SR7                                     | 9926.974  | 38874.023 | CY3Cy5                                       | 5552.976  | 740.538   | NM_006555                               | 7639.855  | 14035.615 |
| SR9                                     | 44774.34  | 11423.927 | NM_006611                                    | 814.704   | 394.93    | SR5                                     | 9958.021  | 10573.602 |
| CY3Cy5                                  | 16902.096 | 1591.586  | NM_004963                                    | 2446.848  | 2250.421  | SR7                                     | 7882.289  | 47306.938 |
| NM_006869                               | 5182.907  | 5354.604  | AF218021                                     | 1145.155  | 934.951   | SR9                                     | 34434.355 | 5451.585  |
| NM_015364                               | 9428.212  | 7711.44   | NM_013262                                    | 18012.561 | 17597.92  | CY3Cy5                                  | 9184.228  | 624.231   |
| NM_006611                               | 541.295   | 421.431   | NM_007185                                    | 13392.604 | 15207.226 | NM_006869                               | 40136.809 | 42789.438 |
| NM_004963                               | 1696.561  | 1748.886  | NM_003221                                    | 615.137   | 791.017   | NM_015364                               | 11021.536 | 11224.271 |
| NM_001181                               | 480.477   | 339.17    | NM_003357                                    | 16853.473 | 15765.299 | NM_006611                               | 646.336   | 664.658   |
| NM_005535                               | 7552.154  | 8109.793  | AF195420                                     | 901.984   | 977.679   | NM_004963                               | 2051.015  | 2744.057  |
| AB037857                                | 445.966   | 571.161   | AK023261                                     | 5589.883  | 5526.022  | NM_001181                               | 459.326   | 723.206   |
| NM_005012                               | 297.478   | 461.879   | NM_005097                                    | 797.181   | 849.385   | NM_005535                               | 24757.725 | 31522.293 |
| AF218021                                | 1064.045  | 1237.182  | NM_014057                                    | 1939.964  | 1734.816  | AB037857                                | 781.666   | 946.016   |
| NM_013262                               | 16333.756 | 18118.404 | NM_001550                                    | 6004.035  | 4452.171  | AF218021                                | 1191.229  | 1697.527  |
| NM_007185                               | 4001.072  | 4721.129  | AK026849                                     | 2293.675  | 2877.059  | NM_013262                               | 14937.756 | 17389.781 |
| NM_003357                               | 8582.784  | 11076.764 | NM_018677                                    | 1342.917  | 1122.928  | NM_007185                               | 5743.388  | 6624.102  |
| AF195420                                | 1650.808  | 1630.71   | NM_002785                                    | 778.97    | 835.748   | NM_003221                               | 1081.011  | 945.62    |
| AK023261                                | 7274.837  | 7733.838  | NM_016582                                    | 4428.434  | 3091.783  | NM_003357                               | 13471.755 | 16746.391 |
| NM_005097                               | 648.153   | 824.864   | NM_014229                                    | 1864.052  | 1765.036  | AF195420                                | 1034.75   | 1063.682  |
| NM_012278                               | 1327.539  | 1315.191  | NM_013265                                    | 19778.932 | 23157.859 | AK023261                                | 8181.628  | 8352.256  |
| AF023142                                | 1759.034  | 1641.697  | NM_014964                                    | 3602.597  | 3409.979  | NM_005097                               | 1246.781  | 2107.797  |
| NM_014057                               | 6557.436  | 6355.632  | NM_014016                                    | 12508.703 | 13378.854 | NM_012278                               | 1850.939  | 2213.212  |
| NM_001550                               | 2689.237  | 3058.905  | NM_013433                                    | 3788.624  | 4035.361  | AF023142                                | 1220.104  | 1626.319  |
| AK026849                                | 719.547   | 748.515   | NM_016169                                    | 2816.199  | 1876.254  | NM_014057                               | 3558.26   | 3688.453  |
| NM_018677                               | 2736.711  | 3002.514  | BF307652                                     | 3568.843  | 2998.17   | NM_001550                               | 6638.781  | 6789.895  |
| NM_002785                               | 1122.893  | 1415.314  | NM_017772                                    | 3248.813  | 2765.304  | AK026849                                | 3855.542  | 3221.231  |
| X78947                                  | 272.996   | 495.817   | AF116574                                     | 2019.078  | 1643.732  | NM_002785                               | 900.217   | 850.648   |
| NM_016582                               | 1043.422  | 765.391   | NM_005529                                    | 558.095   | 382.585   | NM_016582                               | 10347.063 | 11874.363 |
| NM_014229                               | 1293.446  | 1153.299  | NM_005869                                    | 8351.406  | 6233.247  | NM_014229                               | 1326.286  | 1498.228  |
| NM_013265                               | 14695.441 | 14723.093 | AF105067                                     | 2117.896  | 2092.566  | NM_013265                               | 17072.234 | 17938.939 |
| NM_014964                               | 1609.864  | 2026.63   | NM_018676                                    | 1701.869  | 999.741   | NM_014964                               | 2210.585  | 2258.667  |
| NM_014016                               | 5404.803  | 5916.135  | NM_006014                                    | 966.431   | 823.75    | NM_014016                               | 8780.928  | 9420.81   |

|           |           |           |           |           |           |           |           |           |
|-----------|-----------|-----------|-----------|-----------|-----------|-----------|-----------|-----------|
| NM_013433 | 3964.365  | 3868.253  | NM_006280 | 41746.859 | 51553.195 | NM_013433 | 3404.082  | 4074.556  |
| AJ224867  | 575.677   | 597.433   | NM_002155 | 6797.038  | 12014.103 | NM_003794 | 9792.193  | 8912.381  |
| NM_003794 | 8114.666  | 6771.495  | NM_002066 | 777.091   | 943.188   | NM_019892 | 7615.335  | 10137.101 |
| NM_019892 | 6196.038  | 7042.611  | NM_007355 | 53809.91  | 55352.293 | NM_016169 | 5857.021  | 6290.156  |
| NM_016169 | 5370.872  | 6458.469  | NM_006096 | 2448.268  | 3752.216  | BF307652  | 2347.347  | 2735.897  |
| BF307652  | 682.099   | 576.724   | NM_012288 | 4906.188  | 3688.792  | NM_017772 | 4535.656  | 4608.099  |
| NM_017772 | 5178.675  | 4924.18   | NM_005264 | 5171.545  | 3158.174  | AF116574  | 3493.489  | 3715.922  |
| AF116574  | 2884.835  | 3166.082  | NM_020373 | 1493.333  | 829.812   | NM_005529 | 804.189   | 946.636   |
| NM_005529 | 1223.133  | 1544.385  | NM_000714 | 1614.48   | 1501.636  | NM_005869 | 12878.521 | 12712.127 |
| NM_005869 | 11703.992 | 13133.707 | NM_002556 | 3751.781  | 2652.493  | AF105067  | 4671.462  | 5295.784  |
| AF105067  | 5515.752  | 5030.605  | NM_018089 | 6177.543  | 3861.279  | NM_018676 | 4115.391  | 5034.868  |
| NM_018676 | 4830.289  | 5295.572  | L21934    | 2435.943  | 2698.164  | NM_012072 | 1246.197  | 1052.064  |
| NM_012072 | 950.424   | 860.839   | AL117442  | 7294.217  | 5768.298  | NM_006014 | 2167.104  | 2166.424  |
| NM_006014 | 3719.6    | 4237.183  | NM_004695 | 889.425   | 693.712   | NM_006280 | 60021.707 | 58076.891 |
| NM_006280 | 45698.266 | 52007.352 | AF299075  | 1348.827  | 984.742   | NM_002155 | 10176.286 | 7904.396  |
| NM_002155 | 11256.346 | 9588.658  | NM_000340 | 688.505   | 463.982   | NM_002066 | 1978.097  | 1881.626  |
| NM_002066 | 622.268   | 667.911   | NM_007188 | 4173.45   | 5516.162  | NM_007355 | 68823.688 | 69975.047 |
| NM_007355 | 70476.953 | 54291.051 | NM_001214 | 3346.82   | 3162.872  | NM_006096 | 2164.854  | 2394.719  |
| NM_006096 | 7010.637  | 7007.801  | U16851    | 4902.023  | 4303.26   | NM_012288 | 5567.626  | 5709.992  |
| NM_012288 | 6492.843  | 6153.514  | NM_014341 | 10401.076 | 13679.869 | NM_005264 | 4248.765  | 4692.083  |
| NM_005264 | 5159.112  | 5347.052  | NM_020309 | 472.039   | 772.235   | NM_020373 | 2187.679  | 1723.188  |
| NM_020373 | 1779.41   | 1599.133  | NM_000341 | 981.835   | 1591.441  | NM_000714 | 2210.139  | 2409.776  |
| NM_000714 | 2123.139  | 2080.005  | AK023533  | 1955.948  | 2996.034  | NM_002556 | 3531.922  | 4877.869  |
| NM_002556 | 5898.684  | 5410.205  | NM_012450 | 1482.574  | 1590.01   | NM_018089 | 4681.01   | 4917.328  |
| NM_018089 | 7664.656  | 6873.352  | NM_007071 | 10220.388 | 14235.004 | L21934    | 2872.036  | 3072.796  |
| L21934    | 6355.674  | 5835.673  | NM_006812 | 11878.967 | 9792.726  | AL117442  | 5588.626  | 5629.031  |
| AL117442  | 6923.63   | 6638.651  | AK024434  | 7669.607  | 6975.304  | AF299075  | 1205.191  | 1832.363  |
| NM_004695 | 1059.799  | 1130.467  | NM_002388 | 10721.954 | 9654.609  | NM_000340 | 511.053   | 678.451   |
| AF299075  | 1849.943  | 1804.574  | NM_016069 | 34762.695 | 40963.199 | NM_007188 | 7483.484  | 7658.898  |
| NM_000340 | 705.264   | 774.91    | NM_017612 | 3195.169  | 3474.602  | NM_001214 | 11468.655 | 13688.702 |
| NM_007188 | 8713.32   | 8622.586  | NM_013236 | 13626.125 | 17303.824 | AK022409  | 1446.01   | 1672.601  |
| NM_001214 | 4120.206  | 4871.092  | NM_017841 | 8292.855  | 8826.644  | U16851    | 12639.135 | 12847.773 |
| AK022409  | 1409.816  | 1649.13   | NM_001254 | 5038.365  | 6226.715  | NM_014341 | 8857.991  | 7789.346  |
| U16851    | 28030.457 | 28428.754 | NM_020412 | 14649.7   | 17573.129 | NM_020309 | 1509.224  | 1188.416  |
| NM_020309 | 712.475   | 848.993   | NM_003032 | 6660.099  | 6831.207  | NM_000341 | 966.088   | 999.085   |
| NM_000341 | 2124.518  | 1954.39   | NM_017453 | 3522.794  | 5302.856  | AK023533  | 1503.405  | 1198.61   |
| AK023533  | 1826.052  | 1887.325  | AF038564  | 1850.442  | 1995.572  | NM_012450 | 2022.969  | 1613.84   |
| NM_012450 | 1015.407  | 1137.196  | AB033768  | 936.633   | 1017.214  | NM_007071 | 13604.585 | 12508.23  |
| NM_007071 | 13902.803 | 14583.35  | NM_017659 | 1822.847  | 1962.778  | NM_012135 | 482.848   | 973.959   |
| NM_012135 | 568.754   | 557.97    | NM_006904 | 7591.322  | 7980.654  | M37190    | 495.599   | 680.029   |
| NM_006812 | 15329.155 | 11987.687 | NM_004217 | 16145.589 | 20107.01  | NM_006812 | 10570.173 | 11861.778 |
| AK024434  | 3347.077  | 3066.359  | NM_006347 | 26572.654 | 35667.09  | AK024434  | 5943.412  | 6568.636  |
| NM_002388 | 16556.975 | 16302.951 | NM_020406 | 1540.23   | 1769.993  | NM_002388 | 9992.073  | 11386.835 |
| NM_016069 | 26677.326 | 28832.498 | NM_014685 | 16249.725 | 21433.229 | NM_016069 | 24394.662 | 30548.813 |
| NM_017612 | 4032.917  | 4008.418  | NM_001550 | 9908.368  | 8301.871  | NM_017612 | 3680.328  | 4517.045  |
| NM_013236 | 19529.047 | 22144.871 | AK026849  | 2906.992  | 3299.814  | NM_013236 | 13473.605 | 14062.27  |
| NM_017841 | 11374.479 | 14637.104 | NM_018677 | 1138.233  | 877.393   | NM_017841 | 9730.988  | 11284.744 |
| NM_001254 | 9501.409  | 9218.762  | NM_002785 | 1026.36   | 1012.941  | NM_001254 | 6576.445  | 6462.98   |
| NM_020412 | 9508.868  | 9782.953  | X78947    | 450.37    | 677.735   | NM_020412 | 14650.78  | 15470.306 |
| NM_003032 | 6842.089  | 6720.022  | NM_000041 | 26220.336 | 28730.936 | NM_003032 | 8541.103  | 7466.447  |
| NM_017453 | 18457.822 | 16382.409 | W69211    | 688.314   | 555.065   | NM_017453 | 19771.844 | 19618.34  |
| AF038564  | 10097.479 | 9370.815  | AA449931  | 2870.143  | 2782.838  | AF038564  | 5596.729  | 4877.083  |
| AB033768  | 1950.242  | 2051.268  | AA877347  | 21565.523 | 25300.123 | AB033768  | 1199.124  | 1097.414  |

|           |           |           |           |           |           |           |           |           |
|-----------|-----------|-----------|-----------|-----------|-----------|-----------|-----------|-----------|
| NM_006904 | 9538.461  | 8744.283  | BI755551  | 488.537   | 420.153   | NM_017655 | 3103.039  | 2144.848  |
| NM_004217 | 14268.053 | 14475.858 | S57235    | 10849.054 | 10135.919 | NM_006904 | 5844.7    | 4661.677  |
| NM_006347 | 31562.484 | 35673.066 | AI376272  | 2396.551  | 1933.046  | NM_004217 | 15295.902 | 11000.54  |
| NM_020406 | 2400.601  | 2261.839  | BF242229  | 805.035   | 960.713   | NM_006347 | 36121.941 | 26655.662 |
| NM_014685 | 15873.509 | 15214.038 | X75756    | 22766.824 | 26245.918 | NM_020406 | 1819.223  | 1893.225  |
| NM_001550 | 2281.661  | 2015.89   | AI754623  | 1078.382  | 1203.191  | NM_014685 | 16845.922 | 13773.886 |
| AK026849  | 691.263   | 702.986   | AA401326  | 4064.453  | 4432.247  | NM_001550 | 6441.063  | 6208.911  |
| NM_018677 | 2090.699  | 1663.233  | N55461    | 846.731   | 1054.71   | AK026849  | 3565.082  | 3479.682  |
| NM_002785 | 625.096   | 360.945   | AA504482  | 5995.663  | 5265.145  | NM_018677 | 1505.287  | 1443.591  |
| NM_000041 | 12440.729 | 12870.179 | BI602175  | 1000.759  | 586.111   | NM_002785 | 1087.905  | 1075.431  |
| W69211    | 355.116   | 420.605   | NM_016516 | 2715.641  | 3471.705  | X78947    | 291.385   | 390.763   |
| AA449931  | 977.539   | 791.164   | AF263538  | 1432.027  | 1697.546  | NM_000041 | 15970.698 | 20157.973 |
| AA877347  | 33990.547 | 40132.559 | NM_006280 | 52637.633 | 51510.469 | W69211    | 548.429   | 847.234   |
| R54049    | 395.949   | 324.216   | NM_002155 | 6968.069  | 9700.08   | AA449931  | 2883.515  | 3618.767  |
| BI755551  | 574.169   | 805.779   | NM_002066 | 1494.586  | 1240.33   | AA877347  | 29580.641 | 32727.877 |
| S57235    | 9611.229  | 10230.771 | NM_007355 | 65677.047 | 54881.352 | BI755551  | 607.574   | 650.13    |
| AI376272  | 2165.487  | 2306.455  | NM_006096 | 2027.404  | 3133.454  | S57235    | 8901.512  | 9945.365  |
| BF242229  | 1227.808  | 1061.584  | NM_006869 | 21699.219 | 24617.082 | AI376272  | 2690.164  | 2800.37   |
| X75756    | 2825.27   | 3076.825  | NM_015364 | 7429.432  | 9187.134  | BF242229  | 1091.229  | 1060.389  |
| AI754623  | 4005.911  | 3531.78   | NM_006611 | 541.363   | 530.847   | X75756    | 37023.465 | 39860.113 |
| AA401326  | 11356.652 | 10988.293 | NM_004963 | 2087.957  | 1967.938  | AI754623  | 3945.652  | 2664.715  |
| N55461    | 1649.215  | 1734.114  | NM_005535 | 14235.606 | 13725.212 | AA401326  | 13839.792 | 12301.207 |
| AA504482  | 4946.645  | 5293.617  | AB037857  | 805.701   | 712.541   | N55461    | 1405.652  | 1612.359  |
| BI602175  | 585.694   | 564.029   | AF218021  | 842.201   | 990.356   | AA504482  | 7462.695  | 5245.05   |
| NM_006003 | 27350.754 | 29122.928 | NM_013262 | 11815.097 | 12083.515 | BI602175  | 1792.075  | 1497.413  |
| NM_006555 | 9232.15   | 9107.739  | NM_007185 | 8549.542  | 9929.737  | NM_006003 | 24906.49  | 18457.611 |
| NM_016516 | 3227.587  | 3292.826  | NM_003221 | 572.903   | 699.998   | NM_006555 | 5595.466  | 5094.042  |
| AF263538  | 1744.399  | 1520.183  | NM_003357 | 14141.068 | 13033.747 | NM_016516 | 4315.725  | 3530.056  |
| NM_006280 | 43640.672 | 46554.867 | AF195420  | 781.794   | 1013.772  | AF263538  | 1647.088  | 1221.66   |
| NM_002155 | 10680.275 | 7240.933  | AK023261  | 5671.428  | 7055.034  | NM_001771 | 603.891   | 685.246   |
| NM_002066 | 730.593   | 529.231   | NM_012278 | 814.545   | 1107.829  | NM_002066 | 1450.842  | 1836.894  |
| NM_007355 | 69308.734 | 51940.621 | AF023142  | 769.112   | 747.562   | NM_007355 | 63610.711 | 58844.023 |
| NM_006096 | 3748.195  | 3260.045  | NM_016100 | 755.346   | 681.196   | NM_006096 | 2262.914  | 2384.592  |
| NM_006869 | 6358.49   | 7039.642  | NM_014057 | 2627.456  | 3790.857  | NM_006869 | 24334.344 | 29096.389 |
| NM_015364 | 11201.39  | 9829.412  | NM_000341 | 522.857   | 730.214   | NM_015364 | 10798.192 | 11504.827 |
| NM_006611 | 775.608   | 847.934   | AK023533  | 1276.38   | 1629.334  | NM_004963 | 1882.257  | 1977.886  |
| NM_004963 | 2127.249  | 2306.153  | NM_012450 | 1921.962  | 2390.773  | NM_001181 | 409.826   | 694.72    |
| NM_005535 | 9676.249  | 9712.19   | NM_007071 | 9734.567  | 12986.331 | NM_005535 | 26608.234 | 32297.447 |
| AB037857  | 570.916   | 683.626   | NM_016582 | 3401.572  | 3574.104  | AB037857  | 784.133   | 1105.267  |
| AF218021  | 1487.286  | 1465.988  | NM_014229 | 1084.776  | 1339.726  | AF218021  | 1575.228  | 1246.093  |
| NM_013262 | 16353.297 | 17014.93  | NM_013265 | 8968.775  | 8412.527  | NM_013262 | 15294.38  | 12458.056 |
| NM_007185 | 4296.708  | 4654.863  | NM_014964 | 2517.347  | 2257.371  | NM_007185 | 13025.088 | 13470.324 |
| NM_003221 | 719.202   | 471.43    | NM_014016 | 7874.501  | 7863.609  | NM_003221 | 893.807   | 846.199   |
| NM_003357 | 6776.222  | 7246.921  | NM_013433 | 2649.916  | 2814.068  | NM_003357 | 14756.798 | 13135.243 |
| AF195420  | 1698.011  | 1779.203  | NM_003794 | 3543.649  | 2770.044  | AF195420  | 1009.228  | 946.126   |
| AK023261  | 8035.929  | 7754.13   | NM_019892 | 5332.121  | 5197.042  | AK023261  | 6035.264  | 4455.463  |
| NM_005097 | 985.823   | 1301.904  | NM_016169 | 6924.773  | 5739.971  | NM_005097 | 1241.905  | 1028.959  |
| NM_012278 | 1574.04   | 1378.152  | BF307652  | 1475.631  | 1442.298  | NM_012278 | 1369.363  | 1070.879  |
| AF023142  | 1467.644  | 1323.788  | NM_017772 | 3550.74   | 5309.188  | AF023142  | 906.392   | 784.858   |
| NM_016100 | 1073.591  | 1194.811  | AF116574  | 2393.109  | 2773.146  | NM_016100 | 978.465   | 731.718   |
| NM_014057 | 6720.062  | 6554.949  | NM_005529 | 560.887   | 673.823   | NM_014057 | 4114.338  | 4183.154  |
| NM_020309 | 550.491   | 631.837   | NM_005869 | 7844.098  | 8017.993  | NM_000341 | 1492.707  | 1759.311  |
| NM_000341 | 1709.976  | 1867.158  | AF105067  | 3033.02   | 3778.987  | AK023533  | 2064.923  | 2223.063  |

|           |           |           |           |           |           |           |           |           |
|-----------|-----------|-----------|-----------|-----------|-----------|-----------|-----------|-----------|
| AK023533  | 1701.235  | 1680.649  | NM_018676 | 2838.468  | 2325.917  | NM_01245C | 1839.354  | 1832.16   |
| NM_01245C | 613.964   | 631.202   | NM_012072 | 746.356   | 713.879   | NM_007071 | 14413.521 | 14614.783 |
| NM_007071 | 14055.587 | 13358.905 | NM_006014 | 2362.306  | 2732.698  | NM_016582 | 2614.807  | 3094.337  |
| NM_016582 | 1043.892  | 815.728   | NM_006904 | 7083.287  | 7315.445  | NM_014229 | 1022.37   | 1108.217  |
| NM_014229 | 1533.716  | 1261.288  | NM_004217 | 13920.283 | 14267.616 | NM_013265 | 15583.905 | 16677.387 |
| NM_013265 | 15775.268 | 13132.61  | NM_006347 | 25033.875 | 31794.539 | NM_014964 | 1894.106  | 2508.349  |
| NM_014964 | 1976.687  | 1965.692  | NM_020406 | 1786.352  | 1800.083  | NM_014016 | 8518.507  | 8878.789  |
| NM_014016 | 6945.136  | 7122.554  | NM_014685 | 14975.793 | 17480.102 | NM_013433 | 3008.315  | 3966.847  |
| NM_013433 | 4601.385  | 4059.847  | NM_012288 | 4952.59   | 5308.462  | NM_003794 | 9764.784  | 8623.347  |
| NM_003794 | 8908.665  | 7816.515  | NM_005264 | 4626.044  | 4189.103  | NM_019892 | 8552.617  | 8031.053  |
| NM_019892 | 6769.587  | 7546.099  | NM_020373 | 848.179   | 1103.337  | NM_016169 | 7229.569  | 5658.704  |
| NM_016169 | 6209.452  | 7508.362  | NM_000714 | 1730.753  | 2008.52   | BF307652  | 3847.648  | 3209.925  |
| NM_004533 | 356.765   | 353.262   | NM_002556 | 3690.572  | 4176.789  | NM_017772 | 4365.487  | 3170.249  |
| BF307652  | 583.056   | 553.624   | NM_018089 | 7095.61   | 7557.184  | AF116574  | 3852.125  | 3284.713  |
| NM_017772 | 4737.027  | 4549.844  | L21934    | 4278.065  | 4871.119  | NM_005529 | 577.102   | 439.438   |
| AF116574  | 2700.365  | 3258.132  | AL117442  | 7315.019  | 7471.731  | NM_005869 | 11063.772 | 10032.675 |
| NM_005529 | 1391.08   | 1358.073  | NM_004695 | 909.374   | 932.831   | AF105067  | 3510.356  | 3014.904  |
| NM_005869 | 13329.953 | 13136.707 | AF299075  | 1290.806  | 1231.554  | NM_018676 | 3314.888  | 3404.369  |
| AF105067  | 5761.412  | 5748.027  | NM_00034C | 536.59    | 695.837   | NM_012072 | 731.273   | 960.281   |
| NM_018676 | 4672.802  | 4817.879  | NM_007188 | 4808.713  | 5892.191  | NM_006014 | 2332.515  | 3927.078  |
| NM_012072 | 750.047   | 873.55    | NM_001214 | 5015.635  | 5328.017  | NM_006904 | 6891.191  | 6773.394  |
| NM_006014 | 3524.436  | 3617.448  | AK022409  | 1049.855  | 1055.259  | NM_004217 | 12642.896 | 13739.58  |
| NM_006904 | 7150.232  | 5314.235  | U16851    | 12042.669 | 12276.709 | NM_006347 | 39232.289 | 39210.73  |
| NM_004217 | 14144.716 | 14141.002 | NM_006003 | 21790.43  | 25328.781 | NM_020406 | 1690.256  | 2268.508  |
| NM_006347 | 30879.469 | 35557.047 | NM_006555 | 6233.122  | 6173.562  | NM_014685 | 17804.402 | 19721.775 |
| NM_020406 | 1788.861  | 1811.722  | NM_016516 | 2886.085  | 3399.189  | NM_012288 | 5667.947  | 6421.398  |
| NM_014685 | 15378.02  | 13614.41  | AF263538  | 1353.911  | 1193.844  | NM_005264 | 4364.935  | 5298.058  |
| NM_012288 | 6706.903  | 6572.557  | M37190    | 480.397   | 428.037   | NM_020373 | 1972.537  | 2120.289  |
| NM_005264 | 5219.886  | 5429.654  | NM_006812 | 14016.007 | 13541.725 | NM_000714 | 2378.804  | 2853.523  |
| NM_020373 | 1947.26   | 1894.626  | AK024434  | 6370.578  | 5629.706  | NM_002556 | 5091.16   | 6565.2    |
| NM_000714 | 3194.828  | 3123.769  | NM_002388 | 13409.055 | 13389.432 | NM_018089 | 6369.608  | 5825.733  |
| NM_002556 | 6603.93   | 6203.041  | NM_016069 | 39015.621 | 36220.859 | L21934    | 4672.616  | 3043.881  |
| NM_018089 | 8415.842  | 8561.25   | NM_017612 | 3843.292  | 4015.795  | AL117442  | 10888.12  | 7356.107  |
| L21934    | 6754.652  | 6407.59   | NM_013236 | 13802.553 | 16384.582 | NM_004695 | 957.196   | 684.234   |
| AL117442  | 6447.011  | 6279.563  | NM_017841 | 9578.005  | 10783.917 | AF299075  | 1652.133  | 1345.876  |
| NM_004695 | 1003.005  | 1076.375  | NM_001254 | 4986.23   | 4284.535  | NM_007188 | 6884.706  | 6079.121  |
| AF299075  | 1205.512  | 1900.027  | NM_020412 | 19297.488 | 18808.99  | NM_001214 | 9354.065  | 9494.593  |
| NM_00034C | 943.748   | 814.833   | NM_003032 | 9721.226  | 10892.002 | AK022409  | 1079.265  | 1361.228  |
| NM_007188 | 8984.846  | 9327.729  | NM_017453 | 12394.067 | 13458.912 | U16851    | 12809.551 | 13334.173 |
| NM_001214 | 5135.844  | 6259.148  | AF038564  | 5017.395  | 5612.902  | NM_014341 | 10917.973 | 9929.602  |
| AK022409  | 1563.991  | 1627.148  | AB033768  | 1054.745  | 1243.815  | NM_006003 | 27505.076 | 31181.268 |
| U16851    | 28024.408 | 30532.002 | NM_017659 | 2140.169  | 1831.626  | NM_006555 | 6687.943  | 7000.952  |
| NM_014341 | 18566.363 | 19879.871 | AK023261  | 5729.884  | 6427.754  | NM_016516 | 4102.07   | 3949.674  |
| NM_006003 | 26183.447 | 22929.486 | NM_005097 | 1144.22   | 1824.147  | AF263538  | 1506.171  | 1597.39   |
| NM_006555 | 7352.574  | 7354.002  | NM_012278 | 919.641   | 930.933   | NM_012135 | 735.187   | 925.586   |
| NM_016516 | 3512.649  | 2944.949  | AF023142  | 750.249   | 895.473   | M37190    | 380.405   | 793.586   |
| AF263538  | 1415.491  | 1152.774  | NM_01610C | 665.41    | 699.153   | NM_006812 | 11732.037 | 12374.189 |
| NM_012135 | 593.006   | 555.121   | NM_014057 | 3254.825  | 3289.205  | AK024434  | 4941.706  | 4497.414  |
| NM_006812 | 18891.852 | 18756.406 | NM_00155C | 6204.803  | 5205.752  | NM_002388 | 13481.224 | 14023.558 |
| AK024434  | 3663.04   | 3741.485  | AK026849  | 2737.344  | 2841.737  | NM_016069 | 30714.525 | 28745.164 |
| NM_002388 | 17900.877 | 17451.764 | NM_018677 | 1081.08   | 1282.39   | NM_017612 | 3697.009  | 3544.134  |
| NM_016069 | 29897.598 | 39940.902 | NM_002785 | 1109.671  | 729.461   | NM_013357 | 1000.999  | 608.125   |
| NM_017612 | 4336.378  | 5397.379  | NM_000041 | 23294.605 | 21367.055 | NM_013236 | 14348.817 | 11213.558 |

|           |           |           |           |           |           |           |           |           |
|-----------|-----------|-----------|-----------|-----------|-----------|-----------|-----------|-----------|
| NM_013236 | 18773.398 | 21175.4   | W69211    | 511.869   | 532.779   | NM_017841 | 11647.32  | 9516.721  |
| NM_017841 | 11626.707 | 13441.663 | AA449931  | 2740.773  | 1891.425  | NM_001254 | 6052.408  | 4003.76   |
| NM_001254 | 10050.071 | 10181.073 | AA877347  | 28558.385 | 35655.363 | NM_020412 | 27106.537 | 24937.408 |
| NM_020412 | 9185.754  | 10542.95  | S57235    | 10328.533 | 10114.849 | NM_003032 | 10407.696 | 11432.363 |
| NM_003032 | 7444.084  | 7194.439  | AI376272  | 2271.191  | 1965.778  | NM_017453 | 15155.297 | 13103.826 |
| NM_017453 | 19376.207 | 18317.682 | BF242229  | 965.936   | 844.178   | AF038564  | 4894.702  | 4545.763  |
| AF038564  | 10229.591 | 9114.51   | X75756    | 25096.613 | 26469.771 | AB033768  | 953.38    | 1216.917  |
| AB033768  | 2135.27   | 2390.92   | AI754623  | 2242.114  | 2659.528  | NM_017659 | 3231.933  | 3389.038  |
| NM_017659 | 2965.846  | 2451.499  | AA401326  | 7103.646  | 8023.509  | AK023261  | 6548.679  | 7158.712  |
| AK023261  | 6120.873  | 4773.108  | N55461    | 1061.528  | 832.151   | NM_005097 | 947.29    | 1070.126  |
| NM_005097 | 500.333   | 497.854   | AA504482  | 5189.861  | 4674.271  | NM_012278 | 1067.87   | 1215.851  |
| NM_012278 | 1147.329  | 953.242   | NM_005869 | 8595.225  | 9828.118  | AF023142  | 953.803   | 931.866   |
| AF023142  | 1134.813  | 863.298   | AF105067  | 4060.493  | 4344.639  | NM_01610C | 1030.361  | 1062.911  |
| NM_01610C | 947.811   | 793.634   | NM_018676 | 3576.437  | 3852.475  | NM_014057 | 3218.71   | 3747.489  |
| NM_014057 | 5770.887  | 5266.913  | NM_012072 | 867.345   | 626.974   | NM_00155C | 1765.106  | 2060.342  |
| NM_00155C | 1715.987  | 1230.938  | NM_001771 | 584.879   | 420.667   | AK026849  | 1031.112  | 1137.85   |
| AK026849  | 635.927   | 582.415   | NM_002066 | 1347.872  | 999.256   | NM_018677 | 1153.748  | 1339.004  |
| NM_018677 | 2499.886  | 2269.707  | NM_007355 | 63916.641 | 53577.543 | NM_002785 | 869.411   | 1546.617  |
| NM_002785 | 1182.611  | 1122.57   | NM_006096 | 2035.203  | 2469.942  | NM_000041 | 16495.156 | 20639.537 |
| X78947    | 532.39    | 576.797   | NM_006869 | 24559.242 | 28341.586 | W69211    | 1134.05   | 1628.346  |
| NM_000041 | 16831.736 | 20268.301 | NM_015364 | 6354.563  | 4865.335  | AA449931  | 3691.47   | 3249.145  |
| W69211    | 664.422   | 445.718   | NM_006611 | 401.873   | 445.883   | AA877347  | 32979.395 | 24777.811 |
| AA449931  | 1450.841  | 1237.81   | NM_004963 | 2565.284  | 2491.223  | S57235    | 13781.783 | 11397.589 |
| AA877347  | 35991.703 | 44608.758 | NM_005535 | 18163.789 | 14895.915 | AI376272  | 3435.534  | 3326.126  |
| R54049    | 251.848   | 447.215   | AB037857  | 949.148   | 635.89    | BF242229  | 1654.359  | 1240.513  |
| BI755551  | 820.51    | 643.779   | AF218021  | 964.402   | 873.017   | X75756    | 59174.883 | 59692.953 |
| S57235    | 9173.2    | 11065.679 | NM_013262 | 13569.114 | 15068.316 | AI754623  | 3898.619  | 3497.241  |
| AI376272  | 2242      | 2705.284  | NM_007185 | 7785.618  | 10570.451 | AA401326  | 8118.498  | 6938.907  |
| BF242229  | 1082.807  | 1289.269  | NM_003357 | 8765.974  | 7699.263  | N55461    | 1092.158  | 1093.341  |
| X75756    | 3200.738  | 3407.378  | NM_00034C | 555.07    | 720.5     | AA504482  | 10177.341 | 9360.46   |
| AI754623  | 4632.342  | 4310.594  | NM_007188 | 5224.114  | 6367.921  | BI602175  | 1254.159  | 1180.535  |
| AA401326  | 9720.56   | 9545.722  | NM_001214 | 8005.088  | 8260.034  | NM_005529 | 698.948   | 1160.05   |
| N55461    | 1498.697  | 1633.159  | AK022409  | 1163.109  | 1258.04   | NM_005869 | 10624.356 | 11050.023 |
| AA504482  | 5849.767  | 5773.323  | NM_000341 | 1046.525  | 1278.297  | AF105067  | 3697.419  | 3835.249  |
| BI602175  | 561.232   | 546.436   | AK023533  | 1212.816  | 1413.353  | NM_018676 | 2610.265  | 2809.79   |
| NM_005529 | 966.08    | 709.063   | NM_01245C | 1085.588  | 897.195   | NM_012072 | 776.279   | 873.128   |
| NM_005869 | 10216.195 | 7860.475  | NM_007071 | 9514.613  | 9525.08   | NM_006014 | 2242.686  | 2531.6    |
| AF105067  | 4267.306  | 2955.247  | NM_016582 | 3478.907  | 3671.898  | NM_00628C | 49877.031 | 57846.379 |
| NM_018676 | 2988.124  | 2220.515  | NM_014229 | 1061.005  | 1330.753  | NM_002155 | 9118.796  | 9661.521  |
| NM_012072 | 1076.509  | 748.762   | NM_013265 | 14643.395 | 16249.926 | NM_001771 | 601.647   | 902.841   |
| NM_006014 | 4069.604  | 3237.385  | NM_014964 | 2827.583  | 2414.317  | NM_002066 | 1134.267  | 1909.188  |
| NM_00628C | 44650.105 | 47937.324 | NM_014016 | 7905.218  | 8641.968  | NM_007355 | 63688.02  | 56991.316 |
| NM_002155 | 10604.354 | 7996.345  | NM_013433 | 2738.288  | 2189.336  | NM_006096 | 2307.405  | 2454.584  |
| NM_002066 | 958.54    | 1059.928  | NM_003794 | 6813.152  | 5560.312  | NM_006869 | 27080.773 | 42070.77  |
| NM_007355 | 69525.727 | 53073.859 | NM_019892 | 6962.588  | 7141.705  | NM_015364 | 10970.949 | 8621.988  |
| NM_006096 | 5194.584  | 5723.974  | NM_016169 | 5822.178  | 4761.378  | NM_006611 | 732.772   | 585.393   |
| NM_006869 | 6732.047  | 7820.104  | BF307652  | 1047.44   | 849.393   | NM_004963 | 2301.548  | 1715.086  |
| NM_015364 | 10920.099 | 11545.087 | NM_017772 | 2422.983  | 3593.115  | NM_005535 | 48228.898 | 51810.816 |
| NM_006611 | 390.441   | 475.902   | AF116574  | 2652.362  | 2957.53   | AB037857  | 1507.7    | 1232.83   |
| NM_004963 | 2148.599  | 2118.718  | NM_020412 | 21873.408 | 21149.373 | AF218021  | 1563.273  | 2449.654  |
| NM_001181 | 368.783   | 465.78    | NM_003032 | 11708.036 | 12328.727 | NM_013262 | 18018.754 | 28739.531 |
| NM_005535 | 9791.047  | 11671.569 | NM_017453 | 15167.204 | 18577.754 | NM_007185 | 15254.146 | 21843.084 |
| AB037857  | 324.435   | 607.778   | AF038564  | 5770.063  | 6373.113  | NM_003221 | 821.107   | 884.603   |

|           |           |           |           |           |           |           |           |           |
|-----------|-----------|-----------|-----------|-----------|-----------|-----------|-----------|-----------|
| NM_005012 | 447.344   | 416.33    | AB033768  | 1288.564  | 1485.859  | NM_003357 | 14389.461 | 12716.538 |
| AF218021  | 1290.403  | 1336.94   | NM_017659 | 2660.867  | 2587.069  | AF195420  | 738.564   | 787.866   |
| NM_013262 | 16073.014 | 17130.748 | NM_006904 | 7171.786  | 8054.566  | NM_000340 | 495.767   | 718.608   |
| NM_007185 | 3885.844  | 4174.799  | NM_004217 | 15929.923 | 18337.199 | NM_007185 | 6282.125  | 7206.458  |
| NM_003221 | 558.234   | 606.742   | NM_020406 | 2084.697  | 2128.612  | NM_001214 | 4647.882  | 5339.844  |
| NM_003357 | 8956.676  | 10973.629 | NM_014685 | 15098.154 | 14410.404 | AK022409  | 995.833   | 1163.198  |
| AF195420  | 1547.357  | 1731.862  | NM_012285 | 4382.014  | 4556.55   | U16851    | 12413.952 | 12279.859 |
| NM_000340 | 699.353   | 359.882   | NM_005264 | 5666.755  | 5484.701  | NM_014341 | 8513.125  | 9297.162  |
| NM_007185 | 7323.84   | 6591.182  | NM_020373 | 1534.943  | 1938.754  | NM_020305 | 926.591   | 1219.328  |
| NM_001214 | 3178.254  | 3132.882  | NM_000714 | 1955.113  | 2453.156  | NM_000341 | 1449.665  | 1753.796  |
| AK022409  | 1203.807  | 834.714   | NM_002556 | 4069.992  | 3456.401  | AK023533  | 1737.61   | 1987.234  |
| U16851    | 21761.725 | 17931.203 | NM_018089 | 5353.481  | 5472.394  | NM_012450 | 1485.171  | 1731.352  |
| NM_014341 | 18624.137 | 17036.025 | L21934    | 2271.623  | 2802.603  | NM_007071 | 11958.488 | 10592.411 |
| NM_020305 | 731.694   | 787.717   | AL117442  | 6208.329  | 6467.124  | NM_016582 | 2648.863  | 2269.615  |
| NM_000341 | 1900.271  | 2005.198  | NM_004695 | 755.428   | 753.354   | NM_014225 | 1207.638  | 1003.579  |
| AK023533  | 1718.455  | 2114.748  | AK026663  | 1033.761  | 1304.032  | NM_013265 | 21840.129 | 16732.652 |
| NM_012450 | 929.805   | 1260.462  | NM_001174 | 4323.567  | 4937.864  | NM_014964 | 1997.036  | 1557.448  |
| NM_007071 | 16399.096 | 19645.443 | U69645    | 21777.977 | 27430.85  | NM_014016 | 11257.133 | 10264.073 |
| NM_016582 | 1157.694  | 1176.468  | NM_019082 | 9512.197  | 9407.807  | NM_013433 | 3660.544  | 3567.819  |
| NM_014225 | 1933.557  | 1701.098  | NM_001424 | 1958.015  | 1559.95   | AJ224867  | 554.831   | 431.5     |
| NM_013265 | 16633.299 | 16372.064 | AB040950  | 2018.576  | 2130.776  | NM_003794 | 9503.73   | 9882.083  |
| NM_014964 | 1765.091  | 1893.193  | NM_014003 | 7456.979  | 8057.11   | NM_019892 | 11418.974 | 23950.078 |
| NM_014016 | 6766.619  | 6005.211  | NM_001356 | 1556.852  | 1855.264  | NM_016165 | 7133.096  | 12174.956 |
| NM_013433 | 4919.909  | 4502.274  | AB037805  | 10040.475 | 9674.997  | BF307652  | 2981.225  | 2895.443  |
| AJ224867  | 630.19    | 646.67    | NM_016516 | 3216.46   | 3415.13   | NM_017772 | 3980.291  | 3263.774  |
| NM_003794 | 9137.644  | 8948.376  | AF263538  | 1672.841  | 1504.342  | AF116574  | 3088.407  | 3021.543  |
| NM_019892 | 6828.607  | 7809.304  | M37190    | 452.812   | 687.311   | NM_020412 | 9577.321  | 11262.731 |
| NM_016165 | 4836.441  | 6345.292  | NM_006812 | 13734.316 | 12203.304 | NM_003032 | 5500.766  | 5652.866  |
| NM_004533 | 506.609   | 366.433   | AK024434  | 10294.025 | 6150.979  | NM_017453 | 21277.568 | 22213.041 |
| BF307652  | 458.187   | 551.283   | NM_002385 | 13316.62  | 13056.72  | AF038564  | 5926.372  | 5479.594  |
| NM_017772 | 4781.989  | 4550.523  | NM_016069 | 28098.225 | 30243.865 | AB033768  | 1124.596  | 1217.033  |
| AF116574  | 2729.779  | 2819.536  | NM_017612 | 3067.64   | 2992.495  | NM_017659 | 2230.058  | 2238.7    |
| NM_020412 | 9014.194  | 6668.856  | NM_013236 | 13114.408 | 15449.613 | NM_006904 | 5540.986  | 6431.894  |
| NM_003032 | 5682.699  | 4359.668  | NM_017841 | 8710.69   | 8497.729  | NM_004217 | 11040.735 | 12489.475 |
| NM_017453 | 17375.555 | 12222.914 | NM_001254 | 6057.618  | 6893.246  | NM_020406 | 1831.315  | 2192.895  |
| AF038564  | 7143.231  | 5282.291  | NM_004389 | 966.585   | 453.621   | NM_014685 | 16811.74  | 17157.387 |
| AB033768  | 1568.01   | 1765.523  | NM_005925 | 4583.167  | 5470.694  | NM_012285 | 5969.125  | 4560.965  |
| NM_017659 | 2914.138  | 2443.3    | NM_003952 | 3986.243  | 4213.929  | NM_005264 | 4742.692  | 3518.242  |
| NM_006904 | 6914.701  | 7332.291  | NM_005424 | 1720.809  | 1390.787  | NM_020373 | 1891.671  | 1427.474  |
| NM_004217 | 14987.718 | 17048.473 | NM_005975 | 4465.616  | 4936.503  | NM_000714 | 1872.128  | 1899.4    |
| NM_006347 | 34891.93  | 44593.402 | AY007220  | 14456.13  | 12149.498 | NM_002556 | 4685.249  | 4885.074  |
| NM_020406 | 2647.954  | 3150.966  | X89399    | 2050.357  | 2388.113  | NM_018089 | 7170.086  | 11009.929 |
| NM_014685 | 20276.777 | 23759.533 | NM_003805 | 1205.806  | 1531.415  | L21934    | 2870.989  | 2868.447  |
| NM_012285 | 7786.656  | 8953.258  | AK023666  | 1420.395  | 1403.742  | AL117442  | 9084.6    | 7694.128  |
| NM_005264 | 6415.733  | 6903.304  | NM_005399 | 1773.215  | 1217.852  | NM_004695 | 735.085   | 461.453   |
| NM_020373 | 2787.746  | 3030.177  | NM_006573 | 718.014   | 723.178   | AF299075  | 1489.603  | 2463.503  |
| NM_000714 | 4428.766  | 4247.782  | NM_005118 | 755.508   | 776.508   | AK026663  | 1131.661  | 1740.546  |
| NM_002556 | 5763.043  | 6004.761  | NM_015185 | 2733.274  | 2132.351  | NM_001174 | 3240.214  | 3703.174  |
| NM_018089 | 7852.348  | 9039.835  | NM_005374 | 1593.393  | 398.333   | U69645    | 29048.697 | 28829.184 |
| L21934    | 6557.587  | 6754.184  | AF011757  | 1370.157  | 961.907   | NM_019082 | 10802.338 | 8142.903  |
| AL117442  | 5957.267  | 6198.36   | NM_003632 | 2053.759  | 1385.405  | AB040950  | 1704.865  | 1632.079  |
| NM_004695 | 800.738   | 687.531   | NM_002194 | 3234.328  | 3804.366  | NM_014003 | 4745.178  | 6031.195  |
| AK026663  | 1010.45   | 870.234   | NM_000530 | 1392.392  | 1631.642  | NM_001356 | 1059.375  | 957.261   |

|           |           |           |           |           |           |           |           |           |
|-----------|-----------|-----------|-----------|-----------|-----------|-----------|-----------|-----------|
| NM_001174 | 7282.85   | 6388.81   | AB028989  | 858.044   | 801.601   | AB037805  | 4067.708  | 5037.002  |
| U69645    | 22471.48  | 24828.266 | NM_016166 | 14625.303 | 14089.082 | NM_016516 | 3833.149  | 3790.631  |
| NM_019082 | 10140.442 | 9360.782  | NM_002086 | 19873.482 | 18517.605 | AF263538  | 1429.187  | 916.658   |
| NM_001424 | 712.358   | 681.748   | NM_016248 | 1485.197  | 1805.182  | NM_012135 | 930.121   | 700.046   |
| AB040950  | 2457.792  | 3239.903  | NM_005489 | 13529.146 | 11882.608 | M37190    | 669.725   | 611.025   |
| NM_014003 | 8549.144  | 10428.805 | NM_020482 | 3919.828  | 5184.782  | NM_006812 | 11440.263 | 9594.563  |
| NM_001356 | 1544.799  | 1517.817  | NM_002398 | 634.323   | 774.263   | AK024434  | 11220.955 | 10277.293 |
| AB037805  | 1676.708  | 2021.046  | NM_005417 | 2102.433  | 2518.242  | NM_002388 | 14338.378 | 15057.863 |
| NM_016516 | 4078.52   | 4290.536  | NM_002649 | 3611.342  | 3833.826  | NM_016066 | 55264.117 | 53382.238 |
| AF263538  | 2468.898  | 2506.715  | AK025329  | 23530.154 | 20953.018 | NM_017612 | 4178.049  | 4959.99   |
| NM_012135 | 625.569   | 802.925   | NM_001259 | 2387.127  | 1774.115  | NM_013236 | 12698.602 | 11597.472 |
| NM_006812 | 21764.592 | 26238.438 | AL137679  | 4272.876  | 5342.862  | NM_017841 | 7115.239  | 6211.969  |
| AK024434  | 4583.997  | 5277.272  | NM_001786 | 17693.105 | 18536.9   | NM_001254 | 5273.332  | 3861.952  |
| NM_002388 | 17537.158 | 16509.941 | AB040965  | 1357.332  | 766.081   | NM_004388 | 758.301   | 965.417   |
| NM_016066 | 29538.059 | 39150.887 | AK025026  | 3205.088  | 3554.933  | NM_005928 | 2272.354  | 1324.718  |
| NM_017612 | 4502.688  | 4872.144  | AK023052  | 3054.513  | 3143.001  | NM_003952 | 2852.383  | 1909.516  |
| NM_013236 | 17991.695 | 19940.477 | AB018350  | 453.28    | 638.063   | NM_005424 | 854.689   | 663.039   |
| NM_017841 | 11063.525 | 11560.354 | NM_006455 | 56393.625 | 45936.672 | NM_005975 | 4865.774  | 5196.329  |
| NM_004388 | 344.985   | 389.1     | NM_017541 | 963.882   | 654.962   | AY007220  | 4636.777  | 5465.167  |
| NM_005928 | 5594.704  | 5534.581  | NM_018460 | 15700.686 | 12992.923 | NM_004438 | 1207.94   | 1626.985  |
| NM_003952 | 5823.042  | 5157.502  | NM_002705 | 12073.911 | 10777.234 | X89399    | 1797.692  | 1978.804  |
| NM_005975 | 8913.908  | 8872.494  | NM_005591 | 11904.969 | 8357.629  | NM_003808 | 1912.212  | 1246.618  |
| AY007220  | 2403.017  | 2691.242  | NM_002373 | 1511.529  | 1999.541  | AK023666  | 1542.526  | 1049.359  |
| X89399    | 2581.169  | 3168.094  | NM_003128 | 1154.813  | 1446.295  | NM_005396 | 1915.805  | 1225.029  |
| NM_003808 | 2890.469  | 2704.132  | NM_017734 | 499       | 462.842   | NM_006573 | 1029.131  | 574.764   |
| AK023666  | 1125.003  | 1572.988  | AK024251  | 973.39    | 982.098   | NM_005118 | 1059.279  | 1169.316  |
| NM_005396 | 3088.917  | 2695.328  | NM_002545 | 3069.264  | 2966.511  | NM_015185 | 2627.287  | 1767.858  |
| NM_006573 | 1439.578  | 1424.482  | NM_006688 | 46548.016 | 46225.664 | NM_005374 | 1268.148  | 1254.792  |
| NM_005118 | 433.931   | 787.595   | NM_005411 | 5353.935  | 4374.458  | AF011757  | 876.117   | 953.426   |
| NM_015185 | 3945.331  | 3671.42   | NM_004855 | 7601.765  | 8974.438  | NM_003632 | 3540.99   | 5340.217  |
| NM_005374 | 2357.92   | 3108.045  | NM_006952 | 1292.975  | 1647.013  | NM_002194 | 3537.234  | 4286.448  |
| AF011757  | 892.829   | 746.15    | NM_005055 | 756.569   | 807.461   | NM_000530 | 1734.908  | 1623.824  |
| NM_003632 | 1054.746  | 1107.588  | NM_004808 | 2254.488  | 3176.306  | AB028989  | 1075.94   | 856.953   |
| NM_002194 | 1727.707  | 1579.855  | NM_004617 | 1960.766  | 2062.197  | NM_002086 | 19815.047 | 14155.747 |
| NM_000530 | 888.812   | 741.916   | NM_005668 | 7161.446  | 7236.466  | NM_016248 | 1540.058  | 1103.49   |
| AB028989  | 1406.71   | 1811.91   | NM_006748 | 13526.778 | 12380.231 | NM_005488 | 18969.418 | 15548.703 |
| NM_016166 | 8574.664  | 7736.121  | NM_012177 | 6959.816  | 7873.75   | AF191770  | 575.254   | 762.472   |
| NM_002086 | 23860.615 | 26078.035 | NM_006666 | 35370.594 | 41910.168 | NM_020482 | 2235.246  | 2183.27   |
| NM_016248 | 2538.804  | 2101.992  | NM_002807 | 15589.799 | 18457.77  | NM_002398 | 692.945   | 550.428   |
| NM_005488 | 5513.63   | 5967.386  | NM_002799 | 62496.516 | 54833.758 | NM_005417 | 2046.104  | 1861.999  |
| AF191770  | 367.552   | 361.805   | NM_002790 | 45508.453 | 50437.523 | NM_002649 | 3617.451  | 2406.489  |
| NM_020482 | 2207.903  | 2202.705  | NM_018386 | 8667.299  | 8606.339  | AK025329  | 28491.986 | 30491.076 |
| NM_002398 | 1465.112  | 1375.883  | NM_014948 | 1394.116  | 698.748   | NM_001259 | 1149.673  | 1352.461  |
| NM_005417 | 2590.207  | 2797.779  | BF217579  | 13045.089 | 9310.162  | NM_001786 | 19474.947 | 12416.01  |
| NM_002649 | 3908.281  | 3797.645  | NM_004335 | 5514.737  | 2868.697  | AB040965  | 1049.161  | 632.609   |
| AK025329  | 30341.506 | 37442.125 | NM_007011 | 1714.959  | 2022.233  | AK025026  | 3740.838  | 2854.523  |
| NM_001259 | 3621.564  | 3271.628  | Y10210    | 7015.609  | 6947.324  | AK023052  | 2480.146  | 1672.399  |
| AL137679  | 7995.871  | 9305.585  | AB020689  | 3159.096  | 3230.52   | NM_006455 | 53343.855 | 52040.207 |
| NM_001786 | 31364.563 | 39700.484 | AK023916  | 576.57    | 922.614   | NM_017541 | 822.414   | 551.432   |
| AB040965  | 2130.618  | 2371.345  | NM_003203 | 5622.285  | 5549.906  | NM_018460 | 17932.912 | 15066.468 |
| AK025026  | 1048.831  | 1111.464  | NM_002514 | 1563.53   | 1718.888  | NM_002705 | 13063.97  | 14105.107 |
| AK023052  | 2006.345  | 2383.28   | AF177238  | 2305.307  | 1404.947  | NM_005591 | 15969.446 | 17660.873 |
| AB018350  | 1828.109  | 1358.033  | AL096747  | 1161.003  | 1055.323  | NM_002373 | 1664.951  | 1812.794  |

|           |           |           |           |           |           |           |           |           |
|-----------|-----------|-----------|-----------|-----------|-----------|-----------|-----------|-----------|
| NM_00645E | 7282.546  | 8640.764  | AB021641  | 573.304   | 697.643   | NM_00312E | 1213.542  | 1026.426  |
| NM_017541 | 1017.276  | 1411.094  | NM_01800E | 545.772   | 751.539   | NM_00254E | 2204.378  | 2003.074  |
| NM_01846C | 23116.041 | 25882.52  | NM_01240E | 15207.463 | 14455.101 | NM_00668E | 54039.723 | 54997.664 |
| NM_00270E | 1947.943  | 2290.173  | NM_014947 | 30636.139 | 28835.063 | NM_005411 | 7809.953  | 8205.84   |
| NM_005591 | 18523.65  | 15199.469 | AL355698  | 1889.746  | 2356.534  | NM_00485E | 6282.051  | 6335.482  |
| NM_00237E | 2115.879  | 1893.992  | AB033112  | 2318.375  | 2356.307  | NM_00695E | 1288.711  | 1152.24   |
| NM_00312E | 1473.747  | 1461.323  | AK023243  | 1335.984  | 1277.95   | NM_00480E | 1777.653  | 1410.917  |
| NM_017734 | 289.1     | 551.186   | NM_01440E | 3034.199  | 2792.734  | NM_004617 | 1770.481  | 1178.423  |
| AK024251  | 1156.954  | 1185.468  | NM_00142E | 2823.288  | 2714.419  | NM_00566E | 9730.459  | 7450.681  |
| NM_00254E | 1478.743  | 1826.432  | AK022358  | 3750.581  | 2412.015  | NM_00666E | 30927.838 | 27824.359 |
| NM_00668E | 12551.566 | 13243.027 | NM_000977 | 25650.898 | 18016.293 | NM_002807 | 23464.391 | 11924.99  |
| NM_005411 | 570.085   | 538.41    | NM_01420E | 56851.316 | 50592.52  | NM_00279E | 63132.18  | 58156.137 |
| NM_00485E | 13345.336 | 13386.73  | NM_018141 | 18575.402 | 17426.289 | NM_00279C | 42591.703 | 28722.936 |
| NM_00695E | 2201.585  | 1913.172  | NM_016504 | 41874.008 | 47165.137 | NM_01838E | 9330.823  | 5795.112  |
| NM_00505E | 439.057   | 575.464   | U25752    | 61664.961 | 52939.719 | NM_01494E | 2106.88   | 1810.669  |
| NM_00480E | 2586.126  | 2639.848  | X96646    | 36901.797 | 40884.742 | BF217579  | 10916.114 | 9699.565  |
| NM_004617 | 1940.589  | 1564.416  | AB032991  | 12600.963 | 13105.24  | NM_00433E | 5139.587  | 4208.18   |
| NM_00566E | 10854.938 | 9633.848  | AK026985  | 5958.693  | 5679.96   | AF040965  | 20138.873 | 28619.318 |
| NM_00674E | 18257.967 | 17603.262 | AF007153  | 715.943   | 814.575   | AB037840  | 4592.018  | 6799.732  |
| NM_012177 | 11189.39  | 10773.17  | AK000855  | 1337.637  | 1507.556  | NM_007011 | 2449.807  | 2751.94   |
| NM_00666E | 28640.928 | 34015.426 | NM_00410E | 9780.877  | 9903.746  | Y10210    | 6150.835  | 4033.208  |
| NM_002807 | 26328.918 | 30094.016 | NM_00319E | 11921.885 | 11545.277 | AB020689  | 3410.52   | 2880.139  |
| NM_01838E | 12098.265 | 14262.246 | AF220415  | 1190.875  | 1419.323  | NM_00320E | 3778.785  | 3372.907  |
| NM_01494E | 2586.983  | 2677.465  | NM_005174 | 62738.313 | 53575.984 | NM_002514 | 1450.091  | 1543.723  |
| BF217579  | 3656.867  | 3925.524  | NM_00036E | 4357.456  | 4616.156  | AF177238  | 2246.628  | 1743.39   |
| NM_00433E | 3940.733  | 4215.732  | AF110322  | 5525.535  | 2929.872  | AL096747  | 229.951   | 1442.644  |
| AF040965  | 11278.407 | 12320.209 | NM_01345C | 2162.081  | 1531.149  | AB033112  | 1942.293  | 1915.601  |
| AB037840  | 3785.487  | 3697.412  | NM_00453E | 1730.196  | 1618.566  | AK023243  | 1316.087  | 896.147   |
| NM_007011 | 2709.738  | 2724.771  | NM_003077 | 4232.033  | 3482.374  | NM_01440E | 2619.973  | 1329.228  |
| Y10210    | 10361.6   | 9764.313  | NM_00210E | 9685.84   | 9399.041  | NM_00142E | 2769.02   | 2033.905  |
| AB020689  | 4751.85   | 5579.886  | NM_01848E | 2740.8    | 2827.536  | NM_01420E | 51545.004 | 46901.539 |
| AK023916  | 1274.214  | 1151.715  | L13203    | 2501.138  | 2303.707  | NM_018141 | 21977.098 | 14036.104 |
| NM_00320E | 7011.949  | 8601.829  | NM_01804C | 2997.911  | 2911.627  | NM_016504 | 33938.922 | 27675.928 |
| NM_002514 | 993.846   | 886.79    | AB042646  | 3640.697  | 3239.344  | U25752    | 58915.695 | 53808.105 |
| AF177238  | 3348.374  | 1800.249  | NM_003431 | 3570.3    | 3083.369  | X96646    | 32981.688 | 33292.762 |
| AL096747  | 1003.561  | 979.489   | M29581    | 2634.557  | 2155.319  | AB032991  | 8457.57   | 7896.192  |
| AB021641  | 953.386   | 1279.584  | AB037726  | 306.752   | 548.906   | AK026985  | 6511.688  | 7492.554  |
| NM_01800E | 598.511   | 689.86    | AL359622  | 1174.71   | 843.854   | NM_00410E | 8940.202  | 10643.522 |
| NM_01240E | 12042.193 | 13305.789 | AL050204  | 3482.898  | 4097.504  | NM_00319E | 12841.098 | 13787.23  |
| NM_014947 | 11878.824 | 13854.15  | AF085999  | 817.961   | 894.206   | AF220415  | 1325.491  | 835.124   |
| AL355698  | 2378.933  | 2319.356  | AK025316  | 2730.71   | 2252.306  | NM_005174 | 59340.539 | 50961.898 |
| AB033112  | 2403.092  | 2691.632  | AK026357  | 3964.036  | 4082.165  | NM_00036E | 4139.367  | 2741.296  |
| NM_005674 | 578.588   | 668.913   | NM_01832E | 5222.099  | 5453.108  | AF110322  | 2847.338  | 3340.461  |
| AK023243  | 3068.226  | 3257.556  | NM_01423E | 9350.768  | 8182.087  | NM_01345C | 3216.043  | 2413.03   |
| NM_006867 | 990.85    | 841.603   | AK026922  | 1718.852  | 2067.832  | NM_00453E | 2745.06   | 1691.369  |
| NM_00142E | 2813.952  | 2691.389  | AK022645  | 967.096   | 598.601   | NM_003077 | 3772.004  | 2805.391  |
| NM_00551E | 398.447   | 345.509   | NM_01435E | 4525.295  | 4759.959  | NM_00210E | 8555.899  | 14316.803 |
| AK022358  | 4977.391  | 6290.073  | AF070541  | 355.467   | 538.734   | NM_01848E | 3019.311  | 1958.354  |
| NM_000977 | 33451.785 | 38976.465 | AF070552  | 12263.643 | 10983.961 | L13203    | 4573.91   | 2989.572  |
| NM_01420E | 63146.18  | 51474.324 | NM_004271 | 10950.796 | 10470.696 | NM_01804C | 3118.823  | 1741.804  |
| NM_018141 | 21314.705 | 19184.424 | AK022282  | 676.1     | 758.33    | AB042646  | 5363.105  | 2800.43   |
| BE790474  | 523.707   | 255.752   | NM_01826E | 4469.927  | 4910.913  | NM_003431 | 3552.842  | 2663.286  |
| NM_016504 | 51913.727 | 48165.113 | NM_004867 | 32405.764 | 38508.988 | M29581    | 4610.058  | 4947.042  |



|           |           |           |            |           |           |           |           |           |
|-----------|-----------|-----------|------------|-----------|-----------|-----------|-----------|-----------|
| U25752    | 63954.711 | 52362.109 | AL050021   | 17236.525 | 16024.404 | AL359622  | 471.376   | 623.044   |
| X96646    | 45749.031 | 46777.016 | AB002448   | 1806.838  | 2015.984  | AL050204  | 2882.883  | 3520.958  |
| AB032991  | 14473.409 | 13047.73  | AF070580   | 850.486   | 846.426   | AF085999  | 914.793   | 1211.605  |
| AK026985  | 6290.977  | 5001.543  | NM_00383E  | 3270.999  | 3570.804  | AK025316  | 2943.341  | 3948.783  |
| AK000855  | 442.65    | 371.7     | AK023089   | 5547.907  | 5640.23   | AK026357  | 4443.611  | 5760.113  |
| NM_00410E | 11546.884 | 10839.939 | AK026059   | 60863.84  | 50420.309 | NM_01832E | 7148.365  | 10891.638 |
| NM_00319E | 13315.906 | 10669.356 | AK026942   | 1155.096  | 1058.37   | NM_01423E | 7599.22   | 8186.132  |
| AF220415  | 2051.7    | 1343.118  | AK025814   | 3291.106  | 3019.02   | AK026922  | 1536.545  | 1182.256  |
| NM_005174 | 67876.305 | 52954.012 | AK000655   | 13735.678 | 13180.158 | AK022645  | 908.539   | 517.458   |
| NM_00036E | 6750.146  | 6061.969  | AL117611   | 944.922   | 973.009   | NM_01435E | 4488.804  | 3507.21   |
| AF110322  | 5891.551  | 9411.469  | AF131841   | 525.267   | 419.294   | AF070541  | 1849.916  | 1301.031  |
| NM_01345C | 1748.58   | 2137.679  | NM_01793E  | 3585.718  | 3276.32   | AK022006  | 45691.637 | 32858.684 |
| NM_00453E | 2606.198  | 2495.486  | Y10209     | 483.113   | 364.509   | AF070552  | 13625.858 | 9089.862  |
| NM_003077 | 9040.593  | 8570.19   | D63134     | 1224.319  | 1281.641  | NM_004271 | 22043.262 | 38002.207 |
| NM_00210E | 12376.115 | 9978.906  | AJ227893   | 788.304   | 566.91    | AF129928  | 1025.323  | 2003.733  |
| NM_01848E | 2923.458  | 2864.092  | Y12018     | 59972.867 | 46317.117 | AF070610  | 494.54    | 925.514   |
| L13203    | 1656.264  | 1454.563  | Y10513     | 1287.018  | 796.956   | AK022282  | 1023.662  | 804.433   |
| NM_01804C | 3997.328  | 3625.013  | M21536     | 1219.291  | 885.785   | NM_01826E | 5061.044  | 3366.956  |
| AB042646  | 4603.848  | 4632.624  | NM_01402E  | 55682.98  | 51997.758 | NM_004867 | 37867.199 | 26730.443 |
| NM_003431 | 2506.881  | 2322.053  | Z83937     | 1082.144  | 1857.88   | AL050021  | 16898.521 | 9931.774  |
| M29581    | 2295.214  | 2176.189  | L08443     | 1678.518  | 2115.816  | AB002448  | 1033.734  | 878.651   |
| AL359622  | 614.824   | 629.005   | L38936     | 1074.573  | 1582.814  | AF070580  | 704.359   | 845.622   |
| AL050204  | 2806.446  | 2322.923  | D55643     | 2534.761  | 3286.52   | NM_00383E | 4603.53   | 4389.446  |
| AF085999  | 1565.66   | 1477.325  | AK025818   | 3370.962  | 3181.072  | AK023089  | 6131.12   | 8244.824  |
| AK025316  | 2948.286  | 2915.952  | AK023185   | 8611.02   | 7850.137  | AK026059  | 58860.199 | 57180.797 |
| AK026357  | 5433.732  | 5237.216  | AK022183   | 855.128   | 324.593   | AK026942  | 594.91    | 1001.443  |
| NM_01832E | 5413.507  | 4314.564  | NM_01816E  | 201.973   | 705.265   | AK025814  | 3314.344  | 4424.356  |
| NM_01423E | 11314.711 | 10757.207 | AK026345   | 2785.918  | 2379.542  | AK000655  | 14636.849 | 24289.984 |
| AK026922  | 2121.722  | 2200.495  | AB007971   | 1780.609  | 1541.642  | AL117611  | 1325.548  | 2491.111  |
| AK022645  | 1455.156  | 2123.384  | NM_01827E  | 3336.153  | 3144.654  | NM_01793E | 4890.777  | 4109.114  |
| NM_01435E | 6538.122  | 7640.285  | AK026328   | 704.054   | 857.606   | D63134    | 1447.712  | 860.061   |
| AF070541  | 1532.088  | 1304.609  | AK000864   | 1599.402  | 1265.559  | AJ227893  | 750.56    | 505.989   |
| AK022006  | 7816.413  | 7995.469  | AK022414   | 1414.706  | 1323.396  | Y12018    | 59205.457 | 49447.629 |
| AF070552  | 21379.771 | 18726.645 | NM_017624  | 8976.948  | 5767.892  | X64990    | 830.571   | 573.741   |
| AJ270695  | 633.969   | 615.811   | AK000907   | 5173.56   | 4094.555  | Y10513    | 3108.149  | 5426.893  |
| NM_004271 | 1529.504  | 1697.732  | AK024390   | 2042.787  | 1639.899  | M87941    | 636.921   | 1441.688  |
| AF129928  | 576.601   | 865.012   | AK024868   | 139.586   | 1068.066  | M21536    | 1011.448  | 1315.67   |
| AF070610  | 855.937   | 825.343   | AK024517   | 2259.93   | 2528.646  | NM_01402E | 53705.633 | 42196.883 |
| AK022282  | 815.475   | 591.238   | AK024585   | 514.823   | 479.354   | L08443    | 1965.191  | 1066.02   |
| NM_01826E | 5260.014  | 5047.868  | AK024887   | 2870.411  | 2410.071  | L38936    | 910.933   | 583.505   |
| NM_004867 | 38618.781 | 41572.758 | AK025005   | 5663.125  | 9812.392  | D55643    | 1995.964  | 1524.983  |
| AL050021  | 20705.404 | 20151.74  | AF086151   | 1000.408  | 576.856   | AK025818  | 3294.217  | 2678.033  |
| AB002448  | 1893.091  | 2285.518  | AK095587   | 5584.081  | 6374.416  | AK023185  | 8115.769  | 8075.899  |
| NM_00383E | 2312.016  | 2463.345  | AF086043   | 1613.073  | 1392.168  | AK022183  | 519.136   | 693.951   |
| AK023089  | 5107.175  | 5696.606  | AK024174   | 829.394   | 715.865   | NM_01816E | 403.471   | 826.949   |
| AK026059  | 7122.231  | 7401.164  | AK000038   | 1885.589  | 1992.303  | AK026345  | 2030.772  | 2853.69   |
| AK026942  | 726.186   | 572.748   | BC010084   | 1693.524  | 1733.894  | AB007971  | 1160.19   | 715.776   |
| AK025814  | 2999.911  | 2614.971  | U10513     | 4626.384  | 4608.197  | NM_01827E | 3543.699  | 2879.883  |
| AK000655  | 14567.15  | 15710.349 | L10151     | 1703.715  | 1656.82   | AK026328  | 746.772   | 349.876   |
| AL117611  | 1700.958  | 1831.457  | AK022203   | 964.941   | 963.623   | AK000417  | 830.32    | 499.563   |
| AF131841  | 360.161   | 407.432   | BC032236   | 1175.906  | 647.47    | AK000864  | 4255.601  | 2429.106  |
| NM_01793E | 2043.943  | 1919.598  | AK023037   | 3191.576  | 2472.4    | AK022414  | 1616.972  | 1044.259  |
| Y10209    | 334.429   | 450.374   | unknown (E | 479.701   | 309.623   | NM_017624 | 13491.409 | 10476.128 |

|            |           |           |           |           |           |           |           |           |
|------------|-----------|-----------|-----------|-----------|-----------|-----------|-----------|-----------|
| D63134     | 2089.017  | 1936.415  | AK055950  | 1242.986  | 1413.814  | NM_01792E | 639.121   | 1020.74   |
| AJ227893   | 804.143   | 921.202   | AL050122  | 1389.418  | 1375.663  | AK000907  | 7683.046  | 8798.48   |
| Y12018     | 15202.774 | 18081.682 | AK000839  | 13285.933 | 15312.434 | AK024390  | 2426.756  | 1983.994  |
| Y10513     | 1224.509  | 1258.684  | AF086195  | 719.615   | 798.999   | AK024517  | 2208.673  | 1339.912  |
| M87941     | 634.723   | 817.783   | AK021963  | 1167.779  | 2416.331  | AK024887  | 3186.954  | 3459.026  |
| M21536     | 1605.225  | 1511.845  | AK002209  | 946.114   | 935.257   | AF086151  | 272.461   | 605.325   |
| NM_01402E  | 60308.504 | 46796.992 | NM_014354 | 2725.079  | 2907.266  | AK095587  | 5995.745  | 8227.66   |
| Z83937     | 1969.866  | 1598.443  | AL137548  | 11462.647 | 9345.726  | AF086043  | 1414.429  | 2107.326  |
| L08443     | 647.259   | 991.882   | AK095051  | 1309.709  | 1160.011  | AK024174  | 613.452   | 728.653   |
| L38936     | 1271.769  | 1163.315  | AK026468  | 595.473   | 332.391   | AK000038  | 1825.85   | 2506.547  |
| D55643     | 4628.425  | 4851.238  | AF088062  | 1430.762  | 1419.533  | BC010084  | 2181.728  | 3362.26   |
| AK025818   | 5597.503  | 5245.792  | AK024929  | 1617.482  | 1385.004  | U10513    | 5743.889  | 5844.951  |
| AK023185   | 9530.303  | 7946.234  | D17232    | 26851.965 | 34087.82  | L10151    | 1581.366  | 2694.693  |
| AK022183   | 652.831   | 690.276   | NM_00526C | 3160.457  | 3081.321  | AK022203  | 374.705   | 811.905   |
| NM_01816E  | 280.808   | 321.592   | AF085880  | 10396.739 | 9626.301  | BC032236  | 813.062   | 1050.936  |
| AL080073   | 299.292   | 379.24    | AF000990  | 1189.245  | 1288.491  | AK023037  | 3497.144  | 4847.304  |
| AK026345   | 1591.127  | 1408.934  | NM_016094 | 6862.131  | 6693.315  | AK055950  | 1349.559  | 616.326   |
| AB007971   | 301.596   | 438.904   | AK025003  | 3293.585  | 2919.092  | AK000839  | 12235.983 | 10698.807 |
| NM_01827E  | 732.981   | 725.738   | NM_001427 | 6702.281  | 6214.691  | AK021963  | 592.834   | 849.086   |
| AK026328   | 923.596   | 769.717   | NM_01617E | 2453.002  | 2214.931  | AK002209  | 721.555   | 752.032   |
| AK000417   | 573.975   | 602.466   | M15639    | 12009.539 | 11935.861 | NM_017854 | 58221.801 | 51185.125 |
| AK000864   | 1243.537  | 1058.017  | AF130084  | 3564.121  | 3942.301  | NM_014354 | 2248.961  | 2363.769  |
| AK022414   | 2239.854  | 2061.083  | AF133334  | 16613.682 | 16515.043 | AL137548  | 10054.462 | 12278.307 |
| NM_017624  | 6380.262  | 6625.678  | AK026498  | 1884.145  | 1941.612  | AF088062  | 1507.732  | 1111.814  |
| NM_01792E  | 971.214   | 910.986   | NM_003894 | 1985.983  | 2177.782  | AK024929  | 1393.475  | 1297.755  |
| AK000907   | 6026.494  | 7651.837  | AK001007  | 8838.994  | 8622.362  | D17232    | 27552.354 | 25106.393 |
| AK024517   | 2308.082  | 2082.161  | NM_01448E | 773.235   | 765.151   | NM_00526C | 3877.523  | 3690.56   |
| AK024585   | 373.169   | 510.364   | AF116655  | 11876.315 | 12122.719 | AF085880  | 12097.316 | 13856.746 |
| AK024887   | 553.854   | 501.757   | AF086134  | 684.428   | 576.926   | NM_01615E | 465.343   | 612.17    |
| AK025005   | 1043.683  | 986.922   | AF009308  | 33875.738 | 44090.672 | AF000990  | 1312.078  | 1561.117  |
| AF086151   | 1214.646  | 1255.7    | AB032969  | 43499.563 | 46563.164 | NM_016094 | 7702.557  | 9391.339  |
| AK095587   | 13513.642 | 13015.378 | Y11610    | 1381.317  | 1458.684  | AK025003  | 3342.024  | 4592.543  |
| AF086043   | 2112.42   | 2849.004  | AF085940  | 806.206   | 669.722   | NM_001427 | 7314.708  | 8665.714  |
| AK024174   | 1476.378  | 1568.034  | L37695    | 983.489   | 832.065   | NM_01617E | 2760.16   | 3939.832  |
| AK000038   | 3355.637  | 3156.715  | NM_004627 | 5786.11   | 5345.705  | AF130084  | 3568.603  | 4310.998  |
| BC010084   | 422.131   | 819.292   | AK026523  | 2763.745  | 2944.43   | AF133334  | 20818.629 | 23962.674 |
| U10513     | 6393.48   | 6698.495  | AL050217  | 9195.271  | 8974.517  | NM_01629C | 6574.583  | 9326.783  |
| L10151     | 702.901   | 696.646   | L37704    | 1076.411  | 869.184   | AK026498  | 2614.03   | 4189.394  |
| AK022203   | 1621.353  | 1725.839  | NM_00516E | 1608.676  | 1339.94   | NM_003894 | 2237.144  | 2337.491  |
| BC032236   | 727.104   | 734.781   | AB007968  | 1831.563  | 1516.126  | NM_00637E | 35424.559 | 43236.219 |
| AK023037   | 2141.457  | 2429.097  | AL117544  | 485.33    | 674.748   | AK001007  | 5299.876  | 5465.873  |
| S71611     | 223.745   | 439.651   | NM_005664 | 27496.053 | 26317.045 | NM_01448E | 681.189   | 758.581   |
| unknown (S | 419.421   | 439.939   | NM_00627C | 52112.41  | 49210.234 | AF116655  | 14210.16  | 11981.868 |
| AK055950   | 1766.701  | 2202.67   | S81580    | 442.054   | 1353.483  | AF086134  | 756.391   | 424.414   |
| AL050122   | 656.17    | 1461.617  | U50277    | 2720.344  | 3342.557  | AF009308  | 36475.238 | 20392.453 |
| AK000839   | 9780.112  | 8851.609  | NM_00668E | 6108.644  | 7133.733  | AB032969  | 34409.242 | 14198.771 |
| AF086195   | 739.48    | 599.723   | AI889961  | 4774.838  | 4625.43   | Y11610    | 916.713   | 505.652   |
| AK021963   | 1079.503  | 989.256   | AI360116  | 1868.433  | 1481.25   | AF085940  | 964.169   | 394.769   |
| AK002209   | 1070.22   | 1148.813  | AI572835  | 1710.041  | 1843.983  | NM_004627 | 6916.2    | 4515.721  |
| NM_014354  | 2353.445  | 2484.147  | AL136131  | 7407.716  | 7566.139  | AK026523  | 1968.397  | 1071.222  |
| AL137548   | 11660.749 | 14356.03  | AF335109  | 1222.827  | 800.7     | AL050217  | 9364.725  | 6161.041  |
| AK095051   | 1227.709  | 1353.568  | NM_002054 | 948.712   | 603.783   | L37704    | 1056.146  | 832.701   |
| AK026468   | 534.014   | 566.251   | SR10      | 32733.871 | 8578.432  | NM_00516E | 1530.357  | 1562.253  |

|           |           |           |           |           |           |           |           |           |
|-----------|-----------|-----------|-----------|-----------|-----------|-----------|-----------|-----------|
| AF088062  | 1825.347  | 1797.437  | NM_000865 | 3297.275  | 2917.339  | AB007968  | 1639.197  | 1501.974  |
| AK024929  | 1032.947  | 914.182   | NM_000867 | 2372.803  | 2015.575  | NM_005664 | 32024.617 | 27204.178 |
| NM_017779 | 704.198   | 729.566   | AF076642  | 3613.992  | 4075.124  | NM_006270 | 42329.742 | 39554.406 |
| D17232    | 25789.104 | 31513.477 | NM_002386 | 3172.752  | 3004.475  | S81580    | 277.4     | 624.512   |
| NM_005260 | 2226.304  | 1844.436  | NM_005314 | 1300.7    | 1545.287  | U50277    | 2622.719  | 3696.805  |
| AF085880  | 12138.743 | 13933.447 | NM_004885 | 1499.517  | 1774.936  | Z48633    | 3714.879  | 5842.467  |
| NM_016158 | 368.047   | 618.934   | NM_005145 | 1124.111  | 1283.291  | M62627    | 19199.264 | 35243.426 |
| AF000990  | 2096.926  | 1889.835  | NM_012152 | 6929.227  | 6837.974  | NM_006686 | 8636.031  | 13467.375 |
| NM_016094 | 9949.534  | 9875.729  | AK024093  | 2182.118  | 2159.604  | AI889961  | 4899.14   | 3491.417  |
| AK025003  | 1810.884  | 2016.044  | NM_001940 | 3603.594  | 3741.455  | AI360116  | 2482.403  | 1833.682  |
| AK023601  | 755.717   | 690.705   | U83115    | 12819.263 | 11986.36  | AI572835  | 6877.38   | 6174.404  |
| NM_001427 | 10538.614 | 10805.183 | NM_001264 | 10358.864 | 8458.085  | N56684    | 1053.609  | 593.459   |
| NM_016175 | 3377.628  | 4470.255  | NM_013364 | 5719.215  | 5815.829  | M55153    | 1627.2    | 1725.026  |
| M15639    | 15788.836 | 14287.383 | NM_014368 | 1103.826  | 904.633   | AF414120  | 685.166   | 718.784   |
| AF130084  | 5369.309  | 4963.034  | NM_000850 | 5573.326  | 5083.649  | AL136131  | 11409.914 | 11079.84  |
| AF133334  | 18948.752 | 15762.163 | NM_004676 | 907.245   | 670.785   | NM_033357 | 5091.075  | 5269.659  |
| NM_016290 | 5991.623  | 3802.537  | NM_001994 | 3862.288  | 3078.246  | AF335109  | 1543.895  | 1816.52   |
| AK026498  | 2390.127  | 1932.394  | J00129    | 27344.973 | 29347.412 | U59911    | 10862.407 | 11701.011 |
| AF085922  | 1253.368  | 1042.54   | AK022790  | 32360.924 | 36813.352 | NM_002054 | 1622.849  | 1302.756  |
| AK001007  | 14690.928 | 16311.311 | NM_004311 | 19516.369 | 22204.25  | SR10      | 51004.117 | 16695.094 |
| NM_014485 | 1479.073  | 1531.801  | NM_005624 | 1804.186  | 1917.93   | CY3Cy5    | 10041.949 | 305.955   |
| AF116655  | 14992.82  | 14746.086 | NM_002302 | 1703.038  | 1238.471  | NM_000865 | 3250.854  | 2407.103  |
| AF009308  | 39952.941 | 41492.23  | NM_000579 | 706.045   | 747.727   | NM_000867 | 2390.039  | 2040.461  |
| AB032969  | 48674.777 | 45720.414 | AF263462  | 2234.168  | 2271.418  | AF076642  | 4925.751  | 5924.777  |
| Y11610    | 1538.632  | 1345.436  | AB040962  | 632.177   | 998.786   | NM_002386 | 3790.992  | 3949.186  |
| AF085940  | 1498.681  | 1364.033  | NM_000639 | 1738.197  | 1270.591  | NM_005314 | 2287.602  | 2395.753  |
| L37695    | 814.774   | 1180.016  | NM_000942 | 25630.629 | 24733.979 | NM_004885 | 4703.237  | 5183.333  |
| NM_004627 | 9589.56   | 10490.324 | AK056773  | 3685.976  | 3064.539  | NM_005145 | 1558.254  | 1563.716  |
| AK026523  | 2046.692  | 1967.019  | NM_002182 | 3856.267  | 4404.513  | NM_012152 | 21274.475 | 20988.479 |
| AL050217  | 3289.33   | 3532.105  | NM_016470 | 6053.185  | 6306.711  | AK024093  | 4486.89   | 3631.915  |
| L37704    | 817.346   | 740.198   | AL365408  | 21011.988 | 20296.486 | NM_001940 | 5233.486  | 4218.258  |
| NM_005162 | 2259.242  | 2185.758  | AK026204  | 5812.118  | 4029.729  | U83115    | 21431.859 | 21216.451 |
| AB007968  | 2248.392  | 2072.198  | NM_014635 | 3346.283  | 2379.323  | NM_001264 | 18267.447 | 19174.496 |
| AL117544  | 964.652   | 987.353   | NM_004145 | 5800.165  | 5576.926  | NM_013364 | 13153.517 | 11594.419 |
| NM_005664 | 6690.274  | 6152.864  | AK023196  | 1959.124  | 1992.125  | NM_014368 | 1667.343  | 2009.202  |
| NM_006270 | 25471.723 | 23394.266 | NM_018728 | 4085.035  | 4322.509  | NM_000850 | 5677.271  | 5808.688  |
| U50277    | 1490.847  | 1262.775  | AK024014  | 1142.707  | 1060.07   | NM_004676 | 1436.769  | 1672.114  |
| Z48633    | 3360.863  | 2968.455  | NM_016234 | 10381.777 | 11433.593 | NM_001994 | 6044.244  | 7154.384  |
| M62627    | 16140.002 | 15702.282 | NM_001876 | 7772.352  | 8455.724  | J00129    | 35695.855 | 38321.914 |
| NM_006686 | 4623.116  | 3899.54   | NM_016144 | 10572.06  | 13509.12  | NM_003320 | 7135.934  | 6683.624  |
| CY3Cy5    | 12364.987 | 871.39    | AL133099  | 5466.952  | 6227.345  | AK025657  | 12418.188 | 9248.918  |
| AI889961  | 9586.346  | 10657.89  | NM_016082 | 2427.401  | 3668.404  | AF142063  | 1912.242  | 1632.464  |
| AI360116  | 3236.729  | 3229.513  | NM_000433 | 1210.015  | 1751.501  | AK022790  | 40603.246 | 32042.318 |
| NM_013983 | 264.262   | 415.993   | NM_000190 | 4361.141  | 5024.078  | NM_004311 | 23544.088 | 20476.646 |
| AI572835  | 1330.828  | 1547.395  | X15667    | 5454.867  | 5013.302  | NM_005624 | 2657.161  | 2461.526  |
| R20392    | 9023.285  | 10711.243 | NM_017512 | 6075.907  | 5715.682  | NM_002302 | 1273.5    | 1035.443  |
| AA486367  | 7966.913  | 8834.188  | AK023078  | 6624.368  | 5922.758  | AB020672  | 908.279   | 465.12    |
| N56684    | 754.945   | 910.06    | NM_002239 | 49768.961 | 42339.355 | AK026958  | 923.078   | 657.115   |
| M55153    | 1250.407  | 1394.856  | NM_002249 | 23960.404 | 25053.369 | NM_000579 | 1686.791  | 2553.511  |
| AF414120  | 603.79    | 1022.488  | NM_015684 | 4243.23   | 4392.644  | NM_001480 | 954.881   | 913.234   |
| AK097322  | 476.171   | 731.789   | NM_003945 | 29604.693 | 36696.563 | AF263462  | 5701.791  | 5322.977  |
| AL136131  | 11438.101 | 11525.825 | NM_004981 | 3991.237  | 4308.999  | AB040962  | 1010.918  | 929.725   |
| NM_033357 | 8920.569  | 8893.61   | AK096507  | 794.474   | 862.081   | NM_000639 | 2234.04   | 2320.801  |

|           |           |           |           |           |           |           |           |           |
|-----------|-----------|-----------|-----------|-----------|-----------|-----------|-----------|-----------|
| AF335109  | 2150.652  | 2335.22   | NM_016524 | 1538.629  | 1070.391  | AV697672  | 706.741   | 978.619   |
| NM_003263 | 606.92    | 739.167   | NM_007126 | 28475.912 | 28000.014 | NM_000942 | 26258.244 | 31403.652 |
| U59911    | 14799.563 | 15194.108 | AL137631  | 10673.907 | 10348.459 | NM_00219C | 500.891   | 715.372   |
| SB        | 691.623   | 481.246   | NM_016057 | 22065.783 | 26411.467 | AK056773  | 5485.261  | 6905.194  |
| NM_002054 | 1862.398  | 2288.806  | NM_014677 | 2996.811  | 2404.928  | NM_002182 | 15501.153 | 18364.559 |
| SR2       | 75475.531 | 63965.715 | NM_006855 | 1223.39   | 1187.006  | NM_01647C | 6120.106  | 6344.456  |
| SR4       | 30182.393 | 35177.344 | NM_015599 | 1326.15   | 871.855   | AL365408  | 48682.195 | 49485.324 |
| SR6       | 4425.125  | 3870.254  | AB037902  | 749.217   | 290.29    | AK026204  | 9996.992  | 10349.161 |
| SR8       | 14500.376 | 35493.832 | NM_018696 | 9105.575  | 8076.522  | NM_014635 | 4836.664  | 2837.489  |
| SR10      | 54014.637 | 27437.428 | NM_000136 | 22098.621 | 20531.82  | NM_004145 | 15572.823 | 17134.461 |
| CY3Cy5    | 9943.278  | 591.169   | NM_00038C | 5570.827  | 5786.826  | AK023196  | 2523.946  | 1893.414  |
| NM_000865 | 3000.08   | 3646.719  | NM_004628 | 2873.752  | 3226      | NM_016234 | 11872.306 | 8110.465  |
| NM_000867 | 2829.158  | 3363.608  | NM_014876 | 5753.446  | 4987.223  | NM_001876 | 9260.229  | 7341.004  |
| AF076642  | 4151.387  | 4547.298  | NM_005406 | 4717.173  | 4575.473  | NM_016144 | 11185.206 | 9802.469  |
| NM_002386 | 2713.19   | 3149.823  | NM_003328 | 2342.823  | 3357.046  | AL133099  | 7124.726  | 7285.689  |
| NM_005314 | 1915.783  | 2058.412  | X93921    | 2287.778  | 3185.35   | NM_016082 | 3427.891  | 3012.484  |
| NM_004885 | 5289.234  | 5431.096  | AF073482  | 4015.279  | 4922.086  | NM_000433 | 2265.183  | 3018.255  |
| NM_005145 | 1209.124  | 1390.989  | NM_00599C | 2676.368  | 2841.41   | NM_00019C | 18091.846 | 15680.068 |
| NM_012152 | 4443.708  | 5071.926  | NM_016276 | 9243.049  | 8062.26   | X15667    | 13851.134 | 12608.67  |
| AK024093  | 4155.871  | 5231.008  | NM_017762 | 3770.998  | 3798.094  | NM_017512 | 7122.395  | 7290.899  |
| NM_00194C | 5970.627  | 6721.819  | NM_001863 | 64306.328 | 48911.625 | NM_018661 | 743.142   | 937.577   |
| U83115    | 24198.885 | 25079.188 | NM_000921 | 10065.126 | 10004.612 | AK023078  | 9807.496  | 11294     |
| NM_001264 | 12578.896 | 13568.568 | NM_000098 | 4639.665  | 4565.829  | NM_002235 | 58899.313 | 50426.098 |
| NM_013364 | 3154.509  | 3378.889  | NM_000016 | 31150.465 | 40739.207 | NM_002245 | 48605.859 | 49967.934 |
| NM_014368 | 1907.158  | 1990.167  | AK026913  | 6960.444  | 6987.514  | NM_015684 | 4601.377  | 5520.335  |
| NM_00085C | 7410.895  | 7813.177  | AA486367  | 174.669   | 466.464   | NM_003945 | 35816.805 | 43641.883 |
| NM_004676 | 1403.17   | 1221.586  | AL136131  | 8689.24   | 10000.292 | NM_004981 | 16244.406 | 17495.211 |
| NM_007193 | 428.129   | 694.411   | NM_002054 | 506.75    | 634.093   | AK096507  | 829.752   | 1027.978  |
| NM_001994 | 6806.796  | 6019.503  | NM_004482 | 1294.344  | 1173.83   | NM_016524 | 1905.525  | 1937.323  |
| J00129    | 51775.238 | 49920.176 | AK026204  | 6251.903  | 5476.719  | NM_007126 | 48599.777 | 49963.766 |
| NM_00332C | 9983.283  | 10554.345 | NM_014635 | 3359.647  | 2834.956  | AL137631  | 10424.086 | 10925.505 |
| L10146    | 7696.603  | 7883.44   | NM_004145 | 4409.942  | 3936.928  | NM_015595 | 1307.809  | 1140.986  |
| NM_000685 | 11339.286 | 12757.457 | AK023196  | 1543.153  | 1699.247  | NM_018696 | 13918.439 | 16847.609 |
| AK025657  | 19861.178 | 20563.701 | NM_018728 | 4205.876  | 4394.882  | NM_000136 | 24498.1   | 23238.547 |
| AF142063  | 2201.528  | 2596.639  | AK024014  | 923.311   | 1182.632  | AL157456  | 2640.031  | 2332.373  |
| W42849    | 3088.072  | 3800.511  | NM_000865 | 2468.667  | 1619.073  | AL162056  | 2740.197  | 2190.6    |
| AK022790  | 28243.186 | 30228.51  | NM_000867 | 2199.31   | 2429.657  | NM_00038C | 20898.113 | 21254.811 |
| NM_004311 | 19916.875 | 23739.688 | AF076642  | 4021.56   | 3976.813  | NM_004628 | 5011.901  | 5146.37   |
| NM_005624 | 1226.194  | 1388.48   | NM_002386 | 3447.293  | 2997.037  | NM_014876 | 4625.938  | 4777.035  |
| NM_002302 | 1174.008  | 1390.773  | NM_005314 | 1853.094  | 1844.389  | NM_005406 | 8676.187  | 9205.934  |
| AB020672  | 827.313   | 1041.366  | NM_004885 | 2122.54   | 2160.583  | NM_003328 | 4029.502  | 3796.74   |
| AK026958  | 756.586   | 843.711   | NM_005145 | 595.088   | 953.833   | X93921    | 3062.736  | 3347.834  |
| NM_000579 | 1338.361  | 2122.4    | NM_012152 | 3727.906  | 3322.664  | AF073482  | 5231.679  | 5125.643  |
| NM_00148C | 528.365   | 917.467   | AK024093  | 1376.866  | 1759.436  | NM_00599C | 3118.701  | 3318.153  |
| AF263462  | 2615.91   | 3395.822  | NM_00194C | 1845.025  | 2288.25   | NM_016276 | 34235.824 | 43328.148 |
| AB040962  | 1037.681  | 652.736   | U83115    | 13895.278 | 15306.053 | NM_017762 | 3647.112  | 4035.018  |
| NM_000639 | 3168.812  | 3685.788  | NM_001264 | 5804.229  | 6206.039  | NM_001863 | 62048.996 | 61846.582 |
| AV697672  | 995.297   | 813.564   | NM_013364 | 1807.382  | 2853.207  | NM_000921 | 11201.36  | 9775.373  |
| NM_000942 | 37359.141 | 44901.684 | NM_014368 | 449.177   | 710.099   | AF142063  | 1287.714  | 1220.385  |
| NM_002982 | 478.948   | 611.323   | NM_00085C | 3881.311  | 4741.896  | W42849    | 5388.778  | 6107.215  |
| NM_00219C | 1087.49   | 620.208   | NM_004676 | 540.429   | 483.185   | AI889961  | 7484.29   | 5437.634  |
| AK056773  | 5082.168  | 5145.706  | NM_001994 | 5935.813  | 5310.833  | AI360116  | 2971.924  | 3858.78   |
| NM_002182 | 1941.009  | 1961.906  | NM_016524 | 1775.067  | 1666.37   | NM_013983 | 619.029   | 458.798   |

|           |           |           |           |           |           |           |           |           |
|-----------|-----------|-----------|-----------|-----------|-----------|-----------|-----------|-----------|
| NM_01647C | 11697.622 | 11232.146 | NM_007126 | 32814.512 | 27917.18  | AI572835  | 11538.647 | 9923.293  |
| AL365408  | 14900.98  | 15740.513 | AL137631  | 7484.74   | 4553.052  | M55153    | 1316.564  | 1964.676  |
| AK026204  | 5495.041  | 5199.438  | NM_016057 | 11286.104 | 10316.349 | AF335109  | 1070.309  | 1203.054  |
| NM_014635 | 6469.267  | 5783.567  | NM_014677 | 3422.471  | 2492.442  | NM_002054 | 1089.433  | 2100.447  |
| NM_004145 | 5240.958  | 5431.584  | NM_006855 | 918.911   | 943.759   | AK026204  | 10225.543 | 7083.199  |
| AK023196  | 2709.857  | 3366.427  | AK022790  | 30578.996 | 28751.621 | NM_014635 | 5141.951  | 2320.906  |
| NM_018728 | 8894.532  | 7656.297  | NM_004311 | 17648.277 | 17701.514 | NM_004145 | 20922.258 | 23938.168 |
| AK024014  | 1179.453  | 1276.944  | NM_005624 | 1535.25   | 1671.324  | AK023196  | 2655.724  | 2277.22   |
| NM_016234 | 16275.854 | 20199.15  | NM_002302 | 1023.192  | 1058.384  | NM_018728 | 7131.622  | 5918.917  |
| NM_001876 | 9128.368  | 10145.298 | AB020672  | 357.809   | 365.885   | AK024014  | 7445.201  | 7446.844  |
| NM_016144 | 10929.64  | 10313.506 | AK026958  | 229.696   | 430.315   | NM_000865 | 4023.838  | 2990.957  |
| AL133099  | 6683.01   | 7751.627  | NM_000579 | 738.872   | 911.723   | NM_000867 | 2707.529  | 2626.801  |
| NM_016082 | 5244.7    | 5520.197  | AF263462  | 1222.344  | 1343.125  | AF076642  | 6368.024  | 5316.516  |
| NM_000433 | 3575.136  | 3205.687  | NM_000639 | 1428.998  | 1409.074  | NM_002386 | 6659.818  | 6606.784  |
| AF268419  | 464.581   | 1127.204  | NM_000942 | 17001.641 | 21412.563 | NM_005314 | 3916.377  | 4241.276  |
| NM_00019C | 12282.988 | 14337.178 | AK056773  | 3330.86   | 4044.554  | NM_004885 | 4268.313  | 3470.938  |
| X15667    | 3332.178  | 4059.694  | NM_002182 | 5604.961  | 6331.748  | NM_005145 | 1129.817  | 1455.961  |
| NM_017512 | 6316.811  | 8066.246  | NM_01647C | 5755.91   | 8098.904  | U83115    | 12012.466 | 14106.063 |
| NM_018661 | 527.061   | 850.273   | AL365408  | 17198.102 | 21033.811 | NM_001264 | 11643.459 | 14351.19  |
| AK023078  | 8087.817  | 9562.638  | NM_017762 | 3859.001  | 4310.571  | NM_013364 | 3229.733  | 3785.994  |
| NM_002239 | 33685.93  | 36490.395 | NM_001863 | 67360.227 | 45958.328 | NM_014368 | 1298.581  | 1889.205  |
| NM_002249 | 21840.531 | 25501.375 | NM_000921 | 6873.602  | 4767.733  | NM_00085C | 4748.463  | 5816.071  |
| NM_015684 | 5470.41   | 5491.214  | NM_000098 | 4520.086  | 4044.484  | NM_004676 | 831.997   | 1392.537  |
| NM_003945 | 31877.607 | 43908.336 | NM_000016 | 26948.67  | 29609.006 | NM_016524 | 2935.763  | 3323.033  |
| NM_004981 | 1441.371  | 1734.913  | AK026913  | 6474.277  | 6098.809  | NM_007126 | 57631.852 | 46481.367 |
| AK096507  | 1426.787  | 1570.006  | NM_016234 | 11853.796 | 11599.975 | AL137631  | 16812.889 | 17324.1   |
| NM_016524 | 2028.495  | 2075.68   | NM_001876 | 7743.687  | 8124.774  | NM_016057 | 25247.117 | 19370.688 |
| NM_007126 | 21289.561 | 25151.35  | NM_016144 | 10808.292 | 10364.735 | NM_014677 | 4164.577  | 4042.021  |
| AL137631  | 12993.806 | 14667.256 | AL133099  | 5870.915  | 5534.229  | NM_006855 | 1006.875  | 1489.056  |
| NM_016057 | 25215.605 | 32142.076 | NM_016082 | 3450.248  | 3905.648  | AK022790  | 32386.133 | 19128.367 |
| NM_014677 | 4631.592  | 5051.381  | NM_000433 | 1515.437  | 1480.592  | NM_004311 | 20455.764 | 18828.656 |
| NM_006855 | 2342.188  | 1996.767  | NM_00019C | 9516.607  | 10664.479 | NM_005624 | 4040.781  | 3983.362  |
| NM_015599 | 1596.103  | 1307.482  | X15667    | 3252.338  | 3777.955  | NM_002302 | 2122.906  | 2358.811  |
| AB037902  | 874.465   | 803.342   | NM_017512 | 5210.813  | 5255.593  | AB020672  | 1109.997  | 867.785   |
| NM_018696 | 5434.877  | 6197.502  | AK023078  | 6712.919  | 8175.107  | AK026958  | 348.827   | 790.163   |
| NM_000136 | 16405.051 | 22303.488 | NM_002239 | 27991.111 | 34430.898 | NM_000579 | 1562.901  | 1818.268  |
| AL157456  | 565.551   | 689.635   | NM_002249 | 12876.339 | 16461.293 | NM_00148C | 453.23    | 557.153   |
| AL162056  | 3128.356  | 3250.063  | NM_015684 | 3709.636  | 4636.761  | AB040962  | 321.155   | 899.052   |
| NM_00038C | 4988.579  | 5331.725  | NM_003945 | 31208.461 | 39782.297 | NM_000639 | 1050.996  | 2235.848  |
| NM_004628 | 3612.814  | 3570.908  | NM_004981 | 4573.817  | 5184.568  | AV697672  | 367.368   | 450.792   |
| AF085734  | 595.938   | 777.895   | AK096507  | 941.254   | 1023.056  | NM_002982 | 939.112   | 1085.324  |
| NM_006502 | 474.822   | 471.468   | NM_004482 | 876.808   | 604.096   | AK056773  | 5456.463  | 5992.745  |
| NM_014876 | 8750.172  | 9861.734  | NM_015599 | 1205.645  | 864.215   | NM_017762 | 6255.102  | 4487.543  |
| NM_005406 | 10957.406 | 11843.346 | NM_018696 | 8009.088  | 7761.233  | NM_001863 | 62449.43  | 52376.301 |
| NM_003328 | 6805.447  | 6580.256  | NM_000136 | 14006.397 | 13346.098 | NM_000921 | 13977.998 | 9722.62   |
| X93921    | 4961.797  | 4685.616  | AL157456  | 811.659   | 654.222   | NM_000098 | 5405.114  | 3814.352  |
| AF073482  | 8378.361  | 8987.701  | AL162056  | 1450.85   | 1485.343  | NM_000016 | 32696.971 | 30838.623 |
| NM_00599C | 6356.168  | 5331.808  | NM_00038C | 4082.682  | 5323.863  | AK026913  | 9114.858  | 7546.887  |
| NM_016276 | 5418.133  | 6622.11   | NM_004628 | 2785.623  | 3706.526  | NM_016234 | 12788.085 | 9822.992  |
| NM_017762 | 12759.083 | 11960.577 | NM_014876 | 2189.585  | 2126.777  | NM_001876 | 11222.956 | 11515.934 |
| NM_001863 | 68836.797 | 58921.551 | NM_005406 | 4360.905  | 5783.269  | NM_016144 | 17530.762 | 16319.857 |
| NM_000921 | 14219.025 | 14095.346 | NM_003328 | 2531.333  | 3145.242  | AL133099  | 8205.363  | 9831.654  |
| NM_000098 | 6002.953  | 6455.281  | X93921    | 2489.233  | 3057.649  | NM_016082 | 3889.785  | 4725.529  |

|           |           |           |           |           |           |           |           |           |
|-----------|-----------|-----------|-----------|-----------|-----------|-----------|-----------|-----------|
| NM_00001E | 33041.738 | 41850.031 | AF073482  | 4461.703  | 6137.363  | NM_00043E | 2772.603  | 2215.601  |
| AK026913  | 7203.927  | 8378.896  | NM_00599C | 3325.116  | 3673.366  | NM_00019C | 13317.68  | 15783.924 |
| L10146    | 8479.855  | 8708.059  | NM_01627E | 18659.441 | 18077.334 | X15667    | 5087.122  | 6469.993  |
| NM_00068E | 10199.744 | 10757.748 | NM_00085C | 5233.482  | 4163.165  | NM_01751E | 4908.75   | 7318.75   |
| AK025657  | 15796.941 | 13579.674 | NM_00467E | 880.126   | 787.909   | NM_018661 | 300.522   | 807.487   |
| AF142063  | 2098.617  | 2209.625  | NM_00199A | 5549.579  | 4777.461  | NM_00223E | 52585.449 | 51263.398 |
| W42849    | 2252.325  | 2915.39   | NM_00332C | 671.201   | 994.042   | NM_00224E | 50703.094 | 51672.258 |
| AI889961  | 8547.535  | 8987.998  | AI360116  | 1340.477  | 1325.878  | NM_01568A | 5787.831  | 5309.789  |
| AI360116  | 3003.115  | 3259.515  | AI572835  | 923.598   | 1018.47   | AK096507  | 1263.624  | 721.649   |
| AI572835  | 1378.095  | 1488.268  | AL136131  | 6352.813  | 8549.562  | NM_00205A | 1533.628  | 1164.283  |
| R20392    | 7937.64   | 7963.284  | NM_00298E | 690.609   | 330.726   | NM_00448E | 1313.632  | 945.738   |
| AA486367  | 8567.605  | 7619.793  | AK056773  | 3764.275  | 3018.779  | NM_01559E | 2171.081  | 1389.868  |
| N56684    | 945.68    | 769.659   | NM_00218E | 6798.082  | 7185.627  | NM_01869E | 15724.736 | 15670.277 |
| M55153    | 1483.079  | 1308.956  | NM_01647C | 5464.88   | 5948.981  | NM_00013E | 26589.934 | 28437.047 |
| AF414120  | 1094.583  | 1220.827  | AL365408  | 26083.311 | 26065.576 | AL157456  | 1707.478  | 1943.787  |
| AL136131  | 13298.072 | 12227.859 | AK026204  | 7089.493  | 6491.101  | AL162056  | 1888.487  | 1940.802  |
| NM_033357 | 9131.803  | 9407.938  | NM_01463E | 3633.44   | 3392.589  | NM_00038C | 11428.172 | 13360.838 |
| AF335109  | 2802.014  | 2767.335  | NM_00414E | 4337.174  | 3646.736  | NM_00462E | 3378.656  | 4289.36   |
| NM_00326E | 1075.507  | 970.264   | AK023196  | 1722.199  | 1615.756  | NM_01487E | 4561.384  | 5478.523  |
| U59911    | 15030.108 | 13950.018 | NM_01872E | 3888.176  | 4195.167  | NM_00540E | 8038.86   | 8134.031  |
| SB        | 645.528   | 591.649   | AK024014  | 1371.794  | 1204.296  | NM_00332E | 5102.127  | 4605.646  |
| NM_00205A | 1859.672  | 1966.708  | NM_00086E | 1961.294  | 1547.941  | X93921    | 3535.289  | 3120.984  |
| NM_00448E | 2297.054  | 1634.752  | NM_000867 | 1711.765  | 2033.906  | NM_01627E | 49671.602 | 48071.742 |
| AK026204  | 6719.831  | 6985.062  | AF076642  | 2894.744  | 3875.243  | NM_00085C | 6254.595  | 5364.562  |
| NM_01463E | 5470.953  | 4564.765  | NM_00238E | 1007.505  | 1550.627  | NM_00467E | 3136.878  | 2907.914  |
| NM_00414E | 4209.132  | 4833.729  | NM_00531A | 1176.551  | 1794.174  | NM_00719E | 891.22    | 638.751   |
| AK023196  | 2238.616  | 2582.865  | NM_00488E | 2034.228  | 2400.531  | NM_00199A | 10547.041 | 8262.771  |
| NM_01872E | 8187.131  | 6439.788  | NM_00514E | 763.345   | 1042.537  | J00129    | 38960.113 | 37252.582 |
| AK024014  | 1075.203  | 1043.121  | NM_01215E | 4659.173  | 4670.13   | AI889961  | 6751.422  | 5709.938  |
| NM_00086E | 3204.081  | 3317.65   | AK024093  | 2744.421  | 2686.187  | AI360116  | 2276.795  | 2434.648  |
| NM_000867 | 3004.082  | 3064.7    | NM_00194C | 3582.786  | 4231.094  | NM_01398E | 836.882   | 661.576   |
| AF076642  | 4394.748  | 4368.337  | U83115    | 16890.059 | 19923.344 | AI572835  | 9274.597  | 10601.563 |
| NM_00238E | 2561.815  | 3195.31   | NM_00126A | 9852.825  | 9976.593  | M55153    | 1369.795  | 1675.955  |
| NM_00531A | 2416.064  | 2074.738  | NM_01336A | 5496.043  | 6939.465  | AK097322  | 706.244   | 678.018   |
| NM_00488E | 5383.476  | 4434.422  | NM_01436E | 1136.084  | 1056.565  | AL136131  | 13433.985 | 12189.939 |
| NM_00514E | 2106.226  | 1947.37   | NM_00223E | 47591.563 | 38822.629 | NM_00298E | 1036.883  | 644.343   |
| NM_01215E | 5232.306  | 6204.424  | NM_00224E | 37710.504 | 32034.473 | NM_00219C | 936.066   | 1190.45   |
| AK024093  | 5873.682  | 6317.724  | NM_01568A | 4018.992  | 3643.411  | AK056773  | 7178.068  | 6451.032  |
| NM_00194C | 6831.468  | 6895.289  | NM_00394E | 26239.404 | 24294.354 | NM_00218E | 27002.234 | 27179.279 |
| U83115    | 22024.561 | 25352.594 | NM_004981 | 6315.417  | 5241.371  | NM_01647C | 7157.123  | 6742.328  |
| NM_00126A | 13191.402 | 12941.192 | AK096507  | 937.538   | 948.17    | AL365408  | 54306.504 | 50994.734 |
| NM_01336A | 3488.005  | 3024.154  | NM_01652A | 1854.06   | 1681.454  | AK026204  | 13015.132 | 12817.499 |
| NM_01436E | 2265.142  | 2127.795  | NM_00712E | 47627.754 | 44655.582 | NM_01463E | 5967.608  | 4727.109  |
| NM_00085C | 8858.765  | 8383.336  | AL137631  | 11034.3   | 10158.955 | NM_00414E | 22722.092 | 24679.963 |
| NM_00467E | 1255.062  | 1158.85   | NM_016057 | 18471.264 | 19961.473 | AK023196  | 3829.241  | 3543.167  |
| NM_00719E | 539.8     | 498.354   | NM_014677 | 3259.067  | 2419.048  | NM_01872E | 8386.569  | 8033.528  |
| NM_00199A | 6461.322  | 6676.401  | NM_00685E | 1326.281  | 1226.13   | AK024014  | 9030.602  | 11815.294 |
| J00129    | 49150.543 | 45675.82  | AK022790  | 23004.32  | 23776.082 | NM_00086E | 4702.489  | 5689.637  |
| NM_00332C | 10800.773 | 11215.964 | NM_004311 | 16240.538 | 20498.439 | NM_000867 | 2490.266  | 2861.29   |
| NM_01652A | 1577.143  | 1871.998  | NM_00230E | 979.712   | 1095.507  | AF076642  | 4785.343  | 5090.114  |
| NM_00712E | 17718.289 | 18370.566 | AB020672  | 493.619   | 594.613   | NM_00238E | 4042.907  | 5682.279  |
| AL137631  | 11919.557 | 12605.567 | NM_00057E | 1128.693  | 1267.463  | NM_00531A | 2616.084  | 3787.572  |
| NM_016057 | 19253.516 | 19326.307 | NM_00148C | 474.436   | 483.19    | NM_00488E | 3783.584  | 4054.485  |

|           |           |           |           |           |           |           |           |           |
|-----------|-----------|-----------|-----------|-----------|-----------|-----------|-----------|-----------|
| NM_014677 | 3496.058  | 3992.458  | AF263462  | 3173.692  | 3098.387  | NM_005145 | 1442.99   | 1076.704  |
| NM_006855 | 1659.17   | 1837.683  | AB040962  | 504.378   | 705.002   | NM_012152 | 23738.643 | 26797.596 |
| AK022790  | 29967.506 | 27643.471 | NM_000639 | 2853.597  | 2564.36   | AK024093  | 4489.708  | 5212.081  |
| NM_004311 | 15451.549 | 18667.824 | AV697672  | 397.245   | 346.467   | NM_001940 | 3416.387  | 3756.219  |
| NM_005624 | 1171.629  | 1297.635  | NM_000942 | 25330.385 | 30359.645 | U83115    | 21708.004 | 23330.369 |
| NM_002302 | 1328.734  | 1128.356  | NM_005406 | 7420.537  | 6098.29   | NM_014368 | 1701.746  | 2193.911  |
| AB020672  | 490.211   | 857.521   | NM_003328 | 4058.487  | 3858.072  | NM_002235 | 58050.734 | 44977.871 |
| AK026958  | 902.209   | 754.925   | X93921    | 3570.513  | 3358.495  | NM_002245 | 53660.871 | 49495.02  |
| NM_000579 | 1582.173  | 1633.357  | AF073482  | 5753.649  | 5971.302  | NM_003945 | 26790.895 | 25481.166 |
| NM_001480 | 1032.999  | 969.725   | NM_005990 | 4067.625  | 4181.059  | NM_004981 | 28956.326 | 41300.91  |
| AF263462  | 2907.546  | 3582.031  | NM_016276 | 26275.586 | 24491.412 | AK096507  | 1519.544  | 1622.017  |
| AB040962  | 778.988   | 744.618   | NM_017762 | 5432.705  | 5064.448  | NM_016524 | 3226.094  | 3467.77   |
| NM_000639 | 3235.871  | 3674.969  | NM_000921 | 8787.322  | 8731.829  | NM_007126 | 59468.223 | 48939.418 |
| AV697672  | 851.874   | 755.927   | NM_000098 | 3930.579  | 3377.124  | AL137631  | 16614.002 | 19880.76  |
| NM_000942 | 39692.098 | 45174.762 | NM_000016 | 24325.139 | 27281.354 | NM_016057 | 23409.096 | 26868.533 |
| NM_002982 | 698.399   | 693.736   | AK026913  | 7951.309  | 8174.416  | AK022790  | 40542.602 | 43952.754 |
| NM_002190 | 483.148   | 498.636   | NM_016234 | 14040.939 | 15732.334 | NM_004311 | 22664.004 | 26123.154 |
| AK056773  | 4866.921  | 5299.883  | NM_001876 | 9749.633  | 10244.438 | NM_005624 | 3009.26   | 3745.797  |
| NM_002182 | 2190.142  | 2130.796  | NM_016082 | 4059.933  | 4887.331  | NM_002302 | 2912.07   | 2950.425  |
| NM_016470 | 11530.338 | 12608.354 | NM_000433 | 2557.751  | 2688.417  | AB020672  | 833.408   | 858.595   |
| AL365408  | 16547.672 | 17948.336 | NM_000190 | 15099.473 | 15839.666 | AK026958  | 720.586   | 1295.255  |
| NM_017762 | 13201.508 | 13837.045 | X15667    | 7195.045  | 7459.708  | NM_000579 | 1642.404  | 1913.69   |
| NM_001863 | 66912.047 | 53418.441 | NM_017512 | 6879.161  | 7142.767  | AF263462  | 5838.71   | 6350.1    |
| NM_000921 | 13637.067 | 13361.035 | NM_018661 | 662.445   | 631.714   | AB040962  | 1068.164  | 993.659   |
| NM_000098 | 4249.714  | 5436.383  | AK023078  | 10667.1   | 11704.826 | NM_000639 | 2318.988  | 2596.549  |
| NM_000016 | 22184.027 | 28382.416 | NM_014737 | 4980.089  | 5285.488  | NM_000942 | 29495.773 | 32712.549 |
| AK026913  | 6009.83   | 6976.4    | NM_003488 | 6718.431  | 6500.239  | NM_005406 | 8716.474  | 6244.114  |
| NM_016234 | 16782.557 | 18087.455 | NM_001454 | 59167.211 | 40486.977 | NM_003328 | 6547.404  | 4942.411  |
| NM_001876 | 8394.274  | 9279.616  | NM_006558 | 15877.945 | 16177.915 | X93921    | 4080.748  | 7560.057  |
| NM_016144 | 9040.232  | 9383.192  | Z22780    | 679.555   | 340.759   | AF073482  | 6938.083  | 6744.829  |
| AL133099  | 6188.242  | 8306.336  | NM_005797 | 1166.406  | 1033.254  | NM_005990 | 5755.66   | 5982.14   |
| NM_016082 | 6643.083  | 7199.235  | NM_004824 | 3536.199  | 2972.776  | NM_016276 | 55122.371 | 44573.34  |
| NM_000433 | 3763.893  | 3548.551  | U83191    | 6229.188  | 6352.186  | NM_017762 | 7926.755  | 7976.783  |
| NM_000190 | 17078.168 | 19446.535 | NM_013952 | 7264.523  | 9552.193  | NM_001863 | 52160.734 | 52212.141 |
| X15667    | 3503.878  | 3892.319  | NM_004482 | 978.006   | 1160.662  | NM_000921 | 17293.871 | 18318.479 |
| NM_017512 | 7106.314  | 9010.011  | NM_015599 | 2346.946  | 1802.445  | NM_016234 | 18622.543 | 19359.086 |
| NM_018661 | 766.929   | 746.098   | NM_018696 | 14547.942 | 15738.247 | NM_001876 | 9694.437  | 11555.665 |
| NM_001678 | 436.121   | 447       | NM_000136 | 19082.742 | 15531.88  | NM_016144 | 10339.128 | 11381.603 |
| AK023078  | 10060.377 | 11000.374 | AL157456  | 2253.688  | 2384.279  | AL133099  | 7466.594  | 9762.499  |
| NM_002235 | 35967.766 | 38666.172 | AL162056  | 2598.133  | 2883.648  | NM_016082 | 3854.924  | 4514.422  |
| NM_002245 | 17691.318 | 19461.584 | NM_000380 | 9021.923  | 9493.469  | NM_000433 | 2676.011  | 2787.699  |
| NM_015684 | 5415.131  | 5736.435  | NM_004628 | 4498.831  | 5163.538  | NM_000190 | 17852.785 | 17826.758 |
| SB        | 814.052   | 791.84    | NM_006502 | 1639.815  | 2055.995  | X15667    | 14137.501 | 14377.919 |
| NM_002054 | 2396.198  | 2696.977  | NM_014876 | 5987.843  | 6661.554  | NM_017512 | 6619.675  | 8391.559  |
| NM_004482 | 1170.957  | 1067.243  | AB032958  | 1822.593  | 1177.698  | AK023078  | 9102.995  | 9610.547  |
| NM_015599 | 1279.131  | 1256.39   | AK024427  | 5545.863  | 4681.599  | NM_014737 | 9186.533  | 6871.855  |
| AB037902  | 689.498   | 1230.099  | NM_003006 | 2430.167  | 2315.73   | NM_003488 | 9180.662  | 6060.99   |
| NM_018696 | 5849.276  | 6465.613  | NM_000493 | 1288.494  | 1032.853  | NM_001454 | 58039.469 | 48796.672 |
| NM_000136 | 19794.559 | 23606.891 | AF272035  | 5867.826  | 4652.814  | NM_006558 | 19416.145 | 18268.854 |
| AL157456  | 716.207   | 810.61    | AY009133  | 1392.123  | 1106.642  | Z22780    | 328.578   | 618.811   |
| AL162056  | 4437.018  | 3698.625  | NM_000965 | 953.966   | 530.031   | NM_005797 | 2589.964  | 2764.78   |
| NM_000380 | 5163.76   | 5476.45   | NM_013403 | 4035.643  | 3111.3    | NM_004824 | 2246.183  | 2853.667  |
| NM_004628 | 4366.121  | 4792.326  | NM_000674 | 2509.761  | 1961.747  | M17733    | 59796.391 | 55807.043 |

|           |           |           |           |           |           |           |           |           |
|-----------|-----------|-----------|-----------|-----------|-----------|-----------|-----------|-----------|
| AF085734  | 822.684   | 780.099   | AB020671  | 1366.176  | 1180.442  | U83191    | 3934.174  | 5187.481  |
| NM_006502 | 683.333   | 507.415   | NM_000206 | 37400.355 | 43634.051 | NM_015595 | 1774.192  | 1538.458  |
| NM_014876 | 11250.297 | 11283.572 | NM_018255 | 6150.534  | 5956.29   | NM_018696 | 7103.399  | 9363.139  |
| NM_005406 | 11213.749 | 11955.934 | NM_016232 | 2313.334  | 1654.124  | NM_000136 | 38028.68  | 41970.879 |
| NM_003328 | 8153.167  | 7494.986  | M74161    | 3644.785  | 3761.209  | AL157456  | 2930.165  | 3049.742  |
| X93921    | 4723.018  | 4792.752  | NM_016542 | 10368.905 | 12628.774 | AL162056  | 2424.932  | 2464.501  |
| AF073482  | 9796.17   | 8547.546  | NM_000484 | 2639.465  | 1882.034  | NM_000380 | 34718.742 | 37435.332 |
| NM_005990 | 6244.743  | 6590.723  | NM_003855 | 633.861   | 798.474   | NM_004628 | 5231.335  | 5016.681  |
| NM_000850 | 6734.251  | 6660.734  | S40369    | 20781.445 | 18823.439 | NM_014876 | 6065.924  | 6221.529  |
| NM_004676 | 964.096   | 1254.63   | NM_015831 | 14572.49  | 13674.465 | AB032958  | 2441.194  | 1883.94   |
| NM_007193 | 905.031   | 900.609   | AK023154  | 7123.797  | 7701.379  | AK024427  | 5570.742  | 3513.072  |
| NM_001994 | 6203.701  | 6859.22   | Z36820    | 3156.799  | 2962.114  | NM_003006 | 3349.221  | 2826.648  |
| J00129    | 38757.109 | 42574.191 | NM_003967 | 6001.615  | 6322.611  | NM_000493 | 1343.102  | 1094.481  |
| NM_003320 | 7322.049  | 6713.79   | NM_012451 | 3467.484  | 4337.129  | AF272035  | 8091.134  | 9461.302  |
| L10146    | 6560.331  | 6630.214  | NM_006624 | 7491.807  | 7437.293  | AY009133  | 1264.621  | 2049.404  |
| NM_000685 | 6671.424  | 7182.207  | AF130079  | 925.361   | 1000.165  | NM_000965 | 1358.575  | 1311.662  |
| AK025657  | 16777.924 | 14362.981 | NM_017667 | 2062.504  | 2220.475  | NM_013403 | 6545.441  | 7415.382  |
| AF142063  | 2078.123  | 1904.208  | AK002211  | 4353.457  | 3959.988  | NM_004123 | 667.65    | 717.575   |
| W42849    | 2446.005  | 2673.109  | NM_012127 | 4626.376  | 5327.096  | NM_000674 | 4104.064  | 4381.053  |
| AI889961  | 9353.453  | 8823.431  | NM_014454 | 1821.107  | 1713.301  | NM_000206 | 50493.672 | 54542.75  |
| AI360116  | 3897.84   | 3875.709  | NM_017489 | 7314.275  | 7963.503  | NM_018255 | 6338.881  | 6875.79   |
| AI572835  | 1095.926  | 1433.989  | NM_002824 | 16782.902 | 18307.313 | M74161    | 3167.477  | 3952.815  |
| R20392    | 10386.261 | 9079.723  | NM_006835 | 30614.697 | 37252.477 | NM_016542 | 8991.314  | 10670.122 |
| AA486367  | 9653.938  | 8126.799  | NM_006023 | 19665.113 | 18566.145 | NM_000484 | 3334.943  | 3858.534  |
| N56684    | 821.103   | 730.618   | NM_014673 | 9485.802  | 9555.937  | S40369    | 19801.139 | 19803.965 |
| M55153    | 1183.062  | 1138.362  | AB002330  | 3549.609  | 4003.665  | NM_015831 | 12986.88  | 12489.96  |
| AF414120  | 980.449   | 1077.037  | AL137509  | 30894.418 | 36047.41  | AK023154  | 5998.871  | 5975.983  |
| AK097322  | 942.907   | 861.796   | NM_006538 | 5077.743  | 5396.366  | Z36820    | 3918.413  | 3550.709  |
| AL136131  | 12867.62  | 12991.895 | NM_019887 | 18799.18  | 20645.764 | NM_003967 | 7281.033  | 6725.949  |
| NM_033357 | 9816.344  | 9400.806  | NM_004050 | 4654.141  | 3216.906  | NM_012451 | 4840.478  | 4275.061  |
| AF335109  | 2571.416  | 3131.519  | NM_006024 | 14213.223 | 14543.665 | NM_002510 | 1214.089  | 843.597   |
| NM_003263 | 885.341   | 1291.514  | NM_020191 | 6734.155  | 6658.754  | NM_020386 | 788.88    | 695.557   |
| U59911    | 17444.646 | 17993.248 | NM_017434 | 1537.801  | 1712.788  | NM_006624 | 11440.755 | 9890.078  |
| NM_002982 | 439.25    | 556.348   | NM_020182 | 8385.562  | 7628.251  | AF130079  | 1387.864  | 1564.378  |
| NM_002190 | 597.112   | 582.645   | AL137669  | 7480.049  | 8938.184  | NM_017667 | 2761.305  | 2967.14   |
| AK056773  | 3729.586  | 4240.858  | AJ275213  | 1512.257  | 1665.571  | AK002211  | 6884.412  | 8164.104  |
| NM_002182 | 1868.818  | 1859.437  | NM_004390 | 680.371   | 642.757   | NM_012127 | 7480.111  | 7834.242  |
| NM_016470 | 9433.803  | 8804.511  | NM_014263 | 10439.295 | 9152.642  | NM_002824 | 33902.68  | 34253.027 |
| AL365408  | 11097.281 | 9470.238  | NM_020361 | 936.782   | 625.209   | NM_006835 | 32106.889 | 37261.824 |
| AK026204  | 5539.963  | 5203.635  | NM_015907 | 2603.041  | 2290.478  | NM_006023 | 21056.74  | 21603.682 |
| NM_014635 | 4232.039  | 3149.364  | AK026343  | 3852.771  | 4283.188  | NM_014673 | 9654.735  | 11415.454 |
| NM_004145 | 4680.563  | 5098.032  | NM_001912 | 732.602   | 768.416   | NM_006538 | 4149.386  | 4474.149  |
| AK023196  | 2361.237  | 2222.791  | NM_013267 | 1722.742  | 1793.483  | NM_019887 | 18515.525 | 18022.051 |
| NM_018728 | 7943.788  | 6455.517  | NM_002454 | 2024.418  | 1737.914  | NM_004050 | 12500.659 | 13522.988 |
| AK024014  | 997.404   | 1060.02   | NM_001917 | 8393.178  | 8763.834  | NM_006024 | 15200.198 | 13084.819 |
| NM_000865 | 3549.709  | 3847.75   | NM_005956 | 22152.934 | 22758.678 | NM_020191 | 5674.861  | 5693.314  |
| NM_000867 | 3348.819  | 3447.213  | NM_003043 | 5236.467  | 4446.503  | NM_017434 | 5096.417  | 4708.352  |
| AF076642  | 6502.483  | 5604.167  | D87077    | 1936.42   | 1800.329  | NM_020182 | 7179.009  | 8288.943  |
| NM_002386 | 3105.355  | 3146.115  | NM_014308 | 1535.622  | 1262.38   | AL137669  | 7234.034  | 7308.01   |
| NM_005314 | 3040.354  | 2824.251  | L07033    | 4215.984  | 4325.691  | AJ275213  | 1425.35   | 1092.682  |
| NM_004885 | 7221.709  | 6788.231  | AK023934  | 933.989   | 490.73    | NM_004793 | 15796.017 | 13916.479 |
| NM_005145 | 1945.996  | 1859.646  | AK000142  | 2401.013  | 1868.754  | NM_004390 | 705.243   | 582.134   |
| NM_012152 | 5103.708  | 6053.858  | NM_005993 | 11313.515 | 11092.353 | NM_014263 | 8669.988  | 9388.522  |



|           |           |           |           |           |           |           |           |           |
|-----------|-----------|-----------|-----------|-----------|-----------|-----------|-----------|-----------|
| AK024093  | 6677.501  | 7059.931  | AK026341  | 5705.901  | 5379.69   | NM_020361 | 1721.924  | 1812.327  |
| NM_001940 | 7502.307  | 7043.39   | NM_018943 | 4785.055  | 5898.724  | NM_015907 | 2740.642  | 3213.333  |
| U83115    | 24558.949 | 25647.221 | AJ292757  | 718.251   | 872.798   | AK026343  | 4597.255  | 5599.433  |
| NM_001264 | 14849.243 | 16389.777 | AK025239  | 425.801   | 754.571   | NM_001912 | 829.572   | 1230.219  |
| NM_013364 | 3477.851  | 3832.403  | U01922    | 848.389   | 922.552   | NM_013267 | 6200.885  | 8512.542  |
| NM_014368 | 2584.855  | 2447.953  | NM_003999 | 1279.804  | 1341.171  | NM_001917 | 11633.012 | 12374.478 |
| NM_002239 | 25272.893 | 30070.934 | NM_004469 | 387.005   | 496.457   | NM_005956 | 44483.945 | 44944.348 |
| NM_002249 | 15518.151 | 18539.723 | NM_005870 | 815.459   | 765.218   | NM_003043 | 15112.142 | 16782.424 |
| NM_015684 | 4241.682  | 4181.07   | NM_018561 | 4845.775  | 3199.605  | D87077    | 2722.409  | 2909.614  |
| NM_003945 | 28057.09  | 33676.871 | NM_001270 | 7093.198  | 7608.862  | NM_014308 | 818.028   | 1230.407  |
| NM_004981 | 1102.148  | 1676.182  | NM_001952 | 11080.7   | 8846.398  | L07033    | 3710.771  | 3952.07   |
| AK096507  | 595.946   | 618.242   | NM_003223 | 6300.44   | 5613.67   | AK023934  | 616.545   | 492.134   |
| NM_016524 | 970.909   | 1249.251  | NM_006713 | 66231.625 | 45371.66  | AK000142  | 1213.829  | 1579.795  |
| NM_007126 | 16399.396 | 16500.008 | NM_020201 | 11287.172 | 10967.553 | NM_005993 | 10991.003 | 12326.313 |
| AL137631  | 11629.45  | 13158.797 | AK023530  | 670.334   | 728.658   | AK026341  | 5951.204  | 6568.22   |
| NM_016057 | 22156.918 | 22440.021 | NM_016019 | 12705.213 | 12847.628 | NM_018943 | 6868.774  | 5731.626  |
| NM_014677 | 3670.9    | 4636.072  | NM_012245 | 16731.197 | 14502.262 | AJ292757  | 780.729   | 793.213   |
| NM_006855 | 1785.952  | 2184.715  | NM_001533 | 31194.826 | 38550.973 | U01922    | 1325.057  | 1261.537  |
| AK022790  | 35196.105 | 31215.738 | NM_006929 | 8894.116  | 8931.125  | NM_003999 | 2194.033  | 2038.676  |
| NM_004311 | 21423.039 | 23621.904 | NM_003977 | 27413.152 | 35089.301 | NM_018561 | 4395.926  | 4424.044  |
| NM_005624 | 2046.096  | 1569.825  | NM_005998 | 37928.559 | 43989.953 | NM_001270 | 8436.508  | 7971.668  |
| NM_002302 | 1749.943  | 1417.822  | U28424    | 4853.928  | 5284.604  | NM_001952 | 15799.252 | 15435.901 |
| AB020672  | 983.215   | 1599.095  | BF541372  | 3730.139  | 3542.828  | NM_003223 | 11120.254 | 11004.311 |
| AK026958  | 2205.924  | 1930.271  | AF092137  | 5461.172  | 6846.475  | NM_006713 | 58982.57  | 48744.637 |
| NM_000579 | 1868.933  | 2007.304  | NM_004623 | 2380.422  | 3315.823  | NM_020201 | 15192.176 | 15554.616 |
| NM_001480 | 1061.71   | 844.773   | AK024631  | 511.944   | 757.778   | U81557    | 466.146   | 778.557   |
| AF263462  | 3137.948  | 3585.558  | AF087977  | 881.361   | 735.567   | AK023530  | 1190.387  | 1009.688  |
| AB040962  | 1013.523  | 801.832   | AK026949  | 958.398   | 1125.851  | NM_012245 | 14289.783 | 11230.788 |
| NM_000639 | 3957.696  | 4174.037  | NM_004957 | 7526.907  | 6026.84   | NM_001533 | 28334.215 | 31450.102 |
| AV697672  | 1152.95   | 1073.502  | AL050028  | 9677.063  | 8305.196  | NM_006929 | 12354.441 | 10746.746 |
| NM_000942 | 34434.68  | 39789.922 | NM_004955 | 1621.576  | 1739.87   | NM_003977 | 40073.094 | 39083.359 |
| NM_005406 | 9444.006  | 10085.363 | NM_003364 | 1668.12   | 1874.693  | NM_005998 | 38834.902 | 39081.57  |
| NM_003328 | 7230.173  | 6449.176  | NM_017803 | 2242.067  | 2321.765  | U28424    | 4222.392  | 3359.355  |
| X93921    | 4378.572  | 3894.071  | NM_005994 | 5455.996  | 4340.241  | BF541372  | 6255.574  | 6084.706  |
| AF073482  | 8115.773  | 7779.42   | AB027508  | 5956.104  | 4783.894  | AF092137  | 6890.437  | 5789.308  |
| NM_005990 | 5578.407  | 5366.056  | NM_016331 | 6189.362  | 6438.453  | NM_004623 | 2571.343  | 2129.565  |
| NM_016276 | 3305.986  | 3537.312  | NM_014360 | 42856.07  | 32071.689 | NM_016551 | 7340.532  | 6371.158  |
| NM_017762 | 8697.364  | 8500.619  | NM_018952 | 1202.852  | 670.653   | AK024631  | 384.535   | 356.851   |
| NM_000921 | 13876.513 | 14622.656 | AB033053  | 4524.867  | 5023.439  | AF087977  | 1503.343  | 1245.849  |
| NM_000098 | 5156.774  | 6086.941  | NM_001571 | 4457.907  | 5044.399  | AK026949  | 1068.516  | 1006.484  |
| NM_000016 | 28731.875 | 37492.063 | AF126749  | 958.878   | 1010.894  | NM_000371 | 745.865   | 919.561   |
| AK026913  | 7369.621  | 7517.418  | NM_018108 | 3785.985  | 4945.64   | BE732255  | 10370.701 | 8839.793  |
| NM_016234 | 16295.049 | 15803.175 | NM_003408 | 378.5     | 427.178   | NM_004955 | 1727.029  | 1605.81   |
| NM_001876 | 11560.678 | 11413.645 | NM_003450 | 2816.737  | 3056.808  | NM_003364 | 2039.163  | 1732.892  |
| NM_016144 | 12616.251 | 12248.646 | AK021577  | 1864.543  | 2324.627  | NM_017803 | 2945.253  | 2413.012  |
| AL133099  | 7532.739  | 9066.161  | AF075019  | 1495.864  | 1065.801  | AB027508  | 6919.242  | 7204.568  |
| NM_016082 | 7524.461  | 8006.869  | AF147388  | 699.045   | 662.37    | NM_016331 | 8385.577  | 8971.896  |
| NM_000433 | 3912.315  | 4525.074  | AK021498  | 2884.074  | 2175.951  | NM_014360 | 36932.98  | 42490.156 |
| NM_000190 | 16774.619 | 18615.098 | AF085874  | 4221.601  | 3490.615  | NM_018952 | 503.647   | 635.296   |
| X15667    | 3380.863  | 4295.736  | NM_019556 | 2407.29   | 2067.471  | AB033053  | 2485.568  | 2794.132  |
| NM_017512 | 7956.279  | 9612.308  | NM_004753 | 4475.313  | 5213.329  | NM_007358 | 10512.934 | 9745.613  |
| NM_018661 | 311.131   | 893.755   | NM_015462 | 11079.839 | 11142.767 | NM_001571 | 3243.618  | 3357.516  |
| NM_001678 | 347.811   | 358.723   | AK026700  | 1878.518  | 1832.159  | AF126749  | 853.211   | 882.963   |

|           |           |           |           |           |           |           |           |           |
|-----------|-----------|-----------|-----------|-----------|-----------|-----------|-----------|-----------|
| AK023078  | 4864.213  | 5241.045  | AF086242  | 1085.156  | 783.413   | NM_00340E | 901.434   | 857.39    |
| NM_014737 | 7535.765  | 6005.813  | AF086370  | 1134.56   | 506.826   | NM_00345C | 1539.058  | 1634.265  |
| NM_00348E | 10343.458 | 9722.637  | AF086332  | 15409.89  | 15014.092 | AK021577  | 1915.616  | 1545.569  |
| NM_001454 | 65518.473 | 43082.313 | AF086388  | 1915.538  | 2556.774  | AF147390  | 1025.154  | 659.019   |
| NM_00655E | 16207.103 | 14523.603 | AF086444  | 1837.585  | 2252.737  | AF075019  | 1336.255  | 1176.907  |
| Z22780    | 714.718   | 622.694   | AK001043  | 7876.225  | 7647.249  | AF147388  | 964.82    | 715.383   |
| NM_004824 | 6587.425  | 6750.665  | AK024535  | 11684.271 | 12997.991 | AK021498  | 4970.873  | 4275.904  |
| U83191    | 6072.256  | 8355.129  | AL359608  | 1642.31   | 1601.652  | AF085874  | 6403.091  | 6470.982  |
| NM_01395E | 13081.316 | 13102.325 | NM_01649E | 37004.184 | 39970.027 | AF147346  | 1215.633  | 1210.953  |
| NM_00448E | 2031.22   | 1796.254  | AF088025  | 334.884   | 326.095   | AK026959  | 3212.222  | 2885.121  |
| NM_01559E | 1881.573  | 1426.92   | AF085934  | 615.643   | 1007.44   | NM_01955E | 2321.441  | 2158.561  |
| AB037902  | 760.97    | 1201.819  | AF147423  | 811.386   | 511.864   | NM_00475E | 17668.121 | 14982.188 |
| NM_01869E | 7641.344  | 7964.037  | AF075088  | 855.076   | 1068.123  | NM_01546E | 10696.553 | 9087.812  |
| NM_00013E | 19538.793 | 21134.707 | AK023971  | 28400.645 | 34252.914 | AF147377  | 452.286   | 532.912   |
| AL157456  | 1068.594  | 790.21    | AK024738  | 1335.23   | 1938.206  | AK026700  | 2431.275  | 2146.091  |
| AL162056  | 3032.413  | 3292.205  | AL133103  | 1316.811  | 1363.543  | AK000127  | 701.979   | 1040.858  |
| NM_00038C | 6139.166  | 7508.04   | BC015321  | 1614.384  | 1510.576  | AF086370  | 1146.777  | 1468.512  |
| NM_00462E | 4361.495  | 4624.643  | AL359594  | 1695.083  | 1643.493  | AF086332  | 17882.059 | 19890.277 |
| AF085734  | 629.936   | 479.462   | AL137293  | 1642.635  | 1300.576  | AJ404614  | 14738.313 | 12805.404 |
| NM_01487E | 9169.727  | 10023.133 | AL137458  | 1030.769  | 1173.179  | AF086347  | 6893.808  | 6793.867  |
| AB032958  | 1470.869  | 1063.27   | AL157490  | 16357.218 | 16818.342 | AF086388  | 2428.91   | 1974.258  |
| AK024427  | 8199.818  | 8545.158  | AL390167  | 4238.965  | 4863.581  | AF086444  | 1387.661  | 1157.88   |
| NM_00300E | 3767.525  | 2776.042  | AK023657  | 860.879   | 977.934   | AK001043  | 6742.813  | 7549.94   |
| NM_00049E | 599.687   | 696.052   | AF086068  | 3239.207  | 2991.846  | AK024535  | 12253.173 | 10947.167 |
| AF272035  | 6626.132  | 5792.18   | AK026322  | 890.312   | 516.73    | AL359608  | 1529.703  | 1416.478  |
| AY009133  | 1436.127  | 1070.207  | AF086059  | 1542.577  | 2087.9    | NM_01649E | 37696.234 | 35078.262 |
| NM_00096E | 681.535   | 779.709   | AF086091  | 660.294   | 652.948   | AF088025  | 787.716   | 921.75    |
| NM_01340E | 4904.754  | 5091.015  | AF075018  | 1366.925  | 1402.989  | AF085934  | 1092.839  | 1105.433  |
| NM_000674 | 2386.938  | 2808.652  | AK024239  | 1242.074  | 1278.12   | AF147423  | 677.518   | 571.615   |
| AB020671  | 920.728   | 1409.016  | AK021838  | 10186.026 | 8543.304  | AF075088  | 1066.921  | 1112.657  |
| NM_00020E | 47132.07  | 43446.727 | AK021990  | 320.189   | 753.348   | AK023971  | 37281.234 | 33753.945 |
| NM_01825E | 8396.994  | 7481.595  | AF083118  | 1616.214  | 1299.217  | AK024738  | 1671.457  | 1351.755  |
| NM_01623E | 915.473   | 1343.714  | AF089811  | 903.214   | 969.583   | AL133103  | 1566.08   | 1340.386  |
| AF178930  | 1259.075  | 1452.191  | AF147444  | 505.692   | 730.179   | BC015321  | 1895.04   | 1409.56   |
| M74161    | 5643.926  | 4320.605  | AK021909  | 1176.969  | 1194.425  | AL157450  | 2229.585  | 1729.878  |
| NM_01654E | 12508.754 | 12518.494 | AK022043  | 685.219   | 620.28    | AL359594  | 1976.893  | 1423.652  |
| NM_000484 | 2131.663  | 2050.59   | AK022168  | 1106.25   | 930.889   | AL137293  | 3311.58   | 2783.532  |
| S40369    | 22966.596 | 18760.854 | AK022327  | 878.804   | 807.157   | AL137458  | 2297.275  | 2254.126  |
| NM_015831 | 15990.645 | 16541.371 | AK022061  | 421.823   | 304.438   | AL157490  | 25033.236 | 22457.193 |
| AK023154  | 8473.116  | 8874.082  | AK022201  | 1100.29   | 858.637   | AL390167  | 5818.13   | 5431.008  |
| Z36820    | 3928.539  | 3773.046  | AK022353  | 2515.368  | 2461.843  | AK023657  | 575.852   | 985.599   |
| NM_003967 | 4924.138  | 5010.768  | AK026868  | 1039.606  | 996.017   | AF086068  | 1755.851  | 1749.798  |
| NM_012451 | 5308.314  | 4180.341  | AK022200  | 5126.217  | 4026.007  | AF086059  | 1628.579  | 1285.496  |
| NM_00251C | 1526.179  | 1034.344  | AK026967  | 339.345   | 437.49    | AF075018  | 1646.21   | 1961.4    |
| NM_006624 | 10448.909 | 8241.971  | AK023396  | 725.702   | 627.432   | AK024239  | 1014.939  | 943.523   |
| AF130079  | 1249.116  | 905.706   | AF264625  | 369.857   | 463.236   | AK021838  | 21930.201 | 20570.559 |
| NM_017667 | 2673.386  | 2412.859  | NM_018101 | 12593.363 | 10961.419 | AF083118  | 1761.537  | 1944.375  |
| AK002211  | 3301.704  | 2981.002  | AF293366  | 985.189   | 1131.269  | AK000957  | 570.727   | 456.866   |
| NM_012127 | 6819.845  | 6468.652  | BF526704  | 2331.909  | 2352.832  | AF089811  | 408.463   | 538.479   |
| NM_014454 | 2297.458  | 2360.319  | AJ491695  | 6993.112  | 5919.051  | AF147444  | 1165.337  | 1229.702  |
| NM_01748E | 11338.86  | 9308.86   | AF052107  | 17408.779 | 14976.756 | AK021909  | 1607.453  | 976.36    |
| NM_002824 | 21640.396 | 20523.377 | AK022430  | 1414.125  | 1111.316  | AK022327  | 1758.099  | 955.936   |
| NM_00683E | 43141.316 | 43680.906 | AK001022  | 4621.137  | 4394.552  | AK022201  | 1324.624  | 1699.395  |

|           |           |           |           |           |           |           |           |           |
|-----------|-----------|-----------|-----------|-----------|-----------|-----------|-----------|-----------|
| NM_006023 | 22820.244 | 24740.125 | AK021826  | 6154.064  | 5988.56   | AK022353  | 4072.644  | 4039.727  |
| NM_014673 | 9228.281  | 8468.69   | AK024541  | 896.039   | 1404.809  | AK026868  | 1276.742  | 952.33    |
| AB002330  | 6235.091  | 5986.035  | AK024138  | 5926.608  | 6450.157  | AK022200  | 4337.787  | 3848.05   |
| AL137509  | 42915.168 | 41614.828 | Y10505    | 2092.411  | 1669.551  | AK024604  | 1077.905  | 3184.156  |
| NM_006538 | 9052.614  | 8679.447  | U00946    | 13101.497 | 12485.375 | NM_018101 | 15405.99  | 13074.666 |
| NM_019887 | 21672.133 | 20979.82  | NM_005615 | 2523.816  | 2278.291  | AF293366  | 1295.063  | 1499.82   |
| NM_004050 | 1567.023  | 1752.173  | Z34290    | 1235.269  | 1431.921  | BF526704  | 984.117   | 1314.455  |
| NM_006024 | 17877.18  | 16732.186 | AF070642  | 5562.331  | 4689.874  | AJ491695  | 11031.884 | 9788.176  |
| NM_020191 | 12266.003 | 11310.285 | AK027125  | 4081.037  | 3736.228  | AF052107  | 32219.055 | 36310.719 |
| NM_017434 | 1117.167  | 803.97    | AK025311  | 987.896   | 523.784   | AK022430  | 1949.419  | 1413.32   |
| NM_020182 | 5977.993  | 6472.28   | D16918    | 1601.308  | 1489.964  | AK001022  | 3377.592  | 2742.277  |
| AL137669  | 5903.752  | 5726.299  | D16467    | 2108.722  | 2334.809  | AK021826  | 4996.373  | 4684.78   |
| AJ275213  | 2259.874  | 2330.744  | AF090932  | 2050.234  | 1809.501  | AK024541  | 239.442   | 529.937   |
| NM_004793 | 20375.945 | 16751.227 | AF166125  | 2322.41   | 2200.475  | AK024138  | 6065.697  | 6685.983  |
| NM_004390 | 821.182   | 777.221   | AF225425  | 2771.65   | 2363.437  | Y10505    | 2285.75   | 2762.932  |
| NM_014263 | 14116.767 | 14187.789 | AF064848  | 16570.859 | 13071.957 | U00946    | 13427.879 | 11590.266 |
| NM_020361 | 1449.261  | 1122.471  | U61089    | 8439.053  | 5376.256  | Z34290    | 1047.003  | 1898.432  |
| NM_015907 | 4534.17   | 3656.309  | AK001036  | 3889.57   | 3950.407  | AF070642  | 6055.171  | 5230.032  |
| AK026343  | 4358.513  | 4347.496  | AK024858  | 12904.631 | 11267.063 | AK027125  | 3373.141  | 2806.741  |
| NM_001912 | 1206.023  | 1169.638  | NM_001049 | 7154.046  | 7500.247  | D16918    | 1556.992  | 1284.529  |
| NM_013267 | 2146.73   | 2075.719  | AK024554  | 2935.696  | 2463.682  | D16467    | 2356.593  | 1038.94   |
| NM_002454 | 4366.989  | 4223.688  | AK025909  | 8511.521  | 9554.542  | AF090932  | 2900.643  | 2365.416  |
| NM_001917 | 13269.029 | 12178.844 | AK026138  | 2134.613  | 2395.306  | AF166125  | 2770.057  | 3974.219  |
| NM_005956 | 13340.038 | 12480.229 | Z70706    | 622.556   | 507.991   | AF225425  | 3633.011  | 5101.173  |
| NM_003043 | 2882.626  | 2137.976  | AK021434  | 7912.49   | 5562.235  | AF064848  | 22493.336 | 31953.156 |
| D87077    | 1507.71   | 1618.893  | NM_016479 | 11217.156 | 8255.361  | U61089    | 6949.778  | 6072.1    |
| NM_014308 | 1891.845  | 2006.602  | AK000933  | 10938.945 | 9882.693  | AK001036  | 3196.695  | 2351.786  |
| L07033    | 5735.352  | 5446.618  | Y10205    | 1331.384  | 948.777   | AK024858  | 13094.84  | 8510.429  |
| AK023934  | 887.583   | 862.846   | NM_014626 | 1389.335  | 1089.142  | Y16697    | 899.303   | 534.099   |
| AK000142  | 2676.916  | 2403.192  | AK025277  | 1427.27   | 1340.413  | NM_001049 | 5892.567  | 4842.375  |
| NM_005993 | 18151.752 | 16973.582 | AF086095  | 1587.82   | 1655.093  | AK024554  | 1464.87   | 1489.616  |
| AK026341  | 9491.302  | 10582.438 | NM_018352 | 2382.04   | 2437.636  | AF068294  | 4936.114  | 4662.042  |
| NM_018943 | 8118.67   | 8172.245  | AK026880  | 3863.376  | 4028.308  | AK025909  | 7413.727  | 6029.25   |
| AJ292757  | 1444.224  | 1327.688  | AF086061  | 767.568   | 753.291   | AK026138  | 1407.278  | 1436.113  |
| NM_003999 | 1217.429  | 1019.902  | AL080092  | 15854.935 | 14150.605 | AK021434  | 8322.856  | 10564.578 |
| NM_004469 | 754.936   | 730.906   | AF075069  | 1402.102  | 1055.631  | Y10205    | 1168.46   | 1584.255  |
| NM_003433 | 2602.988  | 2649.059  | AL137279  | 1650.101  | 1794.866  | NM_014626 | 1165.005  | 1501.005  |
| NM_005221 | 6656.444  | 5484.667  | M77818    | 29693.766 | 33525.992 | AK025277  | 1523.746  | 1444.989  |
| NM_005870 | 665.44    | 889.417   | AF009267  | 2259.862  | 1869.826  | AF086095  | 1323.801  | 1032.555  |
| NM_018561 | 4608.844  | 3804.035  | AK027129  | 8745.489  | 9269.301  | NM_018352 | 1815.454  | 1450.625  |
| NM_001270 | 9564.75   | 9911.852  | L19367    | 646.843   | 421.609   | AK026880  | 2762.135  | 2294.911  |
| NM_001952 | 9093.999  | 6968.973  | NM_015698 | 8563.367  | 10125.335 | AF086061  | 2364.806  | 1092.702  |
| NM_003223 | 8662.849  | 7386.746  | CY3Cy5    | 7612.511  | 401.313   | AL080092  | 13636.896 | 16899.705 |
| NM_006713 | 60234.012 | 48263.852 | BG696293  | 1209.483  | 1075.323  | AF075069  | 1093.691  | 1827.178  |
| NM_020201 | 7850.776  | 7352.004  | AA777410  | 1626.239  | 1265.704  | NM_005422 | 1207.663  | 1036.206  |
| AK023530  | 1036.976  | 1140.302  | BG113873  | 1009.686  | 790.293   | AL137279  | 2630.692  | 2656.153  |
| NM_016019 | 18791.137 | 14720.791 | BC013135  | 11243.125 | 10673.679 | AK023981  | 1765.744  | 1324.658  |
| NM_012245 | 21786.895 | 16820.938 | AI625002  | 785.004   | 878.329   | AK021874  | 5165.145  | 3519.122  |
| NM_003986 | 387.464   | 350.438   | AA281652  | 2533.799  | 2135.005  | M77818    | 23036.904 | 22796.852 |
| NM_001533 | 49518.668 | 45025.242 | U31905    | 702.497   | 569.654   | AF009267  | 2590.173  | 3054.292  |
| NM_006929 | 11488.397 | 10282.041 | X52479    | 5543.032  | 4724.304  | AK027129  | 6974.095  | 6745.671  |
| NM_003977 | 23514.865 | 22513.434 | BC013200  | 32684.363 | 42813.324 | L19367    | 446.083   | 811.426   |
| NM_005998 | 47264.813 | 44250.574 | AW408832  | 3756.656  | 3629.153  | NM_015698 | 6838.577  | 6212.477  |

|           |           |           |           |           |           |           |           |           |
|-----------|-----------|-----------|-----------|-----------|-----------|-----------|-----------|-----------|
| U28424    | 5311.36   | 5199.941  | AA486364  | 11982.513 | 11113.55  | CY3Cy5    | 19342.07  | 1257.763  |
| BF541372  | 1679.467  | 1640.185  | M15476    | 15963.051 | 10412.234 | BG696293  | 1918.218  | 2063.156  |
| AF092137  | 8208.932  | 8474.845  | U57456    | 1802.068  | 1060.804  | AA777410  | 1848.321  | 1908.937  |
| NM_004623 | 3747.134  | 3806.875  | N70057    | 5710.403  | 4577.489  | BG113873  | 1326.772  | 1614.62   |
| NM_016551 | 8630.97   | 6871.116  | NM_006497 | 4063.93   | 3696.494  | BC013135  | 31114.854 | 40708.801 |
| AK024631  | 807.978   | 713.489   | NM_006892 | 1235.615  | 1062.106  | AI625002  | 1931.306  | 1734.536  |
| AF087977  | 668.942   | 748.122   | SR5       | 8867.578  | 6319.81   | H07899    | 645.949   | 677.721   |
| AK026949  | 988.714   | 982.835   | SR7       | 8442.833  | 41526.934 | AA281652  | 3747.409  | 4034.17   |
| NM_004957 | 8876.108  | 7949.278  | SR9       | 30410.914 | 4846.508  | U31905    | 1699.224  | 1920.641  |
| AL050028  | 12031.924 | 10255.677 | CY3Cy5    | 6927.7    | 450.414   | AW408832  | 9303.925  | 9918.857  |
| NM_000371 | 551.918   | 486.624   | AF254067  | 3163.062  | 2961.621  | AA486364  | 28272.873 | 35317.285 |
| BE732255  | 17090.932 | 15184.874 | NM_016363 | 2009.097  | 1925.183  | M15476    | 48775.82  | 52937.09  |
| NM_004955 | 3561.993  | 3141.121  | AY009090  | 1140.716  | 791.402   | U57456    | 7607.677  | 7819.117  |
| NM_003364 | 3691.601  | 3358.606  | U81380    | 544.047   | 564.359   | N70057    | 22919.232 | 32306.932 |
| NM_017803 | 3041.564  | 2814.752  | NM_016509 | 854.828   | 488.626   | NM_006497 | 19845.842 | 27835.205 |
| NM_005994 | 3071.958  | 4005.212  | AF041038  | 972.718   | 810.047   | NM_006892 | 2607.119  | 2796.126  |
| AB027508  | 4414.9    | 3723.111  | NM_004536 | 2028.719  | 2136.373  | SR5       | 11408.427 | 11558.507 |
| NM_016331 | 8288.821  | 7087.742  | NM_014672 | 3626.121  | 3976.021  | SR7       | 11508.243 | 44920.434 |
| NM_014360 | 5165.737  | 6409.745  | AB058719  | 873.42    | 795.807   | SR9       | 44499.25  | 6832.19   |
| AB033053  | 4702.706  | 4593.047  | AK025935  | 3346.026  | 3104.782  | CY3Cy5    | 22911.184 | 1265.074  |
| NM_007355 | 14188.208 | 12831.811 | AB032953  | 291.657   | 813.592   | NM_016363 | 4983.751  | 4214.571  |
| NM_001571 | 4956.922  | 4642.633  | NM_016441 | 1130.143  | 1484.733  | AY009090  | 1076.222  | 1372.785  |
| AF126749  | 1519.375  | 1123.849  | NM_003474 | 990.551   | 502.981   | NM_005592 | 391.75    | 550.497   |
| NM_018105 | 5840.261  | 4978.523  | NM_004625 | 1474.438  | 1384.84   | U81380    | 1659.325  | 1684.412  |
| NM_003450 | 2723.99   | 2649.136  | NM_007179 | 12909.934 | 10967.896 | NM_016509 | 1954.025  | 2314.656  |
| AK021577  | 3804.719  | 3127.058  | NM_001306 | 1060.096  | 564.61    | AF041038  | 3247.771  | 3565.591  |
| AF147390  | 742.728   | 494.535   | AB046861  | 2838.241  | 2022.829  | AB058719  | 1960.143  | 2146.346  |
| AF075019  | 2094.332  | 1829.484  | NM_005940 | 509.064   | 672.09    | AK025935  | 5030.391  | 4099.302  |
| AF147388  | 819.912   | 828.093   | AF061034  | 4234.71   | 2938.427  | AB032953  | 1544.795  | 1599.949  |
| AK021498  | 1313.565  | 1264.705  | NM_003100 | 4334.843  | 5195.583  | NM_016441 | 5329.638  | 5393.329  |
| AF085874  | 2070.089  | 2617.271  | AF228704  | 6149.926  | 6721.854  | NM_006334 | 5325.715  | 6110.604  |
| AF147346  | 908.595   | 1257.589  | AK022746  | 4075.898  | 3813.003  | NM_003474 | 2450.962  | 2486.513  |
| AK026959  | 3277.538  | 2628.906  | NM_006565 | 7866.041  | 6712.965  | NM_004625 | 6159.556  | 5531.916  |
| NM_019555 | 3265.824  | 3515.414  | NM_006440 | 1706.444  | 975.751   | NM_007179 | 35772.082 | 39723.176 |
| NM_004753 | 2943.879  | 2605.869  | NM_004847 | 1586.158  | 264.971   | NM_001306 | 1910.042  | 1944.166  |
| NM_015462 | 14274.47  | 13369.578 | NM_002255 | 5421.526  | 4450.795  | AB046861  | 4174.051  | 4836.7    |
| AF147377  | 598.49    | 599.375   | BC034483  | 1131.503  | 363.724   | NM_005940 | 1252.596  | 1045.675  |
| AK026700  | 2482.437  | 2592.364  | NM_003620 | 2807.804  | 2205.026  | AF061034  | 21368.008 | 22769.869 |
| AK000127  | 673.629   | 674.669   | NM_013289 | 5258.557  | 4695.229  | X03655    | 1663.337  | 1854.913  |
| AF086242  | 999.155   | 931.342   | AA586375  | 879.199   | 605.169   | NM_003100 | 8421.034  | 10817.826 |
| AF086370  | 846.379   | 1318.61   | BE910339  | 14600.246 | 9529.213  | NM_006845 | 1288.422  | 1424.926  |
| AF086332  | 1954.446  | 1801.458  | U89715    | 9896.082  | 9462.188  | AF228704  | 8293.794  | 9050.862  |
| AJ404614  | 14804.503 | 15078.023 | NM_005227 | 5382.779  | 5644.249  | AK022746  | 6232.054  | 6941.114  |
| AF086347  | 1496.503  | 1182.092  | NM_000286 | 16941.521 | 13524.52  | NM_006565 | 15847.227 | 19238.732 |
| AF086388  | 1011.457  | 718.516   | NM_016454 | 24286.904 | 29045.963 | NM_006440 | 6578.669  | 7493.104  |
| AF086444  | 1494.745  | 1466.769  | NM_003469 | 2769.528  | 3215.511  | NM_004847 | 20916.221 | 26743.764 |
| AK001043  | 5688.108  | 5369.603  | NM_016433 | 2096.551  | 2511.007  | NM_002255 | 14124.879 | 15480.261 |
| AK024535  | 8052.479  | 7394.569  | NM_000859 | 6870.316  | 8066.5    | AF151889  | 26835.758 | 27627.664 |
| AL359608  | 1475.767  | 1503.713  | NM_005480 | 4203.92   | 4111.859  | BC034483  | 2148.027  | 1399.674  |
| NM_016495 | 33374.551 | 32284.76  | AB034694  | 1183.936  | 1438.266  | NM_003620 | 4057.196  | 4171.161  |
| AF088025  | 413.954   | 569.391   | NM_003273 | 6018.829  | 5539.252  | NM_013289 | 5627.456  | 5305.365  |
| AF147423  | 927.463   | 767.563   | AK026404  | 1684.39   | 1508.851  | AA586375  | 1120.382  | 1227.563  |
| AF075088  | 923.615   | 608.185   | NM_017945 | 9020.35   | 10481.192 | BE910339  | 31552.49  | 37900.734 |

|           |           |           |           |           |           |           |           |           |
|-----------|-----------|-----------|-----------|-----------|-----------|-----------|-----------|-----------|
| AK023971  | 37220.949 | 36087.84  | AF208536  | 2509.226  | 2715.379  | U89715    | 10337.643 | 11825.049 |
| AK024738  | 2530.089  | 2143.026  | AB037848  | 926.473   | 648.931   | NM_016454 | 32802.875 | 28184.777 |
| AL133103  | 1841.569  | 2072.792  | NM_006744 | 957.501   | 575.387   | NM_003465 | 4451.031  | 4429.965  |
| BC015321  | 2061.151  | 2172.783  | AF297659  | 780.285   | 236.22    | NM_016433 | 1672.35   | 1391.643  |
| AL157450  | 896.977   | 515.48    | NM_018231 | 1944.106  | 1426.558  | NM_000855 | 4770.515  | 4508.538  |
| AL359594  | 2376.056  | 2644.64   | NM_000583 | 3561.731  | 3018.459  | NM_005480 | 4601.251  | 5079.473  |
| AL137293  | 1619.553  | 1771.187  | NM_014914 | 5085.193  | 5314.177  | AB034694  | 1606.087  | 962.601   |
| AL137458  | 2049.639  | 1727.112  | NM_018289 | 3073.133  | 2915.551  | AK026404  | 2729.508  | 2853.242  |
| AL157490  | 23903.117 | 21493.971 | AB018260  | 1232.962  | 1212.384  | NM_017945 | 11108.721 | 13028.866 |
| AL390167  | 6748.497  | 5792.309  | NM_014766 | 5363.194  | 5238.462  | NM_000392 | 2866.275  | 3352.09   |
| AK023657  | 837.442   | 1122.444  | NM_016627 | 30153.898 | 40814.289 | AF208536  | 2383.13   | 2482.471  |
| AF086068  | 3067.836  | 2389.753  | NM_016121 | 4094.018  | 4517.623  | AB037848  | 1422.324  | 1618.677  |
| AF086059  | 2109.466  | 2019.75   | NM_014769 | 2507.47   | 2576.767  | AF082657  | 7607.758  | 6867.084  |
| AF086069  | 343.12    | 2570.481  | AK026264  | 10424.476 | 10476.289 | NM_006744 | 2644.879  | 1936.801  |
| AF075018  | 1570.712  | 1687.265  | AF222927  | 6455.18   | 6613.753  | AF297659  | 1356.537  | 1402.946  |
| AK024239  | 1476.586  | 1286.415  | NM_014345 | 3900.237  | 3580.924  | NM_018231 | 4478.59   | 4871.869  |
| AK021838  | 3831.373  | 3737.784  | NM_018217 | 9932.394  | 10255.161 | NM_000583 | 5810.806  | 5091.059  |
| AK021990  | 389.675   | 387.849   | AF241831  | 2811.11   | 1676.031  | NM_018289 | 3068.128  | 2485.075  |
| AF083118  | 1379.955  | 1359.05   | NM_003033 | 3337.061  | 2298.977  | AB018260  | 690.905   | 951.956   |
| AF089811  | 409.941   | 480.417   | U96113    | 2314.54   | 1924.302  | NM_014766 | 5723.28   | 6620.328  |
| AF147444  | 620.318   | 703.164   | NM_002733 | 4222.602  | 3824.429  | NM_006345 | 52602.313 | 54660.992 |
| NM_016566 | 688.466   | 464.187   | M31008    | 1223.213  | 581.258   | AK026264  | 16480.654 | 19179.75  |
| AK021909  | 2090.957  | 1884.517  | NM_006288 | 1166.473  | 1166.552  | AF222927  | 8843.47   | 9360.33   |
| AK022043  | 737.445   | 747.229   | NM_016224 | 8515.586  | 7908.325  | NM_014345 | 4451.778  | 4779.471  |
| AK022168  | 1528.112  | 1287.758  | AB046861  | 3373.713  | 2852.136  | AF241831  | 7623.502  | 7169.729  |
| AK022327  | 944.208   | 851.155   | NM_005940 | 696.479   | 646.759   | NM_003033 | 6085.777  | 5632.985  |
| AK022061  | 290.053   | 410.263   | AF061034  | 5823.792  | 4475.683  | U96113    | 3610.79   | 2620.271  |
| AK022201  | 849.688   | 730.524   | X03655    | 598.264   | 733.13    | NM_002733 | 4207.951  | 4002.273  |
| AK022353  | 1694.327  | 1820.36   | BG696293  | 2023.328  | 1660.485  | M31008    | 1266.868  | 1159.686  |
| AK026868  | 837.379   | 420.93    | AA777410  | 1678.376  | 1349.178  | NM_006288 | 2757.164  | 3573.627  |
| AK022245  | 438.587   | 502.009   | BG113873  | 1266.392  | 883.56    | NM_016224 | 9791.138  | 9002.263  |
| AK022200  | 2914.358  | 2737.927  | BC013135  | 10699.479 | 12777.428 | NM_005940 | 568.872   | 510.292   |
| AK023396  | 598.948   | 513.848   | AI625002  | 1405.12   | 1215.631  | AF061034  | 21104.197 | 24604.621 |
| AF264625  | 515.555   | 368.269   | AA281652  | 2473.504  | 2240.227  | X03655    | 1100.888  | 1459.489  |
| NM_018101 | 12758.462 | 10673.632 | U31905    | 548.038   | 796.681   | BG696293  | 2274.633  | 3017.777  |
| AF293366  | 971.95    | 1009.16   | X52479    | 5142.972  | 4686.573  | AA777410  | 2108.949  | 2142.826  |
| BF526704  | 2440.241  | 2105.587  | BC013200  | 36808.25  | 47414.59  | BG113873  | 1013.012  | 1813.118  |
| AJ491695  | 2851.681  | 2321.524  | AW408832  | 4126.827  | 3472.408  | AI625002  | 2469.049  | 2290.311  |
| AF052107  | 10931.555 | 11700.064 | AA486364  | 15632.715 | 15602.23  | H07899    | 523.586   | 735.247   |
| AK022430  | 1278.88   | 1295.801  | M15476    | 20333.664 | 18262.477 | AA281652  | 3188.471  | 3442.364  |
| AK001022  | 4252.181  | 4157.305  | U57456    | 2710.148  | 1969.58   | U31905    | 1419.78   | 1930.924  |
| AL049351  | 2263.613  | 2297.581  | NM_006497 | 4497.668  | 3267.165  | X52479    | 8099.604  | 9762.307  |
| AL137508  | 1548.777  | 1137.609  | NM_006892 | 1068.647  | 1190.876  | BC013200  | 48085.07  | 48920.387 |
| AK021826  | 3364.046  | 3322.063  | AK000124  | 2615.129  | 2086.789  | AW408832  | 11415.667 | 12611.525 |
| AK024541  | 533.701   | 722.341   | NM_004480 | 3559.595  | 2697.165  | AA486364  | 32767.648 | 37705.898 |
| AK024138  | 5646.662  | 4870.726  | BC034483  | 3233.595  | 6493.465  | U57456    | 7945.551  | 8738.813  |
| Y10505    | 2736.044  | 2451.782  | NM_003620 | 3213.273  | 3577.231  | N70057    | 22615.922 | 25380.895 |
| U00946    | 13849.344 | 13346.696 | NM_013289 | 5664.334  | 5334.68   | NM_006497 | 26698.514 | 29685.807 |
| NM_005615 | 1545.488  | 1343.484  | U89715    | 9789.878  | 10856.119 | NM_006892 | 3174.649  | 2922.005  |
| Z34290    | 1583.123  | 1726.99   | AF254067  | 2875.234  | 3480.142  | AK000124  | 1731.061  | 1796.234  |
| AF070642  | 3880.705  | 3925.645  | NM_016363 | 2054.48   | 2360.745  | NM_004480 | 3996.566  | 3655.759  |
| AK027125  | 3957.211  | 4207.498  | AY009090  | 792.102   | 796.343   | NM_003620 | 3832.66   | 3046.967  |
| AK025311  | 342.346   | 465.117   | NM_016509 | 742.778   | 861.879   | NM_013289 | 6240.692  | 5844.5    |

|           |           |           |           |           |           |           |           |           |
|-----------|-----------|-----------|-----------|-----------|-----------|-----------|-----------|-----------|
| D16918    | 1822.621  | 1601.603  | AF041038  | 981.513   | 930.798   | AA586375  | 1255.643  | 1126.099  |
| D16467    | 2801.896  | 2646.469  | NM_004536 | 2380.544  | 2105.806  | BE910339  | 32154.645 | 41797.777 |
| AF090932  | 1423.188  | 1316.55   | NM_014672 | 3085.854  | 3467.409  | U89715    | 9738.926  | 14413.708 |
| AF166125  | 2913.502  | 2348.666  | AK025935  | 2791.69   | 3081.118  | AF254067  | 4781.161  | 5379.034  |
| AF225425  | 1385.013  | 1173.47   | NM_016441 | 998.701   | 1212.839  | NM_016363 | 4761.911  | 5512.174  |
| AF064848  | 7607.106  | 9949.209  | NM_006334 | 2703.806  | 1578.902  | NM_005592 | 1122.991  | 904.114   |
| U61089    | 6398.805  | 6202.803  | NM_003474 | 1236.94   | 832.773   | U81380    | 2152.489  | 2240.71   |
| AK001036  | 3793.895  | 3735.234  | NM_004625 | 1535.051  | 1358.548  | NM_002303 | 666.375   | 728.556   |
| AK024858  | 9841.336  | 10415.942 | NM_007179 | 14630.593 | 11476.247 | NM_016509 | 1865.173  | 1903.134  |
| Y16697    | 1106.755  | 1241.297  | NM_001306 | 961.223   | 576.729   | AF041038  | 4438.356  | 4488.824  |
| NM_001049 | 5421.835  | 4710.629  | AF297659  | 388.776   | 966.669   | NM_004536 | 6322.642  | 6981.67   |
| AK024554  | 2807.461  | 2910.942  | NM_018231 | 2268.349  | 1819.803  | NM_014672 | 5881.517  | 5682.125  |
| AF068294  | 4153.924  | 4051.499  | NM_007163 | 1085.133  | 975.007   | AB058719  | 2744.16   | 3342.864  |
| AK025909  | 12383.594 | 11571.3   | NM_000583 | 4384.134  | 4800.665  | AK025935  | 5159.818  | 4826.2    |
| AK026138  | 5286.253  | 3804.632  | NM_003100 | 4122.897  | 5310.998  | AB032953  | 1201.307  | 1344.372  |
| Z70706    | 249.138   | 391.726   | AF228704  | 4995.342  | 6134.4    | NM_016441 | 5420.411  | 4576.454  |
| AK021434  | 4827.637  | 4337.141  | AK022746  | 3180.453  | 2785.208  | NM_006334 | 5129.553  | 5529.771  |
| NM_016479 | 4611.632  | 4563.125  | NM_006568 | 7768.948  | 6621.477  | NM_003474 | 2936.09   | 2600.674  |
| AK000933  | 14507.054 | 11186.768 | NM_006440 | 2451.33   | 2307.351  | NM_004625 | 3792.662  | 3424.463  |
| Y10205    | 1287.738  | 1424.428  | NM_004847 | 4483.117  | 3305.515  | NM_007179 | 23298.303 | 23451.941 |
| NM_014626 | 1454.83   | 1229.091  | NM_002255 | 6696.546  | 5305.155  | NM_001306 | 1022.052  | 1163.273  |
| AK025277  | 907.913   | 909.902   | U96113    | 2367.798  | 2909.072  | AF297659  | 1050.513  | 665.259   |
| AF086095  | 2513.985  | 2059.688  | NM_002733 | 5293.187  | 5676.38   | NM_018231 | 5655.457  | 4304.526  |
| NM_018352 | 3395.212  | 3012.535  | M31008    | 1433.607  | 1213.303  | NM_000583 | 7483.519  | 6655.63   |
| AK026880  | 3962.125  | 3227.674  | NM_006288 | 3689.871  | 4195.764  | NM_003100 | 6291.049  | 7442.911  |
| AF086061  | 927.219   | 919.121   | NM_016224 | 8535.548  | 11236.566 | NM_006846 | 630.299   | 839.029   |
| AL080092  | 21276.576 | 16666.111 | NM_005227 | 6011.773  | 6103.129  | AF228704  | 9322.909  | 8862.105  |
| AF075069  | 1254.713  | 1335.113  | NM_000286 | 14829.44  | 14787.104 | AK022746  | 6889.957  | 6357.172  |
| AL137279  | 2944.49   | 2614.614  | NM_016454 | 27575.412 | 38163.141 | NM_006568 | 16160.442 | 14580.271 |
| AK023981  | 2809.701  | 1999.314  | NM_003469 | 2380.903  | 3296.392  | NM_006440 | 5680.191  | 5806.052  |
| AK025037  | 1107.64   | 1030.922  | NM_016433 | 1312.449  | 1694.493  | NM_004847 | 16858.748 | 16394.041 |
| AK021874  | 3245.55   | 2137.68   | NM_000859 | 2822.519  | 4418.926  | NM_002255 | 12812.528 | 11688.67  |
| AF086384  | 67692.102 | 49115.551 | NM_005480 | 2941.402  | 3790.072  | AF151889  | 23040.637 | 20885.443 |
| M77818    | 25287.291 | 24001.217 | AB034694  | 583.969   | 1244.476  | U96113    | 2212.715  | 2173.52   |
| AF009267  | 1276.35   | 966.114   | NM_003273 | 3847.656  | 5062.46   | NM_002733 | 4241.222  | 3834.894  |
| AK027129  | 8724.361  | 7347.643  | AF016694  | 6244.226  | 4453.349  | M31008    | 1841.331  | 1660.904  |
| L19367    | 761.772   | 649.847   | AK026404  | 1300.823  | 1672.064  | NM_006288 | 3209.334  | 3418.008  |
| NM_015698 | 10260.337 | 8450.605  | AF208536  | 1581.209  | 1774.102  | NM_016224 | 9538.261  | 10509.925 |
| CY3Cy5    | 16375.47  | 1315.857  | AB037848  | 557.519   | 667.695   | NM_005227 | 5894.024  | 6370.483  |
| BG696293  | 1654.795  | 1680.466  | AF082657  | 4858.846  | 3716.46   | NM_000286 | 18898.887 | 12089.775 |
| AA777410  | 2155.079  | 2459.715  | NM_006744 | 1082.764  | 1203.524  | NM_016454 | 30285.926 | 35200.816 |
| BG113873  | 1786.67   | 2480.013  | NM_006497 | 6159.592  | 6048.667  | NM_003469 | 4570.764  | 4845.891  |
| BC013135  | 20718.162 | 26689.525 | NM_006892 | 1496.567  | 1971.11   | NM_016433 | 1182.445  | 1573.424  |
| AI625002  | 3069.343  | 2397.116  | AK000124  | 2720.843  | 3295.058  | NM_000859 | 6347.406  | 6939.72   |
| H07899    | 894.48    | 903.479   | NM_004480 | 4066.345  | 4238.705  | NM_005480 | 5174.645  | 5108.844  |
| AA281652  | 5032.204  | 5094.002  | NM_014914 | 5588.581  | 5575.592  | AB034694  | 1277.448  | 1308.637  |
| U31905    | 1298.686  | 2177.221  | NM_018289 | 1994.986  | 2343.544  | NM_003273 | 5579.797  | 6653.439  |
| X52479    | 10250.786 | 10364.964 | AB018260  | 884.073   | 1201.766  | AK026404  | 2263.244  | 2542.115  |
| BC013200  | 52273.262 | 56501.324 | NM_014766 | 4247.182  | 4880.434  | NM_017948 | 12022.461 | 11860.97  |
| AW408832  | 4245.884  | 5111.38   | NM_016121 | 3812.249  | 4670.948  | NM_000392 | 3802.521  | 3073.056  |
| AA486364  | 20929.221 | 19966.998 | NM_014769 | 1704.36   | 2362.362  | AF208536  | 1682.804  | 1897.436  |
| M15476    | 15925.084 | 17689.063 | NM_006349 | 40560.988 | 51044.617 | AB037848  | 1607.058  | 1676.442  |
| U57456    | 4846.954  | 5615.319  | AK026264  | 8374.661  | 8677.482  | AF082657  | 6455.822  | 4733.09   |

|           |           |           |           |           |           |           |           |           |
|-----------|-----------|-----------|-----------|-----------|-----------|-----------|-----------|-----------|
| N70057    | 6047.751  | 5817.515  | AF222927  | 5007.385  | 5980.188  | NM_006744 | 1471.949  | 1207.098  |
| NM_006497 | 5403.646  | 6738.576  | NM_014345 | 2936.545  | 2926.45   | NM_006497 | 18457.672 | 17304.258 |
| NM_006892 | 4836.602  | 4780      | NM_018217 | 5439.503  | 4643.218  | NM_006892 | 2707.5    | 2605.948  |
| SR5       | 12673.638 | 13817.397 | AF241831  | 4986.375  | 4521.128  | AK000124  | 2854.883  | 2803.916  |
| SR7       | 12941.97  | 41265.191 | NM_003033 | 4373.045  | 3552.2    | NM_004480 | 4321.087  | 4421.07   |
| SR9       | 53007.691 | 12191.56  | NM_016441 | 1356.069  | 1422.39   | NM_014914 | 4734.812  | 5646.739  |
| CY3Cy5    | 16690.102 | 1216.137  | NM_006334 | 3109.224  | 2463.237  | NM_018285 | 2782.041  | 2853.345  |
| AF254067  | 4473.15   | 4409.775  | NM_003474 | 694.76    | 890.84    | AB018260  | 923.074   | 1171.913  |
| NM_016363 | 2847.76   | 2437.086  | NM_004625 | 2523.951  | 2280.381  | NM_014766 | 3945.313  | 5136.34   |
| AY009090  | 971.169   | 1044.386  | NM_007179 | 17220.014 | 19582.799 | NM_016121 | 4429.705  | 4377.334  |
| U81380    | 1803.673  | 1902.697  | NM_001306 | 881.314   | 701.953   | NM_014765 | 5058.049  | 4930.083  |
| NM_002303 | 477.263   | 589.66    | AB046861  | 3516.279  | 3091.001  | NM_006345 | 58905.242 | 49725.727 |
| NM_016509 | 1505.669  | 1566.766  | NM_005940 | 696.357   | 679.749   | AK026264  | 16885.529 | 18046.734 |
| NM_012296 | 8037.401  | 7986.35   | AF061034  | 4746.931  | 4707.106  | AF222927  | 7907.163  | 7202.569  |
| AF041038  | 1242.787  | 2190.582  | BG696293  | 1574.082  | 1953.198  | NM_014345 | 6584.244  | 7972.178  |
| NM_004536 | 3258.164  | 3285.936  | AA777410  | 1397.884  | 1440.954  | NM_018217 | 14489.916 | 12772.993 |
| NM_014672 | 5077.513  | 5238.756  | BG113873  | 1272.83   | 843.921   | AF241831  | 5938.1    | 3988.156  |
| AB058719  | 894.982   | 1231.902  | AI625002  | 1273.846  | 1137.191  | NM_003033 | 4287.651  | 3405.336  |
| AK025935  | 5362.402  | 5592.456  | AA281652  | 1601.747  | 1680.224  | NM_016441 | 4141.499  | 3471.458  |
| AB032953  | 585.964   | 739.68    | X52479    | 4105.64   | 4036.414  | NM_006334 | 3940.997  | 4099.4    |
| NM_016441 | 3184.435  | 3366.441  | BC013200  | 18520.232 | 25345.992 | NM_003474 | 1412.267  | 1540.596  |
| NM_006334 | 3835.121  | 4781.353  | AW408832  | 1989.569  | 2446.098  | NM_004625 | 3575.091  | 3207.664  |
| NM_003474 | 3674.185  | 3603.938  | AA486364  | 10487.35  | 11507.892 | NM_007179 | 27577.574 | 34156.359 |
| NM_004625 | 4495.149  | 3773.872  | M15476    | 16610.9   | 12438.559 | NM_001306 | 1880.751  | 2395.337  |
| NM_007179 | 20996.395 | 22840.451 | U57456    | 3074.898  | 2676.717  | AB046861  | 3937.389  | 4968.209  |
| NM_001306 | 1293.491  | 1338.831  | N70057    | 5797.681  | 4778.427  | NM_005940 | 1163.861  | 1339.158  |
| AB046861  | 6412.771  | 6863.863  | AK022746  | 3041.07   | 3556.146  | AF061034  | 25202.313 | 34266.281 |
| AB028173  | 770.692   | 818.227   | NM_006568 | 6600.887  | 6588.229  | X03655    | 1558.318  | 1886.747  |
| NM_005940 | 1981.599  | 2267.367  | NM_004847 | 6309.551  | 6392.547  | BG696293  | 2918.215  | 3030.239  |
| AF061034  | 5399.499  | 6785.293  | NM_002255 | 7120.23   | 7258.983  | AA777410  | 2081.059  | 2761.543  |
| X03655    | 1380.095  | 1378.22   | BC034483  | 1222.391  | 957.854   | BG113873  | 1386.923  | 1936.537  |
| NM_005833 | 7718.03   | 7748.847  | NM_003620 | 3113.397  | 3433.452  | AI625002  | 2055.523  | 1742.854  |
| NM_003100 | 6921.733  | 7179.035  | NM_013289 | 6526.953  | 7131.58   | H07899    | 358.105   | 615.135   |
| NM_006768 | 12806.551 | 13105.824 | AF254067  | 4127.163  | 3773.929  | AA281652  | 3413.307  | 3650.178  |
| NM_013322 | 16631.346 | 18217.643 | NM_016363 | 2451.218  | 2727.9    | U31905    | 2548.508  | 2568.141  |
| AB020627  | 4213.822  | 4107.367  | AY009090  | 933.899   | 931.573   | X52479    | 9174.687  | 7711.289  |
| NM_002003 | 1381.713  | 2001.397  | NM_005592 | 223.253   | 322.585   | BC013200  | 49547.789 | 52150.473 |
| NM_005387 | 7314.505  | 8142.582  | NM_016509 | 1014.621  | 905.429   | AW408832  | 8031.831  | 6515.696  |
| NM_006846 | 1175.25   | 1046.048  | AF041038  | 1416.982  | 1875.786  | AA486364  | 31465.443 | 37456.34  |
| AL137938  | 15396.189 | 14418.285 | NM_004536 | 1909.91   | 2406.261  | M15476    | 52031.996 | 52847.047 |
| AF228704  | 14114.254 | 15104.018 | NM_014672 | 3257.738  | 2858.778  | U57456    | 6336.656  | 4699.342  |
| AK022746  | 7347.508  | 7008.756  | AK025935  | 2082.979  | 1832.652  | N70057    | 21586.658 | 18427.59  |
| NM_006568 | 13168.526 | 13085.441 | AF082657  | 5541.041  | 6550.608  | AK022746  | 6384.988  | 5463.089  |
| NM_006440 | 4794.732  | 5272.515  | NM_006744 | 1166.393  | 1954.047  | NM_006568 | 14193.223 | 10952.236 |
| NM_004847 | 4831.917  | 5065.65   | AF297659  | 563.171   | 696.031   | NM_006440 | 5235.698  | 5111.636  |
| NM_002255 | 1509.928  | 1280.414  | NM_018231 | 2383.729  | 2120.063  | NM_004847 | 16672.168 | 18651.826 |
| AF151889  | 22009.121 | 27479.367 | NM_000583 | 4794.085  | 4931.13   | NM_002255 | 11156.389 | 11936.823 |
| BC034483  | 952.015   | 1026.049  | NM_003100 | 7478.63   | 8820.083  | AF151889  | 29116.053 | 33911.684 |
| NM_003620 | 5398.854  | 4924.973  | AF228704  | 5655.412  | 4578.759  | BC034483  | 2283.082  | 2586.831  |
| NM_013289 | 10125.464 | 12060.042 | AF222927  | 6062.35   | 7152.05   | NM_003620 | 3875.661  | 3826.236  |
| AA586375  | 1530.11   | 1354.481  | AF241831  | 5494.685  | 5888.297  | NM_013289 | 6906.316  | 7401.49   |
| BE910339  | 16396.572 | 21005.652 | NM_003033 | 4575.959  | 5346.355  | AA586375  | 1956.826  | 1986.974  |
| U89715    | 9014.431  | 11959.653 | U96113    | 2424.522  | 3174.986  | BE910339  | 43517.367 | 48678.797 |

|           |           |           |           |           |           |           |           |           |
|-----------|-----------|-----------|-----------|-----------|-----------|-----------|-----------|-----------|
| NM_005227 | 9030.128  | 10366.586 | NM_002733 | 6100.034  | 7226.471  | U89715    | 11449.556 | 16096.314 |
| NM_000286 | 23850.453 | 19588.961 | M31008    | 1213.148  | 1608.396  | AF254067  | 4993.302  | 4663.106  |
| NM_016454 | 34192.164 | 42118.219 | NM_006288 | 3591.888  | 3909.909  | NM_016363 | 6673.742  | 7290.289  |
| NM_003469 | 3358.074  | 4098.619  | NM_016224 | 9779.407  | 11400.673 | AY009090  | 1780.435  | 2662.569  |
| NM_016433 | 4549.313  | 4520.056  | NM_005227 | 5444.5    | 6558.262  | U81380    | 1622.356  | 1586.695  |
| NM_000859 | 13633.425 | 12556.921 | NM_000286 | 18168.012 | 15425.156 | NM_002303 | 732.795   | 815.449   |
| NM_005480 | 6952.678  | 7766.117  | NM_016454 | 30537.291 | 40121.465 | NM_016509 | 1649.141  | 1767.377  |
| AB034694  | 2116.432  | 2003.417  | NM_003469 | 3433.779  | 4001.663  | AF041038  | 3945.698  | 3563.22   |
| NM_003273 | 10393.306 | 11498.48  | NM_016433 | 1968.959  | 2364.622  | NM_004536 | 7600.453  | 7130.712  |
| AK026404  | 3505.962  | 4151.086  | NM_000859 | 5873.759  | 7851.183  | NM_014672 | 4916.535  | 3607.086  |
| NM_017948 | 10012.055 | 11691.253 | NM_005480 | 3697.872  | 4133.963  | AB058719  | 2905.924  | 3274.508  |
| NM_000392 | 4850.038  | 4584.363  | AB034694  | 1144.821  | 1319.604  | AK025935  | 5653.478  | 4943.423  |
| AF208536  | 4952.609  | 4911.055  | NM_003273 | 4658.123  | 4993.66   | AB032953  | 1046.092  | 561.786   |
| AB037848  | 1396.191  | 1519.497  | AK026404  | 1637.806  | 1159.758  | AF208536  | 2488.231  | 3012.39   |
| AF082657  | 11229.352 | 11089.121 | NM_017948 | 7279.088  | 6322.953  | AB037848  | 1597.835  | 1154.563  |
| NM_006744 | 2668.578  | 2561.171  | NM_000267 | 4334.091  | 4389.644  | AF082657  | 5340.387  | 6542.314  |
| AF297659  | 1060.735  | 773.346   | NM_016603 | 5841.293  | 5026.939  | NM_006744 | 1768.807  | 1886.992  |
| NM_018231 | 3180.281  | 3549.697  | NM_004398 | 40474.402 | 42974.867 | AF297659  | 1353.467  | 1104.162  |
| NM_007163 | 560.772   | 798.633   | NM_016181 | 651.515   | 495.934   | NM_018231 | 6425.584  | 7129.604  |
| NM_000583 | 5195.124  | 5660.568  | NM_014966 | 10476.511 | 12672.35  | NM_000583 | 8005.123  | 9143.269  |
| NM_004254 | 9058.448  | 9805.766  | NM_014962 | 4017.633  | 4541.207  | NM_003100 | 7878.319  | 7969.768  |
| NM_014914 | 11827.586 | 12255.472 | D87684    | 19190.172 | 19594.059 | NM_006846 | 1290.097  | 1018.165  |
| NM_018289 | 3784.159  | 3689.187  | NM_001586 | 989.384   | 855.125   | AF228704  | 9837.117  | 9097.477  |
| NM_016627 | 33300.031 | 43511.711 | NM_006317 | 2222.095  | 2220.342  | AF222927  | 7847.015  | 6491.484  |
| NM_016121 | 6434.607  | 6501.658  | NM_001219 | 9045.997  | 11976.392 | NM_014345 | 4794.32   | 3827.841  |
| NM_014769 | 3259.248  | 3101.881  | AK000124  | 3180.742  | 3539.759  | NM_018217 | 11912.622 | 9684.952  |
| NM_006349 | 52504.824 | 53825.273 | NM_004480 | 4227.848  | 5209.623  | AF241831  | 5470.309  | 6565.932  |
| AK026264  | 9463.249  | 9315.027  | NM_014914 | 6176.193  | 6906.722  | NM_003033 | 5286.004  | 4645.004  |
| AF222927  | 6561.505  | 5719.476  | NM_018289 | 3383.844  | 3341.18   | U96113    | 2689.377  | 3615.363  |
| NM_014345 | 3626.749  | 3797.902  | AB018260  | 1480.636  | 1314.197  | NM_002733 | 4841.625  | 5467.584  |
| NM_018217 | 10537.749 | 8490.786  | NM_014766 | 6481.029  | 7228.392  | M31008    | 2397.632  | 2686.639  |
| AF241831  | 6122.081  | 6453.329  | NM_016627 | 29320.457 | 36363.977 | NM_006288 | 3716.139  | 4512.55   |
| NM_003033 | 5941.297  | 5547.374  | NM_016121 | 5508.931  | 6201.637  | NM_016224 | 12211.179 | 12134.65  |
| U96113    | 3277.1    | 3270.207  | NM_014769 | 1769.691  | 1800.754  | NM_016454 | 33202.035 | 34184.848 |
| NM_002733 | 8573.563  | 8733.628  | NM_006349 | 33316.426 | 28432.033 | NM_003469 | 5464.12   | 6320.809  |
| M31008    | 1405.985  | 1526.931  | AK026264  | 10090.171 | 7195.641  | NM_016433 | 1623.243  | 1659.029  |
| NM_006288 | 6081.647  | 7649.352  | NM_004385 | 1110.897  | 1290.677  | NM_000859 | 4879.478  | 5412.949  |
| NM_016224 | 6482.714  | 5498.696  | NM_005876 | 28594.887 | 29007.34  | NM_005480 | 3807.662  | 4090.906  |
| AB046861  | 4785.933  | 5664.809  | AF039697  | 1039.253  | 1314.324  | AB034694  | 1244.94   | 928.83    |
| AI625002  | 3415.625  | 2620.903  | NM_004934 | 540.805   | 870.838   | NM_003273 | 6537.829  | 7064.36   |
| H07899    | 1167.703  | 943.188   | AF284436  | 727.865   | 971.423   | AK026404  | 3129.475  | 3508.298  |
| AA281652  | 4389.474  | 4762.239  | NM_004445 | 4347.808  | 5572.489  | NM_017948 | 11418.162 | 9500.865  |
| U31905    | 1073.71   | 1474.241  | U39657    | 11904.091 | 13047.06  | NM_000392 | 4619.099  | 5758.784  |
| X52479    | 9348.926  | 9578.055  | NM_018373 | 2087.295  | 2416.819  | NM_000267 | 7233.454  | 5411.127  |
| BC013200  | 44546.566 | 49944.238 | NM_006449 | 2013.567  | 2076.839  | NM_016603 | 5936.347  | 5716.129  |
| AW408832  | 3120.308  | 3644.905  | BF216030  | 4660.442  | 4899.004  | NM_004398 | 61066.781 | 49649.09  |
| AA486364  | 23526.623 | 20029.617 | AF131839  | 1212.08   | 1641.781  | NM_014966 | 9153.684  | 9470.615  |
| M15476    | 15355.406 | 16174.29  | NM_002757 | 5808.661  | 6428.177  | NM_014962 | 4986.285  | 4671.407  |
| U57456    | 4602.485  | 4688.596  | NM_005657 | 3688.879  | 4128.771  | D87684    | 18251.713 | 12688.989 |
| N70057    | 6765.388  | 6835.416  | NM_017671 | 1710.999  | 1483.82   | NM_001586 | 1736.413  | 1916.113  |
| NM_006497 | 4929.264  | 5154.495  | AB040883  | 6326.581  | 7163.125  | NM_006317 | 3470.57   | 3827.211  |
| NM_006892 | 3922.006  | 4080.084  | NM_018639 | 9045.255  | 9558.138  | NM_001219 | 11129.302 | 10281.718 |
| AK000124  | 2460.956  | 2614.332  | NM_001715 | 3999.332  | 3430.062  | AK000124  | 3009.375  | 2734.988  |



|           |           |           |           |           |           |           |           |           |
|-----------|-----------|-----------|-----------|-----------|-----------|-----------|-----------|-----------|
| NM_00448C | 4553.39   | 4670.309  | NM_00439E | 11763.954 | 10568.515 | NM_00448C | 3451.663  | 4757.436  |
| NM_00559Z | 823.792   | 654.693   | NM_00266Z | 1398.109  | 2893.225  | NM_014914 | 6137.045  | 6233.543  |
| U81380    | 1506.808  | 1586.953  | NM_006094 | 5917.288  | 3772.234  | NM_01828E | 3913.314  | 3237.495  |
| NM_00230Z | 677.87    | 642.631   | AF080158  | 3235.563  | 2156.64   | AB018260  | 1133.122  | 1170.93   |
| NM_01650E | 1433.712  | 1570.121  | AB037794  | 9193.014  | 7231.409  | NM_01476E | 7092.358  | 6884.615  |
| NM_01229E | 7648.056  | 7000.383  | NM_00593E | 1595.538  | 1516.479  | NM_016121 | 5668.763  | 5109.874  |
| AF041038  | 1095.997  | 1228.893  | NM_01241E | 3120.295  | 3849.045  | NM_01476E | 5989.088  | 6293.121  |
| NM_00453E | 2737.998  | 2946.047  | NM_01417E | 6852.98   | 7740.434  | NM_00634E | 56246.758 | 54778.926 |
| NM_01467Z | 5030.267  | 4136.672  | NM_001251 | 20372.584 | 23954.424 | AK026264  | 19531.582 | 20007.168 |
| AB058719  | 1075.028  | 1034.115  | NM_00660E | 609.199   | 785.019   | NM_00438E | 3917.373  | 3877.13   |
| AK025935  | 4611.112  | 4423.132  | NM_00478E | 636.91    | 645.938   | NM_00587E | 59083.344 | 49261.816 |
| AB032953  | 600.96    | 813.533   | AB011112  | 10915.163 | 11045.698 | AF039697  | 793.737   | 979.917   |
| NM_016441 | 2718.115  | 3087.823  | NM_00262Z | 5095.054  | 5646.193  | NM_004934 | 542.486   | 528.604   |
| NM_006334 | 4856.828  | 6390.153  | NM_018844 | 6585.305  | 7075.55   | AF284436  | 768.649   | 677.626   |
| NM_003474 | 4660.336  | 5038.756  | AF279778  | 2215.592  | 2361.837  | NM_00444E | 3668.51   | 3894.503  |
| NM_00462E | 4352.841  | 4029.735  | BE568801  | 1529.378  | 2190.085  | U39657    | 11852.042 | 11169.537 |
| NM_00717E | 20514.672 | 20530.283 | AB002336  | 3801.744  | 3916.915  | NM_01634C | 5745.874  | 5985.09   |
| NM_00130E | 1443.735  | 1646.95   | NM_003127 | 1071.285  | 994.26    | NM_01837Z | 1917.446  | 1596.416  |
| NM_00583Z | 9446.452  | 8948.457  | NM_00663Z | 8118.766  | 6722.771  | NM_00644E | 3200.763  | 3650.975  |
| NM_00310C | 9802.657  | 10630.677 | NM_01626Z | 2504.503  | 2734.052  | BF216030  | 4784.079  | 5098.774  |
| NM_01332Z | 18077.588 | 16911.33  | AB011116  | 12559.362 | 14913.542 | NM_002757 | 5204.179  | 5859.395  |
| AB020627  | 3975.103  | 4427.303  | AB037858  | 3588.77   | 3249.613  | NM_003684 | 3557.65   | 4225.443  |
| NM_00200Z | 1714.089  | 1506.075  | NM_00017Z | 589.056   | 1596.607  | NM_005657 | 2748.778  | 3382.826  |
| NM_005387 | 5677.524  | 5958.679  | NM_00577E | 9492.121  | 7425.13   | NM_017671 | 1319.177  | 1653.869  |
| NM_00684E | 1040.743  | 504.468   | NM_00327C | 1806.001  | 2361.595  | AB040883  | 6496.202  | 5085.43   |
| AL137938  | 15133.131 | 14284.374 | NM_016591 | 1020.719  | 1004.453  | AF264628  | 1317.99   | 1400.068  |
| AF228704  | 12731.595 | 11606.54  | AL157437  | 9526.924  | 9100.863  | NM_00171E | 6075.769  | 7031.806  |
| AK022746  | 6714.441  | 5493.592  | L25629    | 655.41    | 951.458   | NM_00439E | 16459.859 | 15676.151 |
| NM_00656E | 15333.04  | 14881.373 | AJ245539  | 828.823   | 653.152   | NM_00266Z | 1754.366  | 1758.097  |
| NM_00644C | 5355.748  | 5188.339  | NM_00149C | 2379.939  | 2966.688  | NM_006094 | 11504.55  | 13395.514 |
| NM_004847 | 4463.61   | 4037.568  | NM_01774C | 8375.857  | 8089.14   | AF080158  | 4549.707  | 5405.81   |
| NM_00225E | 1490.106  | 1595.189  | AB033052  | 3836.292  | 3715.87   | AB037794  | 18032.543 | 16535.389 |
| AF151889  | 21577.039 | 21253.32  | NM_018227 | 3877.59   | 4578.07   | NM_00593E | 2029.038  | 1682.553  |
| U96113    | 3155.015  | 3715.244  | AF050199  | 888.875   | 1200.782  | NM_01241E | 4170.212  | 2727.274  |
| NM_00273Z | 7723.033  | 9470.628  | NM_00334C | 50301.324 | 50287.43  | NM_01417E | 13560.521 | 11201.766 |
| M31008    | 963.42    | 997.472   | U46752    | 1649.732  | 1669.486  | NM_001251 | 39331.027 | 44480.121 |
| NM_00028E | 24982.889 | 21749.643 | NM_002794 | 66550.898 | 54666.332 | AB011112  | 8960.283  | 8762.141  |
| NM_016454 | 34320.039 | 45879.496 | BF244646  | 47164.172 | 47160.012 | NM_01866E | 6822.398  | 6740.368  |
| NM_00346E | 5663.229  | 6590.346  | AK024030  | 6136.933  | 6292.962  | NM_00262Z | 5310.695  | 5730.994  |
| NM_01643Z | 5958.342  | 5490.657  | AF275808  | 2115.616  | 1560.579  | NM_018844 | 6054.671  | 5150.754  |
| NM_00085E | 14369.446 | 15157.506 | AK024038  | 9597.797  | 9833.063  | AK023212  | 5625.709  | 6462.778  |
| NM_00548C | 8415.753  | 8001.019  | NM_00205E | 1383.069  | 1835.918  | AL353943  | 2841.259  | 2761.51   |
| AB034694  | 2940.912  | 2666.771  | NM_00580Z | 10814.442 | 12023.675 | BE568801  | 1804.069  | 1886.382  |
| NM_00327Z | 9700.761  | 9517.808  | NM_01551E | 8456.223  | 7878.261  | AB002336  | 4146.391  | 4162.835  |
| AK026404  | 2953.534  | 2370.264  | AK001579  | 12264.155 | 11973.149 | NM_003127 | 598.405   | 763.891   |
| NM_01794E | 9313.332  | 9775.257  | NM_00267C | 7986.094  | 8132.592  | NM_00663Z | 5690.193  | 5147.757  |
| NM_00039Z | 3413.515  | 4008.259  | AF163302  | 2934.352  | 2882.072  | NM_01626Z | 3569.127  | 2983.805  |
| AF208536  | 4813.302  | 4986.846  | NM_00640E | 1535.443  | 2057.053  | NM_00577E | 13700.176 | 12353.916 |
| AB037848  | 948.762   | 1439.241  | NM_00198E | 10463.62  | 8292.082  | NM_01763E | 3171.222  | 2878.83   |
| AF082657  | 11466.385 | 11517.445 | NM_00265Z | 6717.499  | 8636.931  | NM_00327C | 1117.01   | 1021.038  |
| NM_006744 | 2041.515  | 1593.548  | NM_005604 | 2645.252  | 2350.344  | NM_016591 | 1219.017  | 1159.26   |
| NM_00689Z | 4248.96   | 5037.908  | S69023    | 2841.657  | 2842.509  | AL157437  | 24151.633 | 24445.102 |
| AK000124  | 2965.245  | 3562.877  | NM_003454 | 4085.228  | 4063.122  | L25629    | 731.693   | 656.392   |

|           |           |           |           |           |           |           |           |           |
|-----------|-----------|-----------|-----------|-----------|-----------|-----------|-----------|-----------|
| NM_00448C | 5295.38   | 5692.676  | NM_00341E | 30474.295 | 42400.789 | AJ245539  | 1082.6    | 518.886   |
| NM_014914 | 10822.29  | 11662.422 | NM_01790E | 7321.526  | 8106.198  | NM_00149C | 2294.291  | 2448.129  |
| NM_004484 | 653.251   | 663.47    | NM_00688E | 551.77    | 1062.951  | NM_01774C | 7653.142  | 7292.727  |
| NM_01828E | 4264.656  | 4545.97   | M25077    | 8836.315  | 9137.653  | AB033052  | 4241.303  | 4393.831  |
| AB018260  | 1151.865  | 1566.288  | NM_01870Z | 1954.542  | 2131.558  | NM_018227 | 5015.037  | 4358.897  |
| NM_01598E | 923.716   | 554.819   | U96131    | 752.338   | 583.987   | U46752    | 2723.326  | 2166.873  |
| NM_01476E | 8598.222  | 10109.208 | NM_00459Z | 2883.72   | 2886.007  | NM_002794 | 56060.754 | 52887.664 |
| NM_016627 | 32167.369 | 36859.973 | NM_00577E | 14917.936 | 14854.121 | BF244646  | 60280.375 | 52801.883 |
| NM_016121 | 5076.259  | 4628.43   | NM_018084 | 22824.895 | 25163.076 | AK024030  | 6233.292  | 5901.02   |
| NM_01476E | 2029.211  | 1724.727  | AF164797  | 68910.898 | 51651.137 | AF275808  | 2185.199  | 2607.208  |
| NM_00634E | 52717.855 | 51801.543 | NM_01784C | 46189.613 | 48446.18  | AK024038  | 6069.903  | 5885.789  |
| AK026264  | 9301.804  | 9768.214  | NM_00141E | 61630.887 | 52537.672 | NM_00205E | 2440.474  | 2351.548  |
| AF222927  | 6862.293  | 6406.648  | NM_004564 | 5445.587  | 4464.536  | NM_00580Z | 18241.863 | 20257.695 |
| NM_01434E | 4658.348  | 5017.51   | AL355743  | 3121.583  | 3257.498  | NM_01551E | 8226.641  | 7626.986  |
| NM_018217 | 11451.177 | 9552.87   | L77571    | 1126.969  | 1048.488  | NM_00267C | 9877.67   | 11005.498 |
| AF241831  | 5796.146  | 6057.931  | X81896    | 794.55    | 726.081   | AF163302  | 5668.244  | 5646.153  |
| NM_00303Z | 5574.292  | 3812.324  | AF070595  | 800.202   | 800.767   | NM_00640E | 4618.502  | 5488.946  |
| NM_00462E | 5221.251  | 4603.737  | NM_00220Z | 2906.363  | 2985.187  | NM_00241E | 9379.414  | 9252.225  |
| NM_00717E | 20732.285 | 22813.338 | NM_00600E | 4132.097  | 4537.876  | NM_00198E | 14565.395 | 13132.394 |
| NM_00130E | 1293.717  | 1463.622  | NM_014364 | 2466.839  | 2254.712  | NM_00265Z | 6120.792  | 4509.573  |
| AB046861  | 5207.361  | 5967.71   | NM_00168E | 66747.242 | 51633.078 | NM_005604 | 2223.923  | 2754.549  |
| AB028173  | 597.901   | 579.241   | NM_006067 | 41293.355 | 48595.887 | S69023    | 2315.891  | 2541.524  |
| NM_00594C | 1939.024  | 1904.477  | NM_000284 | 9465.719  | 9134.385  | NM_003454 | 3417.059  | 4085.308  |
| AF061034  | 7018.612  | 7184.755  | NM_00481Z | 9891.237  | 10837.261 | NM_00341E | 31177.633 | 32774.586 |
| X03655    | 1082.281  | 1790.74   | AK023008  | 5089.135  | 5303.148  | NM_01790E | 7260.996  | 8110.248  |
| BG696293  | 2506.272  | 3199.755  | NM_00468E | 10315.91  | 11341.65  | M25077    | 9139.433  | 9227.52   |
| AA777410  | 2334.362  | 2733.327  | NM_00602E | 43415.23  | 48100.887 | NM_00459Z | 2542.573  | 2809.448  |
| BG113873  | 2034.997  | 2321.734  | AB040956  | 7566.066  | 7809.146  | NM_00577E | 11382.359 | 13176.848 |
| BC013135  | 23606.854 | 26146.131 | NM_016587 | 4887.027  | 3572.118  | NM_00103Z | 61963.73  | 55858.773 |
| AI625002  | 3237.232  | 2551.891  | NM_01795Z | 8286.86   | 7746.001  | NM_018084 | 25826.27  | 27336.197 |
| H07899    | 887.914   | 688.628   | BC000124  | 6072.747  | 5655.722  | AF164797  | 63162.164 | 50269.18  |
| AA281652  | 3999.224  | 3815.82   | Z11773    | 3150.764  | 3545.86   | NM_01784C | 40748.352 | 47108.754 |
| U31905    | 1308.354  | 1113.705  | NM_00148E | 8748.834  | 7152.363  | AK001052  | 23582.168 | 23327.111 |
| X52479    | 8544.494  | 7377.956  | NM_00270Z | 2067.86   | 1652.769  | NM_00141E | 56134.203 | 49864.164 |
| BC013200  | 44420.934 | 48624.223 | AK021510  | 1803.949  | 1910.353  | NM_004564 | 7578.505  | 6982.782  |
| AW408832  | 3299.705  | 3165.156  | AK022711  | 1866.145  | 1806.858  | NM_00096E | 54722.09  | 52499.953 |
| AA486364  | 21334.246 | 19536.537 | AK024310  | 888.304   | 904.098   | AL355743  | 2160.84   | 1624.667  |
| M15476    | 13968.409 | 16239.69  | AK023039  | 3286.287  | 3359.021  | L77571    | 1339.139  | 722.462   |
| U57456    | 4329.276  | 4548.61   | AL109688  | 2407.045  | 2348.756  | X81896    | 1281.453  | 1346.342  |
| N70057    | 5675.062  | 4878.385  | D42044    | 4547.257  | 5034.547  | AF070595  | 581.447   | 534.83    |
| AK022746  | 8498.499  | 8191.882  | AK023009  | 1116.674  | 1585.522  | NM_00220Z | 2879.613  | 3220.348  |
| NM_00656E | 16028.944 | 18693.758 | AK026149  | 890.077   | 846.235   | NM_00600E | 3838.428  | 4024.128  |
| NM_00644C | 7758.898  | 7862.381  | AF038185  | 6782.787  | 5566.322  | NM_00262E | 64960.887 | 50726.609 |
| NM_004847 | 5624.561  | 5972.232  | AK025305  | 3591.798  | 3893.27   | NM_014364 | 2589.685  | 2361.383  |
| NM_00225E | 2009.203  | 1260.068  | AL117415  | 14728.905 | 16762.703 | NM_00168E | 58448.902 | 53428.012 |
| AF151889  | 22713.561 | 25709.561 | AK023616  | 1109.954  | 1768.979  | NM_006067 | 42555.766 | 45512.348 |
| BC034483  | 972.892   | 1071.095  | AK025665  | 7061.792  | 5216.096  | NM_000284 | 14533.783 | 14920.701 |
| NM_00362C | 3665.55   | 3321.86   | AL355694  | 1504.084  | 1611.717  | NM_00481Z | 9454.034  | 8737.057  |
| NM_01328E | 8208.575  | 9301.286  | BC037530  | 30972.434 | 30993.768 | NM_00602E | 34035.301 | 36824.461 |
| AA586375  | 1610.563  | 1430.993  | NM_014851 | 11475.99  | 7468.281  | AB040956  | 7234.071  | 6612.51   |
| BE910339  | 17587.609 | 22808.107 | NM_00716E | 627.723   | 898.303   | NM_016587 | 3925.561  | 2980.693  |
| U89715    | 13689.659 | 16336.656 | AK022811  | 2484.752  | 2977.445  | NM_00351E | 4495.686  | 4005.017  |
| AF254067  | 4851.933  | 4948.64   | AL117635  | 1838.291  | 2420.961  | NM_01795Z | 5917.488  | 6293.687  |

|           |           |           |           |           |           |           |           |           |
|-----------|-----------|-----------|-----------|-----------|-----------|-----------|-----------|-----------|
| NM_016363 | 4353.339  | 3961.824  | AK025332  | 1420.052  | 1138.07   | BC000124  | 7305.099  | 6308.358  |
| AY009090  | 1208.757  | 1067.147  | AB020735  | 1508.401  | 1473.1    | Z11773    | 2812.017  | 2643.64   |
| U81380    | 1376.14   | 1105.659  | D17010    | 743.503   | 588.77    | NM_006914 | 2430.636  | 1735.232  |
| NM_016509 | 1214.6    | 1060.03   | AJ011596  | 5393.568  | 5034.732  | NM_003446 | 54428.773 | 53375.828 |
| NM_012296 | 6484.519  | 5432.306  | U17639    | 603.376   | 796.831   | NM_001485 | 12241.986 | 10859.222 |
| AF041038  | 1324.601  | 1606.028  | X51779    | 960.524   | 995.748   | NM_002702 | 2190.72   | 1759.483  |
| NM_004536 | 2142.675  | 2292.706  | X81001    | 685.253   | 1124.001  | AK021510  | 1660.689  | 1071.382  |
| NM_014672 | 4300.483  | 3498.446  | AL049254  | 2021.633  | 1599.093  | AK022711  | 1643.531  | 1480.352  |
| AB058719  | 603.039   | 948.992   | Z83954    | 5710.979  | 4968.911  | AK024310  | 1079.488  | 790.421   |
| AK025935  | 4144.586  | 4094.18   | M74093    | 3726.218  | 3728.194  | AK023039  | 2406.789  | 2134.54   |
| AB032953  | 626.442   | 776.354   | M28219    | 3165.32   | 2903.552  | AL109688  | 6035.788  | 5940.879  |
| AF208536  | 5627.523  | 5378.575  | L17326    | 1171.934  | 1243.137  | AF074981  | 939.276   | 1208.88   |
| AB037848  | 1672.538  | 2000      | D55640    | 2956.354  | 2862.67   | AK025863  | 3674.398  | 3912.274  |
| NM_018417 | 451.976   | 505.049   | AF085897  | 847.666   | 838.288   | D42044    | 4552.176  | 4580.319  |
| AF082657  | 12871.966 | 13643.702 | AF085822  | 1823.395  | 990.103   | AK023009  | 1102.149  | 779.727   |
| NM_006744 | 2148.908  | 2233.743  | AK021551  | 3976.284  | 3560.416  | AK026149  | 2318.857  | 2068.906  |
| AF297659  | 944.568   | 807.065   | AK025117  | 1341.28   | 1634.302  | AF038185  | 12089.842 | 12680.74  |
| NM_018231 | 2022.918  | 2644.295  | AK000024  | 6843.074  | 6174.401  | AB027011  | 28234.084 | 30991.068 |
| NM_007163 | 693.304   | 765.659   | AK026693  | 3563.079  | 3608.367  | AK025305  | 3248.375  | 2975.78   |
| NM_000583 | 9157.445  | 9587.673  | AK001128  | 1473.872  | 991.221   | AF131788  | 1015.543  | 838.982   |
| NM_004254 | 11846.377 | 12937.283 | AK000794  | 3620.185  | 3548.066  | AL117415  | 13012.306 | 12931.667 |
| NM_005833 | 8522.75   | 8841.856  | AK000950  | 4565.998  | 4927.225  | AK023616  | 1500.391  | 1203.482  |
| NM_003100 | 10444.435 | 10154.791 | AK026812  | 2501.621  | 3237.501  | AK025665  | 5451.805  | 6872.015  |
| NM_006344 | 410.31    | 624.041   | AK000176  | 2057.211  | 2637.086  | AL355694  | 2770.473  | 2616.092  |
| NM_013322 | 14323.64  | 13270.427 | AK000831  | 4596.214  | 5379.747  | AK027152  | 5316.151  | 5868.592  |
| AB020627  | 3375.809  | 3795.347  | AK000981  | 1506.201  | 1651.397  | AF191492  | 1196.87   | 996.858   |
| NM_005387 | 6733.019  | 7616.624  | AK024615  | 871.498   | 861.911   | BC037530  | 53077.797 | 42503.02  |
| NM_006846 | 562.401   | 415.177   | AK025054  | 2535.886  | 1861.701  | NM_014851 | 15758.161 | 16029.757 |
| AL137938  | 12763.138 | 12600.724 | AK024556  | 1208.924  | 883.377   | AK022811  | 2460.15   | 1680.804  |
| AF228704  | 11563.247 | 11638.383 | AK024935  | 1571.789  | 1516.62   | AL117635  | 2373.634  | 2058.353  |
| AF222927  | 8079.11   | 7845.156  | AK025325  | 10124.818 | 11342.371 | AK025332  | 2098.398  | 1934.722  |
| NM_014345 | 5683.569  | 5254.253  | AK023838  | 3299.065  | 1953.863  | AB020735  | 1866.242  | 1816.702  |
| NM_018217 | 12203.695 | 11857.059 | U50531    | 3547.866  | 3747.434  | D17010    | 560.419   | 559.46    |
| AF241831  | 5867.05   | 6700.09   | NM_005318 | 11509.171 | 11922.723 | AJ011596  | 10114.791 | 8717.046  |
| NM_003033 | 6530.228  | 7261.947  | U85653    | 521.812   | 643.656   | U17639    | 1282.361  | 1205.14   |
| U96113    | 2114.24   | 2401.489  | L09099    | 1170.379  | 1592.809  | AL049215  | 59713.367 | 50507.18  |
| NM_002733 | 8408.035  | 9747.655  | AL117474  | 3289.947  | 3426.693  | X51779    | 2714.418  | 2381.076  |
| M31008    | 1724.482  | 1747.884  | NM_005421 | 1569.225  | 1520.183  | X81001    | 1428.888  | 1227.75   |
| NM_006288 | 6143.672  | 7093.659  | AK024580  | 34398.305 | 35697.82  | AL049254  | 3127.082  | 3291.387  |
| NM_016224 | 8866.189  | 8560.078  | AL442093  | 6504.269  | 6405.057  | Z83954    | 6988.946  | 7966.909  |
| NM_005227 | 8815.95   | 10016.886 | AK024331  | 2105.539  | 2233.113  | M74093    | 5283.232  | 5073.84   |
| NM_000286 | 23831.428 | 18345.111 | AK024452  | 2167.144  | 1681.412  | M28219    | 3714.086  | 3577.345  |
| NM_016454 | 31583.119 | 41710.793 | AJ249975  | 993.133   | 963.087   | M90754    | 743.128   | 731.191   |
| NM_003469 | 4752.803  | 5411.921  | AK021733  | 1837.395  | 1804.513  | L17326    | 1431.869  | 1422.041  |
| NM_016433 | 4892.832  | 4265.585  | NM_012449 | 2379.763  | 2146.529  | D17207    | 9970.855  | 10524.78  |
| NM_000859 | 13016.254 | 10604.354 | D16906    | 3934.028  | 3597.243  | D55640    | 4071.253  | 3536.719  |
| NM_005480 | 5498.729  | 6288.458  | AK022335  | 1437.365  | 1328.056  | AF085897  | 1469.987  | 818.594   |
| AB034694  | 2681.129  | 2333.238  | AL110280  | 2611.099  | 2960.584  | AK021551  | 2782.66   | 2350.85   |
| NM_003273 | 9014.054  | 9797.828  | AK024235  | 759.778   | 1106.389  | AK000024  | 12444.532 | 12392.347 |
| AK026404  | 2510.398  | 2712.419  | AF014457  | 414.861   | 740.736   | AK026693  | 2647.974  | 3213.166  |
| NM_017948 | 7641.116  | 8202.444  | NM_017458 | 1313.367  | 1044.861  | NM_012285 | 1233.41   | 1544.975  |
| NM_000392 | 4466.252  | 5173.996  | AF086196  | 934.943   | 1376.394  | AK001128  | 922.728   | 956.504   |
| NM_000267 | 7494.955  | 7080.635  | AF075087  | 661.437   | 475.786   | AK000794  | 5132.648  | 5476.606  |

|           |           |           |           |           |           |           |           |           |
|-----------|-----------|-----------|-----------|-----------|-----------|-----------|-----------|-----------|
| NM_016603 | 6675.069  | 7996.734  | NM_005542 | 59597.582 | 48238.656 | AK000950  | 5885.092  | 5272.119  |
| NM_00439E | 8620.733  | 7195.756  | X95095    | 3830.516  | 3660.452  | AK026812  | 3857.504  | 3399.227  |
| NM_016181 | 671.585   | 770.35    | AB007902  | 1641.066  | 2159.806  | AK000176  | 1887.622  | 1957.186  |
| NM_01496E | 14584.887 | 17211.098 | AF078528  | 29332.945 | 32785.527 | AK000831  | 6358.794  | 5317.523  |
| NM_014962 | 4385.03   | 5093.709  | AF161411  | 7352.605  | 7576.756  | AK000981  | 1960.506  | 1530.055  |
| D87684    | 19011.977 | 15673.159 | AK000450  | 49936.746 | 47220.375 | AK024615  | 1164.443  | 1173.175  |
| NM_00158E | 857.18    | 700.275   | NM_018224 | 13504.556 | 11974.797 | AK025054  | 3837.924  | 3646.591  |
| NM_006317 | 1288.901  | 1586.747  | NM_01989E | 6583.038  | 5722.628  | AK024556  | 1270.409  | 1394.381  |
| NM_00121E | 14035.73  | 13950.417 | NM_01856E | 10578.767 | 9447.111  | AK024935  | 2032.185  | 1661.192  |
| AK000124  | 2979.732  | 3262.996  | J04118    | 1278.052  | 1832.572  | AK025325  | 8622.741  | 6998.857  |
| NM_00448C | 4570.985  | 4246.934  | NM_00073C | 17131.602 | 13112.426 | U50531    | 2472.777  | 2851.548  |
| NM_014914 | 10452.012 | 11740.542 | U31734    | 57940.766 | 45506.469 | NM_00531E | 9774.547  | 8814.239  |
| NM_01828E | 3836.129  | 3394.869  | AF085885  | 5212.574  | 5382.376  | L09099    | 1395.392  | 1898.768  |
| AB018260  | 835.115   | 1365.604  | AL049974  | 2341.945  | 2533.271  | AL117474  | 3994.648  | 3843.833  |
| NM_01476E | 6243.362  | 6505.071  | AK022953  | 675.627   | 936.606   | NM_005421 | 2436.718  | 2850.216  |
| NM_016627 | 28738.598 | 33305.809 | AF009319  | 3589.963  | 3413.922  | AK024580  | 56804.371 | 47521.824 |
| NM_016121 | 4787.785  | 4495.569  | AL365519  | 2052.815  | 1866.456  | AL442093  | 8186.499  | 8103.08   |
| NM_01476E | 1894.477  | 2087.68   | NM_01846E | 16292.112 | 17248.402 | AK024331  | 2450.656  | 2580.496  |
| NM_00634E | 40868.336 | 43553.656 | Z36845    | 1789.681  | 1567.59   | AK024452  | 4124.668  | 4424.467  |
| AK026264  | 8518.675  | 8673.299  | M73792    | 1351.891  | 1547.277  | AJ249975  | 1004.474  | 913.979   |
| NM_00438E | 791.541   | 1028.229  | NM_016127 | 16688.027 | 18783.064 | AK021733  | 2578.815  | 2648.962  |
| NM_00587E | 4281.199  | 5402.102  | AF085939  | 2569.004  | 2757.986  | NM_01244E | 2993.522  | 2942.686  |
| AF039697  | 1169.655  | 1290.792  | NM_006792 | 42749.543 | 48033.527 | AK000543  | 16934.191 | 13923.747 |
| NM_004934 | 1666.381  | 1571.28   | Z36874    | 68389.266 | 51545.27  | AK026683  | 3158.77   | 2660.621  |
| AF284436  | 1202.422  | 1146.271  | AK095477  | 3896.442  | 3612.019  | D16906    | 5827.501  | 4989.229  |
| NM_00444E | 4138.444  | 4463.99   | AK023326  | 1492.855  | 1776.558  | AK022335  | 1066.019  | 1698.423  |
| U39657    | 17168.965 | 16500.723 | AK022462  | 3298.586  | 3826.927  | AL110280  | 3282.275  | 4244.969  |
| NM_01634C | 6303.669  | 6151.638  | NM_02053C | 2045.953  | 1890.947  | AK024235  | 821.806   | 546.42    |
| NM_01837E | 2079.147  | 1905.6    | AK022418  | 2199.55   | 2386.4    | NM_01745E | 1849.153  | 1514.363  |
| NM_00644E | 2505.497  | 2235.384  | AF279777  | 2553.145  | 1711.433  | AF086196  | 1421.896  | 1592.5    |
| BF216030  | 5226.968  | 4682.408  | AK021748  | 2222.83   | 1854.657  | NM_005542 | 61359.09  | 48427.691 |
| AF131839  | 1926.958  | 1915.115  | AL137257  | 15977.532 | 14314.751 | X95095    | 3938.136  | 3843.307  |
| NM_002757 | 7779.238  | 6902.575  | AF086503  | 1054.6    | 934.621   | AB007902  | 1545.97   | 1754.078  |
| NM_003684 | 5670.78   | 5131.125  | CY3Cy5    | 4634.947  | 319.944   | AF078528  | 27923.684 | 31630.344 |
| NM_005657 | 2681.542  | 3544.187  | AA778392  | 1828.902  | 1762.997  | AF161411  | 7357.06   | 6231.065  |
| NM_017671 | 1789.051  | 1499.991  | AI478178  | 885.85    | 968.461   | AK000450  | 48178.715 | 44280.09  |
| AB040883  | 5950.165  | 5004.662  | AA101279  | 4537.685  | 5716.877  | NM_018224 | 12088.596 | 12557.326 |
| NM_01863E | 7470.102  | 7380.901  | M19154    | 698.603   | 699.738   | NM_01989E | 4763.583  | 4368.171  |
| AF264628  | 1140.902  | 1184.104  | AA399410  | 6585.202  | 6777.019  | NM_01856E | 8405.479  | 7388.386  |
| NM_00171E | 1574.255  | 1814.615  | AA137031  | 1001.396  | 1056.253  | J04118    | 1621.004  | 1351.431  |
| NM_00439E | 10031.316 | 11758.215 | AA292226  | 1648.606  | 1495.969  | NM_00073C | 8559.154  | 9817.869  |
| NM_00266E | 1560.725  | 1385.629  | NM_00050C | 1429.222  | 1526.006  | U31734    | 53175.789 | 41431.633 |
| NM_006094 | 6312.518  | 6650.073  | J04449    | 629.661   | 921.124   | AF085885  | 3041.757  | 2409.096  |
| AF080158  | 3721.512  | 4839.646  | BC007031  | 2177.598  | 1858.449  | M24751    | 1748.832  | 1429.075  |
| AB037794  | 12546.159 | 11118.169 | AF129756  | 9390.438  | 10893.652 | AL049974  | 2716.513  | 1979.639  |
| NM_00593E | 2497.372  | 2925.341  | NM_002957 | 9067.188  | 10402.065 | AK022953  | 856.444   | 551.558   |
| NM_01241E | 5968.365  | 5633.916  | BC036369  | 2610.516  | 3111.368  | AF009319  | 4190.265  | 4099.611  |
| NM_01417E | 3086.628  | 2814.031  | X12492    | 10779.593 | 13342.221 | AL365519  | 1696.495  | 1615.259  |
| NM_001251 | 15645.091 | 17166.645 | U93051    | 11132.627 | 14745.199 | NM_01846E | 17437.104 | 18022.902 |
| NM_00660E | 814.257   | 610.052   | SR2       | 69902.336 | 61584.043 | Z36845    | 1992.458  | 2309.433  |
| NM_00478E | 830.016   | 789.074   | SR4       | 20488.748 | 20899.729 | M73792    | 1369.658  | 1292.247  |
| AB011112  | 13256.89  | 14779.796 | SR6       | 2979.839  | 3160.017  | NM_016127 | 14001.533 | 14314.053 |
| NM_01866E | 8534.472  | 9245.958  | SR8       | 11074.445 | 30883.248 | AF085939  | 3142.612  | 3264.18   |

|           |           |           |           |           |           |           |           |           |
|-----------|-----------|-----------|-----------|-----------|-----------|-----------|-----------|-----------|
| NM_002623 | 5728.055  | 6303.749  | SR10      | 37163.211 | 12008.443 | NM_006792 | 49334.84  | 49542.066 |
| NM_018844 | 9766.969  | 9410.19   | CY3Cy5    | 5261.897  | 583.392   | Z36874    | 66962.117 | 52087.762 |
| AF279778  | 2874.255  | 2836.609  | NM_005682 | 1120.078  | 656.458   | AK095477  | 3885.151  | 4063.4    |
| NM_015477 | 9973.031  | 8535.579  | NM_002926 | 1231.57   | 1490.08   | AK023326  | 1515.884  | 1283.663  |
| AK023212  | 4922.183  | 4955.231  | NM_018697 | 1303.226  | 1314.107  | AK022462  | 2791.352  | 3077.536  |
| AL353943  | 4318.357  | 3914.677  | NM_014030 | 12540.933 | 11229.924 | NM_020530 | 1986.509  | 2376.361  |
| BE568801  | 1454.873  | 915.998   | NM_004224 | 1144.222  | 1304.092  | AK022418  | 2016.741  | 1982.642  |
| AB002336  | 4140.299  | 3537.482  | NM_000254 | 5485.239  | 5955.502  | AF279777  | 1752.899  | 1499.901  |
| NM_003127 | 1350.273  | 1141.776  | Z21967    | 4770.768  | 4876.053  | AK021748  | 3368.498  | 3719.407  |
| NM_013286 | 14118.503 | 13222.247 | NM_016185 | 53269.719 | 54937.137 | AK021771  | 407.552   | 496.383   |
| NM_006082 | 66600.422 | 61939.27  | NM_012110 | 7345.408  | 8402.532  | AL137257  | 16017.337 | 14360.533 |
| NM_006633 | 9705.469  | 7643.86   | NM_005461 | 494.958   | 638.378   | AF086503  | 951.739   | 925.553   |
| NM_016262 | 1964.847  | 2041.36   | AF052693  | 2303.435  | 2101.956  | CY3Cy5    | 15043.894 | 540.024   |
| AB011116  | 19311.918 | 19822.971 | NM_001129 | 16615.305 | 15524.37  | AA778392  | 10520.638 | 12620.639 |
| AB037858  | 2981.932  | 3167.776  | L09100    | 1126.151  | 1122.358  | AI478178  | 3363.052  | 4149.799  |
| NM_000173 | 732.76    | 525.15    | NM_005472 | 1696.869  | 1668.129  | AA101279  | 10335.332 | 10889.679 |
| NM_005775 | 10620.185 | 10531.957 | NM_004313 | 470.819   | 1292.36   | M19154    | 3643.537  | 3339.806  |
| NM_003270 | 1762.252  | 1862.329  | NM_013435 | 698.635   | 693.864   | AA399410  | 13678.065 | 14321.341 |
| NM_016591 | 956.475   | 986.941   | NM_000132 | 10830.994 | 10824.88  | AA137031  | 2949.055  | 2399.586  |
| AL157437  | 6382.451  | 6702.729  | NM_001727 | 3464.529  | 4231.98   | AA292226  | 3575.374  | 4150.554  |
| L25629    | 717.966   | 1203.292  | NM_004076 | 1425.303  | 1753.572  | NM_000500 | 3031.42   | 3802.965  |
| AJ245539  | 1350.725  | 1067.698  | NM_007123 | 34993.832 | 47657.43  | J04449    | 2642.105  | 2073.706  |
| NM_001490 | 3521.924  | 3157.362  | BG717460  | 2478.579  | 2962.739  | BC007031  | 5324.093  | 6668.097  |
| NM_017740 | 6864.731  | 7544.254  | NM_004161 | 11399.988 | 12232.637 | AF129756  | 19313.361 | 19086.822 |
| AB033052  | 3397.581  | 3072.084  | NM_001295 | 764.983   | 690.863   | NM_002957 | 24434.133 | 21941.74  |
| NM_018227 | 7052.542  | 6573.303  | NM_005161 | 1456.137  | 893.11    | BC036369  | 5047.975  | 4531.241  |
| AF050199  | 1591.529  | 1061.995  | NM_020347 | 1065.675  | 1178.058  | X12492    | 24967.07  | 20320.064 |
| NM_003340 | 50152.664 | 49505.523 | NM_001462 | 1447.493  | 1784.083  | U93051    | 16781.313 | 21574.197 |
| U46752    | 2034.284  | 2220.489  | NM_004072 | 781.954   | 771.734   | SR2       | 66380.281 | 67306.242 |
| NM_002794 | 65361.211 | 57358.43  | AF068286  | 553.338   | 589.052   | SR4       | 33781.379 | 21532.107 |
| BF244646  | 16565.988 | 15282.171 | AB040957  | 4854.331  | 3239.762  | SR6       | 5638.465  | 2553.16   |
| AK024030  | 7382.791  | 6062.107  | NM_003110 | 4162.269  | 4128.075  | SR8       | 18920.764 | 34836.172 |
| AF275808  | 1757.884  | 1653.34   | NM_003612 | 1938.947  | 1861.103  | SR10      | 55067.996 | 21307.625 |
| AK024038  | 10259.815 | 10647.513 | NM_013230 | 1494.695  | 1559.574  | CY3Cy5    | 10648.711 | 204.922   |
| NM_002055 | 1645.412  | 1311.526  | X72308    | 795.178   | 881.627   | NM_005682 | 2922.254  | 2662.623  |
| NM_005803 | 12220.349 | 12487.784 | NM_005408 | 424.732   | 490.58    | NM_002926 | 2563.612  | 2682.806  |
| NM_015515 | 8301.921  | 7895.182  | BC008376  | 6950.255  | 6619.68   | NM_000233 | 1225.091  | 1918.345  |
| AK001579  | 9434.361  | 8981.433  | AB041269  | 2667.354  | 3009.132  | NM_018697 | 2542.438  | 3561.707  |
| NM_002670 | 7707.858  | 7391.884  | AK024908  | 7107.327  | 7829.635  | AF090116  | 1299.512  | 1196.168  |
| AF163302  | 2035.481  | 1898.668  | NM_018270 | 7786.734  | 8042.66   | NM_000254 | 10546.791 | 11486.873 |
| NM_006408 | 920.903   | 759.716   | NM_000260 | 20837.918 | 24253.578 | Z21967    | 12646.645 | 14786.001 |
| NM_002419 | 5998.999  | 6299.046  | NM_014160 | 7531.743  | 9898.393  | NM_003738 | 1263.291  | 1512.789  |
| NM_001989 | 8490.961  | 10813.593 | AF230877  | 2381.477  | 2984.874  | NM_016185 | 67634.016 | 61548.953 |
| NM_002653 | 8517.129  | 7754.075  | NM_017668 | 8589.117  | 8841.411  | NM_012110 | 17823.818 | 20224.48  |
| NM_005604 | 2739.841  | 2772.323  | AB033049  | 12534.472 | 13480.51  | NM_005461 | 1072.155  | 1140.302  |
| S69023    | 3793.47   | 4017.854  | NM_004377 | 5267.083  | 4667.446  | AF052693  | 6968.388  | 8060.279  |
| NM_003454 | 3363.536  | 4195.422  | AB037815  | 4840.432  | 5040.506  | NM_001129 | 53760.672 | 54794.938 |
| NM_003418 | 41003.055 | 41285.613 | NM_003645 | 6651.404  | 6888.647  | L09100    | 4207.576  | 5440.778  |
| NM_017908 | 7852.792  | 7623.947  | NM_017750 | 3347.329  | 3929.548  | NM_005472 | 3100.551  | 2992.492  |
| NM_006885 | 1303.561  | 1661.616  | AK026196  | 2465.322  | 2983.846  | NM_004313 | 1195.605  | 1441.19   |
| M25077    | 9345.147  | 8912.043  | NM_013348 | 716.438   | 728.524   | NM_013435 | 1703.674  | 2006.526  |
| NM_018702 | 4762.589  | 4249.646  | NM_004977 | 7926.076  | 6219.247  | NM_000132 | 23524.643 | 22505.887 |
| M62843    | 1243.577  | 996.857   | NM_002251 | 1464.774  | 3966.886  | NM_001727 | 11876.091 | 11827.6   |

|           |           |           |           |           |           |           |           |           |
|-----------|-----------|-----------|-----------|-----------|-----------|-----------|-----------|-----------|
| U96131    | 1375.193  | 828.674   | NM_012283 | 33718.977 | 36568.457 | BG717460  | 6244.425  | 6668.743  |
| NM_004593 | 5034.057  | 4175.267  | NM_004700 | 1112.314  | 1321.657  | NM_004161 | 20363.98  | 19774.889 |
| NM_005778 | 22925.826 | 24404.295 | AB020706  | 4609.115  | 5315.593  | NM_001295 | 1673.993  | 2194.257  |
| NM_001032 | 68142.797 | 62327.684 | NM_007166 | 7718.726  | 8397.531  | NM_005161 | 3896.525  | 4457.009  |
| NM_018084 | 29656.002 | 33155.895 | NM_006755 | 6608.776  | 7345.921  | AB037749  | 1342.313  | 1455.862  |
| AF164797  | 65194.512 | 54851.77  | NM_005881 | 3647.556  | 4003.73   | NM_020347 | 3210.8    | 2961.165  |
| NM_017840 | 44838.531 | 46001.492 | L40519    | 1094.363  | 1108.102  | NM_001462 | 5449.175  | 5750.847  |
| AK001052  | 57485.305 | 53165.137 | NM_004204 | 2919.855  | 2750.922  | NM_004072 | 1844.48   | 2201.915  |
| NM_001415 | 62437.27  | 53747.004 | AK002181  | 1288.704  | 1075.324  | AF068286  | 1407.884  | 966.351   |
| NM_004564 | 12846.712 | 11221.322 | AK025769  | 4661.323  | 4643.808  | AB040957  | 9918.619  | 7707.037  |
| NM_000968 | 66109.57  | 57871.121 | NM_005236 | 4644.683  | 4774.924  | NM_006890 | 1021.444  | 1367.089  |
| AL355743  | 3834.779  | 4198.081  | NM_006256 | 6025.75   | 5672.622  | NM_003110 | 8978.783  | 9626.9    |
| L77571    | 1660.596  | 1524.379  | NM_002846 | 1672.75   | 4478.295  | NM_003612 | 4002.369  | 3969.922  |
| X81896    | 960.953   | 956.905   | NM_002837 | 3503.198  | 3223.946  | NM_013230 | 3878.732  | 3217.733  |
| AF070595  | 841.126   | 857.092   | NM_002662 | 615.483   | 953.37    | X72308    | 5150.564  | 4821.228  |
| NM_002202 | 5519.909  | 4867.529  | NM_000132 | 9661.197  | 8226.459  | NM_005408 | 1949.776  | 2340.926  |
| NM_006005 | 6343.422  | 6168.984  | NM_001727 | 4602.971  | 4120.379  | BC008376  | 25997.721 | 34495.797 |
| NM_002629 | 66860.031 | 52977.203 | NM_004076 | 1787.584  | 2124.176  | AB041269  | 4544.331  | 4618.472  |
| NM_014364 | 2440.52   | 2623.641  | NM_007123 | 29681.305 | 35421.453 | AK024908  | 12198.556 | 11898.487 |
| NM_001685 | 60918.547 | 51400.949 | BG717460  | 2787.79   | 2462.394  | NM_018270 | 19453.154 | 20039.631 |
| NM_006067 | 51170.207 | 49458.59  | AA778392  | 2255.094  | 2079.569  | NM_000260 | 60254.504 | 65678.055 |
| NM_000284 | 13262.5   | 11689.56  | AI478178  | 1226.662  | 996.981   | NM_014160 | 13157.881 | 12521.388 |
| NM_004813 | 18263.186 | 15451.93  | AA101279  | 5453.486  | 5329.66   | AF230877  | 7449.849  | 6963.032  |
| AK023008  | 7066.007  | 6994.615  | AA137031  | 655.815   | 719.772   | NM_017668 | 14296.702 | 10486.407 |
| NM_004689 | 11485.518 | 10987.705 | AA292226  | 1129.826  | 973.176   | AB033049  | 56935.348 | 59867.227 |
| NM_006026 | 53121.523 | 45935.07  | NM_000500 | 1236.007  | 1012.153  | NM_004377 | 9126.801  | 10706.213 |
| BG339855  | 1018.334  | 778.944   | J04449    | 1023.574  | 788.714   | AB037815  | 27640.836 | 31291.467 |
| AB040956  | 7376.018  | 6291.267  | BC007031  | 2505.667  | 1805.327  | NM_003645 | 16403.871 | 18682.746 |
| NM_016587 | 4765.102  | 4669.369  | AF129756  | 5825.015  | 4879.63   | NM_017750 | 5588.477  | 6542.777  |
| NM_003516 | 4630.831  | 4290.721  | NM_002957 | 8616.82   | 8100.537  | AK026196  | 5300.089  | 6221.074  |
| NM_017953 | 8274.196  | 8514.087  | BC036369  | 2624.993  | 2354.972  | NM_013348 | 3134.026  | 3278.44   |
| BC000124  | 5210.224  | 4927.323  | X12492    | 10945.936 | 9085.561  | NM_004977 | 11093.675 | 11828.5   |
| Z11773    | 2884.158  | 2913.151  | U93051    | 11925.479 | 7796.993  | NM_012283 | 65773.008 | 61933.168 |
| NM_006914 | 1551.371  | 1360.017  | NM_017540 | 1496.456  | 1323.759  | NM_004700 | 2309.472  | 2282.479  |
| NM_003446 | 20843.205 | 33220.293 | NM_018270 | 10529.119 | 10136.864 | AB020706  | 7920.986  | 9043.691  |
| NM_001485 | 2210.757  | 1778.445  | NM_000260 | 21477.053 | 19748.879 | NM_007166 | 12924.532 | 13624.14  |
| NM_002702 | 2108.147  | 2440.548  | NM_014160 | 8275.575  | 9159.066  | NM_006755 | 10443.084 | 10433.254 |
| AK021510  | 2818.417  | 2221.563  | AF230877  | 2393.27   | 2218.066  | NM_005881 | 6225.361  | 6182.287  |
| AK022711  | 3337.482  | 3875.663  | NM_017668 | 7680.363  | 6955.117  | L40519    | 1601.492  | 1815.959  |
| AK024310  | 1176.598  | 1243.914  | AB033049  | 16140.896 | 14139.382 | NM_004204 | 4991.039  | 5984.137  |
| AK023039  | 4213.228  | 3822.511  | NM_005682 | 975.993   | 708.026   | AK002181  | 2186.107  | 2375.414  |
| AL109688  | 1667.57   | 1760.319  | NM_002926 | 1218.471  | 1162.314  | AK025769  | 9720.868  | 10554.902 |
| AK025863  | 5090.431  | 4373.241  | NM_018697 | 1334.414  | 1755.242  | AW945166  | 2188.117  | 2000.207  |
| D42044    | 5069.355  | 5109.178  | AF090116  | 241.376   | 617.874   | NM_005236 | 8876.79   | 8287.859  |
| AK023009  | 2869.869  | 1819.946  | NM_014030 | 11819.726 | 13063.55  | NM_006256 | 10208.2   | 8858.623  |
| AK026149  | 1256.177  | 1164.167  | NM_004224 | 637.85    | 760.787   | NM_002846 | 4483.615  | 15789.878 |
| AF038185  | 6498.791  | 6623.688  | NM_000254 | 6702.083  | 8482.431  | NM_002837 | 8419.023  | 8196.255  |
| AB027011  | 5687.084  | 5764.747  | Z21967    | 4804.906  | 5414.867  | U06715    | 1692.607  | 2312.3    |
| AK025305  | 3154.015  | 2508.607  | NM_003738 | 559.442   | 599.307   | NM_002662 | 1319.753  | 1355.826  |
| AL117415  | 13654.052 | 11509.229 | NM_016185 | 64347.352 | 60021.668 | NM_000132 | 24074.055 | 23139.381 |
| AK023616  | 1441.629  | 1180.771  | NM_012110 | 7590.679  | 7050.58   | NM_001727 | 12606.183 | 16172.404 |
| AK025665  | 7361.034  | 8678.585  | AF052693  | 1945.816  | 1235.222  | NM_004076 | 5379.064  | 5703.547  |
| AL355694  | 1306.331  | 1243.557  | NM_001129 | 16490.537 | 11797.433 | BG717460  | 5158.505  | 5923.456  |

|           |           |           |           |           |           |           |           |           |
|-----------|-----------|-----------|-----------|-----------|-----------|-----------|-----------|-----------|
| AK027152  | 7164.595  | 6655.461  | L09100    | 1014.648  | 669.862   | AA778392  | 12141.317 | 13626.188 |
| AF191492  | 1451.021  | 1466.241  | NM_005472 | 1864.237  | 1189.136  | AI478178  | 4040.972  | 5533.92   |
| BC037530  | 8896.055  | 8861.221  | NM_004313 | 799.357   | 621.888   | AA101279  | 10725.426 | 13703.718 |
| NM_014851 | 5898.588  | 6589.353  | NM_013435 | 696.849   | 582.504   | AA137031  | 2961.421  | 2425.485  |
| AK022811  | 4249.387  | 4701.49   | NM_007166 | 7378.493  | 7113.375  | J04449    | 2269.594  | 2721.399  |
| AL117635  | 3088.96   | 2672.592  | NM_004161 | 11996.381 | 11028.479 | BC007031  | 7728.945  | 8966.103  |
| AK025332  | 1223.497  | 1246.219  | NM_001295 | 497.41    | 587.501   | AF129756  | 21801.947 | 21457.156 |
| AB040929  | 998.272   | 653.326   | NM_005161 | 1311.621  | 1846.413  | NM_002957 | 21301.096 | 17337.514 |
| AB020735  | 1469.356  | 1474.777  | AB037749  | 435.461   | 520.647   | BC036369  | 5603.332  | 5513.151  |
| D17010    | 584.149   | 635.934   | NM_020347 | 1651.478  | 2187.819  | X12492    | 28691.973 | 28481.781 |
| AJ011596  | 1570.356  | 1232.315  | NM_001462 | 1472.325  | 1693.976  | U93051    | 22881.43  | 29281.473 |
| U17639    | 537       | 472.219   | NM_004072 | 493.522   | 530.571   | NM_017540 | 3058.638  | 2606.056  |
| AL049215  | 4739.534  | 4523.573  | AF068286  | 670.778   | 709.513   | NM_018270 | 18564.176 | 22157.26  |
| X51779    | 922.962   | 829.383   | AB040957  | 5489.127  | 5677.165  | NM_000260 | 67558.367 | 65981.422 |
| AL049254  | 755.46    | 749.172   | NM_003612 | 1285.465  | 1100.082  | NM_014160 | 13558.226 | 14375.688 |
| Z83954    | 3610.116  | 3677.656  | NM_013230 | 1813.351  | 1953.355  | NM_017668 | 13831.262 | 12137.946 |
| M74093    | 2553.518  | 2737.326  | X72308    | 784.75    | 556.491   | AB033049  | 59288.02  | 58690.559 |
| M28219    | 2369.797  | 2006.472  | AB041269  | 2460.803  | 1906.135  | NM_005682 | 2294.637  | 3589.411  |
| L17326    | 490.974   | 743.205   | AK024908  | 6296.335  | 5091.277  | NM_002920 | 3081.703  | 3007.753  |
| D17207    | 4116.025  | 3633.281  | U06715    | 635.622   | 1000.5    | NM_000233 | 1086.814  | 1263.776  |
| D55640    | 4213.049  | 3714.346  | NM_004377 | 4885.999  | 3458.552  | NM_018697 | 2557.399  | 3455.743  |
| AF085897  | 958.15    | 734.926   | AB037815  | 3615.874  | 4054.333  | AF090116  | 1266.935  | 1395.552  |
| AF085822  | 1279.462  | 1430.025  | NM_003645 | 6175.219  | 8641.551  | NM_014030 | 62024.051 | 58674.879 |
| AK021551  | 3592.776  | 3836.981  | NM_017750 | 3146.851  | 4678.445  | NM_004224 | 6108.703  | 10957.922 |
| AK025117  | 1610.937  | 1944.229  | NM_004977 | 4289.162  | 3610.649  | NM_000254 | 11012.893 | 10152.514 |
| AK000024  | 1284.114  | 1309.961  | NM_012283 | 36652.672 | 33192.457 | Z21967    | 14470.029 | 14944.645 |
| AK026693  | 3160.363  | 3072.643  | NM_004700 | 1398.757  | 1467.767  | NM_003738 | 1403.076  | 1561.069  |
| AK001128  | 1581.854  | 1440.716  | NM_017540 | 1746.233  | 1698.071  | NM_016185 | 62089.551 | 60804.762 |
| AK000794  | 3329.576  | 2882.604  | NM_006755 | 6942.433  | 5109.924  | NM_012110 | 15117.914 | 14384.161 |
| AK000950  | 8883.165  | 7250.145  | NM_005881 | 4341.475  | 6883.19   | NM_005461 | 1142.132  | 1395.211  |
| AK026812  | 4092.608  | 3766.6    | NM_005794 | 495.954   | 547.344   | AF052693  | 6752.684  | 7236.742  |
| AK000176  | 2589.211  | 2178.486  | L40519    | 1308.229  | 844.778   | NM_001129 | 36671.266 | 43197.563 |
| AK000831  | 8429.283  | 7006.145  | NM_004204 | 3137.3    | 2730.891  | L09100    | 3087.316  | 3459.859  |
| AK000981  | 2462.554  | 2340.935  | AK002181  | 837.713   | 1037.078  | NM_005472 | 2684.088  | 3074.475  |
| AK024615  | 683.689   | 709.51    | AK025769  | 6168.257  | 6585.493  | NM_004313 | 1372.992  | 1242.871  |
| AK025054  | 957.441   | 1088.31   | NM_002846 | 2776.008  | 9436.308  | NM_013435 | 1450.876  | 1679.168  |
| AK024935  | 338.865   | 515.021   | AF052693  | 1964.768  | 1725.029  | AB020706  | 8276.769  | 8133.831  |
| AK025325  | 3839.964  | 3439.029  | NM_001129 | 12771.205 | 10950.771 | NM_007166 | 14651.15  | 14079.101 |
| S75762    | 697.118   | 1030.804  | L09100    | 458.599   | 600.525   | NM_004161 | 22412.762 | 27090.939 |
| U50531    | 4131.708  | 4407.302  | NM_005472 | 727.037   | 668.042   | NM_001295 | 1456.168  | 2238.125  |
| NM_005318 | 11651.901 | 11260.421 | NM_004313 | 767.694   | 656.717   | NM_005161 | 2661.215  | 3914.295  |
| L09099    | 790.009   | 620.89    | NM_000132 | 10533.887 | 9577.388  | AB037749  | 1710.961  | 2022.771  |
| AL117474  | 3832.095  | 3795.072  | NM_001727 | 3853.34   | 4930.063  | NM_020347 | 2773.688  | 2272.837  |
| NM_005421 | 894.228   | 1107.367  | NM_004076 | 1478.967  | 1546.482  | NM_001462 | 4118.843  | 4595.772  |
| AK024580  | 6233.766  | 7055.09   | NM_007123 | 29153.059 | 31755.209 | NM_004072 | 1797.232  | 2164.985  |
| AL442093  | 6316.233  | 5741.306  | BG717460  | 2429.391  | 3076.977  | AF068286  | 1537.602  | 1403.843  |
| AK024331  | 1397.919  | 1191.869  | AA778392  | 1855.72   | 2143.886  | AB040957  | 10311.372 | 7494.779  |
| AK024452  | 1612.913  | 1822.947  | AI478178  | 718.619   | 859.388   | NM_006890 | 1244.65   | 970.916   |
| AK021733  | 1719.229  | 1840.514  | AA101279  | 5190.221  | 7788.354  | NM_003110 | 10731.716 | 11790.381 |
| NM_012448 | 1370.546  | 1740.035  | AA137031  | 996.786   | 1349.37   | NM_003612 | 3530.033  | 4100.318  |
| AK000543  | 26569.752 | 28435.205 | AA292226  | 1824.319  | 2191.091  | NM_013230 | 3864.351  | 4386.497  |
| AK026683  | 9376.943  | 9434.363  | NM_000500 | 1469.385  | 1519.216  | X72308    | 5381.001  | 5175.637  |
| D16906    | 7455.244  | 6363.156  | BC007031  | 2281.42   | 2269.825  | NM_005408 | 1033.963  | 1299.564  |

|           |           |           |           |           |           |           |           |           |
|-----------|-----------|-----------|-----------|-----------|-----------|-----------|-----------|-----------|
| AK022335  | 958.124   | 833.025   | NM_002957 | 12012.457 | 15548.655 | BC008376  | 19735.23  | 18356.391 |
| AL110280  | 1336.646  | 1221.863  | BC036369  | 2621.749  | 3212.523  | AB041269  | 3687.504  | 2813.582  |
| AK024235  | 693.075   | 735.538   | X12492    | 12775.171 | 13245.876 | AK024908  | 10318.864 | 7372.908  |
| NM_01745E | 1022.579  | 922.14    | X72308    | 781.474   | 845.389   | NM_002837 | 4808.562  | 5403.061  |
| AF086196  | 1493.8    | 1328.418  | BC008376  | 5147.342  | 4062.781  | AL133077  | 18286.867 | 17206.512 |
| AF075087  | 386.835   | 580.154   | AB041269  | 1688.044  | 1270.695  | AK025211  | 4303.202  | 4506.089  |
| NM_005542 | 61890.422 | 47519.941 | AK024908  | 5460.573  | 4500.57   | U06715    | 1253.325  | 1255.863  |
| X95095    | 3950.604  | 3630.971  | NM_01827C | 8640.711  | 10901.14  | NM_013402 | 22123.045 | 23893.941 |
| AB007902  | 377.703   | 648.371   | NM_00026C | 14699.609 | 15578.28  | NM_004377 | 9459.915  | 12002.325 |
| AF078528  | 24865.174 | 22937.502 | NM_01416C | 7254.486  | 6966.953  | AB037815  | 22513.887 | 31172.082 |
| AF161411  | 7905.158  | 6325.75   | AF230877  | 2053.552  | 2018.208  | NM_00364E | 14298.226 | 18549.732 |
| AK000450  | 33800.621 | 33757.281 | NM_01766E | 8043.227  | 10227.158 | NM_01775C | 5561.081  | 5420.782  |
| NM_018224 | 9255.763  | 8059.688  | AB033049  | 10887.157 | 10458.339 | AK026196  | 5704.432  | 6427.578  |
| NM_01989E | 7131.875  | 6203.657  | NM_00292E | 1273.175  | 1830.488  | AV704019  | 1186.778  | 793.157   |
| NM_01856E | 7502.906  | 7122.581  | NM_000233 | 831.364   | 1102.295  | NM_01334E | 2418.931  | 2615.882  |
| J04118    | 1304.495  | 1308.538  | NM_018697 | 1392.894  | 2005.66   | NM_004977 | 8462.396  | 9381.218  |
| NM_00073C | 14472.68  | 18041.43  | NM_01403C | 10780.105 | 8592.391  | NM_00488E | 60533.453 | 59557.156 |
| U31734    | 31539.92  | 38660.461 | NM_004224 | 997.443   | 1290.164  | NM_012283 | 41396.113 | 37632.336 |
| AF085885  | 7088.951  | 6095.808  | NM_000254 | 5563.954  | 5180.476  | NM_00470C | 2220.768  | 1784.937  |
| AK022953  | 822.569   | 820.939   | Z21967    | 4744.168  | 4436.436  | U93051    | 24387.314 | 31024.85  |
| AF009319  | 3194.676  | 2395.17   | NM_012110 | 9548.933  | 13629.438 | NM_01754C | 2958.286  | 3518.125  |
| AL365519  | 1866.748  | 1936.192  | NM_01334E | 854.959   | 861.868   | NM_00675E | 9573.757  | 7577.238  |
| NM_01846E | 18441.502 | 17644.627 | NM_004977 | 6123.685  | 5238.31   | NM_005881 | 5308.453  | 4474.904  |
| Z36845    | 2175.036  | 1800.35   | NM_012283 | 19240.314 | 15816.596 | L40519    | 1653.251  | 1445.024  |
| M73792    | 1790.669  | 1466.116  | NM_00470C | 1016.272  | 845.134   | NM_004204 | 4432.75   | 4304.376  |
| NM_016127 | 17349.156 | 16862.314 | NM_00686E | 10452.128 | 7054.014  | AK002181  | 2141.714  | 2199.341  |
| AF085939  | 3235.689  | 2887.294  | NM_004161 | 11543.19  | 12912.423 | AW945166  | 2743.503  | 2298.669  |
| NM_006792 | 38052.051 | 42364.652 | NM_00129E | 1227.933  | 1301.344  | NM_00523E | 11045.55  | 10476.661 |
| Z36874    | 65224.516 | 51601.023 | NM_005161 | 1355.116  | 1837.272  | NM_00625E | 9496.933  | 7875.795  |
| AK095477  | 3511.589  | 2998.148  | AB037749  | 355.843   | 414.802   | NM_00284E | 4647.609  | 13077.188 |
| AK023326  | 1980.01   | 1649.978  | NM_020347 | 1125.744  | 1036.339  | AF052693  | 5573.326  | 6834.927  |
| AK022462  | 3604.11   | 3637.741  | NM_001462 | 1412.196  | 1270.94   | NM_00112E | 35253.836 | 40176.488 |
| NM_02053C | 1022.544  | 1137.754  | NM_004072 | 594.557   | 470.074   | L09100    | 3364.052  | 3415.829  |
| AK022418  | 2561.715  | 2055.725  | AB040957  | 5039.532  | 4673.301  | NM_005472 | 3161.505  | 4171.696  |
| AF279777  | 1420.518  | 1346.507  | NM_01323C | 1540.262  | 1672.037  | NM_004313 | 1455.854  | 1703.061  |
| AK021748  | 1153.102  | 1034.089  | NM_002837 | 3687.77   | 4775.91   | NM_01343E | 1889.137  | 2324.462  |
| AK021771  | 941.574   | 682.922   | AK025211  | 2090.714  | 1939.774  | NM_000132 | 24631.287 | 26335.01  |
| AL137257  | 9943.395  | 8545.973  | NM_013402 | 9814.639  | 9200.264  | NM_001727 | 8291.784  | 7795.894  |
| AF086503  | 787.764   | 1083.521  | NM_002662 | 359.915   | 415.742   | NM_00407E | 4438.512  | 4257.695  |
| CY3Cy5    | 11567.623 | 587.414   | NM_004377 | 4759.188  | 3667.714  | NM_007123 | 65730.539 | 66658.617 |
| AA778392  | 5459.222  | 6047.172  | AB037815  | 3518.011  | 3592.45   | BG717460  | 5847.38   | 7894.688  |
| AI478178  | 2046.222  | 2513.029  | NM_00364E | 8187.597  | 10975.172 | AA778392  | 10037.614 | 12036.345 |
| AA101279  | 8125.88   | 9190.961  | NM_01775C | 2964.053  | 3253.087  | AI478178  | 2571.208  | 2872.382  |
| M19154    | 2475.895  | 2449.458  | AK026196  | 2934.308  | 2360.24   | AA101279  | 9342.063  | 7770.893  |
| AA399410  | 15594.469 | 16990.107 | NM_016444 | 947.192   | 1195.972  | AA292226  | 4337.673  | 4458.694  |
| AA137031  | 2797.71   | 2836.805  | NM_01783E | 818.126   | 1041.139  | NM_00050C | 4455.883  | 3974.553  |
| AA292226  | 3255.808  | 4018.767  | AL137718  | 4029.399  | 3915.561  | M29873    | 822.326   | 933.448   |
| NM_00050C | 4180.375  | 4336.504  | NM_00346C | 2735.222  | 2059.51   | J04449    | 3033.365  | 2867.569  |
| M29873    | 519.006   | 657.742   | NM_002904 | 25390.613 | 30952.121 | BC007031  | 8233.422  | 8055.545  |
| J04449    | 3325.042  | 3848.569  | NM_00568E | 760.274   | 900.836   | NM_002957 | 30619.098 | 27519.973 |
| BC007031  | 2278.072  | 2583.283  | NM_006767 | 919.982   | 1186.648  | BC036369  | 5497.979  | 4126.917  |
| AF129756  | 11806.237 | 12882.225 | NM_01754C | 1388.876  | 1231.885  | X12492    | 28441.275 | 24298.051 |
| NM_002957 | 15624.916 | 16172.174 | NM_00675E | 6355.004  | 6070.936  | X72308    | 5418.012  | 6103.836  |



|           |           |           |           |           |           |           |           |           |
|-----------|-----------|-----------|-----------|-----------|-----------|-----------|-----------|-----------|
| BC036369  | 4214.421  | 5542.16   | NM_005881 | 4012.771  | 3997.268  | BC008376  | 22404.207 | 23727.207 |
| X12492    | 28905.137 | 39849.32  | NM_005794 | 565.553   | 516.683   | AB041269  | 4397.201  | 6129.53   |
| U93051    | 14356.429 | 16800.014 | L40519    | 1650.204  | 833.211   | AK024908  | 9821.947  | 10763.818 |
| SR2       | 62980.934 | 54246.441 | NM_004204 | 2469.784  | 1755.607  | NM_01827C | 14023.7   | 16657.283 |
| SR4       | 31249.395 | 39185.316 | AW945166  | 1626.269  | 1816.579  | AF230877  | 9509.608  | 11692.461 |
| SR6       | 6387.734  | 5355.708  | NM_002589 | 5324.303  | 6451.181  | NM_01766E | 13644.864 | 11183.118 |
| SR8       | 17721.594 | 46083.848 | AF064846  | 2467.061  | 2767.541  | AB033049  | 58115.922 | 57044.996 |
| SR10      | 55459.137 | 28015.963 | AL110227  | 1317.962  | 1623.925  | NM_005682 | 2366.283  | 2362.034  |
| CY3Cy5    | 12425.735 | 410.239   | NM_00140C | 2693.585  | 2540.655  | NM_00292E | 2471.046  | 2414.862  |
| NM_00040E | 472.723   | 517.339   | AB033281  | 4707.178  | 4839.425  | NM_000233 | 400.854   | 1094.411  |
| NM_005682 | 2106.312  | 2441.013  | NM_002882 | 41647.258 | 38811.953 | NM_018697 | 2783.74   | 3117.361  |
| NM_00292E | 3225.983  | 3019.201  | AB011161  | 1938.819  | 1657.419  | AF090116  | 818.026   | 1071.282  |
| NM_000233 | 880.261   | 964.608   | NM_000827 | 855.217   | 646.808   | NM_01403C | 55410.348 | 53180.082 |
| NM_018697 | 2208.451  | 2230.333  | AF327354  | 3164.988  | 3465.699  | NM_004224 | 5759.627  | 7716.935  |
| AF090116  | 1220.672  | 1242.07   | NM_006259 | 1076.471  | 1126.08   | NM_00373E | 1598.901  | 1590.259  |
| NM_01403C | 13237.292 | 14463.34  | AB014513  | 2026.36   | 2055.032  | NM_01618E | 63621.266 | 61645.406 |
| NM_004224 | 1694.753  | 1430.91   | NM_004747 | 2573.56   | 3303.364  | NM_01211C | 18400.514 | 18566.641 |
| NM_00373E | 983.179   | 2966.532  | NM_002341 | 5002.658  | 4621.864  | NM_005461 | 1150.665  | 1104.823  |
| NM_01618E | 63151.145 | 54319.402 | AL137651  | 1611.088  | 1172.38   | NM_01334E | 2196.231  | 2233.741  |
| NM_01211C | 10074.827 | 11782.862 | NM_01894E | 4327.243  | 3596.134  | NM_004977 | 10632.237 | 12268.975 |
| NM_005461 | 800.714   | 807.754   | NM_00664E | 8550.94   | 7844.938  | NM_00488E | 64360.434 | 57717.641 |
| AF052693  | 4244.138  | 4293.31   | NM_004711 | 1875.418  | 2006.163  | NM_012283 | 65011.336 | 63696.207 |
| NM_001129 | 31955.033 | 39698.875 | AF161361  | 1078.512  | 984.562   | NM_00470C | 2000.483  | 2826.876  |
| L09100    | 1491.685  | 1686.84   | NM_006463 | 11029.228 | 11289.489 | NM_00716E | 13064.525 | 14528.653 |
| NM_005472 | 2261.719  | 3047.811  | NM_001444 | 39913.332 | 39789.504 | NM_004161 | 19531.463 | 22172.371 |
| NM_004313 | 1731.427  | 1690.088  | AK027208  | 1309.268  | 1088.376  | NM_00129E | 1508.167  | 1727.945  |
| NM_01343E | 1240.583  | 1519.046  | NM_016521 | 5405.066  | 4464.431  | NM_005161 | 1972.273  | 3291.25   |
| NM_000132 | 26464.809 | 27776.984 | X98494    | 9257.092  | 6414.854  | AB037749  | 1247.116  | 964.249   |
| NM_001727 | 8799.119  | 9993.313  | NM_00124C | 2756.916  | 1862.83   | NM_020347 | 2808.136  | 2602.446  |
| NM_00407E | 5096.523  | 5248.719  | NM_002709 | 19359.516 | 22826.932 | NM_001462 | 4180.737  | 3690.504  |
| NM_007123 | 58751.711 | 53452.242 | NM_001099 | 1795.355  | 2329.612  | NM_004072 | 1755.583  | 2052.647  |
| BG717460  | 5428.293  | 6515.344  | NM_006823 | 6411.827  | 7103.003  | AF068286  | 1557.494  | 1155.793  |
| NM_01808E | 8313.835  | 10867.786 | NM_007031 | 820.013   | 656.042   | AB040957  | 9503.776  | 6797.439  |
| NM_004161 | 18335.172 | 18458.273 | NM_00135C | 19998.342 | 26281.242 | NM_00689C | 1204.299  | 974.62    |
| NM_00129E | 675.86    | 769.095   | NM_014809 | 908.641   | 1045.498  | NM_00311C | 11760.039 | 11367.366 |
| NM_005161 | 2705.941  | 3359.517  | NM_016074 | 26001.221 | 30791.563 | NM_003612 | 3505.336  | 4004.531  |
| AB037749  | 1100.273  | 972.085   | NM_003921 | 5589.139  | 4907.929  | NM_01323C | 4521.164  | 5265.448  |
| NM_020347 | 3626.115  | 2527.553  | NM_001843 | 1867.464  | 2401.091  | NM_00625E | 8355.102  | 9199.981  |
| NM_001462 | 3375.8    | 3450.421  | NM_01326E | 318.084   | 520.785   | NM_00284E | 4337.132  | 10025.194 |
| NM_004072 | 1529.006  | 1499.44   | NM_000419 | 1153.833  | 1560.558  | NM_002837 | 5740.753  | 6315.363  |
| AF068286  | 2018.752  | 1718.365  | NM_01776E | 5272.955  | 6945.699  | AK025211  | 3778.86   | 5586.381  |
| AB040957  | 8594.063  | 6017.083  | NM_00277E | 1309.74   | 1229.88   | U06715    | 859.881   | 1187.857  |
| NM_00689C | 1465.886  | 1341.182  | AK023398  | 4780.921  | 5346.238  | NM_013402 | 20196.494 | 22177.525 |
| NM_00311C | 5454.326  | 5239.857  | NM_001907 | 727.916   | 459.43    | NM_002662 | 537.417   | 814.342   |
| NM_003612 | 1571.856  | 1267.412  | NM_015711 | 26764.357 | 21348.379 | NM_004377 | 8593.207  | 9969.457  |
| NM_01323C | 3505.375  | 3675.246  | NM_000481 | 1719.942  | 1188.95   | AB037815  | 16990.094 | 18474.314 |
| X72308    | 948.347   | 975.016   | AK025681  | 2662.923  | 2181.085  | NM_00364E | 13768.051 | 14547.042 |
| NM_00540E | 680.47    | 939.034   | NM_01490E | 8261.548  | 7176.104  | NM_01775C | 6220.535  | 5389.125  |
| BC008376  | 4745.288  | 5694.051  | NM_012137 | 3411.039  | 3349.359  | AK026196  | 5682.892  | 6105.2    |
| AB041269  | 3959.862  | 5174.015  | NM_001281 | 10446.734 | 12408.101 | AV704019  | 1065.021  | 1250.849  |
| AK024908  | 10766.884 | 12025.575 | NM_01683E | 1909.578  | 2175.012  | NM_016444 | 1586.95   | 1468.815  |
| NM_01827C | 14788.996 | 17174.633 | AB014522  | 11652.566 | 11471.611 | NM_01783E | 1470.903  | 1267.584  |
| NM_00026C | 6434.047  | 7236.413  | NM_01487E | 5959.287  | 4709.374  | AL137718  | 5376.781  | 5330.735  |

|           |           |           |           |           |           |           |           |           |
|-----------|-----------|-----------|-----------|-----------|-----------|-----------|-----------|-----------|
| NM_01416C | 11800.527 | 12530.898 | NM_016529 | 4708.158  | 5080.603  | NM_00346C | 10848.678 | 15790.125 |
| AF230877  | 4447.041  | 4600.925  | AF116238  | 1932.943  | 1893.63   | NM_002904 | 35217.586 | 51276.301 |
| NM_01766E | 14769.138 | 16375.233 | NM_006982 | 913.895   | 1001.71   | NM_00568E | 2404.274  | 2865.956  |
| AB033049  | 15521.361 | 17314.891 | AB033085  | 3203.394  | 2884.852  | NM_006767 | 1760.446  | 2248.265  |
| NM_004377 | 6501.176  | 7875.155  | AF024703  | 12333.507 | 10782.853 | NM_01754C | 2704.424  | 3148.45   |
| AB037815  | 4740.889  | 3411.061  | NM_016531 | 1995.82   | 2454      | NM_00675E | 8496.475  | 8770.239  |
| NM_00364E | 12652.279 | 12776.803 | NM_003593 | 11043.293 | 8761.637  | NM_005881 | 6531.706  | 7369.97   |
| AF263613  | 5509.779  | 5771.146  | NM_014383 | 35448.949 | 33599.551 | L40519    | 1820.392  | 2351.837  |
| NM_000097 | 5189.616  | 3838.398  | NM_000244 | 7575.3    | 6707.77   | NM_004204 | 5885.221  | 6469.47   |
| NM_00150E | 1401.52   | 1519.503  | NM_01428E | 6214.5    | 3917.839  | AK002181  | 1689.542  | 2035.275  |
| AK022878  | 7555.031  | 7380.193  | AF026816  | 19041.148 | 13189.332 | AK025769  | 10007.959 | 10156.856 |
| NM_01809E | 2229.666  | 2041.4    | NM_004719 | 2768.521  | 2349.38   | AW945166  | 3443.293  | 2977.456  |
| AF217187  | 23589.129 | 25776.412 | NM_018553 | 2797.554  | 2944.088  | NM_00523E | 15192.979 | 19804.807 |
| NM_01775C | 6288.174  | 5912.906  | NM_014633 | 7298.905  | 5054.717  | NM_00258E | 9741.975  | 8010.302  |
| AK026196  | 4885.259  | 4876.527  | AK024508  | 4859.186  | 3770.063  | AF064846  | 2983.881  | 1989.482  |
| AL137668  | 2015.844  | 2012.033  | AK027213  | 6247.198  | 6501.879  | AL110227  | 1828.336  | 1567.173  |
| NM_01334E | 857.333   | 813.434   | AL096749  | 17905.502 | 19821.637 | NM_00140C | 8549.094  | 8994.638  |
| NM_004977 | 6240.798  | 8553.716  | AK023620  | 2275.944  | 2310.757  | AB033281  | 7217.238  | 6167.095  |
| NM_00488E | 61635.477 | 59397.977 | AF086189  | 8450.512  | 8531.849  | NM_002882 | 60028.641 | 58035.285 |
| NM_002251 | 606.183   | 710.982   | AL050055  | 5674.003  | 6483.823  | AB011161  | 2117.218  | 2394.639  |
| NM_012283 | 16394.504 | 18203.217 | NM_005009 | 18341.871 | 18983.182 | NM_000827 | 1372.021  | 1972.977  |
| NM_00470C | 2090.649  | 2238.966  | NM_01459E | 16688.469 | 15985.591 | NM_002944 | 1692.296  | 1687.336  |
| NM_00686E | 16345.979 | 22883.867 | NM_006703 | 11534.406 | 10250.441 | AF327354  | 4757.219  | 6299.705  |
| AB020706  | 11153.153 | 12028.772 | NM_004037 | 4173.191  | 4101.655  | NM_00625E | 940.795   | 1309.861  |
| NM_00716E | 11727.454 | 13550.872 | NM_005116 | 2862.996  | 2808.089  | AB014513  | 13387.12  | 13823.131 |
| NM_016223 | 21296.578 | 27876.373 | NM_00276E | 7693.456  | 6874.955  | NM_004747 | 2668.818  | 3972.469  |
| NM_00286E | 16018.073 | 18640.205 | NM_00078E | 16405.641 | 12669.648 | NM_002341 | 19658.82  | 18196.611 |
| NM_00675E | 22060.279 | 18686.959 | AF254088  | 2046.565  | 1391.945  | AL137651  | 6055.686  | 5958.038  |
| NM_005881 | 8618.696  | 7629.194  | NM_00142C | 1021.682  | 935.33    | NM_01894E | 12050.932 | 12287.212 |
| L40519    | 3549.56   | 3511.299  | NM_00024E | 661.13    | 697.536   | NM_00665C | 2165.52   | 1751.349  |
| NM_004204 | 3174.431  | 3851.197  | AB031046  | 592.43    | 758.182   | AK024436  | 11922.821 | 12329.646 |
| AK002181  | 660.909   | 550.386   | NM_002449 | 19460.701 | 23528.559 | NM_00664E | 14270.361 | 17180.627 |
| NM_001641 | 33027.352 | 41076.637 | AK025388  | 1691.538  | 1035.963  | NM_00086E | 1666.324  | 1485.024  |
| BC015750  | 53368.438 | 50443.285 | AB006631  | 834.47    | 986.677   | NM_004711 | 4885.225  | 4965.394  |
| AK025769  | 7381.792  | 7293.262  | AF291181  | 788.791   | 853.911   | U63542    | 1060.375  | 1039.711  |
| AW945166  | 3333.015  | 2991.97   | NM_005741 | 5182.245  | 5204.454  | NM_006463 | 18043.291 | 15363.937 |
| NM_00523E | 10978.74  | 10371.579 | NM_000964 | 1641.206  | 1016.645  | NM_001444 | 56450.625 | 53909.859 |
| NM_006384 | 27960.912 | 31796.154 | BF343886  | 722.814   | 898.797   | NM_016521 | 10195.789 | 8407.927  |
| NM_013257 | 3273.587  | 2770.979  | NM_013263 | 5042.466  | 5929.815  | X98494    | 14221.063 | 14816.766 |
| AB044546  | 2233.894  | 1739.569  | AL137407  | 6348.067  | 6260.981  | NM_00124C | 6285.541  | 5627.96   |
| NM_01422E | 72694.281 | 68009.289 | AF085839  | 445.737   | 386.894   | NM_00270E | 28510.045 | 40895.379 |
| AF163473  | 7222.289  | 7013.098  | NM_01817E | 4443.95   | 4728.264  | NM_00109E | 4305.649  | 3227.977  |
| NM_00625E | 7178.275  | 8299.174  | AK025204  | 563.103   | 940.74    | NM_006823 | 11449.317 | 11826.254 |
| NM_00284E | 3439.353  | 6957.892  | NM_01900C | 2177.023  | 2314.817  | NM_007031 | 1519.025  | 1832.88   |
| NM_002837 | 7742.831  | 6479.264  | AF143330  | 1587.864  | 1812.434  | NM_002657 | 3386.178  | 3740.292  |
| AL133077  | 34688.012 | 43545.918 | AK025178  | 8068.714  | 8495.756  | NM_00135C | 24767.49  | 28543.414 |
| AK025211  | 4543.102  | 4886.563  | NM_01483E | 7425.574  | 5650.439  | NM_01480E | 5707.289  | 4996.094  |
| U06715    | 1543.943  | 1546.541  | AK001822  | 3288.375  | 2573.395  | NM_016074 | 45510.707 | 40559.832 |
| NM_013402 | 22424.49  | 26032.732 | AK026969  | 5147.54   | 5643.538  | NM_003921 | 9222.781  | 6759.033  |
| NM_002662 | 1570.927  | 1322.378  | AF086287  | 2528.557  | 1888.966  | NM_00420E | 33528.867 | 36390.934 |
| NM_000132 | 22254.336 | 15419.738 | AF086409  | 755.569   | 548.039   | NM_001843 | 5578.731  | 5333.635  |
| NM_001727 | 7971.813  | 8612.793  | AK024268  | 5435.513  | 7640.202  | NM_01326E | 1668.069  | 1777.555  |
| NM_00407E | 5128.193  | 4701.692  | AF086295  | 832.248   | 1049.222  | NM_00041E | 2638.813  | 2652.826  |

|           |           |           |           |           |           |           |           |           |
|-----------|-----------|-----------|-----------|-----------|-----------|-----------|-----------|-----------|
| BG717460  | 4559.622  | 4877.93   | AF086344  | 2144.933  | 2721.713  | NM_01776E | 9094.531  | 8769.076  |
| AA778392  | 4660.749  | 3970.562  | AF052116  | 478.052   | 759.662   | NM_00277E | 2003.963  | 1924.537  |
| AI478178  | 1822.514  | 2180.145  | NM_018087 | 3530.352  | 4287.666  | AK023398  | 6279.208  | 7487.018  |
| AA101279  | 8736.023  | 7868.554  | AL360260  | 1163.825  | 1106.201  | NM_001907 | 1094.254  | 560.969   |
| M19154    | 2349.945  | 2780.229  | AK023647  | 1172.913  | 806.683   | NM_015711 | 65309.285 | 71404.563 |
| AA399410  | 14700.351 | 14495.658 | BC031635  | 1141.037  | 1156.325  | NM_000481 | 1980.15   | 1975.207  |
| AA137031  | 2299.462  | 1614.132  | AF085916  | 536.517   | 747.506   | AK025681  | 4503.571  | 5577.689  |
| AA292226  | 3050.542  | 2756.071  | AL359598  | 1236.861  | 794.501   | NM_01490E | 12152.664 | 15191.902 |
| NM_00050C | 3628.783  | 3752.199  | AF085980  | 635.347   | 892.21    | NM_012137 | 8678.494  | 10939.606 |
| J04449    | 3268.837  | 3740.161  | AF085927  | 2325.819  | 2508.116  | NM_00448E | 34248.277 | 39820.633 |
| BC007031  | 1854.84   | 2307.073  | AF085954  | 11288.645 | 13839.486 | NM_00151E | 64040.348 | 65153.973 |
| AF129756  | 10787.546 | 10345.402 | AL137337  | 1093.904  | 1119.752  | NM_001281 | 9451.2    | 10159.532 |
| NM_002957 | 14452.442 | 11649.772 | AL161969  | 835.294   | 888.424   | NM_01683E | 4091.068  | 3750.475  |
| BC036369  | 3815.765  | 3845.377  | AL442095  | 2095.401  | 1499.643  | NM_003981 | 45030.676 | 48474.254 |
| X12492    | 27040.922 | 31704.512 | AL137378  | 1287.066  | 1106.935  | AB014522  | 22970.467 | 26956.938 |
| U93051    | 15080.407 | 16051.887 | AL137609  | 26024.225 | 23099.787 | NM_01487E | 18085.42  | 17924.4   |
| NM_01754C | 2676.008  | 2999.576  | AL353946  | 3246.218  | 3258.741  | AB033023  | 23180.27  | 26228.709 |
| NM_00239E | 497.707   | 487.577   | X69081    | 4782.617  | 5543.136  | BC027895  | 3181.497  | 2573.308  |
| NM_00026C | 5693.957  | 5097.682  | NM_005714 | 4907.909  | 6272.881  | NM_01652E | 5708.283  | 6116.094  |
| NM_01416C | 10856.409 | 8038.989  | AL359931  | 2934.9    | 3005.966  | AF116238  | 3255.868  | 2928.119  |
| NM_01766E | 11565.54  | 9630.997  | AF086052  | 1168.006  | 1176.084  | AB033085  | 4291.734  | 3282.971  |
| AB033049  | 12685.84  | 13334.973 | AK000954  | 4371.75   | 4637.142  | AF024703  | 10505.1   | 10555.732 |
| NM_00568E | 1734.804  | 1724.361  | AK025800  | 6309.673  | 7177.103  | NM_016531 | 992.1     | 779.165   |
| NM_00292E | 3390.854  | 2889.994  | AK022333  | 1315.052  | 714.587   | NM_00359E | 16982.027 | 14943.719 |
| NM_018697 | 2232.122  | 2530.371  | AF095854  | 2419.213  | 2380.46   | NM_01438E | 61883.848 | 50844.871 |
| AF090116  | 718.993   | 736.023   | AF159093  | 3515.777  | 3989.728  | NM_00024E | 10975.776 | 12863.075 |
| NM_01403C | 12396.092 | 11912.046 | AK021997  | 2331.089  | 3002.558  | NM_01428E | 5972.839  | 4982.91   |
| NM_004224 | 1396.123  | 1404.47   | AK022125  | 871.624   | 953.009   | AF026816  | 31462.807 | 30276.012 |
| NM_000254 | 10826.019 | 10211.33  | AK022244  | 5513.297  | 4592.941  | NM_00471E | 3699.625  | 3772.888  |
| Z21967    | 10477.361 | 10922.457 | AK022381  | 4262.585  | 3083.952  | NM_01855E | 4356.908  | 3728.186  |
| NM_00373E | 1778.156  | 1586.593  | AK022012  | 908.396   | 807.106   | NM_004704 | 5768.576  | 5720.403  |
| NM_01618E | 71917.492 | 59427.75  | AK022149  | 1272.048  | 1041.68   | NM_00545E | 9095.631  | 7583.646  |
| NM_012110 | 9543.933  | 9602.806  | AK022286  | 1911.858  | 1747.399  | NM_01463E | 9436.672  | 5379.525  |
| NM_005461 | 953.218   | 872.215   | AK022411  | 570.166   | 908.765   | NM_00197C | 65926.836 | 60788.078 |
| AF052693  | 3807.837  | 3487.475  | AK022613  | 5419.026  | 5009.406  | NM_00411E | 7652.094  | 6092.03   |
| NM_00112E | 26916.668 | 28675.301 | AL359557  | 535.805   | 627.184   | AK024508  | 6860.491  | 5442.647  |
| L09100    | 1208.705  | 1287.703  | AK027257  | 581.562   | 514.052   | AK027213  | 9901.862  | 9606.032  |
| NM_00547E | 1953.324  | 2144.72   | AK024582  | 652.525   | 585.923   | AL096749  | 37111.832 | 33667.676 |
| NM_00431E | 1711.17   | 1559.853  | NM_014367 | 2610.9    | 2577.017  | AK023620  | 3364.852  | 2610.068  |
| NM_01343E | 862.785   | 1291.197  | NM_01907E | 957.236   | 1062.114  | AF086189  | 15635.58  | 13097.623 |
| NM_00416E | 16027.613 | 11240.842 | AF161441  | 19802.219 | 20818.863 | AL050055  | 5897.737  | 6309.518  |
| AB020706  | 10140.065 | 10601.161 | AL137474  | 2442.05   | 2587.01   | NM_00500E | 20709.176 | 18411.994 |
| NM_00716E | 11024.813 | 10888.674 | AK021572  | 1422.376  | 1146.185  | NM_01459E | 19405.842 | 15219.5   |
| NM_01622E | 19707.719 | 21008.34  | AK026757  | 900.491   | 738.4     | NM_00670E | 14863.934 | 11476.342 |
| NM_00286E | 14936.699 | 14496.233 | AF119908  | 1615.325  | 1700.642  | NM_004037 | 3798.287  | 3910.381  |
| NM_004161 | 18583.549 | 18523.148 | AK000653  | 15618.685 | 16935.463 | NM_00511E | 4742.064  | 5117.88   |
| NM_00129E | 834.282   | 960.127   | AK000908  | 2196.881  | 1653.061  | NM_00276E | 9484.274  | 8640.853  |
| NM_005161 | 2527.864  | 2606.523  | Z70696    | 1325.214  | 1245.254  | NM_00078E | 27416.076 | 30053.271 |
| NM_020347 | 3936.395  | 3097.417  | NM_00579E | 13973.563 | 13712.968 | AF254088  | 2996.597  | 3453.345  |
| NM_00146E | 3333.677  | 3206.423  | AF048847  | 13697.587 | 18708.008 | NM_00142C | 2537.812  | 1925.641  |
| NM_00407E | 1600.988  | 1382.395  | L37718    | 70073.211 | 61238.32  | NM_00024E | 1998.906  | 1908.679  |
| AF068286  | 1596.987  | 1505.192  | AL137717  | 3991.792  | 3462.753  | AB031046  | 2245.013  | 2089.907  |
| AB040957  | 7973.94   | 5360.078  | AF035297  | 2680.829  | 4130.251  | NM_00244E | 38443.586 | 41000.695 |

|           |           |           |           |           |           |           |           |           |
|-----------|-----------|-----------|-----------|-----------|-----------|-----------|-----------|-----------|
| NM_00689C | 1332.796  | 926.639   | NM_014039 | 3740.996  | 3438.627  | AK025388  | 2817.391  | 2471.889  |
| NM_003110 | 5882.07   | 5719.236  | S67154    | 6064.597  | 4627.36   | NM_006147 | 1939.143  | 1536.631  |
| NM_003612 | 959.547   | 1045.895  | AK026181  | 6999.977  | 5328.571  | AB006631  | 2555.168  | 1878.638  |
| NM_01323C | 3855.37   | 3654.157  | AK021451  | 2181.522  | 1718.099  | AF291181  | 1303.098  | 1205.247  |
| X72308    | 813.895   | 883.257   | AK001971  | 1399.329  | 1129.827  | NM_005741 | 7514.586  | 8287.462  |
| NM_00540E | 1042.538  | 900.115   | AF086468  | 2645.167  | 3078.952  | NM_000964 | 4340.521  | 5232.233  |
| BC008376  | 4239.693  | 4135.574  | AK027239  | 2711.779  | 2671.669  | BF343886  | 3211.442  | 3528.827  |
| X87895    | 777.315   | 568.93    | AF005082  | 23754.395 | 27141.779 | NM_013263 | 15263.695 | 14603.46  |
| AB041269  | 4157.093  | 4169.557  | AL117595  | 4373.094  | 4785.239  | AL137407  | 10821.004 | 10029.847 |
| AK024908  | 9190.243  | 9343.015  | AB028988  | 11058.803 | 9484.231  | NM_01817E | 4161.831  | 3100.047  |
| NM_002837 | 6216.356  | 5249.891  | AK023072  | 2596.318  | 2107.886  | AK025204  | 2619.458  | 1413.961  |
| AK025211  | 3162.562  | 3596.47   | AF086105  | 3751.44   | 3734.353  | NM_01900C | 2931.134  | 2501.883  |
| U06715    | 1291.853  | 987.75    | Y10697    | 1202.349  | 794.847   | AF143330  | 2060.044  | 1918.688  |
| NM_013402 | 21131.973 | 19491.816 | AY007166  | 21517.928 | 23352.811 | AK025178  | 11895.41  | 15479.739 |
| NM_002662 | 1101.552  | 1018.212  | NM_004937 | 3002.179  | 2211.695  | AF147359  | 1840.142  | 1779.027  |
| NM_004377 | 6452.444  | 7830.97   | CY3Cy5    | 4634.035  | 236.054   | NM_01483E | 15466.826 | 18699.877 |
| AB037815  | 5052.146  | 4713.991  | AI298884  | 22479.881 | 28987.41  | AK001822  | 10295.505 | 9820.259  |
| NM_00364E | 10312.478 | 10312.35  | D87845    | 2733.49   | 3597.106  | AK026969  | 9225.246  | 8794.965  |
| AF263613  | 4857.952  | 4687.46   | X53279    | 526.54    | 675.552   | AF086287  | 3176.967  | 3057.513  |
| NM_000097 | 5360.271  | 5100.154  | M83254    | 3967.729  | 4642.316  | AF086409  | 1368.199  | 1129.609  |
| AK022878  | 7211.816  | 6247.232  | S56770    | 1151.394  | 884.094   | AK024268  | 5252.498  | 4048.872  |
| NM_01809E | 1898.768  | 1973.027  | AI193606  | 477.238   | 460.466   | AF086295  | 2104.119  | 1778.778  |
| NM_01775C | 4833.468  | 4427.75   | H58872    | 15835.686 | 20207.172 | AF086344  | 3670.494  | 3843.849  |
| AK026196  | 5035.016  | 5003.96   | J02938    | 586.668   | 681.199   | AF086424  | 1731.504  | 1157.636  |
| AL137668  | 2025.183  | 1870.558  | J04543    | 10741.059 | 10443.675 | AL110130  | 1391.418  | 1628.357  |
| AV704019  | 580.165   | 732.213   | S60415    | 564.658   | 505.32    | AF052116  | 1214.75   | 1388.428  |
| NM_01334E | 960.816   | 938.053   | AA456295  | 1728.706  | 1578.328  | NM_018087 | 6881.307  | 7231.539  |
| NM_004977 | 4471.231  | 5682.116  | BE733577  | 3132.574  | 3460.065  | AL360260  | 2702.244  | 2513.73   |
| NM_002251 | 1146.503  | 797.388   | AI817942  | 10641.362 | 12772.178 | AK023647  | 2316.157  | 2677.501  |
| NM_012283 | 12706.553 | 13023.266 | BG762340  | 1200.653  | 1091.949  | BC031635  | 2295.709  | 2065.592  |
| NM_00470C | 1695.134  | 2201.03   | AA009484  | 561.884   | 689.996   | AF085916  | 1332.332  | 952.785   |
| U93051    | 13646.958 | 11615.528 | NM_00545E | 2067.666  | 1777.772  | AL359598  | 1472.416  | 1388.923  |
| NM_01754C | 2627.395  | 2301.919  | NM_006534 | 4576.686  | 4802      | AF085980  | 1114.672  | 984.99    |
| NM_00675E | 23726.867 | 19838.256 | SR5       | 9293.887  | 8223.888  | AF085927  | 3399.098  | 2760.991  |
| NM_005881 | 7820.887  | 6481.848  | SR7       | 6931.117  | 43491.969 | AF085954  | 19811.982 | 29259.578 |
| NM_005794 | 774.62    | 602.198   | SR9       | 27932.131 | 5423.999  | AL137337  | 1436.495  | 691.666   |
| L40519    | 3232.52   | 2994.943  | CY3Cy5    | 5207.033  | 486.932   | AL161969  | 818.75    | 1437.42   |
| NM_004204 | 3616.07   | 3187.874  | NM_016453 | 2756.035  | 3063.995  | AL442095  | 4548.834  | 6682.845  |
| AK002181  | 722.735   | 737.228   | NM_017701 | 1965.396  | 1880.504  | AL137378  | 2847.713  | 2604.902  |
| AK025769  | 6978.968  | 6722.217  | NM_01422E | 2695.874  | 2613.554  | AL137609  | 45962.68  | 45584.547 |
| AW945166  | 2966.413  | 2886.199  | AF142567  | 2794.516  | 2604.507  | AL353946  | 5797.018  | 6094.343  |
| NM_00523E | 10278.26  | 9617.28   | NM_005621 | 5689.615  | 5573.9    | X69081    | 11959.593 | 11336.463 |
| NM_006384 | 27108.555 | 31697.16  | NM_006202 | 58153.246 | 54954.184 | NM_005714 | 2820.838  | 2368.924  |
| NM_013257 | 3232.864  | 2793.867  | NM_003391 | 471.653   | 370.968   | AL359931  | 5723.893  | 4125.33   |
| AB044546  | 2502.765  | 2168.552  | NM_01741C | 1276.49   | 908.446   | AF086052  | 2367.655  | 1755.731  |
| AF163473  | 6956.314  | 6909.694  | NM_016072 | 9204.453  | 9425.544  | AK000954  | 5119.154  | 3834.17   |
| NM_00625E | 8252.873  | 7856.389  | AK026349  | 10855.939 | 10205.249 | AK025800  | 12538.073 | 13546.98  |
| NM_00284E | 3675.44   | 7316.417  | NM_014733 | 1815.803  | 1871.892  | AK022333  | 2026.237  | 2612.25   |
| AF052693  | 3187.125  | 3121.875  | D12485    | 2126.208  | 2052.227  | AK023294  | 1368.188  | 1099.215  |
| NM_001129 | 24129.869 | 20922.326 | AK023204  | 6986.757  | 6521.796  | AF159093  | 6906.875  | 6722.813  |
| L09100    | 859.633   | 702.559   | NM_00344E | 3781.62   | 3979.221  | AF113679  | 1208.837  | 1400.125  |
| NM_005472 | 1732.013  | 1604.538  | NM_00247E | 4499.923  | 5369.438  | AK021997  | 6884.419  | 6687.323  |
| NM_004313 | 1208.069  | 1138.975  | D38163    | 863.649   | 872.582   | AK022125  | 1825.256  | 2270.486  |

|           |           |           |           |           |           |           |           |           |
|-----------|-----------|-----------|-----------|-----------|-----------|-----------|-----------|-----------|
| NM_01343E | 966.859   | 929.313   | D28449    | 15093.396 | 19080.102 | AK022244  | 9925.659  | 11022.823 |
| NM_00013Z | 21740.762 | 19453.102 | AA460480  | 510.586   | 920.036   | AK022381  | 8311.615  | 7983.262  |
| NM_001727 | 6272.498  | 6425.347  | S78774    | 7860.791  | 7053.801  | AK022012  | 2125.968  | 2115.985  |
| NM_00407E | 3705.491  | 2587.288  | NM_00492Z | 6816.78   | 7640.489  | AK022286  | 4432.187  | 3190.365  |
| NM_00712Z | 52447.52  | 50461.672 | NM_002871 | 1557.687  | 1754.081  | AK022411  | 5056.229  | 4032.659  |
| BG717460  | 3729.577  | 4241.563  | NM_006987 | 1272.034  | 1423.691  | AK022613  | 7919.323  | 4172.867  |
| AA778392  | 3998.411  | 4652.195  | NM_00128Z | 5931.594  | 4758.123  | AL359557  | 3832.247  | 2923.156  |
| AI478178  | 1711.728  | 1823.072  | NM_01683C | 4354.047  | 4314.545  | AK027257  | 8142.418  | 7708.239  |
| AA101279  | 7639.101  | 7805.195  | U44105    | 631.407   | 888.75    | AK022099  | 1252.896  | 1497.34   |
| AA399410  | 13923.53  | 14034.219 | NM_01610J | 2756.833  | 2808.549  | NM_014367 | 4239.746  | 4588.328  |
| AA137031  | 2155.341  | 1958.635  | AL133654  | 5457.299  | 4966.811  | NM_01907Z | 1592.495  | 499.175   |
| AA292226  | 2596.117  | 2210.486  | AL137262  | 1272.794  | 949.691   | NM_00236E | 2681.555  | 2386.789  |
| NM_00050C | 2932.458  | 2653.685  | NM_020437 | 2515.218  | 3159.656  | AF161441  | 23720.883 | 18338.758 |
| J04449    | 3048.956  | 3573.964  | NM_01864J | 2067.559  | 1452.127  | AL137474  | 3452.23   | 2346.614  |
| BC007031  | 1553.697  | 1957.257  | NM_01618E | 832.451   | 453.265   | AK021572  | 2424.196  | 1812.702  |
| AF129756  | 9304.771  | 10517.678 | M30142    | 2172.651  | 1966.196  | AK026757  | 1650.313  | 2081.146  |
| NM_002957 | 15397.438 | 12230.314 | NM_00501E | 870.544   | 881.999   | AF119908  | 2716.57   | 2270.217  |
| BC036369  | 3915.134  | 4236.333  | NM_01337E | 9586.453  | 9301.543  | U50539    | 1006.342  | 772.533   |
| X12492    | 28654.545 | 34488.039 | NM_00108E | 1472.912  | 2006.245  | AK000653  | 21667.232 | 18827.658 |
| X72308    | 805.889   | 625.85    | NM_00286C | 9636.743  | 10005.785 | AK000908  | 1846.661  | 1745.651  |
| BC008376  | 3261.65   | 2961.873  | NM_00616E | 4636.161  | 4588.719  | AK000993  | 892.191   | 1551.416  |
| AB041269  | 3713.227  | 3720.882  | NM_00121E | 1198.892  | 1374.376  | Z70696    | 3851.922  | 3862.991  |
| AK024908  | 9509.28   | 9388.496  | NM_01418Z | 1564.883  | 1515.451  | NM_00579Z | 16556.381 | 7794.777  |
| NM_01827C | 12380.71  | 11108.242 | NM_01835Z | 3587.647  | 3068.639  | AF048847  | 14600.066 | 9547.297  |
| NM_00026C | 2906.78   | 3145.07   | NM_00356C | 32216.26  | 35964.004 | AF035297  | 4496.06   | 3938.458  |
| NM_01416C | 9965.529  | 8413.634  | NM_01440J | 2454.279  | 2032.737  | NM_01403E | 6163.439  | 4465.735  |
| AF230877  | 2989.969  | 2848.283  | AL050100  | 1743.487  | 1789.348  | S67154    | 8801.099  | 4485.924  |
| NM_01766E | 12277.322 | 11003.616 | NM_02013E | 2994.058  | 2690.282  | AK026181  | 8015.146  | 5446.592  |
| AB033049  | 10185.984 | 11292.183 | NM_00074E | 8737.589  | 8201.894  | AK021451  | 2977.659  | 3295.922  |
| NM_00568Z | 1360.479  | 1370.165  | NM_00004E | 3143.2    | 3442.395  | AK001971  | 1453.955  | 1543.418  |
| NM_00292E | 3031.774  | 2658.742  | U53531    | 641.131   | 1001.665  | AF086468  | 4058.227  | 3830.527  |
| NM_00023Z | 616.942   | 748.476   | NM_00492E | 25330.898 | 29678.525 | AK027239  | 3152.438  | 3178.476  |
| NM_018697 | 2127.2    | 2207.468  | NM_003234 | 6491.896  | 5871.265  | AF005082  | 32119.26  | 25523.139 |
| AF090116  | 984.106   | 491.07    | AB051826  | 1741.27   | 1496.273  | AL117595  | 6574.917  | 5192.129  |
| NM_01403C | 12500.011 | 11305.897 | AK024964  | 644.286   | 714.341   | AB028988  | 42858.227 | 41853.82  |
| NM_004224 | 1231.594  | 1187.308  | M20697    | 3406.765  | 3662.493  | AK023072  | 2275.657  | 2202.679  |
| NM_000254 | 9226.61   | 9325.086  | NM_01504E | 3234.788  | 2906.361  | AF086105  | 11445.992 | 10857.523 |
| Z21967    | 9876.105  | 9544.869  | NM_002014 | 17463.23  | 23243.656 | AY007166  | 21641.887 | 12846.713 |
| NM_00373E | 1478.863  | 1445.477  | NM_00253E | 9234.459  | 9844.522  | NM_004937 | 9048.888  | 7242.358  |
| NM_01618E | 57499.18  | 53148.918 | NM_01658E | 13954.247 | 15877.663 | CY3Cy5    | 9123.457  | 497.955   |
| NM_012110 | 9620.069  | 10863.123 | NM_014601 | 1922.721  | 1840.556  | AI298884  | 23907.826 | 30346.557 |
| NM_005461 | 989.09    | 1036.646  | NM_017761 | 13860.243 | 15257.556 | D87845    | 2248.603  | 2975.56   |
| NM_01334E | 437.997   | 667.954   | D38163    | 682.083   | 613.502   | M83254    | 4217.499  | 4089.72   |
| NM_004977 | 4199.207  | 4925.494  | D28449    | 18469.662 | 21337.865 | S56770    | 1144.947  | 1092.501  |
| NM_01228Z | 11353.35  | 10987.02  | NM_003281 | 1208.89   | 1129.627  | H58872    | 19203.664 | 8537.43   |
| NM_00470C | 1033.675  | 1158.511  | AA460480  | 1045.503  | 1108.719  | J02938    | 964.366   | 592.886   |
| NM_00416Z | 13620.994 | 13131.874 | AI298884  | 23478.365 | 26867.18  | J04543    | 12765.129 | 8973.199  |
| NM_00686E | 13221.095 | 15533.198 | D87845    | 3234.781  | 3174.748  | S60415    | 933.899   | 678.552   |
| AB020706  | 9497.194  | 9187.824  | X53279    | 602.276   | 509.718   | AA456295  | 1073.824  | 1192.719  |
| NM_00716E | 8723.133  | 8781.871  | M83254    | 2659.978  | 2764.118  | BE733577  | 3937.09   | 4581.043  |
| NM_01622Z | 18388.646 | 17757.596 | S56770    | 856.415   | 1056.207  | AI817942  | 6522.243  | 9228.357  |
| NM_00286E | 13163.756 | 12519.644 | H58872    | 15100.367 | 14032.04  | BG762340  | 1188.672  | 1324.193  |
| NM_004161 | 15839.01  | 14058.322 | J02938    | 919.05    | 551.807   | NM_00545E | 2953.406  | 1954.016  |

|           |           |           |           |           |           |           |           |           |
|-----------|-----------|-----------|-----------|-----------|-----------|-----------|-----------|-----------|
| NM_001295 | 833.993   | 914.253   | J04543    | 8575.737  | 8294.2    | NM_006534 | 6278.892  | 4880.922  |
| NM_005161 | 1995.171  | 2823.541  | S60415    | 904.122   | 652.534   | SR5       | 10539.05  | 10913.815 |
| AB037749  | 706.936   | 758.149   | AA456295  | 1350.911  | 1310.738  | CY3Cy5    | 12201.765 | 801.856   |
| NM_020347 | 3392.617  | 2768.703  | BE733577  | 3080.863  | 2519.804  | NM_016453 | 1999.078  | 2386.255  |
| NM_001462 | 3423.991  | 3467.853  | AI817942  | 9265.427  | 9112.229  | NM_017701 | 1531.081  | 2428.014  |
| NM_004072 | 1710.777  | 1503.32   | BG762340  | 965.68    | 1173.547  | NM_014226 | 2406.544  | 3388.279  |
| AF068286  | 1631.77   | 1591.101  | NM_006534 | 4834.937  | 6027.348  | AF142567  | 1889.339  | 2043.204  |
| AB040957  | 8372.284  | 6393.732  | M30142    | 1796.59   | 1320.02   | NM_005621 | 6442.427  | 5203.36   |
| NM_006890 | 1430.656  | 1348.674  | NM_005018 | 869.288   | 1038.108  | NM_003391 | 2831.448  | 2498.705  |
| NM_003110 | 5967.633  | 6169.173  | NM_013378 | 12278.391 | 10887.721 | NM_017410 | 1799.215  | 2318.889  |
| NM_003612 | 1303.719  | 1464.729  | NM_001085 | 1466.384  | 1698.896  | X99680    | 8439.493  | 12019.714 |
| NM_013230 | 3794.907  | 4376.705  | NM_006110 | 2279.897  | 2384.649  | NM_001448 | 1750.413  | 2567.709  |
| NM_013257 | 2564.95   | 2645.009  | NM_016453 | 2499.036  | 2754.834  | NM_016072 | 7127.892  | 10386.645 |
| AB044546  | 2300.374  | 2104.371  | NM_017701 | 1466.839  | 1402.969  | AK026349  | 12126.411 | 14443.558 |
| AF163473  | 4866.139  | 4282.47   | NM_014226 | 1920.562  | 1925.168  | NM_014733 | 2103.868  | 3299.085  |
| NM_006256 | 5910.802  | 6276.351  | AF142567  | 2225.472  | 1929.375  | D12485    | 3038.016  | 2871.426  |
| NM_002846 | 2388.429  | 4320.238  | NM_005621 | 5900.017  | 6192.808  | AK023204  | 7221.228  | 4795.842  |
| NM_002837 | 5774.862  | 4833.795  | NM_006202 | 44758.387 | 46734.629 | NM_003446 | 3228.797  | 1281.261  |
| AK025211  | 3700.746  | 4011.389  | NM_017410 | 1741.751  | 1691.227  | NM_002478 | 5148.742  | 3295.64   |
| U06715    | 1055.511  | 999.12    | AY009398  | 841.767   | 702.881   | D38163    | 912.045   | 932.146   |
| NM_013402 | 20641.336 | 18440.396 | X99680    | 8872.701  | 8284.928  | NM_004967 | 317.212   | 544.855   |
| NM_002662 | 1143.157  | 942.997   | NM_001448 | 1228.471  | 1439.354  | AA460480  | 2161.925  | 3285.258  |
| NM_004377 | 5555.922  | 7253.881  | NM_016072 | 10049.525 | 11139.41  | S78774    | 10556.155 | 10951.771 |
| AB037815  | 4193.577  | 3685.869  | AK026349  | 12710.362 | 14917.172 | NM_004922 | 5864.572  | 7376.756  |
| NM_003645 | 11382.969 | 11803.267 | NM_014733 | 2000.066  | 2392.874  | NM_002871 | 1563.188  | 1914.616  |
| AF263613  | 4845.407  | 4519.161  | D12485    | 1970.412  | 2660.499  | NM_006987 | 1092.506  | 1069.265  |
| NM_000097 | 4919.985  | 5150.377  | NM_004858 | 2570.709  | 2405.168  | NM_001282 | 6647.962  | 3496.282  |
| NM_018096 | 2416.039  | 2150.056  | S78774    | 7401.04   | 8289.099  | U44105    | 1022.27   | 902.642   |
| NM_017750 | 5668.219  | 5564.074  | NM_004922 | 6242.424  | 6157.734  | NM_016103 | 2718.059  | 4004.956  |
| AK026196  | 5293.516  | 5454.31   | NM_002871 | 1477.703  | 1715.911  | AL133654  | 6451.822  | 5928.024  |
| NM_016444 | 1553.114  | 1577.125  | NM_006987 | 978.261   | 1492.096  | AL137262  | 1559.874  | 2011.313  |
| NM_017839 | 1191.946  | 1573.756  | NM_001282 | 5105.028  | 3269.164  | NM_020437 | 1520.889  | 1907.756  |
| AL137718  | 4468.271  | 4182.252  | NM_016830 | 4255.99   | 4314.157  | NM_018643 | 1598.41   | 513.525   |
| NM_003460 | 2331.262  | 2532.087  | U44105    | 891.435   | 1087.527  | M30142    | 2871.584  | 2137.909  |
| U94354    | 1275.848  | 1044.681  | NM_016103 | 1440.4    | 1645.238  | NM_005018 | 1103.705  | 1754.009  |
| NM_002904 | 27569.426 | 35839.262 | AL133654  | 5607.904  | 4062.738  | NM_001085 | 2443.671  | 2763.164  |
| NM_005686 | 756.974   | 1001.282  | AL137262  | 1305.298  | 1377.461  | NM_006110 | 1912.711  | 2359.051  |
| NM_006767 | 1514.585  | 1539.152  | NM_020437 | 2352.302  | 2150.056  | NM_002860 | 10256.128 | 9869.086  |
| NM_017540 | 2027.755  | 1821.858  | NM_006927 | 16887.049 | 15212.73  | NM_006169 | 3832.785  | 4185.499  |
| NM_006755 | 22098.514 | 18340.301 | NM_014601 | 1699.33   | 1503.331  | NM_001218 | 876.114   | 973.737   |
| NM_005881 | 7974.794  | 6482.187  | NM_006928 | 770.193   | 702.349   | NM_014183 | 1101.462  | 1314.183  |
| NM_005794 | 434.277   | 522.081   | AF237700  | 1652.965  | 1281.783  | NM_018353 | 4135.491  | 1893.551  |
| L40519    | 3273.334  | 3117.494  | NM_002860 | 11043.415 | 12264.698 | NM_003560 | 31269.021 | 26338.547 |
| NM_004204 | 2564.724  | 2965.386  | NM_006169 | 4992.789  | 5592.944  | NM_014403 | 2550.15   | 3532.514  |
| AK002181  | 743.02    | 963.388   | NM_001218 | 1126.267  | 1289.553  | AL050100  | 1876.335  | 3333.858  |
| AF118064  | 540.141   | 615.278   | NM_014183 | 1482.146  | 1524.032  | NM_020139 | 1762.569  | 2615.77   |
| BC015750  | 54734.176 | 47456.723 | NM_018353 | 3441.233  | 3672.705  | NM_005688 | 359.594   | 627.279   |
| AK025769  | 8727.021  | 9344.472  | NM_016373 | 589.592   | 583.44    | NM_000048 | 3567.793  | 6306.557  |
| AW945166  | 3635.51   | 3528.498  | NM_003560 | 29137.434 | 39776.746 | NM_004925 | 21723.113 | 10111.535 |
| NM_005236 | 12670.358 | 12157.129 | NM_014403 | 2177.707  | 1798.952  | NM_003234 | 5044.059  | 4999.706  |
| NM_006384 | 33055.258 | 42413.48  | AL050100  | 1577.018  | 1268.112  | NM_004858 | 2610.413  | 2684.662  |
| NM_002589 | 9331.913  | 9417.983  | NM_020139 | 1941.515  | 2029.169  | AB051826  | 1163.692  | 1542.058  |
| AF064846  | 2644.1    | 2796.742  | U53531    | 812.731   | 396.408   | AK024964  | 378.626   | 660.367   |

|           |           |           |           |           |           |           |           |           |
|-----------|-----------|-----------|-----------|-----------|-----------|-----------|-----------|-----------|
| AL110227  | 1561.998  | 1592.907  | NM_004925 | 23928.707 | 18629.381 | M20697    | 2979.667  | 4512.34   |
| NM_00140C | 3475.357  | 3412.541  | NM_005456 | 1480.346  | 1031.805  | NM_01504E | 3410.751  | 5165.007  |
| AB033281  | 4569.75   | 4301.333  | NM_006534 | 5672.64   | 5213.369  | NM_002014 | 20817.223 | 26222.414 |
| NM_002882 | 47413.133 | 47478.199 | AB051826  | 1595.882  | 1342.991  | NM_01658E | 16609.672 | 33341.09  |
| AB011161  | 2405.353  | 1705.035  | AK024964  | 413.534   | 506.992   | NM_006927 | 16253.641 | 11359.404 |
| NM_000827 | 1588.212  | 763.55    | M20697    | 3809.784  | 3936.477  | NM_014601 | 2267.901  | 2434.934  |
| AF327354  | 3248.002  | 2791.985  | NM_01658E | 14785.855 | 16531.646 | NM_017761 | 19626.098 | 19502.207 |
| NM_00625E | 786.158   | 751.519   | NM_002013 | 16486.965 | 15834.016 | NM_00692E | 868.907   | 1027.63   |
| NM_003961 | 16528.893 | 17119.029 | AK026349  | 10131.695 | 8601.485  | AF237700  | 987.298   | 1024.688  |
| AB014513  | 1193.601  | 1056.206  | NM_014733 | 1862.647  | 2251.492  | D38163    | 1011.944  | 1233.423  |
| NM_004747 | 1683.038  | 1990.674  | D12485    | 2387.966  | 2788.872  | D28449    | 18013.957 | 17604.836 |
| AK024430  | 12873.537 | 14430.226 | AK023204  | 5992.287  | 6186.763  | NM_003281 | 642.985   | 595.138   |
| NM_002341 | 10887.148 | 9771.868  | NM_003449 | 4260.989  | 4394.984  | AA460480  | 1142.016  | 1116.363  |
| AL137651  | 2287.168  | 2402.597  | NM_00247E | 5321.037  | 5184.313  | AI298884  | 27518.523 | 17326.277 |
| NM_01894E | 10502.692 | 10890.765 | D38163    | 1028.374  | 910.895   | D87845    | 2767.869  | 1274.221  |
| NM_00665C | 1641.547  | 1929.288  | NM_004967 | 430.369   | 557.775   | M83254    | 5134.618  | 10796.734 |
| AK024436  | 9759.153  | 10446.742 | D28449    | 16545.197 | 18300.848 | S56770    | 1140.47   | 2353.598  |
| NM_00664E | 12519.133 | 13048.357 | NM_003281 | 837.697   | 815.215   | AI193606  | 477       | 491.262   |
| NM_00086E | 874.652   | 876.236   | AA460480  | 1084.936  | 1193.014  | H58872    | 11341.478 | 11981.098 |
| NM_004711 | 4858.593  | 4227.853  | M83254    | 2355.678  | 2830.493  | J04543    | 9296.588  | 7381.481  |
| U63542    | 870.474   | 764.243   | S56770    | 1040.348  | 777.368   | AA456295  | 1159.126  | 1346.678  |
| AF161361  | 1973.924  | 1662.98   | H58872    | 13717.267 | 13060.069 | BE733577  | 3083.179  | 4740.126  |
| NM_00646E | 24630.209 | 22520.021 | J02938    | 734.381   | 208.067   | AI817942  | 6699.42   | 9552.977  |
| NM_001444 | 42931.02  | 46120.523 | J04543    | 9864.615  | 10140.362 | BG762340  | 1719.276  | 439.789   |
| AK027208  | 1408.392  | 1106.446  | AA456295  | 1020.192  | 1612.301  | AA009484  | 908.346   | 523.422   |
| NM_016521 | 12641.339 | 10517.048 | BE733577  | 2629.318  | 2631.499  | NM_00545E | 2115.705  | 1555.591  |
| X98494    | 9136.525  | 6851.447  | AI817942  | 6980.909  | 6458.585  | NM_006534 | 6606.274  | 6343.155  |
| NM_00124C | 4508.301  | 3826.575  | BG762340  | 998.03    | 736.473   | M30142    | 1932.03   | 1423.983  |
| NM_00270E | 22412.256 | 20625.104 | AA009484  | 1467.729  | 1357.634  | NM_00501E | 825.07    | 1008.138  |
| NM_00109E | 5582.06   | 4593.93   | NM_018643 | 1562.198  | 1415.743  | NM_01337E | 7890.301  | 8551.843  |
| NM_00682E | 7256.917  | 7046.699  | M30142    | 1949.62   | 1749.237  | NM_00108E | 1520.254  | 1141.86   |
| NM_016567 | 16486.037 | 16213.047 | NM_00501E | 916.282   | 1018.67   | NM_00611C | 1715.263  | 1235.38   |
| NM_007031 | 717.654   | 778.522   | NM_01337E | 9765.907  | 8023.104  | NM_01645E | 2581.939  | 2518.721  |
| NM_002657 | 3368.176  | 3069.51   | NM_00108E | 1221.115  | 984.675   | NM_017701 | 1719.562  | 2979.609  |
| NM_00408E | 5327.689  | 5263.81   | NM_017701 | 2226.291  | 2441.852  | NM_01422E | 3092.182  | 5487.118  |
| NM_00135C | 20872.719 | 22440.402 | NM_01422E | 2101.464  | 1765.546  | AF142567  | 1959.425  | 2701.963  |
| NM_01480E | 5784.913  | 6358.801  | AF142567  | 1787.573  | 1319.993  | NM_005621 | 6526.871  | 9194.171  |
| NM_016074 | 50393.367 | 50553.813 | NM_005621 | 5403.697  | 4872.289  | NM_01741C | 1573.267  | 2480.107  |
| NM_003921 | 7991.559  | 8801.996  | NM_00620E | 34465.555 | 32441.895 | X99680    | 11987.457 | 15572.127 |
| NM_00420E | 34148.121 | 41279.68  | NM_01741C | 1503.446  | 1404.997  | NM_00144E | 1604.327  | 727.461   |
| NM_00633E | 865.823   | 843.47    | X99680    | 5252.62   | 4869.668  | NM_01607E | 10017.843 | 4492.257  |
| NM_00184E | 3320.834  | 3557.848  | NM_00144E | 980.483   | 1229.038  | AK026349  | 14286.289 | 8761.211  |
| NM_01326E | 1202.929  | 701.684   | NM_01607E | 7767.258  | 4809.339  | NM_01473E | 2415.724  | 2064.121  |
| NM_00041E | 2046.827  | 2089.896  | NM_00568E | 508.551   | 453.35    | D12485    | 2148.558  | 2247.384  |
| NM_01776E | 8005.575  | 8364.032  | NM_00074E | 11177.204 | 11805.894 | AK023204  | 8052.054  | 9405.153  |
| NM_00277E | 1303.61   | 1202.906  | NM_00004E | 2315.538  | 2428.772  | NM_00344E | 5415.169  | 7102.244  |
| AK023398  | 4473.558  | 4231.2    | U53531    | 720.739   | 715.424   | NM_00247E | 6016.102  | 5637.664  |
| NM_001907 | 1439.672  | 1733.912  | NM_00492E | 25578.662 | 27589.016 | NM_003234 | 3836.838  | 3788.516  |
| NM_015711 | 25666.738 | 26471.768 | NM_003234 | 6147.429  | 5564.053  | NM_00485E | 2020.054  | 1171.21   |
| NM_000481 | 2130.489  | 2252.471  | NM_00485E | 2640.708  | 2702.59   | S78774    | 10639.232 | 9101.605  |
| AK025681  | 4222.923  | 4210.449  | NM_00492E | 6217.753  | 6001.881  | NM_00492E | 6125.167  | 10227.604 |
| NM_01490E | 8704.951  | 8090.696  | NM_002871 | 1814.544  | 1548.864  | NM_002871 | 1575.45   | 1510.013  |
| NM_012137 | 4768.396  | 4522.339  | BE873653  | 28556.053 | 22797.465 | NM_006987 | 1138.869  | 1014.05   |

|           |           |           |           |           |           |           |           |           |
|-----------|-----------|-----------|-----------|-----------|-----------|-----------|-----------|-----------|
| NM_004483 | 25555.043 | 27194.154 | NM_006987 | 1332.6    | 1034.272  | NM_01683C | 2730.823  | 2114.293  |
| NM_001513 | 28633.563 | 36760.566 | NM_001282 | 6024.61   | 4513.813  | NM_016103 | 2446.599  | 3305.06   |
| NM_001281 | 14028.209 | 15049.047 | NM_01683C | 3957.58   | 3337.529  | AL133654  | 5560.683  | 3956.274  |
| NM_016835 | 4592.698  | 4362.469  | U44105    | 824.74    | 702.831   | AL137262  | 1902.574  | 1756.926  |
| NM_003981 | 40195.031 | 48704.48  | NM_016103 | 2213.904  | 2239.725  | NM_020437 | 2098.607  | 645.052   |
| AB014522  | 17107.918 | 18725.066 | AL133654  | 5715.966  | 4440.521  | NM_018643 | 1999.758  | 2149.405  |
| NM_014875 | 13604.808 | 13181.987 | AL137262  | 1513.781  | 1470.271  | NM_006927 | 19914.299 | 25985.311 |
| AB033023  | 19071.963 | 18738.924 | NM_020437 | 1707.931  | 1811.585  | NM_014601 | 2235.314  | 2674.681  |
| BC027895  | 4415.592  | 4719.592  | NM_002014 | 15494.362 | 18526.613 | NM_017761 | 19506.398 | 15458.632 |
| NM_016529 | 6596.315  | 6823.913  | NM_002538 | 9605.744  | 10034.977 | NM_006928 | 590.544   | 321.02    |
| AF116238  | 4778.658  | 5378.262  | NM_016585 | 14660.227 | 16272.756 | AF237700  | 1104.529  | 322.544   |
| NM_006982 | 1293.173  | 1271.199  | NM_002013 | 17821.896 | 20901.875 | NM_00286C | 11653.448 | 8229.609  |
| AB033085  | 4162.402  | 3027.118  | NM_006927 | 15536.334 | 13113.53  | NM_006165 | 5073.203  | 7159.952  |
| AF024703  | 10798.92  | 12658.279 | NM_014601 | 2317.265  | 4989.167  | NM_001218 | 847.689   | 1112.191  |
| NM_016531 | 1204.24   | 1448.854  | NM_017761 | 16204.15  | 15986.55  | NM_018353 | 3515.931  | 3232.298  |
| NM_003593 | 15589.152 | 14275.753 | NM_006928 | 467.652   | 618.155   | NM_00356C | 28848.283 | 36751.523 |
| NM_014383 | 63316     | 51845.91  | AF237700  | 1126.068  | 1119.496  | NM_014403 | 2125.34   | 2330.586  |
| NM_000244 | 8657.166  | 9062.555  | NM_00286C | 10357.249 | 11715.304 | AL050100  | 1696.63   | 2689.259  |
| NM_014285 | 8905.146  | 7542.679  | NM_006165 | 5091.283  | 5778.292  | NM_020135 | 2161.841  | 884.533   |
| AF026816  | 30322.242 | 29106.83  | NM_001218 | 1143.286  | 1049.253  | NM_000748 | 18269.68  | 24709.979 |
| NM_004719 | 6546.928  | 5128.007  | NM_014183 | 1556.53   | 1351.024  | U53531    | 921.463   | 1576.166  |
| NM_018553 | 5894.854  | 6001.591  | AB046780  | 16526.043 | 16226.572 | NM_004925 | 24562.471 | 29431.26  |
| NM_004704 | 7409.244  | 7129.271  | NM_018353 | 3137.719  | 2131.826  | NM_005455 | 1804.943  | 1106.999  |
| NM_005455 | 9291.232  | 10945.397 | NM_016373 | 446.404   | 413.817   | NM_006534 | 6365.721  | 4319.911  |
| NM_014633 | 11196.061 | 9651.669  | NM_00356C | 28995.031 | 32765.244 | AB051826  | 1336.892  | 1072.27   |
| NM_00197C | 70784.727 | 62800.492 | NM_014403 | 1928.204  | 1921.173  | AK024964  | 748.57    | 614.169   |
| AL049674  | 1335.134  | 1295.885  | AL050100  | 1594.894  | 1429.406  | M20697    | 3667.591  | 1137.45   |
| NM_001969 | 1301.382  | 1515.216  | NM_020135 | 1861.964  | 1799.489  | NM_015045 | 3297.616  | 1822.122  |
| NM_004116 | 8054.759  | 8053.326  | AL080207  | 760.846   | 374.077   | NM_002014 | 20661.463 | 16408.557 |
| AK024508  | 11098.78  | 10862.993 | NM_01773C | 7056.245  | 8700.906  | NM_002538 | 8085.787  | 10724.841 |
| AK027213  | 12332.015 | 12607.884 | AB051826  | 1730.215  | 1659.865  | NM_016585 | 18106.793 | 25212.016 |
| AL096749  | 6843.791  | 8233.579  | AK024964  | 582.612   | 551.297   | AK026349  | 13124.587 | 7190.28   |
| AK023620  | 2849.018  | 2646.995  | M20697    | 3821.004  | 3517.651  | NM_014733 | 1872.653  | 1152.995  |
| AF086189  | 4058.285  | 4487.733  | NM_015045 | 2837.32   | 2498.668  | D12485    | 1974.073  | 1208.788  |
| AL050055  | 5884.348  | 6620.737  | AF231022  | 26001.293 | 21000.904 | AK023204  | 5512.351  | 3235.918  |
| NM_005005 | 20203.238 | 20010.346 | NM_016327 | 3429.979  | 3746.633  | NM_003445 | 4473.387  | 4826.602  |
| NM_014595 | 22911.52  | 20765.354 | NM_006569 | 584.789   | 1185.102  | NM_002478 | 4672.998  | 4054.693  |
| NM_006703 | 15358.115 | 14443.843 | NM_006322 | 3919.304  | 4221.89   | D38163    | 588.402   | 652.758   |
| NM_004037 | 5604.964  | 5005.444  | U66702    | 57441.465 | 48753.063 | D28449    | 17518.463 | 18792.572 |
| NM_005116 | 3864.057  | 4144.44   | AF216381  | 14742.845 | 13093.008 | NM_003281 | 693.363   | 1066.3    |
| NM_002765 | 10351.763 | 9232.112  | AB014593  | 1183.071  | 1064.789  | AA460480  | 967.585   | 1470.057  |
| AJ404857  | 797.75    | 810.765   | NM_006235 | 2207.7    | 2571.956  | AI298884  | 20130.568 | 20356.773 |
| NM_000785 | 27740.125 | 26928.336 | NM_014258 | 1206.028  | 829.701   | D87845    | 1818.543  | 2336.35   |
| AF254088  | 2927.239  | 3017.377  | AK026353  | 2204.761  | 2797.02   | M83254    | 3398.734  | 4514.511  |
| NM_00142C | 2275.744  | 1833.02   | L24123    | 6636.939  | 7070.705  | S56770    | 770.242   | 1011.375  |
| NM_000245 | 1788.342  | 1615.957  | AF071111  | 859.942   | 571.505   | AI193606  | 219.497   | 460.8     |
| AB031046  | 682.768   | 757.171   | NM_015942 | 7987.765  | 8676.341  | H58872    | 14773.31  | 9530.638  |
| NM_002445 | 11668.23  | 13473.34  | NM_017907 | 11266.457 | 13613.393 | J02938    | 1071.933  | 353.051   |
| AK025388  | 1226.564  | 1377.838  | NM_002044 | 8148.995  | 8660.257  | J04543    | 10473.987 | 6857.603  |
| NM_006147 | 954.976   | 859.035   | AJ272267  | 2144.319  | 2435.03   | S60415    | 705.933   | 472.63    |
| AB006631  | 2096.951  | 1899.979  | NM_000673 | 1137.736  | 1378.537  | AA456295  | 1516.46   | 1812.118  |
| AF291181  | 985.237   | 1179.051  | NM_002103 | 5996.818  | 7297.083  | BE733577  | 3697.755  | 3945.78   |
| NM_005741 | 6129.941  | 7207.353  | NM_006655 | 4161.584  | 3913.404  | BG762340  | 967.615   | 909.265   |



|           |           |           |           |           |           |           |           |           |
|-----------|-----------|-----------|-----------|-----------|-----------|-----------|-----------|-----------|
| NM_000964 | 2756.266  | 3321.303  | NM_000270 | 13306.378 | 12799.938 | AA009484  | 469.618   | 732.955   |
| BF343886  | 1673.441  | 1558.007  | U89277    | 3415.635  | 3547.5    | NM_018643 | 1844.183  | 1254.733  |
| NM_013263 | 14660.167 | 13719.366 | AK026670  | 1180.007  | 726.352   | M30142    | 1523.106  | 876.11    |
| AL137407  | 3629.687  | 3692.675  | NM_002876 | 3344.209  | 2979.138  | NM_005018 | 569.62    | 817.943   |
| AF085839  | 857.456   | 675.565   | AK022332  | 6328.231  | 7543.728  | NM_013378 | 8654.96   | 9572.823  |
| NM_018178 | 5357.296  | 5540.842  | NM_006465 | 3387.884  | 5308.325  | NM_001085 | 1600.498  | 1784.242  |
| AL365406  | 666.75    | 850.016   | NM_006769 | 4744.851  | 5547.219  | NM_006110 | 979.841   | 808.737   |
| NM_019000 | 2127.47   | 1855.949  | NM_001189 | 1186.527  | 1258.095  | NM_016453 | 2014.147  | 2922.901  |
| AF143330  | 1613.196  | 1753.538  | NM_006992 | 883.784   | 1193.445  | NM_017701 | 1353.541  | 1874.102  |
| AK025178  | 8593.326  | 6558.426  | AF055009  | 5401.448  | 4555.125  | NM_014226 | 2661.263  | 3170.932  |
| AF147359  | 972.627   | 804.854   | AL365370  | 2132.422  | 2001.967  | AF142567  | 992.809   | 1112.481  |
| NM_014835 | 8310.716  | 8058.395  | AK022204  | 1152.815  | 1029.983  | NM_005621 | 4387.396  | 4315.447  |
| AK001822  | 5026.813  | 5480.255  | AL109716  | 1631.065  | 2647.246  | NM_006202 | 62366.664 | 25152.977 |
| AK026969  | 7211.102  | 7417.645  | AF085912  | 1231.455  | 1018.207  | NM_017410 | 2047.361  | 2341.05   |
| AF086287  | 4089.519  | 3977.332  | AK001127  | 1250.023  | 1503.688  | AY009398  | 309.934   | 650.194   |
| AF086356  | 606.331   | 639.713   | U79256    | 11104.598 | 9268.78   | X99680    | 12547.143 | 14480.261 |
| AF086409  | 1779.647  | 1803.599  | AL832550  | 1113.398  | 901.864   | NM_001448 | 1498.551  | 1684.123  |
| AK024268  | 4725.819  | 4857.296  | AF131798  | 685.115   | 700.81    | NM_016072 | 10918.135 | 10261.913 |
| AF086295  | 1975.707  | 2252.752  | AK001731  | 2595.706  | 3888.713  | NM_000748 | 15648.715 | 17763.168 |
| AF086344  | 3273.632  | 3859.986  | AF052176  | 691.183   | 938.061   | NM_000048 | 3905.548  | 5761.928  |
| AF086424  | 1552.645  | 1395.127  | NM_001412 | 4310.493  | 3281.213  | U53531    | 658.802   | 725.261   |
| AL110130  | 1441.971  | 1490.56   | AF095771  | 1457.469  | 1273.609  | NM_004925 | 23996.52  | 14848.616 |
| AF052116  | 1034.267  | 1044.773  | AF086205  | 1187.563  | 1151.058  | NM_003234 | 3899.578  | 3562.073  |
| NM_018087 | 7023.041  | 7609.424  | AF085985  | 755.997   | 1043.516  | NM_004858 | 1882.907  | 1356.301  |
| AL360260  | 2113.71   | 2142.507  | AK026384  | 1356.777  | 1692.516  | S78774    | 9582.609  | 10606.692 |
| AK023647  | 1810.52   | 1352.719  | AK025217  | 2128.343  | 2006.839  | NM_004922 | 5178.525  | 5475.036  |
| BC031635  | 976.12    | 995.85    | AL137342  | 2812.961  | 2421.782  | NM_002871 | 1400.228  | 1191.08   |
| AF085916  | 980.709   | 983.051   | AF075105  | 2050.202  | 1779.69   | BE873653  | 52074.746 | 52247.398 |
| AF085950  | 632.889   | 660.447   | U03241    | 860.282   | 735.82    | NM_006987 | 1281.473  | 291.808   |
| AL359598  | 1610.748  | 1848.849  | NM_005117 | 1172.478  | 1085.389  | NM_001282 | 5896.519  | 1471.036  |
| AF085980  | 1814.144  | 1498.928  | AJ007733  | 809.93    | 1155.015  | NM_016830 | 3632.796  | 2650.471  |
| AF085927  | 5169.413  | 5145.501  | AK021625  | 1979.839  | 2178.103  | U44105    | 899.538   | 1344.376  |
| AF085954  | 11560.635 | 14586.503 | AK021679  | 705.556   | 987.985   | NM_016103 | 2982.274  | 3175.666  |
| AL137337  | 1746.809  | 1857.198  | AK024938  | 633.38    | 672.893   | AL133654  | 6316.288  | 5022.005  |
| AL161969  | 1318.115  | 1081.251  | AK025312  | 2200.576  | 2065.41   | AL137262  | 1519.309  | 2571.607  |
| AL442095  | 1407.997  | 1375.168  | AK027205  | 1096.214  | 1362.516  | NM_020437 | 1940.215  | 2173.159  |
| AL137378  | 2426.113  | 2180.098  | AK022062  | 1261.848  | 887.022   | NM_002014 | 25287.006 | 29951.172 |
| AL137609  | 44141.438 | 50139.652 | AK026493  | 934.685   | 889.058   | NM_002538 | 8695.621  | 10361.771 |
| AL353946  | 7357.557  | 8130.12   | AK002042  | 1303.514  | 754.575   | NM_016585 | 18593.494 | 27209.836 |
| X69081    | 10655.031 | 11047.38  | AL049268  | 643.687   | 545.677   | NM_006927 | 17236.539 | 17455.709 |
| NM_005714 | 1832.433  | 1901.996  | AK023304  | 223.11    | 355.547   | NM_014601 | 2092.487  | 2441.951  |
| AL359931  | 3212.011  | 3145.242  | AK023963  | 10141.176 | 10327.397 | NM_017761 | 18123.623 | 23820.053 |
| AF086052  | 1307.622  | 1954.802  | AK022473  | 6353.169  | 7431.394  | NM_006928 | 572.258   | 482.993   |
| AK000954  | 5262.358  | 5110.616  | AK023810  | 2424.332  | 2328.026  | AF237700  | 947.507   | 673.004   |
| AF086099  | 1117.624  | 1438.504  | U80761    | 9265.436  | 9046.043  | NM_002860 | 10005.453 | 10325.064 |
| AK025800  | 12608.876 | 10833.142 | AK024125  | 963.594   | 1843.612  | NM_006169 | 4150.199  | 3231.17   |
| AK022333  | 1675.301  | 1537.466  | AK024761  | 13667.601 | 11217.784 | NM_001218 | 858.139   | 917.177   |
| AK023294  | 757.812   | 764.354   | M55536    | 2643.376  | 2008.619  | NM_014183 | 1111.35   | 1039.445  |
| NM_017808 | 424.129   | 611.239   | NM_014335 | 15914.159 | 14826.248 | AB046780  | 17126.381 | 18290.869 |
| AF095854  | 1689.678  | 1794.733  | AF086067  | 6282.626  | 6743.696  | NM_018353 | 4099.189  | 848.955   |
| NM_014133 | 569.521   | 424.599   | AK024967  | 6898.144  | 5058.861  | NM_003560 | 33078.473 | 32481.117 |
| AF159093  | 3521.126  | 3191.846  | AK025102  | 2776.298  | 2523.865  | NM_014403 | 2819.297  | 2996.162  |
| AK021997  | 7159.457  | 6276.909  | AF086562  | 1408.503  | 1119.591  | AL050100  | 1905.829  | 2068.422  |

|           |           |           |           |           |           |           |           |           |
|-----------|-----------|-----------|-----------|-----------|-----------|-----------|-----------|-----------|
| AK022125  | 2704.542  | 2271.462  | Y11897    | 724.649   | 662.357   | NM_020135 | 2103.949  | 2249.552  |
| AK022244  | 6331.532  | 6949.186  | AJ011980  | 421.555   | 502.062   | AL080207  | 580.041   | 622.45    |
| AK022381  | 8425.113  | 9073.952  | AY007113  | 1246.174  | 932.381   | NM_017730 | 8071.969  | 9850.99   |
| AK022012  | 2640.957  | 2794.145  | AF130083  | 14362.977 | 11727.854 | AB051826  | 1086.743  | 813.427   |
| AK022149  | 923.333   | 1130.271  | NM_002700 | 4466.827  | 3108.226  | AK024964  | 539.666   | 500.943   |
| AK022286  | 4536.359  | 5257.157  | AB002437  | 13316.84  | 9891.776  | M20697    | 3486.683  | 3875.077  |
| AK022411  | 1388.817  | 1149.829  | AK023496  | 780.283   | 1914.915  | NM_015046 | 3529.096  | 2842.079  |
| AK022613  | 7550.111  | 7460.577  | NM_006777 | 1126.425  | 1168.719  | AF231022  | 39364.656 | 39796.59  |
| AK027257  | 1567.38   | 1597.935  | AK024969  | 6305.106  | 6132.468  | NM_016327 | 5099.61   | 4935.782  |
| AK024582  | 969.141   | 872.417   | NM_019598 | 61.018    | 1517.041  | NM_006322 | 3693.528  | 2231.992  |
| NM_014367 | 2929.264  | 3094.843  | J05063    | 1305.582  | 1103.484  | U66702    | 62398.035 | 53968.328 |
| AK024901  | 859.757   | 1063.421  | NM_012369 | 1366.953  | 1025.964  | L08442    | 429.104   | 846.013   |
| NM_019073 | 1556.554  | 1377.246  | AK025092  | 2969.76   | 2486.636  | AB014593  | 2174.157  | 3360.476  |
| AK025835  | 860.324   | 769.244   | AF130047  | 789.252   | 525.279   | AK074832  | 29151.34  | 33270.859 |
| NM_002365 | 842.185   | 885.948   | Z83944    | 1930.869  | 1550.138  | NM_016265 | 65442.477 | 39927.031 |
| AF161441  | 27704.188 | 29616.098 | AF085871  | 3919.676  | 3349.209  | NM_006235 | 2938.244  | 5279.403  |
| AL137474  | 2367.379  | 2765.824  | AF026564  | 2308.867  | 2195.275  | NM_014258 | 362.33    | 1034.579  |
| AK021572  | 2383.476  | 2471.017  | X97301    | 5782.395  | 5528.597  | AK026353  | 2369.464  | 3770.191  |
| AK026757  | 1372.285  | 1082.82   | NM_019063 | 37803.219 | 18344.758 | L24123    | 4951.038  | 7780.755  |
| AF119908  | 3075.823  | 2947.613  | NM_014336 | 1428.792  | 943.351   | AF071111  | 1533.391  | 1848.38   |
| U50539    | 1032.57   | 1295.463  | AB002308  | 1206.349  | 643.974   | U00954    | 519.1     | 795.939   |
| AK000653  | 23630.48  | 20595.293 | NM_012143 | 7521.068  | 6554.9    | NM_015942 | 9720.978  | 12434.343 |
| AK000908  | 2448.317  | 2940.709  | NM_006658 | 534.205   | 859.909   | NM_017907 | 8925.472  | 10609.8   |
| X96660    | 4854.108  | 5362.736  | AF085892  | 2196.416  | 2551.941  | NM_002044 | 8552.081  | 7561.371  |
| Z70696    | 1744.485  | 1915.252  | AF075114  | 4102.78   | 3486.47   | AJ272267  | 2034.791  | 535.259   |
| NM_005792 | 19519.404 | 21333.826 | AK022218  | 60029.719 | 45841.371 | NM_000673 | 742.394   | 736.927   |
| AF048847  | 18836.914 | 19283.477 | NM_007112 | 9340.622  | 8595.472  | NM_002103 | 5207.216  | 7359.446  |
| L37718    | 67565.047 | 55016.305 | S82075    | 3214.833  | 2360.259  | NM_006665 | 2160.856  | 3496.417  |
| AL137717  | 5930.266  | 5390.722  | Z70766    | 975.035   | 725.282   | NM_000270 | 11936.939 | 18783.328 |
| AF035297  | 4814.9    | 5365.515  | AK000660  | 12213.764 | 9566.428  | U89277    | 2910.911  | 4215.845  |
| NM_014035 | 6203.758  | 7773.124  | NM_014711 | 6783.744  | 5648.448  | AK026670  | 757.231   | 1081.028  |
| S67154    | 10859.251 | 11220.154 | AK022015  | 2158.939  | 2223.797  | NM_002876 | 2699.215  | 981.338   |
| AK026181  | 6628.143  | 6748.835  | D17234    | 708.621   | 645.204   | AK022332  | 3568.075  | 3424.957  |
| AK021451  | 3061.073  | 4093.7    | D63135    | 1149.052  | 1092.958  | NM_006465 | 2675.007  | 1854.002  |
| AK001971  | 1601.155  | 1563.681  | AB033083  | 4549.842  | 3574.203  | NM_006765 | 4778.18   | 2959.337  |
| AF086468  | 3651.774  | 3366.819  | CY3Cy5    | 3643.254  | 263.019   | NM_001189 | 1706.791  | 1547.536  |
| AK027239  | 3863.968  | 3761.911  | H41522    | 827.102   | 1072.838  | NM_006992 | 962.525   | 773.271   |
| AF005082  | 34509.488 | 35638.137 | AA460291  | 8185.146  | 9377.078  | AL365370  | 2964.887  | 2757.231  |
| AL117595  | 4922.666  | 3919.658  | BI821333  | 19127.158 | 23565.02  | AK022204  | 1007.087  | 1294.606  |
| AB028988  | 10532.935 | 10999.7   | X51841    | 25991.59  | 23521.188 | AF086147  | 551.139   | 656.363   |
| AK023072  | 2984.613  | 2670.077  | AF051344  | 4296.956  | 5098.746  | AF085912  | 540.505   | 567.616   |
| AF086105  | 2579.897  | 2553.702  | BG506100  | 13670.339 | 17799.223 | AK001127  | 1924.741  | 2979.582  |
| AK026600  | 3765.059  | 3562.576  | X53586    | 6015.259  | 6746.308  | U79256    | 19483.482 | 26941.271 |
| AK021495  | 4802.588  | 5500.868  | M17176    | 887.448   | 802.691   | AL832550  | 1543.712  | 2483.646  |
| AF067777  | 70336.203 | 57007.457 | M26576    | 585.691   | 714.507   | AK001731  | 3350.367  | 2835.623  |
| Y10697    | 1757.669  | 1347.033  | M32972    | 2259.906  | 2608.282  | AF052176  | 517.095   | 700.658   |
| AY007166  | 25885.174 | 26707.504 | D89854    | 1359.177  | 1641.303  | NM_001412 | 6477.87   | 8352.442  |
| NM_004937 | 6817.215  | 6904.343  | X14885    | 515.309   | 836.527   | AF095771  | 1595.372  | 1996.268  |
| CY3Cy5    | 5539.997  | 523.062   | SR6       | 2435.156  | 3195.284  | AF086205  | 1688.615  | 1782.524  |
| AI298884  | 26129.115 | 38372.117 | SR8       | 10260.482 | 35968.398 | AK024169  | 937.237   | 582.774   |
| D87845    | 3924.376  | 6429.402  | SR10      | 37521.945 | 18118.654 | AF147395  | 1541.929  | 2429.933  |
| M83254    | 1409.597  | 1624.718  | CY3Cy5    | 4903.488  | 329.284   | AF087967  | 595.036   | 765.786   |
| S56770    | 705.087   | 1007.216  | AK025588  | 1690.297  | 1972.351  | AF085985  | 492.792   | 779.487   |

|           |           |           |           |           |           |           |           |           |
|-----------|-----------|-----------|-----------|-----------|-----------|-----------|-----------|-----------|
| H58872    | 17186.352 | 23258.166 | NM_003188 | 5599.61   | 5553.409  | AF075105  | 1858.152  | 1960.476  |
| J02938    | 1081.761  | 1123.5    | NM_007118 | 516.488   | 889.498   | U03241    | 848.74    | 1187.288  |
| J04543    | 13745.496 | 20103.375 | U59431    | 1638.591  | 1775.964  | NM_005117 | 1825.771  | 1929.699  |
| S60415    | 1161.44   | 1516.373  | U49349    | 934.999   | 1053.92   | AJ007733  | 1045.077  | 645.437   |
| AA456295  | 1304.309  | 1531.32   | NM_020152 | 2123.98   | 2663.597  | AK021625  | 3781.776  | 2308.851  |
| BE733577  | 3429.921  | 4441.667  | NM_013404 | 1035.611  | 970.75    | AK021679  | 1156.444  | 1287.469  |
| AI817942  | 8642.149  | 11476.715 | NM_003966 | 746.32    | 756.653   | AK001380  | 6322.542  | 2242.942  |
| BG762340  | 1300.149  | 1539.64   | AK024443  | 64686.621 | 56004.016 | AK024938  | 492.254   | 728.499   |
| AA009484  | 573.23    | 1360.603  | X06710    | 1898.971  | 1907.326  | AK025312  | 2898.301  | 3623.243  |
| NM_005456 | 2009.919  | 2797.258  | AK000896  | 1358.511  | 1743.936  | AK027205  | 722.443   | 657.939   |
| NM_006534 | 4000.836  | 4761.718  | NM_006058 | 17106.174 | 22476.518 | AK026493  | 779.446   | 707.711   |
| SR5       | 6739.99   | 6293.822  | NM_004809 | 2229.017  | 2587.428  | AK002042  | 858.861   | 397.853   |
| SR7       | 7612.877  | 44293.453 | NM_017817 | 3638.453  | 5346.102  | AK023963  | 3943.387  | 3158.78   |
| SR9       | 28876.328 | 5626.411  | NM_018184 | 14107.292 | 15474.419 | AK022473  | 8392.33   | 10678.676 |
| CY3Cy5    | 5656.257  | 435.218   | AB046823  | 1123.628  | 1145.532  | AK023810  | 2182.853  | 2982.335  |
| NM_016453 | 3486.756  | 4062.453  | NM_004929 | 1024.351  | 1274.122  | U80761    | 11804.623 | 14419.129 |
| NM_017701 | 134.957   | 861.649   | NM_004662 | 1014.347  | 810.192   | U61100    | 675.841   | 568.7     |
| NM_014226 | 1007.022  | 1769.571  | NM_016639 | 22986.104 | 22533.945 | NM_018582 | 741.643   | 308.856   |
| AF142567  | 1487.227  | 1810.792  | U61739    | 7060.351  | 7142.166  | AF130117  | 465.713   | 855.406   |
| NM_005621 | 7945.766  | 11143.1   | AJ132089  | 1098.951  | 1046.5    | AK024125  | 766.26    | 1027.157  |
| NM_006202 | 5824.45   | 9363.963  | U92819    | 16561.049 | 16226.677 | AK024761  | 10823.304 | 9416.597  |
| NM_003391 | 733.969   | 914.888   | AB020626  | 1168.884  | 939.623   | NM_014335 | 14154.625 | 9116.536  |
| NM_017410 | 1999.33   | 3267.136  | NM_002036 | 4829.566  | 5528.917  | AF086067  | 6059.28   | 3768.14   |
| X99680    | 1299.466  | 2124.251  | NM_012400 | 598.616   | 845.768   | AK025102  | 2097.232  | 525.493   |
| NM_001448 | 2404.126  | 3478.588  | NM_005384 | 4868.83   | 5583.229  | AF086562  | 1130.089  | 743.776   |
| NM_016072 | 10973.093 | 12689.359 | AB013103  | 640.252   | 526.679   | Y11897    | 653.576   | 396.394   |
| AK026349  | 12038.52  | 17312.775 | AF019225  | 3601.837  | 4661.602  | AY007113  | 1320.93   | 1249.421  |
| NM_014733 | 2915.069  | 4309.23   | AB011139  | 2393.838  | 2877.826  | AF130083  | 13397.048 | 11013.097 |
| D12485    | 2228.933  | 2808.589  | NM_006919 | 828.13    | 1082.018  | NM_002700 | 12890.698 | 9398.92   |
| AK023204  | 7257.683  | 6182.545  | AK022625  | 3997.263  | 4622.539  | AB002437  | 17424.656 | 9281.333  |
| NM_003449 | 4035.11   | 3312.474  | NM_005425 | 442.452   | 528.583   | AK023496  | 743.881   | 1355.338  |
| NM_002478 | 4322.8    | 3903.686  | AK023084  | 2190.113  | 3093.122  | NM_006777 | 1628.587  | 2241.584  |
| D28449    | 15992.576 | 18623.313 | AF237952  | 7634.847  | 8259.42   | AK024969  | 6825.955  | 7758.754  |
| NM_003281 | 540.298   | 664.583   | AL079287  | 3704.054  | 4236.832  | J05063    | 441.839   | 762.387   |
| S78774    | 2444.174  | 3153.135  | NM_014427 | 14406.004 | 14913.964 | NM_012369 | 962.18    | 1395.044  |
| NM_004922 | 6460.786  | 8604.135  | AB046769  | 3661.138  | 4175.721  | AK025092  | 2237.444  | 2751.074  |
| NM_002871 | 2062.767  | 2956.133  | NM_015922 | 11621.553 | 13793.448 | Z83944    | 1722.465  | 270.717   |
| BE873653  | 9273.512  | 13400.792 | NM_020381 | 3628.491  | 4395.286  | AF085871  | 2331.49   | 991.075   |
| NM_006987 | 979.657   | 1816.808  | NM_002957 | 3190.06   | 2829.087  | AF026564  | 1647.495  | 1201.267  |
| NM_001282 | 9973.084  | 8902.499  | NM_018106 | 10258.508 | 10887.329 | X97301    | 4076.253  | 2450.961  |
| NM_016830 | 2622.469  | 3316.155  | NM_003725 | 3367.017  | 3926.838  | NM_019063 | 35746.262 | 40000.082 |
| U44105    | 949.732   | 1457.082  | BE899154  | 2596.422  | 3209.901  | NM_014336 | 2460.681  | 2505.308  |
| NM_016103 | 3272.478  | 4997.103  | NM_004863 | 3011.862  | 3937.467  | AB002308  | 1006.756  | 1185.167  |
| AL133654  | 9061.73   | 9256.67   | AK024573  | 3722.736  | 5354.371  | NM_012143 | 8103.956  | 2356.652  |
| AL137262  | 1466.11   | 1760.527  | NM_002299 | 2558.391  | 2572.301  | AF085892  | 2351.175  | 2494.697  |
| NM_020437 | 2600.059  | 2548.521  | D79998    | 3547.5    | 3414.097  | AF075114  | 5746.329  | 7009.849  |
| NM_018643 | 618.073   | 600.998   | AB032963  | 3944.798  | 4574.282  | AK022218  | 58258.426 | 52996.742 |
| M30142    | 2148.445  | 1868.335  | NM_000385 | 1222.712  | 1701.02   | NM_007112 | 7178.67   | 10527.533 |
| NM_005018 | 1624.934  | 1610.098  | AF301013  | 4831.454  | 5759.036  | S82075    | 2498.877  | 2552.193  |
| NM_013378 | 4184.123  | 5400.099  | U15688    | 2040.808  | 2473.281  | AK000660  | 8750.251  | 3698.852  |
| NM_001085 | 1407.483  | 1779.12   | NM_000483 | 3896.019  | 3769.246  | NM_014711 | 4967.197  | 3989.366  |
| NM_006110 | 2124.342  | 2614.143  | NM_018448 | 11356.449 | 16186.108 | AK022015  | 2380.821  | 1712.678  |
| NM_002860 | 10125.641 | 8420.447  | NM_001659 | 15964.991 | 19701.951 | D63135    | 1031.088  | 965.553   |

|           |           |           |           |           |           |           |           |           |
|-----------|-----------|-----------|-----------|-----------|-----------|-----------|-----------|-----------|
| NM_00616E | 3536.774  | 3781.959  | AB020663  | 4361.902  | 5307.072  | AB033083  | 3760.795  | 3873.921  |
| NM_00121E | 964.221   | 1352.923  | AF297866  | 3817.524  | 4950.037  | CY3Cy5    | 9021.232  | 401.637   |
| NM_01418E | 1646.923  | 1629.258  | NM_002864 | 2443.871  | 4165.624  | H41522    | 2580.379  | 2930.594  |
| AB046780  | 21857.631 | 28913.504 | NM_01430E | 4554.292  | 4483.76   | AA460291  | 15864.571 | 15694.325 |
| NM_01835E | 3659.259  | 3148.217  | NM_01212E | 9347.187  | 8780.814  | BI821333  | 22157.238 | 23683.736 |
| NM_00356E | 47701.074 | 51000.82  | U87972    | 6190.092  | 6121.95   | X51841    | 60742.289 | 60526.633 |
| NM_01440E | 2417.532  | 2701.951  | NM_01792E | 2878.358  | 3607.876  | AF051344  | 11648.553 | 11096.159 |
| AL050100  | 1467.068  | 1501.542  | NM_003171 | 3589.623  | 3195.093  | BG506100  | 15190.554 | 12916.22  |
| NM_02013E | 1107.361  | 1722.951  | NM_006437 | 12534.596 | 15369.062 | X53586    | 6477.5    | 5933.705  |
| NM_00568E | 827.574   | 867.117   | NM_01789E | 3117.576  | 3299.238  | M17176    | 1841.031  | 1737.805  |
| NM_00074E | 3401.361  | 3866.334  | AK021654  | 2105.479  | 1903.594  | M32972    | 8154.356  | 14820.295 |
| NM_00004E | 2957.011  | 2139.04   | NM_016481 | 1622.869  | 1700.81   | D89854    | 1084.573  | 1696.984  |
| U53531    | 890.12    | 745.436   | NM_00392E | 13325.978 | 14922.47  | X14885    | 1661.004  | 1790.982  |
| NM_00492E | 25170.572 | 29525.471 | Z15114    | 4011.699  | 3759.048  | M97815    | 1935.043  | 1951.279  |
| NM_003234 | 6112.96   | 7420.29   | AB040812  | 21686.859 | 25180.963 | NM_00632E | 6251.33   | 6662.171  |
| NM_00485E | 4745.047  | 4636.335  | NM_01762E | 313.447   | 720.144   | SR2       | 68358.188 | 70108.063 |
| AB051826  | 1246.176  | 1533.522  | NM_00628E | 7518.258  | 10115.279 | SR4       | 20299.096 | 20590.422 |
| M20697    | 4072.923  | 4472.624  | NM_00134E | 4349.447  | 6114.064  | SR6       | 3218.545  | 3508.49   |
| NM_01504E | 3099.905  | 3299.337  | NM_00021E | 6675.1    | 7541.227  | SR8       | 10712.925 | 38857.512 |
| NM_002014 | 21875.244 | 20798.412 | AK027148  | 5089.389  | 6782.917  | SR10      | 42378.465 | 17076.504 |
| NM_00253E | 11223.59  | 8370.154  | NM_005084 | 5859.729  | 8849.095  |           | 4436.879  | 8816.021  |
| NM_01658E | 10918.604 | 11083.744 | NM_00728E | 357.929   | 791.558   | CY3Cy5    | 10004.622 | 1571.108  |
| NM_006927 | 9847.656  | 10685.276 | NM_006111 | 9742.565  | 13674.884 | AK025588  | 4871.804  | 5412.097  |
| NM_014601 | 1399.768  | 1417.202  | AK026071  | 8552.056  | 10812.707 | NM_00318E | 6426.561  | 6279.284  |
| NM_017761 | 15349.285 | 20211.5   | AK026074  | 1433.601  | 1421.195  | NM_00711E | 620.609   | 890.512   |
| NM_00692E | 650.19    | 916.575   | NM_00317E | 11689.087 | 10945.451 | U59431    | 8403.743  | 8466.418  |
| AF237700  | 1617.982  | 1620.727  | NM_00480E | 2315.397  | 2219.87   | U49349    | 3627.85   | 4364.356  |
| D38163    | 281.054   | 767.155   | AA903183  | 416.942   | 388.741   | NM_02015E | 3096.866  | 3280.029  |
| NM_004967 | 282.898   | 855.455   | H41522    | 826.402   | 838.226   | NM_013404 | 1731.256  | 2022.158  |
| D28449    | 16925.141 | 24202.049 | AA460291  | 8264.335  | 7560.607  | AK000896  | 3314.635  | 3846.706  |
| NM_003281 | 597.623   | 768.716   | BI821333  | 19562.334 | 18855.627 | AV682011  | 2432.271  | 2350.247  |
| AI298884  | 23312.244 | 25182.594 | X51841    | 26867.232 | 20610.539 | NM_020384 | 4044.54   | 3920.317  |
| D87845    | 3021.411  | 3071.273  | AF051344  | 4702.081  | 4704.47   | NM_00605E | 15889.244 | 14664.864 |
| M83254    | 863.087   | 918.253   | BG506100  | 13852.66  | 16242.195 | NM_00662E | 15349.871 | 16117.06  |
| S56770    | 487.684   | 554.541   | X53586    | 5667.211  | 5898.459  | AK026074  | 1905.327  | 2396.86   |
| H58872    | 13596.834 | 10006.75  | M17176    | 635.544   | 812.795   | NM_00317E | 13419.421 | 17053.871 |
| J02938    | 737.526   | 791.233   | M26576    | 504.854   | 651.996   | NM_00480E | 5915.548  | 10122.314 |
| J04543    | 11852.22  | 8672.865  | M32972    | 2169.281  | 2190.649  | AA903183  | 1173.186  | 1683.722  |
| S60415    | 998.073   | 801.15    | D89854    | 2061.638  | 3443.649  | NM_017817 | 7445.226  | 5546.927  |
| AA456295  | 955.272   | 722.113   | M97815    | 879.752   | 899.858   | NM_018184 | 18585.332 | 17617.402 |
| BE733577  | 2736.465  | 2935.803  | NM_00632E | 6520.22   | 8158.976  | AB046823  | 1652.103  | 1694.002  |
| AI817942  | 7513.666  | 7532.511  | NM_003201 | 6229.227  | 4370.124  | NM_00492E | 1437.284  | 1550.635  |
| BG762340  | 1443.445  | 900.607   | AB011139  | 2448.245  | 2036.342  | NM_00466E | 1285.136  | 1173.801  |
| AA009484  | 434.812   | 784.013   | NM_00691E | 854.715   | 889.622   | NM_01663E | 61816.777 | 58371.016 |
| NM_00545E | 1355.794  | 1734.901  | AK02262E  | 5443.29   | 5665.861  | U61739    | 15955.969 | 16149.49  |
| NM_006534 | 3280.418  | 3787.606  | NM_00542E | 550.154   | 642.894   | AJ132089  | 1158.287  | 1713.833  |
| M30142    | 1912.889  | 1799.898  | AK023084  | 2531.665  | 2457.385  | U92819    | 17636.857 | 16687.604 |
| NM_00501E | 1014.629  | 1077.715  | AK025588  | 1992.738  | 2242.297  | AB020626  | 1054.368  | 1198.338  |
| NM_01337E | 3178.246  | 4052.106  | NM_00318E | 5508.726  | 5004.716  | NM_00203E | 18202.367 | 14931.36  |
| NM_00108E | 1392.221  | 1575.818  | NM_00711E | 584.325   | 688.778   | NM_01240E | 1735.892  | 967.396   |
| NM_006110 | 1242.339  | 1415.413  | U59431    | 2214.651  | 2208.869  | NM_005384 | 4444.101  | 3025.103  |
| NM_01645E | 2579.215  | 2659.402  | U49349    | 1061.927  | 1324.143  | AB013103  | 1507.992  | 1080.603  |
| NM_01422E | 709.371   | 834.953   | NM_02015E | 2267.822  | 2657.611  | AF01922E  | 3545.8    | 2312.052  |

|           |           |           |           |           |           |           |           |           |
|-----------|-----------|-----------|-----------|-----------|-----------|-----------|-----------|-----------|
| AF142567  | 1084.779  | 826.537   | NM_013404 | 770.178   | 1163.312  | Z36803    | 10992.855 | 9269.925  |
| NM_005621 | 6640.036  | 6153.618  | AK000896  | 1367.798  | 2003.458  | NM_013371 | 753.395   | 836.094   |
| NM_006202 | 4493.092  | 3926.909  | AV682011  | 541.066   | 921.556   | NM_000707 | 8485.884  | 8489.423  |
| NM_003391 | 487.64    | 435.87    | NM_006628 | 12477.688 | 15557.846 | AF202092  | 19915.881 | 21587.164 |
| NM_017410 | 1563.988  | 1322.964  | NM_000483 | 3858.041  | 2262.91   | AB011139  | 2158.333  | 2335.942  |
| X99680    | 1035.818  | 966.081   | NM_018448 | 10016.809 | 7863.431  | NM_006919 | 1701.633  | 1805.909  |
| NM_001448 | 2099.512  | 2266.29   | NM_001659 | 13317.611 | 10598.48  | AK022625  | 17442.727 | 18651.781 |
| NM_016072 | 9056.934  | 10804.813 | AB020663  | 4023.454  | 3561.935  | NM_005425 | 692.675   | 865.747   |
| AK026349  | 11349.225 | 11093.014 | AF297866  | 2062.215  | 2235.262  | AK023084  | 8225.534  | 10765.223 |
| NM_014733 | 2208.437  | 2310.319  | NM_002864 | 2338.862  | 2374.248  | BC012333  | 17189.252 | 15981.427 |
| D12485    | 1731.898  | 1919.676  | NM_017817 | 4256.165  | 5619.188  | AF237952  | 10017.522 | 11118.949 |
| AK023204  | 5534.713  | 5810.499  | NM_018184 | 14515.743 | 15365.394 | NM_015922 | 16809.479 | 15534.577 |
| NM_003449 | 3948.476  | 4040.618  | AB046823  | 1273.636  | 1220.079  | NM_020381 | 5434.862  | 5445.389  |
| NM_002478 | 4573.085  | 5352.038  | NM_004929 | 975.505   | 1283.657  | NM_002957 | 6107.324  | 6936.296  |
| NM_003234 | 4659.165  | 5387.672  | NM_004662 | 959.408   | 1336.546  | NM_018106 | 15217.273 | 16979.291 |
| NM_004858 | 3310.992  | 2828.547  | U61739    | 7717.357  | 8115.015  | NM_003725 | 3889.35   | 3999.292  |
| S78774    | 1955.295  | 2093.84   | AJ132089  | 1298.145  | 2054.917  | BE899154  | 2841.15   | 2362.752  |
| NM_004922 | 4889.276  | 4185.536  | U92819    | 13456.982 | 13175.596 | NM_004863 | 4010.107  | 2893.089  |
| NM_002871 | 1703.249  | 1251.359  | AB020626  | 757.87    | 800.031   | AK024573  | 3746.061  | 2750.514  |
| BE873653  | 6242.226  | 5047.852  | NM_002036 | 4409.087  | 4436.304  | NM_002299 | 3548.958  | 2900.096  |
| NM_006987 | 1418.955  | 1050.427  | NM_012400 | 613.696   | 525.117   | D79998    | 4622.708  | 4366.167  |
| NM_001282 | 7374.272  | 4158.509  | NM_005384 | 4173.603  | 4929.845  | AB032963  | 4525.978  | 3911.709  |
| NM_016830 | 3071.519  | 2862.818  | AB013103  | 787.324   | 937.438   | NM_000385 | 1952.38   | 1559.887  |
| U44105    | 838.58    | 886.518   | AF019225  | 2638.557  | 3863.425  | AF301013  | 4539.705  | 4738.74   |
| NM_016103 | 2703.242  | 1973.135  | Z36803    | 6784.236  | 8981.771  | U15688    | 2322.651  | 2539.325  |
| AL133654  | 7713.677  | 6369.023  | NM_000707 | 6289.875  | 7692.935  | NM_000483 | 6869.792  | 8297.701  |
| AL137262  | 1408.406  | 1292.411  | AF202092  | 16429.818 | 22734.416 | NM_018448 | 12342.065 | 11699.538 |
| NM_020437 | 2271.448  | 2284.709  | NM_005084 | 5658.841  | 4438.82   | NM_001659 | 25038.844 | 29558.498 |
| NM_018643 | 620.736   | 609.663   | NM_007283 | 533.376   | 420.729   | AB020663  | 4816.184  | 5311.189  |
| NM_006927 | 10023.983 | 12081.006 | NM_006111 | 8968.354  | 8251.419  | AF297866  | 4293.794  | 4235.653  |
| NM_014601 | 964.199   | 1361.964  | AK026071  | 10408.854 | 9383.021  | NM_002864 | 3016.716  | 3856.215  |
| NM_017761 | 17716.025 | 24515.203 | BC012333  | 12074.783 | 11925.748 | NM_003102 | 1012.724  | 806.808   |
| NM_006928 | 644.025   | 527.478   | AF237952  | 7457.094  | 7841.462  | U87972    | 6280.856  | 6622.055  |
| AF237700  | 1612.364  | 1333.303  | AL079287  | 3903.751  | 4844.708  | NM_017925 | 3416.033  | 3462.248  |
| NM_002860 | 12093.409 | 12227.674 | NM_014427 | 14621.168 | 14980.99  | NM_003171 | 4141.348  | 4089.103  |
| NM_006169 | 3394.913  | 3128.693  | NM_020381 | 4956.776  | 5371.153  | NM_006437 | 13631.825 | 11710.543 |
| NM_001218 | 725.32    | 609.269   | NM_002957 | 4310.218  | 3938.997  | NM_017890 | 3573.861  | 3339.247  |
| NM_014183 | 1644.339  | 1355.529  | NM_018106 | 6487.053  | 5046.209  | AK021654  | 2509.992  | 2262.217  |
| AB046780  | 19409.268 | 17428.844 | NM_003725 | 1988.407  | 1755.222  | NM_016481 | 1356.726  | 1312.988  |
| NM_018353 | 3398.781  | 2908.993  | BE899154  | 1791.281  | 1844.031  | NM_003925 | 17263.504 | 15456.586 |
| NM_003560 | 40315.848 | 44367.645 | NM_004863 | 2869.976  | 3392.65   | Z15114    | 7578.514  | 7726.898  |
| NM_014403 | 2286.351  | 2154.449  | AK024573  | 3298.746  | 4830.116  | AB040812  | 28368.305 | 24778.168 |
| AL050100  | 947.061   | 1170.163  | NM_002299 | 2606.041  | 2384.563  | NM_017625 | 690.78    | 777.56    |
| NM_020139 | 1263.335  | 1640.963  | NM_000385 | 1207.95   | 1680.389  | NM_006285 | 8232.651  | 8653.837  |
| AL080207  | 266.58    | 248.796   | AF301013  | 3881.23   | 5182.645  | NM_001348 | 4642.202  | 6489.144  |
| NM_000748 | 2504.174  | 3063.284  | NM_018992 | 58501.125 | 56447.953 | NM_000215 | 9709.907  | 11497.629 |
| NM_000048 | 2983.708  | 3813.143  | U15688    | 1566.266  | 1710.487  | AK027148  | 17345.994 | 16659.711 |
| U53531    | 768.366   | 854.533   | NM_003102 | 665.558   | 736.285   | NM_005084 | 8823.482  | 8988.586  |
| NM_004925 | 24327.371 | 34466.398 | NM_014305 | 4732.753  | 4944.443  | NM_007283 | 682.149   | 1143.247  |
| NM_005456 | 711.576   | 788.685   | NM_012123 | 11961.705 | 9901.819  | NM_006111 | 10843.987 | 11289.491 |
| NM_006534 | 3028.271  | 2894.221  | U87972    | 7171.171  | 7296.945  | AK026071  | 14917.907 | 16126.616 |
| AB051826  | 1359.84   | 1013.231  | NM_017925 | 3105.931  | 3345.33   | H41522    | 2462.389  | 3174.265  |
| AK026289  | 869.839   | 660.756   | NM_003171 | 2114.823  | 1635.442  | AA460291  | 15299.118 | 16337.672 |

|           |           |           |           |           |           |           |           |           |
|-----------|-----------|-----------|-----------|-----------|-----------|-----------|-----------|-----------|
| AK024964  | 475.237   | 576.469   | NM_006437 | 7687.807  | 7254.617  | BI821333  | 21071.328 | 20755.631 |
| M20697    | 3368.755  | 4057.274  | NM_017890 | 2593.865  | 2513.489  | X51841    | 53700.648 | 57313.957 |
| NM_015046 | 2712.559  | 3153.785  | AK021654  | 1892.757  | 1839.393  | AF051344  | 10926.735 | 10677.297 |
| NM_002014 | 18301.549 | 17834.426 | NM_016481 | 1988.065  | 1906.184  | BG506100  | 16385.6   | 15422.359 |
| AK026349  | 10176.122 | 9280.872  | NM_003925 | 12423.655 | 14574.636 | X53586    | 5215.156  | 4652.84   |
| NM_014733 | 1744.425  | 1632.867  | Z15114    | 4470.559  | 3964.209  | M17176    | 1220.906  | 1187.245  |
| D12485    | 1770.028  | 1538.111  | AB040812  | 20059.695 | 25475.355 | M26576    | 912.409   | 871.144   |
| AK023204  | 5699.593  | 4307.502  | NM_006285 | 7841.167  | 10267.577 | M32972    | 7142.819  | 6774.53   |
| NM_003449 | 3757.889  | 2639.62   | NM_003656 | 27933.244 | 34201.969 | D89854    | 1390.127  | 1333.281  |
| NM_002478 | 4123.774  | 3484.131  | NM_001348 | 3003.871  | 2551.97   | M13207    | 781.407   | 753.426   |
| D28449    | 15320.791 | 9868.623  | NM_020384 | 2024.906  | 1561.445  | X14885    | 1216.375  | 1200.244  |
| NM_003281 | 537.196   | 301.171   | NM_006058 | 14131.831 | 9950.313  | M97815    | 1102.551  | 1671.492  |
| AI298884  | 19861.35  | 17193.953 | NM_006628 | 12068.614 | 8701.39   | NM_006325 | 6956.144  | 8274.319  |
| D87845    | 2319.947  | 2098.322  | M97496    | 17918.58  | 12827.001 | AF085893  | 730.785   | 1079.434  |
| M83254    | 786.227   | 932.313   | AK026074  | 1755.843  | 1271.05   | NM_003201 | 7956.185  | 6911.804  |
| S56770    | 500.525   | 684.267   | NM_003172 | 11632.969 | 10833.808 | AB011139  | 3004.644  | 3744.98   |
| H58872    | 12288.805 | 11038.772 | NM_004809 | 2064.094  | 2096.653  | NM_005425 | 843.656   | 1118.406  |
| J02938    | 573.038   | 649.04    | AA903183  | 358.775   | 581.569   | AK023084  | 8704.638  | 8680.028  |
| J04543    | 10608.012 | 10931.659 | H41522    | 882.41    | 966.802   | AK025588  | 6881.035  | 7318.207  |
| S60415    | 792.696   | 1031.394  | AA460291  | 7453.836  | 6893.324  | NM_003188 | 6519.993  | 6801.687  |
| AA456295  | 1080.775  | 972.434   | BI821333  | 11827.641 | 9135.289  | NM_007118 | 801.113   | 622.074   |
| BE733577  | 2128.469  | 2365.762  | X51841    | 20909.717 | 11051.215 | U59431    | 10002.346 | 9543.667  |
| BG762340  | 1215.97   | 1188.453  | AF051344  | 2664.554  | 2349.179  | U49349    | 2734.049  | 2148.471  |
| AA009484  | 460.986   | 1828.294  | BG506100  | 9796.485  | 9045.534  | NM_020152 | 4369.963  | 4769.204  |
| NM_018643 | 611.14    | 530.863   | X53586    | 4485.419  | 4540.199  | NM_013404 | 2263.203  | 3369.396  |
| M30142    | 1886.246  | 954.331   | M17176    | 651.241   | 913.229   | NM_003966 | 1064.009  | 1134.958  |
| NM_005018 | 1077.437  | 759.357   | M26576    | 465.501   | 522.181   | AK024443  | 63037.66  | 63709.789 |
| NM_013378 | 2692.759  | 2298.999  | M32972    | 1939.338  | 1830.215  | X06710    | 2926.377  | 5276.376  |
| NM_001085 | 1262.571  | 964.482   | D89854    | 1188.027  | 1497.338  | AK000896  | 2911.237  | 2986.522  |
| NM_006110 | 1404.972  | 1134.535  | X14885    | 764.376   | 565.711   | AV682011  | 1334.286  | 1397.026  |
| NM_016453 | 2466.833  | 1882.172  | M97815    | 812.574   | 720.074   | NM_020384 | 5633.722  | 5956.871  |
| NM_014226 | 742.972   | 1140.228  | Z36803    | 6958.59   | 4079.298  | NM_006058 | 18504.488 | 22010.631 |
| AF142567  | 1252.718  | 1172.726  | NM_013371 | 803.163   | 302.333   | NM_000483 | 9143.563  | 7994.169  |
| NM_005621 | 6028.543  | 6337.817  | NM_000707 | 5642.676  | 4487.663  | NM_018448 | 14888.707 | 12997.963 |
| NM_006202 | 3835.487  | 4474.542  | AF202092  | 18571.631 | 18381.172 | NM_001659 | 23408.941 | 24639     |
| NM_003391 | 470.069   | 640.849   | NM_003201 | 6063.504  | 4829.458  | AB020663  | 4998.017  | 5372.274  |
| NM_017410 | 1662.655  | 1999.634  | AB011139  | 2279.749  | 1698.307  | AF297866  | 5016.898  | 5611.621  |
| X99680    | 901.541   | 1211.079  | NM_006919 | 1286.131  | 2179.602  | NM_002864 | 3680.531  | 3352.788  |
| NM_001448 | 2017.185  | 2265.127  | AK022625  | 5335.266  | 5630.252  | NM_017817 | 6898.042  | 5672.955  |
| NM_016072 | 9702.313  | 9827.439  | NM_005425 | 292.505   | 484.318   | NM_018184 | 17889.389 | 19071.623 |
| NM_000748 | 2391.164  | 1751.461  | AK023084  | 2180.423  | 1906.748  | AB046823  | 2045.046  | 2416.053  |
| NM_000048 | 3098.623  | 2460.145  | AK025588  | 1734.94   | 1456.261  | NM_004929 | 2171.594  | 1948.523  |
| U53531    | 786.573   | 462.196   | NM_003188 | 4402.826  | 3676.427  | NM_004662 | 1456.725  | 2237.648  |
| NM_004925 | 26003.387 | 20316.762 | U59431    | 1424.119  | 1506.299  | NM_016639 | 52586.633 | 47358.648 |
| NM_003234 | 4948.177  | 3610.446  | U49349    | 883.32    | 783.399   | U61739    | 16350.671 | 15108.523 |
| NM_004858 | 3038.528  | 2092.296  | NM_020152 | 1937.855  | 1799.65   | AJ132089  | 1133.14   | 1408.197  |
| S78774    | 2018.82   | 1907.931  | NM_013404 | 789.937   | 794.916   | U92819    | 19899.736 | 18541.336 |
| NM_004922 | 5739.443  | 5663.104  | NM_003966 | 433.765   | 894.633   | AB020626  | 1432.08   | 1830.662  |
| NM_002871 | 1741.668  | 1616.365  | AK024443  | 60879.465 | 53172.449 | NM_002036 | 23054.291 | 27091.926 |
| BE873653  | 7040.674  | 7343.078  | X06710    | 1455.98   | 1569.021  | NM_012400 | 1124.353  | 1789.628  |
| NM_006987 | 1088.63   | 1034.348  | AK000896  | 842.878   | 1328.95   | NM_005384 | 5259.624  | 5494.167  |
| NM_001282 | 7253.095  | 5457.832  | AB032963  | 4152.104  | 2734.637  | AB013103  | 1295.602  | 1475.861  |
| NM_016830 | 2570.621  | 3126.945  | NM_000385 | 1115.218  | 964.07    | AF019225  | 5281.396  | 4924.89   |

|           |           |           |           |           |           |           |           |           |
|-----------|-----------|-----------|-----------|-----------|-----------|-----------|-----------|-----------|
| U44105    | 934.253   | 1174.577  | AF301013  | 4366.435  | 3734.431  | Z36803    | 14279.236 | 15399.584 |
| NM_016103 | 2343.356  | 2137.966  | NM_018992 | 64104.418 | 54920.18  | NM_013371 | 828.811   | 1314.1    |
| AL133654  | 7185.749  | 6563.571  | U15688    | 2134.23   | 1948.439  | NM_000215 | 10408.856 | 10310.31  |
| AL137262  | 1258.452  | 1539.621  | NM_000483 | 3711.615  | 2953.433  | AK027148  | 18607.695 | 16451.588 |
| NM_020437 | 2167.725  | 2195.994  | NM_018448 | 9477.138  | 8878.927  | NM_005084 | 9095.783  | 8571.011  |
| NM_002014 | 18356.676 | 11156.576 | NM_001659 | 19512.053 | 26966.158 | NM_007283 | 1067.247  | 926.023   |
| NM_002538 | 11707.622 | 10044.257 | AB020663  | 4090.24   | 3698.125  | NM_006111 | 11203.276 | 12562.84  |
| NM_016585 | 11235.331 | 11102.629 | AF297866  | 2005.371  | 1970.122  | AK026071  | 15089.217 | 15788.313 |
| NM_006927 | 10057.745 | 9712.696  | NM_002864 | 1799.651  | 1776.946  | BC012333  | 14543.287 | 13596.396 |
| NM_014601 | 1199.332  | 1020.804  | NM_017817 | 3837.415  | 3942.179  | AF237952  | 10734.321 | 11784.074 |
| NM_017761 | 15194.478 | 13898.256 | NM_018184 | 12154.876 | 13089.969 | AL079287  | 5651.679  | 6153.714  |
| NM_006928 | 544.85    | 588.248   | AB046823  | 857.538   | 910.202   | NM_014427 | 18295.504 | 19196.703 |
| AF237700  | 1117.533  | 961.594   | NM_004929 | 854.38    | 864.627   | NM_020381 | 5828.149  | 6077.876  |
| NM_002860 | 11543.235 | 11225.207 | NM_016639 | 20442.434 | 19361.566 | NM_002957 | 8766.493  | 8903.904  |
| NM_006169 | 3695.049  | 4365.235  | U61739    | 5923.307  | 5542.172  | NM_018106 | 12223.86  | 12564.718 |
| NM_001218 | 756.437   | 807.583   | AJ132089  | 1287.918  | 1105.264  | NM_003725 | 4441.024  | 4463.661  |
| NM_014183 | 2025.997  | 1530.447  | U92819    | 13454.067 | 14098.377 | BE899154  | 3402.284  | 4678.893  |
| AB046780  | 20901.844 | 23552.648 | AB020626  | 694.852   | 879.806   | NM_004863 | 4740.819  | 5311.279  |
| NM_018353 | 2549.104  | 2015.806  | NM_002036 | 4197.055  | 4430.634  | AK024573  | 4748.355  | 4438.1    |
| NM_003560 | 38665.828 | 42316.762 | NM_005384 | 3695.233  | 3955.828  | NM_002299 | 3484.298  | 3926.451  |
| NM_014403 | 2069.787  | 1882      | Z15114    | 5168.481  | 3448.125  | D79998    | 5011.459  | 7144.838  |
| AL050100  | 1012.747  | 1257.687  | AB040812  | 25234.564 | 22519.607 | AB032963  | 4699.324  | 4823.021  |
| NM_020139 | 1234.517  | 1898.031  | NM_006285 | 8036.324  | 7206.77   | NM_000385 | 2279.61   | 2313.585  |
| NM_017730 | 5895.963  | 5391.7    | NM_003656 | 37617.922 | 32515.496 | AF301013  | 4615.425  | 5272.079  |
| AB051826  | 1038.731  | 1120.499  | NM_001348 | 3667.875  | 3441.773  | NM_018992 | 64770.301 | 62380.875 |
| M20697    | 3666.086  | 3952.986  | NM_000215 | 5645.483  | 5475.605  | NM_006325 | 6983.604  | 6910.151  |
| NM_015046 | 3068.504  | 3096.527  | AK027148  | 7840.051  | 6600.254  | AF085893  | 1097.745  | 1780.735  |
| AF231022  | 1671.963  | 1801.085  | NM_005084 | 6572.098  | 7254.021  | NM_003102 | 705.544   | 932.369   |
| NM_016327 | 4279.916  | 3677.154  | NM_007283 | 584.428   | 501.799   | NM_014305 | 5507.637  | 5231.844  |
| NM_006322 | 4431.428  | 4014.891  | NM_006111 | 5761.933  | 5054.185  | NM_003171 | 4535.375  | 4411.509  |
| U66702    | 13894.263 | 14432.358 | AK026071  | 8774.69   | 7775.833  | NM_006437 | 15518.072 | 15491.041 |
| AF216381  | 14425.49  | 16538.127 | BC012333  | 7663.52   | 7525.046  | NM_017890 | 4106.112  | 5474.917  |
| AB014593  | 1026.333  | 1191.053  | AF237952  | 5054.767  | 5698.669  | AK021654  | 2847.893  | 3455.163  |
| AK074832  | 11063.772 | 12548.917 | AL079287  | 3095.591  | 3017.858  | NM_016481 | 1604.04   | 1838.631  |
| NM_016269 | 69988.414 | 54691.477 | NM_014427 | 10577.552 | 9946.145  | NM_003925 | 15725.422 | 16204.445 |
| NM_006235 | 2303.034  | 1868.235  | AB046769  | 3305.155  | 3510.594  | Z15114    | 8029.691  | 8982.417  |
| NM_014258 | 665.508   | 769.96    | NM_015922 | 11074.673 | 13493.452 | AB040812  | 29197.844 | 29350.742 |
| AK026353  | 1812.971  | 1735.965  | NM_020381 | 3602.684  | 3660.131  | NM_017625 | 518.221   | 639.141   |
| L24123    | 4529.366  | 4377.04   | NM_002957 | 3614.943  | 3321.022  | NM_006285 | 8650.594  | 8594.46   |
| AF071111  | 1035.196  | 816.692   | NM_018106 | 9088.183  | 10040.353 | NM_003656 | 55894.723 | 52207.879 |
| NM_015942 | 7446.058  | 6975.408  | NM_003725 | 2979.826  | 3557.226  | NM_001348 | 4278.517  | 4764.005  |
| NM_017907 | 12491.746 | 12510.158 | BE899154  | 1987.207  | 1862.15   | NM_020384 | 4080.695  | 5789.736  |
| NM_002044 | 12713.638 | 12859.846 | NM_004863 | 2353.839  | 2977.746  | BI821333  | 21607.176 | 20384.318 |
| AJ272267  | 1792.76   | 2634.687  | AK024573  | 3038.422  | 3584.932  | X51841    | 59150.641 | 55865.969 |
| NM_000673 | 1398.464  | 1046.784  | NM_002299 | 1702.485  | 2102.551  | AF051344  | 9838.899  | 10434.843 |
| NM_002103 | 5387.724  | 4862.557  | NM_003830 | 1054.828  | 1098.183  | BG506100  | 16033.957 | 17343.197 |
| NM_006665 | 4879.706  | 4111.472  | NM_000842 | 946.782   | 585.373   | X53586    | 5873.757  | 6870.899  |
| NM_000270 | 11905.204 | 11393.813 | NM_015642 | 1514.437  | 1504.56   | M17176    | 1220.009  | 1176.569  |
| U89277    | 2912.47   | 2843.783  | NM_004640 | 23002.045 | 20036.074 | M26576    | 693.959   | 522.103   |
| AK026670  | 1788.726  | 1719.453  | NM_002901 | 8910.215  | 6609.48   | M32972    | 5495.849  | 6437.138  |
| NM_002876 | 3572.047  | 3417.969  | NM_016222 | 11435.942 | 11933.932 | D89854    | 1411.43   | 1410.861  |
| AK022332  | 4129.994  | 4673.151  | AB037823  | 3696.292  | 3157.901  | M13207    | 452.717   | 1744.668  |
| NM_006465 | 3016.016  | 3063.443  | NM_015380 | 16543.076 | 13437.888 | X14885    | 646.24    | 958.693   |

|           |           |           |           |           |           |           |           |           |
|-----------|-----------|-----------|-----------|-----------|-----------|-----------|-----------|-----------|
| NM_006769 | 4094.656  | 2796.89   | BE254485  | 1684.351  | 1978.587  | M97815    | 797.082   | 1118.059  |
| NM_001189 | 727.19    | 452.551   | NM_002732 | 340.138   | 452.527   | AB013103  | 1230.944  | 837.554   |
| NM_006992 | 900.406   | 1085.733  | AF085893  | 985.809   | 378.163   | AF019225  | 4443.952  | 3749.389  |
| AL365370  | 2206.83   | 2422.486  | NM_003102 | 404.463   | 450.521   | Z36803    | 11798.127 | 11044.763 |
| AK022204  | 540.09    | 704.015   | NM_014305 | 4605.849  | 3487.788  | NM_003201 | 6130.914  | 4691.338  |
| AF086147  | 708.339   | 1028.732  | NM_012123 | 9549.634  | 9122.697  | NM_003188 | 5591.281  | 5334.25   |
| AL109716  | 474.944   | 654.149   | U87972    | 4943.758  | 5329.182  | U59431    | 7867.713  | 8458.204  |
| U79256    | 6299.301  | 4177.68   | NM_017925 | 2541.218  | 3358.826  | U49349    | 1564.103  | 1542.776  |
| AL832550  | 1177.518  | 1136.271  | NM_003171 | 3722.678  | 2864.412  | NM_020152 | 2502.933  | 2641.021  |
| AK001731  | 4787.294  | 3591.518  | NM_006437 | 11987.93  | 12353.997 | NM_013404 | 1844.941  | 1919.65   |
| NM_001412 | 3191.603  | 3445.438  | NM_017890 | 2557.92   | 2180.368  | NM_003966 | 770.122   | 714.082   |
| AF095771  | 1207.776  | 1403.067  | AK021654  | 1446.923  | 1804.764  | AK024443  | 62893.672 | 66984.82  |
| AF086205  | 1031.067  | 941.034   | NM_016481 | 1345.829  | 1147.388  | X06710    | 2603.002  | 3420.435  |
| AF147395  | 1672.531  | 1382.824  | NM_003925 | 8776.766  | 9083.317  | AK000896  | 2354.308  | 2587.8    |
| AF085985  | 662.679   | 688.368   | AF217974  | 3281.182  | 2302.902  | D79998    | 4454.147  | 3999.592  |
| AK026384  | 807.76    | 707.852   | NM_000888 | 4907.214  | 5102.225  | AB032963  | 4508.576  | 3450.528  |
| AK025217  | 684.886   | 624.2     | NM_000595 | 6378.743  | 4599.67   | NM_000385 | 1698.43   | 1426.943  |
| AL137342  | 1355.189  | 965.429   | X99663    | 4233.524  | 4189.969  | AF301013  | 4005.76   | 3624.604  |
| AF075105  | 2119.848  | 1797.407  | NM_016552 | 2137.787  | 1623.016  | NM_018992 | 60311.496 | 57974.531 |
| AK021625  | 1180.474  | 831.25    | NM_003565 | 2672.953  | 1750.149  | U15688    | 2705.879  | 1513.879  |
| AK001380  | 5962.156  | 3514.375  | NM_004841 | 889.162   | 940.391   | NM_000483 | 7832.982  | 6752.622  |
| AK025312  | 2348.688  | 1838.478  | NM_018440 | 11745.587 | 8341.372  | NM_017817 | 6733.733  | 4561.501  |
| AL049268  | 395.076   | 626.507   | AK025470  | 1151.177  | 900.472   | NM_018184 | 17155.313 | 14856.684 |
| AK023963  | 8742.517  | 8665.831  | M35410    | 16993.191 | 17287.842 | AB046823  | 1688.638  | 1616.592  |
| AK022473  | 1591.183  | 1597.279  | AB023227  | 1281.7    | 1436.432  | NM_004925 | 1786.151  | 1456.72   |
| AK023810  | 1857.3    | 1511.387  | NM_005776 | 24968.203 | 26546.227 | NM_004662 | 1144.883  | 871.206   |
| U80761    | 4533.685  | 5585.902  | AK023071  | 4757.061  | 5180.344  | NM_016635 | 60862.152 | 59305.176 |
| U61100    | 702.104   | 529.293   | NM_004041 | 1454.739  | 1680.441  | U61739    | 17692.678 | 16297.501 |
| NM_018582 | 598.52    | 574.458   | AK022888  | 4022.806  | 4163.471  | AJ132089  | 1105.74   | 1305.771  |
| M21539    | 1028.484  | 916.176   | AK024484  | 6960.751  | 5920.371  | U92819    | 16643.219 | 15964.935 |
| AF130117  | 531.701   | 402.129   | NM_002632 | 729.08    | 613.091   | AB020626  | 1144.711  | 1059.245  |
| AK024761  | 17913.961 | 14596.358 | NM_001406 | 535.759   | 931.972   | NM_002036 | 18770.184 | 18900.225 |
| M55536    | 4185.952  | 3418.282  | NM_002292 | 1779.594  | 2257.06   | NM_012400 | 799.47    | 940.398   |
| NM_014335 | 16606.035 | 13695.249 | NM_000166 | 2324.121  | 2582.652  | NM_005384 | 4746.397  | 4710.228  |
| AF086067  | 6509.576  | 5153.063  | AL570170  | 4805.519  | 3316.714  | Z15114    | 7275.707  | 5717.258  |
| AK024967  | 5775.779  | 7003.332  | D56495    | 986.624   | 855.94    | AB040812  | 27491.217 | 19358.326 |
| AK025102  | 2279.4    | 1749.398  | NM_006613 | 11296.2   | 8880.059  | NM_006285 | 8027.717  | 6630.531  |
| AF086562  | 627.815   | 694.259   | NM_004638 | 16194.62  | 12872.954 | NM_001348 | 4241.898  | 3498.863  |
| AJ011980  | 468.435   | 499.879   | NM_005373 | 795.571   | 811.546   | NM_000215 | 9822.576  | 8141.636  |
| AY007113  | 1279.557  | 862.085   | L40027    | 4522.351  | 3917.834  | AF237952  | 8439.458  | 8974.021  |
| AF130083  | 15839.317 | 15247.918 | NM_003718 | 46828.664 | 40466.922 | AL079287  | 4630.675  | 4933.356  |
| NM_002700 | 1131.709  | 912.553   | NM_007062 | 803.634   | 765.46    | NM_014427 | 15508.74  | 16043.47  |
| AB002437  | 16368.012 | 13346.829 | NM_014180 | 19812.098 | 14969.296 | AB046769  | 6867.721  | 6798.375  |
| NM_006777 | 1619.708  | 1463.118  | NM_017706 | 2202.569  | 1430.874  | NM_015922 | 16403.539 | 14071.195 |
| AK024969  | 6263.085  | 5250.129  | AF334406  | 1928.548  | 1778.272  | NM_020381 | 5751.345  | 5911.483  |
| AK025092  | 2245.329  | 2348.358  | NM_017444 | 7634.139  | 6441.319  | NM_002957 | 5081.896  | 5025.363  |
| AF085871  | 2555.503  | 2090.27   | NM_018025 | 5064.266  | 5532.554  | NM_018106 | 11380.6   | 9645.104  |
| AF026564  | 1705.889  | 1461.546  | NM_015999 | 10322.173 | 10977.096 | NM_003725 | 3538.86   | 3384.208  |
| X97301    | 656.213   | 567.718   | NM_003804 | 8986.481  | 8083.943  | BE899154  | 2288.276  | 2580.345  |
| NM_019063 | 38574.387 | 45861.508 | NM_018453 | 10350.901 | 8940.536  | NM_004863 | 3347.899  | 3409.844  |
| NM_014336 | 891.734   | 559.55    | NM_016001 | 12236.858 | 12708.828 | AK024573  | 4062.96   | 3566.033  |
| AB002308  | 2305.498  | 2426.743  | S49432    | 714.365   | 1048.526  | NM_002295 | 3390.742  | 3768.088  |
| NM_003324 | 5179.384  | 6382.731  | D86984    | 2075.592  | 2174.059  | NM_003830 | 1300.472  | 741.367   |



|           |           |           |           |           |           |           |           |           |
|-----------|-----------|-----------|-----------|-----------|-----------|-----------|-----------|-----------|
| NM_012143 | 8253.602  | 8528.96   | NM_015959 | 762.705   | 642.208   | NM_000842 | 1127.495  | 717.684   |
| AF085892  | 2413.875  | 2616.979  | AK026904  | 3650.092  | 3156.778  | NM_015642 | 1470.981  | 1187.307  |
| AF075114  | 3326.284  | 2469.001  | NM_003793 | 1084.079  | 955.516   | NM_004640 | 24284.434 | 20795.205 |
| AK022218  | 58197.637 | 44845.594 | NM_001910 | 1447.394  | 1608.861  | NM_016222 | 9496.815  | 7854.984  |
| NM_007112 | 7155.525  | 7654.197  | NM_001909 | 7854.99   | 8894.405  | AB037823  | 4642.239  | 3815.621  |
| S82075    | 3389.3    | 2879.821  | NM_012198 | 1999.779  | 2133.995  | NM_012123 | 9519.916  | 10163.531 |
| Z70766    | 1007.869  | 824.703   | NM_003368 | 6674.894  | 6161.458  | U87972    | 6176.741  | 5622.135  |
| AK000660  | 11150.697 | 11521.322 | AB040886  | 1508.764  | 1411.69   | NM_017925 | 3519.688  | 2949.776  |
| NM_014711 | 4910.403  | 4222.939  | AB029020  | 2872.79   | 2753.316  | NM_003171 | 4051.77   | 3991.468  |
| AK022015  | 1237.201  | 1293.251  | AK022759  | 3747.084  | 3206.047  | NM_006437 | 15481.76  | 12732.614 |
| D17234    | 502.045   | 514.982   | NM_012333 | 11794.454 | 10529.128 | NM_017890 | 3181.234  | 2850.549  |
| D63135    | 803.076   | 820.537   | AF217798  | 2549.886  | 2293.021  | AK021654  | 2583.873  | 2425.652  |
| AB033083  | 2004.213  | 2003.053  | AF161472  | 6830.298  | 8651.54   | NM_016481 | 1806.565  | 1635.996  |
| CY3Cy5    | 5191.338  | 447.407   | AL133642  | 26493.693 | 37696.777 | NM_003925 | 18218.629 | 18076.227 |
| H41522    | 673.113   | 669.175   | AF124432  | 5476.183  | 5248.641  | AF217974  | 5145.093  | 3929.399  |
| AA460291  | 8874.839  | 9953.912  | NM_006330 | 12763.601 | 15557.412 | NM_003285 | 1273.736  | 952.94    |
| BI821333  | 25676.355 | 31906.084 | NM_015873 | 4365.532  | 4143.857  | NM_000888 | 6573.015  | 4356.617  |
| X51841    | 3189.781  | 4227.971  | NM_000377 | 6855.819  | 6019.389  | NM_000595 | 9290.097  | 7546.979  |
| AF051344  | 5154.938  | 5643.911  | NM_006818 | 604.515   | 761.228   | X99663    | 4939.549  | 4206.186  |
| BG506100  | 17645.398 | 22640.961 | NM_016823 | 3011.594  | 3621.321  | NM_016552 | 3532.866  | 2849.038  |
| X53586    | 6503.066  | 8070.891  | NM_003120 | 2350.335  | 1804.402  | AB023227  | 1658.718  | 1693.282  |
| M17176    | 1253.262  | 1119.343  | X52360    | 3344.86   | 2279.778  | AK023071  | 8054.844  | 8031.171  |
| M26576    | 836.935   | 941.355   | NM_002636 | 17623.939 | 12007.587 | NM_004041 | 1728.892  | 2045.191  |
| M32972    | 2208.093  | 2521.594  | NM_016494 | 36241.742 | 35010.645 | AK022888  | 4169.24   | 3668.546  |
| D11151    | 587.063   | 540.411   | U09410    | 5780.733  | 4790.116  | AK024484  | 6943.67   | 6507.304  |
| D89854    | 2847.567  | 2823.317  | NM_020229 | 1390.01   | 1190.538  | NM_002632 | 886.722   | 759.047   |
| M13207    | 806.325   | 957.794   | NM_001186 | 4119.158  | 3745.926  | NM_001953 | 62827.379 | 58438.918 |
| X14885    | 954.563   | 1023.262  | NM_004502 | 2563.303  | 1573.016  | NM_001406 | 972.712   | 762.727   |
| M97815    | 1077.717  | 1206.902  | AF000560  | 6387.501  | 5364.25   | NM_002292 | 3852      | 4353.308  |
| NM_006325 | 6823.069  | 8078.308  | NM_013282 | 6441.907  | 5255.57   | NM_000166 | 2540.059  | 2936.809  |
| SR4       | 23482.063 | 25894.775 | NM_005777 | 4587.91   | 3962.149  | AF305200  | 665.423   | 859.182   |
| SR6       | 3561.498  | 3647.468  | NM_012345 | 3787.521  | 2844.95   | AL570170  | 3426.361  | 1638.274  |
| CY3Cy5    | 6047.534  | 355.956   | NM_005826 | 17386.479 | 16202.474 | D56495    | 1085.396  | 560.255   |
| AK025588  | 1132.39   | 1357.818  | NM_004592 | 2098.931  | 2048.276  | NM_006613 | 11457.113 | 7172.096  |
| NM_003188 | 6246.163  | 6415.251  | NM_015001 | 5879.008  | 4449.592  | NM_004638 | 12411.962 | 8932.849  |
| NM_007118 | 842.225   | 1017.158  | NM_019027 | 889.77    | 1083.6    | L40027    | 3998.12   | 3587.438  |
| U59431    | 513.152   | 1016.924  | NM_016107 | 3496.367  | 3584.65   | NM_003718 | 42776.395 | 39177.418 |
| U49349    | 1700.333  | 1314.044  | NM_002567 | 33753.914 | 49524.586 | NM_007062 | 910.018   | 594.601   |
| NM_020152 | 3252.67   | 3655.459  | NM_001404 | 4317.531  | 5685.037  | NM_017444 | 7909.599  | 7479.567  |
| NM_013404 | 992.081   | 1081.813  | NM_001605 | 28166.73  | 34496.348 | NM_018025 | 5733.875  | 6906.289  |
| NM_006157 | 230.81    | 401.762   | AF225422  | 11210.16  | 9054.685  | NM_003804 | 18958.188 | 17322.865 |
| NM_003966 | 545.875   | 936.384   | AB040960  | 8106.837  | 9150.039  | NM_018453 | 12296.484 | 10366.394 |
| AK024443  | 53692.137 | 50496.969 | NM_015946 | 6836.21   | 10461.794 | NM_004708 | 62299.746 | 63240.172 |
| X06710    | 3038.171  | 4250.136  | NM_006303 | 4721.098  | 4488.409  | NM_016001 | 12743.23  | 10841.735 |
| AK000896  | 2524.291  | 2894.048  | AL080059  | 4449.317  | 3593.718  | NM_016108 | 8283.778  | 7614.079  |
| AV682011  | 706.571   | 661.227   | AL080219  | 2732.616  | 2067.845  | AL137722  | 1109.927  | 1102.217  |
| NM_003872 | 645.351   | 515.142   | AK026709  | 768.544   | 541.144   | S49432    | 1222.463  | 1130.114  |
| NM_020384 | 2797.62   | 2801.791  | NM_003001 | 1983.843  | 1496.628  | D86984    | 2421.743  | 2187.843  |
| NM_006058 | 17655.393 | 16311.104 | NM_001985 | 8861.887  | 7432.367  | NM_015955 | 1440.8    | 1344.398  |
| M97496    | 8658.856  | 9080.63   | NM_000102 | 650.209   | 894.087   | NM_001910 | 2965.552  | 2316.963  |
| AA903183  | 938.599   | 585.2     | NM_002490 | 23284.627 | 17900.699 | NM_001905 | 8813.475  | 6553.069  |
| NM_017817 | 7656.234  | 7644.028  | BE563532  | 1365.298  | 1167.029  | NM_012198 | 3479.025  | 2407.688  |
| NM_018184 | 13938.974 | 15169.622 | NM_001916 | 6424.845  | 6196.478  | NM_003368 | 7803.563  | 5039.681  |

|           |           |           |           |           |           |           |           |           |
|-----------|-----------|-----------|-----------|-----------|-----------|-----------|-----------|-----------|
| AB046823  | 1591.257  | 1805.475  | NM_002491 | 1546.588  | 1446.215  | AB040886  | 1627.015  | 1345.274  |
| NM_004929 | 1274.909  | 1307.401  | NM_015425 | 2638.011  | 2432.16   | AB029020  | 3006.589  | 3830.636  |
| NM_004662 | 1092.597  | 1128.128  | NM_015153 | 5733.648  | 5086.597  | AK022759  | 3512.088  | 4027.758  |
| NM_016639 | 8520.128  | 9705.856  | AB032966  | 6124.857  | 4009.443  | AF217798  | 4728.123  | 4611.053  |
| U61739    | 4498.125  | 4399.568  | M26747    | 4655.761  | 5002.021  | AF161472  | 8343.196  | 6856.259  |
| AJ132089  | 1523.689  | 2524.603  | NM_014820 | 5373.134  | 5905.566  | AL133642  | 29298.135 | 23809.252 |
| U92819    | 22304.096 | 24861.281 | NM_005035 | 1749.579  | 2188.671  | AB011154  | 1885.632  | 1961.465  |
| AB020626  | 1422.16   | 1456.562  | NM_019014 | 4703.353  | 5042.165  | AF124432  | 3909.624  | 4652.412  |
| NM_002036 | 704.161   | 863.726   | NM_002097 | 29400.051 | 41358.059 | NM_006330 | 12948.51  | 10525.845 |
| NM_012400 | 686.071   | 831.131   | X04706    | 2857.992  | 2351.024  | NM_015873 | 5997.092  | 6792.944  |
| NM_005384 | 5987.835  | 6166.05   | NM_018039 | 1025.114  | 785.309   | NM_000377 | 6819.701  | 6374.184  |
| NM_006850 | 558.878   | 882.29    | NM_006494 | 3561.948  | 3292.912  | NM_006818 | 1387.853  | 1709.297  |
| AB013103  | 1155.418  | 1357.907  | X52343    | 3975.999  | 3726.416  | NM_016823 | 4726.594  | 3687.494  |
| AF019225  | 5921.773  | 6022.57   | NM_005853 | 2730.911  | 2781.098  | NM_003120 | 1441.741  | 791.189   |
| Z36803    | 9777.521  | 10641.514 | NM_014068 | 720.973   | 604.974   | NM_016494 | 38627.602 | 27323.266 |
| NM_013371 | 600.913   | 593.398   | NM_017814 | 8127.734  | 6295.781  | U09410    | 6067.374  | 4223.349  |
| NM_000707 | 7143.028  | 7633.969  | AF131811  | 1882.784  | 1303.17   | NM_020229 | 1905.852  | 966.83    |
| AF202092  | 19207.664 | 18738.463 | AF293026  | 11625.939 | 8992.953  | NM_001186 | 5542.021  | 4556.079  |
| NM_003201 | 7771.759  | 7926.449  | AF236158  | 1006.742  | 602.428   | NM_004502 | 6643.203  | 4511.038  |
| AB011139  | 3237.549  | 3295.789  | AF217986  | 4901.417  | 3885.748  | AF000560  | 9791.898  | 7178.667  |
| NM_006919 | 1146.611  | 1067.106  | AK026320  | 1576.005  | 1044.238  | NM_013282 | 8488.826  | 5669.308  |
| AK022625  | 1317.521  | 2014.481  | AL137530  | 2022.25   | 1463.114  | NM_005777 | 8289.03   | 4891.62   |
| NM_005425 | 613.193   | 760.24    | NM_015953 | 10038.016 | 8853.749  | NM_012345 | 5857.735  | 5088.354  |
| AK023084  | 3134.647  | 3951.515  | AK024775  | 1398.825  | 1411.613  | NM_005826 | 26657.377 | 32609.379 |
| BC012333  | 12205.151 | 12030.597 | AK025562  | 2100.138  | 1931.576  | NM_004592 | 2686.174  | 2927.361  |
| AF237952  | 8166.917  | 8670.653  | AF088024  | 612.265   | 519.096   | NM_015001 | 13365.938 | 12933.502 |
| AL079287  | 4609.754  | 4176.063  | AK025887  | 1002.988  | 721.274   | NM_019027 | 1514.011  | 1400.345  |
| NM_014427 | 11375.692 | 13235.903 | AB037719  | 2844.547  | 3078.913  | NM_016107 | 4496.895  | 3723.415  |
| AB046769  | 5214.488  | 5780.688  | AK024694  | 1620.294  | 1735.67   | NM_002567 | 32811.566 | 25428.545 |
| NM_015922 | 15788.022 | 15268.328 | AK026143  | 2414.029  | 1605.513  | NM_001404 | 3519.765  | 2974.864  |
| NM_020381 | 4757.649  | 5319.847  | AL137578  | 570.389   | 818.767   | NM_001605 | 28555.723 | 25047.412 |
| NM_002957 | 3487.509  | 4237.017  | AL110252  | 1187.373  | 959.616   | AF225422  | 15025.94  | 14254.7   |
| NM_018106 | 11731.013 | 14233.117 | AL050143  | 1279.876  | 868.756   | AB040960  | 11576.665 | 9423.411  |
| NM_003725 | 4070.276  | 4703.542  | AL137616  | 1429.658  | 1143.351  | NM_015946 | 12913.251 | 9178.231  |
| BE899154  | 1550.721  | 1980.372  | AK021752  | 1497.988  | 1345.278  | NM_006303 | 8332.103  | 7085.229  |
| NM_004863 | 3423.915  | 3390.487  | AL050012  | 1143.652  | 827.684   | AL080059  | 3968.47   | 5530.784  |
| AK024573  | 5949.382  | 6361.247  | AL109706  | 10669.865 | 6255.341  | NM_003001 | 2751.57   | 3021.35   |
| NM_002299 | 2893.168  | 3482.072  | AK001118  | 891.964   | 972.604   | NM_001985 | 7227.481  | 4518.708  |
| D79998    | 5006.802  | 6936.24   | AF035291  | 58356.762 | 47434.43  | NM_000102 | 1966.349  | 2093.898  |
| AB032963  | 5532.183  | 5844.844  | AK026291  | 15546.941 | 13118.606 | NM_002490 | 32753.4   | 31124.732 |
| NM_000385 | 1367.749  | 1508.466  | AK021924  | 605.871   | 336.427   | BE563532  | 3055.77   | 2773.694  |
| AF301013  | 4446.31   | 4323.001  | AL049285  | 974.193   | 532.863   | NM_001916 | 9777.106  | 8273.929  |
| NM_018992 | 67140.469 | 56161.91  | AL080208  | 410.633   | 592.752   | NM_002491 | 2497.496  | 2833.919  |
| U15688    | 1366.241  | 1107.14   | L35592    | 7522.969  | 8763.507  | NM_015425 | 3026.591  | 2957.014  |
| NM_000483 | 1521.298  | 1774.302  | NM_012079 | 1031.177  | 1622.014  | NM_015153 | 7430.669  | 4248.207  |
| NM_018448 | 13029.113 | 12895.364 | AL360274  | 20258.207 | 20096.6   | AB032966  | 26588.9   | 17956.842 |
| NM_001659 | 13601.068 | 16896.74  | AK021858  | 775.903   | 509.728   | M26747    | 5624.369  | 4794.147  |
| AB020663  | 3401.035  | 4141.951  | NM_014050 | 5939.13   | 5448.213  | NM_014820 | 7739.749  | 6409.348  |
| AF297866  | 3353.225  | 4063.254  | AF085854  | 635.004   | 891.738   | NM_005035 | 1919.818  | 1931.043  |
| NM_002864 | 6019.556  | 6444.92   | AK027027  | 1102.583  | 644.629   | NM_019014 | 4272.814  | 3464.576  |
| NM_014305 | 5362.845  | 4837.845  | NM_014911 | 798.66    | 490.342   | NM_002097 | 26662.986 | 21296.816 |
| NM_012123 | 9902.791  | 10693.75  | AF009289  | 6099.828  | 4296.927  | X04706    | 4852.341  | 4396.409  |
| U87972    | 3840.816  | 3679.497  | AF040247  | 1730.339  | 1293.033  | NM_018039 | 1327.881  | 1178.065  |

|           |           |           |           |           |           |           |           |           |
|-----------|-----------|-----------|-----------|-----------|-----------|-----------|-----------|-----------|
| NM_01792E | 5506.214  | 5772.66   | AF056439  | 1082.933  | 607.304   | NM_006494 | 6195.505  | 5870.817  |
| NM_003171 | 3903.868  | 3877.826  | AF009303  | 2345.243  | 2060.138  | X52343    | 6773.759  | 6027.211  |
| NM_006437 | 20152.391 | 21302.619 | NM_004474 | 2300.591  | 1902.291  | NM_00585E | 5174.222  | 3691.479  |
| NM_01789C | 3810.607  | 4056.534  | AF056449  | 590.994   | 466.397   | X99681    | 1262.09   | 1087.539  |
| AK021654  | 1741.822  | 1752.487  | AK001033  | 1508.598  | 1795.72   | NM_01406E | 1374.035  | 1774.957  |
| NM_016481 | 2424.322  | 2793.944  | AK021463  | 1179.013  | 1288.929  | NM_017814 | 9119.316  | 9619.011  |
| NM_00392E | 15168.655 | 20143.549 | AK001082  | 1128.325  | 1038.94   | AF074996  | 1495.494  | 1577.228  |
| Z15114    | 5331.959  | 6931.926  | AK001871  | 263.947   | 740.715   | AF131811  | 3114.366  | 2382.002  |
| AB040812  | 35866.047 | 46702.625 | AK021743  | 1491.444  | 1292.031  | AF293026  | 15294.172 | 16124.205 |
| NM_01762E | 712.089   | 906.94    | AK025589  | 4749.757  | 7048.969  | AF236158  | 1219.229  | 1397.449  |
| NM_00628E | 11964.145 | 12060.027 | AK026734  | 812.37    | 807.639   | AF217986  | 6279.368  | 6980.64   |
| NM_00365E | 7417.69   | 8519.219  | NM_01663E | 18218.385 | 14354.438 | AK026320  | 1805.988  | 2286.102  |
| NM_00134E | 4125.949  | 4485.654  | AK023250  | 4265.188  | 3207.022  | AL137530  | 4742.271  | 5308.573  |
| NM_00021E | 4181.826  | 5033.325  | AK024882  | 3025.459  | 2705.126  | NM_01595E | 14388.016 | 13737.389 |
| AK027148  | 5717.756  | 5830.964  | NM_01406E | 9749.843  | 8161.737  | AF147301  | 3367.443  | 4368.378  |
| NM_005084 | 9959.251  | 11750.309 | NM_006304 | 63557.77  | 53241.332 | AF147310  | 1435.767  | 1355.793  |
| NM_00728E | 741.799   | 594.767   | X74804    | 704.088   | 632.674   | AK024775  | 2421.271  | 2522.433  |
| NM_006111 | 14848.688 | 17841.107 | AF293367  | 2653.352  | 2222.48   | AK025562  | 2878.295  | 2060.707  |
| AK026071  | 7017.581  | 9295.914  | AF086231  | 3384.485  | 2567.241  | AF088024  | 1697.156  | 721.437   |
| NM_00230E | 466.621   | 426.51    | AK001494  | 1808.079  | 1842.167  | AK025887  | 2291.314  | 1368.641  |
| AK026074  | 1768.723  | 2052.082  | AL133438  | 2152.205  | 1920.366  | AB037719  | 3246.011  | 2401.662  |
| NM_00317E | 12960.231 | 12550.663 | AK021784  | 886.532   | 511.566   | U00791    | 2002.491  | 1906.223  |
| NM_00480E | 2205.051  | 2517.098  | AF230800  | 1942.513  | 3063.312  | AK024694  | 1887.845  | 1611.531  |
| AA903183  | 598.051   | 578.984   | AK026647  | 980.149   | 1246.335  | AF086229  | 838.567   | 722.544   |
| H41522    | 724.335   | 730.107   | AK022152  | 1202.361  | 1169.952  | AK026143  | 3326.075  | 2065.679  |
| AA460291  | 9781.748  | 11060.063 | NM_003534 | 41097.148 | 39196.77  | AL110252  | 1541.596  | 1369.898  |
| BI821333  | 26100.252 | 32353.637 | L08437    | 3104      | 2640.15   | AL050143  | 2904.408  | 2302.416  |
| X51841    | 3004.227  | 4069.761  | AK057143  | 9671.324  | 8470.816  | AL137616  | 1975.876  | 1888.709  |
| AF051344  | 5140.936  | 5677.673  | NM_015594 | 19647.563 | 12359.006 | AK021752  | 1683.654  | 1295.244  |
| BG506100  | 17038.885 | 18975.332 | AF056423  | 3052.507  | 2121.085  | AL050012  | 1644.427  | 1180.098  |
| X53586    | 4794.068  | 5691.517  | AK026475  | 768.711   | 438.757   | AL109706  | 14665.508 | 11328.25  |
| M17176    | 1357.624  | 1281.399  | K01884    | 973.588   | 353.272   | AK001118  | 1328.619  | 1330.051  |
| M26576    | 1262.402  | 1233.827  | U00962    | 11126.033 | 9491.511  | AF035291  | 58287.648 | 55389.535 |
| M32972    | 2482.716  | 2523.682  | AK026130  | 18568.336 | 15546.918 | AK026291  | 19873.33  | 20850.514 |
| D11151    | 798.518   | 627.007   | NM_01248C | 5318.711  | 4463.711  | AK021924  | 979.104   | 1268.608  |
| D89854    | 2365.601  | 2532.758  | AK024144  | 10367.628 | 10130.904 | AL049285  | 1976.386  | 2671.031  |
| M13207    | 493.998   | 589.825   | Y08959    | 1404.194  | 1725.389  | AL117520  | 1907.336  | 2231.478  |
| X14885    | 671.976   | 684.87    | NM_00534E | 16674.854 | 19010.117 | AL049303  | 1563.069  | 1313.508  |
| M97815    | 853.327   | 984.263   | NM_00534E | 16973.83  | 15425.862 | AL050059  | 107.764   | 774.133   |
| NM_00632E | 7612.811  | 9163.997  | AF196865  | 2529.03   | 2493.359  | AL080208  | 1620.263  | 1129.222  |
| AF085893  | 546.634   | 754.682   | AJ008114  | 59605.773 | 49911.211 | L35592    | 11721.459 | 10606.116 |
| NM_003201 | 7276.385  | 7240.949  | AJ008141  | 610.506   | 656.073   | NM_01207E | 2242.208  | 1568.185  |
| AB011139  | 2772.677  | 3035.547  | AF147432  | 3385.925  | 3307.688  | AL360274  | 26030.33  | 21516.871 |
| NM_00691E | 874.743   | 687.092   | AK024690  | 1128.568  | 1249.303  | NM_01405C | 13427.947 | 10370.249 |
| AK022625  | 1896.173  | 1866.166  | BC005946  | 50929.023 | 42521.621 | AF085854  | 1623.568  | 1003.865  |
| NM_00542E | 391.977   | 602.913   | AK021893  | 2238.045  | 1485.068  | AF074997  | 1639.652  | 1145.185  |
| AK023084  | 2334.897  | 2424.944  | NM_00104E | 8212.672  | 7589.94   | AK027027  | 1289.548  | 1273.107  |
| AK025588  | 1615.4    | 1558.809  | AK026497  | 2724.709  | 2424.245  | NM_014911 | 1166.089  | 1024.718  |
| NM_00318E | 6117.537  | 7286.592  | BE958139  | 1654.183  | 1247.454  | AF009289  | 7268.368  | 6902.928  |
| NM_007118 | 948.71    | 907.701   | AF086516  | 1246.288  | 944.437   | AF040247  | 1726.542  | 2055.929  |
| U59431    | 818.169   | 968.348   | D86978    | 7569.201  | 7878.932  | AF056439  | 1746.992  | 1851.773  |
| U49349    | 1770.633  | 1400.789  | AL080060  | 1091.017  | 839.255   | AF007835  | 456.265   | 1032.832  |
| NM_02015E | 2943.809  | 2853.796  | NM_005267 | 1641.123  | 1114.989  | AF009303  | 4334.46   | 5035.602  |

|           |           |           |           |           |           |           |           |           |
|-----------|-----------|-----------|-----------|-----------|-----------|-----------|-----------|-----------|
| NM_013404 | 669.571   | 820.492   | AF086017  | 944.094   | 867.079   | NM_004474 | 7970.018  | 8598.412  |
| NM_006157 | 520.605   | 596.891   | AK024978  | 12454.302 | 15664.613 | AF056449  | 1432.832  | 1716.401  |
| NM_003966 | 748.072   | 847.82    | U12897    | 3329.387  | 3383.449  | AK001033  | 1539.715  | 1868.736  |
| AK024443  | 43320.922 | 49488.41  | NM_020357 | 5120.964  | 4003.216  | AK021463  | 1401.978  | 1131.03   |
| X06710    | 2309.397  | 2999.75   | AK026836  | 1279.354  | 744.164   | AK021698  | 1227.954  | 2206.998  |
| AK000896  | 1844.755  | 1710.198  | T59562    | 23064.871 | 14677.36  | AK001082  | 2980.693  | 2295.149  |
| AV682011  | 508.802   | 554.643   | NM_018219 | 1399.5    | 1575.707  | AK001871  | 991.53    | 652.416   |
| NM_003872 | 513.301   | 596.073   | NM_014114 | 2279.649  | 2710.851  | AK021743  | 3380.572  | 2581.201  |
| NM_020384 | 2610.814  | 3219.48   | U62822    | 4336.119  | 3462.971  | AK026699  | 1157.468  | 790.772   |
| NM_006058 | 20738.041 | 23370.324 | CY3Cy5    | 7816.459  | 523.923   | AK025589  | 6535.829  | 4269.914  |
| NM_006628 | 13500.787 | 17077.938 | AA220921  | 7663.009  | 12012.8   | AK026734  | 789.968   | 853.294   |
| M97496    | 10622.915 | 12661.852 | N67770    | 858.259   | 748.13    | NM_016633 | 48141.68  | 42541.125 |
| NM_000483 | 1481.858  | 1807.389  | AA486200  | 64019.016 | 61567.898 | AK023250  | 6814.038  | 6712.36   |
| NM_018448 | 12397.804 | 12352.669 | U90065    | 4575.503  | 5695.619  | AK024882  | 2674.018  | 2485.59   |
| NM_001659 | 10589.131 | 10181.011 | AJ005898  | 3001.803  | 2969.433  | NM_014062 | 14414.08  | 16499.168 |
| AB020663  | 3620.309  | 3831.391  | X57303    | 4714.529  | 6740.588  | NM_006304 | 64999.297 | 57747.008 |
| AF297866  | 2861.35   | 3071.039  | AA463224  | 2119.13   | 2248.134  | X74804    | 1401.105  | 1865.284  |
| NM_002864 | 4394.064  | 3777.856  | BG248802  | 6817.762  | 8599.06   | AF293367  | 4245.165  | 4963.129  |
| NM_017817 | 7412.991  | 5768.445  | L19605    | 2332.858  | 2572.021  | AF086231  | 4935.063  | 5998.311  |
| NM_018184 | 16182.53  | 18235.191 | AA876532  | 7978.201  | 9173.824  | AK001494  | 3637.552  | 4339.688  |
| AB046823  | 1896.092  | 1641.703  | S74349    | 1465.413  | 1816.538  | AL133438  | 4129.382  | 3945.713  |
| NM_004929 | 1642.211  | 1550.164  | X07979    | 22898.084 | 25123.393 | AK022310  | 1038.988  | 528.975   |
| NM_004662 | 1233.806  | 1403.815  | BG744224  | 16008.141 | 16992.516 | AK021784  | 1212.107  | 561.523   |
| NM_016639 | 9803.343  | 11826.58  | NM_006079 | 2253.128  | 3097.11   | AF230800  | 2223.406  | 1565.808  |
| U61739    | 4497.56   | 4450.907  | NM_006696 | 5898.645  | 5407.674  | NM_018520 | 3672.078  | 3485.046  |
| AJ132089  | 1397.932  | 2010.238  | SR7       | 7594.923  | 42816.52  | AK026647  | 1591.966  | 1291.919  |
| U92819    | 24112.232 | 26994.568 | SR9       | 27937.084 | 4762.431  | AK022152  | 2259.106  | 2746.578  |
| AB020626  | 1349.212  | 1141.723  | CY3Cy5    | 5272.391  | 1359.862  | NM_003534 | 44040.316 | 33331.809 |
| NM_002036 | 644.585   | 822.209   | AK002163  | 5988.045  | 6406.771  | L08437    | 3830.982  | 4057.742  |
| NM_012400 | 583.267   | 613.924   | NM_002287 | 10735.228 | 11367.645 | AK057143  | 13174.813 | 14310.127 |
| NM_005384 | 5542.458  | 5753.551  | NM_012344 | 2790.504  | 3561.792  | NM_015594 | 30485.316 | 38978.684 |
| NM_006850 | 803.378   | 786.332   | NM_002351 | 34458.387 | 46672.512 | AF056423  | 4813.716  | 5983.7    |
| AB013103  | 1289.334  | 1385.656  | NM_014385 | 2206.227  | 2783.952  | U00956    | 513.496   | 777.613   |
| AF019225  | 5311.759  | 5468.726  | NM_001704 | 767.132   | 913.399   | X04293    | 871.418   | 1641.815  |
| Z36803    | 8901.845  | 8858.247  | AB036432  | 6547.542  | 6125.65   | AK026475  | 929.164   | 1200.502  |
| NM_013371 | 891.06    | 961.921   | NM_014872 | 5676.789  | 6004.748  | K01884    | 1222.248  | 1527.251  |
| NM_000707 | 9470.438  | 11665.699 | NM_032951 | 2513.175  | 2496.054  | U00962    | 27888.689 | 33747.582 |
| AF202092  | 23039.574 | 29880.848 | NM_000503 | 3310.26   | 3980.478  | AK026130  | 38332.758 | 46097.441 |
| NM_000215 | 4147.998  | 4554.944  | NM_002405 | 12709.771 | 13462.05  | Y08959    | 1566.374  | 1882.89   |
| AK027148  | 5410.345  | 5170.801  | AK000004  | 1324.553  | 1800.162  | NM_005346 | 25746.459 | 25546.109 |
| NM_005084 | 8418.463  | 7930.848  | NM_012421 | 15216.825 | 18646.064 | NM_005343 | 28362.975 | 27251.262 |
| NM_007283 | 590.142   | 656.975   | AB014601  | 1329.5    | 1441.648  | AF196865  | 2493.521  | 1719.076  |
| NM_006111 | 12808.599 | 12098.184 | AK001393  | 4820.98   | 6153.086  | AJ008114  | 61059.445 | 49592.43  |
| AK026071  | 5055.329  | 5602.711  | NM_001143 | 734.421   | 874.271   | AJ008141  | 1337.921  | 1719.539  |
| BC012333  | 14085.733 | 12527.787 | AK022638  | 3972.134  | 4925.352  | AF147432  | 6235.353  | 7247.87   |
| AF237952  | 8547.519  | 9667.089  | BG698409  | 1590.912  | 1833.753  | AK024690  | 1928.532  | 1485.862  |
| AL079287  | 4906.639  | 4989.163  | M91368    | 563.638   | 875.516   | BC005946  | 55110.414 | 39825.219 |
| NM_014427 | 12405.584 | 16025.688 | AF224741  | 951.085   | 1065.03   | AK021893  | 3389.24   | 2194.048  |
| AB046769  | 5322.101  | 5294.67   | NM_006594 | 2885.555  | 2910.659  | NM_001048 | 8361.089  | 5263.976  |
| NM_015922 | 16242.653 | 15303.281 | NM_004177 | 2785.085  | 3584.995  | AK026497  | 3886.359  | 3834.765  |
| NM_020381 | 4650.628  | 4984.844  | NM_012429 | 1806.25   | 2377.803  | BE958139  | 2358.081  | 2601.731  |
| NM_002957 | 3535.349  | 3783.94   | NM_004871 | 4858.78   | 5870.476  | AF085359  | 804.449   | 1632.735  |
| NM_018106 | 12943.239 | 14548.766 | NM_005698 | 12698.265 | 14026.497 | AF086516  | 1946.362  | 2402.786  |

|           |           |           |           |           |           |           |           |           |
|-----------|-----------|-----------|-----------|-----------|-----------|-----------|-----------|-----------|
| NM_00372E | 3713.346  | 4208.449  | AF202146  | 11904.586 | 10941.554 | D86978    | 11985.428 | 10859.198 |
| BE899154  | 1758.789  | 1759.76   | NM_014923 | 1266.239  | 1554.685  | AL080060  | 10169.747 | 11287.19  |
| NM_004863 | 3916.069  | 4524.389  | NM_005477 | 1910.012  | 2439.156  | NM_005267 | 5006.604  | 5678.715  |
| AK024573  | 4865.381  | 4905.653  | NM_00431E | 1048.404  | 1442.124  | U80763    | 539.805   | 867.812   |
| NM_00229E | 2300.593  | 3100.25   | L09089    | 380.35    | 263.784   | AK024978  | 15880.12  | 16356.995 |
| D79998    | 4507.235  | 5152.752  | NM_00264C | 5470.51   | 5550.752  | U12897    | 4138.314  | 4196.161  |
| AB032963  | 4244.792  | 4403.367  | M15530    | 6209.437  | 6501.151  | NM_020357 | 16447.082 | 15117.022 |
| NM_00038E | 1092.148  | 1183.603  | NM_001877 | 737.148   | 1013.681  | AK026836  | 2443.456  | 1823.259  |
| AF301013  | 5415.311  | 6077.167  | NM_014207 | 9427.694  | 9547.451  | T59562    | 26237.629 | 20376.967 |
| NM_018992 | 68164.063 | 55118.832 | NM_001634 | 26991.162 | 25132.73  | NM_01821E | 3144.969  | 2925.071  |
| U15688    | 1951.855  | 2267.51   | NM_002267 | 10304.735 | 10659.374 | NM_014114 | 3972.412  | 5235.87   |
| NM_00632E | 6080.912  | 6757.754  | NM_006412 | 7307.151  | 8005.802  | U62822    | 11946.604 | 4676.902  |
| AF085893  | 526.414   | 621.083   | NM_003063 | 7017.672  | 8250.201  | CY3Cy5    | 15615.403 | 684.897   |
| NM_01430E | 5239.648  | 4959.635  | NM_014041 | 57857.66  | 57851.246 | AA220921  | 5900.928  | 7710.227  |
| NM_012123 | 9147.248  | 8861.418  | NM_00716E | 8382.282  | 10420.838 | N67770    | 1412.147  | 1700.762  |
| U87972    | 4048.698  | 4119.514  | NM_014313 | 871.662   | 1381.23   | AA486200  | 65931.133 | 60394     |
| NM_01792E | 5483.326  | 5388.826  | AK024966  | 1251.616  | 1485.845  | U90065    | 5660.888  | 4708.265  |
| NM_003171 | 4348.59   | 4610.235  | AF178941  | 9722.471  | 11456.046 | AJ005898  | 4854.05   | 6342.515  |
| NM_006437 | 20370.779 | 18703.74  | NM_016033 | 11063.054 | 12632.036 | X57303    | 7865.841  | 9722.436  |
| NM_01789C | 4190.055  | 4021.495  | NM_01758E | 5669.854  | 6176.998  | AA463224  | 2410.286  | 2589.974  |
| AK021654  | 2038.91   | 1565      | U61737    | 18131.865 | 19632.428 | BG248802  | 13105.864 | 13052.372 |
| NM_016481 | 1910.191  | 1703.563  | Y10506    | 605.388   | 1910.926  | L19605    | 3667.88   | 3977.646  |
| NM_00392E | 13302.359 | 13959.407 | X06389    | 834.902   | 691.783   | AA876532  | 16317.29  | 18715.893 |
| Z15114    | 4375.265  | 5138.275  | NM_000033 | 2035.944  | 2002.154  | S74349    | 1555.884  | 1766.672  |
| AB040812  | 32021.854 | 38410.715 | NM_014861 | 526.63    | 806.046   | X07979    | 52157.648 | 53684.832 |
| NM_01762E | 472.967   | 452.219   | NM_005694 | 8098.167  | 8038.26   | BG744224  | 23910.943 | 29578.842 |
| NM_00628E | 14129.179 | 15589.095 | NM_01486E | 13727.327 | 14795.877 | NM_00607E | 3510.717  | 4399.843  |
| NM_00365E | 9532.127  | 12807.137 | AL442089  | 8108.131  | 8936.872  | NM_00669E | 6008.733  | 6735.547  |
| NM_00134E | 6404.661  | 7895.67   | NM_00120C | 1421.055  | 2515.656  | SR5       | 11608.185 | 12096.411 |
| AV682011  | 388.08    | 404.797   | AB007964  | 954.851   | 1133.783  | SR7       | 10662.695 | 49294.844 |
| NM_003872 | 313.721   | 509.193   | AF128541  | 6527.871  | 7355.024  | SR9       | 42342.754 | 8387.362  |
| NM_020384 | 2586.842  | 2885.493  | AK026305  | 4157.715  | 4440.505  | CY3Cy5    | 13615.476 | 650.748   |
| NM_00605E | 16496.959 | 14475.518 | NM_002552 | 7127.878  | 8399.013  | AK002163  | 5555.996  | 6151.985  |
| NM_00662E | 10614.08  | 10749.339 | NM_014321 | 6386.752  | 7589.815  | NM_002287 | 9773.415  | 9999.951  |
| M97496    | 7579.279  | 7770.216  | AK022733  | 995.187   | 1503.454  | NM_012344 | 4396.34   | 4500.764  |
| NM_00230E | 555.413   | 291.094   | AB011132  | 8284.286  | 9470.694  | NM_002351 | 40585.254 | 39626.855 |
| AK026074  | 2023.623  | 1999.483  | NM_020362 | 15130.877 | 21319.625 | NM_01438E | 3705.359  | 4281.342  |
| NM_003172 | 12287.019 | 12109.163 | AB040937  | 1528.55   | 1915.908  | NM_001704 | 1473.02   | 1635.597  |
| NM_00480E | 2568.94   | 2824.068  | AF275798  | 27143.006 | 42404.164 | AB036432  | 13803.271 | 14430.966 |
| H41522    | 460.259   | 540.668   | NM_005441 | 11395.864 | 13658.065 | NM_014872 | 6882.589  | 8149.553  |
| AA460291  | 9570.581  | 9852.606  | NM_01607E | 18482.332 | 23149.355 | NM_003643 | 679.6     | 1105.013  |
| BI821333  | 29358.354 | 40939.152 | AK023108  | 2866.633  | 3975.769  | NM_00348C | 2866.015  | 3818.457  |
| X51841    | 3511.907  | 4137.559  | AK026409  | 11737.492 | 9881.231  | NM_00089E | 2022.87   | 2556.337  |
| AF051344  | 4776.963  | 4912.788  | AF097025  | 6633.54   | 6847.817  | NM_032951 | 8197.657  | 10135.324 |
| BG506100  | 16455.057 | 16375.48  | Y11339    | 6464.618  | 6417.855  | NM_000503 | 15994.538 | 15792.077 |
| X53586    | 5938.981  | 7001.812  | AB030176  | 1794.716  | 1626.872  | NM_00240E | 17872.475 | 18001.721 |
| M17176    | 1140.582  | 874.199   | NM_002537 | 11487     | 12381.12  | AK000004  | 2855.292  | 2968.132  |
| M26576    | 640.768   | 750.434   | NM_00313E | 9231.388  | 9438.114  | NM_012421 | 25762.918 | 33387.727 |
| M32972    | 1857.365  | 2149.498  | NM_01231E | 6895.145  | 7294.606  | AB014601  | 1734.068  | 2031.391  |
| D11151    | 449.552   | 561.189   | AF022654  | 910.615   | 266.005   | NM_000023 | 7471.066  | 8390.522  |
| D89854    | 2056.683  | 1737.987  | NM_001143 | 866.371   | 742.66    | AF022654  | 668.95    | 1047.719  |
| M13207    | 459.722   | 654.923   | NM_003282 | 1273.963  | 1380.994  | NM_001143 | 1111.512  | 1491.939  |
| X14885    | 947.985   | 1239.766  | AK022638  | 5275.89   | 6998.398  | AK022638  | 12104.946 | 11129.488 |

|           |           |           |           |           |           |           |           |           |
|-----------|-----------|-----------|-----------|-----------|-----------|-----------|-----------|-----------|
| M97815    | 1419.641  | 1375.085  | BG698409  | 1605.093  | 1512.861  | BG698409  | 3045.934  | 4065.448  |
| AB013103  | 636.5     | 693.602   | AA220921  | 9118.444  | 10336.179 | AF224741  | 190.617   | 1308.75   |
| AF019225  | 4323.577  | 4033.781  | N67770    | 1089.024  | 954.306   | NM_006594 | 2568.698  | 3132.196  |
| Z36803    | 7497.725  | 7157.969  | U90065    | 4415.911  | 4477.399  | NM_004177 | 3467.525  | 2948.547  |
| NM_013371 | 482.418   | 520.94    | AJ005898  | 1873.368  | 2350.924  | NM_012429 | 2036.442  | 1851.164  |
| NM_000707 | 6373.813  | 6293.245  | X57303    | 4432.255  | 5588.122  | NM_004871 | 4773.937  | 4127.826  |
| AF202092  | 19911.307 | 20599.375 | AA463224  | 1312.053  | 1503.26   | NM_005699 | 12798.377 | 12108.374 |
| NM_003201 | 7471.004  | 7320.196  | BG248802  | 6094.931  | 7965.264  | AF202146  | 17617.461 | 12860.232 |
| AB011139  | 2845.499  | 2819.74   | L19605    | 2084.664  | 2632.333  | NM_006399 | 1393.774  | 2311.294  |
| NM_006919 | 786.765   | 925.29    | AA876532  | 8957.302  | 10329.735 | NM_014929 | 1586.552  | 2072.777  |
| AK022625  | 1874.262  | 2055.638  | S74349    | 1497.98   | 2047.045  | NM_005477 | 13690.556 | 14214.576 |
| AK023084  | 1833.169  | 1933.031  | X07979    | 20035.383 | 20622.172 | NM_007019 | 536.297   | 1057.9    |
| AK025588  | 1544.473  | 1504.66   | BG744224  | 15082.623 | 15597.037 | NM_004319 | 1974.584  | 1339.127  |
| NM_003189 | 7179.13   | 8878.406  | NM_006079 | 2777.649  | 3775.948  | L09089    | 777.862   | 396.583   |
| NM_007118 | 694.091   | 937.837   | NM_006699 | 5585.976  | 5348.165  | NM_002640 | 7017.327  | 7831.22   |
| U59431    | 837.012   | 967.076   | NM_018029 | 3998.114  | 4423.892  | M15530    | 10830.256 | 11073.723 |
| U49349    | 1347.505  | 1252.393  | NM_001707 | 21810.199 | 20871.783 | NM_001877 | 1716.731  | 1984.537  |
| NM_020152 | 3073.132  | 3110.897  | M15530    | 6313.737  | 7387.183  | NM_014207 | 14935.801 | 15661.39  |
| NM_013404 | 568.366   | 814.742   | NM_001877 | 1322.238  | 1279.085  | NM_004059 | 816.493   | 834.446   |
| NM_006157 | 267.927   | 386.622   | NM_014207 | 10537.403 | 12257.104 | NM_001634 | 26934.979 | 19703.209 |
| NM_003969 | 418.46    | 565.639   | AK002163  | 5920.823  | 6020.88   | NM_002267 | 8980.143  | 8176.4    |
| AK024443  | 46111.02  | 49944.203 | NM_012344 | 2667.646  | 2705.516  | NM_006412 | 6973.52   | 6514.031  |
| X06710    | 2448.158  | 2849.262  | NM_002351 | 38769.379 | 51698.145 | NM_003069 | 9575.371  | 8209.39   |
| AK000896  | 1987.265  | 1938.245  | NM_014389 | 1721.838  | 2030.027  | NM_014041 | 60607.25  | 64675.988 |
| D79998    | 4168.362  | 4681.044  | NM_001704 | 567.654   | 535.543   | NM_007169 | 9210.603  | 8221.776  |
| AB032963  | 4870.651  | 4161.101  | AB036432  | 6779.501  | 6669.065  | NM_014319 | 736.452   | 1893.001  |
| NM_000389 | 883.598   | 773.693   | NM_014872 | 5582.57   | 6396.116  | AK024966  | 4860.186  | 4814.714  |
| AF301013  | 4493.168  | 4191.514  | NM_003480 | 592.749   | 811.977   | NM_016039 | 16150.052 | 15092.391 |
| NM_018992 | 60147.945 | 49132.109 | NM_032951 | 2471.721  | 2975.527  | NM_017589 | 15180.204 | 16536.076 |
| U15688    | 1518.576  | 1449.006  | NM_000509 | 2927.377  | 2804.655  | U61737    | 54063.125 | 52137.152 |
| NM_000489 | 1488.914  | 1512.532  | NM_002409 | 13283.045 | 14343.497 | X06389    | 1557.882  | 2036.905  |
| NM_018449 | 13473.346 | 12386.567 | AK000004  | 1451.183  | 1409.29   | NM_000039 | 2724.334  | 3538.667  |
| NM_001659 | 11681.997 | 12850.384 | NM_012421 | 16938.455 | 18125.334 | NM_014861 | 1160.179  | 1241.474  |
| AB020663  | 4621.167  | 4554.331  | AB014601  | 1268.221  | 1613.019  | NM_005694 | 14034.914 | 16452.279 |
| AF297866  | 2654.175  | 2653.03   | AK001393  | 5026.122  | 5729.473  | NM_014869 | 12350.928 | 12146.445 |
| NM_002864 | 4252.629  | 3612.303  | NM_000029 | 3519.196  | 3630.083  | AL442089  | 8943.715  | 9523.218  |
| NM_017817 | 8742.535  | 7991.544  | NM_014861 | 742.156   | 877.872   | NM_001200 | 2293.459  | 1534.639  |
| NM_018184 | 17739.986 | 19358.131 | NM_005694 | 9455.962  | 10046.207 | AB007964  | 1027.365  | 1188.064  |
| AB046823  | 2013.159  | 1777.113  | M91368    | 781.607   | 721.257   | AF128541  | 12141.92  | 12232.937 |
| NM_004929 | 1536.278  | 1414.922  | AF224741  | 897.639   | 657.201   | AK026305  | 6805.955  | 7584.933  |
| NM_004662 | 1194.871  | 1165.31   | NM_006594 | 2826.214  | 3120.436  | NM_002552 | 7942.589  | 8269.971  |
| NM_016639 | 9490.148  | 9695.304  | NM_004177 | 2634.298  | 3467.255  | NM_014321 | 8941.494  | 9249.265  |
| U61739    | 3804.677  | 3260.074  | NM_012429 | 1894.734  | 2111.812  | AK022733  | 2018.947  | 2156.952  |
| AJ132089  | 1150.693  | 1713.227  | NM_004871 | 4251.266  | 5655.054  | AB011132  | 11911.701 | 11614.93  |
| U92819    | 22487.986 | 22411.236 | NM_005699 | 10946.669 | 11888.358 | AB040937  | 2080.808  | 1990.605  |
| AB020626  | 956.438   | 1223.911  | AF202146  | 10980.509 | 10696.208 | AF275798  | 32108.779 | 41651.594 |
| NM_002039 | 509.684   | 530.524   | NM_014929 | 1646.762  | 1601.921  | NM_005441 | 13020.726 | 13880.639 |
| NM_012400 | 625.819   | 855.974   | NM_005477 | 2376.584  | 2381.505  | NM_016079 | 20205.072 | 20888.355 |
| NM_005384 | 6019.343  | 5916.236  | NM_004319 | 1356.87   | 1395.165  | AK023108  | 5390.135  | 5218.608  |
| NM_006850 | 1117.656  | 740.77    | NM_002640 | 5873.311  | 5181.687  | AK026409  | 30968.918 | 40822.051 |
| Z15114    | 4318.123  | 4409.185  | Y11339    | 2337.083  | 2159.533  | AF097025  | 17767.346 | 15511.34  |
| AB040812  | 30063.889 | 33253.309 | AB030176  | 844.396   | 641.014   | Y11339    | 9118.716  | 9835.28   |
| NM_017629 | 362.185   | 438.468   | NM_002537 | 10321.722 | 11827.364 | AB030176  | 1279.055  | 1599.285  |

|           |           |           |           |           |           |           |           |           |
|-----------|-----------|-----------|-----------|-----------|-----------|-----------|-----------|-----------|
| NM_006285 | 11923.431 | 11035.731 | NM_003139 | 8441.389  | 8032.861  | NM_002537 | 13961.626 | 13577.602 |
| NM_003656 | 7158.982  | 7769.056  | NM_012316 | 6907.783  | 7344.043  | NM_003139 | 11386.795 | 14599.416 |
| NM_001348 | 5329.833  | 5163.56   | NM_001634 | 26850.148 | 26820.832 | AF022654  | 468.488   | 885.561   |
| NM_000215 | 4615.367  | 4841.309  | NM_002267 | 7565.251  | 9118.366  | NM_001143 | 1279.21   | 917.909   |
| AK027148  | 6369.14   | 6007.026  | NM_006412 | 5525.371  | 6526.053  | BG698409  | 2845.977  | 2596.698  |
| NM_005084 | 9327.643  | 9468.185  | NM_003063 | 5067.553  | 5974.709  | AA220921  | 9568.319  | 11093.968 |
| NM_007283 | 838.768   | 806.603   | NM_014041 | 46328.656 | 52705.176 | N67770    | 1819.345  | 1811.042  |
| NM_006111 | 12879.318 | 13531.674 | NM_007169 | 7356.367  | 7389.311  | AA486200  | 65109.434 | 60398.684 |
| AK026071  | 5887.792  | 6855.63   | NM_014313 | 991.895   | 1300.031  | U90065    | 6458.524  | 5077.117  |
| BC012333  | 17463.07  | 18961.529 | AK024966  | 1371.119  | 1720.685  | AJ005898  | 6125.074  | 6346.783  |
| AF237952  | 9623.25   | 10745.068 | AF178941  | 10172.718 | 10132.497 | X57303    | 11052.916 | 12111.373 |
| AL079287  | 5353.59   | 5557.393  | NM_016033 | 11732.891 | 12159.904 | AA463224  | 2849.318  | 2182.775  |
| NM_014427 | 11918.405 | 14494.009 | NM_017585 | 6815.812  | 7399.094  | BG248802  | 14428.319 | 13978.063 |
| AB046769  | 5685.9    | 5626.76   | U61737    | 17809.488 | 18102.945 | L19605    | 3813.139  | 3800.079  |
| NM_015922 | 16235.515 | 15520.859 | X06389    | 1005.826  | 912.748   | AA876532  | 18924.775 | 22047.543 |
| NM_020381 | 3586.445  | 3749.685  | NM_000033 | 1286.715  | 1142.636  | S74349    | 1602.896  | 1780.69   |
| NM_002957 | 3092.753  | 2790.795  | NM_006079 | 1659.944  | 2394.578  | X07979    | 48318.93  | 58296.387 |
| NM_018106 | 13989.317 | 17198.023 | NM_018026 | 908.772   | 699.37    | BG744224  | 24590.023 | 24215.836 |
| NM_003725 | 4197.54   | 4218.68   | NM_001707 | 10946.293 | 8014.948  | NM_006079 | 3637.022  | 4031.991  |
| BE899154  | 1615.521  | 1980.3    | NM_014868 | 10797.942 | 10867.374 | NM_006696 | 5932.621  | 6900.325  |
| NM_004863 | 5723.356  | 5942.378  | AL442089  | 6870.791  | 6940.447  | NM_018026 | 5095.411  | 5872.073  |
| AK024573  | 6224.79   | 6132.778  | NM_001200 | 1216.663  | 1506.915  | NM_001877 | 1363.554  | 1168.911  |
| NM_002299 | 2844.22   | 3474.994  | AB007964  | 781.287   | 1062.295  | NM_014207 | 11440.729 | 10155.628 |
| NM_003830 | 1549.854  | 1218.478  | AF128541  | 4899.474  | 5082.053  | AK002163  | 6644.192  | 5894.885  |
| NM_000842 | 1000.182  | 1154.431  | AK026305  | 2748.456  | 3211.319  | NM_002287 | 10788.361 | 9934.912  |
| NM_015642 | 2380.612  | 2137.232  | NM_002552 | 6230.774  | 6591.377  | NM_012344 | 5269.256  | 5019.894  |
| NM_004640 | 24687.438 | 27124.143 | NM_014321 | 8429.853  | 8972.661  | NM_002351 | 39269.449 | 43550.758 |
| NM_002901 | 9826.034  | 9117.023  | AK022733  | 1466.644  | 1662.874  | NM_014385 | 4540.808  | 5007.608  |
| NM_016222 | 18744.297 | 16202.467 | AB011132  | 8333.47   | 9517.36   | NM_001704 | 2493.49   | 2087.492  |
| AB037823  | 3320.93   | 3310.572  | NM_020362 | 9453.037  | 10668.98  | AB036432  | 21269.201 | 21268.387 |
| NM_015380 | 28856.541 | 29946.25  | AB040937  | 1205.414  | 1298.182  | NM_014872 | 7880.918  | 8205.215  |
| BE254485  | 3163.368  | 2759.265  | AF275798  | 27548.109 | 37545.754 | NM_003643 | 1030.455  | 1211.218  |
| NM_002732 | 1152.229  | 1276.556  | NM_005441 | 11046.94  | 12382.558 | NM_003480 | 2791.55   | 3750.184  |
| AF085893  | 637.087   | 491.527   | NM_016079 | 19873.025 | 21522.844 | NM_000899 | 658.63    | 1515.59   |
| NM_003102 | 495.179   | 624.87    | AK023108  | 2952.508  | 2888.052  | NM_032951 | 6409.732  | 7930.906  |
| NM_014305 | 6213.108  | 5685.99   | AK026409  | 12549.316 | 12853.61  | NM_000503 | 21520.406 | 25643.363 |
| NM_012123 | 10914.237 | 10555.573 | AF097025  | 5820.503  | 6723.466  | NM_002405 | 15508.894 | 16144.966 |
| U87972    | 4757.04   | 4008.855  | NM_012421 | 3050.553  | 3167.749  | AK000004  | 2357.033  | 2805.967  |
| NM_017925 | 4934.039  | 5203.622  | AK022638  | 4263.495  | 4141.63   | NM_012421 | 27783.637 | 39803.961 |
| NM_003171 | 5149.01   | 4913.959  | BG698409  | 1080.27   | 1038.225  | AB014601  | 1700.625  | 2039.619  |
| NM_006437 | 20871.115 | 21929.988 | AA220921  | 6770.945  | 8788.149  | AK001393  | 12258.8   | 11775.343 |
| NM_017890 | 4049.902  | 4376.725  | AA486200  | 66135.391 | 57140.141 | NM_000023 | 7731.159  | 8811.592  |
| AK021654  | 2094.366  | 2511.952  | U90065    | 4520.042  | 4837.125  | NM_014861 | 1135.335  | 952.09    |
| NM_016481 | 2440.153  | 3434.78   | AJ005898  | 1848.831  | 1481.645  | NM_005694 | 9873.816  | 9043.231  |
| NM_003925 | 18759.91  | 21877.775 | X57303    | 4129.764  | 5259.932  | M91368    | 815.034   | 981.083   |
| AF217974  | 1488.465  | 1717.718  | AA463224  | 1079.185  | 1429.883  | AF224741  | 789.655   | 1040.736  |
| NM_004948 | 562.487   | 531.508   | BG248802  | 6190.859  | 6477.992  | NM_006594 | 3589.727  | 3488.266  |
| NM_000888 | 5928.913  | 4866.743  | L19605    | 1991.732  | 2308.866  | NM_004177 | 3689.856  | 2803.683  |
| NM_000595 | 2629.951  | 2075.784  | AA876532  | 9294.785  | 9278.295  | NM_012425 | 2550.983  | 2183.384  |
| X99663    | 2491.187  | 2560.569  | S74349    | 1541.656  | 1237.922  | NM_004871 | 4698.535  | 4474.305  |
| NM_016552 | 987.137   | 1064.264  | X07979    | 21492.07  | 20339.99  | NM_005698 | 12794.912 | 14433.841 |
| NM_003565 | 3813.292  | 4260.085  | BG744224  | 15717.633 | 15650.468 | AF202146  | 16140.214 | 12450.111 |
| NM_004841 | 1774.947  | 1529.982  | NM_001877 | 855.791   | 693.644   | NM_006393 | 1148.063  | 1504.655  |

|           |           |           |           |           |           |           |           |           |
|-----------|-----------|-----------|-----------|-----------|-----------|-----------|-----------|-----------|
| NM_004114 | 813.507   | 813.302   | NM_014207 | 9421.502  | 8556.971  | NM_014923 | 1967.46   | 2026.821  |
| NM_018440 | 17094.41  | 18511.922 | AK002163  | 5744.196  | 4992.994  | NM_007018 | 788.619   | 1248.484  |
| AK025470  | 1355.632  | 1235.439  | NM_002287 | 9091.828  | 8882.09   | NM_004318 | 1645.941  | 1580.145  |
| M35410    | 35835.961 | 36621.121 | NM_012344 | 2304.995  | 2383.721  | NM_002640 | 6845.926  | 7806.91   |
| AB023227  | 2492.671  | 2420.304  | NM_002351 | 30475.49  | 38818.09  | Y11339    | 6867.938  | 6581.525  |
| NM_005776 | 27837.615 | 32564.23  | NM_014385 | 1825.678  | 2345.885  | AB030176  | 1121.651  | 1157.899  |
| AK023071  | 5307.638  | 5241.238  | NM_001704 | 361.501   | 543.241   | NM_002537 | 8594.378  | 8945.368  |
| NM_004041 | 1769.822  | 1937.297  | AB036432  | 5269.613  | 4547.306  | NM_003139 | 8082.725  | 7964.412  |
| AK022888  | 5974.178  | 6363.301  | NM_014872 | 6180.092  | 5500.891  | NM_012316 | 8585.434  | 7155.507  |
| AK024484  | 7960.689  | 8584.165  | NM_003480 | 605.163   | 603.751   | NM_004059 | 910.279   | 632.655   |
| NM_002632 | 787.356   | 743.135   | NM_032951 | 2702      | 2641.133  | NM_001634 | 30022.779 | 20620.443 |
| NM_001953 | 10638.921 | 12411.323 | NM_000503 | 2386.293  | 2161.49   | NM_002267 | 10796.204 | 9374.934  |
| NM_001406 | 365.357   | 496.424   | NM_017585 | 4555.39   | 3348.134  | NM_006412 | 8172.871  | 7700.708  |
| NM_002292 | 1041.209  | 1101.912  | U61737    | 11437.505 | 7261.825  | NM_003063 | 9879.351  | 9229.431  |
| NM_000166 | 2846.263  | 4087.15   | NM_005694 | 7876.369  | 6632.799  | NM_014041 | 59313.285 | 63151.609 |
| AF305200  | 713.524   | 688.815   | AF224741  | 822.202   | 710.628   | NM_007169 | 10141.301 | 11980.946 |
| AL570170  | 6212.903  | 4622.907  | NM_006594 | 2872.321  | 2992.94   | NM_014313 | 1049.987  | 1189.677  |
| NM_014583 | 366.727   | 312.434   | NM_004177 | 2172.242  | 3078.962  | AK024966  | 4816.377  | 4624.025  |
| NM_006613 | 4429.906  | 3320.444  | NM_012429 | 1534.8    | 1614.016  | AF178941  | 24524.359 | 27960.645 |
| NM_004638 | 13742.118 | 11004.666 | NM_004871 | 3090.586  | 3987.891  | NM_016033 | 14692.26  | 14330.437 |
| NM_005373 | 1133.457  | 492.03    | NM_005698 | 9490.191  | 9795.211  | NM_017585 | 14354.085 | 15254.813 |
| L40027    | 8493.285  | 6737.799  | AF202146  | 10856.699 | 8960.975  | U61737    | 43852.82  | 48047.73  |
| NM_003718 | 40569.91  | 40730.375 | NM_014923 | 1007.807  | 1028.027  | X06389    | 1760.749  | 1984.218  |
| NM_007062 | 1368.012  | 1459.703  | AF275798  | 23310.256 | 23716.248 | NM_000033 | 2705.589  | 4489.097  |
| NM_002010 | 796.937   | 652.925   | NM_005441 | 6462.545  | 5091.657  | NM_006079 | 2190.131  | 2445.228  |
| NM_014180 | 38201.098 | 40003.316 | NM_016079 | 16996.396 | 12162.636 | NM_006696 | 3452.263  | 3627.195  |
| NM_017706 | 3912.965  | 3640.938  | AK023108  | 1990.326  | 1903.26   | NM_018026 | 5364.1    | 4450.588  |
| AF334406  | 3882.382  | 4832.331  | NM_002267 | 8326.023  | 8584.939  | NM_001707 | 25332.186 | 25083.719 |
| NM_017444 | 10809.013 | 10278.529 | NM_006412 | 6133.212  | 6382.598  | AK022983  | 1008.205  | 656.877   |
| NM_018025 | 6800.244  | 7262.766  | NM_003063 | 5054.325  | 5978.197  | NM_014868 | 14505.898 | 13749.347 |
| NM_015999 | 16269.696 | 13739.105 | NM_014041 | 47034.883 | 57103.656 | AL442089  | 12080.026 | 13702.065 |
| NM_003804 | 4418.187  | 4557.463  | NM_007169 | 6510.979  | 7411.525  | NM_001200 | 2554.199  | 2445.734  |
| NM_018453 | 16345.308 | 16648.719 | NM_014313 | 960.407   | 1167.099  | AB007964  | 1214.398  | 1722.514  |
| NM_004708 | 66315.688 | 51593.727 | AK024966  | 1441.919  | 1697.665  | AF128541  | 12059.094 | 14397.173 |
| NM_016001 | 14826.049 | 12464.446 | AF178941  | 9605.88   | 8039.496  | AK026305  | 8611.032  | 10166.782 |
| NM_016108 | 8876.231  | 8412.463  | NM_016033 | 10422.426 | 11042.467 | NM_002552 | 8813.329  | 10714.87  |
| D86984    | 3262.764  | 3654.436  | NM_013439 | 20680.414 | 18460.246 | NM_014321 | 10192.901 | 10838.431 |
| NM_015959 | 259.679   | 497.163   | NM_003406 | 42059.168 | 46562.977 | AK022733  | 2390.319  | 1983.653  |
| AK026904  | 3916.626  | 3308.789  | NM_018316 | 1998.746  | 1602.365  | AB011132  | 9608.172  | 10845.036 |
| AB002364  | 372.38    | 391.487   | AB011180  | 1165.421  | 913.716   | NM_020362 | 17405.24  | 17817.645 |
| NM_003793 | 1248.397  | 1215.985  | AL442089  | 7552.191  | 8006.113  | AB040937  | 1846.53   | 2191.614  |
| NM_001910 | 579.684   | 573.686   | NM_001200 | 1719.704  | 1875.395  | AF275798  | 30654.141 | 40225.695 |
| NM_001909 | 10921.035 | 9172.269  | AB007964  | 1053.12   | 896.143   | NM_005441 | 13859.231 | 13631.882 |
| NM_012198 | 789.09    | 462.042   | AF128541  | 3976.455  | 4334.137  | NM_016079 | 21540.072 | 21231.27  |
| NM_003368 | 10939.367 | 8430.61   | AK026305  | 2582.193  | 3087.96   | AK023108  | 3869.517  | 4194.581  |
| AB040886  | 2410.077  | 2287.447  | NM_002552 | 6067.806  | 6160.471  | AK026409  | 24216.193 | 26357.744 |
| NM_001460 | 748.839   | 403.383   | NM_014321 | 9452.054  | 10734.777 | AF097025  | 16367.002 | 18699.514 |
| AB029020  | 5274.828  | 4578.393  | AK022733  | 2337.713  | 2874.336  | NM_002405 | 13373.844 | 13023.697 |
| AK022759  | 5362.906  | 4442.118  | AB011132  | 8418.484  | 8857.496  | AK000004  | 1817.82   | 1969.822  |
| NM_012333 | 17016.262 | 14170.654 | NM_020362 | 13587.761 | 14405.841 | NM_012421 | 17761.965 | 16585.885 |
| AF217798  | 5490.45   | 5697.81   | AB040937  | 1104.711  | 1720.692  | AB014601  | 879.868   | 832.472   |
| AF161472  | 10925.83  | 11950.462 | NM_000095 | 2485.546  | 2293.511  | AK001393  | 10410.476 | 8190.718  |
| AL133642  | 27908.916 | 27497.027 | NM_004797 | 1529.587  | 1083.699  | NM_000023 | 8013.486  | 7919.013  |



|           |           |           |           |           |           |           |           |           |
|-----------|-----------|-----------|-----------|-----------|-----------|-----------|-----------|-----------|
| AB011154  | 1515.5    | 1564.077  | NM_001338 | 3354.533  | 2688.444  | AF022654  | 906.75    | 1279.827  |
| AF124432  | 5376.351  | 6058.141  | NM_004811 | 16430.25  | 17071.201 | NM_001143 | 1258.374  | 1152.018  |
| NM_006330 | 16416.787 | 15188.016 | AK021910  | 60170.75  | 55541.086 | AK022638  | 9690.233  | 7605.606  |
| NM_015873 | 2543.854  | 2612.721  | M62402    | 3339.88   | 3314.328  | BG698409  | 3446.984  | 4151.725  |
| NM_000377 | 11815.047 | 11662.398 | NM_004748 | 1821.291  | 2074.091  | AA220921  | 10291.076 | 13985.576 |
| NM_006818 | 1551.639  | 1567.37   | NM_002668 | 14803.321 | 17941.359 | N67770    | 1332.791  | 1826.519  |
| NM_016823 | 6046.154  | 4980.203  | NM_004054 | 2094.678  | 2063.809  | AA486200  | 65371.195 | 61868.91  |
| NM_003120 | 2278.21   | 2166.723  | NM_001138 | 1604.527  | 1243.794  | U90065    | 6707.424  | 5008.435  |
| X52360    | 1937.304  | 1534.054  | NM_004219 | 68770.375 | 55700.594 | AJ005898  | 5848.646  | 7246.604  |
| NM_002636 | 6710.422  | 5428.468  | NM_003443 | 26530.328 | 20913.57  | X57303    | 8396.123  | 10024.282 |
| NM_016494 | 27507.137 | 26328.889 | NM_002025 | 7014.944  | 5130.508  | AA463224  | 2505.492  | 2810.607  |
| U09410    | 7248.672  | 5886.016  | AB015228  | 17155.549 | 12930.145 | BG248802  | 12458.067 | 11732.144 |
| NM_020229 | 818.753   | 466.66    | AK025947  | 3051.15   | 2119.014  | L19605    | 3287.083  | 3109.766  |
| NM_001186 | 6650.464  | 5628.394  | AF226048  | 1970.078  | 1582.368  | AA876532  | 14933.407 | 15422.835 |
| NM_004502 | 6687.28   | 6503.436  | NM_005573 | 9713.514  | 10832.421 | S74349    | 1363.487  | 1701.249  |
| AF000560  | 9167.026  | 8711.804  | D50918    | 25862.59  | 23717.996 | X07979    | 43598.426 | 51755.543 |
| NM_013282 | 10977.616 | 9343.222  | U48734    | 9804.043  | 9967.26   | BG744224  | 23598.918 | 26855.756 |
| NM_005777 | 10037.353 | 8018.79   | NM_006400 | 16393.506 | 22741.152 | NM_005477 | 7882.257  | 7966.285  |
| NM_012345 | 5115.513  | 4819.201  | NM_003903 | 7447.644  | 8732.19   | NM_007018 | 698.195   | 718.216   |
| U94387    | 630.258   | 410.972   | NM_017955 | 4478.298  | 4895.24   | NM_004318 | 1132.817  | 874.713   |
| NM_005826 | 21848.732 | 20590.922 | NM_016060 | 9184.861  | 7982.423  | NM_002640 | 5800.395  | 5954.524  |
| NM_004592 | 4499.995  | 5168.979  | NM_002208 | 23380.324 | 23442.783 | M15530    | 10963.343 | 8702.193  |
| NM_015001 | 7877.316  | 8595.234  | AK023518  | 1375.757  | 1649.013  | NM_001877 | 1592.351  | 1661.175  |
| NM_019027 | 2210.676  | 1686.84   | NM_000944 | 2145.499  | 2211.726  | NM_014207 | 14768.007 | 13782.202 |
| NM_016107 | 3860.385  | 3786.911  | NM_012239 | 1389.162  | 1370.641  | AK002163  | 6226.277  | 5799.155  |
| NM_002567 | 32361.859 | 28053.18  | NM_012262 | 1847.765  | 1360.541  | NM_002287 | 10879.934 | 11827.633 |
| NM_001404 | 5894.909  | 5106.085  | NM_013390 | 3974.762  | 3231.356  | NM_012344 | 6078.198  | 5656.844  |
| NM_001605 | 36220.23  | 38147.988 | NM_002829 | 1327.253  | 1102.787  | NM_002351 | 41548.934 | 44670.762 |
| AF225422  | 12169.262 | 9348.769  | NM_005317 | 932.407   | 998.572   | NM_014385 | 4218.014  | 5645.443  |
| AB040960  | 13175.103 | 12286.544 | U12597    | 2735.396  | 2324.629  | NM_001704 | 1568.299  | 1718.837  |
| NM_015946 | 12564.333 | 10779.342 | U28055    | 831.574   | 432.471   | AB036432  | 13853.606 | 14221.465 |
| NM_006303 | 10357.491 | 9383.012  | AB044343  | 2942.395  | 2214.244  | NM_014872 | 6813.198  | 7668.773  |
| AL080059  | 5561.612  | 6126.306  | NM_014662 | 740.444   | 616.887   | NM_003643 | 530.593   | 896.542   |
| AL080219  | 3394.568  | 3591.627  | NM_005178 | 5135.722  | 5351.336  | NM_003480 | 2190.807  | 2206.733  |
| AK026709  | 372.705   | 521.286   | NM_017702 | 10368.758 | 11292.011 | NM_000895 | 1161.365  | 1163.345  |
| AK024165  | 619.163   | 579.601   | AB014516  | 4227.35   | 3801.874  | NM_032951 | 5584.981  | 6533.743  |
| NM_003001 | 3712.662  | 3189.011  | Z83950    | 2515.442  | 2200.043  | NM_000503 | 10249.88  | 10756.134 |
| NM_001985 | 11346.348 | 9265.961  | AL080063  | 3301.664  | 3414.916  | NM_017585 | 12437.491 | 12956.038 |
| NM_000102 | 523.374   | 505.634   | NM_005625 | 15973.164 | 18690.84  | U61737    | 43031.18  | 47880.086 |
| NM_002490 | 35514.035 | 33937.453 | X15262    | 2862.1    | 2570.854  | X06389    | 603.254   | 1236.775  |
| BE563532  | 3332.006  | 2751.842  | NM_005475 | 791.648   | 795.71    | NM_000033 | 2670.799  | 3140.319  |
| NM_001916 | 15835.504 | 14227.677 | AB040918  | 1341.332  | 1376.516  | NM_014861 | 983.289   | 923.65    |
| NM_002491 | 2348.343  | 2375.384  | NM_015859 | 1772.203  | 1462.004  | NM_012434 | 748.163   | 447.075   |
| NM_015425 | 4468.757  | 4077.927  | X60152    | 1010.648  | 860.681   | NM_005694 | 13270.534 | 12787.772 |
| NM_015153 | 9070.079  | 7267.444  | NM_002316 | 913.535   | 1062.4    | M91368    | 1034.773  | 999.074   |
| AB032966  | 2039.578  | 2311.709  | AB023232  | 681.584   | 578.475   | AF224741  | 969.012   | 1335.783  |
| M26747    | 4110.789  | 4997.404  | NM_002502 | 3014.985  | 2847.392  | NM_006594 | 3705.702  | 4309.074  |
| NM_014820 | 8521.677  | 7263.674  | AF226732  | 4967.469  | 4062.725  | NM_004177 | 3273.688  | 3280.606  |
| NM_005035 | 3793.884  | 2960.338  | NM_006312 | 5921.889  | 5455.011  | NM_012425 | 2885.534  | 2863.372  |
| NM_019014 | 4646.402  | 3998.915  | NM_002805 | 903.656   | 819.612   | NM_004871 | 5069.153  | 4739.159  |
| NM_002097 | 31995.637 | 33176.602 | NM_002939 | 14432.638 | 12875.135 | NM_005698 | 11394.943 | 11777.247 |
| X04706    | 883.212   | 869.773   | NM_015836 | 28091.373 | 32111.898 | AF202146  | 15798.419 | 11722.006 |
| NM_018039 | 1375.7    | 1141.238  | NM_004713 | 1976.821  | 1730.68   | NM_006393 | 910.672   | 1175.198  |

|           |           |           |           |           |           |           |           |           |
|-----------|-----------|-----------|-----------|-----------|-----------|-----------|-----------|-----------|
| NM_006494 | 3304.625  | 1928.351  | NM_001698 | 9398.527  | 8689.659  | NM_014923 | 1361.942  | 2004.566  |
| X52343    | 1497.205  | 1280.934  | AF086431  | 1608.296  | 1671.529  | NM_016079 | 17597.967 | 16729.811 |
| NM_005853 | 5645.731  | 4796.022  | NM_014188 | 23214.23  | 21080.658 | AK023108  | 2557.72   | 2917.061  |
| X99681    | 902.463   | 864.975   | NM_000167 | 2761.283  | 2495.299  | AK026409  | 20913.518 | 20401.789 |
| NM_014068 | 739.427   | 667.428   | AY007125  | 1684.493  | 1481.43   | AF097025  | 21494.699 | 20970.744 |
| NM_017814 | 7974.804  | 6705.868  | AB032987  | 985.912   | 848.649   | NM_004059 | 910.53    | 979.643   |
| AF074996  | 349.714   | 467.308   | NM_017567 | 5893.725  | 4121.934  | NM_001634 | 28606.553 | 23965.545 |
| AF131811  | 3057.876  | 2327.138  | NM_000691 | 2291.22   | 2024.779  | NM_002267 | 14879.72  | 11968.938 |
| AF293026  | 15572.801 | 14783.392 | D86971    | 12761.049 | 9998.505  | NM_006412 | 7993.566  | 8048.521  |
| AF217986  | 3644.342  | 2756.396  | NM_003073 | 12106.842 | 11773.526 | NM_003063 | 10797.82  | 10535.024 |
| AK026320  | 1939.073  | 1919.598  | NM_014048 | 1151.249  | 809.681   | NM_014041 | 55211.52  | 50090.043 |
| AL137530  | 1654.165  | 1556.234  | AF274863  | 2506.651  | 1539.856  | NM_007169 | 9223.435  | 9889.463  |
| NM_015953 | 14303.514 | 13373.837 | AF319458  | 532.774   | 618.717   | NM_014313 | 1214.345  | 1072.056  |
| U82310    | 307.146   | 424.177   | AF024697  | 3858.2    | 3468.783  | AK024966  | 3124.692  | 3452.444  |
| AF147310  | 336.757   | 429.507   | NM_005612 | 5557.588  | 3838.985  | AF178941  | 15272.563 | 17954.412 |
| AK024775  | 1174.256  | 1406.088  | AF085891  | 2445.264  | 1325.045  | NM_016033 | 14428.147 | 15168.094 |
| AK025562  | 2307.866  | 1810.931  | AF019618  | 1842.8    | 1606.145  | NM_013439 | 39861.527 | 41089.711 |
| AF088024  | 663.62    | 703.872   | AK025656  | 2045.726  | 1964.361  | NM_003406 | 56954.555 | 50076.641 |
| AK025887  | 548.692   | 470.738   | AF161414  | 2733.388  | 2181.304  | NM_018316 | 3013.719  | 2918.519  |
| AB037719  | 3481.333  | 2681.974  | AK025967  | 779.325   | 1175.771  | AB011180  | 1670.58   | 1383.341  |
| AK024694  | 2661.71   | 2844.423  | AL110177  | 1226.005  | 1251.986  | NM_007167 | 6190.288  | 6168.163  |
| AF086229  | 301.284   | 279.496   | NM_002763 | 15203.432 | 12911.891 | NM_014832 | 6436.333  | 5866.002  |
| AK026143  | 3702.149  | 2473.716  | AF070628  | 920.5     | 861.679   | NM_014868 | 15546.229 | 21083.094 |
| AL137578  | 613.299   | 525.66    | U79293    | 172.137   | 380.351   | AL442089  | 12967.193 | 15831.108 |
| AL110252  | 1765.094  | 1989.499  | NM_015434 | 3472.49   | 3068.868  | NM_001200 | 2866.244  | 2706.93   |
| AL050143  | 1588.617  | 1929.565  | NM_014055 | 3231.193  | 2634.906  | AB007964  | 1439.398  | 1528.261  |
| AL137616  | 965.835   | 809.387   | NM_018691 | 2222.089  | 2284.184  | AF128541  | 13134.49  | 12320.324 |
| AK021752  | 2073.367  | 1798.413  | AK026900  | 5946.183  | 4645.815  | AK026305  | 7598.611  | 7271.377  |
| AL050012  | 1581.635  | 1345.182  | AK024598  | 1623.512  | 1712.823  | NM_002552 | 7169.463  | 7431.28   |
| AL109706  | 4980.438  | 4683.657  | AF087983  | 803.633   | 872.669   | NM_014321 | 8342.049  | 7743.136  |
| AK001118  | 1212.042  | 1509.587  | NM_020234 | 4238.791  | 4209.147  | AK022733  | 2088.445  | 1687.832  |
| AF035291  | 24659.834 | 20781.572 | U70772    | 377.931   | 546.947   | AB011132  | 10603.169 | 9235.146  |
| AK026291  | 19074.18  | 14925.658 | Z36825    | 2854.271  | 2697.728  | NM_020362 | 15203.089 | 14649.255 |
| AK021924  | 986.103   | 800.751   | AF086127  | 975.547   | 589.184   | AB040937  | 1554.802  | 1818.292  |
| AL080106  | 464.201   | 467.581   | AF086157  | 3504.695  | 2682.746  | NM_000095 | 15414.541 | 14181.41  |
| AL117520  | 487.896   | 303.3     | AL109710  | 828.915   | 1067.676  | AL137493  | 1044.471  | 911.767   |
| AL049303  | 482.468   | 611.585   | AK023793  | 1262.065  | 967.102   | NM_001338 | 8454.205  | 7252.704  |
| AL080208  | 871.492   | 846.439   | AK023286  | 2177.338  | 1463.625  | NM_003637 | 1119.253  | 1235.255  |
| L35592    | 1992.418  | 2483.356  | NM_014058 | 808.64    | 775.571   | NM_006382 | 3461.113  | 3551.931  |
| NM_012079 | 2025.265  | 1633.538  | AK026340  | 695.455   | 591.395   | NM_004811 | 21254.949 | 21438.434 |
| BC017695  | 516.077   | 470.999   | AK022686  | 3259.038  | 2634.936  | AK021910  | 67022.547 | 58512.477 |
| AL360274  | 12541.774 | 12564.507 | AK023516  | 5321.255  | 4056.787  | M62402    | 3989.681  | 4785.742  |
| AK021858  | 673.361   | 695.234   | AK023864  | 3198.122  | 2452.818  | NM_002547 | 932.119   | 1360.252  |
| NM_014050 | 10236.666 | 8872.196  | AK023017  | 4668.474  | 4253.526  | NM_004748 | 4453.744  | 3970.729  |
| AF085854  | 1218.461  | 1041.269  | AK023908  | 2906.678  | 2826.838  | NM_002668 | 18386.293 | 16043.158 |
| AF074997  | 1052.162  | 961.524   | AK024236  | 830.293   | 800.737   | NM_001058 | 668.361   | 1071.399  |
| AK027027  | 1019.107  | 863.814   | Z24724    | 11362.704 | 14431.315 | NM_004054 | 5399.524  | 5993.725  |
| NM_014911 | 523.092   | 629.267   | AK022712  | 5663.697  | 5207.459  | NM_001138 | 6578.441  | 6667.45   |
| AF009289  | 897.803   | 884.743   | AK024132  | 1360.896  | 1225.78   | NM_007289 | 767.717   | 1105.571  |
| AF040247  | 1918.465  | 1774.143  | AK021863  | 16178.681 | 17097.338 | NM_004219 | 65801.547 | 55277.469 |
| AF009303  | 2344.524  | 1909.902  | AL133065  | 2035.653  | 1616.084  | NM_003443 | 63721.063 | 54914.648 |
| NM_004474 | 2090.391  | 1870.785  | NM_005297 | 4814.889  | 4332.965  | NM_002025 | 7926.719  | 8497.169  |
| AF056449  | 718.126   | 696.278   | U80769    | 732.64    | 911.034   | AB015228  | 32360.543 | 29723.146 |

|            |           |           |           |           |           |           |           |           |
|------------|-----------|-----------|-----------|-----------|-----------|-----------|-----------|-----------|
| AK001033   | 3018.442  | 2548.225  | AJ011377  | 2793.599  | 2750.676  | AL049685  | 3513.524  | 3834.872  |
| AK021463   | 1153.787  | 759.105   | AL137734  | 1062.416  | 947.277   | AF226048  | 11065.567 | 10743.564 |
| AK001082   | 609.59    | 369.607   | AK023784  | 561.518   | 818.678   | NM_005573 | 11494.398 | 10140.559 |
| AK001871   | 864.536   | 682.709   | AK026323  | 1820.407  | 1546.835  | D50918    | 27157.313 | 25704.416 |
| AK021521   | 490.771   | 350.649   | AL133430  | 20334.219 | 21502.412 | U48734    | 11398.077 | 11730.1   |
| AK021743   | 659.895   | 572.339   | AF070633  | 37624.809 | 37193.395 | NM_00640C | 18870.49  | 21548.176 |
| AK026251   | 541.045   | 490.222   | S51971    | 71508.367 | 60710.398 | NM_003903 | 7244.198  | 7880.644  |
| AK026699   | 837.12    | 763.362   | AF054996  | 14654.642 | 9876.576  | NM_01795E | 5552.619  | 5264.979  |
| AK025182   | 309.472   | 356.72    | AF090098  | 3526.48   | 2727.954  | NM_01606C | 9050.454  | 8151.66   |
| AK025589   | 6819.807  | 5998.69   | AF146694  | 3088.733  | 2513.487  | NM_00220E | 26532.658 | 24046.73  |
| AK026734   | 891.696   | 838.936   | AK057104  | 1260.55   | 1470.57   | AK023518  | 1228.661  | 1439.919  |
| NM_016633  | 5374.978  | 4316.799  | AL133555  | 2102.448  | 1907.212  | NM_000944 | 2766.787  | 2670.504  |
| AK023250   | 7470.051  | 5424.962  | AK024979  | 10442.723 | 7461.712  | NM_01223C | 2958.078  | 2626.897  |
| AK024882   | 4141.058  | 3303.966  | AF233648  | 1927.151  | 1870.148  | NM_012262 | 2857.186  | 2739.304  |
| NM_014062  | 12300.03  | 10795.985 | AK021781  | 522.21    | 637.239   | NM_01339C | 6419.226  | 5887.232  |
| NM_006304  | 67145.188 | 50991.023 | NM_018584 | 2354.499  | 2126.727  | NM_00282E | 2700.46   | 2676.125  |
| X74804     | 1082.881  | 660.922   | AY007126  | 10176.712 | 7477.684  | J02783    | 33424.148 | 35392.473 |
| AF293367   | 4220.877  | 3716.838  | AF085951  | 4249.834  | 3379.376  | AB044343  | 5352.854  | 5318.598  |
| AF086231   | 4784.83   | 3990.654  | AF131787  | 949.958   | 885.415   | NM_01840E | 804.002   | 960.237   |
| AK001494   | 1475.717  | 1163.288  | AF087989  | 1178.185  | 1080.671  | NM_014662 | 897.433   | 1125.803  |
| AL133438   | 4322.926  | 3231.556  | Z70715    | 1123.018  | 986.324   | NM_00517E | 12554.32  | 13722.057 |
| unknown (S | 936.871   | 368.526   | NM_018182 | 5831.586  | 3781.538  | NM_017702 | 14492.913 | 12829.37  |
| AK022310   | 1378.202  | 1652.798  | U80771    | 8536.052  | 4850.288  | AB014516  | 9259.737  | 9247.802  |
| AK021784   | 768.127   | 707.185   | AJ272173  | 8749.687  | 5580.713  | Z83950    | 2672.43   | 2601.502  |
| AF230800   | 505.205   | 401.218   | NM_005649 | 4542.723  | 5070.512  | AL080063  | 3110.154  | 3233.701  |
| NM_01852C  | 2024.122  | 1674.161  | NM_002037 | 5303.265  | 6008.047  | NM_00562E | 17339.531 | 15359.179 |
| AK022152   | 1237.604  | 1338.058  | NM_016346 | 1615.999  | 1191.909  | X15262    | 4149.665  | 4022.364  |
| NM_003534  | 50060.531 | 42914.066 | NM_020157 | 17159.148 | 11602.87  | AB040918  | 3368.034  | 3565.372  |
| L08437     | 5024.5    | 4168.216  | X64991    | 1127.151  | 528.44    | NM_01585E | 5880.459  | 3614.785  |
| AK057143   | 11379.02  | 9169.43   | NM_01432C | 2647.031  | 2265.285  | X60152    | 1647.354  | 1669.156  |
| NM_015594  | 4761.88   | 4512.9    | AK025703  | 4242.986  | 2949.755  | NM_00231E | 2395.02   | 2525.647  |
| AF056423   | 693.998   | 638.986   | NM_01818E | 2738.95   | 1896.651  | AB023232  | 2554.563  | 2683.412  |
| U00956     | 598.495   | 652.751   | AK022598  | 4330.951  | 3070.898  | NM_006312 | 6929.494  | 6964.134  |
| X04293     | 899.988   | 605.354   | NM_018322 | 7965.787  | 6076.611  | NM_00280E | 1327.353  | 1500.28   |
| AK026475   | 1206.902  | 930.996   | AK025862  | 21597.383 | 16524.619 | NM_00293E | 18145.104 | 16273.607 |
| K01884     | 1203.768  | 1106.932  | AK026495  | 2280.43   | 2208.96   | NM_01583E | 36042.676 | 36352.031 |
| U00962     | 2400.109  | 2483.889  | AK025052  | 2562.71   | 2038.722  | NM_004713 | 1891.327  | 1906.334  |
| NM_000522  | 1049.584  | 625.428   | NM_01438E | 1396.344  | 972.96    | NM_00169E | 12346.554 | 11338.464 |
| AK026130   | 7710.237  | 6516.558  | U85044    | 2015.138  | 1168.622  | AF086431  | 3157.841  | 2975.883  |
| NM_01248C  | 1813.505  | 1518.443  | BC018880  | 1214.708  | 818.178   | AK026365  | 3162.427  | 2960.96   |
| AK024144   | 7535.493  | 6450.671  | AF086090  | 2916.598  | 2023.762  | S70004    | 3057.147  | 2283.661  |
| Y08959     | 897.335   | 1048.853  | AK002173  | 25917.4   | 17219.738 | AF105378  | 1362.634  | 1129.558  |
| NM_00534E  | 20041.063 | 15583.478 | NM_01774E | 2151.944  | 1015.858  | NM_000691 | 5846.541  | 7458.47   |
| AF086047   | 447.142   | 390.261   | NM_02018E | 28838.018 | 16039.099 | D86971    | 14889.043 | 18716.67  |
| NM_005343  | 18005.662 | 14508.414 | U88897    | 12816.845 | 7276.979  | NM_003073 | 13411.081 | 18622.875 |
| AB032985   | 876.668   | 1008.419  | CY3Cy5    | 2117.67   | 171.739   | NM_01404E | 1554.025  | 2201.641  |
| AF116698   | 624.424   | 531.93    | U37448    | 2343.76   | 2570.686  | AF274863  | 2174.135  | 2869.329  |
| AF196865   | 2966.771  | 2672.033  | AA927698  | 2315.061  | 3179.15   | AF319458  | 582.4     | 544.523   |
| AJ008114   | 28992     | 26938.676 | AI498426  | 632.463   | 746.47    | AF024697  | 4654.436  | 5278.927  |
| AJ008141   | 906.932   | 754.758   | D01038    | 6085.304  | 7197.956  | AF164156  | 1017.279  | 618.616   |
| AF147432   | 4069.934  | 3190.686  | AB019205  | 957.885   | 1298.882  | D17018    | 1821.769  | 1183.094  |
| AK024690   | 1611.915  | 1204.389  | J05008    | 1286.786  | 1290.805  | AF019618  | 2261.352  | 1670.494  |
| BC005946   | 34451.938 | 27838.92  | U11087    | 484.389   | 476.452   | AK025656  | 2192.125  | 1642.507  |

|           |           |           |           |           |           |           |           |           |
|-----------|-----------|-----------|-----------|-----------|-----------|-----------|-----------|-----------|
| AK021893  | 2093.447  | 1636.148  | D50640    | 2877.395  | 3001.242  | AF161414  | 6981      | 7542.678  |
| NM_00104E | 13500.101 | 11296.066 | M98776    | 3804.761  | 4352.036  | AK025967  | 1322.408  | 1405.592  |
| AK026497  | 3439.564  | 3016.961  | X99135    | 22796.279 | 22886.574 | AL110177  | 1762.742  | 2148.501  |
| BE958139  | 1976.668  | 1586.784  | AF009744  | 1642.493  | 1614.871  | NM_002763 | 19897.418 | 18648.592 |
| AF085359  | 998.025   | 957.053   | NM_17214C | 1935.659  | 1620.496  | AF070628  | 1172.488  | 1146.752  |
| AF086516  | 3062.064  | 2185.141  | SR6       | 2330.722  | 1588.294  | NM_015434 | 3684.485  | 3154.834  |
| D86978    | 14947.114 | 13911.157 | SR8       | 7920.621  | 15296.146 | NM_01405E | 3407.815  | 2836.89   |
| AL080060  | 437.824   | 570.663   | SR10      | 29026.307 | 7304.341  | NM_018691 | 2770.794  | 2581.892  |
| NM_005267 | 3726.282  | 2757.922  | CY3Cy5    | 1676.057  | 54.53     | AK001020  | 1479.463  | 1423.927  |
| U80763    | 837.936   | 689.263   | NM_005311 | 666.049   | 695.582   | AK022098  | 2308.086  | 1686.584  |
| AF086017  | 1394.045  | 1029.405  | NM_00590E | 2199.605  | 2145.243  | AK025020  | 7384.345  | 5806.104  |
| NM_00578C | 530.944   | 427.561   | NM_01623E | 716.07    | 845.267   | AF086009  | 1398.632  | 888.702   |
| AK024978  | 6232.371  | 5249.039  | AF172932  | 707.497   | 995.682   | AF086463  | 5609.976  | 4846.976  |
| U12897    | 5055.988  | 4159.867  | AF295378  | 4178.375  | 5283.465  | AK024130  | 1610.555  | 1783.35   |
| AJ227894  | 1036.259  | 620.17    | AF320908  | 2125.75   | 2467.281  | AL137270  | 950.419   | 1227.314  |
| NM_020357 | 17786.271 | 11987.487 | NM_00408E | 1789.248  | 2283.969  | AK024598  | 2405.439  | 2809.886  |
| AK026836  | 3173.926  | 1840.891  | NM_01244E | 16821.686 | 18189.869 | AF087983  | 1463.423  | 1241.057  |
| T59562    | 8543.75   | 7920.249  | NM_018104 | 909.273   | 975.073   | NM_020234 | 5791.776  | 5568.7    |
| NM_01821E | 743.182   | 671.127   | NM_00442E | 2048.148  | 2320.448  | U70772    | 644.982   | 722.822   |
| AK026368  | 311.146   | 368.067   | U64564    | 1099.652  | 1089.281  | Z36825    | 2995.862  | 3603.136  |
| NM_014114 | 4185.912  | 3668.734  | NM_00647C | 989.438   | 871.623   | U30889    | 1449.112  | 1343.464  |
| U62822    | 9106.602  | 3501.189  | NM_00285E | 2055.812  | 2021.494  | U52838    | 763.944   | 955.329   |
| CY3Cy5    | 11438.783 | 732.504   | AB038463  | 596.947   | 734.35    | AF086127  | 1151.088  | 1367.281  |
| U36798    | 1032.17   | 2158.106  | M30262    | 813.732   | 1630.277  | AF086157  | 3340.801  | 3222.49   |
| AA220921  | 9728.809  | 12140.46  | NM_00546C | 423.096   | 496.737   | AL109710  | 1454.218  | 951.761   |
| N67770    | 913.976   | 1325.882  | AF160477  | 1194.438  | 766       | AF116714  | 979.321   | 692.212   |
| U90065    | 5224.098  | 4192.591  | M12883    | 3439.728  | 3264.755  | NM_01405E | 1497.477  | 1947.876  |
| AJ005898  | 2321.479  | 3022.23   | BG288747  | 7544.239  | 6621.569  | AK026340  | 975.033   | 1109.488  |
| X57303    | 5973.902  | 7362.457  | AI524814  | 2093.218  | 2615.462  | AK022686  | 10944.493 | 10384.066 |
| AA463224  | 2420.495  | 2444.713  | AB024411  | 2097.459  | 1972.131  | AK023516  | 7443.74   | 8024.158  |
| BG248802  | 12736.642 | 13694.045 | NM_002444 | 25857.861 | 33304.031 | AK023864  | 6139.586  | 6219.141  |
| L19605    | 2487.623  | 2785.427  | NM_001104 | 761.728   | 727.637   | AK024183  | 1514.472  | 908.439   |
| AA876532  | 16145.763 | 17984.563 | NM_00298E | 2181.866  | 2370.037  | AK023017  | 7717.434  | 7601.488  |
| S74349    | 1839.642  | 2170.536  | U88898    | 8442.452  | 9488.544  | AK023908  | 5886.73   | 6279.12   |
| X07979    | 20037.523 | 23504.391 | NM_020154 | 29084.918 | 33541.336 | AK024236  | 1290.229  | 1376.657  |
| BG744224  | 9389.225  | 9020.354  | NM_00466E | 1029.655  | 1310.752  | Z24724    | 10032.038 | 7659.076  |
| NM_00607E | 3516.335  | 3817.342  | NM_00530C | 874.228   | 992.99    | AK022712  | 10392.199 | 8482.395  |
| NM_00669E | 6434.165  | 6762.042  | NM_00069E | 6826.974  | 8383.997  | NM_02042E | 2681.792  | 3375.759  |
| SR5       | 6591.099  | 6854.501  | AF031167  | 1737.425  | 1928.536  | AL117439  | 2254.69   | 2017.328  |
| SR7       | 6778.058  | 42713.086 | NM_003204 | 1824.14   | 2125.353  | AL133065  | 3423.289  | 3715.824  |
| SR9       | 33231.953 | 7238.204  | AF254069  | 609.487   | 701.526   | NM_005297 | 19816.537 | 16302.082 |
| CY3Cy5    | 11717.042 | 678.295   | AL117600  | 9607.238  | 10006.228 | U80769    | 1672.695  | 1817.735  |
| AK002163  | 6629.743  | 7913.642  | NM_004487 | 6398.146  | 4415.778  | S80491    | 1099.585  | 841.766   |
| NM_002287 | 15219.991 | 18376.117 | AB029000  | 3690.097  | 4744.46   | AK021678  | 596.401   | 451.251   |
| NM_012344 | 5931.569  | 7377.205  | AK026965  | 4525.625  | 6450.851  | AJ011377  | 4671.123  | 3651.685  |
| NM_01438E | 1776.516  | 2108.8    | AK025859  | 4648.931  | 3970.192  | AL137734  | 1430.029  | 1565.595  |
| AB036432  | 4286.438  | 5518.533  | AL117499  | 13120.663 | 10087.428 | AK023784  | 1360.488  | 989.069   |
| NM_014872 | 6093.552  | 7940.382  | NM_007054 | 1548.691  | 1302.033  | AK026323  | 3160.847  | 2891.073  |
| NM_00348C | 600.939   | 788.526   | AK000160  | 3290.843  | 3082.837  | NM_00349E | 61590.047 | 53556.926 |
| NM_00089E | 797.492   | 914.467   | NM_00603E | 2401.964  | 2673.286  | AL133430  | 24143.137 | 15650.715 |
| NM_032951 | 6527.355  | 8015.747  | NM_01478E | 2252.916  | 2649.617  | AF070633  | 46585.074 | 39196.41  |
| NM_00050E | 1646.843  | 1509.84   | NM_00215E | 787.571   | 1012.742  | AF090098  | 4812.412  | 3739.192  |
| NM_00240E | 17559.719 | 19625.402 | AB040890  | 3000.915  | 3796.54   | AF146694  | 3937.442  | 4529.431  |

|           |           |           |           |           |           |           |           |           |
|-----------|-----------|-----------|-----------|-----------|-----------|-----------|-----------|-----------|
| AK000004  | 2597.062  | 2777.803  | AK024233  | 980.297   | 1085.097  | AK057104  | 2884.474  | 2587.688  |
| NM_012421 | 30900.771 | 36614.73  | AK021870  | 1129.147  | 1520.072  | AL133555  | 3303.956  | 3199.166  |
| AB014601  | 1941.042  | 2066.209  | U06680    | 661.914   | 989.212   | AK024979  | 28311.492 | 33692.047 |
| AF022654  | 757.171   | 1158.222  | NM_005123 | 704.933   | 847.776   | AF233648  | 3252.403  | 3059.312  |
| NM_001143 | 1378.214  | 1234.94   | NM_015584 | 8678.468  | 9909.267  | AK021781  | 698.116   | 837.356   |
| AK022638  | 10607.063 | 11573.408 | NM_002063 | 224.185   | 769.58    | NM_018584 | 2553.776  | 2988.912  |
| BG698409  | 1752.829  | 1925.699  | NM_006667 | 19390.18  | 22484.852 | AK026776  | 962.441   | 1281.634  |
| M91368    | 1891.231  | 1630.795  | NM_000815 | 827.049   | 963.261   | AY007126  | 15362.352 | 17537.055 |
| AF224741  | 1748.566  | 2151.93   | NM_001293 | 632.547   | 452.364   | AF085951  | 6473.999  | 7106.889  |
| NM_006594 | 3341.689  | 4610.902  | AB023173  | 5253.596  | 4857.351  | AF131787  | 1633.619  | 1328.137  |
| NM_004177 | 4958.003  | 4736.909  | AF156548  | 4212.35   | 4267.178  | AF087989  | 1664.12   | 1227.23   |
| NM_012429 | 3621.083  | 4233.449  | NM_000387 | 7514.826  | 10563.56  | Z70715    | 2405.237  | 2227.212  |
| NM_004871 | 7153.451  | 7353.44   | NM_015310 | 582.689   | 502.312   | NM_018182 | 9140.742  | 7240.049  |
| NM_005698 | 15423.591 | 15937.384 | NM_016154 | 11944.926 | 10838.11  | U80771    | 10713.362 | 8974.266  |
| AF202146  | 17068.34  | 15855.698 | NM_005013 | 55700.941 | 55558.965 | AJ272173  | 22250.209 | 20884.463 |
| NM_014923 | 1521.867  | 2174.853  | AB002338  | 1016.817  | 970.544   | Y17180    | 60565.688 | 62882.289 |
| NM_005477 | 5450.402  | 5458.581  | NM_001072 | 1038.464  | 1523.377  | NM_005648 | 5094.241  | 3246.41   |
| NM_007018 | 1128.593  | 1433.239  | NM_014070 | 773.611   | 804.961   | NM_002037 | 5732.158  | 4876.156  |
| NM_004318 | 1523.33   | 1527.861  | NM_016027 | 675.923   | 854.873   | NM_020157 | 27955.818 | 28868.914 |
| L09089    | 540.415   | 711.701   | NM_014297 | 8377.667  | 9367.656  | NM_014320 | 4225.929  | 3473.432  |
| NM_002640 | 6131.697  | 5487.582  | NM_018156 | 5437.012  | 6552.746  | AK025703  | 7430.615  | 6514.81   |
| X03084    | 1149.45   | 983.646   | X98266    | 776.93    | 906.222   | NM_018185 | 3916.082  | 3323.023  |
| M15530    | 8194.393  | 8560.312  | U00930    | 7345.681  | 10214.344 | AK022598  | 6308.864  | 5133.944  |
| NM_000488 | 786.055   | 837.76    | AK024958  | 692.298   | 872.273   | AK024306  | 1259.971  | 1401.031  |
| NM_001877 | 2138.975  | 2374.867  | AL117552  | 1196.382  | 1512.83   | NM_018322 | 10786.823 | 10154.993 |
| NM_014207 | 19721.979 | 23576.482 | NM_002692 | 8527.997  | 10791.052 | AK025862  | 23543.102 | 21744.57  |
| NM_004058 | 1509.25   | 1606.945  | AB023190  | 5738.299  | 6268.572  | AK026495  | 2526.333  | 1756.107  |
| NM_001634 | 29094.744 | 29350.258 | NM_007064 | 787.963   | 489.525   | AK025052  | 2832.734  | 2861.681  |
| NM_002267 | 14107.18  | 11856.85  | NM_006281 | 1377.671  | 1471.622  | NM_014388 | 1965.251  | 2183.972  |
| NM_006412 | 9358.62   | 11568.31  | NM_002738 | 8612.096  | 9266.418  | U85044    | 2051.878  | 1620.393  |
| NM_003063 | 9913.358  | 10300.264 | U23460    | 11244.792 | 10564.257 | BC018880  | 1363.73   | 1142.632  |
| NM_014041 | 47587.66  | 52527.734 | NM_005356 | 30871.986 | 32122.65  | AF086090  | 3402.779  | 2650.343  |
| NM_007168 | 8800.436  | 9543.51   | Z25434    | 1870.895  | 1553.993  | AK002173  | 27345.596 | 25760.73  |
| NM_014313 | 1322.869  | 1422.859  | NM_012399 | 7749.408  | 5645.462  | NM_017748 | 2696.458  | 2420.38   |
| AK024966  | 1504.655  | 1391.577  | AF229804  | 9535.341  | 7019.189  | NM_020188 | 30906.027 | 30777.738 |
| AF178941  | 2063.616  | 2330.519  | AF151638  | 2561.018  | 2259.112  | U88897    | 13531.439 | 10548.364 |
| NM_016033 | 12528.99  | 14116.272 | U90552    | 6221.894  | 6266.442  | CY3Cy5    | 6058.886  | 346.142   |
| NM_017585 | 4732.879  | 5631.847  | NM_005460 | 407.385   | 541.833   | BG617923  | 785.785   | 1455.057  |
| U61737    | 13553.173 | 14068.771 | AF160477  | 967.603   | 971.277   | U37448    | 4032.336  | 5135.639  |
| X06389    | 714.728   | 1309.956  | M12883    | 2874.7    | 3366.239  | AA927698  | 3670.538  | 4879.515  |
| NM_000033 | 4107.646  | 4802.816  | BG288747  | 6630.598  | 6780.751  | AI498426  | 1115.434  | 1422.336  |
| NM_014861 | 857.95    | 1098.341  | U37448    | 2392.451  | 2211.672  | D01038    | 30089.346 | 37243.094 |
| NM_012434 | 1230.031  | 1476.048  | AA927698  | 2635.193  | 2960.492  | AB019205  | 2285.03   | 2559.807  |
| NM_005694 | 16337.041 | 16206.34  | AI498426  | 560.368   | 742.484   | J05008    | 2378.722  | 2271.5    |
| AK022983  | 1169.827  | 1575.767  | D01038    | 7569.27   | 8052.252  | U11087    | 1567.825  | 1867.746  |
| NM_014868 | 16972.859 | 20870.654 | AB019205  | 1024.057  | 1171.624  | D50640    | 4224.203  | 5830.103  |
| AL442089  | 5642.859  | 7315.377  | J05008    | 874.44    | 973.678   | D43747    | 1326.77   | 2559.643  |
| NM_001200 | 2980.656  | 3375.475  | U11087    | 714.853   | 568.023   | M98776    | 10487.234 | 15258.661 |
| AB007964  | 1005.922  | 1428.768  | D50640    | 3044.469  | 2933.141  | AF009744  | 3130.026  | 4263.618  |
| AF128541  | 1560.742  | 1934.657  | M98776    | 3856.041  | 3540.826  | NM_172140 | 6081.673  | 6180.486  |
| AK026305  | 5025.636  | 4660.159  | X99135    | 25950.174 | 21589.59  | SR2       | 66327.578 | 60894.922 |
| NM_002552 | 6746.583  | 6559.705  | AF009744  | 1917.463  | 2473.933  | SR4       | 19709.67  | 14901.273 |
| NM_014321 | 9987.945  | 10062.682 | NM_172140 | 1719.007  | 1707.162  | SR6       | 4121.906  | 2583.856  |

|           |           |           |           |           |           |           |           |           |
|-----------|-----------|-----------|-----------|-----------|-----------|-----------|-----------|-----------|
| AK022733  | 1573.939  | 1744.107  | AK026965  | 2256.999  | 2233.849  | CY3Cy5    | 3787.144  | 145.305   |
| AB011132  | 10534.325 | 10842.601 | AK025859  | 4025.902  | 3879.921  | NM_005311 | 1224.315  | 1422.858  |
| NM_020362 | 14935.803 | 16168.87  | AL117499  | 11985.117 | 13376.922 | NM_005905 | 4507.582  | 5065.454  |
| AB040937  | 2243.912  | 2173.479  | NM_007054 | 1845.48   | 2099.112  | NM_016235 | 1013.274  | 1690.291  |
| AF275798  | 37865.266 | 51354.07  | AK000160  | 2902.01   | 2909.788  | NM_000960 | 902.49    | 1423.562  |
| NM_005441 | 18782.477 | 22563.646 | NM_005311 | 637.793   | 629.094   | AF172932  | 1446.639  | 1624.453  |
| NM_016079 | 27335.115 | 28394.346 | NM_005905 | 2542.631  | 1986.713  | NM_005355 | 1043.9    | 1849.701  |
| AK023108  | 2738.285  | 3238.311  | NM_016235 | 645.694   | 929.699   | NM_002511 | 3050.072  | 3529.738  |
| AK026409  | 7387.278  | 9477.31   | NM_000960 | 481.336   | 693.913   | NM_000794 | 383.684   | 874.781   |
| AF097025  | 5812.497  | 5077.982  | AF172932  | 625.726   | 657.649   | AF295378  | 6533.965  | 7218.693  |
| Y11339    | 4793.485  | 5626.65   | NM_002511 | 354.441   | 598.411   | AF320908  | 2904.756  | 3173.067  |
| AB030176  | 946.924   | 972.924   | AF295378  | 4732.584  | 4565.91   | NM_004085 | 8016.317  | 9142.076  |
| NM_003937 | 538.234   | 662.625   | AF320908  | 2075.934  | 2438.656  | NM_012445 | 55129.629 | 52825.965 |
| NM_002537 | 11815.813 | 12377.421 | NM_004085 | 2401.353  | 2579.993  | NM_018104 | 5080.875  | 7255.259  |
| NM_003135 | 13060.286 | 14651.878 | NM_012445 | 17088.604 | 16945.068 | NM_006080 | 1013.873  | 1205.212  |
| NM_012316 | 8335.868  | 8373.367  | NM_018104 | 1193.843  | 878.869   | U64564    | 2851.355  | 3993.011  |
| AF022654  | 1123.907  | 1444.423  | NM_004429 | 1919.922  | 1690.203  | NM_006470 | 2425.016  | 2035.494  |
| NM_001143 | 1384.374  | 1973.61   | U64564    | 944.223   | 706.096   | NM_002855 | 5547.543  | 5074.392  |
| NM_003282 | 1043.91   | 970.105   | NM_006470 | 1134.066  | 655.208   | AF160477  | 3585.217  | 3643.446  |
| AK022638  | 13646.539 | 13239.131 | NM_002855 | 2163.065  | 1847.727  | M12883    | 9450.818  | 8669.348  |
| BG698409  | 2184.722  | 2532.169  | AB038463  | 663.967   | 434.838   | BG288747  | 13006.742 | 13632.189 |
| AA220921  | 9069.26   | 12718.063 | M30262    | 640.688   | 645.251   | AI524814  | 2996.462  | 3714.723  |
| N67770    | 699.212   | 874.047   | NM_000387 | 5605.645  | 6521.114  | AB024411  | 3520.775  | 4012.478  |
| U90065    | 5310.664  | 4729.26   | NM_004663 | 1371.176  | 1732.565  | NM_002444 | 38758.195 | 43020.227 |
| AJ005898  | 2319.934  | 3293.94   | NM_015310 | 741.933   | 916.032   | NM_001104 | 2084.68   | 2588.783  |
| X57303    | 5641.978  | 6399.045  | AB002338  | 878.187   | 1096.697  | NM_002985 | 10030.621 | 13629.313 |
| AA463224  | 2496.793  | 2524.959  | AI524814  | 1711.064  | 1867.296  | U88898    | 15595.146 | 19071.135 |
| BG248802  | 12333.902 | 12248.234 | AB024411  | 1962.879  | 1992.339  | NM_020154 | 44511.781 | 47252.332 |
| L19605    | 2482.643  | 2523.315  | NM_002444 | 26880.736 | 34927.816 | NM_004665 | 2700.897  | 3232.047  |
| AA876532  | 15431.519 | 16748.314 | NM_001104 | 450.251   | 693.399   | NM_005300 | 1686.2    | 1581.139  |
| S74349    | 1883.526  | 1699.807  | NM_002985 | 1114.477  | 1295.597  | NM_000893 | 1996.322  | 2029.606  |
| X07979    | 19840.111 | 22902.205 | U88898    | 8628.508  | 9029.716  | NM_005091 | 636.074   | 827.672   |
| BG744224  | 8274.724  | 8165.994  | NM_020154 | 29147.717 | 29402.725 | AF031167  | 2790.659  | 2899.821  |
| NM_006079 | 2406.063  | 2311.149  | NM_004665 | 1243.198  | 1379.167  | NM_003204 | 6570.116  | 10954.437 |
| NM_006696 | 5105.49   | 5442.819  | NM_005300 | 798.314   | 746.514   | AF254069  | 1552.663  | 3157.23   |
| NM_018026 | 3549.047  | 4175.95   | AF031167  | 1247.317  | 1178.782  | AL117600  | 18690.004 | 24056.986 |
| NM_001707 | 22495.977 | 26530.85  | NM_003204 | 2490.687  | 2143.807  | NM_001712 | 821.248   | 614.022   |
| X03084    | 956.717   | 1479.311  | AF254069  | 615.564   | 529.78    | NM_004487 | 19001.121 | 17444.617 |
| NM_001877 | 2224.058  | 2601.667  | AL117600  | 8828.917  | 6918.309  | AK026965  | 14073.94  | 16002.952 |
| NM_014207 | 16676.973 | 20537.057 | NM_004487 | 6602.407  | 4989.72   | AK025859  | 6941.483  | 5785.106  |
| AK002163  | 5830.691  | 5720.834  | AB029000  | 3275.142  | 4165.75   | AL117499  | 21731.227 | 21572.93  |
| NM_012344 | 3926.042  | 5240.606  | Z25434    | 4290.291  | 5262.982  | NM_007054 | 2475.05   | 2220.441  |
| NM_002351 | 33376.914 | 40279.23  | NM_005884 | 9538.137  | 12558.709 | AK000160  | 6321.797  | 7983.576  |
| NM_014385 | 2527.907  | 2855.066  | NM_012399 | 8025.416  | 10389.437 | NM_006032 | 5915.871  | 6325.895  |
| NM_001704 | 693.085   | 492.864   | U90552    | 5596.21   | 6624.842  | NM_014785 | 3736.605  | 4612.127  |
| AB036432  | 4701.444  | 5316.681  | NM_006032 | 2371.422  | 2277.189  | NM_002153 | 1137.723  | 1197.052  |
| NM_014872 | 6546.079  | 7100.2    | NM_014785 | 1976.982  | 2278.219  | AB040890  | 6513.515  | 7351.383  |
| NM_003643 | 520.563   | 906.032   | NM_002153 | 778.163   | 1005.311  | AK024233  | 2114.286  | 3050.135  |
| NM_003480 | 1072.461  | 1206.272  | AB040890  | 2620.734  | 3324.638  | AK021870  | 2748.26   | 3342.758  |
| NM_000895 | 1119.651  | 993.876   | AK024233  | 758.467   | 934.878   | U06680    | 1613.928  | 1671.074  |
| NM_032951 | 6254.584  | 7374.353  | AK021870  | 1159.707  | 1264.536  | NM_005123 | 1070.547  | 1680.198  |
| NM_000503 | 1508.181  | 1645.521  | U06680    | 597.935   | 736.061   | NM_015584 | 13315.738 | 15486.793 |
| NM_002405 | 16496.641 | 16375.011 | NM_005123 | 541.024   | 722.897   | NM_001697 | 56441.773 | 52300.664 |

|           |           |           |           |           |           |           |           |           |
|-----------|-----------|-----------|-----------|-----------|-----------|-----------|-----------|-----------|
| AK000004  | 2221.838  | 2805.491  | NM_015584 | 8348.392  | 9324.378  | NM_002063 | 1040.642  | 1102.325  |
| NM_012421 | 24831.266 | 23123.283 | AB032525  | 226.962   | 193.773   | NM_006667 | 64643.902 | 59971.508 |
| AB014601  | 1814.156  | 1858.031  | NM_006667 | 19780.338 | 14960.144 | AK025125  | 785.91    | 1161.482  |
| AK001393  | 13389.313 | 13228.445 | NM_000815 | 845.108   | 697.325   | NM_000815 | 2242.092  | 2868.496  |
| NM_000023 | 3271.32   | 3518.264  | AB023173  | 5137.832  | 5079.196  | NM_001293 | 798.831   | 1038.301  |
| NM_012434 | 1194.381  | 1186.435  | AF156548  | 4371.468  | 5090.226  | AB023173  | 8188.35   | 6232.167  |
| NM_005694 | 16067.196 | 17498.141 | NM_172140 | 1980.568  | 2444.28   | AF156548  | 5709.994  | 5687.252  |
| M91368    | 1653.144  | 1412.746  | NM_001072 | 1135.665  | 917.491   | NM_000387 | 19568.439 | 19247.629 |
| AF224741  | 1261.057  | 1643.963  | NM_014070 | 865.395   | 925.201   | NM_004663 | 2110.613  | 2389.593  |
| NM_006594 | 3413.166  | 3894.279  | NM_016027 | 827.722   | 742.632   | NM_015310 | 1268.941  | 1546.887  |
| NM_004177 | 4168.857  | 3809.872  | NM_014297 | 7969.15   | 8410.125  | NM_016154 | 26187.502 | 30621.229 |
| NM_012429 | 3174.668  | 3068.012  | NM_018156 | 4816.691  | 5146.774  | AB002338  | 3158.843  | 2867.26   |
| NM_004871 | 6205.291  | 5476.158  | X98266    | 654.45    | 606.217   | NM_001072 | 2003.509  | 2534.422  |
| NM_005694 | 15323.496 | 15589.395 | U00930    | 7222.538  | 8465.092  | NM_014070 | 1159.315  | 1187.399  |
| AF202146  | 16796.092 | 12635.781 | AK024958  | 624.374   | 807.248   | NM_016027 | 1571.146  | 1619.753  |
| NM_014923 | 2779.157  | 3170.893  | NM_002439 | 3230.279  | 2952.391  | NM_014297 | 13645.585 | 16096.156 |
| NM_007018 | 1091.003  | 1182.765  | AL117552  | 1172.816  | 1140.843  | NM_018156 | 23004.461 | 27589.977 |
| NM_004318 | 1809.877  | 1424.811  | NM_002692 | 7829.982  | 6911.591  | X98266    | 1664.1    | 2131.047  |
| NM_002640 | 6471.964  | 7339.521  | AB023190  | 5862.941  | 3673.787  | U00930    | 15863.918 | 18678.555 |
| Y11339    | 6731.796  | 8299.524  | NM_007064 | 576.674   | 519.848   | AK024958  | 882.081   | 1130.786  |
| NM_003937 | 948.538   | 878.836   | NM_006281 | 1297.135  | 1181.102  | NM_014575 | 5581.49   | 4872.639  |
| NM_002537 | 14189.974 | 14807.657 | NM_002738 | 8688.771  | 8574.054  | NM_002439 | 6656.271  | 6861.374  |
| NM_003139 | 14519.383 | 14160.737 | U23460    | 13621.932 | 10773.659 | AL117552  | 2378.139  | 2131.208  |
| NM_012316 | 8564.539  | 9524.523  | NM_004429 | 2638.453  | 3145.647  | NM_002692 | 16119.942 | 14607.802 |
| NM_004059 | 1130.947  | 970.578   | U64564    | 1324.823  | 1403.427  | AB023190  | 46690.137 | 54166.098 |
| NM_001634 | 26138.576 | 25390.971 | NM_006470 | 948.998   | 1083.353  | NM_007064 | 1982.156  | 2011.686  |
| NM_002267 | 12766.958 | 11917.828 | NM_002855 | 1958.345  | 2276.75   | NM_006281 | 2747.647  | 2961.917  |
| NM_006412 | 7644.686  | 8538.804  | AB038463  | 613.561   | 708.176   | NM_002738 | 11539.404 | 12666.816 |
| NM_003063 | 8779.312  | 8622.51   | M30262    | 711.456   | 657.13    | U23460    | 39988.348 | 44427.043 |
| NM_014041 | 50302.879 | 54617.535 | NM_005460 | 513.835   | 687.02    | NM_005356 | 48160.277 | 52528.594 |
| NM_007169 | 9462.914  | 9829.525  | AF160477  | 1028.229  | 1126.371  | Z25434    | 4515.576  | 3865.76   |
| NM_014313 | 1006.331  | 1219.555  | M12883    | 2477.434  | 2886.612  | NM_005884 | 18972.02  | 26961.668 |
| AK024966  | 1261.596  | 1270.789  | BG288747  | 6542.004  | 6800.79   | NM_012399 | 14232.062 | 18011.525 |
| AF178941  | 1980.311  | 2465.849  | U37448    | 2192.245  | 2260.502  | AF229804  | 35136.188 | 45258     |
| NM_016033 | 12553.893 | 12833.82  | AA927698  | 1929.559  | 2212.823  | U90552    | 11724.573 | 15769.532 |
| NM_017585 | 2009.521  | 1991.589  | AI498426  | 634.296   | 724.04    | NM_005460 | 1195.721  | 1784.426  |
| U61737    | 7955.65   | 8077.815  | D01038    | 8684.222  | 7025.633  | AF160477  | 2817.838  | 4005.041  |
| X06389    | 579.571   | 871.721   | AB019205  | 973.193   | 833.09    | M12883    | 8162.356  | 9005.147  |
| NM_000033 | 1926.398  | 2573.251  | J05008    | 872.802   | 661.347   | BG288747  | 11071.893 | 13762.965 |
| NM_006079 | 3775.798  | 3831.848  | D50640    | 1881.351  | 1111.168  | BG617923  | 2245.07   | 2171.978  |
| NM_006696 | 6380.734  | 7863.927  | M98776    | 3400.218  | 2977.717  | U37448    | 4013.335  | 5163.794  |
| NM_018026 | 4447.383  | 4494.49   | X99135    | 32783.254 | 23458.283 | BG435851  | 566.632   | 905.033   |
| NM_001707 | 24325.908 | 29843.342 | NM_003204 | 2462.786  | 2909.835  | AA927698  | 3471.488  | 4424.893  |
| AK022983  | 764.801   | 778.263   | AF254069  | 768.192   | 839.362   | AI498426  | 1169.731  | 1409.889  |
| NM_014868 | 15043.249 | 16780.648 | AL117600  | 8527.464  | 9953.983  | D01038    | 32441.355 | 35488.992 |
| AL442089  | 4967.82   | 5624.197  | NM_004487 | 6470.724  | 5951.007  | AB019205  | 2851.987  | 2902.538  |
| NM_001200 | 2962.687  | 2674.846  | AB029000  | 3501.643  | 3880.333  | J05008    | 3130.082  | 3011.515  |
| AB007964  | 953.234   | 1021.478  | AK026965  | 3170.605  | 2446.85   | U11087    | 1558.954  | 1498.264  |
| AF128541  | 1615.245  | 1663.761  | AK025859  | 3299.186  | 3090.87   | D50640    | 4576.744  | 4331.886  |
| AK026305  | 6082.393  | 6620.613  | AL117499  | 12545.84  | 12395.323 | D43747    | 1430.61   | 1643.65   |
| NM_002552 | 7151.412  | 7590.816  | NM_007054 | 1398.316  | 1525.329  | M98776    | 7688.625  | 5731.116  |
| NM_014321 | 8005.012  | 7849.724  | AK000160  | 3113.716  | 2735.008  | AF009744  | 2614.49   | 2471.493  |
| AK022733  | 1443.199  | 1298.512  | NM_005311 | 1112.704  | 891.904   | NM_172140 | 5857.064  | 5834.317  |

|           |           |           |           |           |           |           |           |           |
|-----------|-----------|-----------|-----------|-----------|-----------|-----------|-----------|-----------|
| AB011132  | 10359.994 | 11388.481 | NM_005905 | 2255.259  | 1702.248  | AK026965  | 15416.353 | 22590.371 |
| NM_020362 | 13729.187 | 12835.601 | NM_016235 | 535.427   | 586.343   | AK025859  | 5775.325  | 6485.613  |
| AB040937  | 2299.855  | 2243.808  | AF172932  | 758.111   | 660.084   | AL117499  | 16657.502 | 17382.191 |
| AF275798  | 36883.371 | 45315.449 | NM_002511 | 722.656   | 487.344   | NM_007054 | 2311.493  | 2437.99   |
| NM_005441 | 12349.42  | 10688.286 | AF295378  | 3689.845  | 2282.392  | AB007957  | 849.775   | 1006.88   |
| NM_016079 | 24944.023 | 25980.809 | AF320908  | 1669.357  | 1068.671  | AK000160  | 5098.252  | 6407.897  |
| AK023108  | 2687.013  | 2803.891  | NM_004085 | 2696.598  | 1773.32   | NM_005311 | 1498.94   | 1626.311  |
| AK026409  | 7169.352  | 7989.081  | NM_012445 | 18058.354 | 13357.904 | NM_005905 | 4646.729  | 5387.703  |
| AF097025  | 5620.848  | 6732.95   | NM_018104 | 1003.03   | 918.82    | NM_016235 | 1103.83   | 1565.07   |
| NM_002405 | 18072.273 | 21554.027 | NM_006667 | 28414.766 | 34220.863 | NM_000960 | 953.265   | 1255.216  |
| AK000004  | 3025.706  | 3093.674  | AK025125  | 496.215   | 624.805   | AF172932  | 1251.473  | 1249.991  |
| NM_012421 | 28500.258 | 33471.527 | NM_000815 | 676.966   | 658.59    | NM_005355 | 1253.906  | 1506.687  |
| AB014601  | 1997.074  | 2043.012  | NM_001293 | 480.467   | 694.291   | NM_002511 | 4082.12   | 4301.697  |
| AK001393  | 13056.638 | 11830.614 | AB023173  | 5243.174  | 6153.347  | AF295378  | 6994.951  | 6100.284  |
| NM_000023 | 3126.278  | 3497.165  | AF156548  | 4013.274  | 3650.747  | AF320908  | 3704.191  | 3121.989  |
| AF022654  | 867.998   | 906.787   | NM_000387 | 5644.585  | 5228.517  | NM_004085 | 7907.515  | 8628.135  |
| NM_001143 | 974.973   | 1136.961  | NM_004663 | 1336.382  | 1217.514  | NM_012445 | 35322.82  | 40363.391 |
| NM_003282 | 516.804   | 659.54    | NM_015310 | 555.4     | 744.404   | NM_004425 | 5694.36   | 6056.044  |
| AK022638  | 10598.533 | 10123.647 | NM_016154 | 12645.097 | 13456.719 | U64564    | 2072.505  | 2080.654  |
| BG698409  | 1930.54   | 1899.053  | NM_005013 | 58394.359 | 53672.375 | NM_006470 | 2340.5    | 2376.302  |
| AA220921  | 8152.348  | 9936.449  | AB002338  | 763.91    | 730.117   | NM_002855 | 6842.092  | 6537.551  |
| N67770    | 680.987   | 754.007   | AI524814  | 2031.203  | 2392.187  | AB038463  | 1655.244  | 1701.552  |
| U90065    | 5131.734  | 4370.003  | AB024411  | 1131.129  | 870.396   | M30262    | 2059.056  | 3222.957  |
| AJ005898  | 2419.984  | 2686.454  | NM_002444 | 25098.521 | 28210.861 | NM_000387 | 22245.061 | 30265.555 |
| X57303    | 5967.866  | 7208.253  | NM_001104 | 539.23    | 590.679   | NM_004663 | 2594.176  | 3336.044  |
| AA463224  | 2116.786  | 1836.061  | NM_002989 | 1837.742  | 1421.401  | NM_015310 | 1090.78   | 1742.129  |
| BG248802  | 12344.411 | 12345.643 | U88898    | 8482.128  | 7203.875  | NM_016154 | 26611.666 | 31064.102 |
| L19605    | 2463.115  | 2162.671  | NM_020154 | 26439.881 | 18570.871 | AB002338  | 2484.517  | 2761.692  |
| AA876532  | 12142.21  | 11395.765 | NM_004665 | 938.716   | 466.166   | AI524814  | 4075.033  | 4947.896  |
| S74349    | 1520.38   | 1381.672  | NM_005300 | 771.761   | 294.701   | AB024411  | 3877.084  | 4311.844  |
| X07979    | 17332.457 | 19529.969 | NM_000698 | 9462.439  | 6509.238  | NM_002444 | 44056.969 | 46602.457 |
| BG744224  | 9244.473  | 9834.433  | NM_005091 | 1259.137  | 1152.578  | NM_001104 | 2430.996  | 2343.315  |
| NM_005477 | 4471.619  | 4818.695  | AF031167  | 1515.048  | 2566.954  | NM_002989 | 11942.972 | 11655.601 |
| NM_007018 | 1445.942  | 1246.814  | AB023190  | 8563.164  | 12656.137 | U88898    | 16269.619 | 15025.313 |
| NM_004318 | 1795.471  | 1694.875  | NM_007064 | 920.714   | 1412.311  | NM_020154 | 49588.992 | 37336.914 |
| NM_002640 | 6138.431  | 6496.425  | NM_006281 | 1240.096  | 1736.322  | NM_004665 | 2857.734  | 2861.858  |
| X03084    | 846.288   | 794.062   | NM_002738 | 8984.121  | 11211.162 | NM_005300 | 1759.317  | 1462.276  |
| M15530    | 8215.702  | 8890.187  | NM_005356 | 33361.246 | 33418.406 | NM_000893 | 1477.022  | 1666.827  |
| NM_001877 | 2243.006  | 2024.307  | Z25434    | 2686.018  | 2558.148  | NM_000698 | 20814.67  | 21085.688 |
| NM_014207 | 16841.244 | 15778.579 | NM_005884 | 11367.764 | 14872.785 | NM_005091 | 268.411   | 763.555   |
| AK002163  | 6198.291  | 5872.068  | NM_012399 | 8422.36   | 8812.869  | AF031167  | 2504.046  | 1895.2    |
| NM_012344 | 4310.2    | 4388.968  | AF229804  | 15038.562 | 12277.966 | NM_003204 | 3784.742  | 3250.751  |
| NM_002351 | 32209.969 | 35725.422 | AF151638  | 2615.215  | 2593.803  | AF254069  | 1534.954  | 1247.62   |
| NM_014385 | 1996.859  | 2308.041  | U90552    | 5374.039  | 5790.724  | AL117600  | 15881.761 | 12994.873 |
| AB036432  | 4006.455  | 5609.717  | NM_006032 | 1932.495  | 1912.246  | NM_001712 | 1505.113  | 916.531   |
| NM_014872 | 6362.104  | 6577.857  | NM_014788 | 2107.635  | 2069.81   | AB029000  | 10001.151 | 14772.923 |
| NM_000899 | 718.163   | 594.083   | NM_002153 | 408.794   | 576.342   | Z25434    | 5441.412  | 7758.343  |
| NM_032951 | 5744.776  | 7194.829  | AB040890  | 2811.611  | 2622.097  | NM_005884 | 14517.891 | 21657.705 |
| NM_000503 | 1406.685  | 1663.734  | AK021870  | 1084.158  | 1124.824  | NM_012399 | 13876.82  | 15928.24  |
| NM_017585 | 4715.447  | 4907.182  | U06680    | 737.195   | 443.294   | AF229804  | 47048.992 | 59689.125 |
| U61737    | 12862.915 | 15557.129 | NM_005123 | 774.999   | 259.724   | U90552    | 11464.955 | 13674.207 |
| X06389    | 870.549   | 914.829   | NM_015584 | 7775.957  | 5864.925  | NM_006032 | 7648.546  | 8894.158  |
| NM_000033 | 1749.031  | 1955.949  | NM_001697 | 39548.684 | 22757.764 | NM_014788 | 4302.268  | 5047.28   |



|           |           |           |           |           |           |           |           |           |
|-----------|-----------|-----------|-----------|-----------|-----------|-----------|-----------|-----------|
| NM_014861 | 968.59    | 1122.09   | NM_016098 | 16144.666 | 10454.986 | NM_002153 | 1514.615  | 2256.872  |
| NM_012434 | 1173.175  | 1132.92   | NM_002063 | 443.764   | 671.432   | AB040890  | 6085.134  | 6963.41   |
| NM_005694 | 15025.005 | 12815.619 | AL137479  | 1178.471  | 1228.908  | AK024233  | 2221.575  | 2188.125  |
| M91368    | 1483.375  | 1321.458  | NM_004211 | 1508.363  | 1559.166  | AK021870  | 3039.523  | 2639.557  |
| AF224741  | 1576.49   | 2059.547  | Y10776    | 1661.724  | 1714.268  | U06680    | 1431.902  | 1591.03   |
| NM_006594 | 3658.165  | 3337.813  | AK027241  | 3783.987  | 4562.492  | NM_005123 | 1302.334  | 1193.171  |
| NM_004177 | 4165.81   | 3157.957  | NM_004561 | 902.37    | 904.303   | NM_015584 | 12773.288 | 11154.928 |
| NM_012429 | 3064.328  | 2997.25   | AK024812  | 2988.361  | 2983.221  | NM_001697 | 53815.43  | 55730.996 |
| NM_004871 | 5821.653  | 5189.359  | M20642    | 1005.682  | 903.124   | NM_016098 | 22470.338 | 20811.127 |
| NM_005698 | 15501.503 | 14806.16  | AK026412  | 2373.323  | 2320.471  | NM_002063 | 686.45    | 755.427   |
| AF202146  | 16182.106 | 12630.352 | X89669    | 1299.175  | 1139.97   | NM_006667 | 47046.645 | 43411.613 |
| NM_014923 | 1357.081  | 1806.34   | NM_001072 | 1127.972  | 982.275   | AK025125  | 791.865   | 741.417   |
| AF275798  | 42947.906 | 55411.422 | NM_014070 | 750.781   | 654.486   | NM_000815 | 1898.777  | 1391.622  |
| NM_005441 | 20222.105 | 21149.586 | NM_016027 | 844.637   | 540.952   | NM_001293 | 899.853   | 1029.701  |
| NM_016079 | 28209.613 | 34308.137 | NM_014297 | 8448.298  | 7247.462  | AF156548  | 6742.155  | 9791.988  |
| AK023108  | 3399.538  | 3587.569  | NM_018156 | 6430.359  | 5172.043  | NM_172140 | 5128.917  | 6987.971  |
| AK026409  | 7502.389  | 8598.716  | X98266    | 894.94    | 574.459   | NM_001072 | 2285.975  | 2973.54   |
| AF097025  | 6579.197  | 6256.972  | U00930    | 6544.179  | 4656.224  | NM_014070 | 1473.726  | 1558.483  |
| Y11339    | 6259.924  | 6057.525  | AK024958  | 672.6     | 480.638   | NM_016280 | 476.663   | 899.352   |
| AB030176  | 1547.935  | 1426.27   | NM_014575 | 3810.124  | 2411.628  | NM_016027 | 1147.768  | 1241.698  |
| NM_003937 | 656.294   | 652.174   | NM_002439 | 3907.269  | 3781.198  | NM_014297 | 13943.742 | 12462.138 |
| NM_002537 | 12800.109 | 11601.24  | AL117552  | 1840.57   | 3129.166  | NM_018156 | 27716.506 | 26379.205 |
| NM_003139 | 13348.619 | 13838.047 | NM_002692 | 15322.746 | 27468.127 | X98266    | 1942.965  | 1801.538  |
| NM_012316 | 8056.313  | 7578.5    | X55525    | 977.615   | 897.798   | U00930    | 18746.068 | 15844.341 |
| NM_004059 | 1471.317  | 1297.586  | AB040878  | 641.557   | 724.597   | AK024958  | 1531.946  | 893.022   |
| NM_001634 | 25891.229 | 22346.818 | S74647    | 596.076   | 703.67    | NM_014575 | 5778.387  | 4633.963  |
| NM_002267 | 12343.992 | 9586.499  | NM_003506 | 1419.219  | 1374.396  | NM_002439 | 4940.272  | 4053.447  |
| NM_006412 | 7609.999  | 6732.168  | NM_018093 | 5010.155  | 4989.934  | AL117552  | 2060.76   | 1726.501  |
| NM_003063 | 8436.794  | 8304.915  | NM_000430 | 1831.412  | 1954.634  | NM_002692 | 11620.809 | 8743.747  |
| NM_014041 | 48973.266 | 50265.441 | NM_016656 | 1656.946  | 1096.233  | AB023190  | 28081.908 | 21338.189 |
| NM_007169 | 8839.543  | 9879.521  | NM_015963 | 6166.963  | 6416.588  | NM_007064 | 1270.538  | 1164.872  |
| NM_014313 | 929.099   | 1000.536  | AB007871  | 1165.129  | 925.77    | NM_006281 | 2524.791  | 1946.637  |
| AK024966  | 1264.047  | 1220.216  | NM_017813 | 5607.084  | 5982.702  | NM_002738 | 12176.849 | 9796.379  |
| AF178941  | 1816.989  | 2223.172  | NM_003840 | 2800.631  | 2841.787  | NM_005356 | 52776.441 | 57797.949 |
| NM_016033 | 14703.637 | 17585.842 | NM_018378 | 1021.655  | 761.987   | NM_004429 | 5694.4    | 8309.156  |
| NM_013439 | 50848.617 | 49581.93  | NM_018423 | 1014.394  | 801.295   | U64564    | 2091.634  | 3596.683  |
| NM_003406 | 62336.668 | 55510.898 | NM_001741 | 5298.207  | 4310.31   | NM_006470 | 2543.659  | 3407.716  |
| NM_018316 | 3377.155  | 3053.577  | NM_000745 | 2739.576  | 1932.818  | NM_002855 | 4867.696  | 6014.562  |
| AB011180  | 854.665   | 885.676   | AF116705  | 6813.582  | 4053.012  | AB038463  | 1221.811  | 1348.241  |
| NM_007167 | 6809.179  | 6414.132  | NM_006072 | 1415.8    | 1047.687  | M30262    | 2873.645  | 3063.012  |
| NM_014832 | 8926.61   | 8757.475  | BE794490  | 639.159   | 419.772   | NM_005460 | 1049.419  | 1517.351  |
| NM_003243 | 574.167   | 815.939   | NM_003561 | 2809.709  | 3695.874  | AF160477  | 3710.087  | 4177.132  |
| NM_002477 | 2688.071  | 3463.227  | NM_002991 | 468.566   | 789.482   | NM_003226 | 518.821   | 900.969   |
| NM_018026 | 4108.974  | 4499.912  | NM_004071 | 5191.547  | 5534.44   | M12883    | 7028.321  | 9108.831  |
| NM_001707 | 25798.049 | 23128.842 | NM_001316 | 10549.043 | 12175.771 | BG288747  | 11031.483 | 10884.369 |
| AK022983  | 711.634   | 991.49    | AJ008149  | 2218.062  | 2861.269  | BG617923  | 676.866   | 840.318   |
| NM_014868 | 14438.459 | 15807.81  | NM_002353 | 718.474   | 939.267   | U37448    | 3994.518  | 3613.351  |
| AL442089  | 5202.016  | 5762.93   | NM_012153 | 1838.29   | 1841.731  | AA927698  | 3906.492  | 3407.833  |
| NM_001200 | 3092.257  | 2959.055  | NM_013241 | 3074.657  | 2589.924  | AI498426  | 1463.804  | 985.963   |
| AB007964  | 1011.679  | 1012.034  | NM_015535 | 1564.861  | 1815.338  | D01038    | 22882.898 | 20206.457 |
| AF128541  | 1410.45   | 1671.844  | Z24725    | 4209.884  | 4153.156  | AB019205  | 1808.006  | 1654.339  |
| AK026305  | 5788.771  | 5142.994  | AF161362  | 3564.521  | 2964.472  | J05008    | 1768.178  | 1389.993  |
| NM_002552 | 7069.771  | 7160.662  | NM_015939 | 8316.107  | 8350.279  | U11087    | 845.172   | 672.731   |

|           |           |           |           |           |           |           |           |           |
|-----------|-----------|-----------|-----------|-----------|-----------|-----------|-----------|-----------|
| NM_014321 | 9492.796  | 7953.364  | AB046840  | 1809.15   | 1673.194  | D50640    | 4062.505  | 3442.845  |
| AK022733  | 1476.084  | 1381.457  | AF174487  | 1363.499  | 1135.965  | D43747    | 1095.324  | 1116.443  |
| AB011132  | 11039.861 | 11925.129 | NM_017699 | 974.905   | 341.541   | M98776    | 7933.894  | 5477.781  |
| NM_020362 | 11766.164 | 10714.035 | NM_006407 | 12376.197 | 6586.524  | AF009744  | 3110.626  | 3768.545  |
| AB040937  | 2500.613  | 1878.686  | NM_007373 | 3102.029  | 2091.854  | NM_003204 | 4447.194  | 5782.744  |
| NM_000095 | 1092.12   | 1028.952  | NM_006263 | 50242.371 | 55443.418 | AF254069  | 1269.28   | 2031.401  |
| NM_001338 | 2534.828  | 2596.323  | NM_004791 | 1958.224  | 2244.051  | AL117600  | 16236.596 | 17398.801 |
| NM_003637 | 969.234   | 1097.856  | Z36876    | 3492.485  | 4919.39   | NM_001712 | 819.093   | 994.626   |
| NM_004233 | 7951.002  | 8592.93   | NM_000892 | 883.027   | 1083.531  | NM_004487 | 19081.307 | 18919.906 |
| NM_001544 | 13346.688 | 12902.571 | NM_001873 | 622.797   | 748.738   | AB029000  | 6492.696  | 8235.368  |
| X58531    | 434.241   | 610.139   | AB029025  | 496.17    | 510.445   | AK026965  | 18403.189 | 24219.209 |
| AB011168  | 2482.063  | 2872.697  | NM_003940 | 437.349   | 528.666   | AK025859  | 6259.279  | 6275.766  |
| BE794262  | 1109.201  | 1041.984  | NM_016572 | 1862.476  | 1677.154  | AL117499  | 19172.025 | 20338.596 |
| NM_003212 | 3804.865  | 4044.15   | NM_000027 | 920.363   | 927.274   | NM_007054 | 2270.018  | 2484.376  |
| NM_006382 | 786.063   | 542.198   | NM_017548 | 16315.006 | 12780.89  | AB007957  | 620.086   | 883.541   |
| NM_004811 | 22714.031 | 21584.73  | AF134802  | 1198.125  | 749.008   | AK000160  | 5660.364  | 5441.488  |
| AK021910  | 34711.477 | 38674.711 | NM_018222 | 886.019   | 384.627   | NM_005311 | 1431.478  | 1268.018  |
| M62402    | 4214.037  | 3535.102  | NM_005740 | 3148.422  | 2031.939  | NM_005905 | 4110.556  | 3464.335  |
| NM_004748 | 1664.324  | 1912.709  | NM_004308 | 13643.534 | 6802.246  | NM_016235 | 1086.701  | 977.715   |
| NM_002668 | 19011.156 | 17411.072 | AF112366  | 1895.235  | 1369.671  | NM_000960 | 1147.231  | 1001.945  |
| NM_001058 | 681.162   | 737.227   | NM_004274 | 1075.055  | 1416.976  | AF172932  | 1299.344  | 1274.024  |
| NM_014316 | 57387.914 | 45938.297 | AK024002  | 14937.723 | 20251.904 | NM_005355 | 805.273   | 679.829   |
| NM_004054 | 1617.52   | 1680.785  | NM_020399 | 11653.943 | 19257.465 | NM_002511 | 1098.631  | 1249.407  |
| NM_001138 | 628.594   | 747.109   | AB011117  | 2124.668  | 3225.297  | AF295378  | 6000.97   | 4355.654  |
| NM_007289 | 1078.621  | 1170.403  | AF060935  | 2751.001  | 2542.852  | AF320908  | 3413.328  | 2717.032  |
| NM_004219 | 68081.938 | 55781.305 | AK026886  | 1111.604  | 1379.516  | NM_004085 | 8388.906  | 8354.455  |
| NM_003443 | 21553.273 | 20579.457 | D83778    | 1522.418  | 1606.821  | NM_012445 | 34372.902 | 33996.195 |
| NM_002025 | 9556.884  | 9380.857  | NM_004264 | 4555.131  | 5493.3    | NM_018104 | 3590.712  | 4422.45   |
| AL049685  | 5250.697  | 4157.128  | AK024788  | 1229.509  | 1324.226  | NM_006080 | 899.146   | 937.662   |
| AK026800  | 9318.484  | 9058.813  | NM_004473 | 576.681   | 660.844   | NM_006667 | 63155.906 | 61256.746 |
| NM_001442 | 2576.807  | 1883.445  | AK022696  | 1788.836  | 1838.329  | AK025125  | 581.157   | 968.521   |
| NM_017775 | 8381.862  | 8364.027  | NM_001206 | 1457.681  | 1615.205  | NM_000815 | 1784.09   | 2436.507  |
| AK001958  | 2331.831  | 2359.519  | NM_005016 | 2622.781  | 2072.644  | NM_001293 | 1213.852  | 1313.905  |
| AK025947  | 6348.682  | 6091.235  | NM_014469 | 1145.454  | 1044.847  | AB023173  | 6881.883  | 6258.767  |
| AF217973  | 2957.547  | 2560.176  | NM_014852 | 1829.137  | 1439.313  | AF156548  | 5895.186  | 5819.756  |
| NM_007033 | 21048.922 | 21135.063 | NM_000344 | 15144.606 | 14633.188 | NM_000387 | 22704.646 | 25991.223 |
| AF226048  | 12663.006 | 11530.471 | AF248650  | 2340.706  | 2184.997  | NM_004663 | 1981.682  | 2492.878  |
| NM_005573 | 18945.064 | 14845.353 | S74678    | 30142.973 | 23799.324 | NM_015310 | 1496.438  | 1359.887  |
| AV723708  | 764.867   | 965.482   | NM_001358 | 24561.637 | 15764.886 | NM_016154 | 30489.297 | 34005.129 |
| D50918    | 26978.354 | 21514.49  | NM_004836 | 6133.167  | 4320.041  | NM_005013 | 61535.41  | 59239.773 |
| U48734    | 10692.021 | 10562.572 | AB037751  | 2951.87   | 1564.362  | AB002338  | 2097.678  | 2498.989  |
| NM_006400 | 18106.611 | 19566.822 | S79281    | 4069.351  | 2155.404  | AI524814  | 3897.188  | 3508.172  |
| NM_003903 | 6526.198  | 5913.239  | AK025585  | 3148.268  | 3223.418  | AB024411  | 3609.012  | 3194.001  |
| NM_017955 | 7449.298  | 5930.629  | NM_001414 | 7936.901  | 12979.521 | NM_002444 | 40822.445 | 30951.912 |
| NM_016060 | 10241.331 | 9006.661  | D16891    | 2955.459  | 4114.725  | NM_001104 | 1632.841  | 1414.842  |
| NM_002208 | 20600.846 | 16525.16  | NM_017760 | 2601.091  | 2701.303  | NM_002989 | 6388.261  | 5472.733  |
| NM_007216 | 3124.299  | 3052.814  | NM_015936 | 6841.747  | 9608.038  | U88898    | 14452.116 | 12727.523 |
| AK023518  | 1320.744  | 1183.73   | AL109698  | 2842.892  | 3721.443  | NM_020154 | 35335.578 | 24913.258 |
| NM_000944 | 3474.451  | 3140.776  | AF217980  | 2655.218  | 2385.964  | NM_004665 | 2417.779  | 1502.401  |
| NM_012239 | 2417.71   | 2939.042  | AL117461  | 1344.692  | 1662.728  | NM_005300 | 2121.307  | 1456.235  |
| NM_012262 | 3823.237  | 3428.567  | NM_016499 | 689.095   | 885.789   | NM_000893 | 1548.953  | 1546.877  |
| NM_013390 | 10677.146 | 9293.287  | AF104921  | 27307.924 | 27241.217 | NM_000698 | 28637.945 | 25114.059 |
| J02783    | 35975.113 | 36652.68  | NM_000126 | 12355.574 | 12335.283 | NM_005091 | 1187.74   | 951.748   |

|           |           |           |           |           |           |           |           |           |
|-----------|-----------|-----------|-----------|-----------|-----------|-----------|-----------|-----------|
| NM_018137 | 1484.058  | 1144.08   | AK022291  | 691.677   | 570.452   | AF031167  | 3024.381  | 3290.763  |
| NM_006577 | 35786.453 | 39184.672 | BF239974  | 1517.241  | 1649.397  | AB023190  | 36467.043 | 44400.039 |
| NM_004413 | 1312.534  | 859.879   | NM_000104 | 937.701   | 1029.923  | NM_007064 | 1804.136  | 2445.316  |
| NM_005317 | 1880.411  | 1890.985  | NM_005015 | 13869.271 | 12422.873 | NM_006281 | 2272.674  | 3063.29   |
| AF120493  | 760.708   | 880.328   | NM_004255 | 59169.324 | 49116.77  | NM_002738 | 11464.582 | 14565.129 |
| U12597    | 3588.199  | 3321.316  | NM_000269 | 42460.746 | 35513.102 | NM_005356 | 46567.57  | 53893.246 |
| U28055    | 1120.981  | 1136.037  | AF182288  | 2286.504  | 2253.716  | Z25434    | 7645.892  | 8283.684  |
| AB044343  | 2969.607  | 2868.833  | NM_004491 | 1838.589  | 1386.35   | NM_005884 | 19081.887 | 24465.477 |
| NM_018409 | 731.23    | 541.391   | AK026810  | 2891.651  | 2106.304  | NM_012396 | 14888.847 | 15270.567 |
| NM_014662 | 792.65    | 691.219   | NM_015629 | 8938.125  | 5882.457  | AF229804  | 50788.762 | 57816.66  |
| NM_005178 | 3171.604  | 3139.827  | AF218032  | 5839.618  | 3349.045  | AF151638  | 3864.958  | 3798.098  |
| NM_017702 | 11947.854 | 9877.279  | NM_017542 | 7549.446  | 4598.051  | U90552    | 11667.838 | 12177.333 |
| AB014516  | 3476.926  | 3489.428  | AK024407  | 1148.683  | 363.541   | NM_006032 | 6849      | 6587.504  |
| Z83950    | 2174.11   | 1916.405  | NM_004182 | 33602.125 | 47248.262 | NM_014788 | 3787.303  | 2881.405  |
| AL080063  | 4498.441  | 4083.376  | NM_018419 | 1118.193  | 1801.426  | NM_002153 | 1649.184  | 1542.019  |
| NM_005625 | 16965.938 | 16503.746 | NM_014240 | 1983.984  | 3004.953  | AB040890  | 6280.808  | 4729.34   |
| NM_005475 | 1885.669  | 1784.494  | BE379399  | 1520.61   | 1687.767  | AK024233  | 1909.63   | 2057.882  |
| AB040918  | 1843.13   | 1990.988  | NM_015877 | 1227.198  | 1810.349  | AK021870  | 2609.788  | 1829.189  |
| NM_015859 | 9596.737  | 7157.282  | AL117598  | 1501.252  | 1891.541  | U06680    | 1351.962  | 979.494   |
| X60152    | 2367.689  | 1985.112  | AL109670  | 952.712   | 941.017   | NM_005123 | 1190.659  | 918.363   |
| NM_002316 | 713.048   | 762.358   | AF085831  | 1109.303  | 1227.736  | NM_015584 | 13151.131 | 11690.234 |
| AB023232  | 3035.808  | 3018.643  | AL832149  | 3574.349  | 3762.364  | NM_001697 | 52836.059 | 48302.563 |
| NM_017420 | 644.419   | 780.422   | AK022839  | 2656.628  | 2974.08   | NM_016098 | 24391.09  | 17012.502 |
| AL137589  | 2919.082  | 2267.102  | NM_018350 | 1609.676  | 2278.768  | NM_002063 | 806.88    | 1117.964  |
| NM_002502 | 4494.33   | 4643.531  | AK025839  | 1701.402  | 1606.054  | AL137479  | 1330.777  | 1794.827  |
| AF226732  | 6504.369  | 5456.074  | NM_003946 | 1310.971  | 1241.146  | NM_004211 | 3088.73   | 4168.094  |
| NM_006312 | 8163.018  | 7642.638  | AB045292  | 4143.772  | 4055.078  | Y10776    | 3958.011  | 4330.425  |
| NM_002805 | 1643.775  | 1725.93   | AK022998  | 2528.077  | 2367.064  | AK027241  | 8135.311  | 9481.621  |
| NM_002939 | 17031.805 | 14304.056 | AK025699  | 10335.891 | 9099.953  | NM_004561 | 1113.793  | 1321.289  |
| NM_015836 | 25961.49  | 22339.063 | AF147316  | 259.773   | 349.875   | AK024812  | 6013.552  | 7362.153  |
| NM_004713 | 2554.664  | 2123.912  | AF147353  | 536.838   | 678.904   | M20642    | 2397.449  | 2364.691  |
| NM_003769 | 981.994   | 878.096   | NM_018024 | 5940.995  | 5806.344  | AK026412  | 3640.057  | 3758.583  |
| NM_001698 | 13940.12  | 12559.373 | AK026783  | 1056.541  | 715.445   | X89669    | 3137.806  | 4087.81   |
| AF086431  | 1922.793  | 2008.453  | AK021814  | 1640.418  | 1017.633  | NM_001072 | 2025.265  | 1971.569  |
| AL110204  | 670.205   | 609.191   | AF088035  | 1553.141  | 922.655   | NM_014070 | 1258.145  | 970.437   |
| NM_014188 | 27178.318 | 28329.156 | AF086251  | 1144.745  | 2237.797  | NM_016280 | 436.075   | 265.609   |
| AK026365  | 3500.513  | 3467.341  | NM_018092 | 17137.59  | 23937.238 | NM_016027 | 1196.532  | 886.959   |
| AF105378  | 1057.513  | 649.595   | NM_005842 | 4821.94   | 7862.086  | NM_014297 | 13074.811 | 8709.162  |
| NM_000167 | 5299.372  | 4620.166  | NM_003787 | 533.093   | 735.606   | NM_018156 | 16126.527 | 13795.848 |
| AY007125  | 3585.834  | 3261.219  | AF147419  | 2000.667  | 2326.522  | X98266    | 1509.149  | 1283.815  |
| AB032987  | 2120.693  | 2294.902  | AK024280  | 829.066   | 851.29    | U00930    | 17852.646 | 15226.726 |
| NM_017567 | 10481.979 | 10737.511 | AF075036  | 1116.676  | 758.512   | AK024958  | 1243.271  | 1146.523  |
| NM_000691 | 2785.64   | 2633.103  | NM_014797 | 3810.877  | 3543.214  | NM_014575 | 6365.437  | 5203.819  |
| Y18643    | 748.39    | 586.823   | AK027139  | 732.749   | 963.079   | NM_002439 | 5686.008  | 3628.835  |
| D86971    | 12234.092 | 13797.802 | AL831841  | 3632.724  | 3816.93   | AL117552  | 2523.393  | 1951.546  |
| NM_003073 | 10516.264 | 8978.218  | AL110165  | 1523.347  | 1251.944  | NM_002692 | 14390.917 | 16729.133 |
| NM_014048 | 1010.628  | 956.295   | AL117652  | 667.541   | 735.405   | X55525    | 1379.562  | 1728.039  |
| AF274863  | 1987.926  | 2628.6    | AL050168  | 1861.677  | 1315.273  | NM_000242 | 684.602   | 936.612   |
| AF319458  | 1200.58   | 900.589   | AL122122  | 4145.452  | 2386.456  | AB040878  | 1245.871  | 1640.521  |
| AF024697  | 2074.073  | 1804.027  | AK000122  | 7730.095  | 6066.36   | S74647    | 1141.381  | 1380.66   |
| NM_005612 | 7799.964  | 5200.334  | AK023159  | 2950.568  | 1727.485  | NM_003506 | 2164.356  | 2607.008  |
| D17018    | 413.384   | 353.056   | AK001091  | 2869.347  | 1522.363  | NM_018093 | 7668.031  | 9516.484  |
| AB046852  | 1689.768  | 1380.059  | U80775    | 547.037   | 1186.542  | NM_003389 | 7463.143  | 7836.206  |

|           |           |           |           |           |           |           |           |           |
|-----------|-----------|-----------|-----------|-----------|-----------|-----------|-----------|-----------|
| AF085891  | 2210.764  | 2353.837  | AF086428  | 822.139   | 946.857   | NM_00043C | 2340.256  | 2689.466  |
| X73053    | 994.274   | 1414.37   | AK025310  | 4015.943  | 5006.825  | AB033030  | 823.766   | 968.593   |
| AF019618  | 1837.012  | 1689.332  | AL049353  | 880.008   | 1243.516  | NM_01665E | 2692.384  | 1735.146  |
| AK025656  | 3110.906  | 2664.212  | AI793165  | 112.564   | 1489.208  | NM_01596E | 8694.103  | 8702.499  |
| AF138859  | 865.422   | 741.321   | NM_01489E | 597.239   | 501.781   | AB007871  | 4755.651  | 5385.657  |
| AF161414  | 3625.064  | 3675.909  | AF009269  | 803.466   | 721.495   | NM_01781E | 8560.837  | 7355.206  |
| AK025967  | 1260.599  | 1086.593  | AF009313  | 1698.855  | 1737.408  | NM_00384C | 13938.438 | 8200.096  |
| AL110177  | 1741.911  | 1536.551  | AF056420  | 1038.2    | 838.634   | NM_01837E | 1916.348  | 1333.11   |
| NM_00276E | 13859.208 | 10564.095 | AF090887  | 804.345   | 871.465   | NM_01842E | 2041.199  | 1366.279  |
| AF070628  | 860.507   | 672.735   | AF009279  | 747.273   | 593.071   | NM_00174I | 10361.534 | 8089.155  |
| NM_015434 | 3276.609  | 2850.222  | NM_01588E | 1981.332  | 2448.955  | NM_00074E | 3858.444  | 2981.228  |
| NM_01405E | 3600.891  | 3367.277  | AF056429  | 851.004   | 736.854   | AF116705  | 12467.673 | 10504.262 |
| NM_018691 | 2404.032  | 2328.078  | AF070547  | 2139.412  | 1629.475  | NM_00446C | 1541.212  | 1238.367  |
| AK001020  | 611.232   | 622.562   | AK001110  | 7077.081  | 4171.146  | NM_00607E | 3419.037  | 2951.879  |
| AK022098  | 1856.586  | 1684.732  | AK002184  | 850.52    | 447.469   | BE794490  | 1117.497  | 1137.694  |
| AB040933  | 771.945   | 989.565   | AK021652  | 914.807   | 600.953   | NM_00356I | 3706.927  | 2300.195  |
| AK021875  | 1741.061  | 1492.901  | AK021859  | 1066.374  | 527.187   | NM_00299I | 976.093   | 771.801   |
| AK026900  | 11403.323 | 10339.432 | AK026439  | 845.118   | 1092.829  | NM_00407I | 5460.043  | 8196.037  |
| AK025020  | 9753.623  | 8090.713  | AK025278  | 654.157   | 696.419   | NM_00131E | 13229.756 | 14370.004 |
| AF086009  | 1238.082  | 2575.655  | AK026466  | 416.108   | 1002.327  | AJ008149  | 6242.59   | 6948.685  |
| AF086463  | 1248.567  | 1199.077  | AY007163  | 10280.757 | 12050.171 | NM_00119E | 680.41    | 1039.306  |
| AK024598  | 2658.209  | 2508.944  | NM_00623E | 16285.144 | 15224.113 | NM_00235E | 1621.082  | 1529.115  |
| AF087983  | 1155.712  | 1068.152  | AK023734  | 1041.492  | 615.743   | NM_01215E | 2322.069  | 2211.338  |
| NM_020234 | 4409.221  | 4640.791  | D17265    | 34656.043 | 36626.941 | NM_01324I | 3181.874  | 3304.211  |
| U70772    | 560.781   | 438.217   | AF085827  | 764.687   | 725.378   | NM_01798E | 61990.633 | 62891.516 |
| Z36825    | 997.344   | 1083.342  | Y08266    | 18514.93  | 15623.702 | NM_01553E | 2390.694  | 2401.9    |
| AF086127  | 759.195   | 648.124   | AK002171  | 3907.011  | 2865.844  | Z24725    | 5333.424  | 5784.37   |
| AF086157  | 3970.151  | 3506.75   | AJ002572  | 1663.115  | 1114.077  | AF161362  | 4561.375  | 4066.213  |
| AL109710  | 1598.681  | 1193.323  | AK026897  | 8391.011  | 6924.844  | NM_01593E | 11296.546 | 8191.684  |
| AK023793  | 1622.036  | 1345.398  | AB037861  | 5719.619  | 4312.403  | AB046840  | 3640.408  | 2147.044  |
| AK021544  | 679.79    | 785.999   | AK021887  | 3743.73   | 2315.303  | AF174487  | 2573.764  | 1989.041  |
| AK026340  | 703.983   | 831.62    | AF086180  | 10038.333 | 7336.912  | NM_01769E | 824.596   | 802.543   |
| AK022686  | 1923.283  | 1562.027  | AK022135  | 609.457   | 1126.526  | NM_00504I | 735.642   | 627.463   |
| AK023516  | 5783.211  | 6908.366  | AK022898  | 4048.568  | 6887.795  | NM_006407 | 21418.229 | 12745.418 |
| AK023864  | 2298.986  | 2092.23   | NM_01755E | 7835.808  | 8893.029  | NM_00737E | 3524.669  | 1421.409  |
| AK023017  | 3368.347  | 3263.067  | AK024897  | 400.104   | 563.53    | NM_00626E | 41431.484 | 21358.355 |
| AK023908  | 2041.147  | 1649.809  | NM_003547 | 1712.321  | 1314.371  | NM_00479I | 3464.3    | 2837.883  |
| AK024236  | 945.721   | 1200.649  | AL049980  | 2477.887  | 2106.523  | Z36876    | 4855.755  | 6435.68   |
| Z24724    | 9941.024  | 9502.196  | NM_00668E | 964.639   | 712.255   | NM_00089E | 2186.611  | 2822.15   |
| AK022712  | 3526.137  | 3774.531  | AF070529  | 746.03    | 528.942   | NM_00504E | 1198.634  | 1518.523  |
| AK024132  | 1586.885  | 1867.233  | AK022978  | 1769.157  | 1420.136  | NM_00187E | 920.279   | 1075.171  |
| AK021863  | 21016.453 | 20484.035 | AK021447  | 5697.785  | 3503.237  | AB029025  | 745.563   | 1225.359  |
| AK024208  | 521.944   | 622.537   | AK025096  | 1168.717  | 748.8     | NM_00710C | 51323.496 | 55439.527 |
| NM_005684 | 490.696   | 354.088   | L31955    | 364.51    | 414.52    | NM_002954 | 64337.258 | 60021.395 |
| AL133065  | 3790.318  | 3673.661  | AF131774  | 1701.676  | 1359.329  | NM_00394C | 755.87    | 772.565   |
| U80769    | 520.868   | 2296.62   | AK025793  | 1156.804  | 604.896   | NM_01657E | 2282.005  | 2159.869  |
| S80491    | 849.468   | 808.666   | AK000151  | 694.308   | 462.136   | NM_000027 | 1189.526  | 898.51    |
| AK021678  | 445.997   | 574.367   | AL389942  | 1558.261  | 1199.759  | NM_01754E | 25968.664 | 15852.88  |
| AJ011377  | 3424.224  | 2848.118  | D17052    | 2209.78   | 2203.178  | AF134802  | 1328.604  | 971.06    |
| AK023784  | 219.792   | 1963.83   | D28378    | 64783.375 | 57151.273 | NM_01822E | 1381.88   | 810.191   |
| AK026323  | 1391.137  | 1372.332  | M64700    | 976.618   | 908.845   | NM_00574C | 4811.816  | 4394.726  |
| NM_00349E | 66249.414 | 58248.816 | AF111846  | 521.336   | 572.238   | NM_00430E | 19769.303 | 17078.379 |
| AL133430  | 16784.824 | 14906.822 | NM_001267 | 850.534   | 880.793   | AF112366  | 3400.786  | 2716.78   |

|           |           |           |           |           |           |           |           |           |
|-----------|-----------|-----------|-----------|-----------|-----------|-----------|-----------|-----------|
| AF070633  | 34111.746 | 33987.52  | L41143    | 13711.087 | 14813.961 | NM_004274 | 1523.264  | 1269.569  |
| S51971    | 70588.102 | 66751.516 | NM_005331 | 30195.18  | 30807.691 | AK024002  | 11502.101 | 8859.421  |
| AF054996  | 13823.803 | 13480.447 | NM_014111 | 1046.333  | 987.681   | NM_020396 | 8194.383  | 4101.908  |
| AL133555  | 3176.137  | 2708.078  | S85075    | 1089.563  | 1169.13   | AB011117  | 2177.488  | 1349.492  |
| AK024979  | 922.194   | 929.708   | AJ008129  | 4176.52   | 4127.8    | AF060935  | 3407.332  | 3032.213  |
| AF233648  | 1258.367  | 964.281   | AJ008158  | 659.035   | 884.526   | AK026886  | 1937.596  | 2507.618  |
| AY007126  | 9577.599  | 7452.833  | AF161451  | 26663.367 | 36310.625 | D83778    | 1969.943  | 2311.998  |
| AF085951  | 4093.992  | 3435.338  | X02067    | 26405.168 | 31958.125 | NM_004264 | 6552.559  | 6569.684  |
| AF131787  | 1016.273  | 957.987   | U92013    | 21014.605 | 11279.038 | AK024788  | 1658.32   | 1866.007  |
| AF087989  | 723.922   | 897.595   | AK023965  | 2149.462  | 2270.059  | NM_004473 | 947.153   | 954.307   |
| Z70715    | 1579.071  | 1424.333  | AK026211  | 1856.79   | 1614.38   | AK022696  | 2866.687  | 2391.312  |
| NM_018182 | 5262.622  | 4619.104  | X58968    | 2824.517  | 2400.681  | NM_001206 | 1996.322  | 2549.977  |
| U80771    | 9796.072  | 7193.143  | U92020    | 5548.793  | 4550.012  | NM_005016 | 3027.383  | 3199.912  |
| AJ272173  | 15364.363 | 13539.101 | AL117542  | 1015.666  | 718.198   | NM_014466 | 3687.6    | 3569.298  |
| Y17180    | 62955.754 | 55259.086 | AL109712  | 19718.986 | 19181.689 | NM_014852 | 4449.548  | 3965.565  |
| NM_005649 | 4874.076  | 4309.344  | X04215    | 849.316   | 1227.369  | NM_000344 | 20944.221 | 20577.379 |
| AK021566  | 1269.846  | 1810.147  | NM_017782 | 4454.658  | 6934.61   | AF248650  | 4197.09   | 3017.031  |
| NM_002037 | 5931.768  | 5238.32   | NM_018149 | 7933.851  | 10452.184 | S74678    | 40442.602 | 21939.348 |
| NM_016346 | 840.893   | 960.367   | D16944    | 988.958   | 1258.719  | AF248651  | 984.872   | 569.762   |
| NM_020157 | 1357.498  | 1383.748  | NM_018468 | 29326.146 | 41440.445 | NM_001358 | 34662.941 | 18363.225 |
| X64991    | 1120.759  | 765.444   | Z36814    | 2791.678  | 3511.732  | NM_004836 | 8704.23   | 5353.012  |
| NM_014320 | 3875.251  | 2740.911  | D17045    | 2424.541  | 3018.596  | AB037751  | 5878.906  | 3402.097  |
| AK025703  | 7244.015  | 6091.607  | AK000827  | 8178.802  | 8256.954  | S79281    | 6229.796  | 4111.128  |
| NM_018185 | 3073.413  | 2377.12   | NM_002503 | 56328.43  | 47804.594 | AK025585  | 3325.044  | 1833.501  |
| AK022598  | 5964.335  | 5242.566  | NM_005319 | 13999.339 | 10567.34  | NM_001414 | 9135.305  | 6231.592  |
| AK024306  | 1166.907  | 1144.436  | NM_019058 | 1003.692  | 1168.204  | D16891    | 2667.578  | 1291.127  |
| NM_018322 | 6231.888  | 5942.647  | AK022351  | 3325.824  | 3503.572  | NM_017760 | 3594.073  | 1716.91   |
| AK025862  | 25382.471 | 20595.279 | S74319    | 749.875   | 374.511   | NM_015936 | 9162.858  | 5690.572  |
| AK026495  | 2162.717  | 1903.542  | AK022059  | 1161.014  | 1262.959  | AL109698  | 3095.662  | 4103.387  |
| U85044    | 2121.782  | 1514.867  | NM_020194 | 12230.703 | 19251.613 | AF217980  | 8631.439  | 12067.112 |
| BC018880  | 796.994   | 765.741   | AK026853  | 1018.255  | 1315.607  | AL117461  | 2009.231  | 2474.555  |
| AF086090  | 2304.678  | 1972.758  | AF038183  | 32935.301 | 41795.027 | NM_016496 | 1267.435  | 1715.804  |
| AK002173  | 28972.33  | 26180.787 | NM_017882 | 3776.749  | 3958.697  | AF104921  | 37631.621 | 44033.285 |
| NM_017746 | 1816.315  | 1633.082  | NM_003521 | 2431.695  | 2990.99   | NM_000126 | 15710.876 | 17602.891 |
| NM_020188 | 24001.68  | 21346.842 | CY3Cy5    | 3645.319  | 304.455   | AK022291  | 763.776   | 681.372   |
| U88897    | 15339.135 | 12924.45  | J03571    | 13012.265 | 12261.083 | BF239974  | 2553.036  | 2720.436  |
| CY3Cy5    | 7699.673  | 388.373   | X56134    | 660.121   | 1101.908  | NM_000104 | 1413.434  | 1665.252  |
| BG617923  | 357.363   | 728.582   | NM_001456 | 1272.161  | 1315.638  | NM_005015 | 16622.086 | 18040.08  |
| U37448    | 4327.107  | 5962.431  | H44784    | 718.157   | 666.3     | NM_004255 | 56439.328 | 58827.398 |
| BG435851  | 856.183   | 1041.197  | AI421041  | 42358.57  | 51510.66  | NM_000266 | 56547.598 | 45322.742 |
| AA927698  | 4654.656  | 5371.965  | BI759091  | 2581.093  | 2486.363  | AF182288  | 3775.459  | 3425.394  |
| AI498426  | 2758.955  | 2459.982  | BG685843  | 12313.555 | 17306.906 | NM_004491 | 2793.079  | 1320.589  |
| BG824773  | 507.035   | 396.588   | BI490011  | 2370.038  | 2739.96   | AK026810  | 4553.788  | 2633.075  |
| D01038    | 6306.385  | 6938.952  | AF035771  | 989.643   | 1047.439  | NM_015626 | 9132.391  | 5288.086  |
| AB019205  | 3298.013  | 3837.607  | N20475    | 5813.597  | 7330.453  | AF218032  | 7185.715  | 3845.259  |
| J05008    | 2324.853  | 2377.241  | BI199286  | 8165.562  | 10307.479 | NM_017542 | 9680.105  | 6427.912  |
| U11087    | 1122.893  | 1097.376  | AA026626  | 1488.364  | 1231.659  | AK024407  | 1439.765  | 702.036   |
| D50640    | 4304.795  | 4945.002  | H61726    | 1408.096  | 1541.379  | NM_004182 | 32615.721 | 22822.133 |
| D43747    | 713.459   | 942.267   | NM_004774 | 5548.038  | 5366.628  | NM_018419 | 824.929   | 625.149   |
| M98776    | 10197.073 | 10518.371 | SR5       | 8178.001  | 8537.874  | NM_014240 | 1410.056  | 732.678   |
| X99135    | 6854.495  | 9741.702  | SR7       | 6460.236  | 49088.621 | BE379399  | 1596.431  | 987.215   |
| AF009744  | 4289.389  | 4522.335  | SR9       | 26261.959 | 6036.033  | NM_015877 | 2359.067  | 1649.109  |
| NM_172140 | 5883.846  | 7222.642  | CY3Cy5    | 4400.962  | 430.287   | AL117598  | 2849.904  | 4735.104  |

|           |           |           |           |           |           |           |           |           |
|-----------|-----------|-----------|-----------|-----------|-----------|-----------|-----------|-----------|
| SR6       | 5299.078  | 4737.532  | AF212842  | 306.442   | 1150.396  | AL109670  | 2706.511  | 5970.373  |
| SR8       | 16282.4   | 46070.016 | NM_018404 | 678.293   | 878.416   | AF085831  | 1561.453  | 1545.427  |
| SR10      | 54774.828 | 28362.875 | M27544    | 3041.897  | 3015.48   | AL832149  | 4115.454  | 4445.596  |
| CY3Cy5    | 7026.693  | 279.984   | NM_001118 | 937.398   | 1628.213  | AK022839  | 3215.72   | 3907.198  |
| NM_005311 | 1736.683  | 1925.629  | AL133097  | 3706.28   | 3421.361  | NM_01835C | 3390.746  | 4412.52   |
| NM_00590E | 4021.003  | 4902.984  | NM_001165 | 3361.226  | 3347.147  | AK025839  | 2337.391  | 2859.934  |
| NM_01623E | 1448.4    | 1701.279  | NM_001381 | 64548.465 | 57045.055 | NM_00394E | 2108.801  | 2234.582  |
| NM_00096C | 573.749   | 855.938   | NM_00645E | 5681.463  | 6114.398  | AB045292  | 4457.209  | 4718.063  |
| AF172932  | 2245.867  | 2098.544  | NM_004093 | 1054.041  | 1111.389  | AK022998  | 2982.147  | 2566.389  |
| NM_00535E | 845.492   | 907.058   | NM_001449 | 10587.748 | 12352.446 | AK025699  | 20780.652 | 20657.281 |
| NM_002511 | 1122.572  | 1469.327  | AF086122  | 5931.73   | 6109.48   | AF147353  | 762.503   | 944.315   |
| AF295378  | 6528.343  | 7739.261  | AK024397  | 6350.609  | 5680.016  | NM_018024 | 9761.914  | 7471.242  |
| AF320908  | 3378.984  | 3859.381  | AF073931  | 676.351   | 471.925   | AK027173  | 810.842   | 392.754   |
| NM_00408E | 1405.64   | 1365.438  | NM_00128E | 963.728   | 837.072   | AK026783  | 1295.586  | 978.289   |
| NM_01244E | 23026.027 | 26494.887 | NM_003564 | 2309.052  | 2252.692  | AK021814  | 2218.184  | 1725.932  |
| NM_018104 | 1855.555  | 2588.363  | AK023414  | 669.251   | 663.735   | AF088035  | 1769.84   | 1502.121  |
| NM_00608C | 913.127   | 1238.392  | AF317516  | 11740.64  | 14339.02  | AF086251  | 1036.543  | 888.024   |
| NM_00442E | 2540.491  | 3288.671  | NM_002581 | 1331.601  | 1566.137  | NM_01809Z | 14891.329 | 7059.029  |
| U64564    | 2313.847  | 2766.755  | AI417964  | 689.093   | 804.898   | NM_00584Z | 4906.869  | 3077.119  |
| NM_00647C | 3215.206  | 4008.032  | S78203    | 3880.703  | 4721.718  | NM_003787 | 607.425   | 1040.344  |
| NM_00285E | 4794.233  | 5849.781  | NM_01620E | 10156.033 | 11641.127 | AF147419  | 5464.452  | 5779.176  |
| AB038463  | 2295.713  | 2986.806  | NM_00563E | 7280.867  | 7609.148  | AK024280  | 1482.294  | 1313.858  |
| M30262    | 715.948   | 1028.3    | NM_00723E | 14315.42  | 13849.339 | AF075036  | 1882.564  | 2144.551  |
| NM_00546C | 1773.964  | 2060.179  | NM_00726E | 1937.486  | 2064.615  | NM_014797 | 6449.084  | 6710.388  |
| AF160477  | 2822.958  | 3232.916  | AK026014  | 3081.211  | 3129.623  | AK027139  | 1150.595  | 1259.661  |
| NM_00322E | 357.35    | 691.534   | NM_01484E | 2428.342  | 2565.636  | AL831841  | 8113.954  | 8518.902  |
| M12883    | 6710.635  | 7425.774  | NM_00429E | 4315.722  | 3985.383  | AL110165  | 4702.247  | 4213.051  |
| BG288747  | 14930.951 | 15559.867 | NM_007181 | 4682.797  | 5498.295  | AL117652  | 1227.349  | 1450.881  |
| AI524814  | 4870.723  | 4845.573  | AB007857  | 1618.371  | 1251.139  | AL050168  | 2841.654  | 2783.641  |
| AB024411  | 1355.459  | 1485.957  | NM_00177E | 30968.938 | 38670.824 | AL122122  | 7079.644  | 5406.004  |
| NM_002444 | 43864.574 | 49763.703 | NM_004997 | 11540.755 | 11819.879 | AK000122  | 12715.559 | 8400.667  |
| NM_001104 | 1511.19   | 1086.013  | NM_005923 | 5931.834  | 5958.513  | AK023159  | 3609.453  | 2727.798  |
| NM_00298E | 10217.979 | 10062.559 | NM_00346E | 3207.313  | 3711.657  | AK001091  | 3916.067  | 3055.871  |
| U88898    | 18818.248 | 18963.74  | AF289028  | 1240.406  | 932.8     | AF086428  | 898.832   | 809.13    |
| NM_020154 | 41174.902 | 46999.184 | NM_005127 | 13271.249 | 15465.863 | AK025310  | 4109.525  | 1879.542  |
| NM_00466E | 3490.608  | 3541.37   | NM_005567 | 2735.897  | 3067.268  | AF009269  | 2178.959  | 2116.662  |
| NM_00530C | 2669.034  | 2857.504  | NM_00521E | 11852.086 | 12645.243 | AF009313  | 4625.417  | 6232.1    |
| NM_000893 | 1445.922  | 1546.537  | NM_00662E | 1568.72   | 1615.834  | AF056420  | 1105.523  | 1311.965  |
| NM_00069E | 12483.679 | 11287.878 | NM_00396E | 1821.62   | 1968.425  | AF090887  | 1587.926  | 1710.178  |
| NM_005091 | 1206.236  | 862.694   | NM_004584 | 4695.099  | 5721.688  | AF009279  | 967.173   | 1149.186  |
| AF031167  | 3576.199  | 3397.634  | X15183    | 65768.008 | 63876.875 | NM_015883 | 2501.428  | 2373.552  |
| NM_003204 | 4039.794  | 5259.951  | AK023618  | 5132.046  | 6289.38   | AF056429  | 883.729   | 1229.413  |
| AF254069  | 2261.656  | 2124.303  | NM_001492 | 743.217   | 957.858   | AF070547  | 4870.382  | 5173.756  |
| AL117600  | 19828.297 | 19889.252 | AB012643  | 7266.957  | 5716.218  | AK001110  | 15170.792 | 14618.71  |
| NM_001712 | 1766.256  | 1672.224  | AB023170  | 1225.833  | 1283.129  | AK021801  | 497.478   | 469.325   |
| NM_004487 | 13494.325 | 12601.691 | NM_014153 | 14109.693 | 17237.672 | AK002184  | 1179.915  | 686.677   |
| AB029000  | 9399.217  | 10869.429 | NM_00229E | 15335.944 | 15826.301 | AK021652  | 1165.806  | 986.381   |
| AK026965  | 3617.705  | 4580.856  | NM_000414 | 7442.859  | 7122.596  | AK021859  | 2161.449  | 1537.361  |
| AK025859  | 9145.902  | 8784.209  | NM_01884E | 7993.332  | 8276.481  | AK025826  | 1097.273  | 743.835   |
| AL117499  | 23619.512 | 29029.977 | AY008372  | 881.63    | 837.465   | AK026439  | 2137.762  | 1353.557  |
| NM_007054 | 3609.317  | 4528.224  | NM_00550E | 1881.028  | 1769.458  | AK025278  | 999.285   | 823.779   |
| AB007957  | 1100.107  | 1120.376  | AK026964  | 917.639   | 962.213   | AY007163  | 11326.322 | 15642.492 |
| AK000160  | 6235.043  | 6331.538  | NM_001134 | 1007.693  | 1223.771  | NM_00623E | 38272.027 | 43765.961 |

|           |           |           |           |           |           |           |           |           |
|-----------|-----------|-----------|-----------|-----------|-----------|-----------|-----------|-----------|
| NM_006032 | 3853.248  | 3971.434  | NM_016016 | 14088.412 | 15131.81  | AK023734  | 1272.571  | 2016.174  |
| NM_014788 | 4841.63   | 4926.122  | NM_020407 | 1090.504  | 1240.649  | D17265    | 43511.137 | 44452.824 |
| NM_002153 | 1619.112  | 2072.037  | AF118274  | 7059.531  | 6696.022  | AF085827  | 1113.794  | 1224.756  |
| AB040890  | 7432.747  | 9030.371  | NM_018344 | 3159.771  | 4274.311  | Y08266    | 45975.227 | 46981.969 |
| AK024233  | 2636.467  | 2783.87   | NM_000079 | 5418.008  | 7306.998  | AK002171  | 5668.87   | 6133.095  |
| AK021870  | 4519.083  | 4917.813  | NM_000083 | 1183.242  | 1785.375  | AJ002572  | 2791.448  | 3021.55   |
| U06680    | 2189.467  | 2221.656  | AL110245  | 2921.229  | 2957.095  | AK026897  | 9682.882  | 10260.985 |
| NM_005123 | 1851.37   | 2179.555  | NM_005628 | 23871.332 | 27005.059 | AB037861  | 9456.286  | 10406.351 |
| NM_015584 | 15620.909 | 18748.018 | NM_003951 | 939.54    | 1144.2    | AK021887  | 6259.517  | 4890.84   |
| AB032525  | 874.498   | 530.973   | NM_016605 | 22751.799 | 26932.891 | AF086180  | 11242.262 | 11970.513 |
| NM_002063 | 892.874   | 923.12    | X74609    | 32631.617 | 32467.506 | AK022135  | 2405.402  | 1452.455  |
| NM_006667 | 24921.67  | 31717.061 | NM_018990 | 12110.01  | 11739.674 | AK022898  | 4533.282  | 3510.264  |
| AK025125  | 913.972   | 938.852   | NM_013363 | 1135.7    | 980.45    | NM_017555 | 22223.652 | 17659.367 |
| NM_000815 | 2848.986  | 2558.704  | NM_000947 | 3879.498  | 3855.507  | NM_003547 | 2935.784  | 3005.977  |
| NM_001293 | 1465.625  | 1371.278  | AL096750  | 32247.424 | 32557.941 | AL049980  | 4414.996  | 8000.085  |
| AB023173  | 13726.487 | 14079.526 | NM_016061 | 4160.554  | 4597.99   | NM_006683 | 775.936   | 1193.689  |
| AF156548  | 8713.624  | 8621.89   | NM_016062 | 39252.016 | 41299.031 | AF070529  | 1222.746  | 1121.071  |
| NM_000387 | 7294.29   | 7794.02   | NM_004153 | 2854.63   | 3704.143  | AK022978  | 2522.277  | 2594.604  |
| NM_004663 | 2709.888  | 2932.066  | AK024740  | 2845.467  | 3609.231  | AK021447  | 8417.325  | 9494.52   |
| NM_015310 | 1725.174  | 1819.625  | AF078164  | 9712.045  | 9337.281  | AK025096  | 1647.401  | 1802.034  |
| NM_016154 | 18473.113 | 20402.33  | NM_019049 | 3494.408  | 4146.479  | AF131774  | 3427.301  | 2867.838  |
| NM_005013 | 69998.727 | 57901.434 | NM_012413 | 552.298   | 570.564   | AK025793  | 942.941   | 1085.684  |
| AB002338  | 3042.6    | 3121.015  | AF130101  | 1023.339  | 1229.221  | AK000151  | 793.926   | 857.538   |
| NM_001072 | 2842.009  | 2905.479  | NM_004656 | 7069.985  | 6946.411  | AL389942  | 1637.376  | 2049.487  |
| NM_014070 | 1062.042  | 1515.262  | NM_005576 | 1994.013  | 2112.543  | D17052    | 2042.824  | 2087.217  |
| NM_016027 | 1351.675  | 1214.272  | AF247820  | 767.522   | 915.695   | D28378    | 60900.047 | 55915.668 |
| NM_014297 | 15585.005 | 13820.222 | AF071569  | 2267.023  | 2540.916  | M64700    | 1077.187  | 1049.605  |
| NM_018156 | 11053.902 | 10302.161 | NM_002269 | 2856.891  | 3752.024  | NM_001267 | 796.804   | 743.593   |
| X98266    | 3033.881  | 2844.07   | J04948    | 1590.381  | 2050.326  | L41143    | 9500.146  | 5656.132  |
| U00930    | 20759.182 | 22000.369 | NM_018043 | 535.2     | 970.653   | NM_005331 | 32146.693 | 24258.117 |
| AK024958  | 2000.772  | 1938.593  | AK022564  | 62996.313 | 66641.844 | NM_014111 | 1430.801  | 1308.135  |
| AL117552  | 3519.506  | 3356.639  | NM_003564 | 2192.376  | 2120.694  | S85075    | 794.314   | 877.962   |
| NM_002692 | 13731.185 | 12592.07  | AK023414  | 445.022   | 1103.85   | AJ008129  | 4848.606  | 2970.497  |
| AB023190  | 4416.688  | 5746.102  | AF317516  | 6823.587  | 6951.418  | AJ008158  | 736.255   | 456.702   |
| NM_007064 | 1699.821  | 1627.367  | NM_002581 | 1064.639  | 1172.884  | AF161451  | 15636.207 | 8771.024  |
| NM_006281 | 4103.966  | 4169.096  | J03571    | 12173.216 | 12237.096 | X02067    | 18029.539 | 10036.474 |
| NM_002738 | 16583.439 | 18469.619 | X56134    | 1306.301  | 1385.942  | U92013    | 15144.492 | 20214.533 |
| U23460    | 10229.742 | 12151.732 | NM_001456 | 2101.248  | 1562.932  | AK023965  | 2220.041  | 2888.726  |
| NM_005356 | 62571.633 | 55489.559 | H44784    | 972.937   | 699.599   | AK026211  | 2126.803  | 2259.228  |
| Z25434    | 1956.17   | 1616.721  | BI759091  | 2715.906  | 2866.399  | X58968    | 3536.906  | 4023.952  |
| NM_005884 | 22097.877 | 27024.031 | BG685843  | 13553.295 | 15548.379 | U92020    | 6762.722  | 6936.468  |
| NM_012395 | 16221.15  | 18659.963 | BI490011  | 2097.839  | 1936.608  | AL117542  | 1380.893  | 1629.646  |
| AF229804  | 9846.933  | 12259.872 | AF035771  | 1409.968  | 1245.38   | AL109712  | 25938.25  | 38276.547 |
| AF151638  | 4907.825  | 5683.293  | N20475    | 7415.476  | 7574.122  | NM_017782 | 4510.351  | 4532      |
| U90552    | 13920.09  | 16722.674 | BI199286  | 8652.208  | 9344.773  | NM_018145 | 6056.189  | 6288.958  |
| NM_005460 | 1504.699  | 1353.959  | AA026626  | 1165.559  | 1246.095  | NM_018468 | 24137.998 | 22397.43  |
| AF160477  | 2616.963  | 2487.307  | H61726    | 1121.344  | 1022.265  | Z36814    | 1730.639  | 1535.702  |
| NM_003226 | 802.946   | 1052.737  | NM_004774 | 5275.696  | 4806.946  | D17045    | 1707.825  | 1496.787  |
| M12883    | 5408.628  | 6043.982  | NM_005234 | 5818.599  | 4862.799  | AK000827  | 4633.473  | 3879.925  |
| BG288747  | 12233.527 | 13152.755 | AL050355  | 408.701   | 1039.961  | NM_002503 | 43965.926 | 37431.352 |
| BG617923  | 618.95    | 812.604   | NM_005216 | 10346.594 | 10286.816 | NM_005315 | 9558.574  | 4165.207  |
| U37448    | 4876.089  | 5336.993  | NM_006626 | 1082.329  | 1531.021  | NM_019058 | 852.531   | 528.197   |
| BG435851  | 945.422   | 846.662   | NM_003965 | 807.607   | 556.666   | AK022351  | 1782.204  | 936.891   |

|           |           |           |           |           |           |           |           |           |
|-----------|-----------|-----------|-----------|-----------|-----------|-----------|-----------|-----------|
| AA927698  | 4198.972  | 4116.096  | NM_004584 | 3844.534  | 4757.268  | AK022059  | 925.319   | 553.597   |
| AI498426  | 2173.406  | 2349.494  | AF212842  | 532.179   | 1069.62   | NM_020194 | 9170.201  | 6794.189  |
| BG824773  | 332.284   | 317.341   | NM_018404 | 943.579   | 1105.479  | AK026853  | 689.873   | 480.282   |
| D01038    | 5952.814  | 5986.279  | M27544    | 3853.567  | 4008.519  | AF038183  | 27702.174 | 14964.678 |
| AB019205  | 2513.656  | 2859.745  | NM_001118 | 1170.529  | 1121.103  | NM_017882 | 4265.576  | 2113.752  |
| J05008    | 2592.336  | 2954.475  | NM_001381 | 61160.633 | 56817     | NM_003521 | 3081.316  | 1698.318  |
| U11087    | 1147.039  | 1557.85   | U90908    | 602.846   | 689.34    | CY3Cy5    | 7706.469  | 456.172   |
| D50640    | 4973.051  | 6209.958  | NM_006458 | 5116.871  | 3446.837  | J03571    | 19150.135 | 22924.537 |
| D43747    | 984.031   | 1116.964  | NM_014459 | 1607.667  | 1394.921  | X56134    | 1620.9    | 560.722   |
| M98776    | 11836.513 | 10434.278 | NM_004093 | 1194.823  | 933.651   | NM_001456 | 1654.304  | 1535.86   |
| X99135    | 11291.573 | 13364.285 | NM_001449 | 11963.779 | 9969.423  | H44784    | 1053.114  | 1198.158  |
| AF009744  | 4333.415  | 4364.465  | AF086122  | 5738.8    | 4674.994  | BI759091  | 2087.757  | 4657.395  |
| NM_172140 | 4740.657  | 5183.293  | AK024397  | 6323.963  | 5166.621  | BG685843  | 13292.473 | 19621.316 |
| AF086109  | 766.137   | 642.098   | NM_018047 | 4031.254  | 2781.52   | BI490011  | 2305.341  | 4927.859  |
| AK026965  | 3567.055  | 4201.359  | NM_005022 | 1206.103  | 834.446   | AF035771  | 1119.844  | 1238.516  |
| AK025859  | 6420.684  | 5874.714  | NM_000083 | 1018.907  | 1273.175  | N20475    | 6886.276  | 8728.313  |
| AL117499  | 20140.838 | 22261.236 | AL110245  | 2690.653  | 3341.691  | BI199286  | 6820.183  | 8540.481  |
| NM_007054 | 3021.51   | 3335.166  | NM_005628 | 10570.155 | 8239.596  | AA026626  | 3049.341  | 971.609   |
| AB007957  | 675.839   | 749.582   | NM_003951 | 737.186   | 733.902   | H61726    | 1124.091  | 330.386   |
| AK000160  | 5097.963  | 5761.634  | S78203    | 3384.598  | 4513.396  | NM_004774 | 4454.485  | 3761.258  |
| NM_005311 | 1754.306  | 1690.279  | NM_016208 | 11581.316 | 10374.054 | SR5       | 7622.733  | 8440.619  |
| NM_005905 | 3498.9    | 3981.242  | NM_005638 | 11026.869 | 9887.336  | SR7       | 6229.552  | 50074.484 |
| NM_016235 | 1242.074  | 1297.078  | NM_007235 | 20228.061 | 14700.92  | SR9       | 23768.488 | 4829.78   |
| NM_000960 | 399.618   | 763.529   | NM_007269 | 3990.412  | 2663.959  | CY3Cy5    | 12480.113 | 831.031   |
| AF172932  | 1919.709  | 1980.783  | AK026014  | 4084.59   | 2730.738  | AF212842  | 586.924   | 1640.596  |
| NM_005359 | 559.945   | 646.856   | NM_014845 | 2905.918  | 2281.544  | NM_018404 | 1182.482  | 1308.245  |
| NM_002511 | 1165.535  | 810.161   | NM_004298 | 5156.97   | 4693.051  | M27544    | 3886.914  | 4195.677  |
| NM_000794 | 257.898   | 358.216   | NM_001232 | 1230.169  | 1748.542  | NM_001118 | 1228.38   | 873.624   |
| AF295378  | 7409.102  | 9225.648  | NM_007181 | 5200.369  | 4784.356  | AL133097  | 6611.358  | 4952.46   |
| AF320908  | 3732.66   | 5076.86   | AB007857  | 1843.626  | 1158.202  | NM_001165 | 3681.105  | 5851.062  |
| NM_004085 | 2317.316  | 2863.927  | NM_001778 | 37146.867 | 33492.117 | NM_006458 | 3389.342  | 5990.28   |
| NM_012445 | 29319.152 | 37810.402 | NM_004997 | 14102.241 | 11986.231 | NM_014459 | 596.935   | 869.435   |
| NM_018104 | 3038.478  | 2832      | NM_005923 | 6176.077  | 5131.271  | NM_004093 | 1313.594  | 1621.712  |
| NM_006080 | 736.973   | 770.036   | NM_003465 | 3030.501  | 2351.634  | NM_001449 | 12663.896 | 21361.258 |
| NM_004429 | 2894.657  | 3039.371  | AF289028  | 903.885   | 575.507   | AF086122  | 5567.203  | 1604.788  |
| U64564    | 2376.075  | 2573.474  | NM_005127 | 16094.367 | 18225.047 | AK024397  | 8547.953  | 4976.45   |
| NM_006470 | 3288.901  | 3259.635  | NM_005567 | 3307.073  | 4793.023  | NM_018047 | 3014.567  | 3743.64   |
| NM_002855 | 4838.215  | 5278.09   | AF071569  | 1933.318  | 2498.797  | NM_003564 | 2940.73   | 3205.011  |
| AB038463  | 2648.309  | 3042.791  | NM_002269 | 721.119   | 449.527   | AF317516  | 9339.402  | 10800.539 |
| M30262    | 990.41    | 1087.167  | J04948    | 1022.252  | 1120.043  | NM_002581 | 1447.907  | 1921.493  |
| NM_000387 | 7393.717  | 8523.614  | NM_018043 | 684.138   | 626.526   | AI417964  | 1018.185  | 1521.559  |
| NM_004663 | 2305.522  | 2137.927  | AK022564  | 61754.813 | 52832.703 | S78203    | 4026.875  | 4302.576  |
| NM_015310 | 1440.645  | 1409.105  | AB012643  | 11783.614 | 8756.531  | NM_016208 | 12737.162 | 12742.473 |
| NM_016154 | 16048.952 | 16896.311 | AB023170  | 2356.32   | 2396.915  | NM_005638 | 10875.453 | 9954.501  |
| NM_005013 | 64229.883 | 53369.645 | NM_014153 | 18977.51  | 26649.318 | NM_007235 | 17791.148 | 17936.059 |
| AB002338  | 3351.956  | 3258.975  | NM_002296 | 26931.246 | 30669.842 | NM_007269 | 3828.811  | 1247.375  |
| AI524814  | 5441.496  | 6032.231  | NM_000414 | 12592.147 | 10910.077 | AK026014  | 3926.499  | 4113.305  |
| AB024411  | 2073.611  | 2230.138  | NM_018845 | 8384.008  | 6017.904  | NM_004298 | 2929.014  | 4738.879  |
| NM_002444 | 43756.965 | 48431.832 | AY008372  | 899.471   | 553.216   | NM_007181 | 3094.866  | 4303.121  |
| NM_001104 | 1122.46   | 1287.936  | NM_005505 | 3291.749  | 4308.165  | AB007857  | 1544.785  | 2136.011  |
| NM_002989 | 7998.817  | 9974.541  | AK026964  | 1258.585  | 1808.351  | NM_001778 | 37839.582 | 37913.598 |
| U88898    | 18209.561 | 15784.791 | NM_001134 | 2218.328  | 2354.203  | NM_004997 | 13017.876 | 4616.055  |
| NM_020154 | 41494.355 | 41782.066 | NM_016016 | 17958.037 | 20927.289 | NM_005923 | 5250.42   | 2631.259  |



|           |           |           |           |           |           |           |           |           |
|-----------|-----------|-----------|-----------|-----------|-----------|-----------|-----------|-----------|
| NM_004665 | 4768.882  | 6242.692  | NM_020407 | 1503.592  | 1926.854  | NM_003465 | 2495.333  | 1442.532  |
| NM_005300 | 3324.866  | 3356.557  | AF118274  | 11113.98  | 13170.341 | NM_005127 | 12695.096 | 10805.09  |
| NM_000893 | 1464.018  | 1550.58   | NM_018344 | 3305.496  | 3418.252  | NM_005567 | 6487.504  | 5690.388  |
| NM_000695 | 18979.658 | 19499.271 | NM_000079 | 6720.698  | 9026.438  | NM_005216 | 7866.132  | 6867.211  |
| NM_005091 | 1216.432  | 1239.174  | NM_004774 | 5406.861  | 4162.846  | NM_006626 | 823.473   | 1049.434  |
| AF031167  | 2868.536  | 2888.798  | NM_005234 | 5652.793  | 4872.667  | NM_003965 | 2002.483  | 1449.533  |
| NM_003204 | 4340.594  | 4597.518  | AF007190  | 722.468   | 1167.369  | AK023618  | 4672.596  | 4603.095  |
| AF254069  | 1976.772  | 2162.085  | AB002316  | 1452.512  | 1733.649  | NM_001492 | 727.064   | 963.235   |
| AL117600  | 17343.713 | 16431.117 | NM_018990 | 18688.588 | 22054.463 | AB012643  | 20946.461 | 25145.121 |
| NM_001712 | 1174.524  | 1403.208  | NM_013363 | 2171.112  | 2155.089  | AB023170  | 3165.369  | 3317.044  |
| NM_004487 | 12083.425 | 11475.298 | NM_000947 | 8426.186  | 9275.842  | NM_014153 | 15117.101 | 15191.033 |
| AB029000  | 9146.761  | 9908.264  | AL096750  | 48865.02  | 56352.25  | NM_002296 | 22177.873 | 20504.125 |
| Z25434    | 2139.732  | 2101.756  | NM_016061 | 7028.814  | 9455.022  | NM_000414 | 9887.696  | 14187.837 |
| NM_005884 | 20949.861 | 26568.256 | NM_004153 | 5827.085  | 7887.207  | NM_018845 | 5319.444  | 2006.413  |
| NM_012395 | 14551.716 | 15309.317 | AK024740  | 4745.713  | 5851.217  | AY008372  | 1799.755  | 613.465   |
| AF229804  | 11965.43  | 14787.767 | NM_019049 | 5282.605  | 6282.928  | NM_005505 | 1519.694  | 2074.636  |
| AF151638  | 3901.21   | 4093.83   | NM_005447 | 528.771   | 780.128   | AK026964  | 505.988   | 728.626   |
| U90552    | 10655.151 | 11564.672 | AF130101  | 1022.215  | 1460.809  | NM_001134 | 3034.873  | 1854.681  |
| NM_006032 | 4616.175  | 4518.791  | NM_004656 | 7227.929  | 5464.908  | NM_016016 | 11412.19  | 6645.562  |
| NM_014785 | 4493.619  | 4608.067  | NM_005576 | 1787.292  | 1556.414  | NM_020407 | 1070.166  | 648.131   |
| NM_002153 | 1657.034  | 2084.92   | AF086122  | 8843.974  | 12317.54  | AF118274  | 9176.98   | 6554.1    |
| AB040890  | 6974.312  | 8522.799  | AK024397  | 9006.572  | 10542.649 | NM_018344 | 2681.173  | 2287.487  |
| AK024233  | 1763.862  | 2438.141  | NM_018047 | 3709.039  | 3560.621  | NM_000079 | 6362.647  | 6114.124  |
| AK021870  | 4174.723  | 4181.493  | NM_005022 | 1476.141  | 1830.05   | NM_000083 | 1385.252  | 1074.094  |
| U06680    | 2133.24   | 1873.219  | NM_003564 | 2405.129  | 3065.471  | AL110245  | 4830.613  | 4591.673  |
| NM_005123 | 2135.799  | 2087.779  | AK023414  | 689.206   | 1478.698  | NM_005625 | 24238.375 | 21108.482 |
| NM_015584 | 18103.871 | 24155.535 | NM_002581 | 2038.278  | 2824.995  | NM_003951 | 477.853   | 783.979   |
| NM_016095 | 28597.064 | 35754.863 | AI417964  | 1179.972  | 1440.976  | X74609    | 54002.883 | 58684.195 |
| NM_002063 | 474.831   | 611.294   | J03571    | 23862.037 | 28916.426 | AB002316  | 823.555   | 819.5     |
| NM_006667 | 24348.941 | 30370.492 | T57791    | 536.096   | 518.261   | NM_018990 | 11268.004 | 12625.687 |
| AK025125  | 1034.415  | 942.863   | X56134    | 1673.538  | 2260.502  | NM_013363 | 1284.88   | 1034.154  |
| NM_000815 | 2055.264  | 1953.852  | H44784    | 1626.539  | 1573.959  | NM_000947 | 5874.289  | 4415.554  |
| NM_001293 | 846.068   | 905.355   | BG685843  | 19774.178 | 23860.701 | AL096750  | 43931.914 | 27929.396 |
| AB023173  | 11810.96  | 13122.279 | BI490011  | 2323.42   | 1884.74   | NM_016061 | 5630.92   | 2215.486  |
| AF156548  | 7289.235  | 6612.375  | AF035771  | 1511.949  | 950.486   | NM_016062 | 35740.59  | 14715.554 |
| NM_172140 | 3969.608  | 3793.818  | N20475    | 7605.98   | 6252.375  | NM_004153 | 2924.526  | 1316.176  |
| NM_001072 | 2672.369  | 2279.537  | BI199286  | 9492.614  | 9146.735  | AK024740  | 2712.805  | 1186.984  |
| NM_014070 | 1173.908  | 1076.118  | AA026626  | 1116.539  | 900.253   | AF078164  | 8446.566  | 4193.563  |
| NM_016027 | 1269.63   | 1448.733  | H61726    | 1112.414  | 731.723   | NM_019045 | 3122.137  | 2087.321  |
| NM_014297 | 15860.386 | 16818.486 | NM_004997 | 18741.842 | 21010.854 | AF130101  | 1067.021  | 920.151   |
| NM_018156 | 9295.701  | 9509.413  | NM_005923 | 8618.2    | 10717.87  | NM_004656 | 4993.324  | 3948.413  |
| X98266    | 2370.113  | 2090.95   | NM_003465 | 1536.872  | 1367.413  | NM_005576 | 1878.469  | 1803.871  |
| U00930    | 22212.191 | 27858.854 | NM_005127 | 17154.545 | 19947.244 | AF071569  | 4236.918  | 3460.259  |
| AK024958  | 2261.193  | 2942.549  | NM_005567 | 2174.53   | 2251      | NM_002265 | 4117.265  | 2826.575  |
| NM_002435 | 5797.522  | 5990.82   | NM_005216 | 16386.27  | 18534.773 | J04948    | 1680.684  | 1383.364  |
| AL117552  | 3147.629  | 2778.812  | NM_006626 | 1664.718  | 2255.808  | NM_018043 | 751.45    | 723.986   |
| NM_002692 | 13523.875 | 15102.646 | NM_003965 | 2861.077  | 2701.394  | AK022564  | 61148     | 62795.469 |
| AB023190  | 3533.178  | 3773.611  | NM_004584 | 5102.36   | 4976.886  | NM_003564 | 2034.187  | 2717.691  |
| NM_007064 | 1556.998  | 1320.427  | AK023618  | 5830.615  | 5146.937  | AK023414  | 463.503   | 645.521   |
| NM_006281 | 3224.296  | 3197.86   | AF212842  | 802.057   | 921.781   | AF317516  | 9273.042  | 10087.304 |
| NM_002735 | 13743.928 | 12763.929 | NM_018404 | 992.064   | 701.643   | NM_002581 | 1604.598  | 1581.781  |
| U23460    | 9185.251  | 12010.119 | M27544    | 4792.849  | 3787.491  | AI417964  | 1992.269  | 1838.307  |
| NM_005356 | 50751.004 | 48336     | NM_002255 | 684.05    | 806.245   | J03571    | 20778.035 | 20655.846 |

|           |           |           |           |           |           |           |           |           |
|-----------|-----------|-----------|-----------|-----------|-----------|-----------|-----------|-----------|
| NM_004429 | 2265.12   | 2295.358  | NM_001118 | 1538.67   | 1669.938  | X56134    | 1647.563  | 939.798   |
| U64564    | 2012.15   | 2103.551  | AL133097  | 9083.383  | 8395.961  | NM_001456 | 939.587   | 847.657   |
| NM_006470 | 2576.408  | 2851.596  | NM_001165 | 4471.845  | 3429.664  | AI421041  | 51040.191 | 35046.063 |
| NM_002855 | 3828.434  | 3876.436  | NM_001381 | 61394.422 | 56926.234 | BI759091  | 2669.212  | 2476.701  |
| AB038463  | 1960.19   | 2161.43   | NM_006458 | 4739.765  | 2856.562  | BG685843  | 15021.314 | 11239.313 |
| M30262    | 1265.592  | 1664.236  | NM_014459 | 564.861   | 262.821   | BI490011  | 2459.184  | 1757.105  |
| NM_005460 | 1560.766  | 1315.503  | NM_004093 | 1144.201  | 958.462   | AF035771  | 1222.467  | 988.92    |
| AF160477  | 2312.736  | 2002.293  | NM_001449 | 9523.654  | 7052.596  | N20475    | 6345.68   | 5308.475  |
| NM_003226 | 1023.093  | 1058.726  | NM_016016 | 20456.834 | 25947.875 | BI199286  | 7104.573  | 6015.373  |
| M12883    | 5838.526  | 5705.801  | AF118274  | 5580.666  | 3391.939  | AA026626  | 1265.486  | 1070.861  |
| BG288747  | 11595.651 | 12825.238 | NM_018344 | 2306.558  | 1453.067  | H61726    | 977.802   | 946.759   |
| BG617923  | 531.442   | 792.659   | NM_000079 | 5954.912  | 7355.02   | NM_004774 | 5020.663  | 4001.262  |
| U37448    | 4365.559  | 4529.9    | NM_000083 | 2480.878  | 2020.612  | NM_005234 | 5887.267  | 5311.521  |
| BG435851  | 1129.527  | 807.895   | AL110245  | 4287.003  | 3916.948  | NM_005216 | 6130.137  | 7142.1    |
| AA927698  | 4474.484  | 4748.339  | NM_005628 | 30879.061 | 25301.549 | NM_006626 | 797.728   | 823.201   |
| AI498426  | 2628.689  | 2849.431  | NM_003951 | 667.452   | 439.787   | NM_003965 | 1891.826  | 1762.007  |
| D01038    | 8870.17   | 9987.43   | NM_004172 | 629.426   | 371.419   | NM_004584 | 2801.224  | 2877.865  |
| AB019205  | 3139.218  | 2710.603  | S78203    | 4575.702  | 3891.884  | AF212842  | 1416.912  | 3645.978  |
| J05008    | 2117.035  | 2271.674  | NM_016208 | 11058.403 | 8119.239  | NM_018404 | 710.09    | 763.004   |
| U11087    | 1281.418  | 1547.083  | NM_005638 | 10421.075 | 7863.723  | M27544    | 4953.287  | 3646.354  |
| D50640    | 5110.131  | 6194.698  | NM_007235 | 19839.127 | 14113.686 | NM_001118 | 1218.658  | 851.419   |
| D43747    | 344.874   | 732.673   | NM_007269 | 4403.25   | 3152.411  | AL133097  | 7013.449  | 6316.874  |
| M98776    | 8912.098  | 7860.107  | AK026014  | 4076.898  | 3439.094  | NM_001165 | 3734.218  | 3647.797  |
| X99135    | 9177.027  | 9740.414  | NM_014845 | 2999.724  | 2244.936  | NM_001381 | 58167.328 | 60059.469 |
| AF009744  | 4369.098  | 5065.023  | NM_004298 | 4177.946  | 4147.567  | NM_006458 | 3712.01   | 3298.361  |
| NM_003204 | 3518.281  | 3708.265  | NM_007181 | 4576.649  | 4287.079  | NM_004093 | 1187.656  | 958.174   |
| AF254069  | 1637.135  | 1626.679  | AB007857  | 1225.856  | 1239.88   | NM_001449 | 11314.372 | 10241.244 |
| AL117600  | 18782.67  | 18733.064 | NM_001778 | 30587.451 | 30746.635 | AF086122  | 6102.162  | 5335.335  |
| NM_001712 | 1220.312  | 1285.582  | NM_019049 | 5057.784  | 6804.205  | AK024397  | 10264.526 | 10397.673 |
| NM_004487 | 10864.201 | 9146.91   | AF130101  | 764.019   | 386.813   | NM_018047 | 4081.113  | 3659.429  |
| AB029000  | 10068.063 | 10714.089 | NM_004656 | 5619.295  | 3084.992  | NM_005022 | 1326.929  | 1272.888  |
| AK026965  | 4103.191  | 4267.529  | NM_005576 | 1280.861  | 723.071   | NM_000083 | 1113.529  | 1226.725  |
| AK025859  | 6896.877  | 5340.307  | AF071569  | 2444.848  | 1542.51   | AL110245  | 4139.811  | 4433.342  |
| AL117499  | 20118.893 | 20316.979 | NM_002269 | 3125.326  | 2344.414  | NM_005628 | 20506.186 | 23153.314 |
| NM_007054 | 2927.459  | 2849.887  | J04948    | 1392.577  | 939.273   | NM_003951 | 752.532   | 605.358   |
| AB007957  | 532.196   | 774.074   | NM_018043 | 749.988   | 485.715   | NM_016605 | 29659.621 | 29973.352 |
| AK000160  | 4314.501  | 5332.05   | AK022564  | 63579.625 | 56870.688 | S78203    | 4169.837  | 3424.035  |
| NM_005311 | 1586.394  | 2093.845  | NM_001492 | 979.488   | 817.168   | NM_016208 | 11555.458 | 7672.313  |
| NM_005905 | 3581.255  | 3247.974  | AB012643  | 13394.772 | 10759.504 | NM_005638 | 9743.021  | 7022.092  |
| NM_016235 | 1371.996  | 1410.395  | AB023170  | 1736.651  | 1736.987  | NM_007235 | 16267.277 | 14606.312 |
| NM_000960 | 632.995   | 821.136   | NM_014153 | 15391.648 | 18475.656 | NM_007269 | 3500.747  | 3436.98   |
| AF172932  | 1813.243  | 2760.516  | NM_002296 | 21906.146 | 22275.168 | AK026014  | 4345.884  | 3619.312  |
| NM_005359 | 792.829   | 947.653   | NM_000414 | 9360.497  | 9871.082  | NM_014845 | 2689.229  | 2549.959  |
| NM_002511 | 507.821   | 788.713   | NM_018845 | 7807.262  | 9727.331  | NM_004298 | 4608.014  | 4059.464  |
| AF295378  | 6669.075  | 7368.768  | AY008372  | 679.741   | 999.238   | NM_007181 | 3110.324  | 2754.75   |
| AF320908  | 4064.276  | 5513.243  | NM_005505 | 2144.176  | 2918.815  | AB007857  | 1381.77   | 1566.641  |
| NM_004085 | 1592.184  | 2198.763  | AK026964  | 726.623   | 1001.114  | NM_001778 | 36666.773 | 32188.316 |
| NM_012445 | 25998.014 | 31412.473 | NM_001134 | 1504.952  | 1539.372  | NM_004997 | 12391.135 | 10996.698 |
| NM_018104 | 1808.802  | 2257.442  | NM_006695 | 1909.165  | 2039.539  | NM_005923 | 5920.878  | 4997.672  |
| NM_006080 | 570.614   | 849.48    | NM_004815 | 3590.017  | 2943.605  | NM_003465 | 3053.646  | 2769.815  |
| NM_006667 | 27455.904 | 27510.627 | AK000959  | 3788.155  | 2503.926  | AF289028  | 751.989   | 567.821   |
| AK025125  | 891.668   | 726.675   | AB037743  | 2902.175  | 1946.732  | NM_005127 | 14559.653 | 11295.343 |
| NM_000815 | 2299.954  | 2128.948  | AB046820  | 4358.528  | 3716.123  | NM_005567 | 7222.005  | 6104.842  |

|           |           |           |           |           |           |           |           |           |
|-----------|-----------|-----------|-----------|-----------|-----------|-----------|-----------|-----------|
| NM_001293 | 781.391   | 970.215   | AK025922  | 783.655   | 959.753   | AF071569  | 1972.92   | 1726.646  |
| AB023173  | 11119.758 | 9684.541  | NM_014646 | 2469.429  | 2273.27   | NM_002266 | 3369.398  | 4041.083  |
| AF156548  | 7024.29   | 5535.665  | NM_006375 | 1026.496  | 1097.781  | J04948    | 1630.853  | 1555.245  |
| NM_000387 | 7325.366  | 6575.655  | AF123659  | 5855.606  | 5501.428  | NM_018043 | 742.317   | 705.478   |
| NM_004663 | 2519.945  | 2033.07   | AL050355  | 752.777   | 857.42    | AK022564  | 60879.676 | 62432.934 |
| NM_015310 | 1523.983  | 1351.693  | AF007190  | 486.669   | 779.168   | NM_001492 | 584.461   | 505.465   |
| NM_016154 | 16390.232 | 16631.252 | X74609    | 42102.922 | 41685.59  | AB012643  | 14055.533 | 10185.751 |
| NM_005013 | 58823.121 | 52841.883 | NM_018990 | 11815.271 | 12380.28  | AB023170  | 2317.066  | 1959.031  |
| AB002338  | 2263.862  | 2113.897  | NM_013363 | 1488.993  | 1533.545  | NM_014153 | 9928.166  | 7692.741  |
| AI524814  | 4728.887  | 4725.93   | NM_000947 | 5943.977  | 7702.755  | NM_002296 | 16581.598 | 11029.456 |
| AB024411  | 1303.752  | 936.165   | AL096750  | 28545.26  | 32160.381 | NM_000414 | 6825.496  | 5624.273  |
| NM_002444 | 45294.539 | 47620.332 | NM_016061 | 4613.993  | 5956.228  | NM_018845 | 5614.373  | 4481.582  |
| NM_001104 | 1033.316  | 1198.151  | NM_016062 | 43857.691 | 50695.965 | NM_005505 | 1827.911  | 1914      |
| NM_002989 | 11921.073 | 11871.059 | AF078164  | 8784.484  | 9642.183  | AK026964  | 584.213   | 627.591   |
| U88898    | 19113.396 | 17188.867 | NM_003628 | 3173.62   | 2648.138  | NM_001134 | 2020.075  | 1893.952  |
| NM_020154 | 40598.82  | 47993.641 | NM_005704 | 1516.008  | 1229.986  | NM_016016 | 12717.179 | 11002.953 |
| NM_004665 | 3010.604  | 3522.88   | AF097021  | 455.441   | 576.633   | NM_020407 | 1554.137  | 1289.368  |
| NM_005300 | 3204.688  | 3040.512  | NM_001365 | 1377.938  | 1134.174  | AF118274  | 13288.728 | 12173.86  |
| NM_000893 | 1292.394  | 1258.932  | NM_000677 | 8257      | 7466.691  | NM_018344 | 3423.76   | 2539.486  |
| NM_000696 | 13700.934 | 15034.013 | BF308728  | 1742.381  | 1414.808  | NM_000079 | 6613.982  | 6459.744  |
| NM_005091 | 1114.987  | 880.23    | NM_013280 | 796.247   | 565.411   | NM_004774 | 4575.961  | 3851.602  |
| AF031167  | 3761.776  | 3838.94   | NM_018315 | 15620.988 | 13839.575 | NM_005234 | 5048.36   | 5652.524  |
| AB023190  | 4094.891  | 4245.691  | AF051151  | 1007.301  | 956.095   | X74609    | 44018.723 | 32782.773 |
| NM_007064 | 1739.797  | 1307.575  | AF142421  | 3330.077  | 3717.913  | NM_018990 | 9587.287  | 8588.857  |
| NM_006281 | 2865.458  | 3666.243  | AF257238  | 746.451   | 689.871   | NM_013363 | 1199.748  | 1202.235  |
| NM_002736 | 13052.841 | 13045.494 | AB037836  | 2674.425  | 3243.225  | NM_000947 | 6121.445  | 5412.812  |
| U23460    | 8724.854  | 9809.183  | NM_014247 | 2068.858  | 1979.406  | AL096750  | 53241.941 | 56790.426 |
| NM_005356 | 51782.598 | 47875.129 | NM_018695 | 56928.992 | 52286.82  | NM_016061 | 5137.457  | 4799.295  |
| Z25434    | 2288.277  | 1962.34   | NM_006343 | 1124.428  | 1295.638  | NM_016062 | 42750.07  | 35963.395 |
| NM_005884 | 20527.121 | 21858.561 | NM_014786 | 1554.113  | 1592.491  | NM_004153 | 3064.926  | 2095.568  |
| NM_012396 | 14890.544 | 16143.613 | NM_001423 | 614.949   | 793.699   | AK024740  | 2465.048  | 2421.133  |
| AF229804  | 12551.834 | 15547.319 | NM_015716 | 7193.879  | 7382.977  | AF078164  | 9664.867  | 8895.243  |
| AF151638  | 3997.277  | 4238.994  | NM_003955 | 688.279   | 811.394   | NM_019046 | 3385.994  | 2629.036  |
| U90552    | 10803.648 | 11815.836 | NM_005739 | 5256.291  | 5889.899  | AF130101  | 1319.735  | 960.875   |
| NM_006032 | 3843.604  | 3671.398  | AB023166  | 1277.641  | 1546.366  | NM_004656 | 5458.306  | 4709.032  |
| NM_014786 | 4605.599  | 3655.436  | AB028966  | 5797.968  | 6990.599  | NM_005576 | 2143.72   | 1813.298  |
| NM_002153 | 1273.829  | 1381.623  | NM_005758 | 5530.343  | 5965.735  | AF086122  | 5240.479  | 5063.264  |
| AB040890  | 7187.702  | 7958.851  | AF044774  | 1963.249  | 1379.386  | AK024397  | 11120.174 | 12475.683 |
| AK024233  | 2258.01   | 2296.229  | NM_005402 | 2843.786  | 1596.756  | NM_018047 | 3050.128  | 3500.5    |
| AK021870  | 5081.829  | 5818.185  | AF055027  | 5988.466  | 5639.354  | NM_005022 | 982.86    | 1301.837  |
| U06680    | 2269.362  | 1857.564  | U63541    | 3129.306  | 2266.252  | NM_003564 | 2336.384  | 2493.928  |
| NM_005123 | 1485.281  | 1915.97   | AB033045  | 1614.772  | 1366.637  | AF317516  | 6228.387  | 5259.824  |
| NM_015584 | 18323.145 | 20644.389 | AF055006  | 6247.444  | 5398.521  | NM_002581 | 932.365   | 447.516   |
| NM_016096 | 31432.244 | 35539.641 | NM_004935 | 7038.169  | 6007.187  | AI417964  | 824.263   | 1007.164  |
| AB032525  | 584.287   | 494.007   | NM_006951 | 1546.667  | 1527.211  | J03571    | 17629.572 | 15959.032 |
| NM_002063 | 736.846   | 1003.666  | NM_001896 | 9308.894  | 8076.192  | X56134    | 2049.131  | 1517.218  |
| AL137479  | 1677.52   | 1467.715  | NM_014023 | 1632.584  | 1302.158  | NM_001456 | 1244.256  | 1424.343  |
| NM_004211 | 1439.564  | 1632.662  | NM_002745 | 10737.299 | 10730.916 | H44784    | 750.617   | 598.805   |
| Y10776    | 4261.437  | 4199.211  | D26488    | 5249.17   | 5169.63   | AI421041  | 47502.422 | 40354.789 |
| AK027241  | 3252.417  | 3277.167  | NM_001432 | 1351.903  | 1486.657  | BI759091  | 2869.622  | 3099.975  |
| NM_006978 | 8595.857  | 7987.797  | AK002193  | 1209.307  | 1397.474  | BG685843  | 15440.326 | 14987.572 |
| NM_004561 | 1433.105  | 1533.604  | AB014554  | 2172.851  | 2077.21   | BI490011  | 2213.678  | 2439.649  |
| AK024812  | 7150.101  | 7755.921  | AF097431  | 4738.184  | 5471.507  | AF035771  | 1236.906  | 1565.771  |

|           |           |           |           |           |           |           |           |           |
|-----------|-----------|-----------|-----------|-----------|-----------|-----------|-----------|-----------|
| M20642    | 1870.205  | 1863.367  | NM_001978 | 1378.094  | 1555.943  | N20475    | 7864.868  | 7115.523  |
| AK026412  | 4479.402  | 4556.363  | NM_005897 | 1415.602  | 1591.967  | BI199286  | 7480.592  | 6867.459  |
| X89669    | 1930.83   | 2096.575  | NM_002579 | 1199.229  | 947.915   | AA026626  | 1619.323  | 1375.399  |
| NM_001072 | 2268.894  | 2295.628  | NM_004221 | 8085.58   | 9772.544  | H61726    | 951.675   | 1061.656  |
| NM_014070 | 860.886   | 723.013   | NM_004061 | 1408.612  | 1548.608  | NM_004997 | 11244.004 | 11583.04  |
| NM_014297 | 18299.74  | 17561.865 | NM_003019 | 1100.416  | 1183.337  | NM_005923 | 4007.81   | 3959.103  |
| NM_018156 | 11495.079 | 9905.229  | AL109790  | 979.424   | 965.296   | NM_003465 | 2001.435  | 1550.591  |
| X98266    | 2591.216  | 2643.021  | NM_006923 | 5701.233  | 4949.812  | NM_005127 | 13345.43  | 13155.139 |
| U00930    | 20746.582 | 23328.121 | NM_004615 | 29986.232 | 24641.277 | NM_005567 | 7112.659  | 11554.731 |
| AK024958  | 2167.899  | 2376.896  | AF119889  | 8691.33   | 5987.127  | NM_005216 | 7234.832  | 6000.606  |
| NM_002439 | 7009.078  | 6472.443  | NM_006699 | 4306.373  | 2768.979  | NM_006626 | 749.954   | 565.389   |
| AL117552  | 3337.874  | 3670.806  | AK025645  | 17881.15  | 16965.82  | NM_003965 | 1595.011  | 1208.52   |
| NM_002692 | 18518.117 | 18398.32  | AK023266  | 2546.989  | 3045.789  | NM_004584 | 3202.196  | 2325.938  |
| X55525    | 237.677   | 548.248   | NM_006814 | 14682.22  | 13289.854 | AK023618  | 4592.801  | 3486.918  |
| NM_000242 | 739.718   | 595.96    | NM_005067 | 8340.201  | 8690.06   | AF212842  | 647.409   | 1114.984  |
| AB040878  | 247.275   | 386.384   | AB007899  | 1479.343  | 1057.011  | NM_018404 | 999.233   | 810.977   |
| S74647    | 1365.151  | 1134.372  | NM_002817 | 18456.496 | 15549.671 | M27544    | 6874.665  | 7324.363  |
| NM_003506 | 2561.384  | 3217.772  | NM_002801 | 13687.646 | 13186.404 | NM_002258 | 583.468   | 518.384   |
| NM_018093 | 7639.801  | 6660.394  | BE905810  | 985.073   | 1115.028  | NM_001118 | 1145.638  | 479.437   |
| NM_003012 | 258.392   | 414.127   | NM_014780 | 1565.323  | 1694.119  | AL133097  | 4036.485  | 4654.979  |
| NM_003389 | 7002.242  | 5149.998  | NM_018116 | 424.393   | 555.813   | NM_001165 | 4015.231  | 4747.676  |
| NM_000430 | 2703.429  | 2675.5    | NM_014730 | 10856.545 | 12331.57  | NM_006458 | 4632.108  | 5608.17   |
| AB033030  | 790.568   | 597.924   | NM_014167 | 1390.941  | 1696.967  | NM_004093 | 2224.77   | 2728.37   |
| NM_016656 | 3076.355  | 2142.791  | NM_016063 | 3187.411  | 3291.971  | NM_001448 | 12933.487 | 13550.567 |
| NM_015963 | 12148.661 | 10575.97  | U82987    | 4161.441  | 4258.225  | NM_016016 | 10536.266 | 10044.59  |
| AB007871  | 822.688   | 931.603   | NM_005732 | 2950.601  | 3645.65   | NM_020407 | 1168.022  | 1030.176  |
| NM_017813 | 9747.855  | 8147.826  | NM_014890 | 1307.479  | 1794.014  | AF118274  | 10521.69  | 10078.961 |
| NM_003840 | 3460.099  | 3162.621  | AK056481  | 6314.505  | 7287.985  | NM_018344 | 2455.585  | 2455.596  |
| NM_018378 | 1350.579  | 1609.554  | NM_005433 | 1451.193  | 1863.526  | NM_000079 | 6086.141  | 5963.655  |
| NM_018423 | 2171.295  | 2417.073  | AF232000  | 61267.227 | 57745.18  | AL110245  | 3155.204  | 2702.273  |
| NM_001741 | 13411.666 | 11782.955 | NM_018118 | 964.883   | 692.979   | NM_005628 | 15873.256 | 10933.337 |
| NM_000745 | 7037.549  | 8304.517  | L35035    | 5899.804  | 4184.506  | S78203    | 4304.037  | 4492.963  |
| AF116705  | 11634.909 | 11269.635 | NM_007152 | 1282.86   | 754.46    | NM_016208 | 13870.51  | 11510.763 |
| NM_004460 | 371.636   | 355.684   | NM_018293 | 1810.472  | 1303.705  | NM_005638 | 10106.584 | 8851.808  |
| NM_006072 | 3453.581  | 3985.199  | NM_002955 | 815.658   | 3137.198  | NM_007235 | 14708.332 | 14922.858 |
| BE794490  | 100.24    | 318.571   | NM_001938 | 6474.424  | 6665.262  | NM_007269 | 3648.845  | 3663.861  |
| NM_003561 | 2048.466  | 2615.993  | AF230808  | 5427.906  | 4945.053  | NM_014845 | 3638.66   | 3470.764  |
| NM_002991 | 927.439   | 700.644   | U18910    | 2786.599  | 2540.18   | NM_004298 | 4840.586  | 4890.522  |
| NM_004071 | 6804.732  | 6316.749  | NM_005238 | 7468.558  | 6504.695  | NM_007181 | 4007.357  | 4318.87   |
| NM_001316 | 17122.654 | 12149.229 | AK075306  | 7582.763  | 6879.227  | AB007857  | 1531.216  | 1907.855  |
| AJ008149  | 1143.993  | 1044.572  | AB037820  | 915.118   | 771.025   | NM_001778 | 36361.586 | 34479.211 |
| NM_001192 | 1164.56   | 646.734   | NM_002948 | 56920.07  | 57017.477 | NM_019048 | 3207.749  | 3082.907  |
| NM_002353 | 2033.574  | 1523.364  | AF113008  | 2824.762  | 2823.833  | NM_012413 | 495.093   | 533.206   |
| NM_012153 | 4443.456  | 4029.177  | NM_020217 | 2380.794  | 2240.233  | AF130101  | 1111.201  | 916.121   |
| NM_013241 | 5717.227  | 7237.18   | NM_018135 | 63380.129 | 60872.902 | NM_004656 | 5169.063  | 4736.742  |
| NM_017988 | 26514.576 | 24459.951 | AF205435  | 14645.781 | 14605.937 | NM_005576 | 1798.825  | 1745.401  |
| NM_015535 | 2561.453  | 1716.889  | L05093    | 66112.781 | 66501.148 | AF071569  | 1869.335  | 1100.143  |
| Z24725    | 6000.561  | 5276.651  | AF085983  | 843.394   | 813.339   | NM_002269 | 1427.974  | 830.861   |
| AF161362  | 7287.17   | 5645.154  | AF052105  | 3540.032  | 3166.53   | J04948    | 1329.011  | 673.872   |
| AK024078  | 850.466   | 727.787   | AK001204  | 9473.671  | 8100.249  | NM_018043 | 761.423   | 395.296   |
| NM_003928 | 65578.609 | 55878.391 | M15465    | 3789.465  | 2571.201  | AK022564  | 62220.219 | 61825.875 |
| M57399    | 25476.715 | 25359.76  | J03866    | 10715.746 | 8400.289  | NM_001492 | 890.742   | 658.313   |
| NM_015938 | 11947.871 | 8867.885  | AK022836  | 6243.72   | 5674.314  | AB012643  | 24999.193 | 20184.52  |

|           |           |           |           |           |           |           |           |           |
|-----------|-----------|-----------|-----------|-----------|-----------|-----------|-----------|-----------|
| AB046840  | 5129.292  | 4188.373  | NM_012343 | 14342.177 | 11839.817 | AB023170  | 3079.722  | 2798.139  |
| AF174487  | 1872.065  | 1981.573  | NM_000397 | 1281.458  | 1585.289  | NM_014153 | 15933.281 | 14428.517 |
| NM_017699 | 1135.191  | 1472.168  | BF217340  | 646.366   | 679.347   | NM_002296 | 18270.896 | 16714.344 |
| NM_005041 | 1114.295  | 769.324   | NM_003078 | 4884.438  | 5236.93   | NM_000414 | 7901.07   | 7597.563  |
| NM_006407 | 25609.947 | 23661.092 | AL137703  | 541.191   | 824.44    | NM_005505 | 2193.243  | 2720.656  |
| NM_007373 | 5905.136  | 2969.649  | NM_001809 | 10729.185 | 14415.245 | AK026964  | 845.034   | 699.61    |
| NM_006263 | 48533.02  | 48329.691 | AL117477  | 7378.961  | 9633.843  | NM_001134 | 2145.147  | 2617.621  |
| NM_004791 | 899.691   | 1165.674  | NM_012107 | 5667.976  | 7828.498  | AK023497  | 1157.5    | 1415.727  |
| Z36876    | 7034.876  | 5581.196  | AB037760  | 2988.594  | 3193.115  | NM_006695 | 2032.055  | 2232.972  |
| NM_000892 | 633.789   | 459.246   | NM_015680 | 3046.373  | 3279.169  | NM_004815 | 3367.981  | 3163.643  |
| X75363    | 373.525   | 623.82    | M22637    | 1711.238  | 2049.589  | NM_004147 | 1486.087  | 1638.813  |
| NM_005046 | 516.299   | 507.374   | AB037770  | 869.093   | 1139.728  | AK000959  | 4765.417  | 4660.089  |
| NM_001873 | 1500.83   | 1025.602  | NM_018364 | 8734.156  | 6041.163  | AB037743  | 3699.482  | 4302.146  |
| AB029025  | 740.538   | 554.663   | NM_006778 | 923.194   | 512.661   | AB046820  | 7539.462  | 6691.771  |
| NM_001308 | 458.166   | 297.372   | NM_007022 | 3548.992  | 3628.993  | AK025922  | 593.507   | 706.173   |
| NM_007100 | 54539.461 | 48068.23  | AL049943  | 9967.854  | 8342.728  | NM_014646 | 1239.819  | 918.581   |
| NM_002954 | 65585.633 | 53189.48  | AL137303  | 3760.968  | 3633.766  | AF123659  | 4182.752  | 3591.43   |
| NM_003940 | 1272.806  | 645.125   | AL355708  | 1704.403  | 1423.337  | X74609    | 53974.672 | 54239.773 |
| M26880    | 759.16    | 647.193   | AL161980  | 1005.268  | 914.972   | AB002316  | 592.636   | 566.18    |
| NM_016572 | 4030.879  | 3126.438  | AB002449  | 1278.604  | 1125.09   | NM_018990 | 9932.772  | 10845.157 |
| NM_000027 | 1798.672  | 1564.619  | AK001489  | 2894.601  | 3488.649  | NM_013363 | 943.043   | 982.417   |
| NM_017548 | 24007.709 | 20395.953 | NM_015681 | 3890.946  | 3831.474  | NM_000947 | 5913.771  | 6785.835  |
| AF134802  | 2465.072  | 2445.315  | AF070582  | 2934.102  | 3082.402  | NM_016061 | 5409.45   | 6335.625  |
| NM_018222 | 2048.236  | 1904.725  | NM_006383 | 6930.011  | 7041.708  | NM_016062 | 47923.559 | 57360.457 |
| NM_005740 | 6415.57   | 5454.187  | NM_015400 | 5144.698  | 5545.056  | NM_004153 | 3582.528  | 3689.201  |
| NM_004308 | 22819.672 | 25619.289 | AL359561  | 2220.964  | 2139.021  | AK024740  | 2478.063  | 3380.402  |
| AF112366  | 2268.111  | 2462.063  | AK026464  | 2235.219  | 2568.269  | AF078164  | 10660.931 | 13776.698 |
| NM_004274 | 1288.195  | 1305.008  | AK001362  | 1156.678  | 1397.383  | NM_003628 | 1706.02   | 1789.928  |
| AK024002  | 7773.85   | 9169.16   | AK023491  | 1363.573  | 1578.752  | NM_004648 | 681.413   | 790.224   |
| NM_020399 | 12212.352 | 10416.509 | AK022400  | 1740.022  | 1768.018  | AF029325  | 2166.955  | 1946.66   |
| AB011117  | 3234.456  | 3015.584  | AF052100  | 2349.443  | 3177.922  | NM_005704 | 3110.783  | 2946.909  |
| AF060935  | 4984.047  | 3126.8    | AL110235  | 862.535   | 700.569   | AF097021  | 1460.402  | 1403.267  |
| AK026886  | 2395.928  | 1930.266  | U79245    | 1170.582  | 1271.153  | NM_001365 | 2282.67   | 2179.498  |
| D83778    | 2897.58   | 2382.179  | AF086124  | 2525.796  | 2074.118  | NM_000677 | 4704.385  | 4121.61   |
| NM_004264 | 7370.042  | 6020.268  | AK024820  | 1626.206  | 1505.032  | BF308728  | 2535.809  | 2247.831  |
| AK024788  | 2857.006  | 2589.769  | AB033105  | 1354.955  | 1221.106  | NM_018315 | 31404.035 | 24079.529 |
| NM_004473 | 1055.888  | 701.666   | AF085932  | 258.516   | 1259.441  | AF051151  | 1133.582  | 1037.851  |
| AK022696  | 3684.002  | 2467.988  | AF038192  | 1254.053  | 1015.252  | AF142421  | 3986.41   | 3116.124  |
| NM_001206 | 1912.047  | 1815.687  | NM_017938 | 763.359   | 965.409   | AB037836  | 3094.249  | 2315.812  |
| NM_005016 | 3459.219  | 3114.55   | AJ001865  | 1567.057  | 1730.383  | NM_014247 | 1838.89   | 1694.891  |
| NM_014469 | 1613.306  | 1567.203  | D61704    | 16779.215 | 16734.73  | NM_014786 | 1686.579  | 1586.176  |
| NM_014852 | 2675.351  | 2149.022  | AJ227889  | 1647.97   | 1617.59   | NM_001423 | 642.21    | 675.604   |
| NM_000344 | 19949.578 | 19616.834 | Y12017    | 1009.488  | 1295.68   | NM_015716 | 8138.256  | 10547.417 |
| AF248650  | 4906.461  | 3648.425  | X64989    | 844.731   | 3016.147  | NM_003955 | 1096.629  | 1616.405  |
| S74678    | 45415.855 | 44682.609 | Y10512    | 963.532   | 2283.749  | NM_005739 | 6065.291  | 7962.529  |
| AF248651  | 1209.94   | 1343.071  | L34409    | 28419.738 | 26953.27  | AB023166  | 1815.593  | 3023.625  |
| NM_001358 | 40021.973 | 40487.25  | U12210    | 5766.545  | 6133.978  | AB028966  | 18820.771 | 36425.57  |
| NM_004836 | 15317.336 | 15698.856 | Z83936    | 1038.768  | 1011.752  | NM_005758 | 5805.119  | 5567.871  |
| AB037751  | 7828.568  | 5617.324  | L08440    | 6927.326  | 7715.798  | AF044774  | 3013.529  | 2625.476  |
| S79281    | 11457.662 | 10757.513 | M73799    | 1898.927  | 1633.703  | NM_005402 | 6711.419  | 7037.804  |
| AK025585  | 5493.097  | 4971.594  | AF086119  | 1118.661  | 1332.731  | AF055027  | 7127.17   | 6740.823  |
| NM_001414 | 16852.303 | 18202.199 | NM_003782 | 3405.083  | 3914.739  | U63541    | 4694.197  | 4489.373  |
| D16891    | 4948.967  | 4488.93   | AL353947  | 1038.009  | 647.856   | AB033045  | 2136.324  | 1906.262  |

|           |           |           |           |           |           |           |           |           |
|-----------|-----------|-----------|-----------|-----------|-----------|-----------|-----------|-----------|
| NM_01776C | 4130.714  | 2543.729  | AL442096  | 1695.623  | 1024.854  | AF055006  | 4639.462  | 4317.344  |
| NM_01593E | 12617.867 | 12482.898 | NM_01822E | 1456.195  | 1218.573  | NM_00493E | 4710.351  | 4254.643  |
| AL109698  | 5111.007  | 3747.236  | AJ270693  | 1289.06   | 1427.136  | NM_006951 | 1091.259  | 755.93    |
| AF217980  | 2481.095  | 2352.238  | NM_01779C | 2511.46   | 3138.571  | NM_00189E | 6783.875  | 5103.842  |
| AL117461  | 2564.059  | 2840.849  | AK000861  | 1124.314  | 937.111   | NM_01402E | 1801.514  | 1426.643  |
| NM_01649E | 911.425   | 874.591   | AK025009  | 1444.314  | 1544.221  | NM_00274E | 8151.997  | 5801.723  |
| AF104921  | 34988.332 | 36836.586 | AK000023  | 3095.468  | 3411.91   | D26488    | 5271.891  | 3912.695  |
| NM_00012E | 22166.24  | 25781.996 | AK000652  | 411.466   | 1298.462  | NM_00143E | 1572.015  | 946.531   |
| AK022291  | 1398.972  | 1074.313  | AK000901  | 694.965   | 685.986   | AK002193  | 1392.279  | 1068.259  |
| BF239974  | 2411.44   | 2047.125  | AK024351  | 1739.869  | 1596.88   | AB014554  | 2245.271  | 2079.618  |
| NM_000104 | 1963.67   | 1834.487  | AK024564  | 811.447   | 1211.135  | AF097431  | 3648.927  | 3862.314  |
| NM_00501E | 22793.861 | 21717.697 | AK024867  | 1132.521  | 1068.814  | NM_00197E | 1732.053  | 1516.649  |
| NM_00425E | 56396.055 | 50107.273 | AK024583  | 579.736   | 1001.307  | NM_005897 | 1156.816  | 1258.766  |
| NM_00026E | 42143.672 | 45504.773 | AK024886  | 1490.172  | 1200.948  | NM_00257E | 662.178   | 848.952   |
| AF182288  | 6830.646  | 6338.932  | AK025002  | 3987.029  | 4118.373  | NM_004221 | 7350.945  | 7352.45   |
| NM_004491 | 2958.469  | 1641.511  | AK024011  | 3588.869  | 2903.549  | NM_004061 | 1796.934  | 2459.495  |
| L14787    | 668.643   | 805.223   | AL390145  | 591.909   | 647.938   | NM_00301E | 2182.992  | 4066.865  |
| AK026810  | 7155.913  | 5359.242  | AF119913  | 2392.25   | 2266.775  | AL109790  | 1841.928  | 3046.01   |
| NM_01562E | 16312.857 | 15570.355 | NM_01834C | 2741.025  | 3407.219  | NM_00692E | 4639.994  | 6250.451  |
| AF218032  | 18122.775 | 20033.408 | AF049883  | 3152.465  | 3487.492  | NM_00461E | 39940.203 | 50877.945 |
| NM_01754E | 16691.057 | 12469.455 | U10512    | 641.066   | 733.451   | AF119889  | 17965.031 | 26184.951 |
| AK024407  | 2332.774  | 2521.981  | L10148    | 1586.164  | 1064.473  | M90657    | 613.268   | 955.666   |
| NM_00418E | 38792.41  | 45548.355 | AK026247  | 1219.643  | 1217.948  | NM_00669E | 3837.913  | 4702.039  |
| NM_01841E | 1001.659  | 935.555   | AK024893  | 1046.809  | 755.278   | AK025645  | 21310.254 | 30607.664 |
| NM_01424C | 1320.787  | 1308.302  | AK023302  | 472.35    | 674.201   | AK023266  | 799.865   | 1028.458  |
| BE379399  | 1595.722  | 1228.982  | AL110175  | 988.304   | 1040.326  | NM_006814 | 10397.895 | 12087.234 |
| NM_015877 | 1115.524  | 848.83    | AF288406  | 1278.342  | 1357.032  | NM_005067 | 6192.543  | 6122.662  |
| AL117598  | 2608.576  | 2539.965  | AK027156  | 18534.393 | 20263.342 | AB007899  | 1230.456  | 1339.342  |
| AL109670  | 705.877   | 743.645   | AL157504  | 13445.523 | 15965.369 | NM_002817 | 19080.914 | 22308.805 |
| AF085831  | 1841.133  | 2482.531  | AK023328  | 6534.836  | 8742.563  | NM_002801 | 10918.971 | 10950.507 |
| AL832149  | 4993.829  | 4211.055  | AJ012499  | 68928.57  | 62275.148 | BE905810  | 1018.376  | 999.756   |
| AK022839  | 4163.551  | 3524.475  | AK024900  | 3506.559  | 3253.238  | NM_01478C | 1183.041  | 1227.808  |
| NM_01835C | 1218.951  | 1159.368  | AF119879  | 27754.537 | 19530.645 | NM_01473C | 8649.359  | 6354.501  |
| AK025839  | 3063.736  | 2629.876  | Y10482    | 15654.148 | 10258.686 | NM_014167 | 1444.061  | 1742.068  |
| NM_00394E | 1688.937  | 1430.764  | AY007095  | 2549.914  | 2085.514  | NM_01606E | 3101.345  | 3941.95   |
| AB045292  | 6548.08   | 6155.333  | AF086244  | 3757.711  | 3499.391  | U82987    | 6629.917  | 6920.954  |
| AK022998  | 3470.599  | 3205.227  | AL161992  | 12551.505 | 12339.881 | NM_00573E | 2066.636  | 2534.29   |
| AK025699  | 9364.688  | 9214.154  | AK023551  | 597.674   | 815.627   | NM_01489C | 1586.214  | 2589.703  |
| AF147316  | 574.801   | 624.537   | AK023910  | 2623.657  | 2191.088  | AK056481  | 6403.342  | 8828.557  |
| AF147353  | 641.571   | 536.994   | D16991    | 4132.075  | 4247.521  | NM_00543E | 1538.121  | 2459.712  |
| NM_018024 | 6859.197  | 5808.329  | AK023538  | 1135.495  | 1100.961  | NM_01811E | 979.776   | 1158.289  |
| AK026783  | 1191.495  | 1646.226  | X77485    | 12731.912 | 12126.622 | L35035    | 7606.189  | 9814.09   |
| AF088040  | 383.638   | 502.001   | NM_01449E | 3100.67   | 3317.903  | NM_00715E | 3725.125  | 5903.612  |
| AK021814  | 3941.425  | 3804.038  | AK021555  | 1658.992  | 1878.051  | NM_01829E | 4170.308  | 5654.181  |
| AF086221  | 327.232   | 397.958   | AB046765  | 2046.676  | 2083.717  | NM_00295E | 1217.326  | 1763.706  |
| AF088035  | 1942.186  | 2198.39   | AF133333  | 13921.083 | 13533.025 | NM_00193E | 7978.635  | 11840.917 |
| AF086251  | 1173.204  | 1217.99   | NM_01836E | 2622.523  | 2654.072  | AF230808  | 5209.798  | 7105.379  |
| AL137344  | 440.448   | 495.88    | NM_004881 | 26066.338 | 21159.016 | U18910    | 1515.026  | 2155.285  |
| NM_01809E | 12895.63  | 10248.534 | U94903    | 1430.668  | 1124.111  | NM_00523E | 4072.466  | 4588.532  |
| NM_00584E | 3975.092  | 4164.652  | NM_00515E | 15244.176 | 10901.323 | AK075306  | 8888.875  | 11716.718 |
| NM_003787 | 439.748   | 350.916   | NM_01909E | 14133.583 | 12364.222 | AB037820  | 660.914   | 1102.54   |
| AK024280  | 609.322   | 650.15    | NM_020421 | 6687.605  | 6037.614  | NM_00294E | 53792.672 | 60456.859 |
| AF075036  | 717.887   | 658.395   | D17094    | 2719.27   | 3085.12   | NM_01813E | 65439.051 | 68658.656 |

|           |           |           |           |           |           |           |           |           |
|-----------|-----------|-----------|-----------|-----------|-----------|-----------|-----------|-----------|
| NM_014797 | 3903.71   | 3443.702  | L37690    | 18645.672 | 16858.555 | AF205435  | 13809.781 | 22823.203 |
| AK027139  | 2164.447  | 1393.505  | D61707    | 1835.376  | 1940.757  | AF085983  | 732.761   | 813.666   |
| AL831841  | 2243.39   | 1896.668  | AK021610  | 2755.981  | 2993.857  | AF052105  | 4745.194  | 6356.577  |
| AL110165  | 845.94    | 843.475   | Z36835    | 8959.316  | 10173.895 | AK001204  | 8037.502  | 10615.039 |
| AL117652  | 237.308   | 396.995   | AK023767  | 5385.416  | 5323.875  | M15465    | 5484.14   | 8029.034  |
| AL050263  | 201.233   | 326.958   | AF084516  | 2228.229  | 2348.576  | J03866    | 8992.537  | 11669.117 |
| AL050168  | 960.663   | 1230.557  | AL137554  | 1234.827  | 1480.423  | AK022836  | 4681.296  | 6399.176  |
| AL122122  | 3320.37   | 3496.084  | AJ001907  | 3766.066  | 3727.051  | NM_012343 | 11965.018 | 15200.843 |
| AK000122  | 6003.752  | 6564.172  | M32220    | 6098.708  | 6732.202  | BF217340  | 715.906   | 912.657   |
| AK023159  | 6472.441  | 6093.314  | D17188    | 9724.494  | 10739.646 | NM_003078 | 4247.974  | 6158.681  |
| AK001091  | 1453.313  | 1022.593  | AJ001432  | 49366.375 | 52484.668 | AL137703  | 973.066   | 1361.631  |
| U80775    | 856.581   | 803.167   | NM_020435 | 11091.437 | 12137.905 | NM_001805 | 10691.836 | 13871.089 |
| AF086428  | 605.057   | 673.069   | AF052169  | 2623.876  | 2733.368  | NM_018255 | 447.961   | 674.29    |
| AK025310  | 3743.772  | 3868.663  | CY3Cy5    | 2697.606  | 239.025   | AL117477  | 6333.388  | 7520.413  |
| AL049353  | 462.265   | 558.96    | BF942101  | 2243.828  | 2447.527  | NM_012107 | 6618.299  | 8855.498  |
| NM_014895 | 984.052   | 690.777   | BI825012  | 5215.047  | 4789.376  | AB037760  | 3338.86   | 4052.746  |
| AF009269  | 306.97    | 301.312   | BM051302  | 1421.098  | 1390.166  | NM_015680 | 3446.895  | 5471.552  |
| AF009313  | 375.404   | 344.42    | BE314182  | 4768.916  | 4104.965  | M22637    | 2402.209  | 3840.625  |
| AF056420  | 921.263   | 1306.823  | AI808029  | 855.647   | 609.799   | AB037770  | 1179.681  | 1531.153  |
| AF090887  | 1334.183  | 996.741   | X03225    | 2459.42   | 2376.627  | NM_018364 | 9254.833  | 7044.541  |
| AF009279  | 894.782   | 975.013   | AK097395  | 3527.546  | 3422.864  | NM_006778 | 1114.76   | 1201.18   |
| NM_015883 | 2595.527  | 2299.181  | M12783    | 1270.314  | 1961.488  | NM_007022 | 4396.376  | 4195.478  |
| AF056429  | 824.781   | 977.541   | AK091535  | 610.334   | 763.201   | AL049943  | 13217.291 | 14473.37  |
| AF070547  | 863.564   | 649.951   | AF085357  | 6621.117  | 6216.162  | AL137303  | 2411.193  | 2300.187  |
| AK001110  | 3673.682  | 3441.603  | NM_003841 | 2347.438  | 1384.795  | AL355708  | 1270.775  | 1028.081  |
| AK021801  | 469.302   | 421.908   | NM_080824 | 465.177   | 613.582   | AB002449  | 755.898   | 339.766   |
| AK002184  | 1139.763  | 840.077   | SR2       | 41645.902 | 43839.43  | AK001489  | 2778.914  | 2913.898  |
| AK021652  | 1555.379  | 1508.979  | SR4       | 12490.926 | 15528.944 | NM_015681 | 7077.58   | 7662.64   |
| AK021859  | 484.734   | 544.305   | SR6       | 1695.26   | 1844.331  | AF070582  | 2291.901  | 3340.656  |
| AK025206  | 289.95    | 328.889   | SR8       | 5090.281  | 12479.595 | NM_006383 | 8887.943  | 9968.584  |
| AK026032  | 307.376   | 370.892   | SR10      | 17131.592 | 3966.977  | NM_015400 | 7062.458  | 9306.292  |
| AK026466  | 182.885   | 381.065   | CY3Cy5    | 1819.188  | 147.336   | AK026464  | 1976.999  | 1974.505  |
| AK026828  | 188.057   | 362.08    | NM_014322 | 806.56    | 811.808   | AK001362  | 1057.8    | 1022.279  |
| AY007163  | 10461.699 | 10965.014 | NM_004122 | 2828.681  | 2714.937  | AK022400  | 2572.961  | 2830.849  |
| NM_006235 | 9000.957  | 6980.546  | NM_002928 | 1923.974  | 2291.481  | AF052100  | 2932.302  | 3411.727  |
| AK023734  | 567.954   | 522.384   | NM_000160 | 1398.524  | 1560.136  | AL110235  | 1115.678  | 1390.447  |
| D17265    | 41713.66  | 40371.012 | NM_003301 | 719.641   | 880.009   | U79245    | 1265.693  | 1614.019  |
| AF085827  | 1119.199  | 1221.539  | NM_000955 | 898.502   | 911.856   | AF086124  | 2642.977  | 2502.1    |
| Y08266    | 15846.627 | 12102.858 | U27768    | 695.939   | 679.809   | AK024820  | 1905.08   | 1726.136  |
| AK002171  | 6204.541  | 5111.772  | AF305550  | 4200.534  | 3404.44   | AB033105  | 2475.082  | 2090.528  |
| AJ002572  | 1714.468  | 1331.618  | U66582    | 5017.779  | 5780.869  | AF038192  | 798.602   | 998.395   |
| AK026897  | 9910.637  | 8556.171  | NM_006198 | 1699.144  | 1587.813  | AJ001865  | 843.618   | 585.878   |
| AB037861  | 6379.392  | 6310.259  | NM_000849 | 689.2     | 636.937   | D61704    | 18592.35  | 20509.451 |
| AK021887  | 6839.777  | 5493.416  | NM_004678 | 1233.415  | 2165.966  | AJ227889  | 2471.481  | 2416.952  |
| AF086180  | 12122.87  | 9855.245  | NM_000950 | 6316.505  | 4496.511  | Y12017    | 795.248   | 937.814   |
| AK022135  | 536.695   | 726.343   | NM_005139 | 3397.679  | 3079.777  | X64989    | 708.842   | 848.424   |
| AK022898  | 5119.815  | 5283.451  | NM_000039 | 36158.41  | 36410.594 | L34409    | 19239.865 | 10919.821 |
| NM_017555 | 1808.155  | 1883.427  | NM_020470 | 2054.571  | 1570.498  | U12210    | 4614.42   | 3527.7    |
| AL117592  | 407.406   | 399.814   | AA478950  | 989.03    | 951.699   | L06522    | 1163.653  | 3581.252  |
| NM_003547 | 627.712   | 450.272   | AB029033  | 5195.213  | 5457.5    | Z83936    | 758.574   | 790.385   |
| AL049980  | 4925.714  | 3542.921  | AF091034  | 3226.779  | 2702.736  | L08440    | 12774.028 | 14215.211 |
| NM_006683 | 1308.749  | 1187.594  | NM_005301 | 15957.258 | 15935.722 | M73799    | 2934.853  | 3107.45   |
| AF070529  | 583.7     | 517.932   | NM_004167 | 670.498   | 586.433   | AF086119  | 2271.508  | 2189.921  |

|           |           |           |           |           |           |           |           |           |
|-----------|-----------|-----------|-----------|-----------|-----------|-----------|-----------|-----------|
| AK022978  | 3436.721  | 3595.056  | NM_016653 | 4871.371  | 5560.07   | NM_003782 | 4306.76   | 4578.795  |
| AK021447  | 5014.383  | 3996.042  | AB035124  | 6333.467  | 6006.103  | AL353947  | 647.022   | 916.101   |
| AK025096  | 867.867   | 732.048   | AF060170  | 672.356   | 771.112   | AL442096  | 2489.998  | 2878.121  |
| AF131774  | 2801.58   | 2319.226  | NM_016602 | 540.015   | 628.93    | AK023299  | 1023.049  | 679.551   |
| AK025793  | 519.903   | 717.774   | NM_004409 | 6695.062  | 5253.698  | NM_018228 | 797.571   | 893.352   |
| AK000151  | 705.734   | 511.761   | AK023397  | 1753.898  | 1959.159  | AJ270693  | 1304.727  | 965.748   |
| AL389942  | 974.052   | 991.406   | NM_001725 | 887.253   | 989.036   | NM_017790 | 2816.564  | 2505.647  |
| D17052    | 3393.849  | 2782.912  | NM_004079 | 1964.031  | 1467.229  | AK000861  | 1145.867  | 912.802   |
| D28378    | 68402.406 | 55537.68  | NM_002996 | 696.707   | 371.762   | AK000023  | 2443.792  | 2301.728  |
| M64700    | 324.509   | 309.449   | NM_000383 | 921.449   | 910.726   | AK000901  | 1115.606  | 643.683   |
| AF111846  | 358.437   | 310.373   | X01394    | 15146.581 | 12112.793 | AK024351  | 1161.815  | 1207.765  |
| NM_001267 | 291.991   | 499.32    | NM_000041 | 18081.41  | 13065.301 | AK024867  | 975.239   | 856.38    |
| L41143    | 20162.348 | 20493.418 | NM_002984 | 1002.642  | 971.255   | AK024886  | 756.417   | 1578.451  |
| NM_005331 | 18823.156 | 20243.283 | AB037752  | 2767.673  | 2278.693  | AK025002  | 4619.401  | 8252.526  |
| NM_014111 | 601.278   | 878.153   | AK024821  | 10914.868 | 10050.622 | AK024011  | 3182.671  | 2586.156  |
| S85075    | 899.782   | 936.693   | AB002340  | 1338.008  | 1382.129  | AL390145  | 729.528   | 510.978   |
| AJ008129  | 5001.867  | 4901.872  | NM_000224 | 1000.413  | 773.504   | AF119913  | 2735.96   | 1333.868  |
| AJ008158  | 685.277   | 607.092   | NM_014328 | 6851.226  | 6318.701  | NM_018340 | 2278.57   | 2144.009  |
| AF161451  | 17752.025 | 15486.531 | NM_006414 | 5465.87   | 5806.405  | AF049883  | 3153.068  | 3401.948  |
| X02067    | 19267.66  | 16923.51  | NM_018479 | 11212.243 | 11141.804 | L10148    | 1711.181  | 1388.461  |
| U92013    | 14023.532 | 13139.417 | NM_014362 | 4143.353  | 4160.157  | AK026247  | 667.628   | 615.88    |
| AK023965  | 3503.579  | 2586.119  | NM_018308 | 2180.968  | 2135.869  | AK024893  | 1050.608  | 926.487   |
| AK026211  | 2340.18   | 1761.514  | NM_001832 | 9563.203  | 10224.121 | AK023302  | 584.639   | 667.929   |
| X58968    | 1648.088  | 1401.356  | NM_017774 | 13012.19  | 14417.149 | AL110175  | 1533.525  | 1746.491  |
| U92020    | 2330.402  | 2416.572  | AB037716  | 2179.468  | 2186.896  | AF288406  | 1065.069  | 1444.009  |
| AL117542  | 330.168   | 550.715   | NM_016297 | 2505.827  | 1587.748  | AK027156  | 17380.77  | 15295.992 |
| AL109712  | 6794.673  | 5391.778  | NM_001752 | 2642.003  | 2132.629  | AL157504  | 12733.332 | 11543.96  |
| X04215    | 1205.313  | 991.999   | BC003406  | 2008.988  | 1630.479  | AK023328  | 8692.178  | 10642.575 |
| NM_017782 | 4859.092  | 4848.697  | AL137672  | 538.683   | 599.362   | NM_015931 | 2036.252  | 2776.093  |
| NM_018149 | 6014.918  | 4640.248  | X64177    | 991.236   | 1856.661  | AK026249  | 806.516   | 606.661   |
| D16944    | 767.032   | 742.056   | NM_015994 | 7265.824  | 6207.268  | AF119879  | 54699.238 | 45138.586 |
| NM_018468 | 23103.779 | 21512.738 | NM_002235 | 523.244   | 515.519   | AY007095  | 1078.38   | 1072.78   |
| Z36814    | 1804.58   | 1899.012  | NM_014065 | 1452.839  | 1313.342  | AF086244  | 4732.668  | 3612.883  |
| D17045    | 2100.919  | 1597.024  | NM_001695 | 3333.527  | 2827.918  | AL161992  | 9559.307  | 7207.495  |
| AK000827  | 6091.424  | 4037.743  | NM_002248 | 2228.469  | 1883.908  | AK023551  | 979.716   | 559.656   |
| NM_002503 | 22313.871 | 17012.506 | NM_012281 | 1319.217  | 834.518   | AK023910  | 2952.632  | 2597.374  |
| NM_005319 | 18188.566 | 10513.33  | AK025772  | 2844.409  | 2180.021  | D16991    | 4155.069  | 4021.751  |
| NM_019058 | 841.052   | 867.326   | NM_005509 | 686.166   | 704.152   | AK023538  | 1412.6    | 1493.488  |
| AK022351  | 4350.109  | 2810.749  | NM_152747 | 1472.439  | 1498.699  | U17620    | 489.991   | 726.822   |
| S74319    | 678       | 681.713   | NM_017415 | 1043.249  | 1165.074  | NM_014499 | 2673.852  | 2637.588  |
| AK022059  | 1241.684  | 930.366   | NM_001667 | 20140.617 | 24062.143 | AB046765  | 1928.005  | 1980.971  |
| NM_020194 | 9564.611  | 10793.022 | AB046834  | 560.423   | 987.165   | AF133333  | 12975.404 | 11932.544 |
| AF038183  | 27930.584 | 21767.9   | NM_015957 | 352.181   | 373.972   | NM_018368 | 2112.677  | 2049.101  |
| NM_017882 | 4014.988  | 3424.031  | NM_000262 | 1270.8    | 821.247   | NM_004881 | 41712.805 | 37993.426 |
| NM_003521 | 1501.053  | 1314.96   | NM_017831 | 1608.902  | 1199.705  | U94903    | 2308.158  | 2233.733  |
| CY3Cy5    | 6539.314  | 915.888   | AK022537  | 10457.427 | 8891.232  | NM_005155 | 20650.756 | 19947.883 |
| J03571    | 2991.698  | 2955.076  | AF116632  | 1011.837  | 712.697   | U80764    | 18611.764 | 14029.438 |
| X56134    | 743.866   | 826.976   | AF064597  | 825.396   | 924.409   | AB020684  | 9368.431  | 6215.945  |
| NM_001456 | 1149.332  | 1856.385  | NM_006345 | 4336.326  | 4429.915  | AF077036  | 43136.988 | 30235.824 |
| H44784    | 864.516   | 898.399   | NM_006875 | 2114.559  | 2547.639  | NM_020421 | 4839.247  | 3891.32   |
| AI421041  | 60199.875 | 60134.852 | D87119    | 3910.806  | 4881.275  | D17094    | 2740.634  | 2045.741  |
| BI490011  | 1360.79   | 1287.865  | AL050040  | 709.331   | 628.883   | L37690    | 27354.623 | 23632.434 |
| AF035771  | 1599.668  | 1496.853  | NM_006556 | 12527.866 | 13610.426 | D61707    | 871.743   | 1182.447  |



|           |           |           |           |           |           |           |           |           |
|-----------|-----------|-----------|-----------|-----------|-----------|-----------|-----------|-----------|
| N20475    | 9230.594  | 9672.074  | AL133066  | 673.91    | 422.629   | AK021610  | 3018.671  | 2329.826  |
| BI199286  | 16668.918 | 16104.591 | AF264717  | 2542.815  | 2210.653  | AF084516  | 1584.331  | 1972.126  |
| AA026626  | 1063.026  | 1202.324  | NM_012260 | 5524.223  | 6042.736  | AJ001907  | 1964.789  | 2143.835  |
| H61726    | 1490.914  | 1434.803  | NM_001141 | 5671.396  | 6919.659  | M32220    | 5378.011  | 6280.199  |
| NM_004774 | 4440.793  | 3688.955  | NM_000018 | 10290.624 | 12352.798 | D17188    | 8460.575  | 8176.166  |
| NM_005234 | 3470.373  | 3426.927  | AB028992  | 2185.685  | 2295.708  | AJ001432  | 41378.543 | 39522.41  |
| SR5       | 6604.752  | 5863.784  | L10139    | 895.462   | 703.232   | NM_020435 | 8894.2    | 10440.563 |
| SR7       | 6762.96   | 40708.723 | NM_020470 | 3661.47   | 3220.625  | AF052169  | 3619.166  | 3507.281  |
| SR9       | 24990.512 | 4434.057  | NM_006574 | 620.501   | 668.716   | CY3Cy5    | 5559.18   | 162.545   |
| CY3Cy5    | 5827.112  | 233.753   | AA478950  | 1922.808  | 1758.469  | BF942101  | 2464.787  | 2430.865  |
| AF212842  | 204.948   | 1178.723  | BF942101  | 2537.472  | 2478.333  | BI825012  | 13594.357 | 13569.855 |
| NM_018404 | 1042.785  | 1238.044  | BI825012  | 7988.292  | 7758.029  | BE314182  | 9227.917  | 10405.768 |
| M27544    | 600.562   | 482.573   | M21574    | 612.834   | 644.511   | AI808029  | 2084.483  | 1778.403  |
| NM_001118 | 371.852   | 548.231   | BM051302  | 2227      | 2042.163  | AI971217  | 1096.786  | 1984.615  |
| AL133097  | 1426.005  | 2038.524  | BE314182  | 4530.158  | 3466.776  | X03225    | 4738.2    | 6284.912  |
| NM_001165 | 3684.62   | 4419.78   | AI808029  | 1040.384  | 1080.886  | AK097395  | 12195.424 | 18306.945 |
| NM_001381 | 8846.391  | 9302.819  | X03225    | 2831.469  | 3151.869  | M12783    | 2798.85   | 4789.092  |
| NM_006458 | 1791.015  | 2377.193  | AK097395  | 5055.363  | 4675.559  | AK091535  | 718.696   | 1424.811  |
| NM_014458 | 349.335   | 671.635   | M12783    | 1507.365  | 1874.582  | AF085357  | 12683.063 | 18704.715 |
| NM_004093 | 1679.872  | 1955.493  | AK091535  | 516.042   | 633.63    | NM_003841 | 18004.916 | 35042.484 |
| NM_001448 | 12008.196 | 12419.194 | AF085357  | 9625.567  | 10819.891 | AF296673  | 833.176   | 1313.507  |
| NM_001387 | 486.467   | 452.122   | NM_003841 | 2886.225  | 1681.079  | NM_080824 | 856.664   | 1351.589  |
| AF086122  | 6607.667  | 6458.45   | AF296673  | 293.793   | 1049.271  | SR4       | 17277.24  | 15966.635 |
| AK024397  | 2277.847  | 2430.458  | NM_080824 | 422.543   | 603.052   | SR6       | 2785.987  | 1994.293  |
| NM_003564 | 1286.868  | 1577.837  | NM_018002 | 3198.823  | 4946.388  | SR8       | 10409.153 | 28664.291 |
| AK023414  | 868.954   | 427.304   | AB002340  | 3001.234  | 3066.044  | SR10      | 34997.965 | 9440.733  |
| AF317516  | 12278.867 | 11697.27  | NM_000224 | 1995.62   | 2255.011  | CY3Cy5    | 4663.544  | 214.29    |
| NM_002581 | 543.349   | 658.795   | NM_014328 | 12119.984 | 17807.971 | NM_014322 | 1764.57   | 2395.525  |
| S78203    | 4318.118  | 4322.24   | NM_006414 | 9058.208  | 11588.585 | NM_004122 | 2700.457  | 3266.172  |
| NM_016208 | 10437.146 | 13142.774 | NM_014322 | 1483.543  | 2094.79   | NM_002928 | 5398.145  | 5791.057  |
| NM_005638 | 9663.043  | 11169.189 | NM_004122 | 4403.608  | 5451.41   | NM_003301 | 2765.635  | 3595.579  |
| NM_007235 | 18150.033 | 24274.313 | NM_002928 | 3755.789  | 4534.859  | NM_000955 | 1704.518  | 1481.699  |
| NM_007268 | 4752.04   | 4617.002  | NM_000160 | 1307.019  | 1035.408  | U27768    | 1207.558  | 1404.238  |
| AK026014  | 4243.423  | 4403.578  | NM_003301 | 850.684   | 1080.574  | S73288    | 561.997   | 725.83    |
| NM_014845 | 2982.891  | 3110.167  | NM_000955 | 991.37    | 1275.398  | NM_006198 | 5017.118  | 6197.474  |
| NM_004298 | 5154.124  | 5223.307  | U27768    | 1030.203  | 1361.238  | NM_003812 | 1238.683  | 2652.569  |
| NM_007181 | 5412.533  | 6081.526  | AF305550  | 6715.628  | 6402.559  | NM_000848 | 1181.726  | 2546.506  |
| AB007857  | 1540.195  | 1837.108  | U66582    | 6932.887  | 7554.146  | NM_004678 | 2719.438  | 3679.607  |
| NM_001778 | 33782.293 | 43329.664 | S73288    | 721.718   | 1046.712  | NM_000950 | 18379.699 | 30593.063 |
| NM_004997 | 8073.072  | 9983.09   | NM_006198 | 3089.994  | 4399.137  | NM_005138 | 7066.37   | 9756.355  |
| NM_005923 | 7205.634  | 7129.764  | NM_003812 | 377.654   | 516.938   | L10139    | 1741.195  | 2526.886  |
| NM_003465 | 3418.727  | 3288.682  | NM_000848 | 782.647   | 650.381   | NM_000038 | 67406.82  | 57509.859 |
| AF289028  | 1457.962  | 1261.336  | NM_004678 | 1079.348  | 981.651   | NM_020470 | 5834.677  | 8845.34   |
| NM_005218 | 12655.476 | 10652.712 | NM_000950 | 5975.7    | 4304.361  | NM_006574 | 1523.822  | 3072.215  |
| NM_006628 | 1115.767  | 1089.174  | AK025772  | 4398.728  | 5048.753  | AA478950  | 4195.655  | 5908.166  |
| NM_003965 | 1244.059  | 1193.043  | NM_005509 | 1512.381  | 1654.218  | AB029033  | 9304.204  | 10156.204 |
| NM_004584 | 3963.597  | 3705.265  | NM_152747 | 2260.841  | 2673.24   | AF091034  | 3554.822  | 3312.813  |
| AK023618  | 4857.448  | 4427.251  | NM_017415 | 1567.087  | 2192.508  | NM_005301 | 23253.18  | 21454.4   |
| NM_001492 | 998.764   | 1141.392  | NM_001667 | 30448.254 | 42572.238 | NM_016653 | 4732.293  | 4172.611  |
| AB012643  | 3254.283  | 4387.373  | AB046834  | 788.209   | 1146.421  | AB035124  | 5432.627  | 7404.027  |
| NM_014153 | 6511.589  | 8221.899  | AB029033  | 7953.612  | 9639.961  | AF060170  | 1165.797  | 1443.515  |
| NM_000414 | 7028.243  | 7742.593  | AF091034  | 5664.939  | 7812.913  | NM_016602 | 2005.278  | 2283.085  |
| NM_018845 | 10310.384 | 10921.198 | NM_005301 | 21128.973 | 28851.043 | NM_004408 | 11309.174 | 10861.728 |

|           |           |           |           |           |           |           |           |           |
|-----------|-----------|-----------|-----------|-----------|-----------|-----------|-----------|-----------|
| AY008372  | 841.756   | 1090.455  | NM_016653 | 6291.531  | 6713.35   | AK023397  | 2863.792  | 3824.885  |
| NM_005505 | 2762.085  | 2719.157  | AB035124  | 7141.154  | 6493.227  | NM_001725 | 3555.044  | 7428.458  |
| AK026964  | 951.81    | 1197.85   | AF060170  | 736.564   | 1105.157  | NM_004079 | 5403.035  | 9431.508  |
| NM_001134 | 1320.967  | 1114.49   | NM_016602 | 732.604   | 685.628   | NM_002996 | 1032.805  | 1767.452  |
| NM_016016 | 17416.887 | 20046.729 | NM_004409 | 7536.031  | 6035.658  | NM_000383 | 1249.894  | 1599.02   |
| NM_020407 | 1427.25   | 1673.079  | AK023397  | 2255.041  | 1884.372  | X01394    | 58713.926 | 59448.184 |
| AF118274  | 3200.889  | 3372.795  | NM_001725 | 711.463   | 726.486   | NM_002984 | 2223.343  | 3574.331  |
| NM_018344 | 1576.688  | 1206.165  | NM_004079 | 1890.255  | 2105.235  | AB037752  | 8729.25   | 12833.043 |
| NM_000079 | 5604.072  | 4982.704  | NM_002996 | 578.372   | 608.362   | AK024821  | 16312.617 | 17957.232 |
| NM_000083 | 1339.972  | 1022.998  | NM_000383 | 660.867   | 639.127   | AB002340  | 2797.033  | 3049.388  |
| AL110245  | 1227.593  | 1242.928  | X01394    | 21203.369 | 18663.689 | NM_000224 | 3877.281  | 5150.161  |
| NM_005626 | 24616.957 | 25479.316 | NM_000041 | 19816.293 | 15079.587 | NM_006414 | 8252.177  | 11899.529 |
| NM_003951 | 686.842   | 909.796   | NM_002984 | 1335.604  | 1060.363  | NM_018479 | 10868.481 | 9627.33   |
| X74609    | 5178.658  | 7074.358  | AF317425  | 2405.94   | 2078.378  | NM_014362 | 4119.313  | 3513.493  |
| NM_013363 | 937.872   | 1132.939  | AF264717  | 4189.557  | 4304.255  | NM_018308 | 3001.776  | 2415.872  |
| NM_000947 | 5901.094  | 7058.781  | NM_012260 | 8169.812  | 9682.878  | NM_001832 | 23731.031 | 22638.76  |
| NM_016062 | 44151.512 | 55353.75  | NM_001141 | 7111.688  | 8301.771  | NM_017774 | 14937.691 | 11925.093 |
| AF078164  | 12366.543 | 12406.4   | NM_000018 | 16266.808 | 24537.352 | AB037716  | 1887.494  | 2479.737  |
| NM_019049 | 4507.089  | 4626.745  | AB028992  | 3141.607  | 3966.95   | NM_016297 | 3362.254  | 2863.107  |
| NM_012413 | 521.436   | 762.419   | NM_018479 | 13792.73  | 16845.545 | NM_001752 | 3507.139  | 3816.622  |
| NM_004656 | 7811.605  | 6585.661  | NM_014362 | 5493.592  | 5838.872  | BC003406  | 2853.512  | 4819.161  |
| NM_005576 | 1547.422  | 1739.234  | NM_018308 | 2449.931  | 2739.395  | AL137672  | 1800.748  | 3422.872  |
| AF071569  | 3048.182  | 2566.912  | NM_001832 | 8693.7    | 8670.131  | X64177    | 3892.275  | 4362.825  |
| NM_002269 | 3143.264  | 3281.06   | NM_017774 | 12400.399 | 11693.043 | NM_015994 | 10705.834 | 12984.347 |
| J04948    | 1330.369  | 1058.657  | AB037716  | 1962.066  | 1985.639  | NM_002235 | 398.187   | 1205.49   |
| NM_018043 | 767.381   | 841.591   | NM_004827 | 190.656   | 705.886   | NM_001695 | 5201.516  | 5185.103  |
| AK022564  | 15075.346 | 13698.685 | NM_016297 | 3093.556  | 2739.497  | NM_002248 | 3889.36   | 3658.719  |
| NM_003564 | 1155.266  | 1352.823  | NM_001752 | 2301.326  | 2173.554  | NM_012281 | 2175.581  | 3163.019  |
| AK023414  | 544.802   | 567.363   | BC003406  | 1752.789  | 1918.52   | AK025772  | 4511.337  | 5512.968  |
| AF317516  | 12113.733 | 16396.977 | AL137672  | 564.899   | 451.656   | NM_005509 | 1372.174  | 1711.903  |
| NM_002581 | 609.626   | 787.851   | X64177    | 740.383   | 1481.34   | NM_152747 | 1639.805  | 2533.47   |
| J03571    | 3588.979  | 4911.566  | NM_015994 | 8897.937  | 7765.954  | NM_017415 | 1799.435  | 3253.689  |
| X56134    | 673.083   | 764.056   | NM_014065 | 1849.971  | 1586.089  | NM_000262 | 925.351   | 1260.44   |
| NM_001456 | 1114.277  | 2290.819  | NM_001695 | 4392.049  | 3501.94   | NM_017831 | 1485.962  | 1569.858  |
| H44784    | 869.568   | 1032.409  | NM_002248 | 1789.549  | 1405.332  | AK022537  | 12346.233 | 12706.286 |
| AI421041  | 61873.777 | 61981.953 | NM_012281 | 1093.023  | 666.197   | AF116632  | 1366.66   | 1905.186  |
| BI759091  | 2838.867  | 3803.823  | NM_080824 | 822.596   | 743.722   | AF064597  | 1214.576  | 1458.291  |
| BG685843  | 17831.834 | 17801.561 | NM_000262 | 791.732   | 523.601   | NM_006345 | 6530.304  | 7650.092  |
| BI490011  | 1022.767  | 1375.136  | NM_002435 | 18.798    | 340.567   | NM_006875 | 2358.227  | 3226.567  |
| AF035771  | 1421.869  | 1432.07   | NM_017831 | 1372.198  | 974.074   | AB037769  | 195.578   | 2234.633  |
| N20475    | 8841.403  | 9758.119  | AK022537  | 8529.133  | 6980.118  | AL050040  | 842.837   | 1478.72   |
| BI199286  | 7813.368  | 6066.417  | AF116632  | 706.351   | 460.173   | NM_006556 | 14155.109 | 16058.262 |
| AA026626  | 812.71    | 940.679   | AF064597  | 818.695   | 884.711   | AB028992  | 2247.783  | 2638.489  |
| H61726    | 1539.228  | 1388.898  | NM_006345 | 5684.842  | 4397.206  | L10139    | 985.785   | 846.388   |
| NM_004774 | 4681.627  | 3672.863  | NM_006875 | 1960.571  | 1663.831  | NM_020470 | 3371.001  | 2934.243  |
| NM_005234 | 3532.36   | 3509.137  | D87119    | 3118.883  | 3203.868  | NM_006574 | 598.419   | 600.46    |
| NM_016436 | 620.94    | 388.832   | AL050040  | 660.961   | 463.133   | AA478950  | 1745.919  | 1832.014  |
| AL050355  | 1012.072  | 805.273   | NM_006556 | 11677.965 | 9321.642  | BF942101  | 2773.94   | 2743.821  |
| NM_005216 | 12493.76  | 14105.418 | AL133066  | 339.771   | 570.775   | BI825012  | 13566.152 | 13551.224 |
| NM_006626 | 1006.618  | 1511.939  | NM_000849 | 1380.462  | 700.123   | BM051302  | 1413.692  | 1328.484  |
| NM_003965 | 1270.834  | 1701.264  | NM_004678 | 1490.472  | 1327.851  | BE314182  | 7799.767  | 8329.241  |
| NM_004584 | 4316.861  | 4568.683  | NM_000950 | 9494.305  | 5408.393  | AI808029  | 1464.799  | 2520.147  |
| AK023618  | 5297.637  | 6444.779  | NM_005139 | 5099.358  | 4580.757  | X03225    | 4640.836  | 4543.876  |

|           |           |           |           |           |           |           |           |           |
|-----------|-----------|-----------|-----------|-----------|-----------|-----------|-----------|-----------|
| AF212842  | 129.481   | 1745.677  | NM_000322 | 37866.496 | 33896.25  | AK097395  | 9670.716  | 11732.476 |
| NM_018404 | 1017.34   | 1215.154  | L10139    | 711.531   | 603.183   | M12783    | 2245.482  | 3305.088  |
| M27544    | 358.566   | 410.399   | NM_000039 | 47159.906 | 40277.285 | NM_080824 | 591.794   | 635.412   |
| NM_002258 | 200.186   | 353.206   | NM_020470 | 2139.808  | 1826.579  | AB032956  | 510.589   | 721.417   |
| AL133097  | 1273.759  | 1758.176  | AA478950  | 1134.802  | 813.671   | NM_018002 | 2304.491  | 2338.952  |
| NM_001165 | 4163.879  | 5456.725  | BF942101  | 1467.829  | 990.092   | AB002340  | 2092.539  | 2218.046  |
| NM_001381 | 7950.408  | 9401.493  | BI825012  | 5469.813  | 3627.856  | NM_000224 | 2222.598  | 2245.76   |
| U90908    | 588.08    | 822.921   | M21574    | 274.226   | 537.324   | NM_014328 | 7618.081  | 7357.318  |
| NM_006458 | 3182.846  | 3657.823  | BM051302  | 1416.131  | 994.105   | NM_006414 | 5876.392  | 5833.824  |
| NM_014458 | 559.976   | 665.359   | BE314182  | 3669.352  | 3194.865  | NM_014322 | 1028.149  | 1179.238  |
| NM_004093 | 1259.24   | 1140.517  | AI808029  | 847.825   | 1223.411  | NM_004122 | 2870.904  | 2823.75   |
| AF086122  | 5434.611  | 4667.121  | X03225    | 2285.818  | 3179.721  | NM_002928 | 6781.026  | 6229.768  |
| AK024397  | 2330.268  | 2663.196  | AK097395  | 3677.729  | 5099.456  | NM_000160 | 1681.255  | 1763.504  |
| NM_018047 | 3293.073  | 3122.618  | M12783    | 1017.061  | 1486.929  | NM_003301 | 729.878   | 1593.971  |
| NM_005022 | 634.906   | 788.659   | AK091535  | 494.172   | 581.24    | NM_000958 | 1375.741  | 1489.883  |
| NM_001288 | 680.503   | 656.022   | AF085357  | 6833.165  | 6017.742  | U27768    | 1641.753  | 2499.189  |
| NM_000083 | 1435.937  | 1501.271  | NM_003841 | 1937.306  | 1311.356  | AF305550  | 5833.521  | 7878.374  |
| AL110245  | 1014.152  | 1509.278  | X01394    | 27225.77  | 21313.971 | NM_003812 | 993.85    | 1425.106  |
| NM_005628 | 24215.936 | 33812.543 | NM_000041 | 25228.938 | 19318.654 | NM_000848 | 988.776   | 986.371   |
| NM_003951 | 859.955   | 1059.832  | NM_002984 | 1479.813  | 1219.895  | NM_004678 | 1788.276  | 1510.572  |
| NM_004172 | 609.634   | 744.431   | AF317425  | 1939.515  | 1978.358  | NM_000950 | 8047.751  | 7721.508  |
| S78203    | 5303.778  | 5905.923  | NM_018002 | 2226.452  | 3002.23   | NM_005138 | 6674.566  | 5982.639  |
| NM_016208 | 10118.51  | 11704.815 | AK024821  | 10448.103 | 11523.214 | AK025772  | 2841.737  | 2105.336  |
| NM_005638 | 9481.062  | 10806.204 | AB002340  | 1655.219  | 1671.984  | NM_005508 | 888.563   | 655.625   |
| NM_007268 | 4656.003  | 5314.129  | NM_000224 | 1035.859  | 1066.426  | NM_152747 | 1110.314  | 1229.073  |
| AK026014  | 4816.721  | 5189.494  | NM_014328 | 5779.595  | 5268.266  | NM_017418 | 921.353   | 1147.507  |
| NM_014848 | 3041.441  | 3896.381  | NM_006414 | 4118.537  | 3192.078  | NM_001667 | 25061.631 | 26381.248 |
| NM_004298 | 5009.376  | 5600.953  | NM_014322 | 769.388   | 806.492   | AB046834  | 556.718   | 692.044   |
| NM_001232 | 242.583   | 1057.882  | NM_004122 | 2904.711  | 3457.148  | AB029033  | 8402.134  | 8495.596  |
| AB007857  | 1598.945  | 1698.14   | NM_002928 | 2442.385  | 2245.758  | AF091034  | 4273.696  | 4239.52   |
| NM_001778 | 32258.762 | 29366.938 | NM_000160 | 961.08    | 801.01    | NM_005301 | 24461.301 | 22591.1   |
| NM_004997 | 6686.651  | 5272.984  | NM_003301 | 594.659   | 898.323   | AF060170  | 1101.876  | 1061.656  |
| NM_005923 | 6707.925  | 4987.599  | NM_000958 | 730.741   | 1217.823  | NM_016602 | 697.312   | 1139.987  |
| NM_003468 | 2529.936  | 2294.93   | U27768    | 638.764   | 973.188   | NM_004408 | 11970.662 | 15007.759 |
| AF289028  | 852.671   | 661.541   | AF305550  | 4889.678  | 6314.578  | AK023397  | 3121.067  | 4976.171  |
| NM_005127 | 12936.181 | 10761.681 | U66582    | 4464.338  | 4794.392  | NM_001728 | 4075.849  | 6342.908  |
| NM_005567 | 1060.23   | 1166.845  | NM_006198 | 2016.074  | 2380.709  | NM_000383 | 1520.137  | 1885.815  |
| AF071569  | 2716.971  | 2466.192  | NM_002238 | 463.376   | 474.07    | NM_004633 | 870.274   | 633.876   |
| NM_002268 | 3259.683  | 4112.406  | NM_014068 | 2178.606  | 2617.305  | X01394    | 22670.502 | 17262.842 |
| J04948    | 1311.268  | 1355.807  | NM_001698 | 4645.956  | 5476.072  | NM_000041 | 13040.051 | 9906.122  |
| NM_018043 | 810.475   | 1182.411  | NM_002248 | 3304.246  | 2868.169  | NM_002984 | 1048.474  | 578.506   |
| AK022564  | 4420.692  | 5500.717  | NM_012281 | 1643.946  | 1698.208  | AF264717  | 1672.186  | 1775.07   |
| NM_001492 | 1052.087  | 1254.615  | AK025772  | 2929.016  | 2890.713  | NM_012260 | 6634.254  | 6438.952  |
| AB012643  | 2855.939  | 3822.919  | NM_005508 | 878.057   | 1043.878  | NM_001141 | 4576.717  | 4970.303  |
| AB023170  | 773.717   | 1033.616  | NM_152747 | 947.348   | 849.984   | NM_000018 | 7512.392  | 11511.743 |
| NM_014153 | 5593.797  | 6742.505  | NM_017418 | 938.982   | 978.752   | AB028992  | 1650.771  | 1558.036  |
| NM_002298 | 19202.939 | 20986.832 | NM_001667 | 13959.721 | 12832.201 | NM_018478 | 10271.201 | 9018.233  |
| NM_018848 | 11467.052 | 13006.379 | AB029033  | 2301.078  | 2168.123  | NM_014362 | 4513.835  | 3638.719  |
| AY008372  | 1043.498  | 1397.976  | AF091034  | 3087.372  | 3841.761  | NM_018308 | 2625.222  | 2191.917  |
| NM_005508 | 2651.698  | 2668.403  | NM_005301 | 12298.148 | 11773.736 | NM_001832 | 20634.721 | 22741.334 |
| AK026964  | 629.538   | 1000.988  | NM_016653 | 4584.667  | 5487.854  | NM_017774 | 15825.84  | 14231.033 |
| NM_016018 | 14217.65  | 11085.663 | AB035124  | 6261.149  | 6560.794  | AB037716  | 2121.359  | 2416.607  |
| NM_020407 | 507.484   | 450.87    | AF060170  | 699.853   | 1212.09   | NM_016297 | 3956.725  | 4257.459  |

|           |           |           |           |           |           |           |           |           |
|-----------|-----------|-----------|-----------|-----------|-----------|-----------|-----------|-----------|
| AF118274  | 1980.107  | 1675.951  | NM_016602 | 640.196   | 994.236   | X64177    | 3659.912  | 1764.873  |
| NM_018344 | 1738.208  | 1467.984  | NM_004409 | 6271.636  | 5169.407  | NM_015994 | 10326.952 | 9466.51   |
| NM_000079 | 6016.1    | 6159.584  | AK023397  | 1558.006  | 1634.744  | NM_002235 | 970.321   | 923.481   |
| NM_004774 | 5296.937  | 5216.864  | NM_001725 | 687.356   | 543.196   | NM_014065 | 941.37    | 821.798   |
| NM_005234 | 3386.452  | 3731.08   | NM_004079 | 1670.493  | 1574.39   | NM_001695 | 2373.869  | 1453.274  |
| NM_016436 | 681.897   | 572.488   | NM_002996 | 472.549   | 506.412   | NM_002248 | 2313.286  | 2328.38   |
| AL050355  | 1152.297  | 1083.955  | NM_000383 | 494.741   | 680.408   | NM_012281 | 1498.182  | 1376.593  |
| AF007190  | 378.218   | 405.713   | NM_006875 | 2292.346  | 2594.865  | NM_000262 | 809.455   | 1146.281  |
| X74609    | 5531.938  | 6427.885  | D87119    | 4089.751  | 5060.146  | NM_017831 | 1939.77   | 2541.211  |
| NM_018990 | 13544.851 | 18901.572 | AB037769  | 293.771   | 508.014   | AK024393  | 516.533   | 848.469   |
| NM_013363 | 1165.73   | 1743.455  | AL050040  | 762.481   | 909.636   | AF064597  | 1709.706  | 2421.902  |
| NM_000947 | 6446.593  | 8047.737  | NM_006556 | 13142.003 | 15873.54  | NM_006345 | 5797.168  | 5870.536  |
| AL096750  | 5244.114  | 8203.475  | AL133066  | 626.722   | 909.91    | NM_006875 | 2320.388  | 2297.786  |
| NM_016061 | 4277.858  | 5619.533  | AF264717  | 1802.852  | 1895.531  | D87119    | 4168.34   | 3061.601  |
| NM_004153 | 3433.619  | 3671.967  | NM_012260 | 5701.36   | 5315.331  | AL050040  | 1150.32   | 847.139   |
| NM_019049 | 3757.674  | 2883.452  | NM_001141 | 4890.492  | 4726.773  | NM_006556 | 11797.341 | 8739.536  |
| NM_012413 | 733.778   | 512.374   | NM_000018 | 8734.547  | 9583.066  | NM_000849 | 904.122   | 963.36    |
| AF130101  | 1588.765  | 1521.992  | AB028992  | 1773.727  | 1500.931  | NM_004678 | 1707.649  | 1680.165  |
| NM_004656 | 9555.354  | 8508.203  | NM_018479 | 7391.139  | 7042.875  | NM_000950 | 25754.613 | 28516.795 |
| NM_005576 | 1676.576  | 1693.549  | NM_014362 | 3795.086  | 4199.537  | NM_005139 | 4902.937  | 5573.35   |
| AF086122  | 7341.126  | 6582.39   | NM_018308 | 2404.959  | 3107.372  | NM_000322 | 48238.672 | 47393.867 |
| AK024397  | 2228.924  | 2301.275  | NM_001832 | 6744.238  | 7345.425  | L10139    | 967.226   | 913.354   |
| NM_018047 | 2962.949  | 2655.115  | NM_017774 | 11672.963 | 14057.314 | NM_020470 | 4896.817  | 3749.229  |
| NM_005022 | 962.709   | 988.201   | AB037716  | 2001.843  | 2986.005  | AA478950  | 1815.531  | 2058.18   |
| NM_003564 | 1250.685  | 1393.006  | NM_004827 | 207.591   | 783.689   | BF942101  | 2275.88   | 2057.043  |
| AK023414  | 731.658   | 708.93    | NM_016297 | 2591.103  | 2213.726  | BI825012  | 13030.8   | 12704.258 |
| AF317516  | 13532.827 | 14649.924 | NM_001752 | 2618.871  | 2260.734  | M21574    | 589.633   | 579.673   |
| NM_002581 | 668.026   | 777.865   | BC003406  | 1802.497  | 1684.786  | BM051302  | 1756.054  | 2158.062  |
| J03571    | 3091.238  | 2764.323  | AL137672  | 550.095   | 519.911   | AI971217  | 593.135   | 851.113   |
| X56134    | 619.256   | 788.993   | X64177    | 824.263   | 1321.754  | X03225    | 4543.147  | 4419.151  |
| H44784    | 914.206   | 963.061   | NM_015994 | 7987.824  | 6742.75   | AK097395  | 8665.206  | 8244.345  |
| BI759091  | 2521.801  | 2689.735  | NM_018476 | 17481.664 | 16649.842 | M12783    | 2658.754  | 2283.458  |
| BG685843  | 16940.383 | 12087.464 | AF220492  | 8081.443  | 10206.526 | AK091535  | 1169.234  | 1096.033  |
| BI490011  | 1533.396  | 1089.471  | X89671    | 2006.41   | 2455.469  | AF085357  | 8643.646  | 7119.471  |
| AF035771  | 1441.135  | 1415.508  | NM_014941 | 4674.753  | 4742.678  | NM_003841 | 6772.161  | 6353.946  |
| N20475    | 8412.413  | 7506.398  | NM_018372 | 6530.969  | 8196.973  | AF296673  | 1146.778  | 1397.575  |
| BI199286  | 14234.437 | 10394.478 | NM_013253 | 1578.472  | 2032.309  | NM_004633 | 421.377   | 391.539   |
| AA026626  | 1472.912  | 1858.955  | NM_005895 | 4982.313  | 5945.375  | X01394    | 53171.938 | 51575.148 |
| H61726    | 1489.929  | 1459.901  | D82345    | 15301.806 | 21350.85  | NM_000041 | 38247.594 | 42433.043 |
| NM_004997 | 8190.085  | 8840.514  | NM_003814 | 2018.777  | 2450.35   | NM_002984 | 2750.291  | 5744.06   |
| NM_005923 | 8339.178  | 8828.278  | NM_002968 | 623.46    | 891.958   | AF317425  | 2203.544  | 2143.458  |
| NM_003465 | 2757.018  | 3187.019  | NM_000262 | 1030.916  | 932.41    | NM_018002 | 2153.485  | 2150.838  |
| AF289028  | 968.737   | 959.96    | NM_017831 | 1490.31   | 1315.707  | AB002340  | 2428.35   | 2054.873  |
| NM_005127 | 11771.354 | 10882.222 | AK022537  | 9098.279  | 8349.736  | NM_000224 | 2383.873  | 2050.307  |
| NM_005567 | 815.53    | 815.371   | AF064597  | 730.138   | 864.563   | NM_014328 | 9194.767  | 7021.446  |
| NM_005216 | 18654.188 | 22643.479 | NM_006345 | 4320.783  | 3894.526  | NM_006414 | 5691.33   | 4345.148  |
| NM_006626 | 1466.49   | 1416.991  | NM_003259 | 19878.875 | 21181.803 | NM_014322 | 1251.296  | 910.767   |
| NM_003965 | 1771.75   | 1551.704  | AL080128  | 4839.713  | 4737.958  | NM_004122 | 3155.538  | 3266.089  |
| NM_004584 | 4385.003  | 4227.764  | AB037787  | 6882.435  | 7175.304  | NM_002928 | 8288.757  | 8538.363  |
| AK023618  | 2743.711  | 1261.271  | AB033072  | 729.943   | 821.009   | NM_000160 | 1762.198  | 2121.713  |
| AF212842  | 175.29    | 1099.939  | AB040892  | 1362.204  | 1258.992  | NM_003301 | 1353.772  | 2458.609  |
| NM_018404 | 1428.497  | 1181.106  | NM_001822 | 2203.477  | 2834.942  | NM_000955 | 2182.951  | 2508.461  |
| M27544    | 478.529   | 495.834   | AB002360  | 540.629   | 435.525   | U27768    | 1591.451  | 1606.188  |

|           |           |           |           |           |           |           |           |           |
|-----------|-----------|-----------|-----------|-----------|-----------|-----------|-----------|-----------|
| NM_001118 | 735.346   | 683.082   | NM_018268 | 12848.623 | 14359.462 | AF305550  | 5780.727  | 5076.435  |
| AL133097  | 3720.834  | 4607.534  | AF230904  | 9980.631  | 11055.963 | U66582    | 7759.582  | 7252.198  |
| NM_001381 | 24516.684 | 21938.08  | NM_017596 | 7985.518  | 8731.603  | NM_00619E | 3686.858  | 2696.49   |
| U90908    | 979.697   | 1112.001  | AL157480  | 3369.733  | 3582.253  | NM_003812 | 734.271   | 670.197   |
| NM_00645E | 5087.922  | 5200.266  | NM_01438E | 903.119   | 870.87    | NM_00223E | 446       | 578.891   |
| NM_01445E | 836.889   | 1227.735  | NM_018110 | 1754.425  | 1626.078  | NM_002241 | 527.736   | 579.512   |
| NM_00409E | 5223.18   | 5317.219  | AF312678  | 600.328   | 638.752   | NM_01406E | 1903.515  | 2087.356  |
| NM_00144E | 15735.059 | 17685.432 | NM_00625E | 15957.637 | 27652.439 | NM_00169E | 4082.722  | 4979.14   |
| NM_01601E | 23490.76  | 27649.543 | NM_00386E | 567.691   | 524.544   | NM_00224E | 3432.446  | 5294.442  |
| NM_020407 | 528.906   | 907.494   | NM_018262 | 1338.435  | 1236.358  | NM_012281 | 1853.311  | 2284.213  |
| AF118274  | 1465.25   | 1620.206  | NM_006207 | 1225.918  | 1298.974  | AK025772  | 3062.479  | 2174.109  |
| NM_018344 | 2042.419  | 2321.464  | NM_003220 | 1605.538  | 1381.806  | NM_00550E | 1046.461  | 874.852   |
| NM_00007E | 5410.15   | 6396.799  | AF009674  | 4872.367  | 3858.897  | NM_152747 | 1477.488  | 1063.707  |
| NM_00008E | 2047.401  | 2795.879  | NM_000360 | 1000.449  | 816.016   | NM_01741E | 1827.526  | 2141.818  |
| AL110245  | 1851.142  | 2240.449  | NM_000844 | 674.62    | 682.227   | NM_001667 | 31536.92  | 26090.768 |
| NM_00562E | 28626.656 | 37496.223 | NM_005510 | 5803.741  | 5671.057  | AB046834  | 1116.876  | 1115.654  |
| NM_003951 | 1158.122  | 1514.879  | Z36817    | 787.13    | 763.792   | AB029033  | 9135.422  | 7986.492  |
| NM_004172 | 589.174   | 986.429   | NM_01450E | 20949.877 | 16498.725 | AF091034  | 4455.32   | 3502.351  |
| S78203    | 7234.313  | 8868.525  | NM_00420E | 5493.096  | 5617.146  | NM_005301 | 31056.176 | 28657.877 |
| NM_01620E | 13605.764 | 15908.663 | NM_016162 | 4514.325  | 4513.038  | NM_01665E | 6281.607  | 7547.743  |
| NM_00163E | 637.934   | 550.109   | AF130056  | 3019.457  | 4156.625  | AB035124  | 7468.517  | 6928.439  |
| NM_00563E | 13691.488 | 15386.341 | NM_002201 | 55827.758 | 53460.898 | AF060170  | 1071.443  | 1434.089  |
| AK026014  | 5881.866  | 5835.819  | AK025047  | 1662.98   | 1411      | NM_01660E | 1033.293  | 969.624   |
| NM_01484E | 3930.577  | 3410.882  | NM_00680E | 4170.639  | 5124.72   | NM_00440E | 10247.29  | 9426.893  |
| NM_00429E | 7479.552  | 7216.007  | NM_00676E | 3597.044  | 3387.985  | AK023397  | 2556.378  | 2239.73   |
| NM_007181 | 8730.94   | 8474.344  | NM_006119 | 2996.464  | 3599.335  | NM_00172E | 2611.761  | 2285.759  |
| AB007857  | 2347.089  | 3021.258  | NM_00446E | 1015.433  | 1145.749  | NM_00407E | 4878.011  | 3369.387  |
| NM_00177E | 41002.059 | 39726.246 | AK026927  | 2647.788  | 3035.386  | NM_00299E | 1186.893  | 1042.18   |
| NM_01904E | 5177.942  | 4162.419  | NM_01405E | 13560.377 | 11222.025 | NM_00038E | 1202.518  | 808.255   |
| NM_005447 | 672.964   | 518.069   | NM_001761 | 5282.505  | 4422.605  | NM_00687E | 2299.546  | 2232.996  |
| NM_01241E | 1077.918  | 892.751   | BE884341  | 2019.295  | 2295.038  | D87119    | 2933.073  | 2585.307  |
| AF130101  | 2336.073  | 2445.61   | AF231997  | 2658.352  | 2223.24   | AL050040  | 903.194   | 931.268   |
| NM_00465E | 10411.984 | 8965.089  | NM_00712E | 2013.52   | 2288.09   | NM_00655E | 10584.248 | 9870.568  |
| NM_00557E | 1900.597  | 1553.85   | NM_00259E | 6868.816  | 8112.94   | AL133066  | 551.774   | 595.976   |
| AF071569  | 3228.756  | 2672.909  | NM_020184 | 749.293   | 547.102   | AF264717  | 2522.98   | 2168.144  |
| NM_00226E | 4423.951  | 5589.699  | NM_00581E | 2046.818  | 1777.581  | NM_012260 | 8727.608  | 6259.836  |
| J04948    | 1471.8    | 1609.561  | NM_00122E | 1481.698  | 1759.591  | NM_001141 | 5978.741  | 7111.17   |
| NM_01804E | 913.141   | 748.227   | NM_01491E | 519.12    | 368.324   | NM_00001E | 9841.63   | 10822.869 |
| AK022564  | 6965.524  | 7824.81   | NM_000250 | 738.862   | 533.305   | AB028992  | 2047.262  | 1427.162  |
| NM_00149E | 1339.372  | 1373.799  | NM_018147 | 8289.123  | 7376.663  | NM_01847E | 11212.084 | 8408.037  |
| AB012643  | 4910.646  | 5474.595  | NM_018967 | 1715.949  | 1511.914  | NM_01436E | 4247.753  | 3202.376  |
| AB023170  | 1263.629  | 1565.052  | NM_001850 | 753.199   | 763.844   | NM_01830E | 2606.242  | 2448.436  |
| NM_01415E | 10208.04  | 12301.596 | NM_002160 | 887.389   | 712.395   | NM_00183E | 22184.553 | 22787.732 |
| NM_01884E | 14959.033 | 13536.476 | NM_00567E | 2781.466  | 2548.308  | NM_017774 | 17934.309 | 19535.402 |
| AY008372  | 1944.837  | 1707.344  | NM_002770 | 2482.133  | 3196.958  | AB037716  | 2319.159  | 2639.775  |
| NM_00550E | 4054.384  | 3754.808  | BC030636  | 3481.782  | 4174.229  | NM_016297 | 3487.641  | 3009.581  |
| AK026964  | 1382.104  | 1197.725  | NM_00281E | 6535.478  | 7494.68   | NM_00175E | 3625.348  | 3219.285  |
| NM_001134 | 2011.639  | 2008.968  | NM_02036E | 3220.57   | 3639.337  | BC003406  | 2507.676  | 1927.843  |
| NM_00669E | 1119.784  | 1247.787  | NM_00398E | 713.203   | 909.262   | AL137672  | 984.384   | 759.392   |
| NM_00481E | 6857.439  | 8488.753  | NM_00207E | 6595.522  | 7072.674  | X64177    | 2339.426  | 573.638   |
| NM_004147 | 957.277   | 1306.641  | NM_00211E | 4681.049  | 3312.89   | NM_015994 | 10233.098 | 6154.969  |
| AK000959  | 6183.452  | 6525.997  | NM_004121 | 1500.506  | 1175.728  | X89671    | 2397.097  | 2176.346  |
| AB037743  | 4539.483  | 4737.944  | AY007092  | 3241.462  | 3126.168  | NM_014941 | 5269.183  | 4839.878  |

|           |           |           |           |           |           |           |           |           |
|-----------|-----------|-----------|-----------|-----------|-----------|-----------|-----------|-----------|
| AB046820  | 7768.935  | 7618.466  | NM_001902 | 2460.148  | 2982.325  | NM_018372 | 5520.783  | 4539.027  |
| NM_014646 | 3122.779  | 2903.021  | AL137605  | 12300.918 | 9744.784  | NM_013253 | 1615.836  | 1325.742  |
| NM_006375 | 1604.992  | 949.115   | NM_016261 | 1289.052  | 1049.329  | NM_005895 | 5012.726  | 3416.174  |
| AF123659  | 2218.987  | 2031.842  | NM_006519 | 839.403   | 758.477   | D82345    | 18418.176 | 10065.593 |
| AL050355  | 1057.303  | 1165.239  | NM_004607 | 63766.352 | 57105.328 | NM_003814 | 2223.802  | 1582.862  |
| X74609    | 10942.11  | 9947.373  | NM_012076 | 571.532   | 638.85    | NM_002966 | 1176.275  | 1641.46   |
| AB002316  | 665.497   | 667.848   | NM_007285 | 19051.572 | 14098.855 | NM_000262 | 1005.671  | 1443.94   |
| AL096750  | 10627.856 | 11673.523 | D14678    | 5394.068  | 4813.106  | NM_017831 | 1673.097  | 2164.088  |
| NM_016061 | 6288.353  | 5204.747  | NM_016221 | 3178.237  | 2913.635  | AK022537  | 12015.313 | 11282.509 |
| NM_016062 | 61130.527 | 57477.262 | NM_018113 | 2159.331  | 2412.977  | AF116632  | 1173.695  | 1324.407  |
| NM_004153 | 4770.935  | 4742.83   | NM_005187 | 1644.469  | 1297.328  | AF064597  | 1686.897  | 1109.591  |
| AK024740  | 4843.669  | 5302.408  | U73377    | 2743.434  | 2392.869  | NM_006345 | 5622.993  | 3403.05   |
| AF078164  | 18338.588 | 19203.82  | NM_002199 | 4762.925  | 5210.919  | NM_003255 | 27686.383 | 24780.148 |
| NM_003628 | 3382.138  | 2975.478  | BC005219  | 8168.04   | 7921.346  | AL080128  | 4301.129  | 3634.406  |
| NM_004648 | 639.458   | 950.608   | NM_004268 | 2201.048  | 2179.129  | AB037787  | 7566.328  | 6140.104  |
| AF029325  | 1823.925  | 2277.293  | NM_006662 | 7702.24   | 9272.732  | AB040892  | 2335.489  | 2402.792  |
| NM_005704 | 3023.257  | 3584.525  | NM_004031 | 1695.881  | 1901.8    | NM_001822 | 2262.88   | 1847.134  |
| AF097021  | 703.929   | 867.572   | NM_004514 | 5660.944  | 6732.779  | NM_018268 | 22839.676 | 11590.038 |
| NM_001365 | 1961.592  | 2434.32   | NM_006163 | 1437.847  | 1843.292  | AF230904  | 11639.491 | 5455.068  |
| NM_000677 | 10035.093 | 10928.506 | NM_001272 | 13423.074 | 11566.347 | NM_017596 | 10095.922 | 8154.952  |
| BF308728  | 745.365   | 864.195   | NM_016303 | 6263.386  | 6825.913  | AL157480  | 4586.137  | 3423.698  |
| NM_018315 | 3815.098  | 5467.216  | NM_006196 | 26253.854 | 32083.621 | NM_014386 | 1794.469  | 1048.405  |
| AF051151  | 558.367   | 943.535   | AV733560  | 920.437   | 993.793   | NM_018110 | 2530.048  | 1399.248  |
| AF142421  | 3912.295  | 4051.569  | D17129    | 46287.281 | 38863.664 | AF312678  | 791.613   | 589.832   |
| AF257238  | 640.446   | 665.253   | NM_003091 | 19418.717 | 13943.311 | NM_006253 | 12168.039 | 8799.146  |
| AB037836  | 3613.8    | 3961.3    | NM_004247 | 3473.927  | 3652.69   | NM_003866 | 939.01    | 749.986   |
| NM_014247 | 1755.767  | 1867.314  | NM_017722 | 3788.453  | 3259.868  | NM_018262 | 1814.025  | 2974.499  |
| NM_018695 | 9741.673  | 9176.512  | AL137730  | 3985.15   | 2638.089  | NM_006207 | 4178.983  | 7204.798  |
| NM_006343 | 1760.618  | 819.63    | NM_004500 | 33512.867 | 32923.691 | NM_003220 | 2730.128  | 3515.646  |
| NM_014786 | 1282.63   | 932.327   | NM_003276 | 9436.995  | 5719.572  | AF009674  | 5229.813  | 4171.936  |
| NM_001423 | 1208.065  | 644.887   | AL137681  | 2646.764  | 1628.239  | NM_000360 | 1704.335  | 1815.757  |
| NM_015716 | 3481.431  | 2615.404  | AK025694  | 44649.246 | 35568.984 | NM_000844 | 1211.098  | 1132.275  |
| NM_005739 | 5938.703  | 4032.622  | NM_002157 | 58149.145 | 55472.668 | NM_005510 | 7165.572  | 5995.351  |
| AB023166  | 1464.387  | 1143.997  | NM_004095 | 8893.007  | 7795.286  | Z36817    | 1536.332  | 723.905   |
| AB028966  | 1873.004  | 1511.257  | NM_014365 | 430.183   | 626.833   | NM_014505 | 26194.877 | 17415.885 |
| NM_005758 | 7725.774  | 7652.286  | NM_005147 | 3696.939  | 2722.524  | NM_004205 | 7623.435  | 3414.201  |
| AF044774  | 3306.299  | 2942.777  | NM_014665 | 2855.095  | 2539.627  | NM_016162 | 2654.572  | 2092.738  |
| NM_005402 | 7619.33   | 8395.649  | AK023609  | 2487.619  | 3417.255  | AF130056  | 2192.966  | 1663.73   |
| AF055027  | 11332.109 | 11320.788 | NM_018019 | 3797.598  | 4264.485  | NM_002201 | 44050.785 | 42795.488 |
| U63541    | 4322.717  | 5629.778  | AK027220  | 3903.113  | 3634.237  | AK025047  | 2308.052  | 1811.837  |
| AB033045  | 1917.782  | 2566.503  | NM_018011 | 9835.271  | 10109.55  | NM_006806 | 4103.271  | 2723.423  |
| AF055006  | 6615.082  | 7376.632  | NM_000476 | 1320.448  | 955.263   | NM_006763 | 3030.341  | 1790.344  |
| NM_004935 | 8059.561  | 8637.009  | AF132733  | 2523.443  | 3244.062  | NM_006119 | 2918.914  | 1196.803  |
| NM_006951 | 2089.747  | 2233.734  | NM_001071 | 40580.863 | 51249.449 | NM_004465 | 2713.831  | 927.038   |
| NM_001896 | 9848.854  | 10726.817 | NM_006187 | 2389.751  | 2898.178  | AK026927  | 2822.533  | 1134.667  |
| NM_014023 | 1112.418  | 1381.978  | NM_020354 | 8607.702  | 8535.118  | NM_014055 | 13855.176 | 6002.229  |
| NM_002745 | 3871.009  | 4477.071  | AF202637  | 5527.094  | 5200.816  | BE884341  | 2992.38   | 1479.984  |
| D26488    | 5551.435  | 6037.395  | NM_000026 | 32543.336 | 35474.633 | AF231997  | 2532.092  | 1127.16   |
| NM_001432 | 2232.638  | 2117.278  | AB033016  | 11498.333 | 11149.097 | NM_007125 | 1510.636  | 778.586   |
| AK002193  | 1538.287  | 1867.992  | D87452    | 2954.917  | 4674.976  | NM_002596 | 6444.625  | 4133.011  |
| AB014554  | 1520.908  | 2260.954  | AB037864  | 1680.402  | 1564.927  | NM_020184 | 1181.019  | 736.896   |
| AF097431  | 3777.706  | 2964.981  | L26494    | 1446.784  | 1157.26   | NM_005815 | 2512.306  | 2582.618  |
| NM_001978 | 956.996   | 1048.034  | BF382513  | 2735.367  | 1961.711  | NM_001225 | 1771.341  | 2339.479  |

|           |           |           |           |           |           |           |           |           |
|-----------|-----------|-----------|-----------|-----------|-----------|-----------|-----------|-----------|
| NM_005897 | 1452.402  | 807.597   | AB020713  | 10423.18  | 8792.555  | NM_00025C | 1135.547  | 944.428   |
| NM_002579 | 1086.185  | 777.366   | AK025426  | 939.52    | 753.75    | NM_018147 | 10163.071 | 8717.429  |
| NM_004221 | 8939.108  | 6395.819  | NM_016558 | 4958.483  | 4253.984  | NM_018967 | 3512.156  | 2734.524  |
| NM_004061 | 1658.213  | 1185.987  | NM_007145 | 6209.993  | 5835.036  | NM_00185C | 1256.877  | 1016.764  |
| NM_003019 | 644.201   | 608.756   | AL133112  | 669.088   | 843.71    | NM_00216C | 2158.754  | 1452.512  |
| NM_006923 | 5634.672  | 5254.857  | AF085877  | 1485.693  | 1342.989  | NM_005675 | 2689.484  | 1758.865  |
| NM_004615 | 35641.195 | 46959.199 | AK023857  | 1907.47   | 2385.084  | NM_00277C | 1750.862  | 1371.724  |
| AF119889  | 5153.137  | 5908.007  | NM_016115 | 2227.995  | 3014.042  | BC030636  | 1461.496  | 780.986   |
| NM_002407 | 300.938   | 372.31    | NM_01495C | 3903.91   | 3839.958  | NM_004121 | 2491.928  | 903.044   |
| M90657    | 805.116   | 1334.807  | AL080180  | 720.217   | 474.797   | AY007092  | 3303.137  | 1858.32   |
| NM_006699 | 4379.731  | 4242.969  | X89067    | 718.47    | 660.512   | NM_001902 | 2935.683  | 1484.187  |
| AK025645  | 18595.711 | 22199.039 | AF147376  | 856.73    | 1105.562  | AL137605  | 30770.27  | 23919.482 |
| AK023266  | 1001.373  | 1266.344  | AK027190  | 763.357   | 544.99    | NM_016261 | 1452.771  | 1597.148  |
| NM_006814 | 14559.005 | 16457.619 | AL360136  | 1004.647  | 972.272   | NM_006519 | 1126.88   | 944.301   |
| NM_005067 | 10255.957 | 10624.414 | AF086259  | 1326.94   | 1438.546  | NM_004607 | 63023.145 | 58294.574 |
| AB007899  | 1411.435  | 1468.443  | AF086369  | 1185.145  | 1681.237  | NM_012076 | 865.611   | 758.678   |
| NM_002817 | 19243.4   | 24932.746 | AF086328  | 883.793   | 771.552   | NM_007285 | 23499.268 | 19229.615 |
| NM_002801 | 10695.761 | 11829.791 | AF086427  | 413.842   | 484.02    | D14678    | 8142.104  | 5586.033  |
| BE905810  | 477.281   | 536.288   | AK023753  | 1298.384  | 1002.51   | NM_016221 | 3526.751  | 3310.625  |
| NM_01478C | 1486.518  | 1392.572  | AF086441  | 4315.63   | 3432.525  | NM_018113 | 1968.807  | 1970.471  |
| NM_018116 | 943.165   | 733.222   | AK027255  | 591.316   | 514.493   | NM_005187 | 1919.476  | 1150.311  |
| NM_01473C | 8706.507  | 5970.999  | AK022487  | 425.73    | 275.131   | U73377    | 2953.505  | 2278.592  |
| NM_014167 | 1512.197  | 1080.749  | NM_014117 | 1119.025  | 773.594   | NM_002199 | 4924.853  | 5787.985  |
| NM_016063 | 3068.313  | 3232.41   | AF086087  | 5786.85   | 6031.857  | BC005219  | 4221.591  | 3738.688  |
| U82987    | 2774.751  | 1870.131  | AF085915  | 1653.906  | 1640.205  | NM_004268 | 1569.135  | 1877.59   |
| NM_005732 | 2213.054  | 1543.704  | AF075091  | 3998.833  | 4147.22   | NM_006662 | 9787.419  | 8454.725  |
| NM_01489C | 871.391   | 708.166   | AK000671  | 32684.854 | 38037.469 | NM_004031 | 2031.022  | 1686.117  |
| AK056481  | 7535.093  | 6634.823  | AK002016  | 521.469   | 411.171   | NM_001272 | 16732.385 | 18094.74  |
| NM_005433 | 1563.909  | 1218.387  | AL137425  | 947.278   | 1222.631  | NM_016303 | 7759.005  | 14366.781 |
| AF232000  | 24852.916 | 23804.094 | AL137637  | 638.282   | 880.706   | D17129    | 46312.789 | 13884.204 |
| NM_018118 | 928.616   | 749.206   | AL359584  | 852.717   | 965.211   | NM_003091 | 19769.303 | 8179.903  |
| L35035    | 9011.844  | 9573.987  | AL137285  | 944.801   | 635.412   | NM_004247 | 4521.274  | 2476.384  |
| NM_007152 | 2431.804  | 3255.979  | AL137456  | 1229.282  | 1362.002  | NM_017722 | 3520.778  | 2817.612  |
| NM_018293 | 3070.119  | 2884.922  | AL157489  | 899.704   | 771.141   | AL137730  | 6464.014  | 4107.746  |
| NM_002955 | 1070.829  | 1377.197  | AL390157  | 829.293   | 1132.743  | NM_00450C | 39459.152 | 26302.848 |
| NM_001938 | 9925.396  | 11375.409 | AK021649  | 503.552   | 224.768   | NM_003276 | 10527.971 | 5280.988  |
| AF230808  | 3924.766  | 4279.712  | AK024874  | 332.409   | 388.688   | AL137681  | 2504.767  | 2494.251  |
| U18910    | 2232.004  | 2414.681  | AK021847  | 698.052   | 420.003   | AK025694  | 53105.434 | 51437.566 |
| NM_005238 | 7065.341  | 7633.896  | AK023086  | 3449.864  | 3225.029  | NM_002157 | 64151.359 | 58432.57  |
| S83390    | 516.289   | 616.944   | AF241534  | 383.784   | 505.193   | NM_004095 | 12417.391 | 10253.076 |
| AK075306  | 6066.635  | 6991.946  | NM_017621 | 9110.292  | 8399.102  | NM_005147 | 4306.287  | 2785.476  |
| AB037820  | 696.451   | 538.197   | AK023574  | 1379.416  | 1734.77   | NM_014665 | 3374.233  | 2048.301  |
| NM_00128C | 18706.111 | 14547.802 | AF083117  | 522.564   | 583.772   | AK023609  | 4429.341  | 5659.257  |
| AB019572  | 65412.852 | 55049.434 | AF131767  | 3993.945  | 4906.753  | NM_018019 | 1718.129  | 2429.222  |
| NM_002948 | 47876.121 | 32729.813 | AF211976  | 1065.491  | 1090.724  | AK027220  | 3754.364  | 4859.381  |
| AF113008  | 1763.453  | 1295.092  | AK021807  | 1319.485  | 1977.038  | NM_018011 | 9680.884  | 12239.108 |
| NM_020217 | 2329.48   | 1824.995  | NM_016637 | 880.91    | 860.895   | NM_001071 | 49649.527 | 57497.25  |
| NM_018135 | 60830.992 | 55802.836 | AK021907  | 892.321   | 1468.018  | NM_006187 | 3267.886  | 6065.835  |
| AF205435  | 17226.553 | 12901.609 | AK022029  | 987.208   | 987.809   | NM_020354 | 11486.42  | 19790.834 |
| L05093    | 63663.539 | 56061.281 | AK022320  | 1012.666  | 836.28    | AF202637  | 6200.352  | 11532.271 |
| AF085983  | 354.727   | 479.663   | AK022058  | 841.492   | 611.93    | AB033016  | 11183.593 | 5914.115  |
| AF052105  | 5431.572  | 5770.771  | NM_01828C | 500.406   | 401.247   | AB037864  | 2053.876  | 1805.572  |
| AF131806  | 564.408   | 495.331   | AK026503  | 1197.452  | 1324.714  | L26494    | 1927.483  | 1369.362  |

|           |           |           |           |           |           |           |           |           |
|-----------|-----------|-----------|-----------|-----------|-----------|-----------|-----------|-----------|
| AK001204  | 9350.29   | 9766.025  | AK026671  | 1225.848  | 1233.754  | BF382513  | 3758.027  | 3585.729  |
| M15465    | 2910.636  | 3504.479  | AK025522  | 16340.904 | 15929.596 | AB020713  | 11707.434 | 8556.323  |
| J03866    | 10939.135 | 13422.357 | AK025464  | 58280.57  | 53707.305 | AK025426  | 1126.49   | 1477.241  |
| AK022836  | 5832.055  | 6392.154  | AL049962  | 4426.734  | 5814.892  | NM_01655E | 5788.62   | 4216.46   |
| NM_012343 | 6992.733  | 7426.372  | NM_016941 | 3374.027  | 4036.766  | NM_00714E | 7218.092  | 4621.077  |
| NM_000397 | 1088.651  | 1525.605  | NM_005190 | 612.319   | 713.816   | AL133112  | 1263.636  | 915.628   |
| NM_00204E | 67865.344 | 63095.859 | NM_02040E | 1106.494  | 1215.287  | AF085877  | 507.619   | 715.794   |
| BF217340  | 606.776   | 489.332   | NM_00498E | 9142.562  | 8915.185  | AK002078  | 2395.471  | 3583.209  |
| NM_00307E | 4264.951  | 3098.407  | AL080151  | 1760.814  | 1301.859  | AF085837  | 2568.24   | 4057.211  |
| NM_00180E | 11305.674 | 6482.25   | AL050085  | 459.23    | 444.639   | AK023165  | 2199.727  | 4006.477  |
| AL117477  | 8948.118  | 5490.13   | AK001308  | 462.079   | 601.367   | NM_01495C | 4691.742  | 7877.215  |
| NM_012107 | 5706.59   | 4043.096  | AK024127  | 977.604   | 1198.04   | AL080180  | 1230.443  | 2574.828  |
| AB037760  | 1692.371  | 1537.179  | AK024243  | 514.305   | 484.112   | X89067    | 1345.974  | 3089.824  |
| NM_01568C | 3239.317  | 2551.167  | AK021574  | 1645.797  | 1291.179  | AK027190  | 3011.9    | 1437.475  |
| M22637    | 1346.588  | 587.529   | AF119911  | 11923.521 | 12335.418 | AL360136  | 1178.337  | 654.424   |
| AB037770  | 936.441   | 713.452   | AF116656  | 6555.212  | 7208.807  | AK024196  | 1064.637  | 1343.101  |
| NM_018364 | 7461.646  | 5908.226  | NM_00105C | 4276.029  | 5138.764  | AK023753  | 2523.104  | 2008.535  |
| AK021601  | 345.337   | 432.013   | AF132206  | 1961.408  | 2018.786  | AF086441  | 14072.403 | 11265.14  |
| NM_00677E | 633.613   | 732.42    | AJ001869  | 4759.245  | 5133.531  | AK027255  | 709.598   | 1497.909  |
| NM_007022 | 4746.355  | 5110.383  | AJ002969  | 824.125   | 968.126   | AK094020  | 441.097   | 1002.102  |
| AL049943  | 7929.34   | 9289.137  | NM_00529E | 1117.996  | 1511.9    | AL137425  | 1053.972  | 2594.85   |
| AL137303  | 2692.176  | 3407.322  | NM_020213 | 6150.629  | 5465.596  | AL137285  | 4722.225  | 1844.338  |
| AL355708  | 1704.973  | 2194.558  | D17267    | 9359.238  | 10299.507 | AL137456  | 1359.435  | 561.037   |
| AL161980  | 471.929   | 441.47    | AF200341  | 450.569   | 443.063   | AL157489  | 1220.416  | 1603.408  |
| AB002449  | 1169.514  | 1760.342  | AB040944  | 1453.803  | 1138.116  | AK021847  | 1015.51   | 1212.83   |
| U79248    | 341.979   | 477.462   | NM_01814E | 3489.314  | 2595.15   | AF086101  | 1024.456  | 1674.384  |
| NM_01648C | 28898.424 | 29589.607 | AK024326  | 1743.843  | 2088.348  | AK023086  | 4238.086  | 4135.001  |
| AK001489  | 3526.635  | 2791.41   | U61088    | 646.673   | 462.659   | AF131767  | 3959.353  | 3056.401  |
| NM_015681 | 3237.472  | 2426.388  | AF086467  | 1443.138  | 1289.573  | AK022029  | 1219.661  | 1056.989  |
| AF070582  | 2718.405  | 2478.433  | AL137345  | 2271.931  | 2067.315  | AK022167  | 7431.974  | 2992.91   |
| NM_006383 | 3119.139  | 3331.879  | AK000967  | 2992.768  | 2531.733  | AK022320  | 1175.235  | 568.368   |
| NM_01540C | 1428.747  | 1442.983  | AK021583  | 3486.317  | 2818.187  | AK024381  | 464.33    | 361.096   |
| AL359561  | 2590.036  | 1686.661  | AL137442  | 3730.1    | 2653.132  | AK025522  | 17286.221 | 16276.714 |
| AK026464  | 895.724   | 566.796   | AL049281  | 1013.582  | 1072.61   | AK025464  | 54114.449 | 51004.348 |
| AK001362  | 845.479   | 683.628   | NM_00120E | 26516.092 | 36043.992 | AL049962  | 4234.898  | 4086.023  |
| AK023491  | 860.962   | 639.822   | AL050061  | 1156.322  | 1372.754  | NM_016941 | 2869.261  | 2389.385  |
| AK022400  | 990.225   | 913.366   | AL050206  | 746.467   | 852.274   | NM_00498E | 17385.598 | 7394.594  |
| AF052100  | 1983.622  | 1770.243  | AK026898  | 2901.565  | 2582.599  | AL050085  | 1057.147  | 2383.522  |
| AL110235  | 469.554   | 405.462   | NM_006637 | 607.576   | 725.467   | AK001308  | 2469.125  | 1459.699  |
| U79245    | 1249.976  | 1148.392  | AK022419  | 771.492   | 985.232   | AK024127  | 1266.439  | 2218.648  |
| AF086124  | 1661.753  | 2162.865  | NM_014624 | 1001.903  | 1263.844  | AK021574  | 1774.071  | 999.973   |
| AK024820  | 1805.692  | 2325.215  | NM_01393E | 1655.536  | 1650.998  | AF119911  | 10695.817 | 10936.834 |
| AB033105  | 2183.095  | 2208.674  | AF086145  | 1704.133  | 2472.952  | AF116656  | 5415.843  | 5305.625  |
| AF038192  | 1133.408  | 1497.148  | Z70709    | 1075.064  | 1564.692  | NM_00105C | 3780.734  | 3638.733  |
| NM_01793E | 507.092   | 530.945   | BC002538  | 2572.286  | 2338.245  | AF132206  | 1673.489  | 1106.109  |
| AJ001865  | 1167.7    | 1252.224  | AK022355  | 463.619   | 736.328   | AJ001869  | 6432.104  | 5247.545  |
| AJ227875  | 367.892   | 341.193   | NM_01783E | 1878.033  | 1948.181  | NM_00529E | 1593.849  | 516.898   |
| D61704    | 3972.73   | 3125.837  | AK096584  | 12025.649 | 9931.917  | NM_020213 | 7935.805  | 3134.216  |
| Y10512    | 1102.581  | 752.516   | Z29070    | 953.879   | 877.72    | D17267    | 10422.678 | 4439.35   |
| L34409    | 6438.958  | 4582.242  | AL078636  | 1487.352  | 1426.9    | AB040944  | 2234.193  | 1632.689  |
| U12210    | 4491.553  | 3454.332  | AK022382  | 514.072   | 618.217   | NM_01814E | 3445.485  | 1997.418  |
| Z83936    | 604.043   | 520.61    | AF147362  | 476.345   | 915.879   | AK024326  | 2056.405  | 1099.047  |
| M73799    | 984.587   | 521.228   | AF147365  | 406.822   | 829.754   | U61088    | 960.406   | 731.569   |



|           |           |           |           |           |           |           |           |           |
|-----------|-----------|-----------|-----------|-----------|-----------|-----------|-----------|-----------|
| NM_003782 | 3382.55   | 2611.191  | S72917    | 757.319   | 734.197   | AF086467  | 2074.517  | 3636.722  |
| AL442096  | 396.754   | 706.582   | AF076617  | 61900.469 | 53066.164 | AL137345  | 2589.368  | 5553.353  |
| NM_01822E | 1433.399  | 831.259   | M91159    | 458.687   | 498.149   | AK021583  | 2810.473  | 4176.705  |
| AJ270693  | 1767.167  | 1171.741  | NM_014392 | 6413.563  | 4318.532  | AL137442  | 3502.49   | 3720.456  |
| NM_01779C | 2156.273  | 1607.248  | AK023291  | 8349.736  | 6625.905  | AL049281  | 1562.284  | 2422.51   |
| AK000023  | 2912.697  | 1884.742  | BF541820  | 750.779   | 548.039   | NM_00120E | 32089.354 | 35067.301 |
| AK000901  | 1084.487  | 696.445   | CY3Cy5    | 3181.928  | 218.348   | AK026898  | 3352.41   | 3121.776  |
| AK024886  | 967.72    | 1030.797  | X07696    | 1455.979  | 1199.654  | AK022419  | 827.455   | 1067.969  |
| AK025002  | 762.086   | 679.474   | AA481015  | 955.338   | 718.151   | NM_01393E | 1309.956  | 746.467   |
| AK024011  | 4646.841  | 3657.113  | AI925826  | 1656.653  | 1254.667  | AF086145  | 766.743   | 341.307   |
| AL390145  | 847.965   | 903.417   | U04209    | 4055.402  | 2226.164  | BC002538  | 2292.42   | 1061.54   |
| AF119913  | 2833.55   | 2323.862  | M55284    | 3163.695  | 2697.883  | AK022355  | 1256.767  | 786.618   |
| NM_01834C | 2272.506  | 2419.592  | AA679391  | 783.367   | 641.401   | NM_01783E | 2985.846  | 1156.091  |
| AF049883  | 2329.098  | 2843.346  | BG682146  | 1527.645  | 1190.684  | AK096584  | 26083.543 | 8958.271  |
| L10148    | 413.463   | 829.143   | NM_00506C | 1466.254  | 1410.812  | Z29070    | 767.507   | 313.895   |
| AK026247  | 1047.841  | 728.004   | NM_005437 | 6582.566  | 6335.147  | AL078636  | 1872.061  | 985.01    |
| M14755    | 388.304   | 476.142   | SR7       | 8640.781  | 55722.621 | NM_014392 | 9506.673  | 9848.694  |
| AK024893  | 942.319   | 586.826   | CY3Cy5    | 6167.83   | 210.129   | AK023291  | 8967.422  | 9316.001  |
| AF288406  | 1268.915  | 795.038   | NM_003974 | 5435.313  | 4413.702  | BF541820  | 1399.633  | 1276.258  |
| AK027156  | 13841.343 | 11173.921 | NM_01433E | 11901.466 | 8754.154  | CY3Cy5    | 5897.823  | 182.4     |
| AL157504  | 13682.455 | 9234.938  | NM_00228E | 1378.01   | 1147.174  | X07696    | 4610.825  | 3435.856  |
| AK023328  | 6920.684  | 5476.669  | NM_00441E | 4248.976  | 3411.217  | AA481015  | 1122.517  | 884.088   |
| AJ012499  | 71134.234 | 62560.586 | NM_00062E | 5462.452  | 4178.324  | AI925826  | 4547.603  | 3846.774  |
| AK024900  | 5542.376  | 5422.756  | AB005216  | 1395.108  | 1435.073  | U04209    | 5788.648  | 3341.244  |
| AF119879  | 8543.933  | 8422.052  | NM_00032E | 6511.352  | 6217.497  | Z15108    | 1264.865  | 2022.734  |
| Y10482    | 1532.987  | 1714.321  | AF055020  | 3429.83   | 3021.858  | M55284    | 3820.951  | 6338.242  |
| AY007095  | 981.767   | 1356.478  | NM_00698E | 3359.383  | 4221.896  | AA001218  | 1197.347  | 3013.766  |
| AK023910  | 1877.595  | 1652.243  | AF272043  | 10251.719 | 12461.951 | AA679391  | 2054.339  | 5049.663  |
| D16991    | 2310.985  | 1814.68   | NM_002587 | 4575.833  | 4840.46   | BG682146  | 2979.246  | 4923.216  |
| AB007866  | 2787.381  | 2258.365  | NM_00223E | 2110.16   | 2912.42   | AA884709  | 276.131   | 1395.419  |
| AF075086  | 41458.371 | 33537.848 | NM_00486E | 518.125   | 684.37    | NM_00506C | 2179.92   | 3571.994  |
| X77485    | 1512.138  | 1336.917  | AF130728  | 899.398   | 1269.62   | NM_005437 | 8762.432  | 12920.111 |
| NM_01449E | 2610.9    | 1685.736  | NM_001131 | 10206.107 | 10087.497 | SR5       | 9525.607  | 12868.727 |
| AK021555  | 1418.985  | 1290.749  | NM_002414 | 53655.895 | 53674.734 | SR7       | 8590.985  | 63591.832 |
| AB046765  | 1791.82   | 1186.685  | NM_01466E | 9922.551  | 9722.145  | SR9       | 29081.908 | 7210.01   |
| AF133333  | 13799.605 | 8716.568  | NM_005451 | 1270.204  | 1430.822  | CY3Cy5    | 9262.162  | 566.741   |
| NM_01836E | 2699.758  | 1765.472  | NM_007172 | 3128.183  | 3402.207  | NM_003974 | 8425.41   | 6347.348  |
| NM_004881 | 2575.365  | 2849.753  | NM_006152 | 3385.044  | 3548.327  | NM_00606E | 510.545   | 871.242   |
| U94903    | 796.919   | 630.656   | NM_013333 | 19977.674 | 24117.693 | NM_01433E | 27524.926 | 33053.234 |
| NM_00515E | 5292.871  | 5453.493  | NM_002333 | 1317.35   | 1440.159  | NM_00149E | 1209.235  | 1241.786  |
| NM_01909E | 18086.447 | 14462.357 | NM_00340C | 16532.334 | 20408.271 | NM_00228E | 1064.753  | 1085.03   |
| U80764    | 21565.254 | 16998.91  | NM_00670E | 1880.576  | 1458.094  | NM_00062E | 8764.936  | 7444.915  |
| AB020684  | 9144.899  | 5308.317  | NM_01226E | 6154.095  | 8509.111  | AB005216  | 1853.876  | 1843.121  |
| NM_020421 | 6842.666  | 4668.906  | NM_00455E | 2746.872  | 2920.685  | NM_00236E | 722.844   | 632.782   |
| D17094    | 3358.882  | 1803.693  | X56692    | 5171.921  | 6579.938  | AK000184  | 835.744   | 831.828   |
| L37690    | 4825.419  | 3134.327  | NM_01427E | 3302.619  | 4887.225  | AF055020  | 8909.755  | 12503.854 |
| D61707    | 928.91    | 601.775   | NM_000734 | 11001.967 | 12641.835 | NM_00698E | 4729.301  | 7652.388  |
| AK021610  | 2855.616  | 2325.144  | NM_006644 | 8569.406  | 9679.404  | AF272043  | 9681.485  | 13439.394 |
| Z36835    | 11009.124 | 6423.651  | NM_006583 | 40002.395 | 1057.407  | NM_002587 | 17464.99  | 26290.652 |
| L37703    | 8633.849  | 6921.512  | X82693    | 5821.847  | 5193.721  | NM_00486E | 1619.567  | 1906.232  |
| AK023767  | 2286.125  | 1885.654  | AF317058  | 1509.644  | 1475.044  | NM_00702E | 14236.292 | 16836.031 |
| AF084516  | 1673.756  | 1394.132  | NM_014904 | 1137.736  | 1333.498  | AF130728  | 1544.136  | 3093.317  |
| AL137554  | 926.27    | 664.864   | AL137576  | 10333.476 | 12362.44  | NM_002414 | 58232.75  | 48658.855 |

|           |           |           |           |           |           |           |           |           |
|-----------|-----------|-----------|-----------|-----------|-----------|-----------|-----------|-----------|
| AJ001907  | 1078.976  | 690.641   | NM_018358 | 4379.193  | 4212.553  | NM_000355 | 2140.835  | 3367.136  |
| M32220    | 1401.835  | 925.287   | AF131781  | 4374.178  | 5333.962  | AL133580  | 22743.418 | 31323.406 |
| D17188    | 10876.747 | 8288.587  | NM_003055 | 6201.392  | 6468.962  | NM_014666 | 16250.874 | 20523.029 |
| AJ001432  | 28538.41  | 20823.418 | NM_014824 | 4224.228  | 5751.226  | NM_005451 | 2114.715  | 2197.976  |
| NM_020435 | 10666.237 | 10522.99  | NM_014504 | 2978.264  | 4186.204  | NM_007172 | 6119.407  | 5036.847  |
| AF052169  | 1359.162  | 809.674   | NM_014408 | 18716.791 | 21662.508 | NM_013333 | 23136.619 | 21287.176 |
| BF942101  | 2881.64   | 2887.746  | NM_014741 | 6300.277  | 7510.099  | NM_002333 | 3232.348  | 3956.473  |
| BI825012  | 3066.048  | 2979.894  | AF212247  | 5941.885  | 7149.102  | NM_003400 | 13808.82  | 17427.053 |
| M21574    | 372.661   | 435.477   | AF161407  | 12567.517 | 14259.438 | NM_006705 | 4312.41   | 5421.503  |
| BM051302  | 2187.101  | 1917.301  | NM_014738 | 3969.077  | 4734.164  | NM_014435 | 1844.29   | 2059.637  |
| BE314182  | 6952.8    | 6108.116  | NM_018080 | 3747.944  | 3700.19   | NM_005582 | 1230.538  | 1334.247  |
| AI808029  | 1462.233  | 1406.324  | AF174605  | 5250.647  | 5235.726  | NM_012266 | 7513.286  | 9672.001  |
| X03225    | 4186.992  | 3963.686  | NM_014453 | 18992.311 | 22050.83  | NM_004555 | 3140.175  | 3911.708  |
| AK097395  | 5757.264  | 5672.209  | NM_005713 | 3060.263  | 4809.604  | X56692    | 8236.631  | 10400.226 |
| M12783    | 2792.43   | 2735.069  | AK021951  | 416.132   | 957.447   | NM_014476 | 961.679   | 1127.781  |
| AK091535  | 1317.605  | 1310.793  | AK023553  | 2634.627  | 3371.239  | NM_014278 | 3294.107  | 4394.855  |
| AF085357  | 12879.069 | 11996.644 | NM_014600 | 1152.556  | 1387.994  | NM_005838 | 645.795   | 1014.756  |
| NM_003841 | 473.266   | 673.845   | AF181994  | 2941.579  | 4117.688  | NM_000734 | 13590.395 | 19182.877 |
| AF296673  | 441.345   | 557.611   | NM_018962 | 1197.248  | 1269.426  | X82693    | 7799.304  | 6268.249  |
| NM_080824 | 560.648   | 727.098   | AF125100  | 1283.438  | 1285.052  | AF317058  | 1103.295  | 579.071   |
| SR2       | 66825.211 | 61193.051 | NM_006114 | 8311.849  | 4791.156  | M22538    | 50516.469 | 48414.324 |
| SR4       | 21907.748 | 30096.348 | AF130728  | 965.106   | 1213.11   | NM_006028 | 1099.379  | 1503.928  |
| SR6       | 3938.727  | 5245.574  | NM_001289 | 22270.9   | 25599.322 | NM_014904 | 1346.608  | 1074.344  |
| SR8       | 10467.293 | 29074.508 | NM_001131 | 9194.063  | 9101.833  | AL137576  | 11351.726 | 8308.34   |
| SR10      | 36552.805 | 14154.393 | X07696    | 1655.672  | 1353.642  | NM_018358 | 5557.185  | 5342.643  |
| CY3Cy5    | 4213.174  | 252.286   | AA481015  | 918.17    | 796.613   | AF131781  | 5557.868  | 7151.591  |
| NM_014322 | 1327.233  | 1198.105  | AI925826  | 2000.808  | 1312.067  | NM_006516 | 19787.592 | 19538.869 |
| NM_004122 | 3261.816  | 3038.95   | U04209    | 3758.641  | 2278.393  | NM_015865 | 940.279   | 1571.406  |
| NM_002928 | 2077.002  | 2034.779  | M55284    | 3357.168  | 2271.771  | NM_003055 | 9199.838  | 12108.741 |
| NM_000160 | 2389.125  | 2789.49   | AA679391  | 1046.902  | 486.682   | NM_005075 | 411.961   | 1311.023  |
| NM_003301 | 987.403   | 644.488   | BG682146  | 1580.842  | 1214.004  | NM_006841 | 814.252   | 1142.713  |
| NM_000955 | 897.576   | 623.001   | NM_014278 | 1865.569  | 1960.955  | NM_014824 | 3702.285  | 4174.897  |
| U27768    | 952.414   | 686.828   | NM_000734 | 9696.877  | 7762.533  | NM_014741 | 6028.144  | 9002.792  |
| AF305550  | 5585.717  | 5701.804  | NM_012331 | 1913.394  | 1737.345  | AF212247  | 6921.2    | 9741.548  |
| U66582    | 9231.14   | 10230.869 | NM_006644 | 6350.115  | 5945.414  | AF161407  | 15963.723 | 26435.014 |
| NM_006198 | 3271.216  | 3294.937  | NM_006583 | 47070.238 | 1346.623  | NM_014738 | 4818.638  | 6771.738  |
| NM_000849 | 1230.449  | 1255.792  | NM_003974 | 7885.78   | 7141.251  | NM_016406 | 2908.123  | 3974.29   |
| NM_004678 | 2273.767  | 2258.586  | NM_014339 | 12768.215 | 8056.054  | NM_018080 | 8338.161  | 8905.29   |
| NM_000950 | 4623.031  | 5769.365  | NM_002288 | 1166.582  | 633.654   | AF174605  | 6087.738  | 5748.521  |
| NM_005139 | 8199.685  | 7672.922  | NM_004416 | 4168.737  | 2904.067  | NM_014453 | 18550.943 | 16133.642 |
| NM_000039 | 70456.469 | 67508.648 | NM_000628 | 5613.882  | 4334.713  | NM_005713 | 2746.403  | 2127.421  |
| NM_020470 | 2599.257  | 4149.792  | NM_000325 | 6084.878  | 5122.548  | AK023553  | 2248.261  | 2425.944  |
| AA478950  | 1493.054  | 1556.578  | AF015041  | 902.729   | 603.928   | NM_014600 | 1408.199  | 1657.334  |
| AB029033  | 1122.617  | 1250.26   | AF055020  | 3434.624  | 1803.841  | NM_016733 | 2424.864  | 2956.334  |
| AF091034  | 4415.031  | 4499.199  | NM_006986 | 3078.398  | 2425.96   | AF181994  | 2710.221  | 3279.785  |
| NM_005301 | 12398.176 | 12923.974 | NM_002238 | 1596.808  | 1023.359  | NM_018962 | 1558.931  | 2103.226  |
| NM_004167 | 903.533   | 544.403   | AF131781  | 5186.191  | 3858.885  | AF125100  | 3201.14   | 4010.004  |
| NM_016653 | 6497.779  | 4936.382  | NM_006516 | 13101.716 | 11912.843 | NM_006114 | 14417.563 | 17770.826 |
| AB035124  | 8705.423  | 6149.352  | NM_003055 | 5003.296  | 3768.683  | AF130728  | 1514.492  | 2705.15   |
| AF060170  | 1106.314  | 922.541   | NM_006841 | 730.698   | 1349.552  | NM_001289 | 26707.852 | 22417.701 |
| NM_016602 | 973.744   | 796.283   | NM_002414 | 54353.461 | 43360.77  | NM_001131 | 50970.832 | 51486.965 |
| NM_004409 | 4218.086  | 3653.964  | NM_000355 | 977.801   | 816.923   | X07696    | 5629.727  | 7623.827  |
| AK023397  | 2312.669  | 2140.803  | AL133580  | 16423.209 | 14504.27  | AA481015  | 1926.212  | 2351.553  |

|           |           |           |           |           |           |           |           |           |
|-----------|-----------|-----------|-----------|-----------|-----------|-----------|-----------|-----------|
| NM_001725 | 1019.585  | 973.332   | NM_014666 | 11913.079 | 8857.348  | AI925826  | 7604.875  | 13443.315 |
| NM_004079 | 2866.512  | 2649.695  | NM_005451 | 1299.302  | 679.029   | U04209    | 7136.517  | 6477.648  |
| NM_000383 | 1557.624  | 1307.97   | NM_007172 | 4168.85   | 2777.409  | Z15108    | 3207.169  | 4804.357  |
| NM_004633 | 569.803   | 348.76    | NM_006152 | 2799.256  | 2103.3    | M55284    | 4119.621  | 6314.087  |
| X01394    | 4298.483  | 5076.249  | NM_013333 | 16165.047 | 13013.729 | AA679391  | 1746.039  | 2609.956  |
| NM_000041 | 15686.67  | 16886.145 | NM_002333 | 946.791   | 803.172   | BG682146  | 2665.324  | 2633.71   |
| NM_002984 | 1337.931  | 1427.789  | NM_003400 | 9136.161  | 8108.809  | NM_005060 | 2247.548  | 1763.926  |
| AB037752  | 5244.824  | 5115.766  | NM_006705 | 1222.827  | 917.2     | NM_005437 | 9038.811  | 7747.13   |
| AK024821  | 14967.662 | 16938.971 | NM_005582 | 1059.973  | 1490.972  | AK022417  | 1797.383  | 2226.629  |
| AB002340  | 1937.343  | 2770.773  | NM_004559 | 1659.099  | 1859.438  | U50534    | 879.167   | 1319.459  |
| NM_000224 | 1114.756  | 2352.68   | NM_014600 | 1109.014  | 461.54    | NM_014278 | 3189.287  | 4523.111  |
| NM_014328 | 13693.63  | 17050.207 | NM_016733 | 1989.249  | 1437.223  | NM_000734 | 13223.909 | 12188.282 |
| NM_006414 | 5336.719  | 6650.674  | AF181994  | 1666.877  | 1456.932  | NM_012331 | 2877.361  | 3307.65   |
| NM_018479 | 11676.713 | 11143.886 | NM_018962 | 849.637   | 680.316   | NM_006644 | 9089.397  | 7706.146  |
| NM_014362 | 5322.2    | 5321.48   | AF125100  | 2385.246  | 1868.397  | NM_006583 | 55881.418 | 6065.8    |
| NM_018308 | 1064.386  | 1029.115  | NM_006114 | 25270.178 | 19645.391 | NM_006065 | 355.617   | 1213.923  |
| NM_001832 | 2209.274  | 2701.953  | X82693    | 4536.211  | 3582.518  | NM_014330 | 29733.764 | 41962.871 |
| NM_017774 | 19063.748 | 15634.283 | NM_007176 | 21344.506 | 23881.756 | NM_001495 | 1578.505  | 2209.75   |
| AB037716  | 2768.397  | 2077.274  | NM_002722 | 1774.384  | 1754.463  | NM_002288 | 1549.015  | 2567.987  |
| NM_016297 | 2897.036  | 2075.165  | AF317058  | 884.121   | 845.574   | NM_004410 | 6802.819  | 12416.014 |
| NM_001752 | 3279.049  | 2654.642  | NM_014904 | 959.593   | 1093.122  | NM_000628 | 10727.199 | 16339.801 |
| BC003406  | 2572.94   | 2408.6    | AL137576  | 7123.33   | 8226.499  | AB005216  | 1942.193  | 2668.126  |
| AL137672  | 531.14    | 746.949   | NM_018358 | 2944.084  | 2892.768  | NM_000325 | 14788.598 | 21527.52  |
| X64177    | 3085.09   | 1196.642  | NM_005060 | 1058.695  | 940.641   | AF015041  | 1885.004  | 2059.001  |
| NM_015994 | 9800.079  | 8773.365  | NM_005437 | 5102.479  | 4850.964  | AK000184  | 637.216   | 967.201   |
| NM_014065 | 1859.127  | 1948.996  | AK022417  | 1158.827  | 1584.428  | AF055020  | 7257.744  | 9057.325  |
| NM_001695 | 5515.382  | 4846.392  | NM_014824 | 2205.844  | 2295.129  | NM_006980 | 4721.607  | 4011.794  |
| NM_002248 | 533.747   | 946.172   | NM_014504 | 2096.637  | 2289.75   | AF272043  | 10732.711 | 9470.211  |
| NM_012281 | 883.574   | 1183.254  | NM_014408 | 14119.471 | 12730.202 | NM_002587 | 16070.463 | 19375.662 |
| AK025772  | 3386.844  | 3461.733  | NM_014741 | 4158.457  | 4529.89   | NM_002238 | 2267.595  | 1975.781  |
| NM_005509 | 1591.427  | 2224.781  | AF212247  | 4054.417  | 4822.123  | NM_004868 | 1308.915  | 1173.466  |
| NM_152747 | 1831.78   | 2184.504  | AF161407  | 9202.153  | 9419.301  | NM_004660 | 1660.11   | 1350.985  |
| NM_017415 | 1308.001  | 1733.884  | NM_014738 | 3494.063  | 3620.608  | NM_007028 | 15318.607 | 12263.042 |
| NM_001667 | 21037.824 | 27870.316 | AF174605  | 5846.453  | 6294.853  | AF131781  | 5921.23   | 8275      |
| NM_000262 | 897.37    | 1350.542  | NM_014453 | 13770.904 | 14836.7   | NM_006510 | 20495.271 | 23862.221 |
| NM_017831 | 1075.391  | 882.782   | NM_005713 | 2008.064  | 2656.405  | NM_015865 | 1064.048  | 1799.684  |
| AK024393  | 551.194   | 460.198   | AK023553  | 1868.279  | 1603.431  | NM_003055 | 11296.5   | 16547.139 |
| AK022537  | 11252.542 | 7561.451  | AF272043  | 8283.31   | 12189.758 | NM_005075 | 842.449   | 2067.997  |
| AF064597  | 1000.782  | 698.828   | NM_002587 | 3191.869  | 4099.79   | NM_002414 | 62631.582 | 57000.387 |
| NM_006345 | 5962.655  | 5697.576  | NM_002238 | 1683.504  | 2225.354  | NM_000355 | 2310.894  | 2568.128  |
| NM_006875 | 2540.233  | 2389.524  | NM_004868 | 425.11    | 808.411   | AL133580  | 22742.533 | 28679.395 |
| D87119    | 3210.045  | 3002.076  | NM_004669 | 991.29    | 1394.72   | NM_014666 | 18190.605 | 22475.461 |
| AL050040  | 562.613   | 713.029   | NM_007028 | 8200.754  | 10840.8   | NM_005451 | 3296.346  | 4253.545  |
| NM_006550 | 13291.937 | 10677.879 | AF130728  | 786.261   | 483.361   | NM_007172 | 8030.873  | 11161.063 |
| AL133066  | 807.584   | 458.95    | NM_001289 | 20217.178 | 20443.297 | NM_006152 | 6070.113  | 8329.097  |
| AF264717  | 2722.476  | 4094.77   | NM_001131 | 6120.456  | 5406.029  | NM_013333 | 25950.16  | 30366.922 |
| NM_012260 | 4653.254  | 5699.084  | X07696    | 3458.663  | 5018.057  | NM_002333 | 2908.272  | 4253.263  |
| NM_001141 | 3688.146  | 5140.354  | AA481015  | 867.788   | 1000.411  | NM_003400 | 15029.981 | 19502     |
| NM_000018 | 17015.232 | 24342.855 | AI925826  | 1919.972  | 2000.124  | NM_006705 | 6550.208  | 8803.81   |
| AB028992  | 2238.791  | 2416.038  | U04209    | 4142.285  | 3302.623  | NM_014430 | 1324.96   | 1977.338  |
| NM_000030 | 63957.945 | 52968.035 | AI393201  | 3490.854  | 3924.286  | NM_005582 | 1168.057  | 1272.395  |
| NM_020470 | 2425.282  | 2936.837  | M55284    | 3320.863  | 3658.515  | NM_012260 | 8734.109  | 8757.151  |
| NM_006574 | 740.063   | 735.163   | AA679391  | 864.203   | 944.536   | NM_004550 | 3577.059  | 3251.289  |

|           |           |           |           |           |           |           |           |           |
|-----------|-----------|-----------|-----------|-----------|-----------|-----------|-----------|-----------|
| AA478950  | 1825.303  | 1862.83   | BG682146  | 1462.928  | 1553.554  | X56692    | 8309.594  | 7082.388  |
| BF942101  | 3183.597  | 2230.796  | NM_012266 | 4589.062  | 5309.988  | NM_016733 | 2223.69   | 1745.665  |
| BI825012  | 2722.726  | 2751.647  | NM_004559 | 2243.707  | 3180.849  | AF181994  | 2658.782  | 2620.988  |
| M21574    | 250.76    | 332.527   | X56692    | 3507.443  | 5407.68   | NM_018962 | 2285.141  | 3093.464  |
| BM051302  | 1973.412  | 1550.058  | NM_000734 | 9362.207  | 8735.357  | X82693    | 15635.578 | 23063.152 |
| BE314182  | 6291.158  | 5361.01   | NM_012331 | 1789.26   | 1798.47   | NM_007176 | 34858.305 | 44816.617 |
| AI808029  | 1785.622  | 1465.328  | NM_006644 | 7641.037  | 6587.526  | NM_002722 | 3546.136  | 5058.233  |
| X03225    | 3724.997  | 2432.826  | NM_006583 | 45912.641 | 869.089   | AF317058  | 1404.861  | 2024.412  |
| AK097395  | 4872.597  | 4192.965  | NM_003974 | 5766.372  | 6129.618  | M22538    | 51011.18  | 57225.359 |
| M12783    | 2252.705  | 1854.571  | NM_014339 | 12021.452 | 11697.096 | NM_013356 | 470.115   | 376.636   |
| AK091535  | 1105.703  | 805.906   | NM_002288 | 1097.615  | 1230.56   | NM_005060 | 2223.184  | 1847.478  |
| AF085357  | 12047.629 | 9788.491  | NM_000325 | 6953.285  | 7611.294  | NM_005437 | 6883.87   | 6085.586  |
| NM_080824 | 753.083   | 822.491   | AF015041  | 701.891   | 622.082   | U50534    | 1449.166  | 1686.228  |
| AL137698  | 615.291   | 728.612   | AF055020  | 3380.444  | 2563.032  | NM_014824 | 3779.125  | 6229.008  |
| NM_018002 | 2363.727  | 2341.795  | NM_006986 | 2880.1    | 2884.087  | NM_014504 | 6155.73   | 5043.288  |
| AK024821  | 13027.626 | 10647.985 | NM_014904 | 1068.725  | 588.227   | NM_014408 | 20173.586 | 30033.918 |
| AB002340  | 1921.523  | 1361.79   | AL137576  | 6164.954  | 5666.303  | NM_014741 | 5970.659  | 8306.548  |
| NM_000224 | 1050.356  | 1306.372  | NM_018358 | 2945.894  | 3011.605  | AF212247  | 6861.014  | 10729.18  |
| NM_014328 | 12227.395 | 13476.489 | NM_003055 | 4237.682  | 3511.587  | AF161407  | 19363.383 | 35436.801 |
| NM_006414 | 4755.978  | 4667.272  | NM_002414 | 51395.098 | 48835.809 | NM_005713 | 3101.374  | 2460.315  |
| NM_014322 | 1385.156  | 969.291   | NM_000355 | 606.565   | 778.554   | AK023553  | 2236.443  | 3273.876  |
| NM_004122 | 3359.589  | 2669.063  | AL133580  | 16048.998 | 17065.354 | AF272043  | 8272.419  | 6483.2    |
| NM_002928 | 2007.704  | 1589.134  | NM_014666 | 13060.166 | 13485.9   | NM_002587 | 16432.98  | 11284.042 |
| NM_000160 | 2273.938  | 2207.71   | NM_005451 | 1303.749  | 1437      | NM_002238 | 2175.079  | 2224.764  |
| NM_003301 | 1234.48   | 1163.1    | NM_007172 | 6257.713  | 6065.184  | NM_004868 | 1412.264  | 1542.489  |
| NM_000955 | 1095.134  | 1028.797  | NM_006152 | 3045.291  | 3229.504  | NM_004668 | 1885.82   | 1643.058  |
| AF305550  | 4842.928  | 4096.249  | NM_013333 | 16774.471 | 18551.393 | NM_007028 | 14408.37  | 10184.874 |
| U66582    | 7532.924  | 7525.654  | NM_002333 | 889.597   | 813.651   | AF130728  | 2032.075  | 2310.56   |
| NM_006198 | 2834.096  | 2003.316  | NM_003400 | 12021.694 | 11457.191 | NM_001131 | 51987.141 | 64620.906 |
| NM_000849 | 1142.61   | 1076.014  | NM_006705 | 1294.497  | 1170.013  | X07696    | 4506.896  | 5744.319  |
| NM_004678 | 1879.038  | 1933.594  | AF174605  | 5326.994  | 4515.406  | AA481015  | 1975.629  | 3308.795  |
| NM_000950 | 5220.581  | 8311.514  | NM_014453 | 13569.652 | 11359.347 | AA679391  | 1953.215  | 3019.016  |
| AK025772  | 2937.685  | 2732.226  | NM_005713 | 2126.131  | 2663.123  | BG682146  | 3501.351  | 4722.218  |
| NM_005509 | 1248.754  | 1195.676  | AK023553  | 1759.401  | 1308.667  | NM_012266 | 6020.915  | 4190.415  |
| NM_152747 | 1642.14   | 1569.538  | NM_014600 | 439.652   | 993.861   | NM_004559 | 3595.62   | 2985.827  |
| NM_017415 | 1482.428  | 1281.601  | NM_016733 | 1725.165  | 1738.018  | X56692    | 8519.814  | 7186.621  |
| NM_001667 | 17006.32  | 17242.768 | AF181994  | 1948.423  | 2143.795  | NM_014278 | 3763.827  | 4797.149  |
| AB029033  | 1297.333  | 1332.088  | NM_018962 | 882.647   | 704.137   | NM_012331 | 3051.478  | 2009.429  |
| AF091034  | 4415.08   | 4292.894  | AF125100  | 1827.9    | 1717.012  | NM_006644 | 8796.777  | 4435.675  |
| NM_005301 | 13628.773 | 16020.142 | NM_006114 | 9712.314  | 8660.714  | NM_006583 | 64927.07  | 2752.45   |
| NM_004167 | 783.158   | 893.679   | X82693    | 3700.592  | 3481.667  | NM_003974 | 7856.391  | 4650.764  |
| NM_016653 | 7490.057  | 8364.81   | NM_007176 | 21935.402 | 27353.896 | NM_014339 | 26091.846 | 15811.37  |
| AB035124  | 11079.885 | 12428.648 | NM_002722 | 1531.666  | 1627.918  | NM_001495 | 1810.078  | 2371.411  |
| AF060170  | 1286.269  | 1093.539  | AF317058  | 1020.65   | 1219.331  | NM_004416 | 7965.553  | 13052.521 |
| NM_016602 | 879.383   | 699.45    | M22538    | 37486.941 | 39936.977 | AF015041  | 1901.789  | 2640.257  |
| NM_004409 | 3831.751  | 3776.131  | NM_012297 | 10762.614 | 10023.736 | AK000184  | 1015.876  | 2514.945  |
| AK023397  | 2132.003  | 2023.893  | AB007925  | 26665.072 | 26231.627 | AF055020  | 7015.628  | 11998.469 |
| NM_001725 | 876.365   | 769.407   | NM_000361 | 6817.234  | 6170.738  | NM_006986 | 4547.604  | 6256.272  |
| NM_004079 | 2528.12   | 1563.453  | NM_002475 | 32229.121 | 36399.809 | NM_014904 | 1110.72   | 659.963   |
| NM_000383 | 1123.388  | 847.096   | NM_003836 | 3073.39   | 2846.778  | AL137576  | 8238.048  | 5271.813  |
| X01394    | 2938.898  | 3310.024  | AK022417  | 1137.077  | 813.808   | NM_018358 | 3814.442  | 2975.39   |
| NM_000041 | 15182.548 | 14701.956 | NM_014824 | 2244.125  | 2441.342  | AF131781  | 5462.43   | 6256.649  |
| NM_002984 | 1508.33   | 1485.603  | NM_014504 | 2456.205  | 2663.454  | NM_006516 | 19063.457 | 14664.388 |

|           |           |           |           |           |           |           |           |           |
|-----------|-----------|-----------|-----------|-----------|-----------|-----------|-----------|-----------|
| AF317425  | 3396.476  | 3130.188  | NM_014408 | 13769.867 | 14452.117 | NM_015865 | 743.913   | 830.055   |
| AF264717  | 2058.51   | 1968.224  | NM_014741 | 4638.312  | 4555.752  | NM_003055 | 9577.588  | 7936.906  |
| NM_012260 | 4220.017  | 2940.988  | AF212247  | 4557.628  | 5367.057  | NM_005075 | 528.574   | 388.969   |
| NM_001141 | 4219.882  | 4131.959  | AF161407  | 7524.848  | 7656.553  | NM_006841 | 2328.207  | 1535.663  |
| NM_000018 | 14967.269 | 15847.193 | NM_014738 | 3761.503  | 4001.231  | NM_002414 | 63354.863 | 34860.672 |
| AB028992  | 2187.466  | 1758.851  | NM_016406 | 1518.96   | 1816.988  | NM_000355 | 2319.496  | 2058.638  |
| NM_018479 | 11688.099 | 11501.419 | NM_018080 | 3794.188  | 3194.421  | AL133580  | 20197.109 | 10363.192 |
| NM_014362 | 5687.951  | 6008.184  | NM_007115 | 796.513   | 637.7     | NM_014666 | 15707.068 | 8498.432  |
| NM_018308 | 1293.814  | 1620.236  | NM_004616 | 849.873   | 591.282   | NM_005451 | 3019.768  | 2404.396  |
| NM_001832 | 2492.792  | 4230.658  | NM_017692 | 3847.701  | 3909.236  | NM_007172 | 8229.125  | 7360.687  |
| NM_017774 | 28370.896 | 34314.047 | NM_003975 | 3341.139  | 2564.571  | NM_006152 | 6685.262  | 8582.528  |
| AB037716  | 4352.195  | 5904.354  | NM_004834 | 13231.747 | 11899.229 | NM_013333 | 25464.121 | 30969.701 |
| NM_004827 | 849.787   | 1108.323  | NM_000812 | 862.24    | 1014.323  | NM_002333 | 3273.428  | 4787.221  |
| NM_001926 | 461.249   | 700.628   | AK024747  | 21636.063 | 20918.773 | NM_003400 | 14986.433 | 19353.254 |
| NM_016297 | 3636.865  | 3938.515  | NM_006390 | 2734.029  | 2498.437  | NM_006705 | 4697.833  | 7427.334  |
| NM_001752 | 3649.583  | 4078.738  | NM_003580 | 3348.888  | 3305.176  | NM_014439 | 1206.226  | 2333.801  |
| BC003406  | 2236.26   | 2052.333  | NM_006506 | 2266.454  | 2650.405  | NM_005582 | 1569.766  | 2585.636  |
| AL137672  | 729.333   | 530.908   | NM_003235 | 2127.043  | 1813.185  | AF174605  | 4989.362  | 3623.292  |
| X64177    | 2554.76   | 620.919   | AB042562  | 2135.581  | 1802.561  | NM_014453 | 15198.505 | 12025.509 |
| NM_015994 | 9251.049  | 5222.422  | NM_016009 | 7107.3    | 8436.931  | NM_005713 | 2299.041  | 1348.293  |
| NM_014065 | 1992.944  | 1704.51   | NM_002378 | 1243.479  | 1377.551  | AK023553  | 2364.309  | 3302.31   |
| NM_001695 | 5895.002  | 4888.452  | NM_006097 | 2825.95   | 3262.291  | NM_014600 | 1810.258  | 1654.634  |
| NM_002248 | 880.237   | 818.644   | NM_006113 | 3008.171  | 2897.322  | NM_016733 | 2737.882  | 2534.267  |
| NM_012281 | 1254.709  | 1307.992  | NM_015313 | 14428.898 | 14410.354 | AF181994  | 2059.718  | 1682.017  |
| NM_080824 | 670.479   | 632.79    | AK022287  | 9941.188  | 9337.95   | NM_018962 | 1497.87   | 1126.214  |
| NM_000262 | 1484.951  | 2250.233  | NM_015897 | 2925.722  | 2651.645  | AF125100  | 3238.214  | 2026.697  |
| NM_017831 | 1345.147  | 1257.688  | NM_005436 | 4665.648  | 4093.501  | NM_002722 | 6383.213  | 5696.692  |
| NM_006345 | 5272.442  | 3006.384  | AF177473  | 7748.894  | 5975.382  | AF317058  | 1616.058  | 943.807   |
| NM_006875 | 2984.336  | 2088.386  | NM_000546 | 3702.392  | 2854.579  | M22538    | 50521.73  | 52906.332 |
| D87119    | 3349.161  | 2670.22   | AB023223  | 769.309   | 434.854   | NM_006028 | 1107.544  | 1880.185  |
| AB037769  | 510.019   | 270.764   | AB018257  | 2321.82   | 1613.514  | NM_012297 | 16304.45  | 9768.268  |
| AL050040  | 777.298   | 625.759   | NM_002708 | 21780.623 | 17901.109 | AB007925  | 47146.176 | 29620.732 |
| NM_006556 | 14738.773 | 12962.68  | AK001059  | 809.026   | 1090.29   | NM_018180 | 836.584   | 497.957   |
| NM_000849 | 1433.689  | 1384.049  | NM_007282 | 5125.034  | 4544.171  | NM_000361 | 9131.397  | 5760.763  |
| NM_004678 | 2350.883  | 2045.292  | NM_017610 | 980.998   | 961.707   | NM_002475 | 43938.949 | 28840.457 |
| NM_000950 | 4762.906  | 4896.207  | AK025133  | 10717.896 | 12429.587 | NM_003836 | 7088.577  | 5132.787  |
| NM_005139 | 7538.945  | 6176.77   | NM_004087 | 4115.477  | 5472.193  | NM_017987 | 1629.384  | 1313.826  |
| L10139    | 223.661   | 788.522   | NM_000119 | 2580.887  | 4139.705  | NM_018203 | 670.14    | 1848.778  |
| NM_000039 | 54647.926 | 52925.215 | AK027100  | 1182.705  | 1322.06   | NM_014504 | 3162.069  | 1643.157  |
| NM_020470 | 3542.022  | 5411.437  | NM_003622 | 1746.729  | 1507.408  | NM_014741 | 5917.651  | 7146.339  |
| NM_006574 | 626.715   | 717.66    | NM_001774 | 3322.477  | 2233.966  | AF212247  | 7073.923  | 9228.713  |
| AA478950  | 1594.664  | 1752.813  | AK021645  | 958.283   | 701.408   | AF161407  | 16722.461 | 22917.387 |
| BF942101  | 2693.998  | 1371.521  | NM_013339 | 3029.044  | 2451.722  | NM_014738 | 4914.284  | 7604.296  |
| BE314182  | 9851.037  | 14844.131 | NM_001491 | 1216.321  | 1012.12   | NM_016406 | 2652.97   | 4166.39   |
| AI808029  | 1905.297  | 2733.95   | AK026541  | 2119.659  | 1689.249  | NM_018080 | 8228.061  | 10136.517 |
| AI971217  | 416.941   | 713.771   | NM_005899 | 10703.869 | 8387.492  | NM_007115 | 973.706   | 693.274   |
| AK091535  | 1399.346  | 811.418   | D42055    | 8229.631  | 9043.884  | NM_004616 | 878.213   | 647.182   |
| AF085357  | 11688.497 | 7372.371  | AL137349  | 2398.989  | 2327.8    | NM_017692 | 4726.023  | 3873.163  |
| NM_003841 | 454.156   | 511.554   | NM_003339 | 737.49    | 480.513   | NM_003975 | 4100.829  | 3492.704  |
| NM_004633 | 309.139   | 834.727   | NM_016476 | 33874.156 | 35681.637 | NM_004834 | 14924.282 | 11534.786 |
| X01394    | 7315.863  | 8937.949  | NM_015902 | 1399.371  | 1178.139  | NM_000812 | 2704.575  | 5333.081  |
| NM_000041 | 19671.619 | 23716.451 | NM_020155 | 3116.347  | 2888.863  | AB042562  | 2827.051  | 1621.778  |
| NM_002984 | 1652.707  | 1777.778  | NM_006121 | 3798.632  | 4093.87   | NM_016009 | 10050.318 | 5473.63   |

|           |           |           |           |           |           |           |           |           |
|-----------|-----------|-----------|-----------|-----------|-----------|-----------|-----------|-----------|
| AF317425  | 3439.464  | 2755.527  | AK023520  | 6718.689  | 7817.813  | NM_017431 | 1447.783  | 3221.045  |
| NM_018002 | 3592.552  | 3366.737  | AB014592  | 552.241   | 776.893   | NM_006097 | 9047.742  | 9151.761  |
| AK024821  | 14736.86  | 10700.148 | NM_016952 | 1511.286  | 1434.909  | NM_006113 | 3915.147  | 4356.7    |
| AB002340  | 2649.999  | 2327.622  | NM_001654 | 4471.243  | 4035.758  | NM_015313 | 19113.814 | 23199.322 |
| NM_000224 | 1428.216  | 1245.853  | NM_014519 | 2927.59   | 2235.794  | AK022287  | 13315.491 | 13241.383 |
| NM_014328 | 11389.322 | 8462.711  | NM_007147 | 3882.44   | 2405.91   | NM_015897 | 3545.331  | 2053.52   |
| NM_006414 | 4708.501  | 3751.345  | X65463    | 3528.171  | 2583.091  | NM_005436 | 5798.792  | 4445.689  |
| NM_004122 | 5351.883  | 6967.245  | AK024418  | 1801.429  | 1102.95   | AF177473  | 14417.947 | 10435.21  |
| NM_002928 | 3351.832  | 4223.762  | NM_003367 | 4938.688  | 2923.511  | NM_000546 | 3568.738  | 3147.771  |
| NM_000160 | 3898.521  | 5145.708  | NM_005194 | 13533.141 | 9457.257  | AB018257  | 3546.749  | 2599.189  |
| NM_003301 | 1381.718  | 2044.594  | AB002296  | 2042.48   | 1713.821  | NM_002708 | 23554.396 | 18493.273 |
| NM_000955 | 1241.224  | 1054.978  | NM_012087 | 2833.562  | 2635.424  | AK001059  | 1716.884  | 1254.683  |
| U27768    | 1348.89   | 1900.181  | AF165520  | 804.843   | 868.935   | NM_007282 | 4950.169  | 3605.087  |
| NM_001742 | 624.782   | 929.185   | NM_015679 | 5713.337  | 5363.649  | AB020704  | 3244.594  | 2071.158  |
| U66582    | 11787.747 | 12643.373 | AF299118  | 62211.328 | 59047.426 | NM_000119 | 4908.522  | 5157.889  |
| NM_006198 | 4305.7    | 4653.82   | AK025353  | 15488.713 | 16969.914 | NM_001065 | 10862.296 | 10354.443 |
| NM_002241 | 725.393   | 726.958   | AK056896  | 21242.627 | 24367.102 | AK027100  | 1719.268  | 2046.189  |
| NM_014065 | 3717.876  | 4397.553  | AK022763  | 21757.596 | 24751.965 | AY010111  | 497.085   | 1106.571  |
| NM_001695 | 9138.241  | 8731.513  | AF288207  | 29990.846 | 31988.834 | NM_003622 | 1947.919  | 750.303   |
| NM_002248 | 1085.604  | 1696.165  | NM_001001 | 55394.52  | 54706.832 | NM_001774 | 1694.49   | 1002.587  |
| NM_012281 | 1529.357  | 2047.504  | NM_005715 | 2721.103  | 2726.529  | AK021645  | 944.712   | 910.912   |
| AK025772  | 4850.91   | 4198.437  | AK026992  | 2991.108  | 2860.618  | NM_013336 | 2892.295  | 2089.292  |
| NM_005509 | 2219.274  | 2284.955  | NM_004541 | 34056.148 | 22796.01  | NM_001491 | 2182.894  | 1766.503  |
| NM_152747 | 2865.883  | 3587.227  | NM_006830 | 44856.059 | 27753.129 | AK026541  | 2784.383  | 2449.165  |
| NM_017415 | 1945.133  | 2356.925  | AK026414  | 11536.347 | 8475.572  | NM_005896 | 23870.652 | 15880.183 |
| NM_001667 | 23780.76  | 22705.518 | D17297    | 778.606   | 870.891   | D42055    | 12311.113 | 9015.749  |
| AB046834  | 2867.501  | 1809.679  | NM_004074 | 40252.957 | 42543.133 | AL137349  | 3226.341  | 1820.951  |
| AB029033  | 1336.21   | 1793.605  | NM_018436 | 14646.392 | 13513.676 | NM_020155 | 4560.721  | 3460.084  |
| AF091034  | 6560.684  | 9152.289  | AF157115  | 4792.705  | 5445.159  | BE874471  | 8383.72   | 5482.563  |
| NM_005301 | 16490.668 | 21294.113 | NM_012241 | 3734.152  | 4390.469  | NM_007211 | 9080.543  | 3873.419  |
| NM_004167 | 1053.379  | 1280.013  | AF250288  | 562.604   | 765.729   | AB011152  | 2100.422  | 1223.434  |
| NM_016653 | 9645.984  | 10820.085 | NM_018486 | 2381.19   | 2552.975  | NM_014956 | 9403.15   | 5660.674  |
| AB035124  | 16107.297 | 20391.754 | NM_005324 | 27408.508 | 33173.879 | NM_016952 | 1698.894  | 1848.867  |
| AF060170  | 2138.731  | 3181.6    | AL080201  | 13747.902 | 15664.64  | NM_001654 | 4065.542  | 3782.692  |
| NM_016602 | 1714.11   | 2137.139  | NM_001806 | 7877.997  | 8225.216  | NM_014519 | 2599.878  | 1703.654  |
| NM_004409 | 7374.161  | 9305.533  | AB040941  | 5462.097  | 5096.035  | X65463    | 3507.402  | 3143.746  |
| NM_004079 | 5020.718  | 4484.534  | AL137241  | 1108.434  | 1235.2    | NM_003367 | 5546.396  | 2803.777  |
| NM_000383 | 2117.459  | 2340.889  | AB037742  | 1750.205  | 2148.202  | NM_005194 | 16335.028 | 9140.43   |
| NM_006875 | 5350.701  | 5686.189  | AF272375  | 1133.53   | 1262.01   | AB002296  | 2735.333  | 2209.362  |
| D87119    | 4853.716  | 5617.277  | AK025078  | 887.195   | 743.967   | NM_014315 | 7361.097  | 4061.719  |
| AB037769  | 964.95    | 1065.366  | AK023754  | 814.891   | 393.301   | NM_012087 | 3688.734  | 1922.446  |
| AL050040  | 1526.001  | 1823.789  | AK024737  | 2456.606  | 1884.876  | NM_015679 | 5754.324  | 3612.151  |
| NM_006556 | 21356.439 | 24734.533 | AB007890  | 6333.252  | 4240.103  | AK056896  | 27167.166 | 15900.382 |
| AF264717  | 3377.419  | 3803.366  | AF070591  | 612.749   | 542.67    | AK022763  | 24289.969 | 15272.559 |
| NM_012260 | 6600.216  | 6828.618  | AF286160  | 8459.999  | 8045.685  | NM_000976 | 64603.379 | 62662.301 |
| NM_001141 | 4690.961  | 5768.631  | AF275800  | 2849.136  | 2409.566  | NM_001000 | 62322.48  | 60197.996 |
| NM_000018 | 20582.326 | 19937.443 | AL359605  | 1642.622  | 1757.902  | AF288207  | 38597.727 | 22209.352 |
| NM_018479 | 18010.238 | 21745.227 | AB020633  | 3790.751  | 3995.019  | NM_001001 | 58743.313 | 31606.998 |
| NM_014362 | 5046.305  | 6316.321  | NM_018319 | 4993.348  | 5416.022  | NM_005715 | 4726.298  | 3240.893  |
| NM_018308 | 1318.69   | 1498.921  | AL359559  | 1021.22   | 1128.049  | AK026992  | 3698.485  | 3497.901  |
| NM_001832 | 2812.373  | 4092.428  | AK021714  | 1916.201  | 2708.558  | NM_006830 | 51590.188 | 27367.986 |
| NM_017774 | 30323.15  | 33738.375 | AF088015  | 1041.254  | 716.074   | AK026414  | 15932.912 | 7197.331  |
| AB037716  | 4768.961  | 6503.254  | AF007132  | 674.541   | 505.966   | D17297    | 1254.729  | 683.494   |

|           |           |           |           |           |           |           |           |           |
|-----------|-----------|-----------|-----------|-----------|-----------|-----------|-----------|-----------|
| NM_004827 | 1121.142  | 1210.667  | AK026711  | 1667.667  | 1044.591  | NM_004074 | 33795.578 | 17983.574 |
| NM_001926 | 703.48    | 822.534   | NM_017864 | 4998.427  | 3823.109  | NM_002626 | 42072.621 | 20971.369 |
| NM_016297 | 6156.685  | 6775.23   | NM_004869 | 5355.786  | 3696.904  | NM_018436 | 11916.306 | 6094.429  |
| NM_001752 | 5978.466  | 7491.3    | AF136408  | 1054.13   | 1119.284  | AF157115  | 6529.015  | 4121.363  |
| AL137672  | 942.701   | 1201.663  | X93501    | 1003.37   | 1249.696  | AJ223353  | 7226.543  | 6368.245  |
| X64177    | 4604.383  | 2429.22   | AJ011602  | 1025.81   | 1045.091  | NM_012241 | 5239.964  | 3649.384  |
| NM_015994 | 17381.125 | 16717.744 | M25785    | 1140.932  | 1266.412  | AF250288  | 1255.156  | 852.973   |
| NM_018476 | 24665.039 | 27612.604 | M32443    | 2694.258  | 2514.553  | NM_018486 | 2509.942  | 1557.336  |
| AF220492  | 15584.09  | 13951.072 | AK024759  | 733.849   | 736.35    | NM_005324 | 30307.371 | 20070.629 |
| X89671    | 5075.85   | 4973.387  | AK022309  | 1364.047  | 2910.753  | AL080201  | 17805.605 | 10536.526 |
| NM_014941 | 6315.359  | 6371.046  | AK000063  | 655.373   | 857.201   | NM_001806 | 10967.736 | 14899.677 |
| NM_018372 | 10334.501 | 12022.344 | AK000949  | 1226.178  | 1663.298  | AB040941  | 7255.042  | 14614.062 |
| NM_013253 | 2193.735  | 2630.751  | AK027068  | 460.399   | 702.544   | AB037742  | 2050.72   | 1516.834  |
| NM_005895 | 9048.235  | 10956.063 | AK000974  | 1321.215  | 1608.749  | AF272375  | 1987.493  | 1665.879  |
| D82345    | 26507.234 | 28219.75  | AK024527  | 495.884   | 758.265   | AK025078  | 1110.031  | 555.865   |
| NM_003814 | 4962.998  | 4684.998  | AK025051  | 1180.77   | 1621.257  | AK023754  | 750.647   | 936.15    |
| NM_002968 | 967.649   | 774.686   | AK024553  | 20082.781 | 17082.488 | AK021689  | 939.686   | 1478.005  |
| AL137698  | 817.069   | 859.818   | AF143879  | 4930.265  | 3736.46   | AK024737  | 3345.476  | 5806.242  |
| NM_015957 | 152.351   | 666.01    | AK024621  | 18088.148 | 13808.265 | AB007890  | 10094.402 | 5322.506  |
| NM_000262 | 1693.851  | 2889.616  | AL157449  | 14010.278 | 9076.164  | AF286160  | 9592.436  | 5022.813  |
| NM_017831 | 2227.702  | 3178.967  | AL117582  | 706.152   | 392.634   | AF275800  | 2967.288  | 1629.675  |
| AK024393  | 444.282   | 673.091   | AK025525  | 935.797   | 512.301   | AL359605  | 2324.234  | 1479.316  |
| AK022537  | 13425.691 | 13218.783 | AF090916  | 658.008   | 558.295   | AB020633  | 4259.336  | 5174.542  |
| NM_006345 | 10153.335 | 10567.579 | AK026860  | 8178.158  | 5962.57   | AK025445  | 11635.492 | 15753.284 |
| NM_003259 | 8964.23   | 8304.64   | NM_014898 | 2449.668  | 2245.512  | AL357200  | 2513.793  | 2423.904  |
| AL080128  | 3477.595  | 3169.261  | AK023435  | 2151.894  | 1819.87   | NM_017727 | 15160.537 | 9722.886  |
| AB037787  | 5170.408  | 3926.207  | AF086035  | 6335.367  | 4800.299  | NM_018319 | 5537.521  | 4122.612  |
| AB033072  | 1142.963  | 945.805   | AK022159  | 3948.254  | 2880.688  | AL359559  | 948.057   | 570.253   |
| AB040892  | 733.231   | 852.369   | U25750    | 6643.076  | 4352.856  | AK021714  | 2084.683  | 2103.895  |
| NM_001822 | 2465.242  | 1998.231  | AK023691  | 9083.884  | 5470.877  | NM_020314 | 8265.376  | 9694.632  |
| AB002360  | 737.418   | 452.239   | AK026744  | 764.719   | 608.086   | AK022972  | 4351.111  | 6119.471  |
| NM_018268 | 7567.789  | 5374.074  | NM_005234 | 7284.425  | 5193.903  | AK025996  | 2437.453  | 2351.289  |
| AF230904  | 14207.385 | 10410.578 | BC023536  | 1367.51   | 1472.193  | AF088015  | 1219.638  | 1107.294  |
| NM_017596 | 14115.627 | 11226.941 | NM_001803 | 6323.122  | 6916.561  | AK026702  | 986.034   | 598.472   |
| NM_014386 | 2269.603  | 3044.201  | NM_006233 | 24110.703 | 16504.365 | AF007132  | 1318.85   | 1123.65   |
| NM_018110 | 3833.998  | 5523.159  | AK021889  | 1211.074  | 864.443   | AK026711  | 2741.751  | 4698.324  |
| AF312678  | 1603.933  | 2032.031  | AK000992  | 1505.438  | 1554.128  | NM_017864 | 4958.617  | 6411.448  |
| NM_006253 | 27143.131 | 34045.613 | AF040099  | 469.112   | 647.07    | NM_004869 | 5446.137  | 4413.69   |
| NM_003866 | 1123.775  | 1592.41   | L23544    | 21252.693 | 25257.801 | Z70764    | 2604.393  | 3034.897  |
| NM_018262 | 2562.346  | 3695.148  | NM_019020 | 7760.135  | 8803.286  | Z83948    | 1804.66   | 1257.12   |
| NM_006207 | 927.075   | 1357.436  | AF119892  | 735.106   | 1134.157  | M25785    | 1698.151  | 1007.396  |
| NM_003220 | 1735.594  | 2971.834  | NM_016474 | 2945.81   | 3485.305  | M32443    | 4436.227  | 4580.174  |
| AF009674  | 4954.516  | 5850.969  | NM_000910 | 2014.956  | 1525.002  | D16477    | 996.079   | 925.323   |
| NM_000360 | 2183.897  | 2987.234  | AF086001  | 38596.859 | 26616.047 | AK024759  | 795.813   | 713.549   |
| NM_000844 | 919.8     | 1023.284  | AL117560  | 22583.576 | 14861.521 | AK025041  | 3032.938  | 1088.088  |
| NM_005510 | 9964.664  | 15678.344 | M24749    | 7944.792  | 7288.312  | AK000063  | 986.07    | 636.958   |
| NM_014505 | 20566.033 | 13520.238 | NM_000554 | 47142.281 | 44587.18  | AK027068  | 741.009   | 917.78    |
| NM_004209 | 9577.128  | 6244.063  | AF009317  | 7378.858  | 8365.987  | AK000974  | 1880.862  | 1362.351  |
| NM_016162 | 5906.56   | 3907.331  | AK026583  | 7466.2    | 7980.256  | AK024527  | 1223.587  | 2848.367  |
| AF130056  | 4280.224  | 3603.264  | AF218031  | 12202.821 | 14313.728 | AK025051  | 1352.693  | 1039.405  |
| NM_002201 | 19257.119 | 13586.132 | AF210650  | 4353.972  | 5629.782  | AK024553  | 38860.367 | 35349.355 |
| NM_006806 | 5372.116  | 4681.952  | NM_018356 | 6790.333  | 9889.984  | AK024930  | 482.418   | 871.918   |
| NM_006763 | 2165.4    | 2068.979  | AF085896  | 2063.851  | 2341.959  | AL157449  | 14826.237 | 10624.654 |

|           |           |           |           |           |           |           |           |           |
|-----------|-----------|-----------|-----------|-----------|-----------|-----------|-----------|-----------|
| NM_006119 | 2587.297  | 2210.28   | X74613    | 38290.859 | 42755.684 | AL117582  | 1527.6    | 1275.419  |
| NM_004465 | 1197.297  | 1004.778  | AF075080  | 18386.148 | 17790.113 | AK025525  | 1612.321  | 1782.787  |
| AK026927  | 3271.12   | 2315.896  | AL390183  | 1768.508  | 1882.046  | NM_018233 | 12759.406 | 6897.079  |
| NM_014059 | 16689.848 | 9761.924  | Y13897    | 1766.739  | 2178.893  | AV740891  | 1942.163  | 1092.376  |
| NM_001761 | 11049.824 | 5489.668  | AK001857  | 1624.891  | 2259.206  | AK026860  | 8002.642  | 6202.536  |
| AF231997  | 4529.401  | 5348.253  | AK021525  | 1307.804  | 1475.073  | AK024211  | 1145.584  | 848.171   |
| NM_007125 | 5524.934  | 8357.728  | AF067801  | 1005.29   | 1005.798  | NM_014895 | 2374.607  | 2064.128  |
| NM_002595 | 14565.791 | 20153.297 | AL133577  | 4639.754  | 4852.479  | AK023435  | 2778.333  | 2418.93   |
| NM_020184 | 1552.744  | 2146.621  | AF279773  | 579.273   | 771.727   | AF086035  | 11295.208 | 6930.302  |
| NM_005815 | 3476.288  | 4684.793  | AK025378  | 1756.303  | 1561.27   | U25750    | 5262.39   | 3796.596  |
| NM_001229 | 2434.151  | 3860.402  | NM_000479 | 1906.309  | 1456.79   | AK023502  | 2115.453  | 843.917   |
| NM_014916 | 1181.169  | 1301.06   | AF038199  | 2409.844  | 1674.122  | AK026744  | 972.255   | 612.825   |
| NM_000250 | 1070.868  | 1307.617  | CY3Cy5    | 5103.87   | 345.676   | NM_006233 | 20935.953 | 8946.05   |
| NM_002160 | 1141.017  | 435.272   | BE908993  | 2066.092  | 3628.976  | AK021889  | 1008.005  | 729.12    |
| NM_005675 | 5413.207  | 3535.751  | AB012701  | 724.483   | 1153.72   | AK000992  | 1363.78   | 1136.585  |
| NM_002770 | 3933.69   | 2768.397  | M61156    | 1383.265  | 1872.517  | AF040099  | 1339.445  | 1948.427  |
| BC030636  | 4825.59   | 2814.624  | R44005    | 873.827   | 1261.608  | L23544    | 20314.525 | 19448.811 |
| D21064    | 795.512   | 580.476   | AI942392  | 2740.414  | 4141.745  | NM_019020 | 5618.915  | 4213.304  |
| NM_002812 | 8323.358  | 5911.842  | M55040    | 758.963   | 1096.425  | NM_016474 | 2507.331  | 1515.45   |
| NM_020365 | 4515.49   | 3384.978  | AW009739  | 695.698   | 1098.225  | NM_000910 | 3497.95   | 1757.02   |
| NM_003982 | 1820.364  | 1160.786  | BC036805  | 7531.626  | 11498.457 | AF086001  | 26464.084 | 14096.906 |
| NM_002079 | 9202.555  | 5717.311  | Z74615    | 8091.311  | 9813.367  | AL117560  | 6352.968  | 6660.79   |
| NM_004121 | 1544.13   | 2120.141  | X03884    | 52198.684 | 62090.625 | M24749    | 8358.38   | 12972.953 |
| NM_001902 | 3319.49   | 4463.14   | U36759    | 571.101   | 1058.397  | AF009317  | 5500.516  | 2430.701  |
| AL137605  | 1745.782  | 2377.856  | X91625    | 6419.541  | 8862.039  | AK026583  | 5618.312  | 2839.158  |
| NM_016261 | 2684.489  | 3577.555  | AF001862  | 17390.303 | 24091.986 | Y13897    | 820.777   | 828.612   |
| NM_006519 | 1900.106  | 2608.22   | SR6       | 3093.576  | 4182.428  | AK001857  | 1120.785  | 1151.878  |
| NM_004607 | 67236.086 | 58266.238 | SR8       | 12115.475 | 49451.93  | AK021525  | 6647.576  | 9961.473  |
| NM_005187 | 2986.044  | 1581.867  | SR10      | 31024.555 | 12642.337 | AF067801  | 1082.853  | 2672.359  |
| U73377    | 3232.012  | 2076.458  | CY3Cy5    | 5459.334  | 454.52    | AL133577  | 3606.382  | 2710.249  |
| NM_002199 | 5381.542  | 4991.371  | U87460    | 6322.589  | 8726.303  | AK025378  | 2556.354  | 1621.743  |
| BC005219  | 8559.228  | 6849.716  | NM_003617 | 528.831   | 773.012   | NM_000479 | 2389.18   | 1334.297  |
| NM_004265 | 1873.83   | 1545.99   | NM_001841 | 1090.595  | 1295.108  | AF038199  | 1952.162  | 1653.217  |
| NM_006662 | 2121.141  | 1792.091  | NM_002054 | 1892.346  | 2992.063  | CY3Cy5    | 7160.49   | 329.481   |
| NM_004031 | 986.342   | 909.19    | AF300649  | 1698.683  | 2275.241  | BE908993  | 2330.797  | 3524.099  |
| NM_004514 | 7610.212  | 6164.287  | NM_004125 | 497.994   | 916.922   | AB012701  | 1837.083  | 2060.204  |
| NM_006163 | 1760.275  | 1156.967  | NM_000823 | 1753.382  | 2447.778  | M61156    | 3312.645  | 4187.605  |
| NM_001272 | 14785.37  | 5829.229  | NM_001139 | 2321.457  | 3534.438  | R44005    | 1708.152  | 2171.852  |
| NM_016303 | 8729.706  | 5471.002  | NM_004609 | 10226.092 | 13783.808 | AI942392  | 3295.31   | 3754.316  |
| NM_006196 | 29987.389 | 14973.614 | NM_003772 | 2530.478  | 3572.422  | M55040    | 830.09    | 1014.734  |
| AV733560  | 1382.757  | 517.565   | NM_001541 | 2189.74   | 2900.097  | AW009739  | 928.514   | 1108.449  |
| NM_017722 | 8519.828  | 9788.555  | NM_005416 | 1292.562  | 2198.799  | BC036805  | 9613.312  | 10132.317 |
| AL137730  | 5986.724  | 7914.14   | NM_004670 | 520.276   | 1466.687  | Z74615    | 33153.895 | 36992.117 |
| AL137681  | 5923.606  | 9105.74   | L09081    | 922.119   | 1451.168  | X03884    | 54601.77  | 52979.914 |
| NM_005147 | 4242.127  | 3214.847  | NM_000218 | 70577.648 | 62252.363 | U36759    | 795.513   | 836.06    |
| NM_014665 | 5230.136  | 3242.475  | NM_016113 | 2485.652  | 3741.021  | X91625    | 6303.751  | 5437.79   |
| AK023609  | 2589.456  | 2634.898  | NM_014222 | 2472.381  | 2532.784  | AF090901  | 496.962   | 724.347   |
| NM_018019 | 3245.112  | 2933.785  | NM_000509 | 4399.803  | 7214.684  | AF004231  | 1328.218  | 623.63    |
| AK027220  | 3358.808  | 2784.827  | NM_004542 | 341.143   | 1095.482  | AF001862  | 18887.84  | 10245.049 |
| NM_018011 | 8054.806  | 8389.036  | X06182    | 1647.819  | 2990.963  | SR2       | 57040.598 | 50390.449 |
| NM_000476 | 465.003   | 433.521   | BF217496  | 2527.656  | 3861.116  | SR4       | 20225.66  | 14406.327 |
| AF132733  | 3695.517  | 3336.505  | NM_004762 | 8918.161  | 13917.43  | SR6       | 3332.845  | 1925.813  |
| NM_001071 | 43281.914 | 37693.508 | NM_006641 | 31629.492 | 45200.617 | SR8       | 11195.182 | 20087.381 |



|           |           |           |           |           |           |           |           |           |
|-----------|-----------|-----------|-----------|-----------|-----------|-----------|-----------|-----------|
| NM_006187 | 3256.854  | 2050.826  | NM_000634 | 3911.986  | 6437.163  | SR10      | 38732.039 | 8119.923  |
| NM_020354 | 9431.897  | 6791.286  | NM_014679 | 24440.977 | 31072.943 | CY3Cy5    | 5028.254  | 123.146   |
| AF202637  | 7067.736  | 4873.628  | AB040969  | 2649.978  | 4447.877  | NM_004126 | 880.526   | 2255.255  |
| NM_000026 | 34595.164 | 22923.688 | NM_003467 | 23627.807 | 33853.789 | U87460    | 8621.123  | 12535.699 |
| L26494    | 524.008   | 825.572   | NM_014936 | 2905.141  | 5489.652  | NM_003617 | 538.502   | 1003.77   |
| AK024322  | 850.751   | 622.876   | NM_003943 | 1475.926  | 2475.093  | NM_001841 | 1290.654  | 1639.438  |
| NM_007145 | 9942.753  | 13234.148 | AF119902  | 508.109   | 831.073   | NM_002054 | 4140.057  | 4638.323  |
| AL133112  | 1263.841  | 954.092   | NM_020525 | 3152.008  | 3814.76   | AF300649  | 3196.284  | 4202.506  |
| AF085877  | 571.68    | 498.274   | NM_003890 | 3630.777  | 4476.552  | NM_004125 | 1238.637  | 1334.693  |
| AK002078  | 2054.272  | 1795.993  | BF127978  | 1995.564  | 2160.073  | NM_000823 | 4397.207  | 4549.126  |
| AF085837  | 1227.031  | 1136.549  | AF110801  | 1467.836  | 1378.332  | NM_004414 | 4839.479  | 5209.995  |
| AK023165  | 1420.569  | 1154.057  | NM_016579 | 9783.522  | 7959.978  | NM_003317 | 9500.122  | 9026.64   |
| AK023857  | 377.681   | 451.907   | AB018297  | 604.243   | 963.155   | NM_001139 | 3048.819  | 4143.639  |
| NM_016115 | 2482.327  | 2026.071  | AK022565  | 8419.229  | 8298.923  | NM_004609 | 52093.699 | 47207.664 |
| NM_014950 | 3649.574  | 3439.811  | AK023151  | 2369.651  | 2414.167  | NM_003772 | 2404.351  | 2831.097  |
| AF147376  | 1050.643  | 806.233   | AB033076  | 1749.961  | 2093.976  | NM_001541 | 4257.493  | 4170.851  |
| AK027190  | 653.033   | 555.316   | AK022876  | 2117.208  | 3947.959  | NM_005416 | 1963.398  | 1791.431  |
| AL360136  | 1471.29   | 1529.684  | AF134894  | 1222.389  | 1993.44   | L09081    | 7351.065  | 4366.706  |
| AF086087  | 6716.121  | 4486.734  | NM_003938 | 5417.382  | 6522.351  | NM_000218 | 59060.262 | 60841.832 |
| AK000671  | 8804.163  | 8939.472  | NM_014827 | 17966.629 | 21624.596 | NM_016113 | 4760.151  | 3797.258  |
| AL137425  | 839.918   | 1007.683  | NM_001441 | 1162.842  | 1678.493  | NM_014222 | 2877.474  | 3139.924  |
| AL137637  | 461.718   | 387.837   | NM_018324 | 914.548   | 1275.775  | L14819    | 426.207   | 503.639   |
| AL359584  | 624.784   | 777.476   | AF064255  | 15841.516 | 21469.047 | NM_000509 | 5150.239  | 2676.979  |
| AL137285  | 850.614   | 578.264   | U08853    | 2595.591  | 2934.346  | NM_004542 | 1069.372  | 742.299   |
| AL137456  | 1675.298  | 1650.591  | NM_004261 | 34568.164 | 36034.996 | X06182    | 2295.923  | 1550.041  |
| AL157489  | 890.993   | 838.919   | NM_016006 | 1751.624  | 1717.368  | BF217496  | 7752.832  | 10417.996 |
| AL390157  | 665.379   | 526.832   | NM_016245 | 6390.473  | 5962.663  | NM_004762 | 13335.35  | 19762.135 |
| AK021847  | 1693.77   | 722.48    | AF005632  | 1254.571  | 952.653   | NM_006641 | 53222.879 | 59614.359 |
| AK023086  | 2040.667  | 2486.221  | NM_000903 | 1860.372  | 2054.37   | NM_000634 | 10819.815 | 13643.431 |
| NM_017621 | 4729.459  | 4457.194  | NM_004493 | 14711.016 | 10774.296 | NM_014679 | 42752.422 | 47376.188 |
| AK023574  | 1167.743  | 1169.773  | NM_004047 | 20265.643 | 13729.129 | AB040969  | 3886.421  | 4511.125  |
| AF131767  | 672.549   | 473.745   | NM_004823 | 1643.228  | 1103.932  | NM_003467 | 23862.344 | 31123.889 |
| NM_013343 | 369.129   | 303.06    | Y17179    | 72923.211 | 61294.582 | NM_014936 | 3047.561  | 3366.653  |
| AK021907  | 1519.695  | 1471.257  | AF239613  | 1072.269  | 889.843   | NM_003943 | 2118.738  | 2688.836  |
| AK022029  | 583.278   | 705.455   | AK026840  | 2361.305  | 1631.585  | NM_019052 | 12810.558 | 14912.243 |
| AK022320  | 965.474   | 1244.678  | NM_000288 | 2808.403  | 2572.899  | NM_003202 | 22294.563 | 22081.781 |
| AK026503  | 1775.016  | 1478.537  | AK026317  | 10352.183 | 16413.25  | AF119902  | 793.513   | 1010.709  |
| AK026671  | 868.056   | 651.226   | NM_015044 | 979.146   | 1932.686  | NM_020525 | 7269.502  | 7306.204  |
| AK025522  | 15934.729 | 11268.442 | NM_002867 | 534.683   | 900.737   | X62468    | 616.996   | 724.991   |
| AK025464  | 27026.146 | 21527.033 | NM_000520 | 2684.894  | 2387.385  | NM_003890 | 6631.902  | 5786.324  |
| AL049962  | 4716.562  | 3124.314  | NM_000289 | 842.466   | 577.263   | BF127978  | 5049.518  | 3885.98   |
| NM_016941 | 3301.923  | 2852.524  | NM_001500 | 3307.449  | 2963.839  | AF110801  | 1617.579  | 1491.889  |
| NM_020408 | 2131.166  | 2393.826  | NM_020379 | 618.911   | 429.258   | NM_016579 | 21430.865 | 12321.457 |
| NM_004988 | 1891.613  | 1936.136  | AL110127  | 1041.742  | 806.042   | AB018297  | 1825.738  | 1064.185  |
| AL080151  | 1250.419  | 1468.476  | NM_002528 | 2352.898  | 1916.195  | AK022565  | 8056.416  | 4870.245  |
| AK001308  | 564.309   | 358.117   | D38438    | 717.685   | 606.42    | AK023151  | 2786.424  | 1768.14   |
| AK024127  | 1034.887  | 1000.938  | AF007872  | 3605.192  | 2468.156  | AB033076  | 1756.982  | 1113.787  |
| AK024243  | 610.307   | 886.274   | M30938    | 7095.218  | 4905.828  | AK022876  | 2423.097  | 1657.301  |
| AF119911  | 11913.594 | 10933.974 | NM_015148 | 1480.266  | 1024.738  | AF134894  | 1391.294  | 835.124   |
| AF116656  | 5371.561  | 4427.545  | NM_004714 | 1659.262  | 1061.862  | NM_003938 | 7121.538  | 3718.301  |
| NM_001050 | 2439.451  | 2277.256  | NM_002497 | 14896.447 | 10142.319 | NM_014827 | 24636.059 | 15265.292 |
| AF132206  | 1542.707  | 1661.48   | AB025194  | 4598.256  | 2176.949  | NM_001441 | 1936.858  | 2277.349  |
| NM_020213 | 7852.463  | 8823.177  | NM_006239 | 627.322   | 352.158   | NM_018324 | 1515.672  | 1706.1    |

|           |           |           |           |           |           |           |           |           |
|-----------|-----------|-----------|-----------|-----------|-----------|-----------|-----------|-----------|
| D17267    | 13688.188 | 12834.937 | BC020863  | 586.528   | 1012.716  | AF064255  | 33886.996 | 45110.805 |
| AF200341  | 368.259   | 453.899   | NM_004265 | 46970.25  | 64458.973 | U08853    | 3844.831  | 5181.064  |
| AJ238214  | 691.415   | 843.407   | NM_002572 | 7933.92   | 13272.143 | NM_004261 | 48778.648 | 49634.363 |
| AB040944  | 1284.183  | 1627.021  | NM_000509 | 2465.387  | 1993.714  | NM_016006 | 3131.021  | 3212.859  |
| NM_018145 | 3923.52   | 4522.457  | X06182    | 777.148   | 561.15    | NM_016245 | 10230.084 | 9437.895  |
| AK024326  | 2345.399  | 2472.088  | BE908993  | 1372.934  | 1256.512  | AF005632  | 4560.823  | 4677.235  |
| U61088    | 197.624   | 447.85    | AB012701  | 581.09    | 490.548   | NM_000903 | 3530.033  | 3182.993  |
| AF086467  | 1262.604  | 1676.61   | M61156    | 948.049   | 689.662   | NM_004493 | 23723.482 | 20804.641 |
| AL137345  | 2192.005  | 2274.253  | R44005    | 560.632   | 451.27    | AF309489  | 482.335   | 729.92    |
| AK000967  | 2370.023  | 2415.607  | AI942392  | 1705.026  | 1397.577  | NM_004047 | 28225.279 | 26982.59  |
| AK021583  | 3471.882  | 4419.738  | AW009739  | 514.788   | 356.395   | AF287303  | 740.245   | 717.188   |
| AL137442  | 4555.71   | 4941.871  | BC036805  | 5309.519  | 4073.723  | NM_004823 | 3065.179  | 3007.375  |
| AL049281  | 629.365   | 554.315   | Z74615    | 4802.935  | 3546.349  | Y17179    | 59410.887 | 58774.336 |
| NM_001205 | 21071.809 | 17712.982 | X03884    | 28319.078 | 23109.953 | NM_000891 | 809.378   | 436.022   |
| AK026898  | 2925.35   | 1968.602  | X91625    | 3599.097  | 3040.218  | AF239613  | 1531.673  | 979.314   |
| AK022419  | 983.606   | 637.347   | AF001862  | 10818.801 | 7601.615  | AK026840  | 3359.177  | 1997.426  |
| AJ251832  | 564.77    | 753.21    | NM_016044 | 4139.031  | 8186.526  | NM_000285 | 2933.341  | 2368.47   |
| NM_014624 | 342.826   | 656.301   | AK023151  | 1028.962  | 1056.584  | AK026317  | 12874.22  | 8565.857  |
| NM_013936 | 1003.448  | 1216.214  | AB033076  | 823.895   | 555.726   | X82207    | 32179.27  | 21871.57  |
| AF086145  | 1056.792  | 1163.116  | AK022876  | 1119.764  | 1045.305  | NM_015044 | 1764.381  | 1069.677  |
| Z70709    | 525.622   | 417.784   | AF134894  | 671.021   | 892.215   | NM_002867 | 893.681   | 479.775   |
| BC002538  | 2869.192  | 2598.948  | NM_003938 | 3456.433  | 2966.617  | NM_000520 | 4279.136  | 4955.837  |
| NM_017836 | 4115.463  | 4791.746  | NM_014827 | 14060.473 | 13524.379 | NM_000285 | 1608.252  | 2125.844  |
| AK096584  | 2890.755  | 3659.092  | U87460    | 4529.292  | 5248.121  | NM_001500 | 5230.685  | 6166.836  |
| Z29070    | 1037.905  | 1279.318  | NM_001841 | 789.407   | 746.251   | NM_020375 | 878.683   | 1495.267  |
| AL078636  | 1880.697  | 1778.931  | NM_002054 | 1584.938  | 1529.065  | AL110127  | 2324.486  | 2822.145  |
| AK022382  | 512.026   | 542.48    | AF300649  | 1416.201  | 1302.523  | NM_002525 | 3910.019  | 4365.828  |
| AF147362  | 365.631   | 524.992   | NM_000823 | 1354.761  | 965.791   | D38438    | 4952.74   | 4961.433  |
| S72917    | 781.983   | 1046.981  | NM_004414 | 2651.072  | 2183.38   | AV714945  | 1208.195  | 1052.035  |
| AF076617  | 69127.078 | 59328.883 | NM_003317 | 3106.825  | 2091.294  | AF007872  | 4348.676  | 4176.77   |
| M91159    | 488.796   | 892.801   | NM_001139 | 1239.624  | 1083.856  | M30938    | 11054.775 | 9676.291  |
| NM_014392 | 2455.005  | 2823.545  | NM_004609 | 5838.09   | 4477.364  | NM_015145 | 2704.843  | 2254.184  |
| AK023291  | 8930.662  | 9467.438  | NM_003772 | 1493.743  | 1269.768  | NM_004714 | 2512.394  | 2057.111  |
| BF541820  | 640.921   | 919.708   | NM_001541 | 858.398   | 598.935   | NM_005401 | 447.655   | 692.208   |
| CY3Cy5    | 6398.776  | 324.725   | NM_005416 | 698.195   | 326.528   | NM_002497 | 26405.484 | 10479.182 |
| X07696    | 1342.844  | 1750.918  | L09081    | 723.332   | 293.738   | AB025194  | 10928.988 | 6530.404  |
| AA481015  | 1782.215  | 1751.966  | NM_016113 | 2784.367  | 4759.981  | NM_006235 | 1724.148  | 1290.408  |
| AI925826  | 1740.122  | 2190.772  | NM_014222 | 1826.396  | 3794.446  | BC020863  | 653.603   | 432.099   |
| U04209    | 6089.965  | 4449.182  | AK026840  | 1578.72   | 1859.039  | NM_017897 | 5757.96   | 3273.703  |
| Z15108    | 722.959   | 619.073   | NM_000285 | 1088.203  | 1490.521  | NM_004265 | 40391.688 | 21464.125 |
| M55284    | 3759.945  | 4652.253  | AK026317  | 5935.745  | 5796.823  | NM_002572 | 7396.335  | 3590.709  |
| AA001218  | 578.3     | 678.298   | X82207    | 9715.587  | 11485.77  | L14819    | 378.585   | 763.543   |
| AA679391  | 995.985   | 1315.608  | NM_015044 | 817.017   | 911.641   | NM_000505 | 5054.029  | 3959.488  |
| BG682146  | 2814.626  | 2954.621  | NM_002867 | 420.734   | 398.176   | NM_004542 | 1042.774  | 1249.126  |
| NM_005060 | 1719.137  | 1863.273  | BF217496  | 2038.004  | 2194.265  | X06182    | 3386.101  | 6570.299  |
| SR7       | 6364.055  | 43336.184 | NM_004762 | 9034.448  | 9596.845  | BE908993  | 2663.987  | 3722.779  |
| SR9       | 26193.982 | 5107.455  | NM_006641 | 31679.674 | 32602.174 | AB012701  | 1511.95   | 2145.768  |
| CY3Cy5    | 4908.021  | 242.897   | NM_000634 | 3129.089  | 3153.975  | M61156    | 3347.526  | 3896.703  |
| NM_003974 | 10108.034 | 10825.366 | NM_014679 | 17477.523 | 14633.714 | R44005    | 1683.686  | 1524.107  |
| NM_006065 | 445.243   | 633.923   | AB040969  | 2077.542  | 1443.486  | AI942392  | 3567.932  | 3514.606  |
| NM_014335 | 11129.511 | 13488.969 | NM_003467 | 14116.101 | 12651.209 | M55040    | 809.473   | 1020.568  |
| NM_001495 | 773.954   | 2035.75   | NM_014936 | 1574.017  | 1851.37   | AW009739  | 809.444   | 1065.09   |
| NM_002285 | 1290.775  | 1841.811  | NM_003943 | 921.702   | 943.323   | BC036805  | 9543.707  | 8982.479  |

|           |           |           |           |           |           |           |           |           |
|-----------|-----------|-----------|-----------|-----------|-----------|-----------|-----------|-----------|
| NM_00441E | 6108.806  | 6965.518  | NM_019052 | 8228.941  | 7540.336  | Z74615    | 30047.352 | 29335.781 |
| NM_00062E | 9196.479  | 11019.897 | NM_003202 | 14521.945 | 11768.092 | X03884    | 54306.625 | 46211.09  |
| AB005216  | 1968.327  | 2149.743  | NM_020525 | 1898.353  | 1322.207  | U36759    | 749.638   | 775.081   |
| NM_00032E | 9811.34   | 11436.838 | NM_003890 | 1012.515  | 514.775   | X91625    | 7156.09   | 4806.462  |
| AF015041  | 917.627   | 1021.099  | BF127978  | 984.193   | 581.655   | AF004231  | 886.152   | 569.716   |
| AF055020  | 2174.707  | 2955.245  | AF110801  | 1401.254  | 309.794   | AF001862  | 18300.094 | 9682.657  |
| NM_00698E | 6787.633  | 6671.086  | AB018297  | 1273.199  | 2471.845  | NM_016044 | 3016.437  | 1463.306  |
| AF272043  | 12877.087 | 13668.454 | AK022565  | 8200.254  | 12012.3   | AK023151  | 2311.191  | 2534.831  |
| NM_002587 | 1682.592  | 1595.445  | AB025194  | 4344.372  | 4784.597  | AB033076  | 1500.543  | 1549.112  |
| NM_00223E | 3045.949  | 3116.758  | NM_006239 | 714.222   | 640.75    | AK022876  | 2686.219  | 3033.781  |
| NM_00486E | 790.822   | 710.996   | NM_017897 | 3019.483  | 3824.662  | AF134894  | 1412.67   | 2092.231  |
| NM_00466E | 1580.035  | 1662.412  | NM_004265 | 24420.895 | 27729.84  | NM_00393E | 8368.582  | 12505.178 |
| AF130728  | 984.326   | 1219.228  | NM_002572 | 4316.787  | 4364.115  | NM_014827 | 22249.826 | 34122.973 |
| NM_001131 | 1907.354  | 2361.11   | NM_001441 | 926.623   | 603.001   | NM_00412E | 360.54    | 922.063   |
| AA831963  | 9244.204  | 215.157   | NM_018324 | 740.546   | 967.328   | U87460    | 11010.242 | 10637.847 |
| NM_002414 | 51501.262 | 55461.426 | AF064255  | 13553.583 | 15000.889 | NM_003617 | 586.847   | 650.033   |
| NM_00035E | 522.559   | 544.183   | NM_01636E | 18499.979 | 20265.197 | NM_001841 | 1558.023  | 1508.549  |
| AL133580  | 18862.16  | 22987.66  | U08853    | 3246.313  | 3406.541  | NM_002054 | 3704.279  | 3561.553  |
| NM_01466E | 14442.131 | 16991.213 | NM_004261 | 29911.701 | 28593.027 | AF300649  | 3644.223  | 4170.853  |
| NM_005451 | 2457.592  | 3215.276  | NM_01600E | 1500.077  | 1687.257  | NM_00412E | 1095.01   | 1351.452  |
| NM_007172 | 6896.446  | 8534.821  | NM_016245 | 5620.363  | 5693.567  | NM_000823 | 4485.685  | 4306.144  |
| NM_006152 | 3805.912  | 3573.562  | AF005632  | 1082.517  | 1074.496  | NM_004414 | 4675.11   | 4556.588  |
| NM_013333 | 21856.93  | 25848.299 | NM_000903 | 1894.688  | 1799.002  | NM_003317 | 9465.193  | 6987.688  |
| NM_002333 | 939.07    | 985.682   | NM_004493 | 14465.159 | 11864.059 | NM_001139 | 3294.625  | 2567.405  |
| NM_00340C | 13078.996 | 16014.713 | NM_004047 | 18721.895 | 15263.014 | NM_00460E | 54921.742 | 37322.242 |
| NM_00670E | 867.681   | 1302.54   | NM_004823 | 1204.274  | 574.873   | NM_003772 | 2378.986  | 1792.889  |
| NM_01226E | 7072.883  | 7392.816  | Y17179    | 60835.156 | 43393.734 | NM_001541 | 4957.557  | 3269.16   |
| NM_00455E | 3145.93   | 3025.599  | AF239613  | 1719.091  | 3402.705  | NM_00541E | 1850.142  | 1316.314  |
| X56692    | 4199.142  | 4526.461  | NM_016044 | 1953.287  | 2727.212  | L09081    | 4372.001  | 3314.613  |
| NM_01447E | 488.708   | 525.129   | NM_000520 | 2631.401  | 2614.483  | NM_00021E | 62603.742 | 60797.676 |
| NM_01427E | 2805.19   | 2443.576  | NM_000289 | 597.17    | 846.714   | NM_016113 | 4539.452  | 2845.303  |
| NM_000734 | 11533.864 | 10598.735 | NM_001500 | 3763.981  | 4059.323  | NM_014222 | 3401.43   | 2376.463  |
| NM_006644 | 10676.3   | 9245.704  | NM_00438E | 3209.397  | 4238.654  | AK026840  | 3139.428  | 2486.243  |
| NM_006583 | 72469.594 | 3337.731  | NM_020379 | 496.269   | 742.262   | NM_00028E | 2742.036  | 1969.411  |
| X82693    | 4581.331  | 5150.036  | AL110127  | 1098.408  | 1306.943  | AK026317  | 14866.521 | 10974.059 |
| NM_00717E | 33105.961 | 38165.875 | NM_00252E | 2581.909  | 2271.297  | X82207    | 44281.836 | 40353.309 |
| NM_002722 | 2712.516  | 2499.47   | D38438    | 833.307   | 810.592   | NM_015044 | 1808.86   | 2236.585  |
| AF317058  | 1945.073  | 2299.781  | AF007872  | 3633.624  | 2955.937  | NM_002867 | 813.255   | 956.903   |
| NM_00602E | 576.387   | 632.435   | M30938    | 7350.908  | 5242.597  | BF217496  | 9021.355  | 10703.697 |
| NM_014904 | 1037.849  | 1349.896  | NM_01514E | 1260.081  | 808.05    | NM_004762 | 15173.633 | 15153.386 |
| AL137576  | 10530.24  | 9175.113  | NM_004714 | 1618.241  | 1044.981  | NM_006641 | 54180.926 | 50534.559 |
| NM_01835E | 4071.258  | 4591.59   | NM_00541E | 689.239   | 971.917   | NM_000634 | 11112.566 | 9816.314  |
| NM_01335E | 248.243   | 427.704   | NM_004670 | 201.454   | 725.924   | NM_01467E | 42914.336 | 32777.512 |
| AF131781  | 7232.331  | 7589.093  | NM_00021E | 57226.258 | 57275.066 | AB040969  | 3803.825  | 3485.045  |
| NM_00651E | 15190.899 | 12212.753 | NM_016113 | 1195.73   | 1508.756  | NM_003467 | 24710.127 | 21434.975 |
| NM_01586E | 551.144   | 492.722   | NM_014222 | 1160.589  | 1404.426  | NM_01493E | 2989.49   | 2955.404  |
| NM_00305E | 2387.408  | 2461.55   | NM_000509 | 2685.324  | 3069.93   | NM_003943 | 2733.51   | 2634.708  |
| NM_00507E | 915.565   | 881.444   | NM_004542 | 449.813   | 637.327   | NM_019052 | 13887.218 | 12132.424 |
| NM_006841 | 1033.924  | 802.684   | X06182    | 640.203   | 806.908   | NM_003202 | 22975.318 | 16144.563 |
| NM_014824 | 2608.977  | 2562.33   | BE908993  | 1226.563  | 1760.176  | AF119902  | 921.552   | 733.94    |
| NM_014504 | 2993.237  | 3416.322  | AB012701  | 723.433   | 691.31    | NM_02052E | 10460.192 | 6247.31   |
| NM_01440E | 16462.436 | 22020.248 | M61156    | 950.241   | 629.833   | X62468    | 760.03    | 413.789   |
| NM_014741 | 6925.377  | 8274.534  | AI942392  | 1847.889  | 1542.869  | NM_003890 | 3733.979  | 2632.571  |

|           |           |           |           |           |           |           |           |           |
|-----------|-----------|-----------|-----------|-----------|-----------|-----------|-----------|-----------|
| AF212247  | 5833.213  | 6306.976  | BC036805  | 4837.273  | 3850.715  | BF127978  | 3662.675  | 2720.407  |
| AF161407  | 6326.611  | 6002.864  | Z74615    | 4640.882  | 3064.707  | AF110801  | 1694.043  | 1351.428  |
| NM_014738 | 4561.993  | 5580.828  | X03884    | 27631.877 | 15257.102 | NM_016579 | 19160.209 | 9717.621  |
| NM_018080 | 3765.909  | 4067.441  | X91625    | 3587.551  | 1936.121  | AB018297  | 2029.046  | 910.566   |
| AF174605  | 7310.352  | 6499.313  | NM_003890 | 1931.526  | 2254.652  | AK022565  | 9114.038  | 5824.161  |
| NM_014453 | 15382.339 | 14516.325 | BF127978  | 928.811   | 846.353   | AB025194  | 10582.527 | 11685.592 |
| NM_005713 | 2677.052  | 2577.257  | AF110801  | 1125.213  | 999.04    | NM_006239 | 1857.138  | 1537.688  |
| AK023553  | 1716.57   | 1951.42   | NM_016579 | 6785.08   | 7453.345  | BC020863  | 708.62    | 766.288   |
| NM_014600 | 645.96    | 759.57    | AB018297  | 662.537   | 933.464   | NM_017897 | 5380.867  | 3328.388  |
| NM_016733 | 2881.44   | 2787.3    | AK022565  | 4056.914  | 4334      | NM_004265 | 40376.629 | 33532.629 |
| AF181994  | 2553.178  | 2202.634  | AK023151  | 1210.344  | 1461.749  | NM_002572 | 7525.277  | 6754.993  |
| NM_018962 | 835.141   | 694.41    | AB033076  | 1246.775  | 1194.935  | NM_001441 | 2198.913  | 2011.884  |
| AF125100  | 2515.68   | 2472.772  | AK022876  | 1188.581  | 1678.685  | NM_018324 | 1512.642  | 1455.206  |
| NM_006114 | 12286.838 | 13857.309 | AF134894  | 829.441   | 913.812   | AF064255  | 38724.785 | 33112.313 |
| AF130728  | 1079.323  | 1367.899  | NM_003938 | 3849.787  | 3232.348  | NM_016368 | 56018.164 | 57769.078 |
| NM_001289 | 31155.535 | 32599.498 | NM_014827 | 14658.053 | 14779.163 | U08853    | 4435.059  | 3743.288  |
| NM_001131 | 1009.999  | 1063.198  | U87460    | 6198.463  | 5127.629  | NM_004261 | 45123.488 | 34677.957 |
| H69204    | 888.153   | 3013.685  | NM_001841 | 985.052   | 418.975   | NM_016006 | 2602.188  | 2779.32   |
| X07696    | 1271.08   | 1809.873  | NM_002054 | 1673.486  | 1524.827  | NM_016245 | 10881.928 | 8618.546  |
| AA481015  | 1464.12   | 1432.624  | AF300649  | 1363.428  | 1027.801  | AF005632  | 5741.86   | 4746.723  |
| AI925826  | 1307.438  | 1635.336  | NM_000823 | 1280.778  | 768.754   | NM_000903 | 4511.245  | 2615.878  |
| U04209    | 4786.79   | 2856.889  | NM_004414 | 2450.271  | 1164.315  | NM_004493 | 23065.975 | 14485.504 |
| M55284    | 3706.684  | 3773.168  | NM_003317 | 2519.692  | 1594.997  | NM_004047 | 27505.496 | 12583.771 |
| AA001218  | 480.255   | 565.172   | NM_001139 | 1130.446  | 726.321   | NM_004823 | 2496.067  | 1572.194  |
| AA679391  | 1104.295  | 1072.639  | NM_004609 | 3205.506  | 1807.261  | Y17179    | 58863.746 | 58718.563 |
| BG682146  | 2481.421  | 2680.73   | NM_003772 | 1451.111  | 766.516   | NM_058197 | 446.737   | 737.22    |
| AA884709  | 305.535   | 393.782   | NM_004823 | 1304.623  | 1475.678  | NM_016044 | 3013.223  | 2007.013  |
| NM_005060 | 1770.554  | 1615.805  | Y17179    | 62979.094 | 53569.473 | NM_000520 | 4044.79   | 2378.353  |
| NM_005437 | 11625.63  | 10987.264 | AF239613  | 933.321   | 1270.316  | NM_000289 | 1891.765  | 1369.019  |
| AK022417  | 655.316   | 576.313   | AK026840  | 2015.344  | 1631.493  | NM_001500 | 4940.782  | 3589.954  |
| U50534    | 586.756   | 508.639   | NM_000288 | 1730.28   | 2193.513  | NM_004388 | 4956.675  | 3274.165  |
| NM_000734 | 12977.499 | 13053.307 | AK026317  | 7319.062  | 7913.514  | NM_020379 | 750.427   | 727.787   |
| NM_012331 | 1940.81   | 1759.313  | X82207    | 11652.454 | 12462.348 | AL110127  | 2545.358  | 1497.278  |
| NM_006644 | 11938.916 | 11765.914 | NM_015044 | 807.218   | 991.485   | NM_002528 | 4335.942  | 2576.478  |
| NM_006583 | 65149.18  | 4574.45   | BF217496  | 2281.369  | 2186.829  | D38438    | 5906.818  | 2718.701  |
| NM_003974 | 9575.424  | 9750.151  | NM_004762 | 10677.309 | 8270.156  | AV714945  | 1531.534  | 1048.529  |
| NM_006065 | 230.811   | 856.926   | NM_006641 | 31364.1   | 24384.461 | AF007872  | 5101.699  | 2093.372  |
| NM_014339 | 10417.543 | 12940.175 | NM_000634 | 3663.602  | 2780.158  | M30938    | 12098.097 | 4029.062  |
| NM_001495 | 388.92    | 404.145   | NM_014679 | 17796.172 | 14093.441 | NM_015148 | 3756.444  | 2366.294  |
| NM_002288 | 1190.578  | 1654.618  | AB040969  | 1914.592  | 1406.071  | NM_004714 | 2214.583  | 1472.512  |
| AB005216  | 1674.017  | 1694.719  | NM_003467 | 14701.165 | 11341.139 | NM_002497 | 39459.871 | 27208.678 |
| NM_000325 | 8333.192  | 8726.739  | NM_014936 | 1675.411  | 1401.373  | NM_005416 | 3474.879  | 4277.766  |
| AF015041  | 787.201   | 789.613   | NM_003943 | 1001.094  | 460.925   | NM_004670 | 2384.086  | 3865.464  |
| AF055020  | 1917.721  | 2195.188  | NM_019052 | 7510.255  | 5716.559  | L09081    | 6178.336  | 10425.56  |
| NM_006986 | 6734.571  | 5977.719  | NM_003202 | 14015.561 | 8221.656  | NM_000218 | 59625.855 | 64463.859 |
| AF272043  | 12586.152 | 12668.681 | NM_020525 | 1308.286  | 632.148   | NM_016113 | 6912.667  | 7868.441  |
| NM_002587 | 1560.605  | 1420.005  | NM_015148 | 1425.271  | 2197.538  | NM_014222 | 3207.388  | 3660.841  |
| NM_002238 | 2816.929  | 2498.628  | NM_004714 | 1893.543  | 1993.173  | L14819    | 663.724   | 523.86    |
| NM_004669 | 1996.221  | 1457.696  | AB025194  | 3715.423  | 3422.712  | NM_000509 | 6140.814  | 5377.804  |
| NM_007028 | 13919.625 | 11408.074 | NM_006239 | 490.47    | 747.706   | NM_004542 | 1082.771  | 1445.372  |
| NM_006516 | 16589.84  | 14911.696 | NM_017897 | 3594.814  | 3929.557  | X06182    | 1826.716  | 1889.575  |
| NM_015865 | 484.679   | 436.306   | NM_004265 | 26813.717 | 31699.039 | BE908993  | 2508.323  | 1564.055  |
| NM_003055 | 2607.962  | 2778.577  | NM_002572 | 4659.43   | 4499.374  | AB012701  | 1656.25   | 1033.94   |

|           |           |           |           |           |           |           |           |           |
|-----------|-----------|-----------|-----------|-----------|-----------|-----------|-----------|-----------|
| NM_005075 | 885.089   | 939.848   | NM_001441 | 929.649   | 820.404   | M61156    | 3109.517  | 2106.469  |
| NM_006841 | 526.521   | 1113.28   | NM_018324 | 654.789   | 553.232   | R44005    | 2020.687  | 1065.27   |
| NM_000355 | 551.775   | 808.009   | AF064255  | 14151.535 | 11864.713 | AI942392  | 3849.978  | 2069.432  |
| AL133580  | 18954.559 | 22057.801 | NM_016368 | 19909.104 | 15397.803 | M55040    | 845.175   | 935.158   |
| NM_014666 | 14608.189 | 14465.185 | U08853    | 2563.352  | 2591.813  | AW009739  | 1071.941  | 1519.726  |
| NM_005451 | 2161.339  | 2538.861  | NM_004261 | 29468.586 | 22953.951 | BC036805  | 10859.158 | 8579.428  |
| NM_007172 | 3562.4    | 3758.47   | NM_016006 | 1833.204  | 1502.463  | Z74615    | 47676.938 | 33689.512 |
| NM_006152 | 3123.807  | 3010.52   | NM_016245 | 5840.249  | 4516.102  | X03884    | 53595.617 | 32343.643 |
| NM_013333 | 19364.211 | 17659.441 | AF005632  | 803.701   | 547.427   | X91625    | 7973.615  | 7961.874  |
| NM_002333 | 820.197   | 731.208   | NM_000903 | 1924.244  | 1372.662  | AF090901  | 765.769   | 780.183   |
| NM_003400 | 10606.458 | 10614.86  | NM_004493 | 13638.594 | 8102.7    | AF004231  | 955.189   | 897.833   |
| NM_006705 | 770.421   | 970.027   | NM_004047 | 19348.563 | 11601.193 | AF110801  | 2975.99   | 7384.845  |
| NM_012266 | 7066.333  | 6716.788  | NM_006773 | 1473.158  | 1996.524  | NM_016575 | 26061.893 | 35712.109 |
| NM_004559 | 3128.959  | 2780.915  | AK024439  | 5705.926  | 8577.732  | AB018297  | 1817.225  | 3313.889  |
| X56692    | 4106.447  | 3528.969  | X89676    | 441.299   | 792.482   | AK022565  | 9873.563  | 12446.665 |
| NM_014476 | 750.378   | 369.619   | NM_017488 | 4013.109  | 5370.004  | AK023151  | 2910.399  | 4306.387  |
| NM_014600 | 1331.199  | 2152.009  | AY009400  | 583.984   | 753.939   | AB033076  | 2301.52   | 2486.803  |
| NM_016733 | 3095.442  | 4252.525  | NM_005069 | 817.429   | 771.195   | AK022876  | 2545.58   | 3482.031  |
| AF181994  | 2559.006  | 3167.973  | NM_016044 | 2489.475  | 2551.981  | AF134894  | 1582.052  | 1637.132  |
| NM_018962 | 893.652   | 1003.929  | NM_000520 | 3428.915  | 3270.318  | NM_003938 | 7472.859  | 7541.659  |
| AF125100  | 3104.925  | 3207.959  | NM_000289 | 978.78    | 829.406   | NM_014827 | 24322.533 | 23736.453 |
| NM_006114 | 12637.591 | 14517.608 | NM_001500 | 3836.068  | 3561.939  | NM_004126 | 327.042   | 824.502   |
| NM_007176 | 31972.893 | 36220.844 | NM_004388 | 2956.935  | 3194.21   | U87460    | 10809.952 | 8953.207  |
| AF317058  | 1066.17   | 867.059   | NM_020379 | 508.197   | 234.954   | NM_003617 | 729.629   | 1009.93   |
| M22538    | 34654.816 | 39356.746 | AL110127  | 1107.744  | 1113.207  | NM_001841 | 1569.179  | 1694.576  |
| NM_006028 | 614.809   | 404.057   | NM_002528 | 2317.502  | 1407.423  | NM_002054 | 5740.5    | 6556.827  |
| NM_014904 | 1155.685  | 1384.361  | AF007872  | 3326.759  | 2064.743  | AF300649  | 5413.277  | 6946.389  |
| AL137576  | 9945.442  | 8227.641  | M30938    | 7353.241  | 3815.705  | NM_004125 | 1889.169  | 2148.944  |
| NM_018358 | 4169.417  | 4359.696  | NM_005168 | 1022.978  | 1665.174  | NM_000823 | 6636.477  | 6613.594  |
| NM_016321 | 631.928   | 274.121   | NM_017801 | 6528.12   | 8943.922  | NM_004414 | 5664.239  | 6204.547  |
| NM_013356 | 541.047   | 520.221   | NM_007348 | 3831.967  | 4371.463  | NM_003317 | 9645.443  | 9620.371  |
| NM_005060 | 1953.604  | 2870.718  | U65473    | 2523.69   | 3088.889  | NM_001139 | 3538.642  | 3455.029  |
| NM_005437 | 11848.215 | 13285.69  | D63481    | 7845.26   | 8610.249  | NM_004609 | 45765.082 | 46093.016 |
| AK022417  | 835.828   | 842.328   | AY009951  | 14362.515 | 17443.139 | NM_003772 | 2966.248  | 4271.092  |
| U50534    | 711.115   | 666.483   | AL157424  | 1366.433  | 1485.465  | NM_001541 | 3821.656  | 7550.003  |
| NM_014824 | 3273.871  | 3467.886  | NM_002673 | 946.018   | 758.031   | Y17179    | 58999.859 | 60983.73  |
| NM_014408 | 14845.698 | 16492.211 | NM_003876 | 4244.373  | 3980.617  | NM_000891 | 1139.381  | 1294.511  |
| NM_014741 | 6442.161  | 6757.875  | NM_012295 | 5062.792  | 3688.387  | AF239613  | 2039.663  | 2522.482  |
| AF212247  | 5293      | 5094.76   | NM_015910 | 767.664   | 546.883   | AK026840  | 3885.774  | 5338.571  |
| AF161407  | 5956.16   | 6034.756  | AL133666  | 1361.047  | 1041.716  | NM_000288 | 4247.84   | 5084.981  |
| NM_014738 | 4366.189  | 5318.939  | NM_000663 | 1983.346  | 1266.526  | AK026317  | 15529.438 | 19811.906 |
| NM_016406 | 2586.228  | 2699.646  | NM_004710 | 3671.802  | 2310.335  | X82207    | 44386.164 | 49227.117 |
| NM_018080 | 3287.884  | 3086.904  | NM_004396 | 12466.448 | 7012.545  | NM_015044 | 2098.021  | 2615.318  |
| AF174605  | 6214.967  | 5648.077  | NM_017999 | 2977.229  | 2091.644  | NM_002867 | 908.852   | 1293.627  |
| NM_014453 | 14367.905 | 12520.925 | NM_015989 | 15437.394 | 10089.318 | BF217496  | 10954.252 | 12715.873 |
| NM_005713 | 2761.832  | 2278.742  | NM_001043 | 2050.209  | 1092.762  | NM_004762 | 17762.424 | 24076.631 |
| AK023553  | 1879.091  | 1816.517  | NM_005470 | 3828.393  | 4923.493  | NM_006641 | 60663.238 | 59888.73  |
| AF272043  | 14112.197 | 14661.615 | NM_004225 | 6783.431  | 6866.108  | NM_000634 | 16850.223 | 18663.873 |
| NM_002587 | 1288.89   | 1258.661  | NM_003862 | 1064.563  | 1189.107  | NM_014679 | 59222.617 | 53893.934 |
| NM_002238 | 3057.059  | 2904.809  | NM_002873 | 3240.879  | 3037.414  | AB040969  | 3935.133  | 5661.92   |
| NM_004868 | 568.969   | 566.955   | NM_015571 | 5342.714  | 5421.347  | NM_003467 | 29710.391 | 31643.93  |
| NM_004669 | 1947.02   | 1964.262  | NM_004701 | 10187.4   | 11699.224 | NM_014936 | 4181.408  | 3823.533  |
| NM_007028 | 16003.848 | 15426.607 | AK025554  | 1616.344  | 1654.532  | NM_003943 | 3300.76   | 3268.213  |

|           |           |           |           |           |           |           |           |           |
|-----------|-----------|-----------|-----------|-----------|-----------|-----------|-----------|-----------|
| AF130728  | 978.079   | 1163.493  | BI824151  | 7457.791  | 8060.896  | NM_019052 | 16278.949 | 17933.855 |
| NM_001289 | 32763.084 | 37732.641 | AK021791  | 6430.526  | 5510.214  | NM_003202 | 29605.248 | 27471.137 |
| NM_001131 | 1527.149  | 2169.055  | NM_004052 | 18479.055 | 16833.355 | AF119902  | 1012.198  | 1052.814  |
| X07696    | 1165.021  | 1123.247  | NM_004394 | 8526.978  | 7417.289  | NM_020525 | 6098.314  | 10126.67  |
| AA481015  | 1365.059  | 1229.534  | NM_005727 | 18205.094 | 14523.591 | X62468    | 612.001   | 1177.946  |
| AI925826  | 1033.978  | 865.921   | AK027242  | 2291.676  | 1685.266  | NM_015148 | 4104.204  | 7875.55   |
| U04209    | 5353.418  | 3172.669  | NM_001279 | 8897.19   | 4853.359  | NM_004714 | 3462.078  | 7328.371  |
| AI393201  | 3377.378  | 3238.289  | NM_005010 | 859.504   | 583.967   | NM_005401 | 845.206   | 1101.554  |
| M34664    | 68306.555 | 65146.566 | NM_019055 | 1478.076  | 1013.503  | NM_002497 | 31584.279 | 29786.512 |
| Z15108    | 636.613   | 521.314   | NM_020199 | 1706.965  | 903.582   | AB025194  | 14581.303 | 18415.094 |
| M55284    | 3450.006  | 3767.942  | NM_015884 | 505.535   | 2363.3    | NM_006239 | 2021.534  | 2826.969  |
| AA001218  | 486.098   | 398.903   | AF201380  | 2510.571  | 3214.116  | NM_017897 | 6964.762  | 7950.381  |
| AA679391  | 967.628   | 1074.91   | NM_012392 | 7871.602  | 7532.171  | NM_004265 | 46939.539 | 52892.25  |
| BG682146  | 2405.84   | 1883.209  | NM_014833 | 11953.157 | 12280.657 | NM_002572 | 8225.185  | 10555.952 |
| NM_012266 | 7489.021  | 9111.587  | NM_003878 | 9936.737  | 10657.105 | NM_001441 | 2743.382  | 3736.983  |
| NM_004559 | 3208.375  | 3318.545  | NM_004832 | 592.198   | 528.132   | NM_018324 | 1912.656  | 2728.493  |
| X56692    | 4104.836  | 4666.39   | NM_005957 | 716.692   | 903.807   | AF064255  | 53625.824 | 54115.309 |
| NM_014476 | 312.39    | 454.745   | AK024374  | 1239.139  | 1043.487  | NM_016368 | 59672.48  | 55264.77  |
| NM_014278 | 2828.062  | 2926.823  | NM_007101 | 602.974   | 540.578   | U08853    | 6148.021  | 7524.891  |
| NM_000734 | 13248.134 | 15152.168 | AB033062  | 1344.433  | 1115.572  | NM_004261 | 52973.52  | 53613.215 |
| NM_012331 | 2378.075  | 2528.511  | NM_016437 | 30858.016 | 25683.596 | NM_016006 | 3177.167  | 3794.958  |
| NM_003974 | 9379.655  | 8968.818  | NM_002720 | 10907.856 | 8018.712  | NM_016245 | 12329.376 | 10408.427 |
| NM_014339 | 9822.968  | 10303.055 | AK024716  | 9972.088  | 6639.745  | AF005632  | 7382.364  | 6775.729  |
| NM_001495 | 392.57    | 484.799   | X67155    | 2009.743  | 1166.565  | NM_000903 | 5180.016  | 4392.913  |
| NM_002288 | 1147.831  | 1023.786  | NM_020380 | 5623.613  | 4743.961  | NM_004493 | 28706.914 | 21550.652 |
| NM_004416 | 5016.692  | 5293.086  | NM_002890 | 24009.623 | 15756.846 | AF309489  | 704.813   | 1300.195  |
| NM_000628 | 7093.211  | 6430.265  | NM_001330 | 15162.659 | 8344.488  | NM_004047 | 35814.359 | 52771.109 |
| AB005216  | 1166.25   | 1369.551  | NM_005122 | 759.762   | 682.69    | AF287303  | 604.626   | 1361.092  |
| NM_000325 | 7868.418  | 7260.47   | NM_014552 | 2355.986  | 2721.819  | NM_006773 | 5504.841  | 9709.521  |
| AF015041  | 1015.638  | 709.971   | NM_003072 | 9744.167  | 10926.466 | AK024439  | 14745.601 | 19075.842 |
| NM_002363 | 685.078   | 524.656   | NM_001913 | 2547.461  | 3104.397  | X89676    | 1847.08   | 2248.431  |
| AF055020  | 1778.89   | 2252.494  | AK025594  | 712.009   | 879.372   | NM_012444 | 833.922   | 861.026   |
| NM_006986 | 6108.418  | 4366.843  | AB040931  | 2940.383  | 2614.732  | Z32684    | 2791.611  | 3531.43   |
| NM_014904 | 2013.542  | 2149.635  | NM_003599 | 969.16    | 1179.624  | NM_016512 | 1848.849  | 2609.146  |
| AL137576  | 14190.848 | 14506.646 | BC011826  | 5608.207  | 6316.947  | NM_017488 | 9563.196  | 13134.925 |
| NM_018358 | 6221.527  | 9024.619  | NM_012091 | 2541.242  | 2259.555  | AY009400  | 816.59    | 1350.596  |
| NM_016321 | 525.721   | 729.825   | NM_012321 | 3234.732  | 3003.334  | NM_005069 | 1574.674  | 2739.87   |
| NM_013356 | 374.188   | 965.361   | D13642    | 2655.978  | 2557.836  | NM_016044 | 4019.155  | 5449.353  |
| AF131781  | 11879.119 | 14544.561 | NM_004741 | 8023.423  | 6419.646  | NM_000520 | 4351.954  | 5392.554  |
| NM_006516 | 23399.561 | 22293.48  | NM_018032 | 5443.525  | 3833.672  | NM_000289 | 2468.768  | 2971.143  |
| NM_015865 | 615.133   | 672.915   | NM_003675 | 6823.343  | 5191.394  | NM_001500 | 6254.907  | 8302.756  |
| NM_003055 | 4467.633  | 5319.244  | NM_017518 | 1668.599  | 1437.113  | NM_004388 | 6345.431  | 7528.808  |
| NM_005075 | 1050.527  | 830.317   | NM_004117 | 2182.283  | 1434.573  | NM_020379 | 1101.268  | 1831.627  |
| NM_006841 | 870.133   | 1251.167  | NM_016594 | 4428.155  | 3057.443  | AL110127  | 3770.952  | 3945.899  |
| NM_002414 | 60977.207 | 50817.473 | NM_030752 | 4070.676  | 3042.208  | AK001997  | 779.339   | 747.207   |
| NM_000355 | 519.428   | 680.496   | D26068    | 23509.24  | 15927.106 | NM_002528 | 5587.577  | 5880.54   |
| AL133580  | 17685.504 | 18183.563 | NM_018559 | 5213.822  | 3483.216  | D38438    | 4195.575  | 3468.401  |
| NM_014666 | 13317.485 | 13588.986 | NM_017593 | 3110.596  | 1949.646  | AV714945  | 1337.997  | 1289.167  |
| NM_005451 | 1964.766  | 1942.947  | NM_004282 | 9530.28   | 7963.042  | AF007872  | 5419.155  | 8759.864  |
| NM_007172 | 6582.612  | 6783.601  | AK025695  | 2884.679  | 3500.428  | M30938    | 13655.727 | 21839.924 |
| NM_006152 | 3656.75   | 3075.76   | AK025442  | 5468.247  | 6996.913  | NM_017586 | 16596.398 | 19095.936 |
| NM_013333 | 16097.018 | 13461.657 | AL050041  | 677.465   | 633.697   | NM_004148 | 5619.817  | 6837.572  |
| NM_002333 | 729.099   | 654.433   | NM_002451 | 1520.124  | 2335.126  | X03168    | 2169.579  | 2728.127  |

|           |           |           |           |           |           |           |           |           |
|-----------|-----------|-----------|-----------|-----------|-----------|-----------|-----------|-----------|
| NM_00340C | 11096.484 | 10805.866 | NM_013411 | 682       | 1418.611  | NM_00516E | 3597.651  | 3700.663  |
| NM_00670E | 778.434   | 755.098   | NM_02020C | 303.562   | 618.78    | NM_017801 | 14521.923 | 17348.918 |
| AF174605  | 11221.623 | 12305.206 | NM_00085E | 5294.16   | 5981.968  | NM_00734E | 6429.817  | 8047.549  |
| AL050107  | 772.609   | 760.789   | AF254087  | 1607.085  | 1696.213  | U65473    | 10048.123 | 13278.587 |
| NM_01445E | 21916.107 | 26810.578 | NM_01771E | 1025.002  | 847.288   | D63481    | 18707.691 | 20908.063 |
| NM_00571E | 4855.186  | 4548.717  | AL117607  | 1428.78   | 924.193   | AY009951  | 24974.758 | 28821.195 |
| AK023553  | 3226.04   | 3577.993  | AB037774  | 2758.933  | 1872.406  | AL157424  | 1515.195  | 2111.812  |
| NM_01460C | 1121.654  | 1397.451  | AK024361  | 1042.262  | 1061.352  | AK024422  | 734.818   | 1209.585  |
| NM_01673E | 4465.73   | 4458.754  | NM_00435C | 1851.212  | 1509.281  | NM_00267E | 1575.212  | 2762.53   |
| AF181994  | 4507.675  | 5013.078  | NM_018044 | 3767.987  | 1898.612  | NM_00387E | 7188.787  | 9292.312  |
| NM_01896E | 1420.182  | 1619.092  | AF274347  | 2286.25   | 1369.538  | AJ276310  | 832.196   | 1005.508  |
| AF125100  | 3906.008  | 4952.438  | NM_01855E | 2240.531  | 1780.479  | NM_01229E | 9951.445  | 12737.209 |
| NM_006114 | 18653.283 | 24777.781 | AK023525  | 4074.248  | 4168.098  | NM_01591C | 1571.742  | 1921.541  |
| X82693    | 5578.319  | 5979.581  | AF085829  | 1396.283  | 1300.294  | NM_00022E | 954.397   | 1054.775  |
| NM_00717E | 39920.68  | 38884.965 | AF075029  | 389.466   | 566.803   | AL133666  | 3322.551  | 3883.829  |
| NM_00272E | 3333.151  | 2995.242  | AK021903  | 1991.999  | 2239.763  | NM_00066E | 4905.046  | 3959.28   |
| AF317058  | 1466.492  | 1274.309  | AL390143  | 3174.421  | 2879.92   | NM_00471C | 7365.894  | 6131.727  |
| M22538    | 36071.559 | 33839.496 | AL162075  | 1124.728  | 948.311   | NM_00439E | 20597.096 | 34118.438 |
| NM_00602E | 538.604   | 599.547   | AK021595  | 1279.636  | 1505.778  | NM_01799E | 5150.081  | 7983.902  |
| NM_01229E | 18022.707 | 20023.086 | AK021648  | 983.281   | 1014.254  | NM_01598E | 46828.602 | 55463.262 |
| AB007925  | 11888.075 | 13974.896 | AF147358  | 11563.308 | 10593.696 | NM_00104E | 2906.124  | 5771.406  |
| NM_01818C | 518.004   | 736.466   | NM_01841C | 4762.926  | 6093.47   | NM_00477E | 15316.871 | 15850.261 |
| NM_000361 | 18384.604 | 21599.398 | AF086419  | 1318.524  | 733.67    | NM_019071 | 6530.667  | 5674.703  |
| NM_00247E | 49658.93  | 55313.223 | AF086461  | 795.109   | 401.267   | NM_01439E | 7973.172  | 8718.245  |
| NM_00383E | 3326.596  | 3378.374  | AL833296  | 2117.848  | 1481.39   | AF113685  | 1118.927  | 1294.886  |
| NM_017987 | 1252.254  | 1158.038  | AL110240  | 4336.854  | 3950.055  | NM_00547C | 7284.633  | 8510.208  |
| NM_01820E | 1442.53   | 1309.436  | NM_01537E | 554.717   | 418.199   | AF142570  | 617.766   | 1146.09   |
| AK022417  | 1367.254  | 1525.69   | AF085933  | 631.664   | 552.019   | NM_00422E | 14867.611 | 18612.859 |
| U50534    | 1022.525  | 909.622   | AF147431  | 612.252   | 604.014   | NM_00386E | 1816.164  | 2251.655  |
| NM_014824 | 4672.653  | 5117.349  | AK026422  | 6043.454  | 5086.261  | NM_00287E | 4716.136  | 6068.787  |
| NM_014504 | 3912.251  | 3954.415  | AF085938  | 1135.737  | 1024.916  | NM_015571 | 8445.639  | 10249.464 |
| NM_01440E | 19226.037 | 20751.064 | AK022264  | 941.234   | 1164.452  | NM_004701 | 17706.219 | 19901.924 |
| NM_014741 | 7078.652  | 6871.867  | AL137331  | 1049.148  | 742.077   | AK025554  | 2783.993  | 3595.331  |
| AF212247  | 4966.543  | 4113.569  | AL162040  | 2248.156  | 2229.373  | BI824151  | 13127.05  | 15479.482 |
| AF161407  | 7042.479  | 6131.959  | AL442084  | 839.205   | 850.507   | AK021791  | 11542.915 | 13131.783 |
| NM_01473E | 4855.885  | 5171.252  | AL137371  | 8164.263  | 7453.359  | NM_00405E | 33808.82  | 38910.48  |
| NM_01640E | 2723.989  | 2682.423  | AL137596  | 3329.922  | 2701.112  | NM_004394 | 13959.392 | 16942.5   |
| NM_01808C | 3137.96   | 3814.379  | AL353942  | 12944.35  | 9274.326  | NM_00572E | 46532.551 | 51973.984 |
| NM_00711E | 2235.252  | 1900.027  | Z38010    | 7517.084  | 4376.024  | AK027242  | 3375.365  | 3421.91   |
| NM_00461E | 1205.66   | 1402.63   | AF086114  | 983.202   | 622.981   | NM_00127E | 35825.52  | 38279.559 |
| NM_00436C | 692.986   | 828.396   | AK024204  | 317.777   | 576.154   | NM_00501C | 2118.936  | 3243.308  |
| NM_003821 | 545.151   | 672.605   | AK023737  | 2150.749  | 2003.289  | NM_01905E | 3266.552  | 5870.896  |
| NM_01769E | 6073.851  | 6723.683  | NM_00660E | 5048.043  | 5900.662  | NM_02019E | 2545.469  | 4286.175  |
| NM_00397E | 5696.276  | 7022.384  | NM_01411E | 874.812   | 1096.455  | U96136    | 823.034   | 1608.575  |
| NM_004834 | 19677.955 | 24494.248 | NM_014157 | 982.261   | 1154.535  | AF188747  | 1696.132  | 1800.315  |
| NM_01817E | 644.284   | 794.931   | AF111851  | 1631.956  | 1033.253  | NM_005941 | 466.198   | 1117.507  |
| NM_00081E | 2544.002  | 2742.732  | AL360200  | 534.61    | 428.414   | NM_015884 | 716.626   | 1174.147  |
| AK024747  | 34972.281 | 45605.387 | AK021992  | 810.801   | 1099.439  | AF201380  | 4824.192  | 6334.051  |
| NM_00639C | 6398.805  | 7324.252  | AK022102  | 785.215   | 949.047   | NM_01239E | 13650.804 | 16309.813 |
| NM_00358C | 7943.065  | 9869.929  | AK022235  | 955.349   | 1529.504  | NM_01483E | 18655.885 | 21847.926 |
| NM_00650E | 4763.818  | 5058.654  | AK022378  | 3849.849  | 5228.618  | NM_00004E | 873.863   | 1287.706  |
| NM_00323E | 1461.375  | 1737.127  | AK022009  | 583.254   | 706.933   | NM_00387E | 15983.378 | 18072.557 |
| AB042562  | 3997.686  | 4015.983  | AK022274  | 606.887   | 882.853   | NM_00483E | 1165.757  | 1406.407  |

|           |           |           |           |           |           |           |           |           |
|-----------|-----------|-----------|-----------|-----------|-----------|-----------|-----------|-----------|
| NM_016009 | 12170.454 | 13499.015 | AK022401  | 698.782   | 951.127   | NM_005957 | 1795.155  | 2004.57   |
| NM_002378 | 784.941   | 1108.946  | AK027174  | 560.323   | 777.951   | AK024374  | 2908.348  | 3785.237  |
| NM_001364 | 518.811   | 705.825   | AL110173  | 1554.136  | 1970.395  | NM_007101 | 1511.469  | 2262.398  |
| NM_003726 | 6739.377  | 6876.471  | AK024106  | 616.346   | 1000.99   | NM_018234 | 919.147   | 971.587   |
| NM_006097 | 5583.982  | 6127.377  | AK027254  | 1277.925  | 1947.459  | AB033062  | 1569.938  | 1865.75   |
| NM_006113 | 4681.396  | 5333.418  | NM_017597 | 703.661   | 1118.592  | NM_016437 | 52394.137 | 56094.262 |
| NM_015313 | 29929.67  | 30985.83  | AK021772  | 1098.096  | 1368.231  | NM_002720 | 17946.287 | 19495.199 |
| AK022287  | 16049.534 | 15883.876 | AK026297  | 952.291   | 1005.621  | AK024716  | 16456.613 | 17464.338 |
| NM_015897 | 4199.187  | 5442.463  | AK054831  | 11974.166 | 11507.106 | X67155    | 3932.014  | 3352.725  |
| NM_005436 | 4005.798  | 4851.53   | AK021770  | 1283.538  | 1587.337  | NM_020380 | 10963.866 | 8709.113  |
| AF177473  | 2085.48   | 2252.725  | AK027248  | 2017.238  | 2857.686  | AL137519  | 369.389   | 1120.858  |
| NM_000546 | 3557.77   | 4141.888  | AK022804  | 11871.42  | 17334.867 | NM_002890 | 39555.637 | 59806.504 |
| AB023223  | 968.462   | 937.35    | AF009263  | 2911.877  | 2759.082  | NM_001330 | 49760.137 | 56691.746 |
| AB018257  | 4835.672  | 4292.442  | AF009283  | 772.413   | 1829.21   | NM_015927 | 929.149   | 1171.199  |
| NM_002708 | 27395.896 | 30851.49  | AF086329  | 3458.409  | 4612.142  | NM_014552 | 5943.903  | 4387.75   |
| AK001059  | 1668.578  | 1373.57   | AK022857  | 616.644   | 806.514   | NM_003072 | 14344.09  | 11855.627 |
| NM_007282 | 8838.658  | 8154.556  | AL110206  | 1694.144  | 1514.331  | NM_001913 | 3746.96   | 4336.888  |
| NM_017610 | 2390.598  | 2767.149  | AK024292  | 826.125   | 604.736   | AK025594  | 1726.621  | 1985.894  |
| AL122070  | 1042.144  | 1101.634  | AK026263  | 1370.466  | 1199.769  | AB040931  | 5638.179  | 6332.136  |
| AK025133  | 18194.209 | 18475.586 | U50526    | 941.199   | 1710.919  | NM_003596 | 1618.064  | 1536.619  |
| AB020704  | 2721.593  | 3066.734  | S75105    | 6085.838  | 8909.322  | NM_015911 | 1436.573  | 1091.954  |
| NM_020197 | 623.675   | 835.065   | AF056455  | 10476.22  | 13848.893 | BC011826  | 9064.315  | 7024.247  |
| NM_004087 | 4763.101  | 6225.188  | NM_018510 | 2041.789  | 2694.048  | NM_017647 | 7446.333  | 5096.087  |
| NM_018700 | 1947.114  | 2429.297  | AK024988  | 980.021   | 1538.798  | NM_012091 | 2703.389  | 2790.354  |
| NM_000119 | 2699.345  | 2861.953  | AF026943  | 995.797   | 717.87    | NM_012321 | 5746.261  | 6015.552  |
| NM_001065 | 11831.89  | 12145.854 | L77582    | 965.107   | 889.417   | D13642    | 6633.822  | 6989.097  |
| AK027100  | 3874.184  | 3174.985  | NM_020448 | 1479.274  | 1642.719  | NM_004741 | 13739.933 | 15965.945 |
| AY010111  | 893.17    | 1295.389  | NM_005419 | 2241.231  | 1776.148  | NM_018032 | 8625.424  | 11260.573 |
| NM_016950 | 656.15    | 727.673   | NM_003479 | 32281.201 | 25507.529 | NM_003675 | 14706.47  | 14088.523 |
| NM_003622 | 2797.746  | 2333.609  | NM_020224 | 5115.751  | 4059.764  | NM_017518 | 3432.535  | 3583.106  |
| NM_001774 | 2198.906  | 2152.16   | U17617    | 1463.781  | 1040.482  | NM_004117 | 4228.757  | 4178.564  |
| AK021645  | 1296.471  | 1166.544  | AK022952  | 6992.363  | 6043.673  | NM_016594 | 9082.306  | 6817.286  |
| NM_013339 | 3697.878  | 4148.178  | BF218888  | 646.136   | 705.949   | NM_030752 | 8974.065  | 5400.703  |
| NM_001491 | 1052.438  | 984.636   | AF086401  | 3613.141  | 3571.31   | D26068    | 32492.672 | 49078.074 |
| NM_002642 | 684.21    | 594.235   | L23869    | 1585.428  | 1388.835  | NM_018556 | 14031.501 | 21401.947 |
| AK026541  | 2445.968  | 3630.655  | Z21853    | 3235.638  | 2094.012  | NM_017593 | 4778.867  | 5119.883  |
| NM_005896 | 6387.088  | 6761.204  | U80770    | 615.824   | 618.107   | NM_004282 | 13710.023 | 16082.825 |
| D42055    | 11846.859 | 12262.583 | AB075846  | 561.953   | 491.485   | AK025695  | 2926.583  | 1540.675  |
| AL137349  | 2637.87   | 2809.553  | NM_018342 | 480.231   | 691.39    | AK025442  | 7476.685  | 3908.269  |
| NM_003339 | 863.511   | 795.836   | BC020260  | 1568.427  | 1533.243  | AL050041  | 1253.902  | 514.422   |
| NM_004562 | 555.617   | 649.017   | D17156    | 4951.906  | 4974.033  | NM_002451 | 2767.153  | 1518.87   |
| NM_016476 | 38652.809 | 42429.453 | L04461    | 938.959   | 779.674   | NM_013411 | 1829.674  | 866.012   |
| NM_015902 | 2837.373  | 1756.08   | AK026938  | 14999.237 | 14198.967 | AB007956  | 658.32    | 605.612   |
| NM_020155 | 4358.37   | 4044.537  | AK024373  | 11383.986 | 12364.066 | NM_020200 | 836.83    | 334.935   |
| BE874471  | 11230.271 | 10160.688 | AK022343  | 5237.489  | 5969.847  | NM_000180 | 11626.534 | 7636.574  |
| NM_006121 | 7721.987  | 7528.795  | AK026400  | 1542.041  | 1454.238  | NM_000858 | 9688.523  | 5238.476  |
| AK023520  | 9930.131  | 9887.038  | U92989    | 8355.025  | 7775.513  | AF254087  | 2134.788  | 1374.484  |
| NM_004693 | 980.728   | 930.779   | AF075102  | 1508.647  | 1370.242  | NM_017715 | 1966.061  | 2252.95   |
| NM_007211 | 10433.027 | 9408.994  | NM_018463 | 5359.894  | 4483.02   | AL117607  | 3636.189  | 4756.984  |
| AB011152  | 2781.871  | 3085.685  | X74956    | 17822.061 | 14230.999 | AB037774  | 4266.658  | 5728.4    |
| AB014592  | 1079.198  | 1681.492  | AF132197  | 5279.796  | 4111.593  | NM_005438 | 1028.137  | 1342.275  |
| NM_016952 | 1468.167  | 1763.466  | AK025546  | 770.281   | 508.47    | AK024361  | 2951.99   | 3319.733  |
| NM_001654 | 7268.164  | 7802.273  | AL137487  | 1395.674  | 967.232   | NM_004350 | 2938.549  | 3226.34   |



|           |           |           |           |           |           |           |           |           |
|-----------|-----------|-----------|-----------|-----------|-----------|-----------|-----------|-----------|
| NM_014519 | 3106.98   | 2829.33   | AK023800  | 583.218   | 577.828   | NM_018044 | 5424.536  | 4959.835  |
| NM_007147 | 2538.788  | 2160.966  | AK024120  | 813.383   | 782.686   | NM_001717 | 545.539   | 1269.55   |
| X65463    | 4261.497  | 4112.298  | CY3Cy5    | 6109.653  | 640.198   | AF274347  | 5672.993  | 10040.554 |
| AK024418  | 635.871   | 678.943   | W96179    | 3757.434  | 5433.665  | NM_018555 | 5390.08   | 8129.943  |
| NM_003367 | 8594.36   | 7508.383  | AW247841  | 6140.853  | 8152.284  | AK023525  | 3781.48   | 2622.005  |
| NM_005194 | 19665.492 | 15326.142 | BG568198  | 688.468   | 849.233   | AF085829  | 1855.756  | 1105.721  |
| AB002296  | 2143.202  | 2770.283  | M76559    | 5393.619  | 5942.627  | AF075029  | 1091.828  | 497.739   |
| NM_014315 | 7766.556  | 7239.913  | U03884    | 1653.172  | 2613.138  | AK021903  | 5674.424  | 2659.957  |
| NM_012087 | 3559.758  | 3117.734  | AI222585  | 746.761   | 529.282   | AL390143  | 5444.313  | 3079.22   |
| AF165520  | 2209.264  | 2009.579  | AA411678  | 11308.068 | 9425.369  | AL162075  | 1450.359  | 734.18    |
| AK026072  | 866.467   | 864.889   | AA862813  | 34920.547 | 33605.27  | AK021595  | 1331.011  | 781.614   |
| NM_004289 | 739.877   | 744.976   | AA398427  | 2888.633  | 3518.249  | AK021648  | 1395.859  | 860.784   |
| NM_015679 | 5802.909  | 5610.103  | T55728    | 8769.878  | 10056.933 | AF147358  | 16217.574 | 10423.941 |
| AF299118  | 45666.895 | 45083.516 | H20856    | 2418.079  | 3192.027  | NM_018410 | 6729.344  | 3175.127  |
| AK025353  | 19392.02  | 15349.133 | N62586    | 5813.693  | 7026.094  | AF086355  | 1034.511  | 452.811   |
| AK056896  | 26712.73  | 25080     | AA242743  | 5658.017  | 8181.861  | AF086403  | 705.053   | 667.204   |
| AK022763  | 24867.721 | 20220.508 | NM_004758 | 2542.657  | 2061.123  | AF086314  | 1495.646  | 1719.344  |
| AF288207  | 43171.055 | 46026.336 | NM_005163 | 7614.662  | 8243.831  | NM_016364 | 1446.8    | 1348.278  |
| NM_001001 | 62651.277 | 55548.898 | SR7       | 5557.941  | 41578.129 | AF086419  | 5803.708  | 5045.823  |
| NM_005715 | 3032.44   | 2974.335  | SR9       | 22730.209 | 4851.314  | AF086461  | 1622.382  | 1055.836  |
| AK026992  | 4291.345  | 4353.475  | CY3Cy5    | 5573.65   | 718.57    | AK000789  | 312.301   | 1399.945  |
| X81895    | 585.742   | 372.052   | NM_016382 | 1342.978  | 2341.172  | AF131795  | 523.089   | 1331.408  |
| AL137343  | 1088.151  | 955.608   | AK023117  | 4129.015  | 5072.142  | AL833296  | 3184.021  | 5598.009  |
| NM_004541 | 42195.555 | 44808.891 | AL122046  | 1683.133  | 2612.707  | AL110240  | 6894.472  | 10021.805 |
| NM_006830 | 48374.598 | 46633.227 | AF119914  | 320.414   | 576.12    | AF085919  | 329.072   | 1751.056  |
| AK026414  | 13258.507 | 12511.584 | NM_000855 | 3813.346  | 3714.749  | AF085933  | 945.955   | 638.136   |
| D17297    | 1281.848  | 1045.129  | NM_005536 | 8370.402  | 9113.271  | AF147431  | 655.682   | 792.434   |
| NM_018436 | 24301.498 | 22834.322 | NM_005077 | 2423.893  | 2629.477  | AK026422  | 10502.322 | 7726.879  |
| AF157115  | 6105.846  | 5226.053  | NM_004423 | 5822.527  | 4480.34   | AF085938  | 1559.263  | 1264.104  |
| AJ223353  | 8585.304  | 6790.238  | NM_001990 | 1196.597  | 1088.935  | AK022264  | 1201.848  | 804.012   |
| NM_012241 | 6020.072  | 6580.313  | NM_003311 | 4390.879  | 4459.397  | AL137331  | 1533.767  | 904.908   |
| NM_018486 | 2354.248  | 1962.096  | NM_003776 | 7749.557  | 7766.295  | AL162040  | 4110.173  | 1931.715  |
| NM_005324 | 25875.297 | 20003.605 | NM_015719 | 818.02    | 1176.893  | AL442084  | 1126.95   | 533.084   |
| AL080201  | 14313.284 | 11637.448 | NM_006129 | 1707.185  | 1429.309  | AL137371  | 11008.562 | 4653.629  |
| NM_001806 | 7740.796  | 6236.436  | NM_005593 | 1769.664  | 1009.559  | AL137596  | 3990.856  | 1905.234  |
| AB040941  | 2186.427  | 1874.898  | NM_004684 | 686.032   | 647.438   | AL353942  | 19631.189 | 8826.052  |
| AL137241  | 1417.851  | 1125.706  | BF338709  | 604.669   | 466.047   | Z38010    | 15414.079 | 7364.578  |
| AB037742  | 3074.645  | 2318.582  | AF204171  | 802.842   | 725.691   | AK024713  | 630.28    | 831.759   |
| AF272375  | 1941.088  | 1620.641  | AF100756  | 9638.555  | 9699.508  | AF086114  | 937.375   | 1220.991  |
| AK025078  | 1297.872  | 999.585   | NM_006825 | 4918.673  | 5520.994  | AK024204  | 946.044   | 489.226   |
| AK024737  | 2540.617  | 2219.494  | NM_004862 | 865.203   | 504.807   | AK023737  | 2233.562  | 4779.015  |
| AB007890  | 4207.943  | 3412.304  | NM_001661 | 1205.286  | 787.975   | NM_006609 | 4807.147  | 7493.151  |
| AF070591  | 610.672   | 654.397   | NM_014563 | 2147.121  | 1720.542  | NM_014118 | 667.189   | 1147.13   |
| AF286160  | 9026.156  | 8400.913  | NM_020150 | 5507.903  | 5490.045  | AK023643  | 1175.157  | 2210.541  |
| AF275800  | 2557.109  | 3008.232  | NM_007150 | 4090.492  | 2861.356  | AL390159  | 5445.579  | 10532.801 |
| AL359605  | 1152.943  | 1572.976  | NM_006831 | 3590.55   | 2886.425  | NM_014157 | 1303.426  | 1299.06   |
| AB020633  | 4819.859  | 3907.03   | AL162044  | 9412.041  | 9471.933  | AF090933  | 819.091   | 942.752   |
| AK025445  | 12247.827 | 11109.056 | AK024004  | 3131.21   | 3966.149  | AF111851  | 3631.696  | 3454.958  |
| AL357200  | 1529.995  | 1127.397  | AK022365  | 707.297   | 780.425   | AL360200  | 1238.428  | 697.137   |
| NM_017727 | 13993.537 | 11950.969 | BE892273  | 51838.219 | 55266.457 | AK021992  | 867.882   | 557.572   |
| NM_018319 | 3849.185  | 3162.965  | AF026929  | 835.978   | 1016.371  | AK022235  | 1021.526  | 806.005   |
| AK021714  | 2084.254  | 1812.295  | NM_016734 | 732.131   | 1013.432  | AK022378  | 3498.513  | 2276.237  |
| NM_020314 | 6752.455  | 5837.528  | AF035803  | 540.182   | 729.941   | AK022009  | 603.122   | 562.597   |

|           |           |           |           |           |           |           |           |           |
|-----------|-----------|-----------|-----------|-----------|-----------|-----------|-----------|-----------|
| AK022972  | 4869.332  | 3528.318  | Y08147    | 3636.734  | 4235.033  | AK027174  | 633.737   | 345.852   |
| AK025996  | 1918.962  | 1645.573  | D00174    | 8711.124  | 11328.304 | AL110173  | 1733.776  | 1286.366  |
| AF088015  | 1010.84   | 977.836   | AB000520  | 1610.752  | 2122.562  | AK024106  | 1039.843  | 931.781   |
| AF086168  | 1148.204  | 771.109   | NM_006907 | 1306.623  | 1459.049  | AK025833  | 784.095   | 402.234   |
| AF007132  | 813.788   | 767.331   | NM_002686 | 1213.622  | 2245.425  | AK027254  | 2602.985  | 4069.511  |
| AK026711  | 1839.94   | 1660.196  | NM_006267 | 2916.995  | 3643.614  | NM_017597 | 444.265   | 1170.661  |
| NM_017864 | 4520.595  | 4837.506  | NM_002661 | 14603.639 | 19778.373 | AK021772  | 1453.633  | 2535.283  |
| NM_004869 | 5426.25   | 5177.636  | NM_001263 | 743.886   | 1284.321  | AK026297  | 811.726   | 1589.245  |
| AF136408  | 1092.14   | 1107.82   | AK023982  | 1876.076  | 2009.647  | AK054831  | 28955.727 | 34611.996 |
| AL110203  | 723.976   | 678.57    | NM_018466 | 2839.691  | 3425.808  | AK021770  | 986.419   | 1310.592  |
| AJ011595  | 680.385   | 461.22    | Y11312    | 3832.924  | 4966.687  | AK027248  | 1966.601  | 2775.953  |
| AJ011602  | 580.832   | 593.937   | AF020774  | 688.758   | 598.798   | AK022804  | 13452.3   | 12934.521 |
| AJ002787  | 797       | 879.675   | AB014533  | 6432.1    | 6025.754  | AF009263  | 2867.008  | 2592.058  |
| Z70764    | 1020.778  | 867.908   | M11427    | 814.827   | 938.009   | AF009283  | 938.664   | 742.519   |
| M25785    | 1549.251  | 1284.335  | NM_000744 | 1258.793  | 1024.892  | AF086329  | 4866.978  | 3808.71   |
| M32443    | 775.874   | 689.829   | NM_003039 | 1392.531  | 1135.478  | AK025799  | 1006.668  | 725.951   |
| D16477    | 951.245   | 1034.338  | NM_014509 | 1041.427  | 930.632   | AK022857  | 1444.752  | 939.063   |
| AK024759  | 750.001   | 511.103   | NM_020372 | 3431.469  | 2698.312  | AL110206  | 3349.175  | 6593.513  |
| AK026808  | 481.568   | 545.574   | NM_004979 | 1014.586  | 655.706   | NM_004821 | 1737.725  | 2841.298  |
| AK022309  | 1004.381  | 925.425   | NM_016077 | 3525.196  | 2342.352  | AK024292  | 967.035   | 1684.539  |
| AK000063  | 770.171   | 626.88    | NM_015537 | 9261.469  | 10642.904 | AK026263  | 2158.721  | 3577.189  |
| AK000949  | 2019.636  | 1438.929  | NM_016520 | 27987.664 | 30962.475 | U50526    | 851.198   | 824.47    |
| AK027068  | 849.737   | 597.758   | AB018353  | 6889.804  | 9180.91   | S75105    | 4764.566  | 5489.422  |
| AK000165  | 739.223   | 616.783   | NM_007036 | 10490.289 | 11453.501 | U50537    | 491.85    | 2415.162  |
| AK000974  | 1779.261  | 1281.274  | NM_002617 | 5700.033  | 6884.281  | AK024988  | 795.038   | 1231.225  |
| AK025051  | 984.154   | 647.377   | NM_003313 | 16923.027 | 18147.459 | AF026943  | 1811.609  | 1496.115  |
| AK024553  | 1782.671  | 1644.996  | AF090907  | 3028.014  | 2925.124  | L77582    | 660.992   | 619.074   |
| AF143879  | 6355.146  | 5920.464  | AK024476  | 4942.092  | 3315.234  | NM_020448 | 1594.877  | 1110.565  |
| AK024621  | 22091.742 | 19606.867 | X74794    | 8765.295  | 7585.419  | NM_005419 | 1971.578  | 1344.626  |
| AL157449  | 13891.308 | 12042.062 | AL050298  | 3202.93   | 2440.965  | NM_003479 | 35579.559 | 26692.438 |
| AL117582  | 1210.18   | 722.123   | NM_007079 | 29309.172 | 22599.127 | AK022078  | 424.806   | 486.962   |
| AK025525  | 656.384   | 550.069   | M20696    | 4413.181  | 4063.436  | AF075101  | 658.282   | 438.652   |
| NM_018233 | 5367.566  | 5081.667  | NM_002915 | 1092.983  | 1205.277  | AF130108  | 562.8     | 396.021   |
| AV740891  | 956.09    | 904.161   | NM_006736 | 3711.13   | 4562.541  | NM_020224 | 6860.612  | 3664.534  |
| AK026860  | 6204.76   | 4788.501  | NM_003640 | 2105.697  | 2163.685  | U17617    | 2595.024  | 1715.713  |
| NM_014898 | 2206.907  | 1848.327  | NM_014444 | 4947.472  | 5384.75   | AK022952  | 13466.457 | 17762.816 |
| AK023435  | 1383.832  | 1178.147  | NM_012248 | 7466.317  | 7710.749  | BF218888  | 1492.587  | 2229.893  |
| AF086035  | 7004.414  | 7770.734  | NM_014393 | 4837.224  | 5890.618  | AF086401  | 3424.595  | 3741.257  |
| AK022159  | 4053.857  | 3496.367  | NM_004223 | 15192.656 | 17639.369 | L23869    | 1567.556  | 2076.325  |
| AJ012491  | 664.74    | 488.578   | NM_001355 | 11626.91  | 13081.578 | AB075846  | 515.296   | 628.712   |
| U25750    | 2862.808  | 2401.663  | NM_001216 | 499.232   | 739.774   | NM_018342 | 1018.877  | 893.613   |
| AK023691  | 8056.185  | 8372.051  | U63336    | 767.225   | 991.034   | BC020260  | 1565.492  | 1094.754  |
| AK026744  | 745.635   | 762.412   | NM_004684 | 795.748   | 593.515   | D17156    | 8189.578  | 4384.841  |
| NM_005234 | 3915.464  | 3443.711  | AF204171  | 573.452   | 902.642   | L04461    | 891.953   | 721.161   |
| BC023536  | 771.978   | 882.8     | W96179    | 4245.027  | 4318.046  | AK026938  | 16682.982 | 10052.318 |
| NM_001803 | 6117.1    | 5014.3    | AW247841  | 5917.076  | 6043.377  | AK024373  | 13392.891 | 8884.439  |
| NM_006233 | 21516.578 | 17454.531 | BG568198  | 590.805   | 422.944   | AK022343  | 8350.978  | 5813.582  |
| AK021889  | 878.031   | 961.239   | M76559    | 4368.754  | 4213.917  | AK026400  | 1851.723  | 1500.184  |
| AK000992  | 1345.771  | 1051.389  | AI222585  | 857.868   | 627.644   | U92989    | 10642.877 | 7143.019  |
| L23544    | 16640.178 | 15035.037 | AA411678  | 12493.214 | 13121.7   | AF075102  | 1699.212  | 1478.439  |
| NM_019020 | 5402.364  | 4341.992  | AA862813  | 36711.234 | 44206.93  | NM_018463 | 10930.699 | 6457.043  |
| NM_016474 | 1707.002  | 1119.797  | AA398427  | 2849.059  | 3106.296  | X74956    | 31633.082 | 21326.297 |
| NM_000910 | 2578      | 2310.757  | T55728    | 8745.688  | 8650.496  | AF132197  | 6116.65   | 3475.383  |

|           |           |           |           |           |           |           |           |           |
|-----------|-----------|-----------|-----------|-----------|-----------|-----------|-----------|-----------|
| AF086001  | 9445.878  | 11067.948 | H20856    | 2584.347  | 2383.966  | AK025546  | 1200.91   | 644.889   |
| AL117560  | 25122.814 | 20095.656 | N62586    | 4946.729  | 5368.299  | AL137487  | 6022.102  | 5392.289  |
| M24749    | 7370.037  | 6518.478  | AA242743  | 4500.749  | 4698.454  | AK023800  | 1054.753  | 1791.4    |
| NM_005831 | 52726.602 | 47380.113 | NM_004758 | 2316.85   | 1725.602  | AK024120  | 1835.969  | 4127.671  |
| NM_005850 | 27978.182 | 25412.275 | NM_005163 | 7909.199  | 8573.227  | CY3Cy5    | 7771.834  | 631.165   |
| NM_000554 | 36797.063 | 32835.961 | NM_015361 | 13123.128 | 12219.886 | W96179    | 3301.934  | 2957.639  |
| AF009317  | 4990.757  | 4183.633  | NM_004310 | 12149.412 | 12568.206 | AW247841  | 6662.743  | 6277.432  |
| AK026583  | 5539.912  | 4372.999  | AF035803  | 459.372   | 366.368   | BG568198  | 477.946   | 777.961   |
| AF218031  | 8385.7    | 8346.727  | Y08147    | 2604.12   | 2078.724  | M76559    | 4367.125  | 4594.335  |
| AF210650  | 3119.381  | 2602.995  | D00174    | 8171.768  | 9025.939  | AI222585  | 815.709   | 1342.335  |
| NM_018350 | 6449.883  | 5017.587  | AB000520  | 1352.416  | 983.091   | AA411678  | 12410.939 | 12250.02  |
| AF085896  | 1687.101  | 1445.395  | NM_016382 | 1004.605  | 906.627   | AA862813  | 27681.676 | 28781.447 |
| X74613    | 3484.254  | 4700.704  | AK023117  | 3918.212  | 4005.739  | AA398427  | 2724.029  | 2894.855  |
| AF075080  | 2312.834  | 2241.277  | AL122046  | 1473.685  | 1570.651  | T55728    | 7139.851  | 7999.399  |
| AL390183  | 676.602   | 569.222   | NM_000855 | 2361.198  | 1798.14   | H20856    | 2385.719  | 1971.191  |
| Y13897    | 892.858   | 658.455   | NM_005530 | 8159.493  | 7499.967  | N62586    | 5207.483  | 5823.179  |
| AK001857  | 1876.493  | 1744.566  | NM_005077 | 2755.263  | 3010.513  | NM_004750 | 2196.211  | 3560.366  |
| AK021525  | 533.921   | 615.669   | NM_004423 | 7236.866  | 7386.065  | NM_005163 | 6599.774  | 7596.063  |
| AL133577  | 2121.343  | 1684.735  | NM_001990 | 1548.569  | 1494.861  | SR5       | 6757.644  | 8589.91   |
| NM_000470 | 1733.068  | 1638.89   | NM_002141 | 1077.324  | 1213.033  | CY3Cy5    | 9599.308  | 700.696   |
| AF038199  | 1809.407  | 1582.875  | NM_003311 | 3195.822  | 3522.149  | NM_016382 | 882.137   | 1051.049  |
| CY3Cy5    | 4892.265  | 271.148   | NM_003770 | 6832.111  | 8795.077  | AK023117  | 3949.203  | 4136.852  |
| BE908993  | 3801.506  | 3755.989  | NM_015710 | 765.432   | 1196.292  | AL122046  | 1668.523  | 1509.064  |
| AB012701  | 1317.996  | 1284.173  | NM_006120 | 1558.257  | 1700.433  | NM_000855 | 3503.068  | 4153.941  |
| M61156    | 2082.062  | 2744.635  | NM_000582 | 1872.262  | 1821.815  | NM_005530 | 5152.709  | 4457.707  |
| R44005    | 1564.894  | 1814.945  | NM_005593 | 1319.88   | 1135.185  | NM_005077 | 1584.329  | 1851.96   |
| AI942392  | 5354.101  | 6897.683  | NM_004970 | 673.169   | 505.582   | NM_004423 | 7967.771  | 10619.34  |
| M55040    | 774.838   | 730.707   | NM_016077 | 4210.791  | 3233.857  | NM_001990 | 1526.018  | 1281.422  |
| AW009739  | 1144.614  | 1291.403  | AF100756  | 9007.653  | 9716.6    | NM_002141 | 1349.266  | 1748.979  |
| BC036805  | 7950.769  | 7562.752  | NM_006820 | 3996.201  | 3582.644  | NM_003311 | 2448.242  | 2901.415  |
| Z74615    | 2483.665  | 3283.452  | NM_004862 | 1460.485  | 1760.266  | NM_003770 | 5301.154  | 5657.02   |
| X03884    | 52564.016 | 53180.414 | NM_001661 | 1011.628  | 1164.663  | NM_012464 | 1375.25   | 2968.073  |
| U36759    | 624.982   | 877.633   | NM_014563 | 2081.918  | 1992.489  | NM_006120 | 1125.884  | 1266.407  |
| X91625    | 6604.36   | 6884.186  | NM_020150 | 5883.209  | 6228.024  | NM_000582 | 2769.963  | 3930.415  |
| AF090901  | 571.519   | 764.184   | NM_007150 | 5067.487  | 4369.711  | AJ224741  | 258.065   | 704.417   |
| AF004231  | 353.297   | 637.318   | NM_006831 | 4088.687  | 3537.388  | AF100756  | 7865.609  | 7952.247  |
| AF001862  | 21399.143 | 21730.582 | AL162044  | 5849.476  | 5077.606  | NM_006820 | 5274.264  | 5744.401  |
| NM_058197 | 940.395   | 1297.614  | AK024004  | 1779.332  | 1922.576  | NM_004862 | 568.762   | 509.419   |
| SR6       | 3006.443  | 2715.135  | AK022365  | 338.286   | 578.806   | NM_001661 | 659.996   | 646.079   |
| SR8       | 11413.265 | 35573.477 | BE892273  | 43156.84  | 48733.027 | NM_014563 | 1337.098  | 1495.483  |
| SR10      | 39346.188 | 15669.832 | NM_016734 | 533.126   | 683.521   | NM_020150 | 5048.699  | 5428.6    |
| CY3Cy5    | 4838.301  | 292.842   | NM_014393 | 4739.949  | 5338.922  | NM_007150 | 5052.765  | 4391.623  |
| U87460    | 11896.809 | 12390.555 | NM_004223 | 14190.194 | 13405.007 | NM_006831 | 3181.821  | 2704.415  |
| NM_003617 | 798.276   | 820.287   | NM_006813 | 610.64    | 313.592   | AL162044  | 5011.184  | 5178.787  |
| NM_001841 | 2243.276  | 2748.034  | NM_001355 | 12816.844 | 12346.813 | AK024004  | 1497.456  | 2165.359  |
| NM_002054 | 3565.522  | 5476.217  | NM_001210 | 2237.027  | 2818.251  | AK022365  | 416.607   | 593.713   |
| AF300649  | 1287.36   | 1581.503  | U63336    | 633.866   | 587.642   | BE892273  | 47471.949 | 54395.504 |
| NM_004120 | 947.272   | 626.652   | NM_006907 | 1270.82   | 1123.983  | NM_016734 | 718.176   | 756.986   |
| NM_000823 | 1179.474  | 1302.376  | NM_002680 | 653.498   | 844.598   | AF035803  | 355.728   | 375.37    |
| NM_004414 | 4472.728  | 5277.773  | NM_006267 | 1513.241  | 1338.797  | D00174    | 6810.072  | 8847.934  |
| NM_003317 | 4399.138  | 4582.668  | NM_002661 | 6619.91   | 5387.362  | AB000520  | 864.269   | 1040.913  |
| NM_001130 | 2543.304  | 2338.55   | NM_001263 | 1041.157  | 1179.404  | NM_006907 | 634.991   | 620.794   |
| NM_004600 | 2824.994  | 3473.298  | AK023982  | 1347.996  | 1418.537  | NM_002680 | 622.455   | 590.548   |

|           |           |           |           |           |           |           |           |           |
|-----------|-----------|-----------|-----------|-----------|-----------|-----------|-----------|-----------|
| NM_003772 | 2267.102  | 2571.733  | NM_018466 | 2551.412  | 2787.662  | NM_006267 | 1663.007  | 1401.431  |
| NM_001541 | 417.021   | 673.24    | Y11312    | 2165.881  | 2355.881  | NM_002661 | 8114.097  | 7924.814  |
| NM_005416 | 1227.038  | 1177.311  | AB014533  | 4000.278  | 3844.502  | NM_001263 | 578.663   | 421.542   |
| NM_004670 | 876.108   | 724.472   | M11427    | 513.907   | 648.017   | AK023982  | 957.431   | 934.256   |
| L09081    | 560.098   | 655.499   | NM_000744 | 852.678   | 957.451   | NM_018466 | 1488.155  | 1573.456  |
| NM_016113 | 2285.743  | 2069.233  | NM_003039 | 1155.982  | 1006.659  | Y11312    | 2431.498  | 2295.676  |
| NM_014222 | 2681.682  | 3040.187  | NM_014509 | 722.782   | 995.821   | AB014533  | 6378.868  | 7937.966  |
| NM_000509 | 6101.774  | 6030.975  | NM_020372 | 3137.059  | 3142.666  | M11427    | 517.252   | 605.705   |
| NM_004542 | 1359.008  | 1594.248  | NM_002635 | 47301.602 | 50549.504 | NM_000744 | 832.483   | 968.568   |
| X06182    | 2745.376  | 3065.436  | NM_004758 | 2535.416  | 2045.859  | NM_003039 | 1385.574  | 1848.491  |
| BF217496  | 2459.926  | 2558.757  | NM_005163 | 6474.939  | 5853.619  | NM_014509 | 647.828   | 417.55    |
| NM_004762 | 11587.464 | 11911.782 | NM_015537 | 5108.466  | 4320.136  | U26662    | 428.548   | 528.995   |
| NM_006641 | 38848.484 | 48590.773 | NM_016520 | 20801.535 | 14484.909 | NM_020372 | 5024.745  | 6621.374  |
| NM_000634 | 7713.756  | 8091.626  | AB018353  | 3857.544  | 3607.944  | NM_004979 | 404.226   | 410.8     |
| NM_014679 | 29007.859 | 26760.463 | NM_007036 | 5884.314  | 4046.841  | NM_016077 | 2807.881  | 3001.114  |
| AB040969  | 3325.818  | 3892.126  | NM_002617 | 3093.852  | 2984.128  | NM_015537 | 3091.019  | 2792.678  |
| NM_003467 | 26940.643 | 30240.045 | NM_003313 | 13033.058 | 12629.461 | NM_016520 | 22770.844 | 19240.998 |
| NM_014936 | 3735.619  | 3182.44   | AF090907  | 3306.43   | 4047.293  | AB018353  | 4329.575  | 3832.028  |
| NM_003943 | 1760.261  | 2102.809  | AK024476  | 2800.975  | 2755.808  | NM_007036 | 5486.629  | 4410.506  |
| NM_019052 | 12514.591 | 18028.178 | X74794    | 8104.698  | 8550.49   | NM_002617 | 3690.914  | 5868.113  |
| NM_003202 | 23882.764 | 33790.508 | AL050298  | 3241.263  | 3337.167  | NM_003313 | 12611.116 | 13358.625 |
| AF119902  | 696.195   | 845.172   | NM_007079 | 30105.961 | 29230.229 | AF090907  | 3600.594  | 3292.343  |
| NM_020525 | 1630.821  | 2276.013  | M20696    | 4355.68   | 4443.038  | AK024476  | 5332.477  | 5337.958  |
| X62468    | 459.793   | 390.142   | NM_002915 | 1192.864  | 2017.626  | X74794    | 8420.135  | 8323.873  |
| NM_003890 | 1134.608  | 1553.307  | NM_006736 | 5540.801  | 8614.497  | AL050298  | 3819.167  | 2905.387  |
| BF127978  | 801.909   | 785.263   | NM_003640 | 2149.583  | 2431.132  | NM_007079 | 43377.434 | 53232.965 |
| AF110801  | 1665.611  | 2359.477  | NM_014444 | 4714.912  | 5662.624  | M20696    | 3602.574  | 4201.432  |
| NM_016579 | 11304.075 | 14095.82  | NM_012248 | 7971.81   | 8910.644  | NM_002915 | 622.6     | 693.919   |
| AK022565  | 7733.054  | 7285.049  | NM_014970 | 3892.379  | 4172.697  | NM_006736 | 2862.422  | 3674.943  |
| AK023151  | 2075.33   | 2241.593  | NM_007098 | 525.704   | 247.914   | NM_003640 | 1294.721  | 1580.557  |
| AB033076  | 1719.655  | 2025.303  | NM_015719 | 663.203   | 748.254   | NM_014444 | 3932.595  | 3617.257  |
| AK022876  | 2941.457  | 3499.55   | NM_006129 | 1922.801  | 2185.179  | NM_012248 | 6436.234  | 8286.996  |
| AF134894  | 906.746   | 1048.518  | NM_000582 | 2140.372  | 2198.637  | NM_014393 | 4264.631  | 5527.898  |
| NM_003938 | 6866.952  | 6409.242  | NM_005593 | 1282.854  | 1155.574  | NM_004223 | 13428.882 | 16488.76  |
| NM_014827 | 24256     | 37662.031 | BF338709  | 480.889   | 511.474   | NM_006813 | 366.771   | 525.994   |
| NM_001441 | 1234.769  | 1524.244  | W96179    | 3213.14   | 3090.872  | NM_001355 | 9606.511  | 12174.303 |
| NM_018324 | 798.535   | 897.809   | AW247841  | 6725.859  | 7489.242  | NM_001216 | 619.146   | 858.835   |
| AF064255  | 14299.958 | 13610.922 | BG568198  | 744.859   | 361.32    | U63336    | 506.871   | 641.034   |
| NM_016368 | 18635.594 | 24591.209 | M76559    | 5356.981  | 5586.169  | NM_004684 | 485.784   | 438.469   |
| U08853    | 7036.967  | 8657.366  | AI222585  | 931.759   | 670.814   | BF338709  | 643.996   | 582.196   |
| NM_004261 | 40410.484 | 42238.523 | AA411678  | 11973.881 | 14027.286 | M18182    | 234.589   | 745.16    |
| NM_016006 | 2822.286  | 2651.364  | AA862813  | 34648.832 | 44395.625 | W96179    | 3133.574  | 3216.42   |
| NM_016245 | 8928.106  | 9587.677  | AA398427  | 2469.633  | 2851.537  | AW247841  | 5845.089  | 4198.396  |
| AF005632  | 1284.984  | 1556.637  | T55728    | 8156.498  | 6870.949  | BG568198  | 568.956   | 506.002   |
| NM_000903 | 3317.799  | 4144.325  | H20856    | 2457.289  | 2046.742  | M76559    | 4626.316  | 3875.701  |
| NM_004493 | 24992.85  | 28609.309 | N62586    | 4856.942  | 4776.14   | AI222585  | 667       | 959.638   |
| AF309489  | 93.732    | 819.294   | AK022365  | 813.488   | 469.842   | AA411678  | 10271.601 | 12645.529 |
| NM_004047 | 31346.555 | 37717.805 | BE892273  | 41071.359 | 33785.707 | AA862813  | 24466.986 | 28482.27  |
| AF287303  | 801.462   | 1008.538  | NM_016734 | 664.198   | 631.196   | AA398427  | 1477.731  | 1608.08   |
| NM_004823 | 1888.342  | 1829.805  | Y08147    | 2563.899  | 2246.326  | T55728    | 5883.032  | 6908.619  |
| Y17179    | 68485.867 | 56353.246 | D00174    | 5512.285  | 4094.858  | NM_004758 | 1751.771  | 2850.36   |
| NM_000891 | 824.901   | 1069.079  | AB000520  | 960.435   | 1071.043  | NM_005163 | 4965.007  | 5863.538  |
| AF239613  | 1670.147  | 1760.642  | NM_016382 | 1123.479  | 1084.27   | NM_015361 | 13400.058 | 14664.063 |

|           |           |           |           |           |           |           |           |           |
|-----------|-----------|-----------|-----------|-----------|-----------|-----------|-----------|-----------|
| AK026840  | 3204.469  | 3737.349  | AK023117  | 4397.816  | 4870.384  | AF035803  | 632.818   | 299.163   |
| NM_00028E | 3534.984  | 4084.747  | NM_00085E | 1878.398  | 1657.892  | Y08147    | 2551.79   | 2299.359  |
| AK026317  | 9268.411  | 13030.836 | NM_00553E | 7458.304  | 7105.316  | D00174    | 7112.871  | 7015.804  |
| X82207    | 8867.541  | 10342.454 | NM_005077 | 2907.677  | 2613.785  | AB000520  | 913.541   | 894.081   |
| NM_015044 | 2181.171  | 2075.831  | NM_00442E | 6529.193  | 6512.492  | NM_01638E | 868.098   | 605.073   |
| NM_002867 | 1146.018  | 1419.765  | NM_00199C | 2381.51   | 2309.68   | AK023117  | 2198.442  | 1701.923  |
| NM_00052C | 5433.144  | 5858.505  | NM_002141 | 928.579   | 1186.477  | AL122046  | 1579.581  | 1393.966  |
| NM_00028E | 850.945   | 860.007   | NM_003311 | 3437.307  | 2721.203  | NM_00085E | 3103.503  | 3671.637  |
| NM_00150C | 5998.311  | 5557.43   | NM_000744 | 755.024   | 890.884   | NM_00553E | 7827.253  | 8340.455  |
| NM_00438E | 5223.842  | 5089.802  | NM_00303E | 1350.678  | 1060.463  | NM_005077 | 1732.745  | 2214.131  |
| NM_02037E | 1292.84   | 1827.291  | NM_01450E | 1250.134  | 1976.743  | NM_00442E | 7482.145  | 9583.991  |
| AL110127  | 3051.073  | 3050.266  | U26662    | 608.365   | 467.025   | NM_00199C | 1239.683  | 1136.879  |
| AK001997  | 1088.659  | 1755.518  | NM_02037E | 3981.959  | 3824.147  | NM_002141 | 1215.582  | 1564.557  |
| NM_00252E | 5185.85   | 5855.091  | NM_00263E | 54825.523 | 48669.34  | NM_00377E | 5485.533  | 7591.516  |
| D38438    | 1615.782  | 1397.6    | NM_00497E | 742.557   | 601.833   | NM_01571E | 633.967   | 1071.404  |
| AV714945  | 909       | 832.682   | NM_016077 | 4018.085  | 2980.924  | NM_00612E | 1893.454  | 2464.62   |
| AF089897  | 960.884   | 832.479   | NM_00682E | 4744.729  | 4444.439  | NM_00058E | 3041.276  | 4320.799  |
| AF007872  | 6224.833  | 6685.203  | NM_00486E | 1069.041  | 793.525   | NM_00497E | 535.53    | 688.914   |
| M30938    | 15035.984 | 12953.639 | NM_001661 | 1032.347  | 1104.615  | NM_016077 | 3221.459  | 3288.2    |
| NM_01514E | 2667.904  | 2718.58   | NM_01456E | 2229.237  | 2457.868  | AF100756  | 7490.033  | 7522.948  |
| NM_004714 | 2556.689  | 2846.294  | NM_02015C | 5989.484  | 5647.14   | NM_00682E | 5259.291  | 5531.483  |
| NM_005401 | 786.037   | 943.512   | NM_00715C | 4613.194  | 4257.394  | NM_00486E | 648.593   | 697.279   |
| NM_017677 | 533.614   | 736.218   | NM_006831 | 3728.788  | 3608.602  | NM_001661 | 748.979   | 613.216   |
| NM_002497 | 23928.482 | 15141.483 | AL162044  | 6660.311  | 5450.204  | NM_01456E | 1349.647  | 1393.665  |
| AB025194  | 6171.401  | 6963.076  | AK024004  | 1775.677  | 1703.332  | NM_02015C | 3769.492  | 4643.135  |
| NM_00623E | 948.441   | 1141.681  | NM_00673E | 3546.087  | 3606.523  | NM_00715C | 3382.034  | 3726.695  |
| BC020863  | 582.445   | 1363.745  | NM_00364C | 1778.594  | 2071.8    | NM_006831 | 2399.549  | 2737.442  |
| NM_017897 | 5514.592  | 7820.362  | NM_014444 | 6502.763  | 7330.665  | AL162044  | 4919.792  | 5574.987  |
| NM_00426E | 50705.02  | 51121.895 | NM_01224E | 8749.354  | 9894.432  | AK024004  | 1362.696  | 1905.763  |
| NM_00257E | 9572.551  | 12392.988 | NM_01497C | 4716.549  | 4767.427  | AF026929  | 504.218   | 705.011   |
| NM_00050E | 5735.043  | 3898.708  | NM_01439E | 5082.876  | 5608.324  | NM_016734 | 780.248   | 727.267   |
| NM_00454E | 1437.304  | 1347.554  | NM_00422E | 15983.645 | 16421.197 | NM_01439E | 4569.268  | 4895.835  |
| X06182    | 2056.986  | 2070.908  | NM_00681E | 471.83    | 441.676   | NM_00422E | 13931.124 | 14425.921 |
| BE908993  | 3794.962  | 3478.544  | NM_00135E | 13618.186 | 12790.687 | NM_00681E | 746.106   | 580.762   |
| AB012701  | 1163.957  | 1053.42   | NM_00121E | 619.043   | 822.435   | NM_00135E | 10871.016 | 11091.582 |
| M61156    | 1819.961  | 2227.513  | U63336    | 1166.596  | 1038.138  | NM_00121E | 675.459   | 461.735   |
| R44005    | 1383.113  | 1291.272  | NM_006907 | 1418.217  | 2072.833  | U63336    | 520.63    | 711.235   |
| AI942392  | 4882.368  | 4804.613  | NM_00268E | 713.519   | 1000.178  | NM_00268E | 777.015   | 506.62    |
| M55040    | 1076.323  | 863.725   | NM_006267 | 1973.138  | 2166.112  | NM_006267 | 1475.603  | 1262.974  |
| AW009739  | 1017.979  | 986.117   | NM_002661 | 8923.019  | 7985.351  | NM_002661 | 8007.811  | 8053.063  |
| BC036805  | 7458.273  | 7292.579  | NM_00126E | 363.791   | 498.109   | NM_00126E | 496.033   | 526.169   |
| Z74615    | 2315.401  | 2705.177  | AK023982  | 1406.496  | 1352.816  | AK023982  | 1064.04   | 1227.49   |
| X03884    | 50862.844 | 47238.672 | NM_01846E | 989.596   | 871.47    | NM_01846E | 1565.853  | 1820.22   |
| U36759    | 599.171   | 602.803   | Y11312    | 2405.853  | 2305.897  | Y11312    | 1975.349  | 2499.296  |
| X91625    | 6241.583  | 5748.456  | AB014533  | 3836.783  | 3871.611  | AB014533  | 5474.965  | 7211.726  |
| AF090901  | 590.254   | 938.652   | M11427    | 523.799   | 816.696   | M11427    | 348.554   | 342.433   |
| AF001862  | 18566.877 | 16168.802 | AK022097  | 4950.577  | 4957.884  | U26662    | 524.958   | 1542.749  |
| SB        | 651.014   | 526.045   | NM_00216E | 23152.775 | 26797.344 | NM_02037E | 6913.86   | 7484.554  |
| NM_016044 | 4517.056  | 5191.517  | NM_00616E | 3325.539  | 3767.052  | NM_00263E | 48997.727 | 47087.125 |
| AK023151  | 1815.212  | 1342.03   | NM_016011 | 11836.803 | 11528.816 | NM_00475E | 2129.821  | 2055.836  |
| AB033076  | 1295.675  | 1358.442  | AL035307  | 5193.574  | 5169.177  | NM_00516E | 6430.619  | 6454.622  |
| AK022876  | 2655.976  | 2804.832  | AK023772  | 557.943   | 536.918   | NM_015361 | 14785.102 | 14113.567 |
| AF134894  | 1178.04   | 1281.378  | NM_012234 | 5023.389  | 5971.692  | NM_00431C | 12694.17  | 13342.015 |

|           |           |           |           |           |           |           |           |           |
|-----------|-----------|-----------|-----------|-----------|-----------|-----------|-----------|-----------|
| NM_00393E | 5806.532  | 5778.711  | NM_015361 | 12849.306 | 10918.604 | NM_015537 | 2987.473  | 2106.751  |
| NM_014827 | 17905.205 | 18678.063 | NM_004310 | 13176.872 | 13008.386 | NM_016520 | 22650.363 | 18893.197 |
| U87460    | 11919.7   | 11215.734 | NM_015537 | 9012.123  | 10535.78  | AB018353  | 4337.705  | 4416.681  |
| NM_003617 | 759.51    | 854.923   | NM_016520 | 29898.645 | 41773.145 | NM_00703E | 5507.562  | 4373.474  |
| NM_001841 | 1624.094  | 1769.501  | AB018353  | 4924.193  | 5532.914  | NM_002617 | 3274.637  | 3344.902  |
| NM_002054 | 2955.354  | 2919.058  | NM_00703E | 6561.324  | 4673.386  | AF090907  | 2175.163  | 2272.033  |
| AF300649  | 1492.097  | 1275.258  | NM_002617 | 4336.37   | 3668.489  | AK024476  | 4322.151  | 4851.655  |
| NM_00412E | 675.836   | 757.417   | NM_003313 | 12596.047 | 10480.953 | X74794    | 5214.8    | 4996.427  |
| NM_000823 | 1352.289  | 1333      | AF090907  | 3642.405  | 3484.584  | AL050298  | 3988.624  | 5256.03   |
| NM_004414 | 4176.621  | 4061.102  | AK024476  | 5148.588  | 4959.208  | M20696    | 3963.283  | 4294.615  |
| NM_003317 | 4105.693  | 3625.291  | X74794    | 9458.261  | 9319.455  | NM_00291E | 845.017   | 1063.692  |
| NM_001139 | 2647.142  | 2544.278  | AL050298  | 3319.011  | 4313.72   | NM_01224E | 6262.29   | 6382.212  |
| NM_00460E | 3106.167  | 4597.862  | NM_00707E | 34181.473 | 32894.438 | NM_01497C | 3833.95   | 4071.061  |
| NM_003772 | 2120.103  | 2589.169  | M20696    | 4228.146  | 4043.717  | NM_01571E | 888.466   | 1109.544  |
| NM_00541E | 1140.982  | 1310.732  | NM_00291E | 1294.896  | 1382.651  | NM_00612E | 1374.899  | 1528.094  |
| NM_00467C | 891.463   | 1069.997  | NM_005203 | 410.685   | 907.008   | NM_00058E | 3135.799  | 3484.869  |
| L09081    | 746.435   | 1028.109  | NM_00656E | 2331.231  | 1921.715  | NM_00559E | 1160.672  | 1183.008  |
| NM_00021E | 70055.766 | 60948.738 | AK026154  | 11258.56  | 11963.468 | NM_004684 | 439.162   | 496.547   |
| NM_016113 | 2583.112  | 2948.405  | AL117546  | 28316.904 | 26074.584 | BF338709  | 502.62    | 475.45    |
| NM_014222 | 2680.03   | 3961.967  | AK027073  | 1125.798  | 1050.323  | AF204171  | 578.154   | 392.919   |
| AK026840  | 2815.995  | 2861.826  | NM_000384 | 743.361   | 1080.676  | W96179    | 1246.684  | 1304.229  |
| NM_00028E | 2777.159  | 2325.635  | AB018325  | 4331.037  | 4360.242  | M76559    | 2693.736  | 3360.191  |
| AK026317  | 7330.976  | 6576.883  | AL157482  | 3141.032  | 3490.8    | AI222585  | 816.654   | 1467.9    |
| X82207    | 7891.019  | 7394.213  | NM_003603 | 601.47    | 878.469   | AA411678  | 11487.484 | 12694.117 |
| NM_015044 | 1614.011  | 1936.839  | NM_00542E | 9259.499  | 9433.451  | AA862813  | 29217.689 | 30401.656 |
| NM_002867 | 764.767   | 809.862   | NM_017974 | 1588.674  | 1556.385  | AA398427  | 2437.346  | 3376.971  |
| BF217496  | 2562.856  | 2502.258  | NM_00397E | 781.313   | 1752.726  | T55728    | 6856.14   | 8244.617  |
| NM_004762 | 12006.29  | 11146.314 | X14677    | 3622.281  | 3740.846  | H20856    | 2169.999  | 1680.697  |
| NM_006641 | 36377.168 | 41598.918 | NM_005863 | 5938.786  | 7059.311  | AA242743  | 5571.434  | 6264.743  |
| NM_000634 | 7643.889  | 6876.401  | U17077    | 1764.625  | 1801.27   | AK022365  | 639.949   | 186.006   |
| NM_01467E | 28015.418 | 22260.66  | NM_00091E | 4042.548  | 3610.993  | BE892273  | 51292.996 | 49632.273 |
| AB040969  | 3209.043  | 3275.348  | NM_002344 | 578.311   | 400.057   | AF026929  | 478.215   | 497.373   |
| NM_003467 | 27180.521 | 25316.137 | AK024475  | 2348.677  | 2476.668  | NM_016734 | 540.327   | 728.273   |
| NM_01493E | 3306.664  | 2795.706  | AB026542  | 16183.119 | 17205.516 | Y08147    | 2551.456  | 2616.995  |
| NM_003943 | 1727.017  | 1765.603  | NM_01984E | 3764.386  | 3429.585  | D00174    | 4550.303  | 4232.159  |
| NM_01905E | 12499.223 | 14565.166 | NM_014433 | 965.376   | 1050.72   | NM_01638E | 439.246   | 286.349   |
| NM_00320E | 23489.514 | 23052.279 | NM_00206E | 10839.604 | 9602.798  | AK023117  | 1714.616  | 1289.933  |
| AF119902  | 670.336   | 864.904   | NM_014394 | 60379.145 | 54989.898 | AL122046  | 820.518   | 734.039   |
| NM_02052E | 1545.562  | 1563.823  | NM_005243 | 15351.578 | 12430.335 | NM_00085E | 3650.257  | 4653.905  |
| NM_00389C | 1323.618  | 1661.809  | NM_00621E | 1501.662  | 1449.29   | NM_00553E | 7739.891  | 7867.414  |
| BF127978  | 935.369   | 1058.588  | NM_01814C | 5333.177  | 6908.526  | NM_005077 | 2576.673  | 2870.554  |
| AF110801  | 1941.19   | 3223.713  | NM_01694E | 3131.083  | 3720.568  | NM_00442E | 8533.648  | 9425.266  |
| NM_01657E | 10487.729 | 14014.558 | NM_00014E | 2203.364  | 2651.09   | NM_00199C | 1221.683  | 1230.767  |
| AB018297  | 2804.934  | 3297.035  | AF272372  | 28812.271 | 28320.91  | NM_002141 | 1367.366  | 1430.137  |
| AK022565  | 9780.634  | 12875.562 | AK097045  | 3779.439  | 3238.659  | NM_00377E | 3675.891  | 3311.676  |
| AB025194  | 5247.056  | 4515.008  | AF161356  | 53470.555 | 50693.563 | NM_000744 | 704.904   | 1032.924  |
| NM_00623E | 748.084   | 801.032   | AB014548  | 4452.874  | 5800.745  | NM_00303E | 1120.455  | 1228.71   |
| BC020863  | 419.124   | 649.67    | AK024611  | 15063.925 | 15494.51  | NM_01450E | 1019.924  | 1237.277  |
| NM_017897 | 5086.17   | 4904.636  | BC010420  | 6263.388  | 8103.168  | NM_02037E | 4150.909  | 4812.498  |
| NM_00426E | 41258.395 | 49034.051 | NM_01228C | 22758.443 | 25980.678 | NM_016077 | 1045.83   | 877.136   |
| NM_00257E | 8401.604  | 10935.7   | NM_01817E | 7073.137  | 5790.06   | AF100756  | 4447.369  | 4228.496  |
| NM_001441 | 1489.644  | 1730.346  | U03886    | 870.948   | 692.399   | NM_00682E | 3978.469  | 3394.274  |
| NM_018324 | 906.058   | 932.337   | AK022040  | 1741.742  | 1389.004  | NM_00486E | 801.811   | 636.759   |

|           |           |           |           |           |           |           |           |           |
|-----------|-----------|-----------|-----------|-----------|-----------|-----------|-----------|-----------|
| AF064255  | 13346.973 | 12850.975 | AK022722  | 1349.659  | 1251.569  | NM_001661 | 1037.482  | 1115.791  |
| NM_01636E | 16305.764 | 17080.314 | NM_003591 | 14678.571 | 17382.588 | NM_01456E | 1382.273  | 1109.131  |
| U08853    | 6506.603  | 5959.218  | AL080111  | 18035.254 | 20936.494 | NM_02015C | 4125.072  | 3868.162  |
| NM_004261 | 36539.051 | 39444.813 | NM_00355C | 11148.131 | 10299.078 | NM_00715C | 3815.106  | 2833.668  |
| NM_01600E | 2487.012  | 2303.971  | NM_01464E | 3949.49   | 4661.901  | NM_006831 | 3052.539  | 3275.81   |
| NM_01624E | 8666.789  | 6495.682  | NM_00382E | 3089.096  | 2471.618  | AL162044  | 3779.051  | 3344.945  |
| AF005632  | 1174.827  | 1221.453  | AL110168  | 3379.122  | 3141.517  | AK024004  | 589.678   | 359.379   |
| NM_00090E | 3107.224  | 2939.7    | NM_002831 | 5581.287  | 5269.145  | NM_00673E | 2547.957  | 2574.867  |
| NM_00449E | 24095.705 | 22317.465 | AL833409  | 7051.329  | 8496.414  | NM_00364C | 1652.159  | 1225.586  |
| AF309489  | 392.477   | 500.301   | NM_01596E | 1030.885  | 1368.204  | NM_01439E | 4166.906  | 4256.957  |
| NM_004047 | 29320.725 | 26942.514 | NM_016147 | 6216.009  | 6489.002  | NM_00422E | 13128.183 | 12628.819 |
| AF287303  | 984.454   | 897.911   | NM_00283E | 2654.706  | 3221.769  | NM_00681E | 688.45    | 518.928   |
| NM_00482E | 1887.307  | 2007.182  | NM_01659E | 1739.354  | 1393.212  | NM_00135E | 9457.438  | 9470.361  |
| AB013889  | 382.057   | 559.23    | NM_01832E | 9019.142  | 9512.897  | NM_006267 | 861.201   | 915.707   |
| Y17179    | 63817.789 | 53307.648 | NM_01477E | 635.446   | 462.962   | NM_002661 | 4965.944  | 4917.599  |
| AF239613  | 2344.277  | 2448.398  | NM_00560E | 12771.951 | 13695.918 | AK023982  | 960.911   | 730.224   |
| NM_016044 | 4301.065  | 4281.972  | AF134707  | 1784.093  | 1887.304  | NM_01846E | 1538.362  | 2011.024  |
| NM_00052C | 4924.211  | 6027.546  | BE730629  | 789.559   | 742.087   | AK022097  | 3189.593  | 2780.871  |
| NM_00028E | 1254.603  | 1038.022  | AK027167  | 3388.386  | 4996.329  | NM_00216E | 9609.854  | 7540.954  |
| NM_00150C | 7079.584  | 6497.981  | AK025265  | 5096.457  | 5973.725  | NM_00466C | 9205.169  | 8920.395  |
| NM_00438E | 5274.55   | 5727.706  | NM_01327E | 1009.312  | 1240.049  | NM_00616E | 2114.245  | 1469.399  |
| NM_02037E | 760.205   | 1214.363  | NM_01865E | 18924.496 | 17196.783 | NM_016011 | 9766.967  | 9780.775  |
| AL110127  | 2831.148  | 2878.585  | AB011166  | 2361.983  | 2245.77   | AL035307  | 3940.945  | 3890.078  |
| AK001997  | 833.023   | 601.023   | AK024460  | 3490.351  | 3872.525  | NM_012234 | 4823.434  | 4208.642  |
| NM_00252E | 4714.347  | 4738.994  | NM_00660E | 6979.747  | 4815.362  | NM_015361 | 9422.865  | 7707.708  |
| D38438    | 1324.9    | 1122.64   | S78570    | 588.728   | 523.712   | NM_00431C | 6119.023  | 5111.596  |
| AV714945  | 994.132   | 677.473   | NM_00644E | 29673.229 | 26803.254 | NM_015537 | 3123.583  | 4357.064  |
| AF089897  | 762.901   | 692.474   | NM_00390E | 12028.957 | 10897.333 | NM_01652C | 8573.72   | 7496.542  |
| AF007872  | 5982.495  | 5188.176  | NM_016427 | 12004.475 | 10643.332 | AB018353  | 2122.979  | 1977.186  |
| M30938    | 14099.15  | 13505.873 | NM_00670E | 925.396   | 689.621   | NM_00703E | 3285.644  | 2813.17   |
| NM_01514E | 2855.915  | 3290.109  | U80741    | 4817.589  | 4354.924  | NM_002617 | 966.415   | 1140.948  |
| NM_004714 | 2833.422  | 3267.335  | NM_014497 | 1550.328  | 1500.621  | NM_00331E | 15666.938 | 15082.982 |
| NM_005401 | 730.283   | 841.997   | AL133598  | 5449.247  | 5950.651  | AF090907  | 2580.479  | 2410.031  |
| NM_002497 | 27824.836 | 29164.529 | NM_015511 | 5718.664  | 4776.289  | AK024476  | 5535.305  | 5181.102  |
| NM_00541E | 1038.592  | 756.191   | NM_00662E | 3589.688  | 3514.795  | X74794    | 9646.039  | 8660.52   |
| NM_00467C | 497.052   | 542.905   | NM_004891 | 19322.557 | 17114.754 | NM_00707E | 47439.895 | 49496.574 |
| L09081    | 622.026   | 547.887   | NM_00393E | 568.317   | 583.119   | NM_00291E | 580.671   | 667.456   |
| NM_00021E | 63151.625 | 55795.383 | NM_00287E | 1350.748  | 1226.1    | NM_00520E | 656.33    | 460.606   |
| NM_01611E | 2301.899  | 2117.651  | AF075068  | 20849.561 | 23148.168 | NM_00656E | 1789.323  | 1631.229  |
| NM_01422E | 2296.282  | 2348.198  | AF086529  | 394.76    | 317.004   | AK026154  | 9481.727  | 8130.814  |
| NM_00050E | 5380.033  | 4035.023  | AK024366  | 635.732   | 290.052   | AL117546  | 23166.848 | 17374.648 |
| NM_00454E | 1943.039  | 2538.216  | AK022171  | 574.051   | 408.305   | AK02707E  | 550.19    | 613.394   |
| X06182    | 2088.554  | 1693.93   | NM_018354 | 1356.717  | 1194.913  | NM_000384 | 854.776   | 541.389   |
| BE908993  | 3090.376  | 2765.736  | X78938    | 997.232   | 960.518   | AB018325  | 3688.158  | 3404.973  |
| AB012701  | 895.566   | 1229.199  | AK022379  | 1363.778  | 899.774   | AL157482  | 4382.945  | 4135.304  |
| M61156    | 1633.911  | 1672.837  | AK001439  | 783.781   | 626.067   | NM_00360E | 379.541   | 522.617   |
| R44005    | 1367.465  | 1040.309  | AK023462  | 848.398   | 870.903   | NM_00542E | 2790.038  | 2429.456  |
| AI942392  | 4730.857  | 3866.979  | AK001115  | 1060.835  | 726.024   | NM_017974 | 771.095   | 833.299   |
| M55040    | 716.088   | 581.533   | AK02334E  | 698.364   | 652.566   | X14677    | 1892.377  | 2115.709  |
| AW009739  | 782.206   | 959.089   | AK022452  | 720.349   | 817.946   | NM_00586E | 2084.636  | 2170.227  |
| BC036805  | 6843.042  | 5554.006  | AK023781  | 511.251   | 291.091   | U17077    | 1413.125  | 1457.394  |
| Z74615    | 1818.465  | 2125.817  | AF085881  | 4128.472  | 3696.101  | NM_00091E | 2270.685  | 2421.263  |
| X03884    | 52822.387 | 51180.949 | AK022737  | 9459.052  | 8346.165  | AK024475  | 1423.442  | 1176.846  |

|           |           |           |           |           |           |           |           |           |
|-----------|-----------|-----------|-----------|-----------|-----------|-----------|-----------|-----------|
| U36759    | 953.225   | 938.013   | NM_003472 | 39669.852 | 35875.777 | AB026542  | 14077.304 | 11280.709 |
| X91625    | 7712.539  | 8968.753  | Y11159    | 1472.14   | 1347.472  | NM_019846 | 5859.29   | 4728.898  |
| AF090901  | 760.765   | 883.608   | AB020648  | 4092.398  | 4061.21   | NM_014433 | 1668.503  | 1891.176  |
| AF004231  | 358.428   | 853.579   | AK025798  | 12251.878 | 11106.519 | NM_002062 | 8828.313  | 6972.824  |
| AF001862  | 22792.461 | 31020.418 | AF086173  | 711.369   | 434.112   | NM_014394 | 46810.875 | 37696.004 |
| NM_003890 | 1032.649  | 1150.655  | NM_018366 | 6618.143  | 5559.959  | NM_005243 | 13654.235 | 17446.564 |
| BF127978  | 816.271   | 675.73    | NM_019848 | 7187.616  | 6795.976  | NM_006218 | 2191.738  | 1841.752  |
| AF110801  | 1365.159  | 1446.797  | AL359056  | 603.279   | 613.858   | NM_018140 | 5132.382  | 3426.465  |
| NM_016579 | 10427.037 | 10218.557 | AK021497  | 1031.216  | 1680.918  | NM_016948 | 2831.914  | 3004.732  |
| AB018297  | 2400.644  | 2012.196  | AF124367  | 859.919   | 1506.702  | NM_000142 | 1530.459  | 949.761   |
| AK022565  | 7923.84   | 7113.221  | AK000798  | 721.952   | 647.876   | AF272372  | 23648.818 | 20120.311 |
| AK023151  | 2230.965  | 1964.269  | AK025168  | 520.724   | 251.911   | AK097045  | 2801.754  | 2653.068  |
| AB033076  | 1653.748  | 1484.98   | AK026947  | 22230.676 | 15432.937 | AF161356  | 59252.586 | 64231.141 |
| AK022876  | 3085.936  | 2811.121  | U84526    | 9218.442  | 8045.703  | AB014548  | 5577.931  | 4974.397  |
| AF134894  | 1792.13   | 1498.212  | L23401    | 2625.559  | 1961.824  | NM_018256 | 2831.897  | 2831.152  |
| NM_003938 | 5922.471  | 5223.713  | NM_018090 | 51548.859 | 43794.324 | AK025150  | 559.579   | 457.926   |
| NM_014827 | 18370.234 | 16527.105 | AK022728  | 22115.799 | 17801.125 | AK024611  | 5923.526  | 5389.27   |
| NM_004126 | 269.502   | 646.079   | AL109678  | 1527.757  | 1412.141  | BC010420  | 1095.47   | 1485.8    |
| U87460    | 10511.905 | 9576.461  | AL137524  | 1158.028  | 974.81    | NM_012280 | 14028.747 | 15000.449 |
| NM_003617 | 532.277   | 619.497   | AF218008  | 5048.384  | 4237.178  | NM_018172 | 2255.505  | 2353.375  |
| NM_001841 | 1709.856  | 1356.643  | M22404    | 11246.78  | 7816.063  | U03886    | 385.788   | 354.577   |
| NM_002054 | 2871.023  | 2402.084  | AF052115  | 870.986   | 860.501   | AK022040  | 887.895   | 839.561   |
| AF300649  | 1303.731  | 988.587   | NM_014019 | 16808.303 | 11131.502 | AK022722  | 571.26    | 721.341   |
| NM_004125 | 659.78    | 484.702   | Z70711    | 730.985   | 854.078   | NM_003591 | 11786.801 | 11002.666 |
| NM_000823 | 1060.548  | 1040.991  | AF116653  | 508.589   | 688.585   | AL080111  | 11985.981 | 8534.928  |
| NM_004414 | 4410.104  | 4895.699  | AK025323  | 585.746   | 599.335   | NM_003550 | 7228.513  | 6269.233  |
| NM_003317 | 4201.499  | 5159.858  | NM_013326 | 3850.403  | 3431.092  | NM_014642 | 2818.472  | 2282.047  |
| NM_001139 | 2650.771  | 4057.143  | BC037322  | 1295.944  | 1587.582  | NM_003829 | 1908.373  | 1175.928  |
| NM_004609 | 2227.223  | 3696.886  | Y12022    | 1719.716  | 1863.734  | AL110168  | 3654.969  | 2991.808  |
| NM_003772 | 2591.914  | 4622.128  | AK001375  | 2375.644  | 3222.053  | NM_002831 | 7265.491  | 6279.281  |
| NM_001541 | 898.373   | 1289.39   | NM_019597 | 10376.577 | 14811.663 | AL833409  | 5501.405  | 4909.488  |
| NM_004823 | 1348.44   | 1219.561  | AL137559  | 1004.9    | 1227.791  | NM_015966 | 905.978   | 617.994   |
| Y17179    | 67744.164 | 50692.152 | AF026944  | 3874.151  | 3801.544  | NM_016147 | 5542.039  | 4335.099  |
| AF239613  | 1781.128  | 1797.191  | AK021493  | 3761.612  | 3519.292  | NM_002833 | 1713.296  | 1034.891  |
| AK026840  | 3426.525  | 3774.959  | NM_006161 | 7323.397  | 5660.295  | NM_016592 | 1151.424  | 1261.351  |
| NM_000288 | 3086.247  | 2671.298  | NM_006204 | 629.852   | 378.819   | NM_018326 | 7249.171  | 5681.566  |
| AK026317  | 8722.761  | 8094.518  | NM_012155 | 5445.135  | 4387.703  | NM_005606 | 4879.85   | 5451.405  |
| X82207    | 8384.625  | 8922.957  | AF144700  | 2187.509  | 2116.584  | AF134707  | 982.584   | 779.849   |
| NM_015044 | 1986.453  | 1879.785  | NM_004105 | 9203.858  | 7354.524  | BE730629  | 1029.302  | 1094.522  |
| NM_002867 | 764.366   | 693.922   | AB046825  | 3063.19   | 2497.552  | AK027167  | 2429.232  | 2201.886  |
| BF217496  | 2573.908  | 2227.181  | X64975    | 1095.118  | 813.367   | AK025265  | 4945.699  | 4044.011  |
| NM_004762 | 11766.742 | 10318.316 | AL050297  | 6463.06   | 4604.89   | NM_013279 | 769.376   | 432.772   |
| NM_006641 | 36088.945 | 34761.961 | AK026966  | 2239.045  | 1399.166  | NM_018652 | 14186.173 | 12962.849 |
| NM_000634 | 6283.986  | 4961.625  | AF147398  | 643.8     | 755.352   | AB011166  | 1997.78   | 1450.941  |
| NM_014679 | 30119.959 | 29911.172 | AF185573  | 584.457   | 412.212   | AK024460  | 3559.559  | 2769.701  |
| AB040969  | 2960.419  | 2804.79   | AK025268  | 1683.264  | 1012.57   | NM_006606 | 4060.647  | 3402.744  |
| NM_003467 | 27209.775 | 20895.592 | AL833005  | 3055.629  | 1809.588  | NM_006442 | 14762.776 | 9822.534  |
| NM_014936 | 3810.653  | 2824.969  | L43366    | 2586.203  | 2514.204  | NM_003902 | 6701.426  | 5659.725  |
| NM_003943 | 1781.116  | 2219.043  | AK026124  | 6641.541  | 4768.105  | NM_016427 | 6337.194  | 5326.991  |
| NM_019052 | 11988.483 | 16209.273 | NM_015509 | 4603.876  | 4313.27   | U80741    | 1593.37   | 1333.109  |
| NM_003202 | 27008.895 | 38497.41  | AL110157  | 4112.854  | 4640.4    | NM_014497 | 957.668   | 616.362   |
| AF119902  | 767.622   | 1649.402  | NM_002319 | 7226.115  | 8505.52   | AL133598  | 4925.02   | 4140.085  |
| NM_020525 | 1986.999  | 2785.504  | L38712    | 11380.944 | 10008.254 | NM_015511 | 2713.134  | 2251.35   |



|           |           |           |           |           |           |           |           |           |
|-----------|-----------|-----------|-----------|-----------|-----------|-----------|-----------|-----------|
| X62468    | 367.771   | 1006.204  | U84508    | 1523.319  | 1429.279  | NM_006625 | 2525.359  | 1822.948  |
| NM_015148 | 2233.114  | 2004.239  | NM_017793 | 9093.701  | 7334.915  | NM_004891 | 15137.78  | 10765.159 |
| NM_004714 | 3160.162  | 2759.254  | NM_012131 | 3583.508  | 2432.497  | NM_002879 | 728.343   | 558.263   |
| NM_002497 | 24942.822 | 19826.42  | S41540    | 1771.629  | 1080.056  | AF075068  | 21291.141 | 20548.424 |
| AB025194  | 7565.761  | 10306.266 | CY3Cy5    | 1306.499  | 132.633   | AK024366  | 628.278   | 650.767   |
| NM_006239 | 1320.13   | 1426.418  | AI417481  | 298.063   | 641.129   | X78938    | 654.892   | 615.567   |
| BC020863  | 638.367   | 517.818   | BI906766  | 1185.587  | 1286.102  | AK022379  | 786.729   | 744.857   |
| NM_017897 | 5503.603  | 5853.763  | U60519    | 1767.982  | 2367.438  | AK001439  | 301.843   | 492.328   |
| NM_004265 | 49921.52  | 48157.191 | AA282906  | 1863.991  | 3088.367  | AK001115  | 1280.765  | 1092.858  |
| NM_002572 | 7889.303  | 7436.917  | L02870    | 2274.547  | 2840.36   | NM_014099 | 2125.697  | 1749.118  |
| NM_001441 | 2042.159  | 1830.651  | BG755482  | 7705.319  | 10713.375 | AK022452  | 1628.959  | 539.463   |
| NM_018324 | 760.536   | 911.001   | AI480307  | 7483.87   | 11920.155 | AF085881  | 4300.677  | 3587.684  |
| AF064255  | 12973.415 | 11300.928 | X51420    | 1287.123  | 2683.007  | AK022737  | 9345.204  | 8306.46   |
| NM_016368 | 12836.798 | 10856.764 | X51757    | 6237.639  | 12682.181 | NM_003472 | 38515.145 | 24712.803 |
| U08853    | 7353.167  | 8321.293  | L24038    | 1279.458  | 2041.702  | U92980    | 2553.829  | 1553.42   |
| NM_004261 | 38389.082 | 35669.949 | NM_002751 | 1280.648  | 1687.406  | AF133658  | 1179.298  | 973.457   |
| NM_016006 | 2639.434  | 2175.198  | M55593    | 965.789   | 1576.8    | AB048287  | 6803.09   | 6098.17   |
| NM_016245 | 9523.684  | 8040.318  | NM_078467 | 2892.975  | 2400.537  | Y11159    | 1725.971  | 1470.26   |
| AF005632  | 1267.546  | 1346.931  | SR2       | 49150.172 | 37511.832 | AB020648  | 3412.806  | 3196.813  |
| NM_000903 | 4402.483  | 4905.684  | SR4       | 11934.1   | 8815.063  | AK025798  | 13355.063 | 10641.839 |
| NM_004493 | 27939.777 | 37930.539 | SR6       | 1534.309  | 1405.832  | AF086173  | 319.993   | 374.198   |
| AF309489  | 664.448   | 843.597   | SR8       | 6990.823  | 18802.068 | AK025164  | 594.744   | 445.04    |
| AF287303  | 1134.17   | 1409.271  | SR10      | 26589.672 | 13683.825 | NM_018366 | 4269.482  | 4221.256  |
| NM_006773 | 2672.599  | 2087.346  | CY3Cy5    | 1568.547  | 145.441   | AB040290  | 975.118   | 1003.519  |
| AK024439  | 13748.023 | 10464.085 | NM_016848 | 6583.145  | 8478.306  | NM_019848 | 9852.945  | 10431.404 |
| X89676    | 1146.387  | 834.698   | NM_000514 | 3568.052  | 5346.119  | AL359056  | 661.256   | 627.368   |
| NM_012444 | 758.618   | 732.869   | AL137432  | 3052.725  | 3977.928  | AK021497  | 843.001   | 1043.04   |
| Z32684    | 3574.117  | 3482.979  | NM_000957 | 2271.276  | 2944.935  | AF124367  | 502.086   | 556.445   |
| NM_016512 | 835.861   | 944.939   | NM_019043 | 5173.205  | 5606.532  | AK023803  | 529.625   | 503.862   |
| NM_017488 | 6040.647  | 6067.246  | NM_003240 | 2128.333  | 2139.418  | AK026947  | 32792.676 | 31635.443 |
| AY009400  | 769.87    | 880.171   | NM_016564 | 15547.652 | 17139.908 | U84526    | 8761.288  | 8889.046  |
| NM_005069 | 615.999   | 954.523   | AF279656  | 846.619   | 915.71    | L23401    | 2077.603  | 1368.44   |
| NM_016044 | 4596.851  | 4871.761  | AB007933  | 13293.218 | 11142.956 | AL109678  | 1241.617  | 987.174   |
| NM_000520 | 6390.915  | 5635.75   | NM_006702 | 4660.268  | 3756.76   | AL137524  | 1598.155  | 1314.195  |
| NM_000289 | 1314.833  | 1274.463  | NM_001396 | 2110.468  | 1849.759  | AF218008  | 4338.859  | 3304.344  |
| NM_001500 | 6191.963  | 5570.772  | NM_014474 | 1385.717  | 1728.81   | M22404    | 16638.258 | 17466.564 |
| NM_004388 | 5426.783  | 3400.744  | NM_016249 | 537.21    | 397.325   | AF052115  | 532.069   | 507.988   |
| NM_020379 | 1047.983  | 1302.708  | NM_006181 | 607.493   | 1470.979  | NM_014019 | 16719.814 | 14075.745 |
| AL110127  | 2621.666  | 1702.259  | NM_003796 | 8927.438  | 7313.393  | Z70711    | 1093.386  | 1064.037  |
| AK001997  | 682.668   | 442.744   | NM_002973 | 1859.675  | 2224.035  | AF116653  | 529.826   | 342.612   |
| NM_002528 | 5243.052  | 5621.423  | NM_004436 | 14280.607 | 11381.336 | NM_012368 | 1250.34   | 1280.456  |
| D38438    | 1658.256  | 1763.91   | NM_006580 | 1488.447  | 1027.097  | AK025323  | 675.958   | 678.765   |
| AV714945  | 1205.397  | 1455.032  | NM_001305 | 1031.655  | 789.03    | NM_013326 | 3753.619  | 3354.477  |
| AF089897  | 1298.659  | 1078.98   | NM_005082 | 662.939   | 626.739   | BC037322  | 1068.878  | 869.196   |
| NM_017586 | 4336.729  | 3784.999  | D17028    | 37062.379 | 56725.289 | Y12022    | 1423.282  | 1213.518  |
| NM_004148 | 6094.287  | 5266.843  | NM_013442 | 34625.449 | 53972.672 | AK001375  | 1503.649  | 805.402   |
| X03168    | 1562.636  | 961.041   | BG611243  | 3170.825  | 6281.198  | NM_019597 | 4042.924  | 4032.727  |
| NM_005168 | 3702.5    | 2571.47   | AK023221  | 4419.521  | 5745.562  | AL137559  | 836.405   | 812.391   |
| NM_017801 | 10976.862 | 9249.332  | NM_003664 | 2764.182  | 2931.352  | AF026944  | 2657.884  | 1698.622  |
| NM_007348 | 6793.693  | 5714.283  | NM_002426 | 1531.012  | 1849.756  | AK021493  | 2558.18   | 2407.613  |
| U65473    | 2667.511  | 3394.619  | AK027182  | 646.894   | 768.274   | NM_006161 | 6585.828  | 5259.323  |
| D63481    | 5472.436  | 6023.502  | J03651    | 2317.216  | 2969.329  | NM_006192 | 503.901   | 318.468   |
| AY009951  | 21099.795 | 18204.689 | U61738    | 2407.253  | 3786.381  | NM_006204 | 478.613   | 631.94    |

|           |           |           |           |           |           |           |           |           |
|-----------|-----------|-----------|-----------|-----------|-----------|-----------|-----------|-----------|
| AL157424  | 2190.325  | 2090.4    | AJ132087  | 533.053   | 797.076   | NM_012155 | 5161.045  | 4646.85   |
| AK024422  | 581.278   | 629.931   | U92818    | 455.119   | 924.284   | AF144700  | 1558.217  | 1499.678  |
| NM_002673 | 1261.916  | 1283.257  | NM_000442 | 4220.224  | 4479.538  | AB046825  | 2943.596  | 2624.545  |
| NM_003876 | 7278.143  | 7584.934  | NM_002934 | 1261.195  | 1314.763  | X64975    | 1506.858  | 1418.854  |
| AJ276310  | 591.53    | 457.834   | AK023011  | 10208.909 | 11388.843 | AF071509  | 457.381   | 469.606   |
| NM_012295 | 6297.805  | 4280.263  | NM_016816 | 1091.108  | 1180.058  | AL050297  | 5294.486  | 4408.314  |
| NM_015910 | 956.175   | 636.469   | L17325    | 712.532   | 946.363   | AK026966  | 2006.107  | 1531.687  |
| NM_000222 | 400.631   | 354.522   | NM_017716 | 1088.307  | 1809.757  | AJ009817  | 349.252   | 305.545   |
| AL133666  | 887.047   | 740.095   | M58603    | 7312.316  | 6679.573  | AK025268  | 1122.234  | 1208.615  |
| NM_000663 | 3298.072  | 3298.714  | NM_003639 | 2331.254  | 2231.855  | AL833005  | 2508.112  | 2505.409  |
| NM_004710 | 5650.61   | 6411.73   | NM_000115 | 1785.045  | 1370.169  | L43366    | 2043.54   | 1997.09   |
| NM_004396 | 22145.33  | 30983.395 | AF308801  | 3345.422  | 3045.475  | AK026124  | 5936.89   | 5009.961  |
| NM_001043 | 3418.115  | 4859.559  | NM_007318 | 38624.961 | 25814.508 | NM_015505 | 3228.17   | 2552.412  |
| NM_004779 | 13805.826 | 13587.551 | NM_014874 | 1082.879  | 905.311   | AL110157  | 3309.415  | 1934.586  |
| NM_019071 | 5778.592  | 5357.016  | NM_002762 | 553.815   | 1122.384  | NM_002315 | 5191.807  | 5384.684  |
| NM_014399 | 7924.51   | 7592.291  | NM_006324 | 12731.418 | 25209.254 | L38712    | 6292.773  | 6879.998  |
| AF113685  | 824.487   | 694.533   | NM_005469 | 7841.303  | 9441.112  | U84508    | 1135.113  | 1362.372  |
| NM_005470 | 7877.748  | 7238.366  | NM_016361 | 2814.04   | 3286.497  | NM_017793 | 4634.486  | 4168.497  |
| AF142570  | 629.463   | 658.329   | NM_003708 | 34786.887 | 32984.238 | NM_012131 | 1758.724  | 1916.774  |
| NM_004225 | 18734.197 | 19930.904 | NM_014349 | 5506.377  | 7313.065  | S41540    | 1158.959  | 995.673   |
| NM_003862 | 3368.497  | 3014.488  | AB040895  | 468.337   | 907.418   | CY3Cy5    | 2355.662  | 235.82    |
| NM_002873 | 5908.874  | 6496.242  | NM_018210 | 2973.182  | 4208.374  | AI417481  | 490.202   | 640.939   |
| NM_015571 | 10839.52  | 10047.017 | NM_001096 | 7167.982  | 9643.866  | BI906766  | 859.805   | 997.406   |
| NM_004701 | 25336.227 | 24341.994 | NM_016014 | 5941.861  | 6361.635  | U60519    | 1610.171  | 1985.138  |
| AK025554  | 3062.875  | 2992.143  | NM_000198 | 224.712   | 415.387   | AA282906  | 1876.226  | 2154.355  |
| BI824151  | 12977.256 | 12302.407 | NM_017581 | 2125.49   | 1856.458  | L02870    | 3616.182  | 3504.361  |
| AK021791  | 9451.709  | 8377.988  | AA488804  | 7572.012  | 7078.826  | BG755482  | 6224.842  | 5229.604  |
| NM_004052 | 37050.121 | 27034.602 | NM_006539 | 449.494   | 717.882   | AI480307  | 6070.929  | 4187.808  |
| NM_004394 | 11959.57  | 7346.072  | NM_001684 | 1510.866  | 1446.5    | X51420    | 1017.223  | 812.214   |
| NM_005727 | 3920.873  | 4281.401  | NM_016318 | 4292.79   | 3089.677  | X51757    | 5440.924  | 2353.898  |
| AK027242  | 3190.627  | 2822.397  | NM_013309 | 680.668   | 642.573   | L24038    | 1140.823  | 984.86    |
| NM_001279 | 15095.194 | 13127.907 | NM_019891 | 818.224   | 636.827   | NM_053056 | 489.817   | 374.852   |
| NM_005010 | 2044.905  | 2053.811  | AF038186  | 2436.523  | 2154.423  | SR2       | 48737.34  | 38123.676 |
| NM_020199 | 4606.917  | 6805.412  | NM_016277 | 3440.309  | 2984.5    | SR4       | 13987.356 | 11465.194 |
| U96136    | 1150.028  | 1415.261  | NM_006554 | 6931.325  | 10094.437 | SR6       | 1485.816  | 1368.479  |
| NM_002773 | 620.44    | 438.315   | X99962    | 10067.024 | 21114.119 | SR8       | 8791.832  | 19382.521 |
| NM_015884 | 1283.357  | 1118.56   | AL050114  | 367.931   | 1032.864  | SR10      | 26341.08  | 8116.706  |
| AF201380  | 5971.228  | 6736.481  | AK021492  | 1916.969  | 2383.993  | NM_016848 | 4643.531  | 5953.931  |
| NM_012392 | 17489.164 | 15478.329 | AK023794  | 13609.626 | 17202.434 | NM_000514 | 3213.53   | 5346.166  |
| NM_014833 | 20390.977 | 22359.508 | NM_019885 | 2932.385  | 3449.639  | AL137432  | 2938.417  | 4856.556  |
| NM_000045 | 657.664   | 766.438   | AB033103  | 1357.725  | 1642.966  | NM_000957 | 3349.313  | 4368.309  |
| NM_003878 | 20880.371 | 20461.041 | NM_002907 | 1577.849  | 2149.693  | NM_019043 | 5232.97   | 4747.484  |
| NM_004832 | 928.469   | 988.984   | AK024098  | 839.474   | 892.735   | NM_003240 | 3313.593  | 3109.114  |
| NM_005957 | 1813.646  | 2124.32   | AK001116  | 351.905   | 524.955   | NM_016564 | 35242.844 | 27213.414 |
| AK024374  | 1894.466  | 2002.558  | AK022371  | 2817.021  | 4410.4    | AF279656  | 964.797   | 768.97    |
| NM_007101 | 1020.93   | 1109.534  | D42045    | 3267.635  | 2993.079  | AB007933  | 30771.434 | 19147.924 |
| NM_018234 | 696.282   | 677.217   | AB007953  | 1668.24   | 1996.707  | NM_006702 | 7170.511  | 7123.706  |
| AB033062  | 2074.755  | 1452.999  | NM_014002 | 3867.923  | 4622.099  | NM_006181 | 800.923   | 2558.767  |
| NM_016437 | 43308.004 | 37287.422 | NM_004197 | 3887.51   | 3475.682  | NM_004436 | 17949.037 | 15361.952 |
| NM_002720 | 25968.713 | 21821.752 | NM_004073 | 1724.4    | 3205.146  | NM_006580 | 3636.395  | 3660.27   |
| AK024716  | 21126.215 | 19690.107 | NM_001278 | 3736.553  | 3811.713  | NM_001305 | 1471.228  | 1680.122  |
| X67155    | 5834.157  | 4945.723  | NM_019105 | 1011.787  | 939.319   | NM_005082 | 641.325   | 776.582   |
| NM_020380 | 10123.276 | 9992.842  | NM_000294 | 3101.161  | 2624.403  | D17028    | 28504.02  | 31283.127 |

|           |           |           |           |           |           |           |           |           |
|-----------|-----------|-----------|-----------|-----------|-----------|-----------|-----------|-----------|
| AL137519  | 824.076   | 1013.628  | AJ272212  | 1045.101  | 795.023   | AK023221  | 3832.351  | 3973.259  |
| NM_002890 | 43137.844 | 45714.488 | NM_001626 | 8625.046  | 6228.421  | J03651    | 2890.72   | 3410.917  |
| NM_001330 | 17334.645 | 24170.438 | NM_005677 | 1032.514  | 705.517   | U61738    | 3955.606  | 3550.354  |
| NM_015927 | 494.439   | 852.958   | AF229803  | 428.302   | 1274.297  | AJ132087  | 633.315   | 484.535   |
| NM_005122 | 1393.148  | 1406.202  | AF151810  | 2277.314  | 3361.995  | NM_000442 | 4519.091  | 2977.114  |
| AL133055  | 735.877   | 727.622   | NM_002130 | 31783.549 | 41700.996 | NM_002934 | 2157      | 1209.222  |
| NM_014552 | 2538.954  | 2738.136  | NM_001305 | 1281.13   | 1599.281  | AK023011  | 15582.787 | 9833.382  |
| NM_003072 | 20703.232 | 21459.74  | NM_005082 | 635.052   | 1132.133  | NM_016816 | 1805.477  | 2263.468  |
| NM_001913 | 5265.479  | 5728.998  | D17028    | 28069.152 | 31461.393 | L17325    | 3013.567  | 2479.225  |
| AK025594  | 1930.854  | 1895.682  | NM_013442 | 26773.18  | 31552.824 | NM_000115 | 2895.422  | 2634.768  |
| AB040931  | 6572.081  | 7978.54   | BG611243  | 2878.406  | 3762.841  | AF308801  | 3913.323  | 3988.671  |
| NM_003599 | 3346.255  | 2991.293  | AI417481  | 326.631   | 519.607   | NM_007318 | 49324.609 | 57513.141 |
| NM_015911 | 1674.48   | 1965.132  | BI906766  | 586.539   | 914.267   | NM_014874 | 1090.229  | 1254.722  |
| BC011826  | 10234.459 | 11003.093 | U60519    | 881.084   | 1310.407  | NM_005765 | 18334.029 | 18237.926 |
| NM_017647 | 13220.283 | 13130.969 | AA282906  | 930.956   | 966.461   | NM_002762 | 746.98    | 686.923   |
| NM_012091 | 4599.441  | 4697.25   | L02870    | 1192.455  | 1270.241  | NM_006324 | 10201.37  | 8994.577  |
| NM_012321 | 8329.828  | 8472.199  | BG755482  | 3740.746  | 4580.124  | NM_005469 | 8203.719  | 13129.997 |
| D13642    | 7946.615  | 7358.886  | AI480307  | 4975.717  | 5563.418  | NM_016361 | 2551.11   | 3481.015  |
| NM_004741 | 13908.435 | 12218.475 | X51420    | 722.072   | 819.187   | NM_018210 | 3067.116  | 2657.773  |
| NM_018032 | 7859.325  | 9232.167  | X51757    | 4146.121  | 7747.403  | NM_001096 | 5764.12   | 4339.076  |
| NM_003675 | 15406.114 | 16016.159 | L24038    | 736.172   | 925.637   | NM_016014 | 6293.715  | 4633.611  |
| NM_017518 | 6641.908  | 5944.213  | NM_053056 | 551.053   | 1024.844  | NM_000198 | 896.37    | 581.994   |
| NM_004117 | 6928.067  | 6922.734  | NM_002751 | 1155.918  | 869.015   | NM_018327 | 881.05    | 414.842   |
| NM_016594 | 13379.397 | 12804.751 | M55593    | 501.758   | 608.731   | NM_017581 | 2451.18   | 1509.616  |
| NM_030752 | 12647.538 | 12054.696 | NM_078467 | 2643.035  | 1664.93   | AA488804  | 9153.883  | 6999.086  |
| D26068    | 49156.867 | 45810.742 | AK001883  | 13111.896 | 12276.059 | NM_006539 | 1045.744  | 1648.029  |
| NM_018559 | 10061.629 | 11563.207 | NM_014629 | 4239.555  | 4200.563  | NM_001684 | 1665.229  | 2428.517  |
| NM_017593 | 8115.707  | 8246.684  | NM_007318 | 49864.762 | 50331.059 | NM_016318 | 9267.261  | 8448.813  |
| NM_004282 | 19328.111 | 22790.568 | NM_014874 | 1420.803  | 1853.859  | NM_013309 | 871.878   | 820.937   |
| AK025695  | 4814.711  | 2864.813  | NM_005765 | 17879.689 | 22653.021 | NM_019891 | 1105.581  | 1305.306  |
| AK025442  | 8179.142  | 7071.16   | NM_002762 | 473.561   | 569.974   | AF038186  | 3298.159  | 3714.613  |
| AL050041  | 1421.243  | 1274.548  | NM_006324 | 10595.486 | 13372.17  | NM_016277 | 4217.003  | 4961.926  |
| NM_002451 | 4816.889  | 4707.854  | NM_016848 | 3605.983  | 4490.483  | NM_007247 | 4736.268  | 4796.979  |
| NM_013411 | 2869.222  | 2296.021  | NM_000514 | 1872.416  | 2304.773  | NM_006554 | 3878.263  | 4033.616  |
| AB007956  | 921.806   | 806.627   | AL137432  | 2037.051  | 2399.459  | X99962    | 9940.758  | 13873.762 |
| NM_020200 | 1115.23   | 993.666   | NM_000957 | 1271.935  | 1193.708  | AL050114  | 440.442   | 579.512   |
| NM_001248 | 836.94    | 646.716   | NM_019043 | 5004.609  | 5674.143  | AK021492  | 2510.637  | 3242.513  |
| NM_000156 | 1267.503  | 816.248   | NM_003240 | 1375.056  | 1540.471  | AK023794  | 17126.676 | 19943.699 |
| NM_000180 | 12189.714 | 14164.371 | NM_016564 | 10558.284 | 8890.006  | NM_019885 | 2718.405  | 3047.915  |
| NM_000858 | 26929.449 | 30129.408 | AF279656  | 835.433   | 1262.936  | AB033103  | 1566.789  | 1356.278  |
| AF254087  | 3720.695  | 4273.325  | AB007933  | 11989.893 | 12915.084 | NM_002907 | 1785.532  | 1401.748  |
| NM_017715 | 1747.891  | 1658.238  | NM_006702 | 3607.765  | 3511.521  | AK024098  | 1060.885  | 832.317   |
| AL117607  | 1596.712  | 1975.342  | NM_001396 | 1504.824  | 1477.286  | AK022371  | 3518.602  | 1966.301  |
| AB037774  | 4432.441  | 4463.369  | NM_014474 | 1097.898  | 828.835   | D42045    | 3470.557  | 2528.582  |
| NM_005438 | 1014.126  | 932.933   | NM_016249 | 318.819   | 234.299   | AB007953  | 1541.145  | 1633.955  |
| AK024361  | 3271.637  | 3093.931  | NM_006181 | 525.565   | 465.035   | NM_014002 | 3518.499  | 4380.305  |
| NM_004350 | 4356.997  | 4223.428  | NM_003796 | 8417.435  | 6088.398  | NM_004197 | 4230.083  | 4803.989  |
| NM_018044 | 11371.788 | 12961.854 | NM_002973 | 1626.975  | 1943.716  | NM_004073 | 1265.225  | 1262.481  |
| NM_004503 | 847.43    | 810.961   | NM_004436 | 13835.395 | 12461.86  | NM_001278 | 4389.326  | 3325.008  |
| NM_001717 | 695.968   | 854.452   | NM_006580 | 1513.28   | 1277.78   | NM_019105 | 2263.819  | 1693.966  |
| AF274347  | 1167.235  | 1379.946  | NM_019891 | 1101.863  | 1499.086  | NM_000294 | 4449.38   | 4340.438  |
| AK001144  | 605.67    | 585.576   | AF038186  | 3309.184  | 3634.129  | AJ272212  | 1680.474  | 1563.281  |
| NM_018555 | 3506.654  | 3616.865  | NM_016277 | 3696.443  | 4007.718  | NM_001626 | 21299.848 | 21132.205 |

|           |           |           |           |           |           |           |           |           |
|-----------|-----------|-----------|-----------|-----------|-----------|-----------|-----------|-----------|
| AK023525  | 3782.716  | 2477.737  | NM_007247 | 4581.405  | 5630.567  | NM_005677 | 2109.153  | 2294.802  |
| AF085829  | 865.797   | 792.536   | NM_006554 | 4524.58   | 5874.804  | AF229803  | 644.27    | 700.44    |
| AF075029  | 449.538   | 669.976   | X99962    | 8824.999  | 11556.634 | AF151810  | 1718.064  | 1530.657  |
| AK021903  | 1830.482  | 1215.412  | AK023221  | 3444.786  | 5178.004  | NM_002130 | 34723.09  | 28993.055 |
| AL390143  | 2632.553  | 2468.619  | NM_003664 | 1948.838  | 2378.324  | NM_005082 | 679.82    | 1309.889  |
| AL162075  | 1671.316  | 1799.996  | NM_002426 | 1463.666  | 2527.841  | D17028    | 27456.617 | 33744.719 |
| AF147384  | 489.255   | 654.426   | AK027182  | 354.91    | 562.097   | NM_013442 | 26889.375 | 26906.885 |
| AK021595  | 1972.329  | 2067.357  | J03651    | 2083.142  | 1783.724  | BG611243  | 2196.393  | 2402.114  |
| AK021648  | 688.129   | 862.958   | U61738    | 1421.582  | 1484.995  | AI417481  | 347.118   | 597.651   |
| AF147358  | 12251.482 | 14057.618 | AJ132087  | 438.795   | 752.964   | BI906766  | 756.832   | 510.638   |
| AL110290  | 614.443   | 776.385   | U92818    | 342.665   | 341.543   | U60519    | 1226.396  | 1069.319  |
| NM_018410 | 11374.429 | 11635.925 | NM_000442 | 3595.3    | 2714.317  | AA282906  | 1261.199  | 1245.246  |
| AF147404  | 706.574   | 747.309   | NM_002934 | 1033.977  | 1294.133  | L02870    | 2524.069  | 2262.925  |
| AF086355  | 1005.404  | 685.186   | AK023011  | 9202.106  | 7156.63   | BG755482  | 5014.84   | 3678.585  |
| AF086403  | 688.641   | 402.682   | NM_016816 | 887.659   | 916.124   | AI480307  | 5544.461  | 3623.872  |
| AF086452  | 755.931   | 712.885   | L17325    | 655.062   | 561.671   | X51420    | 1140.052  | 1214.927  |
| NM_016364 | 248.567   | 647.388   | NM_017716 | 681.083   | 788.545   | X51757    | 7734.485  | 14887.71  |
| AF086419  | 1905.613  | 1917.163  | M58603    | 5878.166  | 5337.461  | L24038    | 1226.027  | 1849.379  |
| AF086461  | 1137.498  | 966.274   | NM_003639 | 1896.622  | 1365.618  | NM_053056 | 453.603   | 827.551   |
| AK000789  | 386.126   | 703.848   | NM_000115 | 1428.293  | 1650.848  | NM_006186 | 644.942   | 607.493   |
| AF131795  | 839.584   | 975.937   | AF308801  | 4059.997  | 5175.273  | NM_002751 | 1411.344  | 1312.239  |
| AL833296  | 2835.563  | 3801.232  | AJ272212  | 1487.056  | 1849.608  | M55593    | 1657.61   | 1497.801  |
| AL110240  | 7583.474  | 8610.381  | NM_001626 | 15764.396 | 16024.321 | NM_078467 | 4246.506  | 4792.262  |
| AF085933  | 875.291   | 713.506   | NM_005677 | 1558.243  | 2073.318  | AK001883  | 17988.953 | 12567.437 |
| AF147431  | 722.667   | 659.089   | AF229803  | 471.327   | 763.886   | NM_014629 | 4549.088  | 3923.643  |
| AK026422  | 4161.779  | 3829.256  | AF151810  | 2060.954  | 2295.496  | NM_014874 | 1230.93   | 2152.132  |
| AF085938  | 1891.155  | 1922.694  | NM_002130 | 31124.303 | 38890.688 | NM_005765 | 17624.797 | 16336.394 |
| AK022264  | 1296.729  | 1344.837  | NM_005469 | 7635.704  | 9746.215  | NM_002762 | 723.405   | 726.499   |
| AL137331  | 1193.511  | 1129.078  | NM_016361 | 2168.712  | 2335.108  | NM_006324 | 8770.834  | 8638.241  |
| AL162040  | 3407.782  | 2951.688  | NM_003708 | 26295.861 | 25131.09  | NM_016848 | 4203.865  | 3870.812  |
| AL442084  | 982.372   | 967.04    | NM_014349 | 4631.21   | 6131.514  | NM_000514 | 2777.376  | 2441.658  |
| AL137371  | 10494.266 | 9040.765  | AB040895  | 655.127   | 598.277   | AL137432  | 1633.863  | 1407.297  |
| AL137596  | 3683.427  | 2889.1    | NM_018210 | 2729.6    | 2320.756  | NM_000957 | 2271.74   | 1471.529  |
| AL353942  | 13192.572 | 11443.756 | NM_001096 | 4620.877  | 4585.613  | NM_019043 | 4056.478  | 2622.316  |
| Z38010    | 2436.109  | 2069.226  | NM_016014 | 4986.405  | 3782.398  | NM_003240 | 2367.519  | 1863.056  |
| AF086114  | 663.661   | 642.609   | NM_018327 | 441.682   | 312.088   | NM_016564 | 27050.08  | 24900.119 |
| AK024204  | 772.019   | 1001.381  | NM_017581 | 1924.875  | 1533.95   | AF279656  | 932.867   | 1552.77   |
| AK023737  | 2478.927  | 2466.03   | AA488804  | 6628.999  | 5219.96   | AK021660  | 349.969   | 624.289   |
| NM_006609 | 5838.356  | 6115.522  | NM_006539 | 397.239   | 460.883   | AB007933  | 28859.104 | 28416.551 |
| NM_014118 | 631.328   | 998.831   | NM_001684 | 1310.17   | 1092.875  | NM_006702 | 4935.833  | 5152.845  |
| NM_014157 | 1453.994  | 1109.125  | NM_016318 | 3924.59   | 3453.604  | NM_001396 | 4300.246  | 3575.548  |
| AF090933  | 387.879   | 501.959   | NM_013309 | 1030.389  | 1698.955  | NM_014474 | 1772.494  | 1899.558  |
| AF111851  | 1016.897  | 1058.271  | NM_078467 | 3758.1    | 3311.396  | NM_016249 | 1148.296  | 1212.049  |
| AL360200  | 968.618   | 1241.941  | AK001883  | 16540.049 | 19091.799 | NM_006181 | 1073.411  | 1059.823  |
| AK021992  | 570.091   | 722.415   | NM_014629 | 5583.809  | 6994.619  | NM_003796 | 13439.331 | 12825.147 |
| AK022102  | 490.094   | 564.254   | AL050114  | 566.289   | 710.3     | NM_002973 | 2499.446  | 2854.222  |
| AK022235  | 1292.047  | 808.791   | AK021492  | 2069.368  | 1997.983  | NM_004436 | 17608.387 | 16109.969 |
| AK022378  | 2697.807  | 2119.261  | AK023794  | 9949.009  | 10831.504 | NM_006580 | 3136.567  | 3002.579  |
| AK022009  | 618.564   | 477.849   | NM_019885 | 2791.011  | 3021.257  | NM_019891 | 1911.412  | 4913.917  |
| AK022401  | 561.504   | 598.117   | AB033103  | 1293.934  | 1268.218  | AF038186  | 2748.158  | 3655.777  |
| NM_017597 | 1281.487  | 1264.768  | NM_002907 | 2037.458  | 1562.694  | NM_016277 | 3161.257  | 3998.944  |
| AK021772  | 587.305   | 706.017   | AK024098  | 718.018   | 537.35    | NM_007247 | 3753.87   | 3689.287  |
| AK026297  | 272.996   | 803.89    | AK001116  | 561.352   | 834.29    | NM_006554 | 3178.857  | 3055.606  |

|           |           |           |           |           |           |           |           |           |
|-----------|-----------|-----------|-----------|-----------|-----------|-----------|-----------|-----------|
| AK054831  | 1002.568  | 731.3     | AK022371  | 3515.696  | 7226.9    | X99962    | 7478.226  | 6860.887  |
| AK021770  | 1023.71   | 806.599   | D42045    | 2785.606  | 2410.167  | AK023221  | 3144.154  | 2261.506  |
| AK027248  | 1899.472  | 1278.246  | AB007953  | 1590.199  | 1491.228  | NM_003664 | 1925.752  | 1588.626  |
| AK022804  | 12245.983 | 7919.93   | NM_014002 | 2753.465  | 2084.268  | NM_002426 | 1727.164  | 1304.748  |
| AF009263  | 1171.669  | 1290.922  | NM_004197 | 3178.8    | 2130.545  | AK027182  | 509.421   | 416.346   |
| AF009283  | 925.388   | 922.018   | NM_004073 | 924.292   | 658.775   | J03651    | 1613.752  | 1490.121  |
| AF086329  | 3615.012  | 4180.454  | NM_001278 | 3931.991  | 3928.495  | U61738    | 2302.946  | 2578.985  |
| AK025799  | 669.409   | 566.919   | NM_019105 | 965.718   | 1294.831  | AJ132087  | 562.689   | 645.835   |
| AK022857  | 441.741   | 632.181   | NM_000294 | 6210.56   | 11603.372 | U92818    | 542.364   | 780.534   |
| AL110206  | 1144.649  | 1479.641  | NM_016249 | 613.462   | 731.598   | NM_000442 | 4431.402  | 4375.06   |
| NM_004821 | 990.495   | 946.629   | NM_006181 | 794.044   | 731.142   | NM_002934 | 2000.301  | 2090.209  |
| AK024292  | 1236.7    | 1433.191  | NM_003796 | 11213.69  | 11033.524 | AK023011  | 13403.564 | 14212.959 |
| AK026263  | 1775.796  | 1723.122  | NM_002973 | 2601.88   | 3993.957  | NM_016816 | 1562.031  | 1190.728  |
| U50526    | 925.514   | 796.383   | NM_004436 | 18729.139 | 21476.18  | L17325    | 1519.006  | 1120.008  |
| S75105    | 3456.14   | 2354.676  | NM_006580 | 2868.099  | 3305.297  | NM_017716 | 1187.276  | 1114.897  |
| AF056455  | 1409.964  | 1061.832  | NM_001305 | 1185.67   | 1513.108  | M58603    | 10268.88  | 8137.915  |
| NM_018510 | 1734.242  | 1007.515  | NM_005082 | 629.654   | 911.015   | NM_003635 | 2590.31   | 2262.389  |
| U50537    | 600.422   | 779.679   | D17028    | 24899.234 | 25435.756 | NM_000115 | 2710.806  | 1983.372  |
| AK024988  | 1025.801  | 855.069   | NM_013442 | 24863.025 | 27808.635 | AF308801  | 4310.29   | 4220.653  |
| AF026943  | 1967.48   | 2115.096  | BG611243  | 2255.143  | 2695.73   | AJ272212  | 1705.577  | 2023.01   |
| L77582    | 657.351   | 686.429   | BI906766  | 660.715   | 647.191   | NM_001626 | 17765.338 | 21694.078 |
| NM_020448 | 1545.642  | 1424.422  | U60519    | 928.31    | 959.758   | NM_005677 | 1682.931  | 2303.82   |
| NM_005419 | 2169.167  | 1571.166  | AA282906  | 465.447   | 442.275   | AF229803  | 419.913   | 624.897   |
| L31956    | 360.496   | 492.061   | L02870    | 892.505   | 555.044   | AF151810  | 1180.004  | 1235.597  |
| NM_003479 | 34945.152 | 31484.002 | BG755482  | 4895.646  | 6899.303  | NM_002130 | 26997.146 | 20341.137 |
| AK022078  | 594.772   | 431.223   | AI480307  | 4677.407  | 4684.163  | NM_005465 | 5955.218  | 4918.059  |
| AF130108  | 560.346   | 387.807   | X51420    | 574.448   | 681.004   | NM_016361 | 1930.99   | 1439.715  |
| NM_020224 | 5449.421  | 4171.79   | X51757    | 3234.502  | 2811.206  | NM_003708 | 46682.586 | 43416.496 |
| U17617    | 921.17    | 874.819   | L24038    | 761.313   | 626.538   | NM_014345 | 5427.683  | 3909.739  |
| AK022952  | 10527.516 | 10096.486 | NM_006186 | 208.202   | 433.423   | AB040895  | 434.02    | 293.527   |
| BF218888  | 1970.798  | 1819.412  | NM_002751 | 999.827   | 947.741   | NM_018210 | 2568.764  | 2545.905  |
| AF086401  | 3987.659  | 2802.052  | M55593    | 634.51    | 966.645   | NM_001096 | 4365.468  | 4410.134  |
| L23869    | 1891.029  | 1170.134  | NM_017716 | 1109.488  | 1331.604  | NM_016014 | 6089.796  | 6832.046  |
| Z21853    | 3315.079  | 2397.338  | M58603    | 7943.758  | 9729.273  | NM_018327 | 893.739   | 849.092   |
| U80770    | 706.491   | 497.704   | NM_003639 | 2477.534  | 2616.881  | NM_017581 | 2336.158  | 2148.726  |
| NM_018342 | 1310.933  | 818.55    | NM_000115 | 2361.235  | 3226.885  | AA488804  | 8223.76   | 7939.891  |
| BC020260  | 1253.202  | 880.753   | AF308801  | 4564.423  | 5935.813  | NM_006535 | 531.852   | 627.362   |
| D17156    | 6129.855  | 4966.004  | NM_007318 | 55379.43  | 49083.852 | NM_001684 | 1902.292  | 2122.565  |
| L04461    | 846.001   | 615.242   | NM_014874 | 1556.085  | 2055.287  | NM_078467 | 2990.514  | 3809.106  |
| AK026938  | 11773.376 | 9083.351  | NM_005765 | 15947.209 | 18927.047 | AK001883  | 17623.236 | 14806.208 |
| AK024373  | 7682.195  | 7109.667  | NM_002762 | 499.441   | 424.148   | NM_014625 | 4094.515  | 3525.132  |
| AK022343  | 2930.193  | 2627.819  | NM_006324 | 9378.899  | 10724.274 | AK021492  | 1760.713  | 1421.877  |
| AF119870  | 2148.124  | 2593.363  | NM_016848 | 3066.48   | 2639.8    | AK023794  | 13493.402 | 9638.479  |
| AK026400  | 1146.767  | 963.656   | NM_000514 | 1730.611  | 1325.801  | NM_019885 | 2165.71   | 1702.121  |
| U92989    | 9264.312  | 7169.738  | AL137432  | 1543.876  | 1281.451  | AB033103  | 1184.282  | 1332.093  |
| AF075102  | 1452.244  | 1061.672  | NM_000957 | 808.748   | 527.902   | NM_002907 | 1616.346  | 1154.478  |
| NM_018463 | 2730.128  | 1927.537  | NM_019043 | 3599.36   | 2614.055  | AK024098  | 1202.873  | 1492.605  |
| X74956    | 4036.624  | 2793.743  | NM_003240 | 1582.023  | 1185.14   | AK022371  | 3802.098  | 3476.164  |
| AF132197  | 4843.153  | 4291.69   | NM_016564 | 9025.249  | 7914.862  | D42045    | 3311.89   | 3773.007  |
| AK025546  | 905.986   | 923.987   | AF279656  | 435.169   | 336.722   | AB007953  | 2155.977  | 1960.21   |
| AL137487  | 1525.341  | 1619.97   | AB007933  | 6274.456  | 4121.214  | NM_014002 | 4078.926  | 3913.726  |
| AK023800  | 1936.419  | 1471.345  | NM_006702 | 3915.386  | 4158.376  | NM_004197 | 5696.322  | 6196.352  |
| AK024120  | 848.587   | 1336.325  | NM_001396 | 1486.555  | 1645.86   | NM_016245 | 1310.594  | 1903.013  |

|           |           |           |           |           |           |           |           |           |
|-----------|-----------|-----------|-----------|-----------|-----------|-----------|-----------|-----------|
| CY3Cy5    | 4999.528  | 674.135   | NM_014474 | 1048.86   | 1136.411  | NM_006181 | 472.755   | 608.931   |
| W96179    | 3925.613  | 4411.082  | NM_006539 | 585.445   | 649.72    | NM_003796 | 10382.687 | 11519.309 |
| AW247841  | 4190.54   | 3752.488  | NM_001684 | 1766.415  | 2079.044  | NM_002973 | 2052.811  | 2348.973  |
| BG568198  | 384.626   | 517.463   | AB028977  | 81.651    | 461.289   | NM_004436 | 15470.535 | 15405.19  |
| M76559    | 4097.085  | 4681.427  | NM_000808 | 309.755   | 465.995   | NM_006580 | 2759.187  | 2722.038  |
| U11058    | 389.133   | 455.751   | NM_016318 | 6962.944  | 7380.249  | NM_001305 | 1113.28   | 1021.996  |
| AI222585  | 767.732   | 1049.923  | NM_013309 | 913.082   | 1405.857  | NM_005082 | 368.868   | 713.215   |
| AA411678  | 9624.207  | 9692.146  | NM_019891 | 1012.086  | 1656.719  | D17028    | 22691.867 | 18786.922 |
| AA862813  | 41589.523 | 41538.125 | AF038186  | 3143.474  | 4145.303  | NM_013442 | 20601.396 | 14914.68  |
| AA398427  | 2142.882  | 2468.676  | NM_016277 | 4222.209  | 4375.873  | BG611243  | 1768.51   | 1309.094  |
| T55728    | 6490.899  | 7292.426  | NM_007247 | 4476.987  | 4957.953  | AI417481  | 419.948   | 240.457   |
| H20856    | 2350.46   | 2367.93   | NM_006554 | 4569.454  | 5280.275  | BI906766  | 540.796   | 354.078   |
| N62586    | 3812.537  | 4575.147  | X99962    | 8896.764  | 9608.895  | U60519    | 1148.7    | 1177.472  |
| AA242743  | 2054.415  | 2585.101  | AK023221  | 2469.156  | 2035.311  | AA282906  | 1095.378  | 1364.393  |
| NM_004758 | 1594.959  | 1843.235  | NM_003664 | 1522.302  | 1094.182  | L02870    | 2373.101  | 2958.837  |
| SR5       | 4671.012  | 4508.405  | NM_002426 | 2248.121  | 4222.247  | BG755482  | 5307.655  | 4966.521  |
| SR7       | 4643.554  | 31488.373 | AK027182  | 428.674   | 449.142   | AI480307  | 5893.161  | 6391.264  |
| SR9       | 17518.572 | 3248.025  | J03651    | 2593.732  | 4122.813  | X51420    | 1400.715  | 1551.046  |
| CY3Cy5    | 4372.769  | 514.002   | U61738    | 1377.837  | 1165.171  | X51757    | 5359.702  | 4499.342  |
| NM_016382 | 731.597   | 901.321   | AJ132087  | 434.807   | 358.68    | L24038    | 1347.876  | 1325.393  |
| AK023117  | 2955.539  | 3298.37   | U92818    | 207.682   | 255.948   | NM_017716 | 1346.607  | 1633.208  |
| AL122046  | 1270.631  | 1008.028  | NM_000442 | 3396.4    | 2054.493  | M58603    | 7389.475  | 7924.453  |
| NM_000855 | 969.186   | 1190.007  | NM_002934 | 1144.237  | 684.316   | NM_003639 | 1688.619  | 2396.775  |
| NM_005536 | 5536.518  | 5857.415  | AK023011  | 6616.849  | 5104.236  | NM_000115 | 2170.668  | 2112.878  |
| NM_005077 | 734.897   | 808.512   | NM_016816 | 1197.004  | 993.816   | AF308801  | 3083.999  | 3515.72   |
| NM_004423 | 3825.392  | 4259.206  | L17325    | 751.129   | 684.366   | NM_007318 | 51539.363 | 52940.34  |
| NM_001990 | 1514.656  | 1394.302  | NM_014002 | 4313.494  | 4950.92   | NM_014874 | 706.324   | 537.743   |
| NM_002141 | 528.798   | 481.792   | NM_004197 | 5205.725  | 5169.844  | NM_005765 | 15253.07  | 10257.946 |
| NM_003311 | 2085.03   | 2597.617  | NM_004073 | 1231.958  | 1453.493  | NM_002762 | 660.919   | 494.203   |
| NM_003776 | 6855.534  | 8024.651  | NM_001278 | 4644.916  | 7481.076  | NM_006324 | 8469.89   | 5219.194  |
| NM_007098 | 284.633   | 383.023   | NM_019105 | 2022.709  | 2530.079  | NM_016848 | 3743.136  | 3197.86   |
| NM_015719 | 777.719   | 1068.698  | NM_000294 | 4777.247  | 5505.24   | NM_000514 | 2887.475  | 2599.651  |
| NM_006129 | 1495.376  | 1427.535  | AJ272212  | 1503.389  | 2202.735  | AL137432  | 1927.133  | 2369.98   |
| NM_005593 | 696.891   | 620.597   | NM_001626 | 18477.887 | 17840.748 | NM_000957 | 2850.295  | 5719.524  |
| NM_004684 | 426.059   | 474.705   | NM_005677 | 1889.89   | 1728.419  | NM_019043 | 4238.496  | 4022.141  |
| BF338709  | 308.79    | 418.243   | AF151810  | 1936.906  | 2678.777  | NM_003240 | 2324.74   | 2211.752  |
| AF204171  | 466.193   | 392.704   | NM_002130 | 29483.266 | 30088.48  | NM_016564 | 31887.453 | 30807.795 |
| AF100756  | 7610.111  | 6943.57   | NM_005469 | 6783.721  | 5382.094  | NM_000796 | 720.274   | 1075.644  |
| NM_006825 | 2876.84   | 3280.778  | NM_016361 | 2090.061  | 1513.063  | AF279656  | 1764.273  | 1868.214  |
| NM_004862 | 485.321   | 466.86    | NM_003708 | 25203.881 | 22309.84  | AK021660  | 1301.445  | 1297.371  |
| NM_001661 | 650.689   | 684.641   | NM_014349 | 3562.286  | 3609.21   | AB007933  | 18258.85  | 20249.629 |
| NM_014563 | 1404.806  | 1484.817  | AB040895  | 544.643   | 447.554   | NM_014474 | 1561.796  | 1774.853  |
| NM_020150 | 4516.494  | 5632.836  | NM_018210 | 3034.856  | 2284.834  | NM_006539 | 438.495   | 621.379   |
| NM_007150 | 3974.145  | 3952.428  | NM_001096 | 3559.542  | 2986.053  | NM_001684 | 1656.34   | 1876.611  |
| NM_006831 | 3331.855  | 2864.736  | NM_016014 | 4740.672  | 3022.221  | NM_016318 | 8151.315  | 10251.168 |
| AL162044  | 6015.014  | 6403.937  | NM_017581 | 1944.413  | 1717.681  | NM_013309 | 831.972   | 1002.11   |
| AK024004  | 1594.782  | 1744.834  | AA488804  | 6899.339  | 6130.472  | NM_019891 | 841.258   | 904.843   |
| AK022365  | 393.995   | 475.787   | L29496    | 553.312   | 750.018   | AF038186  | 2169.635  | 2272.134  |
| BE892273  | 3152.149  | 3292.958  | NM_000928 | 399.582   | 575.41    | NM_016277 | 3381.178  | 2811.174  |
| AF026929  | 464.928   | 363.958   | NM_007002 | 12698.274 | 15282.213 | NM_007247 | 3543.176  | 3040.234  |
| NM_016734 | 456.898   | 336.158   | NM_012121 | 1329.278  | 1701.457  | NM_006554 | 2868.497  | 2113.156  |
| AF035803  | 299.431   | 151.438   | NM_003255 | 5196.88   | 7652.621  | X99962    | 6696.045  | 4107.371  |
| Y08147    | 1016.431  | 1153.792  | NM_014155 | 3309.489  | 4529.81   | AK023221  | 2943.021  | 2240.945  |

|           |           |           |           |           |           |           |           |           |
|-----------|-----------|-----------|-----------|-----------|-----------|-----------|-----------|-----------|
| D00174    | 843.274   | 1234.418  | AK026331  | 11908.409 | 13530.504 | NM_003664 | 1908.651  | 1828.02   |
| AB000520  | 926.355   | 999.113   | M30773    | 2904.283  | 4160.964  | NM_002426 | 1947.425  | 2014.321  |
| NM_006907 | 895.714   | 1198.433  | NM_016338 | 9646.861  | 9881.463  | AK027182  | 664.302   | 873.076   |
| NM_002686 | 555.784   | 675.785   | AF113699  | 11622.885 | 8028.126  | J03651    | 2649.872  | 2836.055  |
| NM_006267 | 1721.897  | 1461.872  | AK001883  | 14478.503 | 12267.223 | U61738    | 2829.099  | 2912.765  |
| NM_002661 | 6436.241  | 7392.016  | NM_014629 | 5012.095  | 5516.527  | U92818    | 844.548   | 561.969   |
| NM_001263 | 324.857   | 287.419   | AL050114  | 448.72    | 282.642   | NM_000442 | 6232.7    | 6675.594  |
| AK023982  | 936.139   | 930.57    | AK021492  | 1684.842  | 1391.637  | NM_002934 | 2996.816  | 3081.35   |
| NM_018466 | 1843.502  | 1850.971  | AK023794  | 10066.224 | 11336.302 | AK023011  | 13678.087 | 16308.81  |
| Y11312    | 2010.419  | 2019.461  | NM_019885 | 2750.301  | 1887.29   | NM_016816 | 1374.221  | 1550.925  |
| AB014533  | 1258.638  | 1539.961  | AB033103  | 1430.849  | 1301.319  | L17325    | 1369.509  | 1137.001  |
| M11427    | 209.213   | 233.616   | NM_002907 | 2125.374  | 1279.025  | NM_014002 | 3742.543  | 3924.445  |
| NM_000744 | 315.69    | 831.816   | AK024098  | 922.574   | 643.941   | NM_004197 | 6518.998  | 8918.385  |
| NM_003039 | 659.405   | 787.405   | AK022371  | 2383.802  | 2476.823  | NM_004073 | 2104.551  | 4959.091  |
| NM_014509 | 576.635   | 611.898   | D42045    | 3516.316  | 2919.689  | NM_001278 | 3428.757  | 3811.97   |
| U26662    | 313.17    | 274.513   | AB007953  | 1878.138  | 2147.506  | NM_019105 | 1835.563  | 2426.773  |
| NM_020372 | 498.686   | 500.496   | NM_017820 | 979.372   | 1284.869  | NM_000294 | 3560.57   | 4595.534  |
| NM_002635 | 39338.547 | 34084.266 | NM_001849 | 1402.098  | 1374.789  | AJ272212  | 1524.505  | 2232.931  |
| NM_004979 | 318.352   | 251.936   | NM_003734 | 8863.172  | 9150.266  | NM_001626 | 27290.67  | 28410.758 |
| NM_016077 | 2919.438  | 2863.982  | NM_014935 | 9259.969  | 9860.313  | NM_005677 | 1746.678  | 1603.84   |
| NM_015537 | 2028.625  | 2177.081  | X99660    | 11898.473 | 12239.005 | AF151810  | 1222.363  | 827.952   |
| NM_016520 | 18731.109 | 19267.695 | X03635    | 2738.981  | 2965.723  | NM_002130 | 27309.555 | 15745.219 |
| AB018353  | 3661.318  | 3719.51   | X97671    | 542.594   | 816.232   | NM_005469 | 6833.821  | 6303.248  |
| NM_007036 | 5332.147  | 5062.186  | NM_004351 | 3653.237  | 3311.832  | NM_016361 | 2001.43   | 1826.195  |
| NM_002617 | 2869.659  | 3324.103  | NM_004236 | 8579.439  | 8798.074  | NM_003708 | 46979.293 | 46565.535 |
| NM_003313 | 4781.655  | 5560.218  | AB011093  | 6457.238  | 6560.349  | NM_014349 | 5838.031  | 7414.609  |
| AF090907  | 1922.699  | 1910.685  | NM_005618 | 164.958   | 520.777   | AB040895  | 547.592   | 774.16    |
| AK024476  | 3270.32   | 3641.221  | NM_020533 | 6265.816  | 5476.959  | NM_016014 | 7601.852  | 9520.011  |
| X74794    | 5927.631  | 5716.704  | NM_001894 | 5112.033  | 4555.969  | NM_000198 | 2331.58   | 2596.536  |
| AL050298  | 3038.884  | 2775.348  | NM_000614 | 547.037   | 738.464   | NM_018327 | 1646.18   | 1782.67   |
| NM_007079 | 9247.295  | 10363.095 | AK022884  | 1173.326  | 953.481   | NM_017581 | 2556.819  | 2443.588  |
| M20696    | 3326.509  | 3386.922  | AF305072  | 311.322   | 323.43    | AA488804  | 8583.715  | 6573.57   |
| NM_002915 | 1231.858  | 1127.754  | NM_006620 | 5478.978  | 4042.621  | NM_007002 | 11080.7   | 22189.686 |
| NM_006736 | 3285.778  | 3439.646  | NM_001397 | 1014.312  | 770.751   | NM_012121 | 1259.421  | 1850.998  |
| NM_003640 | 1558.427  | 1777.58   | NM_004772 | 4031.07   | 3131.976  | NM_003255 | 4090.285  | 4371.797  |
| NM_014444 | 4033.194  | 4263.461  | NM_003714 | 3402.429  | 2907.405  | NM_014155 | 2633.634  | 3536.079  |
| NM_012248 | 6939.656  | 6433.467  | NM_004004 | 678.982   | 522.492   | AK026331  | 14728.059 | 17839.598 |
| NM_014970 | 3505.076  | 3401.871  | AF024540  | 1946.151  | 1344.092  | M30773    | 2602.194  | 2040.372  |
| NM_014393 | 3222.653  | 3114.465  | NM_002189 | 1517.26   | 1564.547  | NM_016338 | 10220.964 | 9500.043  |
| NM_004223 | 11467.464 | 10595.39  | U42977    | 3814.461  | 4163.225  | AF113699  | 10052.059 | 8661.556  |
| NM_006813 | 154.404   | 271.767   | NM_002881 | 7001.335  | 7990.04   | AK001883  | 17783.217 | 11031.336 |
| NM_001355 | 10170.852 | 9288.77   | NM_003666 | 2306.677  | 2018.903  | NM_014629 | 4087.315  | 2458.903  |
| NM_001216 | 623.993   | 399.044   | NM_003288 | 4601.813  | 5399.06   | AL050114  | 364.941   | 316.27    |
| U63336    | 607.129   | 588.772   | NM_018242 | 521.261   | 604.342   | AK021492  | 2760.578  | 2528.563  |
| NM_004684 | 592.573   | 392.997   | M83822    | 3413.626  | 3603.638  | AK023794  | 16162.399 | 18706.1   |
| BF338709  | 353.845   | 358.399   | NM_018434 | 12499.416 | 12216.125 | NM_019885 | 3093.762  | 2958.019  |
| AF204171  | 434.55    | 424.992   | NM_003914 | 1369.839  | 1222.081  | AK022371  | 3949.59   | 4537.257  |
| W96179    | 4547.495  | 4183.644  | NM_020423 | 1562.483  | 1548.331  | D42045    | 3720.814  | 3638.01   |
| AW247841  | 4559.198  | 4127.156  | AK021437  | 1157.189  | 927.124   | AB007953  | 1908.455  | 1363.832  |
| BG568198  | 285.368   | 258.405   | NM_003831 | 3387.596  | 2000.714  | NM_017820 | 1221.63   | 1681.296  |
| M76559    | 3844.947  | 3363.147  | AB007965  | 6487.428  | 5999.997  | NM_001849 | 1333.578  | 1832.501  |
| AI222585  | 490.48    | 725.256   | NM_017649 | 875.3     | 2062.585  | NM_003734 | 8893.729  | 12730.101 |
| AA411678  | 8580.028  | 8937.56   | NM_000066 | 695.121   | 1813.768  | NM_014935 | 9023.287  | 9542.508  |

|           |           |           |           |           |           |           |           |           |
|-----------|-----------|-----------|-----------|-----------|-----------|-----------|-----------|-----------|
| AA862813  | 40437.113 | 37034.773 | NM_001196 | 15677.332 | 15010.854 | X99660    | 11480.943 | 16879.436 |
| AA398427  | 2013.098  | 2012.749  | NM_016008 | 1390.505  | 1073.914  | X03635    | 2484.599  | 2716.42   |
| T55728    | 5669.258  | 5611.408  | NM_017744 | 593.08    | 538.486   | NM_004351 | 5770.187  | 4541.132  |
| H20856    | 2197.53   | 1533.818  | NM_001924 | 2592.023  | 1851.708  | NM_004236 | 6989.561  | 4965.051  |
| N62586    | 3279.232  | 3326.204  | NM_017705 | 2132.709  | 1670.313  | AB011093  | 5062.806  | 3510.555  |
| AA242743  | 1760.157  | 1718.084  | NM_001796 | 734.258   | 552.293   | NM_020533 | 7565.157  | 7235.775  |
| NM_004758 | 1372.524  | 1337.841  | AB040880  | 568.354   | 610.562   | NM_001894 | 7541.875  | 7368.959  |
| NM_005163 | 7451.094  | 6087.637  | NM_009587 | 4080.103  | 4079.884  | NM_000614 | 656.881   | 727.661   |
| NM_015361 | 5730.56   | 5929.144  | AL133566  | 828.924   | 810.664   | AK022884  | 1551.638  | 1443.291  |
| NM_004310 | 11231.786 | 10804.353 | M36118    | 3256.507  | 3287.054  | AF305072  | 1171.943  | 1198.978  |
| AF035803  | 294.579   | 530.13    | NM_003399 | 13023.008 | 12368.805 | NM_006620 | 7454.723  | 7766.887  |
| Y08147    | 1399.082  | 1128.271  | NM_001097 | 272.714   | 524.625   | NM_004772 | 4961.489  | 6947.042  |
| D00174    | 1310.181  | 1814.642  | NM_002630 | 749.44    | 852.808   | NM_003714 | 4896.775  | 4811.469  |
| AB000520  | 938.268   | 1094.58   | AJ295149  | 39093.414 | 36872.027 | NM_004004 | 563.694   | 457.335   |
| NM_016382 | 942.974   | 851.203   | NM_013438 | 5283.682  | 7508.582  | AF024540  | 1384.378  | 1037.028  |
| AK023117  | 2674.594  | 2905.8    | NM_014688 | 6007.95   | 5048.556  | NM_002188 | 1164.977  | 1392.322  |
| AL122046  | 1315.269  | 1085.75   | AB037784  | 538.367   | 587       | U42977    | 2970.352  | 3368.301  |
| AF119914  | 250.955   | 240.389   | AL359623  | 1791.147  | 1221.797  | NM_002881 | 4700.519  | 4889.954  |
| NM_000855 | 1090.575  | 1294.431  | AK026920  | 4440.044  | 6907.083  | NM_003666 | 2204.67   | 2359.27   |
| NM_005536 | 5119.86   | 5146.476  | AL137255  | 1319.149  | 992.032   | NM_003288 | 3741.203  | 4899.94   |
| NM_005077 | 767.71    | 750.37    | NM_003370 | 8104.027  | 6972.024  | NM_018242 | 370.993   | 369.769   |
| NM_004423 | 3129.955  | 3909.482  | AB037715  | 932.705   | 731.991   | M83822    | 2594.719  | 2028.592  |
| NM_001990 | 1414.152  | 1301.896  | AF250924  | 4347.519  | 2312.339  | NM_018434 | 9304.861  | 8153.981  |
| NM_002141 | 353.367   | 411.283   | D86979    | 2022.631  | 1195.863  | NM_003914 | 1016.39   | 809.476   |
| NM_003311 | 1663.749  | 1538.396  | AF018081  | 9784.707  | 6869.334  | NM_020423 | 1146.564  | 766.44    |
| NM_003776 | 5994.077  | 5355.576  | NM_020202 | 10880.235 | 9873.702  | AK021437  | 1487.575  | 977.343   |
| NM_007098 | 227.708   | 343.543   | AK022889  | 8434.925  | 7511.611  | NM_003831 | 2777.729  | 2389.58   |
| NM_015719 | 642.427   | 715.868   | X52357    | 48061.566 | 39020.957 | AB007965  | 6696.858  | 6501.044  |
| NM_012464 | 457.945   | 306.291   | AF211891  | 1787.986  | 1881.366  | NM_017648 | 809.774   | 696.815   |
| NM_006129 | 1267.854  | 982.715   | NM_005641 | 2993.37   | 3388.48   | NM_000066 | 932.792   | 849.344   |
| NM_000582 | 648.752   | 764.949   | NM_001668 | 1642.643  | 1912.439  | NM_001196 | 14712.774 | 15184.761 |
| NM_005593 | 700.182   | 639.142   | AK025362  | 1108.939  | 1325.879  | NM_016008 | 1851.199  | 1835.07   |
| NM_004979 | 270.014   | 409.646   | AK021776  | 4158.902  | 4907.763  | NM_017705 | 3216.984  | 4715.268  |
| NM_016077 | 3222.289  | 3477.144  | AK026042  | 1598.366  | 1550.006  | NM_001796 | 2275.231  | 2702.716  |
| AF100756  | 7903.732  | 8338.257  | NM_014233 | 15543.233 | 14086.011 | AB040880  | 715.672   | 685.308   |
| NM_006825 | 2818.696  | 2972.108  | NM_002137 | 54595.316 | 47377.898 | NM_009587 | 6357.869  | 5805.542  |
| NM_004862 | 591.675   | 735.881   | NM_002911 | 2172.636  | 1214.696  | AL133566  | 570.81    | 651.308   |
| NM_001661 | 900.255   | 588.058   | U94386    | 473.067   | 485.003   | M36118    | 5570.335  | 6899.344  |
| NM_014563 | 1275.155  | 1293.368  | NM_016000 | 6903.066  | 4452.121  | NM_003399 | 10206.545 | 12089.774 |
| NM_020150 | 4146.501  | 4227.075  | NM_006372 | 5114.357  | 7012.415  | NM_002630 | 649.471   | 738.551   |
| NM_007150 | 4067.209  | 3370.836  | NM_014150 | 1486.508  | 1664.785  | AJ295149  | 48398.547 | 48989.754 |
| NM_006831 | 3396.451  | 2430.022  | NM_006805 | 16503.068 | 24479.537 | NM_013438 | 5272.772  | 3624.258  |
| AL162044  | 5548.56   | 4189.695  | AF132027  | 16715.727 | 10356.839 | NM_014688 | 4322.753  | 3862.128  |
| AK024004  | 1527.686  | 1451.861  | NM_004681 | 9619.79   | 5607.806  | AL359623  | 1675.816  | 1445.282  |
| BE892273  | 2879.058  | 2710.657  | AB033096  | 5432.016  | 2882.46   | AK026920  | 2836.143  | 2632.092  |
| AF026929  | 441.624   | 379.657   | NM_014886 | 706.673   | 293.476   | AL137255  | 1785.392  | 1969.651  |
| NM_014393 | 3325.293  | 3583.066  | L31408    | 6713.415  | 4186.009  | NM_003370 | 8898.408  | 9238.336  |
| NM_004223 | 11855.158 | 12766.146 | NM_001545 | 8685.713  | 6305.957  | AF250924  | 10603.845 | 12229.55  |
| NM_006813 | 166.351   | 413.858   | NM_004446 | 8950.991  | 7223.137  | D86979    | 2373.635  | 3306.196  |
| NM_001355 | 10303.61  | 9478.546  | AF070625  | 2031.385  | 2099.633  | NM_018212 | 439.132   | 387.679   |
| NM_001216 | 715.295   | 764.389   | AL365512  | 3482.574  | 3100.924  | AF018081  | 20130.953 | 18133.775 |
| NM_006907 | 1312.74   | 1681.894  | AK001740  | 5303.675  | 5755.804  | NM_020202 | 12046.813 | 10740.468 |
| NM_002686 | 762.012   | 853.253   | AF131793  | 1260.496  | 1457.206  | AK022889  | 4747.396  | 5428.266  |



|           |           |           |           |           |           |           |           |           |
|-----------|-----------|-----------|-----------|-----------|-----------|-----------|-----------|-----------|
| NM_006267 | 1929.987  | 1917.224  | NM_005918 | 20928.396 | 22616.309 | X52357    | 38468.445 | 39331.465 |
| NM_002661 | 6955.51   | 8032.169  | J02625    | 8974.021  | 10113.657 | AF211891  | 1202.802  | 1036.93   |
| NM_001263 | 264.468   | 360.7     | Y17175    | 64527.836 | 60141.996 | NM_005641 | 1705.174  | 1548.891  |
| AK023982  | 1041.495  | 1079.246  | NM_004549 | 25654.256 | 24472.191 | NM_001668 | 1174.361  | 782.395   |
| NM_018466 | 2120.101  | 2529.007  | NM_005333 | 19522.744 | 19501.885 | AK021776  | 2661.172  | 2152.092  |
| Y11312    | 1646.657  | 1544.544  | AK026161  | 2815.223  | 2569.802  | AK026042  | 1083.834  | 1163.522  |
| AB014533  | 1173.68   | 1220.744  | NM_004553 | 26395.451 | 19297.287 | NM_014233 | 13911.164 | 13264.913 |
| M11427    | 145.321   | 312.793   | D63484    | 1656.698  | 1028.959  | NM_002137 | 53131.984 | 54607.93  |
| NM_000744 | 272.234   | 369.792   | AK026745  | 4561.045  | 2966.591  | NM_002911 | 1305.401  | 1184.438  |
| NM_003039 | 808.47    | 819.986   | AL157440  | 3008.673  | 3148.181  | U94386    | 582.141   | 615.239   |
| NM_014509 | 640.357   | 602.829   | NM_016423 | 5232.318  | 4240.116  | NM_016000 | 9256.232  | 9352.801  |
| U26662    | 304.801   | 241.381   | AB040975  | 1370.796  | 1113.714  | NM_006372 | 4045.732  | 3698.024  |
| NM_020372 | 663.309   | 628.395   | NM_005119 | 6087.767  | 3711.534  | NM_014150 | 1497.884  | 1319.745  |
| NM_002635 | 43543.324 | 39485.027 | NM_003168 | 18478.783 | 14968.214 | NM_006805 | 21196.859 | 20009.043 |
| NM_004758 | 1606.177  | 1783.151  | AK055844  | 892.095   | 436.812   | AF132027  | 20853.883 | 20977.719 |
| NM_005163 | 7767.514  | 8141.766  | NM_018288 | 6325.161  | 4274.753  | AB033096  | 8224.09   | 7717.25   |
| NM_015537 | 2430.555  | 2947.565  | NM_003146 | 5859.938  | 4129.663  | NM_014886 | 949.146   | 886.025   |
| NM_016520 | 18222.02  | 17040.479 | X52342    | 875.429   | 602.378   | L31408    | 8126.687  | 8029.132  |
| NM_002617 | 2857.71   | 3123.483  | NM_003131 | 11967.829 | 8169.751  | NM_001545 | 10572.781 | 8127.963  |
| NM_003313 | 5227.524  | 5886.896  | NM_005239 | 3348.78   | 2771.179  | NM_004446 | 9800.703  | 7242.952  |
| AF090907  | 2148.55   | 2255.122  | AB014526  | 718.984   | 737.256   | AF070625  | 2436.576  | 2792.876  |
| AK024476  | 3322.063  | 3389.254  | NM_018538 | 667.661   | 831.552   | AL365512  | 2535.606  | 2647.676  |
| X74794    | 5464.821  | 5255.043  | NM_013346 | 1306.37   | 1211.769  | AK001740  | 4750.89   | 4983.276  |
| AL050298  | 3095.637  | 2525.816  | AF131784  | 819.143   | 916.886   | AF131793  | 708.916   | 936.765   |
| NM_007079 | 8785.81   | 8621.081  | NM_017851 | 3270.144  | 3728.281  | NM_005918 | 13510.234 | 13002.381 |
| M20696    | 3241.427  | 2564.776  | AK026182  | 65146.898 | 55640.059 | J02625    | 8012.863  | 10384.445 |
| NM_002915 | 946.339   | 1049.939  | AK025603  | 3134.594  | 3239.028  | Y17175    | 61822.383 | 69431.883 |
| NM_006736 | 2715.151  | 2610.468  | NM_016085 | 21019.789 | 21087.365 | NM_004549 | 25247.4   | 20741.289 |
| NM_003640 | 1578.681  | 1557.197  | AK025768  | 2962.919  | 2406.22   | NM_005333 | 19226.598 | 16138.663 |
| NM_014444 | 4297.505  | 4511.734  | AL117502  | 3016.536  | 2596.261  | AK026161  | 2063.932  | 2107.621  |
| NM_012248 | 7617.86   | 6992.273  | AK001846  | 915.12    | 869.771   | NM_004553 | 24154.453 | 18979.566 |
| NM_014970 | 3768.484  | 4429.135  | AK024637  | 543.017   | 560.607   | D63484    | 1343.859  | 1522.102  |
| NM_007098 | 182.058   | 459.636   | AK024108  | 502.772   | 589.776   | AK026745  | 3600.372  | 4578.069  |
| NM_015719 | 851.829   | 995.285   | AL117454  | 6864.887  | 4891.041  | AL157440  | 2379.289  | 2981.777  |
| NM_012464 | 179.403   | 309.144   | AF272890  | 1592.982  | 1477.495  | NM_016423 | 7625.47   | 8108.876  |
| NM_006129 | 1441.841  | 1374.805  | U00684    | 441.802   | 241.685   | AB040975  | 1657.022  | 1720.4    |
| NM_000582 | 715.467   | 953.318   | NM_016459 | 15941.652 | 7525.795  | NM_005119 | 7379.174  | 5239.842  |
| NM_005593 | 699.666   | 843.407   | AF086227  | 660.193   | 458.082   | AK055844  | 1006.551  | 1243.801  |
| NM_004684 | 435.909   | 332.796   | AK026246  | 1238.033  | 630.68    | NM_018288 | 10325.791 | 9649.195  |
| BF338709  | 348.921   | 317.373   | AF035281  | 1944.557  | 1071.899  | NM_003146 | 7881.574  | 6399.35   |
| W96179    | 4288.409  | 4042.053  | AK026304  | 485.957   | 509.474   | X52342    | 1109.954  | 1146.493  |
| AW247841  | 4370.203  | 3943.419  | AL133446  | 3464.757  | 3266.79   | NM_003131 | 14262.426 | 12941.035 |
| M76559    | 3585.826  | 3422.884  | AF147406  | 387.915   | 593.38    | NM_005239 | 3652.799  | 2882.556  |
| U11058    | 329.653   | 262.899   | U56251    | 1100.912  | 1501.314  | AB014526  | 1029.341  | 1050.437  |
| AI222585  | 549.336   | 607.065   | AK024689  | 573.273   | 706.628   | NM_018538 | 560.849   | 537.156   |
| AA411678  | 9056.781  | 8204.844  | BC035667  | 514.478   | 586.142   | NM_013346 | 1052.818  | 1171.666  |
| AA862813  | 37306.41  | 25473.168 | AL049277  | 2225.716  | 1724.619  | AF131784  | 669.534   | 607.728   |
| AA398427  | 2051.715  | 2276.031  | AL050043  | 499.02    | 448.886   | NM_017851 | 3188.095  | 2803.656  |
| T55728    | 6513.005  | 6330.947  | AL117571  | 986.876   | 483.65    | AK025603  | 2351.104  | 2584.31   |
| H20856    | 2533.308  | 2308.776  | L22263    | 279.896   | 135.962   | NM_016085 | 20208.213 | 16464.271 |
| N62586    | 3920.682  | 4152.253  | AK091573  | 782.671   | 519.255   | AK025768  | 2775.993  | 3069.286  |
| AA242743  | 2155.14   | 2522.475  | AF131814  | 1851.736  | 1605.196  | AL117502  | 2588.956  | 2243.646  |
| AK022365  | 365.768   | 330.812   | AL359600  | 2123.285  | 1555.279  | AK001846  | 1158.508  | 1309.922  |

|           |           |           |           |           |           |           |           |           |
|-----------|-----------|-----------|-----------|-----------|-----------|-----------|-----------|-----------|
| BE892273  | 4153.51   | 4466.717  | AL360144  | 335.361   | 254.615   | AK024637  | 758.566   | 5377.076  |
| AF026929  | 337.311   | 510.387   | BC028617  | 448.683   | 235.646   | AK024108  | 578.452   | 700.305   |
| NM_016734 | 425.496   | 729.014   | AF087999  | 760.536   | 452.587   | AL117454  | 19785.17  | 22768.275 |
| M16006    | 240.719   | 347.695   | NM_003740 | 1697.388  | 1175.026  | AF272890  | 2085.456  | 2274.206  |
| AF035803  | 287.392   | 363.395   | AL050078  | 524.339   | 524.332   | U00684    | 1152.406  | 1267.151  |
| Y08147    | 1186.586  | 1496.038  | NM_014276 | 3782.865  | 3329.968  | NM_016456 | 25102.137 | 24288.455 |
| D00174    | 963.169   | 871.307   | AF035303  | 429.88    | 546.78    | AF086227  | 1798.374  | 1641.701  |
| AB000520  | 959.658   | 923.828   | AF056438  | 1506.874  | 1779.005  | AK026246  | 3704.576  | 3583.436  |
| NM_016382 | 801.27    | 793.122   | AF003737  | 20912.125 | 15979.925 | AF070524  | 578.32    | 388.42    |
| AK023117  | 2822.092  | 2897.025  | AF009296  | 893.594   | 908.473   | AF035281  | 1938.645  | 2307.667  |
| AL122046  | 1395.053  | 1166.056  | AK001011  | 5620.862  | 5110.054  | AK026304  | 424.13    | 406.213   |
| NM_000855 | 1026.457  | 884.417   | AK021457  | 379.277   | 224.534   | AL133446  | 2593.015  | 2506.596  |
| NM_005536 | 5410.281  | 4518.368  | AK021690  | 736.044   | 523.991   | NM_006553 | 613.647   | 2040.381  |
| NM_005077 | 844.076   | 764.092   | AK001840  | 471.937   | 411.415   | AK024689  | 1009.769  | 620.659   |
| NM_004423 | 3425.982  | 3198.966  | AK025148  | 433.419   | 492.977   | BC035667  | 564.685   | 548.032   |
| NM_001990 | 1451.227  | 1229.234  | AK026238  | 450.434   | 271.205   | AL049277  | 2165.345  | 2233.375  |
| NM_002141 | 434.113   | 541.035   | AK026286  | 448.789   | 475.952   | AL050043  | 853.19    | 5131.405  |
| NM_003311 | 2026.52   | 2237.312  | AK026731  | 729.096   | 513.941   | AL117571  | 1568.141  | 1518.369  |
| NM_003776 | 6773.647  | 6924.182  | NM_004192 | 2632.343  | 2632.968  | L22263    | 511.513   | 594.443   |
| NM_000744 | 328.92    | 389.744   | AK024160  | 1054.369  | 1272.806  | AK091573  | 761.044   | 846.429   |
| NM_003039 | 806.546   | 838.695   | AK025077  | 971.772   | 717.114   | AF131814  | 2321.247  | 1683.84   |
| NM_014509 | 375.924   | 633.208   | NM_006417 | 4781.564  | 4284.083  | AL359600  | 2269.967  | 2534.648  |
| NM_020372 | 724.555   | 792.911   | L43350    | 598.233   | 653.296   | AL360144  | 1284.203  | 1405.297  |
| NM_016077 | 2804.723  | 2712.453  | NM_020317 | 7189.841  | 5634.336  | AL117653  | 487.331   | 436.846   |
| AF100756  | 7722.622  | 6891.289  | AL080234  | 4499.751  | 4108.667  | AF087999  | 1074.349  | 1203.328  |
| NM_006825 | 2744.966  | 2926.895  | AK027025  | 706.369   | 750.031   | NM_003740 | 2988.918  | 2325.22   |
| NM_004862 | 408.95    | 380.836   | AK025105  | 517.352   | 565.026   | AL050078  | 1075.985  | 751.337   |
| NM_001661 | 845.409   | 697.812   | AK021675  | 333.742   | 578.527   | NM_014276 | 4964.755  | 4205.655  |
| NM_014563 | 1798.403  | 1364.46   | AF212220  | 4972.782  | 3488.67   | AF035303  | 803.486   | 1394.311  |
| NM_020150 | 4915.527  | 5635.576  | AL137709  | 1628.287  | 1155.523  | AF056438  | 1626.87   | 1716.458  |
| NM_007150 | 4572.937  | 4567.331  | AK023277  | 2192.681  | 1518.907  | AF003737  | 36745.906 | 34715.859 |
| NM_006831 | 3727.439  | 3292.228  | AK000425  | 2401.563  | 2066.726  | AF009296  | 1234.21   | 904.804   |
| AL162044  | 6381.097  | 5270.558  | Z27200    | 1221.361  | 1276.074  | AK001011  | 6120.27   | 5960.437  |
| AK024004  | 1553.657  | 1635.445  | AF070571  | 4841.135  | 4728.515  | AK021690  | 1162.92   | 1247.63   |
| NM_006736 | 2860.945  | 3159.603  | AK023554  | 938.643   | 938.415   | AK001840  | 799.025   | 807.906   |
| NM_003640 | 1558.014  | 1556.622  | NM_003513 | 10609.75  | 9145.564  | AK021486  | 697.667   | 632.573   |
| NM_014444 | 4254.165  | 4634.937  | AK024844  | 1015.646  | 768.083   | AK021740  | 549.917   | 506.177   |
| NM_012248 | 7427.179  | 7945.82   | AL049437  | 903.84    | 805.895   | AK026238  | 742.744   | 575.532   |
| NM_004223 | 13387.011 | 17716.963 | AF161427  | 54971.434 | 47935.047 | AK026694  | 399.704   | 439.343   |
| NM_001355 | 9507.809  | 8643.472  | AK021715  | 9305.051  | 7744.434  | AK025564  | 868.889   | 1172.189  |
| NM_001216 | 594.082   | 508.256   | AK000315  | 10737.051 | 9684.305  | AK026286  | 1180.859  | 1038.451  |
| U63336    | 521.681   | 559.328   | AK023248  | 1089.619  | 1069.228  | AK026731  | 1088.722  | 828.586   |
| NM_006907 | 1163.641  | 1124.901  | NM_012404 | 16422.281 | 12711.034 | NM_004192 | 2652.385  | 2300.168  |
| NM_002686 | 692.946   | 734.414   | AF251190  | 596.244   | 523.108   | AK024160  | 1152.852  | 1292.56   |
| NM_006267 | 1659.688  | 1591.647  | AF130075  | 5776.431  | 3512.352  | AK025077  | 721.412   | 766.638   |
| NM_002661 | 6700.03   | 7027.143  | NM_005444 | 5664.363  | 4596.634  | NM_006417 | 5312.312  | 5725.99   |
| NM_001263 | 360.137   | 318.367   | V00589    | 16709.465 | 11348.408 | L43350    | 659.763   | 853.576   |
| AK023982  | 1072.549  | 899.299   | AL390163  | 1672.466  | 2418.003  | NM_020317 | 5059.654  | 5979.65   |
| NM_018466 | 2349.585  | 2315.777  | NM_018572 | 1197.621  | 1087.302  | AL080234  | 3907.996  | 4280.415  |
| Y11312    | 2461.916  | 2665.246  | AK024838  | 640.366   | 273.93    | AK027025  | 868.421   | 983.742   |
| AB014533  | 1087.176  | 1738.878  | AK000175  | 1471.967  | 1033.043  | AK025105  | 515.626   | 736.361   |
| AK022097  | 983.036   | 1271.305  | AL137736  | 1319.849  | 955.962   | AB002446  | 539.077   | 900.91    |
| NM_002166 | 17917.744 | 16378.396 | AK021897  | 7819.214  | 6409.266  | AF212220  | 5395.804  | 6154.185  |

|           |           |           |           |           |           |           |           |           |
|-----------|-----------|-----------|-----------|-----------|-----------|-----------|-----------|-----------|
| NM_00466C | 7791.417  | 10022.519 | AK001051  | 1449.375  | 1357.755  | AK022082  | 410.178   | 432.392   |
| NM_006165 | 2338.541  | 2741.06   | NM_018317 | 1462.544  | 1383.746  | AL137709  | 2140.277  | 2425.28   |
| AL035307  | 3399.85   | 4141.171  | AF086051  | 751.331   | 989.934   | AK023277  | 2385.416  | 1655.604  |
| AK023772  | 436.102   | 341.737   | AK024356  | 813.16    | 850.703   | AK000425  | 2659.928  | 1781.523  |
| NM_012234 | 4249.124  | 3934.115  | AL049370  | 528.284   | 430.074   | Z27200    | 1050.294  | 1459.096  |
| NM_015361 | 6187.785  | 5615.251  | AL365410  | 6285.442  | 4913.188  | AF070571  | 3392.561  | 3277.361  |
| NM_00431C | 11280.987 | 8836.113  | D17082    | 17393.512 | 14774.931 | AK023554  | 881.549   | 871.404   |
| NM_015537 | 2206.564  | 2112.478  | D17252    | 40752.988 | 31842.193 | NM_003513 | 13196.85  | 6047.761  |
| NM_01652C | 18107.355 | 15570.374 | NM_003673 | 2263.956  | 1092.775  | AK024844  | 617.51    | 646.744   |
| AB018353  | 3812.598  | 3625.055  | Z36823    | 4153.291  | 2916.865  | AL049437  | 788.769   | 790.085   |
| NM_007036 | 5985.078  | 4797.748  | AF147387  | 1762.465  | 2868.882  | AF161427  | 57353.461 | 58974.406 |
| NM_002617 | 3077.781  | 2847.932  | NM_012081 | 2147.398  | 3098.132  | AK021715  | 8948.296  | 10291.622 |
| NM_003313 | 5892.82   | 6187.966  | AL137463  | 604.262   | 533.15    | AK000315  | 10171.705 | 12951.223 |
| AF090907  | 2407.626  | 2590.693  | AF085909  | 4974.781  | 3777.565  | AF251190  | 780.281   | 536.821   |
| AK024476  | 4093.661  | 5551.235  | AF090888  | 734.098   | 474.961   | AF130075  | 8473.472  | 8293.242  |
| X74794    | 7837.331  | 10360.054 | AK027193  | 781.391   | 320.078   | NM_005444 | 5932.063  | 4414.955  |
| AL050298  | 3435.945  | 3756.003  | AF086471  | 5876.2    | 2993.994  | V00589    | 25160.039 | 26781.564 |
| NM_007079 | 10846.175 | 14280.96  | NM_018455 | 8986.891  | 5057.207  | AL390163  | 1170.231  | 1273.914  |
| M20696    | 4026.234  | 3368.247  | AF113018  | 657.956   | 441.589   | NM_018572 | 1546.016  | 1135.126  |
| NM_002915 | 1377.433  | 1514.687  | AK021996  | 1217.568  | 1005.44   | AK024838  | 563.996   | 525.291   |
| AK026015  | 726.558   | 843.822   | AL049337  | 1011.834  | 722.963   | AK000175  | 3739.119  | 3700.559  |
| NM_005203 | 254.742   | 146.944   | CY3Cy5    | 2466.913  | 223.524   | AL137736  | 4000.45   | 3290.807  |
| NM_006566 | 1500.696  | 1639.724  | U13697    | 488.994   | 541.607   | AF143870  | 332.403   | 401.068   |
| AK026154  | 3197.09   | 3382.373  | U04270    | 2345.613  | 1992.312  | AK021427  | 1938.832  | 1682.77   |
| AL117546  | 8308.276  | 13785.715 | AA629719  | 60313.129 | 63181.066 | AK021897  | 5681.25   | 5960.658  |
| AK027073  | 586.684   | 623.6     | AA927528  | 2137.623  | 2950.955  | AK001051  | 924.475   | 904.814   |
| NM_000384 | 651.545   | 725.78    | AA843679  | 3985.085  | 6873.622  | NM_018317 | 1487.708  | 1616.066  |
| AB018325  | 2502.378  | 2375.182  | H68922    | 496.375   | 725.263   | AF086051  | 898.335   | 930.271   |
| AL157482  | 1332.423  | 1148.803  | NM_004957 | 1378.659  | 1924.846  | AK024356  | 1002.818  | 1043.015  |
| NM_003603 | 434.702   | 295.038   | NM_005252 | 513.458   | 869.78    | AL049370  | 667.626   | 864.92    |
| NM_005428 | 7868.074  | 6876.804  | SR5       | 5547.271  | 6357.408  | AL365410  | 5270.886  | 6812.8    |
| NM_017974 | 938.029   | 909.717   | SR7       | 6232.553  | 63790.863 | D17082    | 16212.019 | 20504.93  |
| NM_003979 | 579.065   | 440.842   | SR9       | 15942.95  | 3511.791  | D17252    | 48965.77  | 50910.266 |
| X14677    | 444.018   | 483.407   | CY3Cy5    | 2480.605  | 253.882   | D16476    | 1990.597  | 3155.557  |
| NM_005863 | 3537.522  | 3570.8    | NM_00438C | 6359.856  | 5381.097  | Z36823    | 4570.088  | 4907.94   |
| U17077    | 868.679   | 620.975   | AY007378  | 2414.623  | 2418.726  | AF147387  | 2189.096  | 1965.433  |
| NM_000915 | 2550.438  | 2742.164  | D26070    | 1018.742  | 1000.094  | NM_012081 | 1500.536  | 1392.196  |
| NM_002344 | 272.855   | 460.203   | NM_001642 | 5181.192  | 5364.215  | AL137463  | 498.788   | 415.592   |
| AK024475  | 2545.719  | 2498.797  | NM_001542 | 375.071   | 446.106   | AF085909  | 22959.426 | 23138.217 |
| AJ278865  | 455.039   | 540.513   | X98834    | 2035.091  | 2770.137  | AF090888  | 854.69    | 718.41    |
| AB026542  | 21109.613 | 42190.043 | NM_007035 | 4102.653  | 5945.735  | AK027193  | 1959.751  | 1924.137  |
| NM_019846 | 810.831   | 1510.205  | AB019562  | 710.897   | 1302.432  | AF086471  | 7440.745  | 5619.305  |
| NM_014433 | 794.873   | 672.972   | AF036364  | 1160.945  | 1672.443  | NM_018455 | 11975.497 | 10040.951 |
| NM_002062 | 2706.32   | 2992.527  | AK022847  | 1607.488  | 2027.563  | AF113018  | 1006.559  | 898.296   |
| NM_014394 | 29066.764 | 27719.801 | NM_020203 | 423.511   | 660.858   | AK021996  | 1430.694  | 1368.034  |
| NM_005243 | 11382.238 | 11183.64  | L40992    | 882.364   | 1563.352  | CY3Cy5    | 3176.226  | 277.876   |
| NM_006218 | 2033.814  | 1994.895  | U20582    | 2011.373  | 2916.579  | U13697    | 1306.878  | 3438.709  |
| NM_01814C | 3880.085  | 3135.813  | NM_006808 | 7225.276  | 4946.834  | AA843679  | 9590.767  | 6993.596  |
| NM_016948 | 2114.993  | 1941.812  | NM_006634 | 5614.646  | 3312.936  | H68922    | 563.334   | 1001.78   |
| NM_000142 | 1983.979  | 2138.858  | NM_016465 | 975.345   | 790.106   | NM_004957 | 3215.808  | 5232.432  |
| AF272372  | 16206.755 | 17114.551 | NM_000328 | 788.972   | 805.488   | NM_005252 | 1251.554  | 2166.96   |
| AK097045  | 2220.323  | 2396.515  | NM_013399 | 3164.055  | 3245.005  | SR5       | 6643.4    | 7165.12   |
| AF161356  | 53212.156 | 61768.691 | AL122120  | 1076.074  | 1234.485  | SR7       | 6223.09   | 38021.453 |

|           |           |           |           |           |           |           |           |           |
|-----------|-----------|-----------|-----------|-----------|-----------|-----------|-----------|-----------|
| AB014548  | 4683.98   | 3990.499  | NM_014684 | 919.325   | 1160.48   | SR9       | 22422.568 | 3125.598  |
| NM_018256 | 2377.091  | 2260.731  | AK027247  | 477.686   | 652.062   | CY3Cy5    | 4814.504  | 274.802   |
| AK025150  | 399.614   | 218.865   | NM_002480 | 3935.14   | 5678.897  | NM_002930 | 1536.731  | 772.161   |
| AK024611  | 8917.471  | 8409.446  | NM_017571 | 5570.359  | 6242.552  | NM_004380 | 3652.104  | 4856.008  |
| BC010420  | 4070.149  | 4177.202  | L03169    | 570.04    | 735.31    | D26070    | 1354.266  | 1151.96   |
| NM_012280 | 7690.355  | 7898.623  | NM_001928 | 5744.98   | 6851.628  | NM_001642 | 6540.552  | 3582.137  |
| NM_018172 | 4027.488  | 3997.671  | NM_006399 | 529.577   | 833.882   | NM_001542 | 725.709   | 789.29    |
| U03886    | 522.116   | 355.416   | NM_018965 | 407.096   | 559.839   | NM_005156 | 3367.096  | 2705.011  |
| AK022040  | 1329.05   | 1419.732  | NM_000185 | 1501.423  | 2039.438  | NM_015193 | 635.784   | 406.184   |
| AK022722  | 1148.375  | 1108.928  | Y00816    | 594.61    | 804.392   | AB019562  | 931.883   | 1308.466  |
| NM_003591 | 14169.687 | 14299.217 | NM_001055 | 11113.031 | 7538.019  | AF036364  | 1841.208  | 2513.88   |
| AL080111  | 19504.777 | 28406.244 | NM_015878 | 3090.896  | 2618.561  | NM_020203 | 848.07    | 1458.569  |
| NM_003550 | 2583.528  | 5550.064  | NM_002271 | 24581.195 | 19073.227 | U20582    | 4006.748  | 3554.667  |
| NM_014642 | 4400.207  | 11108.518 | NM_018361 | 2952.257  | 4229.729  | NM_000337 | 1121.054  | 1012.418  |
| AB037821  | 657.875   | 909.611   | NM_019893 | 454.133   | 304.367   | NM_002079 | 6886.926  | 5390.667  |
| NM_003829 | 3629.87   | 4454.879  | AB040966  | 3950.023  | 4122.971  | NM_005173 | 2054.97   | 417.257   |
| AL110168  | 1327.715  | 1141.446  | NM_020132 | 819.414   | 1103.745  | NM_001830 | 980.797   | 292.903   |
| NM_014522 | 786.224   | 578.428   | NM_016467 | 9584.221  | 9986.636  | NM_000328 | 855.34    | 533.907   |
| NM_002831 | 5152.743  | 4671.471  | NM_007253 | 1698.181  | 1492.204  | NM_013399 | 4027.386  | 2976.831  |
| AL833409  | 1376.4    | 1291.811  | NM_019106 | 1043.173  | 1860.639  | NM_002410 | 595.479   | 627.914   |
| NM_015966 | 680.674   | 462.868   | L08436    | 906.497   | 2179.543  | NM_002480 | 4874.521  | 3837.295  |
| NM_016147 | 3489.488  | 2999.208  | NM_000558 | 1142.256  | 1606.092  | NM_017571 | 5437.313  | 3212.702  |
| NM_002833 | 2142.186  | 1868.78   | NM_004198 | 484.455   | 448.749   | AB007946  | 316.454   | 590.213   |
| NM_018326 | 7153.868  | 5142.258  | NM_014170 | 3259.097  | 4360.473  | L03169    | 823.711   | 955.671   |
| NM_001868 | 179.326   | 356.466   | AF116652  | 17144.199 | 19876.285 | NM_018965 | 463.567   | 671.781   |
| NM_014773 | 481.556   | 315.091   | NM_000835 | 431.903   | 563.732   | NM_000185 | 3999.979  | 2719.672  |
| NM_005606 | 8614.173  | 6531.368  | NM_018835 | 2617.045  | 2155.305  | Y00816    | 761.463   | 971.908   |
| AF134707  | 804.373   | 764.9     | NM_003401 | 815.573   | 554.319   | NM_004512 | 3349.6    | 3284.06   |
| BE730629  | 270.944   | 152.863   | AL137724  | 3266.218  | 2889.172  | NM_001055 | 19363.979 | 13367.344 |
| NM_018162 | 352.026   | 169.916   | NM_004758 | 2597.987  | 2633.821  | NM_019893 | 431.503   | 333.127   |
| AK027167  | 799.702   | 816.91    | NM_002913 | 2157.483  | 2345.737  | AB040966  | 5147.535  | 2613.674  |
| AK025265  | 2612.948  | 3251.524  | AK022797  | 864.593   | 806.922   | NM_020132 | 1515.253  | 1370.589  |
| NM_013279 | 1045.029  | 1972.846  | NM_007370 | 4543.589  | 4488.8    | NM_016467 | 11110.849 | 9042.362  |
| NM_018652 | 4116.028  | 8717.896  | NM_006231 | 903.425   | 1055.491  | NM_007253 | 3026.815  | 2344.003  |
| AB011166  | 3604.801  | 6300.48   | AK023471  | 1228.229  | 1647.528  | L08436    | 507.348   | 434.611   |
| AK024460  | 4074.658  | 5176.952  | AF044578  | 1145.678  | 1226.135  | NM_000558 | 5312.607  | 4771.056  |
| NM_006606 | 2617.399  | 2932.46   | NM_001948 | 3102.432  | 4657.483  | NM_004198 | 626.719   | 780.794   |
| S78570    | 766.579   | 737.139   | NM_014034 | 6197.758  | 10013.914 | NM_014170 | 4541.604  | 7974.255  |
| NM_006442 | 14361.6   | 10978.593 | J04474    | 5301.26   | 7784.042  | NM_014148 | 1041.221  | 719.943   |
| NM_003902 | 5466.367  | 3725.972  | NM_003761 | 950.689   | 1125.608  | NM_018835 | 3126.629  | 1501.468  |
| NM_005098 | 222.63    | 125.019   | NM_014011 | 1239.944  | 1804.617  | NM_003401 | 2405.552  | 3719.203  |
| NM_016427 | 3312.739  | 3003.796  | AK025994  | 1125.361  | 1314.279  | NM_004758 | 2283.042  | 1858.201  |
| NM_006706 | 727.564   | 518.263   | L29306    | 417.598   | 573.585   | NM_002913 | 2209.937  | 1752.522  |
| U80741    | 4409.854  | 3230.671  | NM_013989 | 1331.617  | 1547.043  | AK022797  | 1039.402  | 633.973   |
| NM_014497 | 1294.793  | 784.638   | NM_001738 | 740.2     | 1019.553  | NM_007370 | 5175.144  | 2963.617  |
| AL133598  | 7673.214  | 6507.993  | U20582    | 1595.101  | 1208.602  | NM_006231 | 1069.742  | 913.163   |
| NM_015511 | 4519.214  | 5332.472  | NM_002079 | 7317      | 13744.463 | AK023471  | 1593.82   | 1397.869  |
| NM_006625 | 4282.33   | 4319.173  | U04270    | 2732.971  | 2758.025  | AF044578  | 1514.211  | 1638.889  |
| NM_004891 | 16862.148 | 14311.224 | X02152    | 65810.797 | 69548.43  | NM_001067 | 13793.624 | 11154.051 |
| NM_003935 | 501.712   | 463.004   | BG181154  | 1096.202  | 1360.329  | NM_014034 | 7699.453  | 6963.754  |
| NM_003686 | 48.146    | 109.613   | AA843679  | 4272.387  | 6236.763  | NM_005335 | 20785.193 | 20185.811 |
| AF075068  | 19863.662 | 15973.31  | H68922    | 267.292   | 884.618   | J04474    | 6556.707  | 11712.589 |
| AF086529  | 381.935   | 286.448   | NM_004957 | 1393.422  | 1742.971  | L29306    | 407.016   | 614.783   |

|           |           |           |           |           |           |           |           |           |
|-----------|-----------|-----------|-----------|-----------|-----------|-----------|-----------|-----------|
| AK024366  | 187.191   | 449.649   | NM_005252 | 426.827   | 666.777   | NM_013985 | 2914.012  | 2772.634  |
| AK022171  | 62.72     | 228.122   | AF090906  | 470.395   | 1037.941  | NM_001735 | 1370.865  | 1113.51   |
| AK022379  | 473.317   | 666.323   | NM_001925 | 4437.752  | 2896.062  | NM_020203 | 823.912   | 798.626   |
| AK025338  | 267.616   | 229.973   | NM_000185 | 1769.584  | 832.994   | NM_000337 | 505.23    | 778.835   |
| AK001439  | 329.827   | 331.967   | Y00816    | 672.616   | 732.339   | NM_002075 | 6229.601  | 5511.745  |
| AK001115  | 416.594   | 449.118   | NM_004512 | 1685.43   | 1658.01   | U13697    | 712.265   | 1925.66   |
| AL133050  | 393.122   | 523.713   | NM_004380 | 6637.906  | 6339.583  | U04270    | 7003.026  | 4515.163  |
| AK023343  | 234.233   | 288.192   | AY007378  | 2748.023  | 3558.864  | AA927528  | 2661.874  | 3307.934  |
| AK023948  | 241.388   | 500.303   | D26070    | 1376.714  | 1795.087  | X02152    | 60430.84  | 63522.988 |
| AK022452  | 395.556   | 354.363   | NM_001642 | 5351.585  | 8192.707  | BG676364  | 2914.301  | 3561.357  |
| AK023781  | 426.283   | 327.48    | NM_000501 | 8721.944  | 10697.353 | BG181154  | 1305.027  | 2379.753  |
| AF085881  | 3278.448  | 3551.718  | NM_005156 | 3475.613  | 4028.042  | NM_005252 | 881.908   | 1286.537  |
| AK022737  | 4193.781  | 3942.136  | NM_015193 | 217.662   | 661.586   | AF090906  | 524.896   | 594.056   |
| NM_003472 | 28059.734 | 23921.795 | X98834    | 1834.303  | 2567.299  | AB023219  | 2757.793  | 1922.183  |
| U92980    | 2521.598  | 1521.705  | NM_007035 | 3559.896  | 4681.345  | NM_001925 | 6451.46   | 3437.267  |
| AF133658  | 380.098   | 567.443   | AB019562  | 502.192   | 813.805   | NM_000185 | 4561.473  | 5617.547  |
| AB048287  | 1243.777  | 916.879   | NM_006805 | 17801.393 | 16823.102 | Y00816    | 923.511   | 1727.081  |
| Y11159    | 557.222   | 695.627   | NM_006634 | 7783.262  | 8312.522  | NM_004512 | 3301.728  | 5148.647  |
| AB020648  | 2150.819  | 2143.693  | NM_016465 | 1499.572  | 1904.296  | NM_004380 | 10421.821 | 5171.032  |
| AK025798  | 12135.619 | 10809.789 | NM_000325 | 951.829   | 1463.75   | AY007378  | 3836.807  | 3527.831  |
| AF086173  | 232.799   | 268.652   | NM_013395 | 3610.336  | 4640.854  | D26070    | 1423.065  | 2031.614  |
| AK025164  | 582.651   | 668.168   | NM_002410 | 534.113   | 648.391   | NM_000501 | 43090.156 | 59645.852 |
| NM_018365 | 3305.464  | 3109.457  | AL122120  | 1452.817  | 1671.58   | NM_007035 | 6544.544  | 4889.097  |
| AB040290  | 761.218   | 586.589   | NM_014684 | 756.819   | 1178.936  | AB019562  | 703.462   | 825.008   |
| NM_019845 | 2572.426  | 2813.78   | AK027247  | 543.155   | 753.582   | AF036364  | 2730.448  | 2692.921  |
| AL359056  | 640.121   | 340.764   | NM_002480 | 3687.567  | 4984.553  | AK022847  | 2120.543  | 1513.849  |
| AF124367  | 529.79    | 631.195   | NM_017571 | 4877.199  | 4417.666  | NM_006805 | 24621.039 | 16390.781 |
| AK000798  | 359.67    | 459.002   | AB007946  | 362.042   | 574.755   | NM_006634 | 9941.034  | 8150.396  |
| AK023803  | 502.824   | 414.672   | L03169    | 384.691   | 1008.476  | NM_016465 | 1797.811  | 2271.19   |
| AK025168  | 549.719   | 341.704   | M81349    | 415.524   | 333.545   | NM_013395 | 4310.446  | 5783.125  |
| AK026947  | 1459.371  | 1739.34   | NM_014011 | 1131.893  | 921.008   | NM_002410 | 709.568   | 510.619   |
| U84526    | 5044.422  | 4656.095  | AK025994  | 919.455   | 638.737   | AL122120  | 2265.717  | 1956.702  |
| L23401    | 351.252   | 261.066   | NM_013985 | 1168.882  | 789.61    | NM_014684 | 1262.701  | 1259.115  |
| NM_018090 | 7611.927  | 4941.901  | NM_001735 | 636.312   | 450.888   | AK027247  | 885.963   | 974.098   |
| AK022728  | 9394.305  | 10025.265 | NM_001055 | 8478.503  | 5516.299  | NM_002480 | 6682.679  | 6620.302  |
| AL109678  | 1210.752  | 785.439   | NM_002271 | 26860.779 | 27688.098 | NM_014011 | 1252.419  | 824.006   |
| AL137524  | 353.051   | 567.456   | NM_018361 | 2717.116  | 3997.358  | AK025994  | 1328.649  | 1450.807  |
| AF218008  | 2157.215  | 1864.438  | NM_019893 | 560.174   | 509.682   | L29306    | 417.216   | 1530.058  |
| M22404    | 1281.699  | 1064.897  | AB040966  | 4595.761  | 5056.2    | NM_013985 | 2919.05   | 4088.794  |
| AF052115  | 989.735   | 1070.594  | NM_020132 | 986.695   | 1108.626  | NM_001735 | 986.596   | 1555.792  |
| NM_014015 | 5456.363  | 4448.654  | NM_016467 | 10668.277 | 12177.498 | NM_001055 | 21960.764 | 29047.02  |
| AF116653  | 460.82    | 439.818   | NM_007253 | 1701.961  | 2019.185  | NM_002271 | 36023.383 | 23728.281 |
| NM_012365 | 307.558   | 409.868   | NM_019106 | 1285.559  | 2186.976  | NM_018361 | 2685.84   | 2633.316  |
| AK025323  | 675.301   | 572.662   | L08436    | 1188.625  | 2903.859  | NM_019893 | 452.53    | 516.289   |
| NM_013325 | 1140.219  | 996.06    | NM_000555 | 1179.106  | 1723.092  | AB040966  | 5116.517  | 4838.591  |
| BC037322  | 1137.205  | 747.482   | NM_014170 | 3413.639  | 4042.713  | NM_020132 | 1506.697  | 1747.666  |
| Y12022    | 1656.046  | 1165.115  | AF116652  | 18072.305 | 21672.242 | NM_016467 | 11923.599 | 11503.672 |
| AK001375  | 1535.732  | 1151.231  | NM_000835 | 617.025   | 996.496   | NM_007253 | 3666.35   | 3065.532  |
| NM_019597 | 4788.359  | 3822.889  | NM_004957 | 1379.527  | 1193.679  | NM_019106 | 1572.569  | 1536.47   |
| AL137559  | 994.467   | 823.393   | NM_005252 | 434.717   | 200.583   | L08436    | 647.756   | 649.344   |
| AF026944  | 3564.403  | 2673.995  | AB023219  | 1850.942  | 1000.968  | NM_014170 | 3646.398  | 2280.004  |
| AK021493  | 3450.758  | 3710.724  | NM_018835 | 2966.388  | 2159.785  | NM_004957 | 1866.114  | 1231.911  |
| NM_006161 | 1070.681  | 945.069   | NM_003401 | 1496.78   | 1423.638  | NM_005252 | 653.363   | 539.452   |

|           |           |           |           |           |           |           |           |           |
|-----------|-----------|-----------|-----------|-----------|-----------|-----------|-----------|-----------|
| NM_006192 | 388.432   | 245.113   | AL137724  | 3334.858  | 3590.714  | AF090906  | 795.707   | 674.435   |
| NM_006204 | 421.317   | 319.815   | NM_004758 | 3464.135  | 6953.683  | AB023219  | 2795.233  | 2615.508  |
| NM_012155 | 3486.928  | 2788.913  | NM_001551 | 661.638   | 2004.172  | NM_014148 | 784.376   | 1217.877  |
| AF144700  | 1314.57   | 1428.497  | NM_002913 | 2554.823  | 3054.903  | NM_018835 | 3066.864  | 1522.358  |
| NM_002595 | 274.172   | 150.349   | AK022797  | 875.909   | 949.021   | NM_003401 | 1528.032  | 1176.764  |
| NM_004105 | 4885.094  | 4622.005  | NM_007370 | 4511.339  | 5450.7    | AL137724  | 4057.967  | 2979.4    |
| AB046825  | 2167.147  | 2538.884  | NM_006231 | 1000.775  | 1252.18   | NM_004758 | 2495.828  | 2875.867  |
| AF071509  | 299.418   | 196.703   | AK023471  | 1247.488  | 1625.411  | NM_002913 | 2569.697  | 2571.325  |
| AL050297  | 3977.047  | 3040.889  | AF044578  | 1277.484  | 1365.087  | AK022797  | 1410.517  | 1589.366  |
| AK026966  | 2196.699  | 2036.784  | NM_001948 | 2536.08   | 3503.367  | NM_007370 | 5298.44   | 4395.797  |
| AF147398  | 355.223   | 290.205   | NM_001067 | 11464.887 | 18156.893 | NM_006231 | 1194.948  | 1178.424  |
| AF185573  | 359.216   | 312.179   | NM_014034 | 6738.696  | 8860.042  | AK023471  | 1352.823  | 1737.569  |
| AJ009817  | 352.147   | 311.368   | NM_005335 | 17980.113 | 21781.51  | AF044578  | 1811.598  | 2075.306  |
| AK025268  | 1124.332  | 1087.328  | J04474    | 5142.544  | 7279.63   | NM_001948 | 3267.364  | 2295.886  |
| AL833005  | 1976.287  | 1524.412  | NM_003761 | 1127.019  | 1397.299  | NM_001067 | 14438.172 | 8391.525  |
| L43366    | 1212.745  | 928.069   | NM_004726 | 387.253   | 558.277   | NM_015193 | 396.462   | 296.797   |
| AK026124  | 3588.656  | 2664.154  | X98834    | 1988.028  | 1858.951  | X98834    | 2870.194  | 1855.799  |
| NM_015505 | 3661.099  | 2263.409  | NM_007035 | 3620.507  | 2705.174  | NM_007035 | 6481.08   | 4324.862  |
| AL110157  | 3070.825  | 2723.868  | AB019562  | 502.314   | 506.38    | AB019562  | 1029.325  | 952.081   |
| NM_002315 | 5813.529  | 4745.836  | AF036364  | 1033.814  | 882.934   | AF036364  | 1789.641  | 2523.23   |
| L38712    | 2953.507  | 2482.105  | AK022847  | 1138.905  | 790.924   | AK022847  | 2210.966  | 2722.269  |
| U84508    | 481.357   | 498.457   | U20582    | 1791.986  | 1788.979  | NM_020203 | 622.709   | 715.005   |
| NM_017793 | 6080.705  | 6843.445  | NM_002079 | 5286.368  | 7097.605  | U20582    | 2945.305  | 2037.71   |
| NM_012131 | 2956.863  | 3057.012  | U13697    | 522.141   | 654.89    | NM_000337 | 540.697   | 543.882   |
| S41540    | 915.536   | 1033.999  | U04270    | 2586.728  | 3441.642  | NM_002079 | 6101.054  | 4355.806  |
| CY3Cy5    | 1698.413  | 159.146   | AA629719  | 56234.129 | 61100.98  | X75308    | 966.539   | 1090.873  |
| AI417481  | 444.679   | 492.244   | AA927528  | 2838.422  | 3618.876  | U04270    | 6532.048  | 6019.128  |
| BI906766  | 882.801   | 1169.719  | BG181154  | 1044.269  | 1160.316  | L02840    | 416.352   | 447.322   |
| U60519    | 1394.393  | 1334.956  | AA843679  | 3962.452  | 5886.446  | AA629719  | 65369.336 | 66475.117 |
| AA282906  | 485.427   | 474.941   | H68922    | 301.299   | 698.398   | AA927528  | 2475.043  | 2149.222  |
| L02870    | 422.121   | 631.971   | NM_017571 | 4846.296  | 2303.569  | X02152    | 58273.965 | 62265.27  |
| BG755482  | 5077.752  | 5997.26   | AB007946  | 335.33    | 175.372   | NM_017571 | 4056.715  | 1938.83   |
| AI480307  | 5603.988  | 6864.945  | L03169    | 362.471   | 338.216   | AB007946  | 315.551   | 215.469   |
| X51420    | 1421.677  | 1598.77   | NM_001928 | 4336.823  | 1976.348  | L03169    | 931.796   | 2400.663  |
| X51757    | 7217.817  | 7024.793  | NM_000185 | 1222.73   | 1153.583  | NM_001928 | 7271.278  | 4200.276  |
| L24038    | 1560.731  | 1906.453  | NM_004512 | 1896.247  | 1564.594  | NM_018965 | 359.2     | 284.779   |
| NM_053056 | 222.333   | 854.841   | NM_004380 | 7070.616  | 7051.667  | NM_000185 | 3876.233  | 2534.017  |
| NM_006186 | 427.181   | 668.905   | AY007378  | 2652.62   | 3160.53   | Y00816    | 647.175   | 545.566   |
| NM_002751 | 1525.084  | 1829.815  | D26070    | 1099.075  | 1351.933  | NM_002930 | 1171.312  | 641.964   |
| M55593    | 711.607   | 1267.952  | NM_001642 | 5266.414  | 7090.295  | NM_004380 | 11889.605 | 10363.597 |
| NM_078467 | 1725.138  | 2280.24   | NM_000501 | 9805.908  | 11308.93  | NM_004119 | 324.473   | 676.394   |
| SR2       | 56591.328 | 58026.648 | NM_000114 | 528.021   | 657.719   | AY007378  | 4097.282  | 3370.353  |
| SR4       | 15175.354 | 19545.059 | NM_000558 | 1351.107  | 1081.709  | D26070    | 1321.211  | 1751.248  |
| SR6       | 2352.124  | 2564.535  | NM_014170 | 2704.731  | 2025.039  | NM_001642 | 7071.49   | 5927.545  |
| SR8       | 8473.609  | 29719.273 | AF116652  | 16760.377 | 11462.389 | NM_001542 | 571.555   | 710.373   |
| SR10      | 30145.826 | 13068.476 | NM_000835 | 358.457   | 349.205   | NM_000501 | 29199.533 | 19113.773 |
| CY3Cy5    | 2041.151  | 94.348    | NM_006808 | 20123.383 | 18874.451 | NM_000114 | 2278.004  | 1798.129  |
| NM_016848 | 1928.114  | 2422.602  | NM_006634 | 8586.267  | 7985.78   | NM_005156 | 3084.658  | 2226.929  |
| NM_000514 | 1704.057  | 2288.701  | NM_016465 | 1668.667  | 1705.622  | NM_000558 | 4181.204  | 1789.692  |
| AL137432  | 2478.835  | 2952.346  | NM_014684 | 1021.015  | 1164.97   | NM_014170 | 3490.66   | 3380.988  |
| NM_000957 | 426.641   | 584.231   | AK027247  | 711.292   | 1179.124  | AF116652  | 61306.09  | 62792.941 |
| NM_019043 | 6065.788  | 6725.5    | NM_014034 | 5978.533  | 5450.402  | NM_000835 | 618.309   | 601.568   |
| NM_016564 | 1595.614  | 2074.028  | NM_005335 | 15670.042 | 12302.555 | NM_006808 | 12612.839 | 9622.851  |

|           |           |           |           |           |           |           |           |           |
|-----------|-----------|-----------|-----------|-----------|-----------|-----------|-----------|-----------|
| AF279656  | 329.464   | 592.486   | J04474    | 4829.485  | 3272.973  | NM_006634 | 3027.472  | 2841.547  |
| AK021660  | 219.44    | 372.507   | NM_003761 | 898.638   | 672.808   | NM_016465 | 1756.144  | 2064.917  |
| AB007933  | 1684.826  | 2434.48   | NM_014011 | 988.311   | 649.621   | NM_000328 | 849.905   | 808.448   |
| NM_006702 | 6456.232  | 8431.79   | AK025994  | 1115.381  | 603.818   | NM_013395 | 3888.529  | 3504.079  |
| NM_001396 | 2767.593  | 1605.038  | L29306    | 368.074   | 259.787   | NM_002410 | 577.43    | 638.016   |
| NM_014474 | 1354.314  | 1898.064  | NM_013989 | 1558.605  | 976.996   | AL122120  | 1878.947  | 1234.86   |
| NM_016249 | 390.466   | 627.369   | NM_001738 | 1046.235  | 2264.298  | NM_014684 | 814.915   | 688.002   |
| NM_006181 | 1311.548  | 1735.072  | NM_002271 | 29209.838 | 28612.664 | AK027247  | 549.943   | 465.572   |
| NM_003796 | 14721.271 | 19605.822 | NM_018361 | 2992.874  | 3164.782  | NM_002480 | 5640      | 3069.53   |
| NM_002973 | 3249.638  | 4351.706  | NM_019893 | 478.869   | 489.288   | NM_014034 | 6378.952  | 2639.343  |
| NM_004436 | 23104.883 | 27688.135 | AB040966  | 4001.041  | 3949.284  | NM_005335 | 17811.107 | 8995.193  |
| NM_006580 | 1769.147  | 2152.028  | NM_007253 | 1764.429  | 1568.965  | J04474    | 6042.028  | 5472.262  |
| NM_001305 | 312.221   | 581.567   | NM_019106 | 1362.693  | 1589.955  | NM_003761 | 1917.095  | 2777.462  |
| NM_005082 | 1241.039  | 1636.807  | L08436    | 600.873   | 627.298   | NM_004726 | 360.517   | 778.884   |
| D17028    | 28814.563 | 40926.273 | NM_005607 | 2833.014  | 3646.473  | NM_014011 | 1254.54   | 672.565   |
| NM_013442 | 31113.57  | 36819.379 | NM_006761 | 61464.434 | 63479.258 | AK025994  | 1686.303  | 1060.21   |
| BG611243  | 3048.276  | 2655.529  | NM_014897 | 1394.85   | 950.149   | L29306    | 480.407   | 482.48    |
| AK023221  | 3943.799  | 3702.813  | NM_003453 | 5551.068  | 3789.112  | NM_013989 | 3215.506  | 2565.767  |
| NM_003664 | 2139.23   | 2432.607  | NM_018371 | 17071.656 | 9075.572  | NM_001738 | 1322.223  | 1180.733  |
| NM_002426 | 1327.896  | 1512.553  | NM_014390 | 7374.809  | 4972.708  | NM_002271 | 42360.184 | 30826.041 |
| AK027182  | 639.851   | 798.499   | NM_018143 | 757.121   | 306.036   | NM_018361 | 2908.36   | 2791.712  |
| J03651    | 2170.618  | 2889.232  | X78924    | 7222.113  | 3442.815  | NM_019893 | 596.833   | 694.299   |
| U61738    | 560.882   | 581.562   | NM_013250 | 644.671   | 577.884   | AB040966  | 4949.035  | 4555.074  |
| AJ132087  | 939.138   | 1090.501  | NM_018835 | 3493.552  | 3743.603  | NM_020132 | 1731.909  | 2009.573  |
| U92818    | 516.974   | 622.781   | NM_003401 | 1649.583  | 1755.189  | NM_016467 | 10950.619 | 9813.247  |
| NM_000442 | 5108.794  | 7008.781  | AL137724  | 3735.339  | 3915.466  | NM_007253 | 3283.904  | 2697.476  |
| NM_002934 | 1420.119  | 1842.552  | NM_004758 | 2428.836  | 1823.775  | NM_019106 | 1471.609  | 1229.997  |
| AK023011  | 5069.413  | 7197.62   | NM_002913 | 2489.279  | 2925.049  | L08436    | 1649.267  | 1272.017  |
| NM_016816 | 1700.531  | 2059.723  | AK022797  | 1063.894  | 1091.305  | NM_005607 | 2387.953  | 1700.424  |
| L17325    | 1195.288  | 1264.325  | NM_007370 | 4214.803  | 4694.552  | NM_006761 | 55919.98  | 18542.705 |
| NM_017716 | 1677.196  | 2222.837  | NM_006231 | 849.547   | 1151.799  | NM_014897 | 1735.356  | 902.444   |
| M58603    | 12509.03  | 14887.078 | AK023471  | 1363.518  | 1412.45   | NM_003453 | 8042.388  | 12546.293 |
| NM_003639 | 3842.567  | 5684.31   | AF044578  | 1407.023  | 1566.587  | NM_018371 | 30899.389 | 56801.27  |
| NM_000115 | 3801.04   | 3978.3    | NM_001948 | 2841.597  | 3064.921  | NM_014390 | 10728.444 | 4813.676  |
| AF308801  | 5708.54   | 8132.576  | NM_001067 | 11768.962 | 15233.857 | NM_018143 | 478.596   | 292.309   |
| NM_007318 | 11769.298 | 16531.98  | AK025337  | 570.2     | 736.858   | X78924    | 13736.983 | 7959.761  |
| NM_014874 | 1735.971  | 2679.412  | NM_005602 | 746.208   | 444.589   | NM_013250 | 637.145   | 663.459   |
| NM_005765 | 20633.459 | 25443.416 | NM_003573 | 2372.094  | 1435.439  | AF090906  | 711.138   | 978.499   |
| NM_002762 | 478.561   | 501.789   | NM_000296 | 2517.944  | 1303.284  | NM_003401 | 2096.721  | 3041.511  |
| NM_006324 | 11595.082 | 12119.613 | NM_017422 | 2488.19   | 1229.199  | AL137724  | 4552.151  | 3340.588  |
| NM_005469 | 7719.462  | 7518.587  | NM_005879 | 1438.983  | 1799.534  | NM_004758 | 2850.615  | 3094.268  |
| NM_016361 | 2979.913  | 3683.995  | AF147790  | 1751.131  | 2461.635  | NM_006231 | 1117.919  | 1817.054  |
| NM_003708 | 2269.113  | 3188.813  | NM_004112 | 1162.704  | 939.168   | AK023471  | 1555.265  | 1348.343  |
| NM_014349 | 5070.542  | 7223.757  | AK025592  | 5958.938  | 5374.513  | AF044578  | 1901.632  | 1825.719  |
| AB040895  | 705.225   | 1038.268  | Z36776    | 1448.181  | 1223.796  | NM_001948 | 3168.542  | 2189.485  |
| NM_004820 | 78.198    | 508.642   | AB029015  | 1880.105  | 2052.88   | NM_001067 | 14294.148 | 8112.721  |
| NM_018210 | 4709.782  | 6272.429  | NM_002067 | 8787.607  | 8261.681  | AB028984  | 372.334   | 164.303   |
| NM_001096 | 11887.442 | 14265.53  | NM_002430 | 435.09    | 1202.692  | NM_005602 | 1906.934  | 4556.699  |
| NM_016014 | 6438.667  | 8403.972  | NM_006150 | 1480.381  | 1678.388  | NM_003573 | 7822.849  | 15503.606 |
| NM_000198 | 540.761   | 558.163   | NM_020345 | 1461.007  | 1535.586  | NM_000296 | 5863.25   | 12797.622 |
| NM_018327 | 254.749   | 474.112   | NM_003287 | 671.5     | 495.855   | NM_017422 | 10016.207 | 4435.57   |
| NM_017581 | 2823.088  | 3627.725  | NM_012325 | 11887.516 | 9901.75   | NM_005879 | 1401.891  | 1044.419  |
| AA488804  | 11852.779 | 14836.738 | NM_014434 | 1005.846  | 671.831   | AF147790  | 1117.369  | 1153.296  |

|           |           |           |           |           |           |           |           |           |
|-----------|-----------|-----------|-----------|-----------|-----------|-----------|-----------|-----------|
| NM_00653E | 425.623   | 745.848   | NM_019607 | 2765.907  | 1178.821  | AY007233  | 2667.034  | 6287.719  |
| NM_001684 | 2403.081  | 3104.93   | U79260    | 6838.724  | 3728.75   | AK025592  | 5983.348  | 5452.072  |
| AB028977  | 200.362   | 566.792   | NM_00189E | 6648.842  | 4988.814  | NM_00463E | 8326.667  | 5335.938  |
| NM_01631E | 3914.024  | 5934.33   | NM_006447 | 1931.854  | 1048.947  | Z36776    | 2076.7    | 2199.93   |
| NM_01330E | 907.376   | 1348.911  | AF119851  | 433.823   | 257.058   | AB029015  | 1930.744  | 1804.094  |
| NM_019891 | 1286.547  | 2048.524  | NM_01412E | 3855.146  | 4207.109  | NM_002067 | 22426.771 | 12746.273 |
| AF038186  | 3800.596  | 5230.44   | D87455    | 2554.032  | 1965.943  | NM_00243C | 1406.464  | 1691.464  |
| NM_016277 | 4699.329  | 5574.239  | AF080577  | 1058.147  | 849.107   | NM_00615C | 1619.164  | 546.029   |
| NM_007247 | 5541.792  | 7959.344  | L22005    | 5708.183  | 4610.388  | NM_02034E | 1092.11   | 829.246   |
| NM_006554 | 8690.9    | 10474.739 | NM_012291 | 7978.655  | 8458.109  | NM_003287 | 777.755   | 1369.09   |
| X99962    | 10454.922 | 11184.794 | NM_00179C | 2080.351  | 2298.021  | NM_01232E | 20562.137 | 37392.777 |
| AK025587  | 397.705   | 212.293   | NM_01824E | 3816.544  | 3046.072  | NM_014434 | 1529.289  | 4113.432  |
| AL050114  | 698.638   | 845.722   | NM_01493E | 1729.462  | 1574.615  | NM_019607 | 3764.898  | 2246.213  |
| AK021492  | 2632.188  | 3360.801  | Y17866    | 594.694   | 603.568   | U79260    | 8427.521  | 3011.355  |
| AK023794  | 1139.906  | 1503.069  | AK024247  | 695.447   | 513.855   | NM_00189E | 8442.284  | 6330.217  |
| NM_01988E | 4269.956  | 4969.289  | NM_00300E | 2886.85   | 2983.764  | NM_006447 | 2133.293  | 2295.268  |
| AB033103  | 1380.725  | 1729.684  | NM_00284E | 1433.649  | 1514.16   | AF119851  | 757.92    | 643.116   |
| NM_002907 | 3994.747  | 4466.476  | NM_01212E | 514.716   | 966.885   | NM_01412E | 4639.222  | 4794.965  |
| AK024098  | 358.11    | 791.478   | NM_00441E | 1949.523  | 1625.113  | AF080577  | 1696.539  | 2214.561  |
| AK001116  | 342.073   | 441.283   | NM_000917 | 10281.406 | 8623.803  | L22005    | 8157.677  | 7110.158  |
| AK022371  | 6048.985  | 8898.082  | NM_00538E | 11945.393 | 7318.125  | NM_012291 | 11706.688 | 8651.858  |
| D42045    | 5498.602  | 6771.95   | NM_01444E | 17340.906 | 10348.39  | NM_01336E | 1246.746  | 1039.074  |
| AB007953  | 3138.525  | 3470.582  | AL832826  | 996.55    | 607.436   | Y17866    | 705.643   | 739.893   |
| NM_01400E | 4476.303  | 5417.941  | NM_01612E | 1422.664  | 706.56    | AK024247  | 551.105   | 657.688   |
| NM_004197 | 2666.368  | 3578.848  | AB048365  | 966.326   | 370.669   | NM_00300E | 4383.866  | 2866.552  |
| NM_00407E | 1233.167  | 1781.053  | NM_000391 | 2802.718  | 2189.579  | NM_00284E | 1612.906  | 1788.394  |
| NM_00127E | 5719.443  | 7993.793  | AF229179  | 764.812   | 909.731   | NM_00441E | 2556.084  | 3008.139  |
| NM_01910E | 1540.962  | 2054.102  | AK025215  | 7930.657  | 6649.748  | NM_000917 | 14083.566 | 8668.538  |
| NM_000294 | 5833.555  | 8696.501  | NM_018131 | 5943.838  | 5664.677  | NM_00538E | 16161.154 | 5379.709  |
| AJ272212  | 1558.73   | 1547.452  | NM_014834 | 168.636   | 586.506   | NM_01444E | 23894.037 | 7268.185  |
| NM_00162E | 7776.86   | 10258.054 | NM_01763E | 4425.456  | 4368.685  | AL832826  | 1338.921  | 788.667   |
| NM_005677 | 1628.474  | 1909.78   | NM_01246E | 421.175   | 599.289   | NM_01612E | 1425.829  | 1122.366  |
| AF229803  | 722.619   | 656.023   | M27877    | 23904.785 | 28017.184 | AB048365  | 1168.007  | 1708.697  |
| AF151810  | 2658.487  | 2711.658  | D70836    | 39732.277 | 35525.043 | NM_014771 | 8652.789  | 6598.506  |
| NM_00213C | 36447.883 | 35103.176 | D16878    | 894.396   | 961.759   | NM_00227E | 4728.021  | 3533.078  |
| NM_00130E | 330.926   | 519.258   | NM_01494E | 1483.812  | 1047.882  | AK024625  | 540.216   | 1223.195  |
| NM_00508E | 1065.377  | 1018.447  | AK024392  | 2917.452  | 1626.828  | NM_018131 | 7073.141  | 4690.441  |
| D17028    | 27515.932 | 33867.543 | NM_01326C | 1061.35   | 387.839   | NM_01763E | 6782.26   | 4613.808  |
| NM_01344E | 31421.748 | 39033.969 | NM_01830C | 1120      | 670.503   | NM_01246E | 470.615   | 346.29    |
| BG611243  | 3240.153  | 3696.8    | NM_00487E | 1832.441  | 713.928   | M27877    | 21154.299 | 9375.341  |
| AI417481  | 440.015   | 397.054   | NM_018254 | 2563.179  | 930.818   | D70836    | 38239.371 | 12517.518 |
| BI906766  | 878.872   | 1021.974  | NM_01774E | 1568.752  | 855.807   | D16878    | 681.782   | 577.935   |
| U60519    | 1221.922  | 1592.064  | NM_01843E | 2732.308  | 2444.814  | NM_01494E | 2284.024  | 3899.107  |
| AA282906  | 450.464   | 616.225   | NM_000937 | 924.155   | 757.699   | AK024392  | 2636.422  | 1064.499  |
| L02870    | 658.333   | 1508.993  | AK022615  | 20198.02  | 18233.643 | NM_01326C | 980.347   | 367.821   |
| BG755482  | 5813.429  | 10321.866 | NM_00404E | 3995.423  | 3759.389  | NM_01830C | 1337.805  | 981.756   |
| AI480307  | 5725.146  | 8829.319  | BM458096  | 13368.33  | 25351.219 | NM_00487E | 1154.933  | 1416.147  |
| X51420    | 1574.338  | 1763.262  | NM_00562E | 8047.748  | 7896.363  | NM_018254 | 8171.052  | 10447.331 |
| D28235    | 123.159   | 365.187   | D29958    | 12699.215 | 12861.888 | NM_000937 | 776.653   | 1365.44   |
| X51757    | 6805.18   | 7694.27   | NM_015971 | 7207.159  | 6322.358  | AB028451  | 622.141   | 510.877   |
| L24038    | 1378.438  | 1673.194  | D17257    | 48689.387 | 47427.082 | AK024810  | 16763.4   | 9950.992  |
| NM_05305E | 453.502   | 363.787   | AK023309  | 490.59    | 759.365   | BM458096  | 13691.655 | 13293.981 |
| NM_00618E | 515.35    | 577.577   | AK000724  | 4304.274  | 4713.939  | NM_00562E | 10264.252 | 7008.802  |



|           |           |           |           |           |           |           |           |           |
|-----------|-----------|-----------|-----------|-----------|-----------|-----------|-----------|-----------|
| NM_002751 | 1388.658  | 2642.763  | NM_003720 | 11539.709 | 11583.732 | D29958    | 17624.854 | 10498.481 |
| M55593    | 848.276   | 1057.153  | AF097159  | 1064.404  | 731.914   | NM_015971 | 8908.905  | 4652.379  |
| NM_078467 | 1789.093  | 2705.58   | NM_004807 | 1260.266  | 824.614   | D17257    | 56472.285 | 31979.961 |
| AK001883  | 13059.181 | 10028.052 | J03569    | 26092.553 | 13565.028 | AK023309  | 778.67    | 1879.132  |
| NM_014629 | 6213.92   | 5174.818  | NM_003115 | 3452.125  | 1932.309  | AK000724  | 3392.927  | 1724.188  |
| NM_007318 | 11366.481 | 10693.852 | NM_000687 | 9495.426  | 5066.202  | NM_003720 | 11792.382 | 7376.298  |
| NM_014874 | 1886.16   | 1571.094  | NM_018200 | 1716.371  | 1172.522  | AF097159  | 1285.28   | 1912.222  |
| NM_005765 | 19225.564 | 21447.555 | NM_014838 | 3181.123  | 2946.406  | NM_004807 | 1373.063  | 455.263   |
| NM_002762 | 461.587   | 586.279   | NM_007212 | 3630.231  | 3100.771  | J03569    | 52803.352 | 26714.729 |
| NM_006324 | 11115.946 | 15101.679 | AF005067  | 2243.348  | 1793.695  | NM_003115 | 5967.545  | 4196.045  |
| NM_016848 | 1969.89   | 2257.488  | NM_005710 | 6134.026  | 4992.125  | NM_018200 | 1827.059  | 1217.837  |
| NM_000514 | 1712.248  | 2199.075  | AF252284  | 1325.048  | 1146.538  | NM_014838 | 2952.002  | 2790.825  |
| AL137432  | 2393.195  | 2952.312  | NM_014930 | 1560.51   | 931.712   | NM_007212 | 4416.085  | 3285.927  |
| NM_000957 | 554.565   | 684.144   | NM_001530 | 3710.078  | 3290.093  | AF252284  | 1541.435  | 1851.284  |
| NM_019043 | 6809.27   | 8800.252  | U80232    | 9108.259  | 8132.238  | NM_014930 | 1708.118  | 1249.359  |
| NM_003240 | 443.652   | 534.152   | AF086526  | 784.734   | 1023.658  | NM_001530 | 3660.526  | 2171.057  |
| NM_016564 | 2383.906  | 3478.438  | AK025788  | 4446.535  | 7759.779  | U80232    | 12273.505 | 5591.637  |
| NM_000796 | 223.458   | 440.861   | AF086164  | 1229.812  | 1369.272  | AF086526  | 1318.427  | 1324.023  |
| AF279656  | 540.726   | 593.781   | AK025577  | 1033.234  | 763.427   | AK025788  | 3581.776  | 1587.312  |
| AK021660  | 371.961   | 357.582   | AK000216  | 1073.192  | 663.213   | AF086164  | 1423.634  | 1023.328  |
| AB007933  | 1927.119  | 2322.195  | AK023440  | 491.902   | 368.702   | AK025577  | 1310.789  | 1916.25   |
| NM_006702 | 5760.765  | 8377.213  | AB033041  | 10328.114 | 5707.774  | AK000216  | 1460.648  | 1144.936  |
| NM_001396 | 2033.404  | 1148.78   | NM_014894 | 38636.977 | 16877.336 | AK023440  | 602.636   | 368.521   |
| NM_014474 | 1174.044  | 1387.238  | AY007155  | 4885.041  | 3722.257  | AB033041  | 13855.682 | 6915.418  |
| NM_016249 | 347.395   | 836.879   | AK027160  | 2223.363  | 1182.38   | AK027160  | 2382.237  | 1527.066  |
| NM_006181 | 1034.13   | 1168.852  | AL359211  | 777.396   | 991.631   | AL359211  | 1181.585  | 839.375   |
| NM_003796 | 14723.363 | 18673.533 | U79264    | 1366.037  | 1216.815  | AF070526  | 912.146   | 973.808   |
| NM_002973 | 3196.336  | 3693.857  | NM_015699 | 5086.592  | 3748.985  | U79264    | 2388.234  | 2387.267  |
| NM_004436 | 21635.053 | 21558.504 | AF070530  | 12660.522 | 12372.564 | NM_015699 | 8940.804  | 8265.642  |
| NM_006580 | 1656.903  | 1339.671  | AF086487  | 459.841   | 354.308   | AF086487  | 544.991   | 623.401   |
| NM_019891 | 974.473   | 1008.329  | NM_006420 | 1376.889  | 936.554   | NM_006420 | 1288.382  | 1234.941  |
| AF038186  | 3233.638  | 2845.199  | AF131855  | 743.107   | 739.285   | AF131855  | 789.97    | 374.534   |
| NM_016277 | 3480.671  | 3430.14   | AF086046  | 1499.569  | 1124.392  | AF086046  | 1601.005  | 1052.288  |
| NM_007247 | 4828.283  | 4931.731  | AK024962  | 801.791   | 962.491   | AK024962  | 1182.641  | 716.216   |
| NM_006554 | 8081.748  | 9709.221  | AK022164  | 789.57    | 1292.897  | AK025135  | 4514.419  | 2301.095  |
| X99962    | 10757.147 | 13999.611 | AK025135  | 6788.824  | 11896.047 | NM_017926 | 2386.247  | 2439.205  |
| AK023221  | 4708.6    | 4583.401  | NM_017926 | 3086.53   | 4847.521  | AY007145  | 3745.881  | 4243.389  |
| NM_003664 | 2008.63   | 2319.838  | AY007145  | 2424.969  | 1742.995  | AK021573  | 323.679   | 586.948   |
| NM_002426 | 1716.453  | 2228.851  | D38549    | 1694.656  | 1201.498  | D38549    | 2880.474  | 1175.219  |
| AK027182  | 828.453   | 1008.994  | AK024780  | 938.176   | 536.245   | AK024780  | 885.933   | 391.881   |
| J03651    | 2742.047  | 2700.539  | AL359591  | 484.538   | 292.43    | AF085947  | 1134.83   | 653.542   |
| U61738    | 673.046   | 790.065   | U10510    | 3907.87   | 2961.851  | AL359591  | 468.427   | 452.645   |
| AJ132087  | 970.182   | 1099.51   | Z36842    | 817.221   | 773.947   | AK022123  | 583.906   | 574.979   |
| U92818    | 691.155   | 509.172   | AF086137  | 701.554   | 439.012   | U10510    | 6641.948  | 5286.279  |
| NM_000442 | 4253.724  | 3671.485  | AF086155  | 910.006   | 741.744   | Z36842    | 1128.488  | 811.832   |
| NM_002934 | 1519.445  | 1453.841  | AF116677  | 997.289   | 1201.935  | AF086155  | 724.996   | 476.057   |
| AK023011  | 4448.499  | 4058.507  | AK022010  | 485.389   | 722.704   | AK022010  | 894.874   | 1604.091  |
| NM_016816 | 1261.287  | 1138.715  | NM_014159 | 3735.853  | 1706.567  | NM_014159 | 6954.295  | 8716.564  |
| L17325    | 1141.536  | 1095.285  | AK021795  | 402.663   | 318.283   | AK021795  | 1168.86   | 2836.28   |
| NM_017716 | 1517.062  | 1325.875  | AL162042  | 928.96    | 627.983   | AL162042  | 2708.534  | 2048.59   |
| M58603    | 12373.488 | 10903.756 | AK026131  | 451.401   | 254.614   | AK026131  | 1128.896  | 497.553   |
| NM_003639 | 3806.619  | 3922.793  | AK023312  | 969.364   | 498.548   | AK023312  | 1509.041  | 690.092   |
| NM_000115 | 3251.212  | 3102.543  | AL133570  | 498.529   | 244.651   | AL133570  | 593.255   | 462.243   |

|           |           |           |           |           |           |           |           |           |
|-----------|-----------|-----------|-----------|-----------|-----------|-----------|-----------|-----------|
| AF308801  | 5133.429  | 5304.204  | AK026496  | 599.687   | 511.142   | AK021462  | 1590.516  | 1657.196  |
| AJ272212  | 1289.618  | 1198.357  | AK022678  | 1544.105  | 1328.045  | AK021943  | 454.508   | 1290.642  |
| NM_001626 | 6921.362  | 6242.133  | AK023835  | 1521.701  | 1478.327  | AK022678  | 1366.948  | 1388.155  |
| NM_005677 | 1173      | 1021.55   | AK023012  | 728.739   | 694.95    | AK023473  | 392.223   | 456.788   |
| AF229803  | 820.3     | 613.147   | AK023906  | 2195.68   | 2102.794  | AK023835  | 1537.508  | 1601.613  |
| AF151810  | 2714.914  | 2445.566  | AK024234  | 939.943   | 1486.052  | AK024159  | 700.009   | 1003.375  |
| NM_002130 | 32573.131 | 24665.16  | NM_012409 | 2810.291  | 2677.595  | AK023012  | 1052.778  | 1308.48   |
| NM_005469 | 8364.683  | 7818.596  | AL050205  | 4354.279  | 2565.899  | AK023906  | 2577.575  | 1659.136  |
| NM_016361 | 3264.732  | 2510.765  | NM_005691 | 962.735   | 395.238   | AK024234  | 608.906   | 406.186   |
| NM_003708 | 4037.199  | 4706.512  | AF086156  | 438.542   | 124.953   | NM_012409 | 2916.426  | 1524.157  |
| NM_014349 | 5394.233  | 5182.034  | AF130063  | 424.15    | 187.933   | AK021708  | 347.495   | 175.713   |
| AB040895  | 764.039   | 722.376   | AF086528  | 991.598   | 520.171   | AL050205  | 7052.79   | 12778.802 |
| NM_004820 | 291.874   | 311.165   | NM_006543 | 732.158   | 242.855   | AK023947  | 645.705   | 1478.47   |
| NM_018210 | 5779.103  | 7942.86   | AK023018  | 1852.28   | 1440.842  | NM_005691 | 1605.6    | 3585.124  |
| NM_001096 | 12203.846 | 11087.748 | AK022672  | 1399.89   | 1186.628  | AF086156  | 382.413   | 161.689   |
| NM_016014 | 6924.523  | 6807.113  | AK023870  | 1176.196  | 883.905   | AK023814  | 605.168   | 421.183   |
| NM_000198 | 419.536   | 253.956   | AK021599  | 1747.331  | 1848.016  | AF130063  | 503.449   | 283.111   |
| NM_017581 | 2441.451  | 1901.585  | BC030975  | 429.835   | 548.419   | AF086528  | 644.749   | 490.545   |
| AA488804  | 10914.464 | 10537.395 | AK024263  | 1001.594  | 837.059   | AL162043  | 522.59    | 473.941   |
| NM_006539 | 570.822   | 750.518   | NM_016613 | 3274.897  | 2435.108  | AF251187  | 612.676   | 646.485   |
| NM_001684 | 2711.257  | 3552.063  | AF086414  | 1296.778  | 672.098   | NM_006543 | 954.962   | 705.003   |
| NM_000808 | 202.951   | 673.902   | AJ012490  | 4567.48   | 2668.504  | AK023018  | 1502.697  | 1446.431  |
| NM_016318 | 3903.717  | 3629.19   | U84516    | 11003.174 | 4780.243  | AK023870  | 1216.406  | 1281.541  |
| NM_013309 | 996.999   | 908.682   | AL049270  | 1186.84   | 516.167   | AK021599  | 1526.8    | 1299.998  |
| NM_078467 | 2162.967  | 2249.23   | U88834    | 3602.673  | 1642.315  | AK024263  | 717.856   | 284.356   |
| AK001883  | 12894.684 | 8571.9    | BC025324  | 601.056   | 259.228   | NM_016613 | 2757.093  | 1413.012  |
| NM_014629 | 5372.043  | 4283.528  | NM_006087 | 62309.273 | 55789.613 | AF086414  | 2335.016  | 4085.188  |
| AL050114  | 672.461   | 534.654   | NM_003533 | 1258.091  | 736.375   | AJ012490  | 8875.313  | 16777.051 |
| AK021492  | 3313.713  | 3173.927  | AK023726  | 2485.047  | 1201.979  | U84516    | 19499.605 | 37361.574 |
| AK023794  | 1262.592  | 1628.477  | AK024906  | 501.822   | 220.625   | AL049270  | 1641.726  | 3826.084  |
| NM_019885 | 3823.022  | 3534.536  | AF131836  | 1739.221  | 995.905   | U88834    | 8140.043  | 6426.251  |
| AB033103  | 1713.597  | 1868.39   | AF275804  | 19158.65  | 13770.477 | BC025324  | 605.944   | 364.138   |
| NM_002907 | 4102.696  | 2962.504  | AL137488  | 754.229   | 623.414   | NM_006087 | 66577.125 | 58830.57  |
| AK024098  | 711.061   | 662.932   | AL049447  | 50635.934 | 43222.754 | NM_003533 | 1794.469  | 1330.974  |
| AK022371  | 3727.411  | 2887.474  | NM_020527 | 1981.001  | 1685.038  | AL157478  | 501.896   | 706.444   |
| D42045    | 4751.669  | 3788.886  | AB020637  | 7600.441  | 6019.318  | AK023726  | 5127.354  | 4238.068  |
| AB007953  | 2588.427  | 2445.952  | NM_005286 | 2701.257  | 1855.096  | AK024906  | 1089.629  | 804.043   |
| NM_014002 | 4060.89   | 3902.344  | AK024365  | 2395.776  | 1402.712  | AF131836  | 1944.376  | 1686.12   |
| NM_004197 | 3178.964  | 3502.228  | AJ251759  | 986.844   | 1006.857  | AF275804  | 20976.451 | 17219.746 |
| NM_004073 | 1208.96   | 1395.288  | AK024371  | 901.079   | 883.913   | AK024371  | 1754.905  | 3311.502  |
| NM_001278 | 5736.754  | 5657.49   | NM_005454 | 515.035   | 441.859   | NM_005454 | 533.973   | 682.341   |
| NM_019105 | 1685.793  | 1471.007  | AB019569  | 62018.977 | 52156.055 | NM_001889 | 9609.343  | 3650.81   |
| NM_000294 | 4602.182  | 4322.146  | NM_001889 | 12870.404 | 7660.394  | NM_004999 | 505.189   | 315.127   |
| NM_016249 | 469.108   | 519.105   | NM_004999 | 668.098   | 831.965   | X89668    | 23359.07  | 30666.035 |
| NM_006181 | 836.922   | 814.527   | X89668    | 13742.917 | 5031.985  | NM_004458 | 5800.977  | 12037.402 |
| NM_003796 | 13813.609 | 11005.99  | NM_004458 | 4540.878  | 2341.33   | NM_006901 | 1529.261  | 4004.441  |
| NM_002973 | 3339.868  | 3610.93   | NM_006901 | 1161.081  | 543.075   | NM_018530 | 11997.088 | 22663.291 |
| NM_004436 | 20415.85  | 16869.652 | NM_018530 | 5491.25   | 2552.481  | AJ003145  | 490.589   | 592.821   |
| NM_006580 | 1616.961  | 1167.722  | AJ003145  | 357.38    | 188.247   | AK022855  | 14301.295 | 5168.883  |
| NM_001305 | 542.467   | 495.503   | AK022855  | 13810.089 | 7058.14   | AK023816  | 1196.532  | 499.573   |
| NM_005082 | 1158.051  | 958.768   | AL050102  | 1122.9    | 651.637   | AL050102  | 906.339   | 638.392   |
| D17028    | 28819.107 | 27440.623 | AF305686  | 2964.583  | 1597.772  | AF305686  | 3962.542  | 2563.313  |
| NM_013442 | 28721.125 | 25665.842 | AF085832  | 515.676   | 296.613   | AF085832  | 894.701   | 566.679   |

|           |           |           |           |           |           |           |           |           |
|-----------|-----------|-----------|-----------|-----------|-----------|-----------|-----------|-----------|
| BG611243  | 2998.499  | 2148.986  | AK025981  | 2172.821  | 812.132   | AK025981  | 2161.776  | 1727.754  |
| AI417481  | 453.882   | 190.666   | AF086266  | 571.65    | 230.377   | AF113212  | 463.831   | 367.349   |
| BI906766  | 1034.873  | 749.526   | AF086252  | 1122.435  | 876.207   | AF086266  | 669.485   | 709.862   |
| U60519    | 1603.737  | 1299.954  | AK026703  | 824.323   | 696.325   | AF086252  | 1525.629  | 1134.316  |
| AA282906  | 386.171   | 537.572   | NM_017866 | 7330.589  | 5141.792  | AK026703  | 992.629   | 1097.301  |
| L02870    | 696.47    | 675.623   | AJ131244  | 501.466   | 613.5     | CY3Cy5    | 1722.811  | 167.761   |
| BG755482  | 4657.866  | 4524.529  | NM_003536 | 1301.679  | 1197.459  | BI870965  | 3757.3    | 5531.621  |
| AI480307  | 4888.279  | 4731.29   | AF116707  | 2929.254  | 2630.032  | NM_001903 | 10204.989 | 10682.669 |
| X51420    | 1160.183  | 897.03    | U90910    | 2397.19   | 2014.049  | BI835536  | 11658.714 | 12381.589 |
| X51757    | 6837.61   | 5013.238  | CY3Cy5    | 1167.14   | 226.486   | BF205051  | 2895.253  | 3307.574  |
| L24038    | 1057.915  | 1110.188  | AA143087  | 3090.141  | 3196.233  | X02761    | 1600.223  | 2326.179  |
| NM_006186 | 542.907   | 495.479   | U25804    | 1881.173  | 2342.939  | M91463    | 916.237   | 964.692   |
| NM_002751 | 1389.397  | 1367.529  | BI870965  | 1678.58   | 2176.092  | J03060    | 3342.231  | 3612.847  |
| M55593    | 877.998   | 791.961   | NM_001903 | 6889.114  | 8920.515  | X54156    | 715.844   | 647.029   |
| NM_017716 | 1530.195  | 1332.021  | BI835536  | 8202.745  | 8945.432  | NM_003743 | 1901.048  | 1733.435  |
| M58603    | 10984.58  | 9084.295  | BF205051  | 1178.277  | 1404.615  | AA829383  | 5312.146  | 6311.76   |
| NM_003639 | 4427.271  | 5636.58   | X02761    | 433.345   | 523.598   | AF012434  | 9566.969  | 11111.85  |
| NM_001549 | 301.697   | 338.616   | J03060    | 1723.575  | 1721.921  | SR2       | 55377.855 | 48695.395 |
| NM_000115 | 3354.638  | 2754.622  | NM_003743 | 1193.756  | 1195.285  | SR4       | 17140.621 | 11373.204 |
| AF308801  | 5441.409  | 5613.41   | AA829383  | 3498.877  | 4514.577  | SR6       | 2698.389  | 1206.914  |
| NM_007318 | 18847.832 | 17508.998 | AF012434  | 5939.038  | 6299.979  | SR8       | 9045.559  | 11719.558 |
| NM_014874 | 1989.847  | 1629.327  | SR6       | 1703.261  | 1311.165  | SR10      | 43782.352 | 31072.861 |
| NM_005765 | 15693.021 | 14052.929 | SR8       | 6027.878  | 11488.406 | CY3Cy5    | 3663.278  | 266.703   |
| NM_002762 | 817.39    | 581.199   | SR10      | 21394.236 | 5361.675  | NM_004302 | 628.419   | 694.4     |
| NM_006324 | 9851.906  | 8378.725  | CY3Cy5    | 1006.658  | 212.809   | NM_005903 | 2470.005  | 3771.251  |
| NM_016848 | 1630.328  | 1564.739  | NM_005902 | 779.787   | 1101.749  | NM_000861 | 914.094   | 859.279   |
| NM_000514 | 1839.738  | 1504.424  | NM_002850 | 37008.617 | 39649.078 | AB037734  | 769.566   | 992.932   |
| AL137432  | 2323.621  | 1739.178  | NM_004302 | 432.692   | 433.576   | U77493    | 619.294   | 538.956   |
| NM_000957 | 817.024   | 1341.649  | NM_005903 | 1005.611  | 1251.447  | NM_019062 | 591.569   | 786.211   |
| NM_019043 | 6026.178  | 4960.523  | NM_000861 | 700.683   | 662.675   | NM_003873 | 408.529   | 574.47    |
| NM_016564 | 2104.563  | 1873.158  | AB037734  | 635.099   | 735.937   | NM_000263 | 1182.328  | 1322.94   |
| AF279656  | 358.107   | 447.026   | NM_000263 | 690.609   | 567.576   | AF073519  | 7706.228  | 7941.502  |
| AB007933  | 2772.97   | 2206.034  | AF073519  | 5582.439  | 5141.636  | AB001451  | 457.912   | 776.774   |
| NM_006702 | 5544.223  | 5390.485  | AB001451  | 278.47    | 207.312   | NM_017583 | 2596.145  | 3169.769  |
| NM_001396 | 2450.354  | 1407.017  | NM_017583 | 1950.076  | 1927.661  | Y16132    | 11241.021 | 13028.058 |
| NM_014474 | 1228.004  | 1221.778  | Y16132    | 4540.901  | 4306.422  | NM_002521 | 827.314   | 793.957   |
| NM_006539 | 703.555   | 410.678   | NM_002521 | 378.704   | 313.099   | NM_001150 | 948.042   | 578.456   |
| NM_001684 | 2199.73   | 2354.658  | NM_001150 | 364.308   | 360.419   | NM_002856 | 1569.019  | 877.038   |
| NM_000808 | 622.967   | 601.191   | NM_002856 | 681.093   | 475.116   | NM_003225 | 1178.329  | 1512.953  |
| NM_016318 | 3909.435  | 3887.233  | NM_000096 | 1024.155  | 821.268   | NM_000096 | 2307.217  | 5654.729  |
| NM_013309 | 848.814   | 797.522   | AA418251  | 1080.051  | 996.222   | AA418251  | 1391.768  | 4042.136  |
| NM_019891 | 1313.874  | 1071.584  | NM_019045 | 1065.708  | 2220.995  | NM_019045 | 919.736   | 964.494   |
| AF038186  | 3559.293  | 3409.7    | NM_006380 | 3207.286  | 4064.09   | AB020710  | 1582.038  | 1215.537  |
| NM_016277 | 3619.575  | 3284.959  | AB020710  | 1163.484  | 1423.807  | NM_016174 | 4414.624  | 5685.504  |
| NM_007247 | 4524.854  | 4367.849  | NM_016174 | 2388.088  | 3028.578  | NM_020377 | 746.575   | 597.887   |
| NM_006554 | 7519.138  | 6072.076  | U88896    | 645.681   | 808.364   | U88896    | 1631.124  | 1652.981  |
| X99962    | 10726.364 | 8887.8    | NM_005724 | 6099.508  | 6794.622  | AF116702  | 51935.16  | 42681.168 |
| AK023221  | 3908.828  | 3090.92   | X58794    | 759.302   | 834.846   | NM_005724 | 7716.403  | 8571.63   |
| NM_003664 | 1716.836  | 1459.032  | NM_001735 | 1421.12   | 1494.655  | X58794    | 1193.983  | 1995.957  |
| NM_002426 | 1287.081  | 1210.004  | NM_005080 | 11602.527 | 13748.527 | NM_001735 | 2312.036  | 2671.815  |
| AK027182  | 1026.24   | 1119.93   | NM_004887 | 5693.643  | 7222.902  | NM_002349 | 771.919   | 543.986   |
| J03651    | 2593.135  | 1985.065  | NM_006404 | 454.858   | 458.462   | NM_005080 | 14556.861 | 17120.557 |
| U61738    | 580.893   | 792.494   | NM_014795 | 552.668   | 708.79    | NM_004887 | 9269.931  | 9268.399  |

|           |           |           |           |           |           |           |           |           |
|-----------|-----------|-----------|-----------|-----------|-----------|-----------|-----------|-----------|
| AJ132087  | 1285.111  | 1583.319  | M15330    | 525.81    | 667.596   | NM_006404 | 755.143   | 639.56    |
| U92818    | 680.643   | 558.898   | NM_014396 | 2291.278  | 2057.229  | NM_014795 | 692.289   | 840.183   |
| NM_000442 | 4497.514  | 5022.647  | AK027201  | 1180.266  | 1138.828  | NM_002986 | 974.857   | 1343.743  |
| NM_002934 | 1410.284  | 1370.686  | NM_000489 | 3561.82   | 1943.761  | M15330    | 1209.401  | 1767.319  |
| AK023011  | 4937.838  | 4844.452  | X98507    | 1330.483  | 1059.939  | NM_014396 | 2868.259  | 3286.446  |
| NM_016816 | 1308.963  | 1358.879  | NM_016030 | 15236.233 | 11759.678 | AK027201  | 2038.517  | 2340.032  |
| L17325    | 1083.324  | 861.537   | NM_014669 | 6187.808  | 5622.385  | NM_000489 | 7635.885  | 7187.246  |
| NM_014002 | 3823.872  | 3478.343  | NM_005652 | 2852.521  | 2457.468  | X98507    | 2267.673  | 1771.375  |
| NM_004197 | 3164.361  | 3826.074  | AL133064  | 2542.043  | 3898.835  | NM_016030 | 48837.293 | 31837.088 |
| NM_004073 | 1154.363  | 914.694   | NM_006227 | 2568.025  | 3579.656  | NM_014669 | 8418.396  | 5114.767  |
| NM_001278 | 5897.613  | 6113.561  | NM_002905 | 2746.029  | 3460.19   | NM_005652 | 6855.216  | 17845.826 |
| NM_019105 | 1960.489  | 1579.727  | NM_019028 | 5368.972  | 6366.965  | AK026686  | 795.088   | 1803.01   |
| NM_000294 | 5065.463  | 4221.438  | NM_000431 | 2485.316  | 2792.884  | NM_002905 | 4338.036  | 4377.916  |
| AJ272212  | 1390.59   | 1059.503  | AB033118  | 5872.38   | 6587.225  | NM_000700 | 47620.594 | 42723.566 |
| NM_001626 | 7326.682  | 6456.02   | NM_019606 | 2263.909  | 2546.381  | NM_019028 | 10133.098 | 11825.273 |
| NM_005677 | 1756.707  | 1587.463  | NM_001690 | 6197.417  | 6889.731  | NM_000431 | 3049.475  | 3143.349  |
| AF229803  | 1417.061  | 1287.679  | AF034374  | 3591.305  | 4129.589  | NM_013421 | 1134.768  | 1570.14   |
| AF151810  | 2435.199  | 1965.815  | NM_016118 | 5577.392  | 5700.507  | NM_012474 | 9036.173  | 7837.903  |
| NM_002130 | 34300.215 | 26320.014 | NM_018674 | 4231.258  | 5096.204  | AB033118  | 6750.556  | 8887.586  |
| NM_005469 | 8680.22   | 8257.646  | NM_001683 | 15048.826 | 13167.546 | NM_019606 | 2699.762  | 3912.867  |
| NM_016361 | 2928.415  | 2031.261  | NM_001682 | 1692.577  | 1771.79   | NM_001690 | 8621.723  | 8093.621  |
| NM_003708 | 3314.748  | 3598.616  | NM_014405 | 1218.633  | 981.826   | AF034374  | 7799.084  | 8774.753  |
| NM_014349 | 5107.835  | 4796.28   | NM_014928 | 784.9     | 743.909   | NM_016118 | 6656.875  | 5934.207  |
| AB040895  | 874.217   | 719.348   | AK025130  | 2859.917  | 2981.444  | NM_018674 | 13112.008 | 16034.467 |
| NM_018210 | 5473.081  | 6312.521  | NM_017875 | 1368.562  | 1070.559  | NM_001683 | 27016.529 | 29955.813 |
| NM_001096 | 11799.498 | 11492.808 | AK023232  | 1371.779  | 1320.101  | NM_001682 | 1985.761  | 2021.708  |
| NM_016014 | 7503.696  | 7654.488  | NM_000271 | 3846.994  | 3681.667  | NM_014405 | 2139.074  | 3280.754  |
| NM_000198 | 492.963   | 325.883   | NM_018209 | 3505.314  | 3001.731  | NM_000816 | 1001.895  | 1136.214  |
| NM_017581 | 2691.657  | 2354.167  | NM_006184 | 16635.549 | 16359.158 | NM_014928 | 1481.31   | 2053.807  |
| AA488804  | 11435.857 | 10629.607 | AB018268  | 3423.607  | 3319.93   | AK025130  | 4474.735  | 4607.041  |
| L29496    | 693.515   | 424.494   | Z70701    | 5764.292  | 6291.394  | NM_017875 | 1981.421  | 2268.653  |
| NM_007002 | 14938.771 | 12120.838 | AB040972  | 1738.878  | 2430.01   | AK023232  | 3740.537  | 3503.024  |
| NM_012121 | 918.981   | 916.107   | NM_018686 | 8057.737  | 10647.433 | NM_000271 | 8229.749  | 4802.684  |
| NM_003255 | 5651.728  | 4417.708  | NM_017676 | 1106.18   | 1291.268  | NM_018209 | 4531.656  | 2761.437  |
| NM_014155 | 4028.321  | 3001.392  | AK021764  | 424.272   | 461.573   | NM_006184 | 29527.746 | 59481.457 |
| AK026331  | 5980.706  | 6075.208  | NM_005431 | 1648.387  | 1922.911  | AB018268  | 6137.71   | 16432.055 |
| M30773    | 4302.8    | 2983.243  | AB036063  | 1880.846  | 1943.768  | Z70701    | 6955.876  | 6420.872  |
| NM_016338 | 10360.206 | 10170.162 | NM_002894 | 5842.636  | 5864.04   | AB040972  | 3846.132  | 3966.718  |
| AF113699  | 6264.415  | 6391.788  | NM_004629 | 6815.923  | 7727.871  | AF148505  | 2675.96   | 2120.821  |
| AK001883  | 12809.829 | 7607.667  | NM_004260 | 4397.719  | 4699.214  | NM_018686 | 10412.095 | 10180.28  |
| NM_014629 | 5930.501  | 4239.928  | AL050067  | 687.769   | 673.982   | NM_017676 | 1703.642  | 1755.665  |
| AL050114  | 587.417   | 624.664   | NM_004972 | 3230.953  | 3095.755  | NM_005431 | 2221.259  | 2579.014  |
| AK021492  | 3269.07   | 2178.895  | NM_006251 | 4118.243  | 4395.06   | AB036063  | 2255.169  | 2818.875  |
| AK023794  | 1982.551  | 1907.015  | NM_004103 | 4577.677  | 5455.204  | NM_002894 | 6706.483  | 6049.911  |
| NM_019885 | 4360.489  | 3559.722  | NM_002314 | 4209.065  | 4762.752  | NM_004629 | 9095.958  | 8968.722  |
| NM_005328 | 681.376   | 651.996   | NM_001744 | 5349.979  | 5507.835  | NM_004260 | 7704.198  | 9355.048  |
| AB033103  | 1773.962  | 1497.844  | NM_006296 | 1751.351  | 1729.115  | AL050067  | 1176.967  | 1282.014  |
| NM_002907 | 4384.314  | 3057.313  | Z25433    | 2359.385  | 2339.075  | NM_004972 | 4504.22   | 5464.109  |
| AK024098  | 812.856   | 753.879   | NM_005922 | 2563.164  | 2395.371  | NM_006251 | 4843.163  | 5373.905  |
| AK001116  | 285.292   | 447.065   | NM_018638 | 4272.682  | 3756.798  | NM_004103 | 7008.192  | 9591.922  |
| AK022371  | 4331.457  | 3423.983  | AL137593  | 6902.438  | 6745.006  | NM_002314 | 5141.562  | 6116.866  |
| D42045    | 5635.632  | 4739.162  | NM_003915 | 2095.615  | 2102.621  | NM_001744 | 6434.569  | 6673.794  |
| AB007953  | 3107.638  | 2828.71   | NM_000382 | 2555.742  | 2445.246  | NM_006296 | 2578.436  | 2809.058  |

|           |           |           |           |           |           |           |           |           |
|-----------|-----------|-----------|-----------|-----------|-----------|-----------|-----------|-----------|
| NM_003734 | 4702.533  | 4005.392  | NM_002856 | 614.377   | 985.218   | Z25433    | 3614.849  | 3759.046  |
| NM_003247 | 318.753   | 281.729   | AA418251  | 889.131   | 1301.262  | NM_005922 | 3665.066  | 3147.768  |
| NM_014935 | 1220.336  | 1191.958  | AA143087  | 3315.947  | 2931.704  | NM_018638 | 5972.689  | 4177.345  |
| X99660    | 3731.008  | 4167.525  | U25804    | 1692.615  | 2196.147  | AL137593  | 17123.383 | 7897.328  |
| X03635    | 1072.846  | 827.042   | BI870965  | 1844.964  | 2286.979  | NM_003915 | 3119.302  | 5336.526  |
| X97671    | 852.136   | 858.026   | NM_001903 | 7010.082  | 10039.716 | NM_000382 | 3197.896  | 8854.772  |
| NM_004351 | 1650.161  | 1410.013  | BI835536  | 8534.959  | 11231.294 | NM_002856 | 1063.598  | 828.894   |
| NM_004236 | 10911.038 | 11684.59  | BF205051  | 945.678   | 998.426   | NM_003225 | 683.813   | 617.136   |
| AB011093  | 7990.38   | 7252.425  | X02761    | 321.955   | 366.445   | NM_000096 | 1288.375  | 1194.693  |
| NM_002462 | 307.789   | 300.337   | M91463    | 475.678   | 618.687   | AA418251  | 1013.866  | 919.554   |
| NM_005618 | 448.623   | 276.225   | J03060    | 1953.202  | 1764.449  | AA143087  | 6715.784  | 6723.038  |
| NM_020533 | 5718.945  | 5741.817  | X54156    | 407.055   | 575.499   | U25804    | 2210.87   | 2512.083  |
| NM_001894 | 6645.795  | 5119.425  | NM_003743 | 981.122   | 1063.795  | BI870965  | 3264.045  | 3018.004  |
| NM_000614 | 659.564   | 560.65    | AA829383  | 3521.437  | 4231.598  | NM_001903 | 11235.383 | 10156.725 |
| AK022884  | 1605.167  | 1322.15   | AF012434  | 6047.241  | 5927.169  | BI835536  | 12334.22  | 11491.405 |
| AF305072  | 571.073   | 406.686   | AB037791  | 1076.573  | 955.883   | BF205051  | 3178.129  | 3237.684  |
| NM_006620 | 8677.338  | 8005.765  | NM_018124 | 3704.665  | 3992.872  | X02761    | 1713.462  | 1894.028  |
| NM_001397 | 2128.293  | 2110.07   | NM_000489 | 3056.017  | 3287.233  | M91463    | 963.256   | 854.911   |
| Y08770    | 804.878   | 885.559   | X98507    | 1223.027  | 1549.165  | J03060    | 2953.601  | 3894.605  |
| NM_004772 | 5144.244  | 4522.101  | NM_014669 | 5949.339  | 11482.933 | X54156    | 600.656   | 739.788   |
| NM_003714 | 4632.828  | 3525.126  | NM_005652 | 2484.36   | 3173.951  | NM_003743 | 1432.962  | 1489.83   |
| NM_004004 | 651.177   | 553.32    | NM_005902 | 841.79    | 1313.297  | AA829383  | 5042.301  | 5365.553  |
| AF024540  | 2479.931  | 1542.795  | NM_002850 | 40508.113 | 44730.805 | AF012434  | 9429.824  | 9428.127  |
| NM_002189 | 1310.123  | 1124.011  | NM_004302 | 441.577   | 616.979   | AB037791  | 1464.575  | 844.767   |
| U42977    | 4369.593  | 3179.928  | NM_005903 | 1092.786  | 1511.739  | NM_018124 | 6995.478  | 19099.42  |
| NM_002881 | 7767.628  | 7624.824  | NM_000861 | 396.257   | 588.88    | NM_000489 | 6521.204  | 8175.574  |
| NM_003666 | 830.682   | 905.963   | AB037734  | 609.99    | 720.457   | X98507    | 1673.33   | 1281.074  |
| NM_003288 | 6710.475  | 4792.757  | U77493    | 286.151   | 410.73    | NM_016030 | 44423.246 | 39333.449 |
| NM_018242 | 428       | 372.781   | NM_019062 | 235.567   | 363.275   | NM_014669 | 7474.232  | 7254.415  |
| M83822    | 4420.943  | 3906.263  | NM_000263 | 571.57    | 440.236   | NM_005652 | 4745.371  | 4761.005  |
| NM_018434 | 14284.798 | 14291.496 | AF073519  | 5079.556  | 3479.27   | AK026686  | 548.402   | 427.167   |
| NM_003914 | 1627.881  | 1548.312  | NM_017583 | 2183.108  | 1686.917  | NM_005902 | 1126.362  | 772.99    |
| NM_020423 | 2078.317  | 1674.49   | Y16132    | 4373.232  | 3819.586  | NM_004302 | 640.89    | 700.526   |
| AK021437  | 679.619   | 787.041   | NM_016593 | 421.086   | 493.207   | NM_005903 | 1698.277  | 1590.704  |
| NM_003831 | 4461.286  | 4682.636  | NM_002521 | 363.944   | 386.558   | NM_000861 | 786.669   | 1034.412  |
| NM_001759 | 848.65    | 1264.575  | NM_017875 | 1579.944  | 1781.851  | AB037734  | 798.519   | 972.185   |
| AB007965  | 4532.843  | 4024.573  | AK023232  | 1215.727  | 1467.259  | U77493    | 739.086   | 784.156   |
| NM_017649 | 1441.582  | 1066.1    | NM_000271 | 4045.15   | 5310.683  | NM_019062 | 610.165   | 1131.761  |
| NM_000066 | 446.595   | 786.903   | NM_018209 | 3121.77   | 3809.917  | NM_003873 | 508.826   | 562.46    |
| NM_001196 | 19654.574 | 17472.865 | NM_006184 | 16256.55  | 19514.465 | NM_000263 | 1138.691  | 1118.753  |
| NM_016008 | 2114.799  | 1781.839  | AB018268  | 4223.209  | 5404.268  | AF073519  | 7700.393  | 7129.019  |
| NM_017744 | 980.511   | 910.755   | NM_019045 | 839.434   | 821.359   | NM_017583 | 2551.84   | 1951.72   |
| NM_001924 | 4236.233  | 4450.193  | NM_006380 | 2680.973  | 2955.949  | Y16132    | 10632.517 | 7262.832  |
| NM_017705 | 3165.005  | 2261.843  | AB020710  | 1248.726  | 1273.45   | NM_016593 | 719.238   | 686.02    |
| NM_001796 | 546.592   | 556.885   | NM_016174 | 2754.026  | 2723.331  | NM_002521 | 1153.734  | 3051.304  |
| AB040880  | 1170.444  | 950.517   | U88896    | 956.349   | 1255.69   | NM_017875 | 2428.471  | 3781.501  |
| NM_009587 | 3063.532  | 2118.527  | NM_005724 | 5903.527  | 6807.464  | AK023232  | 2728.039  | 2260.194  |
| AL133566  | 872.104   | 610.993   | X58794    | 648.815   | 715.072   | NM_000271 | 6699.037  | 6565.351  |
| M36118    | 699.417   | 632.866   | NM_001735 | 1518.699  | 1515.88   | NM_018209 | 4076.305  | 4119.343  |
| NM_003399 | 3905.695  | 3353.41   | NM_002349 | 356.186   | 456       | NM_006184 | 18617.107 | 17984.279 |
| NM_002630 | 817.336   | 593.794   | NM_005080 | 11682.567 | 12958.062 | AB018268  | 9736.837  | 9458.854  |
| AJ295149  | 12663.77  | 13576.335 | NM_004887 | 5603.344  | 6100.516  | NM_019045 | 1120.517  | 1436.57   |
| NM_013438 | 7184.63   | 4992.785  | NM_006404 | 425.266   | 247.581   | NM_006380 | 2203.01   | 1947.545  |

|           |           |           |           |           |           |           |           |           |
|-----------|-----------|-----------|-----------|-----------|-----------|-----------|-----------|-----------|
| NM_017481 | 462.404   | 66.304    | NM_014795 | 433.592   | 470.579   | NM_016174 | 4413.119  | 5067.974  |
| NM_01468E | 5602.301  | 4965.772  | NM_00298E | 455.602   | 292.801   | NM_020377 | 776.396   | 628.277   |
| AB037784  | 790.432   | 764.316   | M15330    | 1018.214  | 1052.843  | U88896    | 1797.896  | 1761.043  |
| AL359623  | 2494.589  | 1970.685  | NM_01439E | 2518.721  | 2211.265  | NM_005724 | 8004.979  | 9176.618  |
| AL137255  | 1672.47   | 1350.341  | AK027201  | 1160.722  | 1204.358  | X58794    | 1290.712  | 1471.986  |
| NM_00337C | 9898.874  | 9344.102  | Z25433    | 2672.978  | 3430.117  | NM_00173E | 2355.473  | 3101.188  |
| AB037715  | 1316.075  | 1123.076  | NM_00592Z | 2622.792  | 3074.413  | NM_00234E | 631.001   | 832.464   |
| AF250924  | 4624.305  | 4712.107  | NM_01863E | 4545.231  | 5156.661  | NM_00508C | 15240.001 | 19177.066 |
| D86979    | 3028.368  | 2568.681  | AL137593  | 7246.993  | 8224.369  | NM_004887 | 9014.625  | 8839.306  |
| AF018081  | 7831.491  | 6430.287  | NM_00391E | 2262.613  | 2394.488  | NM_006404 | 648.568   | 517.683   |
| NM_02020Z | 11673.75  | 10537.512 | NM_00038Z | 2251.909  | 2738.95   | NM_01479E | 783.501   | 709.68    |
| AF211891  | 2079.902  | 1484.041  | AL133064  | 2283.204  | 2637.169  | NM_00298E | 812.558   | 783.804   |
| NM_005641 | 3887.993  | 3046.56   | NM_006227 | 3036.58   | 3819.086  | M15330    | 990.346   | 694.428   |
| NM_00166E | 1810.438  | 1384.68   | NM_00290E | 2542.585  | 2615.653  | NM_01439E | 2775.229  | 1535.741  |
| AK025362  | 1493.684  | 1299.407  | NM_00070C | 37998.035 | 47496.984 | AK027201  | 2103.679  | 1649.954  |
| AK021776  | 6011.603  | 4818.699  | NM_01902E | 5763.99   | 6203.137  | Z25433    | 4418.869  | 5085.769  |
| AK026042  | 1514.76   | 1214.097  | NM_000431 | 2796.797  | 3558.39   | NM_00592Z | 2971.578  | 2360.3    |
| NM_01423Z | 13254.985 | 12521.945 | NM_013421 | 603.196   | 526.353   | NM_01863E | 4891.146  | 4683.845  |
| NM_002911 | 3092.656  | 4341.533  | AB033118  | 6478.163  | 6847.236  | AL137593  | 10769.541 | 11230.872 |
| AF132027  | 5079.101  | 4724.484  | NM_01960E | 2198.186  | 2213.42   | NM_00391E | 2345.061  | 2279.812  |
| NM_004681 | 12050.987 | 10333.312 | NM_00169C | 6536.747  | 5962.894  | NM_00038Z | 2740.642  | 2800.948  |
| AB033096  | 10592.451 | 9246.244  | AF034374  | 4233.656  | 4677.409  | AL133064  | 2935.564  | 3279.688  |
| NM_01488E | 1490.963  | 998.157   | NM_016118 | 5977.634  | 5531.439  | NM_006227 | 3474.711  | 2958.161  |
| L31408    | 10319.386 | 10626.255 | NM_018674 | 6299.246  | 6774.559  | NM_00290E | 4532.752  | 5150.143  |
| NM_00154E | 11979.736 | 10998.754 | NM_00168Z | 15085.76  | 10892.672 | NM_00070C | 46839.484 | 46218.141 |
| NM_00444E | 10361.12  | 8508.956  | NM_00168Z | 1577.025  | 1579.73   | NM_01902E | 10603.262 | 12363.25  |
| AF070625  | 1758.45   | 1690.268  | NM_01440E | 1398.02   | 1060.247  | NM_000431 | 3624.512  | 3785.157  |
| AL365512  | 4015.501  | 3682.689  | NM_00081E | 738.985   | 689.591   | NM_013421 | 1079.833  | 1161.095  |
| J02625    | 12318.496 | 10143.614 | NM_01492E | 843.433   | 676.266   | AB033118  | 7141.527  | 9531.49   |
| NM_00454E | 28925.645 | 28125.434 | AK025130  | 2755.77   | 2777.017  | NM_01960E | 2911.585  | 3745.323  |
| NM_00533Z | 24959.234 | 22322.414 | AB037791  | 1105.275  | 1244.171  | NM_00169C | 7953.592  | 7862.338  |
| NM_00455Z | 35947.016 | 31598.943 | NM_018124 | 4007.13   | 5340.319  | AF034374  | 7360.199  | 8609.114  |
| AK026745  | 5127.322  | 4344.885  | Z70701    | 6761.884  | 6628.896  | NM_016118 | 6963.647  | 6241.349  |
| AL157440  | 3558.129  | 2830.289  | AB040972  | 2185.191  | 2065.671  | NM_018674 | 14368.346 | 18117.963 |
| NM_01642Z | 7524.275  | 5607.969  | AF148505  | 1838.779  | 2439.909  | NM_00168Z | 26697.572 | 29570.191 |
| NM_005119 | 11029.597 | 7819.984  | NM_01868E | 8844.317  | 11068.053 | NM_00168Z | 2187.781  | 2231.015  |
| NM_00316E | 24486.074 | 23852.854 | NM_01767E | 1377.852  | 1946.818  | NM_01440E | 3888.261  | 4641.711  |
| AK055844  | 2278.275  | 1627.006  | AK021764  | 570.813   | 731.569   | NM_00081E | 1000.787  | 668.126   |
| NM_01828E | 11374.06  | 10395.765 | NM_005431 | 1873.031  | 1932.085  | NM_01492E | 1291.44   | 989.423   |
| NM_00314E | 16415.301 | 16149.393 | AB036063  | 1724.312  | 1828.327  | AK025130  | 2965.243  | 2156.882  |
| X52342    | 1439.933  | 1114.961  | NM_002894 | 6564.842  | 6144.872  | AB037791  | 1325.961  | 1045.881  |
| NM_003131 | 15882.781 | 15859.893 | NM_00462Z | 6957.764  | 8175.333  | NM_018124 | 4883.3    | 4782.158  |
| NM_00523E | 4989.095  | 4673.105  | NM_00426C | 5740.993  | 5867.852  | Z70701    | 8520.03   | 8417.741  |
| AB014526  | 853.418   | 929.613   | AL050067  | 774.361   | 625.137   | AB040972  | 4120.142  | 4937.117  |
| NM_01853E | 934.411   | 856.333   | NM_00497Z | 3703.896  | 2783.335  | AF148505  | 2894.538  | 3533.576  |
| NM_01608E | 23242.67  | 22459.295 | NM_006251 | 4498.2    | 4393.266  | BE260997  | 589.519   | 480.022   |
| AK025768  | 3428.281  | 3498.25   | NM_00410Z | 5322.271  | 4185.274  | NM_01868E | 11552.009 | 11267.419 |
| AL117502  | 3314.358  | 4082.384  | NM_002314 | 4582.331  | 4593.138  | NM_01767E | 1854.114  | 1833.358  |
| AK024637  | 531.202   | 435.288   | NM_001744 | 5456.581  | 5328.722  | AK021764  | 612.457   | 651.856   |
| AK024108  | 527.146   | 394.747   | NM_00629E | 2219.241  | 2003.263  | NM_005431 | 2285.876  | 2819.899  |
| AL117454  | 2771.499  | 2697.288  | AF073519  | 5493.859  | 6362.717  | AB036063  | 2347.708  | 2411.802  |
| AF272890  | 2133.386  | 2097.631  | NM_01758Z | 1875.223  | 2022.64   | NM_002894 | 6420.375  | 7290.086  |
| U00684    | 493.539   | 343.2     | Y16132    | 3627.739  | 3967.696  | NM_00462E | 9264.924  | 9576.243  |

|          |           |           |           |           |           |           |           |           |
|----------|-----------|-----------|-----------|-----------|-----------|-----------|-----------|-----------|
| NM_01645 | 22830.938 | 24158.713 | NM_01659  | 440.161   | 660.665   | NM_00426  | 8607.818  | 9885.843  |
| AF086227 | 930.113   | 741.07    | NM_002521 | 448.026   | 337.946   | AL050067  | 1383.368  | 1322.936  |
| AK026246 | 1666.106  | 1342.283  | NM_00285  | 717.969   | 860.014   | NM_00497  | 4851.39   | 5995.411  |
| AF070524 | 340.114   | 281.459   | NM_00009  | 819.791   | 1181.906  | NM_006251 | 5421.172  | 5832.908  |
| AF035281 | 2056.378  | 2768.364  | AA418251  | 833.523   | 1161.798  | NM_00410  | 7032.098  | 6565.09   |
| AK026304 | 675.068   | 546.577   | AA143087  | 3863.418  | 3302.561  | NM_002314 | 5191.71   | 3690.248  |
| AK024689 | 625.606   | 546.82    | U25804    | 1945.537  | 2225.621  | NM_001744 | 6452.504  | 3520.327  |
| BC035667 | 736.795   | 655.901   | BI870965  | 2203.135  | 2410.187  | NM_00629  | 2120.6    | 1443.402  |
| AL049277 | 689.457   | 714.956   | NM_00190  | 7460.489  | 10385.283 | AF073519  | 6229.452  | 4164.534  |
| AL049988 | 460.352   | 330.953   | BI835536  | 8902.505  | 10430.647 | AB001451  | 501.345   | 674.29    |
| AL117571 | 1349.077  | 989       | BF205051  | 1075.176  | 1122.396  | NM_01758  | 2106.56   | 1849.72   |
| L22263   | 674.655   | 3624.199  | X02761    | 484.798   | 414.441   | Y16132    | 8073.839  | 7850.693  |
| AK091573 | 819.862   | 846.921   | M91463    | 435.108   | 460.636   | NM_01659  | 546.644   | 768.886   |
| AF131814 | 2868.519  | 2058.935  | J03060    | 1758.176  | 1286.769  | NM_002521 | 856.17    | 843.083   |
| AL359600 | 2451.396  | 2367.823  | X54156    | 400.571   | 290.399   | NM_001150 | 594.73    | 640.817   |
| AL360144 | 436.305   | 511.98    | NM_00374  | 1218.616  | 875.514   | NM_00285  | 1211.874  | 1776.156  |
| BC028617 | 1404.384  | 1771.962  | AA829383  | 3828.132  | 3967.404  | NM_00322  | 702.791   | 912.389   |
| AL117653 | 932.761   | 1525.81   | AF012434  | 6720.659  | 5885.149  | NM_00009  | 1540.541  | 1740.691  |
| AF087999 | 1246.16   | 1523.879  | NM_01479  | 319.234   | 412.305   | AA418251  | 1161.246  | 1192.282  |
| NM_00374 | 2619.512  | 2912.264  | M15330    | 497.185   | 731.937   | AA143087  | 7282.242  | 7625.792  |
| AL050078 | 823.682   | 1233.461  | NM_01439  | 2253.509  | 2160.323  | U25804    | 2549.384  | 2501.513  |
| AK021616 | 182.051   | 368.066   | AK027201  | 853.82    | 1141.562  | BI870965  | 3750.33   | 4206.45   |
| AK022933 | 516.852   | 352.03    | NM_00048  | 3364.038  | 2373.575  | NM_00190  | 11105.663 | 10961.301 |
| NM_01427 | 936.024   | 628.527   | X98507    | 1318.741  | 1431.392  | BI835536  | 12528.654 | 11194.911 |
| AF009288 | 545.201   | 901.715   | NM_01603  | 18659.266 | 19294.695 | BF205051  | 3291.235  | 3973.971  |
| AF056438 | 504.275   | 707.039   | NM_01466  | 6108.392  | 7281.577  | X02761    | 1530.422  | 1728.259  |
| AF003737 | 1032.356  | 1002.054  | NM_00565  | 2702.253  | 2873.896  | M91463    | 804.438   | 918.396   |
| AF009296 | 1068.485  | 952.898   | AK026686  | 308.735   | 270.077   | J03060    | 3292.358  | 4195.198  |
| AK001011 | 1467.463  | 1525.463  | NM_00590  | 1145.522  | 1039.606  | X54156    | 506.673   | 755.706   |
| AK021486 | 425.213   | 276.214   | NM_00285  | 45797.969 | 46265.723 | NM_00374  | 1603.49   | 1386.636  |
| AK021740 | 502.407   | 476.171   | NM_00430  | 430.72    | 541.386   | AA829383  | 5248.082  | 3730.656  |
| AK026238 | 1033.065  | 824.633   | NM_00590  | 1308.615  | 1329.96   | AF012434  | 8812.023  | 4101.428  |
| AK026694 | 1259.77   | 1687.953  | NM_00086  | 476.663   | 522.187   | NM_01479  | 651.395   | 368.504   |
| AK025564 | 689.393   | 1147.607  | AB037734  | 595.373   | 502.078   | NM_00298  | 771.327   | 662.85    |
| AK026286 | 1100.82   | 1235.646  | U77493    | 450.853   | 498.362   | M15330    | 707.785   | 1138.562  |
| AK026731 | 1498.824  | 1727.952  | NM_01906  | 433.855   | 318.151   | NM_01439  | 2581.974  | 2823.882  |
| NM_00419 | 4230.534  | 3205.785  | NM_00387  | 215.537   | 186.455   | AK027201  | 2062.65   | 1989.345  |
| AK024160 | 1446.953  | 1376.703  | NM_00026  | 954.325   | 762.319   | NM_00048  | 6076.281  | 6226.915  |
| AK025077 | 1050.275  | 671.61    | NM_00168  | 13987.796 | 15168.042 | X98507    | 2293.125  | 2326.91   |
| NM_00641 | 4045.297  | 3945.076  | NM_00168  | 1536.744  | 1841.704  | NM_01603  | 45031.316 | 40787.203 |
| L43350   | 533.528   | 496.541   | NM_01440  | 1105.098  | 1074.024  | NM_01466  | 7807.975  | 8123.469  |
| NM_02031 | 6354.149  | 6958.663  | NM_00081  | 620.917   | 665.387   | NM_00565  | 4548.517  | 4883.867  |
| AL080234 | 4871.07   | 4819.324  | NM_01492  | 772.804   | 867.159   | AK026686  | 551.301   | 496.674   |
| AK027025 | 745.499   | 776.302   | AK025130  | 2207.757  | 2713.209  | NM_00590  | 1558.6    | 1622.877  |
| AK025105 | 666.456   | 818.201   | NM_01787  | 1352.483  | 1241.175  | NM_00285  | 52541.883 | 73549.852 |
| AK021675 | 508.158   | 528.225   | AK023232  | 1377.074  | 1327.141  | NM_00430  | 643.583   | 791.028   |
| AB002446 | 649.352   | 910.364   | NM_00027  | 4199.619  | 4834.958  | NM_00590  | 1669.418  | 1757.072  |
| AF212220 | 7122.343  | 4960.798  | NM_01820  | 3824.801  | 3581.667  | NM_00086  | 784.179   | 941.66    |
| AK025010 | 432.6     | 365.419   | NM_00618  | 16673.758 | 16993.271 | AB037734  | 807.701   | 807.262   |
| AL137709 | 2327.127  | 3114.355  | AB018268  | 4756.049  | 5394.737  | U77493    | 665.748   | 821.356   |
| AK023277 | 3002.935  | 2403.476  | NM_01904  | 936.665   | 1132.498  | NM_01906  | 796.857   | 624.453   |
| AK000425 | 2463.826  | 2306.058  | NM_00638  | 3114.858  | 3130.766  | NM_00387  | 577.287   | 146.953   |
| Z27200   | 1140.015  | 1196.892  | AB020710  | 1335.889  | 1558.589  | NM_00026  | 1121.282  | 727.497   |

|           |           |           |           |           |           |           |           |           |
|-----------|-----------|-----------|-----------|-----------|-----------|-----------|-----------|-----------|
| AF070571  | 5473.419  | 5154.438  | NM_016174 | 3236.089  | 3087.642  | NM_001683 | 19340.066 | 16218.464 |
| AK023554  | 1348.998  | 1056.01   | NM_020377 | 348.018   | 349.075   | NM_001682 | 1592.226  | 950.62    |
| NM_003513 | 19861.848 | 8599.776  | U88896    | 1192.681  | 1358.27   | NM_014405 | 1898.464  | 2405.032  |
| AL079294  | 537.79    | 439.236   | NM_005724 | 6396.111  | 5059.532  | NM_000816 | 920.658   | 1010.716  |
| AK024844  | 949.524   | 885.161   | X58794    | 987.993   | 876.579   | NM_014928 | 1106.645  | 1489.317  |
| AL049437  | 1164.457  | 1261.427  | NM_001735 | 1654.143  | 1445.022  | AK025130  | 3812.445  | 4164.001  |
| AK000315  | 13752.432 | 14235.336 | NM_005080 | 12501.871 | 10956.104 | NM_017875 | 1845.181  | 2109.865  |
| AK023248  | 1307.583  | 1253.699  | NM_004887 | 6465.829  | 5535.354  | AK023232  | 3288.052  | 3904.355  |
| NM_012404 | 23400.404 | 19755.842 | NM_004972 | 3275.561  | 3199.994  | NM_000271 | 6539.062  | 6401.157  |
| AF251190  | 752.975   | 752.269   | NM_006251 | 4307.327  | 5119.162  | NM_018205 | 4341.33   | 5417.908  |
| AF130075  | 1879.417  | 2386.175  | NM_004103 | 5091.13   | 6042.136  | NM_006184 | 20666.943 | 18741.355 |
| NM_005444 | 7731.188  | 7708.654  | NM_002314 | 4521.715  | 5574.711  | AB018268  | 8392.669  | 7603.181  |
| V00589    | 9772.537  | 8017.165  | NM_001744 | 5096.084  | 5855.369  | NM_019045 | 1140.592  | 942.779   |
| AL390163  | 1613.016  | 1803.528  | NM_006296 | 1822.743  | 2166.772  | NM_006380 | 3519.246  | 3265.997  |
| NM_018572 | 1658.819  | 1386.891  | Z25433    | 2461.186  | 3048.882  | AB020710  | 1656.249  | 1979.528  |
| AL109959  | 393.168   | 399.917   | NM_005922 | 2530.189  | 2856.856  | NM_016174 | 4826.585  | 6722.88   |
| AK024838  | 840.164   | 765.893   | NM_018638 | 4342.51   | 4511.182  | NM_020377 | 878.582   | 696.837   |
| AK000175  | 2717.459  | 2660.99   | AL137593  | 8325.693  | 8194.752  | U88896    | 1773.845  | 1689.593  |
| AL137736  | 1589.602  | 1899.977  | NM_003915 | 2260.975  | 2473.087  | X58794    | 1124.005  | 1440.336  |
| AK021897  | 9175.001  | 7126.491  | NM_000382 | 2221.305  | 2482.81   | NM_001735 | 2227.961  | 2183.873  |
| AK001051  | 1623.542  | 1234.853  | AL133064  | 2901.346  | 3183.318  | NM_002345 | 797.488   | 790.376   |
| NM_018317 | 2114.26   | 1563.8    | NM_006227 | 3649.231  | 4649.483  | NM_005080 | 14942.915 | 11842.038 |
| AF086051  | 1349.736  | 1302.046  | NM_002905 | 4227.771  | 5106.813  | NM_004887 | 7900.012  | 4169.033  |
| AK024356  | 906.115   | 854.752   | NM_000700 | 39694.656 | 42957.125 | NM_004972 | 4006.596  | 2943.91   |
| D17252    | 48072.434 | 45535.082 | NM_019028 | 7121.111  | 7715.021  | NM_006251 | 4293.335  | 2956.833  |
| D16476    | 580.103   | 387.724   | NM_000431 | 2955.043  | 3476.549  | NM_004103 | 6504.077  | 7162.762  |
| NM_003673 | 1089.835  | 1082.254  | NM_013421 | 635.571   | 710.496   | NM_002314 | 5205.192  | 4401.141  |
| Z36823    | 7117.425  | 8738.595  | AB033118  | 5804.368  | 5077.147  | NM_001744 | 6149.932  | 4628.513  |
| NM_012081 | 1694.803  | 1819.739  | NM_019606 | 2610.617  | 2512.127  | NM_006296 | 2175.603  | 2171.773  |
| AL137463  | 430.037   | 968.996   | NM_001690 | 6562.738  | 5164.835  | Z25433    | 3332.847  | 3603.448  |
| AF085909  | 2875.206  | 2860.281  | AF034374  | 4793.603  | 4799.621  | NM_005922 | 3013.826  | 2657.517  |
| AF090888  | 870.034   | 635.262   | NM_016118 | 6641.227  | 4620.726  | NM_018638 | 6202.63   | 5732.207  |
| AK027193  | 921.176   | 893.718   | NM_018674 | 6465.785  | 6173.707  | AL137593  | 16126.854 | 19600.813 |
| AF086471  | 9946.07   | 9156.927  | NM_000068 | 940.392   | 982.246   | NM_003915 | 2644.244  | 2465.129  |
| NM_018455 | 13585.233 | 12364.096 | AB033046  | 6560.655  | 8591.85   | NM_000382 | 2646.914  | 3122.706  |
| AF113018  | 672.949   | 538.745   | NM_015918 | 8021.084  | 9567.115  | AL133064  | 3252.536  | 3761.126  |
| AK021996  | 1122.128  | 1442.931  | AK023228  | 424.215   | 392.676   | NM_006227 | 5046.833  | 5693.154  |
| AL049337  | 704.686   | 824.51    | AB029041  | 3595.553  | 4069.231  | NM_002905 | 5231.313  | 5791.876  |
| CY3Cy5    | 5309.155  | 649.734   | AK026642  | 10037.935 | 10220.96  | NM_000700 | 47940.449 | 47516.168 |
| U13697    | 710.179   | 763.409   | AL359063  | 900.79    | 1181.033  | NM_019028 | 12015.456 | 14323.833 |
| U04270    | 3280.052  | 4039.733  | AL079292  | 3483.665  | 3406.775  | NM_000431 | 3856.404  | 3940.097  |
| AA629719  | 59128.578 | 60853.227 | X89667    | 1306.256  | 1402.625  | NM_013421 | 1102.252  | 1313.295  |
| AA927528  | 2309.536  | 2404.197  | AB037791  | 1147.428  | 1179.464  | AB033118  | 6722.942  | 9234.664  |
| BG181154  | 1578.38   | 1283.086  | NM_018124 | 4395.608  | 4659.402  | NM_019606 | 3105.023  | 3583.017  |
| AA843679  | 3905.97   | 4619.96   | Z70701    | 7432.502  | 7042.886  | NM_001690 | 7853.549  | 7357.851  |
| H68922    | 573.141   | 675.815   | AB040972  | 3208.253  | 3027.542  | AF034374  | 7110.252  | 8014.818  |
| SR5       | 4914.107  | 4631.642  | AF148505  | 2204.391  | 2368.259  | NM_016118 | 7079.44   | 4315.381  |
| SR7       | 5024.357  | 33948.578 | BE260997  | 431.194   | 291.466   | NM_018674 | 8725.264  | 6358.123  |
| SR9       | 18992.684 | 3270.426  | NM_018686 | 9833.695  | 10074.288 | AB033046  | 8110.779  | 6016.352  |
| CY3Cy5    | 2920.282  | 217.259   | NM_017676 | 1414.311  | 1805.706  | NM_015918 | 9115.167  | 8802.25   |
| NM_004380 | 10112.06  | 12819.323 | AK021764  | 515.103   | 459.559   | AK023228  | 497.762   | 484.48    |
| AY007378  | 4082.045  | 4613.137  | NM_005431 | 1672.247  | 1460.477  | AB029041  | 17738.742 | 18437.879 |
| D26070    | 1234.071  | 1237.533  | AB036063  | 1984.212  | 2009.711  | AK026642  | 10965.549 | 11438.236 |



|           |           |           |           |           |           |           |           |           |
|-----------|-----------|-----------|-----------|-----------|-----------|-----------|-----------|-----------|
| NM_001642 | 5961.137  | 7141.47   | NM_002894 | 5943.059  | 4957.857  | AL359063  | 1671.817  | 1636.87   |
| NM_001542 | 647.022   | 789.48    | NM_004629 | 8018.421  | 7069.942  | AL079292  | 4201.131  | 3982.248  |
| NM_000114 | 531.477   | 477.215   | NM_004260 | 6864.897  | 6354.671  | X89667    | 2638.535  | 2641.442  |
| NM_005156 | 4996.178  | 5235.188  | AL050067  | 971.64    | 699.346   | AB037791  | 1423.053  | 1007.452  |
| NM_015193 | 429.976   | 766.544   | NM_015564 | 2208.749  | 3927.9    | NM_018124 | 5871.553  | 6204.786  |
| X98834    | 4513.445  | 5211.223  | AF160476  | 705.478   | 1327.545  | Z70701    | 10255.87  | 11280.161 |
| NM_007035 | 6962.032  | 7581.315  | L22650    | 1153.79   | 2048.891  | AB040972  | 4499.412  | 5455.616  |
| AB019562  | 724.103   | 844.373   | AB014520  | 2960.724  | 2809.069  | AF148505  | 3123.4    | 3568.398  |
| AK022847  | 2222.386  | 2414.592  | AF161420  | 1084.053  | 1297.009  | BE260997  | 688.905   | 582.333   |
| NM_020203 | 749.6     | 546.14    | NM_004907 | 1083.186  | 1290.88   | NM_018686 | 11751.136 | 12569.829 |
| L40992    | 574.606   | 609.632   | NM_002891 | 386.708   | 360.289   | NM_017676 | 1706.948  | 1931.053  |
| U20582    | 4394.231  | 3865.157  | X04526    | 14582.06  | 14384.087 | AK021764  | 712.905   | 834.159   |
| NM_002079 | 6410.849  | 6832.328  | D26067    | 4600.025  | 4165.113  | NM_005431 | 2494.117  | 2613.598  |
| NM_006808 | 30953.439 | 30495.002 | AF227924  | 1780.521  | 1839.013  | AB036063  | 2294.133  | 2869.628  |
| NM_006634 | 10068.698 | 10402.657 | NM_005716 | 13665.42  | 13231.879 | NM_002894 | 7362.919  | 6366.804  |
| NM_016465 | 2246.25   | 3022.91   | NM_006183 | 1456.363  | 1423.533  | NM_004629 | 10011.291 | 9268.646  |
| NM_000328 | 1168.779  | 1188.922  | NM_016087 | 538.911   | 441.124   | NM_004260 | 7884.431  | 7232.263  |
| NM_013399 | 3938.532  | 3932.342  | S59184    | 2423.366  | 1815.743  | AL050067  | 1540.714  | 1140.96   |
| NM_002410 | 460.247   | 557.933   | NM_006661 | 1397.879  | 1336.942  | AK024732  | 597.064   | 575.565   |
| AL122120  | 2509.904  | 2147.37   | NM_005746 | 10897.177 | 11619.955 | NM_015564 | 1359.266  | 1293.209  |
| NM_014684 | 1172.433  | 941.451   | NM_004588 | 869.106   | 761.782   | L22650    | 1515.812  | 966.874   |
| AK027247  | 830.565   | 893.265   | U16126    | 813.227   | 743.794   | AB014520  | 5819.427  | 5606.628  |
| NM_002480 | 7044.16   | 7727.689  | NM_002614 | 384.675   | 356.361   | AF161420  | 1614.547  | 1377.773  |
| NM_017571 | 6040.25   | 5472.779  | NM_005655 | 2143.517  | 2233.551  | NM_004907 | 1275.224  | 1524.215  |
| AB007946  | 879.873   | 618.217   | NM_007314 | 2742.744  | 3151.702  | NM_002891 | 1005.318  | 990.328   |
| L03169    | 1056.868  | 1112.729  | NM_016073 | 2580.823  | 2349.37   | NM_001775 | 676.507   | 571.187   |
| NM_001928 | 6119.295  | 6616.236  | NM_006600 | 16614.758 | 14332.907 | X04526    | 18404.656 | 14755.9   |
| NM_006399 | 969.938   | 836.036   | AF297709  | 1505.917  | 1198.418  | D26067    | 4662.645  | 4677.317  |
| NM_018965 | 511.994   | 554.155   | L77564    | 543.814   | 777.273   | AF227924  | 2614.765  | 2958.975  |
| NM_000185 | 1296.997  | 1240.642  | NM_015384 | 1959.82   | 1937.87   | NM_005716 | 20381.279 | 22944.537 |
| Y00816    | 960.148   | 1065.176  | AK023327  | 1106.804  | 1129.321  | NM_006183 | 1212.907  | 1334.61   |
| NM_004512 | 3641.849  | 4528.851  | AB046858  | 1730.16   | 1546.816  | NM_016087 | 514.557   | 724.533   |
| NM_001055 | 11297.766 | 19969.674 | D50914    | 3190.378  | 3021.013  | S59184    | 2037.013  | 2740.803  |
| NM_015878 | 827.029   | 913.105   | BE878692  | 623.029   | 766.162   | NM_006661 | 2677.429  | 2955.445  |
| NM_018361 | 3611.829  | 3887.323  | NM_002007 | 494.468   | 494.521   | NM_005746 | 15133.482 | 15920.45  |
| NM_019893 | 542.953   | 927.076   | NM_015896 | 1052.364  | 1126.018  | NM_004588 | 1127.651  | 1455.868  |
| AB040966  | 5730.826  | 6193.943  | NM_002305 | 23717.1   | 27759.52  | U16126    | 981.15    | 1240.791  |
| NM_020132 | 1092.373  | 1507.86   | AK025439  | 3001.549  | 2815.807  | NM_002172 | 19730.074 | 15631.432 |
| NM_016467 | 10716.251 | 12467.44  | NM_001737 | 1539.988  | 1320.624  | NM_002614 | 685.507   | 517.285   |
| NM_007253 | 830.76    | 873.404   | Z36784    | 624.264   | 638.731   | NM_005655 | 2136.511  | 1141.271  |
| NM_019106 | 1365.296  | 1432.756  | NM_016626 | 9405.299  | 7931.544  | NM_007314 | 3163.308  | 2410.666  |
| L08436    | 607.785   | 803.733   | NM_007213 | 2200.963  | 2260.698  | NM_016073 | 2886.008  | 1990.951  |
| NM_000558 | 1076.887  | 1343.732  | NM_019064 | 1102.394  | 615.239   | NM_006600 | 17763.199 | 12516.777 |
| NM_004198 | 292.614   | 337.971   | AJ295148  | 873.212   | 984.638   | AF297709  | 1863.645  | 1641.455  |
| NM_014170 | 4156.852  | 4769.044  | NM_016302 | 3979.19   | 3466.365  | L77564    | 1245.332  | 925.215   |
| AF116652  | 5005.263  | 8809.37   | NM_004159 | 13640.375 | 12462.232 | NM_015384 | 2495.958  | 2242.899  |
| NM_000835 | 666.605   | 500.898   | AK021866  | 416.629   | 259.348   | AK023327  | 1216.522  | 760.941   |
| AK000271  | 465.245   | 475.567   | NM_003249 | 5089.738  | 4020.631  | AB046858  | 1718.196  | 1911.535  |
| NM_014148 | 467.541   | 823.095   | M21897    | 623.115   | 666.621   | D50914    | 3980.683  | 3102      |
| NM_018835 | 5735.847  | 7675.954  | AF301463  | 1149.531  | 1225.769  | BE878692  | 961.537   | 811.383   |
| NM_003401 | 1996.64   | 2461.346  | NM_015984 | 6516.431  | 5751.511  | NM_002007 | 701.528   | 905.124   |
| NM_004758 | 1853.916  | 2863.331  | AK025969  | 978.128   | 911.368   | NM_015896 | 1233.374  | 1363.934  |
| NM_002913 | 3915.896  | 4319.606  | NM_006894 | 621.528   | 566.274   | NM_002305 | 35793.023 | 28938.396 |

|           |           |           |           |           |           |           |           |           |
|-----------|-----------|-----------|-----------|-----------|-----------|-----------|-----------|-----------|
| AK022797  | 1137.489  | 1252.948  | AK023031  | 1573.106  | 1633.133  | AK025439  | 3139.909  | 3851.413  |
| NM_00737C | 5001.776  | 5810.162  | NM_01209C | 3674.601  | 3058.846  | NM_001737 | 1918.806  | 2526.735  |
| NM_006231 | 1094.759  | 1523.004  | BE793385  | 707.637   | 1100.511  | Z36784    | 625.149   | 705.855   |
| AK023471  | 1547.806  | 1712.554  | AF177292  | 236.686   | 336.188   | NM_01662E | 10461.197 | 11111.354 |
| AF044578  | 1306.761  | 1163.407  | NM_00308E | 6158.238  | 5103.194  | NM_007213 | 2638.691  | 3000.04   |
| NM_00194E | 3178.72   | 2687.907  | NM_004082 | 4264.919  | 3689.962  | NM_019064 | 1034.432  | 988.554   |
| NM_001067 | 13801.403 | 12225.851 | NM_01439E | 4461.125  | 3732.809  | NM_000094 | 2391.632  | 1876.657  |
| NM_014034 | 7431.985  | 7381.689  | NM_005934 | 9855.685  | 9184.269  | AJ295148  | 758.63    | 471.794   |
| NM_00533E | 17397.605 | 17839.617 | NM_007129 | 3860.04   | 3782.766  | NM_016302 | 3582.823  | 2439.936  |
| J04474    | 7529.034  | 8321.049  | AY004253  | 3995.993  | 3888.462  | NM_00415E | 15605.382 | 10864.315 |
| NM_003761 | 1103.521  | 1158.564  | NM_00214E | 644.389   | 780.346   | AK021866  | 586.806   | 359.11    |
| NM_014011 | 1638.856  | 1641.131  | AL137449  | 1537.367  | 1586.997  | NM_00324E | 6313.507  | 5163.897  |
| AK025994  | 1425.287  | 1887.195  | U88153    | 1505.204  | 1263.014  | M21897    | 843.986   | 597.083   |
| L29306    | 479.315   | 567.652   | NM_01842E | 3865.417  | 3547.761  | AF301463  | 1117.116  | 869.161   |
| NM_01398E | 1526.71   | 1386.084  | NM_006924 | 12903.5   | 11223.361 | NM_015984 | 8093.08   | 9838.974  |
| NM_00173E | 1135.453  | 1209.208  | NM_016024 | 7347.592  | 7067.275  | AK025969  | 1243.537  | 1208.21   |
| L40992    | 635.753   | 1273.752  | NM_018107 | 3840.778  | 3716.329  | NM_006894 | 902.469   | 1072.115  |
| U20582    | 4064.565  | 4239.914  | NM_012279 | 1128.277  | 1125.742  | AK023031  | 1109.349  | 1176.07   |
| NM_00207E | 7062.373  | 7871.232  | BF310673  | 1360.516  | 1552.693  | NM_005717 | 45079.258 | 48522.527 |
| U13697    | 672.402   | 790.007   | R97012    | 15050.42  | 13743.488 | NM_01209C | 5053.354  | 5253.028  |
| U04270    | 3006.026  | 3573.922  | U77700    | 6867.705  | 4487.906  | BE793385  | 1088.11   | 1629.372  |
| AA629719  | 63176.438 | 62692.266 | NM_006567 | 4918.574  | 4511.234  | AF177292  | 549.936   | 297.001   |
| AA927528  | 2596.269  | 2523.402  | AF038554  | 16957.416 | 13279.539 | NM_00308E | 5837.931  | 8147.066  |
| X02152    | 67069.438 | 63769.449 | AF264621  | 3063.169  | 2608.6    | AF043290  | 715.964   | 620.814   |
| BG676364  | 1861.181  | 1780.348  | NM_00587E | 15757.021 | 13526.547 | NM_004082 | 3831.26   | 4323.068  |
| BG181154  | 1300.236  | 1303.205  | NM_004184 | 3957.737  | 2955.654  | NM_01439E | 4511.175  | 4101.639  |
| AA843679  | 3728.601  | 3936.414  | AK075087  | 393.557   | 484.969   | NM_005934 | 8628.841  | 6703.189  |
| H68922    | 531.193   | 428.866   | AK026571  | 3172.768  | 3503.04   | NM_00712E | 4048.629  | 3126.618  |
| NM_004957 | 3398.845  | 3140.66   | AK024673  | 4067.835  | 4373.363  | AY004253  | 4479.247  | 2773.093  |
| NM_005252 | 774.962   | 703.201   | AF070618  | 915.894   | 860.772   | NM_00214E | 683.239   | 739.257   |
| AF090906  | 500.476   | 412.717   | AF131748  | 3017.441  | 2169.76   | AL137449  | 1992.903  | 1728.97   |
| AB023219  | 3589.267  | 2253.622  | NM_00045E | 1627.589  | 1775.369  | U88153    | 2385.692  | 3582.835  |
| NM_00192E | 6635.035  | 7809.051  | NM_00249E | 5973.965  | 5717.7    | X03910    | 13022.238 | 5516.662  |
| NM_00639E | 993.637   | 976.723   | NM_016243 | 2390.917  | 2187.902  | NM_01842E | 4735.233  | 4211.351  |
| NM_01896E | 393.451   | 400.001   | NM_00464E | 4399.569  | 3775.755  | NM_006924 | 15590.538 | 17145.209 |
| NM_00018E | 1114.678  | 1066.583  | NM_00654C | 2388.899  | 2404.194  | NM_016024 | 7478.941  | 7376.585  |
| Y00816    | 854.235   | 1295.734  | NM_01776E | 1098.37   | 1143.207  | NM_018107 | 4375.206  | 4140.798  |
| NM_004512 | 1311.501  | 1907.312  | NM_002811 | 11658.291 | 9516.736  | NM_01227E | 1754.106  | 1534.043  |
| NM_00438C | 9680.989  | 10801.116 | NM_02031C | 1625.814  | 1389.823  | NM_018387 | 10634.198 | 8650.524  |
| AY007378  | 3564.468  | 3885.146  | AK024444  | 530.309   | 587.055   | BF310673  | 1579.497  | 1528.135  |
| D26070    | 910.154   | 907.279   | NM_005802 | 3325.921  | 2762.654  | R97012    | 21399.172 | 19991.053 |
| NM_001642 | 5742.064  | 6939.055  | AB002331  | 3866.055  | 3621.868  | U77700    | 8339.055  | 8455.058  |
| NM_001542 | 668.447   | 653.806   | NM_002504 | 2262.276  | 1770.316  | NM_006567 | 6290.674  | 6056.896  |
| NM_000501 | 2292.566  | 2383.326  | AB046775  | 716.86    | 562.942   | AF038554  | 19911.086 | 17049.699 |
| NM_000114 | 439.951   | 357.431   | X74862    | 1113.482  | 1159.25   | AF264621  | 3883.496  | 3193.762  |
| NM_00515E | 4953.208  | 5222.891  | X65663    | 2889.836  | 2750.462  | NM_00587E | 17358.623 | 15360.495 |
| NM_015193 | 424.718   | 431.577   | NM_00318E | 2308.708  | 2207.766  | NM_004184 | 4400.221  | 2813.161  |
| X98834    | 3888.371  | 4512      | NM_00445E | 7155.65   | 6275.883  | AK075087  | 599.486   | 326.514   |
| NM_00703E | 6068.562  | 4649.997  | NM_004284 | 6334.572  | 5021.578  | AK026571  | 2866.525  | 1774.483  |
| AB019562  | 1442.567  | 1405.338  | NM_012243 | 1999.993  | 1743.503  | AK024673  | 3912.709  | 2284.086  |
| AF036364  | 1848.612  | 1611.108  | AK025743  | 819.258   | 832.271   | AF070618  | 793.79    | 683.075   |
| AK022847  | 2301.644  | 2190.237  | AK023974  | 2135.436  | 1862.062  | AF131748  | 3864.201  | 2520.077  |
| AK000271  | 496.197   | 335.863   | AK023768  | 1053.111  | 1082.728  | NM_00045E | 1954.615  | 1512.317  |

|           |           |           |           |           |           |           |           |           |
|-----------|-----------|-----------|-----------|-----------|-----------|-----------|-----------|-----------|
| NM_00680E | 27358.119 | 29417.588 | NM_014729 | 926.293   | 968.277   | NM_00249E | 7099.857  | 5682.853  |
| NM_006634 | 9172.686  | 9420.444  | AF147335  | 574.651   | 378.87    | NM_016243 | 3416.628  | 3102.539  |
| NM_01646E | 1961.557  | 2057.178  | AK000711  | 1298.156  | 1126.19   | NM_014402 | 44718.473 | 26691.07  |
| NM_00032E | 1098.391  | 1073.351  | BI768072  | 569.83    | 632.776   | NM_00464E | 4263.688  | 4071.826  |
| NM_01339E | 4141.412  | 4676.932  | AK022216  | 3258.102  | 2909.988  | NM_00654C | 2642.759  | 2535.819  |
| NM_00241C | 572.822   | 611.716   | AK025812  | 1939.556  | 1932.799  | NM_01776E | 1628.048  | 1492.744  |
| AL122120  | 2738.465  | 1846.87   | U00960    | 1361.502  | 1140.954  | NM_002811 | 13344.348 | 11455.698 |
| NM_014684 | 1171.342  | 1155.231  | AK022262  | 1008.914  | 877.495   | NM_02031C | 1897.856  | 1592.208  |
| AK027247  | 616.095   | 548.869   | AF088039  | 53429.41  | 49230.055 | NM_005802 | 4286.106  | 3112.002  |
| AB007946  | 630.316   | 690.587   | AF143888  | 357.242   | 319.56    | AB002331  | 4420.868  | 4119.626  |
| L03169    | 1359.612  | 1037.757  | AF086220  | 1152.819  | 743.675   | NM_002504 | 2269.073  | 2189.077  |
| NM_014011 | 1917.91   | 2137.467  | AK023941  | 1376.958  | 1034.317  | AB046775  | 1104.655  | 1037.274  |
| AK025994  | 1972.428  | 2811.634  | AL390083  | 5049.816  | 3312.226  | X74862    | 1198.272  | 1220.625  |
| L29306    | 655.674   | 463.833   | AB020702  | 1105.915  | 1008.963  | X65663    | 4336.791  | 3243.118  |
| NM_01398E | 1507.236  | 1551.057  | AL050227  | 1082.856  | 913.597   | NM_00318E | 2795.376  | 2387.841  |
| NM_00173E | 1101.544  | 1390.964  | AF085905  | 904.943   | 910.455   | NM_00445E | 8751.876  | 8812.379  |
| NM_00105E | 9618.433  | 13426.018 | NM_003847 | 5259.065  | 4308.561  | NM_004284 | 7547.078  | 7113.1    |
| NM_01587E | 986.89    | 838.439   | AK021973  | 1182.615  | 901.702   | NM_012243 | 1586.865  | 1000.07   |
| NM_002271 | 36583.184 | 42401.219 | AL110155  | 823.694   | 279.352   | AK025743  | 739.621   | 486.709   |
| NM_018361 | 3008.076  | 3601.157  | AL050165  | 44968.438 | 39733.777 | AK023974  | 1876.042  | 1416.112  |
| NM_019893 | 815.078   | 696.416   | AL117445  | 1050.323  | 1108.694  | AK023768  | 1141.779  | 1025.708  |
| AB040966  | 5646.094  | 5191.303  | AL122113  | 7702.129  | 6824.857  | NM_01472E | 923.999   | 853.818   |
| NM_020132 | 1358.286  | 1377.729  | AK024415  | 2794.719  | 2101.083  | AF147335  | 452.346   | 686.379   |
| NM_016467 | 11490.334 | 12306.518 | AL049365  | 5273.576  | 4922.929  | AK000711  | 1925.614  | 1644.446  |
| NM_007253 | 710.539   | 844.063   | AB007877  | 641.498   | 366.708   | BI768072  | 705.995   | 485.625   |
| NM_01910E | 1348.53   | 1649.673  | AK025132  | 597.052   | 490.661   | AK022216  | 3787.031  | 3583.275  |
| L08436    | 569.88    | 719.989   | AK025157  | 1301.385  | 1192.865  | AK025812  | 3575.995  | 3619.267  |
| NM_00055E | 958.313   | 1021.025  | NM_02021E | 997.933   | 904.032   | U00960    | 1567.398  | 1492.329  |
| NM_00419E | 255.065   | 665.1     | AK022001  | 2210.487  | 1621.792  | AK022262  | 1154.292  | 1663.441  |
| NM_01417C | 4302.83   | 3730.394  | AK022633  | 963.305   | 802.549   | AF088039  | 50827.836 | 64659.547 |
| AF116652  | 3751.952  | 3949.274  | AK027199  | 810.432   | 509.993   | AF086220  | 1208.647  | 1414.107  |
| NM_00083E | 703.466   | 638.99    | AK000079  | 2736.957  | 1938.015  | AK023941  | 1610.607  | 2452.821  |
| NM_004957 | 3227.665  | 3258.156  | AF009268  | 1564.893  | 1247.39   | AL390083  | 6868.143  | 6854.739  |
| NM_005252 | 918.004   | 1005.532  | AF009312  | 1321.673  | 1975.796  | AB020702  | 972.141   | 1429.72   |
| AB023219  | 3403.137  | 3204.727  | AF009276  | 674.515   | 510.568   | AL050227  | 1137.347  | 1499.753  |
| NM_01414E | 517.351   | 907.958   | AF056428  | 4462.681  | 3745.799  | AF085905  | 1442.918  | 1005.974  |
| NM_01883E | 5150.587  | 5479.092  | AF069136  | 687.627   | 627.563   | NM_003847 | 9195.409  | 6598.156  |
| NM_003401 | 1852.577  | 2171.75   | AK001097  | 524.408   | 221.705   | AK021973  | 1606.211  | 1683.857  |
| AL137724  | 4499.518  | 4530.698  | AK001995  | 399.965   | 404.975   | AL117638  | 669.198   | 152.122   |
| NM_00475E | 1824.366  | 2819.329  | AK021594  | 524.579   | 478.161   | AL050165  | 43895.633 | 51929.113 |
| NM_002913 | 3526.903  | 3570.415  | AK021635  | 1856.74   | 1316.072  | AL117445  | 1140.663  | 1269.625  |
| AK022797  | 1204.694  | 1185.584  | AK021856  | 1055.889  | 1356.943  | AL122113  | 8110.831  | 8938.491  |
| NM_00737C | 5169.433  | 4739.798  | AK025276  | 1931.634  | 1653.561  | AK024415  | 2393.904  | 2807.207  |
| NM_006231 | 1365.85   | 1280.155  | AK026457  | 1275.183  | 853.234   | AL049365  | 5039.215  | 5593.593  |
| AK023471  | 1506.102  | 1591.692  | NM_006272 | 666.575   | 272.631   | AB007877  | 653.927   | 964.025   |
| AF044578  | 1743.934  | 1675.529  | AK024303  | 571.323   | 749.422   | AK025132  | 459.775   | 741.597   |
| NM_00194E | 3385.688  | 2636.242  | AL160131  | 7640.954  | 6046.293  | AK025157  | 1037.59   | 1854.858  |
| NM_001067 | 15399.641 | 14249.957 | AF086045  | 3567.693  | 2789.385  | NM_02021E | 944.659   | 1320.689  |
| J04474    | 8512.045  | 7827.547  | AK027028  | 1301.521  | 1059.801  | AK022001  | 2359.254  | 2686.054  |
| NM_003761 | 952.563   | 948.431   | AK027069  | 270.755   | 301.473   | AK022633  | 1156.433  | 1105.085  |
| NM_015193 | 544.682   | 533.319   | AK026916  | 4865.999  | 4455.172  | AK027199  | 799.033   | 981.599   |
| X98834    | 4119.811  | 4782.989  | AK026914  | 1730.817  | 1486.546  | AK000079  | 2830.043  | 2184.573  |
| NM_00703E | 6581.342  | 6318.917  | Y13808    | 497.099   | 374.777   | AF009276  | 707.026   | 826.804   |

|           |           |           |           |           |           |           |           |           |
|-----------|-----------|-----------|-----------|-----------|-----------|-----------|-----------|-----------|
| AB019562  | 748.753   | 844.8     | Y11166    | 1441.936  | 1488.454  | AF056428  | 5587.577  | 5174.883  |
| AF036364  | 1975.607  | 2037.398  | AK023515  | 1769.078  | 1593.1    | AF069136  | 683.695   | 409.681   |
| AK022847  | 2272.115  | 2401.363  | AL137544  | 259.338   | 231.45    | AK001097  | 650.128   | 72.783    |
| NM_020203 | 597.629   | 609.563   | AL137623  | 15018.361 | 13386.305 | AK021594  | 640.87    | 547.207   |
| L40992    | 716.869   | 860.211   | AK026485  | 514.045   | 419.169   | AK021635  | 1330.464  | 2060.329  |
| U20582    | 4219.533  | 4591.133  | NM_003546 | 2413.376  | 2155.614  | AK021856  | 1368.012  | 1326.856  |
| NM_002079 | 6906.082  | 6822.27   | AF118077  | 2474.233  | 2425.084  | AK025276  | 2515.479  | 2588.72   |
| U13697    | 638.649   | 551.186   | AL137625  | 779.147   | 1055.025  | AK026457  | 852.789   | 1347.666  |
| U04270    | 2997.075  | 2848.756  | AK025750  | 1395.042  | 1581.653  | AJ008131  | 17237.379 | 18005.641 |
| X02152    | 65249.047 | 67542.75  | AK025783  | 1163.498  | 913.765   | AL160131  | 8847.345  | 4243.535  |
| BG676364  | 1632.166  | 1628.565  | AF113675  | 795.346   | 704.744   | AF086045  | 3607.659  | 2279.642  |
| BG181154  | 1516.614  | 1083.529  | AK024514  | 717.368   | 705.155   | AK027028  | 1464.298  | 1087.719  |
| AA843679  | 3538.465  | 2961.098  | NM_020119 | 4317.395  | 3219.66   | AK026916  | 4269.281  | 4028.119  |
| H68922    | 506.435   | 504.458   | AL049417  | 6703.357  | 5788.978  | AK026914  | 2277.936  | 3026.236  |
| NM_017571 | 6917.12   | 6404.64   | AK023507  | 591.987   | 603.08    | Y13808    | 491.156   | 305.594   |
| AB007946  | 694.146   | 699.813   | NM_005169 | 2729.459  | 2742.904  | Y11166    | 1855.458  | 1484.858  |
| L03169    | 1250.898  | 1452.508  | AL109818  | 601.338   | 585.234   | AK023515  | 1924.158  | 1832.463  |
| NM_001928 | 6544.952  | 5853.152  | NM_017929 | 732.671   | 925.913   | AL137623  | 14267.06  | 14786.114 |
| NM_006399 | 705.378   | 890.318   | NM_018472 | 1042.112  | 955.463   | NM_003546 | 2573.538  | 1412.71   |
| NM_000185 | 1081.86   | 1475.812  | AJ008128  | 22233.783 | 16289.57  | AK025783  | 1300.935  | 1098.107  |
| Y00816    | 905.76    | 1030.699  | AL449243  | 8298.125  | 7488.552  | AF113675  | 891.155   | 852.089   |
| NM_004512 | 1300.436  | 1347.499  | M12211    | 1197.651  | 1496.636  | NM_020119 | 3958.489  | 3885.192  |
| NM_004380 | 8752.468  | 8799.238  | AK026449  | 4727.389  | 4030.588  | AL049417  | 6305.262  | 5072.056  |
| AY007378  | 3747.201  | 3543.909  | NM_014027 | 3432.44   | 3823.485  | AK023507  | 742.079   | 1232.845  |
| D26070    | 1091.944  | 907.87    | NM_020467 | 3840.728  | 3536.403  | NM_005169 | 3222.708  | 2820.361  |
| NM_001642 | 5692.519  | 7067.557  | AF116621  | 2971.575  | 2723.685  | AL109818  | 738.332   | 638.732   |
| NM_000501 | 2420.145  | 2059.237  | AF086554  | 1740.73   | 1567.624  | NM_017929 | 862.476   | 982.094   |
| NM_000114 | 495.405   | 433.39    | AL390136  | 14682.437 | 19448.451 | NM_018472 | 1337.656  | 1500.782  |
| NM_005156 | 4730.73   | 4194.469  | AK023156  | 382.182   | 240.794   | AJ008128  | 26530.729 | 28155.457 |
| NM_000558 | 1199.582  | 1410.434  | AF086398  | 52948.219 | 52395.543 | AL449243  | 8757.357  | 8692.295  |
| NM_004198 | 333.09    | 443.506   | AK024545  | 716.332   | 616.767   | M12211    | 1330.627  | 1489.455  |
| NM_014170 | 4396.096  | 4419.006  | AK023444  | 483.811   | 465.694   | AK026449  | 8315.696  | 7666.185  |
| AF116652  | 4161.502  | 5577.824  | AK025953  | 944.526   | 961.713   | NM_014027 | 4340.411  | 2923.952  |
| NM_000835 | 622.977   | 555.737   | NM_003180 | 1669.336  | 1357.199  | AF116621  | 3020.051  | 2066.326  |
| AK000271  | 420.118   | 607.516   | AF086406  | 12601.793 | 10920.935 | AF086554  | 1808.636  | 1296.784  |
| NM_006808 | 26914.156 | 20448.449 | D17216    | 4820.431  | 4351.139  | AL390136  | 13426.498 | 11579.699 |
| NM_006634 | 9945.401  | 8698.788  | AL137581  | 1414.276  | 1296.072  | AK023156  | 579.131   | 506.594   |
| NM_016465 | 1959.234  | 2058.166  | AK024942  | 1761.587  | 1326.723  | AF086398  | 45454.691 | 50679.762 |
| NM_000328 | 1289.051  | 1246.719  | AJ227873  | 13022.692 | 10169.797 | AK024545  | 738.331   | 881.341   |
| NM_013399 | 4764.664  | 5239.815  | AK022886  | 4681.823  | 4095.061  | AK025953  | 1035.404  | 690.244   |
| NM_002410 | 637.894   | 493.028   | AK024665  | 10714.311 | 9827.07   | NM_003180 | 1391.691  | 1748.987  |
| AL122120  | 2936.706  | 1798.989  | AF147363  | 1045.382  | 933.12    | AF086406  | 13679.798 | 11801.587 |
| NM_014684 | 1313.312  | 1154.943  | AJ227880  | 892.417   | 706.646   | D17216    | 4222.705  | 3436.572  |
| AK027247  | 883.693   | 712.168   | AK000691  | 1485.314  | 1420.577  | AL137581  | 1583.191  | 1501.17   |
| NM_002480 | 6777.975  | 5848.999  | AK001448  | 1667.766  | 1293.838  | AK024942  | 1495.414  | 1626.929  |
| NM_014034 | 9107.223  | 11254.614 | AK026890  | 468.622   | 453.18    | AJ227873  | 14941.594 | 17589.432 |
| NM_005335 | 19770.746 | 20536.443 | AL049321  | 3752.876  | 3116.773  | AK022886  | 4879.361  | 5621.058  |
| J04474    | 8374.892  | 8496.958  | CY3Cy5    | 1907.705  | 286.893   | AK024665  | 10265.21  | 11471.991 |
| NM_003761 | 1189.167  | 1171.757  | W74254    | 20142.963 | 25336.129 | AF147363  | 832.44    | 1017.188  |
| NM_014011 | 1873.071  | 1923.424  | M58603    | 6998.302  | 9890.188  | AJ227880  | 1002.707  | 1005.664  |
| AK025994  | 1836.004  | 2158.952  | AA443286  | 825.768   | 667.285   | AK000691  | 1617.126  | 1960.322  |
| L29306    | 544.776   | 669.533   | AB003334  | 8024.309  | 9771.031  | AK001448  | 1843.271  | 1916.24   |
| NM_013989 | 1555.94   | 1831.744  | AW276315  | 834.671   | 909.924   | AK026890  | 638.223   | 546.651   |

|           |           |           |           |           |           |           |           |           |
|-----------|-----------|-----------|-----------|-----------|-----------|-----------|-----------|-----------|
| NM_00173E | 1549.74   | 1393.032  | AA490737  | 762.41    | 768.195   | AL049321  | 3730.694  | 4157.198  |
| NM_00105E | 8890.716  | 10620.898 | AI878886  | 18550.811 | 18954.721 | CY3Cy5    | 3460.845  | 237.252   |
| NM_01587E | 888.591   | 669.144   | BG697179  | 8787.444  | 8339.188  | W74254    | 21651.033 | 19143.48  |
| NM_002271 | 35975.668 | 30395.902 | NM_00213E | 44118.93  | 35525.156 | M58603    | 7390.709  | 6225.568  |
| NM_018361 | 3200.889  | 2703.947  | BM012504  | 3354.254  | 4066.497  | AA443286  | 1035.193  | 878.131   |
| NM_01989E | 863.824   | 798.252   | AA664145  | 1573.26   | 1846.934  | AB003334  | 9445.213  | 7662.124  |
| AB040966  | 6355.353  | 6499.36   | X72308    | 7412.741  | 8058.479  | AW276315  | 714.477   | 687.517   |
| NM_02013E | 1609.5    | 1524.496  | T70999    | 729.321   | 745.906   | AA490737  | 913.137   | 1075.886  |
| NM_016467 | 12151.344 | 11856.676 | T50790    | 705.483   | 955.244   | AI878886  | 16704.117 | 14302.173 |
| NM_00725E | 898.336   | 879.081   | R48168    | 12949.068 | 16153.846 | BG697179  | 7342.135  | 6227.133  |
| NM_01910E | 1355.469  | 1422.576  | NM_00394E | 2420.614  | 3821.651  | NM_00213E | 48986.559 | 47079.148 |
| L08436    | 794.912   | 562.732   | NM_00445E | 1243.415  | 2607.852  | BM012504  | 4810.134  | 5227.376  |
| NM_005607 | 4767.905  | 4657.084  | SR5       | 6245.47   | 8409.315  | AA664145  | 1125.753  | 1048.603  |
| NM_006761 | 60327.965 | 59406.621 | SR7       | 5494.479  | 50775.785 | X72308    | 9160.258  | 10593.642 |
| NM_014897 | 2139.647  | 2508.622  | SR9       | 18640.428 | 4067.073  | T50790    | 684.063   | 701.868   |
| NM_00345E | 8843.086  | 9184.785  | CY3Cy5    | 1954.847  | 250.066   | R48168    | 11251.195 | 12327.477 |
| NM_018371 | 23180.055 | 29422.113 | NM_000591 | 1367.284  | 1748.09   | NM_00394E | 1692.184  | 1984.492  |
| NM_01439E | 12081.411 | 11373.816 | NM_00056E | 889.206   | 850.489   | NM_00445E | 2539.162  | 2573.497  |
| NM_01814E | 780.909   | 778.034   | NM_00201E | 1517.479  | 2227.031  | SR9       | 14111.987 | 3493.829  |
| X78924    | 4544.054  | 4953.083  | NM_017767 | 4238.576  | 3343.882  | CY3Cy5    | 6257.081  | 1072.433  |
| NM_01325E | 986.861   | 918.392   | AK024848  | 5548.074  | 6596.966  | NM_00041E | 472.851   | 445.308   |
| AF090906  | 508.348   | 650.307   | NM_00485E | 1628.887  | 1825.385  | NM_01324E | 347.083   | 472.151   |
| AB023219  | 3787.088  | 3170.631  | NM_00054E | 1286.801  | 1592.534  | NM_000591 | 1242.447  | 1197.471  |
| NM_01414E | 468.521   | 558.768   | U06699    | 4294.134  | 5631.493  | NM_00056E | 1149.509  | 906.039   |
| NM_01883E | 5132.691  | 4203.558  | AJ290954  | 13204.9   | 23035.742 | NM_00201E | 1726.206  | 1317.589  |
| NM_003401 | 1876.786  | 1528.898  | AK025451  | 2334.28   | 3194.079  | AF253318  | 905.875   | 853.362   |
| AL137724  | 3896.273  | 3006.331  | NM_00278E | 1374.327  | 1549.102  | NM_017767 | 7705.747  | 8634.299  |
| NM_00475E | 1916.902  | 2144.589  | AK024396  | 1693.847  | 2026.52   | AK024848  | 4938.804  | 5471.321  |
| NM_00291E | 4677.812  | 4605.145  | U58514    | 1184.644  | 1495.361  | NM_00485E | 1150.416  | 1207.899  |
| AK022797  | 1587.031  | 1695.036  | NM_000544 | 2072.147  | 2712.124  | NM_00054E | 1106.246  | 1213.89   |
| NM_00737E | 6124.208  | 6165.459  | NM_004644 | 427.602   | 938.137   | U06699    | 5755.38   | 6482.961  |
| NM_006231 | 1528.471  | 1886.055  | AV681967  | 1746.475  | 2290.483  | AJ290954  | 11185.175 | 11084.046 |
| AK023471  | 1729.626  | 1499.004  | NM_01825E | 2097.619  | 2699.293  | AK025451  | 1540.064  | 1004.078  |
| AF044578  | 1590.968  | 1354.355  | NM_01655E | 5373.973  | 5516.559  | AK024396  | 1178.049  | 2042.364  |
| NM_00194E | 3153.836  | 2456.605  | AB023136  | 556.26    | 721.278   | U58514    | 1214.984  | 1932.138  |
| NM_001067 | 13844.661 | 10389.39  | NM_00379E | 22220.809 | 21015.549 | NM_000544 | 1939.879  | 1090.131  |
| AK025337  | 623.762   | 746.289   | NM_01423E | 4467.118  | 3885.149  | NM_004644 | 736.478   | 719.191   |
| NM_00357E | 3978.616  | 4132.536  | NM_005701 | 1276.699  | 1114.769  | AV681967  | 2187.569  | 1602.878  |
| NM_00029E | 3060.94   | 3451.135  | NM_00681E | 32886.195 | 30343.059 | NM_01825E | 2239.602  | 1984.302  |
| NM_01230E | 567.758   | 304.685   | NM_014744 | 2205.59   | 2466.167  | NM_01655E | 5805.143  | 5633.88   |
| NM_01742E | 1083.706  | 1322.311  | AF146759  | 979.445   | 742.268   | AB023136  | 635.283   | 739.974   |
| NM_00587E | 1965.364  | 2061.852  | AB032993  | 4382.677  | 3263.333  | NM_00379E | 24434.826 | 19607.393 |
| AF147790  | 1268.575  | 1317.571  | NM_000854 | 3230.413  | 3959.112  | NM_01423E | 3821.372  | 3182.989  |
| NM_00411E | 1246.395  | 1075.409  | AL117423  | 4726      | 5924.529  | NM_005701 | 827.894   | 1227.105  |
| AK025592  | 6287.367  | 5014.25   | NM_002084 | 1827.323  | 2339.473  | NM_00681E | 43418.164 | 44641.621 |
| NM_00463E | 7070.784  | 5438.984  | NM_00475E | 2064.15   | 2272.358  | NM_014744 | 2207.942  | 2194.923  |
| AK023023  | 7526.203  | 7450.097  | NM_00729E | 2510.54   | 3232.585  | AF146759  | 906.532   | 1439.675  |
| NM_01599E | 2966.237  | 2955.031  | NM_003651 | 10763.457 | 13198.666 | AB032993  | 3994.808  | 3372.427  |
| NM_00265E | 686.786   | 872.902   | NM_00326E | 2256.584  | 2822.633  | NM_000854 | 3317.25   | 2954.855  |
| Z36776    | 1228.236  | 1352.252  | NM_02012E | 413.827   | 625.182   | AL117423  | 3835.199  | 3691.427  |
| AB029015  | 2453.056  | 2222.711  | AK022832  | 2718.996  | 2664.891  | NM_00729E | 2338.55   | 3820.07   |
| NM_002067 | 6401.255  | 5051.398  | NM_014641 | 2227.672  | 1370.475  | NM_003651 | 10119.655 | 11069.784 |
| NM_00243E | 733.263   | 534.889   | NM_00446E | 11148.627 | 8764.925  | NM_00326E | 1778.85   | 1090.54   |

|           |           |           |           |           |           |           |           |           |
|-----------|-----------|-----------|-----------|-----------|-----------|-----------|-----------|-----------|
| NM_00615C | 1415.792  | 1590.078  | AB020664  | 2610.656  | 2275.956  | NM_02012E | 487.309   | 511.638   |
| NM_02034E | 1316.139  | 1109.311  | NM_00664C | 17996.395 | 18163.48  | AK022832  | 3021.77   | 1919.778  |
| NM_003287 | 1095.769  | 1411.389  | NM_019112 | 2425.049  | 2175.426  | NM_014641 | 2129.903  | 1666.088  |
| NM_01232E | 17389.707 | 21072.736 | NM_01233E | 10191.472 | 12448.227 | NM_00446E | 9509.54   | 6312.006  |
| NM_019607 | 3802.582  | 4870.851  | NM_02024E | 1498.31   | 1786.873  | AB020664  | 2059.691  | 1625.398  |
| U79260    | 8536.664  | 8074.764  | NM_000084 | 1202.775  | 1504.834  | NM_00664C | 12617.264 | 14785.184 |
| NM_00189E | 9568.729  | 10430.431 | NM_016354 | 1317.442  | 1677.914  | NM_00034E | 2875.298  | 3623.107  |
| NM_006447 | 2452.571  | 3164.577  | NM_00303E | 1432.415  | 1550.852  | NM_019112 | 2224.381  | 2454.706  |
| AF119851  | 401.975   | 443.85    | NM_01815E | 3108.058  | 4508.327  | NM_01233E | 10215.613 | 9735.575  |
| NM_01412E | 3994.294  | 4108.689  | AL050358  | 1125.504  | 1086.208  | NM_02024E | 1296.583  | 1366.723  |
| D87455    | 2885.029  | 2682.073  | NM_004731 | 843.888   | 956.9     | NM_01815E | 3109.894  | 3866.736  |
| AF080577  | 1767.913  | 2193.4    | AB023139  | 3184.804  | 3782.666  | AL050358  | 1659.959  | 2636.578  |
| L22005    | 6171.803  | 5073.951  | NM_01788E | 1329.8    | 1569.342  | NM_004731 | 891.348   | 849.999   |
| NM_012291 | 11935.036 | 9708.599  | D80004    | 1494.179  | 1270.731  | AB023139  | 3417.602  | 3168.174  |
| NM_01336E | 1948.913  | 1440.487  | NM_00094E | 5495.546  | 3365.269  | NM_01788E | 2810.333  | 2103.471  |
| NM_003807 | 2274.622  | 2186.237  | NM_016101 | 3973.004  | 2460.63   | D80004    | 813.123   | 1111.143  |
| NM_00435E | 5378.006  | 4517.261  | NM_00585E | 22387.322 | 14415.899 | NM_00094E | 5243.104  | 3700.245  |
| NM_00179C | 3073.792  | 2781.75   | NM_01462E | 5662.495  | 6489.646  | NM_01607C | 1642.944  | 1226.952  |
| NM_01824E | 4985.637  | 3870.453  | AK025630  | 1823.785  | 1762.218  | NM_01639C | 1148.853  | 815.62    |
| NM_01493E | 2034.267  | 2182.534  | AL365404  | 11578.01  | 10630.671 | NM_016101 | 5846.63   | 5181.287  |
| Y17866    | 805.823   | 623.612   | AK022907  | 3338.979  | 3525.806  | NM_00585E | 42204.871 | 50268.809 |
| AK024247  | 449.419   | 542.614   | NM_01479E | 2361.231  | 1926.579  | NM_02031E | 992.811   | 1152.2    |
| NM_00300E | 2714.136  | 2278.913  | NM_00424E | 1660.751  | 1597.818  | NM_01462E | 5192.683  | 7111.303  |
| NM_00284E | 736.668   | 926.439   | NM_003241 | 694.171   | 950.205   | AK025630  | 1237.257  | 1635.471  |
| NM_01212E | 655.733   | 1503.994  | NM_00268E | 2982.117  | 4071.597  | AL365404  | 16048.527 | 19044.428 |
| AB033025  | 482.731   | 403.293   | AK024504  | 1716.075  | 2162.302  | AK022907  | 5262.204  | 6674.749  |
| NM_01444E | 28506.057 | 33368.469 | AF039023  | 2064.332  | 2686.819  | NM_01479E | 3214.549  | 3892.4    |
| AL832826  | 1773.879  | 1677.23   | NM_005511 | 3137.317  | 4695.876  | NM_00424E | 1045.556  | 1265.908  |
| NM_01612E | 2049.805  | 2390.657  | NM_01469E | 11650.211 | 14210.177 | NM_003241 | 676.365   | 578.114   |
| AB048365  | 1284.031  | 1063.351  | NM_01847E | 4605.128  | 4667.245  | NM_00268E | 2561.497  | 2650.198  |
| NM_000391 | 3424.091  | 3805.217  | X52005    | 16511.117 | 11641.226 | AF039023  | 1733.723  | 1921.219  |
| AF229179  | 444.374   | 397.675   | NM_001047 | 495.481   | 586.026   | NM_005511 | 3174.46   | 3628.529  |
| NM_014771 | 7956.684  | 5830.934  | AK024396  | 2074.642  | 2997.581  | NM_01469E | 18378.107 | 22381.674 |
| NM_00227E | 848.856   | 984.497   | U58514    | 1424.836  | 1797.425  | NM_01847E | 4056.751  | 5230.938  |
| AK025215  | 10839.988 | 10200.436 | AI878886  | 17442.725 | 14155.595 | X52005    | 8979.905  | 8851.947  |
| NM_018131 | 7780.826  | 5367.877  | BG697179  | 8490.176  | 7869.94   | AK024396  | 1424.716  | 1465.952  |
| NM_014834 | 393.338   | 413.496   | NM_00213E | 51813.809 | 48087.848 | U58514    | 1729.877  | 1480.432  |
| NM_01763E | 3714.594  | 2966.094  | BM012504  | 4251.146  | 4488.843  | W74254    | 21760.865 | 19556.113 |
| NM_01246E | 608.04    | 417.935   | AA664145  | 1765.422  | 2311.34   | M58603    | 7223.343  | 4944.8    |
| M27877    | 13680.635 | 14420.081 | X72308    | 8247.936  | 8655.719  | AA443286  | 772.329   | 495.859   |
| D70836    | 38524.691 | 36322.938 | T70999    | 808.268   | 774.06    | AB003334  | 7395.149  | 7281.195  |
| AK024392  | 7490.231  | 14380.255 | T50790    | 854.287   | 993.631   | AW276315  | 610.371   | 674.523   |
| NM_01326C | 1939.596  | 3083.202  | R48168    | 13303.036 | 15993.005 | AA490737  | 931.959   | 1082.635  |
| NM_01830C | 1607.57   | 1740.07   | NM_00394E | 3123.782  | 5003.395  | AI878886  | 17554.518 | 19589.309 |
| NM_00487E | 2513.676  | 2712.833  | NM_00445E | 1392.668  | 2135.625  | BG697179  | 7261.173  | 8746.469  |
| NM_018254 | 2206.689  | 1792.234  | AB040954  | 2527.927  | 3069.531  | NM_00213E | 44317.016 | 42481.328 |
| NM_000937 | 1237.784  | 1218.745  | NM_002081 | 1095.182  | 1231.005  | BM012504  | 3908.116  | 5400.212  |
| AB028451  | 644.841   | 478.431   | NM_002084 | 2099.155  | 2183.725  | AA664145  | 1205.838  | 1628.524  |
| AK024810  | 16578.787 | 12964.562 | D16892    | 18771.85  | 21283.539 | X72308    | 9536.545  | 10621.462 |
| AK022615  | 28741.209 | 27626.16  | NM_00475C | 2080.727  | 2105.189  | T70999    | 613.65    | 594.369   |
| NM_00404E | 5758.155  | 5616.485  | NM_00729E | 2726.908  | 3199.09   | T50790    | 586.183   | 800.334   |
| BM458096  | 13510.111 | 11035.466 | NM_00485E | 1850.063  | 1910.793  | R48168    | 12690.94  | 11764.448 |
| NM_00562E | 10833.677 | 7439.357  | NM_00363E | 472.611   | 466.217   | NM_00394E | 1931.799  | 1920.196  |

|           |           |           |           |           |           |           |           |           |
|-----------|-----------|-----------|-----------|-----------|-----------|-----------|-----------|-----------|
| D29958    | 17191.627 | 13281.077 | NM_000543 | 1513.676  | 1970.279  | NM_004452 | 883.878   | 1085.104  |
| NM_015971 | 10363.092 | 8001.487  | U06699    | 4850.836  | 6016.291  | AB040954  | 2771.941  | 2771.968  |
| D17257    | 55499.668 | 46122.141 | AJ290954  | 12043.259 | 15998.023 | NM_002081 | 1030.549  | 1653.855  |
| AK000724  | 3585.264  | 3876.465  | AK025451  | 2308.673  | 2718.622  | NM_002084 | 1883.366  | 1268.269  |
| NM_003720 | 10947.718 | 11771.428 | NM_002783 | 1279.428  | 1569.171  | D16892    | 17529.627 | 13431.621 |
| AF097159  | 1250.097  | 1648.12   | NM_000084 | 1339.287  | 1909.53   | NM_004750 | 1906.875  | 1689.456  |
| NM_003918 | 753.914   | 734.111   | NM_016354 | 1413.232  | 1603.916  | NM_007295 | 2841.746  | 2474.022  |
| NM_004807 | 4724.549  | 9397.44   | NM_003038 | 1806.12   | 1762.13   | NM_003651 | 10453.083 | 8367.197  |
| AF219140  | 661.18    | 814.323   | NM_018155 | 3135.999  | 3772.325  | NM_000591 | 1365.978  | 1657.109  |
| J03569    | 29969.939 | 29940.279 | AL050358  | 1140.279  | 821.374   | NM_000565 | 1169.012  | 1382.035  |
| NM_000687 | 13749.149 | 11293.709 | NM_016553 | 5266.497  | 4361.245  | NM_002019 | 1840.844  | 1898.668  |
| NM_018200 | 2001.434  | 1251.67   | NM_006819 | 41018.68  | 38986.195 | AF253318  | 845.1     | 1046.379  |
| NM_014838 | 4634.465  | 3918.285  | NM_014744 | 2248.552  | 2511.791  | NM_017767 | 7523.182  | 8156.257  |
| NM_007212 | 3815.918  | 2888.968  | AF146759  | 908.923   | 925.465   | AK024848  | 5895.009  | 6984.652  |
| AF005067  | 2771.418  | 2488.57   | AB032993  | 4745.738  | 4030.356  | NM_004852 | 1389.712  | 1105.016  |
| NM_005710 | 6820.383  | 5448.269  | NM_000854 | 4027.344  | 4183.875  | NM_000543 | 1292.215  | 1334.883  |
| AF252284  | 1650.156  | 1025.657  | AL117423  | 4863.332  | 5428.992  | U06699    | 6505.174  | 6519.631  |
| NM_014930 | 1454.984  | 729.969   | NM_002685 | 2880.955  | 3086.852  | AJ290954  | 12303.667 | 11770.378 |
| NM_001530 | 3889.295  | 2953.053  | AK024504  | 1335.667  | 1856.841  | AK025451  | 1915.522  | 1602.622  |
| U80232    | 6412.174  | 4919.718  | AF039023  | 2459.34   | 2504.165  | NM_002783 | 1297.956  | 1731.56   |
| AF086526  | 832.171   | 932.709   | NM_005511 | 2960.558  | 3221.063  | NM_000084 | 1661.96   | 1394.743  |
| AK025788  | 2471.515  | 3268.638  | NM_014698 | 10730.924 | 8846.073  | NM_016354 | 1166.505  | 1077.878  |
| AF086164  | 988.902   | 1054.767  | NM_018475 | 4679.649  | 3515.174  | NM_003038 | 935.049   | 758.027   |
| AK025577  | 1024.512  | 1035.383  | NM_014641 | 2640.129  | 2455.371  | NM_018155 | 3650.167  | 2588.134  |
| AK000216  | 1094.281  | 1422.852  | NM_004462 | 13302.203 | 14261.823 | AL050358  | 1611.795  | 1922.209  |
| AK023440  | 842.612   | 924.338   | AB020664  | 2805.41   | 3701.392  | NM_004731 | 952.415   | 713.969   |
| AB033041  | 21388.184 | 23011.51  | NM_006640 | 18386.008 | 19320.395 | NM_000544 | 2127.98   | 1789.578  |
| NM_014894 | 6185.919  | 6158.463  | NM_019112 | 2165.128  | 2368.744  | NM_004644 | 676.312   | 404.879   |
| AY007155  | 5060.029  | 3933.702  | NM_012336 | 10498.252 | 11404.033 | AV681967  | 1626.985  | 1353.426  |
| AK027160  | 2156.059  | 1320.735  | NM_020161 | 489.657   | 546.329   | NM_018250 | 1880.559  | 2112.098  |
| AL359211  | 1144.083  | 1008.511  | NM_020246 | 1581.117  | 1419.78   | NM_016553 | 5693.157  | 7617.605  |
| U79264    | 990.328   | 843.55    | NM_003942 | 2377.557  | 2196.842  | AB023136  | 541.169   | 817.98    |
| NM_015698 | 2651.685  | 2346.946  | NM_004452 | 839.728   | 1027.297  | NM_003795 | 26793.002 | 27074.201 |
| AF070530  | 19136.949 | 16555.725 | AB040954  | 2777.701  | 2213.308  | NM_014232 | 4729.854  | 5509.583  |
| NM_006420 | 1121.409  | 954.88    | NM_002081 | 1034.115  | 921.333   | NM_005701 | 896.907   | 1007.475  |
| AF131855  | 1061.491  | 726.277   | D80004    | 1327.94   | 1077.33   | NM_006819 | 43057.48  | 39600.219 |
| AF086046  | 1274.586  | 1212.853  | NM_016070 | 2002.588  | 1629.234  | NM_014744 | 2453.967  | 2348.478  |
| AK024962  | 673.765   | 700.774   | NM_016390 | 1740.782  | 1282.994  | AF146759  | 953.701   | 1046.081  |
| AK022164  | 174.653   | 680.06    | NM_016101 | 5424.755  | 5907.776  | AB032993  | 4498.733  | 3354.599  |
| AK025135  | 3846.067  | 4268.419  | NM_005859 | 25069.902 | 21490.176 | NM_000854 | 3328.104  | 2820.634  |
| NM_017928 | 2377.917  | 2128.917  | NM_020313 | 1201.812  | 1012.775  | AL117423  | 4507.117  | 4591.273  |
| AY007145  | 741.399   | 911.263   | NM_014628 | 5442.64   | 5844.811  | NM_002685 | 3119.941  | 1695.301  |
| D38549    | 1783.924  | 1532.883  | AK025630  | 1934.275  | 2066.575  | AK024504  | 1173.14   | 597.534   |
| AK024780  | 1373.111  | 1247.583  | AL365404  | 12837.761 | 12544.091 | AF039023  | 2150.836  | 1473.394  |
| AF085947  | 489.102   | 533.085   | AK022907  | 4015.627  | 3651.817  | NM_005511 | 4079.83   | 2622.035  |
| AF086000  | 364.515   | 683.998   | NM_014793 | 2565.476  | 2233.719  | NM_014698 | 19971.563 | 15313.771 |
| AL359591  | 599.824   | 504.334   | NM_004245 | 1681.945  | 1290.228  | NM_018475 | 4507.805  | 3547.711  |
| U10510    | 3620.276  | 2878.609  | NM_003241 | 454.421   | 443.592   | NM_003262 | 2529.343  | 1876.262  |
| Z36842    | 823.686   | 761.247   | NM_000543 | 1526.197  | 1594.615  | NM_020125 | 625.293   | 937.11    |
| AF086155  | 855.027   | 688.86    | U06699    | 5129.104  | 5396.537  | AK022832  | 2828.606  | 2298.239  |
| AF116677  | 563.276   | 535.574   | AJ290954  | 10796.378 | 12881.909 | NM_014641 | 2466.677  | 2682.878  |
| NM_014158 | 4549.667  | 2728.816  | AK025451  | 2396.343  | 2050.254  | NM_004462 | 13250.517 | 10622.763 |
| AK021795  | 268.762   | 435.595   | NM_002783 | 1267.974  | 1306.902  | AB020664  | 2445.655  | 2049.415  |

|           |           |           |           |           |           |           |           |           |
|-----------|-----------|-----------|-----------|-----------|-----------|-----------|-----------|-----------|
| AL162042  | 708.744   | 542.25    | X52005    | 14943.811 | 7694.611  | NM_00664C | 14933.089 | 13529.862 |
| AK023312  | 943.332   | 912.683   | U58514    | 1064.736  | 1060.248  | NM_000343 | 790.655   | 665.651   |
| AL133570  | 829.971   | 798.011   | W74254    | 18898.289 | 15519.096 | NM_019112 | 2823.858  | 2397.554  |
| AK022678  | 1486.996  | 1109.034  | AA443286  | 650.992   | 424.273   | NM_012336 | 10840.868 | 10785.384 |
| AK023835  | 2150.005  | 1475.045  | AB003334  | 7506.955  | 6905.738  | NM_020161 | 455.133   | 401.357   |
| AK023906  | 2250.482  | 2087.118  | AW276315  | 796.627   | 547.994   | NM_020246 | 1320.497  | 1339.741  |
| AK024234  | 590.507   | 340.562   | AA490737  | 680.899   | 721.416   | NM_003942 | 2543.736  | 2803.782  |
| NM_012409 | 2223.115  | 2758.432  | AI878886  | 17971.311 | 16889.66  | NM_004452 | 1069.391  | 1382.832  |
| AK021708  | 443.664   | 1091.32   | BG697179  | 8650.068  | 9021.766  | AB040954  | 3046.02   | 2084.768  |
| AL050205  | 5440.354  | 4654.819  | NM_002136 | 51716.039 | 53207.805 | NM_002081 | 1128.953  | 1382.822  |
| AK023947  | 363.352   | 410.149   | BM012504  | 4279.535  | 4144.09   | AB023139  | 3121.455  | 4172.69   |
| NM_005691 | 1116.095  | 1088.078  | AA664145  | 1303.243  | 1610.497  | NM_017885 | 3597.138  | 3336.966  |
| AF086156  | 622.08    | 646.97    | X72308    | 6935.2    | 6752.377  | D80004    | 1318.566  | 2045.872  |
| AK023814  | 564.341   | 497.286   | T70999    | 768.872   | 765.207   | NM_01607C | 2124.192  | 2106.701  |
| AF130063  | 418.595   | 542.435   | T50790    | 737.661   | 690.727   | NM_01639C | 2000.021  | 1674.522  |
| AF086528  | 908.027   | 1034.157  | R48168    | 11708.625 | 12362.831 | NM_016101 | 5690.971  | 6228.167  |
| AL162043  | 455.951   | 324.719   | AB032993  | 5143.78   | 4208.631  | NM_005855 | 46496.059 | 44674.969 |
| NM_006543 | 730.88    | 681.031   | NM_000854 | 3722.594  | 3440.779  | NM_020313 | 892.813   | 1156.178  |
| AK023018  | 1540.577  | 1239.284  | AL117423  | 4820.07   | 5368.97   | NM_014628 | 5078.962  | 4252.849  |
| AK022672  | 1790.601  | 1245.958  | NM_002084 | 1639.405  | 1149.768  | AK025630  | 1335.043  | 1334.229  |
| AK021599  | 1430.37   | 1537.833  | D16892    | 16086.396 | 11325.884 | AL365404  | 16830.563 | 14204.319 |
| AK024263  | 1333.12   | 1986.252  | NM_00475C | 1797.218  | 1471.483  | AK022907  | 4663.5    | 3780.11   |
| NM_016613 | 3234.229  | 3886.616  | NM_007295 | 2648.65   | 2043.885  | NM_014793 | 3697.258  | 4155.805  |
| AF086414  | 682.318   | 816.05    | NM_003651 | 9921.148  | 9270.174  | NM_004245 | 1603.083  | 1551.885  |
| AJ012490  | 4776.305  | 4198.301  | NM_000418 | 470.334   | 504.139   | NM_003241 | 886.866   | 569.425   |
| U84516    | 9775.281  | 8489.617  | NM_000591 | 1094.156  | 967.175   | NM_000543 | 1639.206  | 1697.438  |
| AL049270  | 1286.26   | 941.955   | NM_000565 | 684.691   | 481.637   | U06699    | 8879.954  | 13425.434 |
| U88834    | 1593.726  | 1106.894  | NM_002019 | 1721.581  | 1700.932  | AJ290954  | 14581.175 | 15568.645 |
| BC025324  | 408.627   | 563.411   | AF253318  | 639.773   | 537.555   | AK025451  | 1983.21   | 1666.586  |
| NM_006087 | 61917.441 | 55590.641 | NM_017767 | 4711.448  | 4583.212  | NM_002783 | 1520.509  | 1966.917  |
| NM_003533 | 1508.46   | 1729.948  | AK024848  | 4971.507  | 5556.899  | X52005    | 10781.818 | 13838.663 |
| AK023726  | 2959.936  | 2453.379  | NM_004852 | 1696.026  | 1545.515  | NM_001047 | 675.321   | 869.43    |
| AF131836  | 1274.073  | 1001.255  | NM_019112 | 2087.465  | 2524.079  | AK024396  | 1592.647  | 1986.049  |
| AF275804  | 15564.123 | 13669.816 | NM_012336 | 10253.495 | 12740.996 | U58514    | 1510.283  | 2277.788  |
| AL049447  | 48589.738 | 32906.465 | NM_020246 | 1387.185  | 1425.344  | W74254    | 20166.123 | 18936.273 |
| NM_020527 | 1759.373  | 1623.65   | NM_000084 | 1118.542  | 1026.094  | AA443286  | 969.821   | 956.575   |
| AB020637  | 7269.297  | 5271.614  | NM_016354 | 1238.826  | 1026.585  | AB003334  | 8956.12   | 7073.586  |
| NM_005286 | 1453.871  | 1238.966  | NM_003038 | 1853.169  | 1397.813  | AW276315  | 741.093   | 727.219   |
| AJ251759  | 1133.703  | 752.323   | NM_018155 | 4081.261  | 3637.739  | AA490737  | 627.487   | 357.112   |
| AK024371  | 635.189   | 362.701   | AL050358  | 798.661   | 415.442   | AI878886  | 16726.271 | 14913.171 |
| AB019569  | 22682.15  | 19422.727 | NM_004731 | 808.363   | 731.639   | BG697179  | 7362.392  | 5714.495  |
| NM_001889 | 14309.74  | 28833.449 | NM_000544 | 2055.306  | 2457.463  | NM_002136 | 45484.207 | 32214.451 |
| NM_004999 | 589.956   | 1024.73   | NM_001044 | 557.901   | 282.56    | BM012504  | 4159.82   | 3051.497  |
| X89668    | 6283.727  | 10186.634 | NM_004644 | 494.184   | 560.562   | AA664145  | 1131.57   | 848.264   |
| NM_004458 | 3796.533  | 4250.987  | AV681967  | 1705.598  | 1682.431  | X72308    | 11813.458 | 11339.754 |
| NM_006901 | 916.159   | 1070.515  | NM_01825C | 2039.712  | 1493.845  | T70999    | 549.385   | 692.295   |
| NM_01853C | 3704.219  | 4400.512  | NM_016553 | 5354.1    | 4726.193  | T50790    | 732.258   | 767.497   |
| AJ003145  | 591.718   | 462.491   | AB023136  | 509.783   | 521.516   | R48168    | 13474.421 | 13530.07  |
| AK022855  | 4087.514  | 6979.69   | NM_003795 | 22216.484 | 21667.24  | AB032993  | 6229.729  | 6049.458  |
| AK023816  | 644.198   | 878.707   | NM_014232 | 4774.729  | 4391.195  | NM_000854 | 4234.876  | 5523.268  |
| AL050102  | 1130.263  | 1782.389  | NM_005701 | 1432.398  | 1857.465  | AL117423  | 4915.075  | 7942.097  |
| AF305686  | 4076.487  | 4378.463  | NM_006819 | 37747.227 | 38112.926 | NM_002084 | 2422.571  | 3140.204  |
| AF085832  | 1440.596  | 1588.266  | NM_014744 | 2097.712  | 2476.536  | D16892    | 19206.145 | 21248.354 |



|           |           |           |           |           |           |           |           |           |
|-----------|-----------|-----------|-----------|-----------|-----------|-----------|-----------|-----------|
| AK025981  | 2431.032  | 2110.59   | AF146759  | 854.417   | 979.222   | NM_00475C | 2173.231  | 2745.288  |
| AF086266  | 1032.366  | 699.544   | AL365404  | 10534.835 | 7619.026  | NM_00729E | 2657.512  | 2313.829  |
| AF086252  | 1038.648  | 652.967   | AK022907  | 4107.702  | 3746.752  | NM_003651 | 9876.629  | 12111.876 |
| NM_01786E | 7531.37   | 5858.83   | NM_014793 | 2617.519  | 2113.435  | NM_00041E | 582.753   | 956.824   |
| AJ131244  | 613.194   | 456.344   | NM_00424E | 1605.754  | 1317.671  | NM_01324E | 415.101   | 844.482   |
| NM_00353E | 1250.488  | 865.126   | NM_003241 | 653.029   | 558.394   | NM_000591 | 1302.95   | 1759.123  |
| AF116707  | 2671.628  | 2037.462  | NM_00268E | 2818.074  | 2114.396  | NM_00056E | 1076.211  | 953.475   |
| U90910    | 1093.724  | 899.251   | AK024504  | 1660.848  | 1371.162  | NM_00201E | 2212.973  | 2384.379  |
| AK025765  | 581.627   | 434.386   | AF039023  | 1923.877  | 1906.445  | AF253318  | 703.361   | 688.389   |
| CY3Cy5    | 1887.068  | 200.964   | NM_005511 | 3186.921  | 2602.556  | NM_017767 | 8117.294  | 9465.608  |
| AA143087  | 1914.19   | 1956.302  | NM_01469E | 11910.45  | 8657.902  | AK024848  | 5508.386  | 6693.587  |
| U25804    | 2367.163  | 2124.251  | NM_01847E | 4909.423  | 3973.254  | NM_00485E | 1367.382  | 1013.693  |
| BI870965  | 2563.158  | 2547.784  | NM_00326E | 2383.76   | 2433.636  | NM_00363E | 587.875   | 633.48    |
| NM_00190E | 9649.622  | 7763.21   | NM_02012E | 544.442   | 661.78    | NM_00034E | 878.402   | 1152.254  |
| BI835536  | 12607.378 | 10412.434 | AK022832  | 2390.094  | 1974.481  | NM_01911E | 3017.176  | 3117.815  |
| BF205051  | 1391.342  | 1926.386  | NM_014641 | 2733.413  | 2365.508  | NM_01233E | 14424.24  | 17083.893 |
| X02761    | 329.07    | 682.004   | NM_00446E | 12464.885 | 12969.431 | NM_020161 | 505.81    | 1075.017  |
| M91463    | 463.805   | 753.702   | AB020664  | 2326.803  | 2201.806  | NM_02024E | 1600.353  | 2629.917  |
| U88317    | 612.861   | 1333.53   | NM_00664C | 16495.613 | 15354.914 | NM_000084 | 1709.762  | 3062.552  |
| J03060    | 2387.517  | 3531.046  | NM_000857 | 1053.055  | 935.163   | NM_016354 | 1634.59   | 2136.009  |
| X54156    | 646.912   | 780.072   | L20688    | 56004.133 | 52092.063 | NM_00303E | 1318.094  | 1661.562  |
| NM_00374E | 1767.33   | 1710.143  | X69111    | 15683.184 | 16029.812 | NM_01815E | 3647.729  | 4020.865  |
| AA829383  | 5159.998  | 5661.708  | AB037799  | 1918.228  | 1998.614  | AL050358  | 2070.988  | 3319.799  |
| AF012434  | 9659.871  | 7112.071  | AB007950  | 7605.212  | 7217.533  | NM_004731 | 1109.982  | 1307.132  |
| SR6       | 2352.096  | 2323.487  | AL133111  | 541.422   | 436.928   | NM_000544 | 2791.49   | 3360.892  |
| SR8       | 8884.943  | 24696.773 | AK025593  | 1936.133  | 1764.924  | NM_001044 | 550.593   | 998.697   |
| CY3Cy5    | 4419.44   | 425.55    | AB018304  | 1471.4    | 1412.237  | NM_004644 | 711.478   | 1287.555  |
| NM_00590E | 1414.31   | 1316.447  | NM_007061 | 13157.467 | 10205.191 | AV681967  | 1817.086  | 3074.056  |
| NM_00285C | 46417.156 | 42906.129 | AB040954  | 2650.929  | 1736.444  | NM_01825C | 2073.028  | 3618.151  |
| NM_00430E | 770.441   | 878.244   | NM_002081 | 1032.941  | 919.572   | NM_01655E | 6071.703  | 7103.171  |
| NM_00590E | 1855.519  | 2268.126  | AB023139  | 3034.619  | 2963.054  | AB023136  | 836.806   | 1107.019  |
| NM_000861 | 804.242   | 804.886   | NM_01788E | 3774.354  | 3745.216  | NM_00379E | 28193.064 | 27630.697 |
| NM_000024 | 367.373   | 399.434   | NM_00094E | 5534.235  | 5162.501  | NM_01423E | 5142.922  | 5540.587  |
| AB037734  | 761.946   | 1440.265  | NM_01607C | 2086.558  | 1627.27   | NM_005701 | 969.169   | 914.677   |
| U77493    | 574.717   | 772.923   | NM_01639C | 2018.591  | 1421.619  | NM_00681E | 42493.699 | 50008.469 |
| NM_00387E | 424.276   | 513.927   | NM_016101 | 4589.475  | 4127.919  | NM_014744 | 2520.851  | 3259.558  |
| NM_00026E | 830.696   | 977.248   | NM_00585E | 28664.738 | 23103.018 | AF146759  | 1123.338  | 1804.052  |
| AF073519  | 7293.631  | 6884.12   | NM_02031E | 934.608   | 729.842   | AL365404  | 18064.109 | 15457.755 |
| AB001451  | 397.261   | 518.619   | NM_01462E | 5016.163  | 5289.077  | AK022907  | 6411.636  | 5494.284  |
| NM_01758E | 2172.69   | 2250.333  | AK025630  | 1765.02   | 1658.323  | NM_01479E | 4519.362  | 4065.803  |
| Y16132    | 2571.649  | 2271.309  | NM_005761 | 1514.316  | 919.759   | NM_00424E | 1166.177  | 741.178   |
| NM_002521 | 507.39    | 506.973   | NM_01471E | 3027.633  | 2433.574  | NM_003241 | 803.343   | 573.129   |
| NM_00285E | 1181.146  | 1525.765  | NM_00063E | 775.357   | 754.589   | NM_00268E | 3216.518  | 3736.498  |
| NM_00009E | 3242.005  | 5563.378  | AB002298  | 626.784   | 666.588   | AK024504  | 1282.684  | 1033.834  |
| AA418251  | 1480.719  | 2878.66   | AK024488  | 10621.79  | 11116.904 | AF039023  | 2058.142  | 2378.479  |
| NM_01904E | 1086.155  | 1108.303  | AK023249  | 53892.156 | 62686.211 | NM_005511 | 3908.21   | 5164.063  |
| NM_00638C | 2949.349  | 2646.086  | NM_01744E | 6011.556  | 5176.375  | NM_01469E | 24414.668 | 35335.625 |
| AB020710  | 1643.648  | 1328.497  | NM_00074E | 2166.442  | 1395.188  | NM_01847E | 4711.668  | 8568.849  |
| NM_016174 | 2318.782  | 2109.683  | NM_00721E | 2559.515  | 2106.061  | NM_00326E | 3230.696  | 4578.402  |
| NM_020377 | 720.164   | 1001.161  | Z25436    | 4199.761  | 2987.445  | NM_02012E | 831.786   | 1145.766  |
| U88896    | 1558.925  | 1572.174  | NM_00527E | 5653.713  | 4499.367  | AK022832  | 3643.919  | 5429.229  |
| NM_005724 | 8319.11   | 9017.122  | NM_003844 | 8146.033  | 5990.959  | NM_014641 | 2664.931  | 2651.282  |
| X58794    | 937.142   | 1311.612  | NM_00200E | 13500.772 | 11311.245 | NM_00446E | 12219.354 | 8973.453  |

|           |           |           |           |           |           |           |           |           |
|-----------|-----------|-----------|-----------|-----------|-----------|-----------|-----------|-----------|
| NM_001735 | 1879.792  | 2158.418  | NM_012324 | 3073.124  | 3349.222  | AB020664  | 3070.631  | 3213.179  |
| NM_002349 | 474.051   | 605.215   | AK000039  | 1729.969  | 2986.388  | NM_006640 | 17822.434 | 26513.875 |
| NM_005080 | 15871.524 | 20755.971 | AL137352  | 1332.533  | 1018.073  | NM_000857 | 1417.62   | 937.466   |
| NM_004887 | 6359.865  | 7136.533  | NM_014749 | 1351.578  | 960.105   | L20688    | 61626.406 | 50344.891 |
| NM_006404 | 583.983   | 610.145   | NM_004489 | 3704.571  | 2705.63   | X69111    | 16139.802 | 11035.362 |
| NM_014795 | 645.319   | 634.555   | BI461699  | 762.169   | 542.046   | AB037799  | 2574.009  | 2084.537  |
| NM_002986 | 469.998   | 531.385   | AK090409  | 687.703   | 567.29    | AB007950  | 11927.541 | 7833.699  |
| M15330    | 714.583   | 931.634   | AF172264  | 2500.463  | 2106.213  | AL133111  | 471.985   | 592.384   |
| NM_014396 | 2368.37   | 2345.918  | Y08267    | 1747.429  | 1275.969  | AK025593  | 1929.506  | 1449.719  |
| AK027201  | 1295.228  | 1433.309  | U80756    | 14885.412 | 12993.563 | AB018304  | 1600.444  | 1268.56   |
| NM_000489 | 3240.832  | 3281.6    | NM_018161 | 1319.183  | 1424.054  | NM_007061 | 13315.573 | 10952.062 |
| X98507    | 1699.71   | 2125.887  | NM_005248 | 1159.56   | 913.048   | AB040954  | 3381.89   | 2716.528  |
| NM_016030 | 7923.142  | 9041.303  | NM_004810 | 9685.649  | 11013.503 | NM_002081 | 1226.499  | 1186.958  |
| NM_005652 | 5522.604  | 8344.521  | AL117629  | 4980.441  | 5357.904  | AB023139  | 3616.944  | 7254.882  |
| AK026686  | 630.54    | 1275.56   | NM_002595 | 2581.343  | 2763.209  | NM_017885 | 4037.342  | 6011.036  |
| AL133064  | 2851.862  | 3219.902  | NM_015726 | 1650.886  | 1247.529  | D80004    | 1185.105  | 2784.281  |
| NM_006227 | 3219.481  | 3342.395  | AF174604  | 1428.303  | 1239.112  | NM_000946 | 7647.177  | 10922.149 |
| NM_002905 | 4002.568  | 4464.203  | AB002379  | 3707.338  | 2712.544  | NM_016070 | 3019.146  | 4730.151  |
| NM_000700 | 41478.98  | 35687.828 | AF113223  | 2118.394  | 1846.722  | NM_016390 | 1836.939  | 3308.17   |
| NM_019028 | 4785.41   | 4858.937  | AB046851  | 2725.485  | 1979.774  | NM_016101 | 6751.266  | 10765.483 |
| NM_000431 | 4197.975  | 3528.696  | NM_018174 | 1213.652  | 1129.721  | NM_005859 | 44341.594 | 58303.695 |
| NM_013421 | 556.538   | 847.407   | NM_014548 | 2329.707  | 2163.515  | NM_020313 | 1453.542  | 2573.879  |
| AB033118  | 7317.027  | 9481.11   | NM_004437 | 2405.844  | 2279.274  | NM_014628 | 7410.471  | 13963.012 |
| NM_019606 | 3871.909  | 4764.66   | AK025875  | 1770.893  | 1687.041  | AK025630  | 1917.795  | 3123.448  |
| NM_001690 | 8559.767  | 8920.569  | BC014152  | 61696.68  | 58845.902 | NM_005761 | 1113.628  | 1002.53   |
| AF034374  | 3034.304  | 3005.347  | AB037779  | 22291.717 | 15122.701 | NM_014718 | 2766.648  | 2555.064  |
| NM_016118 | 7475.613  | 4951.378  | NM_000655 | 13272.833 | 9216.937  | NM_000632 | 774.416   | 688.581   |
| NM_018674 | 1451.295  | 1960.094  | NM_000393 | 582.731   | 731.074   | AK024488  | 6163.088  | 5425.848  |
| NM_001683 | 7677.742  | 8555.684  | NM_000889 | 1561.222  | 1006.596  | AK023249  | 38344.801 | 27496.633 |
| NM_001682 | 1700.172  | 1778.257  | NM_003859 | 9764.642  | 7136.525  | NM_017442 | 5112.777  | 4313.109  |
| NM_014405 | 932.751   | 1501.442  | NM_000236 | 1654.52   | 1165.089  | NM_000743 | 1468.662  | 1601.711  |
| NM_000816 | 657.641   | 706.966   | NM_002903 | 23187.934 | 17897.992 | NM_007218 | 1940.46   | 2392.347  |
| NM_014928 | 680.722   | 762.867   | NM_012339 | 3360.883  | 2677.852  | Z25436    | 3920.585  | 3816.391  |
| AK025130  | 2359.511  | 3091.421  | NM_005787 | 19059.188 | 19129.955 | NM_005275 | 5856.303  | 5896.635  |
| NM_017875 | 1220.414  | 1851.721  | NM_002143 | 3093.634  | 3457.303  | NM_002005 | 22616.652 | 29307.607 |
| AK023232  | 2234.257  | 3168.694  | AF284421  | 7991.049  | 6843.79   | NM_012324 | 4486.644  | 5739.617  |
| NM_000271 | 4447.167  | 5428.857  | NM_006048 | 3727.012  | 3189.679  | AK000039  | 1473.704  | 1713.045  |
| AB018268  | 3423.437  | 5442.052  | NM_006360 | 30111.195 | 26727.492 | AL137352  | 1915.683  | 3535.545  |
| Z70701    | 4251.689  | 4863.267  | NM_003968 | 5877.176  | 4569.209  | NM_014749 | 2189.151  | 2814.153  |
| AB040972  | 1499.94   | 2010.479  | NM_002786 | 6092.174  | 5016.386  | NM_004489 | 3789.898  | 5721.615  |
| AF148505  | 2122.351  | 1721.466  | NM_003343 | 8978.48   | 6396.661  | BI461699  | 2529.008  | 2516.058  |
| NM_018686 | 9895.146  | 8627.374  | NM_002789 | 36690.848 | 25229.553 | AK090409  | 913.401   | 1641.165  |
| NM_017676 | 1899.778  | 1962.259  | NM_003470 | 13445.829 | 10436.535 | AF172264  | 3245.959  | 4197.086  |
| AK021764  | 1023.287  | 909.166   | AL080137  | 613.888   | 444.832   | Y08267    | 1554.305  | 988.939   |
| NM_005431 | 2349.602  | 2275.525  | NM_017679 | 1417.544  | 1089.62   | U80756    | 14829.017 | 10352.274 |
| AB036063  | 2077.69   | 3176.133  | AF155103  | 539.56    | 632.061   | NM_018161 | 1478.579  | 1274.33   |
| NM_002894 | 8435.478  | 9097.382  | NM_017704 | 2851.158  | 2296.174  | NM_005248 | 1778.794  | 1537.72   |
| NM_004629 | 8507.428  | 10220.259 | BC006359  | 1354.585  | 926.253   | NM_004810 | 7269.275  | 5793.886  |
| NM_004260 | 5358.856  | 7450.78   | AK026127  | 2471.983  | 1895.155  | AL117629  | 3565.437  | 2798.714  |
| AL050067  | 490.787   | 686.064   | BC016062  | 18178.199 | 15488.428 | NM_002595 | 2822.56   | 2749.014  |
| NM_004972 | 3137.961  | 3546.982  | NM_002814 | 3470.594  | 2460.756  | NM_015726 | 1301.941  | 1053.621  |
| NM_006251 | 4750.719  | 5581.768  | NM_012250 | 3136.407  | 2461.312  | AF174604  | 1980.928  | 1502.039  |
| NM_004103 | 3745.339  | 3084.975  | NM_006283 | 7823.843  | 6018.512  | AB002379  | 5983.287  | 6772.686  |

|           |           |           |           |           |           |           |           |           |
|-----------|-----------|-----------|-----------|-----------|-----------|-----------|-----------|-----------|
| NM_002314 | 5482.929  | 4089.961  | NM_005693 | 807.792   | 531.907   | AF113223  | 1459.375  | 1536.388  |
| NM_001744 | 6597.753  | 4810.854  | X97303    | 11563.855 | 8256.565  | AB046851  | 2092.971  | 2375.69   |
| NM_006296 | 1694.666  | 2159.065  | NM_017530 | 2499.462  | 2009.862  | NM_018174 | 1028.856  | 1214.243  |
| Z25433    | 3460.086  | 4145.464  | AL360183  | 1811.196  | 1809.38   | NM_014548 | 1594.319  | 1234.355  |
| NM_005922 | 4569.213  | 4948.388  | AK027046  | 1852.097  | 1549.073  | NM_004437 | 2256.072  | 1982.071  |
| NM_018638 | 5174.859  | 5496.599  | NM_003113 | 3597.997  | 2931.424  | AK025875  | 1651.139  | 1294.496  |
| NM_000382 | 3243.519  | 5089.958  | NM_016578 | 3494.317  | 3772.549  | BC014152  | 70356.852 | 67330.563 |
| NM_001150 | 179.339   | 510.775   | NM_014319 | 2738.173  | 2768.674  | NM_000226 | 642.684   | 562.301   |
| NM_002856 | 1128.116  | 1050.541  | NM_004865 | 5440.763  | 4375.523  | NM_000655 | 12480.693 | 13848.406 |
| NM_003225 | 1027.41   | 1066.349  | AB019566  | 68645.383 | 70131.32  | NM_000393 | 869.578   | 1395.738  |
| NM_000096 | 1941.414  | 1658.687  | NM_000981 | 62540.16  | 67135.797 | NM_000888 | 1440.145  | 2059.702  |
| AA418251  | 987.455   | 940.709   | NM_002047 | 25784.111 | 15829.13  | NM_003855 | 11945.272 | 7626.535  |
| AA143087  | 2045.115  | 1740.161  | NM_001031 | 66713.836 | 70480.992 | NM_000236 | 1417.814  | 1289.676  |
| U25804    | 2346.636  | 2515.428  | NM_007208 | 13811.245 | 9493.434  | NM_002903 | 31426.684 | 22544.246 |
| BI870965  | 2729.427  | 2501.995  | NM_000999 | 65543.664 | 70347.445 | NM_012338 | 3378.454  | 2880.451  |
| NM_001903 | 10919.854 | 8726.678  | NM_000985 | 17413.682 | 10549.714 | NM_005787 | 19880.391 | 15858.974 |
| BI835536  | 13785.883 | 11945.128 | BF130622  | 10891.459 | 5719.197  | NM_002143 | 2800.047  | 2759.169  |
| BF205051  | 1563.85   | 2245.031  | BU165106  | 1037.706  | 776.596   | AF284421  | 13544.038 | 12718.952 |
| X02761    | 685.858   | 1272.534  | AF038202  | 2097.444  | 2027.586  | NM_006048 | 5273.806  | 3972.847  |
| M91463    | 898.53    | 1503.044  | AB040925  | 766.256   | 731.054   | NM_006360 | 29544.979 | 25506.836 |
| U88317    | 161.647   | 458.163   | BC008837  | 1023.508  | 998.567   | NM_003968 | 5867.812  | 4509.936  |
| J03060    | 2186.742  | 2635.038  | NM_001861 | 921.648   | 805.81    | NM_002786 | 5664.87   | 5833.916  |
| X54156    | 413.9     | 576.547   | AK025558  | 5956.613  | 5845.002  | NM_003343 | 11723.492 | 11707.192 |
| NM_003743 | 1449.889  | 888.465   | AK024355  | 984.166   | 924.249   | NM_002788 | 46929.93  | 39016.305 |
| AA829383  | 4369.427  | 2617.347  | NM_001864 | 35513.984 | 30628.809 | NM_003470 | 15324.135 | 15419.929 |
| AF012434  | 9623.708  | 8053.058  | NM_003477 | 10879.124 | 7972.141  | AL080137  | 639.663   | 636.499   |
| NM_033334 | 369.573   | 448.087   | NM_002654 | 47420.512 | 40421.734 | NM_017679 | 1287.11   | 987.159   |
| AB037791  | 2828.769  | 4626.027  | NM_020382 | 3915.085  | 2414.91   | AF155103  | 843.488   | 1594.166  |
| NM_018124 | 7838.274  | 11278.649 | NM_007192 | 7233.471  | 4913.116  | NM_017704 | 3335.584  | 3443.701  |
| NM_000488 | 2859.127  | 2305.612  | AB002337  | 7339.118  | 4722.35   | BC006359  | 1535.422  | 1633.544  |
| X98507    | 1422.572  | 1460.487  | NM_014933 | 5592.325  | 4629.049  | AK026127  | 2250.514  | 2648.206  |
| NM_016030 | 7281.761  | 6994.479  | NM_003076 | 21260.691 | 15154.346 | NM_002814 | 3419.672  | 4188.92   |
| NM_014668 | 8454.189  | 7103.482  | NM_006385 | 2049.094  | 1476.486  | NM_012250 | 3815.479  | 3380.614  |
| NM_005652 | 3249.583  | 3215.363  | NM_003456 | 3324.259  | 1808.708  | NM_006283 | 10040.414 | 12606.486 |
| AK026686  | 473.96    | 471.371   | NM_002585 | 5375.925  | 3722.412  | NM_005693 | 650.904   | 386.225   |
| NM_005902 | 1515.396  | 1294.195  | AB029016  | 2743.593  | 3455.614  | X97303    | 12357.495 | 6578.69   |
| NM_002850 | 52397.578 | 56100.09  | AL049390  | 759.389   | 611.277   | NM_017530 | 2753.714  | 2028.417  |
| NM_004302 | 893.05    | 1092.658  | AK000584  | 5664.411  | 5096.699  | AL360183  | 1195.164  | 1096.864  |
| NM_005903 | 1857.854  | 2127      | AJ297363  | 1072.338  | 1171.952  | AK027046  | 1718.452  | 1738.611  |
| NM_000861 | 879.297   | 1020.191  | AK026379  | 2466.205  | 2121.648  | NM_003113 | 3784.008  | 2124.533  |
| NM_000024 | 244.526   | 468.384   | AK022965  | 2318.373  | 2229.783  | NM_016578 | 3281.651  | 3464.575  |
| AB037734  | 679.82    | 883.958   | AK024278  | 6539.997  | 5792.159  | NM_014319 | 2289.678  | 2485.313  |
| U77493    | 613.087   | 867.128   | AB056722  | 7504.842  | 6709.498  | NM_004865 | 6183.703  | 5821.942  |
| NM_019062 | 363.543   | 149.292   | NM_013242 | 8986.458  | 7966.686  | NM_002047 | 25741.555 | 22188.418 |
| NM_003873 | 431.763   | 150.031   | NM_012066 | 11482.142 | 8150.481  | NM_001031 | 62133.734 | 62427.262 |
| NM_000263 | 606.875   | 685.614   | AF052168  | 5036.386  | 3754.752  | NM_000999 | 62605.332 | 64785.965 |
| AF073519  | 6934.977  | 6898.949  | AK022632  | 2932.822  | 2091.856  | NM_000985 | 16889.992 | 15859.886 |
| AB001451  | 475.279   | 678.882   | AK021554  | 1532.059  | 1382.076  | BF130622  | 10207.309 | 10037.665 |
| NM_017583 | 2412.144  | 2826.624  | NM_020235 | 3938.484  | 2869.537  | BU165106  | 1214.42   | 871.447   |
| NM_016593 | 1129.089  | 1879.208  | AL109681  | 577.988   | 503.437   | AF038202  | 1610.719  | 1096.608  |
| NM_002521 | 572.578   | 1209.056  | AL162039  | 5394.686  | 3140.754  | AB040925  | 888.976   | 561.834   |
| NM_017875 | 1031.874  | 1185.045  | AK024896  | 3009.058  | 2159.437  | BC008837  | 856.63    | 468.735   |
| AK023232  | 1757.684  | 1729.235  | AL353952  | 824.599   | 927.871   | NM_001861 | 1019.094  | 677.549   |

|           |           |           |           |           |           |           |           |           |
|-----------|-----------|-----------|-----------|-----------|-----------|-----------|-----------|-----------|
| NM_000271 | 3779.637  | 3691.183  | AK021912  | 662.774   | 676.215   | AK025558  | 4602.16   | 3511.428  |
| NM_018209 | 5004.006  | 5404.787  | AK095125  | 783.419   | 715.662   | AK024355  | 1098.52   | 919.556   |
| NM_006184 | 16435.867 | 14535.51  | AK024059  | 2166.764  | 1836.86   | NM_001864 | 28722.201 | 21939.15  |
| AB018268  | 2404.578  | 2535.534  | AB007928  | 1762.434  | 1351.981  | NM_003477 | 6233.022  | 5230.764  |
| NM_019045 | 1239.786  | 1132.696  | AK023645  | 1410.367  | 1743.296  | NM_002654 | 36215.137 | 29446.293 |
| NM_006380 | 3052.836  | 2674.239  | D83543    | 1170.159  | 1353.369  | NM_020382 | 2976.572  | 2022.859  |
| AB020710  | 2023.162  | 2119.254  | NM_016930 | 5786.813  | 8741.629  | NM_007192 | 7564.484  | 5474.662  |
| Z83801    | 495.308   | 321.165   | AJ001861  | 2687.355  | 3555.178  | AB002337  | 7037.674  | 5383.359  |
| NM_016174 | 2404.912  | 2689.003  | NM_005188 | 1016.034  | 1210.219  | NM_014933 | 2894.724  | 2232.16   |
| NM_020377 | 503.683   | 431.657   | X64981    | 3142.529  | 3882.126  | NM_003076 | 18830.391 | 17303.107 |
| U88896    | 1186.899  | 1757.907  | X75692    | 2588.447  | 1901.223  | NM_006385 | 1633.281  | 1556.89   |
| NM_005724 | 7621.016  | 8163.029  | X64988    | 711.238   | 502.047   | NM_003456 | 3347.524  | 2883.305  |
| X58794    | 800.732   | 976.301   | Y10511    | 10201.121 | 14571.609 | NM_002585 | 3802.398  | 4404.271  |
| NM_001735 | 1521.31   | 1235.709  | M26147    | 6521.208  | 5957.037  | AB029016  | 2230.97   | 2133.242  |
| NM_002349 | 465.32    | 330.061   | AF018254  | 921.435   | 827.271   | AL049390  | 1256.816  | 706.97    |
| NM_005080 | 14185.168 | 14224.445 | NM_016240 | 2022.67   | 2924.121  | AK000584  | 5858.754  | 5201.657  |
| NM_004887 | 4704.797  | 4487.545  | AK026459  | 1065.344  | 1193.943  | AJ297363  | 967.049   | 784.824   |
| NM_006404 | 618.331   | 630.526   | AK000027  | 409.827   | 681.673   | AK026379  | 2912.007  | 2137.207  |
| NM_014795 | 593.211   | 774.921   | AK025238  | 624.716   | 664.343   | AK022965  | 2744.481  | 2468.822  |
| NM_002986 | 469.873   | 689.7     | NM_004129 | 1007.61   | 1090.655  | AK024278  | 5885.237  | 5040.033  |
| NM_014396 | 4566.226  | 8095.241  | AK026416  | 19922.236 | 24175.004 | NM_018022 | 1092.557  | 1183.976  |
| AK027201  | 1792.778  | 2765.546  | AK025797  | 3041.203  | 4665.184  | AB056722  | 9460.292  | 9894.727  |
| Z25433    | 2694.412  | 2818.248  | AK000085  | 507.634   | 471.379   | NM_013242 | 6029.249  | 5896.733  |
| NM_005922 | 3445.518  | 2987.872  | AK000019  | 1541.267  | 1638.703  | NM_012066 | 9272.84   | 9089.335  |
| NM_018638 | 3990.033  | 3947.343  | AK000645  | 1012.219  | 1335.791  | AF052168  | 6574.662  | 6566.901  |
| AL137593  | 6846.885  | 7249.387  | AK024947  | 2178.313  | 2343.229  | AK022632  | 1796.522  | 1513.304  |
| NM_003915 | 2354.917  | 1962.463  | NM_017503 | 1344.154  | 1105.59   | AK021554  | 1750.95   | 1533.071  |
| NM_000382 | 2271.31   | 1935.101  | AK024606  | 3291.019  | 3788.021  | NM_020235 | 3563.775  | 3029.344  |
| AL133064  | 2975.354  | 2946.471  | NM_016417 | 22503.771 | 33641.551 | AL109681  | 815.071   | 1341.838  |
| NM_006227 | 3772.529  | 3599.73   | NM_019108 | 3074.044  | 4858.496  | AL162039  | 6745.437  | 7059.852  |
| NM_002905 | 4515.851  | 5120.983  | L10147    | 657.589   | 1055.24   | AK024896  | 1687.608  | 1874.59   |
| NM_000700 | 44928.09  | 50415.699 | AL080118  | 8647.044  | 12257.68  | AK095125  | 408.53    | 335.939   |
| NM_019028 | 5074.061  | 6487.78   | AL049378  | 6195.184  | 9493.491  | AK024059  | 2721.593  | 2111.389  |
| NM_000431 | 5473.988  | 5842.943  | L09086    | 1817.663  | 2060.561  | AB007928  | 1541.946  | 1424.569  |
| NM_013421 | 575.352   | 1789.905  | AK021832  | 821.246   | 826.792   | AK023645  | 1044.968  | 837.997   |
| AB033118  | 6581.556  | 8659.872  | AK021505  | 1589.944  | 1807.499  | D83543    | 846.444   | 755.798   |
| NM_019606 | 3461.337  | 3955.484  | AK021598  | 6910.838  | 7160.35   | NM_016930 | 3791      | 3051.429  |
| NM_001690 | 8020.857  | 5336.245  | AJ012498  | 691.199   | 1034.165  | AJ001861  | 1973.446  | 1474.135  |
| AF034374  | 3128.876  | 2551.617  | NM_005973 | 16406.939 | 20160.309 | X64981    | 1604.208  | 1628.915  |
| NM_016118 | 7131.898  | 4842.234  | X04547    | 3931.211  | 6024.318  | X75692    | 3504.885  | 3221.732  |
| NM_018674 | 1098.943  | 1373.515  | AK025823  | 4186.088  | 5251.541  | Y10511    | 7918.854  | 6359.555  |
| NM_001683 | 7538.511  | 7964.048  | AK026691  | 1514.904  | 1945.214  | M26147    | 5591.609  | 3924.847  |
| NM_001682 | 2131.472  | 2464.791  | AL359941  | 3486.465  | 4001.694  | AF018254  | 830.366   | 790.87    |
| NM_014405 | 1075.07   | 1750.235  | AF035278  | 2117.801  | 2563.516  | L08438    | 3800.92   | 6828.079  |
| NM_014928 | 1234.459  | 2381.445  | AL050202  | 1788.19   | 2130.047  | NM_016240 | 1768.398  | 1482.804  |
| AK025130  | 3830.162  | 5730.764  | U32999    | 11708.208 | 13816.629 | AK026416  | 17010.072 | 16654.07  |
| AB037791  | 1356.066  | 1083.602  | U66052    | 3114.648  | 4061.611  | AK025797  | 496.721   | 545.433   |
| NM_018124 | 5727.451  | 4109.67   | AK024156  | 1610.953  | 1471.632  | AK000019  | 767.147   | 727.56    |
| Z70701    | 4519.107  | 4566.149  | AF086288  | 2270.399  | 3019.572  | AK000645  | 639.553   | 465.191   |
| AB040972  | 1834.821  | 2212.136  | AK023109  | 2276.018  | 3295.367  | AK024947  | 1188.642  | 1433.536  |
| AF148505  | 2383.647  | 2758.592  | NM_005293 | 18049.869 | 20879.193 | NM_017503 | 848.882   | 574.217   |
| BE260997  | 616.02    | 623.891   | AF133332  | 10130.602 | 12785.866 | AK024606  | 4981.452  | 3722.245  |
| NM_018686 | 11605.74  | 11732.798 | AK022805  | 987.993   | 1008.141  | NM_016417 | 15890.919 | 14194.423 |

|           |           |           |           |           |           |           |           |           |
|-----------|-----------|-----------|-----------|-----------|-----------|-----------|-----------|-----------|
| NM_017676 | 2157.476  | 2510.776  | NM_001088 | 4562.287  | 6020.389  | NM_019108 | 1240.658  | 1149.643  |
| AK021764  | 944.818   | 1218.411  | BC015991  | 18157.326 | 25458.391 | AL080118  | 6986.418  | 5924.979  |
| NM_005431 | 1971.927  | 2289.358  | U94902    | 1007.745  | 1376.365  | AL049378  | 3856.01   | 3911.761  |
| AB036063  | 1795.295  | 1920.718  | U46214    | 3109.654  | 4074.475  | L09086    | 878.378   | 1082.644  |
| NM_002894 | 7124.045  | 4884.772  | NM_000310 | 12629.614 | 16663.729 | AK021505  | 955.797   | 871.226   |
| NM_004629 | 8552.609  | 5358.46   | AF161343  | 5824.7    | 8178.373  | AK021598  | 5184.44   | 4444.276  |
| NM_004260 | 4919.588  | 4692.536  | NM_004765 | 11228.511 | 15175.049 | NM_005973 | 14085.596 | 10419.779 |
| AL050067  | 607.725   | 531.515   | AK022246  | 2227.563  | 2596.316  | X04547    | 2905.879  | 1714.583  |
| NM_004972 | 3516.886  | 3640.596  | X75684    | 1462.056  | 1880.829  | AK025823  | 2884.439  | 2278.031  |
| NM_006251 | 6143.156  | 6492.77   | D17200    | 979.314   | 1169.675  | AK026691  | 954       | 853.068   |
| NM_004103 | 3893.244  | 4497.696  | AF113701  | 8412.877  | 10826.779 | AL359941  | 3484.569  | 3333.776  |
| NM_001744 | 11647.354 | 13829.965 | Y11158    | 3254.655  | 4131.526  | AF035278  | 1863.39   | 1509.403  |
| NM_006296 | 2544.623  | 3475.627  | NM_006771 | 14958.981 | 15898.428 | AL050202  | 1044.423  | 906.107   |
| AF073519  | 6004.292  | 5381.951  | L37702    | 11026.791 | 12469.322 | U32999    | 10695.679 | 11317.71  |
| AB001451  | 510.045   | 441.166   | AK022812  | 5704.057  | 6458.637  | U66052    | 5696.414  | 6015.607  |
| NM_017583 | 2070.109  | 2113.343  | U79301    | 4004.824  | 4171.548  | AK024156  | 1000.957  | 1196.541  |
| Y16132    | 3472.228  | 3326.317  | AK022260  | 6895.302  | 7109.72   | AF086288  | 1107.347  | 1243.313  |
| NM_016593 | 575.464   | 602.34    | M32219    | 13364.837 | 19440.969 | AK023109  | 1881.47   | 1215.197  |
| NM_002521 | 658.078   | 374.768   | BC018868  | 1241.382  | 1337.797  | NM_005293 | 19478.285 | 13608.297 |
| NM_002856 | 1087.139  | 859.712   | AF086174  | 770.066   | 874.273   | S50185    | 1013.345  | 748.492   |
| NM_003225 | 897.907   | 1069.216  | AF007128  | 12620.988 | 15200.258 | AF133332  | 6601.647  | 4491.999  |
| NM_000096 | 2507.3    | 3199.323  | CY3Cy5    | 1825.996  | 191.348   | NM_001088 | 11998.689 | 8886.198  |
| AA418251  | 1192.893  | 1319.143  | AI351740  | 4949.736  | 5279.822  | BC015991  | 13115.728 | 10285.25  |
| AA143087  | 1977.388  | 2822.406  | AA444051  | 657.636   | 838.135   | U46214    | 3278.531  | 2473.294  |
| U25804    | 2597.931  | 3312.69   | NM_007164 | 1340.749  | 1417.737  | NM_000310 | 8510.266  | 8590.094  |
| BI870965  | 2724.811  | 3205.068  | BE783826  | 10048.406 | 9659.38   | AF161343  | 3886.302  | 2760.636  |
| NM_001903 | 9769.269  | 8035.104  | X04827    | 842.517   | 1059.778  | NM_004765 | 7252.106  | 6280.532  |
| BI835536  | 12837.016 | 9191.999  | H07088    | 696.122   | 852.642   | AK022246  | 1349.162  | 1358.176  |
| BF205051  | 1328.035  | 1128.803  | AI004656  | 462.608   | 532.605   | X75684    | 799.087   | 629.245   |
| X02761    | 509.494   | 378.066   | BC020596  | 1119.713  | 1143.936  | AF113701  | 5185.655  | 5312.705  |
| M91463    | 607.496   | 334.016   | AF116606  | 51492.324 | 30469.576 | Y11158    | 1286.327  | 1420.734  |
| J03060    | 2396.995  | 2489.194  | X98922    | 3000.981  | 2032.172  | NM_006771 | 13537.429 | 15906.183 |
| X54156    | 545.854   | 686.486   | AK098435  | 3566.614  | 2796.833  | L37702    | 11996.521 | 14014.512 |
| NM_003743 | 1467.097  | 1491.402  | AK092872  | 4022.473  | 7701.467  | AK022812  | 3474.441  | 3661.852  |
| AF012434  | 13896.723 | 17931.984 | NM_145904 | 25196.85  | 40087.594 | U79301    | 4669.877  | 3963.686  |
| NM_006404 | 589.175   | 640.903   | SR2       | 43265.133 | 26553.578 | AK022260  | 5065.527  | 4030.557  |
| NM_014795 | 666.442   | 631.67    | SR4       | 8681.07   | 3274.526  | M32219    | 9899.809  | 6462.332  |
| NM_002986 | 502.616   | 688.258   | SR6       | 1401.616  | 635.403   | BC018868  | 958.985   | 803.994   |
| M15330    | 1065.133  | 1155.567  | SR8       | 5005.237  | 6185.741  | AF086174  | 422.991   | 424.714   |
| NM_014396 | 2428.257  | 2361.815  | SR10      | 19296.568 | 3467.57   | AF007128  | 10477.524 | 8809.506  |
| AK027201  | 1378.87   | 1110.704  | CY3Cy5    | 737.472   | 122.575   | CY3Cy5    | 4453.95   | 304.601   |
| NM_000489 | 3259.678  | 2464.541  | NM_002418 | 434.576   | 673.641   | AI351740  | 4519.658  | 4134.366  |
| X98507    | 1276.098  | 1134.066  | NM_004485 | 1626.471  | 1446.796  | NM_007164 | 1546.94   | 2168.833  |
| NM_016030 | 7878.422  | 7311.575  | NM_012419 | 407.467   | 497.985   | BE783826  | 15798.714 | 20502.396 |
| NM_014669 | 8189.235  | 7713.704  | NM_013296 | 6009.47   | 7087.683  | X04827    | 1059.978  | 1112.713  |
| NM_005652 | 3536.426  | 3599.195  | AL117478  | 624.514   | 690.83    | H07088    | 584.534   | 652.56    |
| AK026686  | 484.688   | 791.401   | NM_005307 | 612.299   | 574.522   | AI004656  | 422.271   | 1306.678  |
| NM_005902 | 1756.927  | 2000.935  | NM_005958 | 1396.934  | 1311.319  | BC008428  | 1751.03   | 1612.471  |
| NM_002850 | 48750.199 | 47122.492 | NM_013436 | 1078.81   | 1049.734  | BC020596  | 2229.758  | 4731.076  |
| NM_005302 | 173.462   | 118.559   | AF225426  | 375.252   | 646.943   | AF116606  | 51299.68  | 65533.066 |
| NM_004302 | 854.135   | 519.639   | NM_005208 | 3511.935  | 2496.519  | X98922    | 3959.573  | 3252.064  |
| NM_005903 | 1527.254  | 975.775   | NM_000421 | 651.467   | 516.229   | AK098435  | 5568.234  | 4675.83   |
| NM_000861 | 771.383   | 536.211   | AK025687  | 7664.099  | 5438.746  | AK092872  | 2604.788  | 2598.766  |

|           |           |           |           |           |           |           |           |           |
|-----------|-----------|-----------|-----------|-----------|-----------|-----------|-----------|-----------|
| AB037734  | 698.816   | 757.745   | AF218941  | 3157.264  | 2564.562  | AF230496  | 362.399   | 459.601   |
| U77493    | 838.815   | 611.023   | AL137264  | 6419.525  | 8233.168  | M16801    | 941.39    | 827.878   |
| NM_003873 | 458.632   | 659.219   | NM_002226 | 446.566   | 270.025   | NM_145904 | 21792.932 | 20369.963 |
| NM_000263 | 1144.983  | 2155.847  | X84370    | 5454.697  | 5497.828  | NM_021963 | 687.378   | 580.134   |
| NM_001683 | 6490.109  | 6474.96   | NM_004039 | 960.431   | 875.836   | SR6       | 2263.023  | 1170.686  |
| NM_001682 | 1582.476  | 1722.182  | AB014558  | 734.802   | 428.399   | SR8       | 7640.877  | 14782.221 |
| NM_014405 | 980.597   | 1822.79   | NM_000118 | 1324.28   | 748.925   | SR10      | 26971.432 | 4778.909  |
| NM_000816 | 802.904   | 809.567   | NM_001298 | 56578.707 | 43642.957 | CY3Cy5    | 2015.83   | 273.762   |
| NM_014928 | 581.357   | 691.879   | BG325046  | 1770.825  | 1290.005  | NM_002418 | 476.295   | 714.477   |
| AK025130  | 3507.486  | 3930.625  | NM_004578 | 1275.482  | 1263.477  | AL117478  | 530.147   | 585.528   |
| NM_017875 | 1170.015  | 1325.538  | NM_000647 | 379.111   | 395.956   | NM_005307 | 837.803   | 1242.766  |
| AK023232  | 1764.613  | 1443.511  | AB046793  | 577.627   | 768.534   | NM_005958 | 1761.58   | 1870.888  |
| NM_000271 | 4206.424  | 4392.594  | NM_017604 | 1630.424  | 1547.136  | NM_013436 | 1811.311  | 2615.122  |
| NM_018209 | 5338.975  | 6783.512  | NM_017738 | 4895.615  | 3888.668  | AF225426  | 668.748   | 1064.963  |
| NM_006184 | 19133.09  | 20471.891 | NM_016557 | 1205.166  | 1164.282  | NM_005208 | 4468.262  | 6883.567  |
| AB018268  | 3134.197  | 4707.173  | NM_000623 | 2187.647  | 2062.911  | NM_000421 | 782.48    | 627.256   |
| NM_019045 | 1393.524  | 1465.825  | AF161348  | 1707.36   | 1126.864  | AK025687  | 12153.58  | 11837.324 |
| NM_006380 | 3098.89   | 3247.248  | NM_018467 | 5685.771  | 4304.678  | AF218941  | 3998.977  | 3703.677  |
| AB020710  | 1633.799  | 1413.515  | NM_006068 | 673.963   | 344.234   | AL137264  | 10501.435 | 8782.878  |
| Z83801    | 474.732   | 244.298   | NM_002038 | 10241.026 | 18465.791 | NM_002226 | 604.559   | 838.342   |
| NM_016174 | 2313.304  | 1856.89   | NM_005729 | 6111.742  | 11992.668 | X84370    | 8184.647  | 7654.145  |
| NM_020377 | 507.023   | 154.382   | NM_015493 | 648.478   | 484.116   | NM_004039 | 1404.837  | 1242.598  |
| U88896    | 963.963   | 563.936   | NM_003747 | 1153.452  | 1207.419  | AB014558  | 864.098   | 931.666   |
| AF116702  | 53096.27  | 43772.137 | AB037744  | 894.365   | 532.726   | NM_006287 | 426.625   | 412.756   |
| NM_005724 | 7674.827  | 7544.915  | NM_007008 | 644.455   | 388.592   | NM_000118 | 2120.521  | 1675.045  |
| X58794    | 547.263   | 834.725   | AL109708  | 575.013   | 294.74    | NM_000913 | 686.174   | 396.754   |
| NM_001735 | 1767.997  | 2125.78   | AF234532  | 440.806   | 324.44    | NM_001298 | 57593.285 | 39290.793 |
| NM_002349 | 604.151   | 854.045   | AF099740  | 1452.371  | 1512.253  | BG325046  | 2963.875  | 1258.276  |
| NM_004887 | 8417.908  | 13276.575 | NM_006117 | 17060.012 | 17277.777 | AK026248  | 882.133   | 980.258   |
| NM_004972 | 3638.793  | 3438.874  | NM_002225 | 2437.372  | 2107.606  | NM_004578 | 1172.538  | 1555.892  |
| NM_006251 | 5423.611  | 5053.812  | NM_006229 | 608.302   | 706.398   | NM_000647 | 402.572   | 428.293   |
| NM_004103 | 4322.777  | 4195.723  | NM_015415 | 19963.023 | 18023.869 | AB046793  | 873.416   | 1334.735  |
| NM_002314 | 6769.659  | 6158.262  | NM_004897 | 2374.48   | 2588.389  | NM_017604 | 2122.604  | 3956.331  |
| NM_001744 | 7378.2    | 5903.774  | NM_002555 | 1412.262  | 1460.776  | NM_016557 | 1507.241  | 1460.124  |
| NM_006296 | 1836.341  | 1709.828  | AF225418  | 1015.268  | 1036.885  | NM_000623 | 2791.161  | 2345.821  |
| Z25433    | 3028.884  | 3029.832  | NM_000309 | 915.62    | 952.871   | AF161348  | 2027.266  | 1882.963  |
| NM_005922 | 3691.502  | 2848.562  | NM_004528 | 15204.488 | 13048.092 | NM_018467 | 7707.958  | 9271.901  |
| NM_018638 | 4653.655  | 4569.151  | NM_002450 | 10263.924 | 10722.549 | NM_006068 | 891.087   | 1314.845  |
| AL137593  | 8274.07   | 8484.877  | NM_001686 | 738.187   | 766.964   | NM_002704 | 360.012   | 239.83    |
| NM_003915 | 2797.71   | 4270.301  | NM_004978 | 363.863   | 268.259   | U16752    | 372.992   | 358.088   |
| NM_000382 | 2992.717  | 4928.668  | NM_000705 | 1254.536  | 1964.853  | NM_002038 | 8511.199  | 7556.404  |
| AL133064  | 2923.108  | 3829.567  | NM_004231 | 47782.148 | 58776.691 | NM_005729 | 6504.079  | 6163.996  |
| NM_006227 | 3898.04   | 4087.384  | AK023107  | 5387.099  | 2582.475  | NM_015493 | 1117.912  | 1185.669  |
| NM_002905 | 4059.553  | 4573.286  | NM_006854 | 5809.916  | 2945.613  | NM_003747 | 1829.311  | 2094.177  |
| NM_000700 | 44565.188 | 40293.797 | NM_004580 | 3411.38   | 1803.645  | AB037744  | 1609.82   | 2140.994  |
| NM_019028 | 4609.583  | 3906.136  | NM_020387 | 16386.994 | 9274.554  | AF141901  | 1144.364  | 1762.077  |
| NM_000431 | 4512.176  | 2645.294  | NM_007246 | 1346.823  | 1414.456  | NM_007008 | 1604.581  | 1732.402  |
| NM_013421 | 378.912   | 540.737   | AF150735  | 3959.994  | 4831.906  | AL109708  | 1003.755  | 458.784   |
| NM_012474 | 12885.323 | 10288.059 | NM_018183 | 1552.938  | 1469.008  | AF234532  | 1057.575  | 421.609   |
| AB033118  | 6836.944  | 7241.685  | NM_012382 | 2450.919  | 2550.228  | AF099740  | 1259.459  | 1842.727  |
| NM_019606 | 3782.564  | 4265.967  | BF038366  | 601.64    | 683.624   | NM_006117 | 21461.457 | 37439.379 |
| NM_001690 | 7864.961  | 7461.605  | NM_016440 | 12373.444 | 8416.276  | NM_002225 | 2270.072  | 3470.83   |
| AF034374  | 3982.616  | 4971.646  | NM_007194 | 2485.306  | 1824.628  | NM_006225 | 532.522   | 926.438   |

|           |           |           |           |           |           |           |           |           |
|-----------|-----------|-----------|-----------|-----------|-----------|-----------|-----------|-----------|
| NM_018674 | 2043.355  | 3218.892  | NM_000314 | 5474.087  | 4068.802  | NM_015415 | 23671.375 | 29583.652 |
| NM_000068 | 658.286   | 527.308   | AB002369  | 1167.936  | 972.353   | NM_004897 | 2376.642  | 3861.781  |
| AB033046  | 11617.682 | 9267.97   | S74620    | 1151.345  | 685.161   | NM_002555 | 1759.629  | 1489.876  |
| NM_015918 | 8139.942  | 8188.813  | AF305239  | 859.281   | 439.663   | AF225418  | 1067.441  | 1082.758  |
| NM_013249 | 448.792   | 469.642   | NM_002827 | 2647.634  | 1019.6    | NM_000309 | 1019.649  | 851.953   |
| AB029041  | 2164.696  | 1862.69   | BF035425  | 3624.197  | 2031.355  | NM_004528 | 20836.285 | 16871.521 |
| AK026642  | 10779.911 | 8903.799  | NM_000159 | 23936.508 | 12570.459 | NM_002450 | 28883.277 | 7382.698  |
| AL359063  | 1995.429  | 1357.647  | NM_014638 | 1304.915  | 970.464   | NM_001688 | 826.972   | 866.551   |
| AL079292  | 3889.859  | 3442.607  | NM_000118 | 1939.993  | 2878.557  | NM_004978 | 404.368   | 351.524   |
| X89667    | 802.079   | 804.907   | NM_001298 | 57839.926 | 60018.398 | NM_000705 | 511.315   | 709.639   |
| AB037791  | 1743.63   | 1691.688  | BG325046  | 2483.197  | 2688.2    | NM_016577 | 1883.141  | 3956.642  |
| NM_018124 | 7749.615  | 8397.82   | AI351740  | 5069.874  | 5808.695  | AK023107  | 8419.539  | 8951.001  |
| Z70701    | 5215.249  | 6029.716  | AA444051  | 563.163   | 605.147   | NM_006854 | 9373.283  | 6849.312  |
| AB040972  | 1816.143  | 2224.095  | NM_007164 | 1386.661  | 913.385   | NM_004580 | 4747.865  | 2109.706  |
| AF148505  | 2286.814  | 2135.443  | BE783826  | 13720.482 | 10768.005 | NM_020387 | 26052.541 | 8066.499  |
| BE260997  | 565.802   | 335.637   | X04827    | 1002.667  | 903.864   | NM_007248 | 1629.879  | 483.385   |
| NM_018688 | 10039.227 | 5746.404  | H07088    | 822.026   | 744.917   | AF150735  | 4891.018  | 4008.808  |
| NM_017678 | 1770.52   | 1201.313  | AI004656  | 435.78    | 413.546   | NM_018183 | 1654.383  | 1553.15   |
| AK021764  | 1150.699  | 643.594   | BC020596  | 1159.235  | 857.582   | NM_012382 | 3284.045  | 2372.021  |
| NM_005431 | 2202.367  | 2005.316  | AF116606  | 55230.477 | 41869.309 | BF038366  | 660.439   | 737.824   |
| AB036063  | 2178.238  | 2583.218  | X98922    | 3055.224  | 1456.241  | NM_012304 | 594.151   | 439.864   |
| NM_002894 | 7567.989  | 7859.835  | AK098435  | 5223.308  | 2799.539  | NM_016440 | 15182.609 | 9351.049  |
| NM_004629 | 10628.906 | 12776.11  | AK092872  | 2446.971  | 1870.751  | NM_007194 | 3348.575  | 2245.07   |
| AL050067  | 940.39    | 1172.727  | NM_145904 | 19155.434 | 9310.54   | NM_000314 | 7303.81   | 5621.969  |
| NM_015564 | 1681.609  | 1741.396  | NM_013334 | 2943.783  | 2603.944  | S74620    | 2372.52   | 1847.59   |
| AF160476  | 703.095   | 358.702   | AB037744  | 1274.913  | 1314.564  | AF305239  | 1370.636  | 1561.906  |
| L22650    | 893.449   | 727.824   | AF141901  | 818.052   | 717.494   | NM_002827 | 4406.323  | 5362.472  |
| AB014520  | 826.775   | 646.572   | NM_007008 | 991.901   | 911.546   | NM_001948 | 865.163   | 726.595   |
| AF161420  | 1353.056  | 1180.765  | AL109708  | 800.926   | 880.577   | BF035425  | 12294.493 | 6686.999  |
| NM_004907 | 775.789   | 725.397   | L29143    | 522.685   | 446.135   | NM_000159 | 55318.484 | 20987.867 |
| NM_001775 | 764.11    | 855.752   | AF234532  | 713.465   | 925.67    | NM_014638 | 1247.06   | 417.662   |
| BE083789  | 386.422   | 442.596   | NM_002418 | 421.829   | 436.578   | NM_006287 | 528.315   | 451.929   |
| D26067    | 5429.22   | 6295.079  | NM_004485 | 1498.371  | 1102.784  | NM_000118 | 2055.145  | 2153.506  |
| AF227924  | 2063.134  | 1842.035  | NM_012419 | 658.268   | 486.769   | NM_000913 | 522.804   | 700.286   |
| NM_005718 | 6507.717  | 6049.975  | NM_013296 | 6058.498  | 5309.055  | NM_001298 | 56937.387 | 51290.926 |
| NM_006183 | 1861.221  | 1659.528  | AL117478  | 730.978   | 488.244   | BG325046  | 3106.934  | 2400.788  |
| NM_016087 | 737.737   | 586.966   | NM_005307 | 526.286   | 328.962   | AI351740  | 6083.4    | 4280.016  |
| S59184    | 2306.211  | 1401.54   | NM_005958 | 1338.335  | 786.362   | AA444051  | 658.218   | 695.547   |
| NM_006661 | 700.289   | 684.563   | NM_013436 | 1488.289  | 1546.251  | NM_007164 | 1875.66   | 1607.405  |
| NM_005748 | 15393.157 | 12949.242 | AF225426  | 701.892   | 506.541   | BE783826  | 16764.16  | 13690.671 |
| NM_004588 | 831.189   | 1069.828  | NM_005208 | 2826.329  | 1376.45   | X04827    | 1007.001  | 710.144   |
| U16126    | 714.141   | 584.583   | NM_000421 | 740.183   | 370.184   | H07088    | 512.013   | 681.316   |
| NM_002172 | 7595.808  | 11771.069 | AK025687  | 3244.414  | 2515.522  | AI004656  | 697.433   | 300.496   |
| NM_002614 | 502.626   | 570.807   | AF218941  | 2627.022  | 1259.954  | BC020596  | 1582.67   | 1145.151  |
| NM_005655 | 2570.239  | 2309.143  | AL137264  | 4001.564  | 1925.641  | AF116606  | 54816.949 | 47058.453 |
| NM_007314 | 3351.302  | 2848.78   | X84370    | 4702.199  | 2469.399  | X98922    | 4447.183  | 3620.03   |
| NM_016073 | 2420.675  | 1717.337  | NM_004039 | 966.311   | 685.343   | AK098435  | 6034.482  | 4919.383  |
| NM_006600 | 20106.391 | 13641.497 | AB014558  | 833.069   | 1230.06   | AK092872  | 3108.614  | 2965.194  |
| AF297709  | 2167.825  | 2089.627  | NM_016577 | 633.926   | 944.752   | M16801    | 763.791   | 624.695   |
| L77564    | 935.108   | 732.715   | AK023107  | 7512.012  | 7157.285  | NM_145904 | 22923.475 | 18398.99  |
| NM_015384 | 2139.809  | 1636.043  | NM_006854 | 8095.001  | 7132.507  | NM_013334 | 3911.637  | 1481.518  |
| AK023327  | 1281.603  | 1343.622  | NM_004580 | 4427.676  | 4923.259  | AB037744  | 1466.096  | 1321.79   |
| AB046858  | 1822.961  | 1518.925  | NM_020387 | 29363.832 | 26385.809 | AF141901  | 923.019   | 1071.756  |

|           |           |           |           |           |           |           |           |           |
|-----------|-----------|-----------|-----------|-----------|-----------|-----------|-----------|-----------|
| BE878692  | 1009.311  | 719.017   | NM_007246 | 1386.814  | 1630.499  | NM_00700E | 1063.616  | 798.55    |
| NM_002007 | 765.22    | 780.503   | AK026248  | 892.179   | 852.197   | AL109708  | 837.307   | 683.214   |
| NM_01589E | 1297.952  | 1048.891  | NM_00457E | 1474.486  | 1047.156  | AF234532  | 1330.562  | 1029.669  |
| NM_00230E | 33403.426 | 24501.979 | NM_000647 | 894.022   | 619.377   | NM_00241E | 394.607   | 390.331   |
| AK025439  | 3145.878  | 2299.512  | AB046793  | 680.765   | 358.629   | NM_00448E | 1624.054  | 1290.338  |
| NM_001737 | 899.211   | 611.735   | NM_017604 | 1948.434  | 1795.766  | NM_01241E | 412.053   | 374.015   |
| Z36784    | 801.664   | 393.713   | NM_01773E | 4215.222  | 3007.112  | NM_01329E | 6580.966  | 4460.756  |
| NM_01662E | 9375.065  | 6195.969  | NM_016557 | 1160.353  | 806.72    | AL117478  | 562.406   | 397.526   |
| NM_00721E | 3495.297  | 2721.28   | NM_00062E | 2157.31   | 1528.88   | NM_005307 | 599.446   | 483.668   |
| NM_019064 | 933.582   | 1095.616  | AF161348  | 1321.233  | 660.746   | NM_00595E | 1549.477  | 957.749   |
| NM_000094 | 1005.825  | 1878.552  | NM_018467 | 3808.374  | 2016.161  | NM_01343E | 1540.212  | 1433.339  |
| AJ295148  | 1037.709  | 1000.73   | NM_00606E | 551.729   | 1335.848  | AF225426  | 510.166   | 507.856   |
| NM_01630E | 3978.255  | 3565.398  | NM_002704 | 382.611   | 924.582   | NM_00520E | 5646.907  | 5503.574  |
| NM_00415E | 14382.454 | 11416.596 | NM_00203E | 6203.282  | 2286.249  | NM_000421 | 675.307   | 755.944   |
| AK021866  | 663.756   | 715.987   | NM_00572E | 4735.568  | 2332.202  | AK025687  | 9915.743  | 7383.876  |
| NM_00324E | 6240.924  | 5114.05   | NM_01549E | 871.421   | 743.661   | AF218941  | 3818.47   | 3091.605  |
| M21897    | 874.988   | 666.791   | NM_003747 | 1911.636  | 4264.933  | AL137264  | 10647.931 | 7067.858  |
| AF301463  | 1225.984  | 1014.221  | NM_002827 | 4977.031  | 4504.102  | NM_00222E | 548.825   | 406.892   |
| NM_015984 | 7940.112  | 6641.327  | NM_00194E | 923.761   | 968.36    | X84370    | 7182.164  | 3555.676  |
| AK022471  | 322.879   | 389.435   | BF035425  | 7807.104  | 6660.047  | NM_00403E | 1027.488  | 481.096   |
| AK025969  | 1528.586  | 1160.533  | NM_00015E | 45876.238 | 36547.199 | AB014558  | 1171.092  | 1035.115  |
| NM_006894 | 382.15    | 360.55    | NM_01463E | 1447.868  | 1445.996  | NM_016577 | 666.113   | 554.746   |
| AK023031  | 1599.96   | 912.756   | AF099740  | 1291.453  | 1008.26   | AK023107  | 7856.292  | 7056.877  |
| NM_005717 | 32439.42  | 15450.896 | NM_006117 | 17722.705 | 17107.648 | NM_006854 | 9262.688  | 7587.229  |
| NM_01209E | 3499.914  | 2452.219  | NM_00222E | 2182.975  | 1777.206  | NM_00458E | 3211.003  | 1710.709  |
| BE793385  | 840.082   | 1087.978  | NM_01541E | 19287.279 | 15097.404 | NM_020387 | 34376.027 | 23586.973 |
| NM_00308E | 4778.694  | 6666.396  | NM_004897 | 2365.353  | 1485.538  | NM_00724E | 1561.895  | 1243.489  |
| AF043290  | 548.55    | 671.212   | NM_00255E | 1055.8    | 738.041   | AK026248  | 910.497   | 649.533   |
| NM_00408E | 5906.857  | 7610.482  | AF225418  | 864.33    | 740.338   | NM_00457E | 1129.154  | 977.944   |
| NM_005934 | 3632.814  | 6673.458  | NM_00030E | 785.476   | 265.654   | AB046793  | 522.153   | 360.328   |
| NM_00712E | 5582.035  | 4326.138  | NM_00452E | 15287.466 | 10494.645 | NM_017604 | 1521.997  | 1030.903  |
| AY004253  | 2292.212  | 2110.849  | AK026381  | 12890.932 | 23674.018 | NM_01773E | 6454.681  | 4436.17   |
| Z46967    | 465.895   | 514.37    | NM_00245E | 17292.324 | 56698.848 | NM_016557 | 1072.365  | 938.784   |
| NM_00214E | 978.468   | 1189.778  | NM_00168E | 900.926   | 671.132   | NM_00062E | 2422.063  | 1736.144  |
| AL137449  | 1933.698  | 1271.888  | NM_00070E | 461.662   | 226.688   | AF161348  | 1780.253  | 1081.333  |
| U88153    | 1779.648  | 1569.068  | NM_004231 | 38505.23  | 20477.9   | NM_018467 | 7858.549  | 7249.316  |
| NM_01842E | 4072.016  | 3679.875  | NM_145904 | 25529.209 | 23832.834 | NM_00606E | 965.198   | 1100.498  |
| NM_00505E | 296.349   | 361.05    | NM_013334 | 3150.907  | 3066.555  | NM_00203E | 7176.247  | 2711.938  |
| NM_006924 | 13005.852 | 13421.53  | AF150735  | 3711.163  | 2622.656  | NM_00572E | 7521.988  | 6475.565  |
| NM_016024 | 6708.298  | 5316.789  | NM_01818E | 1149.998  | 710.657   | NM_01549E | 1621.854  | 2121.285  |
| NM_018107 | 3960.145  | 3692.994  | NM_01238E | 2713.858  | 2166.825  | NM_003747 | 2191.403  | 2426.068  |
| NM_01227E | 1552.458  | 967.191   | BF038366  | 551.305   | 292.886   | NM_002827 | 3704.017  | 3125.188  |
| NM_018387 | 6965.964  | 3005.989  | NM_00245E | 18909.881 | 21857.682 | NM_00194E | 753.345   | 555.834   |
| BF310673  | 1718.455  | 898.892   | NM_01644E | 10174.74  | 4615.792  | BF035425  | 13156.824 | 9242.596  |
| R97012    | 16162.49  | 10788.604 | NM_007194 | 2511.023  | 979.776   | NM_00015E | 54849.816 | 49917.555 |
| U77700    | 4462.037  | 3770.484  | NM_000314 | 4439.344  | 1923.923  | NM_01463E | 1199.357  | 963.34    |
| NM_006567 | 6056.566  | 7188.038  | AB002369  | 1354.697  | 1361.127  | AF099740  | 1296.319  | 1012.955  |
| AF038554  | 20383.637 | 25890.344 | S74620    | 1722.338  | 3547.169  | NM_006117 | 18582.281 | 11711.037 |
| AF264621  | 3233.969  | 3585.121  | AF305239  | 1663.189  | 2847.497  | NM_00222E | 2489.686  | 1777.347  |
| NM_004184 | 7517.398  | 12915.148 | AL137264  | 8074.096  | 7263.575  | NM_00622E | 532.038   | 557.622   |
| AK026571  | 1700.706  | 1543.264  | NM_00222E | 581.622   | 620.217   | NM_01541E | 20660.867 | 13540.8   |
| AK024673  | 3893.021  | 3441.389  | X84370    | 6658.068  | 5968.94   | NM_004897 | 2536.956  | 1787.084  |
| AF070618  | 789.22    | 991.203   | NM_00403E | 1415.421  | 1494.301  | NM_00255E | 1527.115  | 1346.94   |



|           |           |           |           |           |           |           |           |           |
|-----------|-----------|-----------|-----------|-----------|-----------|-----------|-----------|-----------|
| AF131748  | 4752.296  | 3748.118  | AB014558  | 1015.843  | 1069.35   | AF225418  | 989.989   | 933.652   |
| NM_000456 | 2536.894  | 2034.11   | NM_000118 | 2294.864  | 2302.869  | NM_000306 | 884.624   | 670.298   |
| AF190122  | 668.479   | 375.83    | NM_000913 | 449.918   | 443.215   | NM_004526 | 20727.59  | 14072.093 |
| NM_002496 | 9988.675  | 6056.933  | NM_001296 | 57244.629 | 55239.234 | AK026381  | 18206.295 | 15444.324 |
| NM_016243 | 2913.479  | 2071.582  | BG325046  | 1899.027  | 1798.196  | NM_002450 | 27804.666 | 7346.931  |
| NM_004649 | 6569.545  | 5874.298  | AI351740  | 4397.803  | 4391.314  | NM_001686 | 812.626   | 643.336   |
| NM_006540 | 2780.991  | 2358.548  | AA444051  | 546.342   | 354.961   | NM_000705 | 1151.187  | 300.668   |
| NM_017766 | 1438.065  | 1448.963  | NM_007164 | 1341.343  | 601.817   | NM_004231 | 58713.379 | 70621.031 |
| NM_002811 | 14444.126 | 8770.271  | BE783826  | 9422.42   | 4764.705  | NM_002243 | 446.487   | 983.067   |
| NM_020310 | 1553.279  | 1402.798  | X04827    | 832.916   | 385.936   | NM_145904 | 17486.27  | 16607.535 |
| AK024444  | 515.648   | 516.894   | H07088    | 545.979   | 296.17    | NM_013334 | 4317.182  | 2908.018  |
| NM_005802 | 3284.493  | 1957.644  | BC020596  | 1151.576  | 440.988   | AF150735  | 4763.518  | 3449.449  |
| AB002331  | 4589.839  | 3142.384  | AF116606  | 53824.637 | 20222.273 | NM_018183 | 1843.694  | 1423.055  |
| NM_002504 | 2706.22   | 2678.817  | X98922    | 3241.564  | 1153.737  | NM_012382 | 3133.159  | 2346.817  |
| AB046775  | 974.632   | 787.117   | AK098435  | 3911.238  | 2314.002  | BF038366  | 735.521   | 653.088   |
| X74862    | 902.554   | 689.021   | AK092872  | 2663.007  | 3525.694  | NM_002452 | 22573.328 | 17179.879 |
| X65663    | 3324.623  | 2251.308  | AF230496  | 810.436   | 1489.972  | NM_012304 | 501.635   | 413.086   |
| NM_003185 | 3112.376  | 2590.999  | M16801    | 632.678   | 887.898   | NM_016440 | 16543.268 | 4884.638  |
| NM_004456 | 12588.482 | 19809.379 | NM_002036 | 8553.049  | 7430.213  | NM_007194 | 3385.864  | 714.797   |
| NM_004284 | 10491.938 | 15706.467 | NM_005729 | 6839.109  | 6060.968  | NM_000314 | 4354.639  | 4993.957  |
| NM_012243 | 2332.764  | 1621.137  | NM_015493 | 748.49    | 1060.715  | AB002369  | 1603.668  | 3529.338  |
| AL122040  | 486.499   | 325.823   | NM_003747 | 1182.336  | 1374.157  | S74620    | 3088.079  | 5774.23   |
| AK023974  | 1953.802  | 1631.571  | AB037744  | 1410.827  | 1416.816  | AF305239  | 1291.776  | 2356.321  |
| AK023768  | 937.727   | 1051.861  | AF141901  | 731.01    | 498.725   | AL137264  | 8643.56   | 9185.052  |
| NM_014726 | 1586.696  | 1040.35   | NM_007006 | 938.44    | 869.345   | NM_002226 | 426.129   | 442.818   |
| AF147335  | 494.344   | 433.794   | AL109708  | 776.411   | 552.171   | X84370    | 6726.605  | 5523.399  |
| AK000711  | 1597.069  | 936.846   | AF234532  | 778.257   | 732.756   | NM_004036 | 922.356   | 732.696   |
| BI768072  | 512.705   | 499.016   | NM_002416 | 470.171   | 245.884   | AB014558  | 726.131   | 560.239   |
| AK022216  | 1035.078  | 1068.019  | NM_004485 | 1213.563  | 723.19    | NM_000118 | 1896.237  | 1415.569  |
| U00960    | 1213.239  | 857.524   | NM_012419 | 451.63    | 223.146   | NM_000913 | 356.985   | 480.611   |
| AF088039  | 7352.115  | 4428.79   | NM_013296 | 5298.526  | 3147.476  | NM_001296 | 58758.941 | 51003.676 |
| AF086220  | 710.139   | 492.703   | NM_005307 | 750.715   | 865.902   | BG325046  | 2824.078  | 1639.576  |
| AK023941  | 757.667   | 518.059   | NM_005956 | 1119.477  | 599.352   | AI351740  | 4706.911  | 2919.802  |
| AL390083  | 1458.468  | 1622.728  | NM_013436 | 1202.183  | 674.826   | AA444051  | 533.228   | 537.309   |
| AB020702  | 1031.984  | 827.914   | AF225426  | 675.896   | 304.973   | NM_007164 | 1299.033  | 1264.051  |
| AL050227  | 1047.572  | 1568.798  | NM_005206 | 2924.271  | 3000.174  | BE783826  | 19814.625 | 17936.24  |
| AF085905  | 1596.662  | 2156.777  | NM_000421 | 1194.564  | 2399.911  | X04827    | 980.221   | 762.365   |
| NM_013355 | 256.645   | 353.547   | AK025687  | 4246.638  | 7355.369  | H07088    | 646.018   | 686.144   |
| NM_003847 | 1218.637  | 1021.353  | AF218941  | 3454.617  | 5834.834  | AI004656  | 623.028   | 503.108   |
| AK021973  | 784.81    | 828.866   | NM_004976 | 240.063   | 601.898   | BC020596  | 1777.156  | 701.107   |
| AL110155  | 1150.846  | 217.917   | NM_004231 | 51864.855 | 44011.965 | AF116606  | 51107.77  | 15430.839 |
| AL117638  | 823.264   | 160.54    | NM_016577 | 586.942   | 694.469   | X98922    | 4816.364  | 5174.204  |
| AL050165  | 4076.981  | 4053.523  | AK023107  | 7708.756  | 6700.925  | AK098435  | 7046.851  | 12896.842 |
| AL117445  | 564.1     | 638.763   | NM_006854 | 8185.21   | 6837.279  | AK092872  | 3355.78   | 6863.224  |
| AL122113  | 4447.278  | 4519.584  | NM_004580 | 3462.033  | 3127.335  | AF230496  | 500.972   | 1017.773  |
| AK024415  | 1887.807  | 1409.998  | NM_020387 | 23534.816 | 16893.236 | M16801    | 660.368   | 1353.339  |
| AL049365  | 4961.276  | 3062.738  | NM_007246 | 1352.372  | 1167.305  | NM_002036 | 6398.285  | 4509.676  |
| AB007877  | 616.343   | 319.72    | AK026248  | 739.233   | 550.424   | NM_005726 | 5521.553  | 3783.674  |
| AK025157  | 986.894   | 857.034   | NM_004576 | 2081.933  | 1946.256  | NM_015493 | 1015.505  | 746.169   |
| NM_020215 | 1151.791  | 684.429   | AB046793  | 568.283   | 279.49    | NM_003747 | 1864.443  | 1103.764  |
| AK022001  | 1610.344  | 1583.676  | NM_017604 | 1606.759  | 709.313   | AB037744  | 1380.176  | 1003.667  |
| AK022633  | 1047.45   | 1186.516  | NM_017736 | 2074.103  | 944.168   | AF141901  | 789.875   | 821.679   |
| AK027199  | 925.822   | 727.855   | NM_016557 | 1238.121  | 1265.15   | NM_007006 | 794.168   | 625.775   |

|           |           |          |           |           |           |           |           |           |
|-----------|-----------|----------|-----------|-----------|-----------|-----------|-----------|-----------|
| AK000079  | 3327.221  | 5738.157 | NM_000623 | 2090.792  | 770.176   | AL109708  | 1009.636  | 664.134   |
| AJ227874  | 1151.36   | 1027.882 | AF161348  | 1543.729  | 1237.688  | AF234532  | 1061.833  | 870.666   |
| AF009312  | 294.795   | 376.106  | NM_018467 | 6768.287  | 12803.888 | NM_002418 | 512.821   | 522.626   |
| AF127772  | 373.504   | 433.442  | NM_006068 | 1097.259  | 1902.169  | NM_004485 | 1603.951  | 1427.396  |
| AF056428  | 864.406   | 634.704  | NM_002704 | 713.682   | 1391.715  | NM_012419 | 449.363   | 338.818   |
| AF069136  | 414.883   | 417.916  | U16752    | 484.038   | 995.965   | NM_013296 | 7367.718  | 5378.862  |
| AK001097  | 978.863   | 60.528   | NM_016440 | 16845.297 | 14902.521 | AL117478  | 670.369   | 379.769   |
| AK001995  | 523.479   | 295.819  | NM_007194 | 2614.132  | 3058.624  | NM_005307 | 674.256   | 413.946   |
| AK021594  | 388.84    | 135.29   | NM_000314 | 6967.434  | 5662.782  | NM_005958 | 1384.028  | 407.05    |
| AK021635  | 1464.481  | 1209.462 | AB002369  | 1355.173  | 1546.07   | NM_013436 | 2058.966  | 2132.735  |
| AK025276  | 479.707   | 491.59   | S74620    | 2205.275  | 2344.174  | AF225426  | 923.167   | 2197.201  |
| AK026825  | 365.493   | 611.497  | AF305239  | 1136.059  | 1037.827  | NM_005208 | 6815.75   | 13883.195 |
| AJ008131  | 2610.181  | 2810.206 | NM_002827 | 5221.993  | 5037.139  | NM_000421 | 1022.24   | 1784.796  |
| NM_006272 | 576.46    | 460.793  | NM_001946 | 916.095   | 1030.089  | AK025687  | 12742.786 | 22294.08  |
| AK024303  | 716.751   | 705.014  | BF035425  | 7072.823  | 5962.674  | AF218941  | 3829.786  | 8416.945  |
| AL160131  | 8942.425  | 6601.767 | NM_000159 | 41691.777 | 27878.576 | NM_004978 | 552.435   | 420.582   |
| AF086045  | 3598.689  | 2481.822 | NM_014638 | 1426.516  | 1073.413  | NM_000705 | 453.431   | 658.573   |
| AK027028  | 1516.287  | 1340.253 | AF099740  | 1149.066  | 975.519   | NM_004231 | 54888.652 | 49943.199 |
| AK026916  | 4554.38   | 3672.88  | NM_006117 | 15987.107 | 11068.278 | NM_016577 | 753.094   | 736.233   |
| AK026914  | 1129.089  | 949.515  | NM_002225 | 2300.9    | 1439.391  | AK023107  | 7652.846  | 5079.193  |
| Y13808    | 441.323   | 303.729  | NM_015415 | 17128.891 | 6631.353  | NM_006854 | 8954.518  | 6050.146  |
| Y11166    | 2215.945  | 1654.975 | NM_004897 | 2188.714  | 1266.616  | NM_004580 | 4548.094  | 2666.411  |
| AK023515  | 1323.242  | 981.554  | NM_002555 | 1149.061  | 453.755   | NM_020387 | 34144.586 | 22747.709 |
| AL137623  | 936.09    | 1306.906 | AF225418  | 1024.766  | 681.95    | NM_007246 | 1630.381  | 947.256   |
| AK026485  | 327.271   | 717.934  | NM_000309 | 1320.592  | 770.94    | AK026248  | 721.083   | 568.357   |
| NM_003546 | 2375.998  | 1907.834 | NM_004528 | 24365.498 | 45253.117 | NM_004578 | 1286.158  | 1197.458  |
| AF118077  | 2177.937  | 2214.32  | AK026381  | 8906.601  | 13138.141 | NM_000647 | 439.934   | 341.191   |
| AK025750  | 1359.798  | 1204.377 | NM_002450 | 17549.529 | 45860.805 | AB046793  | 621.043   | 553.343   |
| AK025783  | 1342.952  | 1035.866 | NM_001686 | 1344.393  | 2601.394  | NM_017604 | 1755.365  | 1144.875  |
| AF113675  | 479.158   | 485.2    | NM_014723 | 3053.371  | 3013.562  | NM_017738 | 6111.613  | 3349.259  |
| AK024514  | 638.223   | 549.889  | AB011106  | 2366.274  | 2055.09   | NM_016557 | 1127.538  | 564.883   |
| NM_020119 | 4688.698  | 4032.309 | D26362    | 3158.969  | 2988.373  | NM_000623 | 2704.282  | 1503.765  |
| AL049417  | 4065.838  | 3182.884 | NM_013452 | 1689.459  | 1552.826  | NM_006068 | 977.463   | 1427.753  |
| AK023507  | 500.684   | 449.063  | AY009402  | 1785.83   | 1487.446  | NM_002704 | 340.842   | 593.948   |
| NM_005169 | 617.765   | 468.004  | NM_018451 | 1530.564  | 1079.178  | U16752    | 353.972   | 1054.313  |
| AL109818  | 760.609   | 533.897  | NM_012443 | 646.554   | 732.259   | NM_016440 | 19008.51  | 19364.842 |
| BE698533  | 465.058   | 420.603  | NM_007009 | 522.448   | 476.929   | NM_007194 | 3242.266  | 2746.696  |
| NM_017929 | 1047.084  | 565.064  | NM_002584 | 3282.88   | 2995.743  | NM_000314 | 6216.267  | 3672.897  |
| NM_018472 | 987.155   | 978.686  | NM_013334 | 3804.49   | 2509.771  | AB002369  | 947.747   | 1325.256  |
| AJ008128  | 2924.315  | 2274.245 | AF150735  | 4087.872  | 2431.148  | S74620    | 2159.168  | 2395.785  |
| AL449243  | 11291.907 | 9804.676 | NM_018183 | 1622.039  | 1324.028  | AF305239  | 1072.252  | 828.079   |
| AK026449  | 512.718   | 350.582  | NM_012382 | 5920.587  | 10905.387 | NM_002827 | 3906.535  | 2702.552  |
| NM_014027 | 3806.386  | 3139.694 | BF038366  | 1040.85   | 1542.675  | NM_001946 | 967.795   | 992.553   |
| NM_020467 | 4105.79   | 3561.343 | NM_002452 | 25689.311 | 40688.086 | BF035425  | 13442.011 | 14118.103 |
| AF116621  | 3549.421  | 2905.004 | NM_012304 | 687.441   | 1362.396  | NM_001608 | 636.686   | 886.902   |
| AF086554  | 1341.823  | 1352.506 | AF245505  | 930.776   | 994.35    | NM_000159 | 55346.371 | 63827.766 |
| AL390136  | 4015.346  | 3496.552 | AB037776  | 674.037   | 556.432   | NM_014638 | 1435.843  | 1337.493  |
| AF086398  | 13715.242 | 9968.669 | AF196976  | 2810.958  | 2362.864  | AF099740  | 1497.688  | 1561.852  |
| AK024545  | 786.292   | 608.67   | AL050379  | 976.664   | 729.915   | NM_006117 | 18567.482 | 11588.894 |
| AK023444  | 514.065   | 579.404  | NM_003161 | 2240.15   | 1714.798  | NM_002225 | 2825.624  | 2264.873  |
| AK025953  | 1263.83   | 949.844  | NM_014496 | 554.085   | 495.976   | NM_006229 | 613.127   | 490.053   |
| NM_003180 | 1351.558  | 947.771  | NM_016215 | 18368.113 | 14570.451 | NM_015415 | 21768.043 | 10377.573 |
| AF086406  | 13659.131 | 8063.104 | AK026919  | 953.867   | 637.588   | NM_004897 | 2614.933  | 1406.729  |

|           |           |           |           |           |           |           |           |           |
|-----------|-----------|-----------|-----------|-----------|-----------|-----------|-----------|-----------|
| D17216    | 5923.849  | 4332.492  | NM_001501 | 3323.376  | 2650.254  | NM_00255E | 1676.645  | 996.445   |
| AL137581  | 2410      | 1815.549  | NM_00617E | 31161.279 | 25010.898 | AF225418  | 1356.099  | 2805.404  |
| AK024942  | 983.549   | 898.93    | AL137459  | 1947.813  | 1722.883  | NM_00030E | 1274.216  | 2682.475  |
| AJ227873  | 6232.618  | 5270.874  | AB007932  | 1984.823  | 1432.799  | NM_00452E | 15638.408 | 24524.242 |
| AK022886  | 4669.144  | 2811.327  | AF219257  | 19898.205 | 11929.711 | NM_00245E | 36483.332 | 24639.941 |
| AK024665  | 9605.064  | 5448.031  | NM_00397E | 1059.744  | 728.285   | NM_00168E | 978.699   | 2103.16   |
| AF147363  | 1407.724  | 2176.687  | NM_002561 | 3568.986  | 2060.469  | NM_01472E | 3909.345  | 5652.839  |
| AJ227880  | 1008.713  | 597.968   | NM_00610E | 16940.09  | 8454.307  | AB01110E  | 1988.736  | 1982.641  |
| AK001448  | 1211.513  | 645.602   | NM_00620E | 835.836   | 675.414   | D26362    | 2956.43   | 2035.189  |
| AL049321  | 4495.86   | 5225.871  | NM_00080E | 904.65    | 1184.576  | NM_01345E | 1730.082  | 2290.15   |
| CY3Cy5    | 2422.995  | 215.754   | NM_00130E | 1376.35   | 2385.765  | AY00940E  | 2412.798  | 3514.093  |
| W74254    | 18469.748 | 14666.967 | M17783    | 7840.587  | 14215.493 | NM_01845E | 1855.148  | 1214.186  |
| M58603    | 7294.095  | 4753.367  | NM_00317E | 1535.92   | 2495.85   | NM_01244E | 758.174   | 1337.133  |
| AB003334  | 7210.663  | 5867.075  | NM_012437 | 10073.119 | 15711.906 | NM_00700E | 539.814   | 786.545   |
| AW276315  | 342.69    | 668.827   | AF090944  | 636.679   | 497.079   | NM_00258E | 3402.063  | 4307.398  |
| AA490737  | 577.416   | 685.64    | NM_002607 | 1083.299  | 706.115   | NM_01333E | 4854.876  | 4922.374  |
| AI878886  | 18064.594 | 13255.132 | AF116626  | 2720.317  | 2915.077  | AF150735  | 6566.224  | 11920.571 |
| BG697179  | 9103.538  | 6757.044  | NM_00176E | 19272.461 | 17542.605 | NM_01818E | 1282.606  | 1867.83   |
| NM_00213E | 43875.133 | 32628.703 | NM_002527 | 727.623   | 592.043   | NM_01238E | 3105.034  | 4626.575  |
| BM012504  | 1931.228  | 1840.539  | NM_00589E | 2474.783  | 2235.621  | NM_01230E | 806.272   | 1632.94   |
| AA664145  | 1484.304  | 1394.904  | NM_00706E | 30000.461 | 22341.85  | AF24550E  | 1164.754  | 2096.567  |
| X72308    | 3771.885  | 3034.534  | AF149785  | 3179.075  | 2707.971  | AB03777E  | 862.26    | 1078.54   |
| R48168    | 10673.764 | 6779.725  | NM_01206E | 8535.785  | 5850.892  | AF19697E  | 4770.525  | 5831.452  |
| NM_00394E | 1964.698  | 1661.01   | NM_00406E | 6922.833  | 5829.805  | AL05037E  | 1143.173  | 1513.884  |
| SR5       | 4350.17   | 4020.374  | NM_00125E | 7009.141  | 4562.284  | NM_00316E | 2418.204  | 2721.298  |
| SR7       | 4513.076  | 29422.17  | NM_01470E | 2973.466  | 2379.192  | NM_01449E | 710.024   | 821.887   |
| SR9       | 18642.404 | 2995.452  | NM_02020E | 601.959   | 335.56    | NM_01621E | 23212.68  | 29857.734 |
| CY3Cy5    | 2358.957  | 166.969   | NM_001227 | 3785.573  | 4616.26   | AK026919  | 1113.379  | 1870.446  |
| NM_00041E | 603.349   | 649.252   | NM_00119E | 3533.727  | 3864.234  | NM_00150E | 6405.916  | 8417.028  |
| NM_00059E | 780.355   | 579.07    | U15174    | 501.313   | 951.137   | NM_00617E | 44043.805 | 50709.199 |
| NM_00201E | 2123.93   | 2607.042  | NM_01434E | 1212.11   | 2719.16   | AL137459  | 2419.06   | 2895.903  |
| NM_00079E | 2459.53   | 3868.276  | AB040917  | 770.771   | 1781.524  | AB03781E  | 438.816   | 571.529   |
| NM_017767 | 2756.355  | 2647.138  | AA203539  | 483.081   | 817.534   | AB007932  | 1798.944  | 2388.787  |
| AK024848  | 5247.212  | 4416.776  | AK02178E  | 1118.729  | 1794.57   | AF219257  | 33418.813 | 48178.02  |
| NM_00485E | 1634.484  | 1474.475  | NM_00593E | 905.4     | 797.072   | NM_00397E | 1419.903  | 1858.939  |
| NM_00054E | 1452.704  | 891.394   | NM_00427E | 8425.556  | 5622.958  | NM_00256E | 6305.314  | 6442.447  |
| U06699    | 1731.138  | 1341.615  | NM_00190E | 1860.104  | 1232.914  | NM_00080E | 281.262   | 538.743   |
| AJ290954  | 12135.198 | 8613.774  | NM_00028E | 7693.316  | 4305.948  | AL35993E  | 16411.83  | 24088.982 |
| NM_00278E | 870.098   | 693.854   | NM_00591E | 13178.276 | 6437.875  | NM_00130E | 639.168   | 1445.085  |
| AK02439E  | 750.861   | 927.903   | AV702690  | 1786.996  | 992.626   | M17783    | 7329.391  | 12517.407 |
| U58514    | 973.703   | 1020.396  | AL11745E  | 4092.94   | 2546.165  | NM_01859E | 12617.863 | 20503.656 |
| NM_00054E | 1709.051  | 1047.947  | NM_01223E | 2086.034  | 1093.697  | NM_00317E | 1763.273  | 3527.205  |
| NM_00464E | 671.1     | 697.939   | NM_01403E | 10466.797 | 6667.848  | NM_012437 | 13188.294 | 23002.406 |
| AV681967  | 1875.218  | 2222.524  | NM_00206E | 6164.071  | 6688.709  | AF090944  | 909.935   | 1057.701  |
| NM_01825E | 1722.953  | 1947.017  | AF16997E  | 3959.426  | 5041.617  | NM_002607 | 884.8     | 807.959   |
| NM_01655E | 4655.815  | 4317.35   | NM_00573E | 3245.747  | 4726.381  | AF11671E  | 473.963   | 538.569   |
| NM_00570E | 1167.84   | 1033.407  | NM_01813E | 4153.869  | 4312.44   | AF116626  | 2900.634  | 3391.879  |
| NM_00681E | 22458.715 | 20958.869 | NM_01961E | 5867.884  | 8470.354  | NM_00176E | 24472.963 | 25774.156 |
| NM_01474E | 2270.981  | 2105.615  | AF18341E  | 2136.103  | 3619.6    | NM_002527 | 997.171   | 1429.104  |
| AB03299E  | 4571.28   | 3290.644  | BF24459E  | 1192.441  | 1705.938  | NM_00589E | 2536.989  | 2894.404  |
| NM_00085E | 3987.421  | 2874.557  | NM_00588E | 9490.497  | 14792.313 | AF149785  | 4295.258  | 6094.377  |
| AL11742E  | 4595.467  | 3342.064  | U63785    | 1274.91   | 1917.545  | NM_01206E | 8183.391  | 11489.889 |
| NM_00208E | 1513.599  | 2343.221  | NM_00596E | 1951.422  | 3194.366  | NM_00406E | 9554.971  | 10101.256 |

|           |           |           |           |           |           |           |           |           |
|-----------|-----------|-----------|-----------|-----------|-----------|-----------|-----------|-----------|
| NM_00475C | 1238.66   | 1174.994  | NM_003156 | 3143.566  | 5967.911  | NM_001256 | 7359.484  | 8953.356  |
| NM_00729E | 2637.675  | 2576.589  | NM_00310E | 983.239   | 723.769   | NM_014704 | 5030.166  | 6355.82   |
| NM_003651 | 15177.769 | 13101.458 | NM_01331C | 4818.315  | 2345.922  | NM_02020E | 516.189   | 818.685   |
| NM_003262 | 1395.49   | 1371.381  | BC004958  | 2984.867  | 1452.448  | NM_001191 | 3436.084  | 6116.907  |
| AK022832  | 2373.986  | 2458.996  | NM_005762 | 10568.371 | 7012.954  | U15174    | 507.072   | 970.569   |
| AB020664  | 2921.615  | 2193.838  | NM_006473 | 1493.333  | 837.256   | NM_013342 | 3316.145  | 6857.955  |
| NM_00664C | 20858.695 | 17396.787 | NM_014643 | 826.559   | 275.009   | AB040917  | 742.776   | 901.89    |
| NM_000343 | 913.815   | 718.988   | NM_005653 | 1221.439  | 607.279   | AL110261  | 7267.947  | 16119.62  |
| NM_019112 | 2082.279  | 1876.217  | NM_014553 | 1027.195  | 507.787   | AA203539  | 462.751   | 1091.578  |
| NM_01233E | 12453.365 | 9948.459  | NM_00344C | 1104.914  | 633.399   | AK021786  | 1024.183  | 2287.965  |
| NM_02024E | 1257.427  | 1515.031  | NM_00469E | 6246.01   | 3223.941  | NM_005932 | 1003.598  | 818.699   |
| NM_00303E | 2145.651  | 2359.663  | NM_004516 | 14565.268 | 16330.563 | NM_00427E | 6391.672  | 3305.368  |
| NM_01815E | 3725.196  | 3592.874  | NM_006513 | 2130.739  | 2405.603  | NM_004851 | 323.815   | 276.753   |
| NM_004731 | 1075.476  | 1076.057  | NM_00248E | 684.026   | 1108.889  | NM_00190E | 2096.291  | 2481.564  |
| AB023139  | 2820.483  | 2977.079  | NM_00629E | 6176.055  | 6243.509  | NM_00028E | 8439.723  | 9948.13   |
| NM_01788E | 4693.955  | 4514.318  | NM_00154C | 3485.887  | 5558.096  | AV702690  | 1902.648  | 1979.134  |
| D80004    | 876.021   | 1218.734  | NM_012111 | 15763.688 | 23466.563 | AL117452  | 4760.219  | 6213.614  |
| NM_01607C | 1750.975  | 1552.825  | NM_00447C | 14508.839 | 22169.086 | NM_01223C | 2351.828  | 2953.416  |
| NM_01639C | 1010.523  | 1065.034  | NM_00141E | 16495.715 | 24916.285 | NM_01403E | 9854.341  | 11886.703 |
| NM_016101 | 4040.693  | 3776.627  | NM_00375E | 42713.832 | 55094.559 | NM_002061 | 5046.952  | 6205.328  |
| NM_00585E | 4490.614  | 3442.028  | AL049680  | 3485.29   | 5783.923  | AF169974  | 3487.019  | 3900.807  |
| NM_01462E | 5965.59   | 6102.301  | AL133660  | 566.107   | 1007.929  | NM_004522 | 1221.972  | 1141.721  |
| AK025630  | 1674.043  | 1676.581  | AK001595  | 1988.838  | 2172.523  | NM_005733 | 2829.801  | 4642.029  |
| AL365404  | 8221.26   | 7872.809  | NM_01801E | 2624.69   | 3175.504  | NM_01813E | 3415.443  | 6587.071  |
| AK022907  | 2353.681  | 2554.558  | NM_00371E | 8331.081  | 11375.607 | NM_01961E | 6564.392  | 10218.774 |
| NM_014793 | 1137.895  | 1192.625  | M94065    | 1909.252  | 1774.776  | AF183411  | 1336.697  | 1881.536  |
| NM_00424E | 529.094   | 564.989   | BF036874  | 1800.044  | 1526.155  | BF244591  | 1036.969  | 1718.781  |
| NM_005511 | 2635.553  | 3040.45   | BE888487  | 522.18    | 407.321   | U63785    | 1085.725  | 3508.224  |
| NM_01469E | 2227.239  | 2401.534  | AF182419  | 2660.217  | 2999.698  | NM_00596E | 1321.248  | 3086.401  |
| NM_01847E | 4821.33   | 5089.926  | NM_004293 | 558.131   | 477.078   | NM_00315E | 3855.452  | 7393.569  |
| X52005    | 9827.173  | 15530.497 | NM_00701E | 3976.869  | 4721.216  | NM_00310E | 919.903   | 932.945   |
| AK024396  | 883.391   | 1035.684  | NM_002703 | 9580.739  | 10605.062 | NM_01331C | 5362.38   | 3696.419  |
| U58514    | 1245.206  | 1223.119  | NM_00537E | 16261.521 | 18549.686 | BC004958  | 2639.588  | 1462.721  |
| AB003334  | 8585.572  | 6701.637  | NM_00598E | 3361.091  | 4278.5    | NM_005762 | 7310.679  | 3596.756  |
| AW276315  | 637.092   | 611.566   | AK023759  | 1337.522  | 1274.082  | NM_006473 | 865.011   | 537.468   |
| AA490737  | 785.991   | 721.353   | L25270    | 7036.605  | 7421.221  | NM_014643 | 621.212   | 313.311   |
| AI878886  | 18886.529 | 16882.563 | AB033111  | 1336.72   | 2127.851  | NM_005653 | 1062.777  | 778.586   |
| BG697179  | 9092.93   | 7523.58   | AJ276316  | 1829.143  | 2673.412  | NM_014553 | 2021.961  | 2410.831  |
| NM_00213E | 51561.816 | 42096.613 | AF229246  | 4459.789  | 5813.134  | NM_00344C | 1369.729  | 1492.732  |
| BM012504  | 2082.905  | 1884.162  | S64709    | 4580.547  | 8285.366  | NM_00469E | 7214.043  | 7109.875  |
| AA664145  | 1782.682  | 1284.55   | NM_01848E | 678.804   | 1494.521  | U41387    | 10600.688 | 7300.669  |
| X72308    | 4199.53   | 3109.542  | X56465    | 1655.983  | 2787.48   | NM_00451E | 8836.638  | 7595.171  |
| AB040954  | 3470.635  | 3914.906  | NM_003071 | 10665.559 | 18789.645 | NM_006513 | 1219.33   | 1230.001  |
| NM_002081 | 1019.099  | 1009.631  | AK021494  | 2170.273  | 1866.918  | NM_00368E | 20552.418 | 19316.348 |
| NM_002084 | 1487.474  | 1462.23   | AK022117  | 694.294   | 877.848   | NM_00248E | 373.175   | 759.291   |
| D16892    | 20973.045 | 21393.563 | AF075023  | 1247.503  | 1438.9    | NM_00629E | 5721.391  | 9052.557  |
| NM_00475C | 1014.667  | 1335.37   | AL360160  | 26205.115 | 30917.676 | NM_00154C | 2737.283  | 3751.227  |
| NM_00729E | 2932.957  | 2682.725  | AK001092  | 29288.082 | 29725.84  | NM_012111 | 14900.319 | 23473.479 |
| NM_00041E | 645.424   | 1014.267  | AK023427  | 469.695   | 691.608   | NM_00447C | 12308.192 | 16636.238 |
| NM_000591 | 1189.429  | 1152.158  | NM_014144 | 1356.489  | 1785.091  | NM_00375E | 37947.867 | 60872.633 |
| NM_00201E | 1958.489  | 1899.732  | AF147345  | 1331.957  | 1302.003  | AL049680  | 2898.887  | 5445.066  |
| NM_017767 | 3040.511  | 2968.706  | AF147373  | 2635.111  | 3062.346  | AL133660  | 380.691   | 1101.789  |
| AK024848  | 5794.083  | 4772.162  | AK026209  | 934.232   | 999.593   | AK001595  | 1891.022  | 1761.266  |

|           |           |           |           |          |           |           |           |           |
|-----------|-----------|-----------|-----------|----------|-----------|-----------|-----------|-----------|
| NM_000543 | 1580.272  | 1270.163  | AF086253  | 1997.558 | 2827.222  | NM_018015 | 2665.192  | 1779.059  |
| AJ290954  | 14014.551 | 12231.139 | AF086434  | 1187.134 | 1386.35   | NM_003715 | 4770.934  | 2897.265  |
| AK025451  | 2655.634  | 2472.522  | AK022063  | 2505.952 | 2364.194  | M94065    | 1248.052  | 858.147   |
| NM_002783 | 865.8     | 1169.949  | AF086345  | 1867.316 | 1636.457  | BF036874  | 1135.667  | 833.731   |
| NM_000084 | 1456.94   | 1584.724  | AF086464  | 921.92   | 1603.892  | AF182419  | 2546.897  | 1554.055  |
| NM_016354 | 1409.441  | 2648.313  | AL049278  | 3557.735 | 7080.138  | NM_007016 | 3108.509  | 2629.176  |
| NM_003038 | 2334.526  | 3659.713  | AL117519  | 833.386  | 1877.279  | NM_002703 | 6225.64   | 5445.528  |
| NM_018155 | 3718.016  | 3800.025  | AK055338  | 215.84   | 757.162   | NM_005375 | 11154.886 | 7599.528  |
| NM_004731 | 1298.235  | 1466.974  | NM_013318 | 481.693  | 1158.906  | NM_005985 | 3009.977  | 1877.518  |
| NM_000544 | 2450.142  | 1782.024  | AK025063  | 412.01   | 699.153   | NM_015906 | 4961.527  | 4448.909  |
| NM_001044 | 753.335   | 2463.585  | NM_005060 | 1539.117 | 2416.517  | AK023759  | 1373.698  | 2223.81   |
| NM_004644 | 577.598   | 596.721   | AF085935  | 1095.405 | 1401.026  | L25270    | 27075.895 | 45776.191 |
| AV681967  | 2086.688  | 1637.759  | AL035369  | 3528.947 | 5120.82   | AB033111  | 1899.64   | 2977.165  |
| NM_018250 | 1963.258  | 1593.099  | AF075097  | 2372.979 | 4538.874  | AJ276316  | 1592.426  | 3432.619  |
| NM_016553 | 5499.969  | 5153.697  | AK022801  | 2170.494 | 3440.059  | AF229246  | 10276.177 | 20718.758 |
| AB023136  | 603.089   | 605.009   | AL133075  | 8727.794 | 10748.251 | S64709    | 4053.952  | 7311.163  |
| NM_003795 | 23095.686 | 20114.699 | AL137692  | 500.001  | 417.746   | NM_018488 | 670.386   | 1047.254  |
| NM_014232 | 4774.26   | 4421.127  | AL137630  | 2968.417 | 4066.527  | X56465    | 897.623   | 1216.11   |
| NM_005701 | 1963.068  | 1530.126  | AK055236  | 626.905  | 690.254   | NM_003071 | 11810.483 | 22032.254 |
| NM_006819 | 29061.645 | 33017.445 | AL137277  | 4887.991 | 5351.211  | AK021494  | 2855.135  | 2673.617  |
| NM_014744 | 2464.013  | 2194.957  | AL137447  | 1572.276 | 1635.755  | AK022117  | 320.916   | 380.106   |
| AL117423  | 5640.262  | 6944.879  | AL157467  | 1163.639 | 1284.608  | AF075023  | 1061.427  | 820.86    |
| NM_002685 | 2857.896  | 2627.678  | BC023609  | 1963.108 | 2396.25   | AL360160  | 20591.943 | 13594.902 |
| AK024504  | 2058.599  | 2197.773  | AF086395  | 8886.682 | 9319.17   | AK001092  | 30350.195 | 20579.332 |
| AF039023  | 2831.169  | 3125.56   | AF086049  | 1545.353 | 2054.241  | NM_014144 | 819.806   | 513.879   |
| NM_005511 | 3639.212  | 4153.929  | AF114263  | 1551.029 | 2945.329  | AF147345  | 676.27    | 535.552   |
| NM_014698 | 2027.586  | 2728.822  | AF086073  | 77.499   | 1099.783  | AF147373  | 2710.923  | 2017.083  |
| NM_018475 | 4860.203  | 5348.407  | AK026142  | 2152.896 | 3822.559  | AF086253  | 1541.853  | 1296.772  |
| NM_003262 | 1991.53   | 1760.777  | AF161369  | 2370.613 | 3332.045  | AF086303  | 510.316   | 327.871   |
| NM_020125 | 925.64    | 1313.219  | AK027176  | 8537.009 | 11599.559 | AF086434  | 961.777   | 674.422   |
| AK022832  | 2350.45   | 2313.448  | AF073328  | 791.128  | 987.459   | AK022063  | 4360.625  | 7781.819  |
| NM_014641 | 2271.042  | 1954.615  | AF129266  | 398.887  | 712.018   | AF086345  | 4199.584  | 8955.295  |
| NM_004462 | 13672.254 | 8650.797  | AF211968  | 497.338  | 792.206   | AF086464  | 1051.529  | 1928.455  |
| AB020664  | 2846.26   | 2399.962  | Y12019    | 3124.862 | 3886.712  | AL049278  | 2916.27   | 4759.14   |
| NM_006640 | 21397.082 | 18418.582 | AF232217  | 562.587  | 591.564   | AL117519  | 596.846   | 1246.532  |
| NM_000343 | 529.878   | 674.155   | AL137326  | 489.6    | 715.61    | AK055338  | 378.648   | 599.769   |
| NM_019112 | 1903.379  | 2157.901  | AK021898  | 1763.585 | 2261.253  | NM_013318 | 414.994   | 1296.334  |
| NM_012336 | 14006.628 | 13586.156 | AK022024  | 2277.328 | 3679.127  | NM_005060 | 1199.476  | 963.761   |
| NM_020246 | 1371.178  | 1585.693  | AK022163  | 702.946  | 783.3     | AF085935  | 563.42    | 478.284   |
| NM_003942 | 2049.478  | 2608.563  | AK022301  | 2007.781 | 2824.883  | AL035369  | 2462.254  | 1565.309  |
| AB040954  | 2898.347  | 2462.511  | AK021948  | 2110.835 | 2820.893  | AF075097  | 2841.357  | 1858.063  |
| NM_002081 | 1302.74   | 1282.573  | AK022054  | 1001.289 | 1072.677  | AK022801  | 1246.232  | 851.098   |
| AB023139  | 3030.703  | 3164.074  | AK021642  | 970.567  | 1048.621  | AL133075  | 7976.406  | 5202.964  |
| NM_017885 | 4516.739  | 3485.511  | AK022455  | 910.167  | 956.602   | AL137630  | 2249.938  | 1421.356  |
| D80004    | 1389.475  | 1234.916  | AK021987  | 448.609  | 762.567   | AK055236  | 344.346   | 323.04    |
| NM_000946 | 6130.918  | 5713.354  | AK026905  | 3947.332 | 6789.501  | AL137277  | 8778.356  | 6806.952  |
| NM_016070 | 1555.864  | 1574.709  | NM_006638 | 5047.063 | 6586.954  | AL137447  | 880.228   | 610.156   |
| NM_016390 | 1293.72   | 1106.903  | X14675    | 2016.67  | 2104.097  | AL157467  | 724.687   | 484.038   |
| NM_016101 | 3936.907  | 3038.565  | AF071170  | 854.374  | 910.739   | BC023609  | 1461.602  | 1059.004  |
| NM_005859 | 5059.932  | 4272.534  | AF161364  | 849.051  | 671.72    | AK025100  | 407.2     | 242.832   |
| NM_020313 | 470.366   | 561.441   | AF075075  | 1224.525 | 1607.121  | AF086395  | 9289.829  | 15250.372 |
| NM_014628 | 6336.733  | 6746.199  | NM_018304 | 9686.616 | 10859.174 | AF086049  | 2118.855  | 4677.708  |
| AK025630  | 1587.951  | 1473.652  | AK023264  | 751.991  | 1292.127  | AF114263  | 1417.313  | 3071.88   |

|           |           |           |           |           |           |           |           |           |
|-----------|-----------|-----------|-----------|-----------|-----------|-----------|-----------|-----------|
| AL365404  | 8564.461  | 8034.809  | AK024457  | 1833.317  | 2501      | AK026142  | 3079.529  | 5887.351  |
| AK022907  | 2893.589  | 2623.553  | AK026894  | 1150.918  | 1983.18   | AF161369  | 4078.963  | 3625.041  |
| NM_014793 | 1297.333  | 1358.005  | AK026372  | 856.503   | 1278.297  | AK027176  | 7823.389  | 6897.554  |
| NM_004245 | 655.759   | 810.385   | AL109684  | 1193.945  | 1258.898  | AF073328  | 466.926   | 358.352   |
| NM_000543 | 1832.776  | 1738.207  | NM_014186 | 9387.894  | 11214.879 | Y12019    | 1971.834  | 1374.383  |
| U06699    | 1749.099  | 1867.033  | AF056442  | 1628.046  | 1321.755  | AF232217  | 167.633   | 163.112   |
| AJ290954  | 12225.923 | 9590.365  | AK024752  | 43887.867 | 42845.422 | AK021898  | 1446.432  | 1018.792  |
| AK025451  | 1902.413  | 1815.902  | BG117194  | 2531.804  | 3179.216  | AK022024  | 2750.393  | 1442.009  |
| NM_002783 | 1095.933  | 1001.039  | AF131859  | 6573.899  | 8434.993  | AK022301  | 1405.969  | 1206.821  |
| X52005    | 10237.847 | 13358.363 | AK023632  | 510.658   | 814.767   | AK021948  | 1498.013  | 1270.765  |
| AK024396  | 720.208   | 844.835   | AF086118  | 5693.573  | 7117.273  | AK022054  | 758.672   | 995.339   |
| U58514    | 1096.686  | 943.95    | NM_014138 | 2453.729  | 3502.254  | AK022341  | 714.422   | 534.615   |
| W74254    | 17749.973 | 14401.34  | AK025044  | 1119.531  | 1406.337  | AK021642  | 4368.667  | 3989.398  |
| M58603    | 7153.177  | 4659.083  | AK023690  | 823.379   | 1121.461  | AK022455  | 884.403   | 1560.021  |
| AB003334  | 8541.752  | 6660.552  | U48697    | 209.195   | 751.329   | AK021987  | 1415.854  | 3010.065  |
| AW276315  | 626.361   | 555.159   | AF230317  | 693.457   | 643.884   | AK026905  | 4611.277  | 9293.492  |
| AA490737  | 789.834   | 574.374   | AK023806  | 2272.924  | 2293.13   | AK023449  | 605.581   | 1521.799  |
| AI878886  | 18702.715 | 14415.926 | AF088068  | 587.848   | 528.17    | NM_000134 | 458.79    | 1445.958  |
| BG697179  | 8999.292  | 8448.557  | AK026094  | 3501.409  | 4880.905  | NM_006638 | 3124.597  | 3073.874  |
| NM_002136 | 51866.898 | 41766.535 | AF161344  | 2936.344  | 3301.722  | X14675    | 1048.648  | 1021.49   |
| BM012504  | 2134.155  | 1759.762  | AF022793  | 376.278   | 585.978   | AF071170  | 564.961   | 758.057   |
| AA664145  | 1614.601  | 1732.015  | AF086027  | 1735.994  | 3031.816  | AF075075  | 936.772   | 593.239   |
| X72308    | 3944.589  | 3646.385  | NM_001207 | 60859.047 | 61872.66  | NM_018304 | 7025.176  | 4817.587  |
| R48168    | 12915.58  | 13198.123 | AF075045  | 195.685   | 872.729   | AK024457  | 5911.105  | 8883.972  |
| AB032993  | 5501.498  | 5997.985  | AK022154  | 476.247   | 384.568   | AK026894  | 1574.698  | 2602.673  |
| NM_000854 | 4365.967  | 3456.268  | AK022199  | 2444.989  | 3217.876  | AK026372  | 1160.328  | 2144.735  |
| AL117423  | 3064.377  | 2566.594  | NM_006211 | 788.592   | 936.803   | AL109684  | 672.549   | 776.387   |
| NM_002084 | 1809.586  | 1452.203  | NM_003524 | 9028.455  | 9350.658  | NM_014186 | 6654.745  | 7665.855  |
| D16892    | 18280.816 | 13364.607 | AK021438  | 909.393   | 1138.885  | AF056442  | 1071.489  | 1264.842  |
| NM_004750 | 977.777   | 1123.26   | NM_005913 | 712.881   | 914.238   | AK024752  | 31463.314 | 21525.5   |
| NM_007295 | 2522.885  | 2354.018  | S39891    | 1941.256  | 2677.535  | BG117194  | 1601.217  | 1472.556  |
| NM_003651 | 14332.392 | 11279.429 | R17536    | 591.833   | 793.249   | AK024181  | 720.077   | 1281.047  |
| NM_000418 | 546.957   | 502.262   | AK021624  | 872.058   | 1286.884  | AF131859  | 3730.789  | 2402.015  |
| NM_000591 | 1151.971  | 994.971   | AF278605  | 14334.249 | 21191.18  | AF086118  | 3926.169  | 2796.543  |
| NM_002019 | 1967.445  | 1833.005  | NM_006497 | 12722.646 | 14931.892 | NM_014138 | 1392.652  | 1058.679  |
| NM_017767 | 3044.094  | 3265.337  | AK022329  | 735.808   | 555.193   | AK025044  | 1612.026  | 1137.614  |
| AK024848  | 5197.493  | 4628.696  | AL133599  | 1716.291  | 1909.553  | AK023690  | 723.959   | 746.73    |
| NM_004852 | 1758.505  | 1959.328  | AK022380  | 579.555   | 959.282   | AK023806  | 1683.715  | 1644.182  |
| NM_003633 | 436.747   | 573.317   | NM_016472 | 3849.794  | 3784.011  | Y16696    | 19874.51  | 13229.059 |
| NM_000869 | 698.535   | 504.139   | AF086064  | 748.094   | 883.902   | AK026094  | 2824.717  | 1987.036  |
| NM_000343 | 920.614   | 542.493   | AK023042  | 4704.244  | 6134.642  | AF161344  | 6053.292  | 4553.511  |
| NM_019112 | 2128.288  | 1526.13   | NM_016550 | 6810.919  | 7773.109  | AF086027  | 1389.232  | 770.696   |
| NM_012336 | 9446.812  | 7084.983  | AK024813  | 8275.636  | 12376.813 | NM_001207 | 65810.633 | 46188.828 |
| NM_020161 | 687.438   | 590.06    | AJ227909  | 7593.885  | 10252.621 | AK023655  | 776.509   | 389.579   |
| NM_020246 | 1202.359  | 971.691   | AK021880  | 924.455   | 1562.888  | AF075045  | 1068.286  | 485.417   |
| NM_000084 | 1703.62   | 1395.421  | AK024107  | 576.225   | 1359.195  | AK022199  | 1567.005  | 1465.621  |
| NM_016354 | 1444.386  | 1255.855  | CY3Cy5    | 1716.328  | 164.702   | NM_003524 | 5635.174  | 3229.186  |
| NM_003038 | 2643.376  | 2137.438  | BG698522  | 2356.853  | 3165.73   | AK021438  | 423.974   | 347.351   |
| NM_018155 | 3474.833  | 2766.642  | AA152346  | 653.289   | 681.93    | NM_005913 | 493.858   | 420.924   |
| NM_004731 | 1095.73   | 780.405   | L15189    | 1288.661  | 1318.051  | S39891    | 1193.312  | 1007.792  |
| NM_000544 | 2277.354  | 1585.76   | AB023420  | 8148.539  | 5964.754  | AK021624  | 715.221   | 777.755   |
| NM_004644 | 701.167   | 357.998   | BI822179  | 703.503   | 427.281   | AF278605  | 10635.274 | 6582.794  |
| AV681967  | 2042.833  | 1599.408  | AF022912  | 4317.906  | 2229.597  | NM_006497 | 14391.387 | 9974.268  |

|           |           |           |           |           |           |           |           |           |
|-----------|-----------|-----------|-----------|-----------|-----------|-----------|-----------|-----------|
| NM_01825C | 1943.886  | 1940.274  | AA477428  | 15084.902 | 8278.578  | AL133599  | 1194.732  | 1099.765  |
| NM_016553 | 6196.043  | 5495.974  | AA156342  | 781.871   | 422.362   | NM_016472 | 2189.776  | 1425.487  |
| AB023136  | 640.723   | 703.544   | R45594    | 10987.459 | 4564.229  | AF086064  | 615.023   | 716.389   |
| NM_003795 | 25756.539 | 23210.943 | AA278152  | 10147.67  | 5518.652  | AK023042  | 3588.299  | 3104.935  |
| NM_014232 | 5124.5    | 4553.849  | H75530    | 1622.505  | 1182.683  | AK026429  | 686.968   | 631.553   |
| NM_005701 | 1725.426  | 1538.477  | NM_004176 | 2792.526  | 3401.238  | NM_01655C | 5849.131  | 4290.236  |
| NM_006819 | 26246.059 | 23630.258 | SR9       | 12971.149 | 2222.962  | AK024813  | 8391.335  | 5389.486  |
| NM_014744 | 2980.894  | 3323.469  | CY3Cy5    | 2128.501  | 246.156   | AJ227909  | 13984.037 | 11140.265 |
| AL365404  | 12212.251 | 15951.494 | NM_001315 | 5135.421  | 6819.875  | AK021880  | 690.674   | 587.968   |
| AK022907  | 3994.084  | 4927.78   | AF286095  | 1597.373  | 2062.957  | AK024107  | 391.855   | 213.734   |
| NM_014793 | 1567.08   | 1543.229  | NM_000878 | 739.764   | 866.865   | CY3Cy5    | 1676.523  | 111.593   |
| NM_004245 | 614.222   | 596.164   | S66407    | 799.498   | 1356.818  | BG698522  | 4233.68   | 7370.46   |
| NM_003241 | 627.765   | 829.008   | NM_004258 | 18051.584 | 10721.554 | AA152346  | 537.033   | 394.018   |
| NM_002685 | 3272.163  | 3258.814  | NM_001981 | 2731.688  | 1745.141  | L15189    | 1020.018  | 518.977   |
| AK024504  | 2417.829  | 2104.996  | NM_014654 | 424.216   | 225.826   | AB023420  | 8194.897  | 2359.164  |
| AF039023  | 3271.13   | 3473.352  | NM_001585 | 7788.98   | 3141.132  | BI822179  | 784.441   | 537.829   |
| NM_005511 | 3421.988  | 3218.705  | AK026108  | 1679.693  | 931.875   | AF022912  | 5072.042  | 3446.207  |
| NM_014698 | 2157.08   | 1210.363  | NM_006379 | 964.82    | 576.583   | AA477428  | 21050.359 | 17659.57  |
| NM_018475 | 4316.619  | 3065.296  | BF571428  | 851.388   | 478.647   | AA156342  | 1175.928  | 931.843   |
| NM_003262 | 2110.071  | 1425.179  | AB037723  | 963.233   | 415.849   | R45594    | 14722.541 | 11889.604 |
| NM_020125 | 416.563   | 414.096   | NM_006246 | 4206.321  | 2240.628  | H46425    | 796.14    | 567.616   |
| AK022832  | 2398.352  | 1334.464  | NM_016929 | 2844.156  | 2935.074  | AI355949  | 431.657   | 531.565   |
| NM_014641 | 2536.709  | 1930.325  | NM_013943 | 468.872   | 514.635   | AA278152  | 13723.506 | 12740.945 |
| NM_004462 | 15051.776 | 10177.024 | NM_001639 | 7912.795  | 9291.72   | H75530    | 1853.878  | 1945.585  |
| AB020664  | 3409.262  | 3476.109  | H39560    | 287.344   | 408.643   | NM_004176 | 3262.036  | 3688.094  |
| NM_00664C | 23404.576 | 21276.529 | AF182404  | 1891.999  | 2530.628  | CY3Cy5    | 3902.683  | 294.985   |
| NM_000857 | 2162.441  | 2196.397  | NM_006555 | 4046.705  | 4098.635  | NM_001315 | 4039.067  | 2349.135  |
| L20688    | 60759.738 | 54666.27  | NM_014521 | 202.759   | 655.086   | AF286095  | 1574.421  | 1490.463  |
| X69111    | 15090.862 | 13816.709 | NM_002445 | 598.491   | 1007.026  | NM_000878 | 810.53    | 2204.276  |
| AF252283  | 654.278   | 632.495   | NM_017809 | 274.057   | 523.726   | S66407    | 924.652   | 710.048   |
| AB037799  | 2314.491  | 3141.944  | AK023202  | 2657.201  | 2960.851  | NM_004258 | 39882.352 | 17861.707 |
| AB007950  | 3573.504  | 4496.317  | D63877    | 2815.832  | 2882.928  | NM_001981 | 3100.848  | 2854.915  |
| AL133111  | 589.798   | 1370.252  | AF131760  | 1072.594  | 833.789   | NM_014654 | 459.976   | 527.487   |
| AK025593  | 3310.611  | 5703.776  | NM_018698 | 1056.335  | 616.635   | NM_001585 | 25526.625 | 23085.408 |
| AB018304  | 2570.432  | 4550.834  | NM_006461 | 2462.605  | 1659.664  | AK026108  | 3668.991  | 3596.473  |
| NM_007061 | 4871.765  | 7001.09   | NM_018201 | 1628.602  | 666.918   | NM_006379 | 1551.401  | 1397.878  |
| AB040954  | 3350.301  | 2768.201  | NM_003764 | 2470.945  | 1134.221  | BF571428  | 2497.361  | 1959.274  |
| AB023139  | 3239.108  | 2277.585  | NM_006793 | 16290.121 | 13758.863 | AB037723  | 2747.505  | 2554.02   |
| NM_017885 | 4439.965  | 2412.411  | NM_001538 | 1314.445  | 1020.116  | NM_006246 | 5325.136  | 4779.637  |
| D80004    | 979.034   | 759.961   | X97261    | 10529.619 | 33028.621 | NM_004316 | 397.198   | 502.273   |
| NM_000946 | 7440.023  | 9210.753  | NM_001468 | 1503.118  | 1891.391  | NM_016929 | 5003.886  | 4495.155  |
| NM_01607C | 2046.531  | 1008.403  | D87666    | 57141.488 | 56041.762 | NM_001639 | 9071.146  | 8296.19   |
| NM_01639C | 1457.85   | 1046.467  | AF149304  | 533.38    | 906.495   | H39560    | 1459.839  | 10962.175 |
| NM_016101 | 4912.78   | 2974.242  | NM_012095 | 6553.799  | 11301.771 | AF182404  | 1571.492  | 640.579   |
| NM_005859 | 6702.415  | 5074.027  | NM_016438 | 298.696   | 593.771   | NM_006555 | 3961.43   | 2442.711  |
| NM_014628 | 7997.466  | 7983.238  | X73079    | 16543.047 | 23503.422 | NM_014521 | 625.968   | 839.765   |
| AK025630  | 1743.68   | 1795.598  | NM_019091 | 1000.24   | 1064.292  | NM_002445 | 617.237   | 303.812   |
| NM_005761 | 3225.238  | 3883.596  | AF264781  | 750.438   | 787.654   | NM_017809 | 383.418   | 285.85    |
| NM_014718 | 3038.516  | 3565.254  | AK024215  | 2517.03   | 1086.521  | AK023202  | 2509.904  | 761.513   |
| AB028953  | 558.462   | 1150.785  | AB044661  | 2945.934  | 1220.427  | D63877    | 3008.644  | 1520.424  |
| NM_000632 | 994.904   | 1605.501  | NM_016124 | 2296.981  | 1152.117  | AF131760  | 904.372   | 1016.555  |
| AB002298  | 818.748   | 1299.213  | U53530    | 1492.691  | 1360.232  | NM_018698 | 1174.454  | 1205.073  |
| AK024488  | 10064.337 | 15511.562 | NM_006598 | 2728.435  | 2602.56   | NM_006461 | 3686.66   | 3221.962  |

|           |           |           |           |           |           |           |           |           |
|-----------|-----------|-----------|-----------|-----------|-----------|-----------|-----------|-----------|
| AK023249  | 59630.508 | 60311.574 | NM_015948 | 1325.242  | 1355.051  | NM_018201 | 2160.025  | 1856.746  |
| NM_000743 | 2515.854  | 2583.225  | NM_003054 | 2846.563  | 2369.948  | NM_014438 | 537.197   | 562.246   |
| NM_007218 | 2510.704  | 1994.969  | NM_003042 | 713.645   | 1907.137  | NM_014880 | 368.207   | 355.716   |
| Z25436    | 1807.647  | 1700.771  | NM_002219 | 8052.344  | 8286.127  | NM_003764 | 3900.216  | 3282.42   |
| NM_005275 | 6320.762  | 4827.386  | NM_002826 | 2980.046  | 4564.437  | NM_006793 | 19283.779 | 17158.902 |
| NM_003844 | 1879.057  | 1761.974  | AF159141  | 2636.914  | 2460.795  | NM_001538 | 2267.071  | 2813.854  |
| NM_002005 | 12001.996 | 12198.638 | NM_016458 | 7982.376  | 7555.931  | X97261    | 37647.043 | 11398.646 |
| NM_012324 | 2592.226  | 2966.803  | AK022233  | 2016.505  | 2481.777  | NM_001468 | 2076.775  | 1966.781  |
| AK000039  | 1683.029  | 1866.698  | AK026410  | 6659.095  | 4745.417  | D87666    | 54035.559 | 71438.773 |
| NM_014749 | 1148.709  | 895.318   | NM_014637 | 3081.972  | 1461.767  | AF149304  | 481.052   | 374.964   |
| NM_004489 | 4327.464  | 3463.111  | NM_013379 | 8707.571  | 3145.693  | NM_012095 | 4810.506  | 2623.975  |
| BF240063  | 319.806   | 708.498   | AF113208  | 5574.167  | 2391.918  | NM_016438 | 420.999   | 441.182   |
| BI461699  | 1598.272  | 2146.708  | NM_006153 | 3783.392  | 1742.462  | X73079    | 17412.959 | 8958.599  |
| AK090409  | 1169.767  | 1310.438  | NM_012164 | 3087.373  | 1182.792  | NM_019091 | 1116.482  | 423.014   |
| AF172264  | 4417.324  | 3558.609  | AB011156  | 486.602   | 559.149   | AF264781  | 771.998   | 347.58    |
| Y08267    | 1995.013  | 2829.681  | NM_018079 | 848.597   | 894.918   | NM_002456 | 427.291   | 349.779   |
| U80756    | 22410.506 | 26273.201 | NM_004760 | 16502.654 | 14071.355 | AK024215  | 3237.63   | 2493.771  |
| NM_018161 | 1077.198  | 1745.418  | NM_006752 | 3771.738  | 3838.704  | AB044661  | 3995.799  | 2692.644  |
| NM_005248 | 1080.766  | 1608.044  | NM_004428 | 1107.809  | 1297.333  | NM_000606 | 7037.183  | 6608.007  |
| NM_004810 | 11430.143 | 17421.578 | NM_006809 | 3273.279  | 3879.27   | NM_016124 | 3932.052  | 4111.646  |
| AL117629  | 6235.385  | 7474.081  | NM_018199 | 320.63    | 729.562   | NM_019079 | 404.002   | 322.386   |
| NM_015726 | 1880.341  | 2307.234  | NM_013943 | 542.806   | 1343.922  | U53530    | 1774.967  | 1744.551  |
| AF174604  | 1232.806  | 1834.951  | NM_001639 | 8102.712  | 8817.192  | NM_006598 | 3122.103  | 3539.868  |
| AB002379  | 1886.307  | 2931.345  | BG698522  | 1927.682  | 2087.434  | NM_015948 | 1781.366  | 2143.773  |
| AF113223  | 3530.898  | 4322.915  | AA152346  | 420.626   | 409.124   | NM_003054 | 2996.69   | 3286.932  |
| AB046851  | 4070.39   | 5836.435  | L15189    | 1096.292  | 903.444   | NM_004790 | 2011.901  | 3680.118  |
| NM_005745 | 28674.369 | 28509.416 | AB023420  | 8062.757  | 5829.149  | NM_002826 | 2400.139  | 968.511   |
| NM_019858 | 5044.125  | 6276.978  | BI822179  | 795.061   | 405.067   | AF159141  | 3292.088  | 1387.454  |
| NM_018174 | 4041.705  | 4252.901  | AF022912  | 3622.664  | 1250.193  | NM_016458 | 9997.825  | 2565.535  |
| NM_014548 | 4433.988  | 5051.619  | AA477428  | 15603.112 | 6627.418  | AK022233  | 2060.349  | 1141.905  |
| NM_004437 | 5255.693  | 6602.423  | AA156342  | 896.975   | 326.455   | AK026410  | 8272.216  | 6863.844  |
| AK025875  | 4847.678  | 5508.647  | R45594    | 12454.039 | 4849.188  | NM_014637 | 3171.946  | 3093.041  |
| BC014152  | 56088.961 | 58272.656 | H46425    | 685.994   | 1711.822  | NM_013379 | 11814.968 | 12863.467 |
| NM_012418 | 836.884   | 1096.694  | AI355949  | 925.705   | 1133.518  | AF113208  | 8142.357  | 6540.986  |
| NM_000226 | 698.214   | 805.424   | AA278152  | 12969.938 | 11211.009 | NM_006153 | 4830.921  | 4244.257  |
| AB037779  | 9987.56   | 13423.929 | H75530    | 2031.627  | 1508.452  | NM_012164 | 3415.881  | 3087.652  |
| NM_000655 | 25971.576 | 35642.164 | NM_004176 | 2481.295  | 2163.292  | NM_004721 | 633.723   | 549.409   |
| NM_000393 | 1341.76   | 1892.842  | NM_004548 | 36828.715 | 54680.445 | AB011156  | 621.119   | 668.097   |
| NM_000889 | 2359.685  | 3501.301  | AK000554  | 3406.08   | 3722.336  | NM_018079 | 909.931   | 941.429   |
| NM_003859 | 15752.837 | 19446.637 | NM_006472 | 939.83    | 944.374   | NM_004760 | 15609.311 | 16236.017 |
| NM_000236 | 1638.204  | 2686.613  | NM_001538 | 2034.886  | 3400.328  | NM_006752 | 3581.16   | 4386.791  |
| NM_002903 | 4717.927  | 7977.345  | X97261    | 13157.865 | 49059.543 | NM_004428 | 926.26    | 257.311   |
| NM_012339 | 5053.297  | 7653.754  | NM_001468 | 2550.986  | 4406.79   | NM_013943 | 782.161   | 593.847   |
| NM_005787 | 28686.047 | 40427.461 | D87666    | 64711.254 | 58501.199 | NM_001639 | 8482.813  | 4245.339  |
| NM_002143 | 3411.453  | 4802.661  | NM_001315 | 4785.86   | 4616.46   | BG698522  | 3026.742  | 861.664   |
| AF284421  | 1048.574  | 1856.287  | AF286095  | 1219.73   | 853.683   | AA152346  | 479.852   | 353.746   |
| NM_006048 | 3499.936  | 5642.335  | NM_000878 | 476.356   | 483.311   | L15189    | 1337.431  | 1018.815  |
| NM_003968 | 10721.643 | 14574.333 | S66407    | 617.445   | 346.148   | AB023420  | 9383.994  | 7245.154  |
| NM_002786 | 10074.146 | 12516.355 | NM_004258 | 14451.346 | 4965.711  | BI822179  | 978.425   | 957.543   |
| NM_002810 | 4889.458  | 6627.364  | NM_001981 | 2363.316  | 967.747   | AF022912  | 5645.483  | 4225.906  |
| NM_003343 | 9778.203  | 12151.871 | NM_001585 | 8932.338  | 3791.449  | AA477428  | 21401.959 | 16734.195 |
| NM_002789 | 55356.348 | 54730.316 | AK026108  | 3745.808  | 6930.619  | AA156342  | 1151.347  | 854.303   |
| AL080137  | 940.888   | 1116.062  | NM_006379 | 1298.798  | 2303.842  | R45594    | 14585.695 | 13200.412 |



|           |           |           |           |           |           |           |           |           |
|-----------|-----------|-----------|-----------|-----------|-----------|-----------|-----------|-----------|
| NM_017679 | 1421.244  | 2359.528  | BF571428  | 1369.764  | 1300.135  | H46425    | 561.133   | 645.547   |
| AF155103  | 524.196   | 645.659   | AB037723  | 1498.469  | 1072.25   | AI355949  | 435.561   | 406.166   |
| NM_017704 | 4565.429  | 5376.827  | NM_006246 | 4860.057  | 4524.203  | AA278152  | 13720.708 | 14555.667 |
| BC006359  | 3186.124  | 3975.8    | U58096    | 22294.877 | 16255.021 | H75530    | 1809.2    | 1906.754  |
| AK026127  | 5064.149  | 5203.175  | NM_016929 | 3468.837  | 3203.055  | NM_004176 | 2899.564  | 2985.514  |
| NM_002814 | 6178.851  | 8548.081  | NM_012323 | 518.502   | 649.855   | NM_004548 | 28514.01  | 24192.137 |
| NM_012250 | 6340.545  | 7611.091  | NM_000111 | 188.146   | 782.461   | AK000554  | 4838.89   | 10144.812 |
| NM_006283 | 14426.927 | 17856.088 | NM_015948 | 1568.265  | 3047.468  | NM_001538 | 2568.896  | 3745.223  |
| NM_002701 | 803.633   | 654.784   | NM_003054 | 3037.332  | 3123.078  | X97261    | 41400.867 | 13779.829 |
| NM_005693 | 1032.849  | 1090.896  | NM_003042 | 903.041   | 1819.824  | NM_001468 | 2165.394  | 3387.765  |
| X97303    | 14041.36  | 9381.274  | NM_002219 | 8785.873  | 9028.316  | D87666    | 50108.867 | 27575.801 |
| L32162    | 465.126   | 707.708   | AF182404  | 2127.163  | 3060.77   | NM_001315 | 4502.894  | 1526.031  |
| NM_017530 | 1098.43   | 1756.147  | NM_006555 | 3750.964  | 2846.478  | AF286095  | 1843.443  | 915.178   |
| AL360183  | 2665.453  | 3756.149  | NM_014521 | 408.931   | 237.634   | NM_000878 | 679.47    | 781.813   |
| AK027046  | 2500.611  | 3662.902  | NM_002445 | 467.216   | 468.782   | S66407    | 1007.606  | 987.38    |
| NM_003113 | 5381.911  | 6667.61   | NM_017809 | 565.028   | 113.673   | NM_004258 | 44111.203 | 33702.609 |
| NM_003822 | 860.594   | 988.863   | AK023202  | 2305.674  | 999.329   | NM_001981 | 3387.041  | 2395.545  |
| NM_014319 | 2814.848  | 3971.251  | D63877    | 2444.643  | 840.192   | NM_014654 | 673.161   | 766.901   |
| NM_017923 | 347.575   | 669.979   | AF131760  | 867.615   | 424.08    | NM_001585 | 16561.959 | 17839.682 |
| AB019566  | 72256.445 | 66094.922 | NM_018698 | 1164.7    | 541.311   | AK026108  | 2484.135  | 2812.74   |
| BF130622  | 15695.858 | 16879.912 | NM_006461 | 3110.885  | 2270.77   | NM_006379 | 1704.939  | 1662.696  |
| BU165106  | 1562.24   | 1808.018  | NM_018201 | 1927.273  | 1362.755  | BF571428  | 1714.083  | 2086.498  |
| AF038202  | 1854.812  | 1830.68   | NM_014438 | 444.199   | 290.001   | AB037723  | 2725.392  | 2696.887  |
| AB040925  | 708.281   | 873.237   | NM_003764 | 3553.645  | 2480.538  | NM_006246 | 5015.213  | 4423.136  |
| BC008837  | 1311.473  | 1119.649  | NM_006793 | 17526.205 | 14400.311 | U58096    | 24514.596 | 19552.68  |
| NM_001861 | 1529.209  | 1479.383  | NM_018079 | 907.049   | 3047.155  | NM_016929 | 5321.401  | 9353.536  |
| AK025558  | 8239.135  | 10914.944 | NM_004760 | 23971.619 | 35305.418 | NM_012323 | 1194.215  | 2122.977  |
| AK024355  | 1686.519  | 2235.462  | NM_006752 | 5079.65   | 8225.471  | NM_015948 | 1958.215  | 2236.778  |
| NM_001864 | 54899.898 | 54174.367 | NM_004428 | 596.916   | 989.844   | NM_003054 | 3157.417  | 4689.58   |
| NM_003477 | 18036.598 | 18541.938 | NM_006809 | 4260.866  | 7310.165  | NM_003042 | 994.147   | 1546.521  |
| NM_002654 | 62529.266 | 60346.375 | AF149304  | 457.112   | 937.931   | NM_004790 | 417.925   | 267.336   |
| NM_015478 | 1085.332  | 1367.787  | NM_012095 | 7137.717  | 9444.813  | NM_002219 | 7533.632  | 2662.25   |
| NM_020382 | 8021.901  | 7695.404  | NM_016438 | 358.128   | 396.444   | AF182404  | 1682.232  | 565.705   |
| NM_007192 | 16056.539 | 15953.786 | X73079    | 17918.191 | 22387.361 | NM_000804 | 265.485   | 251.794   |
| AB002337  | 11076.273 | 13711.289 | NM_019091 | 1020.503  | 590.159   | NM_006555 | 4106.223  | 3207.747  |
| NM_014933 | 10399.111 | 12337.652 | AF264781  | 684.527   | 207.969   | NM_002445 | 943.223   | 839.953   |
| NM_003076 | 33054.398 | 38344.188 | NM_002456 | 456.959   | 251.798   | NM_017809 | 599.132   | 491.337   |
| NM_006385 | 2782.397  | 3720.456  | AK024215  | 3341.372  | 2115.783  | AK023202  | 3052.524  | 2560.587  |
| NM_003456 | 5550.574  | 5931.789  | AB044661  | 3806.821  | 2502.38   | D63877    | 3311.943  | 2359.664  |
| NM_002585 | 3055.252  | 3631.386  | NM_000606 | 6295.202  | 3981.192  | AF131760  | 1035.71   | 860.826   |
| AB029016  | 3436.753  | 3487.182  | NM_016124 | 2936.458  | 2192.437  | NM_018698 | 1483.692  | 1294.295  |
| AK000584  | 5133.249  | 3963.558  | U53530    | 1529.851  | 1341.391  | NM_006461 | 3903.682  | 2883.43   |
| AJ297363  | 675.264   | 783.279   | NM_006598 | 2623.018  | 2349.095  | NM_018201 | 1909.763  | 1878.149  |
| AK026379  | 2361.877  | 2412.339  | NM_004176 | 4595.408  | 8556.21   | NM_014438 | 577.77    | 617.124   |
| AK022965  | 2731.818  | 2633.99   | NM_004548 | 32329.113 | 40678.539 | NM_014880 | 353.75    | 329.18    |
| AK024278  | 7376.689  | 9838.972  | AK000554  | 3848.344  | 6315.718  | NM_003764 | 3689.947  | 3358.992  |
| NM_018022 | 2178.05   | 2598.963  | NM_006472 | 1242.888  | 2670.682  | NM_006793 | 19720.543 | 19503.891 |
| AB056722  | 1112.378  | 1601.264  | NM_002826 | 2537.452  | 2563.744  | NM_018079 | 995.639   | 1983.672  |
| NM_013242 | 16740.088 | 17786.406 | AF159141  | 2537.498  | 1520.925  | NM_004760 | 16512.264 | 22450.693 |
| NM_012066 | 12453.792 | 16279.104 | NM_016458 | 9064.842  | 5618.931  | NM_006752 | 3498.195  | 4791.046  |
| AF052168  | 3957.227  | 5726.121  | AK022233  | 1868.88   | 956.199   | NM_004428 | 697.805   | 604.773   |
| AK022632  | 4005.335  | 5149.704  | AK026410  | 5609.72   | 1908.174  | NM_006809 | 3281.149  | 1758.888  |
| AK021554  | 957.742   | 1631.358  | NM_014637 | 1765.96   | 627.406   | AF149304  | 382.018   | 221.552   |

|           |           |           |           |           |           |           |           |           |
|-----------|-----------|-----------|-----------|-----------|-----------|-----------|-----------|-----------|
| AF070620  | 447.056   | 840.109   | NM_013379 | 11137.338 | 5316.588  | NM_012095 | 5838.554  | 3649.527  |
| NM_020235 | 6616.371  | 7552.451  | AF113208  | 6872.145  | 4523.718  | NM_016435 | 312.905   | 325.333   |
| AL109681  | 737.506   | 1045.711  | NM_006153 | 4289.839  | 3513.99   | X73079    | 18427.768 | 13952.38  |
| AL162039  | 9166.647  | 11066.754 | NM_012164 | 3528.307  | 2413.939  | NM_019091 | 1522.185  | 883.155   |
| AK024896  | 3266.339  | 4667.752  | NM_004721 | 522.167   | 330.551   | AF264781  | 1011.021  | 785.672   |
| AL353952  | 893.801   | 1093.885  | AB011156  | 543.182   | 730.838   | NM_002455 | 398.168   | 402.249   |
| AK021912  | 507.071   | 814.09    | NM_006245 | 6796.891  | 12809.58  | AK024215  | 3225.117  | 3091.516  |
| AK095125  | 741.14    | 422.629   | NM_004315 | 493.445   | 889.517   | AB044661  | 4333.996  | 3739.032  |
| AK024059  | 1489.722  | 1233.326  | U58096    | 37468.656 | 50901.258 | NM_000605 | 6966.164  | 7076.416  |
| AB007928  | 1154.165  | 1493.338  | NM_016929 | 3687.628  | 3435.38   | NM_016124 | 3978.406  | 4133.929  |
| AK023645  | 1150.161  | 1142.638  | NM_012323 | 800.412   | 1146.341  | NM_019075 | 399.515   | 482.564   |
| D83543    | 494.556   | 697.208   | NM_013943 | 559.952   | 704.882   | U53530    | 1855.461  | 1739.363  |
| NM_016935 | 3462.893  | 3457.075  | NM_001639 | 6991.818  | 5157.463  | NM_006595 | 3088.483  | 4378.263  |
| AJ001861  | 1780.901  | 1564.618  | BG698522  | 1825.294  | 977.567   | NM_004175 | 2514.44   | 6870.416  |
| X75692    | 2412.497  | 2975.203  | AA152346  | 446.098   | 215.265   | NM_004545 | 35637.668 | 64472.68  |
| X64988    | 771.661   | 1173.165  | L15189    | 1173.813  | 607.214   | AK000554  | 2693.28   | 2356.699  |
| Y10511    | 16709.799 | 22699.613 | AB023420  | 7082.206  | 2253.987  | NM_006472 | 967.388   | 654.738   |
| M14624    | 424.943   | 818.155   | BI822179  | 594.194   | 148.821   | NM_002825 | 2660.111  | 1383.825  |
| M26147    | 10775.206 | 13232.231 | AF022912  | 4135.714  | 2124.011  | AF159141  | 3365.791  | 2672.451  |
| AF018254  | 1760.517  | 2326.392  | AA477428  | 19317.682 | 12738.407 | NM_016455 | 19970.734 | 15801.873 |
| NM_016245 | 2324.667  | 3192.775  | AA156342  | 1144.514  | 671.07    | AK022233  | 2176.88   | 1904.898  |
| AK026416  | 571.842   | 250.834   | R45594    | 14177.572 | 10167.12  | AK026410  | 7127.417  | 6105.901  |
| AK025797  | 781.513   | 491.473   | AA278152  | 13099.398 | 10896.233 | NM_014637 | 3253.876  | 3205.757  |
| AK000019  | 910.145   | 477.577   | H75530    | 1909.509  | 1638.032  | NM_013375 | 10408.902 | 11591.883 |
| AK024947  | 943.644   | 1443.838  | NM_003764 | 6663.921  | 10946.07  | AF113208  | 7645.118  | 9728.113  |
| NM_017503 | 1127.176  | 761.367   | NM_004829 | 617.386   | 892.275   | NM_006153 | 4686.252  | 4503.043  |
| AK024606  | 624.549   | 804.428   | NM_006793 | 26282.111 | 40161.16  | NM_012164 | 3218.032  | 3404.764  |
| NM_016417 | 11025.717 | 9336.689  | NM_001535 | 1641.711  | 1882.616  | AK026010  | 390       | 292.781   |
| NM_019105 | 2219.328  | 2019.454  | X97261    | 13247.282 | 55015.395 | AB011156  | 770.186   | 919.575   |
| AL080118  | 4230.616  | 3086.207  | NM_001465 | 1934.637  | 2406.049  | NM_006245 | 5999.346  | 13072.678 |
| AL049378  | 1762.407  | 1492.59   | D87666    | 62628.184 | 57524.961 | NM_004315 | 399.058   | 1205.754  |
| L09086    | 1252.74   | 954.984   | NM_001315 | 4426.177  | 4416.84   | U58096    | 22658.137 | 24522.203 |
| AK021598  | 5332.712  | 6535.541  | AF286095  | 1426.466  | 1231.539  | NM_016925 | 4283.9    | 3771.585  |
| NM_005973 | 6019.699  | 4963.716  | S66407    | 703.523   | 311.787   | NM_012323 | 738.686   | 711.719   |
| X04547    | 2639.168  | 1731.984  | NM_004255 | 20572.398 | 17269.791 | NM_018195 | 294.415   | 200.543   |
| AK025823  | 2605.742  | 2038.126  | NM_001981 | 3042.444  | 2368.463  | NM_013943 | 843.03    | 692.67    |
| AK026691  | 1105.864  | 867.086   | NM_001585 | 8681.488  | 5625.728  | NM_001635 | 7547.941  | 6544.462  |
| AL359941  | 664.062   | 594.255   | AK026108  | 2165.882  | 1570.886  | H39560    | 344.694   | 308.667   |
| U52076    | 835.943   | 501.369   | NM_006379 | 1250.756  | 964.033   | AA152346  | 529.898   | 457.065   |
| AF035278  | 1459.533  | 1200.208  | BF571428  | 1438.812  | 1267.765  | L15189    | 1331.312  | 1228.412  |
| AF086288  | 1586.286  | 837.665   | AB037723  | 1720.549  | 1186.376  | AB023420  | 10035.644 | 8041.32   |
| AK023109  | 1559.34   | 796.038   | NM_000605 | 5185.517  | 5372.686  | BI822179  | 920.714   | 770.602   |
| NM_005293 | 3412.051  | 2574.474  | NM_016124 | 3981.187  | 8189.6    | AF022912  | 5703.74   | 4492.346  |
| AF133332  | 7323.365  | 4676.207  | NM_019075 | 492.645   | 1022.681  | AA477428  | 20459.824 | 21013.125 |
| NM_001085 | 769.737   | 662.405   | U53530    | 1747.864  | 1919.233  | AA156342  | 1304.891  | 1023.69   |
| BC015991  | 10657.318 | 8276.635  | NM_006595 | 3550.607  | 4824.305  | R45594    | 15358.246 | 15209.089 |
| U94902    | 723.416   | 513.563   | NM_015945 | 1626.574  | 2475.998  | H46425    | 816.237   | 898.949   |
| U46214    | 490.6     | 702.373   | NM_003054 | 3152.826  | 4347.783  | AI355949  | 532.977   | 543.875   |
| NM_000315 | 7847.337  | 7594.248  | NM_003042 | 780.931   | 1957.418  | AA278152  | 14438.391 | 13468.946 |
| AF161343  | 2954.738  | 2525.889  | NM_002219 | 9504.59   | 11370.925 | H75530    | 2020.036  | 1562.659  |
| NM_004765 | 8198.87   | 6318.771  | AF182404  | 2134.409  | 2178.022  | NM_003764 | 3699.771  | 7493.958  |
| AK022246  | 864.107   | 777.384   | NM_006555 | 3732.204  | 2800.114  | NM_006793 | 18188.441 | 17458.721 |
| X75684    | 1590.492  | 1682.898  | NM_014521 | 453.526   | 581.009   | NM_001535 | 1761.946  | 1019.377  |

|           |           |           |           |           |           |           |           |           |
|-----------|-----------|-----------|-----------|-----------|-----------|-----------|-----------|-----------|
| L37702    | 4058.043  | 2891.291  | NM_002445 | 534.004   | 169.86    | X97261    | 31060.117 | 4962.7    |
| AK022812  | 3244.985  | 2289.602  | AK023202  | 2683.777  | 1987.52   | NM_00146E | 1923.978  | 1437.375  |
| AK022260  | 2223.645  | 2099.46   | D63877    | 2779.915  | 2094.365  | D87666    | 51898.996 | 48835.074 |
| M32219    | 10784.506 | 9655.64   | AF131760  | 860.477   | 605.82    | NM_00131E | 4719.017  | 3758.334  |
| BC018868  | 1003.192  | 574.683   | NM_01869E | 1413.445  | 1559.738  | AF286095  | 1918.598  | 1511.036  |
| AF007128  | 9464.671  | 6072.295  | NM_006461 | 3117.943  | 2712.929  | NM_00087E | 541.291   | 616.505   |
| CY3Cy5    | 2501.537  | 260.181   | NM_018201 | 1738.199  | 1494.294  | S66407    | 801.662   | 762.249   |
| AI351740  | 9928.49   | 11138.435 | NM_01443E | 539.148   | 539.177   | NM_00425E | 17730.945 | 19769.805 |
| AA444051  | 823.659   | 620.476   | NM_006153 | 6436.269  | 12730.662 | NM_001981 | 3118.746  | 3569.906  |
| NM_007164 | 586.813   | 548.668   | NM_012164 | 5578.611  | 11195.465 | NM_014654 | 526.409   | 637.389   |
| BE783826  | 2863.078  | 3239.477  | AK026010  | 441.478   | 991.981   | NM_00158E | 22624.355 | 24711.818 |
| X04827    | 866.628   | 1098.463  | NM_004721 | 564.906   | 860.097   | AK026108  | 3397.28   | 3980.778  |
| BC020596  | 1864.519  | 2566.282  | AB011156  | 719.212   | 1401.259  | NM_00637E | 2285.692  | 4057.715  |
| AF116606  | 61968.141 | 66390.141 | NM_01807E | 905.945   | 1598.145  | BF571428  | 2265.035  | 1791.852  |
| X98922    | 4227.967  | 4188.858  | NM_004760 | 19175.32  | 22272.436 | AB037723  | 3243.708  | 2436.903  |
| AK098435  | 7415.096  | 9136.524  | NM_006752 | 4673.973  | 6256.99   | NM_00060E | 7721.265  | 21073.32  |
| AK092872  | 3816.318  | 4963.886  | NM_00442E | 597.891   | 1026.271  | NM_016124 | 5214.48   | 14695.172 |
| AF230496  | 1141.372  | 962.232   | NM_00680E | 3911.01   | 5922.642  | NM_01907E | 496.493   | 1142.437  |
| M16801    | 519.275   | 1157.08   | AF149304  | 640.195   | 602.501   | U53530    | 1862.205  | 5051.311  |
| NM_145904 | 38227.012 | 45601.93  | NM_01209E | 7063.532  | 9694.387  | NM_00659E | 2689.488  | 3423.582  |
| SR2       | 49301.281 | 47981.117 | NM_01643E | 664.734   | 655.572   | NM_01594E | 1788.577  | 1265.688  |
| SR4       | 12857.199 | 13240.642 | X73079    | 15282.383 | 8587.589  | NM_003054 | 3178.155  | 2922.448  |
| SR6       | 1728.8    | 1604.689  | NM_019091 | 1086.516  | 330.499   | NM_00304E | 1107.632  | 1333.062  |
| SR8       | 7116.387  | 17070.691 | AF264781  | 898.017   | 549.786   | NM_00221E | 9009.653  | 6382.44   |
| SR10      | 25355.117 | 7806.607  | NM_00245E | 389.033   | 310.238   | AF182404  | 2031.951  | 1630.877  |
| CY3Cy5    | 2716.98   | 162.543   | AK024215  | 3535.552  | 2632.289  | NM_00655E | 3877.937  | 3522.135  |
| NM_00241E | 385.75    | 261.089   | AB044661  | 4004.107  | 3163.357  | NM_00244E | 862.989   | 1325.442  |
| NM_00448E | 1604.531  | 1929.742  | NM_01537E | 1311.66   | 1497.588  | NM_01780E | 751.975   | 692.964   |
| NM_01241E | 688.814   | 600.061   | NM_00117E | 1275.868  | 2624.917  | AK023202  | 3515.371  | 2915.014  |
| NM_01329E | 8601.556  | 8041.862  | NM_013341 | 646.647   | 641.402   | D63877    | 3304.854  | 2996.859  |
| AF225426  | 725.272   | 875.253   | NM_01653E | 1608.852  | 2914.754  | AF131760  | 1012.521  | 1211.575  |
| NM_00520E | 3099.212  | 3584.528  | NM_00406E | 793.16    | 1658.651  | NM_01869E | 1433.371  | 1473.186  |
| NM_000421 | 1005.02   | 959.567   | NM_004941 | 6765.701  | 9806.372  | NM_006461 | 4629.749  | 8733.043  |
| AK025687  | 2092.58   | 2550.636  | AF151831  | 4104.369  | 5694.819  | NM_018201 | 2356.737  | 2496.378  |
| AF218941  | 5017.624  | 5554.208  | AB011121  | 291.192   | 926.701   | NM_01443E | 620.34    | 350.128   |
| AL137264  | 963.808   | 1162.453  | AF083255  | 9517.356  | 16357.612 | NM_01488E | 541.193   | 157.367   |
| NM_00222E | 629.409   | 802.859   | AK022605  | 787.396   | 1827.495  | NM_00615E | 5456.755  | 10476.238 |
| X84370    | 8530.199  | 11302.546 | AK000554  | 4141.279  | 5568.076  | NM_012164 | 4190.312  | 10838.148 |
| NM_00403E | 1789.915  | 2023.026  | NM_00647E | 1081.026  | 1881.13   | AK026010  | 186.371   | 1464.485  |
| AB014558  | 1459.845  | 1296.399  | NM_00282E | 2770.058  | 3737.27   | NM_004721 | 311.644   | 608.628   |
| NM_000118 | 2298.071  | 2203.728  | AF159141  | 3111.477  | 1898.704  | AB011156  | 821.189   | 726.132   |
| NM_00129E | 61836.852 | 63042.098 | NM_01645E | 10299.558 | 5326.516  | NM_01807E | 674.918   | 284.417   |
| BG325046  | 2710.99   | 2473.619  | AK022233  | 1980.991  | 1777.955  | NM_00476E | 14599.376 | 8541.421  |
| AK026248  | 926.3     | 984.636   | AK026410  | 11094.02  | 19915.518 | NM_00675E | 3630.367  | 3070.245  |
| NM_00457E | 1564.818  | 1300.691  | NM_014637 | 4025.985  | 4046.143  | NM_00442E | 574.831   | 507.788   |
| AB046793  | 725.662   | 668.708   | NM_01337E | 13274.669 | 9306.027  | NM_00680E | 3772.873  | 4417.568  |
| NM_017604 | 1610.973  | 1532.278  | AF113208  | 7697.701  | 5945.101  | AF149304  | 528.853   | 434.954   |
| NM_01773E | 4620.62   | 5133.87   | AF019382  | 597.354   | 777.241   | NM_01209E | 6383.964  | 5997.828  |
| NM_016557 | 1804.939  | 1525.809  | BC012757  | 1376.268  | 2077.148  | X73079    | 16928.197 | 14549.146 |
| NM_018467 | 5081.808  | 5947.629  | M96686    | 650.768   | 845.505   | NM_019091 | 1433.053  | 920.334   |
| NM_00606E | 761.511   | 726.117   | NM_00406E | 3125.692  | 5926.819  | L07518    | 451.549   | 279.251   |
| NM_00203E | 9990.004  | 10269.988 | NM_00588E | 560.806   | 633.472   | AF264781  | 1039.127  | 1031.68   |
| NM_00572E | 6357.646  | 7074.121  | NM_00444E | 1100.532  | 2076.39   | NM_00245E | 511.444   | 478.369   |

|           |           |           |           |           |           |           |           |           |
|-----------|-----------|-----------|-----------|-----------|-----------|-----------|-----------|-----------|
| NM_015493 | 853.795   | 966.21    | NM_014591 | 2505.112  | 3055.727  | AK024215  | 3253.535  | 2351.231  |
| NM_003747 | 1929.614  | 1597.76   | NM_014592 | 465.694   | 542.703   | AB044661  | 3940.057  | 2406.197  |
| AB037744  | 1668.849  | 1663.83   | NM_001945 | 2225.129  | 3246.657  | NM_015376 | 1323.64   | 2648.51   |
| AF141901  | 848.792   | 1187.334  | NM_020039 | 2526.077  | 2701.701  | NM_001176 | 1041.097  | 2508.098  |
| NM_007008 | 1292.472  | 1494.462  | NM_006653 | 1883.51   | 3645.08   | NM_013341 | 678.085   | 1703.93   |
| AL109708  | 757.967   | 1000.866  | NM_014442 | 1154.788  | 1607.045  | NM_016536 | 1104.144  | 3010.229  |
| AF099740  | 1183.242  | 1243.351  | AB002313  | 451.392   | 503.698   | NM_004066 | 516.343   | 1164.901  |
| NM_006117 | 18387.967 | 16849     | AB011167  | 1386.348  | 1266.354  | NM_004941 | 5174.036  | 3658.471  |
| NM_002225 | 2855.933  | 2840.81   | NM_005409 | 729.151   | 601.282   | AF151831  | 2699.12   | 1153.393  |
| NM_006229 | 547.734   | 705.853   | NM_000208 | 1694.704  | 1044.22   | AB011121  | 382.678   | 374.551   |
| NM_015415 | 22817.756 | 23750.693 | NM_002188 | 16306.022 | 6181.978  | AF083255  | 5203.771  | 5166.297  |
| NM_004897 | 2604.583  | 3021.85   | AK027119  | 7868.336  | 3024.487  | AK022605  | 872.408   | 1297.995  |
| NM_002555 | 1159.979  | 1093.282  | AB037727  | 12302.064 | 6419.488  | AK000554  | 2496.538  | 4008.952  |
| AF225418  | 1558.092  | 1560.507  | NM_005426 | 2552.645  | 1865.528  | NM_006472 | 1398.949  | 1780.963  |
| NM_000309 | 1007.289  | 1202.887  | NM_004763 | 1073.551  | 878.478   | NM_002826 | 2961.049  | 2491.131  |
| NM_004528 | 18568.715 | 18626.379 | NM_014063 | 6924.683  | 6044.063  | AF159141  | 2188.632  | 1846.172  |
| AK026381  | 6234.528  | 7728.833  | D86964    | 5378.39   | 4517.04   | NM_002420 | 382.546   | 497.519   |
| NM_002450 | 23571.15  | 9850.608  | AL049801  | 3157.523  | 2567.004  | NM_016458 | 9613.443  | 8868.036  |
| NM_001686 | 1027.834  | 1191.411  | NM_016395 | 11106.051 | 8090.088  | AK022233  | 2605.953  | 2489.381  |
| NM_004978 | 474.602   | 536.057   | NM_003152 | 951.68    | 919.196   | AK026410  | 9751.003  | 10933.636 |
| NM_000705 | 471.502   | 445.157   | NM_014727 | 1979.095  | 3524.523  | NM_014637 | 3728.771  | 4141.015  |
| NM_016577 | 710.922   | 755.459   | BE885010  | 549.478   | 1346.528  | NM_013379 | 13240.243 | 15867.313 |
| AK023107  | 8410.734  | 8048.644  | NM_006342 | 6339.925  | 9456.311  | AF113208  | 7166.166  | 4419.277  |
| NM_006854 | 9876.335  | 9022.664  | NM_016396 | 3677.303  | 4506.355  | AF019382  | 658.647   | 1822.776  |
| NM_004580 | 4612.916  | 4806.232  | NM_005689 | 1784.827  | 2247.717  | BC012757  | 847.756   | 3167.213  |
| NM_020387 | 14721.457 | 14563.022 | NM_005552 | 13939.183 | 11160.488 | M96686    | 510.31    | 1905.095  |
| NM_007246 | 2022.785  | 1780.247  | NM_006717 | 3180.535  | 3044.163  | NM_004062 | 2117.037  | 5390.452  |
| AF150735  | 4804.804  | 4486.646  | AL109786  | 2269.276  | 3966.767  | NM_005883 | 629.251   | 1399.309  |
| NM_018183 | 1859.556  | 2184.148  | AK026479  | 4586.718  | 8973.378  | NM_004446 | 588.376   | 506.735   |
| NM_012382 | 3342.17   | 3364.303  | AK022860  | 4001.152  | 5964.024  | NM_014591 | 2303.006  | 823.888   |
| BF038366  | 935.246   | 857.578   | X60188    | 29190.123 | 36878.844 | NM_014592 | 429.847   | 308.407   |
| NM_002452 | 18338.063 | 16643.396 | NM_005977 | 3333.917  | 4099.756  | NM_001945 | 1956.247  | 2171.678  |
| NM_016440 | 6372.192  | 5296.352  | NM_002747 | 373.57    | 575.143   | NM_020039 | 2555.967  | 4398.348  |
| NM_007194 | 2987.098  | 2439.476  | NM_006265 | 35785.906 | 32240.059 | AB002313  | 565.618   | 1285.086  |
| NM_000314 | 7208.697  | 6255.761  | NM_003126 | 448.038   | 784.297   | AB011167  | 1382.414  | 1458.009  |
| S74620    | 1602.99   | 1350.753  | NM_006059 | 1539.563  | 731.849   | NM_005409 | 668.05    | 661.775   |
| AF305239  | 1290.608  | 1138.849  | NM_000347 | 1177.341  | 679.134   | NM_000208 | 1799.65   | 1656.859  |
| NM_002827 | 4618.579  | 3636.757  | M13452    | 1297.453  | 759.892   | NM_002188 | 13376.971 | 10306.106 |
| NM_001946 | 1135.458  | 874.532   | AF082075  | 436.883   | 383.712   | AK027119  | 5900.182  | 5345.653  |
| BF035425  | 1425.597  | 1616.633  | NM_016114 | 2242.463  | 1573.772  | AB037727  | 9028.33   | 8243.647  |
| NM_001608 | 239.756   | 706.072   | AY007114  | 1178.725  | 828.707   | NM_005426 | 2709.306  | 2485.672  |
| NM_000159 | 8270.761  | 8842.938  | AF086604  | 568.53    | 418.26    | NM_004763 | 1369.605  | 1113.358  |
| NM_014638 | 1202.676  | 1464.917  | AB000895  | 918.362   | 643.804   | NM_014063 | 7951.837  | 7302.172  |
| NM_000118 | 2294.183  | 2175.508  | X80031    | 704.94    | 646.23    | D86964    | 6092.406  | 5346.773  |
| NM_001298 | 64904.699 | 71264.211 | AK022178  | 1292.725  | 2322.461  | AL049801  | 3645.24   | 3012.841  |
| BG325046  | 3582.351  | 3592.352  | NM_006011 | 375.539   | 886.988   | NM_016395 | 11211.703 | 6565.036  |
| AI351740  | 8634.245  | 7296.72   | L00635    | 629.519   | 1053.281  | NM_003152 | 620.061   | 545.151   |
| AA444051  | 981.1     | 1344.696  | NM_015601 | 987.435   | 1061.439  | NM_014727 | 2087.327  | 6047.307  |
| NM_007164 | 1878.792  | 2329.284  | NM_001780 | 15766.031 | 20412.994 | BE885010  | 498.238   | 1571.492  |
| BE783826  | 3205.427  | 3417.811  | AJ277442  | 1372.47   | 2804.259  | NM_006342 | 6123.171  | 16988.432 |
| X04827    | 928.511   | 953.782   | NM_004569 | 6442.148  | 7205.704  | NM_016396 | 4944.459  | 13351.304 |
| H07088    | 1190.678  | 1162.851  | AF089088  | 1250.725  | 1259.67   | NM_005689 | 2000.486  | 3055.686  |
| BC020596  | 1172.28   | 1107.524  | L07557    | 5277.611  | 4897.807  | NM_005552 | 15004.404 | 5209.612  |

|           |           |           |           |           |           |           |           |           |
|-----------|-----------|-----------|-----------|-----------|-----------|-----------|-----------|-----------|
| AF116606  | 59182.465 | 57969.066 | D78514    | 7669.898  | 8361.748  | NM_006717 | 3161.373  | 2023.987  |
| X98922    | 3172.85   | 2751.4    | AK021665  | 768.663   | 1273.404  | AL109786  | 1942.133  | 1999.474  |
| AK098435  | 6723.387  | 6073.173  | NM_013366 | 724.863   | 632.915   | AK026479  | 2713.099  | 3792.998  |
| AK092872  | 3405.452  | 2883.595  | NM_002787 | 38321.383 | 36616     | NM_005977 | 2747.134  | 4447.587  |
| M16801    | 743.911   | 565.755   | U95006    | 17280.703 | 21195.057 | NM_006265 | 28273.572 | 19522.396 |
| NM_145904 | 38942.801 | 35817.855 | NM_003347 | 3965.883  | 2819.429  | NM_003126 | 662.312   | 602.883   |
| NM_013334 | 2736.975  | 2739.529  | AF273051  | 1085.47   | 254.643   | NM_006059 | 1447      | 1408.876  |
| AB037744  | 1605.789  | 1452.489  | NM_014516 | 4111.542  | 2269.743  | NM_000347 | 1315.881  | 878.4     |
| AF141901  | 960.424   | 1072.834  | AK021868  | 1508.159  | 1004.408  | AF082075  | 575.59    | 550.674   |
| NM_007008 | 1123.461  | 1066.688  | AK000643  | 57745.68  | 41004.727 | NM_016114 | 2311.102  | 2478.745  |
| AL109708  | 756.695   | 1024.896  | NM_018421 | 4609.121  | 3310.475  | AY007114  | 1601.801  | 1829.689  |
| AF234532  | 597.838   | 630.071   | AB014574  | 34692.973 | 20021.324 | AF086604  | 528.478   | 427.423   |
| NM_002418 | 432.954   | 653.533   | NM_020127 | 1429.03   | 963.757   | AB000895  | 778.909   | 584.274   |
| NM_004485 | 1672.664  | 1835.584  | NM_015623 | 7503.537  | 5900.693  | X80031    | 809.283   | 589.563   |
| NM_012419 | 558.479   | 691.074   | AB045116  | 1545.95   | 1483.299  | AK022178  | 1035.797  | 2930.763  |
| NM_013296 | 8298.658  | 8210.011  | L49054    | 653.567   | 883.56    | NM_006011 | 423.559   | 1125.669  |
| AL117478  | 738.109   | 458.063   | NM_001675 | 1779.119  | 2155.99   | L00635    | 716.142   | 2521.47   |
| NM_005307 | 545.203   | 359.862   | NM_003422 | 1813.957  | 2507.769  | NM_015601 | 1085.224  | 1524.594  |
| NM_005958 | 1664.805  | 1244.913  | NM_001451 | 1817.144  | 1535.739  | NM_001780 | 10487.412 | 17078.193 |
| NM_013436 | 1574.399  | 1268.042  | NM_014779 | 1469.113  | 1315.166  | AJ277442  | 795.524   | 596.734   |
| AF225426  | 676.577   | 259.383   | NM_000192 | 436.817   | 1020.478  | NM_004569 | 5429.305  | 2019.917  |
| NM_005208 | 2748.893  | 2832.287  | NM_002943 | 4098.798  | 6056.691  | AF089088  | 1349.445  | 767.474   |
| NM_000421 | 794.629   | 791.027   | AL133649  | 1147.849  | 748.374   | L07557    | 5560.808  | 5865.8    |
| AK025687  | 2142.006  | 2122.958  | AB018303  | 698.93    | 805.613   | D78514    | 7193.319  | 8305.759  |
| AF218941  | 4305.802  | 3506.37   | NM_015846 | 5247.452  | 5897.806  | NM_013366 | 603.971   | 820.798   |
| AL137264  | 1001.363  | 810.927   | NM_015972 | 11232.196 | 13168.068 | NM_002787 | 32594.934 | 24215.072 |
| NM_002226 | 479.567   | 566.433   | NM_016132 | 3778.695  | 4973.092  | AF273051  | 839.311   | 779.445   |
| X84370    | 6974.454  | 7123.296  | NM_018006 | 1900.906  | 869.032   | NM_014516 | 2618.59   | 2959.052  |
| NM_004039 | 1593.431  | 1742.357  | NM_016090 | 1468.158  | 717.931   | AK021868  | 1913.87   | 1574.089  |
| AB014558  | 1342.529  | 1193.164  | NM_001013 | 45641.348 | 20127.1   | NM_018421 | 4660.298  | 4322.864  |
| NM_016577 | 707.888   | 702.273   | AK024040  | 3017.08   | 2181.08   | AB014574  | 36987.766 | 41671.379 |
| AK023107  | 9579.344  | 8415.876  | NM_005061 | 3337.189  | 2199.786  | NM_020127 | 1573.799  | 2420.189  |
| NM_006854 | 10023.123 | 7515.031  | NM_000997 | 63654.086 | 56012.965 | NM_015623 | 6755.244  | 6415.074  |
| NM_004580 | 5238.223  | 4547.337  | AF182417  | 34261.691 | 17155.225 | AB045116  | 1068.963  | 634.717   |
| NM_020387 | 15442.234 | 14747.642 | AL137354  | 13648.269 | 9633.439  | L49054    | 403.179   | 239.328   |
| NM_007246 | 2018.313  | 1907.586  | AY007128  | 273.452   | 1177.844  | NM_001675 | 1028.43   | 3106.635  |
| AK026248  | 1296.439  | 1927.599  | AF052149  | 7618.686  | 12515.735 | NM_003422 | 1492.346  | 3973.859  |
| NM_004578 | 1463.644  | 1618.736  | AK025586  | 1358.899  | 1891.992  | NM_001451 | 1361.751  | 3753.298  |
| NM_000647 | 440.719   | 447.389   | AL137512  | 930.341   | 1032.871  | NM_014779 | 1293.197  | 2733.366  |
| AB046793  | 728.096   | 769.675   | NM_005036 | 572.735   | 940.738   | NM_002943 | 3824.558  | 1676.917  |
| NM_017604 | 1859.085  | 1581.328  | NM_002541 | 2866.153  | 5545.671  | AL133649  | 1117.347  | 523.814   |
| NM_017738 | 4653.113  | 5728.229  | NM_000056 | 4610.834  | 7042.456  | AB018303  | 677.852   | 528.119   |
| NM_016557 | 1537.286  | 1665.261  | NM_016311 | 28266.311 | 29043.783 | NM_015972 | 9545.278  | 7517.708  |
| NM_000623 | 2580.964  | 2099.396  | NM_000290 | 3073.075  | 4159.722  | NM_018006 | 1658.277  | 1367.66   |
| AF161348  | 1844.436  | 1107.057  | NM_016538 | 3802.681  | 3574.773  | NM_016090 | 817.007   | 651.682   |
| NM_018467 | 4736.941  | 4827.749  | AK023275  | 6140.813  | 4613.753  | NM_001013 | 42171.348 | 29254.119 |
| NM_006068 | 644.846   | 562.457   | AJ223352  | 4372.085  | 3433.233  | NM_005061 | 3344.89   | 2677.778  |
| NM_002038 | 8214.563  | 7138.281  | NM_012238 | 1810.801  | 1306.378  | NM_000997 | 50546.207 | 70059.523 |
| NM_005729 | 6151.339  | 6050.209  | NM_016539 | 5827.621  | 2208.629  | AF182417  | 32106.238 | 31387.033 |
| NM_015493 | 820.242   | 776.312   | NM_006807 | 21497.063 | 7753.427  | AL137354  | 13215.029 | 11448.991 |
| NM_003747 | 1733.07   | 1194.06   | NM_006532 | 1509.184  | 1123.595  | NM_001023 | 50862.691 | 65969.852 |
| NM_002827 | 4553.256  | 3572.477  | U07132    | 2311.399  | 1706.276  | AK021571  | 4233.972  | 3068.123  |
| NM_001946 | 1127.055  | 788.389   | NM_003436 | 725.559   | 401.311   | AY007128  | 208.821   | 978.65    |

|           |           |           |           |           |           |           |           |           |
|-----------|-----------|-----------|-----------|-----------|-----------|-----------|-----------|-----------|
| BF035425  | 1159.369  | 1048.585  | AL035301  | 2600.137  | 5426.952  | AF052149  | 6160.898  | 14428.126 |
| NM_000159 | 7757.838  | 7642.103  | NM_017687 | 2055.496  | 3667      | AK025586  | 751.627   | 1580.558  |
| NM_014638 | 1223.198  | 1262.081  | NM_017975 | 2622.526  | 5127.304  | AL137512  | 642.09    | 1530.355  |
| AF099740  | 1370.96   | 1354.102  | AK025036  | 1740.241  | 2526.564  | NM_005036 | 489.728   | 681.86    |
| NM_006117 | 19025.4   | 20689.688 | AK024843  | 12025.678 | 11543.263 | NM_002541 | 1338.413  | 613.429   |
| NM_002225 | 2950.73   | 3362.113  | AF074994  | 647.837   | 694.13    | NM_000056 | 3613.249  | 2475.146  |
| NM_006229 | 514.941   | 649.558   | NM_017670 | 8650.654  | 14637.254 | NM_016311 | 24367.789 | 15346.494 |
| NM_015415 | 23935.82  | 22647.822 | AF286598  | 1157.332  | 2570.435  | NM_000290 | 3328.17   | 2616.862  |
| NM_004897 | 2702.419  | 4268.392  | AK021468  | 1198.784  | 1933.483  | NM_016538 | 3083.758  | 2661.488  |
| NM_002555 | 1125.932  | 1015.124  | BC033020  | 816.114   | 2015.409  | AK023275  | 4862.29   | 3740.974  |
| AF225418  | 1326.3    | 1178.261  | NM_004366 | 6283.024  | 5881.227  | AJ223352  | 2603.398  | 2000.709  |
| NM_000309 | 1116.17   | 1020.821  | AK026168  | 1894.21   | 2370.628  | NM_012238 | 1503.707  | 1298.545  |
| NM_004528 | 16820.508 | 12438.039 | AJ296152  | 7551.984  | 8317.879  | NM_016539 | 7301.599  | 3296.935  |
| AK026381  | 5917.261  | 7173.623  | AK001067  | 1803.31   | 2541.741  | NM_006807 | 22211.629 | 17598.256 |
| NM_002450 | 22330.363 | 8804.87   | AK027088  | 11564.994 | 12859.694 | L16464    | 572.119   | 779.5     |
| NM_001686 | 1538.023  | 1516.371  | AB037721  | 2413.055  | 1447.699  | NM_006532 | 1982.832  | 2068.222  |
| NM_000705 | 715.295   | 594.47    | AK027120  | 699.704   | 288.116   | U07132    | 2790.299  | 2571.051  |
| NM_004231 | 39461.805 | 34166.48  | AB029001  | 934.652   | 426.501   | NM_003436 | 638.589   | 1045.693  |
| NM_145904 | 38148.648 | 37659.555 | AB006624  | 3039.339  | 2203.814  | AL035301  | 1787.749  | 5121.458  |
| NM_013334 | 2727.761  | 2771.11   | AL109717  | 1256.407  | 1293.256  | NM_017687 | 1609.277  | 4354.494  |
| AF150735  | 4696.87   | 3419.539  | AK025473  | 1808.684  | 2843.936  | NM_017975 | 2297.146  | 6548.258  |
| NM_018183 | 1780.499  | 1706.184  | AF146693  | 683.399   | 778.726   | AK025036  | 1686.306  | 3692.759  |
| NM_012382 | 3354.458  | 2651.375  | AF271070  | 8865.76   | 5847.731  | AK024843  | 10975.039 | 11345.529 |
| BF038366  | 805.289   | 654.812   | NM_014903 | 504.354   | 531.928   | AF074994  | 524.877   | 300.454   |
| NM_002452 | 17285.955 | 17362.143 | AK055959  | 1083.439  | 849.581   | NM_017670 | 4849.251  | 3299.292  |
| NM_012304 | 461.131   | 558.715   | AF052141  | 447.549   | 541.242   | AF286598  | 855.599   | 554.462   |
| NM_016440 | 14482.119 | 13566.793 | AK021705  | 4582.858  | 8349.875  | AK021468  | 742.153   | 576.515   |
| NM_007194 | 3327.114  | 3068.144  | NM_016141 | 10647.763 | 19341.934 | NM_004366 | 5812.802  | 4601.706  |
| NM_000314 | 6720.786  | 5884.103  | AL109702  | 1768.676  | 3321.175  | AK026168  | 1522.84   | 1242.694  |
| AB002369  | 1616.938  | 1513.985  | AK025624  | 7849.599  | 11230.863 | AJ296152  | 7018.904  | 5386.95   |
| S74620    | 1536.818  | 1934.279  | AK026684  | 2037.746  | 2491.468  | AK001067  | 1875.066  | 2586.823  |
| AF305239  | 1105.399  | 893.93    | AL110125  | 3971.805  | 4629.31   | AK027088  | 7209.561  | 6301.036  |
| AL137264  | 1225.263  | 1483.365  | AK022764  | 2517.476  | 4874.957  | AB037721  | 1124.099  | 1319.673  |
| NM_002226 | 665.984   | 831.724   | X89744    | 408.362   | 520.478   | AK027120  | 646.651   | 504.824   |
| X84370    | 7777.737  | 7733.873  | AJ011600  | 914.228   | 1221.038  | AB029001  | 571.609   | 851.362   |
| NM_004039 | 3928.044  | 3180.851  | AJ002785  | 802.266   | 720.441   | AB006624  | 3124.891  | 3140.34   |
| AB014558  | 1477.449  | 1246.624  | AL049251  | 430.765   | 607.02    | AL109717  | 1000.161  | 977.418   |
| NM_000118 | 2472.112  | 3133.612  | Z83945    | 850.646   | 285.996   | AK025473  | 962.479   | 917.01    |
| NM_000913 | 480.877   | 563.561   | L32606    | 490.731   | 410.055   | AF146693  | 1013.427  | 885.504   |
| NM_001298 | 60771.297 | 62478.078 | L05148    | 5852.501  | 3936.255  | AF271070  | 8945.208  | 7073.871  |
| BG325046  | 3166.884  | 2888.57   | AK091125  | 439.203   | 285.879   | AK055959  | 922.054   | 986.033   |
| AI351740  | 8337.536  | 6453.644  | D16474    | 2181.977  | 1614.884  | AF052141  | 334.472   | 404.251   |
| AA444051  | 567.713   | 452.031   | AL080072  | 859.129   | 637.507   | AK021705  | 3369.604  | 8494.702  |
| BE783826  | 2736.677  | 2773.073  | AK024898  | 851.046   | 689.721   | NM_016141 | 12721.089 | 34486.383 |
| X04827    | 890.02    | 680.422   | AL049280  | 1513.903  | 2038.066  | AL109702  | 1502.656  | 2973.947  |
| H07088    | 991.077   | 1062.568  | AK025212  | 4563.385  | 7936.405  | AK025624  | 8384.019  | 10580.424 |
| BC020596  | 1169.859  | 1287.886  | AL157503  | 4775.523  | 7698.836  | AK026684  | 1907.6    | 1341.99   |
| AF116606  | 58659.879 | 60275.941 | AK000053  | 688.905   | 994.312   | AL110125  | 3626.96   | 2889.375  |
| X98922    | 3715.654  | 3351.392  | AK000786  | 967.251   | 807.584   | AK022764  | 1462.864  | 1125.484  |
| AK098435  | 5531.477  | 5476.191  | AK000935  | 729.252   | 1026.35   | AJ011600  | 1235.158  | 982.357   |
| AK092872  | 3445.972  | 2855.684  | AK021458  | 2454.642  | 2794.354  | AJ002785  | 905.959   | 921.886   |
| M16801    | 516.945   | 294.862   | NM_017674 | 1617.928  | 1401.861  | Z70716    | 597.405   | 410.624   |
| M30134    | 473.971   | 608.735   | AK000966  | 509.101   | 346.349   | AL049251  | 1372.938  | 857.325   |

|           |           |           |           |           |           |           |           |           |
|-----------|-----------|-----------|-----------|-----------|-----------|-----------|-----------|-----------|
| NM_00088C | 1021.43   | 1081.431  | AK024525  | 645.698   | 524.956   | Z83945    | 894.38    | 1057.954  |
| NM_00203E | 10840.483 | 12246.197 | AK024909  | 634.171   | 496.728   | L32606    | 404.539   | 307.035   |
| NM_00572E | 6868.012  | 6255.723  | AK024544  | 584.659   | 551.632   | L05148    | 5008.916  | 5062.248  |
| NM_01549E | 1002.915  | 1177.38   | AK001880  | 12384.722 | 23190.24  | AK091125  | 572.666   | 476.213   |
| NM_003747 | 1761.069  | 1565.377  | AF156166  | 1997.549  | 4524.126  | D16474    | 5781.045  | 6637.322  |
| AB037744  | 1654.985  | 1405.269  | NM_01437E | 3222.744  | 4264.929  | AL080072  | 544.888   | 1071.046  |
| AF141901  | 1031.785  | 1844.962  | NM_01420E | 35031.176 | 25854.379 | AK024898  | 941.281   | 810.809   |
| NM_00700E | 1216.948  | 1067.299  | NM_001651 | 3793.823  | 4659.933  | AL049280  | 2040.621  | 5040.099  |
| AL109708  | 905.493   | 922.79    | L32786    | 1602.63   | 1823.14   | AK025212  | 5905.893  | 12367.217 |
| L29143    | 286.487   | 508.013   | U03239    | 169.124   | 496.222   | AL157503  | 3311.67   | 3190.958  |
| AF234532  | 646.516   | 748.977   | AK002023  | 2740.852  | 3304.349  | AK000053  | 566.158   | 325.887   |
| NM_00241E | 662.516   | 541.088   | AF150156  | 659.706   | 779.032   | AK000786  | 1261.417  | 747.375   |
| NM_00448E | 1886.361  | 1518.885  | NM_016464 | 707.637   | 964.498   | AK000935  | 907.516   | 562.487   |
| NM_01241E | 562.159   | 455.443   | L40402    | 882       | 1432.204  | AK021458  | 1059.053  | 895.172   |
| NM_01329E | 8076.41   | 7719.726  | AK022422  | 1147.699  | 860.847   | NM_017674 | 800.306   | 900.359   |
| AL117478  | 598.119   | 549.653   | AK023485  | 812.194   | 701.604   | AK024909  | 993.927   | 1223.856  |
| NM_005307 | 540.129   | 774.513   | AK022474  | 11920.313 | 10024.522 | AK024544  | 1204.022  | 1488.175  |
| NM_00595E | 1884.009  | 2001.549  | AK022392  | 4750.611  | 3700.866  | AK001880  | 7532.358  | 11132.535 |
| NM_01343E | 1848.183  | 2231.724  | AL117451  | 704.684   | 578.395   | AF156166  | 3174.036  | 5648.027  |
| AF225426  | 515.478   | 468.805   | AK025949  | 1051.445  | 2574.972  | NM_01437E | 2668.634  | 3335.973  |
| NM_00520E | 2709.491  | 2989.238  | Y10259    | 4210.359  | 8567.179  | NM_01420E | 27544.898 | 13974.663 |
| NM_000421 | 823.036   | 675.196   | AK021725  | 3312.343  | 4059.075  | NM_001651 | 3705.162  | 2454.628  |
| AK025687  | 1443.296  | 1553.121  | NM_00240E | 6555.29   | 9244.404  | L32786    | 1555.944  | 1039.976  |
| AF218941  | 3632.167  | 3711.346  | AK024282  | 1271.982  | 1500.417  | U03239    | 480.751   | 414.937   |
| NM_00497E | 1342.968  | 1382.081  | AF085838  | 4989.883  | 5526.918  | AK002023  | 3220.052  | 3345.984  |
| NM_004231 | 41040.008 | 42035.957 | NM_018277 | 789.049   | 958.317   | AF150156  | 303.791   | 354.532   |
| NM_016577 | 750.136   | 531.442   | AF014455  | 681.241   | 1000.616  | NM_016464 | 544.504   | 681.143   |
| AK023107  | 9491.724  | 8394.269  | AF086335  | 3027.339  | 5022.52   | L40402    | 1251.64   | 1486.361  |
| NM_006854 | 10565.088 | 10228.477 | AL355741  | 314.205   | 527.971   | AK022422  | 478.842   | 690.264   |
| NM_00458C | 5430.762  | 5323.459  | AB011118  | 12043.39  | 13034.1   | AK022474  | 14871.816 | 16397.963 |
| NM_020387 | 17575.332 | 20078.285 | S66666    | 873.2     | 827.856   | AK022392  | 4772.411  | 6534.283  |
| NM_00724E | 1901.686  | 2010.138  | AK021476  | 1541.561  | 2400.585  | AL117451  | 686.515   | 777.647   |
| AK026248  | 948.711   | 910.32    | NM_01863C | 5756.124  | 7417.969  | AK025949  | 1791.344  | 2143.869  |
| NM_00457E | 1344.485  | 1367.272  | AF086175  | 557.607   | 611.333   | Y10259    | 3137.388  | 2546.359  |
| NM_000647 | 458.958   | 257.301   | AK002196  | 861.495   | 470.764   | AK021725  | 2509.74   | 1729.94   |
| AB046793  | 564.576   | 511.721   | NM_00457E | 808.603   | 663.693   | NM_00240E | 3367.043  | 2520.698  |
| NM_017604 | 1557.772  | 1441.062  | AF040097  | 651.954   | 529.472   | AK024282  | 1028.868  | 714.704   |
| NM_01773E | 4591.799  | 5119.686  | NM_02043E | 784.625   | 510.116   | AF085838  | 2893.31   | 3651.586  |
| NM_016557 | 1456.04   | 1293.041  | AK024182  | 828.08    | 675.827   | NM_018277 | 818.103   | 894.734   |
| NM_00062E | 2185.3    | 2073.787  | NM_00691E | 7719.01   | 7083.633  | AF014455  | 536.088   | 646.27    |
| AF161348  | 1866.927  | 1659.396  | NM_00049E | 9749.89   | 5998.02   | AF086335  | 2315.037  | 2089.698  |
| NM_018467 | 5687.43   | 5522.425  | AL049955  | 24282.428 | 31107.363 | AB011118  | 13448.116 | 14755.915 |
| NM_00606E | 552.302   | 674.294   | AF155654  | 10178.246 | 14541.066 | S66666    | 552.157   | 1188.204  |
| NM_01644C | 17701.158 | 20778.061 | AF088044  | 519.275   | 645.219   | AK021476  | 1946.903  | 3526.214  |
| AB002369  | 2030.268  | 1854.788  | AK000028  | 4921.026  | 5244.585  | NM_01863C | 4257.705  | 6077.726  |
| S74620    | 1788.746  | 1612.429  | NM_01332C | 60279.516 | 57075.949 | AF086175  | 684.512   | 709.242   |
| AF305239  | 1318.965  | 878.822   | AJ245902  | 930.078   | 1695.545  | AK002196  | 626.169   | 652.727   |
| NM_002827 | 4624.975  | 3302.785  | AL050039  | 622.131   | 1100.282  | AF040097  | 756.084   | 1023.915  |
| NM_00194E | 1191.628  | 917.64    | AF009316  | 362.564   | 1110.09   | NM_02043E | 552.056   | 586.028   |
| BF035425  | 1244.167  | 1275.612  | BE816678  | 465.654   | 1032.083  | AK024182  | 716.685   | 878.282   |
| NM_00015E | 10047.631 | 13399.757 | AF087987  | 766.219   | 1262.269  | NM_00691E | 7840.721  | 8207.98   |
| NM_01463E | 1448.624  | 1393.437  | Z36840    | 203.371   | 703.72    | NM_00049E | 8549.856  | 10174.792 |
| AF099740  | 1601.237  | 2067.272  | AK021723  | 461.474   | 348.299   | AL049955  | 18905.826 | 10049.871 |

|           |           |           |           |           |           |           |           |           |
|-----------|-----------|-----------|-----------|-----------|-----------|-----------|-----------|-----------|
| NM_006117 | 18822.891 | 17717.336 | H09474    | 1047.589  | 1432.141  | AF155654  | 9279.566  | 6278.602  |
| NM_002225 | 2609.654  | 2827.042  | AB002368  | 9446.01   | 11089.019 | AF088044  | 405.959   | 419.952   |
| NM_006229 | 690.929   | 702.388   | AL360263  | 59587.922 | 53101.465 | AK000028  | 3268.143  | 2950.036  |
| NM_015415 | 25238.656 | 27256.293 | Z36780    | 1301.077  | 1341.737  | NM_013320 | 43890.125 | 29138.492 |
| NM_004897 | 2420.121  | 2847.769  | AK022403  | 1024.835  | 597.706   | AJ245902  | 534.737   | 616.683   |
| NM_002555 | 1194.976  | 1172.922  | AK022955  | 8193.155  | 4299.464  | AL050039  | 786.551   | 1012.99   |
| AF225418  | 1230.394  | 1457.031  | AK021760  | 647.92    | 529.69    | AF009316  | 493.425   | 600.972   |
| NM_000309 | 1163.565  | 1416.679  | AL137408  | 6311.867  | 3307.181  | AF087987  | 472.945   | 659.608   |
| NM_004525 | 20570.139 | 21641.988 | AF054995  | 1162.886  | 1056.25   | H09474    | 1561.103  | 3080.768  |
| AK026381  | 5725.231  | 7281.808  | AL080176  | 4328.449  | 6545.167  | AB002368  | 9904.783  | 26442.963 |
| NM_002450 | 23751.303 | 10732.803 | AK023627  | 2545.635  | 2401.588  | AL360263  | 49411.801 | 58384.199 |
| NM_001686 | 1033.992  | 1095.534  | CY3Cy5    | 1570.824  | 211.412   | Z36780    | 1438.182  | 1833.735  |
| NM_014723 | 3930.808  | 2867.472  | BI759406  | 1075.581  | 1447.772  | AK022403  | 1332.931  | 1359.74   |
| AB011106  | 2921.837  | 2103.542  | R76099    | 517.023   | 640.64    | AK022955  | 7932.497  | 9682.073  |
| D26362    | 3796.749  | 2264.328  | BI763360  | 588.673   | 595.215   | AK021760  | 462.353   | 479.057   |
| NM_013452 | 748.444   | 750.887   | D25538    | 907.541   | 669.605   | BC035855  | 947.268   | 880.035   |
| AY009402  | 892.74    | 662.406   | NM_000360 | 3190.988  | 3508.088  | AL137408  | 6645.986  | 5637.673  |
| NM_018451 | 1716.107  | 798.306   | X03635    | 1141.188  | 933.456   | AF054995  | 1091.216  | 850.085   |
| NM_012443 | 778.296   | 676.175   | BC011847  | 54179.625 | 63608.852 | AL080176  | 2704.109  | 2422.758  |
| NM_007009 | 693.214   | 860.667   | X03348    | 1206.082  | 1685.642  | AK023627  | 2404.801  | 2563.608  |
| NM_002584 | 4920.41   | 4737.868  | AF353674  | 5935.671  | 6065.317  | CY3Cy5    | 2327.882  | 196.999   |
| NM_013334 | 3423.589  | 3075.385  | BC002645  | 2938.044  | 3271.358  | BI759406  | 2354.901  | 1919.481  |
| AF150735  | 5773.935  | 5669.516  | NM_021138 | 1191.998  | 1213.921  | R76099    | 558.253   | 456.604   |
| NM_018183 | 1888.819  | 1871.65   | BC002792  | 740.642   | 746.607   | S74445    | 552.148   | 488.709   |
| NM_012382 | 4320.356  | 6347.304  | NM_021005 | 1115.667  | 1289.602  | BI763360  | 918.232   | 1179.072  |
| BF038366  | 895.6     | 884.486   | SB        | 458.832   | 545.689   | D25538    | 1079.252  | 1243.75   |
| NM_002452 | 12613.246 | 11714.997 | SR2       | 43075.125 | 34034.082 | NM_000360 | 5764.91   | 5855.941  |
| AF245505  | 1447.702  | 789.084   | SR4       | 9819.96   | 7510.512  | D49950    | 271.449   | 364.933   |
| AB037776  | 1061.945  | 636.087   | SR6       | 1595.324  | 1442.431  | X03635    | 2176.314  | 1960.76   |
| AF196976  | 1570.395  | 929.864   | SR8       | 5044.748  | 14156.827 | X03348    | 2002.437  | 2124.369  |
| AL050379  | 880.729   | 656.138   | SR10      | 19628.781 | 6785.99   | AF353674  | 8867.771  | 9450.831  |
| NM_003161 | 2563.524  | 1575.674  | CY3Cy5    | 1462.031  | 178.181   | BC002645  | 3935.447  | 3750.114  |
| NM_014496 | 397.791   | 232.562   | NM_003834 | 1119.141  | 1371.8    | NM_021138 | 2245.611  | 2481.735  |
| NM_016215 | 9911.861  | 7372.466  | NM_005959 | 2124.627  | 1952.77   | BC002792  | 1172.541  | 1483.579  |
| AK026919  | 1128.464  | 999.503   | NM_003381 | 772.177   | 782.916   | NM_021005 | 1785.895  | 2194.104  |
| NM_001501 | 2047.155  | 1842.735  | NM_005756 | 681.148   | 605.268   | SB        | 581.65    | 545.467   |
| NM_006176 | 21587.24  | 15970.99  | NM_003702 | 7070.969  | 7482.611  | SR2       | 55827.297 | 48771.895 |
| AL137459  | 1538.608  | 1337.181  | NM_000369 | 529.5     | 598.955   | SR4       | 14920.51  | 13659.747 |
| AB037812  | 492.005   | 413.624   | NM_016351 | 951.605   | 1048.393  | SR6       | 2360.399  | 2108.581  |
| AB007932  | 1046.441  | 908.07    | NM_004405 | 1645.026  | 1787.895  | SR8       | 7889.792  | 21012.48  |
| AF219257  | 5591.025  | 5243.504  | NM_001988 | 4109.426  | 3569.073  | SR10      | 27729.766 | 9637.159  |
| NM_003978 | 824.993   | 913.721   | NM_006060 | 2479.335  | 2295.713  | CY3Cy5    | 4192.098  | 437.923   |
| NM_002561 | 3929.576  | 3532.427  | NM_005667 | 2390.114  | 2770.907  | X07203    | 415.579   | 583.518   |
| NM_006103 | 21980.686 | 27871.246 | NM_009589 | 135.513   | 550.074   | NM_003834 | 1944.565  | 1907.989  |
| NM_006206 | 652.554   | 679.152   | L09080    | 958.231   | 1177.905  | NM_005959 | 3476.511  | 4228.562  |
| AL359933  | 10669.257 | 9374.284  | NM_007326 | 2127.996  | 2118.337  | NM_003381 | 1745.399  | 4143.939  |
| NM_001302 | 574.273   | 737.137   | NM_001886 | 3169.864  | 2989.493  | NM_005756 | 988.629   | 881.603   |
| M17783    | 5665.935  | 5252.114  | NM_004467 | 332.408   | 414.564   | NM_003702 | 12016.975 | 13370.089 |
| NM_018590 | 10803.24  | 9913.531  | NM_005622 | 768.419   | 719.646   | NM_000369 | 697.113   | 804.851   |
| NM_003178 | 1274.542  | 1020.697  | NM_018058 | 5532.48   | 6823.148  | NM_016351 | 1225.43   | 1231.72   |
| NM_012437 | 8993.886  | 7502.774  | X69079    | 12653.521 | 13018.689 | NM_004405 | 2454.004  | 2477.406  |
| NM_004744 | 846.931   | 1064.892  | AF091033  | 477.91    | 562.588   | NM_006060 | 3050.614  | 3381.242  |
| NM_002607 | 1455.772  | 586.418   | NM_001122 | 4458.01   | 5167.152  | NM_005667 | 3360.502  | 4535.191  |



|           |           |           |           |           |           |           |           |           |
|-----------|-----------|-----------|-----------|-----------|-----------|-----------|-----------|-----------|
| AF116626  | 3160.792  | 1833.995  | NM_004591 | 842.387   | 772.991   | NM_00630E | 547.412   | 479.31    |
| NM_00176C | 25101.125 | 19305.096 | AL133027  | 767.478   | 837.214   | NM_00006C | 607.97    | 615.758   |
| NM_002527 | 801.612   | 585.208   | AB037732  | 1025.527  | 1277.237  | NM_00958E | 403.531   | 308.445   |
| NM_00589C | 3841.515  | 2323.88   | NM_001837 | 400.102   | 225.606   | L09080    | 2218.767  | 2806.505  |
| NM_00706E | 29732.145 | 17759.498 | NM_00183E | 59186.719 | 64996.043 | NM_00732E | 5589.162  | 6253.028  |
| AF149785  | 2741.934  | 1596.095  | BC016029  | 531.486   | 380.806   | AK023080  | 401.429   | 647.135   |
| NM_01206E | 7894.13   | 6027.062  | M27487    | 438.647   | 426.702   | NM_00188E | 4849.179  | 5734.395  |
| NM_004064 | 6745.798  | 3231.111  | NM_00228E | 38983.605 | 29299.818 | NM_004467 | 368.531   | 579.389   |
| NM_00125E | 8247.313  | 5143.956  | NM_002164 | 687.286   | 748.099   | NM_00562E | 919.029   | 1126.985  |
| NM_014704 | 2931.716  | 1830.363  | NM_003811 | 2532.723  | 2967.109  | NM_01805E | 7743.872  | 9099.51   |
| NM_001227 | 2490.195  | 2052.24   | NM_002981 | 3188.125  | 3780.01   | X69079    | 20479.184 | 26045.922 |
| NM_001191 | 3381.254  | 2231.065  | NM_001244 | 683.781   | 791.362   | AF091033  | 700.146   | 663.525   |
| NM_01334E | 3032.471  | 2716.396  | NM_006137 | 3426.988  | 3529.203  | NM_001122 | 9149.66   | 7572.355  |
| NM_014344 | 1016.371  | 709.935   | NM_01613E | 42020.73  | 37043.477 | NM_004591 | 1227.041  | 1273.784  |
| AB040917  | 723.666   | 726.19    | AL117468  | 5563.8    | 5840.68   | AL133027  | 1128.354  | 1408.925  |
| AL110261  | 1803.648  | 1927.332  | NM_01961E | 5577.721  | 5183.63   | AB037732  | 1393.484  | 2084.162  |
| AK021786  | 1047.072  | 904.74    | NM_00538E | 600.401   | 998.879   | NM_005767 | 432.085   | 542.59    |
| NM_00593E | 2295.045  | 2636.016  | AK027086  | 3976.697  | 3938.342  | NM_001837 | 453.23    | 462.368   |
| NM_00427E | 13888.486 | 14023.979 | AB032997  | 924.264   | 940.604   | M27487    | 789.827   | 732.546   |
| NM_004851 | 484.905   | 580.147   | AF073770  | 2394.251  | 2981.413  | NM_002164 | 1058.169  | 1404.099  |
| NM_00190E | 2604.979  | 3171.291  | AL359401  | 4779.642  | 6279.605  | NM_003811 | 4599.063  | 6749.838  |
| NM_00028E | 16865.717 | 19190.174 | NM_01221E | 1757.816  | 1739.721  | NM_002981 | 4546.498  | 4735.404  |
| NM_005911 | 11628.057 | 20856.615 | NM_01657E | 2595.413  | 2557.493  | NM_001244 | 1532.953  | 1810.596  |
| AV702690  | 2503.426  | 3507.147  | NM_00130E | 5034.464  | 5765.423  | NM_01227E | 433.1     | 513.818   |
| AL117452  | 7451.825  | 7505.686  | M21304    | 374.102   | 465.791   | NM_006137 | 5203.708  | 5889.283  |
| NM_01223C | 2896.038  | 3025.08   | NM_00197E | 4581.401  | 4336.569  | NM_01613E | 51899.055 | 45089.035 |
| NM_01403E | 13437.938 | 15832.241 | AB040896  | 1340.489  | 1188.475  | AL117468  | 8238.114  | 10116.554 |
| NM_002061 | 7564.787  | 7625.926  | NM_001107 | 5148.709  | 5839.075  | NM_01961E | 8085.247  | 9130.401  |
| AF169974  | 2055.936  | 1333.06   | AF151851  | 3214.526  | 2957      | NM_00538E | 1505.956  | 1005.585  |
| NM_00452E | 878.843   | 516.833   | NM_00363E | 10893.769 | 11937.433 | AK027086  | 4987.463  | 5876.724  |
| NM_00573E | 3230.456  | 1686.55   | NM_002234 | 873.44    | 622.641   | AB032997  | 1096.32   | 1349.005  |
| NM_01813E | 2803.618  | 1994.132  | NM_000701 | 1795.524  | 1771.028  | AB002351  | 302.801   | 372.086   |
| NM_01961E | 5077.57   | 2820.569  | AB022696  | 2464.086  | 2036.83   | AF073770  | 2852.618  | 2609.941  |
| AF183411  | 2048.995  | 1629.594  | AF137372  | 4161.319  | 4623.607  | AL359401  | 6537.87   | 4580.19   |
| BF244591  | 958.19    | 506.479   | AF220417  | 1303.424  | 1818.316  | NM_01221E | 2026.736  | 1700.129  |
| NM_00588E | 6734.413  | 4331.025  | D83782    | 3910.504  | 3229.156  | NM_01657E | 2832.057  | 2549.863  |
| U63785    | 775.544   | 700.925   | NM_00207E | 2097.716  | 2206.67   | NM_00130E | 7845.013  | 7113.454  |
| NM_00596E | 1173.69   | 727.238   | NM_000287 | 1727.237  | 2012.38   | M21304    | 653.848   | 568.05    |
| NM_00315E | 2686.028  | 1418.197  | NM_00165E | 1427.787  | 1861.886  | NM_00197E | 5404.206  | 5881.371  |
| NM_00310E | 895.938   | 1444.662  | Z70705    | 542.954   | 643.218   | AB040896  | 1459.655  | 1387.891  |
| NM_01331C | 9489.475  | 10523.305 | NM_002611 | 1415.135  | 2063.941  | NM_00363E | 13425.747 | 16106.351 |
| BC004958  | 5526.396  | 5259.917  | NM_017417 | 1091.43   | 1434.627  | NM_002234 | 1868.048  | 3091      |
| NM_00576E | 25371.668 | 30016.381 | AL133602  | 913.542   | 686.79    | NM_000701 | 2526.17   | 2775.296  |
| NM_00647E | 2507.617  | 3261.075  | AF037219  | 2823.515  | 2223.116  | AB022696  | 4739.764  | 5793.727  |
| NM_01464E | 1414.953  | 1448.867  | AK026075  | 1490.368  | 1405.698  | AF137372  | 6158.824  | 6974.42   |
| NM_00565E | 2270.024  | 2548.836  | NM_000251 | 1927.802  | 2086.024  | AF220417  | 1792.741  | 2083.625  |
| NM_01455E | 1433.761  | 1362.399  | NM_00603E | 2027.52   | 2036.748  | D83782    | 6067.313  | 6752.345  |
| NM_00344C | 1677.246  | 1753.825  | AB011133  | 2353.404  | 2508.326  | NM_00207E | 2737.689  | 3021.611  |
| NM_00469E | 10780.006 | 12621.063 | NM_01757E | 27243.975 | 23138.783 | NM_000287 | 2471.391  | 3283.351  |
| U41387    | 17121.203 | 16594.703 | NM_018444 | 1763.907  | 1670.415  | NM_00165E | 1787.2    | 2815.287  |
| NM_00451E | 13769.221 | 17215.764 | NM_00025E | 1347.98   | 1649.742  | Z70705    | 528.039   | 403.246   |
| NM_00651E | 2157.525  | 1737.919  | NM_006947 | 9533.384  | 11480.775 | NM_002611 | 1259.464  | 1198.804  |
| NM_00368E | 18807.598 | 19905.816 | NM_017917 | 1888.091  | 1975.412  | NM_017417 | 847.02    | 730.652   |

|           |           |           |           |           |           |           |           |           |
|-----------|-----------|-----------|-----------|-----------|-----------|-----------|-----------|-----------|
| NM_00248E | 624.026   | 557.646   | NM_00409C | 3895.417  | 3578.718  | AL133602  | 1051.073  | 999.446   |
| NM_00629E | 7234.395  | 6662.48   | NM_014634 | 7037.201  | 7267.752  | AF037219  | 3994.904  | 3421.78   |
| NM_00154C | 4767.405  | 4408.469  | NM_00191E | 3936.681  | 4016.638  | AK026075  | 1997.273  | 1900.144  |
| NM_012111 | 14066.558 | 10242.224 | BC031485  | 1827.7    | 2000.22   | NM_000251 | 2550.686  | 2419.632  |
| NM_00447C | 11417.372 | 7654.965  | NM_00409E | 6949.299  | 8192.473  | NM_00603E | 2927.977  | 3579.456  |
| NM_00141E | 14501.448 | 11051.542 | X15624    | 1413.932  | 1819.819  | AB011133  | 3951.317  | 5725.801  |
| NM_00375E | 30163.227 | 19002.547 | NM_004467 | 603.494   | 977.695   | NM_01757E | 31188.768 | 24063.844 |
| AL049680  | 3005.089  | 1851.528  | NM_00562E | 869.522   | 950.693   | NM_01844E | 2562.654  | 2707.093  |
| AK001595  | 2658.708  | 2888.131  | NM_01805E | 6010.306  | 7923.821  | NM_00025E | 1859.843  | 1918.217  |
| NM_01801E | 3739.871  | 3767.917  | NM_00454E | 11368.111 | 13824.937 | NM_00694E | 13241.511 | 14353.908 |
| NM_00371E | 8641.664  | 8353.092  | X69079    | 11417.045 | 11614.778 | NM_017917 | 2224.986  | 2436.368  |
| M94065    | 2615.992  | 2691.753  | BI759406  | 1206.813  | 1560.09   | NM_00409C | 6184.905  | 6936.79   |
| BF036874  | 1570.319  | 1310.679  | R76099    | 497.185   | 435.751   | NM_014634 | 8246.12   | 9466.328  |
| BE888487  | 63.589    | 1854.844  | S74445    | 277.659   | 399.454   | NM_00191E | 6582.293  | 7349.08   |
| AF182419  | 3485.516  | 3697.745  | BI763360  | 595.271   | 711.275   | BC031485  | 2424.478  | 2991.175  |
| NM_00429E | 612.622   | 618.541   | D25538    | 880.466   | 818.525   | NM_00409E | 7184.906  | 10484.118 |
| NM_00701E | 4046.595  | 4814.325  | NM_00036C | 3601.903  | 3115.236  | X15624    | 1999.508  | 2398.496  |
| NM_00598E | 1972.32   | 2249.646  | D49950    | 269.899   | 218.929   | NM_004467 | 349.686   | 255.176   |
| NM_01590E | 5736.902  | 7310.304  | NM_00184E | 428.288   | 470.031   | NM_00562E | 629.685   | 569.841   |
| AK023759  | 1308.544  | 1268.533  | X03635    | 1175.881  | 1130.151  | NM_01805E | 5861.555  | 5271.574  |
| L25270    | 13167.356 | 16942.332 | X03348    | 1433.549  | 1594.677  | NM_00454E | 13574.423 | 10955.871 |
| AB033111  | 2656.894  | 2929.566  | AF353674  | 6277.068  | 6634.112  | X69079    | 25082.914 | 18723.135 |
| AJ276316  | 2536.582  | 3134.015  | BC002645  | 3388.397  | 3128.237  | BI759406  | 3152.212  | 2716.989  |
| AF229246  | 3191.772  | 3259.397  | NM_021138 | 1313.553  | 1559.879  | R76099    | 606.012   | 653.647   |
| S64709    | 8365.34   | 9245.962  | BC002792  | 783.288   | 864.621   | S74445    | 501.878   | 524.58    |
| NM_01848E | 680.918   | 559.615   | NM_02100E | 1304.147  | 1146.184  | BI763360  | 850.148   | 969.008   |
| X56465    | 1270.511  | 1628.799  | SB        | 494.618   | 490.64    | D25538    | 1125.832  | 1062.133  |
| NM_003071 | 9425.887  | 10374.808 | NM_00152E | 633.72    | 672.285   | NM_00036C | 6080.14   | 5398.747  |
| AK021494  | 2082.29   | 2183.658  | NM_01742E | 1752.463  | 1642.925  | NM_00184E | 541.114   | 674.955   |
| AK022117  | 461.524   | 526.88    | NM_01961E | 5714.266  | 7323.564  | X03635    | 2457.646  | 3637.491  |
| AF075023  | 458.922   | 468.394   | NM_00538E | 507.357   | 782.652   | AF353674  | 9213.378  | 9504.405  |
| AL360160  | 4442.61   | 5405.447  | AK027086  | 3719.941  | 4459.876  | BC002645  | 4338.121  | 4433.162  |
| AK001092  | 4304.495  | 5737.362  | AB032997  | 914.78    | 1147.218  | NM_021138 | 2416.741  | 3073.146  |
| NM_014144 | 1091.553  | 1217.052  | AL096857  | 2542.75   | 3378.875  | BC002792  | 1261.566  | 1969.863  |
| AF147345  | 711.174   | 869.347   | X07203    | 784.345   | 1916.324  | NM_02100E | 1604.108  | 2055.542  |
| AF147373  | 755.704   | 810.826   | NM_003834 | 1269.62   | 1249.892  | NM_00152E | 770.36    | 816.015   |
| AK026209  | 622.882   | 788.303   | NM_00595E | 2465.211  | 1826.452  | NM_01742E | 2238      | 2865.665  |
| AF086253  | 1282.687  | 1505.558  | NM_003381 | 766.52    | 775.404   | NM_01961E | 7007.778  | 5989.375  |
| AF086303  | 634.485   | 757.863   | NM_00575E | 574.442   | 745.295   | NM_00538E | 893.219   | 500.631   |
| AF086434  | 910.031   | 1072.316  | NM_00370E | 7535.16   | 7171.855  | AK027086  | 4193.278  | 4022.614  |
| AK022063  | 2191.619  | 2571.883  | NM_00036E | 591.74    | 488.67    | AB032997  | 841.103   | 811.731   |
| AF086345  | 4345.831  | 5402.996  | NM_00440E | 1777.677  | 1452.052  | AL096857  | 2681.888  | 2206.995  |
| AF086464  | 828.519   | 833.569   | NM_00198E | 4596.968  | 4285.712  | X07203    | 797.223   | 947.559   |
| AL049278  | 3731.509  | 3813.766  | NM_00606C | 2538.031  | 2515.421  | AB040104  | 366.98    | 409.899   |
| AL117519  | 725.568   | 992.3     | NM_005667 | 2666.187  | 2847.815  | NM_003834 | 2621.752  | 3144.514  |
| NM_00506C | 1456.525  | 1623.81   | NM_00630E | 332.889   | 390.717   | NM_00595E | 3460.591  | 4046.27   |
| AF085935  | 913.526   | 974.201   | NM_00006C | 490.237   | 408.764   | NM_003381 | 1240.071  | 1172.943  |
| AL035369  | 2709.211  | 3519.185  | NM_00958E | 805.364   | 847.422   | NM_00440E | 3027.716  | 4228.645  |
| AF075097  | 651.384   | 844.573   | L09080    | 1201.855  | 1030.013  | NM_00198E | 9677.321  | 10280.068 |
| AK022801  | 2462.785  | 2847.668  | NM_00732E | 2306.241  | 2103.392  | NM_00606C | 3308.606  | 3792.787  |
| AL133075  | 4887.3    | 5116.231  | NM_00188E | 3310.603  | 3393.323  | NM_005667 | 3550.894  | 4868.56   |
| AL137630  | 3163.208  | 3445.791  | AF137372  | 4571.03   | 5639.145  | NM_00630E | 510.549   | 569.043   |
| AK055236  | 717.278   | 668.47    | AF220417  | 1321.007  | 1703.71   | NM_00006C | 648.177   | 741.539   |

|           |           |           |           |           |           |           |           |           |
|-----------|-----------|-----------|-----------|-----------|-----------|-----------|-----------|-----------|
| AL137277  | 1620.726  | 2120.809  | D83782    | 3428.872  | 3571.76   | NM_00958  | 528.636   | 701.719   |
| AL137447  | 990.637   | 1096.401  | NM_00207  | 1957.819  | 2457.463  | L09080    | 2251.625  | 3003.743  |
| AL157467  | 901.784   | 614.758   | NM_000287 | 2343.955  | 4223.703  | NM_00732  | 5657.813  | 6639.431  |
| BC023609  | 817.086   | 873.431   | NM_00165  | 1011.325  | 1276.131  | AK023080  | 449.793   | 482.838   |
| AK025100  | 1076.506  | 997.299   | AF091033  | 542.727   | 437.785   | NM_00188  | 4915.213  | 6222.593  |
| AF086395  | 12420.028 | 13481.54  | NM_001122 | 5684.682  | 5834.75   | AF137372  | 5234.405  | 4935.505  |
| AF086049  | 739.939   | 1321.42   | NM_004591 | 575.183   | 691.385   | AF220417  | 1366.643  | 1367.141  |
| AF114263  | 1681.528  | 1716.957  | AL133027  | 940.347   | 770.229   | D83782    | 8011.389  | 7199.449  |
| AK026142  | 3953.245  | 4031.388  | AB037732  | 1083.947  | 1184.474  | NM_00207  | 2284.385  | 1883.783  |
| AF161369  | 325.682   | 850.191   | NM_005767 | 310.273   | 243.479   | NM_000287 | 2363.091  | 1997.587  |
| AK027176  | 1388.552  | 1943.56   | NM_001837 | 390.372   | 231.414   | NM_00165  | 1784.836  | 1681.115  |
| AF073328  | 583.918   | 511.28    | BC016029  | 681.787   | 628.153   | AF091033  | 921.59    | 1096.642  |
| AF211968  | 493.544   | 610.552   | M27487    | 570.338   | 554.971   | NM_001122 | 11775.057 | 11249.211 |
| Y12019    | 837.314   | 913.278   | NM_002164 | 796.32    | 730.703   | NM_004591 | 2586.969  | 2881.622  |
| AK021898  | 859.546   | 1220.153  | NM_003811 | 2856.449  | 3145.072  | AL133027  | 1091.188  | 1215.244  |
| AK022024  | 4351.75   | 4429.188  | NM_002981 | 3594.117  | 3362.402  | AB037732  | 1597.417  | 2462.374  |
| AK022163  | 2478.198  | 2715.797  | NM_001244 | 650.995   | 900.04    | NM_001837 | 419.954   | 658.618   |
| AK022301  | 1419.42   | 1827.177  | NM_006137 | 3677.72   | 3804.925  | BC016029  | 816.678   | 1115.311  |
| AK021948  | 1404.997  | 2042.077  | NM_01613  | 43382.547 | 36838.363 | M27487    | 757.228   | 1041.268  |
| AK022341  | 785.726   | 941.154   | AL117468  | 5722.403  | 5789.401  | NM_002164 | 1033.489  | 1357.331  |
| AK021642  | 2304.421  | 3628.813  | NM_00409  | 4275.419  | 4963.138  | NM_003811 | 4004.678  | 5634.514  |
| AK021987  | 518.209   | 738.395   | NM_014634 | 6419.415  | 6458.603  | NM_002981 | 5788.045  | 6544.326  |
| AK026905  | 3292.48   | 3811.685  | NM_00191  | 2278.421  | 2824.118  | NM_001244 | 1783.76   | 1998.147  |
| NM_00663  | 4412.416  | 5843.006  | BC031485  | 1571.328  | 1771.259  | NM_01227  | 531.837   | 648.674   |
| X14675    | 1182.935  | 1604.022  | NM_00409  | 6095.526  | 7548.596  | NM_006137 | 5309.619  | 5010.168  |
| AF071170  | 1007.256  | 1325.763  | X15624    | 1381.544  | 1459.948  | NM_01613  | 54260.266 | 44669.68  |
| AF161364  | 518.399   | 876.514   | AF073770  | 2464.137  | 2278.538  | AL117468  | 8597.904  | 10363.871 |
| AF075075  | 1486.222  | 1871.357  | AL359401  | 5934.918  | 6187.986  | NM_00409  | 5005.643  | 3721.237  |
| AK025259  | 304.033   | 696.335   | NM_01221  | 1974.938  | 1455.522  | NM_014634 | 6871.762  | 5927.603  |
| NM_01830  | 13764.209 | 13508.38  | NM_01657  | 2270.323  | 1979.09   | NM_00191  | 8122.478  | 7434.144  |
| AK024457  | 1239.395  | 1741.132  | NM_00130  | 5704.912  | 5639.835  | BC031485  | 2614.016  | 2429.137  |
| AK026894  | 1256.447  | 1380.833  | M21304    | 532.867   | 352.336   | NM_00409  | 6685.914  | 6947.477  |
| AK026372  | 1001.244  | 919.103   | NM_00197  | 4908.808  | 4058.848  | X15624    | 1884.303  | 1601.931  |
| NM_01418  | 4047.259  | 3197.577  | AB040896  | 1464.305  | 1346.866  | AF073770  | 7095.873  | 3877.475  |
| AK024752  | 27078.387 | 19832.746 | AF084645  | 335.716   | 306.889   | AL359401  | 7265.388  | 6321.418  |
| BG117194  | 2873.17   | 2193.837  | NM_00517  | 360.04    | 254.191   | NM_01221  | 2280.733  | 2799.264  |
| AF131859  | 6419.663  | 5999.096  | NM_00363  | 12247.424 | 12809.547 | NM_01657  | 3379.272  | 3574.512  |
| AK023632  | 572.883   | 699.575   | NM_002234 | 782.904   | 922.497   | NM_00130  | 7546.739  | 6577.646  |
| AF086118  | 6555.208  | 9345.475  | NM_000701 | 1528.304  | 1559.624  | M21304    | 692.208   | 494.692   |
| NM_01413  | 2650.3    | 4082.168  | AB022696  | 2987.046  | 2903.672  | NM_00197  | 6762.917  | 7741.529  |
| AK023806  | 721.753   | 1040.677  | NM_02100  | 1211.99   | 1261.945  | AB040896  | 1262.301  | 1551.673  |
| AF088068  | 655.082   | 870.08    | SB        | 389.728   | 421.852   | AF084645  | 484.497   | 321.042   |
| Y16696    | 17195.627 | 19100.018 | NM_00152  | 863.47    | 521.963   | NM_00517  | 381.708   | 466.657   |
| AK026094  | 5398.151  | 5948.17   | NM_01742  | 1807.575  | 1488.809  | NM_00363  | 12830.93  | 16522.035 |
| AF161344  | 5030.774  | 7144.344  | Z70705    | 533.984   | 246.648   | NM_002234 | 1771.402  | 2711.292  |
| AF086027  | 1958.137  | 2508.866  | NM_002611 | 1511.608  | 1418.385  | NM_000701 | 2391.281  | 2898.039  |
| AK022154  | 377.82    | 304.456   | NM_017417 | 794.888   | 455.565   | AB022696  | 5215.425  | 5532.625  |
| AK022199  | 790.976   | 499.132   | AL133602  | 950.223   | 764.664   | NM_02100  | 1319.379  | 1265.918  |
| NM_00352  | 2963.186  | 1107.564  | AF037219  | 3360.724  | 3163.584  | SB        | 531.336   | 366.932   |
| S39891    | 1588.932  | 991.693   | AK026075  | 1636.234  | 1300.024  | NM_00152  | 794.124   | 711.212   |
| AK021624  | 713.518   | 698.662   | NM_000251 | 2236.302  | 1913.626  | NM_01742  | 1768.51   | 1701.95   |
| AF278605  | 9761.128  | 7960.474  | NM_00603  | 2211.071  | 2319.012  | Z70705    | 560.804   | 500.144   |
| NM_006497 | 2163.812  | 2478.583  | NM_00248  | 302.067   | 314.78    | NM_002611 | 1445.044  | 1827.938  |

|           |           |           |           |           |           |           |           |           |
|-----------|-----------|-----------|-----------|-----------|-----------|-----------|-----------|-----------|
| AL133599  | 884.527   | 857.534   | AB011133  | 2335.241  | 2160.021  | NM_017417 | 641.839   | 566.098   |
| NM_016472 | 3990.434  | 3923.568  | NM_017572 | 26736.855 | 27489.217 | AL133602  | 1197.415  | 1327.979  |
| AF086064  | 963.593   | 832.871   | NM_018444 | 1849.079  | 1700.923  | AF037219  | 4192.709  | 5236.513  |
| AK023042  | 6621.692  | 7098.5    | NM_000252 | 1348.168  | 1567.15   | AK026075  | 1843.836  | 2229.215  |
| AF086501  | 1657.713  | 1983.263  | NM_006947 | 9910.869  | 11104.89  | NM_000251 | 2625.415  | 2347.894  |
| AK026429  | 837.554   | 1254.952  | NM_017917 | 1967.806  | 1984.842  | NM_00603E | 3661.642  | 3675.835  |
| NM_01655C | 9714.854  | 11892.54  | NM_00006C | 374.858   | 453.227   | AB011133  | 3203.523  | 3741.919  |
| AK024813  | 10543.27  | 14259.63  | L09080    | 1060.838  | 1951.973  | NM_017572 | 36377.785 | 30857.193 |
| AJ227909  | 7850.458  | 12209.251 | NM_00732E | 1637.444  | 1583.762  | NM_018444 | 2388.856  | 2909.142  |
| AK024107  | 831.861   | 949.57    | AK023080  | 332.427   | 911.553   | NM_000252 | 1924.639  | 2219.21   |
| CY3Cy5    | 5953.31   | 598.727   | NM_00188E | 2546.334  | 3123.204  | NM_006947 | 13639.253 | 14433.786 |
| AA152346  | 440.388   | 513.388   | NM_005622 | 770.169   | 772.026   | NM_017917 | 2730.335  | 2727.092  |
| L15189    | 1152.663  | 1292.534  | NM_01805E | 5153.086  | 4985.77   | NM_00006C | 477.247   | 359.25    |
| AB023420  | 9878.15   | 10120.252 | NM_00454E | 11189.188 | 11660.602 | NM_00958E | 317.809   | 292.588   |
| BI822179  | 956.377   | 2077.541  | X69079    | 11858.291 | 9663.846  | L09080    | 2076.067  | 1808.499  |
| AF022912  | 5697.514  | 5682.718  | BI759406  | 1395.927  | 1331.183  | NM_00732E | 5707.289  | 6345.084  |
| AA477428  | 19900.635 | 25917.953 | R76099    | 527.744   | 515.342   | AK023080  | 322.39    | 429.879   |
| AA156342  | 1679.807  | 1747.176  | S74445    | 389.958   | 393.318   | NM_00188E | 4503.972  | 4996.275  |
| R45594    | 15406.283 | 14464.06  | BI763360  | 742.542   | 821.735   | NM_004467 | 568.79    | 1035.811  |
| H46425    | 284.684   | 440.86    | D25538    | 967.979   | 853.081   | NM_005622 | 884.295   | 1106.949  |
| AI355949  | 435.612   | 524.341   | NM_00036C | 3957.675  | 3902.418  | NM_01805E | 6478.248  | 6892.278  |
| AA278152  | 12879.56  | 10513.531 | X03635    | 1343.265  | 1304.38   | NM_00454E | 14610.321 | 14697.257 |
| H75530    | 1737.691  | 1382.99   | X03348    | 1690.132  | 1716.117  | X69079    | 24447.143 | 21324.67  |
| NM_00417E | 3210.852  | 2881.791  | AF353674  | 6698.512  | 5683.645  | BI759406  | 2817.364  | 2542.784  |
| SR5       | 3417.895  | 2929.499  | BC002645  | 3307.652  | 3451.526  | R76099    | 731.918   | 534.383   |
| SR7       | 3956.168  | 24409.211 | NM_021138 | 1587.022  | 1699.58   | S74445    | 586.336   | 577.471   |
| SR9       | 15712.385 | 2391.799  | BC002792  | 707.756   | 999.866   | BI763360  | 1391.474  | 1257.698  |
| CY3Cy5    | 2461.071  | 183.783   | NM_002981 | 2326.737  | 2881.348  | D25538    | 1210.953  | 1185.871  |
| NM_00131E | 5712.872  | 7697.642  | NM_001244 | 597.377   | 970.958   | NM_00036C | 5857.082  | 6384.452  |
| AF286095  | 748.235   | 1039.033  | NM_01227E | 351.271   | 343.226   | D49950    | 415.809   | 369.923   |
| NM_00087E | 286.766   | 507.658   | NM_006137 | 3620.412  | 4214.128  | NM_00184E | 476.401   | 410.07    |
| S66407    | 545.935   | 682.281   | NM_01613E | 47705.531 | 55537.563 | X03635    | 2664.616  | 2898.422  |
| NM_00425E | 1663.687  | 3298.047  | AL117468  | 5803.742  | 6711.691  | X03348    | 2087.935  | 2478.595  |
| NM_001981 | 3171.558  | 3564.298  | NM_01961E | 5598.205  | 5450.779  | AF353674  | 9682.015  | 9518.03   |
| NM_014654 | 700.137   | 916.2     | NM_00538E | 614       | 840.141   | BC002645  | 4669.008  | 4485.538  |
| NM_00158E | 1061      | 1488.392  | AK027086  | 3889.82   | 4126.132  | NM_021138 | 2613.026  | 2952.074  |
| AK026108  | 1721.679  | 1553.345  | AB032997  | 893.018   | 911.836   | BC002792  | 1405.37   | 1984.7    |
| NM_00637E | 1455.314  | 1939.484  | AL096857  | 2065.122  | 1696.525  | NM_002981 | 3807.003  | 2764.444  |
| BF571428  | 1370.638  | 1369.542  | NM_003834 | 1463.463  | 1435.286  | NM_001244 | 3728.086  | 2283.179  |
| AB037723  | 710.54    | 745.163   | NM_00595E | 2365.684  | 1863.457  | NM_01227E | 467.634   | 430.439   |
| NM_00624E | 4838.35   | 4031.96   | NM_003381 | 897.555   | 862.114   | NM_006137 | 4094.448  | 3600.223  |
| NM_00431E | 424.915   | 187.575   | NM_00575E | 667.83    | 816.113   | NM_01613E | 48330.57  | 38100.379 |
| NM_01692E | 3441.994  | 2963.422  | NM_00370E | 7932.417  | 8422.698  | AL117468  | 7741.916  | 11093.744 |
| NM_00163E | 10459.026 | 9685.93   | NM_00036E | 581.848   | 668.18    | NM_01961E | 7733.655  | 11632.926 |
| AF182404  | 2154.173  | 3147.799  | NM_00440E | 2107.653  | 1837.658  | NM_00538E | 1959.736  | 3816.779  |
| NM_00655E | 2864.526  | 3874.725  | NM_00198E | 4852.639  | 3919.344  | AK027086  | 4519.118  | 5500.253  |
| NM_00244E | 690.146   | 845.867   | NM_00606C | 2709.482  | 2547.742  | AB032997  | 814.629   | 895.114   |
| NM_01780E | 285.444   | 502.087   | NM_005667 | 2624.767  | 3213.278  | AL096857  | 2879.168  | 2646.88   |
| AK023202  | 3766.505  | 4361.442  | NM_003471 | 768.979   | 1110.865  | X07203    | 488.696   | 522.295   |
| D63877    | 3013.775  | 4051.512  | NM_000701 | 1301.223  | 1895.84   | NM_003834 | 2540.664  | 2235.931  |
| AF131760  | 985.153   | 1206.632  | AB022696  | 2502.501  | 2699.217  | NM_00595E | 3342.87   | 3810.562  |
| NM_01869E | 1604.154  | 1979.529  | AF137372  | 4590.747  | 4446.515  | NM_003381 | 1240.029  | 1430.502  |
| NM_006461 | 4904.784  | 5882.489  | AF220417  | 1469.852  | 1659.283  | NM_00575E | 1001.318  | 928.195   |

|           |           |           |           |           |           |           |           |           |
|-----------|-----------|-----------|-----------|-----------|-----------|-----------|-----------|-----------|
| NM_018201 | 2032.933  | 1949.824  | D83782    | 3726.255  | 3134.427  | NM_003702 | 14198.914 | 14176.403 |
| NM_01443E | 525.09    | 885.22    | NM_00207E | 1944.644  | 1296.903  | NM_00036E | 908.161   | 1059.92   |
| NM_003764 | 4032.734  | 3302.482  | NM_000287 | 1792.649  | 1594.514  | NM_00440E | 2968.814  | 4377.655  |
| NM_00679E | 15075.486 | 13734.089 | NM_00165E | 1390.642  | 1471.209  | NM_00198E | 10562.966 | 10247.057 |
| NM_00153E | 699.523   | 757.267   | AF091033  | 762.087   | 441.365   | NM_00606C | 3439.962  | 3822.348  |
| X97261    | 35563.203 | 10392.293 | NM_001122 | 6451.939  | 7255.809  | NM_005667 | 3793.913  | 4506.915  |
| NM_00146E | 1537.958  | 1349.496  | NM_004591 | 874.757   | 690.789   | NM_00630E | 705.516   | 722.293   |
| D87666    | 55237.234 | 55968.629 | AL133027  | 1010.017  | 1084.919  | NM_002234 | 1916.416  | 1417.206  |
| AF149304  | 350.995   | 715.974   | AB037732  | 1342.808  | 1626.672  | NM_000701 | 2036.225  | 1590.247  |
| NM_01209E | 5218.018  | 7022.79   | NM_001837 | 412.843   | 467.02    | AB022696  | 6347.503  | 7610.373  |
| NM_01643E | 319.398   | 307.08    | NM_00183E | 60224.676 | 57936.016 | NM_01437E | 698.162   | 1375.789  |
| X73079    | 12282.55  | 15073.888 | BC016029  | 880.398   | 746.842   | AF137372  | 5914.371  | 8175.049  |
| NM_019091 | 1318.698  | 1352.704  | M27487    | 554.605   | 384.84    | AF220417  | 1666.466  | 2293.626  |
| AF264781  | 786.908   | 867.934   | NM_002164 | 838.714   | 1025.76   | D83782    | 5727.367  | 6121.722  |
| NM_00245E | 823.873   | 412.012   | NM_003811 | 2663.188  | 2784.774  | NM_00207E | 2302.056  | 2070.349  |
| AK024215  | 3570.606  | 5711.541  | NM_018444 | 1851.325  | 2014.956  | NM_000287 | 2017.915  | 2203.318  |
| AB044661  | 4111.122  | 4337.53   | NM_006947 | 9557.502  | 11266.364 | NM_00165E | 1774.037  | 1763.594  |
| NM_00060E | 2511.615  | 4123.536  | NM_017917 | 1968.129  | 1659.239  | AF091033  | 590.896   | 547.768   |
| NM_016124 | 2635.903  | 2462.35   | NM_00409C | 4052.376  | 4437.193  | NM_001122 | 10711.792 | 9977.181  |
| U53530    | 1694.626  | 1309.885  | NM_014634 | 8399.678  | 13097.946 | NM_004591 | 1515.888  | 1441.322  |
| NM_01594E | 1216.599  | 1160.495  | NM_00191E | 3091.383  | 4068.005  | AL133027  | 1182.75   | 1350.005  |
| NM_003054 | 1738.887  | 1805.659  | BC031485  | 1481.069  | 1444.368  | AB037732  | 1362.297  | 1604.787  |
| NM_00221E | 9087.814  | 8693.567  | NM_00409E | 6194.775  | 5787.178  | NM_005767 | 508.355   | 515.765   |
| NM_00282E | 2280.938  | 2692.169  | X15624    | 1321.048  | 1325.167  | NM_001837 | 537.514   | 397.049   |
| AF159141  | 2306.039  | 3002.042  | AF073770  | 2550.708  | 2577.186  | M27487    | 1102.028  | 1213.526  |
| NM_01645E | 3315.231  | 3950.68   | AL359401  | 5776.936  | 5775.581  | NM_002164 | 1235.433  | 1493.64   |
| AK022233  | 2960.248  | 4062.493  | NM_01221E | 2028.265  | 1626.062  | NM_003811 | 4430.842  | 5643.498  |
| AK026410  | 4829.678  | 6567.213  | NM_01657E | 2499.799  | 2212.318  | AB011133  | 2357.434  | 1231.52   |
| NM_014637 | 4159.783  | 5046.266  | NM_00130E | 6009.412  | 6446.618  | NM_01757E | 25484.252 | 11882.349 |
| NM_01337E | 10772.996 | 12672.188 | M21304    | 623.857   | 443.362   | NM_018444 | 2371.435  | 1940.866  |
| AF113208  | 6150.716  | 6807.228  | NM_00197E | 5106.161  | 5528.897  | NM_00025E | 2055.811  | 3801.179  |
| NM_00615E | 3619.734  | 3569.661  | AB040896  | 1439.605  | 1550.138  | NM_006947 | 15568.147 | 32827.535 |
| NM_012164 | 3444.049  | 3204.747  | NM_001107 | 5439.843  | 4661.96   | NM_017917 | 2256.229  | 3451.115  |
| NM_01807E | 1049.651  | 583.435   | AF084645  | 318.659   | 395.985   | NM_00409C | 5639.102  | 5054.753  |
| NM_00476C | 13496.102 | 11322.673 | NM_00363E | 12190.811 | 13126.122 | NM_014634 | 6901.5    | 7281.233  |
| NM_00675E | 3994.928  | 3751.758  | AF040723  | 3954.956  | 4301.776  | NM_00191E | 5941.61   | 6680.762  |
| NM_00442E | 735.922   | 436.574   | X89675    | 866.771   | 900.867   | BC031485  | 2287.15   | 2282.885  |
| NM_00680E | 3365.473  | 3362.414  | NM_01218E | 474.514   | 549.836   | NM_00409E | 6107.848  | 5791.477  |
| NM_01819E | 493.989   | 453.65    | NM_00579E | 7302.822  | 8469.968  | X15624    | 1924.43   | 1410.179  |
| NM_01394E | 510.609   | 646.754   | NM_00421E | 2072.716  | 1957.117  | AF073770  | 3039.641  | 2434.905  |
| NM_00163E | 7125.12   | 6419.539  | NM_01628E | 17587.762 | 16162.177 | AL359401  | 7253.455  | 7247.692  |
| BG698522  | 600.419   | 879.65    | NM_001464 | 689.327   | 782.075   | NM_01221E | 2184.924  | 2205.959  |
| AA152346  | 663.455   | 544.973   | NM_002051 | 3054.696  | 3417.738  | NM_01657E | 3070.595  | 3461.138  |
| L15189    | 1374.842  | 1294.519  | NM_00152E | 785.437   | 558.1     | NM_00130E | 8750.182  | 8346.954  |
| AB023420  | 10572.449 | 10793.465 | NM_01742E | 1537.799  | 1065.479  | M21304    | 566.65    | 607.573   |
| BI822179  | 926.162   | 931.012   | Z70705    | 668.395   | 498.814   | NM_00197E | 6415.804  | 6613.336  |
| AF022912  | 5812.418  | 4349.296  | NM_002611 | 1461.655  | 1444.092  | AB040896  | 1920.303  | 1826.373  |
| AA477428  | 20096.754 | 20615.066 | NM_017417 | 838.813   | 840.502   | AF084645  | 390.812   | 601.044   |
| AA156342  | 1411.94   | 1535.28   | AL133602  | 1244.616  | 1039.007  | NM_00363E | 13175.019 | 15719.548 |
| R45594    | 14766.737 | 13215.426 | AF037219  | 3659.645  | 3516.114  | NM_01218E | 625.046   | 814.959   |
| AI355949  | 547.789   | 409.755   | AK026075  | 1563.73   | 1207.552  | NM_00579E | 8754.694  | 9411.871  |
| AA278152  | 13670.437 | 9995.847  | NM_000251 | 2069.301  | 2382.288  | NM_00421E | 2698.47   | 2476.947  |
| H75530    | 1977.599  | 1443.401  | NM_00603E | 2650.078  | 2739.301  | NM_01628E | 23313.459 | 17146.977 |

|           |           |           |           |           |           |           |           |           |
|-----------|-----------|-----------|-----------|-----------|-----------|-----------|-----------|-----------|
| NM_004176 | 3358.873  | 2689.395  | U87223    | 1757.275  | 1881.186  | NM_001464 | 702.267   | 635.72    |
| NM_004548 | 20949.162 | 15882.111 | NM_000093 | 517.356   | 467.491   | NM_002051 | 4196.553  | 3544.701  |
| AK000554  | 3035.515  | 2824.389  | NM_001779 | 2858.671  | 2797.59   | NM_001523 | 527.892   | 400.873   |
| NM_006472 | 824.47    | 793.161   | AB033059  | 438.677   | 532.165   | NM_017423 | 1687.748  | 1510.593  |
| NM_001538 | 847.518   | 1313.631  | NM_016484 | 3488.739  | 3730.037  | Z70705    | 450.308   | 552.389   |
| X97261    | 43002.152 | 16367.12  | NM_014452 | 1286.151  | 1035.803  | NM_002611 | 1764.041  | 1401.401  |
| NM_001468 | 1831.644  | 2017.834  | AK021536  | 7331.905  | 6264.013  | NM_017417 | 668.811   | 751.302   |
| NM_001315 | 5352.849  | 4891.951  | NM_002600 | 446.697   | 554.461   | AL133602  | 1558.668  | 1697.294  |
| AF286095  | 1137.803  | 1338.359  | NM_003646 | 11141.44  | 7022.57   | AF037219  | 4666.302  | 5233.717  |
| S66407    | 581.03    | 727.4     | NM_006663 | 1151.33   | 1014.379  | AK026075  | 2293.859  | 2521.532  |
| NM_004258 | 1597.91   | 1389.846  | NM_006092 | 930.019   | 794.159   | NM_000251 | 2735.009  | 3038.155  |
| NM_001981 | 3440.593  | 3661.726  | NM_003939 | 796.464   | 711.209   | NM_006038 | 3412.541  | 4292.191  |
| NM_014654 | 652.847   | 583.255   | NM_012424 | 735.552   | 748.133   | NM_002485 | 373.955   | 662.848   |
| NM_001585 | 963.191   | 760.448   | NM_002446 | 1631.179  | 1450.593  | NM_016484 | 3830.168  | 2718.106  |
| AK026108  | 1587.484  | 1230.238  | NM_000863 | 907.371   | 735.005   | NM_014452 | 1471.351  | 1389.079  |
| NM_006379 | 1541.392  | 1499.75   | NM_006651 | 2857.667  | 3083.173  | AK021536  | 8137.071  | 6918.049  |
| BF571428  | 1313.319  | 887.455   | NM_005336 | 6716.447  | 6240.641  | U31285    | 304.096   | 209.645   |
| AB037723  | 710.927   | 593.453   | NM_001419 | 9835.587  | 10012.652 | NM_003646 | 14033.525 | 11487.097 |
| NM_006246 | 5256.962  | 3616.734  | AF119817  | 13162.422 | 11763.581 | NM_006663 | 1133.85   | 907.285   |
| U58096    | 20590.721 | 16991.348 | AL035306  | 1502.841  | 1558.968  | NM_006092 | 876.974   | 963.554   |
| NM_016929 | 3242.9    | 3095.332  | NM_001328 | 11004.528 | 9583.787  | NM_003939 | 816.953   | 707.025   |
| NM_015948 | 1211.293  | 1487.106  | NM_005749 | 2205.542  | 2390.441  | NM_012424 | 790.442   | 671.736   |
| NM_003054 | 2040.71   | 2613.565  | NM_004230 | 1665.264  | 1542.353  | NM_002446 | 2358.541  | 2468.209  |
| NM_002219 | 9266.715  | 11936.62  | NM_014503 | 740.606   | 748.29    | NM_000863 | 1527.606  | 1758.702  |
| AF182404  | 1987.862  | 2278.117  | NM_014659 | 1238.711  | 943.927   | NM_006651 | 3624.364  | 4063.781  |
| NM_006555 | 4769.144  | 4864.145  | NM_004399 | 3398.758  | 2575.446  | NM_005336 | 8626.151  | 8527.16   |
| NM_014521 | 313.241   | 425.87    | NM_006337 | 5021.323  | 4540.184  | NM_001419 | 13512.937 | 12584.304 |
| NM_002445 | 629.468   | 710.666   | NM_004507 | 3033.131  | 2455.45   | AF119817  | 18215.814 | 18720.662 |
| NM_017809 | 454.861   | 164.864   | NM_002710 | 11598.248 | 9904.504  | AL035306  | 2221.12   | 1997.484  |
| AK023202  | 3405.563  | 2990.324  | NM_014060 | 2957.47   | 3234.175  | NM_001328 | 18340.125 | 25146.094 |
| D63877    | 3213.299  | 3109.859  | NM_004749 | 5709.775  | 5487.485  | NM_014503 | 722.868   | 718.81    |
| AF131760  | 1094.517  | 929.893   | BQ446064  | 1456.812  | 1541.708  | NM_014659 | 1475.942  | 1326.562  |
| NM_018698 | 1308.657  | 1074.595  | AF302502  | 6483.748  | 5724.695  | NM_004399 | 3668.229  | 3176.071  |
| NM_006461 | 4235.653  | 3231.289  | AF274571  | 1338.253  | 1194.141  | NM_006337 | 5486.141  | 4065.857  |
| NM_018201 | 2332.215  | 1514.484  | NM_005449 | 1397.198  | 1545.858  | NM_004507 | 3178.955  | 2289.12   |
| NM_003764 | 4053.397  | 3072.279  | NM_003879 | 1632.905  | 1918.216  | NM_002710 | 12224.925 | 9215.815  |
| NM_006793 | 17851.303 | 18991.398 | NM_016052 | 4349.925  | 3433.662  | NM_014060 | 3590.615  | 2931.807  |
| NM_018079 | 1057.576  | 1133.6    | NM_006718 | 1281.541  | 1018.503  | NM_004749 | 7443.136  | 6766.457  |
| NM_004760 | 13596.16  | 17382.363 | NM_005427 | 673.131   | 575.349   | BQ446064  | 2032.189  | 1780.417  |
| NM_006752 | 4369.562  | 4518.762  | NM_016312 | 544.164   | 706.324   | AF302502  | 6179.993  | 4602.776  |
| NM_004428 | 622.631   | 703.704   | AF234887  | 711.172   | 796.349   | AF274571  | 1370.371  | 1282.315  |
| NM_006809 | 3478.399  | 4396.423  | NM_001776 | 1184.883  | 1190.024  | NM_005449 | 1710.121  | 1510.038  |
| AF149304  | 450.723   | 656.052   | NM_001903 | 6877.915  | 8402.149  | NM_003879 | 2254.206  | 2110.122  |
| NM_012095 | 5825.856  | 6522.945  | NM_005857 | 3227.377  | 3693.964  | NM_016052 | 5280.455  | 4595.754  |
| NM_016438 | 320.664   | 377.867   | NM_000429 | 1086.169  | 910.644   | NM_006718 | 1232.655  | 1413.065  |
| X73079    | 12608.292 | 13710.855 | AK027037  | 789.451   | 607.975   | NM_005427 | 770.031   | 932.178   |
| NM_019091 | 1232.467  | 1174.678  | NM_003875 | 7059.14   | 5869.19   | NM_016312 | 834.296   | 689.012   |
| AF264781  | 920.228   | 777.149   | AF191687  | 2312.732  | 1785.402  | AF234887  | 811.84    | 813.759   |
| NM_002456 | 551.344   | 351.328   | NM_000274 | 7428.312  | 5889.801  | NM_001776 | 1387.893  | 1647.025  |
| AK024215  | 3043.889  | 2579.436  | NM_000170 | 1211.287  | 1060.586  | NM_001792 | 399.943   | 343.379   |
| AB044661  | 3773.159  | 2764.513  | NM_000281 | 8951.391  | 8668.388  | NM_001903 | 11094.793 | 8753.155  |
| NM_000606 | 2459.256  | 1998.35   | NM_006031 | 2484.854  | 1661.806  | NM_001874 | 1574.665  | 298.282   |
| NM_016124 | 2887.853  | 2431.598  | NM_002715 | 5567.459  | 4693.466  | NM_000429 | 756.776   | 684.025   |

|           |           |           |           |           |           |           |           |           |
|-----------|-----------|-----------|-----------|-----------|-----------|-----------|-----------|-----------|
| U53530    | 1949.728  | 1822.961  | NM_001020 | 56974.5   | 65349.074 | AK027037  | 595.892   | 512.291   |
| NM_00659E | 3345.644  | 3285.224  | AB020660  | 2432.897  | 2306.943  | NM_00387E | 8490.224  | 4906.599  |
| NM_00417E | 3402.34   | 3656.501  | NM_00665E | 18857.705 | 16565.822 | AF191687  | 3098.734  | 2415.912  |
| NM_00454E | 22639.186 | 24601.539 | NM_018051 | 1249.974  | 947.417   | NM_00304E | 415.244   | 439.695   |
| AK000554  | 2632.028  | 4527.34   | NM_015371 | 3152.85   | 2521.925  | NM_000274 | 10926.12  | 7809.787  |
| NM_00647E | 1046.651  | 774.927   | AB040915  | 1610.027  | 1559.322  | NM_00017C | 1345.6    | 1051.587  |
| NM_00282E | 2618.006  | 2609.335  | AF147791  | 367.126   | 387.883   | NM_000281 | 11824.636 | 9531.063  |
| AF159141  | 3550.848  | 4065.383  | NM_006481 | 1571.898  | 1722.484  | AK001295  | 363.351   | 458.303   |
| NM_01645E | 3733.864  | 3287.747  | AB011115  | 970.225   | 1052.32   | NM_006031 | 1902.208  | 1453.15   |
| AK022233  | 2521.771  | 2972.775  | NM_00391C | 30858.16  | 52342.574 | NM_00271E | 6510.806  | 6220.822  |
| AK026410  | 4096.419  | 3565.802  | AB007913  | 550.957   | 507.183   | NM_00102C | 52114.457 | 66024.547 |
| NM_014637 | 3885.967  | 3614.177  | NM_00669E | 4038.614  | 3251.013  | AB020660  | 3323.033  | 3439.467  |
| NM_01337E | 11574.507 | 10264.434 | NM_00459E | 6354.158  | 6306.848  | NM_00665E | 26341.912 | 25313.039 |
| AF113208  | 5649.684  | 4587.231  | NM_006037 | 7044.74   | 5239.524  | NM_018051 | 1372.791  | 1434.657  |
| NM_00615E | 3629.472  | 2886.759  | NM_015871 | 4463.595  | 4561.205  | NM_015371 | 3621.385  | 3361.823  |
| NM_012164 | 3361.048  | 2774.193  | NM_019037 | 3473.723  | 2523.744  | AB040915  | 1870.025  | 1778.631  |
| NM_004721 | 336.742   | 369.806   | NM_015891 | 3622.536  | 2488.034  | AF147791  | 580.944   | 535.615   |
| AB011156  | 751.397   | 716.608   | NM_00680E | 622.682   | 430.759   | NM_006481 | 2041.053  | 917.966   |
| NM_00624E | 5629.42   | 5267.248  | NM_00506E | 20462.488 | 14214.943 | AB011115  | 1091.405  | 466.322   |
| U58096    | 23175.928 | 21689.34  | NM_00308E | 4977.196  | 4286.181  | NM_00391C | 18732.838 | 11324.688 |
| NM_01692E | 4366.15   | 6072.231  | NM_00375E | 12061.924 | 10317.112 | AB007913  | 438.561   | 271.092   |
| NM_01232E | 344.685   | 377.052   | NM_01759C | 1569.906  | 1372.059  | NM_00669E | 3850.123  | 3244.026  |
| NM_00694E | 212.714   | 763.539   | AB011145  | 4512.719  | 4520.977  | NM_00459E | 6114.698  | 4232.739  |
| NM_01819E | 519.381   | 526.476   | NM_00375C | 11283.671 | 7811.11   | NM_006037 | 7332.916  | 5151.84   |
| NM_01394E | 608.724   | 634.81    | M92422    | 1906.549  | 1858.552  | NM_015871 | 4883.623  | 3701.134  |
| NM_00163E | 11370.789 | 13321.002 | NM_01786E | 1312.372  | 1324.412  | NM_019037 | 4005.317  | 3151.19   |
| BG698522  | 501.797   | 571.941   | AK021888  | 720.591   | 785.113   | NM_015891 | 4083.369  | 2963.047  |
| AA152346  | 562.059   | 426.894   | AK022848  | 1766.049  | 1991.918  | NM_00680E | 815.402   | 558.415   |
| L15189    | 1140.438  | 1162.002  | AL049957  | 1099.828  | 1063.532  | AB037778  | 646.237   | 528.147   |
| AB023420  | 8817.869  | 5654.746  | NM_005847 | 624.84    | 862.308   | NM_00506E | 28460.697 | 22057.592 |
| BI822179  | 654.716   | 497.732   | NM_01815E | 10286.385 | 9532.717  | NM_00308E | 5522.979  | 3269.061  |
| AF022912  | 5151.499  | 3562.436  | NM_00081E | 2798.587  | 2836.251  | NM_00375E | 12693.393 | 10528.859 |
| AA477428  | 15487.051 | 12502.579 | NM_00251E | 1991.64   | 2400.338  | NM_01759C | 2321.844  | 1818.725  |
| AA156342  | 1475.436  | 796.845   | NM_017424 | 5089.592  | 3990.244  | AB011145  | 4522.049  | 3873.568  |
| R45594    | 13227.132 | 10160.422 | NM_00152E | 4973.961  | 4650.822  | NM_00375C | 13559.536 | 10249.383 |
| AI355949  | 441.229   | 359.488   | NM_00088E | 5583.875  | 4550.228  | M92422    | 2319.116  | 1945.323  |
| AA278152  | 13823.528 | 11807.259 | AF254086  | 1248.182  | 1127.418  | NM_01786E | 1386.635  | 1141.357  |
| H75530    | 2229.894  | 2914.77   | AL390142  | 905.951   | 706.118   | AK021888  | 675.614   | 325.52    |
| NM_003764 | 3876.317  | 4351.327  | NM_00656E | 2320.02   | 2003.201  | AK022848  | 1733.255  | 768.855   |
| NM_00679E | 8116.053  | 7519.258  | AB007930  | 4285.593  | 3819.546  | AL049957  | 759.57    | 728.334   |
| NM_00153E | 872.319   | 1250.383  | AJ005273  | 3078.045  | 2826.004  | NM_01815E | 14011.716 | 17269.371 |
| X97261    | 42301.68  | 14083.009 | AK021892  | 2333.148  | 2679.526  | NM_00081E | 4617.644  | 3530.27   |
| NM_00146E | 1783.005  | 1933.443  | NM_003121 | 365.639   | 390.914   | NM_00251E | 2373.854  | 1682.374  |
| NM_00541C | 148.563   | 1246.02   | NM_003437 | 1520.353  | 1563.323  | NM_017424 | 4327.557  | 3293.845  |
| D87666    | 56856.473 | 63101.684 | NM_018337 | 4377.965  | 3672.902  | NM_00152E | 5473.843  | 3819.852  |
| NM_00131E | 4872.578  | 4543.851  | AA193295  | 8702.228  | 7670.821  | NM_00088E | 6095.158  | 4302.677  |
| AF286095  | 1094.145  | 1232.359  | NM_01804E | 4647.354  | 4743.806  | AF254086  | 1388.027  | 1331.264  |
| S66407    | 696.423   | 514.867   | NM_01480E | 1655.266  | 1450.225  | AL390142  | 764.973   | 773.101   |
| NM_00425E | 1190.461  | 871.058   | AK024956  | 350.922   | 462.688   | NM_00656E | 2777.742  | 2295.018  |
| NM_001981 | 3156.504  | 2194.398  | AF147386  | 1222.856  | 1276.894  | AB007930  | 4928.868  | 3424.225  |
| NM_014654 | 436.114   | 525.093   | AF273052  | 7051.899  | 5979.727  | AJ005273  | 2766.996  | 2364.651  |
| NM_00158E | 696.393   | 582.334   | NM_01794E | 6603.053  | 6857.982  | AK021892  | 2730.477  | 2226.351  |
| AK026108  | 1568.129  | 1335.444  | AF147383  | 408.472   | 398.465   | NM_003437 | 1688.714  | 1832.379  |

|           |           |           |           |           |           |           |           |           |
|-----------|-----------|-----------|-----------|-----------|-----------|-----------|-----------|-----------|
| NM_006379 | 1432.848  | 1009.975  | AK025682  | 1359.77   | 1077.752  | NM_018337 | 7384.387  | 6327.569  |
| BF571428  | 1328.982  | 1067.239  | NM_013352 | 523.954   | 428.347   | AA193295  | 9890.647  | 8637.38   |
| AB037723  | 593.239   | 659.438   | NM_016478 | 6339.708  | 5022.025  | NM_018045 | 5914.295  | 5274.161  |
| NM_000606 | 2880.012  | 3632.557  | AL389986  | 6490.247  | 5844.897  | NM_014803 | 1497.047  | 1020.339  |
| NM_016124 | 2693.858  | 2746.688  | AF088052  | 934.91    | 760.92    | AK024956  | 291.885   | 230.484   |
| U53530    | 1512.645  | 1478.987  | AF086342  | 391.15    | 250.678   | AF147386  | 1580.448  | 1295.938  |
| NM_006598 | 3122.98   | 3887.083  | AF086451  | 259.881   | 372.688   | AF273052  | 7081.539  | 11569.766 |
| NM_015948 | 1527.922  | 1451.767  | AF086387  | 738.979   | 636.538   | NM_017943 | 7153.45   | 6860.229  |
| NM_003054 | 2318.255  | 3088.972  | AF086443  | 458.457   | 340.575   | AF147383  | 433.321   | 441.513   |
| NM_002219 | 8863.381  | 7333.779  | AL389941  | 909.276   | 698.384   | AK025682  | 1389.543  | 880.824   |
| AF182404  | 2065.852  | 2252.993  | AB037756  | 1674.613  | 1763.702  | NM_013352 | 444.07    | 457.489   |
| NM_006555 | 4444.073  | 3368.594  | AK001853  | 3259.365  | 3222.566  | NM_016478 | 7394.399  | 6144.698  |
| NM_002445 | 768.249   | 698.37    | AK025071  | 1058.78   | 918.615   | AL389986  | 8036.229  | 6583.072  |
| AK023202  | 3531.315  | 2645.924  | NM_015370 | 1960.139  | 1580.64   | AF086279  | 245.406   | 299.6     |
| D63877    | 2532.474  | 2136.77   | AF085917  | 1088.156  | 1053.791  | AF088052  | 1139.978  | 866.822   |
| AF131760  | 1138.392  | 765.515   | AF085989  | 538.261   | 643.121   | AF086387  | 588.352   | 515.642   |
| NM_018698 | 1407.362  | 908.44    | AL360139  | 39349.809 | 33604.66  | AF086443  | 252.588   | 276.568   |
| NM_006461 | 4351.026  | 3451.544  | AF075110  | 15604.494 | 28073.844 | AL389941  | 841.578   | 869.297   |
| NM_018201 | 2264.201  | 1628.7    | AL137323  | 507.626   | 566.311   | AB037756  | 1736.821  | 1716.71   |
| NM_014438 | 668.718   | 568.577   | AL137494  | 2688.587  | 3009.214  | AK001853  | 3443.257  | 3597.815  |
| NM_006153 | 3898.783  | 4525.732  | AL162037  | 3849.657  | 3258.66   | AK025071  | 1086.504  | 1078.25   |
| NM_012164 | 3817.964  | 3899.107  | AL390150  | 1043.798  | 642.825   | NM_015370 | 1724.417  | 1348.402  |
| AK026010  | 354.414   | 528.341   | AF086063  | 597.223   | 474.294   | AF085917  | 1232.922  | 1264.134  |
| AB011156  | 655.232   | 529.804   | AF086098  | 1067.739  | 1027.815  | AL360139  | 48707.297 | 56346.32  |
| NM_018079 | 912.038   | 824.591   | AF086076  | 741.838   | 571.339   | AF075110  | 10813.325 | 11216.352 |
| NM_004760 | 15053.413 | 15838.242 | AL833393  | 1938.459  | 1490.675  | AL137323  | 572.383   | 345.514   |
| NM_006752 | 4563.938  | 5396.939  | AF088005  | 1474.68   | 1303.78   | AL137494  | 3256.272  | 2228.907  |
| NM_004428 | 674.397   | 702.747   | AF086096  | 4362.039  | 4228.406  | AL162037  | 4048.901  | 2547.366  |
| NM_006809 | 3024.994  | 3153.941  | AL390132  | 527.547   | 464.052   | AL390150  | 763.08    | 591.78    |
| AF149304  | 472.029   | 508.066   | NM_017933 | 2705.65   | 2528.034  | NM_002761 | 482.133   | 427.131   |
| NM_012095 | 5737.572  | 6974.448  | NM_017819 | 8100.427  | 6191.696  | AF086063  | 588.928   | 408.041   |
| X73079    | 13746.746 | 10431.462 | AK024653  | 8537.548  | 8588.116  | AF086098  | 1251.8    | 949.335   |
| NM_019091 | 1334.795  | 861.617   | AF103907  | 799.207   | 575.088   | AF086076  | 684.304   | 951.149   |
| AF264781  | 980.546   | 537.163   | AF094508  | 473.19    | 585.651   | AL833393  | 2528.002  | 2101.777  |
| NM_002456 | 682.536   | 434.365   | AF161351  | 884.602   | 793.913   | AF088005  | 1535.308  | 1144.792  |
| AK024215  | 3761.616  | 5221.882  | AF257098  | 543.1     | 598.92    | AF086096  | 5098.619  | 5477.614  |
| AB044661  | 4451.112  | 4244.04   | AF111782  | 1158.09   | 1165.484  | AL390132  | 460.367   | 445.223   |
| NM_015376 | 1469.59   | 1594.171  | AF151530  | 681.802   | 784.74    | NM_017933 | 2816.158  | 2586.882  |
| NM_001176 | 912.067   | 1087.221  | AK021991  | 442.401   | 373.77    | NM_017819 | 9081.962  | 6482.313  |
| NM_013341 | 487.204   | 528.118   | AK022093  | 2576.81   | 2190.043  | AK024653  | 14928.36  | 10436.658 |
| NM_016536 | 1027.125  | 1199.721  | AK022376  | 426.332   | 339.183   | AF103907  | 743.394   | 422.546   |
| NM_004066 | 550.19    | 555.5     | AK022272  | 646.571   | 687.49    | AF094508  | 356.875   | 375.67    |
| NM_004941 | 4997.564  | 3318.34   | AK027155  | 2585.525  | 2230.317  | AF161351  | 878.38    | 988.351   |
| AF151831  | 2334.336  | 2085.512  | AF264626  | 520.182   | 273.059   | AF111782  | 1365.855  | 1114.575  |
| AF083255  | 5369.312  | 5756.083  | AK027219  | 428.476   | 283.856   | AF151530  | 667.429   | 579.618   |
| AK022605  | 927.526   | 1005.604  | AK024528  | 7893.843  | 6352.221  | AK021991  | 315.249   | 258.424   |
| AK000554  | 2359.12   | 2178.133  | AK000016  | 728.606   | 861.405   | AK022093  | 3442.826  | 2423.408  |
| NM_006472 | 858.994   | 558.768   | AK023367  | 994.738   | 993.738   | AK022376  | 370.496   | 380.821   |
| NM_002826 | 2638.201  | 2337.245  | AL080209  | 1804.739  | 1939.669  | AK022005  | 457.573   | 498.476   |
| AF159141  | 3384.867  | 2233.978  | AL137431  | 445.988   | 388.502   | AK022272  | 785.327   | 655.894   |
| NM_016458 | 3726.165  | 3108.427  | NM_016255 | 1751.335  | 1619.958  | AK027155  | 3079.705  | 1729.717  |
| AK022233  | 2266.163  | 1781.717  | NM_014318 | 1657.019  | 1418.705  | AF221846  | 324.301   | 417.755   |
| AL137713  | 420.407   | 244.041   | AK056674  | 1262.427  | 1083.045  | AK024528  | 5824.204  | 5486.622  |



|           |           |           |           |           |           |           |           |           |
|-----------|-----------|-----------|-----------|-----------|-----------|-----------|-----------|-----------|
| AK026410  | 4517.793  | 3726.862  | AL117588  | 685.649   | 692.77    | AL049311  | 386.504   | 394.476   |
| NM_014637 | 3793.611  | 2585.718  | NM_017708 | 256.044   | 1758.846  | AK000016  | 594.167   | 444.185   |
| NM_013379 | 11653.777 | 12065.109 | BE895529  | 2257.769  | 2372.324  | AK023367  | 1381.645  | 1183.289  |
| AF113208  | 6376.927  | 7312.562  | AK000964  | 497.635   | 626.141   | AL080209  | 1711.72   | 1665.924  |
| BC012757  | 929.623   | 1254.928  | AL117536  | 2387.362  | 2546.447  | NM_016255 | 1575.352  | 1239.557  |
| M96686    | 561.67    | 581.021   | NM_017751 | 7658.711  | 8059.745  | NM_014318 | 1414.981  | 1044.7    |
| NM_004062 | 1957.467  | 1653.147  | NM_003771 | 1334.393  | 1080.605  | AK056674  | 1363.8    | 1269.803  |
| NM_004449 | 984.187   | 918.292   | NM_017860 | 546.111   | 560.734   | AK022042  | 588.442   | 590.918   |
| NM_014591 | 2012.331  | 2163.789  | X91195    | 40967.668 | 41151.902 | AL117588  | 469.343   | 677.322   |
| NM_001945 | 1713.645  | 1734.234  | AF086190  | 1661.827  | 3492.323  | NM_017708 | 217.123   | 516.94    |
| NM_020039 | 1679.113  | 1734.634  | NM_006143 | 644.628   | 1119.743  | BE895529  | 2060.53   | 1333.088  |
| NM_006653 | 1773.033  | 2474.217  | AL050035  | 2567.941  | 2772.718  | AK000964  | 504.07    | 352.63    |
| AB011167  | 1815.2    | 1516.677  | AK024449  | 650.258   | 693.486   | AL117536  | 2035.909  | 2428.42   |
| NM_000208 | 904.213   | 703.743   | AL357201  | 642.77    | 492.442   | NM_017751 | 7519.427  | 11822.654 |
| NM_002188 | 4611.653  | 3037.216  | AF279780  | 33373.543 | 25973.121 | NM_003771 | 2526.679  | 5574.132  |
| AK027119  | 3892.92   | 3139.613  | AK023878  | 477.492   | 541.868   | NM_017860 | 465.36    | 570.591   |
| AB037727  | 2611.605  | 2063.419  | AK021851  | 816.141   | 823.523   | X91195    | 44858.051 | 33776.676 |
| NM_005426 | 2441.664  | 1758.805  | L37717    | 387.89    | 521.195   | AF086190  | 594.438   | 540.539   |
| NM_004763 | 1063.858  | 777.207   | AJ131609  | 1695.592  | 1658.791  | NM_006143 | 351.393   | 270.315   |
| NM_014063 | 7392.963  | 4845.471  | BC019280  | 3824.069  | 3432.037  | AL050035  | 3022.105  | 2721.745  |
| D86964    | 6272.372  | 3938.793  | AF086498  | 654.212   | 633.144   | AK024449  | 503.374   | 532.234   |
| AL049801  | 5089.209  | 4283.86   | AK000687  | 467.05    | 742.173   | AF279780  | 34172.254 | 21127.141 |
| NM_016395 | 10304.978 | 9882.138  | L77565    | 402.547   | 309.529   | AK022510  | 1852.877  | 1957.694  |
| NM_003152 | 1098.035  | 1290.681  | AF079567  | 1762.433  | 1270.209  | AK023878  | 533.255   | 515.691   |
| NM_014727 | 659.721   | 882.948   | AK022177  | 2093.232  | 6149.802  | AK021851  | 471.471   | 480.907   |
| BE885010  | 544.659   | 677.791   | AK023852  | 1317.401  | 2310.266  | AJ131609  | 1883.434  | 1936.396  |
| NM_006342 | 6620.041  | 7576.722  | AF086466  | 1157.616  | 1258.1    | BC019280  | 4077.03   | 4753.072  |
| NM_016396 | 2991.102  | 2742.464  | AB007962  | 3159.542  | 3090.686  | AF086498  | 577.224   | 455.945   |
| NM_005689 | 1851.575  | 1672.65   | AF005081  | 801.582   | 895.092   | AK000687  | 418.539   | 364.854   |
| NM_005552 | 5255.766  | 4222.737  | AK026438  | 712.109   | 1082.208  | AF079567  | 2065.608  | 1479.574  |
| NM_006717 | 3351.109  | 3338.746  | AL050186  | 17830.686 | 19068.443 | AK022177  | 839.29    | 627.344   |
| AL109786  | 2085.547  | 1895.682  | AK021918  | 3913.519  | 4699.886  | AK023852  | 544.068   | 623.054   |
| AK026479  | 2488.258  | 2316.29   | AK021669  | 2586.202  | 2659.409  | AF086466  | 1041.497  | 666.97    |
| AK022860  | 3041.121  | 3063.754  | AL080113  | 31446.459 | 43448.566 | AB007962  | 2066.878  | 1922.222  |
| X60188    | 13569.811 | 10193.302 | AL050083  | 1419.157  | 1823.669  | AF005081  | 834.409   | 649.313   |
| NM_005977 | 2510.184  | 2306.671  | AK022766  | 516.902   | 361.585   | AK026438  | 657.711   | 629.8     |
| NM_006265 | 30355.256 | 24608.713 | AL049422  | 4931.963  | 4731.75   | AK021546  | 823.736   | 1134.223  |
| NM_003126 | 530.188   | 382.63    | AL133089  | 671.991   | 793.267   | AL050186  | 17886.811 | 13956.403 |
| NM_006059 | 1101.041  | 776.852   | AK023526  | 1778.858  | 2356.414  | AK021918  | 3176.041  | 2672.186  |
| NM_000347 | 679.998   | 410.932   | BE266129  | 970.521   | 1047.407  | AK021669  | 2491.107  | 1557.465  |
| M13452    | 700.711   | 388.621   | X66227    | 748.126   | 1683.8    | AL080113  | 23436.592 | 15625.171 |
| NM_016114 | 1989.598  | 1475.959  | AK025602  | 8705.81   | 9030.795  | AL050083  | 933.788   | 901.381   |
| AY007114  | 1489.975  | 1017.003  | AK026309  | 3829.468  | 4213.473  | AK022766  | 240.866   | 235.494   |
| AB000895  | 1119.773  | 806.735   | AL137486  | 2199.182  | 1917.324  | AL049422  | 5201.284  | 4138.536  |
| X80031    | 895.805   | 688.992   | AL110162  | 1344.346  | 2063.718  | AL133089  | 661.381   | 431.331   |
| AK022178  | 835.755   | 877.468   | AF119880  | 498.183   | 397.25    | AK023526  | 2819.616  | 2184.789  |
| L00635    | 624.201   | 664.628   | AK022681  | 9003.357  | 9819.938  | BE266129  | 529.656   | 488.289   |
| NM_015601 | 847.305   | 687.267   | CY3Cy5    | 6215.629  | 574.198   | AK025602  | 10222.349 | 11126.372 |
| NM_001780 | 10180.726 | 8359.665  | Y18483    | 725.775   | 1001.708  | AK026309  | 4178.483  | 3874.186  |
| AJ277442  | 795.713   | 630.742   | AI299075  | 798.921   | 909.033   | AL137486  | 2765.41   | 2926.655  |
| NM_004569 | 3995.545  | 3448.912  | M59979    | 677.976   | 909.362   | AL110162  | 1168.197  | 1217.323  |
| AF089088  | 1332.132  | 1479.961  | AB011098  | 1713.151  | 2415.425  | AK022681  | 10068.279 | 10203.019 |
| L07557    | 4432.847  | 3829.261  | AA609759  | 1881.126  | 2153.054  | CY3Cy5    | 3436.178  | 168.887   |

|           |           |           |           |           |           |           |           |           |
|-----------|-----------|-----------|-----------|-----------|-----------|-----------|-----------|-----------|
| D78514    | 7159.062  | 6371.073  | AA029418  | 7332.21   | 8266.346  | Y18483    | 399.042   | 311.132   |
| AK021665  | 592.187   | 360.785   | AA456001  | 13255.818 | 16626.754 | AI565117  | 48247.375 | 49529.648 |
| NM_013366 | 730.838   | 854.187   | BI818232  | 827.241   | 1141.025  | AI299075  | 658.113   | 490.903   |
| NM_002787 | 27445.291 | 23216.514 | AA451686  | 9335.52   | 14694.521 | M59979    | 551.703   | 509.726   |
| U95006    | 11533.229 | 9755.95   | AA934644  | 852.451   | 1322.06   | AB011098  | 1265.383  | 939.961   |
| NM_003347 | 2647.135  | 2007.336  | NM_003822 | 1151.782  | 1730.257  | AA609759  | 1284.887  | 1342.731  |
| AF273051  | 713.742   | 490.485   | NM_004412 | 9715.132  | 14049.699 | AA029418  | 7204.122  | 6491.091  |
| NM_014516 | 419.628   | 320.454   | SR5       | 9740.213  | 11431.982 | L20815    | 5656.783  | 6070.37   |
| AK021868  | 1433.555  | 981.516   | SR7       | 8045.001  | 55055.535 | AI364483  | 11944.608 | 13253.498 |
| AK000643  | 14064.271 | 12467.801 | SR9       | 23287.465 | 4639.445  | AA456001  | 6453.229  | 7984.043  |
| NM_018421 | 4129.449  | 3316.942  | CY3Cy5    | 2218.032  | 173.183   | AA451686  | 3843.6    | 4055.884  |
| AB014574  | 7887.798  | 6059.408  | NM_019555 | 2623.349  | 4142.512  | AA934644  | 309.937   | 586.782   |
| NM_020127 | 1809.449  | 1128.204  | NM_012096 | 10239.695 | 16291.522 | NM_003822 | 1123.672  | 1064.013  |
| NM_015623 | 7027.957  | 5694.049  | L12052    | 9720.594  | 14681.85  | NM_004412 | 3682.733  | 2289.611  |
| L49054    | 546.297   | 553.842   | AB028976  | 4708.139  | 7628.515  | SR5       | 5646.717  | 4989.116  |
| NM_001675 | 842.13    | 930.368   | AK026337  | 851.602   | 1182.429  | SR7       | 4754.664  | 25728.367 |
| NM_003422 | 1388.872  | 1252.953  | NM_015869 | 1044.449  | 1128.036  | SR9       | 16618.596 | 2076.638  |
| NM_001451 | 1600.173  | 1335.931  | AB031038  | 839.798   | 1349.817  | CY3Cy5    | 4614.674  | 292.749   |
| NM_014779 | 1327.255  | 996.752   | NM_001899 | 1093.63   | 1813.545  | NM_019555 | 1676.225  | 1603.791  |
| NM_002943 | 1670.973  | 1003.979  | NM_004305 | 38590.164 | 45030.215 | NM_012096 | 5822.542  | 3620.285  |
| AL133649  | 1140.772  | 827.047   | NM_006089 | 8295.074  | 9547.691  | NM_003905 | 19197.633 | 14897.372 |
| AB018303  | 621.286   | 331.527   | NM_005992 | 775.947   | 749.074   | L12052    | 5421.449  | 5064.46   |
| NM_015846 | 4551.064  | 3644.272  | NM_003144 | 35059.391 | 33434.41  | AB028976  | 3452.659  | 2574.368  |
| NM_015972 | 8018.329  | 4798.829  | NM_000908 | 516.752   | 440.301   | AK026337  | 791.042   | 646.987   |
| NM_016132 | 2503.124  | 2104.473  | AB011102  | 4885.615  | 3595.141  | NM_015869 | 628.224   | 568.128   |
| NM_018006 | 2078.525  | 1591.016  | D63480    | 1715.025  | 1276.665  | AB031038  | 498.864   | 530.665   |
| NM_016090 | 1780.498  | 1307.512  | NM_002969 | 1478.756  | 1427.807  | NM_004626 | 337.668   | 406.414   |
| NM_001013 | 48288.973 | 31592.641 | NM_004620 | 1083.037  | 828.633   | NM_001899 | 429.473   | 597.676   |
| AK024040  | 3676.805  | 2503.258  | AF087940  | 1635.021  | 973.622   | NM_004305 | 36418.195 | 39206.395 |
| NM_005061 | 3552.157  | 2090.703  | AJ277587  | 1021.314  | 582.519   | NM_006089 | 4975.338  | 5514.864  |
| NM_000997 | 54519.086 | 64701.738 | D87432    | 5798.294  | 6317.684  | NM_003144 | 30838.039 | 31539.396 |
| AF182417  | 33957.738 | 18871.316 | AK023749  | 801.207   | 1142.235  | NM_000908 | 504.746   | 512.877   |
| AL137354  | 14511.97  | 10061.526 | NM_002337 | 3970.746  | 4351.809  | AB011102  | 5050.088  | 4404.103  |
| NM_001023 | 52865.949 | 64355.988 | NM_013245 | 2603.536  | 2773.91   | D63480    | 1494.603  | 1207.397  |
| AK021571  | 7421.85   | 7093.273  | NM_006423 | 28335.498 | 30431.926 | NM_002969 | 1642.352  | 1721.894  |
| AY007128  | 396.549   | 803.86    | NM_004766 | 3675.923  | 3425.145  | NM_004620 | 1081.498  | 750.727   |
| AF052149  | 9129.209  | 14568.417 | NM_005819 | 8233.315  | 9007.903  | AF087940  | 2090.557  | 1985.037  |
| AK025586  | 1112.33   | 862.666   | AK024722  | 1043.685  | 634.496   | AJ277587  | 1053.102  | 1007.053  |
| NM_005036 | 844.271   | 654.322   | AK025520  | 2756.777  | 1719.463  | D87432    | 3309.068  | 3142.701  |
| NM_002541 | 1557.964  | 989.199   | NM_004892 | 13014.873 | 19625.863 | AK023749  | 478.577   | 338.839   |
| NM_000056 | 4035.558  | 2909.828  | NM_014597 | 20460.365 | 28869.729 | NM_002337 | 3595.353  | 2358.507  |
| NM_016311 | 25608.898 | 16198.138 | NM_017896 | 14157.966 | 18296.857 | NM_013245 | 2144.175  | 1337.798  |
| NM_000290 | 2019.785  | 1203.859  | AB002374  | 5640.814  | 7510.867  | NM_006423 | 23692.928 | 18855.678 |
| NM_016538 | 2505.184  | 1733.818  | U17327    | 1622.334  | 1509.701  | NM_004766 | 2715.624  | 2212.887  |
| AK023275  | 4943.997  | 2572.92   | NM_001768 | 3771.011  | 2206.071  | NM_005819 | 7658.764  | 7348.246  |
| AJ223352  | 5144.604  | 2787.721  | NM_000029 | 3849.687  | 2658.21   | AK024722  | 839.98    | 878.939   |
| NM_012238 | 1574.026  | 977.529   | AF035802  | 1509.401  | 788.323   | AK025520  | 2940.205  | 1653.038  |
| NM_016539 | 9976.2    | 3299.103  | Y08145    | 576.884   | 356.72    | NM_004892 | 7707.578  | 7439.922  |
| NM_006807 | 19540.617 | 12243.516 | NM_001838 | 999.281   | 392.827   | NM_014597 | 11465.16  | 10521.417 |
| NM_006532 | 924.745   | 593.185   | NM_013328 | 20568.709 | 19969.596 | NM_017896 | 7010.191  | 6908.594  |
| U07132    | 2187.346  | 1107.676  | NM_000790 | 463.286   | 223.568   | AB002374  | 2281.602  | 2217.731  |
| NM_003436 | 597.357   | 366.768   | NM_002660 | 6311.975  | 6598.664  | U17327    | 695.654   | 729.882   |
| AL035301  | 2643.632  | 3838.214  | NM_015900 | 729.738   | 426.693   | M87790    | 8579.948  | 9294.414  |

|           |           |           |           |           |           |           |           |           |
|-----------|-----------|-----------|-----------|-----------|-----------|-----------|-----------|-----------|
| NM_017687 | 2054.749  | 3919.749  | NM_003706 | 985.259   | 822.468   | NM_00176E | 3639.786  | 3852.993  |
| NM_01797E | 3967.369  | 5992.675  | D87446    | 3875.118  | 3009.998  | NM_00002E | 4957.819  | 5067.362  |
| AK025036  | 2000.215  | 2929.062  | BF540935  | 535.775   | 398.316   | NM_00071E | 350.505   | 474.573   |
| AK024843  | 14970.778 | 22258.184 | NM_00446E | 471.357   | 303.693   | AF035802  | 1500.798  | 1292.745  |
| AF074994  | 815.483   | 1411.094  | NM_007081 | 2873.669  | 1980.835  | Y08145    | 992.77    | 867.585   |
| NM_01767C | 8731.813  | 14142.886 | AB032964  | 3659.889  | 3341.13   | M26123    | 503.464   | 350.98    |
| AF286598  | 1369.919  | 1769.766  | BE733605  | 3087.089  | 2744.395  | NM_00183E | 1067.127  | 877.442   |
| AK021468  | 1059.483  | 1704.336  | NM_003334 | 23981.303 | 16901.91  | NM_01332E | 17325.334 | 14094.421 |
| BC033020  | 1163.083  | 1486.875  | NM_00269E | 7923.24   | 5876.229  | NM_00266C | 4787.46   | 4209.519  |
| NM_00436E | 3736.103  | 5642.823  | NM_003671 | 1142.042  | 1104.984  | NM_01590C | 760.134   | 638.502   |
| AK026168  | 1887.332  | 2668.769  | M20695    | 1817.27   | 1739.394  | NM_00370E | 791.122   | 834.274   |
| AJ296152  | 6335.931  | 4628.707  | AK026000  | 4583.798  | 4473.928  | AL122071  | 1059.742  | 1119.392  |
| AK001067  | 1593.32   | 1153.205  | NM_01783E | 748.715   | 899.79    | AB033054  | 11179.789 | 11841.331 |
| AK027088  | 7451.846  | 6297.046  | NM_00667E | 4618.892  | 4146.55   | NM_01612E | 1078.522  | 1466.413  |
| AB037721  | 662.051   | 519.322   | NM_00302E | 5411.833  | 4229.333  | AF153330  | 1263.969  | 1687.865  |
| AK027120  | 663.438   | 427.727   | NM_00487E | 4105.482  | 3411.435  | NM_00165E | 458.976   | 588.158   |
| AB029001  | 951.715   | 739.44    | NM_01984E | 1095.635  | 1009.166  | D87446    | 4459.54   | 3778.673  |
| AB006624  | 3217.219  | 2300.576  | NM_002951 | 16484.266 | 15914.353 | BF540935  | 3373.537  | 2572.079  |
| AK025473  | 966.061   | 611.904   | NM_002317 | 704.376   | 677.324   | NM_00446E | 626.427   | 459.689   |
| AF146693  | 402.346   | 214.285   | NM_00032C | 3172.231  | 3129.816  | NM_007081 | 2990.787  | 3047.194  |
| AF271070  | 7485.419  | 4039.5    | NM_00313E | 7084.253  | 5255.612  | AB032964  | 2766.456  | 2794.361  |
| NM_01490E | 623.692   | 257.831   | NM_00462C | 1178.66   | 731.204   | BE733605  | 3037.851  | 2832.824  |
| AK055959  | 871.356   | 492.963   | AF087940  | 1197.441  | 1146.47   | NM_003334 | 21319.354 | 22504.859 |
| AF052141  | 519.362   | 329.904   | Y18483    | 940.603   | 1355.553  | NM_00269E | 6081.602  | 6362.821  |
| AK021705  | 4700.161  | 6941.261  | AI299075  | 519.587   | 316.242   | NM_003671 | 1225.368  | 1348.701  |
| NM_016141 | 13086.649 | 21226.381 | M59979    | 469.417   | 465.64    | M20695    | 1333.466  | 1676.071  |
| AL109702  | 1592.475  | 2945.765  | AB011098  | 1252.043  | 1002.529  | AK026000  | 3658.485  | 4831.234  |
| AK025624  | 13826.865 | 20401.361 | AA609759  | 1412.902  | 871.379   | NM_01783E | 673.657   | 821.985   |
| AK026684  | 2361.727  | 4143.686  | AA029418  | 5604.514  | 4580.153  | NM_00667E | 3900.097  | 4285.125  |
| AL110125  | 1602.534  | 2559.616  | L20815    | 5662.157  | 4784.178  | NM_00302E | 5058.844  | 5630.321  |
| AK022764  | 3420.655  | 5186.11   | AI364483  | 9770.732  | 8481.474  | NM_00487E | 7540.537  | 14845.979 |
| AK002118  | 550.702   | 672.286   | AA456001  | 8366.851  | 7489.268  | NM_01984E | 980.423   | 1185.208  |
| AJ011594  | 404.667   | 675.483   | AA451686  | 4871.864  | 3723.059  | NM_002951 | 16574.078 | 20435.287 |
| X89744    | 480.367   | 520.952   | NM_00382E | 537.737   | 666.155   | NM_002317 | 753.975   | 1045.593  |
| AJ002785  | 1109.605  | 1869.531  | NM_00441E | 5381.604  | 5306.044  | NM_00032C | 3588.877  | 3181.793  |
| Z70716    | 490.736   | 754.43    | NM_00205C | 1208.788  | 1002.345  | NM_017921 | 307.624   | 536.282   |
| AL049251  | 686.42    | 1144.029  | NM_007097 | 6271.901  | 5112.112  | NM_00313E | 8813.079  | 8319.445  |
| L32606    | 712.916   | 804.36    | NM_00002E | 3119.997  | 2526.196  | NM_00462C | 1159.542  | 839.898   |
| L05148    | 9097.199  | 13560.95  | NM_00071E | 445.158   | 558.658   | AF087940  | 2223.246  | 1820.113  |
| AK091125  | 421.801   | 591.074   | AF035802  | 5119.234  | 5602.976  | AJ277587  | 1064.837  | 756.676   |
| D16474    | 910.039   | 1002.108  | NM_01209E | 6473.402  | 8532.087  | D87432    | 3180.656  | 3098.467  |
| AL080072  | 621.844   | 444.884   | NM_00390E | 16933.818 | 17009.023 | Y18483    | 503.252   | 459.11    |
| AK024898  | 1243.817  | 668.758   | L12052    | 5602.707  | 5637.192  | AI565117  | 52462.695 | 51714.848 |
| AL049280  | 976.359   | 1747.484  | AB028976  | 3028.813  | 2186.258  | AI299075  | 608.958   | 504.97    |
| AK025212  | 4675.417  | 7011.513  | NM_01586E | 617.914   | 356.624   | M59979    | 585.867   | 609.625   |
| AB021925  | 291.039   | 601.709   | AB031038  | 603.156   | 530.012   | AB011098  | 1137.401  | 1041.973  |
| AL157503  | 5651.633  | 6974.07   | NM_00189E | 490.885   | 602.457   | AA609759  | 1343.411  | 1424.55   |
| AK000053  | 998.894   | 1117.912  | NM_00430E | 23553.117 | 17336.008 | AA029418  | 6181.631  | 6931.993  |
| AK000786  | 845.153   | 1217.756  | NM_00608E | 5342.163  | 4327.425  | L20815    | 6163.923  | 6775.993  |
| AK000935  | 1044.185  | 1348.438  | NM_003144 | 27401.285 | 21350.26  | AI364483  | 9930.915  | 11232.77  |
| AK021458  | 1081.822  | 1635.854  | NM_00090E | 375.208   | 469.006   | AA456001  | 7061.583  | 8112.923  |
| NM_017674 | 663.961   | 1016.992  | AB011102  | 4592.162  | 4518.06   | BI818232  | 641.879   | 982.323   |
| AK000811  | 757.916   | 524.383   | D63480    | 1529.268  | 1415.797  | AA451686  | 5111.372  | 7574.308  |

|           |           |           |           |           |           |           |           |           |
|-----------|-----------|-----------|-----------|-----------|-----------|-----------|-----------|-----------|
| AK000966  | 1207.769  | 1639.024  | NM_002969 | 1404.174  | 1447.082  | NM_003822 | 847.823   | 802.969   |
| AK024525  | 579.128   | 787.481   | NM_002976 | 2987.766  | 10256.457 | NM_004412 | 5042.802  | 5047.771  |
| AK024909  | 566.235   | 830.58    | AK023749  | 377.549   | 729.1     | NM_002050 | 1444.701  | 1594.659  |
| AK024544  | 549.908   | 614.589   | NM_002337 | 3538.018  | 4098.169  | NM_007097 | 6566.081  | 6196.792  |
| AK024629  | 363.849   | 982.083   | NM_013245 | 2900.721  | 2791.917  | NM_000029 | 5950.097  | 5235.842  |
| AK024924  | 591.95    | 443.509   | NM_006423 | 21098.646 | 13143.721 | NM_000715 | 417.642   | 286.506   |
| AK025097  | 722.156   | 1021.011  | NM_004766 | 2787.135  | 2329.064  | AF035802  | 1637.506  | 1216.427  |
| AK001880  | 8301.829  | 12054.614 | NM_005819 | 6107.44   | 5462.117  | Y08145    | 936.969   | 795.833   |
| AF156166  | 2194.133  | 2973.951  | AK024722  | 892.39    | 686.331   | M26123    | 504.404   | 300.252   |
| NM_014373 | 3646.225  | 4961.735  | AK025520  | 2652.261  | 1999.342  | NM_001838 | 784.857   | 1012.43   |
| NM_014206 | 40452.406 | 43587.328 | NM_004892 | 6886.544  | 6725.975  | NM_019555 | 1622.424  | 1733.954  |
| NM_001651 | 924.728   | 1689.49   | NM_014597 | 10450.708 | 10115.512 | NM_012096 | 7665.881  | 5843.382  |
| L32786    | 1082.083  | 1669.141  | NM_017896 | 8022.444  | 5802.731  | NM_003905 | 20200.039 | 18088.9   |
| AK002023  | 1207.444  | 1826.372  | AB002374  | 3175.794  | 2841.177  | L12052    | 5491.526  | 5771.075  |
| NM_016464 | 619.444   | 1071.182  | U17327    | 1353.666  | 1058.642  | AB028976  | 3391.784  | 3168.435  |
| L40402    | 369.888   | 267.576   | M87790    | 11421.472 | 8356.03   | AK026337  | 662.864   | 676.435   |
| AK022422  | 890.856   | 1000.811  | NM_001768 | 3552.549  | 3142.513  | NM_015866 | 577.868   | 556.969   |
| AK023485  | 655.237   | 776.989   | NM_002951 | 13111.491 | 15254.1   | AB031038  | 96.542    | 677.828   |
| AK022474  | 24352.906 | 33829.992 | NM_002317 | 795.247   | 871.897   | NM_004626 | 450.052   | 515.158   |
| AK022392  | 3798.737  | 6277.307  | NM_000320 | 3428.841  | 4006.995  | NM_001896 | 524.67    | 578.656   |
| AL117451  | 964.251   | 1495.404  | NM_003136 | 7650.2    | 9321.238  | NM_004305 | 38122.469 | 41681.449 |
| AK025949  | 1558.062  | 2065.48   | NM_013328 | 17182.521 | 22578.965 | NM_006088 | 6192.21   | 7079.19   |
| Y10259    | 3918.747  | 5432.253  | NM_000790 | 411.833   | 927.222   | NM_003144 | 30342.563 | 24943.436 |
| AK021725  | 3678.919  | 5143.153  | NM_002660 | 4170.583  | 3210.046  | NM_000908 | 577.426   | 556.473   |
| NM_002408 | 5970.386  | 6846.725  | NM_015900 | 693.065   | 418.654   | AB011102  | 5551.001  | 4697.768  |
| AK024282  | 1468.267  | 1913.581  | NM_003706 | 652.746   | 576.696   | D63480    | 1735.928  | 2094.895  |
| AF085838  | 6048.403  | 8244.539  | AL122071  | 845       | 859.826   | NM_002966 | 1899.71   | 1675.338  |
| NM_018277 | 461.773   | 918.839   | AB033054  | 12371.569 | 10807.828 | AK023749  | 576.219   | 518.311   |
| AF014455  | 794.449   | 1246.082  | NM_016122 | 853.732   | 905.508   | NM_002337 | 4233.296  | 3640.234  |
| AF086335  | 620.722   | 813.557   | AF153330  | 1372.754  | 1289.766  | NM_013245 | 2334.735  | 1707.206  |
| AL355741  | 331.627   | 667.318   | NM_001652 | 381.818   | 431.563   | NM_006423 | 24787.346 | 21233.465 |
| AB011118  | 9017.332  | 11286.843 | NM_003822 | 690.14    | 1197.275  | NM_004766 | 2883.104  | 3273.33   |
| S66666    | 768.887   | 1074.954  | NM_004412 | 4777.813  | 5892.915  | NM_005819 | 8700.424  | 9500.928  |
| AK021476  | 786.972   | 665.27    |           | 2968.373  | 4624.252  | AK024722  | 840.892   | 1315.039  |
| NM_018630 | 7639.983  | 8308.245  | NM_002050 | 1402.217  | 1345.396  | AK025520  | 1613.6    | 891.267   |
| AF086175  | 1247.659  | 2118.457  | NM_007097 | 7851.822  | 9526.097  | NM_004892 | 6282.895  | 6970.002  |
| AK002196  | 1282.578  | 1623.642  | D87446    | 4243.126  | 4874.667  | NM_014597 | 13049.019 | 15315.231 |
| NM_004576 | 734.662   | 667.536   | BF540935  | 619.207   | 744.715   | NM_017896 | 6879.618  | 7044.349  |
| AF040097  | 985.937   | 906.476   | NM_004466 | 437.962   | 551.231   | AB002374  | 2347.888  | 2110.236  |
| NM_020436 | 1136.862  | 1561.679  | NM_007081 | 2544.768  | 1461.013  | U17327    | 1015.376  | 896.113   |
| AK024182  | 1563.149  | 1536.81   | AB032964  | 3456.187  | 3467.735  | M87790    | 10590.348 | 10393.719 |
| NM_006913 | 8838.3    | 9757.874  | BE733605  | 2607.575  | 3020.585  | NM_001768 | 3878.161  | 3772.646  |
| NM_000499 | 8650.771  | 11759.408 | NM_003334 | 22019.176 | 16266.772 | NM_002951 | 16430.889 | 15154.784 |
| AL049955  | 34219.629 | 47787     | NM_002693 | 7327.646  | 7207.368  | NM_002317 | 636.18    | 594.796   |
| AF155654  | 11952.384 | 19958.133 | NM_003671 | 1037.303  | 1169.152  | NM_000320 | 2776.425  | 2269.734  |
| AF088044  | 529.439   | 1000.151  | M20695    | 1427.003  | 1327.913  | NM_003136 | 8629.241  | 8515.133  |
| AK000028  | 4785.992  | 6372.446  | AK026000  | 3910.952  | 3608.894  | NM_013328 | 17764.613 | 16090.513 |
| NM_013320 | 52179.078 | 59861.41  | NM_017833 | 610.474   | 791.494   | NM_000790 | 438.952   | 341.808   |
| AJ245902  | 1187.419  | 1519.831  | NM_006675 | 4191.479  | 4537.167  | NM_002660 | 4639.61   | 5116.367  |
| AL050039  | 798.218   | 701.622   | NM_003022 | 5842.817  | 5442.394  | NM_015900 | 858.968   | 869.867   |
| AF009316  | 757.536   | 755.458   | NM_004873 | 4630.765  | 4619.332  | NM_003706 | 685.114   | 756.419   |
| BE816678  | 782.638   | 766.811   | NM_019842 | 1134.819  | 1101.429  | AL122071  | 984.893   | 1055.951  |
| AF087987  | 1008.406  | 1252.786  | NM_003144 | 28378.301 | 37540.129 | AB033054  | 12341.989 | 10470.33  |

|           |           |           |           |           |           |           |           |           |
|-----------|-----------|-----------|-----------|-----------|-----------|-----------|-----------|-----------|
| Z36840    | 410.634   | 535.991   | NM_000908 | 595.814   | 1031.628  | NM_016122 | 927.317   | 879.41    |
| AK021723  | 495.534   | 505.926   | AB011102  | 4765.272  | 5930.711  | AF153330  | 1255.813  | 1206.647  |
| H09474    | 1143.198  | 1072.156  | D63480    | 1598.783  | 2102.777  | NM_001652 | 467.616   | 640.481   |
| AB002368  | 11409.027 | 14326.968 | NM_002969 | 1426.856  | 1981.49   | NM_003822 | 768.936   | 523.741   |
| AL360263  | 50104.543 | 62024.656 | NM_004620 | 1098.965  | 1242.412  | NM_004412 | 4482.319  | 3334.153  |
| Z36780    | 2081.797  | 3003.805  | AF087940  | 1402.362  | 1345.504  | NM_002050 | 1364.239  | 870.068   |
| AK022403  | 1264.045  | 1529.166  | AJ277587  | 802.998   | 811.785   | NM_007097 | 5585.583  | 4991.864  |
| AK022955  | 14500.85  | 16972.811 | D87432    | 3295.084  | 2824.597  | D87446    | 4349.286  | 4173.819  |
| AF131741  | 447.714   | 517.759   | Y18483    | 449.414   | 251.759   | BF540935  | 3317.689  | 3457.549  |
| AK021760  | 972.325   | 1142.565  | AI565117  | 54768.887 | 60715.824 | NM_004466 | 702.265   | 556.349   |
| BC035855  | 613.674   | 660.082   | AI299075  | 489.661   | 301.719   | NM_007081 | 2912.504  | 3201.026  |
| AL137408  | 1960.525  | 2183.068  | M59979    | 553.978   | 335.944   | AB032964  | 3199.646  | 2663.586  |
| AF054995  | 2340.038  | 2402.223  | AB011098  | 1025.385  | 1106.382  | BE733605  | 3634.001  | 3765.728  |
| AL080176  | 6212.529  | 6356.523  | AA609759  | 1257.242  | 1062.901  | NM_003334 | 20387.969 | 21279.025 |
| AK023627  | 3826.601  | 4425.992  | AA029418  | 4821.464  | 3796.695  | NM_002693 | 2563.839  | 2801.614  |
| CY3Cy5    | 2165.384  | 189.081   | L20815    | 4299.783  | 3617.019  | NM_003671 | 1090.733  | 1091.9    |
| BI759406  | 1260.898  | 1163.472  | AI364483  | 9920.382  | 7250.396  | M20695    | 1362.603  | 1241.231  |
| R76099    | 796.201   | 631.213   | AA456001  | 8438.048  | 7072.434  | AK026000  | 3548.637  | 3288.504  |
| S74445    | 491.117   | 592.544   | AA451686  | 4914.799  | 4430.704  | NM_017833 | 646.212   | 428.37    |
| BI763360  | 347.366   | 421.589   | M87790    | 9951.323  | 10267.815 | NM_006675 | 3388.023  | 3246.779  |
| D25538    | 1325.108  | 1229.979  | NM_001768 | 3877.603  | 5148.585  | NM_003022 | 4402.031  | 3900.701  |
| NM_000360 | 5237.272  | 4562.456  | NM_000029 | 3788.485  | 4124.277  | NM_004873 | 3968.298  | 3904.002  |
| NM_001849 | 364.615   | 442.848   | NM_000715 | 730.361   | 940.815   | NM_019842 | 937.351   | 704.77    |
| X03635    | 418.891   | 595.257   | AF035802  | 1566.74   | 1280.447  | NM_003144 | 30121.098 | 22695.529 |
| BC011847  | 51322.164 | 44710.688 | Y08145    | 768.106   | 870.567   | NM_000908 | 682.918   | 550.634   |
| X03348    | 1780.229  | 1433.158  | NM_001838 | 812.707   | 556.195   | AB011102  | 5449.343  | 3725.124  |
| AF353674  | 6634.777  | 4819.918  | NM_019555 | 1715.651  | 1477.311  | D63480    | 1745.039  | 1623.056  |
| BC002645  | 3109.377  | 2759.596  | NM_012096 | 5390.516  | 4839.323  | NM_002969 | 1693.576  | 1483.7    |
| NM_021138 | 1416.303  | 1124.722  | NM_003905 | 17106.453 | 13506.97  | NM_004620 | 824.21    | 790.33    |
| BC002792  | 862.586   | 894.422   | L12052    | 5085.427  | 5189.875  | AF087940  | 2262.677  | 2217.488  |
| NM_021005 | 1147.67   | 937.772   | AB028976  | 2875.299  | 3132.817  | AJ277587  | 993.756   | 1011.904  |
| SB        | 809.524   | 333.205   | AK026337  | 575.956   | 561.418   | D87432    | 3222.91   | 3574.932  |
| SR2       | 41400.961 | 25426.768 | NM_015869 | 549.742   | 286.551   | Y18483    | 519.92    | 402.504   |
| SR4       | 10885.556 | 7747.274  | NM_004626 | 430.286   | 505.677   | AI565117  | 51271.184 | 59792.188 |
| SR6       | 1774.62   | 799.019   | NM_001899 | 417.788   | 446.98    | AI299075  | 481.052   | 555.389   |
| SR8       | 4090.819  | 4997.659  | NM_004305 | 24342.119 | 19178.287 | M59979    | 324.77    | 463.677   |
| SR10      | 18466.223 | 3822.35   | NM_006089 | 5025.33   | 4809.624  | AB011098  | 837.264   | 986.891   |
| CY3Cy5    | 2872.231  | 274.44    | AB033054  | 7348.476  | 8885.606  | AA609759  | 1056.058  | 1246.686  |
| NM_003834 | 1385.356  | 1372.09   | NM_016122 | 933.525   | 1124.587  | AA029418  | 5500.303  | 5437.574  |
| NM_005959 | 3697.272  | 4228.521  | AF153330  | 1166.7    | 1675.572  | L20815    | 4546.452  | 3786.501  |
| NM_003381 | 906.009   | 807.977   | NM_001652 | 300.59    | 486.389   | AI364483  | 9023.327  | 7288.61   |
| NM_005756 | 819.758   | 689.493   | M81768    | 252.336   | 310.074   | AA456001  | 5939.771  | 5580.023  |
| NM_003702 | 12301.562 | 8737.444  | AK023749  | 396.554   | 344.002   | AA451686  | 5497.424  | 4815.429  |
| NM_000369 | 689.114   | 743.853   | NM_002337 | 4306.91   | 3915.609  | M87790    | 11033.963 | 9993.214  |
| NM_016351 | 1065.826  | 1082.552  | NM_013245 | 2285.74   | 2235.953  | NM_001768 | 3730.049  | 3921.488  |
| NM_004405 | 1498.184  | 1629.433  | NM_006423 | 20720.83  | 18108.777 | NM_000029 | 5020.929  | 4511.134  |
| NM_001988 | 2677.648  | 2299.125  | NM_004766 | 2760.643  | 2903.64   | NM_000715 | 400.425   | 376.657   |
| NM_006060 | 3430.098  | 3321.366  | NM_005819 | 5940.808  | 5563.683  | AF035802  | 1907.678  | 1746.049  |
| NM_005667 | 2625.693  | 2207.804  | AK024722  | 929.128   | 763.892   | Y08145    | 916.863   | 993.756   |
| NM_006308 | 495.78    | 211.9     | AK025520  | 2642.851  | 2113.679  | M26123    | 675.116   | 653.072   |
| L09080    | 590.479   | 488.827   | NM_004892 | 6768.549  | 6086.211  | NM_001838 | 836.445   | 1023.071  |
| NM_007326 | 609.536   | 194.407   | NM_014597 | 10221.299 | 9185.062  | NM_019555 | 1718.426  | 1545.245  |
| NM_001886 | 3331.563  | 2952.042  | NM_017896 | 7270.159  | 6198.746  | NM_012096 | 7648.674  | 6897.504  |

|           |           |           |           |           |           |           |           |           |
|-----------|-----------|-----------|-----------|-----------|-----------|-----------|-----------|-----------|
| NM_005622 | 863.72    | 555.604   | AB002374  | 3020.243  | 2585.024  | NM_003905 | 19414.094 | 20842.441 |
| NM_018058 | 6081.969  | 5730.663  | U17327    | 1078.5    | 1010.24   | L12052    | 3798.722  | 6846.06   |
| NM_004548 | 23634     | 30473.91  | NM_017833 | 604.288   | 821.54    | AB028976  | 2976.658  | 3525.76   |
| X69079    | 11576.693 | 13403.104 | NM_006675 | 4072.802  | 4501.774  | AK026337  | 421.584   | 452.584   |
| AF091033  | 352.533   | 381.279   | NM_003022 | 5376.238  | 5462.711  | NM_015865 | 698.643   | 663.213   |
| NM_001122 | 3157.019  | 3287.711  | NM_019842 | 1217.922  | 1437.921  | AB031038  | 546.528   | 408.984   |
| NM_004591 | 507.724   | 524.491   | NM_002951 | 19964.279 | 25850.273 | NM_004626 | 353.458   | 166.784   |
| AL133027  | 1019.801  | 984.726   | NM_003136 | 7257.789  | 5901.767  | NM_001895 | 461.233   | 502.992   |
| AB037732  | 1416.469  | 1325.292  | NM_013328 | 18007.064 | 15699.513 | NM_004305 | 32786.324 | 30077.271 |
| NM_005767 | 499.782   | 417.729   | NM_000790 | 514.823   | 466.807   | NM_006085 | 6304.826  | 5639.866  |
| NM_001837 | 541.952   | 563.451   | NM_002660 | 5030.094  | 4561.027  | AB033054  | 12423.877 | 12016.005 |
| NM_001835 | 40628.816 | 37967.914 | NM_015900 | 563.784   | 577.746   | NM_016122 | 876.751   | 890.272   |
| BC016029  | 801.47    | 728.334   | NM_003706 | 726.249   | 617.735   | AF153330  | 1330.38   | 1746.215  |
| M27487    | 473.518   | 452.986   | AL122071  | 975.955   | 807.871   | NM_001652 | 442.251   | 463.073   |
| NM_002286 | 26653.361 | 22642.344 | NM_014913 | 31069.189 | 23023.682 | AK023749  | 551.585   | 532.293   |
| NM_002164 | 931.362   | 944.895   | NM_005864 | 348.392   | 664.268   | NM_002337 | 3864.184  | 5522.475  |
| NM_003811 | 2537.362  | 2321.057  | NM_012341 | 4739.999  | 4992.124  | NM_013245 | 1408.718  | 1657.069  |
| NM_002981 | 3850.05   | 3139.144  | NM_017797 | 12548.888 | 14240.481 | NM_006423 | 22553.994 | 26541.686 |
| NM_001244 | 491.014   | 397.075   | AK021919  | 705.43    | 939.728   | NM_004766 | 2031.224  | 2379.41   |
| NM_006137 | 5823.089  | 3386.606  | AF000562  | 3446.197  | 4536.325  | NM_005815 | 4557.898  | 5027.272  |
| NM_016135 | 48899.105 | 22670.625 | NM_018100 | 964.536   | 854.138   | AK024722  | 731.893   | 643.947   |
| AL117468  | 4702.154  | 3377.37   | NM_002050 | 1509.818  | 1029.703  | AK025520  | 2598.709  | 1550.19   |
| NM_019613 | 7288.341  | 7261.505  | NM_007097 | 7355.479  | 5834.869  | NM_004892 | 7587.57   | 6311.209  |
| NM_005382 | 1065.29   | 357.77    | D87446    | 4101.246  | 4332.159  | NM_014597 | 10108.138 | 7223.163  |
| AK027086  | 3700.652  | 1632.332  | BF540935  | 845.025   | 805.241   | NM_017896 | 6770.465  | 4816.497  |
| AB032997  | 1127.75   | 714.238   | NM_004466 | 574.193   | 560.561   | AB002374  | 3226.66   | 2495.989  |
| AL096857  | 3060.313  | 3646.133  | NM_007081 | 2493.101  | 2015.545  | U17327    | 1272.393  | 955.881   |
| AF073770  | 3091.902  | 2538.804  | AB032964  | 4002.178  | 4163.754  | NM_017833 | 1086.21   | 917.842   |
| AL359401  | 5852.638  | 6803.604  | BE733605  | 3339.001  | 4468.233  | NM_006675 | 3901.386  | 3499.209  |
| NM_012213 | 1750.495  | 1988.591  | NM_003334 | 27100.627 | 25291.525 | NM_003022 | 3469.544  | 3576.538  |
| NM_016573 | 2105.998  | 1610.778  | NM_002693 | 7872.228  | 8602.536  | NM_004873 | 3677.94   | 3594.572  |
| NM_001303 | 6873.514  | 6791.522  | NM_003671 | 1058.236  | 1279.576  | NM_019842 | 976.5     | 1030.868  |
| M21304    | 403.556   | 368.438   | M20695    | 1617.694  | 1510.394  | NM_002951 | 17440.82  | 17814.549 |
| NM_001979 | 5640.516  | 5320.599  | AK026000  | 4120.625  | 3392.818  | NM_002317 | 806.785   | 801.335   |
| AB040896  | 1665.456  | 1262.314  | NM_005814 | 550.798   | 559.17    | NM_000320 | 3664.018  | 3798.074  |
| NM_001107 | 5957.632  | 5285.201  | NM_016279 | 389.849   | 546.433   | NM_003136 | 8970.779  | 9139.691  |
| AF084645  | 514.401   | 552.68    | NM_000211 | 8805.122  | 9140.623  | NM_013328 | 19349.045 | 19236.209 |
| AF151851  | 4145.477  | 3971.761  | AB037830  | 1172.46   | 1403.104  | NM_000790 | 335.374   | 514.813   |
| NM_005176 | 511.543   | 323.741   | NM_015685 | 2235.189  | 2695.664  | NM_002660 | 3914.22   | 9187.454  |
| NM_003636 | 15871.985 | 14090.063 | NM_004357 | 18714.326 | 20041.541 | NM_015900 | 583.959   | 1032.507  |
| NM_000701 | 1751.82   | 1388.871  | X03324    | 2401.074  | 2470.726  | NM_003706 | 859.771   | 654.732   |
| AB022696  | 636.14    | 488.299   | NM_014934 | 1305.074  | 1282.864  | AL122071  | 1134.874  | 1082.405  |
| AF137372  | 4798.293  | 3319.915  | NM_015385 | 627.254   | 589.319   | NM_014913 | 31968.744 | 27056.223 |
| AF220417  | 3953.726  | 4263.008  | NM_003690 | 4601.859  | 3562.501  | NM_005864 | 558.648   | 460.241   |
| NM_002078 | 2114.836  | 1186.214  | NM_000876 | 4781.24   | 3498.136  | NM_012341 | 2855.441  | 2649.4    |
| NM_000287 | 2056.085  | 2056.477  | NM_014214 | 3760.788  | 4557.173  | NM_003256 | 15756.72  | 12106.415 |
| NM_001656 | 1548.852  | 2686.594  | NM_000856 | 659.958   | 442.05    | D87450    | 4052.117  | 3712.221  |
| Z70705    | 559.018   | 524.806   | NM_005232 | 828.429   | 684.989   | NM_017797 | 15620.358 | 13199.804 |
| NM_002611 | 2164.49   | 2207.785  | NM_002752 | 3482.091  | 4190.597  | AF000562  | 2749.037  | 2777.311  |
| AL133602  | 525.265   | 368.988   | NM_013281 | 1003.57   | 1030.239  | AK025713  | 3683.852  | 3767.762  |
| AF037219  | 3915.614  | 2844.976  | Y11306    | 1254.503  | 1267.889  | NM_018100 | 645.886   | 635.381   |
| AK026075  | 1720.551  | 1708.627  | NM_016112 | 721.528   | 857.284   | NM_002050 | 1192.493  | 1138.89   |
| NM_000251 | 2365.187  | 2240.363  | X85106    | 1561.698  | 1889.246  | NM_007097 | 6454.725  | 7671.658  |

|           |           |           |           |           |           |           |           |           |
|-----------|-----------|-----------|-----------|-----------|-----------|-----------|-----------|-----------|
| AF118071  | 276.003   | 174.176   | NM_003931 | 2279.411  | 3157.573  | D87446    | 4854.214  | 5617.188  |
| NM_00603E | 2208.618  | 1951.116  | NM_012479 | 22239.471 | 18139.23  | BF540935  | 3348.594  | 4235.355  |
| AB011133  | 3353.52   | 3145.131  | AF250226  | 13944.336 | 11231.291 | NM_00446E | 1638.498  | 2108.973  |
| NM_017572 | 26160.801 | 16685.65  | NM_003217 | 36117.395 | 24087.746 | NM_007081 | 2796.938  | 4009.631  |
| NM_018444 | 1711.068  | 1140.918  | AL157475  | 3402.38   | 2724.759  | AB032964  | 3509.358  | 3433.092  |
| NM_000252 | 1283.333  | 1179.122  | NM_006069 | 11689.257 | 8164.828  | BE733605  | 3253.68   | 2672.802  |
| NM_006947 | 10080.023 | 5980.462  | NM_006534 | 2860.544  | 2638.883  | NM_003334 | 17344.326 | 15330.979 |
| NM_017917 | 2367.737  | 2165.394  | NM_017601 | 1585.429  | 1671.503  | NM_002693 | 5853.297  | 5056.708  |
| NM_00409C | 5627.473  | 3614.912  | AF110265  | 9620.934  | 8812.671  | NM_003671 | 1083.913  | 1515.722  |
| BC031485  | 1684.333  | 1511.877  | AF272371  | 57028.195 | 55956.934 | M20695    | 1707.929  | 1665.153  |
| NM_004092 | 7619.423  | 10233.013 | AK021848  | 1597.24   | 1770.24   | AK026000  | 4409.031  | 4408.015  |
| X15624    | 1821.968  | 3166.212  | NM_003704 | 1476.079  | 1430.783  | NM_005814 | 1294.425  | 1202.54   |
| NM_005622 | 831.744   | 752.544   | AK023140  | 1038.161  | 954.975   | NM_01627E | 451.388   | 323.674   |
| NM_01805E | 5872.779  | 6218.439  | AF084362  | 575.682   | 702.361   | NM_000211 | 5769.266  | 4796.015  |
| NM_00454E | 19517.227 | 17345.838 | NM_001553 | 1163.586  | 921.129   | AB037830  | 1122.013  | 987.04    |
| X69079    | 9401.395  | 8073.042  | NM_014173 | 17834.18  | 13763.656 | NM_01568E | 2355.927  | 2482.481  |
| BI759406  | 1188.856  | 1074.45   | NM_001731 | 15685.871 | 16600.396 | NM_004357 | 24243.197 | 22329.723 |
| R76099    | 635.942   | 588.094   | AL137506  | 1185.773  | 1149.665  | X03324    | 3008.428  | 2560.268  |
| BI763360  | 449.307   | 341.327   | AK022961  | 2910.99   | 3623.205  | AF130988  | 526.978   | 655.79    |
| D25538    | 1379.888  | 1372.436  | NM_00737E | 6085.515  | 5750.775  | NM_014934 | 573.753   | 702.337   |
| NM_00036C | 5046.696  | 4284.671  | NM_014371 | 5348.978  | 6632.751  | NM_01538E | 511.279   | 502.728   |
| NM_00184E | 477.211   | 417.596   | AF290512  | 2070.409  | 1868.83   | NM_00369C | 4179.138  | 4394.122  |
| X03635    | 585.261   | 484.526   | NM_00671E | 8626.884  | 8682.546  | NM_00087E | 5224.592  | 6864.744  |
| BC011847  | 55719.215 | 51884.664 | AB002323  | 3845.837  | 4332.635  | NM_014214 | 4983.022  | 7056.604  |
| X03348    | 2085.081  | 1544.876  | AK022241  | 7236.408  | 8058.159  | NM_00085E | 582.017   | 764.183   |
| AF353674  | 7326.841  | 4376.174  | AK022587  | 6080.088  | 12589.074 | NM_005232 | 735.464   | 838.825   |
| BC002645  | 3357.111  | 2347.867  | NM_00550E | 2939.857  | 2649.07   | NM_002752 | 3010.139  | 4536.934  |
| NM_021138 | 1616.684  | 964.313   | NM_005723 | 1762.554  | 1641.589  | NM_013281 | 765.832   | 1034.65   |
| BC002792  | 1782.579  | 2721.27   | AL137404  | 52681.434 | 36997.125 | Y11306    | 952.192   | 1389.644  |
| NM_02100E | 1305.359  | 840.771   | NM_02018E | 3428.364  | 2485.027  | NM_016112 | 405.794   | 535.731   |
| SB        | 804.281   | 568.412   | NM_002832 | 29492.199 | 16872.32  | X85106    | 1262.514  | 1253.712  |
| NM_001523 | 634.281   | 650.038   | NM_017732 | 4456.107  | 3572.785  | NM_003931 | 1853.042  | 1898.453  |
| NM_017423 | 2368.225  | 3866.238  | NM_002851 | 1644.943  | 1771.972  | NM_006681 | 295.803   | 227.027   |
| NM_019613 | 6797.667  | 5809.942  | NM_005339 | 12660.54  | 11665.072 | NM_01247E | 11235.188 | 9755.468  |
| NM_005382 | 1192.572  | 630.425   | NM_00190E | 2879.227  | 2811.209  | AF250226  | 13152.68  | 12988.775 |
| AK027086  | 5970.79   | 6457.271  | NM_004142 | 983.244   | 839.249   | AL157475  | 3881.953  | 3772.299  |
| AB032997  | 1060.817  | 1080.76   | AF108138  | 3624.021  | 3737.671  | NM_00606E | 23545.244 | 22796.693 |
| AL096857  | 2648.801  | 2674.691  | NM_004347 | 620.399   | 645.94    | NM_006534 | 2815.675  | 2835.022  |
| AB040104  | 246.661   | 194.336   | BF340302  | 1632.918  | 1656.982  | NM_017601 | 1336.405  | 1381.511  |
| NM_003834 | 1429.641  | 1286.582  | AK024210  | 2221.972  | 4177.208  | AF110265  | 7010.361  | 6221.545  |
| NM_00595E | 4212.815  | 5129.619  | NM_00227E | 1402.148  | 1568.766  | AF272371  | 42482.383 | 45981.895 |
| NM_003381 | 1096.045  | 909.555   | AL133087  | 2426.394  | 2290.076  | AK021848  | 1256.139  | 1128.047  |
| NM_00575E | 857.629   | 878.173   | NM_01801C | 2159.365  | 2594.254  | NM_003704 | 1231.407  | 1185.342  |
| NM_003702 | 12117.941 | 9372.54   | NM_002274 | 9131.888  | 9044.732  | AK023140  | 1049.414  | 1114.782  |
| NM_00036E | 618.619   | 577.399   | AL080200  | 573.718   | 580.484   | NM_001553 | 1370.342  | 1482.8    |
| NM_016351 | 1178.645  | 1072.334  | BF337874  | 2091.621  | 2349.522  | NM_014173 | 19951.131 | 22183.336 |
| NM_00440E | 1502.802  | 1387.99   | NM_00347E | 11195.644 | 9139.646  | NM_001731 | 19327.926 | 22189.457 |
| NM_00198E | 2761.157  | 1779.3    | NM_000243 | 3099.067  | 3340.863  | AL137506  | 1398.313  | 1724.708  |
| NM_00606C | 3426.478  | 2166.53   | NM_004383 | 11950.063 | 8741.096  | AK022961  | 3228.619  | 3908.275  |
| NM_005667 | 2592.13   | 1846.736  | NM_01225E | 4186.109  | 2477.469  | NM_00737E | 6257.996  | 7638.422  |
| NM_00006C | 477.098   | 338.939   | NM_01632E | 2469.517  | 1965.762  | NM_014371 | 3527.61   | 4882.379  |
| L09080    | 734.372   | 754.885   | NM_001604 | 1731.877  | 1801.549  | AF290512  | 2316.642  | 6081.287  |
| NM_00732E | 566.191   | 439.838   | NM_01765E | 1917.136  | 1609.31   | NM_00671E | 9450.809  | 8018.9    |

|           |           |           |           |           |           |           |           |           |
|-----------|-----------|-----------|-----------|-----------|-----------|-----------|-----------|-----------|
| AK023080  | 389.53    | 638.507   | X16282    | 8882.826  | 7581.191  | AB002323  | 2903.014  | 2786.519  |
| NM_001886 | 4328.39   | 6826.947  | S75264    | 7676.381  | 7095.666  | AK022241  | 6207.885  | 5141.478  |
| AF137372  | 5831.043  | 6871.669  | AF027513  | 1348.484  | 1248.773  | AK022587  | 3984.209  | 3405.328  |
| AF220417  | 3410.405  | 3590.09   | NM_001379 | 2119.944  | 1296.644  | NM_005506 | 2778.347  | 2563.463  |
| D83782    | 3247.859  | 3542.033  | NM_018664 | 5874.077  | 4970.893  | NM_005723 | 1753.421  | 1756.658  |
| NM_002078 | 2164.443  | 2034.049  | NM_005034 | 1133.96   | 1264.918  | NM_020185 | 3588.234  | 3498.645  |
| NM_000287 | 1926.769  | 1898.103  | NM_003926 | 6568.827  | 6894.322  | NM_002832 | 31009.389 | 26686.025 |
| NM_001656 | 1390.12   | 1370.969  | AF085356  | 955.204   | 716.164   | NM_017732 | 3151.441  | 3189.159  |
| AF091033  | 379.338   | 386.533   | NM_016047 | 28232.904 | 24401.678 | NM_002851 | 1824.096  | 1886.972  |
| NM_001122 | 3409.483  | 2876.499  | NM_001499 | 7498.156  | 6139.105  | NM_002071 | 480.209   | 644.12    |
| NM_004591 | 502.334   | 515.456   | BF030165  | 9730.262  | 9055.579  | NM_005339 | 14866.364 | 12811.345 |
| AL133027  | 1052.789  | 952.094   | NM_016732 | 16844.428 | 14940.469 | NM_001906 | 3408.825  | 3086.158  |
| AB037732  | 1542.157  | 1178.194  | NM_014763 | 10278.303 | 6700.593  | NM_004142 | 592.682   | 599.497   |
| NM_005767 | 511.933   | 377.364   | AF086534  | 775.318   | 678.851   | AF108138  | 8487.639  | 14849.022 |
| NM_001837 | 501.095   | 545.145   | AF070617  | 1102.467  | 1000.441  | NM_004347 | 227.438   | 780.255   |
| NM_001839 | 42570.902 | 34504.637 | NM_014918 | 6525.881  | 5977.301  | BF340302  | 4385.699  | 5782.356  |
| BC016029  | 860.009   | 774.485   | NM_003654 | 603.551   | 690.535   | AB037728  | 146.215   | 1008.825  |
| M27487    | 490.672   | 375.509   | NM_000152 | 5989.674  | 7021.607  | AK024210  | 1324.387  | 1567.731  |
| NM_002164 | 766.165   | 405.527   | NM_000154 | 3428.015  | 4028.677  | NM_002276 | 1442.538  | 1733.71   |
| NM_003811 | 2725.814  | 2920.594  | NM_006213 | 484.06    | 688.688   | AL133087  | 2190.447  | 2485.799  |
| NM_002981 | 3522.112  | 3036.271  | NM_003549 | 665.758   | 818.743   | NM_018010 | 785.96    | 1113.382  |
| NM_001244 | 599.359   | 718.471   | NM_000671 | 3121.731  | 2098.671  | NM_002274 | 6187.533  | 6600.121  |
| NM_012275 | 205.096   | 541.392   | NM_006297 | 10404.018 | 10050.611 | AL080200  | 530.782   | 433.847   |
| NM_006137 | 6967.148  | 7278.374  | AF182423  | 1442.243  | 1646.518  | BF337874  | 1765.13   | 1807.27   |
| NM_016139 | 61533.719 | 66508.336 | D26018    | 3524.73   | 3711.965  | NM_003475 | 10641.453 | 12939.795 |
| AL117468  | 5872.735  | 11586.8   | AB037863  | 764.627   | 419.291   | NM_000243 | 2737.441  | 3827.416  |
| NM_004090 | 6065.653  | 6009.823  | BC000363  | 763.739   | 719.816   | NM_012256 | 9743.456  | 8352.009  |
| NM_014634 | 5754.859  | 5808.615  | NM_007237 | 2127.565  | 1388.415  | NM_006006 | 322.144   | 440.378   |
| NM_001919 | 640.025   | 833.63    | NM_004608 | 1002.897  | 872.73    | NM_016325 | 2058.037  | 2428.798  |
| BC031485  | 1790.716  | 1569.774  | NM_018257 | 3296.818  | 2467.97   | NM_001604 | 1572.28   | 1108.644  |
| NM_004092 | 6783.08   | 8652.841  | NM_005919 | 1948.099  | 1378.003  | NM_017656 | 1648.248  | 1312.674  |
| X15624    | 1767.525  | 1486.741  | AF085931  | 2443.297  | 1957.216  | X16282    | 6231.656  | 4648.044  |
| AF073770  | 2810.335  | 2519.545  | AF086112  | 865.96    | 810.789   | NM_014415 | 2367.258  | 1865.921  |
| AL359401  | 6402.467  | 5387.923  | AL137254  | 918.502   | 726.728   | S75264    | 6036.729  | 5610.35   |
| NM_012213 | 1607.506  | 1800.213  | AK026359  | 927.774   | 805.079   | AF027513  | 1396.524  | 1299.632  |
| NM_016573 | 2463.65   | 2254.16   | AF085884  | 808.966   | 1020.481  | NM_001379 | 2166.364  | 2543.805  |
| NM_001303 | 7143.476  | 6461.621  | S81522    | 5174.878  | 5767.709  | NM_018664 | 5989.523  | 8900.087  |
| M21304    | 649.294   | 533.467   | S94541    | 922.195   | 968.045   | NM_005034 | 954.849   | 1019.579  |
| NM_001979 | 5975.75   | 5401.368  | AK024695  | 1688.215  | 1313.879  | NM_003926 | 5643.023  | 6951.543  |
| AB040896  | 1813.601  | 1499.607  | NM_018659 | 489.904   | 695.926   | AF085356  | 1224.149  | 2174.869  |
| NM_001107 | 6310.125  | 5728.553  | AF038174  | 3449.032  | 3185.285  | NM_016047 | 24876.496 | 28251.541 |
| AF084645  | 523.887   | 391.355   | AF070632  | 657.027   | 479.569   | NM_001499 | 6482.539  | 5293.692  |
| NM_003636 | 17668.902 | 20473.561 | AF161359  | 2392.12   | 1560.091  | BF030165  | 9447.048  | 8752.193  |
| NM_002234 | 157.035   | 683.018   | AL365520  | 1343.322  | 744.422   | NM_016732 | 14510.475 | 11660.976 |
| NM_000701 | 2191.703  | 3372.011  | AK023623  | 996.417   | 588.474   | AK026261  | 259.907   | 431.598   |
| AB022696  | 754.317   | 1150.998  | AK021539  | 4318.998  | 3915.717  | AF086534  | 622.282   | 640.036   |
| NM_002233 | 253.025   | 717.443   | AK021819  | 490.959   | 595.181   | AF070617  | 1119.586  | 840.567   |
| NM_014379 | 128.815   | 539.325   | AK026738  | 1609.576  | 1234.549  | NM_014918 | 5127.717  | 3660.177  |
| NM_021005 | 1573.007  | 1355.784  | AK025011  | 990.41    | 1244.082  | NM_003654 | 416.197   | 414.821   |
| SB        | 935.92    | 653.038   | AL157491  | 1070.965  | 1496.888  | NM_000152 | 4915.426  | 3833.339  |
| NM_001523 | 678.638   | 720.617   | NM_005266 | 1768.691  | 2562.35   | D17222    | 5530.278  | 3759.332  |
| NM_017423 | 1992.738  | 1678.422  | AF087965  | 901.727   | 917.374   | NM_000154 | 2948.652  | 2533.688  |
| Z70705    | 526.207   | 449.925   | AF085998  | 1478.376  | 1718.671  | NM_003549 | 470.698   | 574.509   |



|           |           |           |           |           |           |           |           |           |
|-----------|-----------|-----------|-----------|-----------|-----------|-----------|-----------|-----------|
| NM_002611 | 2480.526  | 1840.052  | AK024681  | 851.835   | 737.319   | NM_000671 | 2836.99   | 3098.511  |
| AL133602  | 524.162   | 482.295   | AB007977  | 3063.405  | 2859.246  | NM_006297 | 15023.754 | 18476.83  |
| AF037219  | 4390.819  | 3865.258  | U58663    | 313.744   | 385.908   | AF318366  | 5168.216  | 5996.434  |
| AK026075  | 2200.22   | 1695.633  | U84515    | 1373.152  | 990.578   | AF182423  | 1401.878  | 1398.909  |
| NM_000251 | 2527.823  | 2298.186  | AF086143  | 5862.571  | 3059.768  | D26018    | 3158.219  | 3315.698  |
| NM_00603E | 2287.09   | 1959.758  | AK022239  | 890.122   | 845.813   | AB037863  | 473.126   | 590.14    |
| AB011133  | 3971.9    | 3796.348  | AK024244  | 1903.435  | 1866.585  | BC000363  | 734.771   | 646.154   |
| NM_017572 | 31131.988 | 31492.518 | AK023812  | 651.522   | 993.282   | NM_007237 | 1822.614  | 1564.543  |
| NM_018444 | 1906.182  | 2738.334  | NM_003835 | 1411.386  | 1836.156  | NM_00460E | 621.749   | 813.864   |
| NM_000252 | 1410.016  | 1806.326  | AK000245  | 1629.054  | 1957.396  | NM_018257 | 2870.183  | 3050.292  |
| NM_006947 | 14495.926 | 19145.324 | AF118072  | 1082.115  | 969.106   | NM_00591C | 2067.457  | 2720.341  |
| NM_017917 | 2715.943  | 3887.326  | AF085900  | 12770.649 | 11814.352 | AF085931  | 3431.298  | 2832.127  |
| NM_00006C | 349.42    | 427.778   | AL049443  | 231.666   | 921.005   | AF086112  | 644.211   | 502.198   |
| NM_00958E | 459.892   | 239.629   | AK022420  | 999.415   | 866.685   | AL137254  | 1860.961  | 1381.066  |
| L09080    | 578.509   | 843.216   | AK023254  | 563.589   | 521.692   | AK026359  | 1052.907  | 1161.064  |
| NM_00732E | 592.806   | 491.742   | AK023945  | 9335.831  | 6204.688  | AF085884  | 1925.847  | 1843.621  |
| AK023080  | 397.92    | 493.815   | AK023773  | 658.914   | 655.753   | S81522    | 3516.341  | 3602.884  |
| NM_00188E | 3419.226  | 3086.966  | AK026499  | 684.559   | 619.74    | AF075070  | 406.477   | 297.302   |
| NM_004467 | 297.477   | 424.766   | AK021911  | 7884.681  | 9783.646  | S94541    | 1093.085  | 1318.438  |
| NM_005622 | 720.921   | 525.02    | D17225    | 3731.815  | 5532.563  | AK024228  | 2236.68   | 3162.62   |
| NM_01805E | 6346.489  | 5875.86   | AK021857  | 19823.883 | 24690.193 | NM_016647 | 2478.377  | 2714.829  |
| NM_00454E | 20226.607 | 17577.869 | AK022257  | 2613.145  | 3814.789  | AK024695  | 1207.703  | 1378.67   |
| X69079    | 9030.177  | 6963.62   | BE887356  | 22814.16  | 14176.148 | NM_01865E | 595.648   | 574.733   |
| BI759406  | 1347.559  | 973.227   | X84369    | 936.079   | 1314.33   | AF038174  | 3337.104  | 2561.53   |
| R76099    | 869.745   | 779.477   | AK001074  | 530.215   | 791.758   | AF070632  | 489.962   | 378.923   |
| S74445    | 427.387   | 421.564   | AK025181  | 423.454   | 486.19    | AF161359  | 1138.75   | 937.878   |
| BI763360  | 403.078   | 280.118   | AK021773  | 1672.217  | 975.513   | AL365520  | 1285.474  | 1177.866  |
| D25538    | 1402.279  | 1629.164  | AK027074  | 1946.105  | 884.706   | AL359338  | 530.7     | 526.858   |
| NM_00036C | 5092.061  | 5139.034  | AL365456  | 511.411   | 446.734   | AK023623  | 1066.28   | 1346.591  |
| X03635    | 612.508   | 480.211   | NM_01803E | 642.732   | 657.932   | AK026202  | 482.459   | 359.781   |
| BC011847  | 46432.008 | 48236.902 | U84522    | 1568.53   | 1132.064  | AK021539  | 7576.393  | 7458.406  |
| X03348    | 2402.271  | 2519.393  | AK021694  | 1440.454  | 1267.533  | AK021819  | 575.804   | 516.308   |
| AF353674  | 8558.946  | 10340.858 | AF086013  | 958.11    | 876.437   | AK026738  | 2110.031  | 2476.452  |
| BC002645  | 3807.572  | 3866.663  | U84505    | 3121.908  | 3737.042  | AK025011  | 821.586   | 646.857   |
| NM_021138 | 1752.437  | 2558.567  | X81005    | 2213.248  | 2811.771  | AL157491  | 767.658   | 576.712   |
| BC002792  | 1432.875  | 1920.931  | AL137635  | 712.465   | 718.38    | NM_00526E | 3561.049  | 3476.923  |
| NM_002981 | 4932.334  | 3989.024  | AL049430  | 3889.174  | 3921.282  | AF087965  | 633.656   | 632.894   |
| NM_001244 | 524.231   | 572.292   | AK021461  | 704.969   | 777.824   | AF085998  | 1403.846  | 1386.763  |
| NM_01227E | 253.074   | 191.9     | AB015349  | 907.236   | 567.557   | AB030240  | 421.628   | 347.03    |
| NM_006137 | 6184.258  | 5053.633  | AL079274  | 13532.016 | 12456.098 | AK024681  | 840.52    | 883.597   |
| NM_01613E | 50801.438 | 39678.891 | S46403    | 1462.295  | 2055.454  | X68742    | 641.037   | 647.22    |
| AL117468  | 4777.016  | 4099.541  | AL137398  | 1750.703  | 1570.318  | AF085990  | 677.833   | 801.455   |
| NM_01961E | 7178.9    | 6736.723  | Y12021    | 1126.687  | 968.796   | NM_014907 | 18667.072 | 20220.684 |
| NM_00538E | 1109.218  | 500.403   | AF127771  | 629.436   | 655.369   | AB007977  | 9616.447  | 11180.012 |
| AK027086  | 5662.293  | 5819.904  | NM_01330C | 13520.166 | 8720.07   | NM_014221 | 6021.434  | 6407.722  |
| AB032997  | 1295.901  | 1132.986  | AK026039  | 6149.121  | 3630.695  | U84515    | 1365.763  | 1211.727  |
| AL096857  | 2978.193  | 2466.743  | AF108756  | 10005.813 | 11033.104 | Y11180    | 399.546   | 491.071   |
| AB002351  | 186.398   | 421.842   | NM_00407E | 4195.87   | 3560.483  | AF086106  | 405.661   | 488.085   |
| NM_003834 | 1353.391  | 1597.201  | NM_001887 | 5176.479  | 3471.97   | AF086143  | 5456.775  | 5614.332  |
| NM_00595E | 4083.6    | 5124.009  | NM_00653E | 1904.996  | 1925.267  | AK022239  | 573.195   | 306.473   |
| NM_003381 | 995.01    | 829.316   | AK026747  | 10275.6   | 10292.033 | AK022364  | 332.616   | 465.316   |
| NM_00575E | 903.052   | 770.699   | AL110150  | 4487.245  | 7260.937  | AK024674  | 618.577   | 686.568   |
| NM_00370E | 12808.424 | 8843.152  | NM_00199E | 6501.359  | 7017.797  | AK024244  | 4925.836  | 4599.708  |

|           |           |           |            |           |           |           |           |           |
|-----------|-----------|-----------|------------|-----------|-----------|-----------|-----------|-----------|
| NM_000369 | 900.139   | 849.213   | X87825     | 3266.311  | 4197.247  | AK023812  | 850.628   | 775.143   |
| NM_016351 | 1421.092  | 1380.097  | BE781513   | 782.434   | 825.807   | AL390084  | 2262.998  | 2366.478  |
| NM_004405 | 1583.062  | 1973.682  | NM_015714  | 19647.928 | 14448.451 | AK021479  | 1367.239  | 1359.982  |
| NM_001988 | 3173.884  | 3530.287  | AK075564   | 1140.528  | 1433.981  | NM_003835 | 2154.963  | 2293.043  |
| NM_006060 | 4243.422  | 4538.342  | AK026219   | 2067.113  | 1795.801  | AK000245  | 2540.034  | 2735.062  |
| NM_005667 | 3474.175  | 6407.627  | D28446     | 1352.729  | 1443.894  | AF118072  | 2825.4    | 3875.783  |
| NM_006308 | 517.049   | 735.767   | AK024756   | 3339.074  | 3653.032  | AK023724  | 2537.415  | 3778.286  |
| NM_000701 | 1793.361  | 1819.592  | NM_017911  | 2454.119  | 2005.742  | AK024112  | 495.421   | 620.631   |
| AB022696  | 795.79    | 944.845   | AJ224168   | 2659.905  | 2638.118  | AF085900  | 29197.484 | 31493.352 |
| AF137372  | 4553.104  | 4647.583  | S69873     | 1176.072  | 1021.875  | AK026195  | 397.72    | 428.752   |
| AF220417  | 3244.794  | 2759.82   | AF147325   | 61850.789 | 58901.246 | AK022420  | 1251.37   | 1201.285  |
| D83782    | 3358.931  | 2770.639  | NM_014428  | 1975.764  | 1132.37   | AK023254  | 628.761   | 568.068   |
| NM_002078 | 2333.955  | 2045.399  | AK023584   | 636.044   | 576.159   | AK023945  | 12433.103 | 9485.107  |
| NM_000287 | 1940.782  | 1964.854  | NM_003774  | 541.79    | 419.156   | AK022446  | 715.207   | 651.56    |
| NM_001656 | 1427.118  | 1499.806  | D87466     | 7059.972  | 10518.976 | AK023773  | 695.281   | 973.723   |
| NM_001122 | 3697.98   | 3714.25   | CY3Cy5     | 2565.787  | 355.721   | AF116709  | 1133.804  | 953.347   |
| NM_004591 | 550.24    | 578.722   | AA608568   | 14467.208 | 26727.943 | AK025533  | 1362.133  | 1572.64   |
| AL133027  | 1068.513  | 1166.613  | BG831301   | 30101.426 | 43667.926 | AK021911  | 8962.531  | 9251.073  |
| AB037732  | 1613.095  | 1628.591  | M14764     | 346.224   | 575.576   | D17225    | 2469.561  | 2154.168  |
| NM_001837 | 688.965   | 521.573   | AA478647   | 10427.207 | 15067.676 | AF147430  | 681.866   | 705.098   |
| NM_001839 | 33420.473 | 30569.082 | AW058501   | 639.675   | 1032.798  | AK025766  | 5623.64   | 5169.368  |
| BC016029  | 1005.53   | 951.22    | ID 2623896 | 1153.799  | 1061.43   | U35875    | 35619.109 | 27451.953 |
| M27487    | 747.584   | 753.841   | ID 2602214 | 2305.042  | 1394.529  | AK021857  | 39379.172 | 33705.332 |
| NM_002286 | 24930.057 | 26591.967 | ID 2071279 | 10707.452 | 10737.007 | AK022257  | 2272.272  | 2347.593  |
| NM_002164 | 830.694   | 1110.094  | L10709     | 10577.333 | 16445.297 | BE887356  | 50210.129 | 52580.898 |
| NM_003811 | 3893.424  | 8310.926  | N35489     | 912.428   | 1043.664  | X84369    | 928.18    | 1340.391  |
| AB011133  | 3942.815  | 3697.006  | AI928195   | 1157.641  | 1643.619  | AK001074  | 412.394   | 413.449   |
| NM_017572 | 28355.279 | 21428.773 | AA482489   | 446.615   | 736.855   | AK023329  | 9210.448  | 13519.781 |
| NM_018444 | 1855.683  | 1822.023  | AA458922   | 2624.954  | 1565.307  | AF116686  | 867.834   | 1086.502  |
| NM_000252 | 1282.01   | 1456.119  | NM_145659  | 1223.661  | 653.772   | AK025181  | 483.389   | 320.418   |
| NM_006947 | 9895.582  | 8188.439  | SR2        | 40650.121 | 16154.328 | AK021773  | 1992.442  | 1422.665  |
| NM_017917 | 2127.505  | 1574.955  | SR4        | 10203.578 | 4644.539  | AK027074  | 2034.891  | 1830.348  |
| NM_004090 | 5827.508  | 5115.994  | SR6        | 2047.084  | 1726.474  | AL365456  | 645.249   | 613.59    |
| NM_014634 | 5199.79   | 4756.027  | SR8        | 9710.296  | 31406.336 | NM_018038 | 684.418   | 597.104   |
| NM_001919 | 688.613   | 757.409   | SR10       | 32776.91  | 13957.078 | U84522    | 4070.701  | 3892.167  |
| BC031485  | 2013.194  | 1719.409  | CY3Cy5     | 2965.93   | 369.612   | AK021694  | 1157.347  | 1127.665  |
| NM_004092 | 7374.225  | 9027.471  | NM_017729  | 1225.992  | 1397.602  | AF086013  | 694.004   | 679.465   |
| X15624    | 1878.281  | 1799.495  | NM_005259  | 1878.083  | 1361.88   | U84505    | 3741.195  | 4561.373  |
| AF073770  | 3000.764  | 3127.84   | NM_002840  | 585.685   | 534.292   | X81005    | 1605.205  | 1326.065  |
| AL359401  | 6730.919  | 7818.448  | NM_006174  | 822.553   | 896.422   | AL049265  | 2017.875  | 2878.036  |
| NM_012213 | 1798.699  | 2216.841  | NM_015850  | 3730.112  | 3907.361  | AK022225  | 592.556   | 603.233   |
| NM_016573 | 2536.084  | 2796.617  | NM_004864  | 340.724   | 188.206   | AL137635  | 851.077   | 832.84    |
| NM_001303 | 7898.349  | 9068.458  | NM_002838  | 12563.822 | 7290.585  | AL049430  | 3763.741  | 4380.646  |
| M21304    | 329.303   | 490.467   | AK027377   | 2036.004  | 1777.974  | AK021461  | 815.371   | 1067.999  |
| NM_001979 | 6546.345  | 5411.841  | NM_014686  | 50250.242 | 33437.516 | AB015349  | 664.357   | 992.327   |
| AB040896  | 1634.263  | 1697.855  | BF528358   | 904.88    | 522.132   | AL079274  | 21780.438 | 24147.188 |
| NM_001107 | 6704.891  | 4567.178  | NM_016339  | 953.816   | 753.285   | S46403    | 737.232   | 972.818   |
| AF084645  | 456.427   | 183.095   | NM_002487  | 5866.96   | 4145.528  | AL137398  | 1359.818  | 1897.364  |
| AF151851  | 4778.005  | 6028.765  | NM_013340  | 869.349   | 915.021   | Y12021    | 1706.911  | 1864.783  |
| NM_005176 | 800.26    | 995.743   | NM_005462  | 539.145   | 366.546   | AF127771  | 730.092   | 545.645   |
| NM_003636 | 25282.082 | 47997.18  | NM_012319  | 2041.057  | 1570.108  | NM_013300 | 18626.031 | 15409.269 |
| AF040723  | 1386.408  | 1369.682  | AK026235   | 325.188   | 359.332   | AK026039  | 6519.799  | 6543.137  |
| NM_015527 | 7266.88   | 6286.219  | NM_006510  | 6247.439  | 4166.985  | AF108756  | 13513.084 | 12930.637 |

|           |           |           |           |           |           |            |           |           |
|-----------|-----------|-----------|-----------|-----------|-----------|------------|-----------|-----------|
| X89675    | 434.858   | 568.666   | NM_003141 | 1629.898  | 1172.024  | AF086394   | 286.368   | 489.67    |
| NM_012189 | 362.016   | 454.432   | NM_020245 | 1710.575  | 874.334   | NM_004075  | 7311.327  | 6203.364  |
| NM_005798 | 8554.391  | 7258.564  | NM_007175 | 979.458   | 635.611   | NM_001887  | 4001.942  | 4938.52   |
| NM_004216 | 2564.793  | 2104.163  | AB046381  | 620.839   | 237.519   | NM_006533  | 2827.548  | 3027.211  |
| NM_016289 | 12252.86  | 8139.549  | NM_003018 | 566.88    | 1003.438  | AK026747   | 5079.033  | 6311.789  |
| NM_001464 | 990.025   | 736.043   | NM_000336 | 1016.973  | 1833.623  | AL110150   | 11819.145 | 13593.454 |
| NM_002051 | 4401.777  | 3836.045  | AF215923  | 5555.572  | 4048.735  | NM_001998  | 6949.566  | 6630.071  |
| NM_001523 | 829.511   | 776.878   | U66621    | 7022.445  | 6261.767  | X87825     | 3320.9    | 3504.846  |
| NM_017423 | 1738.068  | 1924.514  | NM_005720 | 12131.383 | 9325.227  | NM_000914  | 609.839   | 906.763   |
| Z70705    | 590.433   | 668.154   | AB040936  | 475.621   | 221.561   | AK001285   | 22513.443 | 20842.324 |
| NM_002611 | 2548.636  | 2360.402  | U61736    | 314.418   | 203.708   | D17215     | 6441.479  | 7369.042  |
| AL133602  | 464.46    | 348.645   | AJ132086  | 655.432   | 583.769   | BE781513   | 792.574   | 1030.759  |
| AF037219  | 4615.871  | 3721.521  | U92816    | 6832.093  | 6798.146  | NM_015714  | 33092.672 | 35395.445 |
| AK026075  | 1855.116  | 1042.888  | BC011987  | 3701.77   | 4569.246  | AK075564   | 1153.852  | 1645.266  |
| NM_000251 | 1292.505  | 246.659   | NM_004106 | 643.059   | 631.735   | AK026219   | 2643.619  | 4104.564  |
| NM_006038 | 3295.107  | 4189.387  | NM_003485 | 1900.301  | 1691.954  | D28446     | 1514.615  | 2267.266  |
| U87223    | 928.212   | 668.619   | NM_005038 | 7434.547  | 6949.314  | AK024756   | 2960.869  | 3330.443  |
| NM_000093 | 641.178   | 455.17    | L03418    | 598.494   | 1461.92   | NM_017911  | 2359.036  | 2847.487  |
| NM_001779 | 2690.49   | 2754.759  | M95923    | 643.284   | 502.069   | AJ224168   | 2426.076  | 2601.579  |
| AB033059  | 574.939   | 547.759   | NM_002415 | 57854.559 | 61727.762 | S69873     | 1051.176  | 750.202   |
| NM_016484 | 4660.152  | 4421.79   | NM_006332 | 6802.103  | 7350.301  | AF147325   | 52488.379 | 54541.496 |
| NM_014452 | 1563.197  | 1528.146  | NM_000916 | 802.05    | 789.846   | NM_014428  | 1675.923  | 1557.663  |
| AF023130  | 335.891   | 260.852   | NM_018663 | 3407.767  | 2615.306  | NM_018497  | 405.029   | 252.799   |
| AK021536  | 8251.772  | 8433.668  | NM_145904 | 7329.231  | 5678.986  | AK023584   | 809.5     | 820.945   |
| NM_002600 | 469.855   | 497.599   | NM_006796 | 6516.17   | 4584.67   | NM_003774  | 410.152   | 525.229   |
| NM_003646 | 12722.536 | 13187.79  | NM_000706 | 640.336   | 382.057   | D87466     | 6567.06   | 6167.615  |
| NM_006663 | 1504.278  | 1963.827  | NM_003655 | 8664.233  | 16081.101 | CY3Cy5     | 2316.074  | 283.771   |
| NM_006092 | 1105.266  | 1624.875  | AK025111  | 592.79    | 780.221   | AA608568   | 9261.405  | 8679.129  |
| NM_003939 | 782.197   | 1104.207  | NM_001732 | 806.132   | 1091.738  | BG831301   | 25027.482 | 22154.225 |
| NM_012424 | 792.702   | 772.407   | AB037798  | 1724.591  | 2500.53   | M14764     | 896.019   | 602.439   |
| NM_002446 | 1527.168  | 1275.748  | NM_000780 | 286.931   | 416.726   | AA478647   | 6508.733  | 6527.936  |
| NM_000863 | 843.17    | 783.641   | AF272663  | 4822.73   | 4026.157  | AW058501   | 350.391   | 497.33    |
| NM_006651 | 677.783   | 316.351   | NM_012190 | 1421.599  | 1414.156  | ID 2623896 | 930.98    | 901.87    |
| NM_005336 | 7595.586  | 9676.826  | AF277719  | 709.49    | 1079.349  | ID 2602214 | 2261.488  | 1967.156  |
| NM_001419 | 13766.578 | 16657.916 | NM_000791 | 2723.194  | 2826.859  | ID 2071279 | 6912.018  | 4590.57   |
| AF119817  | 5946.137  | 11743.102 | NM_003681 | 1906.108  | 2137.232  | L10709     | 7535.492  | 6385.414  |
| AL035306  | 2926.755  | 7063.306  | NM_004800 | 7614.013  | 7503.814  | N35489     | 660.148   | 672.853   |
| NM_001328 | 10628.232 | 8423.826  | AB037738  | 176.141   | 205.552   | AI928195   | 652.726   | 569.222   |
| NM_005749 | 4011.174  | 3334.19   | NM_014954 | 7642.935  | 7869.613  | AA458922   | 1959.257  | 2620.229  |
| NM_004230 | 812.835   | 764.355   | NM_000807 | 437.54    | 497.939   | NM_145659  | 1389.413  | 1423.901  |
| NM_014503 | 868.139   | 880.644   | NM_014909 | 994.678   | 783.387   | NM_021957  | 1502.315  | 2121.628  |
| NM_014659 | 1238.832  | 1152.645  | NM_015700 | 5839.057  | 4912.734  | SR2        | 50014.891 | 41172.824 |
| NM_004399 | 3699.868  | 3468.113  | NM_019087 | 1297.529  | 872.318   | SR4        | 11327.155 | 10789.84  |
| NM_006337 | 5580.613  | 3967.713  | NM_016322 | 457.238   | 342.238   | SR6        | 1644.477  | 1627.077  |
| NM_004507 | 3044.24   | 2446.147  | NM_005072 | 1331.522  | 2622.488  | CY3Cy5     | 1736.374  | 146.699   |
| NM_002710 | 15021.861 | 11948.039 | AF308802  | 1543.367  | 1534.941  | NM_017729  | 1040.718  | 1179.052  |
| NM_014060 | 4037.632  | 3818.131  | S76984    | 7979.732  | 11155.822 | NM_005259  | 2451.317  | 2751.621  |
| NM_004749 | 6379.471  | 6599.13   | NM_005651 | 566.945   | 758.613   | NM_002840  | 338.476   | 461.271   |
| BQ446064  | 2814.726  | 3274.845  | NM_005418 | 182.277   | 168.924   | NM_006174  | 522.2     | 393.326   |
| AF302502  | 8251.654  | 9278.515  | NM_007195 | 1307.997  | 1291.176  | NM_015850  | 3370.833  | 3371.545  |
| AF274571  | 1982.192  | 2863.307  | AK023337  | 1214.496  | 1365.521  | NM_004864  | 408.669   | 350.052   |
| NM_005449 | 2044.174  | 2507.23   | NM_013275 | 10873.082 | 9537.406  | NM_002838  | 12961.639 | 12810.318 |
| NM_003879 | 2164.656  | 2215.171  | AB037842  | 809.234   | 1069.52   | NM_014686  | 55365.223 | 54882.719 |

|           |           |           |            |           |           |           |           |           |
|-----------|-----------|-----------|------------|-----------|-----------|-----------|-----------|-----------|
| NM_016052 | 5025.03   | 3048.718  | U92074     | 577.334   | 556.252   | BF528358  | 766.685   | 590.165   |
| NM_006718 | 1315.8    | 800.636   | NM_019011  | 2926.889  | 3466.076  | NM_016338 | 665.5     | 482.361   |
| NM_005427 | 869.674   | 667.128   | AF459094   | 4302.538  | 5360.747  | NM_002487 | 5307.586  | 4245.186  |
| NM_016312 | 648.909   | 644.972   | NM_003157  | 1577.502  | 1943.316  | NM_013340 | 300.183   | 241.886   |
| AF234887  | 1532.913  | 2205.274  | NM_004938  | 1465.619  | 1960.265  | NM_005462 | 790.918   | 1483.417  |
| NM_001776 | 1692.865  | 3583.109  | NM_014326  | 371.442   | 363.305   | NM_012319 | 1143.998  | 904.529   |
| NM_001792 | 447.091   | 1055.705  | NM_004448  | 272.34    | 277.684   | NM_006510 | 6405.537  | 7892.54   |
| NM_001903 | 17588.959 | 31088.246 | NM_015981  | 530.695   | 556.678   | NM_003141 | 1892.933  | 1880.437  |
| NM_005857 | 3598.005  | 3042.13   | NM_000455  | 2409.548  | 2303.974  | NM_020245 | 2619.049  | 4565.692  |
| NM_000429 | 1048.487  | 983.04    | NM_014791  | 7285.318  | 6530.292  | NM_007175 | 1455.04   | 2161.876  |
| AK027037  | 737.196   | 740.275   | NM_003318  | 5545.053  | 4611.226  | AB046381  | 539.551   | 799.049   |
| NM_003875 | 9532.499  | 7150.45   | NM_004362  | 2515.713  | 1883.797  | AJ011497  | 1278.971  | 1349.372  |
| AF191687  | 2724.86   | 2975.774  | NM_000182  | 7944.037  | 6277.512  | NM_003018 | 485.968   | 353.243   |
| NM_003046 | 484.436   | 873.219   | AK023384   | 2029.847  | 1236.673  | NM_000336 | 941.472   | 1057.458  |
| NM_000274 | 11245.649 | 11906.905 | AB046381   | 891.08    | 873.272   | W61100    | 33620.977 | 31116.404 |
| NM_000170 | 915.905   | 1339.107  | AJ011497   | 957.689   | 1230.228  | AF215923  | 5628.892  | 5870.606  |
| NM_000281 | 13395.274 | 15433.556 | NM_000336  | 945.223   | 1319.503  | U66621    | 6484.561  | 8207.244  |
| NM_006031 | 2709.746  | 2696.635  | W61100     | 18591.604 | 20239.848 | NM_005720 | 11823.547 | 12564.694 |
| NM_002715 | 5431.066  | 3803.045  | AA608568   | 9003.241  | 10892.646 | AB040936  | 353.907   | 315.892   |
| NM_001020 | 55702.512 | 55755.508 | BG831301   | 17161.426 | 16086.308 | U61736    | 403.905   | 428.799   |
| AB020660  | 3519.661  | 3179.323  | AA478647   | 6600.759  | 5979.312  | AJ132086  | 789.685   | 760.821   |
| NM_006659 | 6999.63   | 7694.367  | ID 2623896 | 1181.212  | 1756.361  | U92816    | 8921.175  | 9481.733  |
| NM_018051 | 1780.167  | 3532.952  | ID 2071279 | 7406.456  | 7077.912  | BC011987  | 3600.285  | 3353.148  |
| NM_015371 | 1781.932  | 4131.293  | L10709     | 7206.237  | 8090.877  | NM_004106 | 870.387   | 658.029   |
| AB040915  | 2782.186  | 6529.686  | N35489     | 743.014   | 570.726   | NM_003485 | 2331.129  | 1796.971  |
| AF147791  | 423.965   | 1093.514  | AI928195   | 553.15    | 748.029   | NM_005038 | 6843.912  | 5301.699  |
| NM_006481 | 2631.355  | 1658.624  | AA458922   | 2520.955  | 2101.392  | M95923    | 750.372   | 689.627   |
| AB011115  | 1096.05   | 952.396   | NM_145659  | 954.576   | 895.197   | NM_002415 | 56118.746 | 59555.816 |
| NM_003910 | 17996.979 | 12275.553 | NM_001719  | 4324.148  | 3228.832  | NM_006332 | 7508.954  | 7361.122  |
| NM_006696 | 3628.205  | 2833.096  | AL080062   | 1186.276  | 766.891   | NM_018663 | 3133.131  | 3476.132  |
| NM_004599 | 8318.653  | 5715.75   | NM_145904  | 8557.509  | 8822.183  | NM_145904 | 7683.729  | 15716.795 |
| NM_006037 | 6909.318  | 4965.521  | NM_006796  | 8525.948  | 9082.37   | NM_006796 | 7953.755  | 10949.294 |
| NM_015871 | 5345.987  | 5080.493  | NM_000706  | 760.889   | 749.242   | NM_000706 | 827.254   | 924.51    |
| NM_019037 | 3716.411  | 3551.202  | NM_015941  | 2588.069  | 3220.07   | NM_015941 | 2362.658  | 2605.186  |
| NM_015891 | 5157.054  | 5412.638  | NM_003655  | 6330.997  | 7141.457  | NM_003655 | 6169.674  | 5827.897  |
| NM_006802 | 815.292   | 921.623   | NM_014837  | 3428.283  | 3694.634  | NM_014837 | 3913.824  | 3336.658  |
| NM_005066 | 25959.998 | 22451.596 | NM_017729  | 834.431   | 992.211   | AK025111  | 1081.737  | 1623.472  |
| NM_003089 | 8914.554  | 4691.315  | NM_005259  | 1684.565  | 1426.537  | NM_001732 | 1250.322  | 1333.774  |
| NM_003753 | 14139.565 | 7029.228  | NM_002840  | 464.852   | 530.492   | NM_018690 | 4673.973  | 7445.864  |
| NM_017590 | 2935.007  | 2107.341  | NM_015850  | 3205.562  | 4048.224  | NM_000860 | 6501.373  | 6361.433  |
| AB011145  | 5722.042  | 8187.964  | NM_004864  | 247.659   | 389.243   | AB037798  | 3231.553  | 3149.358  |
| NM_003750 | 17012.129 | 24386.076 | NM_014686  | 47364.348 | 49996.445 | NM_000780 | 522.71    | 569.558   |
| NM_015251 | 273.952   | 684.764   | BF528358   | 987.991   | 1047.99   | AF272663  | 5963.293  | 6397.316  |
| M92422    | 3243.995  | 5994.637  | NM_016339  | 798.726   | 513.355   | NM_012190 | 1276.01   | 913.501   |
| NM_017868 | 2816.278  | 4647.039  | NM_002487  | 6377.89   | 9854.662  | AF277719  | 846.113   | 950.506   |
| AK021888  | 926.252   | 679.616   | NM_013340  | 366.04    | 333.028   | NM_000791 | 2343.984  | 1962.437  |
| AK022848  | 827.359   | 601.796   | NM_005462  | 479.149   | 348.451   | NM_003681 | 1806.106  | 1396.454  |
| AL049957  | 808.057   | 739.948   | NM_012319  | 2109.908  | 1644.887  | NM_004800 | 8125.052  | 5554.587  |
| NM_005847 | 243.748   | 177.639   | NM_006510  | 5327.93   | 4524.155  | AB037738  | 301.827   | 251.861   |
| NM_018159 | 7483.099  | 5525.67   | NM_003141  | 1777.835  | 1302.262  | NM_014954 | 10556.643 | 11288.588 |
| NM_000819 | 3222.616  | 2223.752  | NM_020245  | 1922.819  | 1228.837  | NM_000807 | 1582.454  | 4105.835  |
| NM_002513 | 3554.89   | 2115.813  | NM_007175  | 873.854   | 473.072   | NM_014909 | 1920.976  | 2283.221  |
| NM_017424 | 5854.598  | 4155.714  | X91148     | 479.512   | 639.228   | X91148    | 519.017   | 527.808   |

|           |           |           |           |           |           |            |           |           |
|-----------|-----------|-----------|-----------|-----------|-----------|------------|-----------|-----------|
| NM_001522 | 5592.867  | 4048.386  | NM_015700 | 6707.618  | 7874.647  | NM_015700  | 6927.959  | 10810.932 |
| NM_000883 | 7730.914  | 7738.316  | NM_019087 | 1575.029  | 1525.967  | NM_019087  | 1393.804  | 1573.927  |
| AF254086  | 2053.428  | 2297.492  | NM_016322 | 446.543   | 620.568   | NM_016322  | 647.09    | 631.075   |
| AL390142  | 981.805   | 1254.64   | NM_005072 | 859.3     | 1061.193  | NM_004277  | 346.364   | 577.579   |
| NM_006565 | 4628.693  | 4194.093  | AF215923  | 5337.097  | 5865.147  | NM_005072  | 841.051   | 747.131   |
| AB007930  | 4861.94   | 3445.613  | U66621    | 6872.738  | 6977.25   | AF308802   | 1252.804  | 1551.902  |
| AJ005273  | 3340.682  | 2147.984  | NM_005720 | 12217.122 | 11934.667 | S76984     | 7220.727  | 7877.462  |
| AK021892  | 2777.187  | 2013.116  | AB040936  | 456.967   | 465.409   | NM_014495  | 49945.438 | 55196.594 |
| NM_003121 | 437.07    | 530.53    | U92816    | 6364.882  | 7897.693  | NM_014081  | 732.854   | 554.369   |
| NM_003437 | 2335.717  | 4267.616  | BC011987  | 4059.62   | 5907.137  | NM_005651  | 661.341   | 600.012   |
| NM_018337 | 6787.198  | 11832.191 | NM_004106 | 698.399   | 789.87    | NM_007195  | 1467.803  | 1176.33   |
| AA193295  | 15245.618 | 23571.699 | NM_003485 | 1792.314  | 1857.798  | AK023337   | 2112.45   | 2111.359  |
| NM_018045 | 6454.656  | 12933.333 | NM_005038 | 6012.65   | 5474.109  | NM_013275  | 12277.239 | 10055.415 |
| NM_014803 | 1860.621  | 978.874   | M95923    | 384.501   | 235.527   | AB037842   | 823.982   | 415.987   |
| AK024956  | 303.789   | 233.039   | NM_002415 | 54059.715 | 52724.223 | NM_019011  | 3304.073  | 2365.415  |
| AF147386  | 518.431   | 356.233   | NM_006332 | 6102.035  | 5039.985  | AF459094   | 4421.66   | 3485.096  |
| AF273052  | 5841.058  | 4234.602  | NM_000916 | 745.191   | 540.339   | NM_003157  | 2061.378  | 1794.861  |
| NM_017943 | 7528.148  | 5068.559  | NM_018663 | 2853.287  | 1918.008  | NM_004938  | 966.894   | 937.212   |
| AK025682  | 1039.879  | 601.751   | NM_014791 | 9042.901  | 9931.618  | NM_000455  | 2643.246  | 4204.527  |
| AL049227  | 345.927   | 337.191   | NM_003318 | 5805.164  | 6139.41   | NM_014791  | 9625.394  | 11702.57  |
| NM_013352 | 450.169   | 412.52    | NM_004362 | 2839.91   | 2994.406  | NM_003318  | 5952.217  | 5612.091  |
| NM_016478 | 4482.929  | 5343.072  | NM_000182 | 9815.849  | 10785.267 | NM_004362  | 3542.682  | 5206.375  |
| AL389986  | 8783.249  | 9741.01   | AK023384  | 2080.87   | 2393.684  | NM_000182  | 9777.436  | 10360.774 |
| AF088052  | 619.834   | 409.59    | NM_016026 | 12520.827 | 13705.023 | AK023384   | 1957.166  | 2107.299  |
| AF086387  | 773.306   | 1045.991  | NM_001732 | 1056.838  | 877.508   | NM_016026  | 13429.07  | 11622.787 |
| AF086443  | 599.885   | 1380.5    | NM_018690 | 3040.701  | 3322.667  | AB046381   | 475.607   | 726.9     |
| AL389941  | 1110.054  | 1678.26   | NM_000860 | 3818.18   | 4663.412  | AJ011497   | 1014.74   | 1355.499  |
| AB037756  | 2993.431  | 4773.251  | AB037798  | 1792.063  | 1868.789  | NM_000336  | 811.574   | 817.269   |
| AK001853  | 5027.324  | 9826.222  | AF272663  | 4657.002  | 5304.574  | W61100     | 35751.813 | 38847.742 |
| AK025071  | 1560.347  | 3156.12   | NM_012190 | 1608.58   | 2249.511  | AA608568   | 8667.547  | 8146.027  |
| AF075082  | 273.153   | 255.923   | AB033015  | 360.034   | 355.576   | BG831301   | 19722.492 | 15912.889 |
| NM_015370 | 700.111   | 396.361   | AF277719  | 667.9     | 634.483   | AA478647   | 6760.689  | 5761.104  |
| AF085917  | 1057.405  | 757.979   | NM_000791 | 2341.696  | 2226.941  | ID 2623896 | 1230.586  | 863.27    |
| AF085989  | 803.149   | 477.558   | NM_003681 | 1764.259  | 1834.291  | ID 2602214 | 2705.033  | 2253.129  |
| AL360139  | 9511.225  | 7091.674  | NM_004800 | 6795.688  | 6767.134  | ID 2071279 | 7064.433  | 4725.257  |
| AF075110  | 10431.308 | 6250.072  | AB037738  | 283.062   | 146.043   | L10709     | 7730.999  | 5988.381  |
| AL137323  | 429.06    | 363.595   | NM_004677 | 209.813   | 146.195   | N35489     | 456.585   | 371.77    |
| AL137494  | 2365.063  | 1493.062  | NM_014954 | 7712.466  | 6607.369  | NM_145655  | 1381.38   | 1765.917  |
| AL162037  | 1800.24   | 1075.8    | NM_014909 | 1107.657  | 664.083   | NM_021957  | 484.088   | 587.622   |
| AL390150  | 1183.587  | 1047.579  | NM_145659 | 1438.542  | 1255.749  | NM_001719  | 6472.538  | 5931.397  |
| AF086063  | 469.671   | 485.84    | NM_021957 | 372.837   | 247.453   | AL080062   | 1472.766  | 1227.622  |
| AF086098  | 1102.463  | 1611.18   | NM_001719 | 5075.618  | 5194.648  | NM_145904  | 5370.932  | 5555.63   |
| AF086076  | 926.083   | 2466.078  | AL080062  | 1312.768  | 1509.373  | NM_006796  | 8783.724  | 8502.41   |
| AL833393  | 3750.527  | 6570.162  | AF308802  | 1677.354  | 1850.147  | NM_000706  | 833.867   | 737.554   |
| AF086096  | 2631.986  | 5564.712  | S76984    | 8449.271  | 7809.4    | NM_015941  | 1990.033  | 2163.144  |
| AL390132  | 523.295   | 1001.551  | NM_014495 | 48580.34  | 45754.973 | NM_003655  | 4939.033  | 5071.239  |
| NM_017933 | 242.513   | 828.39    | NM_014081 | 579.11    | 492.739   | NM_014837  | 3419.613  | 3032.319  |
| NM_017819 | 14177.094 | 19341.672 | NM_005651 | 525.731   | 751.541   | NM_017725  | 822.833   | 653.021   |
| AK024653  | 4436.902  | 6655.482  | NM_007195 | 1715.858  | 2594.485  | NM_005255  | 2082.061  | 1889.129  |
| AF103907  | 867.303   | 1204.455  | AK023337  | 1509.54   | 1316.221  | NM_006174  | 634.986   | 448.907   |
| AF161351  | 754.655   | 871.544   | NM_013275 | 10062.904 | 8686.979  | NM_015850  | 4108.25   | 4360.523  |
| AF257098  | 567.244   | 556.471   | AB037842  | 582.179   | 614.089   | NM_002838  | 13448.253 | 10101.737 |
| AF151530  | 682.66    | 575.175   | U92074    | 609.31    | 459.832   | NM_014686  | 55191.422 | 49086.316 |

|            |           |           |            |           |           |           |           |           |
|------------|-----------|-----------|------------|-----------|-----------|-----------|-----------|-----------|
| AK021991   | 573.105   | 81.345    | NM_019011  | 2553.212  | 3271.161  | BF528358  | 694.465   | 428.766   |
| AK022093   | 696.211   | 462.284   | AF459094   | 3773.068  | 3435.913  | NM_016339 | 716.523   | 631.257   |
| AK022137   | 242.926   | 380.457   | NM_003157  | 1472.703  | 1218.086  | NM_006510 | 7340.716  | 9362.794  |
| AK022272   | 598.674   | 542.055   | NM_004938  | 1138.469  | 1037.276  | NM_003141 | 1987.057  | 2188.967  |
| AK027155   | 1261.987  | 2765.197  | NM_014326  | 318.662   | 219.025   | NM_020245 | 2529.324  | 2380.525  |
| AF264626   | 422.266   | 632.611   | NM_004448  | 337.355   | 322.09    | NM_007175 | 1205.2    | 1347.923  |
| AK027219   | 465.393   | 955.72    | NM_015981  | 543.245   | 600.002   | X91148    | 946.881   | 879.713   |
| AK024528   | 2394.835  | 5068.911  | NM_000455  | 2577.082  | 2500.305  | NM_015700 | 6343.23   | 6857.263  |
| AL049311   | 724.262   | 793.075   | NM_012319  | 2087.699  | 1989.314  | NM_019087 | 1478.263  | 1448.781  |
| AK000016   | 651.491   | 1342.091  | AK026235   | 312.229   | 228.728   | NM_016322 | 350.694   | 505.176   |
| AK023367   | 1714.601  | 2903.435  | NM_006510  | 6109.992  | 5431.557  | NM_005072 | 468.735   | 978.899   |
| AL080209   | 3653.687  | 5186.803  | NM_003141  | 1923.124  | 1965.522  | AF215923  | 5205.325  | 4752.682  |
| AL137431   | 486.152   | 397.992   | NM_020245  | 1889.014  | 2127.998  | U66621    | 6665.058  | 6865.715  |
| NM_016255  | 2758.381  | 2531.015  | NM_007175  | 1267.731  | 1385.024  | NM_005720 | 13308.145 | 10424.213 |
| NM_014318  | 2382.765  | 2895.009  | AB046381   | 688.021   | 817.158   | AB040936  | 603.423   | 471.954   |
| unknown (S | 235.848   | 397.997   | AJ011497   | 1026.337  | 1118.862  | U61736    | 488.143   | 550.302   |
| AK021962   | 359.127   | 747.703   | NM_003018  | 343.981   | 384.335   | AJ132086  | 1037.823  | 895.913   |
| AK056674   | 1703.626  | 2473.502  | NM_000336  | 999.917   | 1577.912  | U92816    | 8951.338  | 7828.863  |
| AK022856   | 380.27    | 675.129   | W61100     | 15841.503 | 17545.336 | BC011987  | 3243.626  | 2560.29   |
| AK022042   | 627.918   | 1049.394  | AA608568   | 8227.774  | 9875.874  | NM_004106 | 728.105   | 828.212   |
| AL117588   | 374.639   | 800.951   | BG831301   | 14197.209 | 12736.989 | NM_006332 | 8470.345  | 7977.32   |
| BE895529   | 3114.092  | 4035.513  | AA478647   | 6007.719  | 5866.56   | NM_000916 | 1647.175  | 1450.136  |
| AK000964   | 833.878   | 1410.403  | ID 2623896 | 954.859   | 1039.551  | NM_018663 | 3703.279  | 3359.436  |
| AL117536   | 3595.042  | 4973.828  | ID 2602214 | 1750.968  | 1677.962  | NM_014791 | 10371.539 | 10696.123 |
| NM_017751  | 11252.235 | 10997.806 | ID 2071279 | 5983.742  | 4656.345  | NM_003318 | 6885.053  | 7757.325  |
| NM_003771  | 810.236   | 1091.627  | L10709     | 6102.733  | 5788.629  | NM_004362 | 3552.075  | 3778.261  |
| NM_017860  | 831.312   | 989.762   | N35489     | 549.576   | 410.43    | NM_000182 | 8260.738  | 8603.301  |
| X91195     | 48232.93  | 47392.906 | AI928195   | 604.381   | 447.012   | AK023384  | 1894.009  | 1922.394  |
| AF086190   | 402.745   | 842.758   | AA458922   | 2245.551  | 1920.564  | NM_016026 | 12288.38  | 12261.862 |
| AL050035   | 2539.356  | 3045.848  | M95923     | 496.959   | 414.16    | AK025111  | 497.582   | 516.099   |
| AK024449   | 607.285   | 1333.621  | NM_002415  | 55811.43  | 57789.184 | NM_001732 | 830.324   | 835.709   |
| AL357201   | 404.306   | 946.147   | NM_006332  | 6582.987  | 6483.542  | NM_018690 | 3725.732  | 3323.443  |
| AF279780   | 33966.813 | 44234.652 | NM_000916  | 742.109   | 1062.583  | NM_000860 | 4933.986  | 3903.159  |
| AK022510   | 3126.884  | 4283.309  | NM_018663  | 3590.029  | 3750.952  | AB037798  | 2341.412  | 2336.238  |
| AK023878   | 453.723   | 348.597   | NM_145904  | 7696.087  | 9362.584  | NM_000780 | 374.447   | 427.132   |
| AJ131609   | 1895.147  | 2706.295  | NM_006796  | 8055.969  | 9687.899  | AF272663  | 7882.622  | 8007.685  |
| BC019280   | 3550.221  | 5787.052  | NM_000706  | 719.214   | 923.536   | NM_012190 | 1603.907  | 1283.871  |
| AF086498   | 1422.175  | 2067.975  | NM_015941  | 2621.092  | 3077.078  | AF277719  | 616.566   | 467.522   |
| AK000687   | 1029.36   | 1714.987  | NM_003655  | 6152.49   | 7267.159  | NM_000791 | 2106.38   | 1998.572  |
| L77565     | 502.734   | 829.976   | NM_014837  | 3558.283  | 6107.851  | NM_003681 | 1560.036  | 1848.277  |
| AF079567   | 3414.12   | 5600.666  | NM_017729  | 954.22    | 788.043   | NM_014954 | 18475.229 | 20179.027 |
| AK022177   | 2554.682  | 2776.362  | NM_005259  | 1209.767  | 1206.64   | NM_000807 | 855.77    | 755.614   |
| AK023852   | 1767.18   | 1754.059  | NM_002840  | 467.443   | 636.009   | NM_014909 | 2611.679  | 2558.276  |
| AF086466   | 875.525   | 1241.022  | NM_006174  | 549.565   | 545.973   | NM_145659 | 1345.921  | 1230.465  |
| AB007962   | 1905.324  | 1907.064  | NM_015850  | 2817.353  | 3166.516  | NM_001719 | 4714.095  | 4812.768  |
| AF005081   | 1284.958  | 1649.955  | NM_004864  | 385.034   | 498.447   | AL080062  | 1361.694  | 1444.14   |
| AK026438   | 1132.048  | 984.83    | NM_002838  | 9724.482  | 9663.887  | AF308802  | 1256.526  | 1110.282  |
| AK021546   | 1027.644  | 1281.551  | NM_014686  | 56309.156 | 40815.945 | S76984    | 6457.024  | 6070.035  |
| AL050186   | 25192.754 | 26361.422 | BF528358   | 656.783   | 719.801   | NM_014495 | 52739.598 | 51385.785 |
| AK021918   | 6090.729  | 7160.547  | NM_016339  | 559.762   | 330.862   | NM_014081 | 478.363   | 771.262   |
| AK021669   | 3373.795  | 5200.161  | NM_002487  | 4773.165  | 4260.275  | NM_005651 | 952.714   | 845.663   |
| AL080113   | 38930.727 | 45525.738 | NM_013340  | 260.968   | 279.033   | NM_007195 | 1779.511  | 1515.682  |
| AL050083   | 745.16    | 1408.327  | NM_005462  | 444.389   | 395.083   | AK023337  | 1661.937  | 1512.995  |

|           |           |           |           |           |           |            |           |           |
|-----------|-----------|-----------|-----------|-----------|-----------|------------|-----------|-----------|
| AK022766  | 693.493   | 1196.808  | NM_014954 | 8089.663  | 7658.757  | NM_013275  | 10304.271 | 8169.743  |
| AL049422  | 8876.514  | 14365.476 | NM_000807 | 582.303   | 594.54    | AB037842   | 603.025   | 313.346   |
| AK023526  | 3401.511  | 4332.278  | NM_014909 | 1569.682  | 2121      | NM_019011  | 3357.906  | 2712.899  |
| AF075038  | 337.625   | 509.532   | X91148    | 479.523   | 889.56    | NM_015981  | 1114.148  | 816.274   |
| BE266129  | 517.527   | 547.809   | NM_015700 | 6400.799  | 8015.098  | NM_000455  | 3104.713  | 2796.282  |
| AK025602  | 13195.629 | 21862.184 | NM_019087 | 1766.607  | 1995.21   | NM_012315  | 1620.762  | 1911.92   |
| AK026309  | 5895.987  | 9958.207  | NM_016322 | 425.808   | 512.491   | NM_006510  | 6471.322  | 8324.812  |
| AL137486  | 1197.105  | 2300.842  | NM_004277 | 390.467   | 344.638   | NM_003141  | 2030.265  | 2085.106  |
| AL110162  | 978.298   | 1607.799  | NM_005072 | 739.172   | 794.658   | NM_020245  | 1911.642  | 2021.094  |
| AF119880  | 327.098   | 621.811   | AF215923  | 5110.114  | 5206.113  | NM_007175  | 950.842   | 1161.629  |
| AK022681  | 15769.895 | 29473.914 | U66621    | 6341.35   | 6749.547  | AB046381   | 630.275   | 981.019   |
| CY3Cy5    | 2845.573  | 303.352   | NM_005720 | 11703.252 | 10864.694 | AJ011497   | 1169.027  | 1398.646  |
| M59979    | 412.537   | 357.776   | AB040936  | 331.209   | 198.161   | NM_003018  | 507.152   | 581.555   |
| AB011098  | 1256.246  | 648.781   | U61736    | 245.679   | 174.848   | NM_000336  | 1399.199  | 2925.199  |
| AA451686  | 6641.799  | 8807.9    | AJ132086  | 572.54    | 610.925   | W61100     | 41541     | 53359.16  |
| AA934644  | 320.096   | 285.294   | U92816    | 5900.889  | 4978.566  | AA608568   | 9011.112  | 10050.923 |
| NM_003822 | 1219.735  | 886.22    | BC011987  | 3116.944  | 3990.939  | BG831301   | 19562.922 | 16066.829 |
| NM_004412 | 10207.238 | 20676.883 | NM_004106 | 553.21    | 415.201   | AA478647   | 6381.845  | 4779.058  |
| SR5       | 3775.179  | 3707.678  | NM_003485 | 1675.682  | 1700.373  | ID 2623896 | 776.46    | 747.558   |
| SR7       | 4165.622  | 34262.945 | NM_005038 | 6207.074  | 5053.843  | ID 2602214 | 2325.183  | 2261.363  |
| SR9       | 14680.874 | 2635.728  | NM_003157 | 1535.29   | 2002.762  | ID 2071279 | 7186.602  | 6002.753  |
| CY3Cy5    | 2752.209  | 201.708   | NM_004938 | 1171.476  | 1099.355  | AI928195   | 656.512   | 657.4     |
| NM_019555 | 968.494   | 1051.813  | NM_014326 | 552.512   | 806.327   | AA458922   | 2538.134  | 2523.143  |
| NM_012096 | 5395.06   | 4893.383  | NM_004448 | 281.596   | 237.162   | M95923     | 567.809   | 796.229   |
| L12052    | 4548.944  | 5231.998  | NM_015981 | 904.16    | 869.07    | NM_002415  | 53441.176 | 53785.441 |
| AB028976  | 1928.389  | 1439.874  | NM_000455 | 3348.836  | 3910.068  | NM_006332  | 8492.76   | 8943.483  |
| NM_003144 | 27083.846 | 32623.254 | NM_014791 | 9392.328  | 12990.586 | NM_000916  | 1121.839  | 1312.636  |
| NM_000908 | 546.905   | 377.932   | NM_003318 | 5923.656  | 7587.993  | NM_018663  | 3282.519  | 3202.678  |
| AB011102  | 5235.705  | 5426.794  | NM_004362 | 3015.225  | 3377.71   | NM_145904  | 5198.543  | 5119.33   |
| D63480    | 1787.635  | 1660.665  | NM_000182 | 9135.879  | 10030.479 | NM_006796  | 10062.822 | 15974.764 |
| NM_002969 | 1357.256  | 1070.06   | AK023384  | 1951.933  | 2183.121  | NM_000706  | 1058.879  | 1650.296  |
| NM_004620 | 918.675   | 782.279   | NM_016026 | 11286.759 | 9915.666  | NM_015941  | 1822.683  | 2312.951  |
| AF087940  | 691.588   | 685.193   | AK025111  | 544.554   | 301.476   | NM_003655  | 4953.131  | 5858.306  |
| AJ277587  | 1022.115  | 875.39    | NM_001732 | 816.84    | 643.456   | NM_014837  | 3601.423  | 4388.438  |
| D87432    | 3028.434  | 4694.96   | NM_018690 | 3098.345  | 2544.817  | NM_017725  | 785.584   | 631.509   |
| AK023749  | 328.278   | 296.396   | NM_000860 | 3625.982  | 3854.803  | NM_005255  | 2176.75   | 1632.21   |
| NM_002337 | 4416.596  | 4109.743  | AB037798  | 1704.681  | 1596.71   | NM_002840  | 329.466   | 236.222   |
| NM_013245 | 2211.988  | 1939.076  | NM_000780 | 346.454   | 355.532   | NM_015850  | 3667.552  | 2741.929  |
| NM_006423 | 15724.476 | 15710.337 | AF272663  | 4393.506  | 4016.25   | NM_002838  | 11285.795 | 7315.883  |
| NM_004766 | 3130.084  | 2505.508  | NM_012190 | 1382.185  | 1572.83   | NM_014686  | 53244.27  | 51046.293 |
| NM_005819 | 2669.013  | 2775.422  | AF277719  | 705.222   | 770.766   | BF528358   | 892.539   | 709.318   |
| NM_014597 | 10557.241 | 6732.348  | NM_000791 | 2533.574  | 2552.415  | NM_016339  | 722.62    | 810.612   |
| NM_017896 | 9067.8    | 6540.949  | NM_003681 | 1640.738  | 1761.08   | NM_002487  | 5547.524  | 4946.321  |
| AB002374  | 3646.276  | 2756.79   | NM_004800 | 6787.844  | 6229.587  | NM_013340  | 558.237   | 949.453   |
| U17327    | 1398.271  | 1819.339  | NM_004952 | 4810.887  | 10801.454 | NM_005462  | 636.134   | 655.383   |
| M87790    | 5456.254  | 10390.223 | NM_020414 | 4511.509  | 4497.654  | NM_014954  | 23232.783 | 25372.539 |
| NM_001768 | 2479.944  | 2890.719  | AB037730  | 3469.652  | 3731.983  | NM_000807  | 606.612   | 755.461   |
| NM_000029 | 2061.511  | 2742.603  | NM_001357 | 9223.471  | 11120.423 | NM_014909  | 2230.601  | 2576.441  |
| NM_000715 | 490.769   | 349.016   | NM_014380 | 46879.598 | 42609.402 | X91148     | 616.091   | 531.079   |
| AF035802  | 762.247   | 887.05    | NM_001719 | 5336.308  | 5398.616  | NM_015700  | 6531.526  | 7317.186  |
| M26123    | 391.792   | 436.197   | AL080062  | 1692.013  | 1319.341  | NM_019087  | 1422.799  | 1238.948  |
| NM_001838 | 694.769   | 820.696   | AF308802  | 1831.83   | 1575.559  | NM_004277  | 225.814   | 427.818   |
| NM_013328 | 15334.213 | 13254.78  | S76984    | 8268.188  | 7286.517  | NM_005072  | 567.822   | 514.524   |

|           |           |           |           |           |           |           |           |           |
|-----------|-----------|-----------|-----------|-----------|-----------|-----------|-----------|-----------|
| NM_00079C | 546.853   | 175.189   | NM_01449E | 48533.535 | 47795.449 | AF215923  | 5253.277  | 4523.43   |
| NM_00266C | 4470.775  | 5386.048  | NM_014081 | 507.169   | 484.519   | U66621    | 7176.434  | 6999.245  |
| NM_01590C | 588.056   | 340.924   | NM_005651 | 668.964   | 676.301   | NM_00572C | 9388.794  | 6839.331  |
| NM_00370E | 551.889   | 456.292   | AK023699  | 1997.306  | 2011.747  | U61736    | 277.781   | 244.749   |
| NM_01612Z | 630.185   | 667.458   | NM_00541E | 915.372   | 701.816   | AJ132086  | 874.777   | 723.664   |
| AF153330  | 1151.815  | 1199.075  | NM_00719E | 2376.835  | 2316.328  | U92816    | 8215.403  | 7683.825  |
| D87446    | 3994.515  | 8058.207  | AK023337  | 1921.764  | 1468.484  | BC011987  | 3853.453  | 4195.296  |
| NM_00446E | 489.098   | 487.054   | NM_01327E | 11992.078 | 9604.494  | NM_00410E | 724.89    | 984.909   |
| NM_007081 | 2322.488  | 2669.328  | AB037842  | 693.197   | 797.433   | NM_00348E | 2445.461  | 2271.975  |
| AB032964  | 3150.713  | 3273.044  | U92074    | 624.355   | 572.37    | NM_00503E | 6998.339  | 7157.453  |
| BE733605  | 3147.236  | 2671.711  | NM_019011 | 2538.231  | 3810.864  | NM_003157 | 1924.242  | 2487.974  |
| NM_003334 | 9265.715  | 8976.458  | AF459094  | 4090.317  | 3789.215  | NM_00493E | 1186.632  | 1705.217  |
| NM_00269E | 7049.775  | 5705.83   | NM_002544 | 388.211   | 655.44    | NM_01432E | 529.425   | 420.557   |
| NM_003671 | 1179.112  | 1046.402  | AB011542  | 1222.285  | 1356.895  | NM_00444E | 296.396   | 408.716   |
| M20695    | 880.44    | 712.484   | NM_00185E | 1504.498  | 1356.008  | NM_015981 | 1150.221  | 1197.844  |
| AK026000  | 3295.287  | 3671.74   | U41737    | 531.271   | 519.312   | NM_00045E | 3006.386  | 3551.715  |
| NM_00667E | 3936.526  | 3821.198  | NM_00579E | 650.839   | 853.328   | NM_014791 | 10814.228 | 10419.282 |
| NM_00302Z | 6261.067  | 6495.454  | X99661    | 666.833   | 1107.383  | NM_00331E | 6885.203  | 6012.196  |
| NM_00487E | 4994.338  | 5473.177  | AB037800  | 652.108   | 900.779   | NM_00436Z | 3618.318  | 3518.292  |
| NM_01984Z | 1177.599  | 1148.854  | AK026377  | 1477.635  | 1435.613  | NM_00018Z | 9119.426  | 8285.686  |
| NM_002951 | 16546.658 | 18397.748 | NM_01866C | 4479.597  | 4933.112  | AK023384  | 2048.69   | 2055.427  |
| NM_002317 | 916.71    | 730.437   | NM_003394 | 2425.316  | 1789.802  | NM_01602E | 12993.079 | 10618.085 |
| NM_00032C | 3190.128  | 3601.786  | NM_01463E | 1024.397  | 559.471   | AK025111  | 622.991   | 558.561   |
| NM_017921 | 378.45    | 577.76    | NM_006747 | 1474.392  | 1369.147  | NM_00173Z | 1163.422  | 907.112   |
| NM_00313E | 6964.77   | 7262.272  | NM_00708E | 2046.886  | 2142.508  | NM_01869C | 3363.768  | 2379.059  |
| NM_00462C | 845.167   | 887.715   | NM_00387C | 6288.071  | 5982.685  | NM_00086C | 4581.993  | 2998.49   |
| AF087940  | 731.547   | 764.703   | AK024507  | 1956.724  | 1855.641  | AB037798  | 1941.646  | 972.149   |
| AJ277587  | 846.372   | 781.378   | NM_00124E | 3784.12   | 3830.654  | AF272663  | 7081.605  | 5184.279  |
| D87432    | 2699.06   | 3161.217  | AK025997  | 2161.674  | 2284.913  | NM_01219C | 1198.187  | 1039.019  |
| Y18483    | 345.693   | 501.036   | NM_00554E | 3656.787  | 3116.755  | AF277719  | 418.876   | 824.218   |
| AI565117  | 51555.559 | 50180.246 | NM_00029E | 1469.274  | 1170.882  | NM_000791 | 2330.275  | 2500.865  |
| M59979    | 249.01    | 402.19    | NM_00547E | 525.188   | 397.47    | NM_003681 | 1735.017  | 1669.336  |
| AB011098  | 1196.667  | 756.221   | S51112    | 600.37    | 271.752   | NM_00480C | 6466.24   | 7073.903  |
| AA609759  | 851.541   | 668.603   | NM_014887 | 3521.55   | 3198.343  | NM_00495Z | 3644.087  | 4593.352  |
| AA029418  | 1755.99   | 1669.693  | NM_00259C | 417.961   | 547.223   | AY007239  | 380.865   | 850.78    |
| L20815    | 1531.466  | 1823.86   | NM_01855E | 6843.972  | 5579.397  | NM_020414 | 3944.866  | 4584.405  |
| AI364483  | 1071.217  | 889.802   | NM_005824 | 836.41    | 788.31    | AB037730  | 2967.422  | 3150.115  |
| AA456001  | 1513.291  | 1694.056  | AF052211  | 5111.126  | 5864.091  | AF147429  | 184.037   | 242.008   |
| AA451686  | 5923.853  | 5602.8    | NM_00560C | 5345.237  | 7832.814  | NM_001357 | 7975.86   | 8093.134  |
| NM_00382Z | 495.216   | 425.41    | NM_005967 | 1592.552  | 2049.345  | NM_00389E | 2849.587  | 2766.484  |
| NM_00441Z | 7250.201  | 6320.998  | AB014566  | 2294.879  | 4520.009  | AB037816  | 1129.376  | 850.446   |
| NM_00205C | 784.586   | 729.168   | NM_01422E | 1287.373  | 1327.548  | NM_01438C | 50074.859 | 36107.289 |
| NM_007097 | 8457.364  | 8297.441  | NM_016194 | 1896.011  | 2035.935  | NM_00171E | 6624.951  | 6003.104  |
| NM_00002E | 2151.189  | 2697.937  | AL050385  | 1165.893  | 936.658   | AL080062  | 1117.332  | 907.678   |
| NM_00071E | 339.66    | 463.842   | NM_007027 | 2398.701  | 1749.63   | AF308802  | 1420.523  | 1298.742  |
| AF035802  | 512.065   | 695.338   | NM_00063E | 10201.382 | 6706.063  | S76984    | 6579.188  | 5581.558  |
| M26123    | 411.596   | 175.612   | AB037855  | 863.97    | 762.642   | NM_01449E | 51172.773 | 53147.422 |
| NM_00183E | 719.973   | 861.359   | AK024524  | 6447.864  | 5831.913  | NM_014081 | 547.282   | 583.099   |
| NM_01955E | 1129.075  | 1153.191  | NM_00056Z | 1856.255  | 1593.841  | NM_005651 | 670.282   | 481.778   |
| NM_01209E | 5060      | 3996.914  | NM_02035E | 1988.444  | 1539.26   | NM_00719E | 1872.394  | 1005.624  |
| NM_00390E | 12853.34  | 10634.084 | NM_019011 | 7262.18   | 6547.64   | AK023337  | 2857.667  | 2152.191  |
| L12052    | 4767.909  | 4671.135  | NM_00487E | 3401.626  | 3129.141  | NM_01327E | 11892.169 | 9641.717  |
| AB028976  | 2132.416  | 1221.593  | AB020694  | 4099.365  | 3525.819  | AB037842  | 738.976   | 705.312   |



|           |           |           |           |           |           |           |           |           |
|-----------|-----------|-----------|-----------|-----------|-----------|-----------|-----------|-----------|
| AB031038  | 480.505   | 546.231   | NM_016071 | 15178.124 | 13049.389 | U92074    | 689.993   | 648.877   |
| NM_004626 | 272.073   | 335.306   | AL050131  | 1051.37   | 696.229   | NM_019011 | 3477.811  | 3807.508  |
| NM_001896 | 597.445   | 353.443   | NM_004475 | 4271.945  | 3637.938  | NM_002544 | 433.843   | 466.906   |
| NM_004305 | 3807.001  | 3991.759  | NM_001627 | 2300.168  | 2357.252  | AB011542  | 1268.508  | 1921.542  |
| NM_006086 | 6066.762  | 6629.387  | NM_001226 | 3415.766  | 3704.34   | NM_001853 | 1318.728  | 1516.174  |
| NM_003144 | 25485.809 | 19612.861 | AB050716  | 867.325   | 981.366   | U41737    | 819.977   | 769.626   |
| NM_000906 | 540.777   | 586.596   | X77690    | 1914.359  | 3656.367  | NM_005796 | 814.63    | 528.197   |
| AB011102  | 4966.638  | 4842.805  | NM_006536 | 669.835   | 815.246   | X99661    | 737.172   | 509.037   |
| D63480    | 1662.479  | 1697.606  | NM_005656 | 998.593   | 1502.084  | NM_005927 | 2535.331  | 2630.352  |
| NM_002966 | 1293.368  | 1231.738  | NM_002422 | 824.457   | 961.609   | AB028983  | 1928.94   | 2226.492  |
| NM_002337 | 4173.288  | 4015.084  | NM_006690 | 1053.744  | 1143.84   | AB037800  | 1425.878  | 1047.512  |
| NM_013245 | 2043.212  | 1950.563  | AF218022  | 1749.995  | 1406.745  | AK026377  | 1934.69   | 1494.181  |
| NM_006423 | 17607.146 | 18764.973 | NM_003346 | 3154.386  | 2277.472  | NM_018660 | 4146.593  | 3549.762  |
| NM_004766 | 2863.78   | 2895.183  | AL137663  | 667.853   | 584.358   | NM_003394 | 2809.373  | 2800.581  |
| NM_005816 | 2665.625  | 2851.467  | AB006198  | 12310.195 | 11197.81  | NM_014636 | 1045.328  | 356.081   |
| AK025520  | 3172.726  | 2111.336  | U72518    | 4881.148  | 4681.323  | NM_006747 | 1304.979  | 1124.394  |
| NM_004892 | 6228.547  | 5559.557  | AF264765  | 1090.451  | 914.624   | NM_007086 | 2516.12   | 2015.344  |
| NM_014597 | 11014.785 | 9136.729  | NM_015322 | 2948.259  | 2217.971  | NM_003870 | 6715.974  | 7431.429  |
| NM_017896 | 8533.295  | 6336.241  | NM_016607 | 2908.938  | 2885.31   | AK024507  | 755.652   | 1042.667  |
| AB002374  | 3593.897  | 3199.594  | NM_003275 | 937.203   | 852.732   | NM_001243 | 3667.26   | 3951.204  |
| U17327    | 1307.804  | 1420.554  | NM_000266 | 10671.516 | 8785.796  | AK025997  | 301.219   | 431.058   |
| M87790    | 3468.172  | 4135.853  | M30493    | 10936.422 | 9032.266  | NM_005546 | 2203.308  | 1480.633  |
| NM_001766 | 2822.979  | 3153.827  | AJ008160  | 483.917   | 542.367   | NM_014887 | 3315.985  | 3622.458  |
| NM_002951 | 14025.985 | 15473.097 | NM_004343 | 27815.785 | 20668.6   | NM_002590 | 786.369   | 1101.062  |
| NM_002317 | 631.213   | 682.525   | X52355    | 4784.484  | 4647.675  | NM_005824 | 775.311   | 647.511   |
| NM_000320 | 2658.438  | 3419.709  | NM_006963 | 13602.411 | 17876.539 | AF052211  | 3490.042  | 5177.291  |
| NM_017921 | 250.879   | 509.03    | NM_000307 | 346.245   | 519.96    | NM_005600 | 3119.738  | 3414.411  |
| NM_003136 | 7091.949  | 7382.209  | U66561    | 5058.667  | 6844.875  | NM_005967 | 1567.536  | 1860.779  |
| NM_013326 | 16691.188 | 14678.146 | NM_000306 | 1525.832  | 2030.854  | AB014566  | 2114.328  | 1862.203  |
| NM_002660 | 4181.596  | 4108.575  | NM_002200 | 1975.7    | 2230.885  | NM_014223 | 1359.659  | 1278.211  |
| NM_015900 | 394.413   | 389.84    | AF017433  | 2102.305  | 2021.959  | NM_016194 | 2316.605  | 2311.56   |
| AL122071  | 747.324   | 1034.816  | AF130111  | 4535.125  | 4886.064  | AL050385  | 969.258   | 1037.281  |
| AB033054  | 11147.494 | 9971.939  | NM_016307 | 1642.24   | 1405.407  | NM_007027 | 2559.793  | 1689.404  |
| NM_016122 | 875.469   | 813.893   | AB028449  | 3093.433  | 2473.429  | NM_000633 | 19654.541 | 22738.492 |
| AF153330  | 1288.419  | 1660.987  | NM_004697 | 3545.417  | 3101.712  | AB037855  | 701.759   | 879.532   |
| NM_001652 | 364.416   | 389.399   | AF131776  | 3166.207  | 2150.36   | AK024524  | 5381.184  | 4537.101  |
| NM_004412 | 5126.793  | 6080.682  | NM_020526 | 3157.198  | 2132.033  | NM_000562 | 1319.494  | 1290.071  |
| NM_002050 | 650.625   | 572.722   | NM_007040 | 20155.313 | 13918.28  | NM_019011 | 8547.997  | 7096.788  |
| NM_007097 | 8424.263  | 7891.135  | NM_014483 | 4900.572  | 3699.092  | NM_004876 | 3050.074  | 3023.25   |
| D87446    | 3422.214  | 2957.83   | AK024249  | 1302.922  | 1205.365  | AB020694  | 3053.362  | 1560.591  |
| NM_007081 | 1979.905  | 2229.526  | AF239156  | 6277.643  | 5152.407  | NM_016071 | 15925.626 | 10617.853 |
| NM_003334 | 9822.808  | 8751.666  | NM_020390 | 1611.095  | 1499.333  | NM_004475 | 4295.536  | 3860.974  |
| NM_002693 | 7820.489  | 7975.457  | NM_003321 | 17464.154 | 14227.396 | NM_001627 | 2340.26   | 3427.009  |
| NM_003671 | 1312.67   | 1075.216  | U18937    | 6475.984  | 6314.096  | NM_001226 | 2780.845  | 3951.752  |
| M20695    | 1655.896  | 1656.37   | U01925    | 555.341   | 434.173   | AB050716  | 771.759   | 977.851   |
| AK026000  | 4048.659  | 4409.62   | AJ420488  | 58662.398 | 63034.266 | X77690    | 992.035   | 1477.467  |
| NM_017833 | 642.568   | 483.858   | AF268872  | 1538.776  | 1727.222  | NM_006536 | 730.835   | 828.116   |
| NM_006675 | 4422.308  | 4861.353  | AK022180  | 13975.323 | 11302.836 | NM_005656 | 930.011   | 905.384   |
| NM_003022 | 7111.737  | 7947.072  | AK001384  | 927.414   | 738.879   | NM_002422 | 916.975   | 827.789   |
| NM_004873 | 5195.184  | 6002.495  | AK025437  | 3663.915  | 3741.97   | NM_006690 | 1986.467  | 2143.277  |
| NM_019842 | 1354.909  | 2894.641  | AK074164  | 970.009   | 1797.725  | AF218022  | 1450.451  | 1155.89   |
| NM_003144 | 20753.453 | 20642.365 | NM_004166 | 9269.806  | 13354.135 | NM_003346 | 3287.027  | 2456.215  |
| NM_000906 | 441.865   | 436.49    | AF161353  | 8099.531  | 9284.119  | AL137663  | 1148.674  | 1088.202  |

|           |           |           |           |           |           |           |           |           |
|-----------|-----------|-----------|-----------|-----------|-----------|-----------|-----------|-----------|
| AB011102  | 4530.698  | 4107.737  | NM_000764 | 834.709   | 823.381   | AB006198  | 11639.315 | 10805.532 |
| D63480    | 1624.792  | 1400.675  | NM_004146 | 16399.438 | 12922.62  | U72518    | 3277.131  | 2332.145  |
| NM_002969 | 1246.021  | 1330.24   | NM_003002 | 14039.237 | 14475.982 | AF264765  | 364.54    | 272.636   |
| NM_004620 | 648.904   | 836.838   | D42047    | 1553.717  | 1499.81   | NM_015322 | 2383.125  | 1164.954  |
| AF087940  | 589.955   | 505.28    | AB009282  | 16367.464 | 15198.722 | NM_016607 | 2708.116  | 1885.9    |
| AJ277587  | 879.568   | 592.427   | NM_005004 | 25091.52  | 19589.129 | NM_003275 | 899.139   | 597.594   |
| D87432    | 2541.312  | 2684.272  | NM_003670 | 2602.422  | 2721.042  | NM_000268 | 13294.743 | 14253.189 |
| Y18483    | 392.277   | 469.692   | NM_014639 | 2929.875  | 2574.36   | M30493    | 17031.785 | 17923.203 |
| AI565117  | 49522.645 | 55030.711 | NM_006392 | 2633.52   | 1729.628  | AJ008160  | 613.915   | 648.659   |
| M59979    | 1287.295  | 1125.286  | NM_014717 | 1216.621  | 732.034   | NM_004343 | 22192.031 | 25616.063 |
| AB011098  | 1330.037  | 1219.158  | NM_017922 | 3215.35   | 2073.547  | X52355    | 4194.586  | 4759.871  |
| AA609759  | 1038.807  | 910       | NM_002823 | 55324.688 | 58085.016 | NM_006963 | 18270.398 | 28828.813 |
| AA029418  | 2224.845  | 2098.63   | NM_017916 | 14867.817 | 12164.747 | U66561    | 6240.278  | 5524.935  |
| L20815    | 2138.849  | 2312.865  | NM_001805 | 5150.855  | 4451.766  | NM_000306 | 1630.779  | 1472.705  |
| AI364483  | 1387.042  | 1001.724  | AK022360  | 1893.659  | 1812.848  | NM_002200 | 1290.454  | 1454.133  |
| AA456001  | 1404.95   | 1828.954  | AK095694  | 950.138   | 867.695   | AF017433  | 1706.733  | 1720.599  |
| AA451686  | 5929.337  | 6357.85   | X52341    | 48655.742 | 40553.824 | AF130111  | 3518.593  | 3240.258  |
| M87790    | 4160.062  | 4545.828  | NM_003082 | 5774.629  | 5672.822  | NM_016307 | 2136.617  | 1976.441  |
| NM_001768 | 2666.274  | 3057.46   | AL133632  | 2059.714  | 1961.433  | AB028449  | 2426.869  | 1954.864  |
| NM_000029 | 2527.153  | 3062.717  | AK024551  | 295.389   | 173.768   | NM_004697 | 2846.785  | 2097.298  |
| NM_000715 | 280.294   | 452.713   | AL833249  | 1883.11   | 1596.155  | AF131776  | 2214.542  | 2065.223  |
| AF035802  | 743.405   | 705.577   | NM_018374 | 2433.89   | 3308.432  | NM_020528 | 2211.235  | 1589.49   |
| M26123    | 399.784   | 226.673   | AF131852  | 665.282   | 613.135   | NM_007040 | 19674.52  | 14551.575 |
| NM_001838 | 763.19    | 658.602   | AK021894  | 1579.921  | 2003.484  | NM_014483 | 4309.26   | 3314.867  |
| NM_019555 | 1223.742  | 1256.51   | NM_020424 | 4245.104  | 4527.45   | AK024249  | 1382.484  | 976.307   |
| L12052    | 5558.503  | 6364.764  | AF438313  | 642.933   | 565.082   | AF239156  | 6376.653  | 5118.307  |
| AB028976  | 2673.685  | 2035.956  | AB033009  | 20586.424 | 15867.108 | NM_020390 | 1854.519  | 1254.871  |
| NM_015869 | 676.002   | 1012.158  | AL137761  | 2867.814  | 2890.356  | NM_003321 | 16496.77  | 9492.507  |
| AB031038  | 524.526   | 520.59    | AK022086  | 434.974   | 427.764   | U18937    | 5961.832  | 3445.998  |
| NM_004626 | 555.42    | 445.392   | AF147320  | 896.777   | 694.305   | AJ420488  | 58014.125 | 61562.539 |
| NM_001899 | 810.742   | 908.096   | AK027024  | 468.161   | 442.437   | AF268872  | 1593.365  | 1417.74   |
| NM_004305 | 4999.917  | 7089.724  | AK022339  | 925.786   | 793.708   | AK022180  | 24580.215 | 28754.473 |
| NM_006089 | 5378.434  | 6297.204  | AK022138  | 1137.377  | 809.142   | AK001384  | 927.821   | 1115.352  |
| AB033054  | 8983.183  | 8741.672  | AF086191  | 2543.6    | 2276.077  | AK025437  | 3814.291  | 4054.675  |
| NM_016122 | 673.273   | 743.284   | AF143880  | 434.417   | 587.347   | AK074164  | 643.567   | 643.658   |
| NM_016583 | 490.336   | 463.612   | NM_017638 | 7737.957  | 6242.092  | NM_004168 | 7686.518  | 8258.863  |
| AF153330  | 1105.086  | 1233.38   | AL050013  | 303.295   | 443.945   | AF161353  | 7692.535  | 7937.96   |
| NM_001652 | 395.102   | 303.328   | AL133052  | 1575.615  | 1673.722  | NM_000764 | 704.183   | 845.393   |
| AK023749  | 431.019   | 354.194   | AB037824  | 2381.4    | 2584.438  | NM_004146 | 15329.122 | 17697.441 |
| NM_006423 | 23449.682 | 32060.963 | AF361494  | 655.911   | 513.128   | NM_003002 | 13865.127 | 12808.438 |
| NM_004766 | 3752.376  | 2916.861  | AK022810  | 1178.831  | 1121.093  | D42047    | 1290.959  | 953.832   |
| NM_005819 | 2759.683  | 3115.428  | NM_005110 | 893.092   | 560.595   | AB009282  | 16738.295 | 13495.003 |
| AK024722  | 840.223   | 919.712   | AF147408  | 1592.807  | 1882.458  | NM_005004 | 21839.273 | 11701.952 |
| AK025520  | 3429.685  | 1979.881  | AK027222  | 2671.281  | 2380.169  | NM_003670 | 3325.214  | 2348.75   |
| NM_004892 | 6916.355  | 7844.4    | AF085868  | 246.144   | 206.212   | NM_014639 | 2883.769  | 2049.073  |
| NM_014597 | 12296.608 | 12419.749 | AK054767  | 358.428   | 374.724   | NM_006392 | 1879.897  | 1512.959  |
| NM_017896 | 8576.162  | 8408.96   | AL049301  | 627       | 512.157   | NM_014717 | 1306.838  | 1831.02   |
| AB002374  | 3280.36   | 3454.594  | AL050042  | 1357.534  | 1184.826  | NM_017922 | 4295.163  | 8957.117  |
| U17327    | 1746.119  | 1461.418  | NM_018469 | 1290.595  | 1196.157  | NM_002823 | 55377.723 | 58574.773 |
| NM_017833 | 471.025   | 677.825   | NM_014867 | 2626.82   | 2351.353  | NM_017916 | 17750.676 | 15725.191 |
| NM_006675 | 4755.839  | 6048.992  | AL359932  | 614.01    | 671.918   | NM_001805 | 7454.562  | 4706.708  |
| NM_003022 | 6812.286  | 8415.204  | AB037850  | 3867.219  | 4042.371  | AK022360  | 2072.58   | 1050.354  |
| NM_004873 | 4958.572  | 5768.313  | AK002197  | 1845.7    | 1744.789  | AK095694  | 1133.408  | 860.677   |

|           |           |           |           |           |           |           |           |           |
|-----------|-----------|-----------|-----------|-----------|-----------|-----------|-----------|-----------|
| NM_019842 | 1118.048  | 1393.569  | AF087996  | 777.125   | 692.641   | X52341    | 51437.441 | 46184.449 |
| NM_002951 | 17702.111 | 21036.867 | AK021710  | 1494.967  | 1604.903  | NM_003082 | 6393.489  | 6165.539  |
| NM_002317 | 620.093   | 755.915   | AL137446  | 1339.917  | 1060.192  | AL133632  | 2092.502  | 2561.482  |
| NM_000320 | 2939.771  | 2914.446  | AB025286  | 1479.399  | 926.226   | AK024551  | 516.401   | 471.729   |
| NM_017921 | 465.932   | 331.993   | AF009286  | 549.466   | 630.734   | AL833249  | 2119.366  | 2008.139  |
| NM_003136 | 6940.491  | 6850.433  | AF056437  | 870.885   | 1147.02   | NM_018374 | 3136.876  | 3335.029  |
| NM_013328 | 16810.041 | 16026.711 | NM_005029 | 1410.752  | 1042.767  | AK021894  | 2067.675  | 2095.084  |
| NM_000790 | 516.399   | 415.792   | AF056447  | 1119.938  | 1129.464  | NM_020424 | 4615.637  | 4756.98   |
| NM_002660 | 4713.665  | 5923.538  | AK001010  | 1176.636  | 865.54    | AF438313  | 923.145   | 2156.984  |
| NM_015900 | 484.692   | 360.734   | NM_018076 | 454.453   | 438.379   | AF147341  | 507.403   | 721.845   |
| NM_003706 | 611.551   | 633.442   | AK021442  | 1296.791  | 1488.9    | AB033009  | 21350.861 | 15477.98  |
| AL122071  | 793.032   | 1119.577  | AK001076  | 582.774   | 911.65    | AL137761  | 2973.576  | 1766.092  |
| NM_014913 | 26718.277 | 24109.098 | AK001820  | 385.97    | 303.277   | AK022086  | 523.717   | 719.149   |
| NM_005864 | 544.312   | 658.779   | AK021482  | 2534.652  | 1856.688  | AF147320  | 1282.151  | 1773.362  |
| NM_012341 | 4727.029  | 4849.845  | AK021730  | 283.607   | 362.104   | AK027024  | 399.737   | 245.925   |
| NM_003256 | 15964.862 | 14864.816 | AK025317  | 6266.053  | 4451.782  | AK022339  | 1194.45   | 846.869   |
| D87450    | 5115.227  | 4553.079  | AK026119  | 559.488   | 502.406   | AK022138  | 1283.299  | 1203.022  |
| NM_017797 | 14529.068 | 12726.324 | AK026725  | 1018.049  | 909.668   | AF086191  | 4097.888  | 4221.238  |
| AK021919  | 446.269   | 461.489   | AJ008118  | 54022.703 | 52410.66  | AF143880  | 486.981   | 678.474   |
| AF000562  | 2980.711  | 2424.483  | AK000939  | 371.129   | 322.013   | NM_017638 | 8342.986  | 6115.268  |
| AK025713  | 3302.637  | 3171.707  | AL109674  | 657.468   | 403.96    | AL133052  | 1712.977  | 1140.809  |
| NM_018100 | 767.21    | 734.144   | AK024512  | 7208.659  | 6973.35   | AB037824  | 2536.763  | 2370.149  |
| NM_002050 | 792.908   | 561.149   | AK023454  | 1851.676  | 2099.222  | AF361494  | 711.836   | 795.388   |
| NM_007097 | 9108.453  | 8363.896  | L23207    | 1505.318  | 2050.186  | AK022810  | 1808.118  | 2029.977  |
| D87446    | 3384.189  | 3718.884  | NM_018062 | 995.35    | 999.353   | NM_005110 | 937.276   | 1206.922  |
| NM_007081 | 2213.017  | 2667.669  | NM_007128 | 7172.933  | 6017.746  | X92110    | 294.32    | 599.275   |
| AB032964  | 3561.757  | 3911.7    | NM_007160 | 491.246   | 505.912   | AK023122  | 314.931   | 519.975   |
| BE733605  | 3510.863  | 2799.519  | NM_018627 | 893.158   | 711.671   | AF147408  | 1942.641  | 2321.022  |
| NM_003671 | 1456.21   | 1506.182  | AL157458  | 413.017   | 696.807   | AK027222  | 3467.283  | 3508.311  |
| M20695    | 1134.571  | 1349.871  | NM_015377 | 339.683   | 436.231   | AF054994  | 908.49    | 1029.636  |
| AK026000  | 6186.314  | 14663.348 | AL080085  | 4159.708  | 3767.788  | AF085868  | 383.323   | 271.054   |
| NM_000211 | 8868.644  | 9503.549  | AF086519  | 1048.542  | 1229.889  | AK054767  | 460.993   | 364.446   |
| AB037830  | 994.854   | 772.627   | AF055012  | 2620.72   | 2857.211  | AL049301  | 1010.004  | 1532.79   |
| NM_015685 | 1284.626  | 1366.475  | AK022307  | 3036.408  | 1879.904  | AL050042  | 1571.912  | 1202.095  |
| NM_004357 | 6141.375  | 7646.702  | U00950    | 445.66    | 364.512   | NM_018465 | 1384.617  | 1416.905  |
| X03324    | 3467.594  | 3376.275  | NM_005172 | 1451.628  | 1471.13   | NM_014867 | 2886.09   | 3510.134  |
| AF130988  | 443.353   | 314.415   | AK025192  | 4153.123  | 3383.728  | AL359932  | 553.854   | 416.804   |
| NM_014934 | 587.628   | 520.689   | NM_012403 | 2211.701  | 2954.079  | AB037850  | 4374.107  | 2075.638  |
| NM_015385 | 287.095   | 345.845   | AK022611  | 7153.444  | 9146.759  | AK002197  | 2059.629  | 1922.222  |
| NM_003690 | 3924.631  | 3321.244  | NM_006158 | 4147.525  | 5399.804  | AF087996  | 2025.862  | 1828.345  |
| NM_000876 | 3120.788  | 2438.256  | NM_006346 | 1331.622  | 1515.63   | AK021710  | 1949.405  | 2062.094  |
| NM_014214 | 3856.442  | 3879.669  | AK025240  | 1971.64   | 2277.846  | NM_007017 | 1169.17   | 1265.125  |
| NM_000856 | 786.987   | 555.003   | NM_017633 | 10014.067 | 9337.688  | AL137446  | 2921.209  | 3805.847  |
| NM_005232 | 796.768   | 997.987   | AF086186  | 7335.614  | 6616.097  | AB025286  | 3235.866  | 4076.132  |
| NM_002752 | 4491.354  | 4223.465  | NM_017802 | 3185.7    | 2753.65   | AF009286  | 764.821   | 836.318   |
| NM_013281 | 397.421   | 669.482   | AK023667  | 936.495   | 1032.185  | AB032364  | 364.047   | 462.808   |
| Y11306    | 1087.008  | 987.814   | AJ008137  | 7127.121  | 6258.682  | NM_005025 | 1659.225  | 1555.371  |
| X85106    | 1126.697  | 1266.018  | AF085841  | 562.381   | 592.021   | AF056447  | 1662.844  | 1844.151  |
| NM_003931 | 1639.284  | 1144.552  | U92026    | 1259.073  | 1854.027  | AK001010  | 1278.566  | 1098.778  |
| AF250226  | 15893.07  | 24417.01  | AF086234  | 34681.02  | 46973.145 | NM_018076 | 888.658   | 1197.782  |
| AL157475  | 3086.304  | 3884.729  | AK023680  | 5098.929  | 2884.809  | AK021442  | 2023.819  | 3072.38   |
| NM_006065 | 2597.766  | 2896.782  | AF009324  | 3980.244  | 3833.649  | AK001076  | 997.914   | 432.268   |
| NM_006534 | 2629.856  | 3571.896  | AF019226  | 1565.071  | 1697.479  | AK001820  | 483.363   | 314.621   |

|           |           |           |           |           |           |           |           |           |
|-----------|-----------|-----------|-----------|-----------|-----------|-----------|-----------|-----------|
| NM_017601 | 1369.206  | 1387.827  | AK022112  | 359.598   | 182.584   | AK021482  | 5257.643  | 3931.752  |
| AF110265  | 10139.792 | 9572.855  | AL137480  | 11096.293 | 7692.125  | AK021730  | 433.637   | 490.675   |
| AF272371  | 41837.715 | 38489.859 | AK022182  | 459.299   | 437.554   | AK025317  | 3706.492  | 2376.173  |
| AK021848  | 1412.089  | 1269.183  | D16473    | 2154.938  | 1691.714  | AK026119  | 712.007   | 686.069   |
| NM_003704 | 1446.79   | 1368.861  | AB028968  | 1536.252  | 1858.964  | AK026725  | 1528.342  | 2450.175  |
| AF084362  | 464.981   | 494.011   | AK001202  | 681.392   | 740.774   | AJ008118  | 58698.957 | 56321.742 |
| NM_001553 | 467.04    | 363.361   | AF195764  | 39421.883 | 43312.297 | AK000939  | 561.278   | 701.562   |
| NM_014173 | 25494.012 | 35867.805 | AF055029  | 2327.814  | 3338.622  | AL109674  | 698.896   | 838.412   |
| NM_001731 | 15998.225 | 13902.798 | AK024394  | 2071.623  | 2279      | AK024512  | 7112.943  | 8317.147  |
| AL137506  | 863.846   | 1135.229  | AF147374  | 1853.704  | 2384.093  | AK023454  | 1418.14   | 1772.397  |
| AK022961  | 3417.057  | 3226.611  | AF130091  | 651.9     | 546.487   | L23207    | 1153.203  | 1193.675  |
| NM_007375 | 6121.726  | 6103.201  | L43338    | 7813.324  | 8187.264  | NM_018062 | 1213.594  | 1198.829  |
| NM_014371 | 4922.321  | 4842.323  | AJ227866  | 11266.941 | 8792.969  | NM_007128 | 10072.56  | 7869.56   |
| AF290512  | 434.155   | 569.318   | AF458223  | 4445.832  | 4706.348  | NM_018627 | 647.785   | 999.419   |
| NM_006716 | 7978.881  | 5977.772  | AK026822  | 1246.229  | 1167.811  | NM_015377 | 427.454   | 266.066   |
| NM_005723 | 2234.081  | 2646.449  | AK022838  | 6697.713  | 7132.75   | AL137531  | 1161.059  | 868.45    |
| NM_020185 | 4299.234  | 7444.993  | NM_003509 | 350.56    | 525.867   | AL080085  | 4738.495  | 6722.073  |
| NM_002832 | 31123.414 | 39674.836 | CY3Cy5    | 9125.342  | 865.936   | AK022106  | 1149.554  | 1062.01   |
| NM_017732 | 4085.782  | 4455.489  | AA700390  | 5500.912  | 7563.71   | AF055012  | 2173.071  | 2699.948  |
| NM_002851 | 1552.386  | 2047.13   | Y18474    | 224.034   | 472.667   | AK022307  | 4519.824  | 4937.266  |
| NM_002071 | 312.413   | 391.186   | AA436163  | 1315.402  | 3473.926  | U00950    | 301.031   | 509.556   |
| NM_005339 | 10635.176 | 7749.39   | BI907981  | 644.987   | 920.235   | NM_005172 | 3383.45   | 2414.9    |
| NM_001906 | 5284.197  | 4299.901  | BI603841  | 1342.222  | 1575.142  | AK025192  | 7391.641  | 4158.681  |
| AF108138  | 2925.539  | 3329.589  | Y08136    | 362.317   | 383.397   | NM_012403 | 3346.871  | 1685.233  |
| NM_004347 | 685.224   | 294.757   | AA156863  | 3621.998  | 3835.041  | AK022611  | 7378.598  | 6740.396  |
| BF340302  | 490.609   | 589.215   | BI915199  | 2353.418  | 3047.749  | NM_006158 | 10196.724 | 10182.619 |
| AK024210  | 875.067   | 923.465   | R82957    | 56427.859 | 62939.734 | NM_006346 | 1962.818  | 2485.244  |
| NM_002276 | 474.513   | 295.705   | BI830442  | 724.584   | 667.448   | AK025240  | 2952.301  | 3027.148  |
| AL133087  | 1650.823  | 1410.815  | AI218732  | 1994.469  | 821.734   | NM_017633 | 10735.406 | 8061.752  |
| NM_002274 | 776.697   | 779.015   | NM_004102 | 1313.147  | 921       | AF086186  | 10311.552 | 7485.698  |
| BF337874  | 656.075   | 591.094   | NM_004544 | 4904.044  | 3870.348  | NM_017802 | 3887.314  | 2112.72   |
| NM_003475 | 4259.485  | 6584.289  | SR5       | 4782.347  | 3135.695  | AK023667  | 973.186   | 833.146   |
| NM_000243 | 2548.121  | 2275.101  | SR7       | 4075.792  | 22068.969 | AJ008137  | 9576.464  | 10496.927 |
| NM_004383 | 14246.923 | 14007.394 | SR9       | 14498.512 | 2212.639  | AF085841  | 1096.633  | 1562.275  |
| NM_012256 | 2777.3    | 6048.412  | CY3Cy5    | 2309.287  | 281.09    | AL049232  | 746.956   | 1309.809  |
| NM_016325 | 2207.737  | 2744.707  | NM_018049 | 8054.049  | 13360.932 | U92026    | 1710.044  | 1848.794  |
| NM_001604 | 1296.289  | 1122.276  | NM_005160 | 14472.564 | 19324.865 | AF086234  | 34953.34  | 32923.648 |
| NM_017656 | 1567.96   | 1546.87   | X78817    | 9582.114  | 12359.655 | AK023680  | 5372.887  | 6386.482  |
| X16282    | 6164.563  | 5511.982  | AB023135  | 780.072   | 2308.898  | AF009324  | 3994.963  | 5409.454  |
| AK022519  | 287.878   | 324.38    | AY009401  | 526.624   | 680.123   | AF019226  | 2208.517  | 4041.153  |
| NM_014415 | 4118.308  | 3332.663  | AF294628  | 1375.795  | 2636.549  | AK022112  | 1224.605  | 3404.458  |
| S75264    | 5943.485  | 5002.408  | AK026960  | 630.048   | 1105.984  | AL137480  | 17881.363 | 18873.898 |
| AF027513  | 1518.329  | 1113.538  | NM_001991 | 1148.107  | 1487.002  | AK022182  | 530.379   | 293.146   |
| NM_001379 | 3947.367  | 2975.873  | NM_000193 | 1242.298  | 630.918   | D16473    | 1368.315  | 566.229   |
| NM_018664 | 6002.214  | 5703.799  | BC014586  | 616.194   | 213.941   | AB028968  | 1116.946  | 651.97    |
| NM_005034 | 890.394   | 861.088   | NM_002448 | 2398.352  | 1442.224  | AK001202  | 826.363   | 584.449   |
| NM_003926 | 4654.112  | 4617.682  | AF053952  | 5489.213  | 4758.195  | AF195764  | 54557.926 | 54984.262 |
| AF085356  | 532.77    | 514.309   | NM_003213 | 4018.841  | 3962.595  | AF055029  | 1410.833  | 2899.984  |
| NM_016047 | 25030.604 | 23468.242 | NM_014044 | 3090.257  | 2160.344  | S82164    | 1945.338  | 3900.358  |
| NM_001499 | 5842.163  | 4772.124  | NM_000900 | 739.944   | 638.702   | AK024394  | 2519.319  | 5387.917  |
| NM_016732 | 17404.254 | 16104.796 | AK023684  | 4745.125  | 5329.482  | AF147374  | 1768.608  | 2392.332  |
| NM_014763 | 11022.743 | 8694.509  | NM_000232 | 2019.699  | 2212.253  | AF130091  | 496.65    | 366.642   |
| AF086534  | 469.519   | 598.913   | NM_015057 | 1139.571  | 2828.723  | L43338    | 15994.567 | 10705.102 |

|           |           |           |           |           |           |           |           |           |
|-----------|-----------|-----------|-----------|-----------|-----------|-----------|-----------|-----------|
| AF070617  | 801.033   | 1038.898  | AF303398  | 5782.002  | 8942.837  | AJ227866  | 19231.924 | 11417.525 |
| NM_014918 | 5134.542  | 4574.036  | NM_014810 | 3102.601  | 5636.454  | AF458223  | 5031.466  | 2121.749  |
| NM_003654 | 360.792   | 469.914   | NM_004738 | 4054.302  | 9353.837  | AK026822  | 1375.682  | 955.847   |
| NM_000152 | 3620.969  | 3142.758  | NM_007357 | 5649.244  | 10640.238 | AK022838  | 8380.59   | 9960.399  |
| D17222    | 19561.896 | 14871.378 | NM_003763 | 7251.846  | 12605.779 | NM_003505 | 611.399   | 884.758   |
| NM_000154 | 2658.039  | 2191.838  | AK023448  | 1150      | 1000.043  | CY3Cy5    | 5130.994  | 349.539   |
| NM_003549 | 1392.863  | 878.023   | Y18213    | 2076.492  | 1705.962  | AA700390  | 5032.48   | 5303.545  |
| NM_000671 | 3170.153  | 2810.932  | NM_003283 | 2271.247  | 1610.757  | Y18474    | 408.163   | 320.998   |
| NM_006297 | 4012.996  | 4338.992  | AF249898  | 5152.83   | 2788.244  | AA436163  | 1573.191  | 2704.498  |
| X85325    | 42508.746 | 35587.129 | M69181    | 5380.926  | 2530.725  | BI907981  | 762.954   | 985.488   |
| AF318366  | 4685.617  | 4667.579  | AK027224  | 334.645   | 269.951   | BI603841  | 2451.858  | 2583.125  |
| AF182423  | 1298.163  | 1162.501  | NM_002652 | 299.083   | 258.867   | M19888    | 286.391   | 299.125   |
| D26018    | 2759.502  | 2682.624  | NM_001311 | 3509.393  | 2968.309  | Y08136    | 568.479   | 493.302   |
| BC000363  | 647.107   | 582.978   | NM_017798 | 7280.925  | 5706.311  | AA156863  | 4882.578  | 3454.404  |
| NM_007237 | 1634.958  | 1767.812  | NM_012410 | 579.846   | 688.388   | BI915199  | 2972.897  | 2282.939  |
| NM_004608 | 649.287   | 556.516   | NM_001111 | 6312.196  | 10043.627 | R82957    | 49576.824 | 45920.625 |
| NM_018257 | 3070.759  | 2814.013  | NM_001611 | 1729.465  | 3838.283  | BI830442  | 644.446   | 588.905   |
| NM_005919 | 2093.767  | 1670.749  | AB018310  | 3120.303  | 6577.94   | AI218732  | 2552.335  | 2889.215  |
| AF085931  | 2094.441  | 2064.943  | NM_020133 | 759.036   | 1313.25   | NM_004102 | 4235.865  | 10044.1   |
| AF086112  | 424.564   | 529.636   | NM_015379 | 21070.873 | 38423.242 | NM_004544 | 5623.6    | 4826.322  |
| AL137254  | 588.537   | 549.467   | NM_004878 | 540.682   | 1038.18   | SR5       | 5861.858  | 4760.645  |
| AK026359  | 760.454   | 651.377   | NM_005502 | 303.242   | 288.621   | SR7       | 4748.354  | 27765.5   |
| AF085884  | 795.301   | 854.743   | NM_000742 | 519.072   | 283.037   | SR9       | 18277.18  | 2240.95   |
| S81522    | 4608.902  | 4116.232  | NM_002355 | 7347.437  | 5626.208  | CY3Cy5    | 4660.331  | 418.307   |
| S94541    | 489.733   | 653.793   | AK026608  | 2412.138  | 2253.373  | NM_018049 | 6187.142  | 7611.638  |
| L36587    | 17596.16  | 17280.115 | AB046836  | 1175.159  | 2217.766  | NM_005160 | 10882.3   | 9055.688  |
| AK024228  | 1343.523  | 1077.777  | AJ224166  | 1966.279  | 4357.107  | X78817    | 11873.259 | 12509.96  |
| NM_016647 | 2625.416  | 2339.72   | AK026098  | 5075.386  | 8884.519  | AB023135  | 757.912   | 728.343   |
| AK024695  | 861.392   | 890.462   | NM_012381 | 3367.85   | 7495.742  | NM_003393 | 1655.785  | 967.865   |
| NM_018659 | 681.361   | 645.21    | M20702    | 2188.765  | 3460.428  | AY009401  | 637.946   | 557.121   |
| AF038174  | 2652.195  | 2724.302  | NM_006397 | 17203.666 | 25785.219 | AF294628  | 1251.343  | 957.525   |
| NM_013243 | 472.493   | 363.975   | D83776    | 2138.939  | 2797.086  | AK026960  | 825.654   | 505.552   |
| AF070632  | 362.569   | 369.249   | NM_004088 | 2708.913  | 3923.373  | NM_001991 | 1135.301  | 731.478   |
| AF161359  | 1759.555  | 1886.812  | NM_000138 | 2665.682  | 1697.774  | NM_000193 | 2250.202  | 2189.275  |
| AL365520  | 406.89    | 387.917   | NM_018163 | 964.291   | 497.512   | BC014586  | 806.879   | 860.894   |
| AK021539  | 4018.109  | 4020.2    | AK026362  | 2068.828  | 987.682   | NM_002448 | 3377.518  | 2663.653  |
| AK021819  | 396.641   | 411.324   | NM_004968 | 1629.557  | 1266.636  | AF053952  | 11165.781 | 8377.581  |
| AK026738  | 617.986   | 660.212   | NM_005908 | 1709.744  | 1900.33   | NM_003213 | 6398.277  | 5302.046  |
| AK025011  | 1125.48   | 1090.944  | NM_004785 | 2744.623  | 3328.239  | BF184738  | 1020.853  | 1068.432  |
| AL157491  | 1089.606  | 1013.674  | AK024079  | 706.777   | 623.375   | NM_014044 | 3241.88   | 2700.924  |
| NM_005266 | 971.745   | 798.113   | NM_014674 | 3932.917  | 4453.203  | NM_000900 | 1119.272  | 1138.448  |
| AK024681  | 485.393   | 436.11    | NM_018271 | 680.499   | 659.314   | AK023684  | 5784.082  | 4183.743  |
| X68742    | 481.17    | 491.454   | NM_000547 | 560.642   | 468.519   | NM_000232 | 2622.065  | 1865.405  |
| NM_014907 | 16893.805 | 15135.095 | NM_014652 | 845.28    | 989.432   | NM_015057 | 608.218   | 656.023   |
| AB007977  | 480.24    | 690.672   | AL133020  | 3789.168  | 3822.88   | AF303398  | 4667.88   | 5052.193  |
| NM_014221 | 4947.68   | 4220.674  | NM_014044 | 4072.882  | 6311.604  | NM_014810 | 1881.253  | 1350.7    |
| U58663    | 275.245   | 383.275   | NM_000900 | 811.516   | 2278.286  | NM_004738 | 2367.107  | 2600.638  |
| U84515    | 669.684   | 751.21    | AK023684  | 6588.002  | 11730.132 | NM_007357 | 4714.291  | 4376.595  |
| AF086106  | 420.971   | 300.318   | NM_000232 | 2919.698  | 5524.67   | NM_003763 | 5678.366  | 5173.261  |
| AF086143  | 2886.036  | 2188.222  | AA700390  | 7376.246  | 10568.526 | AK023448  | 1495.561  | 651.724   |
| AK024244  | 737.554   | 742.148   | Y18474    | 448.802   | 724.404   | Y18213    | 2293.577  | 1204.868  |
| AL390084  | 490.792   | 680       | AA436163  | 1475.17   | 3156.928  | NM_003283 | 2903.632  | 1508.451  |
| AK021479  | 648.791   | 576.585   | BI907981  | 720.937   | 1277.438  | AF249898  | 6672.271  | 5361.848  |

|           |           |           |           |           |           |           |           |           |
|-----------|-----------|-----------|-----------|-----------|-----------|-----------|-----------|-----------|
| AF118072  | 926.435   | 881.446   | BI603841  | 1830.811  | 2052.177  | M69181    | 8959.255  | 7983.725  |
| AK023724  | 124.239   | 445.973   | Y08136    | 536.884   | 263.703   | L09078    | 551.526   | 991.082   |
| AF085900  | 2315.506  | 2903.924  | AA156863  | 3281.704  | 1715.026  | NM_001311 | 4041.45   | 3121.13   |
| AK022420  | 2787.834  | 3485.453  | BI915199  | 2189.197  | 1054.667  | NM_01779E | 8325.272  | 6591.957  |
| AK023254  | 551.28    | 592.443   | R82957    | 53037.469 | 32496.793 | NM_01241C | 1296.973  | 957.447   |
| AK023945  | 13323.478 | 10694.337 | AI218732  | 2147.24   | 2337.438  | NM_001111 | 7124.069  | 4888.797  |
| AF116709  | 457.697   | 872.522   | NM_004544 | 4924.356  | 5208.024  | NM_001611 | 1060.556  | 1333.225  |
| AK025533  | 1119.651  | 1019.222  | NM_01889C | 17434.945 | 15746.292 | AB018310  | 3271.829  | 3184.753  |
| AK021911  | 6776.245  | 5962.04   | NM_001311 | 3185.58   | 3498.582  | NM_02013E | 919.687   | 622.259   |
| D17225    | 3403.82   | 3436.92   | NM_01779E | 10345.553 | 13728.706 | NM_01537E | 12911.61  | 10637.697 |
| AF147430  | 401.772   | 470.019   | NM_01241C | 1431.603  | 2956.514  | NM_00487E | 1246.009  | 689.714   |
| AK025766  | 4206.967  | 3142.697  | NM_001111 | 8322.535  | 10450.442 | NM_00550E | 339.067   | 325.244   |
| U35875    | 3667.323  | 3173.63   | NM_01804E | 7509.25   | 8576.596  | NM_00074E | 818.49    | 678.422   |
| AK022257  | 1531.692  | 1493.942  | AJ133439  | 365.407   | 783.043   | NM_00235E | 8575.149  | 6856.548  |
| BE887356  | 4375.209  | 4416.903  | X78817    | 6920.076  | 3680.989  | AK026608  | 2748.708  | 2715.288  |
| X84369    | 835.295   | 1104.069  | AB023135  | 312.962   | 212.703   | AB046836  | 665.991   | 985.975   |
| AK001074  | 331.978   | 437.354   | AF294628  | 1246.866  | 1531.73   | AJ224166  | 1092.714  | 946.037   |
| AK023329  | 9031.267  | 9619.018  | AK026960  | 663.195   | 817.62    | AK026098  | 3582.359  | 3236.73   |
| AF116686  | 471.756   | 626.313   | NM_001991 | 909.118   | 1005.315  | NM_012381 | 2176.119  | 2004.463  |
| AK025181  | 496.793   | 371.167   | NM_00019E | 1063.068  | 1120.545  | M20702    | 1943.473  | 1810.086  |
| AK021773  | 1217.247  | 1245.492  | BC014586  | 485.554   | 621.814   | NM_006397 | 15747.354 | 12885.29  |
| AK027074  | 1651.554  | 1373.984  | NM_00244E | 2581.073  | 2409.618  | D83776    | 1256.1    | 1422.206  |
| NM_01803E | 575.75    | 270.84    | AF053952  | 2988.198  | 3575.485  | NM_00408E | 2167.021  | 1385.709  |
| U84522    | 1032.72   | 1168.232  | NM_00321E | 4596.781  | 5085.212  | NM_00013E | 3233.35   | 2114.42   |
| AK021694  | 1107.152  | 1113.433  | BF184738  | 239.216   | 363.947   | NM_01816E | 1034.348  | 1036.049  |
| AF086013  | 611.918   | 540.852   | NM_015057 | 602.747   | 431.526   | AK026362  | 2741.292  | 2494.582  |
| U84505    | 905.076   | 983.157   | AF303398  | 3304.448  | 1339.453  | NM_00496E | 1648.764  | 1269.78   |
| X81005    | 2000.565  | 1672.981  | NM_01481C | 1684.498  | 667.897   | NM_00590E | 2048.949  | 1919.897  |
| AL049265  | 2135.121  | 1883.875  | NM_00473E | 2372.1    | 1259.113  | NM_00478E | 3943.656  | 2935.051  |
| NM_01235E | 381.741   | 354.864   | NM_007357 | 3804.048  | 2331.979  | NM_000547 | 652.844   | 677.277   |
| AL137635  | 325.06    | 418.971   | NM_00376E | 4877.285  | 4696.852  | NM_01465E | 621.828   | 798.22    |
| AL049430  | 1073.425  | 755.346   | AK023448  | 1176.624  | 1474.637  | AL133020  | 4658.092  | 3752.877  |
| AK021461  | 430.101   | 253.265   | Y18213    | 2260.876  | 2310.928  | NM_01404E | 3030.052  | 2485.988  |
| AB015349  | 521.213   | 524.664   | NM_00328E | 2156.196  | 2048.438  | NM_00090C | 894.378   | 1059.665  |
| AL079274  | 2894.121  | 3064.349  | AF249898  | 5618.769  | 5978.927  | AK023684  | 4995.247  | 5008.685  |
| S46403    | 757.701   | 647.906   | M69181    | 3521.832  | 3632.739  | NM_00023E | 2131.152  | 2027.606  |
| AL137398  | 621.509   | 666.265   | AK027224  | 668.128   | 664.63    | AA700390  | 4695.943  | 3935.663  |
| Y12021    | 636.401   | 788.398   | NM_00242E | 1604.415  | 1085.749  | AA436163  | 1320.604  | 1618.265  |
| AF127771  | 1434.86   | 2056.077  | NM_014674 | 3792.871  | 3523.369  | BI907981  | 554.243   | 831.395   |
| NM_01330C | 11112.098 | 11639.372 | NM_018271 | 750.355   | 734.94    | BI603841  | 2141.013  | 1911.025  |
| AK026039  | 6317.61   | 5860.594  | NM_000547 | 619.107   | 789.27    | M19888    | 278.485   | 189.215   |
| AF108756  | 6823.211  | 4719.18   | NM_01465E | 851.188   | 664.896   | Y08136    | 441.339   | 280.542   |
| NM_00407E | 3630.976  | 2871.524  | AL133020  | 5746.533  | 7712.053  | AA156863  | 4484.036  | 3437.47   |
| NM_001887 | 3859.086  | 4597.931  | NM_00502E | 5305.418  | 3257.825  | BI915199  | 2953.253  | 3114.053  |
| NM_00653E | 877.595   | 1079.343  | NM_001611 | 649.967   | 235.886   | BI830442  | 437.084   | 438.724   |
| AK026747  | 5073.866  | 6158.906  | AB018310  | 2396.278  | 1376.54   | NM_01889C | 18403.746 | 14643.254 |
| AL110150  | 745.917   | 703.69    | NM_02013E | 667.292   | 504.506   | NM_001311 | 4071.083  | 2909.709  |
| NM_00199E | 3929.512  | 3453.345  | NM_01537E | 15652.68  | 16781.186 | NM_01779E | 7593.955  | 7285.135  |
| X87825    | 1240.372  | 1177.271  | NM_00487E | 918.433   | 2900.637  | NM_01241C | 1271.383  | 1266.187  |
| AK001285  | 17251.717 | 16088.367 | AF144638  | 22346.221 | 19203.537 | NM_001111 | 6748.008  | 5280.087  |
| D17215    | 3190.921  | 3277.924  | NM_00550E | 409.712   | 627.238   | NM_01804E | 6591.947  | 5323.235  |
| BE781513  | 604.841   | 371.711   | NM_00074E | 679.578   | 1120.32   | NM_00516C | 10006.481 | 6069.869  |
| NM_015714 | 3772.321  | 3396.795  | NM_00410E | 1253.428  | 1162.451  | X78817    | 9067.763  | 5174.608  |

|            |           |           |           |           |           |           |           |           |
|------------|-----------|-----------|-----------|-----------|-----------|-----------|-----------|-----------|
| AK075564   | 947.95    | 980.317   | NM_004544 | 4742.838  | 3480.635  | AB023135  | 572.608   | 465.277   |
| AK026219   | 1769.154  | 1855.48   | NM_018890 | 19511.789 | 18019.193 | AY009401  | 571.647   | 479.983   |
| D28446     | 523.614   | 540.791   | AB046836  | 599.684   | 343.891   | AK026960  | 1015.346  | 849.877   |
| AK024756   | 2686.094  | 2621.717  | AJ224166  | 907.196   | 480.807   | NM_001991 | 1151.908  | 1408.097  |
| NM_017911  | 2812.492  | 2650.44   | AK026098  | 2989.839  | 1833.993  | AF053952  | 13172.772 | 8966.052  |
| AJ224168   | 2574.798  | 2569.57   | NM_012381 | 1966.576  | 1439.958  | NM_003213 | 5584.4    | 4843.174  |
| S69873     | 1308.008  | 1494.815  | M20702    | 2116.519  | 2156.082  | NM_015057 | 634.67    | 680.967   |
| AF147325   | 60715.805 | 55786.453 | NM_006397 | 12320.58  | 11697.925 | AF303398  | 4535.365  | 2959.02   |
| NM_014428  | 2109.968  | 1975.777  | D83776    | 1532.707  | 1997.931  | NM_014810 | 2112.389  | 931.965   |
| AK023584   | 709.075   | 381.326   | NM_004088 | 1912.729  | 2382.887  | NM_004738 | 2472.106  | 1434.365  |
| NM_003774  | 500.009   | 401.627   | NM_002180 | 1207.186  | 1603.006  | NM_007357 | 4769.213  | 3705.271  |
| D87466     | 5061.953  | 3024.826  | NM_000138 | 2998.068  | 3426.618  | NM_003763 | 5720.307  | 4839.602  |
| CY3Cy5     | 1366.691  | 153.208   | NM_018163 | 1039.993  | 1429.227  | AK023448  | 1477.829  | 1100.157  |
| AA608568   | 8677.776  | 6419.535  | AK026362  | 2564.299  | 3166.322  | NM_002428 | 1793.378  | 1538.837  |
| BG831301   | 4557.875  | 5359.971  | NM_004968 | 2168.739  | 2867.924  | NM_014674 | 3909.673  | 3296.156  |
| M14764     | 465.231   | 383.991   | NM_005908 | 1906.847  | 2462.338  | NM_018271 | 662.563   | 586.647   |
| AA478647   | 6165.563  | 7878.971  | NM_004785 | 3074.091  | 3837.318  | NM_000547 | 478.569   | 478.671   |
| ID 2623896 | 402.893   | 215.943   | AK024079  | 876.833   | 1364.257  | NM_014652 | 606.111   | 840.487   |
| ID 2602214 | 706.162   | 790.521   | NM_000193 | 1415.051  | 1156.211  | AL133020  | 4385.822  | 5154.087  |
| ID 2071279 | 4325.553  | 2834.462  | BC014586  | 582.433   | 425.134   | NM_001611 | 978.513   | 786.383   |
| L10709     | 5370.606  | 3305.603  | NM_002448 | 2288.068  | 1480.637  | AB018310  | 3171.983  | 1851.126  |
| N35489     | 797.724   | 548.977   | AF053952  | 3739.143  | 3520.109  | NM_020133 | 599.236   | 565.944   |
| AI928195   | 832.051   | 492.055   | NM_003213 | 4388.796  | 2829.036  | NM_015379 | 16429.91  | 11378.929 |
| AA458922   | 2767.449  | 1952.565  | BF184738  | 351.216   | 235.285   | NM_000742 | 924.289   | 1434.634  |
| NM_145658  | 1059.249  | 778.686   | NM_014044 | 2340.041  | 1127.795  | NM_002355 | 8763.351  | 6199.666  |
| SR2        | 41473.492 | 25173.662 | NM_000900 | 596.255   | 254.772   | AK026608  | 3006.762  | 3102.094  |
| SR4        | 9897.581  | 6051.993  | AK023684  | 3759.572  | 2481.474  | NM_004102 | 2148.434  | 1876.278  |
| SR6        | 1478.196  | 1008.532  | NM_000232 | 1650.357  | 964.369   | NM_004544 | 5931.77   | 5033.127  |
| SR8        | 5397.09   | 9504.193  | AA700390  | 4346.659  | 3222.643  | NM_018890 | 17256.031 | 12587.214 |
| SR10       | 21210.576 | 4661.447  | AA436163  | 1163.885  | 1368.93   | NM_016204 | 398.871   | 297.869   |
| CY3Cy5     | 872.22    | 89.052    | BI907981  | 497.31    | 573.03    | AB046836  | 755.85    | 634.154   |
| NM_017728  | 879.427   | 775.688   | BI603841  | 967.942   | 656.682   | AJ224166  | 1117.624  | 1172.342  |
| NM_005258  | 432.036   | 397.398   | Y08136    | 517.107   | 572.417   | AK026098  | 3478.913  | 1861.552  |
| NM_002840  | 549.603   | 565.999   | AA156863  | 3889.096  | 3880.198  | NM_012381 | 2405.065  | 1216.499  |
| NM_006174  | 671.93    | 513.824   | BI915199  | 2558.609  | 2827.032  | M20702    | 1992.943  | 1208.126  |
| NM_015850  | 1839.831  | 2041.247  | BI830442  | 830.636   | 1339.565  | NM_006397 | 17109.195 | 10776.362 |
| NM_004864  | 296.566   | 275.969   | AI218732  | 2302.002  | 2710.81   | D83776    | 1663.621  | 2192.225  |
| NM_002838  | 7538.552  | 6801.225  | AF249898  | 5833.113  | 5369.826  | NM_004088 | 2314.884  | 2690.832  |
| NM_014688  | 22591.482 | 20580.826 | M69181    | 6559.362  | 4803.659  | NM_000138 | 3562.534  | 4040.338  |
| BF528358   | 694.547   | 515.956   | AK027224  | 373.083   | 219.931   | NM_018163 | 1272.721  | 1381.018  |
| NM_016338  | 515.699   | 407.442   | NM_001311 | 2745.888  | 1610.531  | AK026362  | 2786.632  | 2475.134  |
| NM_002487  | 5127.276  | 4695.706  | NM_017798 | 5966.426  | 3987.153  | NM_004968 | 3026.718  | 2635.67   |
| NM_013340  | 295.151   | 146.567   | NM_012410 | 813.316   | 416.899   | NM_005908 | 1825.182  | 1693.681  |
| NM_012318  | 2128.834  | 1794.414  | NM_001111 | 4587.854  | 3893.635  | NM_004785 | 3601.771  | 3360.783  |
| AK026235   | 348.397   | 260.651   | NM_018049 | 5534.637  | 4373.837  | AK024079  | 686.746   | 488.765   |
| NM_006510  | 4821.196  | 4493.627  | NM_005160 | 9354.519  | 8065.027  | NM_000193 | 2098.499  | 2306.835  |
| NM_003141  | 1766.291  | 1223.532  | X78817    | 5172.948  | 4762.501  | BC014586  | 595.169   | 487.852   |
| NM_020245  | 1677.829  | 1350.696  | AB023135  | 515.104   | 442.375   | NM_002448 | 3302.313  | 2607.592  |
| NM_007175  | 1501.61   | 1058.828  | AY009401  | 521.927   | 558.585   | AF053952  | 4976.563  | 4518.727  |
| AB046381   | 769.303   | 589.254   | AK026960  | 799.73    | 1005.608  | NM_003213 | 5629.078  | 4324.479  |
| AJ011497   | 383.039   | 218.273   | NM_001991 | 939.943   | 990.105   | BF184738  | 354.652   | 339.437   |
| NM_000338  | 955.296   | 523.882   | NM_005502 | 427.358   | 460.862   | NM_014044 | 2504.073  | 2654.522  |
| W61100     | 5826.951  | 4445.428  | NM_000742 | 663.819   | 728.125   | NM_000900 | 979.945   | 777.978   |

|           |           |           |           |           |           |           |           |           |
|-----------|-----------|-----------|-----------|-----------|-----------|-----------|-----------|-----------|
| AF215923  | 4275.146  | 3572.365  | NM_002355 | 7506.976  | 5573.624  | AK023684  | 5756.336  | 5030.126  |
| U66621    | 4658.742  | 4030.386  | AK026608  | 2459.782  | 2155.815  | NM_000232 | 2425.557  | 1965.614  |
| NM_005720 | 12688.549 | 9760.598  | NM_015057 | 652.834   | 832.962   | AA700390  | 5157.121  | 2430.757  |
| AB040936  | 420.321   | 585.887   | AF303398  | 1681.448  | 1518.079  | Y18474    | 480.446   | 247.169   |
| AB023161  | 144.641   | 369.685   | NM_014810 | 1658.69   | 1165.554  | AA436163  | 1568.432  | 1204.79   |
| AJ132086  | 451.066   | 519.601   | NM_004738 | 2333.711  | 2045.643  | BI907981  | 702.994   | 628.008   |
| U92816    | 2589.902  | 3045.384  | NM_007357 | 3772.756  | 4467.44   | BI603841  | 2202.203  | 2276.766  |
| BC011987  | 1992.458  | 2388.404  | NM_003763 | 4915.827  | 4626.304  | M19888    | 521.224   | 384.071   |
| NM_004100 | 465.53    | 431.539   | AK023448  | 1424.087  | 1497.144  | Y08136    | 687.161   | 523.46    |
| NM_003485 | 1513.257  | 1208.762  | Y18213    | 2214.948  | 2290.735  | AA156863  | 4962.725  | 4006.896  |
| NM_005038 | 7998.765  | 9073.971  | NM_003283 | 2487.669  | 2689.549  | BI915199  | 2695.94   | 2465.233  |
| M95923    | 386.753   | 507.227   | NM_018163 | 1188.358  | 1073.39   | R82957    | 50584.203 | 46624.227 |
| NM_002415 | 55940.859 | 59553.543 | AK026362  | 2521.936  | 1774.868  | AI218732  | 2292.237  | 2096.307  |
| NM_006332 | 6549.46   | 5875.653  | NM_004968 | 1868.37   | 2003.8    | AF249898  | 6376.396  | 5672.185  |
| NM_000910 | 517.148   | 540.049   | NM_005908 | 1569.931  | 2014.558  | M69181    | 5484.068  | 5520.629  |
| NM_018663 | 3662.938  | 3260.256  | NM_004785 | 3248.142  | 2998.725  | AK027224  | 385.632   | 424.821   |
| NM_145904 | 13897.35  | 13684.048 | AK024079  | 711.928   | 668.851   | NM_002652 | 349.327   | 393.485   |
| NM_006790 | 7937.399  | 7081.878  | NM_002428 | 1583.546  | 1715.833  | NM_001311 | 3523.124  | 2804.659  |
| NM_000700 | 560.278   | 643.759   | NM_014674 | 3896.943  | 3060.546  | NM_017790 | 8053.918  | 7048.542  |
| NM_015941 | 3812.448  | 3339.549  | NM_018271 | 546.332   | 544.82    | NM_012410 | 1571.661  | 1270.646  |
| NM_003655 | 7222.875  | 5874.862  | NM_000547 | 501.33    | 525.122   | NM_001111 | 7305.003  | 4318.747  |
| NM_014837 | 3220.159  | 2326.339  | NM_014652 | 845.976   | 616.979   | NM_018040 | 5613.713  | 3036.069  |
| AK025111  | 431.228   | 263.781   | AL133020  | 4117.333  | 3125.754  | NM_005160 | 10281.459 | 6677.75   |
| NM_001732 | 536.495   | 359.574   | NM_001611 | 901.945   | 729.433   | AY009401  | 600.626   | 448.644   |
| NM_018690 | 1325.454  | 1605.19   | AB018310  | 2321.607  | 2043.901  | AF294628  | 1467.307  | 1336.996  |
| NM_000860 | 2765.878  | 2783.925  | NM_020133 | 704.201   | 819.471   | AK026960  | 794.202   | 770.007   |
| AB037798  | 1832.326  | 2341.903  | NM_015379 | 14939.037 | 14582.533 | NM_001991 | 1106.547  | 838.465   |
| NM_000780 | 538.892   | 1218.035  | NM_004878 | 694.447   | 994.652   | NM_005502 | 578.747   | 794.745   |
| AF272663  | 1226.599  | 1198.781  | BF028822  | 513.992   | 483.995   | NM_000742 | 731.474   | 929.017   |
| NM_012190 | 1161.933  | 1317.898  | NM_001777 | 33811.391 | 26178.055 | NM_002355 | 8105.11   | 7266.294  |
| AF277719  | 513.905   | 516.985   | U79457    | 9355.507  | 6970.975  | AK026608  | 2748.104  | 3024.219  |
| NM_000791 | 3007.115  | 3412.696  | AB037832  | 596.865   | 502.314   | NM_015057 | 718.149   | 484.338   |
| NM_003681 | 2318.514  | 1899.744  | NM_001290 | 8554.137  | 6508.122  | NM_007357 | 5227.143  | 5619.156  |
| NM_004800 | 9169.049  | 10556.407 | NM_004344 | 11361.389 | 8370.416  | NM_003763 | 5799.529  | 5647.194  |
| NM_014954 | 3286.05   | 4657.69   | NM_000757 | 1047.726  | 855.313   | AK023448  | 1404.313  | 940.286   |
| NM_000807 | 656.977   | 682.374   | AB046786  | 604.097   | 419.334   | Y18213    | 2134.183  | 1911.876  |
| NM_014900 | 842.444   | 912.051   | NM_016620 | 16595.148 | 12989.609 | NM_003283 | 2558.097  | 2059.664  |
| X91148    | 619.577   | 617.619   | NM_018890 | 17094.014 | 12064.335 | NM_018163 | 881.687   | 1353.156  |
| NM_015700 | 6671.363  | 7252.556  | NM_016204 | 360.388   | 430.724   | AK026362  | 2647.125  | 2976.574  |
| NM_019087 | 1374.006  | 1595.648  | AB046836  | 812.792   | 711.35    | NM_004968 | 2842.098  | 3128.186  |
| NM_016322 | 403.122   | 600.972   | AJ224166  | 1133.073  | 997.653   | NM_005908 | 1823.237  | 1928.816  |
| NM_004277 | 335.269   | 366.764   | AK026098  | 3880.817  | 4279.674  | NM_004785 | 2984.747  | 2859.712  |
| NM_005072 | 985.204   | 835.376   | NM_012381 | 2188.93   | 2769.12   | AK024079  | 866.624   | 704.69    |
| AF308802  | 1391.623  | 794.21    | M20702    | 2373.451  | 2614.188  | NM_002428 | 1642.774  | 1822.572  |
| S76984    | 7128.603  | 5801.364  | NM_006397 | 11884.382 | 10537.546 | NM_014674 | 3396.335  | 3788.821  |
| NM_014495 | 14990.148 | 16424.322 | D83776    | 1453.222  | 1831.409  | NM_018271 | 815.676   | 866.892   |
| NM_014081 | 473.969   | 353.987   | NM_004088 | 2167.008  | 2411.133  | NM_000547 | 645.38    | 431.615   |
| NM_005651 | 888.739   | 1366.514  | NM_000138 | 3268.521  | 4123.302  | NM_014652 | 814.155   | 845.852   |
| AK023699  | 465.687   | 989.691   | AB011541  | 617.066   | 459.383   | AL133020  | 4375.142  | 3385.99   |
| NM_007195 | 1210.913  | 1543.297  | BC032460  | 2952.037  | 2876.45   | NM_004152 | 890.806   | 510.592   |
| AK023337  | 745.598   | 733.806   | NM_014071 | 1206.656  | 1277.385  | NM_020133 | 1170.877  | 1252.069  |
| NM_013275 | 8252.574  | 7617.868  | AK024404  | 949.79    | 940.156   | NM_015379 | 16733.637 | 15473.415 |
| AB037842  | 692.09    | 841.333   | NM_006329 | 1006.268  | 743.332   | NM_004878 | 575.187   | 724.627   |



|            |           |           |           |           |           |           |           |           |
|------------|-----------|-----------|-----------|-----------|-----------|-----------|-----------|-----------|
| U92074     | 647.522   | 557.68    | NM_005166 | 1475.679  | 1086.247  | NM_001777 | 38731.922 | 34573.211 |
| NM_019011  | 3911.5    | 6285.591  | NM_000213 | 9016.585  | 4790.266  | U79457    | 7685.215  | 7212.244  |
| AF459094   | 4266.399  | 5532.35   | BE906107  | 5688.987  | 4295.602  | AB037832  | 817.252   | 894.434   |
| NM_003157  | 1628.919  | 1980.596  | NM_015516 | 3943.98   | 3015.634  | NM_014347 | 4207.509  | 4048.531  |
| NM_004938  | 1150.079  | 1693.631  | AB033065  | 737.299   | 583.834   | NM_001296 | 8943.901  | 7318.494  |
| NM_014326  | 450.403   | 445.645   | NM_004857 | 2439.361  | 4581.841  | NM_004344 | 13470.691 | 12595.472 |
| NM_004448  | 306.489   | 304.868   | NM_012108 | 789.255   | 936.452   | AF085972  | 896.286   | 900.718   |
| NM_015981  | 389.824   | 458.354   | NM_003253 | 692.277   | 713.725   | NM_000757 | 1052.176  | 1398.272  |
| NM_000455  | 3866.444  | 7871.715  | NM_000490 | 383.993   | 387.547   | AB046786  | 662.971   | 661.952   |
| NM_014791  | 10370.728 | 11725.882 | NM_004839 | 2519.373  | 2716.327  | NM_016620 | 19063.002 | 17045.266 |
| NM_003318  | 8323.753  | 7130.137  | NM_012193 | 859.388   | 783.367   | NM_018890 | 19510.627 | 14307.771 |
| NM_004362  | 3139.063  | 5321.072  | NM_003405 | 7535.611  | 7234.636  | NM_016204 | 768.065   | 666.587   |
| NM_000182  | 11517.706 | 11473.047 | NM_004720 | 7236.268  | 10260.193 | AJ224166  | 1316.35   | 1001.98   |
| AK023384   | 2028.187  | 2052.794  | NM_001057 | 1557.108  | 1836.601  | M20702    | 2474.156  | 2118.136  |
| NM_016026  | 12888.986 | 10269.389 | NM_005561 | 6999      | 6125.553  | NM_006397 | 17999.922 | 14155.65  |
| AB046381   | 596.487   | 453.382   | AF272381  | 2859.143  | 2404.265  | D83776    | 1723.501  | 1524.175  |
| AJ011497   | 425.522   | 483.895   | NM_004524 | 1030.014  | 907.741   | NM_004088 | 2457.382  | 2125.908  |
| NM_003018  | 363.249   | 374.968   | NM_006315 | 2354.621  | 2193.842  | NM_000138 | 3302.848  | 2757.92   |
| NM_000336  | 680.006   | 976.693   | NM_018401 | 851.18    | 801.512   | BC032460  | 2656.296  | 3233.112  |
| W61100     | 4910.745  | 7354.853  | NM_005163 | 4341.839  | 4321.703  | NM_014071 | 1275.274  | 1652.806  |
| AA608568   | 10713.916 | 9000.173  | NM_007273 | 21211.289 | 15278.254 | AK024404  | 974.669   | 854.246   |
| BG831301   | 5481.698  | 6241.228  | BE894943  | 685.599   | 673.585   | NM_006328 | 1126.582  | 963.011   |
| AA478647   | 5878.89   | 5842.94   | NM_016422 | 3195.519  | 3403.092  | NM_005166 | 1284.73   | 1104.653  |
| ID 2623896 | 1416.099  | 1507.511  | NM_017878 | 1761.276  | 1487.308  | NM_000213 | 7326.944  | 7678.518  |
| ID 2602214 | 2416.679  | 2718.165  | NM_004494 | 46466.207 | 46695.121 | BE906107  | 7618.544  | 6488.139  |
| ID 2071279 | 7434.406  | 8529.855  | AL049687  | 1068.335  | 877.556   | NM_013288 | 4717.681  | 4269.998  |
| L10709     | 6582.626  | 5886.493  | NM_005643 | 7191.274  | 6559.449  | NM_000490 | 1233.762  | 1233.924  |
| N35489     | 767.819   | 1048.979  | NM_003592 | 2676.342  | 3099.409  | AJ225028  | 764.858   | 442.498   |
| AI928195   | 749.15    | 727.871   | NM_014953 | 2993.503  | 2092.686  | NM_004838 | 3205.375  | 2594.439  |
| AA458922   | 3110.549  | 2934.768  | AF179995  | 2020.527  | 2513.21   | NM_012193 | 1717.199  | 1753.436  |
| NM_145658  | 1351.09   | 1515.411  | NM_016195 | 2981.953  | 1608.149  | NM_003405 | 10738.146 | 7152.025  |
| NM_001718  | 4612.369  | 4600.111  | NM_004523 | 3416.324  | 3215.49   | NM_004720 | 6307.405  | 5258.9    |
| AL080062   | 1466.158  | 1304.035  | NM_004404 | 8626.728  | 8677.743  | NM_001057 | 1629.571  | 1553.899  |
| NM_145904  | 10381.154 | 8007.647  | NM_002960 | 1514.578  | 1359.773  | AF272381  | 2398.508  | 2621.294  |
| NM_006796  | 7604.674  | 6971.551  | AB046788  | 538.075   | 578.977   | NM_004524 | 895.582   | 1883.911  |
| NM_014837  | 3164.624  | 3597.158  | NM_006790 | 1125.648  | 1355.452  | NM_006315 | 2529.748  | 3782.024  |
| NM_017728  | 1158.424  | 991.72    | AL117522  | 3290.454  | 2995.87   | NM_018401 | 970.522   | 698.726   |
| NM_005258  | 355.001   | 364.196   | NM_006572 | 5661.378  | 5317.647  | NM_005163 | 3450.527  | 4359.717  |
| NM_002840  | 322.732   | 386.013   | NM_004784 | 450.428   | 571.435   | NM_007273 | 24932.695 | 23152.938 |
| NM_006174  | 504.87    | 615.2     | NM_019061 | 2414.255  | 2280.228  | AF085994  | 910.922   | 1840.2    |
| NM_015850  | 2654.489  | 3229.37   | AB033007  | 2743.208  | 2534.934  | NM_016422 | 3497.765  | 4458.332  |
| NM_004864  | 255.454   | 279.732   | NM_003781 | 313.996   | 321.366   | NM_017878 | 2747.135  | 3727.309  |
| NM_002838  | 13701.141 | 17204.971 | NM_001304 | 714.791   | 602.094   | NM_016195 | 3954.724  | 1297.655  |
| NM_016338  | 552.597   | 666.622   | NM_003130 | 795.134   | 625.133   | NM_002960 | 5162.555  | 4436.604  |
| NM_002487  | 6732.923  | 9257.573  | NM_004716 | 10887.55  | 7587.44   | AB046788  | 378.956   | 313.373   |
| NM_013340  | 530.098   | 667.516   | D29810    | 2458.986  | 2134.383  | NM_006790 | 2411.016  | 2481.428  |
| NM_012318  | 2609.287  | 3346.434  | NM_000128 | 619.81    | 650.425   | AL117522  | 6673.684  | 5675.838  |
| AK026235   | 426.167   | 542.572   | AB002384  | 1390.18   | 1558.868  | NM_006572 | 7748.958  | 7669.586  |
| NM_006510  | 7359.22   | 14463.335 | NM_018437 | 766.405   | 846.076   | NM_004784 | 484.578   | 523.919   |
| NM_003141  | 1793.807  | 2192.36   | AK023164  | 1388.145  | 702.681   | NM_019061 | 1412.419  | 2311.124  |
| NM_020245  | 1638.967  | 1632.225  | AK027121  | 7467.181  | 6867.359  | AB033007  | 2656.138  | 5810.576  |
| NM_007175  | 1134.878  | 1262.71   | AL117661  | 3590.084  | 3786.777  | NM_001304 | 847.845   | 995.676   |
| X91148     | 640.773   | 638.131   | X64643    | 1909.4    | 1685.133  | NM_018437 | 651.383   | 498.504   |

|           |           |           |           |           |           |           |           |           |
|-----------|-----------|-----------|-----------|-----------|-----------|-----------|-----------|-----------|
| NM_01570C | 6415.429  | 7254.323  | NM_00538C | 6689.999  | 7134.873  | NM_00042C | 384.492   | 270.402   |
| NM_019087 | 2005.049  | 3223.614  | NM_005269 | 392.272   | 232.884   | AK027121  | 8935.432  | 7042.1    |
| AF215923  | 6595.134  | 6606.913  | D70835    | 40682.375 | 28848.127 | NM_01743C | 1868.019  | 1559.948  |
| U66621    | 4316.424  | 3875.227  | NM_002697 | 1674.258  | 1868.499  | AL117661  | 4059.887  | 2859.446  |
| NM_00572C | 14930.935 | 14210.363 | NM_00151E | 8083.599  | 6351.534  | X64643    | 1838.95   | 1342.667  |
| AB040936  | 446.52    | 569.372   | NM_00341C | 4963.209  | 3815.033  | NM_00538C | 6773.49   | 6151.645  |
| AB023161  | 238.645   | 225.882   | NM_01833C | 1094.236  | 1000.521  | NM_002697 | 1610.193  | 2471.449  |
| U61736    | 778.974   | 1183.451  | AK022668  | 1808.914  | 1530.026  | NM_01833C | 1211.21   | 1794.874  |
| AJ132086  | 659.766   | 787.05    | AW975132  | 1523.134  | 1374.291  | AK022668  | 2037.167  | 2092.965  |
| U92816    | 4323.127  | 9848.477  | NM_006051 | 3800.297  | 2891.395  | AW975132  | 1087.632  | 1371.767  |
| NM_00410E | 644.839   | 758.397   | NM_018427 | 2943.942  | 2651.91   | NM_006051 | 2979.051  | 2606.096  |
| NM_00348E | 1598.877  | 2048.242  | NM_01466C | 1074.482  | 1027.298  | NM_018427 | 3265.751  | 2739.597  |
| NM_00503E | 8041.948  | 8621.934  | AF007217  | 1351.434  | 850.834   | AB037801  | 3530.065  | 1988.607  |
| M95923    | 472.127   | 647.087   | AB037753  | 3231.665  | 3520.589  | AL080159  | 8745.233  | 5620.04   |
| NM_00241E | 57497.477 | 57608.426 | NM_004674 | 2588.573  | 2458.076  | NM_01782C | 19786.076 | 15662.11  |
| NM_00633C | 10320.089 | 17445.867 | AB037801  | 3040.876  | 2653.091  | U55185    | 994.371   | 827.442   |
| NM_00091E | 408.369   | 462.615   | AL080159  | 5112.971  | 2395.098  | U30828    | 7184.516  | 5505.346  |
| NM_01866C | 3586.728  | 3106.835  | NM_01782C | 18803.693 | 8377.397  | AF085886  | 47129.063 | 42729.375 |
| NM_014791 | 8242.334  | 7455.813  | U55185    | 937.615   | 566.144   | AK023828  | 2379.08   | 1888.422  |
| NM_00331E | 7347.422  | 6464.722  | U30828    | 8586.685  | 6300.25   | AL080223  | 2745.395  | 3352.945  |
| NM_00436C | 2873.159  | 4956.702  | AF085886  | 52587.984 | 54925.207 | AB018010  | 453.418   | 554.906   |
| NM_00018C | 14660.21  | 31872.85  | AK023828  | 1309.309  | 1387.088  | NM_01461C | 10809.972 | 7547.434  |
| AK023384  | 2291.067  | 6541.622  | AL080223  | 3489.317  | 3111.292  | L48516    | 2257.98   | 1720.249  |
| AK025111  | 455.384   | 571.244   | AK001630  | 8673.592  | 8220.319  | NM_01664E | 7012.083  | 4463.666  |
| NM_00173C | 523.615   | 510.783   | NM_01461C | 6369.054  | 6159.273  | AF083930  | 1935.141  | 1619.602  |
| NM_01869C | 1544.209  | 2163.327  | AF079098  | 789.992   | 672.896   | AB040907  | 636.801   | 477.572   |
| NM_00086C | 3570.345  | 3610.063  | NM_00154C | 850.338   | 752.443   | NM_00342E | 984.583   | 729.391   |
| AB037798  | 1703.837  | 1928.75   | NM_016641 | 6141.327  | 5091.739  | NM_01486C | 964.704   | 704.677   |
| NM_00078C | 394.812   | 491.888   | AB018010  | 694.561   | 555.195   | AK027159  | 1576.771  | 1042.539  |
| AF272663  | 2267.468  | 2503.636  | NM_01461C | 9982.169  | 8403.319  | AK001796  | 542.084   | 622.436   |
| NM_01219C | 1465.892  | 1848.093  | NM_000689 | 505.984   | 426.628   | AL157505  | 792.832   | 830.765   |
| AB033015  | 178.744   | 604.805   | NM_006621 | 3882.591  | 4282.156  | NM_00719C | 1725.421  | 1380.604  |
| AF277719  | 671.365   | 734.58    | BF347398  | 814.438   | 1018.587  | AF043897  | 1304.427  | 1031.62   |
| NM_000791 | 3591.224  | 4538.89   | AK026762  | 2238.257  | 2269.989  | U79246    | 1541.704  | 1176.248  |
| NM_003681 | 2658.885  | 3181.514  | NM_00441C | 1305.38   | 1315.154  | AF052140  | 522.827   | 393.095   |
| NM_00480C | 7863.992  | 8402.204  | L48516    | 2163.337  | 1892.268  | NM_01883C | 639.563   | 577.296   |
| AB037738  | 258.135   | 266.647   | NM_01664E | 6241.118  | 2743.112  | AF007147  | 1054.695  | 786.709   |
| S82769    | 249.523   | 273.934   | AF083930  | 2046.23   | 1025.897  | AF052127  | 1882.142  | 1622.994  |
| NM_004677 | 370.751   | 750.755   | NM_00342E | 1109.211  | 1192.798  | AK024261  | 568.329   | 662.589   |
| NM_014954 | 4303.663  | 6501.618  | NM_01486C | 999.244   | 1385.689  | AF052150  | 460.495   | 862.175   |
| NM_000807 | 604.888   | 589.283   | AK027159  | 1395.526  | 1493.294  | AF086481  | 546.957   | 515.27    |
| NM_01490E | 758.918   | 877.081   | AF075112  | 495.388   | 474.84    | AK024885  | 2438.792  | 2113.446  |
| NM_14565E | 1162.426  | 1034.907  | AK001796  | 506.718   | 512.947   | AK022441  | 904.208   | 1109.019  |
| NM_021957 | 382.073   | 413.766   | AF086152  | 2730.002  | 2499.111  | AK026208  | 3951.542  | 4164.009  |
| AF308802  | 2045.459  | 1895.769  | U78519    | 1467.683  | 1423.686  | NM_016947 | 32107.953 | 36746.543 |
| S76984    | 6156.147  | 6079.548  | AK026872  | 846.325   | 633.554   | NM_01828E | 650.059   | 754.374   |
| NM_01449E | 17656.904 | 19477.754 | AL157505  | 392.947   | 411.718   | AF085961  | 748.328   | 1038.258  |
| NM_014081 | 523.351   | 383.44    | NM_00719C | 2914.78   | 3020.218  | AK024925  | 5121.612  | 5609.52   |
| NM_005651 | 629.999   | 547.295   | AF043897  | 1381.96   | 1388.387  | AL049460  | 3561.903  | 3271.491  |
| NM_00541E | 274.745   | 502.505   | U79246    | 1667.894  | 1753.762  | AF075113  | 637.006   | 613.384   |
| NM_00719E | 1600.628  | 1847.249  | AF052140  | 525.115   | 572.888   | U50536    | 302.305   | 485.479   |
| AK023337  | 989.948   | 1096.221  | AF052127  | 831.534   | 449.821   | Z36807    | 13586.689 | 9422.849  |
| NM_01327E | 11172.375 | 9178.279  | AF052150  | 383.963   | 359.489   | U20896    | 617.245   | 609.375   |

|            |           |           |           |           |           |          |           |           |
|------------|-----------|-----------|-----------|-----------|-----------|----------|-----------|-----------|
| AB037842   | 915.342   | 1080.366  | AL355689  | 912.14    | 1112.954  | NM_01793 | 1281.776  | 1272.149  |
| U92074     | 768.381   | 772.804   | AK024885  | 2701.573  | 4689.355  | AK021837 | 896.509   | 771.203   |
| NM_019011  | 2994.037  | 2985.606  | AK022441  | 666.17    | 664.244   | AK002088 | 6830.261  | 6875.487  |
| AF459094   | 4936.375  | 7882.335  | AK026208  | 3238.773  | 3900.913  | AK022193 | 435.819   | 659.938   |
| NM_003157  | 1873.027  | 1936.327  | NM_016947 | 29226.992 | 24204.568 | AK000106 | 1679.178  | 1578.113  |
| NM_00493   | 1200.37   | 1536.023  | AY007136  | 446.083   | 628.796   | AL117530 | 450.433   | 596.943   |
| NM_01432   | 478.295   | 437.587   | AL359940  | 1616.749  | 1140.849  | AL080191 | 1987.472  | 2292.107  |
| NM_00444   | 365.374   | 431.275   | NM_01828  | 365.018   | 313.42    | AK021639 | 770.016   | 1033.804  |
| NM_015981  | 410.922   | 491.706   | AK024925  | 5178.592  | 4560.985  | AK023189 | 1247.854  | 1339.705  |
| NM_00045   | 3169.33   | 3494.707  | AL049460  | 2011.807  | 1657.817  | AK023464 | 1133.113  | 1315.695  |
| NM_01231   | 2418.924  | 2237.892  | AK022396  | 743.61    | 717.088   | AK023905 | 1337.024  | 1438.549  |
| NM_00651   | 4605.349  | 6561.98   | AF075113  | 804.701   | 688.333   | AK024231 | 2136.139  | 2070.131  |
| NM_003141  | 1885.266  | 2963.387  | AK022892  | 1821.506  | 1315.422  | NM_01694 | 2640.339  | 2535.016  |
| NM_02024   | 1548.765  | 2016.67   | U50536    | 467.285   | 306.375   | AK025757 | 3922.521  | 3839.977  |
| NM_00717   | 968.128   | 1226.108  | Z36807    | 6968.5    | 5734.653  | Y16713   | 453.742   | 683.996   |
| AB046381   | 1003.72   | 981.186   | U20896    | 628.056   | 829.425   | L07394   | 5801.83   | 7209.052  |
| AJ011497   | 323.152   | 380.305   | NM_01793  | 1472.436  | 1826.803  | AK056133 | 1054.441  | 1148.835  |
| NM_00301   | 294.485   | 342.332   | AK021837  | 1181.459  | 1251.037  | NM_01784 | 8630.846  | 9695.109  |
| NM_00033   | 755.712   | 806.417   | AK002088  | 4268.118  | 4225.313  | AF130080 | 552.125   | 536.114   |
| W61100     | 4173.978  | 5676.858  | X98206    | 345.703   | 430.297   | AK026006 | 865.335   | 830.276   |
| AA608568   | 12498.541 | 15089.76  | AK000106  | 1636.043  | 2062.979  | NM_01908 | 4728.191  | 4646.699  |
| BG831301   | 5556.263  | 6811.106  | AK022370  | 980.912   | 1136.029  | AL122072 | 2261.956  | 2373.004  |
| AA478647   | 6543.649  | 6972.47   | AK026765  | 816.168   | 767.898   | AK026221 | 748.186   | 859.79    |
| ID 2623896 | 1192.704  | 919.216   | AL117530  | 344.708   | 321.838   | AK026403 | 1669.304  | 2333.975  |
| ID 2602214 | 2286.494  | 2340.991  | AL080191  | 1572.104  | 1368.445  | AK002162 | 706.337   | 850.346   |
| ID 2071279 | 6759.308  | 6066.66   | AK023189  | 864.372   | 733.478   | AK022980 | 911.219   | 786.968   |
| L10709     | 6789.368  | 5627.708  | AK022127  | 364.718   | 342.846   | AL359058 | 1002.446  | 1175.586  |
| N35489     | 870.167   | 771.48    | AF306347  | 632.695   | 490.933   | AK022439 | 534.636   | 617.037   |
| AI928195   | 735.284   | 713.802   | AK001164  | 1614.189  | 1983.637  | AK026237 | 1739.375  | 1916.503  |
| AA458922   | 2914.96   | 2459.234  | AK023464  | 573.97    | 720.868   | AK023687 | 577.504   | 535.546   |
| M95923     | 469.938   | 359.661   | AK024157  | 657.813   | 631.4     | NM_01763 | 2252.132  | 2492.245  |
| NM_00241   | 52602.867 | 55740.227 | AK022963  | 758.91    | 1185.288  | AK026655 | 1071.621  | 1071.2    |
| NM_00633   | 7301.439  | 6708.088  | AK023905  | 1029.87   | 948.141   | AF129926 | 1415.092  | 1456.571  |
| NM_00091   | 355.558   | 513.89    | AK024231  | 1769.599  | 2555.264  | AK025822 | 1912.769  | 1799.06   |
| NM_01866   | 3454.765  | 3470.668  | NM_01694  | 2265.66   | 2775.008  | AL360140 | 423.301   | 365.439   |
| NM_145904  | 12588.138 | 10241.911 | AK025757  | 3587.104  | 4116.347  | AF201937 | 30317.643 | 25733.379 |
| NM_00679   | 8748.574  | 8753.109  | Y16713    | 387.988   | 391.422   | AL390128 | 2022.664  | 2261.051  |
| NM_00070   | 630.432   | 772.08    | L07394    | 5129.28   | 5270.737  | AF055018 | 5094.717  | 10406.593 |
| NM_015941  | 4182.898  | 4580.905  | AK056133  | 1280.428  | 1323.587  | NM_00521 | 502.426   | 587.604   |
| NM_00365   | 7252.238  | 7373.247  | NM_01784  | 7452.459  | 6822.43   | NM_00552 | 744.331   | 1255.898  |
| NM_014837  | 3999.877  | 4542.833  | AF130080  | 459.225   | 444.549   | NM_00528 | 2125.763  | 3393.4    |
| NM_01772   | 1169.744  | 1289.03   | AK026006  | 795.934   | 956.062   | AK001918 | 1243.006  | 919.375   |
| NM_00525   | 373.831   | 537.061   | NM_01908  | 3143.83   | 3082.052  | NM_01863 | 22324.566 | 20393.568 |
| NM_00284   | 548.407   | 265.611   | AF147440  | 241.81    | 558.498   | AF086048 | 2906.969  | 2820.409  |
| NM_006174  | 565.264   | 468.666   | AL122072  | 1675.581  | 1508.907  | L15616   | 3489.546  | 3445.355  |
| NM_01585   | 2853.473  | 3284.839  | AK026221  | 463.018   | 397.3     | AB019565 | 6822.592  | 5110.835  |
| NM_004864  | 289.602   | 377.218   | Y13870    | 667.308   | 723.543   | D16914   | 51926.273 | 65057.348 |
| NM_00283   | 12960.665 | 10435.715 | AK026403  | 1552.04   | 1423.449  | AA084879 | 811.732   | 1179.181  |
| NM_01468   | 30734.225 | 29375.279 | AK002162  | 606.425   | 514.088   | NM_00083 | 1559.055  | 2454.528  |
| BF528358   | 828.803   | 861.826   | AK022980  | 608.039   | 582.069   | NM_00028 | 3807.272  | 4044.846  |
| NM_01633   | 683.627   | 678.227   | AL359058  | 1046.75   | 819.942   | NM_01246 | 2289.79   | 2641.498  |
| NM_002487  | 5594.366  | 5116.957  | AK022439  | 1097.485  | 1482.094  | NM_01211 | 3494.527  | 3808.953  |
| NM_01334   | 290.458   | 294.829   | AK026237  | 1422.703  | 1859.589  | AK024092 | 3026.172  | 3104.401  |

|           |           |           |            |           |           |            |           |           |
|-----------|-----------|-----------|------------|-----------|-----------|------------|-----------|-----------|
| NM_005462 | 241.996   | 367.589   | AK023687   | 661.823   | 651.921   | U90903     | 833.284   | 724.999   |
| NM_014954 | 3194.18   | 3382.91   | NM_017632  | 2083.748  | 2240.764  | AF278760   | 1868.669  | 2091.614  |
| NM_000807 | 646.694   | 706.41    | AK026655   | 1200.694  | 1210.725  | AB032954   | 2893.785  | 2846.477  |
| NM_014909 | 465.277   | 677.874   | NM_005279  | 393.714   | 439.14    | NM_006003  | 23743.33  | 22866.184 |
| X91148    | 462.626   | 727.174   | AF129926   | 1684.324  | 1848.903  | AL110197   | 3794.556  | 4034.848  |
| NM_015700 | 7136.008  | 7909.084  | AK025822   | 1928.548  | 2326.912  | AF085995   | 843.644   | 959.364   |
| NM_019087 | 1467.221  | 1634.706  | AL360140   | 505.18    | 440.424   | M19723     | 47318.668 | 67478.82  |
| NM_016322 | 529.741   | 546.12    | AF201937   | 32913.281 | 24919.404 | X06256     | 2326.644  | 2714.544  |
| NM_004277 | 443.649   | 565.385   | AL390128   | 1518.914  | 1361.947  | AA709271   | 394.584   | 346.134   |
| NM_005072 | 1105.819  | 1390.039  | AL157429   | 3327.526  | 3676.809  | M34057     | 891.651   | 928.311   |
| AF215923  | 7339.257  | 8737.495  | NM_012071  | 26037.842 | 24542.195 | ID 1984668 | 1559.117  | 1525.182  |
| U66621    | 6986.979  | 7636.635  | AF055018   | 3771.056  | 4552.714  | ID 1832579 | 1752.987  | 1289.932  |
| NM_005720 | 15129.575 | 15114.83  | AF070599   | 618.043   | 616.281   | H-430185 N | 1346.981  | 1094.859  |
| AB040936  | 631.474   | 496.433   | NM_005450  | 1526.978  | 1440.083  | D16583     | 1580.59   | 1482.663  |
| AJ132086  | 509.139   | 746.358   | AK023600   | 558.916   | 929.131   | H44051     | 382.81    | 418.576   |
| U92816    | 3531.998  | 3191.336  | NM_005525  | 749.557   | 760.177   | AA481547   | 13259.029 | 12340.533 |
| BC011987  | 3756.684  | 4347.165  | AK001918   | 640.352   | 744.071   | AA831880   | 864.29    | 716.075   |
| NM_004100 | 641.145   | 636.112   | NM_018635  | 19890.93  | 16688.422 | T64880     | 1523.345  | 1642.466  |
| NM_003485 | 1598.398  | 1589.959  | AF086048   | 2743.317  | 3354.763  | NM_020967  | 1099.405  | 1144.352  |
| NM_005038 | 8175.092  | 9485.953  | L15616     | 3916.108  | 5504.833  | NM_001071  | 39605.07  | 30379.928 |
| NM_003157 | 1778.008  | 1835.356  | AB019565   | 9056.781  | 10745.266 | SR2        | 47958.32  | 35701.855 |
| NM_004938 | 1222.02   | 1238.145  | D16914     | 62419.859 | 67547.07  | SR4        | 12103.229 | 11736.749 |
| NM_014320 | 467.156   | 532.297   | AA084879   | 1064.124  | 879.217   | SR6        | 1969.433  | 1755.938  |
| NM_004448 | 394.186   | 335.263   | NM_000833  | 2033.62   | 1674.183  | SR8        | 7197.916  | 20198.414 |
| NM_015981 | 503.18    | 531.088   | NM_000283  | 4092.278  | 3367.103  | SR10       | 23766.045 | 8791.936  |
| NM_000455 | 2870.197  | 3443.402  | NM_012460  | 2390.323  | 2176.447  | CY3Cy5     | 1275.608  | 201.892   |
| NM_014791 | 9084.703  | 8601.828  | NM_012118  | 2904.307  | 2402.468  | NM_004612  | 1445.36   | 5559.065  |
| NM_003318 | 8108.517  | 7334.517  | AK001133   | 383.419   | 469.257   | NM_001100  | 2232.745  | 5650.432  |
| NM_004362 | 2461.471  | 3330.821  | AK024092   | 2522.732  | 2059.694  | NM_015583  | 1821.989  | 1793.176  |
| NM_000182 | 11131     | 13285.569 | AK002044   | 2844.461  | 2735.907  | NM_018490  | 1469.039  | 1027.204  |
| AK023384  | 2140.67   | 2991.185  | U90904     | 6074.75   | 6320.036  | NM_004778  | 548.441   | 544.255   |
| NM_016020 | 13327.383 | 14382.644 | AF088053   | 2865.337  | 3561.334  | NM_006245  | 4346.461  | 3972.73   |
| AK025111  | 562.96    | 604.974   | AL133662   | 797.176   | 840.286   | NM_004822  | 587.512   | 705.462   |
| NM_001732 | 642.431   | 726.199   | NM_002565  | 693.42    | 922.677   | AK022349   | 4403.235  | 3341.044  |
| NM_018690 | 1216.091  | 1469.045  | U90903     | 838.828   | 959.33    | NM_005750  | 610.68    | 613.368   |
| NM_000860 | 3279.336  | 3297.665  | AF278760   | 1423.756  | 1048.916  | NM_004973  | 4490.75   | 4155.518  |
| AB037798  | 1738.087  | 1849.525  | X58061     | 439.33    | 571.087   | NM_007245  | 8086.457  | 7542.146  |
| AF272663  | 1835.182  | 1685.018  | AB032954   | 2610.107  | 3040.708  | NM_001890  | 776.128   | 532.505   |
| NM_012190 | 1536.384  | 1439.81   | NM_006003  | 24134.918 | 24717.395 | NM_001280  | 3058.054  | 3280.522  |
| AB033015  | 154.516   | 372.178   | AL110197   | 4219.39   | 4368.271  | NM_014648  | 839.982   | 996.836   |
| AF277719  | 596.291   | 641.544   | AF085995   | 860.122   | 1258.764  | NM_019604  | 413.606   | 331.35    |
| NM_000791 | 3238.953  | 2881.767  | CY3Cy5     | 827.225   | 126.694   | NM_005073  | 585.472   | 560.234   |
| NM_003681 | 2264.279  | 2090.63   | AA029300   | 2021.261  | 2115.561  | NM_000951  | 3141.257  | 3760.912  |
| NM_004800 | 7258.278  | 6701.695  | BG708842   | 17668.934 | 18871.398 | X52599     | 414.288   | 587.917   |
| AB037738  | 354.636   | 213.469   | M19723     | 45753.117 | 46914.949 | NM_003920  | 223.227   | 1009.536  |
| NM_004952 | 3759.254  | 3085.973  | X06256     | 1886.516  | 2381.959  | AK024500   | 6895.219  | 8614.961  |
| NM_020414 | 5914.364  | 5171.441  | M34057     | 914.417   | 1741.316  | NM_002564  | 2916.059  | 3837.933  |
| AB037730  | 3146.589  | 3337.66   | ID 1984668 | 1487.506  | 1970.873  | NM_000963  | 1678.07   | 1927.62   |
| NM_001357 | 8790.528  | 8152.603  | ID 1832579 | 1904.835  | 2100.789  | NM_013308  | 2861.923  | 2853.46   |
| NM_003893 | 3495.78   | 3942.202  | H-430185 N | 1348.503  | 1263.618  | AF027302   | 2682.987  | 2043.145  |
| AB037816  | 928.942   | 1258.743  | D16583     | 2391.253  | 1435.16   | NM_002852  | 2139.781  | 1906.179  |
| NM_014380 | 52985.672 | 53431.035 | AA481547   | 11870.574 | 10989.656 | NM_001817  | 2973.499  | 2436.861  |
| NM_014265 | 492.658   | 575.926   | T64880     | 1273.621  | 1174.368  | AF063611   | 883.346   | 770.892   |

|           |           |           |           |           |           |           |           |           |
|-----------|-----------|-----------|-----------|-----------|-----------|-----------|-----------|-----------|
| NM_001719 | 6711.925  | 10889.416 | NM_020967 | 664.107   | 463.487   | NM_006039 | 723.766   | 659.633   |
| AL080062  | 2023.252  | 2514.341  | SR4       | 9985.692  | 7517.083  | NM_002089 | 324.149   | 493.742   |
| AF308802  | 2149.828  | 3436.467  | SR6       | 1905.526  | 1303.297  | NM_014656 | 4613.574  | 4229.812  |
| S76984    | 10290.068 | 12110.187 | SR8       | 6125.198  | 14341.765 | NM_002076 | 3656.356  | 3306.451  |
| NM_014495 | 17027.553 | 21397.604 | SR10      | 20738.383 | 6289.866  | X05299    | 5140.539  | 5334.409  |
| NM_014081 | 558.426   | 455.639   | CY3Cy5    | 874.669   | 169.177   | BM468475  | 1054.606  | 1269.745  |
| NM_005651 | 735.595   | 699.332   | NM_005027 | 890.208   | 723.881   | NM_000318 | 5712.306  | 5957.03   |
| NM_007195 | 1512.54   | 1481.185  | NM_004612 | 1096.556  | 1330.985  | NM_002060 | 5681.194  | 6744.77   |
| AK023337  | 865.974   | 979.124   | NM_005608 | 13264.31  | 13037.387 | AK001230  | 1826.349  | 2259.575  |
| NM_013275 | 11012.269 | 9250.519  | NM_001106 | 2819.904  | 5242.266  | NM_014680 | 5196.789  | 5302.472  |
| AB037842  | 1082.92   | 1040.394  | NM_015583 | 1717.497  | 1822.538  | NM_001956 | 2024.06   | 2445.012  |
| U92074    | 853.262   | 562.938   | NM_018490 | 1184.109  | 1230.828  | AB033064  | 1955.783  | 1945.543  |
| NM_019011 | 3027.21   | 2786.218  | NM_004778 | 584.357   | 532.029   | AK022317  | 4380.691  | 4412.819  |
| AF459094  | 4203.175  | 3679.767  | NM_006245 | 4276.87   | 4722.362  | NM_018396 | 8193.65   | 9428.078  |
| NM_002544 | 160.448   | 270.116   | NM_005103 | 545.582   | 1136.584  | NM_003124 | 3863.605  | 4003.456  |
| AB011542  | 1265.858  | 1254.688  | NM_004822 | 625.628   | 524.64    | NM_004531 | 7027.539  | 6662.543  |
| NM_001853 | 907.602   | 979.489   | AK022349  | 3954.83   | 3388.301  | AL133581  | 2461.594  | 2413.925  |
| U41737    | 290.12    | 280.582   | NM_005750 | 665.008   | 687.575   | NM_002558 | 736.374   | 771.693   |
| NM_005799 | 588.539   | 537.269   | NM_004973 | 3810.08   | 2986.179  | NM_005031 | 4819.201  | 5645.837  |
| X99661    | 884.792   | 850.084   | NM_007245 | 3490.717  | 3022.682  | AB040920  | 719.145   | 599.157   |
| NM_005927 | 2279.071  | 2602.495  | NM_001286 | 2354.897  | 2053.342  | NM_000720 | 925.933   | 899.55    |
| AB028983  | 934.801   | 1475.965  | NM_014648 | 831.496   | 811.214   | NM_004842 | 1782.114  | 1828.665  |
| AB037800  | 729.94    | 981.042   | NM_005073 | 382.718   | 352.476   | AK024639  | 2917.473  | 2700.154  |
| AK026377  | 2190.143  | 2824.987  | NM_000951 | 2194.33   | 2429.622  | NM_015720 | 5367.558  | 5620.708  |
| NM_018660 | 5465.955  | 7225.848  | X52599    | 282.5     | 425.582   | AB007915  | 1136.98   | 1293.582  |
| NM_003394 | 752.948   | 666.383   | AK000158  | 2751.982  | 2973.936  | AB033070  | 916.566   | 1264.133  |
| NM_014636 | 1106.399  | 709.086   | NM_005769 | 362.525   | 643.009   | NM_018229 | 2439.455  | 2516.942  |
| NM_006747 | 2224.936  | 2591.919  | AK024500  | 5295.814  | 5164.914  | NM_006325 | 5994.058  | 7713.798  |
| NM_007086 | 2917.138  | 3418.336  | NM_002564 | 2805.61   | 5037.124  | AY009127  | 11859.592 | 17225.016 |
| NM_003870 | 7032.774  | 5632.702  | NM_000963 | 1406.256  | 2048.051  | NM_014869 | 1179.566  | 1555.825  |
| AK024507  | 413.321   | 312.192   | NM_013308 | 1884.599  | 3427.636  | AB037835  | 1185.744  | 1152.982  |
| NM_001243 | 3852.928  | 3345.872  | AF027302  | 3114.991  | 3177.658  | NM_000157 | 3261.055  | 2368.796  |
| AK025997  | 393.964   | 365.644   | NM_002852 | 1915.345  | 1892.919  | NM_000712 | 14272.039 | 12142.28  |
| NM_005546 | 2626.898  | 2352.704  | NM_001817 | 2589.133  | 2349.889  | NM_018088 | 678.434   | 664.3     |
| NM_000299 | 301.088   | 293.05    | AF063611  | 686.013   | 735.393   | BC013695  | 12077.304 | 11768.232 |
| NM_014887 | 3432.781  | 3312.261  | NM_006039 | 1952.552  | 3857.122  | NM_014846 | 3605.095  | 2817.91   |
| NM_002590 | 399.11    | 206.038   | NM_002089 | 304.85    | 228.043   | AB011164  | 2715.778  | 2652.707  |
| NM_018556 | 5129.95   | 3855.208  | NM_014656 | 2678.327  | 3529.065  | M24750    | 1718.058  | 1633.273  |
| NM_005824 | 967.413   | 700.852   | NM_002076 | 2910.625  | 3211.945  | NM_005965 | 1063.576  | 910.509   |
| AF052211  | 4671.104  | 4023.23   | X05299    | 3429.187  | 2756.491  | NM_002740 | 2662.4    | 2293.574  |
| NM_005600 | 3463.355  | 3023.422  | BM468475  | 919.822   | 976.733   | AL117482  | 2910.043  | 2568.626  |
| NM_005967 | 940.694   | 856.45    | NM_000318 | 4719.388  | 4055.557  | NM_006549 | 24472.578 | 21535.129 |
| NM_013315 | 284.27    | 367.969   | NM_002060 | 4600.228  | 5103.843  | AB018324  | 7447.499  | 6405.675  |
| AB014566  | 2375.669  | 1668.586  | AK001230  | 1554.846  | 1427.837  | NM_002742 | 42456.07  | 55505.965 |
| NM_015678 | 339.454   | 470.153   | NM_014680 | 5150.2    | 4678.971  | Z25431    | 2854.417  | 2755.972  |
| AK025950  | 291.661   | 310.692   | NM_006224 | 38495.438 | 44170.563 | NM_005627 | 3854.102  | 3911.437  |
| NM_014223 | 1415.874  | 1868.988  | NM_000229 | 2346.618  | 2224.168  | M64497    | 1618.458  | 2016.757  |
| NM_016194 | 2721.301  | 3303.603  | NM_003129 | 16498.178 | 18709.117 | NM_007274 | 14571.029 | 15758.165 |
| AL050385  | 1919.36   | 2068.576  | NM_001956 | 2005.135  | 2197.125  | NM_003356 | 3956.345  | 6047.884  |
| NM_007027 | 3491.792  | 3845.087  | AB033064  | 1643.026  | 1810.79   | AF238315  | 489.173   | 476.775   |
| NM_000633 | 6755.887  | 10384.506 | AK022317  | 4416.901  | 4674.566  | NM_014648 | 619.937   | 525.755   |
| AB037855  | 1137.15   | 1805.793  | NM_018396 | 8199.567  | 9277.218  | NM_019604 | 478.087   | 152.979   |
| AK024524  | 6101.37   | 4812.767  | NM_004531 | 7651.74   | 6570.158  | NM_005073 | 584.397   | 333.818   |

|           |           |           |            |           |           |            |           |           |
|-----------|-----------|-----------|------------|-----------|-----------|------------|-----------|-----------|
| NM_000562 | 439.778   | 424.909   | AL133581   | 2616.936  | 2423.338  | NM_000951  | 2339.822  | 2094.406  |
| NM_019011 | 6258.617  | 4887.566  | NM_002558  | 589.508   | 332.052   | X52599     | 270.656   | 342.664   |
| NM_004879 | 2976.091  | 2663.618  | NM_005031  | 4295.923  | 3304.683  | AA029300   | 2016.657  | 2104.588  |
| AB020694  | 3562.967  | 3305.037  | AB040920   | 493.192   | 330.151   | BG708842   | 30151.648 | 25502.748 |
| NM_016071 | 13403.556 | 11803.019 | NM_000720  | 626.397   | 476.163   | M19723     | 51538.004 | 67182.016 |
| AL050131  | 374.047   | 382.725   | NM_004842  | 1822.593  | 2106.298  | X06256     | 2230.524  | 1932.65   |
| NM_004475 | 3645.169  | 2575.769  | AK024639   | 2590.133  | 4328.417  | M34057     | 650.774   | 382.883   |
| NM_001627 | 2301.83   | 1890.2    | NM_015720  | 4244.021  | 6657.08   | ID 1984668 | 950.379   | 915.024   |
| NM_001226 | 4418.636  | 4072.568  | AB007915   | 859.446   | 733.501   | ID 1832579 | 1861.088  | 1460.481  |
| AB050716  | 833.525   | 660.509   | AB033070   | 1834.009  | 1984.119  | H-430185 N | 1387.475  | 1214.862  |
| X77690    | 861.256   | 1022.343  | NM_018229  | 1854.318  | 1815.442  | D16583     | 1655.294  | 1567.047  |
| NM_005658 | 993.295   | 1106.274  | NM_006325  | 5653.525  | 5518.107  | H44051     | 411.176   | 343.702   |
| NM_002422 | 488.645   | 403.222   | AY009127   | 11094.481 | 12031.13  | AA481547   | 13064.9   | 12334.901 |
| AF218022  | 1853.527  | 2106.443  | NM_014869  | 1042.206  | 1228.267  | AA831880   | 785.029   | 724.909   |
| NM_003348 | 3265.949  | 4131.317  | AB037835   | 1076.1    | 994.521   | T64880     | 1590.28   | 1419.814  |
| AB033029  | 640.224   | 465.514   | NM_000157  | 3272.032  | 2498.613  | NM_020967  | 1154.235  | 1188.889  |
| AL137663  | 656.752   | 626.334   | NM_000712  | 13964.413 | 16097.195 | NM_001071  | 44482.109 | 36456.109 |
| AB006198  | 9758.797  | 8418.972  | NM_018088  | 676.161   | 818.549   | AB028990   | 1110.227  | 995.137   |
| U72518    | 3348.644  | 2655.717  | NM_014846  | 3175.259  | 2627.228  | X05299     | 4170.062  | 3107.306  |
| NM_015322 | 2497.224  | 2670.62   | AB011164   | 3037.158  | 2221.305  | BM468475   | 781.749   | 566.771   |
| NM_016607 | 2256.306  | 1802.681  | M24750     | 1545.149  | 1468.953  | NM_000318  | 4509.815  | 3608.842  |
| NM_003275 | 590.091   | 377.09    | NM_005965  | 1362.762  | 1448.46   | NM_002060  | 5164.313  | 5620.381  |
| NM_000268 | 2989.993  | 2308.331  | NM_002740  | 2141.563  | 1771.845  | AK001230   | 1354.214  | 1375.556  |
| M30493    | 3449.334  | 2728.808  | AL117482   | 2381.93   | 1851.669  | NM_014680  | 4252.794  | 3251.644  |
| NM_004343 | 31772.469 | 28137.395 | NM_002742  | 48640.875 | 67614.102 | NM_005027  | 996.259   | 832.733   |
| X52355    | 3253.841  | 2815.726  | Z25431     | 2304.126  | 2140.99   | NM_004612  | 1019.647  | 930.145   |
| NM_006963 | 13918.108 | 10045.292 | NM_005627  | 2888.206  | 3799.195  | NM_005608  | 12598.039 | 11532.621 |
| NM_000307 | 427.82    | 454.779   | M64497     | 1186.76   | 1263.375  | NM_001106  | 1761.016  | 1156.087  |
| U66561    | 5501.092  | 4178.938  | NM_007274  | 14554.622 | 16285.269 | NM_015583  | 1705.472  | 1449.657  |
| NM_000306 | 482.143   | 565.899   | NM_003356  | 2327.139  | 2448.84   | NM_018490  | 1234.245  | 1083.129  |
| NM_002200 | 2624.683  | 2496.345  | NM_014648  | 772.779   | 811.662   | NM_004778  | 485.167   | 534.445   |
| AF017433  | 2233.252  | 2308.431  | NM_005073  | 427.723   | 408.038   | NM_006245  | 4035.663  | 3844.09   |
| AF130111  | 6753.772  | 6845.844  | NM_000951  | 2286.321  | 2611.81   | NM_005103  | 345.924   | 385.634   |
| NM_016307 | 466.666   | 339.529   | X52599     | 254.749   | 236.514   | NM_004822  | 646.826   | 714.461   |
| AB028449  | 2595.401  | 3225.637  | AA029300   | 2471.755  | 3083.165  | AK022349   | 4154.563  | 3189.611  |
| NM_004697 | 4113.545  | 4666.206  | BG708842   | 19958.619 | 18911.324 | NM_005750  | 625.094   | 614.052   |
| U94384    | 412.74    | 500.736   | M19723     | 50505.91  | 62986.766 | NM_004973  | 4219.617  | 4231.422  |
| AF131776  | 2777.252  | 3373.572  | M34057     | 517.297   | 630.941   | NM_007245  | 8623.647  | 10630.506 |
| NM_020528 | 3172.811  | 4014.249  | ID 1984668 | 1444.886  | 1195.414  | NM_001890  | 846.43    | 1007.583  |
| NM_007040 | 13939.721 | 11857.482 | ID 1832579 | 1570.149  | 1342.72   | NM_001286  | 3109.047  | 3551.456  |
| NM_014483 | 6165.777  | 5364.063  | H-430185 N | 1415.814  | 1055.975  | AB007915   | 845.001   | 911.722   |
| AK024249  | 1138.493  | 994.687   | D16583     | 2019.687  | 967.989   | AB033070   | 670.826   | 592.132   |
| AF239156  | 5586.613  | 4543.695  | AA481547   | 11789.452 | 10739.726 | NM_018229  | 2116.207  | 1956.688  |
| NM_020390 | 1632.308  | 1422.196  | AA831880   | 658.506   | 456.515   | NM_006325  | 4945.136  | 5176.687  |
| NM_003321 | 13571.084 | 12269.984 | T64880     | 1170.254  | 1280.762  | AY009127   | 9911.33   | 10702.7   |
| U18937    | 6538.716  | 4544.051  | NM_020967  | 797.307   | 465.313   | NM_014869  | 1036.442  | 1121.276  |
| U01925    | 501.95    | 467.564   | AB028990   | 980.814   | 713.458   | AK000158   | 3576.283  | 3130.949  |
| AJ420488  | 58664.871 | 62877.539 | X05299     | 4377.544  | 4302.803  | NM_005769  | 527.973   | 545.993   |
| AF268872  | 1742.401  | 1270.237  | BM468475   | 729.935   | 835.623   | AK024500   | 7158.961  | 5617.242  |
| AK022180  | 3962.435  | 2431.625  | NM_000318  | 4596.233  | 4434.189  | NM_002564  | 3001.11   | 2379.652  |
| AK001384  | 1013.342  | 948.466   | NM_002060  | 4574.211  | 4266.45   | NM_000963  | 1661.031  | 1434.696  |
| AK025437  | 2997.246  | 2863.55   | AK001230   | 1225.84   | 1362.781  | NM_013308  | 2483.802  | 2466.503  |
| AK074164  | 528.183   | 458.326   | NM_014680  | 4779.729  | 4722.877  | AF027302   | 2994.467  | 3019.464  |

|           |           |           |           |           |           |           |           |           |
|-----------|-----------|-----------|-----------|-----------|-----------|-----------|-----------|-----------|
| NM_00416E | 10549.219 | 9853.866  | NM_005027 | 985.365   | 915.107   | NM_00285Z | 2143.067  | 2143.337  |
| AF161353  | 9510.289  | 9156.235  | NM_00461Z | 1724.708  | 2065.836  | NM_001817 | 3210.717  | 3121.445  |
| NM_00414E | 15624.188 | 14160.714 | NM_00560E | 13430.973 | 12685.396 | AF063611  | 887.067   | 947.729   |
| NM_00300Z | 15907.295 | 14830.043 | NM_012294 | 930.461   | 4698.755  | NM_00603E | 679.654   | 629.55    |
| D42047    | 1722.875  | 1760.678  | NM_00110E | 1406.071  | 1058.345  | NM_00208E | 340.009   | 343.365   |
| AB009282  | 18631.303 | 19802.475 | NM_01558Z | 1512.057  | 1573.32   | NM_01465E | 4419.69   | 4760.414  |
| NM_005004 | 24611.879 | 24269.826 | NM_01849C | 1127.349  | 927.791   | NM_00207E | 4225.383  | 4550.651  |
| NM_00367C | 3788.324  | 3813.946  | NM_00477E | 435.262   | 303.041   | Z25431    | 2221.287  | 2594.566  |
| NM_01463E | 3242.158  | 3239.839  | NM_00624E | 3722.737  | 2891.335  | NM_005627 | 2619.947  | 2082.569  |
| NM_00639Z | 2663.298  | 3074.014  | NM_00482Z | 529.772   | 557.604   | M64497    | 1234.744  | 1417.398  |
| NM_014717 | 1030.87   | 860.688   | AK022349  | 3292.203  | 2836.427  | NM_007274 | 11924.687 | 12508.85  |
| NM_01792Z | 2710.724  | 2569.812  | NM_00575C | 531.92    | 469.06    | NM_00335E | 2576.325  | 2814.617  |
| NM_00282Z | 56263.699 | 59749.859 | NM_00724E | 7613.515  | 7658.844  | AF238315  | 449.588   | 347.787   |
| NM_01791E | 14093.135 | 10071.026 | NM_00189C | 590.252   | 824.983   | NM_006224 | 45829.469 | 40533.945 |
| NM_00180E | 3111.549  | 2547.028  | NM_00128E | 2396.347  | 2516.996  | NM_00022E | 2331.41   | 2856.248  |
| AK022360  | 1868.817  | 1244.621  | AB007915  | 1186.156  | 1000.071  | NM_00699E | 20586.84  | 18839.854 |
| AK095694  | 680.243   | 525.996   | AB033070  | 540.21    | 791.87    | NM_00312E | 15933.009 | 11517.7   |
| X52341    | 35451.617 | 25386.945 | NM_01822Z | 2134.102  | 2553.383  | NM_00195E | 1966.993  | 1801.506  |
| NM_00308Z | 5450.743  | 3221.249  | NM_00632E | 4927.103  | 5071.516  | AB033064  | 1861.103  | 1959.468  |
| AL133632  | 1813.316  | 1033.427  | AY009127  | 10431.19  | 11996.817 | AK022317  | 4534.727  | 4808.213  |
| AK024551  | 460.327   | 319.329   | NM_01486E | 983.042   | 1262.841  | NM_01839E | 8094.564  | 6854.034  |
| AL833249  | 766.974   | 874.042   | NM_00392E | 436.343   | 448.04    | NM_003124 | 4177.56   | 4204.07   |
| NM_018374 | 2945.891  | 2673.788  | AK000158  | 3380.686  | 3707.019  | NM_004531 | 7761.262  | 8276.21   |
| AK021894  | 1506.564  | 1581.712  | NM_00576E | 423.903   | 516.61    | AL133581  | 2556.231  | 2773.082  |
| NM_020424 | 4755.169  | 5305.172  | AK024500  | 5719.58   | 3565.365  | NM_00255E | 607.694   | 628.257   |
| AF438313  | 655.447   | 745.649   | NM_002564 | 2421.963  | 1904.19   | NM_005031 | 4644.791  | 6414.852  |
| NM_01781E | 292.964   | 378.717   | NM_00096Z | 1322.53   | 1464.831  | AB040920  | 609.781   | 678.615   |
| AB033009  | 11756.608 | 13973.001 | NM_01330E | 1554.184  | 1205.098  | NM_00072C | 809.287   | 1048.793  |
| AL137761  | 2655.838  | 2254.949  | AF027302  | 2600.524  | 2309.865  | NM_00484Z | 1962.506  | 2217.279  |
| AK022086  | 459.932   | 558.409   | NM_00285Z | 1722.539  | 1606.78   | AK024639  | 3151.616  | 3375.955  |
| AF147320  | 451.938   | 466.835   | NM_001817 | 2636.684  | 2854.715  | NM_01572C | 5801.052  | 7317.963  |
| AK027024  | 348.84    | 482.617   | AF063611  | 631.933   | 571.692   | NM_020967 | 706.159   | 1040.696  |
| AK022339  | 934.861   | 833.707   | NM_00603E | 592.464   | 488.981   | AB028990  | 664.91    | 647.768   |
| AK022138  | 943.149   | 1073.646  | M28983    | 706.616   | 1384.777  | AB037835  | 1628.343  | 2772.433  |
| AF086191  | 758.352   | 621.353   | NM_01465E | 3730.885  | 4125.102  | NM_01622E | 1273.769  | 1674.569  |
| AF143880  | 432.446   | 334.368   | NM_00207E | 3949.545  | 3915.017  | NM_000157 | 3504.468  | 2455.755  |
| NM_01763E | 6591.946  | 4794.319  | Z25431    | 2150.137  | 2802.576  | NM_00071Z | 13519.077 | 10229.271 |
| AL133052  | 1575.251  | 851.335   | NM_005627 | 2594.557  | 3792.226  | NM_01808E | 525.209   | 357.805   |
| AB037824  | 2175.36   | 1403.007  | M64497    | 1479.12   | 1749.837  | BC013695  | 12864.476 | 11065.719 |
| AF361494  | 347.896   | 268.489   | NM_007274 | 12501.217 | 14445.623 | NM_01484E | 3522.916  | 3549.671  |
| AK022810  | 1023.236  | 526.092   | NM_00335E | 2077.978  | 2163.706  | AB011164  | 3304.999  | 3530.985  |
| NM_005110 | 934.985   | 903.5     | AF238315  | 456.128   | 861.125   | M24750    | 1590.916  | 1300.192  |
| X92110    | 431.216   | 482.46    | NM_006224 | 36747.25  | 32145.094 | NM_00596E | 1021.424  | 1065.473  |
| AK023122  | 425.417   | 362.502   | AL137300  | 4112.366  | 4659.817  | NM_00274C | 2489.85   | 2374.182  |
| AF147408  | 2109.68   | 2270.918  | NM_00022E | 2548.615  | 2583.713  | AL117482  | 2745.638  | 2947.232  |
| AK027222  | 1396.446  | 1554.746  | NM_00699E | 19339.016 | 17761.781 | NM_00654E | 28444.666 | 25898.293 |
| AF054994  | 503.418   | 515.499   | NM_00312E | 14196.163 | 10989.819 | AB018324  | 7451.545  | 8610.4    |
| AF085868  | 562.419   | 584.516   | NM_00195E | 2151.421  | 1499.576  | NM_00274Z | 45426.504 | 57973.793 |
| AK054767  | 261.826   | 304.27    | AB033064  | 1512.842  | 1685.921  | NM_00575C | 535.373   | 732.253   |
| AL049301  | 164.732   | 566.602   | AK022317  | 4590.151  | 3755.292  | NM_00724E | 6807.58   | 7274.006  |
| AL050042  | 815.478   | 891.981   | NM_01839E | 7524.517  | 6099.319  | NM_00189C | 510.582   | 549.198   |
| NM_01846E | 916.876   | 724.907   | NM_003124 | 2721.587  | 1897.119  | NM_00128E | 2659.368  | 3606.163  |
| NM_014867 | 2032.374  | 1640.049  | NM_00688E | 53539.449 | 46983.52  | NM_01464E | 739.623   | 1215.521  |

|           |           |           |            |           |           |            |           |           |
|-----------|-----------|-----------|------------|-----------|-----------|------------|-----------|-----------|
| AB037850  | 2510.507  | 1784.736  | NM_004531  | 7270.64   | 6947.082  | NM_000951  | 2590.683  | 3730.663  |
| AK002197  | 1316.588  | 831.879   | AL133581   | 2814.549  | 2449.565  | X52599     | 383.833   | 444.535   |
| AK021710  | 1197.312  | 893.456   | NM_002558  | 659.146   | 493.015   | AA029300   | 2221.147  | 2068.746  |
| AL137446  | 426.522   | 439.582   | NM_005031  | 4271.215  | 3493.665  | BG708842   | 28446.672 | 20998.045 |
| AF009286  | 636.063   | 517.625   | AB040920   | 674.892   | 493.558   | M19723     | 49176.207 | 57328.695 |
| AF056437  | 631.678   | 686.678   | NM_000720  | 722.8     | 494.405   | X06256     | 2015.446  | 2096.8    |
| AB032364  | 419.35    | 310.021   | NM_004842  | 1947.087  | 2214.882  | AA709271   | 249.92    | 159.698   |
| NM_005028 | 1054.13   | 950.674   | AK024639   | 3047.888  | 3238.711  | M34057     | 677.64    | 479.57    |
| AF056447  | 714.327   | 1038.038  | NM_015720  | 4155.538  | 4477.294  | ID 1984668 | 1636.225  | 1583.38   |
| AK001010  | 556.035   | 601.75    | NM_020967  | 849.457   | 839.096   | ID 1832579 | 1816.182  | 1634.256  |
| NM_018076 | 430.577   | 274.02    | NM_001071  | 33833.328 | 34816.445 | H-430185 N | 1419.327  | 1450.131  |
| AK021442  | 549.764   | 767.939   | AB028990   | 1301.674  | 1516.686  | D16583     | 1678.849  | 2054.317  |
| AK001076  | 604.517   | 672.746   | NM_006708  | 16819.383 | 16946.428 | H44051     | 322.958   | 343.053   |
| AK001820  | 307.005   | 413.924   | NM_016228  | 1190.99   | 1291.912  | AA481547   | 13941.166 | 14697.319 |
| AK021482  | 563.558   | 690.869   | NM_000157  | 3056.646  | 1777.416  | AA831880   | 812.758   | 888.239   |
| AK025317  | 2470.616  | 2203.625  | NM_000712  | 12630.519 | 11073.95  | T64880     | 1626.442  | 1985.071  |
| AJ008118  | 31222.631 | 28075.396 | NM_018088  | 621.595   | 550.56    | NM_006038  | 561.274   | 527.648   |
| AK000939  | 320.474   | 385.873   | BC013695   | 10381.715 | 9065.351  | NM_014658  | 3742.893  | 3973.849  |
| NM_005523 | 373.596   | 204.925   | AK023035   | 3399.224  | 2900.907  | NM_002078  | 3168.304  | 4096.537  |
| AK024512  | 8488.165  | 9012.138  | NM_014846  | 3760.277  | 3467.844  | X05299     | 4412.426  | 5700.647  |
| AK023454  | 1098.585  | 1131.705  | AB011164   | 3225.643  | 2421.989  | AK001230   | 1496.185  | 1031.297  |
| L23207    | 326.861   | 216.326   | M24750     | 1681.235  | 1666.681  | NM_014680  | 4119.255  | 3156.805  |
| NM_018062 | 808.447   | 900.275   | NM_005965  | 978.166   | 709.168   | NM_005027  | 753.59    | 714.034   |
| NM_007128 | 5710.845  | 5100.857  | NM_002740  | 1588.271  | 1527.433  | NM_004612  | 1072.896  | 891.052   |
| NM_007160 | 339.66    | 465.696   | AL117482   | 2368.736  | 1679.416  | NM_005608  | 13230.032 | 11006.396 |
| NM_018627 | 500.238   | 645.808   | NM_006549  | 27600.445 | 24429.82  | NM_001106  | 1671.197  | 1403.238  |
| NM_015377 | 292.213   | 190.376   | AB018324   | 9174.436  | 10394.823 | NM_015583  | 1868.654  | 1851.203  |
| AL137531  | 502.991   | 448.9     | NM_002742  | 46361     | 47510.5   | NM_018490  | 1365.332  | 1355.703  |
| AL080085  | 3692.583  | 2470.709  | NM_004973  | 4128.23   | 4003.533  | NM_004778  | 535.844   | 589.347   |
| AF055012  | 2294.602  | 1924.867  | NM_007245  | 7228.381  | 7712.339  | NM_006245  | 4418.117  | 4081.975  |
| AK022307  | 2210.748  | 2236.258  | NM_001890  | 568.487   | 1163.955  | NM_004822  | 750.165   | 980.114   |
| NM_005172 | 729.558   | 773.762   | NM_001286  | 2586.827  | 2918.533  | AK022349   | 4603.788  | 4153.639  |
| AK025192  | 536.589   | 904.356   | NM_014648  | 720.625   | 825.67    | NM_005031  | 4131.298  | 5378.471  |
| NM_012403 | 882.745   | 921.982   | NM_000951  | 2357.287  | 2712.828  | AB040920   | 657.913   | 780.401   |
| AK022611  | 8210.133  | 11582.467 | AA029300   | 2034.516  | 1448.909  | NM_000720  | 698.937   | 846.458   |
| NM_006158 | 1471.221  | 1956.646  | BG708842   | 22052.773 | 17910.877 | NM_004842  | 1514.375  | 1589.87   |
| NM_006346 | 1026.083  | 918.897   | M19723     | 51990.246 | 45370.551 | AK024639   | 2213.369  | 2412.77   |
| AK025240  | 1697.155  | 1289.467  | X06256     | 2248.89   | 2037.132  | NM_015720  | 5714.809  | 15072.587 |
| NM_017633 | 6966.842  | 4159.75   | M34057     | 472.552   | 489.116   | AB007915   | 936.012   | 1432.656  |
| AF086186  | 779.438   | 474.769   | ID 1984668 | 1280.273  | 959.628   | AB033070   | 621.139   | 731.975   |
| NM_017802 | 2357.874  | 1744.222  | ID 1832579 | 1707.957  | 1460.01   | NM_018228  | 1962.594  | 2146.267  |
| AK023667  | 517.674   | 444.555   | H-430185 N | 1307.252  | 836.384   | NM_006325  | 5093.393  | 4929.29   |
| AJ008137  | 1885.917  | 1232.425  | D16583     | 2425.863  | 1633.446  | AY009127   | 9819.483  | 8144.55   |
| AF085841  | 398.737   | 361.5     | AA481547   | 7079.046  | 6185.68   | NM_014868  | 929.168   | 909.689   |
| U92026    | 413.534   | 482.662   | AA831880   | 1182.083  | 1710.632  | AK000158   | 3885.809  | 3821.54   |
| AF086234  | 25867.215 | 20551.287 | T64880     | 1506.17   | 1573.174  | NM_005768  | 479.901   | 474.361   |
| AK023680  | 5637.187  | 5325.788  | NM_014656  | 4419.823  | 9764.012  | AK024500   | 7620.123  | 8433.972  |
| AF009324  | 4571.391  | 4587.11   | NM_002076  | 3716.674  | 4577.024  | NM_002564  | 3074.323  | 3404.615  |
| AF019226  | 1630.911  | 1323.403  | X05299     | 4948.701  | 6374.105  | NM_000963  | 1896.884  | 1894.341  |
| AL137480  | 8599.474  | 8386.984  | BM468475   | 960.073   | 884.963   | NM_013308  | 2719.779  | 2872.734  |
| AK022182  | 671.98    | 473.89    | NM_000318  | 4790.549  | 4466.863  | AF027302   | 3042.874  | 3289.202  |
| D16473    | 2457.92   | 2389.115  | NM_002060  | 4598.576  | 4694.087  | NM_002852  | 2378.315  | 2894.325  |
| AB028968  | 1989.045  | 1881.36   | AK001230   | 1238.795  | 934.164   | NM_001817  | 3119.431  | 3471.983  |



|           |           |           |           |           |           |           |           |           |
|-----------|-----------|-----------|-----------|-----------|-----------|-----------|-----------|-----------|
| AK001202  | 616.351   | 551.869   | NM_014680 | 4525.771  | 3599.596  | AF063611  | 1067.914  | 1228.912  |
| AF195764  | 21301.225 | 21016.07  | NM_005027 | 1045.041  | 656.866   | NM_005965 | 903.526   | 1115.015  |
| AF055029  | 894.792   | 1031.18   | NM_004612 | 1142.415  | 1105.248  | NM_002740 | 2408.434  | 2315.354  |
| AK024394  | 1670.248  | 1586.198  | NM_005608 | 12001.069 | 9457.864  | AL117482  | 2408.071  | 3332.008  |
| AF147374  | 1258.817  | 949.041   | NM_001106 | 1360.254  | 1186.91   | NM_006545 | 25486.139 | 25378.205 |
| AF130091  | 631.135   | 348.657   | NM_015583 | 1507.666  | 1505.164  | AB018324  | 6563.293  | 6371.617  |
| L43338    | 837.01    | 677.757   | NM_018490 | 1144.162  | 1145.195  | NM_002742 | 47671.297 | 63515.602 |
| AJ227866  | 1765.845  | 1288.488  | NM_004778 | 431.18    | 266.808   | Z25431    | 2657.683  | 2572.612  |
| AF458223  | 4696.432  | 2328.219  | NM_006245 | 3640.816  | 2394.097  | NM_005627 | 3005.254  | 2409.033  |
| AK026822  | 1287.692  | 599.157   | NM_004822 | 783.883   | 1061.799  | M64497    | 1388.659  | 1455.447  |
| NM_018587 | 259.256   | 434.465   | AK022349  | 4009.9    | 3852.825  | NM_007274 | 11943.656 | 8938.9    |
| AK022838  | 5412.724  | 3707.179  | NM_005031 | 3878.632  | 4645.209  | NM_003355 | 2936.481  | 2865.988  |
| NM_003505 | 401.336   | 282.982   | AB040920  | 689.824   | 662.836   | NM_006224 | 47179.953 | 37055.703 |
| CY3Cy5    | 3407.129  | 288.821   | NM_000720 | 636.016   | 812.642   | AL137300  | 3526.898  | 3755.322  |
| AA700390  | 8373.684  | 13372.385 | NM_004842 | 1572.441  | 1889.894  | NM_000225 | 2629.268  | 2824.803  |
| Y18474    | 382.713   | 724.853   | AK024639  | 2117.871  | 3301.951  | NM_006995 | 18406.646 | 16166.854 |
| AA436163  | 1219.885  | 2592.631  | NM_015720 | 3375.872  | 3892.947  | NM_001955 | 2223.046  | 2701.054  |
| BI907981  | 897.735   | 1505.378  | AB007915  | 1009.462  | 1049.858  | AB033064  | 2063.839  | 2167.546  |
| BI603841  | 897.598   | 1426.213  | AB033070  | 824.802   | 952.233   | AK022317  | 4704.9    | 5713.137  |
| M19888    | 331.13    | 760.082   | NM_018229 | 2020.687  | 2467.328  | NM_018395 | 8511.878  | 8944.916  |
| Y08136    | 709.772   | 1217.956  | NM_006325 | 5522.374  | 5243.501  | NM_003124 | 3976.81   | 4589.336  |
| AA156863  | 6247.158  | 7630.18   | AY009127  | 8969.903  | 8336.833  | NM_004531 | 7860.039  | 9851.506  |
| BI915199  | 4512.2    | 6242.196  | NM_014865 | 1134.601  | 932.414   | NM_002555 | 761.596   | 938.442   |
| R82957    | 54606.871 | 65463.805 | AK000158  | 3198.84   | 2362.148  | NM_003585 | 604.997   | 820.736   |
| BI830442  | 491.846   | 721.004   | NM_005765 | 491.018   | 413.621   | NM_000922 | 2692.523  | 2422.272  |
| AI218732  | 3676.232  | 4985.044  | AK024500  | 5581.834  | 4326.397  | NM_013232 | 4335.542  | 4829.566  |
| SR7       | 5724.304  | 53157.063 | NM_002564 | 2565.911  | 2143.382  | NM_000362 | 562.033   | 592.472   |
| SR9       | 23360.912 | 5525.705  | NM_000963 | 1302.363  | 1346.151  | NM_014425 | 2086.571  | 1668.323  |
| CY3Cy5    | 8125.803  | 810.638   | NM_013308 | 1983.212  | 2461.61   | AK000770  | 1053.284  | 1153.03   |
| NM_018045 | 6302.724  | 5364.114  | AF027302  | 2697.708  | 2491.023  | NM_002370 | 19950.906 | 14693.014 |
| NM_005160 | 12156.606 | 7315.236  | NM_002852 | 1460.488  | 1396.528  | NM_015670 | 2317.504  | 2336.524  |
| X78817    | 7815.622  | 12369.738 | NM_001817 | 3228.051  | 3595.621  | NM_014705 | 895.238   | 763.756   |
| AB023135  | 551.111   | 1176.78   | AF063611  | 973.866   | 1178.175  | AB028990  | 900.106   | 500.262   |
| NM_003393 | 421.764   | 705.927   | NM_005965 | 1043.202  | 1239.39   | NM_006705 | 17558.107 | 15274.374 |
| AY009401  | 498.855   | 1352.859  | NM_002740 | 2352.342  | 2628.692  | AB037835  | 1315.377  | 1236.293  |
| AF294628  | 2088.656  | 3787.93   | AL117482  | 3106.178  | 2568.968  | NM_016225 | 935.057   | 854.783   |
| AK026960  | 1334.558  | 1737.434  | NM_006545 | 27816.498 | 26964.5   | NM_000712 | 14303.146 | 13412.858 |
| NM_001991 | 1701.723  | 3063.27   | AB018324  | 6958.503  | 9184.512  | NM_018085 | 662.924   | 585.057   |
| NM_000193 | 813.846   | 1466.582  | NM_002742 | 44457.32  | 55491.777 | BC013695  | 12959.705 | 12228.735 |
| BC014586  | 878.431   | 1094.834  | Z25431    | 2566.026  | 3043.498  | NM_014845 | 4530.614  | 4728.955  |
| NM_002445 | 3778.604  | 4642.735  | NM_005627 | 2850.097  | 3901.4    | M24750    | 2044.647  | 2282.024  |
| AF053952  | 2214.797  | 3086.923  | M64497    | 1455.649  | 1715.874  | AB046776  | 508.348   | 689.385   |
| NM_003213 | 8634.1    | 10182.56  | NM_007274 | 12509.959 | 15331.717 | NM_002687 | 9784.575  | 11734.635 |
| NM_014044 | 5736.662  | 7841.137  | NM_003355 | 1848.358  | 1369.818  | NM_000627 | 1279.115  | 1171.859  |
| NM_000900 | 1264.8    | 1579.033  | NM_006224 | 40914.82  | 28026.219 | NM_000035 | 935.89    | 502.608   |
| AK023684  | 6913.278  | 10106.776 | AL137300  | 3925.447  | 3177.294  | NM_000825 | 607.777   | 733.242   |
| NM_000232 | 2979.723  | 4178.202  | NM_000229 | 2710.672  | 2030.828  | NM_001963 | 417.719   | 394.049   |
| NM_015057 | 635.477   | 453.954   | NM_006995 | 17291.896 | 14057.479 | NM_004334 | 741.83    | 632.119   |
| AF303398  | 875.093   | 565.432   | NM_003129 | 14727.992 | 14118.867 | NM_003885 | 2419.156  | 2362.308  |
| NM_014810 | 2338.931  | 1165.202  | NM_001955 | 2326.932  | 1776.196  | NM_005843 | 1051.942  | 915.563   |
| NM_004735 | 2735.969  | 2269.682  | AB033064  | 1746.478  | 1526.728  | NM_003854 | 413.165   | 395.939   |
| NM_007357 | 3692.461  | 3333.091  | AK022317  | 4177.057  | 4036.445  | NM_017980 | 3361.433  | 2618.238  |
| NM_003763 | 4504.492  | 3898.152  | NM_018395 | 6812.859  | 4789.334  | NM_001252 | 1412.063  | 1458.738  |

|           |           |           |           |           |           |           |           |           |
|-----------|-----------|-----------|-----------|-----------|-----------|-----------|-----------|-----------|
| AK023448  | 1834.204  | 1033.105  | NM_003124 | 3266.509  | 2959.071  | AF053712  | 973.322   | 961.436   |
| Y18213    | 3186.366  | 2391.261  | NM_006886 | 53838.949 | 47598.984 | NM_003947 | 564.963   | 563.265   |
| NM_003283 | 3521.775  | 4046.721  | NM_004531 | 6770.57   | 6440.225  | NM_002821 | 14191.79  | 14696.001 |
| AF249898  | 8188.083  | 6938.474  | AL133581  | 2792.294  | 2815.834  | M96652    | 9133.688  | 9281.681  |
| M69181    | 4769.73   | 7956.959  | NM_002558 | 712.978   | 746.828   | L41690    | 1795.144  | 1877.306  |
| AK027224  | 1015.568  | 1311.23   | NM_003586 | 661.765   | 815.908   | NM_018059 | 1289.162  | 1457.359  |
| L09078    | 460.728   | 577.149   | NM_000922 | 3883.37   | 4328.462  | NM_000939 | 49575.902 | 59195.391 |
| NM_002652 | 787.256   | 1074.212  | NM_013232 | 3748.902  | 3990.907  | NM_005183 | 343.071   | 379.931   |
| NM_001311 | 11325.218 | 15154.957 | NM_000362 | 573.555   | 561.618   | NM_006514 | 2678.832  | 3059.7    |
| NM_017799 | 11811.996 | 16160.315 | NM_014429 | 2216.736  | 2171.07   | AF065164  | 2845.269  | 3347.418  |
| NM_012410 | 1151.793  | 1752.231  | AK000770  | 743.392   | 799.432   | AB028991  | 2816.206  | 2471.292  |
| NM_001111 | 9466.489  | 13747.587 | NM_002370 | 20817.363 | 21327.547 | AF263547  | 6427.317  | 5733.54   |
| NM_001611 | 623.441   | 864.974   | NM_015670 | 3526.185  | 3924.455  | AJ008143  | 4227.278  | 4653.155  |
| AB018310  | 1862.288  | 1639.871  | NM_014709 | 1121.569  | 1304.264  | NM_007144 | 2458.965  | 2272.784  |
| NM_020133 | 754.839   | 412.074   | AB028990  | 1065.575  | 824.167   | NM_005093 | 244.15    | 231.188   |
| NM_015379 | 15409.049 | 10155.445 | NM_006708 | 16595.65  | 14243.854 | NM_004424 | 4139.265  | 4079.798  |
| NM_004878 | 398.482   | 398.238   | AB037835  | 1284.126  | 1244.634  | AL133117  | 2864.611  | 2445.955  |
| AF144638  | 3477.408  | 3012.971  | NM_016228 | 1094.887  | 876.678   | AB033040  | 1251.116  | 1089.922  |
| NM_000742 | 699.379   | 410.565   | NM_000157 | 3242.398  | 2537.617  | AF070586  | 2333.677  | 2247.321  |
| NM_002355 | 7957.432  | 4336.03   | NM_000712 | 12995.395 | 11180.072 | NM_014412 | 998.18    | 863.923   |
| AK026608  | 2609.488  | 2220.678  | NM_018088 | 554.121   | 449.211   | NM_013303 | 2670.048  | 1549.703  |
| AB046836  | 615.899   | 744.29    | BC013695  | 9802.904  | 8163.585  | NM_012227 | 2959.251  | 2135.541  |
| AJ224166  | 965.622   | 1220.188  | AK023035  | 3625.136  | 2898.751  | NM_006101 | 5761.199  | 3138.395  |
| AK026098  | 4267.135  | 6649.345  | NM_014846 | 3452.633  | 3544.702  | NM_001237 | 8480.339  | 6610.966  |
| NM_012381 | 1830.228  | 1802.987  | AB011164  | 4114.755  | 4066.492  | NM_002507 | 1423.312  | 1213.931  |
| M20702    | 1626.652  | 1638.631  | M24750    | 1634.919  | 1809.244  | NM_015962 | 1461.071  | 1524.557  |
| NM_006397 | 11536.364 | 9343.561  | AB046776  | 734.972   | 605.41    | NM_016145 | 551.627   | 541.398   |
| D83776    | 1401.259  | 1124.65   | NM_002687 | 12485.429 | 11735.946 | NM_016078 | 3918.349  | 4082.495  |
| NM_004088 | 2005.335  | 1455.683  | NM_000627 | 1482.061  | 1664.647  | NM_003798 | 624.898   | 671.241   |
| NM_002180 | 1349.076  | 1483.901  | NM_000038 | 1208.51   | 1140.037  | NM_004401 | 2818.85   | 2491.142  |
| NM_000138 | 2884.178  | 2510.944  | NM_000825 | 873.953   | 978.416   | NM_001849 | 2693.257  | 2565.461  |
| NM_018163 | 1374.542  | 1145.592  | NM_004334 | 1092.802  | 1341.035  | AF255910  | 699.968   | 770.274   |
| AK026362  | 2150.367  | 1177.014  | NM_003886 | 2312.159  | 2642.592  | NM_016146 | 5884.308  | 5148.802  |
| NM_004968 | 1748.101  | 1123.096  | NM_005843 | 1499.655  | 1464.436  | AK024343  | 2439.337  | 1976.373  |
| NM_005908 | 1930.406  | 1385.927  | NM_003854 | 485.125   | 395.419   | NM_002569 | 635.601   | 694.036   |
| NM_004785 | 3179.107  | 2147.984  | NM_017980 | 3613.765  | 3011.586  | D42084    | 3488.494  | 2947.572  |
| AK024079  | 1095.083  | 536.556   | NM_001252 | 1468.887  | 1222.63   | NM_014693 | 757.132   | 718.129   |
| NM_002428 | 2125.938  | 1439.925  | AF053712  | 694.941   | 617.644   | AB007896  | 887.246   | 917.084   |
| NM_014674 | 4810.818  | 3200.619  | NM_003947 | 651.776   | 476.36    | AB007916  | 6897.855  | 5815.135  |
| NM_018271 | 689.473   | 257.288   | NM_002821 | 15778.547 | 11454.493 | NM_002874 | 558.64    | 481.224   |
| NM_000547 | 640.9     | 345.615   | M96652    | 6455.236  | 4941.751  | AF049140  | 2192.59   | 1344.663  |
| NM_014652 | 1029.799  | 537.431   | L41690    | 1844.841  | 1490.535  | AL136794  | 1882.836  | 1472.387  |
| AL133020  | 3777.625  | 2444.72   | NM_018059 | 1499.121  | 1069.639  | BC035601  | 30825.055 | 28396.957 |
| NM_014044 | 3101.932  | 3898.519  | NM_000939 | 55834.566 | 58023.91  | NM_001458 | 1451.7    | 1522.374  |
| NM_000900 | 822.043   | 1161.46   | NM_006514 | 2266.057  | 2196.361  | NM_020388 | 4065.97   | 4516.932  |
| AK023684  | 4095.95   | 4928.109  | AF065164  | 2636.484  | 2827.159  | AB046829  | 1905.373  | 1967.293  |
| NM_000232 | 1617.859  | 1761.364  | AB028991  | 3114.103  | 3837.342  | NM_003379 | 16529.381 | 16836.84  |
| AA700390  | 4479.392  | 4387.635  | AF263547  | 7373.014  | 9058.266  | NM_004521 | 8356.176  | 7402.358  |
| AA436163  | 665.771   | 719.316   | AJ008143  | 5728.132  | 5749.262  | AF229162  | 1456.917  | 1807.571  |
| BI907981  | 392.739   | 512.192   | NM_007144 | 3702.959  | 4325.939  | U02309    | 38508.535 | 35012.074 |
| BI603841  | 488.928   | 534.419   | NM_005093 | 381.303   | 512.095   | NM_005257 | 7503.862  | 7991.115  |
| AA156863  | 3248.058  | 2896.759  | NM_004424 | 4914.989  | 4982.667  | AF011573  | 4035.128  | 3563.358  |
| BI915199  | 2508.515  | 1659.642  | AL133117  | 3324.154  | 3446.071  | NM_002145 | 2048.05   | 2657.273  |

|           |           |           |           |           |           |           |           |           |
|-----------|-----------|-----------|-----------|-----------|-----------|-----------|-----------|-----------|
| R82957    | 42654.074 | 23223.328 | AB033040  | 2536.694  | 6280.838  | NM_004831 | 802.495   | 741.016   |
| AI218732  | 2161.35   | 1622.408  | AF070586  | 2447.49   | 3427.952  | NM_014213 | 3447.538  | 3950.966  |
| NM_004102 | 1534.915  | 977.371   | NM_014412 | 1461.36   | 2062.397  | NM_000168 | 1284.604  | 1250.622  |
| NM_004544 | 6062.545  | 4186.553  | NM_013303 | 2941.19   | 2208.869  | AF294629  | 1711.208  | 1407.802  |
| NM_018890 | 15820.502 | 8246.055  | NM_012227 | 3922.188  | 3508.054  | NM_000545 | 3762.552  | 3623.255  |
| NM_002652 | 434.157   | 638.923   | NM_006101 | 5352.381  | 4775.255  | NM_002136 | 39062.285 | 24363.959 |
| NM_001311 | 4741.917  | 4681.2    | NM_001237 | 7407.567  | 6899.062  | AK025571  | 729.868   | 594.671   |
| NM_017798 | 6282.709  | 7215.293  | NM_002507 | 995.042   | 1129.969  | NM_014463 | 31972.975 | 20319.104 |
| NM_012410 | 439.204   | 433.413   | NM_015962 | 1739.021  | 1221.388  | NM_005520 | 12333.983 | 12568.613 |
| NM_001111 | 4977.474  | 5676.75   | NM_016145 | 452.639   | 277.306   | AK023265  | 1669.716  | 1315.4    |
| NM_018049 | 6003.296  | 6212.434  | NM_016078 | 4438.579  | 3740.067  | AB029009  | 1483.2    | 1047.604  |
| NM_005160 | 12363.963 | 9569.62   | NM_003798 | 632.209   | 429.816   | AF112207  | 2045.023  | 1876.955  |
| X78817    | 4869.961  | 5053.743  | NM_004401 | 2375.317  | 1914.472  | NM_005594 | 17399.756 | 16869.268 |
| AF294628  | 1023.024  | 604.112   | NM_001849 | 1574.538  | 1260.58   | NM_004461 | 41750.582 | 51284.727 |
| AK026960  | 691.028   | 480.669   | AF255910  | 581.794   | 665.141   | NM_018473 | 10446.34  | 9322.341  |
| NM_001991 | 983.722   | 749.095   | NM_016146 | 5260.746  | 5375.703  | BF106121  | 1194.683  | 1553.724  |
| NM_000193 | 452.109   | 414.751   | AK024343  | 2588.851  | 2442.49   | AK022590  | 1581.021  | 1324.374  |
| BC014586  | 542.541   | 392.482   | NM_002569 | 914.352   | 914.43    | AK023719  | 2641.03   | 3093.263  |
| NM_002448 | 2144.237  | 1111.495  | D42084    | 4470.533  | 6133.137  | AK025590  | 590.161   | 675.335   |
| AF053952  | 1262.371  | 815.131   | NM_001734 | 1334.608  | 2538.869  | AY007149  | 2138.891  | 2255.83   |
| NM_003213 | 4523.554  | 3141.447  | NM_014693 | 920.35    | 989.434   | M12078    | 533.295   | 534.063   |
| NM_015057 | 830.53    | 964.684   | AB007896  | 963.392   | 1293.631  | NM_004550 | 6457.635  | 4421.657  |
| AF303398  | 1384.964  | 4290.821  | AB007916  | 9271.364  | 10365.105 | NM_000785 | 811.684   | 852.854   |
| NM_014810 | 2400.804  | 2086.97   | NM_002874 | 909.439   | 1392.582  | NM_004110 | 3287.729  | 2591.691  |
| NM_004738 | 2783.5    | 2722.679  | AF049140  | 2300.168  | 1946.211  | NM_013387 | 35284.285 | 22388.389 |
| NM_007357 | 3586.166  | 4520.884  | AL136794  | 1785.096  | 1697.959  | NM_005262 | 4430.931  | 3635.209  |
| NM_003763 | 5744.196  | 9026.179  | BC035601  | 34724.105 | 24747.352 | NM_005757 | 1304.869  | 975.014   |
| AK023448  | 1431.095  | 1146.401  | NM_001458 | 1253.573  | 1062.092  | NM_016483 | 306.65    | 264.661   |
| Y18213    | 2610.654  | 2001.169  | NM_020388 | 3565.075  | 3132.342  | NM_020128 | 817.883   | 734.603   |
| NM_003283 | 2660.838  | 2394.485  | AB046829  | 1828.945  | 1482.976  | NM_005068 | 2091.993  | 2129.71   |
| AF249898  | 7181.906  | 7251.397  | NM_016445 | 729.319   | 680.326   | NM_018223 | 2217.517  | 1778.265  |
| M69181    | 2470.33   | 2010.878  | NM_003379 | 15910.95  | 12729.167 | NM_006693 | 10949.662 | 9038.912  |
| AK027224  | 457.219   | 380.705   | NM_004521 | 6657.759  | 5700.405  | NM_001722 | 1854.844  | 1968.559  |
| NM_002428 | 1993.335  | 2437.595  | AF229162  | 1379.681  | 1215.045  | AB046802  | 1344.666  | 1422.749  |
| NM_014674 | 5172.527  | 6029.958  | U02309    | 40371.5   | 37990.516 | NM_003297 | 1174.58   | 1071.299  |
| NM_018271 | 527.093   | 678.799   | NM_005257 | 10594.266 | 11519.185 | NM_018269 | 6064.801  | 5442.201  |
| NM_000547 | 540.8     | 577.292   | AF011573  | 6280.446  | 7397.018  | AK024633  | 3724.042  | 4345.128  |
| NM_014652 | 1148.354  | 1293.69   | NM_002145 | 3242.622  | 2927.24   | NM_001453 | 4129.307  | 4206.618  |
| AL133020  | 4125.689  | 4405.389  | NM_004831 | 1391.451  | 2189.5    | NM_012075 | 768.377   | 892.218   |
| NM_001611 | 1240.302  | 4084.479  | NM_014213 | 5287.282  | 4936.661  | NM_013381 | 266.654   | 344.472   |
| AB018310  | 2118.464  | 2088.572  | NM_000168 | 2838.745  | 3420.108  | AK023911  | 1589.777  | 1640.46   |
| NM_020133 | 702.175   | 583.348   | AF294629  | 2174.998  | 2865.778  | NM_001283 | 3082.836  | 2760.81   |
| NM_015379 | 14867.015 | 14830.55  | NM_000545 | 5252.035  | 5255.025  | AL110237  | 696.94    | 601.008   |
| NM_004878 | 557.708   | 499.108   | NM_002136 | 44045.723 | 36123.066 | D87470    | 1349.324  | 1073.352  |
| AF144638  | 5036.356  | 10732.603 | AK025571  | 924.589   | 702.897   | AF147307  | 6208.921  | 4551.244  |
| NM_000742 | 650.676   | 700.554   | NM_004940 | 250.506   | 180.748   | AK001829  | 2368.732  | 2195.974  |
| NM_002355 | 7227.929  | 5295.28   | NM_014463 | 27395.887 | 20938.689 | NM_016525 | 2816.659  | 1935.016  |
| AK026608  | 2552.141  | 2395.708  | NM_005520 | 16124.994 | 11064.894 | AK024931  | 7128.17   | 6557.548  |
| NM_004102 | 1097.928  | 1313.245  | AK023265  | 1873.267  | 1386.502  | AL109715  | 355.287   | 299.098   |
| NM_004544 | 7085.741  | 7251.221  | NM_018723 | 362.326   | 329.066   | AK021540  | 319.231   | 290.746   |
| NM_018890 | 18406.146 | 16217.823 | AB029009  | 1325.9    | 1167.669  | AK022258  | 824.032   | 753.201   |
| AB046836  | 535.713   | 658.467   | AF112207  | 2103.644  | 1635.191  | AF088043  | 324.753   | 343.375   |
| AK026098  | 3894.503  | 4303.603  | NM_005594 | 15121.259 | 10894.205 | AF131799  | 431.695   | 570.054   |

|           |           |          |           |           |           |           |           |           |
|-----------|-----------|----------|-----------|-----------|-----------|-----------|-----------|-----------|
| NM_012381 | 1982.597  | 1909.323 | NM_004461 | 27431.641 | 30506.418 | AK000455  | 1286.354  | 1547.736  |
| M20702    | 1964.94   | 1837.861 | NM_018473 | 9286.734  | 7528.595  | NM_00523C | 1053.454  | 1427.384  |
| NM_006397 | 11541.812 | 9071.719 | BF106121  | 964.993   | 922.756   | AL365407  | 626.341   | 597.417   |
| D83776    | 1282.083  | 1118.695 | AK022590  | 1037.593  | 842.154   | AK000840  | 1894.628  | 2648.563  |
| NM_00408E | 1791.771  | 2107.444 | AK023719  | 3605.79   | 6251.41   | AL162073  | 963.815   | 964.025   |
| NM_00218C | 1274.324  | 2194.985 | AK025590  | 903.506   | 1019.027  | AL390160  | 559.212   | 805.737   |
| NM_00013E | 2919.313  | 3814.945 | AY007149  | 2631.828  | 3178.425  | AJ006835  | 2962.595  | 3342.808  |
| NM_018163 | 1224.104  | 1520.298 | M12078    | 755.05    | 1098.477  | AF085890  | 408.663   | 358.401   |
| AK026362  | 1926.733  | 1666.147 | NM_00455C | 13062.751 | 29175.404 | AL110138  | 525.432   | 577.062   |
| NM_00496E | 2668.604  | 2348.565 | NM_00078E | 1386.738  | 2328.292  | AL122039  | 586.764   | 514.879   |
| NM_00590E | 1820.271  | 1635.075 | NM_00411C | 4529.38   | 4542.151  | AF070577  | 4532.439  | 4436.674  |
| NM_00478E | 3360.835  | 2640.125 | NM_013387 | 42643.961 | 39469.355 | AL157484  | 3022.803  | 2855.831  |
| AK024079  | 1116.032  | 438.628  | NM_005262 | 4785.001  | 4468.13   | AK024850  | 787.93    | 778.268   |
| NM_000193 | 705.385   | 629.497  | NM_005757 | 1515.43   | 1371.623  | Y09836    | 745.865   | 535.25    |
| BC014586  | 641.027   | 570.663  | NM_016483 | 403.522   | 265.921   | AL137597  | 3254.707  | 3502.041  |
| NM_00244E | 2617.584  | 2741.339 | NM_02012E | 1131.081  | 939.882   | AK022144  | 2057.863  | 1910.947  |
| AF053952  | 1389.081  | 1456.897 | NM_00506E | 3260.975  | 2056.487  | AF086044  | 493.398   | 537.031   |
| NM_003213 | 5066.893  | 4733.486 | NM_006693 | 10900.109 | 10014.015 | AF131790  | 494.409   | 755.716   |
| NM_014044 | 2891.987  | 2974.71  | NM_001722 | 1813.626  | 1578.041  | AJ011378  | 542.349   | 791.595   |
| NM_00090C | 637.292   | 616.592  | AB046802  | 1878.079  | 1680.089  | AF009266  | 567.038   | 511.778   |
| AK023684  | 4409.844  | 4821.455 | NM_003297 | 956.239   | 566.909   | AF009310  | 302.449   | 463.475   |
| AA700390  | 3933.385  | 3393.406 | NM_018269 | 5494.752  | 4737.329  | AF060168  | 1029.524  | 947.686   |
| AA436163  | 748.172   | 990.799  | AK024633  | 3167.834  | 3613.447  | AF009275  | 1077.034  | 1668.609  |
| BI907981  | 500.257   | 358.941  | NM_001453 | 3116.419  | 3231.29   | AF015251  | 528.689   | 450.11    |
| BI603841  | 438.498   | 183.034  | NM_01207E | 1145.868  | 1144.713  | AF056426  | 686.174   | 750.313   |
| AA156863  | 4103.916  | 5050.545 | AB004851  | 673.324   | 727.395   | NM_01832E | 582.239   | 545.886   |
| BI915199  | 2684.922  | 2414.432 | NM_013381 | 332.759   | 601.154   | AK021778  | 346.898   | 318.088   |
| R82957    | 46940.547 | 30098.66 | AK023911  | 1777.256  | 2314.918  | AK001150  | 2235.987  | 2075.481  |
| AI218732  | 2076.468  | 1608.158 | NM_001283 | 3159.728  | 4870.462  | AK002123  | 369.002   | 447.373   |
| AF249898  | 7206.125  | 7251.686 | AL110237  | 725.035   | 1035.13   | AK021633  | 1084.65   | 942.455   |
| M69181    | 2632.33   | 2970.393 | D87470    | 1971.119  | 2637.777  | AK025659  | 1540.88   | 1559.543  |
| AK027224  | 581.999   | 756.143  | AK024578  | 975.981   | 837.696   | AK026407  | 338.492   | 346.429   |
| NM_001311 | 4583.22   | 3306.981 | AF147307  | 7427.915  | 9843.016  | AK026788  | 1342.118  | 1750.995  |
| NM_01779E | 6358.438  | 5902.924 | AK001829  | 3334.85   | 3762.389  | AK025272  | 978.48    | 1057.659  |
| NM_01241C | 474.126   | 420.711  | NM_01652E | 3407.098  | 3366.039  | AK026824  | 539.161   | 634.778   |
| NM_001111 | 5059.333  | 4510.365 | AK024931  | 9608.165  | 7908.038  | AJ008130  | 11830.406 | 14835.107 |
| NM_01804E | 6439.184  | 5206.079 | AL109715  | 492.831   | 507.902   | AF086502  | 1208.625  | 1536.32   |
| NM_00516C | 9969.586  | 4533.891 | AF086181  | 397.336   | 404.33    | L39924    | 885.438   | 1047.853  |
| X78817    | 3852.066  | 3690.272 | D86985    | 457.137   | 283.538   | U52054    | 4495.527  | 5258.392  |
| AF294628  | 2156.599  | 3640.919 | AK022258  | 770.063   | 915.653   | AK023325  | 997.832   | 1224.64   |
| AK026960  | 1181.118  | 915.48   | AF131799  | 377.872   | 395.999   | NM_01798E | 1148.135  | 990.851   |
| NM_001991 | 916.198   | 716.193  | AK000455  | 1579.865  | 1636.006  | AK025866  | 1968.375  | 2406.942  |
| NM_005502 | 446.127   | 347.13   | NM_00523C | 1146.917  | 1217.146  | AF088058  | 7422.014  | 5812.481  |
| NM_000742 | 730.076   | 733.22   | AL365407  | 745.792   | 781.668   | NM_000513 | 1178.502  | 1477.191  |
| NM_00235E | 8547.675  | 7876.611 | AK000840  | 1914.905  | 2240.978  | Y11165    | 962.73    | 895.994   |
| AK026608  | 2569.933  | 3103.336 | AL162073  | 1238.384  | 1684.736  | BC028422  | 658.542   | 608.882   |
| NM_015057 | 698.969   | 442.738  | AL390160  | 661.919   | 651.305   | AK022219  | 445.118   | 717.368   |
| AF303398  | 772.213   | 587.852  | AJ006835  | 4110.549  | 4842.662  | NM_00354E | 504.096   | 502.018   |
| NM_01481C | 2089.66   | 1130.323 | AL110138  | 874.836   | 804.189   | AK024413  | 521.572   | 450.299   |
| NM_00473E | 2495.44   | 1513.02  | AL122039  | 513.261   | 521.107   | AK022247  | 563.895   | 631.519   |
| NM_007357 | 3153.81   | 2142.739 | AF070577  | 4479.663  | 3145.056  | AK001453  | 4223.296  | 3963.344  |
| NM_003763 | 3874.04   | 2479.737 | AL157484  | 3464.787  | 2637.239  | AB007972  | 1713.188  | 2209.156  |
| AK023448  | 1422.655  | 552.917  | AK024850  | 852.59    | 678.893   | AL390144  | 14060.109 | 15757.117 |

|           |           |           |           |           |           |           |           |           |
|-----------|-----------|-----------|-----------|-----------|-----------|-----------|-----------|-----------|
| Y18213    | 2367.889  | 1271.335  | Y09836    | 704.129   | 564.386   | AK024017  | 882.794   | 837.887   |
| NM_003283 | 4686.003  | 8853.729  | AL137597  | 3117.555  | 2720.338  | X56196    | 507.118   | 367.768   |
| NM_018163 | 1374.418  | 1724.176  | AK022144  | 1776.103  | 1874.877  | D17220    | 5727.061  | 4787.583  |
| AK026362  | 2151.474  | 2475.175  | AF086044  | 405.369   | 382.573   | D28363    | 46052.938 | 33254.906 |
| NM_004968 | 1829.238  | 1873.168  | AF131790  | 572.519   | 557.539   | AB011171  | 1152.376  | 957.548   |
| NM_005908 | 1862.055  | 1932.284  | AJ011378  | 655.41    | 787.638   | NM_005322 | 3322.814  | 3783.211  |
| NM_004785 | 3349.321  | 3499.249  | AF009266  | 811.642   | 1195.2    | AK024465  | 805.443   | 848.182   |
| AK024079  | 1091.016  | 774.199   | AF009310  | 1305.941  | 1931.979  | AK021478  | 4118.036  | 4126.109  |
| NM_002428 | 1803.908  | 1700.763  | AF054991  | 589.645   | 904.883   | AF131782  | 952.187   | 1322.511  |
| NM_014674 | 4779.117  | 4445.923  | AF060168  | 1335.584  | 2364.648  | NM_014210 | 3329.136  | 3423.222  |
| NM_018271 | 463.781   | 592.52    | AF015251  | 586.868   | 914.892   | AK021603  | 1313.815  | 1582.682  |
| NM_000547 | 510.065   | 611.107   | AF056426  | 1421.876  | 1889.281  | AL110136  | 2210.463  | 2482.63   |
| NM_014652 | 1173.14   | 1730.264  | AF064850  | 552.32    | 777.562   | AK002203  | 548.44    | 466.394   |
| AL133020  | 7384.735  | 17811.059 | NM_018329 | 601.68    | 514.675   | AK026469  | 1626.541  | 1916.828  |
| NM_004152 | 5608.087  | 3023.531  | AK021778  | 491.662   | 596.648   | D16935    | 3447.19   | 3676.518  |
| BU565263  | 58223.59  | 59142.625 | AK001150  | 2007.21   | 1388.444  | U92019    | 497.527   | 639.584   |
| NM_005028 | 5814.703  | 3999.909  | AK002123  | 536.227   | 253.177   | U52835    | 1361.786  | 2222.018  |
| NM_001611 | 635.456   | 612.214   | AK021633  | 792.411   | 717.993   | NM_000756 | 1847.663  | 2081.883  |
| AB018310  | 1958.184  | 1135.791  | AK025659  | 1501.406  | 1347.354  | AK022148  | 507.998   | 396.862   |
| NM_020133 | 769.78    | 384.601   | AK026788  | 1796.049  | 1671.467  | Z36811    | 49450.531 | 54260.941 |
| NM_015379 | 14319.911 | 8876.567  | AK025272  | 765.209   | 834.289   | NM_018950 | 7538.658  | 6076.698  |
| NM_004878 | 446.103   | 339.038   | AK026824  | 712.899   | 577.259   | K03200    | 3655.894  | 2464.148  |
| AF144638  | 3031.841  | 1937.669  | AJ008130  | 16352.111 | 17424.221 | U17629    | 2003.608  | 2065.905  |
| NM_001777 | 33976.68  | 29929.68  | NM_003669 | 466.414   | 456.209   | NM_020428 | 2121.928  | 2008.31   |
| U79457    | 10996.182 | 9089.596  | AF086502  | 1635.976  | 2080.012  | U79265    | 935.742   | 910.393   |
| AB037832  | 733.272   | 546.91    | L39924    | 1313.753  | 2063.442  | AK022868  | 4322.548  | 3387.324  |
| NM_014347 | 3332.009  | 3321.214  | U52054    | 8996.359  | 20491.561 | NM_003530 | 422.757   | 442.109   |
| NM_001296 | 8756.823  | 8625.358  | D17226    | 346.425   | 729.354   | AJ227871  | 1027.162  | 779.129   |
| NM_004344 | 11596.553 | 9192.615  | AK023325  | 3539.641  | 13178.682 | AK025344  | 2080.074  | 2310.313  |
| NM_000757 | 860.495   | 627.828   | NM_017985 | 1712.857  | 3439.579  | D28589    | 16727.014 | 16591.137 |
| NM_016620 | 20054.143 | 17526.254 | AK025866  | 2896.731  | 3368.671  | AF301223  | 536.659   | 572.775   |
| NM_018890 | 19043.041 | 18000.479 | AF088058  | 8551.373  | 9045.277  | NM_017867 | 31554.973 | 22406.252 |
| NM_016204 | 3494.785  | 657.735   | NM_000513 | 1303.391  | 1285.871  | U92820    | 4117.996  | 3881.478  |
| AB046836  | 655.885   | 289.481   | Y11165    | 1577.927  | 1459.593  | NM_017937 | 1368.641  | 1725.099  |
| NM_017816 | 5166.755  | 3239.492  | AL137445  | 274.741   | 313.236   | AL360266  | 2282.925  | 2459.975  |
| AJ224166  | 980.797   | 448.215   | BC028422  | 653.539   | 775.716   | AL160132  | 16960.303 | 21158.137 |
| AK026098  | 3362.551  | 2425.979  | AK022219  | 468.613   | 544.872   | NM_019557 | 3898.977  | 4372.156  |
| NM_012381 | 1837.373  | 1560.988  | NM_003545 | 1119.965  | 1719.424  | CY3Cy5    | 4266.424  | 139.442   |
| M20702    | 2034.438  | 2083.742  | AK024413  | 1204.218  | 1568.921  | AA150828  | 1092.045  | 1168.557  |
| NM_006397 | 11874.063 | 8284.457  | AL137752  | 477.81    | 928.277   | AI859208  | 576.86    | 523.99    |
| D83776    | 1594.87   | 1806.08   | AK022247  | 1213.091  | 1219.426  | H64379    | 9594.828  | 11372.145 |
| NM_004088 | 1967.066  | 1758.957  | AK001453  | 5407.068  | 7488.599  | BE208258  | 57919.59  | 58380.215 |
| NM_002180 | 1268.595  | 1168.169  | AB007972  | 2641.226  | 2862.142  | T72202    | 505.22    | 936.383   |
| NM_000138 | 3138.896  | 2040.836  | AL390144  | 18319.48  | 24805.799 | BI831922  | 2738.872  | 3078.203  |
| AB011541  | 452.196   | 472.143   | AK024017  | 1098.973  | 1181.712  | M69238    | 1697.52   | 1825.511  |
| BC032460  | 2463.383  | 2368.846  | X56196    | 1195.129  | 3697.504  | AA599158  | 8505.079  | 9036.69   |
| NM_014071 | 1215.252  | 932.312   | D17220    | 7705.738  | 10696.275 | SR3       | 47690.352 | 26484.813 |
| AK024404  | 1180.409  | 915.805   | D28363    | 54578.914 | 52999.758 | SR5       | 6999.094  | 4721.985  |
| NM_006329 | 916.349   | 797.733   | AB011171  | 1199.521  | 999.688   | SR7       | 5811.412  | 29905.42  |
| NM_005166 | 1193.666  | 1089.654  | NM_005322 | 2733.375  | 2746.519  | SR9       | 17442.949 | 2838.135  |
| NM_000213 | 1305.755  | 1187.234  | AK024465  | 923.37    | 750.807   | CY3Cy5    | 6081.032  | 255.391   |
| BE906107  | 1992.81   | 2270.378  | AK021478  | 4713.567  | 3958.42   | NM_005261 | 813.986   | 745.014   |
| AB040930  | 181.5     | 821.895   | AF131782  | 908.401   | 766.037   | NM_001560 | 949.704   | 822.627   |

|           |           |           |           |           |           |           |           |           |
|-----------|-----------|-----------|-----------|-----------|-----------|-----------|-----------|-----------|
| NM_015516 | 2806.861  | 2050.141  | NM_014210 | 2699.089  | 2716.452  | NM_001783 | 22437.936 | 25019.881 |
| AB033065  | 809.924   | 748.994   | AK021603  | 1857.384  | 1493.332  | J03171    | 5202.556  | 5076.331  |
| NM_004857 | 503.367   | 322.277   | AL110136  | 2943.034  | 2321.6    | NM_004323 | 19784.766 | 15378.256 |
| NM_003253 | 606.125   | 279.356   | AK002203  | 1202.245  | 4526.885  | NM_002310 | 507.407   | 444.551   |
| NM_013285 | 3789.135  | 3114.129  | AK026469  | 2270.619  | 4413.351  | NM_005312 | 2302.588  | 2148.183  |
| NM_002872 | 17888.547 | 15321.984 | D16935    | 3775.223  | 5489.442  | NM_001711 | 1488.334  | 2208.47   |
| NM_000490 | 341.85    | 452.361   | U92019    | 663.31    | 874.494   | NM_020140 | 2488.205  | 3683.796  |
| NM_004839 | 2701.424  | 2356.857  | U52835    | 2355.156  | 2005.499  | NM_001962 | 512.263   | 569.955   |
| NM_012193 | 869.656   | 819.632   | NM_000756 | 2452.363  | 2682.337  | NM_002500 | 799.043   | 689.653   |
| NM_003405 | 10092.401 | 7460.304  | AK022148  | 599.401   | 802.302   | AK026232  | 5399.417  | 4062.522  |
| NM_004720 | 6435.182  | 4704.125  | Z36811    | 50901.785 | 63094.93  | AK023827  | 3100.426  | 2217.092  |
| NM_001057 | 1533.234  | 1228.922  | NM_018950 | 8417.438  | 9100.214  | NM_001117 | 657.873   | 407.769   |
| NM_005561 | 7679.736  | 6184.594  | K03200    | 5183.492  | 5399.21   | NM_000231 | 710.531   | 878.843   |
| AF272381  | 1694.41   | 1235.933  | U17629    | 3043.313  | 3313.629  | L07517    | 2924.95   | 2370.349  |
| NM_004524 | 744.123   | 582.75    | NM_020428 | 3682.041  | 2936.125  | AK022451  | 2272.484  | 2182.502  |
| NM_006315 | 2483.675  | 2316.285  | U79265    | 1659.818  | 1286.462  | NM_014355 | 59531.477 | 63339.488 |
| NM_018401 | 1216.556  | 807.373   | AK022868  | 4922.875  | 4252.255  | BM918441  | 2097.373  | 1590.974  |
| NM_005163 | 4728.456  | 4260.804  | NM_003530 | 479.066   | 312.208   | NM_001045 | 23255.863 | 28512.498 |
| NM_007273 | 18286.861 | 12484.997 | AJ227871  | 1463.228  | 1061.94   | NM_005697 | 11551.867 | 13219.165 |
| AF085994  | 1177.535  | 1995.85   | AK025344  | 2410.39   | 2121.179  | NM_003095 | 12547.38  | 13512.137 |
| NM_016422 | 3437.088  | 3861.403  | D28589    | 19063.832 | 14286.158 | NM_004781 | 1940.683  | 2603.822  |
| NM_004494 | 44243.109 | 29900.234 | AF301223  | 651.086   | 709.346   | NM_018303 | 4298.065  | 4433.692  |
| AL049687  | 908.016   | 817.732   | NM_017867 | 25031.398 | 16277.535 | NM_014758 | 10431.374 | 14571.756 |
| NM_005643 | 6248.226  | 4135.788  | U92820    | 5159.15   | 4566.561  | AL133047  | 743.905   | 966.836   |
| NM_003592 | 2051.537  | 1345.853  | NM_017937 | 1694.242  | 1463.152  | NM_005124 | 4031.29   | 5041.861  |
| NM_014953 | 2864.1    | 985.353   | AL360266  | 2635.564  | 3175.902  | L08240    | 2609.935  | 4031.912  |
| AF179995  | 2147.339  | 1778.605  | AL160132  | 16527.697 | 15301.929 | NM_017952 | 1383.944  | 2060.006  |
| NM_016195 | 3139.266  | 1747.721  | NM_019557 | 3944.029  | 3727.907  | NM_002940 | 2825.416  | 4128.845  |
| NM_002960 | 1167.255  | 1495.528  | CY3Cy5    | 1414.125  | 221.051   | NM_016081 | 17073.176 | 21968.256 |
| NM_006790 | 1274.579  | 1586.611  | AA150828  | 767.932   | 917.926   | NM_006385 | 4399.338  | 4265.881  |
| AL117522  | 1742.392  | 1684.648  | H90764    | 1053.826  | 1380.615  | M30818    | 701.927   | 3424.733  |
| NM_006572 | 6661.324  | 4751.658  | H64379    | 4788.442  | 3911.086  | NM_000163 | 892.538   | 863.848   |
| NM_019061 | 2227.816  | 2204.961  | BE208258  | 59776.348 | 61545.785 | NM_003325 | 65974.961 | 65656.445 |
| AB033007  | 3949.756  | 2445.893  | T72202    | 871.096   | 861.719   | NM_003295 | 56305.738 | 59813.367 |
| NM_001304 | 1687.293  | 1873.835  | BI831922  | 2735.26   | 2319.37   | NM_014330 | 45738.566 | 51663.895 |
| NM_004917 | 449.573   | 1357.171  | M69238    | 1816.398  | 1247.51   | NM_007034 | 819.985   | 1256.772  |
| NM_000504 | 1366.995  | 1107.461  | AA599158  | 6541.009  | 4832.659  | NM_007214 | 11365.135 | 13418.145 |
| NM_003130 | 894.517   | 622.186   | SR3       | 54192.969 | 47598.457 | NM_000311 | 11992.741 | 12181.05  |
| NM_004716 | 3929.969  | 2487.469  | SR9       | 26127.576 | 6161.245  | NM_017905 | 2998.818  | 2129.161  |
| D29810    | 2240.594  | 947.847   | CY3Cy5    | 6154.64   | 439.86    | NM_006335 | 13425.726 | 12151.982 |
| AB002384  | 1491.673  | 1057.883  | NM_005261 | 476.895   | 509.362   | NM_000786 | 501.9     | 288.25    |
| NM_018437 | 796.74    | 762.34    | J03171    | 2432.045  | 1718.157  | NM_017731 | 1039.493  | 1670.358  |
| NM_000422 | 547.723   | 653.646   | NM_005312 | 1987.226  | 1501.005  | AB040891  | 5066.059  | 5896.189  |
| AK023164  | 2147.713  | 3007.699  | NM_001711 | 862.1     | 809.116   | AB037780  | 1775.215  | 2311.643  |
| AK027121  | 7680.516  | 9669.757  | NM_020140 | 1827.97   | 3163.694  | NM_005845 | 14882.638 | 16333.683 |
| AL117661  | 4385.559  | 5619.26   | NM_007029 | 792.413   | 1104.254  | NM_016205 | 16788.508 | 21555.574 |
| X64643    | 1987.088  | 2319.136  | NM_001962 | 782.991   | 419.942   | AK075415  | 653.498   | 1196.752  |
| NM_005380 | 7463.255  | 7493.749  | AK023827  | 5522.924  | 8863.313  | AK025616  | 569.642   | 762.388   |
| NM_005269 | 225.863   | 287.854   | NM_001117 | 836.674   | 1841.041  | NM_018964 | 8209.125  | 11089.201 |
| D70835    | 33867.5   | 24786.631 | NM_000231 | 1051.229  | 1786.458  | NM_000080 | 1947.472  | 2427.191  |
| NM_002697 | 1987.63   | 1595.497  | L07517    | 4557.965  | 7617.192  | NM_001825 | 2933.193  | 3840.511  |
| NM_001518 | 6882.799  | 4811.83   | AK022451  | 1367.485  | 1990.316  | NM_007256 | 1166.946  | 1929.722  |
| NM_003412 | 1368.398  | 1263.921  | NM_001045 | 6299.672  | 3559.429  | AF283645  | 4734.083  | 7104.083  |

|           |           |           |           |           |           |           |           |           |
|-----------|-----------|-----------|-----------|-----------|-----------|-----------|-----------|-----------|
| NM_018336 | 1470.596  | 929.119   | NM_005697 | 6499.819  | 4562.838  | NM_016575 | 3949.966  | 5572.369  |
| AK022668  | 1674.183  | 1113.115  | NM_003099 | 6411.756  | 4914.352  | NM_003897 | 3047.432  | 2633.913  |
| AW975132  | 1076.586  | 930.245   | NM_004781 | 1386.167  | 1002.747  | NM_014165 | 15943.317 | 12642.525 |
| NM_006051 | 3222.73   | 2734.43   | NM_018303 | 2588.586  | 2462.259  | AL442085  | 5279.731  | 4825.193  |
| NM_018427 | 2752.27   | 2487.747  | NM_014758 | 4410.839  | 5298.981  | NM_013313 | 9843.029  | 14126.022 |
| NM_014663 | 1518.767  | 592.282   | AL133047  | 726.808   | 1057.03   | NM_014736 | 21859.863 | 22645.768 |
| AF007217  | 1296.765  | 681.264   | NM_005124 | 3922.321  | 6179.918  | AK023886  | 1552.188  | 1645.277  |
| AB037753  | 3223.836  | 3011.223  | L08240    | 2137.424  | 3139.732  | NM_002553 | 3232.51   | 4355.135  |
| NM_004674 | 3077.237  | 3199.727  | NM_017952 | 1307.359  | 2037.639  | AJ404615  | 3905.154  | 4010.487  |
| AB037801  | 4663.669  | 4553.917  | NM_002940 | 2607.035  | 4112.177  | NM_016053 | 38795.66  | 41484.082 |
| AL080159  | 7653.414  | 9435.017  | NM_016081 | 18154.916 | 22271.629 | AB007869  | 3107.458  | 2906.944  |
| NM_017823 | 20142.566 | 25183.824 | NM_006389 | 7479.219  | 10186.376 | AB046844  | 1863.775  | 2408.521  |
| U55185    | 1286.909  | 1624.76   | NM_000163 | 970.275   | 757.633   | NM_000302 | 1559.889  | 1703.804  |
| U30828    | 10234.498 | 12216.086 | NM_003329 | 66902.805 | 65059.461 | NM_013235 | 38098.262 | 42163.934 |
| AF085886  | 53304.84  | 60083.477 | NM_003299 | 54523.539 | 50250.688 | NM_016015 | 15090.631 | 17137.148 |
| AK023828  | 1213.089  | 1253.635  | NM_014330 | 25508.953 | 30325.535 | AK022900  | 1844.592  | 1593.582  |
| AL080223  | 3867.934  | 3158.381  | NM_007214 | 9483.565  | 12684.696 | AB023216  | 834.234   | 1331.141  |
| AK001630  | 9108.425  | 7094.686  | NM_000311 | 15175.732 | 20960.66  | NM_002266 | 49240.105 | 59321.926 |
| NM_014612 | 3803.916  | 2423.756  | NM_017909 | 4059.15   | 5540.372  | NM_014400 | 8941.475  | 11864.892 |
| AF079098  | 987.147   | 773.81    | NM_006335 | 16332.046 | 19246.367 | AL157492  | 1736.171  | 2256.256  |
| NM_001543 | 1123.588  | 809.97    | NM_000786 | 686.803   | 1093.832  | AL353957  | 4425.585  | 6466.571  |
| NM_016641 | 6876.547  | 4016.037  | AB040891  | 3831.77   | 8538.159  | NM_000231 | 1074.863  | 860.184   |
| AB018010  | 608.961   | 512.414   | AB037780  | 1656.697  | 2049.423  | L07517    | 3281.79   | 1981.204  |
| NM_014610 | 8707.42   | 4579.234  | NM_005845 | 20570.24  | 28139.545 | AK022451  | 2209.714  | 1560.245  |
| NM_006621 | 4119.317  | 2248.544  | NM_016209 | 16908.338 | 15194.201 | BM918441  | 1189.933  | 701.781   |
| AK026762  | 2315.17   | 2710.034  | NM_000080 | 2874.103  | 4214.486  | AA150828  | 1343.474  | 1529.482  |
| NM_004412 | 1452.295  | 1942.197  | NM_001829 | 2612.579  | 3406.788  | AI859208  | 738.878   | 602.518   |
| L48516    | 2550.724  | 3374.154  | NM_007256 | 557.98    | 594.179   | H64379    | 11067.479 | 15403.882 |
| NM_016648 | 6812.809  | 9218.315  | AF283645  | 3774.693  | 2928.583  | T72202    | 581.209   | 462.401   |
| AF083930  | 2802.474  | 4507.08   | NM_016575 | 2452.359  | 3479.879  | BI831922  | 2710.941  | 1989.019  |
| AB040907  | 628.831   | 959.462   | NM_003897 | 2837.958  | 2017.261  | M69238    | 885.574   | 564.128   |
| NM_003426 | 1412.451  | 1849.43   | NM_014165 | 9730.412  | 5598.465  | AA664180  | 1022.411  | 772.551   |
| NM_014862 | 1068.721  | 1350.295  | AL442085  | 3241.041  | 1891.327  | BE294756  | 2267.323  | 2524.584  |
| AK027159  | 1451.498  | 1901.966  | NM_013313 | 4339.955  | 2847.969  | NM_002711 | 2452.442  | 2595.032  |
| AF075112  | 466.635   | 308.859   | NM_014736 | 11479.045 | 7527.97   | AK026092  | 6686.44   | 7899.225  |
| U78519    | 1398.966  | 1117.843  | AK023886  | 1266.047  | 847.106   | AK001175  | 1356.526  | 1620.021  |
| AK026872  | 495.876   | 470.611   | NM_002553 | 1859.214  | 1450.451  | NM_003329 | 61323.469 | 58801.188 |
| NM_007190 | 2010.916  | 1573.967  | AJ404615  | 2944.783  | 2121.726  | NM_003299 | 55414.457 | 42961.066 |
| AF043897  | 1131.398  | 1494.216  | NM_016053 | 23767.477 | 16563.422 | NM_007034 | 724.405   | 679       |
| U79246    | 1617.11   | 2641.854  | AB007869  | 2627.625  | 1976.85   | NM_005261 | 655.094   | 706.794   |
| AF052140  | 675.565   | 900.874   | AB046844  | 1471.639  | 1774.156  | NM_001560 | 496.692   | 652.639   |
| NM_018836 | 282.123   | 656.152   | NM_000302 | 1166.373  | 998.483   | NM_001783 | 19281.666 | 17952.418 |
| AF007147  | 1323.591  | 2060.113  | NM_016015 | 11491.822 | 11000.605 | J03171    | 4053.237  | 3918.103  |
| AF052127  | 1467.64   | 2935.194  | AK022900  | 1287.761  | 1569.433  | NM_005856 | 545.161   | 546.555   |
| AK024261  | 544.417   | 836.178   | AB023216  | 859.494   | 987.409   | NM_005312 | 2168.386  | 2167.666  |
| AF086481  | 748.326   | 1147.543  | NM_002266 | 41269.039 | 39205.059 | NM_001711 | 1310.192  | 1690.573  |
| AK024885  | 3560.599  | 5351.718  | NM_014400 | 6716.392  | 6909.699  | NM_004210 | 11797.608 | 10377.217 |
| AK026208  | 3819.256  | 2765.045  | AL157492  | 1383.659  | 1624.315  | NM_020140 | 2024.027  | 2200.37   |
| NM_016947 | 22333.623 | 13328.308 | AL353957  | 2670.755  | 2528.81   | NM_001962 | 723.224   | 601.484   |
| AK026759  | 1058.185  | 1501.326  | NM_000231 | 642.368   | 379.279   | NM_002500 | 1255.4    | 1618.166  |
| AL359940  | 2994.155  | 5824.639  | L07517    | 2362.327  | 1460.739  | AK026232  | 9724.264  | 9859.517  |
| AK024925  | 1557.043  | 1275.003  | AK022451  | 672.415   | 483.148   | NM_014892 | 26713.385 | 30935.508 |
| AL049460  | 726.747   | 667.715   | BM918441  | 720.565   | 579.162   | AK023827  | 5496.853  | 7138.139  |

|           |           |          |           |           |           |           |           |           |
|-----------|-----------|----------|-----------|-----------|-----------|-----------|-----------|-----------|
| AK022396  | 501.824   | 706.745  | AA150828  | 556.587   | 323.009   | NM_001117 | 654.697   | 825.298   |
| AF075113  | 882.286   | 1023.749 | H64379    | 3750.389  | 2261.428  | NM_001829 | 2975.239  | 2187.283  |
| AF086037  | 454.455   | 623.904  | BE208258  | 60603.953 | 59291.715 | NM_007256 | 797.878   | 622.144   |
| AK022892  | 1179.454  | 1480.62  | T72202    | 942.454   | 562.63    | AF283645  | 3995.928  | 3381.196  |
| U50536    | 518.417   | 1036.445 | BI831922  | 2287.875  | 1257.855  | NM_016575 | 3706.695  | 3360.964  |
| Z36807    | 7568.912  | 9149.999 | NM_002711 | 1923.149  | 2382.729  | NM_001045 | 14847.716 | 15028.127 |
| U20896    | 944.969   | 1195.77  | AK026092  | 3792.803  | 4079.711  | NM_005697 | 7402.981  | 6824.434  |
| U52836    | 519.516   | 781.271  | AK001175  | 1223.557  | 1618.756  | NM_003099 | 8889.146  | 7419.011  |
| NM_017939 | 1783.836  | 3068.439 | NM_003329 | 60032.277 | 28847     | NM_004781 | 2105.061  | 2342.609  |
| AK021837  | 476.046   | 1177.66  | NM_003299 | 33725.652 | 16023.223 | NM_018303 | 3674.836  | 4072.214  |
| AK002088  | 773.72    | 583.447  | NM_007034 | 424.831   | 495.701   | NM_014758 | 8003.868  | 8799.967  |
| AK022193  | 350.221   | 273.242  | NM_005261 | 471.983   | 360.239   | AL133047  | 417.111   | 333.803   |
| AK000106  | 1591.736  | 887.298  | NM_001783 | 9116.596  | 5226.92   | NM_005124 | 2574.041  | 2658.638  |
| AK022370  | 675.485   | 358.242  | J03171    | 2856.493  | 2033.432  | AK000947  | 2850.881  | 2977.133  |
| AL117530  | 1680.462  | 2160.597 | NM_004323 | 9931.99   | 6757.015  | L08240    | 1941.944  | 2126.156  |
| AK023189  | 1060.674  | 1100.796 | NM_005312 | 1915.708  | 1428.411  | NM_017952 | 1470.177  | 1885.18   |
| AF306347  | 1034.568  | 2768.387 | NM_001711 | 831.626   | 468.451   | NM_002940 | 1826.518  | 1463.427  |
| AK001164  | 2555.227  | 3816.99  | NM_004210 | 7299.5    | 5384.852  | NM_016081 | 12281.431 | 9429.014  |
| AK022619  | 299.779   | 614.402  | NM_001496 | 4129.929  | 3210.042  | NM_006389 | 4142.066  | 3312.311  |
| AK023464  | 491.484   | 606.794  | AK026232  | 7087.098  | 8848.892  | M30818    | 632.627   | 687.785   |
| AK024157  | 454.051   | 405.085  | NM_014892 | 18924.59  | 19141.719 | NM_000163 | 487.143   | 657.065   |
| AK022963  | 695.022   | 943.063  | AK023827  | 3731.316  | 3803.811  | NM_005755 | 469.851   | 588.935   |
| AK023563  | 209.018   | 612.315  | NM_001117 | 635.014   | 909.82    | AB023216  | 585.865   | 550.727   |
| AK023905  | 657.304   | 835.954  | NM_001829 | 1841.96   | 1011.184  | NM_002266 | 40141.879 | 23360.16  |
| AK024231  | 933.139   | 1609.967 | AF283645  | 2871.053  | 1922.864  | NM_014400 | 7119.743  | 5612.648  |
| NM_016940 | 1967.805  | 1505.774 | NM_016575 | 1415.676  | 830.291   | AL157492  | 1650.607  | 1213.063  |
| AK025757  | 2590.887  | 1910.49  | NM_001045 | 3583.718  | 2466.744  | AL353957  | 3830.535  | 2820.457  |
| L07394    | 1209.749  | 620.615  | NM_005697 | 4385.432  | 3113.215  | NM_007214 | 9078.675  | 7256.244  |
| AK056133  | 957.563   | 585.93   | NM_003099 | 5135.399  | 4301.318  | NM_000311 | 11941.549 | 10386.942 |
| NM_017845 | 6098.456  | 4427.864 | NM_004781 | 1449.296  | 1047.309  | NM_017909 | 3368.108  | 2830.518  |
| AF130080  | 651.433   | 436.575  | NM_018303 | 1685.656  | 1366.388  | NM_006335 | 12606.329 | 10584.663 |
| AK026006  | 726.788   | 726.628  | NM_014758 | 3480.584  | 2441.585  | NM_000786 | 578.909   | 633.755   |
| NM_019089 | 979.19    | 1151.521 | NM_005124 | 2096.661  | 1077.475  | NM_017731 | 621.818   | 871.488   |
| AL122072  | 1558.597  | 1977.83  | AK000947  | 1873.201  | 1626.101  | AB040891  | 3231.05   | 3161.263  |
| AK026221  | 615.791   | 659.766  | L08240    | 1543.941  | 1112.077  | AB037780  | 1189.982  | 1496.947  |
| Y13870    | 998.602   | 1453.637 | NM_017952 | 848.532   | 641.542   | NM_005845 | 12085.935 | 13731.037 |
| AK026403  | 1536.109  | 2684.259 | M30818    | 530.521   | 575.972   | NM_016209 | 12647.582 | 11554.306 |
| AF086361  | 403.155   | 794.123  | NM_000163 | 529.786   | 575.233   | NM_018964 | 7941.71   | 5862.994  |
| AK002162  | 217.495   | 699.678  | AB023216  | 434.294   | 387.752   | NM_000080 | 1892.499  | 1802.929  |
| AK022980  | 687.617   | 948.771  | NM_002266 | 28093.27  | 15324.583 | NM_002711 | 1576.887  | 941.984   |
| AL359058  | 1362.306  | 1725.205 | NM_014400 | 4102.917  | 3335.693  | AK026092  | 3785.867  | 3164.076  |
| AK022439  | 670.187   | 1248.16  | AL157492  | 991.724   | 866.749   | AK001175  | 1315.503  | 1044.443  |
| AK026237  | 1727.203  | 2035.36  | AL353957  | 1927.14   | 1284.5    | NM_003897 | 3155.534  | 2980.559  |
| AK023687  | 731.529   | 866.009  | NM_007214 | 4507.792  | 3368.422  | NM_014165 | 14740.04  | 14924.066 |
| NM_017632 | 1391.255  | 1209.782 | NM_000311 | 5445.363  | 4314.704  | AL442085  | 5608.728  | 6222.517  |
| AK026655  | 914.738   | 578.238  | NM_017909 | 2010.576  | 1472.195  | NM_013313 | 7071.593  | 6976.256  |
| AF129926  | 1684.741  | 1137.848 | NM_006335 | 7998.472  | 6443.789  | NM_014736 | 13443.549 | 13313.698 |
| AK025822  | 3182.153  | 3860.268 | NM_017731 | 693.433   | 396.486   | AK023886  | 1300.831  | 1706.21   |
| AL360140  | 418.979   | 518.516  | AB040891  | 2322.618  | 1899.142  | NM_002553 | 2218.063  | 2461.635  |
| AF201937  | 27508.344 | 27023.51 | AB037780  | 987.097   | 762.311   | AJ404615  | 5174.441  | 6314.966  |
| AL390128  | 1584.349  | 1757.25  | NM_005845 | 12308.353 | 9657.54   | NM_016053 | 33132.508 | 53075.652 |
| AL157429  | 1218.874  | 1649.217 | NM_016209 | 12693.937 | 11407.302 | AB007869  | 2420.776  | 2503.865  |
| AF055018  | 2916.197  | 5773.932 | NM_000080 | 1034.868  | 1238.867  | AB046844  | 1522.734  | 1249.369  |



|            |           |           |           |           |           |           |           |           |
|------------|-----------|-----------|-----------|-----------|-----------|-----------|-----------|-----------|
| AF070599   | 1038.438  | 1688.109  | NM_002711 | 1076.035  | 709.588   | NM_000302 | 22684.637 | 16638.135 |
| NM_00545C  | 1445.665  | 2362.757  | AK026092  | 2785.356  | 2073.71   | NM_01323E | 35882.035 | 19955.357 |
| AK023600   | 671.485   | 1029.143  | AK001175  | 769.168   | 528.308   | NM_01601E | 14486.527 | 10327.302 |
| NM_00521C  | 240.366   | 529.409   | NM_003897 | 2348.552  | 1570.003  | AK022900  | 1213.217  | 1029.245  |
| NM_00552E  | 732.132   | 1124.324  | NM_01416E | 11134.796 | 10965.229 | NM_00196Z | 640.443   | 280.355   |
| NM_00528E  | 690.459   | 929.19    | AL442085  | 4827.721  | 6280.691  | NM_00250C | 764.42    | 656.379   |
| AK001918   | 870.81    | 1091.57   | NM_01331Z | 1912.396  | 1692.151  | AK026232  | 6703.386  | 4505.572  |
| NM_01863E  | 19549.039 | 22671.107 | NM_01473E | 10946.078 | 7628.718  | NM_01489Z | 18503.854 | 12035.16  |
| AF086048   | 4172.059  | 6205.504  | AK023886  | 895.15    | 618.236   | AK023827  | 4266.263  | 3519.22   |
| L15616     | 3776.867  | 5108.316  | NM_00255Z | 1828.091  | 1178.694  | NM_001117 | 610.712   | 723.388   |
| AB019565   | 11697.318 | 16291.683 | AJ404615  | 2669.898  | 1526.635  | NM_000231 | 617.985   | 623.581   |
| D16914     | 60442.527 | 65678.914 | NM_01605Z | 23578.563 | 14846.09  | L07517    | 2243.344  | 2201.238  |
| AA084879   | 589.944   | 335.948   | AB007869  | 2718.528  | 2434.182  | AK022451  | 1657.525  | 1394.3    |
| NM_00083Z  | 1042.173  | 1453.386  | AB046844  | 1235.117  | 1544.688  | AA150828  | 824.07    | 1466.162  |
| NM_00028Z  | 2645.429  | 3501.022  | NM_00030Z | 1542.735  | 1602.806  | AI859208  | 3925.45   | 8049.744  |
| NM_01246C  | 1838.285  | 1920.673  | NM_01323E | 26847.908 | 23474.553 | H64379    | 6412.688  | 7343.562  |
| NM_012118  | 2618.13   | 3785.462  | NM_01601E | 11869.008 | 12772.607 | BE208258  | 66057.867 | 71017.648 |
| AK024092   | 1979.813  | 3630.198  | AK022900  | 1286.432  | 1243.258  | BI831922  | 2349.686  | 1273.895  |
| AK026285   | 343.245   | 684.701   | AK026232  | 4584.983  | 3377.508  | M69238    | 1135.752  | 1325.06   |
| AK021967   | 334.47    | 804.887   | NM_01489Z | 11914.725 | 8526.318  | AA664180  | 905.904   | 572.675   |
| U90904     | 8413.258  | 10143.856 | AK023827  | 2485.276  | 2015.724  | NM_016081 | 15229.559 | 10434.826 |
| AF088053   | 3674.563  | 4177.173  | NM_000231 | 531.804   | 250.045   | NM_00638E | 4614.645  | 2743.449  |
| AL133662   | 1150.71   | 1840.785  | L07517    | 1757.139  | 1526.403  | M30818    | 593.862   | 423.72    |
| NM_00256E  | 745.911   | 941.705   | AK022451  | 555.765   | 350.922   | NM_00016Z | 573.38    | 521.733   |
| U90903     | 1210.755  | 1609.88   | NM_01435E | 60789.043 | 58903.91  | NM_00332E | 67462.594 | 61272.102 |
| AF278760   | 563.922   | 503.983   | BM918441  | 781.629   | 581.308   | NM_00329E | 43994.582 | 34425.422 |
| X58061     | 635.604   | 754.718   | AA150828  | 938.147   | 1114.434  | NM_01433C | 27324.766 | 23185.117 |
| AB032954   | 2812.838  | 3778.344  | AI859208  | 283.024   | 304.952   | NM_007034 | 642.336   | 664.356   |
| NM_00600Z  | 28427.264 | 32258.686 | H64379    | 3870.912  | 2092.021  | NM_005261 | 688.535   | 753.225   |
| AL110197   | 4772.961  | 6093.33   | BE208258  | 58366.473 | 36830.191 | NM_00156C | 421.947   | 724.666   |
| AF085995   | 1290.627  | 1942.448  | T72202    | 679.164   | 554.929   | NM_00178Z | 14161.308 | 15367.77  |
| CY3Cy5     | 3205.273  | 296.362   | BI831922  | 2429.158  | 2063.9    | J03171    | 3596.382  | 3640.851  |
| AA029300   | 3171.877  | 4157.085  | M69238    | 1243.394  | 1232.38   | NM_00432Z | 14143.865 | 13425.84  |
| BG708842   | 8809.239  | 11630.036 | BE294756  | 770.675   | 327.422   | NM_00531Z | 1601.458  | 926.503   |
| M19723     | 53359.266 | 55044.914 | NM_016081 | 8760.614  | 4885.782  | NM_001711 | 1000.762  | 739.469   |
| X06256     | 3098.805  | 3937.335  | NM_00638E | 3416.885  | 2345.731  | NM_00421C | 11517.118 | 5872.431  |
| M34057     | 457.11    | 927.132   | NM_00332E | 66498.984 | 57617.203 | NM_02014C | 2376.762  | 1438.358  |
| ID 1984668 | 2158.314  | 3312.979  | NM_00329E | 33923.195 | 19044.209 | NM_00149E | 4766.231  | 3301.46   |
| ID 1832579 | 2715.479  | 3132.545  | NM_01433C | 14227.8   | 15294.403 | AK075415  | 690.539   | 566.098   |
| H-430185 N | 2104.792  | 2919.252  | NM_007034 | 639.005   | 645.549   | NM_018964 | 7285.998  | 5334.052  |
| D16583     | 1080.12   | 2415.781  | NM_00178Z | 8818.863  | 6505.094  | NM_00008C | 1892.547  | 1460.926  |
| AA481547   | 23351.775 | 35132.375 | J03171    | 2833.399  | 1803.833  | NM_00182E | 2446.787  | 2281.503  |
| T64880     | 2462.895  | 3670.709  | NM_00432Z | 8160.93   | 4147.273  | NM_00725E | 621.955   | 761.042   |
| NM_020967  | 2266.931  | 4525.072  | NM_00531Z | 1897.266  | 1598.391  | AF283645  | 3616.061  | 3617.493  |
| SR6        | 3102.701  | 4935.772  | NM_001711 | 800.203   | 856.406   | NM_01657E | 3193.566  | 3049.4    |
| SR8        | 10084.844 | 39483.453 | NM_00421C | 8143.538  | 8841.091  | NM_00104E | 13351.718 | 14436.93  |
| SR10       | 36669.742 | 17518.51  | NM_02014C | 1466.632  | 2110.264  | NM_005697 | 7282.835  | 7193.867  |
| CY3Cy5     | 4124.457  | 419.674   | NM_018964 | 3599.079  | 2841.469  | NM_00309E | 7584.034  | 7045.432  |
| NM_005027  | 827.21    | 1490.794  | NM_00008C | 830.789   | 1015.271  | NM_004781 | 1181.999  | 1391.883  |
| NM_00461Z  | 1962.032  | 3068.184  | NM_00182E | 1632.825  | 1174.25   | NM_01830Z | 2380.545  | 1677.731  |
| NM_00560E  | 24237.631 | 27666.637 | AF283645  | 3280.917  | 3056.419  | NM_01475E | 4930.392  | 1961.869  |
| NM_001106  | 2586.739  | 3001.318  | NM_01657E | 1814.63   | 3567.932  | NM_005124 | 2964.533  | 2192.567  |
| NM_01558Z  | 2219.039  | 3283.036  | NM_00104E | 5372.294  | 4260.982  | AK000947  | 2709.301  | 1480.074  |

|           |           |           |           |           |           |           |           |           |
|-----------|-----------|-----------|-----------|-----------|-----------|-----------|-----------|-----------|
| NM_01849C | 308.983   | 537.146   | NM_005697 | 5902.498  | 4819.932  | L08240    | 1861.276  | 1556.223  |
| NM_00477E | 575.42    | 1008.122  | NM_003099 | 5450.542  | 4311.798  | NM_00294C | 2101.529  | 1605.557  |
| NM_00624E | 6897.81   | 7466.582  | NM_004781 | 1497.957  | 1356.418  | AB046844  | 1467.316  | 1277.095  |
| NM_005103 | 593.744   | 1367.256  | NM_018303 | 1817.093  | 1260.867  | NM_000302 | 1793.564  | 1191.584  |
| NM_004822 | 668.014   | 1451.96   | NM_01475E | 3719.509  | 3287.984  | NM_01323E | 32116.313 | 21227.914 |
| AK022349  | 7244.868  | 9198.187  | NM_005124 | 2617.098  | 3205.647  | NM_01601E | 14721.29  | 10985.823 |
| NM_00575C | 526.388   | 1363.333  | AK000947  | 2412.622  | 2898.884  | NM_02012C | 2007.507  | 1680.046  |
| NM_004973 | 7501.222  | 10230.436 | L08240    | 1818.779  | 1744.587  | AK022900  | 1915.54   | 1208.214  |
| NM_00189C | 723       | 1160.619  | NM_00294C | 2529.151  | 2569.262  | AB023216  | 625.67    | 624.193   |
| NM_00128E | 5219.856  | 6417.854  | AB046844  | 849.41    | 713.116   | NM_00226E | 38800.02  | 32530.123 |
| NM_01464E | 1354.842  | 2193.963  | NM_000302 | 1061.653  | 1020.465  | NM_01440C | 6690.268  | 7390.79   |
| NM_005073 | 628.113   | 1421.248  | NM_01323E | 19955.879 | 14490.686 | AL157492  | 1527.476  | 1967.902  |
| NM_000951 | 3163.362  | 5317.558  | NM_01601E | 9944.958  | 9170.809  | AL353957  | 1840.201  | 2707.816  |
| X52599    | 203.356   | 982.307   | NM_02012C | 1299.449  | 1604.626  | NM_007214 | 8441.873  | 9387.407  |
| NM_00392E | 408.808   | 904.101   | AK022900  | 1382.642  | 970.576   | NM_000311 | 12499.148 | 14653.476 |
| AK000158  | 1222.694  | 1844.232  | AB023216  | 550.511   | 349.871   | NM_01790E | 2920.728  | 3704.336  |
| NM_00576E | 353.921   | 701.434   | NM_00226E | 30237.121 | 21268.01  | NM_00633E | 10650.313 | 12485.35  |
| AK024500  | 6715.004  | 9500.229  | NM_01440C | 6374.398  | 7570.295  | NM_00584E | 10667.485 | 6737.214  |
| NM_002564 | 1545.2    | 2486.814  | AL157492  | 1328.931  | 1253.678  | NM_01620E | 12394.889 | 10526.258 |
| NM_000963 | 2294.209  | 3541.419  | AL353957  | 2788.658  | 2969.541  | AK002114  | 7332.865  | 4575.179  |
| NM_01330E | 1983.809  | 2864.101  | NM_007214 | 6752.362  | 7846.292  | AL390184  | 856.347   | 621.771   |
| AF027302  | 5397.518  | 5764.671  | NM_000311 | 16554.506 | 30530.668 | NM_01869E | 660.786   | 370.718   |
| NM_002852 | 2156.788  | 3198.74   | NM_01790E | 2507.169  | 2301.195  | NM_01804E | 478.371   | 305.175   |
| NM_001817 | 4257.597  | 4650.996  | NM_00633E | 8807.654  | 6606.661  | AK026318  | 1547.691  | 1201.631  |
| AF063611  | 1191.315  | 2611.499  | NM_00078E | 385.391   | 326.089   | AF291673  | 1608.32   | 1164.83   |
| NM_00603E | 871.071   | 1516.608  | AB040891  | 3045.875  | 4790.359  | NM_00436E | 16682.902 | 14100.95  |
| NM_00208E | 374.066   | 842.07    | AB037780  | 1267.696  | 1183.579  | NM_01635E | 6033.529  | 5893.789  |
| NM_01465E | 2241.418  | 4360.92   | AK002114  | 4317.472  | 3511.664  | AJ296290  | 5316.995  | 4061.773  |
| NM_00207E | 5628.456  | 8816.392  | AL390184  | 578.163   | 441.617   | AK026092  | 5348.15   | 7142.837  |
| X05299    | 8623.81   | 12768.075 | NM_01869E | 493.514   | 888.514   | AK001175  | 2794.254  | 3842.715  |
| BM468475  | 1197.617  | 2635.213  | NM_01804E | 419.399   | 796.054   | NM_003897 | 3215.732  | 4039.07   |
| NM_00031E | 6815.573  | 9526.751  | AK026318  | 1132.362  | 779.311   | AL442085  | 3951.492  | 3759.754  |
| NM_00206C | 831.183   | 1711.107  | AF291673  | 1101.126  | 676.972   | NM_01473E | 19168.49  | 32743.584 |
| AK001230  | 1621.129  | 3314.392  | NM_00436E | 9255.325  | 7915.525  | AK023886  | 1467.418  | 2627.885  |
| NM_01468C | 7707.667  | 11156.864 | NM_01635E | 4721.269  | 4533.115  | NM_00255E | 3313.56   | 5323.76   |
| NM_006224 | 18953.979 | 23668.709 | AJ296290  | 3996.174  | 3993.128  | NM_01605E | 26961.787 | 21306.51  |
| AL137300  | 4228.588  | 5599.111  | AK026092  | 3432.427  | 3002.045  | AB007869  | 2534.588  | 2602.354  |
| NM_00022E | 3351.459  | 5601.301  | AK001175  | 827.641   | 567.421   | M64108    | 2025.572  | 1488.267  |
| NM_00195E | 1355.506  | 2056.043  | NM_003897 | 3171.682  | 3712.665  | Y17867    | 3310.221  | 2408.009  |
| AB033064  | 2244.635  | 3168.436  | NM_01416E | 10373.566 | 8039.674  | M92642    | 1004.207  | 808.799   |
| AK022317  | 6430.331  | 8502.458  | AL442085  | 4030.931  | 2523.372  | NM_018071 | 3074.763  | 2191.813  |
| NM_01839E | 15293.778 | 18839.537 | AK023886  | 1514.371  | 1757.127  | NM_00433E | 4175.874  | 3029.438  |
| NM_003124 | 4384.651  | 6557.645  | NM_00255E | 2154.934  | 2374.431  | NM_00202C | 16385.439 | 15989.263 |
| AL133581  | 3724.996  | 4364.937  | M64108    | 1078.835  | 677.265   | AL050137  | 941.228   | 1104.616  |
| NM_00255E | 1025.138  | 1510.402  | Y17867    | 1899.739  | 3139.57   | AK024423  | 2465.186  | 2792.589  |
| NM_005031 | 6275.991  | 11991.271 | M92642    | 586.499   | 635.27    | NM_00504E | 33940.563 | 38230.852 |
| NM_00072C | 690.681   | 1042.764  | NM_018071 | 1822.058  | 2017.211  | NM_00597E | 14239.307 | 23612.104 |
| NM_004842 | 2855.202  | 5881.257  | NM_00433E | 3082.305  | 3057.785  | NM_00628E | 7291.539  | 8932.624  |
| AK024639  | 5400.097  | 9298.916  | M31520    | 68107.625 | 62484.297 | NM_020321 | 967.885   | 1321.725  |
| NM_01572C | 334.689   | 723.051   | NM_00202C | 4319.133  | 3286.893  | NM_00411E | 1240.864  | 1167.46   |
| AB007915  | 2055.109  | 4325.734  | AL050137  | 671.557   | 462.003   | AF016004  | 2107.643  | 7551.885  |
| AB033070  | 819.196   | 1656.888  | AK024423  | 2800.031  | 6623.493  | NM_003567 | 2578.153  | 4008.281  |
| NM_01822E | 3591.98   | 5872.471  | NM_00504E | 22261.963 | 15700.107 | AK023362  | 659.447   | 693.481   |

|            |           |           |           |           |           |           |           |           |
|------------|-----------|-----------|-----------|-----------|-----------|-----------|-----------|-----------|
| AY009127   | 21296.217 | 34503.68  | NM_005979 | 8055.546  | 7260.17   | S72604    | 25514.801 | 17145.701 |
| NM_014869  | 1418.841  | 3782.094  | NM_006282 | 6593.517  | 7938.098  | NM_002675 | 2075.908  | 1855.281  |
| NM_006708  | 16172.118 | 8716.896  | NM_020321 | 788.294   | 605.018   | NM_012432 | 23406.133 | 18565.451 |
| AB037835   | 1099.021  | 815.47    | NM_015920 | 22554.27  | 29040.354 | NM_005007 | 10097.053 | 7754.433  |
| NM_000712  | 14554.678 | 7618.729  | AB011113  | 1592.351  | 1317.792  | NM_004417 | 710.466   | 747.03    |
| NM_018088  | 543.265   | 300.297   | NM_004115 | 1114.381  | 688.873   | NM_012290 | 5448.109  | 4980.528  |
| AB011164   | 5505.36   | 6800.984  | NM_018287 | 1097.278  | 644.205   | NM_002431 | 9219.262  | 7451.024  |
| M24750     | 3956.666  | 4584.499  | NM_001955 | 1604.839  | 1520.634  | NM_020466 | 6301.125  | 7693.289  |
| NM_005965  | 1325.258  | 2524.647  | AF016004  | 1556.82   | 2903.865  | AL079280  | 782.465   | 869.784   |
| AL117482   | 5262.66   | 6362.123  | NM_003567 | 2967.766  | 2756.531  | NM_002853 | 5373.458  | 6321.228  |
| NM_006549  | 8114.503  | 13097.404 | NM_007315 | 2095.985  | 1785.271  | NM_002540 | 1274.28   | 1197.833  |
| AB018324   | 14563.524 | 22995.227 | S72604    | 20946.914 | 12926.146 | NM_004574 | 1396.004  | 1641.295  |
| NM_002742  | 6009.279  | 10263.312 | NM_002460 | 494.397   | 565.839   | AF014459  | 3840.348  | 3662.632  |
| Z25431     | 5459.659  | 8282.664  | NM_002675 | 2205.601  | 1998.6    | AK024601  | 7980.148  | 5646.906  |
| NM_005627  | 6810.446  | 9499.06   | NM_012432 | 27814.781 | 40033.777 | S68069    | 7935.028  | 5408.247  |
| M64497     | 2558.052  | 5521.244  | NM_005007 | 6564.655  | 6978.235  | AB011095  | 2216.412  | 1656.036  |
| NM_003356  | 884.346   | 1680.607  | AK024996  | 3952.585  | 2801.099  | NM_006302 | 3333.999  | 2510.934  |
| AF238315   | 522.238   | 1099.445  | NM_004417 | 696.482   | 789.556   | AJ224875  | 7643.346  | 6310.299  |
| NM_014648  | 767.062   | 419.788   | NM_012290 | 13335.337 | 19849.639 | NM_002149 | 3910.038  | 3364.191  |
| NM_005073  | 475.815   | 271.526   | NM_020466 | 3561.851  | 2784.027  | AF043324  | 7781.179  | 6220.342  |
| NM_000951  | 1681.663  | 1128.032  | AL079280  | 486.357   | 551.135   | AK024172  | 1506.01   | 1466.46   |
| AA029300   | 1962.66   | 1623.251  | NM_002853 | 3850.137  | 3972.276  | NM_014814 | 9711.276  | 9942.067  |
| BG708842   | 4300.721  | 2606.143  | NM_003174 | 2626.583  | 5050.211  | NM_016129 | 10904.315 | 12512.81  |
| M19723     | 32680.371 | 14709.894 | NM_012307 | 7889.18   | 4602.726  | NM_002809 | 17105.408 | 17916.584 |
| ID 1984668 | 2697.411  | 3120.368  | NM_002540 | 1521.919  | 670.928   | NM_017912 | 10731.437 | 13341.997 |
| ID 1832579 | 3141.051  | 3613.883  | NM_006371 | 1331.501  | 513.204   | NM_000423 | 3193.359  | 2819.79   |
| H-430185 M | 2518.523  | 4541.64   | NM_018834 | 1161.432  | 804.603   | AB046838  | 2850.945  | 2410.851  |
| D16583     | 967.213   | 2838.602  | AK026882  | 1678.747  | 1663.871  | NM_003036 | 1760.651  | 1524.487  |
| AA481547   | 21312.5   | 32231.346 | AK024601  | 4539.625  | 3671.029  | NM_020529 | 5041.634  | 3929.408  |
| AA831880   | 333.089   | 987.034   | S68069    | 6066.96   | 5757.243  | NM_020395 | 3697.735  | 2249.434  |
| T64880     | 2293.836  | 4088.929  | AB011095  | 1075.034  | 1236.875  | NM_003425 | 1813.931  | 1216.308  |
| NM_020967  | 2425.317  | 4654.723  | NM_001503 | 1120.6    | 1203.585  | NM_013388 | 9573.459  | 6723.288  |
| AB028990   | 2134.148  | 4442.911  | NM_006302 | 3544.783  | 7177.103  | AF038951  | 13351.675 | 9961.506  |
| AK002089   | 448.995   | 912.683   | AJ224875  | 5290.06   | 4915.626  | AK021811  | 2357.686  | 2892.703  |
| X05299     | 4540.772  | 2917.527  | NM_002149 | 3268.295  | 3508.288  | NM_003428 | 4070.01   | 3460.179  |
| NM_000318  | 4356.959  | 2483.937  | AF043324  | 5779.396  | 6537.97   | AF055030  | 2191.021  | 2160.978  |
| NM_002060  | 571.886   | 490.399   | AK024172  | 1507.306  | 2255.656  | AK000589  | 2413.819  | 2299.832  |
| AK001230   | 884.543   | 751       | NM_014814 | 13117.378 | 20384.49  | X53281    | 8880.664  | 7773.385  |
| NM_014680  | 3636.656  | 2346.332  | NM_002797 | 25868.793 | 44147.629 | BC012782  | 1734.146  | 2344.325  |
| NM_005027  | 592.372   | 370.363   | AK024318  | 3540.735  | 7409.826  | AF132026  | 54254.504 | 53081.273 |
| NM_004612  | 1262.34   | 734.027   | NM_016129 | 7596.753  | 6942.914  | AL050353  | 2936.001  | 3648.43   |
| NM_005608  | 13685.997 | 7283.748  | NM_002809 | 15033.495 | 14658.314 | AB037788  | 7154.15   | 6626.15   |
| NM_015583  | 1349.907  | 987.201   | NM_017912 | 5586.297  | 4428.368  | AF147412  | 25406.887 | 33585.371 |
| NM_004778  | 457.545   | 251.297   | NM_000423 | 2775.899  | 2254.222  | NM_000990 | 11198.17  | 13959.195 |
| NM_006245  | 7264.127  | 8926.852  | AB046838  | 2125.71   | 1566.448  | NM_014740 | 3567.151  | 2936.795  |
| NM_004822  | 654.398   | 1333.861  | X98411    | 3918.89   | 3030.65   | NM_015956 | 9248.698  | 7941.301  |
| AK022349   | 6337.776  | 9378.634  | AF116658  | 4750.191  | 4727.711  | AF075008  | 1954.773  | 1314.961  |
| NM_005750  | 813.831   | 1871.459  | NM_014865 | 6365.43   | 6574.657  | NM_006504 | 3355.146  | 2380.05   |
| NM_007245  | 15819.843 | 25504.615 | AB032977  | 6025.645  | 5803.779  | AF070538  | 1252.356  | 884.987   |
| NM_001890  | 766.786   | 1613.095  | NM_020395 | 3269.947  | 4812.167  | AL137430  | 1067.752  | 1208.705  |
| NM_001286  | 5376.674  | 9062.739  | NM_003425 | 1295.38   | 861.441   | NM_000696 | 11227.393 | 7795.411  |
| AB007915   | 922.108   | 1001.689  | NM_013388 | 7629.252  | 6226.002  | NM_002488 | 27178.764 | 20865.916 |
| AB033070   | 574.677   | 484.878   | AF038951  | 7411.729  | 5437.738  | NM_004003 | 12918.981 | 12153.625 |

|           |           |           |           |           |           |           |           |           |
|-----------|-----------|-----------|-----------|-----------|-----------|-----------|-----------|-----------|
| NM_01822E | 1851.326  | 1672.383  | AK021811  | 1796.017  | 1408.311  | NM_00018E | 2187.332  | 2086.295  |
| AY009127  | 9742.056  | 7908.592  | NM_00342E | 1743.111  | 2027.778  | BF244401  | 2518.326  | 2530.411  |
| NM_01486E | 595.013   | 826.174   | AF055030  | 1706.11   | 1281.238  | NM_00471E | 27453.609 | 16725.316 |
| AK000158  | 688.535   | 634.226   | AK000589  | 1825.978  | 1273.19   | AL359585  | 3805.095  | 3434.74   |
| NM_002564 | 719.015   | 794.812   | X53281    | 6259.166  | 4694.174  | AB046850  | 2589.535  | 2801.584  |
| NM_00096E | 1492.028  | 914.932   | BC012782  | 2102.701  | 1870.114  | NM_014801 | 3614.238  | 4635.526  |
| NM_01330E | 1331.106  | 1872.274  | AF132026  | 57812.262 | 56269.516 | NM_00364E | 10266.214 | 10741.635 |
| AF027302  | 6032.108  | 8987.906  | AL050353  | 5338.776  | 9316.604  | AB027013  | 5560.172  | 7546.154  |
| NM_00285E | 1616.965  | 3296.469  | AB037788  | 6543.505  | 4282.789  | BC032686  | 389.922   | 698.944   |
| NM_001817 | 2727.577  | 3857.934  | NM_004587 | 3827.493  | 1571.203  | BF185480  | 2715.018  | 3404.419  |
| AF063611  | 1238.059  | 2521.246  | NM_00097E | 59868.746 | 58851.094 | NM_00212E | 18010.26  | 13779.692 |
| NM_00603E | 665.077   | 1608.316  | AF147412  | 23701.029 | 15455.274 | AL360195  | 1562.94   | 1563.401  |
| NM_01465E | 2132.208  | 4399.027  | AK024570  | 14904.618 | 14529.346 | NM_01781C | 2135.314  | 2046.146  |
| NM_00207E | 5994.815  | 10332.722 | AF161401  | 11658.271 | 10068.638 | NM_003181 | 55550.855 | 61366.516 |
| Z25431    | 2340.411  | 1850.166  | NM_00099C | 10941.469 | 10015.268 | NM_004451 | 1376.519  | 1568.816  |
| NM_005627 | 2951.552  | 2182.381  | NM_01474C | 4092.174  | 4165.048  | NM_004364 | 1048.427  | 673.878   |
| M64497    | 1464.099  | 1441.332  | NM_01595E | 9982.834  | 10382.69  | AK023505  | 3563.725  | 2902.682  |
| NM_00335E | 548.225   | 444.144   | AF075008  | 1333.826  | 932.267   | AB037851  | 8435.45   | 6439.393  |
| NM_006224 | 12699.677 | 9741.406  | NM_006504 | 2140.064  | 1388.119  | AL050389  | 10541.034 | 6888.995  |
| AL137300  | 2127.522  | 1665.872  | AF070538  | 572.658   | 487.509   | AK025855  | 1317.68   | 1188.044  |
| NM_00022E | 1748.991  | 2105.471  | NM_00069E | 8623.049  | 10618.077 | AK024684  | 1777.831  | 1541.018  |
| NM_00195E | 612.997   | 713.587   | NM_00248E | 30702.619 | 40036.629 | NM_01494E | 9604.796  | 7744.013  |
| AB033064  | 1190.889  | 1049.755  | NM_00400E | 4545.823  | 3986.838  | AK001546  | 1354.503  | 1283.792  |
| AK022317  | 2917.37   | 2278.214  | NM_00018E | 1848.728  | 2382.7    | NM_006537 | 7415.504  | 6798.258  |
| NM_01839E | 7763.882  | 4035.923  | BF244401  | 1586.376  | 861.295   | AF007155  | 8243.264  | 7022.162  |
| NM_003124 | 2285.47   | 1783.829  | NM_00471E | 31502.418 | 28953.109 | AK023055  | 620.918   | 736.971   |
| NM_00688E | 58422.398 | 60208.473 | AL359585  | 3373.739  | 2102.044  | AL049282  | 5154.117  | 6311.992  |
| NM_004531 | 12751.884 | 21332.535 | AB046850  | 2658.717  | 1980.714  | AK021443  | 4245.822  | 4840.535  |
| AL133581  | 4137.512  | 6365.891  | NM_014801 | 1780.803  | 1872.444  | AF070569  | 724.871   | 1815.358  |
| NM_00255E | 775.718   | 2018.28   | NM_00364E | 15342.831 | 32711.875 | NM_02023E | 4481.66   | 9171.113  |
| NM_005031 | 6281.201  | 12600.604 | AB027013  | 2214.44   | 2819.264  | AF143873  | 726.829   | 1116.661  |
| AB040920  | 698.193   | 1636.547  | BF185480  | 2320.156  | 1561.436  | AL355732  | 2781.895  | 3479.043  |
| NM_00072C | 686.625   | 1653.268  | NM_00212E | 19089.889 | 6597.837  | NM_01796E | 2431.601  | 2129.717  |
| NM_00484E | 2462.896  | 4594.104  | NM_003074 | 3697.336  | 1909.866  | AF143327  | 1885.837  | 2021.806  |
| AK024639  | 5327.416  | 7524.225  | AL360195  | 1461.876  | 1302.085  | AL137535  | 644.043   | 571.534   |
| NM_020967 | 1090.279  | 834.65    | U14383    | 456.881   | 333.319   | AF131843  | 1217.708  | 1031.528  |
| NM_001071 | 31764.971 | 16166.172 | NM_01781C | 1939.113  | 2041.963  | AK026653  | 1678.162  | 1407.302  |
| AB028990  | 1005.1    | 854.249   | NM_003181 | 61316.117 | 58476.074 | NM_020231 | 1377.671  | 1468.586  |
| NM_00670E | 15844.688 | 8369.458  | NM_004451 | 1839.567  | 1990.777  | AL133118  | 4252.397  | 2929.145  |
| AB037835  | 1020.622  | 997.445   | NM_004364 | 735.774   | 757.434   | AK023571  | 2847.523  | 2267.171  |
| NM_01622E | 925.725   | 872.465   | AK023505  | 4195.904  | 7247.597  | NM_00170E | 5604.036  | 4733.876  |
| NM_000157 | 2363.768  | 2115.321  | AB037851  | 6751.838  | 11683.087 | AK026657  | 2699.6    | 2109.747  |
| NM_00071E | 13079.42  | 7063.935  | AL050389  | 5295.01   | 4137.638  | NM_01805C | 518.11    | 734.293   |
| NM_01808E | 471.648   | 497.94    | AK025855  | 1109.043  | 1236.144  | AF087991  | 17011.535 | 15399.989 |
| BC013695  | 14174.239 | 7324.352  | AK024684  | 909.328   | 1099.714  | Y12839    | 1066.593  | 1101.9    |
| AK023035  | 4601.333  | 3606.198  | NM_01494E | 9236.522  | 8843.709  | X64979    | 546.634   | 1142.078  |
| NM_01484E | 7517.25   | 10738.263 | AK001546  | 1284.183  | 1560.49   | AJ001876  | 1008.341  | 1702.385  |
| AB011164  | 5294.991  | 9816.653  | NM_006537 | 6854.749  | 10227.856 | AJ227884  | 1685.319  | 2209.344  |
| M24750    | 4042.899  | 6598.443  | AF007155  | 13992.217 | 24854.342 | X64986    | 19958.264 | 29181.52  |
| NM_00596E | 1364.906  | 2783.34   | AK023055  | 644.664   | 1295.286  | L38282    | 4103.839  | 5540.742  |
| NM_00274C | 4248.459  | 5726.287  | AL049282  | 5965.601  | 7303.128  | NM_01805E | 4093.851  | 5283.95   |
| AL117482  | 5359.303  | 8630.23   | AK021443  | 2969.649  | 2804.675  | NM_01900E | 2378.49   | 2119.534  |
| NM_00654E | 8129.892  | 13538.835 | AF070569  | 960.932   | 1494.775  | M20838    | 750.569   | 875.908   |

|            |           |           |           |           |           |           |           |           |
|------------|-----------|-----------|-----------|-----------|-----------|-----------|-----------|-----------|
| AB018324   | 15809.534 | 22169.949 | NM_020233 | 2592.065  | 2255.958  | AK022738  | 677.166   | 806.825   |
| NM_002742  | 6478.401  | 12947.195 | AL355732  | 2540.164  | 1373.619  | AK024252  | 665.156   | 608.664   |
| NM_004973  | 3506.857  | 2367.381  | NM_017966 | 1798.087  | 998.024   | AK002095  | 1728.364  | 1489.292  |
| NM_007245  | 8088.666  | 4974.096  | AF143327  | 1528.113  | 1073.335  | AK000821  | 4482.832  | 4081.332  |
| NM_001890  | 353.368   | 290.786   | AL049990  | 920.942   | 1218.63   | AK024526  | 15296.491 | 18222.574 |
| NM_001286  | 2275.369  | 2064.336  | AF131843  | 1159.819  | 1186.292  | AK000848  | 1060.348  | 1287.324  |
| NM_014648  | 839.848   | 710.08    | AK026653  | 1657.093  | 1961.332  | AK023307  | 671.647   | 1154.712  |
| NM_005073  | 499.804   | 339.097   | NM_020231 | 1532.42   | 1369.877  | NM_017618 | 3038.587  | 4078.251  |
| NM_000951  | 1563.094  | 1442.742  | AL133118  | 2918.279  | 2267.923  | AK024945  | 2072.005  | 1970.303  |
| AA029300   | 1863.125  | 1269.076  | AK023571  | 1545.246  | 3246.837  | AK024579  | 4459.21   | 4130.089  |
| BG708842   | 4425.828  | 3064.757  | AF052148  | 599.934   | 1269.643  | S75708    | 13213.031 | 9481.613  |
| M19723     | 33727.602 | 16966.24  | AF131783  | 410.444   | 263.598   | U79291    | 11203.024 | 7771.298  |
| X06256     | 1552.975  | 1234.084  | NM_001702 | 4897.329  | 7395.868  | D17172    | 20522.74  | 16226.613 |
| M34057     | 514.761   | 528.42    | AK026657  | 1851.824  | 2293.945  | AJ227859  | 1221.615  | 642.546   |
| ID 1984668 | 2619.573  | 6434.135  | AL833558  | 725.958   | 1455.967  | NM_018544 | 907.169   | 715.455   |
| ID 1832579 | 3053.334  | 4458.716  | AF087991  | 16363.926 | 21479.912 | L10141    | 768.857   | 677.87    |
| H-430185 M | 2377.997  | 4239.155  | Y12839    | 554.966   | 566.301   | AB020699  | 6393.999  | 6567.156  |
| D16583     | 762.14    | 2572.268  | X64979    | 539.102   | 1099.825  | AF086269  | 2364.454  | 2995.215  |
| AA481547   | 21293.111 | 30076.986 | AJ227884  | 1272.13   | 1239.952  | U90437    | 12549.808 | 13071.699 |
| T64880     | 2992.898  | 5364.054  | X64986    | 9852.079  | 8154.302  | AK000842  | 14004.536 | 13237.742 |
| NM_006039  | 595.396   | 369.034   | L38282    | 2006.738  | 1049.464  | AK023386  | 11053.22  | 11487.642 |
| NM_014656  | 1380.11   | 1195.811  | NM_018056 | 3925.625  | 2548.261  | NM_007053 | 23031.223 | 18595.061 |
| NM_002076  | 2662.204  | 2600.12   | NM_019008 | 2082.277  | 2328.334  | AK022153  | 1436.348  | 1792.979  |
| X05299     | 4906.949  | 3501.313  | M20838    | 1015.345  | 1301.967  | AK022789  | 1021.013  | 714.427   |
| BM468475   | 657.581   | 568.068   | AK022738  | 825.44    | 769.144   | AK023756  | 653.57    | 773.422   |
| NM_000318  | 4750.643  | 3005.576  | AK024252  | 1295.555  | 1923.457  | NM_001126 | 7228.097  | 4356.774  |
| NM_002060  | 542.548   | 599.557   | AK002095  | 688.474   | 497.062   | AK023673  | 4750.686  | 3768.965  |
| AK001230   | 1012.456  | 934.678   | AK000821  | 3918.71   | 4154.304  | NM_018252 | 4413.685  | 3792.771  |
| NM_014680  | 3609.856  | 2450.627  | AK024526  | 7457.33   | 7451.994  | NM_018000 | 52812.078 | 49150.121 |
| NM_005027  | 663.294   | 419.164   | AK000848  | 1068.528  | 1946.749  | AF164963  | 1208.537  | 1018.99   |
| NM_004612  | 1193.171  | 798.157   | AK023307  | 451.422   | 380.648   | AF124366  | 29151.078 | 22139.152 |
| NM_005608  | 12666.446 | 7677.997  | NM_017618 | 1728.182  | 1937.553  | AF130112  | 1316.325  | 1405.156  |
| NM_001106  | 1460.172  | 636.662   | AK024315  | 9275.239  | 8212.35   | NM_000551 | 4312.525  | 3528.338  |
| NM_015583  | 1383.784  | 1612.545  | AK024579  | 2726.425  | 2571.915  | AL365518  | 1493.685  | 1359.201  |
| NM_018490  | 431.388   | 744.993   | AK024877  | 670.004   | 943.957   | AF086257  | 3164.281  | 3136.951  |
| NM_004778  | 508.82    | 1872.271  | S75708    | 15102.357 | 20670.178 | AF075056  | 636.058   | 970.606   |
| NM_006245  | 8279.887  | 13604.561 | U79291    | 9908.854  | 9753.987  | AC119751  | 510.167   | 954.709   |
| NM_005103  | 413.17    | 1008.486  | D17172    | 19620.547 | 21572.619 | U00928    | 1033.355  | 1445.724  |
| NM_004822  | 755.612   | 1597.686  | AJ227859  | 1339.705  | 2274.697  | NM_019056 | 4486.103  | 5513.692  |
| AK022349   | 8360.809  | 14642.021 | NM_018544 | 399.081   | 655.533   | AF279783  | 5236.901  | 6992.875  |
| NM_005031  | 3566.597  | 3061.413  | AB020699  | 4740.308  | 4776.111  | AF182422  | 13240.23  | 13587.912 |
| AB040920   | 529.788   | 429.31    | AF086269  | 2648.604  | 4530.05   | NM_016943 | 732.512   | 872.811   |
| NM_000720  | 343.856   | 377.963   | U90437    | 11546.088 | 13956.734 | AF070602  | 1474.142  | 2065.921  |
| NM_004842  | 1386.273  | 1285.893  | AK000842  | 10730.954 | 10779.348 | BE393290  | 1948.872  | 2792.269  |
| AK024639   | 2862.523  | 2389.014  | AK022153  | 908.147   | 1119.029  | NM_017622 | 2183.721  | 2001.672  |
| AB007915   | 1326.974  | 1353.295  | AK022789  | 631.032   | 491.322   | AF133331  | 10608.138 | 8224.995  |
| NM_018229  | 1785.489  | 1612.816  | AK023756  | 688.532   | 742.902   | AK022289  | 1084.49   | 889.552   |
| NM_006325  | 4044.784  | 3537.664  | NM_001126 | 5657.75   | 3536.875  | AF161403  | 16659.018 | 17368.564 |
| AY009127   | 10812.195 | 8005.949  | AK023673  | 4206.308  | 5368.129  | NM_020183 | 4724.023  | 3018.353  |
| NM_014869  | 744.49    | 713.235   | NM_018252 | 3665.934  | 4476.374  | AL389954  | 753.128   | 561.554   |
| AK000158   | 811.601   | 612.925   | NM_018000 | 46844.434 | 47024.863 | NM_019852 | 1986.17   | 1395.1    |
| AK024500   | 3284.054  | 2074.511  | AF164963  | 414.534   | 771.272   | NM_006118 | 4343.857  | 3613.221  |
| NM_002564  | 950.066   | 575.078   | AF124366  | 25640.85  | 30973.746 | AK026225  | 31814.746 | 24231.152 |

|           |           |           |           |           |           |           |           |           |
|-----------|-----------|-----------|-----------|-----------|-----------|-----------|-----------|-----------|
| NM_000963 | 2431.494  | 4980.533  | AF130112  | 907.456   | 1629.731  | AL050032  | 4785.238  | 3832.105  |
| NM_013308 | 2195.201  | 4478.508  | NM_000551 | 6246.5    | 7885.615  | AF009304  | 738.388   | 890.805   |
| AF027302  | 5766.547  | 9396.922  | AL365518  | 1538.51   | 1470.194  | AF086177  | 6844.676  | 5710.962  |
| NM_002852 | 1766.42   | 3836.567  | AF086257  | 2509.021  | 2580.205  | NM_018949 | 1487.105  | 1605.288  |
| NM_001817 | 3969.584  | 6081.31   | AF075056  | 515.127   | 1184.118  | D17187    | 1665.823  | 1501.4    |
| AF063611  | 1035.13   | 2223.117  | AC119751  | 443.827   | 697.861   | AJ243672  | 1561.601  | 2273.164  |
| NM_005965 | 781.621   | 482.71    | U00928    | 1716.121  | 3722.163  | D17169    | 49983.531 | 52978.918 |
| NM_002740 | 2188.384  | 1608.935  | NM_019056 | 3886.624  | 4552.748  | NM_017924 | 12755.847 | 12959.453 |
| AL117482  | 2209.615  | 1888.702  | AF279783  | 2935.744  | 2329.573  | S81578    | 723.743   | 584.134   |
| NM_006549 | 5392.312  | 4155.519  | AF182422  | 10367.291 | 6512.604  | NM_017546 | 7409.608  | 8565.468  |
| AB018324  | 8380.913  | 5567.324  | AF070602  | 949.264   | 760.487   | AJ001889  | 475.122   | 710.305   |
| NM_002742 | 2987.867  | 2936.836  | BE393290  | 1588.282  | 1943.825  | AL137400  | 2122.754  | 2083.833  |
| Z25431    | 2601.889  | 2120.515  | NM_017622 | 2360.744  | 2555.97   | NM_006511 | 858.839   | 1181.883  |
| NM_005627 | 3330.76   | 2179.688  | AF133331  | 8886.681  | 9356.533  | AF007142  | 2605.402  | 2527.759  |
| M64497    | 1630.324  | 1338.837  | AK022289  | 1061.704  | 1336.383  | AF119853  | 5279.464  | 5222.258  |
| NM_007274 | 10212.22  | 6994.318  | L34408    | 552.126   | 311.437   | CY3Cy5    | 4504.774  | 228.959   |
| NM_003356 | 623.753   | 521.053   | AF161403  | 10919.805 | 10457.09  | AI248827  | 5621.217  | 5361.577  |
| NM_006224 | 13780.313 | 9397.81   | NM_020183 | 4278.125  | 4535.486  | R45026    | 4026.934  | 3265.736  |
| AL137300  | 2263.53   | 1870.627  | NM_018029 | 865.967   | 719.535   | BG386057  | 786.622   | 1328.989  |
| NM_000229 | 1919.099  | 1996.92   | AL389954  | 826.203   | 1223.904  | AI970239  | 3422.625  | 3054.374  |
| NM_006995 | 18215.014 | 10125.28  | NM_019852 | 1721.867  | 2123.671  | AA496452  | 5092.667  | 3467.231  |
| NM_003129 | 17501.518 | 7506.544  | NM_006118 | 3203.161  | 3552.717  | X67594    | 1693.427  | 1420.902  |
| NM_001956 | 805.469   | 610.973   | AK026225  | 32500.836 | 34406.996 | BC008837  | 763.401   | 447.626   |
| AB033064  | 1558.12   | 1710.405  | AL050032  | 1209.199  | 1449.025  | NM_001631 | 909.178   | 2096.025  |
| AK022317  | 5744.504  | 8653.108  | AF009304  | 991.28    | 620.661   | AB000734  | 1759.91   | 4057.443  |
| NM_003124 | 3318.874  | 4999.741  | AF086177  | 8753.958  | 8000.443  | NM_005987 | 59857.941 | 70475.813 |
| AL133581  | 4458.167  | 6839.64   | NM_018949 | 874.507   | 931.335   | X87838    | 3377.813  | 5414.143  |
| NM_002558 | 928.934   | 2107.494  | D17187    | 1795.193  | 1383.49   | NM_033199 | 3316.409  | 4842.085  |
| NM_000922 | 3507.932  | 2117.645  | AJ243672  | 941.821   | 1021.83   | NM_015001 | 2448.145  | 3473.307  |
| NM_013232 | 1349.966  | 963.126   | AL122087  | 560.26    | 659.724   | SR2       | 59053.492 | 64615.066 |
| NM_014429 | 2468.525  | 1536.188  | D17169    | 38266.73  | 19732.863 | SR4       | 14650.611 | 6144.018  |
| AK000770  | 532.587   | 398.493   | NM_017924 | 9753.099  | 6310.658  | SR6       | 2160.412  | 404.275   |
| NM_002370 | 20482.064 | 12006.358 | S81578    | 468.585   | 445.878   | SR8       | 7561.844  | 11009.884 |
| NM_015670 | 4297.143  | 3291.413  | NM_017546 | 5922.171  | 4423.098  | SR10      | 27317.973 | 5567.521  |
| NM_014709 | 1092.348  | 1055.985  | AF086210  | 327.024   | 281.287   | CY3Cy5    | 3147.995  | 165.099   |
| AB028990  | 1131.555  | 906.916   | AL137400  | 1729.184  | 1721.099  | X00094    | 977.832   | 924.382   |
| NM_006708 | 16032.025 | 8186.838  | NM_006511 | 925.76    | 969.096   | NM_003775 | 1300.831  | 1396.551  |
| AB037835  | 1129.182  | 836.518   | AF007142  | 3329.495  | 3744.606  | NM_002082 | 9408.686  | 9302.253  |
| NM_016228 | 944.528   | 777.463   | AF119853  | 3482.588  | 3445.139  | NM_002922 | 518.68    | 478.158   |
| NM_000157 | 2415.156  | 1617.202  | CY3Cy5    | 1310.635  | 145.057   | AF155657  | 21599.939 | 21064.225 |
| NM_000712 | 13488.793 | 5515.169  | AI248827  | 5538.157  | 6466.484  | NM_006056 | 4820.383  | 3990.84   |
| NM_018088 | 561.125   | 344.396   | R45026    | 2553.301  | 2679.128  | AF045229  | 13484.723 | 8128.615  |
| NM_007205 | 279.908   | 593.161   | AI970239  | 1845.079  | 1559.371  | NM_001840 | 8256.324  | 4624.399  |
| AB011164  | 5894.315  | 10346.26  | AA496452  | 4245.16   | 2864.838  | AK025099  | 3636.353  | 1728.294  |
| M24750    | 3940.194  | 5851.312  | X67594    | 1269.36   | 870.092   | NM_000228 | 396.381   | 1063.893  |
| NM_002687 | 7181.719  | 3961.952  | AB000734  | 752.051   | 781.774   | NM_000830 | 1234.27   | 2766.499  |
| NM_000627 | 900.923   | 706.374   | NM_005987 | 59389.559 | 55970.664 | NM_005209 | 758.541   | 1452.829  |
| NM_000038 | 1000.161  | 546.514   | X87838    | 3047.097  | 3140.153  | AF148950  | 767.95    | 1586.079  |
| NM_000825 | 509.017   | 593.929   | NM_033199 | 2455.032  | 2240.666  | NM_001155 | 8479.433  | 12926.469 |
| NM_003886 | 1006.913  | 1061.869  | NM_015001 | 1987.75   | 1630.073  | M62896    | 18842.57  | 25028.369 |
| NM_005843 | 1305.759  | 1094.786  | SR2       | 47333.254 | 28964.104 | NM_000390 | 1827.466  | 1355.588  |
| NM_003854 | 454.439   | 446.262   | SR4       | 11101.296 | 6636.248  | NM_001498 | 57508.25  | 44050.363 |
| NM_017980 | 4439.92   | 3256.735  | SR6       | 1617.846  | 1074.733  | AF263523  | 1826.321  | 1587.479  |

|           |           |           |           |           |           |           |           |           |
|-----------|-----------|-----------|-----------|-----------|-----------|-----------|-----------|-----------|
| NM_001252 | 1442.695  | 1075.287  | SR8       | 6333.091  | 11165.604 | L08441    | 9362.192  | 8358.876  |
| NM_002821 | 13353.204 | 6235.378  | SR10      | 24026.49  | 4737.729  | AA641953  | 2972.195  | 2754.872  |
| M96652    | 534.593   | 278.913   | CY3Cy5    | 1110.277  | 133.106   | AL137764  | 16055.909 | 13583.583 |
| L41690    | 1698.604  | 1007.396  | X00094    | 615.069   | 576.85    | NM_001660 | 17541.074 | 20138.18  |
| NM_018059 | 1609.94   | 976.842   | NM_003775 | 809.098   | 724.949   | NM_000710 | 753.028   | 734.264   |
| NM_005183 | 369.16    | 1055.195  | NM_002082 | 4535.183  | 4398.879  | NM_000752 | 1734.137  | 2362.648  |
| NM_006514 | 998.376   | 2524.414  | AF155657  | 17191.42  | 14355.646 | NM_002018 | 11394.966 | 14803.802 |
| AF065164  | 1129.452  | 2263.715  | NM_006056 | 1883.448  | 1397.841  | NM_002377 | 486.562   | 470.184   |
| AB028991  | 2326.644  | 1256.473  | AF045229  | 10069.316 | 6841.288  | NM_006018 | 676.422   | 581.439   |
| AF263547  | 7908.856  | 2862.476  | NM_001840 | 6187.038  | 4075.432  | AF161383  | 10100.769 | 9189.526  |
| AJ008143  | 1165.516  | 836.073   | AK025099  | 3539.645  | 2093.262  | AF224266  | 3256.331  | 4852.108  |
| NM_007144 | 3068.697  | 2023.459  | NM_016099 | 11921.123 | 8471.504  | U72882    | 15702.537 | 25018.891 |
| NM_004424 | 2018.586  | 1847.237  | NM_000830 | 858.747   | 804.721   | NM_014337 | 14702.04  | 24016.477 |
| AL133117  | 2730.115  | 2149.362  | NM_005209 | 1040.494  | 1371.165  | NM_007161 | 16251.746 | 24311.873 |
| AB033040  | 1125.356  | 794.878   | NM_001155 | 8020.619  | 8003.973  | NM_014387 | 31344.588 | 47166.141 |
| AF070586  | 605.17    | 660.061   | M62896    | 7199.668  | 5909.733  | NM_003641 | 4836.221  | 9442.287  |
| NM_014412 | 1005.738  | 977.023   | NM_017736 | 2073.583  | 1467.098  | NM_012463 | 3505.651  | 5445.91   |
| NM_013303 | 3181.335  | 1744.028  | NM_000390 | 1450.295  | 1676.416  | L29140    | 44234.09  | 59091.395 |
| NM_012227 | 4173.949  | 2564.658  | NM_001498 | 19436.625 | 12229.927 | AK057418  | 4463.816  | 2644.357  |
| NM_006101 | 5510.038  | 3075.02   | AF263523  | 1617.383  | 1265.804  | L37199    | 689.246   | 210.382   |
| NM_001237 | 9698.195  | 4522.199  | L08441    | 11074.793 | 4889.902  | NM_007260 | 1936.194  | 1615.149  |
| NM_002507 | 995.502   | 676.899   | AA641953  | 2297.357  | 1650.775  | AF148646  | 6697.355  | 4469.14   |
| NM_015962 | 1021.946  | 1084.431  | AL137764  | 10849.984 | 12053.608 | AL110218  | 1278.705  | 1034.85   |
| NM_016145 | 469.693   | 357.375   | NM_001660 | 12054.79  | 10653.551 | AB023201  | 4152.579  | 3077.408  |
| NM_016078 | 1724.531  | 829.968   | NM_000710 | 561.912   | 1081.744  | NM_000072 | 874.826   | 1026.042  |
| NM_003798 | 844.907   | 794.742   | NM_000752 | 1981.788  | 2165.855  | NM_000697 | 3704.707  | 4562.357  |
| NM_001849 | 663.693   | 1387.009  | NM_002018 | 5949.255  | 4286.786  | NM_000017 | 12245.413 | 18067.633 |
| AF255910  | 512.055   | 1084.328  | AF161383  | 7868.753  | 6491.968  | NM_000237 | 1001.853  | 1734.518  |
| NM_016146 | 11046.095 | 18726.518 | NM_000410 | 7442.081  | 6079.894  | NM_018346 | 12279.249 | 15736.991 |
| AK024343  | 1825.021  | 703.917   | AF224266  | 631.537   | 678.337   | AL122054  | 4452.646  | 5794.315  |
| NM_002569 | 746.681   | 511.674   | U72882    | 2521.503  | 2332.013  | AB011182  | 2540.486  | 3434.723  |
| D42084    | 3946.865  | 2354.145  | NM_014337 | 5982.722  | 6406.768  | AB023151  | 1116.203  | 2650.612  |
| NM_014693 | 716.998   | 636.078   | NM_007161 | 5305.827  | 5212.969  | NM_000140 | 14339.759 | 15345.572 |
| AB007896  | 765.461   | 744.512   | NM_014387 | 23774.441 | 20030.072 | NM_005125 | 5198.709  | 4675.717  |
| AB007916  | 8111.405  | 4914.119  | NM_003641 | 4591.489  | 6770.036  | NM_020038 | 963.542   | 1068.615  |
| NM_002874 | 1751.863  | 566.642   | NM_012463 | 2096.83   | 2401.641  | NM_016246 | 2513.416  | 3881.877  |
| AF049140  | 1928.802  | 1480.699  | L29140    | 13327.232 | 10117.993 | NM_015926 | 9602.214  | 15242.55  |
| AL136794  | 2437.876  | 1832.914  | AK026448  | 5129.149  | 4735.296  | X03757    | 5066.819  | 7714.23   |
| BC035601  | 13447.803 | 6885.652  | NM_007260 | 2359.615  | 1849.948  | NM_005136 | 887.536   | 1142.11   |
| NM_001458 | 590.763   | 357.776   | AF148646  | 5223.718  | 3878.553  | AK094513  | 972.054   | 1690.239  |
| NM_020388 | 2135.841  | 1303.807  | AL110218  | 980.817   | 920.074   | NM_001183 | 13873.89  | 20190.285 |
| NM_004202 | 5602.622  | 2466.23   | AB023201  | 1823.722  | 1601.256  | NM_000890 | 2091.796  | 3550.664  |
| AB046829  | 1912.428  | 1661.951  | NM_000072 | 860.86    | 998.084   | NM_004976 | 21788.941 | 19975.563 |
| NM_003379 | 6081.407  | 4452.728  | NM_000697 | 1867.259  | 2668.714  | AK021597  | 2155.619  | 751.915   |
| NM_004521 | 16730.01  | 22959.109 | NM_000017 | 7590.098  | 8735.327  | NM_005737 | 40568.484 | 21189.205 |
| AF229162  | 2647.901  | 4550.263  | NM_000237 | 1302.463  | 1663.273  | NM_000014 | 678.346   | 415.3     |
| U02309    | 18525.658 | 27497.959 | NM_018346 | 6806.396  | 4716.071  | NM_006803 | 2077.459  | 2048.705  |
| NM_005257 | 10755.29  | 2822.873  | AL122054  | 2399.169  | 2445.498  | NM_002533 | 2090.404  | 1754.058  |
| AF011573  | 3038.346  | 1292.497  | AB011182  | 1424.3    | 1305.724  | AF235022  | 794.182   | 759.904   |
| NM_002145 | 2104.507  | 1233.898  | AB023151  | 568.87    | 571.382   | AF182814  | 4828.64   | 6337.283  |
| NM_004831 | 1411.039  | 1344.383  | NM_000140 | 5626.974  | 4525.117  | AK026147  | 391.472   | 420.211   |
| NM_014213 | 5588.066  | 4821.832  | NM_005125 | 2776.616  | 1756.004  | NM_005329 | 1162.687  | 1584.293  |
| NM_000168 | 1458.08   | 1000.178  | NM_016246 | 1013.255  | 747.507   | NM_001517 | 15622.395 | 17993.59  |

|           |           |           |           |           |           |           |           |           |
|-----------|-----------|-----------|-----------|-----------|-----------|-----------|-----------|-----------|
| AF294629  | 1288.361  | 1342.322  | NM_015926 | 1986.11   | 1214.793  | NM_005053 | 3781.901  | 3574.924  |
| NM_002136 | 45430.199 | 25702.299 | X03757    | 1962.089  | 2227.876  | D86974    | 4507.059  | 6116.514  |
| NM_014463 | 26484.141 | 14298.538 | NM_018658 | 2862.311  | 2521.422  | NM_018283 | 3808.914  | 5867.851  |
| NM_005520 | 15540.637 | 11333.56  | AK094513  | 718.91    | 728.675   | NM_001983 | 3163.806  | 3770.078  |
| AK023265  | 1501.32   | 1534.208  | NM_001183 | 12275.689 | 13102.188 | NM_004993 | 631.688   | 1201.912  |
| AB029009  | 1552.45   | 742.006   | NM_000890 | 701.827   | 595.912   | M29551    | 18631.867 | 32490.596 |
| AF112207  | 1871.438  | 1113.949  | NM_004976 | 15731.469 | 13242.577 | AB023148  | 715.724   | 1076.253  |
| AJ420488  | 59138.246 | 46192.754 | NM_005737 | 34694.27  | 37413.082 | NM_002929 | 2279.131  | 3431.143  |
| NM_005594 | 9922.305  | 3964.062  | NM_006803 | 1834.174  | 1659.785  | BC028375  | 3020.734  | 2223.49   |
| NM_004461 | 41732.809 | 30571.449 | NM_002533 | 1461.961  | 1401.608  | AB026436  | 4083.727  | 1722.258  |
| NM_018473 | 12866.365 | 8210.101  | AF235022  | 568.088   | 544.785   | NM_016029 | 12282.081 | 7879.551  |
| BF106121  | 1004.054  | 2251.574  | BE799167  | 436.708   | 890.53    | AK024562  | 1668.967  | 1604.605  |
| AK022590  | 2972.376  | 4342.564  | AF182814  | 4227.538  | 5392.317  | NM_014066 | 1672.889  | 1575.446  |
| AK023719  | 1807.564  | 669.391   | NM_005329 | 708.303   | 808.043   | NM_004573 | 1827.889  | 2053.471  |
| AK025590  | 496.602   | 162.363   | NM_000107 | 4377.039  | 4499.798  | NM_001498 | 61022.672 | 60312.164 |
| AY007149  | 1913.521  | 1161.475  | AL157445  | 1361.236  | 1439.684  | AF263523  | 2075.584  | 2954.927  |
| NM_004550 | 8768.268  | 4260.472  | NM_001517 | 6691.907  | 4164.482  | L08441    | 12498.199 | 20924.086 |
| NM_000785 | 990.172   | 887.116   | NM_005053 | 1359.623  | 887.739   | AA641953  | 4308.336  | 5122.048  |
| NM_004110 | 2995.485  | 2213.863  | D86974    | 3126.691  | 1725.822  | AI248827  | 6946.94   | 9277.341  |
| NM_013387 | 40781.605 | 24767.295 | NM_018283 | 3005.137  | 2093.095  | R45026    | 4658.012  | 6134.667  |
| NM_005262 | 3123.546  | 2129.698  | NM_001983 | 2722.677  | 2506.502  | BI768063  | 457.23    | 463.793   |
| NM_005757 | 1263.406  | 1248.223  | NM_004993 | 527.519   | 414.102   | BG386057  | 676.441   | 797.316   |
| NM_016483 | 431.319   | 425.794   | NM_003384 | 10009.953 | 5515.707  | AI970239  | 3291.876  | 2603.406  |
| NM_020128 | 1054.239  | 761.49    | M29551    | 3663.68   | 2824.188  | AA496452  | 5045.975  | 7115.148  |
| NM_005068 | 900.317   | 966.773   | AB023148  | 1111.476  | 954.841   | X67594    | 2487.685  | 3240.892  |
| NM_018223 | 2987.697  | 1946.291  | NM_002929 | 1365.442  | 800.511   | BC008837  | 358.378   | 1023.011  |
| NM_006693 | 13451.53  | 5531.591  | BC028375  | 1874.396  | 1697.903  | NM_001631 | 791.171   | 1662.393  |
| NM_001722 | 1976.258  | 1382.496  | AB026436  | 3305.102  | 2523.746  | AB000734  | 1685.549  | 3473.935  |
| AB046802  | 960.038   | 538.646   | NM_016029 | 9697.949  | 6659.107  | NM_005987 | 58995.711 | 65210.586 |
| NM_003297 | 1023.262  | 583.761   | AK024562  | 1271.499  | 868.963   | X87838    | 3105.886  | 2486.36   |
| NM_018269 | 5682.479  | 3504.918  | NM_014066 | 1769.391  | 1352.018  | NM_033199 | 3112.692  | 1584.78   |
| AK024633  | 5016.691  | 4672.973  | NM_004573 | 1747.629  | 1284.634  | NM_015001 | 2056.094  | 1507.214  |
| NM_001453 | 9574.876  | 16210.6   | NM_000313 | 173.978   | 886.227   | NM_000169 | 4410.826  | 4064.476  |
| AB004851  | 374.593   | 198.83    | NM_001498 | 23931.111 | 12440.427 | AK057418  | 4473.987  | 4841.929  |
| NM_001283 | 4009.645  | 1637.101  | AF263523  | 1710.383  | 1057.291  | NM_007260 | 1628.617  | 2266.423  |
| AL110237  | 409.488   | 542.186   | L08441    | 12932.081 | 6708.521  | AF148646  | 9213.31   | 11445.434 |
| D87470    | 1527.621  | 1299.991  | AA641953  | 3102.283  | 2721.613  | AL110218  | 1361.229  | 1802.453  |
| AF147307  | 7474.314  | 4674.137  | AI248827  | 5609.261  | 6920.155  | AB023201  | 4662.257  | 5783.426  |
| AK001829  | 2675.485  | 2273.033  | AI970239  | 1810.326  | 1235.423  | X00094    | 1316.367  | 1578.15   |
| NM_016525 | 3391.275  | 2534.981  | AA496452  | 4518.39   | 3214.226  | NM_003775 | 1141.253  | 1401.7    |
| AK024931  | 3926.423  | 3106.814  | X67594    | 1213.993  | 870.297   | NM_002082 | 9855.396  | 11297.16  |
| AL109715  | 404.004   | 347.122   | AF363393  | 482.525   | 525.999   | NM_002922 | 482.69    | 258.988   |
| AK022258  | 898.178   | 654.23    | BC008837  | 927.497   | 481.066   | AF155657  | 20663.537 | 27662.91  |
| AK000455  | 1749.694  | 1725.02   | NM_001631 | 777.069   | 607.388   | NM_006056 | 4670.878  | 6816.853  |
| NM_005230 | 1028.971  | 892.206   | AB000734  | 899.522   | 541.607   | AF045229  | 14171.707 | 24115.02  |
| AL162073  | 600.128   | 403.999   | NM_005987 | 64954.012 | 57939.59  | NM_001840 | 7312.288  | 10237.023 |
| AJ006835  | 3753.514  | 2958.731  | X87838    | 2674.053  | 1655.372  | AK025099  | 2953.888  | 3694.298  |
| AF085890  | 458.616   | 450.772   | NM_033199 | 2353.702  | 1178.503  | NM_016099 | 25333.396 | 37369.262 |
| AL122039  | 554.481   | 409.316   | NM_015001 | 1882.135  | 1144.631  | NM_000394 | 433.228   | 484.442   |
| AF070577  | 825.262   | 818.11    | NM_000169 | 3335.699  | 1924.738  | NM_000228 | 689.29    | 990.843   |
| AL157484  | 626.331   | 544.178   | AK057418  | 3509.009  | 2927.011  | NM_000830 | 1288.031  | 2002.373  |
| AK024850  | 609.598   | 457.824   | L37199    | 462.114   | 425.199   | AF148950  | 804.535   | 575.5     |
| Y09836    | 772.666   | 421.467   | NM_007260 | 2658.639  | 2253.612  | NM_001155 | 6779.344  | 6041.548  |



|           |           |           |           |           |           |           |           |           |
|-----------|-----------|-----------|-----------|-----------|-----------|-----------|-----------|-----------|
| AL137597  | 2714.06   | 1526.022  | AF148646  | 5797.652  | 5182.481  | M62896    | 13309.366 | 16267.108 |
| AK022144  | 1280.998  | 805.344   | AL110218  | 1029.956  | 1399.833  | NM_017736 | 2311.198  | 3946.008  |
| NM_014926 | 396.716   | 382.135   | NM_003775 | 2316.34   | 3934.662  | NM_000390 | 1658.064  | 1934.343  |
| AF009266  | 704.074   | 430.074   | NM_002082 | 4482.467  | 3655.221  | AK021597  | 2411.15   | 2423.889  |
| AF060168  | 1146.595  | 1268.448  | AF155657  | 17760.479 | 12386.578 | NM_005737 | 47011.676 | 37055.836 |
| AF015251  | 572.259   | 535.433   | NM_006056 | 1605.329  | 1209.606  | NM_000014 | 769.717   | 661.54    |
| NM_018326 | 499.667   | 539.805   | AF045229  | 9167.888  | 5175.324  | NM_006803 | 2621.896  | 2572.651  |
| AK001150  | 754.342   | 977.446   | NM_001840 | 5362.788  | 3248.877  | NM_002533 | 2500.873  | 2403.653  |
| AK021633  | 707.891   | 484.671   | AK025099  | 2893.906  | 1424.786  | AF235022  | 699.678   | 580.129   |
| AK025659  | 1510.433  | 940.344   | NM_016099 | 10946.179 | 5762.98   | AL137764  | 17767.701 | 13264.318 |
| AK026788  | 490.342   | 334.087   | NM_000228 | 315.963   | 622.812   | NM_001660 | 19627.98  | 18244.586 |
| AK025272  | 900.779   | 396.2     | NM_000830 | 1090.696  | 1164.284  | NM_000710 | 779.887   | 953.455   |
| AK026824  | 512.918   | 299.583   | NM_001155 | 6273.179  | 3514.583  | NM_000752 | 1960.379  | 1346.602  |
| AJ008130  | 4692.613  | 2088.495  | M62896    | 6827.155  | 5631.965  | AB040945  | 530.958   | 737.001   |
| L39924    | 1139.478  | 679.908   | NM_017736 | 1720.519  | 998.212   | NM_002018 | 9493.071  | 11295.357 |
| U52054    | 5454.905  | 2756.2    | NM_000390 | 1453.196  | 877.282   | NM_002377 | 1023.752  | 1941.078  |
| AK023325  | 1048.212  | 823.498   | AK021597  | 1565.224  | 1299.105  | NM_006018 | 374.957   | 683.728   |
| NM_017985 | 924.381   | 629.2     | NM_005737 | 35352.566 | 30144.486 | AF161383  | 8088.189  | 11088.59  |
| AK025866  | 2502.32   | 2138.37   | NM_000014 | 472.886   | 380.747   | NM_000410 | 16021.315 | 21767.023 |
| AF088058  | 8289.975  | 5364.983  | NM_006803 | 2456.703  | 2663.698  | AF224266  | 2986.576  | 5853.728  |
| NM_000513 | 1226.425  | 968.058   | NM_002533 | 1990.275  | 2334.547  | U72882    | 12781.4   | 17483.963 |
| Y11165    | 644.583   | 592.214   | AL137764  | 10520.063 | 10493.174 | NM_014337 | 12090.421 | 11704.931 |
| BC028422  | 526.734   | 340.528   | NM_001660 | 13685.188 | 14855.216 | NM_007161 | 13655.704 | 6894.242  |
| AK001453  | 4155.63   | 2040.477  | NM_000752 | 1542.192  | 1444.711  | NM_014387 | 29184.029 | 20011.42  |
| AB007972  | 671.464   | 567.02    | AB040945  | 466.866   | 268.221   | NM_003641 | 3797.645  | 3582.957  |
| AL390144  | 16153.074 | 7669.89   | NM_002018 | 4692.523  | 2116.252  | NM_012463 | 2580.224  | 2425.229  |
| AK024017  | 505.609   | 311.075   | AF161383  | 7343.976  | 5730.223  | L29140    | 27979.646 | 23991.424 |
| X56196    | 653.447   | 479.032   | NM_000410 | 6935.522  | 5998.565  | AK026448  | 6749.868  | 5629.218  |
| D17220    | 7709.625  | 5187.907  | AF224266  | 1198.956  | 767.404   | AB026436  | 4531.208  | 3836.888  |
| D28363    | 58189.129 | 35043.699 | U72882    | 4957.245  | 3208.52   | NM_016029 | 12860.042 | 9927.971  |
| AB011171  | 431.788   | 290.652   | NM_007161 | 10245.287 | 14319.459 | AK024562  | 2452.686  | 2860.518  |
| NM_005322 | 2332.73   | 1764.189  | NM_014387 | 23080.598 | 16246.563 | NM_014066 | 1936.476  | 2064.28   |
| AK024465  | 577.198   | 427.962   | NM_003641 | 3337.157  | 2265.755  | NM_004573 | 2713.479  | 4354.419  |
| AK021478  | 2561.299  | 2005.577  | NM_012463 | 2096.962  | 1615.868  | NM_000072 | 1035.396  | 804.509   |
| AF131782  | 623.381   | 339.081   | L29140    | 12529.224 | 7807.773  | NM_000697 | 3651.288  | 2793.772  |
| NM_014210 | 2755.924  | 1543.737  | AK026448  | 4905.747  | 3520.531  | NM_000017 | 12529.369 | 8096.54   |
| AL110136  | 1377.603  | 1004.485  | AB026436  | 4142.542  | 3819.2    | NM_000237 | 1168.59   | 917.966   |
| D16935    | 3374.924  | 2235.475  | NM_016029 | 11759.622 | 10944.664 | NM_018346 | 10940.424 | 16744.672 |
| U92019    | 588.9     | 133.492   | AK024562  | 1475.487  | 1766.753  | AL122054  | 3329.68   | 3324.429  |
| U52835    | 1058.119  | 541.031   | NM_014066 | 2457.584  | 3770.835  | AB011182  | 2116.67   | 2927.792  |
| NM_000756 | 1415.234  | 870.377   | NM_004573 | 2160.177  | 2068.692  | AB023151  | 751.289   | 1177.942  |
| Z36811    | 56207.398 | 32515.373 | NM_000697 | 1923.517  | 1774.9    | NM_000140 | 12286.562 | 18246.207 |
| NM_018950 | 7692.2    | 4116.182  | NM_000237 | 582.263   | 906.502   | NM_005125 | 1700.08   | 2061.99   |
| K03200    | 6087.331  | 3932.854  | NM_018346 | 6978.553  | 5352.876  | NM_020038 | 695.022   | 1179.419  |
| U17629    | 2831.088  | 2273.82   | AL122054  | 1805.101  | 1187.999  | NM_016246 | 2351.628  | 4540.046  |
| NM_020428 | 2610.659  | 1719.905  | AB011182  | 1494.155  | 1983.896  | NM_015926 | 9756.835  | 14908.802 |
| U79265    | 1559.675  | 1423.449  | AB023151  | 500.591   | 345.34    | X03757    | 5127.455  | 3396.886  |
| AK022868  | 5745.895  | 3530.123  | NM_000140 | 5536.231  | 3087.176  | NM_018658 | 13747.66  | 7944.309  |
| NM_003530 | 374.128   | 431.151   | NM_005125 | 2959.917  | 2836.558  | NM_005136 | 599.299   | 510.084   |
| AJ227871  | 1299.89   | 1022.174  | NM_020038 | 843.557   | 1735.764  | AK094513  | 960.274   | 738.219   |
| AK025344  | 2172.311  | 1523.441  | NM_016246 | 2078.961  | 2604.505  | NM_001183 | 11842.922 | 9803.795  |
| D28589    | 14008.595 | 9020.106  | NM_015926 | 5212.207  | 5976.151  | NM_000890 | 1602.062  | 1008.197  |
| AF301223  | 650.864   | 534.813   | NM_018658 | 8404.73   | 13180.019 | NM_004976 | 18254.172 | 13291.612 |

|           |           |           |           |           |           |           |           |           |
|-----------|-----------|-----------|-----------|-----------|-----------|-----------|-----------|-----------|
| NM_017867 | 26104.439 | 12368.793 | AK094513  | 522.871   | 587.377   | NM_03319C | 3419.531  | 3111.103  |
| U92820    | 4582.808  | 2322.833  | NM_001183 | 12791.215 | 15552.242 | NM_015001 | 2055.547  | 1832.392  |
| NM_017937 | 1428.35   | 1046.702  | NM_00089C | 580.098   | 471.519   | NM_00016C | 4470.293  | 4728.708  |
| AL360266  | 2339.826  | 1239.971  | NM_00497C | 16149.032 | 14144.827 | AF182814  | 4063.048  | 2278.716  |
| AL160132  | 4246.605  | 2765.698  | NM_03319C | 3506.192  | 2833.112  | NM_00532C | 1304.622  | 2384.156  |
| NM_019557 | 3131.702  | 1743.366  | NM_015001 | 2487.771  | 2521.958  | NM_000107 | 5633.631  | 9476.511  |
| CY3Cy5    | 1340.718  | 149.784   | NM_00016C | 4150.34   | 4266.822  | AL157445  | 4863.837  | 8966.646  |
| AA150828  | 574.844   | 524.583   | AF182814  | 3721.794  | 2633.776  | NM_001517 | 1640.906  | 2740.572  |
| AI859208  | 523.997   | 369.798   | NM_00532C | 896.059   | 535.728   | NM_00505C | 3512.137  | 5816.629  |
| H64379    | 2558.234  | 2320.735  | NM_000107 | 4217.039  | 6845.819  | D86974    | 4398.565  | 7363.514  |
| BE208258  | 59100.09  | 57632.43  | AL157445  | 1293.125  | 1000.725  | NM_01828C | 3796.395  | 4953.207  |
| T72202    | 1205.92   | 1622.992  | NM_001517 | 5979.213  | 3365.736  | NM_00198C | 3267.533  | 4478.894  |
| BI831922  | 3542.923  | 7589.313  | NM_00505C | 1679.572  | 1536.365  | Y12337    | 1722.157  | 1297.597  |
| AA599158  | 6768.154  | 6301.486  | D86974    | 5387.791  | 8140.299  | M29551    | 15345.923 | 11922.476 |
| NM_002711 | 1834.089  | 1512.263  | NM_01828C | 3588.044  | 2781.634  | AB023148  | 708.747   | 589.697   |
| SR1       | 59780.434 | 64153.434 | NM_00198C | 2741.207  | 2116.502  | NM_00292C | 1782.662  | 1426.488  |
| SR7       | 4208.417  | 33415.195 | NM_00499C | 545.143   | 327.626   | BC028375  | 2659.565  | 2251.672  |
| SR9       | 13251.335 | 1990.184  | M29551    | 9535.491  | 6065.867  | NM_00520C | 488.226   | 559.755   |
| CY3Cy5    | 1575.736  | 160.456   | AB023148  | 606.962   | 406.994   | AF148950  | 893.704   | 998.798   |
| NM_00178C | 7402.811  | 5944.832  | NM_00292C | 1953.59   | 3536.206  | NM_001155 | 7735.997  | 7261.617  |
| J03171    | 3602.735  | 3055.439  | BC028375  | 2123.142  | 1617.04   | M62896    | 18485.865 | 19033.176 |
| NM_00432C | 8182.781  | 6511.524  | NM_001155 | 8085.155  | 7649.952  | NM_01773C | 1869.027  | 2529.336  |
| NM_00531C | 2151.688  | 1661.693  | M62896    | 7724.119  | 7416.221  | NM_00039C | 1982.875  | 3526.255  |
| NM_001711 | 673.213   | 639.206   | NM_01773C | 2148.135  | 1517.63   | NM_00149C | 58355.879 | 60121.34  |
| NM_00421C | 10840.893 | 17257.965 | NM_00039C | 1766.951  | 1637.689  | AF263523  | 1946.662  | 1460.786  |
| AK026232  | 7788.542  | 5975.188  | NM_00031C | 370.117   | 550.58    | L08441    | 9188.657  | 5853.819  |
| NM_01489C | 15018.879 | 11304.906 | NM_00149C | 22278.244 | 12182.357 | AA641953  | 4560.221  | 5520.319  |
| AK023827  | 3081.293  | 2897.212  | AF263523  | 1523.541  | 1177.257  | AI248827  | 5714.532  | 9338.251  |
| NM_001117 | 563.636   | 567.462   | L08441    | 12026.814 | 5080.328  | R45026    | 4962.597  | 8959.213  |
| NM_000231 | 448.014   | 607.818   | AA641953  | 2309.302  | 1327.341  | BG386057  | 643.264   | 1217.386  |
| L07517    | 2697.862  | 2731.81   | AI248827  | 4168.363  | 2139.411  | AI970239  | 3637.6    | 5156.12   |
| NM_00104C | 3043.274  | 2244.272  | R45026    | 2626.02   | 4278.046  | AA496452  | 4813.112  | 7008.202  |
| NM_005697 | 4647.76   | 3565.406  | AI970239  | 1618.856  | 738.926   | X67594    | 1985.194  | 3034.397  |
| NM_00309C | 6164.096  | 4057.934  | AA496452  | 4034.853  | 2037.476  | NM_001631 | 674.224   | 716.068   |
| NM_004781 | 1940.122  | 1574.678  | X67594    | 1429.401  | 603.102   | AB000734  | 1559.627  | 985.098   |
| NM_01830C | 2275.702  | 1554.598  | NM_001631 | 582.679   | 166.089   | NM_005987 | 57365.898 | 62417     |
| NM_01475C | 2894.126  | 1992.236  | AB000734  | 735.618   | 279.951   | X87838    | 3533.822  | 2816.315  |
| NM_005124 | 2702.294  | 2403.344  | NM_005987 | 69175.961 | 64185.75  | NM_007161 | 15480.263 | 12848.223 |
| AK000947  | 2481.699  | 2545.68   | X87838    | 2890.817  | 2263.617  | NM_014387 | 30357.002 | 24059.984 |
| L08240    | 1844.202  | 2378.934  | NM_014387 | 23215.115 | 20993.008 | NM_003641 | 4613.749  | 4153.587  |
| NM_01795C | 729.358   | 912.684   | NM_003641 | 4629.63   | 3661.489  | NM_01246C | 2517.522  | 2427.73   |
| NM_00294C | 1359.319  | 1520.195  | NM_01246C | 2164.003  | 2193.14   | L29140    | 35895.813 | 42537.504 |
| NM_016081 | 8372.384  | 7287.171  | AK057418  | 2841.456  | 2668.814  | AK026448  | 7748.059  | 9271.765  |
| NM_00638C | 7760.561  | 5629.052  | NM_00726C | 2066.912  | 1333.224  | AK057418  | 3709.599  | 2583.125  |
| NM_00016C | 414.663   | 494.216   | AF148646  | 4683.904  | 3166.148  | L37199    | 532.609   | 506.933   |
| NM_00332C | 61689.531 | 53110.914 | AL110218  | 815.484   | 606.721   | NM_00726C | 2021.953  | 1406.599  |
| NM_00329C | 24929.717 | 19581.643 | AB023201  | 1838.258  | 1601.059  | AF148646  | 8475.567  | 3571.488  |
| NM_01433C | 7460.158  | 5072.594  | X00094    | 703.667   | 801.301   | AL110218  | 2240.675  | 2466.524  |
| NM_007214 | 5930.912  | 3876.883  | NM_00377C | 680.34    | 466.266   | AB023201  | 4894.889  | 9337.397  |
| NM_000311 | 7943.39   | 5727.672  | NM_00208C | 4344.505  | 2823.413  | X00094    | 1108.58   | 1871.162  |
| NM_01790C | 2646.023  | 1953.194  | AF155657  | 16042.16  | 9052.854  | NM_00377C | 1108.921  | 2593.285  |
| NM_00633C | 8948.381  | 6914.221  | NM_00605C | 1733.316  | 818.579   | NM_00208C | 9827.773  | 18005.957 |
| NM_00078C | 458.299   | 440.94    | AF045229  | 9790.092  | 5062.134  | NM_00292C | 620.471   | 877.773   |

|           |           |           |           |           |           |           |           |           |
|-----------|-----------|-----------|-----------|-----------|-----------|-----------|-----------|-----------|
| NM_017731 | 648.214   | 781.244   | NM_001840 | 5510.522  | 2870.272  | AF155657  | 19166.32  | 26654.146 |
| AB040891  | 3469.879  | 2489.031  | AK025099  | 2954.129  | 1426.557  | NM_006056 | 3700.863  | 5085.646  |
| NM_005845 | 16759.207 | 13457.738 | NM_016099 | 12165.077 | 4951.308  | AF045229  | 13434.647 | 14973.804 |
| NM_016209 | 11585.978 | 11784.036 | NM_000830 | 1126.172  | 832.216   | NM_001840 | 7320.513  | 3116.316  |
| NM_018964 | 2321.564  | 2385.5    | NM_005136 | 710.26    | 897.878   | AK025099  | 3348.453  | 2011.053  |
| NM_000080 | 606.543   | 818.907   | AK094513  | 841.683   | 791.026   | NM_016099 | 26301.637 | 17868.939 |
| NM_001829 | 2706.386  | 2797.854  | NM_001183 | 12074.555 | 14675.296 | NM_000228 | 514.341   | 604.474   |
| AF283645  | 3241.221  | 2989.35   | NM_005737 | 33304.484 | 24112.084 | NM_000830 | 953.371   | 856.629   |
| NM_003897 | 3505.817  | 2580.481  | NM_006803 | 1675.789  | 1185.939  | NM_018658 | 12556.311 | 11894.487 |
| NM_014165 | 10499.508 | 9507.174  | NM_002533 | 1604.619  | 1790.902  | NM_005136 | 550.836   | 647.565   |
| AL442085  | 3390.526  | 2518.803  | AL137764  | 15761.552 | 26374.393 | AK094513  | 999.344   | 844.369   |
| NM_013313 | 4841.543  | 3698.957  | NM_001660 | 15697.99  | 21328.748 | NM_001183 | 12232.463 | 11952.149 |
| NM_014736 | 13743.451 | 10191.321 | NM_000710 | 456.268   | 417.296   | NM_000890 | 1881.778  | 2414.25   |
| AK023886  | 1350.699  | 1002.371  | NM_000752 | 1310.997  | 561.663   | NM_004976 | 19254.389 | 20053.443 |
| NM_002553 | 2294.587  | 2165.566  | AB040945  | 427.017   | 143.28    | AK021597  | 1940.896  | 1969.369  |
| AJ404615  | 4155.792  | 3761.23   | NM_002018 | 4845.807  | 3099.969  | NM_005737 | 45352.195 | 25507.42  |
| NM_016053 | 23222.658 | 21062.063 | NM_006018 | 608.202   | 382.14    | NM_000014 | 739.241   | 494.756   |
| AB007869  | 2390.92   | 2241.202  | NM_000410 | 7470.702  | 5183.623  | NM_006803 | 2288.877  | 1115.102  |
| AB046844  | 1348.494  | 1396.911  | AF224266  | 1132.539  | 527.079   | NM_002533 | 2509.982  | 2601.371  |
| NM_000302 | 1943.631  | 1511.55   | U72882    | 4651.483  | 2576.148  | AF235022  | 948.348   | 1940.82   |
| NM_013235 | 22399.07  | 17517.857 | NM_014337 | 5436.016  | 2894.791  | NM_000710 | 781.274   | 1650.775  |
| NM_016015 | 10409.552 | 7995.368  | Y12337    | 1060.219  | 1285.548  | NM_000752 | 1451.62   | 2682.3    |
| AK022900  | 1488.082  | 1251.43   | M29551    | 9813.496  | 9725.065  | NM_002018 | 11361.641 | 15841.55  |
| AB023216  | 1809.679  | 2579.343  | AB023148  | 899.545   | 1197.331  | AF161383  | 7951.797  | 4598.139  |
| NM_002266 | 40223.582 | 34979.832 | AB026436  | 3406.128  | 3105.666  | NM_000410 | 16530.396 | 13105.991 |
| NM_014400 | 5834.76   | 5829.806  | NM_016029 | 9795.3    | 5469.273  | AF224266  | 2277.482  | 2192.738  |
| NM_000231 | 504.877   | 320.862   | AK024562  | 1546.409  | 1168.603  | U72882    | 12544.88  | 12040.143 |
| L07517    | 2212.409  | 1598.246  | NM_014066 | 1584.936  | 1022.257  | NM_014337 | 13785.813 | 13140.542 |
| AA150828  | 458.67    | 524.789   | NM_004573 | 1808.756  | 1131.892  | Y12337    | 1003.699  | 930.531   |
| AI859208  | 493.195   | 278.187   | NM_000072 | 708.315   | 384.96    | M29551    | 15716.397 | 14415.278 |
| H64379    | 2629.113  | 2540.38   | NM_000697 | 1881.225  | 1526.848  | AB023148  | 719.882   | 657.411   |
| T72202    | 809.757   | 995.531   | NM_000017 | 6746.143  | 2758.327  | NM_002929 | 1966.307  | 1719.633  |
| BI831922  | 2222.388  | 2240.015  | NM_000237 | 653.831   | 721.255   | BC028375  | 4134.958  | 5663.371  |
| M69238    | 1346.917  | 1027.483  | NM_018346 | 7847.983  | 8366.096  | AB026436  | 6023.417  | 8141.992  |
| NM_002711 | 2716.714  | 3444.788  | AL122054  | 2435.07   | 3229.951  | NM_016029 | 12973.609 | 8097.787  |
| NM_003329 | 53852.066 | 28826.328 | AB011182  | 1601.273  | 2025.129  | AK024562  | 1974.871  | 1051.861  |
| NM_003299 | 19945.35  | 11898.793 | AB023151  | 579.49    | 924.83    | NM_014066 | 1761.526  | 1071.646  |
| NM_007034 | 614.776   | 487.608   | NM_000140 | 7628.812  | 9225.021  | NM_004573 | 2981.337  | 4671.023  |
| NM_005261 | 539.838   | 374.201   | NM_005125 | 4214.25   | 5230.532  | NM_000072 | 926.862   | 1354.374  |
| NM_001783 | 7570.125  | 5612.507  | NM_020038 | 561.566   | 1467.262  | NM_000697 | 3054.627  | 6457.679  |
| J03171    | 3701.332  | 2699.325  | NM_016246 | 1828.203  | 1621.028  | NM_000017 | 9697.128  | 16101.655 |
| NM_005312 | 2138.382  | 2704.994  | NM_015926 | 4068.802  | 2259.035  | NM_000237 | 995.157   | 1903.083  |
| NM_001711 | 637.168   | 653.674   | X03757    | 4228.044  | 2249.604  | NM_018346 | 10433.346 | 15270.46  |
| NM_004210 | 7540.006  | 7231.032  | NM_020248 | 16445.025 | 11853.465 | AL122054  | 2255.24   | 2490.006  |
| NM_020140 | 1086.03   | 1054.321  | X89670    | 1326.017  | 2146.362  | AB011182  | 2156.037  | 1198.376  |
| AK026232  | 8697.966  | 7031.229  | NM_001726 | 474.138   | 938.801   | AB023151  | 474.652   | 185.064   |
| NM_014892 | 14767.962 | 11811.048 | NM_004053 | 3938.755  | 4037.691  | NM_000140 | 8839.088  | 7231.502  |
| AK023827  | 2985.892  | 2849.669  | NM_014420 | 556.121   | 865.977   | NM_005125 | 1678.445  | 1795.674  |
| NM_001829 | 2061.976  | 1331.518  | NM_001489 | 1819.153  | 1722.637  | NM_020038 | 453.567   | 541.716   |
| AF283645  | 3421.186  | 2866.706  | NM_020374 | 2408.387  | 1838.103  | NM_016246 | 1592.611  | 1709.982  |
| NM_016575 | 564.13    | 483.779   | NM_014922 | 801.6     | 610.059   | NM_015926 | 8946.251  | 11327.425 |
| NM_001045 | 2633.048  | 2078.235  | NM_000169 | 3952.688  | 2533.142  | X03757    | 5413.415  | 5504.542  |
| NM_005697 | 4163.17   | 2822.055  | AF182814  | 4525.075  | 4119.537  | NM_020248 | 21307.514 | 21280.508 |

|          |           |           |          |           |           |          |           |           |
|----------|-----------|-----------|----------|-----------|-----------|----------|-----------|-----------|
| NM_00309 | 6024.778  | 4352.894  | NM_00532 | 814.195   | 1062.345  | X89670   | 767.328   | 796.742   |
| NM_00478 | 1680.049  | 1443.654  | NM_00010 | 4858.697  | 6123.648  | NM_00405 | 3825.009  | 3721.931  |
| NM_01830 | 2476.884  | 2490.143  | AL15744  | 1867.396  | 2194.494  | NM_00148 | 1833.496  | 2369.863  |
| NM_01475 | 3395.044  | 4108.72   | NM_00151 | 8279.62   | 9821.723  | M20259   | 537.88    | 497.346   |
| NM_00512 | 2588.653  | 2731.031  | NM_00505 | 2037.857  | 2611.809  | NM_02037 | 3047.605  | 3436.273  |
| AK00094  | 2423.908  | 2376.299  | D86974   | 4455.615  | 5238.304  | NM_01492 | 1664.423  | 1077.495  |
| L08240   | 1476.261  | 1309.257  | NM_01828 | 4590.264  | 7128.882  | NM_00016 | 5110.684  | 2820.622  |
| NM_01795 | 865.884   | 1049.736  | NM_00198 | 3863.419  | 6508.069  | NM_00389 | 626.478   | 181.654   |
| NM_00294 | 1378.571  | 1615.985  | NM_00499 | 670.118   | 425.68    | BE79916  | 544.067   | 504.01    |
| NM_01608 | 8989.574  | 7675.204  | NM_00179 | 11535.532 | 8128.795  | AF18281  | 3982.636  | 5583.821  |
| NM_00638 | 9028.992  | 9220.299  | NM_00194 | 3924.492  | 3386.54   | NM_00532 | 1100.59   | 1240.834  |
| NM_00016 | 527.195   | 390.745   | NM_00492 | 8021.609  | 7196.855  | NM_00010 | 4770.216  | 2832.124  |
| AB02321  | 764.131   | 570.514   | AB04092  | 419.202   | 1084.033  | AL15744  | 3080      | 2232.61   |
| NM_00226 | 35898.293 | 24700.439 | NM_00145 | 2499.749  | 2566.252  | NM_00151 | 10506.444 | 8027.184  |
| NM_01440 | 5655.236  | 5112.813  | NM_01551 | 7421.801  | 5827.488  | NM_00505 | 2795.606  | 2951.008  |
| AL15749  | 1171.671  | 1304.615  | NM_00444 | 2136.426  | 1226.09   | D86974   | 3201.569  | 3261.213  |
| AL35395  | 2844.989  | 2902.848  | NM_01741 | 1508.431  | 1215.552  | NM_01828 | 3316.523  | 3141.034  |
| NM_00721 | 6048.214  | 5083.934  | NM_00554 | 470.501   | 1193.918  | NM_00198 | 3798.401  | 3560.321  |
| NM_00031 | 7677.259  | 6179.508  | NM_00296 | 13672.383 | 18255.404 | NM_00499 | 913.136   | 910.143   |
| NM_01790 | 2526.685  | 1899.347  | NM_01644 | 1120.889  | 1408.995  | NM_00179 | 19495.559 | 15439.148 |
| NM_00633 | 9004.621  | 7077.096  | NM_01562 | 5252.381  | 5326.42   | NM_00194 | 2783.793  | 2448.323  |
| NM_00078 | 376.573   | 350.404   | NM_00489 | 3301.15   | 4237.476  | NM_00492 | 5381.525  | 5295.077  |
| NM_00251 | 492.131   | 431.692   | AB00662  | 9875.962  | 12868.463 | AB04092  | 306.024   | 453       |
| NM_01773 | 775.399   | 1163.518  | AF27203  | 10624.605 | 13266.244 | NM_00145 | 2600.755  | 2628.226  |
| AB04089  | 3243.846  | 3415.253  | AF23102  | 5098.937  | 7945.643  | NM_01551 | 9135.787  | 8813.802  |
| NM_01620 | 13554.664 | 14875.86  | NM_00514 | 4366.546  | 6914.065  | NM_00621 | 4682.6    | 5653.676  |
| NM_01896 | 2826.424  | 3433.773  | NM_00474 | 1006.365  | 1280.704  | NM_00444 | 6285.656  | 9830.124  |
| NM_00008 | 1470.816  | 1206.282  | AF14601  | 11697.473 | 16275.694 | NM_00193 | 529.433   | 667.844   |
| NM_00271 | 1956.434  | 1258.53   | Z36782   | 6761.182  | 9749.693  | NM_01741 | 2150.957  | 1391.647  |
| AK02609  | 3257.556  | 2605.166  | M70435   | 972.71    | 2033.942  | NM_00296 | 15603.938 | 7187.935  |
| AK00117  | 1171.519  | 881.854   | NM_00349 | 11381.1   | 8876.97   | AF31186  | 58775.84  | 39520.23  |
| NM_00389 | 3420.746  | 2724.551  | AF21065  | 888.029   | 672.02    | NM_00321 | 723.969   | 501.199   |
| NM_01416 | 9803.328  | 7924.68   | AF09092  | 1093.596  | 1015.739  | NM_01644 | 1400.088  | 642.592   |
| AL44208  | 3598.649  | 3500.478  | AF50894  | 2337.5    | 2027.109  | NM_01562 | 4806.969  | 2948.273  |
| NM_01331 | 5396.78   | 6787.278  | NM_02023 | 1164.87   | 622.007   | NM_00489 | 3220.858  | 2139.418  |
| NM_01473 | 18850.703 | 26019.584 | AF13005  | 990.332   | 609.619   | AB00662  | 11032.658 | 6341.192  |
| AK02388  | 1743.949  | 2896.945  | NM_00388 | 3564.747  | 1969.112  | AF27203  | 10727.565 | 4708.247  |
| NM_00255 | 2820.592  | 2984.098  | NM_01492 | 1906.053  | 1111.494  | AF23102  | 3180.887  | 2375.321  |
| AJ40461  | 3955.306  | 3541.24   | NM_00420 | 5356.873  | 3102.112  | NM_00514 | 3087.491  | 2300.199  |
| AB00786  | 2734.325  | 6305.767  | NM_00195 | 2325.198  | 1880.433  | NM_00474 | 1061.749  | 707.535   |
| AB04684  | 2605.61   | 4155.239  | NM_00239 | 1865.186  | 1138.155  | AF14601  | 8044.907  | 7139.921  |
| NM_00030 | 15416.817 | 16621.58  | NM_00367 | 22698.957 | 22536.631 | Z36782   | 6015.089  | 4959.784  |
| NM_01323 | 24277.43  | 22224.436 | NM_00119 | 3380.481  | 4536.619  | M70435   | 680.664   | 833.273   |
| NM_01601 | 11294.446 | 11774.418 | NM_00668 | 1082.027  | 2276.659  | NM_00349 | 16032.843 | 18942.904 |
| AK02290  | 1577.497  | 1391.896  | NM_00641 | 733.753   | 1155.061  | AF09092  | 722.86    | 681.06    |
| AK02623  | 6722.473  | 5182.716  | NM_01497 | 42193.359 | 54595.691 | AF50894  | 2096.792  | 2055.577  |
| NM_01489 | 14367.354 | 9441.548  | AK02632  | 2569.549  | 4372.972  | NM_02023 | 979.665   | 994.119   |
| AK02382  | 3209.217  | 3067.784  | U83857   | 994.024   | 1922.949  | AF13005  | 780.242   | 701.641   |
| NM_00111 | 667.066   | 464.168   | NM_00123 | 2150.01   | 3888.706  | NM_00388 | 2705.394  | 3233.519  |
| NM_00023 | 765.498   | 599.121   | AK02566  | 3084.079  | 3693.944  | NM_01492 | 3317.993  | 2732.619  |
| L07517   | 2916.027  | 2023.267  | NM_00020 | 1954.591  | 2789.471  | NM_00420 | 11562.478 | 7091.17   |
| NM_01435 | 65139.246 | 68648.547 | AB01153  | 787.081   | 1108.393  | NM_00195 | 2096.962  | 1079.982  |
| AA15082  | 960.823   | 1284.459  | U37028   | 1211.991  | 1897.743  | NM_00239 | 2065.251  | 717.268   |

|           |           |           |           |           |           |           |           |           |
|-----------|-----------|-----------|-----------|-----------|-----------|-----------|-----------|-----------|
| AI859208  | 645.344   | 838.127   | AB014597  | 2560.676  | 3160.58   | NM_007066 | 3425.882  | 1340.616  |
| H64379    | 3332.324  | 5103.437  | S81361    | 1147.485  | 1821.732  | NM_003674 | 38244.465 | 19983.461 |
| T72202    | 1059.414  | 1387.794  | AK024313  | 3734.776  | 2487.41   | NM_001197 | 2872.708  | 1402.712  |
| BI831922  | 2802.835  | 2736.328  | AL359575  | 475.866   | 251.412   | NM_006682 | 1020.521  | 600.589   |
| M69238    | 1134.525  | 1256.513  | NM_015524 | 2470.477  | 1494.598  | NM_014977 | 54081.906 | 44523.23  |
| NM_016081 | 7543.588  | 5069.521  | NM_001673 | 9223.605  | 7276.471  | AK026325  | 1837.418  | 1879.844  |
| NM_006389 | 6897.381  | 4729.893  | NM_016510 | 3330.439  | 5089.311  | U83857    | 747.939   | 694.43    |
| M30818    | 450.886   | 320.179   | NM_014270 | 2809.923  | 5424.964  | NM_001230 | 1786.213  | 1432.935  |
| NM_000163 | 248.182   | 626.35    | NM_000071 | 3745.519  | 5183.885  | AK025662  | 2389.562  | 1724.698  |
| NM_003329 | 59876.48  | 51021.746 | NM_006035 | 2070.416  | 3760.175  | NM_000201 | 1562.08   | 1313.339  |
| NM_003299 | 23908.338 | 15943.625 | NM_006086 | 7736.025  | 9559.03   | AB011539  | 1078.448  | 1060.243  |
| NM_014330 | 6983.969  | 5767.152  | NM_004520 | 9545.667  | 13587.62  | U37028    | 2157.935  | 2153.01   |
| NM_007034 | 833.473   | 571.122   | AK027118  | 13502.256 | 21288.52  | AB014597  | 2525.867  | 2827.019  |
| NM_005261 | 877.276   | 884.49    | AK022882  | 16222.193 | 13889.114 | S81361    | 525.933   | 633.449   |
| NM_001560 | 1291.001  | 1534.707  | NM_006105 | 2753.638  | 4240.547  | AK024313  | 6262.879  | 6825.61   |
| NM_001783 | 9750.887  | 9697.037  | NM_005981 | 657.857   | 1450.177  | AL359575  | 460.975   | 556.707   |
| J03171    | 4279.736  | 4794.735  | NM_016264 | 977.457   | 954.768   | NM_002022 | 580.965   | 538.317   |
| NM_005312 | 2343.296  | 3015.678  | NM_006079 | 11426.596 | 9316.534  | NM_015524 | 4737.122  | 3559.262  |
| NM_001711 | 674.686   | 710.779   | AB037837  | 1946.973  | 2179.435  | NM_001673 | 6167.671  | 3384.718  |
| NM_004210 | 7659.332  | 8947.765  | NM_014595 | 3437.584  | 2764.496  | AK023167  | 556.717   | 442.737   |
| NM_020140 | 1699.828  | 1995.398  | NM_014789 | 972.237   | 693.755   | NM_016510 | 3454.275  | 1969.834  |
| NM_018964 | 2444.554  | 2424.132  | AB046784  | 1014.497  | 529.351   | NM_014270 | 2093.652  | 1273.025  |
| NM_000080 | 634.61    | 647.891   | X52402    | 972.166   | 370.867   | NM_000071 | 2209.631  | 1551.377  |
| NM_001829 | 2312.748  | 2252.876  | AL133663  | 925.785   | 742.723   | NM_006843 | 2214.122  | 1088.37   |
| AF283645  | 3369.097  | 2987.503  | NM_014462 | 2309.868  | 1755.327  | NM_004321 | 2146.085  | 1504.746  |
| NM_016575 | 368.512   | 451.63    | NM_014156 | 52513.621 | 41269.605 | AF311212  | 6957.794  | 4455.703  |
| NM_018557 | 406.108   | 518.324   | NM_003137 | 6420.796  | 11237.628 | NM_006915 | 1960.627  | 1603.801  |
| NM_001045 | 3402.329  | 4374.219  | NM_006938 | 42422.234 | 43416.07  | NM_006035 | 1260.213  | 996.328   |
| NM_005697 | 5356.032  | 6183.717  | NM_020158 | 2793.913  | 3578.762  | NM_006086 | 6734.229  | 5565.505  |
| NM_003099 | 7864.036  | 7501.606  | AK025561  | 4643.058  | 6906.891  | NM_004520 | 9389.938  | 6136.19   |
| NM_004781 | 2229.122  | 2523.759  | NM_018602 | 18160.029 | 20720.061 | AK027118  | 13170.284 | 9046.596  |
| NM_018303 | 2754.393  | 3212.682  | NM_004096 | 5213.979  | 5889.811  | AK022882  | 13988.996 | 11775.695 |
| NM_014758 | 3734.609  | 4330.724  | NM_017629 | 6348.169  | 7497.083  | NM_006105 | 3502.48   | 2824.779  |
| NM_005124 | 2474.762  | 2992.498  | AL049681  | 1817.573  | 2382.467  | NM_005981 | 430.506   | 503.596   |
| AK000947  | 2699.722  | 3085.947  | NM_006584 | 1290.091  | 2038.621  | NM_016264 | 990.423   | 819.75    |
| L08240    | 1561.302  | 1634.472  | AF052181  | 2195.58   | 1899.369  | NM_006079 | 12274.305 | 9137.395  |
| NM_002940 | 1443.14   | 1699.977  | AL050074  | 3821.788  | 2865.36   | AB037837  | 1581.134  | 1647.998  |
| AB046844  | 1468.184  | 1194.478  | AK026436  | 779.832   | 683.661   | NM_014595 | 5659.163  | 5722.054  |
| NM_000302 | 1713.226  | 1403.901  | NM_018061 | 2077.72   | 1556.641  | NM_014789 | 1290.585  | 1341.652  |
| NM_013235 | 22589.508 | 18201.092 | AK023059  | 1075.477  | 777.507   | AB046784  | 1278.665  | 887.327   |
| NM_016015 | 10502.026 | 7453.632  | NM_003551 | 2845.191  | 2039.014  | X52402    | 3185.399  | 3174.245  |
| NM_020120 | 1698.16   | 1345.304  | AK021900  | 1434.025  | 976.497   | AL133663  | 1047.533  | 849.674   |
| AK022900  | 1472.217  | 1241.758  | NM_002764 | 7717.237  | 7472.022  | NM_004992 | 1339.236  | 1203.312  |
| AB023216  | 996.314   | 947.995   | NM_019857 | 632.311   | 1164.322  | NM_014462 | 2240.915  | 1660.784  |
| NM_002266 | 41933.656 | 33070.047 | NM_005962 | 5530.453  | 9954.646  | NM_014156 | 56860.738 | 42956.594 |
| NM_014400 | 6340.616  | 7005.543  | X74864    | 760.721   | 1174.351  | NM_003137 | 5632.187  | 3326.711  |
| AL157492  | 1723.065  | 1653.066  | NM_016170 | 4671.729  | 7378.278  | NM_006938 | 41796.313 | 21028.324 |
| AL353957  | 4594.069  | 8631.509  | S72620    | 38725.031 | 45923.602 | NM_020158 | 2726.441  | 1617.272  |
| NM_007214 | 7720.127  | 8078.497  | NM_005263 | 9247.757  | 13404.977 | AF176085  | 2309.195  | 1706.468  |
| NM_000311 | 9584.307  | 10491.429 | AB033022  | 3661.936  | 5477.293  | NM_006985 | 9544.255  | 7122.292  |
| NM_017909 | 3217.461  | 3721.57   | AF147397  | 456.943   | 492.916   | AF265228  | 1714.421  | 1237.753  |
| NM_006335 | 12322.092 | 13003.53  | AK027158  | 820.929   | 637.385   | NM_003757 | 31554.664 | 23093.559 |
| NM_000786 | 636.784   | 803.922   | AK002187  | 596.376   | 703.319   | AK025561  | 4542.174  | 3082.422  |

|           |           |           |           |           |           |           |           |           |
|-----------|-----------|-----------|-----------|-----------|-----------|-----------|-----------|-----------|
| NM_002519 | 672.017   | 785.4     | AF085836  | 1448.793  | 1065.783  | NM_018602 | 21688.803 | 17144.102 |
| NM_017731 | 936.541   | 1120.953  | AL359654  | 902.374   | 516.908   | NM_004096 | 4072.461  | 3215.342  |
| AB040891  | 3866.64   | 4013.954  | AK024224  | 1928.987  | 2275.394  | NM_017629 | 6213.843  | 4508.268  |
| AB037780  | 512.918   | 650.966   | NM_015362 | 11990.095 | 8462.344  | AL049681  | 1392.353  | 1354.685  |
| NM_005845 | 18470.615 | 17285.443 | AF147344  | 1182.336  | 817.583   | NM_006584 | 1001.781  | 713.106   |
| NM_016209 | 13147.409 | 15454.039 | AF147371  | 1154.69   | 2909.077  | AF052181  | 2320.226  | 2359.252  |
| NM_002029 | 727.17    | 1049.411  | AF086261  | 1119.957  | 2252.826  | AL050074  | 5896.188  | 5993.799  |
| AK002114  | 5688.539  | 4077.417  | AK025088  | 4866.604  | 8168.015  | AK026436  | 885.19    | 601.169   |
| AL390184  | 492.213   | 521.044   | U79295    | 776.773   | 1786.703  | NM_018061 | 2031.428  | 1973.296  |
| NM_018048 | 482.217   | 452.152   | AK002107  | 1077.8    | 945.878   | AK023059  | 867.056   | 884.61    |
| AK026318  | 1744.7    | 1500.425  | NM_003596 | 2902.835  | 4445.677  | NM_003551 | 2678.337  | 2988.716  |
| AF291673  | 1628.069  | 1292.42   | NM_018838 | 4389.804  | 3937.328  | AF305210  | 685.681   | 1043.388  |
| NM_004365 | 8308.592  | 6515.116  | AK021454  | 1992.685  | 1460.864  | AK021900  | 1916.117  | 2108.423  |
| NM_016355 | 8235.641  | 15733.712 | AK022069  | 1166.366  | 790.018   | NM_002764 | 10556.691 | 7865.032  |
| AJ296290  | 6001.779  | 3832.311  | AL137457  | 751.475   | 287.405   | NM_019857 | 1005.975  | 1002.317  |
| AK026092  | 3393.762  | 3083.23   | AL133038  | 1616.067  | 2238.11   | NM_015455 | 30866.047 | 18022.443 |
| AK001175  | 1307.277  | 1873.929  | AL137414  | 904.593   | 615.231   | AF024702  | 10797.757 | 8156.084  |
| NM_003897 | 4700.743  | 5361.872  | AL359574  | 1683.348  | 2836.502  | NM_001964 | 916.985   | 693.846   |
| NM_014165 | 11906.96  | 14043.229 | AL133569  | 1153.052  | 1304.617  | NM_005962 | 5658.135  | 3560.179  |
| AL442085  | 4243.926  | 3969.914  | AF088014  | 539.174   | 812.06    | X74864    | 2110.447  | 1821.527  |
| NM_013313 | 6602.345  | 9454.604  | AL109719  | 807.607   | 779.403   | AK026804  | 3293.324  | 1902.782  |
| NM_014736 | 17367.033 | 14772.072 | AF086093  | 1699.954  | 4239.431  | NM_016170 | 7237.982  | 4738.092  |
| AK023886  | 1346.357  | 1775.973  | U92022    | 964.829   | 2315.052  | NM_006166 | 2446.939  | 1944.654  |
| NM_002553 | 2813.26   | 3138.132  | NM_003650 | 18605.398 | 28882.654 | S72620    | 25985.494 | 19578.566 |
| AJ404615  | 4276.121  | 5087.491  | AK022119  | 2631.34   | 3523.451  | NM_005263 | 8352.801  | 6926.912  |
| NM_016053 | 25769.281 | 26092.039 | AL157488  | 376.97    | 563.924   | AB033022  | 3836.542  | 2914.777  |
| AB007869  | 2307.071  | 2826.562  | NM_016644 | 1545.301  | 2093.864  | AF147397  | 759.576   | 964.885   |
| NM_018071 | 1780.613  | 1338.875  | AF072164  | 1359.356  | 1228.263  | AK027158  | 581.944   | 470.983   |
| NM_004333 | 3021.838  | 2809.041  | NM_018610 | 351.716   | 423.909   | AK002187  | 517.595   | 484.62    |
| AL050137  | 420.937   | 878.232   | NM_017773 | 1814.093  | 1923.961  | AF085836  | 1641.99   | 1484.476  |
| AK024423  | 1965.882  | 2261.211  | AK021885  | 1501.64   | 2640.157  | AL049449  | 916.725   | 1245.201  |
| NM_005043 | 5807.274  | 6700.608  | AK022018  | 388.061   | 1217.085  | AF147347  | 852.112   | 1650.344  |
| NM_005979 | 3105.638  | 3753.16   | AK022161  | 474.908   | 678.362   | AL359654  | 1220.681  | 1210.867  |
| NM_006282 | 6532.829  | 6572.512  | AK022296  | 332.384   | 525.152   | AK024224  | 3359.176  | 3229.54   |
| NM_020321 | 507.845   | 799.502   | AK021940  | 950.888   | 1002.924  | NM_015362 | 14460.319 | 10609.26  |
| NM_015920 | 17285.588 | 16865.678 | AK022338  | 664.691   | 1055.903  | AF147344  | 854.773   | 685.56    |
| AB011113  | 1330.817  | 1289.244  | AK026856  | 1030.226  | 1609.594  | AF147371  | 875.658   | 725.232   |
| NM_004115 | 1000.839  | 766.995   | AL162033  | 1574.968  | 3436.529  | AK023745  | 495.891   | 335.745   |
| NM_018287 | 1274.119  | 1392.349  | AL162010  | 1013.787  | 1982.405  | NM_018982 | 4651.974  | 2910.157  |
| NM_001955 | 880.052   | 1168.149  | AK026893  | 399.522   | 956.256   | AF086254  | 3617.199  | 2221.188  |
| AF016004  | 1346.384  | 3571.76   | AK026761  | 559.96    | 953.258   | AF086261  | 823.354   | 609.039   |
| NM_003567 | 1313.588  | 1575.243  | NM_005001 | 26161.699 | 20174.566 | AF086367  | 1215.045  | 1213.163  |
| NM_007315 | 2078.811  | 1484.585  | AK024175  | 4886.877  | 4037.098  | AF086437  | 989.29    | 713.901   |
| L20686    | 1043.698  | 1233.845  | NM_000510 | 1273.551  | 1165.354  | AK025088  | 3885.21   | 3082.564  |
| NM_000304 | 1760.427  | 2097.877  | NM_017787 | 2814.35   | 3566.073  | U79295    | 776.713   | 651.718   |
| NM_002675 | 1643.869  | 1174.478  | AF009278  | 804.22    | 1702.455  | AK002107  | 705.306   | 622.283   |
| NM_012432 | 6156.17   | 4889.585  | M20839    | 523.609   | 1094.855  | NM_003596 | 2343.852  | 2576.397  |
| NM_005007 | 2691.488  | 2558.051  | NM_020315 | 11348.289 | 19486.422 | NM_018838 | 4763.212  | 3789.457  |
| NM_004417 | 1250.92   | 798.31    | unknown ( | 578.45    | 849.646   | AK021454  | 1673.543  | 1954.983  |
| NM_012290 | 7011.632  | 6795.322  | AK001910  | 1141.686  | 2290.241  | AK022069  | 1316.894  | 1239.619  |
| NM_002431 | 8270.203  | 6863.113  | AK023892  | 758.954   | 1344.605  | AL137457  | 790.475   | 603.981   |
| NM_001827 | 61275.387 | 62296.949 | AF124368  | 708.561   | 852.226   | AF085944  | 722.799   | 1028.975  |
| NM_020466 | 1560.031  | 2004.431  | AF265210  | 1922.774  | 2671.333  | AL133038  | 1268.153  | 1085.239  |

|           |           |           |           |           |           |           |           |           |
|-----------|-----------|-----------|-----------|-----------|-----------|-----------|-----------|-----------|
| AL079280  | 599.374   | 1210.811  | AK024241  | 1141.924  | 1122.728  | AL137414  | 1425.894  | 1181.837  |
| NM_002853 | 4788.315  | 7862.654  | AK025061  | 1012.845  | 1071.227  | AL359574  | 2250.92   | 1981.862  |
| NM_003174 | 2108.613  | 2042.125  | AF088067  | 5880.288  | 4612.064  | AL133569  | 5322.479  | 4593.729  |
| NM_012307 | 2896.705  | 3177.112  | Y10509    | 1024.212  | 747.835   | AL137435  | 428.369   | 465.149   |
| NM_002540 | 2682.32   | 2694.585  | AK024389  | 4093.652  | 2177.554  | AK027189  | 1236.442  | 709.047   |
| NM_006371 | 2181.449  | 2332.878  | AK026793  | 1244.152  | 880.201   | AL109719  | 821.215   | 736.347   |
| NM_018834 | 1011.086  | 1091.799  | NM_001672 | 1235.935  | 2547.494  | AF086093  | 845.628   | 677.922   |
| AK026882  | 1315.123  | 1179.97   | AJ276253  | 11697.496 | 16445.889 | U92022    | 890.77    | 977.311   |
| NM_004574 | 512.738   | 588.356   | NM_018980 | 848.991   | 1703.359  | NM_003650 | 9963.95   | 8577.497  |
| NM_004848 | 1052.044  | 1327.429  | AF086201  | 1468.643  | 2493.378  | AK022119  | 2721.855  | 2819.439  |
| NM_014813 | 584.898   | 749.071   | U48696    | 1532.134  | 2668.777  | NM_016644 | 1186.596  | 1171.862  |
| AF014459  | 1185.941  | 1494.093  | L32136    | 238.879   | 1132.693  | AF085842  | 591.948   | 653.545   |
| S68069    | 5433.564  | 4644.016  | K00629    | 338.025   | 1084.098  | AK023882  | 638.236   | 437.579   |
| AB011095  | 725.589   | 505.614   | NM_004488 | 269.029   | 587.348   | AK026750  | 1012.75   | 1074.036  |
| NM_001503 | 582.423   | 500.055   | AK024515  | 4056.485  | 5257.462  | AF072164  | 1398.797  | 1445.787  |
| NM_006302 | 2609.181  | 2096.734  | AF085862  | 3908.613  | 5665.284  | NM_018610 | 460.486   | 488.283   |
| AJ224875  | 5508.739  | 4619.952  | NM_017998 | 2558.686  | 4915.333  | AF083122  | 578.553   | 567.23    |
| NM_002149 | 4107.395  | 3242.672  | AL049271  | 51550.289 | 50752.563 | AF232216  | 966.564   | 1689.673  |
| AF043324  | 6580.605  | 4814.028  | AK023079  | 32285.826 | 32835.602 | NM_017773 | 3566.889  | 4029.443  |
| AK024172  | 1221.346  | 1153.016  | NM_019609 | 2522.462  | 2546.682  | AK022161  | 459.814   | 565.592   |
| NM_014814 | 12394.271 | 17225.045 | AK026198  | 1832.767  | 1452.126  | AK022296  | 499.196   | 414.921   |
| NM_000423 | 4346.427  | 5227.487  | AF183570  | 1108.196  | 793.596   | AK021940  | 660.454   | 640.721   |
| AB046838  | 3039.883  | 3100.855  | AK024048  | 7584.551  | 9565.081  | AK022189  | 549.723   | 646.654   |
| X98411    | 4416.036  | 4678.318  | AB033093  | 6038.641  | 3750.268  | AK022338  | 595.717   | 782.108   |
| AF116658  | 4398.504  | 4281.713  | NM_005912 | 994.538   | 457.718   | AK026856  | 804.557   | 554.054   |
| NM_014865 | 4455.982  | 5501.045  | NM_005909 | 25990.289 | 11556.577 | AL162033  | 2220.402  | 1844.246  |
| AB032977  | 2295.356  | 2627.375  | AK001948  | 618.401   | 1525.628  | AK026321  | 436.537   | 1015.755  |
| AK001725  | 1451.368  | 1464.786  | AK021879  | 847.376   | 1190.895  | AK026761  | 406.947   | 820.736   |
| NM_003036 | 1477.323  | 1555.456  | AK055991  | 1850.214  | 1733.108  | NM_005001 | 26698.264 | 22194.814 |
| NM_020529 | 4066.46   | 3541.659  | AF113697  | 481.447   | 763.95    | AK024175  | 5677.643  | 4714.584  |
| NM_020395 | 3608.019  | 2640.836  | AF085991  | 2375.473  | 2878.716  | NM_000510 | 1114.765  | 1154.11   |
| NM_003425 | 1129.581  | 905.573   | AF075007  | 537.965   | 1204.675  | NM_017787 | 4344.365  | 6797.105  |
| NM_013388 | 6690.059  | 4583.611  | NM_020427 | 16836.217 | 26444.021 | NM_020315 | 8448.107  | 6916.88   |
| AF038951  | 9960.226  | 6252.894  | AF085920  | 1275.622  | 2053.068  | AK001910  | 1248.58   | 1182.29   |
| AK021811  | 2128.845  | 1987.958  | AK023173  | 7459.278  | 9821.086  | AK023892  | 533.457   | 632.038   |
| NM_003428 | 1482.764  | 1094.082  | AK025225  | 564.993   | 989.265   | AF124368  | 787.284   | 1154.695  |
| AF055030  | 2342.029  | 4068.487  | U79275    | 4905.592  | 5702.764  | AF265210  | 1986.242  | 2164.875  |
| BC012782  | 3986.852  | 10207.777 | AJ227908  | 1020.183  | 1021.389  | AK024241  | 596.467   | 919.349   |
| AF132026  | 61005.855 | 66887.641 | AF007193  | 999.895   | 634.944   | AK025061  | 1216.695  | 1172.265  |
| AB037788  | 10890.479 | 12751.983 | AK022367  | 1122.268  | 899.551   | AF088067  | 7617.499  | 6518.228  |
| AF147412  | 6457.461  | 5797.646  | CY3Cy5    | 1930.404  | 154.224   | AK022213  | 544.528   | 472.279   |
| AK024570  | 15639.2   | 13068.226 | K02765    | 888.489   | 615.716   | AF056441  | 1459.269  | 1754.439  |
| AF161401  | 10351.77  | 9643.004  | M65134    | 552.773   | 472.704   | AK024142  | 224.718   | 464.872   |
| NM_000990 | 10282.721 | 8332.819  | BG539651  | 984.963   | 898.133   | Y10509    | 1199.367  | 1023.739  |
| NM_014740 | 5625.773  | 4770.03   | N52646    | 8629.014  | 7049.584  | AK024389  | 6250.77   | 6412.753  |
| NM_015956 | 9666.612  | 8027.888  | AW160671  | 51377.664 | 42566.605 | AK026793  | 1810.321  | 2576.905  |
| AF075008  | 1636.939  | 1147.309  | BI870529  | 18166.658 | 19306.197 | NM_001672 | 897.043   | 931.467   |
| NM_006504 | 1848.482  | 1712.769  | AA702698  | 1394.82   | 1159.326  | AJ276253  | 15848.061 | 13678.494 |
| AF070538  | 880.849   | 814.863   | AI681514  | 539.181   | 540.989   | AF147314  | 795.137   | 627.466   |
| AL137430  | 541.748   | 334.172   | NM_001300 | 3059.337  | 2674.951  | NM_018980 | 4001.227  | 4187.586  |
| NM_000696 | 7900.559  | 4824.903  | BG748827  | 5549.763  | 4989.903  | AF086201  | 1467.485  | 1981.264  |
| NM_002488 | 25095.559 | 15669.004 | AA952897  | 1741.704  | 1590.6    | AK024712  | 502.973   | 539.512   |
| NM_004003 | 2051.42   | 1509.264  | BG760342  | 5670.824  | 6243.429  | U48696    | 1113.438  | 1093.919  |

|           |           |           |           |           |           |           |           |           |
|-----------|-----------|-----------|-----------|-----------|-----------|-----------|-----------|-----------|
| NM_00018E | 3371.087  | 1866.443  | AA703141  | 2192.725  | 1959.637  | AF230316  | 6198.65   | 5334.29   |
| BF244401  | 1623.211  | 3375.603  | AI122630  | 7729.735  | 9200.004  | K00629    | 267.1     | 217.039   |
| AB046850  | 4889.002  | 11849.691 | NM_002103 | 21527.613 | 20827.322 | AK024515  | 4061.048  | 4677.475  |
| NM_014801 | 1061.483  | 2745.129  | NM_003379 | 6497.565  | 6354.574  | AF085862  | 3997.534  | 4186.233  |
| NM_003642 | 16808.957 | 28400.307 | SR1       | 60275.91  | 64772.941 | NM_01799E | 2095.255  | 1862.002  |
| AB027013  | 1214.112  | 2221.459  | SR3       | 36826.688 | 24399.9   | AL049271  | 36894.191 | 29571.223 |
| NM_00710E | 642.159   | 626.761   | SR5       | 4701.467  | 3674.128  | AK023079  | 26968.027 | 21585.916 |
| NM_003074 | 5268.473  | 4041.623  | SR7       | 4483.575  | 28750.189 | NM_01960E | 1499.777  | 1854.197  |
| AL360195  | 768.008   | 637.992   | SR9       | 16200.604 | 2668.794  | AK026198  | 1529.568  | 1578.312  |
| NM_017810 | 2111.482  | 2043.803  | CY3Cy5    | 2096.666  | 160.943   | AF183570  | 1007.645  | 1069.482  |
| NM_003181 | 23393.744 | 18456.787 | NM_01242E | 4973.953  | 5081.695  | NM_005497 | 25384.41  | 21413.299 |
| NM_004451 | 1597.765  | 2108.297  | NM_00172E | 5845.277  | 6041.961  | AK024048  | 5002.916  | 5083.585  |
| NM_004364 | 637.746   | 445.137   | NM_00556E | 6560.732  | 6488.874  | AB033093  | 6219.68   | 5703.855  |
| AK023505  | 1756.997  | 1259.529  | NM_003824 | 5296.246  | 4750.534  | NM_005912 | 832.998   | 815.7     |
| AB037851  | 4071.87   | 2289.353  | NM_00068E | 526.085   | 507.937   | NM_00590E | 31962.021 | 30804.113 |
| AL050389  | 4465.057  | 2323.721  | NM_012452 | 1345.304  | 1255.486  | AK055991  | 1224.185  | 1189.792  |
| AK025855  | 979.322   | 660.042   | AF229166  | 895.682   | 856.806   | AF113697  | 609.599   | 561.664   |
| AK024684  | 1009.814  | 589.354   | NM_005137 | 2576.267  | 2090.172  | AK022326  | 2051.951  | 2761.808  |
| NM_01494E | 10545.558 | 6545.677  | NM_006764 | 1444.722  | 1371.636  | AF085991  | 922.4     | 1728.76   |
| AK001546  | 1336.102  | 1347.411  | NM_00138E | 385.4     | 335.824   | NM_00568E | 1648.678  | 1479.162  |
| AK023055  | 937.999   | 2466.451  | NM_001163 | 1228.704  | 1309.638  | NM_020427 | 10964.776 | 8616.875  |
| AL049282  | 10307.607 | 20717.039 | NM_00587E | 974.218   | 762.063   | AF085920  | 2704.727  | 3275.513  |
| AK021443  | 4443.435  | 9850.909  | AF308602  | 3692.902  | 3158.913  | AK023173  | 12677.805 | 16764.182 |
| AF070569  | 946.638   | 1678.988  | AB011089  | 1696.997  | 1328.628  | AK025225  | 466.831   | 395.721   |
| NM_02023E | 3329.869  | 4014.642  | AF007192  | 465.865   | 620.384   | U79275    | 4977.007  | 4227.169  |
| AL355732  | 2471.916  | 2679.217  | NM_00127E | 5600.625  | 5471.214  | AJ227908  | 730.697   | 676.915   |
| NM_01796E | 3068.47   | 2928.006  | NM_016157 | 526.753   | 737.802   | AF007193  | 902.956   | 931.347   |
| AF143327  | 1233.808  | 1156.358  | NM_01491E | 20933.203 | 11365.158 | AK022367  | 1283.136  | 1800.953  |
| AL137535  | 1206.625  | 857.266   | NM_01228E | 1650.306  | 1717.8    | BC028589  | 2033.385  | 2296.417  |
| AF131843  | 762.138   | 759.199   | NM_00219E | 5530.99   | 5325.107  | CY3Cy5    | 5104.43   | 319.631   |
| AK026653  | 1505.269  | 1652.215  | D84294    | 2294.139  | 1637.827  | K02765    | 1366.337  | 1918.346  |
| NM_020231 | 1296.04   | 1513.986  | M31659    | 1108.829  | 904.502   | M65134    | 519.883   | 741.55    |
| AL133118  | 4364.038  | 2963.699  | NM_00305E | 3950.052  | 4074.885  | BG539651  | 1244.323  | 1281.258  |
| AK023571  | 481.819   | 321.922   | NM_01622E | 12200.174 | 11043.818 | N52646    | 14760.155 | 14638.804 |
| AF052148  | 557.762   | 520.766   | AK024311  | 978.763   | 1152.203  | AW160671  | 52859.434 | 54304.68  |
| AF131783  | 333.961   | 438.783   | AF052155  | 8614.616  | 9236.37   | BI870529  | 23561.697 | 21474.611 |
| NM_00170E | 2323.897  | 1743.205  | NM_00508E | 1157.721  | 1061.867  | AI681514  | 946.969   | 1016.705  |
| AK026657  | 1904.43   | 1134.313  | AF060902  | 1401.884  | 1353.963  | NM_00130C | 4807.77   | 8694.267  |
| AF087991  | 19098.943 | 11476.758 | AF121858  | 4075.818  | 3864.812  | BG748827  | 5022.177  | 4591.071  |
| AJ227884  | 441.132   | 636.495   | NM_013437 | 4897.374  | 5065.18   | AA952897  | 1780.429  | 1683.936  |
| X64986    | 977.7     | 1057.083  | NM_017681 | 937.181   | 933.04    | BG760342  | 6155.297  | 5107.11   |
| L38282    | 949.723   | 1259.954  | X57655    | 9687.291  | 9262.348  | AA703141  | 2210.801  | 1840.996  |
| NM_01805E | 5176.244  | 4532.937  | AK025966  | 2157.763  | 1828.307  | AI122630  | 9319.947  | 7589.8    |
| NM_01900E | 2324.167  | 2185.015  | NM_01872E | 612.786   | 404.623   | NM_00210E | 22505.822 | 19959.906 |
| M20838    | 681.028   | 508.316   | NM_003081 | 15506.082 | 14073.994 | NM_00337E | 6793.199  | 6145.017  |
| AK022738  | 531.915   | 710.072   | NM_01649E | 7225.128  | 6477.787  | SR1       | 56034.02  | 62958.563 |
| AK024252  | 965.575   | 1350.704  | D50402    | 10565.902 | 9550.012  | SR3       | 40660.379 | 25436.846 |
| AK002095  | 576.242   | 657.28    | M73547    | 8490.921  | 8665.203  | SR5       | 5843.386  | 5871.756  |
| AK000821  | 4493.333  | 2900.217  | NM_003687 | 974.879   | 777.914   | SR7       | 4994.468  | 44917.965 |
| AK024526  | 3461.868  | 4245.594  | NM_004134 | 3062.744  | 2862.299  | SR9       | 16456.506 | 2871.538  |
| NM_01761E | 992.916   | 812.478   | NM_00595E | 2108.208  | 1679.232  | CY3Cy5    | 2871.588  | 213.162   |
| NM_01784E | 476.119   | 527.746   | NM_00404E | 781.464   | 795.739   | NM_00172E | 4711.178  | 7181.986  |
| AK024315  | 12561.615 | 8772.686  | NM_001179 | 382.036   | 373.515   | NM_00556E | 7373.417  | 6664.522  |



|           |           |           |           |           |           |           |           |           |
|-----------|-----------|-----------|-----------|-----------|-----------|-----------|-----------|-----------|
| AK024579  | 1215.24   | 1054.591  | NM_017765 | 6837.3    | 6219.247  | NM_003824 | 6430.996  | 6364.473  |
| S75708    | 6266.709  | 8398.506  | NM_000428 | 595.748   | 1380.241  | NM_000686 | 685.019   | 898.838   |
| U79291    | 12913.648 | 13219.511 | AB040967  | 1397.916  | 1827.784  | NM_012452 | 2459.955  | 2340.421  |
| D17172    | 25177.338 | 29008.328 | NM_014721 | 1017.237  | 1453.53   | AF229166  | 773.022   | 942.823   |
| AJ227859  | 2297.84   | 2475.575  | AK026352  | 740.698   | 928.835   | NM_005137 | 2697.361  | 3564.969  |
| AK022670  | 953.123   | 1079.089  | AL137705  | 2600.935  | 3434.346  | NM_006764 | 1511.85   | 1563.128  |
| AB020699  | 6631.103  | 8829.455  | U41898    | 488.523   | 594.742   | NM_001386 | 866.297   | 1286.26   |
| AF086269  | 1808.434  | 2848.78   | NM_014848 | 507.772   | 705.592   | NM_001163 | 1384.34   | 1506.018  |
| U90437    | 17837.732 | 22441.273 | BF217766  | 765.567   | 1045.255  | NM_005878 | 1782.702  | 1839.107  |
| AK000842  | 8996.931  | 8502.509  | NM_000184 | 1156.906  | 1431.785  | AF308602  | 3280.002  | 3633.059  |
| AK023386  | 6870.424  | 4514.473  | NM_016180 | 459.866   | 442.434   | AB011089  | 1419.498  | 1256.024  |
| NM_007053 | 18238.299 | 14669.337 | NM_000112 | 770.225   | 790.107   | AF007192  | 648.184   | 526.26    |
| AK022789  | 497.318   | 313.15    | NM_005827 | 6976.1    | 6526.374  | NM_001276 | 6115.343  | 5017.229  |
| AK023756  | 807.782   | 758.947   | NM_003053 | 2787.985  | 2849.768  | NM_016157 | 864.8     | 776.852   |
| NM_001126 | 9963.575  | 12373.571 | NM_003044 | 895.473   | 695.332   | NM_014915 | 16281.885 | 18205.895 |
| AK023673  | 5824.133  | 7325.963  | NM_006672 | 3500.816  | 3033.578  | NM_012286 | 1448.605  | 1419.491  |
| NM_018252 | 6186.915  | 6490.278  | AB007875  | 811.73    | 802.741   | NM_002195 | 6346.069  | 5216.25   |
| NM_018000 | 11833.07  | 12695.733 | NM_014796 | 4357      | 4076.708  | D84294    | 1888.214  | 1800.889  |
| AF164963  | 368.579   | 965.55    | NM_001147 | 319.519   | 260.605   | NM_005085 | 1474.826  | 1632.917  |
| AF124366  | 40176.426 | 42898.344 | AL050288  | 23706.074 | 24492.531 | AF060902  | 1503.605  | 1474.999  |
| AF130112  | 1777.199  | 2121.916  | NM_005040 | 4286.024  | 3936.882  | AF121858  | 5907.407  | 6114.182  |
| NM_000551 | 8662.815  | 11979.258 | NM_016391 | 8535.554  | 8103.858  | NM_013437 | 5150.549  | 4881.035  |
| AL365518  | 3148.032  | 3714.058  | M80783    | 428.633   | 415.866   | NM_017681 | 1344.992  | 1065.131  |
| AF086257  | 4021.781  | 4881.389  | AF075033  | 6402.982  | 6311.277  | X57655    | 12524.261 | 10870.33  |
| AF075056  | 687.843   | 929.984   | D50911    | 11035.118 | 10307.816 | AK025966  | 2383.217  | 2318.872  |
| U00928    | 811.307   | 1061.559  | AB011104  | 1405.738  | 1428.546  | NM_018725 | 735.89    | 620.816   |
| NM_019056 | 7596.832  | 8288.504  | AK024069  | 4116.042  | 3282.844  | NM_003081 | 14929.361 | 13109.684 |
| AF279783  | 3355.314  | 4147.826  | NM_004582 | 17729.123 | 16833.801 | NM_016495 | 7896.111  | 7401.486  |
| AF182422  | 18906.508 | 22167.6   | NM_015640 | 10393.191 | 11378.078 | D50402    | 14503.677 | 12375.067 |
| AF070602  | 1059.029  | 1422.136  | AF233450  | 926.035   | 1054.428  | M73547    | 9434.314  | 7405.274  |
| BE393290  | 2326.707  | 3049.127  | NM_016233 | 1160.037  | 1097.856  | NM_003687 | 780.048   | 795.535   |
| NM_017622 | 4336.858  | 4276.276  | NM_000821 | 9754.687  | 8896.261  | NM_004134 | 2764.391  | 2643.419  |
| AF133331  | 14684.619 | 12595.408 | NM_003145 | 23497.164 | 20591.01  | NM_005955 | 2238.905  | 2653.073  |
| AK022289  | 952.319   | 759.849   | NM_001632 | 1300.258  | 1551.88   | NM_004048 | 837.301   | 637.867   |
| AF161403  | 1503.62   | 1069.895  | NM_012264 | 1906.807  | 2056.371  | NM_001179 | 478.644   | 1270.494  |
| NM_020183 | 8266.715  | 9576.892  | AF311312  | 1919.107  | 1895.315  | AB040967  | 1268.206  | 1529.7    |
| NM_018029 | 1513.697  | 1911.278  | NM_014915 | 18907.389 | 10493.009 | NM_014721 | 1242.071  | 1150.938  |
| AL389954  | 1700.478  | 1788.411  | NM_012286 | 1519.052  | 1419.727  | AK026352  | 841.693   | 1177.07   |
| NM_019852 | 3238.162  | 4097.948  | NM_002195 | 5364.053  | 5434.493  | AL137705  | 2247.535  | 2202.073  |
| NM_006118 | 4708.056  | 6140.012  | D84294    | 2404.674  | 1506.666  | U41898    | 444.557   | 532.425   |
| AK026225  | 44921.707 | 44238.379 | K02765    | 1004.051  | 1007.838  | NM_014848 | 425.943   | 420.058   |
| AL050032  | 1321.793  | 1454.629  | M65134    | 512.601   | 608.622   | BF217766  | 738.597   | 1004.942  |
| AF009304  | 1615.932  | 1880.015  | BG539651  | 1017.069  | 865.172   | NM_000184 | 1429.234  | 1145.036  |
| AF086177  | 17966.924 | 20065.281 | N52646    | 9781.892  | 7925.292  | NM_016180 | 441.192   | 269.278   |
| NM_018949 | 1221.153  | 1472.471  | AW160671  | 48288.164 | 43752.184 | NM_000112 | 731.038   | 588.166   |
| Z36847    | 422.614   | 864.91    | BI870529  | 17922.92  | 17367.688 | NM_005827 | 8288.691  | 8192.62   |
| D17187    | 2741.51   | 3313.537  | AA702698  | 925.633   | 824.252   | NM_003053 | 2359.669  | 2388.856  |
| AJ243672  | 1008.379  | 1374.93   | AI681514  | 625.348   | 802.334   | NM_003044 | 740.426   | 854.215   |
| AL122087  | 1300.778  | 1943.865  | NM_001300 | 3185.067  | 3278.194  | NM_006672 | 4700.176  | 3775.618  |
| D17169    | 58983.855 | 50518.402 | BG748827  | 5206.221  | 5000.208  | AB007875  | 1138.301  | 2138.717  |
| NM_017924 | 14131.925 | 17204.828 | AA952897  | 1682.039  | 1569.338  | NM_014796 | 4502.12   | 4575.019  |
| S81578    | 671.885   | 652.142   | BG760342  | 4998.716  | 5399.406  | AL050288  | 27850.264 | 25823.697 |
| NM_017546 | 10585.403 | 12993.487 | AA703141  | 2037.531  | 1729.341  | NM_005040 | 4949.447  | 5058.556  |

|           |           |           |           |           |           |           |           |           |
|-----------|-----------|-----------|-----------|-----------|-----------|-----------|-----------|-----------|
| AL137400  | 1862.323  | 2038.694  | AI122630  | 8332.872  | 8174.242  | NM_016391 | 9685.587  | 11043.516 |
| NM_006511 | 1443.208  | 1069.181  | NM_002103 | 22778.219 | 20490.15  | AF075033  | 5954.01   | 5553.001  |
| AF007142  | 2351.006  | 2387.86   | NM_003379 | 6933.657  | 7092.659  | D50911    | 12754.549 | 13212.984 |
| AF119853  | 3052.839  | 5059.326  | NM_006589 | 5320.997  | 5979.243  | AB011104  | 1310.11   | 1458.075  |
| AF279782  | 791.081   | 1108.215  | NM_004134 | 2542.332  | 2631.062  | AK024069  | 4650.146  | 4540.565  |
| CY3Cy5    | 1142.207  | 122.213   | NM_005955 | 2309.118  | 2065.758  | NM_004582 | 18730.473 | 16977.195 |
| AI248827  | 6117.951  | 3992.496  | NM_004048 | 1010.805  | 1002.824  | NM_015640 | 11025.107 | 8831.896  |
| R45026    | 1502.988  | 1023.133  | NM_012428 | 5539.957  | 5269.74   | AF233450  | 902.723   | 877.412   |
| AI970239  | 1344.977  | 1383.488  | NM_013269 | 497.9     | 363.998   | NM_016233 | 1100.962  | 1116.127  |
| X67594    | 829.635   | 990.895   | NM_001728 | 5867.46   | 5757.183  | NM_000821 | 11533.786 | 8764.943  |
| NM_001631 | 418.98    | 549.861   | NM_005565 | 6457.155  | 5737.004  | NM_003145 | 23753.705 | 19994.621 |
| AB000734  | 488.571   | 527.11    | NM_003824 | 5243.01   | 4449.206  | NM_001632 | 1619.203  | 1186.372  |
| NM_005987 | 51193.961 | 52357.242 | NM_000686 | 646.423   | 471.156   | NM_012264 | 1395.696  | 1066.398  |
| X87838    | 1823.2    | 1486.947  | NM_012452 | 1623.469  | 1466.81   | AF311312  | 1823.508  | 1979.993  |
| NM_033199 | 1864.935  | 1523.705  | AF229166  | 797.17    | 902.549   | NM_014915 | 16805.594 | 26580.658 |
| NM_015001 | 1563.244  | 943.137   | NM_005137 | 2864.792  | 2470.692  | NM_012286 | 2244.756  | 4205.264  |
| SR2       | 36376.805 | 23079.363 | NM_006764 | 988.618   | 1063.884  | NM_002195 | 6786.472  | 10650.637 |
| SR4       | 9296.572  | 6108.047  | NM_001386 | 497.18    | 610.819   | D84294    | 2220.984  | 2939.297  |
| SR6       | 1255.147  | 659.354   | NM_001163 | 1201.505  | 1163.607  | K02765    | 1708.894  | 1446.556  |
| SR8       | 4828.867  | 9465.847  | NM_005878 | 1000.701  | 959.347   | M65134    | 594.223   | 510.96    |
| SR10      | 18218.375 | 3821.266  | AF308602  | 3696.77   | 3700.141  | BG539651  | 1279.705  | 1281.898  |
| CY3Cy5    | 913.516   | 138.552   | AB011089  | 1705.462  | 1575.576  | N52646    | 19738.059 | 19003.209 |
| X00094    | 473.426   | 351.632   | AF007192  | 495.172   | 497.961   | AW160671  | 50053.258 | 50826.527 |
| NM_003775 | 258.558   | 252.79    | NM_001276 | 7146.544  | 7567.138  | BI870529  | 22407.529 | 20104.455 |
| NM_002082 | 1124.727  | 1164.694  | NM_016157 | 770.554   | 1073.966  | AA702698  | 1215.077  | 1886.16   |
| AF155657  | 15753.247 | 13175.896 | NM_000112 | 726.357   | 914.078   | AI681514  | 1102.741  | 867.128   |
| NM_006056 | 703.93    | 682.537   | NM_005827 | 8579.938  | 10969.175 | NM_001300 | 4174.617  | 3542.672  |
| NM_001840 | 5836.805  | 4943.133  | NM_003044 | 903.457   | 796.138   | BG748827  | 4718.624  | 5496.043  |
| AK025099  | 3667.451  | 4108.367  | NM_006672 | 3349.199  | 3595.538  | AA952897  | 1593.645  | 1643.017  |
| NM_016099 | 8947.971  | 8240.129  | M31659    | 816.007   | 906.438   | BG760342  | 5298.562  | 4592.914  |
| NM_000830 | 1390.381  | 1590.484  | NM_003056 | 3888.692  | 4075.152  | AA703141  | 2139.602  | 1697.597  |
| NM_001155 | 6289.272  | 4945.896  | NM_016226 | 11242.994 | 9590.4    | AI122630  | 9179.022  | 7137.635  |
| M62896    | 2274.293  | 1435.578  | AK024311  | 983.88    | 1076.773  | NM_002103 | 18739     | 17402.135 |
| NM_017736 | 1305.277  | 1012.266  | AF052155  | 8311.983  | 7998.663  | NM_003379 | 6686.603  | 6878.674  |
| NM_000390 | 1182.654  | 764.628   | NM_005085 | 1158.892  | 1046.038  | NM_006589 | 4784.435  | 3366.27   |
| NM_001498 | 4568.748  | 3226.432  | AF060902  | 1549.838  | 1709.332  | NM_004134 | 3016.282  | 3583.74   |
| AF263523  | 1268.302  | 901.243   | AF121858  | 3351.536  | 2881.844  | NM_005955 | 3366.458  | 6449.038  |
| L08441    | 6441.984  | 7160.587  | NM_013437 | 4326.408  | 4818.304  | NM_004048 | 817.272   | 1393.103  |
| AA641953  | 1650.543  | 1113.891  | NM_017681 | 852.8     | 985.176   | NM_012428 | 5574.735  | 5785.193  |
| AL137764  | 10032.453 | 11518.084 | X57655    | 10232.029 | 10842.121 | NM_001728 | 4881.551  | 3908.905  |
| NM_001660 | 10945.608 | 8133.124  | AK025966  | 2015.771  | 2559.624  | NM_005565 | 6578.009  | 7155.442  |
| NM_000710 | 451.661   | 282.466   | NM_014440 | 309.628   | 452.981   | NM_003824 | 5756.602  | 5943.522  |
| NM_000752 | 1094.783  | 1133.16   | NM_018725 | 436.256   | 589.526   | NM_000686 | 386.753   | 606.684   |
| NM_002018 | 4391.88   | 3623.92   | NM_003081 | 17374.768 | 17648.939 | NM_012452 | 2356.169  | 2175.166  |
| AF161383  | 10809.302 | 9777.035  | NM_016495 | 6837.408  | 6947.98   | AF229166  | 787.127   | 828.663   |
| NM_000410 | 6211.057  | 7117.384  | D50402    | 11026.191 | 9857.224  | NM_005137 | 3215.897  | 3544.566  |
| AF224266  | 353.516   | 495.083   | M73547    | 9225.522  | 8844.146  | NM_006764 | 1870.063  | 1737.995  |
| U72882    | 2013.227  | 2139.596  | NM_003687 | 1168.948  | 1158.632  | NM_001386 | 963.286   | 952.418   |
| NM_014337 | 4039.212  | 4056.002  | NM_001632 | 2209.091  | 3987.806  | NM_001163 | 1782.377  | 1362.474  |
| NM_007161 | 3866.185  | 3372.127  | NM_012264 | 1729.085  | 2156.241  | NM_005878 | 1806.57   | 2011.466  |
| NM_014387 | 19579.912 | 18687.266 | AF311312  | 1881.78   | 2173.939  | AF308602  | 3306.666  | 3405.279  |
| NM_003641 | 1764.694  | 1968.378  | NM_001179 | 380.176   | 605.075   | AB011089  | 1622.049  | 1550.007  |
| NM_012463 | 1900.173  | 1728.827  | NM_005313 | 21396.596 | 21442.775 | AF007192  | 424.086   | 342.463   |

|           |           |           |           |           |           |           |           |           |
|-----------|-----------|-----------|-----------|-----------|-----------|-----------|-----------|-----------|
| L29140    | 3233.203  | 2979.198  | NM_017765 | 7566.673  | 6950.682  | NM_001276 | 5995.338  | 4934.246  |
| AK026448  | 4065.204  | 2775.48   | NM_000428 | 543.713   | 557.401   | NM_016157 | 859.494   | 608.059   |
| AK057418  | 2255.043  | 1421.525  | AB040967  | 1501.719  | 1219.821  | NM_000112 | 776.661   | 730.36    |
| NM_007260 | 2359.51   | 1859.253  | NM_014721 | 1290.833  | 1348.956  | NM_005827 | 8446.852  | 9739.722  |
| AF148646  | 3630.483  | 2240.281  | AK026352  | 807.726   | 1251.353  | NM_003053 | 4046.288  | 4628.505  |
| AL110218  | 576.709   | 412.971   | AL137705  | 2061.71   | 2304.808  | NM_003044 | 1348.721  | 1765.773  |
| AB023201  | 1402.256  | 854.876   | U41898    | 499.15    | 391.722   | NM_006672 | 7549.036  | 7521.362  |
| NM_000697 | 984.108   | 689.031   | NM_014848 | 434.638   | 650.358   | M31659    | 949.177   | 866.807   |
| NM_000017 | 4966.228  | 3728.03   | BF217766  | 959.992   | 864.734   | NM_016226 | 13880.287 | 13570.009 |
| NM_000237 | 416.235   | 305.954   | NM_000184 | 1428.503  | 1435.607  | AK024311  | 1114.596  | 996.437   |
| NM_018346 | 6524.804  | 6259.522  | NM_016180 | 651.317   | 436.482   | AF052155  | 7691.101  | 6472.276  |
| AL122054  | 2168.643  | 1624.671  | NM_002103 | 20482.389 | 16766.24  | NM_005085 | 1681.111  | 1413.642  |
| AB011182  | 1533.808  | 1181.039  | NM_003379 | 7383.454  | 6731.805  | AF060902  | 2111.318  | 2029.546  |
| AB023151  | 356.104   | 280.389   | NM_006589 | 5818.792  | 6191.612  | AF121858  | 7828.389  | 6993.271  |
| NM_000140 | 5784.887  | 5367.395  | AB007875  | 1347.114  | 1209.705  | NM_013437 | 5511.406  | 5336.571  |
| NM_005125 | 2717.797  | 3310.725  | NM_018261 | 1826.626  | 1857.248  | NM_017681 | 1314.749  | 1057.557  |
| NM_016246 | 608.714   | 627.935   | NM_014796 | 4564.153  | 4051.242  | X57655    | 12562.394 | 9604.694  |
| NM_015926 | 1411.235  | 1445.11   | AL050288  | 14873.646 | 14963.511 | AK025966  | 2671.404  | 2190.188  |
| X03757    | 1970.766  | 2328.223  | NM_005040 | 4163.869  | 4169.271  | NM_018725 | 668.645   | 522.425   |
| NM_005136 | 397.17    | 622.168   | NM_016391 | 8224.471  | 7520.629  | NM_003081 | 19474.133 | 17841.158 |
| AK094513  | 531.501   | 975.697   | M80783    | 515.176   | 483.768   | NM_016495 | 8446.249  | 7414.932  |
| NM_001183 | 10489.29  | 9924.036  | AF075033  | 6583.918  | 6963.02   | D50402    | 18367.277 | 17734.084 |
| NM_004976 | 14221.597 | 11960.412 | D50911    | 11079.724 | 10834.856 | M73547    | 10152.48  | 7641.574  |
| NM_005737 | 31850.518 | 41290.738 | AB011104  | 1338.612  | 1441.213  | NM_003687 | 916.467   | 810.504   |
| NM_006803 | 933.514   | 668.616   | AK024069  | 4413.792  | 3731.32   | NM_003145 | 26686.27  | 26052.32  |
| NM_002533 | 1107.635  | 734.589   | NM_004582 | 17618.209 | 18709.742 | NM_001632 | 3363.746  | 3769.538  |
| AF235022  | 285.16    | 171.195   | NM_015640 | 10259.095 | 10721.912 | NM_012264 | 1515.621  | 1317.436  |
| AF182814  | 4318      | 3316.945  | AF233450  | 1059.821  | 1127.729  | AF311312  | 2381.887  | 2186.252  |
| NM_000107 | 4307.798  | 4561.2    | NM_016233 | 1361.791  | 1265.411  | NM_017765 | 13339.937 | 13305.12  |
| AL157445  | 776.775   | 871.105   | NM_000821 | 10779.621 | 11175.963 | NM_000428 | 900.788   | 730.854   |
| NM_001517 | 3383.436  | 3093.829  | AF308602  | 3619.162  | 2250.672  | AB040967  | 1238.095  | 1112.961  |
| NM_005053 | 637.76    | 755.815   | AB011089  | 1664.6    | 1306.42   | NM_014721 | 1333.258  | 1196.161  |
| D86974    | 2507.97   | 2717.264  | NM_001276 | 6980.297  | 10895.114 | AK026352  | 982.145   | 1185.04   |
| NM_018283 | 3102.096  | 3304.118  | NM_014915 | 21930.305 | 12175.207 | AL137705  | 2630.633  | 2407.658  |
| NM_001983 | 3981.471  | 3526.805  | NM_012286 | 2473.788  | 3071.594  | U41898    | 581.799   | 486.79    |
| NM_004993 | 572.123   | 598.122   | NM_002195 | 5969.739  | 6167.215  | NM_014848 | 505.995   | 461.243   |
| M29551    | 3151.389  | 2935.94   | D84294    | 2409.243  | 2359.679  | BF217766  | 818.865   | 746.442   |
| AB023148  | 595.105   | 711.912   | K02765    | 1107.138  | 1016.423  | NM_000184 | 1654.498  | 1698.127  |
| NM_002929 | 882.703   | 1045.822  | M65134    | 642.865   | 555.157   | NM_016180 | 536.533   | 518.952   |
| BC028375  | 1718.808  | 2033.101  | BG539651  | 1343.431  | 1203.308  | NM_002103 | 30004.232 | 28760.111 |
| NM_016029 | 10944.815 | 8898.104  | N52646    | 10699.856 | 8662.67   | NM_003379 | 7696.383  | 7957.132  |
| AK024562  | 828.38    | 847.529   | AW160671  | 50117.266 | 47495.918 | NM_006589 | 4979.438  | 5048.353  |
| NM_014066 | 1524.432  | 1029.979  | BI870529  | 19064.906 | 22604.141 | AB007875  | 1015.55   | 1097.8    |
| NM_004573 | 969.409   | 721.773   | AA702698  | 950.98    | 1148.162  | NM_018261 | 2066.055  | 1678.851  |
| AF263523  | 2323.223  | 3841.798  | AI681514  | 811.691   | 715.615   | NM_014796 | 4016.512  | 3739.927  |
| L08441    | 6751.542  | 8411.616  | NM_001300 | 3140.61   | 3727.356  | AL050288  | 26670.912 | 20156.758 |
| AA641953  | 2646.97   | 2137.592  | BG748827  | 5541.451  | 5442.173  | NM_005040 | 4465.512  | 3428.433  |
| AI248827  | 5883.456  | 3940.75   | AA952897  | 1664.651  | 1577.105  | NM_016391 | 8871.602  | 8637.149  |
| R45026    | 1717.097  | 1180.441  | BG760342  | 5345.786  | 6066.047  | M80783    | 514.446   | 363.342   |
| AI970239  | 1420.902  | 1605.286  | AA703141  | 2345.714  | 2453.514  | AF075033  | 6011.352  | 5203.88   |
| AA496452  | 5210.774  | 5065.85   | AI122630  | 9415.82   | 17108.357 | D50911    | 13072.89  | 10813.396 |
| X67594    | 552.417   | 796.649   | NM_003081 | 26778.875 | 49321.637 | AB011104  | 1329.684  | 1281.04   |
| NM_001631 | 484.48    | 661.19    | NM_016495 | 6455.721  | 6309.59   | AK024069  | 4245.469  | 3285.559  |

|           |           |           |           |           |           |           |           |           |
|-----------|-----------|-----------|-----------|-----------|-----------|-----------|-----------|-----------|
| AB000734  | 536.773   | 640.938   | NM_003687 | 1421.063  | 1962.657  | NM_004582 | 18965.637 | 15627.563 |
| X87838    | 2502.711  | 2743.487  | NM_004134 | 3539.233  | 5329.691  | NM_015640 | 11035.743 | 10082.408 |
| NM_033199 | 2462.38   | 2783.482  | NM_005955 | 2040.286  | 2358.382  | AF233450  | 923.495   | 947.097   |
| NM_015001 | 1815.566  | 1955.399  | NM_004048 | 860.461   | 1078.624  | NM_016233 | 1161.291  | 1045.992  |
| NM_000169 | 2977.891  | 2279.181  | NM_012428 | 5415.4    | 5429.781  | NM_000821 | 16564.816 | 15225.166 |
| NM_007260 | 2571.903  | 2230.601  | NM_013269 | 349.262   | 322.664   | AF308602  | 3675.698  | 3843.916  |
| AF148646  | 6534.177  | 7449.023  | NM_001728 | 6168.722  | 6594.431  | AB011089  | 1746.691  | 1856.554  |
| AL110218  | 789.045   | 767.401   | NM_005565 | 6916.474  | 6319.132  | AF007192  | 431.029   | 722.692   |
| AB023201  | 1682.365  | 1577.75   | NM_003824 | 5822.787  | 5753.041  | NM_001276 | 6928.829  | 6674.745  |
| X00094    | 696.02    | 574.086   | NM_000686 | 591.957   | 586.719   | NM_016157 | 901.286   | 880.181   |
| NM_002082 | 1320.776  | 1460.924  | NM_012452 | 1570.371  | 1681.469  | NM_014915 | 15736.222 | 19339.43  |
| AF155657  | 16938.623 | 18870.955 | AF229166  | 1018.287  | 931.692   | NM_012286 | 1597.351  | 1564.278  |
| NM_006056 | 836.808   | 1045.01   | NM_005137 | 3193.509  | 3114.371  | NM_002195 | 6830.26   | 5807.822  |
| AF045229  | 13913.222 | 23511.344 | NM_006764 | 1107.993  | 1140.499  | D84294    | 1815.573  | 2032.914  |
| NM_001840 | 5593.125  | 5416.706  | NM_001386 | 471.886   | 421.693   | K02765    | 1407.443  | 1177.036  |
| AK025099  | 4120.44   | 4332.583  | NM_001163 | 1192.207  | 1560.054  | M65134    | 471.613   | 448.099   |
| NM_016099 | 8887.481  | 9087.795  | NM_005878 | 1181.186  | 1275.731  | BG539651  | 1265.976  | 1131.37   |
| NM_001155 | 9927.604  | 13703.276 | BF217766  | 716.943   | 779.289   | N52646    | 14732.594 | 11852.646 |
| M62896    | 3207.144  | 3030.24   | NM_000184 | 1081.652  | 1390.909  | AW160671  | 47702.133 | 47560.98  |
| NM_017736 | 1289.528  | 1287.501  | NM_016180 | 563.529   | 621.949   | BI870529  | 21135.141 | 17871.896 |
| NM_000390 | 1480.613  | 1202.431  | NM_000112 | 759.551   | 1044.677  | AA702698  | 1006.36   | 877.489   |
| NM_006803 | 1573.44   | 1307.872  | NM_005827 | 10226.186 | 17033.271 | AI681514  | 877.659   | 862.042   |
| NM_002533 | 1802.14   | 1497.452  | NM_003053 | 2378.201  | 2338.096  | NM_001300 | 4223.594  | 2644.65   |
| AF235022  | 552.816   | 451.602   | NM_003044 | 643.686   | 843.586   | BG748827  | 4299.206  | 3459.377  |
| AL137764  | 8187.501  | 7150.124  | NM_006672 | 3145.194  | 3352.662  | AA952897  | 1508.793  | 1501.303  |
| NM_001660 | 11795.708 | 11416.969 | M31659    | 986.577   | 910.409   | BG760342  | 5776.71   | 7265.172  |
| NM_000710 | 481.317   | 426.5     | NM_003056 | 3878.534  | 4002.46   | AA703141  | 2323.077  | 1849.204  |
| NM_000752 | 1399.257  | 1980.092  | NM_016226 | 12805.619 | 11939.512 | AI122630  | 9288.238  | 8002.62   |
| AB040945  | 476.986   | 359.207   | AK024311  | 885.596   | 965.162   | NM_003081 | 21932.887 | 20632.994 |
| NM_002018 | 3625.936  | 3776.778  | AF052155  | 8413.659  | 10562.548 | NM_016495 | 8323.148  | 8390.23   |
| NM_002377 | 326.359   | 326.641   | NM_005085 | 1169.842  | 1438.022  | D50402    | 23189.402 | 23637.078 |
| AF161383  | 11829.015 | 11835.959 | AF060902  | 1524.19   | 1654.171  | M73547    | 10305.324 | 12083.213 |
| NM_000410 | 6046.361  | 7173.813  | AF121858  | 3995.873  | 4164.674  | NM_003687 | 1452.995  | 1218.934  |
| U72882    | 2019.777  | 2234.593  | NM_013437 | 4229.618  | 5860.261  | NM_004134 | 3475.191  | 3038.964  |
| NM_014337 | 5412.863  | 7766.145  | NM_017681 | 701.596   | 1183.241  | NM_005955 | 3622.208  | 3954.917  |
| NM_007161 | 6110.155  | 9694.793  | X57655    | 10494.104 | 11156.902 | NM_004048 | 920.102   | 1092.588  |
| NM_014387 | 24452.457 | 26353.742 | AK025966  | 2199.807  | 2199.522  | NM_012428 | 5554.255  | 5093.29   |
| NM_003641 | 2015.823  | 2358.633  | NM_018725 | 641.112   | 1290.988  | NM_013269 | 369.889   | 359.387   |
| NM_012463 | 2254.572  | 2208.996  | AK024069  | 4156.658  | 2953.767  | NM_001728 | 4979.359  | 3770.381  |
| L29140    | 3361.027  | 3393.558  | NM_004582 | 18132.168 | 17779.574 | NM_005565 | 6928.762  | 5110.381  |
| AK026448  | 4351.687  | 3884.814  | NM_015640 | 8973.787  | 8350.483  | NM_003824 | 5521.042  | 5114.733  |
| AB026436  | 3552.795  | 5253.601  | AF233450  | 1016.589  | 1180.349  | NM_000686 | 719.779   | 870.775   |
| NM_016029 | 11683.139 | 10240.53  | NM_016233 | 1131.584  | 1337.697  | NM_012452 | 2194.906  | 1781.507  |
| AK024562  | 1053.422  | 1049.965  | NM_000821 | 10962.238 | 11149.729 | AF229166  | 948.25    | 660.213   |
| NM_014066 | 1959.297  | 1645.543  | NM_020121 | 608.283   | 565.01    | NM_005137 | 2929.282  | 3272.229  |
| NM_004573 | 1108.886  | 1155.454  | NM_003145 | 22750.867 | 24348.332 | NM_006764 | 1577.457  | 1366.85   |
| NM_000072 | 724.055   | 614.1     | NM_001632 | 1197.38   | 1528.426  | NM_001386 | 511.921   | 578.419   |
| NM_000697 | 1075.771  | 1226.904  | NM_012264 | 1497.877  | 1705.381  | NM_001163 | 1311.812  | 1459.893  |
| NM_000017 | 7321.673  | 10212.935 | AF311312  | 1653.01   | 1686.779  | NM_005878 | 1609.544  | 1428.631  |
| NM_000237 | 517.662   | 797.114   | NM_017765 | 8281.191  | 7868.698  | AF169257  | 400.31    | 459.838   |
| NM_018346 | 10532.008 | 19130.295 | NM_000428 | 667.517   | 640.482   | NM_014848 | 557.186   | 916.945   |
| AL122054  | 3138.584  | 3886.01   | AB040967  | 1341.429  | 1265.461  | BF217766  | 800.304   | 1151.298  |
| AB011182  | 744.145   | 658.456   | NM_014721 | 1219.304  | 1311.286  | NM_000184 | 1907.787  | 2983.315  |

|           |           |           |           |           |           |           |           |           |
|-----------|-----------|-----------|-----------|-----------|-----------|-----------|-----------|-----------|
| AB023151  | 580.536   | 465.918   | AK026352  | 748.772   | 1121.661  | NM_01618C | 731.849   | 1066.346  |
| NM_00014C | 5643.904  | 5815.72   | AL137705  | 2326.424  | 3657.335  | NM_000112 | 893.573   | 573.79    |
| NM_00512E | 2453.153  | 2884.698  | NM_007262 | 22222.77  | 17126.438 | NM_005827 | 8983.681  | 9637.741  |
| NM_02003E | 238.267   | 687.437   | NM_014783 | 8787.563  | 16875.125 | NM_003053 | 4957.465  | 5498.587  |
| NM_01624E | 757.423   | 859.179   | NM_014053 | 4892.055  | 11217.058 | NM_003044 | 1297.045  | 1568.724  |
| NM_01592E | 1678.521  | 2485.178  | NM_002571 | 862.06    | 660.589   | NM_006672 | 7394.434  | 6453.05   |
| X03757    | 2107.683  | 2387.476  | NM_004939 | 4810.225  | 4090.937  | NM_00033E | 325.353   | 280.039   |
| NM_01865E | 722.947   | 1140.239  | NM_00142E | 12608.106 | 18954.221 | M31659    | 1136.5    | 935.153   |
| NM_00513E | 333.542   | 583.137   | NM_01571C | 751.47    | 843.721   | NM_01622E | 14474.642 | 12726.598 |
| AK094513  | 405.717   | 399.915   | NM_01415E | 3351.945  | 3671.27   | AK024311  | 1208.451  | 908.278   |
| NM_001183 | 12064.606 | 12353.979 | AK021591  | 2644.588  | 2604.489  | AF052155  | 8597.043  | 6770.958  |
| NM_00497E | 15949.244 | 13505.338 | NM_01467E | 2117.562  | 1845.571  | NM_00508E | 1447.525  | 1419.713  |
| NM_03319E | 2574.231  | 2609.748  | NM_00658E | 5528.59   | 5962.939  | AF060902  | 1494.03   | 1123.574  |
| NM_015001 | 2921.305  | 4786.404  | AB007875  | 1241.532  | 1143.584  | AF121858  | 4639.011  | 4030.495  |
| NM_00016E | 3315.906  | 3011.751  | NM_01479E | 4754.717  | 4871.408  | NM_013437 | 5205.225  | 4639.297  |
| AF182814  | 4333.691  | 3742.353  | NM_00504C | 4473.243  | 4682.198  | NM_017681 | 1032.458  | 919.987   |
| NM_00532E | 796.175   | 1268.492  | NM_016391 | 8874.403  | 11221.191 | X57655    | 12913.348 | 10001.578 |
| NM_000107 | 3735.052  | 3394.675  | M80783    | 523.338   | 583.856   | AK025966  | 2324.787  | 2292.916  |
| AL157445  | 630.153   | 649.891   | AF075033  | 6727.286  | 6660.973  | NM_01872E | 641.957   | 541.887   |
| NM_001517 | 3305.303  | 3505.842  | D50911    | 12292.243 | 13399.246 | AK024069  | 5235.748  | 5425.277  |
| NM_005053 | 455.626   | 552.685   | AB011104  | 1472.918  | 2231.835  | NM_004582 | 23543.529 | 23830.352 |
| D86974    | 2406.951  | 2926.12   | NM_00107E | 397.107   | 289.19    | NM_01564C | 13422.021 | 15614.057 |
| NM_018283 | 3274.998  | 3216.514  | NM_000552 | 3961.084  | 3441.028  | AF233450  | 1045.426  | 1853.755  |
| NM_001983 | 3310.237  | 3104.357  | NM_00380E | 613.058   | 669.532   | NM_016233 | 1778.416  | 3864.997  |
| M29551    | 3314.648  | 3211.139  | AK000860  | 1837.91   | 1449.262  | NM_000821 | 26733.977 | 31403.941 |
| AB023148  | 972.122   | 549.093   | NM_014961 | 893.445   | 719.029   | NM_020121 | 480.813   | 648.887   |
| NM_00292E | 980.259   | 960.817   | NM_02014E | 1922.797  | 1672.37   | NM_00314E | 26707.016 | 24618.469 |
| BC028375  | 2183.415  | 2220.174  | AK021529  | 1942.023  | 1843.235  | NM_001632 | 2046.448  | 2381.808  |
| AF148950  | 336.875   | 389.875   | AB037845  | 3924.031  | 3585.023  | NM_012264 | 1697.449  | 1369.858  |
| NM_001155 | 8572.887  | 8472.021  | NM_00598C | 1158.009  | 994.327   | AF311312  | 2641.502  | 2177.025  |
| M62896    | 3322.85   | 4524.835  | NM_01619C | 27696.201 | 22896.791 | NM_00117E | 469.723   | 465.097   |
| NM_01773E | 1288.811  | 1596.883  | AL137579  | 5874.114  | 5095.576  | NM_01776E | 15561.132 | 14612.934 |
| NM_00039C | 1609.124  | 1723.002  | NM_012383 | 11083.358 | 10587.621 | NM_00042E | 900.532   | 864.034   |
| NM_00149E | 5703.765  | 6243.168  | AJ271684  | 864.238   | 607.344   | AB040967  | 1282.065  | 1267.417  |
| AF263523  | 1402.043  | 1702.446  | AF255342  | 3544.004  | 3173.161  | NM_014721 | 1232.916  | 933.183   |
| L08441    | 7223.972  | 11677.243 | NM_00330C | 5159.693  | 5163.99   | AK026352  | 808.902   | 1075.528  |
| AA641953  | 2251.519  | 2192.961  | AK026682  | 1720.484  | 2153.25   | AL137705  | 2397.405  | 1899.627  |
| AI248827  | 5510.139  | 4816.287  | NM_003942 | 2300.515  | 2957.445  | U41898    | 470.167   | 568.462   |
| R45026    | 1471.825  | 1223.284  | NM_006471 | 48733.418 | 44442.035 | NM_007262 | 28508.402 | 23905.145 |
| AI970239  | 1278.041  | 1316.983  | NM_00416E | 2244.936  | 1809.638  | NM_014783 | 6471.348  | 7040.498  |
| AA496452  | 4916.614  | 5533.801  | NM_00036E | 2266.512  | 2399.142  | NM_014053 | 3939.439  | 4426.906  |
| X67594    | 638.105   | 818.729   | NM_01658E | 2975.861  | 3521.573  | NM_002571 | 1201.262  | 1689.076  |
| NM_001631 | 433.581   | 641.866   | NM_00414C | 601.127   | 501.64    | NM_00493E | 4742.09   | 6448.918  |
| AB000734  | 567.732   | 804.388   | NM_00286E | 4927.108  | 3058.489  | NM_00142E | 11262.492 | 13388.381 |
| NM_005987 | 52640.277 | 65189.516 | NM_00386C | 919.313   | 785.312   | NM_01571C | 1061.162  | 1075.591  |
| X87838    | 3267.045  | 2740.326  | NM_005414 | 622.438   | 390.305   | NM_01415E | 4189.541  | 4396.363  |
| NM_007161 | 5053.682  | 5359.697  | NM_00446E | 3860.22   | 3204.138  | AK021591  | 3208.403  | 2966.931  |
| NM_014387 | 24112.262 | 26431.594 | NM_016031 | 5625.096  | 4899.227  | NM_01467E | 2536.075  | 2230.789  |
| NM_003641 | 2136.731  | 2458.29   | NM_004804 | 2820.096  | 2742.241  | NM_00658E | 6437.108  | 6113.427  |
| NM_012463 | 2660.547  | 2852.892  | M92439    | 4990.124  | 5284.811  | AB007875  | 1367.816  | 1295.855  |
| L29140    | 4179.104  | 4491.511  | AL117665  | 3557.146  | 4029.234  | NM_018261 | 2193.935  | 1623.413  |
| AK026448  | 5139.071  | 4533.201  | AF263541  | 2976.143  | 3169.268  | NM_01479E | 4517.113  | 5065.753  |
| AK057418  | 2640.013  | 2035.169  | NM_001262 | 7049.792  | 7612.587  | AL050288  | 26257.053 | 19874.063 |

|           |           |           |           |           |           |           |           |           |
|-----------|-----------|-----------|-----------|-----------|-----------|-----------|-----------|-----------|
| NM_00726C | 2680.271  | 2804.196  | BE873030  | 826.108   | 829.476   | NM_00504C | 4547.759  | 3940.342  |
| AF148646  | 4941.066  | 4146.816  | NM_00244C | 522.368   | 593.571   | NM_016391 | 9922.579  | 11175.074 |
| AL110218  | 764.209   | 1057.028  | NM_003625 | 554.983   | 712.817   | M80783    | 400.281   | 412.267   |
| AB023201  | 1432.645  | 1379.942  | BC006990  | 8895.318  | 9552.844  | AF075033  | 7120.812  | 6200.767  |
| X00094    | 430.607   | 513.479   | NM_002277 | 825.461   | 833.772   | D50911    | 15017.487 | 13307.905 |
| NM_003775 | 43.802    | 911.821   | M33552    | 7643.775  | 7442.896  | AB011104  | 1504.01   | 1428.643  |
| NM_002082 | 1371.748  | 1717.165  | AJ252060  | 2191.821  | 2547.012  | NM_00324E | 1174.75   | 1580.777  |
| AF155657  | 16094.291 | 16606.301 | NM_006403 | 5082.129  | 5732.373  | NM_00107E | 999.483   | 1160.566  |
| NM_00605E | 892.241   | 951.729   | NM_018977 | 837.552   | 1061.967  | NM_000552 | 8080.42   | 9503.103  |
| AF045229  | 10098.726 | 9617.196  | AJ001402  | 925.309   | 871.89    | NM_00380E | 537.578   | 763.78    |
| NM_00184C | 6012.646  | 5161.924  | NM_00454C | 387.058   | 618.736   | AK000860  | 3416.832  | 4029.54   |
| AK025099  | 3749.056  | 3592.313  | NM_000235 | 4919.746  | 5602.855  | NM_014961 | 1224.205  | 1141.016  |
| NM_01609E | 8593.293  | 7681.806  | NM_015879 | 692.377   | 463.036   | NM_02014E | 1889.847  | 2182.268  |
| NM_00083C | 1741.717  | 1980.521  | AF068236  | 17479.662 | 14834.232 | AK021529  | 4133.614  | 4404.768  |
| NM_01865E | 647.063   | 976.835   | L25628    | 455.41    | 271.975   | AB037845  | 5296.724  | 4617.427  |
| NM_00513E | 357.854   | 238.686   | M37033    | 11209.176 | 6966.353  | NM_00598C | 1384.887  | 1292.836  |
| AK094513  | 428.91    | 384.765   | NM_007171 | 4831.548  | 3542.269  | NM_01619C | 49934.25  | 46171.777 |
| NM_001183 | 13528.563 | 13589.926 | NM_00427E | 1640.436  | 1362.395  | AL137579  | 5181.536  | 4523.329  |
| NM_00497E | 14996.027 | 12920.49  | NM_005632 | 1022.379  | 895.335   | NM_012383 | 13173.381 | 11295.812 |
| AK021597  | 1083.054  | 896.115   | AK021499  | 674.191   | 608.573   | AJ271684  | 1666.854  | 1137.932  |
| NM_005737 | 29275.168 | 25733.301 | AK000336  | 2697.149  | 3174.351  | AF255342  | 9945.012  | 10762.265 |
| NM_006803 | 1502.329  | 1259.571  | NM_002795 | 37455.082 | 34163.902 | NM_00330C | 9179.647  | 9114.501  |
| NM_002533 | 1567.165  | 1535.632  | NM_006292 | 6317.101  | 6523.682  | AK026682  | 1882.235  | 1768.573  |
| AF235022  | 432.483   | 342.23    | AB007948  | 1701.658  | 1693.451  | NM_01772C | 58687.891 | 62908.234 |
| AL137764  | 7650.389  | 6734.398  | AB033066  | 1315.271  | 1000.001  | NM_00465E | 2266.639  | 1839.918  |
| NM_00166C | 2264.256  | 2147.726  | AF126028  | 2521.135  | 2772.826  | NM_003942 | 2322.432  | 2436.25   |
| NM_00071C | 562.139   | 498.274   | NM_007019 | 15404.588 | 16938.666 | NM_006471 | 53394.52  | 43819.926 |
| NM_000752 | 1265.329  | 1387.825  | NM_007075 | 553.007   | 1077.434  | NM_00416E | 2370.065  | 1705.653  |
| AB040945  | 408.244   | 473.659   | NM_016042 | 1553.761  | 1865.431  | NM_00036E | 2123.757  | 2248.059  |
| NM_00201E | 4049.818  | 4145.015  | NM_01764C | 1227.042  | 1047.084  | NM_01658E | 2913.432  | 2250.404  |
| NM_00601E | 314.471   | 376.718   | NM_01908E | 5682.44   | 7175.976  | NM_00414C | 770.674   | 657.549   |
| AF161383  | 10894.465 | 9753.689  | AB002373  | 2250.068  | 2602.709  | NM_00286E | 11194.571 | 16449.545 |
| NM_00041C | 6567.764  | 7237.438  | NM_01635C | 9161.91   | 8922.649  | NM_00386C | 1735.547  | 2665.203  |
| U72882    | 2015.843  | 2298.336  | AK024167  | 8627.815  | 9299.692  | NM_005414 | 805.925   | 724.904   |
| NM_014337 | 5447.108  | 4982.287  | AK025308  | 340.333   | 478.929   | NM_00446E | 8265.792  | 12183.354 |
| M29551    | 4927.149  | 4426.351  | NM_00502E | 2016.376  | 1918.183  | NM_016031 | 7107.771  | 9243.434  |
| AB023148  | 931.983   | 819.74    | AF213356  | 672.719   | 892.895   | NM_004804 | 2674.098  | 2862.192  |
| NM_00292E | 1616.876  | 1314.71   | BC035716  | 1240.806  | 922.36    | M92439    | 8358.604  | 9090.622  |
| BC028375  | 2214.092  | 2290.032  | NM_018014 | 5275.598  | 11754.477 | AL117665  | 4263.482  | 4043.439  |
| AB026436  | 3081.814  | 2902.181  | NM_00235E | 7597.665  | 6009.747  | AF263541  | 3546.195  | 3483.7    |
| NM_01602E | 11452.917 | 11508.805 | AF230809  | 1148.424  | 787.622   | AK027169  | 468.159   | 430.193   |
| AK024562  | 1017.536  | 1225.803  | NM_017894 | 11625.6   | 7213.575  | NM_001262 | 8608.149  | 7426.558  |
| NM_01406E | 1839.22   | 1901.329  | NM_00650E | 996.885   | 1118.706  | BE873030  | 1751.396  | 1482.7    |
| NM_004573 | 1254.542  | 1223.372  | AK025447  | 1342.364  | 1390.915  | NM_00244C | 662.319   | 498.792   |
| NM_000072 | 759.449   | 905.195   | NM_002624 | 19481.434 | 17887.818 | NM_003625 | 1049.999  | 1058.581  |
| NM_000697 | 1317.328  | 1495.677  | AF006199  | 1288.111  | 1341.465  | BC006990  | 9728.796  | 9289.605  |
| NM_000017 | 6656.143  | 7267.256  | NM_004554 | 2170.345  | 2237.705  | NM_002277 | 1910.386  | 1753.231  |
| NM_000237 | 581.837   | 516.515   | NM_018119 | 2370.777  | 2110.769  | NM_019114 | 2199.671  | 1817.375  |
| NM_01834E | 6870.281  | 7228.37   | NM_01457E | 494.938   | 432.822   | M33552    | 8494.685  | 7660.121  |
| AL122054  | 2627.207  | 2556.098  | AL162035  | 540.755   | 625.794   | AJ252060  | 2140.315  | 1497.825  |
| AB011182  | 1432.703  | 1551.699  | NM_006692 | 634.896   | 574.952   | NM_006403 | 6926.695  | 7875.273  |
| AB023151  | 509.728   | 519.595   | NM_003084 | 3516.166  | 3584.931  | NM_018977 | 546.731   | 718.235   |
| NM_00014C | 5844.576  | 5654.369  | NM_002582 | 4286.342  | 5063.334  | AJ001402  | 931.618   | 922.824   |

|           |           |           |           |           |           |           |           |           |
|-----------|-----------|-----------|-----------|-----------|-----------|-----------|-----------|-----------|
| NM_005125 | 2675.404  | 2768.099  | NM_001009 | 54370.684 | 58802.176 | NM_00454C | 441.054   | 305.196   |
| NM_015926 | 1819.672  | 2151.466  | D17289    | 4679.389  | 4448.03   | NM_000235 | 5419.763  | 6963.11   |
| X03757    | 2180.188  | 2097.828  | NM_002949 | 14556.694 | 14013.05  | NM_015875 | 844.22    | 1265.583  |
| NM_020248 | 7870.281  | 9488.817  | NM_01423C | 6190.847  | 6784.528  | AF068236  | 43541.105 | 53065.793 |
| NM_001726 | 464.089   | 361.496   | NM_017748 | 5287.362  | 7003.034  | L25628    | 1416.06   | 1526.403  |
| NM_004053 | 3988.258  | 5045.855  | AK025374  | 2065.731  | 2297.311  | M37033    | 15353.106 | 21062.4   |
| NM_001489 | 2106.268  | 2182.512  | NM_014901 | 12556.525 | 18499.881 | NM_007171 | 6454.311  | 13409.356 |
| NM_020374 | 2299.401  | 2763.578  | AK000005  | 3022.703  | 2493.878  | NM_004278 | 3185.702  | 3817.405  |
| NM_014922 | 648.189   | 696.261   | AF086790  | 983.529   | 610.399   | NM_005632 | 1372.166  | 1534.683  |
| NM_000169 | 3515.225  | 3460.056  | U28480    | 778.98    | 469.891   | AK021499  | 891.749   | 1215.169  |
| AF182814  | 5333.708  | 5476.217  | NM_000108 | 9945.179  | 7749.036  | AK000336  | 3249.981  | 3090.737  |
| NM_005329 | 845.745   | 908.594   | NM_018128 | 2892.511  | 2319.841  | NM_002795 | 49039.313 | 40883.027 |
| NM_000107 | 4528.758  | 4073.363  | NM_016931 | 5263.307  | 4815.091  | NM_006292 | 7155.638  | 7709.477  |
| AL157445  | 770.973   | 913.88    | NM_000162 | 1838.858  | 1596.566  | AB007948  | 2563.933  | 2247.126  |
| NM_001517 | 3856.27   | 3801.665  | AK027067  | 959.859   | 784.766   | AB033066  | 2122.183  | 1256.18   |
| NM_005053 | 530.991   | 596.584   | NM_016287 | 9844.528  | 9276.887  | AF126028  | 2697.515  | 2844.375  |
| D86974    | 2898.043  | 3655.378  | NM_003864 | 5665.67   | 5747.29   | NM_007019 | 17971.719 | 14200.043 |
| NM_018283 | 3483.033  | 3523.106  | NM_006824 | 16855.396 | 15821.696 | NM_007075 | 685.007   | 563.745   |
| NM_001983 | 3902.512  | 4398.836  | NM_002107 | 1002.086  | 980.127   | NM_016042 | 1707.597  | 1739.872  |
| NM_004993 | 631.887   | 555.012   | NM_002694 | 10497.338 | 9611.619  | NM_01764C | 1356.24   | 1065.427  |
| NM_001793 | 4445.134  | 4920.367  | NM_004454 | 1996.101  | 2270.265  | NM_017721 | 1960.674  | 1834.866  |
| NM_001943 | 3718.077  | 3596.644  | NM_000966 | 710.533   | 620.099   | NM_019088 | 5843.786  | 5167.287  |
| NM_004927 | 6325.738  | 6134.596  | NM_012482 | 2431.792  | 2308.259  | AB002373  | 2571.4    | 2282.416  |
| NM_001459 | 2738.179  | 3966.284  | AF217227  | 876.536   | 960.202   | NM_01635C | 21221.947 | 19468.113 |
| NM_015513 | 2343.354  | 2478.276  | AK024141  | 1359.689  | 1544.723  | AK024167  | 7899.402  | 6501.456  |
| NM_006219 | 4827.517  | 4471.446  | U13706    | 442.663   | 421.609   | NM_005026 | 1683.226  | 1408.153  |
| NM_004443 | 642.35    | 492.343   | NM_002813 | 12464.944 | 15404.343 | AF213356  | 498.274   | 621.45    |
| NM_017412 | 1682.084  | 1536.768  | NM_001198 | 558.719   | 767.33    | BC035716  | 1333.264  | 1964.694  |
| NM_005544 | 910.623   | 1309.896  | AK022745  | 5951.053  | 12363.932 | AF230809  | 1584.474  | 2637.412  |
| NM_002964 | 632.329   | 726.639   | AL049450  | 5485.694  | 5038.483  | NM_017894 | 29055.277 | 35868.637 |
| AF311862  | 3969.542  | 4625.501  | NM_005086 | 22350.588 | 16452.842 | NM_006509 | 1103.504  | 1420.838  |
| NM_016447 | 1102.944  | 1279.179  | NM_007238 | 3334.538  | 2934.784  | AK025447  | 1834.167  | 1872.924  |
| NM_015626 | 5135.055  | 5619.317  | AL049340  | 732.305   | 790.36    | NM_014576 | 837.657   | 895.922   |
| NM_004899 | 3420.041  | 3712.757  | NM_017606 | 2397.269  | 3072.195  | AL162035  | 823.505   | 908.162   |
| AB006628  | 2295.571  | 2509.298  | AK024644  | 7033.647  | 6150.021  | NM_006692 | 1274.359  | 1063.16   |
| AF272036  | 8709.409  | 6971.244  | AB019573  | 408.084   | 640.535   | NM_003084 | 3668.473  | 3161.502  |
| AF231023  | 2793.163  | 3174.7    | U68494    | 1120.079  | 2181.1    | NM_002582 | 5952.368  | 6142.11   |
| NM_005148 | 3807.278  | 4127.804  | AF064254  | 853.033   | 843.015   | NM_001009 | 57249.094 | 60520.285 |
| NM_004746 | 644.379   | 603.232   | AK021524  | 391.082   | 222.62    | D17289    | 4925.269  | 4267.599  |
| AF146019  | 8271.407  | 8982.59   | AL137360  | 3970.3    | 3821.963  | NM_002949 | 17541.711 | 16018.84  |
| Z36782    | 5594.979  | 5747.163  | AF143331  | 502.287   | 725.956   | NM_01423C | 6157.333  | 5725.581  |
| M70435    | 838.562   | 924.935   | AK000819  | 400.379   | 540.033   | NM_017748 | 6655.377  | 7579.795  |
| NM_00349C | 4696.835  | 6182.131  | AF201941  | 3385.498  | 3149.833  | AK025374  | 1737.329  | 2580.981  |
| AF210651  | 1360.032  | 1743.149  | AF026941  | 1163.167  | 1107.809  | NM_014901 | 12129.588 | 20611.85  |
| AF090942  | 1100.97   | 1077.576  | NM_00707C | 2877.577  | 2929.393  | AK000005  | 3025.274  | 6255.195  |
| AF508940  | 1954.859  | 2019.679  | AL133019  | 3600.212  | 4031.59   | AF086790  | 1760.92   | 2762.998  |
| NM_020237 | 967.666   | 1221.497  | NM_014895 | 1264.557  | 1186.483  | U28480    | 1283.942  | 1511.137  |
| AF130051  | 1254.359  | 1647.817  | AK024883  | 5772.209  | 8123.215  | NM_000108 | 12800.91  | 15118.336 |
| M25753    | 19040.631 | 16325.061 | AF217989  | 2673.771  | 2887.204  | NM_018128 | 2934.193  | 4182.376  |
| NM_003883 | 3358.868  | 3119.617  | NM_017654 | 1794.687  | 1631.276  | AK027067  | 987.915   | 945.574   |
| NM_014929 | 2643.76   | 2632.499  | AL109696  | 783.447   | 694.681   | NM_016287 | 10994.861 | 10528.448 |
| NM_004203 | 7465.754  | 6905.327  | AJ011593  | 1854.749  | 2292.332  | NM_003864 | 6081.233  | 5588.236  |
| NM_001951 | 3065.366  | 2588.62   | AJ227907  | 328.403   | 469.618   | NM_006824 | 19204.301 | 16431.064 |

|           |           |           |           |           |           |           |           |           |
|-----------|-----------|-----------|-----------|-----------|-----------|-----------|-----------|-----------|
| NM_002391 | 2748.751  | 2440.388  | X89743    | 609.805   | 546.536   | NM_002107 | 1039.671  | 824.891   |
| NM_007066 | 3584.786  | 3234.884  | AJ002784  | 396.698   | 286.329   | NM_002694 | 12042.652 | 9590.231  |
| NM_003674 | 7532.441  | 8408.483  | U17621    | 523.297   | 514.305   | NM_004454 | 2138.517  | 1405.909  |
| NM_001197 | 2727.201  | 2282.214  | AL049239  | 2558.952  | 2093.152  | NM_000966 | 618.151   | 567.671   |
| NM_006682 | 570.68    | 447.564   | NM_013288 | 1021.285  | 1014.26   | NM_012482 | 2711.842  | 2112.854  |
| NM_006410 | 297.769   | 282.703   | M60721    | 2185.825  | 2349.944  | AF217227  | 1197.304  | 932.418   |
| NM_014977 | 5782.176  | 5970.971  | L39061    | 2959.691  | 2692.903  | AK024141  | 1945.882  | 2466.406  |
| AK026325  | 1433.282  | 1626.593  | AF071508  | 1451.407  | 1317.537  | U13706    | 600.551   | 463.79    |
| U83857    | 893.691   | 1094.98   | L07265    | 10146.792 | 8448.148  | AK022745  | 4473.428  | 6376.838  |
| NM_001230 | 1563.785  | 1680.253  | D16472    | 1501.971  | 1640.573  | AL049450  | 6226.414  | 8247.166  |
| AK025662  | 3276.578  | 2408.402  | AK022467  | 456.463   | 407.412   | AK023481  | 313.917   | 656.079   |
| NM_000201 | 1327.664  | 1443.961  | AL157459  | 3425.372  | 4184.844  | AK022011  | 397.845   | 332.984   |
| AB011539  | 513.777   | 410.143   | AB020654  | 338.009   | 480.586   | NM_005086 | 45076.094 | 49061.047 |
| U37028    | 532.565   | 1045.662  | AL353954  | 662.096   | 677.849   | NM_007236 | 3956.921  | 5175.735  |
| AB014597  | 2522.83   | 2705.676  | NM_017630 | 703.718   | 682.151   | AL049340  | 957.31    | 1253.041  |
| AK024313  | 4203.16   | 5703.486  | AK000778  | 929.423   | 1145.209  | NM_017606 | 3099.773  | 6408.388  |
| NM_003891 | 1565.874  | 1591.248  | AK000932  | 361.71    | 266.384   | AK024644  | 8160.998  | 9624.939  |
| AL359575  | 632.728   | 716.382   | AL133573  | 4275.324  | 3877.041  | AB019573  | 506.616   | 612.886   |
| NM_002022 | 361.349   | 503.391   | AK000115  | 513.37    | 529.328   | U68494    | 2409.455  | 1053.505  |
| NM_015524 | 3737.318  | 4251.79   | AK000958  | 608.208   | 552.628   | AF064254  | 1212.718  | 1076.507  |
| NM_001673 | 11394.393 | 10875.827 | AK024523  | 783.548   | 932.139   | AL137360  | 3968.658  | 3969.5    |
| NM_016510 | 3432.469  | 3791.841  | AK024600  | 500.594   | 598.704   | AK000819  | 428.321   | 428.88    |
| NM_014270 | 1887.707  | 1816.431  | AK024543  | 1839.227  | 1438.649  | AF201941  | 3072.794  | 2323.815  |
| NM_000071 | 2215.808  | 2455.385  | AK024624  | 6783.636  | 6027.539  | AF026941  | 1080.32   | 811.208   |
| NM_004321 | 910.151   | 923.292   | AK025090  | 672.103   | 1105.558  | NM_007070 | 2816.21   | 2548.512  |
| AF311212  | 4876.386  | 4465.956  | AF086473  | 585.979   | 624.402   | AL133019  | 4386.823  | 3183.174  |
| NM_006915 | 2318.702  | 2201.135  | D87682    | 1082.562  | 944.816   | NM_014895 | 1180.816  | 1276.342  |
| NM_006035 | 1420.62   | 1714.054  | AF321617  | 2974.31   | 3167.383  | AF217989  | 3320.49   | 4216.626  |
| NM_006086 | 2673.729  | 2583.022  | NM_006950 | 552.864   | 542.406   | NM_017654 | 2236.813  | 2855.223  |
| NM_004520 | 8079.895  | 6879.596  | NM_000682 | 707.995   | 585.009   | L77561    | 479.386   | 560.243   |
| NM_006105 | 2119.366  | 2045.18   | AF086208  | 1688.58   | 2158.836  | AL109696  | 984.745   | 1105.451  |
| NM_005981 | 695.734   | 878.269   | AK023335  | 1313.964  | 1353.063  | AK022190  | 911.159   | 1126.3    |
| NM_000474 | 537.442   | 530.916   | AK023187  | 566.916   | 505.959   | AJ011593  | 2058.254  | 2564.393  |
| NM_006079 | 15883.996 | 13307.715 | AK022231  | 486.026   | 330.858   | X89743    | 639.57    | 865.213   |
| AB037837  | 2075.596  | 2249.29   | NM_019033 | 322.745   | 309.669   | AJ002784  | 440.771   | 391.607   |
| NM_014595 | 3024.77   | 3294.857  | AL133101  | 1696.036  | 1888.186  | U17621    | 824.56    | 870.538   |
| NM_014789 | 1438.817  | 1299.287  | AK024602  | 8370.724  | 11589.942 | AL049239  | 2810.533  | 2879.083  |
| AB046784  | 1458.15   | 1646.931  | NM_018507 | 466.765   | 561.851   | NM_013288 | 1604.974  | 1926.417  |
| X52402    | 696.448   | 1510.715  | NM_000485 | 11345.056 | 10600.624 | M60721    | 1622.853  | 1552.371  |
| AL133663  | 1114.407  | 1952.048  | NM_018542 | 742.121   | 816.986   | L39061    | 3279.717  | 2321.967  |
| NM_004992 | 1198.39   | 1550.574  | AK025503  | 1085.228  | 961.674   | AF071508  | 1409.991  | 1402.357  |
| NM_014462 | 2493.167  | 2471.039  | AF130073  | 1039.22   | 1030.806  | L07265    | 19566.656 | 19605.32  |
| NM_014156 | 25217.717 | 27101.986 | AK024225  | 17947.9   | 16679.885 | D16472    | 2791.185  | 2610.197  |
| NM_003137 | 5980.351  | 5410.729  | AF086334  | 1037.378  | 802.204   | AL157459  | 3137.851  | 3136.58   |
| NM_006936 | 30832.91  | 26030.178 | AL137602  | 1070.082  | 901.15    | AL353954  | 868.387   | 769.232   |
| NM_004515 | 672.287   | 463.106   | NM_003696 | 530.496   | 631.402   | NM_017630 | 756.438   | 925.33    |
| NM_020158 | 2181.957  | 1615.498  | AF075035  | 6253.096  | 6579.007  | AK000778  | 1130.41   | 1266.238  |
| AF176085  | 2109.335  | 1656.138  | AL110180  | 4310.995  | 4457.236  | AL133573  | 4931.756  | 5093.628  |
| NM_006985 | 6578.639  | 6083.763  | BC024924  | 4328.498  | 4903.476  | AK000115  | 476.236   | 680.821   |
| AF265228  | 2062.621  | 2073.865  | NM_017906 | 6989.372  | 6412.729  | AK000958  | 709.934   | 586.901   |
| NM_003757 | 30616.164 | 29720.07  | AL110286  | 3386.962  | 3647.322  | AK024523  | 538.293   | 819.308   |
| AK025561  | 3815.334  | 3475.549  | AF086374  | 553.307   | 540.122   | AK024600  | 778.036   | 595.184   |
| NM_018602 | 2296.395  | 2074.274  | AL162066  | 8589.304  | 8223.262  | AK024543  | 1786.13   | 1751.131  |



|           |           |           |           |           |           |           |           |           |
|-----------|-----------|-----------|-----------|-----------|-----------|-----------|-----------|-----------|
| NM_004096 | 5878.016  | 5366.268  | NM_016096 | 23150.668 | 19946.898 | AK024624  | 7289.316  | 6007.494  |
| NM_017629 | 5248.77   | 5197.642  | U79290    | 1771.531  | 1793.981  | AK025090  | 832.706   | 1199.489  |
| AL049681  | 1402.678  | 1332.888  | X98114    | 491.157   | 382.343   | AF086473  | 945.513   | 957.31    |
| NM_006584 | 806.667   | 875.744   | AK000799  | 10778.336 | 16931.414 | D87682    | 1163.469  | 1315.013  |
| AF052181  | 2239.112  | 2722.141  | NM_015582 | 6882.16   | 7347.808  | AF321617  | 3724.548  | 4586.606  |
| AL050074  | 1573.295  | 2232.379  | AK027091  | 1896.43   | 1652.403  | AF223389  | 377.669   | 395.959   |
| AK026436  | 842.13    | 750.886   | NM_001526 | 1316.583  | 1317.709  | NM_006950 | 488.816   | 826.607   |
| NM_018061 | 2033.359  | 2271.261  | U31738    | 1320.426  | 1079.986  | NM_000682 | 409.843   | 577.694   |
| AK023059  | 936.068   | 881.414   | AF179890  | 4843.895  | 5089.982  | AF086208  | 1647.33   | 1764.264  |
| NM_003551 | 4042.348  | 4125.94   | AK023536  | 7239.56   | 7668.359  | AK023335  | 1620.547  | 1732.01   |
| AF305210  | 397.585   | 581.168   | AK026561  | 914.447   | 947.81    | AK023187  | 661.828   | 572.053   |
| AK021900  | 2500.865  | 3023.258  | AK021568  | 7701.673  | 8967.575  | AL133101  | 1441.621  | 1420.127  |
| NM_002764 | 10113.936 | 12850.597 | Z36838    | 1040.587  | 797.018   | AK024602  | 21355.871 | 27194.238 |
| NM_015455 | 29251.814 | 23097.777 | AF043467  | 712.613   | 566.158   | NM_018507 | 967.765   | 1179.456  |
| AF024702  | 1441.47   | 1355.998  | AF088054  | 1279.894  | 1309.886  | NM_000485 | 9747.545  | 10812.388 |
| NM_001964 | 1239.683  | 925.422   | AK023881  | 2761.68   | 2693.665  | NM_018542 | 940.981   | 923.557   |
| NM_005962 | 4054.631  | 3494.248  | AK027114  | 53111.258 | 58223.258 | AK025503  | 1454.461  | 2016.528  |
| X74864    | 576.537   | 547.872   | NM_016298 | 1550.626  | 1693.215  | AF130073  | 1552.367  | 1507.024  |
| AK026804  | 1833.673  | 1305.444  | NM_003159 | 1055.749  | 1171.434  | AK024225  | 15285.331 | 19808.283 |
| NM_016170 | 1612.753  | 1560.452  | AK023494  | 844.042   | 864.186   | AF086334  | 1092.841  | 1179.484  |
| NM_006166 | 2500.02   | 2281.003  | AF086256  | 542.044   | 402.637   | AF075035  | 23142.85  | 26933.93  |
| S72620    | 24836.041 | 26022.307 | NM_015492 | 3056.505  | 2659.516  | AL110180  | 4326.587  | 4094.378  |
| NM_005263 | 7164.804  | 6159.752  | NM_006933 | 458.277   | 366.811   | BC024924  | 4317.36   | 4412.309  |
| AB033022  | 2031.043  | 1701.118  | AF132204  | 1326.911  | 1103.73   | NM_017906 | 7248.611  | 7786.09   |
| AF147397  | 706.903   | 830.855   | AK022874  | 5360.907  | 5273.398  | AL110286  | 3586.479  | 3457.858  |
| AK027158  | 486.126   | 536.915   | CY3Cy5    | 2037.045  | 441.061   | AF086374  | 411.804   | 412.872   |
| AK002187  | 435.381   | 331.196   | BI912037  | 842.899   | 931.604   | AL162066  | 10345.619 | 10365.045 |
| AF085836  | 572.291   | 693.369   | AA454646  | 727.216   | 922.995   | NM_016096 | 23286.568 | 18071.943 |
| AL049449  | 368.381   | 449.953   | U18087    | 19310.564 | 18930.084 | U79290    | 1762.47   | 1773.597  |
| AL359654  | 438.115   | 534.123   | U66349    | 1012.993  | 1569.175  | NM_014040 | 6192.319  | 6239.151  |
| AK024224  | 2851.433  | 3350.423  | AA057156  | 1203.545  | 1441.426  | AK000799  | 9091.194  | 9019.364  |
| NM_015362 | 13500.67  | 19552.016 | AF166327  | 13918.252 | 15326.463 | NM_015582 | 8065.788  | 8797.608  |
| AF147344  | 1086.149  | 1944.152  | AF260739  | 959.531   | 642.884   | AK027091  | 1584.1    | 1936.869  |
| AF147371  | 876.329   | 709.356   | AF531423  | 2023.221  | 2387.988  | NM_001526 | 1417.577  | 1650.833  |
| NM_018982 | 3807.854  | 3458.239  | X76555    | 771.03    | 935.921   | U31738    | 939.918   | 1052.411  |
| AF086254  | 3778.105  | 4027.317  | NM_005432 | 794.88    | 664.139   | AF179890  | 4712.088  | 5373.29   |
| AF086367  | 737.847   | 722.666   | L10386    | 3357.829  | 2503.663  | AK023536  | 6610.302  | 7310.646  |
| AF086437  | 370.976   | 576.848   | AF061812  | 2418.683  | 1694.43   | AK026561  | 1195.118  | 1485.412  |
| AK025088  | 3065.616  | 2670.732  | AL136756  | 895.539   | 653.771   | AK021568  | 9070.219  | 10048.686 |
| U79295    | 586.578   | 577.18    | NM_012469 | 6066.531  | 4845.336  | Z36838    | 242.239   | 992.756   |
| AK002107  | 679.881   | 546.353   | NM_134260 | 6255.948  | 5245.133  | AK023881  | 2846.037  | 2697.186  |
| NM_003596 | 1196.571  | 1299.048  | SR6       | 1875.631  | 1411.917  | AK027114  | 58171.188 | 59851.941 |
| NM_018838 | 5797.042  | 5377.092  | SR8       | 6025.624  | 12389.291 | NM_016298 | 1280.432  | 1408.865  |
| AK021454  | 2510.109  | 2756.791  | SR10      | 19269.67  | 4848.317  | AK002146  | 599.485   | 508.808   |
| AF085913  | 334.673   | 459.858   | CY3Cy5    | 1754.572  | 131.201   | NM_003159 | 677.212   | 568.942   |
| AF085944  | 1093.689  | 873.33    | AL080157  | 3270.817  | 3773.064  | NM_015492 | 3163.768  | 3268.807  |
| AL133038  | 1143.41   | 1398.17   | NM_005100 | 229.564   | 250.997   | AF132204  | 1186.054  | 1360.572  |
| AL137414  | 1943.323  | 2169.935  | NM_005308 | 1880.191  | 2082.325  | AK022874  | 4678.811  | 3624.311  |
| AL359574  | 1172.998  | 1973.662  | NM_007227 | 597.736   | 630.151   | CY3Cy5    | 1947.314  | 151.629   |
| AL133569  | 907.47    | 1187.978  | NM_007023 | 502.042   | 532.886   | BI912037  | 777.559   | 698.344   |
| AL359604  | 281.554   | 191.404   | NM_014461 | 428.15    | 393.92    | AA454646  | 697.062   | 634.488   |
| AK027189  | 1312.524  | 989.182   | NM_003865 | 916.395   | 1229.49   | U18087    | 20983.525 | 19577.035 |
| AF088014  | 228.485   | 322.171   | AB015330  | 3669.1    | 3215.437  | U66349    | 927.844   | 860.117   |

|           |           |           |           |           |           |           |           |           |
|-----------|-----------|-----------|-----------|-----------|-----------|-----------|-----------|-----------|
| AF086093  | 978.183   | 820.578   | NM_001455 | 2844.663  | 2527.113  | AA057156  | 1126.757  | 903.879   |
| U92022    | 629.382   | 676.198   | L09071    | 476.022   | 362.841   | AF166327  | 13513.581 | 10872.966 |
| NM_00365C | 8067.85   | 7704.559  | NM_003322 | 1153.395  | 762.394   | AF260739  | 705.322   | 515.351   |
| NM_016644 | 1476.338  | 1107.332  | BC036375  | 6658.458  | 5465.176  | AF531423  | 2317.795  | 2155.149  |
| AF072164  | 1740.005  | 1834.655  | NM_006363 | 4270.537  | 4256.348  | X76555    | 661.828   | 641.875   |
| NM_01861C | 350.426   | 516.331   | NM_020415 | 2528.677  | 2829.235  | NM_005432 | 1310.581  | 1264.602  |
| AF232216  | 613.62    | 1391.033  | AL049667  | 5167.161  | 4766.986  | L10386    | 2464.608  | 2378.705  |
| NM_017773 | 2320.913  | 2934.735  | NM_000334 | 1735.438  | 2094.478  | AF061812  | 2886.092  | 2440.983  |
| AK021885  | 506.33    | 550.524   | NM_02040C | 1536.319  | 1476.506  | AL136756  | 955.327   | 1032.419  |
| AK022018  | 893.762   | 941.44    | NM_001504 | 890.228   | 860.728   | NM_01246C | 5635.62   | 6180.389  |
| AK022161  | 538.965   | 601.704   | D50926    | 2436.021  | 2714.675  | NM_13426C | 7882.557  | 6656.308  |
| AK022296  | 544.006   | 742.475   | BF205683  | 1911.225  | 1883.873  | SR6       | 1919.32   | 1481.019  |
| AK021940  | 537.261   | 638.558   | NM_00154E | 532.656   | 391.103   | SR8       | 6334.995  | 16101.454 |
| AK022189  | 320.932   | 319.072   | NM_00075E | 2893.861  | 3044.135  | SR10      | 21970.805 | 7092.104  |
| AK026856  | 739.934   | 660.644   | M17017    | 487.994   | 450.938   | CY3Cy5    | 1861.109  | 164.189   |
| NM_005001 | 27979.051 | 22594.453 | NM_00299C | 5051.086  | 4000.661  | AL080157  | 1889.858  | 2044.995  |
| AK024175  | 4595.543  | 5495.378  | NM_002432 | 1175.591  | 758.442   | NM_00530E | 1606.552  | 1735.783  |
| NM_00051C | 1016.062  | 1040.533  | AB033037  | 896.804   | 787.005   | NM_000911 | 248.794   | 258.051   |
| NM_017787 | 2905.759  | 5024.522  | L40400    | 3657.823  | 3219.536  | NM_007227 | 475.15    | 358.232   |
| NM_02031E | 9592.03   | 9303.896  | AK025688  | 1924.231  | 1457.868  | NM_007023 | 373.627   | 270.445   |
| AK023892  | 387.776   | 325.917   | NM_001195 | 470.635   | 159.45    | NM_014461 | 555.171   | 742.659   |
| AF265210  | 1552.392  | 1738.379  | NM_01444E | 1056.643  | 973.9     | NM_00386E | 585.086   | 583.486   |
| AK024241  | 588.411   | 498.492   | NM_00431E | 5339.846  | 6297.325  | AB015330  | 2378.607  | 2180.194  |
| AF088067  | 3938.267  | 2809.172  | NM_02016E | 3136.281  | 3391.448  | NM_00145E | 2425.809  | 1925.321  |
| AK022213  | 277.714   | 253.915   | S56138    | 436.91    | 449.073   | L09071    | 486.602   | 474.64    |
| AF056441  | 1028.926  | 752.789   | AK023860  | 1029.183  | 1276.035  | NM_003322 | 1030.879  | 1007.016  |
| AK024142  | 466.609   | 510.857   | NM_000031 | 2296.478  | 2570.786  | NM_006363 | 3466.504  | 3592.361  |
| Y10509    | 528.726   | 282.408   | NM_00208E | 24525.25  | 28409.502 | NM_02041E | 1987.404  | 2186.814  |
| AK024389  | 3333.828  | 2831.594  | AK026061  | 775.656   | 1873.79   | AL049667  | 3133.864  | 3520.232  |
| AK026793  | 969.466   | 891.572   | NM_01628E | 9890.877  | 10963.631 | NM_000334 | 1315.972  | 1967.277  |
| NM_001672 | 377.615   | 515.263   | NM_001567 | 1328.921  | 1382.148  | NM_02040C | 1023.825  | 1238.547  |
| AJ276253  | 8172.145  | 8641.717  | NM_00490E | 9701.436  | 10199.116 | NM_001504 | 521.427   | 455.579   |
| AF147314  | 313.855   | 448.124   | AF217971  | 2683.776  | 2247.707  | D50926    | 1691.368  | 1828.831  |
| NM_01898C | 522.789   | 448.675   | NM_00192E | 662.324   | 678.512   | BF205683  | 1542.722  | 1987.416  |
| AF086201  | 1103.33   | 1040.307  | AF245517  | 1020.399  | 1038.456  | NM_00154E | 404.171   | 307.636   |
| U48696    | 914.878   | 755.48    | NM_004982 | 594.995   | 540.659   | NM_00075E | 2745.431  | 2271.073  |
| AF230316  | 3852.881  | 3366.19   | NM_001694 | 44927.504 | 33092.43  | M17017    | 393.99    | 277.378   |
| K00629    | 351.39    | 584.659   | AF286370  | 511.114   | 239.966   | NM_00299C | 4592.27   | 4006.61   |
| AK024515  | 845.195   | 1018.931  | AK026180  | 669.216   | 439.44    | NM_002432 | 1039.701  | 974.085   |
| AF085862  | 1777.625  | 1813.856  | NM_005817 | 3816.794  | 3918.332  | AB033037  | 1070.216  | 1003.419  |
| NM_01799E | 2171.453  | 2233.975  | NM_00391E | 3609.814  | 3856.691  | L40400    | 3174.264  | 3556.432  |
| AL049271  | 34369.156 | 27926.93  | NM_00287C | 16858.063 | 14584.116 | AK025688  | 1605.339  | 1687.467  |
| AK023079  | 29033.328 | 25724.539 | NM_00147E | 22381.773 | 22480.574 | NM_001195 | 305.148   | 350.118   |
| NM_01960E | 1951.906  | 1659.893  | NM_002612 | 218.896   | 355.299   | NM_01444E | 890.961   | 943.739   |
| AK026198  | 577.82    | 534.585   | AF135422  | 2351.379  | 2352.719  | NM_00431E | 4185.244  | 5618.873  |
| AF183570  | 593.174   | 275.189   | NM_00447E | 7397.559  | 7441.651  | NM_02016E | 2278.677  | 2640.01   |
| NM_005497 | 2106.129  | 1714.661  | NM_00261C | 1669.712  | 2100.21   | S56138    | 423.675   | 441.744   |
| AK024048  | 6239.676  | 4646.857  | AF070587  | 4987.428  | 4816.78   | AK023860  | 840.931   | 1111.836  |
| AB033093  | 5772.841  | 4660.065  | BE250526  | 756.762   | 642.279   | NM_01628E | 6345.869  | 8096.901  |
| NM_005912 | 955.898   | 953.917   | NM_01681E | 1490.872  | 1402.392  | NM_001567 | 860.703   | 1403.227  |
| NM_00590E | 12900.252 | 10364.337 | NM_012222 | 3823.712  | 4996.779  | NM_00490E | 7828.092  | 8650.407  |
| AL355717  | 858.824   | 543.695   | NM_005002 | 2580.432  | 2833.284  | AF217971  | 2079.578  | 2438.739  |
| AK055991  | 1297.354  | 1008.146  | NM_00659E | 3396.61   | 3710.03   | NM_00192E | 511.901   | 524.639   |

|           |           |           |           |           |           |           |           |           |
|-----------|-----------|-----------|-----------|-----------|-----------|-----------|-----------|-----------|
| AF113697  | 596.556   | 324.371   | AK023214  | 5834.77   | 5241.192  | AF245517  | 764.756   | 573.914   |
| AF085991  | 551.082   | 512.78    | NM_001469 | 9946.496  | 8871.652  | NM_004982 | 772.792   | 731.425   |
| NM_005683 | 1082.985  | 699.344   | NM_003600 | 4130.25   | 2859.242  | AF286370  | 406.557   | 338.002   |
| NM_020427 | 7897.154  | 6976.492  | NM_017490 | 3122.171  | 2372.337  | NM_000217 | 285.608   | 312.336   |
| AF085920  | 788.403   | 770.724   | NM_002718 | 1455.769  | 1214.446  | AK026180  | 781.726   | 866.445   |
| AK023173  | 2645.219  | 3427.607  | AK026727  | 869.737   | 927.988   | NM_005817 | 3928.627  | 4125.571  |
| AK025225  | 539.512   | 478.646   | NM_002830 | 498.585   | 470.245   | NM_003916 | 3468.892  | 3475.48   |
| U79275    | 504.195   | 448.273   | NM_006247 | 4388.813  | 3449.296  | NM_002870 | 14247.849 | 14487.552 |
| AJ227908  | 755.055   | 1267.887  | AB032983  | 1462.876  | 1438.436  | NM_001478 | 20568.459 | 22002.09  |
| AK022367  | 876.175   | 715.947   | NM_018281 | 3454.093  | 2998.974  | NM_002612 | 178.183   | 249.417   |
| BC028589  | 2937.105  | 2199.657  | NM_004457 | 4777.505  | 4350.645  | AF135422  | 1832.027  | 1952.561  |
| CY3Cy5    | 1407.127  | 111.117   | NM_014049 | 2409.374  | 2626.369  | NM_004479 | 4895.091  | 6938.726  |
| BG539651  | 544.809   | 695.904   | NM_005396 | 400.542   | 199.763   | AF070587  | 4059.786  | 4309.421  |
| N52646    | 5188.286  | 5854.138  | BC036375  | 12812.518 | 11788.816 | BE250526  | 389.558   | 325.994   |
| AW160671  | 52405.484 | 55961.238 | BI912037  | 1014.728  | 1317.889  | NM_016819 | 1066.484  | 1617.113  |
| BI870529  | 21925.633 | 22153.432 | AA454646  | 806.309   | 1090.62   | NM_012222 | 3479.805  | 4680.481  |
| AA702698  | 1048.449  | 1715.23   | U18087    | 17152.834 | 15826.433 | NM_005002 | 2358.262  | 2117.748  |
| AI681514  | 581.538   | 539.641   | U66349    | 1087.286  | 1017.51   | NM_006596 | 2909.558  | 3446.61   |
| NM_001300 | 4473.804  | 5462.104  | AA057156  | 1242.948  | 1308.945  | AK023214  | 4855.955  | 4656.93   |
| BG748827  | 9540.825  | 11119.352 | U19487    | 451.333   | 295.711   | NM_001469 | 8047.48   | 7970.066  |
| AA952897  | 2080.959  | 3248.552  | AF260739  | 834.251   | 612.978   | NM_003600 | 3315.651  | 3375.869  |
| BG760342  | 6499.513  | 7331.436  | AF531423  | 2231.695  | 2193.298  | NM_017490 | 3058.855  | 2430.995  |
| AA703141  | 3641.851  | 4245.436  | X76555    | 832.116   | 486.799   | AK026727  | 1264.351  | 1287.677  |
| AI122630  | 12040.405 | 11315.881 | NM_005432 | 1097.469  | 850.162   | NM_002830 | 576.082   | 570.96    |
| NM_002103 | 9654.627  | 10356.09  | L10386    | 2939.533  | 2654.557  | NM_006247 | 4794.014  | 4935.521  |
| NM_003379 | 9423.577  | 10326.046 | AF061812  | 2474.468  | 2321.607  | AB032983  | 1497.797  | 1569.949  |
| SR5       | 4436.496  | 5456.802  | AL136756  | 1070.347  | 762.012   | NM_018281 | 3413.757  | 4413.417  |
| SR7       | 4914.918  | 41569.219 | NM_012469 | 5371.896  | 3999.179  | NM_004457 | 4792.576  | 4203.508  |
| SR9       | 17899.723 | 3819.315  | NM_134260 | 6646.046  | 5682.396  | NM_014049 | 2423.125  | 2539.528  |
| CY3Cy5    | 3652.014  | 287.284   | AK025688  | 1949.154  | 2397.637  | NM_005396 | 326.016   | 413.992   |
| NM_012428 | 3848.053  | 2230.868  | NM_001195 | 696.964   | 1473.226  | BC036375  | 10244.545 | 9229.547  |
| NM_013269 | 316.996   | 524.636   | NM_014448 | 2789.954  | 5664.311  | U18087    | 20106.141 | 29401.975 |
| NM_001728 | 7666.069  | 6785.506  | AL080157  | 3028.818  | 4221.802  | U66349    | 811.393   | 841.956   |
| NM_005565 | 6474.874  | 6592.397  | NM_007227 | 573.328   | 579.073   | AA057156  | 962.646   | 892.045   |
| NM_003824 | 5305.226  | 5620.353  | NM_007023 | 471.121   | 460.661   | U19487    | 225.119   | 188.584   |
| NM_012452 | 1087.691  | 1348.885  | NM_004624 | 1104.725  | 1261.714  | AF166327  | 15015.76  | 13592.178 |
| AF229166  | 1070.169  | 1342.987  | NM_003865 | 898.871   | 725.544   | AF260739  | 782.211   | 731.979   |
| NM_005137 | 2648.717  | 3132.749  | AB015330  | 3305.771  | 2440.521  | AF531423  | 2416.709  | 2234.246  |
| NM_006764 | 1144.621  | 1887.813  | NM_001455 | 2730.483  | 2696.217  | X76555    | 555.909   | 455.531   |
| NM_001163 | 1313.415  | 1598.617  | L09071    | 544.731   | 392.372   | NM_005432 | 1365.097  | 1165.336  |
| NM_005878 | 533.809   | 650.952   | NM_003322 | 1304.759  | 1125.989  | L10386    | 2711.928  | 2846.854  |
| AF308602  | 5810.977  | 6964.986  | AK026180  | 809.267   | 892.822   | AF061812  | 2831.705  | 3101.277  |
| AB011089  | 1554.178  | 1693.361  | NM_005817 | 5036.478  | 5366.162  | AL136756  | 855.147   | 979.38    |
| AF007192  | 611.311   | 730.908   | NM_003916 | 3716.898  | 4520.889  | NM_012469 | 6415.839  | 6383.101  |
| NM_001276 | 6963.269  | 7320.47   | NM_002870 | 19567.727 | 22627.072 | NM_134260 | 7873.47   | 6974.202  |
| NM_014915 | 16256.481 | 25347.656 | NM_006363 | 4809.549  | 5889.237  | AK025688  | 1664.423  | 2046.132  |
| NM_012286 | 1276.815  | 1697.294  | NM_014879 | 227.95    | 504.306   | NM_001195 | 346.726   | 526.338   |
| NM_002195 | 6965.769  | 7178.596  | AL049667  | 4601.836  | 4263.564  | NM_014448 | 1232.568  | 2791.982  |
| D84294    | 2119.651  | 2760.237  | NM_000334 | 1666.696  | 1713.715  | AL080157  | 2343.398  | 4736.649  |
| M31659    | 889.384   | 832.438   | NM_020400 | 1349.741  | 1174.872  | NM_005308 | 1662.474  | 2084.807  |
| NM_003056 | 2797.999  | 2025.573  | NM_001504 | 863.048   | 596.875   | NM_007227 | 461.411   | 339.467   |
| NM_016226 | 11346.185 | 9117.507  | D50926    | 2137.969  | 1808.819  | NM_007023 | 466.358   | 388.109   |
| AK024311  | 1008.256  | 809.991   | BF205683  | 1502.531  | 1133.381  | NM_005873 | 4986.505  | 5569.463  |

|           |           |           |           |           |           |           |           |           |
|-----------|-----------|-----------|-----------|-----------|-----------|-----------|-----------|-----------|
| AF052155  | 9658.8    | 8123.454  | NM_001548 | 494.414   | 259.851   | NM_004624 | 1322.411  | 1647.622  |
| NM_005085 | 1434.229  | 1601.288  | NM_000758 | 2807.862  | 2569.044  | NM_014461 | 278.603   | 175.902   |
| AF060902  | 1412.845  | 1284.058  | M17017    | 466.781   | 346.701   | NM_003865 | 843.692   | 658.175   |
| AF121858  | 2616.691  | 2651.285  | NM_002990 | 4185.429  | 3546.785  | AB015330  | 2612.737  | 2163.534  |
| NM_013437 | 5753.357  | 6589.476  | NM_002432 | 1404.097  | 1348.76   | NM_001455 | 2800.781  | 2524.304  |
| NM_017681 | 1173.644  | 1439.823  | AB033037  | 1013.335  | 970.334   | L09071    | 411.56    | 433.36    |
| X57655    | 11291.844 | 14098.906 | L40400    | 3179.597  | 3284.075  | NM_003322 | 1221.16   | 1322.108  |
| AK025966  | 2747.913  | 3413.664  | NM_006247 | 5269.092  | 6150.226  | AK026180  | 763.45    | 822.625   |
| NM_018725 | 716.166   | 951.586   | AB032983  | 1679.402  | 1958.339  | NM_005817 | 3495.978  | 4490.601  |
| NM_003081 | 6864.509  | 6844.767  | NM_018281 | 4413.015  | 4314.513  | NM_003916 | 2650.975  | 3356.911  |
| NM_016495 | 8806.233  | 9664.199  | NM_004457 | 4937.75   | 5301.706  | NM_002870 | 14702.395 | 21003.885 |
| D50402    | 2738.839  | 2887.054  | NM_014049 | 2896.625  | 3606.94   | NM_006363 | 4034.603  | 4532.399  |
| M73547    | 11855.816 | 10877.224 | NM_005396 | 297.748   | 637.248   | NM_020415 | 2190.69   | 2310.643  |
| NM_003687 | 679.505   | 678.146   | NM_004315 | 7065.837  | 16215.416 | NM_014879 | 321.556   | 489.473   |
| NM_004134 | 3886.717  | 3896.712  | NM_020166 | 3322.255  | 4000.144  | AL049667  | 3284.269  | 3166.96   |
| NM_005955 | 1417.253  | 1811.776  | S56138    | 553.447   | 747.381   | NM_000334 | 1360.029  | 2434.112  |
| NM_004048 | 939.964   | 1110.957  | AK023860  | 1150.625  | 1388.182  | NM_020400 | 1521.765  | 4042.283  |
| NM_005313 | 18059.43  | 11574.87  | NM_000031 | 3288.637  | 3628.797  | NM_001504 | 647.648   | 1079.751  |
| NM_017765 | 1592.006  | 1222.502  | NM_002085 | 20269.379 | 20684.055 | D50926    | 1902.073  | 2159.222  |
| AB040967  | 853.62    | 754.42    | AK026061  | 936.447   | 713.206   | BF205683  | 1652.629  | 1227.108  |
| NM_014721 | 1340.955  | 1115.704  | NM_016286 | 8507.3    | 7331.788  | NM_001565 | 395.63    | 193.464   |
| AK026352  | 1058.515  | 1297.681  | NM_001567 | 1155.02   | 1024.133  | NM_001548 | 493.822   | 445.115   |
| AL137705  | 2256.223  | 2736.868  | NM_004905 | 7710.743  | 6322.45   | NM_000758 | 3401.717  | 2504.157  |
| BF217766  | 1019.326  | 1432.373  | AF217971  | 2627.197  | 1973.17   | M17017    | 408.13    | 402.039   |
| NM_000184 | 1497.163  | 1853.86   | NM_001925 | 499.068   | 445.94    | NM_002990 | 5020.137  | 4960.033  |
| NM_016180 | 569.293   | 574.333   | AF245517  | 662.846   | 874.55    | NM_002432 | 1332.45   | 1313.96   |
| NM_000112 | 995.054   | 1045.776  | NM_004982 | 904.446   | 711.745   | AB033037  | 1111.208  | 1430.009  |
| NM_005827 | 8423.889  | 9294.149  | NM_001694 | 46591.352 | 46480.527 | L40400    | 3472.512  | 3665.692  |
| NM_003053 | 1354.336  | 1788.512  | NM_000217 | 490.055   | 438.311   | NM_006247 | 4710.367  | 5426.909  |
| NM_006672 | 1062.632  | 1231.041  | NM_012469 | 6355.576  | 7088.208  | AB032983  | 1229.131  | 1295.325  |
| AB007875  | 793.026   | 793.067   | NM_134260 | 6420.055  | 6246.479  | NM_018281 | 3815.167  | 5109.908  |
| NM_018261 | 1620.236  | 1121.796  | NM_001478 | 26128.857 | 29149.809 | NM_004457 | 4154.505  | 4293.832  |
| NM_014796 | 3456.595  | 2007.105  | AF135422  | 2541.588  | 2964.73   | NM_014049 | 1964.638  | 2274.708  |
| AL050288  | 28698.107 | 22200.164 | NM_004479 | 7973.966  | 7763.99   | NM_005396 | 321.067   | 377.987   |
| NM_005040 | 5321.461  | 7042.34   | NM_002610 | 1835.579  | 1994.988  | NM_004315 | 4408.267  | 6330.979  |
| NM_016391 | 6908.582  | 5547.237  | AF070587  | 4875.028  | 3511.887  | NM_020166 | 2534.714  | 2807.024  |
| M80783    | 706.292   | 425.341   | BE250526  | 457.107   | 448.33    | S56138    | 360.371   | 451.07    |
| AF075033  | 8129.797  | 10728.185 | NM_016819 | 1116.469  | 997.071   | AK023860  | 951.379   | 1169.041  |
| D50911    | 15855.736 | 20634.711 | NM_012222 | 3071.803  | 2932.668  | NM_000031 | 2473.33   | 2096.148  |
| AB011104  | 1760.868  | 2547.402  | NM_005002 | 2139.325  | 2194.242  | NM_002085 | 23239.082 | 28342.785 |
| AK024069  | 4313.798  | 4804.096  | NM_006596 | 3059.988  | 2620.846  | AK026061  | 851.341   | 1447.668  |
| NM_004582 | 19260.799 | 19006.398 | AK023214  | 5603.096  | 3988.999  | NM_016286 | 7621.733  | 11843.005 |
| NM_015640 | 13063.827 | 14896.305 | NM_001469 | 7822.482  | 7122.251  | NM_001567 | 994.348   | 1107.54   |
| AF233450  | 2031.818  | 2473.169  | NM_003600 | 3210.601  | 1942.649  | NM_004905 | 8166.63   | 5798.505  |
| NM_016233 | 723.325   | 1074.226  | NM_017490 | 3228.497  | 2833.397  | AF217971  | 2333.041  | 2237.202  |
| NM_000821 | 8956.146  | 9046.244  | NM_002718 | 1090.413  | 957.913   | NM_001925 | 541.517   | 537.609   |
| NM_020121 | 98.872    | 618.646   | AK026727  | 1174.794  | 1150.638  | AF245517  | 701.05    | 652.439   |
| NM_003145 | 27184.633 | 32098.484 | NM_002830 | 567.277   | 714.526   | NM_004982 | 962.699   | 916.135   |
| NM_001632 | 1788.141  | 2167.575  | L09071    | 456.538   | 614.888   | NM_001694 | 47677.988 | 59352.176 |
| NM_012264 | 2372.212  | 2873.017  | NM_003322 | 1432.638  | 1639.482  | AF286370  | 374.662   | 486.787   |
| AF311312  | 1969.767  | 2573.854  | BC036375  | 13087.848 | 14181.732 | NM_000217 | 243.41    | 445.955   |
| NM_014915 | 12242.091 | 17001.236 | BI912037  | 1015.995  | 814.556   | NM_012469 | 6229.369  | 7240.86   |
| NM_012286 | 965.765   | 814.375   | AA454646  | 740.158   | 813.926   | NM_134260 | 7626.208  | 6526.192  |

|           |           |           |           |           |           |           |           |           |
|-----------|-----------|-----------|-----------|-----------|-----------|-----------|-----------|-----------|
| NM_002195 | 5126.636  | 3943.958  | U18087    | 18587.494 | 11959.231 | NM_001478 | 30433.07  | 29255.518 |
| D84294    | 1752.482  | 1473.31   | U66349    | 838.764   | 649.158   | NM_002612 | 292.489   | 420.405   |
| K02765    | 424.818   | 271.519   | AA057156  | 1170.816  | 773.466   | AF135422  | 2230.17   | 1722.992  |
| N52646    | 5211.583  | 5488.012  | AF166327  | 10762.517 | 8168.706  | NM_004479 | 6055.418  | 5565.634  |
| AW160671  | 54545.613 | 56024.512 | AF260739  | 671.286   | 451.098   | NM_002610 | 1610.7    | 1504.382  |
| BI870529  | 21560.549 | 26230.086 | AF531423  | 1757.186  | 1710.494  | AF070587  | 4386.065  | 3615.406  |
| AA702698  | 1321.46   | 2420.867  | X76555    | 794.295   | 735.397   | BE250526  | 536.437   | 537.897   |
| AI681514  | 446.505   | 674.151   | NM_005432 | 960.15    | 830.294   | NM_016819 | 982.514   | 826.765   |
| NM_001300 | 4065.598  | 5006.773  | L10386    | 3018.627  | 2721.634  | NM_012222 | 3384.825  | 3182.956  |
| BG748827  | 9094.176  | 12098.686 | AF061812  | 2690.162  | 2459.526  | NM_005002 | 2392.25   | 2042.066  |
| AA952897  | 2442.986  | 3169.61   | AL136756  | 819.83    | 835.723   | NM_006596 | 3161.462  | 2872.476  |
| BG760342  | 7115.509  | 8718.675  | NM_002990 | 4852.028  | 5397.715  | AK023214  | 5463.679  | 4735.812  |
| AA703141  | 2990.198  | 3674.01   | NM_002432 | 1611.843  | 1502.304  | NM_001469 | 8604.508  | 7881.45   |
| AI122630  | 11112.147 | 12763.281 | AB033037  | 1118.742  | 1419.765  | NM_003600 | 3697.392  | 4137.758  |
| NM_002103 | 8594.892  | 11196.86  | L40400    | 4397.303  | 5464.573  | NM_017490 | 2980.216  | 3284.45   |
| NM_003379 | 8920.38   | 10357.474 | NM_014448 | 1011.82   | 947.524   | NM_002718 | 1133.845  | 1215.539  |
| NM_006589 | 6250.819  | 6729.863  | AL080157  | 3680.824  | 3407.314  | AK026727  | 1211.883  | 1539.539  |
| NM_004134 | 3010.353  | 2695.921  | NM_005308 | 1529.197  | 1316.307  | NM_002830 | 633.354   | 610.407   |
| NM_005955 | 1218.932  | 1215.18   | NM_007227 | 443.979   | 358.73    | NM_003322 | 982.876   | 1211.715  |
| NM_004048 | 752.641   | 822.511   | NM_007023 | 373.304   | 356.578   | BC036375  | 10664.664 | 9593.356  |
| NM_012428 | 4186.597  | 2331.716  | NM_005873 | 4473.372  | 3396.729  | BI912037  | 1014.663  | 833.375   |
| NM_001728 | 8924.461  | 4760.374  | NM_004624 | 993.52    | 1115.51   | AA454646  | 1020.51   | 643.07    |
| NM_005565 | 6049.678  | 3867.473  | NM_003865 | 904.06    | 894.215   | U18087    | 23597.756 | 17067.273 |
| NM_003824 | 5538.086  | 7738.402  | AB015330  | 2268.347  | 1993.651  | U66349    | 943.169   | 710.55    |
| NM_012452 | 866.761   | 1235.354  | NM_001455 | 2359.731  | 2565.283  | AA057156  | 1132.856  | 1006.203  |
| AF229166  | 992.062   | 1262.017  | NM_004982 | 883.217   | 1025.336  | AF166327  | 11948.854 | 9354.342  |
| NM_005137 | 2049.417  | 3503.308  | NM_001694 | 50821.629 | 54576.805 | AF260739  | 745.221   | 639.273   |
| NM_006764 | 1066.058  | 1357.048  | AF286370  | 567.836   | 517.33    | AF531423  | 2696.784  | 2588.463  |
| NM_001163 | 1353.09   | 1478.504  | NM_000217 | 478.56    | 598.389   | X76555    | 687.974   | 869.877   |
| NM_005878 | 356.492   | 566.516   | NM_005817 | 4776.453  | 6385.185  | NM_005432 | 1353.88   | 1433.876  |
| AF308602  | 5983.941  | 9139.904  | NM_003916 | 3821.886  | 3945.802  | L10386    | 2815.591  | 3356.702  |
| AB011089  | 1462.608  | 1608.92   | NM_002870 | 18620.611 | 18316.836 | AF061812  | 3879.246  | 4600.858  |
| AF007192  | 613.801   | 616.9     | NM_006363 | 4292.998  | 3810.399  | AL136756  | 908.54    | 1246.185  |
| NM_001276 | 5901.147  | 6267.185  | NM_020415 | 2316.833  | 2440.612  | NM_002990 | 4703.783  | 5203.664  |
| NM_000112 | 682.907   | 675.915   | AL049667  | 4148.819  | 3310.547  | NM_002432 | 1273.239  | 1268.43   |
| NM_005827 | 9508.139  | 16382.086 | NM_000334 | 1774.304  | 1362.336  | AB033037  | 1110.959  | 917.728   |
| NM_003053 | 1459.79   | 1514.964  | NM_020400 | 1152.276  | 1006.079  | L40400    | 3011.942  | 3331.836  |
| NM_003044 | 466.614   | 818.864   | NM_001504 | 736.289   | 661.576   | AK025688  | 1781.483  | 2165.088  |
| NM_006672 | 1088.152  | 1846.229  | D50926    | 1867.573  | 1492.599  | NM_001195 | 318.785   | 437.471   |
| M31659    | 905.474   | 400.394   | BF205683  | 1873.926  | 1645.401  | NM_014448 | 1249.265  | 881.694   |
| NM_003056 | 2577.612  | 1585.914  | NM_001565 | 419.506   | 327.423   | AL080157  | 2558.674  | 2461.578  |
| NM_016226 | 19991.715 | 34094.207 | NM_001548 | 515.314   | 467.682   | NM_005308 | 1899.735  | 1554.192  |
| AK024311  | 1117.072  | 794.506   | NM_000758 | 3090.887  | 3094.094  | NM_007227 | 582.23    | 435.885   |
| AF052155  | 9744.567  | 5009.028  | M17017    | 541.219   | 511.88    | NM_007023 | 473.053   | 393.774   |
| NM_005085 | 1253.192  | 1346.864  | NM_003600 | 5184.908  | 4780.182  | NM_005873 | 4549.119  | 3410.447  |
| AF060902  | 1297.588  | 1794.149  | NM_017490 | 3730.712  | 3652.643  | NM_004624 | 1660.55   | 1534.349  |
| AF121858  | 2508.028  | 3135.729  | NM_002718 | 1508.881  | 1520.532  | NM_014461 | 272.418   | 321.95    |
| NM_013437 | 5626.106  | 6481.605  | AK026727  | 1410.839  | 1794.421  | NM_003865 | 929.155   | 1395.177  |
| NM_017681 | 1060.817  | 982.146   | NM_004457 | 6749.842  | 13197.561 | AB015330  | 3390.9    | 3827.978  |
| X57655    | 13032.586 | 12602.015 | NM_014049 | 2503.579  | 3909.274  | NM_001455 | 3252.667  | 2982.351  |
| AK025966  | 2527.654  | 3186.289  | NM_005396 | 341.145   | 264.005   | NM_004982 | 733.625   | 669.877   |
| NM_018725 | 531.376   | 609.703   | NM_004315 | 5175.1    | 5845.903  | NM_001694 | 50094.793 | 58536.598 |
| NM_003081 | 7594.958  | 10551.155 | NM_020166 | 2469.644  | 2632.585  | AF286370  | 449.041   | 475.281   |

|           |           |           |           |           |           |           |           |           |
|-----------|-----------|-----------|-----------|-----------|-----------|-----------|-----------|-----------|
| NM_016495 | 8851.448  | 8736.428  | S56138    | 587.851   | 379.428   | NM_000217 | 338.963   | 287.357   |
| D50402    | 2685.356  | 2868.04   | AK023860  | 1116.481  | 1000.964  | AK026180  | 679.8     | 675.113   |
| M73547    | 10703.873 | 9584.45   | NM_000031 | 2847.579  | 2804.454  | NM_005817 | 3973.824  | 4420.093  |
| NM_003687 | 480.899   | 553.6     | NM_002085 | 20956.297 | 17963.746 | NM_003916 | 3177.835  | 2187.85   |
| NM_020121 | 402.907   | 841.974   | AK026061  | 818.822   | 658.298   | NM_002870 | 18736.803 | 15009.336 |
| NM_001632 | 2666.483  | 3294.622  | NM_016286 | 7505.185  | 7261.275  | NM_006363 | 4036.02   | 3312.565  |
| NM_012264 | 2112.793  | 1860.491  | NM_001567 | 917.417   | 710.642   | NM_020415 | 2898.333  | 2426.457  |
| AF311312  | 1527.841  | 1342.869  | NM_004905 | 7769.502  | 8304.631  | AL049667  | 3650.104  | 3441.073  |
| NM_005313 | 19120.361 | 11475.821 | AF217971  | 2515.935  | 2244.13   | NM_000334 | 1943.568  | 2243.697  |
| NM_017765 | 3395.818  | 5022.789  | NM_001925 | 598.139   | 587.312   | NM_020400 | 1260.426  | 1151.218  |
| NM_000428 | 567.066   | 380.613   | AF245517  | 783.022   | 1145.326  | NM_001504 | 938.61    | 876.962   |
| AB040967  | 964.077   | 448.201   | X78926    | 3060.369  | 2989.404  | D50926    | 2332.239  | 2373.963  |
| NM_014721 | 1341.318  | 1710.157  | AJ278110  | 1310.712  | 1834.014  | BF205683  | 2838.912  | 3430.526  |
| AK026352  | 743.26    | 1232.43   | NM_014237 | 1803.609  | 1772.188  | NM_001565 | 404.716   | 294.705   |
| AL137705  | 2290.074  | 3323.279  | NM_020396 | 605.093   | 748.119   | NM_001548 | 506.308   | 443.84    |
| NM_014848 | 545.043   | 765.148   | AF029900  | 2936.518  | 3503.264  | NM_000758 | 4136.982  | 3867.577  |
| BF217766  | 1134.914  | 1369.367  | NM_006547 | 1414.006  | 1540.134  | M17017    | 416.155   | 431.269   |
| NM_000184 | 1410.924  | 1255.067  | NM_001478 | 24501.479 | 21530.605 | NM_003600 | 3934.444  | 5030.414  |
| NM_002103 | 8038.965  | 8283.722  | NM_002612 | 527.826   | 479.152   | NM_017490 | 2659.431  | 3117.86   |
| NM_003379 | 7441.555  | 7647.364  | AF135422  | 2407.134  | 2143.893  | NM_002718 | 1006.024  | 1379.801  |
| NM_006589 | 6807.783  | 6327.934  | NM_004479 | 7671.445  | 5086.641  | AK026727  | 1327.558  | 1499.548  |
| AB007875  | 910.288   | 706.216   | NM_002610 | 1548.232  | 1212.287  | NM_002830 | 557.877   | 543.591   |
| NM_018261 | 2120.87   | 1271.732  | AF070587  | 4452.076  | 3084.125  | NM_006247 | 4520.949  | 4503.053  |
| NM_014796 | 4110.275  | 2289.462  | BE250526  | 538.707   | 355.046   | AB032983  | 1292.937  | 1150.867  |
| AL050288  | 28563.691 | 23266.33  | NM_016819 | 1023.188  | 879.058   | NM_018281 | 3512.338  | 3806.112  |
| NM_005040 | 5015.881  | 5244.424  | NM_012222 | 3706.744  | 3858.693  | NM_004457 | 4255.438  | 3801.948  |
| NM_016391 | 7621.253  | 10957.617 | NM_005002 | 2658.774  | 2414.439  | NM_014048 | 2053.094  | 1757.751  |
| M80783    | 687.843   | 1091.943  | NM_006596 | 3143.455  | 3326.399  | NM_005396 | 329.662   | 295.337   |
| AF075033  | 8289.941  | 9022.628  | AK023214  | 6548.932  | 5827.146  | NM_004315 | 5204.525  | 4204.594  |
| D50911    | 14553.002 | 15641.627 | NM_001469 | 9830.504  | 10506.324 | NM_020166 | 3122.672  | 2736.286  |
| AB011104  | 1667.508  | 1952.515  | BC036368  | 652.344   | 716.78    | S56138    | 391.164   | 349.621   |
| AK024069  | 4948.212  | 7258.512  | NM_001851 | 3211.26   | 3485.565  | AK023860  | 1492.512  | 1231.903  |
| NM_004582 | 21047.383 | 25177.936 | S67789    | 1091.563  | 1138.795  | NM_000031 | 3173.833  | 2713.601  |
| NM_015640 | 11457.964 | 11961.221 | AK022689  | 2953.41   | 3982.692  | NM_002085 | 23025.316 | 17446.482 |
| AF233450  | 1140.422  | 1321.392  | NM_016227 | 1399.746  | 1243.687  | AK026061  | 749.663   | 1042.37   |
| NM_016233 | 861.195   | 834.218   | NM_004705 | 4893.126  | 6130.173  | NM_016286 | 7980.264  | 8321.824  |
| NM_000821 | 5904.996  | 4652.207  | NM_014357 | 2982.885  | 2955.246  | NM_001567 | 1307.675  | 1821.619  |
| AF308602  | 4547.07   | 5663.419  | NM_004067 | 1308.156  | 1548.43   | NM_004905 | 9294.726  | 8846.47   |
| AB011089  | 1932.213  | 3227.717  | NM_000121 | 5970.286  | 5718.201  | AF217971  | 3513.365  | 4091.471  |
| NM_001276 | 5399.434  | 5104.077  | NM_002091 | 4740.164  | 4454.067  | NM_001925 | 560.746   | 683.444   |
| NM_014915 | 12247.213 | 14209.064 | AB033092  | 3676.144  | 3618.454  | AF245517  | 936.232   | 844.761   |
| NM_012286 | 957.125   | 780.624   | NM_003023 | 1128.118  | 765.455   | X78926    | 2442.748  | 3460.527  |
| NM_002195 | 5426.055  | 3305.768  | BC035030  | 3007.131  | 2591.63   | AJ278110  | 850.837   | 1287.569  |
| D84294    | 1722.823  | 1369.454  | NM_016201 | 1260.042  | 1151.911  | NM_014237 | 1136.908  | 1551.959  |
| K02765    | 543.533   | 186.294   | NM_000864 | 1978.242  | 1455.186  | NM_020396 | 342.191   | 416.567   |
| BG539651  | 1671.8    | 804.44    | NM_017977 | 2270.383  | 2225.201  | AF029900  | 2749.43   | 3759.005  |
| AA702698  | 1080.786  | 1387.006  | AF147727  | 1251.73   | 970.398   | NM_003325 | 7248.945  | 8880.127  |
| AI681514  | 537.376   | 494.63    | NM_006751 | 3490.328  | 3529.119  | NM_016178 | 1142.826  | 1517.19   |
| NM_001300 | 3739.272  | 4249.927  | AB037834  | 2336.933  | 2026.774  | AK022639  | 755.022   | 671.698   |
| BG748827  | 7495.631  | 8341.557  | NM_003569 | 1241.075  | 1186.919  | D31766    | 5759.663  | 5722.882  |
| AA952897  | 2226.999  | 2384.365  | NM_014052 | 13855.371 | 14130.137 | NM_006547 | 1094.806  | 839.471   |
| BG760342  | 5916.867  | 5936.307  | NM_002777 | 667.659   | 634.491   | NM_001478 | 23664.93  | 17354.078 |
| AA703141  | 3246.277  | 3081.105  | AF202635  | 826.261   | 1048.872  | NM_002612 | 385.268   | 232.817   |

|           |           |           |           |           |           |           |           |           |
|-----------|-----------|-----------|-----------|-----------|-----------|-----------|-----------|-----------|
| AI122630  | 7471.561  | 4096.978  | NM_014125 | 633.529   | 764.645   | AF135422  | 1985.283  | 1372.921  |
| NM_003081 | 6494.259  | 7292.476  | NM_017904 | 754.159   | 736.826   | NM_004475 | 7318.84   | 6921.886  |
| NM_016495 | 7241.933  | 7681.559  | NM_013367 | 3984.151  | 4044.604  | NM_002610 | 1318.891  | 1237.759  |
| D50402    | 3112.536  | 5138.698  | NM_000321 | 6987.866  | 8269.088  | AF070587  | 4441.035  | 3598.87   |
| M73547    | 10185.77  | 8985.18   | NM_006341 | 14226.079 | 15409.436 | BE250526  | 657.232   | 531.278   |
| NM_003687 | 749.529   | 1702.519  | NM_001709 | 3408.625  | 2702.669  | NM_016815 | 1288.464  | 1352.71   |
| NM_004134 | 3033.631  | 2217.019  | NM_006191 | 3765.273  | 4023.259  | NM_012222 | 5066.994  | 6055.459  |
| NM_005955 | 1313.633  | 1141.507  | NM_001800 | 6307.945  | 6140.168  | NM_005002 | 3234.638  | 2935.15   |
| NM_004048 | 761.296   | 703.887   | NM_004336 | 8209.258  | 7749.073  | NM_006596 | 3830.271  | 3893.195  |
| NM_012428 | 4972.334  | 2766.381  | NM_015949 | 2445.601  | 2154.857  | AK023214  | 6559.543  | 7540.9    |
| NM_013269 | 884.928   | 842.193   | NM_013979 | 3421.352  | 3209.596  | NM_001465 | 4686.67   | 5119.085  |
| NM_001728 | 10790.197 | 7961.802  | NM_003790 | 1479.255  | 1055.622  | BC036368  | 495.757   | 531.313   |
| NM_005565 | 5996.562  | 3145.155  | NM_000494 | 2112.001  | 1853.64   | NM_001851 | 2412.052  | 2557.695  |
| NM_012452 | 730.885   | 895.546   | NM_003722 | 8282.63   | 7899.936  | S67789    | 1028.049  | 972.946   |
| AF229166  | 849.487   | 1315.729  | NM_014430 | 488.949   | 270.28    | AK022689  | 3218.367  | 3162.271  |
| NM_005137 | 2249.076  | 3484.163  | NM_000495 | 417.9     | 620.158   | NM_016227 | 1051.753  | 813.98    |
| NM_006764 | 1278.347  | 1322.095  | AF085883  | 2108.298  | 2127.716  | NM_004195 | 9501.086  | 10816.282 |
| NM_001163 | 1300.017  | 770.953   | NM_016571 | 1169.348  | 1121.791  | NM_004705 | 3198.85   | 3705.706  |
| NM_014848 | 455.85    | 575.043   | NM_003688 | 554.088   | 586.859   | NM_020190 | 5382.946  | 5094.526  |
| BF217766  | 886.272   | 1061.627  | NM_016446 | 2826.866  | 2898.439  | AK024003  | 433.478   | 298.327   |
| NM_000184 | 1120.707  | 1507.459  | NM_002516 | 873.809   | 892.768   | NM_014357 | 2019.603  | 2013.028  |
| NM_016180 | 405.736   | 286.784   | AK023237  | 288.719   | 367.65    | NM_004067 | 981.647   | 919.521   |
| NM_000112 | 709.618   | 541.738   | NM_001870 | 731.059   | 929.68    | NM_000121 | 4899.264  | 3709.008  |
| NM_005827 | 6673.91   | 5984.042  | AJ271216  | 1686.31   | 2107.209  | NM_002091 | 3212.442  | 2364.523  |
| NM_003053 | 1443.347  | 1218.328  | U23028    | 3487.129  | 3469.393  | AB033092  | 3218.628  | 2370.082  |
| NM_006672 | 1785.685  | 3913.992  | NM_000817 | 4265.789  | 3889.5    | NM_003023 | 809.91    | 706.395   |
| M31659    | 1157.581  | 796.613   | NM_006571 | 7818.065  | 7725.4    | BC035030  | 3157.474  | 3141.352  |
| NM_003056 | 3101.371  | 2336.472  | NM_001875 | 404.549   | 364.14    | NM_005340 | 47041.254 | 37582.125 |
| NM_016226 | 14503.694 | 8248.977  | AK022680  | 1765.077  | 1749.675  | NM_016201 | 1417.476  | 1519.349  |
| AK024311  | 1390.733  | 1753.657  | NM_018946 | 6366.485  | 5153.283  | NM_000864 | 2533.048  | 2367.262  |
| AF052155  | 10824.923 | 5352.055  | NM_016359 | 8559.631  | 6840.12   | NM_017977 | 1980.18   | 2092.868  |
| NM_005085 | 1412.995  | 1871.129  | NM_004156 | 6093.084  | 5616.213  | AF147727  | 1365.582  | 1343.322  |
| AF060902  | 1427.698  | 976.386   | AK000561  | 539.122   | 669.865   | NM_006751 | 3529.376  | 3882.116  |
| AF121858  | 2796.583  | 3731.414  | AB051449  | 15439.837 | 13079.658 | AB037834  | 2966.681  | 3119.925  |
| NM_013437 | 4823.138  | 3591.869  | BC009187  | 6552.083  | 7027.913  | NM_003565 | 1738.009  | 1387.394  |
| NM_017681 | 1014.343  | 970.708   | AL133617  | 581.399   | 566.346   | NM_014052 | 10601.53  | 11562.171 |
| X57655    | 11510.199 | 8259.557  | NM_016485 | 6829.309  | 6736.092  | NM_002777 | 465.046   | 640.015   |
| AK025966  | 2077.843  | 1131.843  | NM_002615 | 597.696   | 701.902   | AF202635  | 789.283   | 716.916   |
| NM_018725 | 762.883   | 275.975   | AF090894  | 591.102   | 527.872   | NM_014125 | 508.666   | 535.826   |
| AK024069  | 4257.849  | 4887.672  | NM_006167 | 3911.437  | 4017.746  | NM_017904 | 448.669   | 373.229   |
| NM_004582 | 17563.434 | 17370.785 | NM_016357 | 3908.392  | 4463.314  | NM_013367 | 3038.384  | 2666.127  |
| NM_015640 | 11073.844 | 13032.456 | NM_014500 | 9488.469  | 12963.542 | NM_000321 | 5170.848  | 3752.689  |
| AF233450  | 1712.053  | 2940.022  | AK023792  | 381.049   | 547.94    | NM_006341 | 12456.203 | 11325.353 |
| NM_016233 | 1035.028  | 2035.078  | NM_020149 | 1308.306  | 1315.543  | NM_001705 | 2664.772  | 1545.918  |
| NM_000821 | 6516.753  | 6376.059  | NM_006237 | 1964.47   | 1816.93   | NM_006191 | 3013.287  | 2810.078  |
| NM_020121 | 354.567   | 783.092   | NM_001271 | 3675.936  | 2911.332  | NM_001800 | 5414.985  | 3365.776  |
| NM_003145 | 24430.941 | 20964.07  | NM_003683 | 3446.333  | 3224.501  | NM_004336 | 7794.181  | 5119.238  |
| NM_001632 | 1432.839  | 1486.054  | AF039019  | 3823.453  | 4422.776  | NM_015945 | 2106.447  | 1339.376  |
| NM_012264 | 2023.071  | 2068.803  | NM_012255 | 4989.983  | 5696.716  | NM_013975 | 3123.113  | 2282.075  |
| AF311312  | 1582.442  | 1304.418  | NM_004818 | 5854.522  | 4984.204  | NM_003790 | 1538.78   | 1147.723  |
| NM_005313 | 21474.857 | 13303.685 | J04205    | 9349.07   | 7437.215  | NM_000494 | 2091.885  | 1903.932  |
| NM_017765 | 2207.706  | 1297.576  | D38491    | 4876.198  | 2757.07   | NM_016023 | 1239.776  | 890.413   |
| NM_000428 | 593.097   | 247.908   | AK026835  | 2030.259  | 1631.21   | NM_003722 | 5469.314  | 4956.226  |

|           |           |           |           |           |           |           |           |           |
|-----------|-----------|-----------|-----------|-----------|-----------|-----------|-----------|-----------|
| AB040967  | 1145.191  | 384.383   | NM_002819 | 12570.899 | 9246.266  | NM_01443C | 469.43    | 485.767   |
| NM_014721 | 1950.489  | 2372.788  | NM_013264 | 2690.013  | 2070.901  | NM_00049E | 462.137   | 501.693   |
| AK026352  | 831.828   | 679.773   | NM_00331E | 8770.706  | 7283.366  | AF085883  | 2251.037  | 2331.18   |
| AL137705  | 2092.95   | 1188.308  | NM_00557C | 6701.301  | 5332.059  | NM_016571 | 932.285   | 1211.279  |
| NM_007262 | 34036.582 | 34804.523 | NM_00008E | 4176.591  | 3919.394  | NM_00368E | 553.812   | 566.508   |
| NM_014783 | 6459.568  | 6963.013  | NM_003752 | 3337.465  | 3704.473  | NM_01644E | 3114.28   | 3515.706  |
| NM_014053 | 4497.101  | 5983.536  | NM_003932 | 12062.574 | 12362.755 | NM_00251E | 532.209   | 862.793   |
| NM_002571 | 256.869   | 769.149   | NM_016491 | 11443.808 | 10520.478 | AK023237  | 267.129   | 202.328   |
| NM_00493E | 5354.852  | 5766.793  | NM_00642E | 27254.65  | 27009.041 | NM_00187C | 809.383   | 674.163   |
| NM_00142E | 15315.808 | 13752.739 | NM_015944 | 1089.89   | 1177.774  | AJ271216  | 1418.857  | 1075.122  |
| NM_01571C | 559.238   | 603.473   | NM_002064 | 1376.878  | 1587.499  | U23028    | 2700.789  | 2174.651  |
| NM_01415E | 3102.586  | 3345.07   | NM_015523 | 11551.124 | 10109.531 | NM_000817 | 3601.361  | 3154.378  |
| AK021591  | 3307.796  | 2958.179  | NM_01596C | 7223.557  | 6799.333  | NM_00187E | 386.024   | 248.057   |
| NM_01467E | 1810.106  | 1893.042  | NM_00608E | 4398.716  | 4773.612  | AK022680  | 1590.41   | 937.419   |
| NM_00658E | 6000.034  | 5024.211  | NM_000907 | 5360.313  | 5803.466  | NM_01894E | 6245.291  | 3929.12   |
| AB007875  | 998.244   | 1114.283  | AF254085  | 2693.755  | 2998.143  | NM_01635E | 8948.701  | 5953.015  |
| NM_018261 | 2248.51   | 1713.295  | AK023541  | 377.83    | 220.988   | NM_00415E | 6310.32   | 5497.468  |
| NM_01479E | 4066.431  | 2359.568  | NM_001987 | 938.818   | 637.126   | AK000561  | 619.837   | 883.379   |
| NM_00504C | 5217.635  | 5267.158  | AF244088  | 1251.476  | 1005.732  | AB051449  | 14512.823 | 15278.273 |
| NM_016391 | 7188.599  | 7341.175  | NM_00713E | 811.358   | 668.415   | BC009187  | 7225.732  | 7209.188  |
| M80783    | 706.115   | 570.418   | AK025434  | 495.678   | 546.234   | AL133617  | 626.497   | 605.319   |
| AF075033  | 6304.856  | 3635.901  | AJ251845  | 637.569   | 583.251   | NM_01648E | 7136.746  | 7752.908  |
| D50911    | 12827.964 | 8431.601  | AK000435  | 1408.741  | 1093.833  | NM_00261E | 587.329   | 399.78    |
| AB011104  | 1525.455  | 1779      | AK000569  | 3364.924  | 3315.111  | AF090894  | 613.905   | 469.185   |
| NM_000552 | 4063.883  | 4485.486  | NM_00604E | 2346.914  | 2513.87   | NM_006167 | 2784.438  | 2859.988  |
| NM_00380E | 512.643   | 867.105   | NM_017661 | 2791.282  | 2716.23   | NM_016357 | 3420.525  | 3768.333  |
| AK000860  | 1346.288  | 1039.788  | BC016698  | 8946.348  | 9729.333  | NM_01450C | 6843.777  | 7280.552  |
| NM_014961 | 816.161   | 585.554   | NM_007374 | 9302.669  | 9864.812  | NM_02014E | 1076.994  | 1180.832  |
| NM_02014E | 1873.66   | 1723.767  | AL442086  | 3993.4    | 4192.004  | NM_006237 | 1704.332  | 1879.993  |
| AK021529  | 2190.17   | 3527.804  | BC034819  | 3864.078  | 3911.276  | NM_001271 | 2938.74   | 1631.87   |
| AB037845  | 5103.763  | 4491.065  | AF147313  | 8133.762  | 7162.497  | NM_00368E | 2151.115  | 1759.68   |
| NM_00598C | 1072.129  | 1062.917  | AF147382  | 29938.111 | 31020.08  | AF039019  | 3063.344  | 2826.027  |
| NM_01619C | 3591.226  | 3071.021  | AK001957  | 5144.236  | 5198.907  | NM_01225E | 4669.993  | 3170.64   |
| AL137579  | 3736.419  | 4920.396  | AK000850  | 866.131   | 1121.038  | NM_01819E | 1974.63   | 1407.011  |
| NM_01238E | 16758.836 | 25545.719 | AK021833  | 2160.882  | 2424.576  | NM_00481E | 4879.099  | 3567.209  |
| NM_00330C | 2855.916  | 1210.278  | AF143867  | 1182.111  | 1026.471  | J04205    | 9392.67   | 7097.672  |
| AK026682  | 1835.146  | 1242.384  | AK025889  | 4758.875  | 4569.193  | D38491    | 4470.701  | 1906.817  |
| NM_00465E | 2912.534  | 3432.788  | NM_01471E | 2288.205  | 2026.488  | AK026835  | 2295.499  | 1293.089  |
| NM_003942 | 2629.078  | 2329.887  | AF086448  | 1675.332  | 1171.892  | NM_013264 | 2983.561  | 2799.632  |
| NM_006471 | 46430.23  | 28972.215 | AF086386  | 1327.577  | 1297.756  | NM_00331E | 8761.599  | 8512.111  |
| NM_00416E | 2379.688  | 1615.934  | AF086413  | 318.069   | 329.475   | NM_00557C | 7456.325  | 7701.147  |
| NM_00036E | 1828.132  | 1191.48   | AF086457  | 993.131   | 964.358   | NM_00008E | 5157.194  | 6677.702  |
| NM_01658E | 3324.403  | 2610.772  | AK025469  | 1332.454  | 1467.967  | NM_003752 | 3392.489  | 2957.347  |
| NM_00414C | 738.335   | 772.683   | NM_02023E | 5799.483  | 6065.271  | NM_003932 | 12588.301 | 13069.949 |
| NM_00286E | 1374.308  | 1707.114  | AF070581  | 754.855   | 724.342   | NM_016491 | 11423.066 | 11435.015 |
| NM_00386C | 748.38    | 1192.987  | AK024187  | 699.907   | 1073.072  | NM_00642E | 31819.553 | 31440.813 |
| NM_005414 | 783.045   | 614.54    | AF075079  | 475.914   | 801.171   | NM_003307 | 2665.751  | 3783.288  |
| NM_00446E | 2397.954  | 2311.582  | AK022479  | 3276.766  | 3860.63   | AF070565  | 439.859   | 343.269   |
| NM_016031 | 6119.724  | 5673.465  | AK023572  | 1682.696  | 1612.684  | AK021644  | 932.3     | 874.238   |
| NM_004804 | 4630.832  | 4223.548  | AF086004  | 6519.149  | 6956.839  | NM_015944 | 767.192   | 602.294   |
| M92439    | 4656.416  | 4449.598  | AF147433  | 714.446   | 832.074   | NM_002064 | 1334.744  | 1748.453  |
| AL117665  | 4731.108  | 5124.031  | AF085930  | 538.082   | 667.145   | NM_01552E | 9224.852  | 10988.178 |
| AF263541  | 3440.204  | 3185.721  | AF086006  | 331.812   | 679.459   | NM_01596C | 5652.751  | 5571.38   |



|           |           |           |           |           |           |           |           |           |
|-----------|-----------|-----------|-----------|-----------|-----------|-----------|-----------|-----------|
| AK027169  | 424.368   | 339.114   | AL137318  | 1326.068  | 1717.571  | NM_006085 | 4119.148  | 3287.511  |
| NM_001262 | 8276.496  | 7949.419  | AL137482  | 1319.255  | 3103.399  | NM_000907 | 6298.69   | 3958.96   |
| BE873030  | 362.81    | 504.175   | AL162011  | 9333.408  | 9092.366  | AF254085  | 2882.525  | 2132.006  |
| NM_002440 | 477.618   | 435.126   | AL390177  | 440.628   | 651.472   | AK023541  | 260.167   | 90.19     |
| BC006990  | 9000.765  | 4831.728  | AL137678  | 304.725   | 361.655   | NM_001987 | 1033.693  | 636.051   |
| NM_019114 | 3401.633  | 4333.473  | AK056111  | 657.824   | 790.92    | AF244088  | 1344.653  | 928.276   |
| M33552    | 5542.71   | 6041.412  | AL162055  | 265.389   | 436.331   | NM_007136 | 964.005   | 627.356   |
| AJ252060  | 2837.358  | 1600.64   | Y13807    | 836.413   | 853.831   | AK025434  | 628.681   | 334.26    |
| NM_006403 | 4312.161  | 3253.414  | AK023038  | 755.066   | 555.307   | AJ251845  | 657.046   | 564.562   |
| NM_018977 | 515.225   | 290.464   | AK026206  | 1045.413  | 1014.249  | AK000435  | 1228.511  | 1137.966  |
| NM_000235 | 5789.95   | 8325.901  | AF086074  | 1389.9    | 1049.068  | AK000569  | 3337.972  | 3830.27   |
| NM_015879 | 713.316   | 1041.519  | AK023964  | 2364.395  | 1737.813  | NM_006045 | 2366.007  | 2428.104  |
| AF068236  | 1547.473  | 2001.911  | AF086084  | 794.139   | 825.43    | NM_017661 | 2982.658  | 2905.388  |
| L25628    | 697.286   | 815.496   | AK000156  | 272.428   | 438.836   | BC016698  | 10528.075 | 9750.413  |
| M37033    | 15739.906 | 13610.608 | AL050184  | 818.308   | 984.293   | NM_007374 | 9281.938  | 8899.243  |
| NM_007171 | 4825.823  | 4593.759  | AF085853  | 408.67    | 368.365   | AK027185  | 1214.167  | 1567.797  |
| NM_004278 | 1825.903  | 1778.983  | AK027112  | 2839.424  | 2932.29   | AK025576  | 665.105   | 591.467   |
| NM_005632 | 1253.062  | 1265.391  | AL049314  | 1972.012  | 2366.357  | AF147385  | 452.214   | 443.803   |
| AK021499  | 875.921   | 740.501   | AF093016  | 9353.672  | 9762.349  | AL442086  | 3043.042  | 3495.064  |
| AK000336  | 3715.847  | 3140.016  | AF161345  | 360.997   | 516.716   | BC034819  | 3692.383  | 4135.057  |
| NM_002795 | 41097.395 | 33048.324 | -         | 673.908   | 729.926   | AF147313  | 8043.476  | 11778.191 |
| NM_006292 | 6684.946  | 5189.254  | AF090925  | 484.317   | 731.676   | AF147382  | 32831.77  | 38599.73  |
| AB007948  | 1809.571  | 1508.191  | NM_014163 | 2331.993  | 2556.517  | AK001957  | 4149.926  | 3801.009  |
| AB033066  | 1974.109  | 1480.986  | AK021659  | 583.156   | 629.767   | AK000850  | 500.592   | 553.13    |
| AF126028  | 2769.642  | 2567.007  | NM_014137 | 577.829   | 977.723   | AK021833  | 1183.515  | 1200.637  |
| NM_007019 | 15735.243 | 7434.265  | AK021974  | 1026.119  | 1470.201  | AF143867  | 1619.622  | 1710.334  |
| NM_016042 | 1408.977  | 745.373   | AK022229  | 874.812   | 1098.841  | AK025889  | 3750.328  | 2948.865  |
| NM_017640 | 1176.287  | 892.789   | AK022362  | 2975.331  | 3257.581  | NM_014715 | 1864.173  | 1533.317  |
| NM_017721 | 3030.121  | 4609.486  | AK022004  | 3823.449  | 3603.322  | AF086448  | 1669.47   | 1720.244  |
| NM_019088 | 7267.968  | 8398.077  | AK022390  | 676.491   | 545.624   | AF086386  | 1561.628  | 1018.033  |
| AB002373  | 3030.825  | 1906.32   | AK027134  | 596.874   | 501.984   | AF086413  | 337.469   | 240.518   |
| NM_016350 | 1556.806  | 985.851   | AK024168  | 683.769   | 683.991   | AF086457  | 1135.15   | 1110.883  |
| AK024167  | 8861.22   | 6359.638  | AF264622  | 621.672   | 627.292   | AK025469  | 1540.294  | 1580.72   |
| NM_005026 | 1882.439  | 1081.443  | AK021793  | 2085.119  | 2182.85   | NM_020235 | 5885.909  | 6447.767  |
| BC035716  | 955.596   | 951.829   | AK022255  | 2064.387  | 1647.382  | AF070581  | 652.058   | 629.938   |
| NM_018014 | 3010.708  | 3376.48   | AK023730  | 870.772   | 1013.372  | AK024187  | 802.205   | 851.837   |
| NM_002359 | 6416.382  | 7315.379  | AF161360  | 1168.394  | 1273.733  | AF075079  | 344.509   | 384.372   |
| AF230809  | 1269.71   | 984.625   | AK021720  | 971.554   | 939.014   | AK022479  | 547.437   | 556.194   |
| NM_017894 | 2463.02   | 2264.708  | NM_016497 | 26571.85  | 25624.674 | AK023572  | 529.031   | 929.743   |
| NM_006509 | 1038.806  | 1133.397  | AK000617  | 502.495   | 343.764   | AF086004  | 6188.466  | 7526.879  |
| AK025447  | 1697.063  | 1340.24   | AF009261  | 806.766   | 981.949   | AF147433  | 431.276   | 536.397   |
| NM_002624 | 3982.154  | 7158.629  | AF086264  | 375.825   | 263.132   | AF085930  | 481.615   | 413.811   |
| AF006199  | 1808.4    | 2799.193  | AB037792  | 1582.074  | 1459.581  | AF086006  | 404.098   | 469.987   |
| NM_004554 | 804.05    | 776.185   | AK022480  | 345.005   | 446.915   | AL137318  | 954.045   | 829.657   |
| NM_018119 | 2304.381  | 1661.129  | AK024158  | 522.11    | 273.08    | AL137482  | 521.979   | 661.058   |
| NM_014576 | 598.429   | 621.526   | AL080082  | 731.18    | 611.601   | AL162011  | 10626.034 | 7267.081  |
| AL162035  | 814.698   | 600.702   | AK021623  | 984.312   | 1106.016  | AL390177  | 467.441   | 422.745   |
| NM_006692 | 365.437   | 686.958   | AK023733  | 456.865   | 571.18    | AL137678  | 349.142   | 267.302   |
| NM_003084 | 3781.677  | 2089.842  | U79242    | 813.16    | 921.74    | AK056111  | 691.846   | 636.367   |
| NM_002582 | 4026.391  | 2972.421  | AF056452  | 410.901   | 288.845   | AL162055  | 372.111   | 333.735   |
| NM_001009 | 57538.809 | 37786.691 | AF119901  | 3333.023  | 3391.347  | Y13807    | 1107.605  | 746.357   |
| AB061315  | 490.182   | 297.963   | AK001936  | 1389.686  | 1428.438  | AK023038  | 657.165   | 755.932   |
| D17289    | 4924.408  | 2143.869  | NM_003770 | 26737.871 | 25778.762 | AK026206  | 1336.85   | 1218.333  |

|           |           |           |           |           |           |           |           |           |
|-----------|-----------|-----------|-----------|-----------|-----------|-----------|-----------|-----------|
| NM_00294  | 13436.516 | 5646.395  | AK001395  | 4260.385  | 5644.592  | AF086074  | 2032.773  | 1614.564  |
| NM_01423  | 6513.615  | 3783.478  | S57803    | 7914.312  | 16277.475 | AK023964  | 2382.263  | 3051.635  |
| NM_01774  | 3837.481  | 4575.163  | AF131822  | 972.901   | 1158.866  | AF086084  | 1276.46   | 1224.655  |
| AK025374  | 1867.671  | 2298.8    | AK023131  | 1355.775  | 1787.739  | AK000156  | 278.111   | 279.47    |
| NM_014901 | 12457.914 | 12726.206 | AJ276248  | 484.802   | 716.782   | AL050184  | 1114.692  | 1046.459  |
| AK000005  | 2350.188  | 3008.886  | AL360138  | 266.668   | 236.527   | AF085853  | 435.174   | 386.267   |
| U28480    | 761.761   | 1097.06   | AF085865  | 3892.492  | 3983.751  | AK027112  | 2467.908  | 3054.089  |
| NM_00010  | 10636.535 | 10510.387 | AK025521  | 3420.654  | 3406.862  | AL049314  | 1717.993  | 2218.98   |
| NM_00437  | 57177.367 | 60788.293 | NM_001053 | 44569.281 | 47486.07  | AF093016  | 7727.937  | 9095.536  |
| NM_00556  | 54968.582 | 55852.184 | Z70694    | 2880.166  | 2527.799  | AF161345  | 313.183   | 240.068   |
| NM_00016  | 955.079   | 673.344   | L77602    | 714.689   | 940.283   | -         | 423.649   | 472.052   |
| AK027067  | 955.172   | 892.914   | NM_015421 | 8812.294  | 7601.167  | AF090925  | 502.389   | 598.273   |
| NM_01628  | 11297.759 | 9492.498  | AF086081  | 3828.297  | 4068.564  | NM_01416  | 5040.792  | 6748.707  |
| NM_00386  | 6900.97   | 4221.086  | NM_018111 | 1012.491  | 1244.881  | AK021659  | 317.096   | 311.138   |
| NM_00682  | 14799.69  | 7786.449  | L23867    | 901.366   | 621.057   | AK021974  | 1115.384  | 633.09    |
| NM_00210  | 1285.857  | 655.758   | AB020968  | 649.13    | 632.079   | AK022068  | 606.065   | 577.791   |
| NM_00269  | 11174.162 | 8483.904  | AL138690  | 1754.759  | 2335.17   | AK022229  | 827.641   | 669.275   |
| NM_00445  | 3716.67   | 5354.803  | AK000394  | 688.347   | 782.41    | AK022362  | 3109.048  | 2394.76   |
| NM_00096  | 1009.211  | 904.62    | NM_013941 | 1206.648  | 1362.5    | AK022004  | 3403.952  | 2898.3    |
| NM_01248  | 2470.595  | 938.294   | AF074989  | 1339.023  | 1105.065  | AK022390  | 926.19    | 932.316   |
| AF217227  | 1114.669  | 880.227   | AK001107  | 958.03    | 784.784   | AK027134  | 613.671   | 875.322   |
| AK024141  | 667.04    | 325.557   | AF147393  | 874.739   | 861.443   | AK024168  | 661.039   | 748.667   |
| NM_00281  | 6955.75   | 9294.163  | AK022368  | 575.606   | 877.905   | AF222857  | 242.362   | 305.1     |
| NM_00119  | 587       | 550.291   | AL080112  | 1863.331  | 2459.824  | AF264622  | 537.481   | 678.674   |
| AK022745  | 6315.406  | 6416.73   | AF147361  | 1381.366  | 1323.328  | AK021793  | 3352.854  | 4294.275  |
| AL049450  | 4388.592  | 4732.211  | AL133086  | 1007.049  | 987.891   | AK022255  | 2760.791  | 3250.295  |
| AK022011  | 1488.37   | 1794.329  | NM_012151 | 26953.383 | 27912.305 | AK023730  | 367.63    | 424.25    |
| NM_00508  | 3052.554  | 3286.146  | AF087994  | 1862.954  | 1905.503  | AF161360  | 804.019   | 1013.745  |
| NM_01760  | 3652.246  | 4027.69   | AJ227912  | 1581.268  | 2067.005  | AK021720  | 801.423   | 938.785   |
| AK024644  | 6228.941  | 5679.042  | NM_01819  | 2620.701  | 2756.144  | NM_01649  | 26015.344 | 25223.238 |
| AB019573  | 573.059   | 452.73    | AK025532  | 2914.546  | 2749.106  | AK000617  | 204.962   | 457.599   |
| U68494    | 2522.297  | 929.957   | NM_00352  | 1089.404  | 1223.079  | AF009261  | 563.891   | 653.24    |
| AF064254  | 1018.528  | 1056.089  | BF217847  | 791.879   | 1013.93   | AB037792  | 1807.045  | 1847.849  |
| AL137360  | 2331.473  | 2077.281  | NM_00532  | 3525.754  | 2759.77   | AK022480  | 459.843   | 652.614   |
| AF143331  | 1608.515  | 975.341   | CY3Cy5    | 635.297   | 157.883   | AK024158  | 690.201   | 1217.207  |
| AF201941  | 4065.518  | 2043.74   | BI830936  | 267.862   | 302.228   | AL080082  | 677.744   | 782.815   |
| AF026941  | 1639.026  | 2387.449  | U79292    | 847.423   | 864.331   | AK021623  | 1439.589  | 1531.144  |
| NM_00707  | 2269.772  | 1684.076  | AA947915  | 269.762   | 303.407   | AK023733  | 420.938   | 461.909   |
| AL133019  | 3663.527  | 2627.96   | BI830753  | 330.315   | 455.177   | U79242    | 345.094   | 1129.164  |
| NM_01489  | 593.035   | 147.982   | X68314    | 718.159   | 411.293   | AF056452  | 245.071   | 344.247   |
| AK024883  | 5917.403  | 5597.556  | X71973    | 19242.508 | 12137.775 | AF119901  | 2346.523  | 3836.169  |
| AF217989  | 1580.772  | 1587.843  | T49651    | 10659.118 | 7149.372  | NM_00377  | 28879.971 | 40303.098 |
| NM_01765  | 1800.511  | 1798.335  | N51014    | 1107.602  | 825.126   | AK001395  | 3027.223  | 3455.321  |
| X89743    | 565.898   | 739.243   | BE392471  | 13698.565 | 12653.817 | S57803    | 4421.723  | 5174.122  |
| U17621    | 2054.029  | 573.837   | AI802950  | 844.176   | 833.409   | AF131822  | 781.422   | 382.417   |
| AL049239  | 1043.579  | 562.948   | AA682423  | 435.312   | 1135.388  | AK023131  | 1376.933  | 1594.186  |
| Z83942    | 1800.151  | 3113.532  | AL043686  | 4238.324  | 2970.64   | U61096    | 336.944   | 214.134   |
| NM_01328  | 867.074   | 888.286   | AA490172  | 422.409   | 279.057   | AF085865  | 3491.522  | 3433.667  |
| M60721    | 2582.206  | 1503.385  | AA775212  | 4105.378  | 3259.312  | X78261    | 289.87    | 226.508   |
| L39061    | 3169.411  | 1465.712  | NM_00094  | 1958.462  | 2673.752  | AK025521  | 3633.972  | 3447.079  |
| AF071508  | 584.938   | 555.299   | SR5       | 6466.353  | 5976.14   | NM_00105  | 37835.438 | 49415.66  |
| L07265    | 7058.988  | 12345.529 | SR7       | 5074.044  | 36503.211 | Z70694    | 2475.15   | 2720.122  |
| AL157459  | 2814.589  | 3211.49   | SR9       | 17769.924 | 3114.91   | NM_015421 | 8052.647  | 8608.464  |

|           |           |           |           |           |           |           |           |           |
|-----------|-----------|-----------|-----------|-----------|-----------|-----------|-----------|-----------|
| AB020654  | 577.568   | 541.083   | CY3Cy5    | 2123.493  | 263.374   | AF086081  | 3623.463  | 3471.454  |
| AL353954  | 745.352   | 598.791   | NM_003371 | 3024.764  | 2116.141  | NM_018634 | 386.773   | 413.094   |
| NM_01763C | 649.84    | 476.63    | AK023114  | 2657.416  | 1703.335  | NM_018111 | 786.897   | 788.812   |
| AK000778  | 1025.946  | 1023.4    | NM_00367E | 3173.37   | 2467.693  | L23867    | 435.994   | 463.093   |
| AL133573  | 1322.089  | 981.087   | NM_005631 | 1224.627  | 1039.352  | AB020968  | 500.772   | 501.926   |
| AK000115  | 1516.049  | 450.313   | NM_014419 | 1159.758  | 819.23    | AL138690  | 1306.558  | 1567.742  |
| NM_01795E | 511.577   | 622.345   | NM_01493E | 1992.057  | 1183.603  | AK000394  | 491.495   | 896.608   |
| AK000958  | 382.275   | 292.574   | AF049460  | 209.42    | 254.704   | NM_013941 | 864.607   | 2911.241  |
| AK024523  | 573.67    | 353.04    | AK026066  | 1291.957  | 1849.759  | AF074989  | 837.464   | 1738.058  |
| AK024543  | 846.999   | 1220.062  | NM_005244 | 1920.766  | 1321.893  | AK001107  | 643.601   | 432.456   |
| AK024624  | 1299.944  | 1002.195  | NM_00527C | 713.458   | 601.998   | AF147393  | 494.162   | 613.147   |
| AF086473  | 490.136   | 596.468   | NM_01481E | 1951.9    | 1618.652  | AL080112  | 1791.348  | 1373.749  |
| D87682    | 741.432   | 635.826   | NM_007221 | 5658.424  | 5651.708  | AL137325  | 445.456   | 419.76    |
| AF321617  | 2949.685  | 3591.358  | X54163    | 14710.103 | 17360.697 | AF147361  | 981.447   | 900.676   |
| AV710479  | 396.926   | 446.711   | AK025395  | 593.717   | 751.418   | AL133086  | 986.483   | 816.462   |
| NM_00695C | 703.019   | 948.131   | NM_00038E | 889.355   | 1165.448  | NM_012151 | 28268.055 | 24745.793 |
| NM_000682 | 688.945   | 979.297   | NM_002469 | 376.745   | 483.018   | AF087994  | 1637.59   | 1830.922  |
| AF086208  | 1908.429  | 1131      | NM_01466E | 455.162   | 332.128   | AJ227912  | 1827.683  | 1606.747  |
| AK023335  | 1042.883  | 946.192   | NM_004722 | 1639.413  | 1217.023  | NM_01819E | 2378.305  | 2395.307  |
| AK023187  | 945.75    | 1201.437  | NM_01442E | 807.031   | 529.344   | AK025532  | 2850.907  | 3109.947  |
| AL133101  | 1295.427  | 378.441   | NM_012133 | 1903.416  | 1581.686  | AK021789  | 363.194   | 500.286   |
| AK024602  | 891.37    | 1329.747  | NM_017954 | 651.419   | 564.909   | NM_003522 | 1202.102  | 1317.708  |
| NM_018507 | 618.501   | 655.114   | NM_006612 | 660.874   | 742.782   | BF217847  | 755.712   | 772.68    |
| NM_00048E | 15259.175 | 12758.504 | NM_016451 | 2386.188  | 1581.022  | NM_00532C | 3503.973  | 2072.19   |
| AK025503  | 881.48    | 975.444   | NM_007351 | 11071.157 | 7928.871  | CY3Cy5    | 3782.999  | 178.678   |
| AF130073  | 1205.406  | 1544.083  | AK026266  | 5564.434  | 3623.76   | BI830936  | 989.518   | 662.179   |
| AK024225  | 16602.527 | 19410.404 | NM_007124 | 3187.469  | 2555.995  | U79292    | 5545.146  | 4581.983  |
| AF086334  | 1096.364  | 1387.176  | NM_00317E | 2218.263  | 2283.867  | AA947915  | 461.295   | 674.262   |
| AL137602  | 430.646   | 355.853   | NM_000723 | 891.491   | 576.484   | BI830753  | 837.41    | 643.266   |
| AF075035  | 568.259   | 473.822   | AL096751  | 4465.305  | 3902.458  | X68314    | 1669.362  | 1474.571  |
| AL110180  | 4006.051  | 3974.077  | NM_000364 | 683.042   | 477.13    | X71973    | 22667.521 | 22184.488 |
| BC024924  | 4977.779  | 4191.678  | AF026920  | 4550.669  | 4015.782  | T49651    | 15522.171 | 12924.946 |
| NM_01790E | 5524.193  | 4524.746  | NM_004931 | 2335.434  | 2805.565  | N51014    | 1730.361  | 1515.072  |
| AL110286  | 3467.775  | 3318.357  | NM_00257E | 1711.876  | 2382.653  | BE392471  | 16203.273 | 14330.771 |
| AF086374  | 760.787   | 391.238   | NM_004244 | 2085.841  | 2870.637  | AI802950  | 1618.865  | 1457.833  |
| AL162066  | 2127.615  | 2271.263  | AK001500  | 600.496   | 346.997   | AI741278  | 259.982   | 565.502   |
| NM_01609E | 17417.516 | 8312.54   | NM_006774 | 256.603   | 272.891   | AA682423  | 306.185   | 230.671   |
| U79290    | 1393.205  | 1093.916  | NM_020129 | 601.036   | 480.661   | AL043686  | 6418.562  | 7963.356  |
| X98114    | 493.489   | 673.921   | Y16521    | 1719.359  | 1365.459  | AA490172  | 759.894   | 1164.713  |
| NM_01404C | 6350.484  | 6043.55   | AL050371  | 2100.945  | 1681.021  | AA775212  | 4386.022  | 5438.453  |
| AK000799  | 10429.739 | 9429.875  | NM_002651 | 2044.501  | 1716.084  | NM_00094E | 2678.125  | 2668.643  |
| NM_015582 | 6342.842  | 7156.826  | NM_002413 | 1032.831  | 700.271   | SR5       | 6597.425  | 7167.12   |
| AK027091  | 1628.621  | 1729.885  | NM_001647 | 1259.652  | 991.471   | SR7       | 5503.677  | 39821.016 |
| NM_00152E | 387.683   | 452.092   | NM_01815E | 2227.323  | 1799.746  | SR9       | 17261.711 | 2970.792  |
| U31738    | 1377.07   | 1752.474  | NM_016301 | 5651.178  | 4911.602  | CY3Cy5    | 5390.732  | 261.702   |
| AF179890  | 7307.775  | 8133.527  | AK021975  | 766.47    | 1317.774  | NM_003371 | 14948.346 | 11132.064 |
| AK023536  | 7876.299  | 7442.273  | AB032952  | 13597.514 | 11594.665 | AK023114  | 3508.707  | 3417.782  |
| AK021568  | 7740.144  | 7526.297  | NM_002522 | 4531.195  | 4462.463  | NM_00367E | 4113.409  | 3010.217  |
| AK023881  | 2547.378  | 2352.433  | NM_00297E | 1596.187  | 1625.875  | NM_012301 | 727.439   | 603.261   |
| AK027114  | 16663.613 | 14663.599 | AB040879  | 479.628   | 210.944   | NM_005631 | 1663.737  | 1481.565  |
| NM_01629E | 1501.893  | 1151.645  | AL049935  | 11984.899 | 6709      | NM_01441E | 2920.723  | 3206.169  |
| AK002146  | 395.167   | 487.474   | AB033043  | 3598.52   | 2896.798  | NM_01493E | 2609.81   | 2822.739  |
| NM_015492 | 2436.294  | 3947.607  | NM_01499E | 4346.004  | 3093.87   | AF049460  | 413.725   | 572.334   |

|           |           |           |           |           |           |           |           |           |
|-----------|-----------|-----------|-----------|-----------|-----------|-----------|-----------|-----------|
| NM_006933 | 614.65    | 1379.3    | AK025220  | 1841.947  | 1465.463  | AK026066  | 1413.375  | 1702.563  |
| AK022874  | 4023.456  | 1261.253  | NM_016308 | 9057.928  | 6461.264  | NM_005244 | 3358.147  | 4135.664  |
| CY3Cy5    | 800.984   | 136.025   | D42046    | 2278.758  | 2150.772  | NM_005270 | 585.529   | 696.96    |
| BI912037  | 405.757   | 221.064   | NM_001033 | 8089.945  | 6074.061  | NM_014815 | 1619.849  | 1811.266  |
| AA454646  | 518.338   | 385.656   | NM_004526 | 13533.376 | 11844.173 | NM_007221 | 6651.035  | 7248.919  |
| U18087    | 871.529   | 1152.401  | NM_002526 | 1988.477  | 1462.049  | X54163    | 12926.932 | 12597.586 |
| U66349    | 569.246   | 571.263   | NM_020135 | 4963.475  | 4171.376  | AK025395  | 682.775   | 607.621   |
| AA057156  | 775.559   | 737.214   | NM_018518 | 4553.657  | 3781.128  | NM_000388 | 672.667   | 557.125   |
| AF166327  | 8929.718  | 6306.367  | AK023149  | 1999.901  | 1367.266  | X58377    | 302.055   | 225.047   |
| AF260739  | 1713.086  | 1631.594  | AK023168  | 2618.794  | 2725.357  | NM_002468 | 341.835   | 380.139   |
| AF531423  | 1763.645  | 1685.622  | NM_006646 | 1057.069  | 1437.676  | NM_014668 | 1893.222  | 1082.629  |
| X76555    | 571.963   | 602.337   | NM_004742 | 1020.62   | 929.133   | NM_004722 | 3453.136  | 2450.513  |
| NM_005432 | 514.18    | 417.139   | NM_014753 | 2683.298  | 2018.55   | NM_014425 | 1488.257  | 1140.878  |
| L10386    | 1613.058  | 2151.223  | NM_006585 | 28908.072 | 23961.738 | NM_012133 | 3416.945  | 2254.198  |
| AF061812  | 822.959   | 1206.822  | NM_014331 | 4273.166  | 4409.075  | NM_017954 | 1341.524  | 1193.566  |
| AL136756  | 422.287   | 648.292   | NM_006795 | 13334.703 | 13608.434 | NM_006612 | 1456.149  | 1182.939  |
| NM_012468 | 2986.917  | 3310.129  | AF070568  | 3187.777  | 3712.201  | NM_016451 | 2114.995  | 1972.53   |
| NM_134260 | 4837.132  | 4047.949  | NM_000240 | 3223.036  | 3577.875  | NM_007351 | 13599.666 | 12845.349 |
| SR6       | 1073.629  | 1010.148  | AK055733  | 9877.75   | 11580.985 | AK026266  | 6320.869  | 5487.68   |
| SR8       | 4347.118  | 10101.922 | AF298880  | 4339.701  | 4542.183  | NM_007124 | 3579.899  | 3301.376  |
| SR10      | 13805.452 | 3228.244  | AK025395  | 291.193   | 229.578   | NM_003176 | 2608.802  | 3027.588  |
| CY3Cy5    | 577.59    | 126.356   | NM_000388 | 408.811   | 320.114   | NM_000723 | 1232.635  | 1805.221  |
| AL080157  | 556.001   | 509.413   | NM_002469 | 375.09    | 418.772   | AL096751  | 5328.52   | 7441.285  |
| NM_005308 | 909.689   | 473.066   | BI830936  | 323.429   | 278.149   | NM_000364 | 499.199   | 834.683   |
| NM_007227 | 219.8     | 464.917   | U79292    | 1026.938  | 973.082   | AF026920  | 3819.241  | 4806.646  |
| NM_014461 | 295.164   | 228.461   | AA947915  | 298.683   | 227.921   | NM_004931 | 3012.202  | 3268.382  |
| AB015330  | 675.351   | 856.126   | BI830753  | 225.189   | 353.588   | NM_000607 | 13785.089 | 17928.369 |
| NM_001455 | 1771.042  | 2218.824  | X68314    | 580.169   | 568.856   | NM_002575 | 2355.191  | 2183.506  |
| NM_003322 | 743.8     | 907.423   | X71973    | 16447.92  | 9581.113  | NM_004244 | 2663.211  | 2694.857  |
| BC036375  | 8989.775  | 6938.645  | T49651    | 10456.163 | 7228.989  | AK001500  | 1268.785  | 1169.978  |
| NM_006363 | 4473.979  | 8190.858  | N51014    | 853.96    | 458.114   | NM_006774 | 669.554   | 421.687   |
| NM_020415 | 1043.07   | 757.267   | BE392471  | 10929.355 | 5255.736  | NM_020128 | 1384.175  | 1231.727  |
| AL049667  | 1793.216  | 1443.848  | AI802950  | 736.989   | 535.014   | Y16521    | 4793.408  | 3532.492  |
| NM_000334 | 482.739   | 628.6     | AA682423  | 388.681   | 337.621   | AL050371  | 3238.353  | 3363.242  |
| NM_020400 | 684.167   | 469.474   | AL043686  | 4575.083  | 2844.171  | NM_002651 | 2608.822  | 3162.528  |
| D50926    | 1117.489  | 1037.654  | AA490172  | 501.568   | 347.219   | NM_002413 | 2585.582  | 2783.321  |
| NM_000758 | 2590.742  | 3144.281  | AA775212  | 4407.911  | 3191.573  | NM_017577 | 503.447   | 421.418   |
| NM_002990 | 3252.378  | 3482.905  | NM_000945 | 1937.07   | 2401.03   | NM_001647 | 2937.368  | 3037.743  |
| NM_002432 | 466.713   | 609.097   | NM_002574 | 64568.512 | 51781.738 | NM_018158 | 3351.225  | 3711.829  |
| AB033037  | 680.989   | 792.345   | AB011174  | 1784.488  | 1636.681  | NM_016301 | 7434.365  | 9685.658  |
| L40400    | 1944.311  | 2288.952  | AB043635  | 430.664   | 280.506   | AK021975  | 605.047   | 901.01    |
| AK025688  | 1235.856  | 1452.444  | NM_000607 | 8194.575  | 4866.085  | AB032952  | 19023.814 | 22586.086 |
| NM_014448 | 246.154   | 422.366   | NM_002575 | 1599.308  | 1451.928  | NM_002522 | 18005.762 | 20357.479 |
| NM_004315 | 4193.777  | 8433.853  | NM_004244 | 1740.333  | 1748.603  | NM_002978 | 1127.12   | 1369.652  |
| NM_020166 | 3152.403  | 8049.723  | NM_003371 | 3141.588  | 3190.358  | AB040879  | 1269.819  | 1051.196  |
| S56138    | 271.642   | 773.387   | AK023114  | 2833.237  | 2212.463  | AL049935  | 16579.459 | 10959.081 |
| AK023860  | 420.643   | 372.47    | NM_003678 | 3155.735  | 2909.536  | AB033043  | 9634.865  | 9997.135  |
| NM_016286 | 5152.435  | 2815.654  | NM_005631 | 1168.665  | 842.364   | NM_014998 | 6282.011  | 4929.74   |
| NM_001567 | 653.747   | 762.693   | NM_014419 | 1424.93   | 1201.336  | AK025220  | 3157.429  | 2551.374  |
| NM_004905 | 4856.847  | 3166.249  | NM_014938 | 2507.176  | 1701.877  | NM_016308 | 13862.568 | 9991.554  |
| AF217971  | 639.542   | 749.153   | AF049460  | 386.858   | 305.598   | D42046    | 4089.189  | 3895.355  |
| AF245517  | 847.011   | 670.888   | AK026066  | 1110.807  | 752.086   | NM_001033 | 10600.432 | 9075.307  |
| NM_001694 | 23987.889 | 14927.183 | NM_005244 | 1932.138  | 1223.534  | NM_004526 | 17182.482 | 17018.904 |

|           |          |           |           |           |           |           |           |           |
|-----------|----------|-----------|-----------|-----------|-----------|-----------|-----------|-----------|
| AK026180  | 329.114  | 401.486   | NM_005270 | 742.958   | 1101.225  | NM_002526 | 6504.523  | 8132.874  |
| NM_003916 | 2131.638 | 2594.26   | NM_014815 | 2233.419  | 1826.908  | NM_020135 | 4772.541  | 4746.458  |
| NM_002870 | 2526.8   | 2869.013  | NM_005443 | 2329.836  | 1966.618  | NM_018518 | 5247.842  | 5876.16   |
| NM_001478 | 4293.72  | 7521.802  | NM_007221 | 6978.661  | 7368.817  | AK023149  | 1719.718  | 1708.179  |
| AF135422  | 2908.479 | 6752.6    | NM_002978 | 1026.33   | 812.282   | AK023168  | 3812.294  | 4201.503  |
| NM_004479 | 439.669  | 373.534   | NM_014668 | 719.555   | 909.833   | NM_006646 | 1600.91   | 1982.821  |
| NM_002610 | 1096.721 | 869.362   | NM_004722 | 2509.647  | 2913.934  | NM_004742 | 1386.366  | 1981.286  |
| AF070587  | 2471.952 | 1015.216  | NM_014425 | 838.97    | 860.289   | NM_014753 | 2456.427  | 3121.961  |
| NM_016819 | 563.428  | 605.746   | NM_012133 | 2652.697  | 3079.536  | NM_006585 | 32936.914 | 34196.438 |
| NM_012222 | 1821.141 | 1617.662  | NM_017954 | 1519.883  | 1308.379  | NM_014331 | 3807.902  | 4375.038  |
| NM_005002 | 1468.476 | 1084.691  | NM_006612 | 782.792   | 525.51    | NM_006795 | 12393.26  | 15308.231 |
| NM_006596 | 1961.859 | 1785.948  | NM_016451 | 2243.217  | 1316.393  | AF070568  | 2606.307  | 2676.29   |
| AK023214  | 3167.187 | 2808.99   | NM_007351 | 14931.363 | 11491.258 | NM_000240 | 3197.634  | 3597.434  |
| NM_001469 | 8173.857 | 5560.864  | AK026266  | 6488.461  | 3322.455  | AK055733  | 8586.68   | 9721.802  |
| NM_003600 | 892.683  | 786.326   | NM_007124 | 3258.92   | 1732.782  | AF298880  | 5006.51   | 5759.459  |
| NM_017490 | 1805.858 | 1906.521  | NM_003176 | 2662.181  | 1507.478  | AK025395  | 631.772   | 379.301   |
| NM_002718 | 599.945  | 645.266   | NM_000723 | 1130.399  | 727.237   | NM_000388 | 858.542   | 540.767   |
| AK026727  | 486.976  | 704.103   | AL096751  | 4731.898  | 4064.43   | X58377    | 309.298   | 202.516   |
| NM_002830 | 387.519  | 487.442   | NM_000364 | 1001.271  | 1145.154  | NM_002465 | 392.966   | 322.46    |
| NM_006247 | 3244.555 | 3680.193  | AF026920  | 8110.329  | 10754.983 | BI830936  | 1088.505  | 904.758   |
| AB032983  | 730.912  | 1035.094  | NM_004931 | 4709.171  | 8095.402  | U79292    | 3756.023  | 3640.706  |
| NM_018281 | 1771.374 | 2630.196  | NM_006795 | 9554.284  | 8363.8    | AA947915  | 227.098   | 635.863   |
| NM_014049 | 1566.753 | 1968.083  | AF070568  | 3587.534  | 3568.052  | BI830753  | 344.495   | 350.404   |
| BC036375  | 10475.72 | 13703.656 | NM_000240 | 3000.799  | 3927.654  | X68314    | 1174.472  | 1498.391  |
| BI912037  | 487.916  | 720.785   | AK055733  | 14954.513 | 20693.133 | X71973    | 16961.023 | 17976.008 |
| AA454646  | 477.228  | 207.535   | AF298880  | 6238.333  | 9355.997  | T49651    | 12614.709 | 13542.662 |
| U18087    | 802.742  | 608.852   | AK001500  | 1086.595  | 1300.059  | N51014    | 1100.425  | 1437.083  |
| U66349    | 655.452  | 323.021   | NM_006774 | 642.301   | 1048.797  | BE392471  | 12176.903 | 11610.399 |
| AA057156  | 733.614  | 484.67    | NM_020129 | 1121.734  | 1916.351  | AI802950  | 1264.929  | 1513.879  |
| AF166327  | 7929.38  | 3992      | Y16521    | 3601.047  | 4117.495  | AL043686  | 5934.623  | 7065.265  |
| AF260739  | 1629.631 | 924.41    | AL050371  | 3492.218  | 3985.97   | AA490172  | 552.777   | 965.452   |
| AF531423  | 1679.723 | 1466.202  | NM_002651 | 2400.7    | 1595.111  | AA775212  | 4309.76   | 5196.505  |
| X76555    | 597.238  | 573.783   | NM_002413 | 3035.921  | 2189.024  | NM_000945 | 2497.063  | 2608.786  |
| NM_005432 | 370.532  | 326.131   | NM_017577 | 626.84    | 741.124   | NM_002574 | 61844.395 | 67253.648 |
| L10386    | 1718.572 | 1931.459  | NM_001647 | 1333.23   | 980.099   | AB011174  | 1428.428  | 1822.009  |
| AF061812  | 685.287  | 587.823   | NM_018158 | 3330.846  | 5008.032  | AB043635  | 451.958   | 768.361   |
| AL136756  | 370.968  | 630.405   | NM_016301 | 9207.126  | 14407.884 | NM_000607 | 15347.337 | 11590.439 |
| NM_012469 | 2979.959 | 3457.2    | AK021975  | 981.432   | 1800.396  | AB011099  | 189.91    | 234.353   |
| NM_134260 | 4666.029 | 3980.569  | AB032952  | 20862.76  | 28770.268 | AF090409  | 260.246   | 265.094   |
| AK025688  | 1418.515 | 3625.478  | NM_002522 | 6812.914  | 9387.237  | NM_002575 | 2814.48   | 2021.255  |
| NM_001195 | 317.767  | 853.636   | NM_000945 | 2315.772  | 2444.12   | NM_004244 | 3443.167  | 2415.477  |
| NM_014448 | 484.328  | 1131.733  | NM_002574 | 68553.266 | 70608.055 | NM_003371 | 9761.853  | 8653.785  |
| AL080157  | 655.515  | 653.718   | AB011174  | 2528.432  | 4682.831  | AK023114  | 3247.695  | 3289.548  |
| NM_005308 | 923.833  | 507.858   | AB043635  | 740.359   | 1157.605  | NM_003678 | 2836.507  | 3081.528  |
| NM_007227 | 358.644  | 189.187   | AB040879  | 1248.14   | 1522.85   | NM_012301 | 430.495   | 442.65    |
| NM_007023 | 215.183  | 135.747   | AL049935  | 17286.693 | 12855.291 | NM_005631 | 1392.146  | 1488.999  |
| NM_014461 | 380.371  | 299.593   | AB033043  | 5303.171  | 4947.432  | NM_014419 | 2184.811  | 3154.935  |
| AB015330  | 626.398  | 572.706   | NM_014999 | 6654.096  | 6249.804  | NM_014938 | 2342.718  | 3348.388  |
| NM_001455 | 1715.917 | 1773.875  | AK025220  | 3409.857  | 3238.391  | AF049460  | 1109.91   | 1253.99   |
| NM_003322 | 831.337  | 849.055   | NM_016308 | 9773.318  | 5896.88   | AK026066  | 1112.14   | 1305.401  |
| AK026180  | 548.878  | 866.853   | D42046    | 4053.079  | 4631.156  | NM_005244 | 2652.963  | 3057.307  |
| NM_005817 | 3560.395 | 4933.045  | NM_001033 | 15729.569 | 20774.119 | NM_005270 | 610.575   | 1034.03   |
| NM_003916 | 1617.607 | 1476.222  | NM_002526 | 10938.347 | 14893.938 | NM_014815 | 1528      | 1870.263  |

|           |           |           |           |           |           |           |           |           |
|-----------|-----------|-----------|-----------|-----------|-----------|-----------|-----------|-----------|
| NM_00287C | 6445.597  | 15456.006 | NM_020135 | 9165.066  | 14996.154 | NM_005443 | 2309.357  | 2651.174  |
| NM_006363 | 2286.778  | 1822.491  | NM_01851E | 8222.843  | 11880.129 | NM_007221 | 6114.381  | 6640.662  |
| NM_02041E | 1099.312  | 1148.077  | AK023149  | 3619.625  | 5992.217  | X54163    | 11664.308 | 12283.016 |
| AL049667  | 2013.057  | 1350.418  | AK023168  | 3833.057  | 6129.503  | NM_00297E | 1263.42   | 1045.107  |
| NM_000334 | 528.799   | 300.061   | NM_00664E | 1766.265  | 3505.18   | NM_01466E | 961.615   | 989.183   |
| NM_02040C | 797.628   | 426.732   | NM_004742 | 1398.415  | 2317.485  | NM_004722 | 2496.876  | 2456.393  |
| D50926    | 1231.548  | 886.024   | NM_014753 | 4226.433  | 5319.871  | NM_01442E | 773.661   | 826.138   |
| NM_00075E | 2385.022  | 2795.448  | NM_00527C | 889.814   | 1486.462  | NM_012133 | 2632.954  | 2632.984  |
| NM_00299C | 3160.368  | 3009.171  | NM_01481E | 2680.656  | 3618.656  | NM_017954 | 1230.341  | 1576.379  |
| NM_002432 | 501.486   | 519.69    | NM_005443 | 4268.551  | 7013.32   | NM_006612 | 837.25    | 915.355   |
| AB033037  | 760.738   | 736.943   | NM_007221 | 10675.895 | 15959.586 | NM_016451 | 1846.804  | 2228.536  |
| L40400    | 1980.719  | 1988.127  | X54163    | 25161.775 | 39337.918 | NM_007351 | 11055.971 | 12975.973 |
| NM_006247 | 4943.125  | 6405.58   | AK025395  | 1023.412  | 2083.842  | AK026266  | 5814.682  | 5444.063  |
| AB032983  | 883.951   | 1597.874  | NM_00038E | 931.646   | 1869.608  | NM_007124 | 2736.497  | 2676.347  |
| NM_018281 | 2282.356  | 4055.961  | X58377    | 487.403   | 743.923   | NM_00317E | 1988.146  | 2135.021  |
| NM_004457 | 3601.893  | 4144.074  | NM_002469 | 658.372   | 936.202   | NM_000723 | 807.752   | 1018.225  |
| NM_01404E | 1492.64   | 1544.735  | BI830936  | 1180.461  | 1594.658  | AL096751  | 5303.267  | 9090.655  |
| NM_00431E | 4972.234  | 10284.196 | U79292    | 2182.613  | 1573.196  | NM_000364 | 540.104   | 668.145   |
| NM_02016E | 3411.075  | 7958.971  | AA947915  | 499.743   | 647.27    | AF026920  | 3422.161  | 3915.748  |
| S56138    | 227.76    | 235.899   | BI830753  | 676.471   | 958.692   | NM_004931 | 3110.332  | 3236.285  |
| AK023860  | 552.975   | 504.264   | X71973    | 30917.324 | 34876.484 | NM_00679E | 14085.411 | 14049.104 |
| NM_000031 | 2482.773  | 2406.59   | T49651    | 15091.89  | 11421.361 | AF070568  | 2949.929  | 2517.082  |
| NM_00208E | 17338.082 | 7642.853  | N51014    | 1389.108  | 699.444   | NM_00024C | 4079.413  | 3586.439  |
| NM_01628E | 5610.21   | 2517.002  | BE392471  | 15906.034 | 11857.229 | AK055733  | 8956.473  | 5254.829  |
| NM_001567 | 636.288   | 514.445   | AI802950  | 1300.372  | 2034.115  | AF298880  | 5379.328  | 3945.694  |
| NM_00490E | 4805.698  | 2593.813  | AI741278  | 327.665   | 657.38    | AK001500  | 949.308   | 650.763   |
| AF217971  | 680.689   | 476.113   | AA682423  | 519.709   | 918.296   | NM_006774 | 289.318   | 309.738   |
| NM_00192E | 312.454   | 278.769   | AL043686  | 7097.433  | 9614.03   | NM_02012E | 1121.117  | 1238.419  |
| AF245517  | 544.997   | 546.646   | AA775212  | 6960.665  | 11381.887 | Y16521    | 3823.676  | 3363.907  |
| NM_004982 | 441.237   | 291.497   | NM_000723 | 1234.113  | 1095.933  | AL050371  | 2778.034  | 2931.688  |
| NM_001694 | 26170.779 | 18394.703 | AL096751  | 5193.583  | 5822.589  | NM_002651 | 2765.255  | 3383.417  |
| NM_01246E | 2849.147  | 3041.012  | NM_000364 | 1050.37   | 1099.842  | NM_002413 | 3423.302  | 5059.679  |
| NM_13426C | 4128.818  | 3684.138  | AF026920  | 3976.555  | 4885.262  | NM_001647 | 2249.003  | 2510.377  |
| NM_00147E | 3378.887  | 3078.955  | NM_004931 | 2544.739  | 3463.267  | NM_01815E | 2661.085  | 2918.044  |
| NM_002612 | 250.514   | 1222.309  | NM_000607 | 15104.822 | 14948.269 | NM_016301 | 6322.562  | 7969.585  |
| AF135422  | 2092.639  | 5844.376  | NM_00257E | 1893.613  | 2338.71   | AB032952  | 16829.014 | 20225.912 |
| NM_00447E | 591.764   | 453.3     | NM_004244 | 2177.589  | 2233.692  | NM_002522 | 16681.012 | 19942.154 |
| NM_00261C | 1337.044  | 1371.849  | NM_003371 | 5002.586  | 3164.718  | NM_00094E | 2790.883  | 3129.78   |
| AF070587  | 3397.277  | 2434.315  | AK023114  | 3687.848  | 3187.496  | NM_002574 | 59097.309 | 62578.563 |
| BE250526  | 251.671   | 225.885   | NM_00367E | 3758.576  | 3024.729  | AB011174  | 1696.99   | 1239.575  |
| NM_01681E | 493.089   | 284.383   | NM_012301 | 360.444   | 311.15    | AB043635  | 607.671   | 449.162   |
| NM_012222 | 1610.74   | 960.128   | NM_005631 | 1511.969  | 1063.014  | AB040879  | 1076.894  | 720.376   |
| NM_005002 | 1447.99   | 765.029   | NM_01441E | 1543.888  | 804.849   | AL049935  | 13530.023 | 7302.408  |
| NM_00659E | 2065.737  | 1298.648  | NM_01493E | 3062.996  | 3059.611  | AB033043  | 7820.692  | 7925.264  |
| AK023214  | 3390.419  | 2521.436  | AF049460  | 696.082   | 1110.748  | NM_01499E | 5904.309  | 4558.195  |
| NM_00146E | 7772.833  | 4345.007  | AK026066  | 4932.503  | 6642.201  | AK025220  | 3087.564  | 2242.996  |
| NM_00360C | 879.85    | 705.664   | NM_005244 | 2965.827  | 3854.459  | NM_01630E | 12933.227 | 9722.407  |
| NM_01749C | 1783.202  | 1749.494  | NM_01815E | 3134.896  | 3223.175  | D42046    | 3846.578  | 4656.061  |
| NM_00271E | 777.96    | 973.079   | NM_016301 | 6113.325  | 5031.334  | NM_001033 | 9825.018  | 6958.736  |
| AK026727  | 450.526   | 867.788   | AK021975  | 1019.73   | 1140.664  | NM_00452E | 17206.379 | 14009.144 |
| NM_00283C | 372.966   | 392.242   | AB032952  | 14419.982 | 13400.777 | NM_00252E | 7339.907  | 7281.735  |
| L09071    | 217.348   | 608.015   | NM_002522 | 3176.363  | 3566.305  | NM_02013E | 5932.032  | 5507.916  |
| NM_003322 | 749.024   | 814.132   | NM_00297E | 1150.183  | 838.745   | NM_01851E | 4816.042  | 4014.814  |

|           |           |           |           |           |           |           |           |           |
|-----------|-----------|-----------|-----------|-----------|-----------|-----------|-----------|-----------|
| BC036375  | 8611.749  | 6719.649  | NM_014668 | 1015.073  | 836.785   | AK023149  | 2557.234  | 2243.632  |
| BI912037  | 426.847   | 354.355   | NM_004722 | 2528.277  | 1740.829  | AK023168  | 3451.688  | 3405.341  |
| AA454646  | 544.72    | 496.477   | NM_014425 | 919.492   | 505.666   | NM_006646 | 1380.632  | 1820.369  |
| U18087    | 982.4     | 1111.897  | NM_012133 | 2518.983  | 2431.366  | NM_004742 | 1422.052  | 1496.838  |
| U66349    | 624.413   | 479.578   | NM_017954 | 2103.123  | 1148.426  | NM_014753 | 2423.816  | 2963.34   |
| AA057156  | 680.296   | 358.616   | NM_006612 | 962.983   | 745.066   | NM_006585 | 33617.508 | 31276.938 |
| AF166327  | 9615.755  | 4596.063  | NM_016451 | 2801.236  | 2589.387  | NM_014331 | 3537.297  | 3857.453  |
| AF531423  | 1604.451  | 1266.275  | NM_007351 | 15346.969 | 11113.09  | NM_005270 | 778.901   | 972.749   |
| X76555    | 529.63    | 529.509   | AK026266  | 7329.727  | 5231.061  | NM_014815 | 1807.611  | 2632.392  |
| NM_005432 | 473.866   | 354.671   | NM_007124 | 3720.241  | 3079.535  | NM_005443 | 3263.561  | 3794.432  |
| L10386    | 1704.81   | 1846.653  | NM_003176 | 2742.927  | 2178.801  | NM_007221 | 8707.26   | 11420.822 |
| AF061812  | 614.74    | 810.98    | AK023168  | 4069.062  | 4342.728  | X54163    | 18130.115 | 20399.32  |
| NM_002990 | 2956.176  | 2853.501  | NM_006646 | 1423.69   | 1903.111  | NM_000388 | 596.825   | 831.713   |
| NM_002432 | 419.627   | 537.182   | NM_004742 | 799.978   | 690.873   | NM_002465 | 377.354   | 433.255   |
| AB033037  | 676.814   | 559.052   | NM_014753 | 3411.355  | 2613.396  | BI830936  | 740.131   | 798.024   |
| L40400    | 1843.531  | 2082.31   | NM_006585 | 37574.57  | 35036.031 | U79292    | 4073.263  | 3307.389  |
| AK025688  | 1076.588  | 838.725   | NM_014331 | 4970.272  | 4999.142  | BI830753  | 207.709   | 207.729   |
| NM_001195 | 305.54    | 1046.242  | NM_006795 | 12999.462 | 13243.163 | X68314    | 1157.367  | 1003.135  |
| NM_014448 | 438.816   | 1548.679  | AF070568  | 3693.507  | 3901.534  | X71973    | 14933.54  | 11746.384 |
| NM_005308 | 1010.826  | 871.46    | NM_000240 | 2808.024  | 2359.429  | T49651    | 12545.224 | 9402.832  |
| NM_007227 | 376.209   | 421.624   | AK055733  | 10245.146 | 7713.29   | N51014    | 1164.714  | 881.215   |
| NM_004624 | 582.596   | 225.1     | AF298880  | 4727.547  | 2933.852  | BE392471  | 12874.188 | 9619.334  |
| NM_003865 | 432.899   | 364.13    | AK001500  | 1531.978  | 1071.156  | AI802950  | 1218.835  | 799.198   |
| AB015330  | 727.143   | 714.656   | NM_006774 | 259.65    | 205.716   | AA682423  | 313.763   | 365.158   |
| NM_001455 | 1870.605  | 1569.982  | NM_020129 | 970.875   | 1107.841  | AL043686  | 6006.405  | 5565.21   |
| NM_001694 | 22122.471 | 11059.301 | Y16521    | 3121.343  | 2770.483  | AA490172  | 815.331   | 647.067   |
| AK026180  | 324.48    | 233.086   | AL050371  | 3055.243  | 3959.42   | AA775212  | 4049.126  | 3250.158  |
| NM_005817 | 3462.899  | 4651.371  | NM_002651 | 3191.137  | 3647.538  | NM_000723 | 1100.144  | 610.258   |
| NM_003916 | 4053.592  | 7867.118  | NM_002413 | 3389.514  | 4500.861  | AL096751  | 4953.383  | 3026.841  |
| NM_002870 | 6105.962  | 14277.367 | NM_017577 | 792.384   | 1362.843  | NM_000364 | 602.563   | 498.42    |
| NM_006363 | 4870.854  | 8022.905  | NM_001647 | 1626.915  | 1860.986  | AF026920  | 5309.905  | 5624.165  |
| NM_020415 | 1683.563  | 3156.407  | NM_006228 | 655.445   | 509.213   | NM_004931 | 4165.591  | 3497.03   |
| AL049667  | 2286.09   | 1724.301  | NM_003768 | 5528.874  | 4664.165  | NM_000607 | 15261.271 | 17413.99  |
| NM_000334 | 628.872   | 483.921   | NM_018393 | 1407.6    | 1276.699  | NM_002575 | 3101.129  | 3582.765  |
| NM_020400 | 920.255   | 1330.832  | BF032535  | 2308.898  | 1661.932  | NM_004244 | 3260.465  | 4217.958  |
| D50926    | 1354.404  | 777.624   | NM_018332 | 4109.629  | 3845.747  | NM_003371 | 13865.434 | 18094.52  |
| BF205683  | 257.461   | 73.819    | NM_005096 | 6917.886  | 6098.731  | AK023114  | 2938.67   | 3058.863  |
| NM_001565 | 233.164   | 207.445   | NM_006760 | 926.014   | 899.854   | NM_003678 | 2982.328  | 2580.244  |
| NM_000758 | 2554.24   | 2499.627  | NM_012289 | 4195.338  | 3115.384  | NM_012301 | 279.355   | 292.126   |
| NM_003600 | 967.332   | 882.096   | AB037775  | 1268.985  | 993.327   | NM_005631 | 1669.084  | 1069.249  |
| NM_017490 | 1730.948  | 1757.469  | L27560    | 564.827   | 460.485   | NM_014419 | 2506.943  | 2087.393  |
| NM_002718 | 778.804   | 774.971   | AB011174  | 1330.097  | 862.957   | NM_014938 | 2223.724  | 2062.574  |
| AK026727  | 656.537   | 652.844   | AB043635  | 408.435   | 173.797   | AF049460  | 366.789   | 291.511   |
| NM_006247 | 2822.354  | 1669.646  | AL049935  | 13905.438 | 9519.528  | AK026066  | 1291.92   | 955.702   |
| AB032983  | 646.768   | 379.555   | AB033043  | 4933.023  | 5323.756  | NM_005244 | 2772.729  | 2151.383  |
| NM_018281 | 1590.666  | 1281.376  | NM_014999 | 6152.074  | 5227.528  | NM_018158 | 2742.275  | 1707.892  |
| NM_004457 | 3317.088  | 2783.3    | AK025220  | 3206.448  | 2840.225  | NM_016301 | 6118.697  | 4030.092  |
| NM_014049 | 1572.124  | 1366.189  | NM_016308 | 12667.887 | 13624.076 | AK021975  | 648.241   | 538.323   |
| NM_004315 | 5208.135  | 10604.9   | D42046    | 3593.269  | 4096.916  | AB032952  | 21966.66  | 15143.994 |
| NM_020166 | 2795.779  | 7033.894  | NM_001033 | 10848.469 | 12217.233 | NM_002522 | 21780.117 | 18553.264 |
| S56138    | 470.482   | 1695.241  | NM_004526 | 16192.629 | 17160.5   | NM_002978 | 1130.18   | 1075.753  |
| AK023860  | 792.869   | 2055.091  | NM_002526 | 7439.215  | 7768.398  | NM_014668 | 1687.804  | 2154.404  |
| NM_016286 | 5957.154  | 3262.918  | NM_020135 | 7040.989  | 8676.379  | NM_004722 | 3715.396  | 5257.724  |

|           |          |          |           |           |           |           |           |           |
|-----------|----------|----------|-----------|-----------|-----------|-----------|-----------|-----------|
| NM_001567 | 666.736  | 587.272  | NM_018518 | 6261.854  | 7401.043  | NM_014425 | 1012.006  | 1506.279  |
| NM_004905 | 5630.607 | 3616.568 | AK023149  | 2635.338  | 3277.596  | NM_012133 | 3077.767  | 4077.161  |
| AF217971  | 812.493  | 807.761  | NM_006438 | 424.582   | 333.246   | NM_017954 | 1349.91   | 1969.613  |
| NM_001925 | 323.638  | 222.956  | AK024697  | 3057.372  | 2232.004  | NM_006612 | 867.765   | 1319.975  |
| AF245517  | 737.455  | 648.408  | NM_006460 | 2529.393  | 2327.612  | NM_016451 | 1692.677  | 1955.21   |
| X78926    | 1541.657 | 2100.389 | L34156    | 484.339   | 621.997   | NM_007351 | 13883.479 | 15020.908 |
| AJ278110  | 580.211  | 680.543  | NM_003749 | 1291.879  | 1279.519  | AK026266  | 6501.482  | 7437.738  |
| NM_014237 | 427.148  | 552.546  | NM_003557 | 4605.44   | 3127.509  | NM_007124 | 2635.416  | 3088.889  |
| AF029900  | 371.116  | 272.157  | NM_001257 | 6625.176  | 3725.27   | NM_003176 | 2163.793  | 2230.243  |
| NM_003325 | 5430.891 | 3893.365 | D85245    | 2734.631  | 1450.417  | AK023168  | 3852.428  | 3405.159  |
| NM_016178 | 1067.807 | 867.284  | NM_000943 | 425.554   | 232.017   | NM_006646 | 1710.781  | 1320.041  |
| AK022639  | 278.326  | 148.044  | NM_004658 | 2339.271  | 2002.834  | NM_004742 | 1635.368  | 1073.885  |
| D31766    | 3613.765 | 2186.27  | NM_001250 | 3274.819  | 2741.883  | NM_014753 | 2827.065  | 2631.668  |
| NM_006547 | 656.301  | 355.877  | AF298812  | 843.364   | 648.46    | NM_006585 | 36150.289 | 27057.479 |
| NM_001478 | 4834.683 | 5094.853 | NM_004969 | 1749.724  | 1844.596  | NM_014331 | 4592.948  | 3606.933  |
| NM_002612 | 159.421  | 1190.064 | AJ249900  | 670.573   | 684.983   | NM_006795 | 13423.648 | 12266.264 |
| AF135422  | 2637.429 | 6260.11  | AK022581  | 5166.161  | 4765.968  | AF070568  | 3136.727  | 2495.355  |
| BE250526  | 582.437  | 1718.032 | NM_018054 | 2350.705  | 3110.196  | NM_000240 | 4269.617  | 4752.361  |
| NM_016819 | 696.265  | 1119.874 | NM_000958 | 5282.538  | 6398.887  | AK055733  | 10177.9   | 8560.883  |
| NM_012222 | 1969.407 | 1695.118 | NM_001401 | 1120.081  | 1454.629  | AF298880  | 5822.391  | 5386.596  |
| NM_006596 | 2615.538 | 2457.842 | NM_013271 | 4452.058  | 4974.944  | AK001500  | 1326.591  | 1293.108  |
| AK023214  | 4069.622 | 2829.685 | NM_004157 | 1721.32   | 2204.569  | NM_006774 | 544.661   | 541.028   |
| NM_001469 | 8351.096 | 4236.87  | NM_000684 | 1363.534  | 1644.468  | NM_020129 | 1609.379  | 1800.297  |
| NM_001851 | 1396.683 | 2358.136 | NM_015913 | 9364.491  | 5393.354  | Y16521    | 4212.459  | 3543.447  |
| S67789    | 822.282  | 999.455  | NM_005157 | 5520.726  | 2898.325  | AL050371  | 3545.407  | 4522.101  |
| AK022689  | 1413.493 | 1425.754 | NM_007354 | 411.75    | 197.513   | NM_002651 | 2915.845  | 2344.17   |
| NM_016227 | 727.635  | 595.81   | U67037    | 709.062   | 1009.294  | NM_002413 | 2623.211  | 2772.997  |
| NM_004195 | 712.447  | 688.563  | NM_004960 | 15589.46  | 11854.345 | NM_017577 | 892.233   | 846.01    |
| NM_004705 | 2016.473 | 1735.852 | AF272370  | 9241.273  | 9051.844  | NM_001647 | 2567.952  | 2787.716  |
| NM_020190 | 867.223  | 573.334  | AF130050  | 3580.884  | 2826.284  | NM_006228 | 477.245   | 455.246   |
| NM_014357 | 431.194  | 333.476  | NM_012197 | 5969.612  | 3224.927  | NM_003768 | 5924.951  | 4041.052  |
| NM_004067 | 458.235  | 166.053  | AK024016  | 3358.842  | 1786.043  | NM_018393 | 1630.494  | 1108.746  |
| NM_000121 | 1515.925 | 837.21   | NM_003581 | 2792.295  | 1420.723  | BF032535  | 3696.376  | 2629.917  |
| AB033092  | 2013.729 | 1952.527 | NM_012407 | 1365.31   | 1379.151  | NM_018332 | 3577.701  | 3375.269  |
| M89957    | 211.946  | 830.968  | AF302505  | 2044.591  | 1952.14   | NM_005096 | 7982.151  | 6696.609  |
| NM_003023 | 1079.389 | 3052.766 | NM_007186 | 2133.231  | 1846.602  | NM_006760 | 1197.473  | 1098.234  |
| BC035030  | 1940.538 | 4403.495 | NM_007044 | 4281.414  | 5259.295  | NM_012289 | 4815.149  | 4461.59   |
| NM_000864 | 2682.063 | 6267.586 | AF294326  | 7735.525  | 7897.052  | AB037775  | 2200.772  | 2293.07   |
| NM_017977 | 1778.328 | 4159.602 | AB035301  | 642.272   | 997.957   | L27560    | 1289.561  | 1245.728  |
| AF147727  | 686.016  | 553.347  | AB046800  | 2529.491  | 2802.26   | AB011174  | 1973.071  | 2036.275  |
| NM_006751 | 2486.227 | 1824.462 | NM_002162 | 12581.293 | 12796.521 | AB043635  | 638.027   | 879.631   |
| AB037834  | 1717.394 | 2229.38  | NM_015458 | 1414.507  | 671.5     | AB040879  | 1338.473  | 1640.753  |
| NM_003569 | 832.852  | 679.862  | D13540    | 4799.418  | 3222.247  | AL049935  | 15083.362 | 11094.487 |
| NM_014052 | 8801.229 | 6835.099 | NM_016570 | 8065.112  | 5151.882  | AB033043  | 7700.911  | 9903.552  |
| NM_002777 | 397.706  | 816.639  | AF209198  | 3887.664  | 3942.417  | NM_014999 | 5613.707  | 4824.077  |
| AF202635  | 575.194  | 598.351  | M69012    | 29399.688 | 21997.15  | AK025220  | 3069.176  | 2706.687  |
| NM_014125 | 296.656  | 355.978  | NM_006936 | 15380.564 | 7419.599  | NM_016308 | 14082.347 | 15365.048 |
| NM_013367 | 1608.611 | 1666.318 | NM_001327 | 9168.886  | 4498.137  | D42046    | 4577.272  | 7525.837  |
| NM_000321 | 3447.089 | 1946.003 | NM_000063 | 347.473   | 327.228   | NM_001033 | 11906.596 | 13091.078 |
| NM_006341 | 7166.282 | 3308.521 | AF104914  | 21594.789 | 15938.46  | NM_004526 | 17692.832 | 16113.48  |
| NM_001709 | 1586.757 | 658.282  | NM_014716 | 11983.62  | 10899.47  | NM_002526 | 8136.245  | 7541.575  |
| NM_006191 | 2013.979 | 1009.401 | NM_002638 | 5230.139  | 6097.585  | NM_020135 | 6454.704  | 9789.226  |
| NM_001800 | 2446.566 | 1034.792 | NM_016487 | 1327.151  | 1515.943  | NM_018518 | 5136.368  | 4439.896  |



|           |           |           |           |           |           |           |           |           |
|-----------|-----------|-----------|-----------|-----------|-----------|-----------|-----------|-----------|
| NM_00433E | 4518.312  | 2186.115  | NM_00580E | 13586.125 | 16505.535 | AK023149  | 2486.998  | 2117.601  |
| NM_01594E | 1963.339  | 1471.355  | NM_006401 | 35999.664 | 41269.199 | NM_00643E | 1338.401  | 1079.578  |
| NM_01397E | 2269.663  | 1881.215  | AF269249  | 1097.497  | 527.191   | NM_00184E | 257.191   | 280.421   |
| NM_00379C | 401.846   | 681.397   | D31763    | 3468.709  | 3413.222  | NM_00459E | 263.614   | 233.581   |
| NM_000494 | 1633.383  | 2854.948  | NM_00450E | 2519.533  | 1856.161  | AK024697  | 3328.689  | 3370.807  |
| NM_01443C | 546.901   | 1875.415  | S74529    | 28028.141 | 10344.061 | NM_00646C | 2399.589  | 2991.274  |
| NM_00049E | 518.682   | 1544.19   | NM_00593E | 466.536   | 253.761   | L34156    | 430.002   | 296.476   |
| AF085883  | 2930.504  | 6287.919  | NM_001421 | 515.682   | 572.961   | NM_00374E | 1514.584  | 1541.309  |
| NM_00368E | 296.311   | 169.218   | U69127    | 22989.959 | 18948.693 | NM_003557 | 7877.797  | 6952.723  |
| NM_01644E | 1348.818  | 1850.454  | NM_00583E | 13641.936 | 10278.214 | NM_001257 | 17628.553 | 16830.566 |
| AK023237  | 234.606   | 403.811   | AK023379  | 4957.109  | 5108.034  | D85245    | 8578.967  | 9612.231  |
| NM_00187C | 293.414   | 265.279   | -         | 1175.59   | 1586.01   | NM_00094E | 934.535   | 1040.383  |
| AJ271216  | 1320.455  | 1372.445  | AK022294  | 1071.11   | 610.904   | NM_00465E | 2914.655  | 3959.698  |
| U23028    | 1797.299  | 1686.988  | AF086507  | 1039.613  | 686.147   | NM_00125C | 4640.534  | 5677.613  |
| NM_000817 | 1449.117  | 899.745   | U79289    | 1117.992  | 2022.642  | AF298812  | 1268.978  | 1525.954  |
| NM_006571 | 3616.805  | 1639.916  | NM_00427E | 547.61    | 945.592   | NM_00496E | 1774.025  | 2063.595  |
| AK022680  | 993.288   | 411.092   | NM_00069C | 1081.043  | 613.164   | AJ249900  | 763.353   | 1056.859  |
| NM_01894E | 4251.495  | 2609.171  | NM_00015E | 4766.522  | 2099.921  | AK022581  | 5675.379  | 6077.05   |
| NM_01635E | 6443.939  | 2458.688  | AK024489  | 712.723   | 350.097   | NM_018054 | 2284.012  | 2244.311  |
| NM_00415E | 4783.277  | 3856.704  | NM_000181 | 2566.898  | 1041.225  | NM_00618E | 730.298   | 1048.797  |
| AK000561  | 613.209   | 893.442   | NM_014121 | 879.091   | 980.574   | NM_00095E | 6173.426  | 6475.429  |
| BC009187  | 8328.951  | 12853.48  | NM_00673C | 833.564   | 957.408   | NM_001401 | 1055.784  | 1154.303  |
| AL133617  | 627.298   | 2176.062  | NM_005644 | 6944.458  | 5792.766  | NM_013271 | 7237.414  | 5481.008  |
| NM_01648E | 7631.959  | 11589.479 | NM_01844E | 3342.331  | 2850.057  | NM_004157 | 1646.217  | 1408.212  |
| NM_00261E | 346.492   | 1095.245  | AF182416  | 7140.703  | 7867.011  | NM_000684 | 1280.446  | 1264.353  |
| NM_006167 | 3369.198  | 5874.817  | NM_00599E | 20701.527 | 16044.313 | NM_01591E | 12047.818 | 8199.952  |
| NM_016357 | 2842.664  | 4782.442  | NM_00601E | 1701.388  | 1936.017  | NM_005157 | 7124.003  | 5531.969  |
| NM_01450C | 6418.911  | 10741.296 | NM_004634 | 3258.903  | 3808.613  | NM_007354 | 517.963   | 503.377   |
| NM_02014E | 862.233   | 1087.654  | NM_01752E | 10451.162 | 11831.2   | U67037    | 1553.177  | 1167.471  |
| NM_006237 | 936.068   | 1303.697  | NM_00238E | 17887.396 | 16906.508 | NM_00496C | 12143.174 | 12274.916 |
| NM_001271 | 1491.576  | 1341.633  | NM_00215E | 685.968   | 1130.303  | AF272370  | 10814.809 | 10743.778 |
| NM_00368E | 1359.775  | 1224.509  | AK001357  | 261.983   | 280.187   | AF130050  | 3942.438  | 3077.192  |
| AF039019  | 1605.841  | 1276.746  | NM_015721 | 2821.474  | 1995.678  | AK023045  | 559.408   | 456.733   |
| NM_01225E | 3142.285  | 1778.844  | AF086298  | 1471.789  | 3354.406  | NM_012197 | 9021.025  | 8824.431  |
| NM_00481E | 2286.117  | 1296.881  | AK027238  | 1232.547  | 2182.228  | AK024016  | 5134.501  | 5326.988  |
| J04205    | 4231.3    | 2261.233  | AK000032  | 430.375   | 433.394   | NM_003581 | 4698.004  | 5528.012  |
| D38491    | 3610.887  | 1205.92   | AK025758  | 444.961   | 337.807   | NM_00288E | 227.99    | 186.25    |
| AK026835  | 1347.748  | 705.143   | S94540    | 11567.502 | 8816.091  | NM_012407 | 1453.366  | 1767.661  |
| NM_00281E | 9928.119  | 3165.6    | U79297    | 1728.27   | 1908.354  | AF302505  | 1731.564  | 2897.207  |
| NM_013264 | 1836.766  | 1397.274  | AK002164  | 973.204   | 1073.615  | NM_00718E | 2800.564  | 3048.913  |
| NM_00331E | 7172.643  | 2872.635  | AF052122  | 8650.758  | 8025.231  | NM_007044 | 3567.318  | 4134.346  |
| NM_00008E | 4665.202  | 7451.29   | NM_00131C | 2321.417  | 2568.145  | AF294326  | 6190.854  | 6591.581  |
| NM_00375E | 3629.701  | 5803.576  | AK026924  | 3817.618  | 3260.311  | NM_01467E | 1953.843  | 2752.27   |
| NM_00642E | 42389.934 | 58836.605 | AL122047  | 6001.527  | 6653      | NM_012317 | 58287.555 | 62951.641 |
| NM_003307 | 1533.807  | 2442.616  | AF052091  | 1339.712  | 1525.236  | NM_01785E | 4339.75   | 4210.49   |
| AF070565  | 176.271   | 613.289   | AF086458  | 5053.611  | 5926.021  | NM_016097 | 12385.306 | 13085.124 |
| AK021644  | 1009.221  | 2479.273  | AF086548  | 1949.968  | 1482.681  | AB035301  | 499.497   | 571.659   |
| NM_01659E | 381.006   | 1261.903  | AK024350  | 680.545   | 920.271   | AB046800  | 4016.407  | 4331.875  |
| NM_015944 | 800.676   | 1353.23   | AK023717  | 1282.039  | 1598.08   | NM_00216E | 9774.101  | 10100.599 |
| NM_002064 | 758.273   | 1147.064  | AK023727  | 1288.776  | 1159.342  | NM_01545E | 2134.053  | 1280.806  |
| NM_01552E | 7862.228  | 5809.012  | AK025271  | 476.269   | 575.213   | D13540    | 8270.402  | 5006.083  |
| NM_01596C | 3718.336  | 3384.828  | AF086204  | 3277.422  | 3706.917  | NM_01657C | 10178.573 | 7342.326  |
| NM_00608E | 3134.434  | 2554.725  | NM_007021 | 833.71    | 1306.709  | AF209198  | 3735.652  | 2836.521  |

|           |           |           |           |           |           |           |           |           |
|-----------|-----------|-----------|-----------|-----------|-----------|-----------|-----------|-----------|
| NM_000907 | 3183.131  | 2348.441  | AK026283  | 505.771   | 1036.957  | L09247    | 321.058   | 516.712   |
| AF254085  | 1746.421  | 1027.245  | AK023065  | 393.407   | 271.541   | M69012    | 51550.059 | 47951.711 |
| NM_001987 | 607.906   | 306.276   | AK021570  | 820.254   | 560.908   | NM_006936 | 22479.6   | 19828     |
| AF244088  | 580.996   | 242.697   | AL360204  | 494.898   | 354.746   | NM_001327 | 11513.634 | 9464.144  |
| NM_007136 | 403.145   | 227.131   | AK000103  | 1210.483  | 585.74    | AF321182  | 366.929   | 270.321   |
| AJ251845  | 428.926   | 197.849   | AF085959  | 688.005   | 815.19    | NM_003652 | 371.056   | 442.279   |
| AK000435  | 603.639   | 293.091   | AK023104  | 748.356   | 721.815   | NM_000063 | 1016.127  | 1516.55   |
| AK000569  | 816.168   | 455.172   | AK026923  | 2127.75   | 2231.954  | NM_018386 | 1639.38   | 2134.655  |
| NM_006046 | 1867.421  | 1318.678  | AK023595  | 1322.04   | 2082.462  | AB033026  | 842.279   | 1217.41   |
| NM_017661 | 2972.771  | 4224.713  | U52832    | 331.113   | 356.717   | AF104914  | 22001.605 | 23022.535 |
| BC016698  | 11114.194 | 17569.734 | AK022037  | 400.894   | 1025.126  | NM_014716 | 9421.056  | 10665.433 |
| NM_007374 | 18549.691 | 31982.932 | AK000141  | 7274.08   | 11819.328 | AK023845  | 1855.226  | 2164.904  |
| AK027185  | 875.914   | 686.745   | AL137758  | 2420.342  | 4016.711  | NM_002636 | 5093.143  | 5648.254  |
| AK025576  | 406.538   | 752.301   | AK023865  | 359.565   | 547.677   | NM_016487 | 1837.84   | 2322.681  |
| AF147385  | 254.348   | 840.7     | AK025786  | 1010.985  | 1142.082  | NM_005806 | 9992.974  | 11850.854 |
| AL442086  | 2244.604  | 3804.437  | AK024188  | 1430.613  | 1279.717  | NM_006401 | 34393.965 | 36427.281 |
| BC034819  | 1239.471  | 2431.314  | AK024379  | 835.755   | 1072.452  | AF269249  | 1448.414  | 944.267   |
| AF147313  | 505.561   | 568.158   | AK026820  | 515.05    | 585.193   | X51417    | 461.412   | 279.516   |
| AF147382  | 1136.665  | 1312.192  | AK001716  | 1925.219  | 1170.762  | D31763    | 4787.561  | 2637.68   |
| AK001957  | 2540.223  | 2300.988  | AF113683  | 524.269   | 416.617   | NM_018166 | 6305.776  | 6664.007  |
| AK021833  | 888.074   | 782.063   | AK026821  | 1116.137  | 1192.427  | AK021452  | 3712.045  | 2562.094  |
| AF143867  | 256.084   | 306.222   | AK026280  | 745.247   | 764.786   | NM_004506 | 3695.221  | 3238.638  |
| AK025889  | 2410.646  | 1440.862  | AF113017  | 3098.972  | 3273.884  | S74529    | 43470.453 | 40306.352 |
| NM_014715 | 854.143   | 470.354   | AL080232  | 1957.264  | 1530.059  | NM_005933 | 613.496   | 597.141   |
| AF086448  | 847.493   | 452.797   | AK001120  | 5401.677  | 4516.625  | U97060    | 215.911   | 580.571   |
| AF086386  | 738.758   | 302.824   | AF264629  | 780.909   | 564.397   | M73837    | 3335.262  | 3197.361  |
| AF086457  | 380.657   | 225.123   | AK022416  | 810.05    | 865.381   | U69127    | 11623.214 | 12837.987 |
| AK025469  | 1061.675  | 930.807   | AK023224  | 4441.03   | 4719.152  | NM_005836 | 12772.222 | 9759.961  |
| NM_020236 | 3696.696  | 3091.158  | AK023731  | 2104.003  | 1293.293  | AK023379  | 4813.843  | 5235.288  |
| AK024187  | 567.515   | 1388.338  | AK022442  | 744.482   | 1164.156  | NM_006076 | 1097.414  | 1587.004  |
| AK022479  | 333.782   | 500.385   | AK023336  | 1341.719  | 2563.617  | AK021904  | 5484.474  | 6767.594  |
| AF086004  | 1936.546  | 2451.327  | AK026873  | 5641.226  | 8172.343  | -         | 771.179   | 875.213   |
| AF147433  | 371.544   | 798.797   | AK026394  | 6538.458  | 7803.587  | NM_018292 | 486.738   | 854.134   |
| AF085978  | 188.632   | 232.968   | NM_005446 | 1369.643  | 2817.317  | AL049705  | 9191.807  | 10273.375 |
| AF085930  | 334.29    | 486.422   | AK025943  | 34363.879 | 41585.957 | AK022294  | 2966.002  | 1988.12   |
| AL137318  | 775.179   | 525.189   | BG106479  | 1203.3    | 1577.385  | AF086507  | 1081.517  | 809.077   |
| AL137482  | 434.418   | 244.537   | AF130069  | 5293.011  | 4091.996  | U79289    | 1439.439  | 1206.47   |
| AL162011  | 5072.281  | 2404.985  | AL109669  | 1730.021  | 2878.431  | NM_014026 | 4890.852  | 3962.654  |
| Y13807    | 500.244   | 289.641   | AB037766  | 898.515   | 618.219   | NM_000402 | 1499.756  | 1247.117  |
| AK023964  | 960.693   | 376.101   | AK026995  | 407.106   | 262.245   | NM_004273 | 452.974   | 357.13    |
| AF086084  | 446.32    | 221.755   | AL133091  | 797.706   | 568.561   | NM_000690 | 1601.665  | 1763.249  |
| AL050184  | 474.473   | 356.574   | BF842915  | 424.813   | 430.808   | NM_000155 | 8673.51   | 8082.645  |
| AK027112  | 1481.707  | 1523.397  | AF086212  | 940.559   | 3185.588  | AK024489  | 718.641   | 961.753   |
| AL049314  | 1518.78   | 1397.636  | X82545    | 5854.261  | 5866.735  | NM_000181 | 4342.625  | 4593.774  |
| AF093016  | 4999.926  | 4065.085  | AK024632  | 4501.789  | 3817.382  | NM_014121 | 1303.631  | 1418.664  |
| -         | 313.871   | 483.774   | NM_018474 | 5596.262  | 4776.239  | NM_006730 | 1182.702  | 1154.553  |
| AF090925  | 460.731   | 483.8     | AK024937  | 1569.773  | 3033.77   | NM_005644 | 7080.7    | 9065.399  |
| AF100637  | 214.4     | 206.591   | D17178    | 1439.57   | 2030.496  | NM_018442 | 3497.251  | 4630.585  |
| NM_014163 | 247.096   | 347.153   | AK022094  | 3736.472  | 3820.136  | AF182416  | 5420.146  | 5743.445  |
| AK021974  | 640.906   | 271.725   | AK026695  | 1203.768  | 1603.919  | NM_005996 | 14752.695 | 15815.632 |
| AK022068  | 390.623   | 262.055   | AK022220  | 777.164   | 664.99    | NM_006015 | 1144.619  | 1382.559  |
| AK022229  | 443.06    | 237.257   | U84520    | 1314.559  | 1036.514  | NM_004634 | 2774.268  | 3256.894  |
| AK022362  | 1492.466  | 852.682   | Z11853    | 621.266   | 750.59    | NM_002017 | 6495.676  | 6562.69   |

|            |           |           |             |           |           |           |           |           |
|------------|-----------|-----------|-------------|-----------|-----------|-----------|-----------|-----------|
| AK022004   | 1827.412  | 1127.458  | AL133616    | 11436.309 | 17510.207 | NM_017523 | 7782.2    | 10246.093 |
| AK022390   | 327.633   | 264.448   | AK023391    | 695.45    | 981.027   | NM_002382 | 26927.158 | 30258.205 |
| AK023730   | 201.575   | 193.303   | AK026382    | 2652.953  | 2977.927  | NM_002158 | 556.677   | 854.924   |
| AF161360   | 514.455   | 405.109   | AK091169    | 2492.397  | 2934.535  | U13223    | 8983.044  | 11737.006 |
| AK021720   | 322.482   | 427.211   | NM_014745   | 16541.904 | 15449.603 | NM_016270 | 1683.045  | 1589.885  |
| NM_016497  | 18720.861 | 14345.708 | AF086026    | 3686.784  | 2447.938  | AK001357  | 620.61    | 398.038   |
| AK000617   | 294.786   | 347.135   | NM_016300   | 1523.85   | 797.599   | NM_015721 | 3149.386  | 2394.83   |
| AF009261   | 470.967   | 472.006   | NM_015607   | 19961.021 | 7350.971  | AF086298  | 1193.704  | 913.871   |
| unknown (S | 27.912    | 266.869   | AK026955    | 2054.961  | 2414.194  | AK027238  | 905.794   | 478.619   |
| AB037792   | 983.62    | 636.071   | AL110202    | 22860.953 | 18284.285 | AK000032  | 741.073   | 679.487   |
| AL080082   | 263.617   | 153.893   | AK021980    | 1510.126  | 2464.082  | S94540    | 43050.566 | 45588.336 |
| AK021623   | 500.456   | 245.072   | S46402      | 2222.495  | 4337.914  | U79297    | 2359.16   | 1797.576  |
| AF119901   | 1996.477  | 2446.885  | AF075048    | 653.127   | 500.335   | AK002164  | 1140.411  | 1479.634  |
| AK001936   | 902.621   | 1363.483  | Z83940      | 763.793   | 1085.714  | AF052122  | 16453.293 | 17612.131 |
| NM_003770  | 581.71    | 378.801   | NM_005800   | 2573.738  | 2789.184  | NM_001310 | 2803.563  | 3274.898  |
| AF085865   | 2555.212  | 1596.363  | NM_005290   | 565.323   | 654.752   | AK026924  | 3429.62   | 4376.095  |
| AK025521   | 1940.608  | 1754.729  | AK025802    | 803.608   | 907.38    | AL122047  | 6543.98   | 6784.891  |
| NM_001053  | 4797.77   | 2699.33   | AF085973    | 668.938   | 836.015   | AF052091  | 1885.815  | 1956.261  |
| Z70694     | 641.057   | 375.987   | NM_018013   | 5275.87   | 5272.704  | AK024447  | 57671.84  | 57072.137 |
| NM_015421  | 5856.952  | 2415.163  | AK022517    | 1499.888  | 691.485   | AF052145  | 1138.846  | 1400.81   |
| AF086081   | 1803.187  | 928.602   | NM_000329   | 18089.414 | 10231.792 | AF086458  | 5780.211  | 5288.551  |
| NM_018111  | 331.195   | 168.791   | NM_001182   | 4129.479  | 6446.313  | AF086548  | 2648.334  | 3432.868  |
| L23867     | 273.003   | 469.776   | NM_000333   | 3158.275  | 5372.201  | AK024350  | 708.176   | 831.737   |
| AB020968   | 304.813   | 167.144   | NM_000172   | 3350.91   | 3924.526  | AK023717  | 1796.396  | 2148.819  |
| AL138690   | 1197.884  | 1089.564  | NM_002297   | 2320.058  | 4651.174  | AK023727  | 1319.704  | 1006.839  |
| AK000394   | 405.73    | 201.925   | AB040968    | 3608.565  | 1738.816  | AK025271  | 561.92    | 359.704   |
| NM_013941  | 764.237   | 845.051   | X85323      | 586.926   | 430.555   | AF086204  | 5017.381  | 3580.859  |
| AF074989   | 648.422   | 412.9     | U17615      | 1167.083  | 422.06    | NM_007021 | 937.384   | 668.386   |
| AL137339   | 251.214   | 797.04    | NM_005303   | 1065.501  | 614.274   | AK026283  | 350.291   | 288.786   |
| AL080112   | 2280.947  | 6163.315  | NM_016126   | 10383.052 | 8012.446  | AK022076  | 484.269   | 419.482   |
| AL137325   | 667.769   | 2387.304  | U84119      | 1296.578  | 1125.327  | AK023065  | 369.947   | 221.36    |
| AF147361   | 889.074   | 1760.199  | NM_003608   | 3990.029  | 3251.852  | NM_017678 | 385.81    | 505.896   |
| AL133086   | 978.975   | 930.958   | AF302079    | 15871.559 | 12659.274 | AK021570  | 1694.876  | 1728.82   |
| NM_012151  | 20705.959 | 7023.462  | AJ224167    | 399.976   | 330.299   | AL360204  | 627.864   | 681.316   |
| AF087994   | 1554.676  | 827.996   | NM_002550   | 836.085   | 866.457   | AK000103  | 2682.93   | 2834.638  |
| AJ227912   | 1183.889  | 690.846   | NM_000692   | 1241.36   | 1270.829  | AF085959  | 1003.356  | 1107.653  |
| NM_018195  | 1427.33   | 942.717   | AF086062    | 1084.694  | 1721.673  | AK023104  | 1138.495  | 1375.432  |
| AK025532   | 1127.307  | 704.701   | L47668      | 32570.025 | 29232.26  | AK022181  | 487.304   | 517.419   |
| NM_003522  | 457.922   | 252.81    | NM_017920   | 5512.112  | 5482.252  | AK026923  | 2293.642  | 2901.442  |
| NM_005320  | 1491.576  | 220.754   | AK025345    | 1199.601  | 1238.136  | U61091    | 318.546   | 374.119   |
| CY3Cy5     | 2139.054  | 260.245   | D25274      | 8786.003  | 8231.117  | AK021691  | 16019.854 | 15797.537 |
| BI830936   | 843.781   | 1143.888  | CY3Cy5      | 1300.536  | 149.951   | AK023595  | 897.993   | 1177.378  |
| U79292     | 894.03    | 1005.105  | D50373      | 780.804   | 645.404   | AK000141  | 6016.774  | 3730.657  |
| BI830753   | 547.256   | 410.577   | AA488757    | 2454.517  | 2690.193  | AL137758  | 2592.51   | 1694.859  |
| X68314     | 1287.71   | 1612.569  | AA205399    | 573.883   | 183.461   | AK023865  | 500.108   | 484.094   |
| X71973     | 38677.934 | 46721.238 | H07071      | 604.556   | 183.733   | AK025786  | 1200.88   | 927.695   |
| BE392471   | 28989.225 | 33972.121 | M25322      | 3931      | 5057.806  | AK024188  | 2139.971  | 1649.478  |
| AI802950   | 1411.331  | 1792.229  | H-L 27586 I | 2615.449  | 2796.889  | AK024379  | 700.769   | 626.762   |
| AL043686   | 5547.83   | 7220.794  | ID 214180   | 528.111   | 288.64    | AK026820  | 958.881   | 733.323   |
| AA490172   | 616.19    | 675.929   | ID 1867426  | 2281.101  | 1834.146  | AK001716  | 6629.462  | 6310.911  |
| AA775212   | 7780.535  | 8750.681  | ID 396450   | 376.133   | 722.801   | AF113683  | 477.399   | 592.27    |
| NM_000945  | 4526.444  | 3588.764  | W99328      | 768.339   | 974.726   | NM_014095 | 317.777   | 352.998   |
| SR5        | 6821.167  | 8646.066  | AI434176    | 1468.705  | 1379.981  | AK026821  | 3015.448  | 3036.271  |

|           |           |           |           |           |           |           |           |           |
|-----------|-----------|-----------|-----------|-----------|-----------|-----------|-----------|-----------|
| CY3Cy5    | 5388.358  | 453.191   | H08563    | 669.683   | 567.363   | AK026280  | 1960.339  | 1688.03   |
| NM_003371 | 708.254   | 468.41    | BE735403  | 1097.662  | 779.619   | AF113017  | 9974.714  | 13289.557 |
| NM_001164 | 242.157   | 186.979   | NM_022552 | 4262.276  | 3014.927  | AL080232  | 10433.708 | 12764.443 |
| AK023114  | 3069.762  | 1820.022  | NM_014389 | 5372.188  | 5311.941  | AK001120  | 11543.841 | 14315.015 |
| NM_003678 | 4201.592  | 2536.921  | SR2       | 47440.066 | 18370.324 | AK022416  | 864.564   | 1002.4    |
| NM_014938 | 4450.392  | 6868.316  | SR4       | 12935.63  | 5403.018  | AK023224  | 4952.737  | 5487.357  |
| AF049460  | 676.994   | 889.454   | SR6       | 2132.105  | 776.563   | AK023731  | 3395.326  | 2747.784  |
| NM_000441 | 322.993   | 435.233   | SR8       | 6921.401  | 10956.312 | AK022442  | 953.609   | 1001.049  |
| AK026066  | 1951.496  | 2221.192  | SR10      | 23208.688 | 4236.125  | AK023336  | 1195.299  | 979.146   |
| NM_005244 | 1087.793  | 1289.617  | CY3Cy5    | 1364.953  | 109.232   | AK026873  | 4163.512  | 2874.809  |
| NM_005270 | 1237.765  | 1276.471  | AK025175  | 327.771   | 234.453   | AK026394  | 5342.162  | 4199.281  |
| NM_014815 | 3821.292  | 4348.492  | NM_005811 | 3213.957  | 2437.904  | NM_005448 | 1352.622  | 1016.527  |
| NM_007221 | 9998.299  | 11304.066 | NM_005764 | 801.332   | 514.877   | AK025943  | 27457.525 | 20505.043 |
| X54163    | 27877.377 | 31915.74  | NM_016362 | 623.654   | 367.088   | BG106479  | 1498.175  | 1091.07   |
| AK025395  | 1366.676  | 1395.632  | NM_004214 | 9757.583  | 4602.206  | AF130069  | 16692.115 | 14708.229 |
| NM_014668 | 389.568   | 175.833   | NM_004329 | 7027.6    | 3021.16   | AL109669  | 3301.074  | 3071.4    |
| NM_004722 | 1594.66   | 833.005   | NM_002836 | 6265.189  | 9286.645  | AB037766  | 2333.903  | 1662.398  |
| NM_014425 | 938.101   | 519.347   | NM_020167 | 613.885   | 595.751   | AK026995  | 649.43    | 872.325   |
| NM_012133 | 2866.309  | 1471.198  | AL049963  | 18739.768 | 18681.41  | AL133091  | 1245.054  | 1474.194  |
| NM_017954 | 461.272   | 496.834   | NM_016058 | 29684.281 | 19572.9   | BF842915  | 824.814   | 674.122   |
| NM_006612 | 921.982   | 731.549   | NM_014005 | 1104.176  | 681.351   | X82545    | 11246.231 | 11977.101 |
| NM_016451 | 3185.327  | 2374.537  | NM_004636 | 1706.134  | 3172.33   | AK024632  | 11430.677 | 13908.744 |
| NM_007351 | 16682.602 | 9437.072  | AK022603  | 398.714   | 210.608   | NM_018474 | 10122.872 | 11270.07  |
| AK026266  | 9952.667  | 7252.466  | NM_004896 | 2995.295  | 2692.196  | AK024937  | 1565.406  | 1320.44   |
| NM_007124 | 4976.066  | 3799.883  | NM_003976 | 818.679   | 285.745   | D17178    | 979.933   | 1275.334  |
| NM_003176 | 3505.347  | 2298.498  | NM_017688 | 2113.063  | 2314.593  | AK022094  | 4737.087  | 5672.04   |
| NM_000723 | 1783.162  | 1731.782  | AK025612  | 3237.715  | 1302.985  | AK026695  | 2085.331  | 3821.22   |
| AL096751  | 6026.284  | 6521.154  | NM_012268 | 923.043   | 549.726   | AK022220  | 545.933   | 800.448   |
| NM_000364 | 1196.87   | 1043.729  | NM_004736 | 4272.846  | 3349.052  | U84520    | 4109.792  | 4547.48   |
| NM_000607 | 9554.907  | 15410.819 | NM_006459 | 3860.006  | 3055.064  | Z11853    | 450.266   | 311.092   |
| AB011099  | 398.636   | 370.413   | NM_003827 | 12221.159 | 9679.956  | AL133616  | 8818.204  | 8799.643  |
| NM_004244 | 2833.923  | 4142.689  | NM_004583 | 657.83    | 617.429   | AK026382  | 3462.647  | 2752.804  |
| AK001500  | 690.496   | 314.57    | AF228710  | 6963.957  | 4716.846  | AK091169  | 3219.577  | 2800.432  |
| NM_006774 | 247.2     | 157.427   | NM_018399 | 661.391   | 398.607   | NM_014745 | 49833.262 | 48212.813 |
| NM_020129 | 994.444   | 612.791   | AY007131  | 22090.039 | 13759.58  | AF086026  | 15095.16  | 13528.415 |
| Y16521    | 1927.329  | 1151.909  | U61735    | 3919.351  | 3167.989  | AL133011  | 1646.69   | 1789.691  |
| AL050371  | 2485.452  | 2517.536  | NM_001144 | 8344.11   | 13431.647 | NM_016300 | 2273.378  | 2064.995  |
| NM_002651 | 2850.573  | 2224.633  | AK023766  | 5066.466  | 5652.525  | NM_015607 | 32073.563 | 32071.709 |
| NM_002413 | 1368.951  | 871.876   | NM_001897 | 714.396   | 712.972   | AK026955  | 2545.225  | 2336.085  |
| NM_017577 | 847.501   | 434.594   | NM_003853 | 1029.896  | 837.877   | AL110202  | 27125.762 | 25029.168 |
| NM_001647 | 425.415   | 380.717   | AB033109  | 1324.233  | 1603.311  | AK021980  | 1224.589  | 1428.82   |
| NM_018158 | 3160.313  | 2476.211  | NM_002053 | 14258.885 | 17887.012 | S46402    | 1762.989  | 1822.397  |
| NM_016301 | 5879.724  | 5159.863  | NM_006889 | 778.176   | 878.462   | AF075048  | 1018.593  | 1296.272  |
| AK021975  | 933.635   | 864.502   | NM_002438 | 859.12    | 656.635   | Z83940    | 1237.641  | 1405.899  |
| AB032952  | 6408.954  | 5254.324  | NM_014589 | 983.909   | 744.958   | NM_005800 | 2872.138  | 3787.155  |
| NM_002522 | 789.227   | 645.057   | NM_000759 | 911.145   | 558.239   | AF019617  | 11428.231 | 13943.942 |
| NM_002978 | 851.597   | 783.235   | AK023334  | 951.88    | 391.717   | AL137305  | 5466.07   | 5998.123  |
| AL049935  | 13610.231 | 5609.114  | NM_002563 | 11981.027 | 8394.176  | NM_005290 | 858.85    | 784.584   |
| AB033043  | 2902.132  | 1785.942  | NM_002437 | 1627.088  | 931.412   | AK025802  | 637.344   | 743.71    |
| NM_014999 | 4458.664  | 2753.209  | D79991    | 2632.771  | 1556.767  | AF085973  | 728.66    | 858.361   |
| AK025220  | 2959.576  | 2057.922  | NM_000054 | 2644.545  | 1538.628  | NM_018013 | 5193.488  | 6034.104  |
| NM_016308 | 9896.203  | 8096.983  | NM_014713 | 7625.882  | 5697.208  | AK022517  | 1946.461  | 1317.544  |
| D42046    | 2358.391  | 2154.127  | NM_001812 | 1422.646  | 831.902   | NM_000329 | 20850.193 | 17199.082 |

|           |           |           |           |           |           |             |           |           |
|-----------|-----------|-----------|-----------|-----------|-----------|-------------|-----------|-----------|
| NM_001033 | 11334.271 | 10319.187 | NM_014785 | 740.116   | 474.096   | NM_001182   | 10516.811 | 9351.84   |
| NM_004526 | 17033.385 | 15412.415 | NM_006033 | 2351.545  | 2002.064  | NM_000333   | 2892.189  | 2444.536  |
| NM_002526 | 1231.531  | 1184.005  | NM_004837 | 6892.826  | 5552.914  | NM_000172   | 5429.817  | 4959.127  |
| NM_020135 | 7021.13   | 7286.892  | NM_000370 | 1210.979  | 851.618   | NM_002297   | 8214.125  | 6486.754  |
| NM_018518 | 5638.436  | 5002.122  | BE865893  | 3239      | 2158.282  | AB040968    | 17473.242 | 16433.42  |
| AK023149  | 2824.883  | 2139.379  | NM_003123 | 38742.098 | 19711.27  | X85323      | 1791.919  | 1238.098  |
| AK023168  | 3455.136  | 3081.248  | AY005822  | 1329.781  | 602.022   | AK000802    | 366.326   | 280.55    |
| NM_006646 | 1265.623  | 1290.234  | NM_018129 | 15691.354 | 18520.471 | U17615      | 3130.769  | 2720.185  |
| NM_004742 | 1019.223  | 774.258   | AF289022  | 4427.729  | 7418.84   | NM_005303   | 4659.713  | 5090.918  |
| NM_014753 | 3423.12   | 2643.194  | AB002326  | 388.757   | 281.512   | NM_016126   | 13922.898 | 13263.925 |
| NM_006585 | 30276.213 | 22438.082 | M17252    | 584.706   | 154.081   | U84119      | 2027.349  | 1775.196  |
| NM_014331 | 6035.308  | 4488.29   | NM_016025 | 12289.108 | 9885.521  | NM_003608   | 4306.166  | 4764.014  |
| NM_006795 | 9342.808  | 7291.914  | NM_013319 | 3920.278  | 6608.381  | AF302079    | 19271.811 | 21480.26  |
| AF070568  | 4580.29   | 3581.74   | NM_000746 | 2214.698  | 2818.583  | NM_002550   | 642.188   | 857.117   |
| NM_000277 | 272.856   | 219.925   | NM_000722 | 1027.595  | 945.101   | NM_000692   | 1162.926  | 1478.8    |
| NM_000240 | 2143.705  | 1942.268  | NM_006030 | 929.433   | 884.577   | AF086062    | 1252.694  | 1390.983  |
| AK055733  | 12207.112 | 11373.49  | NM_020410 | 5607.875  | 5001.094  | AF000268    | 293.257   | 346.418   |
| AF298880  | 3832.566  | 4269.315  | AF000143  | 9785.346  | 4251.163  | L47668      | 30401.734 | 35803.492 |
| AK025395  | 419.755   | 313.414   | NM_014211 | 742.215   | 349.864   | NM_017920   | 4996.892  | 6389.624  |
| NM_000388 | 553.782   | 357.58    | NM_000814 | 1848.683  | 966.453   | AK025345    | 1027.532  | 1229.685  |
| NM_002469 | 298.77    | 207.964   | NM_000453 | 1419.562  | 1189.734  | D25274      | 8998.94   | 8817.938  |
| BI830936  | 517.652   | 317.344   | J03077    | 19089.488 | 12070.089 | CY3Cy5      | 2416.248  | 124.226   |
| U79292    | 439.455   | 580.304   | J03048    | 5931.352  | 6351.857  | D50373      | 1012.711  | 922.758   |
| AA947915  | 205.597   | 486.503   | AL157469  | 1143.457  | 613.391   | AA488757    | 4151.444  | 3759.483  |
| BI830753  | 367.947   | 444.515   | NM_002868 | 2628.353  | 3102.699  | H07071      | 5693.095  | 7911.069  |
| X68314    | 940.69    | 1066.444  | AK024100  | 4914.046  | 4497.009  | M25322      | 2846.02   | 3174.784  |
| X71973    | 21598.934 | 17159.662 | NM_005135 | 704.023   | 459.382   | H-L 27586 I | 3830.033  | 3691.71   |
| T49651    | 11779.36  | 11260.798 | NM_000317 | 13641.014 | 8574.803  | ID 214180   | 585.854   | 859.699   |
| N51014    | 1595.489  | 1320.521  | NM_018376 | 4371.932  | 2851.085  | H08563      | 504.782   | 449.574   |
| BE392471  | 14365.469 | 11328.802 | NM_017615 | 620.43    | 353.143   | BE735403    | 819.697   | 667.893   |
| AI802950  | 880.232   | 1019.402  | NM_017438 | 3668.556  | 2181.447  | NM_022552   | 6113.085  | 4282.452  |
| AL043686  | 3461.594  | 3300.285  | U59209    | 2955.632  | 1561.162  | NM_014388   | 5993.974  | 3467.566  |
| AA775212  | 5249.937  | 4277.858  | NM_020195 | 12083.392 | 10231.269 | SR2         | 52475.043 | 46915.43  |
| NM_000945 | 2582.797  | 1625.062  | BC002753  | 139.821   | 314.045   | CY3Cy5      | 3312.23   | 530.686   |
| NM_002574 | 66378.664 | 45799.988 | AK023824  | 6315.4    | 9455.069  | NM_005811   | 3569.433  | 3355.133  |
| AB011174  | 1609.782  | 1420.952  | AL133069  | 1756.487  | 2163.509  | NM_005764   | 858.563   | 728.711   |
| AB043635  | 811.638   | 876.499   | AL117574  | 1125.774  | 1440.967  | NM_016362   | 600.55    | 517.76    |
| NM_000607 | 4182.872  | 2552.633  | AK026055  | 7965.021  | 10215.424 | NM_004214   | 11117.864 | 12516.4   |
| NM_002575 | 1473.138  | 931.846   | AK024126  | 1273.175  | 1657.448  | NM_002836   | 4309.565  | 5255.154  |
| NM_004244 | 1854.846  | 1366.18   | NM_001516 | 4613.081  | 5022.037  | NM_020167   | 1342.756  | 1110.001  |
| NM_003371 | 680.536   | 706.781   | NM_002744 | 2699.886  | 3449.204  | AL049963    | 25164.813 | 15680.878 |
| AK023114  | 2993.819  | 3503.846  | NM_015917 | 12560.953 | 10765.266 | NM_016058   | 34754.238 | 31626.264 |
| NM_003678 | 4741.481  | 4826.783  | NM_020397 | 964.8     | 460.606   | NM_017688   | 2247.482  | 1523.929  |
| NM_005631 | 1982.913  | 1970.448  | NM_000061 | 1236.918  | 792.085   | AK025612    | 3366.34   | 2068.565  |
| NM_014419 | 706.502   | 639.496   | AB046859  | 3823.671  | 3411.546  | NM_012268   | 1300.025  | 931.389   |
| NM_014938 | 2405.456  | 2980.106  | NM_005109 | 6485.484  | 5876.655  | NM_006459   | 4152.924  | 5058.205  |
| AF049460  | 483.953   | 517.664   | AK023573  | 2455.817  | 1929.879  | NM_003827   | 10828.392 | 9282.382  |
| AK026066  | 1154.329  | 1292.006  | NM_002730 | 5365.84   | 3562.981  | NM_004583   | 455.685   | 725.837   |
| NM_005244 | 435.377   | 636.919   | NM_004828 | 1307.787  | 878.972   | NM_001103   | 636.714   | 853.382   |
| NM_005270 | 688.874   | 846.981   | AB011540  | 7421.698  | 5056.139  | AF228710    | 11253.039 | 9426.029  |
| NM_014815 | 2342.493  | 2056.716  | NM_000040 | 1964.026  | 1690.382  | NM_018399   | 768.602   | 685.13    |
| NM_005443 | 3132.094  | 2578.415  | NM_004631 | 1903.429  | 1684.666  | AY007131    | 31555.678 | 31274.23  |
| NM_007221 | 6103.698  | 4892.355  | NM_004736 | 4254.97   | 3310.754  | NM_001144   | 6455.617  | 6364.307  |

|           |           |           |             |           |           |           |           |           |
|-----------|-----------|-----------|-------------|-----------|-----------|-----------|-----------|-----------|
| X54163    | 14160.041 | 11976.551 | NM_006459   | 4604.854  | 2736.558  | AK023766  | 4252.746  | 3250.037  |
| NM_002978 | 491.067   | 448.673   | AA427949    | 462.969   | 303.943   | NM_001897 | 875.63    | 775.066   |
| NM_014668 | 552.335   | 618.951   | D50373      | 1266.763  | 1440.389  | NM_003853 | 1367.414  | 1014.719  |
| NM_004722 | 2162.66   | 2590.214  | AA488757    | 2868.931  | 3501.575  | AB033109  | 1727.404  | 1033.234  |
| NM_014425 | 1074.728  | 880.395   | AA205399    | 672.515   | 949.61    | NM_002053 | 15865.954 | 11609.917 |
| NM_012133 | 2973.958  | 2719.714  | H07071      | 789.566   | 855.728   | NM_006888 | 1057.192  | 1332.028  |
| NM_017954 | 717.305   | 814.478   | M25322      | 2288.592  | 2874.285  | NM_002438 | 1475.112  | 1882.5    |
| NM_006612 | 1171.412  | 1144.552  | H-L 27586 I | 2718.296  | 3440.479  | NM_014588 | 1770.026  | 2498.719  |
| NM_016451 | 3281.423  | 3675.799  | ID 214180   | 589.743   | 723.903   | NM_000758 | 1210.348  | 1944.766  |
| NM_007351 | 18303.676 | 17166.541 | ID 1867426  | 2615.651  | 2760.928  | AK023334  | 872.964   | 1150.01   |
| AK026266  | 9142.767  | 6705.823  | ID 396450   | 659.921   | 434.112   | NM_002563 | 11989.111 | 12511.251 |
| NM_007124 | 4600.905  | 4360.363  | W99328      | 847.883   | 552.734   | NM_002437 | 1617.174  | 1229.918  |
| NM_003176 | 3116.942  | 2863.389  | AI434176    | 1225.963  | 1088.287  | D79991    | 2790.701  | 1607.256  |
| NM_000723 | 1322.072  | 1015.777  | H08563      | 485.94    | 367.008   | NM_014713 | 12503.03  | 8906.117  |
| AL096751  | 3740.544  | 3227.821  | BE735403    | 1092.12   | 599.716   | NM_001812 | 1918.175  | 1132.78   |
| NM_000364 | 548.562   | 611.125   | NM_022552   | 3896.726  | 2202.836  | NM_014785 | 1548.903  | 1353.223  |
| AF026920  | 2100.276  | 2116.841  | NM_014389   | 4923.237  | 3308.354  | NM_006033 | 4231.261  | 3734.891  |
| NM_004931 | 1739.398  | 1723.149  | NM_001718   | 782.153   | 639.093   | NM_004837 | 8467.506  | 6762.923  |
| NM_006795 | 7318.761  | 4326.897  | AF116659    | 591.239   | 489.033   | NM_00037C | 1730.377  | 1453.733  |
| AF070568  | 3295.677  | 2048.719  | NM_000054   | 4637.623  | 4795.409  | BE865893  | 4722.855  | 4706.096  |
| NM_00024C | 1407.895  | 1018.993  | NM_014713   | 15743.338 | 21987.51  | NM_003123 | 60766.016 | 51555.363 |
| AK055733  | 9337.727  | 6754.962  | NM_001812   | 2234.46   | 2583.319  | AY005822  | 1421.517  | 1308.81   |
| AF298880  | 3183.736  | 2812.745  | NM_014785   | 1293.309  | 1422.265  | NM_018128 | 13074.989 | 11696.975 |
| AK001500  | 759.371   | 995.189   | AK025175    | 566.437   | 176.457   | NM_016025 | 12159.604 | 6563.653  |
| NM_006774 | 557.825   | 711.309   | NM_005811   | 4534.035  | 5523.714  | NM_013318 | 2975      | 1851.564  |
| NM_020128 | 1053.011  | 847.628   | NM_005764   | 842.659   | 1151.597  | NM_000748 | 2776.85   | 3632.749  |
| Y16521    | 2261.885  | 2578.472  | NM_016362   | 765.616   | 1255.57   | NM_000722 | 1151.181  | 1575.512  |
| NM_003167 | 301.874   | 393.087   | NM_004214   | 12321.856 | 15688.377 | NM_00603C | 1575.729  | 1577.858  |
| AL050371  | 3616.305  | 6779.045  | NM_004329   | 9381.996  | 10192.245 | NM_02041C | 5917.039  | 5356.725  |
| NM_002651 | 3356.31   | 3653.277  | NM_002836   | 4256.091  | 6445.171  | AF000143  | 19476.662 | 12622.651 |
| NM_002413 | 1475.463  | 1407.193  | AL049963    | 20293.639 | 28562.74  | NM_014211 | 448.638   | 403.15    |
| NM_017577 | 657.565   | 478.313   | NM_016058   | 26342.574 | 11115.174 | NM_000814 | 1989.725  | 1376.435  |
| NM_001757 | 263.875   | 337.225   | NM_014005   | 1209.747  | 842.278   | NM_000453 | 2026.753  | 2398.172  |
| NM_018158 | 3199.688  | 3009.354  | NM_004636   | 1424.807  | 2760.536  | J03077    | 19459.361 | 19183.334 |
| NM_016301 | 5621.867  | 6257.958  | AK022603    | 757.732   | 1083.96   | J03048    | 14059.399 | 4556.431  |
| AK021975  | 761.184   | 1044.518  | NM_004896   | 2760.836  | 2164.413  | NM_002868 | 3486.211  | 4773.729  |
| AB032952  | 5593.982  | 5938.829  | NM_003976   | 623.499   | 337.103   | AK024100  | 7110.774  | 5090.935  |
| NM_002522 | 445.305   | 555.902   | NM_017688   | 2113.968  | 1799.755  | NM_005135 | 722.727   | 969.112   |
| NM_000945 | 2053.017  | 912.12    | AK025612    | 3167.435  | 2455.1    | NM_000317 | 17924.203 | 12253.59  |
| NM_002574 | 57908.184 | 31303.297 | NM_012268   | 906.495   | 683.057   | NM_018376 | 5670.538  | 4675.272  |
| AB011174  | 1465.406  | 981.006   | NM_012203   | 787.826   | 692.398   | NM_017615 | 647.641   | 585.114   |
| AB043635  | 617.101   | 497.306   | AL157469    | 1373.164  | 1885      | NM_017438 | 3819.992  | 3147.612  |
| AB040879  | 768.156   | 813.27    | NM_002868   | 4673.167  | 5231.415  | U59209    | 2763.558  | 2479.557  |
| AL049935  | 16684.811 | 12873.104 | AK024100    | 9069.9    | 9737.023  | NM_020195 | 6278.89   | 6793.218  |
| AB033043  | 3779.039  | 4357.716  | NM_005135   | 985.993   | 958.64    | AK023824  | 4546.926  | 3659.275  |
| NM_014998 | 6287.924  | 6220.779  | NM_003827   | 11955.047 | 12609.695 | AL133069  | 4413.614  | 3306.625  |
| AK025220  | 3857.155  | 4321.104  | NM_004583   | 858.752   | 1036.67   | AL117574  | 760.987   | 368.445   |
| NM_016308 | 12201.106 | 13009.571 | NM_001103   | 772.348   | 1259.486  | AK026055  | 7686.231  | 7976.636  |
| D42046    | 3452.986  | 6874.85   | AF228710    | 7881.62   | 10569.062 | AK024126  | 1250.624  | 1425.193  |
| NM_001033 | 18555.248 | 29516.027 | NM_018399   | 768.006   | 1006.355  | NM_001516 | 5200.398  | 3765.393  |
| NM_002526 | 1559.686  | 1803.599  | AY007131    | 29168.139 | 41688.137 | NM_002744 | 3417.66   | 2037.367  |
| NM_020135 | 7329.882  | 7639.762  | U61735      | 3343.916  | 5419.607  | NM_015917 | 13587.18  | 6164.841  |
| NM_018518 | 6255.124  | 5829.12   | NM_001144   | 7087.093  | 10311.738 | NM_020397 | 721.01    | 366.181   |

|           |           |           |           |           |           |             |           |           |
|-----------|-----------|-----------|-----------|-----------|-----------|-------------|-----------|-----------|
| AK023149  | 2623.376  | 3068.54   | AK023766  | 5924.837  | 6260.542  | NM_000061   | 729.551   | 272.547   |
| AK023168  | 2725.339  | 3062.478  | NM_001897 | 769.433   | 497.596   | AB046859    | 7110.968  | 3140.607  |
| NM_006646 | 1510.251  | 1983.314  | NM_003853 | 988.476   | 761.808   | NM_005109   | 10662.711 | 5898.353  |
| NM_004742 | 744.544   | 843.396   | AB033109  | 2279.228  | 3621.65   | AK023573    | 1929.373  | 1106.746  |
| NM_014753 | 3452.92   | 3467.419  | NM_002053 | 12745.903 | 17517.406 | NM_002730   | 7261.578  | 7135.11   |
| NM_006585 | 32464.16  | 33620.957 | NM_006889 | 801.862   | 700.207   | NM_004828   | 1228.543  | 597.147   |
| NM_014331 | 5889.147  | 6537.926  | NM_002438 | 680.852   | 514.822   | AB011540    | 16654.965 | 10715.624 |
| NM_005270 | 359.867   | 321.242   | NM_014589 | 936.173   | 740.395   | NM_000040   | 3553.539  | 2491.884  |
| NM_014815 | 1932.194  | 1088.419  | NM_000759 | 985.488   | 580.925   | NM_004631   | 3231.099  | 3364.253  |
| NM_005443 | 2709.455  | 1660.848  | AK023334  | 987.896   | 790.532   | NM_004736   | 4378.369  | 3476.233  |
| NM_007221 | 5422.654  | 3719.573  | NM_002563 | 12842.877 | 11564.146 | NM_006459   | 5539.051  | 7260.977  |
| X54163    | 13875.82  | 9045.538  | NM_002437 | 1143.175  | 918.412   | D50373      | 1390.692  | 1615.535  |
| AK025395  | 513.585   | 455.955   | NM_002730 | 9454.423  | 11524.437 | AA488757    | 3937.587  | 3620.586  |
| NM_000388 | 685.311   | 621.892   | NM_004828 | 1847.8    | 2733.105  | H07071      | 543.077   | 317.804   |
| X58377    | 689.289   | 516.041   | AB011540  | 13846.684 | 13952.615 | M25322      | 2408.213  | 2179.441  |
| NM_002469 | 522.394   | 498.68    | NM_000040 | 3871.76   | 4258.778  | H-L 27586 I | 2938.086  | 1892.941  |
| BI830753  | 433.123   | 567.896   | NM_004631 | 4140.979  | 3546.147  | ID 1867426  | 3687.552  | 1899.361  |
| X71973    | 26118.152 | 23821.125 | NM_006033 | 3448.164  | 3170.419  | W99328      | 781.694   | 429.462   |
| T49651    | 13017.381 | 11707.108 | NM_004837 | 10075.488 | 11987.372 | AI434176    | 495.037   | 249.782   |
| N51014    | 1584.347  | 1327.508  | NM_000370 | 1602.742  | 3194.027  | H08563      | 329.381   | 191.638   |
| BE392471  | 14363.897 | 14437.191 | BE865893  | 3187.3    | 4015.813  | BE735403    | 462.556   | 338.754   |
| AI802950  | 971.806   | 831.857   | NM_003123 | 44811.211 | 51509.75  | NM_022552   | 4599.837  | 2230.756  |
| AL043686  | 3450.018  | 4031.028  | AY005822  | 1335.909  | 2670.135  | NM_014389   | 5310.558  | 2511.496  |
| AA775212  | 4664.975  | 5758.347  | NM_018129 | 12308.319 | 16701.943 | NM_001718   | 566.501   | 596.691   |
| NM_000723 | 1164.841  | 753.449   | AF289022  | 4170.671  | 5943.525  | D79991      | 2946.842  | 2570.629  |
| AL096751  | 3169.6    | 1749.061  | NM_016025 | 11155.894 | 6637.846  | NM_000054   | 4157.124  | 4201.672  |
| NM_000364 | 621.197   | 407.763   | NM_013319 | 2105.101  | 1831.261  | NM_014713   | 12973.771 | 10466.234 |
| AF026920  | 2205.376  | 1407.392  | NM_000746 | 1860.373  | 1576.69   | NM_001812   | 1878.685  | 1382.677  |
| NM_004931 | 1579.966  | 1010.236  | NM_000722 | 828.909   | 804.542   | NM_014785   | 641.449   | 999.402   |
| NM_000607 | 5741.439  | 4613.406  | NM_006030 | 777.421   | 656.826   | NM_005811   | 3934.285  | 2934.433  |
| AF090409  | 317.456   | 306.688   | NM_020410 | 4191.25   | 3344.425  | NM_005764   | 815.973   | 605.025   |
| AK023114  | 3324.314  | 4821.912  | AF000143  | 6615.99   | 6082.095  | NM_016362   | 430.571   | 371.467   |
| NM_003678 | 5110.479  | 5410.119  | NM_014211 | 557.319   | 346.376   | NM_004214   | 12095.037 | 15344.557 |
| NM_005631 | 1693.435  | 1737.864  | NM_000814 | 1528.404  | 1567.041  | NM_004329   | 11189.474 | 8907.253  |
| NM_014419 | 634.224   | 688.374   | NM_000453 | 1485.561  | 1855.169  | NM_002836   | 4917.524  | 2340.237  |
| NM_014938 | 2719.124  | 3385.547  | NM_022552 | 7643.357  | 7501.27   | NM_020167   | 954.423   | 676.556   |
| AF049460  | 520.428   | 497.742   | NM_014389 | 8285.433  | 10016.306 | AL049963    | 22091.963 | 11973.888 |
| AK026066  | 1275.936  | 1296.91   | NM_001718 | 864.219   | 1363.528  | NM_016058   | 30533.926 | 17059.863 |
| NM_005244 | 671.271   | 801.594   | AF116659  | 2262.484  | 1949.014  | NM_014005   | 642.905   | 363.596   |
| NM_018158 | 2624.484  | 1685.587  | NM_000317 | 26560.613 | 23545.621 | NM_004636   | 699.507   | 518.736   |
| NM_016301 | 4835.73   | 2976.238  | NM_018376 | 5495.619  | 5546.877  | NM_004896   | 2466.823  | 1141.868  |
| AK021975  | 546.077   | 471.224   | NM_017615 | 884.101   | 1524.244  | NM_017688   | 1470.461  | 638.626   |
| AB032952  | 5977.849  | 3899.779  | NM_017438 | 4107.917  | 4345.025  | AK025612    | 3275.3    | 1735.73   |
| NM_002522 | 653.218   | 652.12    | U59209    | 3071.415  | 3133.92   | NM_012268   | 1437.975  | 858.37    |
| NM_002978 | 832.906   | 863.155   | NM_020195 | 8613.56   | 8850.893  | NM_012203   | 1141.459  | 604.027   |
| NM_014668 | 550.851   | 719.319   | AK023824  | 3971.873  | 2820.953  | J03077      | 19146.064 | 13639.383 |
| NM_004722 | 1916.773  | 2023.112  | AL133069  | 3499.02   | 2477.062  | J03048      | 15361.678 | 6176.368  |
| NM_014425 | 928.309   | 1113.35   | AL117574  | 695.828   | 495.184   | AL157469    | 996.404   | 817.76    |
| NM_012133 | 3643.183  | 3887.041  | AK026055  | 6227.598  | 5194.767  | NM_002868   | 3473.044  | 3371.89   |
| NM_017954 | 581.076   | 846.074   | AK024126  | 1125.129  | 1012.573  | AK024100    | 7066.1    | 6519.637  |
| NM_006612 | 1143.931  | 1121.556  | NM_001516 | 4221.569  | 3579.349  | NM_005135   | 563.407   | 757.453   |
| NM_016451 | 3484.531  | 3606.023  | NM_002744 | 2633.244  | 2368.429  | NM_003827   | 10843.14  | 8848.103  |
| NM_007351 | 16419.822 | 15525.356 | NM_015917 | 5449.064  | 3937.84   | NM_004583   | 470.491   | 417.454   |

|           |           |           |             |           |           |           |           |           |
|-----------|-----------|-----------|-------------|-----------|-----------|-----------|-----------|-----------|
| AK026266  | 9022.736  | 8595.118  | NM_020397   | 505.173   | 556.96    | NM_001103 | 522.401   | 373.287   |
| NM_007124 | 5628.346  | 6041.187  | NM_000061   | 966.328   | 1015.48   | AF228710  | 14167.28  | 9992.736  |
| NM_003176 | 3955.105  | 4598.542  | AB046859    | 6926.059  | 6376.444  | NM_018396 | 554.284   | 928.187   |
| AK023168  | 2655.513  | 1713.559  | NM_005109   | 9019.503  | 14808.948 | AY007131  | 36603.285 | 25240.984 |
| NM_006646 | 1187.839  | 889.061   | NM_013372   | 564.867   | 145.533   | U61735    | 3531.042  | 1901.435  |
| NM_004742 | 796.094   | 576.043   | NM_003976   | 956.025   | 959.198   | NM_001144 | 6888.666  | 4351.366  |
| NM_014753 | 2700.174  | 1941.24   | NM_017688   | 3475.199  | 5601.388  | AK023766  | 4757.666  | 3650.565  |
| NM_006585 | 27119.643 | 19670.354 | AK025612    | 6060.913  | 5703.631  | NM_001897 | 1016.612  | 1092.649  |
| NM_014331 | 5500.573  | 4076.762  | NM_012268   | 1528.59   | 1457.865  | NM_003853 | 1644.016  | 1316.989  |
| NM_006795 | 8564.066  | 7157.803  | NM_012203   | 1214.323  | 1575.473  | AB033109  | 2381.144  | 1764.393  |
| AF070568  | 4052.977  | 2998.253  | NM_004736   | 6817.866  | 6309.427  | NM_006886 | 1143.364  | 942.227   |
| NM_000277 | 232.13    | 268.881   | NM_006895   | 517.621   | 350.136   | NM_002438 | 878.41    | 607.089   |
| NM_000240 | 2131.018  | 1957.817  | NM_006459   | 5058.586  | 5590.094  | NM_014586 | 1381.723  | 627.13    |
| AK055733  | 11569.189 | 10491.18  | D50373      | 1030.253  | 772.627   | NM_000756 | 913.579   | 434.622   |
| AF298880  | 5340.371  | 10881.051 | AA488757    | 2392.24   | 1759.193  | AK023334  | 1082.209  | 1788.493  |
| AK001500  | 1447.561  | 2334.023  | AA205399    | 701.646   | 77.772    | NM_002563 | 10964.905 | 4223.855  |
| NM_006774 | 477.851   | 368.087   | M25322      | 1890.528  | 652.292   | NM_002437 | 1296.01   | 762.296   |
| NM_020129 | 1073.317  | 1129.044  | H-L 27586 I | 2545.635  | 2496.98   | AK023573  | 3000.643  | 2241.199  |
| Y16521    | 2886.556  | 3521.721  | ID 214180   | 562.947   | 412.536   | NM_002730 | 8393.775  | 6572.48   |
| AL050371  | 2962.106  | 3791.841  | ID 1867426  | 2306.862  | 1676.176  | NM_004828 | 1467.737  | 1107.698  |
| NM_002651 | 3359.948  | 3694.952  | W99328      | 728.304   | 667.892   | AB011540  | 28722.027 | 25041.291 |
| NM_002413 | 1635.695  | 1944.278  | AI434176    | 1148.448  | 1720.045  | NM_000040 | 5969.895  | 5857.329  |
| NM_017577 | 1837.794  | 2112.932  | H08563      | 413.003   | 593.902   | NM_004631 | 3396.701  | 4536.666  |
| NM_001647 | 624.506   | 937.091   | BE735403    | 955.31    | 904.409   | NM_006033 | 4419.348  | 3887.768  |
| NM_006228 | 740.628   | 442.888   | NM_002438   | 1023.281  | 1213.116  | NM_004837 | 8444.63   | 5386.958  |
| NM_003768 | 5318.295  | 3810.523  | NM_014589   | 1377.804  | 1201.418  | NM_000370 | 1563.787  | 871.41    |
| NM_018393 | 1505.47   | 1054.381  | NM_000759   | 1363.89   | 1510.97   | BE865893  | 5437.716  | 5922.762  |
| BF032535  | 1009.565  | 759.817   | AK023334    | 1234.703  | 434.861   | NM_003123 | 57853.93  | 53027.215 |
| NM_018332 | 4318.11   | 3421.143  | NM_002563   | 10969.789 | 6297.899  | AY005822  | 1779.772  | 1230.025  |
| NM_005096 | 7625.576  | 5648.653  | NM_002437   | 2433.456  | 1834.653  | NM_018129 | 16900.658 | 12629.86  |
| NM_006760 | 801.706   | 873.664   | D79991      | 4850.458  | 5562.314  | AF289022  | 2770.033  | 2944.125  |
| NM_012289 | 4576.632  | 3326.19   | AK022425    | 826.649   | 662.649   | NM_016025 | 12537.348 | 13590.102 |
| AB037775  | 904.953   | 674.881   | NM_000054   | 3867.858  | 4398.666  | NM_013319 | 2871.954  | 4013.611  |
| L27560    | 650.229   | 841.065   | NM_014713   | 9728.313  | 9103.194  | NM_000722 | 1268.688  | 1395.361  |
| AB011174  | 1827.702  | 1680.451  | NM_001812   | 1693.088  | 1679.952  | NM_006030 | 1410.878  | 1421.662  |
| AB043635  | 755.48    | 1293.849  | NM_014785   | 987.612   | 774.368   | NM_020410 | 6418.531  | 6885.534  |
| AB040879  | 5372.505  | 5781.239  | AK025175    | 1123.64   | 614.444   | AF000143  | 18762.482 | 14963.313 |
| AL049935  | 19097.727 | 16524.057 | NM_005811   | 3295.281  | 1468.117  | NM_014211 | 1514.347  | 1456.412  |
| AB033043  | 3786.267  | 3770.759  | NM_005764   | 788.084   | 522.876   | NM_000814 | 3154.234  | 1520.167  |
| NM_014999 | 6367.433  | 6548.681  | NM_016362   | 609.884   | 211.005   | NM_000453 | 2053.944  | 986.762   |
| AK025220  | 3612.093  | 3658.742  | NM_004214   | 7756.668  | 4176.845  | NM_022552 | 6499.253  | 4384.083  |
| NM_016308 | 13799.693 | 16044.039 | NM_004329   | 6598.583  | 3542.983  | NM_014386 | 7936.756  | 6206.931  |
| D42046    | 3008.17   | 3944.963  | NM_002836   | 3748.714  | 2695.366  | NM_001718 | 465.618   | 603.454   |
| NM_001033 | 14498.01  | 16659.383 | NM_020167   | 672.491   | 515.343   | AF116659  | 1613.269  | 1717.337  |
| NM_004526 | 21361.396 | 22875.539 | AL049963    | 17298.846 | 12563.129 | NM_000317 | 20255.869 | 14605.757 |
| NM_002526 | 1189.667  | 1723.916  | NM_016058   | 22958.852 | 19645.824 | NM_018376 | 5757.077  | 3728.974  |
| NM_020135 | 8249.581  | 10915.571 | NM_014005   | 1276.028  | 921.769   | NM_017615 | 604.247   | 499.809   |
| NM_018518 | 6581.311  | 8044.558  | NM_004636   | 1193.615  | 997.104   | NM_017438 | 4134.217  | 3812.465  |
| AK023149  | 3020.299  | 3788.571  | AK022603    | 356.322   | 327.537   | U59209    | 3390.416  | 2090.427  |
| NM_006438 | 328.496   | 384.522   | NM_004896   | 2254.693  | 2133.127  | NM_020195 | 7689.266  | 6315.075  |
| AK024697  | 2494.727  | 2123.096  | NM_006030   | 1178.268  | 759.47    | AK023824  | 5189.918  | 6558.057  |
| NM_006460 | 2395.5    | 2286.674  | NM_020410   | 6242.471  | 4153.894  | AL133069  | 5547.043  | 7415.202  |
| L34156    | 605.194   | 503.608   | AF000143    | 11301.707 | 6844.812  | AL117574  | 787.539   | 1351.482  |



|           |           |           |           |           |           |             |           |           |
|-----------|-----------|-----------|-----------|-----------|-----------|-------------|-----------|-----------|
| NM_00374C | 1334.154  | 1007.83   | NM_014211 | 498.703   | 324.265   | AK026055    | 8030.169  | 11286.213 |
| NM_003557 | 3429.849  | 2665.037  | NM_000814 | 1994.057  | 2259.723  | AK024126    | 1348.868  | 1489.793  |
| NM_001257 | 3329.936  | 2823.955  | NM_000453 | 1573.866  | 1628.767  | NM_00151C   | 6094.765  | 7401.784  |
| NM_00179E | 487.719   | 382.732   | J03077    | 31287.35  | 27912.361 | NM_002744   | 4305.914  | 5111.749  |
| D85245    | 2447.329  | 2731.22   | J03048    | 11959.06  | 14436.297 | NM_015917   | 16497.965 | 19944.887 |
| NM_000943 | 910.426   | 1625.417  | AL157469  | 1354.24   | 1644.093  | NM_020397   | 1342.891  | 1046.849  |
| NM_00465E | 3139.089  | 3354.458  | NM_00286E | 3677.411  | 6596.927  | NM_000061   | 1600.029  | 1415.001  |
| NM_00125C | 896.136   | 821.314   | AK024100  | 7199.196  | 8704.919  | AB046859    | 8913.114  | 3498.245  |
| AF298812  | 544.05    | 528.975   | NM_00513E | 900.095   | 1013.508  | NM_00510C   | 10444.902 | 4042.849  |
| NM_00496C | 2272.121  | 2586.693  | NM_003827 | 12098.731 | 11551.409 | NM_00397C   | 779.031   | 908.245   |
| AJ249900  | 592.397   | 845.482   | NM_001103 | 776.818   | 300.456   | NM_01768E   | 2477.399  | 2491.052  |
| AK022581  | 4344.334  | 3937.264  | AF228710  | 6633.711  | 3111.215  | AK025612    | 5485.788  | 4576.759  |
| NM_018054 | 3122.55   | 3873.544  | AY007131  | 17998.383 | 7702.535  | NM_01226E   | 2201.437  | 2887.226  |
| NM_00618C | 698.554   | 906.378   | U61735    | 2092.512  | 1766.299  | NM_01220C   | 909.614   | 828.753   |
| NM_00095E | 9287.615  | 15531.512 | NM_001144 | 3397.358  | 3455.233  | NM_00473C   | 4561.921  | 3597.545  |
| NM_001401 | 1592.271  | 1952.426  | AK023766  | 1936.977  | 1840.829  | NM_00689E   | 1070.98   | 1144.923  |
| NM_013271 | 1004      | 1245.102  | NM_001897 | 574.925   | 614.323   | NM_00645C   | 5151.72   | 5276.578  |
| NM_004157 | 2020.586  | 2940.68   | NM_00385C | 445.445   | 600.172   | D50373      | 1240.215  | 1004.061  |
| NM_000684 | 2133.061  | 3399.06   | AB033109  | 1051.374  | 1031.187  | AA488757    | 4417.895  | 5082.927  |
| NM_01591C | 11173.48  | 8628.667  | NM_00205C | 4318.685  | 4588.039  | AA205399    | 734.264   | 618.743   |
| NM_005157 | 6139.091  | 4663.584  | NM_00688C | 628.212   | 826.049   | H07071      | 763.969   | 1115.049  |
| NM_007354 | 459.601   | 406.97    | NM_002744 | 3161.763  | 5939.592  | M25322      | 2812.081  | 4815.818  |
| U67037    | 684.929   | 494.08    | NM_015917 | 13619.952 | 12968.733 | AA436187    | 560.75    | 564.603   |
| NM_00496C | 15763.108 | 13163.896 | NM_020397 | 1183.358  | 1189.803  | H-L 27586 I | 3427.204  | 5256.426  |
| AF272370  | 5439.301  | 4777.186  | NM_000061 | 1375.607  | 1344.649  | ID 214180   | 709.337   | 837.423   |
| AF130050  | 4292.203  | 4104.523  | AB046859  | 8788.83   | 8133.462  | ID 1867426  | 5161.81   | 6506.388  |
| AK023045  | 436.308   | 336.666   | NM_00510C | 13674.146 | 21960.137 | ID 396450   | 656.325   | 783.479   |
| NM_012197 | 6319.196  | 6032.151  | AK023573  | 2807.74   | 1790.607  | W99328      | 1249.844  | 1564.217  |
| AK024016  | 4497.436  | 4549.248  | NM_00273C | 11100.862 | 9411.986  | AI434176    | 1254.581  | 1035.96   |
| NM_003581 | 5873.3    | 7969.75   | NM_00482E | 1369.809  | 1725.673  | H08563      | 1038.657  | 996.177   |
| NM_012407 | 1350.939  | 1975.954  | AB011540  | 11193.823 | 11230.806 | BE735403    | 945.865   | 517.798   |
| AF302505  | 1924.003  | 1752.865  | NM_00004C | 3108.882  | 4395.01   | NM_00243E   | 1537.017  | 1286.918  |
| NM_00718C | 1968.821  | 1348.57   | NM_004631 | 3335.677  | 4129.563  | NM_01458C   | 2064.811  | 1799.629  |
| NM_007044 | 4376.648  | 4233.863  | NM_00603C | 2471.296  | 2510.205  | NM_00075C   | 1902.57   | 2267.657  |
| AF294326  | 7048.878  | 6500.191  | NM_004837 | 7498.464  | 4644.914  | AK023334    | 1540.583  | 1614.634  |
| NM_01467E | 2646.013  | 3262.437  | NM_00037C | 1683.561  | 1164.837  | NM_00256C   | 13956.009 | 12512.508 |
| NM_012317 | 53748.684 | 61386.371 | BE865893  | 2980.779  | 1287.327  | NM_002437   | 1548.194  | 844.698   |
| NM_01785C | 7016.48   | 12012.81  | NM_00312C | 24515.697 | 5133.372  | D79991      | 3585.429  | 3192.191  |
| NM_016097 | 12651.535 | 19170.91  | AY005822  | 829.756   | 57.596    | NM_000054   | 4410.377  | 2712.052  |
| AB035301  | 767.821   | 825.095   | NM_01812C | 2513.819  | 482.211   | NM_01471C   | 14540.628 | 9553.027  |
| AF286113  | 386.583   | 415.98    | AF289022  | 1475.751  | 719.275   | NM_00181C   | 2007.369  | 1021.997  |
| NM_01545E | 1816.739  | 1425.494  | M17252    | 369.019   | 163.66    | NM_01478E   | 887.646   | 900.126   |
| D13540    | 7566.746  | 6341.019  | NM_01602E | 2757.714  | 2642.305  | NM_005811   | 4463.842  | 6587.919  |
| NM_01657C | 7748.573  | 5500.376  | NM_01331C | 859.276   | 728.181   | NM_005764   | 998.733   | 1689.717  |
| AF209198  | 3623.261  | 2240.253  | NM_00074C | 995.812   | 1145.806  | NM_01636C   | 843.901   | 1241.443  |
| L09247    | 296.679   | 250.191   | NM_00072C | 521.902   | 436.828   | NM_004214   | 12712.756 | 19347.217 |
| M69012    | 10204.745 | 12021.11  | NM_00092C | 289.299   | 308.903   | NM_00283C   | 4525.625  | 6522.001  |
| NM_00693C | 17303.148 | 14535.904 | NM_01865E | 2201.304  | 2044.67   | NM_020167   | 1521.742  | 2180.267  |
| NM_001327 | 16712.824 | 13623.309 | NM_00566C | 2889.571  | 3372.637  | AL049963    | 29824.592 | 41571.309 |
| AF321182  | 317.594   | 262.598   | X89960    | 602.881   | 630.236   | NM_01605E   | 42520.441 | 52359.023 |
| AB037722  | 777.755   | 677.583   | NM_00655C | 1443.719  | 1297.656  | NM_01400E   | 1443.031  | 2141.727  |
| NM_00365C | 280.877   | 208.792   | NM_00577C | 3115.6    | 2392.354  | NM_00463C   | 1790.576  | 1806.613  |
| NM_01838C | 1780.934  | 1328.882  | NM_017644 | 5504.128  | 5378.37   | NM_00489C   | 4196.005  | 1694.922  |

|           |           |           |           |           |           |           |           |           |
|-----------|-----------|-----------|-----------|-----------|-----------|-----------|-----------|-----------|
| AB033026  | 718.054   | 691.617   | AB032971  | 339.78    | 789.487   | NM_00603C | 1577.887  | 2356.734  |
| AF104914  | 16732.865 | 13537.847 | NM_002482 | 1380.368  | 1676.008  | NM_02041C | 8327.278  | 9855.767  |
| NM_01471E | 12761.313 | 13869.741 | NM_00171E | 405.308   | 639.482   | AF000143  | 29046.49  | 32635.516 |
| AB002354  | 1087.191  | 1404.237  | AF116659  | 1898.526  | 1875.111  | NM_014211 | 723.538   | 814.283   |
| NM_00227E | 253.4     | 517.569   | NM_000317 | 21056.395 | 24132.396 | NM_000814 | 2864.536  | 2946.955  |
| AK023845  | 2310.132  | 2663.758  | NM_01837E | 5308.496  | 4447.754  | NM_00045E | 2221.891  | 1922.787  |
| NM_00263E | 1211.175  | 1445.686  | NM_01761E | 764.33    | 612.649   | J03077    | 19270.883 | 16888.674 |
| NM_016487 | 793.775   | 1272.382  | NM_01743E | 3931.501  | 2746.397  | J03048    | 16249.684 | 6560.106  |
| AF269249  | 1642.375  | 1357.42   | U59209    | 1944.014  | 436.359   | AL157469  | 1305.963  | 1057.058  |
| X51417    | 523.916   | 550.677   | NM_02019E | 2735.1    | 646.173   | NM_00286E | 4078.247  | 4396.616  |
| D31763    | 3388.073  | 1884.513  | AK023824  | 1070.938  | 1045.677  | AK024100  | 8185.47   | 10500.25  |
| NM_01816E | 5905.813  | 5625.756  | AL133069  | 1112.232  | 1141.497  | NM_00513E | 898.227   | 1168.458  |
| AK021452  | 2967.68   | 2180.179  | AL117574  | 138.424   | 326.718   | NM_003827 | 14885.978 | 21847.574 |
| NM_00450E | 3702.557  | 3298.122  | AK026055  | 2450.969  | 3508.26   | NM_00458E | 726.21    | 1191.883  |
| S74529    | 31162.691 | 26369.588 | AK024126  | 378.432   | 490.979   | AF228710  | 12331.224 | 18025.713 |
| NM_00593E | 1146.018  | 1350.14   | NM_00151E | 1218.137  | 2045.346  | NM_01839E | 678.268   | 1023.712  |
| NM_00559E | 446.229   | 447.108   | NM_01908E | 1892.479  | 1972.169  | U61735    | 3614.771  | 4927.267  |
| NM_001421 | 791.823   | 985.93    | NM_00667C | 3695.698  | 3592.313  | NM_001144 | 7928.698  | 10968.599 |
| M73837    | 4202.977  | 2735.4    | NM_01242E | 6629.853  | 6171.672  | AK023766  | 6308.798  | 8449.847  |
| U69127    | 19505.949 | 14595.369 | NM_00581E | 2094.774  | 2181.4    | NM_001897 | 1651.865  | 1999.226  |
| NM_00583E | 12712.905 | 10014.144 | NM_00275C | 9879.402  | 12542.15  | NM_00385E | 1731.246  | 2330.09   |
| AK023379  | 4913.399  | 5751.169  | NM_000081 | 271.321   | 397.067   | AB033109  | 2518.571  | 2907.525  |
| NM_00607E | 1341.478  | 1688.711  | AK024134  | 5723.917  | 3876.495  | NM_00205E | 15914.379 | 18491.645 |
| AK021904  | 9442.786  | 12059.164 | NM_003014 | 1726.583  | 1583.247  | NM_00688E | 1087.56   | 867.027   |
| -         | 1798.969  | 2130.202  | NM_01855E | 1311.549  | 2178.101  | NM_002744 | 4545.104  | 3745.658  |
| NM_01829E | 954.562   | 1033.797  | NM_001974 | 3905.834  | 4534.924  | NM_015917 | 17215.895 | 14887.494 |
| AK022294  | 1308.205  | 2201.76   | NM_013957 | 955.454   | 884.306   | NM_020397 | 1252.141  | 1528.818  |
| AF086507  | 1076.977  | 918.463   | NM_00246E | 8009.738  | 10332.829 | NM_000061 | 1349.89   | 1509.555  |
| U79289    | 463.35    | 342.005   | NM_00302E | 1999.722  | 2568.86   | AB046859  | 12921.106 | 13449.486 |
| NM_01402E | 3816.209  | 3096.433  | NM_00156E | 1675.021  | 1411.026  | NM_00510E | 13227.675 | 11893.932 |
| NM_00040E | 3298.062  | 2724.306  | NM_016541 | 992.52    | 515.307   | AK023573  | 2928.166  | 1899.708  |
| NM_00069C | 1538.145  | 1226.562  | NM_01854E | 4311.834  | 3292.252  | NM_00273C | 8518.586  | 4916.611  |
| NM_00015E | 5444.592  | 6696.313  | NM_013401 | 736.671   | 228.748   | NM_00482E | 1647.328  | 1372.287  |
| AK024489  | 1175.301  | 1272.061  | NM_01823E | 848.927   | 799.07    | AB011540  | 33966.086 | 30381.922 |
| NM_000181 | 3609.434  | 4172.191  | NM_00685E | 980.58    | 768.836   | NM_00004C | 7452.823  | 10904.653 |
| NM_014121 | 770.701   | 984.364   | NM_00140E | 1020.744  | 921.234   | NM_004631 | 3690.305  | 5120.209  |
| NM_00673C | 844.656   | 1191.188  | NM_00546E | 196.691   | 404.524   | NM_00603E | 5214.352  | 8309.529  |
| NM_005644 | 7548.605  | 7115.284  | AF131778  | 423.836   | 563.725   | NM_004837 | 9451.396  | 12933.013 |
| NM_01844E | 2862.73   | 2639.899  | NM_00156E | 1092.549  | 1600.969  | NM_00037C | 2038.345  | 2697.882  |
| AF182416  | 7267.02   | 5824.579  | NM_01327E | 432.307   | 1123.782  | BE865893  | 7323.063  | 9997.596  |
| NM_00599E | 15425.845 | 12439.162 | NM_003487 | 7306.763  | 4988.923  | NM_00312E | 55972.574 | 54135.156 |
| NM_00601E | 2423.292  | 2495.393  | NM_006887 | 12147.115 | 11773.6   | AY005822  | 1328.085  | 2060.935  |
| NM_004634 | 2594.946  | 3262.011  | NM_006477 | 1522.316  | 1089.058  | NM_01812E | 9371.555  | 12038.586 |
| NM_002017 | 7513.433  | 6947.896  | NM_00288C | 5588.036  | 5060.793  | AF289022  | 2606.361  | 2978.972  |
| NM_01752E | 12373.877 | 13689.472 | NM_00067E | 5789.645  | 4612.361  | M17252    | 430.737   | 611.957   |
| NM_00238E | 10551.733 | 17701.875 | NM_00106E | 1813.076  | 1156.37   | NM_01602E | 14349.711 | 15202.15  |
| NM_00215E | 1087.909  | 1472.112  | NM_004657 | 1925.105  | 1022.392  | NM_01331E | 3509.539  | 4276.915  |
| U13223    | 8784.85   | 10145.148 | NM_006291 | 1267.201  | 1264.744  | NM_00074E | 2695.689  | 2678.376  |
| NM_01627C | 2158.445  | 2544.105  | NM_01817C | 4106.164  | 7266.813  | NM_00072E | 1164.108  | 1496.961  |
| AK001357  | 506.453   | 352.582   | NM_003867 | 839.217   | 1155.316  | NM_01865E | 1936.568  | 1866.979  |
| NM_015721 | 2758.947  | 2311.148  | AK022588  | 712.04    | 887.684   | NM_00566E | 2138.418  | 1844.85   |
| AF086298  | 980.461   | 758.28    | AL162062  | 1419.664  | 1793.578  | X89960    | 632.841   | 656.127   |
| AK027238  | 738.883   | 559.219   | NM_00317E | 9010.011  | 13230.962 | NM_00655C | 1848.167  | 1561.786  |

|           |           |           |           |           |           |           |           |           |
|-----------|-----------|-----------|-----------|-----------|-----------|-----------|-----------|-----------|
| AK025758  | 490.956   | 455.471   | NM_005030 | 14491.054 | 15086.209 | NM_005773 | 4305.911  | 4096.748  |
| S94540    | 1295.91   | 2694.841  | NM_017584 | 2495.518  | 1839.096  | NM_017644 | 5790.799  | 4790.46   |
| U79297    | 2238.624  | 2446.249  | NM_020359 | 1888.319  | 1304.881  | AB032971  | 306.198   | 576.569   |
| AK002164  | 1246.361  | 1475.494  | AB014541  | 3263.132  | 2104.698  | NM_002482 | 1515.076  | 993.444   |
| AF052122  | 2174.082  | 2398.474  | NM_002583 | 1135.675  | 915.809   | NM_001718 | 427.827   | 527.667   |
| NM_00131C | 2646.013  | 2350.721  | NM_006570 | 3320.054  | 4344.862  | AF116659  | 1846.064  | 1728.576  |
| AK026924  | 1069.844  | 843.39    | NM_020348 | 403.871   | 335.877   | NM_000317 | 24039.115 | 33692.406 |
| AL122047  | 6106.691  | 6657.596  | NM_006034 | 1274.4    | 1276.388  | NM_018376 | 6530.429  | 9896.435  |
| AF052091  | 538.481   | 628.753   | NM_005201 | 485.919   | 760.616   | NM_017615 | 825.223   | 1628.542  |
| AK024447  | 54273.395 | 51677.145 | X56807    | 58.563    | 349.766   | NM_017438 | 4324.142  | 6013.216  |
| AF086458  | 5519.914  | 5500.297  | AF174600  | 8261.807  | 9128.649  | U59209    | 3065.723  | 4256.102  |
| AF086548  | 889.581   | 1141.963  | AK001003  | 1715.06   | 1423.862  | NM_020195 | 8467.518  | 13461.481 |
| AK024350  | 970.133   | 1119.329  | NM_002800 | 16677.686 | 14772.781 | AK023824  | 5095.161  | 8169.814  |
| AK023717  | 1550.919  | 2009.618  | NM_018384 | 18612.211 | 13692.364 | AL133069  | 5256.577  | 7695.707  |
| AK023727  | 1476.443  | 1327.412  | NM_001872 | 486.807   | 643.553   | AL117574  | 866.19    | 1086.048  |
| AK025271  | 655.255   | 584.09    | AF282617  | 8463.788  | 8382.013  | AK026055  | 7087.521  | 8793.457  |
| AF086204  | 1469.67   | 1013.35   | AF157323  | 3622.112  | 3299.726  | AK024126  | 1385.543  | 1310.92   |
| NM_007021 | 546.313   | 526.551   | NM_006025 | 1205.922  | 1224.994  | NM_001516 | 6187.854  | 6724.993  |
| AK026283  | 371.902   | 368.578   | NM_005877 | 13425.907 | 11650.164 | NM_019086 | 1759.893  | 1185.496  |
| AK022076  | 329.957   | 386.327   | NM_003338 | 12127.08  | 20532.768 | NM_006670 | 2277.099  | 1293.799  |
| AK021570  | 1040.206  | 927.686   | NM_013396 | 2026.306  | 2909.433  | NM_012425 | 5377.41   | 3570.936  |
| AL360204  | 644.958   | 695.269   | NM_017752 | 1098.825  | 911.798   | NM_005816 | 2298.383  | 1754.969  |
| AK000103  | 550.449   | 695.335   | D26069    | 2418.883  | 2821.601  | NM_002750 | 9486.292  | 8684.105  |
| AK026294  | 295.276   | 325.912   | BF107577  | 1205.507  | 1212.895  | AK024134  | 4464.235  | 2725.899  |
| AF085959  | 847.655   | 1051.262  | NM_005837 | 1005.245  | 1483.747  | NM_003014 | 1891.396  | 1706.17   |
| AK023104  | 954.245   | 1027.118  | NM_016625 | 923.875   | 1089.341  | NM_018558 | 765.139   | 754.814   |
| AK022181  | 312.238   | 347.046   | NM_017493 | 429.225   | 367.896   | NM_001974 | 3939.559  | 2960.637  |
| AK026923  | 908.359   | 1009.592  | NM_006136 | 743.956   | 966.506   | NM_013957 | 969.988   | 1418.844  |
| AK021691  | 19888.525 | 20322.225 | AF237772  | 508.406   | 831.783   | NM_002468 | 9480.531  | 12713.25  |
| AK023595  | 416.06    | 581.964   | AK025934  | 450.953   | 940.742   | NM_003028 | 1861.02   | 2817.605  |
| U52832    | 411.154   | 341.918   | AJ008154  | 284.157   | 969.327   | NM_001566 | 1164.435  | 2187.737  |
| AK000141  | 5728.044  | 3700.057  | NM_006856 | 4589.013  | 5074.862  | NM_016541 | 1111.783  | 1754.112  |
| AL137758  | 2256.624  | 1552.281  | X52350    | 58721.184 | 60183.137 | NM_018548 | 8568.314  | 12953.514 |
| AK025786  | 1053.361  | 626.272   | AF071554  | 1321.585  | 1079.781  | NM_013401 | 2132.457  | 3084.868  |
| AK024188  | 1366.358  | 1645.374  | U90919    | 5378.949  | 7366.534  | NM_018238 | 5364.026  | 8470.013  |
| AK026820  | 942.915   | 901.722   | NM_006177 | 1048.604  | 1027.371  | NM_006858 | 13159.048 | 20188.078 |
| AK001716  | 2372.661  | 2682.652  | AL137286  | 5957.996  | 3487.634  | NM_001405 | 9481.819  | 12924.92  |
| NM_014095 | 345.652   | 371.591   | NM_016358 | 4057.09   | 3411.355  | NM_003880 | 1241.553  | 1643.123  |
| AK026280  | 703.824   | 1027.315  | NM_016275 | 15443.707 | 13680.832 | AF131778  | 961.663   | 1179.56   |
| AF113017  | 1249.927  | 2402.229  | NM_020418 | 6069.083  | 9762.826  | NM_001562 | 2190.978  | 2657.143  |
| AL080232  | 839.682   | 1011.34   | NM_013293 | 8732.24   | 13510.196 | NM_013278 | 1472.551  | 1868.262  |
| AK001120  | 1181.654  | 1505.937  | AF315592  | 5238.65   | 6687.07   | NM_003487 | 8282.972  | 4722.057  |
| AK022416  | 888.522   | 957.987   | AF095844  | 1126.388  | 1103.933  | NM_006887 | 10266.445 | 6119.349  |
| AK023224  | 2859.948  | 3263.838  | NM_015833 | 888.049   | 478.129   | NM_006477 | 1333.169  | 1303.622  |
| AK022442  | 646.912   | 1003.123  | NM_000986 | 51192.695 | 35417.066 | NM_002880 | 4596.935  | 4234.343  |
| AK023336  | 836.166   | 839.93    | AK026760  | 1391.036  | 1267.497  | NM_000678 | 6156.72   | 5725.582  |
| AK023771  | 440.673   | 569.583   | NM_014772 | 500.953   | 762.554   | NM_001066 | 1244.675  | 1171.905  |
| AK026873  | 5163.892  | 8796.265  | AK025248  | 275.879   | 506.838   | NM_004657 | 2844.156  | 2767.703  |
| AK026394  | 4748.591  | 4337.144  | NM_004539 | 1109.463  | 1511.569  | NM_006291 | 581.58    | 1060.015  |
| NM_005448 | 951.886   | 772.591   | NM_006428 | 2125.521  | 3664.873  | NM_018170 | 2496.765  | 1347.304  |
| AK025943  | 28824.057 | 19315.867 | NM_004280 | 1410.17   | 2472.209  | NM_003867 | 1427.965  | 943.267   |
| BG106479  | 1095.146  | 1054.456  | AF110399  | 791.569   | 1486.155  | AK022588  | 452.089   | 222.302   |
| AF130069  | 3038.867  | 2933.99   | AK027094  | 475.662   | 1111.679  | AL162062  | 1131.736  | 1706.585  |

|           |           |           |           |           |           |           |           |           |
|-----------|-----------|-----------|-----------|-----------|-----------|-----------|-----------|-----------|
| AL109669  | 4145.913  | 4848.222  | AL359596  | 1448.122  | 1276.53   | NM_003173 | 9132.508  | 11189.684 |
| AB037766  | 976.23    | 1056.318  | U79249    | 840.389   | 853.264   | NM_005030 | 12020.345 | 15603.796 |
| AK026995  | 864.986   | 937.179   | AK022114  | 1073.436  | 864.626   | NM_017584 | 3358.151  | 4868.368  |
| AL133091  | 667.753   | 804.636   | AL133585  | 1646.864  | 1408.433  | NM_020355 | 3852.443  | 5930.231  |
| BF842915  | 635.541   | 781.962   | NM_002631 | 16335.732 | 14846.728 | AB014541  | 22470.105 | 33292.871 |
| X82545    | 5369.346  | 6534.398  | NM_000775 | 831.197   | 666.395   | NM_002583 | 6689.964  | 8988.639  |
| AK024632  | 2672.735  | 4012.187  | AB032981  | 631.632   | 552.608   | NM_006570 | 17072.658 | 25383.9   |
| NM_018474 | 3810.278  | 3793.73   | BF217864  | 7318.339  | 4324.39   | NM_020348 | 1352.437  | 2399.344  |
| AK024937  | 2420.598  | 2333.344  | NM_005917 | 32185.85  | 44027.535 | NM_006034 | 8609.287  | 12658.001 |
| D17178    | 1760.345  | 1785.878  | NM_007052 | 572.035   | 1040.584  | NM_005201 | 2508.339  | 3529.454  |
| AK022094  | 1787.182  | 2324.975  | BC017044  | 801.431   | 1018.75   | NM_000092 | 255.654   | 940.961   |
| AK026695  | 1463.609  | 1670.518  | AV758498  | 2706.945  | 4231.974  | AF174600  | 6813.563  | 5081.268  |
| AK022220  | 364.268   | 409.54    | NM_020196 | 4283.665  | 6029.03   | AK001003  | 1956.401  | 1414.358  |
| AL137539  | 346.879   | 578.243   | AK024113  | 666.4     | 768.474   | NM_002800 | 19042.34  | 13890.383 |
| AK000807  | 258.001   | 303.515   | NM_018657 | 762.531   | 412.085   | NM_018384 | 16539.404 | 14230.509 |
| U84520    | 2815.383  | 3889.799  | L40410    | 3841.484  | 3206.163  | NM_001872 | 590.925   | 503.429   |
| AL133616  | 5881.154  | 4506.088  | NM_007055 | 610.031   | 788.572   | AF282617  | 10919.23  | 9066.687  |
| AK023391  | 363.398   | 446.688   | NM_016652 | 461.977   | 360.955   | AF157323  | 2919.95   | 3387.71   |
| AK026382  | 2526.691  | 2251.462  | NM_016310 | 960.229   | 1298.093  | NM_006025 | 346.049   | 3141.389  |
| AK091169  | 2575.804  | 2903.372  | AK021562  | 573.541   | 997.47    | NM_005877 | 13369.114 | 5051.046  |
| NM_014745 | 8983.521  | 9126.16   | BC006560  | 546.53    | 1470.405  | NM_003338 | 11010.865 | 15184.04  |
| AF086026  | 4799.924  | 6344.852  | NM_006298 | 447.919   | 926.083   | NM_013396 | 1264.183  | 1382.911  |
| AL133011  | 327.528   | 243.771   | AF060938  | 2239.74   | 4218.66   | NM_017752 | 1953.175  | 2819.926  |
| NM_016300 | 2074.537  | 2447.516  | NM_001973 | 911.78    | 1604.886  | D26069    | 10452.413 | 14692.243 |
| NM_015607 | 23649.867 | 26223.268 | NM_014468 | 2781.736  | 5374.249  | BF107577  | 18185.537 | 28622.336 |
| AK026955  | 2056.905  | 2591.156  | AL050015  | 1986.802  | 1426.336  | NM_005837 | 14134.597 | 19988.668 |
| AL110202  | 24642.705 | 26696.908 | AY007117  | 6943.874  | 7313.051  | NM_016625 | 8392.48   | 8525.375  |
| AK021980  | 1116.108  | 1257.116  | AF039698  | 3517.467  | 4779.438  | NM_017493 | 2142.911  | 2359.568  |
| S46402    | 1774.469  | 2294.543  | AL109679  | 912.98    | 705.365   | NM_006136 | 6258.848  | 7385.123  |
| Z83940    | 919.258   | 1017.947  | AB046828  | 5266.202  | 5419.111  | AF237772  | 2575.692  | 3941.106  |
| NM_005800 | 2434.997  | 2727.533  | AF144487  | 1414.992  | 1764.817  | AK025934  | 1181.557  | 1464.216  |
| AF019617  | 1664.531  | 2127.663  | AL137532  | 1898.48   | 1392.995  | AJ008154  | 595.018   | 1024.95   |
| AL137305  | 5033.425  | 4804.071  | AK025419  | 2751.312  | 1898.829  | NM_006856 | 4726.157  | 3470.934  |
| NM_005290 | 561.813   | 661.193   | NM_017413 | 271.877   | 634.597   | X52350    | 63774.988 | 56955.797 |
| AK025802  | 1018.608  | 1003.143  | NM_013259 | 9123.981  | 13263.103 | AF071554  | 1821.48   | 1496.565  |
| AF085973  | 689.675   | 831.225   | NM_018375 | 6854.4    | 8217.981  | U90919    | 3680.778  | 3341.179  |
| NM_018013 | 1473.645  | 1998.531  | NM_004913 | 586.62    | 589.677   | NM_006177 | 696.723   | 1160.152  |
| AK022517  | 2129.437  | 2035.801  | AK026838  | 1678.891  | 1447.052  | AL137286  | 5903.816  | 7233.07   |
| NM_000329 | 17261.342 | 16720.359 | AK022443  | 1234.028  | 1453.605  | NM_016358 | 6196.113  | 6040.15   |
| NM_001182 | 1818.584  | 2095.877  | AF086187  | 637.937   | 867.165   | NM_016275 | 18014.975 | 8354.822  |
| NM_000333 | 2287.729  | 1975.165  | AF305836  | 2915.955  | 4152.753  | NM_020418 | 5531.945  | 9093.149  |
| NM_000172 | 2118.137  | 2333.802  | AL137383  | 390.673   | 498.664   | NM_013293 | 6342.208  | 9425.48   |
| NM_002297 | 1102.467  | 907.579   | AL035295  | 564.671   | 683.02    | AF315592  | 4577.776  | 5777.293  |
| AB040968  | 2601.345  | 3400.168  | NM_018302 | 1187.808  | 2423.954  | AF095844  | 1630.752  | 2402.344  |
| U17615    | 1319.363  | 1297.066  | AK027252  | 504.399   | 1181.839  | NM_015833 | 2401.597  | 3303.137  |
| NM_005303 | 369.212   | 551.82    | AF165527  | 524.434   | 1240.001  | NM_000986 | 62247.43  | 62519.828 |
| NM_016126 | 13463.097 | 17329.457 | NM_014092 | 866.601   | 1670.844  | AK026760  | 19698.223 | 29201.777 |
| U84119    | 1317.277  | 1528.711  | AL110133  | 5128.674  | 4188.446  | NM_014772 | 2183.899  | 3123.067  |
| NM_003608 | 5321.718  | 7024.134  | AK000529  | 9225.027  | 13379.23  | AK025248  | 2008.541  | 2478.561  |
| AF302079  | 13162.364 | 13584.287 | AK027243  | 2238.252  | 2223.856  | NM_004536 | 11230.721 | 13845.059 |
| AJ224167  | 486.926   | 643.019   | AF147415  | 800.378   | 530.63    | NM_006428 | 5944.947  | 7329.044  |
| NM_000692 | 1020.096  | 1135.184  | AL049273  | 579.728   | 684.315   | NM_004280 | 10569.997 | 14361.839 |
| AF086062  | 783.421   | 802.233   | AL049984  | 226.918   | 259.758   | AF110399  | 666.424   | 606.953   |

|            |           |           |           |           |           |           |           |           |
|------------|-----------|-----------|-----------|-----------|-----------|-----------|-----------|-----------|
| L47668     | 7723.845  | 10587.496 | AK098474  | 545.241   | 1030.378  | AK027094  | 2030.136  | 1796.162  |
| NM_01792C  | 2925.885  | 4063.325  | AL117475  | 1383.884  | 1514.357  | AL359596  | 1762.166  | 1640.968  |
| AK025345   | 1292.079  | 1208.628  | NM_017535 | 2735.481  | 2924.725  | U79249    | 742.309   | 748.708   |
| D25274     | 8684.528  | 9052.436  | AL080161  | 603.249   | 489.363   | AK022114  | 1324.576  | 1069.154  |
| CY3Cy5     | 1582.535  | 171.909   | NM_004267 | 557.803   | 876.91    | AL133585  | 1321.39   | 1519.238  |
| D50373     | 1459.478  | 1967.747  | AL357212  | 238.531   | 387.265   | NM_002631 | 16689.887 | 13598.929 |
| AA488757   | 698.018   | 922.403   | AK026687  | 237.512   | 612.263   | NM_000775 | 425.604   | 650.95    |
| AA205399   | 398.526   | 505.445   | NM_017994 | 750.263   | 1579.812  | AB032981  | 530.019   | 496.352   |
| H07071     | 489.513   | 381.268   | AB023177  | 965.216   | 2143.257  | BF217864  | 6220.992  | 6661.825  |
| M25322     | 881.685   | 1205.324  | Y11609    | 1664.236  | 1277.944  | NM_005917 | 27886.365 | 21777.893 |
| ID 214180  | 492.471   | 481.204   | AJ278482  | 105.647   | 356.324   | NM_007052 | 492.019   | 396.911   |
| ID 1867426 | 1846.176  | 920.272   | NM_012122 | 10169.5   | 10681.268 | BC017044  | 918.119   | 417.692   |
| W99328     | 601.594   | 439.197   | AF009285  | 11242.662 | 9640.551  | AV758498  | 2188.018  | 1889.953  |
| AI434176   | 1557.088  | 800.626   | NM_012125 | 3252.49   | 5746.747  | NM_020196 | 3630.691  | 5947.496  |
| BE735403   | 699.271   | 506.394   | AB032363  | 408.141   | 281.057   | AK024113  | 600.864   | 1364.086  |
| NM_022552  | 4103.689  | 2342.75   | AF009294  | 4029.186  | 2124.324  | NM_018657 | 1412.124  | 1588.734  |
| NM_014389  | 3289.628  | 2403.653  | NM_001524 | 743.887   | 926.959   | L40410    | 19742.146 | 23485.027 |
| SR2        | 43693.664 | 25935.857 | AF056445  | 210.95    | 413.875   | NM_007055 | 1995.949  | 2447.617  |
| SR4        | 11724.599 | 6982.774  | AK000998  | 641.119   | 990.606   | NM_016652 | 1725.113  | 2039.814  |
| SR6        | 1598.066  | 922.187   | AK001225  | 706.301   | 765.695   | NM_01631C | 12227.194 | 14940.349 |
| SR8        | 5923.038  | 10706.723 | AK021684  | 2754.295  | 3145.392  | AK021562  | 700.313   | 945.129   |
| SR10       | 21106.467 | 4490.063  | AK001060  | 352.864   | 583.372   | BC006560  | 710.261   | 666.674   |
| CY3Cy5     | 944.788   | 110.051   | AK025112  | 853.265   | 1056.766  | NM_006296 | 609.988   | 904.063   |
| AK025175   | 293.943   | 534.649   | AK025173  | 665.155   | 1299.534  | AF060938  | 11704.944 | 12125.676 |
| NM_005811  | 3284.982  | 4026.955  | AK025430  | 443.889   | 1050.801  | NM_001973 | 2427.345  | 3852.377  |
| NM_005764  | 571.481   | 585.992   | AF117338  | 2763.928  | 2139.685  | NM_014466 | 2601.672  | 2670.447  |
| NM_016362  | 657.169   | 647.849   | AK025567  | 2946.176  | 2906.302  | AL050015  | 1313.255  | 1199.87   |
| NM_004214  | 12300.16  | 11556.191 | NM_019102 | 708.631   | 690.524   | AY007117  | 5082.058  | 4372.656  |
| NM_004329  | 6220.568  | 6151.539  | U56857    | 2718.77   | 2546.448  | AF039698  | 3986.836  | 3848.716  |
| NM_002836  | 3705.203  | 3513.204  | L43349    | 1299.681  | 1044.689  | AL109679  | 361.582   | 367.315   |
| NM_016056  | 25521.613 | 17938.438 | BE905682  | 504.26    | 452.314   | AB046828  | 6494.772  | 5233.738  |
| NM_014005  | 487.108   | 422.137   | AF086421  | 964.167   | 352.903   | AF144487  | 1641.568  | 1750.894  |
| NM_004636  | 706.841   | 720.424   | AK001612  | 886.025   | 876.833   | AL137532  | 2045.205  | 1907.19   |
| NM_004896  | 2956.008  | 2192.198  | AF161522  | 8007.548  | 9648.266  | AK025419  | 2338.969  | 1967.648  |
| NM_013372  | 439.664   | 271.619   | AF086028  | 3765.518  | 5639.026  | AK074298  | 320.767   | 260.839   |
| NM_003976  | 530.813   | 420.301   | U46119    | 562.205   | 489.338   | NM_013259 | 8749.076  | 6267.004  |
| NM_017686  | 2839.838  | 2218.289  | AK025365  | 681.381   | 1276.832  | NM_018375 | 6743.705  | 4363.889  |
| AK025612   | 3009.346  | 2378.056  | AK023445  | 278.043   | 555.621   | AK026838  | 1967.546  | 3071.661  |
| NM_012266  | 545.218   | 318.466   | AK023489  | 271.602   | 778.391   | AK022443  | 2059.831  | 3862.469  |
| NM_012203  | 688.633   | 662.784   | AK021561  | 361.956   | 1121.347  | AK023371  | 3729.758  | 5729.577  |
| NM_004736  | 5656.722  | 4547.481  | AL050145  | 47.424    | 769.78    | AF086187  | 2877.544  | 3567.68   |
| NM_006459  | 3388.034  | 2634.333  | AK025222  | 415.058   | 1051.026  | AL109784  | 870.437   | 1135.909  |
| NM_003827  | 19956.951 | 25599.637 | NM_003531 | 2837.041  | 2824.001  | AL035295  | 2400.012  | 2590.556  |
| NM_004583  | 966.626   | 893.771   | L08434    | 534.066   | 286.489   | NM_018302 | 3926.032  | 3871.426  |
| NM_001103  | 877.392   | 1182.466  | NM_017799 | 1152.502  | 869.801   | AK027252  | 1843.515  | 2380.137  |
| AF228710   | 3526.625  | 3868.801  | NM_00351C | 655.958   | 455.916   | AF165527  | 1629.722  | 2241.707  |
| NM_018399  | 874.833   | 782.595   | AL137403  | 1726.452  | 1214.043  | NM_014092 | 1016.431  | 828.649   |
| AY007131   | 17949.912 | 19198.496 | AL049348  | 657.946   | 382.782   | AL110133  | 8816.065  | 7578.711  |
| U61735     | 3493.951  | 3541.977  | NM_018534 | 672.291   | 433.592   | AL050053  | 437.478   | 328.638   |
| NM_001144  | 8883.126  | 9986.811  | AB037847  | 2202.664  | 2457.032  | AK000529  | 7176.41   | 5760.259  |
| AK023766   | 6876.901  | 6741.121  | NM_00517C | 2992.096  | 5105.566  | AK027243  | 2372.209  | 2217.968  |
| NM_001897  | 849.885   | 977       | S96437    | 1717.612  | 3004.978  | AF147415  | 1116.743  | 1206.594  |
| NM_003853  | 737.812   | 788.663   | NM_015176 | 1605.038  | 2698.441  | AK098474  | 551.317   | 676.206   |

|           |           |           |           |           |           |           |           |           |
|-----------|-----------|-----------|-----------|-----------|-----------|-----------|-----------|-----------|
| AB033109  | 1490.195  | 1438.136  | AL353939  | 978.924   | 1144.704  | AL117475  | 1245.563  | 1072.712  |
| NM_002053 | 1383.215  | 1218.359  | AL117573  | 3435.626  | 5910.41   | AL049300  | 1472.924  | 546.983   |
| NM_006889 | 926.551   | 801.783   | AL080186  | 682.523   | 324.641   | NM_017535 | 5368.273  | 7949.081  |
| NM_002438 | 729.608   | 675.461   | NM_005306 | 2693.334  | 1811.087  | NM_003887 | 2041.143  | 2542.175  |
| NM_014589 | 1058.588  | 1124.608  | NM_001646 | 1395.942  | 1224.562  | AL357212  | 857.57    | 963.62    |
| NM_000759 | 597.569   | 648.086   | AL137327  | 342.657   | 652.045   | AK026687  | 2662.799  | 3521.771  |
| AK023334  | 1172.359  | 1417.494  | AF358454  | 337.842   | 770.747   | AL117444  | 1265.321  | 1332.712  |
| NM_002563 | 17702.01  | 16452.461 | AF070637  | 96.241    | 298.049   | NM_017994 | 11707.534 | 12980.876 |
| NM_002437 | 1188.686  | 772.63    | AL137634  | 209.831   | 458.074   | AK021693  | 2517.611  | 2157.666  |
| D79991    | 4118.556  | 3430.723  | AK024863  | 987.04    | 1792.023  | Y11609    | 2242.056  | 2237.548  |
| AK022425  | 606.037   | 440.353   | AJ008135  | 1460.913  | 2418.66   | NM_012122 | 10878.958 | 9182.524  |
| NM_000054 | 1368.553  | 1180.378  | AK026908  | 175.445   | 732.537   | AF009285  | 11755.727 | 9415.218  |
| NM_014713 | 11255.775 | 8827.16   | D17110    | 358.083   | 537.089   | NM_012125 | 4184.829  | 3751.465  |
| NM_001812 | 2042.695  | 1278.731  | AL050068  | 305.544   | 457.932   | AB032363  | 618.148   | 780.281   |
| NM_014785 | 1212.186  | 1128.915  | U92025    | 493.972   | 271.764   | AK000998  | 670.247   | 1032.411  |
| NM_006033 | 1118.684  | 1053.233  | AB046766  | 884.904   | 657.168   | AK001225  | 745.329   | 777.617   |
| NM_004837 | 11346.245 | 13420.97  | AF009323  | 719.375   | 660.179   | AK021684  | 2765.924  | 2854.906  |
| NM_000370 | 1624.219  | 1845.892  | U52829    | 569.404   | 187.667   | AK001060  | 1664.406  | 825.644   |
| BE865893  | 1302.648  | 1303.713  | AK001526  | 3945.997  | 1874.185  | AK021480  | 1045.705  | 1802.406  |
| AY005822  | 1070.477  | 871.617   | AF086183  | 1110.323  | 1560.35   | AK025112  | 1917.286  | 1768.571  |
| NM_018129 | 7630.263  | 6782.7    | AK000525  | 2259.146  | 4044.184  | AK025297  | 822.783   | 930.859   |
| AF289022  | 4624.001  | 4274.504  | AL137434  | 1115.917  | 1094.011  | AK025173  | 4115.556  | 4867.973  |
| AB002326  | 512.715   | 432.355   | Z36795    | 3171.649  | 5036.291  | AK025430  | 1320.325  | 1096.131  |
| M17252    | 533.995   | 672.254   | U55186    | 652.437   | 1056.18   | AF117338  | 4622.288  | 6521.235  |
| NM_016025 | 18753.025 | 20605.051 | AL080216  | 1727.921  | 1119.773  | AK025567  | 3369.527  | 3686.808  |
| NM_013319 | 3631.275  | 4416.551  | AF038188  | 1170.057  | 1436.752  | NM_019102 | 485.722   | 591.72    |
| NM_000746 | 2550.447  | 2256.316  | D17046    | 497.398   | 907.602   | U56857    | 5693.528  | 5598.746  |
| NM_000722 | 767.561   | 809.809   | NM_017645 | 264.85    | 645.632   | L43349    | 908.884   | 840.662   |
| NM_006030 | 982.003   | 1136.977  | AJ227864  | 341.705   | 783.57    | BE905682  | 225.035   | 610.018   |
| NM_020410 | 7819.705  | 8743.511  | AF157562  | 555.462   | 837.505   | AF161522  | 7389.083  | 9271.044  |
| AF000143  | 1950.202  | 1674.469  | AK021958  | 1311.572  | 1189.726  | AF086028  | 17671.586 | 27349.574 |
| NM_014211 | 541.753   | 746.834   | M31164    | 489.813   | 1150.278  | U46119    | 2087.129  | 4519.278  |
| NM_000814 | 2596.504  | 2766.412  | AF113674  | 1747.797  | 4593.326  | AK025365  | 1531.623  | 1811.218  |
| NM_000453 | 1704.328  | 1902.933  | NM_003511 | 333.76    | 1548.219  | AK023489  | 779.362   | 889.556   |
| AL157469  | 1562.631  | 1904.599  | CY3Cy5    | 3525.308  | 102.753   | AK021561  | 3843.259  | 3154.656  |
| NM_002868 | 5384.111  | 6276.747  | H97792    | 1459.305  | 975.774   | NM_003531 | 2928.997  | 3513.491  |
| AK024100  | 8098.668  | 8907.963  | M13509    | 723.037   | 485.08    | L08434    | 609.052   | 841.342   |
| NM_005135 | 965.251   | 990.669   | X04076    | 2785.66   | 2885.567  | NM_017795 | 1272.997  | 1410.468  |
| NM_000317 | 9638.825  | 5820.821  | W95082    | 1859.041  | 1958.257  | NM_003510 | 1129.819  | 803.504   |
| NM_018376 | 5404.763  | 3995.833  | AA485362  | 1132.845  | 1013.042  | AL137403  | 2741.661  | 2506      |
| NM_017615 | 1143.043  | 974.89    | AJ222801  | 2949.578  | 2217.397  | AL049348  | 821.24    | 1093.614  |
| NM_017438 | 6148.518  | 5811.748  | W72207    | 3466.657  | 2407.387  | NM_018534 | 1131.318  | 1278.09   |
| NM_020195 | 14643.318 | 16636.396 | U67733    | 498.962   | 320.916   | AB037847  | 2897.519  | 3360.089  |
| AK023824  | 4241.686  | 4601.618  | AI690184  | 19848.893 | 17405.438 | NM_005170 | 2902      | 3188.11   |
| AL133069  | 5491.192  | 6319.772  | T48692    | 800.691   | 510.051   | S96437    | 1618.313  | 2561.657  |
| AL117574  | 1110.419  | 997.436   | AA927490  | 1741.433  | 1286.837  | NM_015176 | 3185.36   | 4251.18   |
| AK026110  | 22.65     | 404.33    | NM_001824 | 53335.035 | 49308.43  | AL353939  | 1203.073  | 1594.918  |
| AK026055  | 9435.3    | 9161.851  | SR5       | 6693.986  | 4983.849  | AL117573  | 4216.876  | 3828.013  |
| AK024126  | 1544.834  | 1513.36   | SR7       | 5372.96   | 30326.41  | AL080186  | 939.146   | 913.964   |
| NM_001516 | 6052.82   | 5903.063  | SR9       | 21419.91  | 3036.073  | NM_005306 | 45462.359 | 37855.691 |
| NM_002744 | 3440.651  | 3182.8    | CY3Cy5    | 3468.596  | 299.573   | NM_001646 | 23973.281 | 26878.592 |
| NM_015917 | 17138.695 | 17126.941 | NM_017818 | 3193.201  | 2449.563  | AL137327  | 3547.621  | 5120.394  |
| NM_020397 | 1698.119  | 1598.318  | NM_020433 | 643.622   | 369.449   | AF358454  | 5815.62   | 7468.22   |

|             |           |           |           |           |           |           |           |           |
|-------------|-----------|-----------|-----------|-----------|-----------|-----------|-----------|-----------|
| NM_000061   | 1663.479  | 1279.014  | NM_001767 | 4629.021  | 3960.239  | AK026090  | 1745.417  | 1435.75   |
| AB046859    | 4280.402  | 4019.917  | AF028823  | 4719.108  | 4516.972  | AL137634  | 949.689   | 1381.636  |
| NM_005109   | 12900.018 | 11566.451 | NM_004295 | 13484.197 | 11559.965 | AK024863  | 3179.653  | 2770.236  |
| NM_004828   | 2486.697  | 2280.536  | NM_002087 | 4959.527  | 4602.74   | AJ008135  | 41321.855 | 17817.715 |
| AB011540    | 1703.22   | 1593.457  | AB023154  | 765.263   | 441.315   | AK026908  | 6068.468  | 4152.831  |
| NM_000040   | 1226.248  | 1099.608  | NM_014585 | 4025.56   | 3023.492  | AL050068  | 703.002   | 541.107   |
| NM_004631   | 4497.162  | 5688.846  | NM_014564 | 716.459   | 338.043   | AB046766  | 820.905   | 908.263   |
| NM_004736   | 5205.646  | 3693.464  | NM_013441 | 3201.416  | 2172.443  | AF009323  | 782.047   | 734.385   |
| NM_006459   | 3989.753  | 3183.985  | NM_014421 | 882.916   | 751.771   | U52829    | 409.455   | 602.753   |
| AA427949    | 744.122   | 484.39    | AB033028  | 1137.715  | 1233.803  | Z25437    | 479.11    | 611.606   |
| D50373      | 1431.217  | 1507.865  | NM_003833 | 9590.21   | 8355.375  | AK001526  | 5396.434  | 5129.887  |
| AA488757    | 1006.741  | 1192.471  | AK000868  | 4226.729  | 2709.26   | AF086183  | 925.871   | 1083.844  |
| AA205399    | 502.525   | 559.791   | NM_001233 | 3191.527  | 2603.828  | AK000525  | 8201.198  | 6116.218  |
| M25322      | 477.109   | 526.722   | NM_001234 | 1141.025  | 823.419   | AL137434  | 1579.681  | 2241.129  |
| AA436187    | 308.477   | 359.566   | BF679789  | 2815.081  | 1766.292  | Z36795    | 2251.26   | 2298.061  |
| H-L 27586 I | 4509.214  | 6100.676  | AB007859  | 1046.259  | 1034.997  | AL080216  | 1967.242  | 1805.954  |
| ID 214180   | 744.226   | 820.197   | NM_006754 | 626.554   | 406.193   | AF038188  | 12595.82  | 11185.906 |
| ID 1867426  | 2646.546  | 2422.044  | NM_001127 | 2959.765  | 3133.267  | AJ227888  | 625.549   | 662.593   |
| ID 396450   | 457.554   | 596.968   | NM_012430 | 2660.044  | 2422.451  | D17046    | 886.766   | 759.649   |
| W99328      | 1124.56   | 1448.295  | NM_003917 | 9864.831  | 8075.051  | NM_017645 | 10009.001 | 7751.195  |
| AI434176    | 2435.791  | 1874.315  | NM_007077 | 1306.34   | 1200.801  | AF157562  | 4348.622  | 3651.4    |
| BE735403    | 936.858   | 761.75    | NM_002956 | 2016.323  | 1974.713  | AK021958  | 5870.468  | 6442.805  |
| NM_022552   | 5614.955  | 4888.677  | AB018739  | 1181.395  | 969.665   | M31164    | 796.987   | 986.243   |
| NM_014389   | 5061.013  | 4696.732  | NM_006750 | 18197.002 | 15694.128 | AF113674  | 12913.299 | 11479.408 |
| NM_001718   | 714.314   | 486.131   | NM_020164 | 4989.619  | 4233.408  | NM_003511 | 776.8     | 2054.804  |
| AF116659    | 1393.775  | 1411.823  | NM_001481 | 862.149   | 833.752   | CY3Cy5    | 7860.349  | 505.121   |
| D79991      | 3233.783  | 2361.892  | U30872    | 1454.855  | 954.314   | M13509    | 872.009   | 850.843   |
| AK022425    | 456.85    | 389.454   | NM_020469 | 5181.091  | 4342.682  | X04076    | 3698.587  | 2994.727  |
| NM_000054   | 1002.162  | 652.307   | NM_014734 | 2149.006  | 1824.941  | W95082    | 2035.991  | 1767.667  |
| NM_014713   | 10175.652 | 7886.288  | NM_002289 | 651.852   | 530.629   | AA485362  | 1482.857  | 1549.458  |
| NM_001812   | 1677.42   | 935.895   | AK026408  | 1869.426  | 1327.07   | AJ222801  | 2826.884  | 3298.237  |
| NM_014785   | 1209.731  | 770.146   | NM_005025 | 1666.75   | 1230.785  | W72207    | 2846.885  | 2931.677  |
| NM_005811   | 2370.094  | 1688.852  | NM_001056 | 1584.031  | 1304.017  | BI772354  | 4027.848  | 6081.105  |
| NM_005764   | 365.982   | 241.816   | AY026461  | 2363.463  | 2274.127  | AA733033  | 2334.601  | 3152.98   |
| NM_016362   | 283.713   | 363.1     | AK025708  | 3273.651  | 3215.412  | AA583574  | 1978.058  | 1656.07   |
| NM_004214   | 6376.627  | 4891.477  | NM_000405 | 541.913   | 520.625   | AI690184  | 25115.445 | 22330.26  |
| NM_004329   | 4744.955  | 4182.413  | NM_005564 | 36397.871 | 32186.652 | AA927490  | 1344.815  | 1021.815  |
| NM_002836   | 3368.436  | 2652.223  | NM_004508 | 4827.228  | 5922.433  | NM_001824 | 56032.172 | 63798.051 |
| NM_020167   | 373.775   | 294.415   | NM_006405 | 6210.188  | 5921.29   | SR5       | 6583.164  | 4493.09   |
| AL049963    | 20715.102 | 16739.697 | AJ245946  | 817.793   | 370.912   | SR7       | 5177.964  | 30485.418 |
| NM_016058   | 30822.811 | 29142.467 | AL137619  | 2184.765  | 1757.662  | SR9       | 18027.586 | 2219.26   |
| NM_014005   | 862.68    | 551.907   | AF319476  | 1318.747  | 1378.468  | CY3Cy5    | 4472.795  | 190.555   |
| NM_004636   | 845.718   | 955.497   | AK001913  | 5113.909  | 4702.626  | NM_017818 | 4442.416  | 4048.758  |
| AK022603    | 666.506   | 830.786   | NM_017737 | 1094.238  | 1154.878  | AF028823  | 6958.533  | 6926.014  |
| NM_004896   | 4949.564  | 5400.671  | NM_004292 | 1810.329  | 1532.614  | NM_004295 | 23280.633 | 26044.15  |
| NM_013372   | 671.411   | 532.914   | NM_015484 | 5135.487  | 5256.856  | NM_002087 | 5619.851  | 7095.86   |
| NM_003976   | 449.859   | 674.805   | NM_018046 | 1927.76   | 1966.144  | AB023154  | 702.652   | 1066.482  |
| NM_017688   | 3804.839  | 3955.106  | NM_013316 | 1720.633  | 1568.38   | NM_014585 | 2318.234  | 2601.149  |
| AK025612    | 3857.119  | 5229.693  | M20701    | 8910.058  | 7624.704  | AF200815  | 605.801   | 752.67    |
| NM_012268   | 490.488   | 627.987   | NM_002912 | 1189.607  | 1110.172  | NM_013441 | 2682.533  | 2096.397  |
| NM_012203   | 1026.941  | 1111.545  | NM_013284 | 3921.268  | 3857.108  | NM_014421 | 816.923   | 698.711   |
| J03077      | 26427.979 | 31531.303 | NM_006739 | 3410.831  | 3945.815  | M60499    | 1466.418  | 1115.781  |
| J03048      | 8927.506  | 4453.954  | NM_013274 | 5348.967  | 5362.395  | NM_003833 | 9323.408  | 6970.824  |

|           |           |           |           |           |           |           |           |           |
|-----------|-----------|-----------|-----------|-----------|-----------|-----------|-----------|-----------|
| AL157469  | 1257.607  | 1094.078  | AL050187  | 1010.321  | 1115.181  | AK000868  | 3745.733  | 2280.688  |
| NM_00286E | 3408.255  | 3831.789  | NM_007127 | 966.752   | 951.906   | NM_001233 | 2750.759  | 2053.175  |
| AK024100  | 6065.274  | 5077.902  | NM_012387 | 14100.858 | 12341.047 | NM_001234 | 860.986   | 502.988   |
| NM_005135 | 598.34    | 493.133   | NM_014735 | 1711.075  | 1521.019  | BF679789  | 1011.14   | 887.173   |
| NM_003827 | 12831.954 | 8841.329  | NM_004252 | 20158.461 | 19750.189 | NM_001127 | 3742.233  | 4829.253  |
| NM_004583 | 717.299   | 379.064   | AF172929  | 14088.309 | 12633.165 | NM_01243C | 3533.502  | 3563.046  |
| NM_001103 | 457.816   | 395.823   | NM_00639E | 12722.246 | 12284.438 | NM_003917 | 16712.777 | 20179.664 |
| AF228710  | 2179.599  | 1531.302  | NM_003833 | 4766.313  | 3937.369  | NM_007077 | 1328.847  | 1754.267  |
| NM_01839E | 566.333   | 323.185   | AK000868  | 3461.406  | 2602.097  | NM_00295E | 2117.11   | 2730.263  |
| AY007131  | 10379.166 | 8110.128  | NM_001233 | 2350.681  | 2383.321  | AB018739  | 888.727   | 1144.52   |
| U61735    | 2573.688  | 1785.297  | BF679789  | 1301.021  | 1676.9    | NM_00675C | 17256.223 | 17250.631 |
| NM_001144 | 7025.387  | 4457.325  | H97792    | 1450.306  | 1327.646  | NM_020164 | 3985.019  | 3011.67   |
| AK023766  | 5345.185  | 2752.911  | L33404    | 865.274   | 450.63    | AK023521  | 3643.285  | 2676.384  |
| NM_001897 | 577.116   | 413.809   | M13509    | 674.647   | 448.777   | NM_014267 | 20904.701 | 17223.381 |
| NM_003853 | 518.501   | 248.326   | X04076    | 2979.913  | 3504.022  | NM_001481 | 640.802   | 361.84    |
| AB033109  | 1187.849  | 883.422   | W95082    | 1804.162  | 2114.739  | U30872    | 843.916   | 942.415   |
| NM_002053 | 1144.105  | 679.471   | AA485362  | 1255.482  | 1174.414  | NM_02046E | 4002.824  | 3074.072  |
| NM_00688E | 756.602   | 513.94    | AJ222801  | 2845.625  | 2519.488  | NM_014734 | 1799.774  | 1266.937  |
| NM_00243E | 700.452   | 360.96    | W72207    | 2496.591  | 2119.418  | AK026408  | 1287.625  | 1065.486  |
| NM_01458E | 905.183   | 588.775   | BI772354  | 3381.563  | 3209.034  | NM_00502E | 1509.853  | 839.366   |
| NM_00075E | 520.708   | 311.273   | AA733033  | 3571.878  | 3306.275  | NM_00105E | 1589.954  | 1711.576  |
| AK023334  | 990.85    | 823.944   | AA583574  | 1098.949  | 1328.16   | NM_00040E | 1042.279  | 1614.672  |
| NM_002563 | 15429.753 | 13046.722 | AI690184  | 18696.809 | 17770.041 | NM_005564 | 41851.941 | 38403.156 |
| NM_002437 | 1446.824  | 1369.615  | AA927490  | 2010.719  | 1546.265  | NM_00450E | 3313.444  | 3582.07   |
| AK023573  | 3222.732  | 3669.403  | NM_014734 | 1445.686  | 1181.281  | NM_00640E | 6537.042  | 5531.809  |
| NM_00273C | 7336.685  | 6761.211  | NM_00228E | 636.552   | 577.094   | AJ245946  | 383.784   | 418.294   |
| NM_00482E | 1504.761  | 1179.875  | AK026408  | 1459.39   | 1135.644  | NM_00674E | 1003.203  | 775.192   |
| AB011540  | 1077.873  | 1131.479  | NM_01781E | 3055.38   | 3496.065  | NM_004694 | 423.27    | 445.453   |
| NM_00004C | 696.494   | 730.185   | NM_00429E | 12045.186 | 12222.664 | AL137619  | 1207.94   | 1013.406  |
| NM_004631 | 2510.424  | 2116.809  | NM_002087 | 5499.485  | 5978.141  | NM_00430C | 8337.631  | 5674.201  |
| NM_006033 | 740.092   | 677.829   | AB023154  | 631.558   | 472.074   | NM_017737 | 1861.302  | 2726.679  |
| NM_004837 | 6532.41   | 6177.03   | NM_001714 | 557.164   | 342.946   | NM_01804E | 1972.096  | 2782.346  |
| NM_00037C | 1234.617  | 1174.393  | NM_01458E | 2397.212  | 2443.565  | NM_01331E | 2212.906  | 2460.429  |
| BE865893  | 869.332   | 1030.505  | AF200815  | 757.184   | 535.622   | M20701    | 10541.577 | 10521.962 |
| NM_003123 | 12635.83  | 10403.608 | NM_014421 | 1196.016  | 758.242   | NM_002912 | 991.676   | 1346.006  |
| AY005822  | 703.016   | 393.488   | AB033028  | 971.8     | 757.152   | NM_013284 | 3383.063  | 3043.995  |
| NM_01812E | 5224.088  | 3719.912  | NM_01243C | 2620.455  | 2627.899  | NM_00673E | 3188.634  | 2508.512  |
| AF289022  | 3307.249  | 2426.307  | NM_003917 | 12220.926 | 10749.803 | NM_013274 | 4208.248  | 3261.355  |
| AB002326  | 404.681   | 307.365   | NM_007077 | 1446.403  | 1137.983  | AL050187  | 1270.862  | 924.96    |
| M17252    | 316.332   | 302.026   | NM_00295E | 2225.814  | 2398.677  | NM_012387 | 12506.584 | 11474.892 |
| NM_01602E | 12292.009 | 7810.718  | AB018739  | 1115.652  | 1066.885  | NM_01473E | 1381.357  | 1135.344  |
| NM_01331E | 2792.513  | 1609.047  | NM_00675C | 21642.504 | 23834.535 | NM_004252 | 17702.871 | 17217.121 |
| NM_00074E | 2107.28   | 1209.276  | NM_020164 | 6015.115  | 5228.981  | AF172929  | 12239.593 | 8635.207  |
| NM_000722 | 440.556   | 283.758   | AK023521  | 5641.819  | 4968.216  | NM_00639E | 13060.043 | 9868.666  |
| NM_00603C | 822.887   | 564.029   | NM_014267 | 22039.135 | 20640.898 | AK025655  | 2576.544  | 1932.677  |
| NM_02041C | 5795.24   | 4120.894  | NM_001481 | 1034.714  | 778.975   | NM_00405E | 1617.696  | 913.153   |
| AF000143  | 1593.9    | 889.651   | U30872    | 1860.735  | 1791.589  | NM_001233 | 3152.104  | 5108.205  |
| NM_000814 | 1768.263  | 1238.767  | AF111783  | 3093.416  | 2410.652  | NM_001234 | 1035.495  | 1331.434  |
| NM_000453 | 1497.234  | 1064.95   | NM_00263E | 1324.841  | 1655.583  | BF679789  | 1786.454  | 2431.006  |
| NM_022552 | 4716.148  | 4896.824  | NM_00639E | 7662.095  | 7813.333  | L33404    | 521.665   | 760.263   |
| NM_01438E | 3916.23   | 4460.679  | AK025655  | 2764.746  | 3242.127  | M13509    | 846.236   | 740.958   |
| NM_00171E | 622.28    | 580.443   | NM_00405E | 2077.747  | 2304.233  | X04076    | 3359.575  | 3244.165  |
| AF116659  | 934.595   | 735.015   | NM_00105E | 1130.914  | 1210.32   | W95082    | 1628.408  | 1376.235  |



|             |           |           |           |           |           |           |           |           |
|-------------|-----------|-----------|-----------|-----------|-----------|-----------|-----------|-----------|
| NM_000317   | 11596.237 | 9285.048  | AY026461  | 2918.55   | 3285.756  | AA485362  | 1091.629  | 1007.16   |
| NM_018376   | 5045.071  | 4546.658  | AK025708  | 3473.829  | 3525.948  | AJ222801  | 2955.857  | 2129.043  |
| NM_017615   | 844.96    | 662.591   | NM_000405 | 806.835   | 618.724   | W72207    | 2850.564  | 2140.441  |
| NM_017438   | 4857.705  | 4134.639  | NM_005564 | 43643.227 | 42565.156 | BI772354  | 3405.01   | 3355.381  |
| U59209      | 5692.976  | 5585.52   | NM_004508 | 5505.274  | 5682.09   | AA733033  | 2682.571  | 2387.151  |
| NM_020195   | 9460.359  | 10217.635 | NM_006405 | 8942.314  | 8601.604  | AA583574  | 1750.39   | 1479.952  |
| AK023824    | 3055.723  | 3053.876  | NM_006749 | 1416.623  | 1432.072  | AI690184  | 16502.076 | 14062.7   |
| AL133069    | 4321.598  | 3702.963  | NM_004694 | 1114.497  | 1006.431  | AA927490  | 1402.151  | 1186.449  |
| AL117574    | 742.136   | 547.966   | AL137619  | 2112.41   | 2016.569  | NM_001824 | 55147.375 | 62374.781 |
| AK026055    | 7784.656  | 5909.126  | NM_001824 | 17632.236 | 15383.872 | NM_005052 | 10646.358 | 6928.564  |
| AK024126    | 1167.917  | 843.44    | BF038439  | 964.709   | 755.713   | AK026408  | 2160.04   | 2926.09   |
| NM_001516   | 4221.273  | 2843.269  | AF319476  | 2174.977  | 2882.594  | NM_005025 | 2186.739  | 3084.608  |
| NM_002744   | 2668.842  | 1260.712  | AK001913  | 5435.023  | 6910.353  | NM_006307 | 623.666   | 1451.304  |
| NM_015917   | 11845.147 | 8115.809  | NM_017737 | 1262.132  | 1295.465  | M74782    | 259.482   | 1201.033  |
| NM_020397   | 1053.324  | 464.309   | NM_004292 | 1958.883  | 1915.701  | NM_017818 | 3214.796  | 4075.15   |
| NM_000061   | 1266.322  | 498.351   | NM_015484 | 5902.541  | 6316.49   | NM_020433 | 469.45    | 553.05    |
| AB046859    | 2504.772  | 1444.853  | NM_018046 | 2526.956  | 2542.28   | NM_001767 | 5798.708  | 5326.178  |
| NM_005109   | 8379.119  | 4699.588  | NM_013316 | 1564.577  | 1647.9    | AF028823  | 6688.587  | 6389.959  |
| NM_013372   | 395.17    | 314.616   | M20701    | 8219.23   | 9185.342  | NM_004295 | 11769.679 | 10853.551 |
| NM_003976   | 368.301   | 685.899   | NM_006739 | 4214.901  | 4832.022  | NM_002087 | 4838.84   | 4245.298  |
| NM_017688   | 2277.857  | 2124.237  | NM_013274 | 5577.937  | 5554.423  | AB023154  | 494.363   | 245.693   |
| AK025612    | 3546.899  | 4791.155  | AL050187  | 1074.032  | 1333.05   | NM_014585 | 2055.74   | 2163.542  |
| NM_012268   | 662.623   | 638.639   | NM_012387 | 15079.735 | 13515.836 | AF200815  | 465.876   | 732.157   |
| NM_012203   | 930.25    | 809.008   | NM_014735 | 1673.129  | 1772.474  | NM_013441 | 2754.107  | 1976.814  |
| NM_004736   | 4530.777  | 4400.31   | NM_004252 | 19269.41  | 23999.635 | NM_014421 | 871.382   | 516.2     |
| NM_006895   | 259.267   | 296.104   | AF172929  | 14416.28  | 17971.549 | M60499    | 1381.505  | 912.527   |
| NM_006459   | 3493.083  | 4158.711  | M60499    | 1381.91   | 1624.814  | NM_003040 | 117.567   | 1441.609  |
| D50373      | 615.314   | 950.303   | NM_003833 | 8434.294  | 7934.955  | NM_004300 | 8765.395  | 12333.226 |
| AA488757    | 699.891   | 746.102   | AK000868  | 4064.925  | 3333.603  | AB007859  | 870.286   | 1196.347  |
| AA205399    | 194.407   | 486.196   | NM_001233 | 3014.044  | 4493.524  | NM_001127 | 2747.63   | 2620.966  |
| M25322      | 629.515   | 644.051   | NM_001234 | 772.385   | 1051.271  | NM_012430 | 2774.722  | 2409.456  |
| H-L 27586 I | 3102.369  | 2820.584  | BF679789  | 1364.317  | 1285.489  | NM_003917 | 12017.248 | 11982.412 |
| ID 1867426  | 1753.543  | 1213.022  | H97792    | 1982.877  | 1458.111  | NM_007077 | 727.857   | 1040.871  |
| W99328      | 759.042   | 448.255   | L33404    | 757.206   | 663.461   | NM_002956 | 1819.839  | 1516.771  |
| AI434176    | 1396.569  | 831.176   | M13509    | 839.315   | 721.991   | AB018739  | 911.942   | 967.745   |
| H08563      | 173.902   | 189.564   | X04076    | 3486.839  | 4282.039  | NM_006750 | 15791.923 | 12292.812 |
| BE735403    | 541.983   | 408.189   | W95082    | 2227.496  | 2540.242  | NM_020164 | 4063.106  | 2689.781  |
| NM_002438   | 573.028   | 783.694   | AA485362  | 1452.224  | 1613.672  | AK023521  | 4216.69   | 3088.164  |
| NM_014589   | 1297.118  | 1433.139  | AJ222801  | 3531.7    | 2752.876  | NM_014267 | 20307.338 | 14372.176 |
| NM_000759   | 743.947   | 818.909   | W72207    | 2742.427  | 2186.846  | NM_001481 | 644.443   | 537.497   |
| AK023334    | 885.912   | 1068.691  | BI772354  | 4370.357  | 3600.164  | U30872    | 1034.34   | 545.79    |
| NM_002563   | 13884.416 | 12844.973 | AA733033  | 4203.798  | 3393.177  | NM_002639 | 1035.541  | 664.32    |
| NM_002437   | 942.745   | 834.645   | AA583574  | 1751.088  | 1710.447  | NM_006398 | 11201.337 | 9948.891  |
| D79991      | 3782.429  | 3385.186  | AI690184  | 16792.092 | 18955.441 | AK025655  | 2618.266  | 2735.152  |
| AK022425    | 442.618   | 445.576   | AA927490  | 2435.193  | 3493.178  | NM_004056 | 1370.424  | 1317.136  |
| NM_000054   | 1108.015  | 1058.873  | NM_001481 | 944.247   | 520.385   | NM_001056 | 904.453   | 1312.491  |
| NM_014713   | 10091.384 | 9679.323  | U30872    | 1164.88   | 992.496   | AY026461  | 3022.789  | 3157.591  |
| NM_001812   | 1946.593  | 1483.17   | AF111783  | 521.778   | 433.4     | AK025708  | 3532.805  | 3582.144  |
| NM_014785   | 1230.115  | 1281.819  | NM_002639 | 1194.514  | 1183.661  | NM_005564 | 30460.379 | 26740.836 |
| NM_005811   | 2165.607  | 2039.502  | NM_014734 | 1302.231  | 1190.97   | NM_004508 | 3213.724  | 3190.893  |
| NM_005764   | 259.507   | 182.291   | NM_002289 | 728.186   | 526.589   | NM_006405 | 6123.104  | 5316.471  |
| NM_004214   | 10589.034 | 11365.91  | AK026408  | 2101.782  | 3280.675  | NM_006749 | 1041.748  | 801.039   |
| NM_004329   | 4706.257  | 5091.461  | NM_005025 | 1487.875  | 1587.948  | NM_005639 | 856.735   | 684.562   |

|           |           |           |           |           |           |           |           |           |
|-----------|-----------|-----------|-----------|-----------|-----------|-----------|-----------|-----------|
| NM_00283E | 3080.066  | 3176.894  | M74782    | 72.65     | 883.105   | NM_004694 | 995.442   | 758.232   |
| NM_01605E | 27954.021 | 29707.869 | NM_01781E | 3539.277  | 3661.622  | NM_000324 | 725.773   | 716.027   |
| NM_01400E | 772.324   | 830.227   | NM_02043E | 1255.946  | 1413.146  | AL137619  | 1579.915  | 1189.392  |
| NM_00463E | 685.617   | 988.161   | AF028823  | 6391.034  | 7363.574  | NM_001824 | 55923.484 | 55845.273 |
| NM_00489E | 3050.827  | 2241.979  | NM_00429E | 18603.637 | 18030.707 | NM_00505E | 11746.113 | 11016.8   |
| NM_00603C | 886.827   | 936.274   | NM_002087 | 6252.258  | 6421.868  | BF038439  | 223.023   | 623.297   |
| NM_02041C | 5751.147  | 6892.082  | AB023154  | 721.105   | 523.353   | AF319476  | 2347.461  | 2237.352  |
| AF000143  | 1632.149  | 1612.144  | NM_001714 | 426.953   | 341.71    | AK001913  | 5869.174  | 6133.175  |
| NM_014211 | 501.785   | 457.469   | NM_01458E | 2606.755  | 1857.544  | NM_017737 | 1244.135  | 1284.072  |
| NM_000814 | 1905.321  | 2267.934  | AF200815  | 860.254   | 403.022   | NM_00429E | 1704.688  | 1658.277  |
| NM_00045E | 1247.229  | 1296.697  | NM_013441 | 3722.022  | 3592.253  | NM_015484 | 6134.1    | 5124.763  |
| J03077    | 29319.445 | 29190.779 | NM_014421 | 1297.799  | 784.015   | NM_01804E | 1951.99   | 1733.202  |
| J03048    | 10349.263 | 5233.446  | NM_00674E | 982.899   | 834.478   | NM_01331E | 1895.121  | 1570.474  |
| AL157469  | 1438.389  | 1349.268  | NM_004694 | 437.829   | 395.385   | M20701    | 9092.823  | 8188.711  |
| NM_00286E | 4042.304  | 4329.54   | AL137619  | 541.139   | 491.621   | NM_00291E | 1018.901  | 1164.551  |
| AK024100  | 6283.666  | 6095.93   | NM_00361E | 715.679   | 804.953   | NM_013284 | 3411.227  | 3217.513  |
| NM_00513E | 808.619   | 775.119   | NM_00430C | 11952.896 | 9677.346  | NM_00673E | 3576.051  | 2879.852  |
| NM_003827 | 14345.758 | 14777.351 | NM_003917 | 15822.588 | 14083.552 | NM_013274 | 4848.109  | 3597.786  |
| NM_00458E | 591.741   | 642.294   | NM_007077 | 1677.508  | 1494.904  | AL050187  | 1082.83   | 1058.676  |
| NM_001103 | 540.716   | 603.876   | NM_00295E | 2482.127  | 2224.345  | NM_007127 | 940.517   | 717.455   |
| AF228710  | 2829.272  | 2552.532  | AB018739  | 1457.061  | 967.983   | NM_00425E | 18362.764 | 14819.155 |
| NM_01839E | 564.502   | 762.412   | NM_00675C | 21167.66  | 17846.588 | AF172929  | 12627.611 | 8501.877  |
| AY007131  | 12881.851 | 13877.83  | NM_020164 | 5549.415  | 4792.921  | M60499    | 1397.547  | 1348.251  |
| U61735    | 2695.145  | 2549.129  | AK023521  | 4965.773  | 4742.114  | NM_00036E | 671.576   | 646.575   |
| NM_001144 | 6758.377  | 6546.843  | NM_014267 | 23591.59  | 20676.986 | NM_00383E | 5976.047  | 6607.074  |
| NM_001897 | 628.023   | 519.007   | AL050187  | 878.388   | 837.416   | AK000868  | 3903.124  | 3571.257  |
| NM_00385E | 505.831   | 712.062   | NM_012387 | 11990.862 | 12893.946 | NM_00123E | 2533.438  | 2685.754  |
| AB033109  | 1391.669  | 1420.788  | NM_01473E | 1331.247  | 1613.2    | NM_001234 | 719.99    | 720.316   |
| NM_00205E | 952.821   | 1035.694  | NM_00425E | 18398.895 | 23040.725 | BF679789  | 1171.66   | 1482.5    |
| NM_00688E | 849.045   | 774.811   | AF172929  | 12167.642 | 12270.909 | H97792    | 1206.382  | 1262.919  |
| NM_002744 | 2853.444  | 2870.811  | NM_00639E | 12642.336 | 22762.963 | L33404    | 504.699   | 311.943   |
| NM_015917 | 13962.872 | 14516.731 | NM_00136E | 589.014   | 184.969   | M13509    | 788.444   | 804.84    |
| NM_020397 | 1160.816  | 1185.327  | NM_00405E | 2428.658  | 2411.919  | X04076    | 3363.646  | 2461.049  |
| NM_000061 | 1297.221  | 1305.277  | NM_00105E | 1098.774  | 880.158   | W95082    | 1620.509  | 1458.759  |
| AB046859  | 3414.824  | 3560.551  | NM_005564 | 42953.285 | 35585.133 | AA485362  | 1464.028  | 1157.17   |
| NM_00510E | 10216.297 | 9753.604  | NM_00450E | 4947.354  | 4681.071  | AJ222801  | 3440.613  | 3791.852  |
| AK023573  | 3135.592  | 3279.076  | NM_00640E | 11456.643 | 20239.943 | W72207    | 2913.159  | 2866.937  |
| NM_00273C | 8076.437  | 7650.921  | AJ245946  | 614.842   | 521.627   | BI772354  | 3926.666  | 3255.027  |
| NM_00482E | 1921.895  | 2040.762  | NM_00239C | 940.456   | 1167.697  | AA733033  | 2480.42   | 2496.478  |
| AB011540  | 1139.984  | 1230.403  | NM_01491C | 1698.275  | 1817.781  | AA583574  | 2148.432  | 1631.229  |
| NM_00004C | 831.077   | 763.142   | AK001064  | 3144.917  | 3277.024  | AI690184  | 15362.474 | 12993.948 |
| NM_004631 | 2676.006  | 3122.224  | AB029031  | 5057.937  | 5927.525  | T48692    | 985.285   | 525.113   |
| NM_00603E | 887.156   | 1367.118  | NM_001294 | 5455.216  | 5875.682  | AA927490  | 1483.677  | 985.881   |
| NM_004837 | 8247.182  | 9191.791  | NM_014241 | 5864.919  | 5814.027  | NM_001481 | 543.745   | 336.661   |
| NM_00037C | 1545.347  | 1636.279  | AL122083  | 2609.163  | 2525.291  | U30872    | 860.835   | 874.256   |
| BE865893  | 919.882   | 852.028   | NM_00505E | 16697.137 | 14321.553 | AF111783  | 347.73    | 426.617   |
| NM_00312E | 14280.531 | 15862.589 | AF319476  | 2017.953  | 1924.998  | NM_00263E | 1174.271  | 1111.666  |
| AY005822  | 722.847   | 701.862   | NM_01804E | 2831.427  | 2945.546  | NM_014734 | 1672.685  | 2033.487  |
| NM_01812E | 6299.221  | 6855.644  | NM_01331E | 2158.885  | 1831.508  | NM_00228E | 682.69    | 676.184   |
| AF289022  | 3646.502  | 4273.869  | M20701    | 8566.941  | 7937.667  | AK026408  | 1597.357  | 1808.556  |
| M17252    | 534.48    | 712.256   | NM_00291E | 1513.375  | 1221.952  | NM_00502E | 1718.141  | 1401.89   |
| NM_01602E | 14893.157 | 13474.058 | NM_013284 | 4387.657  | 4058.693  | NM_01781E | 3385.393  | 3165.861  |
| NM_01331E | 3518.622  | 4245.679  | NM_00673E | 4806.241  | 4732.601  | NM_02043E | 483.61    | 544.987   |

|           |           |           |           |           |           |           |           |           |
|-----------|-----------|-----------|-----------|-----------|-----------|-----------|-----------|-----------|
| NM_00074E | 2213.699  | 2016.881  | NM_013274 | 5622.48   | 6877.031  | NM_001767 | 5326.241  | 4712.106  |
| NM_000722 | 238.375   | 505.246   | AK024955  | 1550.262  | 1599.206  | AF028823  | 6723.974  | 5912.419  |
| NM_016116 | 353.656   | 522.46    | L23206    | 1006.438  | 1099.65   | NM_00429E | 22429.35  | 24212.594 |
| NM_01865E | 2953.51   | 2461.631  | NM_012192 | 1757.701  | 1972.428  | NM_002087 | 5005.195  | 4449.173  |
| NM_005663 | 3214.31   | 3051.778  | NM_006293 | 2277.097  | 2984.565  | NM_01458E | 2712.737  | 2331.473  |
| X89960    | 664.555   | 673.076   | NM_007229 | 2262.577  | 2644.847  | AF200815  | 1050.661  | 1167.35   |
| NM_00655C | 2034.546  | 1745.424  | AB011105  | 1586.716  | 1527.384  | NM_014564 | 954.642   | 866.955   |
| NM_005773 | 3954.793  | 4673.133  | NM_002213 | 601.201   | 282.457   | NM_013441 | 3028.185  | 2010.111  |
| NM_017644 | 5905.778  | 7629.407  | NM_004814 | 8410.146  | 6961.25   | NM_014421 | 716.511   | 589.41    |
| AB032971  | 620.348   | 479.823   | D86976    | 19783.756 | 14460.396 | NM_00674C | 1102.63   | 777.501   |
| NM_002482 | 1449.028  | 1489.119  | AF307080  | 357.743   | 996.19    | NM_004694 | 578.992   | 319.983   |
| NM_00171E | 572.804   | 430.875   | NM_018971 | 1367.265  | 1606.222  | AL137619  | 1760.298  | 1864.824  |
| AF116659  | 1257.443  | 1226.45   | NM_003711 | 2560.695  | 1964.946  | NM_00430C | 8228.311  | 9114.654  |
| NM_000317 | 13592.184 | 13513.233 | NM_00649E | 11080.352 | 11576.869 | AB007859  | 1044.982  | 1135.985  |
| NM_01837E | 5702.734  | 6473.927  | NM_00082E | 706.261   | 242.08    | NM_006754 | 389.874   | 378.205   |
| NM_01761E | 911.355   | 918.481   | NM_00482E | 1138.333  | 1008.183  | NM_001127 | 3255.866  | 3341.165  |
| NM_01743E | 5534.406  | 4615.748  | NM_013314 | 820.996   | 453.197   | NM_01243C | 3063.192  | 3197.277  |
| U59209    | 6075.856  | 6781.909  | NM_002072 | 4581.952  | 4031.704  | NM_003917 | 14150.904 | 14567.95  |
| NM_02019E | 10528.413 | 13039.829 | NM_003182 | 764.029   | 441.712   | NM_007077 | 1150.693  | 1200.308  |
| AK023824  | 3857.79   | 4046.386  | BE904126  | 956.606   | 1082.778  | NM_00295E | 1918.391  | 1837.615  |
| AL133069  | 4644.415  | 5800.328  | AF272380  | 1138.281  | 1258.527  | AB018739  | 1427.69   | 1460.759  |
| AL117574  | 1077.559  | 876.224   | NM_00207C | 4654.313  | 5491.544  | NM_00675C | 16814.551 | 13115.479 |
| AK026055  | 9348.9    | 10643.039 | AF227969  | 1215.741  | 1341.477  | NM_020164 | 3852.85   | 2557.196  |
| AK024126  | 1641.178  | 2039.039  | NM_004102 | 560.698   | 574.305   | AK023521  | 3760.342  | 2727.713  |
| NM_00151E | 4907.69   | 4826.898  | NM_003944 | 3514.77   | 4258.563  | NM_014267 | 19222.977 | 15270.184 |
| NM_01908E | 635.914   | 705.085   | NM_01612C | 26245.301 | 31429.674 | AL050187  | 1562.363  | 829.287   |
| NM_00667C | 5640.538  | 6162.29   | NM_002893 | 1264.349  | 1146.289  | NM_007127 | 297.147   | 565.695   |
| NM_01242E | 8834.238  | 8859.687  | NM_002393 | 4308.414  | 3205.324  | NM_012387 | 13995.327 | 14171.415 |
| NM_00581E | 2505.858  | 2502.386  | NM_002669 | 8318.87   | 6605.85   | NM_01473E | 1793.944  | 1682.337  |
| NM_00275C | 6568.613  | 7537.574  | AB014600  | 3992.703  | 3785.794  | NM_004252 | 19523.246 | 19652.555 |
| NM_000081 | 327.228   | 503.772   | NM_007217 | 13679.624 | 11195.416 | AF172929  | 13145.345 | 13472.912 |
| AK024134  | 2887.39   | 4622.938  | NM_014777 | 5936.082  | 4511.229  | NM_00639E | 14715.078 | 14919.838 |
| NM_003014 | 695.122   | 845.095   | NM_001102 | 9844.2    | 8175.311  | AK025655  | 2621.882  | 2794.449  |
| NM_01855E | 1600.27   | 2128.723  | NM_003803 | 788.973   | 731.725   | NM_00405E | 1576.621  | 1554.999  |
| NM_001974 | 4337.577  | 4819.403  | NM_00281E | 52283.66  | 55623.176 | NM_00105E | 1417.44   | 1292.246  |
| NM_00246E | 6904.105  | 7523.386  | NM_001937 | 5537.323  | 4912.369  | AY026461  | 3174.053  | 3218.426  |
| NM_00302E | 1673.495  | 1907.976  | AK024778  | 1966.903  | 1257.206  | AK025708  | 3824.372  | 3724.246  |
| NM_00156E | 2291.99   | 2279.476  | NM_006044 | 786.506   | 1081.852  | NM_00040E | 933.71    | 1061.131  |
| NM_01854E | 8962.436  | 9324.087  | NM_00206E | 1455.416  | 1940.912  | NM_005564 | 41873.141 | 40628.977 |
| NM_013401 | 1392.051  | 1446.414  | NM_014671 | 1202.615  | 1326.981  | NM_00450E | 3156.483  | 3245.105  |
| AB046770  | 370.806   | 323.257   | NM_001814 | 2610.482  | 2932.825  | NM_00640E | 5475.725  | 4783.4    |
| NM_01823E | 1387.55   | 1238.446  | NM_00565E | 1518.128  | 1080.249  | AJ245946  | 353.375   | 474.181   |
| NM_00685E | 3464.799  | 3771.546  | NM_006012 | 10218.693 | 9235.187  | NM_00239C | 7121.684  | 3717.921  |
| NM_00140E | 1494.62   | 1808.667  | NM_00052E | 543.711   | 745.224   | NM_006142 | 1100.004  | 891.145   |
| NM_00388C | 530.626   | 837.297   | AF007152  | 2108.415  | 1849.055  | AK023256  | 57.354    | 1566.868  |
| NM_00546E | 448.676   | 722.705   | NM_01757E | 1321.028  | 1108.558  | NM_01491C | 6407.45   | 7099.824  |
| AF131778  | 621.863   | 673.215   | AL122100  | 676.731   | 482.538   | AK001064  | 3530.207  | 3001.924  |
| NM_001562 | 1975.018  | 2112.432  | NM_00531C | 1105.893  | 989.814   | AB029031  | 6205.417  | 6408.322  |
| NM_01327E | 420.688   | 592.44    | NM_014423 | 9136.786  | 8873.565  | NM_001294 | 7253.055  | 7308.585  |
| NM_003487 | 8296.899  | 4703.602  | AL110188  | 905.475   | 1495.87   | NM_014241 | 9588.526  | 10494.403 |
| NM_006887 | 14052.21  | 11402.638 | D70834    | 1249.386  | 1833.499  | AF302786  | 3157.794  | 3715.905  |
| NM_006477 | 993.968   | 1039.469  | NM_00097C | 13792.997 | 20188.039 | AL122083  | 2393.167  | 3224.561  |
| NM_00288C | 6347.372  | 6087.351  | NM_005587 | 427.185   | 722.67    | NM_005052 | 13426.925 | 19233.381 |

|           |           |           |           |           |           |           |           |           |
|-----------|-----------|-----------|-----------|-----------|-----------|-----------|-----------|-----------|
| NM_00067E | 1998.363  | 2013.581  | AF038362  | 655.918   | 410.905   | BF038439  | 453.87    | 202.232   |
| NM_00106E | 1613.21   | 1901.74   | NM_00519E | 2422.732  | 1711.1    | AF319476  | 2387.799  | 2340.802  |
| NM_004657 | 688.937   | 584.562   | NM_005481 | 2083.381  | 1768.944  | NM_00429Z | 1796.7    | 1778.152  |
| NM_006291 | 398.14    | 374.868   | NM_00471E | 4009.785  | 3357.657  | NM_015484 | 6556.211  | 5847.746  |
| NM_01817C | 3023.538  | 3654.35   | L40392    | 2621.645  | 1666.956  | NM_01804E | 2195.252  | 2222.456  |
| NM_003867 | 383.369   | 594.945   | NM_001007 | 65398.387 | 68321.227 | NM_01331E | 2181.147  | 2574.069  |
| AK022588  | 911.684   | 1039.603  | NM_003017 | 8157.002  | 6458.054  | M20701    | 11923.705 | 14905.574 |
| AL162062  | 1403.99   | 1258.579  | NM_02036E | 4110.054  | 4069.085  | NM_00291Z | 1494.471  | 2204.06   |
| NM_00317Z | 5648.019  | 5628.752  | NM_020141 | 1246.906  | 2140.692  | NM_013284 | 3553.558  | 4116.221  |
| NM_00503C | 14756.596 | 11803.46  | NM_00648Z | 203.729   | 601.042   | NM_013274 | 4762.21   | 4478.793  |
| NM_017584 | 2976.4    | 3070.619  | NM_00377Z | 615.873   | 849.303   | AK024955  | 27890.963 | 19823.381 |
| NM_02035E | 4582.856  | 3805.072  | NM_00066Z | 813.181   | 1266.727  | NM_01658C | 1906.517  | 2436.348  |
| AB014541  | 8361.7    | 11177.757 | NM_00029Z | 556.517   | 704.643   | AF169693  | 919.917   | 1000.706  |
| NM_00258Z | 4756.3    | 4359.567  | NM_00368E | 5496.416  | 5729.756  | L23206    | 3339.54   | 3152.188  |
| NM_00657C | 10484.949 | 10436.405 | NM_01617Z | 704.464   | 766.243   | NM_01219Z | 8295.485  | 7964.209  |
| NM_02034E | 1319.91   | 1384.406  | NM_00287E | 5844.553  | 6081.018  | NM_00629Z | 3084.902  | 2939.053  |
| NM_006034 | 4826.023  | 5305.54   | NM_004427 | 8696.179  | 7657.61   | NM_00722E | 5290.015  | 5216.719  |
| AB040943  | 588.04    | 683.522   | U90549    | 7144.063  | 7016.712  | NM_00221Z | 274.625   | 679.801   |
| NM_005201 | 1389.395  | 1609.979  | NM_01324C | 8481.353  | 8481.106  | NM_01897C | 633.131   | 801.138   |
| NM_00009Z | 549.393   | 356.116   | NM_015874 | 21237.225 | 16144.976 | NM_004814 | 11687.451 | 12631.928 |
| AF174600  | 8124.228  | 7748.264  | NM_00496E | 51357.313 | 44087.84  | D86976    | 17042.664 | 18622.93  |
| AK001003  | 1766.429  | 1847.966  | AF312393  | 20824.488 | 17060.82  | NM_00326E | 799.345   | 743.181   |
| NM_00280C | 16015.151 | 13214.758 | AF272898  | 6069.002  | 5064.829  | NM_00301E | 1162.568  | 1683.302  |
| NM_018384 | 11216.518 | 12647.228 | AB037817  | 931.734   | 713.92    | NM_003711 | 2025.955  | 2258.643  |
| NM_00187Z | 336.04    | 378.104   | AB032951  | 8230.633  | 6767.594  | NM_00649E | 10739.146 | 10928.702 |
| AF282617  | 8428.269  | 7431.678  | NM_003417 | 1543.733  | 1377.281  | NM_00082E | 665.302   | 684.124   |
| AF157323  | 3529.61   | 3510.467  | NM_00514Z | 12816.265 | 14450.921 | BE904126  | 23757.098 | 15284.068 |
| NM_00602E | 915.909   | 920.487   | AK024073  | 837.193   | 855.694   | AF272380  | 23902.262 | 15681.745 |
| NM_005877 | 14340.411 | 15939.735 | AK022223  | 397.705   | 722.58    | NM_00201Z | 1357.398  | 1493.948  |
| NM_00333E | 4773.233  | 5261.23   | NM_005887 | 346.028   | 988.965   | NM_00207C | 40476.961 | 32372.471 |
| NM_01339E | 2285.207  | 1963.332  | AK024921  | 270.952   | 623.473   | AF227969  | 2885.534  | 3801.497  |
| NM_01775Z | 1634.747  | 1623.644  | AL110232  | 265.005   | 491.799   | AF116657  | 511.347   | 556.711   |
| D26069    | 10817.213 | 11167.197 | AK026103  | 500.497   | 1180.426  | NM_00410Z | 602.567   | 378.397   |
| BF107577  | 1092.806  | 1383.094  | NM_01635Z | 430.084   | 1169.734  | NM_00289Z | 1575.956  | 1583.516  |
| NM_005837 | 11777.868 | 12618.648 | AL080280  | 3392.331  | 3864.074  | NM_00239Z | 7058.118  | 8474.063  |
| NM_01662E | 7439.434  | 5732.679  | AB028947  | 1081.429  | 903.458   | NM_00266E | 9097.912  | 9656.3    |
| NM_01749Z | 2270.416  | 2099.81   | AF035314  | 1060.743  | 913.674   | AB014600  | 3632.596  | 3068.687  |
| NM_00613E | 6018.19   | 5794.817  | NM_01803E | 1318.429  | 1096.131  | X98260    | 3566.117  | 3203.078  |
| AF237772  | 3848.197  | 4000.418  | AF052087  | 1700.196  | 1379.52   | NM_007217 | 12947.635 | 11511.276 |
| AK025934  | 1658.067  | 1322.586  | AF007143  | 1469.247  | 1481.675  | NM_014777 | 6619.705  | 7322.41   |
| AJ008154  | 837.858   | 928.142   | AF147417  | 747.055   | 559.999   | NM_00110Z | 3251.826  | 3111.401  |
| NM_00685E | 4296.762  | 4375.966  | AK023656  | 1131.507  | 992.146   | AK021608  | 1855.766  | 1224.752  |
| X52350    | 59749.551 | 54234.379 | AK022989  | 2741.769  | 2554.37   | NM_004297 | 1155.899  | 670.544   |
| AF071554  | 611.485   | 540.864   | AK001604  | 5050.883  | 4501.395  | NM_00139E | 7432.883  | 6354.152  |
| NM_002147 | 352.367   | 469.447   | AK021619  | 412.757   | 823.003   | NM_00206E | 21008.885 | 19570.051 |
| U90919    | 4881.577  | 4831.084  | AF131762  | 1194.519  | 2103.605  | NM_01333E | 3147.529  | 2764.211  |
| NM_006177 | 658.411   | 591.353   | AY007089  | 556.65    | 1042.044  | NM_014671 | 3929.943  | 4931.392  |
| AL137286  | 6099.681  | 6650.649  | AK021816  | 855.999   | 1263.145  | NM_00565E | 1486.898  | 1451.828  |
| NM_01635E | 623.506   | 935.41    | D43770    | 2526.82   | 4830.12   | NM_00601Z | 7509.103  | 7151.806  |
| NM_01627E | 18269.42  | 22329.646 | AF085960  | 578.475   | 1125.842  | NM_01488E | 2700.104  | 3192.827  |
| NM_02041E | 3151.926  | 3287.346  | AL109691  | 385.644   | 999.534   | AF173935  | 1795.513  | 1655.58   |
| NM_01329Z | 4731.831  | 5710.136  | NM_014254 | 1500.046  | 1662.896  | AK025322  | 8101.976  | 7765.494  |
| AF315592  | 3860.521  | 4098.571  | AF086036  | 518.093   | 509.876   | NM_017887 | 7849.506  | 7666.487  |

|           |           |           |           |           |           |           |           |           |
|-----------|-----------|-----------|-----------|-----------|-----------|-----------|-----------|-----------|
| AF095844  | 1332.855  | 1421.048  | AF086010  | 777.775   | 801.99    | NM_000526 | 770.001   | 913.082   |
| NM_015833 | 2423.676  | 2403.564  | U09197    | 3574.922  | 3024.971  | AF007152  | 1633.38   | 1462.974  |
| NM_000986 | 62019.234 | 60534.668 | Z36800    | 601.537   | 403.562   | NM_00531C | 816.958   | 949.694   |
| AK026760  | 3809.82   | 4453.129  | U15553    | 3695.487  | 2980.006  | NM_018083 | 944.94    | 660.828   |
| NM_014772 | 2477.608  | 3055.541  | Z36829    | 1392.852  | 1235.777  | AL110188  | 7667.02   | 4952.238  |
| AK025248  | 3037.082  | 2961.967  | AK024734  | 5352.356  | 5850.294  | D70834    | 26359.566 | 24027.342 |
| NM_004539 | 15415.687 | 16314.581 | NM_017741 | 3984.841  | 5034.505  | AK000102  | 1336.939  | 1272.596  |
| NM_006428 | 10697.464 | 10122.289 | AK000144  | 854.641   | 1465.828  | AB040916  | 1970.277  | 2000.774  |
| NM_00428C | 14294.016 | 15800.17  | AL117533  | 725.251   | 863.973   | NM_005587 | 2281.498  | 2203.869  |
| AF110399  | 1132.585  | 1208.815  | AK026036  | 788.022   | 1535.472  | AF038362  | 2287.166  | 1868.152  |
| AK027094  | 3492.072  | 3198.874  | AK023422  | 513.787   | 735.511   | NM_005195 | 8312.04   | 8993.351  |
| AL359596  | 1013.468  | 1571.058  | AK022796  | 517.131   | 952.807   | NM_005481 | 2660.332  | 2751.313  |
| U79249    | 904.207   | 958.113   | AL122088  | 617.481   | 708.645   | NM_004715 | 3467.164  | 3666.654  |
| AK022114  | 1190.558  | 1452.58   | AF119912  | 770.554   | 318.444   | L40392    | 1733.533  | 1748.375  |
| AL133585  | 1632.396  | 1944.557  | AL137518  | 1070.726  | 762.132   | NM_00373C | 488.221   | 428.225   |
| NM_002631 | 19037.279 | 17842.268 | AK022556  | 595.654   | 313.275   | AF086497  | 1435.188  | 849.302   |
| NM_000775 | 620.798   | 431.926   | AK023437  | 2117.653  | 1697.979  | NM_020141 | 7907.558  | 7302.794  |
| AB032981  | 628.15    | 569.322   | AK024147  | 822.564   | 411.593   | NM_006482 | 1082.9    | 977.384   |
| BF217864  | 4406.982  | 5764.994  | AK022897  | 1691.619  | 1253.357  | NM_003635 | 1572.82   | 1890.441  |
| NM_005917 | 37434.918 | 39722.988 | AK023556  | 1777.956  | 1557.512  | NM_000662 | 3156.543  | 3366.386  |
| NM_007052 | 629.323   | 636.672   | AK023898  | 5554.038  | 5314.517  | NM_000292 | 2055.823  | 1801.958  |
| BC017044  | 329.488   | 420.635   | NM_01904C | 2238.842  | 3241.65   | NM_003689 | 40565.73  | 41513.938 |
| AV758498  | 2773.82   | 2519.031  | NM_005978 | 808.651   | 1315.712  | NM_016173 | 1232.63   | 1427.513  |
| NM_020196 | 4438.125  | 5094.713  | Y16711    | 1183.912  | 2143.119  | NM_002875 | 7439.809  | 6778.095  |
| AK024113  | 873.922   | 1228.883  | AJ272179  | 953.715   | 1753.48   | NM_004427 | 10723.305 | 13903.02  |
| NM_018657 | 1966.651  | 2186.741  | AJ007015  | 721.738   | 1113.323  | U90549    | 6411.178  | 7995.062  |
| L40410    | 19069.703 | 18885.773 | AL049317  | 1682.255  | 3051.564  | NM_01324C | 7582.999  | 7750.649  |
| NM_007055 | 2790.517  | 2803.505  | AL050090  | 2294.251  | 3959.442  | NM_015874 | 23381.73  | 23012.793 |
| NM_016652 | 3830.295  | 4122.619  | AF086309  | 331.613   | 342.61    | NM_004965 | 53431.219 | 62151.539 |
| NM_01631C | 16591.426 | 26239.951 | AF238870  | 329.686   | 449.102   | AF312393  | 20612.623 | 24528.189 |
| AK021562  | 1577.129  | 1998.834  | AK026279  | 1649.7    | 3790.44   | AF272898  | 4876.783  | 5478.763  |
| BC006560  | 620.271   | 657.07    | AF130094  | 1793.186  | 4402.142  | AB032951  | 5658.213  | 6647.677  |
| NM_006298 | 1099.488  | 1145.695  | AK026673  | 355.307   | 870.16    | AK022223  | 475.051   | 678.074   |
| AF060938  | 11382.238 | 12818.041 | NM_005452 | 527.397   | 612.962   | NM_005887 | 4027.633  | 3334.699  |
| NM_001973 | 2459.215  | 2603.468  | AF170935  | 1074.335  | 1199.962  | AK024921  | 629.433   | 855.115   |
| NM_014468 | 4477.492  | 3889.786  | AK025218  | 849.445   | 526.666   | AK026103  | 2609.411  | 2501.323  |
| AL050015  | 1570.897  | 1639.411  | AJ227899  | 1904.214  | 1723.009  | NM_016353 | 13461.596 | 11894.166 |
| AY007117  | 7909.563  | 8913.596  | AL359607  | 784.907   | 775.716   | AK022567  | 1669.994  | 1487.722  |
| AF039698  | 4073.18   | 6559.691  | AF161371  | 10400.83  | 8545.685  | S77357    | 839.937   | 767.951   |
| AB046828  | 4747.417  | 4449.186  | AK022464  | 1339.102  | 841.088   | AK023450  | 1041.714  | 897.113   |
| AF144487  | 1486.037  | 1226.199  | AF086230  | 1712.616  | 1605.487  | AL080280  | 3837.327  | 5774.999  |
| AL137532  | 1660.506  | 1661.838  | AK023408  | 6180.04   | 5624.906  | AB028947  | 1076.945  | 1735.053  |
| AK025419  | 3320.175  | 3401.961  | AL109671  | 221.883   | 433.205   | AF035314  | 1197.984  | 1145.428  |
| NM_013259 | 540.63    | 601.913   | AK022008  | 614.415   | 924.077   | NM_018036 | 1059.017  | 1425.456  |
| NM_018375 | 3980.186  | 4656.917  | AL080188  | 1609.999  | 2037.01   | AF052087  | 1069.468  | 1507.064  |
| NM_004913 | 338.557   | 626.486   | T99941    | 867.862   | 1073.784  | AF007143  | 1471.139  | 1971.889  |
| AK026838  | 623.812   | 742.18    | AF113678  | 1226.059  | 815.346   | AF147417  | 913.708   | 945.497   |
| AK022443  | 1746.223  | 2512.801  | AL137313  | 50829.793 | 48979.848 | AK023656  | 762.18    | 904.098   |
| AK023371  | 1231.275  | 2125.936  | AB002363  | 8787.314  | 6279.925  | AK022989  | 2687.176  | 4689.18   |
| AF086187  | 6328.843  | 7085.477  | NM_005284 | 2592.331  | 2143.891  | AK001604  | 5237.47   | 8438.076  |
| AF305836  | 10860.003 | 13964.528 | AF086351  | 3698.038  | 4129.247  | AK021619  | 722.394   | 847.457   |
| AL109784  | 1160.576  | 1300.51   | D83199    | 19150.73  | 18426.066 | AK025872  | 527.063   | 593.747   |
| AL137383  | 780.327   | 873.744   | Y16708    | 1006.635  | 718.396   | AF131762  | 22415.068 | 20815.521 |

|            |          |           |            |           |           |           |           |           |
|------------|----------|-----------|------------|-----------|-----------|-----------|-----------|-----------|
| AL035295   | 1187.726 | 1737.014  | AL157453   | 3280.686  | 3910.331  | AY007089  | 1440.842  | 1681.079  |
| NM_018302  | 6247.311 | 5827.643  | NM_019098  | 1123.369  | 1570.077  | AK021816  | 6485.726  | 6821.517  |
| AK027252   | 1346.229 | 1407.439  | AK022212   | 1648.051  | 2418.251  | D43770    | 7058.862  | 6477.156  |
| AF165527   | 1382.968 | 1884.41   | X64974     | 729.48    | 1097.757  | AF085960  | 924.706   | 712.245   |
| NM_014092  | 1267.228 | 1199.916  | NM_000834  | 1301.727  | 1356.205  | AK021519  | 1739.434  | 1570.41   |
| AL110133   | 1523.004 | 1647.09   | NM_006485  | 714.889   | 1111.383  | NM_014254 | 4079.373  | 4179.215  |
| AK000529   | 8644.394 | 12206.251 | AK024109   | 798.685   | 1870.024  | AF086036  | 639.218   | 633.452   |
| AK027243   | 2276.405 | 2462.932  | AK001143   | 1227.2    | 2204.854  | AF086010  | 975.073   | 1066.961  |
| AF147415   | 945.646  | 780.473   | AK001701   | 413.274   | 847.314   | U09197    | 2617.392  | 2664.175  |
| AK098474   | 476.239  | 545.801   | AB007978   | 862.45    | 548.957   | U50529    | 357.68    | 518.41    |
| AL117475   | 861.664  | 822.37    | AF217970   | 1069.529  | 773.342   | Z36800    | 1144.167  | 1694.794  |
| NM_017535  | 1099.208 | 1252.575  | AF086297   | 1251.868  | 1000.551  | U15553    | 2384.327  | 2383.437  |
| AL117539   | 280.827  | 627.771   | AK025455   | 4215.452  | 3438.238  | U52831    | 447.329   | 645.889   |
| L23852     | 346.078  | 439.821   | AK026799   | 5001.915  | 3031.973  | Z36829    | 615.557   | 846.443   |
| NM_003887  | 552.308  | 684.185   | NM_014860  | 993.834   | 562.833   | AK024734  | 4650.637  | 4989.32   |
| NM_004267  | 3779.738 | 4054.211  | AK022549   | 2205.102  | 1714.265  | NM_017741 | 1904.803  | 1882.603  |
| AL357212   | 555.731  | 629.14    | NM_018157  | 1356.793  | 942.329   | AK000144  | 1173.201  | 959.339   |
| AK026687   | 2376.81  | 3161.894  | Z70714     | 4756.084  | 5089.568  | AK000942  | 746.618   | 1036.822  |
| AL117444   | 1157.389 | 1385.445  | AK021640   | 4496.846  | 3517.995  | AL117533  | 2995.371  | 3525.695  |
| NM_017994  | 9833.397 | 10078.122 | NM_016565  | 50197.816 | 51166.406 | AK026036  | 836.412   | 1053.479  |
| AK021693   | 1729.95  | 1786.362  | CY3Cy5     | 1510.711  | 131.828   | AK023422  | 1293.413  | 1374.851  |
| AB023177   | 581.736  | 666.348   | BF310427   | 1453.052  | 1312.874  | AK022796  | 1938.292  | 1964      |
| Y11609     | 839.48   | 696.805   | N94424     | 599.33    | 572.806   | AK095193  | 1235.279  | 1424.199  |
| NM_012122  | 7146.658 | 6614.892  | AA045192   | 809.591   | 747.638   | AK025081  | 952.087   | 852.493   |
| AF009285   | 1679.538 | 1517.933  | H45617     | 614.325   | 484.543   | AL122088  | 1085.779  | 1123.352  |
| NM_012125  | 1790.686 | 1986.54   | M92642     | 780.055   | 687.828   | AF116633  | 506.079   | 786.285   |
| AB032363   | 458.009  | 398.175   | AA464532   | 565.329   | 589.644   | AF119912  | 583.158   | 1101.214  |
| AF009294   | 2423.059 | 3061.79   | H-U 44385  | 12631.954 | 12441.032 | AL137518  | 1085.979  | 1242.482  |
| AK000998   | 500.412  | 648.241   | ID 1654970 | 8221.208  | 11743.55  | AK023437  | 2449.296  | 2767.76   |
| AK021684   | 1818.572 | 2962.424  | ID 2531132 | 7323.962  | 6584.202  | AK024147  | 481.478   | 479.276   |
| AK001060   | 457.777  | 582.3     | BF125928   | 13666.72  | 9166.77   | AK022897  | 1109.663  | 1447.308  |
| AK001819   | 368.392  | 481.523   | BG571026   | 1089.548  | 923.997   | AK023898  | 5330.147  | 5570.446  |
| AK021480   | 715.95   | 1077.028  | AA489017   | 5143.049  | 3191.689  | NM_019040 | 7005.045  | 6693.988  |
| AK025112   | 823.533  | 913.589   | NM_012245  | 11683.604 | 7821.12   | NM_005978 | 1398.429  | 1451.875  |
| AK025297   | 224.115  | 539.417   | NM_133263  | 1104.6    | 743.013   | Y16711    | 1025.953  | 1067.185  |
| AK025173   | 758.693  | 556.361   | SR2        | 46217.516 | 32140.488 | AJ272179  | 2243.866  | 2237.896  |
| AK025430   | 706.246  | 446.239   | SR4        | 12015.012 | 7344.946  | AJ007015  | 4098.744  | 2579.557  |
| AK026269   | 327.523  | 232.833   | SR6        | 1819.319  | 1545.813  | AL049317  | 1510.458  | 1596.309  |
| AF117338   | 2006.395 | 1985.167  | SR8        | 6721.188  | 13684.864 | AL050090  | 1699.44   | 1861.49   |
| AK025567   | 2159.056 | 2299.007  | SR10       | 24287.662 | 6781.867  | AF086309  | 877.284   | 1195.262  |
| NM_019102  | 925.811  | 832.608   | CY3Cy5     | 1786.993  | 159.633   | AF238870  | 1370.799  | 1475.886  |
| U56857     | 728.448  | 947.822   | NM_017450  | 1355.864  | 1531.745  | AK026279  | 5735.563  | 5350.645  |
| L43349     | 1145.869 | 1201.639  | NM_002023  | 1381.664  | 1256.427  | AF130094  | 8176.171  | 7736.316  |
| BE905682   | 634.822  | 567.331   | NM_002839  | 792.512   | 664.208   | AK026673  | 2481.671  | 2496.7    |
| AF086421   | 977.347  | 1005.814  | NM_001616  | 588.051   | 751.186   | NM_005452 | 4692.877  | 5704.462  |
| AK001612   | 993.563  | 864.06    | NM_005904  | 841.099   | 1389.449  | AF170935  | 14553.929 | 17162.855 |
| AF161522   | 7244.18  | 7746.128  | NM_005273  | 13564.119 | 13106.98  | AK025218  | 691.09    | 1107.638  |
| AF086028   | 641.502  | 819.74    | NM_000524  | 561.04    | 604.046   | AJ227899  | 1836.773  | 1672.621  |
| U46119     | 488.95   | 423.088   | NM_006576  | 1095.675  | 1422.381  | AL359607  | 1021.832  | 1210.208  |
| unknown (S | 243.662  | 387.277   | NM_018645  | 1243.57   | 894.559   | AF161371  | 10334.972 | 10796.625 |
| AK025365   | 1706.446 | 2143.09   | AB035266   | 3093.777  | 2661.683  | AK022464  | 953.363   | 1314.551  |
| AK023445   | 473.602  | 591.428   | NM_003744  | 2418.618  | 2235.791  | AF086230  | 1007.774  | 1157.283  |
| AK023489   | 391.172  | 502.897   | NM_006378  | 13554.592 | 9967.441  | AK023408  | 5787.089  | 4678.527  |

|           |           |           |           |           |           |           |           |           |
|-----------|-----------|-----------|-----------|-----------|-----------|-----------|-----------|-----------|
| AK021561  | 386.187   | 594.646   | NM_018132 | 1654.213  | 1671.834  | U84509    | 1664.493  | 1961.037  |
| AK025222  | 435.701   | 462.239   | NM_003061 | 1434.81   | 932.818   | AK002036  | 4034.608  | 4236.556  |
| NM_003531 | 2815.987  | 2974.997  | NM_018207 | 1372.001  | 1006.898  | U84512    | 824.014   | 647.12    |
| NM_01779E | 1154.758  | 1033.486  | NM_00034E | 9925.267  | 6413.083  | AK025775  | 4572.908  | 4597.931  |
| NM_00351C | 531.417   | 531.055   | NM_001862 | 47123.68  | 37252.828 | AB046791  | 1316.601  | 1430.614  |
| NM_00353E | 386.713   | 232.835   | NM_006531 | 1313.685  | 1117.558  | AF043469  | 2549.248  | 3028.495  |
| AL137403  | 290.081   | 485.133   | AB029021  | 8317.493  | 6563.383  | AL109671  | 1168.602  | 1495.945  |
| AL049348  | 371.888   | 302.903   | NM_002101 | 34574.777 | 26447.508 | AK022008  | 1344.986  | 1341.725  |
| AB037847  | 2510.3    | 3080.336  | Z36789    | 3128.349  | 3336.521  | NM_01818E | 3850.414  | 4771.167  |
| NM_00517C | 3503.941  | 3692.394  | J02874    | 1140.935  | 1190.124  | AL080188  | 3404.085  | 3937.534  |
| S96437    | 858.524   | 1447.514  | AF070525  | 11297.18  | 9649.175  | T99941    | 3483.117  | 3909.742  |
| NM_01517E | 1666.301  | 2266.055  | NM_001177 | 7240.895  | 6107.309  | AF113678  | 2058.402  | 2181.378  |
| AL353939  | 872.057   | 721.671   | NM_014447 | 1277.64   | 1372.429  | AL137313  | 56687.27  | 60052.926 |
| AL117573  | 4233.106  | 5126.811  | NM_00235E | 565.601   | 628.309   | Z83951    | 528.415   | 432.165   |
| AL080186  | 348.052   | 452.172   | NM_006691 | 897.472   | 957.237   | AL833529  | 224.408   | 584.972   |
| NM_00530E | 853.918   | 1396.379  | NM_00150E | 926.26    | 699.054   | AB002363  | 6523.59   | 6984.506  |
| NM_00164E | 981.13    | 1293.361  | NM_00371C | 2644.715  | 2559.929  | NM_005284 | 2398.941  | 2742.574  |
| AL137327  | 4264.157  | 5367.375  | Z83805    | 804.257   | 875.301   | AF086351  | 3193.264  | 2891.049  |
| AF358454  | 5495.292  | 5921.982  | NM_00466E | 1130.802  | 1312.493  | D83199    | 20969.115 | 21655.324 |
| AK026090  | 968.326   | 1250.664  | NM_003614 | 995.795   | 863.895   | AK025957  | 368.304   | 1013.949  |
| AL137634  | 1241.524  | 1796.305  | NM_014257 | 3344.138  | 2531.025  | Y16708    | 724.551   | 918.077   |
| AK024863  | 5605.75   | 6813.883  | NM_00484E | 1900.015  | 1848.202  | AL157453  | 3346.552  | 2871.322  |
| AJ008135  | 2418.516  | 2819.244  | AK022845  | 1288.648  | 1173.255  | NM_01909E | 4129.206  | 7467.02   |
| AK026908  | 4981.862  | 8402.448  | S77835    | 324.715   | 411.473   | AK022212  | 21635.547 | 30266.588 |
| D17110    | 985.996   | 1059.249  | NM_00298E | 338       | 376.678   | X64974    | 2348.491  | 3414.074  |
| U92025    | 488.526   | 529.16    | AB018347  | 3962.682  | 3090.128  | NM_000834 | 5576.148  | 7741.918  |
| AB046766  | 932.639   | 1123.907  | AB033073  | 1380.618  | 1162.318  | NM_00648E | 23991.686 | 26890.248 |
| AF009323  | 296.935   | 398.62    | NM_003284 | 905.872   | 677.971   | NM_01245E | 3049.287  | 2978.355  |
| AK001526  | 5291.25   | 4957.407  | NM_018152 | 690.401   | 603.746   | NM_01236C | 672.414   | 439.754   |
| AK000525  | 2125.052  | 2260.071  | NM_00031E | 3809.819  | 3397.958  | AL137268  | 3921.959  | 4170.384  |
| AL137434  | 830.7     | 788.569   | NM_012461 | 4543.465  | 4462.662  | AK001130  | 494.394   | 679.508   |
| Z36795    | 2558.822  | 3508.596  | AK001379  | 1571.533  | 1456.169  | AK022398  | 714.6     | 601.476   |
| AL080216  | 1996.688  | 1946.33   | NM_007072 | 1698.406  | 1619.122  | AK024109  | 2726.566  | 3110.226  |
| AF038188  | 2151.974  | 2507.466  | NM_01232C | 2462.95   | 2076.713  | AF088048  | 1299.066  | 1214.863  |
| D17046    | 561.437   | 790.88    | NM_01820E | 3565.515  | 3564.946  | AK001143  | 3229.813  | 2441.045  |
| NM_01764E | 5548.155  | 5727.465  | NM_01592E | 4595.993  | 5071.921  | AK001701  | 3381.741  | 3502.5    |
| AJ227864  | 826.835   | 983.842   | U90653    | 4218.013  | 4370.571  | AB007978  | 640.457   | 519.123   |
| AF157562  | 4644.649  | 5587.438  | NM_00019E | 586.305   | 580.495   | AF217970  | 924.465   | 779.258   |
| AK021958  | 8216.643  | 13517.823 | NM_01833E | 8343.492  | 9501.99   | AF086297  | 1297.27   | 1420.844  |
| M31164    | 1491.625  | 2905.621  | NM_00674E | 45163.207 | 46127.582 | AK025455  | 3473.131  | 3684.237  |
| AF113674  | 18792.553 | 25764.793 | NM_00027E | 824.169   | 1252.443  | AK026799  | 2967.563  | 2262.636  |
| NM_003511 | 773.306   | 1610.429  | AK000037  | 1044.147  | 1113.12   | NM_01486C | 812.067   | 1066.228  |
| CY3Cy5    | 3676.155  | 288.194   | NM_01476C | 3271.409  | 3601.646  | AK022549  | 1788.828  | 1562.082  |
| H97792    | 899.259   | 959.193   | NM_01839E | 988.939   | 1542.414  | NM_018157 | 1012.338  | 1111.897  |
| X04076    | 3428.647  | 2616.668  | NM_00256C | 15042.308 | 14983.574 | Z70714    | 3985.619  | 3604.948  |
| W95082    | 1726.363  | 1441.091  | NM_014404 | 1046.186  | 1217.884  | AK021640  | 5767.24   | 5567.238  |
| AA485362  | 964.776   | 780.716   | NM_01871E | 493.002   | 596.983   | NM_01656E | 50594.035 | 51697.844 |
| AJ222801  | 1835.036  | 1902.403  | NM_015947 | 4710.938  | 3944.735  | CY3Cy5    | 2277.466  | 172.583   |
| W72207    | 1798.948  | 1867.553  | NM_002042 | 9817.94   | 5961.347  | BF310427  | 1104.184  | 1404.756  |
| AA733033  | 4364.729  | 3767.006  | AB028944  | 678.519   | 509.346   | N94424    | 351.471   | 404.451   |
| AA583574  | 1931.321  | 3456.492  | AJ006268  | 995.496   | 1116.665  | AA045192  | 476.95    | 699.66    |
| U67733    | 407.937   | 569.341   | M74089    | 4811.217  | 3764.045  | H45617    | 357.879   | 413.007   |
| AI690184  | 2898.942  | 2671.696  | AF190864  | 6686.648  | 5523.371  | M92642    | 451.17    | 517.703   |

|           |           |           |            |           |           |            |           |           |
|-----------|-----------|-----------|------------|-----------|-----------|------------|-----------|-----------|
| AA927490  | 1608.811  | 1289.566  | NM_002779  | 3155.205  | 2817.592  | AA464532   | 352.954   | 542.682   |
| NM_001824 | 8036.594  | 6150.572  | L40397     | 20517.969 | 19906.605 | H-U 44385  | 11001.301 | 10539.457 |
| SR9       | 25966.057 | 8637.688  | NM_020198  | 7924.484  | 6852.622  | ID 1654970 | 4708.348  | 3635.667  |
| CY3Cy5    | 1198.639  | 87.514    | AA098879   | 627.531   | 623.932   | ID 2531132 | 5500.807  | 4426.548  |
| NM_017818 | 3484.979  | 2249.405  | NM_000025  | 13891.897 | 11095.685 | ID 4365538 | 280.901   | 180.14    |
| NM_001767 | 4366.318  | 3282.268  | D38521     | 2374.529  | 2559.76   | BF125928   | 12481.881 | 8857.936  |
| AF028823  | 4988.856  | 3423.13   | NM_000403  | 4634.218  | 4940.947  | BG571026   | 1548.4    | 1236.775  |
| NM_004295 | 3415.981  | 2627.2    | NM_018127  | 13464.839 | 13770.729 | AA489017   | 4336.132  | 3232.139  |
| NM_002087 | 6125.482  | 4624.865  | AB020677   | 3349.009  | 2633.244  | NM_012245  | 12746.332 | 9842.438  |
| AB023154  | 483.561   | 327.16    | AB033097   | 2224.794  | 2114.789  | NM_133263  | 1453.354  | 1169.262  |
| AF200815  | 834.707   | 1513.461  | NM_000135  | 1425.096  | 1414.234  | SR2        | 43935.102 | 35861.746 |
| NM_013441 | 1984.143  | 1739.725  | AJ223948   | 4544.321  | 4639.864  | SR4        | 13384.706 | 9856.725  |
| NM_014421 | 457.216   | 295.125   | NM_016218  | 1424.586  | 1373.694  | SR6        | 2481.822  | 1441.58   |
| M60499    | 1249.298  | 882.079   | AK022947   | 2163.495  | 1977.938  | SR8        | 7325.846  | 16023.302 |
| NM_003833 | 4973.86   | 3275.49   | AL050029   | 2367.995  | 2465.952  | SR10       | 25591.697 | 7728.088  |
| AK000868  | 4403.678  | 4072.73   | AL049966   | 681.81    | 628.126   | CY3Cy5     | 1868.605  | 143.981   |
| NM_001233 | 4184.843  | 6159.294  | NM_005204  | 2948.558  | 3048.515  | NM_017450  | 1094.055  | 1125.979  |
| NM_001234 | 842.799   | 1190.141  | NM_016203  | 2030.061  | 2109.558  | NM_002023  | 650.93    | 1139.785  |
| AB007859  | 1356.728  | 1029.921  | NM_002759  | 2612.125  | 2431.797  | NM_002839  | 468.381   | 832.535   |
| NM_006754 | 807.746   | 405.502   | NM_007271  | 1574.262  | 1235.156  | AF190500   | 236.674   | 423.93    |
| NM_001127 | 3345.124  | 2678.919  | NM_006255  | 4872.067  | 3761.095  | NM_001616  | 388.633   | 642.979   |
| NM_012430 | 2620.282  | 1747.772  | BE392143   | 3866.905  | 3463.615  | NM_005904  | 537.146   | 471.349   |
| NM_003917 | 3199.256  | 2306.734  | NM_005813  | 1432.527  | 1053.275  | NM_005273  | 9726.173  | 8283.219  |
| NM_007077 | 630.021   | 344.318   | AB037718   | 4158.298  | 3581.004  | NM_000524  | 405.183   | 512.678   |
| NM_002956 | 1436.721  | 922.524   | AL389994   | 1060.105  | 941.12    | NM_006576  | 1069.571  | 1066.475  |
| AB018739  | 1201.737  | 907.627   | NM_003909  | 4793.161  | 4590.457  | NM_018645  | 601.866   | 640.288   |
| NM_006750 | 15782.289 | 9307.847  | NM_001277  | 5092.225  | 4222.666  | AB035266   | 2238.315  | 1621.828  |
| NM_020164 | 4606.71   | 2552.554  | NM_003659  | 5598.683  | 5603.654  | NM_003744  | 2238.13   | 1327.328  |
| AK023521  | 4988.782  | 3346.623  | AB029021   | 12326.24  | 10244.087 | NM_006378  | 11747.372 | 7654.167  |
| NM_014267 | 20522.193 | 16175.433 | NM_002101  | 29190.551 | 25582.066 | NM_018132  | 1954.087  | 1979.557  |
| NM_001481 | 781.032   | 466.796   | NM_005423  | 1830.86   | 3200.502  | NM_003061  | 1225.573  | 989.368   |
| U30872    | 1268.92   | 842.771   | Z36789     | 3490.393  | 3896.116  | NM_018207  | 1642.5    | 1422.321  |
| AF111783  | 472.713   | 394.128   | J02874     | 1389.177  | 1521.567  | NM_000345  | 9355.442  | 9184.039  |
| NM_020469 | 2178.418  | 1161.747  | BF310427   | 1799.743  | 1827.851  | NM_006531  | 1535.306  | 1661.381  |
| NM_014734 | 1539.672  | 574.274   | AA045192   | 854.575   | 1009.399  | AB029021   | 7964.632  | 8266.769  |
| AK026408  | 1507.277  | 1501.254  | H45617     | 699.297   | 964.135   | NM_005423  | 676.384   | 650.961   |
| NM_005025 | 1983.082  | 3138.317  | M92642     | 1952.058  | 2951.486  | Z36789     | 4082.014  | 3615.366  |
| NM_006307 | 338.758   | 103.083   | AA464532   | 659.908   | 461.185   | J02874     | 838.874   | 1041.661  |
| NM_001056 | 1625.493  | 2182.417  | H-U 44385  | 13739.691 | 11983.176 | AF070525   | 5821.874  | 7004.626  |
| AY026461  | 3248.851  | 3985.491  | ID 1654970 | 6485.561  | 5442.43   | NM_001177  | 4656.018  | 4282.503  |
| AK025708  | 4751.933  | 5308.265  | ID 2531132 | 7596.347  | 9645.449  | NM_014447  | 1119.669  | 1124.642  |
| NM_000405 | 772.44    | 588.826   | ID 4365538 | 620.023   | 1845.183  | NM_006691  | 774.366   | 738.486   |
| NM_005564 | 9007.05   | 5770.272  | BF125928   | 13271.943 | 7126.599  | NM_001505  | 371.462   | 481.046   |
| NM_004508 | 3089.388  | 2252.366  | BG571026   | 1102.019  | 629.426   | NM_003710  | 1992.675  | 2329.706  |
| NM_006405 | 2724.82   | 2019.836  | AA489017   | 5128.685  | 3565.007  | Z83805     | 624.099   | 422.698   |
| AJ245946  | 304.356   | 409.588   | NM_012245  | 11872.898 | 7790.884  | NM_004666  | 937.277   | 896.783   |
| NM_006749 | 1053.429  | 900.962   | NM_133263  | 1227.836  | 1221.327  | NM_003614  | 575.944   | 674.428   |
| NM_004694 | 552.308   | 271.553   | NM_003284  | 1755.367  | 1735.715  | NM_014257  | 2210.812  | 2436.651  |
| AL137619  | 756.047   | 309.46    | NM_018152  | 846.856   | 600.79    | NM_004843  | 1624.469  | 1396.661  |
| NM_003615 | 422.861   | 153.35    | NM_000319  | 3800.051  | 3889.996  | AK022845   | 1228.909  | 871.75    |
| NM_004300 | 8553.68   | 3814.275  | NM_012461  | 4710.395  | 5085.008  | NM_003004  | 269.276   | 131.013   |
| AF319476  | 2979.976  | 3412.801  | AK001379   | 2623.614  | 3743.156  | S77835     | 592.304   | 434.887   |
| AK001913  | 8688.089  | 10598.646 | NM_017450  | 2070.022  | 1923.732  | NM_002985  | 511.137   | 529.638   |



|           |           |           |           |           |           |           |           |           |
|-----------|-----------|-----------|-----------|-----------|-----------|-----------|-----------|-----------|
| NM_017737 | 2161.942  | 2575.317  | NM_002023 | 1448.495  | 1679.745  | AB018347  | 3777.899  | 3344.384  |
| NM_004292 | 3129.131  | 3285.805  | NM_002839 | 940.53    | 1034.184  | NM_003284 | 1208.628  | 957.637   |
| NM_015484 | 6114.94   | 7965.453  | AF190500  | 501.717   | 729.256   | NM_018152 | 413.84    | 427.912   |
| NM_018046 | 2516.961  | 2772.427  | NM_001616 | 675.731   | 671.215   | NM_003257 | 922.196   | 1149.621  |
| NM_013316 | 1047.068  | 1285.15   | NM_005904 | 449.016   | 612.231   | NM_012461 | 5102.718  | 4710.126  |
| M20701    | 4685.227  | 5237.208  | NM_005273 | 14409.777 | 12394.404 | AK001379  | 1438.457  | 1542.452  |
| NM_002912 | 1555.454  | 2364.887  | NM_000524 | 568.489   | 520.788   | NM_007072 | 1333.875  | 1327.587  |
| NM_013284 | 4448.59   | 5652.123  | NM_006576 | 1075.023  | 741.176   | NM_012320 | 1648.958  | 1638.39   |
| NM_006739 | 4721.441  | 3653.907  | NM_018645 | 891.34    | 495.96    | NM_018208 | 2717.329  | 2673.93   |
| NM_013274 | 6047.641  | 6029.859  | AB035266  | 2817.786  | 1223.151  | NM_015929 | 3399.24   | 3858.433  |
| AL050187  | 1200.932  | 1135.587  | NM_003744 | 2238.741  | 1074.454  | U90653    | 2891.671  | 2481.819  |
| NM_007127 | 510.969   | 272.922   | NM_006378 | 12452.833 | 8355.992  | NM_000196 | 376.334   | 492.229   |
| NM_012387 | 12765.045 | 8502.415  | NM_018132 | 1492.198  | 1377.813  | NM_018339 | 4565.987  | 3998.534  |
| NM_014735 | 1426.71   | 895.979   | NM_003061 | 1622.913  | 1342.474  | NM_006745 | 33966.988 | 32104.883 |
| NM_004252 | 20077.043 | 11775.739 | NM_018207 | 1698.652  | 1441.052  | NM_000275 | 685.2     | 866.878   |
| AF172929  | 14104.583 | 8045.582  | NM_000345 | 11082.616 | 8835.166  | AK000037  | 684.083   | 421.567   |
| NM_006398 | 6362.183  | 2732.662  | NM_001862 | 47195.801 | 44328.172 | NM_014760 | 2278.142  | 1664.276  |
| AK025655  | 2621.127  | 1775.147  | NM_006531 | 1391.38   | 1374.545  | NM_018398 | 789.315   | 685.495   |
| NM_004056 | 2253.137  | 909.932   | M74089    | 7391.052  | 8399.855  | NM_002560 | 6530.528  | 5205.508  |
| NM_003833 | 8174.346  | 12960.283 | AF190864  | 5990.152  | 5703.468  | NM_014404 | 1046.508  | 916.952   |
| AK000868  | 6577.256  | 7161.707  | NM_002779 | 4013.731  | 3962.376  | NM_018713 | 413.39    | 511.752   |
| NM_001233 | 3401.491  | 3745.164  | L40397    | 19091.043 | 22290.32  | NM_015947 | 4179.948  | 3659.921  |
| NM_001234 | 1103.544  | 1401.141  | NM_020198 | 8545.655  | 7927.246  | NM_002042 | 7337.229  | 5626.036  |
| BF679789  | 640.002   | 778.635   | AA098879  | 821.072   | 860.77    | AB028944  | 589.947   | 639.416   |
| H97792    | 1352.285  | 1784.526  | AF070525  | 14288.288 | 9943.923  | AJ006268  | 936.037   | 836.228   |
| X04076    | 4093.768  | 4022.165  | NM_001177 | 6628.745  | 6717.87   | M74089    | 4740.634  | 5458.731  |
| W95082    | 2318.358  | 3626.666  | NM_014447 | 1713.308  | 1890.556  | AF190864  | 5644.334  | 5498.163  |
| AA485362  | 1676.622  | 1519.117  | NM_006691 | 1429.033  | 2491.119  | NM_002779 | 2768.933  | 2303.432  |
| AJ222801  | 2686.134  | 3047.535  | NM_001505 | 622.04    | 628.187   | NM_020198 | 6963.145  | 6752.228  |
| W72207    | 2803.859  | 3418.824  | NM_003710 | 2641.536  | 2502.977  | AA098879  | 523.348   | 708.068   |
| BI772354  | 4964.688  | 5030.259  | NM_004843 | 1693.052  | 1226.714  | NM_000025 | 9015.956  | 9065.688  |
| AA733033  | 5803.375  | 6268.521  | AK022845  | 1174.485  | 776.372   | D38521    | 1761.66   | 1709.753  |
| AA583574  | 1682.015  | 1776.309  | S77835    | 488.273   | 464.145   | NM_000403 | 3064.785  | 2423.693  |
| AI690184  | 4432.071  | 5448.486  | AB018347  | 4080.781  | 4123.648  | NM_018127 | 10435.629 | 13108.891 |
| AA927490  | 2539.277  | 3414.468  | AB033073  | 1161.744  | 1307.768  | AB020677  | 1896.791  | 2323.552  |
| NM_001824 | 9075.387  | 9057.36   | NM_005813 | 1523.54   | 1516.949  | AB033097  | 1086.125  | 1345.598  |
| NM_002964 | 443.189   | 403.218   | AB037718  | 5743.268  | 4927.75   | NM_000135 | 727.036   | 1111.007  |
| NM_014734 | 2630.507  | 3445.184  | AL389994  | 1047.383  | 1564.236  | AJ223948  | 3378.306  | 3527.74   |
| NM_002289 | 734.233   | 842.79    | NM_003909 | 4906.34   | 5327.285  | NM_016218 | 1008.516  | 752.106   |
| AK026408  | 1435.302  | 1999.419  | NM_001277 | 5978.76   | 5921.012  | AK022947  | 1388.88   | 1117.975  |
| NM_005025 | 1381.803  | 1466.122  | NM_003659 | 6986.64   | 6285.81   | AL050029  | 1678.313  | 1113.473  |
| NM_006307 | 284.46    | 323.818   | NM_007072 | 1882.393  | 1759.079  | AL049966  | 506.686   | 213.03    |
| NM_017818 | 4511.206  | 4788.33   | NM_012320 | 2428.788  | 2475.146  | NM_005204 | 2419.444  | 1635.37   |
| NM_001767 | 6978.393  | 7684.573  | NM_018208 | 3867.827  | 4594.658  | NM_016203 | 1421.323  | 1183.6    |
| AF028823  | 6415.54   | 7679.283  | NM_015929 | 4465.033  | 4520.301  | NM_002759 | 2501.494  | 1518.697  |
| NM_004295 | 4652.531  | 4958.473  | U90653    | 4282.263  | 4440.58   | NM_007271 | 1407.068  | 1123.434  |
| NM_002087 | 7881.199  | 8791.955  | NM_000196 | 748.928   | 560.784   | NM_006255 | 4214.744  | 4449.491  |
| AB023154  | 802.711   | 611.457   | AK000037  | 1739.594  | 2810.607  | BE392143  | 3475.661  | 2895.361  |
| NM_014585 | 2942.19   | 3265.043  | NM_014404 | 1044.081  | 754.836   | NM_005813 | 1300.682  | 1167.838  |
| AF200815  | 779.531   | 881.786   | NM_015947 | 4931.959  | 4173.04   | AB037718  | 3362.847  | 3055.337  |
| NM_013441 | 2575.642  | 2564.498  | NM_002042 | 9614.559  | 8763.3    | AL389994  | 990.774   | 807.799   |
| NM_014421 | 806.191   | 1012.326  | AB028944  | 633.159   | 725.956   | NM_001277 | 3527.439  | 4397.598  |
| AB033028  | 318.606   | 581.009   | AJ006268  | 777.799   | 967.402   | NM_003659 | 5498.133  | 6413.139  |

|           |           |           |            |           |           |            |           |           |
|-----------|-----------|-----------|------------|-----------|-----------|------------|-----------|-----------|
| NM_01768C | 122.294   | 285.441   | NM_012245  | 14732.071 | 13238.291 | AB029021   | 5984.268  | 7656.65   |
| NM_00430C | 12805.338 | 13947.063 | NM_133263  | 1385.524  | 1569.658  | NM_002101  | 28824.438 | 23922.299 |
| NM_014382 | 341.071   | 120.92    | NM_000025  | 16261.393 | 15208.674 | Z36789     | 2386.197  | 2337.646  |
| AB007859  | 885.686   | 1048.534  | D38521     | 3091.721  | 3408.41   | J02874     | 559.417   | 746.973   |
| NM_006754 | 704.242   | 806.898   | NM_000403  | 5527.558  | 4699.802  | BF310427   | 813.109   | 961.547   |
| NM_001127 | 4128.141  | 4445.252  | NM_018127  | 13084.426 | 11450.337 | N94424     | 369.09    | 511.453   |
| NM_01243C | 3256.084  | 3186.578  | AB020677   | 3005.194  | 1952.963  | H45617     | 387.723   | 389.792   |
| NM_003917 | 4945.141  | 6534.039  | AJ223948   | 6708.6    | 12013.067 | M92642     | 652.194   | 948.373   |
| NM_007077 | 838.014   | 961.86    | NM_016218  | 1970.964  | 4072.876  | AA464532   | 416.62    | 166.972   |
| NM_002956 | 2535.379  | 2758.038  | AK022947   | 3145.286  | 4230.35   | H-U 44385  | 10796.633 | 8080.398  |
| AB018739  | 1525.055  | 2073.599  | NM_005204  | 2503.347  | 1605.675  | ID 1654970 | 5066.416  | 4390.229  |
| NM_00675C | 26588.719 | 24896.061 | NM_016203  | 1774.359  | 1611.486  | ID 2531132 | 5362.143  | 4283.042  |
| NM_020164 | 6603.762  | 5473.62   | NM_002759  | 2306.74   | 2008.513  | ID 4365538 | 255.176   | 111.95    |
| AK023521  | 6776.406  | 6392.162  | NM_007271  | 1878.258  | 1688.534  | BF125928   | 12006.124 | 10279.319 |
| NM_014267 | 26203.107 | 25717.266 | NM_006255  | 5046.458  | 4732.792  | BG571026   | 1140.176  | 724.546   |
| NM_001481 | 1014.998  | 815.65    | BE392143   | 3932.214  | 4034.799  | AA489017   | 4739.773  | 4013.563  |
| U30872    | 1901.178  | 1685.038  | NM_018132  | 2129.941  | 2067.746  | NM_012245  | 13272.394 | 11934.106 |
| AF111783  | 647.024   | 490.369   | NM_003061  | 1693.915  | 1626.624  | NM_133263  | 1410.187  | 1288.29   |
| NM_002639 | 1496.976  | 1213.846  | NM_018207  | 2588.765  | 3704.124  | NM_003284  | 947.336   | 921.326   |
| AK025655  | 3708.959  | 4366.253  | NM_000345  | 12452.797 | 11438.062 | NM_018152  | 390.723   | 536.458   |
| NM_001362 | 248.605   | 295.728   | NM_001862  | 49707.719 | 48789.176 | NM_000319  | 2398.502  | 2879.329  |
| NM_004056 | 3702.673  | 3918.831  | NM_006531  | 1514.851  | 1788.07   | NM_003257  | 353.131   | 211.011   |
| NM_001056 | 1414.439  | 1332.046  | AB029021   | 10225.428 | 8703.411  | NM_012461  | 3657.204  | 3440.053  |
| NM_002539 | 293.481   | 1057.62   | NM_002101  | 40042.961 | 44721.516 | AK001379   | 1133.294  | 1190.45   |
| AY026461  | 2847.428  | 2828.523  | NM_005423  | 515.898   | 625.077   | NM_002023  | 790.762   | 1053.245  |
| AK025708  | 4191.643  | 4274.144  | Z36789     | 3425.547  | 3466.218  | NM_002839  | 357.748   | 455.214   |
| NM_000405 | 609.073   | 478.442   | J02874     | 1528.735  | 1515.221  | AF190500   | 341.975   | 362.541   |
| NM_005564 | 13827.517 | 15448.278 | BF310427   | 1762.842  | 1552.183  | NM_001616  | 442.135   | 581.614   |
| NM_004508 | 4763.629  | 5277.714  | H45617     | 891.279   | 1591.205  | NM_005904  | 449.73    | 227.599   |
| NM_006405 | 4431.065  | 5261.365  | M92642     | 1108.406  | 2629.723  | NM_005273  | 10249.181 | 8592.199  |
| AJ245946  | 469.757   | 706.129   | ID 2531132 | 5828.903  | 3718.308  | NM_000524  | 506.629   | 482.19    |
| NM_006749 | 1387.022  | 1577.229  | BF125928   | 14183.097 | 11625.743 | NM_006576  | 1062.306  | 790.114   |
| NM_005639 | 277.429   | 324.276   | BG571026   | 1069.287  | 1147.827  | NM_018645  | 618.778   | 494.61    |
| NM_004694 | 692.707   | 540.389   | AA489017   | 5328.314  | 4539.116  | AB035266   | 1683.055  | 1359.798  |
| AL137619  | 802.031   | 809.292   | AK022845   | 1323.172  | 1216.15   | NM_003744  | 1975.628  | 1874.88   |
|           | 320.996   | 888.312   | S77835     | 440.314   | 510.721   | NM_006378  | 12587.837 | 10070.288 |
| NM_005052 | 26670.545 | 33310.789 | NM_002985  | 561.345   | 599.546   | NM_018132  | 2264.61   | 2462.711  |
| BF038439  | 396.047   | 495.844   | AB018347   | 5319.635  | 5359.736  | NM_003061  | 1416.172  | 1578.399  |
| AF319476  | 2408.096  | 2005.534  | AB033073   | 1701.51   | 1857.126  | NM_018207  | 1922.487  | 2003.041  |
| AK001913  | 9232.231  | 11805.438 | NM_003284  | 1328.323  | 1282.069  | NM_000345  | 11545.064 | 11876.259 |
| NM_017737 | 1630.819  | 1780.693  | NM_018152  | 915.574   | 1076.015  | NM_001862  | 43219.238 | 50155.617 |
| NM_004292 | 2518.602  | 2780.811  | NM_000319  | 4560.875  | 4624.259  | NM_006531  | 1624.512  | 1803.156  |
| NM_015484 | 7073.373  | 7181.313  | NM_003257  | 1296.375  | 1839.269  | M74089     | 3759.99   | 4215.502  |
| NM_018046 | 2821.008  | 3754.651  | NM_012461  | 5040.449  | 4747.74   | AF190864   | 4322.341  | 4439.14   |
| NM_013316 | 1770.785  | 2300.07   | AK001379   | 1708.536  | 1461.584  | NM_002779  | 2137.204  | 2519.911  |
| M20701    | 7083.076  | 8969      | NM_006576  | 882.516   | 720.294   | L40397     | 13894.131 | 16797.75  |
| NM_002912 | 1817.546  | 2207.197  | NM_018645  | 679.206   | 831.385   | NM_020198  | 5572.899  | 5571.89   |
| NM_013284 | 4981.276  | 5461.085  | AB035266   | 2621.516  | 2021.868  | AA098879   | 491.97    | 482.504   |
| NM_006739 | 5257.719  | 4650.533  | NM_003744  | 2309.296  | 2070.456  | NM_001177  | 4982.512  | 5440.444  |
| NM_013274 | 7684.15   | 7949.588  | NM_006378  | 13852.025 | 11513.869 | NM_014447  | 1132.206  | 1108.849  |
| AL050187  | 1600.266  | 1449.811  | NM_014404  | 2207.529  | 2044.427  | NM_006691  | 750.737   | 702.327   |
| NM_007127 | 352.367   | 241.791   | NM_018713  | 705.215   | 755.352   | NM_001505  | 475.973   | 790.45    |
| NM_012387 | 17331.459 | 16363.258 | NM_015947  | 5519.133  | 6202.957  | NM_00371C  | 2290.321  | 1899.923  |

|           |           |           |           |           |           |           |           |           |
|-----------|-----------|-----------|-----------|-----------|-----------|-----------|-----------|-----------|
| NM_014735 | 2035.157  | 1836.41   | NM_002042 | 13675.458 | 13506.772 | Z83805    | 529.113   | 403.637   |
| NM_004252 | 29936.629 | 27428.701 | AB028944  | 884.438   | 948.23    | NM_004666 | 746.612   | 583.73    |
| AF172929  | 20124.896 | 19813.83  | AJ006268  | 1138.663  | 1262.587  | NM_003614 | 666.642   | 437.827   |
| NM_012465 | 1114.45   | 2187.303  | M74089    | 5827.365  | 4951.47   | NM_014257 | 2266.546  | 1826.322  |
| M60499    | 2247.573  | 2668.697  | AF190864  | 7254.251  | 6575.052  | NM_004843 | 1673.644  | 1718.293  |
| NM_000366 | 478.056   | 273.642   | NM_020198 | 9352.606  | 10715.446 | AK022845  | 1335.956  | 1184.409  |
| NM_003833 | 4506.028  | 3221.445  | AA098879  | 845.21    | 912.007   | S77835    | 572.252   | 347.09    |
| AK000868  | 4245.344  | 2464.983  | NM_004666 | 776.278   | 867.366   | NM_002985 | 507.15    | 404.137   |
| NM_001233 | 2129.9    | 1374.183  | NM_003614 | 815.404   | 944.36    | AB018347  | 4370.058  | 5490.882  |
| NM_001234 | 1127.714  | 752.146   | NM_014257 | 2579.737  | 1929.31   | AB033073  | 1671.873  | 1642.026  |
| BF679789  | 977.718   | 627.213   | NM_001140 | 373.334   | 302.701   | NM_005813 | 1136.065  | 1081.786  |
| H97792    | 1360.978  | 1441.355  | NM_004843 | 1927.749  | 1735.437  | AB037718  | 2519.523  | 2966.733  |
| L33404    | 585.044   | 342.547   | NM_005204 | 3464.23   | 3371.504  | AL389994  | 771.754   | 852.18    |
| X04076    | 4435.823  | 4328.872  | NM_016203 | 2255.386  | 2344.886  | NM_003909 | 3883.028  | 4052.015  |
| W95082    | 2856.55   | 3180.925  | NM_002759 | 3964.344  | 6623.307  | NM_001277 | 2939.906  | 3818.524  |
| AA485362  | 1185.651  | 1364.218  | NM_007271 | 2115.242  | 2393.198  | NM_003659 | 4080.268  | 4814.003  |
| AJ222801  | 2563.695  | 3175.084  | NM_006255 | 6099.775  | 6017.793  | NM_007072 | 1402.549  | 1558.116  |
| W72207    | 2571.291  | 3309.818  | BE392143  | 5125.077  | 5232.682  | NM_012320 | 1921.135  | 2165.821  |
| BI772354  | 5159.831  | 5802.277  | NM_005813 | 1667.05   | 1873.965  | NM_018208 | 2567.202  | 2780.979  |
| AA733033  | 5967.215  | 6276.33   | AB037718  | 6556.583  | 7427.522  | NM_015929 | 3594.091  | 3393.88   |
| AA583574  | 1763.087  | 1958.871  | NM_003659 | 7417.044  | 8857.488  | U90653    | 3555.508  | 2875.3    |
| AI690184  | 3868.564  | 4013.512  | NM_006745 | 39725.742 | 31488.17  | NM_000196 | 432.427   | 723.254   |
| AA927490  | 2094.758  | 1945.03   | NM_000275 | 848.513   | 1146.842  | NM_018339 | 4950.645  | 4960.259  |
| NM_001481 | 482.282   | 401.227   | AK000037  | 896.202   | 874.909   | NM_006745 | 35109.555 | 33081.906 |
| U30872    | 1271.752  | 1098.582  | NM_014760 | 3295.517  | 3109.785  | NM_000275 | 655.11    | 624.075   |
| NM_002639 | 924.314   | 505.412   | NM_018398 | 1120.068  | 1306.993  | AK000037  | 749.764   | 448.267   |
| NM_014734 | 1473.468  | 968.021   | NM_002560 | 12320.14  | 11638.732 | NM_014760 | 2317.318  | 2228.175  |
| NM_002289 | 423.415   | 160.428   | NM_000787 | 706.695   | 610.011   | NM_018398 | 903.092   | 812.933   |
| AK026408  | 1142.562  | 749.606   | U57962    | 3589.398  | 4233.155  | NM_002560 | 7518.422  | 6689.241  |
| NM_005025 | 1352.755  | 780.385   | NM_016176 | 9432.987  | 9990.993  | NM_014404 | 1221.837  | 1165.695  |
| NM_006307 | 370.045   | 236.577   | NM_005574 | 531.53    | 456.642   | NM_018713 | 476.073   | 601.162   |
| NM_017818 | 3504.34   | 2573.974  | NM_017895 | 5303.115  | 4487.926  | NM_015947 | 4478.235  | 4673.855  |
| NM_020433 | 372.379   | 213.017   | NM_004610 | 2060.327  | 1809.803  | NM_002042 | 8014.631  | 7220.837  |
| NM_001767 | 5800.809  | 5365.015  | NM_001612 | 2091.558  | 2288.564  | AB028944  | 839.975   | 1155.223  |
| AF028823  | 6285.302  | 6460.845  | AK027002  | 3229.674  | 4840.755  | AJ006268  | 973.182   | 1113.661  |
| NM_004970 | 158.208   | 380.76    | D38521    | 3725.718  | 5262.436  | NM_012245 | 10403.04  | 11262.021 |
| NM_004295 | 5073.819  | 5152.615  | AB033097  | 1913.735  | 1776.811  | NM_133263 | 930.987   | 1050.724  |
| NM_002087 | 7712.918  | 8271.055  | NM_000135 | 1224.305  | 1081.68   | NM_000025 | 9747.609  | 10856.665 |
| AB023154  | 827.437   | 826.619   | AJ223948  | 4317.644  | 4397.357  | D38521    | 1934.321  | 1753.947  |
| NM_001714 | 459.181   | 208.236   | NM_016218 | 1377.854  | 1319.852  | NM_000403 | 3094.862  | 2718.187  |
| NM_014585 | 2950.629  | 3603.692  | AK022947  | 2223.65   | 2183.458  | NM_018127 | 13242.32  | 34875.422 |
| AF200815  | 739.467   | 878.695   | AL050029  | 2326.726  | 2495.458  | AB020677  | 1970.021  | 2662.933  |
| NM_014564 | 276.11    | 389.207   | AL049966  | 475.599   | 649.04    | AB033097  | 1286.294  | 1619.487  |
| NM_013441 | 2758.49   | 3067.565  | NM_004063 | 400.093   | 425.642   | NM_000135 | 1049.091  | 929.57    |
| NM_014421 | 549.211   | 540.148   | AB040976  | 10908.713 | 11950.434 | AJ223948  | 3499.498  | 2893.655  |
| NM_006749 | 924.525   | 1093.601  | NM_018641 | 6310.856  | 6044.816  | NM_016218 | 922.986   | 681.75    |
| AL137619  | 599.36    | 361.508   | U49089    | 1333.646  | 1381.675  | AK022947  | 1463.432  | 1397.512  |
| NM_003615 | 525.862   | 204.624   | NM_002221 | 3075.075  | 2581.741  | AL050029  | 1652.041  | 1450.176  |
| NM_004300 | 9761.929  | 6267.234  | NM_002371 | 2835.777  | 2989.98   | AL049966  | 385.126   | 422.604   |
| AB007859  | 1221.975  | 833.752   | NM_002562 | 823.915   | 1201.896  | NM_005204 | 2765.446  | 2061.25   |
| NM_006754 | 554.42    | 406.775   | AK024502  | 4726.4    | 7673.684  | NM_016203 | 1802.703  | 1893.069  |
| NM_001127 | 3084.536  | 2304.387  | NM_001124 | 2300.921  | 5285.44   | NM_002759 | 2784.169  | 2432.263  |
| NM_012430 | 2650.564  | 1679.62   | NM_004586 | 4577.662  | 6378.769  | NM_007271 | 1944.161  | 1826.347  |

|           |           |           |           |           |           |            |           |           |
|-----------|-----------|-----------|-----------|-----------|-----------|------------|-----------|-----------|
| NM_003917 | 3714.721  | 3242.366  | NM_004844 | 6250.602  | 6805.668  | NM_00625E  | 5042.832  | 6467.595  |
| NM_007077 | 971.924   | 636.367   | NM_013447 | 776.131   | 767.345   | BE392143   | 4283.38   | 3917.259  |
| NM_00295E | 2320.885  | 2007.719  | AF302109  | 1302.869  | 1330.742  | NM_01813E  | 1860.682  | 1874.144  |
| AB018739  | 1959.706  | 1965.19   | AL117485  | 7473.802  | 6295.627  | NM_003061  | 1200.737  | 1518.046  |
| NM_00675C | 27747.406 | 26164.705 | NM_00350E | 794.513   | 784.311   | NM_018207  | 1260.393  | 1563.994  |
| NM_020164 | 8009.559  | 9012.808  | NM_007191 | 1071.782  | 872.232   | NM_00034E  | 6515.214  | 7151.107  |
| AK023521  | 7599.234  | 7285.408  | AL109667  | 981.823   | 1097.365  | NM_00186E  | 40685.27  | 38701.02  |
| NM_014267 | 27955.008 | 26730.654 | NM_00084C | 661.024   | 296.44    | NM_006531  | 1194.834  | 1187.429  |
| AL050187  | 1166.701  | 1285.931  | AF034102  | 28054.086 | 30084.086 | AB029021   | 5909.833  | 7112.026  |
| NM_012387 | 15768.468 | 22966.678 | AJ008142  | 16237.091 | 16691.221 | NM_002101  | 30629.342 | 28130.316 |
| NM_01473E | 1824.212  | 2115.911  | AL035289  | 389.564   | 575.646   | NM_00542E  | 275.405   | 617.362   |
| NM_00425E | 23906.402 | 26814.945 | NM_00134E | 3495.013  | 4184.079  | Z36789     | 2845.088  | 2531.09   |
| AF172929  | 17962.834 | 17741.822 | NM_00727E | 10923.529 | 9710.24   | J02874     | 585.592   | 646.898   |
| NM_00639E | 8391.397  | 7266.523  | NM_01902E | 33301.746 | 29911.904 | BF310427   | 1110.191  | 1740.083  |
| AK025655  | 2269.082  | 2574.432  | NM_018461 | 5573.91   | 5853.163  | N94424     | 401.875   | 279.12    |
| NM_00405E | 3056.71   | 1877.678  | AF235023  | 8054.91   | 8947.416  | AA045192   | 546.785   | 516.018   |
| NM_00105E | 983.042   | 842.348   | NM_00691C | 5627.111  | 5147.635  | M92642     | 513.561   | 439.217   |
| AY026461  | 2132.444  | 1465.979  | AF162667  | 2871.213  | 2945.916  | AA464532   | 470.759   | 821.595   |
| AK025708  | 2968.588  | 1814.323  | AB046847  | 5149.647  | 4427.106  | H-U 44385  | 12191.922 | 11031.043 |
| NM_00040E | 607.646   | 236.084   | NM_000447 | 2113.339  | 1974.222  | ID 1654970 | 5549.447  | 4832.19   |
| NM_005564 | 11667.426 | 7377.447  | AF303378  | 6196.034  | 8296.55   | ID 2531132 | 6482.271  | 5665.104  |
| NM_00450E | 4401.167  | 3696.171  | NM_016037 | 11196.808 | 12067.681 | AA485665   | 511.622   | 247.539   |
| NM_00640E | 3717.664  | 3155.242  | NM_01614C | 1157.398  | 2236.108  | BF125928   | 14227.369 | 14989.568 |
| AJ245946  | 469.657   | 445.759   | NM_01596E | 396.288   | 618.363   | BG571026   | 1666.227  | 1713.048  |
| NM_00239C | 5449.607  | 6058.518  | NM_000417 | 2383.935  | 2001.73   | AA489017   | 5188.03   | 5150.597  |
| NM_00614E | 691.627   | 935.695   | NM_002424 | 667.751   | 697.715   | AK022845   | 1206.128  | 1681.62   |
| NM_01491C | 2260.641  | 3263.417  | NM_01216E | 2083.791  | 2115.83   | NM_003004  | 532.675   | 722.728   |
| AK001064  | 3553.512  | 4545.919  | NM_00703E | 1598.199  | 1939.527  | S77835     | 542.209   | 799.475   |
| AB029031  | 7127.494  | 8551.706  | AF311324  | 8382.349  | 8567.368  | NM_00298E  | 496.378   | 382.441   |
| NM_001294 | 6388.161  | 7184.778  | AF124433  | 733.592   | 947.702   | AB018347   | 3244.679  | 4860.627  |
| NM_014241 | 9506.758  | 14711.87  | AK001647  | 794.926   | 657.507   | AB033073   | 1380.858  | 1295.439  |
| AF302786  | 3244.789  | 3871.37   | NM_001461 | 561.924   | 511.353   | NM_003284  | 896.562   | 814.078   |
| AL122083  | 1819.614  | 2769.015  | AF061556  | 1838.963  | 1863.078  | NM_01815E  | 372.697   | 486.76    |
| NM_00505E | 17221.027 | 15579.376 | AF036144  | 447.593   | 835.17    | NM_00031E  | 3040.314  | 3337.744  |
| AF319476  | 1811.372  | 1616.521  | NM_00416C | 8537.96   | 7755.996  | NM_003257  | 316.283   | 302.012   |
| AK001913  | 6234.362  | 4849.976  | AL109677  | 1197.208  | 1204.874  | NM_012461  | 4046.645  | 3361.155  |
| NM_017737 | 1172.77   | 986.695   | NM_003941 | 36496.66  | 31240.543 | AK001379   | 1248.505  | 1379.077  |
| NM_00429E | 1989.464  | 1253.224  | AF177909  | 1151.065  | 889.07    | NM_01745C  | 1423.814  | 1484.463  |
| NM_015484 | 4882.005  | 3214.152  | NM_002664 | 1442.869  | 1458.917  | NM_00202E  | 882.471   | 718.487   |
| NM_01804E | 1967.743  | 1203.828  | AB018271  | 1257.367  | 1328.202  | NM_00283E  | 581.898   | 587.977   |
| NM_01331E | 998.65    | 593.169   | AL137665  | 3354.502  | 2836.277  | AF190500   | 281.705   | 402.79    |
| M20701    | 4313.247  | 2347.624  | NM_016434 | 1535.21   | 1507.618  | NM_00161E  | 500.192   | 488.284   |
| NM_00291E | 1261.097  | 854.057   | U36561    | 54648.75  | 61786.762 | NM_005904  | 484.909   | 326.711   |
| NM_013284 | 3636.382  | 2632.564  | NM_017757 | 4096.977  | 4494.656  | NM_00527E  | 11378.382 | 10243.26  |
| NM_00673E | 4054.662  | 2676.76   | AB002306  | 3572.003  | 4120.166  | NM_000524  | 511.21    | 403.12    |
| NM_013274 | 6316.027  | 4007.388  | NM_00130C | 4782.022  | 5036.486  | NM_00657E  | 1399.59   | 1141.644  |
| AL157500  | 546.991   | 586.675   | NM_01247E | 1108.814  | 1241.027  | NM_01864E  | 799.835   | 651.331   |
| AK024955  | 4036.176  | 4700.326  | NM_018187 | 9217.598  | 11896.229 | AB035266   | 2596.713  | 2642.316  |
| AF169693  | 506.704   | 893.644   | NM_00301E | 29152.008 | 25166.232 | NM_003744  | 2398.865  | 2481.746  |
| L23206    | 1873.662  | 2416.548  | NM_00546E | 16872.752 | 14099.024 | NM_00637E  | 13348.733 | 13208.263 |
| NM_01219E | 8303.969  | 8065.973  | NM_00132E | 2988.062  | 3112.681  | NM_014404  | 1117.53   | 1816.794  |
| NM_00629E | 4047.231  | 4239.688  | BC019932  | 4060.775  | 7207.421  | NM_01871E  | 663.561   | 939.414   |
| NM_00722E | 4522.222  | 4614.821  | NM_020144 | 2250.925  | 2033.946  | NM_015947  | 4043.024  | 5398.937  |

|           |           |           |           |           |           |           |           |           |
|-----------|-----------|-----------|-----------|-----------|-----------|-----------|-----------|-----------|
| AB011105  | 662.439   | 800.561   | NM_003908 | 51216.152 | 47476.125 | NM_002042 | 7306.479  | 7843.361  |
| NM_002213 | 583.74    | 378.95    | BE893142  | 1485.716  | 1309.953  | AB028944  | 566.953   | 628.863   |
| NM_018970 | 214.399   | 312.766   | NM_003103 | 5682.857  | 4150.163  | AJ006268  | 888.539   | 955.94    |
| NM_004814 | 9582.86   | 7432.06   | NM_015340 | 4868.237  | 4476.562  | M74089    | 4068.401  | 4758.474  |
| D86976    | 16749.756 | 14710.283 | NM_006451 | 4081.683  | 3188.963  | AF190864  | 4642.441  | 5402.068  |
| NM_004057 | 638.437   | 502.489   | NM_002094 | 2023.044  | 1844.525  | NM_002779 | 2358.708  | 2584.737  |
| NM_018971 | 627.018   | 546.686   | NM_002937 | 1736.262  | 1599.81   | L40397    | 16319.421 | 18255.041 |
| K03175    | 714.002   | 437.906   | NM_003191 | 4160.495  | 3314.37   | NM_020198 | 6286.893  | 5600.732  |
| NM_003265 | 679.022   | 407.803   | AL137476  | 5244.028  | 5210.504  | AA098879  | 426.31    | 469.151   |
| NM_003015 | 339.27    | 276.046   | AF052174  | 2890.187  | 2769.913  | AF070525  | 6887.344  | 6587.105  |
| NM_003711 | 1825.256  | 1181.337  | AF070590  | 1103.053  | 1833.667  | NM_001177 | 5241.835  | 4184.863  |
| NM_006496 | 9502.835  | 4707.618  | NM_004709 | 672.584   | 1618.681  | NM_014447 | 1159.629  | 874.312   |
| NM_000828 | 540.451   | 341.97    | NM_000761 | 37161.508 | 30818.498 | NM_006691 | 803.595   | 817.383   |
| NM_004826 | 617.209   | 272.23    | NM_020142 | 2463.984  | 2341.565  | NM_001505 | 668.289   | 699.408   |
| NM_013314 | 545.916   | 400.549   | NM_000774 | 4530.742  | 4601.637  | NM_003710 | 2530.629  | 1977.421  |
| NM_002072 | 2671.157  | 1826.714  | NM_017781 | 16424.938 | 12988.927 | Z83805    | 618.44    | 408.304   |
| NM_003182 | 448.498   | 285.766   | NM_006004 | 56103.469 | 56554.348 | NM_004666 | 943.135   | 1043.528  |
| BE904126  | 2821.216  | 3613.684  | NM_004894 | 30810.109 | 25268.902 | NM_003614 | 794.119   | 821.265   |
| AF272380  | 9809.667  | 10099.501 | AB028960  | 752.393   | 703.066   | NM_014257 | 3229.324  | 3072.919  |
| NM_004431 | 1018.32   | 1151.068  | AK000689  | 1045.309  | 778.976   | NM_001140 | 423.836   | 463.529   |
| NM_002012 | 2143.248  | 2309.214  | NM_006741 | 5677.705  | 4808.312  | NM_016059 | 182.436   | 182.695   |
| NM_002070 | 39721.109 | 40484.98  | NM_014166 | 10024.886 | 8613.611  | NM_004843 | 2054.9    | 2304.74   |
| AF227969  | 4663.195  | 5525.917  | AL117606  | 4849.702  | 4864.479  | NM_005204 | 2302.127  | 2664.905  |
| AF116657  | 495.727   | 507.17    | NM_012330 | 2144.94   | 2049.106  | NM_016203 | 1363.202  | 1835.58   |
| NM_004102 | 220.839   | 520.628   | AF294278  | 2293.299  | 1715.888  | NM_002759 | 2158.052  | 2804.236  |
| NM_003944 | 3404.02   | 3822.079  | NM_018211 | 3439.477  | 2729.031  | NM_007271 | 1454.639  | 1502.684  |
| NM_016120 | 39049.965 | 35496.598 | NM_014520 | 3138.412  | 2580.88   | NM_006255 | 4077.122  | 4875.387  |
| NM_002893 | 1097.934  | 1220.75   | NM_002616 | 3426.744  | 3635.797  | BE392143  | 3249.273  | 3556.061  |
| NM_002393 | 3918.249  | 3361.063  | AK025712  | 9671.124  | 8312.828  | NM_005813 | 1108.826  | 1012.481  |
| NM_002669 | 7661.779  | 7042.782  | AK026375  | 4429.955  | 4186.944  | AB037718  | 2867.064  | 3583.139  |
| AB014600  | 1474.025  | 1489.275  | NM_014710 | 947.021   | 1101.833  | AL389994  | 828.808   | 905.62    |
| NM_018312 | 3398.107  | 2877.481  | U85992    | 1431.064  | 2029.361  | NM_003909 | 4348.069  | 4241.166  |
| X98259    | 775.462   | 587.202   | AL110152  | 783.971   | 804.362   | NM_001277 | 3419.668  | 4786.962  |
| NM_014792 | 154.388   | 281.283   | AF131745  | 4230.023  | 4401.071  | NM_003659 | 4731.706  | 4342.297  |
| X98260    | 4131.488  | 3105.539  | AL117565  | 3735.85   | 4047.74   | NM_007072 | 1331.626  | 1292.313  |
| NM_007217 | 11018.412 | 8024.383  | AF147305  | 1156.012  | 2516.084  | NM_012320 | 1941.073  | 1491.166  |
| NM_014777 | 2281.141  | 1546.807  | AK022109  | 1848.482  | 2129.161  | NM_018208 | 3001.613  | 2194.979  |
| NM_001102 | 7954.726  | 6840.72   | AK022103  | 720.478   | 1352.332  | NM_015929 | 4066.56   | 3514.852  |
| NM_002818 | 51122.148 | 50427.434 | NM_007030 | 754.545   | 516.617   | U90653    | 3625.542  | 2848.444  |
| NM_001937 | 508.124   | 402.824   | AF086232  | 404.824   | 444.981   | NM_000196 | 539.282   | 517.344   |
| AK024778  | 1278.721  | 681.035   | NM_017742 | 1327.194  | 1393.989  | NM_018339 | 6094.54   | 5459.702  |
| AK021608  | 2980.935  | 3518.466  | NM_005108 | 2220.361  | 2032.421  | NM_000275 | 858.05    | 952.207   |
| NM_006044 | 5698.994  | 6893.994  | AK022292  | 5291.354  | 4497.502  | AK000037  | 1123.507  | 801.486   |
| AK025498  | 3927.301  | 3718.731  | AB051436  | 3213.057  | 2827.703  | NM_014760 | 2830.28   | 2945.851  |
| NM_001395 | 657.238   | 709.397   | AK026482  | 20814.268 | 18427.184 | NM_018398 | 1207.064  | 1178.496  |
| NM_002068 | 13748.475 | 13237.788 | AL137473  | 3715.945  | 3820.643  | NM_002560 | 8135.313  | 9368.232  |
| NM_013338 | 2664.307  | 2938.411  | AJ001873  | 3339.095  | 3181.399  | NM_000787 | 745.011   | 627.754   |
| NM_014671 | 2394.686  | 2527.713  | AK022604  | 2537.923  | 2623.315  | U57962    | 2514.547  | 3194.819  |
| NM_001814 | 10528.514 | 10354.051 | U66048    | 1465.097  | 1357.391  | NM_016176 | 6578.065  | 8655.953  |
| NM_005656 | 1228.926  | 942.555   | AK023401  | 6964.043  | 7809.647  | NM_017895 | 3449.697  | 3322.238  |
| NM_006012 | 12499.769 | 11215.237 | AK001865  | 1145.333  | 1286.344  | NM_004610 | 1255.266  | 1295.68   |
| NM_002151 | 935.095   | 957.646   | AK024035  | 13092.368 | 12104.155 | NM_001612 | 1462.442  | 1521.439  |
| NM_014889 | 2718.298  | 2432.55   | AL050079  | 1687.656  | 1389.522  | AK027002  | 1523.927  | 1805.005  |

|           |           |           |           |           |           |           |           |           |
|-----------|-----------|-----------|-----------|-----------|-----------|-----------|-----------|-----------|
| AF173935  | 1653.667  | 1486.965  | AL080233  | 2938.198  | 2687.996  | AB025254  | 1404.816  | 1958.718  |
| AK025322  | 1509.669  | 1593.382  | AL117591  | 1230.044  | 1011.759  | NM_004081 | 1049.635  | 1115.65   |
| NM_017887 | 7976.676  | 6772.317  | AL050132  | 676.926   | 1422.621  | NM_000025 | 10382.092 | 8189.441  |
| AF007152  | 2038.967  | 1546.019  | AL117663  | 1033.83   | 745.456   | D38521    | 2112.705  | 1413.907  |
| NM_017575 | 1108.827  | 1750.657  | NM_014293 | 1376.838  | 1227.983  | NM_000403 | 4095.182  | 3763.416  |
| NM_014423 | 8818.198  | 6433.175  | AK024432  | 2832.888  | 2307.134  | NM_018127 | 11921.31  | 11679.372 |
| NM_018083 | 2070.809  | 2392.364  | AL137513  | 998.732   | 845.305   | AB020677  | 2593.361  | 2787.146  |
| AL110188  | 5020.309  | 4725.55   | AF088001  | 582.734   | 764.35    | AB033097  | 1371.265  | 1712.956  |
| D70834    | 16700.957 | 18664.301 | NM_018067 | 5861.008  | 4763.685  | AJ223948  | 4423.037  | 4397.7    |
| NM_000970 | 57788.348 | 60433.566 | NM_018956 | 18430.176 | 15559.232 | NM_016218 | 1216.043  | 1093.712  |
| NM_033288 | 634.699   | 569.78    | NM_014787 | 2727.267  | 2530.001  | AK022947  | 1956.757  | 2018.166  |
| AK000102  | 1534.034  | 1351.509  | AL122109  | 835.739   | 824.252   | AL050029  | 2304.372  | 2395.632  |
| AB040916  | 2543.511  | 2402.552  | AF074988  | 1047.275  | 1326.92   | AL049966  | 480.145   | 553.078   |
| NM_005587 | 2316.643  | 1797.794  | AK024946  | 1093.91   | 868.736   | NM_004063 | 335.691   | 487.067   |
| AF038362  | 2096.735  | 1711.396  | AK001432  | 1422.763  | 1626.719  | AB040976  | 5231.244  | 7083.423  |
| NM_005195 | 2363.166  | 2145.834  | AL133568  | 5862.49   | 5952.866  | NM_018641 | 3897.192  | 5594.146  |
| NM_005481 | 2402.002  | 1894.487  | AF009265  | 2215.805  | 2413.278  | U49089    | 792.39    | 971.812   |
| NM_004715 | 2883.84   | 2474      | AF009309  | 1920.996  | 2106.375  | NM_002221 | 1355.434  | 1728.318  |
| L40392    | 2471.58   | 2821.709  | NM_002360 | 2234.41   | 3153.691  | NM_002371 | 2475.281  | 2551.185  |
| BF541482  | 503.098   | 362.455   | AF009274  | 178.237   | 503.999   | NM_002562 | 383.393   | 372.217   |
| NM_001007 | 64568.715 | 66236.195 | AF009322  | 589.263   | 856.733   | AK024502  | 2798.66   | 2525.03   |
| NM_003017 | 7442.597  | 5720.55   | AF056425  | 1262.43   | 1236.393  | NM_001124 | 1532.87   | 1326.764  |
| NM_020366 | 5194.546  | 6636.488  | NM_018033 | 6840.273  | 4892.856  | NM_004586 | 2707.602  | 2249.021  |
| AF086497  | 1574.275  | 1487.261  | AK001945  | 833.29    | 834.557   | NM_004844 | 3780.465  | 3433.532  |
| NM_020141 | 7344.268  | 8011.884  | AK021541  | 482.837   | 347.523   | NM_013447 | 523.195   | 493.119   |
| NM_006482 | 885.436   | 1166.749  | AK021630  | 855.109   | 879.618   | NM_000051 | 2345.614  | 2003.4    |
| NM_003779 | 325.823   | 373.693   | AK021831  | 859.637   | 929.759   | NM_005709 | 376.07    | 201.151   |
| NM_003635 | 2337.163  | 2639.583  | AK025650  | 1632.371  | 1385.88   | NM_004180 | 3256.677  | 2665.206  |
| NM_000662 | 3327.096  | 3179.123  | AK026401  | 974.734   | 857.845   | NM_004786 | 26822.438 | 23439.311 |
| NM_000292 | 1963.422  | 1924.957  | AK026773  | 1083.472  | 1110.525  | AF302109  | 928.354   | 749.268   |
| NM_003689 | 11850.17  | 10028.578 | U73530    | 370.706   | 483.557   | AL117485  | 5348.242  | 4823.315  |
| NM_016173 | 1332.065  | 1154.272  | AF086158  | 7256.58   | 7142.608  | NM_003505 | 641.378   | 567.564   |
| NM_002875 | 6581.049  | 6411.351  | AF086050  | 5395.47   | 5804.397  | NM_007191 | 939.142   | 938.571   |
| NM_004427 | 4815.853  | 4394.167  | AF147375  | 1524.414  | 1585.372  | AL109667  | 717.355   | 713.823   |
| U90549    | 7810.96   | 6964.274  | X51524    | 5571.281  | 5489.848  | NM_000840 | 609.026   | 409.755   |
| NM_013240 | 9147.7    | 8368.217  | AK025759  | 3526.925  | 3953.319  | AF034102  | 22399.182 | 23444.828 |
| NM_015874 | 20399.508 | 18819.352 | AK024105  | 437.212   | 722.463   | AJ008142  | 9500.875  | 12596.144 |
| NM_004965 | 52839.855 | 61644.473 | AJ238556  | 408.439   | 683.411   | AL035289  | 263.926   | 239.901   |
| AF312393  | 5598.4    | 6254.184  | AK021516  | 2403.56   | 2779.945  | NM_001343 | 2453.988  | 2826.684  |
| AF272898  | 2859.686  | 3141.265  | Z70699    | 549.379   | 771.653   | NM_007275 | 6289.135  | 7029.639  |
| AB037817  | 389.952   | 290.733   | NM_006898 | 922.347   | 913.847   | NM_019025 | 17117.188 | 18013.467 |
| AB032951  | 2286.713  | 2367.597  | AK023429  | 766.563   | 587.726   | NM_018461 | 3479.416  | 3287.847  |
| NM_003417 | 1063.156  | 869.702   | AK022276  | 947.923   | 741.049   | AF235023  | 5541.59   | 4687.423  |
| NM_005149 | 5074.922  | 4632.258  | AK026881  | 413.846   | 299.798   | NM_006910 | 3415.341  | 3187.291  |
| AK024073  | 899.246   | 1280.029  | AK023774  | 962.201   | 1008.537  | AF162667  | 1965.963  | 1658.6    |
| AK022223  | 629.168   | 693.023   | AL049377  | 647.464   | 522.63    | AB046847  | 3064.947  | 2269.23   |
| NM_005887 | 4100.023  | 5334.368  | NM_003544 | 53467.488 | 55129.789 | NM_000447 | 937.489   | 861.241   |
| AK024921  | 619.097   | 904.837   | U17640    | 419.619   | 613.816   | NM_006354 | 3540.49   | 2887.023  |
| AL110232  | 144.802   | 251.377   | AK001187  | 3145.98   | 2217.807  | AF303378  | 3800.33   | 2815.072  |
| AK026103  | 2996.799  | 3315.765  | NM_003529 | 19108.516 | 18820.732 | NM_016037 | 8197.304  | 6065.112  |
| NM_016353 | 3382.795  | 3625.707  | AF056436  | 4299.543  | 5357.557  | NM_000043 | 5756.714  | 4836.904  |
| AK022567  | 1629.192  | 1362.582  | AB023191  | 1221.108  | 1212.398  | NM_015965 | 508.476   | 288.695   |
| S77357    | 815.44    | 690.815   | AK027212  | 6083.95   | 6177.792  | NM_000417 | 2527.927  | 2655.986  |

|           |           |           |           |          |          |           |           |           |
|-----------|-----------|-----------|-----------|----------|----------|-----------|-----------|-----------|
| AK023450  | 1354.513  | 1034.624  | X56197    | 1059.346 | 988.336  | NM_020356 | 615.968   | 388.982   |
| AL080280  | 310.647   | 630.885   | NM_005199 | 4504.864 | 4203.811 | AF152527  | 217.519   | 187.445   |
| AB028947  | 380.66    | 465.764   | U90905    | 1285.994 | 1015.371 | NM_012104 | 5688.358  | 7879.434  |
| AF035314  | 889.905   | 988.875   | AF161422  | 2853.566 | 2292.353 | NM_006144 | 19322.506 | 22784.705 |
| NM_018036 | 939.072   | 1900.069  | AL137384  | 1130.156 | 862.349  | AL136549  | 7924.98   | 10174.54  |
| AF052087  | 1615.984  | 2260.928  | AF070619  | 1232.978 | 2159.615 | NM_012166 | 1022.875  | 1305.883  |
| AF007143  | 530.031   | 651.98    | NM_020153 | 2291.38  | 2422.644 | NM_002216 | 299.922   | 327.568   |
| AF147417  | 262.944   | 490.558   | NM_005321 | 4040.525 | 4484.606 | NM_007036 | 914.824   | 868.4     |
| AK023656  | 865.219   | 853.063   | AF073520  | 1567.803 | 1477.913 | AF311324  | 5565.962  | 4637.546  |
| AK022989  | 1030.386  | 771.641   | NM_014015 | 7301.301 | 5779.71  | AF124433  | 593.311   | 413.668   |
| AK001604  | 2239.229  | 1979.849  | AK026839  | 1481.505 | 1095.005 | AK001647  | 404.281   | 273.217   |
| AK021619  | 822.682   | 953.578   | AK024973  | 428.259  | 490.372  | NM_001461 | 477.662   | 387.939   |
| AK025872  | 127.22    | 254.739   | AJ008123  | 3703.79  | 2844.441 | AF061556  | 1306.435  | 1132.692  |
| AF131762  | 21261.68  | 22304.293 | AJ008156  | 1376.693 | 1221.573 | AL162049  | 1037.789  | 790.591   |
| AY007089  | 1853.437  | 2176.305  | AF161437  | 3659.488 | 2955.245 | NM_005032 | 907.336   | 676.79    |
| AK021816  | 153.212   | 513.586   | AK001039  | 3837.1   | 3227.611 | NM_004160 | 4522.53   | 4216.789  |
| AK024018  | 242.197   | 418.149   | AK026465  | 1493.495 | 1470.43  | AL109677  | 1023.344  | 1000.698  |
| D43770    | 11176.271 | 10074.086 | AK024321  | 714.644  | 928.474  | NM_003941 | 30759.617 | 29378.137 |
| AF085960  | 632.377   | 647.984   | U52834    | 1167.692 | 1147.192 | AF177909  | 895.636   | 1084.661  |
| AL109691  | 119.431   | 395.344   | M34428    | 716.995  | 655.348  | NM_002664 | 1375.743  | 1605.96   |
| AK021519  | 1898.444  | 2307.508  | NM_003532 | 468.092  | 428.288  | AB018271  | 1312.304  | 1280.471  |
| NM_014254 | 5638.306  | 10332.753 | NM_017869 | 8306.651 | 6603.137 | AL137665  | 2611.584  | 2781.432  |
| AF086036  | 292.345   | 276.192   | AF075100  | 894.78   | 898.202  | NM_016434 | 960.728   | 964.152   |
| AF086010  | 744.288   | 604.48    | AF203447  | 9673.79  | 9294.626 | NM_017757 | 2177.784  | 2907.642  |
| U09197    | 3126.046  | 3543.307  | NM_018502 | 1820.601 | 1829.201 | NM_002146 | 11364.288 | 14903.86  |
| U50529    | 326.604   | 666.521   | AL080066  | 7897.773 | 6715.06  | AB007892  | 1124.507  | 1486.845  |
| U15553    | 918.236   | 1284.514  | AJ227870  | 1072.948 | 1128.027 | AB037748  | 554.858   | 959.851   |
| U52831    | 371.369   | 349.341   | AL137620  | 689.97   | 1000.27  | AB002306  | 2174.353  | 2025.956  |
| AK024734  | 3357.208  | 2990.507  | NM_005294 | 1868.688 | 1731.618 | NM_001300 | 3674.128  | 3389.654  |
| NM_017741 | 1926.343  | 2117.039  | AF085826  | 1131.101 | 833.167  | NM_012472 | 728.732   | 562.181   |
| AL049332  | 203.039   | 308.703   | AK024362  | 823.353  | 819.16   | NM_018187 | 7173.34   | 9293.27   |
| AK000144  | 1289.08   | 1393.799  | AF118068  | 2744.151 | 1517.559 | NM_003016 | 19886.93  | 18331.676 |
| AK022275  | 397.242   | 489.228   | NM_004164 | 443.062  | 730.839  | NM_005463 | 9630.894  | 7739.139  |
| AK000942  | 831.415   | 1277.805  | NM_019016 | 3155.04  | 3564.906 | NM_001325 | 1987.582  | 1577.343  |
| NM_016346 | 385.152   | 359.397   | M87931    | 874.512  | 1095.97  | NM_018282 | 8684.418  | 5657.878  |
| AL117533  | 615.035   | 1023.2    | CY3Cy5    | 1303.85  | 228.313  | BC019932  | 1585.837  | 1046.332  |
| AK026036  | 975.676   | 1233.479  | BE790116  | 851.891  | 712.229  | AF114818  | 2004.921  | 1650.033  |
| AK022796  | 1384.057  | 1472.406  | M12824    | 2436.984 | 1127.311 | AK025106  | 1455.277  | 1292.298  |
| AF090910  | 303.387   | 235.426   | W60100    | 2889.627 | 1509.055 | NM_020144 | 1854.743  | 1510.797  |
| AK095193  | 270.848   | 398.375   | AA457153  | 2480.433 | 1631.007 | NM_003906 | 42526.695 | 40103.512 |
| AL122088  | 1729      | 1629.069  | AA283122  | 1554.211 | 1441.009 | BE893142  | 1329.025  | 1014.313  |
| AF116633  | 278.408   | 353.847   | AA868504  | 2317.17  | 1927.478 | NM_003103 | 4680.285  | 4491.598  |
| AF119912  | 421.686   | 216.246   | AA877845  | 4875.652 | 4079.179 | NM_015340 | 4157.828  | 4300.744  |
| AL137518  | 293.328   | 399.923   | SR9       | 22076.57 | 3710.239 | NM_006451 | 3911.184  | 3167.223  |
| AK022556  | 439.233   | 454.765   | CY3Cy5    | 3160.381 | 814.17   | NM_002094 | 1850.845  | 1723.352  |
| AK023437  | 660.54    | 784.113   | NM_005810 | 1442.736 | 713.411  | NM_002937 | 1637.198  | 1470.388  |
| AK024147  | 277.561   | 350.471   | AK026223  | 667.64   | 452.597  | AL137476  | 3713.856  | 7216.235  |
| AK022897  | 1054.077  | 1139.384  | NM_000874 | 4768.718 | 2273.453 | AF052174  | 1825.561  | 2856.656  |
| AK023898  | 734.753   | 923.457   | AB007863  | 3084.801 | 1609.023 | AF070590  | 716.383   | 947.773   |
| NM_019040 | 6434.261  | 9147.14   | AK024456  | 2739.105 | 1860.702 | NM_004706 | 187.704   | 580.477   |
| NM_005976 | 780.08    | 952.741   | D31887    | 3609.933 | 2886.541 | NM_000761 | 22579.539 | 30533.385 |
| Y16711    | 727.519   | 1008.939  | NM_002313 | 3780.083 | 3458.565 | NM_020142 | 1469.528  | 1460.357  |
| AJ272179  | 2353.69   | 2592.418  | NM_004459 | 2283.061 | 1908.78  | NM_000774 | 2172.982  | 2429.081  |

|           |           |           |           |           |           |           |           |           |
|-----------|-----------|-----------|-----------|-----------|-----------|-----------|-----------|-----------|
| AJ007015  | 2317.558  | 3146.281  | NM_001502 | 3298.074  | 4233.363  | NM_017781 | 10326.954 | 11005.145 |
| AL049317  | 1792.905  | 2210.894  | AF284223  | 1172.267  | 1243.998  | NM_006004 | 43256.711 | 37974.613 |
| AL050090  | 1452.09   | 1724.555  | AF176012  | 842.627   | 1103.776  | NM_004894 | 22854.271 | 17769.146 |
| AF086309  | 1177.938  | 1062.385  | BE743838  | 8825.688  | 9016.207  | AB028960  | 574.906   | 321.84    |
| AF238870  | 231.807   | 313.931   | AF273046  | 2298.446  | 2392.185  | NM_005648 | 35460.949 | 22151.564 |
| AK026279  | 4669.267  | 3924.498  | NM_001081 | 3164.392  | 3553.764  | NM_006943 | 4858.558  | 3786.006  |
| AF130094  | 2951.081  | 3141.655  | NM_002483 | 1983.788  | 2459.34   | NM_006741 | 3332.274  | 2946.997  |
| AK026673  | 1931.465  | 1570.033  | BF002026  | 2008.287  | 2495.449  | NM_014166 | 7702.612  | 6540.259  |
| NM_005452 | 4101.126  | 4054.679  | NM_014037 | 1279.074  | 491.759   | AL117606  | 4404.945  | 3650.845  |
| AF170935  | 13803.271 | 15699.338 | NM_004866 | 11597.521 | 8070.704  | NM_01233C | 2614.45   | 2784.296  |
| AK025218  | 914.321   | 1744.064  | NM_018688 | 2431.711  | 1511.039  | AF294278  | 1939.655  | 2059.234  |
| AJ227899  | 1319.763  | 1913.208  | AK056652  | 5777.812  | 3551.004  | NM_018211 | 3141.93   | 3806.996  |
| AL359607  | 415.807   | 612.009   | AL137438  | 659.227   | 206.425   | NM_01452C | 2364.502  | 2271.073  |
| AF161371  | 9872.081  | 11629.513 | NM_017957 | 1188.749  | 650.373   | NM_002616 | 3591.134  | 3674.232  |
| AK022464  | 322.096   | 530.244   | NM_003024 | 2142.997  | 1535.088  | AK025712  | 8001.5    | 7384.707  |
| AF086230  | 622.428   | 783.606   | NM_013248 | 4383.742  | 2660.896  | AF052497  | 467.07    | 603.992   |
| AK023408  | 5613.93   | 6145.288  | NM_000034 | 64827.137 | 62033.34  | AK026375  | 2708.711  | 4283.62   |
| U84509    | 625.971   | 1000.301  | AK022230  | 3964.877  | 2739.063  | NM_01471C | 695.352   | 1048.986  |
| AK002036  | 3771.226  | 4502.952  | AK022147  | 9486.136  | 8314.938  | U85992    | 954.081   | 1363.352  |
| U84512    | 437.556   | 484.603   | L25664    | 3082.612  | 2602.338  | AL110152  | 536.488   | 491.382   |
| AK025775  | 4147.486  | 3999.394  | NM_01494C | 2816.274  | 2091.989  | AF131745  | 2606.211  | 3066.111  |
| AB046791  | 748.77    | 744.887   | NM_005783 | 830.555   | 665.606   | AL117565  | 1847.26   | 1821.225  |
| AF043469  | 1993.749  | 2492.854  | NM_00690C | 1683.46   | 1668.682  | AF147305  | 387.818   | 428.441   |
| AL109671  | 356.182   | 502.694   | AJ289111  | 8230.261  | 7866.349  | AK022109  | 1027.316  | 775.78    |
| NM_012375 | 397.448   | 305.548   | NM_016356 | 6054.532  | 5831.864  | AK022103  | 482.93    | 299.711   |
| AK022008  | 1544.347  | 1632.16   | NM_006406 | 6709.894  | 6896.748  | NM_00703C | 477.501   | 546.907   |
| NM_018186 | 4438.728  | 5157.934  | AF216292  | 23685.678 | 22948.688 | AK021527  | 332.677   | 198.813   |
| AL080188  | 3609.184  | 3723.259  | NM_005894 | 655.696   | 637.615   | AF086176  | 323.798   | 302.844   |
| T99941    | 744.031   | 1015.078  | NM_014584 | 9025.831  | 8510.603  | AF086232  | 403.25    | 282.69    |
| AF113678  | 337.096   | 669.855   | M30627    | 566.048   | 642.781   | NM_017742 | 1167.956  | 817.469   |
| AL137313  | 1148.124  | 1588.677  | NM_016649 | 2570.195  | 1168.537  | NM_005108 | 1437.56   | 1592.568  |
| Z83951    | 392.628   | 680.047   | AK090536  | 12347.112 | 8354.144  | AK022292  | 4241.376  | 4852.741  |
| AL833529  | 468.94    | 648.095   | D63477    | 1173.639  | 1551.512  | AB051436  | 2825.99   | 2231.583  |
| AB002363  | 7370.372  | 10740.065 | NM_014051 | 13552.278 | 15351.755 | AK026482  | 11428.557 | 11115.791 |
| NM_005284 | 453.206   | 651.701   | AK025398  | 2727.33   | 2507.516  | AL137473  | 3083.903  | 2871.961  |
| AF086351  | 3559.134  | 4592.678  | AK023056  | 1649.636  | 1151.478  | AJ001873  | 2613.435  | 2935.411  |
| D83199    | 16538.42  | 21054.523 | NM_00112C | 44982.094 | 36219.754 | AB026054  | 385.673   | 624.039   |
| AK025957  | 212.177   | 431.505   | NM_017888 | 2480.353  | 2156.734  | AK022604  | 1539.78   | 1987.051  |
| Y16708    | 471.382   | 748.868   | NM_004915 | 6476.758  | 5301.274  | U66048    | 795.793   | 1320.478  |
| AL157453  | 2974.34   | 3799.142  | AK022207  | 926.184   | 924.925   | AK023401  | 3148.821  | 3140.31   |
| NM_019098 | 4148.093  | 8021.912  | AV708752  | 3431.055  | 3586.105  | AK001865  | 583.358   | 650.668   |
| AK022212  | 9346.354  | 13610.124 | AF119885  | 2908.469  | 4037.091  | AK024035  | 7873.825  | 9429.032  |
| X64974    | 3189.032  | 5611.874  | NM_00075C | 558.031   | 675.826   | AL050079  | 741.692   | 833.412   |
| NM_000834 | 7085.768  | 13995.295 | NM_004996 | 3766.141  | 3641.042  | AL080233  | 1344.951  | 1035.991  |
| NM_006485 | 1284.344  | 1730.035  | NM_005971 | 4393.018  | 3781.828  | AL117591  | 798.037   | 576.987   |
| NM_012458 | 3195.854  | 3493.713  | NM_017435 | 1710.827  | 7149.107  | AL050132  | 369.951   | 197.371   |
| AL137268  | 3148.493  | 3102.721  | NM_013386 | 3112.987  | 3888.722  | AL117663  | 657.205   | 505.205   |
| AK024109  | 1762.884  | 1557.215  | AK026680  | 3956.226  | 2013.453  | NM_014293 | 1620.296  | 1191.506  |
| AF088048  | 2206.03   | 2236.012  | NM_012436 | 28835.264 | 24196.514 | AK024432  | 1738.762  | 1666.209  |
| AK001143  | 2874.769  | 2741.57   | AB014559  | 4358.849  | 4346.633  | AL137513  | 693.495   | 545.199   |
| AK001701  | 4948.144  | 5790.53   | NM_016489 | 8126.733  | 8731.387  | AF088001  | 501.069   | 380.234   |
| AB007978  | 628.063   | 838.436   | NM_005033 | 9967.765  | 10101.698 | NM_018067 | 5247.676  | 5336.279  |
| AF217970  | 1361.029  | 2480.076  | NM_015932 | 56410.438 | 60379.559 | NM_018956 | 14978.045 | 16579.248 |



|            |           |           |           |           |           |           |           |           |
|------------|-----------|-----------|-----------|-----------|-----------|-----------|-----------|-----------|
| AF086297   | 1125.546  | 1600.935  | NM_017949 | 1119.345  | 1053.234  | NM_014787 | 2227.394  | 2147.978  |
| AK025455   | 4249.151  | 5072.691  | AK022169  | 956.876   | 478.178   | AL122109  | 715.055   | 509.186   |
| AK026799   | 1638.188  | 2382.92   | AF015592  | 3534.111  | 1622.018  | AF074988  | 1407.46   | 1097.95   |
| NM_014860  | 659.591   | 1153.243  | AK026795  | 2731.896  | 2229.524  | AK024946  | 844.678   | 665.538   |
| AK022549   | 2995.249  | 4197.086  | NM_016399 | 5465.432  | 4809.077  | AK001432  | 1070.901  | 1784.338  |
| NM_018157  | 1433.308  | 1824.036  | NM_016617 | 14719.478 | 12918.394 | AL133568  | 3065.289  | 4641.849  |
| Z70714     | 3643.579  | 3953.827  | NM_002027 | 10243.795 | 9687.695  | AF009265  | 1454.933  | 2388.239  |
| AK021640   | 711.229   | 916.863   | AL162078  | 2791.733  | 2758.685  | AF009309  | 1853.002  | 2977.236  |
| NM_016565  | 24374.768 | 27801.666 | NM_000919 | 1331.09   | 1258.578  | NM_002360 | 1294.75   | 1663.137  |
| CY3Cy5     | 807.702   | 51.818    | NM_013382 | 11267.106 | 8820.327  | AF009322  | 478.097   | 536.191   |
| BF310427   | 756.011   | 354.435   | AB002314  | 1192.78   | 1280.686  | AF056425  | 720.354   | 756.224   |
| H45617     | 1367.769  | 1361.652  | NM_014043 | 10040.816 | 9787.151  | AF090893  | 438.66    | 326.771   |
| M92642     | 300.1     | 721.896   | NM_014622 | 1382.772  | 1228.274  | NM_018033 | 1688.124  | 1304.565  |
| AA464532   | 631.72    | 1047.43   | AB011114  | 53974.922 | 52482.281 | AK001945  | 602.032   | 541.485   |
| H-U 44385  | 17113.947 | 16503.115 | D11466    | 19895.59  | 18651.521 | AK021541  | 515.971   | 238.12    |
| ID 1654970 | 10319.506 | 8857.63   | NM_014056 | 31234.035 | 28155.488 | AK021630  | 410.284   | 359.809   |
| ID 2531132 | 10606.775 | 9413.046  | D31885    | 28630.324 | 28366.641 | AK021831  | 921.851   | 928.669   |
| AA485665   | 420.75    | 452.166   | BE743838  | 7130.744  | 4419.352  | AK025650  | 1716.793  | 1819.89   |
| BF125928   | 25593.76  | 28568.684 | AF273046  | 1122.415  | 982.39    | AK026401  | 1034.946  | 974.772   |
| BG571026   | 1571.854  | 1731.346  | NM_001081 | 2759.276  | 2940.706  | AK026773  | 801.067   | 1081.29   |
| AA489017   | 7977.161  | 4508.309  | NM_002483 | 1710.667  | 2363.027  | AK026452  | 409.119   | 117.16    |
| NM_012245  | 10975.882 | 4551.043  | BF002026  | 1618.036  | 1756.38   | AF086158  | 4677.731  | 6290.436  |
| NM_133263  | 1660.754  | 709.407   | BE790116  | 935.601   | 846.989   | AF086050  | 3991.032  | 5613.676  |
| SR2        | 50643.313 | 26424.48  | AI922341  | 398.848   | 448.545   | AF147375  | 1359.486  | 1971.192  |
| SR4        | 10462.866 | 2070.677  | M12824    | 3303.452  | 1614.67   | X51524    | 4479.911  | 5616.391  |
| SR6        | 1649.599  | 258.871   | W60100    | 4634.385  | 3099.648  | AK025759  | 2339.546  | 3203.891  |
| SR8        | 5809.742  | 3602.031  | M24898    | 522.691   | 649.401   | AK021516  | 1647.281  | 1941.494  |
| SR10       | 17800.49  | 1390.995  | U72508    | 614.579   | 557.391   | Z70699    | 558.673   | 543.702   |
| CY3Cy5     | 616.234   | 70.097    | AA457153  | 4772.848  | 8880.036  | NM_006895 | 524.022   | 351.351   |
| NM_017450  | 1096.767  | 225.145   | AA283122  | 1503.316  | 1277.841  | AK023429  | 563.791   | 485.335   |
| NM_001616  | 680.719   | 263.613   | AA868504  | 2746.579  | 2220.114  | AK022276  | 752.691   | 807.031   |
| NM_005904  | 1514.736  | 1437.407  | AA877845  | 5755.249  | 5186.857  | AK026881  | 484.572   | 418.761   |
| NM_005273  | 25342.129 | 29639.006 | AA664241  | 33915.141 | 26916.225 | AL133653  | 326.602   | 394.948   |
| NM_000524  | 736.489   | 1167.937  | AI016456  | 595.458   | 511.491   | AK023774  | 1056.413  | 1173.713  |
| NM_006576  | 1316.553  | 1132.023  | NM_000588 | 16542.516 | 16648.918 | AL049377  | 615.379   | 676.255   |
| NM_018645  | 2059.761  | 1840.1    | AK026281  | 1116.946  | 1218.908  | NM_003544 | 42405.902 | 65336.098 |
| AB035266   | 1440.45   | 1089.201  | NM_006406 | 5530.892  | 3452.901  | U17640    | 277.493   | 387.521   |
| NM_003744  | 3475.514  | 3307.657  | AF216292  | 19267.771 | 17113.941 | AK001187  | 1419.546  | 2622.188  |
| NM_006378  | 17269.641 | 15146.92  | NM_000952 | 512.502   | 758.087   | NM_003525 | 8636.663  | 12554.952 |
| NM_018132  | 3332.396  | 3534.293  | NM_005894 | 698.165   | 752.526   | AF056436  | 2219.477  | 2744.727  |
| NM_003061  | 1990.917  | 2482.41   | NM_014584 | 9191.855  | 10126.766 | AB023191  | 915.021   | 1169.368  |
| NM_018207  | 2464.788  | 3067.245  | M30627    | 490.234   | 484.876   | AK027212  | 4038.76   | 4917.859  |
| NM_000345  | 1346.846  | 1465.951  | NM_005810 | 1659.326  | 1700.018  | X56197    | 814.491   | 954.391   |
| NM_001862  | 50139.977 | 35990.75  | M28170    | 499.481   | 573.599   | NM_005195 | 2535.405  | 2950.062  |
| NM_006531  | 1140.7    | 364.529   | AK026223  | 1783.51   | 1151.751  | U90905    | 775.149   | 658.218   |
| NM_005423  | 639.53    | 91.16     | NM_000874 | 5708.193  | 3937.853  | AF161422  | 2222.128  | 2028.629  |
| Z36789     | 4552.521  | 967.237   | NM_005854 | 568.822   | 746.353   | AL137384  | 1410.203  | 623.521   |
| J02874     | 697.921   | 165.567   | AB007863  | 20822.66  | 18467.037 | AF070619  | 858.73    | 838.973   |
| AF070525   | 8139.377  | 2361.74   | AK024456  | 6292.625  | 10493.514 | NM_020153 | 1781.862  | 1506.314  |
| NM_001177  | 5256.609  | 1518.243  | NM_017789 | 772.928   | 764.519   | NM_005321 | 2765.471  | 2273.561  |
| NM_014447  | 1344.271  | 357.37    | D31887    | 4186.686  | 3649.342  | NM_014015 | 5563.413  | 4729.23   |
| NM_006691  | 950.579   | 167.322   | NM_002313 | 3712.597  | 3748.42   | AK026839  | 699.775   | 740.87    |
| NM_001505  | 699.663   | 158.756   | NM_004459 | 2381.999  | 2351.755  | AK024973  | 364.613   | 596.709   |

|           |           |           |           |           |           |           |           |           |
|-----------|-----------|-----------|-----------|-----------|-----------|-----------|-----------|-----------|
| NM_00371C | 4571.022  | 4529.897  | NM_005503 | 1998.075  | 1954.021  | AJ008123  | 2671.49   | 3495.853  |
| Z83805    | 524.058   | 686.374   | NM_001502 | 1669.994  | 1885.872  | AJ008156  | 1089.34   | 1095.182  |
| NM_004666 | 1303.25   | 1405.405  | NM_005721 | 997.346   | 1302.278  | AF147321  | 495.32    | 574.662   |
| NM_003614 | 445.202   | 511.202   | AF284223  | 1385.269  | 1450.898  | AF161437  | 3949.176  | 3601.53   |
| NM_014257 | 1009.699  | 1170.873  | AF176012  | 708.385   | 919.652   | AK001039  | 2536.672  | 3019.165  |
| NM_001140 | 305.013   | 544.234   | NM_005971 | 3301.757  | 2384.563  | AK026465  | 755.04    | 1048.449  |
| NM_004843 | 2671.429  | 2424.283  | NM_017435 | 1502.949  | 8271.508  | AK024321  | 329.218   | 511.11    |
| AK022845  | 1540.581  | 1491.43   | NM_018018 | 730.66    | 932.122   | U52834    | 673.151   | 1011.671  |
| S77835    | 960.952   | 769.535   | NM_013386 | 3352.913  | 4881.781  | AJ227898  | 313.359   | 402.285   |
| NM_002985 | 827.554   | 903.736   | NM_006517 | 422.536   | 665.099   | M34428    | 428.339   | 351.76    |
| AB018347  | 3641.072  | 3099.604  | NM_014037 | 1259.525  | 1261.906  | NM_003532 | 469.887   | 357.768   |
| AB033073  | 476.94    | 555.791   | NM_004866 | 13815.476 | 16397.291 | NM_017865 | 3979.201  | 3770.539  |
| NM_003284 | 761.957   | 738.578   | NM_018688 | 2895.902  | 2582.989  | AF075100  | 534.322   | 511.162   |
| NM_012461 | 4093.639  | 867.201   | AK056652  | 6357.171  | 4371.613  | AF203447  | 4342.658  | 3466.778  |
| AK001379  | 1176.974  | 148.105   | AL137438  | 872.997   | 773.041   | NM_018502 | 1093.373  | 698.974   |
| NM_007072 | 956.635   | 277.264   | NM_017957 | 3108.933  | 3174.034  | AL080066  | 6172.4    | 4983.995  |
| NM_012320 | 1578.522  | 733.766   | NM_003024 | 2190.566  | 2374.193  | AJ227870  | 851.846   | 916.107   |
| NM_018208 | 3038.584  | 1306.812  | NM_013248 | 5984.893  | 5395.175  | AL137620  | 648.599   | 450.052   |
| NM_015929 | 4283.242  | 1573.374  | NM_000034 | 65385.574 | 67119.703 | NM_005294 | 1142.584  | 1345.277  |
| U90653    | 4665.862  | 1694.85   | AK022230  | 4883.104  | 4242.842  | AF085826  | 767.383   | 947.901   |
| NM_000196 | 949.253   | 943.925   | AK022147  | 8894.57   | 7944.62   | AK024362  | 668.229   | 801.807   |
| NM_018339 | 7911.013  | 7205.471  | L25664    | 3335.151  | 3035.18   | AF118068  | 2181.03   | 2524.778  |
| NM_000275 | 1300.844  | 1420.427  | NM_014940 | 3051.588  | 2335.186  | NM_004164 | 324.291   | 391.581   |
| AK000037  | 1489.655  | 811.632   | NM_005783 | 441.264   | 779.121   | NM_019018 | 3458.297  | 4035.444  |
| NM_014760 | 4472.079  | 3354.736  | AK000851  | 466.247   | 589.87    | M87931    | 841.697   | 854.15    |
| NM_018398 | 2852.518  | 2632.115  | NM_006900 | 1941.695  | 1905.857  | CY3Cy5    | 4037.147  | 138.36    |
| NM_002560 | 3791.114  | 3506.244  | AJ289111  | 8226.675  | 9128.354  | L35594    | 543.39    | 671.689   |
| NM_014404 | 1042.299  | 814.287   | NM_016356 | 5113.837  | 5278.857  | BE790116  | 1689.369  | 1442.483  |
| NM_018713 | 393.619   | 444.622   | NM_014043 | 10754.917 | 12496.222 | AI922341  | 1964.375  | 1434.25   |
| NM_015947 | 5886.319  | 4369.972  | NM_014622 | 1682.554  | 1733.683  | M12824    | 3682.566  | 3092.9    |
| NM_002042 | 515.871   | 500.578   | AB011114  | 53374.605 | 58806.75  | W60100    | 2825.333  | 2975.595  |
| AB028944  | 1105.124  | 1228.871  | D11466    | 20965.068 | 31774.773 | M24898    | 1090.463  | 1055.616  |
| AJ006268  | 1497.359  | 1142.064  | NM_014056 | 34723.645 | 48379.098 | U72508    | 667.218   | 571.563   |
| M74089    | 6859.598  | 6906.527  | D31885    | 22725.494 | 30516.455 | AA457153  | 4002.476  | 3718.641  |
| AF190864  | 7480.693  | 6920.705  | NM_016649 | 3362.624  | 3934.271  | AA283122  | 2425.442  | 2669.514  |
| NM_002779 | 2386.626  | 1423.22   | AK090536  | 14242.147 | 14381.268 | AA868504  | 2053.765  | 1856.425  |
| NM_000025 | 7146.299  | 2839.169  | D63477    | 1077.106  | 1266.57   | AA877845  | 7132.135  | 6347.069  |
| D38521    | 2787.511  | 1243.716  | NM_020243 | 30302.229 | 25393.734 | AA664241  | 53139.969 | 54293.336 |
| NM_000403 | 4606.236  | 2694.802  | NM_014051 | 11945.955 | 8152.834  | AI016456  | 743.533   | 895.562   |
| NM_018127 | 19404.234 | 13570.206 | AK025398  | 2754.171  | 2704.261  | NM_000588 | 18917.029 | 19784.609 |
| AB020677  | 2328.925  | 2286.107  | AK023056  | 1776.371  | 1632.3    | SR5       | 7069.945  | 7942.933  |
| AB033097  | 1557.38   | 1283.467  | NM_001120 | 46168.383 | 38221.09  | SR7       | 5469.517  | 49433.191 |
| AJ223948  | 5832.276  | 4364.558  | NM_017888 | 2417.851  | 2494.79   | CY3Cy5    | 6966.178  | 379.659   |
| NM_016218 | 1610.133  | 1397.713  | NM_004915 | 7613.252  | 9908.64   | NM_005810 | 6307.635  | 4754.78   |
| AK022947  | 1796.813  | 1746.752  | AK022207  | 906.545   | 1008.744  | M28170    | 5426.247  | 3301.594  |
| AL050029  | 3534.785  | 3217.125  | AV708752  | 2466.803  | 3192.987  | NM_001555 | 798.463   | 653.743   |
| AL049966  | 792.338   | 772.044   | AF119885  | 1960.35   | 2530.864  | AK026223  | 1462.13   | 1047.423  |
| NM_005204 | 4948.871  | 3981.059  | NM_000750 | 680.114   | 655.676   | NM_000874 | 7923.614  | 4852.721  |
| NM_016203 | 2580.212  | 1522.671  | NM_004996 | 3663.976  | 3954.315  | NM_005854 | 1221.761  | 906.536   |
| NM_002759 | 3671.543  | 2325.091  | NM_000588 | 15538.978 | 16330.949 | AB007863  | 22995.355 | 20957.414 |
| NM_007271 | 2978.792  | 2483.34   | AK026281  | 477.418   | 744.147   | AK024456  | 5600.958  | 4373.562  |
| NM_006255 | 7416.02   | 7868.53   | AK026680  | 4347.634  | 6374.256  | NM_017785 | 904.23    | 919.332   |
| BE392143  | 5806.104  | 5080.788  | NM_012436 | 7587.079  | 7494.268  | D31887    | 4211.671  | 4708.721  |

|            |           |           |           |           |           |           |           |           |
|------------|-----------|-----------|-----------|-----------|-----------|-----------|-----------|-----------|
| NM_005813  | 2609.898  | 2748.625  | AK001299  | 13666.404 | 11967.91  | NM_002313 | 3976.479  | 3661.576  |
| AB037718   | 3116.269  | 2717.569  | AB014559  | 4443.043  | 3271.615  | NM_004459 | 1866.977  | 1841.754  |
| AL389994   | 2319.735  | 2290.045  | NM_016489 | 8793.563  | 8299.885  | NM_005503 | 1847.652  | 2121.86   |
| NM_003909  | 7521.75   | 4187.935  | NM_005033 | 9514.245  | 8096.068  | NM_001502 | 2295.247  | 2963.811  |
| NM_001277  | 3658.731  | 4011.021  | NM_015932 | 60016.859 | 62983.563 | NM_005721 | 976.089   | 979.815   |
| NM_003659  | 5221.169  | 1486.501  | NM_017949 | 1158.519  | 1389.749  | AF284223  | 1324.495  | 1442.02   |
| AB029021   | 2013.934  | 1365.865  | AK022169  | 1060.852  | 1031.242  | AF176012  | 816.753   | 952.542   |
| NM_002101  | 47515.965 | 29872.445 | AF015592  | 4216.088  | 2872.811  | BE743838  | 8210.859  | 8440.641  |
| NM_005423  | 939.495   | 496.467   | AK026795  | 2810.253  | 2579.904  | AF273046  | 3228.89   | 3763.398  |
| Z36789     | 8685.936  | 5463.423  | NM_016399 | 5045.756  | 4482.865  | NM_002483 | 2359.632  | 4283.97   |
| J02874     | 781.955   | 648.842   | NM_016617 | 14619.647 | 12647.672 | BF002026  | 2849.606  | 3519.708  |
| BF310427   | 1440.816  | 1147.372  | NM_002027 | 10319.794 | 9633.813  | NM_004171 | 1421.494  | 979.904   |
| H45617     | 603.129   | 741.492   | AL162078  | 2706.043  | 2932.016  | NM_014037 | 8345.697  | 6443.933  |
| AA464532   | 682.503   | 628.3     | NM_000919 | 1203.257  | 1475.44   | NM_004866 | 16121.341 | 10508.794 |
| H-U 44385  | 17826.838 | 16530.258 | NM_013382 | 13623.981 | 17726.088 | NM_018688 | 3442.321  | 2438.801  |
| ID 1654970 | 11043.799 | 8781.428  | AB002314  | 2976.108  | 4710.057  | AK056652  | 8182.563  | 6984.506  |
| ID 2531132 | 10313.226 | 7813.576  | NM_005503 | 1912.396  | 1751.245  | AL137438  | 787.039   | 684.178   |
| BF125928   | 24108.143 | 20276.438 | NM_001502 | 2225.728  | 3629.596  | NM_017957 | 4792.815  | 4010.152  |
| BG571026   | 1976.605  | 1923.519  | NM_005721 | 1542.027  | 1665.526  | NM_003024 | 2020.77   | 1597.331  |
| AA489017   | 10954.642 | 11028.088 | AF284223  | 1113.322  | 1302.904  | NM_013248 | 4971.451  | 4900.411  |
| NM_012245  | 17998.148 | 15345.262 | AF176012  | 703.265   | 1150.065  | NM_000034 | 66696.141 | 70845.258 |
| NM_133263  | 2452.41   | 3249.889  | BE743838  | 7356.923  | 8721.752  | AK022230  | 5498.637  | 5775.239  |
| NM_003284  | 844.044   | 304.252   | AF273046  | 851.062   | 1007.077  | AK022147  | 13533.163 | 14220.172 |
| NM_018152  | 717.394   | 618.699   | NM_001081 | 2509.818  | 2648.367  | L25664    | 3735.551  | 4113.587  |
| NM_000319  | 7938.246  | 7069.07   | NM_002483 | 1577.633  | 1465.601  | NM_014940 | 2760.571  | 2036.564  |
| NM_003257  | 685.148   | 229.076   | BF002026  | 1532.937  | 1386.802  | NM_005783 | 642.836   | 738.054   |
| NM_012461  | 6687.841  | 3939.786  | BE790116  | 1039.074  | 969.403   | NM_006900 | 3758.142  | 3848.7    |
| AK001379   | 2523.503  | 1635.721  | AI922341  | 1707.101  | 1312.126  | AJ289111  | 8505.141  | 9055.56   |
| NM_017450  | 2042.086  | 1455.658  | M12824    | 4010.826  | 2747.502  | NM_016356 | 10264.079 | 12060.801 |
| NM_002023  | 1174.388  | 817.155   | W60100    | 4382.061  | 3276.67   | NM_006406 | 5660.248  | 6780.858  |
| NM_001616  | 926.102   | 889.055   | M24898    | 550.405   | 588.422   | AF216292  | 25567.113 | 29331.98  |
| NM_005904  | 655.768   | 564.738   | U72508    | 688.034   | 717.697   | NM_000952 | 764.617   | 661.71    |
| NM_005273  | 19071.617 | 13761.826 | AA457153  | 3257.362  | 3398.816  | NM_005894 | 880.05    | 1478.393  |
| NM_000524  | 698.674   | 651.166   | AA283122  | 1477.079  | 1321.902  | NM_014584 | 11440.591 | 18483.211 |
| NM_006576  | 1391.701  | 1378.505  | AA868504  | 2670.11   | 3081.009  | M30627    | 372.277   | 922.352   |
| NM_018645  | 2088.451  | 1650.36   | AA877845  | 5204.211  | 6373.918  | NM_016649 | 3677.861  | 2817.105  |
| AB035266   | 1397.938  | 997.027   | AA664241  | 28976.922 | 33290.188 | AK090536  | 17094.146 | 11090.801 |
| NM_003744  | 3410.681  | 3184.151  | AI016456  | 675.52    | 406.043   | D63477    | 983.262   | 729.641   |
| NM_006378  | 17724.662 | 15560.748 | NM_014940 | 2629.274  | 1420.388  | NM_020243 | 33515.93  | 28022.598 |
| NM_018132  | 3075.044  | 2544.471  | NM_005783 | 559.077   | 439.517   | NM_014051 | 14131.274 | 11144.976 |
| NM_003061  | 2170.661  | 2750.755  | NM_006900 | 1095.156  | 1315.907  | AK025398  | 3182.686  | 2537.413  |
| NM_018207  | 2306.087  | 2633.35   | AJ289111  | 6600.123  | 8955.401  | AK023056  | 1621.348  | 1554.127  |
| NM_000345  | 1093.427  | 882.349   | NM_006406 | 5969.899  | 6379.766  | NM_017888 | 2518.89   | 2351.685  |
| NM_001862  | 53310.004 | 44508.555 | AF216292  | 19717.924 | 19920.064 | NM_004915 | 7660.029  | 6949.877  |
| NM_006531  | 1385.113  | 1472.184  | NM_014584 | 8938.861  | 7400.135  | AK022207  | 1104.39   | 1301.183  |
| M74089     | 6865.871  | 4272.671  | NM_005810 | 4269.682  | 3863.981  | AV708752  | 3830.349  | 4076.062  |
| AF190864   | 7042.514  | 5408.745  | M28170    | 3347.626  | 2539.329  | AF119885  | 2716.769  | 2752.173  |
| NM_002779  | 3569.191  | 2755.969  | NM_001555 | 428.13    | 386.804   | NM_000750 | 690.397   | 771.553   |
| NM_020198  | 9266.704  | 4108.671  | AK026223  | 1423.818  | 1071.117  | NM_004996 | 4474.272  | 4464.951  |
| AA098879   | 702.778   | 594.956   | NM_000874 | 7386.676  | 5334.043  | NM_005971 | 3588.522  | 4422.964  |
| NM_014447  | 2066.452  | 1724.403  | NM_005854 | 780.577   | 556.034   | NM_017435 | 7662.676  | 2176.804  |
| NM_006691  | 1105.888  | 794.825   | AB007863  | 20802.65  | 18380.58  | NM_013386 | 3790.112  | 4673.388  |
| NM_001505  | 686.774   | 464.558   | AK024456  | 6315.179  | 9954.329  | AK026680  | 7783.384  | 5868.403  |

|           |           |           |           |           |           |           |           |           |
|-----------|-----------|-----------|-----------|-----------|-----------|-----------|-----------|-----------|
| NM_00371C | 3410.084  | 2671.117  | NM_017789 | 904.373   | 863.667   | NM_012436 | 59110.086 | 60906.879 |
| Z83805    | 327.929   | 560.422   | D31887    | 4453.021  | 5279.311  | AK001299  | 41788.996 | 31439.863 |
| NM_004666 | 1389.217  | 1320.062  | NM_002313 | 4108.618  | 5182.774  | AB014559  | 21174.488 | 15944.678 |
| NM_003614 | 282.547   | 471.565   | NM_004459 | 2575.975  | 2757.961  | NM_016486 | 11822.95  | 9597.973  |
| NM_014257 | 943.88    | 922.7     | NM_004915 | 5036.446  | 2692.542  | NM_005033 | 9796.468  | 8355.861  |
| NM_001140 | 704.954   | 545.441   | AK022207  | 687.631   | 527.088   | NM_015932 | 66382.719 | 69392.164 |
| NM_004843 | 3237.362  | 3999.807  | AV708752  | 3852.176  | 5937.488  | NM_017946 | 1391.459  | 931.115   |
| AK022845  | 1652.378  | 2297.441  | AF119885  | 2439.823  | 2654.065  | AK022169  | 1369.957  | 1389.703  |
| NM_003004 | 531.787   | 421.824   | NM_004996 | 3921.351  | 4685.621  | AF015592  | 4500.794  | 4531.184  |
| S77835    | 882.335   | 879.647   | NM_005971 | 3421.781  | 4434.498  | AK026795  | 3301.016  | 3701.794  |
| NM_002985 | 841.655   | 1172.004  | NM_017435 | 1486.255  | 9327.142  | NM_016617 | 16305.215 | 16517.576 |
| AB018347  | 2658.874  | 2169.392  | NM_013386 | 3000.762  | 2957.857  | NM_002027 | 10555.483 | 10298.684 |
| AB033073  | 634.642   | 562.529   | NM_006517 | 714.204   | 1033.758  | AL162078  | 3452.717  | 4185.75   |
| NM_005813 | 2410.634  | 1445.539  | NM_004171 | 1314.805  | 1199.031  | NM_000919 | 968.717   | 1317.854  |
| AB037718  | 3096.197  | 2173.55   | NM_014037 | 6895.134  | 5697.988  | NM_013382 | 19124.699 | 21104.9   |
| AL389994  | 2543.886  | 1522.195  | NM_004866 | 14038.972 | 12137.534 | AB002314  | 1906.839  | 1725.723  |
| NM_001277 | 3020.749  | 2486.013  | NM_018688 | 2990.518  | 2576.184  | NM_014043 | 10943.839 | 12997.567 |
| NM_003659 | 7162.622  | 6437.853  | AK056652  | 7034.228  | 5726.603  | NM_014622 | 1813.375  | 1945.156  |
| NM_007072 | 1506.374  | 1287.973  | AL137438  | 892.726   | 749.205   | AB011114  | 55251.305 | 60029.59  |
| NM_012320 | 2909.625  | 2193.459  | NM_017957 | 3601.79   | 3367.848  | D11466    | 21222.85  | 28089.822 |
| NM_018208 | 4736.403  | 4309.291  | NM_003024 | 2446.555  | 2490.975  | NM_014056 | 38701.789 | 56964.93  |
| NM_015929 | 5895.741  | 5049.968  | NM_013248 | 6804.401  | 7804.668  | D31885    | 30594.863 | 33356.801 |
| U90653    | 7460.1    | 5054.175  | NM_000034 | 64438.59  | 67109.891 | BE743838  | 8101.018  | 5517.55   |
| NM_000196 | 953.177   | 775.481   | AK022230  | 5189.324  | 5719.709  | AF273046  | 2856.754  | 2218.528  |
| NM_018339 | 8651.613  | 7362.11   | AK022147  | 11061.007 | 13608.461 | NM_001081 | 2823.665  | 1465.617  |
| NM_006745 | 54507.633 | 55538.918 | L25664    | 5253.005  | 8393.262  | NM_002483 | 2365.495  | 1673.207  |
| NM_000275 | 1213.704  | 1545.347  | NM_002027 | 8955.276  | 6733.833  | BF002026  | 3052.516  | 2650.765  |
| AK000037  | 1493.141  | 1106.098  | AL162078  | 2438.242  | 1964.348  | BE790116  | 1557.117  | 1380.482  |
| NM_014760 | 4092.148  | 4181.824  | NM_000919 | 1173.074  | 848.692   | AI922341  | 1185.289  | 1229.09   |
| NM_018398 | 2945.4    | 3473.535  | NM_013382 | 8215.837  | 6196.277  | M12824    | 3173.923  | 3501.323  |
| NM_002560 | 3267.833  | 4350.229  | AB002314  | 1111.03   | 1651.055  | W60100    | 3332.315  | 3527.628  |
| NM_014404 | 1162.911  | 1644.981  | NM_014043 | 11793.457 | 15923.051 | M24898    | 649.272   | 1022.09   |
| NM_018713 | 640.528   | 669.942   | NM_014622 | 1451.612  | 2158.934  | U72508    | 496.25    | 606.233   |
| NM_015947 | 7506.108  | 8382.329  | AB011114  | 56593.207 | 57328.641 | AA457153  | 3343.616  | 3291.124  |
| NM_002042 | 495.591   | 649.711   | D11466    | 17558.053 | 15645.779 | AA283122  | 1735.122  | 2054.68   |
| AB028944  | 997.306   | 777.591   | NM_014056 | 28560.887 | 23517.141 | AA868504  | 1575.365  | 1511.693  |
| AJ006268  | 1432.785  | 1059.046  | D31885    | 24235.959 | 27313.189 | AA877845  | 6271.655  | 6349.357  |
| NM_012245 | 16781.486 | 9518.276  | NM_016649 | 4273.907  | 4270.948  | AA664241  | 58293.539 | 58180.242 |
| NM_133263 | 1736.416  | 1331.996  | AK090536  | 16350.728 | 13662.913 | AI016456  | 1028.489  | 1105.513  |
| NM_000025 | 9575.529  | 7472.379  | D63477    | 1207.69   | 1358.096  | NM_000588 | 22551.389 | 25524.158 |
| D38521    | 3907.778  | 3273.419  | NM_014051 | 12693.998 | 11005.179 | AK026281  | 2094.124  | 3488.386  |
| NM_000403 | 5555.172  | 4408.067  | AK025398  | 3191.217  | 3781.161  | NM_006406 | 5655.626  | 3758.098  |
| NM_018127 | 15419.349 | 11156.896 | AK023056  | 2023.912  | 2277.895  | AF216292  | 23691.182 | 18311.951 |
| AB020677  | 2510.724  | 2249.59   | NM_017888 | 3521.753  | 4272.424  | NM_000952 | 693.621   | 496.512   |
| AB033097  | 1355.373  | 1316.97   | NM_003150 | 5498.708  | 3567.745  | NM_005894 | 751.396   | 686.382   |
| NM_000135 | 1716.462  | 1581.452  | NM_014784 | 4490.75   | 4324.439  | NM_014584 | 10957.241 | 8760.255  |
| AJ223948  | 6522.55   | 6747.202  | AK026383  | 4349.834  | 3544.986  | M30627    | 607.783   | 398.233   |
| NM_016218 | 1914.272  | 1523.823  | AK023821  | 798.924   | 581.261   | NM_005810 | 6581.964  | 5655.919  |
| AK022947  | 3340.239  | 3496.9    | AB014594  | 5948.089  | 6919.606  | M28170    | 5531.983  | 4553.435  |
| AL050029  | 3958.104  | 3189.378  | M94547    | 1857.485  | 2901.572  | NM_001555 | 513.02    | 747.234   |
| AL049966  | 907.71    | 1249.26   | NM_005087 | 8290.615  | 11841.19  | AK026223  | 1180.485  | 1504.071  |
| NM_005204 | 5253.694  | 4488.766  | NM_012098 | 1113.844  | 1484.612  | NM_000874 | 7319.759  | 5420.953  |
| NM_016203 | 2886.755  | 3100.106  | NM_018095 | 4039.563  | 5241.355  | NM_005854 | 943.906   | 947.739   |

|            |           |           |           |           |           |           |           |           |
|------------|-----------|-----------|-----------|-----------|-----------|-----------|-----------|-----------|
| NM_002759  | 4345.86   | 5010.884  | AB023164  | 3860.779  | 3548.594  | AB007863  | 21742.828 | 22398.828 |
| NM_007271  | 2770.294  | 3728.15   | AK026281  | 511.183   | 676.039   | AK024456  | 4076.553  | 4513.803  |
| NM_006255  | 6611.323  | 5930.677  | AK026680  | 7127.028  | 6931.163  | NM_017789 | 683.097   | 791.873   |
| BE392143   | 4592.837  | 3010.922  | NM_012436 | 58098.828 | 57936.637 | D31887    | 4105.099  | 4553.598  |
| NM_018132  | 2857.503  | 2293.334  | AB014559  | 12821.369 | 10111.912 | NM_002313 | 4226.748  | 4067.326  |
| NM_003061  | 1902.022  | 1691.786  | NM_016489 | 12020.715 | 12607.573 | NM_004459 | 2325.465  | 2216.543  |
| NM_018207  | 1962.225  | 1519.045  | NM_005033 | 10714.703 | 9691.289  | NM_005503 | 2070.76   | 2668.541  |
| NM_000345  | 1101.783  | 705.633   | NM_015932 | 65389.648 | 73335.906 | NM_001502 | 3381.422  | 4299.143  |
| NM_001862  | 52357.238 | 49885.91  | NM_017949 | 2007.452  | 3287.3    | NM_005721 | 1292.325  | 1649.128  |
| NM_006531  | 1032.882  | 1508.479  | AK022169  | 1498.458  | 1475.427  | AF284223  | 1756.338  | 2405.734  |
| AB029021   | 2196.18   | 2450.869  | AF015592  | 5603.702  | 5658.132  | AF176012  | 843.081   | 1066.863  |
| NM_002101  | 48613.289 | 43410.09  | AK026795  | 4048.37   | 5107.854  | NM_005971 | 3352.066  | 2369.827  |
| NM_005423  | 603.654   | 860.496   | NM_016617 | 16354.248 | 18595.492 | NM_017435 | 8139.282  | 1552.243  |
| Z36789     | 7693.414  | 8263.967  | NM_002338 | 7097.749  | 7767.295  | NM_013386 | 3842.592  | 2894.299  |
| J02874     | 847.782   | 1001.102  | AL117666  | 1089.303  | 1068.044  | NM_006517 | 482.474   | 505.523   |
| BF310427   | 1603.649  | 1854.851  | Y17865    | 1198.9    | 702.667   | NM_004171 | 1571.662  | 1501.455  |
| N94424     | 409.721   | 374.626   | NM_005825 | 14573.166 | 12729.277 | NM_014037 | 9217.727  | 8731.295  |
| AI521645   | 541.518   | 431.277   | NM_002756 | 5022.911  | 5470.383  | NM_004866 | 16019.197 | 13078.752 |
| H45617     | 1088.425  | 1426.266  | U79299    | 894.394   | 1387.169  | NM_018688 | 3008.562  | 2888.502  |
| M92642     | 630.577   | 81.752    | AJ000414  | 639.028   | 941.479   | AK056652  | 6982.481  | 7364.857  |
| AA464532   | 717.656   | 1190.795  | AK025674  | 2045.934  | 2382.68   | AL137438  | 993.978   | 822.699   |
| H-U 44385  | 16658.986 | 15377.59  | AF007194  | 2429.911  | 3037.877  | NM_017957 | 4125.937  | 4316.794  |
| ID 1654970 | 10458.184 | 11941.445 | NM_019069 | 1265.283  | 1349.285  | NM_003024 | 2138.641  | 2167.191  |
| ID 2531132 | 11041.328 | 13302.318 | NM_004761 | 3388.069  | 3167.156  | NM_013248 | 4913.156  | 5657.795  |
| ID 4365538 | 229.345   | 400.03    | Z25424    | 3913.122  | 3568.991  | NM_000034 | 65465.52  | 66047.313 |
| AA485665   | 417.737   | 744.276   | U79458    | 8813.219  | 7745.78   | AK022230  | 6263.454  | 6519.994  |
| BF125928   | 25385.355 | 35002.078 | NM_014920 | 804.865   | 899.023   | AK022147  | 15418.112 | 15597.564 |
| BG571026   | 1509.009  | 1318.206  | NM_002961 | 3996.508  | 3703.657  | L25664    | 4894.579  | 5265.481  |
| AA489017   | 8262.109  | 5633.582  | AF064770  | 1111.889  | 1234.468  | NM_014940 | 3160.412  | 3505.209  |
| AK022845   | 1683.366  | 1365.133  | NM_005766 | 1286.475  | 1339.308  | NM_005783 | 869.917   | 1035.822  |
| S77835     | 930.652   | 728.852   | NM_004127 | 39334.617 | 48993.207 | NM_006900 | 3619.542  | 4334.491  |
| NM_002985  | 947.216   | 913.303   | NM_013324 | 6940.992  | 7659.554  | AJ289111  | 7803.557  | 10083.443 |
| AB018347   | 3658.212  | 3770.397  | AL133022  | 1871.606  | 2963.125  | NM_016356 | 6244.543  | 7359.693  |
| AB033073   | 660.871   | 555.48    | NM_003953 | 9780.925  | 19207.045 | NM_014043 | 10604.993 | 6769.876  |
| NM_003284  | 919.971   | 850.275   | NM_006301 | 1577.115  | 1894.991  | NM_014622 | 2013.995  | 1118.639  |
| NM_018152  | 573.638   | 676.772   | AL049925  | 2520.724  | 2307.356  | AB011114  | 56406.805 | 41414.293 |
| NM_000319  | 7935.77   | 8665.541  | NM_012219 | 589.615   | 468.611   | D11466    | 22616.801 | 16220.689 |
| NM_003257  | 529.686   | 566.397   | X72887    | 1311.041  | 764.644   | NM_014056 | 37782.129 | 28850.564 |
| NM_012461  | 8405.488  | 7852.357  | NM_004529 | 1663.558  | 1280.996  | D31885    | 37761.684 | 29509.814 |
| AK001379   | 2578.6    | 3066.141  | NM_000127 | 2593.339  | 2309.983  | NM_016649 | 4388.833  | 3554.742  |
| NM_017450  | 2448.799  | 2822.86   | Y10483    | 13065.242 | 14453.186 | AK090536  | 17407.621 | 16307.145 |
| NM_002023  | 951.503   | 1315.493  | NM_006784 | 1459.012  | 1916.694  | D63477    | 825.99    | 878.464   |
| NM_002839  | 325.054   | 582.38    | NM_017876 | 5012.187  | 6771.752  | NM_020243 | 35158.766 | 31902.99  |
| NM_001616  | 1261.493  | 1758.207  | NM_001087 | 12556.746 | 13017.655 | NM_014051 | 14220.895 | 13529.076 |
| NM_005904  | 976.578   | 892.432   | NM_001826 | 1177.932  | 1068.956  | AK025398  | 2685.06   | 2861.566  |
| NM_005273  | 23559.604 | 26388.379 | AK025352  | 1257.501  | 1363.936  | AK023056  | 1792.509  | 1424.814  |
| NM_000524  | 994.474   | 1447.828  | NM_003721 | 6800.358  | 5050.332  | NM_017888 | 2987.953  | 2908.193  |
| NM_006576  | 1851.487  | 2005.449  | NM_004724 | 2801.676  | 2505.574  | NM_004915 | 9464.592  | 11415.222 |
| NM_018645  | 2501.057  | 3250.548  | NM_001431 | 8912.37   | 9341.067  | AK022207  | 1207.462  | 1614.167  |
| AB035266   | 1575.643  | 1857.852  | NM_018192 | 476.798   | 806.991   | AV708752  | 4098.013  | 4689.497  |
| NM_003744  | 3516.847  | 3950.856  | NM_000427 | 3232.283  | 6080.135  | AF119885  | 3292.477  | 5330.267  |
| NM_006378  | 16594.816 | 12069.29  | NM_014924 | 1918.52   | 2286.027  | NM_004996 | 3624.416  | 3993.194  |
| NM_014404  | 1230.272  | 1620.593  | NM_006946 | 1026.453  | 1434.686  | NM_000588 | 21702.238 | 14154.467 |

|           |           |           |           |           |           |           |           |           |
|-----------|-----------|-----------|-----------|-----------|-----------|-----------|-----------|-----------|
| NM_018713 | 504.292   | 594.175   | NM_000174 | 46369.641 | 53476.898 | AK026281  | 2269.955  | 1809.809  |
| NM_015947 | 7962.635  | 6342.865  | NM_002508 | 2374.091  | 3117.672  | AK026680  | 9780.585  | 9205.864  |
| NM_002042 | 689.598   | 813.347   | NM_014343 | 5330.496  | 6691.755  | NM_012436 | 64001.113 | 64217.625 |
| AB028944  | 1274.932  | 1488.91   | D25303    | 1144.628  | 1762.78   | AK001299  | 34477.266 | 30586.188 |
| AJ006268  | 2333.669  | 2300.506  | AB043007  | 32279.154 | 24078.371 | AB014559  | 18760.605 | 18075.779 |
| M74089    | 7269.376  | 7873.445  | NM_004861 | 2017.013  | 1406.264  | NM_016488 | 10742.73  | 11639.884 |
| AF190864  | 8385.655  | 9973.386  | AF022913  | 3004.404  | 2175.974  | NM_005033 | 9070.832  | 9079.037  |
| NM_002779 | 4255.878  | 4704.77   | NM_000028 | 1225.742  | 710.171   | NM_015932 | 60353.965 | 62301.332 |
| L40397    | 29684.006 | 36338.852 | NM_001382 | 7286.546  | 5890.408  | NM_017948 | 1614.708  | 1357.426  |
| NM_020198 | 10332.285 | 10949.78  | M93718    | 9409.863  | 5851.13   | AK022169  | 1593.216  | 1787.644  |
| AA098879  | 954.677   | 832.932   | NM_005386 | 958.496   | 578.043   | AF015592  | 4573.608  | 5002.112  |
| AF070525  | 18111.611 | 18099.025 | AK023807  | 10320.636 | 7966.719  | AK026795  | 3821.245  | 3793.834  |
| NM_001177 | 9878.052  | 9711.492  | NM_018188 | 4039.993  | 2779.045  | NM_016617 | 18166.256 | 18500.359 |
| NM_014447 | 2313.267  | 2645.569  | AK024273  | 1965.439  | 688.917   | NM_002027 | 11555.394 | 14121.314 |
| NM_006691 | 1314.603  | 1934.98   | X59417    | 42525.117 | 28566.008 | AL162078  | 3545.003  | 4533.423  |
| NM_003710 | 3637.669  | 3478.208  | D28476    | 9448.41   | 8906.834  | NM_000919 | 1116.271  | 1399.247  |
| Z83805    | 653.882   | 711.285   | NM_018249 | 674.64    | 522.889   | NM_013382 | 16721.324 | 25642.662 |
| NM_004666 | 2117.338  | 2475.57   | NM_005558 | 3078.497  | 2905.859  | AB002314  | 1579.769  | 2083.851  |
| NM_003614 | 491.5     | 693.499   | NM_016631 | 1478.351  | 2144.279  | NM_005503 | 1882.435  | 1176.457  |
| NM_014257 | 1097.261  | 1746.363  | AB015617  | 21973.801 | 22548.211 | NM_001502 | 2820.291  | 2216.004  |
| NM_001140 | 552.285   | 873.398   | AK022730  | 2875.219  | 3319.885  | NM_005721 | 1474.234  | 845.951   |
| NM_004843 | 2754.735  | 2776.272  | NM_002256 | 16333.994 | 18446.68  | AF284223  | 1902.429  | 1216.518  |
| NM_005204 | 6543.729  | 5361.169  | NM_005439 | 17049.125 | 19440.061 | AF176012  | 868.083   | 813.052   |
| NM_016203 | 3321.218  | 2635.137  | AB037810  | 6018.937  | 12086.642 | BE743838  | 8166.375  | 6913.639  |
| NM_002758 | 3905.674  | 2764.782  | NM_006593 | 526.262   | 568.834   | AF273046  | 2956.304  | 2579.991  |
| NM_007271 | 2461.709  | 2656.938  | NM_000376 | 2762.218  | 2180.086  | NM_001081 | 2010.533  | 1975.779  |
| NM_006255 | 7302.847  | 7920.74   | NM_000475 | 6658.001  | 5847.556  | NM_002483 | 1968.633  | 1593.672  |
| BE392143  | 6656.162  | 6122.127  | M61872    | 15107.922 | 11355.23  | BF002026  | 2564.354  | 2861.554  |
| NM_005813 | 2429.174  | 2642.044  | AK027089  | 743.555   | 698.455   | BE790116  | 1482.63   | 1665.381  |
| AB037718  | 3263.672  | 2862.622  | X59845    | 914.912   | 534.097   | AI922341  | 1386.482  | 1577.198  |
| AL389994  | 2399.717  | 2391.016  | NM_006284 | 17729.625 | 13660.048 | M12824    | 3530.927  | 3968.304  |
| NM_003908 | 8891.449  | 9138.152  | U18909    | 2518.522  | 2541.753  | W60100    | 3365.892  | 3711.967  |
| NM_001277 | 3734.377  | 4064.064  | NM_003489 | 2545.148  | 2187.081  | M24898    | 958.632   | 1089.866  |
| NM_003658 | 8319.253  | 8328.852  | NM_016589 | 8661.32   | 3144.96   | U72508    | 695.089   | 767.488   |
| NM_007072 | 1838.105  | 1889.307  | NM_003597 | 499.2     | 477.291   | AA457153  | 3600.465  | 4013.232  |
| NM_012320 | 3639.056  | 3596.335  | NM_006561 | 8785.226  | 8019.732  | AA283122  | 2115.126  | 2264.849  |
| NM_018208 | 5809.69   | 7942.364  | NM_017521 | 1898.889  | 1819.334  | AA868504  | 1574.066  | 1899.281  |
| NM_015928 | 7152.258  | 8107.961  | NM_006743 | 420.446   | 254.719   | AA877845  | 5619.958  | 6884.585  |
| U90653    | 8448.109  | 8209.233  | AK025200  | 7112.225  | 6386.513  | AA664241  | 42783.629 | 50670.832 |
| NM_000196 | 998.355   | 694.803   | NM_001383 | 10018.351 | 8506.218  | AI016456  | 649.585   | 570.591   |
| NM_018338 | 11286.135 | 13002.187 | NM_001029 | 60472.875 | 64998.066 | NM_014940 | 3201.49   | 1731.185  |
| NM_006745 | 59155.063 | 57562.129 | NM_005008 | 15036.937 | 15283.593 | NM_005783 | 653.211   | 604.89    |
| NM_000275 | 1721.338  | 2240.88   | NM_016304 | 31384.688 | 29015.07  | NM_006900 | 3591.384  | 2518.229  |
| AK000037  | 1803.137  | 1821.928  | NM_014046 | 16070.821 | 15125.915 | AJ289111  | 9422.991  | 6926.451  |
| NM_014760 | 4565.476  | 6071.934  | L34071    | 6746.156  | 7254.71   | NM_016356 | 11450.934 | 10678.419 |
| NM_018398 | 1298.544  | 1686.475  | AK025201  | 11578.054 | 15760.619 | NM_006406 | 5467.837  | 4688.247  |
| NM_002560 | 3430.713  | 2764.04   | AK021927  | 702.552   | 745.73    | AF216292  | 22786.895 | 21198.01  |
| NM_000787 | 1045.607  | 849.68    | AK022995  | 4352.048  | 4385.06   | NM_000952 | 609.769   | 538.281   |
| U57962    | 3538.867  | 3075.647  | NM_006066 | 12214.184 | 7563.311  | NM_005894 | 681.05    | 730.818   |
| NM_016176 | 15792.784 | 13205.224 | NM_005165 | 9078.282  | 6728.332  | NM_014584 | 9370.902  | 9453.477  |
| NM_017895 | 5682.656  | 5191.242  | NM_005138 | 32268.033 | 22703.172 | M30627    | 604.767   | 290.179   |
| NM_004610 | 1506.633  | 1614.782  | NM_002115 | 19240.729 | 10205.913 | NM_005810 | 6256.818  | 7739.322  |
| NM_001612 | 4147.729  | 4051.232  | AK023162  | 3405.386  | 2701.46   | M28170    | 6238.127  | 6056.003  |

|           |           |           |           |           |           |           |           |           |
|-----------|-----------|-----------|-----------|-----------|-----------|-----------|-----------|-----------|
| AK027002  | 2162.658  | 2444.441  | NM_006396 | 10583.851 | 9719.512  | NM_00155E | 630.527   | 723.014   |
| AB025254  | 2149.158  | 2155.509  | NM_004537 | 1280.786  | 1027.985  | AK026223  | 969.218   | 1420.529  |
| NM_004081 | 718.739   | 741.399   | AL390134  | 10502.71  | 9840.534  | NM_000874 | 6871.346  | 5827.187  |
| NM_00002E | 15429.727 | 14919.086 | NM_020226 | 3461.64   | 3916.796  | NM_005854 | 1106.305  | 1184.157  |
| D38521    | 4469.27   | 5540.435  | NM_01786E | 4538.463  | 4134.407  | AB007863  | 30450.225 | 29753.535 |
| NM_00040E | 7011.446  | 7620.628  | NM_003427 | 2923.425  | 2775.011  | AK024456  | 5018.256  | 5576.369  |
| NM_018127 | 19047.707 | 20482.357 | NM_005920 | 1769.855  | 1883.881  | NM_01778E | 871.186   | 1171.137  |
| AB020677  | 3233.487  | 4391.614  | Y09321    | 785.024   | 1258.649  | D31887    | 4083.973  | 5031.491  |
| AB033097  | 2615.931  | 2891.609  | AK001499  | 5352.714  | 6681.768  | NM_00231E | 4183.083  | 4291.542  |
| NM_00013E | 2402.373  | 2533.548  | AK023568  | 729.921   | 799.178   | NM_00445E | 1830.338  | 2354.468  |
| AJ223948  | 8333.205  | 9927.283  | AK026852  | 2780.015  | 2868.151  | NM_00491E | 8873.388  | 6011.619  |
| NM_01621E | 1918.11   | 1320.14   | AK021629  | 2369.781  | 3789.623  | AK022207  | 1449.875  | 787.931   |
| AK022947  | 4729.181  | 6257.786  | AL110257  | 60700.465 | 60374.52  | AV708752  | 2794.743  | 1491.138  |
| AL050029  | 3519.69   | 4665.279  | AB013384  | 2806.004  | 3405.721  | AF119885  | 3449.072  | 2417.925  |
| AL049966  | 899.72    | 841.795   | AK024824  | 1744.765  | 2235.069  | NM_00499E | 4567.585  | 4046.621  |
| AB040976  | 4340.99   | 4597.057  | AK024270  | 3317.661  | 3868.417  | NM_005971 | 3514.426  | 3382.237  |
| NM_007361 | 464.974   | 606.636   | AK025569  | 4855.037  | 3468.12   | NM_01743E | 3466.115  | 707.554   |
| NM_018641 | 8841.676  | 10680.313 | AK023060  | 1476.947  | 1232.381  | NM_01338E | 3748.979  | 3592.909  |
| U49089    | 1272.27   | 2146.145  | NM_014870 | 1527.598  | 1456.978  | NM_006517 | 503.42    | 769.939   |
| NM_002221 | 2918.132  | 2892.864  | AK021917  | 775.258   | 808.119   | NM_004171 | 1973.343  | 1983.812  |
| NM_002371 | 3911.013  | 5063.391  | AF052146  | 45984.883 | 41353.691 | NM_014037 | 9458.947  | 11053.303 |
| NM_00256E | 1052.944  | 1334.054  | AF143326  | 3995.071  | 3574.261  | NM_00486E | 15840.816 | 16078.326 |
| AK024502  | 7385.525  | 8623.436  | AL049229  | 5840.925  | 5318.633  | NM_01868E | 2721.477  | 3209.811  |
| NM_001124 | 2779.751  | 2659.765  | AK026146  | 6426.62   | 6505.357  | AK056652  | 6164.635  | 7661.717  |
| NM_00458E | 6060.586  | 6941.136  | AK023152  | 5644.172  | 5178.912  | AL137438  | 870.928   | 800.464   |
| NM_004844 | 7971.287  | 9030.409  | AK000155  | 4739.666  | 5032.508  | NM_017957 | 4432.382  | 4555.584  |
| NM_013447 | 1227.427  | 1614.116  | AL389937  | 6919.388  | 9512.592  | NM_003024 | 2449.332  | 2634.452  |
| NM_000051 | 3362.231  | 4587.021  | AK022628  | 55511.453 | 60442.961 | NM_01324E | 5374.214  | 6419.268  |
| NM_00570E | 288.386   | 599.338   | AK021737  | 7228.135  | 7020.789  | NM_000034 | 66819.664 | 74424.461 |
| NM_004180 | 8288.183  | 9221.358  | AL357454  | 1061.332  | 936.647   | AK022230  | 4500.848  | 6478.914  |
| AF302109  | 2619.908  | 3343.486  | AK026295  | 19684.352 | 17010.332 | AK022147  | 12745.832 | 15867.393 |
| AL117485  | 6007.643  | 7754.143  | AK022346  | 702.996   | 652.487   | L25664    | 3065.494  | 3849.685  |
| NM_00350E | 1525.535  | 2419.767  | AK025007  | 8406.041  | 12254.174 | NM_002027 | 11925.63  | 9404.707  |
| NM_007191 | 1045.422  | 1343.168  | NM_01648E | 7651.253  | 11081.914 | AL162078  | 3968.574  | 2940.151  |
| AL109667  | 657.313   | 1310.999  | AK026490  | 50899.207 | 52239.145 | NM_00091E | 1465.136  | 794.345   |
| NM_000840 | 583.766   | 785.259   | NM_00555E | 1103.161  | 1576.175  | NM_01338E | 16399.943 | 13708.697 |
| NM_001094 | 521.922   | 577.292   | AJ001875  | 4397.779  | 5577.415  | AB002314  | 1751.006  | 1407.181  |
| AF034102  | 31704.225 | 20899.404 | Y10204    | 74.733    | 3379.786  | NM_01404E | 10473.175 | 9436.271  |
| AJ008142  | 7234.412  | 8353.438  | NM_007220 | 1675.82   | 1840.756  | NM_01462E | 1369.099  | 1203.116  |
| AL035289  | 695.591   | 751.65    | NM_017777 | 4808.06   | 5650.541  | AB011114  | 52670.711 | 47963.055 |
| NM_00134E | 6418.365  | 6946.292  | AL109722  | 1123.648  | 1307.43   | D11466    | 22219.432 | 21336.463 |
| NM_00727E | 11567.855 | 14023.048 | AK021989  | 695.575   | 867.326   | NM_01405E | 37428.184 | 32534.871 |
| NM_01902E | 8228.883  | 9959.153  | NM_01862E | 1579.283  | 772.598   | D31885    | 36231.152 | 33474.359 |
| NM_018461 | 6511.747  | 8584.502  | AK022298  | 2369.356  | 1818.701  | NM_01664E | 3869.561  | 3593.726  |
| AF235023  | 11905.092 | 14014.696 | AJ277441  | 35895.09  | 42754.813 | AK090536  | 17752     | 19451.121 |
| NM_006910 | 6419.219  | 9700.876  | NM_006057 | 1222.704  | 1214.304  | D63477    | 817.846   | 954.133   |
| AF162667  | 5329.781  | 6711.302  | AK024242  | 17623.135 | 17630.209 | NM_02024E | 33221.117 | 37121     |
| AB046847  | 5675.914  | 6709.253  | AK024559  | 833.387   | 1233.528  | NM_014051 | 9591.524  | 11773.477 |
| NM_000447 | 1386.808  | 1939.606  | AK024943  | 1701.835  | 2376.344  | AK025398  | 2896.563  | 2750.867  |
| NM_006354 | 10767.708 | 12930.433 | AK024410  | 535.889   | 654.587   | AK023056  | 1685.784  | 1658.923  |
| AF303378  | 7210.089  | 8057.307  | AK024577  | 1149.959  | 1138.846  | NM_01788E | 1926.23   | 2226.789  |
| NM_016037 | 14655.039 | 20841.328 | AL359943  | 61081.898 | 61516.605 | NM_003150 | 6061.624  | 4420.705  |
| NM_016140 | 319.775   | 709.359   | NM_000534 | 3876.197  | 4710.359  | NM_014784 | 4260.632  | 3384.792  |

|           |           |           |           |           |           |           |           |           |
|-----------|-----------|-----------|-----------|-----------|-----------|-----------|-----------|-----------|
| NM_01596E | 891.818   | 825.187   | NM_00536E | 2665.165  | 3655.364  | AK026383  | 5539.07   | 4121.853  |
| NM_000417 | 5857      | 7056.591  | L10140    | 1298.13   | 1575.281  | AK023821  | 1099.127  | 836.476   |
| NM_02035E | 349.954   | 790.849   | AL133447  | 3192.581  | 3821.189  | AB014594  | 6286.501  | 5343.666  |
| AF152527  | 351.731   | 734.088   | AB037853  | 22858.572 | 22116.623 | M94547    | 1839.581  | 1466.613  |
| Y11709    | 379.911   | 373.541   | D28450    | 63571.422 | 56638.699 | NM_005087 | 9141.317  | 7948.333  |
| NM_01823E | 8545.14   | 5654.654  | AK056222  | 3044.379  | 1410.407  | NM_01209E | 2279.837  | 2203.638  |
| NM_01216E | 1023.83   | 1419.55   | AL050127  | 3389.37   | 4566.504  | NM_01809E | 4182.094  | 3219.802  |
| NM_00703E | 713.215   | 1006.88   | AK024805  | 11853.403 | 17112.012 | AB023164  | 4308.146  | 3908.284  |
| AF311324  | 13100.84  | 14375.97  | AK001423  | 2813.338  | 3081.767  | AK026281  | 2336.905  | 2450.289  |
| AF124433  | 1699.687  | 1874.651  | AJ012496  | 609.113   | 843.354   | U23862    | 519.885   | 454.266   |
| AK001647  | 978.361   | 1292.776  | AK024090  | 29163.957 | 30006.094 | AK026680  | 10570.734 | 11474.337 |
| NM_001461 | 848.168   | 1220.215  | AL133574  | 2599.54   | 3321.125  | NM_01243E | 60126.914 | 61766.141 |
| AF061556  | 3323.68   | 3484.264  | AK021936  | 3532.321  | 4260.226  | AK001299  | 34467.859 | 37791.051 |
| AL162049  | 2780.297  | 2502.384  | AF147339  | 35517.301 | 38215.813 | AB014559  | 17956.275 | 19955.953 |
| AF036144  | 459.654   | 208.855   | AL390181  | 46055.754 | 53754.676 | NM_01648E | 10159.366 | 12048.433 |
| NM_00503E | 2783.103  | 3472.532  | NM_017914 | 33445.641 | 39800.5   | NM_00503E | 8353.077  | 9425.162  |
| NM_00416E | 10006.596 | 13627.931 | AK024953  | 11243.533 | 12072.86  | NM_01593E | 59002.652 | 61229.93  |
| AL109677  | 2623.421  | 3711.354  | AK024276  | 2697.136  | 1399.542  | NM_01794E | 1619.149  | 1570.643  |
| NM_003941 | 22659.039 | 32324.668 | S83374    | 2076.383  | 768.04    | AK022169  | 1704.522  | 2369.79   |
| AF177909  | 901.248   | 1413.178  | AK025784  | 29645.764 | 28844.873 | AF015592  | 4193.534  | 5929.31   |
| NM_002664 | 2813.854  | 3419.105  | U07199    | 4750.833  | 3768.768  | AK026795  | 3195.042  | 4331.494  |
| AB018271  | 2175.895  | 3174.323  | AK023713  | 1498.361  | 1282.864  | NM_016617 | 15211.492 | 17119.635 |
| AL137665  | 3617.754  | 5595.936  | X81445    | 981.329   | 752.353   | NM_00233E | 9543.707  | 7259.205  |
| NM_016434 | 1365.946  | 1966.758  | U95091    | 2112.454  | 1991.608  | AL117666  | 1267.83   | 1157.645  |
| NM_005634 | 3487.121  | 2902.161  | NM_01790E | 38274.434 | 34385.258 | Y17865    | 3474.99   | 2485.37   |
| NM_017757 | 4352.938  | 5595.929  | AL360145  | 1573.58   | 1596.256  | NM_00582E | 16611.76  | 12563.547 |
| NM_00214E | 1355.691  | 1282.384  | Y12016    | 864.652   | 943.049   | NM_00275E | 4506.213  | 4070.565  |
| AB037748  | 1726.139  | 2572.066  | NM_001178 | 3478.625  | 4950.605  | U79299    | 583.938   | 437.188   |
| AB002306  | 6322.078  | 6810.131  | AK023696  | 9102.442  | 12069.691 | AJ000414  | 567.849   | 439.806   |
| NM_00130E | 7828.418  | 8188.589  | NM_000704 | 2343.911  | 3445.557  | AK025674  | 12289.422 | 12222.075 |
| NM_01247E | 2027.595  | 2859.318  | NM_015987 | 1251.625  | 1221.45   | AF007194  | 11331.274 | 10246.36  |
| NM_018187 | 13736.426 | 19744.801 | AK025205  | 431.797   | 825.857   | NM_01906E | 2307.813  | 2026.409  |
| NM_00546E | 5897.185  | 6742.148  | NM_01960E | 2948.834  | 2850.523  | NM_004761 | 4012.572  | 3839.309  |
| NM_00132E | 4562.843  | 6279.009  | NM_01536E | 857.388   | 731.3     | Z25424    | 3247.414  | 3479.501  |
| NM_01828E | 10515.303 | 10635.407 | Z49090    | 6467.659  | 6498.741  | U79458    | 8332.441  | 9015.615  |
| BC019932  | 3710.484  | 4080.625  | AK021592  | 6514.711  | 5144.202  | NM_01492E | 1130.587  | 1066.699  |
| AF114818  | 6873.048  | 8171.297  | AK025467  | 3378.587  | 1932.941  | NM_002961 | 2059.718  | 2448.876  |
| AK025106  | 3319.438  | 3036.365  | AK026593  | 14338.122 | 15195.468 | NM_01829E | 1086.445  | 1140.476  |
| NM_020144 | 5549.599  | 7316.874  | NM_01766E | 4232.92   | 2852.294  | NM_00067E | 3118.052  | 3749.234  |
| NM_00390E | 61435.77  | 60604.391 | AB007976  | 664.586   | 344.179   | AF064770  | 1178.511  | 1386.062  |
| BE893142  | 2797.009  | 3492.497  | AK024819  | 617.197   | 474.564   | NM_00576E | 1266.036  | 1361.299  |
| NM_00310E | 9120.835  | 13424.721 | AF052106  | 3323.585  | 3357.939  | NM_004127 | 64569.383 | 68695.844 |
| NM_01534E | 8569.338  | 10068.525 | AK000441  | 1420.654  | 1533.673  | NM_013324 | 5755.364  | 7768.556  |
| NM_006451 | 7119.871  | 8976.044  | AK022391  | 1495.925  | 1619.296  | AL133022  | 1096.627  | 1076.173  |
| NM_002094 | 2689.171  | 2163.412  | NM_01612E | 1549.493  | 1307.975  | NM_00395E | 5302.299  | 6213.243  |
| NM_002937 | 2051.873  | 1871.838  | CY3Cy5    | 1982.493  | 207.639   | NM_006301 | 1113.818  | 1256.103  |
| AL137476  | 1073.47   | 1082.074  | R72122    | 4433.361  | 4867.823  | AF222694  | 520.963   | 483.673   |
| AF052174  | 2874.71   | 2300.774  | Z35309    | 3024.501  | 5549.705  | AL049925  | 3376.114  | 2569.098  |
| AF070590  | 813.94    | 836.487   | X04571    | 644.667   | 529.008   | NM_01221E | 1075.583  | 559.493   |
| NM_000761 | 15465.151 | 19177.867 | AA700005  | 607.34    | 650.768   | X72887    | 2121.078  | 1575.779  |
| NM_02014E | 2654.198  | 3084.59   | AA292025  | 1283.662  | 1538.009  | NM_00452E | 2011.405  | 1470.234  |
| NM_000774 | 3434.545  | 3625.745  | AA437226  | 2112.724  | 1557.47   | NM_000127 | 4000.877  | 2978.948  |
| NM_017781 | 3117.984  | 4113.264  | R36143    | 750.112   | 1653.84   | Y10483    | 12429.563 | 10498.515 |



|           |           |           |           |           |           |           |           |           |
|-----------|-----------|-----------|-----------|-----------|-----------|-----------|-----------|-----------|
| NM_004894 | 42311.844 | 51700.93  | XM_056359 | 576.523   | 1578.65   | NM_006784 | 1538.529  | 1447.978  |
| AB028960  | 1060.266  | 1441.57   | D10353/NM | 6366.911  | 11512.1   | NM_017876 | 3593.403  | 3307.71   |
| NM_005648 | 56767.457 | 58260.762 | M15042    | 7036.817  | 13892.618 | NM_001826 | 832.583   | 895.602   |
| AK000689  | 263.423   | 757.18    | AK096645  | 10132.921 | 10385.714 | AK025352  | 828.17    | 684.481   |
| NM_006943 | 8381.357  | 12123.922 | AK092859  | 599.927   | 585.982   | NM_003721 | 6884.964  | 8193.165  |
| NM_006741 | 2449.534  | 3260.608  | NM_019884 | 1795.179  | 2903.35   | NM_004724 | 2490.998  | 2779.159  |
| NM_014166 | 16299.415 | 20254.74  | SR2       | 1703.901  | 3170.146  | NM_001431 | 8615.948  | 9086.193  |
| AL117606  | 8922.183  | 11821.24  | SR4       | 496.486   | 891.524   | NM_000381 | 564.007   | 915.594   |
| NM_012330 | 3453.962  | 5092.853  | SR8       | 344.149   | 1691.55   | NM_000427 | 2140.684  | 2382.135  |
| AF294278  | 1325.4    | 1917.166  | SR10      | 965.943   | 1033.292  | NM_014924 | 1621.269  | 2154.465  |
| NM_018211 | 3736.373  | 5493.615  | CY3Cy5    | 10013.71  | 1267.276  | NM_006946 | 1136.294  | 1933.219  |
| NM_014520 | 4106.689  | 6462.396  | NM_005291 | 14252.898 | 12476.764 | NM_000174 | 56972.938 | 62570.82  |
| AL117508  | 542.841   | 230.172   | AF253316  | 586.641   | 641.198   | NM_002508 | 1847.184  | 2595.59   |
| NM_002616 | 5447.703  | 4942.973  | NM_002923 | 2157.058  | 2793.244  | NM_014343 | 3597.573  | 4713.418  |
| AK026375  | 4368.179  | 3538.83   | NM_006794 | 806.462   | 812.109   | D25303    | 923.823   | 1169.863  |
| NM_014710 | 833.253   | 804.803   | NM_018653 | 788.213   | 1126.214  | AB043007  | 37672.715 | 24438.801 |
| U85992    | 1340.243  | 1006.852  | NM_005388 | 5133.265  | 4830.662  | NM_004861 | 2851.992  | 2252.835  |
| AL110152  | 1753.228  | 1326.001  | NM_007232 | 21714.891 | 30884.846 | NM_016161 | 774.952   | 433.889   |
| AF131745  | 6083.608  | 5650.999  | NM_003027 | 1320.136  | 2494.333  | AF022913  | 4457.3    | 2776.609  |
| AL117565  | 3380.13   | 3178.696  | NM_016257 | 444.213   | 512.183   | NM_000028 | 2618.949  | 1931.935  |
| AF147305  | 663.01    | 919.006   | NM_002717 | 8604.615  | 16335.112 | NM_001382 | 10379.277 | 9518.791  |
| AK022109  | 625.397   | 663.471   | NM_020179 | 3755.814  | 3949.702  | M93718    | 13631.064 | 11344.038 |
| AK022103  | 859.007   | 788.041   | NM_004306 | 2483.086  | 3152.695  | NM_005386 | 1830.31   | 1566.037  |
| NM_007030 | 968.897   | 790.495   | NM_006205 | 425.958   | 986.828   | AK023807  | 12183.991 | 10658.765 |
| AK022111  | 457.445   | 555.561   | NM_004034 | 3064.964  | 7297.292  | AK024273  | 4224.645  | 3280.242  |
| AK021527  | 619.702   | 722.7     | AF193756  | 604.824   | 1270.286  | D28476    | 10524.222 | 11011.155 |
| AF143882  | 1614.04   | 2220.259  | AI492087  | 440.981   | 583.893   | NM_016263 | 4437.808  | 4591.263  |
| U00953    | 546.956   | 848.064   | NM_004193 | 4608.201  | 7838.013  | NM_003335 | 33007.07  | 37453.719 |
| AF086232  | 529.298   | 523.825   | NM_002803 | 13120.968 | 12372.574 | AB002376  | 3763.097  | 4138.035  |
| NM_017742 | 2697.634  | 3114.043  | NM_005508 | 5323.902  | 5584.538  | NM_018246 | 528.755   | 647.733   |
| NM_005108 | 2551.366  | 3831.957  | NM_016568 | 794.239   | 782.158   | NM_005558 | 2185.006  | 2743.016  |
| AK022292  | 3315.18   | 4792.304  | AB033102  | 14369.789 | 20984.24  | NM_016631 | 1699.685  | 2088.79   |
| AK024173  | 193.659   | 559.437   | NM_014774 | 6127.764  | 10974.979 | NM_002256 | 16869.465 | 26975.879 |
| AB051436  | 6755.268  | 7052.553  | NM_014143 | 11516.665 | 20642.416 | AF064839  | 41994.41  | 50445.875 |
| AK026482  | 2593.795  | 2353.95   | M55646    | 9987.623  | 15238.759 | NM_005436 | 10566.705 | 12978.591 |
| AL137473  | 5712.546  | 6199.602  | NM_006112 | 22245.738 | 31818.57  | AB037810  | 5307.913  | 5763.717  |
| AJ001873  | 541.503   | 403.617   | M12807    | 574.833   | 762.288   | NM_006593 | 1089.592  | 865.195   |
| AK022604  | 1644.263  | 1205.596  | NM_001765 | 4210.61   | 5022.226  | NM_000376 | 6417.885  | 5697.681  |
| U66048    | 657.178   | 621.25    | NM_003361 | 563.467   | 438.215   | NM_000475 | 3776.215  | 2356.75   |
| AL080095  | 383.839   | 309.7     | NM_012099 | 597.604   | 663.086   | M61872    | 16391.943 | 12191.877 |
| AK023401  | 892.014   | 594.282   | NM_018684 | 1222.754  | 2776.947  | NM_016153 | 860.784   | 775.272   |
| AK001865  | 1806.293  | 1476.56   | NM_017983 | 524.448   | 578.431   | AK027089  | 892.882   | 763.069   |
| AK024035  | 7852.575  | 8165.903  | BE906724  | 307.401   | 645.751   | X59845    | 1449.993  | 1445.07   |
| AL049331  | 510.318   | 684.796   | NM_002283 | 508.689   | 885.141   | NM_006284 | 17651.279 | 15926.098 |
| AL050079  | 419.582   | 543.054   | AJ276095  | 528.696   | 1001.362  | U18909    | 2320.45   | 2084.313  |
| AL080233  | 629.916   | 717.58    | NM_004819 | 633.343   | 2011.473  | NM_003486 | 3507.331  | 2693.142  |
| AL117591  | 2306.621  | 2776.89   | NM_007184 | 613.285   | 1210.397  | NM_016586 | 13476.763 | 13146.235 |
| AL050132  | 826.465   | 840.432   | AF231916  | 1307.337  | 1220.22   | NM_003597 | 823.445   | 907.999   |
| AL110230  | 433.823   | 526.486   | NM_003501 | 4619.248  | 4914.175  | NM_006561 | 7620.966  | 8116.999  |
| AL117663  | 514.38    | 585.172   | AK022654  | 13628.318 | 11829.304 | NM_017521 | 962.917   | 919.259   |
| NM_014293 | 592.523   | 829.875   | BC002905  | 5509.595  | 5481.194  | AK025200  | 7621.901  | 9550.229  |
| AK024432  | 2921.886  | 5030.55   | NM_001637 | 463.971   | 451.532   | NM_001383 | 7207.542  | 9698.364  |
| AL137513  | 1515.005  | 2282.602  | NM_016630 | 12612.487 | 13419.563 | NM_016304 | 19623.729 | 30167.602 |

|           |           |           |           |           |           |           |           |           |
|-----------|-----------|-----------|-----------|-----------|-----------|-----------|-----------|-----------|
| AF088001  | 718.629   | 1419.882  | NM_014291 | 9403.265  | 15981.538 | NM_006013 | 25443.52  | 35475.613 |
| NM_018067 | 11467.581 | 15638.286 | NM_014631 | 620.797   | 1352.476  | NM_014046 | 9844.193  | 12640.117 |
| NM_018956 | 17146.211 | 22910.104 | NM_001089 | 3021.969  | 4250.396  | L34071    | 3873.146  | 4421.306  |
| NM_014787 | 4720.12   | 6094.296  | NM_000120 | 2734.724  | 4039.201  | AK025201  | 11029.925 | 8271.643  |
| AL122109  | 1034.856  | 1210.173  | AF172327  | 43722.543 | 57934.258 | AK022995  | 4292.784  | 2984.639  |
| AF074988  | 2842.865  | 3515.109  | NM_001676 | 3285.041  | 4141.146  | NM_006066 | 20836.186 | 13952.596 |
| AK024946  | 1125.481  | 1087.171  | NM_000220 | 746.033   | 582.86    | NM_005165 | 3874.649  | 3501.812  |
| AK001432  | 312.722   | 525.322   | NM_004519 | 794.467   | 1305.444  | NM_005138 | 41316.336 | 34183.734 |
| AL133568  | 6820.863  | 6011.923  | NM_001679 | 14343.01  | 20231.486 | NM_002115 | 41221.559 | 44204.281 |
| AF009265  | 2549.024  | 2257.24   | NM_004046 | 42254.73  | 47223.879 | AK023162  | 2589.241  | 3226.096  |
| NM_002360 | 1569.474  | 1823.101  | NM_004983 | 586.203   | 611.928   | NM_006396 | 9935.621  | 10848.725 |
| AF009322  | 1265.192  | 1261.261  | U09384    | 398.887   | 407.816   | NM_018646 | 3128.795  | 2885.136  |
| AF056425  | 1200.699  | 848.012   | NM_006860 | 567.768   | 887.007   | NM_013446 | 2065.931  | 2150.74   |
| AF090893  | 744.008   | 991.389   | NM_004794 | 1036.961  | 2787.339  | NM_004537 | 1168.142  | 1252.432  |
| NM_018033 | 1420.239  | 2129.387  | NM_004163 | 786.379   | 1624.442  | AL390134  | 10379.678 | 12308.506 |
| AK001945  | 660.629   | 568.668   | AK026308  | 613.483   | 1499.553  | NM_020226 | 3337.298  | 3866.221  |
| AK021541  | 633.049   | 723.896   | NM_013337 | 695.606   | 1949.104  | NM_017865 | 3480.572  | 4182.375  |
| AK021766  | 742.44    | 1063.788  | NM_006899 | 8846.412  | 8390.9    | NM_003427 | 2110.67   | 3536.196  |
| AK001147  | 553.073   | 571.211   | NM_012200 | 3776.853  | 3530.986  | NM_005920 | 1865.09   | 2229.322  |
| AK021630  | 604.74    | 849.941   | NM_001724 | 2627.698  | 2646.06   | Y09321    | 895.783   | 1054.855  |
| AK021831  | 1243.427  | 2216.683  | NM_000150 | 1872.358  | 1460.727  | AK001499  | 4113.192  | 2995.505  |
| AK025650  | 654.053   | 1063.356  | AB023152  | 1337.088  | 1173.21   | AK023568  | 714.399   | 761.14    |
| AK026401  | 615.245   | 1057.492  | NM_006212 | 3442.869  | 3410.311  | AK026852  | 3009.728  | 2042.41   |
| AK026773  | 566.265   | 715.885   | AK022872  | 3319.26   | 2493.271  | AK021629  | 1932.706  | 1529.302  |
| AK026452  | 849.952   | 524.595   | AK024272  | 7488.066  | 10446.819 | AL110257  | 58550.656 | 52371.465 |
| U73530    | 425.3     | 450.848   | NM_016381 | 1937.145  | 1824.473  | AB013384  | 2468.769  | 2471.202  |
| AF086158  | 9469.039  | 7666.538  | NM_018035 | 288.289   | 1071.488  | AK024824  | 2146.067  | 2290.062  |
| AF086050  | 5485.994  | 5057.851  | NM_018042 | 2352.933  | 2458.789  | AK024270  | 3752.742  | 3451.674  |
| AF147375  | 713.153   | 594.279   | BE741525  | 945.303   | 623.531   | AK025569  | 6152.991  | 5809.542  |
| X51524    | 1376.476  | 1104.774  | BF030555  | 10679.577 | 7088.84   | AK023060  | 2256.677  | 2452.603  |
| AK025759  | 3958.302  | 3386.099  | NM_012433 | 11331.441 | 11805.635 | NM_014870 | 1527.265  | 1623.065  |
| AK024105  | 687.635   | 642.779   | NM_005605 | 1349.912  | 2785.359  | AK021917  | 904.052   | 948.306   |
| AJ238556  | 1047.023  | 1024.002  | NM_002576 | 483.327   | 499.517   | AF052146  | 51937.52  | 55059.555 |
| Z70699    | 695.628   | 546.372   | NM_003582 | 645.315   | 1362.912  | NM_004870 | 9934.718  | 11612.411 |
| AL049919  | 855.346   | 611.222   | AF169351  | 1344.579  | 2911.539  | AF143872  | 16325.5   | 19442.059 |
| NM_006896 | 798.237   | 589.404   | M14200    | 2215.676  | 4770.127  | AK025686  | 2805.167  | 3650.257  |
| AK023429  | 971.632   | 834.748   | NM_000282 | 720.623   | 1366.118  | AF143326  | 3727.031  | 5258.903  |
| AK022276  | 904.588   | 869.123   | NM_000532 | 938.94    | 1889.984  | AL049229  | 4939.797  | 6703.304  |
| AK026881  | 778.536   | 603.427   | NM_016341 | 1295.087  | 2952.451  | AK026146  | 6436.138  | 7798.98   |
| AL133653  | 879.6     | 588.307   | NM_004034 | 3809.534  | 6029.183  | AK023152  | 4835.049  | 5946.002  |
| AK023774  | 1493.429  | 1790.179  | NM_000130 | 4366.925  | 4028.086  | AK000155  | 4338.913  | 5046.006  |
| NM_003544 | 53348.613 | 47679.492 | AF193756  | 773.402   | 712.297   | AL389937  | 6364.577  | 7288.088  |
| AK001187  | 1319.58   | 2095.136  | AI492087  | 2083.909  | 1844.238  | AK022628  | 47663.34  | 37576.27  |
| NM_003529 | 2444.361  | 2448.783  | R72122    | 3511.939  | 3633.92   | AK021737  | 7048.18   | 5337.699  |
| AF056436  | 1988.446  | 1972.321  | Z35309    | 1494.768  | 776.839   | AL357454  | 1133.021  | 812.162   |
| AB023191  | 1276.221  | 1153.353  | AA700005  | 410.556   | 432.292   | AK026295  | 17085.271 | 12780.721 |
| AK027212  | 6698.515  | 5103.356  | AA292025  | 1025.034  | 1583.397  | AK022346  | 735.474   | 437.124   |
| X56197    | 1525.594  | 1206.547  | AA437226  | 1759.354  | 1612.148  | AK025007  | 5426.557  | 4005.126  |
| NM_005196 | 833.746   | 766.222   | R36143    | 463.303   | 528.484   | NM_016486 | 7558.546  | 6409.906  |
| U90905    | 1766.956  | 1635.582  | XM_056359 | 364.347   | 461.574   | AL117601  | 840.739   | 614.145   |
| AF161422  | 3947.87   | 2996.69   | D10353/NM | 4472.112  | 4445.265  | AK026490  | 52856.008 | 42036.02  |
| AL137384  | 2325.589  | 1237.172  | M15042    | 4861.556  | 3380.384  | AJ227861  | 3063.009  | 2819.016  |
| AF070619  | 1646.404  | 1831.276  | AK056843  | 1112.862  | 1080.994  | AJ001020  | 1414.219  | 1306.792  |

|           |           |           |           |           |           |           |           |           |
|-----------|-----------|-----------|-----------|-----------|-----------|-----------|-----------|-----------|
| NM_020153 | 3956.049  | 4534.73   | U49928    | 4526.627  | 8138.889  | AJ001875  | 4526.462  | 4498.384  |
| NM_005321 | 5135.405  | 5485.446  | AK096645  | 5487.451  | 5456.923  | X64985    | 971.003   | 1300.082  |
| AF073520  | 2119.24   | 2597.991  | NM_019884 | 1986.13   | 3573.156  | NM_00722C | 1423.378  | 2114.435  |
| NM_014015 | 10118.161 | 10729.53  | NM_018291 | 1044.029  | 2257.854  | NM_017777 | 2416.153  | 2532.948  |
| AK026839  | 706.295   | 657.008   | NM_005530 | 542.533   | 863.446   | AL109722  | 806.114   | 1175.064  |
| Z34278    | 631.853   | 548.604   | AF116909  | 2447.108  | 1593.551  | AK021989  | 1158.176  | 872.695   |
| AK024973  | 585.732   | 417.496   | BE906724  | 1423.037  | 2081.705  | AK022298  | 5065.128  | 4756.248  |
| AJ008123  | 3043.252  | 3973.747  | NM_002283 | 5497.845  | 4648.341  | AJ277441  | 48549.273 | 47821.766 |
| AJ008156  | 1332.878  | 1404.558  | AJ276095  | 12576.824 | 12362.528 | NM_006057 | 1897.114  | 2125.617  |
| AF147321  | 699.896   | 483.698   | NM_004819 | 3448.059  | 2921.475  | AK024242  | 15681.602 | 17369.314 |
| AF161437  | 3942.792  | 2061.277  | NM_007184 | 2809.449  | 2282.536  | AK024559  | 1232.84   | 1439.587  |
| AK001039  | 1113.662  | 1209.123  | NM_005291 | 13986.974 | 7475.194  | AK024851  | 1120.939  | 1579.493  |
| AK026465  | 739.971   | 968.868   | AF253316  | 731.993   | 703.883   | AK024943  | 1278.073  | 1659.757  |
| U52834    | 646.259   | 652.642   | NM_002923 | 1743.785  | 2387.403  | AK024577  | 1391.125  | 2379.948  |
| NM_003532 | 586.757   | 356.892   | NM_006794 | 571.166   | 482.138   | AK024876  | 492.091   | 926.695   |
| NM_017869 | 4795.344  | 3616.803  | NM_018653 | 781.426   | 1043.665  | AL359943  | 57409.367 | 46436.297 |
| AF075100  | 1236.202  | 1074.031  | NM_005388 | 5191.389  | 6958.658  | NM_000534 | 2778.512  | 3033.681  |
| AF203447  | 12482.319 | 10869.321 | NM_007232 | 19968.332 | 25791.217 | NM_005365 | 2470.583  | 1964.02   |
| NM_018502 | 2277.967  | 2575.748  | NM_003027 | 788.768   | 648.083   | L10140    | 1129.412  | 1108.02   |
| AL080066  | 13655.882 | 13294.502 | NM_002717 | 4969.414  | 4542.403  | AL133447  | 3337.069  | 3115.555  |
| AJ227870  | 2286.184  | 2121.109  | NM_003025 | 2443.769  | 2308.771  | AB037853  | 41612.75  | 41952.426 |
| AL137620  | 1641.99   | 1268.657  | NM_020179 | 789.043   | 1596.945  | D28450    | 63953.457 | 62254.613 |
| NM_005294 | 909.483   | 899.523   | NM_004306 | 2623.231  | 5218.962  | AK056222  | 4626.86   | 4368.325  |
| AK026879  | 775.608   | 957.398   | NM_001153 | 464.161   | 1092.727  | AK002028  | 45910.836 | 54871.938 |
| AF085826  | 1643.967  | 2437.765  | NM_006786 | 476.12    | 1074.274  | AL050127  | 3529.216  | 5816.897  |
| AK024362  | 1849.702  | 2354.938  | NM_006860 | 8272.569  | 7278.876  | AK024805  | 7458.695  | 9896.503  |
| AF118068  | 3253.891  | 4320.88   | NM_004283 | 1670.26   | 1516.544  | AK001423  | 2731.566  | 2919.302  |
| NM_004164 | 707.261   | 613.628   | NM_004163 | 9929.488  | 9660.715  | AK024090  | 22803.943 | 18096.209 |
| NM_019018 | 4885.398  | 3430.761  | AK026308  | 1447.409  | 1401.054  | AL133574  | 4957.154  | 3833.667  |
| M87931    | 1184.482  | 913.136   | NM_013337 | 2626.141  | 2563.586  | AK021936  | 2734.084  | 2236.17   |
| CY3Cy5    | 3576.114  | 215.462   | NM_004193 | 2338.189  | 1533.016  | AF147339  | 33710.535 | 32447.779 |
| BE790116  | 514.336   | 465.834   | NM_002803 | 12002.68  | 8861.126  | AL390181  | 42330.285 | 33956.816 |
| M12824    | 2618.314  | 1959.103  | NM_005508 | 5940.691  | 8047.697  | NM_017914 | 45525.266 | 41003.086 |
| W60100    | 3856.738  | 3163.97   | NM_006788 | 972.769   | 731.724   | AK024953  | 11851.973 | 12860.743 |
| U72508    | 538.142   | 762.34    | AK025039  | 333.336   | 300.083   | AK024276  | 7776.752  | 7033.364  |
| AA457153  | 3395.708  | 3014.673  | NM_016568 | 965.428   | 708.806   | S83374    | 7345.55   | 7928.645  |
| AA868504  | 3423.638  | 3062.983  | AB033102  | 11451.822 | 8663.436  | AK025784  | 34143.656 | 31278.994 |
| AA877845  | 5508.69   | 5016.52   | NM_014774 | 3890.515  | 2688.133  | U07199    | 4583.603  | 4828.187  |
| AA664241  | 12614.707 | 11713.609 | NM_014143 | 8196.434  | 7204.554  | AK023713  | 1786.102  | 1887.277  |
| NM_000588 | 16914.053 | 20261.223 | M55646    | 5479.097  | 6644.215  | X81445    | 1233.324  | 1979.667  |
| SR7       | 5098.059  | 37003.258 | NM_006112 | 12191.132 | 16952.514 | U95091    | 2264.784  | 3436.953  |
| SR9       | 17918.729 | 3024.934  | M12807    | 510.792   | 475.199   | NM_01790C | 42994.336 | 50799.398 |
| CY3Cy5    | 4247.804  | 1254.002  | NM_001765 | 723.699   | 946.702   | S50182    | 1997.407  | 2609.142  |
| NM_00581C | 1793.535  | 1389.764  | NM_003361 | 554.998   | 568.061   | AL360145  | 1680.77   | 2451.461  |
| AK026223  | 807.414   | 890.522   | NM_012099 | 671.308   | 1035.828  | Y12016    | 1609.71   | 1487.408  |
| NM_000874 | 6007.467  | 3325.658  | NM_018684 | 1554.407  | 3198.756  | NM_001178 | 2997.481  | 2391.206  |
| AB007863  | 1454.566  | 1316.04   | NM_017983 | 484.885   | 863.042   | AK023696  | 6898.123  | 4941.602  |
| AK024456  | 5183.273  | 3737.272  | AF057354  | 1245.969  | 1076.643  | NM_000704 | 2617.104  | 2233.467  |
| D31887    | 3758.95   | 3796.753  | M14200    | 56132.953 | 49630.758 | NM_015987 | 1178.27   | 943.705   |
| NM_002313 | 3913.718  | 3448.921  | NM_000282 | 4088.427  | 4181.509  | NM_019605 | 2379.776  | 2299.201  |
| NM_004459 | 2645.34   | 2267.244  | NM_000532 | 20414.689 | 19669.375 | NM_015365 | 821.327   | 890.319   |
| NM_005503 | 2263.906  | 2587.003  | NM_016341 | 895.032   | 789.46    | Z49090    | 13622.313 | 14095.052 |
| NM_001502 | 977.186   | 997.352   | AF231916  | 1140.631  | 505.791   | AK021592  | 10957.644 | 11740.472 |

|           |           |           |           |           |           |           |           |           |
|-----------|-----------|-----------|-----------|-----------|-----------|-----------|-----------|-----------|
| NM_005721 | 1525.609  | 1290.873  | NM_003501 | 4490.654  | 4169.099  | AK025467  | 4297.867  | 4807.594  |
| AF284223  | 1382.802  | 1829.371  | AK022654  | 13851.732 | 14122.849 | AK026593  | 14404.046 | 15688.576 |
| AF176012  | 793.951   | 1058.175  | BC002905  | 8073.329  | 12566.336 | L37700    | 1977.056  | 2542.816  |
| BE743838  | 8051.716  | 6580.15   | NM_018091 | 13454.68  | 20416.219 | NM_017665 | 5359.504  | 5301.456  |
| AF273046  | 1179.302  | 981.361   | NM_001108 | 5429.384  | 5231.727  | AB007976  | 434.891   | 834.056   |
| NM_001081 | 3105.593  | 2494.213  | NM_001637 | 574.669   | 861.755   | AK024819  | 915.803   | 1273.57   |
| NM_002483 | 2002.658  | 1584.048  | NM_016630 | 10674.793 | 9895.792  | AF052106  | 4021.06   | 4663.278  |
| BF002026  | 2007.398  | 1842.892  | NM_014291 | 7395.945  | 7955.407  | AK000441  | 1648.768  | 1992.725  |
| NM_014037 | 1099.325  | 927.05    | NM_014631 | 489.411   | 335.559   | AK022391  | 875.885   | 1393.957  |
| NM_004866 | 13924.31  | 7696.609  | NM_001089 | 2304.682  | 1733.719  | NM_016125 | 1033.383  | 1256.475  |
| NM_018688 | 2651.514  | 1706.655  | NM_000120 | 2481.37   | 2433.397  | CY3Cy5    | 5615.13   | 207.348   |
| AK056652  | 6102.193  | 4440.72   | AF172327  | 31499.227 | 38145.219 | R72122    | 3200.405  | 2975.485  |
| AL137438  | 780.67    | 548.103   | NM_001676 | 1863.954  | 2106.458  | Z35309    | 1446.043  | 1719.466  |
| NM_017957 | 958.812   | 927.755   | NM_000220 | 406.21    | 406.902   | X04571    | 387.295   | 382.75    |
| NM_003024 | 1853.046  | 1447.923  | NM_001679 | 3215.135  | 3940.044  | AA700005  | 772.073   | 716.649   |
| NM_013248 | 6406.784  | 5449.382  | NM_004046 | 14672.15  | 31019.91  | AA292025  | 1104.36   | 1022.563  |
| NM_000034 | 65453.664 | 67958.055 | NM_004983 | 445.706   | 703.183   | AA437226  | 1617.785  | 1779.703  |
| NM_014940 | 2515.292  | 2534.505  | U09384    | 712.984   | 1019.926  | XM_056359 | 406.742   | 554.705   |
| NM_005783 | 388.141   | 668.226   | NM_019884 | 6625.708  | 6426.496  | D10353/NM | 3401.628  | 3705.335  |
| AJ289111  | 7041.062  | 7479.881  | NM_018291 | 4183.668  | 4201.503  | M15042    | 3819.137  | 3649.454  |
| NM_016356 | 660.637   | 1258.8    | NM_005530 | 5370.64   | 4553.609  | AK056843  | 1157.737  | 1378.894  |
| NM_006406 | 7721.504  | 7655.567  | NM_006899 | 7998.348  | 4251.711  | U49928    | 8312.241  | 8641.451  |
| AF216292  | 20852.162 | 18877.225 | NM_012200 | 2775.023  | 1835.85   | AK096645  | 23488.758 | 23222.443 |
| NM_005894 | 502.646   | 461.94    | NM_001724 | 2471.643  | 2013.427  | AK092859  | 779.948   | 787.141   |
| NM_014584 | 8693.956  | 8612.503  | NM_000150 | 2269.222  | 3236.473  | NM_019884 | 6586.781  | 8360.5    |
| NM_016649 | 3936.147  | 3927.404  | AB023152  | 1743.862  | 2527.917  | SR2       | 58914.504 | 54681.27  |
| AK090536  | 13509.887 | 8734.208  | NM_006212 | 3273.983  | 3613.448  | SR4       | 15771.396 | 12448.952 |
| D63477    | 1152.51   | 762.367   | AK022872  | 3126.495  | 2970.741  | SR6       | 2549.827  | 1781.076  |
| NM_020243 | 23475.943 | 15956.349 | AK024272  | 6183.964  | 5214.045  | SR8       | 8226.523  | 21103.559 |
| NM_014051 | 9387.368  | 6827.138  | NM_016381 | 1715.131  | 1553.357  | SR10      | 28318.076 | 7768.193  |
| AK025398  | 2680.28   | 1872.439  | AL591715  | 524.099   | 395.909   | CY3Cy5    | 5882.472  | 211.161   |
| NM_004915 | 5117.663  | 5003.457  | NM_007254 | 173.834   | 369.619   | NM_005291 | 31950.771 | 28380.758 |
| AK022207  | 550.417   | 772.16    | NM_018042 | 1422.237  | 1919.916  | AF253316  | 817.005   | 901.74    |
| AV708752  | 2973.559  | 2883.631  | BE741525  | 664.306   | 1430.958  | NM_005855 | 468.715   | 691.032   |
| AF119885  | 2319.935  | 2635.107  | BF030555  | 2710.693  | 2778.707  | NM_002923 | 3078.861  | 2665.498  |
| NM_004996 | 4405.168  | 5224.385  | NM_012433 | 2456.739  | 2464.347  | NM_006794 | 810.027   | 785.367   |
| NM_005971 | 4274.134  | 5387.193  | NM_005605 | 869.274   | 962.394   | NM_018653 | 801.578   | 714.169   |
| NM_017435 | 5275.43   | 1293.543  | NM_002576 | 568.3     | 570.815   | NM_005388 | 6245.69   | 5728.323  |
| NM_013386 | 3633.022  | 2871.248  | NM_003582 | 621.771   | 1040.46   | NM_007232 | 27643.904 | 29772.416 |
| AK026680  | 6688.179  | 4925.462  | U52051    | 437.613   | 275.133   | NM_003027 | 876.397   | 1194.949  |
| NM_012436 | 10795.839 | 8356.317  | NM_020179 | 12969.09  | 13866.63  | NM_002717 | 7832.505  | 8285.779  |
| AK001299  | 14817.951 | 10142.089 | NM_004306 | 31412.355 | 28572.195 | NM_014486 | 994.114   | 1113.133  |
| AB014559  | 1962.227  | 1579.071  | NM_001153 | 321.385   | 268.459   | NM_003025 | 8716.375  | 9830.961  |
| NM_016489 | 7788.588  | 6256.979  | NM_006786 | 1620.299  | 1685.623  | NM_004306 | 42926.066 | 52056.797 |
| NM_005033 | 10606.883 | 10278.187 | NM_006205 | 2911.942  | 3365.918  | NM_001153 | 856.518   | 1213.747  |
| NM_015932 | 64052.98  | 63890.285 | NM_004034 | 2300.077  | 1877.081  | NM_006786 | 1563.279  | 1778.608  |
| NM_017949 | 1555.519  | 1262.24   | NM_000130 | 4451.418  | 2954.293  | NM_006205 | 2610.064  | 1962.999  |
| AK022169  | 1064.919  | 990.309   | AF193756  | 475.342   | 462.916   | NM_004034 | 3345.382  | 3044.812  |
| AF015592  | 3746.31   | 3529.731  | AI492087  | 1701.313  | 1864.966  | NM_000130 | 4420.493  | 4041.363  |
| NM_002027 | 10481.827 | 10666.202 | R72122    | 3209.596  | 2727.826  | AI492087  | 1831.12   | 1984.763  |
| AL162078  | 2290.984  | 2371.642  | Z35309    | 1147.234  | 838.72    | NM_004193 | 2708.939  | 2532.698  |
| NM_000919 | 1619.507  | 1427.023  | X04571    | 303.539   | 249.686   | NM_002803 | 16721.676 | 14746.842 |
| NM_013382 | 3397.259  | 3574.648  | AA700005  | 522.742   | 556.911   | NM_005508 | 6363.014  | 6098.194  |

|           |           |           |           |           |           |           |           |           |
|-----------|-----------|-----------|-----------|-----------|-----------|-----------|-----------|-----------|
| AB002314  | 815.394   | 1257.449  | AA292025  | 1133.655  | 720.968   | NM_00678E | 1073.864  | 1246.347  |
| NM_014043 | 11542.679 | 12951.145 | AA437226  | 1896.173  | 1903.618  | AK025039  | 705.235   | 1025.3    |
| NM_014622 | 1534.638  | 1430.737  | R36143    | 276.997   | 305.645   | NM_01656E | 1243.537  | 1175.362  |
| AB011114  | 57903.516 | 52151.605 | XM_056359 | 529.777   | 635.1     | AB033102  | 15579.408 | 15763.19  |
| D31885    | 25284.893 | 23565.98  | D10353/NM | 3745.857  | 3705.296  | NM_014774 | 5934.344  | 6036      |
| BE743838  | 8017.016  | 7028.97   | M15042    | 3462.324  | 5050.623  | NM_014143 | 9972.887  | 9168.439  |
| AF273046  | 1085.016  | 1117.266  | U49928    | 1856.75   | 2026.518  | M55646    | 19546.563 | 19837.699 |
| NM_001081 | 3266.604  | 2175.092  | AK096645  | 3548.448  | 3734.669  | NM_006112 | 23899.293 | 27966.756 |
| NM_002483 | 2155.304  | 1534.851  | M12807    | 637.553   | 588.537   | NM_01209E | 3966.9    | 4241.91   |
| BF002026  | 1831.672  | 1283.414  | NM_00176E | 4578.662  | 4289.838  | NM_018684 | 17730.609 | 18031.777 |
| BE790116  | 1009.136  | 1292.245  | NM_003361 | 1489.142  | 1320.729  | NM_017983 | 1139.868  | 1142.978  |
| AI922341  | 833.287   | 739.285   | NM_01209E | 3319.355  | 3161.864  | AF116909  | 1036.661  | 1064.646  |
| M12824    | 2760.368  | 2082.537  | NM_018684 | 14716.885 | 17907.611 | BE906724  | 1293.823  | 1026.293  |
| W60100    | 3943.706  | 3573.135  | NM_017983 | 1233.166  | 1131.004  | NM_002283 | 5265.119  | 4879.005  |
| AA457153  | 3810.976  | 3416.393  | AF116909  | 1215.238  | 739.844   | AJ276095  | 11722.038 | 11150.244 |
| AA283122  | 428.554   | 415.867   | BE906724  | 1142.274  | 777.975   | NM_00481E | 3352.27   | 3293.066  |
| AA868504  | 4461.912  | 4573.531  | NM_002283 | 6015.831  | 6434.874  | NM_007184 | 2310.804  | 2351.161  |
| AA877845  | 6970.629  | 6558.457  | AJ276095  | 14256.27  | 17279.563 | AF231916  | 3490.491  | 3834.44   |
| AA664241  | 14797.229 | 14954.506 | NM_00481E | 3627.225  | 4794.929  | NM_003501 | 5798.073  | 5863.764  |
| NM_00058E | 14659.115 | 16855.863 | NM_007184 | 2901.428  | 3263.926  | AK022654  | 37293.613 | 38289.969 |
| NM_00640E | 7345.804  | 5760.07   | NM_005291 | 17219.281 | 16719.48  | BC002905  | 7575.115  | 7508.978  |
| AF216292  | 20319.227 | 14104.015 | AF253316  | 609.306   | 453.755   | NM_018091 | 11239.713 | 10626.927 |
| NM_005894 | 709.985   | 511.333   | NM_00585E | 341.333   | 286.033   | NM_00110E | 7570.817  | 7353.185  |
| NM_014584 | 9094.847  | 6228.32   | NM_002923 | 1798.501  | 1718.704  | NM_001637 | 641.283   | 440.716   |
| NM_00581C | 2514.57   | 3094.269  | NM_006794 | 660.749   | 450.607   | NM_01663C | 15385.243 | 14169.287 |
| AK026223  | 598.38    | 595.096   | NM_018653 | 777.975   | 644.443   | NM_014291 | 9109.288  | 7873.173  |
| NM_000874 | 7083.952  | 5253.723  | NM_00538E | 4444.336  | 4803.489  | NM_014631 | 666.331   | 761.803   |
| AB007863  | 1533.381  | 1587.218  | NM_007232 | 14275.3   | 12467.384 | NM_00108E | 3218.71   | 3882.364  |
| AK024456  | 5395.767  | 4979.351  | NM_003027 | 882.066   | 1069.839  | NM_00012C | 2840.178  | 2745.708  |
| NM_01778E | 504.982   | 535.199   | NM_002717 | 1423.085  | 3005.226  | AF172327  | 28745.955 | 26615.041 |
| D31887    | 4295.629  | 3824.187  | NM_00302E | 2667.035  | 2650.564  | NM_00167E | 4919.229  | 5424.227  |
| NM_00618C | 1059.231  | 991.397   | NM_00022C | 380.421   | 268.297   | NM_00022C | 489.874   | 639.876   |
| NM_002313 | 5358.246  | 7148.29   | NM_00451E | 483       | 640.229   | NM_00167E | 23669.463 | 24474.986 |
| NM_00445E | 3080.779  | 2927.368  | NM_00167E | 20653.314 | 18223.043 | NM_004983 | 956.027   | 974.6     |
| NM_005503 | 2504.344  | 3047.483  | NM_00404E | 61787.121 | 63210.961 | U09384    | 984.733   | 976.021   |
| NM_001502 | 1246.409  | 1208.478  | NM_004983 | 812.552   | 554.099   | NM_00686C | 8987.827  | 8895.775  |
| NM_005721 | 1217.642  | 1114.41   | U09384    | 799.331   | 736.526   | NM_004794 | 15308.037 | 13574.485 |
| AF284223  | 1194.471  | 1025.142  | NM_00686C | 8218.683  | 5578.708  | NM_004283 | 1279.07   | 1188.984  |
| AF176012  | 645.537   | 540.4     | NM_004283 | 1437.582  | 1287.179  | NM_004163 | 12507.174 | 10943.277 |
| NM_005971 | 3709.227  | 2917.627  | NM_004163 | 8954.975  | 9210.382  | AK026308  | 1520.933  | 1378.641  |
| NM_01743E | 3992.654  | 857.276   | AK026308  | 2126.447  | 2969.058  | NM_013337 | 2062.802  | 1776.741  |
| NM_01338E | 3347.61   | 2513.428  | NM_013337 | 2160.379  | 2239.426  | NM_00689E | 8970.131  | 7935.006  |
| NM_014037 | 1485.885  | 1390.763  | NM_004193 | 2465.891  | 1925.312  | NM_01220C | 3189.589  | 2967.772  |
| NM_00486E | 17037.229 | 12810.793 | NM_002803 | 11857.405 | 8554.957  | NM_001724 | 3142.949  | 2910.443  |
| NM_01868E | 3090.391  | 2686.318  | NM_00550E | 5026.42   | 4050.297  | NM_00015C | 3112.164  | 2890.926  |
| AK056652  | 6644.244  | 5716.901  | NM_00678E | 864.714   | 730.589   | AB023152  | 1192.086  | 911.267   |
| AL137438  | 768.941   | 840.927   | AK025039  | 319.231   | 214.501   | NM_006212 | 3930.281  | 3188.255  |
| NM_017957 | 1078.453  | 1059.945  | NM_01656E | 983.534   | 755.336   | AK022872  | 4255.725  | 3043.249  |
| NM_003024 | 1819.256  | 1482.577  | AB033102  | 10493.667 | 9803.754  | AK024272  | 9828.306  | 8786.241  |
| NM_01324E | 6971.787  | 6329.905  | NM_014774 | 4262.151  | 6603.024  | NM_016381 | 2312.734  | 2373.642  |
| NM_000034 | 66049.258 | 65111.973 | NM_014143 | 6304.47   | 9107.515  | AL591715  | 621.939   | 720.235   |
| AK022230  | 4158.12   | 4022.42   | M55646    | 3795.812  | 4355.359  | NM_018042 | 2395.997  | 2583.92   |
| AK022147  | 7116.834  | 7317.137  | NM_006112 | 9083.715  | 12011.932 | BE741525  | 1219.528  | 1188.59   |

|           |           |           |           |           |           |           |           |           |
|-----------|-----------|-----------|-----------|-----------|-----------|-----------|-----------|-----------|
| L25664    | 1153.085  | 1090.446  | BE741525  | 1533.59   | 1861.36   | BF030555  | 29514.205 | 32436.576 |
| NM_014940 | 3006.506  | 2852.809  | BF030555  | 15778.526 | 14316.75  | NM_012433 | 16497.16  | 14807.42  |
| NM_005783 | 564.052   | 592.277   | NM_012433 | 13200.893 | 9701.125  | NM_002576 | 3822.651  | 3434.914  |
| AK000851  | 463.1     | 488.36    | NM_005605 | 5160.819  | 5541.073  | NM_003582 | 4051.952  | 4137.412  |
| AJ289111  | 6306.95   | 5233.421  | NM_002576 | 3665.839  | 4431.474  | AF057354  | 606.204   | 690.696   |
| NM_016356 | 620.974   | 977.74    | NM_003582 | 3825.734  | 3403.346  | AF169351  | 8049.13   | 8373.537  |
| NM_014043 | 9434.267  | 6024.957  | AF057354  | 1177.781  | 1040.992  | M14200    | 64214.246 | 59168.434 |
| NM_014622 | 1423.052  | 1006.526  | NM_000282 | 3683.71   | 3441.772  | NM_000282 | 5218.265  | 5275.382  |
| AB011114  | 52018.723 | 31080.547 | NM_000532 | 20672.201 | 17950.615 | NM_000532 | 23653.127 | 22430.057 |
| D11466    | 20963.184 | 14958.875 | NM_016341 | 963.853   | 698.699   | NM_016341 | 977.015   | 902.941   |
| NM_014056 | 25084.256 | 19222.574 | AF231916  | 1268.676  | 1012.738  | NM_004034 | 2797.157  | 2778.153  |
| D31885    | 24860.773 | 20789.293 | NM_003501 | 5012.333  | 4957.579  | NM_000130 | 4235.461  | 3406.665  |
| NM_016649 | 4348.536  | 3903.37   | AK022654  | 14801.043 | 10712.891 | AF193756  | 624.826   | 417.527   |
| AK090536  | 14793.537 | 11471.386 | BC002905  | 5472.677  | 4381.27   | AI492087  | 2502.876  | 2105.766  |
| D63477    | 1620.418  | 1180.285  | NM_018091 | 7999.391  | 8270.933  | R72122    | 3189.926  | 2746.986  |
| NM_020243 | 27400.428 | 25000.766 | NM_001108 | 6381.736  | 6067.479  | Z35309    | 1425.597  | 1184.051  |
| NM_014051 | 10635.633 | 9369.5    | NM_001637 | 384.452   | 306.559   | AA700005  | 902.266   | 1039.757  |
| AK025398  | 4233.273  | 5955.58   | NM_016630 | 11927.603 | 11686.239 | AA292025  | 1467.051  | 1106.468  |
| AK023056  | 2115.141  | 1821.521  | NM_014291 | 6052.704  | 6240.917  | AA437226  | 1970.588  | 1802.59   |
| NM_017888 | 2777.124  | 2806.691  | NM_014631 | 602.396   | 792.706   | R36143    | 572.022   | 624.869   |
| NM_004915 | 5834.13   | 6108.868  | NM_001089 | 2618.797  | 2791.384  | XM_056359 | 732.508   | 610.508   |
| AK022207  | 712.973   | 1003.198  | NM_000120 | 1829.806  | 2004.492  | D10353/NM | 4887.841  | 5154.208  |
| AV708752  | 3152.096  | 3708.58   | AF172327  | 22980.949 | 29417.203 | M15042    | 4945.227  | 5283.02   |
| AF119885  | 1910.329  | 1866.435  | NM_001676 | 2201.667  | 2362.262  | AK056843  | 2139.518  | 1818.613  |
| NM_004996 | 3340.738  | 3642.998  | AB018338  | 12233.992 | 11323.443 | U49928    | 12556.079 | 12507.621 |
| NM_000588 | 12642.926 | 8745.59   | D80010    | 3134.151  | 3315.298  | AK096645  | 26152.566 | 26632.221 |
| U23862    | 2649.003  | 2000.042  | NM_004923 | 976.759   | 957.01    | AK092859  | 979.288   | 1041.779  |
| AK026680  | 6189.146  | 4857.001  | NM_003971 | 1625.521  | 1546.235  | NM_019884 | 6237.813  | 6153.566  |
| NM_012436 | 11181.837 | 9442.155  | AK026973  | 1041.629  | 1007.006  | NM_018291 | 3522.334  | 3559.328  |
| AK001299  | 16893.064 | 14129.898 | NM_005822 | 945.868   | 819.565   | NM_005530 | 5677.127  | 5614.359  |
| AB014559  | 2175.714  | 1797.455  | U81002    | 7283.762  | 7052.45   | AF116909  | 783.761   | 997.61    |
| NM_017949 | 2049.744  | 2112.425  | NM_016299 | 13084.463 | 11733.307 | BE906724  | 1230.628  | 1060.076  |
| AK022169  | 723.945   | 1009.074  | L38517    | 2139.457  | 1914.926  | NM_002283 | 5303.425  | 5082.879  |
| AF015592  | 4162.26   | 4040.344  | NM_018291 | 4370.527  | 3721.706  | AJ276095  | 12989.053 | 11738.174 |
| AK026795  | 3199.851  | 3329.977  | NM_005530 | 5651.32   | 4414.939  | NM_004819 | 4323.17   | 3459.421  |
| NM_016617 | 17692.883 | 25751.91  | NM_006899 | 10577.171 | 9172.286  | NM_007184 | 2826.924  | 2946.689  |
| NM_002027 | 12367.512 | 13793.646 | NM_012200 | 3915.993  | 3139.126  | NM_005291 | 22753.596 | 19497.877 |
| AL162078  | 2201.893  | 2508.911  | NM_001724 | 2439.586  | 1742.42   | AF253316  | 1188.667  | 1035.734  |
| NM_000919 | 1693.071  | 1575.644  | NM_000150 | 2323.047  | 1688.088  | NM_002923 | 2992.829  | 2730.994  |
| NM_013382 | 3283.036  | 3415.796  | AB023152  | 1362.622  | 1053.554  | NM_006794 | 847.72    | 930.693   |
| AB002314  | 862.132   | 994.595   | NM_006212 | 3377.588  | 3432.992  | NM_018653 | 795.025   | 892.296   |
| NM_005503 | 1849.165  | 1547.263  | AK022872  | 3318.898  | 3404.301  | NM_005388 | 6855.935  | 6968.499  |
| NM_001502 | 930.478   | 811.441   | AK024272  | 7353.364  | 7304.745  | NM_007232 | 35939.332 | 38802.277 |
| NM_005721 | 1110.711  | 598.875   | NM_016381 | 2060.671  | 1856.118  | NM_003027 | 1038.459  | 1222.659  |
| AF284223  | 1125.442  | 915.604   | AL591715  | 651.54    | 762.383   | NM_002717 | 7484.898  | 7265.439  |
| AF176012  | 818.609   | 625.755   | NM_007254 | 275.322   | 341.722   | NM_014486 | 620.774   | 387.912   |
| BE743838  | 8510.377  | 7090.222  | NM_018042 | 1752.232  | 2275.222  | NM_003025 | 9758.075  | 10340.928 |
| AF273046  | 1486.052  | 1495.922  | NM_014944 | 9352.05   | 8989.776  | NM_020179 | 12355.17  | 12897.184 |
| NM_001081 | 3287.663  | 2504.836  | NM_001942 | 982.018   | 1609.263  | NM_004306 | 39450.566 | 47715.309 |
| NM_002483 | 2091.398  | 1750.289  | AF200348  | 4661.148  | 4165.724  | NM_006786 | 1480.608  | 1650.311  |
| BF002026  | 1669.365  | 1421.519  | Y11710    | 606.475   | 649.197   | NM_006205 | 2162.808  | 1956.725  |
| BE790116  | 618.882   | 736.047   | NM_002650 | 2252.092  | 1971.444  | NM_006860 | 7657.238  | 7517.645  |
| M12824    | 2892.878  | 3301.233  | NM_003260 | 8978.348  | 7338.979  | NM_004794 | 17035.936 | 12291.23  |

|           |           |           |           |           |           |           |           |           |
|-----------|-----------|-----------|-----------|-----------|-----------|-----------|-----------|-----------|
| W60100    | 4175.634  | 4312.334  | AK024071  | 1794.291  | 1956.26   | NM_004283 | 1518.951  | 1335.391  |
| U72508    | 636.762   | 701.925   | AF056490  | 1589.595  | 1489.013  | NM_004163 | 12912.836 | 10287.044 |
| AA457153  | 3818.863  | 3277.978  | NM_005539 | 1229.63   | 1165.978  | AK026308  | 1787.4    | 1433.267  |
| AA283122  | 561.578   | 597.741   | BF341504  | 438.629   | 431.211   | NM_013337 | 2111.123  | 1957.243  |
| AA868504  | 4201.143  | 3663.604  | NM_005541 | 1203.629  | 1062.644  | NM_004193 | 2405.536  | 2106.873  |
| AA877845  | 6549.954  | 6899.004  | AB002319  | 2015.805  | 1897.195  | NM_002803 | 17197.916 | 15885.728 |
| AA664241  | 13348.479 | 12652.061 | AF039942  | 4806.466  | 4129.013  | NM_005508 | 6958.212  | 5968.069  |
| NM_014940 | 2320.385  | 1597.747  | NM_004421 | 2134.705  | 1692.605  | NM_006788 | 1098.365  | 1971.096  |
| NM_005783 | 720.601   | 563.507   | AB046863  | 9124.009  | 8268.431  | NM_016568 | 1346.36   | 1241.081  |
| AJ289111  | 6564.664  | 4637.023  | M62403    | 5719.797  | 4570.058  | AB033102  | 17654.467 | 16757.244 |
| NM_016356 | 2029.508  | 2183.696  | NM_017883 | 2278.374  | 2376.404  | NM_014774 | 6015.969  | 6721.711  |
| NM_006406 | 7272.778  | 5326.04   | AK025131  | 3371.942  | 3225.024  | NM_014143 | 9265.194  | 9249.51   |
| AF216292  | 19640.518 | 14718.642 | NM_000754 | 19745.988 | 17145.881 | M55646    | 23900.477 | 22532.34  |
| NM_005894 | 651.285   | 591.549   | NM_014619 | 772.975   | 775.143   | NM_006112 | 25079.17  | 22993.379 |
| NM_014584 | 9426.515  | 8020.925  | NM_005629 | 6350.541  | 6144.559  | M12807    | 835.934   | 716.913   |
| NM_005810 | 1893.898  | 2276.416  | J04621    | 791.321   | 955.061   | NM_001765 | 7364.31   | 10781.366 |
| AK026223  | 726.89    | 1088.488  | NM_000718 | 2713.097  | 2979.409  | NM_003361 | 2555.921  | 3376.065  |
| NM_000874 | 7131.112  | 6622.004  | NM_000161 | 3896.85   | 4284.893  | NM_012095 | 2849.443  | 3128.192  |
| AB007863  | 1296.036  | 1000.333  | NM_002634 | 27219.783 | 24681.238 | NM_018684 | 16366.631 | 15470.316 |
| AK024456  | 4783.218  | 4555.072  | NM_017749 | 3416.676  | 3354.001  | NM_017983 | 1077.278  | 958.531   |
| NM_017789 | 615.103   | 631.346   | NM_001972 | 757.059   | 680.527   | AF057354  | 657.455   | 755.563   |
| D31887    | 4509.887  | 4557.783  | NM_001445 | 775.522   | 663.64    | AF169351  | 8663.774  | 7320.116  |
| NM_006180 | 531.031   | 361.484   | NM_002006 | 22129.02  | 22427.711 | M14200    | 64914.848 | 53729.582 |
| NM_002313 | 4944.123  | 6153.795  | NM_007111 | 9037.237  | 8930.106  | NM_000282 | 5363.764  | 4451.994  |
| NM_004459 | 3107.802  | 3004.866  | NM_002048 | 848.419   | 730.553   | NM_000532 | 26714.893 | 23019.484 |
| NM_004915 | 5147.548  | 3999.708  | NM_004702 | 1510.084  | 1126.438  | NM_016341 | 1482.103  | 1240.283  |
| AK022207  | 746.749   | 627.083   | NM_007109 | 3006.172  | 2478.627  | AF231916  | 3451.537  | 3547.1    |
| AV708752  | 2531.383  | 1841.883  | AK023404  | 1273.467  | 1222.466  | NM_003501 | 5651.997  | 4885.391  |
| AF119885  | 1905.338  | 1754.289  | NM_013239 | 2143.949  | 2110.614  | AK022654  | 39086.836 | 41084.129 |
| NM_004996 | 3595.852  | 2741.792  | NM_001789 | 3306.546  | 2803.903  | BC002905  | 7795.017  | 8093.771  |
| NM_005971 | 3759.595  | 3169.713  | NM_016004 | 4739.77   | 4242.954  | NM_018091 | 10880.046 | 11476.159 |
| NM_017435 | 5204.692  | 1293.431  | NM_002655 | 1531.172  | 1466.084  | NM_001108 | 7443.739  | 8305.042  |
| NM_013386 | 3772.591  | 3069.554  | AB028955  | 4531.764  | 4586.621  | NM_001637 | 818.459   | 586.028   |
| NM_014037 | 1502.246  | 1941.027  | U66879    | 9586.467  | 9739.099  | NM_016630 | 15054.904 | 14807.364 |
| NM_004866 | 17554.5   | 16248.472 | NM_016022 | 5799.647  | 6941.427  | NM_014291 | 9226.31   | 8577.655  |
| NM_018688 | 3241.619  | 3504.594  | NM_004874 | 2837.008  | 2876.121  | NM_014631 | 783.452   | 733.086   |
| AK056652  | 7508.435  | 8381.804  | NM_014204 | 1414.776  | 1452.67   | NM_001085 | 3597.989  | 4162.426  |
| AL137438  | 700.675   | 746.969   | S70385    | 8793.125  | 7286.26   | NM_000120 | 2834.916  | 3100.678  |
| NM_017957 | 1204.011  | 1059.438  | M34671    | 7043.188  | 7817.955  | AF172327  | 29512.49  | 27028.709 |
| NM_003024 | 1699.282  | 1582.233  | NM_018509 | 7745.684  | 8653.973  | NM_001676 | 5239.885  | 7331.802  |
| NM_013248 | 6343.844  | 6817.569  | NM_004086 | 5711.988  | 5886.811  | NM_000220 | 1734.708  | 2654.099  |
| NM_000034 | 68602.938 | 64845.313 | AL050199  | 1332.404  | 1341.596  | NM_004519 | 1594.7    | 1518.485  |
| AK022230  | 4557.058  | 4749.844  | NM_001109 | 288.181   | 200.66    | NM_001679 | 23578.861 | 30892.252 |
| AK022147  | 8645.775  | 12246.955 | NM_007352 | 756.936   | 513.959   | NM_004046 | 60102.77  | 60596.703 |
| L25664    | 955.837   | 1333.396  | AF176706  | 2695.646  | 2766.224  | NM_004983 | 737.775   | 793.17    |
| NM_002027 | 8870.636  | 6683.074  | NM_014484 | 979.465   | 1111.703  | U09384    | 805.771   | 1001.438  |
| AL162078  | 1750.087  | 1712.249  | AF163762  | 309.063   | 191.827   | NM_019884 | 5122.18   | 5212.521  |
| NM_000919 | 1512.135  | 1058.821  | NM_001086 | 2139.51   | 2152.33   | NM_018291 | 5510.986  | 4434.764  |
| NM_013382 | 2726.264  | 2837.188  | NM_014670 | 1784.447  | 1616.504  | NM_005530 | 7962.534  | 6221.614  |
| AB002314  | 602.708   | 821.833   | NM_019048 | 6523.451  | 5443.248  | NM_006899 | 11138.213 | 10068.914 |
| NM_014043 | 10203.057 | 9487.825  | NM_001040 | 3011.375  | 2482.009  | NM_012200 | 3900.939  | 3676.39   |
| D11466    | 22030.498 | 17266.637 | AF279698  | 2914.847  | 2631.174  | NM_001724 | 3316.896  | 2963.156  |
| NM_014056 | 28906.988 | 25324.832 | NM_019849 | 2036.54   | 1738.661  | NM_000150 | 3171.517  | 3244.216  |

|           |           |           |           |           |           |           |           |           |
|-----------|-----------|-----------|-----------|-----------|-----------|-----------|-----------|-----------|
| D31885    | 27104.078 | 22576.525 | AB032996  | 36012.387 | 31106.303 | AB023152  | 1114.001  | 1483.538  |
| NM_016649 | 3887.888  | 3607.333  | AB040881  | 4321.978  | 4440.953  | NM_006212 | 3992.168  | 4310.096  |
| D63477    | 1736.452  | 1515.236  | AY007121  | 1532.862  | 1374.574  | AK022872  | 3943.798  | 3264.655  |
| NM_020243 | 28827.221 | 28007.061 | NM_003372 | 14237.554 | 14164.853 | AK024272  | 9248.843  | 8599.458  |
| NM_014051 | 12002.16  | 11809.5   | NM_007317 | 6243.806  | 6740.059  | NM_016381 | 2422.072  | 2334.964  |
| AK025398  | 3434.887  | 3166.522  | AK021466  | 2064.394  | 2238.585  | AL591715  | 718.692   | 760.467   |
| AK023056  | 1961.425  | 1988.3    | NM_006443 | 14958.544 | 14229.917 | NM_018042 | 3450.209  | 3655.235  |
| NM_017888 | 2944.73   | 2959.518  | NM_005081 | 283.602   | 435.038   | BE741525  | 2131.406  | 2196.708  |
| NM_003150 | 6165.27   | 4209.687  | NM_004959 | 728.327   | 756.099   | BF030555  | 32666.434 | 42726.602 |
| NM_014784 | 2847.712  | 2673.644  | AK026022  | 31237.994 | 26171.16  | NM_005605 | 6325.293  | 7093.847  |
| AK026383  | 3054.427  | 2784.68   | NM_003199 | 1644.066  | 1537.537  | NM_002576 | 3410.568  | 3665.281  |
| AK023821  | 885.952   | 1781.925  | NM_002938 | 9263.069  | 8547.007  | NM_003582 | 4451.001  | 4418.816  |
| AB014594  | 6090.907  | 8661.374  | AK023652  | 6947.712  | 7185.241  | NM_020179 | 10515.958 | 9550.903  |
| M94547    | 1969.294  | 2149.592  | AF099032  | 1444.911  | 1217.996  | NM_004306 | 37291.879 | 36942.43  |
| NM_005087 | 9063.067  | 8598.42   | NM_003070 | 3437.258  | 3488.832  | NM_006786 | 1832.382  | 1944.331  |
| AB023164  | 3578.573  | 3486.509  | AL122101  | 2262.155  | 1907.173  | NM_006205 | 3169.509  | 3000.173  |
| AK026281  | 554.795   | 352.99    | NM_004780 | 876.617   | 706.406   | NM_004034 | 4702.667  | 4264.729  |
| AK001299  | 18410.111 | 17541.449 | NM_016216 | 3791.712  | 3169.116  | NM_000130 | 6471.881  | 5837.209  |
| AB014559  | 2339.524  | 2387.579  | AK001649  | 1260.682  | 1205.025  | AF193756  | 570.613   | 631.911   |
| NM_016489 | 9117.415  | 7394.072  | NM_016638 | 11243.649 | 10335.182 | AI492087  | 2183.96   | 2255.432  |
| NM_005033 | 11318.49  | 11846.979 | AB018274  | 9110.466  | 7449.011  | R72122    | 3147.016  | 3197.007  |
| NM_015932 | 61194.625 | 57666.527 | NM_005871 | 8085.179  | 6209.723  | Z35309    | 1720.215  | 2504.48   |
| AK022169  | 749.884   | 996.921   | NM_007042 | 3068.474  | 2371.658  | X04571    | 1943.938  | 2330.779  |
| AF015592  | 4841.065  | 5386.451  | NM_016333 | 9994.728  | 7516.071  | AA700005  | 675.283   | 727.899   |
| AK026795  | 3453.785  | 4866.963  | BE875028  | 3655.341  | 3732.763  | AA292025  | 1249.855  | 1194.844  |
| NM_016617 | 17078.063 | 18717.967 | AK000511  | 4458.503  | 4350.323  | AA437226  | 1984.105  | 1989.013  |
| NM_002338 | 1945.654  | 1949.929  | AF121255  | 2692.463  | 3520.162  | R36143    | 430.949   | 597.448   |
| AL117666  | 801.242   | 1049.669  | NM_005494 | 5798.548  | 6238.183  | XM_056359 | 519.714   | 656.572   |
| NM_005825 | 22970.102 | 26858.797 | NM_017946 | 1164.471  | 1269.432  | D10353/NM | 5092.724  | 5900.776  |
| NM_002756 | 6502.553  | 7114.973  | NM_004953 | 5051.152  | 5510.065  | M15042    | 4975.404  | 5482.894  |
| U79299    | 786.216   | 911.881   | AL049682  | 1432.117  | 1496.137  | U49928    | 9408.647  | 10022.956 |
| AJ000414  | 816.365   | 975.463   | NM_005528 | 5151.837  | 4997.286  | AK096645  | 23338.484 | 26689.814 |
| AK025674  | 2791.149  | 3191.452  | AK022842  | 1789.835  | 1561.416  | AK092859  | 1089.282  | 1097.032  |
| AF007194  | 3101.885  | 2719.852  | NM_007006 | 23623.568 | 22724.457 | M12807    | 869.597   | 764.496   |
| NM_019069 | 1613.78   | 1825.766  | AL137346  | 467.354   | 452.549   | NM_001765 | 5828.384  | 6635.797  |
| NM_004761 | 4492.978  | 4067.548  | NM_017756 | 18483.355 | 16108.706 | NM_003361 | 1931.873  | 1795.889  |
| Z25424    | 5774.722  | 4696.994  | NM_005793 | 7687.015  | 6856.984  | NM_012099 | 3700.948  | 3349.664  |
| U79458    | 12193.105 | 11683.629 | NM_004901 | 2386.343  | 2041.194  | NM_018684 | 19006.273 | 17624.287 |
| NM_014920 | 1011.256  | 1009.526  | U77088    | 1046.163  | 999.916   | NM_017983 | 1235.923  | 1081.523  |
| NM_002961 | 4883.929  | 4494.675  | NM_006721 | 11774.768 | 10416.673 | AF116909  | 1313.184  | 1675.036  |
| NM_018298 | 1154.987  | 1469.37   | NM_016282 | 4964.614  | 5280.488  | BE906724  | 1820.197  | 1763.598  |
| NM_000676 | 1740.072  | 1980.452  | NM_002765 | 7147.837  | 8915.021  | NM_002283 | 7770.546  | 7281.74   |
| AF064770  | 865.046   | 1197.724  | NM_001905 | 2509.766  | 2838.973  | AJ276095  | 15062.976 | 13568.821 |
| NM_005766 | 615.262   | 1106.936  | AF292100  | 3150.041  | 3440.154  | NM_004819 | 4080.705  | 4596.318  |
| NM_004127 | 14888.485 | 20725.18  | NM_003434 | 49548.398 | 47728.609 | NM_007184 | 2648.319  | 2936.163  |
| NM_013324 | 6277.408  | 8575.209  | NM_005654 | 318.938   | 392.485   | NM_005291 | 29921.268 | 37338.848 |
| AL133022  | 2469.47   | 3566.252  | AF024698  | 57118.012 | 58833.34  | AF253316  | 1350.984  | 1224.234  |
| NM_003953 | 7942.019  | 10932.506 | BE904617  | 7748.911  | 8173.641  | NM_005855 | 218.47    | 1424.097  |
| NM_006301 | 972.51    | 1473.476  | AK024495  | 669.585   | 624.185   | NM_002923 | 3139.044  | 2701.017  |
| AL049925  | 2678.205  | 2876.84   | AF024694  | 2230.813  | 2377.572  | NM_006794 | 1078.911  | 1038.47   |
| X72887    | 643.849   | 1091.184  | AF091081  | 9317.366  | 10095.297 | NM_018653 | 1469.295  | 1297.748  |
| NM_004529 | 2718.519  | 3068.428  | AK001758  | 4880.028  | 4761.598  | NM_005388 | 5818.248  | 5121.61   |
| NM_000127 | 3047.501  | 3521.773  | U90842    | 627.45    | 461.343   | NM_007232 | 35757.336 | 40821.973 |



|           |           |           |           |           |           |           |           |           |
|-----------|-----------|-----------|-----------|-----------|-----------|-----------|-----------|-----------|
| Y10483    | 19110.498 | 19596.855 | AF086325  | 1095.222  | 1133.112  | NM_003027 | 1191.574  | 1330.138  |
| NM_006784 | 2613.227  | 3414.479  | NM_004928 | 518.955   | 747.05    | NM_002717 | 6568.114  | 6660.264  |
| NM_017876 | 5182.333  | 5859.696  | AF147401  | 856.95    | 696.216   | NM_003025 | 8410.995  | 9054.671  |
| NM_001087 | 14375.701 | 18633.203 | AJ001904  | 697.284   | 761.414   | NM_004519 | 695.534   | 697.639   |
| NM_001826 | 1328.953  | 1558.771  | AF075022  | 958.796   | 681.435   | NM_001679 | 24584.635 | 25571.057 |
| AK025352  | 1629.742  | 1960.542  | AF075060  | 2246.013  | 2287.716  | NM_004983 | 967.631   | 1025.608  |
| NM_003721 | 6343.331  | 9296.81   | AF147436  | 856.683   | 564.433   | U09384    | 908.336   | 986.87    |
| NM_004724 | 3593.099  | 4231.296  | AK021441  | 1249.292  | 1281.922  | NM_006860 | 8552.677  | 9472.989  |
| NM_001431 | 10787.675 | 13551.988 | AK026018  | 400.168   | 350.718   | NM_004794 | 17966.783 | 13935.817 |
| NM_000427 | 2911.028  | 3131.962  | AF085846  | 3203.537  | 2899.589  | NM_004283 | 1858.698  | 1569.005  |
| NM_014924 | 1402.205  | 1915.291  | AK023901  | 4969.858  | 4187.655  | NM_004163 | 11230.078 | 9706.704  |
| NM_006946 | 1043.265  | 1803.463  | AL109705  | 1581.936  | 1601.636  | AK026308  | 2190.018  | 1906.981  |
| NM_000174 | 10859.624 | 14152.657 | AF147392  | 574.129   | 349.028   | NM_013337 | 2433.056  | 2604.009  |
| NM_002508 | 2312.443  | 2506.232  | AF088057  | 6157.223  | 4787.19   | NM_004193 | 2461.747  | 2744.975  |
| NM_014343 | 4712.246  | 6539.666  | AF086255  | 9241.729  | 7599.163  | NM_002803 | 16160.802 | 19467.205 |
| D25303    | 846.656   | 1031.829  | AK022660  | 549.691   | 555.581   | NM_005508 | 5686.545  | 6576.846  |
| AB043007  | 35491.652 | 34086.355 | AF088051  | 1184.282  | 1347.891  | NM_006788 | 1158.14   | 1377.237  |
| NM_004861 | 698.016   | 688.756   | AF086366  | 580.95    | 448.069   | AK025039  | 1152.684  | 1669.174  |
| NM_016161 | 840.021   | 1048.293  | AF086360  | 3862.814  | 3384.573  | NM_016568 | 1576.946  | 1339.097  |
| AF022913  | 4281.689  | 4951.396  | AF086436  | 588.423   | 658.651   | AB033102  | 16134.238 | 16826.119 |
| NM_000028 | 2265.719  | 2690.612  | AF087993  | 3520.178  | 3823.743  | NM_014774 | 5985.41   | 6346.963  |
| NM_001382 | 6790.85   | 8371.078  | AF035282  | 1384.731  | 1594.013  | NM_014143 | 8997.444  | 8548.906  |
| M93718    | 11859.229 | 13849.322 | AK021966  | 3352.842  | 4087.104  | M55646    | 21034.479 | 22571.158 |
| NM_005386 | 779.694   | 890.299   | AB018292  | 5512.518  | 5786.306  | NM_006112 | 22660.518 | 22434.504 |
| AK023807  | 16453.215 | 16321.707 | AF075032  | 443.825   | 336.499   | NM_002576 | 3859.133  | 3317.883  |
| NM_018188 | 6006.412  | 7093.394  | AF085971  | 1002.658  | 939.283   | NM_003582 | 3900.978  | 4137.865  |
| AK024273  | 2854.515  | 3036.559  | AF147302  | 1548.621  | 1114.072  | AF057354  | 772.291   | 594.823   |
| X59417    | 54204.473 | 60346.617 | AF085929  | 1221.911  | 1315.418  | AF169351  | 9086.251  | 8236.818  |
| D28476    | 10868.487 | 13971.425 | AK001126  | 2794.591  | 2727.68   | NM_000282 | 5188.107  | 4537.35   |
| NM_016263 | 4591.532  | 5770.532  | AF085976  | 5846.237  | 5944.575  | NM_000532 | 27698.191 | 25314.59  |
| NM_003335 | 3441.462  | 4647.536  | AF075104  | 4047.775  | 3827.475  | NM_016341 | 1575.975  | 1026.27   |
| AB002376  | 4216.779  | 5169.257  | AL133025  | 586.986   | 658.114   | AF231916  | 3030.473  | 3969.238  |
| NM_018249 | 651.827   | 678.058   | AL137402  | 9149.897  | 8870.785  | NM_003501 | 5625.357  | 6265.843  |
| NM_005558 | 1764.708  | 2620.056  | AL137617  | 1532.635  | 1299.786  | AK022654  | 41746.824 | 45625.488 |
| NM_016631 | 1357.259  | 1787.424  | AL359568  | 17194.73  | 12211.516 | BC002905  | 8066.869  | 10277.896 |
| AB015617  | 10486.878 | 13866.556 | AL133564  | 3929.694  | 2801.057  | NM_018091 | 11690.295 | 13253.722 |
| AK022730  | 4143.89   | 4584.601  | AL137428  | 1249.458  | 1106.542  | NM_001108 | 7467.357  | 8398.89   |
| AB037810  | 4469.924  | 5864.219  | AL157462  | 1170.215  | 1109.168  | NM_001637 | 1116.343  | 1230.065  |
| NM_006593 | 710.916   | 468.021   | AL359602  | 5417.795  | 4754.604  | NM_016630 | 16199.314 | 16197.856 |
| NM_000376 | 1283.086  | 997.765   | NM_018190 | 39596.094 | 38130.762 | NM_014291 | 9324.889  | 8876.798  |
| NM_000475 | 9434.809  | 6891.366  | AF086054  | 899.953   | 932.157   | NM_014631 | 885.464   | 781.702   |
| M61872    | 16971.566 | 12602.94  | AK022259  | 54731.258 | 50674.238 | NM_001088 | 2972.949  | 3897.869  |
| AK027089  | 2071.43   | 1493.144  | AK022461  | 662.654   | 891.523   | NM_000120 | 2609.94   | 2827.764  |
| X59845    | 1709.918  | 1296.28   | NM_016010 | 4085.786  | 4925.847  | AF172327  | 24844.92  | 25853.113 |
| NM_006284 | 31226.615 | 27127.393 | AK023783  | 555.96    | 411.683   | NM_001676 | 3772.818  | 3674.732  |
| U18909    | 3047.575  | 2511.047  | AF070647  | 25297.619 | 21398.127 | D80010    | 4193.703  | 4962.966  |
| NM_003489 | 4046.738  | 2896.705  | AF116649  | 630.018   | 504.476   | NM_004923 | 1526.549  | 1780.932  |
| NM_016589 | 18742.068 | 17191.965 | AF174394  | 1771.239  | 1646.182  | NM_003971 | 2246.12   | 1926.024  |
| NM_003597 | 923.964   | 874.932   | AK025924  | 333.684   | 251.245   | AK026973  | 1072.852  | 1033.715  |
| NM_006561 | 10999.878 | 12670.706 | AK021876  | 5377.279  | 4469.393  | NM_005822 | 1088.838  | 1000.341  |
| NM_017521 | 1183.458  | 1547.534  | AK022017  | 810.895   | 575.42    | U81002    | 7654.803  | 6663.239  |
| AK025200  | 4882.946  | 5355.804  | AK022160  | 1490.611  | 1199.356  | NM_016299 | 14370.323 | 13245.869 |
| NM_001383 | 10744.046 | 12364.353 | AK022295  | 622.817   | 371.707   | L38517    | 4424.375  | 3931.857  |

|           |           |           |           |           |           |           |           |           |
|-----------|-----------|-----------|-----------|-----------|-----------|-----------|-----------|-----------|
| NM_001029 | 64958.184 | 65046.605 | AK021935  | 2103.362  | 1745.111  | NM_018291 | 5446.377  | 4980.25   |
| NM_005008 | 15792.619 | 20385.258 | AK022187  | 7926.718  | 10125.557 | NM_005530 | 7641.217  | 6851.497  |
| L34071    | 7027.754  | 8371.941  | AK022337  | 991.04    | 1133.044  | NM_006899 | 11058.507 | 10598.045 |
| AK025201  | 11436.01  | 10156.206 | AK026847  | 959.315   | 1042.795  | NM_012200 | 3905.599  | 4424.453  |
| AK021927  | 829.51    | 1027.446  | AK023048  | 714.363   | 598.596   | NM_001724 | 3392.106  | 3611.007  |
| AK022995  | 4670.894  | 3888.776  | AL359560  | 389.312   | 405.417   | NM_000150 | 4811.458  | 6037.386  |
| NM_006060 | 18128.639 | 15212.191 | AK026891  | 1559.643  | 1555.46   | AB023152  | 1271.851  | 1748.71   |
| AV718258  | 1143.464  | 894.537   | AK025573  | 925.854   | 997.314   | NM_006212 | 4907.749  | 4765.071  |
| NM_005165 | 16556.418 | 16352.047 | AK024595  | 846.731   | 987.477   | AK022872  | 4025.669  | 3397.781  |
| NM_005138 | 39854.523 | 40782.59  | AL137562  | 3901.403  | 3828.031  | AK024272  | 9661.25   | 10605.858 |
| NM_002115 | 4337.05   | 5252.775  | M90355    | 57246.438 | 52114.09  | NM_016381 | 2496.415  | 1980.956  |
| AK023162  | 5572.356  | 7153.744  | AK022495  | 4921.482  | 4015.781  | NM_018042 | 2844.617  | 3244.522  |
| NM_006390 | 16008.173 | 17275.371 | AK021632  | 703.632   | 611.647   | NM_014944 | 5519.635  | 7309.178  |
| NM_018640 | 4934.093  | 4107.304  | AK023143  | 375.335   | 471.8     | AF200348  | 5226.776  | 5365.372  |
| NM_018263 | 828.68    | 463.416   | AK026373  | 19414.279 | 16506.779 | Y11710    | 605.225   | 650.03    |
| NM_013440 | 2346.761  | 2210.964  | AK021581  | 5163.094  | 4782.003  | NM_002650 | 2044.036  | 2126.956  |
| NM_004537 | 1443.064  | 1299.256  | AK021744  | 913.086   | 834.042   | NM_003260 | 18085.1   | 23641.23  |
| AL390134  | 11370.38  | 9780.722  | NM_018430 | 15245.082 | 11831.879 | AK024071  | 1605.115  | 1472.938  |
| NM_020220 | 5364.892  | 4293.802  | AK022308  | 441.174   | 341.97    | AF056490  | 1560.299  | 1598.739  |
| NM_017865 | 4736.471  | 4528.604  | AL133640  | 1463.871  | 1858.537  | NM_005530 | 1272.339  | 1242.817  |
| NM_003427 | 2637.583  | 2970.81   | AJ012502  | 8668.617  | 9593.532  | BF341504  | 1142.987  | 1510.398  |
| NM_005920 | 2161.699  | 1909.45   | AK024170  | 589.522   | 949.301   | NM_005541 | 1940.606  | 1831.929  |
| Y09321    | 1643.438  | 1373.066  | AK021722  | 730.637   | 623.235   | AB002319  | 2114.731  | 1935.19   |
| AK001499  | 5455.295  | 3764.548  | NM_000681 | 312.011   | 403.528   | AF039942  | 5776.115  | 6159.594  |
| AK026852  | 2549.998  | 2412.164  | AF147445  | 1939.998  | 2046.22   | NM_004421 | 2672.814  | 2622.531  |
| AK021629  | 2428.073  | 2344.425  | Y10508    | 5954.279  | 5920.553  | AB046863  | 16768.816 | 20720.982 |
| AL110257  | 67966.227 | 60629.164 | NM_005182 | 52701.656 | 50047.551 | M62403    | 11400.524 | 12137.528 |
| AB013384  | 2974.093  | 2558.562  | D17074    | 1276.868  | 1462.191  | NM_017883 | 3231.813  | 2982.654  |
| AK024824  | 842.997   | 504.423   | AF039944  | 6280.826  | 5942.211  | AK025131  | 3899.799  | 4188.688  |
| AK024270  | 2599.84   | 2471.232  | AJ276252  | 942.364   | 942.761   | NM_000754 | 14921.064 | 14906.371 |
| AK025569  | 7885.271  | 8991.347  | AK021716  | 3716.092  | 2897.346  | NM_014610 | 966.165   | 1038.974  |
| AK023060  | 2475.376  | 3040.745  | AK025035  | 8216.776  | 8470.753  | NM_005620 | 10201.307 | 10304.547 |
| NM_014870 | 2254.212  | 2721.016  | AK002085  | 7028.452  | 6496.045  | J04621    | 983.241   | 997.832   |
| AK021917  | 1090.336  | 1716.614  | AL133618  | 1953.23   | 1847.641  | NM_000718 | 2691.031  | 2794.08   |
| AF052146  | 34924.145 | 43392.004 | AF230314  | 456.57    | 535.299   | NM_000161 | 5741.332  | 6650.875  |
| NM_004870 | 12191.641 | 13429.585 | AK001086  | 654.116   | 722.017   | NM_002634 | 22658.414 | 22866.465 |
| AF143872  | 3679.906  | 4622.281  | AJ131610  | 3636.162  | 4325.449  | NM_017740 | 3172.014  | 3159.961  |
| AK025686  | 3271.686  | 3409.068  | S50207    | 324.246   | 356.13    | NM_001972 | 1479.386  | 1488.622  |
| AF143326  | 1019.473  | 1263.197  | AF119872  | 6932.544  | 7446.456  | NM_001445 | 1075.365  | 1229.871  |
| AL049229  | 7699.068  | 7257.749  | X99687    | 453.084   | 281.831   | NM_002000 | 19542.938 | 17289.914 |
| NM_018300 | 2489.439  | 2665.466  | AK023255  | 49011.93  | 47812.66  | NM_007111 | 10042.155 | 8724.011  |
| AK026146  | 2681.36   | 3167.799  | NM_002622 | 36373.168 | 34587.156 | NM_002040 | 795.654   | 606.537   |
| AK023152  | 5281.592  | 6501.421  | AK024185  | 1331.737  | 1261.607  | NM_004702 | 1565.181  | 1359.107  |
| AK000155  | 6463.022  | 6749.646  | NM_015417 | 825.863   | 833.878   | NM_007100 | 2583.466  | 2369.099  |
| AL389937  | 3129.987  | 2683.246  | AK026101  | 5874.589  | 5596.687  | AK023404  | 2445.298  | 2502.344  |
| AL357454  | 791.432   | 690.748   | AK022194  | 21611.445 | 16766.268 | NM_013230 | 1878.404  | 2035.404  |
| AK026295  | 17277.609 | 16018.705 | AF085963  | 1060.128  | 770.444   | NM_001780 | 3713.205  | 3418.564  |
| AK022346  | 677.572   | 661.305   | AF131851  | 573.341   | 405.981   | NM_016004 | 7283.449  | 7619.002  |
| AK025007  | 4732.16   | 3768.748  | AK021436  | 974.319   | 1027.53   | NM_002655 | 2078.967  | 2404.553  |
| NM_016480 | 5843.43   | 4986.475  | U58664    | 869.57    | 541.755   | AB028955  | 20657.283 | 23298.402 |
| AK026490  | 53074.855 | 42037.871 | AF085937  | 674.667   | 653.037   | U66879    | 14676.076 | 15577.661 |
| AJ227861  | 1256.432  | 1014.14   | AL137569  | 2349.301  | 1957.636  | NM_016022 | 7009.272  | 6399.997  |
| NM_005553 | 706.591   | 657.779   | AK021920  | 2731.338  | 2054.848  | NM_004874 | 3339.253  | 2806.615  |

|           |           |           |           |           |           |           |           |           |
|-----------|-----------|-----------|-----------|-----------|-----------|-----------|-----------|-----------|
| AJ001875  | 1670.112  | 1616.169  | AL049415  | 1181.557  | 661.909   | NM_014204 | 1232.095  | 1291.624  |
| AJ227883  | 1071.053  | 529.454   | AK022375  | 1299.652  | 1227.405  | S70385    | 9213.915  | 10325.583 |
| Y10204    | 892.69    | 735.54    | AI065056  | 599.374   | 514.126   | M34671    | 11129.251 | 9976.993  |
| Y10507    | 1019.375  | 746.915   | NM_003378 | 36992.684 | 32104.717 | NM_018508 | 11002.73  | 11111.697 |
| L33813    | 763.935   | 483.618   | AL110194  | 10413.91  | 9239.305  | NM_004088 | 9076.553  | 9685.811  |
| L77562    | 1231.203  | 766.065   | AF138860  | 3726.281  | 3999.34   | AL050199  | 1061.996  | 1269.112  |
| L13433    | 1560.516  | 1779.456  | NM_006687 | 1879.162  | 1816.982  | NM_001109 | 1252.074  | 1267.515  |
| NM_007220 | 3100.246  | 3735.391  | NM_013301 | 366.066   | 303.398   | NM_007352 | 714.241   | 656.037   |
| D25271    | 738.583   | 583.269   | NM_017673 | 1208.502  | 826.253   | AF176706  | 2435.06   | 2447.345  |
| NM_017777 | 6012.699  | 6011.255  | AB046857  | 1155.984  | 851.402   | NM_014484 | 784.194   | 758.834   |
| AL109722  | 1423.065  | 1893.617  | AK024408  | 8879.351  | 8449.049  | NM_001088 | 1822.736  | 1438.889  |
| AK022298  | 6340.125  | 6710.685  | AF086307  | 15054.306 | 14639.204 | NM_014670 | 2490.004  | 2071.528  |
| AJ277441  | 10970.55  | 15015.791 | L19364    | 2536.431  | 3546.25   | NM_019048 | 6768.591  | 7498.637  |
| AK024242  | 24678.664 | 25249.191 | NM_005390 | 1762.995  | 1677.872  | NM_001040 | 2682.211  | 2796.635  |
| AK024559  | 2297.988  | 1874.387  | CY3Cy5    | 11699.547 | 2170.558  | AF279698  | 4197.606  | 4832.912  |
| AK024851  | 1200.348  | 971.249   | AA757170  | 322.809   | 547.222   | NM_019848 | 2573.411  | 2568.793  |
| AL359943  | 45592.426 | 43579.836 | L07738    | 387.519   | 778.314   | NM_000048 | 802.752   | 699.282   |
| NM_000534 | 3329.422  | 4724.681  | Z48054    | 253.492   | 990.723   | AB040881  | 4652.253  | 4468.104  |
| NM_005365 | 2293.26   | 3010.638  | H90415    | 463.864   | 1130.858  | AY007121  | 1929.361  | 1906.265  |
| L10140    | 587.908   | 878.891   | AA676470  | 499.48    | 634.658   | NM_003372 | 16688.479 | 15877.341 |
| AL133447  | 3473.502  | 3890.139  | AA457155  | 769.404   | 1194.677  | NM_007317 | 7115.473  | 5860.295  |
| AB037853  | 6804.043  | 8646.72   | BM014365  | 316.775   | 1843.356  | AK021466  | 2383.967  | 2350.737  |
| D28450    | 58377.535 | 58323.438 | H91842    | 882.309   | 1320.198  | Z36796    | 63387.598 | 61129.164 |
| AK056222  | 3719.607  | 4316.51   | U78045    | 328.257   | 1090.118  | NM_006443 | 14801.116 | 13848.956 |
| AK002028  | 56260.137 | 58036.594 | AA878561  | 15994.567 | 33583.965 | NM_004958 | 570.663   | 495.03    |
| AL050127  | 1903.151  | 2570.697  | BF688309  | 369.466   | 537.365   | AK026022  | 27947.336 | 27047.846 |
| AK024805  | 14403.916 | 18983.242 | AI538525  | 1040.315  | 708.493   | NM_003198 | 2051.658  | 1828.213  |
| AK001423  | 2721.713  | 3596.408  | NM_000623 | 396.668   | 318.391   | NM_002938 | 9561.613  | 8534.657  |
| AK024090  | 21998.805 | 25265.887 | NM_000941 | 1710.893  | 1740.865  | AK023652  | 8673.343  | 8186.364  |
| AL133574  | 420.228   | 727.223   | SR5       | 6361.541  | 5554.346  | AF099032  | 1526.572  | 1710.422  |
| AK021936  | 2289.126  | 3382.51   | SR7       | 6735.724  | 51189.273 | NM_003070 | 4571.894  | 3938.881  |
| AF147339  | 5435.829  | 6963.617  | SR9       | 20551.01  | 3499.829  | AL122101  | 3694.927  | 3532.517  |
| AL390181  | 48413.563 | 46157.094 | CY3Cy5    | 2800.517  | 186.587   | NM_004780 | 865.914   | 761.013   |
| NM_017914 | 16875.061 | 18114.262 | U62858    | 331.411   | 556.956   | NM_016218 | 4793.106  | 4595.822  |
| AK024953  | 10264.489 | 11262.801 | NM_001781 | 454.696   | 1055.344  | AK001649  | 1148.09   | 889.955   |
| AK024276  | 1005.439  | 1365.851  | AF035121  | 277.255   | 498.731   | NM_016638 | 12339.288 | 12354.956 |
| S83374    | 1615.902  | 2189.917  | NM_006953 | 607.56    | 1217.203  | AB018274  | 9084.168  | 9678.278  |
| AK025784  | 21061.568 | 20658.176 | NM_002530 | 101.385   | 1315.408  | NM_005871 | 12680.269 | 11679.823 |
| NM_017900 | 42106.766 | 54577.895 | U96173    | 288.979   | 804.94    | NM_016333 | 12459.698 | 11010.276 |
| S50182    | 2853.02   | 4021.44   | NM_018941 | 239.453   | 470.305   | BE875028  | 2772.487  | 2929.345  |
| AL360145  | 1262.107  | 1861.599  | BE730585  | 482.3     | 376.873   | AK000511  | 3691.531  | 3487.792  |
| Y12016    | 2771.494  | 2899.726  | NM_005954 | 467.258   | 590.475   | AF121255  | 2842.324  | 2597.102  |
| S75763    | 61358.41  | 61445.32  | NM_012471 | 690.691   | 575.025   | NM_005494 | 4644.833  | 4487.226  |
| NM_001178 | 3561.032  | 4010.041  | NM_001321 | 3767.7    | 3409.507  | NM_017948 | 996.168   | 813.043   |
| AK023696  | 5178.807  | 7317.346  | AB018264  | 3009.74   | 3011.404  | NM_004953 | 2977.658  | 2721.202  |
| NM_000704 | 2831.002  | 3935.107  | NM_006911 | 1494.845  | 1314.236  | NM_012198 | 975.531   | 1147.141  |
| NM_015987 | 1833.497  | 1947.142  | U92544    | 1338.317  | 960.1     | AL049682  | 1053.276  | 1063.25   |
| NM_019605 | 3319.763  | 3905.281  | NM_006791 | 3804.531  | 3695.55   | NM_005528 | 4006.144  | 3843.5    |
| NM_015368 | 1027.492  | 1488.811  | AJ278348  | 13328.744 | 15264.887 | AK022842  | 1717.432  | 1586.766  |
| Z49090    | 1876.829  | 2296.678  | AI285199  | 886.722   | 580.406   | NM_007008 | 29234.209 | 25973.553 |
| AK021592  | 1173.646  | 1820.687  | AK023106  | 536.789   | 810.782   | NM_017758 | 33420.496 | 34638.59  |
| AK025467  | 3641.69   | 4459.601  | NM_016730 | 697.516   | 1175.349  | NM_005793 | 7445.879  | 6736.757  |
| AK026593  | 16553.373 | 18917.277 | AL035297  | 268.856   | 660.623   | NM_004901 | 2720.744  | 2457.831  |

|           |           |           |           |           |           |           |           |           |
|-----------|-----------|-----------|-----------|-----------|-----------|-----------|-----------|-----------|
| AF052106  | 4271.829  | 5092.358  | NM_004408 | 367.31    | 725.529   | U77088    | 1179.482  | 1427.884  |
| AK000441  | 1733.943  | 2051.815  | AJ131244  | 275.875   | 763.221   | NM_006721 | 12971.363 | 12613.167 |
| AK022391  | 1928.231  | 2731.091  | NM_002532 | 162.619   | 861.889   | NM_002765 | 8894.549  | 7489.724  |
| NM_016167 | 3181.221  | 4488.664  | NM_012388 | 295.89    | 804.222   | NM_001905 | 1651.805  | 1733.486  |
| NM_016125 | 2036.684  | 2672.735  | NM_016651 | 392.969   | 917.309   | AF292100  | 5298.279  | 4628.36   |
| CY3Cy5    | 3395.307  | 202.156   | NM_001671 | 429.297   | 767.762   | NM_003434 | 54648.867 | 52416.977 |
| R72122    | 3441.262  | 2707.353  | NM_019843 | 251.217   | 622.175   | AF024698  | 63412.176 | 60061.203 |
| Z35309    | 1171.454  | 911.654   | NM_016192 | 509.548   | 1123.273  | BE904617  | 23871.367 | 22746.789 |
| X04571    | 567.091   | 524.512   | BE878426  | 3100.877  | 7224.78   | AK024495  | 916.742   | 857.41    |
| AA292025  | 1743.067  | 1746.347  | NM_001745 | 483.44    | 897.275   | AF024694  | 3881.082  | 3766.956  |
| AA437226  | 3201.471  | 2497.816  | NM_003825 | 1407.57   | 1743.821  | AF091081  | 6972.251  | 5880.149  |
| D10353/NM | 1237.869  | 1232.675  | AK025006  | 7631.977  | 13542.392 | AK001758  | 4758.23   | 3858.72   |
| M15042    | 6053.692  | 5544.318  | AF218014  | 9651.654  | 8765.103  | AF086325  | 1696.977  | 1607.707  |
| U49928    | 6465.632  | 5855.477  | NM_006678 | 2296.531  | 2424.562  | NM_004928 | 570.886   | 648.062   |
| AK096645  | 19363.602 | 20403.139 | AY007729  | 21757.117 | 19495.895 | AF147401  | 1387.744  | 1030.946  |
| AK092859  | 1231.09   | 1090.301  | NM_014424 | 1116.431  | 512.096   | AJ001904  | 987.56    | 932.548   |
| NM_019884 | 7769.437  | 7854.514  | AF159092  | 2363.407  | 1698.871  | AF075022  | 1674.31   | 2021.146  |
| SR2       | 56147.98  | 58411.344 | BC007318  | 9783.131  | 7361.465  | AF075060  | 3181.062  | 3690.739  |
| SR4       | 15077.013 | 14943.108 | M36693    | 2739.582  | 3144.542  | AF147436  | 994.115   | 1141.868  |
| SR6       | 2392.166  | 1886.681  | NM_016292 | 7346.585  | 7116.838  | AK021441  | 1419.962  | 1706.33   |
| SR8       | 8592.598  | 20260.383 | NM_002601 | 6494.475  | 6325.458  | AK026018  | 703.441   | 798.538   |
| SR10      | 28571.908 | 8649.136  | NM_005898 | 1264.465  | 2294.012  | AK023901  | 8029.486  | 8479.604  |
| CY3Cy5    | 3346.305  | 191.505   | NM_002889 | 1520.348  | 3096.031  | AL109705  | 1449.319  | 1382.948  |
| NM_005291 | 902.469   | 753.246   | NM_001360 | 615.274   | 984.825   | AF147392  | 496.062   | 635.25    |
| NM_002923 | 2897.402  | 2605.977  | AK026656  | 374.208   | 654.807   | AF088057  | 6371.167  | 7708.875  |
| NM_018653 | 652.538   | 662.904   | AJ276207  | 1101.124  | 1956.061  | AF086255  | 18818.002 | 19618.469 |
| NM_005388 | 4102.156  | 3736.161  | AB011131  | 766.897   | 1033.996  | AK022660  | 814.574   | 631.987   |
| NM_007232 | 2843.444  | 3165.819  | NM_000751 | 4506.688  | 4524.689  | AF088051  | 2633.593  | 2234.021  |
| NM_003027 | 1270.736  | 1524.941  | NM_014849 | 5090.067  | 4239.168  | AF086366  | 1066.803  | 1060.308  |
| NM_002717 | 7403.368  | 6080.433  | NM_001042 | 4445.632  | 4111.153  | AF086360  | 3899.056  | 4187.234  |
| NM_003025 | 7380.612  | 6181.063  | NM_012229 | 4013.779  | 3444.864  | AF086436  | 498.085   | 728.413   |
| NM_020179 | 14275.896 | 11863.25  | NM_005071 | 954.286   | 643.721   | AF087993  | 3439.472  | 3119.33   |
| NM_004306 | 28833.012 | 29089.85  | AB023147  | 3691.262  | 3718.237  | AF035282  | 1127.556  | 1400.638  |
| NM_006786 | 1469.744  | 1627.279  | NM_016615 | 4569.441  | 3948.765  | AK021966  | 4794.352  | 4950.888  |
| NM_006205 | 4673.695  | 4626.995  | NM_001046 | 1087.783  | 718.512   | AB018292  | 8020.484  | 9123.875  |
| NM_004034 | 1858.847  | 1593.262  | AB046774  | 420.1     | 639.936   | AF075032  | 382.27    | 241.468   |
| NM_000130 | 962.393   | 1008.692  | NM_003504 | 714.134   | 1101.26   | AF085971  | 1164.639  | 1006.719  |
| AI492087  | 2383.591  | 1794.725  | NM_013298 | 515.649   | 1403.223  | AF147302  | 1786.689  | 2519.34   |
| NM_004193 | 2757.646  | 2281.32   | NM_007267 | 1115.379  | 2160.334  | AF085929  | 3153.831  | 4822.609  |
| NM_002803 | 13884.404 | 11892.56  | Z36816    | 672.956   | 1234.388  | AK001126  | 3448.029  | 4141.325  |
| NM_005508 | 6652.456  | 5630.521  | NM_005865 | 731.015   | 889.305   | AF085976  | 6773.139  | 7124.144  |
| NM_006788 | 998.503   | 940.643   | NM_006413 | 1057.581  | 1347.963  | AF075104  | 7537.142  | 8469.834  |
| AK025039  | 386.422   | 714.845   | AK025542  | 755.759   | 857.812   | AK021724  | 639.9     | 902.428   |
| NM_016568 | 1059.51   | 696.912   | AF207547  | 669.754   | 633.028   | AL133025  | 1283.518  | 1453.245  |
| AB033102  | 4174.799  | 4313.115  | NM_002768 | 7314.096  | 6169.283  | AL137402  | 12033.457 | 13233.481 |
| NM_014774 | 5865.118  | 5759.115  | NM_003691 | 4559.664  | 4808.07   | AL137617  | 1981.557  | 2287.813  |
| NM_014143 | 12085.082 | 10600.334 | NM_002950 | 21023.67  | 20721.342 | AL359568  | 26168.305 | 27309.438 |
| M55646    | 889.941   | 1240.149  | NM_002318 | 3001.338  | 2738.019  | AL133564  | 7201.45   | 8363.9    |
| NM_006112 | 21958.613 | 21901.908 | NM_001433 | 749.195   | 795.53    | AL137428  | 1386.894  | 1163.306  |
| M12807    | 731.188   | 377.388   | NM_003134 | 51509.828 | 55067.621 | AL157462  | 1410.989  | 1217.492  |
| NM_001765 | 3395.515  | 3912.568  | NM_004314 | 3323.668  | 3760.969  | AL359602  | 9308.429  | 9859.757  |
| NM_003361 | 767.941   | 725.254   | NM_018247 | 7039.382  | 7206.401  | NM_018190 | 42442.285 | 40630.316 |
| NM_012095 | 1875.241  | 1504.108  | NM_017979 | 6531.012  | 6310.103  | AF086054  | 1141.749  | 1006.37   |

|           |           |           |           |           |           |            |           |           |
|-----------|-----------|-----------|-----------|-----------|-----------|------------|-----------|-----------|
| NM_018684 | 10799.403 | 8959.674  | NM_019644 | 462.509   | 664.409   | AK022259   | 59816.965 | 56489.449 |
| NM_017983 | 1783.806  | 1349.606  | NM_006791 | 418.103   | 776.707   | AK022461   | 999.501   | 939.75    |
| AF116909  | 1909.516  | 1946.037  | AJ278348  | 1155.187  | 2975.562  | NM_01601C  | 3553.827  | 3208.88   |
| NM_002283 | 1100.306  | 1093.557  | L07738    | 668.094   | 1126.397  | AK023783   | 777.826   | 560.942   |
| AJ276095  | 14456.789 | 15801.919 | Z48054    | 617.754   | 729.237   | AF070647   | 28641.9   | 25685.475 |
| NM_004819 | 3499.472  | 3532.195  | H90415    | 587.825   | 717.781   | AF116649   | 1382.5    | 1230.41   |
| NM_007184 | 2950.576  | 3161.66   | AA676470  | 614.149   | 1339.524  | AF174394   | 2407.624  | 2468.471  |
| AF231916  | 583.051   | 764.712   | AA457155  | 1269.286  | 1156.892  | AF083121   | 599.481   | 832.008   |
| NM_003501 | 4119.904  | 3712.866  | BM014365  | 628.679   | 783.629   | AF144054   | 574.864   | 720.274   |
| AK022654  | 1369.221  | 1241.983  | H91842    | 352.851   | 556.004   | AK021876   | 8917.326  | 9909.735  |
| BC002905  | 4385.417  | 4606.161  | U78045    | 960.072   | 771.121   | AK022017   | 1221.777  | 832.553   |
| NM_018091 | 9337.318  | 8698.375  | AA878561  | 55914.617 | 60294.977 | AK022160   | 2070.919  | 2242.91   |
| NM_001108 | 6507.316  | 6475.918  | BF688309  | 319.12    | 374.695   | AK022295   | 868.765   | 793.503   |
| NM_01663C | 13898.856 | 11370.563 | AI538525  | 1054.345  | 1392.716  | AK021935   | 2621.874  | 2830.137  |
| NM_014291 | 7710.543  | 5885.396  | NM_000623 | 414.968   | 347.494   | AK022187   | 13983.36  | 15561.317 |
| NM_014631 | 602.071   | 843.174   | NM_000941 | 1953.585  | 2012.611  | AK022337   | 1889.925  | 1556.278  |
| NM_001089 | 963.2     | 982.305   | AF222980  | 903.244   | 845.683   | AK026847   | 852.943   | 754.589   |
| NM_00012C | 2468.858  | 2440.278  | AK026758  | 3643.701  | 3288.092  | AK023048   | 780       | 923.565   |
| AF172327  | 39582.449 | 34030.371 | AF159092  | 583.266   | 830.151   | AL359560   | 716.116   | 578.557   |
| NM_001676 | 1386.372  | 1581.726  | BC007318  | 566.587   | 940.502   | AK026891   | 1662.385  | 1839.468  |
| NM_00022C | 405.4     | 531.12    | M36693    | 462.102   | 605.595   | AK025573   | 761.586   | 920.419   |
| NM_001679 | 19551.318 | 17935.211 | NM_016292 | 896.675   | 1475.188  | AK024595   | 644.013   | 628.335   |
| U09384    | 372.326   | 717.988   | NM_001781 | 293.112   | 658.049   | AL137562   | 4886.561  | 4370.593  |
| NM_00686C | 6551.58   | 6523.2    | NM_014432 | 486.032   | 800.612   | M90355     | 62347.5   | 59899.371 |
| NM_004283 | 2144.981  | 2070.477  | NM_00253C | 339.639   | 205.467   | AK022495   | 5763.506  | 6010.002  |
| NM_004163 | 2788.381  | 2702.066  | U96173    | 983.215   | 1722.01   | AK021632   | 725.786   | 978.096   |
| AK026308  | 740.715   | 800.715   | NM_018941 | 1773.508  | 1707.947  | AK026373   | 19946.572 | 23897.412 |
| NM_013337 | 2673.077  | 2867.061  | NM_020241 | 1329.716  | 936.091   | AK021581   | 4027.539  | 4035.449  |
| NM_006899 | 11450.253 | 9128.455  | BE730585  | 637.439   | 297.907   | unknown (S | 2279.512  | 3733.052  |
| NM_01220C | 3550.479  | 3541.498  | NM_00198C | 1784.443  | 3569.973  | AK021744   | 1184.503  | 1247.115  |
| NM_001724 | 3819.225  | 2873.5    | NM_005954 | 725.707   | 469.727   | NM_01843C  | 17583.904 | 19639.498 |
| NM_00015C | 1649.201  | 1825.851  | NM_012471 | 956.083   | 419.049   | AL110200   | 1851.585  | 1984.373  |
| AB023152  | 1984.219  | 1891.863  | NM_001321 | 4623.919  | 3606.708  | AL133640   | 2130.883  | 2288.355  |
| NM_006212 | 1533.556  | 1513.578  | AB018264  | 3623.273  | 3540.17   | AJ012502   | 11813     | 11485.582 |
| AK022872  | 3513.569  | 2505.798  | NM_006911 | 1343.977  | 1609.974  | AK021722   | 1105.806  | 1280.194  |
| AK024272  | 7409.923  | 6594.913  | U92544    | 1153.452  | 969.837   | NM_000681  | 858.017   | 796.061   |
| NM_016381 | 2475.479  | 1877.49   | NM_012229 | 500.84    | 507.228   | AF147445   | 2436.372  | 2445.235  |
| NM_018042 | 2207.152  | 1627.555  | NM_005071 | 592.686   | 664.001   | Y10508     | 9854.991  | 9874.602  |
| BE741525  | 1545.514  | 1286.405  | AB023147  | 1289.24   | 2688.214  | NM_005182  | 57698.848 | 53533.434 |
| BF030555  | 2425.482  | 2157.457  | NM_016615 | 728.05    | 1008.913  | D17074     | 1606.499  | 1860.418  |
| NM_012433 | 14478.938 | 13483.829 | NM_00563C | 742.682   | 1222.527  | AF039944   | 8635.415  | 7551.183  |
| NM_002576 | 3667.349  | 3236.791  | AK023106  | 1282.865  | 3094.292  | AJ276252   | 1024.146  | 1099.074  |
| NM_003582 | 3721.787  | 3272.295  | NM_01673C | 1101.354  | 2015.826  | AK021716   | 5760.5    | 6321.603  |
| AF057354  | 1684.845  | 1165.194  | AL035297  | 289.549   | 727.587   | AK025035   | 13928.213 | 14230.926 |
| M14200    | 60876.863 | 55250.441 | NM_004408 | 422.432   | 590.562   | AK002085   | 10203.37  | 11706.967 |
| NM_000282 | 5948.108  | 8369.015  | AJ131244  | 574.796   | 556.576   | AF086200   | 1587.301  | 1309.277  |
| NM_000532 | 30475.217 | 43665.141 | NM_002532 | 515.01    | 359.782   | AL133618   | 6132.675  | 8650.033  |
| NM_016341 | 1515.101  | 1271.258  | NM_012388 | 1190.411  | 788.145   | AF230314   | 881.291   | 1142.395  |
| NM_004034 | 1569.693  | 1174.988  | NM_001671 | 918.848   | 1365.983  | AK001086   | 1399.165  | 1431.72   |
| NM_00013C | 993.521   | 1020.658  | NM_019843 | 2504.618  | 2701.197  | AJ131610   | 6355.821  | 6409.408  |
| AF193756  | 980.326   | 1301.712  | NM_016192 | 6984.419  | 6748.99   | S50207     | 1020.482  | 1142.412  |
| AI492087  | 2439.746  | 2552.885  | BE878426  | 56046.074 | 55503.398 | AF119872   | 10275.472 | 10553.202 |
| R72122    | 3610.576  | 2905.243  | NM_001745 | 16929.594 | 18558.811 | X99687     | 1436.397  | 1435.907  |

|           |           |           |           |           |           |           |           |           |
|-----------|-----------|-----------|-----------|-----------|-----------|-----------|-----------|-----------|
| Z35309    | 1281.192  | 1056.492  | NM_003825 | 7791.218  | 9232.413  | AI275123  | 998.323   | 944.362   |
| X04571    | 466.088   | 550.89    | AK025006  | 14520.155 | 13799.334 | AK023255  | 54377.094 | 47250.441 |
| AA700005  | 679.12    | 414.856   | AF218014  | 10217.642 | 9471.983  | AK024185  | 1555.555  | 1763.009  |
| AA292025  | 1092.349  | 1156.805  | NM_006678 | 3231.889  | 3103.244  | NM_015417 | 660.687   | 1045.585  |
| AA437226  | 2353.924  | 2392.326  | AY007729  | 23774.705 | 19595.357 | AK026101  | 6995.684  | 6561.125  |
| D10353/NM | 1355.914  | 1244.143  | NM_001433 | 378.746   | 491.416   | AK022194  | 27624.438 | 29462.135 |
| M15042    | 6481.161  | 7748.323  | NM_003134 | 9007.205  | 19308.787 | AF085963  | 1760.229  | 2181.407  |
| U49928    | 5941.483  | 5350.638  | NM_004314 | 3331.546  | 6803.969  | AF131851  | 615.536   | 786.492   |
| AK096645  | 18604.674 | 16471.391 | NM_018247 | 713.564   | 1234.125  | AK021436  | 1357.758  | 1684.282  |
| AK092859  | 901.404   | 887.943   | NM_017979 | 791.493   | 1530.672  | U58664    | 1135.558  | 1589.866  |
| NM_019884 | 7766.245  | 7133.842  | NM_005898 | 1501.557  | 2803.536  | AF085937  | 660.114   | 766.634   |
| NM_018291 | 5866.108  | 6879.111  | NM_002889 | 1507.597  | 2578.917  | AL137569  | 4538.945  | 5105.063  |
| NM_005530 | 7337.604  | 6928.46   | AF078866  | 464.414   | 462.354   | AK021920  | 3317.805  | 3776.313  |
| AF116909  | 1858.74   | 1610.02   | NM_016075 | 638.023   | 804.05    | AL049415  | 2445.809  | 2599.157  |
| NM_002283 | 1131.555  | 1037.081  | NM_001360 | 27633.215 | 28777.025 | AK022375  | 1297.021  | 1731.953  |
| AJ276095  | 13863.231 | 12786.421 | AK026656  | 4568.646  | 4801.691  | AI065056  | 626.256   | 851.949   |
| NM_004819 | 3545.047  | 3303.771  | AJ276207  | 8752.086  | 10827.843 | NM_003378 | 56067.801 | 54694.508 |
| NM_007184 | 2322.927  | 2591.891  | AB011131  | 10668.056 | 9639.532  | AL110194  | 13766.717 | 14690.894 |
| NM_005291 | 1005.923  | 931.43    | NM_000751 | 5832.9    | 4401.394  | AF138860  | 3134.671  | 3451.604  |
| NM_002923 | 2762.615  | 1966.949  | NM_014849 | 4982.457  | 4620.834  | NM_006687 | 2027.042  | 2189.732  |
| NM_005388 | 3630.068  | 3714.798  | NM_001042 | 4664.865  | 4960.091  | NM_013301 | 2069.619  | 2347.182  |
| NM_007232 | 3172.692  | 4134.997  | NM_000623 | 389.011   | 609.006   | NM_017673 | 1890.773  | 1191.974  |
| NM_003027 | 927.228   | 803.503   | NM_000941 | 1110.772  | 2180.32   | AB046857  | 2519.85   | 2530.79   |
| NM_016257 | 802.128   | 958.854   | AF222980  | 253.031   | 523.794   | AK024408  | 15176.947 | 16024.971 |
| NM_002717 | 8176.261  | 7111.29   | AK026758  | 577.053   | 700.767   | AJ227905  | 482.764   | 894.617   |
| NM_003025 | 6485.247  | 5770.62   | NM_012201 | 543.49    | 570.463   | L19364    | 2722.203  | 2389.897  |
| NM_020179 | 13023.579 | 13107.489 | AB046774  | 280.596   | 198.923   | NM_005390 | 2644.333  | 3445.499  |
| NM_004306 | 29301.596 | 32640.957 | AK022385  | 3874.745  | 2937.512  | CY3Cy5    | 7497.789  | 454.42    |
| NM_006786 | 1734.092  | 1836.093  | AK024584  | 1881.161  | 2209.294  | L07738    | 564.626   | 784.919   |
| NM_006205 | 4493.972  | 3891.363  | NM_003504 | 4405.624  | 6811.819  | Z48054    | 1887.402  | 1853.893  |
| NM_006860 | 6406.313  | 5676.2    | AK022830  | 836.989   | 963.107   | H90415    | 3278.454  | 2530.649  |
| NM_004283 | 2192.595  | 1891.55   | Z36816    | 3741.901  | 4611.895  | AA676470  | 14227.994 | 13057.799 |
| NM_004163 | 2732.397  | 2520.985  | NM_005865 | 5254.735  | 4994.294  | M38258    | 848.691   | 671.679   |
| NM_013337 | 2070.139  | 1988.689  | NM_006413 | 11117.12  | 12577.228 | AA457155  | 12359.562 | 11476.119 |
| NM_004193 | 3647.815  | 3104.433  | NM_017684 | 1104.998  | 739.376   | BM014365  | 1113.519  | 833.227   |
| NM_002803 | 13163.741 | 10940.854 | AK025542  | 3472.984  | 3632.993  | H91842    | 687.364   | 454.926   |
| NM_005508 | 7616.727  | 6754.576  | AF207547  | 886.543   | 473.068   | U78045    | 1207.777  | 767.65    |
| NM_006788 | 793.638   | 855.446   | NM_002768 | 7125.928  | 6210.98   | AA878561  | 53154.848 | 53932.734 |
| NM_016568 | 1124.356  | 1407.997  | NM_003691 | 4177.082  | 5153.618  | BF688309  | 568.528   | 350.125   |
| NM_002987 | 523.58    | 782.421   | NM_002950 | 21333.762 | 19853.537 | AI538525  | 807.899   | 703.432   |
| AB033102  | 4339.598  | 4948.187  | NM_002318 | 2929.614  | 2813.064  | NM_000941 | 1484.64   | 1432.322  |
| NM_014774 | 7902.674  | 9391.552  | NM_001321 | 674.56    | 572.533   | SR5       | 7023.884  | 5586.245  |
| NM_014143 | 11885.636 | 11830.083 | U92544    | 377.806   | 426.438   | SR7       | 5539.997  | 37746.109 |
| M55646    | 942.018   | 1239.8    | NM_006791 | 564.4     | 278.807   | SR9       | 18697.672 | 2553.759  |
| NM_006112 | 19061.697 | 20441.35  | AJ278348  | 3287.369  | 2835.139  | CY3Cy5    | 4894.869  | 151.333   |
| M12807    | 598.58    | 941.733   | AI285199  | 212.561   | 1254.294  | U62858    | 983.305   | 1455.591  |
| NM_001765 | 3975.484  | 4506.521  | BI906283  | 141.843   | 1513.141  | NM_001781 | 3150.205  | 2828.9    |
| NM_003361 | 870.267   | 769.099   | AA676470  | 12057.392 | 10703.67  | NM_014432 | 1512.97   | 1644.326  |
| NM_012099 | 1688.592  | 1866.126  | M38258    | 906.408   | 972.811   | NM_001558 | 1964.787  | 1901.231  |
| NM_018684 | 10811.314 | 10324.088 | AA457155  | 10065.187 | 7995.232  | NM_006953 | 489.765   | 391.235   |
| NM_017983 | 1639.915  | 1639.787  | BM014365  | 1209.622  | 1161.009  | NM_002530 | 445.823   | 565.578   |
| AF057354  | 1463.494  | 1148.08   | H91842    | 456.682   | 419.478   | U96173    | 1715.605  | 1703.506  |
| M14200    | 59888.766 | 49557.957 | U78045    | 1066.849  | 734.499   | NM_018941 | 1757.962  | 1628.172  |

|           |           |           |           |           |           |           |           |           |
|-----------|-----------|-----------|-----------|-----------|-----------|-----------|-----------|-----------|
| NM_000282 | 3909.865  | 3971.004  | AA878561  | 52945.406 | 58375.449 | NM_020241 | 996.028   | 1138.673  |
| NM_000532 | 25504.729 | 23138.217 | BF688309  | 341.317   | 329.891   | BE730585  | 423.863   | 530.355   |
| NM_016341 | 1240.179  | 1030.955  | AI538525  | 912.24    | 1032.195  | NM_00198C | 1685.97   | 1419.955  |
| AF231916  | 770.269   | 630.6     | NM_003825 | 649.669   | 820.538   | NM_005954 | 379.531   | 331.966   |
| NM_003501 | 4103.579  | 3151.157  | AK025006  | 930.33    | 824.955   | NM_012471 | 551.307   | 456.054   |
| AK022654  | 1555.69   | 1388.643  | AF218014  | 882.781   | 686.87    | NM_001321 | 3921.048  | 3357.633  |
| BC002905  | 4758.41   | 5512.969  | NM_006678 | 434.43    | 477.741   | AB018264  | 3842.954  | 3032.669  |
| NM_018091 | 9219.84   | 7430.327  | AY007729  | 2345.935  | 1862.086  | NM_006911 | 1159.408  | 960.864   |
| NM_001108 | 6943.679  | 6396.713  | AF159092  | 561.334   | 408.779   | U92544    | 1460.653  | 1685.284  |
| NM_001637 | 550.032   | 561.351   | BC007318  | 2556.943  | 2703.071  | NM_006791 | 3054.016  | 2791.274  |
| NM_01663C | 13424.424 | 15714.931 | M36693    | 931.975   | 1119.932  | AJ278348  | 13515.604 | 10706.2   |
| NM_014291 | 7602.092  | 8058.001  | NM_016292 | 3070.822  | 4593.21   | AI285199  | 1073.031  | 871.555   |
| NM_014631 | 976.612   | 814.903   | NM_001781 | 4050.191  | 10964.579 | NM_01673C | 10808.22  | 12855.534 |
| NM_00108E | 1068.878  | 1244.082  | NM_014432 | 1833.326  | 2292.496  | AL035297  | 1643.104  | 2124.377  |
| NM_00012C | 2373.148  | 2656.115  | NM_00155E | 2205.546  | 1700.495  | NM_00440E | 1263.177  | 1747.11   |
| AF172327  | 38408.98  | 39728.258 | NM_006953 | 308.862   | 252.086   | AJ131244  | 1782.178  | 1523.664  |
| NM_00167E | 1192.436  | 1689.403  | NM_00253C | 725.265   | 326.395   | NM_002532 | 4683.443  | 4236.274  |
| NM_00167E | 19399.088 | 23062.654 | U96173    | 1669.838  | 1489.885  | NM_01238E | 4230.125  | 3586.614  |
| U09384    | 636.858   | 1093.909  | NM_018941 | 1982.907  | 1429.824  | NM_016651 | 706       | 628.339   |
| NM_019884 | 9293.063  | 8596.464  | NM_020241 | 1378.701  | 836.543   | NM_001671 | 1444.114  | 1100.297  |
| NM_018291 | 3925.136  | 3691.161  | NM_00198C | 1983.947  | 2066.737  | NM_019843 | 2601.324  | 2758.433  |
| NM_00553C | 7043.373  | 6255.546  | NM_000751 | 1057.537  | 952.141   | NM_016192 | 4662.867  | 4267.593  |
| NM_00689E | 13771.574 | 11314.612 | NM_01484E | 830.961   | 781.937   | BE878426  | 51218.941 | 50994.383 |
| NM_01220C | 4329.851  | 3458.133  | NM_001042 | 2892.272  | 2447.889  | NM_00174E | 16769.061 | 20802.758 |
| NM_001724 | 3267.924  | 2648.538  | NM_01222E | 1005.556  | 632.158   | NM_00382E | 6365.676  | 7340.229  |
| NM_00015C | 1406.06   | 1339.023  | AB023147  | 1925.174  | 2923.728  | AK025006  | 15504.304 | 12717.24  |
| AB023152  | 1785.154  | 1975.255  | NM_01661E | 1699.683  | 1895.612  | AF218014  | 9361.053  | 7656.436  |
| NM_006212 | 1564.898  | 1947.105  | NM_00563C | 937.534   | 1025.722  | NM_00667E | 3265.98   | 2721.579  |
| AK022872  | 4644.906  | 3880.89   | AJ131244  | 1790.819  | 2094.93   | AY007729  | 27105.996 | 26281.912 |
| AK024272  | 7893.725  | 8058.711  | NM_002532 | 3877.448  | 4323.386  | NM_014424 | 615.465   | 650.76    |
| NM_016381 | 2447.222  | 2510.386  | NM_01238E | 5892.358  | 5082.051  | AF159092  | 1986.886  | 1452.469  |
| AL591715  | 504.926   | 648.156   | NM_016651 | 625.984   | 679.973   | BC007318  | 8853.365  | 6579.904  |
| NM_018042 | 1982.055  | 1850.673  | NM_001671 | 1228.521  | 1079.916  | M36693    | 1977.925  | 1784.705  |
| BE741525  | 1460.33   | 1407.944  | NM_019843 | 2679.824  | 2626.755  | NM_016292 | 7302.208  | 4891.667  |
| BF030555  | 2138.763  | 2624.318  | NM_016192 | 6446.82   | 5645.91   | NM_002601 | 7023.938  | 4246.715  |
| NM_012433 | 14167.993 | 13856.994 | BE878426  | 56097.363 | 57002.109 | NM_00589E | 7766.357  | 8125.167  |
| NM_00257E | 4556.939  | 5796.648  | NM_00174E | 17763.023 | 16838.49  | NM_00288E | 15697.479 | 18325.316 |
| NM_003582 | 5441.445  | 5706.255  | AK025542  | 757.339   | 630.61    | BF311880  | 3503.357  | 4133.888  |
| U52051    | 341.83    | 334.039   | NM_00276E | 2338.167  | 2886.915  | NM_01607E | 851.341   | 529.159   |
| NM_02017E | 14469.81  | 12251.754 | NM_003691 | 1422.742  | 3273.893  | NM_00136C | 27030.344 | 25516.613 |
| NM_00430E | 28695.773 | 28006.057 | NM_00295C | 5297.655  | 7534.937  | AK026656  | 3928.75   | 3750.111  |
| NM_00678E | 1843.39   | 1827.917  | NM_00231E | 826.762   | 1071.871  | AJ276207  | 6687.795  | 5614.223  |
| NM_00620E | 4398.786  | 4255.478  | NM_001433 | 382.933   | 480.907   | AB011131  | 11052.391 | 10749.436 |
| NM_004034 | 1835.795  | 1782.347  | NM_018247 | 5487.579  | 6221.793  | NM_000751 | 6252.47   | 5915.792  |
| NM_00013C | 905.298   | 1000.146  | NM_01797E | 5062.924  | 5439.938  | NM_01484E | 4361.133  | 3805.127  |
| AI492087  | 1936.908  | 2015.909  | AF078866  | 7981.374  | 8115.433  | NM_001042 | 5756.164  | 4179.452  |
| R72122    | 3584.111  | 3285.631  | BF311880  | 6533.78   | 4684.707  | NM_01222E | 3847.489  | 3284.793  |
| Z35309    | 932.458   | 1188.609  | NM_01607E | 1155.123  | 830.511   | NM_005071 | 659.06    | 587.605   |
| X04571    | 534.306   | 736.098   | NM_00136C | 28228.563 | 22729.797 | AB023147  | 3357.96   | 2907.832  |
| AA292025  | 1042.746  | 1131.095  | AK026656  | 5523.357  | 4330.52   | NM_01661E | 4487.664  | 4032.232  |
| AA437226  | 2425.7    | 2664.054  | AJ276207  | 10062.687 | 11834.47  | NM_00563C | 1192.742  | 673.884   |
| D10353/NM | 944.413   | 1461.402  | AB011131  | 11847.895 | 11171.466 | NM_012201 | 2799.047  | 2945.568  |
| M15042    | 5549.133  | 5599.974  | AF164794  | 3893.014  | 5031.179  | AK024584  | 7055.193  | 3960.795  |

|           |           |           |           |           |           |           |           |           |
|-----------|-----------|-----------|-----------|-----------|-----------|-----------|-----------|-----------|
| U49928    | 7452.204  | 8221.327  | NM_001173 | 887.825   | 778.901   | NM_003504 | 12815.314 | 11230.968 |
| AK096645  | 22423.211 | 31804.152 | AB020656  | 736.862   | 389.2     | NM_01329E | 4304.506  | 3704.034  |
| AK092859  | 1670.595  | 1951.945  | AK023648  | 1171.881  | 1391.021  | NM_007267 | 2876.19   | 2774.274  |
| M12807    | 936.793   | 662.512   | NM_000412 | 681.371   | 527.36    | AK022830  | 691.266   | 670.05    |
| NM_00176E | 3835.307  | 4849.281  | AF077033  | 1670.574  | 1843.981  | Z36816    | 2816.16   | 2457.191  |
| NM_003361 | 658.426   | 532.371   | NM_004991 | 861.519   | 1413.224  | NM_00586E | 4287.879  | 4419.339  |
| NM_01209E | 2036.116  | 1857.878  | AF222980  | 927.226   | 761.557   | NM_00641E | 12534.108 | 13330.28  |
| NM_018684 | 10443.131 | 11926.395 | AK026758  | 3060.406  | 3024.259  | NM_017684 | 545.937   | 789.424   |
| NM_01798E | 1451.296  | 1826.595  | NM_012201 | 5310.196  | 5769.552  | AK025542  | 2417.967  | 2301.088  |
| AF116909  | 1536.007  | 1971.285  | AB046774  | 1843.894  | 2362.694  | AF207547  | 806.33    | 559.784   |
| NM_00228E | 1113.079  | 1212.94   | AK022385  | 17520.188 | 16834.953 | NM_00276E | 6817.76   | 5367.537  |
| AJ276095  | 14223.026 | 15676.688 | NM_00277E | 788.471   | 722.888   | NM_003691 | 4466.915  | 3165.314  |
| NM_00481E | 3585.894  | 4147.56   | AK024584  | 7675.534  | 4213.16   | NM_00295C | 22427.258 | 18297.605 |
| NM_007184 | 2443.764  | 3041.547  | NM_003504 | 11202.156 | 10621.931 | NM_00231E | 1981.541  | 2042.185  |
| NM_005291 | 831.626   | 1016.655  | NM_01329E | 4266.077  | 3798.99   | NM_00143E | 576.747   | 748.689   |
| NM_00292E | 3356.67   | 3545.458  | NM_007267 | 3293.996  | 3089.781  | NM_003134 | 57299.969 | 51262.898 |
| NM_01865E | 490.571   | 536.222   | AK022830  | 883.983   | 652.067   | NM_004314 | 3950.915  | 2983.3    |
| NM_00538E | 4108.982  | 4736.477  | Z36816    | 3950.448  | 3598.213  | NM_018247 | 6559.834  | 4830.036  |
| NM_00723E | 2997.409  | 4199.316  | NM_00586E | 5934.706  | 5158.237  | NM_01797E | 5266.684  | 4239.308  |
| NM_003027 | 961.05    | 1091.421  | NM_00641E | 12173.167 | 12823.21  | L07738    | 670.035   | 595.655   |
| NM_01448E | 963.057   | 745.719   | NM_00021E | 506.584   | 453.242   | Z48054    | 1751.2    | 1792.265  |
| NM_00302E | 9098.022  | 10922.96  | AF135960  | 630.313   | 589.685   | H90415    | 2766.897  | 2370.185  |
| NM_00167E | 17981.324 | 20619.545 | NM_01421E | 9247.734  | 10098.831 | AA676470  | 12164.67  | 12538.97  |
| NM_00404E | 66003.234 | 64724.82  | NM_00301C | 1716.171  | 2166.459  | M38258    | 676.402   | 655.201   |
| U09384    | 739.08    | 1193.036  | NM_006871 | 690.252   | 904.264   | AA457155  | 8571.01   | 11446.332 |
| NM_00686C | 6635.802  | 7968.629  | NM_019074 | 3177.412  | 3437.172  | BM014365  | 810.246   | 809.78    |
| NM_00428E | 2260.159  | 2252.4    | NM_018494 | 16634.213 | 29449.137 | H91842    | 478.496   | 519.724   |
| NM_00416E | 2874.542  | 3202.03   | AK000006  | 852.805   | 1244.638  | AA878561  | 62548.52  | 58241.52  |
| AK026308  | 776.707   | 1095.33   | NM_001115 | 868.579   | 891.761   | AI538525  | 924.084   | 767.663   |
| NM_013337 | 2309.31   | 2738.429  | NM_014921 | 1557.976  | 1299.577  | NM_000941 | 1402.695  | 1204.828  |
| NM_00419E | 2925.746  | 2991.964  | NM_016581 | 33784.832 | 32987.242 | AF222980  | 898.708   | 713.812   |
| NM_00280E | 14917.606 | 14951.951 | NM_01325E | 2167.446  | 2294.241  | AK026758  | 3082.868  | 2458.341  |
| NM_00550E | 7059.037  | 7574.08   | NM_00718E | 652.959   | 447.092   | NM_002601 | 7230.342  | 5693.055  |
| NM_01848E | 811.059   | 638.347   | AJ238243  | 9937.307  | 10869.421 | U62858    | 1702.418  | 1704.163  |
| NM_00678E | 820.954   | 903.446   | J05046    | 13962.847 | 13803.378 | NM_001781 | 4248.827  | 3168.606  |
| AK025039  | 478.136   | 637.7     | NM_01231E | 3595.597  | 3158.391  | NM_01443E | 1294.467  | 1313.029  |
| NM_01656E | 1003.634  | 1386.722  | NM_002751 | 3698.997  | 3387.133  | NM_00155E | 1905.673  | 1767.318  |
| NM_002987 | 472.03    | 1109.781  | NM_004291 | 740.198   | 538.885   | NM_00253C | 417.788   | 608.633   |
| AB033102  | 4336.255  | 4116.854  | NM_00381E | 4726.136  | 4289.971  | U96173    | 1539.667  | 1382.707  |
| NM_014774 | 5890.761  | 6927.483  | NM_00491E | 3656.255  | 2852.376  | NM_018941 | 1754.735  | 1522.216  |
| M55646    | 1141.458  | 1013.197  | U79304    | 15697.39  | 12618.637 | NM_020241 | 1021.563  | 956.227   |
| NM_00611E | 22152.4   | 25266.939 | NM_016267 | 2912.49   | 2663.892  | BE730585  | 478.14    | 392.062   |
| BE741525  | 1668.642  | 1962.151  | NM_004671 | 4782.622  | 5362.881  | NM_00198C | 1716.734  | 1283.351  |
| BF030555  | 2331.004  | 2968.259  | NM_00518C | 6615.207  | 6502.774  | NM_012471 | 477.673   | 496.694   |
| NM_01243E | 14073.944 | 12968.487 | NM_00652E | 2670.679  | 2903.513  | NM_001321 | 3565.398  | 2680.368  |
| NM_00560E | 3696.857  | 4208.999  | U35622    | 754.709   | 591.535   | AB018264  | 3351      | 3651.367  |
| NM_00257E | 4564.121  | 5552.779  | NM_00704E | 1884.635  | 1806.989  | NM_006911 | 1144.18   | 934.273   |
| NM_00358E | 5153.66   | 6191.764  | NM_003627 | 2680.156  | 2753.98   | U92544    | 1495.162  | 1320.13   |
| AF057354  | 2043.458  | 2128.479  | NM_01214E | 22183.068 | 23846.879 | NM_01222E | 3047.609  | 3496.104  |
| NM_00028E | 4324.553  | 4861.572  | AF305779  | 1326.361  | 1631.908  | AK023106  | 1283.113  | 1479.912  |
| NM_00053E | 25457.24  | 23342.881 | AF225416  | 9452.761  | 13200.173 | NM_01673C | 22414.445 | 20883.967 |
| NM_016341 | 1348.515  | 1231.479  | NM_016231 | 3736.349  | 3780.694  | AL035297  | 2002.335  | 1729.115  |
| AF231916  | 637.393   | 679.734   | NM_00209E | 4588.073  | 4532.807  | NM_00440E | 2075.904  | 2321.92   |



|           |           |           |           |           |           |           |           |           |
|-----------|-----------|-----------|-----------|-----------|-----------|-----------|-----------|-----------|
| NM_003501 | 4469.28   | 4345.865  | AB042555  | 5059.1    | 4925.889  | AJ131244  | 1725.957  | 1473.434  |
| AK022654  | 1521.962  | 1670.08   | NM_013975 | 3557.478  | 3531.794  | NM_002532 | 4251.654  | 4306.444  |
| BC002905  | 5377.363  | 8057.643  | NM_003843 | 4569.375  | 4674.552  | NM_012388 | 3366.71   | 3443.443  |
| NM_018091 | 10022.62  | 10180.151 | NM_012216 | 2141.881  | 2120.653  | NM_016651 | 725.877   | 756.652   |
| NM_001108 | 7009.252  | 8122.513  | NM_005338 | 409.714   | 453.765   | NM_001671 | 905.312   | 1022.977  |
| NM_016630 | 12437.611 | 14695.339 | X73502    | 1186.182  | 1021.425  | NM_019843 | 3161.998  | 2276.121  |
| NM_014291 | 7835.22   | 6918.274  | NM_020445 | 38492.383 | 29883.631 | NM_016192 | 3855.57   | 3523.814  |
| NM_014631 | 896.772   | 846.334   | NM_016376 | 10014.807 | 8603.771  | BE878426  | 55607.391 | 50787.922 |
| NM_001088 | 910.366   | 1192.307  | AB046848  | 3074.631  | 2502.566  | NM_001745 | 16313.309 | 11649.997 |
| NM_000120 | 2887.83   | 3389.178  | AL133057  | 4466.223  | 5297.28   | NM_003825 | 7145.694  | 7050.748  |
| AF172327  | 49854.977 | 50270.695 | U04845    | 5670.293  | 6515.673  | AK025006  | 14515.669 | 12007.67  |
| NM_001676 | 1457.648  | 2143.552  | NM_018103 | 4791.782  | 5037.277  | AF218014  | 8663.426  | 6656.19   |
| AB018338  | 1943.475  | 2255.299  | AK026302  | 6738.659  | 6501.271  | NM_006678 | 3501.885  | 2521.83   |
| D80010    | 4528.72   | 5652.649  | NM_012214 | 6814.997  | 5322.395  | AY007729  | 22687.074 | 20447.438 |
| NM_004923 | 1173.903  | 1320.694  | AF049656  | 9213.848  | 7359.093  | NM_001433 | 475.571   | 773.489   |
| NM_003971 | 2321.861  | 1864.972  | NM_000312 | 892.143   | 918.018   | NM_017979 | 6600.083  | 5898.278  |
| AK026973  | 1342.757  | 1507.672  | NM_003963 | 682.288   | 728.218   | NM_005898 | 13435.276 | 11949.246 |
| NM_005822 | 655.972   | 1052.826  | AC009729  | 543.869   | 414.321   | NM_002888 | 34291.352 | 31745.928 |
| U81002    | 11181.586 | 11423.956 | NM_016598 | 6277.632  | 11122.987 | AF078866  | 3891.244  | 3992.916  |
| NM_016298 | 13810.151 | 15386.485 | BE874867  | 21755.307 | 24674.971 | BF311880  | 5275.871  | 6252.235  |
| L38517    | 718.979   | 628.693   | AL136719  | 4449.782  | 5213.598  | NM_016075 | 665.873   | 930.051   |
| NM_018291 | 4270.515  | 4109.603  | NM_014109 | 8752.688  | 10319.65  | NM_001360 | 28658.049 | 25182.33  |
| NM_005530 | 7108.077  | 6575.155  | NM_012160 | 1821.669  | 1515.534  | AK026656  | 4289.699  | 3739.473  |
| NM_006898 | 13173.042 | 14035.407 | NM_006357 | 42853.688 | 42363.121 | AJ276207  | 3374.605  | 2417.993  |
| NM_012200 | 5099.397  | 5970.281  | NM_014248 | 52211.789 | 55244.27  | AB011131  | 10807.091 | 9063.997  |
| NM_001724 | 3170.075  | 3414.644  | AK027070  | 1093.193  | 978.411   | NM_000748 | 411.292   | 410.851   |
| NM_000150 | 1306.127  | 1399.705  | AF129533  | 358.37    | 549.638   | NM_000751 | 6476.687  | 5763.928  |
| AB023152  | 1758.3    | 1980.485  | NM_003341 | 9555.674  | 13388.462 | NM_014848 | 5254.644  | 4881.587  |
| NM_006212 | 1983.189  | 2175.86   | NM_017785 | 1242.485  | 1043.254  | NM_001042 | 6132.75   | 5659.449  |
| AK022872  | 4554.772  | 3755.331  | NM_006249 | 3553.613  | 3282.691  | NM_020041 | 334.146   | 354.49    |
| AK024272  | 8458.027  | 9079.806  | NM_018318 | 1731.204  | 1335.993  | NM_000941 | 1377.577  | 1508.309  |
| NM_016381 | 2488.449  | 2825.904  | AB020640  | 1944.335  | 1483.931  | AF222980  | 868.235   | 888.402   |
| AL591715  | 636.505   | 666.3     | D29954    | 11127.394 | 9180.187  | AK026758  | 3725.286  | 3703.277  |
| NM_018042 | 2716.807  | 2415.608  | AF007131  | 5461.467  | 5232.331  | NM_012201 | 5037.785  | 4389.063  |
| NM_014944 | 7650.287  | 9419.55   | NM_006839 | 2739.167  | 2186.406  | AB046774  | 1337.143  | 1193.871  |
| NM_001942 | 290.253   | 689.023   | NM_000223 | 1184.249  | 939.401   | AK022385  | 15738.493 | 14395.877 |
| AF200348  | 5194.989  | 6176.769  | NM_005851 | 2127.41   | 2118.695  | NM_002775 | 711.498   | 1229.042  |
| Y11710    | 690.63    | 724.798   | AF119256  | 1628.167  | 1632.585  | AK024584  | 8308.405  | 4232.887  |
| J03756    | 605.167   | 500.644   | X74497    | 557.856   | 417.066   | NM_003504 | 15077.372 | 14316.805 |
| NM_002650 | 2702.155  | 3645.829  | NM_012210 | 1375.839  | 861.821   | NM_013298 | 5335.799  | 7063.094  |
| NM_003260 | 1786.452  | 2057.91   | U10072    | 1564.363  | 1408.166  | NM_007267 | 3212.352  | 3595.71   |
| AK024071  | 2717.944  | 2916.907  | AF222749  | 14894.053 | 14649.7   | AK022830  | 733.376   | 889.797   |
| AF056490  | 2045.486  | 2626.681  | NM_003410 | 4160.703  | 3868.26   | Z36816    | 2647.966  | 2600.871  |
| NM_005538 | 2113.801  | 2341.884  | NM_007146 | 3526.268  | 3311.931  | NM_005865 | 4851.469  | 4431.47   |
| NM_005541 | 1203.354  | 1592.406  | NM_002229 | 1016.281  | 784.943   | NM_006413 | 12522.494 | 11269.976 |
| AB002319  | 1571.99   | 1764.264  | S69027    | 3953.217  | 4042.845  | NM_017684 | 565.84    | 688.877   |
| AF039942  | 5153.871  | 5503.187  | NM_012119 | 2017.506  | 2011.435  | AK025542  | 3158.318  | 3298.252  |
| NM_004421 | 2189.169  | 2287.236  | X99631    | 18169.883 | 19319.258 | AF207547  | 711.914   | 770.28    |
| AB046863  | 1598.439  | 1512.116  | NM_001730 | 1937.693  | 1851.84   | NM_002768 | 7454.756  | 7184.086  |
| M62403    | 1123.258  | 1237.257  | AB014589  | 2883.771  | 3079.865  | NM_003691 | 5160.431  | 3966.174  |
| NM_017883 | 2392.844  | 2535.909  | AF248649  | 842.049   | 885.892   | NM_002950 | 23800.457 | 17146.207 |
| AK025131  | 3671.724  | 3850.998  | U37146    | 12778.104 | 10806.527 | NM_002318 | 2543.786  | 2369.357  |
| NM_000754 | 14809.725 | 15154.79  | NM_012086 | 3812.957  | 3137.792  | NM_005954 | 454.819   | 458.618   |

|           |           |           |           |           |           |           |           |           |
|-----------|-----------|-----------|-----------|-----------|-----------|-----------|-----------|-----------|
| NM_014619 | 813.663   | 1018.831  | NM_000991 | 57740.434 | 59595.145 | NM_012471 | 617.944   | 773.313   |
| NM_005629 | 2829.104  | 3410.138  | NM_016034 | 18555.793 | 13291.373 | NM_001321 | 2051.856  | 2596.671  |
| J04621    | 1175.375  | 1217.3    | X69150    | 52363.215 | 54783.23  | AB018264  | 4213.688  | 3897.815  |
| NM_000718 | 4633.373  | 5465.553  | NM_018285 | 6145.16   | 5420.341  | NM_006911 | 970.391   | 1164.224  |
| NM_000161 | 6366.203  | 7290.4    | AK022393  | 4123.982  | 3766.829  | U92544    | 1674.653  | 2139.286  |
| NM_002634 | 37745.32  | 51201.055 | AK026654  | 1155.699  | 1005.639  | NM_006791 | 3092.031  | 3306.526  |
| NM_017749 | 4656.278  | 4957.657  | AB020643  | 694.378   | 514.38    | AJ278348  | 12787.01  | 10545.904 |
| NM_001972 | 1303.305  | 1349.919  | AK025496  | 4118.042  | 3982.479  | AI285199  | 1302.036  | 1147.726  |
| NM_001445 | 1231.366  | 1452.699  | NM_005205 | 49320.254 | 53698.121 | L07738    | 849.619   | 954.587   |
| NM_002006 | 29860.947 | 28496.561 | NM_001966 | 780.456   | 628.557   | Z48054    | 2686.004  | 2141.545  |
| NM_007111 | 14320.849 | 13683.359 | NM_016138 | 1471.976  | 1290.01   | H90415    | 2812.616  | 2546.585  |
| NM_002048 | 1220.002  | 1522.291  | Z36833    | 55825.527 | 61688.961 | AA676470  | 12848.952 | 11936.348 |
| NM_004702 | 2014.742  | 2070.901  | NM_014355 | 1698.593  | 1652.915  | M38258    | 703.635   | 635.246   |
| NM_007109 | 4106.418  | 4057.321  | M21191    | 29765.502 | 26487.631 | AA457155  | 10692.977 | 10452.979 |
| AK023404  | 456.423   | 1073.958  | AF072810  | 1389.374  | 1212.57   | BM014365  | 971.352   | 895.683   |
| NM_013239 | 4292.882  | 4385.945  | L19778    | 928.843   | 564.864   | H91842    | 487.38    | 615.682   |
| NM_001789 | 3249.45   | 3042.435  | AF174482  | 2708.21   | 2101.239  | U78045    | 1208.391  | 1235.97   |
| NM_016004 | 6706.096  | 7257.52   | NM_003528 | 851.015   | 571.77    | AA878561  | 53411.871 | 53047.961 |
| NM_002655 | 2223.586  | 2637.231  | NM_017769 | 673.92    | 495.291   | BF688309  | 590.869   | 485.308   |
| AB028955  | 1890.974  | 1810.951  | D85131    | 18668.191 | 14703.413 | AI538525  | 954.952   | 777.721   |
| U66879    | 8597.339  | 9674.796  | NM_004956 | 497.017   | 284.492   | NM_003825 | 6761.555  | 8699.058  |
| NM_016022 | 9136.033  | 9371.218  | D30612    | 3286.826  | 2579.075  | AK025006  | 15237.959 | 16327.708 |
| NM_004874 | 4178.759  | 3775.858  | NM_002163 | 518.112   | 427.663   | AF218014  | 8713.338  | 10143.591 |
| NM_014204 | 2673.708  | 3114.775  | U52097    | 16047.042 | 13764.908 | NM_006678 | 3824.127  | 3634.524  |
| S70385    | 9260.23   | 11950.121 | NM_003416 | 2617.813  | 2919.701  | AY007729  | 32140.555 | 36873.617 |
| M34671    | 10901.082 | 12076.006 | NM_017594 | 1077.823  | 1090.891  | NM_014424 | 461.44    | 686.721   |
| NM_018509 | 13533.771 | 14874.688 | AK027237  | 1089.815  | 895.189   | AF159092  | 1822.986  | 2008.654  |
| NM_004086 | 9533.039  | 10087.446 | AK027104  | 1379.698  | 1332.009  | BC007318  | 9271.267  | 9161.851  |
| AL050199  | 2208.68   | 2827.717  | AL133090  | 22316.652 | 19458.729 | M36693    | 2470.46   | 2133.422  |
| NM_007352 | 239.79    | 674.273   | AF085867  | 6299.399  | 5405.304  | NM_016292 | 7622.45   | 8311      |
| AF176706  | 2776.521  | 3036.96   | AK026158  | 491.327   | 420.539   | NM_001781 | 4512.038  | 3633.138  |
| NM_014484 | 1214.03   | 1177.341  | AF086510  | 4050.897  | 3605.796  | NM_014432 | 1465.859  | 1505.825  |
| NM_001086 | 3035.994  | 2852.931  | Z36779    | 2878.363  | 2589.482  | NM_001558 | 2203.495  | 1916.674  |
| NM_014670 | 1007.143  | 916.998   | NM_002816 | 1653.521  | 1370.663  | NM_002530 | 563.774   | 634.368   |
| NM_019048 | 7941.653  | 8389.573  | NM_017822 | 6578.54   | 5336.494  | U96173    | 2132.205  | 2301.417  |
| NM_001040 | 3676.417  | 3688.797  | AK026844  | 2490.189  | 1633.799  | NM_018941 | 1681.244  | 1618.032  |
| AF279698  | 1933.887  | 2135.607  | AK026735  | 2884.781  | 2411.558  | NM_020241 | 1396.14   | 2752.585  |
| NM_019849 | 1302.804  | 1247.647  | AL110104  | 16698.125 | 12051.112 | BE730585  | 426.84    | 613.833   |
| NM_007317 | 8088.467  | 8565.707  | AF240633  | 974.193   | 683.48    | NM_001980 | 1853.082  | 1390.974  |
| AK021466  | 2037.928  | 2460.524  | AK027056  | 2942.656  | 2020.553  | NM_000749 | 640.464   | 718.635   |
| NM_001559 | 448.275   | 615.01    | AK024294  | 1809.94   | 1075.201  | NM_000751 | 5014.777  | 5775.457  |
| NM_005081 | 382.131   | 742.366   | AL110126  | 2003.435  | 1744.376  | NM_014849 | 5316.135  | 5856.157  |
| NM_004959 | 873.456   | 1022.872  | AF052172  | 12366.527 | 8697.854  | NM_001042 | 7356.541  | 6250.261  |
| AK026022  | 36594.465 | 35395.738 | AB014573  | 4995.316  | 4371.918  | NM_012229 | 3667.356  | 3909.628  |
| NM_003199 | 2292.702  | 2465.694  | AK025418  | 630.051   | 344.754   | NM_005071 | 1034.097  | 838.807   |
| NM_002938 | 9153.363  | 10397.018 | AK091109  | 23483.705 | 22449.197 | AB023147  | 3556.822  | 3377.998  |
| AK023652  | 841.464   | 1310.853  | AF032897  | 445.915   | 281.509   | NM_016615 | 5984.63   | 5435.611  |
| AF099032  | 1846.01   | 2053.408  | NM_014967 | 2364.859  | 1882.386  | NM_005630 | 1112.647  | 1135.603  |
| NM_003070 | 3703.09   | 3783.45   | AK022915  | 4669.385  | 4541.741  | NM_016730 | 27721.033 | 42800.082 |
| AL122101  | 1230.255  | 1346.792  | AF131834  | 974.007   | 842.027   | AL035297  | 2093.943  | 1883.786  |
| NM_004780 | 1180.058  | 1223.097  | AL355711  | 1530.079  | 1056.669  | NM_004408 | 1894.447  | 2422.451  |
| NM_016216 | 4312.42   | 4044.854  | AK025851  | 1948.336  | 1331.659  | AJ131244  | 1839.887  | 1484.784  |
| NM_005871 | 17310.412 | 15590.543 | AJ011409  | 13087.379 | 13324.985 | NM_002532 | 4462.971  | 3396.956  |

|           |           |           |           |           |           |           |           |           |
|-----------|-----------|-----------|-----------|-----------|-----------|-----------|-----------|-----------|
| NM_007042 | 6353.415  | 7523.723  | AJ227906  | 897.427   | 553.534   | NM_01238E | 5163.065  | 4802.499  |
| BE875028  | 3887.827  | 3560.74   | AJ001906  | 373.927   | 363.125   | NM_016651 | 2284.643  | 2210.683  |
| NM_01794E | 1438.103  | 1379.41   | L10404    | 896.605   | 511.665   | NM_001671 | 1305.835  | 1344.773  |
| NM_00495E | 7241.961  | 8021.632  | AF283776  | 5466.009  | 5082.94   | NM_01984E | 3215.047  | 3706.455  |
| AL049682  | 2108.746  | 2246.109  | L10123    | 18363.104 | 14174.384 | NM_01619E | 5512.073  | 6284.613  |
| NM_00552E | 7444.908  | 7029.153  | D16877    | 1834.714  | 1298.458  | BE878426  | 54463.184 | 48896.867 |
| AK022842  | 1773.642  | 1822.467  | AL109781  | 3165.06   | 2512.999  | NM_00174E | 17241.219 | 14242.515 |
| NM_00700E | 32794.141 | 30200.988 | AK021895  | 1245.315  | 952.07    | AK025542  | 4160.466  | 3984.057  |
| AL137346  | 497.338   | 732.12    | AK000036  | 4163.175  | 4357.99   | AF207547  | 799.63    | 1068.142  |
| NM_01775E | 1592.751  | 1438.867  | AK000769  | 752.615   | 469.105   | NM_00276E | 8231.852  | 9416.25   |
| NM_00579E | 10418.925 | 11092.891 | AK000924  | 559.386   | 314.529   | NM_003691 | 5873.429  | 5390.798  |
| NM_004901 | 3083.63   | 2666.802  | AK022252  | 411.426   | 231.182   | NM_00295C | 27670.047 | 25435.605 |
| U77088    | 1142.787  | 1277.979  | AK000114  | 1772.028  | 1334.998  | NM_00231E | 2741.17   | 2872.906  |
| NM_006721 | 15236.84  | 13696.514 | AK000952  | 2673.88   | 1748.926  | NM_00143E | 798.954   | 802.983   |
| NM_01628E | 6543.803  | 5556.213  | AK024520  | 4336.169  | 4427.827  | NM_004314 | 4117.485  | 4226.119  |
| NM_00276E | 8484.29   | 8387.65   | AK024592  | 1271.583  | 874.387   | NM_01797E | 7146.872  | 8630.979  |
| NM_003434 | 62020.734 | 61572.48  | AK024904  | 1937.886  | 1309.257  | NM_00589E | 14727.982 | 15662.844 |
| AF024698  | 65478.773 | 69574.742 | AK025030  | 1532.27   | 1152.55   | NM_00288E | 47451.035 | 51740.547 |
| BE904617  | 1944.86   | 1665.553  | AK024542  | 3436.972  | 2628.901  | AF078866  | 5418.781  | 5011.063  |
| AK024495  | 1450.445  | 1410.364  | AK024915  | 356.201   | 209.223   | BF311880  | 5810.149  | 6526.253  |
| AF024694  | 2370.537  | 2979.04   | AB050477  | 3296.786  | 3801.281  | NM_01607E | 905.211   | 985.838   |
| AF086325  | 977.658   | 1234.186  | AK000152  | 582.28    | 430.965   | NM_00136C | 30945.381 | 33014.086 |
| NM_00492E | 1215.735  | 1019.233  | AK024300  | 843.962   | 613.081   | AK026656  | 6160.379  | 7756.742  |
| AF147401  | 1072.929  | 793.294   | L09092    | 731.334   | 384.116   | AJ276207  | 7668.899  | 7063.891  |
| AJ001904  | 1235.521  | 941.532   | NM_01213E | 1371.736  | 1452.813  | AB011131  | 11226.103 | 10439.748 |
| AF075022  | 1034.695  | 711.822   | NM_01212E | 953.179   | 933.281   | AF164794  | 11946.222 | 12140.521 |
| AF075060  | 3184.682  | 2863.279  | AK025716  | 796.615   | 1215.837  | NM_00117E | 2130.781  | 2573.484  |
| AF147436  | 1010.264  | 581.921   | AF086202  | 14099.683 | 15556.99  | AB020656  | 2307.96   | 2590.978  |
| AK021441  | 2344.09   | 1328.59   | AK022352  | 320.617   | 407.772   | AK023648  | 5600.731  | 6063.553  |
| AK026018  | 1040.803  | 692.819   | AK023270  | 1304.413  | 1360.366  | NM_00041E | 1607.556  | 1563.036  |
| AF085846  | 5357.681  | 3735.745  | AF085979  | 18992.773 | 21416.619 | AF077033  | 3351.593  | 3924.978  |
| AF147392  | 1258.177  | 826.965   | AK023112  | 2174.408  | 2382.394  | D50406    | 634.767   | 597.14    |
| AF088057  | 1365.795  | 1850.738  | NM_01780E | 27079.848 | 22747.834 | NM_01778E | 557.548   | 658.591   |
| AF086255  | 5858.838  | 6733.461  | AK001937  | 35118.371 | 31086.453 | NM_004991 | 883.223   | 906.252   |
| AK022660  | 995.526   | 1029.707  | AL365517  | 977.465   | 852.91    | NM_012201 | 5651.841  | 5699.372  |
| AK023883  | 1624.974  | 828.965   | AK021988  | 5628.617  | 4411.496  | AB046774  | 1327.949  | 1578.083  |
| AF087993  | 7205.275  | 8209.344  | AF086494  | 19313.398 | 17363.707 | AK022385  | 21832.102 | 24052.631 |
| AF035282  | 1331.011  | 1469.798  | BI769977  | 676.856   | 520.965   | NM_00277E | 1817.183  | 2176.087  |
| AK021966  | 5298.071  | 6361.563  | AL137567  | 1022.155  | 788.945   | AK024584  | 9152.521  | 4985.477  |
| AB018292  | 1656.148  | 1621.383  | AK024913  | 2617.898  | 2205.75   | NM_003504 | 13873.604 | 11900.201 |
| AF075032  | 818.436   | 936.797   | AB007961  | 1900.384  | 1511.364  | NM_01329E | 5353.874  | 4908.278  |
| AF085971  | 1519.199  | 1365.972  | NM_005547 | 2013.947  | 2972.419  | NM_007267 | 4220.434  | 4570.757  |
| AF147302  | 909.147   | 1518.692  | AF119862  | 9987.074  | 10260.148 | AK022830  | 1038.406  | 1206.544  |
| AF085929  | 948.675   | 1354.555  | U17628    | 1458.695  | 997.487   | Z36816    | 3492.402  | 4453.618  |
| AK001126  | 1648.281  | 1601.176  | AF119867  | 2308.734  | 2163.197  | NM_00586E | 7058.204  | 10211.696 |
| AF085976  | 7055.895  | 6708.84   | AL357205  | 9568.846  | 12287.272 | NM_00641E | 13559.296 | 12903.138 |
| AF075104  | 1544.163  | 1207.063  | AF124819  | 764.65    | 826.619   | NM_017684 | 780.131   | 790.793   |
| AL133025  | 1249.3    | 1091.779  | D17091    | 2326.565  | 2087.809  | NM_00021E | 661.477   | 1105.729  |
| AL137617  | 1285.191  | 832.744   | AL133074  | 2347.934  | 2273.787  | NM_00220E | 310.84    | 767.701   |
| AL359568  | 22977.934 | 25229.49  | AF086318  | 5554.436  | 4128.241  | AF135960  | 1318.307  | 1344.644  |
| AL133564  | 888.96    | 956.615   | AF088012  | 922.703   | 703.295   | NM_01421E | 24662.285 | 27825.574 |
| AL137428  | 1763.343  | 1839.565  | NM_018121 | 1508.47   | 1310.324  | NM_00301C | 3294.304  | 3191.185  |
| AL157462  | 1929.893  | 1559.496  | AK026708  | 3182.072  | 2919.387  | NM_018494 | 8549.357  | 10122.738 |

|           |           |           |           |           |           |           |           |           |
|-----------|-----------|-----------|-----------|-----------|-----------|-----------|-----------|-----------|
| AL359602  | 1142.435  | 949.086   | NM_017903 | 3618.783  | 3233.039  | AK000006  | 264.412   | 584.557   |
| NM_01819C | 52970.613 | 54652.652 | NM_018074 | 1799.31   | 1819.074  | NM_001115 | 964.345   | 913.751   |
| AF086054  | 1714.571  | 1670.212  | NM_000909 | 3107.096  | 2801.487  | NM_01325E | 1937.018  | 1592.357  |
| AF086089  | 1546.805  | 788.098   | U31737    | 1178.487  | 856.258   | NM_007183 | 433.642   | 794.829   |
| AK022461  | 778.604   | 878.54    | AK024828  | 1547.656  | 1196.763  | AJ238243  | 11185.38  | 12036.224 |
| NM_01601C | 6572.574  | 5603.59   | AF009315  | 1163.514  | 984.757   | J05046    | 17461.75  | 17287.363 |
| AK023783  | 986.92    | 737.536   | NM_019013 | 1151.911  | 1119.083  | NM_01231E | 3538.288  | 3663.411  |
| AF070647  | 42290.648 | 34356.789 | NM_006783 | 438.892   | 296.891   | NM_002751 | 4442.149  | 4823.747  |
| AF174394  | 1230.767  | 985.142   | S70313    | 8790.429  | 7923.174  | NM_004291 | 1774.981  | 1471.325  |
| AK025384  | 687.319   | 345.268   | AK021607  | 2495.201  | 2232.067  | NM_00381E | 3925.191  | 4446.998  |
| AF083121  | 773.483   | 518.107   | AK025860  | 1392.617  | 1335.373  | AK022635  | 448.102   | 600.756   |
| AK021876  | 6755.122  | 5714.745  | NM_02018E | 6630.575  | 6188.685  | NM_004912 | 3876      | 4957.291  |
| AK022017  | 1027.922  | 1110.908  | AK022424  | 300.465   | 317.619   | U79304    | 18425.381 | 27592.078 |
| AK022160  | 1167.248  | 1321.619  | AF090947  | 1397.296  | 1092.726  | NM_016267 | 2975.064  | 3015.032  |
| AK022295  | 840.333   | 867.798   | NM_005047 | 3141.777  | 2496.041  | NM_004671 | 6274.683  | 6173.46   |
| AK021935  | 2215.779  | 2251.681  | AJ272196  | 10930.749 | 10966.489 | NM_00518C | 12500.291 | 14203.845 |
| AK026891  | 1799.654  | 1796.163  | X58162    | 3262.437  | 2450.488  | NM_00652E | 3428.538  | 4266.082  |
| AK025573  | 592.795   | 698.405   | AK022825  | 748.055   | 446.995   | NM_00704E | 3503.02   | 3545.773  |
| AL137562  | 5606.557  | 5129.792  | CY3Cy5    | 2717.421  | 265.299   | NM_003627 | 4751.885  | 5202.552  |
| M90355    | 62245.93  | 58574.242 | L35251    | 2699.092  | 3132.375  | AF305779  | 1184.769  | 1321.213  |
| AK022495  | 7280.413  | 7120.627  | BE910395  | 1526.779  | 1565.689  | AF225416  | 9932.984  | 9186.569  |
| AK021632  | 878.668   | 960.689   | N46828    | 2374.24   | 4192.864  | NM_016231 | 2589.068  | 2419.534  |
| AK026373  | 19388.662 | 19502.359 | BI908302  | 12094.478 | 10580.289 | NM_002093 | 4777.589  | 4420.219  |
| AK021581  | 10151.518 | 8441.007  | AA460969  | 3985.582  | 3327.44   | AB042555  | 7896.882  | 8303.279  |
| NM_01843C | 11888.112 | 11422.545 | BG695859  | 1047.98   | 893.818   | NM_017763 | 635.755   | 842.807   |
| AK022308  | 543.055   | 500.77    | M85079    | 3923.557  | 4005.451  | NM_01397E | 3093.625  | 3177.19   |
| AL133640  | 2433.183  | 2138.281  | AA457671  | 12209.562 | 12026.725 | NM_003843 | 3729.409  | 4664.624  |
| AJ012502  | 12469.864 | 12566.238 | X07437    | 3091.409  | 2842.528  | NM_01221E | 1629.702  | 1414.838  |
| AK021722  | 1029.27   | 1119.435  | NM_000641 | 1417.555  | 1233.744  | X73502    | 1789.058  | 1567.09   |
| AF147445  | 1527.12   | 1634.847  | AE006466  | 3695.901  | 3728.439  | NM_02044E | 51038.465 | 53342.859 |
| Y10508    | 3017.735  | 3200.496  | BC008737  | 48946.852 | 44079.52  | NM_01637E | 11923.632 | 13446.806 |
| D17074    | 1625.064  | 1901.663  | BC011655  | 7434.262  | 6960.67   | AB046848  | 4838.662  | 6490.661  |
| AF039944  | 9765.621  | 7563.704  | BC002396  | 4236.266  | 3577.202  | AL133057  | 5684.618  | 6948.588  |
| AJ276252  | 1007.122  | 1008.409  | NM_02209E | 1124.529  | 1078.696  | U04845    | 6829.102  | 7445.423  |
| AL133618  | 1126.333  | 1105.146  | SR2       | 49429.289 | 38578.051 | NM_018103 | 3913.278  | 4079.479  |
| AK001086  | 479.098   | 709.783   | SR4       | 13489.449 | 9090.999  | AK026302  | 8112.337  | 7754.648  |
| AJ131610  | 4057.333  | 3511.257  | SR6       | 2314.544  | 1826.307  | NM_012214 | 11173.254 | 11873.824 |
| AF119872  | 8933.797  | 9905.958  | SR8       | 7608.208  | 15993.246 | AF049656  | 17225.564 | 22701.436 |
| AK023255  | 60812.023 | 55579.707 | SR10      | 26354.863 | 8377.266  | NM_000312 | 1200.777  | 1359.448  |
| NM_002622 | 42566.918 | 34669.129 | CY3Cy5    | 2376.197  | 148.517   | NM_003963 | 964.458   | 1052.105  |
| AK024185  | 1725.283  | 1768.941  | NM_02037C | 1153.935  | 1181.343  | AC009729  | 550.75    | 451.074   |
| NM_015417 | 1917.653  | 1397.421  | NM_004767 | 1019.225  | 1255.987  | NM_01659E | 5796.28   | 5928.402  |
| AK026101  | 2913.323  | 2909.108  | BF310159  | 6843.69   | 7251.878  | AL136719  | 4237.224  | 4620.395  |
| AK022194  | 4288.188  | 5267.147  | NM_01898E | 1830.646  | 1994.428  | NM_01410E | 9780.468  | 9872.447  |
| AF085963  | 767.993   | 839.611   | AB044934  | 769.038   | 424.318   | NM_01216C | 2019.291  | 1550.692  |
| AK021920  | 2552.701  | 1757.167  | U27655    | 1924.101  | 1639.829  | AK027070  | 850.594   | 916.696   |
| AL049415  | 766.095   | 897.592   | NM_00336C | 1574.998  | 1723.6    | NM_003341 | 10718.891 | 10225.962 |
| AK022375  | 1065.806  | 1287.612  | Z21965    | 15928.272 | 14460.759 | NM_01778E | 1305.547  | 1397.271  |
| NM_00337E | 7478.981  | 8610.133  | NM_012427 | 1565.313  | 1845.068  | NM_00624E | 3876.568  | 3308.386  |
| AL110194  | 15130.954 | 15492.883 | AF131857  | 7670.681  | 7047.279  | NM_01831E | 1698.764  | 1545.096  |
| AF138860  | 1390.725  | 1121.468  | NM_000852 | 27872.963 | 28908.17  | AB020640  | 2296.109  | 2206.133  |
| NM_006687 | 2160.943  | 1995.448  | NM_00039E | 728.77    | 689.378   | D29954    | 12720.148 | 11577.199 |
| NM_013301 | 510.991   | 846.676   | AW797282  | 680.791   | 513.36    | AF007131  | 6656.06   | 5778.202  |

|           |           |           |           |           |           |           |           |           |
|-----------|-----------|-----------|-----------|-----------|-----------|-----------|-----------|-----------|
| NM_017673 | 1487.634  | 1655.643  | NM_002402 | 545.106   | 448.747   | NM_006835 | 2593.814  | 3106.407  |
| AB046857  | 1756.43   | 2098.778  | L09070    | 1856.367  | 1805.363  | NM_005851 | 1716.975  | 2179.166  |
| AK024408  | 1537.024  | 2220.731  | NM_000062 | 13547.498 | 14099.813 | AF119256  | 1693.404  | 1967.318  |
| AF086307  | 17053.633 | 18527.803 | NM_009590 | 5688.235  | 4879.357  | X74497    | 617.157   | 992.047   |
| L19364    | 4467.389  | 3938.513  | AL133037  | 1206.135  | 1088.823  | NM_012210 | 1460.261  | 1490.524  |
| NM_005390 | 1183.662  | 1780.319  | NM_020350 | 3738.392  | 3283.106  | U10072    | 2253.602  | 2595.077  |
| CY3Cy5    | 4657.579  | 254.971   | NM_000350 | 1772.762  | 1731.933  | NM_003410 | 7019.028  | 7073.529  |
| Z48054    | 3572.51   | 2895.452  | X91103    | 4078.375  | 3481.125  | NM_007140 | 3831.431  | 3250.487  |
| H90415    | 3076.245  | 2076.507  | AA419164  | 1058.37   | 1281.666  | NM_002225 | 769.989   | 924.506   |
| AA676470  | 4678.114  | 4054.442  | AL117235  | 690.393   | 626.698   | NM_012119 | 1575.714  | 1357.579  |
| M38258    | 784.311   | 948.864   | NM_014822 | 3109.322  | 3734.813  | X99631    | 12087.556 | 11895.032 |
| AA457155  | 3318.214  | 3878.015  | NM_005296 | 1725.649  | 1956.839  | NM_001730 | 1868.22   | 1573.872  |
| BM014365  | 1289.876  | 1053.831  | NM_001337 | 607.584   | 381.598   | AK026290  | 555.288   | 591.626   |
| H91842    | 484.658   | 433.013   | NM_003611 | 2094.923  | 2268.567  | AF248649  | 510.906   | 761.976   |
| AA878561  | 57761.523 | 61174.348 | AB014538  | 1264.054  | 1486.799  | U37146    | 12804.572 | 13133.142 |
| AI538525  | 1127.545  | 1201.126  | NM_006209 | 560.914   | 403.485   | NM_012080 | 3984.756  | 4524.842  |
| NM_000941 | 2649.769  | 2279.824  | AK025118  | 4886.31   | 5223.912  | NM_000991 | 56133.863 | 55631.555 |
| SR5       | 5429.223  | 5225.627  | NM_000727 | 1102.231  | 994.068   | NM_016034 | 22260.299 | 19620.621 |
| SR7       | 6532.638  | 43175.211 | NM_005385 | 6319.708  | 5761.117  | X69150    | 55762.285 | 55144.383 |
| SR9       | 20047.555 | 3496.991  | NM_018985 | 2438.394  | 2271.322  | NM_001025 | 57386.629 | 58799.973 |
| CY3Cy5    | 5696.266  | 314.095   | NM_006074 | 19157.631 | 18503.4   | NM_016067 | 27409.6   | 36508.555 |
| U62858    | 1005.809  | 868.836   | AF208232  | 12204.716 | 12975.577 | AK022393  | 3795.494  | 4015.367  |
| NM_001781 | 4302.293  | 3218.887  | NM_002988 | 5559.92   | 4611.984  | AK026654  | 1391.074  | 1649.722  |
| AF035121  | 461.527   | 469.726   | NM_004186 | 771.079   | 617.809   | AK025245  | 679.092   | 886.558   |
| NM_014432 | 2203.763  | 1595.481  | NM_016258 | 7255.827  | 6937.243  | NM_016138 | 2580.089  | 2269.294  |
| NM_001558 | 1520.145  | 1383.94   | AF203032  | 1714.618  | 1569.717  | Z36833    | 54060.988 | 52255.32  |
| U96173    | 1439.639  | 1323.644  | AB014542  | 7974.076  | 6015.233  | AW963246  | 765.742   | 695.338   |
| NM_018941 | 1745.797  | 1539.219  | NM_014640 | 1433.638  | 1293.182  | NM_004580 | 313.331   | 506.061   |
| NM_001980 | 2049.687  | 1831.418  | Y10518    | 22701.215 | 19016.896 | NM_014355 | 1850.341  | 1899.767  |
| NM_005954 | 300.486   | 429.664   | AF155135  | 9731.634  | 8974.597  | M21191    | 28348.031 | 26855.367 |
| NM_012471 | 1333.713  | 1006.785  | NM_014790 | 837.679   | 943.173   | L19778    | 989.188   | 827.831   |
| NM_001321 | 1367.852  | 1497.914  | NM_003571 | 4359.717  | 4273.088  | AF174482  | 4377.195  | 4865.14   |
| AB018264  | 681.148   | 571.202   | AB032965  | 18484.361 | 15771.886 | NM_003528 | 875.27    | 1020.697  |
| NM_006911 | 2425.663  | 2149.102  | AF133424  | 2823.264  | 2510.683  | NM_017760 | 867.235   | 740.538   |
| U92544    | 529.313   | 566.683   | NM_005003 | 27507.195 | 26739.309 | D85131    | 14566.055 | 13821.634 |
| NM_006791 | 4214.688  | 3961.404  | AF084560  | 5265.001  | 7192.536  | NM_004950 | 542.501   | 460.482   |
| AJ278348  | 20046.664 | 19126.734 | NM_015715 | 568.868   | 694.807   | D30612    | 3205.323  | 3233.968  |
| AK023106  | 2442.955  | 1878.007  | NM_000032 | 2894.878  | 2875.688  | NM_002163 | 740.105   | 775.577   |
| NM_016730 | 744.892   | 886.716   | NM_002083 | 2248.349  | 1948.268  | NM_003410 | 2969.847  | 3164.99   |
| AL035297  | 1998.431  | 1635.022  | NM_002035 | 5822.73   | 5821.896  | AL079289  | 739.665   | 451.918   |
| NM_004408 | 1568.803  | 1449.473  | NM_014900 | 1200.826  | 1180.137  | NM_017594 | 1378.65   | 1421.516  |
| AJ131244  | 2635.025  | 1876.038  | BF342908  | 1393.098  | 1075.457  | AK027237  | 1589.88   | 1371.173  |
| NM_002532 | 3732.64   | 3211.601  | AF118073  | 669.933   | 728.17    | AK027104  | 2367.216  | 2115.688  |
| NM_012388 | 1682.795  | 1481.41   | AK023510  | 4862.143  | 4809.606  | AL133090  | 21649.771 | 21068.967 |
| NM_001671 | 1203.865  | 1139.604  | NM_004345 | 1597.098  | 1394.099  | AF085867  | 7823.265  | 7711.27   |
| NM_019843 | 2668.807  | 2563.589  | NM_000702 | 27755.158 | 30718.535 | AK026158  | 759.909   | 672.573   |
| NM_016192 | 5740.032  | 5799.305  | X71490    | 10597.89  | 10019.677 | AF086510  | 5034.164  | 4823.393  |
| BE878426  | 52667.57  | 49744.691 | AF257081  | 1269.963  | 1084.766  | Z36779    | 2694.622  | 3150.83   |
| NM_001745 | 16282.577 | 15874.542 | NM_001688 | 22955.752 | 18519.242 | NM_018422 | 561.82    | 513.618   |
| NM_003825 | 7255.975  | 8980.396  | NM_003631 | 766.498   | 610.704   | NM_002810 | 1695.086  | 1746.5    |
| AK025006  | 16669.951 | 23537.777 | NM_000219 | 531.903   | 515.03    | NM_017513 | 502.993   | 868.465   |
| NM_004301 | 440.581   | 192.004   | NM_002232 | 1083.699  | 1006.609  | NM_017822 | 8308.017  | 8792.18   |
| AF218014  | 9082.228  | 9312.639  | NM_016100 | 4100.175  | 3638.728  | AK026844  | 4269.91   | 6435.291  |

|           |           |           |           |           |           |           |           |           |
|-----------|-----------|-----------|-----------|-----------|-----------|-----------|-----------|-----------|
| NM_006678 | 457.45    | 491.042   | NM_014570 | 4651.744  | 4303.098  | AK026735  | 4326.445  | 6814.798  |
| AY007729  | 9128.861  | 8092.839  | NM_014747 | 4555.333  | 3893.239  | AL110104  | 24452.689 | 31206.346 |
| NM_014424 | 539.577   | 439.768   | Y19240    | 5012.291  | 4851.026  | AF240633  | 1323.003  | 1710.683  |
| AF159092  | 1860.403  | 1569.275  | AF091029  | 4984.756  | 4624.694  | AK027056  | 2449.554  | 3435.504  |
| BC007318  | 9654.009  | 10054.748 | X97074    | 12118.169 | 10367.428 | AK024294  | 1736.55   | 1760.092  |
| NM_016292 | 10772.189 | 10841.102 | NM_004135 | 4606.849  | 5264.864  | AL110126  | 1889.895  | 2074.717  |
| NM_002601 | 10170.4   | 9489.939  | NM_000203 | 596.348   | 585.041   | AF052172  | 16222.184 | 19821.348 |
| NM_005898 | 14890.421 | 11410.14  | NM_013443 | 3032.452  | 4337.91   | AB014573  | 7021.635  | 7225.791  |
| NM_002888 | 2426.947  | 2228.134  | NM_000925 | 11799.723 | 13226.038 | AK025418  | 774.173   | 774.654   |
| AF078866  | 12296.158 | 10026.426 | NM_000465 | 2050.859  | 2678.606  | AK091109  | 23184.654 | 22708.898 |
| NM_016075 | 1149.43   | 1442.614  | NM_000123 | 6736.621  | 7006.747  | AF032897  | 421.26    | 729.967   |
| NM_001360 | 32293.191 | 34956.066 | AL137501  | 852.454   | 890.809   | NM_014967 | 3003.202  | 4062.95   |
| AK026656  | 699.727   | 511.463   | BE858979  | 608.062   | 651.642   | AK022915  | 7398.956  | 8642.09   |
| AJ276207  | 13273.368 | 10990.843 | NM_000122 | 3170.061  | 2777.171  | AF131834  | 1116.872  | 1171.876  |
| AB011131  | 9532.829  | 10492.59  | NM_006712 | 58323.629 | 60173.563 | AL355711  | 1574.644  | 1896.493  |
| NM_000751 | 2056.544  | 2928.353  | NM_006240 | 1102.661  | 810.398   | AK025851  | 2459.03   | 2410.309  |
| NM_014848 | 5742.854  | 4626.425  | NM_007026 | 4439.69   | 3977.465  | AJ011409  | 14270.571 | 13252.29  |
| NM_001042 | 4337.557  | 3907.32   | M37712    | 14449.896 | 9202.111  | AJ227906  | 1981.668  | 2287.039  |
| NM_012228 | 3983.63   | 3929.893  | NM_002648 | 590.59    | 666.993   | AJ011598  | 447.999   | 616.357   |
| NM_005071 | 612.135   | 537.547   | AF070670  | 3845.652  | 3421.6    | AJ001906  | 581.274   | 908.834   |
| NM_012201 | 8265.03   | 7167.951  | NM_016156 | 5013.682  | 5002.226  | U17633    | 466.088   | 335.123   |
| AB046774  | 1820.545  | 1679.762  | NM_016528 | 1563.558  | 1739.206  | L10404    | 1463.228  | 1596.402  |
| AK022385  | 13305.311 | 12746.3   | NM_015974 | 3467.292  | 3277.67   | AF283776  | 7182.523  | 7771.754  |
| NM_002775 | 488.371   | 879.157   | NM_014384 | 5210.999  | 5420.175  | L10123    | 29985.143 | 33032.035 |
| AK024584  | 7353.905  | 4262.537  | NM_002573 | 7997.496  | 7756.74   | D16877    | 3198.313  | 3725.459  |
| NM_003504 | 12085.842 | 11037.686 | AL133037  | 1418.931  | 1557.378  | L19363    | 425.104   | 475.985   |
| NM_013298 | 4209.625  | 4401.059  | NM_020350 | 4503.977  | 4100.606  | AL109781  | 3079.892  | 3070.297  |
| NM_007267 | 5437.329  | 5196.933  | NM_000350 | 2280.022  | 2088.761  | AK021895  | 2729.647  | 3507.608  |
| AK022830  | 1040.094  | 1355.093  | X91103    | 4664.929  | 4171.854  | AK024563  | 248.071   | 489.714   |
| Z36816    | 6857.274  | 7081.872  | AA419164  | 1540.848  | 1547.421  | AK000036  | 4462.809  | 4525.834  |
| NM_005865 | 2547.202  | 2235.746  | L35251    | 3216.291  | 3163.47   | AK000769  | 652.138   | 673.341   |
| NM_006413 | 12196.313 | 11318.942 | BE910395  | 1217.494  | 1049.024  | AK000924  | 836.946   | 535.75    |
| NM_017684 | 1459.562  | 1732.206  | N46828    | 2000.538  | 1995.839  | AK022252  | 684.986   | 588.692   |
| AF207547  | 684.053   | 537.169   | BI908302  | 12139.672 | 10802.551 | AK000114  | 2484.756  | 2446.485  |
| NM_002768 | 8496.2    | 9317.14   | AA460969  | 4411.501  | 4285.521  | AK000952  | 4322.9    | 4668.687  |
| NM_003691 | 6857.467  | 5756.457  | BG695859  | 855.298   | 861.994   | AK024520  | 4372.392  | 4257.937  |
| NM_002950 | 24323.426 | 26969.518 | M85079    | 4355.293  | 5428.149  | AK024592  | 2027.742  | 2289.021  |
| NM_002318 | 960.515   | 871.811   | AA457671  | 12992.887 | 15200.653 | AK024904  | 1766.905  | 2525.406  |
| NM_001433 | 818.497   | 872.294   | X07437    | 3569.717  | 3019.553  | AK025030  | 1938.915  | 1825.723  |
| NM_003134 | 56615.418 | 52335.555 | NM_000641 | 1340.208  | 1388.594  | AK024542  | 5416.653  | 5617.074  |
| NM_017978 | 4891.275  | 5087.08   | AE006466  | 3388.59   | 2238.699  | AK024915  | 498.875   | 560.875   |
| NM_006791 | 4342.443  | 4448.551  | BC008737  | 48817.813 | 41909.184 | AB050477  | 3364.051  | 3395.342  |
| AJ278348  | 16985.832 | 15165.813 | BC011655  | 7899.444  | 7786.777  | AK000152  | 671.216   | 811.304   |
| L07738    | 780.348   | 458.54    | BC002396  | 4499.4    | 4310.638  | AK024300  | 1350.791  | 1445.493  |
| Z48054    | 4307.545  | 4295.97   | NM_022095 | 1361.795  | 1185.403  | L09092    | 733.128   | 904.564   |
| H90415    | 3372.774  | 3259.415  | AF112219  | 24903.336 | 23531.271 | NM_012132 | 1727.248  | 1588.801  |
| AA676470  | 4368.059  | 4045.685  | NM_000521 | 434.493   | 385.007   | NM_012128 | 1373.02   | 1399.483  |
| M38258    | 1028.307  | 1065.059  | NM_014640 | 1639.276  | 1891.023  | AK024881  | 289.439   | 777.525   |
| AA457155  | 3062.028  | 3727.295  | Y10518    | 29781.811 | 31748.742 | AK025716  | 883.102   | 991.896   |
| BM014365  | 1391.712  | 1411.045  | AF155135  | 11731.099 | 11103.178 | AF086202  | 14575.959 | 13920.813 |
| H91842    | 335.685   | 641.749   | NM_014790 | 1015.23   | 1236.038  | AK023270  | 3522.139  | 3544.573  |
| U78045    | 219.436   | 579.115   | NM_003571 | 5552.616  | 5386.667  | AF085979  | 27250.896 | 24690.822 |
| AA878561  | 59518.055 | 58015.559 | AB032965  | 23207.154 | 23058.922 | AK023112  | 2242.279  | 2544.978  |

|           |           |           |           |           |           |           |           |           |
|-----------|-----------|-----------|-----------|-----------|-----------|-----------|-----------|-----------|
| AI538525  | 1359.132  | 1069.728  | NM_020370 | 1030.592  | 1064.029  | NM_017806 | 27573.797 | 26700.236 |
| NM_000623 | 413.532   | 478.452   | NM_004767 | 754.543   | 833.979   | AK001937  | 53799.121 | 53979.734 |
| NM_000941 | 2943.751  | 2838.238  | BF310159  | 6828.655  | 7663.358  | AL365517  | 1194.171  | 1229.539  |
| AF222980  | 1280.044  | 751.113   | NM_000316 | 386.151   | 256.551   | AK021988  | 7441.312  | 9453.204  |
| AK026758  | 5140.826  | 4483.32   | NM_018986 | 1911.282  | 2030.278  | AF086494  | 21269.684 | 20980.617 |
| NM_014424 | 679.257   | 253.922   | U27655    | 1962.707  | 1901.557  | BI769977  | 1212.779  | 1002.666  |
| AF159092  | 1987.394  | 1670.735  | NM_003360 | 1488.199  | 1561.004  | AL137567  | 999.818   | 1226.114  |
| BC007318  | 10473.283 | 10462.037 | Z21965    | 16833.428 | 14822.025 | AK024913  | 2855.916  | 2410.088  |
| M36693    | 4383.403  | 4184.204  | NM_012427 | 627.569   | 687.66    | AB007961  | 2257.098  | 2372.909  |
| NM_016292 | 9014.911  | 9279.918  | AF131857  | 8122.257  | 7240.846  | NM_005547 | 2348.866  | 2700.071  |
| NM_002601 | 8875.02   | 8033.365  | NM_000852 | 27269.658 | 25746.789 | AF119862  | 8979.689  | 8652.676  |
| U62858    | 1283.957  | 1223.532  | NM_000399 | 718.14    | 643.865   | U17628    | 1054.755  | 925.868   |
| NM_001781 | 5195.036  | 5139.4    | AW797282  | 634.167   | 510.511   | AF119867  | 2912.067  | 3061.92   |
| AF035121  | 552.647   | 485.277   | NM_002402 | 443.27    | 477.005   | AL357205  | 9807.17   | 16473.328 |
| NM_014432 | 2050.406  | 1949.25   | L09070    | 1858.021  | 1962.461  | AF124819  | 1154.576  | 880.313   |
| NM_001558 | 2204.489  | 1868.38   | NM_000062 | 13393.282 | 14183.952 | D17091    | 2801.009  | 2713.116  |
| U96173    | 2147.127  | 2588.973  | NM_009590 | 5676.512  | 6099.248  | AL133074  | 3106.082  | 2907.443  |
| NM_018941 | 2630.338  | 3076.504  | NM_016106 | 4170.98   | 4618.338  | AF086318  | 8798.821  | 9536.311  |
| NM_020241 | 489.013   | 654.446   | NM_014570 | 5294.872  | 5158.411  | AF088012  | 857.889   | 594.042   |
| NM_001980 | 2077.45   | 2080.799  | NM_014747 | 5125.151  | 5431.202  | NM_018121 | 1154.311  | 828.399   |
| NM_005954 | 493.583   | 386.979   | Y19240    | 5813.935  | 5744      | AK026708  | 5320.864  | 6200.881  |
| NM_012471 | 1033.512  | 928.241   | AF091029  | 6101.258  | 5980.103  | NM_017903 | 5969.653  | 8265.483  |
| NM_001321 | 1528.422  | 1513.922  | X97074    | 21336.488 | 19702.791 | NM_018074 | 1980.603  | 2240.488  |
| AB018264  | 618.909   | 790.863   | AL117235  | 671.454   | 660.361   | NM_000909 | 3947.142  | 3844.884  |
| NM_006911 | 2256.097  | 2378.753  | NM_014822 | 3352.599  | 4857.032  | U31737    | 370.948   | 667.145   |
| U92544    | 623.824   | 709.431   | NM_001337 | 687.005   | 1076.493  | AK024828  | 1272.86   | 1326.099  |
| NM_012229 | 4467.517  | 4330.341  | NM_003611 | 3245.716  | 4176.795  | AF009315  | 1307.141  | 1590.051  |
| NM_005071 | 504.889   | 592.723   | AB014538  | 1255.933  | 1224.265  | NM_006783 | 738.991   | 634.076   |
| AB023147  | 3655.815  | 4511.52   | NM_006209 | 463.607   | 450.566   | L37711    | 468.78    | 563.158   |
| NM_016615 | 205.069   | 457.326   | AK025118  | 4964.665  | 5419.162  | S70313    | 7422.368  | 7006.001  |
| NM_005630 | 1340.695  | 1098.999  | NM_000727 | 1041.362  | 752.976   | AK021607  | 2180.649  | 1969.967  |
| NM_001046 | 1045.641  | 1351.658  | NM_002621 | 528.734   | 471.371   | AK025860  | 1516.705  | 1275.841  |
| AK023106  | 2370.566  | 2420.36   | NM_005385 | 6893.051  | 5614.713  | NM_020186 | 8980.438  | 8589.8    |
| NM_016730 | 925.207   | 1115.732  | NM_018985 | 2442.669  | 2216.665  | AF090947  | 2991.526  | 4618.343  |
| AL035297  | 2238.083  | 2262.83   | NM_006074 | 17662.965 | 14545.87  | NM_005047 | 2718.332  | 3301.071  |
| NM_004408 | 1539.971  | 1800.064  | AF208232  | 10571.688 | 8865.213  | AJ272196  | 14232.759 | 13896.141 |
| AJ131244  | 2698.647  | 2710.998  | NM_002988 | 5772.658  | 5465.899  | X58162    | 4050.924  | 4079.456  |
| NM_002532 | 5180.1    | 5155.135  | NM_004186 | 780.104   | 705.254   | AK022825  | 519.388   | 552.789   |
| NM_012388 | 1722.662  | 2049.045  | NM_016258 | 7137.785  | 6526.833  | CY3Cy5    | 3441.093  | 178.356   |
| NM_016651 | 573.497   | 285.801   | AF203032  | 1827.725  | 1731.116  | L35251    | 2413.262  | 3107.524  |
| NM_001671 | 1647.744  | 1780.042  | AB014542  | 7232.303  | 5855.683  | BE910395  | 931.954   | 1220.194  |
| NM_019843 | 3218.051  | 3222.205  | AF070670  | 8341.708  | 12943.458 | N46828    | 993.348   | 1116.074  |
| NM_016192 | 6464.675  | 6237.188  | NM_016156 | 5084.225  | 5361.97   | BI908302  | 7665.822  | 8975.22   |
| BE878426  | 53909.734 | 53018.207 | NM_016528 | 2112.374  | 2064.111  | AA460969  | 3287.009  | 3079.773  |
| NM_001745 | 15623.564 | 17915.666 | NM_015974 | 3930.943  | 4582.459  | BG695859  | 700.031   | 656.638   |
| NM_003825 | 7025.644  | 9100.791  | NM_014384 | 5324.689  | 5911.576  | M85079    | 2662.018  | 2958.066  |
| AK025006  | 14881.871 | 13436.882 | NM_002573 | 8386.727  | 9149.966  | AA457671  | 9940.271  | 8165.725  |
| AF218014  | 8106.098  | 9525.962  | AF133424  | 2456.313  | 1828.139  | X07437    | 3029.839  | 2587.998  |
| NM_006678 | 489.979   | 555.022   | NM_005003 | 30306.988 | 34146.012 | NM_000641 | 1561.379  | 856.347   |
| AY007729  | 7969.929  | 8401.363  | AF084560  | 6352.507  | 9529.841  | AE006466  | 2553.472  | 2089.944  |
| NM_001433 | 950.85    | 849.625   | NM_015715 | 673.096   | 1005.786  | BC008737  | 32437.119 | 22315.324 |
| NM_003134 | 55844.469 | 52039.371 | NM_000032 | 3283.171  | 3825.632  | BC011655  | 6956.138  | 4839.58   |
| NM_004314 | 3700.461  | 3659.267  | NM_002083 | 2336.548  | 2180.109  | BC002396  | 3524.356  | 2816.157  |

|           |           |           |           |           |           |           |           |           |
|-----------|-----------|-----------|-----------|-----------|-----------|-----------|-----------|-----------|
| NM_018247 | 7845.073  | 7521.673  | NM_002035 | 6520.502  | 7552.995  | NM_022095 | 876.812   | 646.205   |
| NM_017979 | 4242.45   | 4973.772  | NM_014900 | 1210.155  | 969.094   | SR6       | 2339.278  | 1342.967  |
| NM_005895 | 14820.697 | 14349.686 | BF342908  | 1101.319  | 1112.87   | SR8       | 8086.287  | 16824.16  |
| NM_002885 | 2054.798  | 2286.011  | AF118073  | 729.881   | 659.792   | SR10      | 28162.59  | 6616.657  |
| AF078866  | 11560.157 | 11760.259 | AK023510  | 5276.044  | 4707.761  | CY3Cy5    | 2337.949  | 163.847   |
| BF311880  | 298.301   | 373.206   | NM_004345 | 1960.778  | 1591.64   | NM_020370 | 961.675   | 982.735   |
| NM_016075 | 1602.868  | 1528.995  | NM_000702 | 27664.574 | 26819.258 | NM_004767 | 480.839   | 694.314   |
| NM_001360 | 32811.98  | 32135.295 | X71490    | 9269.217  | 8712.733  | BF310159  | 5834.684  | 6083.839  |
| AK026656  | 471.428   | 605.807   | AF257081  | 940.786   | 845.968   | NM_018985 | 1542.158  | 1712.947  |
| AJ276207  | 11033.813 | 10261.042 | NM_001685 | 23617.262 | 18856.219 | U27655    | 1401.347  | 1374.674  |
| AB011131  | 8671.204  | 11398.644 | NM_003631 | 569.221   | 768.927   | NM_003360 | 1271.486  | 1067.099  |
| NM_000751 | 1580.856  | 1629.494  | NM_000219 | 535.976   | 518.208   | Z21965    | 12245.785 | 10456.559 |
| NM_014845 | 4870.747  | 4672.216  | NM_002232 | 1113.899  | 875.564   | NM_012427 | 659.016   | 416.077   |
| NM_001042 | 4588.615  | 4265.222  | NM_022095 | 1447.538  | 1142.259  | AF131857  | 6937.186  | 4961.126  |
| NM_000941 | 2677.674  | 2492.761  | AF112219  | 24014.635 | 25344.496 | NM_000852 | 25049.313 | 16992.133 |
| AF222980  | 1168.987  | 915.973   | NM_000521 | 574.397   | 618.596   | AW797282  | 771.422   | 645.964   |
| AK026758  | 5669.327  | 5845.454  | NM_004135 | 5506.946  | 7530.849  | L09070    | 2199.034  | 1376.107  |
| NM_012201 | 7175.446  | 6883.488  | NM_000203 | 668.391   | 490.476   | NM_000062 | 14448.73  | 9824.419  |
| AB046774  | 2248.04   | 2164.053  | NM_013443 | 2568.362  | 2481.698  | NM_009590 | 6018.291  | 4959.827  |
| AK022385  | 14600.841 | 13081.81  | NM_000925 | 12468.237 | 12987.206 | AL133037  | 1680.644  | 1441.786  |
| NM_002775 | 976.484   | 1222.267  | NM_000465 | 2686.358  | 3155.111  | NM_020350 | 4120.8    | 2939.985  |
| AK024584  | 7801.646  | 3964.748  | NM_000123 | 6363.783  | 6560.74   | NM_000350 | 1543.282  | 1216.943  |
| NM_003504 | 14432.946 | 14072.663 | AL137501  | 1079.442  | 1138.306  | X91103    | 4151.312  | 4010.238  |
| NM_013295 | 5339.263  | 5323.189  | BE858979  | 559.675   | 585.119   | AA419164  | 1483.052  | 1177.119  |
| NM_007267 | 4811.825  | 4860.589  | NM_000122 | 3115.729  | 2597.757  | AL117235  | 560.553   | 552.159   |
| AK022830  | 1168.882  | 1018.446  | NM_006712 | 56650.984 | 61210.711 | NM_014822 | 2510.547  | 2528.709  |
| Z36816    | 6348.161  | 6549.981  | NM_006240 | 829.027   | 829.854   | NM_005295 | 1340.277  | 1648.515  |
| NM_005865 | 2516.021  | 2328.059  | NM_007026 | 4532.361  | 4018.271  | NM_001337 | 385.193   | 422.368   |
| NM_006413 | 12954.789 | 11521.133 | M37712    | 15103.113 | 9743.407  | NM_003611 | 1816.846  | 2340.54   |
| NM_017684 | 1370.093  | 1643.947  | NM_002645 | 808.549   | 755.104   | AB014538  | 1496.051  | 2221.605  |
| AF207547  | 591.455   | 410.155   | AW797282  | 619.354   | 695.764   | NM_006205 | 378.025   | 371.394   |
| NM_002765 | 8036.313  | 8052.919  | NM_002402 | 612.661   | 822.58    | AK025118  | 4147.181  | 4446.885  |
| NM_003691 | 6688.04   | 6412.451  | L09070    | 2068.423  | 2340.099  | NM_000727 | 959.826   | 759.036   |
| NM_002950 | 24338.709 | 22629.664 | NM_000062 | 16176.05  | 17420.09  | NM_002621 | 381.51    | 269.219   |
| NM_012471 | 770.032   | 535.406   | NM_009590 | 6216.721  | 6757.928  | NM_005385 | 4518.843  | 3878.804  |
| NM_001321 | 1510.438  | 1442.036  | AL133037  | 1414.536  | 1523.646  | NM_018985 | 2153.828  | 1214.365  |
| AB018264  | 719.481   | 668.268   | NM_020350 | 4420.688  | 4451.955  | NM_006074 | 15854.27  | 11515.76  |
| NM_006911 | 2743.477  | 2776.236  | NM_000350 | 2326.038  | 2240.752  | AF208232  | 11542.395 | 7455.213  |
| U92544    | 651.457   | 789.848   | X91103    | 4969.6    | 4442.914  | NM_002985 | 3435.062  | 3011.639  |
| NM_006791 | 5045.052  | 5132.898  | AA419164  | 1509.137  | 1669.155  | NM_004185 | 976.515   | 580.474   |
| AJ278348  | 17325.459 | 15934.774 | L35251    | 3368.152  | 2867.703  | NM_016255 | 6303.599  | 4707.825  |
| NM_015872 | 581.612   | 351.728   | BE910395  | 1302.539  | 1268.452  | AF203032  | 2278.148  | 1608.566  |
| L07738    | 566.51    | 430.685   | N46828    | 1474.979  | 1544.884  | AB014542  | 5314.178  | 3434.609  |
| Z48054    | 3845.228  | 4231.712  | BI908302  | 11069.464 | 9388.206  | NM_014640 | 1569.569  | 1285.016  |
| H90415    | 3575.619  | 3162.611  | AA460969  | 3874.994  | 4336.428  | Y10518    | 24208.453 | 22577.373 |
| AA676470  | 4809.032  | 4601.684  | BG695859  | 971.662   | 914.038   | AF155135  | 10425.577 | 9509.774  |
| M38258    | 1046.171  | 939.043   | M85079    | 4556.925  | 5033.668  | NM_014790 | 1296.263  | 950.154   |
| H91842    | 374.184   | 416.245   | AA457671  | 12713.699 | 12980.626 | NM_003571 | 5014.903  | 4248.625  |
| AA878561  | 58144.492 | 61657.289 | X07437    | 3384.043  | 2995.617  | AB032965  | 25679.043 | 24503.943 |
| AI538525  | 1665.611  | 1919.908  | NM_000641 | 1331.968  | 1296.62   | AF133424  | 1857.127  | 2330.47   |
| NM_003825 | 8308.662  | 9164.118  | AE006466  | 3235.776  | 2123.9    | NM_005003 | 18447.396 | 18619.533 |
| AK025006  | 14408.278 | 13700.019 | BC008737  | 46955.371 | 39650.625 | AF084560  | 4044.268  | 5162.392  |
| AF218014  | 9483.154  | 9415.547  | BC011655  | 8331.892  | 7223.407  | NM_015715 | 467.894   | 445.991   |



|           |           |           |           |           |           |           |           |           |
|-----------|-----------|-----------|-----------|-----------|-----------|-----------|-----------|-----------|
| NM_00667E | 398.628   | 304.615   | BC002396  | 4543.912  | 4245.525  | NM_00003Z | 2668.261  | 3671.488  |
| AY007729  | 11065.78  | 11490.036 | AF208232  | 12681.523 | 13791.97  | NM_00208Z | 1625.967  | 2158.503  |
| NM_014424 | 509.582   | 486.198   | NM_00298E | 7456.628  | 7114.56   | NM_00203E | 5255.263  | 5478.458  |
| AF159092  | 2016.47   | 2080.263  | NM_00418E | 1031.986  | 1348.535  | NM_01490C | 862.068   | 966.188   |
| BC007318  | 10645.89  | 11588.777 | NM_01625E | 8261.906  | 8111.683  | BF342908  | 1334.078  | 1195.953  |
| M36693    | 4528.431  | 4691.632  | AF203032  | 2165.631  | 2321.168  | AF118073  | 539.855   | 614.817   |
| NM_01629Z | 5449.76   | 5264.302  | AB014542  | 9612.143  | 9053.14   | AK023510  | 3967.746  | 3075.347  |
| NM_002601 | 7695.294  | 5437.005  | NM_01464C | 1672.421  | 1940.694  | NM_00434E | 1363.669  | 1282.519  |
| U62858    | 1316.49   | 1051.687  | AF155135  | 13366.905 | 13847.911 | NM_00070Z | 20681.893 | 13819.704 |
| NM_001781 | 6238.744  | 7202.945  | NM_01479C | 918.006   | 1056.566  | X71490    | 6754.178  | 5488.049  |
| AF035121  | 552.683   | 594.976   | NM_003571 | 5402.102  | 5546.583  | AF257081  | 732.912   | 535.715   |
| NM_01443Z | 2330.023  | 2648.174  | AB032965  | 23709.275 | 22889.34  | NM_00168E | 21603.844 | 14488.237 |
| NM_00155E | 1690.091  | 1729.432  | NM_02037C | 975.961   | 1231.295  | NM_003631 | 445.374   | 301.511   |
| U96173    | 1812.431  | 1893.454  | NM_004767 | 636.072   | 651.984   | NM_00223Z | 1277.316  | 660.662   |
| NM_018941 | 1663.236  | 1999.563  | BF310159  | 7247.845  | 7310.423  | NM_01610E | 4276.825  | 3414.591  |
| NM_00198C | 2310.11   | 2198.45   | NM_00031E | 656.279   | 745.162   | NM_01457C | 5536.039  | 3970.548  |
| NM_000751 | 1623.138  | 1360.599  | NM_01898E | 2009.803  | 1884.76   | NM_014747 | 5271.376  | 4270.488  |
| NM_01484E | 5275.161  | 5816.986  | AB044934  | 476.197   | 331.978   | Y19240    | 5403.052  | 4180.233  |
| NM_00104Z | 5137.579  | 5046.244  | U27655    | 1664.844  | 1330.952  | AF091029  | 4267.159  | 3989.442  |
| NM_01222E | 4280.102  | 4670.091  | NM_00336C | 1304.501  | 1253.458  | X97074    | 9589.854  | 8164.956  |
| NM_005071 | 536.849   | 404.375   | Z21965    | 16836.121 | 16517.816 | NM_00413E | 2661.133  | 3250.114  |
| AB023147  | 3484.487  | 4196.694  | NM_012427 | 578.744   | 641.072   | NM_01344Z | 1662.395  | 2167.392  |
| NM_00563C | 1442.906  | 1294.708  | NM_00085Z | 27305.627 | 25337.756 | NM_00092E | 9378.431  | 10203.932 |
| AK023106  | 2316.48   | 2365.125  | NM_00039E | 618.543   | 567.461   | NM_00046E | 1861.612  | 1897.768  |
| NM_01673C | 724.145   | 751.213   | AF257081  | 1822.219  | 1676.03   | NM_00012Z | 4846.63   | 6062.241  |
| AL035297  | 2405.066  | 2079.701  | NM_00168E | 27361.482 | 23284.766 | AL137501  | 601.828   | 490.076   |
| NM_00440E | 2091.052  | 3178.685  | NM_003631 | 857.717   | 1019.997  | BE858979  | 464.896   | 221.508   |
| AJ131244  | 3020.31   | 4148.139  | NM_00021E | 660.773   | 705.659   | NM_00012Z | 2613.153  | 1622.012  |
| NM_00253Z | 5301.811  | 5904.17   | NM_00223Z | 1529.462  | 1274.177  | NM_00671Z | 53341.531 | 46246.477 |
| NM_01238E | 1911.13   | 2550.792  | NM_01610E | 4559.371  | 5129.436  | NM_00624C | 1037.11   | 780.021   |
| NM_001671 | 1321.152  | 1454.776  | NM_014747 | 5611.349  | 5752.244  | NM_00702E | 3425.872  | 2523.516  |
| NM_01984Z | 2700.574  | 3199.554  | Y19240    | 5723.395  | 6065.479  | M37712    | 13513.015 | 6640.171  |
| NM_01619Z | 6198.335  | 6103.979  | AF091029  | 6053.482  | 6243.175  | NM_00264E | 691.873   | 420.247   |
| BE878426  | 55608.105 | 50727.277 | X97074    | 9635.895  | 8882.349  | AF070670  | 3602.882  | 3008.526  |
| NM_00174E | 16137.799 | 16623.109 | AL117235  | 573.552   | 589.116   | NM_01615E | 5422.796  | 4683.749  |
| AF207547  | 671.21    | 671.468   | NM_01482Z | 3202.933  | 3492.105  | NM_01652E | 1929.126  | 1434.542  |
| NM_00276E | 8730.37   | 9143.018  | NM_00529E | 2069.389  | 1919.02   | NM_015974 | 3867.571  | 2738.818  |
| NM_003691 | 7410.908  | 6122.011  | NM_001337 | 696.596   | 503.372   | NM_014384 | 5053.133  | 4206.563  |
| NM_00295C | 25978.002 | 25950.813 | NM_003611 | 2311.546  | 2372.281  | NM_00257Z | 6969.115  | 6878.079  |
| NM_00231E | 977.902   | 811.642   | AB014538  | 1401.294  | 1787.658  | AL133037  | 1137.584  | 1527.786  |
| NM_00143Z | 962.889   | 773.021   | NM_00620E | 586.167   | 448.517   | NM_02035C | 2951.671  | 3057.739  |
| NM_003134 | 54128.082 | 48386.195 | AK025118  | 4987.082  | 4984.578  | NM_00035C | 1599.052  | 1906.042  |
| NM_004314 | 3958.948  | 3117.138  | NM_000727 | 1112.067  | 997.935   | X91103    | 3820.947  | 5525.153  |
| NM_018247 | 7219.976  | 5864.991  | NM_002621 | 507.821   | 256.551   | AA419164  | 1230.103  | 1192.967  |
| NM_01797E | 4445.422  | 4430.279  | NM_01898E | 2338.656  | 1992.711  | L35251    | 2566.49   | 2783.631  |
| NM_00589E | 15039.941 | 14261.928 | NM_006074 | 16168.054 | 14367.007 | BE910395  | 850.394   | 928.069   |
| NM_00288E | 2523.883  | 2317.142  | NM_00671Z | 56547.977 | 60602.641 | N46828    | 1180.612  | 1005.988  |
| AF078866  | 14474.824 | 14602.655 | NM_00624C | 1475.001  | 1454.362  | BI908302  | 8215.281  | 8232.865  |
| BF311880  | 1525.186  | 1036.399  | NM_00702E | 5643.462  | 6184.083  | AA460969  | 3163.411  | 3619.819  |
| NM_01607E | 1768.574  | 2152.913  | M37712    | 16760.416 | 13668.784 | BG695859  | 641.193   | 702.181   |
| NM_00136C | 33739.305 | 35574.328 | NM_00264E | 1002.052  | 799.394   | M85079    | 2537.33   | 1719.907  |
| AK026656  | 709.14    | 748.629   | AF070670  | 7681.368  | 7785.247  | AA457671  | 9539.577  | 7187.901  |
| AJ276207  | 13324.289 | 12544.159 | NM_01615E | 6100.223  | 8530.479  | X07437    | 4362.81   | 3241.744  |

|           |           |           |           |           |           |           |           |           |
|-----------|-----------|-----------|-----------|-----------|-----------|-----------|-----------|-----------|
| AB011131  | 9236.658  | 11018.238 | NM_016528 | 2258.641  | 2428.282  | NM_000641 | 1500.398  | 1116.876  |
| AF164794  | 16565.592 | 19865.295 | NM_015974 | 4323.282  | 4492.845  | AE006466  | 2331.06   | 1648.016  |
| NM_001173 | 2292.335  | 2418.135  | NM_014384 | 5724.545  | 6585.364  | BC011655  | 7284.521  | 5689.398  |
| AB020656  | 3380.405  | 3613.881  | NM_002573 | 8874.134  | 8941.021  | BC002396  | 4374.514  | 3445.958  |
| NM_000412 | 987.048   | 974.987   | AF133424  | 2276.832  | 2067.957  | NM_022095 | 1104.531  | 858.057   |
| AF077033  | 4488.42   | 3892.562  | NM_005003 | 28352.832 | 28615.15  | AF112219  | 24321.227 | 18568.492 |
| NM_004991 | 1339.57   | 857.189   | AF084560  | 4894.416  | 4747.504  | NM_000521 | 468.894   | 250.846   |
| AF222980  | 1089.932  | 937.427   | NM_015715 | 580.443   | 698.946   | NM_014640 | 1251.277  | 1345.734  |
| AK026758  | 5884.814  | 5211.728  | NM_000032 | 3574.101  | 3737.74   | Y10518    | 27325.744 | 35760.855 |
| NM_012201 | 8260.349  | 7345.891  | NM_002083 | 2622.079  | 2563.877  | AF155135  | 8692.258  | 13444.012 |
| AB046774  | 1903.183  | 2184.359  | NM_002035 | 5303.272  | 5892.823  | NM_014790 | 1101.477  | 1228.262  |
| AK022385  | 16979.203 | 17762.352 | NM_014900 | 1221.45   | 1038.448  | NM_003571 | 2584.604  | 3562.575  |
| NM_002775 | 809.439   | 943.305   | BF342908  | 1052.468  | 1100.376  | AB032965  | 26428.477 | 32325.85  |
| AK024584  | 11057.577 | 9550.634  | AF118073  | 818.192   | 929.48    | NM_020370 | 850.313   | 905.247   |
| NM_003504 | 16061.079 | 17816.432 | AK023510  | 5443.045  | 4782.891  | NM_004767 | 731.983   | 679.297   |
| NM_013298 | 4762.307  | 5469.139  | NM_004345 | 1872.485  | 1433.096  | BF310159  | 6359.123  | 5285.431  |
| NM_007267 | 5097.987  | 5340.282  | NM_000702 | 28148.004 | 26236.344 | NM_018980 | 1533.259  | 1295.504  |
| AK022830  | 1158.189  | 1362.306  | X71490    | 9726.603  | 9638.487  | AB044934  | 379.505   | 455.301   |
| Z36816    | 6875.186  | 6706.468  | NM_014273 | 18764.715 | 27875.398 | U27655    | 1189.725  | 858.346   |
| NM_005865 | 2776.623  | 3026.126  | AF039442  | 1309.789  | 2064.82   | NM_003360 | 1465.571  | 1070.946  |
| NM_006413 | 12910.817 | 12754.041 | NM_004680 | 1151.055  | 1377.819  | Z21965    | 10805.729 | 8552.024  |
| NM_017684 | 1486.319  | 1734.38   | AF104260  | 457.72    | 598.706   | NM_012427 | 513.61    | 483.676   |
| AL049689  | 255.606   | 461.408   | NM_005671 | 2540.95   | 3127.496  | NM_000852 | 26685.512 | 17487.184 |
| NM_000210 | 692.681   | 686.796   | NM_017409 | 4653.111  | 6035.707  | NM_000390 | 527.969   | 399.07    |
| AF135960  | 944.185   | 995.944   | NM_019625 | 2693.828  | 3573.225  | AW797282  | 675.242   | 531.066   |
| NM_014210 | 7101.978  | 8319.613  | NM_006729 | 3819.573  | 4889.238  | NM_002402 | 497.07    | 421.034   |
| NM_003010 | 3858.608  | 3573.205  | NM_006071 | 1393.66   | 1587.98   | L09070    | 2367.648  | 2021.284  |
| NM_006871 | 1045.845  | 946.186   | NM_012230 | 7802.04   | 8776.769  | NM_000062 | 15156.742 | 12448.058 |
| NM_019074 | 703.541   | 614.178   | AF112219  | 10673.306 | 10383.35  | NM_009590 | 7057.455  | 6060.376  |
| NM_018494 | 2327.709  | 2060.791  | NM_000521 | 641.722   | 817.906   | NM_016100 | 2889.269  | 3338.727  |
| AK000006  | 870.626   | 842.476   | NM_004135 | 4692.906  | 4350.996  | NM_014570 | 3720.836  | 4268.98   |
| NM_001115 | 1029.993  | 695.887   | NM_013443 | 2649.129  | 2625.925  | NM_014747 | 3661.778  | 4833.22   |
| NM_014921 | 2552.907  | 2147.576  | NM_000925 | 12213.427 | 13669.273 | AF091029  | 3944.927  | 5133.565  |
| NM_016581 | 10939.463 | 9988.625  | NM_000465 | 2166.926  | 2942.607  | X97074    | 13165.54  | 15843.023 |
| NM_013255 | 3419.104  | 2708.691  | NM_000123 | 6426.618  | 6985.48   | NM_014822 | 2612.396  | 2419.741  |
| NM_007183 | 791.366   | 1528.43   | AL137501  | 1005.123  | 1023.697  | NM_005290 | 1391.362  | 1466.737  |
| AJ238243  | 8703.508  | 9894.58   | BE858979  | 827.864   | 749.423   | NM_003611 | 1723.34   | 1906.602  |
| J05046    | 2713.516  | 3597.321  | NM_000122 | 3220.689  | 2796.584  | AB014538  | 1194.383  | 1067.617  |
| NM_012318 | 5387.805  | 6719.707  | U87223    | 808.56    | 827.12    | AK025118  | 4208.59   | 3012.271  |
| NM_002751 | 2435.202  | 3387.146  | X91348    | 25143.723 | 27520.393 | NM_000727 | 775.288   | 509.123   |
| NM_004291 | 567.635   | 926.578   | Z36505    | 3785.848  | 4578.679  | NM_005385 | 5023.66   | 4016.713  |
| NM_003810 | 5882.427  | 7291.334  | NM_001854 | 2223.163  | 2601.086  | NM_018985 | 2388.179  | 1515.765  |
| NM_004912 | 3965.045  | 3998.371  | NM_017913 | 2483.072  | 3304.911  | NM_006074 | 16387.969 | 11874.194 |
| U79304    | 10485.668 | 13160.373 | NM_002755 | 12789.162 | 17048.012 | AF208232  | 12494.946 | 9863.936  |
| NM_016267 | 282.619   | 350.393   | AK024799  | 25686.148 | 28317.332 | NM_002980 | 4532.52   | 4183.67   |
| NM_004671 | 4437.49   | 6080.85   | NM_000924 | 7226.793  | 8308.789  | NM_004180 | 941.749   | 879.53    |
| NM_005180 | 14743.807 | 17376.656 | NM_003330 | 13489.502 | 16797.756 | NM_016250 | 7483.071  | 6244.641  |
| NM_006520 | 7218.659  | 7314.185  | NM_003647 | 1684.856  | 1735.559  | AF203032  | 2578.956  | 2017.227  |
| U35622    | 715.093   | 438.992   | NM_001699 | 13452.825 | 13741.15  | AB014542  | 5834.209  | 4267.947  |
| NM_007045 | 3600.877  | 3678.257  | AB006589  | 292.616   | 487.208   | AF070670  | 2392.722  | 2705.084  |
| NM_003627 | 5134.731  | 5685.032  | NM_018351 | 1045.19   | 896.283   | NM_016150 | 4511.515  | 5070.063  |
| NM_012145 | 31612.189 | 26329.971 | AK023019  | 997.78    | 967.557   | NM_014384 | 3707.442  | 4786.53   |
| AF305779  | 2277.101  | 1732.396  | NM_147171 | 4012.702  | 2974.048  | NM_005003 | 19116.957 | 20367.262 |

|           |           |           |           |           |           |           |           |           |
|-----------|-----------|-----------|-----------|-----------|-----------|-----------|-----------|-----------|
| AF225416  | 13727.763 | 11845.695 | AF238083  | 4201.268  | 4157.473  | AF084560  | 4509.209  | 4908.636  |
| NM_016231 | 5869.893  | 4788.375  | NM_002962 | 512.326   | 687.849   | NM_015715 | 487.377   | 525.656   |
| NM_002093 | 6689.692  | 4539.959  | NM_016388 | 2504.826  | 2150.292  | NM_000032 | 3740.668  | 3649.213  |
| AB042555  | 1828.162  | 1377.772  | AB046783  | 3247.092  | 3713.166  | NM_002083 | 1654.715  | 1659.963  |
| NM_017763 | 1030.659  | 1177.012  | NM_000845 | 1044.719  | 860.207   | NM_002035 | 5617.233  | 4840.814  |
| NM_013975 | 4904.303  | 5289.126  | NM_014965 | 3824.788  | 3550.824  | NM_014900 | 1024.15   | 900.872   |
| NM_003843 | 4913.385  | 4750.02   | NM_004882 | 14543.458 | 13181.914 | BF342908  | 946.976   | 732.414   |
| NM_012216 | 3657.038  | 3625.868  | AL390148  | 11515.931 | 11029.184 | AF118073  | 496.18    | 386.433   |
| NM_007203 | 89.675    | 889.888   | AK024055  | 1195.672  | 1320.037  | AK023510  | 4355.046  | 3086.254  |
| NM_005338 | 1058.102  | 1230.405  | U10485    | 1281.125  | 1646.498  | NM_004345 | 1305.61   | 1054.555  |
| X73502    | 1564.964  | 1836.388  | AK025326  | 10351.693 | 10936.736 | X71490    | 8150.644  | 7446.235  |
| NM_020445 | 5825.411  | 7247.911  | NM_013376 | 1514.965  | 1971.118  | AF257081  | 982.095   | 1143.948  |
| NM_016376 | 11828.969 | 11872.516 | NM_017964 | 1833.235  | 2041.514  | NM_001688 | 25070.107 | 16625.459 |
| AB046848  | 1266.975  | 1247.726  | NM_016272 | 418.902   | 570.913   | NM_003631 | 613.004   | 472.676   |
| AL133057  | 5756.349  | 6196.486  | NM_016428 | 2370.581  | 2681.305  | NM_000219 | 391.57    | 315.462   |
| U04845    | 7100.018  | 6702.249  | NM_004083 | 6770.483  | 8198.128  | NM_002232 | 1366.092  | 1039.071  |
| NM_018103 | 4852.845  | 5343.93   | NM_016039 | 13443.995 | 13756.207 | AF112219  | 18441.068 | 22620.609 |
| AK026302  | 13826.613 | 13056.53  | NM_001184 | 4084.62   | 4195.302  | NM_004135 | 3248.25   | 3672.745  |
| NM_012214 | 11693.211 | 12249.12  | NM_015530 | 10510.152 | 11028.473 | NM_013443 | 1924.076  | 1629.792  |
| AF049656  | 4921.264  | 5270.57   | NM_016238 | 4415.495  | 4311.587  | NM_000925 | 10542.142 | 7936.066  |
| AC009729  | 490.011   | 631.916   | NM_001758 | 726.764   | 558.735   | NM_000465 | 2206.145  | 1764.593  |
| NM_016598 | 7747.107  | 5777.632  | BE546276  | 862.243   | 751.37    | NM_000123 | 5342.384  | 4622.047  |
| BE874867  | 7865.308  | 6225.66   | NM_004725 | 14680.878 | 13265.989 | AL137501  | 709.306   | 659.568   |
| AL136719  | 6678.81   | 5365.609  | NM_015997 | 3508.594  | 3741.443  | BE858979  | 601.304   | 477.219   |
| NM_014105 | 11865.639 | 9628.652  | NM_001167 | 4280.057  | 3327.398  | NM_006712 | 53810.297 | 57245.727 |
| NM_012160 | 2285.742  | 1738.076  | NM_012115 | 3737.279  | 4002.272  | NM_006240 | 1070.194  | 741.51    |
| NM_006357 | 13790.794 | 12378.709 | NM_004933 | 21363.971 | 22854.617 | NM_007026 | 4005.563  | 3492.241  |
| NM_014248 | 55035.91  | 47910.109 | M96577    | 10837.165 | 12187.619 | M37712    | 15045.245 | 7772.741  |
| AK027070  | 2599.28   | 2415.677  | NM_013258 | 8089.236  | 7370.119  | NM_002648 | 868.512   | 853.658   |
| NM_003341 | 12304.007 | 5380.603  | NM_003842 | 3367.49   | 3030.944  | AW797282  | 583.195   | 536.474   |
| NM_017785 | 1042.651  | 971.334   | L11238    | 9468.086  | 9474.577  | L09070    | 1879.533  | 2413.313  |
| NM_006249 | 3198.736  | 3725.609  | AK025684  | 1155.193  | 1123.922  | NM_000062 | 11375.737 | 12758.222 |
| NM_018318 | 2357.12   | 3260.388  | NM_012205 | 5380.059  | 4989.188  | NM_009590 | 4663.904  | 5705.879  |
| AB020640  | 1644.493  | 2309.878  | K02046    | 3863.609  | 3942.858  | AL133037  | 1251.366  | 1632.013  |
| D29954    | 12514.457 | 14454.47  | AL110151  | 8898.346  | 8858.391  | X91103    | 4368.067  | 4762.571  |
| AF007131  | 7070.446  | 6029.444  | NM_003293 | 596.048   | 448.973   | AA419164  | 1111.882  | 1093.411  |
| NM_006839 | 4202.875  | 4062.578  | NM_004995 | 5520.779  | 6314.199  | L35251    | 2695.116  | 2330.24   |
| NM_000223 | 947.503   | 1123.672  | AK023320  | 232.28    | 201.533   | BE910395  | 1055.706  | 754.85    |
| NM_005851 | 3439.061  | 3385.678  | NM_000386 | 11102.869 | 12087.315 | N46828    | 938.492   | 942.701   |
| AF119256  | 2097.179  | 1945.314  | NM_007231 | 767.03    | 585.226   | BI908302  | 5832.015  | 4572.433  |
| X74497    | 502.732   | 564.489   | NM_001190 | 4503.738  | 4394.15   | AA460969  | 3226.464  | 2034.709  |
| NM_012210 | 2349.427  | 1774.056  | NM_005271 | 9362.517  | 9774.575  | BG695859  | 726.059   | 523.282   |
| U10072    | 1911.542  | 1927.759  | NM_015654 | 8235.257  | 6978.039  | M85079    | 2575.136  | 1800.914  |
| AF222749  | 10042.061 | 9853.019  | NM_012244 | 2271.036  | 2266.56   | AA457671  | 11430.676 | 8469.692  |
| NM_003410 | 1980.748  | 2368.406  | NM_004341 | 1639.811  | 1360.302  | X07437    | 2537.405  | 2889.462  |
| NM_007146 | 6275.226  | 5442.42   | AB082521  | 6188.36   | 5554.922  | NM_000641 | 1305.522  | 1065.871  |
| NM_002229 | 1847.997  | 1806.439  | AK026806  | 1001.696  | 556.051   | AE006466  | 2740.141  | 2528.596  |
| X99631    | 18206.273 | 16567.965 | AL050182  | 1675.33   | 1567.701  | BC008737  | 38522.031 | 30363.326 |
| NM_001730 | 2897.868  | 2155.806  | NM_020040 | 1623.046  | 1648.568  | BC011655  | 8380.535  | 7114.176  |
| AK026290  | 648.047   | 399.74    | NM_002374 | 2515.792  | 2691.551  | BC002396  | 4976.244  | 4292.978  |
| AB014589  | 4974.537  | 3276.9    | AK026940  | 3444.073  | 3339.855  | AF208232  | 11300.847 | 14014.46  |
| AF248649  | 2107.689  | 2101.572  | AF155117  | 3572.692  | 3328.077  | NM_004186 | 974.472   | 1320.845  |
| U37146    | 6202.853  | 6273.088  | AB014527  | 797.136   | 667.535   | NM_016258 | 6107.793  | 7767.051  |

|           |           |           |           |           |           |           |           |           |
|-----------|-----------|-----------|-----------|-----------|-----------|-----------|-----------|-----------|
| NM_012086 | 5444.225  | 5513.004  | NM_004411 | 2288.063  | 1771.769  | AF203032  | 1632.613  | 1788.085  |
| NM_000991 | 58599.355 | 55998.293 | NM_015938 | 6939.3    | 5125.283  | AB014542  | 3316.052  | 3609.108  |
| NM_016034 | 25535.457 | 36294.535 | NM_000740 | 632.437   | 534.315   | NM_014640 | 1393.378  | 1769.727  |
| X69150    | 55011.824 | 55192.238 | NM_017843 | 3401.488  | 2955.955  | NM_014790 | 1245.563  | 1139.469  |
| NM_001025 | 56347.586 | 63433.859 | AK025985  | 1646.593  | 3131.635  | NM_003571 | 5051.404  | 5127.408  |
| NM_016067 | 45069.82  | 50948.227 | NM_013256 | 2251.747  | 2427.626  | AB032965  | 24454.707 | 26803.219 |
| NM_018285 | 10205.221 | 11268.735 | NM_004143 | 1350.565  | 1366.251  | NM_020370 | 965.806   | 676.029   |
| AK022393  | 7098.943  | 8106.455  | X66087    | 1757.643  | 2705.81   | NM_004767 | 607.702   | 446.648   |
| AK026654  | 1920.442  | 1886.92   | NM_016328 | 7247.472  | 9560.058  | BF310159  | 6307.2    | 5403.667  |
| AB020643  | 899.691   | 1122.065  | NM_017544 | 15971.767 | 18676.314 | NM_018986 | 1702.149  | 1138.562  |
| AK025496  | 5324.224  | 5356.89   | NM_003153 | 1726.637  | 2073.836  | U27655    | 1358.179  | 1005.756  |
| NM_005205 | 52125.672 | 49450.305 | NM_016285 | 1822.168  | 1899.953  | NM_003360 | 1488.497  | 1246.288  |
| NM_001966 | 682.455   | 1030.518  | NM_014707 | 867.815   | 1105.44   | Z21965    | 14552.278 | 13346.741 |
| NM_016138 | 5548.121  | 6165.295  | AF025771  | 1531.793  | 1527.728  | NM_012427 | 769.565   | 478.54    |
| AW963246  | 632.221   | 498.71    | NM_018215 | 1568.463  | 1433.821  | AF131857  | 7474.196  | 6571.617  |
| NM_014355 | 2889.781  | 2380.889  | NM_005083 | 13970.113 | 10964.224 | NM_000852 | 28928.143 | 21493.779 |
| M21191    | 58821.055 | 54779.141 | NM_007187 | 11692.216 | 9796.622  | NM_000396 | 649.31    | 493.278   |
| AF072810  | 3173.528  | 1860.245  | NM_001828 | 437.7     | 633.745   | AF257081  | 1333.753  | 1997.023  |
| L19778    | 1579.052  | 2411.503  | NM_018983 | 13891.926 | 12993.955 | NM_001688 | 19294.533 | 25300.5   |
| AF174482  | 2609.496  | 2645.474  | NM_003096 | 8528.078  | 7971.892  | Y19240    | 4324.284  | 4482.251  |
| NM_003528 | 850.564   | 823.37    | NM_007279 | 4317.703  | 4322.029  | AF091029  | 4559.095  | 4718.399  |
| NM_017769 | 1012.867  | 1090.846  | BE390833  | 15206.167 | 13815.417 | X97074    | 12932.501 | 12980.261 |
| D85131    | 39456.375 | 47642.063 | NM_004730 | 9958.441  | 8193.672  | AL117235  | 422.213   | 475.381   |
| NM_004956 | 644.584   | 639.678   | NM_000801 | 3516.136  | 2949.118  | NM_014822 | 2688.757  | 2184.008  |
| D30612    | 4344.254  | 4581.257  | NM_006115 | 16046.123 | 15862.355 | NM_005296 | 1367.774  | 1311.815  |
| NM_002163 | 568.216   | 509.164   | NM_005801 | 5458.509  | 4304.423  | NM_001337 | 578.014   | 448.551   |
| U52097    | 5430.768  | 6126.135  | NM_018198 | 4022.845  | 3461.816  | NM_003611 | 1484.935  | 1311.526  |
| NM_003416 | 3554.937  | 4480.135  | NM_001539 | 21614.607 | 21009.502 | AB014538  | 1301.24   | 1067.874  |
| NM_017594 | 1093.849  | 1173.821  | NM_012267 | 610.456   | 405.393   | NM_006209 | 356.399   | 339.076   |
| AK027237  | 1033.83   | 1031.677  | AK027232  | 14008.771 | 13667     | AK025118  | 3350.299  | 3158.903  |
| AF075017  | 599.014   | 564.368   | NM_012204 | 664.384   | 617.068   | NM_000727 | 1053.719  | 744.051   |
| AK027104  | 2267.08   | 2565.681  | NM_003613 | 1328.741  | 1430.93   | NM_005385 | 6944.679  | 6528.04   |
| AL133090  | 44329.133 | 44751.152 | NM_000022 | 48551.223 | 46190.426 | NM_018985 | 2469.422  | 1448.835  |
| AF085867  | 11910.384 | 10850.109 | NM_016576 | 7814.332  | 8040.92   | NM_006074 | 19874.037 | 15504.76  |
| AK026158  | 585.28    | 571.241   | NM_004213 | 1315.26   | 1331.806  | NM_007026 | 4127.656  | 5326.913  |
| AF086510  | 6562.744  | 7172.916  | NM_000906 | 1639.974  | 1475.21   | M37712    | 13261.314 | 10869.172 |
| Z36779    | 1759.803  | 2249.708  | NM_000480 | 6348.385  | 6133.986  | NM_002648 | 889.891   | 902.897   |
| NM_018422 | 618.503   | 563.804   | AF254084  | 31643.639 | 30704.482 | AF070670  | 3342.849  | 4172.751  |
| NM_002816 | 1978.567  | 2406.645  | AK022976  | 1448.056  | 1301.15   | NM_016528 | 1823.336  | 1743.891  |
| NM_017513 | 513.003   | 476.253   | AB048791  | 7396.049  | 6488.043  | NM_015974 | 3374.521  | 3391.542  |
| AK025288  | 508.097   | 767.243   | NM_003107 | 17552.467 | 15930.075 | NM_014384 | 4235.417  | 4203.752  |
| NM_017822 | 9043.703  | 10042.361 | NM_006874 | 3905.11   | 3972.474  | NM_002573 | 6815.313  | 8916.748  |
| AK026844  | 1925.507  | 2847.332  | AB046777  | 3790.473  | 4437.671  | AF133424  | 1773.454  | 1562.457  |
| AK026735  | 1643.559  | 2094.296  | AJ251844  | 2429.109  | 2464.118  | NM_005003 | 16720.158 | 14708.174 |
| AL110104  | 16603.605 | 22101.428 | D16815    | 1856.116  | 1494.444  | AF084560  | 4515.269  | 4596.37   |
| AK027056  | 1144.235  | 1864.107  | NM_001880 | 4048.418  | 4185.127  | NM_015715 | 449.305   | 262.224   |
| AK024294  | 2487.227  | 3679.471  | AB028943  | 1631.718  | 1604.397  | NM_000032 | 2942.277  | 2530.632  |
| AL110126  | 4142.5    | 4090.593  | NM_006194 | 1727.862  | 1578.507  | NM_002083 | 1470.065  | 1314.264  |
| AF052172  | 3476.102  | 5074.952  | AK001603  | 5345.3    | 4456.187  | NM_002035 | 5552.6    | 4867.806  |
| AB014573  | 4009.684  | 4359.228  | U71601    | 2516.512  | 2179.377  | NM_014900 | 920.722   | 769.856   |
| AK025418  | 431.964   | 787.949   | AF042838  | 1292.925  | 1514.835  | BF342908  | 1237.002  | 1401.877  |
| AK091109  | 35091.305 | 32009.873 | AL137511  | 472.325   | 671.487   | AF118073  | 773.086   | 550.966   |
| NM_014967 | 2524.834  | 2471.771  | X91221    | 447.973   | 775.89    | AK023510  | 5173.352  | 4090.108  |

|           |           |           |           |           |           |           |           |           |
|-----------|-----------|-----------|-----------|-----------|-----------|-----------|-----------|-----------|
| AK022915  | 7271.2    | 7399.101  | AF075031  | 524.494   | 534.412   | NM_00434E | 1422.161  | 1464.516  |
| AF131834  | 1647.166  | 1721.362  | AF075062  | 11524.064 | 16618.277 | X71490    | 8633.613  | 8295.963  |
| AL355711  | 1692.007  | 1532.696  | NM_00418E | 651.939   | 926.815   | NM_01427E | 13351.177 | 20211.504 |
| AK025851  | 2802.856  | 2647.328  | AF147381  | 6598.088  | 8113.866  | AF104260  | 797.621   | 885.949   |
| AJ011409  | 22856.055 | 23454.576 | AB002452  | 529.175   | 847.203   | NM_005671 | 1730.148  | 2650.202  |
| V00541    | 335.088   | 615.538   | AF088075  | 1106.817  | 1248.153  | NM_01740E | 3466.307  | 4806.874  |
| AJ011598  | 508.747   | 693.297   | AK026376  | 4356.685  | 4454.938  | NM_01962E | 2524.702  | 3529.581  |
| AJ001906  | 439.822   | 496.084   | AF088061  | 3341.456  | 3189.805  | NM_006071 | 1015.33   | 1066.31   |
| L10404    | 1003.636  | 581.118   | AF086286  | 2907.751  | 3213.47   | NM_01223E | 6187.36   | 6657.994  |
| AF283776  | 9898.089  | 9592.828  | AF086376  | 2004.079  | 1932.633  | AF112219  | 21511.412 | 20021.492 |
| L10123    | 11808.636 | 18219.486 | AF086410  | 822.001   | 877.007   | NM_000521 | 531.827   | 561.141   |
| D16877    | 1546.745  | 1856.874  | AF086455  | 794.572   | 897.821   | NM_00413E | 3370.929  | 2552.771  |
| L19363    | 449.285   | 449.434   | AK022997  | 6803.045  | 7685.819  | NM_01344E | 2226.773  | 1716.669  |
| AL109781  | 1767.118  | 1475.153  | NM_017617 | 3400.543  | 2866.624  | NM_00092E | 10867.172 | 7295.656  |
| AK021895  | 263.271   | 575.622   | AF131830  | 1211.208  | 1276.232  | NM_00046E | 2169.18   | 1845.442  |
| AK000036  | 8793.265  | 7356.503  | NM_014811 | 703.935   | 716.27    | NM_00012E | 5742.77   | 6648.36   |
| AK000769  | 907.748   | 920.865   | AF147426  | 1493.49   | 1766.882  | AL137501  | 692.714   | 683.601   |
| AK000114  | 3085.65   | 2618.957  | BC019667  | 16747.098 | 19174.813 | BE858979  | 704.792   | 434.158   |
| AK000952  | 1150.69   | 1558.371  | AK026026  | 8762.343  | 11099.122 | U87223    | 533.139   | 759.046   |
| AK024520  | 7263.9    | 6653.125  | AF085941  | 13741.873 | 17753.076 | X91348    | 15889.945 | 23955.92  |
| AK024904  | 2137.646  | 2499.59   | Z69892    | 7241.413  | 7723.209  | Z36505    | 2348.716  | 3211.908  |
| AK025030  | 827.375   | 811.383   | AK023590  | 638.835   | 816.306   | NM_001854 | 1888.464  | 2086.539  |
| AK024542  | 1086.661  | 1150.097  | AF087961  | 1053.699  | 1008.019  | AK024799  | 22768.943 | 29570.754 |
| AB050477  | 5106.037  | 4625.079  | AL137309  | 1903.017  | 2302.654  | NM_000924 | 4899.453  | 6051.987  |
| AK000152  | 675.597   | 694.958   | AL137475  | 883.713   | 966.833   | NM_00333E | 10957.858 | 12209.799 |
| L09092    | 833.956   | 775.164   | AL161956  | 3855.739  | 4533.773  | NM_003647 | 1178.783  | 1326.597  |
| NM_01213E | 2470.182  | 2543.454  | AL390176  | 2468.91   | 2779.16   | NM_00169E | 16239.371 | 23037.875 |
| NM_01212E | 1174.086  | 1149.401  | AL137356  | 1008.793  | 1020.66   | NM_018351 | 869.008   | 1075.317  |
| AK024881  | 614.243   | 174.44    | AL137547  | 1389.097  | 1244.329  | AK023019  | 923.14    | 661.745   |
| AK025716  | 1189.309  | 1205.336  | AK021994  | 1144.279  | 1218.282  | NM_147171 | 3325.659  | 1977.499  |
| AF086202  | 19451.779 | 17110.156 | Z70763    | 1214.66   | 1199.245  | AF238083  | 3594.697  | 3192.071  |
| AK022352  | 386.169   | 520.464   | AK023802  | 9647.54   | 9569.911  | NM_00296E | 551.095   | 468.381   |
| AK023270  | 684.677   | 559.701   | AF086103  | 813.274   | 706.366   | NM_01638E | 2449.288  | 2394.669  |
| AF085979  | 23890.836 | 27465.742 | AL080135  | 807.995   | 686.545   | AB046783  | 3216.37   | 2871.004  |
| AK023112  | 2533.904  | 2680.084  | AK023158  | 1556.284  | 1540.893  | NM_00084E | 1090.826  | 908.555   |
| NM_01780E | 17144.316 | 19070.004 | AF085852  | 4890.067  | 3827.005  | NM_01496E | 3143.729  | 2900.308  |
| AK001937  | 4007.304  | 3773.486  | AK023952  | 956.36    | 1277.085  | NM_00488E | 13297.538 | 10207.729 |
| AL365517  | 488.643   | 734.545   | AK000787  | 1431.832  | 1223.153  | AL390148  | 10319.911 | 8772.713  |
| AK021988  | 5597.886  | 5347.317  | AF090885  | 17326.582 | 29153.57  | AK024055  | 1428.889  | 1328.13   |
| AF086494  | 35298.668 | 31010.984 | AF161342  | 520.682   | 763.44    | U10485    | 576.672   | 945.481   |
| BI769977  | 1075.314  | 1138.004  | NM_01664E | 447.686   | 645.501   | AK025326  | 5119.863  | 7805.917  |
| AL137567  | 965.051   | 1299.239  | NM_01408E | 1706.407  | 2739.516  | NM_01337E | 1029.549  | 1319.195  |
| AK024913  | 4025.417  | 3852.1    | AF100636  | 636.442   | 685.914   | NM_017964 | 1172.174  | 1267.596  |
| AB007961  | 902.787   | 1016.048  | AF161366  | 511.849   | 458.689   | NM_01642E | 1622.532  | 2271.846  |
| NM_005547 | 1037.549  | 979.65    | AK022197  | 1987.065  | 1676.966  | NM_00408E | 4720.026  | 5979.608  |
| AF119862  | 16261.826 | 13573.42  | AK021970  | 504.337   | 479.161   | NM_01603E | 8088.323  | 10195.15  |
| U17628    | 1872.757  | 1901.504  | AK022066  | 51597.473 | 46294.609 | NM_001184 | 2901.257  | 3885.291  |
| AF119867  | 1919.6    | 1399.954  | AK022224  | 1016.364  | 952.396   | NM_01553E | 8264.396  | 8133.731  |
| AL357205  | 11898.039 | 13764.215 | AK022359  | 829.653   | 912.499   | NM_01623E | 3310.609  | 3897.14   |
| AF124819  | 1336.927  | 1218.234  | AK022000  | 1331.709  | 1266.956  | NM_00175E | 548.446   | 598.401   |
| D17091    | 3431.564  | 2744.634  | AK022129  | 2504.192  | 1807.765  | BE546276  | 616.705   | 682.024   |
| AL133074  | 3838.423  | 4864.882  | AK022263  | 2623.954  | 2126.082  | NM_00472E | 14047.293 | 13380.509 |
| AF086318  | 1153.521  | 1611.485  | AK022384  | 1059.595  | 846.346   | NM_015997 | 3008.902  | 3550.072  |

|           |           |           |           |           |           |           |           |           |
|-----------|-----------|-----------|-----------|-----------|-----------|-----------|-----------|-----------|
| AF088012  | 1833.75   | 1642.798  | AK027097  | 733.986   | 679.089   | NM_001167 | 3703.748  | 4043.814  |
| NM_018121 | 1579.512  | 1599.807  | AK024613  | 657.328   | 429.824   | NM_012115 | 2955.138  | 2718.439  |
| AK026708  | 3991.79   | 3822.771  | AK027198  | 1246.69   | 1082.599  | NM_004933 | 9279.657  | 7180.723  |
| NM_017903 | 4630.25   | 4752.629  | AK000257  | 1126.355  | 1166.882  | M96577    | 10903.164 | 8965.775  |
| NM_018074 | 3523.293  | 2632.849  | NM_006160 | 5110.732  | 5404.802  | NM_013258 | 4795.022  | 4737.959  |
| NM_000909 | 5823.696  | 4814.528  | NM_000529 | 483.067   | 679.365   | NM_003842 | 3228.547  | 3325.473  |
| U31737    | 782.333   | 643.106   | AF009259  | 798.606   | 891.153   | L11238    | 9973.212  | 8443.023  |
| NM_019013 | 2294.504  | 2384.404  | AF009260  | 1232.547  | 1131.608  | AK025684  | 1016.916  | 983.799   |
| NM_006783 | 443.015   | 553.319   | NM_003079 | 3096.377  | 3178.447  | NM_012205 | 2677.477  | 2298.498  |
| L37711    | 582.385   | 554.379   | NM_017902 | 3840.31   | 4802.459  | K02046    | 2465.411  | 2653.649  |
| S70313    | 6912.444  | 7371.023  | AK021981  | 618.281   | 561.253   | AL110151  | 6574.821  | 11458.016 |
| AK021607  | 3510.81   | 3256.788  | AL359567  | 1280.707  | 1566.402  | NM_004995 | 3538.289  | 5523.7    |
| AF090947  | 777.386   | 1261.89   | NM_017726 | 2872.193  | 2875.632  | NM_000386 | 8580.707  | 10842.679 |
| NM_005047 | 4488.235  | 7217.63   | AK026716  | 596.093   | 756.17    | NM_007231 | 409.109   | 681.522   |
| AJ272196  | 14194.99  | 16295.591 | AL049325  | 14081.941 | 12196.282 | NM_001190 | 3665.566  | 4241.105  |
| AF116662  | 1003.762  | 1262.597  | AK024154  | 12598.653 | 11360.726 | NM_005271 | 8021.22   | 10874.977 |
| AK022825  | 709.324   | 331.592   | AF086341  | 982.66    | 1146.233  | NM_015654 | 6764.061  | 10274.15  |
| CY3Cy5    | 4719.524  | 173.085   | AK026672  | 1692.871  | 1773.34   | NM_012244 | 2650.16   | 3983.153  |
| L35251    | 2999.347  | 2977.962  | S83282    | 57816.172 | 61478.961 | NM_004341 | 1121.985  | 1453.147  |
| BE910395  | 1117.761  | 963.67    | AK024164  | 37873.16  | 41951.012 | AB082521  | 4778.919  | 5082.195  |
| N46828    | 876.12    | 689.73    | AF052130  | 10274.888 | 14899.448 | AL050182  | 982.118   | 791.334   |
| BI908302  | 2809.834  | 2793.076  | AF130090  | 15338.776 | 15753.578 | NM_020040 | 1205.109  | 1215.035  |
| AA460969  | 4585.479  | 4314.582  | AL096727  | 1543.47   | 1960.994  | NM_002374 | 1174.785  | 864.109   |
| BG695859  | 1087.081  | 829.688   | AL080110  | 9678.766  | 10747.709 | AK026940  | 3213.67   | 3347.279  |
| M85079    | 1254.615  | 1065.299  | NM_020425 | 1603.408  | 1702.881  | AF155117  | 4103.021  | 3780.628  |
| AA457671  | 12846.76  | 10438.933 | AK024076  | 2799.552  | 2755.385  | AB014527  | 719.262   | 745.755   |
| X07437    | 648.425   | 715.369   | M87940    | 1956.089  | 2056.413  | NM_004411 | 1922.249  | 1564.929  |
| NM_000641 | 1562.315  | 1138.01   | L77588    | 2796.078  | 2766.422  | NM_015938 | 5843.253  | 5532.047  |
| AE006466  | 2355.898  | 1797.256  | AF086304  | 18328.453 | 20526.863 | NM_000740 | 621.088   | 620.583   |
| BC002396  | 7139.534  | 8192.551  | AB032976  | 2205.653  | 2587.863  | NM_017843 | 3338.731  | 2560.836  |
| NM_022095 | 2945.986  | 2710.044  | AF301222  | 21662.836 | 27706.83  | AK025985  | 3358.183  | 15783.321 |
| SR6       | 3004.642  | 1842.589  | AJ131606  | 407.604   | 245.441   | NM_013256 | 1619.537  | 2809      |
| SR8       | 8067.299  | 21461.148 | AF215981  | 8488.157  | 8663.548  | NM_004143 | 1090.123  | 1697.754  |
| SR10      | 26407.756 | 6063.707  | NM_000732 | 54170.094 | 53504.797 | X66087    | 898.97    | 1238.068  |
| CY3Cy5    | 3132.842  | 130.876   | AF130044  | 1072.181  | 950.835   | NM_016328 | 4284.055  | 6181.432  |
| NM_020370 | 1037.667  | 1018.25   | AF116709  | 459.386   | 535.755   | NM_017544 | 13247.109 | 19566.461 |
| BF310159  | 9087.196  | 7518.971  | AF087980  | 2460.92   | 2514.446  | NM_003153 | 827.887   | 1495.916  |
| NM_018986 | 2944.521  | 3089.766  | NM_013939 | 583.982   | 614.734   | NM_016285 | 1727.526  | 2060.835  |
| AB044934  | 725.273   | 578.994   | AB038651  | 5633.167  | 5293.146  | NM_014707 | 1065.073  | 1096.444  |
| U27655    | 947.125   | 674.546   | AL359603  | 1289.935  | 1343.528  | AF025771  | 1165.074  | 1330.39   |
| NM_003360 | 2081.766  | 1655.721  | X84838    | 641.099   | 875.581   | NM_018215 | 1384.947  | 1075.728  |
| Z21965    | 2884.272  | 2753.066  | NM_013940 | 512.221   | 662.669   | AB033110  | 1536.271  | 2843.507  |
| NM_012427 | 923.772   | 491.308   | AL117643  | 1990.722  | 1843.552  | NM_005083 | 9358.566  | 12833.328 |
| AF131857  | 9450.021  | 7237.893  | AF069135  | 4774.229  | 4303.914  | NM_007187 | 11392.762 | 13611.402 |
| AW797282  | 962.839   | 723.813   | AK026524  | 1377.559  | 1204.84   | NM_018983 | 12707.99  | 10431.542 |
| NM_002402 | 951.282   | 611.945   | AB011157  | 6467.141  | 6928.699  | NM_003096 | 8139.79   | 5992.187  |
| L09070    | 1938.418  | 1190.649  | U17632    | 762.168   | 783.596   | NM_007279 | 3438.975  | 3088.798  |
| NM_000062 | 21857.713 | 14471.22  | AK026764  | 1800.422  | 2167.068  | BE390833  | 17283.221 | 12637.461 |
| NM_009590 | 6834.614  | 4994.511  | AF113700  | 2709.689  | 3247.477  | NM_004730 | 8657.718  | 8426.456  |
| AL133037  | 1652.748  | 1353.462  | NM_017835 | 15114.858 | 15289.661 | NM_000801 | 3932.227  | 3509.494  |
| NM_020350 | 5674.106  | 3548.204  | NM_018347 | 2625.393  | 2647.656  | NM_006115 | 16920.732 | 15748.702 |
| NM_000350 | 844.052   | 343.182   | AK024986  | 777.755   | 651.409   | NM_005801 | 4014.976  | 3572.023  |
| X91103    | 1068.756  | 1001.763  | AK026730  | 1297.667  | 1237.574  | NM_018198 | 3111.075  | 2614.775  |

|           |           |           |           |           |           |           |           |           |
|-----------|-----------|-----------|-----------|-----------|-----------|-----------|-----------|-----------|
| AA419164  | 2093.793  | 1497.713  | AK024739  | 1745.992  | 2049.326  | NM_001535 | 23173.361 | 19653.625 |
| AL117235  | 778.53    | 607.47    | AK098681  | 852.413   | 1156.557  | NM_012267 | 394.639   | 382.52    |
| NM_014822 | 3538.776  | 3786.05   | AK026772  | 1020.354  | 964.496   | AK027232  | 13848.431 | 31750.111 |
| NM_005296 | 1350.891  | 1361.766  | NM_014260 | 13671.585 | 13836.005 | NM_012204 | 450.701   | 1121.18   |
| NM_001337 | 524.278   | 657.726   | AK026458  | 841.599   | 860.746   | NM_000022 | 41577.109 | 54065.648 |
| NM_003611 | 1351.283  | 1572.14   | AK022266  | 520.047   | 413.058   | NM_016576 | 5996.08   | 6953.462  |
| AB014538  | 845.503   | 859.439   | CY3Cy5    | 1634.855  | 179.223   | NM_004213 | 1623.787  | 1458.551  |
| AK025118  | 5416.669  | 4590.069  | M23254    | 799.595   | 2122.721  | NM_001925 | 54370.953 | 58540.809 |
| NM_000727 | 626.95    | 502.974   | BE618539  | 724.393   | 970.987   | NM_000906 | 1443.339  | 1432.713  |
| NM_005385 | 3046.463  | 3315.156  | R28062    | 3367.886  | 4604.948  | NM_000480 | 6650.396  | 10390.134 |
| NM_018985 | 2711.348  | 1848.667  | AI627464  | 652.818   | 873.601   | AF254084  | 32648.16  | 36045.105 |
| AF208232  | 14069.925 | 11177.959 | BI756258  | 5342.54   | 6865.636  | AK022976  | 1258.318  | 1345.314  |
| NM_002985 | 1567.245  | 1339.125  | AF110020  | 515.077   | 438.508   | AB048791  | 5710.86   | 5271.103  |
| NM_004186 | 792.641   | 555.721   | AL050095  | 5505.132  | 8521.132  | NM_003107 | 13438.486 | 12839.462 |
| NM_016255 | 8744.612  | 7158.639  | SR5       | 6863.423  | 7737.152  | NM_006874 | 3490.419  | 2357.957  |
| AF203032  | 1783.986  | 1118.098  | SR7       | 5510.338  | 43372.098 | AB046777  | 3912.901  | 3001.607  |
| AB014542  | 4030.642  | 2171.892  | SR9       | 20929.279 | 4161.506  | AJ251844  | 2152.052  | 1792.905  |
| NM_014640 | 2108.272  | 1592.119  | CY3Cy5    | 3170.594  | 274.518   | D16815    | 1355.131  | 1328.207  |
| Y10518    | 3494.574  | 3059.169  | NM_014805 | 2022.652  | 4351.58   | NM_001880 | 3421.983  | 3145.438  |
| AF155135  | 8887.306  | 7934.672  | AB006627  | 325.135   | 1424.223  | AB028943  | 1561.265  | 1209.667  |
| NM_014790 | 1400.3    | 1113.395  | NM_000416 | 5609.096  | 6088.116  | NM_006194 | 1541.071  | 1132.917  |
| NM_003571 | 1677.531  | 1652.108  | NM_002965 | 1120.901  | 2265.171  | AK001603  | 3310.421  | 3334.258  |
| AB032965  | 4282.842  | 4224.129  | AB007883  | 1342.277  | 1594.428  | U71601    | 1803.346  | 1692.153  |
| AF133424  | 946.593   | 1293.981  | NM_003839 | 372.298   | 328.223   | AF042838  | 1406.345  | 2251.454  |
| NM_005003 | 25232.596 | 33382.098 | AK093780  | 10244.748 | 14435.031 | AL137511  | 598.964   | 1147.72   |
| AF084560  | 3119.008  | 3710.582  | AY009397  | 59942.25  | 45762.488 | AF075062  | 7334.608  | 12405.321 |
| NM_015715 | 224.147   | 355.358   | NM_007037 | 10436.757 | 6625.643  | AF147381  | 6420.355  | 7940.6    |
| NM_000032 | 2054.556  | 2475.301  | NM_005492 | 1887.183  | 2880.66   | AB002452  | 728.335   | 1254.773  |
| NM_002083 | 1177.927  | 1485.534  | NM_004859 | 13885.346 | 27675.184 | AK027101  | 11902.875 | 14334.356 |
| NM_002035 | 8569.265  | 9050.723  | NM_016352 | 2821.422  | 4363.444  | AF010236  | 546.687   | 837.997   |
| NM_014900 | 703.782   | 800.868   | NM_000070 | 2437.789  | 3102.292  | AF088075  | 993.413   | 950.407   |
| BF342908  | 536.408   | 459.808   | NM_001202 | 1602.855  | 2322.542  | AK026376  | 3701.643  | 3235.575  |
| AF118073  | 1157.845  | 1258.973  | AB037804  | 502.58    | 596.781   | AF088061  | 2318.429  | 2392.34   |
| AK023510  | 5553.703  | 5284.803  | U34249    | 751.734   | 1000.126  | AF086286  | 1662.727  | 1542.489  |
| NM_004345 | 1133.57   | 1210.503  | NM_003289 | 52441.527 | 51187.941 | AF086376  | 1857.781  | 1826.708  |
| X71490    | 8481.008  | 6732.434  | NM_006323 | 16126.712 | 30221.914 | AF086410  | 798.172   | 607.576   |
| AF257081  | 553.091   | 452.96    | NM_016466 | 3590.914  | 5447.768  | AF086455  | 737.052   | 767.978   |
| NM_001685 | 25384.025 | 19107.299 | NM_001493 | 7602.52   | 9856.637  | AK022997  | 7184.668  | 5839.69   |
| NM_003631 | 1466.121  | 626.876   | NM_014841 | 512.262   | 963.961   | NM_017617 | 2543.528  | 2361.598  |
| NM_002232 | 1578.332  | 1012.159  | NM_014426 | 16762.545 | 26195.076 | AF131830  | 1265.235  | 1006.061  |
| NM_016106 | 5114.717  | 4043.049  | NM_006816 | 40970.051 | 42578.91  | NM_014811 | 419.932   | 591.749   |
| NM_014570 | 5594.775  | 4230.188  | AK026518  | 44531.848 | 20309.691 | AF147426  | 1051.457  | 1763.104  |
| NM_014747 | 3865.851  | 3378.302  | NM_000255 | 12881.96  | 7057.451  | BC019667  | 14977.957 | 29724.875 |
| Y19240    | 5845.295  | 4224.865  | AB033055  | 7096.04   | 5540.9    | AK026026  | 3904.68   | 7689.075  |
| AF091029  | 1638.447  | 1445.69   | AF311287  | 4194.925  | 3868.05   | AF085941  | 9650.865  | 17593.344 |
| X97074    | 3377.612  | 2773.202  | X87896    | 639.141   | 778.611   | Z69892    | 5763.244  | 9216.339  |
| NM_004135 | 6656.786  | 6996.706  | M88310    | 1711.706  | 2013.881  | AK023590  | 601.694   | 919.104   |
| NM_000203 | 459.963   | 523.38    | NM_000042 | 1421.247  | 2129.333  | AF087961  | 711.85    | 970.739   |
| NM_013443 | 2139.378  | 2164.294  | AF035787  | 818.27    | 1115.591  | AL137309  | 1594.895  | 1914.169  |
| NM_000925 | 14224.151 | 14536.544 | NM_016335 | 1337.557  | 1406.147  | AL137475  | 914.129   | 1054.938  |
| NM_000465 | 3142.221  | 3515.677  | NM_003165 | 9163.294  | 16393.914 | AL161956  | 4313.777  | 4856.433  |
| NM_000123 | 6004.898  | 6194.259  | NM_003906 | 9430.022  | 10294.805 | AL390176  | 2198.755  | 2367.201  |
| AL137501  | 1069.976  | 1012.411  | AL359590  | 41887.914 | 61607.91  | AL137356  | 823.363   | 950.181   |

|           |           |           |           |           |           |           |           |           |
|-----------|-----------|-----------|-----------|-----------|-----------|-----------|-----------|-----------|
| NM_006712 | 36792.465 | 35046.164 | NM_002861 | 13278.616 | 23734.064 | AL137547  | 982.099   | 1359.705  |
| NM_006240 | 690.045   | 503.855   | NM_003080 | 4963.424  | 6812.337  | AK021994  | 1298.755  | 1041.894  |
| NM_007026 | 4908.94   | 3688.688  | NM_013268 | 661.001   | 1269.365  | AK023802  | 5973.72   | 5903.923  |
| M37712    | 16068.173 | 9496.314  | NM_002645 | 2502.143  | 2804.35   | AF086103  | 542.12    | 647.747   |
| NM_002648 | 926.847   | 445.989   | AB033027  | 1409.84   | 685.865   | AL080135  | 332.625   | 236.632   |
| AF070670  | 3100.656  | 2269.875  | AK021805  | 9851.557  | 8148.83   | AK023158  | 1459.612  | 1217.054  |
| NM_016156 | 5836.483  | 4379.922  | AB014550  | 2977.746  | 2547.527  | AF085852  | 2301.114  | 2214.689  |
| NM_016528 | 2720.55   | 2098.112  | AF320294  | 2786.751  | 3114.083  | AK023952  | 1168.364  | 1961.605  |
| NM_015974 | 4631.103  | 3289.228  | AF161436  | 4689.45   | 4407.423  | AK000787  | 959.659   | 1834.307  |
| NM_014384 | 6518.794  | 5515.605  | NM_004299 | 2242.686  | 2861.252  | AF090885  | 10953.743 | 14066.631 |
| NM_002573 | 12073.894 | 10748.848 | NM_001171 | 1351.613  | 1367.124  | AF161342  | 478.829   | 609.812   |
| AL133037  | 1354.807  | 1740.107  | NM_002250 | 5357.524  | 7167.531  | NM_016646 | 443.345   | 670.104   |
| NM_020350 | 5293.348  | 4181.572  | NM_006478 | 4693.628  | 9416.091  | NM_014082 | 1324.694  | 1826.299  |
| NM_000350 | 583.827   | 583.922   | AF132734  | 28926.385 | 47287.242 | AF100636  | 423.664   | 384.865   |
| X91103    | 1000.059  | 1152.175  | NM_018379 | 3571.85   | 6237.274  | AK022197  | 1236.051  | 1208.543  |
| AA419164  | 1727.681  | 1709.473  | NM_016403 | 35961.949 | 43231.773 | AK022066  | 48324.723 | 51298.367 |
| L35251    | 3023.281  | 3132.546  | NM_015603 | 2512.057  | 3137.664  | AK022224  | 1336.35   | 1179.155  |
| BE910395  | 1321.959  | 1226.589  | NM_001921 | 8418.716  | 8862.53   | AK022359  | 759.088   | 882.28    |
| N46828    | 882.509   | 792.519   | NM_006230 | 14680.231 | 18446.029 | AK022000  | 863.997   | 802.866   |
| BI908302  | 3008.628  | 3127.155  | NM_014699 | 5153.286  | 4841.874  | AK022129  | 1551.916  | 1450.666  |
| AA460969  | 4867.394  | 4580.624  | NM_013400 | 10267.83  | 6102.095  | AK022263  | 1798.653  | 2218.787  |
| BG695859  | 899.651   | 960.118   | AK026257  | 2901.751  | 1184.902  | AK022384  | 661.101   | 771.012   |
| M85079    | 1360.452  | 1035.454  | AK023836  | 6181.854  | 4693.64   | AK027097  | 500.195   | 526.92    |
| AA457671  | 13448.062 | 12382.183 | NM_018109 | 3740.756  | 2962.154  | AK000257  | 1054.815  | 1801.396  |
| X07437    | 734.555   | 745.146   | AJ299442  | 3881.72   | 4539.887  | NM_006160 | 5835.875  | 9983.545  |
| NM_000641 | 1510.576  | 1238.84   | NM_000129 | 3172.189  | 3292.357  | NM_000529 | 659.31    | 837.764   |
| AE006466  | 2066.013  | 2021.163  | NM_003762 | 9410.713  | 11068.978 | AF009259  | 734.979   | 1032.883  |
| BC011655  | 9926.803  | 8060.503  | NM_014465 | 1027.496  | 2030.955  | AF009260  | 1093.036  | 1057.36   |
| BC002396  | 4644.768  | 3905.932  | D87292    | 1198.685  | 1508.007  | NM_003079 | 1763.413  | 2347.149  |
| NM_022095 | 1908.236  | 1633.613  | NM_005498 | 2055.255  | 2374.409  | NM_017902 | 2623.168  | 3083.038  |
| AF112219  | 25934.791 | 24976.744 | AB037804  | 676.703   | 1015.154  | AL359567  | 953.632   | 1032.4    |
| NM_000521 | 540.44    | 394.915   | U34249    | 962.992   | 1710.408  | NM_017726 | 2461.405  | 2762.917  |
| NM_014640 | 2200.29   | 2085.816  | NM_003289 | 63715.516 | 73082.938 | AK026716  | 512.876   | 653.295   |
| Y10518    | 3055.234  | 3760.089  | M74220    | 493.884   | 1034.28   | AL049325  | 7154.771  | 7243.444  |
| AF155135  | 8183.485  | 8763.816  | M23254    | 990.413   | 1587.926  | AK024154  | 7954.053  | 19851.264 |
| NM_014790 | 1117.615  | 1076.726  | BE618539  | 939.162   | 1213.662  | AF086341  | 1012.363  | 1698.028  |
| NM_003571 | 1608.531  | 1797.245  | R28062    | 2598.642  | 1531.129  | AK026672  | 1351.855  | 1822.932  |
| AB032965  | 4083.337  | 4686.075  | BI756258  | 3801.814  | 2270.935  | S83282    | 62114.25  | 72380.078 |
| NM_020370 | 1194.228  | 1167.492  | AA608557  | 10678.996 | 19218.24  | AK024164  | 39353.746 | 50385.359 |
| NM_004767 | 565.371   | 633.433   | AL050095  | 5603.101  | 5397.433  | AF052130  | 8293.426  | 13291.865 |
| BF310159  | 9677.19   | 8104.005  | NM_000498 | 726.839   | 927.227   | AF130090  | 12131.424 | 14939.692 |
| NM_018986 | 3487.232  | 3546.169  | NM_000664 | 1472.728  | 2107.992  | AL096727  | 1257.141  | 1511.23   |
| AB044934  | 551.522   | 787.595   | AF075085  | 54852.555 | 59389.09  | AL080110  | 7888.502  | 8920.035  |
| U27655    | 897.521   | 892.261   | NM_005892 | 1894.228  | 2603.046  | NM_020425 | 1206.928  | 1658.685  |
| NM_003360 | 2213.252  | 1658.787  | NM_000042 | 1701.703  | 2111.892  | AK024076  | 1666.86   | 1920.169  |
| Z21965    | 3194.288  | 3482.219  | AF035787  | 1258.556  | 1792.261  | M87940    | 1568.619  | 1482.504  |
| NM_012427 | 805.421   | 594.011   | NM_014808 | 2134.553  | 4487.702  | L77588    | 1926.053  | 2201.442  |
| NM_000852 | 41546.5   | 34150.07  | NM_000416 | 4138.215  | 2137.385  | AF086304  | 15700.893 | 14479.02  |
| NM_000399 | 601.841   | 637.613   | NM_002965 | 1016.256  | 1083.65   | AB032976  | 1748.28   | 1786.82   |
| AW797282  | 975.225   | 626.204   | AB007883  | 1295.517  | 812.613   | AF301222  | 20662.299 | 19616.586 |
| NM_002402 | 955.594   | 553.247   | NM_007037 | 13778.71  | 10550.216 | AF215981  | 5323.065  | 5812.581  |
| L09070    | 2317.922  | 1717.536  | NM_005492 | 2057.746  | 2688.728  | NM_000732 | 52904.887 | 47461.215 |
| NM_000062 | 23644.963 | 20299.695 | AF038196  | 3384.905  | 4337.73   | AF130044  | 887.841   | 992.073   |



|           |           |           |           |           |           |           |           |           |
|-----------|-----------|-----------|-----------|-----------|-----------|-----------|-----------|-----------|
| NM_00959C | 7431.703  | 6791.052  | NM_004859 | 10423.844 | 12011.446 | AF087980  | 2082.511  | 1880.091  |
| NM_01610E | 5109.787  | 4830.855  | NM_016352 | 1018.486  | 1485.122  | NM_01393E | 482.226   | 754.802   |
| NM_01457C | 5720.418  | 5856.514  | NM_005014 | 704.973   | 1326.888  | AB038651  | 3956.15   | 6082.896  |
| NM_014747 | 3659.869  | 3648.678  | NM_00007C | 2221.22   | 3121.413  | AL359603  | 1014.207  | 1368.101  |
| Y19240    | 5938.338  | 5803.401  | NM_00225C | 3844.291  | 2832.003  | NM_01394C | 638.36    | 1154.718  |
| AF091029  | 1788.698  | 1770.324  | NM_006323 | 8224.3    | 5036.312  | AL117643  | 1357.528  | 1616.593  |
| X97074    | 3942.161  | 3731.795  | NM_01646E | 2650.996  | 1799.134  | AF069135  | 3929.121  | 4494.016  |
| AL117235  | 498.172   | 744.449   | NM_001493 | 6269.56   | 3789.612  | AK026524  | 1052.498  | 1236.757  |
| NM_014822 | 3909.324  | 3115.123  | NM_014841 | 423.442   | 339.916   | AB011157  | 4506.357  | 4714.626  |
| NM_00529E | 1370.419  | 1656.696  | AK026518  | 47648.195 | 38055.906 | U17632    | 737.119   | 799.175   |
| NM_001337 | 535.669   | 630.166   | NM_00025E | 15445.766 | 12992.093 | AK026764  | 1505.004  | 1211.818  |
| NM_003611 | 1528.447  | 1761.491  | AB033055  | 7898.79   | 8286.83   | AF113700  | 2083.295  | 2160.024  |
| AB014538  | 1161.836  | 858.632   | AF311287  | 4702.935  | 5724.065  | NM_01783E | 12536.476 | 12569.81  |
| AK025118  | 5626.021  | 5100.458  | NM_00309E | 1695.809  | 2507.726  | NM_018347 | 2152.222  | 2162.016  |
| NM_000727 | 833.236   | 553.825   | NM_014781 | 3160.568  | 4844.102  | AK024986  | 483.943   | 577.194   |
| NM_002621 | 505.532   | 291.534   | BU629989  | 1053.566  | 1369.608  | AK026730  | 946.524   | 957.837   |
| NM_00538E | 3156.104  | 3648.216  | X87896    | 789.201   | 1152.671  | AK024739  | 1777.675  | 1958.284  |
| NM_01898E | 2814.95   | 1833.578  | M88310    | 1853.339  | 2256.99   | AK098681  | 720.316   | 957.953   |
| NM_006074 | 15459.196 | 11550.386 | NM_01844E | 5264.58   | 2516.427  | AK026772  | 831.665   | 855.494   |
| AF208232  | 14088.585 | 11817.943 | NM_01446E | 1038.355  | 523.943   | NM_01426C | 11775.593 | 11071.264 |
| NM_00298E | 1466.458  | 1277.725  | D87292    | 1062.643  | 374.97    | AK026458  | 764.262   | 790.506   |
| NM_00418E | 889.179   | 692.307   | NM_00549E | 1570.987  | 724.167   | CY3Cy5    | 6358.091  | 241.084   |
| NM_01625E | 8626.365  | 8063.32   | NM_01633E | 1266.734  | 532.549   | M23254    | 1060.836  | 943.19    |
| AF203032  | 2049.856  | 1991.409  | NM_00316E | 5256.429  | 3462.175  | BE618539  | 1576.14   | 1293.531  |
| AB014542  | 4189.44   | 3219.885  | NM_00390E | 8030.82   | 4593.409  | R28062    | 3374.606  | 2492.133  |
| AF070670  | 3688.517  | 3566.357  | AL359590  | 24100.699 | 15768.096 | AI627464  | 984.2     | 625.708   |
| NM_01615E | 5698.998  | 5811.386  | NM_002861 | 7757.807  | 6539.789  | BI756258  | 5358.747  | 5003.982  |
| NM_01652E | 2940.212  | 2667.202  | NM_00308C | 3537.062  | 2539.173  | AI342225  | 67280.414 | 66206.063 |
| NM_015974 | 4512.421  | 4052.749  | NM_01326E | 461.904   | 299.691   | AA634103  | 68085.469 | 85198.5   |
| NM_014384 | 6486.646  | 7350.411  | NM_00264E | 1981.367  | 1736.094  | AF110020  | 1375.874  | 1299.806  |
| NM_002573 | 11150.272 | 12849.206 | AB033027  | 1348.555  | 1208.589  | AA608557  | 9583.921  | 8288.479  |
| AF133424  | 1195.431  | 1290.331  | AK021805  | 10708.552 | 11019.919 | AL050095  | 7102.352  | 6799.707  |
| NM_005003 | 24597.715 | 26981.332 | AB014550  | 3016.791  | 3596.831  | NM_00049E | 1261.312  | 1425.3    |
| AF084560  | 3000.954  | 3443.813  | AF320294  | 3192.738  | 4097.359  | NM_000664 | 1802.129  | 1765.018  |
| NM_000032 | 2191.221  | 2391.155  | AF320293  | 941.628   | 1133.868  | SR5       | 8960.521  | 9628.577  |
| NM_002083 | 1322.365  | 1707.689  | AF161436  | 3992.125  | 6779.087  | SR7       | 6803.988  | 44378.52  |
| NM_00203E | 7967.479  | 8153.624  | NM_020402 | 3050.255  | 6176.84   | SR9       | 22721.055 | 4706.53   |
| NM_01490C | 738.963   | 933.729   | NM_00429E | 2213.156  | 3051.203  | CY3Cy5    | 8579.924  | 269.68    |
| AF118073  | 1171.458  | 1158.119  | NM_001171 | 1286.634  | 1768.813  | NM_01480E | 2427.851  | 2116.118  |
| AK023510  | 5046.033  | 4807.236  | NM_00049E | 361.498   | 259.61    | AB006627  | 1649.999  | 1216.461  |
| NM_00434E | 821.117   | 1147.49   | NM_000664 | 1260.77   | 669.3     | NM_00041E | 8586.442  | 6310.568  |
| NM_000702 | 35019.758 | 30615.83  | AF075085  | 49383.422 | 25031.031 | NM_00296E | 1960.165  | 1361.468  |
| X71490    | 8140.479  | 8271.565  | NM_005892 | 3023.865  | 1170.781  | AB007883  | 4827.205  | 4043.568  |
| AF257081  | 359.935   | 468.113   | NM_00647E | 2329.285  | 1333.713  | AK093780  | 10627.878 | 9630.445  |
| NM_00168E | 24835.73  | 22479.311 | AF132734  | 11943.439 | 7569.825  | NM_007037 | 32898.836 | 33251.594 |
| NM_003631 | 1007.694  | 949.404   | NM_01837E | 1773.529  | 928.627   | NM_005492 | 3048.094  | 2482.178  |
| NM_002232 | 1541.258  | 1349.488  | NM_016403 | 18389.813 | 9344.907  | AF038196  | 4638.017  | 5228.3    |
| NM_02209E | 2360.314  | 2678.595  | NM_015603 | 1442.567  | 766.108   | NM_00485E | 19221.824 | 20774.609 |
| AF112219  | 24219.371 | 26070.17  | NM_001921 | 7203.337  | 6127.074  | NM_016352 | 2058.615  | 1999.511  |
| NM_000521 | 810.874   | 579.896   | NM_00623C | 10439.853 | 9953.522  | NM_005014 | 1274.884  | 961.801   |
| NM_00413E | 7106.45   | 6308.023  | NM_01469E | 5060.022  | 4352.811  | NM_006944 | 988.759   | 1070.842  |
| NM_000203 | 497.368   | 559.611   | NM_01340C | 9720.282  | 10131.692 | NM_00007C | 4889.769  | 5250.253  |
| NM_013443 | 2481.657  | 2555.162  | AK026257  | 3286.233  | 2459.465  | NM_001202 | 2075.824  | 2458.38   |

|           |           |           |           |           |           |           |           |           |
|-----------|-----------|-----------|-----------|-----------|-----------|-----------|-----------|-----------|
| NM_000925 | 13626.127 | 13797.633 | AK023836  | 6633.753  | 7087.313  | AB037804  | 709.407   | 985.62    |
| NM_000465 | 2619.699  | 3025.626  | NM_018109 | 4427.762  | 4334.053  | U34249    | 649.368   | 931.638   |
| AF116685  | 276.633   | 335.074   | AJ299442  | 4150.531  | 5900.89   | NM_003285 | 67297.453 | 67862.047 |
| NM_000123 | 6086.027  | 6782.934  | NM_000129 | 4769.619  | 11283.371 | NM_006323 | 14008.285 | 8927.369  |
| AL137501  | 1172.313  | 1102.656  | NM_003762 | 9490.805  | 11857.308 | NM_016466 | 3652.473  | 2370.159  |
| NM_000122 | 4520.337  | 3823.82   | NM_004859 | 6255.574  | 3200.409  | NM_001493 | 10561.267 | 8973.269  |
| NM_006712 | 39341.188 | 36505.844 | NM_016352 | 639.415   | 344.361   | NM_014841 | 1037.956  | 752.05    |
| NM_006240 | 1107.42   | 770.386   | NM_005014 | 698.339   | 383.619   | NM_014426 | 17275.438 | 16568.176 |
| NM_007026 | 4731.936  | 4233.171  | NM_000070 | 1652.497  | 1026.252  | NM_006816 | 44331.957 | 40409.094 |
| M37712    | 18832.314 | 11903.602 | NM_001202 | 1296.553  | 774.868   | NM_000258 | 18491.246 | 16949.77  |
| NM_002648 | 862.32    | 650.803   | U34249    | 495.632   | 336.344   | AB033055  | 9566.28   | 8897.53   |
| AW797282  | 827.334   | 794.756   | NM_003289 | 46741.395 | 26087.354 | AF311287  | 5693.599  | 5247.8    |
| NM_002402 | 840.22    | 946.524   | M23254    | 568.581   | 645.082   | NM_003098 | 1930.302  | 2401.387  |
| L09070    | 2020.164  | 2098.956  | BE618539  | 723.372   | 494.575   | NM_014781 | 4541.298  | 4967.005  |
| NM_000062 | 23948.25  | 25922.729 | R28062    | 2363.447  | 2014.894  | X87896    | 1209.393  | 1208.201  |
| NM_009590 | 6661.193  | 6735.292  | AI627464  | 522.185   | 622.114   | M88310    | 2311.403  | 2652.215  |
| AL133037  | 1695.544  | 1880.661  | BI756258  | 4012.972  | 3429.89   | NM_000042 | 1997.642  | 2488.333  |
| NM_020350 | 5215.41   | 4345.415  | AI342225  | 54270.18  | 60736.879 | AF035787  | 1159.517  | 1444.47   |
| NM_000350 | 667.247   | 764.039   | AF110020  | 740.907   | 1121.726  | NM_016335 | 2243.28   | 1688.632  |
| X91103    | 1245.26   | 1215.553  | AA608557  | 8003.668  | 11642.843 | NM_003165 | 8614.322  | 6305.663  |
| AA419164  | 2157.81   | 2149.064  | AL050095  | 4974.974  | 6690.873  | NM_003906 | 15296.205 | 13185.876 |
| L35251    | 3296.967  | 3689.41   | NM_003098 | 1150.308  | 831.875   | AL359590  | 49580.91  | 38332.219 |
| BE910395  | 1302.067  | 1229.922  | NM_014781 | 2772.945  | 2018.662  | NM_002861 | 14236.197 | 14181.361 |
| N46828    | 904.748   | 838.191   | BU629989  | 640.41    | 300.277   | NM_003080 | 6802.625  | 6958.851  |
| BI908302  | 3113.713  | 2938.507  | M88310    | 1365.325  | 986.279   | NM_013268 | 730.698   | 767.983   |
| AA460969  | 5064.993  | 4719.3    | NM_000042 | 1202.256  | 804.262   | NM_002645 | 3016.275  | 2895.224  |
| BG695859  | 1045.747  | 877.198   | AF035787  | 604.951   | 417.087   | AB033027  | 2886.85   | 2880.694  |
| M85079    | 1360.863  | 1205.545  | NM_014808 | 1179.018  | 1307.625  | AK021805  | 16604.717 | 16761.119 |
| AA457671  | 13574.991 | 10662.62  | AB006627  | 416.755   | 372.468   | AB014550  | 5579.356  | 5550.139  |
| X07437    | 576.558   | 771.996   | NM_000416 | 4584.658  | 4174.423  | AF320294  | 5950.094  | 6545.216  |
| NM_000641 | 1922.286  | 1510.566  | NM_002965 | 1527.258  | 1770.46   | AF320293  | 968.069   | 1290.217  |
| AE006466  | 2590.55   | 2249.359  | AB007883  | 1230.716  | 1073.647  | AF161436  | 7550.659  | 8956.119  |
| BC008737  | 36701.152 | 33735.348 | AK093780  | 9503.002  | 20008.936 | NM_020402 | 4154.41   | 5237.761  |
| BC011655  | 10268.285 | 9258.671  | NM_007037 | 15006.322 | 17515.51  | NM_004295 | 3083.844  | 3273.413  |
| BC002396  | 4574.308  | 4291.289  | NM_005492 | 1788.758  | 3073.934  | NM_001171 | 1382.033  | 1451.6    |
| AF208232  | 12683.311 | 14987.256 | AF038196  | 3820.838  | 7366.746  | NM_002250 | 6202.827  | 6598.759  |
| NM_002988 | 1771.293  | 2300.885  | AF320294  | 2107.938  | 1157.72   | NM_006478 | 2911.03   | 2483.679  |
| NM_004186 | 720.153   | 811.669   | AF161436  | 3754.101  | 2312.092  | AF132734  | 20213.328 | 14191.187 |
| NM_016258 | 8182.516  | 8300.969  | NM_020402 | 1775.146  | 1184.277  | NM_018379 | 3005.658  | 1931.87   |
| AF203032  | 1266.379  | 1457.79   | NM_004295 | 2021.448  | 1383.741  | NM_016403 | 34606.348 | 26019.006 |
| AB014542  | 3682.743  | 2965.533  | NM_001171 | 1193.317  | 596.778   | NM_015603 | 2290.977  | 2056.701  |
| NM_014640 | 2320.287  | 2410.629  | NM_002250 | 3768.824  | 2675.843  | AK021788  | 975.095   | 915.156   |
| Y10518    | 4068.621  | 5340.595  | NM_006323 | 9565.694  | 7929.489  | NM_001921 | 11839.802 | 9802.977  |
| AF155135  | 9265.878  | 11290.254 | NM_016466 | 2666.373  | 2911.019  | NM_006230 | 16355.791 | 14718.708 |
| NM_014790 | 1473.913  | 1477.791  | NM_001493 | 6293.598  | 5013.81   | NM_014695 | 12338.324 | 12406.043 |
| NM_003571 | 2088.367  | 2243.885  | NM_014841 | 592.909   | 687.8     | NM_013400 | 15471.572 | 17800.867 |
| AB032965  | 4393.402  | 4981.488  | NM_014426 | 11463.259 | 13434.08  | AK026257  | 4769.592  | 4691.333  |
| NM_020370 | 1462.438  | 1389.042  | AK026518  | 48238.734 | 52153.313 | AK023836  | 4699.868  | 5086.15   |
| NM_004767 | 631.761   | 575.058   | NM_000258 | 14222.296 | 15576.892 | NM_018105 | 6208.656  | 6199.625  |
| BF310159  | 9365.903  | 8569.379  | AB033055  | 6128.082  | 7864.225  | AJ299442  | 7216.088  | 7516.773  |
| NM_018986 | 3448.264  | 3102.945  | AF311287  | 3764.687  | 4681.781  | NM_000125 | 5010.847  | 5397.713  |
| AB044934  | 632.251   | 565.164   | AJ299442  | 3289.368  | 2216.292  | NM_003762 | 9261.788  | 9545.52   |
| U27655    | 837.218   | 862.378   | NM_000129 | 2852.68   | 1957.277  | NM_018446 | 7488.313  | 7464.776  |

|           |           |           |           |           |           |           |           |           |
|-----------|-----------|-----------|-----------|-----------|-----------|-----------|-----------|-----------|
| NM_00336C | 2216.205  | 2061.52   | NM_003762 | 6981.771  | 5244.147  | NM_000187 | 1056.42   | 1338.313  |
| Z21965    | 3319.095  | 3129.417  | NM_018446 | 5707.619  | 4245.149  | NM_001202 | 1579.835  | 1032.645  |
| NM_012427 | 902.184   | 633.581   | NM_000187 | 551.315   | 615.308   | U34249    | 863.426   | 563.568   |
| AF131857  | 10174.184 | 9199.402  | NM_014465 | 920.016   | 861.91    | NM_003285 | 59909.902 | 51681.875 |
| NM_000852 | 42837.34  | 41767.367 | D87292    | 920.92    | 789.308   | M23254    | 986.584   | 984.271   |
| NM_000395 | 694.269   | 609.763   | NM_005498 | 1976.514  | 1659.874  | BE618539  | 1356.728  | 1490.582  |
| AF257081  | 556.327   | 786.072   | NM_016335 | 1373.861  | 1251.034  | R28062    | 3719.029  | 3340.321  |
| NM_001688 | 23986.951 | 28794.574 | NM_003165 | 5972.746  | 5969.815  | AI627464  | 545.543   | 778.881   |
| NM_003631 | 1004.546  | 777.093   | NM_003906 | 9111.961  | 6948.457  | BI756258  | 5150.735  | 5849.433  |
| NM_002232 | 1445.822  | 1267.115  | AL359590  | 25728.977 | 20944.658 | AF110020  | 1367.153  | 1651.292  |
| NM_016106 | 5077.108  | 5733.743  | NM_002861 | 8563.244  | 7709.738  | AA608557  | 8094.817  | 7702.933  |
| NM_01457C | 6255.296  | 6995.917  | NM_00308C | 3608.334  | 3376.316  | AL050095  | 4776.002  | 4319.838  |
| NM_014747 | 4215.444  | 5320.759  | NM_002645 | 2123.476  | 2893.528  | NM_000495 | 1127.878  | 1449.382  |
| Y19240    | 6452.579  | 7312.3    | AB033027  | 1705.343  | 2248.902  | NM_000664 | 1846.062  | 2402.334  |
| AF091029  | 1763.882  | 1914.98   | AB014550  | 2296.734  | 3698.477  | AF075085  | 66736     | 65732.023 |
| X97074    | 4416.741  | 4576.778  | NM_006826 | 17936.613 | 12854.918 | NM_005892 | 3164.778  | 3592.671  |
| AL117235  | 809.88    | 910.319   | AB007973  | 5252.515  | 4664.191  | NM_000042 | 2402.035  | 1734.154  |
| NM_014822 | 3294.842  | 2978.171  | M96843    | 3989.869  | 2442.275  | AF035787  | 1294.718  | 765.319   |
| NM_005295 | 1326.508  | 1504.68   | NM_017791 | 1559.111  | 987.071   | NM_014805 | 2603.636  | 2239.083  |
| NM_001337 | 489.497   | 536.337   | NM_005882 | 7727.147  | 5467.804  | AB006627  | 1969.793  | 1968.122  |
| NM_003611 | 1492.741  | 1346.487  | BC012304  | 5949.003  | 4656.627  | NM_000415 | 8298.049  | 8452.749  |
| AB014538  | 924.969   | 933.504   | AB046815  | 2959.954  | 2322.344  | NM_002965 | 1653.359  | 1717.587  |
| AK025118  | 5498.137  | 5117.917  | AF075085  | 53324.594 | 43167.973 | AB007883  | 4147.434  | 4891.338  |
| NM_000727 | 812.516   | 540.909   | NM_005892 | 1846.727  | 1773.124  | AK093780  | 11823.567 | 10843.479 |
| NM_002621 | 647.985   | 462.274   | NM_006475 | 2645.353  | 2052.923  | AY009397  | 67881.508 | 70982.781 |
| NM_005385 | 3161.607  | 3546.843  | AF132734  | 14158.73  | 11848.575 | NM_007037 | 32989.664 | 35812.066 |
| NM_018985 | 2840.16   | 2112.026  | NM_018379 | 1825.033  | 1398.689  | NM_005492 | 1614.558  | 1405.258  |
| NM_006074 | 15269.635 | 12363.906 | NM_016403 | 20746.047 | 14517.87  | AF038196  | 3605.494  | 4150.596  |
| NM_006712 | 41533.969 | 49995.594 | NM_015603 | 1328.156  | 1145.605  | NM_004855 | 14821.588 | 16798.383 |
| NM_00624C | 748.538   | 777.732   | NM_001921 | 7084.723  | 6789.181  | NM_016352 | 2051.533  | 1994.682  |
| NM_007025 | 5198.044  | 5301.065  | NM_00623C | 11085.908 | 11703.387 | NM_005014 | 874.223   | 1157.549  |
| NM_002645 | 993.108   | 888.664   | NM_014695 | 5427.554  | 4622.209  | NM_006944 | 1287.574  | 2238.33   |
| AF070670  | 3545.637  | 4163.837  | NM_01340C | 12149.208 | 14081.893 | NM_004407 | 653.112   | 927.09    |
| NM_016155 | 6308.475  | 7396.428  | AK026257  | 3605.87   | 4449.362  | NM_00007C | 3937.863  | 4507.221  |
| NM_016525 | 3447.705  | 4233.648  | AK023836  | 7886.829  | 9632.932  | NM_00225C | 6226.568  | 4471.621  |
| NM_015974 | 5237.541  | 5268.558  | NM_005075 | 6389.354  | 4431.989  | NM_006323 | 14550.897 | 12216.094 |
| NM_014384 | 7139.754  | 8079.08   | AF253321  | 1294.429  | 870.53    | NM_016465 | 3999.071  | 3928.783  |
| NM_002573 | 12842.019 | 14952.441 | U80735    | 3513.425  | 2553.382  | NM_001493 | 11388.386 | 12554.123 |
| AF133424  | 1142.062  | 1529.742  | NM_01785C | 2120.053  | 1461.534  | NM_014841 | 909.836   | 889.605   |
| NM_005003 | 24975.195 | 30854.273 | NM_016522 | 901.143   | 621.961   | NM_014425 | 17779.494 | 17151.033 |
| AF084560  | 3118.289  | 3940.333  | NM_002224 | 3217.038  | 2206.913  | NM_006815 | 47994.109 | 50798.676 |
| NM_015715 | 452.923   | 372.435   | X07979    | 31835.078 | 20566.652 | AK026518  | 55753.391 | 58365.613 |
| NM_000032 | 2277.975  | 2566.604  | NM_000082 | 2101.001  | 1889.193  | NM_000255 | 12599.453 | 14165.209 |
| NM_002083 | 1447.975  | 1595.433  | L13857    | 1506.833  | 1315.447  | AB033055  | 4979.543  | 4884.443  |
| NM_002035 | 8371.408  | 7514.567  | NM_018095 | 6698.981  | 6627.8    | AF311287  | 2906.621  | 3004.933  |
| NM_01490C | 841.95    | 901.054   | AF286164  | 1374.681  | 1520.676  | NM_003095 | 1709.702  | 2085.373  |
| BF342908  | 482.193   | 517.205   | AF146277  | 5883.956  | 5009.522  | NM_014781 | 4086.838  | 5462.176  |
| AF118073  | 1082.238  | 1134.575  | AF055033  | 8281.351  | 7666.003  | BU629989  | 998.585   | 1327.638  |
| AK023510  | 5925.804  | 5432.227  | NM_01770C | 821.517   | 882.003   | X87896    | 1021.869  | 1760.91   |
| NM_004345 | 994.528   | 1250.183  | M37191    | 5875.782  | 5222.574  | M88310    | 2078.953  | 2443.06   |
| NM_000702 | 35295.801 | 32240.211 | NM_005242 | 670.82    | 721.79    | NM_018445 | 8330.686  | 6177.356  |
| X71490    | 7829.506  | 7207.43   | NM_00302C | 1130.093  | 1226.62   | NM_000187 | 1274.404  | 777.531   |
| NM_014273 | 12341.765 | 16319.889 | NM_003404 | 42271.738 | 43233.336 | NM_014465 | 2417.309  | 2108.602  |

|           |           |           |           |           |           |           |           |           |
|-----------|-----------|-----------|-----------|-----------|-----------|-----------|-----------|-----------|
| AF039442  | 1805.219  | 1792.581  | NM_001114 | 1903.488  | 2693.177  | D87292    | 1512.789  | 1327.726  |
| AF104260  | 730.209   | 681.82    | X82240    | 1651.035  | 1242.375  | NM_00549E | 3025.196  | 2928.795  |
| NM_01740E | 4173.776  | 4796.861  | NM_01399E | 6763.001  | 4557.182  | NM_01633E | 3626.977  | 3521.464  |
| NM_01962E | 1532.287  | 1699.129  | NM_00601C | 14903.109 | 10638.798 | NM_00316E | 9766.817  | 11011.563 |
| NM_00672E | 4517.527  | 4956.949  | K03191    | 2251.049  | 1545.31   | NM_00390E | 20828.855 | 23668.742 |
| NM_006071 | 1771.133  | 1950.616  | NM_00507E | 15035.473 | 9743.703  | AL359590  | 50831.871 | 49490.508 |
| NM_01223E | 5858.513  | 6243.556  | NM_00519E | 9969.281  | 4807.711  | NM_002861 | 15590     | 16820.369 |
| AF112219  | 26082.67  | 32149.66  | NM_00458E | 1397.799  | 842.349   | NM_00308C | 7180.848  | 7655.559  |
| NM_000521 | 777.623   | 656.673   | NM_01503E | 4269.702  | 4209.149  | NM_01326E | 747.02    | 685.989   |
| NM_00413E | 7454.667  | 7007.928  | AK022956  | 3797.827  | 3783.214  | NM_00264E | 2952.673  | 3288.619  |
| NM_00020E | 654.349   | 564.424   | AK023121  | 2489.724  | 4106.777  | AB033027  | 1994.403  | 2406.095  |
| NM_01344E | 2665.45   | 2609.36   | NM_014104 | 38508.488 | 41507.797 | AK021805  | 10458.908 | 11914.72  |
| NM_00092E | 13451.4   | 13445.585 | NM_00239E | 1943.331  | 1952.89   | AB014550  | 3691.545  | 3953.835  |
| NM_00046E | 3202.557  | 2835.123  | NM_00274E | 46523.359 | 39956.082 | AF320294  | 4498.583  | 5159.831  |
| NM_00012E | 5968.238  | 7449.923  | NM_01821E | 5553.313  | 4955.761  | AF320293  | 601.011   | 697.659   |
| AL137501  | 1057.233  | 1241.123  | NM_00339C | 2095.825  | 1982.979  | AF161436  | 7446.318  | 11432.404 |
| BE858979  | 485.634   | 335.382   | AL137747  | 2613.27   | 1955.423  | NM_02040E | 4596.592  | 8464.497  |
| NM_00012E | 4730.475  | 3809.591  | NM_01475E | 3702.538  | 3230.967  | NM_00429E | 3274.489  | 4183.646  |
| U87223    | 1144.344  | 736.115   | AF077188  | 8214.097  | 7710.233  | NM_001171 | 1543.604  | 1702.797  |
| X91348    | 4229.202  | 4915.396  | NM_01244E | 7586.053  | 7530.711  | NM_00049E | 1395.172  | 728.055   |
| Z36505    | 4541.068  | 4713.549  | NM_01833E | 798.686   | 1044.251  | NM_000664 | 1689.349  | 1381.215  |
| NM_001854 | 581.02    | 519.29    | NM_01868E | 39086.375 | 39858.02  | AF075085  | 73114.086 | 62518.602 |
| NM_01791E | 2719.733  | 2977.091  | NM_006984 | 2373.345  | 2960.411  | NM_00589E | 4483.83   | 3614.292  |
| NM_00275E | 10405.488 | 12299.728 | AF231919  | 1318.605  | 1462.137  | NM_00647E | 3682.792  | 4203.913  |
| AK024799  | 887.746   | 1001.975  | NM_018214 | 1637.306  | 2465.349  | AF132734  | 23190.434 | 22135.479 |
| NM_00333C | 14910.643 | 16714.953 | Y11718    | 775.39    | 950.096   | NM_01837E | 3452.462  | 3632.81   |
| NM_002481 | 435.026   | 544.059   | AL133644  | 4724.206  | 2784.591  | NM_01640E | 39113.277 | 38181.922 |
| NM_003647 | 1816.999  | 2121.988  | NM_00270E | 1591.335  | 1261.763  | NM_01560E | 2342.894  | 2601.156  |
| NM_00169E | 1459.526  | 1840.919  | NM_01902E | 51244.961 | 54825.52  | AK021788  | 927.836   | 1090.607  |
| AB006589  | 440.573   | 600.414   | NM_00442C | 1328.367  | 1285.96   | NM_001921 | 12192.434 | 11224.612 |
| NM_018351 | 637.991   | 597.876   | NM_00549E | 8883.297  | 7795.323  | NM_00623C | 16208.382 | 15907.897 |
| AK023019  | 1127.614  | 1333.464  | NM_01538E | 7668.038  | 9285.905  | NM_01469E | 13940.073 | 15033.032 |
| NM_147171 | 3844.262  | 2988.326  | NM_00173E | 2226.752  | 2516.34   | NM_01340C | 14606.184 | 16667.123 |
| AF238083  | 1567.119  | 1409.915  | NM_00506E | 1124.92   | 901.077   | AK026257  | 4140.244  | 4504.291  |
| NM_00296E | 821.739   | 647.998   | NM_01782E | 11581.784 | 10265.699 | AK023836  | 6183.79   | 7103.015  |
| NM_01638E | 2862.641  | 2945.315  | NM_01403E | 3085.814  | 2871.037  | NM_01810E | 4175.133  | 4013.318  |
| AB046783  | 4906.754  | 4598.63   | NM_02012E | 15723.114 | 14492.385 | AJ299442  | 5728.068  | 6555.648  |
| NM_00084E | 713.481   | 702.594   | NM_01343E | 7976.822  | 7656.658  | NM_00012E | 5822.543  | 9203.84   |
| NM_004604 | 10894.755 | 11616.636 | AB020716  | 797.643   | 865.093   | NM_00376E | 9465.085  | 9917.979  |
| NM_01496E | 2228.452  | 2449.76   | NM_00229E | 59951.004 | 64358.465 | NM_00485E | 13716.078 | 10331.794 |
| NM_00488E | 7953.634  | 6396.014  | AK027130  | 1399.587  | 1281.045  | NM_01635E | 1664.447  | 1217.041  |
| AL390148  | 9714.698  | 9543.536  | NM_00547E | 18177.072 | 21264.402 | NM_005014 | 1095.574  | 765.255   |
| AK024055  | 1674.725  | 1535.559  | NM_00573C | 39634.387 | 43462.289 | NM_006944 | 852.948   | 891.909   |
| U10485    | 2040.604  | 2349.603  | NM_00539E | 1619.995  | 1059.512  | NM_00007C | 4983.794  | 4857.331  |
| AK025326  | 1191.343  | 1655.414  | AL133572  | 4086.052  | 2890.531  | NM_00120E | 1884.702  | 1952.166  |
| NM_01337E | 1672.763  | 2034.184  | AK022500  | 2255.863  | 1570.876  | AB037804  | 770.384   | 643.862   |
| NM_017964 | 2142.145  | 2194.329  | U52096    | 4308.742  | 2706.843  | U34249    | 1166.25   | 950.112   |
| NM_01627E | 971.866   | 1158.418  | AB013897  | 1743.393  | 1204.323  | NM_00328E | 66597.891 | 62961.508 |
| NM_00408E | 9831.735  | 11637.276 | NM_00552E | 27800.945 | 21936.604 | AI200114  | 1264.322  | 1475.951  |
| NM_001184 | 5244.068  | 6469.832  | AK001669  | 3017.127  | 2339.87   | M23254    | 907.672   | 953.625   |
| NM_01553C | 11044.065 | 12743.819 | NM_00619C | 11400.179 | 12269.591 | BE618539  | 1169.173  | 1336.598  |
| NM_01623E | 4878.672  | 6577.903  | NM_00636E | 5086.385  | 5826.063  | R28062    | 2701.901  | 3377.447  |
| NM_00175E | 814.043   | 828.434   | NM_00413E | 440.731   | 593.12    | AI627464  | 659.688   | 734.015   |

|           |           |           |           |           |           |           |           |           |
|-----------|-----------|-----------|-----------|-----------|-----------|-----------|-----------|-----------|
| BE546276  | 626.297   | 608.934   | NM_001618 | 4175.008  | 2989.541  | BI756258  | 3633.324  | 4136.013  |
| NM_004725 | 15908.369 | 13837.792 | BC000401  | 13810.808 | 13694.754 | AF110020  | 1070.94   | 1275.445  |
| NM_015997 | 2599.538  | 3060.3    | NM_006425 | 5636.186  | 5816.693  | AA608557  | 8256.797  | 10230.168 |
| NM_001167 | 1395.312  | 1771.375  | BF344046  | 676.931   | 983.674   | AL050095  | 5269.681  | 6660.346  |
| NM_012115 | 3483.489  | 2920.656  | AF432218  | 13405.869 | 13699.178 | NM_003095 | 1931.108  | 1573.192  |
| NM_004933 | 4325.36   | 4888.453  | NM_004286 | 4668.517  | 9638.44   | NM_014781 | 4352.628  | 3248.124  |
| M96577    | 12592.786 | 11141.694 | AK025082  | 2879.187  | 1901.199  | BU629989  | 1206.738  | 1033.744  |
| NM_013255 | 1218.862  | 1253.683  | AF086535  | 671.858   | 528.683   | X87896    | 1288.069  | 1357.858  |
| NM_003842 | 4860.066  | 5284.475  | AB040901  | 785.31    | 735.264   | M88310    | 2866.895  | 2549.666  |
| NM_016184 | 1832.807  | 1942.985  | AL137406  | 4055.998  | 3314.422  | NM_000042 | 1967.082  | 2134.641  |
| L11238    | 14416.503 | 14605.664 | NM_012253 | 4028.054  | 2991.167  | AF035787  | 879.26    | 1186.608  |
| AK025684  | 1441.752  | 1356.988  | NM_006876 | 1668.51   | 1263.262  | NM_014805 | 2140.778  | 2124.589  |
| NM_012205 | 1422.777  | 1126.691  | NM_000293 | 1626.181  | 1134.817  | AB006627  | 1336.855  | 1338.652  |
| K02046    | 6942.44   | 6261.531  | NM_003745 | 1329.618  | 1199.185  | NM_000415 | 7467.581  | 8105.99   |
| AL110151  | 9174.596  | 11838.304 | AF153821  | 1509.656  | 1966.098  | NM_002965 | 1601.18   | 1792.186  |
| NM_003293 | 397.202   | 690.589   | NM_013370 | 2005.429  | 2732.229  | AB007883  | 3198.461  | 3148.647  |
| NM_000385 | 10314.163 | 13577.546 | NM_001374 | 684.83    | 752.941   | AK093780  | 8572.903  | 9440.853  |
| NM_007231 | 900.016   | 1118.151  | NM_003310 | 7303.457  | 7431.636  | NM_001645 | 677.423   | 921.34    |
| NM_001190 | 5959.507  | 7193.361  | AK024461  | 1928.585  | 2068.843  | NM_005492 | 2425.292  | 2545.273  |
| NM_005271 | 12944.342 | 17542.418 | AK025485  | 1199.841  | 421.895   | AF038196  | 4142.5    | 4694.684  |
| NM_015654 | 7862.537  | 11680.647 | NM_017635 | 3143.768  | 3067.582  | AF320294  | 4020.735  | 3355.117  |
| NM_012244 | 3137.393  | 3914.112  | X62534    | 2180.004  | 2457.837  | AF161436  | 7012.305  | 6227.782  |
| NM_004341 | 1559.892  | 2212.641  | AF027147  | 30027.041 | 23674.684 | NM_020402 | 4047.11   | 4181.404  |
| AB082521  | 4213.637  | 4889.921  | M62399    | 5571.575  | 6132.049  | NM_004295 | 3643.345  | 3176.994  |
| AL050182  | 877.214   | 801.365   | NM_002357 | 592.246   | 813.823   | NM_001171 | 1465.219  | 1554.903  |
| NM_020040 | 1937.335  | 1765.141  | U71600    | 1747.787  | 2622.576  | NM_002250 | 5118.1    | 5262.893  |
| AK026940  | 3788.628  | 3755.136  | NM_004472 | 1457.124  | 1642.565  | NM_006323 | 9888.692  | 11101.206 |
| AF155117  | 3801.935  | 3503.584  | AB037862  | 1741.54   | 2815.354  | NM_016465 | 3247.369  | 3368.296  |
| AB014527  | 1082.559  | 1263.799  | AK023887  | 705.8     | 428.73    | NM_001493 | 9502.119  | 12931.906 |
| NM_004411 | 2923.272  | 3507.881  | AF088022  | 10176.898 | 7214.325  | NM_014841 | 459.013   | 683.465   |
| NM_015935 | 7083.262  | 8099.792  | AK026537  | 1967.492  | 1574.846  | NM_014425 | 15153.134 | 16643.078 |
| NM_000740 | 675.429   | 725.096   | NM_015485 | 3322.034  | 2292.471  | NM_000255 | 16109.37  | 18396.156 |
| NM_017843 | 5044.137  | 3856.527  | NM_002665 | 6722.816  | 9306.551  | AB033055  | 6982.29   | 8239.828  |
| AK025985  | 973.932   | 1462.458  | AF202145  | 3818.777  | 3743.039  | AF311287  | 3751.866  | 4067.435  |
| NM_013255 | 2398.047  | 2733.363  | AK026155  | 1557.366  | 1281.393  | AJ299442  | 5985.453  | 4861.642  |
| NM_004143 | 1311.728  | 1277.123  | NM_018052 | 44445.105 | 59689.805 | NM_000125 | 4068.552  | 3656.258  |
| X66087    | 1351.455  | 1106.823  | AK022386  | 4984.886  | 5251.863  | NM_003762 | 8791.956  | 9149.918  |
| NM_016325 | 2981.904  | 3433.106  | NM_002767 | 6801.16   | 7288.858  | NM_018445 | 6243.406  | 6642.193  |
| NM_017544 | 8951.632  | 10327.964 | AF131846  | 12903.802 | 13190.149 | NM_000187 | 1119.23   | 1018.27   |
| NM_003153 | 1548.757  | 2330.13   | AF088069  | 3022.669  | 3606.467  | NM_014465 | 2137.1    | 2153.831  |
| NM_016285 | 1784.823  | 2094.838  | AF086551  | 984.751   | 1059.01   | D87292    | 984.562   | 1351.831  |
| NM_014707 | 1615.71   | 1765.086  | NM_013393 | 5427.799  | 7375.292  | NM_005495 | 2007.013  | 2432.544  |
| AF025771  | 2077.004  | 2309.142  | AK025072  | 1245.043  | 993.194   | NM_016335 | 2402.909  | 2838.584  |
| NM_018215 | 2588.138  | 2735.215  | L10378    | 9978.885  | 7779.523  | NM_003165 | 7099.836  | 7913.886  |
| AB033110  | 588.107   | 576.527   | AJ227860  | 1728.452  | 1481.185  | NM_003905 | 13405.666 | 16991.758 |
| NM_005083 | 4190.75   | 3863.286  | AL157448  | 695.887   | 598.863   | AL359590  | 46925.5   | 51558.289 |
| NM_007187 | 11760.272 | 13286.938 | AF026942  | 2131.914  | 1842.189  | NM_002861 | 13242.623 | 16020.639 |
| NM_001825 | 632.882   | 733.016   | AJ276429  | 1002.014  | 839.058   | NM_003080 | 5169.766  | 6143.14   |
| NM_018983 | 15682.876 | 17941.105 | AL117657  | 1011.578  | 825.533   | NM_013265 | 728.15    | 813.379   |
| NM_003095 | 10618.01  | 9413.146  | AK023589  | 1153.362  | 1004.866  | NM_002645 | 2741.267  | 2930.573  |
| NM_007275 | 6148.347  | 5834.223  | AK021590  | 1692.783  | 3101.482  | AB033027  | 3043.731  | 4007.459  |
| BE390833  | 23659.004 | 20646.783 | AK023998  | 2291.722  | 2847.037  | AK021805  | 14515.724 | 17851.814 |
| NM_004730 | 9006.141  | 9278.289  | AK021643  | 508.562   | 693.191   | AB014550  | 4538.097  | 4383.819  |

|           |           |           |           |           |           |           |           |           |
|-----------|-----------|-----------|-----------|-----------|-----------|-----------|-----------|-----------|
| NM_000801 | 4565.052  | 4141.204  | U84507    | 1065.265  | 962.741   | NM_006826 | 26883.461 | 21265.146 |
| NM_006115 | 12992.355 | 12160.061 | AK000872  | 1239.039  | 1892.656  | AB007973  | 9141.274  | 7538.235  |
| NM_005801 | 5838.885  | 6180.953  | AK027147  | 7448.539  | 9979.908  | NM_002995 | 672.833   | 837.995   |
| NM_018195 | 5501.942  | 5184.981  | AK026084  | 695.751   | 472.543   | M96843    | 8292.761  | 8532.46   |
| NM_001535 | 22432.967 | 20032.541 | AK022415  | 19135.094 | 8475.392  | NM_017791 | 2178.434  | 2408.97   |
| NM_012267 | 659.737   | 596.719   | AL137368  | 848.74    | 947.16    | NM_005882 | 10337.003 | 10977.368 |
| AK027232  | 5974.601  | 9022.475  | AK026787  | 2751.827  | 1836.811  | BC012304  | 8112.004  | 9109.804  |
| NM_012204 | 1110.615  | 1063.125  | AK023542  | 765.273   | 628.524   | AB046815  | 3336.753  | 4251.709  |
| NM_003613 | 1161.801  | 1533.455  | AK000203  | 835.659   | 523.035   | AF075085  | 59733.535 | 58322.449 |
| NM_000022 | 46515.988 | 48954.805 | AK021845  | 3597.052  | 3272.302  | NM_005892 | 3082.625  | 3206.306  |
| NM_016576 | 13224.108 | 14286.237 | NM_018592 | 2017.88   | 1655.022  | NM_006475 | 3136.921  | 3862.364  |
| NM_004213 | 1696.896  | 1755.635  | NM_018503 | 15798.536 | 13145.66  | AF132734  | 16954.561 | 17455.656 |
| NM_001925 | 45401.355 | 54575.34  | NM_016449 | 21478.348 | 26046.219 | NM_018375 | 2640.325  | 3220.419  |
| NM_000906 | 1904.307  | 2167.77   | NM_018512 | 4638.403  | 5038.586  | NM_016403 | 36052.645 | 39269.508 |
| NM_000480 | 8145.077  | 8506.257  | AK022412  | 3903.48   | 4456.232  | NM_015603 | 2411.283  | 2700.18   |
| AF254084  | 41103.297 | 45150.355 | AK023073  | 3919.599  | 3362.427  | AK021788  | 850.101   | 910.697   |
| AK022976  | 1593.554  | 1568.648  | AK022438  | 946.335   | 1285.405  | NM_001921 | 10378.524 | 10674.264 |
| AB048791  | 4771.34   | 5322.14   | AK023764  | 619.823   | 846.244   | NM_006230 | 14902.036 | 14606.781 |
| NM_003107 | 14148.922 | 15370.102 | AK024082  | 562.404   | 786.657   | NM_014695 | 10414.074 | 13260.291 |
| NM_006874 | 4384.594  | 4022.063  | AK025062  | 1873.023  | 1662.561  | NM_013400 | 13669.7   | 14218.613 |
| AB046777  | 4522.25   | 3800.623  | Z27405    | 20320.17  | 13740.534 | AK026257  | 5009.3    | 5470.56   |
| AJ251844  | 2559.341  | 2469.648  | AK023412  | 833.775   | 770.926   | AK023836  | 10222.364 | 13221.449 |
| D16815    | 2740.212  | 2898.92   | NM_014617 | 36605.777 | 25302.666 | NM_018105 | 5790.401  | 8204.649  |
| NM_001880 | 4277.421  | 4196.313  | AK074682  | 2900.861  | 2479.829  | NM_005076 | 17310.891 | 15012.598 |
| AB028943  | 1031.502  | 1002.407  | X74605    | 880.757   | 470.808   | AF253321  | 1705.623  | 1365.569  |
| NM_006194 | 1673.632  | 1291.864  | AK024513  | 693.901   | 695.589   | U80735    | 4989.552  | 4353.454  |
| AK001603  | 1767.798  | 1700.939  | BC036692  | 674.616   | 561.14    | NM_017850 | 2669.318  | 3738.393  |
| U71601    | 2581.867  | 2137.15   | AJ009640  | 2175.471  | 2082.848  | NM_016522 | 1698.698  | 1917.406  |
| AF042838  | 1582.19   | 1338.682  | Y11163    | 757.585   | 720.86    | NM_002224 | 3539.14   | 4374.455  |
| AL137511  | 627.667   | 710.769   | AF035308  | 4032.159  | 3994.241  | X07979    | 53510.121 | 52503.68  |
| X91221    | 450.791   | 398.861   | NM_014054 | 4526.491  | 4095.227  | NM_003874 | 3966.187  | 3092.803  |
| AF075062  | 4819.864  | 5137.739  | AK021840  | 46343.18  | 41406.016 | NM_000082 | 3428.011  | 3200.902  |
| AF147381  | 10739.423 | 10490.572 | AK022228  | 1850.636  | 2081.458  | L13857    | 1554.769  | 1728.292  |
| AK027101  | 6663.181  | 7475.5    | AF086480  | 1816.244  | 2077.794  | NM_018095 | 6327.21   | 7015.907  |
| AF010236  | 687.791   | 714.893   | AK022122  | 1036.434  | 1220.659  | AF286164  | 1772.38   | 1774.278  |
| AF088075  | 1715.65   | 1690.35   | AK000806  | 36427.387 | 19868.191 | AF146277  | 12139.877 | 11944.005 |
| AK026376  | 3440.18   | 3258.538  | NM_016471 | 5866.534  | 4617.431  | AF055033  | 30200.258 | 31350.703 |
| AF088061  | 3519.128  | 3467.264  | NM_001145 | 1072.709  | 795.464   | NM_017700 | 1057.785  | 1208.831  |
| AF086286  | 2116.179  | 2059.844  | NM_005364 | 7469.739  | 5731.749  | M37191    | 12272.345 | 12854.296 |
| AF086376  | 1426.39   | 1467.805  | AK023482  | 3760.543  | 2709.348  | NM_005242 | 1082.911  | 554.858   |
| AF086410  | 1118.583  | 954.971   | AK022798  | 817.135   | 748.287   | NM_003020 | 1058.182  | 1247.923  |
| AF086455  | 764.322   | 767.93    | AL157423  | 685.577   | 684.801   | NM_001114 | 2592.169  | 3670.92   |
| AK022997  | 11684.572 | 11058.071 | NM_017941 | 2103.057  | 1769.448  | X82240    | 1328.374  | 1552.161  |
| NM_017617 | 2605.731  | 2611.404  | AF301016  | 1275.866  | 1052.072  | NM_013995 | 9276.9    | 8644.305  |
| AF131830  | 1337.27   | 1123.746  | BE900527  | 1450.646  | 1199.883  | NM_006010 | 24764.277 | 24761.127 |
| AF147426  | 2232.92   | 2010.226  | D28384    | 62315.582 | 59071.305 | K03191    | 2724.873  | 2477.111  |
| BC019667  | 1265.163  | 1363.346  | AF118079  | 41443.25  | 38915.207 | NM_005075 | 17677.178 | 20590.762 |
| AK026026  | 1172.01   | 1232.423  | AF277572  | 617.661   | 931.326   | NM_005192 | 49036.578 | 47907.625 |
| AF085941  | 15369.782 | 14992.316 | AL365413  | 2104.633  | 2689.847  | NM_004585 | 3276.402  | 3441.516  |
| Z69892    | 6613.025  | 7584.136  | NM_005255 | 7922.697  | 9269.973  | NM_015032 | 6325.907  | 4965.063  |
| AK023590  | 578.17    | 575.452   | NM_000440 | 2136.786  | 1681.18   | AK022956  | 5720.925  | 6488.8    |
| AF087961  | 272.825   | 388.79    | NM_001297 | 5157.989  | 2940.4    | AK023121  | 1425.864  | 1621.401  |
| AL137309  | 2317.196  | 2679.58   | NM_004403 | 8827.563  | 4633.537  | NM_014104 | 52441.594 | 53522.512 |

|           |           |           |             |           |           |           |           |           |
|-----------|-----------|-----------|-------------|-----------|-----------|-----------|-----------|-----------|
| AL137475  | 851.566   | 1042.542  | X64993      | 1295.093  | 785.756   | NM_002392 | 2433.09   | 2758.457  |
| AL161956  | 4432.851  | 5803.947  | NM_004434   | 9873.265  | 5566.472  | NM_002749 | 61585.148 | 60401.633 |
| AL390176  | 3396.529  | 4324.755  | NM_016230   | 2244.437  | 1776.639  | NM_018216 | 7202.927  | 7186.343  |
| AL137356  | 641.555   | 790.489   | NM_001083   | 1034.002  | 685.118   | NM_003390 | 3327.195  | 3764.816  |
| AL137547  | 843.828   | 781.324   | AK023966    | 5576.125  | 4409.228  | AL137747  | 4841.715  | 5382.912  |
| AK021994  | 1288.39   | 1679.215  | AK025702    | 2867.319  | 2057.031  | NM_014755 | 6353.111  | 6786.83   |
| Z70763    | 793.922   | 872.236   | NM_018958   | 1023.903  | 697.236   | AF077188  | 10727.491 | 10506.428 |
| AK023802  | 5905.708  | 4891.015  | AK025119    | 803.179   | 1242.364  | NM_012446 | 9910.421  | 9889.772  |
| AF086103  | 449.015   | 589.519   | AJ224170    | 741.118   | 589.306   | NM_018338 | 914.933   | 852.455   |
| AL080135  | 819.285   | 841.663   | AF085866    | 3786.166  | 5614.034  | NM_018685 | 50147.281 | 47463.008 |
| AK023158  | 1445.8    | 1757.469  | CY3Cy5      | 1427.027  | 330.463   | NM_006984 | 2162.706  | 2275.05   |
| AK000580  | 401.17    | 412.872   | AA397813    | 61913.762 | 58161.141 | NM_018214 | 3068.084  | 4275.317  |
| AF085852  | 2847.234  | 3002.017  | W47350      | 1976.07   | 2086.45   | AL133644  | 12101.933 | 9512.079  |
| AK023952  | 1313.965  | 1205.614  | AI160964    | 598.437   | 613.871   | NM_002706 | 3255.432  | 3111.055  |
| AK000787  | 516.189   | 582.49    | W68291      | 7899.052  | 6916.293  | NM_019023 | 62555     | 65110.977 |
| AF090885  | 21142.445 | 23069.742 | N64384      | 1291.771  | 1185.628  | NM_004420 | 1924.639  | 1730.973  |
| AF161342  | 698.451   | 436.211   | H-X 53655 I | 634.22    | 585.167   | NM_002970 | 1193.597  | 1499.595  |
| NM_016646 | 447.279   | 700.307   | H-U 05770 I | 6534.517  | 6464.036  | NM_005495 | 21439.084 | 20620.227 |
| NM_014082 | 1515.12   | 1451.388  | H-M 65199   | 6400.874  | 5863.8    | NM_013270 | 854.997   | 1158.704  |
| AK022197  | 875.262   | 888.91    | H-M 32315   | 985.362   | 795.895   | NM_015387 | 12395.022 | 12181.089 |
| AK021970  | 733.537   | 903.817   | H-V00536M   | 1733.439  | 1471.746  | NM_001733 | 4356.708  | 3846.309  |
| AK022066  | 13983.816 | 15977.014 | H-D85429M   | 35951.938 | 36569.715 | NM_005065 | 1265.655  | 1379.048  |
| AK022224  | 1661.43   | 1411.655  | BF439832    | 1528.232  | 1563.07   | NM_017825 | 18081.32  | 18219.559 |
| AK022359  | 1050.473  | 1120.876  | BG819162    | 608.346   | 818.169   | NM_014035 | 4618.071  | 5049.268  |
| AK022000  | 661.883   | 714.514   | NM_017532   | 4946.046  | 4969.249  | NM_020122 | 24057.256 | 20479.033 |
| AK022129  | 679.129   | 1013.63   | SR6         | 2175.664  | 1645.15   | NM_013432 | 9495.426  | 8765.941  |
| AK022263  | 1102.777  | 1121.493  | SR8         | 7654.7    | 19875.877 | NM_002298 | 67084.25  | 68672.039 |
| AK022384  | 493.564   | 474.108   | SR10        | 28035.432 | 8980.697  | AK027130  | 1399.967  | 2248.209  |
| AK027198  | 456.529   | 406.816   | CY3Cy5      | 1479.322  | 129.058   | NM_005475 | 24595.553 | 28344.084 |
| AK000257  | 1044.674  | 1126.714  | NM_004447   | 5155.879  | 5222.573  | NM_005730 | 52207.57  | 56897.719 |
| NM_006160 | 1345.769  | 1629.111  | NM_001204   | 1256.261  | 894.5     | NM_005392 | 3077.329  | 2363.325  |
| AF009259  | 247.75    | 362.441   | NM_012116   | 1726.377  | 1691.476  | AL133572  | 7265.966  | 6491.872  |
| AF009260  | 869.987   | 1130.829  | NM_000020   | 1957.672  | 1940.619  | AK022500  | 2900.738  | 2551.957  |
| NM_003079 | 4236.199  | 5321.139  | NM_002442   | 3664.907  | 4226.438  | BC021298  | 755.808   | 1148.47   |
| NM_017902 | 3673.698  | 4250.505  | AB033091    | 3732.848  | 2374.617  | U52096    | 6966.393  | 7213.905  |
| AK021981  | 766.113   | 814.883   | NM_004557   | 4355.916  | 3777.928  | AB013897  | 1256.273  | 1510.854  |
| AL359567  | 1119.98   | 1040.234  | NM_014757   | 14114.154 | 9949.936  | NM_005526 | 39185.063 | 47605.648 |
| NM_017726 | 782.867   | 751.032   | NM_017893   | 737.128   | 676.555   | AK001669  | 3155.374  | 3579.404  |
| AK026716  | 566.46    | 567.771   | NM_001584   | 3102.283  | 3484.3    | NM_006195 | 1122.88   | 1450.62   |
| AL049325  | 1779.105  | 1705.8    | NM_012259   | 28868.033 | 26327.92  | NM_006190 | 16938.43  | 16007.018 |
| AK024154  | 1209.051  | 1348.349  | AF272357    | 1720.999  | 1468.458  | NM_006368 | 7492.41   | 8294.851  |
| AF086341  | 1860.49   | 1480.359  | NM_016372   | 20511.301 | 18087.486 | NM_004133 | 819.106   | 846.982   |
| AK026672  | 1314.362  | 1807.86   | AB020705    | 2120.747  | 2063.884  | NM_001618 | 6795.084  | 7945.84   |
| AK024164  | 13763.221 | 14892.235 | NM_014333   | 961.134   | 889.877   | BC000401  | 19477.496 | 21253.574 |
| AF052130  | 10334.135 | 13040.482 | NM_002980   | 1338.779  | 1315.668  | NM_006425 | 8390.833  | 7380.875  |
| AF130090  | 20068.717 | 22892.113 | BG491613    | 16243.854 | 18730.932 | BF344046  | 1589.494  | 1803.669  |
| AL096727  | 1478.097  | 2151.242  | NM_002728   | 755.016   | 671.531   | AF432218  | 17554.434 | 17651.523 |
| AL080110  | 10564.081 | 11944.726 | NM_000450   | 527.118   | 397.103   | NM_004286 | 3939.301  | 4033.794  |
| NM_020425 | 1851.686  | 2537.468  | NM_004513   | 4487.346  | 4008.867  | AK025082  | 5321.333  | 4145.524  |
| AK024076  | 2145.582  | 3036.296  | NM_001708   | 27906.234 | 26304.08  | AF086535  | 1117.821  | 626.727   |
| M87940    | 1123.957  | 1376.81   | NM_017735   | 1814.291  | 1849.199  | AB040901  | 1245.489  | 994.356   |
| L77588    | 649.16    | 845.57    | AB033044    | 3091.327  | 2751.958  | AL137406  | 5253.49   | 4143.637  |
| AF086304  | 20009.385 | 23012.551 | AB014564    | 895.916   | 666.583   | NM_012253 | 7195.707  | 5475.494  |

|           |           |           |             |           |           |           |           |           |
|-----------|-----------|-----------|-------------|-----------|-----------|-----------|-----------|-----------|
| AB032976  | 2048.119  | 1602.824  | NM_020230   | 4714.824  | 5122.103  | NM_006876 | 2252.389  | 1959.414  |
| AF301222  | 23574.254 | 22632.488 | NM_006762   | 47201.18  | 45030.07  | NM_000293 | 1670.367  | 1567.095  |
| NM_000732 | 58867.766 | 59286.754 | NM_016430   | 1404.522  | 1923.862  | NM_003748 | 1645.419  | 2047.942  |
| AF130044  | 652.528   | 547.513   | BE382905    | 653.921   | 740.435   | AF153821  | 1659.055  | 1980.89   |
| AF087980  | 2552.799  | 2520.959  | AK022558    | 3605.192  | 4223.388  | NM_013370 | 2947.313  | 3349.855  |
| NM_013939 | 510.785   | 538.497   | NM_000824   | 2199.726  | 2167.365  | NM_003310 | 7442.55   | 6473.948  |
| AB038651  | 5746.382  | 6542.652  | NM_004259   | 2660.21   | 2293.773  | AK024461  | 2521.069  | 2652.882  |
| X84838    | 826.861   | 1170.364  | NM_016271   | 4146.134  | 3339.477  | NM_017635 | 3627.151  | 3242.084  |
| AL117643  | 2596.121  | 2239.2    | NM_016619   | 2972.376  | 2703.869  | X62534    | 3617.944  | 3232.62   |
| AF075063  | 119.889   | 407.25    | NM_014481   | 1965.759  | 2409.919  | AF027147  | 39995.375 | 49131.527 |
| AK026524  | 926.163   | 1166.973  | U22172      | 1290.593  | 1242.362  | M62399    | 8870.13   | 12733.473 |
| AB011157  | 5401.811  | 6785.529  | AB032960    | 2174.991  | 2277.88   | NM_002357 | 1334.608  | 2088.367  |
| U17632    | 674.018   | 566.182   | NM_014264   | 8610.918  | 8649.071  | U71600    | 3580.371  | 5576.9    |
| AK026764  | 1890.22   | 2136.05   | AF020089    | 1307.242  | 1470.162  | NM_004472 | 2779.566  | 4246.355  |
| AF113700  | 3100.927  | 3415.611  | NM_006257   | 6037.254  | 6248.663  | AB037862  | 2593.402  | 3325.893  |
| NM_017835 | 13931.908 | 15820.56  | NM_016281   | 6375.186  | 6115.691  | AK023887  | 1167.73   | 742.289   |
| NM_018347 | 2038.25   | 1924.126  | NM_004734   | 14557.253 | 12614.206 | AF088022  | 11787.876 | 8131.73   |
| AF086223  | 564.427   | 240.969   | AK024793    | 1747.426  | 1632.765  | AK026537  | 1916.116  | 1787.578  |
| AK024986  | 601.365   | 588.922   | AF208291    | 854.278   | 1110.995  | NM_015485 | 5847.544  | 4036.414  |
| AK026730  | 1436.043  | 1344.311  | L10284      | 50585.199 | 57172.871 | NM_002666 | 8481.372  | 7441.896  |
| AK024739  | 2270.914  | 2384.883  | NM_000276   | 1229.188  | 2119.008  | AF202145  | 6041.985  | 9354.109  |
| AK026772  | 783.64    | 895.835   | NM_015886   | 930.735   | 1072.505  | AK026155  | 1855.974  | 1641.552  |
| NM_014260 | 14439.371 | 13108.439 | NM_004262   | 1275      | 1179.551  | NM_018052 | 49529.012 | 46789.816 |
| AK026458  | 936.32    | 837.291   | AA397813    | 58623.102 | 55950.656 | AK022386  | 7017.454  | 8288.447  |
| CY3Cy5    | 6665.366  | 420.997   | W47350      | 1750.86   | 1893.793  | NM_002767 | 7868.265  | 8401.077  |
| M23254    | 687.646   | 502.655   | AI160964    | 374.135   | 685.071   | AF131846  | 30403.455 | 35510.898 |
| R28062    | 3706.862  | 3712.708  | W68291      | 7779.488  | 7232.878  | AF088069  | 4032.588  | 4079.964  |
| AI627464  | 1193.724  | 1082.257  | N64384      | 1146.828  | 1116.452  | AF086551  | 1892.432  | 3315.911  |
| BI756258  | 5790.371  | 6728.482  | H-X 53655 I | 645.172   | 577.531   | NM_013393 | 9088.485  | 12416.901 |
| AI342225  | 6803.955  | 8043.722  | H-U 05770 I | 6179.487  | 7125.385  | AK025072  | 2670.799  | 1944.81   |
| AA634103  | 59699.25  | 59060.391 | H-M 65199   | 6480.074  | 5936.38   | L10378    | 15947.463 | 11145.436 |
| AA608557  | 10592.926 | 9950.208  | H-M 32315   | 872.756   | 879.589   | AK022179  | 867.258   | 498.324   |
| AL050095  | 3906.65   | 3535.236  | H-V00536M   | 1547.849  | 1640.305  | AJ227860  | 3327.692  | 2188.604  |
| SR5       | 6546.888  | 6832.993  | BF439832    | 1716.867  | 1622.387  | AL157448  | 1637.448  | 1000.376  |
| SR7       | 6672.813  | 46707.727 | BG819162    | 787.968   | 867.873   | AF026942  | 3331.234  | 2282.639  |
| SR9       | 23227.729 | 4638.349  | NM_017532   | 5502.171  | 5909.025  | AJ276429  | 3267.522  | 2613.745  |
| CY3Cy5    | 8114.428  | 584.189   | AB033044    | 3357.527  | 3417.699  | AL117657  | 2200.066  | 1519.544  |
| NM_014808 | 2204.889  | 2182.501  | AB014564    | 897.772   | 869.67    | AK023589  | 1530.766  | 1645.999  |
| NM_000416 | 6748.933  | 7077.058  | NM_020230   | 5497.938  | 5382.669  | AK021590  | 4126.307  | 3320.767  |
| NM_002965 | 2037.282  | 2354.178  | NM_016430   | 1531.674  | 1800.469  | AB002441  | 1227.314  | 793.905   |
| AK093780  | 11390.265 | 9686.785  | NM_004447   | 5320.068  | 5396.398  | AK023998  | 3919.62   | 2837.703  |
| AY009397  | 8834.418  | 8867.006  | NM_001204   | 1142.597  | 1014.922  | AK021643  | 783.208   | 841.656   |
| NM_007037 | 1849.483  | 1940.41   | BF131321    | 680.188   | 430.398   | AK000872  | 2462.628  | 2198.624  |
| AF038196  | 4089.104  | 4282.85   | NM_012116   | 1653.079  | 1576.772  | AK027147  | 14630.981 | 12480.582 |
| NM_004859 | 4729.805  | 4758.549  | NM_000020   | 1761.68   | 1778.99   | AK026084  | 1105.454  | 941.028   |
| NM_005014 | 1381.868  | 1501.515  | NM_002442   | 3483.2    | 4160.487  | AL137368  | 1596.065  | 1049.175  |
| NM_000070 | 721.376   | 588.106   | AB033091    | 3936.78   | 2854.674  | AK021932  | 1820.532  | 1283.724  |
| NM_001202 | 2427.646  | 2484.5    | NM_004557   | 4897.344  | 4406.819  | AK026787  | 6366.72   | 5267.459  |
| NM_003289 | 8644.691  | 9986.721  | NM_017893   | 755.069   | 925.868   | AK023542  | 1684.046  | 1272.076  |
| NM_006323 | 15559.781 | 14588.933 | NM_001584   | 3479.594  | 4368.457  | AK000203  | 1579.132  | 795.457   |
| NM_016466 | 5384.19   | 5152.56   | NM_012259   | 31546.547 | 29953.25  | AK021845  | 11795.466 | 7958.183  |
| NM_001493 | 7377.98   | 9627.856  | AF272357    | 1699.97   | 2029.828  | AK022434  | 756.675   | 443.022   |
| NM_014841 | 993.147   | 1053.962  | NM_016372   | 18130.76  | 20532.656 | NM_018592 | 4289.875  | 2955.908  |



|           |           |           |             |           |           |           |           |           |
|-----------|-----------|-----------|-------------|-----------|-----------|-----------|-----------|-----------|
| NM_01442E | 18686.402 | 20104.482 | AB020705    | 2437.962  | 2708.52   | NM_01850E | 49339.012 | 36253.137 |
| NM_00681E | 22347.242 | 23663.285 | NM_01433E   | 1095.831  | 1499.271  | NM_01644E | 39383.613 | 28637.512 |
| AK026518  | 49893.895 | 47421.375 | NM_00298E   | 1382.825  | 1383.953  | AL049670  | 8614.22   | 8171.465  |
| AB033055  | 9552.672  | 9799.779  | NM_00272E   | 744.341   | 902.705   | NM_01851E | 16306.394 | 16366.247 |
| AF311287  | 4663.271  | 4732.498  | NM_00045E   | 582.568   | 872.636   | AK022412  | 5521.724  | 4711.974  |
| NM_00309E | 2551.431  | 2428.41   | NM_00044E   | 478.075   | 550.362   | AK023073  | 8986.118  | 7515      |
| NM_014781 | 4652.131  | 4301.575  | NM_00451E   | 4454.65   | 5308.724  | AK023922  | 998.856   | 974.555   |
| X87896    | 834.248   | 682.725   | NM_00170E   | 30096.508 | 33020.492 | AK022438  | 2040.994  | 2592.986  |
| M88310    | 2116.558  | 2266.292  | NM_01773E   | 1933.612  | 1888.482  | AK023316  | 579.286   | 1150.908  |
| NM_00004E | 1987.661  | 2051.45   | AF208291    | 886.377   | 955.413   | AK023764  | 1459.786  | 1358.954  |
| AF035787  | 1361.597  | 1728.315  | NM_00027E   | 1414.35   | 1636.606  | AK024082  | 778.791   | 773.728   |
| NM_00340E | 702.331   | 668.508   | BE382905    | 411.089   | 484.346   | AK025062  | 3515.311  | 3869.622  |
| NM_00316E | 6557.093  | 6130.33   | AK022558    | 3372.624  | 3280.907  | AK023412  | 2989.508  | 3188.478  |
| NM_00390E | 3770.896  | 4465.134  | NM_00080E   | 329.122   | 604.999   | NM_01461E | 62061.227 | 57229.559 |
| AL359590  | 31155.193 | 33151.602 | NM_01753E   | 5201.35   | 5129.959  | AK074682  | 8057.421  | 9065.172  |
| NM_002861 | 11965.24  | 12315.261 | NM_00425E   | 1913.145  | 1359.283  | X74605    | 1805.928  | 2110.404  |
| NM_00308E | 2832.888  | 3186.493  | NM_016271   | 4865.526  | 4483.242  | AK024513  | 2022.888  | 1457.431  |
| NM_01326E | 630.591   | 690.383   | NM_01661E   | 3027.818  | 2782.524  | BC036692  | 1737.235  | 1284.496  |
| NM_00264E | 2486.761  | 3123.527  | NM_014481   | 2390.323  | 3110.581  | AJ009640  | 4144.421  | 3291.555  |
| AB033027  | 1083.872  | 1202.624  | U22172      | 2067.617  | 2332.655  | Y11163    | 1530.542  | 954.04    |
| AK021805  | 6339.798  | 6717.494  | AB032960    | 2633.733  | 3076.022  | AK022026  | 1009.736  | 883.807   |
| AB014550  | 3688.474  | 4576.617  | NM_014264   | 8946.554  | 9644.425  | AF147340  | 1250.606  | 1269.514  |
| AF320294  | 952.263   | 1200.742  | AF020089    | 1659.883  | 1650.838  | AF035308  | 15017.622 | 15094.075 |
| AF161436  | 3934.415  | 4664.215  | NM_006257   | 6612.706  | 7636.102  | NM_014054 | 6018.721  | 5954.507  |
| NM_02040E | 1089.771  | 1373.995  | NM_016281   | 6995.432  | 7460.771  | AK021840  | 55408.07  | 52748.418 |
| NM_00429E | 3319.203  | 2910.471  | NM_004734   | 16930.141 | 16625.629 | AK022228  | 2801.176  | 2928.616  |
| NM_00225E | 9019.762  | 8187.225  | AK024793    | 1817.357  | 2052.394  | AK022031  | 684.341   | 1114.885  |
| S81591    | 1379.431  | 1376.286  | NM_01225E   | 30512.762 | 25830.793 | AF003738  | 578.208   | 831.738   |
| NM_00647E | 4287.815  | 4615.725  | AF272357    | 1797.819  | 1694.912  | AF086480  | 2553.952  | 3019.338  |
| AF132734  | 25557.457 | 29598.307 | NM_01637E   | 23355.553 | 19972.537 | AK000806  | 63459.438 | 57058.473 |
| NM_01837E | 2526.677  | 3276.948  | AB020705    | 3748.873  | 5518.688  | NM_016471 | 10466.485 | 11565.12  |
| NM_01640E | 25032.176 | 26300.359 | NM_01433E   | 1272.649  | 1195.684  | NM_00114E | 1845.78   | 1323.577  |
| NM_01560E | 1890.938  | 2113.128  | NM_00298E   | 1527.374  | 1817.114  | NM_005364 | 12801.567 | 10131.017 |
| NM_001921 | 12146.826 | 10654.324 | NM_00710E   | 49717.969 | 44550.973 | AK023482  | 6492.125  | 5583.96   |
| NM_00623E | 19271.877 | 20641.457 | BG491613    | 15954.082 | 15896.202 | AK022798  | 1726.014  | 2135.13   |
| NM_01469E | 4100.749  | 4145.684  | AA397813    | 56652.832 | 55140.375 | AL157423  | 1945.153  | 2373.85   |
| NM_01340E | 16863.256 | 16518.963 | W47350      | 1767.004  | 1481.834  | AK023115  | 1324.854  | 1506.793  |
| AK026257  | 4946.715  | 4745.105  | AI160964    | 813.368   | 725.046   | AK023176  | 1547.901  | 1748.978  |
| AK023836  | 4669.204  | 3789.609  | W68291      | 8109.955  | 8632.313  | AL161991  | 28065.352 | 28062.686 |
| NM_01810E | 5909.391  | 5770.321  | N64384      | 1755.168  | 1980.365  | D17032    | 38575.047 | 36953.27  |
| AJ299442  | 6460.336  | 6862.793  | H-X 53655 I | 625.125   | 571.35    | AL137292  | 957.54    | 1185.296  |
| AB040897  | 469.28    | 442.798   | H-U 05770 I | 6521.255  | 7368.332  | NM_017941 | 4449.934  | 4251.993  |
| NM_00012E | 1547.576  | 1350.172  | H-M 65199   | 7477.514  | 6856.648  | AF301016  | 1595.695  | 1528.974  |
| NM_00376E | 14486.611 | 14694.477 | H-M 32315   | 888.055   | 932.997   | BE900527  | 2325.782  | 2061.429  |
| NM_01844E | 10124.835 | 10316.932 | H-V00536M   | 1630.818  | 1649.751  | D28384    | 52868.246 | 50850.996 |
| NM_00018E | 878.89    | 960.014   | H-D85429M   | 33763.945 | 39963.961 | AF118079  | 51965.203 | 46207.363 |
| NM_01446E | 1796.432  | 1522.582  | BF439832    | 1581.741  | 1592.4    | AF277572  | 1043.517  | 1368.818  |
| D87292    | 1385.834  | 1582.033  | BG819162    | 677.906   | 814.751   | AL365413  | 3678.497  | 3870.073  |
| NM_00549E | 683.135   | 733.954   | NM_00272E   | 885.751   | 1163.344  | NM_00525E | 7517.76   | 6364.669  |
| NM_00120E | 2699.918  | 2194.805  | NM_00045E   | 721.516   | 674.513   | NM_00044E | 7760.854  | 7067.545  |
| U34249    | 600.124   | 703.711   | NM_00044E   | 543.995   | 341.867   | NM_00129E | 6154.581  | 6001.676  |
| NM_00328E | 8482.071  | 9679.771  | NM_00451E   | 4820.829  | 4617.795  | NM_00440E | 10172.211 | 9789.847  |
| M23254    | 1312.704  | 817.868   | NM_00170E   | 28389.252 | 30063.453 | X64993    | 1361.816  | 1554.076  |

|           |           |           |           |           |           |           |           |           |
|-----------|-----------|-----------|-----------|-----------|-----------|-----------|-----------|-----------|
| BE618539  | 607.436   | 763.141   | NM_017735 | 2371.742  | 2331.229  | NM_004434 | 14199.196 | 12303.597 |
| R28062    | 3838.559  | 4004.663  | AB033044  | 3824.914  | 4236.797  | NM_016230 | 4516.618  | 3282.805  |
| AI627464  | 1102.396  | 934.085   | AB014564  | 975.585   | 818.478   | NM_001083 | 2558.939  | 1762.018  |
| BI756258  | 5349.188  | 6355.614  | NM_020230 | 5145.079  | 4177.225  | AK023966  | 9857.614  | 6050.679  |
| AI342225  | 6474.711  | 7705.692  | NM_006762 | 50018.891 | 40848.98  | AK025702  | 4848.914  | 3380.504  |
| AA634103  | 62870.141 | 66853.578 | NM_006352 | 1718.779  | 1521.835  | NM_018958 | 2364.213  | 1985.497  |
| AA608557  | 11947.179 | 10911.065 | NM_016430 | 1338.178  | 1852.386  | AL050200  | 1230.678  | 1303.553  |
| AL050095  | 4601.026  | 4326.035  | NM_004447 | 4973.361  | 4766.043  | NM_002367 | 774.722   | 992.443   |
| NM_000664 | 1929.237  | 2280.769  | NM_001204 | 1135.235  | 1143.259  | AK022038  | 4109.541  | 5215.795  |
| NM_000042 | 1766.636  | 1832.967  | BF131321  | 685.519   | 931.027   | L31901    | 734.037   | 1174.729  |
| AF035787  | 1326.078  | 1365.632  | NM_012116 | 1538.893  | 1589.325  | AK025119  | 1006.483  | 1030.228  |
| NM_003403 | 643.619   | 731.371   | NM_000020 | 2068.133  | 1992.194  | AF085866  | 5640.08   | 6410.727  |
| NM_014808 | 2731.384  | 2492.371  | NM_000956 | 14241.846 | 13974.038 | NM_006106 | 764.13    | 833.47    |
| AB006627  | 630.469   | 556.237   | NM_002442 | 3359.541  | 3695.916  | CY3Cy5    | 4932.238  | 190.333   |
| NM_000416 | 6504.748  | 7015.367  | AB033091  | 4050.667  | 2354.555  | AA397813  | 62650.43  | 61570.133 |
| NM_002965 | 1841.943  | 1484.234  | NM_004557 | 3601.702  | 3169.902  | W47350    | 2449.704  | 2205.919  |
| AK093780  | 12033.816 | 11428.633 | NM_014757 | 15426.919 | 12561.147 | W68291    | 5639.427  | 5410.004  |
| NM_007037 | 2082.091  | 1671.369  | NM_017893 | 826.256   | 857.183   | H-M 32315 | 690.148   | 963.112   |
| AF038196  | 3907.343  | 4081.383  | NM_001584 | 3376.409  | 4031.666  | H-V00536M | 1184.234  | 1241.01   |
| NM_004859 | 5991.072  | 6642.155  | NM_000809 | 1041.314  | 887.78    | BG819162  | 919.023   | 837.796   |
| NM_006944 | 770.995   | 509.531   | NM_005953 | 36538.781 | 61747.41  | NM_017532 | 5184.887  | 5067.449  |
| NM_002250 | 9013.312  | 7773.596  | NM_014264 | 8384.076  | 9513.349  | SR2       | 56395.957 | 51328.68  |
| S81591    | 1024.844  | 1090.596  | AF020089  | 1773.814  | 2192.614  | SR4       | 15724.42  | 11906.103 |
| NM_001493 | 7703.434  | 8489.951  | NM_006257 | 6138.466  | 5785.948  | SR6       | 2081.783  | 1603.144  |
| NM_014841 | 1058.569  | 986.086   | NM_016281 | 6780.463  | 5891.677  | SR8       | 8371.485  | 20754.781 |
| NM_014426 | 20362.297 | 22137.486 | NM_004734 | 15758.871 | 15545.881 | SR10      | 30998.246 | 8483.786  |
| AK026518  | 58364.805 | 57963.289 | AF208291  | 875.717   | 1266.151  | CY3Cy5    | 4265.371  | 123.661   |
| NM_000258 | 18536.447 | 15188.446 | NM_004877 | 51090.859 | 48628.926 | NM_004447 | 5661.494  | 4770.242  |
| AB033055  | 9086.271  | 8095.956  | L10284    | 47792.059 | 43664.297 | NM_001204 | 1396.971  | 1356.162  |
| AF311287  | 4251.479  | 4575.109  | NM_000276 | 1054.744  | 1148.694  | NM_012116 | 1745.307  | 1696.195  |
| NM_003098 | 2884.26   | 2984.39   | BE382905  | 743.78    | 795.974   | NM_000020 | 2679.99   | 2749.2    |
| NM_014781 | 5281.415  | 4493.53   | AK022558  | 4070.589  | 4846.797  | NM_000956 | 970.714   | 1704.408  |
| BU629989  | 1374.838  | 1387.426  | NM_004259 | 1974.339  | 1860.11   | NM_014757 | 17551.326 | 18402.303 |
| X87896    | 827.514   | 753.786   | NM_016271 | 4766.106  | 5170.468  | NM_017893 | 1876.771  | 1812.861  |
| M88310    | 2139.984  | 2210.095  | NM_016619 | 3064.982  | 2822.236  | NM_012258 | 43903.273 | 54080.836 |
| NM_018446 | 10616.335 | 10546.606 | NM_014481 | 2432.25   | 2596.121  | AF272357  | 1203.173  | 1257.31   |
| NM_000187 | 812.461   | 962.333   | U22172    | 1902.798  | 1971.458  | NM_016372 | 32371.826 | 32165.232 |
| NM_014465 | 2149.521  | 2340.331  | AB032960  | 2554.516  | 2780.767  | AB020705  | 2887.802  | 2053.308  |
| D87292    | 1407.92   | 1593.623  | NM_017675 | 866.814   | 652.169   | NM_014333 | 1571      | 1095.41   |
| NM_005498 | 1274.859  | 1808.647  | NM_015991 | 833.872   | 966.808   | NM_002980 | 1010.086  | 899.553   |
| NM_016335 | 553.08    | 802.181   | NM_004932 | 416.233   | 538.534   | NM_007102 | 67980.523 | 70621.43  |
| NM_003165 | 6593.033  | 5915.598  | NM_002342 | 658.307   | 1096.423  | BG491613  | 20846.119 | 20597.432 |
| NM_003906 | 3820.225  | 4226.005  | NM_002184 | 2540.263  | 3915.488  | NM_000448 | 621.05    | 875.533   |
| AL359590  | 31702.006 | 30389.855 | NM_014883 | 4805.476  | 7481.329  | NM_004513 | 8354.124  | 8267.609  |
| NM_002861 | 10926.126 | 10338.566 | U56387    | 1102.694  | 1184.876  | NM_001708 | 29803.857 | 25382.68  |
| NM_003080 | 3495.185  | 4080.48   | NM_003657 | 1786.297  | 2522.978  | NM_017735 | 2873.054  | 3370.79   |
| NM_004042 | 478.004   | 790.36    | AL049296  | 4295.209  | 4384.249  | AB033044  | 3968.388  | 3490.793  |
| NM_013268 | 512.718   | 682.859   | NM_014471 | 13367.625 | 12095.351 | AB014564  | 730.718   | 810.294   |
| NM_002645 | 2688.494  | 3271.011  | D49356    | 668.924   | 886.983   | NM_020230 | 5401.839  | 5435.733  |
| AB033027  | 1616.875  | 1523.733  | NM_007110 | 2675.973  | 3246.128  | NM_006762 | 56107.352 | 55882.539 |
| AK021805  | 6886.725  | 6805.223  | U50383    | 14355.926 | 19236.205 | NM_006352 | 1771.532  | 1652.63   |
| AB014550  | 3703.061  | 3703.823  | AK025085  | 11914.124 | 18454.982 | NM_016430 | 920.213   | 1171.346  |
| AF320294  | 953.888   | 1499.447  | NM_016317 | 704.892   | 987.189   | NM_005094 | 3457.662  | 3354.64   |

|           |           |           |           |           |           |           |           |           |
|-----------|-----------|-----------|-----------|-----------|-----------|-----------|-----------|-----------|
| AF320293  | 622.555   | 942.751   | NM_006290 | 15305.223 | 26537.744 | BE382905  | 739.497   | 663.416   |
| AF161436  | 5004.874  | 5917.559  | AK022290  | 1100.349  | 1884.177  | NM_002152 | 6451.378  | 6282.576  |
| NM_020402 | 1152.125  | 1286.092  | NM_004849 | 8534.103  | 8722.183  | AK022558  | 4956.445  | 4719.036  |
| NM_004299 | 2997.578  | 3255.387  | AL137527  | 7806.883  | 8161.433  | AK023787  | 2439.854  | 2300.862  |
| NM_000498 | 531.536   | 638.185   | J04974    | 10682.552 | 10881.586 | NM_007177 | 11549.782 | 11708.764 |
| NM_000664 | 2007.805  | 2705.156  | NM_007058 | 9219.795  | 6830.908  | NM_000809 | 860.283   | 1257.315  |
| AF075085  | 58552.035 | 60998.848 | NM_001528 | 1604.554  | 1081.69   | AL359592  | 1000.128  | 970.165   |
| NM_005892 | 1557.533  | 2536.495  | NM_007014 | 1578.135  | 1193.523  | NM_006078 | 9322.968  | 9659.638  |
| NM_006478 | 4064.323  | 4578.12   | AL096740  | 1199.066  | 1022.976  | NM_000824 | 2699.289  | 3145.51   |
| AF132734  | 23684.154 | 23277.66  | AF191545  | 2989.006  | 2839.815  | AK023915  | 6520.759  | 6146.391  |
| NM_018379 | 2430.263  | 2674.191  | NM_014554 | 4068.421  | 3733.186  | AK026842  | 2248.583  | 1738.363  |
| NM_016403 | 24055.131 | 22204.031 | AK023968  | 3524.848  | 4156.878  | NM_002395 | 1524.829  | 1446.263  |
| NM_015603 | 2175.519  | 2233.235  | NM_004652 | 1544.232  | 1349.029  | NM_004259 | 2859.015  | 2477.346  |
| NM_001921 | 12350.33  | 13454.404 | AK025425  | 37279.555 | 38621.457 | NM_016619 | 3591.518  | 4686.42   |
| NM_006230 | 19414.195 | 21639.629 | NM_005781 | 3652.834  | 2734.071  | AB032960  | 2267.665  | 2247.987  |
| NM_014699 | 2341.949  | 2869.298  | BC036740  | 7746.242  | 6485.728  | NM_014264 | 8566.489  | 8301.721  |
| NM_013400 | 19116.686 | 18416.871 | NM_001747 | 17146.953 | 16634.309 | AF020089  | 1944.714  | 1889.543  |
| AK026257  | 5344.247  | 5415.952  | NM_001148 | 17963.795 | 13970.19  | NM_006257 | 7129.44   | 6367.511  |
| AK023836  | 5582.965  | 4432.775  | AF242522  | 6600.49   | 7283.835  | NM_016281 | 12428.881 | 9969.214  |
| NM_018109 | 6088.218  | 5832.135  | AJ008152  | 2535.309  | 2565.13   | NM_004734 | 22918.861 | 22523.664 |
| AJ299442  | 6513.708  | 6734.55   | NM_004024 | 5222.443  | 5178.281  | AK024793  | 2381.421  | 2505.714  |
| AB040897  | 602.853   | 856.661   | X52345    | 21357.883 | 14966.695 | AF208291  | 1198.41   | 1099.838  |
| NM_000129 | 1832.295  | 1717.179  | NM_006965 | 5179.42   | 3759.186  | L10284    | 55041.488 | 57631.199 |
| NM_003762 | 14756.242 | 13839.853 | AF027142  | 62613.688 | 53375.719 | NM_000276 | 1312.827  | 1312.891  |
| NM_004859 | 5366.319  | 5414.936  | AF221520  | 3686.851  | 3693.224  | NM_000019 | 64153.941 | 65503.488 |
| NM_005014 | 1392.81   | 1148.407  | NM_006941 | 39987.164 | 35375.902 | BG491613  | 20995.359 | 18529.113 |
| NM_006944 | 681.009   | 495.808   | AB037852  | 626.799   | 747.409   | AA397813  | 59975.746 | 58047.551 |
| NM_004407 | 582.828   | 542.263   | NM_005360 | 1238.216  | 1572.086  | W47350    | 2528.736  | 2124.713  |
| NM_000070 | 1000.763  | 1055.65   | NM_004349 | 7853.83   | 7794.349  | W68291    | 5317.935  | 6988.23   |
| NM_001202 | 2498.943  | 2337.838  | NM_002092 | 13660.988 | 13274.248 | N64384    | 1585.343  | 1929.266  |
| AB037804  | 371.564   | 673.629   | NM_018077 | 2807.552  | 2861.927  | H-X 53655 | 920.957   | 840.523   |
| U34249    | 660.851   | 962.03    | NM_016839 | 12719.927 | 11288.376 | H-U 05770 | 8064.091  | 7413.357  |
| NM_003289 | 9189.775  | 9409.93   | NM_005968 | 54559.098 | 55811.316 | H-M 65199 | 5739.221  | 5613.768  |
| M23254    | 748.144   | 779.011   | AK021416  | 2391.958  | 2313.587  | H-M 32315 | 879.477   | 1030.536  |
| BE618539  | 643.545   | 507.953   | NM_018471 | 13656.42  | 14766.771 | H-V00536M | 1254.495  | 1322.727  |
| R28062    | 3827.512  | 3675.612  | NM_003819 | 6440.171  | 8081.961  | H-D85429M | 40276.824 | 34892.555 |
| AI627464  | 1229.821  | 1315.783  | NM_016183 | 3077.854  | 3101.603  | BF439832  | 1618.041  | 1189.439  |
| BI756258  | 5082.248  | 5137.507  | NM_004872 | 5130.536  | 5217.864  | BG819162  | 686.164   | 642.119   |
| AI342225  | 6776.286  | 7200.098  | NM_001958 | 42247.102 | 31973.893 | NM_017532 | 4744.16   | 4708.015  |
| AA634103  | 63449.504 | 62100.43  | NM_004757 | 4581.4    | 3775.349  | M38449    | 5688.306  | 4984.18   |
| J04599    | 362.964   | 506.662   | NM_015904 | 7347.698  | 7496.484  | AB033044  | 3818.588  | 3235.296  |
| AA608557  | 12959.782 | 13317.121 | NM_001960 | 53950.832 | 52282.555 | AB014564  | 646.674   | 841.971   |
| AL050095  | 6216.941  | 6749.234  | NM_018122 | 3676.093  | 3605.971  | NM_020230 | 5278.356  | 5015.686  |
| NM_003098 | 3198.369  | 3078.388  | AF035318  | 1321.345  | 1186.879  | NM_006352 | 1325.917  | 1492.212  |
| NM_014781 | 5405.727  | 5072.641  | NM_015456 | 8254.303  | 7351.606  | NM_016430 | 809.294   | 1193.24   |
| BU629989  | 1197.048  | 1424.713  | AK025056  | 1945.818  | 2871.627  | NM_004447 | 4530.414  | 4318.956  |
| X87896    | 979.702   | 964.665   | AF140710  | 4390.291  | 3239.672  | NM_001204 | 1226.579  | 1498.917  |
| M88310    | 2308.578  | 2395.584  | NM_012088 | 10784.71  | 10433.454 | BF131321  | 952.528   | 631.212   |
| NM_000042 | 2191.219  | 2242.149  | NM_017947 | 910.633   | 1087.616  | NM_012116 | 1905.108  | 2478.687  |
| AF035787  | 1267.674  | 1395.347  | NM_002494 | 8929.73   | 7764.167  | NM_000020 | 2926.964  | 3018.111  |
| NM_014808 | 2650.305  | 2386.317  | M58510    | 10782.942 | 16373.366 | NM_000956 | 393.022   | 549.69    |
| AB006627  | 532.308   | 501.057   | NM_000782 | 930.553   | 631.817   | NM_002442 | 3189.274  | 2588.848  |
| NM_000416 | 7005.892  | 7082.525  | BE396003  | 1580.435  | 1389.06   | AB033091  | 4694.973  | 4390.616  |

|           |           |           |           |           |           |           |           |           |
|-----------|-----------|-----------|-----------|-----------|-----------|-----------|-----------|-----------|
| NM_002965 | 1594.419  | 1406.826  | AK023300  | 1507.246  | 1486.755  | NM_004557 | 4292.219  | 4233.982  |
| AK093780  | 11849.987 | 10579.926 | NM_018082 | 1331.482  | 1302.242  | NM_014757 | 19795.965 | 18770.695 |
| AF038196  | 4821.033  | 6510.723  | NM_003904 | 6605.979  | 7234.05   | NM_017893 | 738.642   | 803.48    |
| AF320294  | 924.258   | 1025.129  | NM_006234 | 31277.709 | 31078.158 | NM_001584 | 2888.158  | 2630.835  |
| AF320293  | 614.039   | 819.101   | AB028987  | 5267.182  | 5067.581  | NM_012259 | 40757.875 | 45812.551 |
| AF161436  | 5314.757  | 6166.913  | NM_003594 | 2023.655  | 1987.861  | AF272357  | 1177.407  | 1144.594  |
| NM_020402 | 1026.859  | 1724.249  | NM_005521 | 4734.952  | 5003.751  | NM_016372 | 27236.732 | 27488.359 |
| NM_004299 | 3138.857  | 3070.176  | AF164438  | 7809.983  | 6354.707  | AB020705  | 2582.435  | 2720.424  |
| NM_001171 | 544.134   | 458.835   | AK022284  | 2558.228  | 2403.435  | NM_014333 | 1365.685  | 1248.796  |
| NM_002250 | 8587.741  | 6767.418  | AB040893  | 3416.947  | 3260.032  | NM_002980 | 881.784   | 1223.019  |
| S81591    | 1145.01   | 1271.193  | AL137727  | 3014.696  | 2355.712  | NM_016274 | 14396.919 | 14715.777 |
| NM_003304 | 556.336   | 793.554   | L17327    | 1076.711  | 574.368   | NM_014251 | 1384.541  | 1361.33   |
| NM_006323 | 15392.902 | 13126.506 | AF074986  | 1097.739  | 689.341   | NM_002728 | 519.635   | 698.666   |
| NM_016466 | 5151.521  | 4437.167  | AL049240  | 1978.435  | 1880.561  | NM_000450 | 625.068   | 773.568   |
| NM_001493 | 6712.877  | 7009.631  | U80773    | 1225.802  | 1233.559  | NM_004513 | 6722.059  | 6825.372  |
| NM_014841 | 788.601   | 895.959   | AK021745  | 1387.849  | 1532.019  | NM_001708 | 23928.609 | 22352.773 |
| NM_014426 | 18883.779 | 17801.061 | L38937    | 7851.764  | 7172.71   | NM_017735 | 2732.699  | 2498.233  |
| AB033055  | 10491.656 | 9632.111  | AK021700  | 864.258   | 956.132   | AF208291  | 1688.509  | 1425.135  |
| AF311287  | 5659.923  | 4749.638  | AK000801  | 4869.018  | 6085.152  | L10284    | 55857.613 | 54727.848 |
| AJ299442  | 7402.063  | 8161.486  | D85433    | 6465.924  | 6959.249  | NM_000276 | 1489.551  | 1031.09   |
| AB040897  | 609.974   | 782.841   | AF086184  | 15826.247 | 16135.11  | NM_000019 | 60878.059 | 62061.145 |
| NM_000129 | 1543.621  | 2110.681  | NM_018275 | 5064.048  | 4746.534  | AK023701  | 730.192   | 703.072   |
| NM_003762 | 15584.865 | 14473.937 | AL049266  | 6681.875  | 6769.693  | NM_005094 | 3811.1    | 3421.81   |
| NM_018446 | 9805.306  | 10483.734 | AF088045  | 1065.609  | 1174.047  | BE382905  | 1155.315  | 1255.855  |
| NM_000187 | 1248.036  | 1697.627  | AF007149  | 1036.331  | 1191.611  | NM_002152 | 8379.296  | 9871.386  |
| NM_014465 | 1935.435  | 1669.058  | NM_014705 | 415.08    | 548.794   | AK022558  | 4827.723  | 4331.664  |
| D87292    | 1197.258  | 1380.679  | AK001469  | 2708.323  | 2466.658  | NM_006476 | 62517.422 | 59829.891 |
| NM_005498 | 1137.99   | 897.393   | AK021627  | 1212.212  | 1351.777  | AK023787  | 2733.238  | 2093.385  |
| NM_003165 | 5690.223  | 5105.03   | AF085859  | 1556.867  | 954.142   | NM_002133 | 2541.177  | 2523.768  |
| NM_003906 | 3448.464  | 3471.646  | AF085888  | 494.811   | 595.158   | NM_007177 | 11823.323 | 11069.205 |
| AL359590  | 30132.381 | 25428.119 | AK026307  | 627.199   | 521.262   | AB018258  | 416.905   | 688.111   |
| NM_002861 | 10418.161 | 8818.948  | AL049975  | 692.308   | 924.815   | AL359592  | 888.342   | 1082.155  |
| NM_003080 | 3257.401  | 3294.929  | AL117464  | 4684.147  | 4377.652  | NM_006078 | 7588.707  | 8646.352  |
| NM_013268 | 731.71    | 645.678   | AL080160  | 974.365   | 1036.601  | NM_000824 | 2923.125  | 3019.622  |
| NM_002645 | 2974.48   | 3185.959  | L23849    | 613.341   | 618.651   | NM_017532 | 4760.29   | 4401.751  |
| AB033027  | 1289.98   | 1532.379  | AL157477  | 2665.822  | 2760.523  | M38449    | 6008.458  | 4763.184  |
| AK021805  | 6818.516  | 6555.577  | AB002318  | 1996.854  | 1614.212  | AK023915  | 8028.278  | 8442.675  |
| AB014550  | 3849.655  | 3495.963  | AL357535  | 1354.787  | 1217.077  | AK026842  | 2032.153  | 2601.049  |
| NM_006826 | 37137.984 | 37661.121 | AL049951  | 2246.544  | 2034.147  | NM_002395 | 1717.404  | 1554.391  |
| AB007973  | 15252.663 | 16707.83  | AK024963  | 539.73    | 779.066   | NM_004259 | 2693.463  | 2232.352  |
| NM_002999 | 835.072   | 945.74    | AK023725  | 2771.566  | 2642.695  | NM_016271 | 5496.506  | 5381.204  |
| M96843    | 4449.425  | 4359.558  | AK022936  | 4675.199  | 5630.548  | NM_016619 | 3210.091  | 2750.829  |
| NM_017791 | 1147.986  | 1529.122  | AK024385  | 2536.651  | 2581.67   | NM_014481 | 2079.17   | 1850.992  |
| NM_005882 | 13203.834 | 14795.579 | NM_017709 | 2013.406  | 1520.797  | U22172    | 2750.991  | 2352.131  |
| BC012304  | 9871.43   | 12011.085 | AF049615  | 785.706   | 442.936   | AB032960  | 2803.829  | 2988.383  |
| AB046815  | 4267.366  | 4868.414  | NM_014358 | 27543.504 | 38942.113 | NM_014264 | 10160.96  | 7722.734  |
| AF075085  | 61736.285 | 59292.773 | AF009282  | 4705.126  | 4967.018  | AF020089  | 1959.587  | 1925.24   |
| NM_005892 | 1555.863  | 1875.098  | AF024704  | 9298.535  | 7701.046  | NM_006257 | 7264.802  | 6175.49   |
| NM_006478 | 3777.45   | 4405.054  | AF056431  | 1146.24   | 1181.083  | NM_016281 | 13201.648 | 10855.255 |
| AF132734  | 21635.158 | 21812.109 | NM_016412 | 937.134   | 891.269   | NM_004734 | 22787.129 | 24275.879 |
| NM_018379 | 2448.586  | 2910.379  | AF009293  | 1370.638  | 969.203   | AK024793  | 2539.844  | 2800.292  |
| NM_016403 | 24382.217 | 23625.229 | NM_004158 | 60670.492 | 51339.949 | NM_012259 | 32799.402 | 34775.305 |
| NM_015603 | 968.887   | 1228.216  | AF056444  | 4157.544  | 3772.457  | AF272357  | 1237.285  | 857.164   |

|           |           |           |           |           |           |           |           |           |
|-----------|-----------|-----------|-----------|-----------|-----------|-----------|-----------|-----------|
| NM_001921 | 12503.045 | 11838.227 | AK000989  | 1842.922  | 2218.99   | NM_016372 | 23925.16  | 19908.471 |
| NM_006230 | 19821.65  | 19097.715 | AK002210  | 4875.691  | 4489.565  | AB020705  | 2389.438  | 2215.414  |
| NM_014695 | 2647.521  | 3147.656  | AK021677  | 790.317   | 865.209   | NM_014333 | 1381.202  | 1260.911  |
| NM_013400 | 20446.688 | 20370.623 | AK001057  | 886.825   | 792.124   | NM_002980 | 869.695   | 919.689   |
| AK026257  | 5785.229  | 6359.584  | AK021471  | 1018.74   | 878.73    | NM_007102 | 66796.867 | 69005.367 |
| AK023836  | 7818.341  | 8182.5    | AK021709  | 893.993   | 628.314   | BG491613  | 23053.066 | 25558.641 |
| NM_018105 | 7649.189  | 8354.275  | AK025109  | 2707.226  | 3058.026  | AA397813  | 57183.289 | 57630.281 |
| NM_005076 | 1719.116  | 2026.638  | AK026057  | 2214.178  | 2106.36   | W47350    | 2895.752  | 2510.179  |
| AF253321  | 918.501   | 877.605   | AJ008117  | 12088.427 | 8914.932  | W68291    | 4416.273  | 3651.652  |
| U80735    | 8018.717  | 8189.967  | AJ008147  | 28221.832 | 21600.145 | N64384    | 1478.677  | 1422.384  |
| NM_017850 | 3438.184  | 4093.53   | AK024369  | 1738.912  | 1282.808  | H-X 53655 | 899.562   | 877.815   |
| NM_016522 | 928.094   | 602.196   | L43345    | 1728.93   | 1404.73   | H-U 05770 | 8700.767  | 7574.239  |
| NM_002224 | 4404.187  | 6498.269  | AF180297  | 4988.175  | 4156.934  | H-M 65199 | 8005.124  | 6812.02   |
| X07979    | 14151.233 | 15676.492 | AK023245  | 2163.292  | 1972.759  | H-M 32315 | 1094.324  | 1063.635  |
| NM_003874 | 3290.164  | 3045.045  | AF086224  | 888.566   | 500.724   | H-V00536M | 1712.792  | 1408.798  |
| NM_000082 | 3188.165  | 2834.365  | S56365    | 60295.008 | 57344.016 | H-D85429M | 42515.195 | 43639.598 |
| L13857    | 1575.014  | 1704.084  | AK023607  | 856.79    | 911.62    | BF439832  | 1705.673  | 1941.507  |
| NM_018095 | 8636.449  | 8275.791  | AL049997  | 10851.345 | 11959.383 | BG819162  | 822.169   | 624.189   |
| AF286164  | 2239.234  | 1605.888  | AK024118  | 764.813   | 973.259   | NM_002725 | 638.702   | 647.692   |
| AF146277  | 6870.191  | 5984.68   | X89657    | 579.172   | 881.89    | NM_000450 | 919.932   | 589.915   |
| NM_002555 | 659.045   | 527.477   | AK024509  | 2463.019  | 2209.044  | NM_004513 | 6259.235  | 6281.281  |
| NM_017700 | 1776.938  | 1470.311  | NM_017847 | 3347.305  | 2553.437  | NM_001705 | 24958.385 | 21836.842 |
| M37191    | 5570.776  | 5606.583  | AL049675  | 2341.785  | 1853.241  | NM_017735 | 2483.916  | 2177.218  |
| NM_005242 | 835.891   | 847.145   | AL050151  | 788.535   | 614.739   | AB033044  | 2946.861  | 2798.088  |
| NM_003020 | 1001.285  | 950.645   | NM_003537 | 21656.887 | 19950.992 | AB014564  | 666.948   | 775.711   |
| NM_001114 | 3054.784  | 3572.619  | AF056419  | 24261.131 | 24161.936 | NM_020230 | 5747.753  | 7106.107  |
| X82240    | 4055.166  | 4103.241  | AF074983  | 1123.987  | 1383.42   | NM_006762 | 53327.598 | 60953.168 |
| NM_013995 | 13197.671 | 13883.113 | AK021862  | 749.999   | 449.626   | NM_006352 | 1744.829  | 2176.594  |
| NM_004455 | 689.703   | 715.112   | AK024177  | 1840.78   | 1950.043  | NM_016430 | 975.365   | 1219.566  |
| NM_006010 | 27349.109 | 35568.102 | AK024827  | 8375.919  | 8579.036  | NM_004447 | 5217.47   | 4261.384  |
| K03191    | 5343.167  | 7233.841  | AK021952  | 869.469   | 1145.574  | NM_001204 | 1511.596  | 1431.964  |
| NM_005075 | 32992.242 | 40649.891 | AF090102  | 714.323   | 645.297   | BF131321  | 554.28    | 839.952   |
| NM_004585 | 2764.788  | 3418.05   | K01564    | 1496.796  | 1364.532  | NM_012116 | 1563.89   | 1350.567  |
| NM_015032 | 4313.804  | 3227.544  | AB023175  | 10937.823 | 9071.631  | NM_000020 | 2593.273  | 1980.87   |
| AK022956  | 5941.451  | 6534.388  | AL359563  | 1627.658  | 1614.837  | NM_002442 | 3812.657  | 2719.217  |
| AK023121  | 1962.755  | 1634.559  | NM_005304 | 679.627   | 558.71    | AB033091  | 4685.931  | 4582.466  |
| NM_014104 | 17552.15  | 18907.127 | NM_014477 | 1023.329  | 968.102   | NM_004557 | 5019.64   | 4856.743  |
| NM_002392 | 3388.701  | 3265.301  | AF086478  | 4731.052  | 5463.561  | NM_014757 | 19890.902 | 21378.982 |
| NM_002745 | 14273.196 | 16112.554 | AF086022  | 594.438   | 843.759   | NM_017893 | 782.26    | 939.276   |
| NM_018216 | 7133.13   | 6688.458  | AK021514  | 57713.277 | 53117.852 | NM_001584 | 3049.106  | 2574.767  |
| NM_003390 | 3110.603  | 2983.532  | AJ008134  | 1847.639  | 2346.17   | NM_000805 | 470.587   | 961.828   |
| AL137747  | 1278.584  | 1023.726  | S71486    | 2001.241  | 3454.729  | AL359592  | 893.523   | 871.048   |
| NM_014755 | 4765.928  | 4595.345  | L33808    | 19386.021 | 17554.121 | NM_006075 | 7725.704  | 7612.484  |
| AF077188  | 13464.396 | 12176.106 | D31886    | 3522.658  | 2993.271  | NM_000824 | 2387.627  | 2571.895  |
| NM_012446 | 11731.075 | 10921.32  | U92024    | 584.984   | 266.357   | NM_016274 | 15852.063 | 17361.697 |
| NM_018685 | 53784.637 | 53641.891 | AK023330  | 5390.792  | 4075.437  | NM_014264 | 9417.135  | 9084.382  |
| NM_018214 | 2223.795  | 2614.49   | AF075071  | 1880.45   | 1363.969  | AF020089  | 1543.974  | 1337.819  |
| AL133644  | 7912.816  | 6596.48   | AF001892  | 787.31    | 740.114   | NM_006257 | 6570.447  | 5046.012  |
| NM_002706 | 3711.985  | 4050.197  | X93500    | 1814.857  | 1620.785  | NM_016281 | 11519.597 | 8651.822  |
| NM_019023 | 16946.496 | 19707.695 | U79271    | 1801.825  | 1808.929  | NM_004734 | 21684.611 | 20806.285 |
| NM_004420 | 2915.744  | 3001.244  | NM_019885 | 1212.667  | 1649.01   | AK024793  | 2575.275  | 2623.355  |
| NM_005495 | 20142.498 | 21407.152 | AK024609  | 5534.305  | 5330.743  | AF208291  | 1789.525  | 1576.13   |
| NM_015387 | 11241.666 | 11208.957 | NM_018120 | 5522.437  | 5004.75   | NM_000276 | 1474.898  | 1746.84   |

|           |           |           |           |           |           |           |           |           |
|-----------|-----------|-----------|-----------|-----------|-----------|-----------|-----------|-----------|
| NM_001733 | 1199.769  | 1854.086  | AK027209  | 2387.893  | 1849.967  | NM_000019 | 60928.242 | 58853.98  |
| NM_005065 | 2134.557  | 2077.665  | AK026874  | 815.684   | 721.402   | AK023701  | 1011.884  | 1131.898  |
| NM_017825 | 15372.818 | 14001.896 | AK024178  | 502.217   | 580.807   | NM_005094 | 3745.404  | 3376.825  |
| NM_014035 | 4069.66   | 3408.888  | D17217    | 2548.623  | 3114.046  | AK023787  | 3611.318  | 4540.805  |
| NM_020122 | 20048.777 | 17507.201 | AF088033  | 2314.533  | 2092.913  | NM_002133 | 1727.978  | 2496.238  |
| NM_013432 | 8815.334  | 8317.879  | NM_020422 | 3933.705  | 4315.278  | M38449    | 6329.273  | 6049.446  |
| AB020716  | 1196.424  | 1348.481  | AJ227897  | 848.538   | 1125.982  | NM_004255 | 3255.266  | 4761.364  |
| NM_002295 | 67363.367 | 62339.578 | AY007156  | 2122.085  | 1946.419  | NM_016619 | 3895.039  | 5107.583  |
| AK027130  | 1971.561  | 3143.816  | AF086408  | 51767.961 | 51432.719 | NM_014481 | 3008.081  | 3305.507  |
| NM_005730 | 18932.75  | 19690.623 | AK023979  | 3114.411  | 3315.297  | U22172    | 3097.503  | 2957.19   |
| NM_005392 | 3582.932  | 3054.069  | CY3Cy5    | 5963.175  | 589.094   | AB032960  | 2882.576  | 3095.553  |
| AL133572  | 8403.359  | 9698.597  | U13738    | 2880.435  | 2704.403  | NM_017675 | 900.612   | 965.914   |
| AK022500  | 4057.817  | 4181.167  | AF068236  | 48057.742 | 57984.25  | NM_015991 | 1225.042  | 721.104   |
| BC021298  | 1474.071  | 1821.017  | H94487    | 2085.996  | 2249.277  | NM_000230 | 3757.845  | 2665.794  |
| U52096    | 5304.504  | 5464.115  | BG681747  | 31631.975 | 34278.789 | U56387    | 1415.343  | 1446.246  |
| AB013897  | 2587.183  | 3150.089  | H63077    | 35586.781 | 34697.473 | NM_003657 | 1153.568  | 979.562   |
| NM_005525 | 26428.42  | 33225.234 | AA679352  | 21699.262 | 21512.678 | AL049296  | 6308.589  | 5289.799  |
| AK001669  | 1629.957  | 1451.896  | AA437291  | 372.301   | 478.755   | NM_014471 | 50437.895 | 50398.371 |
| NM_006195 | 1044.51   | 1071.892  | X04503    | 2436.433  | 1876.749  | NM_004397 | 2908.241  | 3712.289  |
| NM_006190 | 18371.254 | 14543.597 | D45917    | 2084.023  | 2006.55   | NM_003185 | 13551.395 | 18639.547 |
| NM_006365 | 6899.721  | 6674.538  | X52001    | 2393.6    | 2296.404  | NM_020235 | 4962.763  | 3787.495  |
| NM_001615 | 2540.745  | 2642.431  | BI823872  | 28212.672 | 24354.371 | D49356    | 950.957   | 569.258   |
| BC000401  | 21264.002 | 20770.813 | AA430552  | 3706.014  | 3510.007  | NM_018575 | 2514.81   | 2459.556  |
| NM_006425 | 8607.15   | 7149.558  | X66142    | 4751.965  | 3745.016  | NM_006201 | 4575.511  | 4422.407  |
| BF344046  | 1210.064  | 1205.88   | R45054    | 2637.533  | 2402.554  | NM_007110 | 2530.132  | 2123.179  |
| AK025082  | 3312.565  | 3526.26   | NM_000620 | 643.555   | 657.819   | NM_004845 | 13210.229 | 12983.512 |
| AF086535  | 1634.75   | 2004.161  | NM_000905 | 9342.115  | 7692.025  | AL137527  | 8725.538  | 8456.089  |
| AB040901  | 1512.386  | 1613.292  | SR5       | 7633.063  | 6080.655  | AK024186  | 730.169   | 795.817   |
| AL137406  | 7393.873  | 8028.955  | SR7       | 6024.542  | 40298.848 | J04974    | 17834.404 | 16432.732 |
| NM_012253 | 12798.783 | 12008.961 | SR9       | 22009.742 | 3678.639  | NM_007055 | 7603.675  | 6288.549  |
| NM_006875 | 3524.164  | 3592.783  | CY3Cy5    | 5996.81   | 491.54    | NM_001525 | 4165.761  | 4906.548  |
| NM_000293 | 3036.19   | 2856.304  | AF312769  | 2245.232  | 2076.623  | NM_007014 | 1596.266  | 1795.348  |
| NM_003745 | 2432.231  | 2582.915  | AB020668  | 707.837   | 690.574   | AL096740  | 1641.545  | 1745.712  |
| NM_012265 | 676.817   | 643.171   | NM_006203 | 15156.525 | 17552.893 | AF191545  | 4524.222  | 3648.55   |
| AF153821  | 611.488   | 713.478   | NM_013261 | 351.585   | 439.737   | NM_014554 | 4320.588  | 3402.068  |
| NM_013370 | 2516.193  | 2905.848  | AF309553  | 7092.331  | 6278.137  | AK023968  | 4144.364  | 5290.833  |
| NM_001374 | 440.773   | 877.488   | NM_003605 | 2294.75   | 2341.232  | NM_005154 | 1019.344  | 1206.954  |
| NM_003310 | 10503.188 | 10126.739 | NM_006139 | 9818.95   | 10540.52  | NM_016532 | 8039.536  | 9960.336  |
| AK024461  | 3718.287  | 4662.024  | NM_000100 | 36315.02  | 33463.879 | NM_005781 | 5899.188  | 6596.597  |
| AK025485  | 881.94    | 854.352   | NM_003993 | 3617.178  | 2835.756  | BC036740  | 15255.258 | 16834.877 |
| NM_017635 | 5275.961  | 4523.995  | NM_018961 | 4921.248  | 4345.324  | NM_001747 | 14959.033 | 17706.434 |
| X62534    | 3387.621  | 2817.058  | NM_005585 | 2812.486  | 3190.895  | NM_001148 | 15455.204 | 17456.906 |
| AF027147  | 20439.24  | 18594.238 | NM_012242 | 377.509   | 496.449   | NM_004024 | 7708.581  | 5739.258  |
| U71600    | 3396.494  | 3533.031  | NM_006895 | 2343.127  | 2292.863  | X52345    | 26604.053 | 25279.646 |
| NM_004472 | 1831.468  | 1770.806  | NM_001130 | 58377.574 | 54617.844 | NM_006955 | 7414.011  | 6410.75   |
| AB037862  | 3491.98   | 3077.98   | NM_002975 | 3901.55   | 3271.105  | AF027142  | 53065.602 | 57819.613 |
| AF086285  | 1109.252  | 1233.869  | AK023511  | 7017.313  | 7584.107  | S67970    | 786.61    | 806.856   |
| AF085924  | 707.332   | 1139.609  | NM_002725 | 882.019   | 824.611   | AF221520  | 3200.152  | 2519.635  |
| AK023887  | 744.661   | 788.217   | NM_014375 | 11337.134 | 11302.187 | NM_006941 | 43296.188 | 43948.035 |
| AF088022  | 10196.848 | 8613.949  | NM_017812 | 15373.574 | 18162.398 | AB037852  | 744.314   | 865.227   |
| AK026537  | 3627.726  | 4044.52   | AF204173  | 663.528   | 895.004   | NM_005360 | 1175.501  | 1673.754  |
| NM_015485 | 5184.622  | 4829.383  | J03260    | 2104.389  | 2247.289  | NM_005965 | 59808.977 | 57053.617 |
| AF085992  | 398.109   | 729.228   | AB014514  | 2928.644  | 3317.697  | AK021416  | 2837.964  | 2945.149  |

|           |           |           |           |           |           |           |           |           |
|-----------|-----------|-----------|-----------|-----------|-----------|-----------|-----------|-----------|
| NM_002666 | 12311.549 | 9525.912  | NM_002865 | 4203.371  | 4920.137  | NM_018471 | 18712.316 | 21890.881 |
| AF202145  | 6159.767  | 7476.784  | NM_003566 | 1539.745  | 1381.18   | NM_016183 | 2845.609  | 2917.938  |
| AK026155  | 3022.501  | 2882.488  | NM_004249 | 556.266   | 844.692   | NM_004872 | 6087.059  | 5037.77   |
| NM_018052 | 3266.979  | 3384.684  | NM_003731 | 12070.917 | 10095.603 | NM_001958 | 53836.867 | 48988.613 |
| AF143322  | 746.27    | 523.583   | NM_005446 | 4803.916  | 4241.262  | NM_004757 | 5307.16   | 5492.824  |
| AK022386  | 2211.607  | 2160.445  | NM_013292 | 3891.757  | 3343.892  | NM_015904 | 8947.296  | 8316.216  |
| AF131846  | 4288.483  | 3557.302  | NM_002387 | 4158.955  | 6401.495  | NM_001960 | 59780.117 | 57256.414 |
| AF088069  | 6507.82   | 4431.621  | NM_000069 | 841.772   | 865.363   | NM_018122 | 3877.001  | 4235.099  |
| AF086551  | 1501.923  | 1446.735  | AB023217  | 929.948   | 951.557   | AF035318  | 1553.399  | 1182.436  |
| AF263545  | 729.443   | 819.675   | L08902    | 598.018   | 761.506   | NM_015456 | 10038.638 | 7685.512  |
| NM_013393 | 10965.727 | 12380.312 | J02639    | 1759.959  | 1795.2    | AK025056  | 2236.9    | 2308.425  |
| AK025072  | 4859.373  | 4846.596  | M58050    | 7042      | 6108.198  | AF140710  | 7757.019  | 7490.866  |
| AK022410  | 709.501   | 942.731   | NM_007263 | 13565.639 | 12671.711 | NM_012088 | 18170.273 | 21716.395 |
| L10378    | 15412.972 | 15133.701 | AF206020  | 1481.244  | 2337.661  | NM_017947 | 1225.544  | 1212.221  |
| AK022179  | 1255.6    | 1065.603  | NM_014410 | 833.663   | 817.711   | NM_002494 | 6116.269  | 5419.165  |
| AK022173  | 704.729   | 508.016   | AF305835  | 441.951   | 581.731   | M58510    | 9766.882  | 9361.881  |
| AJ227860  | 2910.623  | 2858.719  | NM_002150 | 3106.566  | 2852.533  | AK023300  | 2765.809  | 2934.429  |
| AL157448  | 1228.58   | 1564.307  | NM_004595 | 9724.526  | 9932.75   | NM_018082 | 1848.51   | 2346.554  |
| AF026942  | 4345.377  | 4166.897  | NM_020178 | 691.797   | 914.003   | NM_003904 | 7459.047  | 6703.146  |
| AJ276429  | 666.257   | 1126.201  | NM_002264 | 2460.857  | 2625.226  | NM_006234 | 35271.945 | 38633.453 |
| AL117657  | 1963.433  | 1962.636  | NM_014754 | 18853.717 | 20662.629 | AK026387  | 775.111   | 801.528   |
| AK023589  | 1749.296  | 2107.604  | D49387    | 825.226   | 457.007   | AB028987  | 5609.032  | 5712.492  |
| AK021590  | 928.36    | 969.252   | AF050146  | 4111.485  | 3399.569  | NM_003594 | 2232.03   | 2070.034  |
| AB002441  | 690.528   | 565.885   | NM_000116 | 4593.829  | 4364.409  | NM_005521 | 6242.712  | 6372.164  |
| AK023998  | 3680.638  | 3060.427  | NM_006698 | 7395.956  | 6810.756  | AF164438  | 19220.688 | 28797.313 |
| AK021643  | 855.569   | 913.828   | NM_006804 | 10696.561 | 9455.509  | AK022284  | 4091.927  | 4443.839  |
| AK000872  | 2883.994  | 2989.705  | NM_015969 | 9123.557  | 8605.021  | AB040893  | 3245.681  | 3091.987  |
| AK027147  | 11716.58  | 9354.729  | NM_003051 | 3500.435  | 2965.924  | AK025844  | 1784.225  | 2126.166  |
| AK026084  | 1674.104  | 1177.224  | NM_145342 | 4861.14   | 5040.325  | AL137727  | 3634.244  | 5050.374  |
| AK022415  | 3412.215  | 2776.249  | AJ278917  | 8536.669  | 8007.97   | L17327    | 1678.442  | 2711.943  |
| AL137368  | 2645.927  | 2403.878  | AK025641  | 35111.707 | 34922.473 | AF074986  | 1569.535  | 1949.198  |
| AK021932  | 1467.614  | 1331.346  | AK025886  | 2137.607  | 2043.137  | AL049240  | 3942.261  | 4642.834  |
| AK026787  | 1320.094  | 1677.547  | NM_003058 | 688.671   | 804.562   | U80773    | 2133.027  | 2409.426  |
| AK023542  | 1369.122  | 1407.046  | NM_001720 | 1295.059  | 1103.147  | AK021745  | 1714.123  | 2180.832  |
| AK000203  | 1293.855  | 1317.799  | NM_018390 | 6654.035  | 6347.353  | L38937    | 8254.154  | 8317.207  |
| AK021845  | 946.482   | 1393.784  | AB037724  | 6072.022  | 5869.485  | U90907    | 2492.11   | 2312.426  |
| NM_018592 | 5182.432  | 5493.5    | AK025086  | 1819.039  | 1897.624  | AK024327  | 1806.092  | 2345.967  |
| NM_018503 | 3196.31   | 3349.536  | AK026151  | 3814.762  | 3541.651  | AK021700  | 1025.795  | 1453.122  |
| NM_016449 | 8274.989  | 9822.029  | NM_014140 | 3130.936  | 3421.118  | NM_014135 | 892.184   | 606.023   |
| AL049670  | 6127.56   | 6351.99   | NM_002916 | 5482.995  | 5791.192  | AK024395  | 755.081   | 760.037   |
| NM_018512 | 1183.346  | 1491.133  | M20700    | 7141.903  | 7064.9    | AK000801  | 5375.436  | 5241.572  |
| AK022412  | 7359.941  | 5853.289  | NM_001034 | 15489.335 | 15138.276 | D85433    | 9387.752  | 8482.038  |
| AK022438  | 1523.041  | 1836.587  | NM_002689 | 2431.797  | 2257.327  | AF086184  | 12539.659 | 12436.507 |
| AK023764  | 1615.672  | 1161.73   | NM_017686 | 1698.822  | 1605.723  | NM_018275 | 7452.399  | 8251.191  |
| NM_003948 | 1364.636  | 901.059   | AL096734  | 839.733   | 896.83    | AL049266  | 10024.152 | 9491.321  |
| AK025062  | 5513.93   | 4769.966  | AK000800  | 2272.694  | 2729.132  | AK021560  | 1784.554  | 2287.722  |
| Z27405    | 3405.682  | 4228.403  | NM_018154 | 4576.799  | 5174.209  | AF088045  | 2097.592  | 2764.373  |
| AK023412  | 1964.05   | 1994.485  | NM_005358 | 444.549   | 559.349   | AF007149  | 1379.387  | 1835.575  |
| NM_014617 | 54847.074 | 43155.594 | BC006287  | 4294.676  | 4446.208  | AK001469  | 3688.036  | 3445.277  |
| AK074682  | 6057.763  | 3840.504  | AB023198  | 4146.371  | 4762      | AK021627  | 1661.883  | 1796.987  |
| X74605    | 1038.191  | 625.112   | AF304163  | 22975.809 | 23694.039 | AF085859  | 3041.446  | 2639.7    |
| AK024513  | 1193.008  | 783.886   | NM_005231 | 5553.259  | 6917.869  | AF085888  | 521.336   | 751.057   |
| BC036692  | 688.016   | 671.429   | AF064729  | 3408.212  | 3310.353  | AK026307  | 1077.086  | 1483.406  |

|           |           |           |           |           |           |           |           |           |
|-----------|-----------|-----------|-----------|-----------|-----------|-----------|-----------|-----------|
| AJ009640  | 3760.953  | 2727.168  | NM_005412 | 20400.816 | 21814.117 | AL049975  | 1252.76   | 654.255   |
| Y11163    | 2683.861  | 2328.589  | NM_012113 | 1979.031  | 2085.95   | AL080067  | 1154.58   | 1055.308  |
| AF086391  | 618.377   | 450.468   | NM_002725 | 864.456   | 679.351   | AL117464  | 6794.144  | 5348.153  |
| AF147340  | 749.065   | 714.546   | NM_014375 | 9774.624  | 8060.617  | AL080160  | 1379.911  | 1299.573  |
| AF035308  | 990.224   | 946.015   | NM_017812 | 14211.361 | 16978.602 | AL157477  | 4296.118  | 4109.311  |
| NM_014054 | 8159.611  | 5715.048  | AF204173  | 771.255   | 787.321   | AB002318  | 2458.311  | 1900.342  |
| AK021840  | 62833.41  | 47807.477 | J03260    | 2277.616  | 2322.075  | AL357535  | 2644.13   | 2724.061  |
| AK022228  | 4195.278  | 3717.666  | U13738    | 2868.742  | 2565.858  | AK023725  | 3942.081  | 4154.354  |
| AK022031  | 845.752   | 763.634   | H63077    | 38316.168 | 37144.031 | AK022936  | 5494.481  | 6427.972  |
| AF086480  | 1698.654  | 1275.836  | AA679352  | 22174.918 | 21082.721 | AK024385  | 4872.927  | 4983.924  |
| AK022122  | 1273.111  | 835.422   | AA437291  | 580.684   | 521.119   | NM_017705 | 2299.76   | 2933.58   |
| AK000806  | 10121.404 | 12014.087 | X04503    | 3712.813  | 3067.058  | AF009282  | 5363.841  | 4493.515  |
| NM_016471 | 16351.514 | 19214.291 | D45917    | 2130.906  | 2266.395  | AF024704  | 11448.39  | 10495.19  |
| Z11852    | 670.853   | 988.97    | X52001    | 2578.757  | 2501.172  | AF056431  | 2065.515  | 1386.862  |
| D21861    | 513.581   | 679.021   | BI823872  | 28043.803 | 28047.873 | NM_016412 | 1499.497  | 1480.427  |
| NM_001145 | 2494.6    | 1760.43   | AA430552  | 4505.309  | 3981.102  | AF009293  | 1631.671  | 1003.043  |
| NM_005364 | 3437.261  | 2575.306  | X66142    | 5354.043  | 4467.188  | NM_004155 | 65492.199 | 58849.102 |
| AK023482  | 7821.005  | 4885.16   | NM_005913 | 478.598   | 365.334   | AF056444  | 10636.353 | 7665.609  |
| AK022798  | 1719.644  | 1853.484  | R45054    | 3185.934  | 3470.306  | AK000989  | 3672.987  | 2377.852  |
| AL157423  | 1078.939  | 842.307   | NM_000620 | 625.743   | 883.743   | AK002210  | 7784.008  | 7053.677  |
| AK023115  | 983.703   | 741.969   | NM_000905 | 12280.319 | 14852.063 | AK021677  | 1276.142  | 1571.108  |
| AK023176  | 2493.282  | 1805.593  | AL117398  | 4273.062  | 4128.387  | AK001057  | 2210.115  | 1547.123  |
| AL161991  | 23834.084 | 13886.521 | AY007158  | 58106.852 | 61118.93  | AK021471  | 952.411   | 1139.54   |
| D17032    | 43005.566 | 26386.211 | M58050    | 6535.991  | 6054.997  | AK021709  | 1191.555  | 1221.013  |
| NM_017941 | 2523.305  | 1630.299  | NM_007263 | 12766.015 | 12432.648 | AK025109  | 2585.363  | 2040.522  |
| AF301016  | 2017.093  | 846.315   | AF206020  | 1094.578  | 1109.364  | AK025295  | 708.232   | 539.9     |
| BE900527  | 2404.969  | 1535.354  | NM_014410 | 923.078   | 767.007   | AK026713  | 1083.215  | 1193.105  |
| D28384    | 75265.734 | 62694.754 | NM_013261 | 372.877   | 222.571   | AJ008117  | 16117.062 | 13672.057 |
| AF118079  | 63025.902 | 52327.82  | AF309553  | 6429.318  | 5436.442  | AJ008147  | 32072.484 | 28053.584 |
| AL365413  | 1397.04   | 1492.198  | NM_003605 | 2579.923  | 2518.412  | L43345    | 1570.815  | 968.254   |
| NM_005255 | 3070.688  | 2952.569  | NM_006139 | 10018.902 | 10268.639 | AF180297  | 4900.159  | 4063.734  |
| NM_000440 | 10173.545 | 10847.877 | NM_003993 | 3691.796  | 3613.943  | AK023245  | 2177.54   | 2163.541  |
| NM_001297 | 6742.027  | 10241.013 | NM_018961 | 4897.871  | 5301.273  | AF147303  | 973.458   | 910.912   |
| NM_004403 | 23140.629 | 40883.328 | NM_005586 | 3332.353  | 4125.21   | AF086224  | 944.407   | 686.71    |
| X64993    | 3101.279  | 4697.694  | NM_012242 | 465.686   | 596.888   | S56365    | 62887.781 | 59349.375 |
| NM_004434 | 15808.038 | 22435.506 | NM_006896 | 2932.114  | 3544.543  | AK023607  | 1220.194  | 994.131   |
| NM_006265 | 904.035   | 730.426   | NM_001130 | 58920.961 | 68802.641 | NM_017847 | 6275.471  | 5564.497  |
| NM_016230 | 5419.665  | 5753.059  | NM_002975 | 4225.336  | 4262.447  | AL049675  | 3985.913  | 3422.857  |
| AK023966  | 10650.681 | 10139.724 | AK023511  | 7395.539  | 8476.521  | NM_003537 | 18453.475 | 18435.002 |
| AK025702  | 5891.931  | 6492.612  | NM_014556 | 5208.892  | 5097.833  | AF056419  | 37706.656 | 40569.352 |
| NM_018955 | 804.445   | 503.148   | NM_001615 | 59057.906 | 64570.238 | AF074983  | 2196.501  | 2276.668  |
| AL050200  | 994.371   | 437.466   | AK025886  | 1953.069  | 1690.95   | AK021862  | 1278.521  | 1158.312  |
| NM_002367 | 1176.989  | 650.97    | NM_003055 | 884.37    | 1048.651  | AK024177  | 2979.774  | 3110.311  |
| AK022038  | 1855.388  | 1419.19   | AB014514  | 2556.609  | 2685.111  | AK024827  | 14989.609 | 14278.563 |
| AK025119  | 1837.73   | 1030.329  | NM_002865 | 4452.252  | 4734.355  | AF090102  | 536.162   | 645.182   |
| NM_006365 | 1472.383  | 597.884   | NM_003566 | 1572.653  | 1307.974  | K01564    | 2366.246  | 2757.856  |
| AJ224170  | 2827.924  | 1815.761  | NM_004249 | 511.64    | 633.588   | AB023175  | 19644.338 | 17788.52  |
| AF085866  | 6709.566  | 5546.73   | NM_007159 | 23853.703 | 24026.615 | AL359563  | 2045.624  | 1517.233  |
| NM_006105 | 584.857   | 579.674   | NM_003731 | 12934.43  | 13253.974 | NM_014477 | 1474.764  | 1256.32   |
| CY3Cy5    | 3574.995  | 237.43    | NM_005446 | 5396.555  | 5642.683  | L33808    | 22680.213 | 21062.063 |
| AA397813  | 67416.172 | 64496.445 | NM_013292 | 5515.249  | 7246.313  | D31886    | 5254.185  | 4078.687  |
| W47350    | 2410.05   | 2342.054  | NM_002387 | 4952.69   | 7001.977  | U92024    | 837.675   | 959.123   |
| W68291    | 11152.526 | 10762.649 | NM_000069 | 934.167   | 984.966   | AK023330  | 8259.464  | 8097.295  |



|           |           |           |           |           |           |           |           |           |
|-----------|-----------|-----------|-----------|-----------|-----------|-----------|-----------|-----------|
| N64384    | 1736.363  | 2110.288  | AB023217  | 1084.909  | 937.61    | AF075071  | 1883.903  | 1536.22   |
| H-V00536M | 1723.593  | 1434.929  | L08902    | 699.044   | 724.556   | AF001892  | 821.249   | 814.529   |
| NM_017532 | 1673.156  | 1239.831  | J02639    | 1851.15   | 2286.501  | X93500    | 2915.8    | 2494.01   |
| SR8       | 9554.979  | 25181.543 | NM_005231 | 5444.276  | 6056.476  | U79271    | 2791.456  | 2197.559  |
| SR10      | 36003.953 | 11244.419 | AF064729  | 2011.484  | 1784.3    | NM_01988E | 1492.842  | 1266.814  |
| CY3Cy5    | 2683.135  | 183.976   | NM_005412 | 17379.051 | 18933.758 | AK024609  | 9896.403  | 8911.755  |
| NM_004447 | 10566.903 | 11476.139 | NM_012113 | 1577.745  | 2173.674  | AK023660  | 1201.41   | 1436.751  |
| NM_002442 | 5041.911  | 4338.709  | NM_002150 | 3652.51   | 3412.573  | NM_01812C | 13754.95  | 14711.764 |
| NM_004557 | 2340.739  | 3268.305  | NM_00459E | 10222.321 | 11393.27  | AK026874  | 1982.25   | 1846.784  |
| NM_017893 | 462.663   | 579.352   | NM_02017E | 1089.37   | 1234.8    | AK024178  | 633.825   | 857.636   |
| NM_01225E | 5137.223  | 5008.661  | NM_002264 | 2262.946  | 2631.24   | D17217    | 3315.086  | 3552.681  |
| AF272357  | 1752.303  | 1763.328  | NM_014754 | 18086.039 | 19534.799 | AF088033  | 3382.583  | 3558.278  |
| NM_016372 | 5915.491  | 5671.609  | D49387    | 746.327   | 885.748   | NM_020422 | 4742.314  | 5005.496  |
| AB020705  | 3275.354  | 2826.149  | AF050146  | 4699.831  | 4168.498  | AF086408  | 54126.816 | 50351.496 |
| NM_014333 | 1318.178  | 1183.777  | NM_000116 | 4732.166  | 4640.29   | AK023979  | 3592.876  | 2763.698  |
| NM_002980 | 1297.702  | 1347.161  | NM_00669E | 8033.6    | 8616.342  | CY3Cy5    | 13465.202 | 687.869   |
| NM_007102 | 9367.339  | 10123.89  | NM_006804 | 11904.475 | 12436.213 | U13738    | 2315.386  | 2544.236  |
| BG491613  | 24546.465 | 24810.336 | NM_01596E | 9708.457  | 11274.911 | AF068236  | 33326.469 | 42152.695 |
| NM_012484 | 1007.581  | 602.458   | NM_003051 | 3145.259  | 3995.007  | H94487    | 1822.918  | 2006.54   |
| NM_000450 | 566.217   | 442.671   | NM_145342 | 4632.708  | 4935.021  | BG681747  | 43837.27  | 43655.664 |
| NM_004513 | 3182.3    | 3477.337  | AJ278917  | 7279.411  | 7376.177  | H63077    | 45795.387 | 48645.148 |
| NM_00170E | 38043.512 | 33734.379 | AK025641  | 35368.5   | 35146.535 | AA679352  | 26748.934 | 23011.279 |
| NM_01773E | 2016.402  | 2217.627  | NM_000620 | 637.818   | 740.801   | AA437291  | 1280.365  | 1020.008  |
| AB033044  | 2323.892  | 2163.709  | AL117398  | 3561.421  | 3680.702  | X04503    | 2665.767  | 2173.996  |
| AB014564  | 1167.284  | 1397.599  | AY007158  | 53400.063 | 53636.352 | D45917    | 1303.394  | 1636.387  |
| NM_020230 | 6649.28   | 8203.527  | NM_001720 | 1310.597  | 1150.334  | X52001    | 3242.81   | 2877.229  |
| NM_006762 | 41260.496 | 48740.82  | NM_018390 | 7209.863  | 7810.461  | BI823872  | 19445.455 | 15692.461 |
| NM_006352 | 3758.659  | 4015.817  | AB037724  | 7454.556  | 9769.744  | AA430552  | 4611.355  | 4171.79   |
| NM_016430 | 1262.817  | 1607.451  | AK025086  | 1772.48   | 2060.323  | X66142    | 5164.085  | 4725.682  |
| NM_005094 | 4230.697  | 4813.4    | AK026151  | 5023.869  | 6105.985  | R45054    | 3105.238  | 2916.291  |
| BE382905  | 876.913   | 1131.058  | NM_014140 | 3762.44   | 4351.304  | NM_000620 | 660.768   | 769.338   |
| NM_002152 | 4941.881  | 5460.117  | NM_00291E | 5774.965  | 6272.923  | NM_00090E | 10803.714 | 10446.017 |
| NM_001701 | 670.729   | 894.506   | M20700    | 7700.957  | 7920.188  | SR5       | 9210.678  | 10234.468 |
| AK022558  | 5197.208  | 6066.375  | NM_001034 | 17227.668 | 18563.104 | SR7       | 7764.35   | 53160.223 |
| NM_00647E | 63160.898 | 61071.316 | NM_00268E | 2417.778  | 2815.282  | SR9       | 21956.68  | 3522.288  |
| NM_000824 | 3303.475  | 3561.294  | NM_01768E | 2340.705  | 2811.535  | CY3Cy5    | 11930.923 | 494.01    |
| AK023915  | 3892.264  | 3434.92   | AL096734  | 839.828   | 1232.569  | AF312769  | 2782.363  | 3442.045  |
| AK026842  | 2711.99   | 2606.362  | AK000800  | 2372.343  | 3024.38   | AB020668  | 634.332   | 883.114   |
| NM_00239E | 408.073   | 694.706   | NM_018154 | 5185.323  | 5065.266  | NM_006203 | 21515.191 | 25358.139 |
| NM_00425E | 2873.988  | 3024.87   | NM_00535E | 419.439   | 368.766   | AF309553  | 6223.981  | 5955.934  |
| NM_016271 | 3979.302  | 3879.241  | BC006287  | 3917.466  | 4159.943  | NM_00360E | 1497.394  | 1508.046  |
| NM_01661E | 4409.943  | 4536.697  | AB023198  | 4430.448  | 4250.635  | NM_00613E | 12300.686 | 11686.347 |
| NM_014481 | 3989.573  | 3928.48   | AF304163  | 21747.375 | 22128.994 | NM_003993 | 2594.377  | 2348.055  |
| U22172    | 814.225   | 949.178   | NM_00689E | 2585.439  | 2661.098  | NM_018961 | 5002.499  | 5249.443  |
| AB032960  | 3642.028  | 4296.38   | NM_00297E | 3921.704  | 3441.383  | NM_00558E | 3920.226  | 3562.909  |
| NM_014264 | 12769.24  | 10968.31  | AK023511  | 6591.166  | 8111.946  | NM_012242 | 786.275   | 690.698   |
| AF020089  | 1265.088  | 1125.245  | NM_01455E | 5061.016  | 4703.158  | NM_00689E | 3321.098  | 2981.961  |
| NM_006257 | 8729.498  | 7657.347  | NM_00161E | 58712.695 | 62251.797 | NM_001130 | 64110.906 | 61736.508 |
| NM_016281 | 7277.068  | 6185.147  | NM_00272E | 802.527   | 939.347   | NM_00297E | 4846.156  | 4852.541  |
| NM_004734 | 13378.536 | 12354.563 | NM_017812 | 14562.881 | 16223.059 | AK023511  | 8999.146  | 7431.863  |
| AK024793  | 1814.906  | 1833.264  | AF204173  | 645.569   | 617.62    | NM_01455E | 4605.043  | 5230.651  |
| AF208291  | 770.199   | 601.847   | J03260    | 2046.773  | 1950.445  | NM_01437E | 15982.7   | 17423.746 |
| NM_00027E | 1642.864  | 2083.12   | U13738    | 2824.71   | 2324.844  | NM_017812 | 20112.529 | 18762.902 |

|           |           |           |           |           |           |           |           |           |
|-----------|-----------|-----------|-----------|-----------|-----------|-----------|-----------|-----------|
| NM_02035E | 671.742   | 862.177   | AF068236  | 45966.141 | 41720.086 | J03260    | 1868.176  | 1754.36   |
| AA397813  | 62537.781 | 58217.633 | H94487    | 944.297   | 877.457   | AB014514  | 3479.56   | 4333.215  |
| W47350    | 2289.272  | 1906.159  | BG681747  | 34427.277 | 35726.098 | NM_00286E | 6008.567  | 6907.865  |
| W68291    | 10514.875 | 10757.394 | H63077    | 38755.672 | 41302.707 | NM_00356E | 1643.493  | 1219.168  |
| N64384    | 1324.289  | 1056.52   | AA679352  | 22423.932 | 24030.063 | NM_003731 | 11715.838 | 9939.222  |
| H-X 53655 | 689.466   | 912.323   | AA437291  | 584.738   | 692.406   | NM_00544E | 4282.372  | 3419.997  |
| H-U 05770 | 10545.921 | 11018.479 | X04503    | 3206.528  | 2987.602  | NM_01329E | 3922.376  | 3444.264  |
| H-M 65199 | 2970.58   | 2790.503  | D45917    | 2271.254  | 3272.782  | NM_00238E | 3835.108  | 2983.725  |
| H-M 32315 | 640.882   | 729.267   | X52001    | 2599.522  | 2767.493  | NM_00006E | 1536.855  | 1148.342  |
| H-V00536M | 1645.06   | 1448.38   | BI823872  | 26058.195 | 26791.795 | AB023217  | 881.126   | 1024.993  |
| BF439832  | 2247.232  | 2137.635  | AA430552  | 4145.667  | 3979.095  | L08902    | 973.463   | 866.847   |
| NM_01753E | 1903.65   | 2120.948  | X66142    | 4487.711  | 4271.861  | J02639    | 2864.804  | 2534.621  |
| M38449    | 15399.265 | 15276.86  | R45054    | 2994.967  | 2751.249  | NM_00726E | 10925.678 | 11504.887 |
| AB033044  | 1617.635  | 1631.019  | NM_00238E | 4140.073  | 3663.462  | AF206020  | 1854.503  | 2038.515  |
| AB014564  | 1372.501  | 1369.09   | AB023217  | 964.795   | 1072.504  | NM_01441C | 679.28    | 770.455   |
| NM_00444E | 7650.875  | 6317.592  | L08902    | 766.393   | 697.977   | NM_00215C | 5349.895  | 4787.709  |
| NM_001204 | 1539.982  | 1216.115  | J02639    | 1762.732  | 2049.706  | NM_00459E | 13926.197 | 14521.581 |
| BF131321  | 807.608   | 690.787   | M58050    | 6672.061  | 5668.469  | NM_02017E | 778.493   | 679.93    |
| NM_012116 | 1131.704  | 1111.958  | AF206020  | 996.18    | 1209.126  | NM_002264 | 1569.548  | 2016.602  |
| NM_00002C | 1500.966  | 2024.074  | NM_01441C | 715.776   | 635.453   | NM_014754 | 23964     | 24751.359 |
| NM_00244E | 5691.18   | 4697.836  | AF312769  | 2658.654  | 2511.391  | D49387    | 894.197   | 1204.365  |
| AB033091  | 3140.023  | 4291.255  | AB020668  | 814.15    | 787.212   | AF050146  | 4658.951  | 4762.085  |
| NM_00455E | 2232.427  | 2538.425  | NM_00620E | 14902.634 | 16519.059 | NM_00011E | 5549.938  | 5357.056  |
| NM_01789E | 1288.979  | 979.329   | AF309553  | 6713.941  | 6746.084  | NM_00669E | 9072.062  | 9973.809  |
| NM_001584 | 5754.481  | 5029.738  | NM_00360E | 2791.342  | 3294.774  | NM_006804 | 15184.804 | 14864.354 |
| NM_01225E | 5531.484  | 5988.954  | NM_00613E | 11279.135 | 15959.936 | NM_01596E | 11260.173 | 10513.019 |
| AF272357  | 2127.883  | 2699.561  | NM_00399E | 3313.4    | 2894.591  | NM_003051 | 4974.424  | 4671.805  |
| NM_01637E | 10222.933 | 10516.113 | NM_018961 | 4789.379  | 4998.446  | NM_14534E | 7381.77   | 6529.525  |
| AB020705  | 4017.877  | 3998.384  | NM_00558E | 3086.968  | 3416.112  | AJ278917  | 15740.286 | 14428.225 |
| NM_01433E | 1742.409  | 1838.445  | NM_01224E | 438.302   | 474.466   | AK025886  | 1414.798  | 1626.952  |
| NM_00298C | 1702.645  | 1496.018  | NM_003051 | 3085.213  | 3588.203  | NM_00172C | 1650.223  | 1762.955  |
| NM_00272E | 579.416   | 888.415   | NM_14534E | 4878.707  | 5505.646  | NM_01839C | 5521.673  | 5155.873  |
| NM_00045C | 788.983   | 703.113   | AJ278917  | 11024.958 | 15914.308 | AB037724  | 7396.519  | 7258.016  |
| NM_00044E | 642.772   | 604.683   | AK025641  | 36097.555 | 33850.766 | AK025086  | 2110.904  | 2086.663  |
| NM_00451E | 4238.981  | 4312.176  | NM_00103E | 362.957   | 237.744   | AK026151  | 5601.776  | 6526.79   |
| NM_00170E | 45850.227 | 47217.547 | AK025886  | 2056.201  | 1853.889  | NM_01414C | 4309.976  | 4476.088  |
| NM_01773E | 2595.161  | 2700.381  | NM_00305E | 686.594   | 729.396   | NM_00291E | 7517.096  | 7134.191  |
| AF208291  | 698.818   | 707.712   | AB014514  | 2585.879  | 2475.313  | M20700    | 8215.862  | 7500.962  |
| BE382905  | 1096.654  | 1266.433  | NM_00286E | 4486.721  | 5327.433  | NM_001034 | 20535.742 | 18203.137 |
| AK022558  | 6607.464  | 7489.664  | NM_00356E | 2372.232  | 3341.138  | NM_00268E | 2441.043  | 2634.1    |
| NM_00080E | 612.443   | 709.988   | NM_00715E | 22958.846 | 22618.422 | NM_01768E | 3103.004  | 2672.596  |
| NM_000824 | 3385.851  | 3812.467  | NM_003731 | 13440.967 | 12931.504 | AL096734  | 745.948   | 575.973   |
| NM_01753E | 1514.024  | 1464.859  | NM_00544E | 5289.382  | 5090.392  | AK000800  | 3131.85   | 2598.974  |
| AK026842  | 2654.333  | 2807.875  | NM_01329E | 4343.473  | 3882.153  | NM_018154 | 5667.477  | 5188.551  |
| NM_00239E | 1377.715  | 937.299   | AK000800  | 2327.365  | 2610.894  | NM_00535E | 743.518   | 602.462   |
| NM_00425E | 2837.188  | 3233.165  | NM_018154 | 4869.305  | 5856.168  | BC006287  | 5675.931  | 5297.186  |
| NM_016271 | 4713.356  | 5030.389  | NM_00535E | 363.069   | 455.254   | AB023198  | 4268.574  | 3886.028  |
| NM_01661E | 4867.672  | 5246.712  | BC006287  | 3906.861  | 4361.787  | NM_005231 | 6358.339  | 8283.387  |
| NM_014481 | 3967.075  | 4021.167  | AB023198  | 4552.326  | 6089.698  | AF064729  | 3351.693  | 4670.405  |
| U22172    | 752.325   | 889.592   | AF304163  | 23538.738 | 23608.658 | NM_00541E | 19692.465 | 21342.582 |
| AB032960  | 3866.897  | 3627.656  | NM_005231 | 5562.935  | 6123.942  | NM_01211E | 3595.152  | 4348.794  |
| NM_014264 | 14360.625 | 13041.925 | AF064729  | 3355.843  | 3963.57   | NM_00272E | 786.457   | 1035.954  |
| AF020089  | 1350.016  | 1494.745  | NM_00541E | 18327.365 | 18202.457 | NM_01437E | 15614.38  | 20330.152 |

|             |           |           |           |           |           |           |           |           |
|-------------|-----------|-----------|-----------|-----------|-----------|-----------|-----------|-----------|
| NM_006257   | 10801.828 | 9559.042  | NM_012113 | 1791.025  | 1757.198  | NM_017812 | 22719.293 | 30038.311 |
| NM_016281   | 8583.587  | 7395.838  | NM_002150 | 5322.604  | 4422.58   | AF204173  | 756.247   | 871.651   |
| NM_004734   | 14286.181 | 13663.611 | NM_004595 | 10829.793 | 10231.137 | J03260    | 2881.473  | 3339.984  |
| AK024793    | 1140.673  | 1476.227  | NM_020178 | 917.175   | 906.1     | U13738    | 2845.817  | 3207.306  |
| NM_012259   | 5778.236  | 6699.709  | NM_002264 | 2409.492  | 2529.706  | AF068236  | 55689.992 | 53996.047 |
| AF272357    | 1693.865  | 1858.927  | NM_014754 | 24262.775 | 34415.605 | H94487    | 2132.315  | 2317.353  |
| NM_002980   | 1462.759  | 916.327   | D49387    | 842.986   | 931.238   | BG681747  | 44003.902 | 42086.488 |
| NM_015886   | 467.301   | 644.562   | AF050146  | 4856.64   | 5277.271  | H63077    | 49582.215 | 47345.516 |
| NM_007102   | 10048.655 | 11316.231 | NM_000116 | 5456.656  | 5406.76   | AA679352  | 27494.547 | 24215.131 |
| BG491613    | 24716.936 | 26275.334 | NM_006698 | 8510.356  | 8820.553  | AA437291  | 508.875   | 637.918   |
| AA397813    | 61545.578 | 59709.473 | NM_006804 | 12728.186 | 11770.841 | X04503    | 3080.886  | 2528.549  |
| W47350      | 2280.708  | 2226.874  | NM_015969 | 9476.098  | 9768.74   | D45917    | 1821.934  | 1641.995  |
| H-X 53655 I | 723.685   | 1005.796  | NM_004517 | 6053.207  | 6790.902  | X52001    | 3590.98   | 3134.738  |
| H-U 05770 I | 9580.114  | 9527.684  | AI017418  | 625.107   | 409.016   | BI823872  | 19297.035 | 18261.275 |
| H-M 65199   | 3192.739  | 3337.162  | NM_000679 | 1279.698  | 1369.972  | AA430552  | 4423.565  | 4021.586  |
| H-M 32315   | 950.888   | 715.422   | AF218006  | 35618.992 | 35326.465 | X66142    | 5238.015  | 5152.532  |
| H-V00536M   | 1829.797  | 1475.21   | AK026935  | 14316.005 | 13585.502 | R45054    | 3025.73   | 3140.982  |
| H-D85429M   | 55978.75  | 52625.703 | NM_020162 | 5775.835  | 5392.943  | NM_000620 | 726.615   | 804.784   |
| BF439832    | 2393.578  | 2231.374  | AK027124  | 43448.188 | 40100.824 | NM_000905 | 10283.314 | 11855.51  |
| NM_000450   | 1803.737  | 1641.995  | M31212    | 45043.652 | 42380.582 | AL117398  | 4554.379  | 5492.33   |
| NM_000448   | 1744.579  | 1162.378  | AL117398  | 3918.878  | 2923.031  | M58050    | 8301.953  | 9820.972  |
| NM_004513   | 3487.338  | 2919.637  | AY007158  | 56393.285 | 57614.246 | NM_007263 | 12032.599 | 14846.724 |
| NM_001708   | 36940.359 | 32609.576 | NM_001720 | 1507.36   | 1422.781  | AF206020  | 1870.353  | 2183.222  |
| NM_017735   | 2378.944  | 2072.86   | NM_018390 | 7893.777  | 6205.453  | NM_014410 | 1257.318  | 1423.229  |
| AB033044    | 1714.51   | 1688.148  | AB037724  | 5862.769  | 5143.169  | AF305835  | 581.056   | 888.624   |
| AB014564    | 2027.913  | 2276.071  | AK025086  | 2468.452  | 3894.864  | AF312769  | 3394.072  | 4313.464  |
| NM_020230   | 7499.98   | 7654.073  | AK026151  | 5160.489  | 6882.47   | AB020668  | 805.907   | 832.153   |
| NM_006762   | 45925.836 | 55563.309 | NM_014140 | 4695.651  | 8312.419  | NM_006203 | 24422.973 | 28020.859 |
| NM_006352   | 2935.286  | 3827.461  | NM_002916 | 6737.64   | 8332.309  | AF309553  | 6429.035  | 6259.243  |
| NM_016430   | 1242.507  | 1721.65   | M20700    | 8571.667  | 8785.651  | NM_003605 | 1779.437  | 2064.641  |
| NM_004447   | 8586.22   | 7512.606  | NM_001034 | 18099.326 | 17882.275 | NM_006139 | 12852.38  | 11830.518 |
| NM_001204   | 1059.692  | 1066.813  | NM_002689 | 2387.659  | 2525.651  | NM_003993 | 2672.378  | 2460.781  |
| NM_000956   | 1285.014  | 1023.354  | NM_017686 | 2434.993  | 2510.867  | NM_018961 | 5522.513  | 6226.207  |
| NM_002442   | 5555.058  | 5084.853  | AL096734  | 647.564   | 830.865   | NM_005586 | 3177.57   | 3601.93   |
| AB033091    | 3085.617  | 3483.154  | NM_016645 | 6393.81   | 5456.746  | NM_012242 | 755.183   | 745.88    |
| NM_004557   | 1945.219  | 1834.267  | L14723    | 6163.368  | 5072.161  | NM_006896 | 3073.989  | 3386.266  |
| NM_014757   | 11844.254 | 13012.598 | AK024462  | 14186.887 | 12423.023 | NM_001130 | 67473.781 | 66823.727 |
| NM_017893   | 632.488   | 803.724   | NM_005711 | 614.817   | 680.542   | NM_002975 | 4450.044  | 4715.615  |
| NM_001584   | 6083.626  | 5146.462  | NM_019601 | 902.6     | 870.718   | AK023511  | 8553.94   | 6465.914  |
| NM_000809   | 297.236   | 618.373   | NM_002206 | 1629.841  | 1582.696  | NM_014556 | 4722.553  | 4615.705  |
| NM_005953   | 61558.207 | 38927.617 | NM_007074 | 763.188   | 595.343   | AK025886  | 1502.945  | 2103.61   |
| NM_014264   | 14629.84  | 12539.921 | NM_002230 | 591.519   | 516.792   | NM_003058 | 1274.67   | 1342.207  |
| AF020089    | 1143.563  | 1441.311  | NM_003815 | 3468.601  | 2778.325  | AB014514  | 3022.417  | 3411.63   |
| NM_006257   | 9347.564  | 8002.21   | NM_001430 | 1327.637  | 1210.536  | NM_002865 | 5860.527  | 6181.438  |
| NM_016281   | 8016.452  | 7113.468  | AB010098  | 668.893   | 487.824   | NM_003566 | 1983.203  | 1271.02   |
| NM_004734   | 12754.909 | 14065.431 | U17989    | 1920.938  | 1830.628  | NM_007155 | 21717.094 | 19312.203 |
| AK024793    | 1350.551  | 1528.736  | U62325    | 761.116   | 830.777   | NM_003731 | 11513.948 | 10308.968 |
| AF208291    | 1310.15   | 1126.329  | AL137595  | 657.589   | 623.229   | NM_005446 | 3520.064  | 3392.65   |
| NM_004259   | 2867.151  | 3272.75   | NM_018028 | 1468.117  | 1354.451  | NM_013292 | 3224.574  | 3811.527  |
| NM_016271   | 4094.745  | 4727.117  | AF249267  | 37562.504 | 34893.723 | NM_002387 | 2886.711  | 2743.479  |
| NM_016619   | 4615.898  | 4478.065  | NM_004113 | 658.635   | 649.793   | NM_000069 | 917.031   | 651.009   |
| NM_014481   | 4025.151  | 3647.17   | X84939    | 4816.881  | 5460.892  | AB023217  | 742.288   | 739.677   |
| U22172      | 825.083   | 818.299   | NM_018320 | 22593.029 | 21999.98  | L08902    | 882.403   | 476.86    |

|           |           |           |           |           |           |           |           |           |
|-----------|-----------|-----------|-----------|-----------|-----------|-----------|-----------|-----------|
| AB032960  | 4006.094  | 3103.245  | NM_002069 | 3061.754  | 3061.24   | J02639    | 2184.006  | 1906.184  |
| NM_015991 | 1041.972  | 1020.836  | NM_016056 | 17531.348 | 14395.404 | NM_005231 | 6448.697  | 6043.512  |
| NM_002184 | 2258.381  | 2090.764  | M65066    | 11563.792 | 11182.056 | AF064729  | 3208.536  | 3423.435  |
| NM_014883 | 4448.358  | 4259.715  | NM_016951 | 1644.232  | 1809.078  | NM_005412 | 21692.348 | 30351.223 |
| U56387    | 1029.666  | 986.925   | NM_013251 | 1109.535  | 1018.147  | NM_012113 | 3005.426  | 2986.023  |
| NM_003657 | 1644.386  | 1334.11   | NM_006099 | 2822.46   | 3000.138  | NM_002150 | 6885.244  | 6542.674  |
| AL049296  | 6602.298  | 5394.995  | AF272379  | 3204.011  | 3776.026  | NM_004595 | 14502.351 | 13999.451 |
| NM_014471 | 1442.191  | 1867.115  | NM_012326 | 1630.044  | 1785.4    | NM_020178 | 863.597   | 748.074   |
| NM_004397 | 1065.842  | 715.798   | NM_003085 | 24511.303 | 20986.148 | NM_002264 | 1835.821  | 1792.811  |
| NM_003189 | 15932.992 | 17354.668 | NM_016084 | 18088.605 | 16000.122 | NM_014754 | 23534.475 | 23042.363 |
| NM_020238 | 7816.607  | 8115.297  | AF095289  | 31444.625 | 35905.82  | D49387    | 1142.255  | 983.753   |
| D49356    | 1304.759  | 1089.546  | NM_005537 | 4911.789  | 4749.732  | AF050146  | 4708.797  | 5207.592  |
| NM_018579 | 3652.606  | 3292.23   | NM_019003 | 3733.48   | 3696.463  | NM_000116 | 5318.997  | 5051.817  |
| NM_006201 | 6635.122  | 5473.157  | NM_015935 | 4054.271  | 3615.061  | NM_006698 | 9697.019  | 9663.401  |
| NM_007110 | 3102.648  | 2764.719  | AF182412  | 1067.623  | 927.644   | NM_006804 | 13383.947 | 12969.455 |
| NM_006290 | 15828.385 | 14201.057 | AK027200  | 1719.374  | 1402.157  | NM_015965 | 10287.14  | 9723.237  |
| AK022290  | 1047.099  | 996.441   | S78372    | 547.508   | 368.783   | NM_003051 | 4722.631  | 5734.435  |
| NM_003680 | 53771.305 | 56537.574 | U03106    | 2804.845  | 2610.332  | NM_145342 | 6419.535  | 5403.382  |
| AF118124  | 9078.378  | 9914.163  | NM_000075 | 18421.037 | 17205.895 | AJ278917  | 12639.226 | 9481.169  |
| NM_004849 | 10436.791 | 11236.404 | NM_006845 | 9636.182  | 10178.174 | AK025641  | 31342.604 | 28878.918 |
| AL137527  | 12207.84  | 11877.744 | NM_014885 | 819.11    | 917.749   | NM_000620 | 749.065   | 670.894   |
| AK024186  | 532.635   | 407.4     | M73239    | 506.777   | 574.469   | AL117398  | 4525.846  | 5678.646  |
| J04974    | 903.853   | 887.269   | NM_004945 | 7090.409  | 7938.058  | NM_001720 | 1793.986  | 2175.854  |
| NM_007058 | 11198.218 | 11926.438 | NM_020242 | 4572.823  | 8838.902  | NM_018390 | 6570.807  | 6210.238  |
| NM_007014 | 1836.872  | 2093.828  | NM_001788 | 26498.494 | 24673.578 | AB037724  | 7875.698  | 7602.783  |
| AL096740  | 964.277   | 882.276   | NM_007178 | 50708.816 | 52580.977 | AK025086  | 1811.556  | 1530.934  |
| AF191545  | 3806.38   | 3169.463  | NM_002209 | 14260.003 | 12679.986 | AK026151  | 5707.963  | 5445.307  |
| NM_014554 | 2248.799  | 2169.359  | NM_002291 | 987.862   | 1255.682  | NM_014140 | 4161.644  | 3859.366  |
| AK023968  | 5693.552  | 6318.826  | AL137477  | 9485.288  | 8304.063  | NM_002916 | 7120.458  | 6141.201  |
| NM_004652 | 1533.557  | 1532.452  | AF284580  | 854.502   | 865.105   | M20700    | 8471.107  | 7765.066  |
| AK025974  | 5201.424  | 6227.746  | AK024961  | 3384.134  | 2670.307  | NM_001034 | 19774.107 | 17192.961 |
| NM_005781 | 2466.973  | 2452.773  | NM_016068 | 4111.052  | 3805.544  | NM_002689 | 1799.872  | 1786.223  |
| BC036740  | 7748.792  | 8462.478  | NM_014256 | 1273.529  | 1057.466  | NM_017686 | 2762.169  | 2493.422  |
| NM_001747 | 27325.496 | 32235.748 | NM_015967 | 3231.547  | 3038.149  | AL096734  | 518.827   | 476.136   |
| AF242522  | 13423.81  | 11303.803 | NM_012237 | 761.181   | 735.15    | AK000800  | 2751.521  | 2840.938  |
| AJ008152  | 711.757   | 957.53    | NM_003595 | 738.127   | 737.26    | NM_018154 | 4954.888  | 4300.122  |
| NM_006965 | 6329.029  | 5231.826  | NM_002409 | 5380.835  | 4973.211  | BC006287  | 4764.647  | 3533.204  |
| AF027142  | 42273.59  | 38694.402 | NM_004994 | 22200.373 | 22918.824 | AB023198  | 4140.496  | 3461.525  |
| S67970    | 443.385   | 506.92    | NM_006610 | 6756.984  | 5490.134  | AF304163  | 17976.141 | 18352.496 |
| AF221520  | 4569.925  | 3495.736  | NM_001333 | 1827.283  | 2152.321  | NM_006896 | 2986.707  | 2878.629  |
| NM_006941 | 5919.788  | 6177.656  | NM_003791 | 4889.912  | 4779.52   | NM_002975 | 4277.302  | 5068.907  |
| NM_004349 | 10612.776 | 9982.02   | NM_018017 | 6580.518  | 6269.94   | AK023511  | 8326.476  | 7281.605  |
| NM_002092 | 15399.684 | 15000.463 | AK001296  | 8761.456  | 7960.347  | NM_014556 | 4038.236  | 5305.475  |
| NM_018077 | 3038.26   | 2963.454  | AK000173  | 998.965   | 745.086   | NM_014375 | 15984.486 | 18348.77  |
| NM_016839 | 7742.185  | 7158.09   | NM_018365 | 2709.566  | 4524.689  | NM_017812 | 20726.773 | 21720.988 |
| NM_005968 | 23375.393 | 26654.623 | NM_006586 | 17730.234 | 15225.032 | AF204173  | 915.196   | 1037.75   |
| AK021416  | 2348.261  | 2797.152  | AJ272180  | 3345.449  | 3651.865  | J03260    | 2159.521  | 2445.819  |
| NM_018471 | 15906.571 | 17398.461 | AK025709  | 1530.897  | 1707.133  | U13738    | 2754.367  | 2482.657  |
| NM_006560 | 8202.41   | 9081.042  | NM_019016 | 9529.656  | 8420.635  | AF068236  | 47271.672 | 46502.41  |
| NM_016183 | 3624.886  | 3641.411  | NM_012261 | 8933.587  | 10884.479 | H94487    | 2105.657  | 2367.769  |
| NM_004872 | 7689.126  | 7744.125  | NM_015556 | 5082.947  | 6560.917  | BG681747  | 46145.809 | 38815.742 |
| NM_001958 | 3942.726  | 3860.121  | NM_018416 | 2579.775  | 2406.373  | H63077    | 50089.016 | 43973.262 |
| NM_001960 | 53721.824 | 59016.582 | NM_004606 | 4505.135  | 3671.876  | AA679352  | 27408.322 | 20014.439 |

|           |           |           |           |           |           |           |           |           |
|-----------|-----------|-----------|-----------|-----------|-----------|-----------|-----------|-----------|
| NM_018122 | 4935.02   | 5009.132  | D70833    | 60174.813 | 60406.059 | X04503    | 3439.487  | 2684.088  |
| AF035318  | 3089.537  | 2636.487  | NM_016621 | 2240.198  | 2189.959  | D45917    | 1756.743  | 1613.784  |
| NM_015456 | 10782.747 | 10828.323 | AB046808  | 4695.741  | 6378.154  | X52001    | 3341.417  | 3595.223  |
| AK025056  | 3143.564  | 2159.112  | AK026265  | 1534.703  | 1514.761  | BI823872  | 19582.127 | 19614.107 |
| AF140710  | 2696.943  | 2685.806  | AF015313  | 582.987   | 442.864   | AA430552  | 4629.304  | 4265.094  |
| NM_012086 | 13051.486 | 10453.647 | NM_006466 | 1547.435  | 1274.724  | X66142    | 4895.306  | 4544.116  |
| NM_017947 | 1135.476  | 1264.795  | NM_005681 | 2389.358  | 1880.6    | R45054    | 2502.851  | 3320.101  |
| NM_002494 | 6279.456  | 6179.241  | NM_015156 | 4689.203  | 4834.101  | NM_002387 | 2758.239  | 2451.787  |
| M58510    | 7033.937  | 6075.63   | NM_012384 | 3754.794  | 3329.273  | AB023217  | 645.294   | 908.079   |
| BE396003  | 2967.956  | 2761.366  | NM_004653 | 4293.956  | 5317.208  | L08902    | 915.515   | 763.038   |
| NM_018082 | 1309.553  | 1685.526  | AF233453  | 2334.61   | 1958.981  | M58050    | 7434.696  | 8445.97   |
| NM_003904 | 9401.788  | 10856.219 | D87454    | 9626.987  | 9753.658  | NM_007263 | 10338.593 | 9943.662  |
| NM_006234 | 33202.164 | 38308.855 | NM_007020 | 3369.234  | 3944.156  | AF206020  | 1865.151  | 1948.859  |
| AB028987  | 6830.653  | 9294.92   | NM_000713 | 4634.764  | 4881.7    | NM_014410 | 920.867   | 1020.742  |
| NM_003594 | 3131.603  | 3464.03   | NM_016055 | 1996.137  | 2027.559  | AF312769  | 3463.199  | 3251.684  |
| NM_005521 | 6029.26   | 5062.515  | NM_013291 | 9167.631  | 9215.154  | AB020668  | 1412.807  | 1057.011  |
| AF164438  | 1260.23   | 1363.514  | NM_002936 | 14300.72  | 15016.73  | NM_006203 | 32489.959 | 29477.58  |
| AF060937  | 794.735   | 635.966   | NM_014161 | 3754.396  | 4206.392  | AF309553  | 6589.07   | 5061.252  |
| AB040893  | 2676.937  | 3009.896  | BF312817  | 3211.192  | 4210.57   | NM_003605 | 1794.052  | 2214.846  |
| AL137727  | 6998.451  | 6393.412  | AF086491  | 2541.896  | 2238.21   | NM_006135 | 12937.688 | 13422.938 |
| L17327    | 2204.622  | 2808.782  | NM_014856 | 1098.266  | 1005.755  | NM_003993 | 3701.911  | 3506.127  |
| AF074986  | 1356.607  | 2024.678  | NM_003492 | 2401.135  | 2377.214  | NM_018961 | 5873.367  | 5715.822  |
| AF075004  | 1663.606  | 667.706   | NM_003780 | 22458.115 | 20034.037 | NM_005586 | 3608.748  | 3781.03   |
| AL049240  | 2039.466  | 2047.308  | NM_002711 | 650.097   | 866.085   | NM_012242 | 920.568   | 1353.122  |
| U80773    | 1924.644  | 1944.285  | NM_000199 | 15001.936 | 17924.818 | NM_003051 | 3788.756  | 3662.31   |
| AK021745  | 1718.991  | 1673.945  | NM_003778 | 65873.914 | 67033.43  | NM_145342 | 6888.142  | 7637.458  |
| L38937    | 5244.696  | 4594.497  | AK023263  | 3475.603  | 3950.647  | AJ278917  | 12040.166 | 12655.543 |
| U90907    | 4130.82   | 4112      | NM_004622 | 2977.49   | 3002.21   | AK025641  | 31756.875 | 36659.016 |
| AK024327  | 3062.11   | 3089.469  | AK021445  | 1298.167  | 1391.769  | NM_001038 | 958.253   | 910.091   |
| AK024395  | 670.02    | 286.117   | NM_017934 | 4658.597  | 4159.272  | AK025886  | 1476.612  | 1662.218  |
| AK000801  | 8480.649  | 8259.537  | NM_014168 | 43793.531 | 37325.457 | NM_003058 | 560.865   | 638.15    |
| D85433    | 10100.083 | 11890.487 | AF211971  | 5117      | 4348.329  | AB014514  | 4203.484  | 4540.105  |
| AF086184  | 2945.079  | 3074.96   | NM_002931 | 3495.569  | 3272.095  | NM_002865 | 5946.991  | 6278.979  |
| NM_018275 | 1725.451  | 1929.471  | NM_013448 | 39743.078 | 40385.043 | NM_003566 | 1758.97   | 1297.151  |
| AL049266  | 9071.446  | 9185.8    | X65232    | 41938.91  | 43203.363 | NM_007155 | 22638.305 | 20673.316 |
| AF007149  | 1681.783  | 1764.03   | U12767    | 498.381   | 690.737   | NM_003731 | 15089.813 | 13777.625 |
| NM_014705 | 730.568   | 799.78    | U17630    | 827.422   | 713.572   | NM_005446 | 5008.59   | 4438.609  |
| AK001469  | 5128.441  | 5387.924  | M33782    | 1032.418  | 1493.463  | NM_013292 | 3577.125  | 3390.451  |
| AK021627  | 2547.192  | 2026.665  | NM_002196 | 547.089   | 529.491   | AK000800  | 3019.819  | 2964.772  |
| AF085859  | 1065.356  | 1090.856  | NM_017755 | 11061.824 | 13214.267 | NM_018154 | 5168.348  | 5953.497  |
| AF085888  | 2092.699  | 710.578   | AK022551  | 3630.002  | 3478.284  | NM_005358 | 694.182   | 779.911   |
| AL049260  | 368.428   | 461.704   | AF085968  | 1391.205  | 1121.574  | BC006287  | 5174.049  | 7224.82   |
| AL049975  | 656.449   | 539.113   | AK023665  | 560.481   | 515.716   | AB023198  | 3992.538  | 4518.555  |
| AL117464  | 2368.34   | 2284.014  | AB011136  | 1810.945  | 1797.586  | AF304163  | 16512.486 | 16819.58  |
| L23849    | 919.269   | 724.243   | AF085898  | 6170.793  | 5448.207  | NM_005231 | 5166.852  | 4913.688  |
| AL157477  | 3696.467  | 3705.414  | AK021552  | 1200.942  | 2989.798  | AF064729  | 2482.641  | 2844.322  |
| AB002318  | 2269.669  | 1737.432  | AL442094  | 602.142   | 512.219   | NM_005412 | 17458.809 | 17243.264 |
| AL049951  | 3536.089  | 4895.953  | AL161960  | 2414.257  | 2292.344  | NM_012113 | 2493.67   | 2229.375  |
| AK024963  | 612.821   | 944.703   | AL049964  | 1487.092  | 1682.71   | NM_002150 | 9276.855  | 10230.319 |
| AK023725  | 3487.045  | 3667.2    | AK023269  | 2330.63   | 2451.791  | NM_004595 | 15241.958 | 15748.962 |
| AK022936  | 9128.913  | 8492.01   | AF070564  | 4268.71   | 3892.045  | NM_020178 | 1095.747  | 1002.086  |
| AK024385  | 1651.641  | 1780.913  | AK021439  | 14691.214 | 16959.746 | NM_002264 | 2351.271  | 2883.07   |
| NM_017705 | 2618.274  | 2407.909  | AF052099  | 2793.899  | 3736.66   | NM_014754 | 26452.129 | 28427.396 |

|           |           |           |           |           |           |           |           |           |
|-----------|-----------|-----------|-----------|-----------|-----------|-----------|-----------|-----------|
| AF049615  | 731.758   | 753.706   | AL110111  | 2362.864  | 2338.183  | D49387    | 1122.743  | 1389.644  |
| NM_01435E | 42448.719 | 43542.984 | AF070543  | 1767.453  | 1876.44   | AF050146  | 5408.875  | 7578.95   |
| AF009282  | 8180.114  | 9711.517  | AF086525  | 491.923   | 574.396   | NM_00011E | 5511.862  | 6605.935  |
| AF024704  | 2516.166  | 2141.443  | AF086509  | 476.179   | 738.247   | NM_00669E | 9914.59   | 10118.703 |
| AF056431  | 1413.747  | 1478.331  | NM_01477E | 6549.722  | 6984.004  | NM_006804 | 18175.641 | 19595.201 |
| NM_016412 | 661.478   | 785.188   | AK001171  | 18993.412 | 19434.295 | NM_01596E | 12351.765 | 14982.583 |
| AF009293  | 1732.13   | 1655.762  | AK026273  | 5364.66   | 4139.21   | NM_004517 | 5287.906  | 4789.499  |
| NM_00415E | 23723.445 | 24797.766 | NM_02025C | 15510.65  | 14521.982 | AI017418  | 784.553   | 720.062   |
| AF056444  | 2003.044  | 1746.627  | AF055007  | 606.491   | 669.991   | NM_00067E | 2681.102  | 2809.974  |
| AK000989  | 2358.507  | 2069.272  | NM_012337 | 1241.719  | 1373.715  | AF218006  | 46793.324 | 54710.137 |
| AK002210  | 1993.77   | 1956.615  | AL389879  | 8931.161  | 8267.601  | AK026935  | 17562.74  | 19609.768 |
| AK021677  | 1595.893  | 1664.105  | AK022869  | 2648.209  | 2814.749  | NM_020162 | 5773.386  | 5767.71   |
| AK001057  | 1045.844  | 1047.766  | NM_016111 | 14317.391 | 14674.704 | AK027124  | 52676.59  | 59513.402 |
| AK001808  | 454.584   | 601.241   | AF085958  | 57971.84  | 63493.855 | AL117398  | 5216.186  | 6454.971  |
| AK021471  | 1344.772  | 1311.711  | AK021906  | 832.499   | 1419.653  | AY007158  | 60563.102 | 62608.559 |
| AK025109  | 3755.959  | 3036.379  | AF086021  | 4847.478  | 6507.401  | NM_00172C | 3097.757  | 4062.093  |
| AK026057  | 900.976   | 1068.596  | AL117655  | 470.286   | 520.956   | NM_01839C | 8423.454  | 8837.079  |
| AJ008117  | 3826.497  | 3610.281  | AK024472  | 3963.955  | 4568.812  | AB037724  | 9312.905  | 10577.654 |
| AJ008147  | 11719.555 | 9874.007  | NM_01797E | 4607.481  | 4530.351  | AK025086  | 2576.792  | 2726.398  |
| AK024369  | 2103.687  | 2368.055  | U06700    | 1150.61   | 1186.453  | AK026151  | 7303.155  | 8315.826  |
| L43345    | 2236.121  | 2115.796  | U63828    | 2937.058  | 2723.888  | NM_01414C | 4834.517  | 5167.819  |
| AF180297  | 4157.79   | 5462.278  | Z36794    | 793.687   | 864.476   | NM_00291E | 8168.647  | 6864.742  |
| AK023245  | 2701.838  | 2893.438  | Z36828    | 11621.521 | 11927.095 | M20700    | 8333.396  | 9039.457  |
| AF086224  | 815.691   | 894.966   | AF086121  | 16657.289 | 18545.113 | NM_001034 | 21071     | 18566.854 |
| S56365    | 15131.042 | 13187.804 | AF086140  | 1539.525  | 1663.966  | NM_00268E | 2536.689  | 2427.42   |
| AL049997  | 19381.617 | 19253.668 | AK026915  | 2150.095  | 1887.673  | NM_01768E | 3305.671  | 3398.766  |
| AK024118  | 1326.709  | 1289.156  | AL110259  | 966.228   | 1766.384  | AL096734  | 998.686   | 1180.325  |
| X89657    | 1391.85   | 1628.18   | AB033100  | 18606.752 | 18497.219 | NM_01664E | 6917.942  | 7933.264  |
| AK024509  | 1025.026  | 1330.276  | AL390138  | 1746.109  | 1522.56   | L14723    | 12179.382 | 14177.363 |
| NM_017847 | 4963.627  | 4045.969  | AL137290  | 5190.223  | 4573.879  | AK024462  | 19992.834 | 23329.129 |
| AL049675  | 2303.175  | 2193.058  | AK023458  | 1021.045  | 1181.036  | NM_005711 | 969.129   | 1018.331  |
| NM_003537 | 6562.781  | 7229.352  | AK021606  | 600.411   | 931.283   | NM_019601 | 739.971   | 783.429   |
| AF056419  | 10830.52  | 10340.732 | NM_014124 | 26498.037 | 21214.313 | NM_00220E | 1751.37   | 2218.268  |
| AF074983  | 1988.119  | 1873.169  | AF119888  | 787.113   | 670.659   | NM_00223C | 568.323   | 735.549   |
| AK021862  | 1224.989  | 1238.879  | AK001551  | 2024.132  | 1808.772  | NM_00143C | 2126.823  | 2996.608  |
| AK024177  | 1392.313  | 1423.71   | AK001825  | 1362.104  | 1340.401  | AB010098  | 721.914   | 712.746   |
| AK024827  | 7252.989  | 6851.228  | AK024714  | 659.549   | 564.132   | U17989    | 2341.362  | 2589.902  |
| K01564    | 1469.52   | 1467.723  | AK022363  | 1024.216  | 924.324   | U62325    | 1158.656  | 1113.141  |
| AB023175  | 2168.816  | 2495.969  | AK022485  | 521.396   | 607.766   | AL137595  | 781.744   | 883.961   |
| AL359563  | 2585.477  | 2160.14   | AK023395  | 2933.641  | 2057.547  | NM_01802E | 1596.214  | 1630.383  |
| AF086478  | 6673.488  | 7562.837  | AK023818  | 3977.569  | 3119.991  | AF249267  | 52575.789 | 56724.91  |
| AF086022  | 590.288   | 621.199   | AK023895  | 910.156   | 1203.179  | NM_004113 | 675.418   | 828.687   |
| AK021514  | 63005.672 | 58731.863 | AK024206  | 7554.057  | 7028.3    | X84939    | 4433.157  | 4602.599  |
| AJ008134  | 556.812   | 870.822   | NM_006262 | 4028.327  | 3975.154  | NM_01832C | 28671.488 | 30464.822 |
| S71486    | 2794.653  | 2732.426  | AK026598  | 2098.46   | 2251.676  | NM_00206E | 2633.789  | 2052.687  |
| L33808    | 9110.817  | 11859.451 | AK023602  | 1396.029  | 1545.004  | NM_01605E | 18819.793 | 15706.396 |
| D31886    | 6410.439  | 4788.779  | NM_018097 | 37111.859 | 34620.09  | M65066    | 12331.676 | 11029.17  |
| AF075071  | 776.445   | 734.438   | AF130043  | 556.94    | 526.847   | NM_016951 | 2526.695  | 2704.964  |
| AL080213  | 1008.498  | 1052.329  | Y11167    | 1435.53   | 1370.885  | NM_013251 | 1080.555  | 1155.489  |
| AF001892  | 792.911   | 904.129   | AK026813  | 815.527   | 832.325   | NM_00609E | 3512.346  | 3484.693  |
| X93500    | 2526.423  | 2384.314  | AK027225  | 865.686   | 629.167   | AF272379  | 3760.348  | 3954.935  |
| U79271    | 1672.661  | 1573.217  | AK023083  | 2204.156  | 2586.623  | NM_01232E | 2286.981  | 2617.382  |
| NM_01988E | 1160.414  | 953.485   | AF130093  | 571.479   | 652.609   | NM_00308E | 28912.674 | 42340.883 |

|           |           |           |           |           |           |           |           |           |
|-----------|-----------|-----------|-----------|-----------|-----------|-----------|-----------|-----------|
| AK024609  | 8874.967  | 7504.916  | AF116622  | 611.637   | 905.997   | NM_016084 | 13591.706 | 14542.209 |
| AK023660  | 818.005   | 882.503   | NM_005325 | 651.213   | 517.559   | AF095289  | 35158.664 | 38178.746 |
| NM_018120 | 6690.744  | 6941.471  | AF217967  | 1307.321  | 1278.703  | NM_005537 | 6182.448  | 5461.865  |
| AK026874  | 851.811   | 769.446   | NM_018150 | 6931.761  | 6598.236  | NM_019003 | 3794.651  | 3492.315  |
| AK024178  | 816.841   | 883.017   | NM_017918 | 12896.502 | 13516.419 | NM_015935 | 4408.336  | 4345.466  |
| D17217    | 3497.094  | 4096.427  | NM_017855 | 46878.117 | 42413.77  | AF182412  | 1424.63   | 1924.988  |
| AF088033  | 597.61    | 786.601   | AB007954  | 2041.095  | 1892.381  | AK027200  | 2138.896  | 2401.958  |
| NM_020422 | 6655.779  | 5903.757  | AK026494  | 2576.498  | 2532.078  | S78372    | 445.166   | 740.585   |
| AJ227897  | 483.828   | 312.315   | AK023508  | 1286.115  | 1400.562  | U03106    | 3226.197  | 4587.261  |
| AY007156  | 2317.156  | 2628.929  | AK025840  | 2894.946  | 2924.155  | NM_000075 | 19749.588 | 21655.65  |
| AF086408  | 58718.164 | 56296.234 | BC024009  | 2956.24   | 2975.477  | NM_006845 | 16417.234 | 17344.391 |
| AK023979  | 4789.546  | 4700.608  | AF128543  | 5451.927  | 5201.416  | NM_014885 | 1083.794  | 1098.374  |
| CY3Cy5    | 9261.96   | 655.419   | AK022071  | 739.848   | 640.385   | M73239    | 394.705   | 779.825   |
| U13738    | 4217.316  | 3904.462  | NM_004189 | 1271.536  | 1257.492  | NM_004945 | 6362.378  | 6865.636  |
| AF068236  | 1378.866  | 1362.07   | U84510    | 6385.485  | 5011.427  | NM_020242 | 4621.083  | 4198.837  |
| BG681747  | 40941.664 | 37548.129 | S83198    | 11014.409 | 8953.385  | NM_001785 | 26436.305 | 23115.92  |
| H63077    | 49283.957 | 46815.305 | AF052119  | 17633.895 | 15140.783 | NM_007175 | 56013.227 | 54319.633 |
| AA679352  | 32107.715 | 27701.863 | X94290    | 2168.912  | 2109.942  | NM_017682 | 453.899   | 567.906   |
| AA437291  | 673.089   | 531.004   | AK026685  | 13650.532 | 12858.459 | NM_002205 | 12729.421 | 11245.25  |
| X04503    | 1339.218  | 1419.736  | AF090927  | 27499.27  | 24301.836 | NM_002291 | 1180.309  | 1372.414  |
| D45917    | 1110.292  | 1102.693  | AL137642  | 1126.329  | 1077.969  | AL137477  | 8749.794  | 10762.227 |
| X52001    | 2909.284  | 2998.138  | AL133619  | 7240.342  | 6709.069  | AF284580  | 1120.212  | 1001.601  |
| BI823872  | 49532.223 | 51194.566 | AK025902  | 3696.086  | 3889.476  | AK024961  | 2539.187  | 2404.624  |
| AA430552  | 620.886   | 524.604   | AL353949  | 486.253   | 827.071   | NM_016065 | 5432.602  | 6093.925  |
| R45054    | 1155.292  | 1206.413  | NM_005181 | 2669.976  | 4027.008  | NM_014255 | 1063.285  | 1126.018  |
| SR5       | 7149.425  | 7105.818  | AF026945  | 629.086   | 718.059   | NM_015967 | 3167.806  | 3714.96   |
| SR7       | 6463.944  | 48250.504 | AF143676  | 5796.89   | 6527.928  | NM_012237 | 645.765   | 435.85    |
| SR9       | 25275.486 | 6925.374  | U66044    | 8106.272  | 8234.01   | NM_002405 | 5032.458  | 5458.207  |
| CY3Cy5    | 10786.541 | 665.807   | NM_005247 | 27758.375 | 21663.314 | NM_004994 | 19931.477 | 19399.963 |
| AF312769  | 1574.081  | 873.935   | NM_005283 | 1072.429  | 1014.31   | NM_006610 | 6681.981  | 6075.571  |
| AB020668  | 1769.173  | 990.214   | AL122089  | 3526.13   | 3380.339  | NM_001333 | 2432.763  | 2640.918  |
| NM_006203 | 765.946   | 550.571   | AA203665  | 1872.29   | 1870.145  | NM_003791 | 6513.688  | 7376.893  |
| AF309553  | 10400.761 | 9491.236  | U95646    | 972.038   | 1111.23   | NM_018017 | 10213.635 | 10985.397 |
| NM_003605 | 3436.467  | 3372.552  | Y16705    | 1923.01   | 1779.723  | AK001296  | 10367.234 | 13611.399 |
| NM_006135 | 14793.284 | 13417.672 | AF279775  | 4428.102  | 4479.484  | AK000173  | 1112.465  | 1321.175  |
| NM_002725 | 874.09    | 623.955   | NM_001821 | 7927.917  | 6212.282  | NM_018365 | 1988.983  | 1848.325  |
| NM_014375 | 949.907   | 1492.073  | NM_005647 | 1331.281  | 1219.924  | NM_006585 | 19263.346 | 19396.281 |
| NM_017812 | 16697.461 | 16099.476 | X64978    | 9746.028  | 7518.445  | AJ272180  | 2751.019  | 2751.938  |
| AF204173  | 829.718   | 1156.53   | NM_000912 | 32115.971 | 33048.742 | AK025709  | 1609.155  | 1792.687  |
| J03260    | 1119.776  | 949.654   | NM_002345 | 1055.395  | 816.143   | NM_019015 | 12253.775 | 16688.336 |
| AB014514  | 2825.894  | 3231.727  | U57971    | 1485.015  | 1359.297  | NM_012261 | 10129.225 | 12839.671 |
| NM_002865 | 5786.845  | 5111.313  | X89673    | 801.819   | 512.256   | NM_015555 | 4975.555  | 5309.113  |
| NM_003565 | 2213.191  | 1832.544  | AK024593  | 1110.721  | 943.123   | NM_018415 | 2801.362  | 2391.494  |
| NM_004245 | 790.089   | 650.761   | Z83934    | 1372.892  | 1252.895  | NM_004605 | 3540.826  | 3645.649  |
| NM_005445 | 6299.51   | 5520.335  | NM_018355 | 5847.225  | 5832.675  | D70833    | 64916.727 | 59712.18  |
| NM_013292 | 5914.882  | 4918.816  | AK022020  | 1868.988  | 1418.479  | NM_016621 | 1786.584  | 1795.561  |
| NM_002387 | 5428.036  | 4754.7    | U17634    | 383.086   | 428.219   | AB046808  | 3383.196  | 3255.063  |
| L08902    | 483.752   | 505.275   | AK000263  | 11196.697 | 11633.929 | AK026265  | 1222.679  | 1269.047  |
| J02639    | 2455.763  | 2487.555  | Y13895    | 570.493   | 1273.297  | AF015313  | 1016.819  | 745.444   |
| NM_007263 | 25301.295 | 28146.271 | NM_017447 | 2744.104  | 3069.122  | NM_006465 | 1605.067  | 1361.415  |
| NM_001755 | 11144.471 | 13191.713 | AL049452  | 695.424   | 841.577   | NM_005681 | 2366.255  | 2180.01   |
| AF305835  | 557.637   | 853.69    | NM_016622 | 2443.319  | 2528.406  | NM_015155 | 4835.127  | 5079.736  |
| NM_002150 | 1930.846  | 1645.916  | AK026976  | 1810.109  | 2180.363  | NM_012384 | 3666.945  | 3576.332  |

|           |           |           |             |           |           |           |           |           |
|-----------|-----------|-----------|-------------|-----------|-----------|-----------|-----------|-----------|
| NM_00459E | 15694.911 | 14866.396 | AF070559    | 6663.739  | 6770.981  | NM_00465E | 2884.777  | 2407.896  |
| NM_02017E | 1233.948  | 820.359   | D42043      | 6987.483  | 7062.958  | AF233453  | 2171.01   | 2209.104  |
| NM_002264 | 4439.392  | 3764.598  | CY3Cy5      | 1627.739  | 120.188   | D87454    | 7784.704  | 7610.066  |
| NM_014754 | 25829.055 | 24219.994 | BG744154    | 18596.318 | 19654.551 | NM_00702C | 2021.657  | 2713.96   |
| D49387    | 593.794   | 750.39    | Z11694      | 9316.975  | 9828.041  | NM_00071E | 5008.146  | 5752.88   |
| AF050146  | 729.298   | 776.624   | BF983177    | 375.68    | 514.97    | NM_01605E | 2260.655  | 2486.301  |
| NM_000116 | 6563.087  | 7374.373  | Z26317      | 3031.719  | 2854.395  | NM_013291 | 6570.466  | 5553.833  |
| NM_00669E | 10598.423 | 10324.422 | X16983      | 18910.09  | 15962.803 | NM_00293E | 14480.441 | 15704.665 |
| NM_006804 | 10714.567 | 10471.249 | X56160      | 1728.173  | 1372.396  | NM_014161 | 2549.726  | 2707.514  |
| NM_01596E | 11872.76  | 12832.229 | BG679991    | 907.361   | 625.823   | BF312817  | 3135.537  | 3258.996  |
| NM_003051 | 1368.071  | 1409.331  | H-Y 00097 I | 8090.119  | 8019.175  | AF086491  | 5183.602  | 5661.414  |
| NM_14534E | 4109.48   | 4345.3    | H-Y 00711 I | 64618.684 | 67061.219 | NM_01485E | 1314.458  | 961.48    |
| AJ278917  | 835.212   | 1081.061  | H-X 16707 I | 1574.766  | 1311.909  | NM_00349E | 1695.331  | 2075.212  |
| AK025641  | 7908.209  | 9426.53   | AL038354    | 30483.674 | 29700.797 | NM_00378C | 30045.965 | 30675.203 |
| AK025886  | 2523.276  | 3748.205  | R14607      | 607.327   | 631.266   | NM_00377E | 64981.859 | 61814.563 |
| NM_00305E | 1146.219  | 1419.951  | W84867      | 322.41    | 501.158   | NM_001041 | 674.112   | 667.1     |
| NM_01839C | 13446.683 | 13537.647 | NM_02197E   | 3433.325  | 3051.056  | AK023263  | 4865.874  | 6989.494  |
| AB037724  | 7349.019  | 7259.809  | SR2         | 53274.52  | 46522.344 | NM_00462E | 3392.601  | 3715.076  |
| AK025086  | 2565.618  | 2454.456  | SR4         | 14925.689 | 10874.186 | AK021445  | 1866.869  | 2226.611  |
| AK026151  | 2133.733  | 2017.222  | SR6         | 2448.29   | 1996.905  | NM_017934 | 6982.356  | 6232.406  |
| NM_01414C | 5056.606  | 5025.684  | SR8         | 8287.398  | 18367.971 | NM_01416E | 41555.922 | 40410.516 |
| NM_00291E | 10209.001 | 9520.821  | SR10        | 28855.473 | 7861.427  | AF211971  | 4214.47   | 3398.949  |
| M20700    | 10975.413 | 11600.669 | CY3Cy5      | 1329.503  | 118.888   | NM_002931 | 2498.257  | 2880.568  |
| NM_001034 | 25456.701 | 30011.725 | NM_001284   | 32375.645 | 33420.465 | NM_01344E | 47783.336 | 50829.973 |
| NM_00268E | 4246.441  | 4331.514  | NM_00324E   | 17122.227 | 17462.123 | X65232    | 37762.93  | 42030.391 |
| NM_01768E | 4459.789  | 3917.702  | NM_00284E   | 445.218   | 418.853   | U12767    | 501.983   | 521.662   |
| AL096734  | 1139.84   | 1334.404  | U31099      | 1009.151  | 764.895   | U17630    | 1134.694  | 1158.423  |
| AK000800  | 3879.505  | 3960.66   | NM_001105   | 2744.086  | 2495.148  | M33782    | 964.507   | 1032.436  |
| NM_018154 | 9119.482  | 9060.684  | NM_00558E   | 1114.553  | 990.824   | NM_00219E | 691.719   | 541.717   |
| NM_00535E | 664.431   | 720.804   | NM_00207E   | 2172.241  | 2006.074  | NM_01775E | 9489.479  | 7794.566  |
| BC006287  | 5967.603  | 6832.336  | Y08756      | 4810.234  | 4511.873  | NM_01569E | 710.092   | 742.671   |
| AB023198  | 8111.11   | 9199.461  | NM_00556E   | 16943.965 | 17156.746 | AK022551  | 3163.005  | 4040.574  |
| AF304163  | 45298.375 | 55508.727 | AY007090    | 520.725   | 635.322   | AF085968  | 1586.255  | 2037.351  |
| NM_005231 | 8905.48   | 9015.63   | NM_00643E   | 457.364   | 521.868   | AK023665  | 768.435   | 657.165   |
| AF064729  | 3081.248  | 3513.242  | NM_00510E   | 1329.666  | 1495.267  | AB011136  | 2099.328  | 2142.742  |
| NM_00541E | 29017.309 | 37624.492 | NM_00451E   | 803.778   | 820.569   | AL161960  | 1834.612  | 2300.448  |
| NM_012113 | 4295.901  | 5450.607  | NM_006501   | 866.244   | 942.916   | AL049964  | 1514.697  | 1899.61   |
| NM_00272E | 1575.322  | 1365.847  | NM_00271E   | 9332.603  | 9445.213  | AK023269  | 3037.131  | 3657.973  |
| NM_01437E | 1505.349  | 1692.396  | AB035356    | 565.954   | 867.128   | AF070564  | 5503.36   | 5173.805  |
| NM_01781E | 19788.09  | 19559.967 | AV752086    | 1337.468  | 1332.059  | AK021439  | 18882.135 | 18556.389 |
| AF204173  | 957.69    | 1209.381  | NM_01610E   | 5256.142  | 5600.521  | AF052099  | 2651.906  | 3350.702  |
| J03260    | 1820.255  | 1881.486  | NM_00437E   | 4031.469  | 3735.988  | AL110111  | 2008.862  | 2236.732  |
| U13738    | 6363.994  | 6678.429  | NM_00027E   | 1285.566  | 1303.954  | AF070543  | 1654.88   | 1777.178  |
| AF068236  | 2073.676  | 1790.979  | NM_00684E   | 58721.121 | 63755.676 | NM_01477E | 6093.39   | 6790.375  |
| BG681747  | 47383.793 | 50657.207 | NM_00560E   | 20694.604 | 18055.336 | AK001171  | 17907.201 | 21329.451 |
| H63077    | 55767.473 | 57699.539 | NM_001061   | 723.775   | 497.783   | AK026273  | 15072.049 | 18216.125 |
| AA679352  | 37059.328 | 39168.59  | AB011100    | 2217.022  | 2219.024  | NM_02025C | 23271.928 | 26244.094 |
| AA437291  | 777.754   | 804.005   | U61741      | 701.202   | 871.3     | AF055007  | 901.143   | 1159.072  |
| X04503    | 1546.674  | 1801.906  | NM_01240E   | 6545.625  | 6820.768  | NM_012337 | 1479.77   | 1503.105  |
| D45917    | 1169.189  | 1352.281  | M76676      | 4406.954  | 4514.785  | AL389879  | 7970.288  | 7612.535  |
| X52001    | 3110.273  | 3066.906  | NM_003857   | 419.954   | 666.372   | AK022869  | 2931.786  | 2688.42   |
| AA430552  | 713.119   | 760.577   | AL137690    | 705.569   | 692.716   | NM_016111 | 17006.447 | 19213.932 |
| X66142    | 4244.63   | 4754.708  | Z83804      | 2038.178  | 1880.285  | AF085958  | 62144.715 | 61830.855 |



|           |           |           |           |           |           |           |           |           |
|-----------|-----------|-----------|-----------|-----------|-----------|-----------|-----------|-----------|
| R45054    | 2521.821  | 2931.565  | NM_004386 | 1308.169  | 1343.696  | AF086021  | 4116.807  | 4837.605  |
| NM_000620 | 965.527   | 1097.7    | U67784    | 755.538   | 833.769   | AK024472  | 2845.987  | 2961.124  |
| NM_000905 | 8432.86   | 10293.756 | NM_007366 | 1160.678  | 1175.605  | NM_017976 | 6378.636  | 7155.336  |
| AL117398  | 4449.306  | 5860.669  | NM_000592 | 685.097   | 777.768   | U06700    | 1887.752  | 3037.238  |
| AY007158  | 15651.934 | 20225.584 | NM_016584 | 7662.035  | 7775.835  | U63828    | 3266.349  | 2554.308  |
| M58050    | 10522.006 | 12203.381 | NM_001815 | 1138.555  | 1143.46   | Z36794    | 1481.724  | 1321.008  |
| NM_007263 | 25786.674 | 24580.342 | NM_000064 | 6149.832  | 6150.882  | Z36828    | 10355.518 | 12368.979 |
| AF206020  | 647.259   | 396.085   | NM_006725 | 5772.142  | 5833.292  | AF086121  | 18015.295 | 16030.831 |
| AF305835  | 1740.356  | 1771.155  | NM_003326 | 1676.54   | 1903.144  | AF086140  | 1334.738  | 1453.97   |
| AF312769  | 655.357   | 493.911   | NM_004568 | 40263.949 | 41089.441 | AK026915  | 2502.931  | 1861.536  |
| AB020668  | 788.13    | 610.154   | NM_000202 | 2422.172  | 2377.63   | AL110259  | 1724.265  | 1795.687  |
| NM_006203 | 906.099   | 961.126   | NM_005496 | 12148.433 | 10521.634 | AB033100  | 20444.176 | 17067.777 |
| AF309553  | 12853.068 | 12419.91  | NM_016608 | 676.422   | 607.6     | AL390138  | 2847.771  | 2950.973  |
| NM_003605 | 3676.572  | 3796.142  | NM_002858 | 6018.002  | 6207.533  | AL137290  | 6544.848  | 5856.55   |
| NM_006139 | 15406.339 | 15809.774 | NM_004817 | 1805.409  | 1659.594  | AK024180  | 817.512   | 576.378   |
| NM_000100 | 52734.898 | 54561.98  | NM_018975 | 18295.066 | 20083.418 | AK023458  | 973.133   | 1280.708  |
| NM_003993 | 6324.732  | 6053.44   | AB023215  | 8990.93   | 7888.049  | AK021606  | 942.12    | 1146.727  |
| NM_018961 | 6521.645  | 7585.491  | NM_018073 | 2814.993  | 2915.916  | NM_014124 | 40995.508 | 42840.887 |
| NM_005586 | 2068.715  | 2108.031  | AL137529  | 3910.099  | 4218.488  | AF119888  | 853.358   | 1122.094  |
| NM_012242 | 2834.962  | 2451.53   | NM_012332 | 1506.303  | 1437.123  | AK001551  | 2753.249  | 3646.872  |
| NM_006896 | 3235.304  | 3393.35   | AK026648  | 2416.658  | 3658.876  | AK001825  | 1595.227  | 1462.778  |
| NM_001130 | 51147.148 | 53513.215 | NM_000497 | 1285.376  | 1392.842  | AK024714  | 1976.341  | 1728.982  |
| NM_002975 | 2293.688  | 3007.162  | NM_017421 | 2095.912  | 1877.858  | AK022363  | 1994.137  | 2120.622  |
| NM_001615 | 68535.359 | 64056.551 | AK025977  | 17137.506 | 16606.736 | AK022485  | 629.272   | 935.78    |
| AK025886  | 2717.232  | 2729.651  | AK023130  | 8185.507  | 7241.68   | AK023395  | 3531.316  | 3649.645  |
| NM_003058 | 1161.631  | 929.21    | NM_000273 | 808.627   | 748.074   | AK023818  | 5334.396  | 5100.51   |
| AB014514  | 4935.689  | 5950.96   | NM_002899 | 9303.086  | 8703.848  | AK024139  | 566.67    | 790.252   |
| NM_002865 | 6099.737  | 6393.034  | NM_000486 | 610.148   | 734.817   | AK023895  | 1052.792  | 1274.515  |
| NM_003566 | 2658.058  | 1821.009  | BE876237  | 1002.093  | 1330.186  | AK024206  | 9898.21   | 12256.908 |
| NM_004249 | 1255.345  | 854.337   | NM_005397 | 1442.597  | 1632.422  | NM_006262 | 3088.172  | 2674.989  |
| AK026315  | 25550.133 | 22389.473 | NM_000806 | 8061.724  | 9210.213  | AK026598  | 2841.453  | 2514.074  |
| NM_007159 | 23483.637 | 18778.842 | NM_006320 | 3261.524  | 3404.379  | AK023602  | 1511.601  | 1526.679  |
| NM_003731 | 22484.957 | 22110.266 | AB014511  | 4327.161  | 5180.25   | NM_018097 | 38552.453 | 27343.199 |
| NM_005446 | 7310.722  | 6620.848  | NM_014252 | 7490.885  | 7505.912  | AF130043  | 1220.71   | 954.57    |
| NM_013292 | 5928.155  | 5280.553  | NM_001662 | 18412.875 | 20947.148 | Y11167    | 2259.827  | 1552.638  |
| NM_002387 | 5049.121  | 4457.89   | NM_016131 | 9782.578  | 9654.936  | AK026813  | 1914.767  | 1170.161  |
| NM_000069 | 915.273   | 712.718   | NM_006822 | 2512.208  | 2617.058  | AK027225  | 1158.651  | 935.75    |
| AB023217  | 1538.645  | 1741.526  | NM_012142 | 8610.419  | 9116.098  | AK023083  | 3420.792  | 2661.42   |
| J02639    | 2245.365  | 2306.932  | NM_016429 | 2612.748  | 2372.877  | AF116622  | 873.172   | 595.147   |
| NM_005231 | 8370.683  | 7379.468  | NM_018264 | 1610.104  | 1688.081  | NM_005325 | 838.804   | 496.328   |
| AF064729  | 1609.808  | 1628.203  | NM_014580 | 732.797   | 701.728   | AF217967  | 1193.781  | 1160.358  |
| NM_005412 | 28027.109 | 26279.512 | AB028998  | 870.882   | 881.997   | NM_018150 | 11581.374 | 12037.825 |
| NM_012113 | 3718.31   | 3434.333  | NM_000153 | 752.662   | 986.362   | NM_017918 | 18107.363 | 17829.273 |
| NM_002150 | 3398.222  | 2738.697  | NM_002033 | 1747.343  | 2288.059  | NM_017855 | 50983.324 | 46070.082 |
| NM_004595 | 16642.998 | 16061.154 | NM_004111 | 2859.701  | 2472.091  | AB007954  | 2445.477  | 2370.059  |
| NM_020178 | 1384.651  | 1422.295  | AF085966  | 4133.554  | 3917.297  | AK026494  | 3636.559  | 3259.969  |
| NM_002264 | 4084.073  | 4594.352  | NM_005316 | 3567.552  | 2975.805  | AK022067  | 554.852   | 705.006   |
| NM_014754 | 25213.592 | 24915.607 | NM_016316 | 3485.76   | 3904.853  | AK023508  | 1965.078  | 1593.672  |
| D49387    | 866.986   | 1052.328  | NM_003369 | 7353.396  | 7822.195  | AK025840  | 3831.516  | 4279.364  |
| AF050146  | 742.117   | 927.218   | NM_000057 | 2946.266  | 3140.431  | BC024009  | 4327.498  | 3504.834  |
| NM_000116 | 6852.277  | 8123.42   | NM_018343 | 5976.234  | 6533.354  | AF128543  | 6092.072  | 5916.83   |
| NM_006698 | 11251.217 | 11492.027 | NM_017719 | 1928.51   | 2221.932  | AK022071  | 621.929   | 423.248   |
| NM_006804 | 11665.709 | 12011.218 | AF064078  | 557.432   | 742.537   | NM_004185 | 1924.311  | 1794.535  |

|           |           |           |             |           |           |             |           |           |
|-----------|-----------|-----------|-------------|-----------|-----------|-------------|-----------|-----------|
| NM_01596  | 10894.029 | 11500.907 | AL049688    | 1488.606  | 1668.458  | U84510      | 7802.686  | 5364.375  |
| NM_003051 | 1461.443  | 1595.775  | NM_002737   | 5598.455  | 5115.03   | S83198      | 17449.854 | 13025.09  |
| NM_145342 | 5084.521  | 4109.486  | Z25427      | 4163.799  | 4431.12   | AF052119    | 22583.006 | 19272.404 |
| AJ278917  | 940.779   | 810.662   | NM_004672   | 9380.508  | 10096.64  | X94290      | 2964.1    | 2193.148  |
| AK025641  | 7317.623  | 7816.846  | NM_001353   | 3272.375  | 3058.861  | AK026685    | 33661.125 | 29490.607 |
| NM_000620 | 971.354   | 788.352   | NM_005198   | 4807.62   | 4193.387  | AF090927    | 32151.793 | 29093.168 |
| NM_000905 | 9181.562  | 8965.666  | NM_006848   | 61523.313 | 59772.406 | AL137642    | 1730.705  | 1325.139  |
| AL117398  | 3907.976  | 4356.354  | NM_005603   | 26066.031 | 24671.031 | AL133619    | 10366.233 | 7553.458  |
| AY007158  | 16858.361 | 15977.78  | NM_001061   | 746.957   | 799.187   | AK025902    | 4315.403  | 3159.507  |
| NM_001720 | 976.478   | 883.313   | BG744154    | 20754.596 | 21677.303 | NM_005181   | 2148.311  | 1857.163  |
| NM_018390 | 14142.304 | 14473.137 | Z11694      | 9077.475  | 9278.32   | AF026945    | 784.916   | 367.338   |
| AB037724  | 7420.783  | 7448.141  | BF983177    | 477.431   | 204.797   | AF143676    | 6493.473  | 5282.269  |
| AK025086  | 2371.433  | 2211.257  | Z26317      | 2629.144  | 2376.074  | U66044      | 11722.07  | 9392.942  |
| AK026151  | 2159.945  | 2389.698  | X16983      | 19311.551 | 17975.516 | NM_005247   | 45438.078 | 30222.707 |
| NM_014140 | 5633.812  | 5665.412  | X56160      | 2092.187  | 1869.493  | NM_005283   | 1927.609  | 1502.747  |
| NM_002910 | 9735.905  | 9571.242  | BG679991    | 1064.71   | 824.322   | AL122089    | 3878.189  | 3059.527  |
| M20700    | 11342.576 | 10748.238 | H-Y 00097 I | 9105.345  | 10693.983 | AA203665    | 4097.386  | 3518.951  |
| NM_001034 | 25462.457 | 25372.736 | AL038354    | 33206.598 | 32723.242 | U95646      | 1339.275  | 1243.657  |
| NM_002689 | 4001.988  | 3871.338  | R14607      | 674.512   | 620.896   | Y16705      | 2390.022  | 2037.664  |
| NM_017680 | 2917.787  | 2782.288  | NM_021970   | 3195.893  | 2869.283  | AF279775    | 6563.69   | 6177.372  |
| AL096734  | 1352.54   | 1207.44   | NM_005718   | 7951.692  | 7193.546  | NM_001821   | 6720.184  | 5362.307  |
| AK000800  | 3332.36   | 3099.206  | NM_005490   | 12453.109 | 12660.286 | NM_005647   | 1295.461  | 1109.476  |
| NM_018154 | 6497.751  | 5356.299  | NM_016608   | 783.845   | 761.377   | X64978      | 12181.518 | 11209.828 |
| NM_005358 | 712.376   | 302.93    | NM_002858   | 5807.512  | 6541.318  | NM_000912   | 42977.598 | 40624.594 |
| BC006287  | 4788.305  | 4703.982  | NM_004817   | 1776.378  | 3150.625  | NM_002345   | 1366.951  | 1262.609  |
| AB023198  | 7350.578  | 7175.218  | NM_018975   | 19642.629 | 24288.873 | U57971      | 2443.722  | 2023.328  |
| AF304163  | 38436.48  | 40658.328 | AB023215    | 10568.682 | 10821.05  | X89673      | 1006.571  | 786.937   |
| NM_006890 | 3499.597  | 3615.462  | NM_001284   | 34835.324 | 35429.859 | AK024593    | 2530.455  | 2020.635  |
| NM_001130 | 50282.375 | 50477.68  | NM_003242   | 16966.166 | 16433.096 | Z83934      | 1260.32   | 1153.196  |
| NM_002975 | 2853.251  | 2986.892  | NM_002849   | 414.268   | 488.161   | NM_018350   | 6668.955  | 5635.377  |
| AK023511  | 12234.618 | 9691.961  | U31099      | 908.997   | 731.75    | AK022020    | 1611.474  | 1648.421  |
| NM_014550 | 5389.698  | 6309.645  | NM_001105   | 2533.213  | 2384.908  | AK000263    | 13844.65  | 9411.229  |
| NM_001615 | 62811.602 | 56894.93  | NM_005585   | 1031.284  | 1144.186  | Y13895      | 534.619   | 328.438   |
| NM_002725 | 860.244   | 729.713   | NM_002075   | 2224.828  | 2282.758  | NM_017447   | 2787.405  | 2175.188  |
| NM_014375 | 1915.719  | 1916.311  | Y08756      | 5039.561  | 5108.21   | AL049452    | 1529.521  | 920.65    |
| NM_017812 | 20794.102 | 20061.498 | NM_005563   | 16871.979 | 17265.826 | NM_016622   | 2982.628  | 2034.981  |
| AF204173  | 2582.468  | 2879.61   | AY007090    | 774.848   | 429.688   | AK026976    | 1928.292  | 2169.043  |
| J03260    | 1229.374  | 1317.784  | NM_005102   | 1292.331  | 1218.232  | AF070559    | 6858.388  | 5350.72   |
| U13738    | 4029.732  | 4385.282  | NM_004518   | 704.2     | 612.399   | D42043      | 10486.748 | 9169.758  |
| AF068236  | 2176.949  | 1952.056  | NM_006501   | 970.542   | 963.661   | CY3Cy5      | 2945.512  | 102.098   |
| BG681747  | 43694.969 | 43120.641 | NM_002719   | 7981.548  | 6309.2    | BG744154    | 16671.805 | 16861.863 |
| H63077    | 52212.125 | 49299.887 | AB035356    | 480.354   | 654.879   | Z11694      | 5614.871  | 5175.309  |
| AA679352  | 31924.9   | 26368.143 | AV752086    | 974.867   | 934.513   | Z26317      | 2133.448  | 2258.479  |
| AA437291  | 687.87    | 460.815   | NM_016102   | 4576.015  | 4519.958  | X16983      | 18125.98  | 21019.594 |
| X04503    | 1387.981  | 1137.732  | NM_004370   | 4133.126  | 4128.97   | X56160      | 2913.436  | 2658.815  |
| D45917    | 1163.281  | 988.267   | NM_000272   | 1041.195  | 1269.694  | BG679991    | 1491.546  | 1374.388  |
| X52001    | 2839.999  | 2512.421  | NM_014252   | 7297.929  | 7506.652  | H-Y 00097 I | 8074.124  | 5788.207  |
| BI823872  | 47769.559 | 49055.172 | NM_001662   | 18258.07  | 20614.861 | H-Y 00711 I | 65402.469 | 68959.977 |
| AA430552  | 459.772   | 744.117   | NM_016131   | 8651.768  | 10577.188 | H-X 16707 I | 1737.227  | 1292.306  |
| X66142    | 3439.856  | 2792.477  | NM_006822   | 2822.221  | 3932.519  | AL038354    | 32626.266 | 23070.75  |
| R45054    | 1992.801  | 2093.936  | NM_012142   | 8819.653  | 9165.533  | R14607      | 911.036   | 837.957   |
| NM_002387 | 5341.239  | 4255.017  | NM_016429   | 2550.453  | 2654.61   | NM_021970   | 3457.98   | 2513.844  |
| NM_000060 | 922.245   | 782.975   | AB011100    | 2294.525  | 2134.193  | SR2         | 55241.633 | 43060.242 |

|           |           |           |           |           |           |           |           |           |
|-----------|-----------|-----------|-----------|-----------|-----------|-----------|-----------|-----------|
| AB023217  | 1223.565  | 1402.083  | U61741    | 713.883   | 1008.904  | SR4       | 17590.33  | 11701.807 |
| L08902    | 745.74    | 670.437   | NM_012402 | 6497.427  | 6441.677  | SR6       | 3055.098  | 1496.999  |
| J02639    | 3301.31   | 3145.626  | M76676    | 3959.458  | 4113.721  | SR8       | 9959.631  | 17700.039 |
| M58050    | 9182.558  | 9847.082  | NM_003857 | 551.617   | 701.198   | SR10      | 32816.996 | 6860.188  |
| NM_007263 | 25107.732 | 21857.689 | AL137690  | 775.114   | 994.558   | CY3Cy5    | 2106.686  | 78.967    |
| AF206020  | 681.228   | 664.309   | Z83804    | 2006.096  | 2081.715  | NM_003242 | 13518.813 | 13491.5   |
| AB020668  | 880.01    | 1270.378  | NM_004386 | 1491.595  | 1603.3    | NM_005102 | 1182.344  | 1250.34   |
| NM_006203 | 463.998   | 540.845   | U67784    | 810.972   | 1023.045  | NM_004518 | 958.933   | 850.604   |
| AF309553  | 10618.434 | 10002.162 | NM_007366 | 2114.807  | 2248.34   | NM_006501 | 800.845   | 754.645   |
| NM_003605 | 3235.867  | 3168.653  | NM_000592 | 1357.961  | 1651.813  | NM_002719 | 9284.697  | 7530.07   |
| NM_006139 | 13688.994 | 12107.521 | NM_016584 | 7468.402  | 7020.424  | AB035356  | 637.754   | 506.961   |
| NM_000100 | 46163.918 | 47961.082 | NM_001815 | 1078.851  | 880.704   | AV752086  | 1273.985  | 1208.099  |
| NM_001900 | 60707.066 | 56276.289 | NM_000064 | 4773.058  | 3351.147  | NM_016102 | 5313.678  | 4993.59   |
| NM_003993 | 5204.395  | 5044.176  | NM_006725 | 4819.439  | 4432.939  | NM_004376 | 5109.702  | 3854.219  |
| NM_018961 | 5787.569  | 6174.676  | NM_003326 | 1224.504  | 1032.172  | NM_000272 | 1719.211  | 1415.821  |
| NM_005586 | 2175.986  | 1855.578  | NM_004568 | 33180.359 | 31518.232 | NM_005603 | 34053.848 | 23405.186 |
| NM_003051 | 1510.589  | 1391.156  | NM_000202 | 2160.901  | 1846.133  | NM_001061 | 808.366   | 491.118   |
| NM_001133 | 568.923   | 632.055   | Z25427    | 4675.986  | 4552.052  | U61741    | 1302.682  | 1720.024  |
| NM_145342 | 5174.427  | 4901.086  | NM_004672 | 10162.884 | 11450.394 | NM_012402 | 5969.699  | 9005.73   |
| AJ278917  | 693.201   | 899.829   | NM_001353 | 4312.575  | 6541.478  | Z83804    | 2608.535  | 2616.133  |
| AK025641  | 8420.574  | 8273.83   | NM_005198 | 5270.788  | 5188.585  | U67784    | 1753.414  | 1739.621  |
| NM_003058 | 1017.215  | 1165.802  | NM_018073 | 2751.242  | 3006.374  | NM_007366 | 1561.444  | 1291.313  |
| AB014514  | 3360.453  | 3441.546  | AL137529  | 3838.248  | 3825.14   | NM_000592 | 757.516   | 694.171   |
| NM_002865 | 5740.357  | 5775.468  | NM_012332 | 1313.572  | 1259.56   | NM_016584 | 9420.007  | 9074.192  |
| NM_003566 | 2375.415  | 1681.782  | AK026648  | 1975.413  | 1846.136  | NM_001815 | 1438.438  | 1237.021  |
| NM_004249 | 966.775   | 902.055   | NM_000497 | 1175.7    | 1259.849  | NM_000064 | 7615.505  | 5995.393  |
| NM_007159 | 35129.77  | 33402.348 | NM_017421 | 2180.924  | 2336.202  | NM_006725 | 6156.293  | 5628.604  |
| NM_003731 | 22184.791 | 20081.008 | AK025977  | 14987.468 | 14958.595 | NM_003326 | 1485.905  | 1429.523  |
| NM_005446 | 7123.39   | 6172.818  | AK023130  | 7421.794  | 7812.784  | NM_004568 | 47754.961 | 39103.457 |
| NM_013292 | 5674.589  | 5819.569  | NM_000273 | 756.471   | 806.601   | NM_000202 | 2501.31   | 2357.599  |
| AK000800  | 3409.731  | 3406.792  | NM_002899 | 9158.986  | 9147.373  | NM_005496 | 16058.438 | 10196.756 |
| NM_018154 | 8529.354  | 9443.337  | NM_000486 | 782.937   | 739.197   | NM_016608 | 951.677   | 675.188   |
| NM_005358 | 730.889   | 559.867   | BE876237  | 850.586   | 709.294   | NM_004817 | 2004.391  | 1293.531  |
| BC006287  | 5709.126  | 6315.838  | NM_005397 | 1302.059  | 955.942   | NM_018975 | 24212.428 | 16675.359 |
| AB023198  | 8381.577  | 7897.692  | NM_000806 | 7145.412  | 5242.894  | AB023215  | 9753.974  | 6911.05   |
| AF304163  | 44860.176 | 45805.781 | NM_006320 | 2324.012  | 2371.164  | NM_018073 | 3030.473  | 3628.409  |
| AF064729  | 3357.427  | 3332.865  | AB014511  | 3599.652  | 3694.932  | AL137529  | 4344.276  | 5610.208  |
| NM_012113 | 3919.594  | 4267.939  | NM_021976 | 3276.207  | 3539.513  | NM_012332 | 1411.196  | 1913.776  |
| NM_020178 | 1185.718  | 1119.118  | NM_005718 | 8413.732  | 8006.957  | AK025977  | 21740.742 | 26059.49  |
| NM_002264 | 3842.331  | 3657.601  | NM_018264 | 1583.08   | 1421.889  | AK023130  | 7252.086  | 7893.694  |
| NM_014754 | 23218.986 | 22647.498 | NM_014580 | 790.211   | 670.193   | NM_000273 | 1314.462  | 1681.596  |
| D49387    | 585.922   | 772.357   | AB028998  | 712.278   | 800.994   | NM_002899 | 9655.229  | 9995.235  |
| AF050146  | 797.74    | 961.799   | NM_000153 | 946.234   | 719.455   | NM_000486 | 823.247   | 918.366   |
| NM_000116 | 6484.823  | 7218.1    | NM_002033 | 2558.87   | 2674.261  | BE876237  | 1241.234  | 1087.657  |
| NM_006698 | 11552.2   | 13068.755 | AK091794  | 623.334   | 557.654   | NM_005397 | 1698.303  | 1439.139  |
| NM_006804 | 11521.439 | 11894.429 | NM_004111 | 2768.818  | 2754.184  | NM_000806 | 6618.461  | 6195.707  |
| NM_015969 | 10438.277 | 11112.728 | AF085966  | 4228.182  | 4459.571  | NM_006320 | 2280.636  | 1879.573  |
| NM_004517 | 9810.779  | 7956.108  | NM_005316 | 3514.157  | 3742.745  | AB014511  | 4764.301  | 3346      |
| AI017418  | 902.334   | 997.506   | NM_016316 | 3703.588  | 3869.745  | NM_014252 | 8480.145  | 6904.351  |
| NM_000679 | 816.327   | 805.209   | NM_003369 | 6957.443  | 5571.209  | NM_001662 | 17651.518 | 13947.855 |
| AF218006  | 10276.938 | 12055.005 | NM_000057 | 2697.499  | 2551.129  | NM_016131 | 10754.244 | 7930.791  |
| AK026935  | 2882.742  | 2905.906  | NM_018343 | 4629.141  | 3610.766  | NM_006822 | 2712.551  | 2092.716  |
| AK027124  | 12693.005 | 14587.551 | AK095793  | 690.86    | 388.597   | NM_012142 | 9865.589  | 6395.043  |

|           |           |           |             |           |           |             |           |           |
|-----------|-----------|-----------|-------------|-----------|-----------|-------------|-----------|-----------|
| AB037813  | 680.024   | 1075.813  | NM_003177   | 3095.871  | 2413.693  | NM_016425   | 2695.36   | 1909.047  |
| AL117398  | 4719.536  | 5636.992  | NM_017719   | 1563.686  | 1230.824  | NM_018264   | 1532.836  | 1843.836  |
| AY007158  | 18690.344 | 23130.961 | AL049688    | 1274.149  | 1160.278  | NM_014580   | 870.454   | 802.907   |
| NM_001720 | 750.498   | 999.471   | NM_002737   | 5022.169  | 5417.619  | AB028998    | 577.366   | 586.41    |
| AB037724  | 7589.348  | 8059.963  | NM_002719   | 9218.279  | 9346.563  | NM_000153   | 573.087   | 1144.222  |
| AK025086  | 2747.024  | 2851.236  | AB035356    | 599.941   | 654.616   | NM_002033   | 2672.146  | 3058.199  |
| AK026151  | 2384.652  | 2980.469  | AV752086    | 1282.122  | 1533.202  | AK091794    | 460.039   | 849.119   |
| NM_014140 | 5146.224  | 6062.446  | NM_016102   | 5247.609  | 6195.363  | NM_004111   | 2972.631  | 2832.089  |
| NM_001034 | 25197.93  | 29132.275 | NM_004376   | 3738.73   | 3842.628  | AF085966    | 4364.215  | 4717.802  |
| NM_002689 | 4977.81   | 4782.041  | NM_000272   | 1475.941  | 1518.478  | NM_005316   | 3644.493  | 4005.985  |
| NM_017686 | 3010.014  | 3315.371  | NM_001061   | 666.597   | 589.701   | NM_016316   | 3256.054  | 2984.653  |
| AL096734  | 1442.5    | 1326.364  | BG744154    | 18739.83  | 19688.666 | NM_003369   | 7383.471  | 5672.645  |
| NM_016645 | 9153.888  | 8882.311  | Z11694      | 8650.419  | 10071.854 | NM_000057   | 2735.024  | 2020.375  |
| L14723    | 3062.23   | 3575.067  | BF983177    | 339.547   | 455.01    | NM_018343   | 5178.614  | 3889.161  |
| AK024462  | 5102.594  | 5857.167  | Z26317      | 2835.335  | 2498.015  | AK095793    | 776.939   | 626.993   |
| NM_005711 | 1386.66   | 1416.098  | X16983      | 17276.66  | 15833.57  | NM_003177   | 3090.038  | 2572.115  |
| NM_019601 | 1982.101  | 1622.989  | X56160      | 2292.601  | 2191.503  | NM_017719   | 1529.387  | 1312.303  |
| NM_007074 | 1416.547  | 1633.59   | BG679991    | 1140.066  | 913.852   | AL049688    | 1624.279  | 1180.61   |
| NM_006614 | 604.982   | 521.827   | H-Y 00097 I | 8231.446  | 8154.502  | NM_002737   | 5428.608  | 3971.152  |
| NM_002230 | 683.793   | 1002.615  | H-Y 00711 I | 58371.441 | 61541.648 | Z25427      | 4477.842  | 3240.27   |
| NM_003815 | 3484.806  | 3313.308  | H-X 16707 I | 1143.496  | 1061.91   | NM_004672   | 9838.102  | 7949.623  |
| AB010098  | 1534.159  | 1084.326  | AL038354    | 30592.203 | 31019.584 | NM_001353   | 3828.364  | 2685.614  |
| U17989    | 2424.973  | 2617.772  | R14607      | 675.107   | 465.298   | NM_006214   | 3298.898  | 2201.117  |
| U62325    | 1346.335  | 1593.01   | NM_000064   | 6651.304  | 7602.292  | AJ010228    | 4347.496  | 2881.866  |
| NM_018028 | 2997.226  | 2493.807  | NM_006725   | 6375.775  | 8845.447  | NM_005198   | 4585.663  | 3901.596  |
| AF249267  | 7543.96   | 7516.83   | NM_003326   | 1300.137  | 1241.396  | NM_006848   | 60787.215 | 61413.969 |
| NM_004113 | 1147.225  | 935.939   | NM_004568   | 39228.813 | 38530.695 | NM_005603   | 40989.391 | 38978.254 |
| X84939    | 6315.183  | 6127.503  | NM_000202   | 2312.789  | 2352.604  | NM_001061   | 791.152   | 617.107   |
| NM_018320 | 6090.218  | 6004.17   | NM_005496   | 12584.539 | 10195.06  | BG744154    | 18481.59  | 19757.199 |
| NM_002069 | 5566.808  | 5388.574  | NM_002858   | 5976.227  | 5888.348  | Z11694      | 6788.205  | 6209.701  |
| NM_016056 | 20614.854 | 20777.002 | NM_004817   | 1350.534  | 1704.164  | Z26317      | 2057.246  | 1759.864  |
| AF188492  | 823.762   | 670.492   | NM_018975   | 19168.652 | 21283.328 | X16983      | 18174.85  | 17955.285 |
| NM_016951 | 2727.88   | 3004.333  | AB023215    | 10172.258 | 10138.92  | X56160      | 2295.989  | 2183.614  |
| NM_013251 | 731.743   | 961.896   | NM_001284   | 35718.715 | 36927.211 | BG679991    | 942.798   | 707.834   |
| NM_006099 | 4328.703  | 3923.504  | NM_003242   | 18126.822 | 24725.768 | H-Y 00097 I | 7520.648  | 5571.656  |
| AF272379  | 7268.057  | 7194.779  | NM_002849   | 583.476   | 789.907   | H-Y 00711 I | 59880.836 | 60674.602 |
| NM_012326 | 3385.54   | 3410.172  | U31099      | 895.18    | 842.937   | H-X 16707 I | 1269.524  | 1067.48   |
| NM_003085 | 3914.844  | 4024.746  | NM_001105   | 2980.083  | 3017.115  | AL038354    | 34810.793 | 27245.988 |
| AF095289  | 46250.684 | 46993.711 | NM_005585   | 1443.261  | 1397.088  | R14607      | 907.924   | 801.449   |
| NM_005537 | 8527.158  | 7928.16   | NM_002075   | 2047.961  | 1902.22   | NM_021976   | 2994.809  | 2470.477  |
| AC003962  | 844.222   | 640.293   | Y08756      | 5633.016  | 5019.867  | NM_005718   | 7910.489  | 5767.175  |
| NM_019003 | 6419.12   | 6975.658  | NM_005563   | 16351.27  | 13111.182 | NM_005496   | 13223.321 | 8803.289  |
| NM_015935 | 4686.24   | 5122.569  | NM_005102   | 1368.008  | 1238.44   | NM_016608   | 842.896   | 921.983   |
| AF182412  | 1706.214  | 1768.669  | NM_004518   | 580.411   | 709.401   | NM_002858   | 5609.572  | 5146.386  |
| AK027200  | 2940.136  | 3170.278  | NM_006501   | 752.731   | 751.581   | NM_004817   | 1392.75   | 1457.088  |
| S78372    | 817.595   | 889.568   | NM_005397   | 1588.351  | 1712.779  | NM_018975   | 20800.992 | 21412.883 |
| U03106    | 2742.186  | 2747.084  | NM_000806   | 9084.453  | 8810.77   | AB023215    | 11157.548 | 11581.985 |
| NM_000075 | 26126.141 | 26527.02  | NM_006320   | 3018.365  | 2669.904  | NM_001284   | 35739.5   | 35353.719 |
| NM_014885 | 1361.438  | 1340.597  | AB014511    | 3966.432  | 4041.741  | NM_003242   | 12458.862 | 9425.024  |
| M73239    | 772.9     | 939.876   | NM_014252   | 6754.126  | 6682.476  | U31099      | 897.066   | 345.332   |
| NM_004945 | 9543.07   | 9954.662  | NM_001662   | 17471.014 | 16900.217 | NM_001105   | 2913.789  | 1645.019  |
| NM_020242 | 5704.729  | 5875.292  | NM_016131   | 9151.093  | 9701.937  | NM_005585   | 877.526   | 573.644   |
| NM_001788 | 31928.82  | 31720.881 | NM_006822   | 2331.309  | 2584.447  | NM_002075   | 2503.251  | 1962.826  |

|           |           |           |           |           |           |           |           |           |
|-----------|-----------|-----------|-----------|-----------|-----------|-----------|-----------|-----------|
| NM_00717E | 39056.902 | 43280.641 | NM_01214Z | 8636.025  | 9378.833  | Y08756    | 7270.173  | 5528.887  |
| NM_002291 | 1824.369  | 1651.077  | NM_016429 | 2600.344  | 2476.919  | NM_00556Z | 19018.154 | 11594.773 |
| AL137477  | 8703.479  | 9550.983  | AB011100  | 2577.711  | 3255.614  | AY007090  | 745.545   | 422.515   |
| AF284580  | 1823.104  | 1645.921  | U61741    | 1137.384  | 1377.981  | NM_00643E | 427.712   | 414.244   |
| AK024961  | 7501.881  | 7244.352  | NM_01240Z | 7257.172  | 8007.527  | NM_00510Z | 1346.002  | 1077.778  |
| NM_01606E | 7448.461  | 7499.312  | M76676    | 5097.853  | 6746.84   | NM_00451E | 844.354   | 954.159   |
| NM_01425E | 1168.291  | 1029.969  | NM_003857 | 842.955   | 1070.875  | NM_006501 | 917.832   | 915.788   |
| NM_012237 | 1587.37   | 1991.377  | AL137690  | 805.323   | 958.14    | NM_00271E | 9830.296  | 8908.919  |
| NM_00359E | 1634.659  | 1836.989  | Z83804    | 2191.22   | 1890.403  | AB035356  | 610.532   | 876.798   |
| NM_00240E | 1576.787  | 1584.98   | NM_00438E | 1250.086  | 1156.074  | AV752086  | 1346.406  | 1006.563  |
| NM_00499A | 44860.406 | 48954.59  | U67784    | 885.512   | 1397.341  | NM_01610Z | 5312.93   | 4112.071  |
| NM_00661C | 2221.231  | 2648.939  | NM_00736E | 980.78    | 1063.388  | NM_00437E | 5450.995  | 3423.669  |
| NM_00133Z | 3067.358  | 2989.762  | NM_00059Z | 765.394   | 660.864   | NM_00027Z | 1411.285  | 1297.003  |
| AK001296  | 6950.267  | 9141.579  | NM_01658A | 7077.243  | 6928.24   | NM_01425Z | 7104.735  | 5905.706  |
| AK000173  | 1279.785  | 1665.455  | NM_00181E | 986.549   | 1061.682  | NM_00166Z | 13430.224 | 12648.302 |
| NM_01836E | 2504.172  | 2707.807  | AK095793  | 1096.809  | 1153.334  | NM_016131 | 11134.758 | 12195.959 |
| NM_00658E | 4983.444  | 5259.855  | NM_003177 | 3523.56   | 3655.899  | NM_00682Z | 2927.912  | 4447.627  |
| AJ272180  | 4518.896  | 4720.97   | NM_01771E | 2007.115  | 3100.261  | NM_01214Z | 8877.179  | 12942.997 |
| AK025709  | 2799.919  | 3178.275  | AF064078  | 679.362   | 499.618   | NM_01642E | 2168.883  | 2881.256  |
| NM_01901E | 4877.488  | 6500.108  | AL049688  | 1443.606  | 1323.368  | AB011100  | 3023.427  | 3980.483  |
| NM_012261 | 14030.284 | 14315.565 | NM_002737 | 5211.451  | 4348.78   | U61741    | 1030.969  | 950.579   |
| NM_01555E | 13445.169 | 13465.161 | Z25427    | 4638.87   | 4056.605  | NM_01240Z | 6681.491  | 8283.739  |
| NM_01841E | 5249.44   | 4037.221  | NM_00467Z | 10416.408 | 10579.66  | M76676    | 3971.952  | 4521.895  |
| NM_00460E | 7560.343  | 7793.5    | NM_00135Z | 3327.977  | 3644.467  | NM_003857 | 553.797   | 803.334   |
| D70833    | 67167.695 | 61144.996 | NM_00621A | 2682.521  | 3195.397  | AL137690  | 561.545   | 942.451   |
| NM_016621 | 3578.078  | 3078.96   | NM_00519E | 5930.991  | 6177.332  | Z83804    | 2413.754  | 1880.114  |
| AB046808  | 6156.478  | 6059.154  | NM_01807Z | 3382.985  | 4760.23   | NM_00438E | 1663.755  | 1403.693  |
| AK026265  | 2822.899  | 3431.3    | AL137529  | 5198.665  | 5984.594  | U67784    | 1156.781  | 824.218   |
| AF015313  | 1089.28   | 1168.773  | NM_01233Z | 1703.193  | 2153.277  | NM_00736E | 1412.949  | 1285.031  |
| NM_00646E | 2529.401  | 2107.612  | AK026648  | 2492.559  | 2958.066  | NM_00059Z | 776.461   | 695.705   |
| NM_005681 | 2759.971  | 2592.981  | NM_000497 | 1391.551  | 1662.924  | NM_01658A | 9863.065  | 9017.216  |
| NM_01515E | 6515.585  | 5843.605  | NM_017421 | 2112.426  | 2245.08   | NM_00181E | 1593.38   | 1364.64   |
| NM_01238A | 4793.345  | 3635.317  | AK025977  | 17034.092 | 17565.135 | NM_00006A | 7944.532  | 6197.977  |
| D87454    | 17025.053 | 17767.697 | AK023130  | 7969.804  | 6914.656  | NM_00672E | 6141.961  | 5312.788  |
| NM_00702C | 7684.615  | 8627.961  | NM_00027Z | 546.073   | 816.282   | NM_00332E | 1638.553  | 1270.333  |
| NM_00071Z | 5846.992  | 6448.921  | NM_00289E | 8248.052  | 7172.964  | NM_00456E | 48871.414 | 31775.217 |
| NM_01605E | 1066.436  | 1303.57   | BE876237  | 861.887   | 784.82    | NM_00020Z | 2619.812  | 1810.921  |
| NM_013291 | 18344.949 | 20512.213 | NM_01475C | 8488.524  | 8996.905  | Z25427    | 4004.688  | 4757.968  |
| NM_00293E | 20534.193 | 24072.576 | NM_01591Z | 826.042   | 838.635   | NM_00467Z | 8118.011  | 8598.892  |
| NM_014161 | 6360.165  | 6306.462  | NM_00046C | 1287.187  | 1038.932  | NM_00135Z | 3789.779  | 4340.443  |
| BF312817  | 3381.787  | 3998.339  | AB002339  | 1204.479  | 1075.627  | NM_00621A | 3154.76   | 4858.564  |
| NM_01485E | 1888.187  | 1971.818  | NM_00510A | 11920.763 | 12142.294 | AJ010228  | 6093.451  | 10371.94  |
| NM_00349Z | 2862.945  | 2787.398  | NM_00688E | 27467.211 | 25741.973 | NM_00519E | 5363.903  | 9287.986  |
| NM_00378C | 9674.209  | 9261.519  | AL137423  | 5260.802  | 6227.469  | AK021426  | 253.499   | 872.669   |
| NM_002711 | 936.513   | 576.126   | AB018322  | 2292.185  | 2689.66   | NM_01807Z | 3258.283  | 4354.139  |
| NM_00019E | 14493.932 | 14827.823 | NM_00706E | 19588.328 | 22266.029 | AL137529  | 5341.66   | 7599.82   |
| NM_00377E | 18470.334 | 19044.699 | NM_00571E | 9877.583  | 9087.566  | NM_01233Z | 1732.232  | 2301.099  |
| NM_001041 | 557.943   | 442.768   | NM_01826A | 1999.982  | 1923.452  | AK026648  | 1974.16   | 2171.338  |
| AK023263  | 6427.881  | 5989.359  | AB028998  | 783.413   | 1378.479  | NM_000497 | 1813.13   | 2969.968  |
| NM_00462Z | 4076.065  | 3862.135  | NM_00015Z | 1105.389  | 1179.649  | NM_017421 | 1685.082  | 1373.265  |
| AK021445  | 816.769   | 815.057   | NM_00203Z | 2759.368  | 2752.368  | AK025977  | 21398.637 | 22817.076 |
| NM_01793A | 4935.258  | 4517.164  | AK091794  | 529.076   | 393.043   | AK023130  | 8194.501  | 9427.298  |
| NM_01416E | 20829.084 | 21505.447 | NM_004111 | 2739.335  | 2456.871  | NM_00027Z | 1051.628  | 936.106   |

|           |           |           |           |           |           |            |           |           |
|-----------|-----------|-----------|-----------|-----------|-----------|------------|-----------|-----------|
| AF211971  | 7568.727  | 5915.227  | AF085966  | 3614.076  | 3133.842  | NM_002896  | 11273.428 | 10239.27  |
| NM_002931 | 4154.791  | 4593.4    | NM_005316 | 3376.648  | 2758.19   | NM_000486  | 838.928   | 730.138   |
| NM_013446 | 6408.319  | 6320.751  | NM_016316 | 3396.829  | 3261.309  | BE876237   | 1236.042  | 1311.684  |
| X65232    | 17054.254 | 20296.998 | NM_003369 | 6271.325  | 5112.697  | NM_005397  | 1781.489  | 1355.036  |
| U12767    | 507.697   | 758.98    | NM_000057 | 2255.267  | 2279.851  | NM_000806  | 7121.243  | 6391.231  |
| U17630    | 615.086   | 824.892   | NM_018343 | 5026.565  | 4439.121  | NM_006320  | 2807.966  | 1827.331  |
| M33782    | 1803.851  | 1829.207  | AL137461  | 471.74    | 1104.162  | AB014511   | 4850.721  | 3280.674  |
| NM_017756 | 11540.096 | 12800.253 | AF114264  | 1313.796  | 1202.221  | NM_021976  | 2870.737  | 4086.426  |
| AK022551  | 5818.388  | 5613.074  | NM_017514 | 643.944   | 414.227   | NM_005716  | 6990.466  | 10375.918 |
| AF086162  | 620.628   | 578.122   | NM_018972 | 2835.667  | 2725.482  | NM_018264  | 1623.634  | 1684.6    |
| AK023665  | 812.791   | 794.367   | AB037828  | 1336.814  | 1149.934  | NM_014580  | 1016.509  | 676.151   |
| AB011136  | 2281.16   | 2066.977  | AB023210  | 1414.634  | 1589.601  | AB028998   | 743.827   | 567.241   |
| AF085898  | 4684.85   | 4710.814  | AB037786  | 1945.508  | 1748.736  | NM_000153  | 1171.408  | 687.142   |
| AL161960  | 2794.083  | 3099.636  | NM_003646 | 9889.303  | 12241.06  | NM_002033  | 1135.016  | 1341.845  |
| AL049964  | 1785.883  | 2032.9    | AB037735  | 1048.163  | 1293.865  | AK091794   | 1139.817  | 1367.937  |
| AK023269  | 2837.917  | 2584.248  | AK002177  | 2952.014  | 3854.476  | NM_004111  | 3639.401  | 5239.641  |
| AF070564  | 1282.509  | 1543.425  | AK024429  | 2808.27   | 3246.262  | AF085966   | 4739.287  | 5603.13   |
| AK021439  | 8218.004  | 8690.205  | NM_003496 | 47292.191 | 51644.746 | NM_005316  | 4404.562  | 7089.753  |
| AF052099  | 2225.679  | 2138.231  | AB000509  | 5310.367  | 5680.269  | NM_016316  | 4444.054  | 6137.731  |
| AL110111  | 728.25    | 744.024   | AB018314  | 1652.124  | 1600.794  | NM_003366  | 9330.558  | 10723.039 |
| AF070543  | 2073.033  | 2236.844  | NM_004376 | 898.24    | 811.914   | NM_000057  | 2929.017  | 2395.269  |
| AF086525  | 888.231   | 846.674   | NM_018037 | 956.813   | 914.931   | NM_018343  | 6000.144  | 3456.198  |
| AF086509  | 867.191   | 794.24    | NM_001110 | 5108.047  | 3646.561  | AK095793   | 1178.262  | 744.239   |
| NM_014776 | 8327.073  | 7757.275  | NM_003222 | 1322.881  | 1253.937  | NM_003177  | 3760.099  | 3092.09   |
| AK001171  | 16801.596 | 17428.975 | NM_000841 | 4568.931  | 4226.799  | NM_017716  | 1906.039  | 1484.472  |
| AK026273  | 926.2     | 1060.24   | NM_001245 | 2159.397  | 2031.053  | AF064078   | 618.476   | 620.201   |
| NM_020250 | 14523.369 | 12798.733 | NM_002574 | 60466.492 | 66401.375 | AL049688   | 1761.066  | 1061.291  |
| AF055007  | 1466.357  | 1486.897  | AJ008139  | 4226.463  | 4416.988  | NM_002737  | 6258.792  | 3751.749  |
| NM_012337 | 2086.81   | 2000.432  | NM_004326 | 4585.333  | 4742.325  | NM_002716  | 8389.785  | 12001.599 |
| AL389879  | 1186.999  | 1184.126  | NM_000882 | 687.83    | 937.458   | AB035356   | 549.794   | 915.458   |
| AK021542  | 571.989   | 638.01    | NM_004577 | 5093.729  | 4539.445  | AV752086   | 1437.148  | 2410.808  |
| AK022869  | 4649.533  | 3511.401  | AF007157  | 16218.773 | 15553.807 | NM_016102  | 6973.156  | 9980.856  |
| NM_016111 | 4191.691  | 4245.624  | D38553    | 6648.463  | 7542.593  | NM_004376  | 4359.102  | 4574.523  |
| AF085958  | 22588.465 | 23136.088 | NM_006170 | 6307.452  | 5411.429  | NM_000272  | 1481.345  | 2005.715  |
| AF086021  | 2605.408  | 2956.491  | NM_014296 | 7021.207  | 6887.106  | NM_006846  | 59839.957 | 65248.109 |
| AF085982  | 603.931   | 544.888   | AK001581  | 5518.714  | 5722.156  | NM_005603  | 39842.977 | 38036.734 |
| AL117655  | 711.582   | 710.491   | NM_005862 | 3585.104  | 3707.648  | NM_001061  | 1189.391  | 1072.281  |
| AK024472  | 3239.548  | 2474.618  | NM_000546 | 4278.179  | 4063.564  | BG744154   | 18288.557 | 15846.495 |
| NM_017976 | 5373.918  | 5584.683  | AK022541  | 7971.732  | 10189.618 | Z11694     | 7085.704  | 5222.532  |
| U06700    | 1110.042  | 1113.115  | AB002297  | 4041.182  | 4446.623  | Z26317     | 2677.762  | 1831.574  |
| U63828    | 1183.25   | 1230.353  | NM_005020 | 23695.32  | 23344.133 | X16983     | 24105.678 | 32337.734 |
| Z36828    | 3422.781  | 4005.764  | NM_014077 | 7201.349  | 7604.414  | X56160     | 2895.815  | 3033.051  |
| AF086121  | 27640.938 | 24811.719 | NM_018412 | 1282.704  | 1440.329  | BG679991   | 1483.047  | 2232.506  |
| AF086140  | 1561.865  | 1547.659  | NM_012329 | 5477.78   | 5259.294  | H-Y 000971 | 9960.507  | 7794.425  |
| AK026915  | 1203.797  | 1428.175  | M14087    | 19664.184 | 22235.857 | H-Y 007111 | 62497.609 | 61959.246 |
| AL110259  | 766.823   | 1176.073  | NM_000885 | 12429.296 | 10206.393 | H-X 167071 | 1907.644  | 1437.677  |
| AB033100  | 30205.906 | 28412.658 | M59040    | 1054.292  | 1057.44   | AL038354   | 38798.512 | 26168.469 |
| AF162715  | 658.978   | 892.719   | NM_017582 | 20788.375 | 37380.164 | R14607     | 996.19    | 679.171   |
| AL390138  | 820.773   | 681.555   | NM_015239 | 3721.344  | 6611.68   | NM_000064  | 8991.546  | 13120.796 |
| AL137290  | 1747.673  | 1770.299  | AK026962  | 2321.787  | 2825.974  | NM_000202  | 2695.745  | 2925.227  |
| AK024180  | 1142.747  | 1118.272  | NM_006799 | 484.969   | 393.518   | NM_005496  | 15767.525 | 13676.511 |
| AK023458  | 334.463   | 640.757   | X04366    | 3073.425  | 3353.045  | NM_002856  | 6899.912  | 6571.076  |
| AK021606  | 944.62    | 974.749   | NM_000505 | 36111.938 | 33683.832 | NM_004817  | 1788.665  | 1529.162  |

|           |           |           |           |           |           |           |           |           |
|-----------|-----------|-----------|-----------|-----------|-----------|-----------|-----------|-----------|
| NM_014124 | 6275.458  | 6007.653  | NM_018656 | 479.854   | 462.18    | NM_018975 | 21978.809 | 20225.893 |
| AK001551  | 904.086   | 705.837   | NM_000666 | 1938.001  | 1957.136  | AB023215  | 13045.234 | 10983.936 |
| AK001825  | 2181.517  | 1708.072  | NM_003481 | 4124.102  | 4351.675  | NM_001284 | 39497.289 | 30805.754 |
| AK024714  | 948.906   | 923.394   | AB046814  | 1530.031  | 1514.937  | NM_003242 | 15393.615 | 10598.769 |
| AK022363  | 634.196   | 886.184   | NM_017778 | 614.071   | 697.096   | NM_002846 | 568.995   | 381.15    |
| AK022485  | 874.678   | 1066.253  | NM_017664 | 4389.133  | 5249.278  | U31099    | 678.633   | 749.604   |
| AK023395  | 807.32    | 802.472   | NM_007059 | 7444.814  | 6442.052  | NM_001105 | 3765.35   | 2808.3    |
| AK023895  | 1014.07   | 1036.999  | NM_006870 | 21715.063 | 22880.852 | NM_005585 | 1158.052  | 980.71    |
| AK024206  | 2509.202  | 2912.961  | NM_007359 | 6059.367  | 6011.319  | NM_002075 | 2898.25   | 4483.811  |
| NM_006262 | 2114.794  | 1968.285  | L13283    | 583.546   | 496.048   | Y08756    | 11951.686 | 18400.852 |
| AK026598  | 2605.689  | 2564.382  | AF303888  | 10681.714 | 10197.502 | NM_005563 | 23927.018 | 17548.855 |
| AK023602  | 2455.662  | 2986.5    | NM_000077 | 1008.427  | 821.598   | AY007090  | 615.044   | 450.809   |
| NM_018097 | 50330.449 | 47719.117 | AF176646  | 422.798   | 495.233   | NM_005102 | 1733.518  | 811.723   |
| AF130043  | 1402.132  | 1316.193  | NM_007084 | 2357.579  | 3668.773  | NM_004518 | 844.714   | 729.763   |
| Y11167    | 4586.929  | 3727.353  | M97191    | 21705.701 | 25901.527 | NM_006501 | 1037.437  | 809.852   |
| AK026813  | 1215.541  | 1100.738  | AK023015  | 15827.136 | 18910.82  | AB014511  | 4101.189  | 4795.192  |
| AK027225  | 885.145   | 1018.418  | NM_003457 | 14677.573 | 13470.907 | NM_014252 | 7923.185  | 10030.561 |
| AK023083  | 4106.675  | 4669.534  | NM_012391 | 1906.103  | 1749.755  | NM_001662 | 16864.18  | 21242     |
| AF130093  | 688.113   | 625.691   | NM_005254 | 4978.392  | 5429.479  | NM_016131 | 10838.808 | 11858.361 |
| AF116622  | 1494.768  | 1287.667  | NM_005611 | 1322.092  | 1157.294  | NM_006822 | 2652.808  | 3452.573  |
| AF217967  | 1766.288  | 1693.408  | AF141655  | 1779.985  | 1473.862  | NM_012142 | 9477.895  | 9886.676  |
| NM_018150 | 8026.762  | 7623.517  | NM_007345 | 1185.543  | 1262.369  | NM_016426 | 2806.738  | 2761.393  |
| NM_017918 | 16294.446 | 16784.523 | NM_007007 | 12843.565 | 13064.518 | AB011100  | 2407.194  | 2347.683  |
| NM_017855 | 60010.184 | 56499.004 | NM_006386 | 1283.33   | 970.325   | U61741    | 1131.998  | 938.037   |
| AB007954  | 1791.288  | 1773.534  | NM_006559 | 21513.301 | 23144.379 | NM_012402 | 6679.171  | 6224.924  |
| AK026494  | 999.278   | 983.227   | NM_004501 | 39631.84  | 38670.133 | M76676    | 4069.705  | 3018.519  |
| AK025840  | 3262.716  | 3619.136  | NM_004966 | 16976.09  | 17642.537 | NM_003857 | 512.942   | 482.693   |
| BC024009  | 848.763   | 533.312   | NM_006700 | 1867.453  | 2209.056  | AL137690  | 785.953   | 604.395   |
| AF128543  | 895.851   | 897.143   | NM_006445 | 12951.362 | 12719.401 | Z83804    | 2788.026  | 2398.04   |
| AK022071  | 965.54    | 870.654   | NM_012109 | 6843.279  | 5814.419  | NM_004386 | 2650.299  | 3845.956  |
| U84510    | 1718.271  | 1532.107  | AF019633  | 3082.957  | 2566.429  | U67784    | 1157.193  | 974.507   |
| S83198    | 5919.857  | 4929.867  | AB002361  | 3487.825  | 2758.394  | NM_007366 | 1481.941  | 940.792   |
| AF052119  | 21184.596 | 22515.037 | NM_018060 | 5592.169  | 4279.648  | NM_000592 | 757.499   | 806.549   |
| X94290    | 3762.84   | 3789.138  | NM_014239 | 4029.578  | 3297.483  | NM_016584 | 9717.152  | 6843.188  |
| AK026685  | 4072.26   | 4566.895  | NM_017662 | 3723.81   | 3132.956  | NM_001815 | 1261.739  | 974.131   |
| AF090927  | 12095.079 | 13255.229 | U88837    | 1299.767  | 855.009   | AK095793  | 813.033   | 1588.81   |
| AL137642  | 1835.259  | 1680.397  | NM_017446 | 24278.43  | 20915.174 | AL049688  | 2079.32   | 2727.096  |
| AL133619  | 8523.878  | 7997.284  | AK001478  | 4897.506  | 6444.034  | NM_002737 | 5549.22   | 6852.496  |
| AK025902  | 4625.579  | 4813.376  | AK025697  | 8469.618  | 8496.188  | Z25427    | 5003.242  | 7040.095  |
| AL353949  | 576.005   | 653.184   | AK021734  | 1020.768  | 845.401   | NM_004672 | 10154.021 | 13207.223 |
| NM_005181 | 1002.124  | 1087.678  | D00265    | 30790.229 | 26397.928 | NM_001353 | 4368.129  | 5165.706  |
| AF026945  | 931.172   | 669.938   | NM_000779 | 521.721   | 569.154   | NM_006214 | 3015.831  | 4104.079  |
| AF143676  | 7564.688  | 5810.475  | NM_004552 | 45705.043 | 36571.184 | AJ010228  | 6512.731  | 6651.379  |
| U66044    | 785.776   | 905.62    | NM_000143 | 3472.137  | 3557.194  | NM_005196 | 5069.704  | 5952.006  |
| NM_005247 | 2501.577  | 2663.385  | AF317889  | 668.206   | 602.739   | NM_018073 | 3153.181  | 3012.332  |
| NM_005283 | 722.16    | 474.641   | AL137294  | 4955.574  | 8155.435  | AL137529  | 4725.932  | 4067.428  |
| AL122089  | 4038.981  | 4465.304  | NM_003743 | 2146.16   | 2677.604  | NM_012332 | 1595.148  | 1372.537  |
| AA203665  | 1361.355  | 1493.304  | AB037797  | 1062.849  | 1127.46   | AK026648  | 1960.12   | 1594.499  |
| U95646    | 1152.69   | 1233.27   | NM_001520 | 1903.851  | 2000.531  | NM_000497 | 1388.589  | 1179.013  |
| Y16705    | 1114.64   | 1023.027  | AL050367  | 713.705   | 603.117   | NM_017421 | 1764.095  | 1401.028  |
| AF279775  | 1470.192  | 1216.972  | NM_017870 | 927.904   | 724.337   | AK025977  | 22431.918 | 21296.119 |
| NM_001821 | 4102.573  | 5252.428  | AL133633  | 1813.01   | 1814.263  | AK023130  | 7839      | 4951.12   |
| NM_005647 | 1673.91   | 1659.728  | AK026817  | 776.788   | 506.943   | NM_000273 | 807.726   | 1055.68   |

|             |           |           |           |           |           |           |           |           |
|-------------|-----------|-----------|-----------|-----------|-----------|-----------|-----------|-----------|
| X64978      | 5468.778  | 7395.012  | AL157442  | 15639.951 | 11531.533 | NM_002895 | 9718.513  | 6857.536  |
| NM_000912   | 17770.75  | 15042.088 | AB011148  | 1921.064  | 1238.221  | NM_000485 | 771.212   | 416.21    |
| NM_002345   | 803.198   | 1133.435  | AL389938  | 21531.42  | 15867.563 | BE876237  | 1096.507  | 854.497   |
| U57971      | 540.844   | 545.371   | NM_001949 | 31272.184 | 27836.172 | NM_000835 | 401.14    | 439.825   |
| X89673      | 969.071   | 871.257   | NM_003507 | 1083.13   | 1708.317  | NM_014750 | 8602.48   | 8516.401  |
| AK024593    | 917.565   | 559.905   | AK026591  | 1320.698  | 1480.596  | NM_015912 | 1272.974  | 1884.759  |
| Z83934      | 1843.469  | 1897.472  | AK001889  | 2709.406  | 3454.41   | NM_000460 | 1358.166  | 1956.774  |
| NM_018355   | 8042.846  | 7145.218  | AK025726  | 2074.582  | 2040.621  | AB002339  | 1680.494  | 2182.433  |
| AK022020    | 2343.421  | 2495.672  | AJ227869  | 3349.744  | 2825.636  | NM_005104 | 10432.756 | 13050.51  |
| AF147399    | 879.708   | 637.976   | AK026189  | 474.999   | 388.967   | NM_006885 | 27492.027 | 39232.859 |
| U17634      | 885.035   | 665.186   | AK026790  | 460.316   | 532.091   | AL137423  | 5201.666  | 7980.019  |
| AK000263    | 11097.297 | 8901.322  | AL117613  | 7187.84   | 5915.887  | AB018322  | 2395.122  | 3308.586  |
| Y13895      | 880.224   | 626.564   | AL137753  | 5193.455  | 6593.666  | NM_007065 | 22971.986 | 36556.301 |
| NM_017447   | 4531.32   | 3505.458  | AK021785  | 856.732   | 1767.981  | NM_005715 | 6951.852  | 7652.883  |
| AL049452    | 1681.071  | 1651.026  | AF147370  | 1020.864  | 2780.932  | NM_018264 | 1520.76   | 1895.186  |
| NM_016622   | 2849.028  | 2802.733  | AL110262  | 13255.586 | 13252.975 | NM_014580 | 1022.563  | 773.982   |
| AK026976    | 2604.28   | 2183.115  | AK025627  | 11014.442 | 15693.754 | AB028998  | 590.879   | 296.129   |
| AF070559    | 12865.668 | 12100.051 | AF216077  | 3639.611  | 3508.392  | NM_000153 | 834.844   | 629.835   |
| D42043      | 6536.903  | 5868.257  | AF086238  | 485.401   | 570.955   | NM_002033 | 2579.265  | 1979.467  |
| CY3Cy5      | 3151.818  | 128.376   | AK021612  | 5808.962  | 4773.744  | AK091794  | 894.341   | 491.979   |
| BG744154    | 22412.566 | 22424.104 | AF088031  | 905.111   | 762.395   | NM_004111 | 3083.527  | 2022.838  |
| Z11694      | 6602.152  | 5799.544  | AK002025  | 40862.262 | 38024.621 | AF085966  | 4355.937  | 2951.943  |
| Z26317      | 4139.876  | 3902.133  | AK026299  | 1976.364  | 1921.085  | NM_005315 | 3542.329  | 2761.725  |
| X16983      | 12739.569 | 14781.423 | NM_017794 | 1348.582  | 1612.748  | NM_016315 | 5131.292  | 7090.625  |
| BG679991    | 650.082   | 734.878   | AK025170  | 1390.629  | 1366.386  | NM_003365 | 8325.979  | 5094.024  |
| H-Y 00097 I | 11071.769 | 10536.92  | AB033031  | 1644.013  | 2217.463  | NM_000057 | 3320.113  | 1465.287  |
| AL038354    | 30629.824 | 31581.793 | AF085872  | 9052.439  | 8493.137  | NM_018343 | 5923.168  | 3190.777  |
| NM_021975   | 3696.966  | 3185.072  | AK022538  | 6862.922  | 6812.831  | X15880    | 56525.473 | 59717.055 |
| SR6         | 2328.663  | 1684.436  | AL360257  | 724.765   | 716.139   | AF114264  | 1752.872  | 2345.928  |
| SR8         | 8340.206  | 21245.799 | AK022342  | 804.978   | 920.167   | NM_018972 | 2031.733  | 2582.004  |
| SR10        | 29632.816 | 9135.364  | AF147420  | 1499.312  | 1429.213  | AB037828  | 1357.112  | 1553.202  |
| CY3Cy5      | 2375.079  | 88.869    | AL049312  | 2021.888  | 1962.676  | AB023210  | 998.52    | 1472.613  |
| NM_001284   | 39082.844 | 37749.113 | AL050072  | 2981.897  | 4319.465  | AB037786  | 2116.319  | 3175.161  |
| NM_003242   | 2899.398  | 2782.037  | AL080225  | 399.869   | 1596.339  | NM_003645 | 9833.559  | 10269.468 |
| U31099      | 814.937   | 772.309   | AL117590  | 1078.605  | 2706.312  | AB037735  | 676.648   | 681.039   |
| NM_001105   | 2537.807  | 2518.708  | AL049357  | 4375.503  | 5446.477  | AK002177  | 1982.582  | 2100.59   |
| NM_005585   | 1574.596  | 1587.077  | AL110223  | 554.627   | 979.708   | AK024429  | 2664.815  | 2632.157  |
| Y08756      | 913.358   | 691.315   | AK027180  | 3098.665  | 3751.115  | AB000509  | 5420.832  | 4244.586  |
| NM_005563   | 21106.516 | 24518.148 | AK026802  | 484.914   | 523.707   | AB018314  | 1792.794  | 1490.148  |
| NM_005102   | 1772.984  | 1858.219  | NM_004544 | 12186.281 | 13256.064 | NM_004375 | 862.403   | 656.138   |
| NM_004515   | 974.79    | 575.342   | AF086041  | 982.875   | 738.687   | AJ238899  | 918.661   | 666.076   |
| NM_006501   | 1839.557  | 2094.545  | Y15167    | 1406.247  | 1085.439  | NM_018037 | 1257.894  | 970.162   |
| NM_002715   | 10591.995 | 11921.082 | AL133080  | 3218.053  | 2350.665  | NM_001110 | 5570.737  | 3198.576  |
| AB035356    | 972.877   | 776.602   | NM_017792 | 4886.847  | 4321.223  | NM_003222 | 1391.217  | 1057.905  |
| AV752086    | 855.04    | 702.664   | AK025213  | 6068.647  | 6474.06   | NM_000841 | 5874.707  | 7173.28   |
| NM_016102   | 1896.711  | 1642.572  | NM_014945 | 3110.035  | 2214.395  | NM_016563 | 560.472   | 718.245   |
| NM_004375   | 5074.365  | 4308.869  | AL080221  | 1121.546  | 1044.228  | NM_001245 | 3004.649  | 1518.277  |
| NM_000272   | 1766.314  | 1522.177  | AL137370  | 1035.935  | 1260.121  | NM_003672 | 11413.653 | 12040.446 |
| NM_005603   | 6854.165  | 4826.781  | AF009262  | 10967.005 | 12810.474 | NM_002574 | 59835.66  | 61863.699 |
| NM_001061   | 2219.252  | 1878.049  | AF050198  | 1602.23   | 1599.106  | AJ008139  | 3300.294  | 3635.014  |
| AB011100    | 2999.53   | 3357.431  | AK024346  | 2090.189  | 1964.218  | NM_004325 | 3586.719  | 3865.954  |
| U61741      | 1409.527  | 1496.414  | AF056422  | 1073.955  | 949.275   | NM_000882 | 585.441   | 784.312   |
| NM_012402   | 8828.253  | 9461.183  | AF090892  | 598.957   | 765.37    | NM_004577 | 4219.071  | 4695.342  |



|           |           |           |           |           |           |           |           |           |
|-----------|-----------|-----------|-----------|-----------|-----------|-----------|-----------|-----------|
| M76676    | 3863.967  | 4743.472  | AK001089  | 1459.83   | 1833.758  | AF007157  | 15123.904 | 21681.367 |
| NM_003857 | 648.498   | 614.318   | AK001919  | 961.743   | 1138.753  | D38553    | 7283.112  | 9839.564  |
| AL137690  | 1053.885  | 1243.669  | AK021535  | 797.06    | 1079.669  | NM_00617C | 4535.393  | 6196.382  |
| Z83804    | 2867.055  | 2815.202  | AK021753  | 2172.815  | 1839.033  | NM_01429E | 6710.707  | 5371.15   |
| NM_00438E | 1222.864  | 1446.555  | AK001139  | 2455.312  | 2877.575  | AK001581  | 4167.186  | 3721.125  |
| U67784    | 945.446   | 1475.632  | AK002090  | 1060.878  | 1138.374  | NM_00586Z | 3306.68   | 2755.36   |
| NM_00736E | 1694.977  | 2219.363  | AK021822  | 838.382   | 852.411   | NM_00054E | 3565.964  | 3476.797  |
| NM_00059Z | 1045.221  | 1554.059  | AK025246  | 4347.283  | 3963.251  | AB002297  | 4656.168  | 3627.185  |
| NM_016584 | 1673.421  | 1824.662  | AK025847  | 2225.537  | 1755.603  | NM_00502C | 24490.305 | 21217.49  |
| NM_00181E | 840.214   | 699.794   | AK000944  | 642.313   | 615.078   | NM_014077 | 7083.74   | 5511.075  |
| NM_000064 | 2880.539  | 3230.537  | NM_014174 | 26030.238 | 28661.109 | NM_01841Z | 1304.712  | 834.258   |
| NM_00672E | 5032.888  | 5233.327  | AF147337  | 3646.412  | 3947.764  | NM_01232E | 5169.775  | 3437.682  |
| NM_00332E | 1566.312  | 1475.6    | AK025203  | 47268.367 | 51841.652 | M14087    | 19299.027 | 10220.84  |
| NM_00456E | 52625.93  | 47366.648 | AK026981  | 3284.536  | 3182.405  | NM_00088E | 12907.939 | 11212.51  |
| NM_00020Z | 3301.685  | 3030.17   | AL133656  | 2562.673  | 1852.362  | M59040    | 1227.085  | 751.705   |
| NM_00549E | 15739.854 | 12357.009 | AL050037  | 13182.878 | 11710.527 | NM_01758Z | 16949.217 | 19628.889 |
| NM_004817 | 2069.421  | 1705.646  | NM_001417 | 29018.084 | 25500.84  | NM_01523E | 3640.064  | 3728.21   |
| NM_01897E | 19448.938 | 18767.676 | AK022236  | 5094.709  | 4804.331  | AK026962  | 2145.275  | 1908.909  |
| AB023215  | 3807.587  | 3216.239  | AK000073  | 496.528   | 481.242   | X04366    | 2847.6    | 2585.992  |
| AK021426  | 330.1     | 703.553   | AK024773  | 822.203   | 642.137   | NM_00050E | 41230.102 | 46017.07  |
| NM_01807Z | 4745.504  | 5353.055  | AL390180  | 868.523   | 730.306   | NM_00066E | 1929.581  | 2867.042  |
| AL137529  | 6008.668  | 7444.474  | X60484    | 839.441   | 1377.775  | NM_003481 | 4228.671  | 5166.314  |
| NM_01233Z | 837.482   | 787.198   | AF055019  | 1731.07   | 1806.721  | AB046814  | 1033.096  | 1009.113  |
| AK026648  | 3272.909  | 3389.539  | NM_00352E | 8478.054  | 7191.303  | NM_017664 | 4140.562  | 3317.528  |
| NM_000497 | 1773.072  | 2047.723  | AK000229  | 809.744   | 707.774   | AK025523  | 335.03    | 488.806   |
| NM_017421 | 4051.722  | 4256.168  | AF056432  | 3986.098  | 3382.551  | NM_00705E | 7607.524  | 7803.385  |
| AK025977  | 15424.982 | 18738.678 | AK001987  | 13568.503 | 12215.134 | NM_00687C | 25486.131 | 17229.213 |
| AK023130  | 9948.956  | 11416.737 | NM_01333Z | 2023.936  | 2100.492  | NM_00735E | 6969.689  | 5261.214  |
| NM_00027Z | 990.069   | 867.388   | X56199    | 1899.354  | 1543.666  | AF303888  | 13159.703 | 12886.682 |
| NM_00289E | 3680.861  | 4383.811  | NM_00519Z | 2381.295  | 2327.008  | NM_000077 | 941.064   | 870.679   |
| NM_00048E | 2403.689  | 2829.358  | AL162006  | 750.293   | 677.176   | NM_007084 | 1203.181  | 1397.129  |
| BE876237  | 2860.614  | 3269.11   | NM_017971 | 17894.711 | 15372.765 | M97191    | 22027.279 | 27955.957 |
| NM_005397 | 1853.986  | 2243      | AF090097  | 966.245   | 1017.39   | AK023015  | 14247.121 | 14516.339 |
| NM_00080E | 607.568   | 603.377   | AF116620  | 10764.335 | 10957.032 | NM_003457 | 15287.944 | 15625.036 |
| NM_00632C | 4586.451  | 3883.509  | AF293335  | 34586.219 | 29255.582 | NM_012391 | 1743.359  | 1953.467  |
| AB014511  | 6420.191  | 5500.428  | AL080065  | 809.177   | 903.156   | NM_005254 | 2463.589  | 3778.592  |
| NM_01425Z | 9140.584  | 8245.303  | AK024431  | 11875.542 | 11549.698 | NM_005611 | 1179.382  | 1137.372  |
| NM_016131 | 10593.133 | 8812.019  | X96644    | 6760.269  | 5630.14   | AF141655  | 1433.902  | 1645.529  |
| NM_00682Z | 2150.262  | 2118.957  | Z34281    | 19753.49  | 15986.95  | NM_00734E | 837.702   | 1163.86   |
| NM_01214Z | 9175.093  | 7053.651  | NM_01867E | 34305.113 | 30131.846 | NM_00483C | 1153.483  | 1551.83   |
| NM_01642E | 3186.918  | 3076.66   | AJ008122  | 20294.674 | 16143.077 | NM_007007 | 10264.442 | 14405.825 |
| NM_018264 | 2434.498  | 2688.251  | AK022667  | 36109.555 | 26314.596 | NM_00638E | 879.168   | 1274.226  |
| NM_01458C | 565.466   | 785.438   | AK026667  | 492.994   | 542.876   | NM_00655E | 20289.301 | 23208.424 |
| AB028998  | 2033.385  | 2036.612  | AF113211  | 1296.17   | 1580.293  | NM_004501 | 34686.23  | 33366.137 |
| NM_00015Z | 938.077   | 1049.802  | AL117568  | 2989.49   | 3358.797  | NM_00496E | 15950.598 | 14058.729 |
| NM_00203Z | 3257.865  | 3254.374  | NM_00084Z | 605.851   | 529.804   | NM_00670C | 1710.63   | 1627.214  |
| AK091794  | 718.059   | 743.513   | S71805    | 2198.194  | 1596.232  | NM_00644E | 13123.574 | 11864.51  |
| NM_004111 | 1325.334  | 1445.26   | NM_018391 | 1597.239  | 1584.445  | NM_01210E | 8356.766  | 7019.487  |
| AF085966  | 5047.666  | 6232.359  | U90917    | 680.073   | 479.611   | AF019633  | 3322.82   | 2086.313  |
| NM_00531E | 4219.172  | 4447.153  | AK022140  | 3458.254  | 2861.818  | AB002361  | 4385.278  | 2747.442  |
| NM_01631E | 3834.357  | 4179.086  | AK023372  | 16966.955 | 12445.914 | NM_01806C | 6354.506  | 4243.468  |
| NM_00336E | 6329.003  | 5961.501  | AF086527  | 701.866   | 724.244   | NM_01423E | 3504.112  | 2316.236  |
| NM_000057 | 3654.219  | 3653.47   | U21072    | 1675.933  | 1969.893  | NM_01766Z | 3828.612  | 2309.931  |

|            |           |           |           |           |           |           |           |           |
|------------|-----------|-----------|-----------|-----------|-----------|-----------|-----------|-----------|
| NM_018343  | 6878.302  | 6581.554  | AK024377  | 861.126   | 1270.985  | U88837    | 1549.906  | 2059.356  |
| AK095793   | 658.89    | 640.602   | AK023557  | 2358.828  | 2495.948  | NM_017446 | 32491.365 | 20466.033 |
| NM_003177  | 3841.178  | 4437.415  | U17625    | 532.105   | 629.835   | AK001478  | 3300.483  | 4044.17   |
| NM_017719  | 2338.885  | 2214.151  | AB040887  | 3546.632  | 4105.483  | AK025697  | 7301.879  | 8617.386  |
| AF064078   | 547.47    | 511.91    | AK025196  | 1894.88   | 1904.072  | AK021734  | 758.32    | 1417.149  |
| AL049688   | 1756.257  | 1311.365  | AJ227879  | 1064.86   | 1004.357  | AF075028  | 366.127   | 532.718   |
| NM_002737  | 6168.893  | 5042.905  | AK024800  | 926.504   | 995.769   | D00265    | 36748.574 | 43681.727 |
| Z25427     | 4487.82   | 4229.584  | AK000401  | 2084.845  | 1672.472  | NM_000779 | 544.234   | 674.864   |
| NM_001353  | 2847.125  | 2359.356  | AF305068  | 1129.777  | 980.986   | NM_004552 | 47504.988 | 50401.531 |
| NM_006214  | 3017.654  | 2977.956  | D17231    | 44319.434 | 44998.59  | NM_000143 | 3397.127  | 3630.512  |
| AJ010228   | 5280.662  | 4773.43   | AF531295  | 2318.852  | 2217.457  | AF317889  | 593.039   | 792.855   |
| NM_005196  | 4293.572  | 4025.565  | CY3Cy5    | 1459.885  | 164.79    | AL137294  | 4655.164  | 5085.809  |
| NM_006846  | 62345.363 | 57892.289 | BF974315  | 4584.241  | 4033.209  | NM_003743 | 1237.775  | 1662.331  |
| NM_005603  | 9278.458  | 9109.823  | AI652705  | 2735.67   | 1936.675  | AB037797  | 1001.917  | 1009.694  |
| NM_001061  | 780.56    | 734.733   | AW009565  | 3980.371  | 3001.616  | NM_001520 | 1870.103  | 1851.275  |
| Z11694     | 7286.522  | 6760.596  | AI570478  | 1380.743  | 1378.797  | AL050367  | 803.881   | 737.627   |
| Z26317     | 3835.037  | 3886.656  | X07767    | 5829.658  | 5968.917  | NM_017870 | 821.406   | 814.532   |
| X16983     | 13132.405 | 15395.774 | AF252284  | 1529.502  | 1610.839  | AL133633  | 2232.662  | 1621.577  |
| X56160     | 444.055   | 464.794   | SR5       | 9066.145  | 14569.143 | AK026817  | 945.289   | 554.102   |
| BG679991   | 885.485   | 848.154   | SR7       | 5257.631  | 39859.781 | AL157442  | 15315.541 | 10960.494 |
| H-Y 000971 | 11626.658 | 10267.904 | SR9       | 20342.91  | 3689.558  | AB011148  | 2115.331  | 1160.16   |
| NM_021976  | 4074.738  | 3253.785  | CY3Cy5    | 2648.027  | 256.942   | AL389938  | 24142.072 | 17140.143 |
| NM_005718  | 11069.296 | 9391.688  | M33197    | 67467.906 | 65292.547 | NM_001946 | 32018.34  | 39451.672 |
| NM_005496  | 16737.914 | 15520.717 | NM_007264 | 13293.859 | 9679.137  | NM_003507 | 954.749   | 1259.56   |
| NM_002858  | 8815.11   | 9156.21   | NM_016511 | 9855.976  | 6934.973  | AK026591  | 1222.395  | 1507.33   |
| NM_004817  | 1972.521  | 1924.364  | NM_003559 | 2458.26   | 1994.307  | AK001889  | 2660.98   | 3373.827  |
| NM_018975  | 21051.676 | 25410.264 | NM_002185 | 518.565   | 471.871   | AK025726  | 2327.468  | 2439.138  |
| NM_001284  | 38106.879 | 39191.832 | M55337    | 486.495   | 390.714   | AJ227869  | 4100.896  | 3970.115  |
| NM_003242  | 2767.447  | 2452.559  | NM_016533 | 53509.855 | 38985.156 | AK026189  | 679.731   | 962.417   |
| U31099     | 741.066   | 796.565   | NM_014751 | 4857.941  | 4313.857  | AL117613  | 5091.807  | 6149.792  |
| NM_001105  | 2415.051  | 2086.116  | NM_002347 | 14609.516 | 11998.285 | AL137753  | 4520.562  | 5618.819  |
| NM_005585  | 1214.884  | 1320.265  | AB046807  | 1417.969  | 1511.552  | AK021785  | 394.946   | 727.673   |
| Y08756     | 628.622   | 517.488   | M30629    | 4885.911  | 6075.294  | AL110262  | 12645.152 | 15448.664 |
| NM_004518  | 541.885   | 545.072   | BE539299  | 1324.195  | 1417.129  | AK025627  | 14646.309 | 22048.033 |
| NM_006501  | 1418.364  | 1397.999  | AF193873  | 1700.105  | 1626.539  | AF216077  | 2751.309  | 2803.318  |
| NM_002719  | 10771.722 | 10159.106 | NM_002628 | 1169.656  | 1687.492  | AF086238  | 584.508   | 900.104   |
| AB035356   | 943.842   | 1008.43   | M23575    | 490.644   | 761.036   | AK021612  | 9222.203  | 10303.927 |
| AV752086   | 1107.345  | 673.038   | AA190729  | 3915.453  | 6379.748  | AF088031  | 798.626   | 686.166   |
| NM_016102  | 1872.288  | 1871.058  | NM_018057 | 917.73    | 745.455   | AK002025  | 47906.844 | 28073.803 |
| NM_004376  | 5196.43   | 4114.694  | M33197    | 64278.613 | 67005.75  | AK026299  | 2407.469  | 1443.11   |
| NM_000272  | 1765.852  | 1352.627  | NM_003665 | 896.137   | 754.535   | NM_017794 | 1861.255  | 1068.567  |
| NM_014252  | 8900.685  | 8672.259  | AF220217  | 723.865   | 702.555   | AK025170  | 2247.512  | 3215.179  |
| NM_001662  | 22841.006 | 24909.449 | NM_013323 | 10916.836 | 8322.648  | AB033031  | 1248.401  | 1849.752  |
| NM_016131  | 10933.125 | 11756.038 | M33197    | 2265.553  | 2410.682  | AF085872  | 9049.793  | 9725.62   |
| NM_006822  | 2704.793  | 3202.323  | NM_000853 | 2690.742  | 2156.365  | AK022538  | 16059.562 | 19842.193 |
| NM_012142  | 9299.392  | 9157.29   | AF016903  | 18020.715 | 15318.465 | AL360257  | 1601.293  | 2482.792  |
| NM_016429  | 3387.052  | 3724.271  | NM_015675 | 2931.607  | 2523.424  | AK022342  | 1147.959  | 2196.021  |
| AB011100   | 2760.903  | 2497.165  | NM_012483 | 10064.4   | 10304.812 | AF147420  | 1260.614  | 1603.515  |
| U61741     | 1297.344  | 1248.292  | NM_003496 | 5141.713  | 5843.807  | AL049312  | 2078.813  | 2306.241  |
| NM_012402  | 7078.14   | 7783.205  | AB023420  | 13437.104 | 14459.819 | AL050072  | 2878.102  | 2928.281  |
| M76676     | 3125.153  | 3198.862  | NM_007342 | 3610.417  | 3145.239  | AL117590  | 1571.477  | 2202.472  |
| U67784     | 906.104   | 906.328   | NM_005672 | 395.536   | 430.688   | AL049357  | 4883.377  | 9576.176  |
| NM_007366  | 1435.802  | 1479.039  | D25217    | 1898.23   | 1368.468  | AL110223  | 553.54    | 725.553   |

|           |           |           |           |           |           |           |           |           |
|-----------|-----------|-----------|-----------|-----------|-----------|-----------|-----------|-----------|
| NM_000592 | 675.12    | 883.977   | NM_006351 | 6323.448  | 4702.502  | AK027180  | 3055.839  | 2951.784  |
| NM_016584 | 1715.867  | 1590.225  | M33197    | 60764.578 | 55545.551 | NM_004544 | 13923.5   | 13179.378 |
| NM_001815 | 697.743   | 651.581   | NM_004683 | 4574.394  | 3217.459  | AF086041  | 1121.002  | 904.364   |
| NM_000064 | 3035.446  | 2837.61   | AK023226  | 1594.359  | 1443.966  | Y15167    | 828.146   | 967.657   |
| NM_006725 | 5271.529  | 5268.812  | AK025263  | 761.745   | 581.644   | AL133080  | 2437.923  | 2256.842  |
| NM_003326 | 1773.105  | 1762.045  | M33197    | 66938.242 | 62106.801 | NM_017792 | 5467.123  | 4030.385  |
| NM_004568 | 46709.449 | 40729.035 | NM_001467 | 1030.725  | 1794.022  | AK025213  | 6733.607  | 5326.017  |
| NM_000202 | 3283.163  | 2733.081  | NM_018066 | 21124.605 | 19462.432 | NM_014945 | 2735.56   | 1665.487  |
| Z25427    | 4795.771  | 5067.993  | NM_006931 | 6413.473  | 6469.066  | AL080221  | 1131.528  | 883.057   |
| NM_004672 | 13533.808 | 13909.832 | NM_005050 | 5628.191  | 7142.72   | AL137370  | 1013.073  | 1125.608  |
| NM_001353 | 2877.598  | 3058.371  | AJ133127  | 700.248   | 1511.927  | AF009262  | 9982.669  | 10238.813 |
| NM_006214 | 3312.302  | 3562.028  | NM_018976 | 9608.437  | 12316.33  | AF009306  | 489.54    | 596.159   |
| AJ010228  | 4855.032  | 4892.05   | NM_003355 | 8824.858  | 10337.328 | AF050198  | 1559.471  | 1627.737  |
| NM_005198 | 3658.814  | 4851.675  | NM_005074 | 1443.349  | 1780.746  | AK024346  | 2321.223  | 3375.608  |
| NM_018073 | 3143.69   | 3013.461  | NM_004558 | 3496.694  | 2810.178  | AF056422  | 869.248   | 1139.897  |
| AL137529  | 5053.443  | 4824.005  | AL079296  | 670.193   | 697.301   | AF090892  | 853.042   | 927.687   |
| NM_012332 | 364.699   | 624.225   | NM_014770 | 1606.633  | 1528.576  | AK001089  | 1114.759  | 1283.857  |
| AK026648  | 2485.557  | 2537.372  | M33197    | 69922.977 | 65524.02  | AK001919  | 1104.074  | 1773.734  |
| NM_017421 | 4482.491  | 3817.895  | AK023103  | 2752.165  | 2565.214  | AK021535  | 1225.104  | 1869.033  |
| AK023130  | 10084.591 | 10585.235 | NM_017858 | 3021.081  | 2622.481  | AK021753  | 2574.644  | 4938.496  |
| NM_000273 | 759.561   | 867.134   | NM_019059 | 38732.207 | 31876.477 | AK001139  | 4132.413  | 6264.475  |
| NM_002899 | 3880.728  | 4402.789  | D80008    | 2026.644  | 1835.516  | AK002090  | 1512.825  | 1709.103  |
| NM_000486 | 665.857   | 720.036   | X56789    | 1314.303  | 1518.668  | AK021822  | 1110.715  | 1259.497  |
| BE876237  | 1221.187  | 1432.065  | AK001069  | 36377.945 | 25776.709 | AK025191  | 363.946   | 438.831   |
| NM_005397 | 1797.664  | 1826.981  | NM_014306 | 7771.81   | 12452.379 | AK025246  | 5748.901  | 5510.93   |
| NM_000806 | 526.334   | 640.235   | NM_001084 | 5194.626  | 10628.107 | AK025847  | 2277.724  | 2068.779  |
| NM_006320 | 4347.936  | 4099.758  | NM_018622 | 7307.432  | 8070.729  | AK000944  | 458.08    | 427.51    |
| AB014511  | 5597.602  | 4171.61   | M33197    | 64953.77  | 66020.016 | NM_014174 | 27311.479 | 28642.451 |
| NM_021976 | 5083.727  | 5175.03   | NM_005867 | 7435.229  | 8225.629  | AF147337  | 3447.081  | 4222.562  |
| NM_005718 | 10506.757 | 10726.102 | AK026031  | 13079.4   | 12511.82  | AK025203  | 50965.906 | 52426.508 |
| NM_018264 | 1975.032  | 1762.127  | NM_016468 | 28703.08  | 25489.551 | AK026981  | 3537.438  | 3487.501  |
| AB028998  | 1392.319  | 1602.254  | AF193873  | 1349.614  | 903.006   | NM_006394 | 269.982   | 503.993   |
| NM_000153 | 799.284   | 996.578   | NM_002628 | 1159.511  | 939.655   | AL133656  | 2214.657  | 3282.115  |
| NM_002033 | 2412.847  | 2197.683  | AA190729  | 3376.316  | 2795.402  | AL050037  | 13741.161 | 14619.901 |
| AK091794  | 718.952   | 1017.499  | BF974315  | 5534.423  | 5018.849  | NM_001417 | 31119.447 | 38845.465 |
| AF085966  | 5142.269  | 5664.969  | AI652705  | 3028.475  | 2339.941  | AK022236  | 5173.717  | 4635.815  |
| NM_005316 | 4083.873  | 4882.712  | AI570478  | 1501.006  | 1438.532  | AK000073  | 774.667   | 673.634   |
| NM_016316 | 3798.363  | 3901.734  | X65293    | 1813.807  | 1629.028  | AK000618  | 696.846   | 646.857   |
| NM_003369 | 6987.066  | 6371.172  | AF252284  | 2876.631  | 3540.53   | AK024773  | 689.356   | 699.535   |
| NM_000057 | 3330.414  | 2790.186  | BU727558  | 928.928   | 1548.559  | AL390180  | 908.059   | 488.211   |
| NM_018343 | 7155.082  | 6644.546  | M33197    | 11227.532 | 12481.615 | X60484    | 962.086   | 1259.211  |
| AK095793  | 705.863   | 676.114   | AL050139  | 7127.766  | 8475.031  | AF055019  | 1564.039  | 1084.551  |
| NM_003177 | 3985.13   | 3686.638  | U90878    | 987.843   | 906.795   | NM_003525 | 7712.032  | 6026.715  |
| NM_017719 | 2204.007  | 2073.506  | NM_006597 | 35614.934 | 27764.986 | AK000229  | 1001.384  | 1533.79   |
| AL049688  | 1539.003  | 1390.378  | NM_012483 | 9292.6    | 7110.641  | AF056432  | 3849.295  | 5464.893  |
| NM_002737 | 6184.195  | 4276.701  | NM_003498 | 4901.228  | 4129.897  | AK001987  | 27217.895 | 36491.238 |
| NM_002719 | 11916.879 | 11831.509 | AB023420  | 11705.748 | 10181.908 | NM_013332 | 2839.68   | 2850.708  |
| AB035356  | 1061.933  | 866.116   | M33197    | 63894.328 | 66142.945 | X56199    | 3729.255  | 3761.485  |
| AV752086  | 942.475   | 1085.457  | NM_007264 | 14843.216 | 11776.436 | NM_005193 | 3771.619  | 4740.714  |
| NM_016102 | 5336.596  | 6016.643  | NM_016511 | 13395.759 | 10505.482 | AL162006  | 831.768   | 1237.375  |
| NM_004376 | 5073.503  | 5228.436  | NM_003559 | 2775.586  | 2391.347  | NM_017971 | 35551.727 | 43886.625 |
| NM_000272 | 1670.532  | 1685.555  | NM_002185 | 924.891   | 989.337   | AF090097  | 1344.972  | 2078.025  |
| NM_006848 | 62251.082 | 58001.867 | M55337    | 535.083   | 288.405   | AF054998  | 617.465   | 1217.729  |

|             |           |           |           |           |           |           |           |           |
|-------------|-----------|-----------|-----------|-----------|-----------|-----------|-----------|-----------|
| NM_005603   | 8773.485  | 8071.277  | M33197    | 64775.797 | 71927.375 | AF116620  | 12259.901 | 19141.033 |
| NM_001061   | 836.6     | 660.78    | NM_013229 | 2455.646  | 928.354   | AK024431  | 13794.12  | 27949.988 |
| BG744154    | 24576.314 | 22839.834 | NM_016533 | 55834.844 | 42811.336 | AF116635  | 733.934   | 580.159   |
| Z11694      | 7448.796  | 6786.062  | NM_014751 | 6866.486  | 6671.952  | X96644    | 8431.574  | 9409.742  |
| Z26317      | 4087.102  | 3568.942  | NM_002347 | 19079.617 | 22483.01  | Z34281    | 24457.85  | 29511.75  |
| X16983      | 13828.65  | 17624.752 | AB046807  | 1834.939  | 2585.676  | NM_018678 | 46616.504 | 47453.395 |
| X56160      | 631.135   | 681.022   | M33197    | 64936.488 | 74428.586 | AJ008122  | 20704.4   | 17835.111 |
| BG679991    | 1098.973  | 959.946   | NM_014623 | 6279.326  | 9131.081  | NM_006220 | 813.693   | 650.178   |
| H-Y 00097 I | 12619.623 | 8969.683  | NM_007244 | 9542.307  | 9551.9    | AK022667  | 38457.891 | 24217.125 |
| H-M 59964   | 605.735   | 432.61    | M30629    | 6590.618  | 6500.497  | AK026667  | 915.661   | 284.316   |
| H-Y 00711 I | 60501.738 | 60463.688 | M33197    | 60087.422 | 62941.754 | AF113211  | 1021.325  | 1282.072  |
| H-X 16707 I | 1126.383  | 1073.537  | NM_018976 | 9401.698  | 8370.046  | AL117568  | 3345.959  | 4215.187  |
| AL038354    | 33255.348 | 29919.139 | NM_003355 | 7493.378  | 7528.209  | NM_000843 | 498.513   | 534.315   |
| NM_000064   | 2780.932  | 2802.765  | NM_005074 | 1315.569  | 1099.387  | S71805    | 1714.233  | 1941.155  |
| NM_006725   | 5767.84   | 6458.576  | NM_004170 | 809.861   | 1033.051  | NM_018391 | 1819.235  | 1784.849  |
| NM_003326   | 1737.929  | 2019.168  | NM_018057 | 1378.632  | 1203.68   | U90917    | 880.606   | 882.024   |
| NM_004568   | 49663.539 | 49345.992 | M33197    | 64592.676 | 69377.688 | AK022140  | 3800.958  | 4009.481  |
| NM_000202   | 3679.656  | 4003.857  | NM_015717 | 1149.532  | 1502.399  | AK023372  | 18452.061 | 21356.869 |
| NM_005496   | 16616.117 | 15764.971 | NM_015925 | 753.169   | 780.501   | AF086527  | 630.936   | 885.498   |
| NM_002858   | 7970.906  | 8698.267  | NM_003665 | 1146.167  | 1285.005  | U21072    | 1867.252  | 2028.629  |
| NM_004817   | 2096.768  | 2235.063  | AF220217  | 1119.698  | 1732.333  | AK024377  | 734.489   | 934.528   |
| NM_018975   | 21492.879 | 25230.635 | NM_013323 | 10614.202 | 9390.304  | AK027107  | 783.952   | 1191.417  |
| AB023215    | 4342.206  | 4761.447  | NM_017426 | 3926.278  | 3678.252  | U17625    | 754.294   | 1289.919  |
| NM_001284   | 40267.68  | 42032.441 | M33197    | 2323.279  | 2456.825  | AB040887  | 4162.494  | 5693.975  |
| NM_003242   | 2647.059  | 2748.649  | NM_000853 | 3303.438  | 3449.338  | AK025196  | 2637.654  | 3079.327  |
| U31099      | 895.191   | 892.352   | AF016903  | 22569.547 | 24870.701 | AK024800  | 989.265   | 1145.21   |
| NM_001105   | 2441.668  | 2505.244  | NM_015675 | 4502.302  | 6111.442  | AK000401  | 2431.271  | 1836.327  |
| NM_005585   | 1377.571  | 1668.223  | AK022267  | 566.305   | 1129.729  | AF305068  | 1036.813  | 761.119   |
| NM_002075   | 512.461   | 553.042   | NM_016040 | 3580.836  | 4556.681  | D17231    | 49405.836 | 30742.283 |
| Y08756      | 493.465   | 448.692   | AF031136  | 51182.996 | 42266.922 | AF531295  | 2220.266  | 1308.866  |
| NM_005563   | 20665.121 | 18224.896 | NM_015983 | 5006.435  | 3540.151  | CY3Cy5    | 8387.916  | 261.514   |
| NM_005102   | 1642.157  | 1504.327  | NM_018622 | 6286.208  | 4853.583  | BF974315  | 5418.59   | 3939.718  |
| NM_004518   | 613.16    | 508.173   | M33197    | 63232.863 | 65380.797 | AI652705  | 4837.761  | 3107.081  |
| NM_006501   | 1225.757  | 1096.403  | NM_005867 | 7652.521  | 6823.216  | AA446028  | 589.366   | 861.105   |
| NM_005397   | 1836.174  | 2384.358  | AK026031  | 11571.506 | 9992.547  | M80583    | 1156.316  | 1378.248  |
| NM_000806   | 538.834   | 657.091   | NM_016468 | 23720.713 | 19234.813 | AW009565  | 7010.846  | 6761.155  |
| NM_006320   | 5621.524  | 5125.643  | NM_005672 | 509.953   | 559.739   | AI570478  | 2124.731  | 1907.238  |
| AB014511    | 7456.246  | 9206.062  | D25217    | 2101.174  | 1681.862  | X07767    | 8603.665  | 7061.405  |
| NM_014252   | 9127.264  | 10701.378 | NM_006351 | 7149.649  | 7330.89   | AF252284  | 4177.295  | 3172.039  |
| NM_001662   | 22572.221 | 23311.174 | M33197    | 57424.508 | 58235.258 | BU727558  | 1267.598  | 743.414   |
| NM_016131   | 10953.549 | 11529.737 | NM_004683 | 5611.252  | 5028.726  | SR1       | 57003.535 | 55837.539 |
| NM_006822   | 2269.085  | 3289.199  | AK023226  | 1696.475  | 1817.883  | SR3       | 50697.934 | 45206.551 |
| NM_012142   | 9796.414  | 11325.46  | AK025263  | 803.389   | 684.127   | SR5       | 9194.981  | 7173.732  |
| NM_016429   | 3447.319  | 4408.443  | M33197    | 63129.609 | 67473.195 | SR7       | 7080.683  | 45124.707 |
| AB011100    | 2527.098  | 2791.312  | NM_001467 | 816.494   | 871.002   | SR9       | 22051.162 | 3453.85   |
| U61741      | 1494.747  | 1411.138  | NM_018066 | 25775.691 | 30722.793 | CY3Cy5    | 10220.707 | 370.093   |
| NM_012402   | 7841.465  | 9448.326  | NM_006931 | 8913.829  | 17322.744 | M33197    | 74562.383 | 63951.695 |
| M76676      | 3718.264  | 3245.463  | NM_020344 | 7842.645  | 9968.467  | NM_007264 | 24986.014 | 20091.764 |
| NM_003857   | 792.533   | 558.6     | AF119868  | 508.623   | 743.448   | NM_016511 | 16480.506 | 12961.706 |
| AL137690    | 1000.391  | 1043.359  | AF252284  | 1996.78   | 1432.212  | NM_003555 | 3026.492  | 2440.485  |
| Z83804      | 3160.851  | 2783.813  | BU727558  | 574.265   | 354.108   | NM_002185 | 1608.315  | 918.305   |
| NM_004386   | 1398.903  | 1170.706  | M33197    | 10941.135 | 9378.291  | M55337    | 1337.011  | 757.701   |
| U67784      | 916.703   | 939.805   | AL050139  | 6932.894  | 6346.243  | NM_013225 | 1784.942  | 1268.494  |

|           |           |           |           |           |           |           |           |           |
|-----------|-----------|-----------|-----------|-----------|-----------|-----------|-----------|-----------|
| NM_007366 | 1638.099  | 1495.292  | NM_004558 | 4977.105  | 3929.847  | NM_016533 | 63237.684 | 61875.578 |
| NM_000592 | 1162.568  | 1095.512  | NM_014770 | 2171.362  | 1805.593  | NM_014751 | 22363.459 | 22403.758 |
| NM_016584 | 1977.011  | 1927.32   | M33197    | 72900.117 | 65681.523 | NM_002347 | 44780.375 | 46676.844 |
| NM_001815 | 569.044   | 601.388   | AK023103  | 4624.213  | 5328.971  | AB046807  | 3490.32   | 2251.431  |
| AK095793  | 724.22    | 884.98    | NM_017858 | 3226.491  | 3309.158  | M33197    | 66529.773 | 73969.93  |
| NM_003177 | 4180.932  | 4876.694  | NM_019059 | 39483.316 | 27402.822 | NM_014623 | 9818.535  | 7782.945  |
| NM_017719 | 2757.839  | 2839.271  | D80008    | 2263.281  | 2376.724  | NM_007244 | 10189.269 | 8240.182  |
| AF064078  | 525.184   | 577.902   | X56789    | 1397.345  | 1450.762  | M30629    | 7772.158  | 5953.581  |
| AL049688  | 1565.864  | 1579.169  | AK001069  | 31154.281 | 29397.686 | AF193873  | 4733.718  | 3957.463  |
| NM_002737 | 6704.033  | 5846.944  | NM_000359 | 14111.524 | 12525.362 | NM_002628 | 2028.438  | 1788.767  |
| Z25427    | 4749.788  | 6374.392  | NM_006395 | 1251.579  | 1846.203  | M23575    | 931.504   | 934.093   |
| NM_004672 | 15008.402 | 15739.294 | NM_014306 | 7436.226  | 7798.357  | AA190729  | 3999.672  | 2574.099  |
| NM_001353 | 2678.239  | 3173.25   | NM_001084 | 3088.768  | 3088.288  | NM_004170 | 1060.437  | 1312.235  |
| NM_006214 | 3115.77   | 3358.816  | M33197    | 64763.969 | 70533.305 | NM_018057 | 2917.291  | 2901.223  |
| AJ010228  | 5324.557  | 6439.215  | NM_014623 | 6286.079  | 5874.666  | M33197    | 66790.5   | 66244.117 |
| NM_005198 | 3694.48   | 4919.004  | NM_007244 | 7776.351  | 5875.965  | NM_015717 | 2087.197  | 2055.902  |
| NM_018073 | 3597.578  | 3727.441  | M30629    | 6654.149  | 5602.924  | NM_015925 | 1630.578  | 1354.299  |
| AL137529  | 5344.463  | 6176.598  | AF193873  | 1418.957  | 1068.017  | NM_003665 | 1923.283  | 1651.004  |
| NM_012332 | 646.754   | 808.87    | NM_002628 | 1267.594  | 1079.034  | AF220217  | 1499.649  | 992.661   |
| AK026648  | 2489.348  | 2486.464  | AA190729  | 3580.53   | 2917.366  | NM_013323 | 21851.904 | 20867.053 |
| NM_000497 | 1974.634  | 1561.469  | BF974315  | 6624.62   | 6375.965  | NM_014937 | 945.544   | 590.693   |
| NM_017421 | 4213.246  | 3173.15   | AI652705  | 3164.594  | 2938.078  | M33197    | 3110.474  | 2413.464  |
| AK025977  | 14733.582 | 14366.285 | AA446028  | 441.025   | 687.348   | NM_000853 | 4935.295  | 5431.984  |
| AK023130  | 10570.829 | 9719      | AI570478  | 1357.677  | 1419.588  | AF016903  | 47161.477 | 49149.98  |
| NM_000273 | 800.551   | 659.591   | X07767    | 6082.259  | 7141.8    | NM_015675 | 6133.83   | 5474.933  |
| NM_002899 | 3570.834  | 3500.132  | X65293    | 737.457   | 497.824   | AK022267  | 1018.81   | 1028.882  |
| NM_000486 | 684.052   | 747.517   | AF016903  | 17282.83  | 13434.434 | NM_016040 | 3960.997  | 3456.022  |
| BE876237  | 1338.939  | 1211.757  | NM_015675 | 3594.661  | 3096.925  | M33197    | 66625.805 | 70461.188 |
| NM_014750 | 10496.782 | 9476.447  | AK022267  | 622.11    | 675.457   | AF031136  | 63109.77  | 60402.938 |
| NM_015912 | 938.057   | 764.919   | NM_016040 | 3136.345  | 2440.346  | U90878    | 968.547   | 797.533   |
| NM_000460 | 943.575   | 846.141   | M33197    | 66317.563 | 65694     | NM_006597 | 55784.34  | 47336.73  |
| AB002339  | 1049.29   | 1065.435  | AF031136  | 50953.805 | 38416.543 | NM_012483 | 12638.13  | 12492.136 |
| NM_005104 | 15458.353 | 15234.792 | U90878    | 1641.145  | 1377.136  | NM_003498 | 7410.597  | 5960.644  |
| NM_006888 | 30219.084 | 34078.051 | NM_006597 | 39784.672 | 31019.066 | AB023420  | 17534.303 | 13193.616 |
| AL137423  | 7995.207  | 9299.524  | NM_012483 | 10062.704 | 7624.649  | NM_007342 | 6771.873  | 6267.897  |
| AB018322  | 2799.851  | 2630.15   | NM_003498 | 5181.784  | 4388.355  | NM_005672 | 798.473   | 919.104   |
| NM_007068 | 1527.132  | 2220.116  | AB023420  | 12692.948 | 11676.977 | D25217    | 2842.352  | 2242.03   |
| NM_005718 | 12248.052 | 15987.187 | NM_016511 | 15895.421 | 11384.964 | NM_006351 | 10198.912 | 8331.735  |
| NM_018264 | 1917.625  | 2112.168  | NM_003559 | 2832.234  | 2380.026  | M33197    | 66702.844 | 66348.57  |
| NM_014580 | 792.641   | 522.72    | NM_002185 | 652.953   | 864.174   | NM_004683 | 7373.215  | 4216.941  |
| AB028998  | 1633.597  | 1483.896  | M55337    | 828.111   | 731.575   | AK023226  | 3117.634  | 3197.839  |
| NM_000153 | 1069.858  | 1064.229  | M33197    | 71411.836 | 65776.984 | AK025263  | 1291.894  | 1003.607  |
| NM_002033 | 2819.766  | 2691.812  | NM_013229 | 1405.4    | 1271.034  | M33197    | 66644.43  | 66450.617 |
| AK091794  | 608.459   | 608.735   | NM_016533 | 59645.98  | 54402.707 | NM_001467 | 1044.269  | 849.433   |
| NM_004111 | 1148.884  | 1135.99   | NM_014751 | 7064.341  | 6271.766  | NM_018066 | 51294.234 | 54135.539 |
| AF085966  | 4426.897  | 4195.784  | NM_002347 | 18039.072 | 15625.898 | NM_006931 | 14093.21  | 17992.111 |
| NM_005316 | 3691.316  | 4145.874  | AB046807  | 1801.673  | 1294.639  | NM_020344 | 11945.996 | 14382.816 |
| NM_016316 | 3751.686  | 3778.72   | NM_018066 | 21306.934 | 17883.215 | AF119868  | 837.641   | 888.071   |
| NM_003369 | 6147.638  | 5611.533  | NM_006931 | 6941.5    | 6277.541  | NM_005050 | 6097.525  | 9152.054  |
| NM_000057 | 3404.508  | 2713.846  | NM_020344 | 7987.688  | 7552.597  | NM_018976 | 13432.618 | 15688.235 |
| NM_018343 | 7313.84   | 5121.427  | AF119868  | 764.508   | 797.18    | NM_003355 | 9860.3    | 9321.548  |
| X15880    | 6872.222  | 6940.515  | NM_005050 | 5473.786  | 4623.285  | NM_005074 | 1553.837  | 1631.934  |
| AF114264  | 1333.148  | 1199.713  | M33197    | 61395.844 | 66167.867 | NM_004558 | 6475.479  | 6560.292  |

|           |           |           |           |           |           |           |           |           |
|-----------|-----------|-----------|-----------|-----------|-----------|-----------|-----------|-----------|
| NM_017514 | 657.761   | 814.464   | NM_018976 | 10574.169 | 9528.893  | AL079296  | 1391.831  | 1229.629  |
| AB018261  | 437.971   | 564.317   | NM_003355 | 8217.281  | 7582.533  | NM_01477C | 4842.679  | 4076.667  |
| NM_018972 | 2750.295  | 2869.48   | NM_005074 | 1543.08   | 1485.147  | M33197    | 67566.867 | 62850.027 |
| AB037828  | 1567.912  | 1263.301  | NM_018057 | 1875.303  | 1661.415  | D80008    | 2839.279  | 2207.427  |
| AB023210  | 2310.104  | 2987.059  | M33197    | 64543.414 | 68622.328 | X56789    | 1550.627  | 1456.443  |
| AB037786  | 1537.447  | 1496.701  | NM_015717 | 1745.721  | 1211.296  | AK001069  | 62229.66  | 61724.98  |
| NM_00364E | 10588.11  | 12971.901 | NM_015925 | 641.099   | 638.595   | NM_00093E | 1298.434  | 1769.128  |
| AB037735  | 857.369   | 890.365   | NM_003665 | 1267.793  | 1209.522  | NM_00035E | 16873.854 | 23963.066 |
| AK002177  | 1028.031  | 1053.858  | AF220217  | 1002.509  | 1169.198  | NM_00639E | 2562.205  | 2780.033  |
| AK024429  | 2967.237  | 2927.258  | NM_013323 | 15991.354 | 14164.811 | NM_01430E | 10889.629 | 12138.846 |
| NM_00349E | 5627.013  | 6603.561  | NM_01742E | 5174.253  | 4841.012  | NM_001084 | 3525.708  | 3850.606  |
| AB000509  | 6309.961  | 6416.852  | M33197    | 3029.66   | 2601.787  | NM_018622 | 9154.351  | 11861.349 |
| AB018314  | 2265.418  | 2194.577  | NM_000853 | 3940.614  | 2906.855  | M33197    | 66801.914 | 68005.109 |
| NM_00437E | 922.604   | 896.056   | M33197    | 63632.949 | 65033.809 | NM_005867 | 8383.089  | 9131.714  |
| AJ238899  | 1000.96   | 783.82    | NM_000359 | 12528.794 | 8851.377  | AK026031  | 18754.645 | 19830.162 |
| NM_018037 | 1537.198  | 1383.066  | NM_00639E | 1329.474  | 1214.745  | NM_01646E | 41474.699 | 34978.77  |
| NM_001110 | 6192.256  | 5491.554  | NM_01430E | 7538.962  | 6309.826  | AF193873  | 2657.176  | 2250.797  |
| NM_003222 | 1441.562  | 1368.926  | NM_001084 | 3626.8    | 3161.247  | NM_00262E | 1743.969  | 1285.831  |
| NM_000841 | 1055.124  | 1095.331  | NM_015983 | 7082.721  | 4672.895  | M23575    | 1128.556  | 921.93    |
| NM_00124E | 2724.798  | 1933.219  | NM_018622 | 7770.211  | 4728.008  | AA190729  | 4724.271  | 2359.834  |
| NM_003672 | 1193.277  | 1033.918  | M33197    | 73838.625 | 65457.047 | BF974315  | 8535.084  | 3587.306  |
| NM_002574 | 62885.102 | 61760.199 | NM_005867 | 8535.568  | 6371.127  | AI652705  | 6498      | 7922.004  |
| AJ008139  | 4002.029  | 3878.912  | AK026031  | 14431.729 | 10722.2   | M80583    | 1182.413  | 806.04    |
| NM_00432E | 4068.103  | 3728.864  | NM_01646E | 28441.453 | 21239.213 | AI570478  | 1651.49   | 2214.055  |
| NM_000882 | 1070.589  | 1150.385  | NM_007342 | 4623.198  | 5094.071  | X07767    | 8488.242  | 8800.305  |
| NM_004577 | 6206.001  | 7035.389  | NM_005672 | 689.869   | 516.458   | AF252284  | 3959.513  | 4604.85   |
| AF007157  | 11747.084 | 11956.074 | D25217    | 2669.665  | 3463.378  | BU727558  | 1143.768  | 1441.382  |
| D38553    | 9399.985  | 9405.184  | NM_006351 | 8135.336  | 8639.186  | AL050139  | 10442.925 | 10038.134 |
| NM_00617C | 6693.397  | 8864.036  | M33197    | 59357.641 | 51945.418 | NM_006597 | 51261.301 | 44185.457 |
| NM_01429E | 11678.062 | 10595.035 | NM_004683 | 8194.205  | 9103.647  | NM_012483 | 12382.368 | 8503.2    |
| AK001581  | 5540.09   | 5456.585  | AK023226  | 2794.258  | 4796.463  | NM_00349E | 9181.455  | 4919.911  |
| NM_005862 | 2983.866  | 2699.875  | AK025263  | 1112.929  | 1278.124  | AB023420  | 19047.119 | 10510.544 |
| NM_00054E | 3516.973  | 3492.315  | NM_001467 | 1198.435  | 1316.208  | NM_016511 | 19274.582 | 22768.537 |
| AK022541  | 11646.728 | 10362.295 | NM_00468E | 8604.988  | 6483.129  | NM_00355E | 3260.862  | 3914.258  |
| AB002297  | 6048.67   | 6394.582  | AB037725  | 1191.663  | 966.945   | NM_00218E | 1345.358  | 878.596   |
| NM_00502C | 3948.55   | 3627.989  | M33197    | 54941.148 | 57107.504 | M55337    | 1134.543  | 1444.087  |
| NM_014077 | 12101.176 | 10724.858 | NM_01771E | 2505.222  | 2161.533  | M33197    | 75604.141 | 63991.992 |
| NM_018412 | 2007.032  | 1726.765  | NM_00486C | 4116.437  | 3518.626  | NM_01322E | 1885.164  | 2663.662  |
| NM_01232E | 3764.281  | 3853.073  | AF217190  | 10695.187 | 9242.785  | NM_016533 | 62057.438 | 61895.355 |
| M14087    | 26837.789 | 23385.408 | AB028981  | 44723.59  | 39515.785 | NM_014751 | 17683.316 | 24605.443 |
| NM_00088E | 11779.378 | 12240.571 | NM_00680C | 9203.753  | 9217.129  | NM_002347 | 35961.598 | 44588.82  |
| NM_017582 | 20622.789 | 21973.689 | NM_00247E | 868.574   | 1360.622  | AB046807  | 2925.327  | 3118.584  |
| NM_01523E | 4498.818  | 4078.162  | NM_00272E | 7329.406  | 9763.697  | M33197    | 66396.828 | 78067.125 |
| AK026962  | 1712.843  | 1646.632  | M33197    | 16864.953 | 19431.504 | NM_014623 | 9887.136  | 10790.744 |
| NM_00679E | 532.095   | 848.992   | AL050139  | 10865.742 | 15453.858 | M30629    | 6113.14   | 7217.38   |
| X04366    | 5126.892  | 5154.322  | NM_002593 | 807.327   | 1200.928  | M33197    | 66653.156 | 68934.828 |
| NM_00050E | 9144.734  | 10376.075 | NM_00455E | 7718.752  | 10282.337 | NM_01897E | 13414.296 | 11120.929 |
| NM_01865E | 658.483   | 650.644   | AL079296  | 1361.383  | 2221.361  | NM_00335E | 9631.662  | 5639.549  |
| NM_00066E | 3003.897  | 3337.561  | NM_01477C | 3325.485  | 3958.447  | NM_005074 | 1894.825  | 1186.986  |
| NM_003481 | 5357.974  | 6212.157  | AB037737  | 1047.86   | 1169.117  | NM_018057 | 4793.757  | 4706.825  |
| AB046814  | 1561.786  | 1552.435  | AK023103  | 5139.795  | 8141.565  | NM_015717 | 2866.795  | 3663.683  |
| NM_01777E | 667.055   | 694.235   | NM_01785E | 5954.063  | 8418.365  | NM_01592E | 1733.397  | 2109.833  |
| NM_017664 | 5784.976  | 5041.756  | NM_01905E | 59907.242 | 61837.73  | AF220217  | 1307.698  | 862.225   |

|           |           |           |           |           |           |           |           |           |
|-----------|-----------|-----------|-----------|-----------|-----------|-----------|-----------|-----------|
| AK025523  | 851.471   | 759.835   | NM_013347 | 881.404   | 1108.472  | NM_013323 | 20216.002 | 19547.9   |
| NM_007059 | 6475.909  | 5969.988  | D80008    | 3323.747  | 4222.49   | NM_014937 | 1205.986  | 1861.44   |
| NM_006870 | 22667.391 | 22998.619 | AK001069  | 53665.543 | 55876.227 | NM_017426 | 6777.173  | 9478.915  |
| NM_007359 | 6413.697  | 7041.787  | NM_004132 | 4422.565  | 6041.942  | M33197    | 3849.927  | 4167.104  |
| L13283    | 691.382   | 626.981   | NM_014844 | 6695.894  | 8569.53   | NM_000853 | 4789.86   | 5975.639  |
| AF303888  | 13136.855 | 11275.298 | M33197    | 58511.641 | 65972.078 | NM_015675 | 5785.997  | 5843.179  |
| NM_000077 | 812.411   | 872.08    | NM_018492 | 9450.28   | 15829.275 | AK022267  | 957.599   | 1204.28   |
| NM_007084 | 811.145   | 899.397   | NM_001346 | 5296.672  | 7176.911  | NM_016040 | 4198.015  | 3920.577  |
| M97191    | 10091.31  | 10129.85  | NM_003149 | 3715.844  | 5267.089  | M33197    | 66542.797 | 68834.758 |
| AK023015  | 22483.146 | 22633.443 | NM_003377 | 18653.365 | 24452.326 | AF031136  | 64196.766 | 64662.293 |
| NM_003457 | 16357.969 | 16427.535 | NM_002220 | 10589.137 | 13759.833 | NM_015983 | 5239.184  | 3649.466  |
| NM_012391 | 1709.219  | 1768.521  | AB033034  | 7537.499  | 9895.852  | NM_018622 | 10848.252 | 9232.267  |
| NM_005254 | 5553.074  | 6572.871  | D38169    | 7077.694  | 10861.764 | M33197    | 66822.109 | 66352.734 |
| NM_005611 | 2619.146  | 2803.435  | AJ293294  | 4884.412  | 7560.723  | NM_005867 | 10533.395 | 6152.637  |
| AF141655  | 1212.812  | 1432.588  | NM_018171 | 2291.829  | 3420.015  | AK026031  | 21353.545 | 19361.773 |
| NM_007345 | 1883.166  | 2081.423  | NM_002447 | 10425.934 | 15574.484 | NM_016466 | 46209.523 | 30878.053 |
| NM_004830 | 1437.9    | 1996.695  | NM_014145 | 22010.324 | 33864.34  | NM_007342 | 8704.006  | 10283.758 |
| NM_007007 | 12861.795 | 14626.163 | NM_002223 | 4774.156  | 7941.018  | NM_005672 | 1345.968  | 1189.808  |
| NM_006386 | 887.307   | 882.321   | M33197    | 57256.473 | 66329.898 | NM_006351 | 11101.325 | 12407.617 |
| NM_006559 | 23565.471 | 28773.096 | NM_005490 | 13990.508 | 17374.285 | M33197    | 66385.195 | 68092.664 |
| NM_004501 | 35693.746 | 38056.277 | NM_003151 | 5960.156  | 6841.825  | NM_004683 | 5685.586  | 4134.513  |
| NM_004966 | 20691.791 | 23403.133 | NM_006811 | 12927.385 | 10677.067 | AK023226  | 3130.5    | 2667.283  |
| NM_006700 | 2222.65   | 2184.671  | NM_005601 | 3955.175  | 5034.395  | AK025263  | 1373.488  | 1841.619  |
| NM_006445 | 17459.672 | 16062.683 | NM_016151 | 20523.432 | 27251.539 | M33197    | 66658.234 | 70261.492 |
| NM_012109 | 6044.69   | 5177.641  | NM_004324 | 3046.027  | 5101.668  | NM_006931 | 12458.648 | 12725.998 |
| AF019633  | 3291.757  | 2524.514  | NM_005614 | 25326.896 | 37319.082 | NM_020344 | 10515.078 | 10191.294 |
| AB002361  | 1014.719  | 886.192   | AK026270  | 2594.135  | 3107.135  | AF119868  | 778.561   | 858.119   |
| NM_018060 | 8136.505  | 7767.335  | NM_004556 | 3397.479  | 4886.397  | NM_005050 | 6100.92   | 7716.332  |
| NM_014239 | 6090.454  | 5258.027  | D90075    | 1507.386  | 2594.45   | AF252284  | 4270.543  | 2946.509  |
| NM_017662 | 3725.879  | 3519.866  | M33197    | 60946.281 | 64734.723 | BU727558  | 1164.533  | 1037.86   |
| U88837    | 2077.292  | 1729.814  | NM_014857 | 800.285   | 578.632   | M33197    | 16109.777 | 11487.437 |
| NM_017446 | 27672.182 | 24268.629 | AK023827  | 3226.549  | 2803.948  | AL050139  | 17010.293 | 16960.998 |
| AK001478  | 4666.515  | 5361.161  | AK021702  | 4251.755  | 4964.466  | NM_004556 | 12793.078 | 15677.046 |
| AK025697  | 9737.332  | 8534.388  | NM_003885 | 4321.766  | 5633.84   | AL079296  | 2072.202  | 2058.217  |
| AK021734  | 640.908   | 781.419   | AL161977  | 777.478   | 776.046   | NM_014770 | 5936.491  | 5186.136  |
| AF075028  | 306.548   | 489.926   | NM_003936 | 3557.141  | 4769.163  | M33197    | 68282.664 | 63780.809 |
| D00265    | 38483.625 | 41903.582 | M33197    | 59462.633 | 67243.578 | AK023103  | 5498.916  | 4769.863  |
| NM_004552 | 50318.902 | 51745.199 | NM_002688 | 2525.156  | 3261.982  | NM_017856 | 5557.23   | 5220.217  |
| NM_000143 | 3731.927  | 3889.39   | NM_020369 | 1262.037  | 1564.38   | NM_019059 | 60681.352 | 59639.395 |
| AF317889  | 1199.575  | 723.732   | NM_004415 | 5607.836  | 5685.581  | NM_013347 | 848.268   | 1290.884  |
| AL137294  | 4506.574  | 4833.188  | NM_007278 | 28304.898 | 22673.125 | D80008    | 3992.577  | 4179.428  |
| NM_003743 | 1865.742  | 1690.091  | NM_005219 | 32557.936 | 28667.4   | X56789    | 2115.984  | 2188.096  |
| AB037797  | 1287.384  | 1033.762  | NM_004723 | 6071.2    | 4786.826  | AK001069  | 65068.5   | 65431.68  |
| NM_001520 | 3724.584  | 3229.96   | M33197    | 60153.879 | 63091.91  | NM_000935 | 895.427   | 707.777   |
| AL050367  | 905.269   | 797.061   | NM_018413 | 19273.703 | 17442.143 | NM_000359 | 15742.961 | 15779.17  |
| AL133633  | 2644.44   | 2715.908  | AB018299  | 27064.787 | 23793.982 | NM_006395 | 1485.096  | 1804.967  |
| AK026817  | 926.51    | 704.735   | NM_005245 | 11245.911 | 16290.115 | NM_014306 | 9669.532  | 11927.188 |
| AL157442  | 11050.45  | 10884.164 | M33197    | 62151.703 | 68208.391 | NM_001084 | 2364.784  | 2975.962  |
| AB011148  | 1622.4    | 1516.626  | NM_016219 | 13181.791 | 15052.757 | M33197    | 66486.461 | 75452.563 |
| AL389938  | 6154.727  | 5250.059  | NM_004751 | 1533.929  | 1027.669  | NM_014623 | 9891.563  | 5448.026  |
| NM_001949 | 42182.297 | 39834.234 | AK025605  | 2933.378  | 3361.518  | NM_007244 | 10676.094 | 7123.578  |
| NM_003507 | 1753.646  | 1652.716  | NM_003783 | 803.065   | 805.095   | M30629    | 11271.129 | 13378.704 |
| AK026591  | 1493.986  | 1594.371  | NM_007000 | 5053.209  | 3750.214  | AF193873  | 4337.482  | 3981.681  |

|           |           |           |           |           |           |           |           |           |
|-----------|-----------|-----------|-----------|-----------|-----------|-----------|-----------|-----------|
| AK001889  | 3087.486  | 2987.299  | M23161    | 8465.859  | 5198.386  | NM_00262E | 2440.025  | 2047.065  |
| AK025726  | 2578.966  | 2471.129  | NM_00610C | 561.985   | 363.829   | M23575    | 953.613   | 1052.11   |
| AJ227869  | 4233.392  | 3932.583  | NM_003197 | 7513.726  | 5851.911  | BF974315  | 6080.122  | 3039.746  |
| AK026189  | 810.711   | 626.208   | AF176705  | 7531.897  | 5046.755  | AI652705  | 5774.735  | 5696.971  |
| AK026790  | 424.196   | 503.569   | D29012    | 31262.834 | 37704.793 | AA973397  | 3295.977  | 8081.736  |
| AL117613  | 4360.423  | 5084.017  | NM_017414 | 3198.791  | 4235.122  | AA446028  | 1701.307  | 2004.217  |
| AL137753  | 5866.938  | 5738.193  | NM_012179 | 23735.67  | 25419.139 | M80583    | 1502.816  | 1558.2    |
| AK021785  | 554.598   | 617.782   | NM_002793 | 8947.479  | 9300.723  | AI570478  | 1354.88   | 1346.39   |
| AL110262  | 10614.076 | 9934.553  | NM_00478E | 3150.937  | 2922.927  | X07767    | 8409.51   | 10588.994 |
| AK025627  | 4454.668  | 4872.876  | M33197    | 59598.563 | 64817.313 | AF016903  | 47470.281 | 46880.246 |
| AF216077  | 763.275   | 694.413   | AL442083  | 4996.298  | 5640.635  | NM_01567E | 7579.25   | 5866.347  |
| AK021612  | 1388.295  | 1734.789  | D63487    | 3855.126  | 4366.31   | NM_01604C | 4219.244  | 2121.058  |
| AF088031  | 1495.684  | 1069.118  | AK097791  | 6352.187  | 6585.309  | U90878    | 1324.054  | 821.508   |
| AK002025  | 58064.223 | 53712.965 | AK022705  | 2240.098  | 2731.297  | NM_006597 | 56986.477 | 55158.074 |
| AK026299  | 2891.48   | 2719.946  | NM_016404 | 7557.87   | 7497.914  | NM_012483 | 12205.307 | 12077.691 |
| NM_017794 | 1676.047  | 1529.822  | L03426    | 4485.99   | 5091.701  | AB023420  | 13090.661 | 9110.691  |
| AK025170  | 778.178   | 667.121   | NM_020163 | 3058.156  | 5142.715  | NM_016511 | 22759.996 | 27739.734 |
| AB033031  | 1925.437  | 1808.192  | NM_00660E | 1210.85   | 522.951   | NM_00355E | 3608.4    | 4423.444  |
| AF085872  | 523.388   | 581.727   | NM_000457 | 1665.853  | 1083.16   | NM_00218E | 2281.963  | 2776.461  |
| AK022538  | 1118.347  | 1089.098  | M34356    | 2737.809  | 2166.236  | M55337    | 2108.591  | 2295.862  |
| AL049312  | 1339.98   | 1101.268  | AJ133115  | 4365.88   | 3882.34   | M33197    | 71476.063 | 63737.141 |
| AL117590  | 685.148   | 560.693   | X51630    | 7284.182  | 5827.011  | NM_01322E | 2273.288  | 2252.489  |
| AL049357  | 1169.697  | 1744.426  | NM_00505E | 2758.934  | 2742.08   | NM_016533 | 59730.648 | 60869.734 |
| AK027180  | 1825.138  | 1821.846  | NM_00196E | 877.951   | 443.03    | NM_014751 | 15963.32  | 18199.178 |
| NM_004544 | 13834.707 | 14095.258 | AF208502  | 17703.031 | 13166.244 | NM_002347 | 27411.199 | 32609.719 |
| AF086041  | 668.754   | 827.848   | M33197    | 55519.77  | 58524.336 | AB046807  | 2734.703  | 2941.847  |
| Y15167    | 1370.421  | 1978.53   | AF264750  | 22971.299 | 26052.354 | NM_01806E | 52019.406 | 53046.516 |
| AL133080  | 3099.991  | 4189.974  | NM_00698C | 1892.955  | 1362.74   | NM_006931 | 14129.258 | 10665.248 |
| NM_017792 | 5731.688  | 6112.317  | AK023904  | 4382.933  | 4459.404  | NM_020344 | 12794.434 | 7033.394  |
| AK025213  | 7559.262  | 7329.931  | NM_01795E | 5746.611  | 5706.308  | AF119868  | 561.969   | 441.959   |
| NM_01494E | 3416.667  | 3704.677  | NM_01649E | 3029.255  | 3327.331  | M33197    | 66793.57  | 67509.313 |
| AL080221  | 1366.925  | 1495.683  | NM_01430E | 4970.263  | 4477.068  | NM_01897E | 16456.023 | 16680.82  |
| AL137370  | 1086.144  | 1076.901  | M33197    | 54044.336 | 53125.098 | NM_00335E | 10662.324 | 8875.133  |
| AF009262  | 17623.309 | 15623.932 | NM_004094 | 2544.116  | 2758.053  | NM_018057 | 3965.455  | 4109.109  |
| AF009306  | 643.104   | 562.554   | NM_02023E | 2652.872  | 2326.738  | NM_01592E | 1917.338  | 2320.582  |
| AF050198  | 1675.611  | 1414.142  | AK027059  | 10260.064 | 8884.589  | NM_00366E | 2351.609  | 2696.141  |
| AK024346  | 1703.734  | 1962.024  | AF151109  | 11466.073 | 8097.468  | AF220217  | 2000.835  | 2137.776  |
| AF056422  | 544.244   | 472.119   | L34070    | 9735.026  | 12498.637 | NM_013323 | 22799.119 | 27830.018 |
| AK001919  | 921.916   | 1133.526  | AF038182  | 1405.743  | 1390.922  | NM_01742E | 6771.506  | 6973.18   |
| AK021535  | 1115.723  | 944.928   | NM_01647E | 6296.023  | 5069.719  | M33197    | 3377.842  | 3442.579  |
| AK021753  | 590.026   | 737.091   | AF086472  | 980.373   | 830.283   | NM_000853 | 4215.62   | 5528.802  |
| AK002090  | 1249.186  | 1431.13   | NM_00186E | 53235.672 | 34483.359 | NM_00084E | 1801.953  | 2415.648  |
| AK021618  | 402.9     | 558.006   | NM_006441 | 6931.306  | 5604.476  | M33197    | 66601.867 | 71205.406 |
| AK021822  | 999.258   | 1048.499  | NM_00191E | 2803.988  | 2243.544  | NM_00093E | 1060.064  | 867.073   |
| AK025246  | 2450.022  | 2440.802  | NM_01824E | 8934.911  | 11414.315 | NM_00035E | 13923.633 | 6318.924  |
| AK025847  | 487.978   | 900.952   | M33197    | 64828.34  | 63308.094 | NM_00639E | 2831.375  | 1290.93   |
| AK000944  | 540.701   | 539.839   | AF252390  | 852.026   | 777.529   | NM_01430E | 11215.794 | 11611.961 |
| NM_014174 | 29535.398 | 29767.342 | NM_012117 | 14378.589 | 13571.938 | NM_001084 | 4203.904  | 3277.243  |
| AF147337  | 2840.394  | 2640.587  | D17130    | 60359.75  | 61746.945 | NM_015983 | 6421.193  | 5694.754  |
| AK025203  | 11427.638 | 10318.723 | X76302    | 8853.471  | 9096.365  | NM_018622 | 9975.695  | 10067.607 |
| AK026981  | 1307.867  | 1274.016  | AK026276  | 960.979   | 1006.673  | M33197    | 66159.969 | 63560.02  |
| AL359558  | 166.115   | 704.532   | M33197    | 63538.676 | 64187.777 | NM_005867 | 10816.589 | 13698.859 |
| AL133656  | 904.686   | 1174.127  | X52354    | 2326.224  | 1892.765  | AK026031  | 18908.609 | 12290.547 |



|           |           |           |           |           |           |           |           |           |
|-----------|-----------|-----------|-----------|-----------|-----------|-----------|-----------|-----------|
| AL050037  | 15594.94  | 15163.552 | NM_005413 | 918.267   | 1152.265  | NM_01646E | 40668.523 | 27212.135 |
| NM_001417 | 33259.48  | 31001.766 | NM_002315 | 2789.057  | 2663.098  | NM_007342 | 3493.233  | 2933.898  |
| AK022236  | 6905.017  | 6913.342  | AK024191  | 1423.898  | 1346.989  | NM_004683 | 8729.464  | 9724.448  |
| AK000073  | 542.224   | 700.569   | D83781    | 1895.422  | 1471.82   | AK023226  | 3398.046  | 3456.303  |
| AK000618  | 743.295   | 370.036   | AL832699  | 1844.34   | 1459.387  | AK025263  | 1473.138  | 1873.687  |
| AK024773  | 585.548   | 777.838   | NM_012191 | 1012.511  | 932.17    | M33197    | 67761.883 | 63752.344 |
| AL390180  | 803.87    | 765.757   | M33197    | 62919.445 | 57340.262 | NM_001467 | 1097.752  | 1010.57   |
| X60484    | 746.187   | 726.571   | AK000757  | 5634.717  | 5070.19   | NM_00468E | 12671.528 | 8541.754  |
| AF055019  | 1866.69   | 1219.632  | AL359577  | 1497.686  | 1224.412  | AB037725  | 992.137   | 483.741   |
| NM_00352E | 10962.387 | 8388.816  | NM_018139 | 1935.404  | 1723.861  | M33197    | 59626.172 | 46772.344 |
| AK000229  | 913.495   | 755.1     | NM_014805 | 3771.29   | 2829.416  | NM_01771E | 2682.826  | 1188.226  |
| AF056432  | 5344.753  | 4768.705  | AF052120  | 2205.748  | 2827.578  | NM_00486C | 11838.298 | 14467.075 |
| AK001987  | 5996.481  | 6333.029  | NM_014871 | 2748.259  | 2426.691  | AF217190  | 14156.468 | 10513.588 |
| NM_013332 | 2628.656  | 2786.272  | AK026754  | 457.65    | 904.27    | AB028981  | 54773.398 | 57481.238 |
| X56199    | 954.173   | 908.081   | M33197    | 56876.27  | 60006.938 | NM_00680C | 10161.398 | 8670.341  |
| NM_005193 | 1778.275  | 1774.141  | AL137552  | 1676.009  | 1670.554  | NM_00247E | 1804.975  | 2829.106  |
| AL162006  | 657.845   | 963.536   | AK025794  | 4238.045  | 3570.043  | NM_00272E | 7763.161  | 8097.884  |
| NM_017971 | 3793.073  | 4419.581  | AF131835  | 847.121   | 948.493   | M33197    | 15619.008 | 11407.938 |
| AF090097  | 805.704   | 866.915   | AK024522  | 1760.603  | 1788.833  | AL050139  | 10775.392 | 8893.285  |
| AF054998  | 478.83    | 470.226   | NM_00719E | 8436.878  | 7110.929  | NM_00455E | 7865.465  | 8768.035  |
| AF116620  | 14010.847 | 18449.049 | NM_01495E | 590.174   | 698.721   | AL079296  | 2877.134  | 3093.412  |
| AF293335  | 11772.44  | 13035.272 | M33197    | 58083.621 | 63703.148 | NM_01477C | 4199.219  | 5462.911  |
| AL080065  | 924.33    | 1028.265  | AK023220  | 2044.553  | 2326.636  | AK023103  | 5846.201  | 6485.033  |
| AK024431  | 13348.433 | 14676.225 | AK024566  | 916.845   | 1522.427  | NM_01785E | 6112.842  | 6553.008  |
| AF116635  | 640.303   | 783.03    | M33197    | 60216.129 | 62683.699 | NM_01905E | 62955.582 | 62611.297 |
| X96644    | 7054.81   | 7729.922  | AK024981  | 16916.508 | 13389.503 | NM_013347 | 458.432   | 1218.063  |
| Z34281    | 13175.751 | 15027.229 | AK027246  | 1288.114  | 1267.077  | D80008    | 3350.664  | 3835.067  |
| NM_01867E | 2171.679  | 2610.779  | U80766    | 4860.004  | 3593.013  | X56789    | 1855.352  | 2383.49   |
| AJ008122  | 7293.099  | 7150.661  | AK001638  | 1452.553  | 1013.276  | AK001069  | 61363.75  | 63323.348 |
| AK022667  | 33817.047 | 41190.648 | AF161386  | 6711.539  | 4861.624  | NM_004132 | 5354.046  | 3318.172  |
| AK026667  | 725.453   | 660.322   | AL365369  | 4182.66   | 2756.741  | NM_014844 | 8809.168  | 9584.996  |
| AF113211  | 672.325   | 660.28    | AK025454  | 6531.247  | 5157.283  | M33197    | 62660.184 | 59500.43  |
| AL117568  | 4017.568  | 4302.569  | M33197    | 42938.23  | 37838.762 | NM_018492 | 11285.74  | 10340.156 |
| S71805    | 2116.783  | 2953.758  | X05826    | 7850.361  | 6067.349  | NM_00134E | 7006.481  | 6783.071  |
| NM_018391 | 2016.06   | 2343.062  | Y11608    | 771.714   | 746.78    | NM_00314E | 7652.932  | 7973.26   |
| U90917    | 751.676   | 1002.823  | AJ001872  | 3187.524  | 2688.88   | NM_003377 | 20625.305 | 19669.885 |
| AK022140  | 1913.102  | 1805.692  | M33197    | 59270.16  | 67927.406 | NM_00222C | 14943.439 | 15266.051 |
| AK023372  | 5711.35   | 6931.79   | L33811    | 543.175   | 1255.662  | AB033034  | 6559.251  | 6155.92   |
| AF086527  | 803.488   | 737.027   | L77559    | 873.005   | 785.943   | D38169    | 4393.419  | 3921.655  |
| U21072    | 1481.476  | 1344.457  | NM_00559E | 1472.056  | 1933.734  | AJ293294  | 5320.06   | 5332.707  |
| AK024377  | 962.2     | 1075.381  | Y10515    | 1090.521  | 943.733   | NM_018171 | 2817.054  | 3125.066  |
| U38438    | 392.733   | 718.259   | M87942    | 782.558   | 942.554   | NM_002447 | 14349.13  | 16840.604 |
| AK025621  | 716.235   | 565.807   | AK023636  | 12292.267 | 10308.747 | NM_01414E | 14081.427 | 16518.674 |
| AK023557  | 3454.345  | 3547.717  | D25272    | 2051.942  | 3069.399  | NM_002223 | 6666.597  | 7454.844  |
| U17625    | 780.806   | 923.591   | M33197    | 57844.25  | 65221.715 | NM_00549C | 12653.516 | 13982.35  |
| AB040887  | 5073.735  | 4472.632  | NM_02016E | 2157.703  | 2421.68   | NM_003151 | 6202.197  | 8371.132  |
| AK025196  | 929.503   | 1079.86   | AK025931  | 44791.617 | 28667.836 | NM_006811 | 14019.785 | 14402.727 |
| AJ227879  | 1199.377  | 1196.115  | M33197    | 820.99    | 823.477   | NM_005601 | 5192.73   | 5024.664  |
| AK024800  | 1000.305  | 1185.647  | AK021972  | 913.439   | 680.285   | NM_004324 | 3237.758  | 2041.773  |
| AK000401  | 3067.931  | 3056.329  | M33197    | 59083.879 | 56097.129 | NM_005614 | 27962.803 | 15332.59  |
| D17231    | 54854.867 | 52713.676 | AK001083  | 1864.42   | 2062.399  | AK026270  | 2796.556  | 4043.907  |
| AF531295  | 1031.336  | 1249.025  | AK000185  | 1971.4    | 1754.208  | NM_00455E | 4846.587  | 3939.412  |
| CY3Cy5    | 7095.999  | 363.867   | NM_017962 | 1125.775  | 908.551   | NM_014857 | 1292.501  | 1183.01   |

|           |           |           |            |           |           |           |           |           |
|-----------|-----------|-----------|------------|-----------|-----------|-----------|-----------|-----------|
| BF974315  | 12129.387 | 11159.306 | AK000865   | 1014.275  | 1060.495  | AK023827  | 4801.393  | 4119.914  |
| T74985    | 934.644   | 817.946   | M33197     | 64074.27  | 64782.594 | AK021702  | 5649.555  | 3876.481  |
| AI652705  | 2463.165  | 1760.616  | AK024779   | 1156.576  | 1295.163  | NM_003885 | 2705.135  | 2329.337  |
| AA446028  | 1028.674  | 508.484   | AK024406   | 1845.581  | 3000.525  | NM_003936 | 2869.382  | 3194.354  |
| AW009565  | 6434.728  | 4825.955  | AK024568   | 6052.248  | 7033.295  | M33197    | 61451.254 | 62597.875 |
| AI570478  | 3646.746  | 2749.342  | AK024994   | 965.574   | 1488.704  | NM_002688 | 2410.413  | 3129.546  |
| X07767    | 10075.27  | 7360.333  | NM_018381  | 748.557   | 643.795   | NM_020365 | 1119.313  | 1376.127  |
| SR5       | 8185.902  | 7277.643  | M33197     | 60981.418 | 52801.918 | NM_004415 | 7812.879  | 11319.403 |
| SR7       | 8331.478  | 44939.867 | AK026277   | 13076.037 | 9906.664  | NM_007278 | 36142.086 | 37784.469 |
| SR9       | 23770.402 | 3505.093  | U10509     | 1748.963  | 1323.767  | NM_004723 | 7932.403  | 8133.412  |
| CY3Cy5    | 6885.543  | 306.343   | NM_007165  | 28590.639 | 24009.629 | M33197    | 50136.5   | 51520.426 |
| NM_016511 | 1579.06   | 1600.856  | NM_014018  | 5643.803  | 3947.23   | NM_018413 | 32469.625 | 34841.098 |
| NM_003559 | 2204.307  | 1961.834  | AF085956   | 5238.834  | 4418.748  | M33197    | 66609.086 | 63666.723 |
| NM_002185 | 1090.137  | 804.815   | NM_019116  | 1751.062  | 1139.527  | NM_016219 | 22188.793 | 11356.808 |
| NM_013229 | 1624.657  | 1525.697  | AF147318   | 1579.741  | 1818.133  | NM_004751 | 4048.588  | 1971.888  |
| NM_016533 | 22053.793 | 22377.578 | unknown (S | 967.947   | 754.942   | AK025605  | 8260.987  | 10265.342 |
| NM_014751 | 940.074   | 928.506   | M33197     | 59104.039 | 59961.828 | NM_003783 | 1467.805  | 1522.958  |
| NM_002347 | 12960.763 | 12349.06  | AL137556   | 2051.45   | 2929.218  | NM_007000 | 11625.547 | 11724.401 |
| AB046807  | 2488.007  | 1855.477  | NM_014696  | 4609.758  | 5383.628  | NM_006100 | 1280.38   | 1754.218  |
| NM_007244 | 2581.548  | 1987.891  | AL359055   | 2274.19   | 2805.734  | NM_003197 | 9349.004  | 5818.083  |
| M30629    | 5346.015  | 4520.155  | NM_014908  | 4234.913  | 4264.296  | AF176705  | 5563.209  | 5595.626  |
| BE539299  | 925.976   | 590.141   | AF086125   | 1231.412  | 733.094   | D29012    | 31338.412 | 27615.701 |
| M23575    | 764.105   | 411.01    | AK023547   | 538.948   | 445.709   | NM_017414 | 5317.707  | 5253.84   |
| AA190729  | 4873.154  | 3422.776  | U67847     | 2203.929  | 1645.715  | NM_002793 | 13226.231 | 16655.871 |
| M33197    | 67145.406 | 73564.383 | AL137321   | 5300.125  | 3271.357  | NM_004788 | 4382.465  | 5948.014  |
| NM_015717 | 961.08    | 1019.317  | M33197     | 58022.203 | 52921.352 | AL442083  | 5831.518  | 7639.672  |
| NM_003665 | 583.584   | 532.63    | AK024207   | 4446.564  | 3344.794  | D63487    | 6188.508  | 5992.245  |
| AF220217  | 1622.292  | 907.146   | AK021843   | 1133.879  | 759.584   | AK097791  | 8916.399  | 9763.176  |
| NM_013323 | 5530.12   | 4682.694  | AF075025   | 2177.597  | 1692.49   | NM_020367 | 773.424   | 1225.739  |
| NM_014937 | 601.419   | 825.862   | AF088008   | 1848.808  | 1458.322  | AK022705  | 3889.802  | 4610.233  |
| M33197    | 4490.333  | 3686.851  | AK023528   | 1782.142  | 2380.527  | NM_016404 | 5207.222  | 6077.139  |
| NM_000853 | 2371.418  | 3001.133  | AK023043   | 2572.314  | 4358.686  | L03426    | 6721.183  | 7831.295  |
| AF016903  | 4540.024  | 5513.743  | M33197     | 57925.742 | 62108.039 | NM_006608 | 2504.917  | 1744.762  |
| NM_015675 | 2025.27   | 1561.623  | AF147349   | 11592.026 | 10768.221 | NM_000457 | 2671.619  | 1306.022  |
| AK022267  | 863.261   | 793.321   | AL050346   | 17099.102 | 22779.432 | M34356    | 5536.695  | 4795.433  |
| M33197    | 67073.18  | 73747.578 | AK001520   | 6105.513  | 5836.48   | AJ133115  | 7594.393  | 6962.352  |
| AF031136  | 4084.813  | 3450.83   | AK021731   | 668.42    | 710.105   | X51630    | 12687.26  | 14199.142 |
| U90878    | 2144.431  | 1417.32   | D90070     | 7536.704  | 8669.456  | NM_005056 | 6339.399  | 7881.96   |
| NM_006597 | 66398.273 | 64863.32  | AF132601   | 1126.382  | 1125.057  | AF208502  | 19336.545 | 9662.016  |
| NM_012483 | 1642.666  | 1763.071  | M33197     | 59071.992 | 55412.445 | M33197    | 63710.926 | 63245.992 |
| NM_003498 | 5070.718  | 5348.056  | AF086179   | 1016.003  | 1247.692  | AF264750  | 25925.297 | 21958.721 |
| AB023420  | 17165     | 16931.582 | AK025807   | 4034.708  | 4509.198  | NM_006980 | 3029.316  | 3158.359  |
| NM_007342 | 8409.017  | 9836.392  | AK022478   | 1317.621  | 1874.476  | NM_017956 | 12767.785 | 17694.381 |
| NM_005672 | 1302.684  | 1490.001  | M33197     | 61061.859 | 62247.641 | NM_017826 | 1163.346  | 1891.782  |
| D25217    | 2890.193  | 3826.122  | AK025266   | 3698.902  | 2894.462  | NM_014309 | 3426.365  | 3764.964  |
| NM_006351 | 10640.767 | 10640.799 | AK001843   | 3925.349  | 2818.753  | M33197    | 36481.348 | 36031.031 |
| M33197    | 67261.578 | 68915.117 | AK000548   | 43162.98  | 27175.523 | NM_004094 | 3509.409  | 4236.082  |
| AK023226  | 2886.091  | 2990.566  | NM_003920  | 17522.467 | 11235.982 | NM_020236 | 4733.516  | 5053.107  |
| AK025263  | 1132.94   | 919.896   | NM_004787  | 10254.771 | 6533.914  | AK027059  | 9904.83   | 11195.107 |
| M33197    | 67354.961 | 65576.695 | AF087984   | 5426.814  | 3723.479  | AF151109  | 14864.514 | 17607.135 |
| NM_001467 | 928.532   | 1004.382  | AF009302   | 1488.124  | 1206.042  | NM_015414 | 66442.211 | 75599.633 |
| NM_018066 | 6948.608  | 7200.994  | M33197     | 57085.406 | 59683.453 | L34070    | 4199.707  | 3876.945  |
| NM_006931 | 9613.251  | 8374.244  | AK022273   | 5352.607  | 8033.393  | AF038182  | 2560.812  | 1504.977  |

|           |           |           |           |           |           |           |           |           |
|-----------|-----------|-----------|-----------|-----------|-----------|-----------|-----------|-----------|
| NM_020344 | 3418.55   | 3233.847  | NM_015882 | 1400.873  | 1570.008  | NM_016475 | 10427.884 | 4960.226  |
| AF119868  | 1465.361  | 1443.493  | AK027161  | 771.975   | 1446.112  | AF086472  | 2754.416  | 2143.237  |
| NM_005050 | 8279.517  | 9849.596  | AK024271  | 2048.452  | 3218.692  | NM_001865 | 65588.297 | 62189.508 |
| NM_018976 | 15396.251 | 15684.994 | AK021650  | 8197.462  | 11824.073 | NM_006441 | 14140.634 | 8871.719  |
| NM_003355 | 14393.933 | 12239.353 | AL050210  | 3743.809  | 6179.593  | NM_001915 | 2569.429  | 1997.78   |
| NM_005074 | 1310.701  | 1104.031  | L37699    | 1608.271  | 2358.884  | NM_018245 | 9878.523  | 12001.571 |
| NM_004555 | 2667.965  | 2907.979  | M33197    | 60366.898 | 58802.598 | M33197    | 66671.625 | 70352.477 |
| AL079296  | 1001.726  | 1091.368  | AL050173  | 2288.2    | 2577.537  | AF252390  | 1917.709  | 1772.67   |
| NM_014770 | 2358.487  | 1820.214  | D80002    | 2230.298  | 2544.669  | NM_012117 | 26928.992 | 23638.488 |
| M33197    | 67088.578 | 68369.992 | U17637    | 3127.151  | 3663.588  | X52354    | 2886.918  | 3112.848  |
| AK023103  | 5277.169  | 5146.367  | AF207831  | 780.011   | 1129.854  | NM_005413 | 1728.227  | 1995.139  |
| NM_017855 | 5169.933  | 5137.009  | AF131853  | 915.27    | 680.859   | NM_002315 | 3141.435  | 3674.433  |
| NM_019055 | 52301.57  | 61720.273 | M33197    | 44167.016 | 50657.129 | AK024191  | 1504.287  | 1615.913  |
| NM_013347 | 981.579   | 1055.622  | NM_018272 | 4033.659  | 5200.287  | D83781    | 3466.468  | 1632.528  |
| D80008    | 4274.333  | 4586.645  | CY3Cy5    | 1664.586  | 166.39    | AL832699  | 4259.467  | 3670.516  |
| X56789    | 1393.828  | 1231.229  | R19938    | 8354.618  | 7224.275  | NM_012191 | 2465.061  | 1853.068  |
| AK001069  | 8851.273  | 8506.475  | N94487    | 7027.299  | 6198.693  | AK000757  | 13610.072 | 12804.929 |
| NM_000355 | 2439.146  | 1864.389  | AI886795  | 6960.175  | 6323.931  | AL359577  | 3084.543  | 2054.674  |
| NM_006395 | 1338.29   | 701.922   | D10495    | 1237.693  | 1171.873  | NM_018135 | 2526.589  | 1819.101  |
| NM_014305 | 13120.359 | 14432.787 | BF344679  | 1667.296  | 1841.103  | NM_014805 | 6283.603  | 6648.024  |
| NM_001084 | 4800.533  | 5501.095  | M36634    | 928.847   | 937.261   | AF052120  | 3585.595  | 3223.925  |
| NM_018622 | 10327.111 | 9589.32   | M14156    | 5206.156  | 5017.073  | NM_014871 | 3189.849  | 3952.507  |
| M33197    | 67413.242 | 63670.992 | U87939    | 987.787   | 878.704   | AK026754  | 1284.187  | 1447.039  |
| NM_005867 | 14508.907 | 12790.218 | U86961    | 1363.074  | 1278.131  | M33197    | 65491.172 | 64384.68  |
| AK026031  | 11660.407 | 10065.719 | NM_005191 | 875.863   | 523.324   | AK025794  | 6412.201  | 9042.952  |
| NM_016465 | 35757.809 | 29803.061 | AK094237  | 3310.806  | 3195.593  | NM_003541 | 3817.359  | 4802.27   |
| BE539299  | 955.411   | 829.613   | L07592    | 953.018   | 812.287   | AK024522  | 4280.091  | 5613.88   |
| AF193873  | 790.636   | 1094.589  | NM_006981 | 1288.419  | 1275.688  | NM_014955 | 593.419   | 1082.942  |
| NM_002625 | 1049.059  | 1154.678  | SR2       | 53848.215 | 49941.703 | M33197    | 64524.191 | 64773.074 |
| M23575    | 767.746   | 670.343   | SR4       | 18564.287 | 17914.551 | AK023220  | 2596.857  | 3185.371  |
| AA190729  | 4885.622  | 4122.205  | SR6       | 3135.441  | 2999.47   | AK024566  | 484.397   | 1005.506  |
| BF974315  | 11636.476 | 8604.854  | SR8       | 7913.47   | 22320.49  | M33197    | 71032.695 | 63724.547 |
| T74985    | 1128.301  | 1367.797  | SR10      | 28198.783 | 8889.092  | AK024981  | 42953.633 | 31292.512 |
| AI652705  | 3089.871  | 3244.837  | CY3Cy5    | 2412.196  | 216.915   | AK027246  | 3772.326  | 3970.549  |
| AA446028  | 995.689   | 931.341   | M33197    | 60320.223 | 61832.633 | U80766    | 12507.215 | 11946.203 |
| M80583    | 1271.015  | 822.5     | NM_007365 | 2061.707  | 1561.005  | AK001638  | 2499.314  | 2714.016  |
| AI570478  | 2967.564  | 2123.89   | NM_014776 | 2394.464  | 1978.473  | AF161386  | 17625.561 | 18036.34  |
| X07767    | 8811.29   | 6554.465  | NM_006480 | 24605.715 | 20856.553 | AK025454  | 10007.511 | 8936.041  |
| AF252284  | 2619.295  | 2157.453  | NM_007223 | 50479.172 | 42043.211 | M33197    | 66712.047 | 69075.602 |
| M33197    | 15214.073 | 11904.563 | NM_000145 | 998.433   | 1217.863  | X05826    | 11606.087 | 7859.562  |
| AL050139  | 9180.099  | 7640.429  | AF030107  | 1717.631  | 2506.486  | Y11608    | 2013.346  | 2509.52   |
| U90878    | 2456.086  | 2267.946  | NM_000871 | 887.014   | 1050.911  | AJ001872  | 6736.83   | 7248.657  |
| NM_006597 | 55118.867 | 58218.438 | M33197    | 60378.797 | 60230.313 | AJ227882  | 1089.736  | 1103.389  |
| NM_012483 | 2002.758  | 2200.486  | NM_018965 | 1158.061  | 1257.301  | L33811    | 2095.97   | 3275.32   |
| NM_003495 | 4410.083  | 4701.822  | AF086924  | 59122.273 | 51789.957 | NM_005595 | 3427.397  | 3813.836  |
| AB023420  | 15760.063 | 15293.851 | NM_000264 | 942.631   | 832.142   | Y10515    | 3872.804  | 3957.837  |
| NM_016511 | 1949.005  | 2804.068  | AB058740  | 10189.107 | 7520.087  | AK023636  | 12766.063 | 13522.378 |
| NM_003555 | 2826.86   | 3723.328  | NM_001885 | 990.187   | 1042.964  | D25272    | 2778.359  | 3377.305  |
| NM_002185 | 1206.593  | 812.098   | M33197    | 61368.082 | 63654.746 | M33197    | 66692.32  | 68822.656 |
| M33197    | 66594.156 | 66027.359 | NM_001154 | 13976.397 | 15855.75  | NM_020165 | 2531.14   | 2983.471  |
| NM_013225 | 1811.369  | 1564.947  | NM_001815 | 1031.174  | 851.725   | AK025931  | 65162.895 | 61885.949 |
| NM_016533 | 20946.574 | 17314.621 | NM_016935 | 563.368   | 631.713   | M33197    | 2001.339  | 1503.968  |
| NM_014751 | 801.084   | 535.178   | NM_001993 | 815.293   | 647.296   | AK021972  | 1961.4    | 1594.762  |

|           |           |           |           |           |           |            |           |           |
|-----------|-----------|-----------|-----------|-----------|-----------|------------|-----------|-----------|
| NM_002347 | 12259.726 | 9791.652  | NM_000175 | 9482.234  | 10994.51  | M33197     | 66506.18  | 68552.117 |
| AB046807  | 2374.494  | 1680.294  | NM_015725 | 12093.636 | 13185.131 | AK001083   | 3316.447  | 2934.49   |
| M33197    | 67188.102 | 69896.852 | R61452    | 1480.503  | 1751.044  | AK000185   | 3623.162  | 3462.815  |
| NM_014623 | 10306.657 | 10444.847 | NM_012455 | 5502.294  | 5285.161  | NM_017962  | 2356.779  | 3014.064  |
| NM_007244 | 2258.615  | 2087.396  | NM_002806 | 8890.664  | 8606.538  | AK027227   | 1123.387  | 1424.346  |
| M30629    | 4110.154  | 4041.491  | M33197    | 62427.496 | 62035.324 | AK024558   | 1306.866  | 2137.992  |
| NM_018976 | 16498.199 | 18435.154 | NM_001716 | 1721.207  | 2480.709  | AK024779   | 2250.054  | 2583.947  |
| NM_003355 | 13865.629 | 12754.288 | NM_002030 | 560.36    | 362.599   | AK024406   | 2982.591  | 3043.92   |
| NM_005074 | 950.759   | 1223.956  | NM_006564 | 5016.749  | 5648.557  | AK024568   | 17489.725 | 20850.355 |
| NM_013272 | 893.03    | 810.507   | NM_004802 | 2208.959  | 2348.002  | M33197     | 69275.445 | 63893.887 |
| M33197    | 67419.602 | 66867.031 | M33197    | 58837.449 | 64713.258 | AK026277   | 29263.988 | 26026.889 |
| NM_015717 | 1035.443  | 1042.672  | NM_002983 | 926.331   | 1034.641  | U10509     | 5791.12   | 4770.98   |
| NM_015925 | 733.186   | 753.008   | NM_000074 | 7646.187  | 6419.739  | NM_007165  | 52707.777 | 49654.352 |
| NM_003665 | 747.103   | 619.843   | BF434335  | 25199.459 | 21592.945 | NM_014018  | 10299.475 | 7343.835  |
| AF220217  | 1497.339  | 1455.985  | M57627    | 632.887   | 878.941   | AF085956   | 6326.758  | 7519.618  |
| NM_013323 | 6208.357  | 6966.36   | NM_002993 | 1930.907  | 2137.347  | NM_019116  | 3960.156  | 4404.846  |
| NM_014937 | 1047.352  | 1204.109  | AK026946  | 1779.219  | 2061.201  | AF147318   | 3215.215  | 4124.615  |
| NM_017426 | 9557.912  | 8250.32   | M33197    | 57938.582 | 62738.93  | unknown (S | 1365.9    | 1389.099  |
| M33197    | 2981.442  | 2302.966  | NM_003192 | 4362.293  | 4372.884  | M33197     | 61684.785 | 64082.797 |
| NM_000853 | 2649.373  | 2438.994  | NM_018449 | 5075.759  | 4897.779  | AL137556   | 3677.636  | 3404.863  |
| AF016903  | 3981.141  | 4403.636  | AF086129  | 1334.81   | 1358.557  | NM_014696  | 10137.56  | 12476.384 |
| NM_015675 | 2148.679  | 2065.029  | NM_014458 | 4809.502  | 4751.766  | AL359055   | 3257.036  | 3513.876  |
| AK022267  | 1155.297  | 1014.007  | AF235049  | 3284.507  | 4640.815  | NM_014908  | 5692.604  | 6906.494  |
| NM_016040 | 6635.803  | 6062.019  | NM_001995 | 2100.536  | 2081.845  | AF086125   | 3728.058  | 1667.96   |
| AF031136  | 3354.793  | 3234.226  | NM_000183 | 8452.194  | 7155.802  | AL079279   | 997.933   | 1020.288  |
| NM_018622 | 10874.255 | 11411.359 | AY004175  | 2943.463  | 2623.057  | AK023547   | 1280.457  | 1124.098  |
| M33197    | 67288.453 | 70585.281 | M33197    | 61856.281 | 63414.051 | U67847     | 5716.412  | 5871.283  |
| NM_005867 | 16282.473 | 15957.626 | NM_012327 | 2364.249  | 2809.337  | AL137321   | 10606.381 | 12694.813 |
| AK026031  | 11871.287 | 11458.905 | NM_000904 | 4935.235  | 5801.511  | M33197     | 63032.211 | 61695.215 |
| NM_016468 | 33084.203 | 30595.748 | NM_016048 | 5953.577  | 6788.652  | AK024207   | 7004.15   | 5308.03   |
| NM_007342 | 6641.869  | 6463.547  | NM_000375 | 7936.426  | 7294.681  | AK021843   | 2482.521  | 2492.126  |
| NM_005672 | 1152.816  | 946.045   | NM_018849 | 6849.259  | 7821.13   | AF075025   | 4411.153  | 4381.26   |
| D25217    | 2763.915  | 3286.537  | AJ000096  | 727.108   | 697.341   | AF116623   | 1359.086  | 1730.889  |
| NM_006351 | 9992.23   | 9448.736  | M33197    | 58459.895 | 59027.852 | AF088008   | 4372.771  | 5453.655  |
| M33197    | 62923.637 | 61229.621 | AF279890  | 1566.468  | 1393.006  | AK023528   | 1240.444  | 1619.52   |
| AK023226  | 2767.796  | 2284.585  | NM_002236 | 2120.879  | 2189.585  | AK023043   | 2561.834  | 2074.256  |
| AK025263  | 1056.161  | 1064.194  | NM_012069 | 3266.305  | 4694.098  | M33197     | 64926.77  | 62458.41  |
| M33197    | 66911.578 | 62984.023 | NM_016601 | 854.757   | 1102.342  | AF147349   | 14947.77  | 15575.094 |
| NM_001467 | 679.076   | 574.694   | NM_017905 | 10099.381 | 10978.097 | AK001520   | 12637.729 | 12944.852 |
| NM_018066 | 6620.176  | 6297.441  | NM_006815 | 28978.498 | 25599.137 | AK021731   | 2040.55   | 2645.459  |
| NM_006931 | 9608.444  | 9087.015  | NM_001663 | 5145.763  | 5581.41   | D90070     | 15103.915 | 15241.39  |
| NM_020344 | 3637.534  | 3855.277  | NM_004218 | 14138.872 | 13057.112 | Y12235     | 1805.686  | 2463.131  |
| AF119868  | 1086.604  | 1074.967  | NM_016530 | 9626.266  | 10394.443 | AF132601   | 1009.254  | 679.346   |
| AF252284  | 3154.624  | 3346.892  | NM_014804 | 1634.456  | 2010.812  | M33197     | 62237.23  | 58222.488 |
| M33197    | 17302.73  | 15279.901 | L40520    | 4205.669  | 3256.919  | AF086179   | 2230.474  | 2012.852  |
| AL050139  | 7774.138  | 7943.124  | NM_002633 | 13743.335 | 13531.57  | AK025807   | 4779.92   | 6267.801  |
| NM_004558 | 2124.385  | 2443.151  | NM_002878 | 7176.708  | 8796.538  | M33197     | 66162.297 | 62495.566 |
| AL079296  | 887.624   | 990.885   | NM_002412 | 643.758   | 779.028   | AK025266   | 8321.737  | 10635.01  |
| NM_014770 | 2107.647  | 2021.544  | NM_017723 | 2306.261  | 1494.802  | AK001843   | 6213.221  | 4965.605  |
| M33197    | 66926.719 | 67064.602 | AK022922  | 1857.661  | 1740.646  | AK000548   | 58408.984 | 57731.91  |
| AK023103  | 5680.241  | 5968.438  | NM_006462 | 5514.619  | 3861.285  | NM_003920  | 40931.895 | 48774.023 |
| NM_017858 | 4788.876  | 5183.092  | AK024750  | 4160.849  | 3331.622  | NM_004787  | 44787.637 | 47179.914 |
| NM_019058 | 54735     | 48506.918 | NM_000400 | 18072.998 | 12743.357 | AF087984   | 12433.442 | 12015.771 |

|           |           |           |           |           |           |           |           |           |
|-----------|-----------|-----------|-----------|-----------|-----------|-----------|-----------|-----------|
| NM_013347 | 1242.017  | 921.415   | M33197    | 56714.336 | 57238.969 | AF009302  | 2623.929  | 1908.276  |
| D80008    | 4616.087  | 3466.664  | NM_002613 | 4135.375  | 4271.091  | M33197    | 63930.602 | 60758.457 |
| X56789    | 1695.762  | 1282.18   | NM_004419 | 5586.549  | 6367.787  | AK022273  | 11905.872 | 11877.843 |
| AK001069  | 10110.778 | 9170.459  | NM_018650 | 1633.553  | 1992.85   | NM_015882 | 2805.931  | 2869.908  |
| NM_000935 | 1344.403  | 1806.437  | AK026945  | 18812.619 | 20325.209 | AK027161  | 1474.307  | 1404.955  |
| NM_000359 | 3571.661  | 4249.713  | NM_014369 | 1420.337  | 1189.341  | AK024271  | 2999.438  | 2546.319  |
| NM_006395 | 1274.479  | 1173.022  | M33197    | 58363.305 | 61374.074 | AK021650  | 13139.283 | 12957.969 |
| NM_014306 | 10689.87  | 11484.308 | NM_001398 | 27091.785 | 24158.664 | AL050210  | 5278.337  | 5697.645  |
| NM_001084 | 4080.212  | 3734.281  | AB050049  | 4850.195  | 5409.774  | AL050173  | 3750.355  | 3818.578  |
| M33197    | 67114.789 | 75898.953 | J05125    | 800.72    | 930.711   | D80002    | 3110.272  | 3473.708  |
| NM_014623 | 10466.574 | 11026.621 | NM_001993 | 886.374   | 679.757   | U17637    | 10360.455 | 12476.669 |
| NM_007244 | 2145.091  | 2323.73   | BF575833  | 1184.162  | 1488.814  | AF207831  | 1786.979  | 1619.918  |
| M30629    | 4570.086  | 5332.126  | NM_000175 | 8507.335  | 8034.363  | AK023174  | 1145.597  | 1060.847  |
| BE539299  | 778.231   | 826.06    | NM_015725 | 11475.647 | 12377.257 | NM_003548 | 1441.922  | 1560.954  |
| AF193873  | 807.252   | 999.967   | R61452    | 1310.517  | 1285.533  | M33197    | 62741.773 | 64086.766 |
| NM_002628 | 859.542   | 1257.991  | R19938    | 9127.701  | 9601.202  | NM_018272 | 8553.659  | 8877.737  |
| M23575    | 676.616   | 779.088   | AI886795  | 7557.321  | 7894.351  | CY3Cy5    | 7770.992  | 216.988   |
| AA190729  | 5116.647  | 4737.413  | D10495    | 1103.356  | 1175.187  | R19938    | 12440.916 | 8576.715  |
| BF974315  | 10987.427 | 9976.061  | BF344679  | 1835.382  | 1877.946  | N94487    | 10788.085 | 8687.143  |
| AI652705  | 2658.208  | 2521.911  | M36634    | 875.982   | 1012.07   | AI886795  | 7875.687  | 6431.532  |
| AA446028  | 1086.414  | 982.544   | M14156    | 4182.465  | 4020.809  | D10495    | 1347.054  | 1277.153  |
| M80583    | 1215.233  | 719.576   | U87939    | 850.378   | 801.676   | BF344679  | 2248.736  | 1696.161  |
| AW451878  | 3015.936  | 2488.344  | U86961    | 1693.657  | 1300.548  | M36634    | 1735.765  | 1353.958  |
| AI570478  | 3572.508  | 3289.619  | AK094237  | 3811.575  | 3867.599  | M14156    | 9201.909  | 7847.017  |
| X07767    | 10322.405 | 9817.766  | L07592    | 839.551   | 904.035   | U87939    | 1057.218  | 1152.916  |
| AF016903  | 3671.975  | 3731.517  | NM_006981 | 1360.127  | 1426.158  | U86961    | 1549.165  | 1267.646  |
| NM_015675 | 1945.142  | 1935.885  | M33197    | 66217.398 | 61942.445 | AK094237  | 2372.12   | 2111.908  |
| AK022267  | 736.143   | 1008.692  | AK027244  | 1391.54   | 1253.898  | L07592    | 497.217   | 689.258   |
| NM_016040 | 4871.319  | 5024.388  | NM_018449 | 3507.144  | 3099.036  | NM_006981 | 1432.141  | 934.556   |
| AF031136  | 3215.44   | 3681.335  | AF086129  | 1254.082  | 1141.991  | SR2       | 50949.793 | 55409.984 |
| U90878    | 2366.13   | 1852.697  | NM_014458 | 4154.064  | 4013.267  | SR4       | 14375.805 | 12265.683 |
| NM_006597 | 53175.824 | 60366.215 | AF235049  | 2815.432  | 3057.554  | SR6       | 2386.29   | 1469.54   |
| NM_012483 | 1775.516  | 2444.719  | M33197    | 60076.105 | 60043.836 | SR8       | 8338.272  | 20882.496 |
| NM_003498 | 4714.811  | 4852.195  | NM_007369 | 2493.412  | 2701.689  | SR10      | 34214.387 | 9144.055  |
| NM_016511 | 2921.495  | 2768.509  | NM_014776 | 2671.661  | 2965.732  | CY3Cy5    | 7234.775  | 207.34    |
| NM_003559 | 3500.502  | 3386.079  | NM_006480 | 27786.824 | 29024.219 | M33197    | 63659.504 | 63332.832 |
| NM_002185 | 1282.787  | 1108.615  | NM_007223 | 57846.52  | 59770.566 | NM_007369 | 2720.776  | 2031.812  |
| M55337    | 761.622   | 706.001   | NM_000145 | 1260.157  | 1837.363  | NM_014776 | 4862.92   | 3655.719  |
| M33197    | 67284.438 | 66309.57  | AF030107  | 1514.417  | 2015.347  | NM_006480 | 59591.371 | 55056.777 |
| NM_013229 | 1815.892  | 1959.242  | NM_000871 | 935.428   | 1011.563  | NM_007223 | 60482.457 | 58169.293 |
| NM_016533 | 28871.4   | 34289.41  | M33197    | 59982.215 | 57710.918 | NM_000145 | 1343.667  | 1217.113  |
| NM_014751 | 974.65    | 1282.836  | NM_018968 | 2024.793  | 2131.467  | AF030107  | 2268.596  | 1826.413  |
| NM_002347 | 13096.724 | 13101.359 | AF086924  | 60750.813 | 53318.93  | NM_000871 | 1131.797  | 916.43    |
| AB046807  | 3512.991  | 2787.509  | NM_000264 | 932.011   | 1073.121  | M33197    | 63201.57  | 61032.453 |
| NM_018066 | 5660.792  | 5504.896  | AB058740  | 11131.75  | 11822.737 | NM_018968 | 1380.993  | 1095.095  |
| NM_006931 | 9122.567  | 8463.371  | NM_003385 | 476.757   | 528.055   | AF086924  | 55643.465 | 54618.145 |
| NM_020344 | 4271.075  | 5046.316  | NM_001888 | 1022.658  | 1131.21   | NM_000264 | 1162.639  | 1017.941  |
| AF119868  | 1256.124  | 1489.791  | M33197    | 60231.648 | 59548.719 | AB058740  | 10416.244 | 8339.967  |
| M33197    | 63030.688 | 64131.543 | NM_001154 | 12998.979 | 9955.41   | NM_003385 | 584.851   | 748.774   |
| NM_019844 | 597.361   | 736.505   | NM_001819 | 1427.642  | 1102.51   | NM_001888 | 1408.318  | 890.047   |
| NM_018976 | 17392.879 | 22343.186 | NM_016938 | 478.212   | 424.775   | M33197    | 56231.785 | 58864.855 |
| NM_003355 | 15115.966 | 15963.886 | M33197    | 58898.727 | 56922.703 | NM_001154 | 13317.681 | 10794.584 |
| NM_005074 | 856.001   | 1080.337  | NM_006815 | 23268.521 | 19476.322 | NM_001819 | 1396.074  | 1491.75   |

|           |           |           |           |           |           |           |           |           |
|-----------|-----------|-----------|-----------|-----------|-----------|-----------|-----------|-----------|
| NM_013272 | 608.688   | 914.99    | NM_001663 | 4041.042  | 3994.598  | NM_001993 | 1534.806  | 1333.029  |
| M33197    | 67281.398 | 65470.504 | NM_004218 | 11790.128 | 11733.938 | BF575833  | 1544.173  | 884.242   |
| NM_015717 | 1665.327  | 1815.269  | NM_016530 | 8603.827  | 8247.171  | NM_015725 | 11326.451 | 9199.106  |
| NM_015925 | 1080.624  | 1299.768  | NM_014804 | 1652.761  | 1477.368  | R61452    | 2367.908  | 1657.688  |
| NM_003665 | 1185.188  | 708.635   | NM_012455 | 5514.97   | 5029.224  | NM_012455 | 8631.149  | 7428.419  |
| AF220217  | 1858.438  | 1392.192  | NM_002806 | 8407.952  | 7194.332  | NM_002806 | 14905.991 | 10972.702 |
| NM_013323 | 7186.343  | 6604.604  | M33197    | 61438.969 | 64106.426 | M33197    | 61646.664 | 59137.027 |
| NM_014937 | 1285.965  | 1877.209  | NM_001716 | 1530.763  | 2462.64   | NM_001716 | 1485.321  | 1217.599  |
| NM_017426 | 9020.072  | 10464.113 | NM_002030 | 554.305   | 666.75    | NM_002030 | 1122.566  | 812.495   |
| M33197    | 4144.441  | 3587.49   | NM_006073 | 445.825   | 606.623   | NM_006073 | 801.188   | 728.365   |
| NM_000853 | 2448.855  | 2616.224  | NM_004802 | 2551.712  | 2407.265  | NM_006564 | 8333.13   | 8684.751  |
| NM_000846 | 1538.18   | 957.291   | M33197    | 61192.027 | 61663.859 | NM_004802 | 2703.505  | 2098.937  |
| NM_000359 | 2925.614  | 3623.796  | NM_000074 | 6783.968  | 6953.214  | M33197    | 62969.727 | 61572.66  |
| NM_006395 | 1542.579  | 1548.63   | BF434335  | 17144.08  | 12735.85  | NM_000074 | 10670.023 | 7944.042  |
| NM_014306 | 12003.961 | 12931.197 | M57627    | 1386.226  | 1708.751  | BF434335  | 31382.949 | 24991.168 |
| NM_001084 | 4067.308  | 4933.045  | NM_002993 | 1239.934  | 845.824   | M57627    | 1269.893  | 1431.104  |
| NM_015983 | 2855.176  | 3138.051  | AK026946  | 1661.121  | 1108.838  | NM_002993 | 1552.911  | 1360.553  |
| NM_018622 | 10961.996 | 13984.483 | M33197    | 59813.266 | 55665.984 | AK026946  | 1380.893  | 1198.147  |
| M33197    | 67336.703 | 69538.281 | NM_003192 | 4295.854  | 3059.771  | M33197    | 60907.258 | 58211.355 |
| NM_005867 | 16743.469 | 20051.568 | NM_002828 | 6101.464  | 5767.433  | NM_003192 | 4896.669  | 4191.59   |
| AK026031  | 13459.001 | 14420.677 | NM_014369 | 1255.83   | 1381.473  | NM_018446 | 5794.265  | 4497.398  |
| NM_016466 | 36075.719 | 37740.465 | M33197    | 57922.906 | 58005.363 | AF086129  | 2909.779  | 1713.701  |
| NM_007342 | 7656.386  | 8535.267  | NM_001398 | 23034.986 | 21980.064 | AF235049  | 4946.5    | 3878.997  |
| NM_005672 | 1296.996  | 1762.071  | AB050049  | 4847.211  | 5429.497  | NM_005164 | 877.305   | 598.915   |
| D25217    | 3559.47   | 3661.951  | J05125    | 705.387   | 848.434   | NM_001995 | 2561.273  | 2692.086  |
| NM_006351 | 13643.97  | 12531.098 | NM_005164 | 492.505   | 1065.611  | NM_000183 | 12578.374 | 13400.476 |
| M33197    | 65643.156 | 63356.41  | NM_001995 | 2049.996  | 2130.921  | AY004175  | 3609.781  | 4077.012  |
| NM_004683 | 868.14    | 814.385   | NM_000183 | 15036.317 | 22370.143 | M33197    | 61631.461 | 65439.859 |
| AK023226  | 3502.139  | 2732.725  | AY004175  | 5369.574  | 7471.169  | NM_012327 | 5035.493  | 5502.095  |
| AK025263  | 1266.597  | 1342.588  | M33197    | 60467.07  | 61883.59  | NM_000904 | 8594.51   | 9046.192  |
| M33197    | 67316.953 | 64817.418 | NM_012327 | 3668.766  | 6050.231  | NM_016046 | 9665.384  | 9192.831  |
| NM_001467 | 991.205   | 871.568   | NM_000904 | 5599.624  | 8772.142  | NM_000375 | 13351.192 | 14249.462 |
| AB037725  | 1826.002  | 1778.296  | NM_000375 | 7876.32   | 7411.794  | NM_000265 | 861.35    | 785.751   |
| M33197    | 61080.324 | 59480.465 | NM_000265 | 1100.602  | 842.624   | NM_018846 | 6541.206  | 7299.378  |
| NM_017718 | 3783.343  | 3512.069  | NM_018846 | 7341.996  | 8421.652  | AJ000096  | 911.774   | 1262.803  |
| NM_004860 | 5079.608  | 5930.044  | AJ000096  | 690.496   | 673.782   | M16796    | 586.823   | 851.391   |
| AF217190  | 14143.404 | 14215.169 | M33197    | 54805.363 | 59493.535 | AF279890  | 2616.741  | 3189.727  |
| AB028981  | 8232.204  | 9908.023  | AF279890  | 1423.84   | 921.872   | NM_002236 | 4013.957  | 3923.842  |
| NM_006800 | 2843.712  | 3095.842  | NM_002236 | 2333.874  | 1529.703  | NM_012069 | 4398.971  | 3443.305  |
| NM_002476 | 821.01    | 1143.148  | NM_012069 | 2365.211  | 1705.537  | NM_016601 | 1386.766  | 1247.744  |
| NM_002729 | 10361.644 | 11634.029 | NM_001689 | 53549.059 | 43008.359 | NM_017905 | 12914.131 | 11290.786 |
| M33197    | 20601.529 | 20779.82  | NM_016601 | 1008.259  | 949.367   | M33197    | 61199.359 | 57901.484 |
| AL050139  | 8864.604  | 8494.11   | NM_017905 | 9299.914  | 8277.201  | NM_006815 | 30838.432 | 25170.287 |
| NM_004558 | 2492.197  | 2714.716  | NM_006981 | 1214.379  | 863.075   | NM_001663 | 6648.624  | 5012.805  |
| AL079296  | 985.275   | 963.187   | M33197    | 62319.227 | 61088.594 | NM_016530 | 13095.921 | 9108.974  |
| NM_014770 | 3005.946  | 2868.724  | AK027244  | 1396.783  | 1077.839  | NM_014804 | 1576.868  | 1141.835  |
| AB037737  | 958.908   | 1117.988  | L40520    | 4347.101  | 3338.96   | L40520    | 4168.622  | 4006.265  |
| M33197    | 67302.313 | 64553.047 | NM_002633 | 21989.096 | 30076.732 | NM_002633 | 24872.73  | 23041.355 |
| AK023103  | 6285.822  | 6136.201  | NM_002878 | 6385.94   | 4891.713  | M33197    | 63269.094 | 60814.043 |
| NM_017858 | 5284.449  | 5200.459  | NM_017723 | 2677.996  | 2119.032  | NM_002878 | 12675.671 | 13808.72  |
| NM_013347 | 947.471   | 883.619   | AK022922  | 4515.042  | 4271.067  | NM_017723 | 3709.908  | 3512.945  |
| D80008    | 2693.282  | 2575.182  | NM_006462 | 6028.443  | 4097.471  | AK022922  | 3250.046  | 2807.294  |
| X56789    | 1480.377  | 1627.175  | AK024750  | 4258.144  | 2937.744  | NM_006462 | 7560.497  | 7533.481  |

|           |           |           |           |           |           |           |           |           |
|-----------|-----------|-----------|-----------|-----------|-----------|-----------|-----------|-----------|
| AK001069  | 9133.433  | 8651.877  | NM_000400 | 17879.799 | 11136.797 | NM_000400 | 37251.012 | 52979.961 |
| NM_004132 | 866.282   | 801.568   | M33197    | 59321.059 | 54532.223 | M33197    | 56586.246 | 58494.02  |
| NM_014844 | 2390.879  | 2567.665  | NM_002613 | 4701.813  | 4418.192  | NM_002613 | 6152.897  | 6313.684  |
| M33197    | 61471.77  | 60809.176 | NM_004419 | 5342.058  | 4697.871  | NM_004419 | 5947.971  | 5741.654  |
| NM_018492 | 10744.224 | 11575.866 | U47635    | 8797.378  | 9196.431  | NM_018650 | 2532.058  | 2656.312  |
| NM_001346 | 1204.956  | 1135.235  | NM_018650 | 2004.594  | 2596.922  | AK026945  | 16589.613 | 15353.215 |
| NM_003149 | 1842.148  | 2037.63   | AK026945  | 22921.6   | 29352.479 | NM_002828 | 8280.213  | 7816.142  |
| NM_003377 | 19283.086 | 20917.443 | NM_001888 | 1078.575  | 836.198   | NM_014369 | 1338.651  | 1394.108  |
| NM_002220 | 4235.177  | 5111.357  | M33197    | 57937.551 | 58103.289 | M33197    | 61750.688 | 60401.789 |
| AB033034  | 6926.748  | 7047.306  | NM_001154 | 10983.822 | 9064.59   | NM_001398 | 27759.379 | 29358.801 |
| D38169    | 2299.763  | 2208.789  | NM_016938 | 977.39    | 1421.061  | AB050049  | 5242.248  | 5545.937  |
| AJ293294  | 5528.878  | 4687.812  | NM_001993 | 2022.682  | 1886.093  | J05125    | 1170.677  | 913.657   |
| NM_018171 | 2089.265  | 1862.368  | NM_000175 | 10207.49  | 9518.023  | NM_001993 | 761.929   | 1005.971  |
| NM_002447 | 5406.913  | 4329.072  | NM_015725 | 13389.987 | 10607.047 | NM_000175 | 16462.547 | 13842.401 |
| NM_014145 | 18682.082 | 16020.235 | R61452    | 1316.064  | 957.51    | NM_015725 | 13741.448 | 14319.752 |
| NM_014141 | 1185.977  | 1431.498  | R19938    | 9130.966  | 7157.679  | R61452    | 1605.55   | 2030.185  |
| NM_002223 | 2450.073  | 2475.121  | AI886795  | 7008.641  | 4878.775  | R19938    | 15067.522 | 14433.199 |
| NM_003151 | 7063.341  | 6992.962  | D10495    | 1119.064  | 601.385   | N94487    | 13538.506 | 14015.937 |
| NM_006811 | 14408.252 | 14687.432 | BF344679  | 2115.397  | 1572.461  | AI886795  | 8162.936  | 9434.069  |
| NM_005601 | 4255.983  | 3537.545  | BG743223  | 1424.611  | 2100.011  | D10495    | 1420.412  | 1403.29   |
| NM_016151 | 5337.797  | 4931.467  | M36634    | 1985.298  | 2028.301  | BF344679  | 2142.137  | 2330.237  |
| NM_004324 | 2957.117  | 2750.833  | M14156    | 4106.492  | 3783.63   | M36634    | 1882.84   | 1900.796  |
| NM_005614 | 24158.246 | 24432.607 | U87939    | 1935.62   | 1842.896  | M14156    | 7922.664  | 9799.095  |
| AK026270  | 2148.911  | 3035.975  | U86961    | 1592.77   | 1508.407  | U87939    | 1084.835  | 1482.999  |
| NM_004556 | 3626.335  | 4235.438  | U47924    | 546.667   | 439.706   | U86961    | 1428.407  | 1766.68   |
| D90075    | 2017.165  | 2510.093  | AK094237  | 3706.666  | 3705.453  | AK094237  | 2993.748  | 2724.436  |
| NM_014857 | 632.669   | 765.493   | L07592    | 758.753   | 606.787   | L07592    | 580.021   | 816.59    |
| AK023827  | 874.674   | 813.471   | BF434335  | 23416.74  | 10683.826 | NM_006981 | 1098.593  | 1093.03   |
| AK021702  | 4712.569  | 5166.209  | NM_002993 | 1340.223  | 806.902   | M33197    | 64866.574 | 59237.711 |
| NM_003885 | 4953.977  | 4935.542  | AK026946  | 1606.879  | 1097.621  | AK027244  | 1216.469  | 1370.969  |
| AL161977  | 816.119   | 884.933   | M33197    | 60418     | 59096.102 | NM_018449 | 5857.497  | 4978.011  |
| NM_003936 | 6003.133  | 4755.477  | NM_003192 | 4100.739  | 2634.367  | AF086129  | 1197.454  | 1146.321  |
| M33197    | 60461.148 | 59462.281 | NM_018449 | 5245.979  | 4558.863  | NM_014458 | 6033.459  | 7278.673  |
| NM_002688 | 3717.66   | 3003.916  | AF086129  | 1075.338  | 1005.91   | AF235049  | 5222.297  | 6118.953  |
| NM_020369 | 1503.215  | 1015.763  | NM_014458 | 4869.743  | 3430.271  | M33197    | 63083.496 | 61336.836 |
| NM_004415 | 1515.32   | 1408.861  | AF235049  | 3090.411  | 2305.539  | NM_007369 | 2738.907  | 2979.979  |
| NM_007278 | 39600.242 | 38258.629 | NM_006480 | 34230.379 | 32074.609 | NM_014776 | 5256.453  | 5064.328  |
| NM_004723 | 9528.27   | 9573.678  | NM_007223 | 58055.871 | 57437.543 | NM_006480 | 56132.246 | 58007.855 |
| M33197    | 62474.242 | 60314.063 | NM_000145 | 2025.506  | 1986.017  | NM_007223 | 60317.133 | 58294.211 |
| NM_018413 | 28756.289 | 26491.047 | AF030107  | 1735.657  | 1687.339  | NM_000145 | 1791.907  | 1761.638  |
| AB018299  | 5612.819  | 4957.209  | NM_000871 | 1239.747  | 1580.709  | AF030107  | 2194.322  | 2522.494  |
| NM_005245 | 11387.724 | 12148.563 | M33197    | 61644.832 | 60803.168 | NM_000871 | 1268.259  | 1629.094  |
| M33197    | 67231.133 | 71507.648 | NM_018968 | 1178.631  | 1106.513  | M33197    | 61641.582 | 59392.203 |
| NM_016219 | 14809.662 | 13713.104 | AF086924  | 60017.012 | 51066.824 | NM_000264 | 1254.371  | 1431.308  |
| NM_004751 | 2033.831  | 2240.144  | NM_000264 | 767.728   | 637.69    | AB058740  | 11040.07  | 11012.824 |
| AK025605  | 6618.307  | 7955.103  | AB058740  | 9914.013  | 9067.732  | NM_003385 | 872.298   | 954.936   |
| NM_003783 | 1578.907  | 1998.886  | AF279890  | 1185.368  | 869.118   | NM_001888 | 1044.685  | 1211.761  |
| NM_007000 | 5337.768  | 6012.474  | NM_002236 | 1911.373  | 1264.688  | M33197    | 64229.273 | 63360     |
| NM_006100 | 1225.597  | 1229.641  | NM_012069 | 2274.774  | 1812.083  | NM_001154 | 14161.083 | 15430.635 |
| NM_003197 | 10265.704 | 10888.707 | NM_001689 | 60690.414 | 53225.371 | NM_001819 | 1478.408  | 1543.52   |
| AF176705  | 11437.212 | 15771.198 | NM_016601 | 1213.145  | 1316.564  | M33197    | 63622.355 | 58801.801 |
| D29012    | 45074.27  | 56961.488 | NM_017905 | 9763.64   | 9255.36   | NM_006815 | 32264.145 | 30911.426 |
| NM_017414 | 4975.53   | 5681.957  | M33197    | 61675.711 | 60063.285 | NM_001663 | 6600.101  | 6771.347  |

|           |           |           |           |           |           |           |           |           |
|-----------|-----------|-----------|-----------|-----------|-----------|-----------|-----------|-----------|
| NM_012179 | 31003.023 | 30998.199 | NM_006815 | 43475.742 | 44741.41  | NM_004218 | 15703.912 | 18043.221 |
| NM_002793 | 11794.907 | 11278.972 | NM_001663 | 7234.159  | 8082.652  | NM_016530 | 13906.633 | 15101.829 |
| NM_004788 | 6778.819  | 5795.549  | NM_004218 | 18098.932 | 21861.004 | NM_014804 | 2526.553  | 2994.156  |
| M33197    | 67417.68  | 67384.859 | NM_016530 | 13199.517 | 15491.611 | NM_012455 | 7939.95   | 9430.734  |
| AL442083  | 5055.229  | 5176.584  | NM_014804 | 2445.641  | 2240.246  | NM_002806 | 14370.829 | 16576.994 |
| D63487    | 4582.316  | 5535.178  | NM_012455 | 7541.91   | 9571.721  | NM_001716 | 1533.213  | 1579.619  |
| AK097791  | 4943.406  | 4990.796  | NM_002806 | 13071.304 | 16815.686 | NM_002030 | 947.674   | 843.211   |
| NM_020367 | 674.39    | 761.408   | NM_001716 | 1877.696  | 2356.854  | NM_006073 | 1108.184  | 1096.136  |
| AK022705  | 2930.557  | 3454.74   | NM_002030 | 962.099   | 1130.656  | NM_006564 | 5945.506  | 7001.329  |
| NM_016404 | 8719.365  | 9139.871  | NM_006073 | 941.759   | 1044.992  | NM_000074 | 10411.189 | 9272.778  |
| L03426    | 5775.834  | 6000.716  | NM_004951 | 590.489   | 369.31    | BF434335  | 30020.596 | 29415.859 |
| M33197    | 61914.992 | 61773.434 | NM_006564 | 5862.86   | 5602.046  | M57627    | 711.238   | 962.509   |
| NM_020163 | 1506.05   | 1641.322  | NM_004802 | 1896.158  | 1936.005  | NM_002993 | 1797.945  | 2287.378  |
| NM_006608 | 642.222   | 774.859   | M33197    | 61185.109 | 60119.984 | AK026946  | 1550.544  | 1572.24   |
| NM_000457 | 1419.722  | 1200.092  | NM_000074 | 7190.508  | 4878.125  | M33197    | 62624.266 | 59939.047 |
| M34356    | 5287.024  | 4904.11   | M33197    | 57342.457 | 56537.594 | NM_003192 | 5117.969  | 4933.115  |
| AJ133115  | 8199.47   | 8959.144  | NM_002613 | 4597.172  | 5168.012  | NM_002828 | 8885.996  | 7802.397  |
| X51630    | 14812.46  | 15304.856 | NM_004419 | 7449.009  | 8150.688  | NM_014368 | 1247.273  | 1063.446  |
| NM_005056 | 3724.924  | 3737.168  | U47635    | 10619.678 | 13487.415 | M33197    | 63269.797 | 61410.457 |
| NM_001965 | 943.991   | 884.238   | NM_018650 | 2814.783  | 4630.904  | NM_001398 | 26020.627 | 28405.273 |
| AF208502  | 19764.125 | 21698.525 | AK026945  | 18355.568 | 20252.66  | AB050049  | 6513.549  | 7231.28   |
| M33197    | 60952.469 | 59153.777 | NM_002828 | 11011.935 | 13752.709 | J05125    | 1256.201  | 1440.059  |
| AF264750  | 38956.938 | 49304.254 | NM_014369 | 1809.469  | 1924.197  | NM_005164 | 998.072   | 1160.325  |
| NM_006980 | 3763.15   | 4057.324  | M33197    | 58589.781 | 58540.07  | AY004175  | 2118.903  | 2321.261  |
| AK023904  | 4090.665  | 3980.487  | NM_001398 | 34439.246 | 35989.164 | M33197    | 62225.531 | 65867.094 |
| NM_017956 | 3513.652  | 3410.263  | AB050049  | 6594.639  | 8122.379  | NM_012327 | 4783.282  | 4290.827  |
| NM_016496 | 5310.679  | 4380.304  | J05125    | 1231.314  | 1482.475  | NM_000375 | 11767.435 | 13236.318 |
| NM_014309 | 7198.769  | 5935.844  | NM_005164 | 634.954   | 706.941   | NM_000265 | 881.547   | 809.641   |
| M33197    | 61251.641 | 62266.371 | NM_001995 | 2806.362  | 2641.136  | NM_018848 | 5862.616  | 6603.545  |
| NM_004094 | 4261.227  | 3993.455  | AY004175  | 3334.042  | 2289.514  | AJ000096  | 2083.567  | 1337.024  |
| NM_020236 | 6000.3    | 5553.046  | M33197    | 59120.047 | 59990.793 | AF279890  | 2434.794  | 2698.885  |
| AK027059  | 20266.186 | 20869.289 | NM_012327 | 2925.457  | 2481.54   | NM_002236 | 3335.449  | 3778.907  |
| AF151109  | 22930.543 | 24902.957 | NM_000904 | 5663.965  | 6234.622  | NM_012068 | 5160.649  | 5631.885  |
| NM_015414 | 67251.289 | 69218.086 | NM_016048 | 6446.232  | 6134.44   | NM_001688 | 62470.234 | 63389.699 |
| L34070    | 7005.69   | 7460.228  | NM_000375 | 7632.96   | 5285.88   | NM_016601 | 2745.052  | 2696.351  |
| AF038182  | 2265.621  | 2586.141  | NM_018849 | 6276.657  | 5059.515  | NM_017905 | 15399.827 | 15200.254 |
| NM_016475 | 8664.436  | 8918.212  | AJ000096  | 554.805   | 730.278   | NM_006981 | 1129.757  | 1159.097  |
| AF086472  | 1634.186  | 1834.833  | M33197    | 58528.535 | 59851.574 | M33197    | 62424.422 | 63076.758 |
| NM_014917 | 616.737   | 656.445   | AF015910  | 22906.318 | 17837.768 | AK027244  | 1740.883  | 2428.293  |
| M33197    | 1076.304  | 552.397   | BC009993  | 4881.684  | 5877.987  | L40520    | 4670.773  | 5999.635  |
| NM_001865 | 59162.125 | 56323.313 | M33197    | 58380.984 | 60794.113 | NM_006680 | 1425.93   | 947.554   |
| NM_006441 | 10919.099 | 13734.968 | AB049150  | 491.776   | 2189.43   | NM_002633 | 28491.92  | 28844.188 |
| NM_001918 | 3886.946  | 4367.291  | NM_016824 | 4299.214  | 4033.225  | NM_006279 | 907.515   | 1349.722  |
| NM_018245 | 4675.919  | 5650.542  | NM_003031 | 4664.434  | 3893.56   | NM_002878 | 10937.851 | 13672.289 |
| M33197    | 66898.805 | 63051.914 | NM_007170 | 1606.297  | 1101.719  | NM_017723 | 2055.844  | 2617.937  |
| X76302    | 11462.679 | 10575.103 | NM_003008 | 1180.395  | 1292.005  | AK022922  | 3165.958  | 2990.434  |
| AK026276  | 1313.049  | 1342.743  | NM_004100 | 523.626   | 372.541   | NM_006462 | 6085.179  | 6681.447  |
| X52354    | 4467.755  | 4213.438  | M33197    | 61201.652 | 58793.176 | NM_000400 | 34520.277 | 40326.805 |
| NM_005413 | 899.829   | 639.592   | AK027244  | 1517.207  | 1214.361  | M33197    | 60617.629 | 61419.988 |
| NM_002315 | 2503.044  | 2215.14   | L40520    | 4558.948  | 3169.151  | NM_002613 | 6881.519  | 5901.979  |
| AK024191  | 2475.143  | 1840.856  | NM_002633 | 17797.254 | 15389.898 | NM_004419 | 7185.968  | 7746.998  |
| D83781    | 3359.359  | 3826.483  | M33197    | 59803.422 | 59537.281 | U47635    | 9620.206  | 9691.236  |
| AF075013  | 740.524   | 533.801   | NM_002878 | 6884.298  | 7254.461  | NM_018650 | 2302.231  | 2154.774  |



|           |           |           |           |           |           |           |           |           |
|-----------|-----------|-----------|-----------|-----------|-----------|-----------|-----------|-----------|
| AL832699  | 2967.635  | 3167.79   | NM_002412 | 695.215   | 797.184   | AK026945  | 20040.379 | 18790.109 |
| NM_012191 | 1141.987  | 1158.219  | NM_017723 | 3036.759  | 2440.563  | NM_00188E | 1247.314  | 792.188   |
| M33197    | 60604.703 | 54718.18  | AK022922  | 2276.665  | 2285.488  | M33197    | 61995.902 | 62215.723 |
| AK000757  | 9786.379  | 10310.306 | NM_006462 | 6488.759  | 5694.549  | NM_001154 | 16763.525 | 21038.967 |
| AL359577  | 3104.679  | 3343.176  | AK024750  | 3914.486  | 4075.064  | NM_00181E | 1531.035  | 1991.568  |
| NM_01813E | 3945.161  | 3773.626  | NM_00040C | 19144.508 | 17400.254 | NM_01693E | 952.716   | 923.566   |
| NM_01480E | 5700.645  | 6862.843  | NM_01588E | 3572.161  | 2927.181  | NM_00199E | 813.297   | 1366.084  |
| AF052120  | 3482.813  | 4056.362  | NM_01588E | 58801.504 | 56404.848 | BF575833  | 1443.153  | 1004.506  |
| NM_014871 | 3375.377  | 4479.284  | NM_00427E | 4554.069  | 3418.391  | NM_00017E | 18922.629 | 19502.779 |
| AK026754  | 1344.744  | 1787.456  | NM_00233E | 11604.687 | 7976.611  | NM_01572E | 8537.091  | 8780.919  |
| M33197    | 60077.277 | 54898.203 | NM_00285E | 2886.376  | 1979.468  | R61452    | 1325.682  | 1491.187  |
| AK025794  | 5352.266  | 6113.89   | NM_00524E | 1710.897  | 1201.614  | R19938    | 10725.19  | 10945.81  |
| NM_003541 | 1051.087  | 687.253   | NM_017651 | 928.719   | 770.552   | AI886795  | 6966.315  | 6371.419  |
| AF131835  | 1073.553  | 948.471   | AF161339  | 6042.337  | 4621.198  | D10495    | 1227.073  | 1136.546  |
| M33197    | 60257.539 | 57763.672 | M33197    | 62887.727 | 61874.91  | BF344679  | 1616.426  | 2008.099  |
| AK023220  | 3195.713  | 2376.604  | AL137662  | 1036.763  | 921.129   | M36634    | 1735.588  | 1730.478  |
| AK024566  | 1018.368  | 931.844   | AK000354  | 4720.251  | 5293.886  | M14156    | 6170.525  | 5443.767  |
| M33197    | 62995.387 | 60874.52  | AL161984  | 811.931   | 1147.01   | U87939    | 888.488   | 1061.712  |
| AK024981  | 35072.211 | 29827.732 | NM_00395C | 494.365   | 853.219   | U86961    | 1222.842  | 1425.037  |
| AK027246  | 2362.306  | 2548.508  | NM_01488E | 2005.81   | 2624.435  | AK094237  | 2759.95   | 2704.452  |
| U80766    | 5533.251  | 4961.303  | NM_00083E | 1259.306  | 1466.217  | L07592    | 827.691   | 751.494   |
| AK001638  | 2011.485  | 2666.327  | M33197    | 59932.594 | 61283.773 | BF434335  | 28782.596 | 24994.607 |
| AF161386  | 12195.374 | 14456.618 | NM_00151C | 1124.565  | 962.177   | NM_00299E | 2111.524  | 2295.436  |
| AL365369  | 6581.868  | 7508.577  | AK024474  | 6884.83   | 6942.153  | AK026946  | 2395.012  | 2462.397  |
| AK025454  | 3651.334  | 4560.208  | NM_00686E | 620.3     | 738.538   | M33197    | 61724.395 | 61989.551 |
| M33197    | 67461.734 | 64055.617 | NM_017901 | 1903.419  | 2112.701  | NM_00319E | 6594.11   | 7124.093  |
| X05826    | 14611.001 | 14004.156 | NM_00427E | 3852.363  | 4888.383  | NM_01844E | 6285.164  | 8138.244  |
| Y11608    | 706.443   | 598.832   | NM_01758E | 1856.468  | 1542.027  | AF086129  | 1288.076  | 1746.351  |
| AJ227882  | 926.799   | 769.876   | AK023582  | 3333.328  | 2001.694  | NM_01445E | 6147.746  | 6374.996  |
| M33197    | 56855.832 | 53624.527 | NM_00035E | 1331.672  | 1016.49   | AF235049  | 5036.803  | 4997.597  |
| L77559    | 1087.445  | 816.074   | NM_00193C | 14831.849 | 14917.211 | M33197    | 63915.398 | 61016.016 |
| NM_00559E | 854.617   | 789.201   | M33197    | 60763.242 | 62567.906 | NM_00736E | 1770.186  | 2007.92   |
| Y10515    | 644.58    | 555.852   | AF263537  | 5093.372  | 6201.647  | NM_01477E | 3963.412  | 4108.927  |
| M87942    | 442.617   | 674.775   | NM_01589E | 12290.425 | 12825.962 | NM_00648C | 52037.523 | 55241.617 |
| AK023636  | 4705.45   | 4744.318  | NM_00018E | 1542.141  | 1727.814  | NM_00722E | 60615.184 | 58528.84  |
| M33197    | 68666.313 | 62882.582 | AL050050  | 1882.571  | 1366.172  | NM_00014E | 1087.853  | 972.895   |
| NM_02016E | 766.298   | 818.72    | NM_00525E | 618.684   | 993.638   | AF030107  | 2098.517  | 1910.975  |
| AB037771  | 1050.798  | 685.696   | NM_00469C | 2091.261  | 1887.972  | NM_000871 | 873.134   | 945.121   |
| AK025931  | 11920.423 | 9827.364  | M33197    | 61144.957 | 62671.844 | M33197    | 64209.023 | 61203.957 |
| M33197    | 1877.088  | 1864.163  | NM_013374 | 37421.168 | 39349.016 | NM_01896E | 1090.06   | 1156.328  |
| M33197    | 66647.461 | 66981.859 | NM_00325E | 9984.539  | 11536.914 | AF086924  | 57747.887 | 57966.824 |
| AK001083  | 3961.644  | 3928.87   | NM_00122E | 5214.722  | 6038.77   | NM_000264 | 1214.694  | 1024.218  |
| AK000185  | 2024.842  | 2207.342  | AK026607  | 584.864   | 674.943   | AB058740  | 10966.535 | 10552.387 |
| NM_01796E | 1324.58   | 1551.412  | NM_016561 | 37251.48  | 38963.18  | AF279890  | 2048.519  | 2075.367  |
| AK027227  | 1162.886  | 1095.127  | NM_00122E | 2685.461  | 2971.895  | NM_00223E | 2996.613  | 3165.839  |
| NM_017834 | 1179.938  | 892.531   | NM_01424E | 35636.867 | 36434.281 | NM_01206E | 4541.354  | 4076.791  |
| AK000865  | 1594.913  | 973.139   | M33197    | 58013.863 | 61835.996 | NM_00168E | 64934.551 | 63083.023 |
| M33197    | 67426.211 | 68461.945 | L36531    | 605.087   | 663.388   | NM_016601 | 1274.771  | 1659.004  |
| AK024779  | 985.83    | 1323.709  | AL110226  | 56214.285 | 56728.625 | NM_01790E | 11971.257 | 14113.933 |
| AK024568  | 810.312   | 900.653   | AB046822  | 1727.471  | 1943.181  | M33197    | 63163.098 | 63573.43  |
| NM_018381 | 1498.6    | 1340.36   | M33197    | 1840.393  | 2060.005  | NM_00681E | 36942.59  | 48961.883 |
| AK022769  | 1089.447  | 943.243   | AK024809  | 535.003   | 586.084   | NM_00166E | 7380.747  | 8049.159  |
| M33197    | 65456.578 | 62826.676 | NM_00030E | 3474.465  | 3912.248  | NM_00421E | 20056.445 | 19328.352 |

|            |           |           |           |           |           |           |           |           |
|------------|-----------|-----------|-----------|-----------|-----------|-----------|-----------|-----------|
| AK026277   | 23006.582 | 22610.367 | NM_012128 | 1033.92   | 221.812   | NM_01653C | 13780.203 | 13250.904 |
| U10509     | 3605.052  | 2969.075  | X69636    | 2675.748  | 3216.124  | NM_014804 | 2278.574  | 2182.909  |
| NM_00716E  | 15548.902 | 15206.082 | M33197    | 59901.992 | 62802.352 | NM_01245E | 7401.369  | 8151.735  |
| NM_01401E  | 9450.682  | 10797.601 | NM_004173 | 15536.707 | 14705.925 | NM_00280E | 12626.35  | 13027.874 |
| AF085956   | 11861.259 | 13900.144 | NM_013974 | 2831.912  | 3267.758  | M33197    | 66008.297 | 64321.91  |
| NM_01911E  | 2936.604  | 3275.835  | NM_017547 | 3717.179  | 3988.448  | NM_00171E | 1644.729  | 1724.218  |
| AF147318   | 1348.045  | 1740.278  | NM_003983 | 6262.624  | 6435.038  | NM_00203C | 823.716   | 634.899   |
| unknown (S | 2747.267  | 2852.343  | AK023708  | 1231.983  | 1556.566  | NM_006564 | 5939.985  | 6003.102  |
| M33197     | 62500.105 | 58588.594 | NM_00210E | 604.597   | 546.481   | NM_004802 | 1748.166  | 2049.005  |
| AL137556   | 2306.636  | 2385.711  | M33197    | 58684.172 | 64874.289 | M33197    | 63769.879 | 61242.363 |
| NM_01469E  | 4639.091  | 4941.986  | NM_018464 | 31540.811 | 33678.668 | NM_000074 | 10582.858 | 9445.236  |
| AL359055   | 1601.613  | 1426.195  | D43948    | 4585.647  | 5464.15   | M33197    | 60814.969 | 61099.957 |
| NM_01490E  | 7545.248  | 7648.428  | NM_01231C | 9869.28   | 11220.314 | NM_002613 | 4662.621  | 3606.677  |
| AF086125   | 1217.175  | 1281.136  | BE410824  | 652.193   | 653.677   | NM_00441E | 3804.683  | 3947.927  |
| AK023547   | 1217.911  | 1057.767  | BF382116  | 6908.363  | 6467.33   | U47635    | 9909.391  | 9908.269  |
| U67847     | 3144.679  | 2728.235  | NM_003193 | 9258.185  | 10118.464 | NM_01865C | 2997.149  | 3607.837  |
| AL137321   | 7103.517  | 8125.624  | AF113216  | 1659.649  | 2130.182  | AK026945  | 23746.141 | 25061.338 |
| M33197     | 62466.945 | 61730.969 | NM_005197 | 8414.85   | 4777.919  | NM_00282E | 10639.499 | 13764.222 |
| AK024207   | 7663.889  | 7215.03   | AL137421  | 51401.43  | 45982.344 | NM_01436E | 1770.062  | 1863.374  |
| AK021843   | 2385.135  | 3025.758  | M33197    | 61199.133 | 56339.762 | M33197    | 61686.633 | 59691.703 |
| AF075025   | 3628.618  | 4731.949  | NM_007241 | 1535.757  | 1631.109  | NM_00139E | 22382.16  | 22299.852 |
| AF088008   | 3050.446  | 3883.296  | NM_000124 | 725.683   | 752.902   | AB050049  | 5657.223  | 4880.173  |
| AK023528   | 824.3     | 1018.139  | NM_01799E | 5225.356  | 6989.726  | J05125    | 1212.944  | 925.193   |
| AK023043   | 2780.051  | 3105.543  | NM_014517 | 3883.744  | 4572.412  | NM_00199E | 2294.353  | 2392.245  |
| M33197     | 64646.891 | 60807.676 | NM_00546E | 3972.813  | 4369.381  | NM_000183 | 12187.745 | 14763.287 |
| AF147349   | 26642.797 | 31113.949 | NM_00426E | 6689.044  | 8058.189  | AY004175  | 3882.433  | 4150.342  |
| AL050346   | 5491.291  | 5769.479  | NM_00340E | 1208.733  | 1093.273  | M33197    | 64246.559 | 64382.797 |
| AK001520   | 11219.077 | 10778.84  | D31765    | 2039.822  | 1903.251  | NM_012327 | 4373.359  | 4111.883  |
| AK021731   | 913.832   | 1008.861  | NM_006107 | 11191.69  | 7093.782  | NM_000904 | 7826.906  | 7092.041  |
| D90070     | 12057.598 | 12604.967 | NM_00417E | 2022.268  | 2044.367  | NM_01604E | 8922.167  | 8981.867  |
| M33197     | 64324.41  | 56960.762 | AF288288  | 18206.672 | 15538.597 | NM_00037E | 10800.639 | 12433.984 |
| AF086179   | 2726.652  | 2660.432  | NM_01764E | 6864.366  | 6738.005  | NM_00026E | 1158.565  | 882.737   |
| AK025807   | 7643.451  | 6734.273  | AL050368  | 1822.692  | 2006.416  | NM_01884E | 5352.101  | 6309.168  |
| AK022478   | 645.152   | 807.472   | NM_003092 | 22254.922 | 21358.234 | AJ000096  | 1841.297  | 1494.334  |
| M33197     | 63455.621 | 60877.59  | M33197    | 59068.613 | 59479.813 | M16796    | 787.537   | 612.5     |
| AK025266   | 6674.085  | 5604.533  | NM_005861 | 2303.402  | 2923.062  | AF015910  | 41779.293 | 42468.043 |
| AK001843   | 6412.839  | 5932.494  | NM_01884E | 3154.678  | 3627.859  | BC009993  | 4019.141  | 3970.42   |
| AK000548   | 55228.387 | 51537.41  | NM_00376C | 3104.112  | 3545.067  | M33197    | 60974.605 | 62078.855 |
| NM_00392C  | 14994.707 | 15041.545 | AB037759  | 1974.044  | 2037.609  | NM_016824 | 6177.789  | 6246.533  |
| NM_004787  | 5760.56   | 6387.829  | AK025998  | 4177.696  | 5157.069  | NM_003031 | 6580.203  | 7921.875  |
| AF087984   | 7565.051  | 7955.99   | AL080080  | 15022.116 | 18209.029 | NM_00717C | 1916.313  | 2214.836  |
| AF009302   | 5286.852  | 5005.385  | NM_018482 | 2297.348  | 2154.179  | NM_00300E | 1659.461  | 1580.451  |
| M33197     | 62342.203 | 62531.285 | NM_01788C | 2167.776  | 1639.219  | M33197    | 62708.727 | 59451.676 |
| AK022273   | 963.113   | 1322.706  | AF090945  | 4425.176  | 3829.061  | AK027244  | 1363.137  | 1276.229  |
| AK027161   | 773.622   | 860.059   | M33197    | 61863.676 | 61601.84  | L40520    | 3478.189  | 3585.22   |
| AK024271   | 2750.335  | 3275.925  | NM_001161 | 11225.239 | 15554.01  | NM_002633 | 26384.828 | 21174.549 |
| AK021650   | 4602.925  | 5242.407  | NM_004044 | 12157.859 | 17810.805 | M33197    | 50367.215 | 46928.898 |
| AL050210   | 2813.668  | 4659.637  | NM_000221 | 16380.232 | 16145.731 | NM_00287E | 9715.443  | 10906.921 |
| L37699     | 2149.173  | 2138.239  | H75678    | 2338.11   | 2277.634  | NM_017723 | 4143.508  | 4403.7    |
| M33197     | 67097.711 | 68581.594 | NM_00253E | 929.096   | 1149.892  | AK022922  | 3525.221  | 3048.702  |
| AL050173   | 2344.218  | 2227.613  | AB002359  | 2185.966  | 1837.104  | NM_006462 | 6862.431  | 7629.421  |
| D80002     | 3179.473  | 3223.614  | M33197    | 4493.076  | 5598.135  | NM_00040C | 38142.848 | 42726.902 |
| AF207831   | 1141.171  | 1616.356  | AB007864  | 1358.913  | 1770.661  | NM_01588E | 3456.895  | 3815.81   |

|           |           |           |           |           |           |           |           |           |
|-----------|-----------|-----------|-----------|-----------|-----------|-----------|-----------|-----------|
| AK023174  | 1322.001  | 1073.756  | NM_002198 | 5273.703  | 5863.078  | NM_015888 | 61153.391 | 58037.336 |
| NM_003548 | 1064.647  | 1119.767  | AF024693  | 640.03    | 745.849   | NM_000212 | 825.931   | 1015.396  |
| M33197    | 62357.586 | 57497.598 | AK025905  | 2128.602  | 2208.816  | NM_004276 | 3745.64   | 4139.521  |
| NM_018272 | 1067.218  | 1565.441  | AL121733  | 2486.333  | 2560.088  | NM_002332 | 18493.406 | 19759.145 |
| CY3Cy5    | 5291.848  | 190.374   | BE958072  | 950.518   | 876.488   | NM_002858 | 2907.212  | 2909.607  |
| R19938    | 12238.519 | 9421.43   | M33197    | 57738.387 | 58977.527 | NM_005246 | 2362.209  | 2390.911  |
| N94487    | 3310.621  | 3279.203  | NM_017532 | 610.289   | 645.228   | NM_017651 | 1188.402  | 1174.917  |
| AI886795  | 10086.275 | 10177.384 | NM_014480 | 2848.658  | 2362.082  | AF161339  | 7084.214  | 8103.406  |
| D10495    | 1870.18   | 1558.657  | NM_005938 | 975.253   | 1358.18   | M33197    | 63446.031 | 62338.262 |
| BF344679  | 2563.597  | 2935.893  | NM_014169 | 10912.856 | 12709.451 | AL137662  | 1000.903  | 1543.802  |
| M36634    | 1305.746  | 1219.676  | NM_004964 | 42973.805 | 58145.906 | AK000354  | 5286.853  | 5689.442  |
| U87939    | 1205.559  | 1189.696  | AL117497  | 1660.273  | 977.935   | AL161984  | 733.255   | 896.345   |
| U86961    | 1410.96   | 1489.482  | AK023612  | 1311.624  | 2083.815  | NM_014882 | 2810.414  | 3065.237  |
| AK094237  | 4613.51   | 4248.568  | AF147437  | 1597.234  | 2256.647  | NM_000836 | 3008.687  | 2937.619  |
| L07592    | 1030.021  | 1185.102  | M33197    | 60697.973 | 61005.988 | M33197    | 63046.316 | 60303.973 |
| NM_006981 | 2055.855  | 1705.066  | AF147360  | 829.295   | 981.594   | NM_001510 | 2260.922  | 2609.244  |
| SR2       | 55418.91  | 60372.141 | AL137269  | 11426.569 | 10276.888 | AK024474  | 11193.738 | 11345.851 |
| SR4       | 20263.85  | 24263.197 | AK021983  | 2420.686  | 2710.56   | NM_006862 | 964.542   | 843.304   |
| SR6       | 3537.214  | 3175.773  | Y11681    | 11525.605 | 9887.966  | NM_017901 | 2687.845  | 2895.64   |
| SR8       | 9353.334  | 28850.283 | AL110135  | 22338.195 | 15903.475 | NM_004272 | 5334.391  | 4375.886  |
| SR10      | 38595.789 | 16495.822 | NM_006993 | 16881.717 | 20684.09  | NM_017588 | 1396.795  | 1372.122  |
| CY3Cy5    | 6410.809  | 293.304   | NM_002336 | 952.991   | 749.426   | AK023582  | 1948.071  | 1557.804  |
| NM_007368 | 1752.208  | 1552.746  | M33197    | 61719.676 | 61955.816 | NM_000358 | 2288.403  | 2658.981  |
| NM_014776 | 1966.462  | 1843.281  | AF086316  | 531.792   | 455.91    | NM_001930 | 26017.121 | 33799.004 |
| NM_006480 | 4169.722  | 4602.54   | AF086429  | 1305.244  | 1288.049  | NM_001564 | 6440.158  | 7081.413  |
| NM_007223 | 27380.178 | 25183.672 | AF086302  | 3063.945  | 3325.221  | M33197    | 61194.066 | 59338.527 |
| NM_000145 | 1222.217  | 1470.077  | AF086439  | 1058.7    | 742.107   | AF263537  | 6459.55   | 6266.736  |
| AF030107  | 4223.279  | 6090.891  | M33197    | 58063.711 | 59807.48  | NM_015895 | 16609.322 | 15382.848 |
| NM_000871 | 2359.534  | 2362.11   | AF038171  | 1019.119  | 1303.823  | NM_000188 | 1120.703  | 854.098   |
| M33197    | 63410.035 | 58399.934 | AF052160  | 750.406   | 1536.94   | AL050050  | 2417.377  | 1320.927  |
| NM_018968 | 962.854   | 796.401   | AK026512  | 2342.247  | 2336.322  | NM_005256 | 1150.69   | 744.891   |
| AF086924  | 32266.051 | 33496.633 | M33197    | 58346.762 | 59134.125 | NM_004690 | 1351.833  | 1730.335  |
| NM_000264 | 1248.338  | 1200.8    | AF085969  | 1106.736  | 1041.937  | M33197    | 62346.52  | 64368.098 |
| AB058740  | 5299.18   | 4959.019  | AF144233  | 2312.548  | 1774.609  | NM_013374 | 38948.02  | 44024.711 |
| NM_001888 | 1024.704  | 827.942   | AK022986  | 1071.367  | 1133.949  | NM_003252 | 12934.527 | 12731.028 |
| NM_001819 | 1730.48   | 1319.432  | AF085975  | 2524.999  | 3335.945  | NM_001228 | 6059.264  | 5417.207  |
| NM_016938 | 1365.763  | 1198.889  | AF075103  | 1055.38   | 1290.48   | AK026607  | 639.96    | 902.693   |
| NM_001993 | 832.263   | 509.321   | AF085943  | 453.857   | 514.092   | NM_016561 | 34509.176 | 41203.902 |
| NM_000175 | 13704.499 | 12755.014 | M33197    | 59390.934 | 58580.734 | NM_001225 | 4563.165  | 4682.63   |
| NM_015725 | 6919.244  | 7444.43   | AL137390  | 1925.965  | 1913.12   | AB046822  | 1299.351  | 1219.226  |
| R61452    | 2671.736  | 3476.462  | AL137611  | 5257.296  | 5027.02   | M33197    | 2185.062  | 1870.875  |
| NM_012455 | 8755.841  | 8505.203  | AL359566  | 24156.924 | 21814.578 | NM_000308 | 3077.101  | 4195.827  |
| M33197    | 67358.711 | 66471.367 | AL137427  | 2300.067  | 2885.675  | X69636    | 2101.285  | 2098.461  |
| NM_001716 | 913.996   | 967.697   | AL157460  | 2970.297  | 3012.931  | M33197    | 63584.445 | 63466.145 |
| NM_002030 | 873.148   | 744.709   | AL359595  | 582.214   | 588.311   | NM_004173 | 6555.269  | 6674.897  |
| NM_004951 | 820.638   | 582.319   | M33197    | 58189.645 | 61234.445 | NM_013974 | 2133.589  | 2338.893  |
| NM_006564 | 4465.576  | 3596.028  | AK026718  | 2674.441  | 3843.462  | NM_017547 | 2725.019  | 2853.612  |
| NM_004802 | 2046.975  | 2049.818  | AK022035  | 5689.493  | 5658.351  | NM_003983 | 4008.256  | 4831.183  |
| M33197    | 67415.922 | 65263.859 | M33197    | 59139.77  | 60092.449 | AK023708  | 1456.498  | 1486.674  |
| NM_000074 | 5579.371  | 4753.665  | NM_004337 | 2982.219  | 3488.861  | M33197    | 62018.828 | 66162.523 |
| BF434335  | 30246.789 | 23714.676 | AK022141  | 745.768   | 687.206   | NM_018464 | 39014.004 | 41509.922 |
| M57627    | 726.882   | 717.507   | AK023942  | 22852.529 | 18932.535 | D43948    | 6743.256  | 5901.964  |
| AK026946  | 3368.805  | 3171.547  | M33197    | 59893.98  | 55587.68  | NM_012310 | 12703.251 | 14941.135 |

|           |           |           |           |           |           |           |           |           |
|-----------|-----------|-----------|-----------|-----------|-----------|-----------|-----------|-----------|
| M33197    | 62178.859 | 64028.23  | AK022046  | 536.19    | 983.019   | BE410824  | 742.371   | 956.405   |
| AF086129  | 2030.747  | 1867.282  | AK027207  | 1200.291  | 1538.882  | BF382116  | 6660.901  | 7775.005  |
| NM_01445E | 4857.3    | 5391.348  | AJ227892  | 1520.232  | 1493.817  | NM_003193 | 15500.029 | 15897.149 |
| AF235049  | 5878.536  | 6794.559  | M33197    | 59578.465 | 60447.102 | AF113216  | 1081.292  | 1064.652  |
| NM_005164 | 1008.406  | 712.186   | AK022013  | 1130.49   | 1037.05   | NM_005197 | 4793.189  | 4260.606  |
| NM_00199E | 3178.757  | 3293.667  | AK022155  | 2047.324  | 1995.765  | AL137421  | 12700.447 | 12022.005 |
| NM_000183 | 12158.954 | 12183.495 | AK022288  | 977.5     | 948.716   | M33197    | 64973.242 | 61743.059 |
| AY004175  | 3139.322  | 3271.585  | AK021916  | 586.005   | 709.297   | NM_007241 | 2505.329  | 3028.36   |
| M33197    | 63350.305 | 63482.922 | AK024201  | 899.377   | 934.208   | NM_000124 | 1458.685  | 1228.47   |
| NM_012327 | 2323.303  | 2058.335  | AK022331  | 559.626   | 523.63    | NM_01799E | 8973.28   | 9001.014  |
| NM_000904 | 7788.37   | 7736.035  | M33197    | 57625.996 | 57559.199 | NM_014517 | 3476.647  | 4370.259  |
| NM_01604E | 9897.292  | 8614.052  | AK026878  | 576.633   | 619.273   | NM_00546E | 3606.177  | 3430.453  |
| NM_00037E | 11333.758 | 12859.925 | AK021589  | 1007.354  | 674.852   | NM_00426E | 7700.064  | 6962.354  |
| NM_00026E | 944.591   | 966.484   | D17152    | 9679.332  | 8147.223  | NM_00340E | 1246.217  | 1191.383  |
| NM_01884E | 1803.339  | 1597.105  | AK024464  | 13115.606 | 10706.294 | D31765    | 1305.108  | 1337.907  |
| AJ000096  | 936.14    | 888.824   | AK026748  | 601.981   | 811.85    | NM_006107 | 9738.967  | 9349.728  |
| M33197    | 64398.73  | 61134     | AK023638  | 1054.006  | 976.391   | NM_00417E | 1718.409  | 1362.461  |
| AF279890  | 387.221   | 402.051   | M33197    | 1338.752  | 1408.699  | AF288288  | 11556.258 | 12962.491 |
| NM_01206E | 545.56    | 509.967   | AK025423  | 4253.327  | 4643.27   | NM_01764E | 7900.944  | 7385.98   |
| NM_016601 | 489.844   | 808.595   | M33197    | 57415.93  | 58544.184 | AL050368  | 2257.57   | 2132.896  |
| NM_01790E | 9473.512  | 9436.637  | AL049846  | 1125.34   | 1265.403  | NM_003092 | 28117.188 | 33523.266 |
| NM_00681E | 47895.426 | 55075.109 | AK024161  | 1596.609  | 2141.346  | M33197    | 62459.93  | 63437.98  |
| NM_001663 | 7275.385  | 8101.429  | AK021682  | 18409.199 | 18870.117 | NM_005861 | 4654.631  | 5568.706  |
| NM_01653C | 15901.621 | 16386.08  | AJ012500  | 1738.656  | 1822.916  | NM_01884E | 2111.206  | 2396.07   |
| NM_014804 | 2700.547  | 3080      | AF085833  | 562.436   | 406.226   | NM_00376C | 6202.791  | 7684.875  |
| L40520    | 6728.968  | 5845.539  | U00944    | 1007.312  | 1266.028  | AK025998  | 3720.671  | 2911.512  |
| NM_002633 | 21637.049 | 16998.586 | BC035058  | 5108.644  | 5245.456  | AL080080  | 14697.067 | 13448.838 |
| M33197    | 62848.188 | 63890.281 | X57566    | 5275.317  | 4686.635  | NM_018482 | 2064.983  | 2403.807  |
| NM_00287E | 5128.37   | 5209.26   | M33197    | 58228.082 | 61635.219 | NM_01788C | 3585.773  | 4168.896  |
| NM_002412 | 989.823   | 837.083   | NM_01861E | 8590.655  | 9846.295  | AF090945  | 2652.361  | 3462.498  |
| NM_017723 | 1429.077  | 1759.692  | AK023809  | 2267.24   | 1888.101  | M33197    | 64466.637 | 61116.188 |
| AK022922  | 2945.025  | 2772.355  | M87943    | 61904.68  | 58865.281 | NM_001161 | 11788.892 | 12681.8   |
| NM_006462 | 8477.861  | 8747.812  | AL360137  | 1452.456  | 1370.387  | NM_004044 | 11986.704 | 13114.56  |
| AK024750  | 2429.708  | 2037.049  | U28131    | 60181.555 | 57194.477 | NM_000221 | 8959.123  | 8930.637  |
| NM_00040C | 10085.261 | 14658.646 | AY007106  | 4171.995  | 6919.056  | H75678    | 2048.184  | 1842.771  |
| M33197    | 59782.625 | 62148.633 | M33197    | 59602.094 | 59755.246 | NM_00253E | 1214.344  | 763.343   |
| NM_002613 | 4614.025  | 3750.259  | AL049299  | 553.332   | 1058.004  | AB002359  | 1950.902  | 1708.307  |
| NM_00441E | 2227.581  | 2264.652  | NM_00608E | 47860.648 | 52497.863 | M33197    | 4347.805  | 4089.588  |
| NM_01865C | 2141.413  | 1894.423  | NM_01826E | 586.312   | 791.652   | AB007864  | 1148.787  | 963.258   |
| AK026945  | 29350.896 | 28267.734 | AF130086  | 3514.04   | 3599.89   | NM_00219E | 5031.17   | 5399.332  |
| NM_01436E | 2315.555  | 2438.247  | AK023858  | 11404.568 | 13225.328 | AF024693  | 1300.004  | 1169.204  |
| M33197    | 62730.121 | 65039.266 | M33197    | 60971.055 | 58547.789 | AK025905  | 3374.791  | 5227.816  |
| AB050049  | 9617.533  | 9540.413  | AF250920  | 3466.84   | 4383.324  | M33197    | 61984.902 | 60257.391 |
| J05125    | 1604.997  | 1505.05   | NM_017733 | 5350.714  | 5654.849  | NM_017532 | 890.645   | 761.473   |
| NM_001993 | 466.618   | 713.593   | NM_014042 | 15189.888 | 16323.774 | NM_01448C | 3199.094  | 3578.548  |
| NM_00017E | 13324.504 | 10306.844 | M33197    | 58787.609 | 58954.703 | NM_00593E | 1044.145  | 815.342   |
| NM_01572E | 6525.896  | 6162.313  | AF317550  | 713.149   | 653.377   | NM_01416E | 11787.063 | 10539.915 |
| R61452    | 1634.355  | 1774.578  | NM_003543 | 426.028   | 361.644   | NM_004964 | 38009.141 | 38543.699 |
| N94487    | 4329.15   | 4795.088  | AK025416  | 790.949   | 931.755   | AL117497  | 1967.774  | 2124.78   |
| AI886795  | 12888.169 | 11598.757 | AK022165  | 860.486   | 925.308   | AF075016  | 826.369   | 920.416   |
| D10495    | 1923.792  | 1876.014  | M33197    | 58953.105 | 58099.633 | AK023612  | 1279.046  | 1560.828  |
| BF344679  | 2914.451  | 2573.847  | AK022372  | 2581.756  | 2439.629  | M33197    | 64011.934 | 61784.148 |
| U87939    | 2231.599  | 2051.881  | AJ227863  | 769.111   | 451.635   | AF147360  | 1564.232  | 1128.187  |

|           |           |           |           |           |           |           |           |           |
|-----------|-----------|-----------|-----------|-----------|-----------|-----------|-----------|-----------|
| U86961    | 1943.544  | 1863.882  | NM_003520 | 925.167   | 841.941   | AL137269  | 12703.724 | 12492.089 |
| AK094237  | 5413.61   | 4619.814  | AL137380  | 848.309   | 642.462   | AK021983  | 3078.351  | 2450.186  |
| L07592    | 1202.323  | 881.925   | M33197    | 59044.934 | 60620.738 | Y11681    | 13183.009 | 12755.904 |
| NM_006981 | 2388.591  | 2345.163  | AL137658  | 25463.039 | 25379.51  | AL110135  | 7110.165  | 5003.168  |
| M33197    | 66137.953 | 65302.293 | D16888    | 889.933   | 1209.703  | NM_006993 | 28273.035 | 25478.723 |
| AK027244  | 3976.047  | 4053.102  | U79277    | 569.824   | 784.69    | NM_002336 | 1309.455  | 1399.675  |
| NM_018449 | 6147.898  | 5750.008  | AF068298  | 5740.822  | 7579.116  | M33197    | 62406.395 | 68142.664 |
| AF086129  | 1862.645  | 1648.567  | Z70770    | 1792.152  | 1973.972  | AF086316  | 645.932   | 1615.573  |
| NM_014458 | 4690.644  | 4435.996  | AJ227900  | 4570.727  | 5216.966  | AF086354  | 1252.554  | 2120.294  |
| M33197    | 63104.953 | 62545.238 | AK023242  | 1422.551  | 1488.428  | AF086429  | 5812.037  | 5926.9    |
| NM_007369 | 1893.109  | 1857.737  | M33197    | 58746.879 | 59698.973 | AF086302  | 3702.888  | 3748.289  |
| NM_014776 | 2380.827  | 2147.641  | AK024101  | 601.199   | 853.064   | AF086439  | 3091.082  | 2807.279  |
| NM_006480 | 5314.463  | 5446.787  | CY3Cy5    | 3307.823  | 231.684   | M33197    | 62638.211 | 60710.023 |
| AF030107  | 919.154   | 936.05    | BI762229  | 18917.994 | 15083.515 | AF038171  | 1247.346  | 1089.823  |
| NM_000871 | 1070.744  | 979.666   | BG618320  | 1989.002  | 1463.906  | AF052160  | 1318.282  | 1333.678  |
| M33197    | 59154.023 | 57845.016 | Y00787    | 917.925   | 751.518   | AK026512  | 2050.701  | 2097.447  |
| NM_018968 | 1236.572  | 910.082   | NM_007276 | 3842.64   | 2466.887  | M33197    | 61543.527 | 62326.578 |
| AF086924  | 28639.793 | 32134.219 | N34462    | 1752.63   | 1625.641  | AF085969  | 1320.65   | 1219.498  |
| NM_000264 | 1112.591  | 1196.479  | AI658778  | 1925.053  | 1721.288  | AF144233  | 3563.199  | 4372.498  |
| AB058740  | 6916.569  | 5594.795  | L19067    | 5888.064  | 5383.465  | AF085925  | 740.659   | 939.461   |
| NM_003385 | 1155.393  | 843.809   | Z48482    | 803.579   | 667.495   | AK022986  | 730.295   | 889.23    |
| NM_001888 | 1472.552  | 993.92    | W60413    | 682.754   | 779.367   | AF085975  | 2064.683  | 1743.485  |
| M33197    | 62686.664 | 63190.258 | BI823365  | 4967.383  | 7749.146  | AF075103  | 1308.083  | 1521.352  |
| NM_001154 | 20809.117 | 20680.322 | X06318    | 8719.726  | 13478.787 | AF085943  | 569.313   | 815.025   |
| NM_016938 | 819.487   | 803.285   | AL834159  | 3417.033  | 3857.791  | M33197    | 66876.711 | 69580.203 |
| M33197    | 59991.449 | 58573.742 | NM_000164 | 30792.883 | 30963.582 | AL137390  | 2484.767  | 2365.922  |
| NM_006815 | 40532.43  | 43265.91  | SR5       | 8965.795  | 6947.034  | AL137611  | 9837.011  | 8427.265  |
| NM_001663 | 7123.873  | 6872.158  | SR7       | 7042.408  | 47904.629 | AL359566  | 42074.879 | 45435.727 |
| NM_004218 | 16808.516 | 17507.547 | SR9       | 25606.545 | 4682.481  | AL137427  | 4293.82   | 4290.17   |
| NM_016530 | 13881.055 | 12618.879 | CY3Cy5    | 3692.207  | 204.435   | AL157460  | 2535.196  | 2682.73   |
| NM_014804 | 2700.92   | 2783.621  | NM_003682 | 1022.625  | 1387.73   | M33197    | 61930.602 | 64627.449 |
| NM_012455 | 10281.259 | 12613.568 | NM_000207 | 674.549   | 517.715   | AK026718  | 3644.511  | 2978.02   |
| NM_002806 | 14762.61  | 13737.327 | NM_006314 | 8125.337  | 6497.675  | AK022035  | 7368.018  | 6768.283  |
| NM_001716 | 841.785   | 1066.347  | NM_001782 | 1717.188  | 1355.771  | M33197    | 59319.984 | 61756.941 |
| NM_006564 | 3425.871  | 3292.903  | NM_000797 | 2244.003  | 1896.179  | NM_004337 | 3415.186  | 3045.735  |
| NM_004802 | 1933.589  | 2036.073  | NM_016293 | 8692.901  | 8136.655  | AK022141  | 2027.755  | 1769.439  |
| M33197    | 61693.879 | 61358.348 | AL080148  | 3508.177  | 2969.403  | AK023942  | 30005.426 | 34160.328 |
| NM_000074 | 5538.339  | 5326.936  | NM_006731 | 1192.496  | 1024.075  | M33197    | 66105.5   | 68109.953 |
| BF434335  | 29868.375 | 27683.625 | NM_020134 | 616.669   | 411.378   | AK027207  | 1491.456  | 1721.87   |
| M57627    | 757.446   | 988.737   | NM_014061 | 794.208   | 809.196   | AJ227892  | 1963.502  | 2034.4    |
| NM_002993 | 1016.378  | 616.311   | BC034395  | 617.242   | 625.569   | M33197    | 63530.043 | 68026.156 |
| AK026946  | 4629.933  | 4288.68   | NM_002479 | 761.69    | 724.4     | AK022013  | 1227.277  | 1065.058  |
| M33197    | 60034.926 | 60684.273 | NM_000348 | 4944.779  | 5395.314  | AK022155  | 3302.671  | 3449.52   |
| NM_003192 | 7255.242  | 7251.347  | NM_005059 | 991.499   | 1100.729  | AK022288  | 1134.854  | 1423.846  |
| NM_002828 | 8425.655  | 7728.959  | NM_004950 | 2771.967  | 3757.002  | AK021916  | 1284.647  | 1106.933  |
| NM_014369 | 3039.764  | 3048.101  | NM_000724 | 5252.679  | 8118.697  | AK024201  | 970.327   | 1033.895  |
| M33197    | 59951.785 | 59387.504 | NM_002557 | 9828.012  | 9569.547  | AK022331  | 1145.075  | 1230.224  |
| NM_001398 | 33523.711 | 30853.535 | NM_005662 | 38012.133 | 33471.898 | M33197    | 63793.105 | 60808.504 |
| AB050049  | 10230.861 | 10075.663 | NM_003060 | 610.263   | 541.108   | AK026878  | 1182.583  | 1195.711  |
| J05125    | 1497.834  | 1631.918  | AK021489  | 23517.744 | 20491.561 | AK021589  | 998.032   | 996.988   |
| NM_005164 | 1250.734  | 1326.927  | NM_004525 | 449.702   | 395.237   | D17152    | 18112.371 | 18617.496 |
| NM_001995 | 3491.734  | 4077.106  | NM_003895 | 935.223   | 886.542   | AK024464  | 15391.364 | 18788.145 |
| AY004175  | 3373.224  | 3259.567  | NM_004317 | 8564.295  | 7152.851  | AK026748  | 974.144   | 1745.033  |

|           |           |           |           |           |           |           |           |           |
|-----------|-----------|-----------|-----------|-----------|-----------|-----------|-----------|-----------|
| M33197    | 61411.832 | 64985.371 | NM_014645 | 2517.057  | 1995.571  | AK023638  | 1179.217  | 1929.307  |
| NM_012327 | 2767.957  | 3139.277  | NM_014708 | 2767.291  | 2072.879  | M33197    | 1485.353  | 1556.879  |
| NM_000904 | 8135.474  | 7800.876  | NM_003693 | 1461.218  | 1260.65   | AK025423  | 3859.433  | 3988.165  |
| NM_016048 | 8535.093  | 8510.348  | NM_000356 | 22189.234 | 18423.131 | M33197    | 62327.555 | 58656.234 |
| NM_000375 | 9657.719  | 10457.244 | NM_018134 | 35717.121 | 21525.01  | AL049846  | 1352.194  | 1428.737  |
| NM_018849 | 2261.483  | 2386.038  | NM_013247 | 6703.548  | 5400.094  | AK024161  | 1375.728  | 1413.122  |
| AJ000096  | 1048.397  | 928.559   | NM_006770 | 2169.962  | 1696.5    | AK021682  | 30216.492 | 29863.439 |
| M16796    | 843.787   | 622.232   | BE394704  | 643.761   | 583.023   | U00944    | 2038.204  | 1554.161  |
| AF279890  | 615.064   | 648.708   | NM_004703 | 2636.077  | 2631.494  | BC035058  | 6547.235  | 7228.316  |
| NM_012069 | 802.328   | 605.952   | NM_001512 | 784.647   | 796.792   | X57566    | 6911.319  | 7520.896  |
| NM_001689 | 56454.266 | 60108.07  | NM_014706 | 7779.919  | 7900.637  | M33197    | 63752.02  | 61960.629 |
| NM_016601 | 545.914   | 748.739   | AK023172  | 499.947   | 571.511   | NM_018616 | 13314.327 | 13078.333 |
| NM_017905 | 8871.473  | 8913.687  | AJ001348  | 1033.382  | 881.576   | AK023809  | 2648.119  | 2750.054  |
| NM_006981 | 1621.525  | 1345.748  | NM_014007 | 1654.248  | 2552.499  | M87943    | 62473.188 | 59815.809 |
| SB        | 884.41    | 1378.361  | AB033006  | 3912.32   | 3898.214  | AL360137  | 1697.53   | 2152.988  |
| M33197    | 63936.559 | 64537.91  | AF020314  | 1675.375  | 1783.824  | U28131    | 54961.258 | 54373.801 |
| AK027244  | 3283.085  | 3754.425  | NM_016332 | 12088.427 | 11166.794 | AY007106  | 5991.795  | 8113.214  |
| L40520    | 6739.063  | 7569.328  | AK023936  | 636.464   | 606.375   | M33197    | 63259.527 | 59331.801 |
| NM_002633 | 25120.725 | 19282.053 | NM_006457 | 2488.098  | 2786.349  | AF048848  | 845.743   | 683.747   |
| NM_002878 | 6083.712  | 6057.97   | AF000381  | 4531.614  | 4131.246  | AL049299  | 763.126   | 1138.104  |
| NM_017723 | 1844.349  | 1812.392  | NM_012105 | 4868.297  | 4411.438  | NM_006088 | 57877.906 | 56092.188 |
| AK022922  | 2979.25   | 2765.066  | S82470    | 4755.705  | 3456.26   | NM_018265 | 785.946   | 730.014   |
| NM_006462 | 8855.614  | 9259.586  | AB020695  | 1847.214  | 1273.406  | AF130086  | 5315.549  | 5780.183  |
| NM_000400 | 11226.358 | 14718.715 | AB028982  | 572.651   | 676.91    | AK023858  | 19555.15  | 19295.219 |
| M33197    | 63058.387 | 62038.207 | NM_002004 | 2684.848  | 2367.695  | M33197    | 62252.055 | 63459.781 |
| NM_002613 | 5229.734  | 5011.32   | NM_005121 | 1259.8    | 1144.617  | AF250920  | 3514.213  | 2727.897  |
| NM_004419 | 2676.357  | 3058.938  | NM_020221 | 811.134   | 844.308   | NM_017733 | 5016.229  | 5006.215  |
| U47635    | 11285.587 | 9505.7    | NM_000747 | 2611.135  | 2757.085  | NM_014042 | 18286.826 | 18944.492 |
| NM_018650 | 2629.605  | 2595.873  | NM_005415 | 3115.763  | 2952.663  | AF317550  | 1087.297  | 1650.999  |
| AK026945  | 25347.846 | 20387.324 | AL137708  | 403.492   | 174.177   | AK025416  | 899.137   | 1236.253  |
| NM_001888 | 1543.555  | 1276.913  | AJ275973  | 16993.408 | 17975.814 | AK022165  | 777.591   | 867.279   |
| M33197    | 57582.453 | 57921.48  | NM_006493 | 3798.863  | 4404.426  | U23860    | 978.816   | 1254.901  |
| NM_016938 | 2002.219  | 1779.27   | U76362    | 3638.986  | 3656.644  | M33197    | 62575.387 | 61874.867 |
| NM_001993 | 738.308   | 905.88    | AF040248  | 673.676   | 758.232   | AL049263  | 1031.475  | 725.642   |
| NM_000175 | 13880.099 | 11713.046 | NM_014228 | 1392.269  | 1392.905  | AK022372  | 5332.458  | 5774.122  |
| NM_015725 | 6909.665  | 6483.796  | AL832292  | 4365.7    | 4651.484  | AJ227863  | 1542.754  | 1405.241  |
| R61452    | 1965.703  | 2031.96   | NM_003045 | 9349.744  | 8265.382  | NM_003520 | 1358.732  | 1043.243  |
| R19938    | 13055.037 | 11968.344 | NM_002618 | 2432.317  | 2366.087  | AL137380  | 711.603   | 861.874   |
| AI886795  | 12006.614 | 10959.367 | L27479    | 1115.386  | 1387.168  | M33197    | 51497.137 | 49841.852 |
| D10495    | 2036.76   | 1738.447  | NM_002193 | 954.357   | 782.933   | AL137658  | 30251.24  | 38014.594 |
| BF344679  | 2766.255  | 2560.644  | NM_001388 | 7869.098  | 6230.718  | D16888    | 1528.161  | 1324.156  |
| M36634    | 570.677   | 616.464   | X76770    | 2760.994  | 1841.779  | U79277    | 699.483   | 675.481   |
| M14156    | 886.885   | 883.014   | AB037808  | 2059.363  | 1613.501  | AF068298  | 8173.278  | 9660.632  |
| U87939    | 1513.628  | 1561.13   | NM_016038 | 4861.697  | 3173.938  | Z70770    | 2916.057  | 3053.113  |
| U86961    | 1541.954  | 1953.478  | Z36821    | 8323.916  | 13269.927 | AJ227900  | 6505.216  | 6189.619  |
| AK094237  | 5489.47   | 4513.018  | AF289485  | 5987.618  | 4465.132  | AK023242  | 1780.912  | 1611.504  |
| L07592    | 1322.513  | 1139.925  | AF130092  | 1340.621  | 985.053   | M33197    | 63061.188 | 68987.844 |
| BF434335  | 31105.232 | 22015.307 | AK024794  | 1528.301  | 1753.518  | CY3Cy5    | 7471.375  | 244.165   |
| M57627    | 957.323   | 964.151   | NM_019853 | 9600.924  | 12312.798 | AI417775  | 518.754   | 619.698   |
| NM_002993 | 627.67    | 917.113   | NM_017992 | 3882.399  | 3045.676  | BI762229  | 20053.127 | 21518.561 |
| NM_003192 | 7947.081  | 9334.271  | NM_005400 | 1042.876  | 867.561   | BG618320  | 3331.031  | 2558.865  |
| NM_018449 | 7210.368  | 7745.246  | AK023061  | 648.038   | 943.114   | Y00787    | 1056.154  | 1013.144  |
| AF086129  | 1823.267  | 1742.218  | NM_007255 | 3307.811  | 4032.507  | NM_007276 | 4609.563  | 4032.392  |

|           |           |           |           |           |           |           |           |           |
|-----------|-----------|-----------|-----------|-----------|-----------|-----------|-----------|-----------|
| D79994    | 786.051   | 738.392   | NM_003668 | 9602.479  | 8473.462  | N34462    | 2260.935  | 2009.317  |
| NM_014458 | 5032.672  | 5008.999  | NM_013384 | 58751.141 | 57459.902 | AI658778  | 2556.129  | 2427.527  |
| NM_007368 | 2326.462  | 2521.44   | NM_001187 | 2099.758  | 2057.01   | L19067    | 7262.056  | 6577.528  |
| NM_014776 | 2006.847  | 2461.119  | NM_018241 | 4323.655  | 3943.65   | Z48482    | 891.871   | 760.325   |
| NM_006480 | 5315.015  | 5999.058  | NM_005834 | 9325.28   | 9521.466  | W60413    | 1012.11   | 639.197   |
| NM_007223 | 31859.158 | 32027.1   | NM_000724 | 3240.187  | 3035.002  | BI823365  | 3802.503  | 2687.645  |
| NM_000145 | 1325.129  | 1341.373  | NM_002557 | 7971.908  | 5605.494  | X06318    | 7381.389  | 6037.816  |
| AF030107  | 788.43    | 1024.855  | BG618320  | 3172.234  | 3682.463  | AL834159  | 3910.375  | 2951.78   |
| NM_000871 | 882.152   | 995.241   | Y00787    | 1218.946  | 1006.404  | NM_000164 | 28246.365 | 27686.729 |
| M33197    | 61847.48  | 58432.168 | NM_007276 | 4485.089  | 3026.827  | SR5       | 9615.884  | 6714.608  |
| NM_018968 | 1283.101  | 1230.699  | N34462    | 1999.523  | 1870.348  | SR7       | 6855.603  | 34716.336 |
| AF086924  | 31744.514 | 39010.465 | Z48482    | 1000.727  | 796.588   | SR9       | 23245.535 | 2426.194  |
| NM_000264 | 1497.084  | 1396.967  | W60413    | 902.902   | 792.947   | CY3Cy5    | 6131.543  | 173.359   |
| AB058740  | 7694.046  | 6723.597  | BI823365  | 3417.017  | 2671.124  | NM_003682 | 955.896   | 856.827   |
| NM_012068 | 754.247   | 706.06    | X06318    | 8122.86   | 12527.624 | NM_000207 | 1074.714  | 872.147   |
| NM_001688 | 63035.969 | 65544.883 | AL834159  | 3064.886  | 2946.961  | NM_002531 | 781.917   | 615.994   |
| NM_016601 | 966.616   | 1092.319  | NM_000164 | 24794.99  | 12487.421 | NM_006314 | 8111.01   | 6461.651  |
| NM_017905 | 10705.046 | 11437.481 | NM_016217 | 15869.581 | 15080.426 | NM_001782 | 1836.925  | 1584.709  |
| M33197    | 64141.871 | 61487.191 | AK025971  | 4077.291  | 4366.168  | NM_000797 | 6060.311  | 6466.56   |
| NM_006815 | 45286.129 | 45962.91  | NM_014007 | 1301.278  | 976.369   | NM_014927 | 791.342   | 647.01    |
| NM_001663 | 8554.261  | 7712.244  | AB033006  | 3284.55   | 2043.262  | NM_016293 | 13716.677 | 12609.649 |
| NM_004218 | 20696.342 | 20514.719 | AF020314  | 1547.181  | 1138.767  | AL080148  | 3838.033  | 3541.074  |
| NM_016530 | 15287.274 | 15469.863 | NM_016332 | 9438.136  | 6623.771  | NM_006731 | 1126.342  | 830.854   |
| NM_014804 | 1992.941  | 2529.428  | AK023936  | 841.969   | 574.455   | NM_018487 | 689.106   | 396.307   |
| NM_012455 | 8362.784  | 9252.429  | NM_006457 | 2913.938  | 2929.12   | NM_020134 | 988.177   | 652.378   |
| NM_002806 | 12580.212 | 12326.119 | NM_003682 | 1151.68   | 1010.857  | NM_014061 | 1054.972  | 539.816   |
| M33197    | 64870.207 | 65238.844 | NM_000207 | 716.792   | 886.769   | BC034395  | 686.892   | 467.369   |
| NM_001716 | 1212.473  | 1246.385  | NM_006314 | 8733.154  | 7994.651  | NM_002479 | 1070.152  | 1070.73   |
| NM_002030 | 855.139   | 816.252   | NM_001782 | 1871.494  | 2435.379  | NM_000348 | 3325.788  | 2987.874  |
| NM_006073 | 650.451   | 559.671   | NM_002754 | 545.156   | 384.849   | NM_004950 | 2107.26   | 2602.002  |
| NM_004951 | 974.62    | 864.98    | NM_000797 | 1990.132  | 2650.495  | NM_000724 | 4258.56   | 3260.424  |
| NM_006564 | 4299.023  | 4797.264  | NM_016293 | 11713.961 | 18023.711 | NM_002557 | 7746.568  | 6379.749  |
| NM_004802 | 1966.448  | 2245.767  | AF217525  | 782.984   | 815.226   | BE728156  | 625.389   | 506.034   |
| M33197    | 60673.418 | 60660.539 | AL080148  | 5368.446  | 6690.887  | NM_005662 | 48767.633 | 34667.32  |
| NM_000074 | 6665.537  | 5719.679  | NM_006731 | 1431.781  | 1050.241  | NM_003060 | 642.993   | 518.421   |
| M33197    | 60298.172 | 59119.102 | NM_018487 | 634.53    | 887.158   | AK021489  | 32255.041 | 25087.672 |
| NM_002613 | 4684.989  | 4424.869  | NM_020134 | 842.275   | 460.631   | NM_004525 | 841.989   | 445.922   |
| NM_004419 | 2802.944  | 3121.783  | NM_014061 | 781.396   | 655.066   | NM_003895 | 844.272   | 760.965   |
| U47635    | 10351.194 | 10627.995 | BC034395  | 709.091   | 329.768   | NM_004317 | 10141.868 | 9093.283  |
| NM_018650 | 3086.45   | 3813.135  | NM_002479 | 1044.261  | 1298.617  | NM_014645 | 3998.41   | 3692.282  |
| AK026945  | 33690.199 | 36824.094 | NM_000348 | 5454.844  | 6243.705  | NM_014708 | 4227.888  | 3894.523  |
| NM_002828 | 10547.517 | 11238.016 | NM_005059 | 1206.054  | 1378.621  | NM_003693 | 2065.75   | 1259.343  |
| NM_014368 | 2558.841  | 2832.585  | NM_004950 | 2366.97   | 3274.27   | NM_000356 | 32314.568 | 34808.582 |
| M33197    | 61468.969 | 60091.215 | NM_006493 | 4151.523  | 4298.442  | NM_018134 | 47446.383 | 49542.563 |
| NM_001398 | 18235.533 | 17874.475 | U76362    | 3188.398  | 2502.906  | NM_013247 | 7776.124  | 6204.071  |
| AB050049  | 9882.31   | 9911.708  | AF040248  | 753.016   | 521.087   | NM_006770 | 2336.963  | 1854.693  |
| J05125    | 1348.952  | 1458.521  | NM_014228 | 1377.819  | 1464.303  | BE394704  | 487.848   | 542.762   |
| NM_005164 | 1047.976  | 1049.133  | AL832292  | 6194.548  | 6936.019  | NM_004703 | 3698.449  | 2698.033  |
| NM_001995 | 3152.85   | 3047.196  | NM_003045 | 11508.202 | 12920.941 | NM_001512 | 1293.427  | 901.146   |
| NM_000183 | 12590.121 | 13018.086 | NM_005662 | 45361.563 | 44498.387 | NM_014706 | 8696.633  | 6027.34   |
| AY004175  | 3753.784  | 3460.712  | NM_003060 | 816.346   | 1197.896  | AK023172  | 582.272   | 355.145   |
| M33197    | 63020.957 | 63114.309 | AK021489  | 33664.879 | 43453.43  | AJ001348  | 894.061   | 852.438   |
| NM_012327 | 1948.106  | 1879.62   | NM_004525 | 501.506   | 1099.488  | NM_014007 | 1380.134  | 1203.803  |

|           |           |           |           |           |           |           |           |           |
|-----------|-----------|-----------|-----------|-----------|-----------|-----------|-----------|-----------|
| NM_000904 | 7994.558  | 7532.603  | NM_003895 | 1393.029  | 1936.019  | AB033006  | 3566.841  | 3093.91   |
| NM_016048 | 8513.726  | 9128.177  | NM_004317 | 12245.718 | 17861.816 | AF020314  | 1629.719  | 1155.913  |
| NM_000375 | 9115.356  | 10866.413 | NM_014645 | 4353.449  | 6538.621  | NM_016332 | 6894.941  | 6123.103  |
| NM_000265 | 516.087   | 746.892   | NM_014708 | 4814.688  | 7058.075  | AK023936  | 969.038   | 455.749   |
| NM_018849 | 2188.726  | 2610.874  | NM_003693 | 1920.721  | 1899.856  | NM_006457 | 2918.447  | 3049.757  |
| AJ000096  | 884.041   | 1386.637  | NM_000356 | 25507.977 | 27746.688 | AF000381  | 2370.054  | 1458.859  |
| M16796    | 728.65    | 819.067   | NM_018134 | 48566.293 | 51313.188 | NM_012105 | 6435.934  | 4479.01   |
| AF015910  | 9089.938  | 6785.886  | NM_013247 | 8436.381  | 8921.562  | S82470    | 4744.53   | 4017.815  |
| BC009993  | 4793.516  | 4236.062  | NM_006770 | 3100.243  | 3893.79   | AB020695  | 2572.219  | 1804.505  |
| M33197    | 59839.5   | 58535.047 | BE394704  | 858.768   | 1581.995  | AB028982  | 1226.829  | 1153.577  |
| NM_016824 | 7259.458  | 7535.226  | NM_004703 | 3046.921  | 2817.012  | NM_002004 | 2400.29   | 2143.865  |
| NM_003031 | 6331.945  | 6907.35   | NM_001512 | 783.275   | 714.48    | NM_005121 | 1589.744  | 1417.378  |
| NM_007170 | 1972.729  | 2230.674  | NM_014706 | 7730.444  | 7783.883  | NM_020221 | 1276.383  | 1063.374  |
| NM_003008 | 2868.568  | 2713.343  | AK023172  | 558.994   | 865.851   | NM_000747 | 2597.706  | 1948.518  |
| NM_004100 | 3624.262  | 3119.013  | AF139768  | 383.999   | 668.876   | NM_005415 | 3413.769  | 2584.813  |
| M33197    | 63664.703 | 61291.266 | AJ001348  | 924.611   | 1033.864  | AJ275973  | 19006.592 | 13552.973 |
| AK027244  | 3166.671  | 3858.983  | NM_007255 | 3111.315  | 2817.684  | NM_006493 | 4300.997  | 3725.015  |
| L40520    | 6499.146  | 8197.342  | NM_003668 | 7869.873  | 7928.536  | U76362    | 4757.981  | 3841.823  |
| NM_002633 | 21522.047 | 16843.193 | NM_013384 | 51531.758 | 53727.246 | AF040248  | 643.901   | 832.444   |
| M33197    | 58862.355 | 58608.234 | NM_001187 | 2691.509  | 4163.114  | NM_014228 | 920.507   | 735.441   |
| NM_002878 | 5359.346  | 6268.287  | NM_018241 | 5117.124  | 6353.118  | AL832292  | 5920.326  | 4432.833  |
| NM_002412 | 1311.505  | 964.202   | NM_005834 | 11577.99  | 13263.145 | NM_003045 | 8226.408  | 7122.045  |
| NM_017723 | 1667.784  | 2316.305  | AF000381  | 6107.504  | 7322.04   | NM_002618 | 2705.657  | 2928.385  |
| AK022922  | 3028.938  | 2757.388  | NM_018075 | 645.143   | 442.031   | L27479    | 837.759   | 663.146   |
| NM_006462 | 9664.338  | 11094.672 | NM_012105 | 4946.681  | 6200.47   | NM_002193 | 1232.084  | 1114.953  |
| NM_000400 | 11645.209 | 15166.72  | S82470    | 5392.996  | 4408.869  | NM_001388 | 8088.437  | 7118.784  |
| NM_015885 | 4157.054  | 4154.412  | AB020695  | 2294.465  | 2130.202  | X76770    | 3754.903  | 2874.962  |
| NM_015885 | 60926.496 | 60550.688 | AB028982  | 1140.753  | 1103.23   | AB037808  | 1016.073  | 1035.739  |
| NM_000212 | 947.313   | 870.14    | NM_002004 | 3123.545  | 3918.031  | NM_016038 | 4269.776  | 3565.881  |
| M33197    | 61767.254 | 63557.508 | NM_005121 | 1314.839  | 1893.411  | Z36821    | 8234.633  | 7571.45   |
| NM_004276 | 8293.979  | 8329.851  | NM_020221 | 1262.832  | 1326.197  | AF289485  | 5256.065  | 4115.177  |
| NM_002332 | 25937.375 | 22340.439 | NM_000747 | 2670.93   | 1991.036  | AF130092  | 2392.958  | 1766.387  |
| NM_002859 | 3280.045  | 3481.332  | NM_005415 | 3390.523  | 2613.706  | AK024794  | 1720.42   | 1304.985  |
| NM_005246 | 2822.417  | 2436.122  | AL137708  | 206.824   | 586.697   | NM_019853 | 12061.378 | 8236.455  |
| NM_017651 | 1552.109  | 1602.051  | AJ275973  | 16019.95  | 21520.76  | NM_017992 | 4347.201  | 3272.703  |
| AF161339  | 6982.416  | 8978.323  | AL834159  | 3603.732  | 4844.234  | NM_005400 | 796.341   | 532.392   |
| M33197    | 62924.242 | 65007.551 | NM_000164 | 15716.52  | 11849.348 | AK023061  | 585.282   | 603.782   |
| AL137662  | 818.94    | 1143.992  | NM_016217 | 14234.546 | 14175.914 | NM_007255 | 2283.127  | 2168.395  |
| AK000354  | 4550.091  | 4356.141  | AK025971  | 4256.381  | 3838.668  | NM_003668 | 10708.071 | 8788.899  |
| AL161984  | 1030.102  | 854.885   | NM_002618 | 3318.728  | 3964.386  | NM_013384 | 57845.289 | 50827.652 |
| NM_003950 | 804.372   | 732.61    | L27479    | 826.207   | 795.405   | NM_001187 | 2251.556  | 1664.497  |
| NM_014882 | 2474.438  | 2287.492  | NM_002193 | 1344.429  | 1000.075  | NM_018241 | 5400.844  | 4102.699  |
| NM_000836 | 1778.993  | 1689.127  | NM_001388 | 10528.366 | 9258.803  | NM_005834 | 8074.405  | 6001.896  |
| NM_001510 | 1408.745  | 1549.214  | X76770    | 3550.385  | 3106.899  | NM_000724 | 2070.598  | 1985.708  |
| AK024474  | 8002.213  | 7906.26   | AB037808  | 2839.951  | 2582.619  | NM_002557 | 6916.417  | 8120.618  |
| NM_006862 | 1238.824  | 1363.853  | AF289485  | 6857.04   | 7894.751  | BI762229  | 18742.215 | 17099.262 |
| NM_017901 | 2082.135  | 2562.94   | AF130092  | 1761.494  | 1889.34   | BG618320  | 3359.512  | 2276.439  |
| NM_004272 | 6234.681  | 6307.336  | AK024794  | 1954.461  | 1829.361  | Y00787    | 1258.712  | 1049.917  |
| NM_017589 | 4351.259  | 4185.782  | NM_019853 | 9139.59   | 7047.302  | NM_007276 | 4771.281  | 3015.547  |
| AK023582  | 2723.375  | 2573.574  | NM_017992 | 4129.868  | 4248.938  | N34462    | 2932.859  | 1716.015  |
| NM_000358 | 1946.506  | 1796.799  | NM_005400 | 876.296   | 772.442   | AI658778  | 1942.287  | 1581.44   |
| NM_001930 | 23390.9   | 20379.465 | AK023061  | 869.831   | 1631.767  | L19067    | 6319.545  | 4940.362  |
| AK025270  | 2159.624  | 1943.891  | NM_014061 | 837.458   | 874.901   | Z48482    | 862.428   | 512.895   |



|           |           |           |           |           |           |           |           |           |
|-----------|-----------|-----------|-----------|-----------|-----------|-----------|-----------|-----------|
| NM_001564 | 6668.185  | 5209.352  | BC034395  | 730.23    | 234.538   | W60413    | 598.184   | 609.841   |
| M33197    | 63207.746 | 60214     | NM_002479 | 734.444   | 510.876   | BI823365  | 3225.974  | 2531.365  |
| AF263537  | 8497.169  | 8084.883  | NM_000348 | 3474.026  | 2860.17   | X06318    | 6024.82   | 4922.427  |
| NM_015895 | 19435.113 | 19916.262 | NM_005059 | 1112.547  | 705.043   | AL834159  | 3628.905  | 2957.95   |
| NM_004675 | 869.281   | 753.934   | NM_004950 | 2426.834  | 1813.568  | NM_000164 | 24671.625 | 23985.943 |
| NM_000189 | 2959.782  | 3064.178  | NM_000724 | 4682.07   | 4032.602  | NM_016217 | 17761.637 | 14739.223 |
| AL050050  | 2849.205  | 2186.431  | NM_002557 | 8172      | 5532.051  | AK025971  | 4081.104  | 2776.901  |
| NM_005256 | 824.014   | 988.004   | BE728156  | 338.157   | 475.373   | NM_014007 | 1253.484  | 933.612   |
| NM_004690 | 2565.927  | 2184.281  | AI417775  | 355.84    | 281.166   | AB033006  | 3897.812  | 3727.017  |
| M33197    | 55217.371 | 54332.363 | BI762229  | 20250.484 | 18035.281 | AF020314  | 1489.618  | 1434.25   |
| NM_013374 | 48174.957 | 49952.488 | BG618320  | 2284.778  | 1922.758  | NM_016332 | 5933.938  | 7137.1    |
| NM_003252 | 11721.407 | 12782.319 | Y00787    | 980.616   | 984.997   | NM_006457 | 2663.319  | 3023.778  |
| NM_001228 | 5740.742  | 5499.663  | NM_007276 | 3462.456  | 2879.398  | NM_003682 | 803.728   | 1077.661  |
| AK026607  | 836.34    | 781.643   | N34462    | 1865.536  | 1998.419  | NM_000207 | 1554.071  | 1654.987  |
| NM_016561 | 54000.98  | 58802.059 | AI658778  | 2091.862  | 2333.451  | NM_002531 | 1722.354  | 1396.578  |
| NM_014245 | 33183.867 | 42060.977 | L19067    | 6227.483  | 4968.983  | NM_006314 | 9922.831  | 11468.354 |
| M33197    | 60970.336 | 64260.289 | Z48482    | 791.497   | 587.138   | NM_001782 | 1672.205  | 1735.917  |
| L36531    | 1058.568  | 770.723   | W60413    | 819.836   | 762.443   | NM_002754 | 416.243   | 465.222   |
| AL110226  | 16160.735 | 19526.172 | BI823365  | 4530.581  | 5394.994  | NM_000797 | 5554.483  | 5960.223  |
| AB046822  | 2587.579  | 2667.765  | X06318    | 8894.581  | 11678.322 | NM_016293 | 12303.376 | 12313.631 |
| M33197    | 3571.288  | 3044.703  | NM_004703 | 2783.572  | 2720.527  | AL080148  | 3595.79   | 3014.012  |
| AK024809  | 1356.442  | 1178.745  | NM_001512 | 853.131   | 566.951   | NM_006731 | 1037.74   | 831.503   |
| NM_000308 | 6362.964  | 5284.372  | NM_014706 | 7704.85   | 7812.275  | NM_020134 | 785.312   | 418.079   |
| X69636    | 2855.771  | 3196.187  | AJ001348  | 1105.055  | 754.879   | NM_014061 | 998.287   | 629.79    |
| NM_004173 | 2811.095  | 3283.208  | NM_014007 | 1226.049  | 911.05    | NM_002479 | 1075.849  | 728.568   |
| NM_013974 | 6624.725  | 7253.338  | AB033006  | 3751.322  | 2537.703  | NM_000348 | 3014.486  | 2176.306  |
| NM_017547 | 6049.043  | 5490.512  | AF020314  | 1712.16   | 1364.525  | NM_005059 | 977.304   | 1007.631  |
| NM_003983 | 8389.212  | 10021.012 | NM_016332 | 9948.203  | 7498.123  | NM_004950 | 1675.674  | 1481.284  |
| AK023708  | 1803.551  | 1680.043  | AK023936  | 462.007   | 307.2     | NM_006493 | 4167.108  | 3451.752  |
| NM_002108 | 764.916   | 1130.789  | NM_006457 | 2073.114  | 2221.429  | U76362    | 5595.904  | 5169.994  |
| M33197    | 63473.355 | 62687.668 | NM_003682 | 821.606   | 794.651   | AF040248  | 865.642   | 795.054   |
| NM_018464 | 35691.102 | 44332.301 | NM_000207 | 514.15    | 440.107   | NM_014228 | 1306.247  | 1184.784  |
| D43948    | 6660.53   | 5907.338  | NM_002531 | 351.297   | 853.499   | AL832292  | 6229.497  | 6425.647  |
| NM_012310 | 12296.533 | 14285.72  | NM_006314 | 6938.071  | 7370.63   | NM_003060 | 705.62    | 691.895   |
| BE410824  | 946.121   | 973.645   | NM_001782 | 1897.153  | 1498.968  | AK021489  | 36910.09  | 36291.125 |
| BF382116  | 8513.985  | 9326.912  | NM_002754 | 304.322   | 415.503   | NM_004525 | 624.928   | 629.732   |
| NM_003193 | 12288.137 | 11030.495 | NM_000797 | 1979.023  | 2435.99   | NM_003895 | 1190.603  | 967.405   |
| AF113216  | 1744.536  | 2069.584  | NM_014927 | 402.878   | 460.656   | NM_004317 | 11050.335 | 10947.416 |
| NM_005197 | 8123.83   | 6943.809  | NM_016293 | 9688.52   | 11974.15  | NM_014645 | 4442      | 4796.157  |
| AL137421  | 21872.955 | 19310.248 | AF217525  | 521.353   | 729.98    | NM_014708 | 3836.224  | 4152.44   |
| M33197    | 61501.559 | 61810.68  | AL080148  | 3921.469  | 3078.89   | NM_003693 | 1526.338  | 1416.196  |
| NM_007241 | 2452.032  | 2130.523  | NM_006731 | 1291.8    | 928.352   | NM_000356 | 31232.453 | 31980.84  |
| NM_000124 | 1125.857  | 950.423   | NM_020221 | 1389.285  | 823.22    | NM_018134 | 48190.668 | 54194.223 |
| NM_017996 | 9085.181  | 8683.342  | NM_000747 | 2675.846  | 1713.608  | NM_013247 | 8173.348  | 8663.94   |
| NM_004269 | 11415.225 | 11843.378 | NM_005415 | 3198.289  | 2263.276  | NM_006770 | 2728.031  | 3138.929  |
| NM_003409 | 2058.134  | 2126.622  | AL137708  | 426.787   | 603.772   | BE394704  | 568.646   | 775.027   |
| D31765    | 1813.362  | 2108.195  | AJ275973  | 18078.932 | 28651.021 | NM_004703 | 4180.788  | 5535.151  |
| NM_006107 | 14465.878 | 14611.337 | NM_006493 | 3820.335  | 3731.931  | NM_001512 | 1541.682  | 1518.873  |
| NM_004175 | 3092.781  | 2914.313  | U76362    | 3989.012  | 4330.773  | NM_014706 | 11758.616 | 14495.68  |
| AF288288  | 8141.56   | 8993.539  | AF040248  | 685.157   | 754.967   | AK023172  | 770.249   | 861.729   |
| NM_017646 | 7026.715  | 7493.934  | NM_014228 | 1819.684  | 2280.055  | AF139768  | 468.097   | 434.365   |
| AL050368  | 3105.453  | 3046.544  | AL832292  | 4358.97   | 4539.049  | AJ001348  | 829.755   | 767.385   |
| NM_003092 | 28030.221 | 36329.719 | NM_003045 | 6920.614  | 7081.014  | NM_007255 | 2487.313  | 2169.96   |

|           |           |           |           |           |           |           |           |           |
|-----------|-----------|-----------|-----------|-----------|-----------|-----------|-----------|-----------|
| M33197    | 59008.879 | 62494.801 | NM_005662 | 43244.016 | 49814.188 | NM_00366E | 10968.458 | 10325.845 |
| NM_005861 | 789.267   | 1466.607  | NM_00306C | 740.719   | 533.674   | NM_013384 | 60232.59  | 54200.957 |
| NM_01884E | 5073.257  | 5302.155  | AK021489  | 23238.182 | 24076.463 | NM_001187 | 2597.41   | 2439.394  |
| NM_00376C | 3285.211  | 2908.467  | NM_00452E | 440.28    | 687.219   | NM_018241 | 5379.03   | 5434.423  |
| AB037759  | 3106.231  | 2710.05   | NM_00389E | 1032.84   | 1038.902  | AF000381  | 6889.887  | 7843.087  |
| AK025998  | 6574.66   | 5867.168  | NM_004317 | 11017.527 | 16298.221 | NM_01210E | 7521.945  | 6839.36   |
| AL080080  | 13668.54  | 14390.28  | NM_01464E | 2962.275  | 3218.121  | S82470    | 5827.985  | 5549.143  |
| NM_01848E | 2329.176  | 2393.934  | NM_01470E | 2791.236  | 2891.107  | AB020695  | 3022.436  | 2339.25   |
| NM_01788C | 3294.554  | 3083.029  | NM_00369E | 1419.292  | 1491.082  | AB028982  | 888.903   | 1079.932  |
| AF090945  | 3733.338  | 4188.528  | NM_00035E | 22683.336 | 23215.852 | NM_002004 | 2359.026  | 2453.224  |
| M33197    | 63721.867 | 61325.207 | NM_018134 | 37741.508 | 24432.699 | NM_005121 | 1661.737  | 1877.274  |
| NM_001161 | 14188.28  | 15639.895 | NM_013247 | 9825.458  | 12199.552 | NM_00164E | 24900.594 | 24404.201 |
| NM_004044 | 14816.324 | 15915.135 | NM_00677C | 2753.734  | 2650.046  | NM_020221 | 1537.758  | 1848.869  |
| NM_000221 | 14940.794 | 16103.919 | BE394704  | 570.998   | 828.288   | NM_000747 | 3550.737  | 3875.198  |
| H75678    | 3959.712  | 3991.137  | AK024794  | 1675.461  | 1627.681  | NM_00541E | 4684.191  | 5055.672  |
| NM_00253E | 1734.345  | 1603.88   | NM_01985E | 8426.493  | 7500.377  | AL137708  | 494.173   | 550.541   |
| AB002359  | 2306.177  | 2405.392  | NM_01799E | 3603.741  | 3551.039  | AJ275973  | 22848.078 | 23868.561 |
| M33197    | 6397.451  | 6081.339  | NM_00540C | 1085.241  | 738.037   | AL834159  | 3636.924  | 3314.554  |
| AB007864  | 1355.491  | 1537.825  | AK023061  | 701.534   | 922.177   | NM_016217 | 20930.422 | 22689.813 |
| NM_00219E | 6603.167  | 7116.48   | NM_00725E | 2815.629  | 2419.512  | AK025971  | 4172.873  | 4960.741  |
| AF024693  | 1049.604  | 1230.867  | NM_00366E | 9342.474  | 9163.912  | NM_00261E | 4210.896  | 5030.835  |
| AK025905  | 3067.878  | 3900.774  | NM_013384 | 55920.082 | 52558.348 | L27479    | 1222.371  | 1058.556  |
| AL121733  | 3086.95   | 3231.709  | NM_001187 | 1427.432  | 1531.301  | NM_00219E | 2003.055  | 2246.509  |
| M33197    | 60488.102 | 57770.785 | NM_018241 | 3435.8    | 3263.646  | NM_00138E | 9857.117  | 10922.285 |
| NM_01753E | 1298.086  | 1397.147  | NM_005834 | 9033.634  | 8712.089  | X76770    | 3939.498  | 4876.168  |
| NM_01448C | 1748.895  | 2189.242  | AF000381  | 4247.254  | 4920.664  | AB037808  | 2601.71   | 2589.229  |
| NM_00593E | 1854.703  | 1772.756  | NM_01807E | 681.834   | 693.387   | NM_01603E | 4224.629  | 5007.988  |
| NM_01416E | 11299.598 | 11756.354 | NM_01210E | 4534.153  | 5069.123  | Z36821    | 10476.417 | 10835.431 |
| NM_004964 | 35760.66  | 35375.215 | S82470    | 5263.553  | 5364.927  | AF289485  | 6394.65   | 6438.217  |
| AL117497  | 1581.797  | 1672.417  | AB020695  | 869.023   | 1000.083  | AF130092  | 2732.78   | 3723.473  |
| AK023612  | 1702.484  | 1424.778  | AB028982  | 752.116   | 756.94    | NM_01609E | 9096.717  | 9488.634  |
| M33197    | 63693.75  | 59442.758 | NM_002004 | 2866.407  | 2922.62   | AK024794  | 2193.091  | 2386.347  |
| AF147360  | 1394.047  | 1354.398  | NM_005121 | 1277.461  | 1577.147  | NM_01985E | 13336.337 | 12564.784 |
| AL137269  | 19288.283 | 22788.115 | NM_01909E | 4841.01   | 6168.22   | NM_01799E | 5005.308  | 4827.527  |
| AK021983  | 3536.431  | 3412.822  | NM_01472E | 1751.92   | 1379.351  | NM_00540C | 840.604   | 832.438   |
| Y11681    | 17220.91  | 18407.447 | NM_00689E | 3256.99   | 2946.36   | AK023061  | 1083.786  | 908.681   |
| AL110135  | 16939.5   | 14877.354 | NM_019117 | 1908.358  | 1607.885  | NM_014061 | 803.944   | 757.737   |
| NM_00699E | 27478.051 | 26367.744 | NM_01830E | 3136.299  | 3265.107  | BC034395  | 445.117   | 517.82    |
| NM_00233E | 1076.481  | 978.236   | NM_01765E | 3944.555  | 3007.963  | NM_00034E | 4228.455  | 3971.75   |
| M33197    | 67297.813 | 69329.008 | NM_01867E | 6670.236  | 5309.819  | NM_00505E | 929.993   | 1355.612  |
| AF086429  | 663.307   | 873.34    | NM_01664E | 618.747   | 773.615   | NM_00495C | 1988.754  | 2404.283  |
| AF086302  | 1857.273  | 1732.592  | NM_00677E | 2911.125  | 2756.909  | NM_000724 | 4035.333  | 4040.989  |
| AF086439  | 669.052   | 787.994   | NM_016217 | 11073.602 | 9497.741  | NM_002557 | 9596.852  | 11109.355 |
| M33197    | 60163.133 | 59911.676 | AK025971  | 3751.699  | 3443.551  | BE728156  | 443.768   | 531.212   |
| AF038171  | 2185.218  | 2002.541  | NM_00261E | 2938.076  | 2637.126  | AI417775  | 389.812   | 695.91    |
| AF052160  | 1183.172  | 1397.186  | L27479    | 740.065   | 956.118   | BI762229  | 18480.031 | 20274.648 |
| AK026512  | 1427.283  | 1762.441  | NM_00219E | 1158.733  | 1356.514  | BG618320  | 3358.111  | 3608.122  |
| M33197    | 62109.59  | 58585.16  | NM_00138E | 9348.084  | 7962.377  | Y00787    | 1478.038  | 1612.356  |
| AF085969  | 907.241   | 918.315   | X76770    | 3285.594  | 3033.59   | NM_00727E | 3718.946  | 3419.871  |
| AF144233  | 1535.997  | 1421.264  | AB037808  | 2506.607  | 2679.29   | N34462    | 2379.483  | 1851.478  |
| AK022986  | 954.599   | 943.183   | NM_01603E | 5645.532  | 5521.947  | AI658778  | 2247.562  | 2047.871  |
| AF085975  | 1163.333  | 973.048   | AF090911  | 420.648   | 404.257   | L19067    | 7194.199  | 7438.538  |
| AF075103  | 2193.751  | 2002.509  | Z36821    | 8899.459  | 7869.189  | Z48482    | 671.78    | 829.804   |

|           |           |           |           |           |           |           |           |           |
|-----------|-----------|-----------|-----------|-----------|-----------|-----------|-----------|-----------|
| AF085943  | 984.753   | 1082.028  | AF289485  | 7236.073  | 6569.71   | W60413    | 679.6     | 794.571   |
| M33197    | 67415.578 | 64702.555 | AF130092  | 1691.593  | 1683.387  | BI823365  | 3422.384  | 3802.198  |
| AL137390  | 3184.454  | 3507.214  | AF300612  | 49078.359 | 43641.645 | X06318    | 7096.699  | 7242.144  |
| AL137611  | 6408.982  | 6689.189  | AB014557  | 1274.211  | 1071.051  | NM_004703 | 3681.232  | 3657.844  |
| AL359566  | 26698.256 | 26026.877 | NM_005578 | 4624.407  | 3474.418  | NM_001512 | 1379.304  | 1343.231  |
| AL137427  | 2566.962  | 2539.206  | NM_003653 | 19658.578 | 16252.873 | NM_014706 | 9080.078  | 10225.472 |
| AL157460  | 1956.731  | 1811.713  | NM_018457 | 16676.602 | 14161.228 | AK023172  | 261.429   | 742.712   |
| AL359595  | 788.241   | 973.832   | NM_002953 | 7376.907  | 6494.357  | AJ001348  | 865.859   | 1064.796  |
| M33197    | 67081.211 | 66474.508 | NM_002187 | 933.644   | 1068.958  | NM_014007 | 1309.222  | 1811.078  |
| AF088010  | 627.627   | 599.556   | NM_014246 | 5348.195  | 5319.699  | AB033006  | 4376.059  | 4584.396  |
| AK026718  | 3630.553  | 3360.634  | NM_014859 | 958.466   | 1274.666  | AF020314  | 1786.441  | 1804.133  |
| AK022035  | 2976.998  | 3023.998  | NM_001116 | 827.692   | 632.781   | NM_016332 | 8014.18   | 7773.046  |
| M33197    | 61892.504 | 56560.91  | BC035395  | 9101.279  | 8552.253  | AK023936  | 664.383   | 847.877   |
| NM_004337 | 4188.275  | 4414.348  | NM_001703 | 11102.924 | 10151.151 | NM_006457 | 2822.95   | 3166.791  |
| AK022141  | 1134.902  | 1446.079  | NM_020126 | 5321.169  | 4733.715  | NM_003682 | 957.508   | 1028.585  |
| AK023942  | 2309.319  | 2434.407  | NM_013982 | 3914.597  | 4166.646  | NM_000207 | 918.169   | 958.818   |
| M33197    | 67397.609 | 67065.625 | NM_005049 | 3083.67   | 2636.821  | NM_002531 | 584.811   | 630.213   |
| AK022046  | 1130.623  | 1057.147  | NM_003882 | 623.462   | 636.905   | NM_006314 | 8549.259  | 9333.319  |
| AK027207  | 1385.716  | 1358.306  | NM_004630 | 10879.364 | 9666.37   | NM_001782 | 1375.146  | 1465.462  |
| AJ227892  | 2392.105  | 2644.515  | AK023001  | 8400.294  | 7695.456  | NM_000797 | 4872.251  | 4670.024  |
| M33197    | 62616.867 | 59205.539 | NM_014826 | 11322.671 | 11190.986 | NM_016293 | 10857.665 | 13320.875 |
| AK022013  | 1133.647  | 1301.477  | AF201947  | 1074.356  | 1071.635  | AF217525  | 330.847   | 661.425   |
| AK022155  | 1983.658  | 1981.333  | U01147    | 2162.011  | 1865.136  | AL080148  | 3739.389  | 3574.485  |
| AK022288  | 740.146   | 709.955   | NM_004040 | 9654.016  | 7733.172  | NM_006731 | 2381.073  | 2491.879  |
| AK021916  | 686.189   | 861.78    | NM_006116 | 3506.175  | 3340.922  | NM_018487 | 2229.053  | 2067.63   |
| AK024201  | 665.182   | 848.827   | NM_003587 | 7922.1    | 6755.059  | NM_020221 | 1235.013  | 1053.426  |
| AK022174  | 853.471   | 653.739   | X90978    | 1693.993  | 1825.658  | NM_000747 | 2857.549  | 3243.991  |
| M33197    | 59573.848 | 63061.352 | BF219403  | 25192.674 | 22039.367 | NM_005415 | 4394.225  | 4733.446  |
| AL359626  | 586.889   | 682.758   | NM_016119 | 4939.003  | 5092.368  | AJ275973  | 20459.158 | 23943.822 |
| AK021589  | 827.422   | 944.542   | AK075450  | 2073.598  | 2117.305  | NM_006493 | 4570.598  | 4782.303  |
| D17152    | 15801.396 | 15349.979 | AF178983  | 3408.069  | 3750.678  | U76362    | 5725.371  | 6679.22   |
| AK024464  | 19524.309 | 19159.15  | NM_001324 | 8381.378  | 7839.859  | AF040248  | 804.6     | 1108.411  |
| AK026748  | 1263.7    | 1189.003  | AB037795  | 2290.15   | 2121.397  | NM_014228 | 715.478   | 973.728   |
| AK023638  | 1437.609  | 1700.946  | D43949    | 3449.305  | 3747.008  | AL832292  | 5518.463  | 5792.836  |
| M33197    | 2373.907  | 1688.916  | AF111849  | 46908.641 | 42608.5   | NM_003045 | 9032.02   | 10541.365 |
| AK025423  | 10648.854 | 8931.396  | AK022975  | 1169.776  | 1059.135  | NM_005662 | 48465.43  | 47290.441 |
| AL050022  | 892.965   | 822.822   | NM_015344 | 4718.132  | 4632.945  | NM_003060 | 739.274   | 866.794   |
| M33197    | 64147.211 | 62113.234 | NM_004288 | 2327.783  | 2434.945  | AK021489  | 32625.213 | 29176.289 |
| AK024161  | 2118.215  | 2223.797  | AL122055  | 3276.335  | 3118.24   | NM_004525 | 538.511   | 647.674   |
| AK021682  | 4109.175  | 4467.52   | NM_005132 | 20944.996 | 18102.25  | NM_003895 | 1067.015  | 1005.173  |
| AJ012500  | 1755.687  | 1641.435  | X07695    | 484.412   | 373.543   | NM_004317 | 8906.124  | 7658.447  |
| AF085833  | 1144.067  | 1155.461  | D87458    | 995.078   | 872.472   | NM_014645 | 3668.422  | 3035.67   |
| L19368    | 557.186   | 1078.807  | NM_001399 | 378.706   | 350.526   | NM_014708 | 3782.906  | 3541.11   |
| U00944    | 1115.794  | 1678.478  | AK021750  | 4860.962  | 4361.792  | NM_003693 | 1077.775  | 1206.368  |
| BC035058  | 7098.208  | 7117.495  | NM_003626 | 2333.427  | 2396.076  | NM_000356 | 21670.123 | 22270.199 |
| X57566    | 7643.361  | 8251.699  | NM_006932 | 570.801   | 762.032   | NM_018134 | 46677.41  | 53600.121 |
| M33197    | 62726.621 | 62395.277 | AK023594  | 6687.378  | 5957.447  | NM_013247 | 8919.297  | 7515.305  |
| NM_018616 | 19021.594 | 19119.314 | AB010099  | 15470.053 | 13899.592 | NM_006770 | 2356.924  | 2538.202  |
| AK023809  | 2993.806  | 3591.336  | AB039920  | 5196.519  | 4990.738  | BE394704  | 1287.822  | 2226.037  |
| M87943    | 61177.586 | 59915.309 | AB046782  | 2384.248  | 2714.99   | AK024794  | 1955.002  | 2162.45   |
| AL360137  | 1690.884  | 2248.816  | NM_004190 | 21831.295 | 22261.574 | NM_019853 | 14492.208 | 14277.494 |
| U28131    | 47924.711 | 49959.27  | NM_014275 | 5598.981  | 6204.483  | NM_017992 | 5591.511  | 5329.794  |
| AY007106  | 7332.693  | 9029.158  | NM_000409 | 4494.903  | 4912.216  | NM_005400 | 1543.841  | 1986.131  |

|           |           |           |           |           |           |           |           |           |
|-----------|-----------|-----------|-----------|-----------|-----------|-----------|-----------|-----------|
| M33197    | 62795.383 | 59322.844 | AF208005  | 2061.705  | 2753.144  | AK023061  | 813.219   | 854.441   |
| AF048848  | 863.342   | 707.36    | NM_002231 | 18909.266 | 20257.643 | NM_007255 | 3631.899  | 3673.903  |
| NM_006085 | 28801.26  | 33196.355 | NM_020474 | 13934.901 | 12825.021 | NM_003665 | 12948.311 | 12687.193 |
| NM_018265 | 774.751   | 896.162   | NM_002643 | 3951.57   | 4237.91   | NM_013384 | 60524.527 | 51752.156 |
| AF130086  | 1295.871  | 1845.13   | NM_017807 | 7106.438  | 8490.741  | NM_001187 | 2044.092  | 1866.28   |
| AK023858  | 1958.586  | 1774.172  | NM_014746 | 2455.887  | 2865.659  | NM_018241 | 4999.314  | 5669.106  |
| M33197    | 62237.805 | 59072.887 | NM_000462 | 8646.782  | 8683.256  | NM_005834 | 8126.615  | 8488.833  |
| AF250920  | 4925.629  | 3323.991  | NM_003336 | 10693.539 | 9831.756  | AF000381  | 5958.694  | 5750.446  |
| NM_017733 | 4865.885  | 5806.075  | NM_005805 | 20779.459 | 19774.049 | NM_012105 | 6574.993  | 5828.338  |
| NM_014042 | 17077.643 | 17789.027 | NM_004181 | 529.375   | 647.584   | S82470    | 4421.352  | 3773.6    |
| M33197    | 59464.141 | 60642.848 | NM_003900 | 4147.014  | 4413.748  | AB020695  | 2538.395  | 1871.727  |
| AF317550  | 1567.241  | 976.979   | NM_003337 | 3664.536  | 4435.23   | AB028982  | 926.927   | 1223.851  |
| AK025416  | 1684.571  | 1501.758  | AF298152  | 3352.644  | 2409.997  | NM_002004 | 2596.048  | 2594.783  |
| AK022165  | 1137.723  | 938.015   | AF117233  | 8730.07   | 9090.918  | NM_005121 | 1824.633  | 1797.847  |
| AF090883  | 846.128   | 1269.934  | NM_015845 | 669.668   | 745.558   | NM_019096 | 5617.179  | 5512.581  |
| U23860    | 853.758   | 1268.794  | NM_001723 | 1677.63   | 1853.477  | NM_014725 | 2653.946  | 3057.439  |
| M33197    | 61908.953 | 60389.461 | NM_016015 | 1998.846  | 2643.604  | NM_006892 | 3675.427  | 4274.663  |
| AL049263  | 1139.124  | 1531.827  | M94362    | 18856.945 | 17952.039 | NM_019117 | 2126.387  | 2355.735  |
| AK022372  | 3806.476  | 4892.196  | AK024707  | 1336.126  | 1259.383  | NM_018305 | 4129.56   | 4707.579  |
| AJ227863  | 905.742   | 1070.927  | NM_014255 | 3828.859  | 3772.591  | NM_017655 | 5017.858  | 5637.375  |
| NM_003520 | 1080.847  | 977.242   | AK022909  | 1953.103  | 2099.58   | NM_018675 | 11486.066 | 12080.992 |
| AL137380  | 826.314   | 898.275   | NM_006530 | 14355.604 | 15007.516 | NM_016643 | 956.745   | 905.508   |
| M33197    | 61970.941 | 60422.082 | AB033024  | 1317.001  | 1006.955  | NM_006775 | 3631.857  | 3904.236  |
| AL137658  | 16917.398 | 21474.07  | NM_018942 | 2643.559  | 2333.755  | NM_016217 | 17969.406 | 17898.746 |
| D16888    | 753.269   | 849.903   | NM_005531 | 14946.327 | 19318.785 | AK025971  | 4392.918  | 4295.683  |
| U79277    | 758.192   | 718.531   | NM_006977 | 1949.685  | 2543.1    | NM_002615 | 3801.348  | 3275.373  |
| AF068298  | 7521.615  | 6909.057  | AF217226  | 6437.233  | 5582.125  | L27479    | 1063.98   | 952.344   |
| Z70770    | 1545.793  | 1790.152  | AL359578  | 509.479   | 602.295   | NM_002193 | 1460.612  | 1310.751  |
| AJ227900  | 5480.125  | 4489.554  | NM_005522 | 1930.098  | 3023.433  | NM_001385 | 6238.293  | 6733.874  |
| AK023242  | 1567.945  | 1489.885  | NM_005760 | 6042.083  | 6722.754  | X76770    | 3322.82   | 3283.07   |
| M33197    | 60640.461 | 57658.641 | NM_007265 | 3304.206  | 4281.011  | AB037808  | 2097.256  | 2123.398  |
| CY3Cy5    | 9034.025  | 499.51    | AK023639  | 6735.655  | 7619.592  | NM_016035 | 4353.218  | 4763.046  |
| BI762229  | 22344.373 | 24770.381 | AL122118  | 363.144   | 354.271   | Z36821    | 9620.039  | 10528.554 |
| Y00787    | 891.999   | 701.383   | AL137700  | 1104.942  | 1279.395  | AF289485  | 5833.388  | 6048.016  |
| NM_007275 | 4703.133  | 4843.171  | NM_004904 | 1180.429  | 1408.138  | AF130092  | 2301.144  | 2562.723  |
| N34462    | 1812.524  | 1822.689  | NM_003083 | 3243.534  | 3083.156  | AB014557  | 2083.235  | 2185.645  |
| AI658778  | 3669.261  | 4242.248  | NM_006789 | 2472      | 2897.615  | NM_005575 | 7969.966  | 5155.696  |
| L19067    | 8799.392  | 8474.349  | NM_000982 | 1727.746  | 2024.47   | NM_003653 | 21062.303 | 21796.279 |
| Z48482    | 815.501   | 884.514   | NM_012423 | 53978.535 | 55715.848 | NM_018457 | 22597.734 | 29185.109 |
| W60413    | 557.48    | 613.59    | AK026367  | 25266.418 | 21739.381 | NM_002953 | 7564.704  | 8153.612  |
| BI823365  | 4886.13   | 4215.376  | AK026491  | 10607.913 | 9598.387  | NM_002187 | 1337.402  | 1497.209  |
| X06318    | 9866.566  | 10107.901 | NM_001015 | 56777.73  | 60660.203 | NM_014245 | 6679.043  | 6809.813  |
| AL834159  | 2468.222  | 3451.66   | AL110170  | 19855.756 | 21528.787 | NM_014855 | 1575.583  | 1239.558  |
| NM_000164 | 547.597   | 589.04    | AK021747  | 1850.538  | 1697.23   | NM_001116 | 760.524   | 841.644   |
| SR9       | 30713.215 | 6230.823  | AK025640  | 7259.053  | 7491.81   | BC035395  | 9818.862  | 8322.938  |
| CY3Cy5    | 8500.416  | 281.033   | NM_019101 | 1661.469  | 1501.208  | NM_001703 | 12254.92  | 10320.127 |
| NM_003682 | 1646.969  | 1602.055  | NM_000920 | 2422.138  | 2671.154  | NM_020125 | 4458.273  | 4743.508  |
| NM_000207 | 817.859   | 992.178   | NM_020375 | 8147.741  | 8011.341  | NM_013982 | 3228.086  | 3044.516  |
| NM_001782 | 2655.407  | 3220.262  | NM_016049 | 15400.729 | 16542.166 | NM_005045 | 2959.179  | 3515.804  |
| NM_002754 | 979.876   | 840.289   | NM_013311 | 12250.987 | 13100.074 | NM_003882 | 585.359   | 725.627   |
| NM_000797 | 1198.411  | 1345.302  | NM_014649 | 4154.122  | 4104.425  | NM_004630 | 11529.264 | 11878.732 |
| NM_016293 | 9611.602  | 12698.733 | AL117488  | 2553.665  | 2315.526  | AK023001  | 9598.988  | 10573.19  |
| AF217525  | 585.343   | 460.551   | NM_012240 | 2253.599  | 2477.713  | NM_014825 | 11560.396 | 11257.593 |

|           |           |           |           |           |           |           |           |           |
|-----------|-----------|-----------|-----------|-----------|-----------|-----------|-----------|-----------|
| AL080148  | 900.294   | 687.895   | NM_019005 | 11445.571 | 11336.669 | AF201947  | 1505.061  | 1413.509  |
| NM_006731 | 1524.895  | 1716.997  | NM_004739 | 16341.218 | 16631.406 | U01147    | 2454.097  | 2647.438  |
| NM_020134 | 462.625   | 458.087   | AV752216  | 1152.646  | 1492.389  | NM_004040 | 12317.211 | 13027.367 |
| NM_014061 | 1032.531  | 770.78    | NM_005341 | 1994.429  | 2400.779  | NM_006116 | 4448.344  | 4799.987  |
| BC034395  | 414.945   | 565.927   | AF181999  | 1185.089  | 1292.33   | NM_005456 | 769.397   | 780.695   |
| NM_002479 | 584.062   | 860.211   | NM_001934 | 5221.958  | 4933.316  | X90978    | 2136.891  | 1890.028  |
| NM_000348 | 711.219   | 351.531   | AB011090  | 2041.052  | 2317.471  | BF219403  | 42104.938 | 50260.742 |
| NM_005059 | 1034.63   | 1315.642  | NM_000209 | 513.157   | 747.319   | NM_016119 | 5308.199  | 6058.194  |
| NM_000724 | 6403.746  | 6095.654  | NM_018682 | 8554.874  | 9725.214  | AK075450  | 5246.724  | 5365.505  |
| NM_002557 | 10546.521 | 10105.69  | NM_006545 | 13857.173 | 13303.685 | AF178983  | 6095.494  | 6507.495  |
| NM_005662 | 48499.402 | 57057.98  | NM_016534 | 3883.556  | 4325.089  | NM_001324 | 6551.963  | 6889.979  |
| NM_003060 | 1076.257  | 1125.95   | AB021923  | 932.359   | 1226.58   | AB037795  | 1961.303  | 2187.562  |
| AK021489  | 35824.199 | 42938.195 | AK024240  | 842.119   | 965.08    | D43949    | 2690.149  | 2746.543  |
| NM_004525 | 572.366   | 722.496   | NM_016456 | 44699.008 | 40250.688 | AK022975  | 1007.496  | 778.6     |
| NM_003895 | 1617.149  | 1680.437  | AK022677  | 3502.685  | 3766.357  | NM_015344 | 4275.842  | 4027.085  |
| NM_004317 | 17632.561 | 20831.488 | AF035288  | 357.302   | 514.169   | NM_004288 | 2241.189  | 1819.826  |
| NM_014645 | 4164.563  | 4646.332  | AL137645  | 7221.507  | 7279.987  | AL122055  | 3927.344  | 3663.942  |
| NM_014708 | 4702.885  | 5179.728  | AK026141  | 1625.285  | 2030.045  | NM_005132 | 21012.219 | 25632.816 |
| NM_003693 | 1325.65   | 1419.047  | AF217993  | 4900.821  | 5145.921  | D87458    | 1447.954  | 1479.789  |
| NM_000356 | 18286.648 | 19521.596 | AF131823  | 861.011   | 1046.772  | AK021750  | 4193.524  | 4355.14   |
| NM_018134 | 2837.405  | 2973.766  | AK026324  | 9514.151  | 9558.939  | NM_003626 | 2176.897  | 2667.115  |
| NM_013247 | 10088.595 | 11376.988 | AK025253  | 2389.586  | 2051.43   | NM_006932 | 527.413   | 810.769   |
| NM_006770 | 746.964   | 719.048   | AK025004  | 1436.259  | 1572.952  | AK023594  | 7090.912  | 7722.443  |
| BE394704  | 751.378   | 860.914   | AL136818  | 2059.368  | 2345.806  | AB032989  | 439.205   | 554.117   |
| NM_004703 | 3303.147  | 3963.842  | AF146798  | 2309.553  | 2348.909  | AB010099  | 19259.156 | 23642.223 |
| NM_001512 | 1073.793  | 908.797   | AK022049  | 522.925   | 684.956   | AB039920  | 6244.907  | 7208.904  |
| NM_014706 | 9479.405  | 9475.364  | AF086517  | 6427.627  | 5615.22   | AB046782  | 2746.184  | 3052.006  |
| AK023172  | 814.917   | 891.279   | AK025740  | 19019.305 | 25026.367 | NM_004190 | 22465.348 | 19425.457 |
| AJ001348  | 228.373   | 524.772   | AK000311  | 7250.997  | 9447.143  | NM_014275 | 6214.755  | 6701.099  |
| NM_014007 | 1869.466  | 2032.84   | AK025346  | 54857.367 | 55776.402 | NM_000409 | 4365.239  | 4937.867  |
| AB033006  | 1264.776  | 1245.844  | AK022583  | 6610.178  | 7090.566  | AF208005  | 1565.71   | 1606.954  |
| AF020314  | 2645.219  | 2349.06   | AL137534  | 57465.465 | 57302.66  | NM_002231 | 14604.119 | 15250.187 |
| NM_016332 | 5581.039  | 5103.075  | AF052121  | 2766.003  | 2824.662  | NM_020474 | 15471.176 | 14093.33  |
| AK023936  | 418.826   | 510.836   | AL359062  | 1945.483  | 2317.794  | NM_002643 | 4502.64   | 4829.346  |
| NM_006457 | 3792.705  | 3925.972  | AK026869  | 2388.483  | 2131.968  | NM_017807 | 7387.89   | 6790.44   |
| AF000381  | 5563.501  | 5800.013  | AK023150  | 798.783   | 664.436   | NM_014746 | 2703.699  | 2330.288  |
| NM_018075 | 1282.159  | 1558.665  | AK022192  | 893.404   | 622.856   | NM_000462 | 11147.82  | 10750.027 |
| NM_012105 | 7675.263  | 7711.319  | NM_019099 | 56675.313 | 54341.738 | NM_003336 | 10305.765 | 10184.656 |
| S82470    | 8557.212  | 8807.593  | AJ227904  | 313.492   | 452.234   | NM_005805 | 26206.75  | 31963.033 |
| AB020695  | 3518.146  | 3523.148  | Y12020    | 21375.473 | 20961.896 | NM_003900 | 3653.539  | 3288.806  |
| AB028982  | 875.056   | 1121.861  | AJ001905  | 1148.151  | 1329.496  | NM_003337 | 3907.605  | 3786.939  |
| NM_002004 | 3941.547  | 4171.289  | U17635    | 1519.561  | 1950.237  | AF298152  | 4384.488  | 3251.941  |
| NM_005121 | 2613.318  | 2143.552  | AL049930  | 584.28    | 970.156   | AF117233  | 11150.785 | 10234.817 |
| NM_020221 | 903.562   | 844.428   | L23870    | 583.436   | 825.71    | NM_015848 | 918.617   | 747.088   |
| NM_000747 | 3731.123  | 3235.579  | D55644    | 592.132   | 558.754   | NM_001723 | 2201.41   | 2170.409  |
| NM_005415 | 5619.202  | 5298.496  | D16951    | 753.536   | 640.146   | NM_016018 | 2990.733  | 3278.708  |
| AJ275973  | 16501.986 | 18255.002 | L19362    | 650.274   | 505.318   | M94362    | 20968.461 | 24673.754 |
| NM_006493 | 5389.242  | 5410.628  | L33807    | 1805.915  | 1999.394  | AK024707  | 1424.35   | 1573.313  |
| NM_014228 | 1058.574  | 1015.923  | U80774    | 391.646   | 508.208   | NM_014255 | 2037.353  | 2088.454  |
| AL832292  | 6468.673  | 5863.093  | AB007975  | 1014.053  | 1203.057  | AK022909  | 2177.521  | 2921.624  |
| NM_003045 | 5726.282  | 6069.353  | AL137603  | 409.544   | 568.695   | NM_006530 | 18679.344 | 19680.338 |
| NM_002618 | 3925.952  | 3919.836  | AK026888  | 685.369   | 661.941   | AB033024  | 1439.83   | 1492.328  |
| L27479    | 1797.788  | 1710.068  | AK021821  | 1080.396  | 1191.485  | NM_018942 | 2719.094  | 3508.584  |

|           |           |           |           |           |           |           |           |           |
|-----------|-----------|-----------|-----------|-----------|-----------|-----------|-----------|-----------|
| NM_002193 | 1982.863  | 2262.81   | AL049328  | 1098.943  | 1517.356  | NM_005531 | 17088.633 | 17173.387 |
| NM_00138E | 9324.535  | 12414.133 | AK000030  | 1881.354  | 1851.583  | NM_006977 | 2507.539  | 2362.853  |
| X76770    | 5344.985  | 5351.376  | NM_017932 | 1256.094  | 1323.785  | AF217226  | 10297.249 | 9898.896  |
| AB037808  | 4962.444  | 5167.716  | AK000910  | 2774.038  | 3565.169  | NM_005522 | 1948.607  | 1873.157  |
| NM_01603E | 10846.995 | 11616.073 | AF252280  | 8961.042  | 12124.999 | NM_00576C | 16370.457 | 15188.589 |
| AF090911  | 1184.945  | 974.492   | AK000107  | 945.713   | 1146.152  | NM_00726E | 4752.692  | 5561.506  |
| Z36821    | 9979.904  | 11920.452 | AK000795  | 936.909   | 486.865   | AK023639  | 8395.151  | 8221.28   |
| AF289485  | 11215.843 | 11899.921 | AK000951  | 776.317   | 816.786   | AL137700  | 2076.352  | 1847.984  |
| AF130092  | 1226.099  | 1324.799  | AK024518  | 19606.65  | 20747.764 | NM_004904 | 1430.076  | 1470.477  |
| AK024794  | 2987.226  | 2732.062  | AK024586  | 379.886   | 503.559   | NM_003083 | 3883.992  | 4525.659  |
| NM_019853 | 13393.679 | 10158.696 | AK025017  | 2820.392  | 3044.131  | NM_00678E | 2892.825  | 2664.836  |
| NM_017992 | 5727.942  | 5768.852  | AK024534  | 586.957   | 392.462   | NM_000982 | 2343.256  | 2621.098  |
| NM_00540C | 476.892   | 461.677   | AK024914  | 3421.408  | 2890.732  | NM_012423 | 52022.551 | 58427.781 |
| AK023061  | 1454.175  | 1417.789  | BC030949  | 4801.882  | 4757.549  | AK026367  | 23750.635 | 26352.727 |
| NM_00725E | 2407.262  | 2439.351  | AF116615  | 2098.241  | 1930.884  | AK026491  | 7968.004  | 9229.376  |
| NM_00366E | 10455.072 | 8925.805  | U17636    | 52386.156 | 52853.645 | NM_00101E | 59137.738 | 61104.563 |
| NM_013384 | 63815.762 | 59943.93  | NM_01854E | 5890.575  | 6176.29   | AL110170  | 22400.445 | 25792.332 |
| NM_001187 | 3062.285  | 2558.763  | U52699    | 19438.432 | 18362.357 | AK021747  | 2917.714  | 2493.527  |
| NM_018241 | 6389.934  | 5846.875  | S71613    | 1394.679  | 1596.721  | AK025640  | 9143.863  | 8807.23   |
| NM_005834 | 15705.376 | 15125.066 | AJ011910  | 13364.307 | 10757.894 | AF131772  | 408.197   | 750.06    |
| NM_000724 | 5521.899  | 5941.276  | AK024378  | 1247.645  | 1112.256  | NM_019101 | 1897.331  | 2362.61   |
| NM_000553 | 291.071   | 414.407   | NM_01402E | 8083.47   | 9990.509  | NM_00092C | 3326.667  | 3341.424  |
| NM_002557 | 10378.765 | 9751.951  | D61703    | 8256.542  | 11066.584 | NM_02037E | 11065.393 | 9503.75   |
| NM_004477 | 440.596   | 463.759   | AF086198  | 19285.686 | 21798.506 | NM_01604E | 15437.734 | 13855.352 |
| BE728156  | 590.089   | 517.668   | AL137382  | 32452.484 | 28655.602 | NM_013311 | 14257.831 | 12231.889 |
| BI762229  | 29666.164 | 34777.141 | AK024599  | 4270.547  | 4983.485  | NM_000291 | 66823.75  | 61836.73  |
| Y00787    | 961.231   | 784.085   | AK024928  | 336.992   | 733.26    | NM_018081 | 6724.777  | 6639.86   |
| NM_00727E | 4712.188  | 4259.578  | NM_01445C | 16471.857 | 18616.084 | NM_01464E | 2970.998  | 3856.919  |
| N34462    | 1653.175  | 1211.131  | NM_017991 | 2296.826  | 2069.819  | AL117488  | 2082.765  | 2379.737  |
| AI658778  | 3007.457  | 3047.656  | L37198    | 1191.449  | 1338.923  | NM_01224C | 2617.167  | 2806.713  |
| L19067    | 8197.411  | 7265.073  | U67822    | 1305.635  | 1210.255  | NM_01900E | 16838.455 | 12844.576 |
| Z48482    | 867.474   | 801.803   | AK021921  | 882.637   | 1028.888  | NM_00473E | 18684.064 | 21143.172 |
| W60413    | 605.224   | 638.029   | AK025431  | 2575.035  | 2701.284  | AV752216  | 1165.648  | 1373.713  |
| BI823365  | 4351.53   | 3494.946  | AK023662  | 1020.31   | 1080.598  | NM_005341 | 2334.137  | 2866.38   |
| X06318    | 9212.495  | 9392.523  | AF086274  | 42086.801 | 41039.008 | AF181999  | 1164.616  | 1199.843  |
| AL834159  | 2498.337  | 2330.727  | AK023682  | 1462.465  | 1267.811  | NM_001934 | 5183.235  | 5855.678  |
| NM_000164 | 482.398   | 550.208   | AK024024  | 7115.859  | 7237.143  | AB011090  | 1874.836  | 1730.032  |
| NM_016217 | 8689.316  | 7410.727  | AF000991  | 745.755   | 463.686   | NM_00020E | 655.318   | 874.401   |
| AK025971  | 4835.478  | 3593.964  | AK000685  | 12700.345 | 8527.679  | NM_018682 | 10018.804 | 9920.816  |
| NM_014007 | 2221.569  | 2782.36   | D28381    | 23611.58  | 24517.182 | NM_00654E | 29649.635 | 31112.246 |
| AB033006  | 1549.475  | 1384.306  | BE706519  | 600.052   | 1041.533  | NM_016534 | 4198.804  | 4321.711  |
| AF020314  | 2499.736  | 2381.063  | AF130064  | 47110.664 | 54582.551 | AB021923  | 1303.513  | 1341.689  |
| NM_016332 | 4489.002  | 4145.72   | U17624    | 1280.571  | 2133.885  | AK024240  | 1270.681  | 1204.408  |
| AK023936  | 537.366   | 740.189   | AK025184  | 333.331   | 561.142   | NM_01645E | 53075.309 | 45199.672 |
| NM_006457 | 3649.692  | 4053.717  | D16988    | 51261.313 | 52438.625 | AK022677  | 4361.208  | 3971.03   |
| NM_003682 | 1163.206  | 933.354   | AK001959  | 11440.708 | 13216.289 | AF035288  | 707.246   | 894.367   |
| NM_000207 | 648.044   | 704.694   | U36217    | 2366.308  | 2947.017  | AL137645  | 19653.535 | 23250.32  |
| NM_006314 | 725.93    | 833.622   | AL389880  | 708.486   | 839.054   | AK026141  | 2153.027  | 2355.969  |
| NM_001782 | 2685.688  | 2833.912  | AL157452  | 809.44    | 789.429   | AK022894  | 2685.135  | 2784.886  |
| NM_000797 | 955.14    | 783.895   | AK024155  | 20334.738 | 17905.168 | AF217993  | 7920.106  | 8603.977  |
| NM_016293 | 8660.574  | 10466.279 | AL359334  | 15812.73  | 10020.406 | AF131823  | 1180.081  | 1319.023  |
| AF217525  | 463.855   | 475.073   | AK027095  | 2725.045  | 3308.46   | AK026324  | 13239.653 | 12925.534 |
| AL080148  | 676.716   | 642.238   | AF062097  | 1219.901  | 1131.817  | AK025253  | 2597.708  | 3661.837  |

|           |           |           |           |           |           |            |           |           |
|-----------|-----------|-----------|-----------|-----------|-----------|------------|-----------|-----------|
| NM_006731 | 1402.884  | 1360.141  | NM_019847 | 2293.279  | 2864.626  | AF131777   | 1008.042  | 1037.569  |
| NM_014061 | 776.718   | 649.783   | D17093    | 19562.752 | 19540.771 | AK025004   | 1985.271  | 2353.282  |
| BC034395  | 492.581   | 423.837   | AK022784  | 868.442   | 996.186   | AF146798   | 1961.446  | 2409.224  |
| NM_002479 | 644.298   | 575.301   | AL117521  | 4912.776  | 4900.235  | AK022049   | 830.263   | 688.28    |
| NM_005059 | 1326.512  | 1259.79   | AK021913  | 5799.409  | 5580.47   | AF086517   | 3985.103  | 4753.526  |
| NM_004950 | 797.981   | 659.269   | AL137489  | 32627.555 | 31099.275 | AK025740   | 17268.357 | 18521.785 |
| NM_006493 | 4940.176  | 5910.058  | AF009311  | 5387.435  | 4537.357  | AK000311   | 7327.813  | 8048.83   |
| U76362    | 859.197   | 498.304   | S73397    | 1604.156  | 1985.598  | AK025346   | 58426.566 | 57157.219 |
| AF040248  | 694.224   | 687.536   | AK023939  | 1168.864  | 995.89    | AK022583   | 6663.721  | 6655.75   |
| NM_014228 | 1377.674  | 1379.572  | AL050219  | 561.749   | 485.09    | AL137534   | 62842.07  | 62020.746 |
| AL832292  | 6934.904  | 6187.079  | AK024433  | 3214.306  | 3907.107  | AF052121   | 5135.576  | 6850.347  |
| NM_003045 | 5627.833  | 5921.847  | U82321    | 742.735   | 1165.196  | AL359062   | 3370.977  | 3767.853  |
| NM_003060 | 738.665   | 1054.887  | AL050376  | 844.596   | 771.144   | AK026869   | 2131.714  | 2452.88   |
| AK021489  | 31978.5   | 32955.926 | AL359652  | 1632.224  | 2246.329  | AK022192   | 962.795   | 863.741   |
| NM_004525 | 889.173   | 640.877   | AK022423  | 1842.019  | 1819.568  | NM_019095  | 61775.387 | 58024.801 |
| NM_003895 | 1464.729  | 1548.333  | AF088021  | 12157.777 | 12117.214 | Y12020     | 43339.051 | 48241.086 |
| NM_004317 | 14745.09  | 14062.523 | BF509267  | 3787.782  | 4549.924  | AJ001905   | 1677.907  | 1672.66   |
| NM_014645 | 3678.639  | 3304.296  | NM_002455 | 12730.912 | 14905.03  | U17635     | 2096.593  | 2263.934  |
| NM_014708 | 3196.572  | 3069.552  | NM_002959 | 12077.127 | 13882.969 | AL049930   | 1015.874  | 1158.826  |
| NM_003693 | 988.961   | 864.027   | AB046773  | 581.867   | 523.818   | Z83946     | 661.411   | 699.721   |
| NM_000356 | 16272.354 | 14503.778 | AK000899  | 11415.204 | 10447.358 | D55638     | 660.879   | 826.525   |
| NM_018134 | 2188.843  | 2333.125  | CY3Cy5    | 4006.964  | 396.105   | L23870     | 1514.245  | 1216.213  |
| NM_013247 | 9008.194  | 7938.186  | AW300857  | 10922.915 | 9539.484  | D55644     | 1257.353  | 2623.828  |
| NM_006770 | 776.568   | 1104.368  | H85962    | 27583.967 | 21599.77  | D16951     | 635.5     | 805.038   |
| BE394704  | 1267.066  | 637.613   | BG742446  | 1434.83   | 1505.331  | L33807     | 1993.263  | 2191.719  |
| NM_004703 | 2513.459  | 2591.962  | AA864554  | 1605.118  | 1509.588  | AB007975   | 1667.936  | 1922.871  |
| NM_001512 | 1317.442  | 1039.328  | X66945    | 3660.857  | 3111.252  | AK026888   | 675.569   | 694.019   |
| NM_014706 | 9603.313  | 9183.852  | X12830    | 2195.572  | 3065.81   | AK021821   | 641.401   | 605.781   |
| AK023172  | 1032.408  | 1025.74   | M57650    | 4269.704  | 5671.688  | AL049328   | 1544.276  | 1655.246  |
| AF139768  | 640.827   | 602.795   | BC023978  | 1114.349  | 1426.135  | AK000030   | 1641.106  | 1680.977  |
| NM_007255 | 2508.368  | 2744.915  | M21302    | 1917.305  | 1896.424  | NM_017932  | 1090.18   | 1239.097  |
| NM_003668 | 12235.126 | 11991.123 | NM_016346 | 2939.276  | 3741.005  | AK000910   | 4856.224  | 6418.269  |
| NM_013384 | 60066.598 | 58312.328 | SR6       | 2707.747  | 2215.959  | AF252280   | 19890.16  | 20088.039 |
| NM_001187 | 2830.891  | 2638.791  | SR8       | 8064.387  | 17182.203 | AK000107   | 852.301   | 1015.665  |
| NM_018241 | 6478.798  | 6046.042  | SR10      | 27455.172 | 7303.086  | AK000951   | 645.927   | 961.875   |
| NM_005834 | 14266.92  | 14625.049 | CY3Cy5    | 2249.125  | 147.65    | AK024518   | 14825.526 | 15258.034 |
| NM_018075 | 988.284   | 999.138   | NM_001525 | 26907.559 | 24724.563 | AK025017   | 4602.785  | 5783.651  |
| NM_012105 | 6760.077  | 5724.282  | NM_006055 | 4592.946  | 4394.549  | AK024534   | 452.544   | 847.07    |
| S82470    | 7896.339  | 6695.432  | NM_004296 | 1017.801  | 558.067   | AK024914   | 3666.547  | 4714.738  |
| AB020695  | 2998.105  | 2426.809  | NM_005048 | 709.859   | 792.049   | BC030949   | 3577.037  | 3370.563  |
| AB028982  | 563.318   | 489.297   | NM_018841 | 1413.724  | 1099.085  | AF116615   | 1105.261  | 1707.752  |
| NM_002004 | 3761.448  | 3429.633  | NM_003728 | 8652.949  | 10027.271 | U17636     | 61611.957 | 56902.41  |
| NM_005121 | 2273.783  | 1996.854  | NM_014352 | 4414.328  | 5374.433  | NM_018546  | 3112.491  | 4485.137  |
| NM_020221 | 927.094   | 758.571   | NM_012481 | 1982.175  | 2416.119  | U52699     | 19248.402 | 19394.672 |
| NM_000747 | 3988.391  | 3745.526  | L09102    | 10071.018 | 9434.146  | S71613     | 795.587   | 1067.385  |
| NM_005415 | 6427.039  | 6548.444  | U68488    | 1346.483  | 1354.934  | AJ011910   | 11286.284 | 12401.8   |
| AJ275973  | 21651.006 | 26498.893 | NM_016247 | 2897.164  | 3993.166  | AK024378   | 1296.189  | 1760.628  |
| AL834159  | 3282.014  | 3262.372  | NM_012282 | 1266.653  | 1255.007  | NM_014026  | 7181.86   | 7340.559  |
| NM_000164 | 832.224   | 684.328   | NM_003323 | 19000.248 | 18221.857 | D61703     | 6287.318  | 9031.449  |
| NM_016217 | 7095.902  | 7175.134  | BG685310  | 3017.016  | 2619.313  | unknown (S | 773.22    | 1023.734  |
| AK025971  | 3934.073  | 3758.232  | NM_018668 | 5967.231  | 6315.635  | AK024599   | 5650.6    | 6406.68   |
| NM_002618 | 3711.896  | 3499.313  | NM_004227 | 1164.228  | 1399.082  | AK024928   | 488.525   | 695.964   |
| L27479    | 1750.004  | 1530.427  | NM_005282 | 1920.073  | 1976.242  | NM_014450  | 14630.696 | 15627.348 |

|           |           |           |           |           |           |           |           |           |
|-----------|-----------|-----------|-----------|-----------|-----------|-----------|-----------|-----------|
| NM_00138E | 8337.593  | 8692.515  | NM_001736 | 787.192   | 690.566   | NM_017991 | 1949.406  | 2059.141  |
| X76770    | 3520.788  | 4825.378  | AB028949  | 1766.305  | 1459.783  | L37198    | 1343.845  | 1883.515  |
| AB037808  | 4388.05   | 4292.226  | AL137580  | 765.078   | 866.476   | U67822    | 718.667   | 1240.086  |
| NM_01603E | 10468.063 | 9905.073  | NM_004101 | 1042.532  | 902.757   | AK021921  | 714.963   | 979.464   |
| AF090911  | 606.84    | 385.258   | NM_00299E | 33827.242 | 26363.17  | AK025431  | 2007.363  | 1804.928  |
| Z36821    | 9890.678  | 10032.715 | AB033114  | 567.843   | 1113.796  | AK023662  | 961.437   | 939.701   |
| AF289485  | 12697.891 | 12489.836 | NM_01444E | 4737.288  | 5368.814  | AF086274  | 44194.707 | 41980.793 |
| AF130092  | 715.038   | 811.028   | NM_00521E | 5537.747  | 7240.817  | AK023682  | 1631.725  | 1400.318  |
| AK024794  | 3046.083  | 3147.406  | NM_00641E | 2096.493  | 2212.52   | AK024024  | 2883.728  | 2997.738  |
| NM_01985E | 14424.445 | 13237.718 | AB020676  | 962.203   | 1259.108  | AK000685  | 10450.19  | 13542.113 |
| NM_01799E | 5736.839  | 6520.747  | AK024715  | 793.555   | 1766.054  | D28381    | 19321.666 | 23144.555 |
| NM_00540C | 890.85    | 831.732   | U90942    | 59055.668 | 62596.523 | AK023543  | 1223.215  | 1039.343  |
| BF851643  | 687.627   | 699.787   | NM_01836C | 2545.28   | 2001.835  | BE706519  | 848.156   | 785.916   |
| AK023061  | 2167.298  | 1992.411  | AL365415  | 1424.044  | 1513.492  | AF130064  | 48403.184 | 44190.531 |
| NM_014061 | 1319.943  | 1149.567  | L29147    | 12216.23  | 11239.358 | U17624    | 1238.056  | 1131.196  |
| BC034395  | 653.503   | 755.135   | NM_02022E | 2886.658  | 2217.049  | AK025184  | 643.306   | 880.217   |
| NM_00247E | 678.465   | 1022.248  | AK024685  | 3363.947  | 3144.455  | D16988    | 56524.121 | 51957.074 |
| NM_00034E | 513.501   | 563.741   | NM_00367E | 15080.263 | 13909.029 | AK001959  | 12444.601 | 12952.028 |
| NM_00505E | 1208.589  | 1333.175  | AF113007  | 1388.835  | 1321.812  | U36217    | 3375.02   | 3661.806  |
| NM_00495C | 752.058   | 955.708   | NM_00068E | 4502.474  | 3836.144  | AL359334  | 10577.756 | 14894.345 |
| NM_000724 | 5076.798  | 5916.835  | D82061    | 3484.114  | 3311.311  | AK027095  | 3613.982  | 3677.926  |
| NM_002557 | 10947.381 | 11815.386 | AJ293009  | 4936.693  | 4423.249  | AF062097  | 997.971   | 1129.645  |
| NM_004477 | 309.447   | 467.79    | NM_000374 | 2458.122  | 2519.764  | NM_019847 | 2165.251  | 2613.904  |
| BE728156  | 672.926   | 350.458   | NM_00224E | 4734.797  | 5646.966  | D17093    | 15946.127 | 15078.424 |
| AI417775  | 234.125   | 518.222   | D87445    | 8259.371  | 6958.527  | AK022784  | 734.434   | 1114.587  |
| BI762229  | 28530.262 | 31650.43  | NM_00023E | 4932.724  | 4515.528  | AL117521  | 3630.584  | 3940.45   |
| BG618320  | 369.833   | 393.678   | NM_002247 | 1006.407  | 868.148   | AK021913  | 6559.62   | 6528.202  |
| Y00787    | 746.822   | 769.699   | NM_00498C | 24967.693 | 29033.387 | AL137489  | 30611.111 | 29893.508 |
| NM_00727E | 4547.117  | 4802.565  | AB011094  | 15378.986 | 19012.885 | AF009311  | 3225.444  | 3851.633  |
| N34462    | 1805.406  | 1808.482  | NM_003224 | 2340.38   | 2516.682  | S73397    | 1739.437  | 1641.836  |
| AI658778  | 3240.314  | 3732.86   | NM_00165E | 53368.98  | 55791.199 | AK023939  | 1023.216  | 1074.279  |
| L19067    | 8828.179  | 8550.504  | NM_006827 | 26724.84  | 24528.387 | AL050219  | 1086.453  | 1190.397  |
| Z48482    | 974.729   | 877.307   | AK021761  | 7008.61   | 6775.612  | L37709    | 591.274   | 896.836   |
| W60413    | 722.035   | 811.644   | NM_00148E | 5811.287  | 5692.989  | AK024433  | 2717.372  | 3251.063  |
| BI823365  | 4449.773  | 4925.241  | NM_01897E | 9892.23   | 8749.15   | U82321    | 1642.056  | 1526.245  |
| X06318    | 7807.923  | 7437.921  | NM_002591 | 5284.06   | 4405.167  | AL050376  | 884.313   | 1148.092  |
| NM_00470E | 4151.897  | 4153.052  | NM_02021E | 7582.693  | 8291.896  | AL359652  | 2773.077  | 2892.158  |
| NM_00151E | 1137.086  | 1297.847  | AK021860  | 2640.311  | 4601.697  | AK022423  | 1296.208  | 1532.423  |
| NM_01470E | 9840.668  | 11303.145 | AF143321  | 1233.646  | 937.27    | AF088021  | 9016.67   | 11648.656 |
| AK023172  | 863.866   | 1029.432  | AB046842  | 2024.978  | 1814.297  | BF509267  | 4044.718  | 4533.661  |
| AF139768  | 570.468   | 666.222   | NM_00485C | 1863.702  | 1726.993  | NM_00245E | 12067.35  | 12228.787 |
| AJ001348  | 654.446   | 586.155   | NM_00282E | 5329.138  | 5160.193  | AK000899  | 13663.588 | 15521.054 |
| NM_014007 | 2173.63   | 2768.179  | BF306955  | 1426.908  | 1501.038  | CY3Cy5    | 7426.304  | 139.447   |
| AB033006  | 1754.492  | 2061.155  | NM_001394 | 9888.605  | 8570.679  | AW300857  | 12545.841 | 9995.937  |
| AF020314  | 2538.207  | 2621.442  | NM_018441 | 9477.623  | 9069.829  | H85962    | 27415.422 | 31440.732 |
| NM_01633E | 6951.085  | 7501.731  | NM_00077E | 4698.087  | 5982.301  | BG742446  | 1517.392  | 1363.131  |
| AK023936  | 399.785   | 663.286   | NM_00160E | 1942.352  | 1829.196  | AA864554  | 1632.056  | 958.488   |
| NM_006457 | 3991.99   | 3915.383  | BE733234  | 1208.033  | 1293.444  | X66945    | 3128.74   | 2671.242  |
| NM_00368E | 1132.765  | 1147.08   | NM_001157 | 891.469   | 832.039   | X12830    | 2151.75   | 1898.061  |
| NM_000207 | 763.809   | 617.692   | NM_01228E | 1565.334  | 1454.405  | U00482    | 875.837   | 648.491   |
| NM_002531 | 412.496   | 342.178   | NM_00671C | 746.517   | 829.371   | K01904    | 6299.573  | 4955.98   |
| NM_006314 | 1057.374  | 1159.025  | NM_00332E | 21463.789 | 18811.91  | BE538886  | 1759.553  | 1128.111  |
| NM_00178E | 2485.647  | 3385.114  | BG685310  | 2582.506  | 2062.715  | NM_00222E | 6077.486  | 1445.057  |



|           |           |           |           |           |           |           |           |           |
|-----------|-----------|-----------|-----------|-----------|-----------|-----------|-----------|-----------|
| NM_002754 | 636.408   | 516.642   | AW300857  | 19721.043 | 14490.362 | M57650    | 3243.354  | 1982.167  |
| NM_000797 | 990.973   | 1202.836  | H85962    | 30119.535 | 21567.268 | BC023978  | 873.871   | 571.456   |
| NM_014927 | 218.687   | 442.367   | BG742446  | 1722.098  | 1562.909  | M21302    | 2538.24   | 1787.682  |
| NM_016293 | 9352.685  | 10683.891 | AA864554  | 1550.784  | 1378.672  | SR8       | 10436.801 | 14645.399 |
| AF217525  | 691.696   | 772.624   | X66945    | 3986.42   | 4449.577  | SR10      | 35949.449 | 5759.417  |
| AL080148  | 829.28    | 875.983   | AI160703  | 386.587   | 989.659   | CY3Cy5    | 4896.747  | 69.364    |
| NM_006731 | 1730.073  | 2209.277  | X12830    | 2435.012  | 3571.298  | NM_001525 | 29784.783 | 21944.154 |
| NM_020134 | 217.765   | 348.699   | U00482    | 1353.441  | 2079.445  | NM_006055 | 4716.986  | 3681.703  |
| NM_020221 | 1086.695  | 1240.269  | K01904    | 9129.638  | 9181.944  | NM_004296 | 1409.982  | 1648.795  |
| NM_000747 | 4277.777  | 4401.903  | BE538886  | 994.29    | 1135.348  | NM_018841 | 1262.703  | 1040.421  |
| NM_005415 | 6307.328  | 7352.4    | NM_002228 | 6373.952  | 3460.035  | NM_005226 | 1047.408  | 528.05    |
| AJ275973  | 20693.365 | 25034.668 | M57650    | 2286.523  | 2016.253  | AL133105  | 2808.267  | 1865.347  |
| NM_006493 | 5037.709  | 5487.592  | BC023978  | 992.564   | 928.53    | AK022859  | 1942.719  | 1484.396  |
| U76362    | 458.457   | 502.16    | M21302    | 1654.854  | 1761.103  | NM_014864 | 6843.782  | 5319.446  |
| AF040248  | 804.452   | 700.595   | NM_016346 | 2426.714  | 2295.269  | NM_003728 | 11085.505 | 7882.985  |
| NM_014228 | 1899.728  | 1915.325  | AK024865  | 4147.173  | 3702.733  | NM_014352 | 4486.51   | 2795.856  |
| AL832292  | 6436.523  | 6879.336  | NM_007210 | 1592.442  | 1485.552  | NM_012481 | 1483.639  | 729.814   |
| NM_003045 | 6102.936  | 6791.689  | U90942    | 61321.504 | 61703.988 | L09102    | 13883.478 | 11183.949 |
| NM_005662 | 42766.969 | 47836.914 | NM_014942 | 623.605   | 866.606   | U68488    | 782.471   | 1003.056  |
| NM_003060 | 821.967   | 999.865   | NM_018360 | 2925.623  | 2619.415  | NM_016247 | 4242.674  | 4601.231  |
| AK021489  | 30691.023 | 34110.785 | AL365415  | 1696.315  | 1499.017  | NM_001157 | 953.948   | 1196.227  |
| NM_004525 | 675.003   | 710.15    | L29147    | 23204.342 | 18003.785 | NM_012282 | 1922.635  | 2147.81   |
| NM_003895 | 1448.94   | 1634.492  | NM_001525 | 29817.232 | 24537.887 | NM_006710 | 1720.004  | 1222.727  |
| NM_004317 | 15117.927 | 15179.849 | NM_006055 | 4877.685  | 4511.165  | NM_018668 | 7184.938  | 6555.595  |
| NM_014645 | 3778.518  | 3789.316  | NM_004296 | 798.101   | 740.244   | NM_004227 | 1641.665  | 1483.927  |
| NM_014708 | 3766.833  | 3950.423  | NM_005048 | 666.152   | 788.635   | NM_005282 | 2439.992  | 1860.55   |
| NM_003693 | 1018.75   | 1215.354  | NM_005972 | 608.706   | 839.862   | NM_001736 | 877.296   | 681.232   |
| NM_000356 | 19533.436 | 19051.254 | NM_018841 | 1535.862  | 1802.2    | AB028949  | 1832.622  | 1880.785  |
| NM_018134 | 2435.281  | 2507.476  | NM_005226 | 1091.692  | 1178.121  | AL137580  | 1050.085  | 864.835   |
| NM_013247 | 12348.788 | 13702.562 | AL133105  | 2446.838  | 2884.256  | NM_004101 | 1293.016  | 926.345   |
| NM_006770 | 708.717   | 755.908   | AK022859  | 1499.126  | 1289.184  | NM_002995 | 36289.211 | 29153.537 |
| BE394704  | 840.453   | 1052.343  | NM_014464 | 1090.645  | 983.059   | AB033114  | 943.459   | 586.98    |
| AK024794  | 2830.721  | 3240.907  | NM_014864 | 6479.703  | 8018.686  | NM_015978 | 2268.666  | 1785.621  |
| NM_019853 | 15013.619 | 14910.163 | NM_014352 | 4317.795  | 4725.223  | NM_003810 | 4779.536  | 3412.486  |
| NM_017992 | 6309.012  | 7064.944  | NM_012481 | 1734.332  | 1582.645  | NM_004908 | 578.834   | 416.661   |
| NM_005400 | 791.432   | 604.172   | L09102    | 8490.358  | 7207.215  | NM_014443 | 3969.656  | 2208.668  |
| AK023061  | 1657.801  | 1608.803  | NM_016247 | 2288.082  | 2310.444  | NM_005212 | 4787.693  | 4049.89   |
| NM_007255 | 3113.995  | 3295.437  | AB011094  | 18688.311 | 29097.5   | NM_006419 | 2683.921  | 1163.008  |
| NM_003668 | 12703.272 | 13321.728 | NM_003224 | 2588.64   | 2798.101  | AB020676  | 791.543   | 697.167   |
| NM_013384 | 61527.602 | 54580.781 | NM_001658 | 58573.531 | 55592.863 | AK024715  | 1356.635  | 1482.613  |
| NM_001187 | 3390.221  | 3538.98   | AK021761  | 8746.717  | 7277.042  | U90942    | 68251.523 | 64887.691 |
| NM_018241 | 5605.288  | 7151.919  | AK024536  | 1099.846  | 866.842   | NM_014942 | 1029.462  | 1050.986  |
| NM_005834 | 13507.367 | 14237.682 | NM_018668 | 7242.804  | 6307.326  | NM_018360 | 3621.021  | 4521.422  |
| AF000381  | 3844.108  | 3940.015  | NM_004227 | 1437.512  | 1434.505  | AK022489  | 430.666   | 534.547   |
| NM_018075 | 1035.207  | 1095.369  | NM_005282 | 2253.926  | 2504.753  | L29147    | 23267.529 | 29288.701 |
| NM_012105 | 6574.827  | 6334.257  | NM_001736 | 832.273   | 994.918   | NM_020228 | 3815.275  | 3651.934  |
| S82470    | 6761.227  | 6384.405  | AB028949  | 2063.457  | 1831.538  | AK024685  | 3672.069  | 3835.441  |
| AB020695  | 3082.82   | 2537.668  | AL137580  | 926.726   | 1209.412  | NM_003676 | 19727.766 | 19209.906 |
| AB028982  | 537.48    | 535.968   | NM_004101 | 1087.987  | 1325.894  | AF113007  | 1837.262  | 1729.535  |
| NM_002004 | 4109.33   | 4186.096  | NM_002995 | 25931.279 | 22907.49  | NM_000688 | 5704.399  | 4117.857  |
| NM_005121 | 2348.355  | 2241.592  | AB033114  | 548.479   | 909.072   | U39573    | 1137.319  | 895.661   |
| NM_019096 | 6024.89   | 6479.981  | NM_015978 | 1752.284  | 1502.685  | D82061    | 4279.127  | 3997.756  |
| NM_014725 | 1065.456  | 1572.399  | NM_003810 | 3182.943  | 2296.352  | AJ293009  | 4345.038  | 4037.691  |

|           |           |           |           |           |           |           |           |           |
|-----------|-----------|-----------|-----------|-----------|-----------|-----------|-----------|-----------|
| NM_006892 | 6026.531  | 7009.708  | NM_014443 | 4183.481  | 4413.525  | NM_000374 | 3087.425  | 2519.763  |
| NM_019117 | 1410.939  | 1635.651  | NM_005212 | 5495.225  | 5579.165  | NM_000502 | 7830.987  | 7086.285  |
| NM_018309 | 4229.048  | 4999.161  | NM_006419 | 1483.794  | 1320.575  | NM_001696 | 26031.637 | 20080.398 |
| NM_017658 | 1352.129  | 1433.881  | AB020676  | 365.575   | 706.196   | NM_004975 | 2628.59   | 1584.261  |
| NM_018679 | 1015.309  | 1106.783  | AK024715  | 647.86    | 695.363   | NM_002245 | 4601.721  | 2001.021  |
| NM_016643 | 1227.61   | 1149.228  | BF306955  | 1636.987  | 2135.784  | D87445    | 9760.778  | 8517.07   |
| NM_002580 | 897.639   | 1215.13   | NM_001394 | 11721.868 | 11758.383 | NM_000238 | 4694.436  | 3213.047  |
| NM_006779 | 2118.487  | 2380.016  | NM_018441 | 9194.662  | 12217.489 | NM_002247 | 1269.384  | 1417.576  |
| NM_016217 | 9803.686  | 10209.214 | NM_001609 | 1967.491  | 1837.89   | NM_004980 | 32167.418 | 44580.852 |
| AK025971  | 4684.09   | 4424.957  | BE733234  | 1102.64   | 1356.259  | AB011094  | 26370.662 | 30700.668 |
| NM_002618 | 3353.774  | 3716.398  | NM_020228 | 3105.741  | 2750.133  | NM_003224 | 3632.082  | 4590.89   |
| L27479    | 1818.596  | 1670.316  | AK024685  | 3782.821  | 3884.301  | AK021761  | 9177.895  | 12044.169 |
| NM_002193 | 751.724   | 693.943   | NM_003676 | 15267.22  | 16393.508 | AK024536  | 1380.543  | 1719.832  |
| NM_001388 | 8650.219  | 8552.422  | AF113007  | 1386.993  | 1516.557  | NM_001483 | 4097.95   | 3237.146  |
| X76770    | 3901.587  | 4782.537  | NM_000688 | 5617.928  | 8221.824  | NM_018973 | 10366.878 | 9105.126  |
| AB037808  | 4558.256  | 4431.279  | U39573    | 551.565   | 1239.585  | NM_002591 | 8872.625  | 8220.361  |
| NM_016038 | 10532.515 | 10036.006 | D82061    | 3798.521  | 4696.137  | AK021860  | 1292.802  | 1005.349  |
| AF090911  | 697.314   | 397.448   | AJ293009  | 4245.397  | 4377.77   | AL137266  | 5253.841  | 4081.984  |
| Z36821    | 9866.413  | 9477.463  | NM_000374 | 1616.247  | 1814.962  | NM_016457 | 2770.339  | 2210.876  |
| AF289485  | 10880.105 | 10140.607 | NM_000502 | 3196.006  | 2925.25   | NM_005057 | 2290.593  | 1478.08   |
| AF130092  | 1005.321  | 1021.238  | NM_001359 | 21647.541 | 29094.838 | AF143321  | 1049.746  | 984.971   |
| AF300612  | 10330.533 | 11493.838 | NM_001696 | 23583.639 | 39484.863 | AB046842  | 2400.978  | 2343.146  |
| AB014557  | 862.093   | 900.577   | NM_004975 | 1411.039  | 931.563   | NM_004850 | 2421.949  | 2881.069  |
| NM_005578 | 5608.361  | 3804.031  | NM_002245 | 3425.838  | 3267.614  | NM_002822 | 7530.639  | 8016.496  |
| NM_003653 | 23773.705 | 27626.064 | D87445    | 7208.925  | 6695.132  | BF306955  | 2120.524  | 2223.31   |
| NM_018457 | 5991.663  | 6198.558  | NM_000238 | 4435.485  | 4446.101  | NM_001394 | 12685.545 | 12301.015 |
| NM_002953 | 9063.576  | 10140.111 | NM_002247 | 868.821   | 928.65    | NM_001609 | 3261.652  | 3502.392  |
| NM_002187 | 1083.018  | 1110.104  | NM_004980 | 17985.49  | 19261.699 | BE733234  | 1506.082  | 1836.895  |
| NM_014246 | 2148.69   | 1979.307  | NM_016346 | 2773.281  | 2919.792  | NM_001157 | 851.351   | 733.893   |
| NM_014859 | 1757.694  | 1693.229  | AK024865  | 4365.258  | 4172.975  | NM_012282 | 1765.832  | 1128.933  |
| AF311912  | 759.025   | 707.714   | NM_007210 | 1872.546  | 1553.821  | AW300857  | 16710.85  | 17042.271 |
| NM_001116 | 716.159   | 649.532   | NM_001483 | 5327.385  | 4166.498  | H85962    | 41553.809 | 46591.066 |
| BC035395  | 17864.594 | 15894.996 | NM_018973 | 10682.509 | 12571.331 | X12830    | 2473.809  | 1666.472  |
| NM_001703 | 14199.938 | 13011.493 | NM_002591 | 7553.826  | 11931.036 | U00482    | 1244.829  | 826.481   |
| NM_020126 | 4432.227  | 4466.395  | NM_020216 | 7664.166  | 8016.719  | K01904    | 8481.374  | 6991.489  |
| NM_013982 | 6581.465  | 5970.309  | AK021860  | 1388.589  | 1444.394  | BE538886  | 1848.104  | 1131.863  |
| NM_005049 | 4640.682  | 4250.066  | AL137266  | 4676.153  | 4739.748  | NM_002228 | 7386.532  | 2764.991  |
| NM_003882 | 914.641   | 872.932   | NM_016457 | 2743.352  | 2290.503  | M57650    | 3919.381  | 4512.336  |
| NM_004630 | 11674.8   | 12484.962 | NM_005057 | 2230.542  | 2139.135  | BC023978  | 1302.077  | 1360.21   |
| AK023001  | 4114.023  | 3518.055  | AF143321  | 1005.277  | 679.743   | M21302    | 2420.908  | 3105.205  |
| NM_014826 | 20472.596 | 17503.092 | AB046842  | 1821.427  | 1660.804  | NM_016346 | 4299.249  | 4030.682  |
| AF201947  | 1513.938  | 1297.26   | NM_004850 | 1661.394  | 1493.636  | AK024865  | 6513.671  | 6925.427  |
| U01147    | 3755.953  | 3416.965  | NM_002822 | 4733      | 4303.457  | NM_007210 | 2635.159  | 2920.097  |
| NM_004040 | 5053.326  | 4250.033  | NM_014352 | 5026.38   | 6181.867  | U90942    | 44303.004 | 42346.957 |
| NM_006116 | 2422.064  | 2532.822  | NM_012481 | 1884.079  | 2487.291  | NM_014942 | 1023.187  | 813.037   |
| NM_003587 | 1750.457  | 1617.84   | L09102    | 11060.539 | 9274.983  | NM_018360 | 3090.879  | 2107.329  |
| X90978    | 2627.439  | 2304.535  | U68488    | 462.218   | 475.634   | AL365415  | 3036.013  | 1966.659  |
| BF219403  | 6979.546  | 7981.508  | NM_016247 | 2624.081  | 2092.629  | L29147    | 36229.789 | 32564.846 |
| NM_016119 | 7425.001  | 5900.762  | NM_001157 | 790.512   | 560.822   | NM_001525 | 38191.426 | 33952.066 |
| AK075450  | 528.701   | 590.439   | NM_012282 | 1670.849  | 1473.901  | NM_018841 | 1653.079  | 1127.102  |
| AF178983  | 3108.683  | 2671.962  | NM_006710 | 917.958   | 472.803   | NM_005226 | 1903.258  | 1699.285  |
| NM_001324 | 14145.356 | 13363.405 | NM_003323 | 21629.861 | 22102.385 | AL133105  | 3879.623  | 3347.097  |
| AB037795  | 3387.372  | 3820.048  | BG685310  | 2664.347  | 2921.046  | AK022859  | 2972.787  | 2931.506  |

|           |           |           |           |           |           |           |           |           |
|-----------|-----------|-----------|-----------|-----------|-----------|-----------|-----------|-----------|
| D43949    | 6367.2    | 6440.884  | AW300857  | 27033.824 | 41787.219 | NM_000214 | 880.111   | 1183.362  |
| AK022975  | 1739.236  | 1681.211  | H85962    | 38786.109 | 50129.984 | NM_014864 | 8959.833  | 11455.706 |
| NM_015344 | 6709.49   | 5903.454  | BG742446  | 1446.271  | 1584.736  | NM_003728 | 9894.527  | 11206.472 |
| NM_004288 | 3881.355  | 4204.235  | AA864554  | 1574.182  | 1793.435  | NM_014352 | 4580.372  | 4128.785  |
| AL122055  | 3865.806  | 3782.2    | X66945    | 4181.415  | 5419.39   | NM_012481 | 2203.039  | 2698.595  |
| NM_005132 | 32990.535 | 34726.48  | X12830    | 1365.722  | 1403.714  | L09102    | 15617.054 | 18618.314 |
| D87458    | 991.093   | 880.47    | U00482    | 986.839   | 613.302   | NM_016247 | 4184.023  | 4775.301  |
| AK021750  | 4468.486  | 4476.272  | K01904    | 8040.227  | 4890.041  | AB011094  | 17308.334 | 12100.22  |
| NM_003628 | 3665.595  | 3102.681  | BE538886  | 802.729   | 745.809   | NM_003224 | 2413.894  | 1832.53   |
| NM_006932 | 1124.045  | 1028.4    | NM_002228 | 6343.798  | 3107.178  | NM_001658 | 65317.77  | 59297.391 |
| AK023594  | 8092.24   | 7034.57   | M57650    | 3454.465  | 3478.486  | NM_006827 | 39874.285 | 30352.754 |
| AB032989  | 613.451   | 485.442   | BC023978  | 886.102   | 949.604   | AK021761  | 9930.554  | 8214.445  |
| AB010099  | 4502.163  | 4587.538  | M21302    | 1226.829  | 1016.486  | AK024536  | 1911.814  | 1437.099  |
| AB039920  | 2781.317  | 2869.836  | NM_005212 | 4552.935  | 4135.259  | NM_018668 | 10082.597 | 7411.822  |
| AB046782  | 2949.11   | 2817.427  | NM_006419 | 3532.383  | 3799.74   | NM_004227 | 1964.057  | 1962.343  |
| NM_004190 | 38706.199 | 37668.047 | AK024715  | 809.326   | 545.304   | AB028949  | 2897.964  | 3136.919  |
| NM_014275 | 9739.411  | 9065.952  | U90942    | 56519.613 | 48283.555 | AL137580  | 1398.617  | 1462.125  |
| NM_000408 | 1662.866  | 1920.141  | NM_014942 | 835.863   | 503.579   | NM_004101 | 1749.087  | 1554.444  |
| AF208005  | 3195.668  | 2990.857  | NM_018360 | 3515.259  | 2806.499  | NM_002998 | 43485.461 | 43639.504 |
| NM_002643 | 6651.67   | 6622.245  | AL365415  | 1920.634  | 1970.452  | AB033114  | 998.412   | 832.386   |
| NM_017807 | 8739.51   | 8856.317  | L29147    | 32764.424 | 49327.945 | NM_015978 | 3055.183  | 2991.838  |
| NM_014748 | 4560.984  | 4341.544  | NM_001525 | 37803.188 | 53847.789 | NM_003810 | 5157.048  | 5146.013  |
| NM_000462 | 11873.985 | 11741.069 | NM_006055 | 5190.194  | 5614.647  | NM_004908 | 513.374   | 742.407   |
| NM_003338 | 14892.32  | 15277.191 | NM_004296 | 717.738   | 904.294   | NM_014443 | 4873.931  | 4949.064  |
| NM_005805 | 25919.939 | 28819.578 | NM_005048 | 923.813   | 1237.554  | NM_005212 | 5995.869  | 7411.168  |
| NM_004181 | 1006.562  | 789.516   | NM_018841 | 1392.848  | 1049.97   | M14584    | 541.287   | 535.732   |
| NM_003900 | 4590.158  | 4613.214  | NM_005226 | 948.922   | 527.104   | NM_006419 | 2056.095  | 1698.138  |
| NM_003337 | 5410.667  | 5138.557  | AL133105  | 2139.012  | 1908.487  | AB020676  | 1011.936  | 732.543   |
| AF298152  | 3373.653  | 2171.986  | AK022859  | 1901.73   | 1743.136  | BF306955  | 1865.045  | 1884.384  |
| AF117233  | 10735.136 | 8015.574  | NM_014864 | 6277.482  | 7262.802  | NM_001394 | 9441.549  | 10148.486 |
| NM_001723 | 2865.523  | 2402.771  | NM_003728 | 5461.12   | 4872.411  | NM_018441 | 14176.96  | 14368.045 |
| M94362    | 14706.308 | 15683.649 | NM_004975 | 1234.349  | 1295.176  | NM_000778 | 15427.749 | 12533.101 |
| AK024707  | 1792.547  | 1706.609  | NM_002245 | 3548.776  | 3010.707  | NM_001608 | 2474.342  | 1544.202  |
| NM_014255 | 1807.272  | 1580.501  | D87445    | 8125.529  | 6778.28   | BE733234  | 1282.731  | 848.738   |
| AK022909  | 3267.936  | 2412.256  | NM_000238 | 5313.016  | 5203.773  | NM_020228 | 5113.583  | 4073.929  |
| NM_006530 | 18874.242 | 17857.9   | NM_002247 | 1631.914  | 2223.24   | AK024685  | 3641.56   | 2809.659  |
| AB033024  | 1261.447  | 1263.263  | NM_004980 | 35980.293 | 48961.082 | NM_003678 | 19866.357 | 17661.4   |
| NM_018942 | 947.338   | 736.268   | AB011094  | 16192.607 | 19222.66  | AF113007  | 2412.231  | 2221.936  |
| NM_005531 | 18183.775 | 17544.252 | NM_003224 | 2876.524  | 2951.551  | NM_000688 | 6595.515  | 3953.897  |
| NM_006977 | 2604.513  | 2296.467  | NM_001658 | 59848.242 | 58877.512 | U39573    | 1098.918  | 745.911   |
| AF217226  | 5581.879  | 4588.666  | NM_006827 | 29659.748 | 26680.205 | D82061    | 4787.705  | 4738.219  |
| NM_005522 | 2057.302  | 1786.96   | AK021761  | 9795.36   | 13260.962 | AJ293009  | 4941.625  | 4485.777  |
| NM_005760 | 6634.404  | 6051.94   | AK024536  | 1316.648  | 1762.815  | NM_000374 | 3582.468  | 3253.333  |
| NM_007265 | 5925.039  | 6023.314  | NM_018668 | 8140.792  | 9960.899  | NM_000502 | 7979.963  | 9873.418  |
| AK023639  | 14839.151 | 14385.44  | NM_004227 | 1720.333  | 1565.935  | NM_001358 | 27839.803 | 32823.953 |
| AL122118  | 1398.543  | 935.836   | NM_005282 | 2294.436  | 2529.035  | NM_001698 | 27779.207 | 32619.77  |
| AL137700  | 2909.868  | 3485.54   | NM_001736 | 899.309   | 824.028   | NM_004975 | 2498.729  | 1998.962  |
| NM_004904 | 1750.388  | 1837.587  | AB028949  | 1650.892  | 1575.078  | NM_002245 | 5868.251  | 4830.199  |
| NM_003083 | 3439.542  | 3895.185  | AL137580  | 955.376   | 843.829   | D87445    | 10719.664 | 12554.408 |
| NM_006788 | 2515.564  | 2225.358  | NM_004101 | 1020.127  | 927.906   | NM_000238 | 4308.164  | 4048.592  |
| NM_000982 | 2543.143  | 2434.073  | NM_002995 | 31129.598 | 21373.055 | NM_002247 | 1485.902  | 1846.735  |
| NM_012423 | 69526.867 | 65163.652 | NM_015978 | 1523.411  | 1393.749  | NM_004980 | 27929.445 | 33916.895 |
| AK026367  | 38230.477 | 39771.789 | NM_003810 | 3535.848  | 2627.663  | NM_016348 | 2973.126  | 3553.831  |

|           |           |           |           |           |           |           |           |           |
|-----------|-----------|-----------|-----------|-----------|-----------|-----------|-----------|-----------|
| AK026491  | 19499.602 | 18346.605 | NM_014443 | 2898.325  | 2781.948  | AK024865  | 4874.529  | 4253.088  |
| NM_001015 | 69541.617 | 66553.563 | NM_016457 | 2360.211  | 2301.795  | NM_007210 | 1580.307  | 1416.867  |
| AL110170  | 26180.74  | 33825.852 | NM_005057 | 2384.07   | 3398.949  | NM_001483 | 4253.96   | 4505.191  |
| AK021747  | 1145.132  | 1033.994  | AF143321  | 696.54    | 727.406   | NM_018973 | 13130.482 | 8455.915  |
| AK025640  | 4638.307  | 4455.861  | AB046842  | 1999.148  | 1540.452  | NM_002591 | 9807.137  | 7538.76   |
| AF131772  | 518.832   | 505.953   | NM_004850 | 1551.396  | 1615.429  | AL049334  | 1120.634  | 1083.891  |
| NM_019101 | 904.505   | 877.742   | NM_002822 | 5270.737  | 4485.042  | NM_020216 | 10553.287 | 5895.067  |
| NM_000920 | 3563.345  | 3118.54   | BF306955  | 1206.003  | 1312.288  | AK021860  | 1872.622  | 1787.323  |
| NM_020375 | 11665.313 | 11523.969 | NM_001394 | 12654.146 | 12634.281 | AL137266  | 6375.992  | 7042.271  |
| NM_016049 | 23744.516 | 26132.918 | NM_018441 | 10909.558 | 11776.397 | NM_016457 | 3713.037  | 4418.457  |
| NM_013311 | 19425.393 | 19291.361 | NM_000778 | 8281.076  | 10472.003 | NM_005057 | 2909.96   | 3328.938  |
| NM_000291 | 62778.363 | 57754.074 | NM_001609 | 2292.49   | 2251.121  | AF143321  | 1268.642  | 1555.527  |
| NM_018081 | 7491.223  | 8425.207  | BE733234  | 1555.549  | 1891.891  | AB046842  | 3247.515  | 3886.635  |
| NM_014649 | 5298.059  | 6753.955  | NM_020228 | 3374.148  | 3767.256  | NM_004850 | 2470.278  | 2900.169  |
| AL117488  | 1962.485  | 2877.047  | AK024685  | 3700.118  | 3749.33   | NM_002822 | 7907.102  | 8182.281  |
| NM_012240 | 3312.22   | 3421.385  | NM_003676 | 15728.938 | 17785.861 | NM_014352 | 5342.46   | 7197.082  |
| NM_019005 | 15841.556 | 13133.537 | AF113007  | 1413.457  | 1147.068  | NM_012481 | 1152.529  | 1378.385  |
| NM_004739 | 18738.27  | 18942.502 | NM_000688 | 4166.686  | 4191.601  | L09102    | 17650.92  | 18866.334 |
| AV752216  | 2254.768  | 1882.488  | D82061    | 3604.433  | 3175.44   | U68488    | 782.045   | 628.06    |
| NM_005341 | 2545.628  | 2775.441  | AJ293009  | 4234.467  | 3359.407  | NM_016247 | 3697.703  | 3290.723  |
| AF181999  | 1464.754  | 1400.314  | NM_000374 | 1889.619  | 1315.311  | NM_001157 | 726.243   | 779.432   |
| NM_001934 | 6974.329  | 6587.07   | NM_000502 | 3722.127  | 3225.811  | NM_012282 | 1567.627  | 1924.57   |
| AB011090  | 2787.755  | 2457.444  | NM_001359 | 20628.012 | 18991.578 | NM_006710 | 692.737   | 862.831   |
| NM_000209 | 799.734   | 780.198   | NM_001696 | 18346.547 | 16804.389 | NM_003323 | 25687.014 | 18705.561 |
| NM_018682 | 14507.039 | 15085.782 | AF190900  | 10485.817 | 9311.511  | BG685310  | 2775.147  | 1669.431  |
| NM_006545 | 12543.01  | 12629.89  | NM_020404 | 10226.896 | 11570.763 | AW300857  | 11926.712 | 8427.382  |
| NM_016534 | 7247.028  | 6719.147  | BE972401  | 6789.9    | 7661.343  | H85962    | 18283.445 | 13693.128 |
| AB021923  | 448.359   | 755.318   | NM_017425 | 2509.841  | 2667.99   | AA864554  | 2100.351  | 1109.263  |
| AK024240  | 464.672   | 689.069   | AB007922  | 1123.028  | 826.39    | X66945    | 4793.944  | 3368.033  |
| NM_016456 | 46265.27  | 45947.395 | NM_015982 | 5434.461  | 4188.692  | AI160703  | 842.243   | 618.541   |
| AK022677  | 4932.401  | 5403.6    | NM_003746 | 38646.219 | 31179.496 | X12830    | 2121.649  | 2814.459  |
| AF035288  | 636.693   | 695.883   | NM_002910 | 30116.381 | 31092.662 | U00482    | 1384.274  | 1497.43   |
| AL137645  | 2126.824  | 2574.058  | AC096970  | 19700.75  | 20154.801 | Z80998    | 1083.696  | 1316.862  |
| AK026141  | 2186.602  | 2654.196  | AK024865  | 4687.031  | 5312.564  | K01904    | 9667.89   | 11804.181 |
| AK022894  | 3238.912  | 3728.313  | NM_007210 | 2041.206  | 1779.646  | BE538886  | 1598.793  | 1544.105  |
| AF217993  | 4889.915  | 6256.905  | NM_001483 | 7047.709  | 7482.184  | NM_002228 | 8576.707  | 4042.609  |
| AF131823  | 1011.132  | 925.213   | NM_018973 | 9837.944  | 8254.682  | M57650    | 4657.433  | 5027.651  |
| AK026324  | 4310.842  | 6350.652  | NM_002591 | 5422.41   | 4311.105  | BC023978  | 1295.883  | 1715.721  |
| AK021971  | 558.676   | 583.219   | NM_020216 | 6653.046  | 5329.416  | M21302    | 3171.548  | 4171.667  |
| AK025253  | 1716.669  | 1828.983  | AK021860  | 1756.101  | 1180.336  | NM_005212 | 4507.565  | 5900.112  |
| AK025004  | 1917.305  | 1791.861  | AL137266  | 4363.015  | 3809.697  | NM_006419 | 1336.833  | 1499.182  |
| AL136818  | 2582.754  | 2920.767  | U95031    | 470.726   | 715.823   | AB020676  | 873.958   | 652.834   |
| AF146798  | 1084.452  | 1309.078  | NM_014288 | 16016.4   | 15838.005 | AK024715  | 2114.26   | 1732.656  |
| AK022049  | 1201.193  | 925.57    | AF035300  | 1226.714  | 1356.816  | U90942    | 60662.141 | 57613.168 |
| AF086517  | 1200.111  | 1140.121  | NM_017703 | 9297.998  | 8293.839  | NM_014942 | 854.025   | 885.857   |
| AK025740  | 17008.43  | 15158.707 | NM_015320 | 3362.987  | 3857.118  | NM_018360 | 3615.396  | 4324.097  |
| AK000311  | 10954.23  | 11904.097 | NM_004055 | 1638.206  | 1408.761  | AL365415  | 2289.619  | 2299.673  |
| AK025346  | 62850.176 | 58111.441 | NM_014726 | 16173.544 | 15883.717 | L29147    | 19615.355 | 15287.264 |
| AK022583  | 5818.85   | 5888.813  | AJ297349  | 2688.617  | 2193.345  | NM_001525 | 30253.057 | 22479.586 |
| AL137534  | 31067.992 | 32580.598 | NM_005828 | 7191.299  | 7320.906  | NM_004296 | 1533.008  | 1483.113  |
| AF052121  | 557.604   | 622.287   | NM_001619 | 2046.748  | 2029.802  | NM_005048 | 1190.885  | 868.249   |
| AL359062  | 2068.912  | 2260.044  | NM_006599 | 2417.145  | 2763.235  | NM_005972 | 644.387   | 959.739   |
| AK026869  | 1399.411  | 1768.628  | NM_004463 | 625.339   | 772.77    | NM_018841 | 1648.416  | 1765.498  |

|           |           |           |           |           |           |           |           |           |
|-----------|-----------|-----------|-----------|-----------|-----------|-----------|-----------|-----------|
| AK022192  | 754.345   | 653.363   | NM_005936 | 2022.914  | 1445.447  | NM_005226 | 1185.518  | 1400.968  |
| NM_019095 | 61310.195 | 55390.012 | U43586    | 1204.567  | 824.551   | AL133105  | 3552.254  | 3653.273  |
| AJ227904  | 673.64    | 553.643   | NM_006271 | 6414.977  | 5583.016  | AK022859  | 2199.275  | 2392.152  |
| Y12020    | 1987.835  | 1886.518  | NM_018647 | 1445.064  | 1494.361  | NM_000214 | 780.576   | 493.569   |
| U17635    | 1710.609  | 2273.973  | NM_003026 | 898.495   | 529.306   | NM_014864 | 9353.25   | 8128.403  |
| AL049930  | 620.042   | 618.598   | NM_000721 | 54983.168 | 42495.035 | NM_003728 | 12469.12  | 14721.445 |
| D55638    | 759.536   | 296.242   | NM_003933 | 3111.183  | 2667.206  | NM_004975 | 1164.091  | 1309.843  |
| D55644    | 886.542   | 726.402   | NM_005095 | 3387.638  | 3369.979  | NM_002245 | 4548.918  | 3521.306  |
| L33807    | 3466.638  | 3096.097  | NM_000055 | 7080.491  | 5384.008  | D87445    | 8790.988  | 8930.495  |
| U80774    | 749.046   | 608.253   | NM_003163 | 5464.87   | 4318.268  | NM_000238 | 3229.472  | 3338.898  |
| AB007975  | 2419.119  | 2316.091  | NM_019057 | 3477.304  | 3038.159  | AK021761  | 9296.36   | 11512.438 |
| AL137603  | 721.259   | 590.329   | NM_002677 | 673.953   | 809.783   | AK024536  | 1922.61   | 2283.292  |
| AK026888  | 868.724   | 822.523   | NM_016205 | 3863.382  | 3514.265  | NM_018668 | 8606.765  | 6980.627  |
| AK021821  | 973.774   | 981.433   | NM_005759 | 3320.334  | 3069.028  | NM_004227 | 2097.142  | 1645.802  |
| AK000772  | 531.892   | 578.72    | AF149724  | 3299.771  | 2966.98   | NM_005282 | 3017.527  | 1778.989  |
| AL049328  | 1818.415  | 1984.184  | BC020745  | 1933.243  | 1339.154  | NM_001736 | 1031.917  | 717.935   |
| AK000030  | 884.439   | 956.861   | NM_006367 | 20050.896 | 22010.918 | AB028949  | 2361.195  | 1575.858  |
| NM_017932 | 710.138   | 961.925   | NM_006732 | 25437.031 | 23303.311 | AL137580  | 1164.619  | 1528.404  |
| AK000910  | 1704.04   | 1544.1    | NM_004354 | 5539.641  | 6240.151  | NM_004101 | 1665.826  | 1676.091  |
| AF252280  | 677.413   | 699.244   | NM_004661 | 5429.204  | 4778.92   | NM_002995 | 39067.418 | 46534.414 |
| AK000107  | 629.063   | 873.212   | NM_001610 | 3820.354  | 3721.953  | AB033114  | 794.338   | 1023.603  |
| AK024518  | 32113.855 | 28028.717 | NM_001241 | 2020.233  | 2183.994  | NM_015978 | 2747.01   | 2840.839  |
| AK025017  | 1228.16   | 991.94    | AF217504  | 3853.098  | 4682.17   | NM_003810 | 4765.397  | 3966.26   |
| AK024914  | 2197.185  | 1949.345  | AK027102  | 6095.373  | 5099.048  | NM_004908 | 590.677   | 508.973   |
| BC030949  | 7537.846  | 6399.452  | AL109714  | 1105.677  | 1030.915  | NM_014443 | 6134.192  | 4599.281  |
| AF116615  | 1470.32   | 1408.265  | NM_004632 | 4736.074  | 4471.743  | NM_016457 | 2386.44   | 2773.212  |
| U17636    | 58227.156 | 53530.547 | NM_017919 | 7496.466  | 6918.742  | NM_005057 | 2309.046  | 2387.975  |
| NM_018546 | 3607.148  | 3444.411  | NM_014456 | 4326.126  | 3854.131  | AF143321  | 780.538   | 1125.847  |
| U52699    | 16369.908 | 15335.473 | NM_004740 | 18208.877 | 14621.804 | AB046842  | 2192.558  | 2682.385  |
| S71613    | 1619.795  | 1553.647  | NM_003805 | 4024.476  | 3186.951  | NM_001394 | 10815.502 | 11486.639 |
| AJ011910  | 10275.06  | 10341.448 | NM_019886 | 5549.938  | 4910.196  | NM_001605 | 3202.247  | 3634.327  |
| AK024378  | 914.049   | 1125.284  | NM_003278 | 50355.473 | 40581.859 | BE733234  | 1555.147  | 2439.923  |
| NM_014026 | 10481.594 | 9372.333  | AK021957  | 58953.707 | 52597.156 | NM_020228 | 5071.426  | 6000.909  |
| D61703    | 790.033   | 655.123   | NM_016623 | 15910.717 | 17544.008 | AK024685  | 4185.069  | 3619.891  |
| AF086198  | 32981.141 | 30020.732 | NM_001334 | 2512.622  | 2544.645  | NM_003676 | 18411.801 | 15590.248 |
| AL137382  | 5016.638  | 4649.709  | NM_004771 | 3113.602  | 3960.003  | AF113007  | 2029.499  | 1298.731  |
| AK024599  | 7096.708  | 6502.965  | AL365514  | 1880.909  | 1914.838  | NM_000688 | 6411.986  | 4172.444  |
| AK024928  | 557.927   | 514.52    | NM_018299 | 1668.691  | 1711.611  | U39573    | 881.257   | 1032.077  |
| NM_014450 | 28358.344 | 26040.535 | NM_002104 | 1396.467  | 2065.455  | D82061    | 4687.589  | 5320.909  |
| NM_017991 | 2547.361  | 2706.762  | NM_005504 | 7071.015  | 8873.348  | AJ293009  | 5217.107  | 6306.91   |
| L37198    | 957.221   | 719.536   | AF234654  | 2824.233  | 2965.089  | NM_000374 | 3474.733  | 3972.226  |
| U67822    | 1433.089  | 1237.02   | NM_000110 | 3641.581  | 3915.287  | NM_000502 | 9013.457  | 11708.815 |
| AK021921  | 284.319   | 653.123   | NM_016002 | 27673.947 | 32165.16  | NM_001355 | 30933.143 | 34458.434 |
| AK025431  | 3442.687  | 2900.642  | NM_014549 | 2882.151  | 3087.554  | NM_001696 | 34273.742 | 39471.328 |
| AK023662  | 1617.385  | 1493.225  | NM_017832 | 1367.717  | 1461.761  | AF190900  | 11390.152 | 13178.244 |
| AF086274  | 56034.289 | 54429.953 | NM_001713 | 6404.992  | 5624.039  | NM_020404 | 4774.808  | 5249.007  |
| AK023682  | 2303.552  | 2187.668  | NM_015367 | 10243.419 | 10518.013 | BE972401  | 5519.877  | 5546.502  |
| AK024024  | 3458.873  | 3476.39   | NM_014498 | 3066.181  | 4200.41   | NM_017425 | 3786.75   | 4927.642  |
| AF000991  | 396.02    | 519.16    | NM_002375 | 10813.617 | 11530.617 | NM_003746 | 37935.707 | 52446.047 |
| AK000685  | 10337.646 | 14994.538 | AF055016  | 3910.694  | 2502.926  | AK024865  | 5745.189  | 5164.903  |
| D28381    | 30332.529 | 37447.676 | NM_007234 | 23445.26  | 18879.682 | NM_007210 | 1995.164  | 1591.436  |
| BE706519  | 796.898   | 1167.888  | NM_014567 | 4481.228  | 3466.375  | NM_001483 | 5011.217  | 4333.093  |
| AF130064  | 57441.02  | 55414.262 | NM_017842 | 4795.579  | 3444.485  | NM_018973 | 12386.48  | 7387.106  |

|           |           |           |           |           |           |           |           |           |
|-----------|-----------|-----------|-----------|-----------|-----------|-----------|-----------|-----------|
| U17624    | 2222.314  | 1695.17   | AB037809  | 2044.231  | 2149.412  | NM_002591 | 7310.502  | 7425.05   |
| AK025184  | 628.24    | 492.122   | AB011129  | 2112.576  | 1633.695  | NM_020216 | 10980.377 | 10948.08  |
| D16988    | 53741.738 | 53131.313 | NM_014391 | 14224.359 | 14982.789 | AK021860  | 2276.155  | 2530.785  |
| AK001959  | 14643.021 | 13610.147 | NM_004270 | 3294.715  | 3357.258  | AL137266  | 6556.887  | 6484.51   |
| U36217    | 3185.324  | 3072.169  | NM_012082 | 405.237   | 769.296   | U95031    | 616.279   | 735.065   |
| AL389880  | 1131.023  | 983.707   | NM_001537 | 5248.012  | 5064.03   | NM_014288 | 21246.373 | 23814.166 |
| AK024155  | 26588.354 | 22777.99  | U80743    | 2347.895  | 2475.357  | AF035300  | 1516.001  | 1523.43   |
| AL359334  | 12332.879 | 16884.684 | NM_001352 | 3934.784  | 4988.625  | NM_017703 | 10940.065 | 13541.452 |
| AK027095  | 3111.262  | 2688.593  | D15050    | 3038.816  | 3324.589  | NM_005828 | 8875.288  | 9186.781  |
| AF062097  | 904.731   | 1087.967  | NM_006527 | 10615.567 | 11013.229 | NM_001619 | 2691.062  | 3845.906  |
| NM_019847 | 3647.926  | 3930.823  | NM_006627 | 3304.559  | 3635.172  | NM_006599 | 3792.991  | 3643.461  |
| D17093    | 28853.121 | 25357.973 | NM_007363 | 17060.49  | 15942.893 | NM_004463 | 672.934   | 744.216   |
| AK022784  | 1777.727  | 1805.04   | NM_003093 | 54118.531 | 56191.094 | NM_005936 | 1614.754  | 1502.435  |
| AL117521  | 5087.376  | 5694.214  | U05589    | 1472.126  | 1150.188  | U43586    | 2011.239  | 1372.486  |
| AK021913  | 1949.74   | 2333.553  | NM_014473 | 18831.973 | 14907.221 | NM_006271 | 5920.401  | 7642.51   |
| AL137489  | 34064.398 | 33986.492 | NM_002295 | 66714.898 | 65307.094 | NM_018647 | 2659.078  | 2951.721  |
| AF009311  | 1464.729  | 1560.869  | NM_001762 | 14159.157 | 9778.904  | NM_003026 | 1043.708  | 1388.654  |
| S73397    | 3162.723  | 2668.631  | NM_016306 | 19382.168 | 17981.326 | NM_003933 | 4335.774  | 4868.453  |
| AK023939  | 1304.622  | 1344.088  | BE258640  | 14744.188 | 9875.561  | NM_018640 | 712.558   | 1133.428  |
| AK024433  | 2737.984  | 2991.51   | NM_003314 | 8714.204  | 6348.495  | NM_005095 | 5968.902  | 5970.041  |
| U82321    | 930.123   | 1195.706  | U79273    | 2397.054  | 1974.87   | NM_000055 | 11587.434 | 11819.948 |
| AL050376  | 794.833   | 1083.82   | AK022050  | 2733.187  | 2434.521  | NM_003163 | 10497.385 | 10878.555 |
| AL359652  | 1420.54   | 1034.887  | NM_002512 | 64091.492 | 60742.762 | NM_019057 | 3240.531  | 4057.096  |
| AK022423  | 553.441   | 651.243   | AL365411  | 4337.778  | 4633.295  | NM_002677 | 758.621   | 618.313   |
| AF088021  | 7958.211  | 8207.804  | M24470    | 485.913   | 712.829   | NM_016205 | 2641.841  | 3832.842  |
| BF509267  | 2544.875  | 2554.573  | NM_016066 | 4840.903  | 4986.455  | NM_005755 | 4271.967  | 4676.58   |
| NM_002455 | 15138.624 | 13939.686 | NM_001249 | 2008.695  | 2231.421  | AF149724  | 1836.106  | 2054.333  |
| NM_002959 | 16825.666 | 14555.36  | AK024677  | 1377.731  | 1633.752  | NM_004354 | 7098.473  | 7148.169  |
| AB046773  | 592.115   | 721.142   | NM_000036 | 2520.663  | 2962.906  | NM_004661 | 5703.506  | 5406.529  |
| AK000899  | 12483.137 | 15016.747 | AF254082  | 35901.734 | 39104.828 | NM_002009 | 1110.242  | 1118.819  |
| CY3Cy5    | 7126.073  | 281.702   | AF205718  | 8219.566  | 8347.668  | NM_001610 | 5058.26   | 6569.709  |
| AW300857  | 4533.68   | 4276.069  | AY004252  | 771.189   | 981.701   | NM_001241 | 2082.222  | 3030.296  |
| H85962    | 6571.79   | 7408.278  | NM_006261 | 2106.468  | 2134.994  | AF217504  | 2974.875  | 3739.508  |
| BG742446  | 1549.046  | 1834.1    | AK027045  | 3180.778  | 2938.076  | AK027102  | 5358.431  | 5719.74   |
| AA864554  | 2593.806  | 2611.52   | AF169796  | 3732.037  | 4127.431  | AL109714  | 1237.411  | 1031.719  |
| X66945    | 5336.414  | 6024.347  | AK001814  | 4110.697  | 3404.426  | NM_004632 | 4301.974  | 2819.544  |
| X12830    | 727.738   | 840.19    | NM_007222 | 1656.659  | 1807.281  | NM_017919 | 10748.655 | 10012.452 |
| U00482    | 479.835   | 785.796   | NM_003435 | 4256.334  | 3432.436  | NM_014456 | 5917.017  | 6595.268  |
| K01904    | 9341.354  | 12562.55  | NM_016291 | 9886.146  | 8210.16   | NM_004740 | 23727.246 | 24864.986 |
| BE538886  | 960.243   | 1252.813  | NM_005937 | 54099.035 | 38075.508 | NM_019886 | 7302.423  | 7488.631  |
| NM_002228 | 10588.79  | 5482.533  | AK001503  | 2909.551  | 3427.788  | NM_003278 | 63457.078 | 59425.535 |
| M57650    | 1046.34   | 1302.097  | AK022880  | 2062.29   | 1763.921  | NM_000426 | 604.419   | 1105.064  |
| BC023978  | 517.847   | 619.774   | NM_003601 | 20312.816 | 21552.953 | AK021957  | 67955.773 | 66039.711 |
| M21302    | 691.601   | 1176.36   | AK001228  | 3450.663  | 3677.033  | NM_016623 | 17468.506 | 22061.596 |
| NM_016346 | 2438.406  | 2477.841  | AK026778  | 2475.611  | 2468.963  | NM_001334 | 770.059   | 836.296   |
| SR2       | 58953.074 | 60988.859 | AF074987  | 2298.999  | 2192.433  | NM_004771 | 3274.797  | 3808.575  |
| SR4       | 17847.311 | 18566.285 | AK001058  | 25615.551 | 25328.689 | AL365514  | 1213.909  | 1586.781  |
| SR6       | 2951.895  | 2237.043  | AK026239  | 4494.967  | 4478.38   | NM_018299 | 1499.911  | 1767.772  |
| SR8       | 9241.092  | 27077.545 | AF086283  | 1014.235  | 1342.446  | NM_002104 | 1214.63   | 1129.217  |
| SR10      | 32911.73  | 11374.035 | AF086281  | 2049.261  | 2219.784  | NM_005504 | 7239.712  | 7994.155  |
| CY3Cy5    | 4503.338  | 195.107   | AF086393  | 2158.532  | 1974.92   | AF234654  | 3275.125  | 2783.356  |
| NM_006055 | 6898.271  | 6569.397  | AF086453  | 927.07    | 925.71    | NM_000110 | 4167.98   | 4656.309  |
| NM_004296 | 822.191   | 665.197   | AF070621  | 10729.55  | 10674.547 | NM_016002 | 39475.895 | 43722.055 |

|           |           |           |           |           |           |           |           |           |
|-----------|-----------|-----------|-----------|-----------|-----------|-----------|-----------|-----------|
| NM_00106C | 396.791   | 595.092   | NM_02024C | 7907.846  | 8209.916  | NM_01454C | 3117.472  | 3962.966  |
| NM_00522C | 789.305   | 949.08    | AK023678  | 11254.032 | 9137.204  | NM_000531 | 701.131   | 939.974   |
| AL133105  | 3463.686  | 3153.833  | AF052090  | 6920.089  | 5484.824  | NM_01783C | 2223.753  | 2206.071  |
| NM_014864 | 7916.461  | 7679.028  | AK023718  | 6878.702  | 8232.517  | NM_00171C | 6850.726  | 6416.43   |
| NM_00372E | 1152.046  | 1041.287  | AF075089  | 3061.401  | 3102.68   | NM_015367 | 10504.562 | 8069.626  |
| NM_01435C | 780.707   | 647.495   | AF241255  | 947.893   | 995.521   | NM_01449E | 4371.134  | 2408.59   |
| NM_012481 | 2076.152  | 1787.406  | AF086007  | 61721.551 | 61917.367 | NM_00181C | 4636.828  | 4127.345  |
| L09102    | 2339.379  | 3781.192  | AK000803  | 4034.321  | 4888.129  | AF055016  | 4149.092  | 3829.485  |
| NM_016247 | 1896.527  | 1968.004  | AK022374  | 1919.262  | 2114.092  | NM_007234 | 32005.48  | 23085.848 |
| NM_001157 | 940.966   | 1030.794  | AF085926  | 11100.238 | 11912.729 | NM_014567 | 5990.356  | 6341.907  |
| NM_01228C | 1757.614  | 1738.814  | AF085948  | 518.931   | 688.843   | NM_01784C | 7178.956  | 6928.866  |
| NM_00671C | 864.51    | 791.932   | AL137307  | 4740.932  | 5757.324  | AB037809  | 2367.717  | 2613.248  |
| BG685310  | 3165.287  | 2435.348  | AL137468  | 7826.715  | 7326.876  | AB011129  | 1372.302  | 1570.865  |
| NM_01866E | 8377.133  | 8230.31   | AL162007  | 27954.822 | 27162.604 | NM_014391 | 8291.198  | 9058.88   |
| NM_00528C | 2823.486  | 2768.405  | AL390137  | 23038.387 | 22173.029 | NM_00427C | 4367.154  | 4247.158  |
| NM_00173C | 1405.522  | 1335.301  | AL162045  | 1217.484  | 1160.647  | NM_01208C | 589.504   | 684.868   |
| AB028949  | 1556.8    | 1488.615  | AK022437  | 20261.27  | 18152.406 | NM_001537 | 5569.953  | 7336.097  |
| AL137580  | 722.336   | 976.868   | AF086102  | 860.242   | 619.383   | U80743    | 1576.228  | 1862.869  |
| NM_004101 | 1237.669  | 1350.427  | AF116682  | 41306.742 | 33383.668 | NM_00135C | 4322.588  | 4024.552  |
| NM_00299E | 8349.712  | 9404.437  | AL137259  | 3945.367  | 3852.102  | D15050    | 2751.813  | 1748.428  |
| AB033114  | 662.562   | 808.901   | AL122107  | 3950.208  | 3527.977  | NM_006527 | 12563.077 | 12353.315 |
| NM_01597E | 1639.07   | 1443.651  | AF075021  | 1071.891  | 1040.771  | NM_006627 | 3761.792  | 3324.712  |
| NM_00381C | 3774.82   | 3192.705  | AK025140  | 8585.978  | 6290.742  | NM_00736C | 17254.982 | 17957.469 |
| NM_00490E | 464.86    | 718.922   | AK023394  | 1287.666  | 1280.966  | NM_00309C | 60010.043 | 58094.055 |
| NM_01444C | 838.254   | 828.584   | AF090093  | 22887.65  | 27062.459 | U05589    | 1688.175  | 2469.497  |
| NM_00521C | 3956.15   | 4233.016  | AF161340  | 7200.964  | 8855.378  | NM_01447C | 24403.711 | 21604.051 |
| NM_00641C | 2502.771  | 2182.899  | AF242771  | 1160.514  | 1330.543  | NM_00309E | 68315.578 | 64876.473 |
| AB020676  | 734.309   | 659.771   | NM_01856C | 15930.878 | 21297.336 | NM_01638E | 2660.302  | 1727.293  |
| AK024715  | 1183.341  | 1140.587  | AF098666  | 985.159   | 740.779   | NM_00176C | 13026.697 | 9766.706  |
| U90942    | 7844.931  | 8110.334  | AF290544  | 809.419   | 540.283   | NM_01630C | 21715.217 | 18519.197 |
| NM_01494C | 556.229   | 567.958   | AK021969  | 1322.803  | 1484.336  | NM_00375E | 882.491   | 647.065   |
| NM_01836C | 2036.422  | 1794.588  | AK022065  | 2099.534  | 2122.561  | BE258640  | 21273.113 | 28104.43  |
| L29147    | 714.33    | 690.034   | AK022221  | 2814.626  | 2531.509  | NM_003314 | 15317.63  | 17019.174 |
| NM_02022E | 1043.585  | 1017.678  | AK022356  | 855.603   | 790.673   | U79273    | 2118.25   | 2838.719  |
| AK024685  | 5089.792  | 4776.653  | AK021998  | 1835.809  | 1204.138  | AK022050  | 2480.904  | 3175.894  |
| NM_00367E | 15745.756 | 12977.394 | AK022126  | 2124.848  | 2275.886  | NM_00251C | 68364.867 | 66463.016 |
| AF113007  | 1609.24   | 1527.169  | AK022256  | 984.14    | 867.193   | AL365411  | 2846.204  | 3972.511  |
| NM_00068E | 8288.223  | 7113.892  | AK022383  | 3328.946  | 3298.39   | M24470    | 580.367   | 633.311   |
| D82061    | 3024.722  | 3193.019  | AK027041  | 3989.689  | 4096.245  | NM_01606E | 4883.375  | 4988.164  |
| AJ293009  | 3051.388  | 3336.899  | NM_00535E | 21053.195 | 16627.912 | NM_00124C | 1369.538  | 1253.524  |
| NM_000374 | 1536.42   | 1362.596  | AK027195  | 945.782   | 594.279   | AK024677  | 1254.768  | 1129.372  |
| NM_00050C | 1325.717  | 1224.551  | AK000937  | 1404.652  | 1759.102  | NM_00003C | 2801.94   | 2661.536  |
| NM_00135E | 20246.115 | 18995.414 | AF035306  | 2701.107  | 2992.189  | AF254082  | 36857.313 | 35672.441 |
| NM_00224E | 5328.66   | 4269.408  | AK091662  | 872.268   | 1073.003  | AF205718  | 7955.563  | 8364.384  |
| D87445    | 10318.867 | 8938.558  | NM_003954 | 1471.314  | 2041.626  | NM_00342C | 390.868   | 517.864   |
| NM_00023E | 3574.456  | 3824.47   | NM_01634E | 1029.683  | 1474.625  | AY004252  | 1012.334  | 1210.387  |
| NM_002247 | 1584.019  | 1788.034  | AK023877  | 862.61    | 946.117   | NM_006261 | 3476.438  | 3292.882  |
| NM_00498C | 908.388   | 856.918   | AK024213  | 30095.664 | 26914.27  | AK027045  | 2702.945  | 2354.251  |
| AB011094  | 27542.223 | 27630.547 | AK025093  | 919.877   | 544.184   | AF169796  | 4443.665  | 3445.677  |
| NM_003224 | 4128.895  | 4286.346  | AK022184  | 1545.002  | 1235.483  | AK026157  | 1251.308  | 1196.006  |
| NM_00165E | 33775.727 | 36250.133 | AB007959  | 1175.231  | 1070.029  | AK001814  | 4936.172  | 4110.99   |
| NM_006827 | 30583.496 | 30489.732 | AK026002  | 1148.812  | 1146.657  | NM_00722C | 1711.571  | 1523.597  |
| AK021761  | 6361.891  | 6382.325  | AK024360  | 461.998   | 921.145   | NM_00343E | 4668.166  | 4415.754  |

|           |           |           |           |           |           |           |           |           |
|-----------|-----------|-----------|-----------|-----------|-----------|-----------|-----------|-----------|
| NM_001483 | 7811.1    | 7681.396  | AK024153  | 2041.228  | 2563.369  | NM_016291 | 12422.725 | 13779.408 |
| NM_018973 | 16001.312 | 12525.963 | Y10516    | 6698.604  | 8272.204  | NM_005937 | 61986.871 | 58163.887 |
| AL049334  | 758.16    | 435.212   | AF056451  | 1232.312  | 1599.805  | AK023259  | 818.745   | 835.856   |
| NM_020216 | 8582.084  | 7015.719  | AF015039  | 8001.722  | 10924.064 | AK001503  | 1451.876  | 1680.432  |
| AK021860  | 1174.841  | 991.901   | U50528    | 2073.156  | 2465.077  | AK022880  | 1347.009  | 2066.301  |
| NM_016457 | 5433.722  | 4262.388  | AB020632  | 3995.185  | 3955.082  | NM_003601 | 23160.07  | 26467.809 |
| NM_005057 | 3721.942  | 3209.321  | NM_018614 | 50238.738 | 45046.57  | AK001228  | 2874.48   | 3019.279  |
| AB046842  | 2428.291  | 2678.169  | AL117549  | 2156.647  | 2163.514  | AK026778  | 2477.905  | 2329.712  |
| NM_004850 | 1783.057  | 1972.545  | NM_005222 | 6028.703  | 5561.572  | AF074987  | 3077.744  | 3232.833  |
| NM_002822 | 6623.457  | 7015.56   | BC024308  | 17161.221 | 15882.064 | AK001058  | 35887.707 | 41836.199 |
| BF306955  | 826.345   | 928.845   | NM_000538 | 3653.301  | 3706.345  | AK026239  | 5155.534  | 5158.11   |
| NM_001394 | 15694.166 | 14229.899 | AK001838  | 59750.496 | 56558.5   | AF086283  | 1670.692  | 1878.294  |
| NM_018441 | 13326.142 | 12733.305 | NM_018295 | 1699.605  | 2864.781  | AF088047  | 831.529   | 874.23    |
| NM_000778 | 20856.602 | 21634.164 | AF070574  | 821.359   | 1010.273  | AF086281  | 2952.672  | 2703.521  |
| NM_001609 | 2843.173  | 2758.234  | AF086262  | 3220.99   | 3867.011  | AF086393  | 2212.215  | 2193.653  |
| BE733234  | 2483.711  | 2318.562  | AF086292  | 5650.47   | 4648.663  | AF086453  | 1265.969  | 1444.813  |
| NM_001157 | 1029.452  | 1006.347  | AK023769  | 555.004   | 611.325   | AF070621  | 14168.693 | 14014.075 |
| NM_012282 | 1712.771  | 1784.152  | AK024342  | 17469.234 | 17564.625 | NM_020240 | 10692.574 | 10399.096 |
| NM_006710 | 937.862   | 916.401   | AL137712  | 8081.921  | 8264.466  | AK023678  | 14509.161 | 13366.007 |
| NM_003323 | 27163.301 | 24686.818 | L77599    | 57402.25  | 55417.559 | AF052090  | 7951.39   | 7943.007  |
| BG685310  | 3321.042  | 2436.887  | AK021673  | 27378.568 | 26997.236 | AK023718  | 7480.51   | 8187.571  |
| AW300857  | 4598.493  | 3988.091  | AB014543  | 2661.427  | 2448.598  | AF075089  | 1079.582  | 1257.67   |
| H85962    | 5771.282  | 6151.325  | NM_018445 | 10146.204 | 9301.336  | AF086007  | 59206.035 | 58559.141 |
| BG742446  | 1506.453  | 1366.069  | AK022743  | 11662.15  | 9894.15   | AK000803  | 4397.762  | 5382.907  |
| AA864554  | 2506.498  | 1887.057  | NM_014627 | 1835.17   | 1751.143  | AK022374  | 1445.265  | 2187.541  |
| X66945    | 5423.074  | 5228.199  | NM_013938 | 12684.446 | 12175.214 | AF085926  | 4905.192  | 6908.029  |
| X12830    | 696.447   | 789.681   | NM_013986 | 57801.996 | 57147.375 | AF085948  | 650.794   | 873.114   |
| U00482    | 646.465   | 631.173   | U55055    | 1575.99   | 2590.781  | AL137307  | 6476.193  | 6979.707  |
| K01904    | 10149.542 | 10151.343 | AB018319  | 2848.655  | 2341.972  | AL137468  | 12361.205 | 13409.094 |
| BE538886  | 1155.385  | 987.877   | AK001101  | 3823.47   | 2935.793  | AL162007  | 46778.617 | 46972.254 |
| NM_002228 | 11738.2   | 5445.678  | BM973473  | 1258.934  | 1328.291  | AL390137  | 6994.282  | 7355.281  |
| M57650    | 1314.914  | 1216.856  | AK021637  | 1324.428  | 1325.352  | AL137340  | 1558.606  | 1425.901  |
| BC023978  | 631.737   | 460.786   | AK021658  | 641.842   | 556.197   | AL137542  | 1191.895  | 1192.148  |
| M21302    | 928.501   | 1056.757  | U17631    | 1787.686  | 1582.552  | AL162045  | 1708.132  | 1899.307  |
| NM_016346 | 2789.684  | 2627.286  | AL137723  | 2060.969  | 2327.723  | AK022437  | 28220.426 | 30175.971 |
| AK024865  | 5905.948  | 5607.204  | AK024046  | 2976.778  | 2901.351  | AB042410  | 1535.831  | 1696.187  |
| NM_007210 | 2567.814  | 2835.984  | NM_017931 | 3619.847  | 3506.352  | AF086102  | 1500.483  | 835.548   |
| U90942    | 7803.821  | 7148.492  | AK022793  | 2727.572  | 2650.177  | AF116682  | 66159.547 | 65481.91  |
| NM_014942 | 576.228   | 405.021   | AJ227910  | 1827.457  | 2225.991  | AL137259  | 5649.246  | 5789.322  |
| NM_018360 | 2372.909  | 1911.222  | AF001893  | 1336.771  | 1218.586  | AL122107  | 7713.444  | 5815.823  |
| AL365415  | 2194.807  | 2212.633  | X04236    | 12685.001 | 12315.928 | AF075021  | 1767.752  | 1695.203  |
| L29147    | 607.455   | 586.025   | AK093746  | 16477.457 | 16823.957 | AK025140  | 12205.799 | 9604.424  |
| NM_001525 | 46071.551 | 48779.898 | D16875    | 1942.9    | 2138.178  | AK023394  | 1629.023  | 1933.703  |
| NM_006055 | 6509.549  | 6219.167  | AK027171  | 2887.894  | 3039.726  | AF090093  | 23569.432 | 25744.49  |
| NM_004296 | 741.934   | 685.301   | AK021945  | 9586.205  | 9322.98   | AF161340  | 6691.005  | 7252.684  |
| NM_005972 | 737.256   | 640.483   | L23545    | 1397.214  | 963.837   | AF242771  | 773.35    | 974.689   |
| NM_001060 | 438.964   | 356.901   | CY3Cy5    | 2112.737  | 240.948   | NM_018562 | 16214.757 | 17910.205 |
| NM_018841 | 560.029   | 825.849   | U13022    | 3073.271  | 2026.907  | AF098666  | 762.88    | 829.466   |
| NM_005226 | 1218.573  | 1102.088  | R23251    | 18452.471 | 12844.899 | AF161365  | 676.251   | 744.628   |
| AL133105  | 3662.656  | 3002.338  | AA702640  | 1284.871  | 1073.977  | AF290544  | 615.508   | 569.873   |
| AK022859  | 506.119   | 636.266   | T68583    | 5009.463  | 6042.68   | AK021969  | 2301.154  | 2264.174  |
| NM_014864 | 8645.473  | 8754.323  | AA481944  | 62636.758 | 66228.383 | AK022065  | 3181.487  | 3536.186  |
| NM_003728 | 1304.489  | 1559.865  | AF038440  | 1695.049  | 2368.074  | AK022221  | 4486.974  | 5237.107  |



|           |           |           |           |           |           |           |           |           |
|-----------|-----------|-----------|-----------|-----------|-----------|-----------|-----------|-----------|
| NM_014352 | 936.91    | 1165.938  | M31158    | 2994.832  | 5245.254  | AK022356  | 1599.59   | 1526.197  |
| NM_012481 | 1757.736  | 1729.37   | H00742    | 2675.745  | 3918.635  | AK021998  | 2781.045  | 2662.81   |
| L09102    | 1929.671  | 2524.241  | D42108    | 1550.759  | 1818.064  | AK022126  | 3870.316  | 4296.391  |
| U68488    | 479.249   | 881.449   | BG700922  | 3649.688  | 5381.856  | AK022256  | 1467.529  | 1849.713  |
| NM_016247 | 1725.479  | 1512.417  | AI366068  | 884.735   | 707.022   | AK022383  | 5580.31   | 7904.08   |
| AB011094  | 25356.242 | 24302.875 | N57553    | 709.885   | 643.262   | AK027041  | 5008.187  | 5264.306  |
| NM_006827 | 35572.223 | 37545.34  | AF080158  | 3138.654  | 2019.817  | AK024332  | 2366.892  | 1073.043  |
| AK021761  | 6901.403  | 7755.951  | BM664556  | 1159.072  | 1009.153  | NM_005355 | 34845.492 | 38407.5   |
| NM_018668 | 7924.261  | 8150.483  | SR7       | 5970.168  | 37826.824 | AK027195  | 903.598   | 622.994   |
| NM_004227 | 2136.161  | 2282.66   | SR9       | 25129.596 | 4076.809  | AK000937  | 1451.857  | 892.975   |
| NM_005282 | 3325.252  | 3214.446  | CY3Cy5    | 3975.85   | 507.946   | AK024890  | 513.938   | 537.933   |
| NM_001736 | 1367.108  | 1521.408  | M33197    | 74154.805 | 65641.641 | AF035306  | 967.462   | 1330.96   |
| AB028949  | 1529.884  | 1907.133  | NM_007024 | 5298.776  | 3543.477  | AK091662  | 670.702   | 1144.663  |
| AL137580  | 942.792   | 949.388   | NM_013231 | 2553.235  | 1803.574  | NM_003954 | 1240.668  | 1363.995  |
| NM_004101 | 1550.133  | 1459.572  | NM_012106 | 5691.555  | 4031.372  | NM_016348 | 1324.792  | 1328.147  |
| NM_002995 | 8002.832  | 8301.278  | NM_006254 | 1377.027  | 904.034   | AK022003  | 658.983   | 862.684   |
| AB033114  | 739.076   | 752.541   | X95425    | 3347.88   | 4200.333  | AK023877  | 1421.628  | 1319.787  |
| NM_015978 | 1541.008  | 1268.24   | NM_004422 | 9051.252  | 14191.743 | AK024213  | 41718     | 32238.92  |
| NM_003810 | 4214.965  | 3923.039  | NM_016562 | 2140.282  | 3139.485  | AK025093  | 1721.851  | 1330.099  |
| NM_004908 | 559.394   | 823.288   | M33197    | 64191.828 | 63874.633 | AK022184  | 2016.638  | 2721.235  |
| NM_014443 | 1221.244  | 854.839   | AY009399  | 30780.414 | 36369.77  | AB007959  | 2041.906  | 2386.413  |
| NM_005212 | 4322.038  | 4544.389  | NM_004895 | 5750.565  | 5930.042  | AK026002  | 686.328   | 833.432   |
| NM_006419 | 2400.236  | 2148.328  | U59748    | 1354.313  | 1597.703  | AK024153  | 1799.022  | 1896.026  |
| AB020676  | 514.34    | 526.896   | L32537    | 987.979   | 654.595   | Y10516    | 6361.467  | 7535.724  |
| AK024715  | 1037.197  | 1104.502  | NM_014303 | 13143.489 | 8405.226  | AF056451  | 718.305   | 849.468   |
| BF306955  | 934.089   | 879.617   | NM_003118 | 4228.91   | 4404.654  | AF015039  | 3353.417  | 3595.699  |
| NM_018441 | 14670.889 | 14472.866 | L02922    | 27038.396 | 24392.832 | U50528    | 1793.164  | 2081.104  |
| NM_000778 | 25123.205 | 28282.453 | NM_001797 | 1999.076  | 2185.743  | AB020632  | 4452.781  | 6185.202  |
| NM_001609 | 2803.259  | 2954.226  | NM_003154 | 912.54    | 844.175   | NM_018614 | 53514.762 | 50117.207 |
| BE733234  | 2367.609  | 2611.375  | NM_004235 | 879.045   | 1143.133  | AL117549  | 2271.207  | 2902.224  |
| NM_020228 | 1078.51   | 1142.163  | AK023459  | 5481.892  | 6499.824  | NM_005222 | 2283.928  | 3058.666  |
| AK024685  | 5015.455  | 4717.085  | NM_012139 | 6207.524  | 3784.543  | BC024308  | 17237.834 | 21433.297 |
| NM_003676 | 17145.074 | 17392.139 | AF121856  | 5145.869  | 2348.063  | NM_000538 | 3911.254  | 5195.911  |
| AF113007  | 1697.44   | 1911.281  | NM_006421 | 4074.605  | 2096.608  | AK001838  | 60576.117 | 52555.719 |
| NM_000688 | 8904.868  | 8831.53   | NM_017457 | 29405.938 | 42135.488 | NM_018295 | 943.923   | 1216.436  |
| D82061    | 3030.603  | 2748.561  | NM_003765 | 27620.697 | 41210.246 | AF070574  | 1347.757  | 1346.69   |
| AJ293009  | 3670.225  | 4114.606  | M33197    | 64645.719 | 66589.711 | AF086262  | 4026.278  | 4001.821  |
| NM_000374 | 1602.144  | 1674.881  | NM_018202 | 19912.541 | 17930.963 | AF086292  | 8034.642  | 8732.622  |
| NM_000502 | 1143.076  | 1308.054  | AB023197  | 5467.855  | 4745.773  | AK023769  | 1014.555  | 1312.934  |
| NM_001358 | 21522.525 | 21403.783 | NM_022173 | 6646.891  | 4467.419  | AK024342  | 24389.219 | 26987.771 |
| NM_001696 | 24338.57  | 22843.924 | AB040970  | 5091.237  | 3809.788  | AL137712  | 11073.181 | 14323.898 |
| NM_002245 | 5599.923  | 3808.675  | NM_018330 | 4759.285  | 3808.989  | L77599    | 59278.063 | 52214.008 |
| D87445    | 10987.389 | 12725.931 | AB023222  | 1402.991  | 1307.429  | AK021673  | 35936.953 | 35727.488 |
| NM_000238 | 3506.91   | 3462.669  | M33197    | 88136.547 | 65010.316 | AB014543  | 3948.973  | 4322.681  |
| NM_002247 | 1340.551  | 1160.492  | U50342    | 5180.882  | 4533.649  | NM_018445 | 16072.012 | 14518.452 |
| NM_004980 | 1010.987  | 1093.443  | NM_000295 | 639.983   | 842.507   | AK022743  | 18881.635 | 22115.4   |
| NM_016346 | 2031.252  | 2344.537  | AF103795  | 1833.361  | 2900.204  | NM_014627 | 1356.17   | 1687.775  |
| AK024865  | 6413.639  | 5819.05   | NM_006215 | 787.811   | 698.717   | NM_013938 | 7603.778  | 9637.594  |
| NM_007210 | 2696.572  | 3157.753  | U80018    | 651.536   | 672.813   | NM_013986 | 48540.316 | 50209.637 |
| NM_001483 | 8044.814  | 8945.953  | NM_000717 | 1258.054  | 718.144   | U55055    | 1624.766  | 1559.954  |
| NM_018973 | 16287.619 | 14712.104 | M33197    | 68407.984 | 63328.645 | AB018319  | 2705.048  | 2979.145  |
| AL049334  | 666.943   | 440.47    | NM_004845 | 3664.468  | 3648.142  | AK001101  | 2076.483  | 3193.475  |
| NM_020216 | 9090.845  | 8176.114  | NM_007107 | 19114.115 | 23331.018 | BM973473  | 1719.645  | 2111.764  |

|           |           |           |           |           |           |           |           |           |
|-----------|-----------|-----------|-----------|-----------|-----------|-----------|-----------|-----------|
| AK021860  | 1027.183  | 994.948   | NM_000047 | 12308.68  | 18245.26  | AK021637  | 616.297   | 559.078   |
| AK000119  | 275.218   | 297.112   | NM_006319 | 8362.286  | 13583.298 | U17631    | 909.86    | 1393.288  |
| AB046816  | 2029.213  | 1720.113  | NM_018226 | 5125.224  | 6158.472  | AL137723  | 2805.615  | 2219.848  |
| AL137266  | 8126.759  | 7241.226  | NM_004605 | 655.849   | 1844.298  | AK024046  | 3668.327  | 3378.85   |
| NM_016457 | 5488.286  | 5428.961  | Z36813    | 5148.089  | 3781.377  | NM_017931 | 4893.788  | 5045.925  |
| NM_005057 | 3130.145  | 3163.664  | NM_006660 | 5706.401  | 5563.887  | AK022793  | 3228.104  | 2945.467  |
| AB046842  | 3366.914  | 3956.786  | NM_006685 | 36022.629 | 37202.988 | AJ227910  | 2418.334  | 2440.624  |
| NM_004850 | 1518.351  | 1925.696  | M33197    | 20459.229 | 21843.992 | AF001893  | 1126.712  | 886.759   |
| NM_002822 | 5642.098  | 5844.269  | NM_004045 | 9488.214  | 8893.693  | X04236    | 17785.205 | 14516.69  |
| NM_014352 | 726.425   | 1083.042  | NM_001891 | 1942.872  | 1201.259  | AK093746  | 20556.77  | 16890.283 |
| NM_012481 | 2192.397  | 2171.88   | NM_001440 | 30748.137 | 15149.719 | D16875    | 3424.656  | 1423.532  |
| L09102    | 2754.05   | 3987.487  | NM_016618 | 2204.043  | 1325.505  | AK027171  | 3768.771  | 4026.197  |
| U68488    | 577.693   | 934.53    | AB014568  | 23657.344 | 11730.72  | AK021945  | 14145.003 | 14672.492 |
| NM_016247 | 1883.572  | 1762.003  | AK022238  | 554.381   | 570.041   | L23545    | 2333.995  | 2420.654  |
| NM_001157 | 988.151   | 1233.225  | NM_012249 | 7440.404  | 4878.248  | CY3Cy5    | 17883.137 | 1370.65   |
| NM_012282 | 1780.524  | 2191.82   | AK022546  | 8777.125  | 11399.364 | U13022    | 3738.629  | 3313.911  |
| NM_006710 | 1156.36   | 1302.019  | NM_014067 | 15172.82  | 24339.914 | R23251    | 34144.441 | 40571.211 |
| NM_003323 | 26187.904 | 30156.721 | NM_002914 | 12013.642 | 19280.748 | AA702640  | 2707.901  | 2284.003  |
| BG685310  | 3010.288  | 3139.937  | NM_020385 | 2702.251  | 2413.217  | T68583    | 5461.262  | 4899.378  |
| AW300857  | 4699.07   | 4224.031  | NM_006541 | 1174.015  | 1101.639  | AA481944  | 47483.469 | 43035.82  |
| H85962    | 5305.526  | 5456.618  | NM_004328 | 2430.931  | 2009.684  | AF038440  | 1858.154  | 2074.234  |
| BG742446  | 1479.368  | 1613.487  | NM_004581 | 5906.532  | 6217.127  | M31158    | 4146.653  | 3624.073  |
| AA864554  | 2525.696  | 2151.872  | NM_006817 | 17314.236 | 17025.822 | H00742    | 4528.994  | 4572.244  |
| X66945    | 5573.079  | 5276.277  | NM_007108 | 25922.871 | 29774.412 | D42108    | 2513.972  | 2719.567  |
| X12830    | 876.594   | 851.113   | NM_015921 | 40619.453 | 43710.953 | BG700922  | 3655.027  | 4198.854  |
| U00482    | 1005.992  | 990.489   | AB040900  | 20148.242 | 21784.35  | AI366068  | 2006.964  | 2654.328  |
| Z80998    | 567.555   | 621.423   | NM_001080 | 782.401   | 772.458   | N57553    | 1345.789  | 2089.768  |
| K01904    | 9870.064  | 11193.179 | NM_001797 | 2638.35   | 2432.729  | AF080158  | 4401.566  | 5334.69   |
| BE538886  | 1416.263  | 1455.49   | NM_003154 | 1073.643  | 961.014   | BM664556  | 2345.711  | 2142.331  |
| NM_002228 | 11843.026 | 5472.036  | NM_004235 | 638.324   | 701.897   | SR1       | 66025.5   | 80333.422 |
| M57650    | 1429.21   | 1211.438  | AK023459  | 5574.821  | 5780.844  | SR3       | 56284.504 | 62213.559 |
| BC023978  | 769.102   | 910.122   | U13022    | 3225.134  | 2299.106  | SR7       | 8302.682  | 56992.781 |
| M21302    | 679.07    | 768.858   | AA702640  | 1859.37   | 2196.25   | SR9       | 27831.555 | 6364.352  |
| NM_005212 | 4603.671  | 5684.916  | T68583    | 3436.217  | 4002.007  | CY3Cy5    | 15976.614 | 703.698   |
| NM_006419 | 2462.466  | 2200.154  | AA481944  | 29803.637 | 22146.322 | M33197    | 69249.922 | 63798.758 |
| AB020676  | 607.026   | 767.143   | AF038440  | 945.632   | 1123.361  | NM_007024 | 12878.031 | 15571.264 |
| AK024715  | 941.601   | 1323.878  | M31158    | 2374.067  | 2375.916  | NM_013231 | 6213.411  | 7949.336  |
| U90942    | 10517.254 | 11656.255 | D42108    | 1550.037  | 1566.505  | NM_006254 | 2080.688  | 1495.104  |
| NM_014942 | 574.792   | 804.99    | BG700922  | 2478.672  | 2597.623  | X95425    | 3011.278  | 2511.888  |
| NM_018360 | 2292.523  | 2910.48   | AI366068  | 1094.869  | 1205.921  | NM_004422 | 7962.924  | 6983.973  |
| AL365415  | 2465.977  | 2213.886  | N57553    | 1105.553  | 1044.075  | NM_016562 | 2495.98   | 2733.884  |
| L29147    | 664.295   | 805.097   | AF080158  | 3225.016  | 3495.267  | NM_004895 | 15468.387 | 16408.178 |
| NM_001525 | 48166.711 | 48480.852 | BM664556  | 1410.642  | 1734.777  | U59748    | 2665.758  | 2974.85   |
| NM_006055 | 6484.737  | 6952.535  | M33197    | 64513.027 | 69599.266 | L32537    | 978.008   | 1145.564  |
| NM_004296 | 826.856   | 783.102   | NM_016545 | 5149.194  | 5514.303  | NM_014863 | 1428.971  | 1593.712  |
| NM_005972 | 584.625   | 619.876   | NM_000295 | 614.762   | 461.019   | NM_003154 | 3271.724  | 4041.612  |
| NM_018841 | 723.485   | 733.5     | AF103795  | 774.744   | 519.32    | NM_004235 | 1575.228  | 2124.223  |
| NM_005226 | 1016.342  | 1070.68   | NM_007024 | 9698.865  | 11790.149 | AK023459  | 8589.084  | 10958.967 |
| AL133105  | 3917.218  | 3657.21   | NM_013231 | 3299.654  | 4312.049  | NM_012135 | 14355.681 | 15943.548 |
| NM_014864 | 9169.333  | 9159.715  | NM_012106 | 6587.797  | 7167.779  | NM_006421 | 5913.657  | 3998.249  |
| NM_003728 | 1726.483  | 2520.019  | NM_006254 | 1196.88   | 1462.276  | NM_017457 | 28942.344 | 19973.734 |
| NM_004975 | 633.466   | 517.969   | X95425    | 2708.997  | 2797.901  | NM_003765 | 20650.012 | 19806.102 |
| NM_002245 | 5681.9    | 4668.032  | NM_004422 | 4124.781  | 2866.935  | NM_018202 | 25506.102 | 22311.938 |

|           |           |           |           |           |           |           |           |           |
|-----------|-----------|-----------|-----------|-----------|-----------|-----------|-----------|-----------|
| D87445    | 12143.96  | 12361.089 | NM_016562 | 1509.2    | 859.806   | AB023197  | 5046.146  | 4897.951  |
| NM_00023E | 4405.479  | 4508.725  | M33197    | 63970.063 | 64486.191 | NM_022173 | 9651.211  | 9539.305  |
| NM_002247 | 1024.441  | 1486.799  | AY009399  | 27708.063 | 25775.348 | NM_01833C | 7031.839  | 9351.673  |
| NM_00498C | 925.149   | 1267.494  | NM_00489E | 5444.63   | 4639.207  | M33197    | 69976.375 | 63651.551 |
| AB011094  | 26072.941 | 25024.455 | U59748    | 1394.568  | 1205.999  | U50342    | 4025.116  | 4190.697  |
| NM_003224 | 4542.707  | 4801.208  | L32537    | 673.914   | 785.451   | AF026932  | 623.029   | 1105.119  |
| NM_00165E | 40846.93  | 43364.805 | NM_014303 | 13967.552 | 13094.863 | AF103795  | 1492.723  | 1456.617  |
| NM_006827 | 33558.086 | 34652.203 | M33197    | 64645.656 | 65760.539 | NM_00621E | 1121.145  | 1079.207  |
| AK021761  | 5984.913  | 7016.79   | M95610    | 17685.543 | 17589.086 | U80018    | 2006.187  | 1971.713  |
| AK024536  | 632.891   | 672.019   | NM_003118 | 3712.423  | 3845.166  | NM_000717 | 2900.303  | 3157.655  |
| NM_01866E | 7929.068  | 7628.039  | L02922    | 23276.852 | 21830.734 | NM_00484E | 6492.923  | 4688.562  |
| NM_004227 | 2157.842  | 1935.979  | M33197    | 14323.884 | 7875.863  | NM_007107 | 19929.428 | 15429.482 |
| NM_005282 | 2897.49   | 2891.932  | NM_00404E | 9649.616  | 5259.758  | NM_000047 | 28024.365 | 26109.645 |
| NM_00173E | 1405.545  | 1280.047  | NM_001891 | 1925.753  | 945.14    | M68874    | 666.014   | 755.494   |
| AB028949  | 1808.511  | 1767.719  | NM_012139 | 10931.253 | 12843.768 | NM_00631E | 8932.107  | 8499.021  |
| AL137580  | 1052.883  | 951.371   | AF121856  | 9174.726  | 12665.54  | NM_01822E | 6948.573  | 6186.666  |
| NM_004101 | 1705.495  | 1630.561  | NM_006421 | 5710.507  | 7210.621  | Z36813    | 7482.071  | 7670.345  |
| NM_00299E | 9580.112  | 11007.013 | NM_017457 | 17615.125 | 12735.844 | NM_004727 | 1254.925  | 1457.823  |
| AB033114  | 718.207   | 855.173   | NM_00376E | 15908.411 | 12636.895 | M33197    | 17283.432 | 17905.738 |
| NM_01597E | 1388.296  | 1639.172  | NM_00586E | 1413.683  | 1313.104  | NM_00404E | 13709.569 | 14364.866 |
| NM_00381C | 4043.499  | 3404.87   | M33197    | 69468.617 | 59923.797 | NM_001891 | 3603.252  | 4491.894  |
| NM_00490E | 895.031   | 765.747   | NM_018202 | 20297.201 | 16455.346 | NM_00144C | 58370.25  | 59686.121 |
| NM_014443 | 1624.879  | 1673.191  | AB023197  | 6154.47   | 5795.901  | NM_001201 | 1817.841  | 2124.131  |
| NM_016457 | 5411.625  | 5174.063  | NM_022173 | 9734.996  | 11605.865 | NM_01661E | 3868.611  | 4047.93   |
| NM_005057 | 3564.253  | 3497.878  | AB040970  | 8474.063  | 11153.539 | AB014568  | 52342.309 | 38828.246 |
| AF143321  | 636.596   | 653.318   | NM_01833C | 7179.865  | 9295.69   | NM_01224E | 8401.296  | 6411.278  |
| AB046842  | 2973.771  | 2780.305  | AB023222  | 1565.009  | 2079.445  | AK022546  | 12260.886 | 11762.854 |
| NM_00485C | 1738.762  | 2073.221  | AB033088  | 1462.178  | 1535.615  | NM_014067 | 20256.617 | 21408.096 |
| NM_002822 | 6300.908  | 6740.544  | M33197    | 67212.141 | 65669.508 | NM_002914 | 15485.51  | 14793.043 |
| BF306955  | 673.887   | 1034.95   | U50342    | 3871.259  | 4099.947  | NM_02038E | 3423.106  | 3254.593  |
| NM_001394 | 17093.404 | 16352.393 | NM_015921 | 36238.047 | 23463.668 | NM_006541 | 1968.034  | 1569.778  |
| NM_018441 | 13764.461 | 12922.67  | AB040900  | 20451.666 | 14410.166 | NM_00432E | 3483.378  | 4472.782  |
| NM_00077E | 23181.439 | 26654.09  | NM_00108C | 1099.962  | 808.375   | NM_004581 | 8377.221  | 8950.856  |
| NM_00160E | 2737.918  | 2830.589  | NM_001482 | 858.401   | 678.41    | NM_006817 | 18830.986 | 18680.924 |
| BE733234  | 2252.004  | 2370.939  | U80018    | 940.232   | 827.571   | NM_015921 | 48139.887 | 53544.023 |
| NM_02022E | 1106.259  | 1303.381  | NM_000717 | 1794.321  | 2657.875  | AB040900  | 24720.264 | 29893.408 |
| AK024685  | 5353.887  | 5392.104  | M33197    | 64764.363 | 71561.945 | NM_00108C | 975.82    | 1240.792  |
| NM_00367E | 17719.178 | 18150.576 | NM_00484E | 3588.911  | 3379.516  | NM_001482 | 1935.983  | 2725.553  |
| AF113007  | 1616.803  | 1662.344  | NM_007107 | 13929.799 | 13610.84  | NM_001797 | 3771.875  | 3478.503  |
| NM_00068E | 8310.372  | 6866.307  | NM_000047 | 6638.634  | 6090.255  | NM_003154 | 3256.523  | 4018.36   |
| U39573    | 699.187   | 793.744   | NM_00631E | 5862.539  | 6409.838  | NM_00423E | 3639.313  | 1705.891  |
| D82061    | 3126.107  | 3257.781  | NM_01822E | 5194.46   | 4793.379  | AK023459  | 8082.635  | 4835.398  |
| AJ293009  | 4321.118  | 5272.655  | NM_00460E | 782.709   | 937.663   | U13022    | 3406.574  | 2446.007  |
| NM_000374 | 1905.303  | 1846.796  | Z36813    | 7676.112  | 11009.723 | R23251    | 33908.531 | 27274.057 |
| NM_000502 | 1448.325  | 1629.614  | NM_00666C | 7017.965  | 8629.838  | AA702640  | 2893.67   | 2624.5    |
| NM_00135E | 23941.967 | 23475.363 | NM_004727 | 511.77    | 874.112   | T68583    | 5979.395  | 6450.28   |
| NM_00169E | 25084.016 | 25473.201 | NM_00668E | 31743.943 | 29724.391 | AA481944  | 46289.898 | 47227.465 |
| AF190900  | 13463.201 | 12535.908 | AF080158  | 3195.698  | 1791.026  | AF038440  | 951.211   | 1049.56   |
| NM_020404 | 2259.311  | 2059.078  | BM664556  | 1577.614  | 1269.036  | M31158    | 3302.076  | 3136.157  |
| BE972401  | 4377.548  | 4564.757  | M33197    | 64168.504 | 66051.688 | H00742    | 3971.052  | 4580.904  |
| NM_01742E | 3442.291  | 3631.074  | NM_01654E | 5765.026  | 3975.941  | D42108    | 2385.98   | 2052.441  |
| AB007922  | 1213.268  | 1237.028  | NM_00144C | 37979.727 | 23944.076 | BG700922  | 3583.477  | 3475.811  |
| NM_015982 | 3763.954  | 4155.829  | NM_01661E | 5405.938  | 8112.468  | AI366068  | 2541.663  | 2156.669  |

|           |           |           |           |           |           |           |           |           |
|-----------|-----------|-----------|-----------|-----------|-----------|-----------|-----------|-----------|
| NM_003746 | 37219.859 | 43570.934 | AB014568  | 37268.551 | 41299.691 | N57553    | 1401.907  | 1646.792  |
| NM_002910 | 2724.461  | 3286.224  | NM_012249 | 9749.022  | 7850.518  | AF080158  | 4193.022  | 4705.22   |
| AC096970  | 6478.023  | 7094.371  | AK022546  | 6073.159  | 5733.751  | BM664556  | 2437.743  | 2694.918  |
| AK024865  | 6367.007  | 6267.461  | NM_014067 | 13721.397 | 12773.226 | NM_016545 | 8247.768  | 10363.229 |
| NM_007210 | 3008.303  | 2896.085  | NM_002914 | 10225.082 | 8867.844  | NM_000295 | 1441.037  | 1218.54   |
| NM_001483 | 8181.09   | 8272.712  | NM_020385 | 2684.902  | 2457.113  | AF103795  | 1311.22   | 755.256   |
| NM_018973 | 15421.92  | 13273.606 | NM_014877 | 780.208   | 1237.08   | NM_006215 | 1126.873  | 610.653   |
| NM_002591 | 653.442   | 652.812   | NM_006541 | 1459.224  | 2264.294  | M33197    | 66526.672 | 66659.922 |
| AL049334  | 509.546   | 752.64    | NM_004328 | 2530.841  | 3264.387  | NM_007024 | 11401.741 | 11760.849 |
| NM_020216 | 9359.656  | 9672.539  | NM_004581 | 5737.252  | 6597.734  | NM_013231 | 5973.937  | 6274.759  |
| AK021860  | 1746.34   | 1515.173  | NM_006817 | 14826.538 | 11278.422 | NM_012106 | 10279.329 | 9868.927  |
| AL137266  | 9292.397  | 8645.977  | NM_007108 | 23725.801 | 23670.33  | NM_006254 | 2184.408  | 2079.355  |
| U95031    | 860.469   | 672.797   | M33197    | 68545.773 | 65709.719 | X95425    | 2963.282  | 3117.712  |
| AL137311  | 564.159   | 480.858   | M95610    | 19262.791 | 14821.867 | NM_004422 | 7031.497  | 7148.825  |
| NM_014288 | 19752.463 | 23237.43  | NM_003118 | 4541.001  | 3170.479  | NM_016562 | 1925.062  | 2429.683  |
| AF035300  | 2729.92   | 2260.009  | L02922    | 27288.311 | 18616.342 | M33197    | 65866.828 | 63632.492 |
| NM_017703 | 11758.14  | 12587.863 | NM_001797 | 2389.72   | 1621.094  | AY009399  | 37586.371 | 37162.906 |
| NM_015320 | 1554.583  | 1942.343  | NM_003154 | 1273.85   | 741.417   | NM_004895 | 14729.328 | 15629.722 |
| NM_004055 | 1477.351  | 1676.782  | AK023459  | 7565.737  | 9793.135  | U59748    | 2743.552  | 3054.588  |
| AJ297349  | 4056.436  | 4052.775  | BI762154  | 901.267   | 1136.862  | L32537    | 1001.343  | 997.605   |
| NM_005828 | 9168.246  | 8946.062  | U13022    | 3809.028  | 2993.256  | NM_014303 | 26832.602 | 34412.902 |
| NM_001619 | 1189.567  | 839.751   | R23251    | 20292.627 | 15744.916 | L02922    | 33167.656 | 39317.336 |
| NM_006599 | 1503.274  | 1571.504  | AA702640  | 1617.28   | 1921.136  | M33197    | 32022.709 | 33854.543 |
| NM_004463 | 445.992   | 602.161   | T68583    | 3912.585  | 3630.806  | NM_004045 | 14453.112 | 6855.081  |
| NM_005936 | 1068.507  | 1047.537  | AA481944  | 43342.441 | 35648.254 | NM_001891 | 3081.794  | 1893.747  |
| U43586    | 1192.557  | 1017.691  | AF038440  | 1203.998  | 1185.003  | NM_012135 | 14090.951 | 13958.896 |
| NM_006271 | 4133.772  | 4009.807  | M31158    | 2457.981  | 3599.367  | NM_006421 | 5884.688  | 6341.375  |
| NM_018647 | 2819.887  | 2814.701  | D42108    | 1817.136  | 2391.883  | NM_003765 | 19537.377 | 19453.01  |
| NM_003026 | 773.254   | 1236.477  | BG700922  | 3135.035  | 3815.514  | NM_005868 | 1068.103  | 1443.73   |
| NM_003933 | 1428.422  | 1603.237  | AI366068  | 1172.646  | 1482.16   | NM_018202 | 23918.596 | 22211.064 |
| NM_005095 | 5023.241  | 4269.434  | N57553    | 751.99    | 719.426   | AB023197  | 5095.905  | 4644.099  |
| NM_000055 | 8948.182  | 8495.099  | AB040970  | 6273.417  | 3866.067  | NM_022173 | 9001.195  | 9869.951  |
| NM_003163 | 1086.332  | 1231.379  | NM_018330 | 5826.749  | 4149.913  | AB040970  | 6215.188  | 5855.23   |
| NM_019057 | 6234.792  | 6731.469  | AB023222  | 1701.286  | 1548.781  | NM_018330 | 6493.953  | 6102.804  |
| NM_002677 | 1304.668  | 1042.586  | AB033088  | 2110.088  | 1532.442  | AB023222  | 2066.727  | 1429.385  |
| NM_016205 | 4303.213  | 4753.112  | M33197    | 76742.25  | 62759.129 | AB033088  | 1657.246  | 2038.798  |
| NM_005759 | 6212.527  | 6141.025  | U50342    | 3619.011  | 3023.208  | M33197    | 72792.656 | 63565.273 |
| AF149724  | 3362.029  | 3556.254  | NM_000295 | 827.718   | 761.068   | U50342    | 5719.105  | 5731.82   |
| BC020745  | 2340.433  | 2609.501  | AF103795  | 1634.564  | 1567.774  | AB040900  | 34421.719 | 19894.578 |
| NM_006367 | 28641.533 | 29868.033 | NM_006215 | 928.453   | 937.911   | NM_001080 | 1393.048  | 623.079   |
| NM_004354 | 8884.453  | 8652.351  | NM_013231 | 2952.641  | 3206.372  | NM_001482 | 1647.254  | 978.506   |
| NM_004661 | 8235.782  | 7796.161  | NM_012106 | 6248.381  | 6154.348  | U80018    | 1582.826  | 1621.345  |
| NM_002009 | 654.304   | 577.34    | NM_006254 | 1442.265  | 1438.766  | NM_000717 | 2491.813  | 2193.939  |
| NM_001610 | 4840.611  | 4313.383  | X95425    | 1979.897  | 2048.969  | NM_004845 | 5853.094  | 5974.818  |
| NM_001241 | 3267.516  | 2866.06   | NM_004422 | 6165.573  | 9870.153  | NM_000047 | 20977.354 | 22021.873 |
| AF217504  | 3742.027  | 3409.95   | NM_016562 | 1474.219  | 1944.787  | NM_006319 | 6785.712  | 7376.941  |
| AK027102  | 3228.195  | 3763.232  | M33197    | 64417.297 | 64900.293 | Z36813    | 8981.866  | 9508.445  |
| AL109714  | 1913.242  | 1780.85   | AY009399  | 35900.809 | 44140.539 | NM_006660 | 10865.561 | 11405.241 |
| NM_004632 | 5733.705  | 5581.675  | NM_004895 | 6048.438  | 6633.642  | NM_001486 | 1107.838  | 1331.671  |
| NM_017919 | 5411.313  | 5611.717  | U59748    | 1597.776  | 1950.45   | NM_004727 | 1693.85   | 1698.315  |
| NM_014456 | 8125.845  | 8185.591  | L32537    | 922.533   | 768.073   | NM_000555 | 1965.066  | 2552.66   |
| NM_004740 | 20084.963 | 22354.072 | NM_014303 | 13187.018 | 8311.154  | BM664556  | 2844.256  | 1268.585  |
| NM_019886 | 6623.99   | 5823.729  | NM_006660 | 7519.639  | 6389.612  | M33197    | 66232.43  | 66109.609 |

|           |           |           |           |           |           |           |           |           |
|-----------|-----------|-----------|-----------|-----------|-----------|-----------|-----------|-----------|
| NM_00327E | 13658.79  | 13769.271 | NM_004727 | 671.023   | 754.815   | NM_01654E | 8456.666  | 6691.922  |
| NM_00042E | 941.619   | 645.747   | NM_00668E | 38283.27  | 27171.754 | NM_00144C | 61447.273 | 52842.301 |
| M29540    | 684.371   | 546.33    | M33197    | 22635.902 | 14824.998 | NM_001201 | 1461.251  | 1357.415  |
| AK021957  | 64666.422 | 60748.777 | NM_00404E | 19004.242 | 23947.676 | NM_01661E | 3401.004  | 3160.129  |
| NM_01662E | 21956.822 | 26748.605 | NM_001891 | 2732.902  | 2282.288  | AB014568  | 54044.172 | 54477.957 |
| NM_001334 | 883.891   | 993.662   | NM_01213E | 7394.611  | 6981.843  | NM_01224E | 5869.109  | 6298.101  |
| NM_004771 | 5552.15   | 6166.121  | AF121856  | 6236.929  | 6040.641  | AK022546  | 9781.984  | 9552.072  |
| AL365514  | 3178.187  | 3191.466  | NM_006421 | 4694.552  | 6498.457  | NM_014067 | 17288.721 | 17463.822 |
| NM_01829E | 2217.421  | 2017.809  | NM_017457 | 22365.572 | 35261.766 | NM_002914 | 13971.15  | 15592.01  |
| NM_002104 | 2295.045  | 2328.708  | NM_00376E | 22919.676 | 35817.664 | NM_02038E | 3438.303  | 3255.323  |
| NM_005504 | 7527.245  | 8411.874  | NM_00586E | 1834.451  | 2533.4    | NM_006541 | 2344.407  | 2147.003  |
| AF234654  | 3699.4    | 3369.281  | M33197    | 70190.813 | 65661.656 | NM_00570E | 6531.857  | 8458.287  |
| NM_000110 | 6858.251  | 6402.564  | NM_01820E | 20692.809 | 19397.412 | NM_00432E | 4251.332  | 6073.898  |
| NM_01600E | 16597.639 | 17199.182 | AB023197  | 4715.792  | 3829.579  | NM_004581 | 9944.477  | 12351.954 |
| NM_01454E | 2297.729  | 2335.253  | NM_02217E | 6472.13   | 5473.404  | NM_006817 | 22855.24  | 26819.662 |
| NM_01783E | 1862.268  | 1652.845  | NM_00432E | 2747.91   | 2595.862  | M33197    | 66499.336 | 65217.848 |
| NM_00171E | 710.693   | 694.053   | NM_004581 | 7508.708  | 6650.968  | M95610    | 36387.117 | 22666.762 |
| NM_015367 | 16566.66  | 14988.791 | NM_006817 | 18306.006 | 15269.427 | NM_00311E | 5959.647  | 4328.097  |
| NM_01449E | 2718.73   | 2771.429  | NM_00710E | 27725.424 | 20115.656 | L02922    | 35300.598 | 27648.662 |
| NM_00237E | 9591.063  | 9544.357  | NM_015921 | 39200.754 | 29088.688 | NM_001797 | 4209.42   | 3924.524  |
| NM_00181E | 6579.894  | 7107.623  | AB040900  | 26200.869 | 23456.33  | NM_003154 | 2620.968  | 3035.936  |
| AF055016  | 6278.264  | 6566.533  | NM_00108C | 1506.46   | 1570.83   | NM_00423E | 1218.563  | 1170.635  |
| NM_007234 | 35444.617 | 36754.813 | NM_00148E | 545.02    | 583.169   | AK023459  | 7468.938  | 7552.841  |
| NM_014567 | 2492.461  | 2101.267  | NM_000717 | 1090.798  | 1125.2    | U13022    | 1963.013  | 2258.191  |
| NM_01784E | 9779.066  | 9047.132  | M33197    | 71465.18  | 64117.234 | R23251    | 26548.201 | 27047.637 |
| AB037809  | 2982.308  | 3154.763  | NM_00484E | 2885.6    | 3810.274  | AA702640  | 1884.943  | 1780.302  |
| AB011129  | 2279.333  | 2717.791  | NM_007107 | 16149.249 | 22205.604 | T68583    | 5140.943  | 5856.671  |
| NM_014391 | 17542.17  | 18731.518 | NM_000047 | 11293.444 | 16503.932 | AA481944  | 46728.625 | 57674.063 |
| NM_00427C | 5094.079  | 5752.572  | NM_00631E | 6971.958  | 8372.395  | AF038440  | 1933.415  | 1961.316  |
| NM_01208E | 1668.513  | 2341.594  | NM_01822E | 6543.647  | 7967.386  | M31158    | 4364.9    | 4361.713  |
| NM_001537 | 6171.41   | 7245.318  | NM_00460E | 911.794   | 1264.854  | D42108    | 3467.25   | 4200.83   |
| U80743    | 3250.648  | 3567.977  | Z36813    | 6132.4    | 5080.132  | BG700922  | 4763.895  | 5972.977  |
| NM_00135E | 6971.583  | 6210.577  | AF303889  | 816.961   | 778.691   | AI366068  | 3733.398  | 4527.912  |
| D15050    | 5224.774  | 3671.416  | M33197    | 62699.707 | 65802.148 | N57553    | 1238.411  | 1937.408  |
| NM_006527 | 15304.227 | 16225.311 | AK022649  | 9685.187  | 10292.979 | AB040970  | 9398.378  | 3856.538  |
| NM_006627 | 7195.36   | 7291.076  | NM_016507 | 7874.112  | 8776.454  | NM_01833C | 8968.833  | 4459.307  |
| NM_00736E | 24519.738 | 26129.236 | NM_002024 | 12413.472 | 11573.789 | AB023222  | 2194.357  | 1145.338  |
| NM_00309E | 63609.359 | 60116.102 | NM_00274E | 27710.246 | 23655.377 | AB033088  | 2191.515  | 1396.775  |
| U05589    | 2236.896  | 2937.886  | AF173358  | 22784.072 | 22594.748 | M33197    | 77973.32  | 64136.156 |
| NM_01447E | 20445.381 | 20054.834 | NM_01636E | 4839.928  | 6665.874  | U50342    | 6897.956  | 4924.626  |
| NM_00309E | 62183.801 | 59857.867 | M33197    | 64930.672 | 65823.914 | NM_00029E | 1594.121  | 1460.053  |
| NM_01638E | 2927.915  | 3273.626  | NM_01654E | 6859.221  | 7317.576  | AF026932  | 838.572   | 859.49    |
| NM_00229E | 68105.609 | 72506.281 | NM_00144C | 38077.473 | 29978.998 | AF103795  | 1313.89   | 1197.036  |
| NM_00176E | 24503.188 | 25116.381 | NM_01661E | 2938.559  | 2480.48   | NM_00621E | 934.042   | 686.189   |
| NM_01630E | 21879.281 | 22690.113 | AB014568  | 24356.234 | 19648.445 | NM_013231 | 4488.303  | 4967.044  |
| NM_00375E | 1789.211  | 1916.383  | NM_01224E | 8936.198  | 9525.027  | NM_006254 | 1871.136  | 2109.261  |
| BE258640  | 28136.182 | 30911.021 | NM_014067 | 14669.402 | 18579.645 | X95425    | 4313.338  | 5008.214  |
| NM_003314 | 14656.699 | 15466.96  | NM_002914 | 11176.531 | 13773.931 | NM_00442E | 7638.301  | 8413.709  |
| AL355730  | 714.877   | 672.026   | NM_02038E | 2682.067  | 2448.666  | NM_01656E | 2554.565  | 3119.677  |
| U79273    | 2852.291  | 3712.183  | NM_014877 | 750.146   | 1464.714  | M33197    | 70038.633 | 63549.039 |
| AK022050  | 550.97    | 939.217   | NM_006541 | 1147.465  | 1427.815  | AY009399  | 46866.203 | 48816.66  |
| NM_00251E | 62234.52  | 58937.547 | NM_01817E | 1897.019  | 2659.149  | U59748    | 3652.134  | 4533.603  |
| AL365411  | 4845.512  | 5474.321  | NM_006197 | 13548.583 | 12314.848 | L32537    | 1171.974  | 1600.862  |

|           |           |           |           |           |           |           |           |           |
|-----------|-----------|-----------|-----------|-----------|-----------|-----------|-----------|-----------|
| M24470    | 1106.198  | 1089.593  | NM_014181 | 4305.057  | 6885.535  | NM_014303 | 32668.49  | 43136.695 |
| NM_016066 | 6410.906  | 7170.406  | M29273    | 2757.695  | 3189.194  | NM_006660 | 11068.702 | 5502.251  |
| NM_001249 | 2129.14   | 2246.045  | M33197    | 64795.367 | 69812.367 | NM_001486 | 1044.01   | 610.716   |
| AK024677  | 2626.554  | 2593.476  | NM_004854 | 4218.506  | 4055.191  | NM_004727 | 1504.029  | 966.695   |
| NM_000036 | 4081.091  | 3371.275  | AJ245418  | 15400.444 | 11964.537 | NM_006685 | 69751.195 | 62935.84  |
| AF254082  | 54546.871 | 52983.781 | NM_006377 | 4193.291  | 3702.095  | M33197    | 36015.434 | 29829.619 |
| AF205718  | 2676.938  | 3547.833  | AF244129  | 6328.291  | 7802.38   | NM_004045 | 15340.826 | 13312.653 |
| AY004252  | 1099.8    | 1079.322  | NM_002436 | 5724.284  | 6032.076  | NM_001891 | 2526.559  | 2433.705  |
| NM_006261 | 1428.535  | 1489.254  | NM_018362 | 6971.381  | 7313.479  | AF121856  | 8691.276  | 8916.435  |
| AK027045  | 5390.78   | 6419.248  | M33197    | 66838.891 | 64598.105 | NM_006421 | 7248.469  | 8542.396  |
| AF169796  | 3954.188  | 4171.496  | NM_004755 | 2520.885  | 2093.315  | NM_017457 | 33413.457 | 36595.355 |
| AK026157  | 1107.533  | 1420.714  | NM_002186 | 3694.413  | 3847.206  | NM_003765 | 25627.488 | 31501.311 |
| AK001814  | 8864.936  | 7364.919  | NM_006182 | 1079.309  | 1447.272  | NM_005866 | 1603.311  | 1388.363  |
| NM_007222 | 2244.858  | 2368.739  | AL137543  | 7758.758  | 9333.915  | NM_018202 | 28759.129 | 29891.873 |
| NM_003435 | 3968.205  | 4387.671  | M33197    | 1446.864  | 2491.047  | AB023197  | 6061.109  | 6024.29   |
| NM_016291 | 10889.363 | 10818.581 | NM_001957 | 3928.028  | 6729.945  | NM_022173 | 11213.26  | 10861.432 |
| NM_005937 | 48709.355 | 47393.008 | AK024533  | 12945.025 | 15630.938 | M33197    | 72766.672 | 64043.895 |
| AK023259  | 635.4     | 586.97    | NM_002736 | 20978.98  | 21510.494 | NM_005705 | 6611.935  | 4195.316  |
| AK001503  | 1110.99   | 1386.906  | NM_004246 | 5740.962  | 5642.715  | NM_004328 | 4096.514  | 2612.861  |
| AF075027  | 767.125   | 701.07    | NM_002285 | 1756.028  | 1514.548  | NM_004581 | 11002.947 | 8688.27   |
| AK022880  | 1293.846  | 1371.307  | NM_006694 | 30839.453 | 22934.039 | NM_006817 | 25428.203 | 19624.254 |
| NM_003601 | 28873.092 | 32516.617 | NM_005207 | 3694.092  | 3038.27   | NM_007108 | 34947.254 | 35368.469 |
| AF086375  | 676.745   | 714.614   | NM_003087 | 4583.001  | 3386.871  | NM_015921 | 59500.586 | 53827.996 |
| AK001228  | 4358.83   | 4539.787  | NM_001630 | 3742.008  | 2052.758  | AB040900  | 19671.811 | 20964.932 |
| AF074987  | 3921.587  | 4005.687  | M33197    | 67675.203 | 65674.469 | NM_001080 | 1245.829  | 862.853   |
| AK001058  | 9221.282  | 11209.007 | NM_002031 | 1657.812  | 1528.491  | NM_001482 | 972.195   | 1216.169  |
| AK026239  | 5163.232  | 5044.104  | AF305081  | 6503.86   | 5592.982  | U80018    | 1152.828  | 1442.18   |
| AF086283  | 1043.385  | 917.739   | NM_004712 | 10525.793 | 7417.436  | NM_000717 | 2122.812  | 2307.341  |
| AF088047  | 897.45    | 699.077   | AF118078  | 2903.36   | 2696.032  | M33197    | 68941.57  | 63915.41  |
| AF086281  | 1605.948  | 1712.842  | NM_020169 | 1118.236  | 1188.45   | NM_004845 | 6417.829  | 6665.786  |
| AF086372  | 590.565   | 503.587   | AL157428  | 1338.954  | 939.954   | NM_006319 | 7913.533  | 8487.669  |
| AF086393  | 1182.674  | 1137.836  | M33197    | 63758.41  | 65777.227 | NM_018226 | 7324.835  | 8263.754  |
| AF086453  | 516.93    | 452.966   | NM_005858 | 3732.366  | 3594.502  | Z36813    | 8223.851  | 8707.867  |
| AF070621  | 16750.668 | 15884.491 | AK025163  | 1478.58   | 1409.807  | AB018327  | 4069.637  | 2355.304  |
| NM_020240 | 12022.139 | 11235.306 | NM_014931 | 14780.576 | 16174.499 | AF303889  | 1752.819  | 920.528   |
| AK023678  | 6091.813  | 5048.475  | NM_014487 | 12341.164 | 18177.029 | M33197    | 66760.695 | 65945.938 |
| AF052090  | 5143.441  | 5800.874  | NM_018070 | 9118.538  | 13714.358 | AK022649  | 11184.097 | 8065.283  |
| AK023718  | 13639.784 | 13228.754 | NM_002484 | 11082.42  | 15305.666 | NM_016507 | 11158.162 | 9685.403  |
| AF075089  | 592.849   | 701.808   | M33197    | 63739.535 | 68194.492 | NM_002024 | 13602.717 | 11220.233 |
| AF086007  | 8294.375  | 8691.291  | NM_018240 | 59619.082 | 65442.285 | NM_002743 | 26906.555 | 29062.871 |
| AK000803  | 4945.883  | 4398.232  | AL162052  | 1779.934  | 1753.769  | AF173358  | 26140.199 | 27264.07  |
| AK022374  | 2280.635  | 1965.078  | AK025941  | 1811.148  | 1733.093  | NM_016366 | 8421.178  | 8775.599  |
| AF085926  | 1508.961  | 1615.667  | M33197    | 61138.332 | 61069.391 | M33197    | 66581.664 | 68819.43  |
| AF085948  | 553.01    | 586.836   | NM_015914 | 2347.221  | 1839.203  | NM_016545 | 7338.867  | 6988.725  |
| AL137307  | 8612.184  | 8710.773  | AF059531  | 6669.919  | 4535.945  | NM_001440 | 47866.363 | 49064.898 |
| AL137468  | 9727.936  | 10281.857 | NM_002707 | 14011.671 | 9731.127  | NM_001201 | 2176.267  | 2182.428  |
| AL390137  | 5298.564  | 5495.524  | AF029777  | 2258.339  | 2227.325  | NM_016618 | 3254.48   | 3116.281  |
| AL137340  | 958.897   | 1185.503  | NM_003352 | 2592.444  | 2335.084  | AB014568  | 42731.184 | 47588.25  |
| AL137542  | 997.14    | 797.694   | AK026884  | 19076.184 | 20322.076 | NM_012249 | 6278.337  | 7801.129  |
| AL162045  | 1447.863  | 1367.895  | S82198    | 1154.05   | 1287.499  | AK022546  | 9839.321  | 10516.233 |
| AK022437  | 31509.639 | 29479.697 | NM_002594 | 3663.596  | 3559.366  | NM_014067 | 21747.201 | 22903.838 |
| AB042410  | 1106.919  | 748.132   | NM_001159 | 1164.515  | 1140.815  | NM_002914 | 14489.699 | 16557.473 |
| AF116682  | 51364.793 | 49529.344 | NM_031407 | 4472.265  | 4644.539  | NM_020385 | 3567.087  | 3847.989  |

|           |           |           |           |           |           |           |           |           |
|-----------|-----------|-----------|-----------|-----------|-----------|-----------|-----------|-----------|
| AL137259  | 1782.354  | 1730.169  | M33197    | 58729.398 | 62605.738 | NM_006541 | 1999.328  | 1877.273  |
| AL122107  | 1950.928  | 1612.7    | AK000410  | 61716.84  | 63267.766 | NM_018179 | 1740.431  | 738.852   |
| AF075021  | 1796.915  | 1491.021  | NM_020193 | 3143.511  | 4046.112  | NM_006197 | 9811.516  | 3655.697  |
| AK025140  | 10730.528 | 8512.111  | D86982    | 876.409   | 1882.892  | NM_014181 | 4455.225  | 2561.012  |
| AK023394  | 1429.133  | 1481.393  | NM_005619 | 1925.219  | 2522.067  | M29273    | 3328.325  | 2635.107  |
| AF090093  | 34610.316 | 34135.594 | D87440    | 11273.982 | 16762.932 | M33197    | 65469.082 | 66624.672 |
| AF161340  | 7443.972  | 6475.329  | AK000332  | 20865.221 | 27676.916 | NM_004854 | 6217.605  | 4934.756  |
| NM_018562 | 24568.416 | 22749.549 | AL080156  | 1432.611  | 1809.745  | AJ245418  | 23158.596 | 22145.539 |
| AF098666  | 489.827   | 603.02    | NM_006738 | 2669.275  | 2354.513  | NM_006377 | 7999.42   | 7783.784  |
| NM_014134 | 598.672   | 648.696   | NM_016260 | 2128.366  | 1316.864  | AK026427  | 1693.68   | 1857.417  |
| AK021969  | 1876.873  | 2036.898  | NM_002895 | 1360.475  | 1021.948  | AF244129  | 6841.269  | 5531.753  |
| AK022065  | 2448.59   | 2554.644  | NM_013351 | 20548.883 | 13244.083 | NM_002436 | 7720.908  | 7588.328  |
| AK022221  | 1220.146  | 1224.034  | NM_012340 | 4345.147  | 4116.509  | NM_018362 | 5407.452  | 5600.539  |
| AK021998  | 671.005   | 562.49    | NM_006022 | 2503.671  | 2009.388  | M33197    | 66684.695 | 65843.414 |
| AK022126  | 1824.465  | 1742.574  | AK025110  | 2446.02   | 2239.681  | NM_004755 | 2700.03   | 2760.251  |
| AK022256  | 399.654   | 607.042   | X52339    | 51188.652 | 46513.777 | NM_002186 | 5137.208  | 6381.083  |
| AK027041  | 6496.072  | 6536.447  | M33197    | 59802.953 | 61906.957 | NM_006182 | 1321.488  | 1600.469  |
| AK024332  | 905.327   | 914.438   | AB046830  | 4945.255  | 3995.387  | AL137543  | 9003.866  | 9495.374  |
| NM_005355 | 3726.533  | 3823.511  | NM_007122 | 4590.5    | 3697.081  | NM_004444 | 15796.783 | 17370.891 |
| AF035306  | 1637.984  | 1608.822  | NM_001488 | 2046.287  | 1705.619  | M33197    | 1428.008  | 1481.639  |
| AK091662  | 1373.633  | 1262.929  | NM_016202 | 11928.376 | 9671.731  | NM_001957 | 3816.606  | 3302.038  |
| AB038318  | 429.888   | 676.364   | NM_016604 | 1839.832  | 2293.78   | AK024533  | 23337.066 | 27551.395 |
| NM_003954 | 1804.817  | 1651.842  | M33197    | 62127.664 | 68796.289 | NM_002736 | 11191.17  | 11952.743 |
| NM_016348 | 1363.266  | 1198.739  | NM_006276 | 2350.969  | 4964.362  | NM_004246 | 7687.253  | 9737.311  |
| AF009290  | 407.3     | 403.933   | NM_003407 | 3269.599  | 6156.142  | NM_002285 | 3027.34   | 1590.637  |
| AK022003  | 760.222   | 766.96    | NM_007209 | 63457.145 | 71489.516 | NM_006694 | 39457.551 | 25865.781 |
| AK023877  | 1662.404  | 958.271   | NM_003729 | 3546.241  | 5173.502  | NM_005207 | 4577.707  | 3563.363  |
| AK024213  | 47833.75  | 44813.625 | BC015899  | 12913.744 | 15460.171 | NM_014467 | 1213.004  | 741.022   |
| AB007959  | 992.502   | 970.328   | NM_017986 | 7381.928  | 3251.954  | NM_003087 | 7037.126  | 6095.007  |
| AK026002  | 1194.225  | 776.059   | AK023629  | 1007.268  | 588.971   | NM_001630 | 5822.688  | 4838.758  |
| AK024360  | 798.728   | 873.039   | AK024846  | 5219.692  | 3380.193  | NM_002031 | 2535.625  | 2407.248  |
| AK024153  | 3183.666  | 3015.331  | AK001451  | 9817.836  | 5717.072  | AF305081  | 7428.719  | 6989.353  |
| Y10516    | 11453.671 | 10723.131 | M33197    | 46619.762 | 29368.994 | NM_004712 | 14943.737 | 15744.69  |
| AF056451  | 580.014   | 546.626   | NM_007180 | 2858.309  | 3110.277  | AF118078  | 3793.297  | 3459.149  |
| AF015039  | 10878.479 | 10313.763 | NM_005609 | 993.101   | 857.6     | NM_020166 | 1153.976  | 1564.039  |
| U50528    | 2106.96   | 2351.851  | NM_005476 | 7510.676  | 7174.22   | AL157428  | 1886.735  | 2115.409  |
| AB020632  | 4406.191  | 4953.96   | NM_005660 | 4855.716  | 5972.577  | M33197    | 66715.742 | 67784.5   |
| NM_018614 | 61173.293 | 56049.188 | AK023902  | 2771.875  | 3576.562  | NM_005858 | 5140.895  | 5832.258  |
| AL117549  | 3392.616  | 3427.403  | NM_000401 | 1076.851  | 1576.998  | AK025163  | 2003.383  | 2004.852  |
| NM_005222 | 1829.575  | 2011.783  | NM_005223 | 817.178   | 558.448   | NM_014931 | 11877.473 | 12221.528 |
| BC024308  | 19480.51  | 22831.688 | AB011173  | 8795.786  | 9230.8    | NM_014487 | 14915.692 | 13807.655 |
| NM_000538 | 3741.615  | 4212.964  | AB023195  | 2010.442  | 2320.559  | NM_018070 | 8899.392  | 9586.685  |
| AK001838  | 62495.324 | 63435.094 | U43431    | 1378.157  | 1498.473  | NM_002484 | 13119.373 | 14958.423 |
| NM_018295 | 762.298   | 1364.516  | AK021563  | 1760.286  | 2509.651  | M33197    | 65838.648 | 68197.766 |
| AF070574  | 1153.932  | 1270.123  | AB006622  | 2062.714  | 3157.141  | NM_018240 | 66338.766 | 74559.492 |
| AF086262  | 4771.06   | 5224.377  | M33197    | 62728.773 | 68947.461 | AL162052  | 2138.668  | 2322.418  |
| AF086292  | 1285.12   | 1146.101  | AK097041  | 9230.606  | 10544.021 | AK025941  | 2160.173  | 2290.449  |
| AK023769  | 625.925   | 668.136   | AF068744  | 38880.141 | 43008.18  | M33197    | 66350.938 | 64860.023 |
| AK024342  | 4159.463  | 4120.563  | AK000762  | 3459.881  | 4096.784  | NM_015914 | 3510.477  | 2620.652  |
| AL137712  | 1145.281  | 1680.777  | NM_004571 | 799.146   | 988.477   | AF059531  | 11109.694 | 8063.65   |
| L77599    | 6928.02   | 8584.079  | AJ345030  | 4660.53   | 3163.818  | NM_002707 | 20527.885 | 16070.581 |
| AK021673  | 42765.359 | 42916.793 | AK023631  | 3416.611  | 3644.418  | NM_003352 | 3749.168  | 3269.444  |
| AB014543  | 3865.576  | 3102.257  | AK023472  | 13064.393 | 7978.093  | AK026884  | 30806.652 | 29425.561 |

|           |           |           |           |           |           |           |           |           |
|-----------|-----------|-----------|-----------|-----------|-----------|-----------|-----------|-----------|
| NM_01844E | 18715.773 | 16802.955 | AL109729  | 1292.922  | 1196.464  | S82198    | 1360.238  | 1344.01   |
| AK022743  | 6749.697  | 6544.838  | M33197    | 61662.109 | 58725.355 | NM_002594 | 5861.053  | 5876.89   |
| NM_014627 | 2230.385  | 2141.46   | S79912    | 13630.849 | 14630.187 | NM_001159 | 1835.823  | 1714.083  |
| NM_01393E | 7691.089  | 8019.665  | AL110283  | 1815.379  | 1353.166  | NM_031407 | 5624.581  | 6231.952  |
| NM_01398E | 59287.355 | 56356.039 | AK026892  | 3569.453  | 3188.242  | M33197    | 60782.73  | 62879.402 |
| U55055    | 2508.279  | 2556.513  | S83275    | 20808.334 | 14437.245 | AK000410  | 62882.973 | 63176.086 |
| AB018319  | 4205.189  | 3650.321  | AL117427  | 5219.925  | 4822.477  | NM_02019E | 3252.975  | 3621.121  |
| AK001101  | 2835.458  | 3092.854  | M33197    | 60733.23  | 61685.574 | NM_00561E | 1615.555  | 1758.029  |
| BM973473  | 1490.102  | 2194.282  | AF052118  | 12798.646 | 12359.222 | D87440    | 14320.125 | 15487.01  |
| AK021637  | 517.831   | 717.162   | AK025166  | 4448.891  | 5621.713  | AK000332  | 44596.793 | 52403.336 |
| AK021658  | 608.9     | 724.353   | AL359586  | 1747.008  | 2870.215  | AL080156  | 3499.21   | 2443.836  |
| AL137723  | 2644.729  | 2720.275  | AF147421  | 1125.456  | 1760.117  | NM_00673E | 2700.392  | 2735.275  |
| AK024046  | 4404.115  | 4260.14   | AF035290  | 2206.476  | 3631.764  | NM_01626C | 3013.309  | 1505.575  |
| NM_017931 | 2626.896  | 2466.588  | AK023216  | 2587.07   | 2859.047  | NM_00289E | 2314.246  | 1705.407  |
| AK022793  | 1451.053  | 1612.195  | M33197    | 61307.863 | 63898.23  | AF276513  | 954.988   | 677.328   |
| AJ227910  | 3742.207  | 3232.799  | AF086547  | 870.826   | 1510.786  | NM_013351 | 38747.738 | 26051.873 |
| AF001893  | 1341.313  | 1457.873  | AK023288  | 1802.94   | 2036.231  | NM_01234C | 11017.179 | 9477.418  |
| X04236    | 10530.385 | 13227.52  | AK022198  | 1733.785  | 1576.799  | NM_00602E | 3559.678  | 3754.896  |
| AK093746  | 3685.188  | 4191.691  | M33197    | 58519.199 | 64698.879 | AK025110  | 3300.927  | 3028.16   |
| D16875    | 1424.628  | 1516.951  | AK022428  | 1801.457  | 1786.715  | X52339    | 62081.672 | 58118.148 |
| AK027171  | 3800.677  | 4755.054  | AK000788  | 2906.212  | 2846.095  | M33197    | 64801.789 | 63345.98  |
| AK021945  | 13597.389 | 15767.502 | AK025089  | 8176.317  | 10341.778 | AB046830  | 6976.864  | 6119.169  |
| L23545    | 1972.438  | 1475.016  | M33197    | 63672.219 | 64437.98  | NM_00712E | 6645.541  | 6734.892  |
| CY3Cy5    | 10138.32  | 614.237   | AF085996  | 2496.789  | 2723.888  | NM_00148E | 2771.844  | 2327.255  |
| U13022    | 5003.18   | 4707.504  | AK001279  | 2725.425  | 2598.657  | NM_01620E | 19885.539 | 21141.096 |
| R23251    | 23852.623 | 22040.004 | AK001567  | 1620.773  | 1500.916  | NM_016604 | 2170.951  | 2094.558  |
| AA702640  | 2197.915  | 1947.71   | M33197    | 60127.082 | 61000.301 | M33197    | 66476.016 | 71035.539 |
| T68583    | 2335.541  | 2503.737  | U52839    | 3245.047  | 4855.584  | NM_00627E | 2514.774  | 2397.43   |
| AA481944  | 2800.2    | 3544.808  | X78262    | 720.623   | 1090.634  | NM_003407 | 5189.966  | 5535.249  |
| AF038440  | 942.202   | 1062.752  | U42379    | 734.595   | 1150.372  | NM_00720E | 66406.477 | 70602.031 |
| M31158    | 2726.413  | 3306.216  | M33197    | 58656.59  | 61492.512 | NM_00372E | 3079.406  | 3671.213  |
| H00742    | 1530.655  | 1863.043  | AK026984  | 31746.342 | 40243.223 | BC015899  | 10473.126 | 12449.694 |
| D42108    | 2224.844  | 1872.845  | AK022088  | 1995.857  | 1396.584  | NM_01798E | 17576.211 | 10294.246 |
| BG700922  | 4563.647  | 5925.986  | NM_013391 | 1199.717  | 1047.562  | AK023629  | 1801.333  | 1102.458  |
| N57553    | 1776.177  | 2425.613  | AL157466  | 3563.551  | 4444.288  | AK024846  | 7629.716  | 4458.874  |
| AF080158  | 3960.35   | 4678.277  | AK024336  | 2571.792  | 2584.107  | AK001451  | 15718.775 | 10187.055 |
| BM664556  | 1955.764  | 1642.951  | AK023862  | 857.226   | 809.098   | M33197    | 61555.973 | 57872.32  |
| SR5       | 7803.95   | 7771.089  | NM_018621 | 1176.539  | 1455.646  | NM_00718C | 3427.667  | 2762.241  |
| SR7       | 7925.533  | 53927.258 | AK022016  | 1125.075  | 1439.567  | NM_00560E | 1734.633  | 1399.977  |
| SR9       | 27183.52  | 6239.952  | M33197    | 65567.336 | 65232.285 | NM_00547E | 9763.677  | 10304.847 |
| CY3Cy5    | 11591.554 | 826.76    | AK022118  | 1565.931  | 1317.287  | NM_00566C | 7697.041  | 8000.084  |
| M33197    | 66836.914 | 67679.305 | AK026453  | 7362.168  | 6544.727  | AK023902  | 3255.155  | 3859.78   |
| NM_007024 | 4532.929  | 4093.346  | AK025673  | 768.18    | 780.769   | NM_000401 | 1153.356  | 1172.44   |
| NM_013231 | 1037.403  | 823.599   | M33197    | 61158.957 | 62147.922 | NM_00522E | 1169.143  | 869.907   |
| NM_01210E | 8177.756  | 7645.772  | AK022431  | 841.605   | 1288.483  | AB011173  | 12421.396 | 12644.434 |
| NM_006254 | 2594.337  | 2238.473  | AK023305  | 38757.617 | 41271.43  | AB023195  | 3033.407  | 3183.723  |
| NM_00442E | 6059.737  | 6696.467  | AK023763  | 2930.149  | 4633.302  | U43431    | 2335.075  | 3040.115  |
| NM_00489E | 3615.027  | 4164.622  | AK022729  | 3350.691  | 3800.031  | AK021563  | 1625.173  | 1442.187  |
| U59748    | 1312.848  | 1647.507  | AL050374  | 2079.413  | 2290.504  | AB006622  | 2356.478  | 2801.138  |
| L32537    | 1074.253  | 1110.84   | M33197    | 62262.563 | 59855.453 | M33197    | 66544.352 | 65347.918 |
| L02922    | 23998.018 | 22096.205 | M28639    | 5626.479  | 5598.582  | AK097041  | 11501.117 | 11685.21  |
| NM_001797 | 969.103   | 1296.5    | AL122073  | 30517.51  | 26465.361 | AF068744  | 51223.34  | 53133.293 |
| NM_003154 | 712.203   | 692.09    | AF116655  | 8163.927  | 7239.465  | NM_004497 | 780.259   | 1158.796  |



|           |           |           |           |           |           |           |           |           |
|-----------|-----------|-----------|-----------|-----------|-----------|-----------|-----------|-----------|
| AK023459  | 6153.744  | 6899.08   | AJ243222  | 1881.106  | 1689.487  | AK000762  | 4534.584  | 4936.583  |
| NM_012139 | 6614.524  | 5251.359  | AK026132  | 4247.458  | 4018.445  | NM_004571 | 799.668   | 1082.512  |
| AF121856  | 8516.778  | 7557.111  | Y11162    | 830.268   | 801.939   | AJ345030  | 4954.588  | 2696.06   |
| NM_006421 | 5205.325  | 4502.521  | M33197    | 58551.582 | 60136.504 | AK023631  | 1768.466  | 1725.059  |
| NM_017457 | 22331.881 | 17256.547 | AF070584  | 2391.733  | 2017.568  | AK023472  | 19440.484 | 12590.654 |
| NM_003765 | 15115.749 | 16519.787 | AF165185  | 732.697   | 1035.203  | AK021796  | 1252.589  | 353.465   |
| NM_018202 | 37338.16  | 45299.734 | AF075006  | 1104.664  | 1475.8    | AL109729  | 1985.282  | 1463.211  |
| AB023197  | 11206.247 | 12005.513 | M33197    | 56966.43  | 58553.301 | AF007146  | 945.247   | 941.144   |
| NM_022173 | 11469.735 | 13983.896 | AK000903  | 34176.027 | 38079.211 | M33197    | 63826.742 | 61050.629 |
| AB040970  | 10625.553 | 9824.026  | AK023938  | 1439.793  | 1550.093  | S79912    | 39158.832 | 45147.258 |
| NM_018330 | 10023.988 | 8844.212  | AL110169  | 1113.283  | 1631.297  | AL110283  | 1468.605  | 1675.362  |
| AB023222  | 2750.756  | 3033.461  | L13743    | 4101.312  | 3576.95   | AK026892  | 4244.52   | 4713.895  |
| M33197    | 66804.008 | 64430.152 | U84519    | 2215.875  | 2769.292  | S83275    | 47986.527 | 44338.027 |
| U50342    | 4958.483  | 4144.481  | Z11849    | 8349.933  | 6617.015  | AL117427  | 13332.415 | 13589.743 |
| NM_000295 | 1104.383  | 759.022   | AJ002788  | 3975.652  | 3697.499  | M33197    | 63930.043 | 62764.453 |
| AF103795  | 3219.596  | 2785.163  | M33197    | 62507.203 | 61362.516 | AF052118  | 27251.77  | 34824.383 |
| U80018    | 1362.023  | 1424.469  | AF052103  | 1073.885  | 815.095   | AK025166  | 8004.357  | 11043.573 |
| NM_000717 | 1818.715  | 1484.721  | AF075050  | 1607.224  | 1512.233  | AL359586  | 1637.341  | 1890.693  |
| M33197    | 69917.711 | 63864.305 | AK024842  | 1384.116  | 1194.16   | AF147421  | 1643.271  | 1708.497  |
| NM_004845 | 1741.095  | 1420.393  | NM_018382 | 2376.383  | 1500.428  | AF035290  | 3268.057  | 2951.123  |
| NM_007107 | 16431.67  | 14548.111 | BC022303  | 2485.244  | 2810.626  | AK023216  | 2425.965  | 2894.209  |
| NM_006319 | 12710.917 | 14667.29  | M33197    | 60799.559 | 64541.395 | M33197    | 63352.309 | 61402.977 |
| NM_018226 | 9145.499  | 10122.354 | D17203    | 61778.68  | 59089.879 | AF086547  | 1484.452  | 1419.232  |
| NM_004605 | 1980.321  | 2165.407  | NM_006495 | 4859.104  | 7045.904  | AK023288  | 2120.662  | 2371.303  |
| Z36813    | 10126.317 | 10700.319 | NM_005288 | 4714.461  | 4945.988  | AK022198  | 1568.325  | 1905.653  |
| NM_006660 | 9752.835  | 10911.636 | AK022101  | 1525.894  | 2131.098  | M33197    | 70648.75  | 63037.852 |
| NM_004727 | 877.818   | 1152.501  | NM_003251 | 2588.287  | 2668.732  | AK022428  | 1737.717  | 1209.621  |
| NM_006685 | 1731.207  | 1504.908  | AF086203  | 310.067   | 685.731   | AK023457  | 1600.196  | 1255.215  |
| M33197    | 24062.76  | 18618.971 | AB046772  | 1419.025  | 1497.789  | AK025089  | 12004.043 | 8372.069  |
| NM_004045 | 13563.229 | 11628.483 | M33197    | 64327.309 | 63506.844 | M33197    | 64016.016 | 63204.438 |
| NM_001891 | 1711.922  | 2087.943  | AL442080  | 1839.944  | 2116.585  | AF085996  | 3515.02   | 3107.135  |
| NM_001440 | 60965.938 | 64419.754 | AY007143  | 8471.915  | 9505.312  | AK001279  | 3347.607  | 3764.416  |
| NM_001201 | 585.893   | 768.964   | L15557    | 1321.208  | 1147.697  | AF086407  | 1036.144  | 1124.783  |
| NM_016618 | 2749.981  | 2178.547  | M33197    | 62572.469 | 65439.137 | AK001567  | 2589.179  | 2254.01   |
| AB014568  | 9670.295  | 8764.675  | NM_001563 | 8922.938  | 10181.339 | AL109707  | 1025.607  | 1301.572  |
| NM_012249 | 3761.045  | 3668.891  | NM_000266 | 1427.335  | 1163.493  | M33197    | 62804.656 | 61937.297 |
| AK022546  | 6029.344  | 5363.146  | X89666    | 3074.594  | 2379.622  | U52839    | 4379.417  | 5748.513  |
| NM_014067 | 4611.352  | 4006.321  | NM_017429 | 312.77    | 306.745   | X78262    | 1066.587  | 834.018   |
| NM_002914 | 14666.392 | 15664.354 | NM_003104 | 6864.492  | 5138.219  | U42379    | 1140.203  | 1079.976  |
| NM_020385 | 2748.306  | 2609.24   | NM_014581 | 2048.424  | 1412.551  | M33197    | 64348.762 | 61796.699 |
| NM_014877 | 1452.896  | 1746.044  | NM_000898 | 782.347   | 482.511   | AK026984  | 38211.477 | 37444.023 |
| NM_006541 | 1883.518  | 2389.202  | M33197    | 59756.129 | 60225.586 | AK022088  | 2911.411  | 1289.495  |
| M33197    | 66432.352 | 80703.156 | AK024448  | 7035.436  | 5283.896  | NM_013391 | 1625.503  | 810.387   |
| NM_005705 | 3195.621  | 4326.026  | NM_014406 | 2700.428  | 2461.574  | M33197    | 73143.164 | 64081.883 |
| NM_004328 | 3054.848  | 4370.553  | Z11801    | 1379.305  | 1474.485  | AL157466  | 5405.938  | 3856.281  |
| NM_004581 | 8695.032  | 9959.512  | S68954    | 8918.84   | 24374.328 | AL389981  | 1182.85   | 1235.309  |
| NM_006817 | 25170.119 | 31956.949 | S81335    | 2350.523  | 2001.596  | AK024336  | 3726.799  | 2891.776  |
| NM_007108 | 33571.418 | 36771.313 | AF052109  | 1854.98   | 4587.99   | AK023862  | 989.321   | 1021.465  |
| NM_015921 | 48764.645 | 50999.395 | M33197    | 55773.188 | 50411.969 | NM_018621 | 2100.683  | 1857.844  |
| AB040900  | 32521.396 | 32836.652 | NM_003353 | 40772.141 | 40216.793 | AK022016  | 1461.356  | 1424.153  |
| NM_001080 | 1925.238  | 2131.73   | AK026502  | 656.392   | 771.711   | AK021628  | 1168.37   | 804.987   |
| NM_001482 | 1103.845  | 997.371   | X82127    | 22188.18  | 23938.898 | M33197    | 66533.539 | 64533.246 |
| NM_001797 | 961.252   | 1578.62   | AL122044  | 3820.804  | 4633.004  | AK022118  | 2820.165  | 2566.589  |

|           |           |           |             |           |           |           |           |           |
|-----------|-----------|-----------|-------------|-----------|-----------|-----------|-----------|-----------|
| NM_003154 | 728.996   | 654.727   | NM_018296   | 2068.913  | 2095.627  | AK026453  | 13561.758 | 12558.081 |
| AK023459  | 6928.863  | 8120.516  | M33197      | 57333.809 | 63178.336 | AK025673  | 1750.635  | 1741.524  |
| U13022    | 5596.333  | 4958.766  | AF070578    | 1124.326  | 1156.518  | AF116678  | 834.782   | 1173.568  |
| AA702640  | 2164.094  | 2171.049  | CY3Cy5      | 2346.31   | 116.904   | M33197    | 63950.719 | 64715.988 |
| T68583    | 2667.873  | 3138.274  |             | 832.927   | 1111.527  | AK022431  | 1276.936  | 1599.851  |
| AA481944  | 3023.86   | 3153.648  | AA418907    | 890.96    | 1025.564  | AK023305  | 62181.176 | 60975.785 |
| AF038440  | 1009.012  | 1233.056  | M65291      | 629.582   | 862.052   | AK023763  | 7828.645  | 8300.367  |
| M31158    | 1570.651  | 1865.444  | AA115473    | 7304.145  | 7893.836  | AK022729  | 4257.052  | 3187.276  |
| H00742    | 1310.003  | 1295.991  | AA872397    | 4141.589  | 4307.196  | NM_006166 | 15663.396 | 9923.909  |
| D42108    | 1745.083  | 1735.475  | M24283      | 718.031   | 973.89    | AL050374  | 3965.669  | 2836.8    |
| BG700922  | 4420.443  | 4475.674  | AA709414    | 1532.128  | 1367.786  | M33197    | 64622.531 | 65220.176 |
| AI366068  | 1735.669  | 1945.609  | D12676      | 4208.589  | 3707.691  | M28639    | 9049.129  | 7821.258  |
| N57553    | 1299.384  | 1552.88   | NM_000939   | 43057.656 | 40227.594 | AL122073  | 43252.941 | 40351.773 |
| AF080158  | 3997.176  | 4652.115  | NM_004295   | 18573.354 | 16509.387 | AF116655  | 11599.222 | 10542.64  |
| BM664556  | 1820.369  | 1702.628  | H-X 02812 I | 3145.333  | 3576.99   | AJ243222  | 1987.621  | 2705.676  |
| M33197    | 66656.438 | 70559.93  | U75898      | 2066.357  | 1964.422  | AK026132  | 5288.292  | 5289.918  |
| NM_016545 | 8303.295  | 7665.927  | M29039      | 1025.969  | 902.325   | Y11162    | 1373.032  | 1378.741  |
| NM_000295 | 1367.852  | 1452.275  | M59815      | 698.422   | 964.708   | M33197    | 65225.047 | 62837.641 |
| AF103795  | 1265.802  | 1225.798  | M33210      | 727.13    | 673.535   | AF070584  | 3713.51   | 3808.101  |
| NM_006215 | 453.959   | 635.176   | SR2         | 53760.383 | 59203.902 | AF165185  | 600.423   | 1110.989  |
| NM_007024 | 5853.359  | 5978.64   | SR4         | 17544.918 | 16791.932 | AF075006  | 1986.275  | 1660.007  |
| NM_013231 | 1322.974  | 1503.842  | SR6         | 2674.559  | 2115.286  | M33197    | 61832     | 64847.805 |
| NM_012106 | 9594.651  | 10676.836 | SR8         | 8727.479  | 22619.904 | AK000903  | 52530.703 | 54593.813 |
| NM_006254 | 2874.581  | 3220.783  | SR10        | 31442.09  | 10166.6   | AK023938  | 2360.641  | 2953.768  |
| NM_004422 | 5875.013  | 6956.423  | CY3Cy5      | 2351.706  | 143.933   | AL110169  | 2289.421  | 2064.95   |
| M33197    | 66025.766 | 68920.617 | NM_004799   | 11039.79  | 9273.383  | L13743    | 3128.619  | 2538.128  |
| AY009399  | 46459.613 | 55080.359 | NM_006733   | 1578.739  | 1856.079  | U84519    | 2203.297  | 1380.401  |
| NM_004895 | 3043.541  | 3024.888  | NM_002039   | 1461.19   | 1345.08   | Z11849    | 11594.685 | 8142.108  |
| U59748    | 1154.805  | 1078.789  | NM_014047   | 28467.75  | 26212.428 | AJ002788  | 4498.127  | 2921.406  |
| L32537    | 786.482   | 977.806   | AK022901    | 1642.836  | 1584.584  | M33197    | 64314.973 | 65381.703 |
| NM_014303 | 8776.201  | 9861.174  | M33197      | 66088.156 | 64714.641 | AF052103  | 3774.36   | 4411.145  |
| M95610    | 20992.727 | 21549.785 | AF037332    | 9299.533  | 8747.735  | AF075050  | 2480.008  | 2439.325  |
| NM_003118 | 3057.777  | 2787.255  | NM_014571   | 975.029   | 829.525   | AK024842  | 2282.603  | 2184.483  |
| L02922    | 25586.338 | 27766.42  | NM_006052   | 2730.887  | 3280.145  | AK022962  | 876.855   | 523.62    |
| M33197    | 23300.639 | 20491.537 | AB040912    | 4416.222  | 5566.658  | NM_018382 | 1764.989  | 1448.05   |
| NM_004045 | 14058.723 | 13138.49  | NM_006243   | 6544.405  | 8710.439  | BC022303  | 3929.13   | 3460.947  |
| NM_001891 | 1680.745  | 1851.288  | M33197      | 59585.551 | 64358.598 | M33197    | 64958.633 | 59302.543 |
| NM_012139 | 7925.419  | 7664.004  | AJ011129    | 6825.518  | 7832.191  | D17203    | 63911.512 | 61127.027 |
| AF121856  | 10884.134 | 11304.29  | AF282874    | 864.449   | 826.427   | NM_006495 | 5006.526  | 6047.388  |
| NM_006421 | 5830.373  | 6098.342  | NM_001039   | 1137.583  | 1139.015  | NM_005288 | 1959.881  | 2944.017  |
| NM_017457 | 24965.895 | 24013.414 | NM_006387   | 7088.621  | 8069.505  | AK022101  | 2591.912  | 2433.046  |
| NM_003765 | 15449.031 | 16577.848 | NM_005646   | 4531.854  | 3440.615  | NM_003251 | 5027.788  | 5899.17   |
| NM_005866 | 1985.394  | 2211.308  | NM_006639   | 946.855   | 1105.564  | AF086203  | 1158.379  | 1451.142  |
| M33197    | 66669.094 | 65167.711 | BI767871    | 1979.09   | 1766.323  | AB046772  | 2366.683  | 3364.335  |
| NM_018202 | 30735.303 | 29673.697 | AK022817    | 3065.139  | 2370.132  | M33197    | 64448.965 | 63489.43  |
| AB023197  | 8758.781  | 9010.16   | M33197      | 66411.984 | 68200.711 | AL442080  | 2466.772  | 3122.959  |
| NM_022173 | 10576.686 | 10575.861 | AB037831    | 1529.435  | 2067.761  | AY007143  | 30908.828 | 39485.629 |
| AB040970  | 9371.72   | 8816.694  | NM_012103   | 20449.18  | 23399.266 | L15557    | 2131.056  | 2197.918  |
| NM_018330 | 7668.75   | 7270.866  | AL122077    | 10332.027 | 10716.57  | M33197    | 65219.262 | 60345.051 |
| AB033088  | 2603.167  | 2719.741  | NM_014632   | 1385.245  | 1110.124  | NM_001563 | 11868.298 | 7160.98   |
| M33197    | 67588.289 | 63571.613 | NM_006422   | 2242.51   | 2909.263  | NM_000266 | 1537.061  | 1108.562  |
| U50342    | 5648.864  | 4651.513  | BE789195    | 643.317   | 1137.94   | X89666    | 4983.583  | 4013.478  |
| NM_015921 | 50423.809 | 51800.512 | NM_016946   | 3034.329  | 3042.615  | NM_017425 | 755.667   | 768.466   |

|           |           |           |           |           |           |             |           |           |
|-----------|-----------|-----------|-----------|-----------|-----------|-------------|-----------|-----------|
| AB040900  | 35343.371 | 37892.313 | M33197    | 66607.57  | 73467.195 | NM_003104   | 10776.687 | 9977.007  |
| NM_00108C | 1774.869  | 1875.09   | NM_007259 | 3162.59   | 3371.972  | NM_014581   | 4056      | 4423.161  |
| NM_001482 | 1332.051  | 1314.978  | NM_018402 | 1380.377  | 1308.028  | NM_00089E   | 1143.048  | 1105.587  |
| U80018    | 1712.774  | 1624.51   | NM_018009 | 1317.056  | 905.987   | M33197      | 61115.23  | 62121.664 |
| NM_000717 | 2629.827  | 2417.328  | AK075081  | 2476.988  | 2088.289  | AK024448    | 8086.947  | 7412.122  |
| M33197    | 66171.641 | 66219.359 | NM_00089E | 12161.414 | 11280.838 | NM_01440E   | 3555.404  | 3620.98   |
| NM_00484E | 2133.417  | 2381.367  | NM_00382C | 25455.502 | 19982.016 | Z11801      | 1148.764  | 1360.741  |
| NM_007107 | 18481.67  | 21999.17  | NM_01591E | 6164.427  | 7161.503  | AK027253    | 771.016   | 1028.672  |
| NM_000047 | 1023.663  | 854.598   | M33197    | 66678.797 | 72903.063 | S68954      | 38902.684 | 10637.613 |
| NM_00631E | 12002.396 | 11400.275 | NM_01651E | 9443.375  | 12042.658 | S81335      | 3856.738  | 4483.105  |
| NM_01822E | 7874.383  | 7750.416  | NM_00618E | 20723.371 | 22879.172 | AF052109    | 9160.966  | 4628.964  |
| NM_00460E | 1781.781  | 1643.304  | NM_01480C | 13453.232 | 14689.24  | M33197      | 59822.363 | 60789.445 |
| Z36813    | 8804.064  | 9160.196  | NM_001557 | 918.755   | 795.637   | NM_00335E   | 53766.434 | 53370.012 |
| NM_00666C | 9661.316  | 9819.23   | AF147311  | 4822.356  | 4840.986  | X82127      | 40270.523 | 50516.305 |
| NM_004727 | 990.797   | 918.446   | NM_002131 | 41687.586 | 44193.734 | AL122044    | 6023.056  | 8127.059  |
| NM_00668E | 1874.16   | 2440.31   | NM_017927 | 3326.247  | 3004.182  | NM_01829E   | 2864.504  | 3382.323  |
| AF080158  | 4021.04   | 4013.406  | NM_020151 | 11558.981 | 10153.035 | NM_00575E   | 2248.891  | 2568.06   |
| BM664556  | 1802.228  | 1319.382  | NM_005891 | 49697.242 | 48250.977 | M33197      | 61029.633 | 64419.309 |
| NM_00144C | 59963.504 | 59859.457 | NM_00164E | 1326.776  | 1540.162  | AF070578    | 1707.769  | 2192.499  |
| NM_001201 | 959.716   | 1161.665  | NM_00395E | 2746.253  | 3358.136  | CY3Cy5      | 12096.967 | 628.925   |
| NM_01661E | 4327.37   | 3214.26   | M33197    | 56590.34  | 59906.258 | AA115473    | 5446.442  | 8020.784  |
| AB014568  | 11744.976 | 12421.542 | NM_00350C | 6637.456  | 8563.125  | AA872397    | 2281.795  | 2238.95   |
| AK022238  | 983.343   | 1159.78   | NM_014317 | 4082.84   | 4255.821  | M24283      | 568.956   | 1026.209  |
| NM_01224E | 6150.765  | 7104.294  | L09234    | 19100.529 | 22163.598 | AA709414    | 954.13    | 1316.719  |
| AK022546  | 5879.159  | 6821.693  | NM_00005E | 2520.05   | 2418.812  | D12676      | 3899.475  | 3262.921  |
| NM_014067 | 4611.115  | 3997.844  | AK026740  | 816.874   | 1230.693  | NM_00093E   | 16059.89  | 19446.178 |
| NM_002914 | 12972.622 | 12858.85  | NM_017881 | 7618.782  | 7400.557  | NM_00429E   | 9368.361  | 10101.105 |
| NM_02038E | 2139.832  | 1955.28   | M33197    | 59797.445 | 61496.184 | H-X 02812 I | 2457.832  | 2720.61   |
| NM_014877 | 1313.084  | 1190.385  | NM_017634 | 8131.115  | 8736.35   | U75898      | 2179.62   | 2331.47   |
| NM_006541 | 1717.639  | 1580.142  | NM_00081E | 789.912   | 816.675   | M59815      | 1040.678  | 1169.208  |
| M33197    | 66837.68  | 64689.992 | NM_01889E | 1087.596  | 1180.948  | NM_006917   | 1522.84   | 1843.389  |
| NM_00570E | 3272.955  | 4521.791  | AJ300465  | 1573.401  | 1176.483  | SR2         | 55208.336 | 59607.121 |
| NM_00432E | 3205.723  | 4419.602  | X86400    | 1961.669  | 2205.285  | SR4         | 17970.309 | 18390.848 |
| NM_004581 | 9421.14   | 10048.399 | NM_00081C | 1854.444  | 2430.331  | SR6         | 2662.094  | 1975.674  |
| NM_006817 | 24160.771 | 27599.088 | AF069307  | 4911.357  | 5160.205  | SR8         | 9230.203  | 26388.936 |
| NM_00710E | 40018.297 | 48204.109 | M33197    | 59849.363 | 59996.441 | SR10        | 36391.746 | 11029.082 |
| M33197    | 66657.969 | 73069.867 | U92978    | 4377.539  | 4515.284  | CY3Cy5      | 8809.993  | 412.906   |
| M95610    | 20517.504 | 17164.32  | NM_00573E | 1016.575  | 1097.115  | NM_00479E   | 6944.125  | 9664.635  |
| NM_003118 | 2893.713  | 2217.032  | NM_01448E | 1287.069  | 1377.963  | NM_00673E   | 1490.844  | 1558.057  |
| L02922    | 26720.131 | 26655.613 | NM_01338E | 5889.562  | 5090.243  | NM_014047   | 20728.701 | 24139.592 |
| NM_001797 | 1263.093  | 1657.679  | NM_00532E | 16384.68  | 17557.059 | M33197      | 67540.344 | 69735.008 |
| NM_003154 | 1087.106  | 1110.108  | NM_00728E | 912.808   | 1067.836  | AF037332    | 8807.459  | 8872.461  |
| AK023459  | 6922.653  | 8227.195  | NM_01406E | 1621.321  | 1093.078  | NM_014571   | 800.636   | 1176.364  |
| U13022    | 6280.4    | 6577.479  | AB035130  | 2494.631  | 2497.061  | NM_00605E   | 1401.779  | 1818.172  |
| R23251    | 26966.324 | 32582.82  | NM_00335E | 2409.576  | 2622.601  | AB040912    | 1364.859  | 1624.046  |
| AA702640  | 2101.966  | 1729.58   | M33197    | 50726.965 | 53772.965 | NM_003871   | 768.233   | 946.085   |
| T68583    | 2322.321  | 2281.753  | AF119917  | 471.851   | 585.986   | NM_00624E   | 7341.282  | 8060.022  |
| AA481944  | 2824.336  | 2519.395  | AK021834  | 494.172   | 936.142   | M33197      | 66982.727 | 73259.703 |
| AF038440  | 662.787   | 802.097   | NM_01791E | 2847.625  | 3647.823  | AJ011129    | 7070.344  | 7635.743  |
| M31158    | 2420.387  | 2435.23   | NM_00357E | 4139.214  | 4416.134  | AF282874    | 1207.695  | 1217.118  |
| H00742    | 1217.199  | 1416.093  | AL049283  | 2416.976  | 2180.748  | NM_00103E   | 821.913   | 944.208   |
| D42108    | 1722.866  | 1395.789  | M33197    | 60141.051 | 62004.82  | NM_006387   | 7381.04   | 8893.268  |
| BG700922  | 4372.106  | 4833.26   | NM_002401 | 29426.541 | 25647.473 | NM_00564E   | 4574.272  | 4871.737  |

|           |           |           |             |           |           |           |           |           |
|-----------|-----------|-----------|-------------|-----------|-----------|-----------|-----------|-----------|
| AI366068  | 1707.112  | 1817.054  | NM_001274   | 5930.785  | 6839.778  | NM_006635 | 1412.346  | 924.15    |
| N57553    | 1261.265  | 1582.939  | NM_003913   | 1389.177  | 1487.568  | BI767871  | 3350.733  | 3005.774  |
| AB040970  | 8252.521  | 6715.286  | NM_002227   | 3936.191  | 3982.889  | AK022817  | 2172.41   | 2473.313  |
| NM_01833C | 7139.48   | 5704.663  | NM_007199   | 1781.626  | 1969.37   | M33197    | 66393.063 | 68947.547 |
| AB023222  | 1742.598  | 1305.655  | AB002301    | 1107.888  | 1629.632  | AB037831  | 2978.911  | 2856.746  |
| AB033088  | 2244.195  | 1387.935  | AB014530    | 9034.838  | 8120.51   | NM_012103 | 24666.508 | 28224.248 |
| M33197    | 68708.391 | 63124.848 | M33197      | 59060.547 | 63266.809 | AL122077  | 3223.229  | 3869.715  |
| U50342    | 5733.598  | 3306.4    | NM_005989   | 4126.143  | 3670.756  | NM_014632 | 982.924   | 1127.261  |
| NM_000295 | 1346.614  | 991.765   | AB014607    | 7356.021  | 6483.875  | NM_006422 | 1935.599  | 2054.664  |
| AF103795  | 1453.795  | 1282.839  | AF134401    | 1515.48   | 2257.27   | NM_016946 | 2535.54   | 2720.867  |
| NM_006215 | 641.872   | 470.911   | NM_006387   | 4918.58   | 4565.052  | M33197    | 67105.75  | 77143.797 |
| NM_013231 | 1329.073  | 1283.595  | NM_005646   | 4052.347  | 3848.86   | NM_007255 | 2962.341  | 3063.644  |
| NM_006254 | 2492.877  | 2325.058  | NM_006639   | 949.56    | 1137.644  | NM_018005 | 581.744   | 1055.086  |
| NM_004422 | 5137.156  | 5015.826  | BI767871    | 1642.817  | 1589.447  | AK075081  | 2487.931  | 3259.333  |
| M33197    | 66812.414 | 67919.586 | AA418907    | 1244.873  | 1972.466  | NM_000895 | 13642.784 | 14593.4   |
| AY009399  | 48632.996 | 51806.133 | M65291      | 577.512   | 594.2     | NM_00382C | 23261.336 | 25253.715 |
| NM_004895 | 2493.805  | 2930.808  | AA115473    | 6857.351  | 6396.753  | NM_015915 | 3209.863  | 3427.517  |
| U59748    | 1132.037  | 1203.652  | AA872397    | 3661.06   | 3411.312  | M33197    | 67580.266 | 69777.43  |
| L32537    | 700.902   | 910.97    | M24283      | 1123.623  | 789.141   | NM_016518 | 10564.331 | 10468.816 |
| NM_014303 | 9775.683  | 12792.919 | AA709414    | 1806.568  | 1273.013  | NM_006185 | 24163.629 | 29703.098 |
| NM_00666C | 8201.019  | 5911.787  | D12676      | 4206.153  | 3562.301  | NM_01480C | 11566.314 | 12923.593 |
| NM_004727 | 1082.572  | 987.716   | NM_000939   | 45712.586 | 42467.027 | NM_001557 | 958.269   | 974.492   |
| NM_006685 | 2851.986  | 2733.626  | NM_004295   | 18179.133 | 17543.838 | AF147311  | 6715.851  | 6144.721  |
| M33197    | 28081.488 | 15882.112 | H-X 02812 I | 2614.39   | 2968.425  | NM_002131 | 41688.32  | 45843.453 |
| NM_004045 | 14373.139 | 10415.625 | U75898      | 2381.118  | 2074.803  | NM_017927 | 4120.913  | 4266.326  |
| NM_001891 | 1631.282  | 1489.222  | M29039      | 1032.574  | 1344.31   | NM_020151 | 17498.182 | 17068.512 |
| AF121856  | 9028.627  | 8063.927  | M59815      | 922.029   | 1221.787  | NM_005891 | 61877.605 | 57114.852 |
| NM_006421 | 4493.885  | 4578.773  | NM_006917   | 737.364   | 719.833   | NM_001645 | 2268.712  | 2252.198  |
| NM_017457 | 21451.252 | 17352.752 | M33197      | 1451.195  | 1349.786  | NM_003955 | 3888.894  | 3654.597  |
| NM_003765 | 13663.242 | 14720.802 | AB011146    | 3365.82   | 4249.292  | M33197    | 61350.754 | 64559.707 |
| NM_005865 | 1986.11   | 2527.014  | NM_006185   | 17733.094 | 14260.496 | NM_00350C | 8117.642  | 7855.986  |
| M33197    | 68490.117 | 62919.035 | NM_01480C   | 10654.6   | 9787.563  | NM_014317 | 5901.185  | 5087.871  |
| NM_018202 | 33257.961 | 33282.418 | NM_001557   | 1078.663  | 1735.13   | L09234    | 21642.139 | 18744.898 |
| AB023197  | 8460.773  | 8847.113  | AF147311    | 5287.896  | 6299.723  | NM_000055 | 3400.095  | 2966.337  |
| NM_022173 | 10645.191 | 11363.09  | NM_002131   | 46412.953 | 53465.766 | AK026740  | 1582.242  | 1245.607  |
| M33197    | 68849.539 | 63706.219 | NM_017927   | 3332.353  | 3255.577  | NM_017881 | 6281.492  | 5902.895  |
| NM_005705 | 3065.737  | 3410.842  | M33197      | 65589.734 | 69241.586 | NM_017634 | 6218.61   | 6431.86   |
| NM_004325 | 3317.609  | 2848.762  | NM_001203   | 4239.685  | 4867.375  | NM_000813 | 1149.39   | 1230.353  |
| NM_004581 | 10552.79  | 9370.221  | NM_004799   | 9726.299  | 7193.752  | NM_018896 | 1280.316  | 1370.638  |
| NM_006817 | 26651.828 | 24928.803 | NM_006733   | 1242.48   | 1235.12   | AJ300465  | 2670.252  | 2632.815  |
| NM_007105 | 38375.363 | 33386.633 | NM_014047   | 29113.973 | 28362.975 | X86400    | 2272.422  | 2165.304  |
| NM_015921 | 55627.238 | 52351.727 | AK022901    | 1855.357  | 1965.313  | NM_00081C | 2913.506  | 3716.291  |
| AB040900  | 41469.973 | 39446.887 | M33197      | 59815.008 | 62765.242 | AF069307  | 4739.149  | 4785.421  |
| NM_00108C | 2138.378  | 1385.236  | AF037332    | 8986.751  | 9950.558  | M33197    | 64427.449 | 61420.633 |
| NM_001482 | 1725.451  | 1441.583  | NM_014571   | 963.667   | 932.025   | U92978    | 5381.247  | 6258.851  |
| U80018    | 1290.938  | 1509.335  | NM_006052   | 1931.06   | 1693.818  | NM_005735 | 2471.266  | 1817.673  |
| NM_000717 | 2529.935  | 2440.741  | AB040912    | 9410.552  | 11730.337 | NM_014485 | 1215.659  | 891.47    |
| M33197    | 66116.383 | 67319.492 | NM_006243   | 6374.385  | 6373.981  | NM_013385 | 6831.671  | 6191.066  |
| NM_004845 | 1273.908  | 1221.663  | M33197      | 60405.801 | 62549.879 | AB014567  | 1107.07   | 812.513   |
| NM_007107 | 15556.563 | 14862.119 | AJ011129    | 7596.517  | 8159.457  | NM_005325 | 19842.381 | 19290.73  |
| NM_000047 | 616.357   | 625.089   | AF282874    | 919.768   | 1147.458  | NM_007285 | 989.296   | 839.593   |
| NM_006315 | 11269.156 | 11332.069 | NM_001039   | 815.606   | 658.745   | NM_014065 | 653.517   | 956.99    |
| NM_018225 | 7755.075  | 7491.127  | M33197      | 56563.836 | 56701.492 | AB035130  | 2319.88   | 2473.821  |

|           |           |           |           |           |           |             |           |           |
|-----------|-----------|-----------|-----------|-----------|-----------|-------------|-----------|-----------|
| NM_004605 | 1695.156  | 2065.127  | U92978    | 4042.37   | 3707.673  | NM_003355   | 2259.915  | 2546.612  |
| Z36813    | 9160.319  | 9473.631  | NM_005738 | 1146.606  | 953.497   | M33197      | 56773.809 | 57209.313 |
| AB018327  | 3996.191  | 3380.272  | NM_014488 | 1445.065  | 1860.685  | AF119917    | 923.558   | 816.608   |
| AF303889  | 1548.867  | 1638.527  | NM_013389 | 2815.956  | 2344.199  | NM_017915   | 3341.022  | 3657.195  |
| M33197    | 66450.359 | 67239.523 | AB014567  | 1099.825  | 1107.698  | AL050097    | 605.575   | 921.755   |
| AK022649  | 13003.022 | 13562.578 | AK022817  | 2425.588  | 2785.329  | AL049283    | 2093.591  | 2254.836  |
| NM_016507 | 5709.507  | 7091.673  | NM_018034 | 7325.419  | 7170.763  | M33197      | 58753.969 | 61957.945 |
| NM_002024 | 8038.343  | 6755.781  | M33197    | 60716.438 | 61748.609 | NM_002401   | 38132.781 | 48030.645 |
| NM_002743 | 35143.074 | 42293.418 | AB037831  | 1825.866  | 1661.355  | NM_001274   | 7088.431  | 7576.75   |
| AF173358  | 13451.408 | 12127.661 | NM_012103 | 21272.395 | 19426.596 | NM_003913   | 1661.788  | 2171.083  |
| NM_016545 | 9803.983  | 9282.142  | AL122077  | 12485.477 | 10666.031 | NM_002227   | 6464.627  | 5065.818  |
| NM_001440 | 60374.27  | 61736.215 | NM_014632 | 1418.349  | 1151.254  | NM_007195   | 1850.166  | 1835.242  |
| NM_001201 | 859.057   | 838.533   | NM_006422 | 1775.279  | 2493.221  | AB002301    | 1576.484  | 1248.023  |
| NM_016618 | 3725.106  | 3799.039  | BE789195  | 518.974   | 900.071   | AB014530    | 11470.802 | 11904.001 |
| AB014568  | 10387.113 | 10492.038 | NM_016946 | 2401.999  | 2636.413  | M33197      | 63711.352 | 65363.543 |
| AK022238  | 750.2     | 1044.36   | NM_018402 | 1384.759  | 1379.382  | NM_005985   | 5384.354  | 4730.393  |
| NM_012249 | 5130.96   | 4817.883  | NM_018009 | 1765.105  | 1736.445  | AB014607    | 9269.263  | 6413.636  |
| AK022546  | 4395.262  | 4805.093  | AK075081  | 3798.986  | 2875.766  | AF134401    | 1424.06   | 998.991   |
| NM_014067 | 3999.28   | 4175.7    | NM_000895 | 11819.112 | 12994.958 | NM_006387   | 8763.729  | 9503.165  |
| NM_002914 | 13732.834 | 15329.882 | NM_003820 | 35376.309 | 34028.219 | NM_005646   | 3957.489  | 4768.021  |
| NM_020385 | 2200.817  | 2563.794  | NM_015915 | 8999.996  | 9193.629  | NM_006635   | 1167.509  | 1312.445  |
| NM_014877 | 1529.156  | 1325.517  | NM_016518 | 12096.97  | 12798.408 | BI767871    | 1899.381  | 2422.078  |
| NM_006541 | 1605.009  | 1690.327  | AB002301  | 1277.177  | 1580.581  | AA115473    | 6877.95   | 8028.964  |
| NM_018179 | 1776.159  | 1040.971  | AB014530  | 10805.061 | 10339.443 | M24283      | 586.902   | 1307.762  |
| NM_006197 | 10881.834 | 4460.503  | M33197    | 57298.816 | 60012.289 | AA709414    | 1265.461  | 1274.989  |
| NM_014181 | 4465.638  | 3043.053  | NM_005989 | 3814.584  | 4077.26   | D12676      | 3537.168  | 3886.266  |
| M29273    | 1076.969  | 917.238   | AB014607  | 4789.126  | 4447.043  | NM_000935   | 28163.555 | 34272.977 |
| M33197    | 66740.148 | 69557.313 | AF134401  | 1130.792  | 1716.728  | NM_004295   | 17896.279 | 19083.322 |
| NM_004854 | 4126.028  | 3222.955  | NM_020151 | 9887.991  | 11334.305 | H-X 02812 I | 3623.694  | 3376.625  |
| AJ245418  | 5822.202  | 5023.285  | NM_005891 | 50122.297 | 48970.629 | U75898      | 3457.298  | 3040.385  |
| NM_006377 | 6343.946  | 6622.242  | NM_001645 | 1700.195  | 1430.789  | M29039      | 1064.286  | 1082.549  |
| AK026427  | 1486.93   | 1043.76   | NM_003956 | 2550.029  | 2791.114  | M59815      | 978.441   | 1093.341  |
| AF244129  | 7698.896  | 5946.231  | M33197    | 58514.676 | 60770.543 | NM_006917   | 728.651   | 731.323   |
| NM_018362 | 6195.298  | 6812.292  | NM_003500 | 6081.807  | 6084.277  | M33197      | 1660.311  | 1281.2    |
| M33197    | 67875.102 | 63637.945 | NM_014317 | 3388.136  | 3545.369  | AB011146    | 4154.823  | 2932.974  |
| NM_004755 | 5777.471  | 5659.312  | L09234    | 17993.564 | 19522.383 | NM_006185   | 24343.16  | 26508.648 |
| NM_002186 | 4645.604  | 5465.911  | NM_000059 | 1816.344  | 1892.234  | NM_014800   | 14641.598 | 15154.281 |
| NM_006182 | 938.936   | 1098.151  | AK026740  | 972.142   | 1219.475  | NM_001557   | 1205.104  | 1491.787  |
| AL137543  | 9622.069  | 10801.815 | M33197    | 56213.023 | 64686.297 | AF147311    | 5336.542  | 6708.383  |
| NM_004444 | 2979.802  | 4009.51   | NM_017634 | 10672.103 | 12763.99  | NM_002131   | 48594.84  | 55773.25  |
| M33197    | 1764.913  | 1318.793  | NM_000813 | 1530.429  | 1334.418  | NM_017927   | 3737.664  | 3848.267  |
| NM_001957 | 6504.814  | 7934.252  | NM_018896 | 3252.942  | 3913.098  | M33197      | 87138.867 | 63733.367 |
| AK024533  | 4872.67   | 6587.279  | AJ300465  | 2968.163  | 2108.065  | NM_001203   | 4280.447  | 3416.508  |
| NM_002736 | 26948.477 | 32500.045 | X86400    | 2294.205  | 2475.342  | NM_004795   | 7954.316  | 9869.175  |
| NM_004246 | 2114.384  | 2597.759  | AF069307  | 5108.644  | 5359.659  | NM_006733   | 1679.241  | 1522.512  |
| NM_002285 | 2280.792  | 1616.354  | NM_006917 | 765.781   | 648.519   | NM_014047   | 13974.091 | 13545.816 |
| NM_006694 | 36924.258 | 32428.855 | M33197    | 1795.134  | 2453.638  | AK022901    | 2450.889  | 2174.889  |
| NM_005207 | 5638.982  | 3607.353  | AB011146  | 4006.019  | 4986.567  | M33197      | 61619.305 | 60360.918 |
| NM_014467 | 861.26    | 649.689   | NM_005326 | 19596.43  | 19970.703 | AF037332    | 10954.029 | 9957.642  |
| NM_003087 | 3084.193  | 2709.334  | NM_007286 | 800.22    | 571.229   | NM_014571   | 1235.527  | 1264.059  |
| NM_001630 | 2986.934  | 3358.285  | NM_014069 | 2241.349  | 2017.871  | NM_006052   | 1738.163  | 1920.702  |
| NM_002031 | 2485.115  | 1959.608  | AB035130  | 2884.958  | 2627.981  | AB040912    | 5708.763  | 4849.386  |
| AF305081  | 9657.075  | 9083.35   | NM_003359 | 2632.997  | 2784.383  | NM_006243   | 8457.309  | 7134.691  |

|           |           |           |             |           |           |           |           |           |
|-----------|-----------|-----------|-------------|-----------|-----------|-----------|-----------|-----------|
| NM_004712 | 14404.834 | 14062.669 | M33197      | 50957.367 | 53518.25  | M33197    | 67123.211 | 69838.773 |
| AF118078  | 3640.642  | 3282.296  | NM_017915   | 3759.732  | 4371.1    | AJ011129  | 7858.782  | 7564.653  |
| NM_020169 | 1806.807  | 2101.877  | AK021513    | 763.556   | 962.859   | AF282874  | 1177.708  | 1171.913  |
| AL157428  | 1650.229  | 1991.317  | NM_003579   | 4057.271  | 4008.965  | M33197    | 60519.539 | 56197.289 |
| M33197    | 66731.563 | 68366.945 | AL049283    | 2671.689  | 2922.438  | U92978    | 2804.39   | 2906.272  |
| BE904175  | 1518.498  | 1259.581  | NM_002401   | 47501.816 | 46488.535 | NM_005738 | 964.873   | 1882.886  |
| NM_005858 | 5054.847  | 5748.156  | NM_001274   | 7076.161  | 8388.369  | NM_013388 | 2907.098  | 3617.031  |
| AK025163  | 1483.357  | 1501.878  | NM_003913   | 1622.867  | 1416.876  | AK022817  | 2299.712  | 2922.583  |
| NM_014931 | 16807.109 | 20016.291 | NM_002227   | 5118.273  | 4450.23   | NM_018034 | 6017.098  | 6238.129  |
| NM_014487 | 10331.205 | 10904.216 | NM_007199   | 2475.525  | 2491.553  | M33197    | 46674.754 | 49425.398 |
| NM_018070 | 9463.187  | 10159.262 | NM_006243   | 6590.464  | 6094.755  | AB037831  | 1746.746  | 1274.936  |
| NM_002484 | 8437.204  | 12504.047 | M33197      | 59217.43  | 60819.285 | NM_012103 | 14674.749 | 14500.006 |
| M33197    | 66743.664 | 68192.891 | AJ011129    | 5719.467  | 6489.695  | AL122077  | 8258.639  | 8720.076  |
| NM_018240 | 17599.506 | 22538.824 | AF282874    | 1184.065  | 2765.727  | NM_014632 | 1220.24   | 1413.683  |
| AL162052  | 1884.291  | 2314.296  | NM_001039   | 4265.934  | 5026.424  | NM_006422 | 2309.94   | 2153.475  |
| AK025941  | 2926.828  | 2880.438  | NM_006387   | 5847.388  | 6833.209  | BE789195  | 639.52    | 958.396   |
| M33197    | 64340.953 | 64062.391 | NM_005646   | 4530.807  | 3629.151  | NM_016946 | 2622.149  | 2388.887  |
| NM_015914 | 3812.095  | 3747.386  | NM_006639   | 1230.248  | 1183.46   | M33197    | 65963.695 | 68528.813 |
| AF059531  | 6151.509  | 7603.608  | NM_001692   | 852.026   | 692.978   | NM_007258 | 3343.347  | 3173.064  |
| NM_002707 | 26359.189 | 35888.578 | BI767871    | 2379.406  | 2684.393  | NM_018402 | 1445.569  | 1396.757  |
| NM_003352 | 3979.673  | 2265.299  | AA418907    | 1137.194  | 912.557   | NM_018008 | 1121.829  | 926.852   |
| AK026884  | 29449.396 | 26841.574 | M65291      | 592.952   | 800.021   | AK075081  | 3079.632  | 3524.805  |
| S82198    | 1247.181  | 999.433   | AA115473    | 6845.409  | 7973.698  | NM_000898 | 15234.503 | 17311.066 |
| NM_002594 | 3707.576  | 3736.553  | AA872397    | 4458.65   | 4468.179  | NM_003820 | 30333.432 | 35175.082 |
| NM_001159 | 1202.711  | 1311.519  | M24283      | 1165.605  | 841.339   | NM_015918 | 2849.768  | 2897.07   |
| NM_031407 | 6147.506  | 7275.208  | AA709414    | 1773.728  | 1622.037  | AB002301  | 2795.925  | 2630.556  |
| M33197    | 61566.902 | 61052.914 | D12676      | 4579.82   | 4180.738  | AB014530  | 13070.729 | 14744.003 |
| D86982    | 992.094   | 1051.196  | NM_000939   | 47672.785 | 46843.371 | M33197    | 60692     | 60482.168 |
| NM_005619 | 1009.13   | 1270.194  | H-X 02812 I | 3749.896  | 3786.389  | NM_005988 | 3808.977  | 4470.109  |
| D87440    | 6463.763  | 7118.293  | U75898      | 3773.846  | 2966.281  | AB014607  | 4560.08   | 4893.841  |
| AK000332  | 2057.724  | 2736.35   | M29039      | 1408.605  | 1446.85   | AF134401  | 881.02    | 1247.485  |
| AL080156  | 2347.692  | 1591.229  | M59815      | 1162.311  | 975.2     | NM_020151 | 10390.662 | 12358.784 |
| NM_006738 | 5476.107  | 5500.63   | M33210      | 763.469   | 913.156   | NM_005891 | 41500.527 | 45412.863 |
| NM_016260 | 3660.535  | 2460.754  | AK075081    | 2883.133  | 2295.463  | NM_001648 | 1090.778  | 1386.77   |
| NM_002898 | 1880.659  | 1444.084  | NM_000898   | 12972.853 | 12170.17  | NM_003956 | 2660.332  | 2604.897  |
| NM_013351 | 30676.174 | 34688.898 | NM_003820   | 28971.551 | 24695.189 | M33197    | 63023.867 | 61548.641 |
| NM_012340 | 2561.487  | 3443.846  | NM_015918   | 3617.068  | 3413.99   | NM_003500 | 4496.992  | 3582.88   |
| NM_006022 | 3443.158  | 4155.216  | M33197      | 62901.164 | 62407.145 | NM_014317 | 5617.937  | 5498.682  |
| AK025110  | 3218.535  | 3038.209  | NM_016518   | 11147.579 | 11614.358 | L09234    | 21128.869 | 20053.123 |
| X52339    | 52971.258 | 36638.855 | NM_006188   | 21309.063 | 24693.482 | NM_000058 | 3429.058  | 3230.933  |
| M33197    | 63225.063 | 61533.91  | NM_014800   | 12816.749 | 15171.7   | AK026740  | 1461.14   | 1308.474  |
| AB046830  | 7982.174  | 6031.234  | NM_001557   | 829.541   | 567.328   | NM_017881 | 15151.614 | 14311.383 |
| NM_007122 | 6888.962  | 7604.938  | AF147311    | 3752.258  | 3559.042  | NM_017634 | 13423.663 | 13293.213 |
| NM_001488 | 3804.012  | 2910.266  | NM_017927   | 3896.797  | 2837.939  | NM_000813 | 1644.909  | 1518.084  |
| NM_016202 | 11907.858 | 12047.538 | NM_004799   | 12803.059 | 10503.263 | NM_018896 | 1987.804  | 1908.091  |
| NM_012476 | 990.216   | 628.74    | NM_006733   | 1908.616  | 1798.484  | AJ300465  | 2763.076  | 3394.838  |
| NM_016604 | 3458.252  | 2747.105  | NM_014047   | 28644.068 | 25973.857 | X86400    | 2385.394  | 2504.247  |
| M33197    | 66769.727 | 68229.75  | AK022901    | 1944.962  | 1799.27   | AF069307  | 5805.904  | 6571.319  |
| NM_006276 | 2602.8    | 2910.084  | AF037332    | 9986.388  | 9648.7    | NM_006917 | 2518.899  | 2022.607  |
| NM_003407 | 3693.934  | 4008.123  | NM_014571   | 1320.534  | 908.411   | SB        | 1413.161  | 2066.76   |
| NM_007209 | 62506.633 | 63464.805 | NM_006052   | 2702.532  | 2187.555  |           | 798.85    | 1295.88   |
| NM_003728 | 5285.413  | 5472.823  | AB040912    | 23260.457 | 24998.457 | M33197    | 1103.992  | 1365.879  |
| BC015899  | 19553.754 | 21670.936 | NM_003871   | 871.074   | 658.974   | AB011146  | 3136.992  | 3370.294  |

|           |           |           |           |           |           |             |           |           |
|-----------|-----------|-----------|-----------|-----------|-----------|-------------|-----------|-----------|
| NM_01798E | 1947.167  | 2281.252  | NM_000813 | 1389.022  | 1410.538  | NM_00367E   | 735.346   | 1196.597  |
| AK023629  | 1983.148  | 1949.608  | NM_01889E | 1141.219  | 1360.617  | NM_00532E   | 18773.674 | 22008.314 |
| AK024846  | 8155.844  | 8433.844  | AJ300465  | 1949.987  | 1716.585  | NM_01406E   | 1331.014  | 1869.246  |
| AK001451  | 18363.154 | 17445.926 | X86400    | 1345.483  | 1580.766  | AB035130    | 2408.076  | 2606.158  |
| M33197    | 62905.406 | 58304.832 | NM_00081C | 2983.527  | 2563.818  | NM_00335E   | 2594.655  | 2779.883  |
| NM_00718C | 2883.599  | 2912.647  | AF069307  | 5339.035  | 5678.639  | M33197      | 55111.98  | 53307.109 |
| NM_00560E | 2025.389  | 2367.177  | M33197    | 62128.977 | 63290.855 | AF119917    | 2087.964  | 2595.011  |
| NM_00547E | 11888.281 | 14704.466 | U92978    | 3930.645  | 3935.358  | NM_01791E   | 4429.263  | 4456.047  |
| NM_00566C | 6331.24   | 5633.295  | NM_00573E | 853.988   | 549.125   | AL050097    | 860.327   | 663.825   |
| AK023902  | 3814.991  | 2254.05   | AB014567  | 927.331   | 1009.142  | AL049283    | 2527.556  | 2096.349  |
| NM_000401 | 2618.769  | 1528.888  | NM_018034 | 9831.413  | 9985.936  | NM_002401   | 49973.992 | 59252.797 |
| NM_00522E | 1920.496  | 1504.841  | M33197    | 61638.922 | 62820.199 | NM_001274   | 8700.361  | 8901.282  |
| AB011173  | 12622.158 | 12013.902 | AB037831  | 1841.443  | 2434.101  | NM_00391E   | 3363.287  | 3619.095  |
| AB023195  | 4637.071  | 4280.6    | NM_01210E | 20739.191 | 22817.1   | NM_002227   | 7593.593  | 6062.792  |
| U43431    | 2790.774  | 2671.411  | AL122077  | 13918.912 | 13089.512 | NM_00719E   | 2674.119  | 3138.619  |
| AK021563  | 2112.208  | 2359.312  | NM_01463E | 1378.755  | 1376.096  | NM_00624E   | 10489.206 | 10025.695 |
| AB006622  | 1408.45   | 1739.76   | NM_00642E | 1906.481  | 2412.971  | NM_00725E   | 1063.633  | 1143.218  |
| M33197    | 66102.539 | 63650.922 | NM_01694E | 2905.882  | 3054.222  | M33197      | 61717.469 | 61646.008 |
| AK097041  | 3864.436  | 5061.673  | M33197    | 61807.969 | 62187.559 | AJ011129    | 5871.816  | 8244.14   |
| AF068744  | 4123.057  | 5841.727  | NM_00725E | 3701.969  | 3356.608  | AF282874    | 1255.579  | 1216.266  |
| NM_004497 | 656.353   | 942.008   | NM_01840E | 1367.51   | 1355.756  | NM_00638E   | 5377.677  | 6153.019  |
| AK000762  | 4069.187  | 4378.227  | NM_01800E | 2167.88   | 1626.631  | NM_00564E   | 2670.793  | 3177.086  |
| NM_004571 | 1148.45   | 1223.185  | M33197    | 56348.398 | 56356.723 | NM_00663E   | 1159.917  | 1133.329  |
| AJ345030  | 5245.348  | 4441.622  | NM_002401 | 34342.598 | 32813.371 | BI767871    | 4639.081  | 4791.322  |
| AK023631  | 2504.372  | 3044.534  | NM_001274 | 7200.869  | 7219.67   | AA418907    | 1844.577  | 2271.281  |
| AK023472  | 14989.729 | 12065.597 | NM_00391E | 1528.499  | 1744.548  | AA115473    | 9437.078  | 9774.587  |
| AK021796  | 1345.148  | 952.884   | NM_002227 | 3216.337  | 3210.534  | AA872397    | 5730.897  | 4940.309  |
| AL109729  | 2272.542  | 1843.709  | NM_00719E | 960.435   | 1289.876  | M24283      | 723.447   | 1042.977  |
| AF007146  | 1437.558  | 1233.066  | AB002301  | 1236.583  | 1877.168  | AA709414    | 2066.19   | 2143.647  |
| M33197    | 61923.363 | 61901.594 | AB014530  | 9260.071  | 7495.047  | D12676      | 6264.069  | 6334.452  |
| S79912    | 2768.247  | 3576.209  | M33197    | 57404.473 | 58216.352 | NM_00093E   | 30490.354 | 35009.301 |
| AL110283  | 1971.996  | 1616.533  | NM_00598E | 3614.34   | 2584.707  | H-X 02812 I | 3304.614  | 3341.816  |
| AK026892  | 5217.718  | 3813.952  | AB014607  | 7286.82   | 5849.695  | U75898      | 3727.398  | 4103.013  |
| S83275    | 2779.488  | 2412.604  | AF134401  | 1328.568  | 1638.032  | M29039      | 880.873   | 1000.028  |
| AL117427  | 8400.43   | 6614.654  | NM_020151 | 13911.279 | 14139.707 | M59815      | 1211.753  | 1121.012  |
| M33197    | 61555.629 | 58534.941 | NM_005891 | 47096.383 | 52046.512 | AK075081    | 4822.621  | 5606.33   |
| AF052118  | 27453.566 | 23457.756 | NM_00164E | 2071.07   | 2300.952  | NM_00089E   | 16415.021 | 16726.688 |
| AK025166  | 3706.44   | 4326.272  | NM_00395E | 3706.973  | 4072.307  | NM_00382C   | 32487.713 | 39827.441 |
| AL359586  | 1399.739  | 1767.819  | NM_00350C | 7241.96   | 8145.221  | NM_01591E   | 3866.387  | 3917.079  |
| AF035290  | 2270.537  | 2556.9    | NM_014317 | 4333.071  | 4647.644  | M33197      | 59557.121 | 59975.074 |
| AK023216  | 3526.128  | 3712.508  | L09234    | 18464.67  | 21485.84  | NM_01651E   | 10277.59  | 10985.317 |
| M33197    | 63071.926 | 61872.371 | NM_00005E | 2467.508  | 2385.715  | NM_00618E   | 25603.92  | 31133.631 |
| AF086547  | 1141.834  | 1401.946  | AK026740  | 1213.55   | 1161.439  | NM_01480C   | 15641.828 | 13896.991 |
| AK023288  | 2171.47   | 2452.949  | NM_017881 | 10880.877 | 11425.686 | NM_001557   | 1364.702  | 1305.434  |
| AK022198  | 1332.225  | 1711.521  | NM_017634 | 12211.645 | 11883.132 | AF147311    | 7068.678  | 6823.196  |
| M33197    | 62162.035 | 60336.727 | NM_01774E | 2670.884  | 3140.761  | NM_002131   | 53464.109 | 59317.871 |
| AK022428  | 2483.404  | 1752.963  | NM_00030C | 4609.654  | 4637.176  | NM_00479E   | 28412.264 | 28428.805 |
| AK023457  | 1839.288  | 1591.823  | M33197    | 66558.688 | 70239.344 | NM_00673E   | 1797.251  | 1433.319  |
| AK025089  | 15653.31  | 11447.976 | AV756917  | 4705.443  | 5711.437  | NM_01404E   | 20507.943 | 20551.945 |
| AK023298  | 795.025   | 882.671   | NM_01838C | 14054.33  | 18695.617 | AK022901    | 1867.887  | 1968.286  |
| M33197    | 64325.453 | 63311.625 | AK001442  | 2716.547  | 2973.492  | M33197      | 64270.859 | 64110.887 |
| AF085996  | 825.086   | 722.746   | NM_01207C | 1385.994  | 1567.895  | AF037332    | 11938.024 | 11556.782 |
| AK001279  | 3836.993  | 2965.456  | NM_01903E | 1227.463  | 1309.326  | NM_014571   | 1123.218  | 1096.674  |

|           |           |           |           |           |           |           |           |           |
|-----------|-----------|-----------|-----------|-----------|-----------|-----------|-----------|-----------|
| AF086407  | 958.003   | 986.143   | AF183423  | 7134.223  | 6281.659  | NM_006052 | 1693.962  | 1917.952  |
| AF085949  | 684.153   | 799.898   | NM_001351 | 419.742   | 776.205   | AB040912  | 14173.614 | 12601.535 |
| AK001567  | 2704.014  | 2334.38   | M33197    | 1620.174  | 1493.093  | NM_003871 | 868.63    | 766.86    |
| M33197    | 59819.965 | 60647.238 | AB011146  | 3851.13   | 3600.542  | NM_000813 | 1959.298  | 1945.557  |
| U42379    | 1316.904  | 1429.197  | NM_005326 | 22045.41  | 29231.305 | NM_018896 | 2026.991  | 2183.83   |
| M33197    | 66150.078 | 63909.172 | NM_007286 | 1063.82   | 1079.736  | AJ300465  | 3304.48   | 3234.112  |
| AK026984  | 57804.074 | 58069.16  | NM_014069 | 4806.376  | 5384.432  | X86400    | 2106.23   | 2188.395  |
| NM_013391 | 1734.5    | 1201.225  | NM_003359 | 3303.622  | 3907.057  | NM_000810 | 3382.096  | 3953.332  |
| M33197    | 67463.844 | 62975.414 | M33197    | 49683.711 | 52230.055 | AF069307  | 6444.667  | 6573.742  |
| AL157466  | 7306.003  | 5083.841  | AF119917  | 620.521   | 1133.319  | M33197    | 61924.957 | 56438.543 |
| AL389981  | 1247.751  | 731.372   | AK021834  | 610.727   | 1165.282  | U92978    | 5081.503  | 4488.43   |
| AK024336  | 4272.157  | 3859.13   | NM_017915 | 3316.909  | 3977.634  | NM_005738 | 1545.018  | 1258.062  |
| AK023862  | 1073.349  | 1085.51   | AL050097  | 545.516   | 837.346   | NM_014488 | 1388.268  | 1254.71   |
| NM_018621 | 1926.397  | 1783.526  | AK021513  | 689.06    | 769.39    | NM_013388 | 8818.359  | 9756.599  |
| AK022016  | 653.079   | 926.734   | AL049283  | 2717.542  | 2093.542  | AB014567  | 2121.781  | 1892.023  |
| AK021628  | 891.281   | 789.526   | NM_002214 | 859.95    | 785.468   | NM_018034 | 16468.143 | 15469.813 |
| M33197    | 66644.266 | 63287.121 | AF005258  | 1966.26   | 1933.826  | M33197    | 65408.863 | 65773.883 |
| AK022118  | 2641.861  | 2121.745  | NM_000887 | 1512.909  | 1852.329  | AB037831  | 3074.525  | 2386.807  |
| AK026453  | 11545.261 | 9442.813  | AF277292  | 974.395   | 1031.504  | NM_012103 | 17144.809 | 15626.218 |
| AK025673  | 832.745   | 548.509   | M33197    | 63305.113 | 59251.211 | AL122077  | 10925.12  | 11334.673 |
| M33197    | 63506.375 | 61903.828 | X99659    | 47888.52  | 46868.449 | NM_014632 | 1284.098  | 1554.442  |
| AK023912  | 2331.438  | 1744.373  | NM_015416 | 6152.44   | 5727.346  | NM_006422 | 2233.784  | 2171.373  |
| AK022431  | 1009.979  | 1312.532  | NM_002731 | 3285.553  | 3101.216  | BE789195  | 1658.032  | 1584.008  |
| AK023305  | 1994.419  | 2307.225  | NM_003899 | 8096.292  | 6673.888  | NM_016946 | 2465.625  | 2622.377  |
| AK022729  | 3311.582  | 3047.631  | X99662    | 5578.119  | 4518.88   | M33197    | 61785.551 | 59990.668 |
| NM_006168 | 4975.109  | 3799.748  | NM_003473 | 41336.453 | 41460.684 | NM_007258 | 3059.667  | 2853.651  |
| AL050374  | 1391.528  | 1029.559  | NM_014325 | 5971.187  | 6522.298  | NM_018402 | 1654.209  | 1339.877  |
| M33197    | 66896.547 | 65495.098 | M33197    | 57704.313 | 59439.234 | M33197    | 59996.07  | 61337.004 |
| M28639    | 12973.028 | 10402.066 | NM_012453 | 748.611   | 700.328   | NM_002401 | 53202.211 | 58045.23  |
| AL122073  | 48701.328 | 41567.672 | NM_006016 | 58623.945 | 58784.945 | NM_001274 | 8365.772  | 8714.474  |
| AF116655  | 15937.462 | 11363.437 | NM_001242 | 5947.506  | 7365.902  | NM_003913 | 2143.813  | 2370.463  |
| AJ243222  | 1832.019  | 2270.858  | NM_001882 | 2481.346  | 2816.706  | NM_002227 | 6322.556  | 5763.413  |
| AK026132  | 6479.762  | 9193.016  | NM_014891 | 21753.445 | 28210.359 | NM_007198 | 1895.03   | 1718.725  |
| Y11162    | 1869.361  | 1692.38   | NM_013392 | 12399.7   | 15849.771 | AB002301  | 1782.91   | 1346.603  |
| M33197    | 66203.25  | 65496.543 | M33197    | 60856.461 | 61475.547 | AB014530  | 15679.93  | 15944.273 |
| AF070584  | 3461.313  | 3063.292  | NM_003236 | 1695.441  | 1620.503  | NM_005988 | 7523.624  | 8043.553  |
| AF075006  | 1009.182  | 1234.597  | AF052692  | 2305.954  | 1872.582  | AB014607  | 11204.722 | 10107.465 |
| M33197    | 65730.281 | 68376.484 | NM_002820 | 662.853   | 694.876   | AF134401  | 1666.168  | 1423.089  |
| AK000903  | 56741.375 | 61345.586 | NM_005228 | 1750.569  | 1802.638  | NM_020151 | 17488.73  | 16775.959 |
| AK023938  | 1886.676  | 2198.31   | NM_002354 | 1904.48   | 1947.65   | NM_005891 | 59338.754 | 58206.496 |
| AL110169  | 2354.53   | 2507.205  | NM_000179 | 1213.488  | 1871.458  | NM_001645 | 2300.76   | 2124.566  |
| L13743    | 1909.354  | 1411.239  | NM_005215 | 680.086   | 1179.272  | NM_003956 | 2953.412  | 2876.092  |
| Z11849    | 14530.608 | 11983.438 | NM_006602 | 3811.692  | 3701.083  | M33197    | 62089.609 | 61992.813 |
| AJ002788  | 5655.279  | 3723.699  | M33197    | 59923.68  | 57752.109 | NM_003500 | 7653.374  | 6997.381  |
| U84527    | 954.905   | 448.869   | AL079314  | 3002.322  | 3598.822  | NM_014317 | 6291.98   | 5467.591  |
| M33197    | 66083.047 | 68352.859 | NM_001260 | 2807.841  | 2983.782  | L09234    | 19195.92  | 16931.293 |
| AF052103  | 731.636   | 1049.686  | NM_001950 | 9715.043  | 11076.451 | NM_000058 | 2913.646  | 2575.138  |
| AF075050  | 3433.133  | 3386.922  | AK026364  | 3961.25   | 3864.854  | AK026740  | 1466.212  | 1356.081  |
| AK024842  | 2979.785  | 3281.192  | NM_018117 | 1733.254  | 1938.636  | NM_017881 | 8828.943  | 8235.265  |
| NM_018382 | 2768.111  | 2339.31   | NM_006999 | 2269.897  | 2189.008  | NM_017634 | 13719.894 | 14005.403 |
| BC022303  | 4328.982  | 3637.971  | NM_006286 | 4293.592  | 4069.132  | NM_017743 | 3708.51   | 3840.296  |
| M33197    | 66754.078 | 67308.656 | M33197    | 57625.402 | 55888.098 | NM_000300 | 8450.819  | 8589.408  |
| D17203    | 67378.25  | 63144.766 | NM_004331 | 22641.256 | 28148.871 | M33197    | 67507.602 | 71440.367 |



|             |           |           |           |           |           |           |           |           |
|-------------|-----------|-----------|-----------|-----------|-----------|-----------|-----------|-----------|
| NM_00649E   | 5000.821  | 6328.666  | NM_01599E | 1975.325  | 2004.884  | AV756917  | 4679.98   | 4732.286  |
| AK022101    | 1312.661  | 1895.419  | NM_015703 | 12585.171 | 14150.697 | NM_01838C | 14621.049 | 18618.379 |
| NM_003251   | 1072.65   | 1162.521  | AB018337  | 3332.266  | 3719.401  | AK001442  | 3931.697  | 3900.821  |
| AF086203    | 663.654   | 1153.245  | NM_01448E | 2680.555  | 3085.907  | NM_01207C | 1931.877  | 2345.298  |
| AB046772    | 2520.445  | 2988.771  | AK025273  | 5691.062  | 5204.329  | NM_01903E | 1843.164  | 1918.611  |
| M33197      | 66505.57  | 70851.086 | M33197    | 57974.547 | 56181.352 | M33197    | 1465.84   | 1424.021  |
| AL442080    | 3150.149  | 3532.568  | NM_001794 | 2841.735  | 2462.629  | AB011146  | 4713.653  | 4051.882  |
| AY007143    | 9500.164  | 12401.929 | NM_00220E | 3454.262  | 2735.409  | NM_00532E | 31164.08  | 35099.641 |
| L15557      | 1320.708  | 1412.24   | M33197    | 54337.031 | 57151.586 | NM_01406E | 1459.827  | 1819.145  |
| M33197      | 66474.281 | 67036.117 | NM_000131 | 1305.889  | 1030.005  | AB035130  | 3825.184  | 3564.592  |
| NM_00156E   | 16349.854 | 15934.924 | NM_00183E | 1108.106  | 1221.025  | NM_00335E | 2697.191  | 2310.487  |
| NM_00026E   | 1568.115  | 2269.473  | NM_001911 | 21505.137 | 22455.107 | M33197    | 56783.707 | 52799.5   |
| X89666      | 6294.594  | 6050.848  | NM_000537 | 1214.416  | 950.728   | AF119917  | 1293.533  | 1010.885  |
| NM_01742E   | 990.981   | 1251.869  | NM_006503 | 2170.44   | 2117.165  | NM_01791E | 3843.987  | 3683.547  |
| NM_003104   | 10277.617 | 10324.225 | AB002321  | 930.527   | 955.674   | AL049283  | 2237.249  | 2151.499  |
| NM_014581   | 2333.46   | 2167.643  | NM_00251E | 1165.932  | 1099.975  | NM_002214 | 1937.789  | 1611.127  |
| M33197      | 62526.023 | 63457.906 | M33197    | 1586.015  | 1487.376  | AF005258  | 2350.344  | 2370.801  |
| AK024448    | 8650.711  | 10124.493 | AB020698  | 1737.766  | 2134.202  | NM_000887 | 1395.289  | 1752.288  |
| NM_01440E   | 6998.296  | 6473.592  | U68382    | 1604.307  | 1512.47   | AF277292  | 1271.349  | 1042.546  |
| Z11801      | 1558.347  | 1467.367  | NM_00396E | 4505.905  | 3879.825  | M33197    | 61554.207 | 59540.672 |
| AK027253    | 578.813   | 658.335   | NM_004651 | 8140.573  | 7911.008  | X99659    | 61196.078 | 58943.012 |
| S68954      | 49707.605 | 15782.849 | NM_00336E | 957.546   | 1073.271  | NM_01541E | 7298.394  | 7819.262  |
| S81335      | 1911.375  | 1745.626  | M33197    | 55749.336 | 59037.684 | NM_002731 | 5017.032  | 5214.585  |
| AF052109    | 5732.732  | 1614.832  | NM_01756E | 11395.881 | 11363.097 | NM_00389E | 15884.783 | 14917.419 |
| M33197      | 62937.594 | 62099.52  | NM_00145E | 2101.155  | 1859.963  | X99662    | 7669.806  | 7939.811  |
| NM_00335E   | 22364.656 | 24874.115 | NM_00290E | 2396.614  | 2589.119  | NM_00347E | 60149.715 | 62038.922 |
| AK026502    | 1042.463  | 1282.891  | AK024480  | 1583.561  | 1448.693  | NM_01432E | 5050.617  | 5831.535  |
| X82127      | 5764.585  | 10164.105 | Y13871    | 12899.395 | 12998.277 | M33197    | 61191.172 | 60633.945 |
| AL122044    | 4328.492  | 5373.006  | NM_012134 | 597.489   | 549.096   | NM_00601E | 50257.594 | 61349.27  |
| NM_01829E   | 854.349   | 1218.216  | AL137725  | 19148.781 | 11110.677 | NM_00124E | 8125.363  | 9346.835  |
| M33197      | 61117.531 | 60865.566 | M33197    | 58460.125 | 60746.305 | NM_00188E | 2083.526  | 1994.457  |
| AF070578    | 1632.033  | 1717.985  | AJ008151  | 22369.838 | 17964.652 | NM_014891 | 18249.945 | 17919.805 |
| CY3Cy5      | 6056.681  | 262.361   | AK024149  | 1450.599  | 1407.979  | NM_00323E | 1925.754  | 1575.401  |
| AA418907    | 1049.596  | 1134.295  | AK023094  | 1075.378  | 1287.967  | NM_00345E | 954.416   | 992.124   |
| M65291      | 807.963   | 739.138   | M33197    | 59970.426 | 57095.438 | AF052692  | 1409.766  | 1816.596  |
| AA115473    | 7275.608  | 9092.193  | NM_004091 | 2356.488  | 2522.066  | NM_00282C | 1159.681  | 854.13    |
| AA872397    | 1723.211  | 1755.019  | X74070    | 54225.477 | 56605.656 | NM_00522E | 2104.36   | 2112.776  |
| M24283      | 1161.839  | 1161.413  | AF027219  | 1322.566  | 1316.973  | NM_002354 | 2947.878  | 2094.799  |
| AA709414    | 897.872   | 1176.557  | BC022846  | 1800.356  | 1410.186  | NM_00017E | 2633.417  | 2061.429  |
| D12676      | 5818.871  | 6118.277  | NM_00633E | 12150.071 | 10146.3   | AF062739  | 1716.163  | 2096.841  |
| NM_00093E   | 44295.84  | 57903.953 | M33197    | 57186.469 | 57833.477 | NM_00660E | 5953.042  | 6494.049  |
| NM_00429E   | 6489.825  | 6899.543  | NM_00289E | 10014.588 | 9574.333  | M33197    | 61259.805 | 61592.246 |
| H-X 02812 I | 7390.946  | 6401.763  | AK022749  | 9899.086  | 9473.563  | AL079314  | 4361.605  | 4865.865  |
| M29039      | 1140.635  | 1528.109  | BF031409  | 8537.089  | 7881.544  | NM_00126C | 3762.146  | 4100.622  |
| M59815      | 987.464   | 907.951   | NM_00704E | 4497.844  | 4504.973  | NM_00195C | 10321.882 | 11477.946 |
| M33210      | 1782.099  | 1773.665  | BE378791  | 1400.051  | 1369.232  | AK026364  | 2232.199  | 2249.344  |
| SR2         | 56702.934 | 61047.816 | U94388    | 1749.922  | 1800.061  | NM_018117 | 1717.58   | 1560.942  |
| SR4         | 18415.695 | 16517.842 | NM_01232E | 12814.169 | 13200.123 | NM_00699E | 1631.379  | 1802.737  |
| SR6         | 3054.316  | 2290.593  | M33197    | 58606.984 | 59207.891 | NM_00628E | 2496.861  | 2715.718  |
| SR8         | 11013.516 | 26959.68  | NM_00488E | 48312.871 | 49921.371 | M33197    | 60588.871 | 62947.953 |
| SR10        | 34813.277 | 10579.058 | AK025314  | 2956.359  | 3299.587  | NM_004331 | 25917.885 | 34519.406 |
| CY3Cy5      | 5630.926  | 242.29    | NM_00210E | 5969.316  | 8540.604  | NM_01599E | 2597.767  | 2902.631  |
| NM_00120E   | 5858.911  | 6263.073  | NM_000984 | 56145.344 | 61457.109 | NM_01570E | 13826.382 | 13555.437 |

|           |           |           |           |           |           |           |           |           |
|-----------|-----------|-----------|-----------|-----------|-----------|-----------|-----------|-----------|
| NM_004799 | 7411.509  | 8153.764  | NM_002453 | 6498.132  | 5731.684  | AB018337  | 3224.563  | 3197.047  |
| NM_006733 | 2214.051  | 1872.763  | AK000780  | 37327.688 | 31784.945 | NM_014489 | 2674.064  | 2366.263  |
| NM_014047 | 34644.234 | 39332.695 | AK026721  | 3720.437  | 4332.729  | AK025273  | 4437.939  | 4248.293  |
| AK022901  | 1310.834  | 1052.744  | AK023027  | 8671.124  | 8748.752  | M33197    | 55878.84  | 56885.297 |
| NM_014571 | 1055.488  | 1156.705  | AK025598  | 1655.918  | 1293.253  | NM_001794 | 1627.744  | 1405.743  |
| NM_006052 | 4051.843  | 4134.876  | AB002348  | 40359.91  | 36607.078 | NM_002205 | 3851.571  | 3700.612  |
| AB040912  | 5593.923  | 5056.45   | M33197    | 40171.828 | 43903.641 | M33197    | 61793.723 | 58696.754 |
| NM_006243 | 6679.803  | 6464.894  | M64714    | 771.205   | 1227.792  | NM_000131 | 1956.748  | 1704.15   |
| M33197    | 61830.48  | 62973.961 | NM_005006 | 6241.456  | 7331.164  | NM_001836 | 1051.724  | 1027.717  |
| AJ011129  | 6915.394  | 7718.505  | AK027033  | 3449.32   | 3087.154  | NM_001911 | 23460.969 | 22924.225 |
| AF282874  | 1260.717  | 1062.418  | NM_000106 | 2406.566  | 2023.186  | NM_000537 | 1712.387  | 1569.74   |
| NM_001039 | 751.757   | 876.853   | NM_003000 | 22239.203 | 21114.418 | NM_006503 | 4114.124  | 3770.406  |
| NM_006387 | 8049.561  | 7334.524  | NM_002495 | 24778.951 | 21793.297 | AB002321  | 896.232   | 1269.916  |
| NM_005646 | 3988.669  | 3690.736  | M33197    | 60140.375 | 57311.133 | NM_002515 | 1688.058  | 1937.136  |
| NM_006639 | 898.512   | 622.886   | NM_016284 | 4826.773  | 4045.003  | M33197    | 1746.64   | 1757.237  |
| AK022817  | 3215.063  | 2884.748  | NM_014593 | 4022.225  | 3730.28   | U68382    | 1347.52   | 668.261   |
| M33197    | 66489.922 | 71884.031 | NM_006833 | 15896.431 | 16936.068 | NM_003969 | 2552.022  | 2542.96   |
| AB037831  | 2824.602  | 2334.238  | NM_012257 | 2517.353  | 2952.524  | NM_004651 | 4919.284  | 5172.905  |
| NM_012103 | 29237.592 | 31012.322 | U37690    | 32295.83  | 31450.814 | M33197    | 63511.273 | 64308.852 |
| AL122077  | 1837.903  | 1880.922  | NM_005120 | 2453.917  | 2049.067  | NM_017569 | 13620.84  | 12575.284 |
| NM_014632 | 1615.118  | 1602.56   | AB029012  | 19673.729 | 16364.381 | NM_001456 | 1885.881  | 1863.442  |
| NM_006422 | 3048.456  | 2768.315  | M33197    | 62125.699 | 59660.859 | NM_002906 | 3114.407  | 2652.316  |
| BE789195  | 657.217   | 845.743   | NM_006299 | 1285.486  | 990.288   | AK024480  | 1851.714  | 840.146   |
| NM_007259 | 5047.792  | 4042.495  | AF060936  | 9298.587  | 6368.153  | Y13871    | 14408.882 | 13020.101 |
| NM_018402 | 1720.745  | 1336      | NM_005568 | 745.935   | 692.863   | AL137725  | 11703.218 | 11001.083 |
| NM_018009 | 1226.55   | 1222.013  | NM_018167 | 922.949   | 1050.885  | M33197    | 62016.789 | 60628.754 |
| AK075081  | 2391.395  | 3218.323  | AL050088  | 8487.225  | 6766.365  | AK024149  | 1984.614  | 1998.471  |
| NM_000895 | 16525.09  | 17231.299 | AK024939  | 8679.02   | 9267.269  | AK023094  | 2036.272  | 1956.685  |
| NM_003820 | 12982.554 | 14572.756 | AK001561  | 3004.952  | 2829.887  | M33197    | 62205.27  | 63171.512 |
| NM_015915 | 3504.238  | 3769.864  | AB007880  | 4077.381  | 4400.152  | NM_004091 | 3531.78   | 3035.858  |
| M33197    | 66961.336 | 69476.891 | AK024950  | 772.26    | 692.733   | X74070    | 63348.758 | 65763.992 |
| NM_016518 | 16637.109 | 13012.705 | M33197    | 60704.402 | 55774.48  | AF027219  | 2076.762  | 2102.467  |
| NM_006185 | 8876.2    | 6561.041  | NM_014146 | 1521.858  | 1182.029  | BC022846  | 2190.979  | 2226.008  |
| NM_014800 | 15433.522 | 12952.201 | AF147356  | 8954.923  | 7269.24   | NM_006333 | 14195.921 | 14364.678 |
| NM_001557 | 677.7     | 743.512   | NM_018843 | 4756.202  | 3873.405  | M33197    | 61551.773 | 60040.832 |
| AF147311  | 4897.95   | 4083.317  | AK024275  | 1182.553  | 749.43    | NM_002898 | 10978.423 | 9813.316  |
| NM_002131 | 45246.121 | 50917.625 | AL049461  | 3592.15   | 3757.766  | AK022749  | 12718.144 | 14375.058 |
| NM_017927 | 3098.146  | 3408.634  | M33197    | 55437.246 | 52982.434 | BF031409  | 8954.36   | 8753.872  |
| NM_020151 | 14767.352 | 15186.752 | AL109782  | 8845.609  | 8386.882  | NM_007043 | 4867.749  | 5763.929  |
| NM_005891 | 58699.152 | 57584.141 | AF086225  | 1890.925  | 2100.384  | BE378791  | 1368.749  | 1165.873  |
| NM_001645 | 2031.811  | 2010.599  | NM_005844 | 8055.636  | 6809.483  | U94388    | 1984.206  | 1519.155  |
| NM_003956 | 5186.951  | 5218.648  | AK024941  | 5565.567  | 5160.648  | NM_012322 | 15479.285 | 14235.183 |
| M33197    | 63004.793 | 64177.301 | AF056434  | 1469.305  | 1832.729  | NM_002109 | 6484.636  | 6527.142  |
| NM_003500 | 11509.021 | 10889.28  | AF086199  | 929.137   | 607.768   | NM_000984 | 67618.391 | 69331.086 |
| NM_014317 | 5385      | 5814.363  | M33197    | 58890.215 | 50919.039 | NM_002453 | 4859.695  | 3714.068  |
| L09234    | 31355.707 | 35317.211 | AK025489  | 2546.391  | 2058.281  | AK000780  | 37344.395 | 40286.219 |
| NM_000059 | 3211.083  | 2912.764  | AB075853  | 905.801   | 779.46    | AK026721  | 4160.439  | 3778.6    |
| AK026740  | 1221.363  | 1019.179  | AL390152  | 2467.77   | 1063.886  | AK023027  | 6209.625  | 5321.747  |
| NM_017881 | 5757.535  | 6221.865  | M33197    | 57615.941 | 58676.164 | AK025598  | 1874.679  | 1937.15   |
| NM_017634 | 9167.246  | 10302.606 | NM_018126 | 3932.849  | 4199.385  | AB002348  | 54753.613 | 52777.516 |
| NM_000813 | 1160.731  | 1183.059  | AK024506  | 7592.064  | 7463.541  | M33197    | 56054.246 | 52819.258 |
| NM_018896 | 994.281   | 982.495   | NM_014179 | 3906.064  | 4546.706  | M64714    | 1279.931  | 942.695   |
| X86400    | 2698.045  | 2988.458  | AF086326  | 4702.853  | 5425.807  | AK026043  | 568.443   | 761.262   |

|             |           |           |           |           |           |           |           |           |
|-------------|-----------|-----------|-----------|-----------|-----------|-----------|-----------|-----------|
| NM_00081C   | 1110.172  | 1042.901  | AF147409  | 609.817   | 722.571   | NM_00500E | 10696.961 | 11010.194 |
| AF069307    | 5837.99   | 6796.715  | M33197    | 60779.484 | 59260.441 | AK027033  | 4295.48   | 4683.009  |
| M33197      | 60521.992 | 61477.195 | AL080057  | 831.506   | 1128.68   | NM_00010E | 4450.355  | 4699.925  |
| U92978      | 3362.33   | 3032.976  | AL117528  | 1385.435  | 1109.54   | NM_00300C | 33644.828 | 34574.102 |
| NM_00573E   | 1244.06   | 1095.505  | M33197    | 57331.633 | 56824.824 | NM_00249E | 40790.898 | 38523.227 |
| NM_01448E   | 1908.401  | 1048.12   | AK025948  | 1780.082  | 1663.5    | M33197    | 61152.371 | 61090.172 |
| NM_01338E   | 1943.298  | 1812.338  | AK000674  | 577.242   | 555.966   | NM_016284 | 3510.5    | 3561.458  |
| AB014567    | 1569.472  | 1739.848  | AJ238555  | 617.649   | 762.266   | NM_01459E | 4999.459  | 4822.399  |
| NM_00532E   | 20132.803 | 19676.057 | AL353948  | 17440.119 | 13299.265 | NM_00683E | 20345.535 | 17112.762 |
| NM_00728E   | 1640.535  | 723.391   | AL122043  | 936.031   | 892.173   | NM_012257 | 3085.775  | 2737.99   |
| NM_01406E   | 1345.091  | 1215.182  | M33197    | 58059.273 | 56863.801 | U37690    | 36612.836 | 35173.465 |
| AB035130    | 1443.448  | 1674.641  | AK025869  | 5785.308  | 3794.581  | NM_00512C | 2547.634  | 2177.797  |
| NM_00335E   | 3569.045  | 3171.315  | M33197    | 60857.984 | 59593.645 | AB029012  | 16854.055 | 15282.845 |
| M33197      | 55290.77  | 56238.586 | AF056430  | 2347.554  | 2253.271  | M33197    | 67013.25  | 64741.141 |
| AF119917    | 944.782   | 712.853   | NM_01490E | 627.074   | 867.489   | NM_00629E | 1149.287  | 1367.913  |
| NM_01791E   | 5037.36   | 6076.172  | AF009291  | 2683.656  | 2963.515  | AL050088  | 8379.005  | 7854.682  |
| AL050097    | 915.467   | 610.513   | M33197    | 60957.32  | 57157.422 | AK024939  | 10291.934 | 9950.728  |
| AK021513    | 1056.834  | 847.913   | NM_01805E | 2857.38   | 2050.267  | AK001561  | 11052.725 | 10360.95  |
| AL049283    | 2920.809  | 2575.819  | AK002199  | 1892.776  | 1448.673  | AB007880  | 6791.712  | 6705.017  |
| M33197      | 60504.914 | 62608.266 | AK021662  | 2100.481  | 1960.995  | AK024950  | 3100.32   | 3281.021  |
| NM_002401   | 13878.421 | 15579.535 | AK001038  | 1280.191  | 1064.118  | M33197    | 64853.535 | 63400.715 |
| NM_001274   | 11161.137 | 10596.467 | AK001802  | 1224.158  | 880.817   | AF147356  | 13092.659 | 12582.01  |
| NM_00391E   | 1486.534  | 1912.1    | AK021469  | 1447.343  | 1413.856  | NM_01884E | 6808.176  | 5815.762  |
| NM_002227   | 6112.89   | 4795.73   | AK021706  | 1675.388  | 1269.993  | AK024275  | 1613.544  | 1472.596  |
| NM_00719E   | 1416.492  | 1179.662  | M33197    | 58326.59  | 55157.723 | AL049461  | 4900.786  | 4622.743  |
| AB002301    | 1637.246  | 1452.891  | AK026601  | 1027.594  | 921.205   | AL137424  | 1197.686  | 705.405   |
| AB014530    | 4752.447  | 4180.536  | AK025161  | 1800.039  | 1247.237  | M33197    | 62844.582 | 59388.238 |
| M33197      | 61802.559 | 65955.656 | AK025387  | 1216.51   | 908.116   | AL109782  | 11951.199 | 9735.102  |
| NM_00598E   | 1914.615  | 2056.341  | AK026259  | 34480.539 | 28816.934 | AF086225  | 1661.652  | 1337.854  |
| AB014607    | 2083.532  | 2038.077  | AJ008115  | 23269.787 | 21301.775 | NM_005844 | 10661.905 | 9228.348  |
| AF134401    | 1929.817  | 1886.321  | AF083125  | 1737.98   | 2176.584  | AK024941  | 6604.127  | 5844.957  |
| NM_006387   | 9242.622  | 9368.547  | U72851    | 885.218   | 1133.905  | AF056434  | 1419.958  | 1716.95   |
| NM_00564E   | 4635.996  | 5045.828  | M33197    | 60814.781 | 58593.426 | AL390152  | 3966.978  | 4263.275  |
| NM_00663E   | 1482.218  | 1329.019  | AK022970  | 1738.628  | 2093.89   | M33197    | 63509.734 | 59425.031 |
| M65291      | 301.279   | 839.267   | AK026212  | 3833.9    | 3994.871  | NM_01812E | 3991.015  | 4076.667  |
| AA115473    | 6316.827  | 6765.303  | AF086222  | 3564.926  | 3313.074  | AK024506  | 10423.1   | 9869.159  |
| AA872397    | 1486.919  | 1489.503  | AF086415  | 4647.021  | 4622.837  | NM_01417E | 5994.24   | 5449.081  |
| M24283      | 1268.005  | 1292.251  | M33197    | 56699.297 | 56883.902 | AF086326  | 6316.269  | 7895.826  |
| AA709414    | 999.271   | 1259.3    | AK024470  | 2016.934  | 2021.991  | AF147409  | 1134.958  | 1357.396  |
| D12676      | 5036.706  | 4811.902  | NM_00422E | 9735.429  | 8886.949  | M33197    | 62527.18  | 61369.387 |
| BC012593    | 706.23    | 415.223   | AK023400  | 515.262   | 760.261   | AL080057  | 2162.049  | 1672.795  |
| NM_00093E   | 44989.707 | 56710.734 | NM_00643E | 19828.248 | 20268.393 | AL117528  | 1542.328  | 1692.519  |
| NM_00429E   | 6513.688  | 6797.421  | AK023897  | 1345.707  | 1345.047  | M33197    | 61000.746 | 57170.273 |
| H-X 02812 I | 6934.048  | 6704.529  | AF025441  | 4433.95   | 5701.904  | AK025948  | 1523.504  | 1382.852  |
| M29039      | 1183.506  | 1531.481  | U62823    | 2436.468  | 2629.698  | AJ238555  | 1005.94   | 738.885   |
| M59815      | 896.804   | 903.675   | NM_00353E | 12566.499 | 13770.532 | AL353948  | 28697.559 | 30290.355 |
| M33197      | 1979.916  | 2034.699  | AK026768  | 2962.236  | 3425.505  | M33197    | 61576.379 | 59351.363 |
| AB011146    | 4752.925  | 4527.871  | M33197    | 58841.223 | 56263.75  | AK025869  | 8409.256  | 7220.28   |
| NM_00618E   | 7428.573  | 7247.512  | AK000852  | 18730.24  | 16368.656 | M33197    | 67902.336 | 61992.215 |
| NM_01480C   | 15326.524 | 14345.746 | AF251188  | 4802.5    | 4280.255  | AF023203  | 1237.592  | 1451.99   |
| NM_001557   | 934.457   | 951.563   | AK026418  | 4632.397  | 4330.279  | AF056430  | 2763.395  | 3187.747  |
| AF147311    | 4949.087  | 4287.526  | AF086194  | 34437.5   | 24286.787 | NM_01490E | 1545.913  | 1601.616  |
| NM_002131   | 44597.535 | 50074.715 | AK026811  | 4151.98   | 3870.811  | AF009291  | 4507.329  | 4667.762  |

|           |           |           |           |           |           |           |           |           |
|-----------|-----------|-----------|-----------|-----------|-----------|-----------|-----------|-----------|
| NM_017927 | 3120.35   | 3233.223  | M33197    | 57628.559 | 53105.352 | AF056440  | 2337.84   | 1662.7    |
| NM_004799 | 7380.246  | 9150.009  | AK023633  | 2811.905  | 2291.843  | M33197    | 66065.469 | 57066.063 |
| NM_006733 | 1705.155  | 1801.974  | NM_006179 | 1708.292  | 1482.394  | NM_018055 | 7277.641  | 7035.27   |
| NM_002039 | 741.085   | 716.967   | AL360165  | 4125.795  | 3238.933  | AK002199  | 4419.358  | 5038.229  |
| NM_014047 | 31807.762 | 42282.922 | M33197    | 60934.953 | 59581.484 | AK021662  | 7378.52   | 7631.988  |
| AK022901  | 1022.174  | 997.907   | AJ008132  | 7112.682  | 6836.536  | AK001038  | 1186.686  | 860.119   |
| M33197    | 63719.254 | 63359.504 | NM_005281 | 5963.502  | 5206.986  | AK001802  | 2998.795  | 2793.99   |
| AF037332  | 13164.928 | 14381.734 | NM_005549 | 2767.829  | 2846.676  | AK021469  | 1196.045  | 1331.242  |
| NM_014571 | 1299.777  | 1351.256  | M33197    | 55858.508 | 56096.223 | AK021706  | 3459.793  | 3021.53   |
| NM_006052 | 3687.272  | 4351.441  | U12129    | 1279.525  | 1102.011  | M33197    | 64975.176 | 56629.059 |
| AB040912  | 6009.233  | 5336.156  | S81242    | 52979.063 | 50685.809 | AK026052  | 974.145   | 640.661   |
| NM_006243 | 5735.904  | 5196.542  | AF230801  | 1584.305  | 1477.901  | AK026601  | 851.045   | 1006.095  |
| M33197    | 59591.242 | 61744.477 | AF075072  | 2982.454  | 2212.49   | AK025161  | 2068.842  | 2282.554  |
| AJ011129  | 6539.684  | 6679.041  | M33197    | 58809.805 | 57112.43  | AK026259  | 34366.719 | 30725.301 |
| AF282874  | 1213.298  | 974.125   | NM_002509 | 2594.897  | 2447.528  | AJ008115  | 42592.184 | 44292.629 |
| NM_001039 | 1170.568  | 845.704   | U38442    | 7653.563  | 6240.5    | AF083125  | 2356.926  | 1946.375  |
| NM_005739 | 1001.494  | 1204.214  | AF110136  | 1291.08   | 870.568   | U72851    | 1318.38   | 1555.4    |
| NM_014488 | 1635.351  | 1371.002  | AK026706  | 2399.272  | 2027.726  | AL049241  | 452.828   | 704.995   |
| NM_013389 | 1543.94   | 1578.46   | AB007936  | 40296.531 | 32711.283 | M33197    | 64116.363 | 64094.461 |
| AB014567  | 1979.545  | 1874.023  | D28391    | 36510.625 | 27249.891 | X51526    | 1068.902  | 1336.659  |
| NM_018034 | 7458.057  | 6931.999  | M33197    | 55116.719 | 48088.469 | AK022970  | 2129.674  | 3056.959  |
| M33197    | 57622.117 | 58074.34  | AK026859  | 608.74    | 519.916   | AK026212  | 5025.723  | 5775.387  |
| AB037831  | 2635.11   | 2484.166  | AJ227896  | 4782.416  | 4429.391  | AF086222  | 5523.796  | 5280.902  |
| NM_012103 | 27330.553 | 31532.598 | L32841    | 5081.084  | 5228.985  | AF086415  | 5839.763  | 6158.305  |
| AL122077  | 1929.373  | 1948.941  | M33197    | 57268.516 | 57857.004 | M33197    | 58607.898 | 52652.035 |
| NM_014632 | 1392.756  | 1666.687  | AF131770  | 2524.468  | 3075.538  | AK024470  | 2398.994  | 2496.964  |
| NM_006422 | 2668.986  | 2113.035  | CY3Cy5    | 2640.61   | 222.363   | NM_004226 | 8084.664  | 6589.558  |
| BE789195  | 744.227   | 732.841   | AI298534  | 563       | 705.453   | AL137436  | 1461.081  | 1077.678  |
| NM_016946 | 3510.018  | 3497.75   | R71691    | 1438.906  | 1432.96   | NM_006432 | 31771.295 | 33307.246 |
| M33197    | 60711.164 | 63495.262 | AW167715  | 637.24    | 1210.306  | AK023897  | 1978.418  | 1823.642  |
| NM_007259 | 4338.784  | 4978.69   | AA424735  | 2906.095  | 3487.998  | AF025441  | 6193.877  | 4947.663  |
| NM_018402 | 1381.64   | 1023.108  | U78294    | 5058.301  | 5708.36   | U62823    | 4207.217  | 4123.509  |
| NM_018009 | 881.733   | 1298.054  | AA171613  | 585.835   | 582.011   | NM_003535 | 27210.385 | 30581.355 |
| AK075081  | 2340.084  | 2744.556  | BI760394  | 8472.071  | 9598.149  | AK026768  | 4857.768  | 6341.1    |
| NM_000895 | 15360.561 | 14706.628 | AA555216  | 713.152   | 676.757   | M33197    | 63829.77  | 61709.5   |
| NM_003820 | 13057.565 | 12673.987 | U09117    | 15647.276 | 19881.248 | AK000852  | 44185.809 | 45557.781 |
| NM_015915 | 4063.112  | 3292.846  | M21054    | 691.192   | 1002.958  | AF251188  | 8552.24   | 7430.601  |
| M33197    | 60839.539 | 61613.82  | M18468    | 1231.397  | 1115.078  | AK026418  | 7465.796  | 7672.492  |
| NM_016518 | 18696.885 | 15655.759 | H66070    | 5579.222  | 7520.75   | AF086194  | 40754.574 | 44113.949 |
| AB002301  | 2305.655  | 2023.197  | AA164741  | 15093.054 | 22362.383 | AK026811  | 7548.153  | 7814.336  |
| AB014530  | 5448.711  | 5555.737  | AI189375  | 1081.61   | 1589.465  | M33197    | 65807.016 | 61890.789 |
| M33197    | 61819.355 | 62127.324 | AI978885  | 2581.706  | 3355.802  | AK023633  | 2443.886  | 2368.894  |
| NM_005989 | 2036.133  | 2460.311  | AK054960  | 16532.432 | 20831.346 | M84507    | 278.518   | 1042.635  |
| AB014607  | 2592.042  | 1977.989  | L15344    | 5329.505  | 7916.826  | NM_006179 | 1370.649  | 1462.335  |
| AF134401  | 1904.101  | 1853.638  | SR5       | 10101.535 | 12963.379 | AL360165  | 3368.387  | 3476.805  |
| NM_020151 | 17045.379 | 17661.355 | SR7       | 7963.716  | 54988.512 | AJ008132  | 5819.912  | 5010.015  |
| NM_005891 | 58704.008 | 58599.676 | SR9       | 26895.637 | 5292.519  | NM_005281 | 5264.475  | 4896.343  |
| NM_001645 | 2258.447  | 2495.086  | CY3Cy5    | 3876.17   | 252.359   | NM_005549 | 1627.785  | 1694.825  |
| NM_003956 | 4918.944  | 5200.008  | NM_014586 | 7111.616  | 7350.072  | M33197    | 62511.039 | 60510.609 |
| M33197    | 61509.699 | 63566.828 | NM_014366 | 10880.057 | 10082.486 | U12129    | 8255.755  | 7225.037  |
| NM_003500 | 11008.474 | 9774.887  | NM_000923 | 924.49    | 1151.51   | S81242    | 58985.465 | 59778.523 |
| NM_014317 | 4962.577  | 5120.441  | NM_006453 | 2551.953  | 3612.815  | AF230801  | 3098.933  | 2916.38   |
| L09234    | 28253.873 | 28215.564 | NM_018096 | 2397.943  | 2828.213  | AF075072  | 4767.569  | 3976.017  |

|             |           |           |           |           |           |           |           |           |
|-------------|-----------|-----------|-----------|-----------|-----------|-----------|-----------|-----------|
| NM_000059   | 3178.352  | 3040.083  | AL390078  | 860.493   | 911.06    | M33197    | 62445.066 | 61266.141 |
| AK026740    | 1119.831  | 1079.851  | NM_004036 | 2279.723  | 2804.877  | NM_002509 | 8223.376  | 8994.013  |
| NM_017881   | 6155.244  | 6444.346  | NM_015986 | 5022.126  | 6900.851  | U38442    | 10954.737 | 11506.083 |
| M33197      | 59742.141 | 62470     | NM_006546 | 1674.067  | 2624.268  | AF110136  | 2390.346  | 2775.35   |
| NM_017634   | 9129.327  | 8684.352  | NM_014959 | 2717.178  | 2794.053  | AK026706  | 6254.634  | 6998.114  |
| NM_000813   | 1481.149  | 1138.794  | NM_003992 | 8473.836  | 11001.892 | AB007936  | 59883.805 | 58429.266 |
| NM_018896   | 1135.841  | 1243.137  | AF279265  | 3686.874  | 4457.036  | AK001558  | 838.795   | 987.531   |
| AJ300465    | 768.845   | 790.009   | NM_007350 | 315.572   | 709.581   | D28391    | 23742.672 | 24689.264 |
| X86400      | 2861.515  | 2826.159  | NM_005213 | 3844.953  | 3806.381  | M33197    | 38043.074 | 35073.586 |
| NM_000810   | 829.521   | 1122.035  | AB040914  | 1553.702  | 1791.092  | AK026859  | 758.384   | 851.029   |
| AF069307    | 5414.289  | 6000.142  | NM_002997 | 8643.966  | 9973.387  | AJ227896  | 9447.15   | 9118.755  |
| M33197      | 2389.794  | 2123.035  | NM_002379 | 19183.947 | 27193.801 | M33197    | 59788.656 | 56996.746 |
| AB011146    | 4653.166  | 4232.78   | AB007929  | 5781.703  | 9409.043  | AF131770  | 2801.494  | 2735.287  |
| NM_005326   | 20118.857 | 18297.17  | NM_004579 | 10515.12  | 13817.636 | CY3Cy5    | 9307.787  | 571.122   |
| NM_007286   | 1586.188  | 1169.135  | AA203126  | 3905.21   | 4809.585  | AI298534  | 432.164   | 547.332   |
| NM_014069   | 1835.277  | 2281.348  | L12347    | 2629.337  | 3812.526  | R71691    | 932.102   | 1048.742  |
| AB035130    | 2261.991  | 2348.397  | NM_001622 | 2687.287  | 3287.179  | AA424735  | 1929.782  | 1744.836  |
| NM_003359   | 3568.551  | 3066.392  | Z36788    | 1341.23   | 1780.79   | U78294    | 2521.691  | 3498.112  |
| M33197      | 55140.34  | 52152.223 | NM_018477 | 7002.3    | 7712.281  | BI760394  | 4021.502  | 3796.667  |
| AF119917    | 1076.723  | 648.129   | U20536    | 3946.196  | 3585.326  | AA555216  | 547.804   | 902.134   |
| NM_017915   | 3984.702  | 4875.053  | NM_004853 | 8310.077  | 8488.788  | U09117    | 3888.634  | 4938.104  |
| AL050097    | 573.242   | 687.612   | NM_001494 | 23874.939 | 30316.498 | M18468    | 1073.13   | 949.053   |
| NM_003579   | 5235.874  | 5110.112  | NM_017707 | 1208.297  | 1100.245  | H66070    | 994.669   | 1075.694  |
| AL049283    | 2906.431  | 3086.811  | NM_004206 | 5338.74   | 5481.187  | AA164741  | 12302.447 | 12883.068 |
| M33197      | 57413.594 | 55959.398 | NM_004603 | 10540.732 | 11750.895 | AI189375  | 883.575   | 1165.282  |
| NM_002401   | 16511.385 | 18311.42  | AK022849  | 2299.903  | 2093.851  | AI978885  | 2702.723  | 2627.854  |
| NM_001274   | 10391.33  | 10601.661 | AF040964  | 5124.619  | 4549.894  | AK054960  | 15641.128 | 17434.832 |
| NM_003913   | 1576.855  | 1976.474  | NM_001939 | 6256.504  | 7587.181  | L15344    | 3994.707  | 3887.587  |
| NM_002227   | 6916.487  | 4915.698  | NM_003279 | 11117.288 | 11504.483 | SR1       | 58645.723 | 57539.98  |
| NM_007199   | 1228.605  | 1271.134  | AB014599  | 8137.55   | 8499.824  | SR3       | 52112.223 | 55210.309 |
| NM_006243   | 6874.433  | 7064.295  | NM_004393 | 1330.661  | 1887.494  | SR5       | 8846.578  | 9296.571  |
| M33197      | 61659.586 | 59198.238 | AB018345  | 1282.576  | 1948.775  | SR7       | 6686.517  | 39465.547 |
| AJ011129    | 7672.804  | 8690.646  | NM_005832 | 573.08    | 1109.524  | SR9       | 21455.889 | 3673.789  |
| AF282874    | 1063.454  | 1431.339  | AW407841  | 2262.283  | 3168.962  | CY3Cy5    | 7669.086  | 149.253   |
| NM_001039   | 997.641   | 841.94    | U15197    | 437.223   | 744.398   | NM_000923 | 859.044   | 829.077   |
| NM_006387   | 8646.534  | 9960.694  | NM_001879 | 2972.41   | 3617.828  | NM_006453 | 1111.257  | 1159.671  |
| NM_005646   | 4766.525  | 5585.035  | AF264014  | 10427.081 | 12677.555 | NM_018096 | 856.978   | 854.597   |
| NM_006639   | 1510.597  | 1200.69   | L09098    | 362.691   | 653.111   | AL390078  | 257.655   | 427.102   |
| NM_001692   | 729.026   | 569.274   | NM_001831 | 1290.366  | 1800.155  | NM_004036 | 1437.166  | 1884.961  |
| AA115473    | 5807.998  | 6102.578  | NM_000137 | 1004.189  | 953.996   | NM_015986 | 3158.71   | 3117.876  |
| AA872397    | 1336.326  | 1346.277  | NM_012102 | 6027.032  | 5398.515  | NM_006546 | 835.837   | 811.844   |
| M24283      | 1009.523  | 1099.858  | AF163572  | 11110.777 | 10926.315 | NM_014959 | 1083.79   | 1476.097  |
| AA709414    | 1079.339  | 994.234   | NM_000897 | 3205.883  | 3736.032  | NM_003992 | 3345.105  | 3793.249  |
| D12676      | 4752.322  | 4530.439  | NM_000487 | 1119.828  | 1025.312  | AF279265  | 3195.141  | 3331.108  |
| NM_000939   | 47746.176 | 59951.504 | NM_006411 | 15453.04  | 14557.655 | NM_007350 | 369.616   | 450.026   |
| NM_004295   | 7011.694  | 7916.082  | NM_014182 | 4229.863  | 4614.714  | NM_005213 | 2806.806  | 3129.074  |
| H-X 02812 I | 6997.991  | 7433.103  | AB040884  | 517.132   | 472.379   | AB040914  | 1469.28   | 1546.62   |
| U75898      | 527.129   | 444.836   | NM_000492 | 10633.676 | 10971.655 | NM_002997 | 4950.402  | 5416.874  |
| M29039      | 1214.821  | 1684.336  | NM_001170 | 6564.604  | 6492.472  | NM_002379 | 16776.23  | 16576.576 |
| M59815      | 913.163   | 1015.283  | AL137716  | 536.673   | 882.794   | AB007929  | 6295.748  | 6099.765  |
| AK075081    | 2674.044  | 3088.72   | NM_004696 | 1484.078  | 1684.176  | NM_004579 | 6450.312  | 8615.936  |
| NM_000895   | 17294.223 | 20437.092 | NM_014342 | 3144.352  | 3573.861  | AA203126  | 3194.832  | 3579.413  |
| NM_003820   | 14174.074 | 15743.93  | Z50169    | 1008.039  | 1205.72   | L12347    | 4121.15   | 5051.072  |

|           |           |           |           |           |           |           |           |           |
|-----------|-----------|-----------|-----------|-----------|-----------|-----------|-----------|-----------|
| NM_01591E | 3706.881  | 4421.167  | AB043997  | 1194.41   | 1490.087  | NM_00162Z | 2793.608  | 2744.443  |
| M33197    | 63942.094 | 60820.441 | AF097645  | 961.059   | 936.001   | Z36788    | 1461.376  | 1502.246  |
| NM_01651E | 17242.625 | 14916.416 | NM_00177Z | 2031.994  | 1765.411  | NM_018477 | 7824.037  | 8370.015  |
| NM_00618E | 9048.645  | 8887.274  | Z70704    | 2039.921  | 1695.114  | U20536    | 2970.685  | 2974.394  |
| NM_01480C | 13800.423 | 12527.839 | NM_01436Z | 2939.832  | 2850.992  | NM_00034Z | 400.077   | 747.791   |
| NM_001557 | 909.074   | 835.397   | NM_00323Z | 1433.701  | 1546.596  | NM_00485Z | 9549.372  | 8392.924  |
| AF147311  | 5575.705  | 5778.598  | NM_00137E | 7016.793  | 8279.413  | NM_00149A | 17315.813 | 17028.455 |
| NM_002131 | 49049.859 | 52801.582 | NM_00231Z | 3762.385  | 4052.442  | NM_017707 | 1103.265  | 1006.557  |
| NM_017927 | 2906.62   | 2827.2    | M20699    | 2861.9    | 3229.782  | NM_00420E | 5991.553  | 5359.083  |
| NM_00479E | 6637.748  | 7421.539  | NM_00477A | 3872.618  | 2990.73   | NM_01588E | 237.262   | 609.971   |
| NM_00673Z | 1661.059  | 1584.651  | NM_016937 | 4855.645  | 4170.979  | NM_00460Z | 8564.146  | 9390.81   |
| NM_014047 | 29271.424 | 36108.547 | NM_00269C | 10370.647 | 10682.319 | AK022849  | 2217.964  | 2796.227  |
| AK022901  | 1115.229  | 1357.421  | NM_01232E | 4221.965  | 4502.613  | AF040964  | 5089.565  | 5774.622  |
| M33197    | 64885.457 | 60337.219 | NM_007341 | 1486.441  | 1579.226  | NM_00193Z | 2913.551  | 2487.525  |
| AF037332  | 13534.578 | 12446.18  | NM_01650E | 1414.534  | 1586.735  | NM_00327Z | 5259.271  | 6425.572  |
| NM_014571 | 1177.471  | 1153.607  | NM_00645E | 6936.795  | 7162.015  | AB014599  | 5354.318  | 4698.29   |
| NM_00605Z | 4081.587  | 4220.047  | AK026062  | 6802.085  | 9281.317  | NM_00439Z | 708.614   | 863.396   |
| AB040912  | 3690.178  | 2902.867  | AF047002  | 43575.992 | 50066.223 | AB018345  | 807.512   | 1278.334  |
| NM_00081Z | 1127.924  | 1285.462  | AL050082  | 3400.679  | 4703.86   | NM_00583Z | 487.414   | 652.531   |
| NM_01889E | 1110.821  | 1237.157  | NM_00662Z | 53706.875 | 61639.148 | AW407841  | 1025.85   | 1388.053  |
| AJ300465  | 830.338   | 995.024   | NM_01658E | 45596.645 | 52530.102 | NM_00187Z | 2736.379  | 2414.376  |
| X86400    | 2721.506  | 3195.463  | NM_00313E | 14000.697 | 18312.502 | AF264014  | 9568.443  | 10587.927 |
| NM_00081C | 986.242   | 1018.047  | L12347    | 3383.932  | 3506.014  | L09098    | 371.172   | 325.235   |
| AF069307  | 4246.56   | 4777.421  | NM_00162Z | 1999.191  | 2198.805  | NM_00415E | 829.067   | 487.084   |
| M33197    | 58379.801 | 56822.91  | Z36788    | 1739.293  | 1519.844  | NM_001831 | 1531.084  | 1166.544  |
| U92978    | 3672.752  | 4008.873  | AI298534  | 886.949   | 482.268   | NM_000137 | 3814.97   | 3197.364  |
| NM_00573E | 1197.791  | 1274.389  | R71691    | 1227.899  | 1170.773  | NM_01210Z | 4911.974  | 5455.975  |
| NM_01448E | 1932.788  | 1600.934  | AW167715  | 795.997   | 840.827   | NM_005017 | 31723.428 | 33655.289 |
| NM_01338E | 1796.989  | 2166.115  | AA424735  | 2519.276  | 3360.266  | AF163572  | 14597.07  | 14197.325 |
| AB014567  | 1882.433  | 1770.32   | U78294    | 5679.614  | 4928.825  | NM_000897 | 3522.911  | 4228.78   |
| NM_01803A | 5331.036  | 4424.942  | AA171613  | 1325.371  | 707.848   | NM_000487 | 1321.216  | 1356.572  |
| M33197    | 61961.066 | 60589.816 | BI760394  | 8075.33   | 7452.673  | NM_006411 | 20455.014 | 22265.592 |
| AB037831  | 2035.807  | 1738.833  | AA555216  | 1660.085  | 3134.875  | NM_01418Z | 1502.214  | 1423.735  |
| NM_01210Z | 21725.424 | 21966.709 | U09117    | 10493.805 | 10113.849 | AB040884  | 301.698   | 441.12    |
| AL122077  | 1763.289  | 1767.645  | M21054    | 692.65    | 729.896   | NM_00049Z | 8090.013  | 8382.598  |
| NM_01463Z | 1109.708  | 1368.511  | M18468    | 1002.839  | 1156.883  | NM_01208E | 1757.521  | 2022.808  |
| NM_00642Z | 2549.373  | 2590.277  | H66070    | 2948.504  | 4507.122  | AK024382  | 524.884   | 849.941   |
| BE789195  | 1000.096  | 1619.409  | AA164741  | 12077.906 | 14089.233 | NM_00117C | 6855.888  | 9048.841  |
| NM_01694E | 3701.707  | 4109.952  | AI189375  | 1410.36   | 1091.755  | AL137716  | 994.57    | 1123.17   |
| M33197    | 60318.016 | 59943.512 | AI978885  | 2396.439  | 2543.476  | NM_00469E | 1454.485  | 1841.606  |
| NM_00725E | 4229.333  | 4584.728  | AK054960  | 10109.693 | 13259.647 | NM_01434Z | 3913.03   | 5089.2    |
| NM_01840Z | 1527.042  | 1354.36   | L15344    | 3575.21   | 3888.303  | Z50169    | 881.16    | 705.763   |
| NM_01800E | 1184.102  | 1378.456  | NM_01447C | 962.691   | 1535.728  | AB043997  | 2422.978  | 2122.776  |
| M33197    | 58044.797 | 57251.453 | NM_00166E | 28307.25  | 45659.574 | NM_00177Z | 1416.261  | 1087.884  |
| NM_002401 | 12993.762 | 14625.493 | NM_00187Z | 2070.511  | 1988.04   | Z70704    | 1811.795  | 1640.614  |
| NM_00127A | 8921.086  | 8841.028  | AF264014  | 9229.58   | 9994.938  | NM_01436Z | 2409.185  | 2176.2    |
| NM_002227 | 2628.166  | 1868.325  | NM_01458E | 6786.288  | 6189.318  | NM_000557 | 5208.617  | 4731.294  |
| NM_00719E | 892.867   | 737.127   | NM_01436E | 9231.101  | 7556.773  | NM_00323Z | 1814.932  | 1569.923  |
| AB002301  | 1157.251  | 726.171   | NM_00645Z | 2594.739  | 3049.48   | NM_00137E | 7917.029  | 7685.239  |
| AB014530  | 4896.31   | 5580.655  | NM_01809E | 2108.112  | 1991.902  | NM_00231Z | 4743.005  | 4833.661  |
| M33197    | 60493.188 | 61181.078 | AL390078  | 951.07    | 1268.125  | M20699    | 3897.483  | 4097.021  |
| NM_00598E | 2495.407  | 3058.264  | NM_00403E | 3006.58   | 2718.686  | NM_00477A | 9078.593  | 7715.997  |
| AB014607  | 2794.207  | 2937.246  | NM_01598E | 3355.051  | 3677.639  | NM_016937 | 4757.154  | 5646.795  |

|           |           |           |           |           |           |           |           |           |
|-----------|-----------|-----------|-----------|-----------|-----------|-----------|-----------|-----------|
| AF134401  | 2712.214  | 2249.473  | NM_006546 | 1413.632  | 1513.495  | NM_00269C | 12040.687 | 12741.038 |
| NM_020151 | 13011.581 | 13375.281 | NM_014959 | 3084.201  | 3046.634  | NM_01232E | 4656.367  | 4831.159  |
| NM_005891 | 54850.133 | 54212.316 | NM_003992 | 7748.107  | 8958.439  | NM_007341 | 871.295   | 932.913   |
| NM_00164E | 1818.024  | 1596.33   | AF279265  | 3557.306  | 3611.698  | NM_01650E | 2566.488  | 2488.204  |
| NM_00395E | 3927.731  | 2987.147  | NM_005213 | 2782.625  | 2503.781  | NM_00645E | 16144.095 | 15650.636 |
| M33197    | 63020.484 | 61035.68  | NM_002997 | 9120.923  | 9312.187  | AK026062  | 8736.194  | 7990.871  |
| NM_00350C | 8541.706  | 6799.833  | NM_002379 | 17072.393 | 18347.91  | AF047002  | 50944.051 | 56607.156 |
| NM_014317 | 3699.386  | 3784.693  | AB007929  | 5414.883  | 6162.522  | AL050082  | 4430.427  | 4908.698  |
| L09234    | 24430.572 | 28514.34  | NM_004579 | 5228.198  | 4677.991  | NM_006623 | 68444.148 | 60742.336 |
| NM_00005E | 2940.848  | 3406.574  | AA203126  | 3465.633  | 3902.102  | NM_01658E | 47944.613 | 49825.625 |
| AK026740  | 1203.972  | 1163.443  | Z50169    | 928.536   | 1019.007  | NM_00313E | 12279.208 | 11610.402 |
| NM_017881 | 5296.091  | 5510.545  | NM_004853 | 10913.029 | 12597.924 | L12347    | 5147.973  | 4441.376  |
| NM_017634 | 9577.446  | 9583.482  | NM_001494 | 20480.457 | 24138.895 | NM_001622 | 2403.01   | 2285.404  |
| NM_017743 | 3595.947  | 4197.633  | NM_017707 | 1068.735  | 1771.718  | Z36788    | 1419.435  | 1475.341  |
| NM_00030C | 2104.198  | 2315.295  | NM_00420E | 5418.487  | 5835.795  | NM_018477 | 7721.766  | 7855.72   |
| M33197    | 66999.508 | 69399.852 | NM_004603 | 18215.607 | 18658.047 | U20536    | 2816.608  | 2816.416  |
| AV756917  | 1535.792  | 1398.854  | AK022849  | 4775.873  | 4782.994  | AI298534  | 837.578   | 902.618   |
| NM_01838C | 2081.884  | 2054.113  | AF040964  | 8399.992  | 9198.85   | R71691    | 1465.974  | 1239.907  |
| NM_01207C | 1164.552  | 1236.862  | AK023527  | 283.014   | 633.586   | AA424735  | 2347.349  | 2833.887  |
| AF183423  | 10134.507 | 10833.26  | NM_001939 | 5912.922  | 6473.4    | U78294    | 5099.93   | 6680.063  |
| NM_001351 | 945.995   | 1316.97   | NM_003279 | 5536.886  | 5112.803  | BI760394  | 8818.491  | 8325.391  |
| M33197    | 2959.374  | 2464.323  | AB014599  | 8227.189  | 8102.021  | AA555216  | 706.741   | 722.501   |
| AB011146  | 6124.271  | 5250.244  | NM_004393 | 1409.792  | 1769.713  | U09117    | 11732.311 | 12413.917 |
| NM_00532E | 18764.887 | 16912.902 | AB018345  | 1557.639  | 1389.032  | M21054    | 478.56    | 357.538   |
| NM_00728E | 982.245   | 749.972   | NM_005832 | 849.516   | 717.019   | M18468    | 777.934   | 685.654   |
| NM_01406E | 1384.89   | 1495.298  | AW407841  | 2262.509  | 2410.217  | H66070    | 1262.495  | 1277.219  |
| AB035130  | 1326.798  | 1686.4    | U15197    | 682.66    | 749.649   | AA164741  | 14750.081 | 12865.836 |
| NM_00335E | 2782.265  | 2771.045  | AL050082  | 4089.673  | 4717.66   | AI189375  | 1214.901  | 1199.033  |
| M33197    | 53974.645 | 51890.723 | NM_006623 | 54823.887 | 57817.34  | AI978885  | 3684.276  | 3154.953  |
| AF119917  | 949.737   | 885.591   | NM_000137 | 4422.173  | 4972.478  | AK054960  | 15109.548 | 18003.695 |
| NM_01791E | 4810.952  | 4698.474  | NM_012102 | 7463.39   | 7121.357  | L15344    | 4561.29   | 4890.761  |
| AK021513  | 529.503   | 887.917   | NM_005017 | 35068.488 | 38525.289 | NM_01447C | 812.666   | 932.02    |
| AL049283  | 2635.078  | 2121.362  | AF163572  | 17178.119 | 20791.516 | NM_00166E | 29446.414 | 31423.068 |
| AF005258  | 1196.451  | 861.579   | NM_000897 | 3821.79   | 4280.103  | NM_00187E | 1535.156  | 1389.429  |
| M33197    | 62569.07  | 67026.641 | NM_000487 | 1939.806  | 2393.312  | AF264014  | 6201.472  | 5935.35   |
| X99659    | 3393.276  | 3867.254  | NM_006411 | 28202.844 | 33062.805 | L09098    | 600.362   | 720.58    |
| NM_01541E | 1308.682  | 1430.083  | NM_014182 | 4748.205  | 6140.129  | NM_001831 | 1374.526  | 842.417   |
| NM_00389E | 4553.466  | 4046.553  | AB040884  | 595.074   | 954.977   | NM_000923 | 960.503   | 801.328   |
| X99662    | 3097.507  | 2905.926  | NM_000492 | 12667.187 | 14647.146 | NM_00645E | 2135.439  | 1963.274  |
| NM_003473 | 22094.73  | 21820.559 | NM_012089 | 2980.782  | 2971.333  | NM_01809E | 1629.336  | 1793.02   |
| NM_01432E | 7047.864  | 7324.744  | NM_001170 | 4942.689  | 6109.03   | AL390078  | 517.194   | 559.709   |
| NM_00601E | 47081.848 | 44282.379 | AL137716  | 1033.984  | 728.4     | NM_00403E | 2321.768  | 2264.256  |
| NM_001242 | 2376.694  | 2127.806  | NM_00469E | 1476.111  | 1176.135  | NM_01598E | 4919.11   | 4266.577  |
| NM_001882 | 963.395   | 1275.618  | NM_014342 | 3358.954  | 3355.194  | NM_00654E | 959.542   | 997.892   |
| NM_014891 | 19214.441 | 22652.379 | AK054960  | 17694.391 | 16535.9   | NM_01495E | 2008.155  | 2001.897  |
| NM_013392 | 7519.172  | 7240.472  | L15344    | 5419.316  | 5280.586  | NM_003992 | 3811.909  | 3067.374  |
| M33197    | 60243.883 | 58337.965 |           | 2532.291  | 2862.435  | AF279265  | 3989.532  | 3737.708  |
| NM_00323E | 1098.805  | 878.184   | NM_01447C | 860.284   | 1201.986  | NM_005213 | 3385.282  | 3304.115  |
| AF052692  | 1194.891  | 1522.713  | NM_00166E | 27243.281 | 27528.84  | AB040914  | 918.387   | 1020.367  |
| NM_00522E | 965.901   | 1014.598  | NM_001773 | 1900.698  | 1857.549  | NM_002997 | 4096.111  | 4972.022  |
| NM_002354 | 1727.804  | 1275.725  | Z70704    | 1858.03   | 1806.31   | NM_00237E | 16253.126 | 16219.676 |
| NM_00521E | 647.326   | 753.02    | NM_014363 | 2783.35   | 2228.737  | AB007929  | 5935.901  | 5758.777  |
| M33197    | 60373.25  | 56594.582 | NM_000557 | 4859.365  | 5974.754  | NM_00457E | 6224.436  | 7360.242  |

|           |           |           |           |           |           |           |           |           |
|-----------|-----------|-----------|-----------|-----------|-----------|-----------|-----------|-----------|
| NM_00195C | 5454.406  | 5524.879  | NM_003239 | 1546.784  | 1519.489  | AA203126  | 3052.251  | 3418.011  |
| AK026364  | 4864.958  | 5575.247  | NM_001375 | 7699.997  | 8539.728  | Z50169    | 741.248   | 730.073   |
| NM_018117 | 2798.067  | 2729.991  | NM_002312 | 4616.774  | 5880.234  | AB043997  | 1913.993  | 1232.897  |
| NM_00628E | 6207.949  | 6046.105  | M20699    | 5315.775  | 5996.753  | NM_004853 | 10088.69  | 10328.837 |
| M33197    | 61053.574 | 59590.645 | NM_004774 | 8734.956  | 7840.904  | NM_001494 | 16555.096 | 18676.379 |
| NM_004331 | 25450.771 | 24877.467 | NM_016937 | 4703.151  | 4931.761  | NM_017707 | 956.229   | 895.288   |
| NM_01599E | 2384.835  | 2151.709  | NM_00269C | 10740.463 | 11958.105 | NM_00420E | 5730.361  | 4982.042  |
| NM_015703 | 6863.407  | 7723.618  | NM_01232E | 3889.753  | 4751.428  | NM_004603 | 10385.622 | 10964.702 |
| AB018337  | 4046.362  | 3662.748  | NM_007341 | 1240.337  | 1721.517  | AK022849  | 2525.833  | 2575.48   |
| NM_01448E | 4954.151  | 4665.397  | NM_01650E | 1679.09   | 1907.688  | AF040964  | 5881.164  | 4851.59   |
| AK025273  | 9351.216  | 9504.19   | NM_00645E | 11187.437 | 9451.823  | NM_00193E | 5115.973  | 4210.252  |
| M33197    | 60580.59  | 57936.191 | AK026062  | 7098.631  | 7979.146  | NM_00327E | 10510.99  | 12079.279 |
| NM_001794 | 2984.261  | 3005.393  | AF047002  | 41491.465 | 41449.234 | AB014599  | 6431.515  | 5196.328  |
| NM_00220E | 2993.047  | 3349.926  | AB040914  | 2028.422  | 1626.871  | NM_004393 | 785.901   | 658.794   |
| M33197    | 58471.762 | 56376.531 | NM_002997 | 8776.255  | 8776.341  | AB018345  | 838.231   | 836.315   |
| NM_000131 | 827.834   | 546.9     | NM_00237E | 17454.223 | 15902.594 | NM_005832 | 958.597   | 705.39    |
| NM_00183E | 1267.083  | 1249.212  | AB007929  | 5567.178  | 6112.596  | AW407841  | 1562.303  | 1753.99   |
| NM_001911 | 25184.771 | 30421.777 | NM_00457E | 8175.801  | 9185.504  | U15197    | 598.108   | 694.416   |
| NM_006503 | 1828.067  | 1755.828  | AA203126  | 3440.762  | 4442.718  | AL050082  | 5196.267  | 4918.417  |
| U68382    | 1776.826  | 1883.989  | L12347    | 4026.603  | 3773.569  | NM_006623 | 60303.309 | 57707.965 |
| NM_00396E | 6586.3    | 5901.368  | NM_001622 | 3722.975  | 2788.605  | NM_01658E | 42430.91  | 45130.43  |
| NM_004651 | 10439.394 | 8864.582  | Z36788    | 1464.176  | 1432.99   | NM_00313E | 9585.382  | 10101.513 |
| NM_003363 | 1477.5    | 1214.872  | NM_018477 | 6441.2    | 6689.214  | NM_000137 | 5283.075  | 4191.786  |
| M33197    | 59784.102 | 58563.414 | U20536    | 3428.585  | 2855.319  | NM_012102 | 4169.745  | 5161.835  |
| NM_01756E | 7916.779  | 8523.371  | AI298534  | 817.669   | 773.999   | NM_005017 | 28219.475 | 34859.484 |
| NM_00145E | 1737.915  | 2415.858  | R71691    | 1423.265  | 1724.819  | AF163572  | 9391.142  | 9367.748  |
| NM_00290E | 2586.646  | 2624.885  | AW167715  | 621.417   | 733.834   | NM_000897 | 1957.467  | 2248.524  |
| AK024480  | 1060.534  | 1161.915  | AA424735  | 2561.553  | 2581.946  | NM_000487 | 2221.17   | 2187.447  |
| Y13871    | 9152.271  | 8810.223  | U78294    | 6066.101  | 5718.316  | NM_006411 | 23670.551 | 27622.184 |
| NM_012134 | 1118.63   | 824.501   | BI760394  | 9487.381  | 9241.289  | NM_014182 | 2845.47   | 2853.84   |
| AL137725  | 14834.426 | 16899.883 | AA555216  | 756.786   | 682.458   | NM_000492 | 11558.817 | 10795.525 |
| M33197    | 60796.547 | 59427.078 | U09117    | 13965.869 | 13174.894 | NM_01208E | 1856.231  | 2078.422  |
| AJ008151  | 5321.242  | 6362.236  | M21054    | 369.936   | 783.819   | NM_00117C | 7605.634  | 8486.609  |
| AK024149  | 1125.505  | 952.121   | M18468    | 1327.66   | 1258.95   | AL137716  | 864.237   | 618.887   |
| AK023094  | 933.079   | 637.297   | H66070    | 2522.787  | 2954.761  | NM_00469E | 1783.626  | 2081.483  |
| M33197    | 60696.008 | 57629.551 | AA164741  | 12130.476 | 16217.445 | NM_014342 | 5310.832  | 6674.432  |
| NM_004091 | 2734.607  | 3009.963  | AI189375  | 883.162   | 913.872   | AK054960  | 18409.109 | 17337.359 |
| X74070    | 62024.613 | 59754.051 | AI978885  | 2400.332  | 2169.953  | L15344    | 4144.61   | 4528.892  |
| NM_006333 | 3002.75   | 2748.55   | AB014599  | 7774.427  | 6028.248  | NM_01447C | 864.949   | 796.818   |
| M33197    | 59902.887 | 56540.707 | NM_004393 | 970.397   | 1002.11   | NM_00166E | 28393.566 | 26692.469 |
| NM_00289E | 2379.02   | 2337.615  | AB018345  | 1468.941  | 1539.978  | NM_001773 | 1142.107  | 1144.416  |
| AK022749  | 2073.963  | 2008.634  | NM_005832 | 562.261   | 746.199   | Z70704    | 1220.392  | 1334.973  |
| BF031409  | 9340.866  | 8348.59   | AW407841  | 2159.241  | 2378.849  | NM_014363 | 2519.285  | 3072.769  |
| NM_007043 | 4725.413  | 4460.67   | U15197    | 593.085   | 815.904   | NM_000557 | 3034.588  | 3168.083  |
| BE378791  | 1287.341  | 1116.989  | NM_00187E | 3109.804  | 3400.154  | NM_00323E | 1009.464  | 1287.445  |
| U94388    | 1995.405  | 2098.2    | AF264014  | 8652.258  | 8847.731  | NM_00137E | 7314.319  | 7257.159  |
| NM_012322 | 13622.534 | 13828.108 | L09098    | 637.531   | 526.935   | NM_002312 | 3971.171  | 4313.278  |
| M33197    | 62652.773 | 58754.293 | NM_00415E | 532.993   | 530.823   | M20699    | 4133.775  | 4247.05   |
| NM_00488E | 56017.695 | 59439.891 | NM_001831 | 1334.553  | 1506.384  | NM_004774 | 10332.279 | 8112.856  |
| AK025314  | 3014.813  | 3540.442  | NM_01458E | 7907.108  | 7777.892  | NM_016937 | 5830.976  | 5353.83   |
| NM_00210E | 6936.009  | 6705.261  | NM_01436E | 11207.072 | 8204.326  | NM_00269C | 12142.147 | 11211.142 |
| NM_000984 | 62954.031 | 61871.875 | NM_000923 | 852.793   | 875.24    | NM_01232E | 5161.887  | 4899.101  |
| NM_002453 | 6464.048  | 5604.96   | NM_006453 | 2736.946  | 2461.348  | NM_007341 | 885.272   | 1095.936  |



|           |           |           |           |           |           |           |           |           |
|-----------|-----------|-----------|-----------|-----------|-----------|-----------|-----------|-----------|
| AK000780  | 49778.813 | 53897.098 | NM_018096 | 2273.851  | 1956.447  | NM_016508 | 1951.544  | 1942.328  |
| AK026721  | 4397.046  | 4724.652  | AL390078  | 623.494   | 930.555   | NM_006456 | 13183.265 | 13397.626 |
| AK023027  | 809.889   | 866.447   | NM_004036 | 2919.906  | 2665.59   | AK026062  | 8640.854  | 9016.616  |
| AK025598  | 2014.593  | 2304.379  | NM_015986 | 5519.015  | 5321.05   | AF047002  | 56607.789 | 58179.617 |
| AB002348  | 19223.193 | 18979.992 | NM_006546 | 1530.891  | 1525.919  | AB040914  | 1238.14   | 1461.103  |
| M33197    | 54464.563 | 52045.609 | NM_014959 | 1786.339  | 1951.754  | NM_002997 | 4681.114  | 4862.534  |
| M64714    | 985.49    | 1116.378  | NM_003992 | 7485.444  | 8086.715  | NM_002379 | 12555.242 | 12729.731 |
| NM_005006 | 2349.377  | 1984.38   | AF279265  | 3642.331  | 3607.372  | AB007929  | 6087.393  | 5659.398  |
| AK027033  | 1312.35   | 1351.937  | NM_005213 | 2930.302  | 2863.688  | NM_004579 | 5628.113  | 4822.338  |
| NM_003000 | 7448.961  | 6746.386  | AK024382  | 666.504   | 755.594   | AA203126  | 2440.277  | 2219.394  |
| NM_002495 | 7531.217  | 7018.362  | NM_001170 | 9418.29   | 7985.14   | L12347    | 4053.293  | 3853.942  |
| M33197    | 60110.766 | 61752.48  | AL137716  | 1266.091  | 906.602   | NM_001622 | 1846.564  | 1858.257  |
| NM_016284 | 7376.654  | 7631.748  | NM_004696 | 1601.666  | 1629.471  | Z36788    | 1414.417  | 1293.514  |
| NM_014593 | 3807.703  | 3675.017  | NM_014342 | 4320.217  | 5179.473  | NM_018477 | 7407.421  | 7383.897  |
| NM_006833 | 20794.363 | 18063.807 | Z50169    | 1282.719  | 1442.123  | U20536    | 2374.654  | 2064.537  |
| NM_012257 | 4109.259  | 3308.202  | AB043997  | 1476.082  | 1417.182  | AI298534  | 465.952   | 655.497   |
| U37690    | 30893.539 | 33489.605 | NM_004853 | 9845.821  | 8455.604  | R71691    | 1067.625  | 1331.967  |
| NM_005120 | 2963.333  | 3351.955  | NM_001494 | 21669.922 | 18551.855 | AA424735  | 2917.007  | 2737.456  |
| AB029012  | 5565.747  | 6021.369  | NM_017707 | 1205.299  | 1266.534  | U78294    | 5798.456  | 6021.745  |
| M33197    | 66098.211 | 67553.813 | NM_004206 | 5680.818  | 5681.936  | BI760394  | 8719.569  | 7991.345  |
| NM_006299 | 1448.02   | 1402.518  | NM_004603 | 17002.223 | 16650.676 | AA555216  | 700.827   | 710.116   |
| AF060936  | 6313.899  | 4909.131  | AK022849  | 4547.986  | 3871.531  | U09117    | 5164.414  | 5252.958  |
| NM_018167 | 1307.034  | 1155.822  | AF040964  | 8910.434  | 9835.149  | M21054    | 700.072   | 725.712   |
| AL050088  | 7708.838  | 9723.682  | NM_001939 | 7210.828  | 7282.043  | M18468    | 1009.072  | 926.168   |
| AK024939  | 11291.793 | 10454.701 | NM_003279 | 9675.978  | 8583.048  | H66070    | 3529.416  | 2781.565  |
| AK001561  | 756.685   | 620.174   | NM_012328 | 4144.972  | 4778.651  | AA164741  | 16235.461 | 14084.726 |
| AB007880  | 4228.463  | 4957.066  | NM_007341 | 1323.085  | 1378.041  | AI189375  | 1598.953  | 1522.414  |
| AK024950  | 909.823   | 665.571   | NM_016508 | 1670.676  | 1793.721  | AI978885  | 4658.155  | 4665.773  |
| M33197    | 61587.637 | 58767.594 | NM_006456 | 17747.27  | 13438.055 | AB014599  | 6522.736  | 4643.548  |
| AF147356  | 2324.051  | 2552.614  | AK026062  | 6871.494  | 6803.632  | NM_004393 | 718.992   | 926.93    |
| NM_018843 | 1261.168  | 1224.299  | AF047002  | 43182.559 | 41461.75  | AB018345  | 630.03    | 973.534   |
| AL049461  | 1051.779  | 783.434   | AL050082  | 4329.341  | 4259.628  | NM_005832 | 536.477   | 461.94    |
| M33197    | 62155.961 | 59163.824 | NM_006623 | 56302.031 | 49999.523 | AW407841  | 1098.863  | 875.142   |
| AL109782  | 9092.616  | 8171.083  | NM_016588 | 38548.441 | 34651.902 | NM_001879 | 1181.143  | 1371.588  |
| AF086225  | 3026.341  | 2257.776  | NM_003135 | 10053.838 | 9467.369  | AF264014  | 6242.775  | 6106.04   |
| NM_005844 | 1505.497  | 1600.999  | NM_000137 | 5712.789  | 4681.519  | NM_001831 | 862.608   | 811.172   |
| AK024941  | 6541.772  | 6475.94   | NM_012102 | 7453.19   | 8405.157  | NM_014586 | 4552.382  | 3724.914  |
| AF086199  | 369.018   | 559.137   | NM_005017 | 29558.344 | 32813.867 | NM_014366 | 10161.906 | 9972.965  |
| M33197    | 60344.242 | 55050.473 | AF163572  | 15591.635 | 14550.872 | NM_000923 | 701.666   | 477.645   |
| AK025489  | 1960.766  | 1833.112  | NM_000897 | 4172.224  | 3089.021  | NM_006453 | 1953.556  | 1884.749  |
| AB075853  | 447.95    | 513.901   | NM_000487 | 1490.204  | 1689.728  | NM_018096 | 1803.965  | 1742.882  |
| AL390152  | 1062.773  | 954.102   | NM_006411 | 24202.861 | 22504.742 | AL390078  | 585.269   | 539.823   |
| M33197    | 61573.32  | 61799.371 | NM_014182 | 4158.071  | 4192.359  | NM_004036 | 1723.773  | 1571.321  |
| NM_018126 | 5767.161  | 5348.723  | AB040884  | 973.945   | 835.251   | NM_015986 | 4016.562  | 3778.904  |
| AK024506  | 7028.294  | 6442.024  | NM_000492 | 14510.087 | 15145.505 | NM_006546 | 1719.105  | 1040.802  |
| NM_014179 | 6435.768  | 5526.001  | NM_012089 | 3179.525  | 3079.009  | NM_014959 | 1826.317  | 2067.839  |
| AF086326  | 2882.027  | 3473.823  | AJ272057  | 15715.446 | 12742.973 | NM_003992 | 5701.462  | 5014.834  |
| M33197    | 60497.598 | 57678.531 | NM_004402 | 1661.385  | 1223.486  | AF279265  | 4951.665  | 4308.568  |
| AL117528  | 659.389   | 791.112   | AK024216  | 27933.965 | 25717.061 | NM_007350 | 336.393   | 393.091   |
| M33197    | 61360.648 | 58447.203 | Y16752    | 11221.022 | 9660.111  | NM_005213 | 3661.251  | 3499.721  |
| AK025948  | 2400.594  | 2736.52   | NM_014694 | 1470.413  | 1726.221  | AK024382  | 240.518   | 306.592   |
| AK000674  | 789.465   | 708.426   | NM_020156 | 3474.828  | 3603.137  | NM_001170 | 6932.132  | 8029.375  |
| AJ238555  | 506.351   | 667.288   | NM_014830 | 3750.71   | 3359.442  | AL137716  | 865.725   | 926.746   |

|           |           |           |           |           |           |           |           |           |
|-----------|-----------|-----------|-----------|-----------|-----------|-----------|-----------|-----------|
| L23850    | 526.406   | 607.444   | AF355402  | 4149.938  | 3489.099  | NM_00469E | 1397.562  | 1842.264  |
| AL353948  | 1628.634  | 2311.309  | AK000407  | 6102.002  | 4791.444  | Z50169    | 568.472   | 538.285   |
| AL122043  | 1100.101  | 1337.079  | NM_01447C | 1043.52   | 1041.175  | AB043997  | 1561.077  | 1154.091  |
| M33197    | 61802.781 | 56897.613 | NM_00166E | 25622.293 | 26700.396 | NM_00485E | 9252.788  | 7904.521  |
| AK025869  | 6194.182  | 7382.322  | AF097645  | 414.731   | 324.028   | NM_00149A | 9525.389  | 8984.406  |
| M33197    | 66630.18  | 64273.211 | NM_00177E | 1597.005  | 2212.234  | NM_00420E | 3696.945  | 3262.703  |
| AF056430  | 1696.376  | 1362.963  | Z70704    | 1825.169  | 1953.813  | AF040964  | 9134.123  | 7291.57   |
| M33197    | 66605.156 | 63393.91  | NM_01436E | 3294.273  | 2878.219  | NM_00193E | 5148.093  | 4560.89   |
| AK001802  | 633.967   | 740.44    | NM_000557 | 6302.262  | 6343.611  | NM_00327E | 9271.257  | 9164.776  |
| AK021469  | 2362.003  | 2752.79   | NM_00323E | 1222.729  | 1524.806  | NM_01232E | 4613.34   | 4099.5    |
| M33197    | 63886.5   | 63945.73  | NM_00137E | 10950.848 | 13403.271 | NM_01650E | 2472.835  | 2222.375  |
| AK025161  | 848.977   | 1206.505  | NM_00231E | 4250.304  | 4477.76   | NM_00645E | 12641.507 | 12811.929 |
| AK026259  | 2368.323  | 2993.822  | M20699    | 4937.028  | 4704.286  | NM_01658E | 42200.801 | 42688.473 |
| AJ008115  | 15202.442 | 17506.027 | NM_00477A | 6826.183  | 6835.01   | NM_00313E | 9221.204  | 8755.771  |
| AF083125  | 2223.765  | 2268.351  | NM_016937 | 3520.744  | 3411.658  | NM_000137 | 3415.899  | 3214.425  |
| U72851    | 766.726   | 868.57    | NM_00269C | 9641.092  | 10317.133 | NM_01210E | 4458.54   | 5046.87   |
| M33197    | 62770.117 | 58111.246 | AB033086  | 503.19    | 362.235   | NM_005017 | 25687.871 | 29019.094 |
| AK022970  | 983.544   | 1041.799  | NM_01823E | 6465.782  | 5564.697  | AF163572  | 5554.554  | 5817.351  |
| AK026212  | 667.074   | 857.47    | U88892    | 1626.902  | 1544.981  | NM_000897 | 998.283   | 835.53    |
| AF086222  | 1086.476  | 843.773   | AK023755  | 1351.113  | 1099.228  | NM_000487 | 760.591   | 1022.744  |
| AF086415  | 1380.449  | 1210.363  | NM_00572E | 3051.88   | 2685.903  | NM_006411 | 17261.031 | 15231.16  |
| M33197    | 61565.781 | 60785.277 | NM_012211 | 903.191   | 735.641   | NM_01418E | 3578.568  | 4073.916  |
| AK024470  | 4344.513  | 4362.14   | AB040877  | 7631.916  | 6400.462  | AB040884  | 872.977   | 518.865   |
| NM_00422E | 11742.226 | 12373.431 | AB040927  | 940.644   | 793.694   | NM_00049E | 12236.509 | 10978.507 |
| AK023400  | 597.829   | 846.103   | AK026737  | 3135.324  | 2136.645  | NM_01208E | 1603.195  | 1791.637  |
| NM_00643E | 24933.711 | 23264.357 | NM_00021C | 5195.044  | 4358.57   | AJ272057  | 5010.874  | 4357.645  |
| AK023897  | 1103.843  | 990.364   | NM_00628E | 5833.332  | 5292.809  | NM_00440E | 1410.885  | 1182.855  |
| AF025441  | 7211.346  | 5981.519  | NM_019067 | 4048.361  | 3458.725  | AK024216  | 18950.57  | 19040.34  |
| U62823    | 3724.835  | 3580.546  | AF251025  | 1582.306  | 1612.537  | Y16752    | 5408.945  | 5244.694  |
| NM_00353E | 5937.49   | 5825.103  | NM_015677 | 6792.832  | 6083.833  | NM_01469A | 1342.3    | 1267.678  |
| AK026768  | 1131.964  | 961.834   | NM_00177E | 9002.863  | 6552.036  | NM_01483C | 4080.008  | 3969.098  |
| M33197    | 60856.207 | 59611.469 | AB011087  | 1391.001  | 1129.977  | AF355402  | 2637.533  | 2985.937  |
| AK000852  | 3554.665  | 3650.557  | AF161341  | 6359.038  | 5685.94   | AK000407  | 3345.512  | 3427.32   |
| AF251188  | 2093.372  | 2102.561  | AJ249902  | 2423.781  | 2823.085  | NM_01447C | 710.07    | 857.292   |
| AK026418  | 1389.552  | 1200.54   | NM_00438A | 4102.551  | 6115.525  | NM_00166E | 23955.434 | 22595.93  |
| AF086194  | 16618.352 | 18968.969 | L05500    | 13542.678 | 17804.322 | NM_00177E | 1022.676  | 761.889   |
| AK026811  | 2245.933  | 1926.937  | NM_01230E | 29517.004 | 26966.586 | Z70704    | 1698.724  | 1251.91   |
| M33197    | 61778     | 55870.656 | AF222903  | 3754.525  | 4310.439  | NM_01436E | 2470.292  | 2150.019  |
| AK023633  | 2310.581  | 2086.781  | NM_00622E | 3648.49   | 3780.601  | NM_000557 | 5713.137  | 5674.097  |
| AF085967  | 868.628   | 671.669   | L10374    | 10552.667 | 9280.756  | NM_00323E | 879.99    | 1265.352  |
| NM_00617E | 1285.336  | 1698.413  | AB016902  | 3164.832  | 2646.74   | NM_00137E | 5295.532  | 5130.147  |
| AL360165  | 3880.489  | 5561.322  | AF272378  | 31659.539 | 21155.389 | NM_00231E | 1966.079  | 1755.939  |
| M33197    | 61745.211 | 55937.922 | NM_00024E | 5346.753  | 4638.808  | M20699    | 3527.528  | 3694.177  |
| AJ008132  | 8941.916  | 10328.791 | NM_01431C | 1026.241  | 617.961   | NM_00477A | 8344.146  | 7240.434  |
| NM_005281 | 1991.982  | 2340.471  | NM_00586C | 11489.104 | 8150.559  | NM_016937 | 3810.156  | 3905.819  |
| NM_00554E | 877.312   | 1129.95   | AF095288  | 32226.924 | 28324.004 | NM_00347E | 617.083   | 473.764   |
| M33197    | 58797.527 | 56272.211 | AK025116  | 589.112   | 503.702   | NM_00269C | 12820.905 | 11709.772 |
| U12129    | 681.025   | 467.083   | AK026271  | 15406.354 | 13370.509 | NM_01823E | 4281.61   | 5192.997  |
| S81242    | 55051.625 | 52567.391 | NM_00179E | 8564.668  | 6946.608  | U88892    | 1756.543  | 1631.844  |
| AF075072  | 802.29    | 936.298   | AF090895  | 1620.907  | 1229.259  | AK023755  | 1348.392  | 1469.74   |
| M33197    | 61651.227 | 60836.918 | NM_00561C | 8116.216  | 6703.423  | NM_00572E | 3132.637  | 2485.41   |
| U38442    | 2739.712  | 2643.799  | AL133651  | 2375.607  | 2217.879  | NM_012211 | 1038.86   | 1130.863  |
| AK026706  | 743.118   | 892.595   | AB014532  | 5527.959  | 4352.94   | AB040877  | 3118.037  | 2592.184  |

|           |           |           |           |           |           |           |           |           |
|-----------|-----------|-----------|-----------|-----------|-----------|-----------|-----------|-----------|
| AB007936  | 4801.111  | 4944.8    | NM_003478 | 4528.574  | 3778.529  | AB040927  | 1238.667  | 610.579   |
| D28391    | 25996.592 | 26667.84  | BE275227  | 568.601   | 512.283   | AK026737  | 2195.993  | 2099.048  |
| M33197    | 56129.781 | 54917.035 | NM_016237 | 6803.53   | 5988.322  | NM_00021C | 5526.424  | 6344.2    |
| AK026859  | 729.411   | 561.926   | NM_004924 | 4418.972  | 5058.919  | NM_006288 | 4877.961  | 4604.183  |
| L32841    | 3769.855  | 3629.722  | NM_001798 | 7113.494  | 7725.238  | NM_019067 | 3371.398  | 2845.046  |
| M33197    | 57849.977 | 56191.203 | NM_001211 | 5650.039  | 5772.236  | AF251025  | 1167.878  | 988.417   |
| AF131770  | 3952.76   | 3821.218  | NM_006505 | 1077.781  | 1089.156  | NM_015677 | 5070.985  | 5389.697  |
| CY3Cy5    | 6354.783  | 410.212   | AB033050  | 2549.574  | 2948.618  | NM_001772 | 7240.798  | 6411.304  |
| R71691    | 1530.833  | 1530.515  | NM_004356 | 16271.995 | 15988.203 | AL162032  | 510.669   | 666.782   |
| AA424735  | 2476.423  | 2014.308  | NM_001855 | 598.119   | 533.867   | AB011087  | 1247.341  | 1208.921  |
| U78294    | 3499.639  | 3523.088  | BC015022  | 4123.754  | 4474.945  | NM_004384 | 2788.124  | 2660.417  |
| BI760394  | 6176.889  | 5828.39   | NM_006697 | 7442.924  | 5707.149  | L05500    | 8863.356  | 8639.712  |
| AA555216  | 1040.166  | 822.751   | M19182    | 1134.713  | 766.69    | NM_012306 | 25539.879 | 29506.818 |
| U09117    | 1517.017  | 1473.533  | AK025707  | 2402.102  | 1810.946  | AF222903  | 1389.503  | 1279.262  |
| M21054    | 332.97    | 653.473   | NM_002406 | 52130.406 | 48963.344 | NM_006226 | 806.23    | 1160.805  |
| M18468    | 1094.361  | 1178.195  | U87169    | 3029.257  | 2543.827  | L10374    | 10588.845 | 10134.153 |
| H66070    | 509.918   | 576.099   | NM_002073 | 1422.303  | 1380.909  | NM_000248 | 4311.043  | 3979.762  |
| AA164741  | 17272.996 | 19949.416 | AF117222  | 733.711   | 643.567   | NM_01431C | 748.989   | 975.559   |
| AI189375  | 513.973   | 621.295   | NM_001935 | 48285.516 | 41708.07  | AF095288  | 29000.584 | 29904.494 |
| AI978885  | 1229.309  | 1308.386  | NM_001749 | 1340.314  | 1189.41   | AF130114  | 174.505   | 211.287   |
| AK054960  | 13171.316 | 15070.121 | AF090327  | 750.895   | 513.033   | NM_001798 | 9257.206  | 9976.244  |
| L15344    | 4101.933  | 4176.476  | NM_003291 | 6081.854  | 5176.204  | AL133651  | 1767.959  | 1938.752  |
| SR1       | 61531.027 | 59213.875 | AK022950  | 3430.001  | 2990.911  | AB014532  | 5308.17   | 5432.389  |
| SR3       | 60406.063 | 57966.066 | S75755    | 4970.095  | 3714.584  | NM_003478 | 4321.665  | 4188.709  |
| SR5       | 7257.824  | 7046.387  | AF176518  | 1394.131  | 1100.296  | NM_016237 | 6865.179  | 6594.113  |
| SR7       | 7781.073  | 49414.414 | AB014576  | 15391     | 14370.23  | AB033050  | 2317.441  | 2271.075  |
| SR9       | 30560.994 | 5307.763  | NM_019044 | 4733.588  | 4256.026  | NM_004356 | 16194.574 | 15459.951 |
| CY3Cy5    | 5936.318  | 280.595   | AK000145  | 661.444   | 526.744   | NM_001855 | 648.433   | 340.247   |
| NM_014586 | 11135.031 | 10253.631 | AF174601  | 5008.703  | 6471.967  | BC015022  | 1987.92   | 2164.461  |
| NM_014366 | 11563.822 | 11776.938 | AF279865  | 959.782   | 1250.421  | AK025707  | 2404.344  | 2417.201  |
| NM_000923 | 857.622   | 546.762   | NM_01470C | 1538.027  | 1590.848  | NM_002073 | 1592.292  | 1577.771  |
| NM_006453 | 3889.201  | 3491.247  | NM_014714 | 928.371   | 1577.284  | AF117222  | 1066.291  | 663.421   |
| NM_018096 | 2638.137  | 2121.399  | NM_005687 | 6163.376  | 6001.67   | NM_001748 | 1009.844  | 726.92    |
| AL390078  | 597.878   | 428.205   | NM_005983 | 8189.866  | 9024.022  | AK022950  | 3799.519  | 3407.456  |
| NM_004036 | 2189.295  | 2253.422  | NM_017652 | 6214.793  | 3718.03   | AF176518  | 879.056   | 984.455   |
| NM_015986 | 5336.911  | 4921.43   | X59268    | 6612.191  | 4287.672  | AB014576  | 10673.423 | 10785.832 |
| NM_006546 | 2564.936  | 2470.395  | D70832    | 51824.688 | 39628.934 | NM_019044 | 4904.46   | 5071.234  |
| NM_014958 | 2223.614  | 2228.788  | NM_001429 | 7014.091  | 4869.848  | AF174601  | 4192.001  | 4185.72   |
| NM_003992 | 6804.93   | 5792.938  | M61870    | 1201.049  | 724.414   | AF279865  | 983.423   | 1104.2    |
| AF279265  | 5009.063  | 4305.092  | AK026980  | 1861.477  | 1416.037  | NM_01470C | 1188.962  | 1357.558  |
| NM_00735C | 680.637   | 375.656   | AJ277915  | 570.426   | 364.627   | NM_014714 | 1593.496  | 1356.531  |
| NM_005213 | 2881.707  | 2520.941  | NM_020368 | 4113.905  | 3176.518  | NM_015644 | 707.301   | 852.354   |
| AB040914  | 721.816   | 908.436   | AF024708  | 27523.584 | 19269.674 | NM_005687 | 5641.659  | 6377.183  |
| NM_002997 | 5816.104  | 6538.782  | NM_006467 | 3171.418  | 2666.701  | NM_005983 | 4832.125  | 4109.017  |
| NM_002378 | 23434.602 | 22889.592 | NM_017566 | 6276.981  | 5156.712  | D70832    | 47628.793 | 44999.055 |
| AB007929  | 5792.386  | 6133.146  | NM_006582 | 1727.077  | 1640.644  | NM_001428 | 4087.038  | 3936.85   |
| NM_004578 | 9932.299  | 9752.439  | AB033019  | 5411.189  | 4536.825  | M61870    | 977.279   | 1029.458  |
| AA203126  | 4099.923  | 2744.921  | NM_001452 | 576.836   | 501.293   | AK026980  | 1775.023  | 1851.001  |
| L12347    | 510.695   | 646.237   | NM_006162 | 957.05    | 690.124   | NM_020368 | 3390.265  | 2877.778  |
| NM_001622 | 845.747   | 414.027   | NM_014764 | 10302.538 | 9379.915  | AF024708  | 14603.854 | 14447.644 |
| Z36788    | 915.161   | 959.725   | NM_018078 | 1786.431  | 1882.981  | NM_001452 | 336.399   | 455.269   |
| NM_018477 | 6479.439  | 7502.229  | NM_016013 | 547.15    | 420.022   | NM_006162 | 642.656   | 632.859   |
| U20536    | 6033.322  | 5294.108  | NM_01605C | 443.052   | 602.108   | NM_014764 | 7813.524  | 7179.276  |

|           |           |           |           |           |           |           |           |           |
|-----------|-----------|-----------|-----------|-----------|-----------|-----------|-----------|-----------|
| NM_004853 | 11967.564 | 10628.19  | NM_007080 | 23612.385 | 23146.607 | NM_018078 | 2792.593  | 2025.026  |
| NM_001494 | 28158.492 | 28874.33  | AK026912  | 3426.137  | 4453.39   | NM_016013 | 893.267   | 439.671   |
| NM_017707 | 1885.406  | 2158.691  | AK023531  | 3750.092  | 3226.466  | NM_016050 | 1025.461  | 637.02    |
| NM_004206 | 6543.355  | 6345.133  | AB011128  | 10417.075 | 7549.493  | NM_007080 | 22637.674 | 22221.232 |
| NM_004603 | 2473.36   | 2357.582  | AK026742  | 1246.858  | 1166.516  | AK026912  | 3451.793  | 3046.776  |
| AK022849  | 4415.924  | 4309.276  | AK025074  | 4033.505  | 3955.183  | AK023531  | 2488.444  | 2546.383  |
| AF040964  | 9996.146  | 9331.563  | NM_000303 | 10718.449 | 8265.892  | AB011128  | 5666.938  | 6837.637  |
| NM_001939 | 7985.677  | 7510.985  | NM_006242 | 582.557   | 683.226   | AK026742  | 1109.152  | 875.534   |
| NM_003279 | 1275.304  | 1667.891  | X78712    | 880.376   | 871.816   | AK025074  | 2787.688  | 2370.927  |
| AB014599  | 7696.654  | 7047.053  | NM_001497 | 1477.792  | 1386.585  | NM_000303 | 7709.82   | 9442.208  |
| NM_004393 | 1730.168  | 1615.234  | NM_004130 | 6198.306  | 6339.824  | NM_006242 | 481.061   | 497.749   |
| AB018345  | 2161.169  | 1766.094  | NM_006348 | 1110.58   | 1163.071  | X78712    | 816.579   | 454.252   |
| NM_005832 | 588.369   | 412.913   | AF067972  | 10727.459 | 9151.819  | NM_001497 | 1089.926  | 865.728   |
| AW407841  | 2894.381  | 1972.771  | NM_004958 | 1248.942  | 1209.052  | NM_004130 | 3881.352  | 4057.18   |
| U15197    | 595.797   | 531.347   | D87076    | 1343.615  | 1264.168  | NM_006348 | 33665.191 | 1602.458  |
| NM_001879 | 1307.753  | 1330.581  | NM_014149 | 1428.715  | 992.46    | AF067972  | 11966.106 | 11615.762 |
| AF264014  | 13744.305 | 14392.925 | AB020635  | 3139.15   | 2166.881  | D87076    | 1126.176  | 1097.49   |
| L09098    | 554.408   | 485.653   | NM_006515 | 1665.207  | 1309.963  | NM_014149 | 1052.678  | 1225.648  |
| NM_004155 | 491.603   | 424.552   | NM_005224 | 1414.732  | 1272.98   | AB020635  | 1919.776  | 1969.152  |
| NM_001831 | 1816.456  | 1178.663  | NM_012144 | 2780.635  | 2359.382  | NM_006515 | 1601.639  | 1676.013  |
| NM_000137 | 5654.421  | 5411.602  | X65231    | 57640.402 | 48458.938 | NM_005224 | 871.245   | 750.633   |
| NM_012102 | 4371.992  | 4916.449  | NM_002908 | 2211.358  | 1541.604  | NM_012144 | 3086.173  | 3768.444  |
| NM_005017 | 19747.783 | 18148.877 | AF205632  | 2216.06   | 1678.425  | X65231    | 59568.625 | 52635.133 |
| AF163572  | 1836.606  | 1806.578  | NM_005378 | 13445.659 | 9954.264  | NM_002908 | 2125.979  | 2318.284  |
| NM_000897 | 868.302   | 736.956   | NM_002397 | 449.664   | 357.867   | AF205632  | 2241.842  | 1948.349  |
| NM_000487 | 1895.518  | 1830.22   | AF000672  | 1307.121  | 1333.953  | NM_005378 | 16141.532 | 16873.307 |
| NM_006411 | 16470.773 | 16606.379 | AK002195  | 459.61    | 577.025   | AF000672  | 1587.619  | 1699.857  |
| NM_014182 | 6377.104  | 7119.824  | AF086128  | 670.735   | 911.088   | AK002195  | 582.778   | 460.152   |
| AB040884  | 896.135   | 720.215   | AK022850  | 3814.255  | 2950.026  | AK022850  | 2023.198  | 2198.339  |
| NM_000492 | 17325.018 | 17219.711 | NM_016490 | 2435.501  | 2201.833  | NM_016490 | 1497.204  | 1673.149  |
| NM_012089 | 4638.405  | 5669.993  | AF038193  | 796.948   | 527       | AF038193  | 565.193   | 474.24    |
| NM_001170 | 2398.499  | 3138.049  | AL137498  | 4229.338  | 3933.562  | AL137498  | 3919.479  | 3091.334  |
| AL137716  | 622.855   | 678.462   | AK024289  | 2263.077  | 1750.475  | AK024289  | 1236.879  | 1433.086  |
| NM_004696 | 753.032   | 738.407   | S66168    | 5278.304  | 4203.576  | S66168    | 3517.661  | 4398.428  |
| NM_017694 | 555.978   | 577.905   | NM_003851 | 8990.729  | 8425.695  | NM_003851 | 12457.978 | 14447.721 |
| NM_014342 | 3873.837  | 5042.117  | U79244    | 615.479   | 715.79    | AK024150  | 1641.284  | 1660.2    |
| AB043997  | 1559.028  | 1100.576  | AK024150  | 1462.619  | 1377.871  | AF070536  | 1970.664  | 1681.39   |
| AF097645  | 359.57    | 387.673   | AF070536  | 2416.674  | 1750.792  | AK022297  | 442.124   | 551.719   |
| Z70704    | 854.259   | 882.669   | AK022297  | 811.889   | 670.938   | U79300    | 1365.5    | 1462.804  |
| NM_014363 | 3154.641  | 2822.274  | U79300    | 1535.382  | 1196.504  | AK025151  | 10864.699 | 12159.592 |
| NM_000557 | 978.96    | 940.201   | AK025151  | 9056.736  | 5739.185  | AK025550  | 3774.2    | 4133.737  |
| NM_003239 | 653.367   | 570.443   | AK025550  | 3801.185  | 2847.103  | AF088076  | 20146.406 | 24488.229 |
| NM_001375 | 11522.923 | 11669.474 | AF088076  | 16688.713 | 14423.565 | AF086543  | 2566.455  | 2592.874  |
| NM_002312 | 4536      | 5150.279  | AF086543  | 4085.93   | 3347.796  | AB046797  | 808.668   | 781.52    |
| M20699    | 6166.014  | 6663.779  | AB046797  | 929.169   | 849.779   | AK002098  | 2366.092  | 2501.87   |
| NM_004774 | 6234.285  | 5442.652  | AK002098  | 1813.552  | 1960.291  | AK025156  | 18569.715 | 18470.18  |
| NM_016937 | 2516.881  | 2579.134  | AK025156  | 21767.969 | 23891.516 | AK022116  | 3270.948  | 3637.869  |
| NM_002690 | 11180.06  | 12244.181 | AK022116  | 3808.541  | 4809.952  | AF026526  | 1200.592  | 1064.594  |
| NM_012328 | 4777.981  | 5228.9    | AF026526  | 3051.393  | 3285.35   | AK026207  | 5782.45   | 4578.614  |
| NM_007341 | 1360.752  | 1581.3    | AK026207  | 10387.592 | 8782.998  | AK024984  | 8674.738  | 9635.403  |
| NM_016508 | 1790.277  | 1865.773  | AK024984  | 7461.255  | 6704.228  | AK000276  | 431.024   | 471.254   |
| NM_006456 | 1048.76   | 1053.663  | AL110236  | 731.544   | 353.44    | AF085955  | 520.587   | 595.293   |
| AK026062  | 9649.198  | 9439.987  | AF085955  | 645.788   | 551.055   | AF075106  | 5115.475  | 4569.391  |

|           |           |           |           |           |           |           |           |           |
|-----------|-----------|-----------|-----------|-----------|-----------|-----------|-----------|-----------|
| AF047002  | 59764.547 | 59550.766 | AF075106  | 5524.459  | 5276.852  | AK023339  | 5304.125  | 6086.112  |
| AL050082  | 5466.089  | 5675.023  | AF086008  | 931.205   | 822.355   | AF086008  | 1009.659  | 898.966   |
| NM_006623 | 61519.637 | 60202.516 | AF087970  | 427.88    | 578.032   | AF087970  | 1564.674  | 1078.961  |
| NM_016588 | 48186.09  | 50964.832 | AF086029  | 1312.598  | 1071.125  | AF086029  | 605.985   | 793.081   |
| NM_003135 | 19258.479 | 18124.191 | U05597    | 901.832   | 788.148   | AF075115  | 861.808   | 363.086   |
| L12347    | 647.017   | 463.448   | U50524    | 613.039   | 298.18    | U05597    | 584.537   | 606.262   |
| NM_001622 | 697.616   | 700.303   | U52050    | 663.444   | 224.525   | U52050    | 653.263   | 841.178   |
| Z36788    | 694.449   | 857.632   | U73799    | 879.263   | 611.019   | U73799    | 1046.312  | 1285.807  |
| NM_018477 | 7735.267  | 7468.146  | AK021668  | 31058.762 | 29148.861 | AK021668  | 32245.299 | 32024.84  |
| U20536    | 4432.936  | 4416.928  | AF086148  | 25588.926 | 41881.805 | AF086148  | 21314.049 | 20608.15  |
| R71691    | 1243.185  | 1544.384  | NM_018363 | 1654.854  | 1132.311  | NM_018363 | 1567.613  | 1452.13   |
| AA424735  | 2335.413  | 2489.167  | AJ245433  | 7376.85   | 6867.605  | AJ245433  | 7292.885  | 6475.567  |
| U78294    | 4132.077  | 4444.72   | AK021942  | 31999.014 | 29501.004 | AK021942  | 24088.871 | 20288.025 |
| BI760394  | 5364.684  | 5429.943  | NM_014127 | 955.907   | 1231.07   | NM_014127 | 776.238   | 736.866   |
| AA555216  | 676.039   | 603.347   | AL360187  | 832.765   | 956.979   | AL360187  | 841.895   | 648.306   |
| U09117    | 1281.618  | 1514.326  | AK021878  | 589.734   | 525.962   | AK021878  | 711.795   | 693.632   |
| M21054    | 395.04    | 532.643   | AK021817  | 1769.394  | 1412.455  | AK021817  | 1906.43   | 2398.896  |
| M18468    | 921.905   | 1011.457  | AL080103  | 590.734   | 603.402   | AL080103  | 1312.202  | 869.325   |
| H66070    | 467.974   | 320.745   | AK023217  | 3139.284  | 3456.49   | AK023217  | 2652.592  | 2617.887  |
| AA164741  | 18140.521 | 19568.619 | AK091038  | 530.645   | 821.429   | AK021883  | 801.964   | 619.696   |
| AI189375  | 138.591   | 1291.053  | AK024193  | 2136.388  | 2495.763  | AF119887  | 11721.736 | 10923.81  |
| AI978885  | 9812.605  | 14710.568 | AK024438  | 10728.807 | 9250.673  | AK091038  | 627.171   | 579.448   |
| AK054960  | 13898.767 | 14987.749 | AK022482  | 1639.868  | 1201.367  | AK024193  | 2582.272  | 2791.966  |
| L15344    | 5510.963  | 6350.703  | AK022803  | 1534.803  | 1249.059  | AK024438  | 9682.733  | 10158.112 |
| NM_014470 | 1513.316  | 1179.317  | AK023517  | 1861.995  | 2058.105  | AF161337  | 865.705   | 574.568   |
| NM_001665 | 34931.195 | 35967.082 | AK023869  | 5028.287  | 5311.3    | AK022482  | 1502.479  | 1307.587  |
| NM_001879 | 1439.873  | 1495.58   | NM_017728 | 1474.157  | 1414.784  | AK024135  | 815.971   | 977.858   |
| AF264014  | 12165.139 | 11852.667 | U80772    | 734.214   | 943.86    | AK022803  | 4145.355  | 5195.115  |
| L09098    | 636.142   | 313.56    | NM_006189 | 957.412   | 1201.909  | AK023517  | 2428.112  | 1731.954  |
| NM_004155 | 328.442   | 475.302   | AJ272177  | 651.894   | 860.292   | AK023869  | 6643.227  | 5466.528  |
| NM_001831 | 1418.105  | 1019.726  | AK026402  | 20272.91  | 23986.092 | NM_017728 | 878.536   | 766.168   |
| NM_014586 | 10794.966 | 9870.41   | AF111846  | 1607.525  | 2409.36   | U80772    | 522.555   | 410.858   |
| NM_014366 | 9751.222  | 11616.443 | M11948    | 53558.547 | 53786.52  | NM_006189 | 787.599   | 647.085   |
| NM_000923 | 808.592   | 649.737   | Z36850    | 395.627   | 437.668   | AJ272177  | 951.618   | 723.128   |
| NM_006453 | 3212.463  | 3323.013  | AK024618  | 1617.45   | 2376.206  | AK026402  | 19306.723 | 17780.139 |
| NM_018096 | 2015.603  | 2337.11   | AL049969  | 923.849   | 1060.926  | AF111846  | 1683.632  | 1656.048  |
| AL390078  | 496.509   | 503.967   | NM_005220 | 1422.174  | 1573.232  | M11948    | 62153.332 | 54877.316 |
| NM_004036 | 1987.908  | 2235.13   | AK026366  | 52351.176 | 41478.492 | Z36850    | 604.088   | 565.174   |
| NM_015986 | 4896.66   | 4103.091  | AK024229  | 22257.471 | 11882.995 | AK024618  | 1482.182  | 1651.631  |
| NM_006546 | 2332.597  | 2085.11   | AK021467  | 2253.568  | 1694.803  | AL049969  | 1547.273  | 2111.797  |
| NM_014959 | 2253.909  | 2898.283  | NM_020371 | 1500.852  | 1564.468  | NM_018619 | 737.002   | 623.183   |
| NM_003992 | 7971.387  | 7944.241  | AK022498  | 3576.544  | 3882.799  | AK000208  | 432.001   | 912.566   |
| AF279265  | 4452.435  | 5452.168  | U84506    | 2294.716  | 1970.008  | AK000470  | 1134.128  | 905.703   |
| NM_007350 | 942.594   | 512.946   | U21556    | 53311.465 | 49805.859 | NM_014566 | 678.784   | 609.748   |
| NM_005213 | 3196.51   | 3020.198  | AB002444  | 675.675   | 546.55    | AK024229  | 34276.031 | 36384.977 |
| AB040914  | 717.94    | 817.525   | AB002344  | 3508.448  | 4207.472  | AK021824  | 488.646   | 658.867   |
| NM_002997 | 7351.285  | 7551.717  | BF210352  | 1761.196  | 1968.459  | AK021467  | 7883.209  | 7795.213  |
| NM_002379 | 26945.395 | 25565.768 | NM_006829 | 3341.312  | 3751.954  | NM_020371 | 2418.092  | 2262.006  |
| AB007929  | 6470.917  | 5916.031  | NM_017669 | 12942.189 | 13744.652 | AK022498  | 3167.291  | 2638.539  |
| NM_004579 | 7551.796  | 7256.515  | AF147379  | 30329.275 | 30942.777 | U84506    | 1465.438  | 1297.887  |
| AA203126  | 5271.656  | 3964.196  | AK023760  | 4615.761  | 6171.786  | U21556    | 59278.457 | 48617.844 |
| AB043997  | 1111.677  | 1237.587  | X98415    | 60527.504 | 49668.215 | AB002444  | 871.743   | 921.788   |
| NM_004853 | 10114.599 | 10230.962 | AK024205  | 1784.429  | 2258.256  | AB002344  | 3276.266  | 3098.304  |

|           |           |           |           |           |           |           |           |           |
|-----------|-----------|-----------|-----------|-----------|-----------|-----------|-----------|-----------|
| NM_001494 | 25168.641 | 30058.047 | AF086034  | 13273.81  | 14799.272 | BF210352  | 1425.918  | 1254.883  |
| NM_017707 | 1456.012  | 1368.003  | AK000174  | 1387.653  | 1065.354  | NM_006829 | 2450.956  | 2266.657  |
| NM_004206 | 5152.133  | 4585.966  | AF130071  | 1286.283  | 1140.612  | NM_017669 | 13411.777 | 14834.681 |
| NM_004603 | 2432.216  | 3080.052  | AL390170  | 675.214   | 797.34    | AF147379  | 34890.285 | 37950.301 |
| AK022849  | 4122.364  | 4479.073  | AK022887  | 760.917   | 1114.773  | AK023760  | 2563.11   | 2536.464  |
| AF040964  | 11683.322 | 10888.776 | AK000745  | 15977.985 | 15454.849 | X98415    | 60348.465 | 50049.602 |
| AK023527  | 404.7     | 362.143   | NM_005299 | 639.916   | 847.24    | AF130071  | 1041.004  | 1055.725  |
| NM_001939 | 8827.733  | 8520.804  | NM_015901 | 1614.272  | 1538.589  | AL390170  | 1070.456  | 963.556   |
| NM_003279 | 1988.373  | 1754.848  | AF130065  | 713.72    | 520.611   | AK022887  | 1286.421  | 1256.597  |
| AB014599  | 10879.907 | 9042.106  | Z83935    | 998.022   | 579.076   | AK000745  | 16829.986 | 14058.951 |
| NM_004393 | 1659.187  | 1409.834  | AF093744  | 2167.022  | 1516.345  | NM_005299 | 692.786   | 731.54    |
| AB018345  | 1273.471  | 1152.584  | NM_018687 | 20432.307 | 12213.244 | NM_015901 | 1048.568  | 1264.517  |
| NM_005832 | 615.08    | 483.214   | M57417    | 22642.953 | 12335.061 | AF130065  | 335.806   | 623.652   |
| AW407841  | 2674.806  | 2089.098  | NM_020524 | 5434.659  | 7609.737  | Z83935    | 1071.091  | 1359.248  |
| U15197    | 664.118   | 539.45    | NM_001999 | 2480.853  | 2409.748  | NM_006365 | 795.502   | 590.946   |
| AL050082  | 4449.995  | 3627.193  | X64977    | 1607.268  | 1488.554  | AF093744  | 3043.708  | 3418.109  |
| NM_006623 | 51593.941 | 49446.258 | AF064851  | 789.929   | 1069.262  | NM_018687 | 25520.715 | 25893.146 |
| NM_016588 | 36912.344 | 34884.293 | NM_002602 | 9751.656  | 7766.975  | M57417    | 45923.816 | 43433.5   |
| NM_003135 | 15099.14  | 16302.713 | NM_016239 | 465.176   | 554.952   | NM_020524 | 9388.255  | 8378.888  |
| NM_000137 | 4754.368  | 5031.008  | NM_003383 | 3905.364  | 5057.239  | NM_001999 | 2997.153  | 3468.541  |
| NM_012102 | 4322.556  | 4144.395  | D17271    | 10832.252 | 15221.08  | X64977    | 1508.149  | 1770.346  |
| NM_005017 | 16818.875 | 16679.426 | X91648    | 1474.774  | 1543.803  | NM_002602 | 16556.977 | 21223.301 |
| AF163572  | 1411.581  | 1408.38   | AK026658  | 655.512   | 541.771   | NM_016239 | 1598.951  | 1600.769  |
| NM_000897 | 790.181   | 789.394   | AF282264  | 7509.01   | 9552.415  | NM_003383 | 4263.341  | 4543.817  |
| NM_000487 | 1668.93   | 1265.316  | AF086322  | 3412.185  | 3455.603  | D17271    | 8104.496  | 7663.313  |
| NM_006411 | 15596.759 | 17428.313 | Z70717    | 1551.433  | 1511.038  | X91648    | 1244.174  | 1206.048  |
| NM_014182 | 6623.282  | 7174.236  | AK024736  | 849.354   | 833.028   | AF282264  | 12332.463 | 12127.158 |
| AB040884  | 688.899   | 731.199   | X79308    | 1763.92   | 1571.479  | AF086322  | 4519.283  | 4590.338  |
| NM_000492 | 20327.658 | 19395.266 | NM_017660 | 8349.638  | 5661.815  | Z70717    | 1497.292  | 1659.016  |
| NM_012089 | 5383.211  | 4719.411  | AB011151  | 2817.291  | 1400.356  | AK024736  | 849.318   | 966.129   |
| AK024382  | 346.993   | 623.212   | U92995    | 5562.849  | 2648.194  | X79308    | 1293.224  | 1460.658  |
| NM_001170 | 2791.553  | 2892.661  | Z70769    | 730.948   | 457.678   | NM_017660 | 9647.449  | 9418.666  |
| AL137716  | 521.302   | 647.347   | NM_007106 | 2123.11   | 1480.188  | AB011151  | 6450.658  | 6067.173  |
| NM_004696 | 436.57    | 575.51    | AL137555  | 3548.62   | 2497.238  | U92995    | 7633.787  | 7756.191  |
| NM_014342 | 4445.304  | 4358.953  | AL133017  | 1987.203  | 1278.171  | Z70769    | 1190.962  | 991.785   |
| AK054960  | 12349.333 | 12033.772 | CY3Cy5    | 2203.724  | 179.629   | NM_007117 | 701.858   | 700.912   |
| L15344    | 4853.028  | 4666.664  | X00588    | 703.174   | 797.956   | NM_007106 | 2180.69   | 2732.484  |
| NM_014470 | 1145.734  | 1030.812  | AI359037  | 32509.787 | 34005.457 | AL137555  | 2848.723  | 3513.316  |
| NM_001665 | 30729.523 | 28399.734 | J04513    | 485.689   | 619.288   | AL133017  | 2312.275  | 2372.17   |
| AF097645  | 501.455   | 241.908   | X15998    | 1246.161  | 1180.205  | CY3Cy5    | 6746.984  | 274.376   |
| NM_001773 | 404.771   | 415.903   | X17519    | 17090.701 | 15952.639 | AI359037  | 36729.211 | 41316.426 |
| Z70704    | 700.287   | 695.015   | NM_001883 | 923.617   | 995.215   | X15998    | 559.984   | 570.109   |
| NM_014363 | 2354.122  | 2809.899  | NM_004628 | 2636.725  | 2462.373  | M76482    | 525.432   | 827.99    |
| NM_000557 | 853.748   | 983.208   | L31785    | 1224.004  | 1192.716  | X17519    | 16428.969 | 22947.482 |
| NM_001375 | 10243.066 | 11366.679 | H-M 69043 | 3859.852  | 4846.998  | NM_001883 | 779.347   | 1003.85   |
| NM_002312 | 3749.12   | 4399.374  | AF077374  | 1453.847  | 1697.969  | NM_004628 | 2607.411  | 2041.797  |
| M20699    | 5495.993  | 6462.272  | U43901    | 1176.825  | 1218.302  | L31785    | 1586.117  | 1593.369  |
| NM_004774 | 6269.125  | 5441.223  | X59065    | 552.48    | 549.646   | H-M 69043 | 4813.322  | 4962.858  |
| NM_016937 | 3125.222  | 2633.055  | M59828    | 10090.341 | 11784.564 | AF077374  | 1751.84   | 1957.029  |
| NM_002690 | 12507.092 | 13090.94  | NM_016134 | 816.506   | 899.614   | U43901    | 1279.968  | 1187.216  |
| NM_012328 | 4779.455  | 4769.979  | SR2       | 50755.629 | 51501.094 | X59065    | 1142.541  | 813.14    |
| NM_007341 | 1244.657  | 1136.806  | SR4       | 16276.815 | 17065.162 | M59828    | 12751.484 | 9884.052  |
| NM_016508 | 2235.697  | 2105.134  | SR6       | 2484.309  | 1854.007  | NM_016134 | 943.955   | 1173.455  |

|           |           |           |           |           |           |           |           |           |
|-----------|-----------|-----------|-----------|-----------|-----------|-----------|-----------|-----------|
| NM_006456 | 986.208   | 907.295   | SR8       | 8450.918  | 19668.578 | SR2       | 51195.035 | 55270.352 |
| AK026062  | 9561.064  | 9150.948  | SR10      | 29553.344 | 7935.262  | SR4       | 18274.936 | 14089.247 |
| AF047002  | 60089.254 | 56074.711 | CY3Cy5    | 1098.487  | 136.216   | SR6       | 2947.986  | 2594.434  |
| AB040914  | 545.695   | 620.757   | NM_000612 | 7299.932  | 7429.752  | SR8       | 10560.594 | 22652.393 |
| NM_002997 | 5053.716  | 5488.153  | NM_004257 | 12819.161 | 11795.108 | CY3Cy5    | 4033.08   | 117.774   |
| NM_002379 | 20001.592 | 15341.765 | NM_002844 | 4115.221  | 4479.386  | NM_000612 | 7429.453  | 7344.943  |
| AB007929  | 4988.332  | 4816.878  | NM_000683 | 1300.006  | 1351.255  | NM_004257 | 12961.92  | 13100.813 |
| NM_004579 | 7227.438  | 7558.309  | NM_003629 | 3235.987  | 3421.701  | NM_002844 | 4507.239  | 5423.025  |
| AA203126  | 3059.92   | 2319.386  | NM_005901 | 12658.757 | 16257.337 | NM_000683 | 1388.612  | 1422.839  |
| L12347    | 569.034   | 594.415   | NM_004248 | 1786.974  | 2237.04   | NM_003629 | 1442.37   | 2554.746  |
| NM_001622 | 678.558   | 365.353   | NM_000959 | 419.779   | 806.03    | NM_005901 | 11978.408 | 16451.307 |
| Z36788    | 640.9     | 730.484   | NM_001313 | 609.153   | 678.165   | NM_004248 | 299.663   | 633.563   |
| NM_018477 | 7129.181  | 8176.396  | NM_002362 | 868.591   | 968.228   | NM_002362 | 1448.872  | 1630.684  |
| U20536    | 4292.46   | 4391.063  | NM_004796 | 517.091   | 639.048   | NM_004796 | 584.993   | 449.469   |
| R71691    | 1061.405  | 1227.399  | NM_000435 | 2881.079  | 3362.724  | NM_000435 | 4124.435  | 4817.997  |
| AA424735  | 2508.93   | 2334.63   | NM_001842 | 7592.237  | 7812.014  | NM_001842 | 19016.672 | 19735.398 |
| U78294    | 3612.315  | 3543.725  | AB017169  | 789.263   | 721.643   | AL080170  | 2477.067  | 2299.215  |
| AA171613  | 438.072   | 372.558   | AL080170  | 2275.636  | 2981.808  | AB039903  | 5710.262  | 5327.146  |
| BI760394  | 6434.8    | 6661.338  | AB039903  | 5317.7    | 5460.751  | NM_000542 | 17033.197 | 17241.113 |
| AA555216  | 561.588   | 465.705   | NM_000542 | 12141.06  | 10410.317 | NM_006851 | 1712.051  | 2118.798  |
| U09117    | 1579.601  | 1783.081  | NM_014625 | 1304.194  | 632.128   | AK001560  | 1091.915  | 910.019   |
| M21054    | 459.837   | 394.384   | NM_006851 | 1829.52   | 1600.252  | AB001328  | 1242.742  | 1201.458  |
| M18468    | 863.738   | 890.434   | AK001560  | 714.206   | 734.184   | AK022600  | 7769.398  | 8354.926  |
| H66070    | 510.163   | 536.88    | AB001328  | 668.194   | 671.603   | AK023142  | 2514.929  | 3249.974  |
| AA164741  | 19041.545 | 18092.541 | H99588    | 1074.378  | 1225.857  | U61740    | 5848.349  | 6559.274  |
| AI189375  | 553.088   | 684.778   | AK022600  | 9375.22   | 9242.894  | NM_006409 | 53658.781 | 54002.238 |
| AI978885  | 1197.464  | 1060.135  | AK023142  | 2765.348  | 2569.518  | AB049054  | 2239.151  | 3276.092  |
| AB014599  | 8795.952  | 7018.319  | U61740    | 11345.346 | 10608.585 | NM_015071 | 1981.304  | 2103.766  |
| NM_004393 | 1668.981  | 1177.187  | NM_006409 | 51654.914 | 54846.105 | NM_013227 | 1164.626  | 1870.181  |
| AB018345  | 1564.919  | 1296.373  | AB049054  | 4485.405  | 4127.256  | Z83803    | 896.213   | 1202.075  |
| NM_005832 | 436.195   | 485.975   | NM_015071 | 1880.004  | 2417.357  | AF027205  | 30488.715 | 39743.508 |
| AW407841  | 2309.846  | 1668.801  | NM_013227 | 2287.404  | 2857.383  | AF075012  | 1277.683  | 1289.491  |
| U15197    | 567.315   | 408.851   | Z83803    | 855.427   | 1079.28   | NM_001570 | 1225.453  | 1574.38   |
| NM_001879 | 1561.158  | 1470.172  | AF027205  | 39051.914 | 38733.051 | NM_015658 | 545.011   | 793.677   |
| AF264014  | 12407.104 | 12013.295 | AF075012  | 801.767   | 847.75    | NM_000589 | 3196.393  | 4003.009  |
| L09098    | 379.985   | 357.586   | NM_001570 | 961.917   | 1044.493  | NM_016546 | 11523.286 | 12672.879 |
| NM_001831 | 1474.946  | 1146.636  | NM_015658 | 537.578   | 629.07    | AF309653  | 2095.36   | 2373.059  |
| NM_014586 | 9712.31   | 8391.839  | NM_000589 | 2864.982  | 2666.017  | NM_002620 | 12886.936 | 13962.955 |
| NM_014366 | 8639.732  | 9265.668  | NM_016546 | 11394.215 | 10687.883 | S79267    | 1484.287  | 1266.16   |
| NM_000923 | 664.828   | 780.487   | AF309653  | 1194.901  | 1377.335  | NM_001816 | 1368.282  | 1074.021  |
| NM_006453 | 3269.939  | 3164.814  | NM_002620 | 12628.046 | 16111.157 | NM_003784 | 53817.68  | 51528.68  |
| NM_018096 | 1998.44   | 2234.448  | S79267    | 971.225   | 967.789   | NM_000195 | 28258.055 | 30049.379 |
| AL390078  | 400.365   | 486.164   | NM_001816 | 621.867   | 827.929   | NM_005445 | 13314.822 | 7712.137  |
| NM_004036 | 2205.692  | 2273.219  | NM_003784 | 47011.609 | 48532.863 | NM_014899 | 2981.501  | 3617.686  |
| NM_015986 | 3711.983  | 3137.069  | NM_000195 | 21207.373 | 26078.967 | NM_003630 | 8220.463  | 7395.604  |
| NM_006546 | 2439.371  | 2175.646  | NM_005445 | 11730.088 | 14017.669 | NM_000046 | 3383      | 2678.408  |
| NM_014959 | 2257.765  | 2149.524  | NM_014899 | 3354.635  | 4139.998  | NM_003219 | 1472.269  | 1561.069  |
| NM_003992 | 8259.705  | 6818.483  | NM_003630 | 7659.019  | 8139.868  | NM_004910 | 2447.601  | 2540.649  |
| AF279265  | 3932.082  | 3907.465  | NM_000046 | 2792.923  | 3195.982  | AB013452  | 1472.085  | 1544.695  |
| NM_007350 | 341.122   | 477.122   | NM_003219 | 1027.69   | 1163.972  | M93107    | 5632.249  | 5187.499  |
| NM_005213 | 3242.201  | 3130.25   | NM_006709 | 3034.915  | 2443.704  | BC001479  | 5380.912  | 6413.281  |
| AK024382  | 677.775   | 223.194   | NM_004910 | 2249.442  | 2336.345  | NM_002461 | 24517.455 | 27112.129 |
| NM_001170 | 2309.644  | 2993.617  | AB013452  | 803.525   | 1279.925  | AB032986  | 55366.742 | 49162.758 |

|           |           |           |           |           |           |           |           |           |
|-----------|-----------|-----------|-----------|-----------|-----------|-----------|-----------|-----------|
| AL137716  | 391.628   | 537.366   | M93107    | 5129.486  | 6058.146  | NM_01752E | 36889.512 | 45702.863 |
| NM_00469E | 785.2     | 831.218   | BC001479  | 6538.896  | 7370.426  | NM_01603E | 7503.065  | 8985.653  |
| NM_01434E | 4031.708  | 3640.259  | NM_002461 | 33804.988 | 44476.047 | NM_01432A | 53304.309 | 50516.352 |
| Z50169    | 378.684   | 385.616   | NM_005771 | 676.048   | 935.028   | NM_001687 | 26637.68  | 30649.947 |
| AB043997  | 924.581   | 962.057   | AB032986  | 55319.406 | 52003.914 | AK026374  | 1924.335  | 1943.463  |
| NM_00485E | 10446.66  | 10591.536 | NM_01752E | 39505.035 | 39071.453 | NM_00116E | 1714.066  | 2183.677  |
| NM_00149A | 26328.508 | 29231.988 | NM_01603E | 7635.55   | 7929.639  | AK024648  | 8705.373  | 8402.793  |
| NM_017707 | 1528.891  | 1654.719  | NM_01432A | 57817.477 | 52442.836 | NM_00071E | 840.858   | 980.159   |
| NM_00420E | 6717.465  | 5947.029  | NM_001687 | 23390.971 | 21543.268 | NM_00345E | 8525.646  | 9177.768  |
| NM_00460E | 2958.309  | 3041.633  | AK026374  | 1792.283  | 1861.622  | NM_000171 | 777.976   | 660.427   |
| AK022849  | 4755.667  | 4548.341  | NM_00116E | 1420.795  | 1886.731  | AL354615  | 2246.413  | 2340.617  |
| AF040964  | 14345.391 | 11237.167 | AK024648  | 6299.728  | 6055.936  | NM_01334E | 46268.023 | 44580.598 |
| NM_00193E | 10045.335 | 8189.572  | NM_00345E | 5843.956  | 8136.794  | NM_00370E | 3379.334  | 3091.851  |
| NM_00327E | 1673.535  | 1584.438  | AL354615  | 2980.695  | 4415.843  | NM_006861 | 2784.437  | 2376.027  |
| NM_01232E | 5104.831  | 4879.982  | NM_01334E | 52719.766 | 56539.383 | NM_00582E | 7907.491  | 6910.594  |
| NM_007341 | 1662.691  | 1214.738  | NM_00370E | 3616.157  | 4467.263  | NM_00046E | 2716.008  | 2247.099  |
| NM_01650E | 1911.45   | 1541.694  | NM_006861 | 2734.708  | 3061.262  | NM_01554A | 7394.179  | 5911.653  |
| NM_00645E | 1016.586  | 990.997   | NM_00582E | 5470.882  | 4818.663  | NM_01590E | 30312.451 | 33754.012 |
| AK026062  | 8534.705  | 6890.15   | NM_00046E | 2919.342  | 3699.849  | NM_00089E | 1415.961  | 1270.37   |
| AF047002  | 50874.414 | 52542.289 | NM_01554A | 6190.452  | 8656.932  | AB040672  | 1362.126  | 1703.339  |
| AL050082  | 3629.798  | 3583.833  | NM_01590E | 25324.828 | 31223.982 | NM_00219E | 1495.369  | 1523.633  |
| NM_00662E | 48138.699 | 47167.727 | NM_00089E | 999.621   | 966.456   | NM_005491 | 8063.12   | 10088.619 |
| NM_01658E | 36625.168 | 38325.48  | AB040672  | 2227.973  | 1896.603  | NM_00386E | 1063.874  | 839.488   |
| NM_00313E | 13184.607 | 12134.396 | NM_00219E | 2305.4    | 1806.236  | AK025599  | 6191.667  | 8464.897  |
| NM_000137 | 4499.638  | 4006.605  | NM_005491 | 10015.807 | 8489.653  | X63417    | 3062.715  | 3041.902  |
| NM_01210E | 4786.56   | 5624.101  | NM_00386E | 1767.809  | 2360.177  | S94539    | 21684.721 | 29158.938 |
| NM_005017 | 17099.254 | 19459.354 | AK025599  | 5435.747  | 7386.402  | NM_00640E | 1918.13   | 2070.811  |
| AF163572  | 1956.456  | 2300.308  | X63417    | 2077.212  | 2494.659  | NM_00578E | 2394.276  | 2160.702  |
| NM_000897 | 596.91    | 850.613   | S94539    | 24794.34  | 22833.252 | NM_01824E | 8422.3    | 8383.892  |
| NM_000487 | 1893.469  | 1763.637  | NM_00640E | 1842.605  | 2053.718  | AK001695  | 6256.579  | 7022.504  |
| NM_006411 | 17298.754 | 17078.039 | NM_00578E | 2070.943  | 1874.155  | NM_00625E | 1702.549  | 1374.964  |
| NM_01418E | 7816.731  | 7466.924  | NM_01824E | 6220.432  | 5522.041  | NM_001721 | 1260.086  | 782.558   |
| AB040884  | 917.688   | 832.316   | AK001695  | 6089.508  | 4677.302  | NM_014397 | 3175.243  | 2480.188  |
| NM_00049E | 12232.347 | 10254.643 | NM_01788E | 1421.851  | 1526.233  | AB023182  | 3580.251  | 3083.728  |
| NM_01208E | 5778.686  | 5476.7    | NM_00625E | 1292.393  | 1932.982  | NM_003607 | 3968.112  | 3385.072  |
| AJ272057  | 19085.26  | 18382.863 | NM_001721 | 829.717   | 1003.655  | NM_00657E | 3596.151  | 3209.509  |
| NM_00440E | 2107.428  | 1989.253  | NM_014397 | 2099.033  | 3115.341  | NM_01325A | 3269.85   | 2848.89   |
| AK024216  | 21704.67  | 20083.264 | AB023182  | 2904.52   | 2839.584  | NM_000437 | 17250.248 | 13948.813 |
| Y16752    | 1259.42   | 1248.136  | NM_003607 | 4372.522  | 5403.222  | AB046819  | 7707.154  | 5271.11   |
| NM_01469A | 593.835   | 649.295   | NM_00657E | 3037.29   | 3184.959  | NM_00609C | 7998.499  | 8705.639  |
| NM_02015E | 4260.204  | 4726.065  | NM_01325A | 2513.12   | 2733.158  | NM_00290C | 5842.061  | 4162.284  |
| NM_01483C | 4059.374  | 3968.612  | NM_000437 | 12834.668 | 14130.468 | NM_006851 | 1689.791  | 1988.283  |
| AF355402  | 4919.781  | 4745.716  | AB046819  | 6469.248  | 6655.011  | AK001560  | 844.772   | 1055.773  |
| AK000407  | 6769.208  | 6855.443  | NM_00609C | 7256.138  | 7510.908  | H99588    | 1677.048  | 1160.953  |
| NM_01447C | 1408.434  | 1180.748  | NM_00290C | 5063.459  | 5454.552  | X00588    | 735.575   | 863.782   |
| NM_00166E | 26996.471 | 28806.646 | NM_006851 | 1489.996  | 2043.368  | AI359037  | 42287.387 | 48477.801 |
| Z70704    | 846.515   | 834.191   | AK001560  | 751.185   | 733.2     | BI754285  | 327.168   | 643.083   |
| NM_01436E | 2803.674  | 3096.82   | AB001328  | 594.489   | 827.543   | X15998    | 1343.732  | 1387.887  |
| NM_000557 | 1048.256  | 1275.825  | NM_00094E | 388.884   | 898.467   | X17519    | 15577.279 | 19151.916 |
| NM_00323E | 437.245   | 763.82    | H99588    | 1283.615  | 1439.392  | NM_00188E | 1612.85   | 1884.174  |
| NM_00137E | 11200.301 | 12282.287 | X00588    | 772.892   | 926.923   | NM_00462E | 2286.102  | 2660.505  |
| NM_00231E | 4540.019  | 4029.705  | AI359037  | 35416.578 | 35045.746 | H-M 69043 | 5552.295  | 4270.992  |
| M20699    | 5884.627  | 6671.905  | BI754285  | 456.527   | 615.402   | AF077374  | 1890.762  | 1456.135  |



|           |           |           |           |           |           |           |           |           |
|-----------|-----------|-----------|-----------|-----------|-----------|-----------|-----------|-----------|
| NM_004774 | 6433.623  | 4868.156  | X15998    | 1813.227  | 1526.501  | X59065    | 805.643   | 746.86    |
| NM_016937 | 3207.314  | 3225.734  | X17519    | 15198.903 | 13049.858 | M59828    | 13536.854 | 13831.853 |
| NM_00269C | 12258.197 | 12336.662 | NM_001883 | 1296.857  | 1014.909  | NM_016134 | 1007.276  | 740.848   |
| AB033086  | 749.399   | 627.051   | NM_00462E | 2728.488  | 2615.769  | AJ010482  | 2666.094  | 2060.273  |
| NM_01823E | 5733.002  | 6113.143  | L31785    | 1873.032  | 2809.844  | NM_00544E | 13956.52  | 7650.206  |
| AK023755  | 1146.782  | 1078.035  | H-M 69043 | 4419.972  | 5562.464  | NM_01489E | 2859.033  | 2880.273  |
| NM_00572E | 4303.659  | 3219.331  | AF077374  | 1461.93   | 1278.976  | NM_00363C | 7355.3    | 10117.983 |
| NM_012211 | 462.468   | 461.399   | U43901    | 1173.362  | 1186.483  | NM_00670E | 2974.821  | 2897.207  |
| AB040877  | 739.982   | 759.243   | X59065    | 525.135   | 542.254   | NM_00061E | 8571.31   | 9315.597  |
| AB040927  | 1177.002  | 836.179   | M59828    | 9779.307  | 12755.12  | NM_004257 | 15568.636 | 17645.074 |
| AK026737  | 1032.61   | 1150.765  | NM_016134 | 590.926   | 444.934   | NM_002844 | 5274.671  | 5903.746  |
| NM_00021C | 4652.083  | 5190.189  | AJ010482  | 2521.592  | 2601.938  | NM_00068E | 2363.328  | 2465.84   |
| NM_00628E | 7570.726  | 7930.625  | NM_00544E | 10135.081 | 11790.279 | NM_00362E | 2070.466  | 2741.038  |
| NM_019067 | 4532.17   | 3726.704  | NM_01489E | 2704.639  | 3899.437  | NM_005901 | 14059.223 | 17782.387 |
| AF251025  | 1906.609  | 1939.143  | NM_00363C | 5967.958  | 7519.022  | NM_00424E | 1065.569  | 1244.637  |
| NM_015677 | 8717.847  | 9156.459  | NM_00004E | 2643.519  | 3438.15   | NM_00236E | 1434.167  | 1271.694  |
| NM_00177E | 3582.364  | 3210.528  | NM_00321E | 1604.56   | 1340.115  | NM_00479E | 897.149   | 681.005   |
| AL162032  | 274.8     | 379.088   | NM_00670E | 3596.556  | 3908.266  | NM_00043E | 5961.635  | 4547.981  |
| AB011087  | 1603.697  | 1821.005  | NM_00061E | 10139.241 | 12966.987 | NM_00184E | 17048.041 | 16107.785 |
| AF161341  | 1751.226  | 1836.015  | NM_004257 | 13407.845 | 16248.098 | AB017169  | 708.021   | 1574.166  |
| AJ249902  | 1653.922  | 1805.145  | NM_002844 | 3927.323  | 4438.244  | AL080170  | 2633.383  | 2908.199  |
| NM_004384 | 4327.597  | 4569.893  | NM_00068E | 1325.17   | 1240.729  | AB039903  | 6209.829  | 5870.12   |
| L05500    | 15244.008 | 13484.66  | NM_00362E | 2901.095  | 3276.936  | NM_00054E | 17142.65  | 14290.677 |
| NM_01230E | 6463.754  | 5959.051  | NM_005901 | 11272.549 | 12093.97  | NM_01462E | 742.353   | 559.698   |
| AF222903  | 4308.851  | 4115.519  | NM_00424E | 1381.775  | 1859.67   | NM_00370E | 4092.704  | 4494.89   |
| NM_00622E | 3429.875  | 3539.128  | NM_00095E | 399.348   | 513.712   | NM_006861 | 3236.121  | 3978.798  |
| L10374    | 5553.658  | 5861.195  | NM_00131E | 492.124   | 399.686   | NM_00582E | 7680.651  | 7814.102  |
| AB016902  | 853.149   | 773.222   | NM_00236E | 937.963   | 1164.832  | NM_01590E | 15206.865 | 18972.182 |
| AF272378  | 2272.993  | 2326.571  | NM_00479E | 444.536   | 573.242   | AK022600  | 1694.176  | 1970.402  |
| NM_00024E | 7052.705  | 6417.04   | NM_00043E | 2623.41   | 2566.656  | AK023142  | 2577.596  | 3342.046  |
| NM_01431C | 729.351   | 535.685   | NM_00184E | 9484.778  | 8707.318  | U61740    | 7976.782  | 9823.299  |
| NM_00586C | 2125.692  | 1825.543  | AB017169  | 478.999   | 656.565   | NM_00640E | 53942.688 | 55166.355 |
| AF095288  | 28651.672 | 27186.051 | AL080170  | 2206.077  | 2072.556  | NM_015071 | 2710.587  | 3090.911  |
| AK025116  | 462.539   | 336.385   | AB039903  | 5480.984  | 5382.357  | AF027205  | 39329.418 | 42684.742 |
| NM_00179E | 8508.279  | 8899.977  | NM_00054E | 10167.66  | 9170.281  | AF075012  | 2196.277  | 2395.28   |
| AF090895  | 1599.715  | 1771.036  | NM_00370E | 2995.816  | 3929.093  | NM_00157C | 1763.504  | 1723.906  |
| NM_00561C | 10801.176 | 10497.505 | NM_006861 | 2512.007  | 3043.757  | NM_01565E | 665.289   | 909.261   |
| AL133651  | 2987.504  | 3302.199  | NM_00582E | 3826.21   | 4015.329  | NM_00058E | 3791.611  | 2524.62   |
| AB014532  | 2488.56   | 3150.132  | NM_00046E | 2516.205  | 2849.368  | NM_01654E | 14140.316 | 12071.526 |
| NM_00347E | 3406.093  | 3857.299  | NM_015544 | 5517.011  | 6016.433  | AF309653  | 2212.518  | 1818.845  |
| NM_016237 | 7323.894  | 8156.681  | NM_01590E | 26755.74  | 26736.795 | NM_00262C | 12077.512 | 11909.66  |
| NM_004924 | 6184.549  | 4313.796  | AK022600  | 12030.831 | 14450.623 | S79267    | 1407.948  | 1127.199  |
| NM_00179E | 8614.664  | 8626.48   | AK023142  | 3257.445  | 4696.094  | NM_00181E | 1154.158  | 959.974   |
| NM_001211 | 6092.349  | 5408.427  | U61740    | 15315.256 | 16849.393 | NM_003784 | 56685.543 | 47405.371 |
| NM_00650E | 935.562   | 888.006   | NM_00640E | 55481.668 | 54461.809 | NM_00019E | 27054.785 | 21109.672 |
| AB033050  | 2659.347  | 2404.253  | AB049054  | 5656.542  | 5990.093  | NM_00657E | 4355.9    | 4455.02   |
| NM_00435E | 17923.75  | 16821.035 | NM_015071 | 2050.161  | 2466.333  | NM_013254 | 4032.134  | 4144.767  |
| NM_00185E | 737.976   | 943.649   | NM_013227 | 1641.285  | 2275.907  | NM_000437 | 15245     | 14842.06  |
| BC015022  | 6343.368  | 6292.554  | Z83803    | 688.079   | 1246.781  | AB046819  | 7280.061  | 8717.247  |
| NM_006697 | 13033.238 | 11627.575 | AF027205  | 41957.137 | 40418.543 | NM_01603E | 12178.972 | 12679.724 |
| M19182    | 1449.345  | 1211.315  | AF075012  | 1078.113  | 1351.431  | NM_014324 | 54458.27  | 56525.438 |
| AK025707  | 2662.898  | 2445.428  | NM_00157C | 948.243   | 912.939   | NM_001687 | 29795.35  | 28487.004 |
| NM_00240E | 11027.661 | 11249.755 | NM_01565E | 934.863   | 602.628   | AK026374  | 2323.506  | 2337.245  |

|           |           |           |           |           |           |           |           |           |
|-----------|-----------|-----------|-----------|-----------|-----------|-----------|-----------|-----------|
| U87169    | 3879.013  | 3704.85   | NM_000589 | 2805.385  | 2531.912  | NM_001169 | 2054.574  | 2079.055  |
| NM_002073 | 608.772   | 742.982   | NM_016546 | 11603.535 | 12302.205 | AK024648  | 8246.678  | 7631.193  |
| AF117222  | 442.204   | 485.055   | AF309653  | 1466.127  | 1281.786  | NM_000719 | 987.334   | 650.303   |
| NM_001749 | 2774.626  | 2984.1    | NM_002620 | 12617.229 | 12573.024 | NM_003459 | 7753.018  | 7723.678  |
| AF090327  | 527.205   | 647.728   | S79267    | 887.061   | 1098.166  | NM_000171 | 727.304   | 747.069   |
| NM_003291 | 4893.26   | 5147.183  | NM_001816 | 754.434   | 1089.541  | AL354615  | 2928.353  | 2264.196  |
| AK022950  | 3927.816  | 3427.519  | NM_003784 | 46653.477 | 47193.469 | NM_013349 | 45647.211 | 38996.555 |
| S75755    | 2753.6    | 3548.519  | NM_000195 | 15161.757 | 15584.06  | NM_016134 | 641.649   | 1056.349  |
| AF176518  | 945.605   | 944.339   | NM_006575 | 2803.785  | 2943.7    | AJ010482  | 2601.761  | 2899.4    |
| AB014576  | 12530.913 | 12587.206 | NM_013254 | 2471.853  | 2677.531  | AB040672  | 2199.617  | 2351.8    |
| NM_019044 | 5129.826  | 4431.326  | NM_000437 | 12255.489 | 13657.309 | NM_002192 | 1559.156  | 1772.429  |
| AF174601  | 4404.384  | 4156.884  | AB046819  | 7146.967  | 6466.429  | AK025599  | 6398      | 7740.725  |
| AF279865  | 1129.143  | 894.029   | NM_006090 | 6477.245  | 7317.647  | X63417    | 2664.611  | 3472.13   |
| NM_014700 | 1908.421  | 1756.254  | NM_002900 | 6624.689  | 7969.666  | S94539    | 40817.223 | 46187.957 |
| NM_014714 | 1154.338  | 1272.845  | NM_004910 | 2352.832  | 2242.821  | S45570    | 775.197   | 926.67    |
| NM_005687 | 9061.802  | 10009.092 | AB013452  | 1133.858  | 1529.478  | NM_006402 | 2389.536  | 2044.14   |
| NM_005983 | 14908.644 | 14092.447 | M93107    | 7011.876  | 8560.315  | NM_005785 | 2691.231  | 2352.547  |
| NM_017652 | 2597.691  | 2899.594  | BC001479  | 7752.842  | 10807.108 | NM_018248 | 8921.038  | 9192.669  |
| X59268    | 6564.57   | 6510.792  | NM_002461 | 29907.146 | 32495.426 | AK001695  | 7732.402  | 7174.642  |
| D70832    | 27233.775 | 31612.631 | NM_005771 | 891.597   | 750.061   | NM_017886 | 1975.743  | 2024.022  |
| NM_001429 | 3834.976  | 3948.228  | AB032986  | 52396.109 | 51351.531 | NM_006252 | 1806.36   | 1791.215  |
| AK026980  | 1816.974  | 2051.627  | NM_017528 | 47673.078 | 48512.762 | NM_001721 | 1297.662  | 1266.34   |
| NM_020368 | 5266.231  | 5167.439  | NM_016032 | 9322.046  | 12395.841 | NM_014397 | 3008.589  | 3133.387  |
| AF024708  | 19492.779 | 20961.211 | NM_014324 | 50372.5   | 55578.5   | AB023182  | 5066.606  | 4023.345  |
| NM_006467 | 3719.23   | 3866.848  | NM_001687 | 23944.076 | 25408.277 | NM_003607 | 4660.122  | 3606.457  |
| NM_017566 | 5012.845  | 5230.758  | AK026374  | 1927.013  | 2196.031  | AB017169  | 895.389   | 1407.237  |
| NM_006582 | 2687.843  | 2624.983  | NM_001169 | 1870.798  | 2357.077  | AL080170  | 1821.988  | 2408.8    |
| AB033019  | 3040.026  | 3450.111  | AK024648  | 5606.237  | 6680.006  | AB039903  | 5104.851  | 4915.866  |
| NM_001452 | 633.751   | 569.642   | NM_000719 | 424.006   | 481.464   | NM_000542 | 19563.068 | 22618.178 |
| NM_006162 | 1293.816  | 1450.072  | NM_003459 | 5266.593  | 6908.345  | NM_000948 | 252.686   | 1126.751  |
| NM_014764 | 12871.735 | 13139.794 | NM_000171 | 567.498   | 488.223   | BI754285  | 987.43    | 1066.982  |
| NM_018078 | 3042.069  | 3077.637  | AL354615  | 2791.033  | 2712.86   | X15998    | 2313.021  | 2467.607  |
| NM_016013 | 1095.867  | 1067.238  | NM_013349 | 37765.719 | 33168.234 | M76482    | 923.557   | 704.205   |
| NM_016050 | 1347.422  | 1219.61   | AJ010482  | 2349.497  | 2501.545  | X17519    | 18118.943 | 18882.32  |
| NM_007080 | 26805.15  | 28582.848 | NM_000896 | 685.981   | 848.783   | NM_001883 | 1841.995  | 1755.703  |
| AK026912  | 2735.569  | 2314.949  | AB040672  | 1878.883  | 1906.281  | NM_004628 | 2983.55   | 3702.062  |
| AK023531  | 5202.719  | 4699.857  | NM_002192 | 2033.378  | 1285.261  | L31785    | 2213.104  | 1789.397  |
| AB011128  | 6685.09   | 8535.644  | NM_005491 | 12531.025 | 10994.369 | H-M 69043 | 6846.727  | 5331.692  |
| AK026742  | 1001.283  | 916.151   | NM_003869 | 2285.205  | 2623.375  | AF077374  | 2184.455  | 2240.851  |
| AK025074  | 3176.203  | 2875.143  | AK025599  | 5375.349  | 6723.249  | U43901    | 2030.375  | 1677.012  |
| NM_000303 | 3689.39   | 4024.541  | X63417    | 2342.167  | 2687.299  | X59065    | 1006.487  | 758.898   |
| X78712    | 1331.542  | 1337.75   | S94539    | 29477.094 | 31812.24  | M59828    | 15821.118 | 10813.38  |
| NM_001497 | 1553.569  | 1403.566  | NM_006402 | 2492.481  | 3613.854  | AF309653  | 1941.725  | 2044.917  |
| NM_004130 | 6628.808  | 6688.09   | NM_005785 | 2491.816  | 2951.719  | NM_002620 | 11609.375 | 12082.497 |
| NM_006348 | 1436.341  | 1547.155  | NM_018248 | 6406.098  | 8442.144  | NM_001816 | 909.737   | 649.455   |
| AF067972  | 13434.111 | 14246.691 | AK001695  | 6296.17   | 5466.704  | NM_003784 | 43105.539 | 43153.801 |
| NM_004958 | 1427.027  | 1646.132  | NM_017886 | 2087.859  | 3085.069  | NM_000195 | 29834.096 | 31900.906 |
| D87076    | 1669.475  | 1593.363  | NM_006252 | 1360.723  | 1913.442  | NM_005445 | 12492.466 | 8551.413  |
| NM_014149 | 1161.929  | 1368.334  | NM_001721 | 829.331   | 1245.739  | NM_014899 | 2916.357  | 2528.79   |
| AB020635  | 2818.935  | 3367.149  | NM_014397 | 2105.1    | 2232.449  | NM_003630 | 7176.012  | 6550.152  |
| NM_006515 | 1149.994  | 1536.106  | AB023182  | 2995.402  | 2647.851  | NM_000046 | 2872.345  | 2818.852  |
| NM_005224 | 2143.841  | 2164.968  | NM_003607 | 3374.822  | 2696.699  | NM_003219 | 1548.325  | 1839.123  |
| NM_012144 | 686.44    | 478.744   | AB017169  | 659.951   | 645.647   | NM_004257 | 14353.489 | 13951.934 |

|           |           |           |           |           |           |           |           |           |
|-----------|-----------|-----------|-----------|-----------|-----------|-----------|-----------|-----------|
| X65231    | 59191.664 | 52990.957 | AL080170  | 2189.583  | 1961.922  | NM_002844 | 6066.506  | 5353.627  |
| NM_00290E | 3259.588  | 2971.863  | AB039903  | 5408.979  | 6030.561  | NM_000683 | 2349.542  | 2218.035  |
| AF205632  | 2951.632  | 2691.832  | NM_000542 | 16112.001 | 16588.598 | NM_00362E | 3255.095  | 3444.981  |
| NM_00537E | 3450.269  | 3620.067  | NM_01462E | 324.271   | 498.786   | NM_005901 | 14194.499 | 13196.438 |
| NM_002397 | 589.332   | 297.198   | NM_006851 | 1456.153  | 1433.628  | NM_00424E | 1884.26   | 1965.755  |
| AF000672  | 1626.916  | 1367.649  | AK001560  | 998.776   | 1075.743  | NM_001313 | 923.336   | 865.016   |
| AF086128  | 338.893   | 529.251   | AB001328  | 742.361   | 1130.81   | NM_002362 | 1497.606  | 1032.016  |
| AK026099  | 212.054   | 470.428   | NM_00094E | 536.905   | 874.064   | NM_00479E | 951.932   | 752.473   |
| AK022850  | 2763.838  | 2464.267  | H99588    | 1453.085  | 1311.149  | NM_00043E | 5210.494  | 4308.444  |
| NM_01649C | 467.604   | 594.79    | X00588    | 1346.531  | 1855.219  | NM_001842 | 16291.124 | 11909.913 |
| AL137498  | 5980.956  | 5519.458  | AI359037  | 37567.035 | 43239.582 | NM_00345E | 8809.975  | 9217.732  |
| AK024289  | 482.075   | 817.766   | BI754285  | 811.246   | 692.532   | NM_000171 | 966.305   | 746.298   |
| S66168    | 1453.042  | 1759.966  | X15998    | 2195.904  | 1970.27   | AL354615  | 2496.668  | 2945.387  |
| AK001942  | 313.15    | 364.247   | M76482    | 400.153   | 703.714   | NM_01334E | 44636.223 | 46283.207 |
| NM_003851 | 8744.048  | 9063.207  | X17519    | 18919.699 | 20908.959 | NM_00370E | 3611.195  | 3914.519  |
| U79244    | 630.285   | 450.512   | NM_001883 | 1342.167  | 1111.127  | NM_006861 | 3171.104  | 2878.859  |
| AK024150  | 1036.099  | 1138.699  | NM_00462E | 2666.405  | 2707.886  | NM_00582E | 7314.098  | 7175.677  |
| AF070536  | 1095.191  | 1004.302  | L31785    | 1945.924  | 2285.974  | NM_00046E | 3389.453  | 3889.607  |
| AK022297  | 317.904   | 410.996   | H-M 69043 | 5010.245  | 6523.161  | NM_015544 | 8531.449  | 8351.819  |
| U79300    | 568.771   | 433.923   | AF077374  | 1911.771  | 2447.545  | NM_01590E | 32943.91  | 36089.73  |
| AK025151  | 3028.637  | 2863.635  | U43901    | 1526.15   | 1488.986  | AK022600  | 12263.248 | 12928.918 |
| AK025550  | 5147.221  | 5065.169  | X59065    | 557.823   | 465.112   | AK023142  | 3657.488  | 4275.42   |
| AF088076  | 20242.309 | 19192.041 | M59828    | 8750.043  | 8704.406  | U61740    | 13221.884 | 10943.593 |
| AF086543  | 3171.875  | 3194.972  | AF309653  | 1035.37   | 1144.182  | NM_00640E | 56117.664 | 51183.426 |
| AB046797  | 1217.448  | 1070.566  | NM_00262C | 12657.528 | 12310.389 | AB049054  | 5777.735  | 5168.119  |
| AK002098  | 2538.6    | 2501.259  | S79267    | 2087.808  | 1671.763  | NM_015071 | 2528.016  | 2186.479  |
| AK025156  | 17394.113 | 15373.733 | NM_00181E | 757.861   | 925.703   | NM_013227 | 2014.074  | 1652.438  |
| AK022116  | 427.161   | 466.43    | NM_003784 | 48530.543 | 50511.047 | Z83803    | 932.23    | 1006.658  |
| AF026526  | 1702.06   | 1499.822  | NM_00019E | 25791.328 | 30096.873 | AF027205  | 43085.828 | 42551.258 |
| AK026207  | 7325.737  | 6660.37   | NM_00544E | 9783.887  | 9774.475  | AF075012  | 1897.369  | 1650.754  |
| AK024984  | 855.785   | 669.751   | NM_01489E | 2937.21   | 2525.16   | NM_00157C | 1629.252  | 1560.929  |
| AK000276  | 558.064   | 242.614   | NM_00363C | 6722.726  | 7629.691  | NM_01565E | 907.446   | 626.534   |
| AL110236  | 917.68    | 722.202   | NM_00004E | 2698.411  | 3339.425  | NM_00058E | 3935.879  | 1993.09   |
| AF075106  | 6670.321  | 6093.136  | NM_00321E | 1795.778  | 1849.307  | NM_01654E | 15877.881 | 10732.452 |
| AK023339  | 4711.749  | 5446.797  | NM_00670E | 3971.321  | 4459.638  | NM_01788E | 2171.576  | 2556.694  |
| AF085981  | 592.397   | 388.488   | NM_000612 | 10604.047 | 12949.753 | NM_006252 | 1907.797  | 1393.241  |
| AF086008  | 433.134   | 558.522   | NM_004257 | 15941.697 | 15233.281 | NM_001721 | 932.303   | 889.429   |
| AF086029  | 1219.805  | 1513.602  | NM_002844 | 5051.356  | 5812.206  | NM_014397 | 3862.313  | 3302.354  |
| AF075115  | 367.911   | 619.703   | NM_000683 | 1576.889  | 1792.958  | AB023182  | 4437.798  | 3959.866  |
| U05597    | 926.029   | 1100.574  | NM_00362E | 3234.795  | 3404.384  | NM_003607 | 5028.927  | 4683.808  |
| U52050    | 402.943   | 306.655   | NM_005901 | 10372.38  | 11208.261 | NM_00657E | 3572.831  | 3950.814  |
| AK021668  | 50006.141 | 45916     | NM_00424E | 1521.445  | 1406.713  | NM_013254 | 3582.199  | 3946.881  |
| AF086148  | 40594.402 | 36802.453 | NM_00095E | 670.087   | 527.699   | NM_000437 | 11401.538 | 10788.283 |
| NM_018363 | 1746.587  | 1719.759  | NM_001313 | 670.817   | 565.293   | AB046819  | 7526.448  | 8283.181  |
| AJ245433  | 4278.95   | 4900.714  | NM_002362 | 891.109   | 1132.668  | NM_00609C | 9041.853  | 11374.997 |
| AK021942  | 44375.426 | 41067.914 | NM_00479E | 768.523   | 803.746   | NM_00290C | 5392.941  | 7088.174  |
| NM_014127 | 1283.401  | 1220.047  | NM_00043E | 2558.38   | 2242.042  | NM_00491C | 3390.315  | 3570.91   |
| AL360187  | 814.649   | 992.004   | NM_001842 | 9441.517  | 8177.998  | AB013452  | 1673.984  | 1648.146  |
| AK021878  | 339.782   | 408.42    | NM_00071E | 584.409   | 707.389   | M93107    | 10002.99  | 8403.416  |
| AK021817  | 448.573   | 448.205   | NM_00345E | 6462.879  | 6670.797  | BC001479  | 12138.704 | 10630.985 |
| AK023217  | 4006.551  | 4664.789  | NM_000171 | 523.065   | 984.905   | NM_002461 | 38868.266 | 41590.059 |
| AK021883  | 314.255   | 548.993   | AL354615  | 2810.37   | 3304.229  | NM_005771 | 1042.027  | 808.053   |
| AF090902  | 6507.931  | 6696.207  | NM_01334E | 47224.18  | 48226.395 | AB032986  | 55883.344 | 51163.898 |

|           |           |           |           |           |           |           |           |           |
|-----------|-----------|-----------|-----------|-----------|-----------|-----------|-----------|-----------|
| AF119887  | 1184.9    | 1525.64   | NM_003705 | 3471.738  | 4793.998  | NM_01752E | 44555.211 | 45951.371 |
| AK091038  | 1378.165  | 1806.98   | NM_006861 | 2465.87   | 3498.019  | NM_01603Z | 12764.897 | 14210.058 |
| AK024193  | 3652.95   | 3963.767  | NM_005829 | 6628.399  | 7055.23   | NM_014324 | 55833.055 | 52568.047 |
| NM_018543 | 403.832   | 555.985   | NM_000466 | 3065.236  | 3014.089  | NM_001687 | 31402.15  | 31482.658 |
| AK024438  | 3948.795  | 4676.81   | NM_015544 | 6559.396  | 8772.901  | AK026374  | 2803.452  | 2641.57   |
| AK022482  | 980.022   | 901.902   | NM_01590E | 26646.664 | 30916.83  | NM_001169 | 2454.66   | 1787.365  |
| AK023811  | 369.488   | 388.41    | AK022600  | 12039.468 | 16924.871 | AK024648  | 8946.917  | 6970.217  |
| AK022803  | 970.076   | 1151.95   | AK023142  | 3320.775  | 4328.671  | NM_00079E | 852.424   | 1285.15   |
| AK023517  | 3747.549  | 2821.262  | U61740    | 15155.617 | 14419.842 | AB037761  | 19047.436 | 20067.361 |
| AK023869  | 10503.85  | 9785.837  | NM_006409 | 55294.953 | 55205.898 | NM_01400E | 42250.102 | 42478.824 |
| NM_01772E | 1949.719  | 1856.788  | AB049054  | 4798.765  | 4218.626  | NM_014731 | 1727.193  | 1533.943  |
| U80772    | 646.415   | 672.031   | NM_015071 | 1692.063  | 2094.216  | AF035191  | 28142.846 | 30054.922 |
| NM_00618E | 588.234   | 476.188   | NM_013227 | 1740.289  | 1619.224  | NM_00405E | 1675.175  | 1747.871  |
| AJ272177  | 985.063   | 715.887   | Z83803    | 585.097   | 715.062   | NM_004527 | 1170.678  | 1639.663  |
| AK026402  | 22788.615 | 23866.037 | AF027205  | 36847.305 | 37688.063 | NM_01206Z | 20676.391 | 21303.463 |
| AF111846  | 3202.525  | 2647.108  | AF075012  | 1088.603  | 1352.738  | AK026717  | 1070.504  | 1376.037  |
| M11948    | 60924.012 | 59913.469 | NM_001570 | 2606.596  | 5594.426  | AJ010482  | 2846.489  | 3304.466  |
| AK024618  | 1596.999  | 1602.887  | NM_01565E | 1375.287  | 2010.267  | NM_00089E | 1022.537  | 1362.407  |
| AL049969  | 953.457   | 1118.207  | NM_000589 | 3315.257  | 2835.579  | AB040672  | 2670.143  | 2360.846  |
| NM_00522C | 598.22    | 853.013   | NM_01654E | 12272.884 | 12176.281 | NM_00219Z | 2455.719  | 2261.849  |
| NM_01861E | 317.844   | 581.391   | NM_01788E | 2238.226  | 2132.19   | NM_005491 | 13037.157 | 14274.881 |
| AK000208  | 264.706   | 494.912   | NM_00625Z | 1121.713  | 1341.003  | NM_00386E | 4161.758  | 3993.928  |
| AK000470  | 580.846   | 444.798   | NM_001721 | 795.454   | 1119.995  | AK025599  | 6962.283  | 8196.351  |
| AK026366  | 59012.516 | 54956.004 | NM_014397 | 1766.149  | 1816.404  | X63417    | 3032.346  | 3536.166  |
| AK024229  | 22207.367 | 23164.342 | AB023182  | 3775.601  | 4407.925  | S94539    | 40762.066 | 44819.109 |
| AK021824  | 582.24    | 548.238   | NM_003607 | 3377.435  | 3785.531  | NM_00640Z | 2919.929  | 2622.005  |
| AK021467  | 641.65    | 620.768   | NM_00657E | 3258.915  | 2616.832  | NM_00578E | 3476.054  | 2664.621  |
| NM_020371 | 1921.844  | 2306.72   | NM_013254 | 3336.146  | 3730.952  | NM_01824E | 9977.314  | 8712.397  |
| AK022498  | 4233.726  | 3919.49   | NM_000437 | 15413.951 | 19076.184 | AK001695  | 9277.195  | 6522.097  |
| U84506    | 1387.778  | 1403.957  | AB046819  | 7717.968  | 9458.778  | AB040898  | 894.352   | 1070.407  |
| U21556    | 22260.555 | 27586.895 | NM_00609C | 10090.228 | 13756.445 | AB031547  | 523.179   | 1213.239  |
| AB002444  | 554.692   | 426.605   | NM_00290C | 8547.526  | 9839.939  | NM_00397C | 2529.559  | 3436.297  |
| AB002344  | 3099.85   | 3334.516  | NM_00491C | 2879.238  | 3140.988  | AK022496  | 990.536   | 1315.932  |
| BF210352  | 2598.319  | 2369.542  | AB013452  | 1752.581  | 1940.384  | AB042636  | 723.034   | 909.942   |
| NM_00682E | 3225.045  | 4189.358  | M93107    | 3368.683  | 3258.044  | AB033035  | 1290.339  | 939.802   |
| NM_01766E | 7030.41   | 8412.796  | BC001479  | 6111.983  | 5245.534  | NM_00288Z | 5634.479  | 6413.488  |
| AF147379  | 3538.852  | 4534.985  | NM_002461 | 17172.33  | 17181.387 | NM_01901Z | 2524.903  | 2883.554  |
| AK023760  | 3135.681  | 3972.445  | NM_005771 | 1004.999  | 653.32    | NM_000141 | 475.096   | 706.185   |
| X98415    | 33797.27  | 45345.066 | AK026374  | 1615.663  | 2212.066  | NM_01615C | 3475.153  | 3752.587  |
| AK024205  | 1230.298  | 1317.148  | NM_001169 | 1594.645  | 2174.389  | U57058    | 1070.763  | 1218.972  |
| AF086034  | 11478.527 | 13460.261 | AK024648  | 5169.271  | 5468.092  | AL137452  | 2183.76   | 2277.976  |
| AK000174  | 1753.403  | 2523.436  | NM_00079E | 898.246   | 799.278   | NM_00431Z | 52069.02  | 48914.762 |
| AF130071  | 381.805   | 676.473   | AB037761  | 21381.297 | 18912.039 | NM_001347 | 7720.915  | 8883.369  |
| AL390170  | 1338.139  | 1093.284  | NM_01400E | 54533.477 | 43929.699 | AK024549  | 19602.551 | 22015.242 |
| AK022887  | 1227.667  | 1352.767  | NM_014731 | 962.399   | 1226.221  | NM_00633E | 11128.438 | 11397.432 |
| AK000745  | 18547.102 | 21740.061 | AF035191  | 16755.182 | 18968.699 | NM_007164 | 9308.03   | 10460.512 |
| NM_015901 | 901.282   | 935.328   | NM_00405E | 1650.194  | 1833.07   | NM_000261 | 2266.37   | 2183.04   |
| NM_00636E | 918.861   | 746.566   | NM_004527 | 1174.669  | 1213.876  | NM_00260E | 1686.64   | 1660.734  |
| AF093744  | 4501.408  | 4493.401  | NM_01206Z | 14166.766 | 16589.822 | NM_00257C | 2685.18   | 2341.47   |
| NM_018687 | 14476.791 | 16112.63  | AK026717  | 908.925   | 1073.647  | NM_00318Z | 3770.215  | 3881.342  |
| M57417    | 9441.67   | 10553     | AJ010482  | 2849.706  | 3548.997  | NM_00358E | 1083.209  | 383.38    |
| NM_020524 | 6799.603  | 7837.225  | NM_00089E | 1197.638  | 900.201   | NM_019851 | 3873.73   | 3222.995  |
| NM_00199E | 3275.398  | 5745.409  | AB040672  | 1330.047  | 1162.459  | NM_00323E | 898.755   | 471.657   |

|           |           |           |           |           |           |           |           |           |
|-----------|-----------|-----------|-----------|-----------|-----------|-----------|-----------|-----------|
| X64977    | 2140.761  | 3146      | NM_002192 | 2205.298  | 1339.991  | NM_018367 | 1242.064  | 1576.67   |
| AF064851  | 499.745   | 426.708   | NM_005491 | 7941.136  | 4939.591  | NM_001363 | 10708.887 | 12936.242 |
| NM_002602 | 5772.415  | 9514.525  | NM_003869 | 1513.516  | 1251.993  | NM_014096 | 12531.773 | 15299.994 |
| X89672    | 511.314   | 364.988   | AK025599  | 4876.405  | 5252.397  | NM_005706 | 2780.823  | 2841.629  |
| NM_003383 | 3934.823  | 4526.124  | X63417    | 1765.956  | 2091.182  | NM_001261 | 5338.222  | 6650.003  |
| D17271    | 7536.665  | 8674.438  | S94539    | 15500.207 | 14262.754 | NM_001977 | 2053.35   | 2246.103  |
| X91648    | 1299.886  | 1580.044  | NM_005785 | 1683.684  | 1823.629  | NM_007219 | 4601.558  | 4593.72   |
| AK026658  | 897.561   | 1077.078  | NM_018248 | 5127.904  | 7713.802  | AK026854  | 3800.759  | 3043.829  |
| AF282264  | 12084.806 | 13625.019 | AK001695  | 4552.072  | 4537.538  | NM_001266 | 6408.093  | 7086.875  |
| AF086322  | 3729.239  | 4161.86   | AB040898  | 916.121   | 975.3     | NM_002506 | 1321.529  | 1418.966  |
| Z70717    | 1407.071  | 2018.442  | AB031547  | 1383.289  | 1419.915  | NM_004906 | 11081.553 | 10913.982 |
| AK024736  | 424.896   | 685.296   | NM_003970 | 2854.646  | 2243.241  | X98261    | 725.394   | 618.594   |
| X79308    | 1636.756  | 1621.309  | AK022496  | 1392.318  | 1379.08   | NM_012447 | 18088.715 | 16079.673 |
| AF086476  | 571.003   | 585.652   | AB042636  | 1120.983  | 731.731   | NM_006366 | 1421.066  | 1421.606  |
| NM_017660 | 10093.863 | 8934.739  | AB033035  | 630.581   | 361.451   | AK027013  | 39659.527 | 42299.461 |
| AB011151  | 1533.151  | 1708.87   | NM_002883 | 4348.717  | 5037.452  | NM_001344 | 53115.883 | 55750.898 |
| U92995    | 6017.066  | 4852.858  | NM_019012 | 1714.696  | 1822.773  | NM_018294 | 7864.282  | 7489.295  |
| Z70769    | 911.755   | 1129.802  | NM_000141 | 802.614   | 951.242   | AL389934  | 3636.841  | 3599.629  |
| NM_007106 | 2572.97   | 3368.052  | NM_016150 | 2071.859  | 2411.139  | NM_004330 | 9553.673  | 8654.134  |
| AL137555  | 1978.309  | 2558.713  | NM_002674 | 415.877   | 672.08    | AF151802  | 9325.885  | 9094.828  |
| AL133017  | 2972.174  | 3511.654  | U57058    | 786.609   | 843.987   | AB006746  | 4130.19   | 3351.474  |
| CY3Cy5    | 4124.171  | 195.022   | AL137452  | 1787.644  | 2221.158  | NM_006496 | 2438.613  | 2479.05   |
| X00588    | 520.249   | 825.69    | NM_004312 | 25384.16  | 23048.895 | AB023233  | 4004.36   | 3113.163  |
| AI359037  | 37291.191 | 43793.367 | NM_001347 | 2621.694  | 2254.37   | NM_004366 | 1843.291  | 1244.335  |
| BI754285  | 473.786   | 345.146   | AK024549  | 8238.814  | 5886.936  | NM_018130 | 8695.315  | 8483.538  |
| X15998    | 355.516   | 415.498   | NM_006338 | 4505.206  | 3441.832  | AF085878  | 509.436   | 922.983   |
| M76482    | 470.644   | 560.112   | NM_007164 | 2584.415  | 2311.393  | AB006630  | 2087.022  | 1660.173  |
| X17519    | 21333.506 | 27249.23  | NM_000261 | 964.499   | 1093.645  | NM_016155 | 2312.114  | 2616.819  |
| NM_004628 | 2925.375  | 3348.649  | NM_002606 | 726.537   | 1062.133  | NM_001224 | 14874.698 | 16657.207 |
| L31785    | 2368.58   | 1838.993  | NM_002570 | 1120.413  | 1444.397  | NM_017811 | 19744.18  | 19751.57  |
| H-M 69043 | 6028.799  | 5973.025  | NM_003183 | 2055.426  | 2491.434  | NM_001566 | 2676.07   | 2900.395  |
| AF077374  | 1024.488  | 981.623   | NM_003585 | 448.174   | 838.159   | AK023284  | 2038.865  | 2429.965  |
| U43901    | 1720.44   | 1679.559  | NM_019851 | 1024.071  | 1379.58   | AF106069  | 804.445   | 850.684   |
| X59065    | 534.496   | 604.329   | NM_003238 | 340.702   | 262.036   | NM_005101 | 26219.85  | 22962.557 |
| M59828    | 14335.538 | 12750.603 | NM_018367 | 1571.578  | 1774.467  | NM_004205 | 940.456   | 303.917   |
| NM_016134 | 961.702   | 838.592   | NM_001363 | 8578.017  | 8618.665  | AF130060  | 21261.324 | 20812.609 |
| SR2       | 53236.191 | 55538.098 | NM_014096 | 14443.882 | 13173.675 | NM_007057 | 29662.221 | 27685.66  |
| SR4       | 18567.303 | 21295.854 | NM_005706 | 5279.187  | 3722.078  | NM_000177 | 2502.028  | 2358.97   |
| SR6       | 2734.38   | 2516.999  | NM_001261 | 7667.984  | 6651.646  | NM_003387 | 14655.525 | 14535.3   |
| SR8       | 10273.61  | 31181.373 | NM_001977 | 1479.249  | 1862.406  | U60665    | 1083.921  | 1160.721  |
| SR10      | 37121.84  | 13204.408 | NM_007219 | 3250.503  | 3129.362  | NM_005507 | 58480.715 | 59191.078 |
| CY3Cy5    | 4273.675  | 151.108   | AK026854  | 3238.739  | 2959.613  | AL080133  | 6754.905  | 5781.817  |
| NM_000612 | 11335.192 | 9907.188  | NM_004906 | 9222.642  | 8871.509  | AY014403  | 1754.907  | 1553.064  |
| NM_004257 | 16397.523 | 18304.086 | NM_012447 | 6487.421  | 6361.766  | NM_006912 | 7743.266  | 6622.186  |
| NM_002844 | 4162.24   | 4731.451  | AK027013  | 18336.07  | 13436.656 | X12534    | 3282.83   | 2914.815  |
| NM_003629 | 3013.27   | 4662.259  | NM_001344 | 34599.91  | 23875.434 | NM_003112 | 2295.763  | 2092.026  |
| NM_005901 | 13479.772 | 14204.731 | NM_018294 | 4661.876  | 3400.374  | NM_014323 | 6700.136  | 6885.589  |
| NM_004248 | 870.317   | 917.207   | AL389934  | 1271.374  | 1476.742  | NM_003205 | 5345.318  | 5479.801  |
| NM_000959 | 406.263   | 470.602   | NM_004330 | 6355.581  | 5979.308  | AB002324  | 2378.762  | 2397.044  |
| NM_001313 | 404.033   | 394.18    | AF151802  | 6378.96   | 5899.462  | AK026231  | 1508.207  | 1572.259  |
| NM_002362 | 1500.43   | 1176.976  | AB006746  | 2066.539  | 1716.039  | NM_002140 | 22445.025 | 18779.188 |
| NM_004796 | 632.206   | 626.825   | AB023233  | 1769.104  | 2594.578  | NM_020143 | 6737.801  | 5979.236  |
| NM_000435 | 712.398   | 729.727   | NM_004370 | 378.745   | 509.416   | NM_012466 | 4981.667  | 5316.216  |

|           |           |           |           |           |           |           |           |           |
|-----------|-----------|-----------|-----------|-----------|-----------|-----------|-----------|-----------|
| NM_001842 | 548.345   | 717.7     | NM_018130 | 7217.002  | 8093.568  | NM_005131 | 7358.062  | 7196.104  |
| AL080170  | 3480.398  | 3190.92   | AF085878  | 1212.122  | 1220.821  | NM_007056 | 4308.758  | 4792.871  |
| AB039903  | 8945.228  | 8257.402  | AB006630  | 1954.156  | 1616.138  | AF083383  | 8074.389  | 7772.677  |
| NM_000542 | 2164.55   | 2225.375  | NM_016155 | 3787.33   | 2606.579  | NM_006925 | 6616.891  | 9135.763  |
| NM_014625 | 575.967   | 321.45    | NM_001569 | 2568.628  | 2487.637  | NM_004890 | 55161.914 | 52485.484 |
| NM_006851 | 2174.442  | 1983.52   | NM_004131 | 562.481   | 548.939   | AK023181  | 7734.714  | 6688.011  |
| AB001328  | 575.53    | 439.73    | AF106069  | 678.721   | 496.854   | NM_004294 | 2859.239  | 2913.399  |
| NM_000948 | 798.57    | 799.074   | NM_005101 | 17675.061 | 15387.482 | NM_005051 | 24797.1   | 24574.359 |
| H99588    | 1976.82   | 1631.978  | NM_004205 | 427.392   | 316.828   | NM_001968 | 35975.598 | 33092.488 |
| AK023142  | 3481.948  | 3644.413  | AF130060  | 4822.594  | 3816.027  | D17259    | 55838.313 | 55532.938 |
| U61740    | 10503.096 | 10732.932 | NM_007057 | 15163.001 | 14474.551 | AF264627  | 36701.871 | 30040.422 |
| NM_006409 | 55719.559 | 51339.598 | NM_000177 | 1926.741  | 1868.086  | AL133053  | 1813.279  | 1710.856  |
| AB049054  | 5023.625  | 4668.258  | NM_003387 | 8237.579  | 7710.628  | NM_018142 | 7109.008  | 7746.728  |
| NM_015071 | 1849.24   | 1768.372  | U60665    | 1095.276  | 1210.59   | NM_017653 | 6502.229  | 6648.572  |
| NM_013227 | 2417.588  | 1898.45   | NM_005507 | 54396.809 | 54102.363 | AL109695  | 11500.579 | 14284.581 |
| Z83803    | 730.551   | 928.767   | AL080133  | 2616.048  | 3155.604  | NM_002168 | 5735.792  | 6697.099  |
| AF027205  | 43560.039 | 43767.07  | AY014403  | 1470.062  | 1795.232  | NM_004453 | 3065.365  | 3533.162  |
| AF075012  | 978.071   | 1129.956  | NM_006912 | 3545.383  | 4470.573  | NM_016229 | 4021.708  | 3867.914  |
| NM_001570 | 1253.406  | 1133.555  | X12534    | 2621.82   | 1861.954  | NM_018244 | 3902.273  | 4120.648  |
| NM_015658 | 775.379   | 981.008   | X65665    | 352.999   | 388.772   | NM_002492 | 35478.398 | 32351.113 |
| NM_000589 | 4205.208  | 3445.749  | NM_003112 | 2074.913  | 1265.088  | AB046855  | 1881.036  | 1488.909  |
| NM_016546 | 17890.955 | 15420.336 | NM_014323 | 5785.965  | 4578.567  | NM_005642 | 9678.282  | 8212.177  |
| AF309653  | 868.593   | 862.311   | NM_003205 | 5193.933  | 6386.501  | NM_018105 | 4114.956  | 2769.447  |
| NM_002620 | 3745.508  | 3823.382  | AB002324  | 2075.759  | 1984.339  | AK023452  | 5155.209  | 4566.583  |
| S79267    | 685.941   | 408.468   | AK026231  | 1021.833  | 875.375   | NM_000332 | 1194.756  | 1128.464  |
| NM_003784 | 50953.66  | 46144.918 | NM_002140 | 14093.182 | 10441.467 | AK022215  | 12103.667 | 10940.837 |
| NM_000195 | 12009.402 | 9347.602  | NM_020143 | 4337.99   | 2756.446  | U90305    | 638.52    | 529.845   |
| NM_005445 | 14391.038 | 9411.899  | NM_012469 | 3499.673  | 1938.003  | NM_001527 | 14480.592 | 14127.34  |
| NM_014899 | 2808.762  | 2840.118  | NM_005131 | 4800.332  | 2582.869  | AK025269  | 9566.646  | 8343.282  |
| NM_003630 | 9387.913  | 8333.105  | NM_007056 | 2869.644  | 1945.985  | NM_001438 | 775.913   | 810.956   |
| NM_000046 | 3888.336  | 4002.178  | AF083383  | 4124.071  | 3341.071  | AB040971  | 1894.315  | 1552.586  |
| NM_003219 | 1420.292  | 1130.584  | NM_006925 | 5558.139  | 3521.95   | NM_006562 | 5103.134  | 4806.556  |
| NM_006709 | 3793.588  | 3978.671  | NM_004890 | 21806.83  | 18879.766 | NM_018456 | 3128.887  | 3435.212  |
| NM_004910 | 2827.538  | 3866.873  | AK023181  | 3948.945  | 3600.842  | AK002183  | 2178.515  | 2387.31   |
| AB013452  | 1140.35   | 910.367   | NM_004294 | 1807.257  | 1185.12   | NM_018996 | 3736.729  | 4019.793  |
| M93107    | 7633.335  | 7025.713  | NM_005051 | 14867.106 | 10718.212 | AL137304  | 4015.081  | 4583.419  |
| BC001479  | 6413.572  | 5355.979  | NM_001968 | 21516.76  | 16573.754 | AL049274  | 1082.172  | 989.46    |
| NM_002461 | 31392.008 | 32703.611 | D17259    | 56273.664 | 57192.516 | NM_018279 | 4773.721  | 5348.547  |
| NM_005771 | 826.709   | 740.579   | AB002366  | 370.338   | 292.128   | AK026883  | 4526.153  | 5115.772  |
| AB032986  | 54559.625 | 49476.496 | AF264627  | 9197.289  | 6791.936  | NM_014350 | 22918.553 | 20927.154 |
| NM_017528 | 47053.285 | 49775.301 | AL133053  | 1878.013  | 1845.664  | AL390185  | 3121.503  | 2836.379  |
| NM_016032 | 4919.666  | 5438.629  | NM_018142 | 6949.926  | 6698.138  | AF086235  | 9698.109  | 8746.535  |
| NM_014324 | 42586.453 | 45947.215 | NM_017653 | 5840.879  | 5085.479  | AF143886  | 2447.496  | 2516.104  |
| NM_001687 | 33528.949 | 34462.766 | AL109695  | 23816.893 | 16182.596 | AK025975  | 2711.009  | 3007.097  |
| AK026374  | 1818.044  | 1646.312  | NM_002168 | 4956.156  | 4377.024  | NM_014664 | 3600.051  | 2973.864  |
| NM_001169 | 2697.198  | 2317.569  | AK027115  | 470.244   | 590.347   | AL109788  | 840.639   | 773.717   |
| AK024648  | 7356.824  | 6102.409  | NM_004453 | 1065.432  | 907.683   | NM_014952 | 40191.91  | 35545.984 |
| NM_000719 | 606.745   | 438.588   | NM_016229 | 3154.958  | 2365.514  | AF087962  | 6015.071  | 5643.169  |
| NM_003459 | 4262.67   | 3794.04   | NM_018244 | 2292.917  | 2409.044  | AL050197  | 7609.995  | 9786.811  |
| AB032526  | 483.114   | 469.119   | NM_002492 | 20299.494 | 14250.345 | AF085870  | 9208.939  | 10419.865 |
| NM_000171 | 392.588   | 500.063   | AB046855  | 873.51    | 581.935   | AL050063  | 857.062   | 580.016   |
| AL354615  | 4792.546  | 5385.651  | NM_005642 | 6691.247  | 3401.632  | AL117580  | 14147.517 | 14322.705 |
| NM_013349 | 37106.848 | 41201.477 | NM_018105 | 2957.165  | 1080.456  | AL050124  | 1031.478  | 877.799   |

|           |           |           |           |           |           |           |           |           |
|-----------|-----------|-----------|-----------|-----------|-----------|-----------|-----------|-----------|
| NM_00370E | 4699.676  | 4880.007  | AK023452  | 3586.231  | 2050.514  | AJ001893  | 2407.064  | 2050.844  |
| NM_006861 | 5358.722  | 5087.021  | NM_000332 | 677.889   | 308.349   | NM_01481E | 10362.615 | 9931.566  |
| NM_00582E | 9070.334  | 9812.342  | AK022215  | 8393.515  | 5056.936  | AF086040  | 1751.681  | 1668.058  |
| NM_00046E | 3950.269  | 4219.537  | NM_001527 | 9326.588  | 6857.175  | AB032988  | 4387.623  | 3413.268  |
| NM_015544 | 7493.431  | 7611.92   | AK025269  | 2277.147  | 1414.404  | AK023559  | 7826.619  | 6312.71   |
| NM_01590E | 28671.498 | 37287.785 | AB040971  | 1013.348  | 607.307   | AL049233  | 2071.874  | 1653.278  |
| NM_00089E | 713.009   | 590.086   | NM_006562 | 862.259   | 660.125   | NM_01769E | 3205.031  | 2371.034  |
| NM_005491 | 10277.757 | 12924.688 | AK024254  | 1648.126  | 1378.832  | AL050166  | 6299.572  | 5533.88   |
| NM_00386E | 1816.375  | 2124.584  | NM_01845E | 2954.551  | 2953.065  | NM_00619E | 702.33    | 783.504   |
| AK025599  | 7482.274  | 7105.058  | AK026697  | 1600.983  | 1109.301  | AF056454  | 1046.099  | 821.642   |
| X63417    | 2196.093  | 2658.661  | NM_019021 | 3721.069  | 3545.027  | AF009270  | 1695.617  | 1869.933  |
| S94539    | 10869.921 | 11950.31  | NM_004717 | 1050.07   | 590.928   | AF009318  | 1907.921  | 2036.086  |
| NM_00640E | 3978.004  | 3477.788  | AK002183  | 1167.837  | 1406.037  | AF056421  | 1434.325  | 1666.078  |
| NM_00578E | 3552.341  | 3254.332  | NM_01899E | 2157.101  | 1527.971  | AF090889  | 750.396   | 837.241   |
| NM_01824E | 8806.813  | 7678.201  | AL137304  | 3610.656  | 4112.449  | AK001085  | 2361.521  | 2084.963  |
| AK001695  | 7226.007  | 6080.251  | AL049274  | 930.55    | 1110.866  | AK001906  | 3716.126  | 3757.542  |
| NM_01788E | 2366.139  | 1778.469  | NM_01827E | 3738.573  | 3211.896  | AK021528  | 2105.928  | 1865.629  |
| NM_00625E | 1479.53   | 1387.935  | AK026883  | 1355.067  | 1306.769  | AK021746  | 4275.906  | 4449.445  |
| NM_001721 | 1872.137  | 1544.118  | NM_01435C | 11420.975 | 5859.164  | AK021617  | 660.151   | 554.417   |
| NM_014397 | 3207.521  | 3575.684  | U00925    | 6382.047  | 4216.128  | AK021810  | 1767.521  | 1805.224  |
| AB023182  | 4262.445  | 5193.109  | AL390185  | 1027.54   | 679.553   | AK026743  | 666.069   | 619.199   |
| NM_003607 | 5324.793  | 5531.196  | AF086235  | 5239.619  | 4103.576  | AK025214  | 971.951   | 665.542   |
| NM_00657E | 3318.846  | 3394.232  | AF143886  | 1406.277  | 734.248   | AK025846  | 1802.82   | 1447.396  |
| NM_013254 | 4515.231  | 5101.352  | AK025583  | 38385.293 | 29254.574 | AK026805  | 5359.712  | 4844.289  |
| NM_000437 | 28841.434 | 32090.662 | NM_014664 | 2599.535  | 2062.356  | U00959    | 2994.602  | 2491.573  |
| AB046819  | 10901.151 | 11551.23  | AL109788  | 481.993   | 226.634   | NM_01457E | 30750.357 | 31288.963 |
| NM_00609C | 11894.044 | 15093.005 | NM_01495E | 13710.021 | 7787.471  | AF147306  | 6807.54   | 8082.438  |
| NM_00290C | 5928.964  | 5943.199  | AB037765  | 1500.999  | 1703.132  | AF086267  | 3993.469  | 5743.52   |
| NM_006851 | 2501.577  | 2772.927  | AK025068  | 4211.265  | 3698.867  | X74606    | 1297.754  | 1402.136  |
| AK001560  | 831.484   | 720.902   | AK026720  | 2621.841  | 1890.624  | NM_01218E | 5336.237  | 5314.642  |
| AB001328  | 449.241   | 503.184   | AL137566  | 4126.494  | 3302.804  | AK026785  | 3111.307  | 3239.923  |
| NM_00094E | 984.446   | 886.71    | AF087962  | 3555.448  | 2973.251  | AK022994  | 851.295   | 913.154   |
| H99588    | 1716.905  | 1778.411  | AL050197  | 5003.781  | 4618.482  | NM_01822E | 32209.076 | 30366.449 |
| X00588    | 769.294   | 603.555   | AF085870  | 569.106   | 657.035   | AK025534  | 1861.932  | 1630.96   |
| AI359037  | 34771.145 | 38652.551 | AL117580  | 2782.139  | 1894.914  | AK022577  | 717.276   | 884.514   |
| M76482    | 655.005   | 738.313   | AL110190  | 1476.339  | 792.316   | AF091526  | 2468.204  | 1715.893  |
| X17519    | 18080.59  | 21236.527 | AJ001893  | 1278.818  | 1035.875  | AK022170  | 784.142   | 427.914   |
| NM_00188E | 559.104   | 536.549   | NM_01481E | 5997.855  | 4544.79   | AL390169  | 754.344   | 478.688   |
| NM_00462E | 2807.846  | 2555.391  | AB032988  | 2746.642  | 2087.623  | M60749    | 4079.504  | 4430.503  |
| L31785    | 2562.774  | 1875.557  | AK023559  | 2119.775  | 1478.916  | X79986    | 2103.217  | 1773.742  |
| H-M 69043 | 6665.742  | 4571.855  | AB037859  | 33450.078 | 32289.969 | NM_00352E | 15542.261 | 14346.343 |
| AF077374  | 1184.424  | 995.004   | AL049233  | 905.096   | 767.429   | X01448    | 1388.292  | 1407.307  |
| U43901    | 1689.994  | 2347.471  | NM_01769E | 1514.462  | 1209.721  | NM_01650E | 10753.887 | 11407.726 |
| X59065    | 691.844   | 498.954   | AL050166  | 4336.437  | 3831.519  | AK056351  | 47603.633 | 50372.137 |
| M59828    | 15153.657 | 14074.505 | AK026705  | 2511.043  | 2180.222  | NM_01469C | 10706.637 | 10560.601 |
| NM_016134 | 1086.716  | 977.057   | NM_00360E | 1260.073  | 1247.556  | NM_01769E | 5519.744  | 5729.167  |
| AJ010482  | 4974.387  | 5986.733  | AF009258  | 33831.066 | 31315.471 | AF086490  | 2404.903  | 2163.089  |
| NM_00544E | 15378.443 | 11522.23  | AF009305  | 1585.853  | 1235.8    | AF131738  | 35929.77  | 39534.73  |
| NM_01489E | 2841.482  | 3165.881  | AF009318  | 695.575   | 372.378   | AK021666  | 7981.685  | 9524.062  |
| NM_00363C | 8585.625  | 9257.193  | AF056421  | 979.611   | 289.08    | AK024081  | 1251.193  | 1494.127  |
| NM_00004E | 3449.253  | 3305.073  | AF090889  | 422.521   | 392.602   | AK024825  | 4784.167  | 4807.975  |
| NM_00321E | 1237.098  | 1420.718  | AK001085  | 703.304   | 427.357   | AF086317  | 11443.226 | 11010.125 |
| NM_00670E | 4019.291  | 3593.9    | AK001906  | 953.101   | 732.307   | U16850    | 10375.995 | 10203.231 |

|           |           |           |           |           |           |           |           |           |
|-----------|-----------|-----------|-----------|-----------|-----------|-----------|-----------|-----------|
| NM_000612 | 13283.202 | 11555.667 | AK021528  | 922.159   | 676.476   | AL390178  | 1941.394  | 2004.099  |
| NM_004257 | 16785.986 | 18926.691 | AK021746  | 931.052   | 517.529   | AF147326  | 636.296   | 670.399   |
| NM_002844 | 5530.617  | 6371.504  | AK001136  | 571.441   | 539.567   | Z36806    | 3157.1    | 2969.138  |
| NM_000683 | 432.81    | 374       | AK021810  | 525.808   | 507.264   | NM_01861E | 1720.788  | 1764.064  |
| NM_003629 | 3333.555  | 4107.288  | AK025846  | 577.444   | 688.626   | AJ008121  | 36061.52  | 32163.08  |
| NM_005901 | 13384.492 | 13314.709 | AK026805  | 856.685   | 805.065   | AJ008153  | 2580.014  | 2258.829  |
| NM_00424E | 802.589   | 932.837   | AL389983  | 8529.529  | 5826.988  | AK023739  | 4280.292  | 3671.059  |
| NM_000959 | 555.593   | 492.972   | AJ008159  | 1001.913  | 759.788   | NM_001507 | 2327.742  | 2201.578  |
| NM_01906E | 704.019   | 592.457   | AK000995  | 1418.812  | 877.106   | AL389876  | 1937.977  | 1695.84   |
| NM_002362 | 1487.127  | 1439.302  | U00959    | 1438.287  | 636.891   | AK022120  | 3413.407  | 4143.208  |
| NM_00479E | 807.631   | 618.362   | NM_01457E | 13438.021 | 8925.675  | Z70762    | 1347.658  | 1730.638  |
| NM_00043E | 1263.781  | 822.415   | AF147306  | 4272.364  | 2271.673  | D17099    | 1033.018  | 812.351   |
| NM_001842 | 561.859   | 451.496   | AF086267  | 1341.352  | 922.325   | BF037206  | 5162.855  | 4858.753  |
| AB017169  | 529.703   | 515.419   | X74606    | 623.624   | 271.448   | AK021474  | 21402.176 | 26037.211 |
| AL080170  | 4030.871  | 4216.281  | NM_012183 | 927.88    | 509.766   | AK023642  | 896.407   | 1027.947  |
| AB039903  | 11082.807 | 10935.166 | AK026785  | 1661.549  | 1061.171  | AW511510  | 875.397   | 891.086   |
| NM_000542 | 2017.057  | 2454.39   | AK022994  | 351.322   | 335.844   | U52827    | 1285.32   | 1359.314  |
| NM_01462E | 463.688   | 489.778   | NM_01822E | 16530.1   | 14590.455 | AL049466  | 19142.521 | 17498.287 |
| NM_00370E | 4691.13   | 4890.936  | AK025534  | 644.245   | 607.6     | AB037802  | 3787.212  | 4396.875  |
| NM_006861 | 4516.624  | 3877.89   | AK022577  | 567.874   | 565.421   | AL137450  | 2990.73   | 2990.739  |
| NM_005829 | 6087.357  | 5995.764  | AF091526  | 705.159   | 351.327   | AK023058  | 1551.203  | 1828.521  |
| NM_00046E | 3163.381  | 3401.619  | M60749    | 5130.729  | 3610.377  | NM_012064 | 6518.163  | 5324.66   |
| NM_015544 | 5809.295  | 5915.315  | X79986    | 864.518   | 740.864   | AK001460  | 1468.218  | 1226.818  |
| NM_01590E | 25493.268 | 29271.717 | NM_003523 | 9707.114  | 6871.953  | AK092508  | 4236.637  | 3769.36   |
| AK022600  | 792.76    | 845.3     | X01448    | 1070.448  | 558.02    | AK027111  | 51051.215 | 48752.25  |
| AK023142  | 3815.992  | 3603.886  | NM_016503 | 5933.719  | 3801.921  | NM_00351E | 1120.721  | 916.166   |
| U61740    | 10869.171 | 11645.396 | AK056351  | 26346.213 | 12399.354 |           |           |           |
| NM_00640E | 51076.551 | 46714.789 | NM_014690 | 3883.058  | 1601.937  |           |           |           |
| AB049054  | 4844.736  | 4961.17   | AF086490  | 906.06    | 736.765   |           |           |           |
| NM_015071 | 2200.334  | 2048.238  | AF131738  | 20938.256 | 9984.093  |           |           |           |
| NM_013227 | 2281.508  | 1935.787  | AK021666  | 1463.099  | 696.442   |           |           |           |
| Z83803    | 1160.957  | 909.985   | AK024081  | 561.473   | 402.867   |           |           |           |
| AF027205  | 43073.914 | 37967.129 | AK024825  | 2751.518  | 1903.386  |           |           |           |
| AF075012  | 1752.402  | 1639.126  | AF086317  | 5089.502  | 3969.216  |           |           |           |
| NM_001570 | 1249.547  | 1181.293  | U16850    | 4502.258  | 3147.333  |           |           |           |
| NM_01565E | 1061.711  | 1260.319  | AL390178  | 709.335   | 419.884   |           |           |           |
| NM_00058E | 5768.354  | 4335.535  | Z36806    | 1761.446  | 1714.352  |           |           |           |
| NM_01654E | 18890.307 | 18758.619 | NM_01861E | 1268.902  | 964.032   |           |           |           |
| AF309653  | 665.517   | 891.827   | AJ008121  | 17721.48  | 13898.553 |           |           |           |
| NM_002620 | 4151.899  | 4829.47   | AJ008153  | 737.755   | 759.419   |           |           |           |
| S79267    | 456.338   | 465.334   | AK023739  | 1144.82   | 976.549   |           |           |           |
| NM_00181E | 1199.817  | 961.334   | NM_005830 | 7948.346  | 5978.043  |           |           |           |
| NM_003784 | 53663.922 | 48117.668 | NM_001507 | 2662.365  | 1629.793  |           |           |           |
| NM_00019E | 10984.037 | 10392.714 | AL389876  | 1011.37   | 977.59    |           |           |           |
| NM_00657E | 3578.294  | 3129.578  | AK022120  | 1956.323  | 1323.966  |           |           |           |
| NM_013254 | 3678.465  | 4176.696  | U92015    | 431.314   | 216.123   |           |           |           |
| NM_000437 | 25169.395 | 25368.309 | Z70762    | 426.105   | 144.555   |           |           |           |
| AB046819  | 9257.911  | 10132.89  | BF037206  | 737.622   | 671.227   |           |           |           |
| NM_006090 | 11601.859 | 13284.348 | AK021474  | 7909.429  | 4472.469  |           |           |           |
| NM_002900 | 5329.348  | 6220.387  | AK023642  | 551.847   | 714.406   |           |           |           |
| NM_004910 | 2669.868  | 2589.733  | AW511510  | 446.889   | 359.963   |           |           |           |
| AB013452  | 1456.443  | 1350.28   | U52827    | 1785.726  | 1722.302  |           |           |           |
| M93107    | 7625.766  | 8617.281  | AL049466  | 12215.68  | 11791.531 |           |           |           |



|                  |           |           |                  |           |          |
|------------------|-----------|-----------|------------------|-----------|----------|
| <b>BC001479</b>  | 6929.87   | 8317.811  | <b>AB037802</b>  | 3255.014  | 3965.398 |
| <b>NM_002461</b> | 38598.219 | 44146.832 | <b>AL137450</b>  | 2124.601  | 1573.793 |
| <b>NM_005771</b> | 765.092   | 740.674   | <b>NM_012064</b> | 1095.815  | 955.568  |
| <b>AB032986</b>  | 52153.137 | 50610.129 | <b>AK001460</b>  | 810.684   | 595.312  |
| <b>NM_017528</b> | 49057.887 | 51667.777 | <b>AK027111</b>  | 50258.645 | 49304.23 |
| <b>NM_016032</b> | 5934.448  | 5223.305  | <b>NM_003518</b> | 650.559   | 882.019  |
| <b>NM_014324</b> | 46325.57  | 48884.492 |                  |           |          |
| <b>NM_001687</b> | 35509.93  | 41511.09  |                  |           |          |
| <b>AK026374</b>  | 2517.962  | 2502.012  |                  |           |          |
| <b>NM_001169</b> | 3781.681  | 3291.714  |                  |           |          |
| <b>AK024648</b>  | 9736.514  | 9300.107  |                  |           |          |
| <b>NM_000719</b> | 642.366   | 690.239   |                  |           |          |
| <b>NM_003459</b> | 4497.925  | 5124.65   |                  |           |          |
| <b>AB032526</b>  | 537.248   | 687.78    |                  |           |          |
| <b>NM_000171</b> | 457.815   | 519.101   |                  |           |          |
| <b>AL354615</b>  | 6425.383  | 5848.036  |                  |           |          |
| <b>NM_013349</b> | 41457.082 | 47233.086 |                  |           |          |
| <b>NM_016134</b> | 851.255   | 874.553   |                  |           |          |
| <b>AJ010482</b>  | 4091.307  | 5193.858  |                  |           |          |
| <b>NM_000783</b> | 397.892   | 438.595   |                  |           |          |
| <b>NM_000896</b> | 660.593   | 670.159   |                  |           |          |
| <b>AB040672</b>  | 582.241   | 634.99    |                  |           |          |
| <b>NM_002192</b> | 1226.795  | 1191.33   |                  |           |          |
| <b>NM_005491</b> | 10589.375 | 14690.287 |                  |           |          |
| <b>NM_003869</b> | 1883.693  | 2526.516  |                  |           |          |
| <b>AK025599</b>  | 7455.376  | 7306.644  |                  |           |          |
| <b>X63417</b>    | 2822.706  | 2336.787  |                  |           |          |
| <b>S94539</b>    | 11679.126 | 12459.537 |                  |           |          |
| <b>NM_006402</b> | 4840.104  | 4143.73   |                  |           |          |
| <b>NM_005785</b> | 4211.936  | 3637.999  |                  |           |          |
| <b>NM_018248</b> | 9933.421  | 9382.967  |                  |           |          |
| <b>AK001695</b>  | 6128.526  | 5936.751  |                  |           |          |
| <b>NM_017886</b> | 2146.731  | 2484.116  |                  |           |          |
| <b>NM_006252</b> | 2238.397  | 2024.438  |                  |           |          |
| <b>NM_001721</b> | 1705.454  | 1554.877  |                  |           |          |
| <b>NM_014397</b> | 3790.804  | 4607.506  |                  |           |          |
| <b>AB023182</b>  | 4718.905  | 4451.29   |                  |           |          |
| <b>NM_003607</b> | 5695.798  | 5255.299  |                  |           |          |
| <b>AB017169</b>  | 564.436   | 541.697   |                  |           |          |
| <b>AL080170</b>  | 2760.562  | 2225.2    |                  |           |          |
| <b>AB039903</b>  | 8255.456  | 9607.189  |                  |           |          |
| <b>NM_000542</b> | 2152.076  | 2377.376  |                  |           |          |
| <b>NM_014625</b> | 247.711   | 351.938   |                  |           |          |
| <b>NM_006851</b> | 1966.408  | 1856.932  |                  |           |          |
| <b>AK001560</b>  | 674.546   | 955.66    |                  |           |          |
| <b>AB001328</b>  | 610.453   | 423.7     |                  |           |          |
| <b>NM_000948</b> | 794.69    | 650.085   |                  |           |          |
| <b>H99588</b>    | 1542.401  | 1287.512  |                  |           |          |
| <b>X00588</b>    | 555.464   | 640.518   |                  |           |          |
| <b>AI359037</b>  | 37926.887 | 42139.023 |                  |           |          |
| <b>BI754285</b>  | 506.511   | 587.148   |                  |           |          |
| <b>M76482</b>    | 582.56    | 768.149   |                  |           |          |
| <b>X17519</b>    | 21582.564 | 24324.154 |                  |           |          |

|           |           |           |
|-----------|-----------|-----------|
| NM_001883 | 573.13    | 390.593   |
| NM_004628 | 3182.368  | 3343.263  |
| L31785    | 2212.294  | 2500.599  |
| H-M 69043 | 6767.771  | 6771.697  |
| AF077374  | 1406.064  | 1181.504  |
| U43901    | 1687.738  | 2109.132  |
| X59065    | 377.914   | 657.947   |
| M59828    | 15589.24  | 15280.424 |
| AF309653  | 712.928   | 641.197   |
| NM_002620 | 3456.287  | 4144.58   |
| S79267    | 332.382   | 430.882   |
| NM_001816 | 490.871   | 431.554   |
| NM_003784 | 46653.059 | 46154.367 |
| NM_000195 | 8048.122  | 8638.975  |
| NM_005445 | 12277.844 | 9132.371  |
| NM_014895 | 2571.844  | 3151.886  |
| NM_003630 | 7758.06   | 8753.621  |
| NM_000046 | 3485.423  | 2936.154  |
| NM_003219 | 1247.118  | 1243.106  |
| NM_006709 | 3523.441  | 3926.858  |
| NM_000612 | 11771.912 | 10410.608 |
| NM_004257 | 18843.107 | 20337.701 |
| NM_002844 | 6142.809  | 6202.693  |
| NM_003629 | 3646.802  | 3988.549  |
| NM_005901 | 14136.156 | 14211.506 |
| NM_004248 | 1054.354  | 1216.627  |
| NM_000959 | 367.223   | 378.908   |
| NM_001313 | 562.619   | 640.563   |
| NM_002362 | 1330.051  | 1470.052  |
| NM_004796 | 779.087   | 683.947   |
| NM_001842 | 449.804   | 775.508   |
| NM_000719 | 880.002   | 475.413   |
| NM_003459 | 4363.085  | 4473.256  |
| NM_000171 | 561.76    | 547.203   |
| AL354615  | 4786.878  | 5246.674  |
| NM_013349 | 30293.303 | 36871.25  |
| NM_003705 | 3741.354  | 4081.271  |
| NM_006861 | 4697.478  | 4938.809  |
| NM_005829 | 8191.967  | 9086.366  |
| NM_000466 | 3233.138  | 3552.831  |
| NM_015544 | 6152.068  | 5633.553  |
| NM_015908 | 21891.59  | 28118.346 |
| AK022600  | 660.071   | 666.237   |
| AK023142  | 3592.797  | 3366.659  |
| U61740    | 12899.936 | 12854.851 |
| NM_006409 | 56031.566 | 48812.551 |
| AB049054  | 4387.485  | 5252.29   |
| NM_015071 | 1798.502  | 1656.393  |
| NM_013227 | 3987.567  | 2826.531  |
| Z83803    | 680.344   | 722.026   |
| AF027205  | 44792.188 | 42657.477 |
| AF075012  | 1589.936  | 1427.545  |
| NM_015658 | 1051.744  | 1215.722  |

|          |           |           |
|----------|-----------|-----------|
| NM_00058 | 5057.04   | 4915.981  |
| NM_01654 | 17901.695 | 18200.166 |
| NM_01788 | 2520.137  | 3334.828  |
| NM_00625 | 1208.78   | 1156.058  |
| NM_00172 | 1368.794  | 1275.161  |
| NM_01439 | 2887.593  | 2809.256  |
| AB02318  | 4368.522  | 4745.074  |
| NM_00360 | 4968.315  | 4721.954  |
| NM_00657 | 3069.367  | 3113.418  |
| NM_01325 | 4124.86   | 4882.673  |
| NM_00043 | 22302.42  | 25055.176 |
| AB04681  | 8741.899  | 8880.846  |
| NM_00609 | 10886.028 | 11513.251 |
| NM_00290 | 5208.973  | 5475.709  |
| NM_00491 | 2477.001  | 2745.446  |
| AB01345  | 1042.85   | 1193.357  |
| M93107   | 8212.834  | 7884.994  |
| BC00147  | 6806.59   | 6072.414  |
| NM_00246 | 37273.68  | 37037.027 |
| NM_00577 | 989.172   | 940.182   |
| AB03298  | 51519.773 | 45978.883 |
| NM_01752 | 52351.254 | 52654.793 |
| NM_01603 | 6518.542  | 6426.479  |
| NM_01432 | 51743.965 | 48967.141 |
| NM_00168 | 32570.877 | 28585.625 |
| AK02637  | 2055.877  | 2246.163  |
| NM_00116 | 3464.392  | 3318.438  |
| AK02464  | 9523.401  | 9462.274  |
| NM_00079 | 1499.068  | 1624.62   |
| AB03776  | 32309.121 | 34101.988 |
| NM_01400 | 30698.141 | 32307.131 |
| NM_01473 | 667.317   | 940.973   |
| AF03519  | 22978.592 | 23186.555 |
| NM_00405 | 1470.823  | 1675.709  |
| NM_00452 | 802.348   | 1018      |
| NM_01206 | 16183.907 | 18377.156 |
| AK02671  | 792.857   | 1029.183  |
| AJ01048  | 4537.433  | 4549.354  |
| NM_00078 | 214.839   | 468.295   |
| NM_00089 | 863.801   | 835.854   |
| AB04067  | 601.351   | 538.109   |
| NM_00219 | 789.684   | 699.601   |
| NM_00549 | 11151.297 | 14557.489 |
| NM_00386 | 1900.67   | 1754.195  |
| AK02559  | 7505.164  | 8004.868  |
| X63417   | 3135.796  | 3492.16   |
| S94539   | 12903.051 | 15418.076 |
| NM_00640 | 4668.175  | 3221.813  |
| NM_00578 | 3904.585  | 3942.831  |
| NM_01824 | 9447.645  | 9220.363  |
| AK00169  | 9020.331  | 8788.452  |
| AB04089  | 798.115   | 863.444   |
| AB03154  | 541.484   | 557.19    |

|           |           |           |
|-----------|-----------|-----------|
| NM_00397C | 3469.042  | 3462.094  |
| AK022496  | 1113.55   | 1246.445  |
| AB042636  | 454.631   | 513.057   |
| AB033035  | 578.272   | 709.912   |
| NM_002883 | 7113.377  | 8801.87   |
| NM_019012 | 2402.639  | 3202.047  |
| NM_000141 | 597.396   | 552.407   |
| NM_01615C | 798.996   | 776.581   |
| NM_002674 | 379.117   | 389.961   |
| U57058    | 597.576   | 1092.317  |
| AL137452  | 4744.048  | 3322.729  |
| NM_004312 | 10061.365 | 9200.026  |
| NM_001347 | 6770.663  | 6230.814  |
| AK024549  | 6062.882  | 6533.88   |
| NM_00633E | 1012.937  | 1183.68   |
| NM_007164 | 2621.314  | 3144.097  |
| NM_000261 | 2064.727  | 1982.087  |
| NM_00260E | 1599.436  | 1524.49   |
| NM_00257C | 4072.292  | 3561.904  |
| NM_003183 | 4362.642  | 3637.584  |
| NM_00358E | 524.443   | 624.133   |
| NM_019851 | 908.197   | 1136.771  |
| NM_00323E | 468.771   | 597.31    |
| NM_018367 | 1775.695  | 2364.764  |
| NM_001363 | 7900.666  | 8773.625  |
| NM_01409E | 14153.811 | 15897.677 |
| NM_00570E | 4696.899  | 5151.562  |
| NM_001261 | 8723.666  | 9725.782  |
| NM_001977 | 2358.911  | 2497.535  |
| NM_00721E | 4053.321  | 4936.352  |
| AK026854  | 3927.084  | 3761.253  |
| NM_00126E | 6534.84   | 7361.375  |
| NM_00250E | 813.003   | 690.491   |
| NM_00490E | 15882.256 | 15847.653 |
| X98261    | 547.655   | 508.092   |
| NM_012447 | 19291.512 | 15808.465 |
| NM_00636E | 647.967   | 564.632   |
| AK027013  | 43122.828 | 32788.648 |
| NM_001344 | 49807.816 | 48102.742 |
| NM_018294 | 7351.278  | 7539.019  |
| AL389934  | 2174.706  | 2112.298  |
| NM_00433C | 11506.775 | 10681.927 |
| AF151802  | 13214.313 | 13656.599 |
| AB006746  | 3471.036  | 3127.375  |
| NM_00649E | 828.313   | 688.91    |
| AB023233  | 2799.668  | 2351.738  |
| NM_00437C | 888.142   | 816.691   |
| NM_01813C | 8608.513  | 9096.547  |
| AF085878  | 746.768   | 544.098   |
| AB006630  | 2796.248  | 2357.496  |
| NM_01615E | 2857.743  | 3514.447  |
| NM_001224 | 15912.204 | 16142.204 |
| NM_017811 | 13869.388 | 13466.376 |

|           |           |           |
|-----------|-----------|-----------|
| NM_001569 | 5593.203  | 6185.884  |
| AK023284  | 4000.721  | 3651.814  |
| AF106069  | 985.142   | 1279.007  |
| D87438    | 651.622   | 279.862   |
| NM_005101 | 27520.729 | 21144.373 |
| NM_004205 | 1560.871  | 785.605   |
| AF130060  | 9036.566  | 7452.873  |
| NM_007057 | 20398.004 | 21309.734 |
| NM_000177 | 4260.043  | 3785.672  |
| NM_003387 | 8796.525  | 8378.108  |
| U60665    | 3143.756  | 2303.866  |
| NM_005507 | 50454.156 | 49183.566 |
| AL080133  | 4496.918  | 4520.587  |
| AY014403  | 1086.894  | 1883.968  |
| NM_006912 | 4221.88   | 3965.318  |
| X12534    | 4490.613  | 3877.395  |
| X65665    | 679.476   | 511.325   |
| NM_003112 | 2373.304  | 2542.694  |
| NM_014323 | 6229.986  | 5153.368  |
| NM_003205 | 7808.882  | 8668.748  |
| NM_002165 | 868.506   | 827.237   |
| AK026231  | 1539.803  | 1741.804  |
| NM_002140 | 22624.375 | 17817.195 |
| NM_020143 | 6932.811  | 5283.413  |
| NM_012469 | 8831.324  | 10877.492 |
| NM_005131 | 8775.417  | 7673.727  |
| NM_007056 | 5643.486  | 5085.081  |
| AF083383  | 10469.191 | 10499.067 |
| NM_006925 | 6289.986  | 8745.971  |
| NM_004890 | 23892.826 | 23464.76  |
| AK023181  | 8424.811  | 6877.626  |
| NM_004294 | 3687.598  | 2940.52   |
| NM_005051 | 24727.529 | 23441.707 |
| NM_001968 | 35464.063 | 34599.234 |
| D17259    | 52243.344 | 51008.344 |
| AB002366  | 493.83    | 531.898   |
| AF264627  | 20636.707 | 18861.449 |
| AL133053  | 1876.205  | 1862.187  |
| NM_018142 | 6576.154  | 6696.474  |
| NM_017653 | 6496.958  | 6391.359  |
| AL109695  | 11916.095 | 14300.571 |
| NM_002168 | 7601.932  | 7871.651  |
| AK027115  | 528.798   | 648.067   |
| NM_004453 | 2783.859  | 3086.494  |
| NM_016229 | 4711.944  | 4552.939  |
| NM_018244 | 4822.616  | 6141.601  |
| NM_002492 | 26196.484 | 24548.682 |
| AB046855  | 2349.039  | 1786.377  |
| NM_005642 | 13092.943 | 11678.438 |
| NM_018105 | 5136.648  | 3244.344  |
| AK023452  | 7399.484  | 5761.271  |
| AF155065  | 626.102   | 515.898   |
| NM_000332 | 1100.066  | 1016.929  |

|           |           |           |
|-----------|-----------|-----------|
| AK022215  | 15820.07  | 15049.697 |
| U90305    | 127.881   | 546.21    |
| NM_001527 | 16196.198 | 15401.666 |
| AK025269  | 4342.803  | 3354.975  |
| NM_00143E | 1007.622  | 566.324   |
| AB040971  | 1773.006  | 1817.754  |
| NM_006562 | 1388.198  | 1122.046  |
| AK024254  | 851.146   | 960.533   |
| NM_01845E | 3004.825  | 3164.171  |
| AK026697  | 828.579   | 820.723   |
| NM_019021 | 3667.165  | 4012.724  |
| AK002183  | 1937.258  | 2228.968  |
| NM_01899E | 3748.751  | 4411.214  |
| AL137304  | 3494.586  | 3548.292  |
| AL049274  | 1137.784  | 913.414   |
| NM_01827E | 5621.212  | 6525.556  |
| AF147369  | 550.432   | 248.393   |
| AK026883  | 2285.313  | 2253.732  |
| NM_01435C | 21327.398 | 16862.008 |
| U00925    | 19260.676 | 15781.765 |
| AL390185  | 928.908   | 696.396   |
| AF086235  | 6722.174  | 5539.755  |
| AF143886  | 1034.911  | 883.633   |
| AK025975  | 561.585   | 425.973   |
| AK025583  | 54293.668 | 44767.805 |
| NM_014664 | 4362.425  | 4154.194  |
| AL109788  | 787.283   | 844.767   |
| NM_014952 | 8171.131  | 9979.991  |
| AB037765  | 1940.589  | 1676.783  |
| AK025068  | 4780.018  | 4970.243  |
| AK026720  | 3062.591  | 3343.305  |
| AL137566  | 6430.78   | 7064.531  |
| AF087962  | 4941.831  | 4208.108  |
| AL050197  | 5322.64   | 6053.362  |
| AF085870  | 562.693   | 540.118   |
| AL080217  | 443.472   | 360.074   |
| AL117580  | 694.782   | 828.534   |
| AL110190  | 2148.167  | 2770.205  |
| AJ001893  | 3422.148  | 2786.122  |
| NM_01481E | 11325.038 | 9698.213  |
| AB032988  | 5886.542  | 6432.027  |
| AK023559  | 4711.559  | 3478.992  |
| AB037859  | 42007.172 | 37957.793 |
| AL049233  | 789.036   | 1095.211  |
| NM_01769E | 1570.23   | 1578.254  |
| AL050166  | 6077.168  | 6716.575  |
| AK026705  | 1174.96   | 1344.843  |
| NM_003602 | 690.892   | 379.107   |
| AF009258  | 54559     | 52216.965 |
| AF009305  | 1203.253  | 1090.265  |
| AF056454  | 379.686   | 273.28    |
| AF009270  | 653.574   | 835.681   |
| AF009318  | 809.592   | 1156.105  |

|           |           |           |
|-----------|-----------|-----------|
| AF056421  | 634.213   | 498.234   |
| AF090889  | 1080.036  | 953.887   |
| AK001085  | 551.817   | 723.506   |
| AK001906  | 362.394   | 594.935   |
| AK021528  | 1080.678  | 1135.647  |
| AK021746  | 917.109   | 935.389   |
| AK001136  | 1108.27   | 1504.752  |
| AK021617  | 634.301   | 735.138   |
| AK021810  | 674.754   | 551.592   |
| AK025595  | 511.484   | 616.442   |
| AK026743  | 462.658   | 402.342   |
| AK025846  | 339.718   | 440.62    |
| AK026805  | 1154.705  | 1256.39   |
| AL389983  | 10451.379 | 10318.696 |
| AJ008159  | 625.33    | 624.695   |
| AK000995  | 1093.999  | 1520.768  |
| U00959    | 1398.263  | 1245.53   |
| NM_014578 | 17505.02  | 17902.938 |
| AF147306  | 4944.455  | 5066.053  |
| AF086267  | 2444.82   | 2344.275  |
| X74606    | 1225.355  | 1292.48   |
| NM_012183 | 758.217   | 885.862   |
| AK026785  | 3601.355  | 4593.3    |
| AK022994  | 886.235   | 717.365   |
| NM_018225 | 34762.047 | 32740.949 |
| AK025534  | 1201.128  | 1224.76   |
| AK022577  | 1153.284  | 1233.112  |
| AF091526  | 1603.367  | 1254.493  |
| AK022170  | 509.115   | 551.322   |
| AL390169  | 423.773   | 552.342   |
| M60749    | 6664.138  | 7137.347  |
| X79986    | 1369.199  | 919.633   |
| NM_003523 | 9996.313  | 9515.495  |
| X01448    | 1178.532  | 1309.75   |
| NM_016503 | 4021.136  | 4816.699  |
| AK056351  | 44735.25  | 45355.941 |
| NM_014690 | 15310.108 | 14945.912 |
| NM_017695 | 7231.61   | 7148.794  |
| AF086490  | 2434.313  | 3232.104  |
| AF131738  | 26371.527 | 35213.281 |
| AK021666  | 2111.416  | 2449.574  |
| AK024081  | 887.868   | 867.737   |
| AK024825  | 5175.91   | 4722.933  |
| AF086317  | 14156.456 | 12659.836 |
| U16850    | 8679.563  | 7812.253  |
| AL390178  | 1075.896  | 1128.233  |
| Z36806    | 2813.468  | 3187.427  |
| NM_018615 | 3202.616  | 2438.202  |
| AJ008121  | 34919.324 | 31604.908 |
| AJ008153  | 1736.729  | 1656.423  |
| AK023739  | 1402.591  | 1860.319  |
| NM_005830 | 14867.452 | 17105.857 |
| NM_001507 | 2226.856  | 2264.886  |

|                  |           |           |
|------------------|-----------|-----------|
| <b>X92108</b>    | 781.51    | 828.12    |
| <b>AL389876</b>  | 465.345   | 539.127   |
| <b>AK022120</b>  | 854.87    | 786.172   |
| <b>Z70762</b>    | 1582.28   | 1748.215  |
| <b>D17099</b>    | 654.76    | 715.674   |
| <b>BF037206</b>  | 2058.698  | 1666.076  |
| <b>AK021474</b>  | 6165.08   | 5204.901  |
| <b>AK023642</b>  | 620.458   | 732.135   |
| <b>AW511510</b>  | 730.614   | 561.553   |
| <b>U52827</b>    | 592.032   | 504.808   |
| <b>AL049466</b>  | 17645.961 | 12635.685 |
| <b>AB037802</b>  | 4765.917  | 4930.201  |
| <b>AL137450</b>  | 3839.114  | 3552.711  |
| <b>NM_012064</b> | 1010.364  | 655.995   |
| <b>AK001460</b>  | 1494.293  | 1710.867  |
| <b>AK092508</b>  | 862.732   | 1334.37   |
| <b>AK027111</b>  | 53682.66  | 50379.578 |
| <b>NM_003518</b> | 1503.879  | 1364.932  |











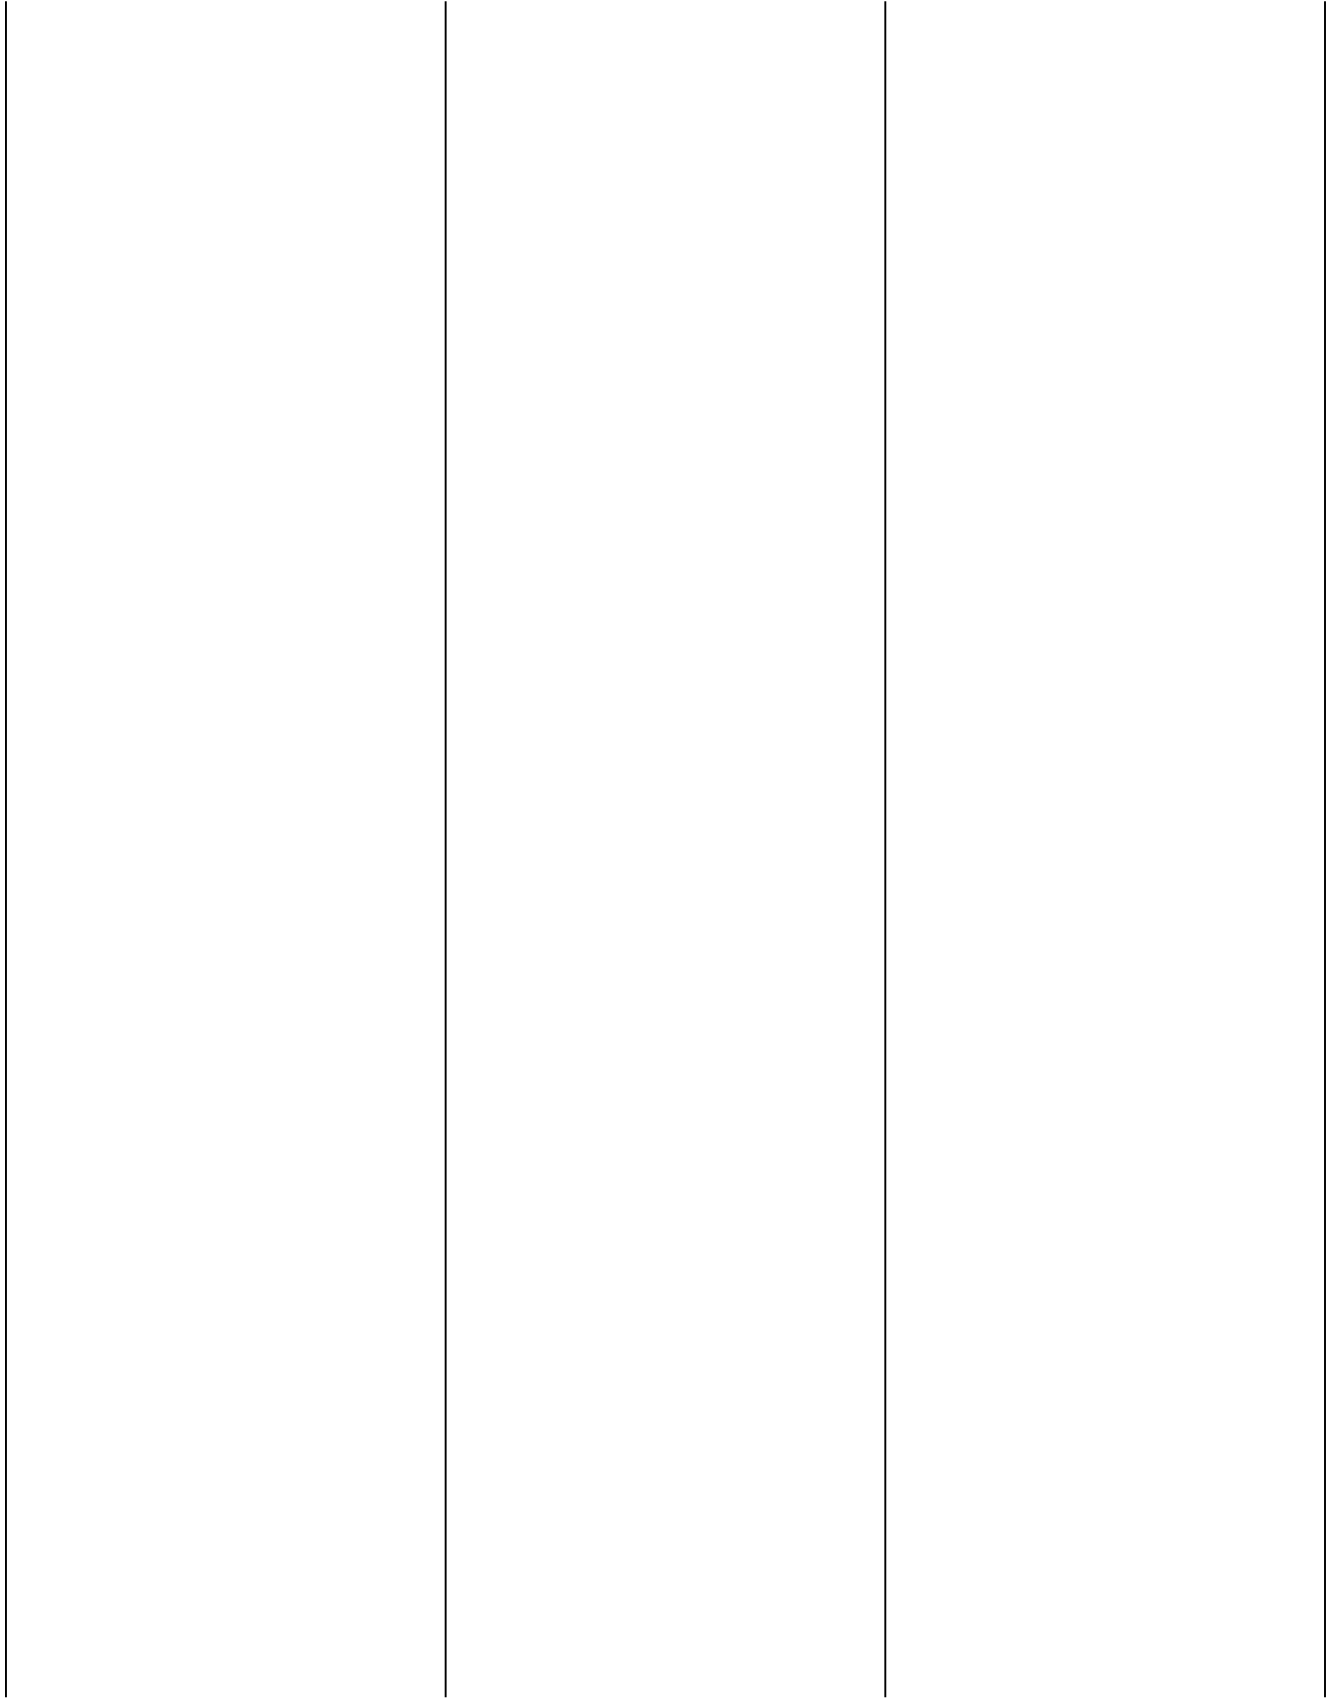













| <i>Replicate 2</i> |               |               | <i>Replicate 3</i> |               |               | <i>Replicate 3</i> |               |               |
|--------------------|---------------|---------------|--------------------|---------------|---------------|--------------------|---------------|---------------|
| <i>control</i>     |               |               | <i>2uM TPEN</i>    |               |               | <i>control</i>     |               |               |
| <i>ID</i>          | <i>AMPCH1</i> | <i>AMPCH2</i> | <i>ID</i>          | <i>AMPCH1</i> | <i>AMPCH2</i> | <i>ID</i>          | <i>AMPCH1</i> | <i>AMPCH2</i> |
| CY3Cy5             | 4510.851      | 223.382       | CY3Cy5             | 9084.775      | 490.582       | CY3Cy5             | 3264.819      | 191.84        |
| NM_000041          | 40163.5       | 36082.125     | NM_000041          | 10138.579     | 10397.815     | NM_000041          | 11717.163     | 7230.907      |
| W69211             | 961.358       | 577.962       | AA449931           | 1787.781      | 3067.471      | W69211             | 559.157       | 454.123       |
| AA449931           | 6809.748      | 3639.569      | AA877347           | 12878.805     | 15920.521     | AA449931           | 1871.386      | 1729.191      |
| AA877347           | 30965.502     | 48071.023     | S57235             | 4595.856      | 4125.098      | AA877347           | 17128.699     | 17900.287     |
| S57235             | 12111.991     | 25351.697     | AI376272           | 1334.312      | 1370.282      | S57235             | 5550.526      | 5434.808      |
| AI376272           | 3049.596      | 5555.857      | BF242229           | 627.136       | 974.365       | AI376272           | 1103.824      | 978.831       |
| BF242229           | 1105.646      | 1261.512      | X75756             | 25798.551     | 30755.117     | BF242229           | 667.78        | 723.772       |
| X75756             | 39695.629     | 30057.188     | AI754623           | 2027.206      | 1435.129      | X75756             | 12293.181     | 10471.099     |
| AI754623           | 2237.603      | 1896.884      | AA401326           | 10566.512     | 11093.3       | AI754623           | 1239.784      | 1268.555      |
| AA401326           | 10701.229     | 10991.565     | N55461             | 591.902       | 1063.183      | AA401326           | 5408.823      | 5562.494      |
| N55461             | 1278.814      | 1083.548      | AA504482           | 4193.41       | 3685.945      | N55461             | 712.561       | 709.951       |
| AA504482           | 6091.61       | 7537.947      | NM_006003          | 11869.55      | 10877.384     | AA504482           | 4609.295      | 4159.293      |
| BI602175           | 804.006       | 987.605       | NM_006555          | 4249.366      | 4678.745      | BI602175           | 508.396       | 241.222       |
| NM_006003          | 23342.174     | 26403.143     | SR5                | 4037.926      | 4858.257      | NM_006003          | 15575.78      | 29735.494     |
| NM_006555          | 5478.9        | 6235.428      | SR7                | 4571.598      | 42050.109     | NM_006555          | 4012.688      | 10592.861     |
| SR5                | 9346.266      | 10746.891     | SR9                | 15068.298     | 2539.081      | SR5                | 5860.838      | 3856.057      |
| SR7                | 7482.531      | 58612.215     | CY3Cy5             | 8591.577      | 467.223       | SR7                | 4414.689      | 35259.559     |
| SR9                | 29489.955     | 7979.213      | NM_006869          | 14051.401     | 15730.807     | SR9                | 19617.855     | 2440.663      |
| CY3Cy5             | 7923.685      | 504.352       | NM_015364          | 3218.612      | 2557.744      | CY3Cy5             | 3313.348      | 162.836       |
| NM_006869          | 45941.992     | 39736.066     | NM_006611          | 903.936       | 1335.92       | NM_006869          | 15925.209     | 10332.662     |
| NM_015364          | 7483.759      | 7501.648      | NM_005535          | 9777.866      | 20652.842     | NM_015364          | 5284.547      | 3732.487      |
| NM_004963          | 2276.034      | 1376.187      | AF218021           | 766.535       | 671.966       | NM_004963          | 1087.859      | 838.832       |
| NM_005535          | 24707.205     | 13806.443     | NM_013262          | 6258.826      | 7521.81       | NM_005535          | 11892.597     | 13085.16      |
| AB037857           | 888.179       | 480.593       | NM_007185          | 5986.512      | 7478.213      | AB037857           | 510.99        | 444.398       |
| AF218021           | 1912.022      | 3804.947      | NM_003221          | 432.138       | 1184.059      | AF218021           | 698.067       | 636.378       |
| NM_013262          | 12709.999     | 10997.541     | NM_003357          | 8803.255      | 14043.124     | NM_013262          | 6791.768      | 5803.318      |
| NM_007185          | 10337.62      | 6785.034      | AK023261           | 3560.011      | 4151.721      | NM_007185          | 3528.778      | 3250.834      |
| NM_003357          | 14690.632     | 9508.689      | NM_005097          | 856.271       | 1085.037      | NM_003357          | 5997.835      | 4122.198      |
| AF195420           | 712.627       | 719.234       | NM_012278          | 955.726       | 847.697       | AF195420           | 480.681       | 493.211       |
| AK023261           | 5822.552      | 10142.024     | NM_014057          | 2017.446      | 2516.88       | NM_005097          | 806.488       | 723.292       |
| NM_005097          | 945.238       | 1389.467      | NM_001550          | 4157.583      | 4032.136      | NM_012278          | 715.979       | 1015.232      |
| NM_012278          | 1193.004      | 1543.599      | AK026849           | 2683.293      | 2667.45       | AF023142           | 268.232       | 1581.418      |
| NM_014057          | 2702.287      | 3381.689      | NM_018677          | 1031.106      | 840.486       | NM_014057          | 1898.73       | 1638.775      |
| NM_001550          | 6457.584      | 7378.292      | NM_002785          | 784.397       | 901.795       | AK026849           | 2963.091      | 3824.295      |
| AK026849           | 4306.204      | 6304.528      | NM_016582          | 1156.174      | 1132.251      | NM_002785          | 777.024       | 342.337       |
| NM_018677          | 1181.251      | 1741.665      | NM_014229          | 369.433       | 959.816       | NM_016582          | 2489.182      | 1967.386      |
| NM_002785          | 1785.863      | 2527.121      | NM_013265          | 4036.588      | 4505.582      | NM_014229          | 713.572       | 739.651       |
| X78947             | 343.23        | 1121.971      | NM_014964          | 1268.337      | 1468.147      | NM_013265          | 9687.73       | 8290.571      |
| NM_016582          | 4376.797      | 3799.536      | NM_014016          | 3977.255      | 9125.226      | NM_014964          | 1897.704      | 1369.929      |
| NM_014229          | 896.904       | 802.957       | NM_013433          | 1271.503      | 3273.7        | NM_014016          | 4492.89       | 4621.034      |
| NM_013265          | 14594.543     | 11276.978     | AJ224867           | 935.314       | 1316.663      | NM_013433          | 1545.79       | 1794.909      |
| NM_014964          | 2593          | 1773.167      | NM_003794          | 3826.421      | 6416.434      | NM_003794          | 4606.089      | 4880.703      |
| NM_014016          | 7741.685      | 6046.63       | NM_019892          | 2822.594      | 3652.752      | NM_019892          | 4642.921      | 4732.941      |
| NM_013433          | 2249.043      | 1898.006      | NM_016169          | 2605.9        | 2461.933      | NM_016169          | 4281.56       | 3143.316      |
| NM_003794          | 5884.653      | 3446.911      | BF307652           | 1668.347      | 2230.645      | BF307652           | 1232.42       | 781.593       |
| NM_019892          | 6932.319      | 3834.203      | NM_017772          | 1860.089      | 2939.543      | NM_017772          | 1501.912      | 1749.392      |
| NM_016169          | 7947.012      | 3647.182      | AF116574           | 2279.655      | 2799.651      | AF116574           | 1496.002      | 1415.053      |

|           |           |           |           |           |           |           |           |           |
|-----------|-----------|-----------|-----------|-----------|-----------|-----------|-----------|-----------|
| BF307652  | 3009.472  | 1738.684  | NM_005529 | 542.807   | 872.459   | AF105067  | 1962.613  | 2236.138  |
| NM_017772 | 2351.639  | 1939.962  | NM_005869 | 6332.811  | 7702.728  | NM_018676 | 1344.771  | 1250.301  |
| AF116574  | 2847.145  | 1822.999  | AF105067  | 2393.942  | 2903.66   | NM_012072 | 302.791   | 1258.301  |
| NM_005869 | 7595.897  | 6885.167  | NM_018676 | 2151.556  | 1906.963  | NM_006014 | 1250.17   | 1201.422  |
| AF105067  | 2510.923  | 2666.546  | NM_006014 | 1093.681  | 1011.83   | NM_006280 | 30853.947 | 21488.986 |
| NM_018676 | 3418.612  | 3194.913  | NM_006280 | 35775.43  | 40178.156 | NM_002066 | 759.025   | 740.663   |
| NM_012072 | 847.171   | 948.688   | NM_002155 | 5492.021  | 4416.293  | NM_007355 | 55580.32  | 56533.73  |
| NM_006014 | 2053.391  | 2231.135  | NM_001771 | 582.269   | 744.476   | NM_012288 | 2681.169  | 2390.411  |
| NM_006280 | 54186.773 | 56682.727 | NM_002066 | 1082.996  | 1162.656  | NM_005264 | 3064.957  | 1868.833  |
| NM_002155 | 6319.432  | 11305.665 | NM_007355 | 58605.703 | 64602.684 | NM_020373 | 1176.165  | 751.519   |
| NM_001771 | 978.937   | 1579.618  | NM_006096 | 1725.08   | 1532.317  | NM_000714 | 1387.698  | 1497.369  |
| NM_002066 | 3383.927  | 3544.765  | NM_012288 | 1454.18   | 1642.746  | NM_002556 | 2026.535  | 2164.057  |
| NM_007355 | 52936.734 | 63354.738 | NM_005264 | 1030.582  | 1115.476  | NM_018089 | 2668.225  | 2479.091  |
| NM_006096 | 2440.594  | 3933.927  | NM_000714 | 631.631   | 799.85    | L21934    | 1341.729  | 1280.73   |
| NM_012288 | 3738.213  | 3997.344  | NM_002556 | 2316.473  | 3349.282  | AL117442  | 2714.425  | 2532.748  |
| NM_005264 | 3931.516  | 3628.5    | NM_018089 | 1935.268  | 2451.955  | NM_007188 | 2377.453  | 2774.108  |
| NM_020373 | 1224.653  | 1514.562  | L21934    | 1018.623  | 1141      | NM_001214 | 5392.381  | 7168.05   |
| NM_000714 | 1686.281  | 1931.87   | AL117442  | 2878.936  | 3384.284  | AK022409  | 556.98    | 1158.617  |
| NM_002556 | 3607.944  | 3266.409  | NM_004695 | 481.109   | 864.777   | U16851    | 8162.666  | 5447.235  |
| NM_018089 | 3271.217  | 1667.401  | AF299075  | 999.467   | 1729.734  | NM_014341 | 5101.87   | 3473.6    |
| L21934    | 1689.475  | 995.502   | NM_000340 | 610.234   | 1075.839  | NM_020309 | 703.325   | 1014.495  |
| AL117442  | 7918.275  | 5068.245  | NM_007188 | 3667.855  | 4591.465  | NM_000341 | 736.966   | 591.872   |
| NM_004695 | 841.04    | 793.743   | NM_001214 | 5208.125  | 10641.238 | AK023533  | 578.837   | 953.416   |
| AF299075  | 1692.962  | 911.777   | AK022409  | 1006.805  | 968.508   | NM_007071 | 6933.838  | 7004.278  |
| NM_000340 | 1351.079  | 1623.781  | U16851    | 8290.085  | 8086.946  | M37190    | 531.32    | 252.242   |
| NM_007188 | 5528.168  | 6398.78   | NM_014341 | 5317.747  | 4589.361  | NM_006812 | 6880.593  | 6687.41   |
| NM_001214 | 9935.101  | 10918.896 | NM_020309 | 892.754   | 1159.688  | AK024434  | 4787.845  | 5499.646  |
| AK022409  | 1637.596  | 1785.79   | NM_000341 | 804.72    | 918.124   | NM_002388 | 5724.141  | 6337.626  |
| U16851    | 12439.691 | 10976.163 | AK023533  | 942.393   | 1079.564  | NM_016069 | 19312.27  | 18473.893 |
| NM_020309 | 1855.954  | 1996.833  | NM_012450 | 1949.981  | 1870.567  | NM_017612 | 1889.886  | 1844.897  |
| NM_000341 | 1220.918  | 2617.068  | NM_007071 | 7876.08   | 7651.603  | NM_013236 | 5190.254  | 4923.387  |
| AK023533  | 1578.634  | 3205.916  | NM_006812 | 2609.798  | 2511.375  | NM_017841 | 4720.358  | 4395.116  |
| NM_012450 | 3310.606  | 5066.716  | AK024434  | 2001.1    | 1859.251  | NM_001254 | 2162.192  | 1825.211  |
| NM_007071 | 14176.651 | 22366.135 | NM_002388 | 6640.872  | 4787.718  | NM_020412 | 11740.509 | 7965.858  |
| NM_006812 | 8343.03   | 4391.119  | NM_016069 | 8031.09   | 7858.267  | NM_003032 | 4976.761  | 4569.062  |
| AK024434  | 5609.444  | 2807.039  | NM_017612 | 1740.396  | 1849.213  | NM_017453 | 9219.614  | 9092.664  |
| NM_002388 | 9182.238  | 8023.486  | NM_013236 | 8908.15   | 7007.561  | AF038564  | 2556.754  | 2382.557  |
| NM_016069 | 26306.047 | 24709.574 | NM_017841 | 5418.314  | 5569.968  | AB033768  | 832.025   | 762.157   |
| NM_017612 | 1952.891  | 1704.077  | NM_001254 | 3322.172  | 3624.126  | NM_017659 | 1436.542  | 898.054   |
| NM_013236 | 9821.744  | 8294.169  | NM_020412 | 11589.184 | 19299.646 | NM_006904 | 2514.895  | 1607.418  |
| NM_017841 | 9707.781  | 23064.207 | NM_003032 | 4070.284  | 5958.151  | NM_004217 | 7425.983  | 5623.304  |
| NM_001254 | 5772.085  | 12007.06  | NM_017453 | 7327.961  | 7517.97   | NM_006347 | 19715.98  | 15350.073 |
| NM_020412 | 25784.662 | 20570.533 | AF038564  | 3213.174  | 3960.664  | NM_020406 | 1138.117  | 1238.423  |
| NM_003032 | 7262.897  | 5734.647  | AB033768  | 1158.649  | 1086.171  | NM_014685 | 9613.14   | 7609.556  |
| NM_017453 | 14718.647 | 15681.76  | NM_017659 | 1560.843  | 1650.531  | NM_001550 | 3541.238  | 2523.487  |
| AF038564  | 4897.487  | 3929.306  | NM_006904 | 4570.971  | 4001.796  | AK026849  | 2383.905  | 2723.04   |
| AB033768  | 1167.777  | 1247.821  | NM_004217 | 8581.91   | 7806.914  | NM_018677 | 646.913   | 438.961   |
| NM_006904 | 5645.492  | 8402.915  | NM_006347 | 21489.555 | 18379.678 | NM_002785 | 480.96    | 624.743   |
| NM_004217 | 14132.038 | 23571.615 | NM_020406 | 1366.933  | 978.146   | NM_000041 | 14903.844 | 12539.033 |
| NM_006347 | 29219.025 | 48925.68  | NM_014685 | 8600.025  | 7500.5    | AA449931  | 1972.077  | 1943.645  |
| NM_020406 | 2426.853  | 4779.155  | NM_000041 | 5720.573  | 6370.179  | AA877347  | 15476.739 | 15814.428 |
| NM_014685 | 17085.244 | 32604.672 | AA449931  | 1107.595  | 1071.034  | S57235    | 4879.609  | 3263.27   |
| NM_001550 | 2741.474  | 1426.749  | AA877347  | 10376.922 | 7830.719  | AI376272  | 898.617   | 650.256   |

|           |           |           |           |           |           |           |           |           |
|-----------|-----------|-----------|-----------|-----------|-----------|-----------|-----------|-----------|
| AK026849  | 1209.292  | 766.447   | S57235    | 4386.266  | 4061.931  | BF242229  | 629.29    | 412.178   |
| NM_018677 | 901.864   | 427.055   | AI376272  | 1732.011  | 1488.334  | X75756    | 18003.539 | 11134.429 |
| NM_002785 | 540.236   | 320.073   | BF242229  | 596.408   | 848.028   | AI754623  | 1333.319  | 1265.23   |
| NM_000041 | 21528.746 | 11360.271 | X75756    | 27867.91  | 42630.477 | AA401326  | 7967.936  | 7053.805  |
| W69211    | 471.86    | 353.858   | AI754623  | 1701.499  | 2114.616  | AA504482  | 5035.563  | 2515.881  |
| AA449931  | 2072.639  | 1333.029  | AA401326  | 9489.924  | 13413.284 | NM_006003 | 13055.053 | 8757.379  |
| AA877347  | 22286.006 | 18360.754 | N55461    | 733.289   | 1118.299  | NM_006555 | 2841.325  | 2107.242  |
| S57235    | 9963.2    | 6114.295  | AA504482  | 4054.315  | 6520.743  | NM_016516 | 1601.994  | 1717.356  |
| AI376272  | 4313.907  | 8027.933  | NM_006003 | 9127.934  | 7624.568  | AF263538  | 648.076   | 432.063   |
| BF242229  | 1609.3    | 3438      | NM_006555 | 3637.437  | 3571.144  | NM_006280 | 31904.768 | 23023.451 |
| X75756    | 49508.18  | 46481.738 | NM_016516 | 2010.362  | 1599.27   | NM_002155 | 4229.569  | 4340.629  |
| AI754623  | 4026.635  | 4529.332  | AF263538  | 1018.62   | 1080.202  | NM_001771 | 284.318   | 554.693   |
| AA401326  | 13064.033 | 11188.232 | NM_006280 | 14172.279 | 13896.15  | NM_002066 | 1082.534  | 741.998   |
| N55461    | 1277.451  | 868.254   | NM_002155 | 2580.541  | 2240.814  | NM_007355 | 53153.016 | 63688.258 |
| AA504482  | 6763.9    | 5403.976  | NM_007355 | 57996.133 | 54601.934 | NM_006096 | 968.503   | 1223.099  |
| BI602175  | 1208.947  | 818.434   | NM_006096 | 1003.952  | 787.091   | NM_006866 | 21498.607 | 21769.391 |
| NM_006003 | 22357.279 | 26651.25  | NM_006866 | 12127.634 | 11588.609 | NM_015364 | 5113.442  | 5502.554  |
| NM_006555 | 5488.504  | 10559.698 | NM_015364 | 3042.467  | 2548.381  | NM_004963 | 1251.792  | 1082.814  |
| NM_016516 | 3301.001  | 6781.733  | NM_004963 | 623.144   | 782.737   | NM_005535 | 7797.908  | 6140.902  |
| AF263538  | 2025.76   | 4366.063  | NM_005535 | 11591.196 | 10550.789 | AF218021  | 1170.101  | 864.73    |
| NM_006280 | 37598.676 | 25545.854 | AF218021  | 817.214   | 1543.922  | NM_013262 | 9468.992  | 7135.196  |
| NM_002155 | 5125.974  | 3065.009  | NM_013262 | 9250.848  | 11970.256 | NM_007185 | 8532.844  | 7659.645  |
| NM_002066 | 969.093   | 519.746   | NM_007185 | 6685.183  | 11869.54  | NM_003357 | 7317.661  | 3390.084  |
| NM_007355 | 59957.336 | 60850.102 | NM_003221 | 490.908   | 933.431   | AK023261  | 2434.85   | 2279.641  |
| NM_006096 | 1408.719  | 1138.25   | NM_003357 | 9700.151  | 19915.568 | NM_012278 | 455.68    | 262.526   |
| NM_006866 | 24004.699 | 14726.911 | AF195420  | 873.223   | 941.045   | NM_014057 | 1805.97   | 1525.895  |
| NM_015364 | 5170.136  | 3188.422  | AK023261  | 4655.507  | 6125.419  | NM_020309 | 741.819   | 602.395   |
| NM_004963 | 1867.245  | 1087.775  | NM_005097 | 869.112   | 867.689   | NM_000341 | 864.659   | 479.752   |
| NM_005535 | 28569.967 | 17753.314 | NM_012278 | 886.949   | 1096.484  | AK023533  | 696.541   | 1004.452  |
| AB037857  | 1249.114  | 1270.177  | AF023142  | 505.142   | 581.554   | NM_012450 | 632.809   | 832.758   |
| NM_005012 | 312.57    | 1599.386  | NM_014057 | 1768.398  | 1911.592  | NM_007071 | 8234.861  | 10635.156 |
| AF218021  | 1461.406  | 1057.049  | NM_012450 | 1072.155  | 1175.537  | NM_016582 | 3078.194  | 3345.156  |
| NM_013262 | 14099.743 | 9410.345  | NM_007071 | 3837.394  | 3981.634  | NM_014229 | 673.264   | 1159.187  |
| NM_007185 | 11639.525 | 10259.333 | NM_016582 | 1548.191  | 1805.794  | NM_013265 | 7178.248  | 7219.839  |
| NM_003221 | 1021.068  | 880.785   | NM_013265 | 3452.234  | 4011.902  | NM_014964 | 1445.259  | 1926.094  |
| NM_003357 | 16998.291 | 13875.409 | NM_014964 | 566.382   | 925.274   | NM_014016 | 4284.292  | 4130.382  |
| AF195420  | 850.862   | 755.943   | NM_014016 | 3538.944  | 4145.82   | NM_013433 | 1375.168  | 910.659   |
| AK023261  | 5764.13   | 7924.281  | NM_013433 | 1215.401  | 1429.112  | NM_003794 | 3844.664  | 3373.051  |
| NM_005097 | 1241.845  | 1969.825  | NM_003794 | 4070.784  | 5350.514  | NM_019892 | 4587.654  | 4418.192  |
| NM_012278 | 1445.314  | 2581.495  | NM_019892 | 3319.035  | 6104.647  | NM_016169 | 7360.271  | 5570.995  |
| AF023142  | 1067.612  | 1904.042  | NM_016169 | 3466.092  | 4818.562  | BF307652  | 2371.383  | 1149.986  |
| NM_016100 | 713.633   | 1941.932  | BF307652  | 1521.236  | 1784.241  | NM_017772 | 2065.822  | 1696.226  |
| NM_014057 | 2971.715  | 5496.576  | NM_017772 | 1833.605  | 3358.33   | AF116574  | 1531.225  | 1075.629  |
| NM_020309 | 1063.473  | 844.871   | AF116574  | 2006.941  | 3228.701  | NM_005529 | 478.557   | 424.906   |
| NM_000341 | 749.978   | 764.969   | NM_005869 | 6209.133  | 5913.72   | NM_005866 | 4121.624  | 3232.083  |
| AK023533  | 1106.918  | 776.634   | AF105067  | 1890.04   | 1578.254  | AF105067  | 1319.78   | 950.107   |
| NM_012450 | 1140.951  | 950.085   | NM_018676 | 1491.71   | 1132.963  | NM_018676 | 1093.308  | 848.35    |
| NM_007071 | 8222.084  | 5205.573  | NM_006014 | 924.275   | 916.095   | NM_006014 | 1143.236  | 1088.596  |
| NM_016582 | 1752.24   | 748.449   | NM_006904 | 2315.001  | 2764.329  | NM_006904 | 2079.777  | 1547.066  |
| NM_014229 | 879.704   | 481.58    | NM_004217 | 5524.472  | 5614.418  | NM_004217 | 8046.696  | 5664.17   |
| NM_013265 | 11529.608 | 7417.267  | NM_006347 | 17140.904 | 13435.858 | NM_006347 | 20714.883 | 13638.213 |
| NM_014964 | 2332.808  | 834.044   | NM_020406 | 383.85    | 579.088   | NM_020406 | 1095.529  | 1021.664  |
| NM_014016 | 6755.34   | 5262.025  | NM_014685 | 3306.72   | 3070.644  | NM_014685 | 10042.987 | 8105.78   |

|           |           |           |           |           |           |           |           |           |
|-----------|-----------|-----------|-----------|-----------|-----------|-----------|-----------|-----------|
| NM_013433 | 2004.901  | 1485.151  | NM_012288 | 2292.907  | 2586.635  | NM_012288 | 2352.579  | 3755.106  |
| NM_003794 | 6364.676  | 6013.003  | NM_005264 | 1271.975  | 1298.348  | NM_005264 | 2700.958  | 1840.632  |
| NM_019892 | 7880.449  | 5366.608  | NM_000714 | 470.004   | 626.799   | NM_020373 | 1009.171  | 1068.953  |
| NM_016169 | 8374.912  | 4564.397  | NM_002556 | 1399.41   | 2061.702  | NM_000714 | 1215.5    | 1038.273  |
| BF307652  | 3155.708  | 2069.535  | NM_018089 | 1750.634  | 2862.167  | NM_002556 | 1817.989  | 1547.597  |
| NM_017772 | 3502.434  | 3208.593  | L21934    | 1278.176  | 1258.231  | NM_018089 | 3166.112  | 5030.015  |
| AF116574  | 3486.214  | 3566.723  | AL117442  | 3129.942  | 3621.521  | L21934    | 1881.754  | 1187.65   |
| NM_005529 | 543.903   | 1120.367  | NM_004695 | 726.099   | 6845.468  | AL117442  | 4637.3    | 2973.451  |
| NM_005869 | 8048.337  | 13082.415 | AF299075  | 999.984   | 1470.875  | AF299075  | 815.017   | 357.461   |
| AF105067  | 2749.883  | 4705.641  | NM_007188 | 3177.249  | 3610.365  | NM_007188 | 2898.146  | 2056.107  |
| NM_018676 | 3256.409  | 5869.218  | NM_001214 | 5114.139  | 7291.197  | NM_001214 | 3368.149  | 2709.825  |
| NM_006014 | 2125.885  | 3150.064  | AK022409  | 599.509   | 463.29    | U16851    | 5585.792  | 4127.693  |
| NM_006904 | 2797.191  | 2429.095  | U16851    | 4608.854  | 4645.373  | NM_014341 | 3959.267  | 2638.201  |
| NM_004217 | 9733.067  | 8810.829  | NM_014341 | 3630.168  | 3480.155  | NM_006003 | 13154.034 | 12140.995 |
| NM_006347 | 25531.172 | 21669.656 | NM_006003 | 4094.07   | 4032.509  | NM_006555 | 2471.939  | 2384.899  |
| NM_020406 | 1235.526  | 1173.464  | NM_006555 | 2475.825  | 3165.101  | NM_016516 | 1512.85   | 1572.226  |
| NM_014685 | 12866.374 | 11743.185 | NM_016516 | 1231.181  | 1155.556  | AF263538  | 434.872   | 884.385   |
| NM_012288 | 3769.161  | 1571.424  | AF263538  | 598.733   | 829.793   | NM_006812 | 7225.909  | 6273.175  |
| NM_005264 | 3306.412  | 1632.204  | NM_006812 | 2731.622  | 2753.155  | AK024434  | 5008.985  | 4294.388  |
| NM_020373 | 1074.629  | 690.817   | AK024434  | 1659.605  | 2194.882  | NM_002388 | 7980.202  | 9448.88   |
| NM_000714 | 1878.505  | 1106.191  | NM_002388 | 5227.223  | 6811.616  | NM_016069 | 23316.662 | 14746.082 |
| NM_002556 | 3371.111  | 2272.67   | NM_016069 | 4866.857  | 7192.317  | NM_017612 | 1965.189  | 1184.534  |
| NM_018089 | 4574.431  | 3088.456  | NM_017612 | 1470.58   | 1752.572  | NM_013236 | 6646.932  | 4868.315  |
| L21934    | 2061.631  | 1441.981  | NM_013236 | 6605.407  | 7105.65   | NM_017841 | 5685.466  | 4180.727  |
| AL117442  | 6454.471  | 5048.405  | NM_017841 | 5245.724  | 5524.105  | NM_001254 | 3255.049  | 2231.832  |
| AF299075  | 1239.849  | 1505.951  | NM_001254 | 2699.78   | 2633.176  | NM_020412 | 9743.783  | 6461.692  |
| NM_000340 | 328.595   | 1031.42   | NM_003032 | 3794.688  | 4413.975  | NM_003032 | 2626.766  | 1807.897  |
| NM_007188 | 4415.104  | 7298.001  | NM_017453 | 6725.236  | 5941.452  | NM_017453 | 5579.365  | 4521.447  |
| NM_001214 | 8024.015  | 10667.764 | AF038564  | 2532.415  | 2237.038  | AF038564  | 1629.237  | 1491.676  |
| AK022409  | 656.269   | 1471.046  | AB033768  | 598.833   | 648.243   | AB033768  | 470.819   | 571.169   |
| U16851    | 9630.824  | 16834.252 | NM_017659 | 1159.856  | 1132.092  | NM_017659 | 778.016   | 475.96    |
| NM_014341 | 8242.503  | 13937.876 | AK023261  | 3315.433  | 3181.603  | AK023261  | 2966.588  | 5403.113  |
| NM_006003 | 15801.257 | 12420.854 | NM_005097 | 540.972   | 581.859   | NM_005097 | 516.344   | 927.75    |
| NM_006555 | 3525.766  | 2403.054  | NM_014057 | 1419.809  | 1110.678  | NM_012278 | 683.012   | 1409.554  |
| NM_016516 | 2177.285  | 2471.29   | NM_001550 | 1721.166  | 1783.393  | AF023142  | 410.758   | 745.674   |
| AF263538  | 778.61    | 898.704   | AK026849  | 529.687   | 448.203   | NM_016100 | 284.964   | 1127.887  |
| NM_006812 | 8336.772  | 4169.317  | NM_000041 | 5034.18   | 6978.797  | NM_014057 | 1688.547  | 3047.64   |
| AK024434  | 5609.055  | 2062.525  | AA449931  | 609.546   | 1167.002  | NM_001550 | 3406.28   | 5656.578  |
| NM_002388 | 10125.035 | 6576.386  | AA877347  | 7141.541  | 8090.366  | AK026849  | 1850.314  | 3290.729  |
| NM_016069 | 28936.131 | 30507.355 | S57235    | 2914.156  | 3940.667  | NM_018677 | 385.706   | 920.378   |
| NM_017612 | 2523.857  | 2241.216  | AI376272  | 828.096   | 1131.318  | NM_002785 | 483.151   | 514.815   |
| NM_013236 | 8734.189  | 9763.446  | AI754623  | 1257.429  | 1269.587  | AA449931  | 2168.96   | 2190.884  |
| NM_017841 | 8085.158  | 10091.545 | AA401326  | 6571.993  | 6735.347  | AA877347  | 17795.883 | 21880.873 |
| NM_001254 | 4107.089  | 5974.457  | N55461    | 413.83    | 694.82    | S57235    | 5901.143  | 4420.778  |
| NM_020412 | 14803.278 | 16506.051 | AA504482  | 2016.859  | 2188.896  | AI376272  | 904.993   | 628.477   |
| NM_003032 | 5864.88   | 8913.409  | NM_005869 | 3762.62   | 3644.991  | BF242229  | 527.388   | 418.591   |
| NM_017453 | 12345.438 | 18041.949 | AF105067  | 1134.174  | 763.723   | X75756    | 11182.859 | 8510.012  |
| AF038564  | 4174.071  | 6016.394  | NM_018676 | 1172.026  | 1024.373  | AI754623  | 725.648   | 764.053   |
| AB033768  | 680.033   | 1667.699  | NM_006014 | 815.77    | 639.397   | AA401326  | 4218.063  | 3803.9    |
| NM_017659 | 2762.444  | 3693.52   | NM_006280 | 24311.15  | 22988.307 | N55461    | 488.607   | 460.909   |
| AK023261  | 2819.478  | 1840.416  | NM_002155 | 3407.177  | 2426.088  | AA504482  | 3465.479  | 2426.882  |
| NM_005097 | 560.173   | 513.964   | NM_002066 | 631.188   | 919.147   | NM_005869 | 4650.362  | 6634.258  |
| NM_012278 | 395.161   | 782.126   | NM_007355 | 55228.699 | 62060.648 | AF105067  | 1834.211  | 2242.731  |

|           |           |           |           |           |           |           |           |           |
|-----------|-----------|-----------|-----------|-----------|-----------|-----------|-----------|-----------|
| NM_01610C | 527.049   | 982.791   | NM_00609E | 941.241   | 1106.036  | NM_01867E | 1297.062  | 1893.981  |
| NM_014057 | 2023.21   | 2212.51   | NM_00686E | 14744.147 | 18478.537 | NM_006014 | 971.54    | 2169.41   |
| NM_00155C | 2828.666  | 2530.296  | NM_015364 | 2664.385  | 2685.557  | NM_00215E | 4662.648  | 11628.421 |
| AK026849  | 1541.691  | 1749.497  | NM_00496E | 882.144   | 908.127   | NM_006611 | 543.044   | 2365.738  |
| NM_018677 | 608.949   | 455.864   | NM_00553E | 9793.796  | 15891.215 | NM_00496E | 1681.777  | 2403.066  |
| NM_00278E | 618.81    | 306.216   | AF218021  | 538.453   | 845.113   | NM_001181 | 220.588   | 1180.089  |
| NM_000041 | 24511.176 | 12978.184 | NM_01326E | 6506.314  | 7398.65   | NM_00553E | 10253.461 | 15449.68  |
| W69211    | 667.652   | 529.677   | NM_00718E | 4777.393  | 6529.99   | AF218021  | 649.191   | 833.924   |
| AA449931  | 3806.545  | 2467.696  | NM_003221 | 453.939   | 505.687   | NM_01326E | 5029.836  | 6095.896  |
| AA877347  | 23093.158 | 17257.125 | NM_003357 | 7116.098  | 10309.372 | NM_003357 | 4205.651  | 4204.703  |
| S57235    | 8976.683  | 6861.953  | AF195420  | 629.041   | 582.64    | NM_00718E | 3159.865  | 5778.766  |
| AI376272  | 2288.06   | 2352.466  | NM_00718E | 2198.47   | 2422.723  | AK022409  | 785.899   | 567.284   |
| BF242229  | 983.537   | 1569.417  | NM_001214 | 2662.858  | 2676.143  | U16851    | 5847.886  | 3514.778  |
| X75756    | 32942.254 | 40702.273 | AK022409  | 841.465   | 1324.116  | NM_01326E | 9141.061  | 15342.475 |
| AI754623  | 2135.43   | 3266.846  | U16851    | 3882.433  | 3207.932  | NM_014964 | 927.305   | 1157.909  |
| AA401326  | 7980.83   | 11298.201 | NM_014341 | 3700.775  | 2977.428  | NM_01401E | 3427.577  | 4220.234  |
| N55461    | 943.436   | 1007.042  | NM_02030E | 639.483   | 792.979   | NM_01343E | 1032.767  | 1640.012  |
| AA504482  | 4390.569  | 6405.046  | NM_000341 | 596.893   | 1018.39   | NM_003794 | 3653.093  | 5731.175  |
| BI602175  | 598.568   | 1227.526  | AK023533  | 822.25    | 706.834   | NM_01989E | 3682.184  | 4771.237  |
| NM_00586E | 6099.969  | 5207.702  | NM_01245C | 1259.309  | 1901.375  | NM_01616E | 3987.426  | 4624.017  |
| AF105067  | 1782.946  | 1874.848  | NM_007071 | 6561.39   | 8640.081  | BF307652  | 1597.364  | 2469.753  |
| NM_01867E | 1254.78   | 1204.328  | NM_01658E | 2393.739  | 3439.9    | NM_01777E | 1440.585  | 2638.897  |
| NM_01207E | 494.705   | 815.192   | NM_01422E | 813.912   | 840.825   | NM_02041E | 10622.108 | 18224.07  |
| NM_006014 | 1475.807  | 1172.263  | NM_01326E | 6806.62   | 7895.059  | AF038564  | 2836.585  | 3021.889  |
| NM_00206E | 951.944   | 548.093   | NM_014964 | 1149.692  | 1140.856  | AB033768  | 884.221   | 921.113   |
| NM_00735E | 59786.215 | 55602.305 | NM_01401E | 3911.689  | 4323.327  | NM_01765E | 1687.798  | 1437.923  |
| NM_00609E | 1655.012  | 950.701   | NM_01343E | 1463.598  | 2134.813  | NM_02040E | 1241.14   | 939.256   |
| NM_00686E | 40788.145 | 27889.709 | NM_003794 | 3740.86   | 4099.352  | NM_01468E | 10331.017 | 5849.356  |
| NM_015364 | 8051.661  | 13372.439 | NM_01989E | 2430.465  | 3542.158  | NM_01228E | 2069.656  | 2407.079  |
| NM_00496E | 1753.753  | 918.917   | NM_01616E | 2446.764  | 3190.314  | NM_000714 | 851.327   | 1055.461  |
| NM_00553E | 26349.117 | 28761.371 | BF307652  | 804.994   | 1194.722  | NM_00255E | 1075.432  | 1239.983  |
| AB037857  | 746.177   | 1633.026  | NM_01777E | 995.977   | 1074.765  | NM_01808E | 2113.859  | 1811.827  |
| AF218021  | 1248.147  | 1788.617  | AF116574  | 1310.095  | 1590.259  | L21934    | 940.454   | 978.59    |
| NM_01326E | 12610.336 | 17284.207 | NM_02041E | 9150.004  | 7868.536  | AL117442  | 3963.282  | 4074.875  |
| NM_00718E | 8031.417  | 11250.852 | NM_00303E | 3331.882  | 3382.533  | AK026663  | 946.928   | 1583.555  |
| NM_003221 | 514.499   | 873.496   | NM_01745E | 5262.423  | 4486.962  | U69645    | 16532.701 | 23759.441 |
| NM_003357 | 9822.814  | 11529.876 | AF038564  | 2656.88   | 3460.602  | NM_01908E | 6209.797  | 7459.099  |
| NM_00718E | 4700.312  | 3422.593  | NM_01765E | 1144.012  | 1063.991  | NM_001424 | 1162.222  | 1259.648  |
| NM_001214 | 5083.689  | 4198.074  | NM_006904 | 4594.214  | 4088.876  | NM_01400E | 4769.735  | 8931.468  |
| U16851    | 7200.364  | 9072.185  | NM_004217 | 6673.315  | 5270.404  | NM_00135E | 2624.987  | 3474.049  |
| NM_014341 | 5237.478  | 5223.264  | NM_02040E | 1022.36   | 797.937   | AB037805  | 3949.807  | 1841.177  |
| NM_02030E | 621.63    | 501.4     | NM_01468E | 6603.816  | 6025.975  | NM_01651E | 1179.72   | 590.53    |
| NM_000341 | 744.07    | 732.179   | NM_01228E | 3739.787  | 5091.824  | NM_00681E | 5249.087  | 4401.396  |
| NM_01245C | 1377.973  | 538.701   | NM_005264 | 2545.632  | 2867.536  | AK024434  | 3094.146  | 2286.902  |
| NM_007071 | 8170.182  | 5897.544  | NM_02037E | 710.767   | 756.246   | NM_00238E | 4545.076  | 3690.819  |
| NM_01658E | 3866.33   | 2945.194  | NM_000714 | 1005.378  | 971.47    | NM_01606E | 18509.051 | 14299.518 |
| NM_01422E | 827.756   | 533.378   | NM_00255E | 2656.581  | 4925.699  | NM_01761E | 1128.821  | 820.333   |
| NM_01326E | 11940.019 | 8294.744  | NM_01808E | 2361.419  | 2718.814  | NM_01323E | 4703.258  | 3486.729  |
| NM_014964 | 1519.462  | 609.451   | L21934    | 1895.839  | 1886.913  | NM_017841 | 4141.382  | 3073.491  |
| NM_01401E | 7698.341  | 7016.382  | AL117442  | 2831.247  | 3172.215  | NM_001254 | 1214.909  | 657.721   |
| NM_01343E | 2833.62   | 2837.657  | AK026663  | 992.432   | 1321.146  | NM_00592E | 3090.834  | 3953.821  |
| NM_003794 | 6630.26   | 9921.485  | NM_001174 | 2691.92   | 2798.772  | AY007220  | 3726.334  | 1710.87   |
| NM_01989E | 6740.636  | 9478.225  | U69645    | 8799.035  | 7951.741  | NM_00380E | 847.765   | 521.531   |

|           |           |           |           |           |           |           |           |           |
|-----------|-----------|-----------|-----------|-----------|-----------|-----------|-----------|-----------|
| NM_016166 | 6158.53   | 7561.128  | NM_019082 | 5695.3    | 5483.721  | AK023666  | 425.249   | 373.799   |
| BF307652  | 1492.185  | 2210.704  | NM_001424 | 839.635   | 936.684   | NM_005396 | 466.606   | 246.348   |
| NM_017772 | 2849.656  | 4518.703  | AB040950  | 910.694   | 758.541   | NM_003632 | 1001.041  | 538.798   |
| NM_020412 | 14412.482 | 7800.761  | NM_014003 | 3395.566  | 3236.924  | NM_002194 | 1301.908  | 1089.359  |
| NM_003032 | 5826.663  | 3856.167  | NM_001356 | 888.45    | 560.126   | NM_016166 | 5871.327  | 4076.479  |
| NM_017453 | 13055.588 | 10070.958 | AB037805  | 5141.58   | 5285.607  | NM_002086 | 7001.078  | 4347.281  |
| AF038564  | 3488.384  | 3391.466  | NM_016516 | 1938.257  | 2125.71   | NM_005486 | 9462.937  | 6718.847  |
| AB033768  | 683.117   | 1334.944  | AF263538  | 1289.127  | 1169.295  | AF191770  | 302.796   | 842.252   |
| NM_017656 | 2117.891  | 2408.978  | NM_006812 | 5432.887  | 5250.384  | NM_020482 | 2584.358  | 5814.064  |
| NM_006904 | 4084.123  | 4156.693  | AK024434  | 3797.701  | 3666.91   | NM_002396 | 627.055   | 1675.741  |
| NM_004217 | 9732.996  | 9322.604  | NM_002386 | 8679.391  | 7345.846  | AK025329  | 9727.159  | 13335.665 |
| NM_020406 | 1127.009  | 792.369   | NM_016069 | 16302.771 | 15575.984 | NM_001256 | 938.703   | 935.108   |
| NM_014686 | 13076.669 | 9390.314  | NM_017612 | 1925.021  | 1973.748  | AL137679  | 1299.479  | 1570.123  |
| NM_012286 | 3578.575  | 2152.153  | NM_013236 | 9563.478  | 8459.659  | NM_001786 | 6055.571  | 4400.428  |
| NM_005264 | 2846.886  | 1271.164  | NM_017841 | 5668.519  | 7590.407  | AK025026  | 1005.217  | 518.512   |
| NM_000714 | 1923.427  | 1576.96   | NM_001254 | 3435.255  | 3236.733  | AK023052  | 815.009   | 299.274   |
| NM_002556 | 4073.133  | 3804.195  | NM_004386 | 333.065   | 472.603   | NM_006456 | 39922.367 | 25699.559 |
| NM_018086 | 3719.068  | 5517.667  | NM_005926 | 3138.122  | 2105.824  | NM_018466 | 5402.275  | 3743.279  |
| L21934    | 2264.009  | 3364.818  | NM_003952 | 619.927   | 508.922   | NM_002706 | 4312.774  | 2344.069  |
| AL117442  | 4872.127  | 7199.905  | NM_005424 | 1479.071  | 1674.544  | NM_005591 | 4499.127  | 2299.268  |
| NM_004696 | 1215.455  | 2667.971  | NM_005976 | 977.414   | 722.828   | NM_002376 | 250.002   | 446.252   |
| AK026663  | 936.91    | 666.536   | AY007220  | 6087.091  | 5698.895  | NM_002546 | 681.987   | 399.446   |
| NM_001174 | 2324.362  | 1789.207  | X89399    | 1418.199  | 859.98    | NM_006686 | 42705.215 | 30652.484 |
| U69645    | 19975.174 | 18083.119 | NM_003806 | 708.031   | 384.337   | NM_005411 | 3299.624  | 2236.783  |
| NM_019082 | 7463.811  | 6141.717  | AK023666  | 967.922   | 1044.169  | NM_006952 | 897.078   | 2281.299  |
| NM_001424 | 965.675   | 1293.179  | NM_005396 | 1118.935  | 1493.92   | NM_005056 | 479.221   | 1639.802  |
| AB040950  | 1505.354  | 2057.356  | NM_015186 | 1373.783  | 1085.782  | NM_004806 | 1261.134  | 2374.607  |
| NM_014003 | 5019.366  | 4706.248  | NM_005374 | 902.54    | 815.44    | NM_006666 | 16410.699 | 28404.596 |
| NM_001356 | 1296.156  | 991.755   | AF011757  | 383.549   | 399.198   | NM_002807 | 8703.179  | 12447.096 |
| AB037805  | 7306.653  | 4561.036  | NM_003632 | 1392.766  | 1394.087  | NM_002796 | 56696.699 | 60338.547 |
| NM_016516 | 2291.542  | 1700.117  | NM_002194 | 1130.935  | 1091.045  | NM_002796 | 14407.288 | 13045.117 |
| AF263538  | 788.699   | 646.682   | NM_016166 | 8547.43   | 7965.401  | NM_018386 | 2888.443  | 3230.604  |
| NM_006812 | 9309.742  | 5717.537  | NM_002086 | 13156.653 | 9792.792  | NM_014946 | 826.433   | 1072.673  |
| AK024434  | 5548.06   | 4312.879  | NM_016246 | 859.59    | 1705.205  | BF217579  | 8434.92   | 10425.998 |
| NM_002386 | 11136.926 | 12243.221 | NM_005486 | 13496.036 | 19488.594 | NM_004336 | 2708.877  | 3046.751  |
| NM_016069 | 27512.465 | 30504.922 | NM_020482 | 1559.995  | 1648.824  | AF040965  | 5946.641  | 7273.299  |
| NM_017612 | 3298.949  | 3912.575  | NM_002396 | 459.15    | 658.913   | AB037840  | 1229.886  | 1047.891  |
| NM_013236 | 11201.616 | 17767.51  | NM_005417 | 1357.696  | 1095.459  | NM_007011 | 846.599   | 544.079   |
| NM_017841 | 8404.085  | 12747.316 | NM_002646 | 2340.067  | 1979.238  | Y10210    | 1717.414  | 1136.704  |
| NM_001254 | 4443.515  | 6349.269  | AK025329  | 7185.176  | 4894.761  | AB020689  | 762.367   | 577.331   |
| NM_005926 | 3084.205  | 2563.853  | NM_001256 | 900.958   | 629.567   | NM_003203 | 1248.232  | 942.03    |
| NM_003952 | 2438.648  | 2963.167  | AL137679  | 1909.767  | 1575.476  | NM_002514 | 1029.673  | 506.624   |
| NM_005424 | 1833.769  | 2093.581  | NM_001786 | 13336.645 | 8327.691  | NM_012406 | 6468.883  | 11069.038 |
| NM_005976 | 3710.375  | 3159.344  | AB040965  | 735.273   | 661.824   | NM_014947 | 16283.215 | 25323.402 |
| AY007220  | 12283.809 | 8344.966  | AK025026  | 2082.915  | 1560.624  | AL355698  | 636.955   | 866.99    |
| NM_004436 | 2637.847  | 1405.333  | AK023052  | 1247.016  | 1347.935  | AB033112  | 1084.097  | 1442.552  |
| X89399    | 1249.921  | 674.293   | AB018350  | 508.675   | 387.193   | AK023243  | 970.941   | 2280.109  |
| NM_003806 | 1542.907  | 2025.156  | NM_006456 | 44428.281 | 49005.563 | NM_014406 | 1068.931  | 1543.343  |
| AK023666  | 845.907   | 500.426   | NM_018466 | 12921.691 | 9693.085  | NM_001422 | 2406.187  | 5041.481  |
| NM_005396 | 1061.828  | 732.056   | NM_002706 | 4622.927  | 3618.624  | AK022358  | 1881.651  | 4094.535  |
| NM_005118 | 497.738   | 1116.671  | NM_005591 | 6060.56   | 4180.096  | NM_000977 | 13823.771 | 20672.166 |
| NM_015186 | 1857.48   | 1330.353  | NM_002376 | 729.33    | 483.145   | NM_014206 | 24697.498 | 32942.957 |
| NM_005374 | 2155.91   | 2099.411  | NM_003126 | 480.741   | 549.518   | NM_018141 | 5545      | 5483.008  |



|           |           |           |           |           |           |           |           |           |
|-----------|-----------|-----------|-----------|-----------|-----------|-----------|-----------|-----------|
| NM_003632 | 1658.696  | 1975.182  | NM_002545 | 1352.318  | 912.575   | NM_016504 | 16966.219 | 14156.587 |
| NM_002194 | 1918.866  | 1978.408  | NM_006688 | 52687.512 | 59659.426 | U25752    | 53503.621 | 63554.816 |
| NM_000530 | 1056.356  | 1233.865  | NM_005411 | 5488.886  | 5787.151  | X96646    | 17781.318 | 14006.545 |
| NM_016166 | 12300.847 | 14994.23  | NM_004855 | 5057.562  | 2672.029  | NM_004109 | 4691.16   | 5359.048  |
| NM_002086 | 16620.273 | 22563.346 | NM_006952 | 788.393   | 505.935   | NM_003198 | 5273.262  | 3760.349  |
| NM_016248 | 1256.386  | 2427.592  | NM_004808 | 1217.833  | 706.787   | AF220415  | 624.02    | 581.68    |
| NM_005489 | 17739.434 | 20453.082 | NM_004617 | 1146.253  | 737.903   | NM_005174 | 55249.402 | 47498.949 |
| NM_020482 | 1923.491  | 1607.197  | NM_005668 | 5091.326  | 2635.647  | NM_000365 | 1744.011  | 1597.372  |
| NM_002398 | 625.712   | 515.486   | NM_006748 | 3778.695  | 2357.887  | AF110322  | 1886.944  | 881.196   |
| NM_005417 | 2222.195  | 3401.49   | NM_012177 | 4768.641  | 3258.285  | NM_013450 | 1989.358  | 2450.373  |
| NM_002649 | 2493.758  | 2854.41   | NM_006666 | 31140.025 | 32842.934 | NM_004538 | 996.954   | 1097.01   |
| AK025329  | 21136.816 | 19098.686 | NM_002807 | 14779.305 | 9771.959  | NM_003077 | 1574.685  | 1115.236  |
| NM_001259 | 1255.012  | 910.691   | NM_002799 | 58950.742 | 63301.98  | BE784999  | 42.534    | 1704.387  |
| AL137679  | 2728.843  | 2046.497  | NM_002790 | 27852.936 | 24701.383 | NM_002105 | 3004.033  | 3759.363  |
| NM_001786 | 12469.557 | 8605.171  | NM_018386 | 7358.8    | 5328.02   | NM_018489 | 764.401   | 1043.458  |
| AB040965  | 660.881   | 511.78    | BF217579  | 7487.295  | 9051.146  | L13203    | 1103.317  | 1290.957  |
| AK025026  | 1559.958  | 762.202   | NM_004335 | 2150.505  | 1935.065  | NM_018040 | 1190.726  | 1748.351  |
| AK023052  | 1615.705  | 717.728   | AF040965  | 6834.508  | 5987.736  | AB042646  | 1332.108  | 1637.667  |
| NM_006455 | 48109.281 | 29658.191 | AB037840  | 1755.417  | 1794.253  | NM_003431 | 2347.23   | 4455.326  |
| NM_017541 | 593.863   | 286.068   | NM_007011 | 926.548   | 695.876   | M29581    | 2044.875  | 2791.068  |
| NM_018460 | 18169.982 | 16573.467 | Y10210    | 3338.408  | 3179.46   | AL050204  | 2144.595  | 1575.156  |
| NM_002705 | 4358.172  | 5595.751  | AB020689  | 1559.563  | 1082.238  | AF085999  | 424.614   | 529.448   |
| NM_005591 | 9783.433  | 11303.24  | NM_003203 | 2548.279  | 3114.413  | AK025316  | 1106.047  | 1044.327  |
| NM_002373 | 970.374   | 1035.885  | NM_002514 | 735.555   | 827.46    | AK026357  | 1179.489  | 630.605   |
| NM_003128 | 596.296   | 1912.609  | AF177238  | 1436.457  | 1210.397  | NM_018323 | 1969.545  | 1390.972  |
| NM_017734 | 1981.545  | 7507.393  | AL096747  | 700.135   | 451.131   | NM_014235 | 3312.469  | 2187.302  |
| NM_002545 | 1546.281  | 2405.37   | AB021641  | 370.863   | 313.656   | AK026922  | 474.06    | 306.859   |
| NM_006688 | 53251.91  | 54403.934 | NM_012406 | 6340.154  | 3753.247  | NM_014353 | 2232.714  | 1239.995  |
| NM_005411 | 9071.75   | 10222.63  | NM_014947 | 15270.304 | 7324.444  | AK022006  | 28167.871 | 23169.818 |
| NM_004855 | 5329.256  | 2914.845  | AL355698  | 535.258   | 377.095   | AF070552  | 4846.729  | 4408.411  |
| NM_006952 | 736.423   | 731.16    | AB033112  | 1380.936  | 582.544   | NM_004271 | 8983.951  | 7010.871  |
| NM_004808 | 1322.053  | 689.029   | AK023243  | 773.379   | 813.679   | NM_018266 | 1431.806  | 1090.318  |
| NM_004617 | 1528.442  | 2212.379  | NM_014409 | 1251.344  | 1250.039  | NM_004867 | 11827.116 | 9415.955  |
| NM_005668 | 6354.233  | 7090.188  | NM_001422 | 1374.784  | 1892.335  | AL050021  | 6414.454  | 6074.215  |
| NM_006748 | 9236.062  | 7119.405  | AK022358  | 1820.762  | 1722.609  | AB002448  | 465.531   | 382.675   |
| NM_012177 | 6177.45   | 5505.145  | NM_000977 | 10302.108 | 7249.74   | NM_003838 | 1309.782  | 1669.635  |
| NM_006666 | 41819.918 | 30003.449 | NM_014205 | 18658.131 | 17416.949 | AK023089  | 2311.049  | 2070.149  |
| NM_002807 | 16451.951 | 10063.434 | NM_018141 | 10809.571 | 8943.794  | AK026059  | 50043.352 | 44560.879 |
| NM_002799 | 60765.395 | 58850.367 | U25752    | 56071.762 | 60001.738 | AK025814  | 1549.097  | 874.731   |
| NM_002790 | 31513.465 | 21001.314 | X96646    | 20823.971 | 29323.455 | AK000655  | 3788.395  | 1819.429  |
| NM_018386 | 7137.157  | 3695.192  | AB032991  | 9045.206  | 4117.868  | NM_017936 | 1623.229  | 1614.842  |
| NM_014948 | 1333.6    | 589.19    | AK026985  | 4522.076  | 3021.75   | X64983    | 13581.241 | 19147.281 |
| BF217579  | 9614.354  | 6173.169  | NM_004109 | 6045.531  | 2345.006  | D63134    | 455.817   | 490.037   |
| NM_004335 | 3515.283  | 2395.911  | NM_003198 | 7857.888  | 3360.044  | Y12018    | 52056.402 | 29324.877 |
| AF040965  | 8830.104  | 8560.389  | AF220415  | 561.207   | 328.259   | Y10513    | 633.232   | 505.452   |
| AB037840  | 2796.161  | 2611.785  | NM_005174 | 57595.266 | 46364.789 | NM_014029 | 34415.613 | 22555.342 |
| NM_007011 | 1514.116  | 1904.38   | NM_000365 | 2845.597  | 1750.039  | L08443    | 615.342   | 438.926   |
| Y10210    | 5925.892  | 6961.659  | AF110322  | 1504.936  | 2100.527  | L38936    | 595.321   | 476.05    |
| AB020689  | 2116.194  | 2837.498  | NM_013450 | 1732.652  | 1760.748  | AK025818  | 956.056   | 797.529   |
| NM_003203 | 3921.306  | 5378.354  | NM_004538 | 1377.167  | 1227.229  | AK023185  | 3467.448  | 2181.034  |
| NM_002514 | 897.809   | 1271.2    | NM_003077 | 1930.406  | 1304.818  | AK026345  | 1264.352  | 941.969   |
| AF177238  | 1554.212  | 1487.544  | NM_002105 | 3939.75   | 2647.917  | NM_018278 | 1060.596  | 942.818   |
| AL096747  | 361.078   | 330.08    | NM_018489 | 996.42    | 1112.331  | AK000864  | 892.267   | 603.519   |

|           |           |           |           |           |           |           |           |           |
|-----------|-----------|-----------|-----------|-----------|-----------|-----------|-----------|-----------|
| NM_012406 | 7064.386  | 3357.677  | L13203    | 1287.807  | 1633.642  | NM_017624 | 6180.352  | 2486.692  |
| NM_014947 | 16519.395 | 15295.84  | NM_018040 | 1570.754  | 1149.478  | AK000907  | 2243.828  | 1244.674  |
| AB033112  | 1477.58   | 1102.106  | AB042646  | 4555.664  | 4438.826  | AK024390  | 588.101   | 832.543   |
| AK023243  | 1079.257  | 733.576   | M29581    | 2350.886  | 2832.486  | AK024517  | 1045.798  | 773.617   |
| NM_014409 | 1815.137  | 1187.708  | AL050204  | 1709.448  | 950.132   | AK024887  | 491.162   | 1521.899  |
| NM_001422 | 1939.194  | 1236.026  | AK025316  | 2089.625  | 1090.263  | AK095587  | 3082.562  | 2833.398  |
| AK022358  | 3271.593  | 3078.574  | AK026357  | 3068.767  | 1682.533  | AF086043  | 842.302   | 853.607   |
| NM_000977 | 19713.555 | 22107.242 | NM_018323 | 4121.395  | 2511.158  | AK000038  | 437.322   | 524.462   |
| NM_016504 | 30557.236 | 39799.594 | NM_014235 | 5102.221  | 2613.214  | U10513    | 1701.355  | 1758.405  |
| U25752    | 56543.746 | 59522.973 | AK026922  | 897.3     | 613.553   | L10151    | 696.305   | 548.431   |
| X96646    | 32611.41  | 42975     | NM_014353 | 2866.189  | 2221.943  | AK022203  | 529.127   | 440.445   |
| AB032991  | 10633.038 | 5662.666  | AK022006  | 26111.922 | 29106.77  | AK023037  | 2253.934  | 2459.203  |
| AK026985  | 2871.224  | 2153.383  | AF070552  | 7722.716  | 7488.537  | AK055950  | 408.21    | 563.67    |
| NM_004109 | 5391.005  | 4097.71   | NM_004271 | 5668.212  | 3703.86   | AL050122  | 470.558   | 320.697   |
| NM_003198 | 6275.981  | 3653.563  | AK022282  | 483.599   | 538.433   | AK000839  | 5084.31   | 5455.564  |
| AF220415  | 643.029   | 469.919   | NM_018266 | 2835.846  | 2897.699  | NM_017854 | 48528.387 | 44207.813 |
| NM_005174 | 60220.664 | 55897.969 | NM_004867 | 23917.768 | 22264.072 | NM_014354 | 964.813   | 1117.898  |
| NM_000365 | 2906.592  | 1500.121  | AL050021  | 8609.098  | 6312.545  | AL137548  | 4439.121  | 3200.374  |
| AF110322  | 3229.267  | 1191.418  | AB002448  | 615.961   | 386.507   | AK095051  | 303.348   | 331.965   |
| NM_013450 | 1704.914  | 991.435   | AF070580  | 357.772   | 641.185   | AF088062  | 562.204   | 827.224   |
| NM_004538 | 2000.663  | 1529.097  | NM_003838 | 3682.333  | 3911.335  | AK024929  | 623.68    | 336.671   |
| NM_003077 | 2469.689  | 1743.496  | AK023089  | 3926.174  | 2003.351  | NM_017779 | 331.402   | 2560.029  |
| NM_002967 | 964.982   | 1078.481  | AK026059  | 54513.891 | 45203.844 | D17232    | 9565.727  | 9789.126  |
| NM_002105 | 5266.797  | 7500.617  | AK026942  | 759.094   | 477.854   | NM_005260 | 1362.496  | 1243.114  |
| NM_018489 | 2302.753  | 5343.272  | AK025814  | 2550.032  | 2453.59   | AF085880  | 2635.446  | 2158.655  |
| L13203    | 1922.405  | 2732.759  | AK000655  | 10844.265 | 19918.891 | NM_016094 | 1412.605  | 1227.306  |
| NM_018040 | 2489.378  | 2888.385  | AL117611  | 918.85    | 1706.039  | AK025003  | 593.279   | 379.581   |
| AB042646  | 4543.487  | 6623.464  | NM_017936 | 2510.214  | 1467.569  | NM_001427 | 2120.749  | 1876.043  |
| NM_003431 | 4883.598  | 5803.946  | D63134    | 934.531   | 529.196   | NM_016175 | 833.151   | 848.767   |
| M29581    | 5404.782  | 5513.592  | Y12018    | 55007.125 | 53052.176 | M15639    | 4138.772  | 5551.913  |
| AL050204  | 2340.879  | 1405.861  | Y10513    | 1064.382  | 815.816   | AF130084  | 1182.74   | 1924.218  |
| AF085999  | 470.703   | 249.851   | NM_014029 | 37864.887 | 27052.262 | AF133334  | 6123.519  | 4918.55   |
| AK025316  | 1696.615  | 1053.45   | Z83937    | 701.54    | 503.092   | NM_016290 | 1882.453  | 1661.299  |
| AK026357  | 2120.491  | 1778.829  | L08443    | 1375.106  | 2065.241  | AK026498  | 646.967   | 948.825   |
| NM_018323 | 3329.996  | 2170.206  | L38936    | 581.332   | 508.449   | NM_003894 | 921.344   | 605.087   |
| NM_014235 | 6808.987  | 4255.594  | D55643    | 688.866   | 677.945   | NM_006373 | 21989.416 | 20266.32  |
| AK026922  | 1156.117  | 819.142   | AK025818  | 2119.42   | 1718.203  | AK001007  | 1994.873  | 1878.389  |
| AK022645  | 658.674   | 480.966   | AK023185  | 4168.604  | 2946.428  | AF116655  | 5359.706  | 6353.748  |
| NM_014353 | 2079.624  | 1000.403  | AK026345  | 1374.063  | 2254.742  | AF009308  | 13121.358 | 12180.558 |
| AK022006  | 20647.123 | 10687.089 | NM_018278 | 2314.86   | 1285.015  | AB032969  | 20406.621 | 18557.244 |
| AF070552  | 9482.474  | 8262.558  | AK026328  | 434.069   | 324.138   | Y11610    | 564.485   | 711.498   |
| AJ270695  | 1779.806  | 2474.755  | AK000864  | 3563.198  | 2129.295  | NM_004627 | 1340.21   | 888.197   |
| NM_004271 | 17482.76  | 19434.18  | AK022414  | 1173.038  | 761.721   | AL050217  | 2461.687  | 1735.89   |
| NM_004867 | 34898.316 | 47131.656 | NM_017624 | 7714.686  | 8436.783  | AB007968  | 461.059   | 396.562   |
| AL050021  | 16437.279 | 19616.889 | AK000907  | 2919.856  | 2725.186  | NM_005664 | 13557.033 | 11717.634 |
| AB002448  | 1835.012  | 2096.823  | AK024390  | 1100.443  | 654.73    | NM_006270 | 28176.307 | 28921.127 |
| AF070580  | 629.126   | 941.469   | AK024517  | 1157.054  | 1191.272  | U50277    | 1489.298  | 1408.736  |
| NM_003838 | 4488.251  | 5585.806  | AK024887  | 1961.206  | 1666.987  | Z48633    | 1296.411  | 817.045   |
| AK023089  | 3659.656  | 1780.906  | AK095587  | 3865.324  | 1833.938  | M62627    | 6146.657  | 7788.545  |
| AK026059  | 58722.297 | 45291.77  | AF086043  | 1001.456  | 647.571   | NM_006688 | 2444.669  | 3335.286  |
| AK025814  | 2974.776  | 2645.142  | AK000038  | 1161.456  | 1917.206  | AI889961  | 2128.084  | 1731.12   |
| AK000655  | 5919.964  | 8051.646  | BC010084  | 911.547   | 1359.95   | AI360116  | 1001.147  | 845.92    |
| NM_017936 | 3675.958  | 2441.576  | U10513    | 3522.848  | 1726.534  | AI572835  | 1376.912  | 799.797   |

|           |           |           |           |           |           |           |           |           |
|-----------|-----------|-----------|-----------|-----------|-----------|-----------|-----------|-----------|
| D63134    | 961.857   | 778.068   | AK022203  | 745.081   | 582.798   | R20392    | 3861.894  | 2598.325  |
| Y12018    | 54580.918 | 36028.711 | BC032236  | 674.713   | 461.33    | AA486367  | 2062.415  | 1310.83   |
| Y10513    | 1696.201  | 1829.018  | AK023037  | 2392.62   | 2990.126  | AL136131  | 2215.469  | 1460.627  |
| L08443    | 2692.443  | 4311.631  | AK055950  | 942.04    | 552.109   | NM_033357 | 1910.094  | 946.358   |
| L38936    | 1397.494  | 2423.134  | AK000839  | 5470.366  | 3679.058  | AF335109  | 721.941   | 370.498   |
| D55643    | 2661.276  | 3361.812  | AK002209  | 472.937   | 180.916   | NM_002054 | 388.18    | 560.478   |
| AK025818  | 2348.251  | 2209.619  | NM_014354 | 1928.376  | 1847.335  | SR6       | 1483.481  | 1450.957  |
| AK023185  | 6398.104  | 7286.15   | AL137548  | 7903.309  | 11025.672 | SR8       | 3598.941  | 10950.236 |
| NM_01816E | 406.601   | 813.626   | AK095051  | 612.492   | 797.87    | SR10      | 22756.793 | 6052.873  |
| AK026345  | 1884.768  | 2459.209  | AF088062  | 1083.69   | 1090.143  | NM_00086E | 2052.834  | 1205.506  |
| AB007971  | 444.52    | 339       | AK024929  | 1087.958  | 913.385   | NM_000867 | 1657.938  | 774.517   |
| NM_01827E | 2409.69   | 1323.946  | NM_01777E | 896.03    | 719.463   | AF076642  | 2349.446  | 2086.613  |
| AK000864  | 4762.529  | 2318.025  | D17232    | 51287.645 | 41704.789 | NM_00238E | 1048.136  | 555.284   |
| AK022414  | 1791.384  | 1358.869  | NM_00526C | 3642.272  | 5448.722  | NM_005314 | 1213.836  | 713.989   |
| NM_017624 | 9092.661  | 5968.576  | AF085880  | 9243.979  | 17515.846 | NM_00488E | 1456.812  | 1005.649  |
| NM_01792E | 661.301   | 1232.552  | AF000990  | 1001.303  | 938.074   | NM_00514E | 688.213   | 289.537   |
| AK000907  | 6071.878  | 7309.334  | NM_016094 | 5490.646  | 10305.923 | NM_01215E | 5166.962  | 2908.345  |
| AK024517  | 3299.735  | 3723.127  | AK025003  | 1888.131  | 2500.567  | NM_00194C | 890.11    | 525.886   |
| AK024585  | 677.298   | 775.667   | AK023601  | 305.446   | 479.761   | U83115    | 5723.056  | 4026.632  |
| AK024887  | 2982.008  | 1728.556  | NM_001427 | 3994.913  | 1472.286  | NM_001264 | 7746.424  | 5090.251  |
| AK025005  | 562.246   | 1167.686  | NM_01617E | 998.791   | 664.205   | NM_013364 | 5226.157  | 5180.663  |
| AK095587  | 4965.455  | 6983.489  | M15639    | 6229.41   | 3939.136  | NM_01436E | 827.794   | 787.779   |
| AF086043  | 997.566   | 1973.575  | AF130084  | 2860.163  | 1681.614  | NM_00085C | 725.367   | 379.594   |
| AK000038  | 1305.271  | 2254.441  | AF133334  | 12347.063 | 10475.656 | NM_00467E | 627.272   | 487.205   |
| BC010084  | 981.069   | 1182.011  | NM_01629C | 3100.403  | 1330.915  | NM_001994 | 3007.561  | 2410.123  |
| U10513    | 3119.32   | 4560.519  | AK026498  | 979.075   | 556.7     | J00129    | 11036.088 | 10094.293 |
| L10151    | 1531.066  | 2063.21   | NM_003894 | 1704.619  | 661.246   | NM_00332C | 2968.256  | 3024.382  |
| AK022203  | 1185.887  | 1182.41   | AK001007  | 4833.952  | 4903.581  | L10146    | 4225.365  | 4524.757  |
| BC032236  | 676.326   | 349.177   | NM_01448E | 477.091   | 275.093   | AK025657  | 2422.543  | 2616.683  |
| AK023037  | 2572.739  | 1075.153  | AF116655  | 12927.393 | 6442.782  | W42849    | 540.976   | 1147.355  |
| AL050122  | 1085.64   | 1771.913  | AF009308  | 30877.076 | 15017.143 | AK022790  | 23384.01  | 15036.956 |
| AK024209  | 549.176   | 1381.349  | AB032969  | 23635.492 | 10728.554 | NM_004311 | 13445.385 | 10289.458 |
| AK000839  | 10845.162 | 11396.479 | Y11610    | 898.796   | 1041.35   | NM_005624 | 1858.217  | 1033.717  |
| AK021963  | 702.649   | 814.885   | AF085940  | 708.009   | 1180.484  | NM_00230E | 1456.515  | 998.463   |
| AK002209  | 1102.95   | 918.029   | L37695    | 1001.084  | 1530.795  | NM_00057E | 791.888   | 549.646   |
| NM_017854 | 31368.893 | 32586.082 | NM_004627 | 5766.029  | 4807.944  | NM_00063E | 749.529   | 445.11    |
| NM_014354 | 1711.252  | 1856      | AK026523  | 1852.187  | 1043.866  | NM_00094E | 16784.119 | 14012.914 |
| AL137548  | 8077.497  | 8768.106  | AL050217  | 6610.172  | 8580.075  | AK056773  | 2194.459  | 2145.083  |
| AK095051  | 604.838   | 743.232   | NM_00516E | 1221.141  | 702.657   | NM_00218E | 4482.556  | 4947.089  |
| AF088062  | 2822.12   | 3389.551  | AB007968  | 1040.425  | 561.426   | NM_01647C | 2902.683  | 3275.921  |
| AK024929  | 1082.611  | 2107.223  | NM_005664 | 17948.648 | 9488.955  | AL365408  | 16850.645 | 13335.571 |
| NM_01777E | 882.371   | 1675.123  | NM_00627C | 33906.797 | 21191.234 | AK026204  | 4442.083  | 3776.419  |
| D17232    | 16470.768 | 22316.68  | U50277    | 1449.218  | 1256.366  | NM_01463E | 1910.611  | 1781.691  |
| NM_00526C | 2562.261  | 1325.899  | Z48633    | 1859.406  | 1065.82   | NM_00414E | 3457.463  | 3353.605  |
| AF085880  | 7816.701  | 3129.241  | M62627    | 10681.088 | 5918.396  | AK023196  | 445.611   | 528.396   |
| AF000990  | 907.549   | 784.271   | NM_00668E | 3969.409  | 2151.943  | NM_01872E | 1074.546  | 1400.894  |
| NM_016094 | 6705.519  | 4699.003  | CY3Cy5    | 6792.053  | 267.423   | NM_016234 | 8409.715  | 6471.178  |
| AK025003  | 1979.24   | 1473.866  | AI889961  | 2833.829  | 2543.272  | NM_00187E | 5157.89   | 3599.05   |
| NM_001427 | 4219.477  | 3628.345  | AI360116  | 1413.401  | 1552.975  | NM_016144 | 9073.626  | 5183.622  |
| NM_01617E | 1605.15   | 1881.256  | NM_01398E | 320.042   | 429.667   | AL133099  | 4071.98   | 2309.986  |
| M15639    | 8399.026  | 9913.428  | AI572835  | 2916.362  | 3034.913  | NM_01608E | 1469.828  | 902.686   |
| AF130084  | 3708.829  | 3611.242  | R20392    | 5568.428  | 6385.797  | NM_00043E | 952.103   | 805.008   |
| AF133334  | 18028.303 | 19878.35  | AA486367  | 4032.532  | 2846.83   | NM_00019C | 2689.177  | 2085.425  |

|           |           |           |           |           |           |           |           |           |
|-----------|-----------|-----------|-----------|-----------|-----------|-----------|-----------|-----------|
| NM_01629C | 4114.125  | 4539.168  | N56684    | 200.468   | 363.779   | X15667    | 3812.7    | 2582.301  |
| AK026498  | 1414.426  | 1493.941  | M55153    | 809.853   | 757.967   | NM_017512 | 3228.964  | 2442.531  |
| NM_003894 | 1613.166  | 1438.369  | AF414120  | 573.516   | 493.739   | AK023078  | 2642.561  | 2868.935  |
| NM_006373 | 35288.563 | 36653.223 | AK097322  | 229.376   | 355.563   | NM_00223C | 33085.879 | 26050.957 |
| AK001007  | 3982.988  | 4230.043  | AL136131  | 5240.026  | 4631.944  | NM_00224C | 22396.352 | 19002.602 |
| AF116655  | 7291.995  | 10131.177 | NM_033357 | 4167.96   | 4853.468  | NM_015684 | 2674.759  | 2149.853  |
| AF009308  | 24362.197 | 33012.215 | AF335109  | 1262.303  | 1212.685  | NM_00394E | 22770.592 | 22690.631 |
| AB032969  | 49224.445 | 51491.828 | NM_003263 | 715.135   | 736.419   | NM_004981 | 5663.83   | 5528.951  |
| Y11610    | 918.991   | 1358.164  | U59911    | 5621.299  | 8328.574  | NM_016524 | 1018.334  | 1179.812  |
| NM_004627 | 7075.6    | 3590.531  | NM_002054 | 770.089   | 1147.366  | NM_00712C | 31405.346 | 33079.195 |
| AK026523  | 1682.547  | 1272.639  | SR6       | 1236.597  | 1434.992  | AL137631  | 5069.345  | 5239.332  |
| AL050217  | 7386.802  | 6444.342  | SR10      | 22046.898 | 8500.693  | NM_016057 | 8106.16   | 9008.609  |
| L37704    | 755.266   | 576.921   | CY3Cy5    | 9276.881  | 335.46    | NM_014677 | 1632.026  | 1370.416  |
| NM_005162 | 1117.731  | 1058.432  | NM_00086E | 2350.293  | 2751.014  | NM_01559C | 982.869   | 364.001   |
| AB007968  | 889.781   | 1017.986  | NM_000867 | 1403.562  | 1849.742  | NM_01869C | 7306.65   | 4087.52   |
| NM_005664 | 24459.443 | 21572.529 | AF076642  | 2723.317  | 3102.097  | NM_00013C | 7075.86   | 4025.093  |
| NM_00627C | 43312.922 | 44899.199 | NM_00238C | 2388.272  | 2318.335  | AL157456  | 963.039   | 534.742   |
| U50277    | 2719.708  | 2461.154  | NM_005314 | 1648.62   | 1877.586  | AL162056  | 833.746   | 678.916   |
| Z48633    | 3540.061  | 3308.451  | NM_00488E | 2739.824  | 2793.03   | NM_00038C | 5779.128  | 4164.972  |
| M62627    | 13536.784 | 17224.85  | NM_00514E | 586.131   | 609.008   | NM_00462E | 1439.723  | 992.361   |
| NM_00668E | 5230.672  | 6098.055  | NM_012152 | 7355.836  | 7539.865  | NM_01487E | 1680.225  | 1259.864  |
| CY3Cy5    | 7435.604  | 234.183   | AK024093  | 2164.069  | 2217.606  | NM_00540E | 3137.403  | 3244.005  |
| AI889961  | 4777.174  | 6982.7    | NM_00194C | 2347.223  | 1950.055  | NM_00332E | 1991.891  | 1905.642  |
| NM_013983 | 972.731   | 994.166   | U83115    | 9546.9    | 9862.127  | X93921    | 1351.891  | 1332.03   |
| AI572835  | 8557.589  | 10720.023 | NM_001264 | 8271.983  | 8629.577  | AF073482  | 1994.443  | 2110.534  |
| R20392    | 8139.112  | 9466.486  | NM_013364 | 6208.487  | 6477.868  | NM_00599C | 1409.394  | 1399.571  |
| AA486367  | 5638.796  | 4525.455  | NM_01436E | 1158.108  | 747.61    | NM_01627E | 16148.486 | 13449.524 |
| M55153    | 664.606   | 1224.194  | NM_00085C | 4056.145  | 3446.013  | NM_017762 | 2185.64   | 2373.323  |
| AF414120  | 707.231   | 730.074   | NM_00467E | 1161.696  | 1522.326  | NM_001863 | 65191.355 | 60677.277 |
| AK097322  | 729.161   | 788.357   | NM_007193 | 227.736   | 427.106   | NM_000921 | 5810.935  | 6928.452  |
| AL136131  | 9753.194  | 10991.237 | NM_001994 | 5089.924  | 6047.51   | NM_00009E | 1383.804  | 1268.405  |
| NM_033357 | 6098.741  | 6275.914  | J00129    | 25348.125 | 30168.314 | NM_00001E | 12823.811 | 16026.789 |
| AF335109  | 1647.659  | 1690.868  | NM_00332C | 5056.835  | 5696.574  | AK026913  | 2193.083  | 2523.791  |
| NM_003263 | 982.728   | 697.284   | L10146    | 5450.951  | 6147.71   | AK025657  | 5477.232  | 3899.163  |
| U59911    | 10282.699 | 11937.548 | NM_00068E | 6162.492  | 7358.607  | AF142063  | 491.233   | 536.846   |
| NM_002054 | 1520.502  | 1651.14   | AK025657  | 8921.552  | 8173.528  | W42849    | 1055.168  | 516.437   |
| SR10      | 45019.594 | 18149.936 | AF142063  | 1278.418  | 1182.555  | AI889961  | 1003.701  | 790.258   |
| CY3Cy5    | 8868.054  | 291.516   | W42849    | 1445.5    | 2353.542  | AI360116  | 807.599   | 877.706   |
| NM_00086E | 5544.076  | 6773.355  | AK022790  | 18584.281 | 13359.049 | AI572835  | 1905.075  | 1678.14   |
| NM_005314 | 3606.182  | 3650.507  | NM_004311 | 9786.351  | 9911.119  | R20392    | 4719.854  | 3787.079  |
| NM_00488E | 2718.124  | 3865.046  | NM_005624 | 1484.508  | 1731.21   | AA486367  | 2519.272  | 1425.457  |
| NM_00514E | 906.572   | 1331.06   | NM_002302 | 1019.666  | 1003.89   | AL136131  | 2259.263  | 2231.02   |
| NM_012152 | 14082.725 | 13346.088 | AB020672  | 566.59    | 614.808   | AF335109  | 479.565   | 744.751   |
| AK024093  | 3458.016  | 3943.8    | AK026958  | 724.804   | 730.689   | AK026204  | 4654.992  | 3173.769  |
| NM_00194C | 4042.609  | 5016.335  | NM_00057E | 946.647   | 1001.893  | NM_01463E | 1796.66   | 859.505   |
| U83115    | 18810.83  | 19943.422 | NM_00148C | 288.384   | 378.126   | NM_00414E | 4804.874  | 3098.65   |
| NM_001264 | 16964.471 | 14796.991 | AF263462  | 1746.134  | 1890.772  | AK023196  | 713.122   | 684.421   |
| NM_013364 | 10554.847 | 13012.349 | AB040962  | 485.511   | 408.474   | NM_01872E | 1387.668  | 1109.881  |
| NM_01436E | 1878.075  | 2101.696  | NM_00063E | 907.525   | 965.915   | AK024014  | 1375.224  | 893.723   |
| NM_00085C | 5528.583  | 5995.303  | AV697672  | 709.261   | 593.016   | NM_00086E | 1672.95   | 955.164   |
| NM_00467E | 1292.362  | 1595.548  | NM_000942 | 14054.664 | 14163.396 | NM_000867 | 1238.322  | 847.225   |
| NM_007193 | 764.651   | 1115.314  | NM_002982 | 777.021   | 602.39    | AF076642  | 2151.453  | 2117.458  |
| NM_001994 | 9225.749  | 8149.554  | AK056773  | 3440.386  | 4917.845  | NM_00238C | 2137.813  | 1338.793  |

|           |           |           |           |           |           |           |           |           |
|-----------|-----------|-----------|-----------|-----------|-----------|-----------|-----------|-----------|
| J00129    | 31273.127 | 40909.477 | NM_002182 | 11902.537 | 14647.047 | NM_005314 | 1154.774  | 690.325   |
| NM_00332C | 5289.536  | 6322.533  | NM_01647C | 3933.035  | 3845.232  | NM_00488E | 697.898   | 353.727   |
| AK025657  | 11424.03  | 16561.859 | AL365408  | 35287.168 | 41894.539 | NM_00514E | 421.427   | 690.496   |
| AF142063  | 892.448   | 1273.544  | AK026204  | 4923.487  | 6101.589  | NM_01215E | 5282.943  | 4152.39   |
| W42849    | 1883.69   | 1660.974  | NM_01463E | 3053.839  | 2450.238  | AK024093  | 1557.171  | 1698.714  |
| AK022790  | 38581.676 | 44614.629 | NM_00414E | 8765.907  | 9848.695  | NM_00194C | 1592.83   | 1997.864  |
| NM_004311 | 22930.758 | 30668.42  | AK023196  | 1479.217  | 1696.578  | U83115    | 8703.69   | 9599.169  |
| NM_00057E | 2407.006  | 2395.906  | NM_01872E | 4614.727  | 4102.915  | NM_001264 | 6842.967  | 6522.674  |
| AF263462  | 5365.479  | 5163.801  | AK024014  | 4778.135  | 6004.104  | NM_013364 | 4401.627  | 6076.514  |
| AB040962  | 1196.755  | 918.941   | NM_016234 | 9242.297  | 6864.879  | NM_01436E | 827.869   | 1174.461  |
| NM_00063E | 2821.991  | 2124.449  | NM_00187E | 5321.979  | 5108.926  | NM_00085C | 2736.914  | 2988.991  |
| AV697672  | 1045.445  | 578.324   | NM_016144 | 8355.218  | 6486.363  | NM_00467E | 718.789   | 735.203   |
| NM_00094E | 20479.85  | 19572.162 | AL133099  | 3080.496  | 3799.389  | NM_001994 | 2295.167  | 1988.357  |
| NM_00298E | 1155.459  | 801.604   | NM_01608E | 2377.391  | 2075.316  | J00129    | 13699.168 | 14131.737 |
| NM_00219C | 730.312   | 373.701   | NM_00043E | 1597.29   | 1661.349  | NM_00332C | 1195.629  | 1579.558  |
| AK056773  | 7241.261  | 8232.7    | NM_00019C | 9160.6    | 5947.778  | NM_016524 | 1042.488  | 910.53    |
| NM_00218E | 19397.457 | 20251.08  | X15667    | 4824.69   | 4228.87   | NM_00712E | 32953.453 | 22394.736 |
| NM_01647C | 5632.992  | 7255.318  | NM_01751E | 3069.822  | 3208.477  | AL137631  | 3988.798  | 2371.565  |
| AL365408  | 52285.695 | 52648.5   | NM_00167E | 416.211   | 489.693   | NM_016057 | 8265.823  | 5756.501  |
| AK026204  | 12343.856 | 11080.038 | AK023078  | 5246.784  | 5881.989  | NM_014677 | 1091.941  | 617.224   |
| NM_01463E | 4373.971  | 3640.872  | NM_00223E | 47611.797 | 44363.383 | NM_00685E | 518.441   | 360.929   |
| NM_00414E | 13996.712 | 13615.215 | NM_00224E | 39917.305 | 46733.18  | AK022790  | 19301.676 | 13116.368 |
| AK023196  | 1835.143  | 2154.899  | NM_015684 | 2703.209  | 3598.633  | NM_004311 | 11249.241 | 9149.534  |
| NM_01872E | 3734.132  | 3724.774  | NM_00394E | 20685.037 | 23880.211 | NM_005624 | 1128.351  | 1006.512  |
| AK024014  | 1654.785  | 1815.513  | NM_004981 | 13969.375 | 15439.458 | AK026958  | 648.325   | 228.67    |
| NM_016234 | 16481.551 | 18568.33  | AK096507  | 676.051   | 984.856   | NM_00057E | 726.371   | 623.683   |
| NM_00187E | 9250.979  | 11135.832 | NM_016524 | 1651.759  | 1995.876  | NM_00148C | 321.002   | 297.474   |
| NM_016144 | 13614.09  | 17782.701 | NM_00712E | 36895.574 | 44975.469 | AF263462  | 1698.733  | 2022.07   |
| NM_00043E | 2404.025  | 2621.484  | AL137631  | 8989.858  | 10830.576 | AB040962  | 4702.009  | 5517.698  |
| NM_00019C | 14652.36  | 14236.941 | NM_016057 | 15969.791 | 15701.556 | NM_00063E | 1163.572  | 1008.08   |
| X15667    | 13085.459 | 9972.987  | NM_014677 | 1950.95   | 2039.282  | AV697672  | 175.933   | 390.211   |
| NM_01751E | 5590.641  | 4963.187  | NM_00685E | 978.543   | 1028.865  | NM_00094E | 15247.233 | 15330.406 |
| NM_018661 | 1117.983  | 534.782   | NM_01559E | 762.484   | 784.348   | NM_00298E | 374.043   | 473.008   |
| AK023078  | 9569.535  | 9573.185  | NM_01869E | 10988.419 | 8762.708  | AK056773  | 2083.958  | 2069.026  |
| NM_00223E | 60708.609 | 54672.844 | NM_00013E | 13824.976 | 14701.498 | NM_00218E | 3610.768  | 4785.514  |
| NM_00224E | 53174.285 | 51957.73  | AL157456  | 1115.982  | 1042.749  | NM_01647C | 490.384   | 798.071   |
| NM_015684 | 5480.694  | 5036.271  | AL162056  | 1402.661  | 904.302   | AL365408  | 18679.688 | 16861.205 |
| NM_00394E | 34747.836 | 39913.215 | NM_00038C | 12845.604 | 10469.159 | NM_01776E | 2205.449  | 1498.902  |
| NM_004981 | 23222.041 | 24580.729 | NM_00462E | 2184.808  | 1630.837  | NM_00186E | 57944.766 | 47377.855 |
| AK096507  | 1371.887  | 2331.717  | NM_01487E | 3638.647  | 3427.466  | NM_000921 | 5572.708  | 4052.799  |
| NM_016524 | 4901.996  | 4409.688  | NM_00540E | 4361.481  | 5110.191  | NM_00009E | 1531.099  | 1057.76   |
| NM_00712E | 60996.586 | 57002.719 | NM_00332E | 1858.13   | 1894.915  | NM_00001E | 8346.783  | 6071.206  |
| AL137631  | 10853.555 | 11827.545 | X93921    | 1884.999  | 2502.433  | AK026913  | 3515.994  | 2448.433  |
| NM_016057 | 19522.002 | 22862.785 | AF073482  | 4083.625  | 3858.278  | NM_016234 | 5918.702  | 5326.318  |
| NM_014677 | 3167.047  | 2531.04   | NM_00599C | 2825.509  | 3071.777  | NM_00187E | 4824.006  | 5041.709  |
| NM_00627E | 910.447   | 1070.015  | NM_01627E | 52678.18  | 54014.254 | NM_016144 | 5631.373  | 4639.888  |
| NM_01559E | 1373.124  | 1275.027  | NM_01776E | 4002.278  | 4870.645  | AL133099  | 1184.414  | 961.712   |
| AB037902  | 1292.115  | 1117.319  | NM_00186E | 53924.039 | 53246.832 | NM_01608E | 2198.051  | 2068.423  |
| NM_01869E | 17497.129 | 16205.149 | NM_000921 | 9503.396  | 9735.368  | NM_00043E | 1040.26   | 997.048   |
| NM_00013E | 29385.109 | 26535.008 | NM_00009E | 2929.969  | 3430.054  | NM_00019C | 7587.97   | 8327.404  |
| AL157456  | 2058.403  | 2525.895  | NM_00001E | 20246.787 | 23978.215 | X15667    | 4665.607  | 5199.659  |
| AL162056  | 1302.159  | 1703.836  | AK026913  | 5020.363  | 6404.663  | NM_01751E | 3615.195  | 3488.717  |
| NM_00038C | 12804.174 | 11336.466 | L10146    | 5546.542  | 4279.716  | AK023078  | 5722.716  | 6385.609  |

|           |           |           |           |           |           |           |           |           |
|-----------|-----------|-----------|-----------|-----------|-----------|-----------|-----------|-----------|
| NM_00462E | 3158.866  | 2889.602  | NM_00068E | 6223.458  | 5638.775  | NM_00223E | 43773.625 | 37321.566 |
| NM_01487E | 4390.415  | 4491.092  | AK025657  | 8590.146  | 6346.674  | NM_00224E | 25231.803 | 23856.578 |
| NM_00540E | 6754.041  | 7896.996  | AF142063  | 1186.94   | 857.074   | NM_015684 | 2751.508  | 2698.591  |
| NM_00332E | 3504.285  | 3662.156  | W42849    | 1514.145  | 1810.901  | NM_00394E | 18296.898 | 18571.674 |
| X93921    | 3434.882  | 3123.18   | AI889961  | 2690.085  | 2723.379  | NM_004981 | 3066.475  | 3204.355  |
| AF073482  | 5330.082  | 5032.192  | AI360116  | 1467.385  | 1494.4    | AK096507  | 412.988   | 446.267   |
| NM_00599C | 4470.618  | 4182.999  | AI572835  | 3086.797  | 2939.36   | NM_00448E | 527.302   | 131.451   |
| NM_01627E | 46027.738 | 53657.59  | R20392    | 5874.416  | 5511.66   | NM_00013E | 14055.044 | 10931.414 |
| NM_01776E | 5087.191  | 6270.908  | AA486367  | 3765.421  | 2888.18   | AL157456  | 639.359   | 728.665   |
| NM_00186E | 63796     | 61047.516 | N56684    | 507.021   | 377.592   | AL162056  | 500.434   | 894.865   |
| NM_000921 | 10130.631 | 10953.068 | M55153    | 888.972   | 850.884   | NM_00038C | 4259.678  | 4501.937  |
| NM_00009E | 3354.15   | 3250.132  | AF414120  | 473.507   | 438.231   | NM_00462E | 1837.782  | 1670.588  |
| NM_00001E | 19792.059 | 21723.346 | AK097322  | 327.55    | 373.935   | NM_01487E | 2717.133  | 3210.99   |
| AK026913  | 2039.514  | 1983.339  | AL136131  | 3194.119  | 4427.082  | NM_00540E | 3731.39   | 4057.632  |
| L10146    | 499.709   | 933.872   | NM_033357 | 4126.899  | 4670.097  | NM_00332E | 2018.317  | 2712.041  |
| NM_00068E | 692.964   | 1130.548  | AF335109  | 1252.225  | 1431.224  | X93921    | 1074.457  | 980.87    |
| AK025657  | 12017.527 | 17917.221 | NM_00326E | 526.534   | 816.846   | AF073482  | 2153.685  | 2746.694  |
| AF142063  | 1683.947  | 1843.44   | U59911    | 5964.976  | 7991.16   | NM_00599C | 1156.58   | 1244.37   |
| W42849    | 4691.17   | 4177.159  | NM_002054 | 1620.549  | 2920.281  | NM_01627E | 14982.86  | 15044.491 |
| AI889961  | 4938.051  | 4901.903  | NM_00448E | 858.929   | 765.641   | NM_00467E | 757.558   | 493.65    |
| AI360116  | 2767.952  | 3736.083  | AK026204  | 5207.44   | 3741.385  | NM_001994 | 1201.022  | 729.198   |
| AI572835  | 8201.68   | 7110.947  | NM_01463E | 2461.099  | 1659.005  | W42849    | 1652.746  | 1514.194  |
| R20392    | 7170.783  | 7428.898  | NM_00414E | 7394.937  | 6447.759  | AI889961  | 3094.7    | 4640.385  |
| AA486367  | 5411.825  | 3408.178  | AK023196  | 1301.04   | 1181.615  | AI360116  | 903.543   | 1378.654  |
| N56684    | 552.288   | 738.679   | NM_01872E | 3934.533  | 2818.789  | AI572835  | 941.191   | 1048.744  |
| M55153    | 1001.346  | 1120.823  | AK024014  | 4181.639  | 5148.404  | R20392    | 3181.987  | 3685.552  |
| AF414120  | 1012.237  | 868.525   | NM_00086E | 2112.077  | 2546.188  | AA486367  | 2767.527  | 2169.519  |
| AK097322  | 712.875   | 871.331   | NM_000867 | 1298.041  | 1655.216  | AL136131  | 6061.27   | 5921.572  |
| AL136131  | 10082.826 | 10982.695 | AF076642  | 2819.648  | 1838.251  | AF335109  | 421.431   | 808.87    |
| NM_033357 | 7437.806  | 6728.752  | NM_00238E | 2319.951  | 2536.767  | NM_00298E | 535.471   | 437.709   |
| AF335109  | 1903.452  | 2177.38   | NM_005314 | 1820.258  | 1541.113  | AK056773  | 1883.768  | 1666.062  |
| NM_00326E | 696.991   | 505.678   | NM_00488E | 2405.756  | 1996.822  | NM_00218E | 8958.419  | 9749.858  |
| U59911    | 12114.075 | 10508.94  | NM_00514E | 507.694   | 535.254   | NM_01647C | 2755.66   | 3103.731  |
| NM_002054 | 1297.675  | 1264.347  | NM_01215E | 7445.136  | 8723.431  | AL365408  | 27119.055 | 22644.535 |
| AK026204  | 10874.586 | 9935.643  | AK024093  | 1641.907  | 2161.094  | AK026204  | 3614.122  | 3049.174  |
| NM_00414E | 15273.032 | 16253.008 | NM_00194C | 2068.156  | 2386.553  | NM_01463E | 1955.319  | 1218.42   |
| AK023196  | 2386.558  | 2288.502  | U83115    | 9900.318  | 11211.671 | NM_00414E | 5272.777  | 5308.636  |
| NM_01872E | 5951.166  | 6199.487  | NM_001264 | 9562.819  | 9810.073  | AK023196  | 1222.885  | 1655.837  |
| AK024014  | 8573.077  | 7799.824  | NM_013364 | 7709.364  | 7972.286  | NM_01872E | 1886.483  | 2335.849  |
| NM_00086E | 4558.091  | 3712.311  | NM_01436E | 1335.847  | 1991.013  | AK024014  | 1240.812  | 1255.688  |
| NM_000867 | 2023.635  | 2015.396  | NM_00085C | 3364.161  | 5903.473  | NM_00086E | 1477.365  | 1194.787  |
| AF076642  | 3149.942  | 3471.682  | NM_00467E | 1206.748  | 2872.735  | NM_000867 | 371.536   | 741.856   |
| NM_00238E | 3419.748  | 2646.838  | NM_00719E | 321.149   | 769.01    | AF076642  | 2138.832  | 2647.026  |
| NM_005314 | 2751.197  | 2443.631  | NM_001994 | 5721.81   | 7037.565  | NM_00238E | 1660.71   | 1333.106  |
| NM_00488E | 2788.85   | 3205.593  | J00129    | 25651.006 | 24968.672 | NM_005314 | 1281.916  | 1683.596  |
| NM_00514E | 1382.378  | 1029.26   | NM_00332C | 5522.571  | 5238.071  | NM_00488E | 1707.057  | 2205.997  |
| NM_01215E | 16234.218 | 16726.104 | NM_016524 | 1462.642  | 1189.947  | NM_01215E | 5891.735  | 5957.55   |
| AK024093  | 3115.293  | 4590.279  | NM_00712E | 34023.68  | 33388.332 | AK024093  | 1335.55   | 2078.554  |
| NM_00194C | 4300.227  | 4681.638  | AL137631  | 7169.583  | 6692.317  | NM_00194C | 1872.645  | 2372.349  |
| U83115    | 21993.965 | 23018.75  | NM_016057 | 12115.039 | 10150.852 | U83115    | 8844.492  | 9175.718  |
| NM_001264 | 25361.098 | 22423.523 | NM_014677 | 1243.033  | 1257.927  | NM_001264 | 7705.204  | 7566.858  |
| NM_013364 | 13151.822 | 13190.729 | NM_00685E | 586.843   | 582.66    | NM_013364 | 2578.861  | 3820.472  |
| NM_00719E | 595.17    | 1185.858  | AK022790  | 13870.554 | 10855.315 | NM_01436E | 294.336   | 3103.935  |

|           |           |           |           |           |           |           |           |           |
|-----------|-----------|-----------|-----------|-----------|-----------|-----------|-----------|-----------|
| NM_001994 | 5573.241  | 5834.508  | NM_004311 | 10284.754 | 8633.978  | NM_002239 | 48386.723 | 47078.488 |
| J00129    | 17725.967 | 16638.037 | NM_005624 | 1437.15   | 1262.196  | NM_002249 | 34524.414 | 43697.895 |
| NM_003320 | 1509.38   | 2144.937  | NM_002302 | 1147.342  | 977.587   | NM_015684 | 1943.553  | 2142.709  |
| NM_016524 | 5428.345  | 5607.47   | AB020672  | 661.008   | 617.41    | NM_003945 | 25729.676 | 39339.211 |
| NM_016057 | 17381.605 | 23919.568 | AK026958  | 619.028   | 365.554   | NM_004981 | 8733.494  | 13306.449 |
| NM_014677 | 4029.741  | 3952.157  | NM_000579 | 1428.619  | 1403.381  | AK096507  | 516.463   | 845.219   |
| NM_006855 | 954.858   | 1519.461  | AF263462  | 1706.764  | 2362.631  | NM_016524 | 1470.587  | 1801.116  |
| AK022790  | 21501.75  | 15546.396 | AB040962  | 336.63    | 762.352   | NM_007126 | 47608.363 | 51289.586 |
| NM_004311 | 11739.254 | 9102.765  | NM_000639 | 732.682   | 1373.873  | AL137631  | 8087.311  | 11048.251 |
| NM_005624 | 2571.249  | 2477.97   | AV697672  | 743.378   | 647.884   | NM_016057 | 13312.092 | 18765.154 |
| NM_002302 | 2329.32   | 2133.954  | NM_000942 | 18403.639 | 25477.805 | NM_014677 | 1462.982  | 1107.196  |
| AB020672  | 857.831   | 866.001   | NM_002982 | 543.503   | 909.173   | NM_006855 | 390.417   | 596.096   |
| AK026958  | 1130.273  | 1219.985  | NM_002190 | 391.798   | 826.219   | AK022790  | 16694.313 | 17381.6   |
| NM_000579 | 1575.733  | 1578.107  | AK056773  | 3650.353  | 4999.055  | NM_004311 | 11893.043 | 14489.859 |
| NM_001480 | 590.947   | 765.519   | NM_002182 | 15974.977 | 17651.242 | NM_005624 | 1209.526  | 1579.76   |
| AF263462  | 5769.347  | 6478.406  | NM_016470 | 5469.115  | 4569.1    | NM_002302 | 665.966   | 965.156   |
| AB040962  | 849.786   | 1270.68   | AL365408  | 44817.527 | 44290.547 | AK026958  | 204.21    | 634.515   |
| NM_000639 | 2534.258  | 2330.307  | NM_017762 | 2348.693  | 1765.141  | AF263462  | 1809.176  | 1950.531  |
| AV697672  | 864.295   | 738.829   | NM_001863 | 58096.695 | 46829.914 | NM_000639 | 997.564   | 844.44    |
| AK056773  | 4789.058  | 5694.124  | NM_000921 | 6548.321  | 5163.756  | NM_000942 | 12116.243 | 14522.487 |
| NM_002182 | 13394.019 | 14643.282 | NM_000098 | 2071.447  | 2047.38   | NM_005406 | 3538.493  | 4734.271  |
| NM_016470 | 2003.629  | 1806.728  | NM_000016 | 13973.1   | 12955.025 | NM_003328 | 2084.54   | 2723.516  |
| AL365408  | 32331.336 | 33143.422 | AK026913  | 3674.831  | 3531.258  | X93921    | 1889.316  | 3654.853  |
| NM_017762 | 5364.096  | 6826.334  | NM_016234 | 6265.833  | 5639.083  | AF073482  | 2217.906  | 3636.649  |
| NM_000098 | 3793.652  | 4749.399  | NM_001876 | 4175.214  | 4216.307  | NM_005990 | 2369.482  | 3616.809  |
| NM_000016 | 27519.824 | 36018.648 | NM_016144 | 6799.556  | 4925.424  | NM_016276 | 36455.496 | 39170.16  |
| AK026913  | 7843.864  | 5921.454  | AL133099  | 4011.563  | 4181.479  | NM_017762 | 4256.704  | 8655.554  |
| NM_016234 | 10411.592 | 10392.271 | NM_016082 | 2419.929  | 2358.507  | NM_000921 | 9610.83   | 17629.496 |
| NM_001876 | 8195.042  | 8746.787  | NM_000433 | 1640.933  | 1349.425  | NM_000098 | 2048.699  | 3060.889  |
| NM_016144 | 13509.542 | 13310.552 | NM_000190 | 7534.717  | 8788.64   | NM_000016 | 17758.381 | 27745.75  |
| AL133099  | 8217.532  | 7517.933  | X15667    | 3835.186  | 4405.672  | AK026913  | 5983.779  | 9448.891  |
| NM_016082 | 3472.165  | 4111.56   | NM_017512 | 3498.497  | 4210.13   | NM_016234 | 7755.102  | 12214.985 |
| NM_000433 | 2445.913  | 2245.908  | NM_001678 | 283.599   | 437.213   | NM_001876 | 4470.883  | 7970.003  |
| NM_000190 | 14127.843 | 15944.71  | AK023078  | 6779.537  | 8737.835  | NM_016144 | 8432.262  | 14198.61  |
| X15667    | 10669.974 | 11334.466 | NM_002239 | 55240.164 | 49532.715 | AL133099  | 4217.774  | 5763.144  |
| NM_017512 | 6470.411  | 6849.998  | NM_002249 | 54053.375 | 51290.488 | NM_016082 | 1953.942  | 3533.479  |
| NM_018661 | 1131.008  | 933.279   | NM_015684 | 3324.521  | 3619.572  | NM_000433 | 1067.05   | 2366.378  |
| NM_001678 | 651.262   | 772.069   | NM_003945 | 23321.877 | 25369.203 | NM_000190 | 6980.018  | 9147.115  |
| AK023078  | 9469.479  | 11459.366 | NM_004981 | 16933.256 | 18372.805 | X15667    | 4405.454  | 5608.629  |
| NM_002239 | 60385.875 | 52601.84  | AK096507  | 820.689   | 1029.937  | NM_017512 | 2752.458  | 3154.196  |
| NM_002249 | 48715.32  | 52559.777 | NM_002054 | 548.292   | 934.039   | NM_018661 | 244.449   | 1568.616  |
| NM_015684 | 3833.466  | 3739.604  | NM_004482 | 350.954   | 297.383   | AK023078  | 4905.842  | 5507.482  |
| NM_003945 | 31958.656 | 36342.148 | NM_015599 | 627.452   | 691.614   | NM_014737 | 4011.096  | 3756.558  |
| NM_004981 | 6696.123  | 6061.872  | AB037902  | 543.835   | 210.058   | NM_003488 | 4010.357  | 4129.966  |
| AK096507  | 638.716   | 567.498   | NM_018696 | 9674.979  | 7544.253  | NM_001454 | 54891.16  | 46728.91  |
| NM_004482 | 788.862   | 662.034   | NM_000136 | 12259.862 | 19113.916 | NM_006558 | 9271.866  | 9655.928  |
| NM_015599 | 1201.219  | 1172.881  | AL157456  | 1176.256  | 1488.211  | Z22780    | 503.114   | 573.197   |
| NM_018696 | 13562.896 | 12485.581 | AL162056  | 1473.308  | 1268.088  | NM_005797 | 779.58    | 1140.396  |
| NM_002056 | 577.399   | 607.343   | NM_000380 | 11195.054 | 12286.185 | NM_004824 | 862.426   | 1487.275  |
| AL162056  | 1932.95   | 2283.894  | NM_004628 | 2217.517  | 2310.816  | NM_013952 | 5678.163  | 9580.135  |
| NM_000380 | 13534.79  | 15633.945 | NM_014876 | 4080.451  | 5247.056  | NM_004482 | 641.687   | 1004.813  |
| NM_004628 | 3998.395  | 4785.481  | NM_005406 | 6267.897  | 8407.357  | NM_015599 | 885.865   | 709.306   |
| NM_014876 | 5181.253  | 5505.263  | NM_003328 | 4923.635  | 5402.146  | AL157456  | 298.219   | 1044.53   |

|           |           |           |           |           |           |           |           |           |
|-----------|-----------|-----------|-----------|-----------|-----------|-----------|-----------|-----------|
| NM_005406 | 6637.569  | 8453.426  | X93921    | 2478.619  | 2156.899  | AL162056  | 928.333   | 1923.108  |
| NM_003328 | 2725.441  | 3270.314  | AF073482  | 4967.885  | 3958.35   | NM_000380 | 6113.592  | 8538.218  |
| X93921    | 2375.598  | 3102.408  | NM_005990 | 2746.922  | 2727.272  | NM_004628 | 1769.662  | 2743.524  |
| AF073482  | 3634.508  | 4636.371  | NM_016276 | 49006.715 | 48351.203 | NM_014876 | 3872.487  | 4217.227  |
| NM_005990 | 1108.251  | 934.792   | NM_000850 | 2827.861  | 2291.993  | AK024427  | 2446.891  | 1733.026  |
| NM_016276 | 40936.859 | 40667.254 | NM_004676 | 867.289   | 754.57    | NM_003006 | 1379.906  | 1078.534  |
| NM_001994 | 9523.222  | 8027.685  | NM_007193 | 318.627   | 565.494   | AF272035  | 3133.534  | 2724.99   |
| J00129    | 26782.818 | 29281.832 | NM_001994 | 4442.36   | 4784.435  | AY009133  | 633.359   | 727.467   |
| NM_003320 | 5179.144  | 6319.516  | AK025657  | 8345.816  | 6742.343  | NM_013403 | 2532.229  | 2287.204  |
| AK025657  | 12106.726 | 15023.438 | AF142063  | 1487.34   | 1515.313  | NM_000674 | 1570.488  | 1705.221  |
| AF142063  | 1167.12   | 1354.511  | W42849    | 1384.731  | 1616.504  | AB020671  | 548.051   | 687.303   |
| W42849    | 2536.423  | 2281.063  | AI889961  | 2905.988  | 3636.216  | NM_000206 | 23347.889 | 29665.547 |
| AI889961  | 4372.802  | 4151.952  | AI360116  | 1631.131  | 1973.855  | NM_018255 | 1404.598  | 1351.832  |
| AI360116  | 2326.087  | 3688.626  | NM_013983 | 360.746   | 536.972   | NM_016232 | 732.058   | 845.405   |
| AI572835  | 6996      | 8091.858  | AI572835  | 3562.434  | 4114.289  | AF178930  | 464.41    | 791.28    |
| R20392    | 10346.553 | 12887.818 | R20392    | 5502.4    | 5638.741  | M74161    | 1132.395  | 1220.439  |
| AA486367  | 5962.935  | 6593.037  | AA486367  | 3938.275  | 3432.073  | NM_016542 | 3409.431  | 3845.607  |
| N56684    | 528.862   | 613.926   | N56684    | 503.391   | 420.986   | NM_000484 | 1454.436  | 1680.922  |
| M55153    | 1177.652  | 1958.45   | M55153    | 946.443   | 1398.695  | S40369    | 8946.624  | 9118.868  |
| AK097322  | 684.229   | 602.708   | AF414120  | 563.952   | 1027.337  | NM_015831 | 5758      | 7391.884  |
| AL136131  | 9228.021  | 10207.974 | AK097322  | 533.13    | 708.387   | AK023154  | 2954.563  | 3805.936  |
| NM_033357 | 2952      | 2713.946  | AL136131  | 7237.675  | 8557.187  | Z36820    | 1351.634  | 1990.858  |
| AF335109  | 1072.356  | 1496.28   | AF335109  | 1334.622  | 1233.25   | NM_003967 | 2266.88   | 2898.948  |
| U59911    | 6657.406  | 6102.992  | NM_002982 | 761.549   | 478.53    | NM_012451 | 2360.521  | 3628.83   |
| AK056773  | 6794.566  | 4722.195  | AK056773  | 2434.628  | 3493.109  | NM_002510 | 512.563   | 337.284   |
| NM_002182 | 20699.074 | 19142.232 | NM_002182 | 12796.321 | 11647.702 | NM_006624 | 3788.176  | 3061.875  |
| NM_016470 | 5380.618  | 5467.055  | NM_016470 | 3659.973  | 2747.671  | NM_017667 | 975.478   | 917.056   |
| AL365408  | 43432.07  | 47147.266 | AL365408  | 27060.439 | 23541.738 | AK002211  | 2377.462  | 1942.296  |
| AK026204  | 8465.773  | 6683.127  | AK026204  | 4637.247  | 3037.744  | NM_012127 | 2901.829  | 3385.418  |
| NM_014635 | 3650.879  | 3150.57   | NM_014635 | 2001.549  | 1571.636  | NM_014454 | 898.2     | 1123.831  |
| NM_004145 | 10452.665 | 10870.478 | NM_004145 | 8751.777  | 7954.334  | NM_017488 | 4096.372  | 5275.376  |
| AK023196  | 1764.638  | 2401.453  | AK023196  | 1558.816  | 1267.659  | NM_002824 | 13587.66  | 13720.829 |
| NM_018728 | 4446.573  | 4923.548  | NM_018728 | 4331.188  | 3311.925  | NM_006835 | 16052.132 | 17760.977 |
| AK024014  | 4561.376  | 5131.965  | AK024014  | 5254.352  | 8148.22   | NM_006023 | 9847.469  | 11300.202 |
| NM_000865 | 4118.203  | 4221.943  | NM_000865 | 2392.443  | 4407.502  | NM_014673 | 4889.56   | 5598.695  |
| NM_000867 | 2409.047  | 3367.405  | NM_000867 | 1547.45   | 2070.3    | AB002330  | 1123.701  | 1507.601  |
| AF076642  | 3796.326  | 5776.287  | AF076642  | 2651.526  | 3049.779  | AL137509  | 15632.072 | 14784.223 |
| NM_002386 | 3506.714  | 4179.669  | NM_002386 | 2058.265  | 2996.14   | NM_006538 | 1752.557  | 2126.586  |
| NM_005314 | 3751.778  | 5539.473  | NM_005314 | 1676.243  | 2082.889  | NM_019887 | 8963.869  | 9281.688  |
| NM_004885 | 4319.723  | 6991.682  | NM_004885 | 2660.892  | 2726.93   | NM_004050 | 3790.515  | 3834.733  |
| NM_005145 | 4763.529  | 6172.421  | NM_005145 | 677.501   | 1094.018  | NM_006024 | 5988.486  | 6881.275  |
| NM_012152 | 18724.717 | 18982.502 | NM_012152 | 11208.579 | 14522.807 | NM_020191 | 754.68    | 608.731   |
| AK024093  | 3942.961  | 4515.6    | AK024093  | 3254.864  | 3757.379  | NM_017434 | 1781.096  | 2177.255  |
| NM_001940 | 4490.988  | 4426.274  | NM_001940 | 3350.74   | 3425.669  | NM_020405 | 189.803   | 372.634   |
| U83115    | 16529.58  | 19302.398 | U83115    | 12929.38  | 13921.072 | NM_020182 | 4268.483  | 4252.073  |
| NM_001264 | 14981.083 | 13037.486 | NM_013364 | 8318.566  | 9024.816  | AL137669  | 2276.091  | 2432.093  |
| NM_013364 | 1630.693  | 1746.87   | NM_002239 | 39698.781 | 37488.457 | AJ275213  | 828.67    | 1190.378  |
| NM_014368 | 1168.218  | 1130.73   | NM_002249 | 36203.453 | 34962.91  | NM_004793 | 2892.472  | 1888.706  |
| NM_002249 | 57405.707 | 48901.055 | NM_015684 | 1985.867  | 2604.633  | NM_014263 | 3398.51   | 2293.311  |
| NM_015684 | 5371.575  | 4507.662  | NM_003945 | 18742.457 | 15516.4   | NM_020361 | 733.596   | 469.112   |
| NM_003945 | 31294.41  | 28840.945 | NM_004981 | 10929.371 | 9581.562  | AK026343  | 2137.928  | 2023.709  |
| NM_004981 | 16484.928 | 12681.826 | AK096507  | 457.21    | 579.853   | NM_001912 | 710.288   | 550.085   |
| AK096507  | 1104.157  | 2176.342  | NM_016524 | 1201.919  | 986.085   | NM_013267 | 1528.261  | 1556.728  |



|           |           |           |           |           |           |           |           |           |
|-----------|-----------|-----------|-----------|-----------|-----------|-----------|-----------|-----------|
| NM_016524 | 2135.388  | 2152.256  | NM_007126 | 35380.707 | 32473.5   | NM_002454 | 1667.214  | 1567.5    |
| NM_007126 | 55449.41  | 49485.375 | AL137631  | 9237.042  | 8808.628  | NM_001917 | 5159.975  | 5790.764  |
| AL137631  | 10208.938 | 11714.778 | NM_016057 | 14070.561 | 9923.319  | NM_005956 | 14109.073 | 12709.485 |
| NM_016057 | 18005.65  | 20180.924 | NM_014677 | 1955.819  | 2054.546  | NM_003043 | 5305.962  | 5371.363  |
| NM_014677 | 3296.531  | 3578.256  | NM_006855 | 757.356   | 727.447   | D87077    | 1088.413  | 1202.355  |
| NM_006855 | 1310.711  | 1492.982  | AK022790  | 16981.986 | 18204.391 | NM_014308 | 635.278   | 657.818   |
| AK022790  | 34385.691 | 42640.008 | NM_004311 | 10795.66  | 11576.662 | L07033    | 1891.477  | 1855.35   |
| NM_004311 | 21205.789 | 28183.863 | NM_005624 | 1748.848  | 1937.682  | AK000142  | 1216.995  | 1442.768  |
| NM_005624 | 2230.786  | 2858.094  | NM_002302 | 1080.205  | 1111.023  | NM_005993 | 6918.226  | 8624.146  |
| NM_002302 | 1525.612  | 1478.071  | AB020672  | 259.605   | 456.557   | AK026341  | 4235.746  | 4086.592  |
| AB020672  | 1371.904  | 1405.732  | AK026958  | 529.316   | 663.206   | NM_018943 | 1996.499  | 2592.123  |
| AK026958  | 817.914   | 1106.743  | NM_000579 | 995.922   | 1243.012  | AJ292757  | 407.392   | 491.919   |
| NM_000579 | 1858.59   | 1968.477  | NM_001480 | 507.006   | 670.949   | NM_003996 | 668.053   | 583.94    |
| NM_001480 | 658.558   | 845.333   | AF263462  | 1847.146  | 2496.933  | NM_018561 | 1365.102  | 1312.55   |
| AF263462  | 5227.427  | 4999.958  | NM_000639 | 948.758   | 1175.799  | NM_001952 | 6975.448  | 4577.112  |
| AB040962  | 725.082   | 663.501   | NM_000942 | 18206.818 | 18547.309 | NM_003223 | 4705.905  | 3278.634  |
| NM_000639 | 2266.914  | 1958.889  | NM_005406 | 3127.921  | 3479.898  | NM_006713 | 57159.102 | 46136.992 |
| AV697672  | 851.231   | 829.934   | NM_003328 | 1085.573  | 1313.703  | NM_020201 | 7138.017  | 6260.861  |
| NM_000942 | 23577.139 | 17884.453 | X93921    | 2288.269  | 2078.954  | NM_016019 | 7440.734  | 5950.914  |
| NM_003328 | 3869.571  | 4019.394  | AF073482  | 2693.833  | 2409.213  | NM_012245 | 9922.489  | 7716.751  |
| X93921    | 3535.691  | 3447.712  | NM_005990 | 2209.909  | 1956.696  | NM_001533 | 19645.564 | 22909.617 |
| AF073482  | 5587.521  | 5458.748  | NM_016276 | 38372.328 | 38248.898 | NM_006929 | 7341.744  | 7784.706  |
| NM_005990 | 3498.287  | 3248.441  | NM_017762 | 1960.445  | 1964.432  | NM_003977 | 25847.76  | 32255.521 |
| NM_016276 | 54439.52  | 49733.77  | NM_001863 | 57108.816 | 45353.777 | NM_005998 | 14229.397 | 17020.406 |
| NM_017762 | 4903.795  | 5189.561  | NM_000921 | 7705.147  | 5435.167  | U28424    | 1720.062  | 1900.191  |
| NM_001863 | 60651.145 | 56469.871 | NM_000098 | 2133.8    | 2534.808  | BF541372  | 1639.765  | 1840.987  |
| NM_000921 | 12315.248 | 11926.139 | NM_000016 | 16425.99  | 17642.219 | AF092137  | 2571.996  | 2364.192  |
| NM_000098 | 3785.832  | 3588.24   | AK026913  | 4897.406  | 6733.826  | NM_004623 | 1338.011  | 1111.134  |
| NM_000016 | 18508.055 | 21119.398 | NM_016234 | 10221.767 | 10069.146 | NM_016551 | 2279.238  | 1686.988  |
| AK026913  | 10018.143 | 9264.654  | NM_001876 | 5936.358  | 7295.539  | AK024631  | 524.12    | 409.923   |
| NM_016144 | 13388.651 | 18124.674 | NM_016144 | 9041.85   | 7975.223  | AF087977  | 552.24    | 995.173   |
| AL133099  | 6893.326  | 7662.506  | AL133099  | 3999.313  | 4942.918  | BE732255  | 6690.772  | 5940.7    |
| NM_016082 | 3971.475  | 5195.226  | NM_016082 | 2164.35   | 3219.885  | NM_004955 | 977.132   | 737.275   |
| NM_000433 | 3657.579  | 4180.771  | NM_000433 | 2104.343  | 2178.672  | NM_017803 | 1180.62   | 892.759   |
| NM_000190 | 16936.668 | 17689.17  | NM_000190 | 9931.868  | 10635.543 | NM_005994 | 2422.686  | 1496.144  |
| X15667    | 11783.322 | 11400.715 | X15667    | 7124.598  | 7821.872  | AB027508  | 4467.848  | 3073.758  |
| NM_017512 | 6711.868  | 6771.549  | NM_017512 | 3750.066  | 5035.61   | NM_016331 | 2360.184  | 2477.581  |
| AK023078  | 7373.899  | 5815.871  | NM_018661 | 720.989   | 770.514   | NM_014360 | 32322.307 | 12987.941 |
| NM_014737 | 6546.351  | 5014.938  | NM_001678 | 313.379   | 412.366   | NM_018952 | 686.646   | 459.66    |
| NM_003488 | 7227.316  | 6363.144  | AK023078  | 5669.946  | 6616.997  | AB033053  | 2026.116  | 1967.159  |
| NM_001454 | 54599.711 | 48871.617 | NM_014737 | 2641.55   | 1828.349  | NM_007358 | 7280.034  | 8513.463  |
| NM_006558 | 16553.873 | 13560.59  | NM_003488 | 3197.735  | 2475.534  | AK021577  | 500.508   | 1122.926  |
| Z22780    | 711.929   | 737.94    | NM_001454 | 59804.23  | 45823.02  | AF147390  | 107.672   | 321.25    |
| NM_005797 | 1550.326  | 1439.937  | NM_006558 | 7308.876  | 6644.179  | AF075019  | 1452.134  | 1847.637  |
| NM_004824 | 1398.394  | 1396.993  | Z22780    | 244.304   | 311.773   | AF147388  | 591.45    | 787.458   |
| M17733    | 60350.32  | 57031.23  | NM_005797 | 637.128   | 630.192   | AK021498  | 2641.584  | 2806.196  |
| U83191    | 4299.961  | 3810.032  | NM_004824 | 1214.713  | 931.239   | AF085874  | 2982.721  | 3423.646  |
| NM_013952 | 9647.521  | 9928.796  | M17733    | 56733.508 | 54906.023 | AF147346  | 736.747   | 553.618   |
| NM_004482 | 1017.869  | 1019.414  | U83191    | 2491.424  | 2279.999  | AK026959  | 1793.605  | 1853.43   |
| NM_018696 | 15002.427 | 15644.978 | NM_013952 | 4376.381  | 3701.776  | NM_019556 | 1441.969  | 1396.272  |
| NM_000136 | 34332.664 | 34291.566 | NM_004482 | 689.045   | 389.232   | NM_004753 | 2593.365  | 2442.811  |
| AL157456  | 2514.21   | 2124.187  | NM_018696 | 14565.072 | 16983.789 | NM_015462 | 3394.279  | 2828.013  |
| AL162056  | 2160.463  | 2305.572  | NM_000136 | 17035.633 | 26485.074 | AK026700  | 862.256   | 747.759   |

|           |           |           |           |           |           |           |           |           |
|-----------|-----------|-----------|-----------|-----------|-----------|-----------|-----------|-----------|
| NM_000380 | 22102.645 | 21641.703 | AL157456  | 1636.051  | 3045.708  | AF086332  | 9604.4    | 7807.473  |
| NM_004628 | 4252.049  | 4202.293  | AL162056  | 1565.952  | 2133.456  | AF086432  | 325.671   | 188.293   |
| NM_014876 | 4952.588  | 3380.718  | NM_000380 | 23411.895 | 26487.797 | AJ404614  | 8886.554  | 7659.947  |
| AB032958  | 1706.002  | 1155.171  | NM_004628 | 2817.569  | 2914.273  | AF086347  | 3596.408  | 3155.039  |
| AK024427  | 4954.586  | 4330.537  | NM_014876 | 2662.178  | 3430.432  | AF086388  | 1587.034  | 1678.097  |
| NM_003006 | 2757.936  | 2240.906  | AB032958  | 793.464   | 660.943   | AF086444  | 769.54    | 968.555   |
| NM_000493 | 1004.906  | 790.009   | AK024427  | 2696.565  | 2071.659  | AK001043  | 2775.773  | 1709.268  |
| AF272035  | 5351.188  | 5559.34   | NM_003006 | 1545.394  | 1051.095  | AK024535  | 7120.089  | 6876.926  |
| AY009133  | 1387.369  | 1207.85   | NM_000493 | 553.835   | 363.538   | NM_016498 | 10339.844 | 8460.92   |
| NM_000965 | 736.054   | 475.073   | AF272035  | 3051.536  | 2909.9    | AF085934  | 823.892   | 1158.318  |
| NM_013403 | 4632.886  | 3134.418  | AY009133  | 669.219   | 890.848   | AK023971  | 34946.254 | 45096.051 |
| NM_000674 | 3288.764  | 2529.534  | NM_000965 | 319.005   | 607.564   | AK024738  | 1089.129  | 1562.121  |
| AB020671  | 910.126   | 1070.169  | NM_013403 | 2095.948  | 1731.796  | AL133103  | 695.874   | 1380.994  |
| NM_000206 | 38025.25  | 38510.105 | NM_000674 | 1590.742  | 1727.824  | BC015321  | 689.409   | 843.153   |
| NM_018255 | 5014.822  | 6787.092  | NM_000206 | 25052.199 | 28243.348 | AL157450  | 945.937   | 1142.131  |
| NM_016232 | 1261.044  | 1893.443  | NM_018255 | 3347.482  | 4723.875  | AL359594  | 875.943   | 1315.976  |
| AF178930  | 1123.463  | 1604.415  | NM_016232 | 1108.653  | 989.477   | AL137293  | 1174.898  | 984.441   |
| M74161    | 2641.862  | 2937.73   | AF178930  | 964.424   | 1031.67   | AL137458  | 1035.217  | 1238.934  |
| NM_016542 | 7086.851  | 9340.05   | M74161    | 2531.476  | 2392.939  | AL157490  | 15462.599 | 16747.59  |
| NM_000484 | 3099.643  | 2198.557  | NM_016542 | 6602.266  | 8383.296  | AL390167  | 3771.033  | 4174.476  |
| S40369    | 16551.096 | 15323.819 | NM_000484 | 1488.488  | 2779.525  | AK023657  | 773.025   | 777.904   |
| NM_015831 | 8208.871  | 9584.281  | NM_003855 | 1609.12   | 2951.969  | NM_014332 | 577.564   | 444.154   |
| AK023154  | 5042.185  | 5790.356  | S40369    | 12125.3   | 16537.514 | AF086068  | 833.401   | 1019.705  |
| Z36820    | 2321.579  | 2175.372  | NM_015831 | 7593.015  | 7999.829  | AF086059  | 883.386   | 967.394   |
| NM_003967 | 2117.255  | 1585.004  | AK023154  | 3622.342  | 3524.851  | AK024239  | 744.109   | 520.974   |
| NM_012451 | 3367.042  | 2572.141  | Z36820    | 2316.779  | 2084.523  | AK021838  | 8399.31   | 6126.626  |
| NM_002510 | 1007.752  | 1082.442  | NM_003967 | 3743      | 3428.75   | AF083118  | 992.166   | 1047.072  |
| NM_020386 | 661.722   | 291.379   | NM_012451 | 2622.089  | 2714.295  | AF147444  | 548.972   | 607.685   |
| NM_006624 | 7593.031  | 7648.997  | NM_002510 | 667       | 427.121   | NM_014126 | 400.676   | 552.137   |
| AF130079  | 750.649   | 447.612   | NM_020386 | 603.042   | 430.792   | AK021909  | 1032.324  | 2223.504  |
| NM_017667 | 2148.315  | 1424.279  | NM_006624 | 4795.29   | 3323.345  | AK022043  | 507.211   | 832.172   |
| AK002211  | 3834.525  | 3019.959  | AF130079  | 607.14    | 389.536   | AK022168  | 833.831   | 1369.661  |
| NM_012127 | 5228.064  | 5008.113  | NM_017667 | 995.249   | 1031.998  | AK022327  | 673.908   | 1236.127  |
| NM_014454 | 1852.842  | 1425.573  | AK002211  | 2719.137  | 1955.546  | AK021959  | 359.163   | 565.634   |
| NM_017489 | 6637.855  | 6076.925  | NM_012127 | 2822.696  | 1967.292  | AK022061  | 504.819   | 737.417   |
| NM_002824 | 25403.625 | 21182.596 | NM_014454 | 1362.882  | 1242.723  | AK022201  | 1775.488  | 2512.2    |
| NM_006835 | 27872.578 | 28707.867 | NM_017489 | 3962.346  | 3061.121  | AK022353  | 2573.22   | 4363.979  |
| NM_006023 | 17211.605 | 20964.762 | NM_002824 | 15378.481 | 16640.85  | AK026868  | 678.933   | 1252.101  |
| NM_014673 | 7072.707  | 10419.559 | NM_006835 | 21102.75  | 20828.736 | AK022200  | 3085.854  | 2448.35   |
| AB002330  | 2564.048  | 3624.962  | NM_006023 | 12370.767 | 12185.66  | AK023396  | 222.148   | 370.403   |
| AL137509  | 26012.703 | 33106.953 | NM_014673 | 5181.935  | 5471.17   | NM_018101 | 7152.579  | 6886.353  |
| NM_006538 | 3500.497  | 4469.103  | AB002330  | 2409.818  | 2184.638  | BF526704  | 1024.363  | 1268.942  |
| NM_019887 | 16525.264 | 16341.845 | AL137509  | 20605.764 | 18769.533 | AK001022  | 2737.137  | 4537.124  |
| NM_004050 | 8118.246  | 6814.142  | NM_006538 | 2901.194  | 3199.362  | AL049351  | 7112.215  | 9833.523  |
| NM_006024 | 10333.75  | 11078.111 | NM_019887 | 12049.348 | 14358.178 | AK021826  | 3152.84   | 5499.777  |
| NM_020191 | 4471.173  | 4599.438  | NM_004050 | 7514.977  | 10441.526 | AK024541  | 237.227   | 548.893   |
| NM_017434 | 2394.288  | 2354.659  | NM_006024 | 8032.538  | 11707.314 | AK025341  | 379.952   | 365.285   |
| NM_020182 | 6637.732  | 5311.597  | NM_020191 | 2713.298  | 3962.608  | AK024138  | 2667.887  | 3441.027  |
| AL137669  | 3385.888  | 2769.308  | NM_017434 | 2161.419  | 2195.481  | Y10505    | 1314.852  | 1458.215  |
| NM_004793 | 12901.607 | 10250.93  | NM_020405 | 421.458   | 609.547   | U00946    | 7481.337  | 9049.843  |
| NM_004390 | 658.698   | 402.702   | NM_020182 | 4262.278  | 4237.441  | AF070642  | 1985.658  | 2175.673  |
| NM_014263 | 6806.216  | 6187.456  | AL137669  | 3196.379  | 3307.635  | AK027125  | 1786.586  | 2146.684  |
| NM_020361 | 1109.83   | 1211.77   | AJ275213  | 614.858   | 684.889   | AK025311  | 355.353   | 300.549   |

|           |           |           |           |           |           |           |           |           |
|-----------|-----------|-----------|-----------|-----------|-----------|-----------|-----------|-----------|
| NM_015907 | 1867.303  | 1534.232  | NM_004793 | 8598.288  | 10033.277 | D16918    | 509.151   | 654.834   |
| AK026343  | 3384.091  | 3219.572  | NM_004390 | 560.486   | 384.853   | D16467    | 909.143   | 1046.368  |
| NM_001912 | 1000.278  | 866.742   | NM_014263 | 5545.921  | 3379.12   | AF090932  | 1068.549  | 551.67    |
| NM_013267 | 2604.547  | 2122.168  | NM_020361 | 817.603   | 586.616   | AF166125  | 1152.843  | 758.436   |
| NM_002454 | 2375.317  | 2029.896  | NM_015907 | 1383.669  | 1016.906  | AF225425  | 1509.712  | 1256.53   |
| NM_001917 | 9039.313  | 9796.621  | AK026343  | 1618.767  | 1523.594  | AF064848  | 11126.69  | 8650.45   |
| NM_005956 | 39101.098 | 34372.215 | NM_001912 | 704.335   | 502.753   | U61089    | 3566.566  | 2718.393  |
| NM_003043 | 8281.856  | 10020.118 | NM_013267 | 2551.799  | 2535.484  | AK001036  | 1429.788  | 1853.338  |
| L07033    | 3019.668  | 3654.391  | NM_002454 | 2106.518  | 2420.056  | AK024858  | 8422.794  | 8091.521  |
| AK000142  | 1726.146  | 1699.741  | NM_001917 | 5818.306  | 5862.868  | Y16697    | 601.756   | 592.684   |
| NM_005993 | 12469.832 | 11997.618 | NM_005956 | 34699.391 | 34301.258 | NM_001046 | 4210.398  | 5017.772  |
| AK026341  | 6725.111  | 6135.468  | NM_003043 | 9739.033  | 10385.193 | AK024554  | 1043.544  | 945.02    |
| NM_018943 | 6475.149  | 5266.152  | D87077    | 1376.514  | 1316.239  | AF068294  | 1808.73   | 1647.78   |
| AJ292757  | 721.481   | 820.149   | NM_014308 | 799.276   | 773.261   | AK025909  | 2603.67   | 2659.166  |
| U01922    | 1418.832  | 1153.466  | L07033    | 2694.168  | 2698.401  | AK026138  | 802.272   | 1690.669  |
| NM_003996 | 1635.03   | 1164.387  | AK023934  | 222.042   | 244.411   | Z70706    | 149.046   | 391.862   |
| NM_003433 | 9773.104  | 9938.38   | AK000142  | 1322.921  | 1332.421  | AK021434  | 2689.19   | 2446.363  |
| NM_005221 | 3905.629  | 4896.848  | NM_005993 | 7810.037  | 9098.39   | NM_016479 | 8012.158  | 6985.734  |
| NM_005870 | 601.981   | 806.455   | AK026341  | 4359.39   | 5289.782  | AK000933  | 8507.202  | 9368.278  |
| NM_018561 | 3066.419  | 2844.55   | NM_018943 | 4011.91   | 4634.534  | Y10205    | 888.332   | 870.49    |
| NM_001270 | 6042.82   | 5868.357  | AK025239  | 264.494   | 403.883   | NM_014626 | 769.024   | 990.492   |
| NM_001952 | 11992.878 | 10048.84  | U01922    | 823.029   | 534.482   | AK025277  | 450.864   | 700.052   |
| NM_003223 | 8127.243  | 6731.978  | NM_003996 | 1012.515  | 789.169   | AF086095  | 718.971   | 754.368   |
| NM_006713 | 57703.27  | 53181.914 | NM_004469 | 215.048   | 363.302   | NM_018352 | 874.972   | 1061.607  |
| NM_020201 | 8860.029  | 8598.462  | NM_003433 | 6440.988  | 5241.461  | AK026880  | 1420.768  | 1663.369  |
| U81557    | 305.252   | 541.02    | NM_005221 | 3831.644  | 3764.218  | AL080092  | 8696.559  | 8658.818  |
| AK023530  | 755.062   | 750.784   | NM_005870 | 611.036   | 693.342   | AL137279  | 1446.429  | 1682.373  |
| NM_016019 | 11870.902 | 12685.275 | NM_018561 | 2267.488  | 1731.83   | AK023981  | 965.804   | 750.301   |
| NM_001533 | 30376.424 | 39229.398 | NM_001270 | 4369.493  | 2855.98   | AK021874  | 2448.913  | 2448.308  |
| NM_006929 | 16446.488 | 13939.473 | NM_001952 | 8453.273  | 5834.216  | AF009267  | 784.263   | 476.565   |
| NM_003977 | 40933.82  | 42379.215 | NM_003223 | 5026.434  | 3603.812  | AK027129  | 2943.629  | 2253.738  |
| NM_005996 | 42244.43  | 43143.578 | NM_006713 | 52802.043 | 41798.574 | NM_015696 | 5044.668  | 5557.239  |
| U28424    | 4381.608  | 3923.856  | NM_020201 | 6218.337  | 6121.386  | CY3Cy5    | 9123.694  | 371.47    |
| BF541372  | 5221.928  | 4698.733  | AK023530  | 669.09    | 566.938   | BG696293  | 698.332   | 610.577   |
| AF092137  | 6609.758  | 5425.347  | NM_016019 | 10507.994 | 9090.673  | AA777410  | 711.981   | 636.139   |
| NM_004623 | 2312.178  | 1582.385  | NM_012245 | 6810.597  | 5449.958  | BC013135  | 9519.983  | 9410.123  |
| NM_016551 | 9270.042  | 10409.569 | NM_001533 | 26529.996 | 25783.514 | AA281652  | 598.375   | 689.841   |
| AK024631  | 1781.116  | 2382.644  | NM_006929 | 11291.128 | 12812.755 | U31905    | 656.509   | 1121.483  |
| AF087977  | 924.394   | 1301.389  | NM_003977 | 23919.352 | 21781.988 | X52479    | 2825.259  | 2730.172  |
| AK026949  | 1055.277  | 671.596   | NM_005996 | 25815.938 | 23244.293 | BC013200  | 20725.684 | 22300.271 |
| NM_004957 | 3750.56   | 3419.776  | U28424    | 2913.595  | 2674.718  | AW408832  | 3211.522  | 2686.2    |
| AL050028  | 6841.111  | 6673.018  | BF541372  | 3228.447  | 2638.391  | AA486364  | 9380.749  | 9362.175  |
| NM_000371 | 491.022   | 591.964   | AF092137  | 2789.755  | 2269.106  | M15476    | 24758.912 | 15554.636 |
| BE732255  | 7506.493  | 7376.71   | NM_004623 | 1482.519  | 1422.301  | U57456    | 3293.276  | 2704.309  |
| NM_004955 | 1069.094  | 1084.436  | NM_016551 | 5421.371  | 4325.177  | NM_006892 | 1189.104  | 1147.936  |
| NM_003364 | 1987.465  | 2228.902  | AK026949  | 682.914   | 434.08    | SR5       | 6899.989  | 6318.544  |
| NM_017803 | 1950.629  | 2064.233  | NM_004957 | 3872.201  | 2343.187  | SR7       | 5660.93   | 41546.094 |
| NM_005994 | 5770.259  | 7386.558  | AL050028  | 4032.214  | 2575.873  | SR9       | 22168.01  | 3506.202  |
| AB027508  | 4232.887  | 5108.779  | BE732255  | 8526.04   | 5056.03   | CY3Cy5    | 6897.301  | 250.126   |
| NM_016331 | 4777.26   | 5533.864  | NM_004955 | 718.255   | 835.436   | AF254067  | 1731.747  | 2159.271  |
| NM_014360 | 49285.832 | 38245.215 | NM_003364 | 939.746   | 1250.633  | NM_016363 | 2120.091  | 2290.389  |
| NM_018952 | 1011.46   | 786.852   | NM_017803 | 1195.866  | 1423.961  | AY009090  | 352.453   | 354.56    |
| AB033053  | 3598.62   | 3135.22   | NM_005994 | 3912.465  | 4295.119  | NM_004536 | 1730.955  | 1725.122  |

|           |           |           |           |           |           |           |           |           |
|-----------|-----------|-----------|-----------|-----------|-----------|-----------|-----------|-----------|
| NM_00735E | 13912.488 | 12008.029 | AB027508  | 2513.506  | 2428.772  | NM_01467E | 1580.7    | 1597.099  |
| NM_001571 | 2745.117  | 3025.163  | NM_016331 | 4297.724  | 3446.115  | AB058719  | 771.245   | 604.741   |
| AF126749  | 1097.845  | 1129.373  | NM_01436C | 27423.795 | 41050.566 | AK025935  | 1685.48   | 1703.66   |
| NM_01810E | 4219.335  | 4033.648  | NM_01895E | 595.936   | 946.588   | NM_016441 | 1346.031  | 1364.273  |
| NM_00340E | 1375.04   | 1043.545  | AB033053  | 2165.994  | 2894.66   | NM_006334 | 1921.278  | 1079.503  |
| NM_00345C | 1825.588  | 1267.41   | NM_00735E | 7072.11   | 6879.249  | NM_003474 | 764.84    | 922.902   |
| AK021577  | 1553.718  | 1244.035  | NM_001571 | 2169.821  | 1872.641  | NM_00462E | 1724.084  | 1454.734  |
| AF147390  | 606.449   | 1046.845  | AF126749  | 629.61    | 582.145   | NM_00717E | 12531.979 | 11114.356 |
| AF075019  | 2163.763  | 2484.27   | NM_01810E | 3330.705  | 2446.802  | AB046861  | 2176.414  | 3093.594  |
| AF147388  | 703.965   | 605.373   | NM_00340E | 531.743   | 577.21    | AF061034  | 9177.718  | 6946.841  |
| AK021498  | 3618.545  | 2825.928  | NM_00345C | 2024.483  | 1641.663  | X03655    | 721.196   | 564.738   |
| AF085874  | 4932.094  | 4010.392  | AK021577  | 1597.107  | 1186.326  | NM_00310C | 990.392   | 1258.424  |
| AF147346  | 907.16    | 556.23    | AF147390  | 452.906   | 180.803   | AF228704  | 2438.507  | 2270.633  |
| AK026959  | 2567.506  | 2284.938  | AF085879  | 334.641   | 250.47    | AK022746  | 2397.451  | 1938.975  |
| NM_01955E | 1824.879  | 2121.827  | AF075019  | 1242.522  | 1041.705  | NM_00656E | 5549.451  | 4537.129  |
| NM_00475E | 8525.522  | 7685.362  | AF147388  | 399.15    | 378.279   | NM_00644C | 2707.689  | 2122.967  |
| NM_01546E | 5906.366  | 5775.817  | AK021498  | 2435.541  | 1623.733  | NM_00484E | 6647.308  | 3600.323  |
| AK026700  | 2131.496  | 2310.74   | AF085874  | 2821.108  | 2321.478  | NM_00225E | 6015.924  | 4498.918  |
| AF086242  | 1471.728  | 998.883   | AF147346  | 783.89    | 342.847   | BC034483  | 1307.832  | 899.899   |
| AF086370  | 1195.135  | 952.386   | AK026959  | 2156.1    | 1429.854  | NM_00362C | 2096.323  | 1458.888  |
| AF086332  | 19214.166 | 19817.521 | NM_00475E | 7601.39   | 8086.644  | NM_01328E | 3216.141  | 4006.942  |
| AJ404614  | 16019.015 | 13106.403 | NM_01546E | 5131.434  | 4867.956  | AA586375  | 766.382   | 699.27    |
| AF086347  | 12512.208 | 9172.559  | AF147377  | 63.532    | 127.122   | NM_00522E | 2662.149  | 2966.918  |
| AF086388  | 3084.407  | 3077.059  | AK026700  | 1393.465  | 1827.213  | NM_00028E | 9886.626  | 8004.363  |
| AF086444  | 1840.2    | 1592.439  | AK000127  | 161.431   | 264.017   | NM_016454 | 13883.16  | 16346.682 |
| AK001043  | 6311.54   | 5168.902  | AF086242  | 781.317   | 672.704   | NM_00346E | 1027.445  | 1340.654  |
| AK024535  | 10121.382 | 7942.433  | AF086370  | 413.144   | 798.907   | NM_01643E | 608.801   | 706.033   |
| AL359608  | 1148.711  | 703.968   | AF086332  | 21963.07  | 23145.258 | NM_00085E | 1000.738  | 797.254   |
| NM_01649E | 35269.777 | 20682.295 | AF086432  | 194.637   | 427.962   | NM_00548C | 975.455   | 800.387   |
| AF088025  | 906.791   | 572.588   | AJ404614  | 12218.807 | 14034.249 | AB034694  | 564.544   | 556.197   |
| AK024286  | 649.414   | 431.335   | AF086347  | 6929.601  | 7150.23   | NM_00327E | 1516.281  | 1474.369  |
| AF085934  | 1574.693  | 1012.792  | AF086388  | 2263.227  | 1861.151  | AK026404  | 1400.415  | 1270.763  |
| AF147423  | 705.152   | 774.461   | AF086444  | 1006.028  | 804.552   | NM_01794E | 5129.257  | 6178.415  |
| AF075088  | 1024.77   | 515.432   | AK001043  | 3804.888  | 3820.041  | NM_00039E | 1525.776  | 1301.058  |
| AK023971  | 36649.004 | 32374.951 | AK024535  | 9922.988  | 7478.011  | AB037848  | 840.451   | 631.215   |
| AK024738  | 1162.369  | 1297.394  | AL359608  | 1007.582  | 888.916   | AF082657  | 2213.62   | 1672.264  |
| AL133103  | 1069.754  | 1148.374  | NM_01649E | 29760.896 | 25440.229 | NM_006744 | 720.358   | 795.396   |
| BC015321  | 1448.831  | 1441.671  | AK024286  | 291.958   | 327.925   | NM_018231 | 2624.444  | 2077.479  |
| AL157450  | 2330.11   | 1686.113  | AF085934  | 601.343   | 562.885   | NM_014914 | 2303.614  | 2391.949  |
| AL359594  | 2201.053  | 1837.206  | AF075088  | 873.793   | 354.731   | NM_01828E | 674.882   | 687.685   |
| AL137293  | 2927.874  | 2855.814  | AK023971  | 18966.492 | 9084.985  | NM_01476E | 3073.871  | 3128.646  |
| AL390167  | 5660.24   | 5804.475  | AK024738  | 697.787   | 471.735   | NM_01662E | 11885.773 | 15379.23  |
| AF086068  | 1113.839  | 1347.392  | BC015321  | 994.111   | 957.154   | NM_016121 | 1968.29   | 2424.972  |
| AK026322  | 934.511   | 172.297   | AL157450  | 1114.175  | 1029.969  | NM_01476E | 2148.029  | 2312.027  |
| AF086059  | 1788.744  | 1528.507  | AL359594  | 1078.245  | 910.089   | NM_00634E | 35574.746 | 45160.801 |
| AF075018  | 1525.976  | 377.135   | AL137293  | 1166.252  | 1333.023  | AK026264  | 7644.133  | 7015.428  |
| AK021838  | 22833.33  | 19413.732 | AL137458  | 904.742   | 854.632   | AF222927  | 3535.806  | 3095.716  |
| AF083118  | 1726.571  | 1941.979  | AL157490  | 11015.126 | 7945.99   | NM_01434E | 1654.005  | 1369.361  |
| AF132602  | 780.458   | 5011.94   | AL390167  | 3610.093  | 3152.073  | NM_01821E | 6491.069  | 6126.907  |
| AK000957  | 968.921   | 256.939   | AK023657  | 267.958   | 623.53    | AF241831  | 3146.27   | 3649.38   |
| AF147444  | 1614.059  | 1066.751  | NM_01433E | 542.605   | 589.727   | NM_00303E | 1957.115  | 1447.106  |
| NM_01656E | 538.395   | 646.5     | AF086068  | 1772.891  | 1284.921  | U96113    | 1399.766  | 1466.229  |
| AK021909  | 1975.984  | 1925.422  | AF086059  | 1197.738  | 897.652   | NM_00273E | 2563.247  | 2128.525  |

|           |           |           |           |           |           |           |           |           |
|-----------|-----------|-----------|-----------|-----------|-----------|-----------|-----------|-----------|
| AK022043  | 807.212   | 671.499   | AF075018  | 1024.506  | 875.835   | M31008    | 969.128   | 365.401   |
| AK022168  | 800.075   | 1156.234  | AK024239  | 1022.844  | 831.861   | NM_00628E | 1844.721  | 1628.47   |
| AK022327  | 925.302   | 1521.008  | AK021838  | 12921.576 | 13246.326 | NM_016224 | 5048.458  | 3988.128  |
| AK021959  | 390.888   | 440.624   | AK021990  | 309.81    | 923.896   | AB046861  | 1207.514  | 1266.284  |
| AK022201  | 3093.702  | 2638.974  | AF083118  | 1033.238  | 834.043   | AF061034  | 5562.837  | 4019.415  |
| AK022353  | 4544.159  | 4315.182  | AF089811  | 769.218   | 382.013   | X03655    | 335.265   | 364.094   |
| AK026868  | 1557.879  | 1169.997  | AF147444  | 692.279   | 803.152   | BG696293  | 475.957   | 724.31    |
| AK022200  | 6383.493  | 5078.413  | NM_01656E | 369.402   | 295.886   | AA777410  | 1056.547  | 952.634   |
| NM_018101 | 12810.105 | 11188.701 | AK021909  | 991.723   | 561.553   | BC013135  | 10416.968 | 11719.466 |
| BF526704  | 1939.107  | 1885.748  | AK022043  | 416.756   | 525.813   | AI625002  | 888.242   | 732.851   |
| AJ491695  | 10811.416 | 8477.169  | AK022168  | 756.039   | 696.735   | AA281652  | 1247.442  | 1406.609  |
| AF052107  | 27842.98  | 20478.777 | AK022327  | 462.77    | 611.258   | U31905    | 739.704   | 970.134   |
| AK022430  | 2589.259  | 2411.732  | AK022061  | 248.306   | 253.865   | X52479    | 3311.383  | 3170.71   |
| AK001022  | 3590.788  | 3200.687  | AK022201  | 1292.815  | 1946.975  | BC013200  | 19040.484 | 20513.801 |
| AL049351  | 14997.69  | 11601.955 | AK022353  | 3079.839  | 3714.201  | AW408832  | 2864.975  | 2309.676  |
| AL137508  | 1205.727  | 259.304   | AK026868  | 721.149   | 1076.162  | AA486364  | 10710.522 | 10642.736 |
| AK021826  | 6794.752  | 5149.563  | AK022200  | 3023.519  | 3020.953  | N70057    | 7316.683  | 6002.989  |
| AK024138  | 4468.609  | 4256.613  | AF264625  | 665.373   | 439.569   | NM_006497 | 5938.949  | 4489.098  |
| Y10505    | 2071.771  | 1893.026  | NM_018101 | 10450.507 | 9867.474  | NM_00689Z | 1155.99   | 1128.07   |
| U00946    | 12180.679 | 10914.472 | AF293366  | 778.089   | 1079.042  | AK000124  | 1458.23   | 1169.608  |
| NM_00561E | 5310.222  | 4377.939  | AJ491695  | 6176.337  | 4262.028  | NM_00448C | 1845.264  | 1365.724  |
| Z34290    | 1457.709  | 1560.148  | AF052107  | 14506.837 | 8203.935  | BC034483  | 1099.508  | 791.104   |
| AF070642  | 6388.158  | 4370.308  | AK022430  | 949.056   | 1008.854  | NM_00362C | 1176.942  | 1595.097  |
| AK027125  | 4074.216  | 3876.553  | AK001022  | 2043.825  | 1988.466  | NM_01328E | 1436.923  | 1457.997  |
| AK025311  | 804.12    | 271.924   | AL049351  | 10134.048 | 7926.07   | AF254067  | 1901.301  | 2086.683  |
| D16918    | 1178.938  | 985.632   | AK021826  | 3093.853  | 2989.188  | NM_01636E | 1451.889  | 1527.964  |
| D16467    | 2138.023  | 2194.755  | AK024138  | 3100.147  | 2647.691  | AY009090  | 346.974   | 518.352   |
| AF090932  | 1923.995  | 1969.334  | Y10505    | 1521.039  | 1763.245  | NM_00230E | 600.238   | 738.377   |
| AF166125  | 2298.466  | 2053.122  | U00946    | 9962.325  | 12397.918 | NM_01650E | 575.937   | 753.761   |
| AF225425  | 4989.713  | 4529.399  | NM_00561E | 3346.285  | 3061.533  | NM_00453E | 1914.121  | 1545.043  |
| AF064848  | 24395.801 | 18462.711 | Z34290    | 904.67    | 354.739   | NM_01467Z | 1796.997  | 1771.428  |
| U61089    | 7473.172  | 6085.381  | AF070642  | 3358.19   | 2502.461  | AK025935  | 1913.446  | 1770.541  |
| AK001036  | 2822.361  | 3292.118  | AK027125  | 2626.138  | 2005.313  | NM_016441 | 1103.358  | 1235.589  |
| AK024858  | 14852.362 | 11749.325 | AK025311  | 250.062   | 324.466   | NM_006334 | 1952.597  | 1408.265  |
| Y16697    | 1321.793  | 773.34    | D16918    | 763.052   | 729.416   | NM_00462E | 1835.962  | 1532.744  |
| NM_00104E | 8330.834  | 6137.003  | D16467    | 1384.69   | 899.233   | NM_00717E | 12042.726 | 8819.416  |
| AK024554  | 1966.894  | 1431.028  | AF090932  | 593.823   | 828.7     | NM_018231 | 1177.351  | 1435.496  |
| AF068294  | 5001.02   | 3821.47   | AF166125  | 973.209   | 948.731   | NM_00716E | 1867.993  | 13060.165 |
| AK025909  | 7521.167  | 7009.102  | AF225425  | 3022.81   | 3410.386  | NM_00310C | 2358.146  | 2705.13   |
| AK026138  | 1542.839  | 1318.747  | AF064848  | 13196.011 | 15328.764 | NM_00676E | 1266.609  | 2168.241  |
| AK021434  | 7168.816  | 5361.202  | U61089    | 3746.406  | 5727.503  | AF228704  | 4012.642  | 3190.023  |
| NM_01647E | 14787.488 | 10794.744 | AK001036  | 2856.976  | 4387.212  | AK022746  | 2673.392  | 1957.747  |
| AK000933  | 14230.719 | 12284.55  | AK024858  | 8313.397  | 11607.915 | NM_00656E | 6278.613  | 6057.193  |
| Y10205    | 1471.532  | 1102.413  | Y16697    | 515.224   | 657.627   | NM_00644C | 2892.093  | 2337.62   |
| NM_01462E | 1493.745  | 1262.436  | NM_00104E | 4611.855  | 4522.748  | NM_004847 | 8429.558  | 6806.617  |
| AK025277  | 1089.56   | 1159.826  | AK024554  | 1040.294  | 1009.455  | NM_00225E | 5864.649  | 3409.872  |
| AF086095  | 1182.452  | 1174.568  | AF068294  | 2341.254  | 2486.667  | U96113    | 949.774   | 1170.429  |
| NM_01835Z | 1591.619  | 1786.368  | AK025909  | 3927.795  | 3409.671  | NM_00273E | 1329.671  | 2773.497  |
| AK026880  | 2579.642  | 2246.987  | AK026138  | 1082.601  | 951.751   | M31008    | 3395.357  | 11456.195 |
| AF086061  | 1226.053  | 754.253   | AK021434  | 3038.167  | 2124.623  | NM_00628E | 888.255   | 826.176   |
| X79985    | 1129.446  | 570.563   | NM_01647E | 9132.584  | 7728.919  | NM_016224 | 2715.237  | 2893.556  |
| AL080092  | 12677.577 | 12015.196 | AK000933  | 6845.281  | 3841.109  | NM_005227 | 1903.232  | 1933.048  |
| AF075069  | 1241.289  | 1222.584  | Y10205    | 560.76    | 349.285   | NM_00028E | 8893.388  | 6789.598  |

|           |           |           |           |           |           |           |           |           |
|-----------|-----------|-----------|-----------|-----------|-----------|-----------|-----------|-----------|
| AL137279  | 1663.189  | 1760.648  | NM_014626 | 1023.311  | 897.941   | NM_016454 | 17188.953 | 22821.313 |
| AK023981  | 1551.141  | 1371.493  | AK025277  | 924.498   | 465.374   | NM_003466 | 1694.223  | 2024.588  |
| AK025037  | 1038.686  | 998.357   | AF086095  | 775.964   | 358.637   | NM_016433 | 873.261   | 999.005   |
| AK021874  | 7848.932  | 4576.901  | NM_018352 | 1150.767  | 795.362   | NM_000856 | 2314.469  | 2639.935  |
| M77818    | 31533.434 | 23647.127 | AK026880  | 2088.282  | 1255.938  | NM_005480 | 2192.227  | 2200.222  |
| AF009267  | 3231.115  | 2604.574  | AF086061  | 418.106   | 370.803   | AB034694  | 552.746   | 775.455   |
| AK027129  | 6676.5    | 5944.388  | AL080092  | 9458.052  | 7458.119  | NM_003273 | 2597.493  | 2310.355  |
| NM_015696 | 6674.572  | 6826.547  | AF075069  | 638.101   | 832.185   | AK026404  | 1169.873  | 1196.759  |
| CY3Cy5    | 17725.514 | 954.688   | AL137279  | 1702.591  | 1774.189  | NM_017946 | 5814.341  | 5227.059  |
| BG696293  | 2470.632  | 2353.053  | AK023981  | 1494.813  | 1619.803  | NM_000392 | 2237.446  | 2636.188  |
| AA777410  | 1027.313  | 1261.961  | AK025037  | 857.287   | 1161.349  | AB037848  | 701.969   | 532.822   |
| BG113873  | 945.556   | 1230.65   | AK021874  | 5467.678  | 6466.69   | AF082657  | 2589.388  | 1971.353  |
| BC013135  | 23808.857 | 28795.752 | M77818    | 16680.52  | 13906.563 | NM_006744 | 968.133   | 681.424   |
| AI625002  | 1268.809  | 1266.609  | AF009267  | 1683.961  | 1757.877  | AK000124  | 479.719   | 531.594   |
| H07899    | 377.029   | 495.019   | AK027129  | 4131.774  | 3081.392  | NM_004480 | 1423.226  | 1212.751  |
| AA281652  | 2754.516  | 3068.459  | L19367    | 421.065   | 254.02    | NM_014914 | 2144.593  | 1958.09   |
| U31905    | 1117.179  | 1842.025  | NM_015696 | 4539.578  | 3940.142  | NM_018286 | 1210.972  | 1349.436  |
| X52479    | 5113.736  | 6050.488  | BG696293  | 1766.619  | 1745.584  | AB018260  | 358.795   | 492.852   |
| BC013200  | 32030.326 | 50489.523 | AA777410  | 1091.067  | 1293.314  | NM_014766 | 2257.011  | 2812.6    |
| AW408832  | 7213.697  | 8205.576  | BG113873  | 868.685   | 1149.365  | NM_016121 | 2041.162  | 2355.177  |
| AA486364  | 19495.068 | 24445.686 | BC013135  | 24731.09  | 20905.209 | NM_014766 | 2100.575  | 2383.003  |
| M15476    | 40329.789 | 49259.73  | AI625002  | 1358.667  | 1121.288  | NM_006346 | 36790.602 | 38920.082 |
| U57456    | 6460.452  | 7638.604  | H07899    | 798.988   | 503       | AK026264  | 8075.492  | 7495.134  |
| NM_006892 | 2475.124  | 3169.233  | AA281652  | 2644.519  | 2511.894  | AF222927  | 3672.835  | 3436.244  |
| SR5       | 10370.566 | 11746.77  | U31905    | 1764.707  | 1795.803  | NM_014346 | 1354.701  | 1071.262  |
| SR7       | 9588.747  | 54319.293 | X52479    | 6362.141  | 4035.573  | NM_018217 | 6164.544  | 4886.643  |
| SR9       | 38102.262 | 8391.051  | BC013200  | 26297.326 | 26228.525 | AF241831  | 3686.804  | 2656.596  |
| CY3Cy5    | 19065.297 | 858.828   | AW408832  | 4351.206  | 4102.069  | NM_003033 | 1978.903  | 1236.156  |
| AF254067  | 2419.646  | 2586.46   | AA486364  | 18161.094 | 13854.977 | NM_004626 | 647.202   | 911.568   |
| NM_016363 | 5200.197  | 4177.127  | M15476    | 24622.029 | 29241.93  | NM_007176 | 7059.107  | 7892.042  |
| AY009090  | 1226.275  | 793.559   | U57456    | 3106.806  | 3218.817  | AB046861  | 1526.745  | 1498.825  |
| U81380    | 1309.409  | 1245.521  | N70057    | 8790.828  | 10250.864 | AF061034  | 4929.993  | 4282.474  |
| NM_016506 | 976.702   | 1144.928  | NM_006497 | 7043.148  | 8603.683  | X03655    | 408.014   | 327.391   |
| AF041038  | 2249.116  | 2398.609  | NM_006892 | 1068.282  | 1466.478  | BG696293  | 1135.299  | 1611.796  |
| NM_004536 | 2800.64   | 3035.667  | SR5       | 3186.534  | 4027.59   | AA777410  | 1150.639  | 1235.244  |
| NM_014672 | 3418.479  | 4925.497  | SR7       | 4257.979  | 38599.809 | BG113873  | 586.623   | 647.108   |
| AB058719  | 2114.913  | 2283.309  | SR9       | 14223.813 | 3130.542  | AI625002  | 1031.24   | 889.84    |
| AK025935  | 3929.996  | 4697.994  | CY3Cy5    | 15175.038 | 824.678   | AA281652  | 1091.909  | 1084.133  |
| AB032953  | 921.008   | 1533.579  | AF254067  | 4603.438  | 4695.559  | U31905    | 865.705   | 1190.745  |
| NM_016441 | 3826.648  | 5307.39   | NM_016363 | 4584.751  | 4290.776  | X52479    | 3220.131  | 3029.417  |
| NM_006334 | 5736.19   | 5940.532  | AY009090  | 730.027   | 837.933   | BC013200  | 22158.525 | 20695.09  |
| NM_003474 | 2326.189  | 2432.844  | U81380    | 1057.18   | 964.515   | AW408832  | 2757.572  | 1719.686  |
| NM_004626 | 3574.575  | 3891.098  | NM_016506 | 1250.904  | 929.335   | AA486364  | 11106.393 | 9247.949  |
| NM_001306 | 1340.363  | 1555.15   | AF041038  | 2304.587  | 2478.543  | M15476    | 27328.414 | 17822.664 |
| AB046861  | 4203.264  | 3781.587  | NM_004536 | 5369.625  | 5602.213  | U57456    | 2883.891  | 2170.91   |
| AF061034  | 15908.318 | 14060.51  | NM_014672 | 3471.457  | 2762.156  | N70057    | 7457.604  | 5300.854  |
| X03655    | 1354.08   | 1411.24   | AB058719  | 1579.452  | 1648.991  | AK022746  | 1745.509  | 2216.06   |
| NM_003100 | 3644.272  | 3741.594  | AK025935  | 2572.373  | 2414.14   | NM_006440 | 1535.808  | 1341.692  |
| NM_005387 | 5520.502  | 6346.327  | AB032953  | 741.941   | 591.171   | NM_004847 | 3090.987  | 2840.491  |
| NM_006846 | 576.454   | 616.083   | NM_016441 | 2121.448  | 2120.957  | NM_002256 | 3603.656  | 3310.582  |
| AF228704  | 6759.22   | 8046.794  | NM_006334 | 1724.536  | 1905.38   | BC034483  | 775.132   | 469.229   |
| AK022746  | 6901.719  | 7147.134  | NM_003474 | 1538.004  | 863.879   | NM_003620 | 925.076   | 993.381   |
| NM_006566 | 13110.505 | 16757.24  | NM_004626 | 3855.092  | 3915.043  | NM_013286 | 2502.681  | 2700.221  |

|           |           |           |           |           |           |           |           |           |
|-----------|-----------|-----------|-----------|-----------|-----------|-----------|-----------|-----------|
| NM_00644C | 5349.866  | 6832.208  | NM_001306 | 1174.896  | 1349.945  | AF254067  | 2750.698  | 2991.99   |
| NM_004847 | 19658.955 | 21854.818 | NM_00594C | 399.797   | 408.39    | NM_016363 | 2111.475  | 2411.351  |
| NM_00225E | 9921.34   | 10101.515 | AF061034  | 4822.352  | 6193.923  | U81380    | 745.784   | 660.88    |
| BC034483  | 1826.319  | 1275.849  | X03655    | 442.018   | 499.197   | NM_016509 | 559.37    | 836.216   |
| NM_00362C | 3218.873  | 3243.373  | NM_00310C | 4493.459  | 4402.022  | NM_00453E | 2146.837  | 1515.798  |
| NM_01328E | 5691.468  | 5649.398  | NM_005387 | 4996.131  | 4698.933  | NM_014672 | 1928.004  | 1750.162  |
| AA586375  | 1233.178  | 1117.368  | AF228704  | 5836.682  | 4943.618  | AB058719  | 994.023   | 732.986   |
| BE910339  | 30746.678 | 31508.357 | AK022746  | 3870.704  | 3548.96   | AK025935  | 2005.007  | 1456.804  |
| U89715    | 12048.003 | 13160.88  | NM_00656E | 7290.022  | 6280.667  | AF082657  | 2062.259  | 1724.975  |
| NM_005227 | 1775.662  | 1802.857  | NM_00644C | 4069.18   | 3691.258  | NM_006744 | 606.335   | 519.088   |
| NM_00028E | 5523.779  | 4257.813  | NM_004847 | 11071.689 | 11540.516 | NM_018231 | 1453.367  | 1410.459  |
| NM_016454 | 7390.675  | 6729.526  | NM_00225E | 4397.835  | 4784.791  | NM_00310C | 2860.559  | 3105.711  |
| NM_00346E | 1026.924  | 961.035   | BC034483  | 645.638   | 990.054   | AF228704  | 3745.026  | 2598.452  |
| NM_016433 | 1033.328  | 891.633   | NM_01328E | 3330.629  | 3999.167  | AF222927  | 2906.851  | 4014.917  |
| NM_00085E | 4518.064  | 4346.779  | AA586375  | 855.338   | 1047.452  | NM_018217 | 2153.471  | 2702.732  |
| NM_00548C | 3336.848  | 3703.581  | BE910339  | 12830.027 | 15773.166 | AF241831  | 1683.003  | 2127.738  |
| AB034694  | 1312.517  | 1159.317  | U89715    | 3933.375  | 4777.617  | NM_003033 | 2151.916  | 2118.427  |
| NM_003273 | 4261.059  | 3874.792  | NM_005227 | 4334.788  | 3271.012  | U96113    | 701.744   | 783.395   |
| AK026404  | 2080.921  | 2599.578  | NM_00028E | 13442.402 | 8519.247  | NM_002733 | 1363.166  | 1420.659  |
| NM_000392 | 2502.822  | 3486.39   | NM_016454 | 21595.313 | 20895.023 | M31008    | 647.066   | 951.66    |
| AF208536  | 2274.798  | 3631.961  | NM_00346E | 4977.151  | 4969.074  | NM_00628E | 1773.054  | 1994.597  |
| AB037848  | 1228.447  | 1800.3    | NM_016433 | 1391.965  | 1356.486  | NM_016224 | 3752.557  | 4526.187  |
| AF082657  | 7413.488  | 7494.221  | NM_00085E | 5929.831  | 3631.646  | NM_005227 | 2978.956  | 3623.634  |
| NM_006744 | 2136.586  | 2115.746  | NM_00548C | 2926.551  | 2336.374  | NM_00028E | 8129.212  | 7087.385  |
| NM_018231 | 3612.65   | 4082.824  | AB034694  | 1429.066  | 1045.965  | NM_016454 | 16451.248 | 17989.449 |
| NM_000583 | 7051.295  | 6687.56   | NM_003273 | 3415.135  | 3190.561  | NM_00346E | 2398.19   | 2246.326  |
| NM_014914 | 2607.494  | 3024.762  | AK026404  | 1926.004  | 1767.11   | NM_016433 | 1061.478  | 1352.184  |
| NM_01828E | 2370.719  | 2312.237  | NM_01794E | 6979.302  | 6658.1    | NM_00085E | 2812.878  | 2912.751  |
| AB018260  | 984.805   | 999.919   | NM_000392 | 3168.978  | 2858.125  | NM_00548C | 3180.776  | 2772.205  |
| NM_01476E | 4842.404  | 4543.101  | AB037848  | 1095.316  | 823.473   | AB034694  | 664.651   | 877.285   |
| NM_016627 | 27787.18  | 33726.434 | AF082657  | 3125.228  | 3308.435  | NM_003273 | 1989.59   | 1893.992  |
| NM_016121 | 2760.315  | 4221.982  | NM_006744 | 1368.187  | 1163.399  | AK026404  | 953.263   | 588.857   |
| AK026264  | 18608.656 | 21036.664 | NM_018231 | 3056.147  | 4283.345  | NM_01794E | 5847.227  | 5587.773  |
| AF222927  | 7494.862  | 8734.178  | NM_000583 | 3647.074  | 3243.159  | NM_000392 | 1948.312  | 1295.72   |
| NM_01434E | 4377.235  | 5377.567  | NM_014914 | 4822.487  | 4339.965  | NM_000267 | 2162.272  | 2892.673  |
| NM_018217 | 11524.153 | 12493.829 | NM_01828E | 2498.539  | 2263.733  | NM_016603 | 1115.971  | 1840.074  |
| AF241831  | 6957.252  | 8516.162  | AB018260  | 931.606   | 758.325   | NM_00439E | 21780.664 | 27992.771 |
| NM_003033 | 4935.814  | 5612.191  | NM_01476E | 3170.198  | 2665.945  | NM_01496E | 2780.022  | 3020.829  |
| U96113    | 2632.972  | 3759.243  | NM_016627 | 23454.588 | 20466.836 | NM_014962 | 1170.863  | 1199.421  |
| NM_002733 | 4662.123  | 5126.65   | NM_016121 | 3549.148  | 3296.231  | D87684    | 6495.737  | 5716.866  |
| M31008    | 1317.627  | 1400.516  | NM_01476E | 3243.127  | 3439.738  | NM_00158E | 484.303   | 721.503   |
| NM_00628E | 3422.717  | 3686.191  | NM_00634E | 46545.707 | 51460.766 | NM_006317 | 678.646   | 933.123   |
| NM_016224 | 10505.082 | 9935.367  | AK026264  | 12055.297 | 11854.523 | NM_00121E | 3200.103  | 5596.934  |
| AB046861  | 3143.727  | 2704.344  | AF222927  | 5101.299  | 4232.471  | AK000124  | 808.419   | 1165.078  |
| NM_00594C | 670       | 642.202   | NM_01434E | 2591.694  | 2695.346  | NM_00448C | 1287.847  | 2021.249  |
| AF061034  | 21034.414 | 17975.625 | NM_018217 | 7003.753  | 5387.249  | NM_014914 | 4023.839  | 4747.275  |
| X03655    | 1399.996  | 1139.065  | AF241831  | 4132.657  | 5148.179  | NM_01828E | 1843.967  | 1776.541  |
| BG696293  | 2056.977  | 1951.557  | NM_003033 | 2571.47   | 3572.669  | AB018260  | 554.319   | 669.173   |
| AA777410  | 1674.024  | 1735.424  | U96113    | 2041.055  | 2037.375  | NM_016627 | 13838.036 | 20163.141 |
| BG113873  | 1009.223  | 1180.794  | NM_002733 | 2025.909  | 2181.976  | NM_016121 | 1265.828  | 1168.252  |
| BC013135  | 21250.713 | 23286.984 | M31008    | 909.329   | 901.423   | NM_00634E | 38534.055 | 42123.969 |
| U31905    | 1814.244  | 1818.488  | NM_00628E | 1825.597  | 1784.478  | AK026264  | 10112.827 | 6914.65   |
| X52479    | 7762.874  | 8301.458  | NM_016224 | 3311.627  | 4029.959  | NM_00438E | 1907.115  | 2681.043  |

|           |           |           |           |           |           |           |           |           |
|-----------|-----------|-----------|-----------|-----------|-----------|-----------|-----------|-----------|
| BC013200  | 44094.734 | 52199.5   | AB046861  | 2789.559  | 2437.749  | NM_005876 | 24204.803 | 30479.43  |
| AW408832  | 9412.071  | 10195.285 | NM_005940 | 833.374   | 496.867   | NM_004445 | 1282.43   | 2083.849  |
| AA486364  | 24650.893 | 31312.416 | AF061034  | 11272.554 | 12022.435 | U39657    | 4559.268  | 6607.257  |
| M15476    | 52395.57  | 55172.988 | X03655    | 613.231   | 760.259   | NM_016340 | 784.086   | 1494.065  |
| U57456    | 7055.161  | 8635.566  | BG696293  | 1935.873  | 1853.984  | NM_018373 | 909.045   | 1563.328  |
| N70057    | 21132.258 | 24016.301 | AA777410  | 1416.226  | 1281.988  | BF216030  | 2689.822  | 4004.639  |
| NM_006497 | 19259.072 | 21595.877 | BG113873  | 1094.515  | 940.803   | AF131839  | 708.129   | 538.704   |
| NM_006892 | 2680.857  | 3379.404  | BC013135  | 27651.777 | 26066.352 | NM_003684 | 2000.515  | 2683.174  |
| AK000124  | 2352.689  | 2549.457  | AI625002  | 1367.651  | 1126.813  | NM_005657 | 1258.349  | 1702.939  |
| NM_004480 | 4081.969  | 4584.436  | AA281652  | 2239.329  | 2139.197  | NM_017671 | 1001.021  | 1280.568  |
| BC034483  | 1548.224  | 1019.446  | U31905    | 1725.322  | 1771.707  | AB040883  | 2347.286  | 3116.658  |
| NM_003620 | 3616.411  | 2441.061  | X52479    | 5410.654  | 5373.404  | NM_018630 | 4259.295  | 6265.688  |
| NM_013280 | 6791.142  | 5892.799  | BC013200  | 23159.174 | 31862.943 | AF264628  | 614.094   | 1184.478  |
| AA586375  | 1453.02   | 1627.039  | AW408832  | 4415.864  | 5298.155  | NM_001715 | 2761.195  | 3482.413  |
| BE910339  | 34795.879 | 32908.004 | AA486364  | 19819.428 | 21749.211 | NM_004395 | 5407.235  | 5387.859  |
| U89715    | 11026.171 | 12367.157 | M15476    | 26455.615 | 43999.277 | NM_002663 | 418.884   | 564.899   |
| AF254067  | 4649.821  | 4393.24   | U57456    | 3373.837  | 5181.623  | NM_006094 | 5499.108  | 3684.493  |
| AF041038  | 3110.791  | 3542.697  | N70057    | 9965.694  | 14247.015 | AF080158  | 2479.503  | 2044.618  |
| NM_004530 | 6146.102  | 6255.785  | NM_006497 | 12195.295 | 17478.219 | AB037794  | 8035.153  | 8712.886  |
| NM_014672 | 4544.371  | 5425.292  | NM_006892 | 1762.677  | 1930.533  | NM_012415 | 675.649   | 643.674   |
| AB058719  | 3339.865  | 2513.44   | AK000124  | 773.555   | 1201.45   | NM_014178 | 3303.385  | 3611.693  |
| AK025935  | 5605.061  | 6033.364  | NM_004480 | 1148.193  | 1228.404  | NM_001251 | 9436.182  | 9269.56   |
| AB032953  | 1008.763  | 993.86    | BC034483  | 763.037   | 742.545   | AB011112  | 3558.119  | 3629.711  |
| NM_016441 | 3980.987  | 5055.942  | NM_003620 | 2749.143  | 2196.01   | NM_018660 | 1120.563  | 1315.272  |
| NM_006334 | 4580.777  | 3795.198  | NM_013280 | 4379.271  | 4199.015  | NM_002623 | 2882.204  | 2999.442  |
| NM_003474 | 3075.419  | 2587.452  | AA586375  | 1606.83   | 1419.891  | NM_018844 | 2881.9    | 2863.937  |
| NM_004625 | 3312.002  | 3974.526  | U81380    | 1168.621  | 979.335   | AF279778  | 837.196   | 890.683   |
| NM_007170 | 28159.627 | 28695.709 | NM_002303 | 597.565   | 449.055   | NM_015477 | 3005.241  | 4302.482  |
| NM_001300 | 1708.951  | 1758.792  | NM_016500 | 1160.331  | 1154.064  | AL353943  | 1304.697  | 1740.154  |
| NM_018231 | 4141.998  | 3051.209  | AF041038  | 2030.857  | 2747.1    | BE568801  | 1106.543  | 1866.422  |
| NM_000583 | 7795.791  | 7571.944  | NM_004530 | 4412.653  | 5539.353  | AB002336  | 2266.227  | 2678.212  |
| NM_006840 | 828.326   | 1005.09   | NM_014672 | 3483.583  | 3561.92   | NM_013280 | 6244.916  | 9382.185  |
| AF228704  | 8452.207  | 9780.273  | AB058719  | 1590.202  | 2059.63   | NM_016262 | 1931.658  | 3157.447  |
| AK022746  | 6562.856  | 7258.569  | AK025935  | 3113.772  | 4022.303  | AB011116  | 8330.825  | 14278.308 |
| NM_006560 | 14172.163 | 19016.58  | AB032953  | 490.013   | 587.214   | AB037858  | 2699.583  | 3548.022  |
| NM_006440 | 5354.86   | 6454.035  | NM_016441 | 2174.758  | 2525.89   | NM_005775 | 3560.959  | 4334.388  |
| NM_004847 | 18008.322 | 16785.744 | NM_006334 | 1556.958  | 2148.019  | NM_017630 | 1154.38   | 1357.436  |
| NM_002255 | 12302.518 | 10977.513 | NM_004625 | 1529.474  | 1273.002  | AL157437  | 4691.063  | 3935.873  |
| AF151889  | 25657.865 | 28267.527 | NM_007170 | 7144.981  | 9372.645  | NM_017740 | 2141.742  | 2067.752  |
| U96113    | 1869.958  | 1557.097  | AF297659  | 676.988   | 815.43    | NM_018227 | 1071.5    | 1649.557  |
| NM_002733 | 4626.486  | 3024.05   | NM_018231 | 4850.321  | 4186.748  | NM_003340 | 30402.01  | 34613.633 |
| M31008    | 1569.953  | 1292.631  | NM_000583 | 5363.744  | 5697.676  | U46752    | 996.502   | 1188.329  |
| NM_006280 | 3122.722  | 3143.601  | AF202889  | 530.495   | 529.563   | NM_002794 | 48127.922 | 49242.336 |
| NM_016224 | 9080.688  | 8944.658  | NM_005387 | 4810.028  | 6370.84   | BF244646  | 36765.219 | 35609.449 |
| NM_005227 | 5437.977  | 4853.212  | AF228704  | 5085.768  | 5578.884  | AK024030  | 3083.399  | 2503.338  |
| NM_016433 | 1608.881  | 1363.66   | AK022746  | 2942.117  | 3135.933  | AF275808  | 1277.157  | 817.566   |
| NM_000850 | 5428.048  | 6771.897  | NM_006560 | 5975.354  | 5907.797  | AK024038  | 4670.243  | 4159.519  |
| NM_005480 | 3363.048  | 3991.971  | NM_006440 | 1722.496  | 1794.494  | NM_002055 | 1182.363  | 1133.072  |
| AB034694  | 1104.754  | 1281.649  | NM_004847 | 3075.8    | 3845.89   | NM_005803 | 7407.244  | 8412.349  |
| NM_003273 | 5326.797  | 5483.665  | NM_002255 | 1295.525  | 1857.188  | NM_015515 | 4268.398  | 4167.799  |
| AK026404  | 2618.134  | 2780.588  | U96113    | 2070.038  | 1859.611  | AK001579  | 8578.779  | 7993.926  |
| NM_017940 | 8144.442  | 10649.322 | NM_002733 | 3061.885  | 2593.001  | NM_002670 | 3916.831  | 5296.468  |
| NM_000392 | 2877.26   | 3626.683  | M31008    | 1238.627  | 1074.447  | AF163302  | 2162.654  | 2959.993  |



|           |           |           |           |           |           |           |           |           |
|-----------|-----------|-----------|-----------|-----------|-----------|-----------|-----------|-----------|
| AF208536  | 3180.897  | 3422.561  | NM_006288 | 3029.092  | 2762.615  | NM_006408 | 1491.868  | 1774.372  |
| AB037848  | 1426.412  | 1596.536  | NM_016433 | 1907.336  | 1347.677  | NM_002419 | 3950.027  | 4636.005  |
| AF082657  | 7020.432  | 6243.205  | NM_000859 | 6179.492  | 3839.018  | NM_001988 | 6591.907  | 6340.782  |
| NM_006744 | 1442.413  | 1426.838  | NM_005480 | 3138.563  | 2573.901  | NM_002653 | 1572.416  | 1820.628  |
| NM_006497 | 12250.615 | 9396.427  | NM_003273 | 2815.5    | 2903.328  | NM_005604 | 990.631   | 940.15    |
| NM_006892 | 2098.993  | 1753.44   | AK026404  | 2008.745  | 2154.942  | S69023    | 819.995   | 1129.426  |
| AK000124  | 2430.077  | 1746.138  | NM_017948 | 6781.507  | 10433.771 | NM_003454 | 1021.182  | 980.319   |
| NM_004480 | 3276.889  | 3354.311  | NM_000392 | 2244.705  | 2841.262  | NM_003418 | 12320.846 | 13722.885 |
| NM_014914 | 5034.454  | 4716.809  | AB037848  | 262.154   | 574.665   | NM_017908 | 2521.438  | 2751.681  |
| NM_018288 | 2434.895  | 2474.197  | AF082657  | 1754.715  | 2016.34   | M25077    | 2800.881  | 3157.349  |
| AB018260  | 870.437   | 1047.832  | NM_006744 | 418.299   | 485.128   | NM_018702 | 1315.514  | 1535.261  |
| NM_014766 | 5013.791  | 5802.829  | NM_006497 | 9778.172  | 9579.221  | M62843    | 424.143   | 626.067   |
| NM_016627 | 30314.729 | 39789.379 | NM_006892 | 1903.489  | 1598.038  | U96131    | 258.374   | 360.954   |
| NM_016121 | 3241.924  | 4812.418  | NM_014766 | 4831.354  | 4597.962  | NM_004593 | 1310.037  | 1253.215  |
| NM_014769 | 4499.084  | 5963.494  | NM_016121 | 3554.145  | 3698.165  | NM_005778 | 8992.948  | 6706.447  |
| NM_006349 | 58770.055 | 55551.555 | NM_014769 | 3072.066  | 4125.957  | NM_018084 | 13482.974 | 11595.046 |
| AK026264  | 18455.156 | 19333.301 | NM_006349 | 41485.094 | 49626.98  | AF164797  | 51997.879 | 49181.102 |
| AF222927  | 7236.483  | 8343.038  | AK026264  | 9334.461  | 10027.641 | NM_017840 | 22531.373 | 19789.355 |
| NM_014345 | 4186.607  | 5322.586  | AF222927  | 4838.857  | 4716.621  | AK001052  | 31231.387 | 28144.584 |
| NM_018217 | 9740.95   | 11814.756 | NM_014345 | 1611.648  | 1712.61   | NM_001415 | 29357.654 | 16042.357 |
| AF241831  | 6340.976  | 6038.895  | NM_018217 | 3740.547  | 3815.019  | NM_004564 | 2597.963  | 1783.852  |
| NM_003033 | 4928.743  | 4623.072  | AF241831  | 2262.799  | 2567.201  | NM_000968 | 55270.742 | 52005.711 |
| NM_016441 | 2263.52   | 2365.383  | NM_003033 | 1130.34   | 1266.078  | AL355743  | 1907.308  | 2249.019  |
| NM_006334 | 3391.868  | 2287.311  | NM_016441 | 2492.498  | 3424.633  | X81896    | 304.906   | 404.401   |
| NM_003474 | 1228.015  | 1072.983  | NM_006334 | 1762.765  | 2782.549  | NM_002202 | 1416.553  | 1951.277  |
| NM_004625 | 2826.826  | 2375.417  | NM_003474 | 1423.735  | 1277.301  | NM_006005 | 1433.969  | 1670.537  |
| NM_007179 | 25555.508 | 19265.729 | BG696293  | 2347.185  | 2225.095  | NM_002629 | 54531.813 | 50395.906 |
| NM_001306 | 1508.525  | 892.858   | AA777410  | 1272.276  | 1558.23   | NM_014364 | 673.645   | 759.251   |
| AB046861  | 3966.646  | 2869.773  | BG113873  | 1104.638  | 1299.925  | NM_001685 | 44768.695 | 49026.777 |
| NM_005940 | 635.024   | 621.221   | AI625002  | 1236.959  | 828.613   | NM_006067 | 20800.281 | 24037.43  |
| AF061034  | 18724.73  | 15963.559 | H07899    | 590.312   | 488.434   | NM_000284 | 4993.259  | 6223.778  |
| X03655    | 1236.774  | 1119.617  | AA281652  | 2113.514  | 2218.326  | NM_004813 | 4487.794  | 6590      |
| BG696293  | 1976.374  | 2325.12   | U31905    | 1024.235  | 1044.535  | NM_004688 | 4926.194  | 5776.181  |
| AA777410  | 1722.128  | 1927.735  | X52479    | 4679.189  | 5006.166  | NM_006026 | 23918.555 | 22104.434 |
| BG113873  | 1151.87   | 1245.848  | BC013200  | 17685.836 | 23802.6   | AB040956  | 3952.604  | 3923.709  |
| BC013135  | 24124.287 | 31282.818 | AW408832  | 2716.893  | 3567.144  | NM_016587 | 2505.504  | 1353.153  |
| AI625002  | 1927.565  | 1846.07   | AA486364  | 10132.009 | 9932.475  | NM_017953 | 3947.741  | 2469.936  |
| H07899    | 587.153   | 629.932   | M15476    | 11742.71  | 14520.91  | BC000124  | 2833.82   | 2275.673  |
| AA281652  | 3526.174  | 3023.15   | U57456    | 1400.447  | 1970.488  | Z11773    | 1129.293  | 1079.476  |
| U31905    | 1687.11   | 2344.375  | N70057    | 4392.128  | 5350.267  | NM_006914 | 915.195   | 632.926   |
| X52479    | 6390.291  | 7467.331  | AK022746  | 5048.479  | 6838.971  | NM_003446 | 41265.734 | 16822.311 |
| BC013200  | 40627.285 | 52108.984 | NM_006568 | 8292.719  | 10092.162 | NM_001485 | 3159.278  | 1895.436  |
| AW408832  | 8412.198  | 8245.188  | NM_006440 | 3902.348  | 3609.889  | NM_002702 | 668.958   | 478.532   |
| AA486364  | 26277.658 | 33256.5   | AF254067  | 4444.016  | 4382.57   | AK021510  | 610.46    | 602.722   |
| M15476    | 44596.32  | 46969.727 | NM_016363 | 4464.352  | 3983.084  | AK022711  | 715.254   | 638.295   |
| U57456    | 6396.35   | 5541.711  | AY009090  | 868.189   | 979.896   | AK023039  | 807.467   | 969.214   |
| N70057    | 17919.186 | 14650.096 | NM_005592 | 449.275   | 491.06    | AL109688  | 800.335   | 1005.055  |
| AK022746  | 5257.911  | 4331.063  | U81380    | 736.305   | 927.524   | AK025863  | 1588.531  | 1547.322  |
| NM_006568 | 11647.21  | 12408.204 | NM_016509 | 657.231   | 712.814   | D42044    | 1392.435  | 1278.301  |
| NM_006440 | 4412.663  | 3601.823  | AF041038  | 578.348   | 842.805   | AF038185  | 4095.551  | 3478.275  |
| NM_004847 | 15172.396 | 8762.097  | NM_004536 | 1279.119  | 1841.769  | AL117415  | 6720.808  | 5905.114  |
| NM_002255 | 8554.066  | 6911.947  | NM_014672 | 2109.699  | 1794.63   | AK023616  | 797.863   | 639.726   |
| AF151889  | 24094.52  | 24347.818 | AB058719  | 558.188   | 785.343   | AK025665  | 2841.563  | 1683.783  |

|           |           |           |           |           |           |           |           |           |
|-----------|-----------|-----------|-----------|-----------|-----------|-----------|-----------|-----------|
| BC034483  | 1778.076  | 1670.293  | AK025935  | 1640.547  | 1720.14   | AL355694  | 686.654   | 561.442   |
| NM_00362C | 3418.999  | 2985.107  | AB037848  | 1145.658  | 1146.181  | AK027152  | 1915.117  | 1812.996  |
| NM_01328E | 6365.811  | 4682.675  | NM_000583 | 809.082   | 801.606   | BC037530  | 22008.814 | 15757.884 |
| AA586375  | 1291.051  | 1135.527  | NM_00310C | 3947.632  | 3552.009  | NM_014851 | 7423.031  | 4292.515  |
| BE910339  | 31762.203 | 29776.639 | AF228704  | 2601.133  | 2738.593  | AL117635  | 922.349   | 539.622   |
| U89715    | 11676.386 | 14257.889 | AF222927  | 5862.851  | 5638.67   | AB020735  | 518.607   | 378.258   |
| AF254067  | 5125.022  | 4896.95   | NM_01434E | 3139.865  | 4359.735  | AJ011596  | 1837.254  | 1076.31   |
| NM_01636E | 5451.082  | 5151.984  | NM_018217 | 6723.663  | 7798.148  | AL049215  | 23608.039 | 22080.369 |
| AY009090  | 1641.457  | 1019.577  | NM_003033 | 3450.875  | 3506.799  | X51779    | 1080.609  | 1123.834  |
| U81380    | 1563.673  | 1705.07   | U96113    | 2171.436  | 1678.241  | AL049254  | 1079.406  | 767.523   |
| NM_01650E | 1553.813  | 1688.726  | NM_002733 | 2695.836  | 1802.345  | Z83954    | 3984.43   | 2352.811  |
| AF041038  | 2679.253  | 2999.822  | M31008    | 953.695   | 1076.982  | M74093    | 2249.431  | 1299.289  |
| NM_00453E | 6188.773  | 5714.016  | NM_00628E | 2403.59   | 3183.19   | M28219    | 1514.014  | 1110.929  |
| NM_014672 | 4577.708  | 4674.604  | NM_016224 | 8815.236  | 8023.523  | D17207    | 4865.875  | 3605.51   |
| AB058719  | 3114.173  | 2398.273  | NM_005227 | 3634.792  | 3579.277  | D55640    | 1855.834  | 1452.494  |
| AK025935  | 5347.903  | 5513.276  | NM_00028E | 9213.286  | 7750.825  | AF085822  | 1267.998  | 771.911   |
| AB032953  | 1231.964  | 1007.247  | NM_016454 | 19964.27  | 19801.125 | AK021551  | 1998.781  | 2033.73   |
| AF208536  | 1522.003  | 1250.303  | NM_00346E | 2309.504  | 2014.268  | AK000024  | 1506.548  | 983.427   |
| AB037848  | 956.334   | 851.05    | NM_016433 | 1134.061  | 1055.919  | AK026693  | 853.797   | 725.074   |
| AF082657  | 5132.691  | 7602.204  | NM_00085E | 3402.067  | 2903.052  | AK000794  | 2633.205  | 1495.409  |
| NM_006744 | 1274.692  | 1095.683  | NM_00548C | 1466.79   | 1419.955  | AK000950  | 4347.927  | 3137.742  |
| AF297659  | 1095.797  | 568.114   | AB034694  | 1067.451  | 686.75    | AK026812  | 1939.448  | 1063.438  |
| NM_018231 | 4708.901  | 2965.278  | NM_003273 | 1979.503  | 1905.071  | AK000176  | 1589.059  | 1082.5    |
| NM_00058E | 7271.234  | 6768.479  | AK026404  | 1061.789  | 825.822   | AK000831  | 3926.301  | 2542.323  |
| NM_00310C | 7006.437  | 7737.005  | NM_01794E | 2966.048  | 3276.387  | AK000981  | 1246.587  | 742.364   |
| NM_00684E | 956.437   | 1076.409  | NM_000392 | 1293.536  | 1486.058  | AK025054  | 1245.848  | 554.806   |
| AF228704  | 8852.098  | 7616.121  | NM_000267 | 4214.393  | 4212.872  | AK024556  | 722.571   | 448.217   |
| AF222927  | 5568.167  | 4600.796  | NM_016603 | 3110.557  | 5650.847  | AK024935  | 1042.489  | 616.796   |
| NM_01434E | 2959.433  | 2034.483  | NM_00439E | 41169.039 | 46738.406 | AK025325  | 4831.779  | 6496.61   |
| NM_018217 | 7968.313  | 9140.077  | NM_016181 | 253.246   | 461.922   | NM_00531E | 3094.285  | 1885.66   |
| AF241831  | 5353.098  | 7027.097  | NM_01496E | 6491.379  | 5682.936  | AL117474  | 1545.501  | 1142.131  |
| NM_00303E | 3637.282  | 2686.141  | NM_014962 | 2664.968  | 2288.645  | AK024580  | 21908.283 | 16950.281 |
| U96113    | 2287.433  | 1716.087  | D87684    | 11424.544 | 7167.47   | AL442093  | 2629.861  | 1998.382  |
| NM_00273E | 3323.856  | 2373.151  | NM_00158E | 1295.143  | 761.187   | AK024331  | 745.869   | 1187.017  |
| M31008    | 1574.054  | 1132.165  | NM_006317 | 1294.884  | 1431.677  | AK024452  | 1530.137  | 2246.829  |
| NM_00628E | 3439.789  | 3425.758  | NM_00121E | 8463.755  | 10085.055 | AK021733  | 1490.082  | 850.065   |
| NM_016224 | 9858.768  | 11423.561 | AK000124  | 2158.822  | 2256.805  | NM_01244E | 1167.499  | 1416.545  |
| NM_005227 | 6122.018  | 6340.544  | NM_00448C | 3294.307  | 2791.36   | AK000543  | 8042.009  | 10408.685 |
| NM_00028E | 17051.428 | 14723.613 | NM_014914 | 6031.682  | 5131.002  | AK026683  | 2842.367  | 3215.133  |
| NM_016454 | 29710.117 | 37956.016 | NM_01828E | 2049.312  | 1893.998  | D16906    | 1723.95   | 1510.089  |
| NM_00346E | 4856.154  | 5785.99   | AB018260  | 714.067   | 684.989   | AK022335  | 476.256   | 758.598   |
| NM_01643E | 1654.595  | 2151.489  | NM_01476E | 2845.228  | 3116.469  | AL110280  | 1100.125  | 1638.658  |
| NM_00085E | 5583.152  | 8288.349  | NM_016627 | 15499.702 | 16978.756 | AK024235  | 156.344   | 495.136   |
| NM_00548C | 3678.023  | 4097.398  | NM_016121 | 1406.689  | 1551.313  | NM_01745E | 396.252   | 698.52    |
| AB034694  | 894.339   | 1460.279  | NM_01476E | 1096.011  | 1574.427  | AF086196  | 552.286   | 1456.556  |
| NM_00327E | 5671.699  | 5728.63   | NM_00634E | 24981.904 | 32615.66  | NM_00554E | 38072.473 | 51903.59  |
| AK026404  | 2839.436  | 3148.353  | AK026264  | 5808.218  | 6777.637  | X95095    | 2719.788  | 2675.298  |
| NM_01794E | 11730.586 | 11532.216 | NM_00438E | 1605.539  | 1204.153  | AB007902  | 608.756   | 596.054   |
| NM_000392 | 4252.545  | 5002.867  | NM_00587E | 38170.527 | 46096.371 | AF078528  | 17015.543 | 20002.58  |
| NM_000267 | 4627.171  | 2533.066  | NM_004934 | 907.912   | 451.51    | AF161411  | 3582.351  | 5844.638  |
| NM_01660E | 4564.895  | 3247.852  | AF284436  | 696.092   | 842.991   | AK000450  | 34582.34  | 46175.039 |
| NM_00439E | 45529.859 | 36904.84  | NM_00444E | 2984.316  | 2251.309  | NM_018224 | 7253.191  | 8518.181  |
| NM_01496E | 7647.862  | 5369.57   | U39657    | 9205.727  | 6308.51   | NM_01989E | 2699.695  | 3598.583  |

|           |           |           |           |           |           |           |           |           |
|-----------|-----------|-----------|-----------|-----------|-----------|-----------|-----------|-----------|
| NM_014962 | 3605.344  | 2423.381  | NM_016340 | 4266.015  | 2805.217  | NM_01856E | 5815.406  | 8724.979  |
| D87684    | 15382.34  | 15237.222 | NM_018373 | 1665.493  | 1859.674  | J04118    | 689.869   | 825.62    |
| NM_00158E | 1240.775  | 1112.043  | NM_00644E | 1427.769  | 1496.218  | NM_00073C | 6646.275  | 3909.952  |
| NM_006317 | 2062.145  | 1551.583  | BF216030  | 7343.212  | 6280.491  | U31734    | 35400.141 | 22947.049 |
| NM_00121E | 8575.242  | 8486.188  | AF131839  | 480.443   | 913.104   | AF085885  | 1646.57   | 1154.051  |
| AK000124  | 2548.217  | 2357.017  | NM_002757 | 3255.824  | 3526.566  | AF009319  | 1379.434  | 1217.369  |
| NM_00448C | 3384.155  | 3842.611  | NM_003684 | 1647.232  | 1715.066  | AL365519  | 659.243   | 735.925   |
| NM_014914 | 6014.568  | 6341.168  | NM_005657 | 2116.611  | 2122.531  | NM_01846E | 7475.332  | 6889.973  |
| NM_01828E | 3286.892  | 3420.488  | NM_017671 | 1079.371  | 919.788   | Z36845    | 506.043   | 563.391   |
| AB018260  | 988.616   | 950.764   | AB040883  | 3287.762  | 3144.192  | NM_016127 | 7941.39   | 10199.987 |
| NM_01476E | 6998.986  | 7046.055  | NM_01863E | 4528.837  | 4820.71   | AF085939  | 1311.007  | 2162.278  |
| NM_016627 | 30510.965 | 39324.523 | NM_00171E | 2075.749  | 2324.994  | AK095477  | 2499.479  | 3031.16   |
| NM_016121 | 4755.776  | 6168.384  | NM_00439E | 3264.735  | 5020.027  | AK023326  | 816.568   | 1039.169  |
| NM_01476E | 8520.048  | 8002.278  | NM_002663 | 584.551   | 501.758   | AK022462  | 2201.463  | 3346.452  |
| NM_00634E | 60197.043 | 59994.402 | NM_006094 | 1470.019  | 1993.029  | NM_02053C | 1522.895  | 1726.677  |
| AK026264  | 20641.012 | 20351.963 | AF080158  | 1004.553  | 1534.689  | AK022418  | 1612.887  | 2418.871  |
| NM_00438E | 2367.375  | 1560.91   | AB037794  | 5746.67   | 5587.21   | AF279777  | 1160.475  | 1171.97   |
| NM_00587E | 42158.465 | 24451.516 | NM_00593E | 1609.923  | 1002.402  | AK021748  | 1943.495  | 2602.511  |
| NM_004934 | 564.294   | 500.82    | NM_01241E | 2154.13   | 1474.059  | AL137257  | 7654.04   | 10312.459 |
| NM_00444E | 3728.504  | 2917.566  | NM_01417E | 8340.847  | 7807.966  | AF086503  | 305.904   | 537.794   |
| U39657    | 10750.309 | 8093.708  | NM_001251 | 20928.291 | 20700.355 | CY3Cy5    | 5621.057  | 585.669   |
| NM_01634C | 4222.935  | 5257.104  | AB011112  | 5048.295  | 3904.297  | AA778392  | 6997.105  | 7793.246  |
| NM_018373 | 1490.466  | 1313.333  | NM_01866E | 4212.7    | 3459.997  | AI478178  | 1309.551  | 1504.986  |
| NM_00644E | 1978.725  | 1198.605  | NM_002623 | 3003.734  | 3063.777  | AA101279  | 2890.683  | 3291.461  |
| BF216030  | 5560.288  | 4078.115  | NM_018844 | 4628.612  | 6486.941  | M19154    | 1036.227  | 934.776   |
| AF131839  | 970.122   | 1086.039  | AF279778  | 1205.644  | 1348.69   | AA399410  | 5119.185  | 2547.802  |
| NM_002757 | 4893.726  | 5312.052  | NM_015477 | 5000.62   | 4602.563  | AA137031  | 1344.829  | 620.895   |
| NM_003684 | 3505.231  | 3487.957  | AK023212  | 3073.751  | 3137.628  | AA292226  | 2648.526  | 1014.343  |
| NM_005657 | 3469.179  | 3292.438  | AL353943  | 1622.017  | 1766.084  | NM_00050C | 1306.54   | 1008.275  |
| NM_017671 | 1744.875  | 1806.607  | BE568801  | 1634.127  | 1408.26   | J04449    | 910.03    | 1790.698  |
| AB040883  | 6006.834  | 6639.317  | AB002336  | 2309.461  | 1740.623  | BC007031  | 5043.807  | 7419.732  |
| NM_01863E | 10188.135 | 10535.437 | NM_003127 | 636.291   | 629.44    | AF129756  | 12391.192 | 20651.863 |
| AF264628  | 764.511   | 1015.7    | NM_01328E | 6332.452  | 6175.998  | NM_002957 | 17765.457 | 31661.48  |
| NM_00171E | 6816.44   | 6993.346  | NM_00608E | 66283.109 | 54105.086 | BC036369  | 2641.012  | 5409.299  |
| NM_00439E | 20759.957 | 18955.35  | NM_006633 | 2242.893  | 2480.181  | X12492    | 14511.209 | 24293.787 |
| NM_002663 | 1895.195  | 2049.243  | NM_01626E | 816.032   | 882.739   | U93051    | 13965.336 | 19175.682 |
| NM_006094 | 14128.056 | 10958.104 | AB011116  | 3501.712  | 4705.962  | SR2       | 58891.367 | 58447.16  |
| AF080158  | 5538.122  | 5039.704  | AB037858  | 969.31    | 1594.775  | SR4       | 17987.146 | 17277.578 |
| AB037794  | 16461.408 | 17975.221 | NM_00577E | 4404.082  | 4338.073  | SR6       | 2716.129  | 2436.189  |
| NM_00593E | 1551.085  | 1074.652  | NM_00327C | 904.686   | 504.416   | SR8       | 8613.482  | 29613.992 |
| NM_01241E | 2306.642  | 1672.253  | NM_016591 | 957.537   | 1103.781  | SR10      | 30989.998 | 9484.149  |
| NM_01417E | 9829.38   | 6078.147  | AL157437  | 9596.332  | 7997.259  | CY3Cy5    | 2496.544  | 98.738    |
| NM_001251 | 28657.34  | 17543.771 | L25629    | 723.556   | 475.836   | NM_00568E | 1881.848  | 2051.102  |
| AB011112  | 8214.018  | 4835.243  | AJ245539  | 280.072   | 512.414   | NM_00292E | 1046.933  | 1865.855  |
| NM_01866E | 5511.748  | 5165.805  | NM_00149C | 2104.085  | 1376.941  | NM_018697 | 1033.256  | 888.578   |
| NM_002623 | 4012.928  | 3314.938  | NM_01774C | 5729.324  | 3672.676  | NM_01403C | 39100.547 | 14364.333 |
| NM_018844 | 6121.757  | 4324.993  | AB033052  | 2844.457  | 2478.653  | NM_004224 | 9442.845  | 3319.844  |
| AF279778  | 1981.876  | 1557.103  | NM_018227 | 3488.088  | 2801.891  | Z21967    | 6688.74   | 7497.637  |
| NM_015477 | 6866.693  | 6287.442  | AF050199  | 646.066   | 712.185   | NM_00373E | 619.333   | 1502.611  |
| AK023212  | 5698.879  | 5536.217  | NM_00334C | 41925.043 | 43859.648 | NM_005461 | 584.071   | 1310.78   |
| AL353943  | 2661.281  | 2818.116  | U46752    | 2368.364  | 2502.533  | AF052693  | 3911.77   | 7335.643  |
| BE568801  | 1663.481  | 2763.692  | NM_002794 | 51320.309 | 43768.945 | L09100    | 2226.924  | 4533.059  |
| AB002336  | 3832.008  | 3952.212  | BF244646  | 57340.805 | 47754.156 | NM_00547E | 1665.067  | 2418.6    |

|           |           |           |           |           |           |           |           |           |
|-----------|-----------|-----------|-----------|-----------|-----------|-----------|-----------|-----------|
| NM_003127 | 1569.098  | 1409.767  | AK024030  | 4225.692  | 4230.109  | NM_004313 | 956.777   | 947.758   |
| NM_013286 | 13271.632 | 14982.785 | AF275808  | 1431.057  | 1313.449  | NM_013435 | 1087.289  | 1754.944  |
| NM_006082 | 60623.535 | 66687.18  | AK024038  | 6176.987  | 5566.233  | NM_000132 | 12949.033 | 16109.114 |
| NM_006633 | 6432.108  | 6375.173  | NM_002055 | 1155.957  | 1054.223  | BG717460  | 1452.42   | 1140.883  |
| NM_016262 | 3045.876  | 3000.324  | NM_005803 | 9212.25   | 11083.017 | NM_004161 | 10503.396 | 9801.206  |
| AB011116  | 15048.221 | 17517.018 | NM_015515 | 4906.253  | 4657.076  | NM_001295 | 774.695   | 1044.874  |
| AB037858  | 6976.685  | 6560.692  | AK001579  | 6515.566  | 7315.183  | NM_005161 | 1698.717  | 1652.919  |
| NM_000173 | 647.309   | 480.005   | NM_002670 | 2633.023  | 2830.601  | NM_020347 | 796.316   | 353.463   |
| NM_005775 | 13618.027 | 14870.146 | AF163302  | 1283.641  | 1819.982  | NM_001462 | 2003.339  | 1029.704  |
| NM_017639 | 2157.778  | 2104.342  | NM_006408 | 1010.728  | 915.542   | NM_004072 | 878.186   | 488.602   |
| NM_003270 | 1389.5    | 793.234   | NM_002419 | 1729.521  | 1664.855  | NM_006890 | 492.982   | 931.667   |
| NM_016591 | 1485.851  | 582.72    | NM_001989 | 6565.713  | 6256.634  | NM_003110 | 9831.314  | 15783.128 |
| AL157437  | 23758.076 | 14395.286 | NM_002653 | 3935.769  | 3071.433  | NM_003612 | 2993.362  | 4603.415  |
| L25629    | 987.258   | 629.31    | NM_005604 | 1505.181  | 1341.947  | NM_013230 | 1751.428  | 3754.448  |
| NM_001490 | 2404.949  | 1791.591  | S69023    | 1639.526  | 1433.06   | X72308    | 4996.652  | 9053.061  |
| NM_017740 | 7688.417  | 3797.133  | NM_003454 | 2275.693  | 2527.368  | NM_005408 | 503.75    | 1144.801  |
| AB033052  | 3855.879  | 2406.617  | NM_003418 | 26066.408 | 19370.092 | AB041269  | 2444.503  | 3178.085  |
| NM_018227 | 4170.316  | 3050.088  | NM_017908 | 5103.578  | 4753.267  | AK024908  | 6264.861  | 6461.308  |
| AF050199  | 1010.543  | 657.816   | NM_006885 | 763.024   | 562.415   | NM_018270 | 10921.621 | 12192.987 |
| NM_003340 | 53590.617 | 51138.074 | M25077    | 6739.959  | 7025.261  | AB033049  | 35744.031 | 20318.441 |
| U46752    | 3100.864  | 3086.782  | NM_018702 | 1845.871  | 2178.498  | NM_004377 | 3585.194  | 2645.387  |
| NM_002794 | 61145.078 | 55460.863 | M62843    | 687.586   | 589.895   | AB037815  | 11207.676 | 9475.257  |
| BF244646  | 62830.719 | 58093.309 | U96131    | 607.008   | 426.918   | NM_003645 | 6429.894  | 7159.856  |
| AK024030  | 6464.934  | 5849.409  | NM_004593 | 2317.687  | 1995.255  | NM_017750 | 2883.106  | 4454.429  |
| AF275808  | 2551.197  | 2238.977  | NM_005778 | 9574.811  | 10391.017 | AK026196  | 2401.442  | 5462.086  |
| AK024038  | 10032.921 | 9665.367  | NM_001032 | 62585.367 | 55410.918 | NM_013348 | 2278.499  | 3393.568  |
| NM_002055 | 2320.882  | 1996.502  | NM_018084 | 14034.553 | 14463.166 | NM_004977 | 11184.105 | 10192.888 |
| NM_005803 | 18884.535 | 19731.189 | AF164797  | 56169.531 | 48923.109 | NM_004888 | 49670.102 | 62549.934 |
| NM_015515 | 10109.597 | 8587.895  | NM_017840 | 26764.967 | 29740.799 | NM_012283 | 65553.719 | 65332.902 |
| AK001579  | 24956.648 | 24966.887 | AK001052  | 19341.449 | 22293.805 | NM_007166 | 5534.107  | 5045.591  |
| NM_002670 | 11815.043 | 12425.084 | NM_001415 | 23211.479 | 24151.045 | NM_006755 | 4038.233  | 5369.439  |
| AF163302  | 6161.314  | 5039.257  | NM_004564 | 2022.853  | 1772.192  | NM_005881 | 1953.321  | 1695.398  |
| NM_006408 | 5505.335  | 4879.17   | NM_000968 | 37321.75  | 42952.316 | L40519    | 729.047   | 490.775   |
| NM_002419 | 10783.148 | 9251.626  | AL355743  | 1963.61   | 1800.537  | NM_004204 | 2358.969  | 1398.757  |
| NM_001989 | 13553.059 | 7304.76   | L77571    | 628.933   | 513.138   | AK002181  | 1081.926  | 401.467   |
| NM_002653 | 5422.93   | 3329.725  | X81896    | 553.186   | 641.091   | NM_002837 | 2788.573  | 3180.24   |
| NM_005604 | 4216.502  | 2990.838  | NM_002202 | 2687.127  | 2373.613  | U06715    | 582.364   | 876.57    |
| S69023    | 2907.528  | 2399.469  | NM_006005 | 2857.296  | 2506.019  | NM_013402 | 8843.217  | 11958.45  |
| NM_003454 | 4444.92   | 3496.423  | NM_002629 | 61695.641 | 46659.184 | NM_000132 | 12360.938 | 11907.015 |
| NM_003418 | 28981.424 | 26861.691 | NM_014364 | 2340.137  | 2148.616  | NM_001727 | 3338.726  | 3425.588  |
| NM_017908 | 6714.269  | 4049.59   | NM_001685 | 48502     | 49707.883 | NM_004076 | 1601.716  | 2013.747  |
| NM_006885 | 662.22    | 536.493   | NM_006067 | 29422.744 | 31176.789 | BG717460  | 1813.219  | 1180.926  |
| M25077    | 8235.404  | 7462.204  | NM_000284 | 5795.82   | 5716.239  | AA778392  | 4256.615  | 2712.196  |
| NM_018702 | 3072.692  | 3005.87   | NM_004813 | 6262.366  | 5877.656  | AI478178  | 1108.639  | 677.433   |
| M62843    | 788.273   | 786.301   | AK023008  | 3360.865  | 4237.425  | AA101279  | 2958.78   | 3050.449  |
| NM_004593 | 2617.74   | 3026.469  | NM_004689 | 5787.529  | 5961.346  | M19154    | 1411.91   | 2190.196  |
| NM_005778 | 16956.488 | 17882.654 | NM_006026 | 24412.557 | 27646.436 | AA399410  | 6336.753  | 9884.311  |
| NM_018084 | 24348.32  | 29324.656 | BG339855  | 471.35    | 559.733   | AA137031  | 1153.408  | 2262.566  |
| AF164797  | 59140.344 | 56352.797 | AB040956  | 3749.734  | 3529.017  | AA292226  | 3401.829  | 7006.478  |
| NM_017840 | 48381.793 | 56258.246 | NM_016587 | 1464.687  | 2094.307  | NM_000500 | 1985.556  | 4766.843  |
| AK001052  | 54566.32  | 56103.906 | NM_003516 | 2154.377  | 1654.771  | J04449    | 1036.971  | 2045.02   |
| NM_001415 | 58821.23  | 56311.332 | NM_017953 | 3765.43   | 4249.263  | BC007031  | 6245.246  | 7931.832  |
| NM_004564 | 9165.743  | 9060.022  | BC000124  | 3001.294  | 3886.314  | BC036369  | 3347.847  | 3926.619  |

|           |           |           |           |           |           |           |           |           |
|-----------|-----------|-----------|-----------|-----------|-----------|-----------|-----------|-----------|
| NM_00096E | 63539.941 | 60868.375 | Z11773    | 1801.928  | 1389.849  | X12492    | 13550.898 | 20814.906 |
| AL355743  | 3723.678  | 3963.287  | NM_006914 | 1122.923  | 1143.065  | U93051    | 15324.11  | 19743.674 |
| L77571    | 1236.409  | 1991.248  | NM_00344E | 12541.005 | 28723.127 | NM_01754C | 1116.375  | 533.781   |
| X81896    | 2452.148  | 2981.116  | NM_00148E | 1821.085  | 2554.811  | NM_01827C | 8153.589  | 8754.87   |
| AF070595  | 907.902   | 1060.536  | AK021510  | 1687.075  | 1187.166  | NM_00026C | 43900.836 | 50103.926 |
| NM_00220Z | 4238.943  | 5512.5    | AK022711  | 2069.387  | 1361.232  | NM_01416C | 5493.249  | 6832.286  |
| NM_00600E | 4876.171  | 4845.458  | AK024310  | 821.475   | 690.912   | NM_00568Z | 894.363   | 1115.869  |
| NM_00262E | 64175.102 | 53747.688 | AK023039  | 1742.836  | 2254.553  | NM_00292E | 1193.485  | 2003.439  |
| NM_01436A | 2490.126  | 2062.447  | AL109688  | 5359.29   | 7321.378  | NM_00023Z | 127.596   | 1101.785  |
| NM_00168E | 56475.691 | 47989.418 | AF074981  | 995.701   | 1063.011  | NM_018697 | 1157.004  | 2911.477  |
| NM_006067 | 38855.32  | 28942.002 | AK025863  | 2219.919  | 1923.939  | AF090116  | 496.062   | 1330.184  |
| NM_00028A | 10553.706 | 7078.762  | D42044    | 1862.456  | 1746.21   | NM_01403C | 46902.016 | 59762.688 |
| NM_00481Z | 8826.41   | 8839.003  | AK023009  | 655.024   | 605.922   | NM_00422A | 11687.951 | 14857.247 |
| AK023008  | 5868.361  | 5416.827  | AK026149  | 1065.877  | 1057.218  | NM_00025A | 5896.537  | 10922.714 |
| NM_00468E | 6796.72   | 7738.624  | AF038185  | 5106.389  | 6672.381  | Z21967    | 6693.871  | 6327.872  |
| NM_00602E | 36438.734 | 42824.301 | AB027011  | 14581.221 | 15225.43  | NM_00373E | 674.235   | 694.332   |
| BG339855  | 401.746   | 509.603   | AK025305  | 2058.707  | 2075.431  | NM_01211C | 13028.083 | 17453.117 |
| AB040956  | 5819.152  | 5251.959  | AF131788  | 406.008   | 494.498   | NM_005461 | 510.696   | 1031.427  |
| NM_016587 | 4637.712  | 3140.933  | AL117415  | 10172.673 | 9063.988  | AF052693  | 3372.802  | 3218.294  |
| NM_01795Z | 6845.556  | 7374.424  | AK023616  | 1268.095  | 1178.738  | NM_00112E | 21448.096 | 13600.165 |
| BC000124  | 6484.135  | 5747.604  | AK025665  | 3076.723  | 3391.104  | L09100    | 1205.87   | 674.033   |
| Z11773    | 3030.101  | 3360.866  | AL355694  | 1107.573  | 1293.73   | NM_00547Z | 1221.733  | 410.492   |
| NM_006914 | 2342.274  | 2538.293  | AK027152  | 3010.091  | 2853.266  | NM_01343E | 804.295   | 505.68    |
| NM_00344E | 63073.727 | 53611.922 | AF191492  | 400.319   | 548.731   | NM_004161 | 9515.753  | 9447.934  |
| NM_00148E | 15841.161 | 13637.026 | BC037530  | 14461.875 | 22129.996 | NM_00129E | 735.395   | 1620.955  |
| NM_00270Z | 2379.241  | 2705.385  | NM_014851 | 2860.995  | 4299.654  | NM_005161 | 2095.003  | 3579.65   |
| AK021510  | 2071.948  | 2522.433  | AK022811  | 2036.557  | 1709.718  | AB037749  | 647.196   | 1424.312  |
| AK022711  | 3407.693  | 5768.69   | AL117635  | 3152.468  | 2385.302  | NM_020347 | 1245.216  | 2684.959  |
| AK024310  | 1220.481  | 2478.009  | AK025332  | 2406.565  | 3247.958  | NM_00146Z | 2043.936  | 3387.484  |
| AK023039  | 3339.877  | 4852.589  | AB020735  | 1194.605  | 1197.877  | NM_00407Z | 1029.192  | 2132.597  |
| AL109688  | 6650.089  | 7504.323  | AJ011596  | 5785.327  | 5509.279  | AF068286  | 609.834   | 943.695   |
| AF074981  | 1592.213  | 1729.302  | U17639    | 505.38    | 940.283   | AB040957  | 4746.873  | 3729.569  |
| AK025863  | 3630.252  | 3566.159  | AL049215  | 59070.965 | 50057.578 | NM_00689C | 714.73    | 1044.376  |
| D42044    | 3924.778  | 3769.685  | X51779    | 1851.124  | 1911.802  | NM_00361Z | 2345.146  | 3119.44   |
| AK026149  | 1895.677  | 812.23    | X81001    | 1237.618  | 1088.982  | NM_01323C | 1498.213  | 1584.207  |
| AF038185  | 12145.098 | 5517.209  | AL049254  | 1560.777  | 1946.138  | X72308    | 2866.683  | 3796.632  |
| AB027011  | 27219.711 | 22109.861 | Z83954    | 4355.794  | 4410.419  | BC008376  | 9585.087  | 2550.959  |
| AK025305  | 2979.022  | 2716.738  | M74093    | 2393.761  | 2705.963  | AB041269  | 1931.854  | 804.039   |
| AL117415  | 14617.008 | 13078.157 | M28219    | 1513.071  | 1265.425  | AK024908  | 4678.959  | 2223.85   |
| AK023616  | 951.658   | 1179.975  | L17326    | 886.693   | 835.577   | NM_002837 | 2381.375  | 2536.239  |
| AK025665  | 6689.941  | 5310.213  | D17207    | 7541.078  | 7272.521  | AL133077  | 14584.626 | 15072.299 |
| AL355694  | 1785.708  | 1897.384  | D55640    | 1875.03   | 1551.851  | AK025211  | 1514.803  | 1763.452  |
| AK027152  | 5178.455  | 5801.161  | AF085822  | 656.614   | 748.687   | NM_01340Z | 8121.122  | 4830.826  |
| AF191492  | 1442.4    | 1195.198  | AK021551  | 2676.486  | 2389.341  | NM_004377 | 5032.663  | 3536.317  |
| BC037530  | 55090.609 | 53008.699 | AK000024  | 11476.77  | 9631.322  | AB037815  | 16714.957 | 18590.758 |
| NM_014851 | 17639.217 | 14575.745 | AK026693  | 2444.143  | 2095.844  | NM_00364E | 8622.384  | 13655.913 |
| NM_00716E | 674.461   | 769.007   | NM_01228E | 960.341   | 1193.315  | NM_01775C | 2838.132  | 2903.389  |
| AK022811  | 3650.588  | 5409.779  | AK001128  | 592.689   | 740.557   | NM_01334E | 1574.053  | 2320.055  |
| AL117635  | 3652.732  | 5431.666  | AK000090  | 1124.135  | 914.037   | NM_004977 | 4807.436  | 3683.378  |
| AK025332  | 2769.359  | 3261.308  | AK000794  | 7222.936  | 7565.947  | NM_01228Z | 46685.406 | 28527.564 |
| AB040929  | 3226.644  | 3874.7    | AK000950  | 3890.678  | 3260.363  | U93051    | 12424.802 | 9681.419  |
| AB020735  | 2059.361  | 3045.847  | AK026812  | 2692.346  | 2604.542  | NM_01754C | 1115.656  | 795.518   |
| D17010    | 616.154   | 660.51    | AK000176  | 1381.243  | 1335.447  | NM_00675E | 4619.573  | 4454.495  |

|           |           |           |           |           |           |           |           |           |
|-----------|-----------|-----------|-----------|-----------|-----------|-----------|-----------|-----------|
| AJ011596  | 6081.582  | 4648.833  | AK000831  | 3144.834  | 2465.93   | NM_005881 | 1987.748  | 2181.507  |
| X79984    | 9087.21   | 3321.443  | AK000981  | 1024.925  | 563.412   | NM_004204 | 2091.98   | 2653.174  |
| AL049215  | 49148.969 | 37276.563 | AK024615  | 856.62    | 947.117   | AK002181  | 909.485   | 1944.75   |
| X51779    | 3107.683  | 2819.312  | AK025054  | 1604.415  | 1822.428  | AK025769  | 4972.197  | 8217.583  |
| AL049254  | 3257.56   | 2733.892  | AK024556  | 1085.97   | 1120.288  | AW945166  | 927.209   | 1379.622  |
| Z83954    | 7653.675  | 5977.997  | AK024935  | 1196.481  | 1229.986  | AF052693  | 2202.228  | 1639.785  |
| M74093    | 4747.271  | 4367.726  | AK025325  | 10797.062 | 7911.65   | NM_005472 | 1552.092  | 1259.236  |
| M28219    | 2896.095  | 2772.539  | U50531    | 3027.406  | 2910.893  | NM_013435 | 765.706   | 611.92    |
| L17326    | 1530      | 1198.214  | NM_005318 | 8278.071  | 8397.757  | NM_000132 | 13492.931 | 9530.636  |
| D17207    | 9856.147  | 9908.352  | L09099    | 920.128   | 1120.477  | NM_001727 | 3852.116  | 4302.181  |
| D55640    | 3896.539  | 4256.587  | AL117474  | 2785.839  | 2619.359  | NM_004076 | 2090.43   | 3080.761  |
| AF085897  | 856.003   | 1224.323  | NM_005421 | 2403.837  | 2512.121  | BG717460  | 1734.227  | 2762.796  |
| AF085822  | 2701.534  | 2311.402  | AK024580  | 61285.141 | 48160.559 | AA778392  | 4782.123  | 8498.703  |
| AK021551  | 5121.959  | 7256.577  | AL442093  | 7096.472  | 6848.034  | AI478178  | 1235.311  | 1838.875  |
| AK025117  | 2552.981  | 3258.284  | AK024331  | 1303.618  | 1631.591  | AA101279  | 2742.081  | 1819.393  |
| AK000024  | 16090.881 | 20131.348 | AK024452  | 1462.419  | 1739.781  | AA137031  | 1121.099  | 1705.679  |
| AK026693  | 3144.584  | 4020.797  | AJ249975  | 784.269   | 869.356   | AA292226  | 1662.041  | 1380.147  |
| AK000090  | 1358.863  | 1162.742  | AK021733  | 1590.168  | 1484.301  | NM_00050C | 1155.659  | 1211.877  |
| AK000794  | 5012.967  | 3975.952  | NM_012449 | 1890.378  | 2363.472  | J04449    | 859.096   | 1524.382  |
| AK000950  | 7228.363  | 6178.323  | AK000543  | 17155.973 | 11599.909 | BC007031  | 2391.36   | 2209.224  |
| AK026812  | 5592.647  | 4973.314  | AK026683  | 4862.83   | 4027.768  | AF129756  | 9586.711  | 3602.799  |
| AK000176  | 2968.833  | 3175.168  | D16906    | 5452.395  | 5070.07   | NM_002957 | 11699.1   | 5126.162  |
| AK000831  | 6057.37   | 7051.269  | AK022335  | 745.027   | 831.457   | BC036369  | 2632.482  | 1048.637  |
| AK000981  | 916.752   | 1112.129  | AL110280  | 2601.562  | 3224.006  | X12492    | 11191.356 | 5387.045  |
| AK024615  | 1650.135  | 1791.964  | AK024235  | 567.176   | 404.095   | X72308    | 2072.39   | 1474.016  |
| AK025054  | 4291.445  | 3576.115  | NM_017458 | 1750.527  | 1735.427  | BC008376  | 15286.651 | 8732.721  |
| AK024556  | 1976.817  | 1781.024  | AF086196  | 1130.919  | 1214.875  | AB041269  | 1555.74   | 1090.43   |
| AK024935  | 2532.608  | 2191.231  | NM_005542 | 46559.906 | 45432.73  | AK024908  | 3826.479  | 2458.508  |
| AK025325  | 15353.109 | 19126.943 | X95095    | 4433.703  | 5646.684  | NM_01827C | 6426.24   | 3876.833  |
| U50531    | 4969.807  | 7107.276  | AB007902  | 816.267   | 1123.554  | NM_017668 | 5618.408  | 8809.752  |
| NM_005318 | 14634.1   | 20652.338 | AF078528  | 20159.299 | 21503.102 | AB033049  | 43481.875 | 56815.637 |
| U85653    | 809.344   | 983.103   | AF161411  | 4974.942  | 4584.546  | NM_005682 | 1119.017  | 1290.004  |
| L09099    | 1584.945  | 2029.448  | AK000450  | 25828.273 | 25212.578 | NM_002926 | 670.864   | 1223.37   |
| AL117474  | 4254.533  | 4683.765  | NM_018224 | 8869.829  | 7666.476  | NM_018697 | 1047.436  | 2368.271  |
| NM_005421 | 1472.38   | 1229.202  | NM_019896 | 2929.897  | 3254.451  | AF090116  | 266.362   | 1062.454  |
| AK024580  | 54317.66  | 30916.814 | NM_018569 | 5904.515  | 6146.036  | NM_01403C | 29622.223 | 20647.441 |
| AL442093  | 6462.119  | 4693.851  | J04118    | 652.253   | 510.631   | NM_004224 | 6087.746  | 3244.511  |
| AK024331  | 2625.228  | 2382.381  | NM_00073C | 5973.076  | 7389.491  | NM_000254 | 4457.693  | 1600.94   |
| AK024452  | 2718.156  | 2718.09   | U31734    | 41136.84  | 35719.926 | Z21967    | 4692.902  | 1258.321  |
| AJ249975  | 1244.76   | 1496.681  | AF085885  | 2660.844  | 2240.232  | NM_016185 | 50171.008 | 15459.568 |
| AK021733  | 2943.474  | 3084.279  | AF009319  | 3021.576  | 3343.647  | NM_01211C | 9456.454  | 3930.495  |
| NM_012449 | 3124.192  | 3552.988  | AL365519  | 1287.196  | 1625.307  | NM_004977 | 8562.781  | 6087.89   |
| AK000543  | 22397.256 | 37024.383 | NM_018465 | 13207.016 | 15155.949 | NM_004888 | 44176.535 | 41503.441 |
| AK026683  | 6773.329  | 8296.824  | Z36845    | 1837.567  | 1392.968  | NM_012283 | 56158.102 | 40583.27  |
| D16906    | 9114.603  | 11501.565 | M73792    | 1112.092  | 1447.74   | NM_004161 | 6812.598  | 7902.571  |
| AK022335  | 1411.51   | 2044.315  | NM_016127 | 15035.403 | 14212.767 | NM_001295 | 795.099   | 1449.935  |
| AL110280  | 4388.212  | 6097.345  | AF085939  | 2161.81   | 2681.438  | NM_005161 | 1796.56   | 2780.454  |
| AK024235  | 480.587   | 859.576   | NM_006792 | 37232.797 | 42162.488 | AB037749  | 426.01    | 1041.216  |
| NM_017458 | 799.647   | 831.283   | Z36874    | 61624.195 | 46363.715 | NM_020347 | 1148.629  | 1084.679  |
| AF086196  | 921.807   | 569.396   | AK095477  | 2842.176  | 2683.449  | NM_001462 | 1761.389  | 951.178   |
| NM_005542 | 53123.066 | 46891.746 | AK023326  | 1134.119  | 933.859   | AB040957  | 4153.228  | 598.626   |
| X95095    | 4355.647  | 3567.016  | AK022462  | 2491.629  | 1739.057  | NM_00311C | 5048.531  | 1814.497  |
| AF078528  | 25507.904 | 23137.16  | NM_02053C | 2137.116  | 2148.894  | NM_003612 | 1551.054  | 523.238   |

|           |           |           |           |           |           |           |           |           |
|-----------|-----------|-----------|-----------|-----------|-----------|-----------|-----------|-----------|
| AF161411  | 5911.36   | 5214.933  | AK022418  | 1889.578  | 1248.638  | NM_01323C | 1335.881  | 738.724   |
| AK000450  | 44437.598 | 40888.645 | AF279777  | 1207.241  | 1209.301  | NM_01422E | 32349.957 | 27910.508 |
| NM_018224 | 14558.685 | 12781.321 | AK021748  | 1980.954  | 3489.84   | NM_002837 | 1825.846  | 1176.587  |
| NM_01989E | 5813.904  | 5774.099  | AL137257  | 12373.233 | 12794.333 | AL133077  | 13448.306 | 7349.678  |
| NM_01856E | 9742.355  | 10175.711 | CY3Cy5    | 12809.348 | 586.94    | AK025211  | 1394.539  | 840.888   |
| J04118    | 1121.683  | 1400.044  | AA778392  | 3922.67   | 3507.648  | NM_01340Z | 8573.954  | 4701.991  |
| NM_00073C | 20746.846 | 23511.518 | AI478178  | 1165.68   | 1240.683  | NM_00266Z | 349.92    | 630.799   |
| U31734    | 59345.453 | 45879.656 | AA101279  | 3222.924  | 2648.978  | NM_004377 | 3901.542  | 3559.517  |
| AF085885  | 5732.411  | 7081.961  | M19154    | 902.754   | 900.531   | AB037815  | 13750.562 | 23335.908 |
| M24751    | 2890.631  | 4093.209  | AA399410  | 6159.381  | 5506.403  | NM_00364E | 6181.149  | 10014.865 |
| AK022953  | 831.338   | 1245.621  | AA137031  | 897.097   | 768.276   | NM_01775C | 2373.299  | 596.207   |
| AF009319  | 4968.512  | 4340.714  | AA292226  | 2231.16   | 1638.462  | AK026196  | 1865.339  | 620.333   |
| AL365519  | 2092.082  | 2370.021  | NM_00050C | 1338.077  | 1085.965  | NM_016444 | 1053.001  | 1290.311  |
| NM_01846E | 16344.739 | 17339.623 | J04449    | 787.85    | 709.725   | NM_003707 | 7073.195  | 5786.253  |
| Z36845    | 1957.981  | 925.092   | BC007031  | 2421.419  | 2664.306  | AL137718  | 2206.658  | 1833.128  |
| M73792    | 1238.512  | 822.145   | AF129756  | 3944.202  | 3618.824  | NM_00346C | 6404.541  | 3612.925  |
| NM_016127 | 14528.156 | 11453.307 | NM_002957 | 5155.724  | 5780.763  | NM_002904 | 21133.113 | 10818.307 |
| AF085939  | 2423.895  | 2166.922  | BC036369  | 1781.926  | 1848.808  | NM_01418E | 7143.11   | 3007.379  |
| NM_00679Z | 43204.699 | 43278.758 | X12492    | 6417.433  | 5669.63   | NM_00568E | 1489.209  | 668.232   |
| Z36874    | 63071.664 | 57514.73  | U93051    | 6903.393  | 6953.423  | NM_006767 | 753.684   | 389.645   |
| AK095477  | 3550.415  | 3168.135  | SR2       | 29079.152 | 29973.834 | NM_01754C | 1491.996  | 677.688   |
| AK023326  | 1124.357  | 1095.111  | SR4       | 6339.301  | 5275.775  | NM_00675E | 3817.466  | 3691.266  |
| AK022462  | 3514.374  | 3624.308  | SR6       | 504.769   | 561.532   | NM_005881 | 1948.353  | 3484.572  |
| NM_02053C | 2337.394  | 2545.473  | SR8       | 2437.696  | 8314.152  | L40519    | 604.867   | 801.224   |
| AK022418  | 3410.99   | 3582.333  | SR10      | 21660.744 | 5691.631  | NM_004204 | 2396.099  | 3364.858  |
| AF279777  | 2011.594  | 1688.778  | CY3Cy5    | 12562.538 | 410.16    | AK002181  | 623.461   | 154.372   |
| AK021748  | 5552.255  | 3613.173  | NM_00568Z | 743.351   | 750.185   | NM_001641 | 12522.8   | 2642.777  |
| AL137257  | 13757.497 | 13215.34  | NM_00292E | 508.251   | 665.643   | BC015750  | 58943.023 | 17944.488 |
| AF086503  | 835.814   | 736.188   | NM_018697 | 914.867   | 767       | AK025769  | 3537.719  | 704.071   |
| CY3Cy5    | 12456.547 | 592.644   | AF090116  | 552.873   | 365.565   | NM_00258E | 4424.874  | 3010.187  |
| AA778392  | 11483.544 | 10843.156 | NM_01403C | 29247.375 | 31329.055 | AF064846  | 1175.529  | 1011.273  |
| AI478178  | 2279.841  | 3128.54   | NM_004224 | 2647.593  | 3999.355  | AL110227  | 1066.028  | 780.424   |
| AA101279  | 7342.758  | 8047.865  | Z21967    | 4077.527  | 3643.686  | NM_002944 | 1060.2    | 252.164   |
| M19154    | 2184.458  | 2468.314  | NM_01618E | 9155.822  | 8991.883  | AF327354  | 1677.109  | 1158.937  |
| AA399410  | 9816.978  | 11053.875 | NM_012110 | 1818.834  | 2430.299  | AB014513  | 6122.98   | 6277.337  |
| AA137031  | 1821.508  | 2212.674  | AF052693  | 999.703   | 1257.093  | NM_004747 | 1476.268  | 2546.672  |
| AA292226  | 3409.195  | 3503.693  | NM_001129 | 8064.461  | 8123.764  | NM_002341 | 7102.493  | 11042.543 |
| NM_00050C | 3624.365  | 4453.291  | L09100    | 1230.278  | 1095.466  | AL137651  | 2856.328  | 1529.074  |
| M29873    | 995.479   | 817.371   | NM_00547Z | 988.586   | 960.922   | NM_01894E | 3316.599  | 866.832   |
| J04449    | 2490.214  | 2491.443  | NM_01343E | 479.985   | 370.956   | NM_00081E | 2181.906  | 657.296   |
| BC007031  | 14645.43  | 15412.458 | BG717460  | 1806.959  | 1181.266  | AK024436  | 1697.913  | 273.31    |
| NM_002957 | 48717.203 | 47098.07  | NM_004161 | 9733.374  | 8246.002  | NM_00664E | 1949.846  | 234.809   |
| BC036369  | 5512.023  | 4301.792  | NM_00129E | 679.696   | 604.497   | NM_004711 | 1308.276  | 513.206   |
| X12492    | 32234.621 | 33497.578 | NM_005161 | 1069.197  | 894.619   | AF161361  | 559.271   | 1057.93   |
| U93051    | 27448.629 | 21285.148 | NM_020347 | 1299.856  | 865.802   | NM_001444 | 39144.871 | 58803.434 |
| SR2       | 66735.023 | 66510.289 | NM_00146Z | 1644.577  | 1283.657  | NM_00124C | 3654.53   | 1596.64   |
| SR4       | 28420.834 | 20826.602 | NM_00407Z | 951.982   | 614.265   | NM_00270E | 12599.1   | 7012.771  |
| SR6       | 4432.955  | 3205.933  | NM_003110 | 2021.859  | 2341.258  | NM_00682Z | 5015.321  | 2809.798  |
| SR8       | 14794.974 | 29439.613 | NM_01323C | 445.843   | 535.273   | NM_002657 | 819.569   | 842.041   |
| SR10      | 49832.004 | 10739.873 | X72308    | 1138.845  | 1244.028  | NM_00135C | 11009.313 | 16779.563 |
| CY3Cy5    | 8157.992  | 337.884   | BC008376  | 6894.162  | 6192.677  | NM_01480E | 1573.623  | 1847.591  |
| NM_00568Z | 2282.364  | 2255.314  | AB041269  | 1580.123  | 1372.032  | NM_016074 | 13962.787 | 6812.415  |
| NM_00292E | 1921.841  | 2394.471  | AK024908  | 3968.65   | 4491.656  | NM_003921 | 2110.235  | 441.066   |

|           |           |           |           |           |           |           |           |           |
|-----------|-----------|-----------|-----------|-----------|-----------|-----------|-----------|-----------|
| NM_018697 | 2055.191  | 2359.511  | NM_018270 | 4951.851  | 4783.737  | NM_004208 | 5932.447  | 1848.016  |
| AF090116  | 667.796   | 1509.71   | NM_017668 | 5716.464  | 3544.767  | NM_001843 | 705.904   | 376.836   |
| NM_014030 | 48882.773 | 45465.406 | AB033049  | 35797.504 | 34036.82  | NM_017768 | 2262.916  | 699.412   |
| NM_004224 | 11134.853 | 11379.337 | NM_004377 | 3217.917  | 3413.806  | NM_002776 | 1472.927  | 3208.931  |
| NM_000254 | 9991.401  | 10140.24  | AB037815  | 8769.329  | 7966.734  | AK023398  | 3821.936  | 7228.828  |
| Z21967    | 4890.644  | 5481.74   | NM_003645 | 5374.583  | 4837.336  | NM_001907 | 485.063   | 1228.231  |
| NM_003738 | 1250.349  | 1676.133  | NM_017750 | 1349.586  | 1340.342  | NM_015711 | 59180.059 | 54929.086 |
| NM_016185 | 62414.23  | 62786.961 | AK026196  | 1092.109  | 938.472   | AK025681  | 2052.702  | 1131.67   |
| NM_005461 | 1132.221  | 1070.586  | NM_004977 | 2465.547  | 2718.041  | NM_014905 | 5582.186  | 2517.503  |
| AF052693  | 11938.866 | 9009.656  | NM_004888 | 20892.059 | 23889.479 | NM_012137 | 3181.262  | 1484.847  |
| NM_001129 | 50078.973 | 43054.113 | NM_012283 | 24187.637 | 29400.482 | NM_004483 | 4909.336  | 4343.334  |
| L09100    | 4654.949  | 4705.028  | NM_007166 | 4361.157  | 3979.809  | NM_001513 | 53094.086 | 55219.547 |
| NM_005472 | 5300.013  | 3660.575  | NM_006755 | 998.032   | 722.514   | NM_001281 | 3500.297  | 7088.378  |
| NM_004313 | 1672.008  | 1188.856  | NM_005881 | 1234.567  | 1155.095  | NM_016835 | 1727.978  | 3650.699  |
| NM_013435 | 2135.176  | 1685.46   | NM_004204 | 494.869   | 450.48    | NM_003981 | 19549.361 | 16784.305 |
| NM_001727 | 10453.389 | 6669.281  | NM_001641 | 6479.662  | 5860.44   | U26596    | 20281.656 | 6755.649  |
| BG717460  | 3258.818  | 1898.513  | BC015750  | 44039.391 | 43891.434 | AF070600  | 53397.648 | 16129.629 |
| NM_004161 | 16433.518 | 17960.646 | AK025769  | 2770.231  | 1974.278  | AB014522  | 5049.295  | 1728.43   |
| NM_001295 | 1320.308  | 1362.864  | NM_005236 | 1524.988  | 1502.197  | NM_014875 | 3001.052  | 2143.485  |
| NM_005161 | 3445.901  | 2870.947  | NM_006256 | 3123.958  | 3151.064  | AB033023  | 3173.961  | 804.879   |
| AB037749  | 882.081   | 948.85    | NM_002846 | 1968.904  | 3479.613  | NM_016528 | 1157.405  | 204.165   |
| NM_020347 | 1914.904  | 2585.574  | NM_002837 | 1059.742  | 803.388   | AF116238  | 1498.618  | 1520.093  |
| NM_001462 | 3589.858  | 4174.136  | AL133077  | 4549.35   | 3709.351  | NM_006982 | 487.836   | 689.898   |
| NM_004072 | 1794.482  | 1654.989  | NM_000132 | 2394.642  | 2794.144  | AB033085  | 2910.358  | 5328.539  |
| AF068286  | 1316.572  | 821.925   | NM_004076 | 547.446   | 511.89    | AF024703  | 13292.999 | 26063.943 |
| AB040957  | 8618.189  | 7119.312  | NM_007123 | 4445.596  | 4507.585  | NM_016531 | 1120.127  | 2210.068  |
| NM_006890 | 1568.663  | 1460.552  | AA778392  | 1101.296  | 1337.289  | NM_003593 | 9218.277  | 14684.477 |
| NM_003110 | 16937.857 | 17974.023 | AI478178  | 387.151   | 590.537   | NM_014383 | 41645.734 | 25721.326 |
| NM_003612 | 6329.112  | 6364.9    | AA101279  | 1556.269  | 1354.819  | NM_000244 | 4530.834  | 3585.207  |
| NM_013230 | 3214.792  | 4064.764  | AA399410  | 1599.607  | 1926.804  | NM_014285 | 3332.402  | 2477.853  |
| X72308    | 10171.844 | 9758.537  | NM_000500 | 383.227   | 524.994   | AF026816  | 19661.59  | 11241.218 |
| NM_005408 | 1367.011  | 1225.161  | BC007031  | 1255.619  | 1307.704  | NM_018553 | 1496.49   | 973.105   |
| BC008376  | 27777.596 | 21854.369 | NM_002957 | 4638.054  | 5646.581  | NM_005455 | 2666.447  | 2016.122  |
| AB041269  | 4095.99   | 2778.714  | BC036369  | 1632.448  | 1608.786  | NM_014633 | 3488.768  | 6231.148  |
| AK024908  | 10188.814 | 6149.138  |           | 90.635    | 951.604   | NM_001970 | 55442.594 | 62400.066 |
| NM_018270 | 13834.153 | 10861.853 | NM_017540 | 700.515   | 756.522   | NM_006810 | 9115.771  | 5073.316  |
| NM_014160 | 8387.263  | 6307.375  | NM_018270 | 2790.025  | 3077.446  | AK024054  | 5239.235  | 1353.061  |
| AF230877  | 6730.714  | 3784.082  | NM_014160 | 2497.499  | 2923.672  | NM_004116 | 3007.203  | 828.201   |
| NM_017668 | 9829.447  | 6371.091  | AF230877  | 1036.275  | 1568.054  | AK024508  | 2632.991  | 518.068   |
| AB033049  | 27027.674 | 22576.936 | NM_017668 | 2693.011  | 2868.721  | AK027213  | 4074.872  | 848.529   |
| NM_004377 | 8726.964  | 8347.75   | AB033049  | 15327.506 | 16648.998 | AL096749  | 16225.396 | 8653.449  |
| AB037815  | 23838.961 | 21781.977 | NM_005682 | 702.107   | 474.491   | AK023620  | 1161.177  | 763.675   |
| NM_003645 | 14541.803 | 14839.023 | NM_002926 | 981.308   | 654.894   | AF086189  | 9293.176  | 6709.523  |
| AF263613  | 4536.648  | 5169.768  | NM_018697 | 707.557   | 619.249   | NM_005116 | 1461.658  | 822.892   |
| NM_017750 | 5192.711  | 5184.302  | NM_014030 | 6114.043  | 7696.685  | NM_002766 | 4016.252  | 3300.532  |
| AK026196  | 5274.987  | 4963.797  | NM_004224 | 732.896   | 992.821   | NM_000788 | 11741.811 | 8766.389  |
| AV704019  | 480.247   | 834.618   | NM_000254 | 1564.042  | 1419.547  | NM_002448 | 14036.078 | 19557.836 |
| NM_013348 | 5190.932  | 4040.228  | Z21967    | 1428.03   | 1561.763  | AK025388  | 1114.013  | 1456.878  |
| NM_004977 | 14748.639 | 9842.306  | NM_016185 | 13626.168 | 12609.613 | NM_006147 | 481.357   | 1379.617  |
| NM_004888 | 62061.941 | 62447.023 | NM_012110 | 4167.312  | 4642.751  | NM_005741 | 2850.853  | 694.53    |
| NM_012283 | 64267.672 | 63031.355 | AF052693  | 2217.862  | 2562.624  | NM_000964 | 2084.13   | 466.737   |
| NM_004700 | 1883.802  | 1626.151  | NM_001129 | 11257.012 | 10952.604 | NM_013263 | 5211.522  | 1611.111  |
| AB020706  | 6394.923  | 5570.333  | L09100    | 1537.444  | 1502.898  | AL137407  | 4182.596  | 1881.072  |



|           |           |           |           |           |           |           |           |           |
|-----------|-----------|-----------|-----------|-----------|-----------|-----------|-----------|-----------|
| NM_007166 | 9220.236  | 8117.902  | NM_005472 | 763.531   | 841.118   | NM_018178 | 1748.994  | 1045.047  |
| NM_002869 | 10540.592 | 9788.063  | NM_007166 | 3557.984  | 3581.052  | NM_019000 | 1026.984  | 549.414   |
| NM_006755 | 9691.375  | 13230.572 | NM_004161 | 6345.594  | 5988.046  | AF143330  | 715.913   | 875.492   |
| NM_005881 | 4850.272  | 6117.639  | NM_005161 | 814.734   | 860.378   | AK025178  | 2889.174  | 3346.299  |
| L40519    | 2110.786  | 2049.539  | NM_020347 | 1030.876  | 1120.687  | NM_014835 | 4013.114  | 5267.093  |
| NM_004204 | 5309.328  | 5765.69   | NM_001462 | 669.468   | 690.172   | AK001822  | 3191.79   | 2964.317  |
| AK002181  | 2236.092  | 2150.202  | AB040957  | 2540.042  | 1390.717  | AK026969  | 2690.245  | 2464.384  |
| AK025769  | 8307.46   | 8827.288  | NM_003110 | 1661.624  | 1449.755  | AF086287  | 1139.658  | 348.223   |
| AW945166  | 2749.11   | 2728.116  | NM_013230 | 541.636   | 615.951   | AK024268  | 1709.413  | 2516.632  |
| NM_005236 | 10159.807 | 10062.159 | X72308    | 2273.612  | 2427.685  | AF086295  | 794.249   | 1756.953  |
| NM_006384 | 24088.34  | 24987.326 | BC008376  | 10803.518 | 10034.901 | AF086344  | 1127.124  | 1925.737  |
| NM_013257 | 2496.549  | 2839.357  | AB041269  | 1029.811  | 1518.609  | NM_018087 | 2313.817  | 710.337   |
| AF163473  | 4353.229  | 3611.24   | AK024908  | 3772.79   | 3649.457  | AL360260  | 861.702   | 193.396   |
| NM_006256 | 8122.396  | 4946.885  | NM_002837 | 978.679   | 857.292   | AK023647  | 682.204   | 200.73    |
| NM_002846 | 3076.971  | 7617.983  | AL133077  | 4824.707  | 4775.287  | BC031635  | 1074.118  | 377.92    |
| NM_002837 | 5575.003  | 3935.726  | AK025211  | 665.709   | 694.789   | AF085927  | 1522.19   | 1236.123  |
| AL133077  | 30554.84  | 34418.871 | NM_013402 | 4084.871  | 3538.085  | AF085954  | 13189.186 | 12979.979 |
| AK025211  | 2804.549  | 3088.554  | NM_004377 | 1897.635  | 1697.354  | AL442095  | 1577.88   | 1271.528  |
| NM_000132 | 21988.641 | 22170.668 | AB037815  | 5332.986  | 5780.584  | AL137378  | 867.483   | 829.63    |
| NM_001727 | 11217.086 | 11750.021 | NM_003645 | 2598.797  | 2580.96   | AL137609  | 20414.371 | 12526.471 |
| NM_004076 | 4659.167  | 5701.898  | NM_017750 | 671.248   | 754.901   | AL353946  | 2276.8    | 1057.509  |
| BG717460  | 5059.32   | 5493.558  | AK026196  | 1120.446  | 1149.58   | X69081    | 3492.85   | 2841.168  |
| AA778392  | 14985.038 | 15304.934 | NM_013348 | 792.444   | 694.959   | NM_005714 | 2216.737  | 1499.494  |
| AI478178  | 4021.493  | 4609.002  | NM_004977 | 3557.441  | 4040.791  | AL359931  | 1917.102  | 2301.32   |
| AA101279  | 7418.741  | 7382.748  | NM_012283 | 23628.787 | 26761.664 | AF086052  | 684.994   | 790.859   |
| AA137031  | 3150.248  | 2573.473  | U93051    | 4627.448  | 5531.441  | AK000954  | 2862.865  | 1888.94   |
| AA292226  | 7377.576  | 6659.49   | NM_017540 | 766.833   | 782.342   | AK025800  | 4185.86   | 812.23    |
| NM_000500 | 4112.567  | 4580.894  | NM_006755 | 2928.905  | 2024.423  | AK022333  | 1219.923  | 379.687   |
| J04449    | 2600.494  | 2249.832  | NM_005881 | 2105.318  | 1376.332  | AF095854  | 1706.733  | 898.486   |
| BC007031  | 9068.362  | 6503.08   | L40519    | 747.003   | 609.969   | AF159093  | 3999.219  | 3214.593  |
| NM_002957 | 28613.891 | 24830.047 | NM_004204 | 1561.855  | 1510.812  | AK022125  | 819.33    | 799.875   |
| BC036369  | 4361.193  | 2919.185  | AK002181  | 702.581   | 1077.199  | AK022244  | 4102.98   | 2335.684  |
| X12492    | 24504.084 | 15677.029 | AK025769  | 2940.399  | 2808.895  | AK022381  | 2196.171  | 931.01    |
| U93051    | 23276.293 | 18357.238 | AW945166  | 485.409   | 583.505   | AK022012  | 857.126   | 464.57    |
| NM_017540 | 1702.363  | 1557.016  | NM_005236 | 1478.625  | 1786.373  | AK022286  | 1296.705  | 1380.968  |
| NM_018270 | 15838.938 | 19395.295 | NM_002846 | 2008.26   | 3063.459  | AK022613  | 3213.267  | 2314.6    |
| NM_000260 | 59517.875 | 60899.301 | AF052693  | 1623.245  | 1585.506  | NM_014367 | 2324.689  | 3973.195  |
| NM_014160 | 9671.35   | 12024.255 | NM_001129 | 7479.144  | 7537.306  | NM_002365 | 1366.237  | 1412.993  |
| NM_017668 | 11930.019 | 10975.668 | L09100    | 642.766   | 631.434   | AF161441  | 13470.357 | 8427.107  |
| AB033049  | 62765.984 | 58721.734 | NM_005472 | 888.77    | 1158.19   | AL137474  | 1288.837  | 1214.865  |
| NM_005682 | 3138.756  | 2311.981  | NM_013435 | 427.139   | 491.081   | AK021572  | 1104.326  | 811.079   |
| NM_002926 | 2119.763  | 2548.005  | NM_000132 | 5296.016  | 5625.43   | AK026757  | 1431.843  | 1619.324  |
| NM_000233 | 840.107   | 788.514   | NM_001727 | 2665.957  | 2427.91   | AF119908  | 1223.922  | 1896.187  |
| NM_018697 | 2348.831  | 2333.752  | NM_004076 | 1150.359  | 879.478   | U50539    | 173.946   | 3678.15   |
| NM_014030 | 63757.332 | 55765.684 | NM_007123 | 14221.147 | 13474.31  | AK000653  | 11302.988 | 17422.979 |
| NM_004224 | 12224.336 | 10850.381 | BG717460  | 1436.713  | 1373.589  | AK000908  | 1367.129  | 2040.123  |
| NM_000254 | 9661.295  | 7920.307  | AA778392  | 3889.358  | 4655.741  | AK000993  | 440.153   | 909.541   |
| Z21967    | 14770.035 | 9544.737  | AI478178  | 985.939   | 1499.503  | Z70696    | 773.968   | 1649.453  |
| NM_003738 | 1238.33   | 1304.741  | AA101279  | 2644.512  | 3531.271  | NM_005792 | 8762.374  | 13235.137 |
| NM_016185 | 59195.879 | 60469.16  | AA137031  | 654.842   | 863.833   | AF048847  | 6919.696  | 10746.227 |
| NM_012110 | 15970.182 | 12862.617 | AA292226  | 406.179   | 699.973   | AF035297  | 1863.751  | 3616.467  |
| NM_005461 | 980.598   | 697.132   | BC007031  | 1499.469  | 1788.457  | NM_014035 | 2230.862  | 3928.247  |
| AF052693  | 7221.056  | 6157.438  | AF129756  | 4499.35   | 4700.949  | S67154    | 3357.055  | 4296.135  |

|           |           |           |           |           |           |           |           |           |
|-----------|-----------|-----------|-----------|-----------|-----------|-----------|-----------|-----------|
| NM_001129 | 36981.027 | 41976.461 | NM_002957 | 8475.992  | 8302.038  | AK026181  | 9458.679  | 9313.452  |
| L09100    | 2129.902  | 1817      | BC036369  | 2317.401  | 2282.625  | AK021451  | 1616.052  | 2134.048  |
| NM_005472 | 1718.649  | 824.483   | X12492    | 7951.563  | 7921.542  | AK001971  | 760.346   | 1360.62   |
| AB020706  | 7243.082  | 7510.874  | X72308    | 1331.374  | 1552.948  | AF086468  | 1626.628  | 3284.14   |
| NM_002869 | 7921.932  | 10583.661 | BC008376  | 8177.547  | 9714.49   | AK027239  | 1417.501  | 1818.098  |
| NM_004161 | 18259.059 | 17130.074 | AB041269  | 1580.017  | 1762.515  | AF005082  | 14572.802 | 12915.998 |
| NM_001295 | 1924.757  | 2101.213  | AK024908  | 4264.066  | 4380.063  | AL117595  | 2263.571  | 5739.981  |
| NM_005161 | 3481.909  | 2867.628  | NM_018270 | 6113.767  | 5774.447  | AB028988  | 20560.516 | 27446.584 |
| AB037749  | 919.114   | 895.075   | AF230877  | 3279.649  | 2781.596  | AK023072  | 1070.227  | 1917.151  |
| NM_020347 | 2611.851  | 2777.529  | NM_017668 | 4990.865  | 4322.35   | AF086105  | 8462.577  | 8997.494  |
| NM_001462 | 4408.795  | 4010.776  | AB033049  | 29197.51  | 37395.715 | Y10697    | 1141.081  | 2732.42   |
| NM_004072 | 1939.224  | 1863.16   | NM_005682 | 1027.67   | 793.43    | AY007166  | 13771.75  | 20194.965 |
| AF068286  | 1161.222  | 876.789   | NM_002926 | 1131.296  | 993.638   | NM_004937 | 1398.971  | 2400.14   |
| AB040957  | 7629.455  | 4711.106  | NM_018697 | 753.153   | 885.937   | CY3Cy5    | 3452.477  | 224.789   |
| NM_006890 | 1265.345  | 812.325   | NM_014030 | 8000.897  | 9307.406  | AI298884  | 11355.267 | 10202.101 |
| NM_003110 | 11593.334 | 9796.655  | NM_004224 | 441.606   | 1252.331  | D87845    | 829.79    | 777.256   |
| NM_003612 | 4320.646  | 3539.646  | NM_000254 | 1129.046  | 1259.832  | M83254    | 1491.649  | 1688.65   |
| NM_013230 | 2907.171  | 3104.971  | Z21967    | 1612.176  | 2026.267  | S56770    | 452.849   | 341.057   |
| X72308    | 6138.271  | 4853.18   | NM_012110 | 5730.784  | 6940.347  | H58872    | 5467.966  | 6318.511  |
| BC008376  | 18102.621 | 11204.602 | NM_013348 | 732.042   | 633.756   | J04543    | 2707.082  | 1892.786  |
| AB041269  | 2681.904  | 1696.233  | NM_004977 | 2914.527  | 3169.304  | BE733577  | 1012.416  | 730.397   |
| AK024908  | 6962.72   | 4466.833  | NM_004888 | 26674.357 | 33761.523 | AI817942  | 2458.351  | 1996.154  |
| NM_002837 | 4922.769  | 7106.163  | NM_012283 | 36620.813 | 42214.484 | NM_006534 | 1896.37   | 1851.833  |
| AL133077  | 32024.684 | 40572.715 | NM_004161 | 10346.04  | 9252.784  | SR5       | 5173.697  | 4984.239  |
| AK025211  | 3831.282  | 4666.731  | NM_001295 | 573.069   | 678.547   | SR7       | 3477.741  | 37220.391 |
| U06715    | 1426.416  | 1559.504  | NM_005161 | 1240.566  | 1316.845  | SR9       | 14725.845 | 3221.336  |
| NM_002662 | 764.163   | 1082.476  | NM_020347 | 1489.568  | 1236.603  | CY3Cy5    | 4549.385  | 237.265   |
| NM_004377 | 11272.042 | 11569.756 | NM_001462 | 1799.204  | 1623.751  | NM_016453 | 1227.011  | 1239.865  |
| AB037815  | 37710.168 | 39507.172 | AB040957  | 3728.388  | 3005.361  | NM_017701 | 415.902   | 372.838   |
| NM_003645 | 14876.2   | 14999.047 | NM_006890 | 454.307   | 570.568   | NM_014226 | 839.663   | 757.202   |
| AF263613  | 4772.815  | 5686.985  | NM_003612 | 1496.227  | 1170.604  | AF142567  | 542.735   | 590.523   |
| NM_017750 | 4264.028  | 4325.02   | NM_013230 | 1251.256  | 1068.368  | NM_005621 | 2227.529  | 2200.942  |
| AK026196  | 3950.029  | 3397.562  | NM_002837 | 2399.949  | 1701.766  | NM_006202 | 34750.73  | 28536.346 |
| AV704019  | 700.315   | 724.655   | AL133077  | 12271.955 | 10525.79  | NM_017410 | 448.918   | 519.416   |
| NM_013348 | 3661.366  | 2681.775  | AK025211  | 1578.438  | 1419.855  | X99680    | 2695.719  | 2265.474  |
| NM_004977 | 13670.031 | 9219.752  | U06715    | 641.281   | 602.896   | NM_001448 | 534.523   | 369.027   |
| NM_012283 | 48262.773 | 36748.102 | NM_013402 | 9068.907  | 8806.527  | NM_016072 | 3640.517  | 3314.063  |
| NM_004700 | 1189.254  | 1375.858  | NM_004377 | 4287.805  | 4646.465  | AK026349  | 4619.519  | 4431.807  |
| NM_017540 | 2580.067  | 3040.547  | AB037815  | 12799.292 | 14782.265 | NM_014733 | 493.989   | 378.863   |
| NM_006755 | 9849.437  | 13839     | NM_003645 | 7056.003  | 6819.082  | AK023204  | 1096.057  | 1083.893  |
| NM_005881 | 4809.134  | 5496.644  | NM_017750 | 1256.941  | 1300.208  | NM_002478 | 1697.435  | 2089.075  |
| L40519    | 1761.946  | 2027.212  | AK026196  | 1935.849  | 1779.858  | D28449    | 7665.854  | 10210.054 |
| NM_004204 | 4376.228  | 4913.035  | AV704019  | 287.59    | 303.493   | NM_003281 | 422.718   | 726.047   |
| AK002181  | 1658.888  | 1613.951  | NM_016444 | 515.267   | 503.987   | AA460480  | 592.143   | 1012.162  |
| AK025769  | 6994.379  | 6021.566  | NM_017839 | 657.385   | 381.026   | S78774    | 4189.103  | 4149.708  |
| AW945166  | 2223.056  | 2134.723  | AL137718  | 2878.622  | 2548.924  | NM_004922 | 2048.971  | 1607.95   |
| NM_005236 | 8821.668  | 9117.285  | NM_003460 | 3892.218  | 3606.1    | NM_002871 | 496.631   | 553.948   |
| NM_006256 | 10390.775 | 13812.376 | NM_002904 | 16329.914 | 17310.934 | NM_006987 | 326.601   | 401.467   |
| NM_002846 | 4179.978  | 23355.754 | NM_014189 | 7756.121  | 7560.725  | NM_001282 | 2122.678  | 1563.058  |
| NM_001129 | 56049.754 | 54523.082 | NM_005686 | 1663.456  | 1673.599  | NM_016830 | 904.241   | 878.138   |
| L09100    | 6465.123  | 7569.462  | NM_006767 | 648.428   | 678.798   | NM_016103 | 634.161   | 652.45    |
| NM_005472 | 5042.495  | 5255.224  | NM_017540 | 1295.065  | 1398.035  | AL133654  | 1605.981  | 892.211   |
| NM_004313 | 1329.105  | 1871.99   | NM_006755 | 4503.356  | 4072.159  | AL137262  | 356.283   | 252.229   |

|           |           |           |           |           |           |           |           |           |
|-----------|-----------|-----------|-----------|-----------|-----------|-----------|-----------|-----------|
| NM_01343E | 1880.049  | 2490.976  | NM_005881 | 3730.671  | 3376.562  | NM_020437 | 629.608   | 509.992   |
| NM_000132 | 23895.305 | 24825.223 | L40519    | 1177.615  | 1100.784  | NM_018643 | 595.378   | 521.709   |
| NM_001727 | 11672.977 | 11583.219 | NM_004204 | 2793.028  | 3330.247  | M30142    | 615.418   | 867.569   |
| NM_00407E | 4680.56   | 5912.16   | AK002181  | 1332.407  | 1528.123  | NM_01337E | 4351.2    | 3948.701  |
| NM_007123 | 61605.773 | 60174.047 | AW945166  | 941.332   | 893.153   | NM_00108E | 785.443   | 1282.668  |
| BG717460  | 4095.433  | 4020.269  | NM_002589 | 1505.841  | 1520.781  | NM_006110 | 681.29    | 822.808   |
| AA778392  | 10059.644 | 9815.166  | AF064846  | 586.546   | 586.396   | NM_00286C | 3479.464  | 4063.061  |
| AI478178  | 3378.387  | 3297.722  | AL110227  | 663.382   | 672.727   | NM_00616E | 1993.628  | 2075.229  |
| AA101279  | 6820.647  | 9015.95   | NM_00140C | 6905.844  | 6063.96   | NM_014183 | 290.678   | 199.799   |
| AA137031  | 2441.187  | 1947.12   | AB033281  | 2331.314  | 1434.927  | NM_018353 | 1166.125  | 905.415   |
| AA292226  | 5500.259  | 4816.554  | NM_002882 | 33371.184 | 34120.523 | NM_00356C | 10610.547 | 10996.989 |
| NM_00050C | 3556.602  | 3562.652  | AB011161  | 1094.44   | 880.336   | NM_014403 | 497.651   | 345.192   |
| J04449    | 2570.054  | 2136.979  | NM_000827 | 756.558   | 791.25    | AL050100  | 447.916   | 426.302   |
| BC007031  | 9694.723  | 10714.939 | NM_002944 | 884.16    | 904.586   | NM_02013E | 1043.179  | 760.303   |
| AF129756  | 21792.33  | 21871.242 | AF327354  | 2664.181  | 2645.045  | AL080207  | 261.617   | 366.956   |
| NM_002957 | 44242.488 | 55575.086 | NM_006259 | 618.127   | 837.459   | NM_00074E | 5467.24   | 4773.926  |
| BC036369  | 5932.042  | 8561.344  | NM_004747 | 2622.249  | 2744.434  | NM_00004E | 1192.422  | 1329.294  |
| X12492    | 27147.535 | 31438.477 | NM_002341 | 8010.082  | 8954.341  | NM_00492E | 9917.791  | 11166.388 |
| X72308    | 8701.951  | 9533.765  | AL137651  | 2806.593  | 3805.969  | NM_003234 | 2358.259  | 2455.504  |
| NM_00540E | 1288.548  | 1496.379  | NM_01894E | 4374.118  | 4703.792  | NM_00485E | 1244.475  | 1493.468  |
| BC008376  | 33625.457 | 30891.619 | NM_00664E | 3547.208  | 4020.178  | AB051826  | 379.688   | 503.449   |
| AB041269  | 6130.238  | 6167.012  | NM_004711 | 1261.555  | 1296.405  | M20697    | 1487.922  | 1416.481  |
| AK024908  | 9024.438  | 10954.539 | NM_006463 | 8661.55   | 7157.301  | NM_01504E | 1628.671  | 1420.172  |
| NM_01827C | 16061.272 | 17728.482 | NM_001444 | 30226.164 | 26309.484 | NM_002014 | 8391.1    | 11498.881 |
| AF230877  | 10723.275 | 11770.49  | AK027208  | 651.275   | 551.267   | NM_00253E | 2713.368  | 2458.282  |
| NM_01766E | 10239.381 | 8654.881  | NM_016521 | 6517.148  | 6422.632  | NM_01658E | 7663.507  | 6341.165  |
| AB033049  | 61549.078 | 61341.527 | X98494    | 8043.279  | 7801.828  | NM_014601 | 1340.354  | 1689.238  |
| NM_005682 | 2237.986  | 1904.945  | NM_00124C | 4031.711  | 4024.339  | NM_017761 | 9403.104  | 12428.97  |
| NM_00292E | 2436.445  | 1976.806  | NM_002709 | 16780.561 | 16780.922 | AF237700  | 421.248   | 429.703   |
| NM_000233 | 885.078   | 695.348   | NM_001099 | 2471.477  | 1961.882  | D38163    | 470.714   | 445.925   |
| NM_018697 | 2274.493  | 2885.509  | NM_006823 | 6242.985  | 6180.706  | NM_004967 | 321.339   | 298.066   |
| AF090116  | 937.66    | 1587.267  | NM_007031 | 1127.779  | 857.841   | D28449    | 7244.466  | 6047.349  |
| NM_004224 | 9428.404  | 8473.413  | NM_002657 | 1664.073  | 1971.575  | AA460480  | 359.242   | 372.6     |
| NM_000254 | 11419.282 | 13825.823 | NM_00135C | 13342.514 | 17915.25  | AI298884  | 9144.231  | 9968.844  |
| Z21967    | 19594.898 | 27218.736 | NM_014809 | 2743.653  | 2621.704  | D87845    | 742.404   | 796.129   |
| NM_00373E | 1808.409  | 2888.731  | NM_016074 | 14972.463 | 13988.285 | M83254    | 1001.808  | 791.308   |
| NM_01334E | 5116.52   | 5123.089  | NM_003921 | 3156.043  | 2821.009  | S56770    | 281.003   | 220.541   |
| NM_004977 | 14508.408 | 12994.239 | NM_00420E | 10848.024 | 10956.056 | H58872    | 4766.192  | 5200.733  |
| NM_012283 | 66416.297 | 58637.434 | NM_000419 | 618.034   | 569.889   | J02938    | 377.084   | 318.27    |
| NM_00470C | 2419.765  | 2363.639  | NM_01776E | 3483.044  | 3074.168  | J04543    | 4347.429  | 4529.109  |
| AB020706  | 6194.821  | 7398.648  | NM_00277E | 1633.734  | 1298.375  | AA456295  | 439.893   | 522.202   |
| NM_00716E | 10672.688 | 11106.297 | AK023398  | 3365.123  | 2828.365  | BE733577  | 1162.474  | 1052.793  |
| NM_004161 | 15981.192 | 13848.869 | NM_001907 | 586.51    | 458.529   | AI817942  | 2494.617  | 2915.178  |
| NM_00129E | 1639.474  | 1392.576  | NM_015711 | 65030.613 | 54945.508 | NM_006534 | 3388.053  | 4577.572  |
| NM_005161 | 2845.805  | 2403.324  | NM_00005C | 1417.303  | 949.311   | AL133109  | 986.336   | 1804.365  |
| AB037749  | 1188.302  | 1042.637  | NM_000481 | 1072.776  | 1108.132  | M30142    | 545.64    | 427.49    |
| NM_020347 | 2558.145  | 2293.78   | AK025681  | 2495.118  | 2674.241  | NM_00501E | 364.879   | 284.779   |
| NM_004072 | 1957.363  | 1827.845  | NM_01490E | 6508.789  | 7128.478  | NM_01337E | 3287.335  | 2008.114  |
| AF068286  | 1723.478  | 2480.524  | NM_012137 | 4301.637  | 4494.496  | NM_00108E | 535.536   | 703.059   |
| AB040957  | 10694.265 | 11397.169 | NM_001281 | 4598.196  | 5787.839  | NM_006110 | 589.38    | 496.376   |
| NM_00689C | 1227.418  | 781.776   | NM_01683E | 1642.153  | 1664.15   | NM_016453 | 813.532   | 740.337   |
| NM_003110 | 9945.242  | 8595.896  | NM_003981 | 15099.648 | 16319.576 | NM_017701 | 504.089   | 321.303   |
| NM_003612 | 2873.506  | 2112.495  | AB014522  | 4149.594  | 4447.874  | NM_01422E | 872.901   | 619.493   |

|           |           |           |           |           |           |           |           |           |
|-----------|-----------|-----------|-----------|-----------|-----------|-----------|-----------|-----------|
| NM_01323C | 2943.322  | 3985.245  | NM_014875 | 2575.188  | 2627.385  | AF142567  | 513.414   | 522.207   |
| NM_00625E | 10301.182 | 9983.339  | AB033023  | 3772.407  | 4268.307  | NM_005621 | 1904.413  | 1930.768  |
| NM_00284E | 5341.055  | 17829.414 | BC027895  | 643.182   | 750.915   | NM_00620Z | 36615.168 | 30635.184 |
| NM_002837 | 5005.864  | 6479.403  | NM_016529 | 1138.554  | 1124.843  | NM_01741C | 732.918   | 677.122   |
| U06715    | 1110.548  | 1320.488  | AF116238  | 1355.267  | 1180.543  | X99680    | 3894.135  | 4674.972  |
| NM_004377 | 9354.622  | 8008.212  | AB033085  | 2211.001  | 1935.816  | NM_00144E | 495.247   | 640.331   |
| AB037815  | 25240.492 | 20388.945 | AF024703  | 9346.121  | 9094.793  | NM_01607Z | 4766.223  | 5827.761  |
| NM_00364E | 10555.479 | 11957.787 | NM_016531 | 718.362   | 503.074   | AK026349  | 6371.398  | 7825.59   |
| AF263613  | 3886.013  | 4909.139  | NM_00359Z | 8863.028  | 9764.747  | NM_01473Z | 804.66    | 1258.795  |
| NM_01775C | 4455.228  | 3508.068  | NM_01438Z | 28109.863 | 28924.756 | D12485    | 919.718   | 1132.701  |
| AK026196  | 4644.441  | 4174.484  | NM_000244 | 4230.791  | 4662.428  | AK023204  | 2629.159  | 3736.003  |
| AV704019  | 1050.353  | 580.932   | NM_01428E | 3734.06   | 3678.717  | NM_00344E | 1649.345  | 2645.181  |
| NM_016444 | 1747.324  | 1924.044  | AF026816  | 14537.961 | 15508.973 | NM_00247E | 2252.597  | 3869.743  |
| NM_01783E | 1473.418  | 1573.649  | NM_004719 | 2495.571  | 2089.438  | NM_003234 | 1090.075  | 821.552   |
| AL137718  | 4438.728  | 5158.309  | NM_01855Z | 2620.753  | 2219.08   | NM_00485E | 783.295   | 760.676   |
| NM_00346C | 15734.346 | 14678.507 | NM_004704 | 3056.916  | 2922.354  | S78774    | 3012.54   | 2890.121  |
| U94354    | 773.127   | 947.765   | NM_00545E | 5121.671  | 6196.695  | NM_00492Z | 1660.34   | 1137.502  |
| NM_002904 | 30677.363 | 40070.938 | NM_01463Z | 4668.831  | 5427.856  | NM_002871 | 504.26    | 731.01    |
| NM_01418E | 14727.608 | 16772.916 | NM_00197C | 34561.387 | 43529.641 | NM_006987 | 391.688   | 277.106   |
| NM_00568E | 2868.048  | 3267.002  | NM_00681C | 8415.764  | 7688.381  | NM_00128Z | 2515.345  | 2101.596  |
| NM_006767 | 1594.935  | 1637.513  | NM_004116 | 1354.103  | 1334.11   | NM_01683C | 2252.296  | 1780.151  |
| NM_01754C | 2111.183  | 2580.805  | AK024508  | 3023.026  | 3030.671  | U44105    | 286.571   | 448.593   |
| NM_00675E | 9111.974  | 9544.944  | AK027213  | 3050.951  | 2951.079  | NM_01610Z | 931.904   | 773.197   |
| NM_005881 | 4873.433  | 5604.531  | AL096749  | 10329.036 | 10726.541 | AL133654  | 2023.736  | 1687.292  |
| L40519    | 2366.785  | 2172.369  | AK023620  | 1739.3    | 1153.166  | AL137262  | 650.125   | 865.358   |
| NM_004204 | 5170.624  | 4395.18   | AF086189  | 5590.819  | 5908.807  | NM_020437 | 712.605   | 860.992   |
| AK002181  | 1740.375  | 1822.625  | AL050055  | 3943.439  | 4245.843  | NM_01864Z | 1226.891  | 1267.629  |
| AF118064  | 564.847   | 842.313   | NM_005009 | 8457.013  | 7109.228  | NM_006927 | 7866.722  | 6510.722  |
| AW945166  | 2337.079  | 1468.329  | NM_01459E | 10519.805 | 9423.945  | NM_014601 | 901.957   | 608.408   |
| NM_00523E | 9107.193  | 5902.22   | NM_00670Z | 8331.34   | 8601.532  | NM_017761 | 7867.638  | 6131.304  |
| NM_00258E | 10904.078 | 12728.147 | NM_004037 | 2494.915  | 2425.492  | NM_00692E | 256.151   | 316.793   |
| AF064846  | 3239.861  | 3403.445  | NM_005116 | 2236.799  | 2054.106  | AF237700  | 405.162   | 272.752   |
| AL110227  | 986.215   | 1425.656  | NM_00276E | 4585.203  | 4521.051  | NM_00286C | 3893.066  | 4391.792  |
| NM_00140C | 14038.166 | 14955.79  | NM_00078E | 9935.28   | 9106.991  | NM_00616E | 1765.521  | 1702.669  |
| AB033281  | 5726.103  | 6991.471  | AF254088  | 1294.696  | 1399.786  | NM_01418Z | 466.851   | 367.198   |
| NM_00288Z | 54876.133 | 55804.348 | NM_00142C | 927.562   | 1300.913  | NM_01835Z | 1330.498  | 1103.241  |
| AB011161  | 2212.39   | 2102.844  | NM_00024E | 716.052   | 838.407   | NM_00356C | 16017.396 | 18565.213 |
| NM_000827 | 1547.481  | 1734.881  | AB031046  | 1072.629  | 1296.262  | NM_01440Z | 902.091   | 920.778   |
| NM_002944 | 1551.078  | 1609.042  | NM_00244Z | 15073.099 | 19363.59  | AL050100  | 518.153   | 379.815   |
| AF327354  | 3627.72   | 4608.032  | AK025388  | 956.156   | 974.956   | NM_02013E | 541.351   | 447.528   |
| AB014513  | 17075.068 | 15093.537 | NM_005741 | 2201.063  | 2058.174  | NM_00074E | 4676.553  | 5400.275  |
| NM_004747 | 3772.253  | 3636.912  | NM_000964 | 850.902   | 1173.131  | NM_00004E | 1524.178  | 2225.836  |
| NM_002341 | 14021.937 | 12859.455 | BF343886  | 498.543   | 534.981   | NM_00492E | 13123.695 | 18914.275 |
| AL137651  | 4615.547  | 3734.531  | NM_01326Z | 3270.423  | 3320.159  | NM_00545E | 1110.67   | 753.419   |
| NM_01894E | 11324.386 | 16275.731 | AL137407  | 3901.51   | 3679.455  | NM_006534 | 2438.042  | 1659.167  |
| NM_00664E | 9808.004  | 8331.982  | NM_01817E | 2449.768  | 2076.85   | AB051826  | 449.67    | 342.913   |
| NM_00086E | 2417.365  | 3515.687  | AK025204  | 787.362   | 614.211   | AK024964  | 258.97    | 327.587   |
| NM_004711 | 4465.561  | 7294.536  | NM_01900C | 1473.822  | 1258.626  | M20697    | 1457.12   | 1487.343  |
| AF161361  | 1617.687  | 2058.762  | AF143330  | 1250.826  | 1038.917  | NM_01504E | 2165.188  | 2701.866  |
| NM_00646Z | 19810.266 | 23836.629 | AK025178  | 5659.365  | 5271.123  | NM_002014 | 9741.423  | 13894.005 |
| NM_001444 | 52006.414 | 54798.793 | AF147359  | 513.268   | 590.991   | AK026349  | 6601.314  | 5243.02   |
| AK027208  | 1303.739  | 1393.604  | NM_01483E | 6830.322  | 7683.043  | NM_01473Z | 555.373   | 636.876   |
| NM_016521 | 11038.713 | 13481.066 | AK001822  | 3804.553  | 3557.573  | D12485    | 616.377   | 577.65    |

|           |           |           |           |           |           |           |           |           |
|-----------|-----------|-----------|-----------|-----------|-----------|-----------|-----------|-----------|
| X98494    | 15111.681 | 13176.146 | AK026969  | 4122.513  | 4443.806  | AK023204  | 2637.434  | 2502.71   |
| NM_001240 | 6829.785  | 6203.767  | AF086287  | 1157.997  | 1244.897  | NM_003448 | 2150.456  | 1710.389  |
| NM_002709 | 25596.27  | 29594.818 | AK024268  | 770.255   | 976.752   | NM_002478 | 2186.364  | 1636.16   |
| NM_001098 | 3203.28   | 3889.626  | AF086344  | 636.232   | 674.179   | D38163    | 266.334   | 246.076   |
| NM_006823 | 9094.816  | 7955.011  | NM_018087 | 3041.843  | 3052.118  | D28449    | 8500.187  | 8445.259  |
| NM_007031 | 1680.222  | 1533.092  | AL360260  | 1343.724  | 1346.121  | AA460480  | 387.894   | 356.25    |
| NM_002657 | 3051.087  | 3601.421  | AK023647  | 1140.249  | 1155.78   | AI298884  | 10790.502 | 10915.608 |
| NM_001350 | 19127.518 | 15938.131 | AF085927  | 741.891   | 1061.392  | D87845    | 946.669   | 1140.212  |
| NM_014809 | 4002.204  | 3787.736  | AF085954  | 11565.706 | 13982.856 | M83254    | 1167.619  | 1189.992  |
| NM_016074 | 42212.746 | 49710.012 | AL137337  | 1061.3    | 908.379   | S56770    | 454.195   | 434.126   |
| NM_003921 | 6845.934  | 5807.993  | AL161969  | 496.609   | 372.627   | H58872    | 6326.021  | 9702.334  |
| NM_004208 | 29515.148 | 25723.141 | AL442095  | 1674.133  | 1998.121  | J04543    | 4925.109  | 7487.344  |
| NM_001843 | 3404.943  | 3807.296  | AL137378  | 912.721   | 923.083   | S60415    | 414.071   | 414.03    |
| NM_013266 | 550.635   | 1126.652  | AL137609  | 13480.593 | 12514.67  | AA456295  | 710.809   | 920.851   |
| NM_000419 | 1733.821  | 1417.591  | AL353946  | 2107.63   | 1522.299  | BE733577  | 1415.836  | 2071.769  |
| NM_017768 | 5679.349  | 5127.667  | X69081    | 2106.105  | 1885.501  | BG762340  | 494.485   | 601.296   |
| NM_002776 | 3499.845  | 3089.387  | NM_005714 | 1037.922  | 1575.086  | AA009484  | 306.716   | 623.987   |
| AK023398  | 6886.387  | 7608.759  | AL359931  | 760.295   | 1160.023  | NM_018643 | 927.72    | 540.904   |
| NM_001907 | 1050.94   | 1221.028  | AK000954  | 1757.734  | 2094.197  | M30142    | 468.655   | 554.333   |
| NM_015711 | 65721.367 | 63914.734 | AK025800  | 5293.606  | 5171.906  | NM_005018 | 406.758   | 420.976   |
| NM_000050 | 2262.019  | 1818.666  | AK022333  | 983.941   | 1152.395  | NM_013378 | 4291.368  | 3102.378  |
| NM_000481 | 2064.012  | 1184.152  | AF095854  | 1087.216  | 715.497   | NM_001088 | 749.637   | 652.765   |
| AK025681  | 4013.053  | 3452.304  | AF159093  | 3387.263  | 3840.087  | NM_006110 | 599.512   | 526.607   |
| NM_014908 | 11645.031 | 12626.351 | AF113679  | 470.311   | 630.477   | NM_016453 | 1090.061  | 1038.416  |
| NM_012137 | 8926.635  | 10099     | AK021997  | 1854.239  | 1829.109  | NM_017701 | 571.571   | 633.564   |
| NM_004483 | 28392.803 | 38251.863 | AK022244  | 1967.632  | 2504.657  | NM_014226 | 961.453   | 849.216   |
| NM_001513 | 65255.41  | 65294.156 | AK022381  | 1779.229  | 1710.292  | AF142567  | 881.204   | 850.593   |
| NM_001281 | 9269.752  | 7647.682  | AK022012  | 386.099   | 473.201   | NM_005621 | 3102.337  | 5075.426  |
| NM_016835 | 3452.5    | 3759.402  | AK022286  | 891.56    | 933.689   | NM_003391 | 490.1     | 882.194   |
| U26596    | 49465.395 | 56269.176 | AK022613  | 2316.588  | 2615.065  | NM_017410 | 850.104   | 1032.87   |
| AB014522  | 21195.572 | 33530.223 | AL359557  | 1037.506  | 1032.516  | X99680    | 4014.471  | 5755.9    |
| NM_014875 | 13763.215 | 12789.996 | AK027257  | 417.715   | 469.658   | NM_001448 | 863.693   | 1365.769  |
| AB033023  | 18841.512 | 28068.574 | AK024582  | 662.879   | 633.056   | NM_016072 | 5807.59   | 8698.834  |
| BC027895  | 2303.664  | 1360.278  | AK024143  | 1142.861  | 1155.956  | NM_000748 | 4800.733  | 3101.371  |
| NM_016529 | 4906.234  | 2590.659  | NM_014367 | 1570.373  | 1684.904  | NM_000048 | 1518.602  | 1200.074  |
| AF116238  | 3890.283  | 4165.471  | NM_002365 | 902.485   | 1128.456  | U53531    | 359.758   | 301.747   |
| NM_006982 | 1301.366  | 1183.179  | AF161441  | 6389.789  | 6944.712  | NM_004928 | 9592.256  | 6963.885  |
| AB033085  | 5332.298  | 4854.964  | AL137474  | 980.526   | 1068.542  | NM_003234 | 1844.119  | 1727.797  |
| AF024703  | 22523.762 | 22647.359 | AL133023  | 305.838   | 597.047   | NM_004858 | 1029.471  | 936.461   |
| NM_016531 | 1239.194  | 1416.074  | AK021572  | 1484.677  | 1241.162  | S78774    | 3327.028  | 3755.092  |
| NM_003593 | 19753.324 | 20097.936 | AK026757  | 1325.458  | 1212.257  | NM_004922 | 2250.309  | 2068.762  |
| NM_014383 | 58860.645 | 51522.172 | AF119908  | 1524.934  | 851.975   | NM_002871 | 758.187   | 765.164   |
| NM_000244 | 10450.199 | 11011.83  | AK000653  | 9917.012  | 9570.897  | NM_006987 | 702.797   | 970.154   |
| NM_014288 | 6243.072  | 6160.863  | AK000908  | 955.643   | 1187.007  | NM_016830 | 2393.71   | 2725.324  |
| AF026816  | 36876.438 | 32602.869 | Z70696    | 550.725   | 743.062   | U44105    | 461.502   | 749.249   |
| NM_004719 | 4010.021  | 4747.899  | NM_005792 | 6231.26   | 6305.201  | NM_016103 | 940.704   | 1848.998  |
| NM_018553 | 4050.612  | 3936.161  | AF048847  | 5817.617  | 5584.309  | AL133654  | 1879.399  | 2052.019  |
| NM_004704 | 5881.85   | 4850.354  | AF035297  | 2223.317  | 2347.401  | AL137262  | 876.73    | 1043.754  |
| NM_005455 | 9430.472  | 6829.528  | NM_014039 | 2887.631  | 3460.59   | NM_020437 | 1142.392  | 1587.586  |
| NM_014633 | 9176.407  | 7303.431  | S67154    | 3553.315  | 4169.958  | NM_002014 | 7951.182  | 8472.311  |
| NM_006810 | 28716.541 | 22039.234 | AK026181  | 11739.161 | 14110.114 | NM_006927 | 9033.283  | 7185.34   |
| NM_004116 | 7269.168  | 9393.44   | AK021451  | 1670.512  | 2610.578  | NM_014601 | 1289.04   | 1237.585  |
| AK024508  | 7024.748  | 4347.336  | AK001971  | 964.181   | 951.147   | NM_017761 | 10309.297 | 10553.118 |

|           |           |           |           |           |           |           |           |           |
|-----------|-----------|-----------|-----------|-----------|-----------|-----------|-----------|-----------|
| AK027213  | 8649.064  | 7951.031  | AF086468  | 2029.855  | 1764.964  | NM_00692E | 330.721   | 237.863   |
| AL096749  | 46379.113 | 47646.941 | AK027239  | 1649.968  | 1363.212  | AF237700  | 460.364   | 410.324   |
| AK023620  | 2649.264  | 2290.074  | AF005082  | 13258.498 | 11130.48  | NM_00286C | 4103.044  | 5558.621  |
| AF086189  | 14167.198 | 13735.179 | AL117595  | 3762.644  | 3054.206  | NM_00616E | 2200.021  | 2530.384  |
| AL050055  | 7650.281  | 8255.892  | AB028988  | 15471.786 | 18520.328 | NM_01418E | 597.904   | 849.47    |
| NM_00500E | 22515.402 | 22419.246 | AK023072  | 1319.383  | 1270.621  | NM_01835E | 1622.732  | 1592.38   |
| NM_01459E | 20835.971 | 20216.217 | AF086105  | 5636.403  | 5514.93   | NM_00356C | 18748.449 | 25503.92  |
| NM_00670E | 16494.334 | 17785.418 | Y10697    | 1404.513  | 1220.948  | NM_01440E | 1245.278  | 2068.405  |
| NM_004037 | 4944.032  | 5641.242  | AY007166  | 14464.797 | 14461.959 | AL050100  | 801.637   | 1553.444  |
| NM_005116 | 4345.125  | 5101.247  | NM_004937 | 3691.697  | 3283.4    | NM_02013E | 1304.958  | 1072.065  |
| NM_00276E | 10595.111 | 10888.509 | CY3Cy5    | 2571.176  | 131.208   | AL080207  | 368.574   | 753.357   |
| NM_00078E | 26343.879 | 28259.525 | AI298884  | 17485.115 | 14162.942 | NM_01773C | 3235.537  | 2461.341  |
| AF254088  | 3172.449  | 3817.437  | D87845    | 1810.042  | 4638.454  | AB051826  | 553.83    | 455.465   |
| NM_00142C | 2055.752  | 3078.927  | X53279    | 374.732   | 507.974   | M20697    | 1905.496  | 2554.594  |
| NM_00024E | 1470.403  | 1590.02   | M83254    | 2603.451  | 1772.885  | NM_01504E | 2051.722  | 2479.563  |
| AB031046  | 1482.045  | 1022.784  | S56770    | 535.004   | 502.998   | AF231022  | 8408.372  | 5651.123  |
| NM_00244E | 32688.732 | 30446.191 | H58872    | 14092.876 | 7349.004  | NM_016327 | 1741.595  | 1264.59   |
| AK025388  | 2688.406  | 3287.099  | J02938    | 685.007   | 799.16    | NM_00632E | 1201.261  | 1894.959  |
| AB006631  | 1547.131  | 1180.191  | J04543    | 7933.929  | 11177.669 | U66702    | 32396.672 | 22200.85  |
| NM_005741 | 5698.262  | 3603.724  | S60415    | 483.389   | 608.746   | AF216381  | 6674.051  | 7057.432  |
| NM_000964 | 2972.074  | 1586.27   | AA456295  | 573.765   | 509.046   | AB014593  | 667.773   | 515.762   |
| NM_01326E | 13097.441 | 16567.75  | BE733577  | 1612.538  | 947.38    | AK074832  | 12589.975 | 7800.112  |
| AL137407  | 10177.205 | 11008.773 | AI817942  | 3484.481  | 3955.294  | NM_01626E | 41434.758 | 32818.219 |
| AF085839  | 1306.007  | 1319.356  | BG762340  | 561.992   | 568.612   | NM_00623E | 1186.943  | 1065.036  |
| NM_01817E | 5300.756  | 5513.217  | NM_00545E | 939.608   | 867.007   | AK026353  | 1054.928  | 795.206   |
| AK025204  | 2157.192  | 2059.017  | NM_006534 | 3292.514  | 2566.132  | L24123    | 2681.578  | 2606.722  |
| NM_01900C | 2552.489  | 2864.422  | SR5       | 5241.755  | 4700.465  | AF071111  | 357.158   | 520.248   |
| AF143330  | 1976.892  | 2445.089  | SR7       | 5051.962  | 52157.633 | NM_01594E | 2300.473  | 1653.735  |
| AK025178  | 9258.734  | 9831.971  | CY3Cy5    | 3407.334  | 174.722   | NM_017907 | 2659.348  | 1913.125  |
| AF147359  | 1794.015  | 1673.767  | NM_01645E | 1034.586  | 1051.137  | NM_002044 | 4037.789  | 3333.036  |
| NM_01483E | 11291.161 | 13548.019 | NM_017701 | 1135.313  | 2715.143  | AJ272267  | 929.34    | 1073.031  |
| AK001822  | 7712.431  | 9273.051  | NM_01422E | 1456.898  | 3254.514  | NM_00067E | 538.789   | 439.21    |
| AK026969  | 8309.461  | 10745.008 | AF142567  | 978.967   | 925.573   | NM_00210E | 2511.209  | 2553.078  |
| AF086287  | 3797.68   | 3374.809  | NM_005621 | 4478.902  | 4023.488  | NM_00666E | 2087.034  | 1877.892  |
| AF086409  | 1760.857  | 2624.576  | NM_003391 | 292.99    | 655.768   | NM_00027C | 3657.103  | 3049.433  |
| AK024268  | 5826.294  | 10190.312 | NM_01741C | 1185.743  | 2901.743  | U89277    | 1755.484  | 1758.717  |
| AF086295  | 1349.722  | 1317.735  | X99680    | 3647.556  | 2411.798  | NM_00287E | 912.682   | 613.262   |
| AF086344  | 2809.557  | 2396.693  | NM_00144E | 944.94    | 1043.442  | AK022332  | 1686.364  | 2008.913  |
| AF086424  | 1087.471  | 663.207   | NM_01607E | 7183.439  | 16127.226 | NM_00646E | 1510.282  | 1779.598  |
| AL110130  | 894.649   | 1106.058  | AK026349  | 9634.973  | 12160.403 | NM_00676E | 2488.284  | 2696.144  |
| AF052116  | 871.479   | 1090.716  | NM_01473E | 1190.486  | 2212.683  | NM_00118E | 718.262   | 765.735   |
| NM_018087 | 4983.307  | 4992.061  | D12485    | 1439.339  | 1423.253  | NM_00699E | 583.039   | 777.489   |
| AL360260  | 1811.418  | 1604.068  | AK023204  | 3726.874  | 3294.278  | AL365370  | 1291.588  | 1717.008  |
| AK023647  | 1462.819  | 1081.49   | NM_00344E | 2323.496  | 1424.023  | AK001127  | 683.754   | 794.154   |
| BC031635  | 2354.118  | 2027.08   | NM_00247E | 2724.902  | 1674.125  | U79256    | 5699.587  | 5985.743  |
| AF085916  | 1259.326  | 1216.48   | D38163    | 528.715   | 584.681   | AL832550  | 595.673   | 673.43    |
| AL359598  | 1716.819  | 1599.919  | NM_003281 | 532.233   | 1171.359  | NM_00141E | 2078.465  | 2299.913  |
| AF085980  | 743.754   | 903.514   | AA460480  | 739.195   | 1338.153  | AF095771  | 1038.909  | 1152.081  |
| AF085927  | 3258.628  | 3052.269  | S78774    | 3710.905  | 2229.124  | AF086205  | 716.831   | 517.807   |
| AF085954  | 15397.466 | 18370.57  | NM_00492E | 3450.483  | 7867.705  | AK024169  | 433.792   | 401.955   |
| AL137337  | 998.103   | 1348.712  | NM_002871 | 1161.723  | 2397.156  | AF147395  | 826.876   | 604.062   |
| AL442095  | 4668.148  | 4257.37   | NM_006987 | 721.254   | 705.126   | AF085985  | 366.947   | 309.528   |
| AL137378  | 2647.188  | 3049.344  | NM_00128E | 3530.747  | 1990.073  | AK026384  | 264.32    | 268.174   |

|           |           |           |           |           |           |           |           |           |
|-----------|-----------|-----------|-----------|-----------|-----------|-----------|-----------|-----------|
| AL137609  | 43188.063 | 50497.172 | NM_016830 | 1606.419  | 1119.985  | AF075105  | 970.109   | 1213.465  |
| AL353946  | 5690.025  | 6889.946  | U44105    | 657.496   | 796.446   | NM_005117 | 694.303   | 448.532   |
| X69081    | 7276.513  | 7615.923  | NM_016103 | 1707.715  | 2454.242  | AJ007733  | 289.96    | 336.717   |
| NM_005714 | 5598.287  | 7726.287  | AL133654  | 3374.683  | 3972.506  | AK021625  | 1730.788  | 1188.234  |
| AL359931  | 2843.904  | 1756.587  | AL137262  | 734.201   | 785.809   | AK021679  | 356.802   | 357.327   |
| AF086052  | 1447.187  | 1451.882  | NM_020437 | 948.254   | 639.59    | AK001380  | 2328.45   | 1308.74   |
| AK000954  | 4882.799  | 5571.903  | NM_018643 | 735.221   | 462.737   | AK025312  | 1591.564  | 1140.445  |
| AK025800  | 7112.76   | 8325.276  | M30142    | 1077.221  | 683.257   | AK027205  | 553.797   | 355.955   |
| AK022333  | 1744.517  | 1070.253  | NM_005018 | 1105.307  | 2115.182  | AL049268  | 624.392   | 880.594   |
| AF095854  | 2920.586  | 3209.589  | NM_001085 | 1480.159  | 3798.035  | AK023963  | 3891.599  | 4324.621  |
| NM_014162 | 1218.671  | 645.274   | NM_006110 | 1207.17   | 2223.235  | AK022473  | 2609.615  | 2817.251  |
| AF159093  | 6392.157  | 5095.758  | NM_002860 | 6095.759  | 3090.515  | AK023810  | 977.648   | 893.764   |
| AK021997  | 4886.561  | 4645.594  | NM_006169 | 1907.099  | 1412.295  | U80761    | 6838.957  | 6217.478  |
| AK022125  | 1690.845  | 2395.616  | NM_001218 | 584.54    | 615.927   | U61100    | 292.463   | 299.377   |
| AK022244  | 8938.937  | 8942.132  | NM_014183 | 705.456   | 1314.883  | M21539    | 329.788   | 296.703   |
| AK022381  | 8433.783  | 10420.359 | NM_018353 | 2588.222  | 1891.104  | AF130117  | 333.231   | 275.263   |
| AK022012  | 1880.462  | 1710.101  | NM_003560 | 22046.332 | 27635.646 | AK024125  | 311.943   | 307.508   |
| AK022286  | 3638.363  | 3950.15   | NM_014403 | 1619.353  | 863.633   | AK024761  | 6927.394  | 6325.588  |
| AK022613  | 6908.162  | 3751.481  | AL050100  | 1036.793  | 1001.605  | NM_014335 | 8936.388  | 8691.057  |
| AL359557  | 681.732   | 1048.515  | NM_020139 | 1310.632  | 2211.72   | AF086067  | 3341.623  | 3393.594  |
| AK027257  | 808.914   | 1235.812  | AL080207  | 401.347   | 705.49    | AK024967  | 3565.535  | 3693.578  |
| AK024143  | 813.971   | 762.136   | NM_000748 | 6560.249  | 7524.003  | AK025102  | 1864.136  | 1894.484  |
| NM_014367 | 3611.479  | 4303.328  | NM_000048 | 2223.749  | 4111.333  | AF086562  | 773.823   | 837.365   |
| NM_019073 | 1332.205  | 770.355   | U53531    | 404.829   | 429.044   | AY007113  | 533.328   | 445.002   |
| NM_002365 | 2545.851  | 1852.445  | NM_004925 | 15126.095 | 10376.516 | AF130083  | 7041.46   | 5317.071  |
| AF161441  | 21617.203 | 18762.17  | NM_003234 | 3480.831  | 6671.682  | NM_002700 | 4535.771  | 2688.905  |
| AL137474  | 2648.381  | 2310.333  | NM_004858 | 1423.828  | 3707.671  | AB002437  | 10235.806 | 5519.2    |
| AK021572  | 1701.049  | 2126.379  | AB051826  | 748.06    | 240.722   | NM_006777 | 1081.065  | 640.307   |
| AK026757  | 1596.909  | 1385.191  | M20697    | 2371.503  | 3891.914  | AK024969  | 3643.074  | 2866.94   |
| AF119908  | 2467.316  | 2578.992  | NM_015046 | 2425.918  | 3682.857  | AK022250  | 409.416   | 302.933   |
| U50539    | 713.69    | 1009.651  | NM_002014 | 15813.448 | 23130.492 | NM_012369 | 711.101   | 616.099   |
| AK000653  | 21024.477 | 24545.748 | NM_006927 | 8857.375  | 5950.41   | AK025092  | 1053.931  | 1283.903  |
| AK000908  | 2366.322  | 2824.494  | NM_014601 | 1403.632  | 1100.35   | Z83944    | 1047.521  | 1154.103  |
| AK000993  | 1141.802  | 920.539   | NM_017761 | 13596.891 | 17182.152 | AF085871  | 1572.914  | 1721.743  |
| Z70696    | 1972.094  | 1487.524  | NM_006928 | 570.007   | 1356.991  | AF026564  | 997.941   | 1193.177  |
| NM_005792 | 18107.791 | 30550.984 | AF237700  | 1040.448  | 1564.669  | NM_019063 | 24406.613 | 8585.494  |
| AF048847  | 14255.897 | 21985.396 | D38163    | 351.217   | 202.835   | NM_014336 | 1051.999  | 622.339   |
| L37718    | 66131.289 | 65772.758 | D28449    | 10432.363 | 3459.005  | AB002308  | 781.115   | 465.015   |
| AL137717  | 5535.636  | 3805.623  | AA460480  | 483.945   | 289.675   | NM_012143 | 4572.307  | 3214.525  |
| AF035297  | 3898.344  | 4687.092  | AI298884  | 14806.328 | 6535.567  | AF085892  | 1367.279  | 1120.864  |
| NM_014039 | 4508.132  | 4073.973  | D87845    | 1492.033  | 1074.25   | AF075114  | 3026.281  | 1606.261  |
| S67154    | 7180.567  | 7369.848  | M83254    | 2069.637  | 1415.959  | AK022218  | 51873.094 | 45502.848 |
| AK026181  | 10016.982 | 9736.816  | S56770    | 571.995   | 1065.288  | NM_007112 | 4776.933  | 5066.111  |
| AK021451  | 2417.294  | 2626.925  | AI193606  | 277.099   | 598.733   | S82075    | 1372.61   | 1712.29   |
| AK001971  | 1509.04   | 1930.01   | H58872    | 9459.424  | 8117.581  | Z70766    | 419.849   | 278.865   |
| AF086468  | 2881.307  | 3451.245  | J02938    | 379.475   | 411.678   | AK000660  | 5935.703  | 6989.675  |
| AK027239  | 3219.254  | 3306.862  | J04543    | 6939.329  | 7224.214  | NM_014711 | 2004.512  | 2098.806  |
| AF005082  | 27491.518 | 35825.598 | S60415    | 378.06    | 594.873   | AK022015  | 943.974   | 1368.499  |
| AL117595  | 5342.736  | 7287.727  | AA456295  | 629.952   | 542.901   | D63135    | 679.948   | 529.88    |
| AB028988  | 31003.684 | 35673.84  | BE733577  | 1818.489  | 2583.002  | CY3Cy5    | 4767.351  | 433.665   |
| AK023072  | 2750.968  | 2435.392  | AI817942  | 3523.383  | 5453.75   | H41522    | 1219.62   | 1327.92   |
| AF086105  | 6229.369  | 6220.038  | BG762340  | 483.83    | 314.448   | AA460291  | 7670.061  | 8500.613  |
| Y10697    | 1529.721  | 1904.131  | NM_005456 | 857.942   | 683.586   | AF051344  | 3410.038  | 3224.399  |

|           |           |           |           |           |           |           |           |           |
|-----------|-----------|-----------|-----------|-----------|-----------|-----------|-----------|-----------|
| AY007166  | 22655.715 | 23814.02  | NM_006534 | 3870.211  | 2351.914  | BG506100  | 6953.551  | 8585.94   |
| NM_004937 | 3608.922  | 6081.123  | M30142    | 724.512   | 334.605   | X53586    | 6490.606  | 7503.663  |
| CY3Cy5    | 7184.617  | 317.497   | NM_005018 | 625.126   | 353.578   | M32972    | 2934.364  | 2817.975  |
| AI298884  | 23161.242 | 28340.611 | NM_013378 | 4308.436  | 2352.383  | D89854    | 742.484   | 910.589   |
| D87845    | 2217.784  | 2705.488  | NM_001085 | 1311.76   | 650.488   | X14885    | 708.528   | 806.917   |
| M83254    | 3203.593  | 3204.064  | NM_006110 | 540.909   | 301.125   | M97815    | 1160.787  | 1252.01   |
| S56770    | 833.71    | 992.914   | NM_016453 | 1172.264  | 2167.895  | NM_006325 | 4418.925  | 5427.831  |
| H58872    | 14194.103 | 11780.857 | NM_017701 | 1085.227  | 1053.591  | SR2       | 54729.039 | 62881.688 |
| J02938    | 722.851   | 901.498   | NM_014226 | 1485.573  | 2086.209  | SR4       | 16428.389 | 15835.512 |
| J04543    | 10746.814 | 9837.472  | AF142567  | 645.987   | 2308.81   | SR6       | 1530.709  | 1563.503  |
| AA456295  | 1174.206  | 667.252   | NM_005621 | 3973.436  | 6892.192  | SR8       | 7677.681  | 25409.135 |
| BE733577  | 3471.541  | 1436.39   | NM_006202 | 57344.02  | 48025.422 | SR10      | 10436.793 | 2205.663  |
| AI817942  | 7790.468  | 4061.63   | NM_003391 | 241.344   | 896.374   | CY3Cy5    | 2472.028  | 113.96    |
| BG762340  | 992.808   | 821.573   | NM_017410 | 869.462   | 1235.075  | AK025588  | 1948.96   | 2066.66   |
| AA009484  | 766.607   | 734.248   | X99680    | 2985.707  | 3928.456  | NM_003188 | 3451.115  | 3744.432  |
| NM_005456 | 1618.196  | 1517.357  | NM_001448 | 845.074   | 924.547   | U59431    | 2905.455  | 3250.118  |
| NM_006534 | 5502.224  | 5010.302  | NM_016072 | 5990.825  | 4100.84   | NM_020152 | 1033.677  | 1317.727  |
| SR5       | 10586.87  | 8477.83   | AK026349  | 8193.944  | 6676.354  | X06710    | 1686.299  | 1330.488  |
| SR7       | 7784.362  | 45667.828 | NM_014733 | 1168.408  | 634.429   | AK000896  | 1566.011  | 1826.906  |
| SR9       | 28412.859 | 4454.657  | D12485    | 1360.168  | 858.996   | NM_003872 | 524.161   | 987.303   |
| CY3Cy5    | 7904.285  | 385.9     | AK023204  | 4452.239  | 2691.542  | NM_020384 | 3408.665  | 3460.109  |
| NM_016453 | 1714.043  | 4207.977  | NM_003449 | 2955.578  | 2624.332  | NM_006058 | 12285.456 | 14158.515 |
| NM_017701 | 1448.158  | 2504.088  | NM_002478 | 3198.776  | 1706.933  | AK026074  | 1048.539  | 943.283   |
| NM_014226 | 2370.273  | 3878.905  | NM_003234 | 2311.771  | 786.143   | NM_003172 | 2581.865  | 2392.897  |
| AF142567  | 1781.333  | 2113.218  | NM_004858 | 875.048   | 348.015   | NM_004809 | 686.793   | 548.128   |
| NM_005621 | 6087.633  | 8474.455  | S78774    | 3663.338  | 3076.793  | NM_017817 | 3939.968  | 5008.701  |
| NM_017410 | 1609.411  | 1702.197  | NM_004922 | 3363.389  | 3577.126  | NM_018184 | 11257.568 | 12677.815 |
| X99680    | 7526.347  | 3048.796  | NM_002871 | 998.489   | 872.666   | AB046823  | 901.411   | 1423.394  |
| NM_001448 | 1243.796  | 680.324   | NM_006987 | 568.648   | 845.361   | NM_004929 | 870.27    | 1170.667  |
| NM_016072 | 10947.111 | 6482.747  | NM_001282 | 3317.188  | 2265.441  | NM_004662 | 1720.885  | 1906.237  |
| AK026349  | 14161.823 | 8878.932  | NM_016830 | 1956.988  | 3062.213  | NM_016639 | 21976.656 | 23096.17  |
| NM_014733 | 1676.231  | 1236.049  | U44105    | 612.318   | 1341.765  | U61739    | 5554.79   | 5751.356  |
| D12485    | 1587.127  | 1628.366  | NM_016103 | 1416.782  | 2315.424  | U92819    | 7245.05   | 7545.994  |
| AK023204  | 5885.51   | 5117.765  | AL133654  | 3442.203  | 3475.585  | NM_002036 | 7422.295  | 8774.111  |
| NM_002478 | 4996.077  | 4202.464  | AL137262  | 700.072   | 691.613   | AB013103  | 1567.977  | 1892.818  |
| D38163    | 998.959   | 803.888   | NM_020437 | 883.037   | 622.743   | AF019225  | 3287.134  | 3751.751  |
| AA460480  | 936.654   | 1410.885  | NM_018643 | 795.795   | 698.02    | Z36803    | 7302.32   | 7946.886  |
| S78774    | 5294.211  | 4908.276  | NM_006927 | 10374.019 | 8072.263  | NM_013371 | 765.013   | 996.258   |
| NM_004922 | 4393.56   | 3892.256  | NM_014601 | 1349.303  | 1390.946  | NM_000707 | 4894.593  | 5287.674  |
| NM_002871 | 967.371   | 1712.348  | NM_017761 | 12815.44  | 8971.198  | AB011139  | 716.491   | 783.53    |
| NM_006987 | 869.244   | 1260.363  | NM_006928 | 316.372   | 375.902   | AK022625  | 1787.93   | 1535.76   |
| NM_001282 | 6126.085  | 7164.726  | AF237700  | 399.522   | 208.897   | AK023084  | 2098.093  | 1937.928  |
| U44105    | 655.17    | 1061.973  | NM_002860 | 5679.268  | 5606.97   | BC012333  | 9509.51   | 9826.56   |
| NM_016103 | 2161.062  | 2319.359  | NM_006169 | 2756.375  | 6406.434  | AF237952  | 7369.377  | 7478.204  |
| AL133654  | 4540.245  | 4037.423  | NM_001218 | 962.85    | 2070.557  | AL079287  | 3020.875  | 3923.029  |
| AL137262  | 1032.51   | 1010.469  | NM_014183 | 916.561   | 1317.635  | NM_014427 | 10633.18  | 10662.836 |
| NM_020437 | 1442.587  | 527.474   | NM_018353 | 2727.319  | 1910.236  | AB046769  | 3604.224  | 3813.822  |
| X87888    | 649.506   | 1546.562  | NM_003560 | 23601.879 | 34417.867 | NM_015922 | 9197.238  | 12102.343 |
| NM_018643 | 1900.778  | 1779.939  | NM_014403 | 1665.436  | 1716.94   | NM_020381 | 985.555   | 1347.471  |
| M30142    | 1827.949  | 1451.891  | AL050100  | 860.786   | 2020.975  | NM_002957 | 1525.746  | 1558.078  |
| NM_001085 | 2089.343  | 2980.316  | NM_020139 | 1049.961  | 1374.529  | NM_018106 | 5619.278  | 5374.345  |
| NM_006110 | 1963.262  | 2747.755  | NM_000748 | 7526.679  | 4538.033  | NM_003725 | 3218.288  | 4405.335  |
| NM_002860 | 6634.565  | 8455.484  | NM_000048 | 1860.761  | 1210.78   | BE899154  | 1111.477  | 1263.998  |



|           |           |           |           |           |           |           |           |           |
|-----------|-----------|-----------|-----------|-----------|-----------|-----------|-----------|-----------|
| NM_00616E | 3135.689  | 2790.411  | U53531    | 580.816   | 501.136   | NM_00486E | 2111.701  | 2784.968  |
| NM_00121E | 702.714   | 1117.63   | NM_00492E | 18608.039 | 28422.234 | AK024573  | 2869.935  | 3112.794  |
| NM_01418E | 1063.469  | 1730.305  | NM_00545E | 1877.658  | 4411.992  | NM_00229E | 2385.166  | 2305.969  |
| NM_01835E | 3084.748  | 3129.296  | AB051826  | 1112.352  | 2340.944  | D79998    | 3501.779  | 3463.367  |
| NM_00356C | 34539.77  | 39775.508 | M20697    | 2366.535  | 3744.943  | AB032963  | 3702.582  | 3617.91   |
| NM_01440E | 2264.976  | 2017.313  | NM_01504E | 2075.359  | 2791.68   | NM_00038E | 1463.363  | 1645.461  |
| AL050100  | 1323.264  | 1230.112  | NM_002014 | 14134.963 | 10078.994 | AF301013  | 3809.735  | 3697.421  |
| NM_02013E | 1978.522  | 1045.671  | AK026349  | 12068.905 | 23392.727 | U15688    | 1890.269  | 1886.879  |
| AL080207  | 400.117   | 321.328   | D12485    | 1548.448  | 3734.606  | NM_00048E | 6223.336  | 5554.874  |
| NM_00074E | 11608.896 | 8026.105  | AK023204  | 4095.197  | 3548.891  | NM_01844E | 5763.071  | 7188.988  |
| NM_00004E | 3051.967  | 2955.182  | NM_00344E | 2637.832  | 3867.39   | NM_00165E | 10819.093 | 8656.802  |
| NM_00492E | 29015.91  | 34083.977 | NM_00247E | 3290.673  | 1436.747  | AB020663  | 2702.209  | 2544.526  |
| NM_003234 | 4109.065  | 4589.084  | D38163    | 410.743   | 436.802   | NM_01430E | 2996.937  | 3975.69   |
| NM_00485E | 2833.586  | 4369.714  | D28449    | 13606.047 | 14708.785 | NM_01212E | 7609.641  | 9228.464  |
| AB051826  | 1282.558  | 1915.604  | NM_003281 | 414.098   | 384.465   | U87972    | 5313.06   | 5516.227  |
| M20697    | 3549.531  | 3627.32   | AA460480  | 909.381   | 623.547   | NM_01792E | 1587.009  | 1767.237  |
| NM_01504E | 3270.14   | 3024.609  | AI298884  | 15781.856 | 7684.066  | NM_003171 | 2072.585  | 1943.005  |
| NM_002014 | 20307.781 | 27722.758 | D87845    | 922.903   | 585.695   | NM_006437 | 7568.841  | 10087.271 |
| NM_00253E | 8921.198  | 12187.385 | M83254    | 2089.109  | 4171.394  | NM_01789C | 1864.169  | 2196.833  |
| NM_01658E | 14351.594 | 19922.146 | S56770    | 563.256   | 833.511   | AK021654  | 1573.285  | 1719.853  |
| NM_006927 | 19441.213 | 28445.434 | H58872    | 9234.498  | 5272.494  | NM_016481 | 2853.489  | 3612.171  |
| NM_014601 | 3083.498  | 3884.325  | J02938    | 512.746   | 338.7     | NM_00392E | 12904.238 | 14164.852 |
| NM_017761 | 21532.125 | 28246.961 | J04543    | 6656.164  | 4795.278  | Z15114    | 8418.085  | 8379.715  |
| NM_00692E | 988.606   | 1200.207  | AA456295  | 548.001   | 324.544   | AB040812  | 15599.101 | 20053.939 |
| AF237700  | 791.334   | 889.631   | BE733577  | 2005.118  | 1018.855  | NM_00628E | 6022.018  | 7099.846  |
| D38163    | 1162.073  | 1748.77   | AI817942  | 3876.423  | 2752.295  | NM_00134E | 3376.251  | 3686.476  |
| NM_004967 | 407.912   | 1268.713  | BG762340  | 690.249   | 944.96    | NM_00021E | 7753.896  | 6981.123  |
| D28449    | 17425.752 | 21167.854 | AA009484  | 485.533   | 1175.361  | AK027148  | 6773.728  | 7421.071  |
| NM_003281 | 569.444   | 1073.887  | NM_01864E | 725.219   | 343.05    | NM_005084 | 2404.968  | 2542.352  |
| AA460480  | 1084.844  | 1634.533  | M30142    | 866.765   | 442.766   | NM_006111 | 1761.518  | 1694.833  |
| AI298884  | 20934.623 | 19987.436 | NM_00501E | 604.357   | 449.004   | AK026071  | 3565.982  | 2800.354  |
| D87845    | 1957.225  | 2115.953  | NM_01337E | 5709.462  | 3849.794  | AK026074  | 1235.396  | 1664.949  |
| M83254    | 2547.734  | 2619.259  | NM_00108E | 1647.764  | 968.987   | H41522    | 1097.521  | 1576.052  |
| S56770    | 837.04    | 1339.609  | NM_006110 | 1003.27   | 1429.218  | AA460291  | 6289.622  | 6842.382  |
| AI193606  | 503.629   | 844.289   | NM_01645E | 911.688   | 732.244   | BI821333  | 12085.729 | 14864.382 |
| H58872    | 11745.505 | 18508.18  | NM_017701 | 1308.425  | 3237.019  | X51841    | 43894.277 | 28353.977 |
| J02938    | 1074.812  | 1455.927  | NM_01422E | 1707.944  | 4240.204  | AF051344  | 3394.047  | 3678.85   |
| J04543    | 9224.274  | 8815.678  | AF142567  | 810.988   | 830.765   | BG506100  | 7855.011  | 11337.752 |
| S60415    | 712.581   | 795.136   | NM_005621 | 4116.125  | 5285.744  | X53586    | 2593.341  | 3774.491  |
| AA456295  | 1334.608  | 2189.88   | NM_01741C | 972.801   | 622.325   | M17176    | 602.432   | 719.573   |
| BE733577  | 3183.193  | 4059.646  | X99680    | 4742.88   | 2233.21   | M32972    | 3117.901  | 3471.52   |
| AI817942  | 9319.938  | 12156.844 | NM_00144E | 987.82    | 808.538   | D89854    | 769.227   | 927.279   |
| BG762340  | 1092.775  | 2310.7    | NM_01607E | 6656.6    | 7885.742  | M97815    | 794.657   | 849.015   |
| AA009484  | 895.115   | 1727.234  | NM_00074E | 6707.238  | 5540.921  | NM_00632E | 5172      | 4747.555  |
| NM_00545E | 2200.303  | 2811.581  | NM_00004E | 2111.169  | 1574.635  | NM_003201 | 3777.598  | 4345.806  |
| NM_006534 | 6213.655  | 8372.192  | U53531    | 579.505   | 450.353   | AK023084  | 3497.923  | 3783.808  |
| M30142    | 1713.686  | 2887.917  | NM_00492E | 16388.285 | 8847.737  | AK025588  | 1425.813  | 1623.583  |
| NM_00501E | 874.743   | 1568.635  | NM_003234 | 3003.988  | 1752.55   | NM_00318E | 2461.033  | 2607.434  |
| NM_01337E | 7454.726  | 9402.863  | NM_00485E | 1731.157  | 840.984   | NM_02015E | 1730.796  | 2636.004  |
| NM_00108E | 1538.737  | 2572.53   | S78774    | 3638.346  | 4805.338  | NM_013404 | 697.903   | 606.786   |
| NM_006110 | 962.519   | 1630.448  | NM_00492E | 3607.804  | 7002.48   | NM_00396E | 522.071   | 792.581   |
| NM_01645E | 2013.265  | 3904.116  | NM_002871 | 932.019   | 1215.051  | AK024443  | 62895.598 | 66380.547 |
| NM_017701 | 1551.288  | 2799.257  | NM_006987 | 768.342   | 834.419   | X06710    | 1658.218  | 2276.731  |

|           |           |           |           |           |           |           |           |           |
|-----------|-----------|-----------|-----------|-----------|-----------|-----------|-----------|-----------|
| NM_014226 | 2512.518  | 4447.558  | NM_016830 | 1539.848  | 3167.303  | AK000896  | 1334.516  | 1455.531  |
| AF142567  | 1832.13   | 3043.592  | U44105    | 496.8     | 1116.92   | NM_020384 | 1245.737  | 1104.405  |
| NM_005621 | 5554.87   | 9235.008  | NM_016103 | 1589.065  | 1060.231  | NM_006058 | 7436.797  | 7031.706  |
| NM_003391 | 517.744   | 728.076   | AL133654  | 3817.825  | 1542.147  | NM_006628 | 7888.864  | 6821.137  |
| NM_017410 | 1860.748  | 2980.857  | AL137262  | 833.456   | 431.203   | M97496    | 12245.015 | 7528.474  |
| AY009398  | 508.877   | 1228.616  | NM_020437 | 1274.082  | 635.338   | NM_000483 | 4196.573  | 3801.654  |
| X99680    | 12598.587 | 16849.699 | NM_002014 | 16225.706 | 9584.875  | NM_018448 | 4211.85   | 6272.1    |
| NM_001448 | 1920.377  | 3600.462  | NM_002538 | 5724.81   | 3772.203  | NM_001658 | 13232.713 | 15004.448 |
| NM_016072 | 11909.066 | 17459.402 | NM_016585 | 8752.644  | 10088.351 | AB020663  | 2655.297  | 2857.786  |
| AK026349  | 15572.13  | 20705.148 | NM_006927 | 12552.947 | 9076.247  | AF297866  | 1700.204  | 2384.106  |
| NM_014733 | 2014.672  | 3455.697  | NM_017761 | 16076.435 | 27466.488 | NM_002864 | 1343.072  | 1776.057  |
| D12485    | 2493.486  | 2851.699  | AF237700  | 646.096   | 365.53    | NM_017817 | 2737.105  | 3787.178  |
| AK023204  | 6017.763  | 5248.918  | NM_002860 | 7507.578  | 4833.454  | NM_018184 | 8408.232  | 9581.067  |
| NM_003448 | 3595.111  | 2584.537  | NM_006169 | 3750.926  | 2350.184  | AB046823  | 708.303   | 845.731   |
| NM_002478 | 3760.729  | 2596.792  | NM_001218 | 696.577   | 569.465   | NM_004928 | 856.589   | 1334.932  |
| NM_003234 | 4592.207  | 7446.032  | NM_014183 | 829.799   | 571.858   | U61739    | 8356.733  | 9260.617  |
| NM_004858 | 2570.012  | 4572.971  | NM_018353 | 2921.051  | 2658.389  | AJ132089  | 663.821   | 835.574   |
| S78774    | 8318.161  | 11439.851 | NM_003560 | 21583.891 | 29939.803 | U92819    | 10428.737 | 12711.293 |
| NM_004922 | 4368.605  | 4761.943  | NM_014403 | 1312.121  | 975.747   | AB020626  | 679.894   | 991.071   |
| NM_002871 | 1013.361  | 1089.507  | AL050100  | 1020.371  | 988.355   | NM_002036 | 8136.803  | 9586.234  |
| NM_006987 | 709.683   | 895.091   | NM_020139 | 1047.507  | 823.067   | NM_005384 | 5656.793  | 9018.275  |
| NM_016830 | 2897.958  | 2211.926  | NM_017730 | 5064.317  | 4203.996  | AB013103  | 506.753   | 1033.81   |
| U44105    | 921.521   | 1671.518  | AB051826  | 817.165   | 473.841   | AF019225  | 2192.726  | 2235.431  |
| NM_016103 | 2214.089  | 4002.172  | M20697    | 2600.182  | 1730.029  | Z36803    | 2941.044  | 2143.669  |
| AL133654  | 6050.997  | 6607.317  | NM_015046 | 2644.801  | 3466.495  | NM_000707 | 3307.354  | 3210.991  |
| AL137262  | 1679.637  | 1293.618  | AF231022  | 18731.363 | 13783.482 | AF202092  | 11990.276 | 10688.729 |
| NM_020437 | 1799.591  | 1578.171  | NM_016327 | 2848.495  | 1101.196  | NM_000215 | 6494.205  | 5757.58   |
| NM_018643 | 1317.503  | 1249.737  | NM_006322 | 2320.642  | 1362.25   | AK027148  | 3989.926  | 4461.958  |
| NM_006927 | 17178.934 | 26289.756 | AF216381  | 9049.548  | 13004.653 | NM_005084 | 4788.501  | 5443.63   |
| NM_014601 | 2828.593  | 3803.473  | AB014593  | 1077.65   | 1800.378  | NM_006111 | 4231.692  | 4389.781  |
| NM_017761 | 22550.967 | 38097.828 | NM_006235 | 1824.812  | 2510.017  | AK026071  | 6030.554  | 5894.585  |
| NM_006928 | 680.229   | 1971.237  | AK026353  | 1205.961  | 531.743   | BC012333  | 4028.006  | 3687.645  |
| AF237700  | 1088.12   | 1137.733  | L24123    | 4093.63   | 1511.03   | AF237952  | 2259.705  | 2537.75   |
| NM_002860 | 9487.647  | 13558.383 | NM_015942 | 6154.674  | 11348.951 | AL079287  | 3491.95   | 4179.286  |
| NM_006168 | 3922.468  | 3535.252  | NM_017907 | 2904.652  | 2903.58   | NM_014427 | 9431.316  | 9027.919  |
| NM_001218 | 796.689   | 539.57    | NM_000673 | 657.842   | 297.797   | AB046769  | 3043.52   | 3910.025  |
| NM_014183 | 848.552   | 557.498   | NM_002103 | 4333.515  | 1959.106  | NM_020381 | 2307.887  | 3152.026  |
| NM_018353 | 2616.757  | 1733.828  | NM_006665 | 3762.758  | 3177.224  | NM_002957 | 2916.291  | 3530.205  |
| NM_003560 | 34126.359 | 20031.26  | NM_000270 | 8455.297  | 6760.062  | NM_018106 | 8784.312  | 9763.928  |
| NM_014403 | 2478.725  | 1825.753  | U89277    | 2535.542  | 6250.599  | NM_003725 | 2570.003  | 3501.479  |
| AL050100  | 1829.905  | 1614.786  | AK026670  | 572.659   | 715.444   | BE899154  | 1518.362  | 1329.081  |
| NM_000048 | 3093.217  | 3271.509  | NM_002876 | 2783.916  | 5244.337  | NM_004863 | 2003.059  | 2681.103  |
| U53531    | 471.145   | 627.466   | AK022332  | 1972.54   | 2371.166  | AK024573  | 2687.285  | 3369.997  |
| NM_004925 | 22549.693 | 21490.369 | NM_006465 | 1898.958  | 1799.217  | NM_002298 | 2007.798  | 1933.724  |
| NM_005456 | 1807.371  | 2684.198  | NM_006769 | 3221.06   | 2784.069  | D79998    | 2430.973  | 2133.038  |
| BE890041  | 9953.684  | 6167.552  | NM_001189 | 540.514   | 346.153   | AB032963  | 2092.235  | 2466.906  |
| AB051826  | 1118.696  | 857.851   | AL365370  | 1588.113  | 603.64    | NM_018992 | 64095.227 | 69318.047 |
| NM_015046 | 4192.166  | 3797.9    | AK022204  | 714.863   | 1301.912  | U15688    | 824.571   | 658.048   |
| NM_002014 | 20817.008 | 17781.998 | AF086147  | 517.421   | 422.277   | NM_006325 | 3690.304  | 3604.35   |
| D12485    | 1961.193  | 3673.644  | AL109726  | 467.914   | 605.224   | NM_014305 | 1402.48   | 1811.099  |
| AK023204  | 7548.848  | 12362.251 | AF085912  | 388.418   | 339.191   | NM_012123 | 4252.894  | 4588.724  |
| D38163    | 1223.132  | 1794.611  | AK001127  | 839.645   | 1564.934  | NM_003171 | 3205.985  | 3497.406  |
| NM_004967 | 609.517   | 865.018   | U79256    | 12521.392 | 12411.145 | NM_006437 | 9811.946  | 12435.71  |

|           |           |           |           |           |           |           |           |           |
|-----------|-----------|-----------|-----------|-----------|-----------|-----------|-----------|-----------|
| D28449    | 18935.211 | 24742.656 | AL832550  | 1053.357  | 1128.258  | NM_01789C | 1585.082  | 1933.469  |
| NM_003281 | 639.703   | 730.56    | AF131798  | 575.429   | 1106.287  | AK021654  | 1764.66   | 1492.027  |
| AA460480  | 763.247   | 782.699   | NM_001412 | 3041.39   | 1116.629  | NM_016481 | 1895.937  | 2358.521  |
| AI298884  | 16477.646 | 13981.378 | AF095771  | 1000.078  | 496.836   | NM_00392E | 13357.43  | 12626.731 |
| D87845    | 1450.689  | 1151.144  | AF086205  | 905.101   | 588.094   | Z15114    | 4781.81   | 3140.621  |
| X53279    | 759.561   | 362.451   | AK024169  | 447.783   | 394.541   | AB040812  | 19703.77  | 20632.34  |
| M83254    | 1752.76   | 934.773   | AF147395  | 719.121   | 274.451   | NM_00628E | 1659.086  | 1937.292  |
| S56770    | 787.198   | 980.904   | AF087967  | 540.252   | 1237.013  | NM_00365E | 35416.414 | 27990     |
| H58872    | 14390.515 | 13607.248 | AF085985  | 546.752   | 526.854   | NM_00134E | 2020.371  | 1605.71   |
| J02938    | 563.16    | 1339.589  | AK026384  | 346.844   | 428.345   | AV682011  | 371.747   | 1640.938  |
| J04543    | 11273.39  | 10771.527 | AK025217  | 628.296   | 703.109   | NM_00387Z | 104.979   | 3002.159  |
| S60415    | 768.977   | 822.956   | AF075105  | 1866.727  | 3145.573  | NM_020384 | 1959.613  | 2601.065  |
| BE733577  | 2675.952  | 2566.016  | NM_005117 | 717.843   | 472.017   | NM_00605E | 10262.497 | 10651.444 |
| AI817942  | 6780.139  | 6537.931  | AJ007733  | 289.44    | 337.358   | NM_00662E | 7045.555  | 6765.378  |
| BG762340  | 733.743   | 489.45    | AK021625  | 2541.477  | 1611.801  | AK026074  | 936.626   | 990.047   |
| AA009484  | 656.696   | 878.951   | AK021679  | 485.862   | 222.916   | NM_00317Z | 3425.49   | 2649.245  |
| NM_00401C | 191.231   | 1441.393  | AK001380  | 4146.042  | 1312.01   | NM_00480E | 1505.353  | 1455.116  |
| X87888    | 445.866   | 992.654   | AK024938  | 251.576   | 362.984   | BI821333  | 13287.383 | 19054.645 |
| NM_018643 | 1767.582  | 2734.501  | AK025312  | 2167.104  | 2181.757  | X51841    | 45525.438 | 31833.949 |
| NM_01618E | 560.633   | 813.226   | AK027205  | 352.741   | 616.407   | AF051344  | 4242.595  | 3980.19   |
| M30142    | 1915.964  | 1699.471  | AK026493  | 383.705   | 580.797   | BG506100  | 8199.394  | 9437.576  |
| NM_00501E | 1091.611  | 1744.619  | AK002042  | 380.423   | 467.688   | X53586    | 2584.264  | 2737.075  |
| NM_01337E | 6062.834  | 5078.992  | AL049268  | 656.531   | 1060.077  | M26576    | 3521.894  | 3155.596  |
| NM_00108E | 1457.374  | 1480.226  | AK023963  | 4069.256  | 2910.014  | M32972    | 5544.903  | 3419.543  |
| NM_006110 | 1160.244  | 738.316   | AK022473  | 3886.769  | 3711.654  | D89854    | 466.225   | 766.436   |
| NM_017701 | 930.914   | 536.384   | AK023810  | 1097.639  | 507.801   | AB013103  | 1150.559  | 2566.832  |
| NM_01422E | 2311.633  | 1588.261  | U80761    | 6359.56   | 5865.237  | AF019225  | 2544.944  | 2812.667  |
| AF142567  | 1756.19   | 1336.844  | U61100    | 551.244   | 743.076   | Z36803    | 6177.225  | 7358.211  |
| NM_005621 | 6823.803  | 6077.058  | M21539    | 393.564   | 243.925   | NM_000707 | 4449.041  | 4249.789  |
| NM_00620Z | 69106.016 | 51277.68  | AF130117  | 309.063   | 157.348   | NM_003201 | 2588.274  | 2611.308  |
| NM_01741C | 1659.011  | 1585.63   | AK024125  | 542.802   | 358.417   | AB011139  | 1124.173  | 1008.274  |
| X99680    | 11246.897 | 10294.645 | AK024761  | 10749.251 | 7522.905  | AK022625  | 3452.268  | 3507.794  |
| NM_00144E | 1569.754  | 1821.514  | NM_01433E | 12282.307 | 9635.39   | AK023084  | 2918.607  | 2829.491  |
| NM_01607Z | 10560.52  | 9888.085  | AF086067  | 4957.091  | 1698.714  | AK025588  | 1844.273  | 2066.952  |
| NM_00568E | 662.937   | 728.988   | AK024967  | 5476.336  | 11675.175 | NM_00318E | 2197.791  | 2395.798  |
| NM_00074E | 9585.873  | 13730.951 | AK025102  | 2009.725  | 3715.365  | U59431    | 3489.879  | 3019.221  |
| NM_00004E | 4107.866  | 7395.136  | AF086562  | 777.814   | 960.285   | U49349    | 1122.895  | 795.351   |
| U53531    | 1486.185  | 2584.825  | Y11897    | 514       | 718.531   | NM_02015Z | 1674.01   | 1540.216  |
| NM_00492E | 25127.076 | 37829.563 | AY007113  | 774.638   | 334.232   | AK024443  | 62878.953 | 61462.039 |
| NM_003234 | 4053.081  | 3431.615  | AF130083  | 6955.728  | 3588.823  | X06710    | 919.668   | 613.629   |
| NM_00485E | 2161.824  | 1671.009  | NM_00270C | 5329.849  | 11614.331 | AK000896  | 1073.446  | 1045.403  |
| S78774    | 4908.051  | 2073.505  | AB002437  | 10999.85  | 8943.969  | NM_01899Z | 60040.438 | 61896.145 |
| NM_00492Z | 3928.999  | 1904.688  | NM_006777 | 844.331   | 384.111   | U15688    | 923.186   | 852.071   |
| NM_002871 | 885.074   | 815.93    | AK024969  | 4622.465  | 1939.215  | NM_00048E | 3672.364  | 2861.425  |
| NM_006987 | 1540.998  | 1939.334  | AK022250  | 603.555   | 751.272   | NM_01844E | 3997.881  | 4283.571  |
| NM_00128Z | 5929.299  | 5014.297  | AK025092  | 1461.353  | 1280.093  | NM_00165E | 9395.908  | 7958.072  |
| NM_01683C | 3129.038  | 2573.693  | Z83944    | 1003.135  | 1558.278  | AB020663  | 2279.621  | 2102.793  |
| U44105    | 678.195   | 746.137   | AF085871  | 1512.751  | 1733.844  | AF297866  | 1512.445  | 1850.375  |
| NM_01610E | 2012.473  | 1889.922  | AF026564  | 884.012   | 538.049   | NM_002864 | 1540.936  | 1860.286  |
| AL133654  | 5157.056  | 4894.666  | X97301    | 1572.674  | 649.55    | NM_017817 | 3220.069  | 3721.062  |
| AL137262  | 1732.597  | 1917.926  | AL110141  | 39825.371 | 13133.486 | NM_018184 | 8380.01   | 8643.321  |
| NM_020437 | 1786.621  | 2102.87   | NM_01906E | 15775.268 | 12462.184 | AB046823  | 1159.737  | 1012.933  |
| NM_002014 | 21929.609 | 37568.469 | NM_01433E | 470.089   | 560.923   | NM_00492E | 882.354   | 1206.855  |

|           |           |           |           |           |           |           |           |           |
|-----------|-----------|-----------|-----------|-----------|-----------|-----------|-----------|-----------|
| NM_006927 | 13053.852 | 17676.588 | AB002308  | 748.574   | 1905.294  | NM_004662 | 644.306   | 674.55    |
| NM_014601 | 2779.156  | 4402.272  | NM_012143 | 5288.581  | 2602.983  | NM_016639 | 36201.566 | 38500.465 |
| NM_017761 | 20692.357 | 27070.127 | AF085892  | 1754.069  | 953.611   | U61739    | 8135.808  | 7743.863  |
| NM_006928 | 864.301   | 661.419   | AF075114  | 3520.043  | 1443.766  | AJ132089  | 688.627   | 549.342   |
| AF237700  | 924.51    | 314.91    | AK022218  | 59049.66  | 54891.648 | U92819    | 7320.32   | 5961.857  |
| NM_002860 | 7694.441  | 3123.646  | NM_007112 | 5976.118  | 6029.803  | AB020626  | 636.476   | 777.487   |
| NM_006169 | 3603.958  | 1194.332  | S82075    | 2363.963  | 3745.205  | NM_002036 | 10552.37  | 9698.82   |
| NM_014183 | 794.898   | 938.005   | Z70766    | 437.929   | 782.334   | NM_012400 | 709.262   | 386.306   |
| NM_018353 | 3828.642  | 4796.975  | AK000660  | 8758.07   | 12478.412 | NM_005384 | 1445.5    | 865.4     |
| NM_003560 | 32478.322 | 27906.852 | NM_014711 | 3167.379  | 4013.695  | NM_003656 | 49226.016 | 50884.813 |
| NM_014403 | 1702.607  | 1865.242  | AK022015  | 1349.66   | 2787.782  | NM_001348 | 2705.25   | 2761.657  |
| NM_020139 | 2397.147  | 2685.82   | D63135    | 332.283   | 254.454   | NM_000215 | 6672.252  | 5307.605  |
| AL080207  | 587.112   | 775.567   | AB033083  | 2184.31   | 899.79    | AK027148  | 7351.811  | 6613.55   |
| NM_017730 | 6373.477  | 11031.605 | NM_017828 | 7911.243  | 2878.74   | NM_005084 | 4045.503  | 3965.683  |
| AB051826  | 1201.045  | 1184.698  | CY3Cy5    | 2351.867  | 151.531   | NM_006111 | 4924.25   | 5347.088  |
| M20697    | 3969.269  | 5626.814  | H41522    | 1147.149  | 763.068   | AK026071  | 8198.421  | 7673.204  |
| NM_015046 | 3258.6    | 3555.125  | AA460291  | 6075.913  | 4723.039  | BC012333  | 9046.188  | 8811.009  |
| AF231022  | 10531.723 | 13243.769 | BI821333  | 9715.217  | 5846.352  | AF237952  | 6206.292  | 6044.81   |
| NM_016327 | 2985.942  | 5099.416  | X51841    | 26037.791 | 27557.898 | AL079287  | 2732.811  | 3238.578  |
| NM_006322 | 2474.402  | 2317.677  | AF051344  | 3308.944  | 1917.857  | NM_014427 | 12006.977 | 8433.754  |
| U66702    | 33879.344 | 28533.105 | BG506100  | 9745.353  | 6778.28   | AB046769  | 3372.757  | 3322.708  |
| AF216381  | 13609.173 | 8586.188  | X53586    | 4614.937  | 5112.363  | NM_015922 | 9101.724  | 10132.808 |
| L08442    | 355.845   | 1401.978  | M17176    | 500.601   | 806.993   | NM_020381 | 2929.623  | 3139.682  |
| AB014593  | 1357.906  | 2071.971  | M26576    | 355.991   | 629.016   | NM_002957 | 3016.235  | 3052.095  |
| AK074832  | 15317.293 | 10540.551 | M32972    | 3875.523  | 4674.24   | NM_018106 | 8636.418  | 7905.921  |
| NM_016269 | 60328.914 | 38564.336 | D89854    | 983.84    | 1435.576  | NM_003725 | 2659.288  | 2695.614  |
| NM_006235 | 1013.193  | 606.911   | M13207    | 652.347   | 844.282   | BE899154  | 804.372   | 642.451   |
| AK026353  | 1124.939  | 427.251   | X14885    | 757.357   | 1690.774  | NM_004863 | 2250.68   | 2024.049  |
| L24123    | 2883.567  | 586.013   | M97815    | 1078.44   | 1677.637  | AK024573  | 2326.024  | 1977.125  |
| AF071111  | 1070.567  | 2211.628  | NM_006325 | 4782.391  | 7750.178  | NM_002299 | 1152.141  | 743.322   |
| NM_015942 | 7740.668  | 9866.053  | SR2       | 52511.016 | 63018.113 | NM_003830 | 808.742   | 1143.404  |
| NM_017907 | 7047.849  | 5651.402  | SR4       | 11925.565 | 14311.181 | NM_015642 | 1321.578  | 2585.554  |
| NM_002044 | 8430.532  | 6687.792  | SR6       | 1931.208  | 2270.724  | NM_002901 | 7856.323  | 7612.67   |
| AJ272267  | 1735.024  | 1919.819  | SR8       | 7330.815  | 27606.404 | NM_016222 | 7923.018  | 9687.466  |
| NM_000673 | 993.496   | 495.562   | SR10      | 27303.605 | 11877.864 | AB037823  | 2900.238  | 2450.745  |
| NM_002103 | 2361.984  | 549.819   | CY3Cy5    | 5719.55   | 318.776   | NM_015380 | 13911.8   | 12737.105 |
| NM_006665 | 3509.697  | 1254.262  | AK025588  | 2566.07   | 1694.943  | BE254485  | 1868.218  | 2138.061  |
| NM_000270 | 10526.533 | 5362.479  | NM_003188 | 3329.868  | 1851.241  | NM_014305 | 2991.967  | 3432.519  |
| U89277    | 2277.71   | 1303.839  | U59431    | 3276.436  | 1928.611  | NM_012123 | 8081.39   | 7523.253  |
| AK026670  | 540.941   | 587.55    | U49349    | 695.742   | 485.442   | U87972    | 5155.174  | 4792.973  |
| NM_002876 | 1666.667  | 1161.859  | NM_020152 | 1466.596  | 843.962   | NM_017925 | 2313.391  | 2995.858  |
| AK022332  | 2892.92   | 2144.615  | NM_013404 | 541.609   | 670.916   | NM_003171 | 2511.441  | 1802.385  |
| NM_006465 | 2078.357  | 1742.622  | AV682011  | 1138.266  | 1054.195  | NM_006437 | 9592.597  | 9516.643  |
| NM_006769 | 3739.416  | 2442.573  | NM_020384 | 2561.576  | 3979.94   | NM_017890 | 1140.2    | 759.957   |
| NM_001189 | 857.866   | 879.601   | NM_006058 | 10432.069 | 13747.326 | AK021654  | 1778.764  | 1286.509  |
| NM_006992 | 844.515   | 721.908   | NM_006628 | 11880.591 | 14611.861 | NM_016481 | 1282.874  | 1022.092  |
| AL365370  | 2117.682  | 1796.907  | AK026074  | 1313.299  | 2156.768  | NM_003925 | 9579.086  | 7527.08   |
| AF085912  | 952.87    | 450.593   | NM_003172 | 8542.133  | 9051.184  | AF217974  | 3094.769  | 2391.436  |
| AB028963  | 2007.432  | 931.427   | NM_004809 | 3930.469  | 4651.062  | NM_000595 | 4424.304  | 4902.95   |
| U79256    | 13416.459 | 7681.064  | AA903183  | 810.894   | 779.598   | X99663    | 3076.263  | 3194.096  |
| AF131798  | 987.417   | 1109.172  | NM_017817 | 4665.759  | 2205.084  | NM_016552 | 2509.034  | 2226.239  |
| AK001731  | 2583.693  | 2431.152  | NM_018184 | 11717.046 | 8883.659  | NM_003565 | 2464.127  | 1591.639  |
| NM_001412 | 3801.367  | 2207.809  | AB046823  | 1005.916  | 667.955   | NM_018440 | 9038.241  | 7220.947  |

|           |           |           |           |           |           |           |           |           |
|-----------|-----------|-----------|-----------|-----------|-----------|-----------|-----------|-----------|
| AF095771  | 1174.617  | 872.371   | NM_004929 | 1263.542  | 1014.62   | AK025470  | 1116.387  | 1037.702  |
| AF086205  | 899.853   | 956.708   | NM_004662 | 693.641   | 495.966   | M35410    | 12388.749 | 13019.867 |
| AF147395  | 1037.874  | 346.64    | NM_016639 | 40175.664 | 32326.59  | AB023227  | 832.744   | 1278.926  |
| AK025217  | 2230.818  | 1455.369  | U61739    | 8163.71   | 4723.057  | NM_005776 | 20543.227 | 19266.928 |
| AF075105  | 2092.986  | 1397.391  | AJ132089  | 485.908   | 775.148   | AK023071  | 5146.633  | 4491.508  |
| AF086144  | 735.619   | 586.606   | U92819    | 11293.687 | 7963.461  | NM_004041 | 1262.234  | 1464.728  |
| NM_005117 | 1333.663  | 1012.817  | AB020626  | 865.48    | 777.834   | AK022888  | 3092.465  | 3412.785  |
| AJ007733  | 606.882   | 239.799   | NM_002036 | 13270.24  | 15847.528 | AK024484  | 4698.335  | 4193.772  |
| AK021625  | 2262.505  | 1449.923  | NM_012400 | 571.702   | 739.7     | NM_001953 | 51589.738 | 45478.707 |
| AK021679  | 975.638   | 430.407   | Z36803    | 9229.944  | 13542.79  | NM_002292 | 1502.078  | 1121.749  |
| AK001380  | 4644.872  | 767.224   | NM_013371 | 1176.641  | 1378.731  | NM_000166 | 2112.047  | 1401.244  |
| AK025312  | 1023.596  | 421.148   | NM_000707 | 5233.231  | 7984.96   | AF305200  | 1271.576  | 992.074   |
| AK002042  | 482.438   | 463.512   | AF202092  | 16927.625 | 23280.736 | AL570170  | 2552.682  | 2285.412  |
| AL049268  | 1217.26   | 891.725   | AB011139  | 1671.258  | 2385.559  | NM_006613 | 7438.07   | 6776.849  |
| AK023963  | 5536.623  | 3654.157  | NM_006919 | 799.76    | 1264.277  | NM_004638 | 8317.852  | 7280.096  |
| AK022473  | 4383.92   | 3117.755  | AK022625  | 15689.492 | 15392.162 | L40027    | 3143.395  | 2836.293  |
| AK023810  | 1292.277  | 1114.648  | NM_005425 | 518.216   | 497.412   | NM_003718 | 37567.316 | 34050.734 |
| U80761    | 9511.604  | 9920.306  | AK023084  | 5283.521  | 6979.116  | NM_007062 | 478.01    | 429.555   |
| U61100    | 720.407   | 276.084   | BC012333  | 10213.604 | 5323.122  | NM_014180 | 25653.189 | 25906.857 |
| M21539    | 531.336   | 308.915   | AF237952  | 7415.16   | 5472.231  | NM_017706 | 1858.496  | 1519.995  |
| AK024761  | 13132.448 | 6392.206  | AL079287  | 3146.159  | 2925.781  | AF334406  | 983.109   | 1329.649  |
| NM_014335 | 16230.24  | 9475.22   | NM_014427 | 13198.133 | 24655.73  | NM_017444 | 5929.677  | 4718.303  |
| AF086067  | 6511.672  | 3535.688  | AB046769  | 4075.712  | 4145.214  | NM_018025 | 5116.227  | 4835.297  |
| AK024967  | 6557.786  | 4066.891  | NM_015922 | 8476.456  | 4894.104  | NM_015995 | 6643.796  | 6478.775  |
| AK025102  | 3375.469  | 1715.588  | NM_020381 | 2536.917  | 1554.334  | NM_003804 | 11032.863 | 9427.829  |
| AF086562  | 1080.404  | 705.931   | NM_002957 | 3843.35   | 2190.74   | NM_018453 | 8202.825  | 7292.069  |
| AY007113  | 1406.228  | 1062.785  | NM_018106 | 8237.521  | 6532.355  | NM_004708 | 60895.102 | 64311.875 |
| AF130083  | 12036.705 | 8680.859  | NM_003725 | 2934.698  | 3219.644  | NM_016001 | 8825.507  | 6852.774  |
| NM_002700 | 2340.797  | 639.741   | BE899154  | 1743.087  | 2420.383  | NM_016108 | 5327.388  | 4402.882  |
| AB002437  | 16021.817 | 4577.594  | NM_000385 | 1923.378  | 3141.435  | D86984    | 1747.854  | 1234.469  |
| AK023496  | 480.057   | 309.24    | U15688    | 1423.816  | 2457.051  | NM_015955 | 1232.713  | 793.37    |
| NM_006777 | 1655.422  | 936.681   | NM_000483 | 5460.298  | 8218.986  | AK026904  | 2409.353  | 2477.364  |
| AK024969  | 4899.141  | 2466.123  | NM_018448 | 10772.838 | 12461.436 | NM_001905 | 4819.63   | 5925.511  |
| AK022250  | 1374.716  | 1022.004  | NM_001659 | 18967.25  | 22710.537 | NM_012198 | 1573.294  | 1821.289  |
| AK025092  | 2230.412  | 2136.377  | AB020663  | 3244.448  | 4052.871  | NM_003368 | 3170.206  | 3314.679  |
| Z83944    | 1527.686  | 1090.987  | AF297866  | 4412.998  | 4932.21   | AB040886  | 901.516   | 1144.85   |
| AF085871  | 2967.797  | 1840.288  | NM_002864 | 2142.659  | 2603.343  | AB029020  | 1516.142  | 1865.924  |
| X97301    | 3072.324  | 2375.993  | NM_003102 | 610.738   | 295.363   | AK022759  | 2911.689  | 2481.482  |
| AL110141  | 51249.41  | 30227.896 | NM_014305 | 3382.977  | 1967.921  | NM_012333 | 10300.344 | 8889.965  |
| NM_019063 | 38517.379 | 17459.225 | NM_012123 | 6813.799  | 5096.959  | AF217798  | 2965.883  | 2994.429  |
| NM_012143 | 7439.704  | 4349.684  | U87972    | 5927.774  | 2628.879  | AF161472  | 4560.029  | 4026.19   |
| AF085892  | 2142.441  | 1252.697  | NM_017925 | 2152.01   | 1078.05   | AL133642  | 16634.283 | 15935.247 |
| AF075114  | 3335.983  | 1259.916  | NM_003171 | 2289.79   | 2233.318  | AB011154  | 1313.632  | 1530.344  |
| AK022218  | 57270.879 | 46832.297 | NM_006437 | 10171.24  | 10149.773 | AF124432  | 3148.443  | 1712.999  |
| NM_007112 | 6586.851  | 5394.221  | NM_017890 | 2161.678  | 2563.836  | NM_006330 | 7299.516  | 6041.548  |
| S82075    | 5786.514  | 6036.409  | NM_001348 | 2883.239  | 5082.9    | NM_015873 | 3031.74   | 2037.138  |
| Z70766    | 995.222   | 1768.887  | NM_000215 | 7250.919  | 12737.799 | NM_000377 | 3846.835  | 2786.502  |
| AK000660  | 9802.803  | 6869.412  | AK027148  | 10084.188 | 14557.565 | NM_003120 | 1646.699  | 1358.751  |
| NM_014711 | 3177.547  | 2689.612  | NM_005084 | 5599.823  | 7516.754  | X52360    | 2428.628  | 2179.798  |
| AK022015  | 1641.495  | 1116.026  | NM_007283 | 650.023   | 841.83    | NM_002636 | 10861.488 | 8654.243  |
| AB033083  | 2624.316  | 1944.674  | NM_006111 | 6864.928  | 8066.348  | NM_016494 | 15532.41  | 17816.141 |
| NM_017828 | 1898.144  | 744.768   | AK026071  | 11026.371 | 13971.889 | NM_020225 | 3092.66   | 2543.841  |
| CY3Cy5    | 6623.346  | 357.967   | AK026074  | 1212.695  | 1006.499  | NM_001186 | 3708.08   | 4391.632  |

|           |           |           |           |           |           |           |           |           |
|-----------|-----------|-----------|-----------|-----------|-----------|-----------|-----------|-----------|
| H41522    | 3615.015  | 3912.984  | NM_003172 | 9477.588  | 11367.788 | NM_004502 | 4275.304  | 3425.331  |
| AA460291  | 15820.937 | 13530.941 | NM_004809 | 4500.694  | 3425.204  | AF000560  | 4987.509  | 4238.085  |
| BI821333  | 21874.643 | 20866.846 | AA903183  | 572.341   | 1169.918  | NM_013282 | 4405.815  | 4060.407  |
| X51841    | 52832.98  | 53977.945 | H41522    | 1722.162  | 1079.322  | NM_005777 | 4993.002  | 4531.785  |
| X53586    | 5348.473  | 6586.332  | AA460291  | 8464.669  | 3972.031  | NM_012345 | 3553.153  | 2576.085  |
| M17176    | 3179.889  | 3676.139  | BI821333  | 15654.257 | 13412.732 | NM_005826 | 18149.84  | 19931.721 |
| M32972    | 5163.648  | 3720.323  | X51841    | 38355.566 | 49213.293 | NM_004592 | 2186.162  | 1856.113  |
| D89854    | 1319.348  | 982.646   | AF051344  | 6079.4    | 6906.455  | NM_015001 | 9156.589  | 6712.283  |
| NM_006325 | 4561.745  | 3349.127  | BG506100  | 11181.791 | 12706.901 | NM_019027 | 1065.383  | 825.344   |
| SR4       | 14798.711 | 10726.38  | M26576    | 1103.324  | 1734.782  | NM_016107 | 2253.978  | 2056.558  |
| SR6       | 2509.044  | 2897.323  | M32972    | 6139.909  | 12701.658 | NM_002567 | 22544.775 | 22858.211 |
| CY3Cy5    | 7010.025  | 645.122   | D89854    | 2241.862  | 2267.235  | NM_001404 | 2109.613  | 1724.878  |
| AK025588  | 5740.755  | 7171.836  | M97815    | 967.708   | 2206.982  | NM_001605 | 20669.031 | 16831.053 |
| NM_003188 | 7639.38   | 10852.933 | NM_006325 | 5646.536  | 10442.498 | AF225422  | 8099.216  | 5092.558  |
| NM_007118 | 660.001   | 805.611   | AF085893  | 776.104   | 1226.251  | AB040960  | 4262.058  | 2674.329  |
| U59431    | 6585.616  | 5586.898  | NM_003201 | 4137.913  | 1942.04   | NM_015946 | 1389.657  | 962.048   |
| U49349    | 1457.678  | 1190.888  | AB011139  | 1428.757  | 784.511   | AL080059  | 2723.275  | 2472.178  |
| NM_020152 | 3199.455  | 2655.384  | NM_006919 | 570.916   | 694.541   | AL080219  | 1786.782  | 1440.189  |
| NM_006157 | 166.582   | 1600.958  | AK022625  | 14373.023 | 9727.185  | NM_003001 | 2190.385  | 3198.358  |
| NM_003966 | 1253.136  | 1451.637  | NM_005425 | 581.187   | 826.737   | NM_001985 | 6494.471  | 8183.342  |
| X06710    | 2818.885  | 3893.026  | AK023084  | 4515.652  | 3938.976  | NM_000102 | 746.261   | 1371.595  |
| AK000896  | 4797.438  | 8364.688  | AK025588  | 3372.634  | 1789.098  | NM_002490 | 14375.887 | 11438     |
| NM_003872 | 611.64    | 917.056   | NM_003188 | 4746.195  | 4140.058  | BE563532  | 1266.874  | 1086.236  |
| NM_020384 | 4160.181  | 6194.281  | U59431    | 5810.041  | 7961.294  | NM_001916 | 5702.65   | 5066.268  |
| NM_006058 | 14176.437 | 20679.818 | U49349    | 1033.399  | 1246.341  | NM_002491 | 1608.987  | 1847.343  |
| AK026074  | 1357.714  | 1096.503  | NM_020152 | 1905.744  | 2834.226  | NM_015425 | 2020.292  | 2180.576  |
| NM_003172 | 7527.623  | 6177.113  | NM_003966 | 1838.189  | 2093.865  | NM_015153 | 4970.887  | 5364.017  |
| NM_004809 | 2405.266  | 1855.963  | AK024443  | 62904.262 | 60722.824 | AB032966  | 15484.432 | 15043.705 |
| NM_017817 | 6364.939  | 11736.189 | X06710    | 1463.275  | 2494.36   | M26747    | 4299.334  | 3265.293  |
| NM_018184 | 18142.676 | 28118.42  | AK000896  | 2490.846  | 4005.843  | NM_014820 | 4642.342  | 3454.398  |
| AB046823  | 2189.178  | 3102.22   | NM_003872 | 443.023   | 1241.271  | NM_005035 | 1513.995  | 1326.053  |
| NM_004929 | 1441.453  | 2402.385  | NM_020384 | 3215.263  | 4924.653  | NM_019014 | 3002.778  | 2608.846  |
| NM_004662 | 936.23    | 1474.356  | NM_006058 | 13461.695 | 16468.576 | NM_002097 | 17742.957 | 14563.853 |
| NM_016639 | 54094.887 | 56609.164 | NM_006628 | 13219.127 | 15867.045 | X04706    | 3197.38   | 1752.507  |
| U61739    | 14360.839 | 15608.445 | NM_000483 | 5113.714  | 2305.247  | NM_018039 | 675.352   | 537.141   |
| AB020626  | 1038.526  | 1643.833  | NM_018448 | 8381.046  | 3651.26   | NM_006494 | 2392.206  | 1665.909  |
| NM_002036 | 15962.903 | 18883.328 | NM_001659 | 16227.113 | 15050.746 | X52343    | 2433.292  | 1516.3    |
| NM_012400 | 943.179   | 1286.596  | AB020663  | 2829.173  | 1846.305  | NM_005853 | 843.594   | 587.21    |
| AB013103  | 1136.567  | 1717.731  | AF297866  | 3352.009  | 2855.088  | NM_017814 | 4042.961  | 3334.766  |
| AF019225  | 3551.091  | 4584.241  | NM_002864 | 1956.385  | 1844.042  | AF074996  | 932.927   | 1200.667  |
| Z36803    | 8022.822  | 5661.725  | NM_017817 | 4320.336  | 1755.764  | AF131811  | 2356.506  | 2193.783  |
| NM_013371 | 1023.232  | 1378.544  | NM_018184 | 11258.035 | 6325.425  | AF293026  | 10819.85  | 13112.919 |
| NM_000707 | 5594.47   | 5423.014  | AB046823  | 1268.865  | 892.645   | AF236158  | 960.415   | 958.688   |
| AB011139  | 2142.245  | 1753.512  | NM_004929 | 1369.741  | 1335.72   | AF217986  | 3290.145  | 2906.354  |
| NM_006919 | 1454.097  | 1607.589  | NM_004662 | 806.558   | 1075.528  | AL137530  | 1428.421  | 908.921   |
| AK022625  | 8879.595  | 7347.256  | NM_016639 | 57677.691 | 52432.328 | NM_015953 | 6816.231  | 5644.096  |
| AK023084  | 6464.46   | 4866.016  | U61739    | 13015.566 | 15868.874 | AK024775  | 1533.838  | 1052.058  |
| BC012333  | 17286.463 | 26080.303 | AJ132089  | 711.707   | 1609.995  | AK025562  | 1877.803  | 1557.256  |
| AF237952  | 11210.437 | 15907.609 | U92819    | 14336.107 | 18611.141 | AK025887  | 916.205   | 780.409   |
| AL079287  | 5491.856  | 8124.858  | AB020626  | 1420.482  | 1876.97   | AB037719  | 2250.842  | 2429.232  |
| NM_014427 | 21150.34  | 25157.6   | NM_002036 | 23005.574 | 32430.289 | AK024694  | 828.145   | 934.101   |
| AB046769  | 5677.177  | 7719.274  | NM_012400 | 1007.193  | 1502.266  | AK026143  | 1811.812  | 1211.059  |
| NM_015922 | 13865.532 | 17197.453 | NM_005384 | 4561.636  | 7051.694  | AL137616  | 811.628   | 743.258   |

|           |           |           |           |           |           |           |           |           |
|-----------|-----------|-----------|-----------|-----------|-----------|-----------|-----------|-----------|
| NM_020381 | 4088.795  | 3167.549  | AB013103  | 1314.391  | 2028.874  | AK021752  | 1295.872  | 917.595   |
| NM_002957 | 5940.784  | 5751.819  | AF019225  | 4683.919  | 7667.962  | AL109706  | 11690.248 | 9975.236  |
| NM_018106 | 13873.793 | 14609.553 | Z36803    | 11817.877 | 15519.632 | AK001118  | 854.864   | 897.746   |
| NM_003725 | 4575.557  | 6074.647  | NM_013371 | 827.016   | 1162.398  | AF035291  | 56373.477 | 51104.953 |
| BE899154  | 2413.555  | 2502.98   | NM_000707 | 6420.555  | 7014.756  | AK026291  | 11819.112 | 11037.329 |
| NM_004863 | 4280.295  | 5849.057  | NM_000215 | 6018.016  | 4226.52   | AL049303  | 971.725   | 2506.094  |
| AK024573  | 4791.273  | 6717.814  | AK027148  | 7809.356  | 4045.391  | L35592    | 6183.821  | 4319      |
| NM_002299 | 4148.068  | 5960.898  | NM_005084 | 5518.626  | 3932.18   | NM_012079 | 1597.572  | 1251.905  |
| D79998    | 5793.253  | 7047.538  | NM_006111 | 7683.209  | 5998.953  | AL360274  | 16177.01  | 8926.437  |
| AB032963  | 2287.893  | 2450.918  | AK026071  | 10177.308 | 13772.5   | AK021858  | 440.372   | 575.185   |
| NM_000385 | 845.712   | 447.954   | BC012333  | 9852.732  | 5349.575  | NM_014050 | 5579.455  | 3508.714  |
| NM_018992 | 61921.418 | 64770.047 | AF237952  | 6762.3    | 5980.59   | AK027027  | 832.809   | 673.731   |
| NM_000483 | 3445.211  | 2830.83   | AL079287  | 3416.492  | 2970.054  | NM_014911 | 509.825   | 577.791   |
| NM_018448 | 2135.589  | 2015.1    | NM_014427 | 13664.811 | 15253.397 | AF009289  | 6102.126  | 5810.807  |
| NM_001659 | 17976.799 | 18591.506 | AB046769  | 5516.829  | 7276.986  | AF056439  | 843.323   | 646.332   |
| AB020663  | 3311.466  | 3211.713  | NM_015922 | 10179.952 | 12171.609 | AF009303  | 2024.01   | 2022.623  |
| AF297866  | 2365.026  | 1531.407  | NM_020381 | 3423.094  | 4590.436  | NM_004474 | 2573.507  | 2272.179  |
| NM_002864 | 2230.683  | 1461.826  | NM_002957 | 4942.874  | 7405.398  | AK001033  | 1421.225  | 1434.017  |
| NM_003102 | 257.295   | 3150.313  | NM_018106 | 9159.211  | 11002.055 | AK001082  | 1935.402  | 1932.559  |
| NM_014305 | 4995.105  | 7428.107  | NM_003725 | 3231.658  | 4199.086  | AK021743  | 1962.459  | 1795.515  |
| NM_012123 | 12139.955 | 13629.467 | BE899154  | 2393.312  | 3850.703  | AK025589  | 3875.182  | 2645.269  |
| U87972    | 6362.417  | 6771.18   | NM_004863 | 3238.633  | 4928.134  | NM_016633 | 26427.914 | 21170.295 |
| NM_017925 | 3367.649  | 3546.12   | AK024573  | 3711.943  | 4903.39   | AK023250  | 5060.185  | 4070.59   |
| NM_003171 | 2902.267  | 2013.802  | NM_002299 | 2966.837  | 4873.486  | AK024882  | 1947.473  | 1895.411  |
| NM_006437 | 10933.074 | 12342.269 | D79998    | 3516.044  | 6686.726  | NM_014062 | 12515.906 | 18409.691 |
| NM_017890 | 2849.315  | 2117.054  | AB032963  | 3773.256  | 5616.051  | AL109720  | 1241.305  | 1901.25   |
| AK021654  | 2662.663  | 3168.927  | NM_000385 | 1942.166  | 3193.089  | NM_006304 | 60954.754 | 63142.746 |
| NM_016481 | 1781.81   | 1317.692  | AF301013  | 4109.156  | 5130.462  | AF293367  | 2869.742  | 2880.295  |
| NM_003925 | 19385.801 | 22491.883 | U15688    | 1969.285  | 2116.185  | AF086231  | 1332.262  | 946.833   |
| Z15114    | 9808.374  | 10254.775 | NM_006325 | 4163.951  | 2216.01   | AK001494  | 2161.883  | 1646.687  |
| AB040812  | 24242.633 | 28069.205 | AF085893  | 461.099   | 481.44    | AL133438  | 1998.927  | 1603.439  |
| NM_006285 | 3701.742  | 2913.92   | NM_003102 | 579.626   | 631.288   | AK022310  | 831.834   | 581.342   |
| NM_003656 | 48558.078 | 44686.355 | NM_014305 | 3426.99   | 1784.788  | NM_018520 | 1498.578  | 1173.951  |
| NM_001348 | 1404.667  | 1188.646  | NM_012123 | 9194.688  | 8646.932  | NM_003534 | 27213.336 | 26819.135 |
| NM_000215 | 4499.781  | 3898.602  | U87972    | 7993.291  | 7920.2    | L08437    | 2838.79   | 2509.364  |
| AK027148  | 5761.604  | 5845.129  | NM_017925 | 2544.505  | 3154.821  | AK057143  | 7729.428  | 7116.288  |
| NM_005084 | 1670.05   | 2096.932  | NM_003171 | 2820.165  | 3502.705  | NM_015594 | 21571.754 | 15319.911 |
| NM_006111 | 4034.636  | 3619.312  | NM_006437 | 11455.562 | 11002.979 | AF056423  | 1935.892  | 1975.056  |
| AK026071  | 9535.11   | 5879.539  | NM_017890 | 2609.31   | 3074.777  | X04293    | 592.291   | 659.637   |
| AK026074  | 1846.794  | 1331.011  | AK021654  | 2220.62   | 3307.695  | AK026475  | 453.486   | 513.526   |
| NM_003172 | 10237.604 | 7634.992  | NM_016481 | 1252.267  | 2178.546  | U00962    | 10938.731 | 8252.417  |
| NM_004809 | 5163.694  | 3804.422  | NM_003925 | 14822.279 | 19716.059 | AK026130  | 23382.975 | 21147.336 |
| AA903183  | 841.775   | 945.871   | Z15114    | 6624.136  | 10361.052 | NM_012480 | 5772.82   | 4285.107  |
| H41522    | 2653.937  | 2774.405  | AB040812  | 19600.133 | 25905.023 | AK024144  | 11858.738 | 8986.558  |
| AA460291  | 13795.862 | 11359.71  | NM_017625 | 514.914   | 799.229   | Y08959    | 981.844   | 830.883   |
| BI821333  | 17890.135 | 16428.529 | NM_006285 | 6495.877  | 8479.605  | NM_005346 | 19475.467 | 21109.506 |
| X51841    | 49231.332 | 49983.688 | NM_001348 | 2568.975  | 3801.426  | AJ008114  | 42716.91  | 24176.563 |
| AF051344  | 6072.824  | 5861.801  | NM_020384 | 2098.128  | 999.175   | AF147432  | 2653.841  | 1915.485  |
| BG506100  | 11888.815 | 12837.37  | NM_006058 | 12011.88  | 6370.547  | AK024690  | 685.612   | 530.261   |
| X53586    | 4865.559  | 5687.709  | NM_006628 | 10474.699 | 7579.844  | BC005946  | 45052.555 | 40010.934 |
| M17176    | 1766.831  | 1767.738  | M97496    | 20262.588 | 21825.533 | AK021893  | 2010.574  | 1488.841  |
| M26576    | 804.828   | 920.198   | AK026074  | 1598.952  | 871.078   | NM_001048 | 5836.959  | 5710.836  |
| M32972    | 7274.981  | 6617.276  | NM_003172 | 10280.752 | 15005.904 | AK026497  | 2264.25   | 2100.171  |

|           |           |           |           |           |           |           |           |           |
|-----------|-----------|-----------|-----------|-----------|-----------|-----------|-----------|-----------|
| D89854    | 901.125   | 2112.661  | NM_004809 | 4550.771  | 4537.622  | AF085359  | 805.95    | 1292.319  |
| NM_006325 | 1655.017  | 1791.467  | AA903183  | 554.2     | 1049.538  | AF086516  | 1201.895  | 1484.126  |
| NM_003201 | 5605.427  | 5182.979  | H41522    | 3023.636  | 3535.316  | D86978    | 6176.462  | 6967.831  |
| AB011139  | 1604.504  | 1266.525  | AA460291  | 13519.933 | 12427.961 | AL080060  | 6007.798  | 4613.868  |
| NM_006919 | 1030.202  | 901.124   | BI821333  | 16886.941 | 17133.58  | NM_005267 | 2263.58   | 2246.212  |
| AK022625  | 15630.952 | 14170.715 | X51841    | 40817.723 | 55211.855 | AF086017  | 745.608   | 728.644   |
| NM_005425 | 643.972   | 958.187   | AF051344  | 8231.743  | 9067.786  | AK024978  | 9889.415  | 9241.068  |
| AK023084  | 6109.645  | 5932.881  | BG506100  | 13446.904 | 12591.641 | U12897    | 3230.743  | 2952.119  |
| AK025588  | 5452.903  | 5172.381  | X53586    | 5611.392  | 7401.625  | NM_020357 | 13208.936 | 12777.736 |
| NM_003188 | 6271.01   | 6838.588  | M17176    | 818.93    | 1187.3    | AK026836  | 1932.172  | 1688.508  |
| NM_007118 | 550.074   | 995.193   | M26576    | 759.01    | 945.738   | T59562    | 18861.926 | 9333.903  |
| U59431    | 6295.437  | 6344.08   | M32972    | 5885.001  | 8441.256  | NM_018219 | 1300.021  | 472.969   |
| U49349    | 1826.097  | 2329.294  | D89854    | 1016.718  | 1959.172  | NM_014114 | 1866.788  | 1364.875  |
| NM_020152 | 2649.031  | 5177.443  | M13207    | 650.648   | 1093.548  | U62822    | 4300.421  | 2026.769  |
| NM_013404 | 2123.278  | 2343.54   | M97815    | 1181.231  | 1392.478  | CY3Cy5    | 3768.205  | 227.001   |
| AK024443  | 63373.043 | 64147.504 | AB013103  | 811.021   | 606.229   | AA220921  | 1455.577  | 2036.539  |
| NM_020384 | 1246.786  | 918.396   | AF019225  | 3290.54   | 1319.023  | U90065    | 1779.878  | 2115.988  |
| NM_006058 | 9847.684  | 9180.939  | Z36803    | 7997.362  | 3320.123  | AJ005898  | 1388.586  | 1120.118  |
| NM_006628 | 8692.046  | 7636.644  | NM_013371 | 674.102   | 490.588   | X57303    | 2015.779  | 2451.893  |
| M97496    | 34973.133 | 27505.146 | NM_000707 | 6687.184  | 5494.135  | AA463224  | 709.822   | 698.503   |
| NM_000483 | 6912.292  | 6242.601  | AF202092  | 16996.5   | 17261.244 | BG248802  | 4064.037  | 4303.509  |
| NM_018448 | 5470.428  | 5584.953  | NM_003201 | 4476.021  | 2971.919  | L19605    | 965.416   | 1054.305  |
| NM_001659 | 18114.801 | 14679.445 | AB011139  | 1817.976  | 849.784   | AA876532  | 3946.56   | 4083.427  |
| AB020663  | 3537.443  | 3540.508  | NM_006919 | 565.074   | 793.927   | S74349    | 636.781   | 534.371   |
| AF297866  | 4011.739  | 4134.382  | AK022625  | 19299.383 | 15485.93  | X07979    | 15927.654 | 9549.976  |
| NM_002864 | 3711.479  | 5361.566  | NM_005425 | 591.48    | 522.879   | BG744224  | 10416.016 | 11238.393 |
| NM_017817 | 5959.12   | 7364.404  | AK023084  | 6461.138  | 5968.688  | NM_006079 | 1767.839  | 3569.06   |
| NM_018184 | 15296.092 | 15897.423 | AK025588  | 5238.893  | 4674.998  | NM_006696 | 3119.554  | 3969.38   |
| AB046823  | 1472.617  | 1987.13   | NM_003188 | 5035.284  | 5481.245  | SR7       | 5636.522  | 44752.426 |
| NM_004929 | 1200.204  | 1411.809  | NM_007118 | 462.026   | 626.103   | SR9       | 20880.494 | 6034.681  |
| NM_004662 | 745.03    | 1063.036  | U59431    | 8420.78   | 8939.958  | CY3Cy5    | 8478.271  | 332.454   |
| NM_016639 | 55881.738 | 55208.914 | U49349    | 1440.326  | 1577.111  | AK002163  | 1492.42   | 1760.87   |
| U61739    | 4684.913  | 3661.644  | NM_020152 | 2295.99   | 2872.526  | NM_002287 | 2293.499  | 2760.564  |
| U92819    | 5736.4    | 4547.12   | NM_013404 | 1316.476  | 2253.915  | NM_012344 | 907.968   | 1190.882  |
| NM_002036 | 9001.276  | 8748.777  | AK024443  | 63674.555 | 61816.422 | NM_014385 | 1148.117  | 1305.042  |
| NM_005384 | 1055.153  | 989.837   | X06710    | 1595.077  | 2938.041  | NM_001704 | 591.456   | 1017.597  |
| AF019225  | 951.95    | 981.107   | AK000896  | 1748.154  | 1985.14   | AB036432  | 2501.353  | 3104.675  |
| Z36803    | 4076.95   | 3604.708  | D79998    | 3210.436  | 3172.391  | NM_014872 | 2666.835  | 3750.876  |
| NM_000707 | 3471.256  | 2763.796  | AB032963  | 3035.09   | 1403.313  | NM_032951 | 2327.998  | 1996.056  |
| AF202092  | 12153.013 | 10828.516 | NM_000385 | 1572.634  | 931.039   | NM_000503 | 4935.594  | 3612.621  |
| NM_000215 | 7608.848  | 8677.36   | AF301013  | 3323.833  | 3299.624  | NM_002405 | 7025.361  | 6740.305  |
| AK027148  | 8815.613  | 8013.12   | NM_018992 | 62688.879 | 57359.66  | AK000004  | 1230.613  | 1308.42   |
| NM_005084 | 5163.589  | 5472.844  | U15688    | 1881.824  | 2361.383  | NM_012421 | 13410.144 | 13750.177 |
| NM_006111 | 8112.038  | 8439.509  | NM_000483 | 5510.642  | 5804.042  | AB014601  | 790.418   | 548.004   |
| AK026071  | 14546.952 | 14448.362 | NM_018448 | 9850.886  | 4483.131  | AK001393  | 6666.377  | 5066.887  |
| BC012333  | 13443.036 | 13070.453 | NM_001659 | 18268.777 | 12273.077 | AK022638  | 6389.766  | 10991.793 |
| AF237952  | 8670.76   | 10572.779 | AB020663  | 3371.681  | 3612.6    | BG698409  | 1729.638  | 2802.135  |
| AL079287  | 4690.159  | 4848.202  | AF297866  | 4946.627  | 5193.468  | NM_006594 | 899.829   | 1018.947  |
| NM_014427 | 17791.289 | 15877.593 | NM_002864 | 2562.825  | 2820.109  | NM_004177 | 607.427   | 1090.153  |
| AB046769  | 5693.925  | 6120.487  | NM_017817 | 5014.34   | 3479.573  | NM_012429 | 910.252   | 1461.721  |
| NM_015922 | 2925.385  | 3964.857  | NM_018184 | 13506.612 | 13166.128 | NM_004871 | 1341.352  | 2312.17   |
| NM_020381 | 1872.517  | 1768.236  | AB046823  | 1462.831  | 1590.731  | AF202146  | 3797.357  | 4465.045  |
| NM_002957 | 3580.703  | 2970.29   | NM_004929 | 1159.103  | 1149.256  | NM_014923 | 468.468   | 445.624   |



|           |           |           |           |           |           |           |           |           |
|-----------|-----------|-----------|-----------|-----------|-----------|-----------|-----------|-----------|
| NM_01810E | 4941.634  | 4420.805  | NM_004662 | 879.008   | 1021.205  | NM_005477 | 3832.278  | 3760.72   |
| NM_00372E | 1098.758  | 1127.603  | U61739    | 16367.694 | 17866.266 | NM_00431E | 570.143   | 355.382   |
| BE899154  | 1575.152  | 1436.298  | AJ132089  | 704.736   | 1378.298  | NM_00264C | 3059.839  | 2442.247  |
| NM_00486E | 1730.599  | 1406.796  | U92819    | 13915.245 | 16972.629 | M15530    | 4985.079  | 3639.406  |
| AK024573  | 1550.448  | 1822.828  | AB020626  | 831.383   | 1484.161  | NM_001877 | 826.336   | 1023.127  |
| NM_00229E | 2216.458  | 2422.995  | NM_00203E | 27890.518 | 47194.523 | NM_014207 | 7469.328  | 8236.707  |
| D79998    | 3085.714  | 2932.804  | NM_01240C | 978.45    | 2219.902  | NM_001634 | 9407.587  | 9515.382  |
| AB032963  | 1784.006  | 1845.472  | NM_005384 | 4886.296  | 6417.226  | NM_002267 | 2332.326  | 2620.194  |
| NM_00038E | 1194.539  | 1668.736  | Z15114    | 6139.069  | 8252.397  | NM_00641E | 2243.19   | 2951.696  |
| AF301013  | 1655.233  | 1868.105  | AB040812  | 18409.852 | 9535.047  | NM_00306E | 2514.098  | 3459.225  |
| NM_01899E | 57246.141 | 62222.055 | NM_00628E | 5776.954  | 3916.513  | AF178941  | 3528.109  | 4263.919  |
| U15688    | 1429.189  | 1355.764  | NM_00134E | 2483.274  | 2985.866  | NM_01603E | 6285.518  | 7968.547  |
| NM_00632E | 2626.665  | 2370.29   | NM_00021E | 6657.574  | 8234.669  | NM_01758E | 4353.591  | 3754.905  |
| AF085893  | 779.723   | 918.681   | AK027148  | 11665.276 | 8442.665  | U61737    | 24813.645 | 21424.42  |
| NM_00310E | 2196.987  | 5332.603  | NM_005084 | 6227.646  | 3296.789  | NM_00003E | 1197.899  | 692.424   |
| NM_01430E | 4076.826  | 4954.758  | NM_00728E | 574.816   | 368.217   | NM_005694 | 5622.92   | 4724.218  |
| NM_01212E | 9084.231  | 9696.864  | NM_006111 | 9362.813  | 6834.759  | NM_01486E | 5877.056  | 6157.279  |
| U87972    | 1274.992  | 1192.834  | AK026071  | 13426.427 | 11751.67  | AL442089  | 2804.45   | 3557.736  |
| NM_01792E | 1421.27   | 1188.25   | BC012333  | 12583.547 | 9664.686  | NM_00120C | 500.6     | 596.862   |
| NM_003171 | 2396.5    | 1753.079  | AF237952  | 8239.342  | 9562.744  | AF128541  | 2666.378  | 3570.274  |
| NM_006437 | 7809.312  | 8301.986  | AL079287  | 4153.014  | 4313.437  | AK022733  | 531.885   | 999.81    |
| NM_01789C | 1768.606  | 1885.97   | NM_014427 | 15163.99  | 15511.113 | AB011132  | 2178.307  | 3407.577  |
| AK021654  | 1787.827  | 1704.276  | AB046769  | 6456.184  | 6418.047  | NM_02036E | 4342.021  | 5787.512  |
| NM_016481 | 468.173   | 2465.35   | NM_020381 | 3422.283  | 5219.309  | AF275798  | 13147.245 | 16220.876 |
| NM_00392E | 13765.685 | 21774.656 | NM_002957 | 6288.076  | 9056.93   | NM_005441 | 5084.721  | 5354.391  |
| Z15114    | 5986.197  | 6700.61   | NM_01810E | 9649.931  | 11686.04  | NM_01607E | 8467.003  | 8539.868  |
| AB040812  | 20792.412 | 22560.684 | NM_00372E | 3621.943  | 4349.353  | AK023108  | 1647.856  | 1614.824  |
| NM_00628E | 5884.784  | 6023.798  | BE899154  | 2807.956  | 4236.599  | AK026409  | 12601.744 | 8723.046  |
| NM_00365E | 62383.492 | 61583.266 | NM_00486E | 3233.242  | 4736.488  | AF097025  | 5565.895  | 4890.305  |
| NM_00134E | 2684.499  | 2360.675  | AK024573  | 3786.468  | 4903.813  | Y11339    | 4930.612  | 3811.683  |
| AV682011  | 363.171   | 1211.272  | NM_00229E | 3348.445  | 4036.085  | AB030176  | 1005.07   | 549.952   |
| NM_00605E | 12945.599 | 12678.01  | NM_00383C | 1365.394  | 1946.975  | NM_002537 | 4088.555  | 3079.913  |
| NM_00662E | 8681.864  | 7483.029  | NM_00084E | 495.185   | 590.715   | NM_00313E | 3202.202  | 2729.851  |
| AA903183  | 681.735   | 1899.552  | NM_01564E | 1089.822  | 687.142   | NM_01231E | 4149.561  | 4140.622  |
| H41522    | 1601.536  | 1415.771  | NM_00464C | 16775.648 | 9392.606  | AK022638  | 3401.066  | 5157.412  |
| AA460291  | 8864.861  | 8569.163  | NM_01622E | 7956.183  | 9501.98   | BG698409  | 792.445   | 757.807   |
| BI821333  | 13712.354 | 14176.756 | AB037823  | 4073.915  | 4399.844  | AA220921  | 2758.385  | 4415.576  |
| X51841    | 50558.352 | 47125.758 | NM_01538C | 17339.359 | 12636.282 | AJ005898  | 1065.054  | 1061.405  |
| AF051344  | 6282.508  | 5211.213  | BE254485  | 1549.781  | 756.873   | X57303    | 1459.322  | 2058.458  |
| BG506100  | 8199.413  | 9230.346  | NM_00273E | 797.279   | 766.252   | BG248802  | 4484.615  | 5655.763  |
| X53586    | 2348.956  | 2379.239  | AF085893  | 1240.961  | 1045.656  | L19605    | 1375.015  | 1301.913  |
| M32972    | 4435.876  | 4961.598  | NM_00310E | 1185.414  | 1149.332  | AA876532  | 4748.349  | 4731.829  |
| D89854    | 836.494   | 1757.305  | NM_01430E | 4692.381  | 4528.576  | S74349    | 648.25    | 636.442   |
| X14885    | 593.711   | 1071.703  | NM_01212E | 10304.855 | 9511.846  | X07979    | 16073.319 | 11883.662 |
| M97815    | 722.886   | 773.501   | U87972    | 7556.653  | 7553.165  | BG744224  | 9103.754  | 8738.858  |
| AB013103  | 1162.468  | 1811.784  | NM_01792E | 2484.008  | 2840.902  | NM_00607E | 1765.937  | 1411.102  |
| NM_013371 | 898.705   | 682.185   | NM_003171 | 3603.701  | 4794.584  | NM_00669E | 2747.739  | 2037.834  |
| NM_000707 | 5897.428  | 4974.025  | NM_006437 | 13379.191 | 14407.109 | NM_01802E | 2183.29   | 2076.827  |
| AK023084  | 4906.647  | 4286.73   | NM_01789C | 2983.886  | 3600.639  | NM_001707 | 11279.02  | 10188.95  |
| AK025588  | 3704.035  | 4114.963  | AK021654  | 3014.523  | 3682.512  | M15530    | 1589.097  | 2165.542  |
| NM_00318E | 4009.924  | 5369.792  | NM_016481 | 1500.713  | 1840.84   | NM_014207 | 4850.748  | 7272.586  |
| U59431    | 4594.843  | 3906.505  | NM_00392E | 16604.119 | 16254.527 | AK002163  | 1819.462  | 2802.148  |
| U49349    | 1105.409  | 1000.503  | AF217974  | 5488.662  | 9287.984  | NM_012344 | 802.613   | 1102.048  |

|           |           |           |           |           |           |           |           |           |
|-----------|-----------|-----------|-----------|-----------|-----------|-----------|-----------|-----------|
| NM_013404 | 934.282   | 556.243   | NM_003285 | 581.027   | 353.898   | NM_002351 | 15047.162 | 20482.877 |
| NM_002364 | 4246.793  | 4474.674  | NM_000888 | 3035.631  | 1279.35   | NM_014385 | 795.337   | 1098.498  |
| NM_003966 | 1124.438  | 3622.525  | NM_000595 | 8231.47   | 4684.758  | AB036432  | 3757.525  | 3455.028  |
| AK024443  | 64833.07  | 68745.406 | X99663    | 4393.392  | 3651.063  | NM_014872 | 3422.867  | 3252.266  |
| X06710    | 1804.616  | 2161.346  | NM_016552 | 4846.123  | 7986.543  | NM_003480 | 750.148   | 627.532   |
| AK000896  | 2161.542  | 1887.732  | AK025340  | 438.291   | 371.676   | NM_032951 | 1963.343  | 1617.372  |
| D79998    | 4990.33   | 4175.612  | NM_003565 | 3151.143  | 1734.6    | NM_000503 | 4870.1    | 3257.525  |
| AB032963  | 3369.927  | 3203.878  | NM_004841 | 1579.438  | 738.815   | NM_002405 | 7296.925  | 6756.325  |
| NM_000385 | 1549.742  | 1480.657  | NM_004114 | 405.907   | 327.308   | AK000004  | 1262.349  | 1425.958  |
| AF301013  | 3268.815  | 3318.913  | NM_018440 | 13818.015 | 12910.47  | NM_012421 | 12790.979 | 11448.936 |
| NM_018992 | 58348.84  | 61530.773 | M35410    | 12290.771 | 9665.393  | AB014601  | 625.545   | 503.773   |
| U15688    | 1891.674  | 1747.117  | AB023227  | 2010.427  | 1690.143  | AK001393  | 5386.785  | 5516.393  |
| NM_000483 | 3323.146  | 2966.004  | NM_005776 | 23717.174 | 19804.494 | NM_000023 | 2980.802  | 2587.264  |
| NM_002864 | 1705.882  | 1920.938  | AK023071  | 7646.856  | 7938.162  | NM_005694 | 4058.878  | 5054.181  |
| NM_017817 | 4119.747  | 7563.85   | NM_004041 | 2133.49   | 2246.427  | NM_006594 | 1357.213  | 1344.897  |
| NM_004929 | 972.254   | 1532.078  | AK022888  | 3679.967  | 4557.132  | NM_004177 | 1286.192  | 1527.192  |
| NM_004662 | 652.308   | 611.145   | AK024484  | 5827.479  | 5931.307  | NM_004871 | 1271.025  | 2001.259  |
| AJ132089  | 1114.54   | 902.077   | NM_002632 | 584.217   | 899.526   | NM_005698 | 5332.045  | 4601.143  |
| U92819    | 13302.828 | 14455.759 | NM_001406 | 900.514   | 989.453   | AF202146  | 6820.236  | 4826.668  |
| AB020626  | 882.032   | 1109.412  | NM_002292 | 6245.54   | 6553.775  | NM_014923 | 1402.222  | 1258.315  |
| NM_002036 | 12585.834 | 16200.824 | NM_000166 | 2591.556  | 3295.066  | NM_004318 | 621.296   | 495.44    |
| NM_012400 | 897.231   | 1129.324  | AF305200  | 1179.739  | 1121.257  | NM_002640 | 2966.752  | 2505.267  |
| NM_005384 | 3982.108  | 4572.915  | AL570170  | 3782.897  | 3191.769  | Y11339    | 1343.512  | 1349.083  |
| Z15114    | 8720.842  | 7138.875  | D56495    | 592.258   | 393.362   | AB030176  | 406.604   | 542.635   |
| AB040812  | 28358.258 | 28375.291 | NM_006613 | 7915.191  | 5440.351  | NM_002537 | 5307.375  | 7692.522  |
| NM_006285 | 7150.886  | 7197.646  | NM_004638 | 10033.069 | 9483.289  | NM_003139 | 3194.544  | 4878.146  |
| NM_001348 | 2538.392  | 2110.301  | L40027    | 3466.583  | 2550.212  | NM_012316 | 3497.412  | 4863.625  |
| NM_000215 | 3905.957  | 3298.513  | NM_003718 | 39781.613 | 26205.119 | NM_001634 | 9720.473  | 10491.131 |
| AK027148  | 10171.385 | 8450.441  | NM_007062 | 767.199   | 540.886   | NM_002267 | 3546.291  | 4626.935  |
| NM_005084 | 5780.651  | 6400.662  | NM_014180 | 29240.656 | 10257.579 | NM_006412 | 1647.678  | 1876.492  |
| NM_006111 | 6371.471  | 5590.874  | NM_017706 | 2186.819  | 2279.593  | NM_003063 | 2048.078  | 2495.384  |
| AK026071  | 9186.479  | 7185.207  | AF334406  | 1436.425  | 1181.862  | NM_014041 | 36051.945 | 41659.492 |
| NM_014427 | 14425.11  | 13761.203 | NM_017444 | 6436.334  | 7112.145  | NM_007169 | 3820.864  | 4323.525  |
| AB046769  | 4665.738  | 5171.787  | NM_018025 | 6101.804  | 5461.313  | AK024966  | 1336.97   | 1387.907  |
| NM_015922 | 11057.839 | 12684.319 | NM_015999 | 8592.375  | 6202.965  | AF178941  | 4520.376  | 3600.322  |
| NM_020381 | 4267.168  | 4316.083  | NM_003804 | 13125.113 | 13407.131 | NM_016033 | 6216.594  | 5571.465  |
| NM_002957 | 5192.868  | 4969.932  | NM_018453 | 9414.488  | 8959.248  | NM_017585 | 4649.109  | 4128.025  |
| NM_018106 | 10446.742 | 10126.102 | NM_004708 | 62440.777 | 60784.504 | U61737    | 22047.373 | 17765.977 |
| NM_003725 | 3281.902  | 3751.254  | NM_016001 | 12076.355 | 10351.615 | X06389    | 697.478   | 414.602   |
| BE899154  | 1969.455  | 2513.914  | S49432    | 2821.178  | 2284.806  | NM_000033 | 1067.851  | 1145.404  |
| NM_004863 | 2920.75   | 3604.467  | D86984    | 1526.906  | 1796.326  | NM_006079 | 540.27    | 511.099   |
| AK024573  | 3425.241  | 4529.603  | NM_015959 | 831.244   | 1204.892  | NM_006696 | 858.325   | 719.838   |
| NM_002299 | 2966.861  | 3169.294  | AK026904  | 2846.996  | 1281.312  | NM_001707 | 10460.096 | 11383.223 |
| NM_003830 | 1241.291  | 993.842   | NM_001910 | 1972.422  | 2022.551  | NM_014868 | 4132.772  | 6346.021  |
| NM_000842 | 1158.249  | 763.241   | AK023354  | 452.84    | 880.716   | AL442089  | 3264.375  | 4039.331  |
| NM_015642 | 1661.67   | 1110.859  | NM_001909 | 7138.55   | 7537.759  | AB007964  | 416.616   | 454.288   |
| NM_004640 | 20667.885 | 18126.049 | NM_012198 | 2186.044  | 1717.03   | AF128541  | 3921.489  | 3509.988  |
| NM_016222 | 1329.766  | 1048.001  | NM_003368 | 6441.783  | 2023.606  | AK026305  | 3725.716  | 3518.026  |
| AB037823  | 2587.815  | 2320.676  | AB040886  | 943.81    | 446.276   | NM_002552 | 3325.193  | 3575.253  |
| NM_015380 | 18882.117 | 16293.889 | AB029020  | 2495.278  | 2748.086  | NM_014321 | 3832.577  | 3742.971  |
| BE254485  | 1761.375  | 1673.599  | AK022759  | 2874.952  | 1949.875  | AK022733  | 810.236   | 815.122   |
| AF085893  | 1047.22   | 557.348   | NM_012333 | 11597.282 | 7777.064  | AB011132  | 3511.148  | 3473.012  |
| NM_012123 | 9653.503  | 10072.245 | AF217798  | 3530.245  | 4410.224  | NM_020362 | 5000.361  | 3986.772  |

|           |           |           |           |           |           |           |           |           |
|-----------|-----------|-----------|-----------|-----------|-----------|-----------|-----------|-----------|
| U87972    | 4354.095  | 4410.213  | AF161472  | 6589.451  | 6663.387  | AB040937  | 637.643   | 630.975   |
| NM_017925 | 2370.393  | 2981      | AL133642  | 22996.018 | 23419.318 | AF275798  | 14067.338 | 15046.659 |
| NM_003171 | 3256.407  | 3440.815  | AB011154  | 1422.095  | 1944.926  | NM_005441 | 6178.602  | 6039.347  |
| NM_006437 | 13018.408 | 14725.887 | AF124432  | 3303.748  | 4774.344  | NM_016079 | 10085.747 | 9866.342  |
| NM_017890 | 2780.289  | 3111.798  | NM_006330 | 11894.932 | 11005.596 | AK023108  | 1444.373  | 1660.939  |
| AK021654  | 2596.349  | 3240.259  | NM_015873 | 7759.355  | 7176.435  | AK026409  | 12007.13  | 8295.498  |
| NM_016481 | 1737.592  | 1641.499  | NM_000377 | 6406.551  | 5791.494  | AF097025  | 5501.625  | 4689.168  |
| NM_003925 | 15171.32  | 16771.051 | NM_006818 | 1383.965  | 1322.112  | NM_002405 | 1418.893  | 1593.392  |
| AF217974  | 6923.788  | 4008.484  | NM_016823 | 3126.088  | 2963.718  | NM_012421 | 3467.598  | 4047.661  |
| NM_003285 | 1395.601  | 1266.143  | NM_003120 | 1375.453  | 516.418   | AB014601  | 590.9     | 765.13    |
| NM_000885 | 4036.377  | 3433.626  | X52360    | 3544.2    | 1384.245  | AK001393  | 5462.015  | 8213.155  |
| NM_000595 | 4361.01   | 3212.32   | NM_002636 | 21436.137 | 10172.615 | NM_000023 | 1275.551  | 1552.185  |
| X99663    | 1649.09   | 1231.446  | NM_016494 | 33347.633 | 25549.813 | NM_001143 | 310.415   | 899.074   |
| NM_016552 | 3669.368  | 2456.221  | U09410    | 5534.375  | 8959.1    | AK022638  | 3701.661  | 5991.319  |
| NM_003565 | 2922.279  | 2037.398  | NM_020229 | 1474.321  | 1399.364  | BG698409  | 471.102   | 600.373   |
| NM_004841 | 1316.349  | 687.84    | NM_001186 | 4030.894  | 4995.398  | AA220921  | 4201.008  | 5740.25   |
| NM_018440 | 12282.555 | 6903.423  | NM_004502 | 5131.915  | 2924.519  | N67770    | 476.576   | 484.783   |
| AK025470  | 1630.021  | 3017.917  | AF000560  | 5072.313  | 3426.47   | AA486200  | 62232.785 | 54380.27  |
| AB023227  | 1533.703  | 1243.196  | NM_013282 | 6293.933  | 2714.418  | U90065    | 2461.341  | 1779.529  |
| NM_005776 | 23933.104 | 24806.6   | NM_005777 | 5149.188  | 2196.779  | AJ005898  | 1519.583  | 1105.205  |
| AK023071  | 7004.088  | 6785.515  | NM_012345 | 3823.71   | 2107.43   | X57303    | 2075.28   | 1926.182  |
| NM_004041 | 1709.666  | 2027.596  | NM_005826 | 22409.279 | 18398.697 | BG248802  | 4408.794  | 4303.98   |
| AK022888  | 3014.208  | 3760.536  | NM_004592 | 1777.411  | 1594.813  | L19605    | 1319.273  | 1083.33   |
| AK024484  | 6471.134  | 7474.136  | NM_015001 | 8954.515  | 6868.801  | AA876532  | 5455.883  | 5341.319  |
| NM_002632 | 839.563   | 669.691   | NM_019027 | 1170.341  | 1209.609  | S74349    | 453.067   | 443.584   |
| NM_001406 | 834.237   | 1010.19   | NM_016107 | 2637.217  | 2870.782  | X07979    | 16481.287 | 12064.335 |
| NM_002292 | 2851.266  | 3465.484  | NM_002567 | 26970.344 | 20858.355 | BG744224  | 8633.77   | 8232.416  |
| NM_000166 | 2919.366  | 4114.165  | NM_001404 | 2706.079  | 2537.169  | NM_005477 | 2468.13   | 2889.003  |
| AF305200  | 812.335   | 1301.398  | NM_001605 | 23687.627 | 22632.285 | NM_002640 | 1122.557  | 1300.882  |
| AL570170  | 4358.353  | 2844.847  | AF225422  | 17624.881 | 15554.01  | M15530    | 2039.908  | 2928.05   |
| D56495    | 1144.247  | 400.406   | AB040960  | 8813.529  | 6208.148  | NM_014207 | 3631.856  | 4787.059  |
| NM_006613 | 6902.81   | 3549.29   | NM_015946 | 9810.733  | 8317.9    | AK002163  | 3057.577  | 2932.889  |
| NM_004635 | 3065.383  | 1889.771  | NM_006303 | 5766.801  | 5484.396  | NM_002287 | 4499.155  | 3589.771  |
| L40027    | 2686.602  | 2113.759  | AL080059  | 2689.368  | 1096.216  | NM_012344 | 1049.624  | 1129.223  |
| NM_003718 | 36576.809 | 24547.027 | AL080219  | 2693.406  | 1258.516  | NM_002351 | 18315.08  | 14666.157 |
| AF334406  | 1568.646  | 697.422   | AK026709  | 828.447   | 302.879   | NM_014385 | 1782.095  | 1345.878  |
| NM_018025 | 5772.657  | 4321.526  | NM_003001 | 2046.85   | 2202.947  | AB036432  | 3781.616  | 2201.985  |
| NM_015995 | 8713.242  | 8536.313  | NM_001985 | 5766.879  | 4170.45   | NM_014872 | 3337.718  | 2301.165  |
| NM_003804 | 13855.481 | 12642.954 | NM_000102 | 1124.142  | 1423.097  | NM_003480 | 839.692   | 505.623   |
| NM_018453 | 10986.787 | 14147.098 | NM_002490 | 21976.133 | 21072.717 | NM_032951 | 1950.603  | 1769.945  |
| NM_004705 | 63748.051 | 67096.844 | BE563532  | 1129.66   | 596.703   | NM_000503 | 4590.764  | 3784.822  |
| NM_016001 | 10853.182 | 11572.034 | NM_001916 | 4513.6    | 2221.033  | NM_017585 | 1681.724  | 1750.324  |
| S49432    | 1226.491  | 2314.606  | NM_002491 | 1256.646  | 638.79    | U61737    | 9840.595  | 10207.17  |
| D86984    | 2177.097  | 3082.056  | NM_015153 | 6432.447  | 6129.602  | X06389    | 416.548   | 381.729   |
| NM_015955 | 782.216   | 761.79    | AB032966  | 33830.844 | 32988.098 | NM_000033 | 760.685   | 1013.783  |
| AK026904  | 5316.717  | 4188.006  | M26747    | 4821.734  | 3703.682  | NM_014861 | 378.319   | 657.715   |
| NM_003793 | 1296.525  | 2615.411  | NM_014820 | 5834.225  | 4573.993  | NM_005694 | 4976.824  | 4986.441  |
| NM_001910 | 2180.223  | 1336.516  | NM_005035 | 1312.059  | 1278.138  | M91368    | 1071.569  | 983.249   |
| NM_001905 | 5929.849  | 4770.004  | NM_019014 | 3182.359  | 3159.559  | AF224741  | 569.102   | 328.368   |
| AB040886  | 1182.832  | 2752.482  | NM_002097 | 21121.176 | 19354.051 | NM_006594 | 1525.149  | 1101.283  |
| AB029020  | 5192.277  | 5296.957  | NM_018039 | 732.234   | 933.45    | NM_004177 | 1221.042  | 1385.858  |
| AK022759  | 3078.303  | 2403.611  | NM_006494 | 5569.389  | 6421.38   | NM_012425 | 1107.469  | 1127.581  |
| NM_012333 | 12301.773 | 10838.967 | X52343    | 6437.984  | 6296.634  | NM_004871 | 2073.776  | 1849.711  |

|           |           |           |           |           |           |           |           |           |
|-----------|-----------|-----------|-----------|-----------|-----------|-----------|-----------|-----------|
| AF217798  | 4213.411  | 5582.391  | NM_005853 | 2489.161  | 2680.168  | NM_00569E | 5539.153  | 3594.206  |
| AF161472  | 8085.805  | 12887.434 | X99681    | 1311.17   | 1181.168  | AF202146  | 6595.711  | 4551.982  |
| AL133642  | 25055.764 | 37525.035 | NM_017814 | 6862.946  | 2246.734  | NM_00639E | 549.265   | 347.972   |
| AB011154  | 1783      | 2210.909  | AF074996  | 1949.257  | 796.575   | AF275798  | 13050.066 | 17745.875 |
| AF124432  | 4432.675  | 4292.448  | AF131811  | 2940.436  | 3249.199  | NM_005441 | 3946.925  | 4418.39   |
| NM_00633C | 11850.775 | 11111.646 | AF293026  | 11578.305 | 16967.25  | NM_01607E | 5818.587  | 6505.856  |
| NM_01587E | 5897.814  | 5781.402  | AF236158  | 755.606   | 755.305   | AK023108  | 734.112   | 698.502   |
| NM_000377 | 7001.362  | 7995.67   | AF217986  | 3814.568  | 2679.848  | AK026409  | 7004.646  | 6014.25   |
| NM_00681E | 1230.717  | 1260.116  | AK026320  | 1029.824  | 850.767   | AF097025  | 2589.297  | 3090.803  |
| NM_01682E | 3745.996  | 3304.394  | AL137530  | 2383.682  | 2816.208  | Y11339    | 3262.121  | 3764.292  |
| NM_00312C | 2306.196  | 1832.751  | NM_01595E | 7667.946  | 2709.629  | AB030176  | 299.424   | 889.796   |
| X52360    | 4502.887  | 3518.654  | AF147310  | 543.364   | 876.514   | NM_002537 | 3186.694  | 3849.601  |
| NM_00263E | 29323.234 | 19118.574 | AK024775  | 1608.599  | 1181.266  | NM_00313E | 2657.639  | 2714.673  |
| NM_01649A | 36661.406 | 24107.92  | AK025562  | 2123.915  | 2091.709  | NM_01231E | 3946.04   | 4311.465  |
| U09410    | 2197.308  | 1156.178  | AF088024  | 504.847   | 549.174   | NM_00405E | 890.99    | 864.756   |
| NM_02022E | 1259.856  | 317.521   | AK025887  | 1028.909  | 1053.662  | NM_00163A | 16770.303 | 14402.797 |
| NM_00118E | 3302.445  | 2854.056  | AB037719  | 2574.318  | 2629.73   | NM_002267 | 4436.7    | 4793.069  |
| NM_00582E | 25204.406 | 14035.864 | AK024694  | 1265.735  | 1761.49   | NM_00641E | 3534.809  | 3027.994  |
| NM_00459E | 2426.572  | 2129.966  | AK026143  | 2812.494  | 2320.149  | NM_00306E | 3776.932  | 3255.506  |
| NM_015001 | 11296.413 | 9007.077  | AL110252  | 1058.82   | 1264.839  | NM_014041 | 36905.129 | 26560.336 |
| NM_019027 | 1673.856  | 1822.422  | AL050143  | 1496.182  | 1930.612  | NM_00716E | 4477.604  | 3743.357  |
| NM_016107 | 3838.651  | 5048.172  | AL137616  | 1200.371  | 1434.726  | AK024966  | 1353.207  | 1196.481  |
| NM_002567 | 29849.492 | 53208.27  | AK021752  | 873.223   | 430.755   | AF178941  | 6485.012  | 4534.082  |
| NM_00140A | 3379.124  | 3973.027  | AL050012  | 638.96    | 363.476   | NM_01603E | 7397.442  | 7876.918  |
| NM_00160E | 25613.848 | 31784.83  | AL109706  | 11459.17  | 10701.942 | NM_01831E | 719.818   | 830.948   |
| AF225422  | 13948.352 | 14426.911 | AK001118  | 983.847   | 1767.852  | NM_007167 | 1735.927  | 1997.509  |
| AB040960  | 10139.571 | 11008.479 | AF035291  | 61399.859 | 53850.695 | NM_01483E | 2321.299  | 2663.961  |
| NM_01594E | 9763.237  | 10238.422 | AK026291  | 12931.871 | 11750.942 | NM_002477 | 3941.174  | 5569.703  |
| NM_00630E | 6240.322  | 7159.158  | AK021924  | 629.858   | 778.26    | NM_01802E | 1133.121  | 1579.185  |
| AL080059  | 4141.515  | 3162.888  | AL049285  | 1294.035  | 1402.23   | NM_001707 | 13109.481 | 14117.29  |
| AL080219  | 3375.234  | 2162.04   | AL117520  | 1229.697  | 633.201   | NM_01486E | 6427.183  | 6555.808  |
| NM_003001 | 1666.761  | 981.545   | AL049303  | 616.246   | 453.724   | AL442089  | 5071.235  | 5151.968  |
| NM_00198E | 5131.07   | 3158.56   | AL080208  | 751.176   | 458.78    | NM_00120C | 1431.475  | 1704.498  |
| NM_01515E | 5384.598  | 3574.81   | L23851    | 628.254   | 773.969   | AB007964  | 488.282   | 246.778   |
| AB032966  | 22845.865 | 16519.988 | L35592    | 10548.333 | 13040.196 | AF128541  | 5336.372  | 3003.176  |
| M26747    | 4072.377  | 2805.042  | NM_01207E | 1371.079  | 1443.874  | AK026305  | 3191.366  | 2727.688  |
| NM_01482C | 5796.072  | 5500.185  | AL360274  | 19423.752 | 21425.977 | NM_00255E | 3409.226  | 3177.6    |
| NM_00503E | 1398.555  | 2126.979  | AK021858  | 523.642   | 685.378   | NM_014321 | 3474.808  | 2744.845  |
| NM_019014 | 3798.702  | 4735.633  | NM_01405C | 10767.867 | 10245.572 | AK022733  | 757.403   | 426.354   |
| NM_002097 | 24711.523 | 28239.813 | AF085854  | 1118.166  | 966.227   | AB011132  | 4667.324  | 5696.835  |
| X04706    | 5082.974  | 5494.269  | AF074997  | 1160.13   | 1171.972  | NM_02036E | 7475.64   | 6040.359  |
| NM_01803E | 650.276   | 1218.213  | NM_014911 | 473.867   | 401.946   | AB040937  | 764.291   | 769.084   |
| NM_00649A | 8126.983  | 8993.103  | AF009289  | 5943.315  | 2736.013  | NM_00009E | 2090.5    | 2350.18   |
| X52343    | 4528.674  | 4522.874  | AF040247  | 1068.891  | 759.267   | NM_00133E | 1751.541  | 2193.354  |
| NM_00585E | 3657.424  | 4004.154  | AF056439  | 1017.603  | 643.223   | NM_00423E | 2584.292  | 3211.959  |
| X99681    | 914.902   | 1047.156  | AF009303  | 3011.235  | 4975.767  | NM_00154A | 2303.154  | 2682.909  |
| NM_01406E | 900.708   | 596.219   | NM_00447A | 4327.578  | 3004.169  | AB011168  | 1476.559  | 2055.052  |
| NM_017814 | 6002.723  | 4133.776  | AF056449  | 1020.847  | 822.999   | BE794262  | 1552.809  | 1877.022  |
| AF074996  | 1325.446  | 628.947   | AK001033  | 1672.184  | 631.73    | NM_00321E | 5500.78   | 4671.367  |
| AF131811  | 3142.694  | 1647.358  | AK001781  | 291.95    | 231.968   | NM_00638E | 1154.319  | 1030.175  |
| AF293026  | 9976.434  | 6510.334  | AK021463  | 784.471   | 523.988   | NM_004811 | 9201.306  | 8474.96   |
| AF217986  | 4976.87   | 2843.615  | AK021698  | 740.892   | 629.125   | AK021910  | 57089.848 | 44442.184 |
| AK024775  | 2099.099  | 1090.086  | AK001082  | 5415.356  | 4325.718  | M62402    | 1424.912  | 1253.792  |

|           |           |           |           |           |           |           |           |           |
|-----------|-----------|-----------|-----------|-----------|-----------|-----------|-----------|-----------|
| AK025562  | 1737.97   | 1634.417  | AK001871  | 668.166   | 648.332   | NM_00474E | 1545.82   | 1187.022  |
| AF088024  | 745.922   | 797.768   | AK021743  | 9248.051  | 7255      | NM_00266E | 8344.712  | 7324.147  |
| AK025887  | 1492.992  | 1353.564  | AK026699  | 676.217   | 836.101   | NM_01431E | 32418.037 | 23302.643 |
| AB037719  | 2059.009  | 2446.963  | AK025589  | 2387.389  | 2285.577  | NM_004054 | 2707.571  | 1506.574  |
| AK024694  | 1354.718  | 2051.777  | AK026734  | 619.876   | 696.459   | NM_00113E | 2385.32   | 1959.517  |
| AK026143  | 2930.649  | 2417.601  | NM_016633 | 42999.805 | 41863.43  | NM_00421E | 50040.688 | 53688.301 |
| AL110252  | 1484.858  | 1422.51   | AK023250  | 5201.397  | 2473.787  | NM_00344E | 26130.367 | 25009.133 |
| AL050143  | 1563.919  | 1672.038  | AK024882  | 2376.479  | 880.396   | NM_00202E | 2049.662  | 2190.7    |
| AL137616  | 1851.289  | 1157.918  | NM_014062 | 10184.033 | 3761.462  | AB015228  | 11158.666 | 12762.754 |
| AK021752  | 1352.753  | 552.672   | NM_006304 | 65168.277 | 47366.531 | AL049685  | 788.371   | 1118.568  |
| AL050012  | 1056.793  | 851.394   | AF293367  | 2598.123  | 2013.356  | AK026800  | 2044.88   | 2303.174  |
| AL109706  | 9714.953  | 5598.678  | AF086231  | 3055.797  | 2760.086  | NM_00144E | 588.999   | 911.335   |
| AK001118  | 1155.982  | 609.284   | AK001494  | 1798.329  | 873.158   | NM_01777E | 2364.738  | 3031.908  |
| AF035291  | 59764.738 | 43441.016 | AL133438  | 2213.783  | 1186.886  | AK025947  | 2087.042  | 2738.679  |
| AK026291  | 15280.273 | 9041.302  | AK022310  | 709.03    | 793.513   | AF217973  | 1188.386  | 1672.723  |
| AL080208  | 735.772   | 956.4     | AK021784  | 585.213   | 1178.671  | NM_00703E | 10204.214 | 11239.112 |
| L35592    | 9679.66   | 8253.979  | AF230800  | 1715.133  | 1501.014  | AF226048  | 5269.518  | 5796.467  |
| NM_01207E | 1619.933  | 1419.059  | NM_01852C | 2060.607  | 1758.038  | NM_00557E | 4881.893  | 3904.23   |
| AL360274  | 24513.885 | 25174.609 | AK026647  | 874.646   | 1287.19   | D50918    | 14061.793 | 10488.432 |
| NM_01405C | 12057.913 | 13173.425 | AK022152  | 1307.473  | 1610.361  | U48734    | 5589.642  | 4684.238  |
| AF085854  | 1066.869  | 1486.509  | AK057143  | 10787.71  | 13738.968 | NM_00640C | 9043.767  | 11299.262 |
| AF074997  | 934.866   | 1421.798  | NM_015594 | 24200.965 | 15136.785 | NM_00390E | 2506.273  | 2026.447  |
| AK027027  | 1237.025  | 732.071   | AF056423  | 3054.16   | 1395.169  | NM_01795E | 2806.207  | 1948.382  |
| NM_014911 | 1327.986  | 935.427   | X04293    | 627.555   | 419.968   | NM_01606C | 4702.35   | 3897.351  |
| AF009289  | 5708.487  | 4117.372  | AK026475  | 976.095   | 800.44    | NM_00220E | 12509.795 | 9200.743  |
| AF040247  | 1239.096  | 858.104   | K01884    | 895.226   | 1170.545  | NM_000944 | 617.966   | 325.97    |
| AF056439  | 1294.7    | 880.48    | U00962    | 19177.959 | 11741.457 | NM_01226E | 592.98    | 735.293   |
| AF009303  | 3000.356  | 2399.954  | NM_000522 | 710.363   | 293.245   | NM_01339C | 1166.356  | 1132.092  |
| AK001082  | 3246.875  | 2576.649  | AK026130  | 31867.715 | 21490.939 | NM_00282E | 832.027   | 881.216   |
| AK001871  | 725.455   | 555.385   | NM_01248C | 6658.011  | 5177.979  | J02783    | 12568.243 | 16615.994 |
| AK021743  | 4451.498  | 3960.931  | AK024144  | 9090.237  | 6146.767  | NM_005317 | 829.771   | 967.575   |
| AK026251  | 1625.549  | 2252.901  | Y08959    | 1548.783  | 1514.014  | U12597    | 1401.734  | 1566.507  |
| AK026699  | 1167.054  | 1299.418  | NM_00534E | 25127.861 | 20700.111 | AB044343  | 4018.028  | 3559.655  |
| AK025182  | 173.626   | 961.335   | NM_00534E | 30527.764 | 30625.65  | NM_00517E | 6257.62   | 3894.769  |
| AK025589  | 5306.222  | 8726.478  | AB032985  | 760.419   | 740.564   | NM_01770E | 6022.124  | 5104.9    |
| AK026734  | 984.331   | 943.22    | AF196865  | 1949.271  | 1969.652  | AB014516  | 3508.787  | 2096.892  |
| NM_01663E | 45427.867 | 33620.238 | AJ008114  | 55645.273 | 49618.855 | Z83950    | 1345.182  | 1190.106  |
| AK023250  | 6957.127  | 4574.938  | AJ008141  | 634.538   | 1078.638  | AL080063  | 1718.182  | 972.197   |
| AK024882  | 2519.54   | 2071.555  | AF147432  | 3138.944  | 3116.46   | NM_00562E | 6635.497  | 5523.839  |
| NM_01406E | 10265.229 | 7267.906  | AK024690  | 829.852   | 1033.093  | AB040918  | 738.145   | 499.167   |
| NM_006304 | 59624.902 | 49993.637 | AK021893  | 2690.667  | 4269.176  | NM_01585E | 1102.357  | 979.607   |
| X74804    | 965.897   | 660.469   | NM_00104E | 6210.353  | 3651.295  | X60152    | 479.54    | 483.112   |
| AF293367  | 3177.196  | 2555.774  | AK026497  | 2541.652  | 814.383   | AB023232  | 723.053   | 1030.063  |
| AF086231  | 4180.78   | 2986.793  | BE958139  | 1174.705  | 516.067   | NM_00250E | 1296.517  | 1547.194  |
| AK022310  | 2154.55   | 2102.867  | AF085359  | 713.984   | 454.703   | AF226732  | 2669.172  | 2457.088  |
| AK021784  | 1416.125  | 1431.533  | AF086516  | 963.654   | 852.445   | NM_00631E | 3374.899  | 3306.794  |
| AF230800  | 2270.587  | 2715.049  | D86978    | 8946.008  | 11901.731 | NM_00293E | 7518.313  | 6069.569  |
| NM_01852C | 2345.994  | 2823.24   | AL080060  | 13942.632 | 8795.887  | NM_01583E | 20608.791 | 17230.031 |
| AK026647  | 978.01    | 1045.091  | NM_005267 | 5406.125  | 2559.132  | NM_00471E | 913.603   | 405.18    |
| AK022152  | 1077.436  | 1063.122  | AF086017  | 827.484   | 690.804   | NM_00097E | 54781.887 | 52595.824 |
| NM_003534 | 40045.633 | 27714.076 | AK024978  | 16910.125 | 12000.897 | NM_01418E | 24581.016 | 21598.291 |
| L08437    | 3525.715  | 2324.764  | U12897    | 3181.148  | 3091.946  | AK026365  | 774.853   | 871.052   |
| AK057143  | 8572.882  | 6877.602  | AJ227894  | 630.993   | 568.067   | NM_017567 | 3882.705  | 3684.175  |

|           |           |           |           |           |           |           |           |           |
|-----------|-----------|-----------|-----------|-----------|-----------|-----------|-----------|-----------|
| NM_015594 | 28863.264 | 16057.626 | NM_020357 | 15584.342 | 14414.061 | NM_000691 | 1343.468  | 1977.792  |
| AF056423  | 2774.514  | 2117.195  | AK026836  | 1791.656  | 1704.052  | D86971    | 7142.597  | 4721.238  |
| X04293    | 900.415   | 516.869   | T59562    | 24426.631 | 27759.857 | NM_003073 | 5887.078  | 4941.285  |
| AK026475  | 1011.519  | 499.776   | NM_018219 | 2828.583  | 2931.578  | NM_014048 | 484.381   | 375.674   |
| K01884    | 985.872   | 852.321   | NM_014114 | 2243.413  | 3230.741  | AF274863  | 1319.771  | 446.085   |
| U00962    | 23188.008 | 22065.686 | U62822    | 5295.24   | 3910.563  | AF024697  | 1765.179  | 1223.277  |
| AK026130  | 32695.533 | 25783.939 | CY3Cy5    | 9669.901  | 393.161   | AF161414  | 2045.801  | 2375.933  |
| NM_012480 | 7285.473  | 4418.94   | AA220921  | 5520.921  | 6501.697  | AK025967  | 629.011   | 642.525   |
| AK024144  | 10522.189 | 8186.819  | N67770    | 1106.789  | 1344.392  | AL110177  | 942.568   | 821.619   |
| Y08959    | 1542.844  | 1624.255  | AA486200  | 65612.117 | 56249.617 | NM_002763 | 9934.222  | 6803.55   |
| NM_005346 | 17603.896 | 15204.042 | U90065    | 4029.123  | 3358.636  | NM_015434 | 1557.472  | 988.048   |
| NM_005343 | 29076.051 | 30737.412 | AJ005898  | 4257.923  | 5247.59   | NM_014055 | 1489.497  | 1021.362  |
| AB032985  | 1918.884  | 1717.397  | X57303    | 7138.788  | 9473.148  | NM_018691 | 1055.436  | 553.417   |
| AF116698  | 1301.376  | 1153.281  | AA463224  | 1727.614  | 2255.271  | AK026900  | 2978.344  | 2646.09   |
| AF196865  | 2073.199  | 2681.215  | BG248802  | 8816.562  | 9906.487  | AK025020  | 3270.788  | 5446.316  |
| AJ008114  | 59420.395 | 52997.938 | L19605    | 2356.76   | 3458.451  | AK024598  | 1420.864  | 1460.033  |
| AJ008141  | 331.186   | 1257.918  | AA876532  | 11968.201 | 14840.746 | AF087983  | 846.061   | 695.925   |
| AF147432  | 4638.806  | 5103.326  | S74349    | 1339.058  | 1403.938  | NM_020234 | 3254.956  | 2722.694  |
| AK024690  | 1133.928  | 1040.182  | X07979    | 35068.324 | 46902.598 | Z36825    | 1184.045  | 1044.423  |
| BC005946  | 52616.715 | 43225.449 | BG744224  | 18613.504 | 29910.277 | AF086157  | 2092.3    | 1026.088  |
| AK021893  | 2864.874  | 1702.663  | NM_006079 | 2530.369  | 2666.965  | AK023286  | 1128.458  | 1027.797  |
| NM_001048 | 5722.112  | 3819.942  | NM_006696 | 3794.406  | 4510.547  | AK026340  | 503.024   | 354.021   |
| AK026497  | 2590.608  | 1887.667  | SR5       | 5932.976  | 6877.757  | AK022686  | 3419.967  | 2118.381  |
| BE958139  | 1604.766  | 1106.891  | SR7       | 6112.135  | 44082.031 | AK023516  | 3601.092  | 1790.657  |
| AF085359  | 779.696   | 616.613   | SR9       | 19888.717 | 4505.036  | AK023864  | 2581.513  | 1886.762  |
| AF086516  | 2135.215  | 1633.224  | CY3Cy5    | 12090.68  | 666.561   | AK023017  | 3657.981  | 4995.52   |
| D86978    | 7903.033  | 7908.733  | AK002163  | 4000.02   | 4223.237  | AK023908  | 1971.221  | 2120.891  |
| AL080060  | 8520.417  | 6058.604  | NM_002287 | 6271.732  | 6510.651  | AK024236  | 536.07    | 350.142   |
| NM_005267 | 3721.791  | 3370.647  | NM_012344 | 2804.466  | 3280.677  | Z24724    | 1114.153  | 1578.428  |
| AF086017  | 1228.636  | 882.923   | NM_002351 | 28283.047 | 43181.691 | AK022712  | 2032.151  | 2060.534  |
| AK024978  | 11015.251 | 9189.992  | NM_014385 | 2451.65   | 2983.77   | AK021863  | 2862.227  | 2931.526  |
| U12897    | 3247.647  | 3062.765  | NM_001704 | 1475.195  | 1541.896  | AL137734  | 780.075   | 435.494   |
| AJ227894  | 878.082   | 874.558   | AB036432  | 11767.881 | 15786.284 | AK026323  | 1410.035  | 744.288   |
| NM_020357 | 15053.612 | 11985.737 | NM_014872 | 4647.638  | 6507.442  | NM_003493 | 39819.66  | 31064.184 |
| AK026836  | 2275.911  | 1919.064  | NM_003643 | 490.341   | 988.758   | AL133430  | 4304.192  | 3295.272  |
| T59562    | 26206.977 | 21463.209 | NM_003480 | 1577.066  | 2720.85   | AF070633  | 9006.896  | 7130.916  |
| NM_018219 | 3205.425  | 2857.763  | NM_000899 | 822.793   | 1532.5    | AF090098  | 1191.321  | 1028.91   |
| NM_014114 | 3331.485  | 4030.52   | NM_032951 | 4539.53   | 5762.199  | AF146694  | 2141.653  | 1897.071  |
| U62822    | 5701.223  | 4633.973  | NM_000503 | 7320.666  | 9146.559  | AK057104  | 1179.66   | 1251.853  |
| CY3Cy5    | 9911.014  | 569.542   | NM_002405 | 10698.404 | 12441.206 | AF233648  | 1394.351  | 1380.273  |
| U36798    | 778.702   | 1216.555  | AK000004  | 1898.191  | 2483.436  | NM_018584 | 1439.347  | 996.936   |
| AA220921  | 10437.335 | 17380.422 | NM_012421 | 17113.133 | 21468.996 | AY007126  | 5993.547  | 3886.876  |
| N67770    | 1722.86   | 2945.097  | AB014601  | 1482.477  | 1166.843  | AF085951  | 2590.773  | 1678.219  |
| U90065    | 4968.965  | 7283.712  | NM_000023 | 4694.669  | 5148.363  | AF131787  | 585.66    | 592.523   |
| AJ005898  | 5781.242  | 6853.946  | AF022654  | 558.267   | 652.4     | AF087989  | 711.945   | 739.008   |
| X57303    | 8129.932  | 9550.327  | NM_001143 | 740.27    | 1067.792  | U80771    | 4419.84   | 4570.75   |
| AA463224  | 1765.022  | 1946.176  | AK022638  | 4484.779  | 4416.733  | AJ272173  | 9264.733  | 6784.333  |
| BG248802  | 10895.569 | 8719.609  | BG698409  | 2047.17   | 2605.899  | Y17180    | 55923.117 | 60501.266 |
| L19605    | 3058.718  | 4809.696  | NM_006594 | 2681.836  | 3205.799  | NM_005649 | 994.804   | 748.309   |
| AA876532  | 14566.479 | 16987.467 | NM_004177 | 2088.187  | 2199.517  | AK025862  | 10457.853 | 8127.19   |
| S74349    | 1499.933  | 1417.854  | NM_012429 | 1633.587  | 1719.296  | AK026495  | 1092.125  | 777.697   |
| X07979    | 57291.273 | 48132.074 | NM_004871 | 2822.927  | 3457.927  | AK025052  | 1746.552  | 1442.997  |
| BG744224  | 22609.178 | 23768.588 | NM_005698 | 8202.83   | 9516.313  | NM_014388 | 882.141   | 514.847   |

|           |           |           |           |           |           |           |           |           |
|-----------|-----------|-----------|-----------|-----------|-----------|-----------|-----------|-----------|
| NM_006079 | 3453.215  | 4336.065  | AF202146  | 11507.027 | 14187.646 | U85044    | 621.256   | 376.77    |
| NM_006696 | 5463.426  | 6433.423  | NM_006393 | 1651.622  | 2485.998  | BC018880  | 423.11    | 299.104   |
| SR5       | 11696.125 | 10915.669 | NM_014923 | 1227.751  | 1712.919  | AF086090  | 1399.505  | 1690.006  |
| SR7       | 8962.245  | 53727.637 | NM_005477 | 6885.702  | 8675.336  | NM_020188 | 15641.819 | 18023.369 |
| SR9       | 37232.645 | 8217.312  | NM_004318 | 1109.625  | 1142.473  | U88897    | 5723.358  | 3304.641  |
| CY3Cy5    | 11837.972 | 584.621   | NM_002640 | 3925.128  | 4086.786  | CY3Cy5    | 2907.71   | 210.596   |
| AK002163  | 5939.02   | 8399.533  | M15530    | 5575.449  | 5190.252  | U37448    | 1957.435  | 5151.695  |
| NM_002287 | 9176.984  | 11677.218 | NM_001877 | 790.838   | 1349.349  | BG435851  | 419.216   | 1197.659  |
| NM_012344 | 3854.991  | 5419.636  | NM_014207 | 7710.224  | 10723.882 | AA927698  | 2208.456  | 3837.377  |
| NM_014385 | 3128.664  | 4234.259  | NM_004059 | 628.743   | 612.48    | AI498426  | 618.552   | 1602.714  |
| NM_001704 | 972.441   | 972.269   | NM_001634 | 19289.504 | 18269.193 | D01038    | 15469.168 | 31595.621 |
| AB036432  | 10018.285 | 9054.284  | NM_002267 | 8481.932  | 8765.767  | AB019205  | 918.725   | 1626.631  |
| NM_014872 | 5983.56   | 7531.784  | NM_006412 | 4822.359  | 5248.772  | J05008    | 1306.242  | 1377.585  |
| NM_003480 | 2153.712  | 2075.634  | NM_003063 | 6208.797  | 6361.521  | U11087    | 548.835   | 1129.96   |
| NM_000899 | 960.684   | 1090.304  | NM_014041 | 43823.168 | 53401.441 | D50640    | 1509.987  | 2967.3    |
| NM_032951 | 5402.778  | 5735.687  | NM_007169 | 6851.074  | 7428.875  | M98776    | 3394.276  | 8020.723  |
| NM_000503 | 13346.43  | 10160.051 | NM_014313 | 647.284   | 897.489   | AF009744  | 1074.744  | 2515.029  |
| NM_002405 | 15078.54  | 18217.367 | AK024966  | 3979.686  | 4643.811  | NM_172140 | 2694.623  | 5898.1    |
| AK000004  | 2959.702  | 4053.238  | NM_016033 | 9890.703  | 11797.22  | SR6       | 1656.373  | 3020.082  |
| NM_012421 | 28425.559 | 36979.73  | NM_017585 | 6493.397  | 8943.333  | SR8       | 6016.215  | 38801.195 |
| AB014601  | 1478.004  | 1532.427  | U61737    | 32460.072 | 44722.965 | SR10      | 17533.652 | 8187.351  |
| AK001393  | 12332.741 | 13796.348 | X06389    | 1083.173  | 1444.767  | CY3Cy5    | 1306.793  | 90.287    |
| NM_000023 | 5580.309  | 6060.224  | NM_000033 | 1505.888  | 1750.545  | NM_005311 | 405.22    | 564.8     |
| AF022654  | 948.027   | 1055.507  | NM_014861 | 693.589   | 684.927   | NM_005905 | 1913.972  | 1941.745  |
| NM_001143 | 1146.293  | 1248.512  | NM_012434 | 475.978   | 631.483   | NM_016235 | 490.413   | 1506.169  |
| NM_003282 | 589.554   | 891.576   | NM_005694 | 6670.67   | 8074.625  | NM_000960 | 459.138   | 1297.529  |
| AK022638  | 11001.042 | 12632.021 | NM_014868 | 9075.248  | 10011.967 | AF172932  | 567.886   | 1341.613  |
| BG698409  | 2893.19   | 3541.855  | AL442089  | 9543.567  | 12045.766 | NM_005359 | 312.166   | 517.685   |
| M91368    | 559.178   | 759.581   | NM_001200 | 1392.559  | 1378.975  | NM_002511 | 1123.689  | 1571.503  |
| AF224741  | 547.371   | 1259.835  | AB007964  | 723.358   | 1166.568  | AF295378  | 2780.604  | 3291.133  |
| NM_006594 | 2132.908  | 2398.785  | AF128541  | 7357.561  | 8996.463  | AF320908  | 1271.929  | 966.018   |
| NM_004177 | 1894.808  | 2139.053  | AK026305  | 6760.214  | 7034.076  | NM_004085 | 4317.24   | 3450.603  |
| NM_012429 | 2010.629  | 2375.978  | NM_002552 | 5703.121  | 6389.03   | NM_012445 | 16342.401 | 16317.169 |
| NM_004871 | 3256.378  | 3662.473  | NM_014321 | 7418.829  | 7892.234  | NM_018104 | 1790.769  | 1567.342  |
| NM_005698 | 8850.898  | 9163.802  | AK022733  | 1442.283  | 1653.604  | NM_006080 | 351.166   | 743.869   |
| AF202146  | 12784.455 | 5111.049  | AB011132  | 7843.694  | 11032.762 | U64564    | 1119.714  | 2218.975  |
| NM_006393 | 1431.375  | 1333.487  | AB040937  | 1713.263  | 2263.037  | NM_006470 | 1150.813  | 2664.875  |
| NM_014923 | 1136.454  | 1297.435  | AF275798  | 22813.938 | 26621.021 | NM_002855 | 3753.06   | 7115.741  |
| NM_005477 | 10897.267 | 10592.876 | NM_005441 | 9032.932  | 8595.193  | AB038463  | 813.434   | 1754.49   |
| NM_007018 | 775.047   | 1015.321  | NM_016079 | 14143.563 | 16079.452 | M30262    | 1300.14   | 3495.061  |
| NM_004318 | 1391.189  | 1609.79   | AK023108  | 2885.393  | 3483.104  | NM_005460 | 411.792   | 1074.28   |
| L09089    | 548.069   | 650.356   | AK026409  | 24783.051 | 34081.344 | AF160477  | 1709.296  | 2113.735  |
| NM_002640 | 6303.265  | 6495.039  | AF097025  | 10401.577 | 11508.946 | M12883    | 4529.462  | 5429.521  |
| X03084    | 487.323   | 707.125   | Y11339    | 6945.995  | 7067.279  | BG288747  | 4663.511  | 11240.481 |
| M15530    | 8735.81   | 9957.515  | AB030176  | 758.157   | 1162.978  | AI524814  | 1624.43   | 2149.655  |
| NM_001877 | 1454.162  | 1994.258  | NM_002537 | 7948.213  | 7154.508  | AB024411  | 1426.93   | 1131.128  |
| NM_014207 | 14975.699 | 15314.204 | NM_003139 | 5782.926  | 5447.044  | NM_002444 | 14202.117 | 18170.297 |
| NM_004059 | 552.336   | 446.248   | NM_012316 | 5451.702  | 5011.76   | NM_001104 | 864.899   | 584.12    |
| NM_001634 | 25867.344 | 36323.512 | AF022654  | 524.632   | 776.674   | NM_002989 | 2331.942  | 1060.147  |
| NM_002267 | 7054.685  | 8542.783  | NM_001143 | 899.522   | 1226.67   | U88898    | 5422.312  | 5847.748  |
| NM_006412 | 6573.175  | 10219.286 | AK022638  | 4978.987  | 4641.998  | NM_020154 | 20987.385 | 19168.271 |
| NM_003063 | 8152.981  | 10870.39  | BG698409  | 2380.921  | 2908.539  | NM_004665 | 952.523   | 925.809   |
| NM_014041 | 49796.988 | 62528.707 | AA220921  | 5403.979  | 8776.897  | NM_005300 | 634.544   | 831.999   |

|           |           |           |           |           |           |           |           |           |
|-----------|-----------|-----------|-----------|-----------|-----------|-----------|-----------|-----------|
| NM_007169 | 6162.993  | 6747.764  | N67770    | 943.305   | 1357.443  | NM_000893 | 575.477   | 706.562   |
| NM_014313 | 704.497   | 1133.809  | AA486200  | 64395.793 | 56807.395 | NM_000698 | 20102.543 | 19193.541 |
| AK024966  | 3295.779  | 1760.213  | U90065    | 4032.851  | 3563.648  | AF031167  | 741.159   | 741.694   |
| AF178941  | 23419.848 | 18128.48  | AJ005898  | 3324.199  | 4422.664  | NM_003204 | 1360.962  | 1079.493  |
| NM_016033 | 12236.045 | 12722.88  | X57303    | 6402.153  | 8849.81   | AF254069  | 622.006   | 660.342   |
| NM_017585 | 16750.854 | 15360.689 | AA463224  | 1285.006  | 2028.969  | AL117600  | 7346.547  | 7173.884  |
| U61737    | 52247.758 | 53512.539 | BG248802  | 7245.563  | 9618.583  | NM_001712 | 522.213   | 811.853   |
| X06389    | 1622.782  | 1646.545  | L19605    | 2069.577  | 2534.686  | NM_004487 | 10131.585 | 14941.609 |
| NM_000033 | 3243.427  | 2893.628  | AA876532  | 9773.663  | 10101.267 | AB029000  | 3748.481  | 6597.433  |
| NM_014861 | 1300.414  | 1430.011  | S74349    | 906.104   | 1118.559  | AK026965  | 4469.706  | 6254.877  |
| NM_012434 | 739.704   | 816.064   | X07979    | 28669.951 | 40090.285 | AK025859  | 2983.705  | 5020.569  |
| NM_005694 | 12931.226 | 14464.709 | BG744224  | 17596.75  | 22164.795 | AL117499  | 7992.669  | 13563.32  |
| AK022983  | 704.452   | 353.877   | NM_006079 | 2302.588  | 2213.65   | NM_007054 | 1176.479  | 1662.284  |
| NM_014868 | 10708.239 | 11063.381 | NM_006696 | 3214.981  | 4280.07   | AK000160  | 2699.219  | 7246.18   |
| AL442089  | 8824.607  | 12798.71  | NM_018026 | 2624.606  | 3218.301  | NM_006032 | 2753.381  | 2327.641  |
| NM_001200 | 1599.398  | 2631.927  | NM_001707 | 11036.009 | 13914.391 | NM_014788 | 1388.341  | 1766.293  |
| AB007964  | 1034.111  | 1749.606  | NM_000949 | 164.205   | 1728.28   | NM_002153 | 697.743   | 770.764   |
| AF128541  | 10067.903 | 13354.481 | M15530    | 5907.168  | 7440.512  | AB040890  | 2444.379  | 2790.588  |
| AK026305  | 4809.555  | 5677.052  | NM_001877 | 978.617   | 1265.177  | AK024233  | 686.396   | 813.376   |
| NM_002552 | 5793.274  | 6990.188  | NM_014207 | 7498.06   | 9297.037  | AK021870  | 735.494   | 424.47    |
| NM_014321 | 5999.56   | 5995.021  | AK002163  | 3672.971  | 4046.245  | U06680    | 477.788   | 515.957   |
| AK022733  | 1874.596  | 783.562   | NM_002287 | 5419.896  | 6563.007  | NM_015584 | 4835.576  | 4130.995  |
| AB011132  | 9207.566  | 6915.444  | NM_012344 | 2387.256  | 2494.174  | NM_016098 | 9508.39   | 7285.188  |
| NM_020362 | 14432.029 | 13065.037 | NM_002351 | 27941.055 | 32254.383 | NM_000815 | 731.199   | 516.475   |
| AB040937  | 1456.965  | 1526.666  | NM_014385 | 2446.182  | 3159.155  | AB023173  | 3361.376  | 2237.831  |
| AF275798  | 30116.676 | 32066.76  | NM_001704 | 1710.832  | 1572.548  | AF156548  | 2548.045  | 1794.236  |
| NM_005441 | 12803.872 | 14409.866 | AB036432  | 10893.806 | 16228.573 | NM_000387 | 7993.712  | 6976.269  |
| NM_016079 | 18790.303 | 21926.045 | NM_014872 | 4448.046  | 7473.475  | NM_004663 | 1122.562  | 1840.698  |
| AK023108  | 3354.875  | 4079.136  | NM_003643 | 423.616   | 611.513   | NM_015310 | 509.406   | 942.674   |
| AK026409  | 33808.984 | 38543.188 | NM_003480 | 1393.79   | 1661.334  | NM_016154 | 8749.549  | 12337.765 |
| AF097025  | 14652.404 | 16913.775 | NM_000899 | 726.492   | 731.274   | NM_005013 | 52203.73  | 53836.746 |
| Y11339    | 10264.443 | 11438.163 | NM_032951 | 3038.905  | 3963.692  | AB002338  | 1090.861  | 2626.244  |
| AB030176  | 1158.032  | 1781.419  | NM_000503 | 5627.966  | 6517.271  | NM_001072 | 921.13    | 1129.513  |
| NM_003937 | 627.436   | 775.261   | NM_002405 | 9197.373  | 9967.126  | NM_014070 | 513.242   | 400.706   |
| NM_002537 | 13593.913 | 14602.321 | AK000004  | 1390.695  | 1808.75   | NM_016027 | 552.01    | 679.719   |
| NM_003139 | 9756.215  | 10634.173 | NM_012421 | 13201.346 | 15935.333 | NM_014297 | 4723.117  | 3260.968  |
| NM_012316 | 8718.314  | 9472.938  | AB014601  | 1355.607  | 2023.175  | NM_018156 | 6382.348  | 5303.36   |
| NM_001143 | 1511.096  | 714.546   | AK001393  | 6043.618  | 6641.511  | X98266    | 787.092   | 638.047   |
| AK022638  | 9780.711  | 16453.828 | NM_000023 | 4231.04   | 4552.558  | U00930    | 6283.943  | 4849.988  |
| BG698409  | 2884.494  | 4128.037  | NM_005694 | 7341.731  | 7511.161  | AK024958  | 347.08    | 294.011   |
| U36798    | 448.701   | 1150.618  | M91368    | 719.39    | 640.157   | NM_002439 | 2181.803  | 2339.599  |
| AA220921  | 8258.247  | 13366.107 | AF224741  | 350.54    | 774.424   | AL117552  | 831.284   | 850.613   |
| N67770    | 870.868   | 1405.443  | NM_006594 | 2163.141  | 2761.077  | NM_002692 | 5109.036  | 3581.488  |
| AA486200  | 61499.203 | 60893.758 | NM_004177 | 2157.25   | 1796.569  | NM_007064 | 553.851   | 279.39    |
| U90065    | 4008.023  | 2989.569  | NM_012429 | 1338.423  | 1816.511  | NM_006281 | 864.629   | 716.434   |
| AJ005898  | 3783.991  | 1915.158  | NM_004871 | 2693.947  | 3901.188  | NM_002738 | 4482.782  | 2976.78   |
| X57303    | 8307.087  | 6130.444  | NM_005698 | 8259.02   | 7917.426  | U23460    | 18314.645 | 10907.782 |
| AA463224  | 1788.977  | 1871.87   | AF202146  | 8313.209  | 8106.561  | NM_005356 | 19865.359 | 13029.012 |
| BG248802  | 11172.119 | 9952.239  | NM_006393 | 568.643   | 1282.124  | Z25434    | 1841.598  | 955.514   |
| L19605    | 2633.182  | 2393.668  | NM_014923 | 791.242   | 1352.55   | NM_005884 | 7396.608  | 9353.838  |
| AA876532  | 14278.396 | 15933.495 | NM_005477 | 5331.645  | 6198.937  | NM_012399 | 5571.752  | 5412.577  |
| S74349    | 1492.145  | 1724.946  | NM_004318 | 866.893   | 978.851   | AF229804  | 15486.454 | 17368.035 |
| X07979    | 52566.453 | 57756.359 | NM_002640 | 3411.502  | 4204.421  | AF151638  | 853.28    | 791.14    |



|           |           |           |           |           |           |           |           |           |
|-----------|-----------|-----------|-----------|-----------|-----------|-----------|-----------|-----------|
| BG744224  | 20411.355 | 26443.232 | Y11339    | 8670.153  | 7399.245  | U90552    | 5205.882  | 12935.857 |
| NM_006079 | 3564.436  | 5236.71   | AB030176  | 928.187   | 1163.649  | NM_00546C | 335.664   | 718.266   |
| NM_018026 | 5341.828  | 5704.459  | NM_002537 | 10008.293 | 9860.749  | AF160477  | 1380.24   | 1856.085  |
| NM_001707 | 24766.936 | 25219.533 | NM_003139 | 5921.285  | 6476.253  | M12883    | 3383.897  | 3948.406  |
| M15530    | 7372.709  | 8479.087  | NM_012316 | 6421.195  | 6623.531  | BG288747  | 3189.307  | 3641.989  |
| NM_001877 | 1200.084  | 1435.958  | NM_004059 | 349.186   | 750.681   | U37448    | 1277.784  | 1291.832  |
| NM_014207 | 11690.095 | 17545.502 | NM_001634 | 18545.434 | 17250.32  | AA927698  | 1205.691  | 928.049   |
| AK002163  | 5537.207  | 5989.321  | NM_002267 | 8549.521  | 8015.656  | AI498426  | 437.631   | 373.187   |
| NM_002287 | 7729.712  | 6247.675  | NM_006412 | 4260.023  | 5932.667  | D01038    | 12228.11  | 13524.649 |
| NM_012344 | 2474.089  | 1385.428  | NM_003063 | 6539.044  | 7935.103  | AB019205  | 681.63    | 466.179   |
| NM_002351 | 32022.852 | 20601.625 | NM_014041 | 44594.48  | 51949.297 | J05008    | 790.197   | 602.552   |
| NM_014385 | 2508.552  | 2358.428  | NM_007169 | 6063.747  | 7021.54   | U11087    | 581.027   | 407.504   |
| NM_001704 | 876.675   | 1019.877  | NM_014313 | 704.84    | 784.26    | D50640    | 1315.154  | 988.996   |
| AB036432  | 10557.527 | 8908.268  | AK024966  | 2610.07   | 2564.714  | M98776    | 2239.689  | 1416.553  |
| NM_014872 | 6026.868  | 6228.259  | AF178941  | 11581.934 | 13733.089 | X99135    | 43760.469 | 20166.75  |
| NM_003643 | 602.306   | 703.359   | NM_016033 | 8364.451  | 8439.103  | AF009744  | 1011.71   | 358.915   |
| NM_003480 | 2257.305  | 2345.531  | NM_017585 | 10975.319 | 13652.408 | NM_17214C | 1862.651  | 1017.08   |
| NM_000899 | 1046.592  | 1130.051  | U61737    | 32378.092 | 44579.301 | AK026965  | 5188.521  | 4953.954  |
| NM_032951 | 5349.979  | 6813.163  | X06389    | 911.375   | 1545.657  | AK025859  | 2355.012  | 2496.855  |
| NM_000503 | 12569.871 | 11792.471 | NM_000033 | 1649.493  | 2309.883  | AL117499  | 7524.283  | 9876.858  |
| NM_002405 | 14947.882 | 18473.643 | NM_006079 | 2801.852  | 2175.511  | NM_007054 | 937.392   | 926.125   |
| NM_012421 | 26623.359 | 32656.52  | NM_006696 | 4279.869  | 4536.434  | AB007957  | 609.831   | 827.736   |
| AB014601  | 1845.717  | 2269.278  | NM_018026 | 3916.905  | 4281.295  | AK000160  | 1522.643  | 1238.995  |
| AK001393  | 14113.935 | 15323.333 | NM_001707 | 18992.01  | 24325.848 | NM_005311 | 463.689   | 519.578   |
| NM_000023 | 7901.235  | 7727.97   | AK022983  | 450.095   | 938.307   | NM_005905 | 1340.301  | 735.146   |
| NM_005694 | 8778.842  | 5435.596  | NM_014868 | 9893.849  | 11064.719 | AF172932  | 393.567   | 574.9     |
| M91368    | 822.536   | 528.158   | AL442089  | 12915.722 | 14450.433 | NM_002511 | 923.649   | 728.198   |
| AF224741  | 1099.078  | 386.239   | NM_001200 | 1254.879  | 1385.058  | AF295378  | 2573.376  | 1490.341  |
| NM_006594 | 2114.55   | 1442.819  | AB007964  | 616.595   | 1310.539  | AF320908  | 1257.066  | 691.008   |
| NM_004177 | 1861.538  | 1530.575  | AF128541  | 8633.894  | 10973.652 | NM_004085 | 3779.186  | 2790.604  |
| NM_012429 | 1761.64   | 1556.528  | AK026305  | 7100.673  | 8184.473  | NM_012445 | 13350.595 | 9669.355  |
| NM_004871 | 2877.837  | 3250.378  | NM_002552 | 6046.852  | 7096.347  | NM_018104 | 1247.728  | 603.234   |
| NM_005698 | 10403.966 | 11066.142 | NM_014321 | 6929.555  | 7113.785  | NM_004429 | 2738.165  | 1615.795  |
| AF202146  | 13342.366 | 10565.03  | AK022733  | 1348.804  | 1560.615  | U64564    | 743.778   | 753.905   |
| NM_006393 | 1185.853  | 1500.474  | AB011132  | 6907.478  | 6847.828  | NM_00647C | 718.792   | 1539.137  |
| NM_014923 | 1422.715  | 1693.881  | NM_020362 | 9332.224  | 9108.348  | NM_002855 | 2464.97   | 5437.163  |
| NM_005477 | 12637.876 | 13122.234 | AB040937  | 1071.415  | 1070.622  | NM_000387 | 8804.271  | 9428.358  |
| NM_007018 | 550.606   | 1307.316  | AF275798  | 21129.723 | 20904.098 | NM_004663 | 852.679   | 1266.945  |
| NM_004318 | 1407.891  | 1689.721  | NM_005441 | 8533.023  | 8773.64   | NM_01531C | 470.399   | 552.418   |
| L09089    | 506.643   | 795.206   | NM_016079 | 16178.601 | 18258.672 | NM_016154 | 8834.061  | 10266.746 |
| NM_00264C | 5808.081  | 6658.055  | AK023108  | 3436.921  | 4061.226  | AB002338  | 673.111   | 989.521   |
| Y11339    | 6826.85   | 5042.582  | AK026409  | 30786.432 | 40793.285 | AI524814  | 1213.256  | 1607.531  |
| AB030176  | 842.179   | 598.264   | AF097025  | 9206.403  | 11023.425 | AB024411  | 1065.667  | 582.711   |
| NM_002537 | 8425.32   | 6055.048  | NM_002405 | 11642.477 | 9926.709  | NM_002444 | 12797.442 | 12052.904 |
| NM_003139 | 6370.208  | 3721.115  | AK000004  | 1954.966  | 1499.674  | NM_001104 | 809.63    | 500.844   |
| NM_012316 | 6393.276  | 4307.015  | NM_012421 | 16803.01  | 16608.275 | NM_002989 | 2748.624  | 3004.156  |
| NM_004059 | 535.555   | 380.584   | AB014601  | 1494.338  | 1267.173  | U88898    | 4721.813  | 3387.086  |
| NM_001634 | 21923.906 | 12148.069 | AK001393  | 6676.89   | 6149.149  | NM_020154 | 18377.73  | 11266.589 |
| NM_002267 | 6813.917  | 6121.074  | NM_000023 | 7236.067  | 10105.995 | NM_004665 | 906.811   | 587.911   |
| NM_006412 | 5441.387  | 4551.525  | AF022654  | 1404.925  | 1875.266  | NM_00530C | 622.522   | 441.092   |
| NM_003063 | 7744.847  | 8175.443  | NM_001143 | 1007.402  | 1012.799  | NM_000893 | 507.814   | 222.637   |
| NM_007169 | 7353.49   | 8218.189  | AK022638  | 5149.176  | 4506.717  | NM_000698 | 12932.15  | 8125.008  |
| AK024966  | 2757.527  | 3236.218  | BG698409  | 3426.318  | 3586.843  | AF031167  | 780.857   | 357.267   |

|           |           |           |           |           |           |           |           |           |
|-----------|-----------|-----------|-----------|-----------|-----------|-----------|-----------|-----------|
| NM_01758E | 15588.781 | 18179.785 | AA220921  | 6752.074  | 8342.529  | NM_003204 | 1404.953  | 421.321   |
| U61737    | 51955.918 | 50461.563 | N67770    | 1021.279  | 1686.338  | AF254069  | 446.389   | 298.358   |
| X06389    | 1631.647  | 1906.273  | AA486200  | 63555.402 | 56502.988 | AL117600  | 4807.811  | 4630.107  |
| NM_000033 | 2911.075  | 3188.513  | U90065    | 4484.951  | 3663.333  | NM_001712 | 177.062   | 461.648   |
| NM_006079 | 1755.87   | 1632.564  | AJ005898  | 2928.347  | 4288.449  | NM_004487 | 5559.474  | 2218.223  |
| NM_006696 | 3836.09   | 2876.545  | X57303    | 5084.496  | 6779.934  | Z25434    | 2097.467  | 1955.33   |
| NM_018026 | 4198.291  | 2360.05   | AA463224  | 1080.698  | 1201.609  | NM_005884 | 8631.324  | 14304.494 |
| NM_001707 | 20363.688 | 11486.76  | BG248802  | 7107.418  | 6051.53   | NM_012396 | 5658.585  | 6195.632  |
| NM_01486E | 11673.677 | 6987.7    | L19605    | 1830.629  | 1767.289  | AF229804  | 31380.021 | 25540.861 |
| AL442089  | 8300.537  | 7092.496  | AA876532  | 10483.254 | 10656.809 | U90552    | 3287.23   | 1939.859  |
| NM_00120C | 1537.967  | 1608.343  | S74349    | 1007.078  | 1311.949  | NM_006032 | 2128.714  | 1705.473  |
| AF128541  | 8994.017  | 9315.278  | X07979    | 35679.188 | 47380.805 | NM_01478E | 1229.812  | 1397.512  |
| NM_014321 | 7206.806  | 9521.484  | BG744224  | 19017.361 | 22578.188 | AB040890  | 1988.226  | 1665.566  |
| AK022733  | 1817.943  | 1894.614  | NM_005477 | 7126.548  | 5439.138  | AK024233  | 877.378   | 621.303   |
| NM_005441 | 14014.792 | 20764.844 | NM_00431E | 989.053   | 891.228   | AK021870  | 848.304   | 478.204   |
| NM_016079 | 21087.16  | 25186.883 | L09089    | 794.745   | 333.616   | U06680    | 469.11    | 316.102   |
| AK023108  | 4063.99   | 4938.8    | NM_00264C | 3344.388  | 3776.719  | NM_015584 | 5295.3    | 4032.44   |
| AK026409  | 34096.355 | 30715.719 | X03084    | 453.749   | 932.821   | NM_001697 | 23400.111 | 22471.996 |
| AF097025  | 16717.449 | 15855.024 | M15530    | 8244.355  | 6568.83   | NM_01609E | 8774.428  | 8676.355  |
| NM_00240E | 11322.927 | 9250.698  | NM_001877 | 1086.39   | 1139.545  | NM_006667 | 27268.17  | 13493.041 |
| AK000004  | 1939.724  | 1622.387  | NM_014207 | 10112.361 | 9738.564  | NM_00081E | 527.082   | 277.869   |
| NM_012421 | 21098.561 | 20457.611 | AK002163  | 4118.017  | 4797.244  | AB023173  | 1492.964  | 592.811   |
| AB014601  | 802.94    | 865.143   | NM_002287 | 7196.682  | 9319.289  | NM_17214C | 1975.94   | 1916.319  |
| AK001393  | 10787.22  | 9153.416  | NM_012344 | 2676.878  | 2353.864  | NM_001072 | 605.598   | 766.501   |
| NM_000023 | 6331.457  | 5195.036  | NM_002351 | 29961.221 | 32472.049 | NM_01407C | 612.191   | 335.729   |
| AF022654  | 630.451   | 772.92    | NM_01438E | 2636.559  | 2826.158  | NM_016027 | 451.964   | 306.36    |
| NM_001143 | 870.029   | 800.132   | NM_001704 | 1384.683  | 1088.925  | NM_014297 | 5051.272  | 3253.487  |
| AK022638  | 6665.056  | 5937.369  | AB036432  | 9194.153  | 9666.882  | NM_01815E | 7383.953  | 4253.328  |
| BG698409  | 2478.805  | 1841.348  | NM_014872 | 4555.153  | 5106.556  | X98266    | 720.123   | 531.87    |
| AA220921  | 7089.328  | 10214.627 | NM_003643 | 423.326   | 599.369   | U00930    | 6012.578  | 5543.859  |
| U90065    | 4213.795  | 5324.585  | NM_00348C | 1509.115  | 1819.621  | AK024958  | 300.539   | 488.068   |
| AJ005898  | 3814.361  | 4585.083  | NM_000899 | 598.337   | 908.567   | NM_01457E | 1855.557  | 2681.481  |
| AA876532  | 14681.305 | 20819.428 | NM_032951 | 4233.952  | 5142.717  | NM_00243E | 1974.828  | 2813.187  |
| S74349    | 1344.148  | 1541.597  | NM_000503 | 6558.41   | 6281.827  | AL117552  | 607.37    | 742.262   |
| X07979    | 54546.582 | 51878.441 | NM_01758E | 14070.614 | 12510.062 | NM_002692 | 4101.268  | 2906.142  |
| NM_005477 | 7436.158  | 7107.764  | U61737    | 35698.379 | 38849.168 | AB023190  | 14699.076 | 5338.033  |
| NM_00431E | 832.229   | 905.891   | X06389    | 1332.234  | 1379.107  | NM_007064 | 372.564   | 225.226   |
| NM_00264C | 4477.216  | 3448.688  | NM_000033 | 2864.185  | 2831.673  | NM_006281 | 541.802   | 649.898   |
| M15530    | 6619.344  | 5453.167  | NM_014861 | 1036.166  | 641.615   | NM_00273E | 1548.289  | 832.666   |
| NM_001877 | 915.977   | 599.243   | NM_005694 | 9233.706  | 7220.551  | U23460    | 17018.467 | 7867.706  |
| NM_014207 | 11561.242 | 10157.239 | M91368    | 977.251   | 717.759   | NM_00535E | 15785.666 | 9872.18   |
| AK002163  | 4751.032  | 6085.121  | AF224741  | 621.521   | 686.863   | NM_00442E | 2470.464  | 3235.711  |
| NM_002287 | 8848.619  | 9403.861  | NM_006594 | 3538.216  | 3238.348  | U64564    | 896.714   | 1133.862  |
| NM_012344 | 2474.594  | 2967.552  | NM_004177 | 2915.431  | 2059.454  | NM_00647C | 776.203   | 1358.434  |
| NM_003643 | 688.067   | 936.626   | NM_012429 | 1880.883  | 1907.399  | NM_00285E | 2276.303  | 2955.669  |
| NM_00348C | 2439.704  | 2055.258  | NM_004871 | 3813.648  | 3510.029  | AB038463  | 579.659   | 841.874   |
| NM_000899 | 856.998   | 994.708   | NM_00569E | 8438.015  | 7070.696  | M30262    | 1353.543  | 2199.76   |
| NM_032951 | 5168.593  | 5350.831  | AF202146  | 10957.452 | 8568.294  | NM_00546C | 485.354   | 851.185   |
| NM_01758E | 10211.42  | 7734.22   | NM_006393 | 1527.957  | 1663.879  | AF160477  | 1105.345  | 1312.927  |
| U61737    | 43738.977 | 35052.672 | NM_014923 | 1033.547  | 1056.007  | M12883    | 2857.59   | 2447.275  |
| X06389    | 1165.043  | 747.15    | AF275798  | 23966.262 | 18598.479 | BG288747  | 3722.089  | 2634.539  |
| NM_000033 | 2857.985  | 2155.126  | NM_005441 | 9339.053  | 8060.163  | U37448    | 1469.831  | 897.153   |
| NM_014861 | 761.29    | 583.416   | NM_016079 | 15772.069 | 13339.723 | AA927698  | 1377.944  | 1518.569  |

|           |           |           |           |           |           |           |           |           |
|-----------|-----------|-----------|-----------|-----------|-----------|-----------|-----------|-----------|
| NM_005694 | 9591.967  | 9568.845  | AK023108  | 4131.102  | 3532.854  | AI498426  | 335.999   | 976.027   |
| M91368    | 648.968   | 743.881   | AK026409  | 42093.668 | 38123.43  | D01038    | 10687.047 | 15285.895 |
| AF224741  | 937.784   | 688.924   | AF097025  | 17710.199 | 14196.758 | AB019205  | 566.098   | 955.57    |
| NM_006594 | 2745.306  | 3076.997  | Y11339    | 10279.369 | 9007.745  | J05008    | 709.258   | 1050.05   |
| NM_004177 | 2184.406  | 2768.227  | AB030176  | 876.627   | 833.06    | D50640    | 961.21    | 386.412   |
| NM_012429 | 1919.71   | 2406.399  | NM_003937 | 584.805   | 401.049   | M98776    | 966.259   | 259.242   |
| NM_004871 | 3341.808  | 4929.948  | NM_002537 | 13864.938 | 11482.683 | X99135    | 41140.898 | 16097.709 |
| NM_005694 | 11082.832 | 12176.544 | NM_003139 | 7039.776  | 5500.144  | AF009744  | 714.1     | 296.046   |
| AF202146  | 13274.174 | 12339.109 | NM_012316 | 8108.728  | 7265.537  | NM_003204 | 2069.686  | 2145.422  |
| NM_006393 | 1301.781  | 1224.431  | NM_001634 | 21751.117 | 14931.778 | AF254069  | 587.183   | 820.7     |
| NM_014923 | 1452.729  | 1497.459  | NM_002267 | 11327.834 | 9075.1    | AL117600  | 6873.214  | 8406.022  |
| AF275798  | 25589.9   | 23642.426 | NM_006412 | 6256.757  | 6178.031  | NM_001712 | 297.216   | 720.383   |
| NM_005441 | 10818.692 | 9178.779  | NM_003063 | 8555.148  | 8348.677  | NM_004487 | 8967.097  | 10134.637 |
| NM_016079 | 16411.205 | 14441.084 | NM_014041 | 46895.824 | 43567.57  | AK026965  | 6066.819  | 5891.796  |
| AK023108  | 2532.565  | 2307.274  | NM_007169 | 6778.055  | 6984.327  | AK025859  | 2766.183  | 2676.014  |
| AK026409  | 27858.48  | 18254.709 | NM_014313 | 790.851   | 817.366   | AL117499  | 7457.318  | 5985.104  |
| AF097025  | 17682.416 | 14217.611 | AK024966  | 4510.515  | 4303.608  | NM_007054 | 723.873   | 382.781   |
| Y11339    | 9926.98   | 7367.62   | AF178941  | 26938.471 | 27853.988 | AK000160  | 1866.313  | 992.456   |
| AB030176  | 906.228   | 1043.125  | NM_016033 | 10180.862 | 9471.224  | NM_005905 | 2192.73   | 1171.481  |
| NM_002537 | 10044.937 | 8177.93   | NM_013439 | 34941.895 | 26041.729 | NM_016235 | 471.602   | 554.272   |
| NM_003139 | 8438.885  | 6613.785  | NM_003406 | 43628.027 | 35397.684 | NM_000960 | 362.972   | 647.779   |
| NM_012316 | 6615.648  | 6530.489  | NM_018316 | 3464.536  | 3282.908  | AF172932  | 322.711   | 1342.92   |
| NM_004059 | 717.578   | 640.382   | AB011180  | 3203.116  | 2871.457  | NM_002511 | 628.527   | 799.237   |
| NM_001634 | 25110.834 | 16643.08  | NM_007167 | 8276.391  | 6964.06   | AF295378  | 2396.785  | 1427.654  |
| NM_002267 | 9687.407  | 9141.67   | NM_014832 | 6387.307  | 5290.103  | AF320908  | 654.163   | 175.18    |
| NM_006412 | 7131.11   | 7652.222  | NM_003243 | 801.973   | 654.48    | NM_012445 | 10658.771 | 5711.271  |
| NM_003063 | 8870.469  | 10131.738 | NM_002477 | 23114.941 | 18529.982 | NM_018104 | 1154.573  | 560.976   |
| NM_014041 | 51736.906 | 46634.621 | NM_018026 | 5624.242  | 4408.214  | NM_006667 | 37957.512 | 42504.875 |
| NM_007169 | 7552.031  | 9081.914  | NM_001707 | 20477.094 | 20460.336 | AK025125  | 195.062   | 618.355   |
| NM_014313 | 1172.872  | 1549.503  | AK022983  | 566.67    | 759.135   | NM_000815 | 815.47    | 1261.97   |
| AK024966  | 3339.115  | 3471.237  | NM_014868 | 12048.289 | 9530.844  | NM_001293 | 403.587   | 676.105   |
| NM_016033 | 14203.128 | 14452.085 | AL442089  | 15423.054 | 15570.694 | AB023173  | 3126.301  | 3504.937  |
| NM_013439 | 33367.527 | 32392.504 | NM_001200 | 2151.331  | 1483.888  | NM_000387 | 8931.336  | 9777.506  |
| NM_003406 | 45800.789 | 42758.875 | AB007964  | 990.782   | 983.936   | NM_004663 | 887.814   | 891.928   |
| NM_018316 | 2263.839  | 2419.94   | AF128541  | 9023.879  | 8464.734  | NM_015310 | 537.668   | 561.187   |
| AB011180  | 1329.349  | 1082.067  | AK026305  | 10422.635 | 8266.825  | NM_016154 | 10045.539 | 8576.409  |
| NM_007167 | 7193.816  | 5720.066  | NM_002552 | 5729.109  | 4994.77   | NM_005013 | 43083.461 | 27945.301 |
| NM_014832 | 5274.739  | 4485.052  | NM_014321 | 7489.135  | 6825.29   | AB002338  | 854.352   | 816.987   |
| NM_002477 | 10383.212 | 8874.654  | AK022733  | 1572.694  | 1470.261  | AI524814  | 1432.639  | 994.265   |
| NM_018026 | 4249.417  | 4102.568  | AB011132  | 8742.202  | 8658.574  | AB024411  | 1599.167  | 1188.646  |
| NM_001707 | 21311.049 | 18101.115 | NM_020362 | 13546.249 | 14479.561 | NM_002444 | 18398.305 | 33464.711 |
| AK022983  | 660.017   | 600.618   | AB040937  | 5816.858  | 6356.956  | NM_001104 | 676.297   | 1479.226  |
| NM_014868 | 12824.491 | 10494.813 | NM_000095 | 19790.686 | 15221.396 | NM_002989 | 2649.975  | 7210.802  |
| AL442089  | 8955.278  | 8708.393  | AL137493  | 1024.529  | 908.154   | U88898    | 5366.134  | 15035.177 |
| NM_001200 | 2309.378  | 2360.088  | NM_004797 | 730.803   | 1118.701  | NM_020154 | 22827.594 | 39198.125 |
| AB007964  | 1323.446  | 1149.475  | NM_001338 | 11203.248 | 11574.383 | NM_004665 | 844.225   | 477.005   |
| AF128541  | 10769.623 | 9356.834  | NM_003637 | 1065.368  | 1224.439  | NM_000893 | 443.558   | 409.079   |
| AK026305  | 6562.537  | 6547.451  | BC035133  | 1029.179  | 974.839   | NM_000698 | 12546.679 | 6779.159  |
| NM_002552 | 6438.459  | 7445.658  | NM_004233 | 6660.873  | 4792.824  | AB023190  | 21971.057 | 22272.262 |
| NM_014321 | 7532.051  | 8197.228  | NM_001544 | 7775.669  | 5777.334  | NM_007064 | 711.444   | 1072.008  |
| AK022733  | 1599.759  | 1689.523  | X58531    | 1701.084  | 1568.258  | NM_006281 | 1034.817  | 1387.66   |
| AB011132  | 9944.923  | 9822.021  | AB011168  | 12720.031 | 11259.975 | NM_002738 | 5197.876  | 6725.24   |
| AB040937  | 2116.599  | 2404.59   | BE794262  | 6644.205  | 5494.299  | U23460    | 25833.672 | 25538.938 |

|           |           |           |           |           |           |           |           |           |
|-----------|-----------|-----------|-----------|-----------|-----------|-----------|-----------|-----------|
| NM_000095 | 7836.196  | 7133.595  | NM_003212 | 12789.783 | 12604.16  | NM_005356 | 15941.071 | 8383.437  |
| AL137493  | 886.416   | 733.064   | NM_006382 | 4937.882  | 3506.215  | Z25434    | 2369.275  | 2031.891  |
| NM_001338 | 6739.012  | 5047.608  | M62402    | 2651.331  | 2069.082  | NM_005884 | 8186.769  | 12506.037 |
| NM_003637 | 600.188   | 641.371   | NM_004748 | 4853.792  | 3924.527  | NM_012396 | 5682.408  | 4552.769  |
| BC035133  | 923.264   | 610.187   | NM_002668 | 16116.938 | 13898.903 | AF229804  | 37240.887 | 19497.121 |
| NM_004233 | 5969.98   | 5168.047  | NM_014316 | 50447.965 | 45275.703 | AF151638  | 1563.337  | 1253.641  |
| NM_001544 | 7989.846  | 5987.378  | NM_004054 | 8215.378  | 9155.798  | U90552    | 4269.727  | 2509.438  |
| X58531    | 1796.527  | 1250.313  | NM_001138 | 6613.707  | 5722.854  | NM_006032 | 2067.997  | 784.165   |
| AB011168  | 8187.589  | 6796.045  | NM_007289 | 670.635   | 543.482   | NM_014788 | 1550.84   | 1392.911  |
| BE794262  | 4558.987  | 4059.996  | NM_004219 | 64290.93  | 54790.727 | NM_002153 | 851.467   | 1391.757  |
| NM_003212 | 10990.928 | 8761.572  | NM_003443 | 62969.375 | 53424.98  | AB040890  | 2741.1    | 6015.589  |
| NM_006382 | 2003.477  | 2128.426  | NM_002025 | 10668.259 | 16873.965 | AK024233  | 1146.924  | 2679.884  |
| NM_004811 | 16812.695 | 15171.199 | AB015228  | 30747.035 | 38901.301 | AK021870  | 1238.387  | 2927.264  |
| AK021910  | 64557.902 | 61829.438 | AL049685  | 2679.053  | 2702.452  | U06680    | 824.331   | 2211.413  |
| M62402    | 2500.631  | 3026.9    | AK026800  | 6299.434  | 6157.339  | NM_005123 | 292.826   | 409.159   |
| NM_002547 | 334.471   | 731.091   | NM_001442 | 1797.716  | 1151.924  | NM_015584 | 4306.598  | 1792.806  |
| NM_004748 | 3097.609  | 3027.975  | NM_017775 | 7507.005  | 6558.411  | NM_001697 | 17054.705 | 6588.849  |
| NM_002668 | 17320.133 | 17188.613 | AK001958  | 1113.312  | 974.286   | NM_016098 | 6842.397  | 2219.847  |
| NM_001058 | 771.203   | 774.998   | AK025947  | 5548.422  | 4492.109  | AL137479  | 718.392   | 668.738   |
| NM_004054 | 6966.897  | 6730.307  | AF217973  | 10180.81  | 7976.17   | NM_004211 | 1589.287  | 1747.389  |
| NM_001138 | 8160.932  | 8048.372  | NM_007033 | 16497.043 | 13808.591 | Y10776    | 1778.314  | 2290.208  |
| NM_007289 | 600.398   | 829.822   | AF226048  | 9727.772  | 7102.817  | AK027241  | 3679.246  | 4096.161  |
| NM_004219 | 61874.645 | 54018.129 | NM_005573 | 8921.057  | 7484.376  | NM_006978 | 3813.613  | 4548.94   |
| NM_003443 | 60197.461 | 50012.516 | D50918    | 22187.51  | 18229.285 | AK024812  | 2393.571  | 2402.139  |
| NM_002025 | 7345.537  | 7357.097  | U48734    | 10249.894 | 8458.153  | M20642    | 963.838   | 795.397   |
| AB015228  | 27705.826 | 22353.533 | NM_006400 | 12475.319 | 13176.171 | AK026412  | 1301.825  | 1161.206  |
| AL049685  | 2678.038  | 2371.632  | NM_003903 | 5405.567  | 4910.012  | X89669    | 1621.961  | 1055.607  |
| AK026800  | 7399.992  | 5197.613  | NM_017955 | 5575.801  | 4818.177  | NM_001072 | 809.327   | 366.527   |
| NM_001442 | 1641.738  | 1458.354  | NM_016060 | 8501.997  | 8013.661  | NM_014070 | 645.59    | 563.632   |
| NM_017775 | 8489.254  | 5866.408  | NM_002208 | 17775.986 | 15046.653 | NM_016027 | 541.797   | 779.881   |
| AK001958  | 1299.58   | 1302.444  | NM_007216 | 2517.931  | 2493.363  | NM_014297 | 5265.456  | 10473.362 |
| AK025947  | 5326.806  | 4768.745  | AK023518  | 1427.307  | 1999.36   | NM_018156 | 9719.603  | 25496.311 |
| AF217973  | 6067.894  | 6215.299  | NM_000944 | 2135.269  | 1501.098  | X98266    | 636.454   | 942.916   |
| NM_007033 | 14804.229 | 12676.474 | NM_012239 | 2159.865  | 1987.521  | U00930    | 6187.932  | 5690.903  |
| AF226048  | 9651.292  | 8429.722  | NM_012262 | 2364.993  | 2198.57   | NM_014575 | 1142.812  | 534.361   |
| NM_005573 | 9104.271  | 8943.92   | NM_013390 | 6827.956  | 7074.629  | NM_002436 | 1724.966  | 845.243   |
| D50918    | 25438.02  | 24231.635 | NM_002829 | 2824.832  | 2777.767  | NM_002692 | 1880.264  | 875.632   |
| U48734    | 7994.311  | 9720.642  | J02783    | 28844.225 | 29042.998 | X55525    | 788.126   | 650.463   |
| NM_006400 | 14836.542 | 18930.488 | NM_018137 | 597.135   | 457.233   | AB040878  | 730.57    | 904.941   |
| NM_003903 | 4947.069  | 5268.063  | NM_006577 | 24672.508 | 21052.232 | S74647    | 551.479   | 560.903   |
| NM_017955 | 5103.104  | 5224.001  | NM_005317 | 2483.232  | 2001.635  | NM_003506 | 790.58    | 669.466   |
| NM_016060 | 8156.043  | 9418.418  | AF120493  | 1100.44   | 1137.726  | NM_018093 | 3483.503  | 3591.417  |
| NM_002208 | 22832.561 | 22859.588 | U12597    | 3666.429  | 3039.992  | NM_000430 | 858.741   | 594.652   |
| AK023518  | 1444.687  | 1452.368  | U28055    | 736.886   | 643.512   | NM_016656 | 1217.254  | 558.307   |
| NM_000944 | 2293.124  | 2012.552  | AB044343  | 13773.661 | 10718.387 | NM_015963 | 2861.107  | 1574.605  |
| NM_012239 | 2343.82   | 2053.105  | NM_001285 | 685.004   | 737.363   | AB007871  | 2262.583  | 1199.267  |
| NM_012262 | 2171.676  | 2256.778  | NM_018409 | 624.368   | 799.122   | NM_017813 | 3083.105  | 2758.643  |
| NM_013390 | 5582.06   | 5641.098  | NM_014662 | 879.275   | 923.686   | NM_003840 | 3887.571  | 5223.255  |
| NM_002829 | 2071.307  | 1974.645  | NM_005178 | 11419.783 | 11483.438 | NM_018378 | 545.097   | 795.761   |
| J02783    | 31810.635 | 30215.846 | NM_017702 | 10521.505 | 7432.528  | NM_018423 | 930.131   | 1336.463  |
| NM_018137 | 719.899   | 767.887   | AB014516  | 8525.884  | 7564.406  | NM_001741 | 4348.177  | 11039.673 |
| NM_006577 | 26682.523 | 20048.379 | Z83950    | 2300.816  | 1958.954  | NM_000745 | 1876.94   | 3835.636  |
| NM_004413 | 679.476   | 681.772   | AL080063  | 3510.305  | 3219.218  | AF116705  | 4963.638  | 8855.603  |

|           |           |           |           |           |           |           |           |           |
|-----------|-----------|-----------|-----------|-----------|-----------|-----------|-----------|-----------|
| NM_005317 | 2746.653  | 1953.414  | NM_016590 | 625.977   | 683.879   | NM_004460 | 545.719   | 524.07    |
| U12597    | 3080.692  | 2728.358  | NM_005625 | 12617.691 | 12127.15  | NM_006072 | 1309.124  | 551.534   |
| U28055    | 709.984   | 598.367   | X15262    | 4005.458  | 4518.775  | BE794490  | 499.175   | 312.418   |
| AB044343  | 6385.33   | 5465.984  | NM_005475 | 709.799   | 863.418   | NM_003561 | 1717.193  | 1388.551  |
| NM_014662 | 954.302   | 970.196   | AB040918  | 2803.229  | 1868.329  | NM_004071 | 2862.962  | 2650.414  |
| NM_005178 | 11272.085 | 10432.666 | NM_015859 | 3976.919  | 2228.054  | NM_001316 | 5387.276  | 6148.343  |
| NM_017702 | 9808.027  | 11304.071 | X60152    | 1496.643  | 1428.502  | AJ008149  | 3123.572  | 3707.209  |
| AB014516  | 7146.456  | 6887.756  | NM_002316 | 2620.297  | 2245.258  | NM_002353 | 545.327   | 670.528   |
| Z83950    | 2591.626  | 2451.207  | AB023232  | 3847.1    | 2648.729  | NM_012153 | 1277.883  | 1426.403  |
| AL080063  | 3045.913  | 3427.617  | NM_017420 | 344.75    | 565.576   | NM_013241 | 748.612   | 667.288   |
| NM_016590 | 559.796   | 735.122   | AL137589  | 1653.983  | 2192.457  | Z24725    | 1814.328  | 1197.706  |
| NM_005625 | 15235.066 | 16431.703 | NM_002502 | 3206.65   | 3201.422  | AF161362  | 1722.187  | 857.755   |
| X15262    | 3927.731  | 3633.094  | AF226732  | 8239.692  | 7171.125  | NM_015939 | 5295.127  | 5056.144  |
| NM_005475 | 989.682   | 968.332   | NM_006312 | 6255.341  | 4925.211  | AB046840  | 1379.713  | 3544.831  |
| AB040918  | 1774.71   | 1514.687  | NM_002805 | 1045.331  | 983.765   | AF174487  | 881.947   | 1820.134  |
| NM_015859 | 4029.925  | 3333.434  | NM_002939 | 13059.439 | 10423.897 | NM_006407 | 6330.454  | 5452.309  |
| X60152    | 1482.568  | 1528.119  | NM_015836 | 30113.379 | 24478.16  | NM_007373 | 899.642   | 276.647   |
| NM_002316 | 2175.889  | 2180.273  | NM_004713 | 1533.354  | 1310.443  | NM_006263 | 5233.088  | 2222.181  |
| AB023232  | 2521.353  | 2536.056  | NM_001698 | 10084.935 | 8039.074  | NM_004791 | 895.343   | 303.15    |
| AL137589  | 2391.861  | 1700.77   | NM_000661 | 64404.52  | 58896.41  | Z36876    | 1819.015  | 1810.621  |
| NM_002502 | 3582.526  | 2686.306  | NM_000973 | 64704.348 | 56831.719 | NM_000892 | 812.168   | 750.338   |
| AF226732  | 7352.003  | 6469.368  | AF086431  | 2943.962  | 1954.946  | NM_005046 | 288.379   | 523.359   |
| NM_006312 | 5260.066  | 5071.544  | NM_014188 | 54203.68  | 42907.512 | NM_007100 | 25833.545 | 21843.428 |
| NM_002805 | 1110.038  | 1170.015  | AK026365  | 3139.325  | 2950.561  | NM_002954 | 55650.93  | 66981.227 |
| NM_002939 | 15233.794 | 16492.453 | S70004    | 3003.017  | 2567.63   | NM_016572 | 862.074   | 375.857   |
| NM_015836 | 31248.654 | 42303.816 | AF105378  | 2662.427  | 2939.806  | NM_017548 | 14796.322 | 31821.125 |
| NM_004713 | 2077.703  | 2155.563  | NM_000167 | 4264.238  | 4874.717  | AF134802  | 520.493   | 949.777   |
| NM_003769 | 777.409   | 881.932   | AY007125  | 2701.237  | 2617.086  | NM_005740 | 1111.118  | 2402.442  |
| NM_001698 | 12719.356 | 13028.83  | AB032987  | 1889.781  | 2170.498  | NM_004308 | 6260.79   | 6577.409  |
| AF086431  | 1970.804  | 1848.152  | NM_017567 | 12006.975 | 11542.383 | AF112366  | 1196.75   | 363.571   |
| AL110204  | 912.455   | 525.106   | NM_000691 | 5779.231  | 5988.9    | NM_004274 | 552.755   | 291.42    |
| NM_014188 | 38816.953 | 37509.902 | D86971    | 14612.052 | 13229.942 | AK024002  | 6045.465  | 1683.156  |
| AK026365  | 2611.951  | 3230.914  | NM_003073 | 10664.138 | 10126.869 | NM_020399 | 4895.852  | 2684.673  |
| S70004    | 2618.269  | 2339.532  | NM_014048 | 1305.115  | 1035.625  | AF060935  | 1349.302  | 1074.065  |
| AF105378  | 1677.627  | 1780.882  | AF274863  | 1369.398  | 1650.082  | AK026886  | 814.545   | 953.644   |
| NM_000167 | 3845.817  | 4104.97   | AF319458  | 621.467   | 622.519   | D83778    | 824.092   | 824.342   |
| AY007125  | 2673.849  | 2274.786  | AF024697  | 5132.228  | 4698.404  | NM_004264 | 2443.492  | 2652.376  |
| AB032987  | 2084.385  | 1658.54   | AF164156  | 590.518   | 541.97    | AK024788  | 760.984   | 1041.714  |
| NM_017567 | 11866.951 | 8660.163  | NM_005612 | 4109.217  | 2565.249  | AK022696  | 1290.602  | 722.25    |
| NM_000691 | 4494.301  | 4769.921  | D17018    | 915.259   | 768.03    | NM_001206 | 986.127   | 696.156   |
| NM_003073 | 11879.989 | 17680.359 | AB046852  | 948.736   | 946.412   | NM_005016 | 1078.991  | 587.97    |
| NM_014048 | 1297.532  | 2019.729  | AF086167  | 1153.243  | 924.325   | NM_014469 | 1306.603  | 679.908   |
| AF274863  | 2204.703  | 2503.041  | AF085891  | 7616.881  | 7529.177  | NM_014852 | 1813.984  | 783.898   |
| AF319458  | 693.518   | 1108.132  | AF019618  | 1898.02   | 1692.027  | NM_000344 | 9659.883  | 5503.931  |
| AF024697  | 4782.023  | 5977.694  | AK025656  | 2014.398  | 1463.938  | AF248650  | 1693.481  | 1488.074  |
| NM_018651 | 883.443   | 1590.031  | AF138859  | 590.074   | 533.147   | S74678    | 18906.016 | 35175.863 |
| AF164156  | 545.454   | 1115.243  | AF161414  | 8603.827  | 6454.086  | AF248651  | 569.684   | 1768.43   |
| NM_005612 | 6216.03   | 6774.825  | AK025967  | 1418.096  | 1053.895  | NM_001358 | 22520.24  | 51580.172 |
| D17018    | 1103.011  | 748.62    | AL110177  | 1705.801  | 1376.376  | NM_004836 | 4193.095  | 7803.167  |
| AB046852  | 1310.525  | 975.901   | NM_002763 | 14540.477 | 12584.153 | AB037751  | 2549.416  | 6964.106  |
| AF086167  | 1029.194  | 1015.059  | AF070628  | 983.249   | 756.925   | S79281    | 2466.931  | 3886.743  |
| AF085891  | 3955.734  | 3698.896  | AF038194  | 837.847   | 692.35    | AK025585  | 1487.66   | 583.473   |
| AF019618  | 1807.195  | 1777.572  | U79293    | 980.295   | 676.937   | NM_001414 | 3236.008  | 1128.943  |

|           |           |           |           |           |           |           |           |           |
|-----------|-----------|-----------|-----------|-----------|-----------|-----------|-----------|-----------|
| AK025656  | 1287.384  | 1181.003  | NM_015434 | 2819.917  | 2265.406  | D16891    | 809.965   | 497.444   |
| AF161414  | 5396.231  | 4845.239  | NM_014055 | 2894.446  | 2215.054  | NM_01776C | 610.813   | 227.147   |
| NM_002763 | 17419.023 | 19312.115 | NM_018691 | 2123.205  | 1584.751  | NM_01593C | 514.296   | 198.325   |
| AF070628  | 1307.187  | 2311.942  | AK001020  | 1455.941  | 851.072   | AL109698  | 1240.204  | 1482.368  |
| AF038194  | 1071.08   | 1543.145  | AK022098  | 1874.632  | 1894.743  | AF217980  | 3083.495  | 2588.874  |
| NM_015434 | 3357.102  | 4505.151  | AB040933  | 1644.938  | 1463.987  | AL117461  | 1088.841  | 1111.41   |
| NM_018691 | 2351.862  | 3547.065  | AK021875  | 704.894   | 703.308   | NM_01649C | 521.462   | 598.085   |
| AK001020  | 1412.141  | 1517.832  | AK022072  | 1114.241  | 1162.132  | AF104921  | 18002.189 | 15522.559 |
| AK022098  | 1534.412  | 1523.024  | AK026900  | 6485.366  | 5930.195  | NM_00012C | 7430.174  | 7638.542  |
| AB040933  | 1209.265  | 994.478   | AK025020  | 5716.499  | 4137.845  | AK022291  | 444.635   | 729.547   |
| AK021875  | 511.223   | 654.494   | AF086009  | 909.956   | 782.743   | BF239974  | 1669.06   | 1535.162  |
| AK022072  | 986.813   | 553.602   | AF086463  | 7776.714  | 7707.295  | NM_000104 | 628.461   | 506.348   |
| AK026900  | 7778.937  | 6580.75   | AK024130  | 987.547   | 1057.032  | NM_005015 | 8374.325  | 5516.179  |
| AK025020  | 5486.136  | 5984.943  | AK024598  | 2027.305  | 1742.742  | NM_004255 | 43149.199 | 27226.943 |
| AF086009  | 766.162   | 888.409   | AF087983  | 1259.659  | 839.066   | NM_00026C | 31280.523 | 17880.98  |
| AF086463  | 2235.969  | 2128.609  | NM_020234 | 4819.149  | 3528.49   | AF182288  | 1685.905  | 831.89    |
| AK024130  | 883.598   | 888.51    | Z36825    | 4314.665  | 4408.349  | NM_004491 | 1076.969  | 317.176   |
| AK024598  | 2582.484  | 2820.842  | U30889    | 1569.922  | 1249.055  | AK026810  | 1955.336  | 2730.919  |
| NM_020234 | 4707.702  | 7275.289  | U52838    | 959.079   | 794.062   | NM_01562C | 5547.993  | 14143.19  |
| U70772    | 765.514   | 1541.197  | Z36846    | 303.777   | 798.385   | AF218032  | 3941.962  | 5451.082  |
| Z36825    | 4619.287  | 5213.36   | AF086127  | 638.851   | 709.248   | NM_017542 | 4938.159  | 15034.479 |
| U30889    | 1758.091  | 2336.059  | AF086157  | 2541.958  | 2318.746  | AK024407  | 494.03    | 785.221   |
| Z36846    | 865.198   | 503.709   | AL109710  | 1318.263  | 1311.806  | NM_004182 | 15602.289 | 8411.009  |
| AL109710  | 1238.391  | 1184.733  | AK021538  | 1453.292  | 1605.754  | NM_01424C | 606.305   | 225.227   |
| AK021538  | 1146.057  | 679.972   | AK022185  | 853.802   | 730.382   | NM_015877 | 1252.06   | 886.223   |
| AK023793  | 3950.695  | 3389.063  | AK023286  | 4701.333  | 4232.378  | AL117598  | 1089.484  | 1445.914  |
| AK023286  | 4687.789  | 3302.455  | AK021544  | 1065.881  | 929.247   | AL109670  | 789.821   | 845.354   |
| AK021544  | 605.338   | 641.32    | AL079282  | 960.72    | 1037.658  | AF085831  | 585.129   | 597.125   |
| AL079282  | 1025.785  | 719.794   | AF116714  | 976.503   | 989.552   | AL832149  | 1572.419  | 1571.801  |
| AF116714  | 679.022   | 586.641   | NM_01405E | 2210.613  | 2175.753  | AK022839  | 1845.527  | 2020.185  |
| NM_01405E | 1852.095  | 1334.644  | AK025045  | 470.687   | 430.04    | NM_01835C | 1402.207  | 1540.114  |
| AK027170  | 787.805   | 587.231   | AK026340  | 1037.57   | 938.763   | AK025839  | 1019.706  | 1005.796  |
| AK022686  | 11717.778 | 10361.447 | AK027170  | 323.366   | 880.853   | NM_00394C | 964.738   | 837.885   |
| AK023516  | 8693.052  | 7541.743  | AK022686  | 8709.188  | 6925.375  | AB045292  | 1898.328  | 1560.873  |
| AK023864  | 10535.436 | 9711.159  | AK023516  | 4110.847  | 3746.077  | AK022998  | 1108.732  | 632.825   |
| AK023017  | 7064.897  | 8517.586  | AK023864  | 11670.88  | 10854.037 | AK025699  | 10289.75  | 4345.813  |
| Z24724    | 7623.905  | 7536.33   | AK023017  | 6352.548  | 5690.039  | NM_018024 | 3821.907  | 2461.264  |
| AK022712  | 11323.978 | 9912.757  | AK023610  | 637.246   | 469.186   | AK026783  | 722.86    | 1091.671  |
| AK024132  | 1659.427  | 1550.008  | AK023908  | 6940.139  | 6062.254  | AF088040  | 373.39    | 1108.422  |
| AK021863  | 21110.152 | 17739.545 | AK024236  | 1560.907  | 1006.492  | AK021814  | 1269.877  | 2010.437  |
| AK024208  | 795.042   | 565.45    | Z24724    | 9208.805  | 8105.635  | AF088035  | 841.042   | 1582.949  |
| NM_005684 | 662.761   | 530.327   | AK022712  | 12662.433 | 11868.537 | AF086251  | 435.25    | 453.011   |
| AK022293  | 988.918   | 921.192   | AK024132  | 1722.567  | 1523.5    | NM_018092 | 5643.771  | 3090.071  |
| AL117439  | 1350.732  | 1222.811  | AK024208  | 579.574   | 664.046   | NM_005842 | 1693.812  | 311.01    |
| AL133065  | 3362.714  | 3428.722  | NM_02042C | 752.048   | 599.536   | AF147419  | 2063.415  | 1751.967  |
| NM_005297 | 18577.453 | 14423.64  | NM_005684 | 772.375   | 955.199   | AK024280  | 532.12    | 603.48    |
| U80769    | 1720.536  | 1262.778  | AK022293  | 1737.327  | 2235.294  | AF075036  | 830.319   | 1033.389  |
| S80491    | 707.346   | 761.63    | AL117439  | 1581.906  | 1864.837  | NM_014797 | 2161.437  | 1850.681  |
| AK021678  | 680.353   | 631.861   | AL133065  | 3541.206  | 4994.501  | AK027139  | 416.894   | 595.567   |
| AJ011377  | 3767.221  | 4463.383  | NM_005297 | 21461.982 | 23214.963 | AL831841  | 3690.912  | 2870.73   |
| AK021802  | 460.434   | 774.408   | U80769    | 1569.247  | 1427.246  | AL110165  | 1662.329  | 819.876   |
| AL137734  | 1926.627  | 1942.877  | S80491    | 697.445   | 531.119   | AL117652  | 996.048   | 373.247   |
| AK023784  | 1493.503  | 1668.617  | NM_014565 | 860.373   | 450.092   | AL050168  | 1473.704  | 650.599   |

|           |           |           |           |           |           |           |           |           |
|-----------|-----------|-----------|-----------|-----------|-----------|-----------|-----------|-----------|
| AK026323  | 2832.698  | 3104.405  | AJ011377  | 3508.576  | 2425.128  | AL122122  | 2834.394  | 3692.848  |
| NM_003493 | 60302.867 | 56073.445 | AL137734  | 1115.309  | 1305.855  | AK000122  | 8942.101  | 8087.159  |
| AL133430  | 23865.25  | 20002.613 | AK023784  | 1216.715  | 1170.536  | AK023159  | 1894.298  | 2299.445  |
| AF070633  | 47367.195 | 41359.617 | AK026323  | 1654.56   | 1353.925  | AK001091  | 2905.411  | 5544.098  |
| AF054996  | 15094.416 | 10817.773 | NM_003493 | 57560.266 | 49078.75  | AF033199  | 849.169   | 3372.652  |
| AF090098  | 4387.608  | 3052.033  | AL133430  | 28879.717 | 29174.256 | AK025310  | 660.006   | 297.245   |
| AF146694  | 4481.785  | 3481.149  | AF070633  | 42037.258 | 41728.527 | NM_014896 | 407.034   | 381.471   |
| AK057104  | 2350.728  | 1951.911  | NM_018370 | 757.26    | 583.012   | AF009269  | 785.138   | 508.076   |
| AL133555  | 3024.334  | 2878.844  | AF054996  | 15579.795 | 15732.266 | AF009313  | 2408.135  | 1641.07   |
| AK024979  | 35578.5   | 32017.629 | AF090098  | 5202.807  | 6528.455  | AF056420  | 700.17    | 613.389   |
| AF233648  | 2847.008  | 2314.612  | AF146694  | 5173.521  | 8709.949  | AF090887  | 629.742   | 678.853   |
| AK021781  | 932.122   | 720.344   | AK057104  | 3656.892  | 3496.333  | AF009279  | 269.343   | 834.826   |
| NM_018584 | 2539.336  | 2017.454  | AL133555  | 3555.057  | 3745.585  | NM_015883 | 1001.885  | 1169.887  |
| AY007126  | 12489.701 | 11733.929 | AK024979  | 44916.918 | 41103.391 | AF070547  | 2188.53   | 1223.668  |
| AF085951  | 6183.014  | 5753.181  | AF233648  | 2395.553  | 2193.57   | AK001110  | 10622.024 | 6894.302  |
| AF131787  | 1345.099  | 1594.058  | AK021781  | 1339.16   | 1017.907  | AK002184  | 279.013   | 732.046   |
| AF087989  | 1882.814  | 2092.641  | NM_018584 | 2539.713  | 1988.303  | AK021652  | 479.08    | 1036.868  |
| Z70715    | 1678.088  | 2133.035  | AY007126  | 13764.208 | 11112.334 | AK021859  | 1167.344  | 1014.736  |
| NM_018182 | 9002.669  | 9427.671  | AF085951  | 5074.456  | 4226.31   | AK025826  | 614.979   | 1603.421  |
| U80771    | 11139.497 | 11262.334 | AF131787  | 1274.535  | 1160.74   | AK026439  | 1932.406  | 4538.488  |
| NM_006186 | 585.848   | 973.851   | AF087989  | 1388.457  | 1477.459  | AK025278  | 676.995   | 316.757   |
| AJ272173  | 17629.607 | 21243.9   | Z70715    | 1468.352  | 1496.584  | AY007163  | 5222.956  | 4520.003  |
| Y17180    | 54765.102 | 54481.211 | NM_018182 | 7025.378  | 6754.859  | NM_006236 | 21505.002 | 17313.404 |
| NM_005649 | 4011.904  | 3679.792  | U80771    | 9117.097  | 7643.603  | AK023734  | 669.434   | 887.673   |
| AK021566  | 965.823   | 829.767   | NM_006186 | 810.854   | 464.663   | D17265    | 20661.023 | 19941.402 |
| NM_002037 | 4997.557  | 4647.411  | AJ272173  | 16473.721 | 13622.887 | AF085827  | 492.095   | 577.641   |
| NM_020157 | 29902.869 | 23891.865 | Y17180    | 57851.145 | 52853.199 | Y08266    | 19052.795 | 19897.113 |
| X64991    | 1457.049  | 1090.954  | NM_005649 | 4054.085  | 3290.129  | AK002171  | 1641.737  | 1769.058  |
| NM_014320 | 2613.686  | 2302.474  | AK021566  | 480.839   | 528.748   | AJ002572  | 1189.045  | 864.936   |
| AK025703  | 5890.498  | 4433.344  | NM_002037 | 5835.276  | 5061.002  | AK026897  | 3878.864  | 2978.615  |
| NM_018185 | 3737.17   | 2400.505  | NM_020157 | 41554.941 | 40036.875 | AB037861  | 4022.387  | 2950.308  |
| AK022598  | 5502.703  | 3925.055  | X64991    | 1389.75   | 1368.974  | AK021887  | 2465.96   | 1974.555  |
| AK024306  | 1542.624  | 970.011   | NM_014320 | 3709.289  | 3105.641  | AF086180  | 6617.25   | 4165.941  |
| NM_018322 | 10399.464 | 7001.89   | AK025703  | 7472.364  | 7378.522  | AK022135  | 1559.125  | 3279.092  |
| AK025862  | 21720.492 | 13952.16  | NM_018185 | 4449.372  | 4734.701  | AK022898  | 2499.339  | 5304.889  |
| AK026495  | 2163.213  | 1561.349  | AK022598  | 5747.843  | 6207.381  | NM_017556 | 8543.168  | 2864.99   |
| AK025052  | 2457.28   | 2319.458  | AK024306  | 1178.191  | 1167.012  | AL117592  | 3835.875  | 1880.243  |
| NM_014386 | 1785.669  | 1508.534  | NM_018322 | 10981.325 | 8822.425  | NM_003547 | 1016.441  | 1126.939  |
| NM_002546 | 543.202   | 510.046   | AK025862  | 22566.209 | 15850.448 | AL049980  | 1934.444  | 1841.914  |
| U85044    | 1735.248  | 1458.497  | AK026495  | 1759.209  | 1541.514  | AK022978  | 930.725   | 1238.562  |
| BC018880  | 1193.976  | 1250.888  | AK025052  | 1830.897  | 1144.943  | AK021447  | 3505.995  | 3434.32   |
| AF086090  | 2847.671  | 3075.663  | NM_014386 | 1618.964  | 1417.479  | AK025096  | 593.287   | 1968.075  |
| AK002173  | 28025.771 | 38704.484 | NM_002546 | 495.752   | 561.057   | AF131774  | 1043.014  | 971.13    |
| NM_017746 | 2268.953  | 3069.982  | U85044    | 1348.121  | 855.105   | AK025793  | 572.978   | 305.689   |
| NM_020186 | 33730.125 | 43525.039 | BC018880  | 774.803   | 862.433   | AL389942  | 827.457   | 692.945   |
| M87929    | 772.619   | 791.568   | AF086090  | 2406.202  | 2146.822  | D17052    | 848.171   | 607.132   |
| U88897    | 13337.953 | 14525.227 | AK002173  | 21455.881 | 18955.666 | D28378    | 52899.691 | 37464.887 |
| CY3Cy5    | 5190.686  | 280.351   | NM_017746 | 2183.735  | 2024.132  | NM_001267 | 427.727   | 452.536   |
| U37448    | 4033.656  | 4947.706  | NM_020186 | 30379.486 | 29180.318 | L41143    | 4751.939  | 5010.91   |
| BG435851  | 583.378   | 822.142   | U88897    | 11278.719 | 8061.09   | NM_005331 | 19855.695 | 46429.762 |
| AA927698  | 3458.153  | 5356.303  | CY3Cy5    | 6439.829  | 245.997   | NM_014111 | 959.327   | 1818.588  |
| AI498426  | 1271.388  | 2107.736  | BG617923  | 494.405   | 732.756   | AJ008129  | 1982.464  | 1241.274  |
| D01038    | 18516.475 | 23466.752 | U37448    | 2708.305  | 3179.554  | AJ008158  | 1953.567  | 1663.303  |

|           |           |           |           |           |           |           |           |           |
|-----------|-----------|-----------|-----------|-----------|-----------|-----------|-----------|-----------|
| AB019205  | 2217.614  | 3202.353  | AA927698  | 2609.075  | 3340.62   | AF161451  | 4197.68   | 2021.731  |
| J05008    | 2581.649  | 2440.205  | AI498426  | 916.419   | 1262.38   | X02067    | 6483.603  | 3990.113  |
| U11087    | 1075.14   | 1572.545  | D01038    | 26117.627 | 37128.773 | U92013    | 8631.797  | 3752.461  |
| D50640    | 4085.774  | 3582.422  | AB019205  | 1600.656  | 2084.825  | AK023965  | 1064.72   | 1076.458  |
| D43747    | 1345.604  | 1628.816  | J05008    | 1474.106  | 1770.466  | AK026211  | 1042.391  | 802.329   |
| M98776    | 6806.64   | 10508.979 | U11087    | 577.134   | 1047.437  | X58968    | 1472.183  | 1700.542  |
| X99135    | 51045.41  | 49896.766 | D50640    | 2240.476  | 3237.841  | U92020    | 2823.107  | 2065.042  |
| AF009744  | 2608.179  | 2308.238  | D43747    | 447.419   | 490.204   | AL117542  | 562.321   | 638.299   |
| NM_172140 | 4932.736  | 6756.11   | M98776    | 2728.546  | 3226.245  | AL109712  | 10568.861 | 7838.836  |
| SR2       | 64983.125 | 66650.93  | X99135    | 52256.824 | 52839.805 | NM_017782 | 1825.672  | 1544.396  |
| SR4       | 22540.063 | 26121.066 | AF009744  | 1278.945  | 1768.429  | NM_018145 | 2247.52   | 1697.407  |
| SR6       | 3648.84   | 4069.251  | NM_172140 | 2124.43   | 3100.086  | NM_018465 | 11812.589 | 9133.729  |
| SR8       | 12222.959 | 28493.262 | SR6       | 2160.372  | 2570.283  | Z36814    | 943.046   | 538.879   |
| SR10      | 45945.633 | 21740.066 | SR8       | 8567.236  | 32154.645 | D17045    | 712.95    | 432.988   |
| CY3Cy5    | 3525.735  | 65.744    | SR10      | 27915.508 | 12163.142 | AK000827  | 2621.787  | 1214.955  |
| NM_005311 | 1580.85   | 2225.159  | CY3Cy5    | 7143.501  | 332.515   | NM_002503 | 24704.375 | 9014.984  |
| NM_005905 | 5161.088  | 4708.931  | NM_005311 | 944.913   | 1313.94   | NM_005315 | 4314.01   | 2025.822  |
| NM_016235 | 991.517   | 1458.201  | NM_005905 | 2851.963  | 3825.161  | AK022351  | 964.43    | 869.424   |
| NM_000960 | 1233.747  | 1382.201  | NM_016235 | 762.19    | 797.224   | AK022059  | 435.02    | 808.814   |
| AF172932  | 1181.544  | 1990.902  | NM_000960 | 845.184   | 873.983   | NM_020194 | 4655.446  | 5329.806  |
| NM_005355 | 1202.419  | 1343.288  | AF172932  | 1112.18   | 1290.451  | AF038183  | 17689.18  | 52228.039 |
| NM_002511 | 1846.292  | 2393.635  | NM_005355 | 1147.44   | 1307.778  | NM_017882 | 1743.406  | 1211.683  |
| AF295378  | 6347.409  | 8329.747  | NM_002511 | 2130.95   | 2981.538  | NM_003521 | 1332.526  | 325.12    |
| AF320908  | 4107.923  | 3525.946  | AF295378  | 4624.734  | 5843.874  | CY3Cy5    | 2966.461  | 183.174   |
| NM_004085 | 7177.224  | 8077.008  | AF320908  | 1887.123  | 2962.987  | J03571    | 9194.714  | 6011.18   |
| NM_012445 | 33460.832 | 32937.996 | NM_004085 | 4147.143  | 6445.819  | X56134    | 806.037   | 1058.381  |
| NM_018104 | 2811.278  | 2925.526  | NM_012445 | 22891.166 | 34437.68  | NM_001455 | 722.781   | 507.798   |
| NM_006080 | 1048.215  | 1185.09   | NM_018104 | 2494.754  | 3999.083  | AI421041  | 28351.258 | 25414.348 |
| NM_004425 | 4046.152  | 3448.456  | NM_006080 | 287.415   | 484.106   | BI759091  | 1037.123  | 916.446   |
| U64564    | 1839.415  | 1198.815  | NM_004425 | 3287.232  | 5455.443  | BG685843  | 6548.991  | 6535.894  |
| NM_006470 | 2353.095  | 2620.771  | U64564    | 1207.994  | 1957.584  | BI490011  | 1037.204  | 1036.026  |
| NM_002855 | 5025.078  | 4607.294  | NM_006470 | 1379.838  | 1667.676  | AF035771  | 709.528   | 881.922   |
| AB038463  | 1415.914  | 1463.816  | NM_002855 | 3550.88   | 4638.115  | N20475    | 2619.286  | 3190.38   |
| M30262    | 1724.015  | 1628.992  | AB038463  | 745.284   | 1194.569  | BI199286  | 2425.275  | 3240.356  |
| NM_005460 | 1139.009  | 1372.757  | M30262    | 1943.185  | 2823.788  | AA026626  | 519.926   | 641.166   |
| M12883    | 5562.721  | 6183.363  | NM_005460 | 784.905   | 1132.669  | H61726    | 668.014   | 873.184   |
| BG288747  | 12348.451 | 16967.391 | AF160477  | 2844.447  | 3865.573  | NM_004774 | 3066.675  | 4073.884  |
| AI524814  | 3626.306  | 5204.842  | M12883    | 4753.828  | 6564.057  | NM_005234 | 3817.181  | 5222.481  |
| AB024411  | 3350.941  | 3244.499  | BG288747  | 6953.788  | 13434.77  | SR5       | 5921.352  | 5670.676  |
| NM_002444 | 35567.512 | 48368.414 | AI524814  | 2323.267  | 2779.266  | SR7       | 4642.102  | 50384.188 |
| NM_001104 | 2502.494  | 2647.564  | AB024411  | 1521.703  | 2136.827  | SR9       | 16503.377 | 4496.662  |
| NM_002985 | 9913.121  | 12781.003 | NM_002444 | 29670.41  | 32353.986 | CY3Cy5    | 5393.536  | 313.526   |
| U88898    | 13741.391 | 19021.428 | NM_001104 | 1444.958  | 1590.462  | M27544    | 2256.857  | 1909.387  |
| NM_020154 | 41516.207 | 51736.461 | NM_002985 | 7621.047  | 8285.459  | NM_001118 | 607.264   | 571.238   |
| NM_004665 | 2601.516  | 3790.475  | U88898    | 11841.41  | 12448.607 | AL133097  | 3014.84   | 2220.17   |
| NM_005300 | 1950.613  | 2065.804  | NM_020154 | 31398.385 | 39075.707 | NM_001165 | 1890.573  | 1501.565  |
| NM_000893 | 1610.988  | 1469.199  | NM_004665 | 1949.313  | 2264.019  | NM_001381 | 61483.895 | 65789.555 |
| NM_000695 | 25869.842 | 27172.691 | NM_005300 | 1216.007  | 1373.118  | NM_006455 | 2308.48   | 2026.38   |
| AF031167  | 1946.279  | 2053.8    | NM_000893 | 1177.943  | 1377.293  | NM_004093 | 660.753   | 953.995   |
| NM_003204 | 3336.676  | 3777.356  | AF031167  | 1471.129  | 1876.009  | NM_001445 | 6995.222  | 9330.377  |
| AF254069  | 1050.051  | 1118.043  | NM_003204 | 3332.566  | 5091.634  | AF086122  | 3535.945  | 4721.019  |
| AL117600  | 13824.653 | 12661.547 | AF254069  | 809.749   | 1074.318  | AK024397  | 5799.447  | 6785.813  |
| NM_001712 | 1390.521  | 2980.822  | AL117600  | 10728.238 | 12579.733 | NM_018047 | 2108.086  | 2207.876  |



|           |           |           |           |           |           |           |           |           |
|-----------|-----------|-----------|-----------|-----------|-----------|-----------|-----------|-----------|
| NM_004487 | 19615.98  | 28628.469 | NM_001712 | 537.077   | 578.391   | NM_003564 | 1244.658  | 1761.524  |
| AB029000  | 6960.094  | 6821.389  | NM_004487 | 14073.875 | 19068.063 | S78203    | 1783.015  | 1407.554  |
| AK026965  | 12097.848 | 11115.756 | AB029000  | 3596.996  | 4399.142  | NM_016208 | 6363.019  | 3866.314  |
| AK025859  | 6545.377  | 7373.599  | AK026965  | 13819.444 | 19475.459 | NM_005638 | 6313.92   | 5149.001  |
| NM_007054 | 2459.665  | 2650.768  | AK025859  | 4585.916  | 5120.35   | NM_007238 | 7536.695  | 6798.504  |
| AB007957  | 649.482   | 561.498   | AL117499  | 14740.543 | 16349.685 | NM_007268 | 2010.66   | 1568.671  |
| AK000160  | 5465.747  | 5132.092  | NM_007054 | 1638.417  | 2480.889  | AK026014  | 1952.779  | 1727.701  |
| NM_006032 | 7281.118  | 8030.171  | AB007957  | 345.58    | 505.815   | NM_014848 | 1587.103  | 1609.856  |
| NM_014788 | 3691.677  | 4615.909  | AK000160  | 4027.134  | 5592.974  | NM_004298 | 1759.411  | 2270.913  |
| NM_002153 | 1380.64   | 1680.357  | NM_006032 | 4465.584  | 5693.556  | NM_007181 | 2017.191  | 2274.406  |
| AB040890  | 5266.961  | 6761.769  | NM_014788 | 2929.378  | 3134.674  | AB007857  | 608.719   | 753.604   |
| AK024233  | 2436.16   | 3219.426  | NM_002153 | 1031.495  | 1114.019  | NM_001778 | 22717.611 | 24168.17  |
| AK021870  | 2610.838  | 4067.149  | AB040890  | 4787.76   | 4217.419  | NM_004997 | 8535.64   | 8282.147  |
| U06680    | 1859.89   | 2610.808  | AK024233  | 1693.582  | 1726.992  | NM_005923 | 3517.574  | 3490.505  |
| NM_005123 | 1132.778  | 1378.705  | AK021870  | 1655.249  | 1907.316  | NM_003468 | 1978.577  | 3201.157  |
| NM_015584 | 13031.576 | 15549.344 | U06680    | 1137.405  | 1352.88   | AF289028  | 534.026   | 790.586   |
| NM_002063 | 825.633   | 683.988   | NM_005123 | 911.436   | 970.467   | NM_005127 | 9171.529  | 12480.669 |
| NM_006667 | 27647.23  | 27411.502 | NM_015584 | 9703.371  | 12073.745 | NM_005567 | 2273.696  | 2603.613  |
| NM_000815 | 1563.432  | 1413.241  | NM_001697 | 34928.492 | 46780.051 | NM_005218 | 5352.181  | 5949.95   |
| NM_001293 | 767.752   | 1325.884  | NM_002063 | 607.434   | 788.373   | NM_006628 | 501.22    | 577.715   |
| AB023173  | 7831.396  | 7102.582  | AK025125  | 368.31    | 620.034   | NM_003968 | 1289.097  | 1490.57   |
| AF156548  | 5943.618  | 5421.183  | NM_000815 | 1242.768  | 1912.764  | NM_004584 | 3090.97   | 4009.369  |
| NM_000387 | 15212.887 | 12493.465 | NM_001293 | 491.565   | 798.981   | NM_001492 | 516.692   | 567.834   |
| NM_004663 | 2173.748  | 2561.854  | AB023173  | 5048.126  | 5877.094  | AB012643  | 8175.296  | 5997.405  |
| NM_015310 | 1102.917  | 1515.027  | AF156548  | 3888.86   | 5332.837  | AB023170  | 992.957   | 1040.061  |
| AB002338  | 1913.046  | 2454.486  | NM_000387 | 14507.65  | 17559.797 | NM_014153 | 6872.072  | 8604.272  |
| NM_001072 | 1998.586  | 2432.535  | NM_004663 | 1510.756  | 2114.621  | NM_002298 | 11165.43  | 8577.121  |
| NM_014070 | 846.244   | 1289.205  | NM_015310 | 1349.281  | 1762.262  | NM_000414 | 4387.271  | 3212.789  |
| NM_016280 | 746.52    | 650.981   | NM_016154 | 19142.369 | 26291.293 | NM_005508 | 997.799   | 780.485   |
| NM_016027 | 1170.367  | 1599.84   | NM_005013 | 54985.344 | 54342.41  | NM_016018 | 6931.977  | 5688.093  |
| NM_014297 | 12893.574 | 17148.033 | AB002338  | 1606.555  | 2148.39   | NM_020407 | 622.747   | 810.268   |
| NM_018156 | 27799.027 | 33173.594 | NM_001072 | 1096.835  | 1548.999  | AF118274  | 4953.3    | 4188.686  |
| X98266    | 2892.863  | 3313.795  | NM_014070 | 926.261   | 1107.94   | NM_018344 | 1371.491  | 1192.993  |
| U00930    | 15704.151 | 22112.994 | NM_016027 | 736.257   | 945.758   | NM_000078 | 3242.939  | 3086.966  |
| AK024958  | 1032.766  | 1532.225  | NM_014297 | 7842.203  | 8529.391  | NM_000083 | 696.695   | 649.262   |
| NM_002692 | 12073.031 | 11211.05  | NM_018156 | 18006.801 | 21528.082 | AL110245  | 2339.829  | 2229.054  |
| AB023190  | 11292.488 | 10049.089 | X98266    | 1573.799  | 2008.628  | NM_005628 | 12785.686 | 15372.693 |
| NM_007064 | 1708.402  | 1260.097  | U00930    | 13750.368 | 17118.947 | X74609    | 35483.387 | 47959.535 |
| NM_006281 | 2377.149  | 1703.14   | AK024958  | 906.275   | 1021.256  | NM_018990 | 6497.194  | 10557.231 |
| NM_002738 | 10444.776 | 8840.113  | NM_014575 | 4514.65   | 5498.501  | NM_013363 | 829.794   | 1514.529  |
| U23460    | 34143.887 | 22075.041 | NM_002439 | 3909.085  | 4204.322  | NM_000947 | 3843.042  | 6750.843  |
| NM_005358 | 45258.703 | 50473.156 | AL117552  | 1456.142  | 1322.611  | NM_019048 | 1597.478  | 1456.193  |
| Z25434    | 4422.943  | 3640.872  | NM_002692 | 9974.719  | 11384.555 | AF130101  | 536.748   | 579.792   |
| NM_005884 | 17222.75  | 25534.025 | NM_007064 | 1179.043  | 1775.148  | NM_004658 | 3070.606  | 1989.172  |
| NM_012398 | 13025.891 | 15814.474 | NM_006281 | 1793.292  | 2106.953  | NM_005578 | 1056.068  | 605.887   |
| U90552    | 9098.389  | 10662.923 | NM_002738 | 7898.813  | 9417.229  | AF071569  | 1336.004  | 1316.378  |
| NM_005460 | 1010.723  | 1310.62   | U23460    | 35207.398 | 42323.492 | NM_002268 | 2373.804  | 1856.561  |
| AF160477  | 3446.558  | 4760.762  | NM_005358 | 25182.201 | 35181.703 | J04948    | 942.143   | 866.51    |
| NM_003228 | 358.612   | 797.152   | Z25434    | 3219.906  | 4441.278  | NM_018043 | 463.77    | 1001.243  |
| M12883    | 6799.262  | 7730.75   | NM_005884 | 13106.979 | 16508.842 | AK022564  | 59727.367 | 66963.445 |
| BG288747  | 10783.867 | 13391.89  | NM_012398 | 9830.988  | 11254.84  | NM_003564 | 1395.784  | 1149.325  |
| BG617923  | 574.755   | 1011.531  | AF229804  | 48274.297 | 55871.406 | AF317516  | 4956.393  | 4741.265  |
| U37448    | 4547.226  | 5818.205  | AF151638  | 2869.726  | 3328.96   | NM_002581 | 996.498   | 1052.553  |

|           |           |           |           |           |           |           |           |           |
|-----------|-----------|-----------|-----------|-----------|-----------|-----------|-----------|-----------|
| BG435851  | 462.736   | 1340.049  | U90552    | 8123.656  | 10154.734 | AI417964  | 535.109   | 772.327   |
| AA927698  | 3298.454  | 5243.07   | NM_005460 | 673.144   | 968.529   | J03571    | 11651.353 | 14990.9   |
| AI498426  | 1156.585  | 1748.27   | AF160477  | 1853.282  | 2355.06   | X56134    | 796.877   | 1202.288  |
| D01038    | 18795.305 | 21094.289 | M12883    | 3904.056  | 4428.627  | NM_001456 | 1036.399  | 689.295   |
| AB019205  | 1860.603  | 2607.558  | BG288747  | 6660.49   | 7274.602  | H44784    | 497.945   | 1031.409  |
| J05008    | 2138.76   | 1616.419  | BG617923  | 1886.794  | 1495.13   | BI759091  | 1505.156  | 3432.752  |
| U11087    | 1939.16   | 1626.587  | U37448    | 2540.707  | 2995.374  | BG685843  | 8643.458  | 20253.84  |
| D50640    | 3986.223  | 2770.621  | AA927698  | 2765.121  | 3214.829  | BI490011  | 947.69    | 1670.877  |
| D43747    | 1474.051  | 787.061   | AI498426  | 1250.584  | 1224.625  | AF035771  | 745.357   | 978.688   |
| AF009744  | 2695.996  | 2334.446  | D01038    | 20499.783 | 28018.729 | N20475    | 4112.729  | 5480.056  |
| NM_172140 | 5075.38   | 3684.665  | AB019205  | 1327.79   | 1487.539  | BI199286  | 4990.775  | 6602.172  |
| AK026965  | 21392.281 | 24862.77  | J05008    | 1435.007  | 1550.37   | AA026626  | 1015.762  | 1293.182  |
| AK025859  | 6151.601  | 6479.286  | U11087    | 877.851   | 1199.071  | H61726    | 524.939   | 663.226   |
| AL117499  | 17544.141 | 21749.705 | D50640    | 2277.76   | 4051.566  | NM_005234 | 3611.552  | 3325.805  |
| NM_007054 | 2018.383  | 2715.259  | D43747    | 721.359   | 954.782   | NM_005216 | 4374.16   | 2851.914  |
| AB007957  | 682.442   | 921.917   | M98776    | 4383.741  | 4570.244  | NM_003965 | 781.141   | 500.831   |
| AK000160  | 5210.295  | 6518.764  | X99135    | 62171.973 | 54596.051 | NM_004584 | 2735.781  | 1745.362  |
| NM_005311 | 1322.174  | 2130.778  | AF009744  | 1479.68   | 2255.996  | M27544    | 3234.868  | 2898.84   |
| NM_005905 | 5360.521  | 4680.177  | NM_172140 | 3672.252  | 4664.173  | NM_001165 | 2057.635  | 2077.026  |
| NM_016235 | 1561.491  | 1880.483  | AK026965  | 13452.5   | 18782.744 | NM_001381 | 59748.109 | 64294.16  |
| NM_000960 | 728.526   | 1150.917  | AK025859  | 4105.042  | 4410.386  | NM_006455 | 2920.551  | 4227.815  |
| AF172932  | 1490.756  | 1532.61   | AL117499  | 11416.558 | 12104.112 | NM_004093 | 1141.079  | 3088.258  |
| NM_005355 | 719.88    | 987.927   | NM_007054 | 1211.264  | 1354.494  | NM_001445 | 8149.279  | 17161.734 |
| NM_002511 | 1595.462  | 1923.078  | AK000160  | 3113.014  | 3804.223  | AK024397  | 5001.83   | 8674.426  |
| AF295378  | 6494.631  | 5496.907  | NM_005311 | 696.407   | 967.082   | NM_018047 | 2447.981  | 2728.096  |
| AF320908  | 3099.515  | 2846.984  | NM_005905 | 2482.549  | 3570.004  | NM_005022 | 881.729   | 1092.936  |
| NM_004085 | 5759.025  | 4835.654  | NM_016235 | 723.418   | 962.98    | AL110245  | 2386.368  | 1947.89   |
| NM_012445 | 39854.113 | 56647.633 | NM_000960 | 949.425   | 1154.078  | NM_005625 | 11013.354 | 7032.823  |
| NM_004425 | 4511.715  | 3768.902  | AF172932  | 1158.779  | 1255.116  | NM_016605 | 17236.676 | 12822.217 |
| U64564    | 1838.201  | 2138.282  | NM_005355 | 800.632   | 1006.816  | S78203    | 2631.724  | 2491.578  |
| NM_006470 | 2216.298  | 3515.442  | NM_002511 | 1535.151  | 2033.516  | NM_016205 | 7241.035  | 5786.935  |
| NM_002855 | 6072.95   | 6574.213  | AF295378  | 4812.334  | 5545.612  | NM_005635 | 7095.417  | 7194.676  |
| AB038463  | 1379.316  | 1148.748  | AF320908  | 2094.468  | 3033.477  | NM_007235 | 9502.321  | 10275.521 |
| M30262    | 1798.749  | 981.007   | NM_004085 | 5195.89   | 7863.488  | NM_007265 | 2131.714  | 2117.004  |
| NM_000387 | 22537.867 | 25414.051 | NM_012445 | 28354.197 | 39001.625 | AK026014  | 2510.306  | 2672.745  |
| NM_004663 | 2040.862  | 2577.957  | NM_018104 | 2939.405  | 4128.601  | NM_014845 | 1737.555  | 1869.581  |
| NM_015310 | 1610.821  | 2586.251  | NM_006080 | 275.355   | 745.056   | NM_004295 | 2548.51   | 3520.827  |
| AB002338  | 1685.061  | 2713.466  | NM_004425 | 4124.311  | 6579.611  | NM_001232 | 1968.45   | 3177.088  |
| AI524814  | 3329.153  | 5059.865  | U64564    | 1615.825  | 2070.505  | NM_007181 | 1570.928  | 1726.95   |
| AB024411  | 4116.949  | 4229.254  | NM_006470 | 1855.834  | 2223.944  | AB007857  | 957.56    | 814.68    |
| NM_002444 | 36406.848 | 50439.906 | NM_002855 | 4899.346  | 6725.745  | NM_001775 | 25963.971 | 29729.262 |
| NM_001104 | 1084.002  | 1666.099  | AB038463  | 1046.184  | 1036.322  | NM_004997 | 6719.819  | 6883.175  |
| NM_002985 | 6309.634  | 7146.545  | M30262    | 2708.927  | 3185.404  | NM_005923 | 3871.237  | 4818.75   |
| U88898    | 12090.82  | 13561.664 | NM_000387 | 14789.161 | 17670.918 | NM_003465 | 1981.449  | 3200.455  |
| NM_020154 | 37522.441 | 36256.871 | NM_004663 | 1438.17   | 1812.724  | AF289028  | 626.87    | 1251.264  |
| NM_004665 | 2681.115  | 2740.678  | NM_015310 | 929.905   | 1044.847  | NM_005127 | 9621.896  | 20926.207 |
| NM_005300 | 1794.424  | 1795.841  | AB002338  | 1222.9    | 1421.69   | NM_005567 | 1950.79   | 4095.356  |
| NM_000893 | 1496.005  | 1058.51   | AI524814  | 2334.218  | 2625.185  | AF071569  | 905.891   | 774.199   |
| NM_000695 | 26280.611 | 23613.959 | AB024411  | 1993.423  | 2106.633  | NM_002265 | 1848.912  | 1600.652  |
| AF031167  | 2150.055  | 1995.35   | NM_002444 | 30003.195 | 31394.51  | J04948    | 747.028   | 687.466   |
| NM_003204 | 3625.616  | 2554.835  | NM_001104 | 1614.135  | 1895.009  | NM_018043 | 480.436   | 366.958   |
| AF254069  | 1496.696  | 1912.798  | NM_002985 | 6003.408  | 7237.508  | AK022564  | 57906.441 | 56703.637 |
| AL117600  | 14263.462 | 14988.277 | U88898    | 9865.761  | 10373.996 | NM_001492 | 581.321   | 585.238   |

|           |           |           |           |           |           |           |           |           |
|-----------|-----------|-----------|-----------|-----------|-----------|-----------|-----------|-----------|
| NM_001712 | 795.032   | 729.348   | NM_020154 | 28801.365 | 31596.25  | AB012643  | 7378.109  | 4639.569  |
| NM_004487 | 17388.779 | 8584.178  | NM_004665 | 1783.54   | 1905.151  | AB023170  | 1124.649  | 872.256   |
| AB029000  | 6330.229  | 4101.283  | NM_005300 | 1219.442  | 1394.369  | NM_014153 | 5351.188  | 5927.188  |
| Z25434    | 5305.033  | 5806.557  | NM_000893 | 1055.018  | 1485.504  | NM_002296 | 11290.649 | 11457.688 |
| NM_005884 | 17135.613 | 26998.195 | NM_005091 | 353.994   | 459.551   | NM_000414 | 4616.187  | 4052.874  |
| NM_012399 | 12961.229 | 13793.709 | AF031167  | 1680.525  | 1983.403  | NM_018845 | 3786.753  | 3719.234  |
| U90552    | 9973.193  | 12934.407 | NM_003204 | 3726.126  | 4715.78   | NM_005505 | 1339.267  | 1526.627  |
| NM_006032 | 7990.974  | 8309.715  | AF254069  | 1080.686  | 1013.948  | AK026964  | 322.268   | 400.801   |
| NM_014788 | 3884.791  | 4485.105  | AL117600  | 12689.424 | 14104.798 | NM_001134 | 1149.139  | 1150.073  |
| NM_002153 | 1804.211  | 2227.065  | NM_001712 | 649.731   | 698.509   | AK023497  | 471.424   | 1444.613  |
| AB040890  | 5833.022  | 8023.358  | NM_004487 | 20873.184 | 24503.082 | NM_016016 | 7240.637  | 6303.437  |
| AK024233  | 2098.63   | 2609.193  | AB029000  | 4406.742  | 5011.481  | NM_020407 | 626.075   | 676.287   |
| AK021870  | 2076.518  | 3080.258  | Z25434    | 3571.646  | 4237.217  | AF118274  | 5275.406  | 3977.586  |
| NM_005123 | 1067.578  | 871.21    | NM_005884 | 11736.301 | 14513.606 | NM_018344 | 1433.693  | 1336.065  |
| NM_015584 | 12716.899 | 12781.6   | NM_012399 | 7096.891  | 7603.979  | NM_000079 | 3637.62   | 2891.309  |
| NM_001697 | 49596.566 | 48597.203 | U90552    | 6779.646  | 7302.706  | NM_004774 | 2017.669  | 1371.896  |
| NM_016098 | 22000.836 | 19139.525 | NM_006032 | 4524.632  | 5474.697  | NM_005234 | 2980.031  | 1884.28   |
| NM_002063 | 907.979   | 689.293   | NM_014788 | 2836.127  | 2932.542  | X74609    | 39538.297 | 30289.004 |
| NM_006667 | 48804.781 | 40320.906 | NM_002153 | 1041.984  | 1417.58   | AB002316  | 598.707   | 611.28    |
| AK025125  | 803.267   | 903.637   | AB040890  | 4653.705  | 5186.781  | NM_018990 | 6399.714  | 5542.002  |
| NM_000815 | 1500.821  | 1758.48   | AK024233  | 1419.227  | 1744.909  | NM_013363 | 793.406   | 833.584   |
| NM_001293 | 647.24    | 727.118   | AK021870  | 1609.681  | 1887.692  | NM_000947 | 3945.162  | 3693.372  |
| AB023173  | 7277.182  | 4051.991  | U06680    | 1017.061  | 1232.546  | AL096750  | 39666.598 | 32885.957 |
| AF156548  | 5581.235  | 3095.788  | NM_005123 | 686.983   | 1115.779  | NM_016061 | 3589.404  | 3559.588  |
| NM_172140 | 5539.175  | 6054.44   | NM_015584 | 8658.585  | 11148.136 | NM_016062 | 37617.23  | 35070.891 |
| NM_001072 | 2371.13   | 2727.031  | NM_001697 | 36830.406 | 47036.93  | NM_004153 | 2177.669  | 3261.586  |
| NM_014070 | 1083.796  | 1672.502  | NM_002063 | 769.699   | 952.857   | AK024740  | 2137.726  | 2389.331  |
| NM_016027 | 1032.322  | 1310.312  | NM_006667 | 58390.496 | 54240.453 | AF078164  | 7123.775  | 6103.353  |
| NM_014297 | 11531.557 | 13826.808 | NM_000815 | 1529.494  | 1742.824  | NM_019049 | 2106.118  | 2112.42   |
| NM_018156 | 15223.557 | 15902.588 | NM_001293 | 576.88    | 846.559   | AF130101  | 580.922   | 761.278   |
| X98266    | 1794.813  | 1500.325  | AB023173  | 5647.335  | 5749.21   | NM_004656 | 3561.865  | 2904.256  |
| U00930    | 15384.012 | 14054.763 | AF156548  | 4551.365  | 5216.825  | NM_005576 | 986.519   | 1204.26   |
| AK024958  | 1082.923  | 1353.882  | NM_172140 | 3183.224  | 3746.299  | AF086122  | 2610.648  | 2167.234  |
| NM_014575 | 6002.704  | 5671.591  | NM_001072 | 1324.724  | 1538.667  | AK024397  | 4837.45   | 2849.95   |
| NM_002439 | 5318.238  | 5951.763  | NM_014070 | 823.961   | 968.237   | NM_018047 | 1562.867  | 1236.091  |
| AL117552  | 2405.095  | 3315.786  | NM_016027 | 1013.899  | 1057.22   | NM_005022 | 672.072   | 876.728   |
| NM_002692 | 11981.071 | 8722.89   | NM_014297 | 8194.52   | 9335.197  | NM_003564 | 1514.191  | 1413.732  |
| AB023190  | 30991.674 | 23846.174 | NM_018156 | 16663.457 | 18465.184 | AF317516  | 3087.509  | 2093.156  |
| NM_007064 | 1390.989  | 1726.922  | X98266    | 1400.254  | 1491.048  | NM_002581 | 620.62    | 674.745   |
| NM_006281 | 2077.812  | 1782.248  | U00930    | 13078.593 | 13966.646 | AI417964  | 760.176   | 536.86    |
| NM_002738 | 11034.646 | 7328.357  | AK024958  | 1043.804  | 1023.033  | J03571    | 12941.59  | 12071.193 |
| U23460    | 34869.594 | 19132.49  | NM_014575 | 4208.238  | 4498.14   | X56134    | 905.592   | 1003.655  |
| NM_005356 | 42265.148 | 28146.039 | NM_002439 | 4792.427  | 5357.653  | NM_001456 | 1034.605  | 737.169   |
| NM_004429 | 5679.099  | 7120.973  | AL117552  | 1606.346  | 1703.273  | AI421041  | 41385.469 | 38739.527 |
| U64564    | 2635.539  | 2514.243  | NM_002692 | 11356.186 | 12769.923 | BI759091  | 2197.705  | 2711.41   |
| NM_006470 | 3118.714  | 3827.196  | AB023190  | 41192.52  | 43160.203 | BG685843  | 8412.281  | 8755.084  |
| NM_002855 | 8403.848  | 8803.887  | NM_007064 | 1344.708  | 1962.136  | BI490011  | 1311.522  | 822.55    |
| AB038463  | 1290.84   | 1685.006  | NM_006281 | 1568.798  | 2092.63   | AF035771  | 624.851   | 477.852   |
| M30262    | 4437.95   | 5676.936  | NM_002738 | 8747.892  | 10765.877 | N20475    | 3523.802  | 3218.422  |
| NM_005460 | 1370.954  | 1610.091  | NM_005356 | 34138.02  | 40496.527 | BI199286  | 4702.003  | 4654.726  |
| AF160477  | 4206.015  | 4268.305  | NM_004429 | 4209.059  | 5546.051  | AA026626  | 724.328   | 518.687   |
| M12883    | 7336.876  | 9661.025  | U64564    | 1224.114  | 1427.04   | H61726    | 633.575   | 637.806   |
| BG288747  | 10196.855 | 11626.634 | NM_006470 | 1508.053  | 1623.373  | NM_004997 | 5850.351  | 3305.869  |

|           |           |           |           |           |           |           |           |           |
|-----------|-----------|-----------|-----------|-----------|-----------|-----------|-----------|-----------|
| BG617923  | 577.198   | 823.32    | NM_002855 | 4549.531  | 5160.929  | NM_005923 | 2544.56   | 1780.921  |
| U37448    | 4066.432  | 3707.208  | AB038463  | 953.426   | 663.731   | NM_003465 | 1575.18   | 1367.219  |
| BG435851  | 1033.409  | 842.277   | M30262    | 2335.908  | 2583.069  | NM_005127 | 7483.665  | 7772.493  |
| AA927698  | 3198.094  | 2778.483  | NM_005460 | 546.712   | 726.142   | NM_005567 | 2412.668  | 2655.524  |
| AI498426  | 1242.692  | 1271.752  | AF160477  | 2595.651  | 3298.646  | NM_005216 | 5196.139  | 5110.208  |
| D01038    | 19288.916 | 27002.506 | NM_003226 | 310.748   | 498.82    | NM_003965 | 957.138   | 568.684   |
| AB019205  | 2513.833  | 5335.23   | M12883    | 5639.887  | 6745.295  | NM_004584 | 2624.323  | 2488.543  |
| J05008    | 2107.875  | 1421.692  | BG288747  | 7402.242  | 8999.913  | AK023618  | 2882.651  | 3088.849  |
| U11087    | 1160.011  | 1066.434  | U37448    | 2366.213  | 3117.449  | AF212842  | 343.341   | 806.212   |
| D50640    | 3995.682  | 3925.586  | AA927698  | 2914.168  | 3283.436  | NM_018404 | 699.286   | 875.375   |
| D43747    | 1556.824  | 717.781   | AI498426  | 987.611   | 1020.4    | M27544    | 3049.275  | 2993.471  |
| M98776    | 5963.824  | 3767.88   | D01038    | 26638.283 | 32027.18  | NM_001118 | 877.148   | 912.909   |
| X99135    | 58829.113 | 43757.758 | AB019205  | 1660.529  | 2091.893  | AL133097  | 4277.011  | 3764.275  |
| AF009744  | 2097.497  | 1497.075  | J05008    | 2085.382  | 2203.959  | NM_001165 | 2276.385  | 1794.748  |
| NM_003204 | 4810.708  | 5742.511  | U11087    | 1216.721  | 1469.858  | NM_006455 | 2409.549  | 1572.089  |
| AF254069  | 1324.206  | 1629.747  | D50640    | 3080.436  | 4098.638  | NM_004093 | 912.653   | 1259.853  |
| AL117600  | 17980.365 | 20461.996 | D43747    | 1073.91   | 1184.891  | NM_001445 | 8477.589  | 8076.932  |
| NM_001712 | 917.092   | 1120.529  | M98776    | 5915.897  | 5545.604  | NM_016016 | 5753.183  | 4348.789  |
| NM_004487 | 31890.396 | 33928.664 | AF009744  | 2269.167  | 2642.253  | NM_020407 | 593.827   | 609.33    |
| AB029000  | 7857.49   | 10292.351 | NM_003204 | 3693.273  | 4270.023  | AF118274  | 4959.169  | 4005.595  |
| AK026965  | 27183.734 | 28575.73  | AF254069  | 883.034   | 922.913   | NM_018344 | 1556.264  | 1538.367  |
| AK025859  | 7054.188  | 6354.999  | AL117600  | 13309.978 | 10712.387 | NM_000075 | 3936.741  | 4030.512  |
| AL117499  | 19347.52  | 20428.336 | NM_004487 | 19138.297 | 15846.271 | NM_000083 | 625.945   | 806.181   |
| NM_007054 | 2285.181  | 2106.606  | AB029000  | 5875.025  | 5275.537  | AL110245  | 1231.229  | 1153.109  |
| AK000160  | 4671.023  | 5226.869  | AK026965  | 20019.129 | 20444.893 | NM_005625 | 10947.966 | 10480.721 |
| NM_005311 | 1431.765  | 1536.557  | AK025859  | 5085.372  | 4614.303  | S78203    | 2210.36   | 2785.741  |
| NM_005905 | 3771.011  | 2246.743  | AL117499  | 14940.343 | 13083.481 | NM_016205 | 7078.287  | 6491.471  |
| NM_016235 | 1316.548  | 992.859   | NM_007054 | 1793.806  | 1748.034  | NM_005635 | 7532.255  | 7631.238  |
| NM_000960 | 883.828   | 971.523   | AK000160  | 4321.055  | 4388.212  | NM_007235 | 10401.621 | 9861.009  |
| AF172932  | 1194.399  | 892.295   | NM_005311 | 1090.346  | 873.684   | NM_007265 | 1989.541  | 1838.629  |
| NM_002511 | 1830.561  | 3091.138  | NM_005905 | 2948.25   | 3621.6    | NM_014845 | 1562.156  | 1371.974  |
| AF295378  | 6381.787  | 5009.683  | NM_016235 | 891.987   | 879.457   | NM_004295 | 2475.563  | 2380.667  |
| AF320908  | 3643.043  | 2943.018  | NM_000960 | 1133.271  | 941.635   | NM_007181 | 2597.87   | 1944.885  |
| NM_004085 | 7405.353  | 4600.043  | AF172932  | 963.084   | 1017.46   | AB007857  | 818.461   | 614.903   |
| NM_012445 | 42849.078 | 29261.1   | NM_005355 | 676.423   | 815.843   | NM_001775 | 24944.479 | 22377.416 |
| NM_018104 | 3697.85   | 2389.191  | NM_002511 | 3400.781  | 3304.365  | NM_019045 | 1623.454  | 1437.117  |
| NM_006667 | 44504.262 | 45259.598 | AF295378  | 6007.466  | 5971.036  | AF130101  | 799.581   | 926.113   |
| AK025125  | 836.422   | 811.528   | AF320908  | 2341.127  | 2781.78   | NM_004655 | 3531.287  | 4551.785  |
| NM_000815 | 2291.53   | 2650.231  | NM_004085 | 7979.289  | 8981.908  | NM_005575 | 1365.662  | 2153.589  |
| NM_001293 | 982.68    | 1380.495  | NM_006080 | 527.257   | 536.718   | AF071569  | 584.193   | 990.786   |
| AB023173  | 9955.681  | 10287.004 | NM_006667 | 55262.656 | 51833.949 | NM_002265 | 2819.714  | 5096.041  |
| AF156548  | 6542.268  | 7226.296  | NM_000815 | 1688.625  | 1598.901  | J04948    | 978.191   | 973.14    |
| NM_000387 | 28584.021 | 33086.027 | NM_001293 | 892.87    | 780.096   | NM_018043 | 497.768   | 447.271   |
| NM_004663 | 2535.879  | 2949.489  | AB023173  | 7091.171  | 4827.343  | AK022564  | 58318.348 | 54976.898 |
| NM_015310 | 1648.562  | 1995.164  | AF156548  | 4152.727  | 3547.138  | NM_001492 | 568.894   | 508.486   |
| NM_016154 | 32488.836 | 38618.852 | NM_000387 | 21482.164 | 19399.098 | AB012643  | 8771.536  | 7097.651  |
| NM_005013 | 57624.434 | 59408.73  | NM_004663 | 2002.314  | 1608.549  | AB023170  | 1274.312  | 979.076   |
| AB002338  | 2313.282  | 2717.902  | NM_015310 | 1609.656  | 1337.857  | NM_014153 | 7418.821  | 8762.87   |
| AI524814  | 3472.637  | 4134.71   | NM_016154 | 24675.84  | 25649.582 | NM_002295 | 12234.528 | 12785.238 |
| AB024411  | 1981.264  | 1508.097  | NM_005013 | 65090.883 | 54485.828 | NM_000414 | 5645.874  | 4768.611  |
| NM_002444 | 34071.793 | 28527.613 | AB002338  | 2044.77   | 1745.588  | NM_018845 | 3652.684  | 2870.792  |
| NM_001104 | 1214.199  | 887.853   | AI524814  | 3164.073  | 3122.984  | NM_005505 | 1075.175  | 764.124   |
| NM_002985 | 6022.709  | 4887.389  | AB024411  | 2510.319  | 2697.451  | NM_001134 | 912.727   | 767.111   |

|           |           |           |           |           |           |           |           |           |
|-----------|-----------|-----------|-----------|-----------|-----------|-----------|-----------|-----------|
| U88898    | 17582.643 | 33220.957 | NM_002444 | 33545.406 | 32063.674 | NM_006695 | 1300.447  | 1404.845  |
| NM_020154 | 41460.16  | 33513.391 | NM_001104 | 1968.245  | 2188.478  | NM_004815 | 2696.436  | 4361.455  |
| NM_004665 | 2705.452  | 1785.831  | NM_002989 | 8411.113  | 8384.513  | NM_004147 | 1042.199  | 1460.876  |
| NM_005300 | 1688.109  | 1333.415  | U88898    | 12750.154 | 10784.097 | AK000959  | 3709.897  | 5598.856  |
| NM_000893 | 1496.841  | 815.573   | NM_020154 | 39962.969 | 38924.492 | AB037743  | 2763.023  | 4615.25   |
| NM_000695 | 32686.846 | 21099.297 | NM_004665 | 2959.024  | 2638.373  | AB046820  | 5385.65   | 9420.709  |
| AF031167  | 1975.83   | 1965.89   | NM_005300 | 1596.812  | 1332.251  | NM_014646 | 1618.618  | 3084.503  |
| AB023190  | 42848.68  | 46712.059 | NM_000893 | 1571.443  | 1802.164  | NM_006375 | 949.716   | 1733.853  |
| NM_007064 | 2296.967  | 2138.608  | NM_005091 | 621.827   | 490.298   | AF123659  | 3066.305  | 3156.479  |
| NM_006281 | 3166.396  | 3794.844  | AF031167  | 1912.129  | 1780.424  | X74609    | 20505.984 | 21013.725 |
| NM_002735 | 11542.367 | 14531.662 | AB023190  | 38871.316 | 36432.641 | AB002316  | 778.83    | 832.955   |
| NM_005355 | 48180.223 | 55516.363 | NM_007064 | 1758.605  | 1488.182  | NM_018990 | 11325.432 | 20915.586 |
| Z25434    | 5913.623  | 6740.232  | NM_006281 | 2095.745  | 1514.418  | NM_013363 | 1202.423  | 1828.984  |
| NM_005884 | 17699.547 | 27643.656 | NM_002735 | 9760.404  | 8814.713  | NM_000947 | 3470.728  | 4652.202  |
| NM_012395 | 13932.641 | 15018.525 | U23460    | 38498.461 | 32831.902 | AL096750  | 38954.02  | 37089.211 |
| AF229804  | 54920.18  | 58500.82  | NM_005355 | 35381.32  | 32843.301 | NM_016061 | 3313.026  | 2754.305  |
| AF151638  | 4248.596  | 4264.531  | Z25434    | 4641.169  | 3985.403  | NM_016062 | 31236.975 | 22207.275 |
| U90552    | 10086.462 | 11371.866 | NM_005884 | 13950.217 | 15414.458 | NM_004153 | 1430.548  | 1383.06   |
| NM_006032 | 5460.477  | 5676.278  | NM_012395 | 11975.038 | 10308.052 | AK024740  | 1761.261  | 1960.44   |
| NM_014785 | 3260.091  | 3123.067  | AF229804  | 50923.598 | 51856.23  | AF078164  | 7557.821  | 6231.113  |
| NM_002153 | 950.864   | 652.214   | AF151638  | 3166.483  | 2932.052  | NM_003625 | 1324.968  | 988.349   |
| AB040890  | 5984.883  | 6731.967  | U90552    | 11107.474 | 9418.452  | AF029325  | 1158.332  | 1208.099  |
| AK024233  | 1791.214  | 1542.767  | NM_006032 | 6282.498  | 6518.956  | NM_005704 | 1532.028  | 1598.301  |
| AK021870  | 2286.715  | 2087.319  | NM_014785 | 4364.875  | 3406.633  | AF097021  | 1136.488  | 1251.817  |
| U06680    | 1281.128  | 1445.16   | NM_002153 | 1278.835  | 1582.911  | NM_001365 | 1172.792  | 1189.501  |
| NM_005123 | 1043.957  | 1096.543  | AB040890  | 5494.524  | 4986.422  | NM_000677 | 2927.188  | 2952.66   |
| NM_015584 | 12764.783 | 9985.669  | AK024233  | 1928.594  | 1989.059  | BF308728  | 1849.117  | 2729.358  |
| NM_001697 | 51397.492 | 33536.371 | AK021870  | 1800.105  | 1747.375  | NM_013280 | 796.364   | 1599.846  |
| NM_016095 | 24095.139 | 16543.633 | U06680    | 1272.557  | 1074.247  | NM_018315 | 8411.881  | 12647.874 |
| NM_002063 | 957.364   | 640.622   | NM_005123 | 1021.11   | 932.467   | AF051151  | 728.595   | 1309.342  |
| AL137479  | 1459.204  | 1530.801  | NM_015584 | 11123.427 | 11447.503 | AF142421  | 2620.321  | 4712.477  |
| NM_004211 | 3744.471  | 3515.019  | NM_001697 | 42895.102 | 43077.18  | AF257238  | 446.877   | 910.608   |
| Y10776    | 4337.774  | 5458.019  | NM_016095 | 21144.74  | 19794.666 | AB037836  | 1595.397  | 3283.873  |
| AK027241  | 7681.426  | 8934.775  | NM_002063 | 1003.354  | 923.393   | NM_014247 | 1564.444  | 2537.657  |
| NM_004561 | 901.216   | 1575.117  | AL137479  | 1057.229  | 923.165   | NM_018695 | 60811.488 | 72398.805 |
| AK024812  | 5557.375  | 6874.496  | NM_004211 | 2820.002  | 2582.542  | NM_006343 | 972.67    | 2992.664  |
| M20642    | 2492.163  | 2153.505  | Y10776    | 2677.454  | 2249.172  | NM_014785 | 1728.82   | 3371.161  |
| AK026412  | 3478.234  | 4660.08   | AK027241  | 8157.541  | 6751.542  | NM_015716 | 3532.023  | 4184.655  |
| X89669    | 4611.272  | 4787.249  | NM_006975 | 6231.862  | 4288.978  | NM_005735 | 3684.553  | 4823.953  |
| NM_001072 | 1727.151  | 2055.2    | NM_004561 | 730.571   | 789.147   | AB023166  | 825.093   | 1194.623  |
| NM_014070 | 1034.811  | 805.305   | AK024812  | 4378.848  | 3657.781  | AB028966  | 5587.614  | 6955.43   |
| NM_016027 | 1094.758  | 830.61    | M20642    | 1927.824  | 1762.458  | NM_005755 | 2636.21   | 2214.585  |
| NM_014297 | 11653.276 | 8024.312  | AK026412  | 2877.151  | 2316.751  | AF044774  | 1502.314  | 762.465   |
| NM_018156 | 17277.65  | 13622.036 | X89669    | 2828.178  | 2962.4    | NM_005402 | 4024.105  | 3213.091  |
| X98266    | 1910.543  | 1120.627  | NM_001072 | 1730.503  | 1509.71   | AF055027  | 4028.777  | 3167.688  |
| U00930    | 17300.604 | 19817.17  | NM_014070 | 1248.081  | 1159.88   | U63541    | 2818.399  | 2407.786  |
| AK024958  | 901.324   | 700.744   | NM_016027 | 1301.276  | 990.763   | AB033045  | 1271.677  | 978.759   |
| NM_014575 | 6394.36   | 3474.567  | NM_014297 | 11698.99  | 10165.713 | AF055006  | 3362.943  | 2838.531  |
| NM_002435 | 5998.263  | 3244.196  | NM_018156 | 23953.943 | 21572.584 | NM_004935 | 3124.47   | 4084.075  |
| AL117552  | 2646.435  | 1838.611  | X98266    | 1968.961  | 1793.923  | NM_001895 | 5725.027  | 5660.638  |
| NM_002692 | 13416.986 | 10455.175 | U00930    | 16865.545 | 15974.295 | NM_014023 | 1024.833  | 708.753   |
| X55525    | 1628.878  | 1996.033  | AK024958  | 1212.118  | 1078.015  | NM_002745 | 4880.822  | 7094.25   |
| NM_000242 | 621.02    | 877.684   | NM_014575 | 5552.717  | 4603.247  | D26488    | 3681.729  | 4825.869  |

|           |           |           |           |           |           |           |           |           |
|-----------|-----------|-----------|-----------|-----------|-----------|-----------|-----------|-----------|
| AB040878  | 1325.279  | 1270.878  | NM_002439 | 7290.404  | 7013.242  | NM_001432 | 1108.988  | 2234.541  |
| S74647    | 1018.375  | 1452.004  | AL117552  | 2321.641  | 1861.757  | AK002193  | 930.583   | 1325.206  |
| NM_003506 | 2176.325  | 2521.379  | NM_002692 | 12549.402 | 11025.377 | AB014554  | 1336.731  | 1728.589  |
| NM_018093 | 8853.455  | 9656.538  | X55525    | 1490.099  | 1298.08   | AF097431  | 4286.179  | 6685.455  |
| NM_003012 | 357.768   | 506.665   | NM_000242 | 803.914   | 494.933   | NM_001978 | 1274.252  | 2338.715  |
| NM_003389 | 7213.63   | 8561.744  | AB040878  | 1823.605  | 1398.03   | NM_005897 | 898.311   | 1787.89   |
| NM_000430 | 2740.551  | 2926.488  | S74647    | 1091.047  | 801.265   | NM_002579 | 684.159   | 1479.032  |
| AB033030  | 962.129   | 994.525   | NM_003506 | 1846.205  | 1823.664  | NM_004221 | 4355.798  | 6416.55   |
| NM_016656 | 2720.149  | 1960.586  | NM_018093 | 7274.93   | 7127.732  | NM_004061 | 1225.986  | 1824.846  |
| NM_015963 | 8841.064  | 9783.487  | NM_003389 | 6055.276  | 5263.005  | NM_003019 | 1162.544  | 1232.84   |
| AB007871  | 4341.561  | 3930.655  | NM_000430 | 2169.985  | 1690.147  | NM_006923 | 2526.661  | 1759.26   |
| NM_017813 | 7799.904  | 7741.857  | AB033030  | 742.87    | 465.27    | NM_004615 | 21768.451 | 16086.109 |
| NM_003840 | 5203.362  | 3452.356  | NM_016656 | 2184.351  | 1204.458  | AF119889  | 8849.627  | 6742.883  |
| NM_018378 | 1362.081  | 1354.539  | NM_015963 | 7033.843  | 5351.243  | NM_006699 | 1683.991  | 1831.751  |
| NM_018423 | 2030.099  | 1328.577  | AB007871  | 6801.477  | 6907.546  | AK025645  | 11341.165 | 13941.413 |
| NM_001741 | 9763.35   | 7309.792  | NM_017813 | 7796.088  | 7859.951  | AK023266  | 665.703   | 1313.682  |
| NM_000745 | 4287.991  | 5239.795  | NM_003840 | 10240.019 | 9234.103  | NM_005067 | 5310.644  | 5900.417  |
| AF116705  | 12380.245 | 7063.405  | NM_018378 | 1716.482  | 1666.142  | NM_002817 | 8958.388  | 10986.29  |
| NM_004460 | 1559.417  | 1173.452  | NM_018423 | 1861.513  | 1873.448  | NM_002801 | 7607.454  | 8518.251  |
| NM_006072 | 3701.7    | 2315.626  | NM_001741 | 8588.122  | 8238.45   | BE905810  | 580.656   | 584.504   |
| BE794490  | 1117.828  | 616.19    | NM_000745 | 3615.927  | 3186.806  | NM_014780 | 779.379   | 645.85    |
| NM_003561 | 4746.221  | 2407.501  | AF116705  | 15264.828 | 14596.911 | NM_014730 | 8048.613  | 9307.649  |
| NM_004071 | 7680.432  | 13054.213 | NM_004460 | 1942.369  | 1930.651  | NM_014167 | 2191.518  | 5241.079  |
| NM_001316 | 13089.646 | 19918.459 | NM_006072 | 4686.336  | 4606.77   | NM_016063 | 2205.333  | 2547.767  |
| AJ008149  | 6087.093  | 6804.604  | BE794490  | 1749.942  | 1896.001  | U82987    | 2314.852  | 2502.716  |
| NM_002353 | 511.739   | 1004.59   | NM_003561 | 4233.981  | 4579.035  | NM_005732 | 1692.042  | 1172.903  |
| NM_012153 | 2600.018  | 3199.856  | NM_002991 | 548.272   | 561.414   | AK056481  | 3544.771  | 2601.506  |
| NM_013241 | 2604.911  | 2969.269  | NM_004071 | 4442.207  | 4473.042  | NM_005433 | 901.35    | 639.805   |
| NM_017988 | 51152.754 | 52880.082 | NM_001316 | 11029.534 | 7979.399  | L35035    | 2942.338  | 1990.019  |
| NM_015535 | 2085.988  | 3239.101  | AJ008149  | 8990.54   | 7107.698  | NM_007152 | 1503.562  | 1008.419  |
| Z24725    | 5149.929  | 5807.674  | NM_001192 | 468.1     | 379.235   | NM_018293 | 1341.672  | 1289.536  |
| AF161362  | 5252.631  | 4886.84   | NM_002353 | 1226.648  | 851.725   | NM_001938 | 3669.912  | 3300.379  |
| AK024078  | 1160.762  | 888.935   | NM_012153 | 2512.583  | 1758.274  | AF230808  | 2792.903  | 2973.632  |
| NM_015939 | 10334.955 | 6782.286  | NM_013241 | 2310.108  | 2160.294  | U18910    | 1005.331  | 1142.327  |
| AB046840  | 3040.154  | 2948.783  | NM_017988 | 55921.875 | 54099.734 | NM_005238 | 3180.385  | 2800.354  |
| AF174487  | 1583.025  | 1187.899  | NM_015535 | 2083.998  | 1560.088  | AK075306  | 3716.459  | 3237.648  |
| NM_017699 | 803.203   | 1179.835  | Z24725    | 4207.326  | 2572.989  | NM_001280 | 15292.666 | 12556.989 |
| NM_005041 | 1125.967  | 1587.155  | AF161362  | 3401.091  | 2429.409  | AB019572  | 57256.871 | 58130.648 |
| NM_006407 | 17871.434 | 15851.802 | NM_015939 | 10175.736 | 9064.084  | NM_002948 | 39277.336 | 26452.01  |
| NM_007373 | 3261.547  | 1266.359  | AB046840  | 2799.235  | 2508.594  | AF113008  | 1532.354  | 950.576   |
| NM_006263 | 37486.336 | 22053.221 | AF174487  | 2603.449  | 2519.609  | NM_020217 | 1555.037  | 852.565   |
| NM_004791 | 2838.995  | 1348.759  | NM_017699 | 693.409   | 652.473   | NM_018135 | 47565.773 | 33272.961 |
| Z36876    | 5021.922  | 7119.901  | NM_005041 | 666.504   | 467.941   | AF205435  | 10136.894 | 7336.237  |
| NM_000892 | 2118.186  | 2233.156  | NM_006407 | 16284.126 | 12719.92  | AF052105  | 2480.555  | 1557.66   |
| X75363    | 578.838   | 764.096   | NM_007373 | 2532.259  | 1954.53   | AK001204  | 6721.395  | 4110.759  |
| NM_005046 | 527.451   | 609.298   | M34572    | 542.335   | 705.239   | M15465    | 3023.023  | 1945.364  |
| NM_001873 | 980.617   | 1092.27   | NM_006263 | 32923.797 | 32897.75  | J03866    | 4622.726  | 3383.225  |
| AB029025  | 761.579   | 913.558   | NM_004791 | 4137.518  | 3584.136  | AK022836  | 3300.661  | 3820.738  |
| NM_003940 | 576.28    | 862.642   | Z36876    | 4002.921  | 3078.7    | NM_012343 | 7171.134  | 5925.371  |
| NM_016572 | 2254.035  | 1936.071  | NM_000892 | 2363.287  | 1941.49   | NM_003078 | 2769.104  | 2102.095  |
| NM_000027 | 1146.148  | 992.641   | NM_005046 | 917.186   | 630.583   | AL137703  | 578.841   | 598.994   |
| NM_017548 | 21757.195 | 13388.878 | NM_001873 | 920.734   | 636.489   | NM_001809 | 5225.506  | 4662.321  |
| AF134802  | 1413.312  | 1576.183  | AB029025  | 674.07    | 539.776   | AL117477  | 3200.896  | 2821.502  |

|           |           |           |           |           |           |           |           |           |
|-----------|-----------|-----------|-----------|-----------|-----------|-----------|-----------|-----------|
| NM_018222 | 1439.717  | 2456.499  | NM_007100 | 42920.09  | 38941.152 | NM_012107 | 2822.188  | 2524.83   |
| NM_005740 | 5166.082  | 8104.033  | NM_002954 | 62804.313 | 53805.25  | AB037760  | 1431.073  | 1066.732  |
| NM_004308 | 20591.076 | 17795.414 | NM_016572 | 1749.482  | 1493.887  | NM_015680 | 1453.806  | 1458.198  |
| AF112366  | 3215.034  | 1631.753  | NM_000027 | 912.676   | 819.14    | M22637    | 862.595   | 991.923   |
| NM_004274 | 1841.425  | 676.292   | NM_017548 | 24544.959 | 22475.617 | NM_018364 | 4634.564  | 2774.305  |
| AK024002  | 17019.705 | 14015.655 | AF134802  | 1324.445  | 1208.721  | NM_007022 | 2479.623  | 1919.05   |
| NM_020398 | 9792.902  | 5784.219  | NM_018222 | 1081.969  | 845.074   | AL049943  | 9724.798  | 5561.846  |
| AB011117  | 1852.21   | 934.991   | NM_005740 | 5755.202  | 5373.659  | AL355708  | 509.753   | 598.802   |
| AF060935  | 3170.968  | 3061.469  | NM_004308 | 18550.477 | 16475.559 | AK001489  | 1381.242  | 1436.504  |
| AK026886  | 1973.795  | 2608.593  | AF112366  | 4183.167  | 4016.448  | NM_015681 | 2384.818  | 2266.423  |
| D83778    | 1912.993  | 2093.308  | NM_004274 | 2750.654  | 2705.156  | AF070582  | 1563.297  | 1201.419  |
| NM_004264 | 6470.646  | 7881.679  | AK024002  | 16821.131 | 17304.512 | NM_006383 | 3848.684  | 3116.583  |
| AK024788  | 1903.046  | 2376.104  | NM_020398 | 13489.863 | 13260.771 | NM_015400 | 3305.77   | 2735.031  |
| NM_004473 | 732.987   | 749.664   | AB011117  | 1824.735  | 1357.21   | AL359561  | 1319.296  | 1383.003  |
| AK022696  | 2785.562  | 2225.794  | AF060935  | 3068.729  | 1738.812  | AK026464  | 1281.232  | 1222.241  |
| NM_001206 | 3163.43   | 2423.062  | AK026886  | 1499.383  | 1430.115  | AK001362  | 549.997   | 594.01    |
| NM_005016 | 3929.117  | 3397.212  | D83778    | 1355.503  | 1045.176  | AK022400  | 993.505   | 759.785   |
| NM_014469 | 4008.855  | 3309.126  | NM_004264 | 6124.907  | 3581.479  | AF052100  | 1523.68   | 1322.547  |
| NM_014852 | 5576.987  | 3903.899  | AK024788  | 1708.545  | 1083.115  | AL110235  | 1093.121  | 5694.906  |
| NM_000344 | 19740.074 | 14881.285 | AK022696  | 2184.508  | 1637.678  | U79245    | 1638.466  | 8603.637  |
| AF248650  | 3698.678  | 2545.364  | NM_001206 | 1963.916  | 1686.018  | AF086124  | 1263.693  | 826.483   |
| AF248651  | 951.011   | 755.577   | NM_005016 | 2859.97   | 2456.097  | AK024820  | 675.801   | 535.631   |
| NM_001358 | 35197.25  | 23164.748 | NM_014469 | 4778.802  | 3804.309  | AB033105  | 1033.242  | 810.706   |
| NM_004836 | 11328.308 | 20327.914 | NM_014852 | 4617.691  | 3200.483  | AJ001865  | 968.982   | 739.57    |
| AB037751  | 5758.084  | 7657.683  | NM_000344 | 19398.07  | 17467.191 | X64982    | 740.821   | 872.858   |
| S79281    | 5923.634  | 3613.501  | AF248650  | 3227.14   | 2781.092  | D61704    | 9162.991  | 7957.146  |
| AK025585  | 3245.241  | 1793.562  | S74678    | 35189.512 | 28842.459 | AJ227889  | 719.272   | 791.147   |
| NM_001414 | 8937.671  | 4247.681  | AF248651  | 974.705   | 716.49    | L34409    | 12041.645 | 10291.335 |
| D16891    | 2576.409  | 1261.531  | NM_001358 | 35651.418 | 24632.518 | U12210    | 4150.268  | 3243.498  |
| NM_017760 | 3679.537  | 1680.001  | NM_004836 | 10789.949 | 8698.545  | L08440    | 3537.952  | 3406.189  |
| NM_015936 | 8632.796  | 4198.505  | AB037751  | 4657.943  | 3664.59   | M73799    | 1451.58   | 1370.633  |
| AL109698  | 3454.185  | 4299.199  | S79281    | 5638.411  | 3822.179  | AF086119  | 3056.61   | 14465.96  |
| AF217980  | 8620.19   | 8439.641  | AK025585  | 3010.318  | 2649.741  | NM_003782 | 1780.092  | 2845.127  |
| AL117461  | 2392.858  | 2800.077  | NM_001414 | 9079.474  | 8153.925  | AL442096  | 987.316   | 729.853   |
| NM_016498 | 1301.865  | 1287.563  | D16891    | 2859.089  | 2617.377  | NM_018228 | 876.959   | 523.52    |
| AF104921  | 35366.301 | 36950.012 | NM_017760 | 3212.089  | 2270.733  | AJ270693  | 880.664   | 952.322   |
| NM_000126 | 15519.603 | 16782.375 | NM_015936 | 11398.009 | 10991.098 | NM_017790 | 1568.208  | 1636.703  |
| AK022291  | 977.649   | 991.567   | AL109698  | 2496.346  | 2033.281  | AK000023  | 1848.594  | 1839.075  |
| BF239974  | 2664.029  | 3425.716  | AF217980  | 5225.744  | 3948.483  | AK000901  | 732.609   | 674.827   |
| NM_000104 | 1442.413  | 1572.441  | AL117461  | 1832.813  | 1421.136  | AK024351  | 720.517   | 396.169   |
| NM_005015 | 18560.188 | 18689.418 | NM_016498 | 962.921   | 855.058   | AK024886  | 731.562   | 865.275   |
| NM_004255 | 62073.391 | 55797.664 | AF104921  | 27968.236 | 22919.545 | AK025002  | 3285.841  | 6808.418  |
| NM_000268 | 38240.242 | 34237.477 | NM_000126 | 13908.605 | 10002.701 | AK024011  | 1193.407  | 693.647   |
| AF182288  | 3820.007  | 3405.399  | AK022291  | 709.954   | 694.351   | AF119913  | 789.982   | 469.818   |
| NM_004491 | 2261.861  | 1183.015  | BF239974  | 3381.531  | 2565.541  | AF049883  | 1361.828  | 945.994   |
| AK026810  | 4105.781  | 2064.235  | NM_000104 | 1203.574  | 789.145   | L10148    | 1185.38   | 632.028   |
| NM_015628 | 9545.635  | 4634.849  | NM_005015 | 14426.12  | 11269.467 | AK026247  | 704.987   | 625.609   |
| AF218032  | 7475.429  | 4263.48   | NM_004255 | 64297.84  | 47935.215 | AK023302  | 290.313   | 435.743   |
| NM_017542 | 10132.61  | 6152.512  | NM_000268 | 52357.605 | 42103.965 | AL110175  | 535.028   | 686.393   |
| AK024407  | 1498.859  | 769.484   | AF182288  | 2594.19   | 2085.625  | AF288406  | 553.332   | 1011.756  |
| NM_004182 | 32639.469 | 16789.164 | NM_004491 | 1941.525  | 1339.191  | AK023328  | 6480.155  | 7023.008  |
| NM_018418 | 956.374   | 299.423   | AK026810  | 3794.16   | 2684.92   | NM_015931 | 1246.006  | 6174.464  |
| NM_014240 | 1552.192  | 702.87    | NM_015628 | 9323.503  | 7343.523  | AJ012499  | 58347.66  | 55676.168 |

|           |           |           |           |           |           |           |           |           |
|-----------|-----------|-----------|-----------|-----------|-----------|-----------|-----------|-----------|
| NM_015877 | 2667.498  | 1320.644  | AF218032  | 5884.085  | 4504.821  | AK024900  | 2145.756  | 1694.406  |
| AL117598  | 2442.012  | 2746.001  | NM_017542 | 8989.031  | 7842.407  | AF119879  | 20053.99  | 12465.602 |
| AL109670  | 2437.259  | 2875.144  | AK024407  | 1403.623  | 1318.696  | AY007095  | 752.642   | 391.632   |
| AF085831  | 1714.851  | 1710.029  | NM_004182 | 31540.711 | 29244.537 | AF086244  | 3461.686  | 2340.108  |
| AL832149  | 3969.722  | 4874.813  | NM_018419 | 943.379   | 789.329   | AL161992  | 9239.805  | 6648.528  |
| AK022839  | 3027.295  | 4184.027  | NM_014240 | 1464.248  | 1419.172  | AK023910  | 1990.336  | 1426.583  |
| NM_018350 | 2859.007  | 3641.562  | BE379399  | 1437.886  | 1120.309  | D16991    | 2811.735  | 2252.967  |
| AK025839  | 2867.713  | 3043.117  | NM_015877 | 4377.298  | 4087.878  | AK023538  | 803.371   | 540.734   |
| NM_003946 | 1681.946  | 1865.879  | AL117598  | 2070.937  | 1703.327  | X77485    | 12274.343 | 8183.251  |
| AB045292  | 4791.843  | 5071.345  | AL109670  | 2030.09   | 1617.474  | NM_014496 | 2067.27   | 1562.325  |
| AK022998  | 2826.816  | 2217.644  | AF085831  | 1064.771  | 974.259   | AK021555  | 1166.325  | 989.52    |
| AK025699  | 21639.111 | 16502.088 | AL832149  | 3479.39   | 2551.286  | AB046765  | 3099.366  | 2592.203  |
| AF147353  | 957.091   | 585.998   | AK022839  | 2924.537  | 2401.793  | AF133333  | 9270.546  | 19197.926 |
| NM_018024 | 7703.926  | 5759.89   | NM_018350 | 2282.031  | 1937.514  | NM_018366 | 1109.032  | 1036.95   |
| AK027173  | 1167.726  | 825.766   | AK025839  | 2530.478  | 2056.807  | NM_004881 | 19073     | 11388.889 |
| AK026783  | 1402.227  | 615.278   | NM_003946 | 1858.832  | 1337.781  | U94903    | 723.639   | 419.248   |
| AF088040  | 668.9     | 174.439   | AB045292  | 3291.23   | 3183.824  | NM_005156 | 6861.461  | 2831.747  |
| AK021814  | 2516.15   | 1489.965  | AK022998  | 2309.057  | 1665.762  | U80764    | 10263.32  | 7501.917  |
| AF086221  | 756.733   | 829.54    | AK025699  | 16540.07  | 14950.659 | AB020684  | 5991.324  | 4208.285  |
| AF088035  | 1721.622  | 1210.491  | AF147353  | 651.933   | 482.619   | AF077036  | 35768.668 | 25104.418 |
| AF086251  | 984.33    | 446.772   | NM_018024 | 8616.06   | 7896.337  | NM_020421 | 4033.884  | 2386.409  |
| NM_018092 | 12816.862 | 7754.203  | AK027173  | 437.561   | 689.951   | D17094    | 2057.249  | 1339.891  |
| NM_005842 | 3389.375  | 2140.844  | AK026783  | 1096.571  | 1039.257  | L37690    | 15857.105 | 9187.526  |
| NM_003787 | 344.762   | 834.642   | AF088040  | 436.785   | 360.385   | D61707    | 859.742   | 699.294   |
| AF147419  | 5024.995  | 5492.432  | AK021814  | 2139.302  | 2290.707  | AK021610  | 2070.614  | 1333.756  |
| AK024280  | 1591.074  | 1154.484  | AF088035  | 1073.117  | 1327.742  | Z36835    | 4217.591  | 3331.796  |
| AF075036  | 1867.996  | 2290.2    | AF086251  | 827.718   | 706.932   | AK023767  | 2580.26   | 1736.698  |
| NM_014797 | 5167.096  | 5462.082  | NM_018092 | 12672.48  | 11460.87  | AF084516  | 1083.777  | 1065.613  |
| AK027139  | 1400.685  | 1807.855  | NM_005842 | 3614.897  | 3193.848  | AJ001907  | 1593.062  | 1244.519  |
| AL831841  | 7069.167  | 6595.052  | AF147419  | 4842.322  | 3894.571  | M32220    | 3754.897  | 4640.013  |
| AL110165  | 3295.679  | 2476.844  | AK024280  | 953.877   | 661.886   | NM_020436 | 7709.665  | 6518.198  |
| AL117652  | 1151.941  | 1176.736  | AF075036  | 2031.677  | 1589.776  | AF052169  | 1852.335  | 1242.431  |
| AL050168  | 3633.83   | 2003.438  | NM_014797 | 6117.36   | 4999.291  | CY3Cy5    | 3283.405  | 206.276   |
| AL122122  | 4959.384  | 3383.939  | AK027139  | 970.525   | 677.209   | BF942101  | 1613.625  | 1709.809  |
| AK000122  | 8831.274  | 5843.102  | AL831841  | 5858.424  | 4596.666  | BI825012  | 5873.797  | 4891.854  |
| AK023159  | 3646.848  | 2136.408  | AL110165  | 3890.975  | 2829.936  | BM051302  | 939.796   | 1071.228  |
| AK001091  | 4335.272  | 6212.426  | AL117652  | 1040.423  | 981.215   | X03225    | 2904.567  | 4491.074  |
| AF086428  | 1004.598  | 422.703   | AL050168  | 2674.079  | 2615.869  | AK097395  | 4699.779  | 4726.284  |
| AK025310  | 3447.432  | 2015.896  | AL117447  | 553.031   | 676.922   | M12783    | 1231.822  | 1519.486  |
| AL049353  | 447.632   | 724.265   | AL122122  | 4585.983  | 5626.198  | AK091535  | 386.568   | 719.362   |
| AI793165  | 837.202   | 921.288   | AK000122  | 15620.491 | 14194.095 | AF085357  | 7108.919  | 7652.893  |
| NM_014896 | 605.166   | 679.138   | AK023159  | 3309.178  | 2742.092  | NM_003841 | 12104.617 | 5110.745  |
| AF009269  | 2117.176  | 2185.358  | AK001091  | 8215.098  | 7362.805  | AF296673  | 609.493   | 464.558   |
| AF009313  | 5236.309  | 4166.396  | AF086428  | 1060.978  | 946.382   | SR2       | 57427.273 | 52523.539 |
| AF056420  | 1279.489  | 1260.751  | AK025310  | 3370.755  | 3086.914  | SR4       | 11532.276 | 7448.898  |
| AF090887  | 1445.806  | 1492.055  | NM_014896 | 536.132   | 521.707   | SR6       | 1749.801  | 1186.409  |
| AF009279  | 775.477   | 1063.781  | AF009269  | 1979.439  | 1467.613  | SR8       | 5723.068  | 11643.708 |
| NM_015883 | 2098.531  | 2602.715  | AF009313  | 2892.771  | 3048.497  | SR10      | 26431.049 | 6058.148  |
| AF056429  | 1054.619  | 968.907   | AF056420  | 829.076   | 891.49    | CY3Cy5    | 2268.392  | 123.924   |
| AF070547  | 4460.216  | 4073.048  | AF090887  | 1564.185  | 911.515   | NM_014322 | 772.071   | 1094.535  |
| AK001110  | 15191.911 | 13171.336 | AF009279  | 800.535   | 607.298   | NM_004122 | 2008.14   | 2005.631  |
| AK021652  | 1015.546  | 621.934   | NM_015883 | 2485.648  | 1918.218  | NM_002926 | 2302.472  | 2366.023  |
| AK021859  | 2101.74   | 1139.861  | AF056429  | 766.573   | 651.33    | NM_000160 | 1023.172  | 1285.845  |



|           |           |           |           |           |           |           |           |           |
|-----------|-----------|-----------|-----------|-----------|-----------|-----------|-----------|-----------|
| AK026439  | 1667.313  | 1069.369  | AF070547  | 4145.409  | 3202.511  | NM_003301 | 573.524   | 1001.652  |
| AK025278  | 1018.683  | 629.51    | AK001110  | 16976.688 | 14658.741 | NM_00095E | 1079.704  | 1670.55   |
| AK026828  | 543.924   | 810.096   | AK021801  | 550.679   | 362.084   | U27768    | 876.294   | 1182.459  |
| AY007163  | 13647.955 | 15710.905 | AK001153  | 576.715   | 509.98    | AF305550  | 4082.961  | 4567.827  |
| NM_00623E | 31714.584 | 33644.621 | AK002184  | 1068.958  | 866.215   | U66582    | 4681.507  | 4534.048  |
| AK023734  | 1961.09   | 1544.231  | AK021652  | 970.164   | 882.027   | NM_00619E | 2951.91   | 3283.11   |
| D17265    | 44353.129 | 50879.594 | AK021859  | 2201.101  | 2215.614  | NM_00381E | 591.161   | 754.429   |
| AF085827  | 1133.831  | 1390.563  | AK025826  | 1830.965  | 1332.579  | NM_00084E | 985.04    | 865.306   |
| Y08266    | 41530     | 44490.676 | AK026439  | 2811.155  | 2692.384  | NM_00467E | 1429.255  | 1799.048  |
| AK002171  | 5434.495  | 5590.869  | AK025278  | 1299.5    | 1173.913  | NM_00095C | 18973.711 | 13586.625 |
| AJ002572  | 2723.166  | 2337.066  | AK026466  | 616.186   | 503.461   | NM_00513E | 4380.599  | 4315.588  |
| AK026897  | 9434.465  | 9250.947  | AY007163  | 12120.481 | 9769.997  | L10139    | 749.676   | 432.504   |
| AB037861  | 8824.614  | 9063.42   | NM_00623E | 41556.445 | 35977.313 | NM_02047C | 3043.808  | 1911.725  |
| AK021887  | 5450.959  | 5371.191  | AK023734  | 1684.768  | 1585.41   | AA478950  | 1118.815  | 981.882   |
| AF086180  | 12032.634 | 11235.56  | D17265    | 39864.75  | 30403.477 | AB029033  | 3299.641  | 2863.747  |
| AK022135  | 1731.103  | 824.792   | AF085827  | 1009.632  | 512.616   | AF091034  | 2367.216  | 2604.092  |
| AK022898  | 3959.68   | 4607.654  | Y08266    | 43658.359 | 33408.484 | NM_005301 | 14753.854 | 15139.959 |
| NM_01755E | 18502.123 | 11270.603 | AK002171  | 4454.07   | 3643.177  | NM_01665E | 2638.748  | 3169.496  |
| NM_003547 | 2168.26   | 3540.932  | AJ002572  | 1803.855  | 1398.116  | AB035124  | 4812.503  | 4940.042  |
| AL049980  | 4203.827  | 5131.862  | AK026897  | 7557.282  | 6115.405  | AF060170  | 1008.297  | 1420.406  |
| NM_00668E | 912.427   | 1484.029  | AB037861  | 8499.45   | 7255.894  | NM_01660E | 889.664   | 1218.563  |
| AF070529  | 831.07    | 959.015   | AK021887  | 4975.901  | 3237.001  | NM_00440E | 9261.539  | 7615.993  |
| AK022978  | 2287.914  | 2360.953  | AF086180  | 11787.72  | 9147.415  | AK023397  | 1651.899  | 2249.111  |
| AK021447  | 7651.258  | 8732.567  | AK022135  | 4060.738  | 4082.502  | NM_00172E | 1813.471  | 2281.099  |
| AK025096  | 2025.347  | 1870.399  | AK022898  | 3686.356  | 3457.719  | NM_00407E | 3103.648  | 2956.959  |
| AF131774  | 3417.321  | 3403.887  | NM_01755E | 34985.699 | 32026.268 | NM_00299E | 577.03    | 1190.221  |
| AK025793  | 920.14    | 912.147   | AL117592  | 637.282   | 529.729   | NM_00038E | 1029.367  | 1399.283  |
| AL389942  | 1810.484  | 1431.019  | NM_003547 | 3949.234  | 2390.717  | X01394    | 48476.105 | 44767.723 |
| D17052    | 2172.344  | 1673.177  | AL049980  | 4194.39   | 3232.552  | NM_000041 | 27966.098 | 24535.914 |
| D28378    | 59773.398 | 57845.063 | NM_00668E | 916.82    | 801.788   | NM_002984 | 1481.217  | 1194.843  |
| M64700    | 1279.433  | 640.929   | AF070529  | 1298.195  | 667.107   | AB037752  | 4100.404  | 3784.297  |
| L41143    | 9111.061  | 6285.483  | AK022978  | 2164.546  | 1564.555  | AK024821  | 8491.71   | 5376.954  |
| NM_005331 | 26504.107 | 16606.449 | AK021447  | 8450.001  | 6732.381  | NM_000224 | 1044.096  | 671.64    |
| NM_014111 | 1090.96   | 610.555   | AK025096  | 2243.106  | 1802.823  | NM_01432E | 5889.344  | 4823.409  |
| S85075    | 885.091   | 620.745   | L31955    | 668.706   | 239.83    | NM_006414 | 4936.93   | 3801.239  |
| AJ008129  | 3916.891  | 3222.436  | AF131774  | 2765.132  | 2118.671  | NM_01847E | 7340.009  | 6591.813  |
| AF161451  | 15830.57  | 10402.621 | AK025793  | 738.294   | 778.086   | NM_01436E | 3394.911  | 3325.41   |
| X02067    | 10651.686 | 10047.159 | AK000151  | 503.175   | 609.695   | NM_01830E | 1460.233  | 1872.274  |
| U92013    | 21627.236 | 26874.625 | AL389942  | 1689.893  | 1368.575  | NM_00183E | 13200.247 | 12461.604 |
| AK023965  | 2638.743  | 5040.7    | D17052    | 1574.895  | 1293.789  | NM_017774 | 15340.229 | 16724.707 |
| AK026211  | 2355.544  | 2968.782  | D28378    | 65046.75  | 55930.148 | AB037716  | 1547.415  | 1956.74   |
| X58968    | 3412.672  | 4092.5    | M64700    | 846.265   | 733.079   | NM_016297 | 2786.079  | 2334.521  |
| U92020    | 7341.313  | 6418.637  | NM_001267 | 919.841   | 667.904   | NM_00175E | 2632.836  | 3062.557  |
| AL117542  | 1259.752  | 1317.111  | L41143    | 10528.819 | 9962.205  | BC003406  | 1877.12   | 2331.586  |
| AL109712  | 27481.988 | 24659.688 | NM_005331 | 52499.949 | 47657.648 | X64177    | 611.218   | 1680.98   |
| X04215    | 653.055   | 985.888   | NM_014111 | 2127.009  | 1657.888  | NM_015994 | 6617.038  | 6115.571  |
| NM_01778E | 4175.958  | 3797.635  | S85075    | 823.789   | 949.446   | NM_01406E | 1691.474  | 1710.988  |
| NM_01814E | 5744.782  | 5315.232  | AJ008129  | 5151.124  | 4452.335  | NM_00169E | 3200.495  | 2609.944  |
| NM_01846E | 22103.139 | 21405.031 | AJ008158  | 803.656   | 601.647   | NM_00224E | 1874.777  | 1174.654  |
| Z36814    | 1921.554  | 1445.678  | AF161451  | 14752.646 | 12810.827 | NM_012281 | 936.397   | 490.052   |
| D17045    | 1584.771  | 1038.547  | X02067    | 15244.804 | 13602.71  | AK025772  | 2419.447  | 1385.526  |
| AK000827  | 4441.455  | 2775.29   | U92013    | 13893.233 | 13277.023 | NM_00550E | 553.202   | 425.53    |
| NM_00250E | 39396.664 | 21528.072 | AK023965  | 1783.475  | 1607.852  | NM_152747 | 1189.915  | 937.687   |

|           |           |           |           |           |           |           |           |           |
|-----------|-----------|-----------|-----------|-----------|-----------|-----------|-----------|-----------|
| NM_005319 | 8906.395  | 3689.393  | AK026211  | 1599.158  | 1188.724  | NM_017415 | 772.773   | 524.103   |
| AK022351  | 2140.561  | 770.527   | X58968    | 2859.968  | 2558.824  | NM_001667 | 15361.243 | 12573.118 |
| NM_020194 | 7741.808  | 5825.272  | U92020    | 5360.179  | 4314.107  | NM_000262 | 674.113   | 688.223   |
| AF038183  | 22756.307 | 15711.39  | AL117542  | 2135.516  | 2057.511  | NM_017831 | 1219.068  | 1117.941  |
| NM_017882 | 3456.093  | 2258.414  | AL109712  | 26936.83  | 26050.627 | AK022537  | 10511.24  | 9190.782  |
| NM_003521 | 2056.413  | 2616.499  | X04215    | 718.181   | 525.299   | AF064597  | 1000.794  | 1712.193  |
| CY3Cy5    | 5505.495  | 464.089   | NM_017782 | 3254.37   | 2851.908  | NM_006345 | 3991.524  | 3797.932  |
| J03571    | 7478.252  | 6176.258  | NM_018149 | 4212.247  | 3347.018  | NM_006875 | 1499.191  | 1728.749  |
| X56134    | 884.361   | 1048.254  | NM_018468 | 20994.127 | 15730.348 | D87119    | 3399.987  | 3062.112  |
| NM_001456 | 1502.24   | 1017.765  | Z36814    | 1817.557  | 1206.856  | AL050040  | 587.097   | 742.655   |
| H44784    | 648.207   | 574.029   | D17045    | 1587.748  | 1232.894  | NM_006556 | 7197.491  | 4874.605  |
| AI421041  | 38157.848 | 30943.922 | AK000827  | 3535.692  | 3236.347  | AL133066  | 408.217   | 375.29    |
| BI759091  | 2654.324  | 2314.281  | NM_002503 | 41601.238 | 37847.953 | AF264717  | 1322.22   | 795.734   |
| BG685843  | 12749.204 | 16701.836 | NM_005319 | 7729.485  | 4581.034  | NM_012260 | 4176.581  | 3118.916  |
| BI490011  | 2371.966  | 3124.553  | NM_019058 | 911.56    | 950.173   | NM_001141 | 3965.386  | 2942.523  |
| AF035771  | 1097.004  | 1857.191  | AK022351  | 2350.881  | 1622.746  | NM_000018 | 6861.805  | 9308.36   |
| BI199286  | 5671.296  | 9841.572  | AK022059  | 652.707   | 706.085   | AB028992  | 884.654   | 842.589   |
| AA026626  | 1702.677  | 2132.013  | NM_020194 | 8388.203  | 6690.973  | L10139    | 576.08    | 416.77    |
| H61726    | 1046.357  | 1834.782  | AK026853  | 647.74    | 785.952   | NM_020470 | 3163.358  | 2061.959  |
| NM_004774 | 4585.821  | 4662.721  | AF038183  | 25655.795 | 23513.613 | AA478950  | 1418.708  | 1031.629  |
| NM_005234 | 4101.493  | 4106.748  | NM_017882 | 5353.187  | 4429.126  | BF942101  | 1898.357  | 2032.414  |
| SR5       | 6005.055  | 5295.198  | NM_003521 | 3152.789  | 3142.098  | BI825012  | 9143.745  | 7418.974  |
| SR7       | 4639.793  | 43239.688 | CY3Cy5    | 1986.614  | 185.198   | M21574    | 488.405   | 550.694   |
| SR9       | 15871.638 | 3448.979  | J03571    | 8457.338  | 4189.827  | BM051302  | 835.566   | 749.259   |
| CY3Cy5    | 5658.005  | 383.22    | X56134    | 752.207   | 427.571   | BE314182  | 5697.478  | 4979.306  |
| AF212842  | 590.601   | 2044.575  | NM_001456 | 759.912   | 490.789   | AI808029  | 682.688   | 833.962   |
| NM_018404 | 834.069   | 782.673   | H44784    | 357.041   | 185.949   | AI971217  | 2253.56   | 2223.367  |
| NM_001118 | 717.884   | 715.51    | AI421041  | 40370.559 | 13779.241 | AK097395  | 5035.814  | 4351.605  |
| AL133097  | 3780.21   | 3418.124  | BI759091  | 1780.028  | 814.345   | M12783    | 1317.184  | 1538.345  |
| NM_001165 | 3622.923  | 3252.451  | BG685843  | 10697.525 | 4659.387  | AK091535  | 666.721   | 613.888   |
| NM_006458 | 5017.174  | 5054.42   | BI490011  | 829.448   | 438.551   | AF085357  | 7028.111  | 5732.91   |
| NM_014459 | 142.589   | 1046.86   | AF035771  | 694.97    | 412.011   | NM_003841 | 9649.097  | 2425.059  |
| NM_004093 | 1140.911  | 2472.767  | N20475    | 4859.5    | 2396.803  | AF296673  | 334.892   | 413.149   |
| AF086122  | 5433.099  | 8044.232  | BI199286  | 5186.99   | 4470.777  | NM_018002 | 2236.354  | 3499.925  |
| AK024397  | 10205.869 | 11258.268 | AA026626  | 739.355   | 976.713   | AB002340  | 1772.757  | 1924.321  |
| NM_018047 | 2350.982  | 2701.786  | H61726    | 961.736   | 2341.605  | NM_000224 | 1286.413  | 1083.921  |
| NM_003564 | 1762.074  | 1939.122  | NM_004774 | 3535.334  | 3793.051  | NM_014328 | 5271.249  | 5477.802  |
| AF317516  | 5623.774  | 6269.842  | NM_005234 | 3925.376  | 3560.459  | NM_006414 | 5188.241  | 5579.702  |
| NM_002581 | 977.386   | 1017.512  | SR7       | 5209.088  | 38533.691 | NM_014322 | 1084.321  | 1668.343  |
| S78203    | 3231.952  | 4336.197  | SR9       | 17858.674 | 1554.769  | NM_004122 | 2393.441  | 2454.216  |
| NM_007235 | 12646.58  | 13151.594 | CY3Cy5    | 1687.973  | 106.575   | NM_002928 | 1673.951  | 1278.528  |
| NM_007269 | 2828.03   | 3162.985  | NM_018404 | 398.446   | 303.647   | NM_000160 | 1242.292  | 1288.05   |
| AK026014  | 1919.418  | 1937.708  | M27544    | 2536.575  | 1924.749  | NM_003301 | 578.042   | 735.677   |
| NM_004298 | 2946.633  | 3244.4    | AL133097  | 3240.644  | 1762.037  | NM_000955 | 1137.596  | 1259.372  |
| NM_001232 | 461.466   | 668.461   | NM_001165 | 2591.444  | 1257.485  | U27768    | 439.303   | 989.196   |
| NM_007181 | 3418.543  | 4566.314  | NM_006458 | 1985.686  | 992.54    | AF305550  | 4499.75   | 3806.016  |
| AB007857  | 1336.943  | 2244.697  | NM_004093 | 628.501   | 240.205   | U66582    | 6292.121  | 5807.127  |
| NM_001778 | 33441.836 | 50132.211 | NM_001449 | 9323.634  | 3980.696  | NM_006198 | 2777.163  | 2342.207  |
| NM_004997 | 15851.523 | 20328.262 | AF086122  | 4822.678  | 5723.229  | NM_003812 | 476.804   | 591.62    |
| NM_005923 | 5463.491  | 6239.688  | AK024397  | 5391.259  | 8323.477  | NM_000849 | 512.399   | 364.954   |
| NM_003465 | 1979.424  | 2702.727  | NM_018047 | 2344.492  | 3787.577  | NM_004678 | 1344.327  | 1284.785  |
| AF289028  | 420.694   | 510.867   | NM_003564 | 1052.996  | 719.012   | NM_000950 | 15215.132 | 8229.236  |
| NM_005127 | 9507.301  | 11232.499 | AF317516  | 7003.456  | 5061.398  | AK025772  | 2861.098  | 4244.533  |

|           |           |           |           |           |           |           |           |           |
|-----------|-----------|-----------|-----------|-----------|-----------|-----------|-----------|-----------|
| NM_005567 | 6487.984  | 5952.367  | NM_002581 | 961.184   | 621.658   | NM_005505 | 873.978   | 1748.439  |
| NM_005216 | 6777.149  | 6815.554  | AI417964  | 736.778   | 355.63    | NM_152747 | 1422.333  | 2768.139  |
| NM_003965 | 1333.787  | 1215.456  | S78203    | 2803.415  | 1254.14   | NM_017415 | 1168.128  | 2068.079  |
| NM_004584 | 3064.564  | 3179.098  | NM_016208 | 6992.287  | 2998.612  | NM_001667 | 20213.992 | 35479.445 |
| AK023618  | 3385.413  | 3204.202  | NM_005638 | 7939.139  | 5128.114  | AB046834  | 541.234   | 1099.095  |
| NM_001492 | 583.747   | 990.001   | NM_007235 | 11599.269 | 7553.316  | AB029033  | 3968.958  | 5473.078  |
| AB012643  | 9910.884  | 9660.495  | NM_007269 | 2329.198  | 1332.226  | AF091034  | 3460.872  | 4238.989  |
| AB023170  | 2064.108  | 2142.698  | AK026014  | 2940.38   | 1580.751  | NM_005301 | 16973.822 | 24797.811 |
| NM_000414 | 4952.996  | 4001.63   | NM_004298 | 3140.906  | 1526.933  | NM_004167 | 474.747   | 1011.533  |
| NM_018845 | 3828.28   | 3722      | NM_007181 | 2165.523  | 657.059   | NM_016653 | 4261.546  | 6613.696  |
| NM_005505 | 1415.958  | 1337.03   | AB007857  | 696.648   | 256.765   | AB035124  | 5180.584  | 9504.594  |
| AK026964  | 474.939   | 829.154   | NM_001778 | 26081.854 | 9633.923  | NM_016602 | 826.117   | 1248.024  |
| NM_001134 | 2582.342  | 2702.559  | NM_004997 | 8567.871  | 6210.773  | NM_004405 | 10673.997 | 13616.622 |
| NM_016016 | 10666.808 | 11993.055 | NM_005923 | 3693.681  | 2139.349  | AK023397  | 2547.074  | 3727.937  |
| NM_020407 | 1386.319  | 1875.876  | NM_003465 | 2257.863  | 2003.636  | NM_001725 | 2434.509  | 2449.237  |
| AF118274  | 10626.524 | 8732.603  | NM_005127 | 10445.683 | 8552.169  | NM_004075 | 4009.821  | 4759.239  |
| NM_018344 | 2380.667  | 2529.06   | NM_005567 | 2234.197  | 3322.258  | NM_002996 | 633.83    | 1188.047  |
| NM_000079 | 4385.67   | 5246.715  | NM_005216 | 5212.17   | 3880.379  | NM_000383 | 971.896   | 1438.563  |
| NM_000083 | 676.017   | 719.141   | NM_006626 | 519.537   | 653.02    | X01394    | 43790.848 | 43454.824 |
| AL110245  | 4030.281  | 3631.204  | NM_003965 | 1457.67   | 1724.162  | NM_000041 | 21296.797 | 13509.38  |
| NM_005628 | 16504.369 | 16378.418 | NM_004584 | 3240.655  | 3836.267  | NM_002984 | 1119.932  | 452.516   |
| X74609    | 35624.324 | 39686.242 | X15183    | 64309.156 | 67630.813 | AF317425  | 1911.475  | 1103.455  |
| NM_000947 | 2382.597  | 2100.135  | AK023618  | 3180.271  | 1548.369  | AF264717  | 1676.889  | 1451.97   |
| NM_016062 | 40293.266 | 35131.68  | AB012643  | 9770.781  | 4629.975  | NM_012260 | 5264.635  | 5305.72   |
| AF078164  | 9393.268  | 9647.03   | AB023170  | 1032.443  | 528.626   | NM_001141 | 5114.07   | 5454.597  |
| NM_019049 | 2271.681  | 2638.446  | NM_014153 | 6280.168  | 3578.599  | NM_000018 | 7329.643  | 8484.953  |
| NM_012413 | 591.328   | 1022.702  | NM_002296 | 14217.555 | 7189.074  | AB028992  | 1362.197  | 2173.724  |
| AF130101  | 849.092   | 1032.802  | NM_000414 | 3830.948  | 3763.05   | NM_018475 | 10204.075 | 14793.666 |
| NM_004656 | 4295.26   | 3907.141  | NM_018845 | 3464.777  | 2018.446  | NM_014362 | 4346.241  | 7008.281  |
| NM_005576 | 1468.165  | 1399.669  | NM_005505 | 1175.031  | 461.8     | NM_018308 | 2760.844  | 3095.49   |
| AF247820  | 703.284   | 843.235   | AK026964  | 357.479   | 163.744   | NM_001832 | 12407.42  | 19513.41  |
| NM_002269 | 1957.571  | 2121.532  | NM_001134 | 1172.29   | 408.715   | NM_017774 | 15869.337 | 28224.758 |
| J04948    | 870.878   | 1105.921  | NM_016016 | 7745.356  | 2840.664  | AB037716  | 1994.786  | 4246.303  |
| NM_018043 | 655.484   | 601.339   | NM_020407 | 1060.069  | 1035.314  | NM_004827 | 361.65    | 2783.848  |
| AK022564  | 57088.566 | 66196.945 | AF118274  | 6525.154  | 13235.584 | NM_001926 | 556.927   | 1916.396  |
| NM_003564 | 1353.37   | 1609.121  | NM_018344 | 1561.153  | 3606.875  | NM_016297 | 3114.159  | 4473.795  |
| AF317516  | 3489.289  | 4189.806  | NM_000079 | 4579.961  | 3533.352  | NM_001752 | 3416.697  | 5375.848  |
| J03571    | 3057.431  | 2332.347  | NM_000083 | 697.36    | 773.175   | BC003406  | 1608.943  | 2847.256  |
| NM_001456 | 760.758   | 538.368   | AL110245  | 2061.451  | 4071.888  | AL137672  | 985.244   | 1381.055  |
| H44784    | 803.196   | 671.762   | NM_005628 | 17598.455 | 21846.367 | X64177    | 1103.883  | 5310.511  |
| AI421041  | 47572.316 | 48815.039 | NM_016605 | 19978.855 | 13077.288 | NM_015994 | 8810.313  | 14389.236 |
| BI759091  | 2424.245  | 2689.1    | X74609    | 28079.291 | 11477.761 | NM_002235 | 455.621   | 345.602   |
| BG685843  | 12366.848 | 13889.149 | NM_018990 | 6246.361  | 4280.893  | NM_002241 | 802.382   | 529.631   |
| BI490011  | 2513.545  | 2147.488  | NM_013363 | 496.872   | 548.51    | NM_014065 | 2245.695  | 2479.097  |
| AF035771  | 932.801   | 1065.654  | NM_000947 | 3955.501  | 3663.46   | NM_001695 | 3433.544  | 2220.8    |
| N20475    | 5428.458  | 4991.003  | AL096750  | 22661.297 | 15327.802 | NM_002248 | 2224.925  | 1818.947  |
| BI199286  | 5122.616  | 5706.307  | NM_016061 | 3185.515  | 1927.154  | NM_012281 | 1235.003  | 641.147   |
| AA026626  | 1275.157  | 1344.142  | NM_016062 | 34547.984 | 14388.738 | NM_000262 | 2383.221  | 2228.338  |
| H61726    | 758.721   | 759.712   | NM_004153 | 1262.057  | 436.276   | AK024393  | 574.721   | 579.913   |
| NM_004774 | 3953.102  | 3211.448  | AK024740  | 6133.815  | 2615.464  | AK022537  | 11687.76  | 19062.791 |
| NM_005234 | 3626.734  | 3549.549  | AF078164  | 3860.117  | 1303.576  | AF116632  | 690.369   | 1246.165  |
| NM_005216 | 2790.53   | 3905.995  | NM_019049 | 2484.87   | 653.547   | AF064597  | 1134.006  | 1853.36   |
| M27544    | 1721.724  | 1733.875  | AF130101  | 942.085   | 912.495   | NM_006345 | 4988.008  | 8892.969  |

|           |           |           |           |           |           |           |           |           |
|-----------|-----------|-----------|-----------|-----------|-----------|-----------|-----------|-----------|
| AL133097  | 6660.722  | 5672.778  | NM_004656 | 3270.935  | 3190.469  | NM_006875 | 2585.723  | 3387.927  |
| NM_006458 | 3100.439  | 2899.088  | NM_005576 | 1325.427  | 2305.782  | D87119    | 3814.343  | 5873.526  |
| NM_004093 | 713.194   | 734.621   | AF071569  | 1553.961  | 1308.218  | AL050040  | 723.101   | 681.345   |
| NM_001449 | 8940.557  | 9410.435  | NM_002269 | 2877.178  | 4905.4    | NM_006556 | 9859.384  | 13540.452 |
| AF086122  | 5108.75   | 4625.803  | J04948    | 1406.676  | 1302.401  | AL133066  | 665.567   | 865.995   |
| AK024397  | 9802.997  | 8980.639  | NM_018043 | 754.034   | 498.76    | NM_000849 | 768.908   | 514.804   |
| NM_018047 | 3124.723  | 2674.255  | AK022564  | 60303.828 | 54541.766 | NM_004678 | 1800.5    | 1561.261  |
| NM_005022 | 881.157   | 964.494   | NM_003564 | 758.863   | 511.959   | NM_000950 | 14443.251 | 7260.846  |
| AL110245  | 655.193   | 1069.273  | AF317516  | 4629.695  | 2100.318  | L10139    | 512.496   | 522.636   |
| NM_005628 | 8606.999  | 11322.655 | NM_002581 | 668.824   | 434.366   | NM_020470 | 4180.813  | 2493.868  |
| S78203    | 2101.755  | 2057.507  | AI417964  | 513.234   | 470.24    | NM_006574 | 2553.079  | 1439.007  |
| NM_016208 | 6152.031  | 5821.583  | J03571    | 8655.336  | 6760.355  | AA478950  | 3519.949  | 1978.889  |
| NM_005638 | 3969.93   | 3987.545  | X56134    | 842.436   | 642.711   | BF942101  | 2904.838  | 2151.65   |
| NM_007235 | 9402.246  | 9017.712  | NM_001456 | 931.442   | 1020.815  | BM051302  | 932.168   | 904.468   |
| NM_007269 | 2352.958  | 2397.513  | AI421041  | 40294.398 | 14775.668 | BE314182  | 5399.273  | 5017.334  |
| AK026014  | 3069.013  | 2829.111  | BI759091  | 1659.124  | 750.497   | AI808029  | 1128.425  | 1339.28   |
| NM_014845 | 1849.625  | 1893.058  | BG685843  | 10627.132 | 2648.685  | AI971217  | 651.54    | 1094.38   |
| NM_004298 | 2923.763  | 3421.903  | BI490011  | 996.57    | 477.558   | X03225    | 3431.497  | 5233.034  |
| NM_007181 | 2250.317  | 2197.426  | AF035771  | 650.641   | 252.553   | AK097395  | 5015.861  | 5245.696  |
| AB007857  | 1199.456  | 1222.676  | N20475    | 4549.732  | 2128.865  | M12783    | 1652.745  | 3067.129  |
| NM_005923 | 4898.594  | 4149.205  | BI199286  | 4668.024  | 3182.757  | AK091535  | 883.379   | 2303.444  |
| NM_003465 | 2121.594  | 1992.893  | AA026626  | 861.185   | 1169.858  | AF085357  | 8853.06   | 13465.283 |
| AF289028  | 447.44    | 504.653   | H61726    | 675.092   | 719.57    | NM_003841 | 11111.517 | 6540.784  |
| NM_005127 | 9746.421  | 11458.504 | NM_004774 | 3270.609  | 3451.354  | AF296673  | 480.295   | 817.342   |
| NM_005567 | 4862.408  | 4335.942  | NM_005234 | 3098.867  | 4560.315  | X01394    | 38268.156 | 24159.955 |
| J04948    | 976.035   | 1459.211  | NM_005216 | 4132.332  | 1705.041  | NM_000041 | 19885.869 | 12990.302 |
| AK022564  | 57410.18  | 61680.977 | NM_003965 | 715.179   | 285.725   | NM_002984 | 1198.29   | 794.44    |
| AB012643  | 11520.181 | 9582.615  | NM_004584 | 2387.178  | 959.623   | AF317425  | 2085.453  | 1830.89   |
| AB023170  | 1245.152  | 1109.882  | X15183    | 60606.148 | 58105.66  | NM_018002 | 1895.249  | 2029.956  |
| NM_014153 | 6090.05   | 5781.406  | AK023618  | 2725.22   | 2392.722  | AB002340  | 1910.697  | 1629.994  |
| NM_002296 | 9045.846  | 9830.906  | AF212842  | 215.911   | 1030.641  | NM_000224 | 1730.544  | 1372.026  |
| NM_000414 | 6155.01   | 4716.041  | NM_018404 | 432.704   | 1120.248  | NM_014328 | 7003.697  | 6771.039  |
| NM_018845 | 3520.129  | 3008.135  | M27544    | 2893.879  | 3963.04   | NM_006414 | 5634.572  | 5057.382  |
| AY008372  | 1539.88   | 1332.554  | NM_001118 | 592.085   | 664.049   | NM_014322 | 692.795   | 695.637   |
| NM_005505 | 1089.482  | 1378.325  | AL133097  | 3408.595  | 2650.297  | NM_004122 | 1700.955  | 1637.826  |
| NM_001134 | 1439.62   | 1457.652  | NM_001165 | 2843.036  | 1417.214  | NM_002928 | 3137.29   | 2643.574  |
| NM_016016 | 8588.924  | 8448.915  | NM_001381 | 60780.699 | 37438.184 | NM_000160 | 1164.23   | 932.005   |
| NM_020407 | 1189.811  | 1021.879  | NM_006458 | 2304.506  | 835.362   | NM_003301 | 734.855   | 714.311   |
| AF118274  | 10394.731 | 8279.35   | NM_004093 | 633.303   | 380.992   | NM_000955 | 1071.28   | 942.511   |
| NM_018344 | 2198.524  | 1879.165  | NM_001449 | 10852.666 | 15234.353 | U27768    | 812.606   | 836.135   |
| NM_000079 | 2412.97   | 2780.839  | AF086122  | 4351.87   | 4896.294  | AF305550  | 3878.663  | 2972.469  |
| NM_004774 | 2231.173  | 3462.723  | AK024397  | 4958.134  | 6033.056  | U66582    | 6427.967  | 5465.263  |
| NM_005234 | 1703.273  | 2592.899  | NM_018047 | 2544.014  | 4314.631  | S73288    | 268.853   | 469.055   |
| X74609    | 46388.152 | 41527.113 | NM_005022 | 586.419   | 523.141   | NM_006198 | 3274.085  | 4420.403  |
| NM_018990 | 6815.769  | 5415.333  | NM_000083 | 541.167   | 367.569   | NM_003812 | 651.993   | 863.767   |
| NM_013363 | 524.577   | 442.834   | AL110245  | 1166.636  | 414.968   | NM_014065 | 1522.154  | 1343.933  |
| NM_000947 | 3777.258  | 3799.089  | NM_005628 | 12617.45  | 3811.287  | NM_001695 | 3497.049  | 2736.267  |
| AL096750  | 51241.086 | 44470.922 | NM_016605 | 15443.785 | 8930.61   | NM_002248 | 1499.472  | 926.43    |
| NM_016061 | 3619.47   | 3239.714  | S78203    | 2988.583  | 2897.684  | NM_012281 | 1423.411  | 1111.689  |
| NM_016062 | 38349.516 | 35357.383 | NM_016208 | 8354.139  | 16842.928 | AK025772  | 2390.46   | 2404.5    |
| NM_004153 | 2089.265  | 2296.906  | NM_005638 | 8683.445  | 7252.506  | NM_005509 | 698.377   | 718.029   |
| AK024740  | 1952.987  | 2214.55   | NM_007235 | 13761.607 | 9658.795  | NM_152747 | 1360.918  | 1419.721  |
| AF078164  | 6999.813  | 7234.682  | NM_007269 | 3008.45   | 1947.405  | NM_017415 | 1503.095  | 2248.159  |

|           |           |           |           |           |           |           |           |           |
|-----------|-----------|-----------|-----------|-----------|-----------|-----------|-----------|-----------|
| NM_019049 | 2030.443  | 2112.221  | AK026014  | 3057.907  | 1508.529  | NM_001667 | 23611.229 | 22742.096 |
| AF130101  | 741.301   | 618.26    | NM_014845 | 2361.105  | 845.604   | AB046834  | 592.834   | 585.313   |
| NM_004656 | 3331.38   | 3037.532  | NM_004298 | 3607.464  | 1381.997  | AB029033  | 3364.096  | 2872.092  |
| NM_005576 | 1154.263  | 848.947   | NM_007181 | 2513.903  | 876.344   | AF091034  | 2483.202  | 2172.448  |
| AF086122  | 3464.782  | 5437.881  | AB007857  | 829.644   | 678.027   | NM_005301 | 14716.284 | 11852.546 |
| NM_018047 | 1781.808  | 1692.027  | NM_001778 | 28832.539 | 33666.719 | NM_016653 | 3233.596  | 2438.353  |
| NM_005022 | 618.97    | 500.07    | NM_004997 | 8617.834  | 8378.984  | AB035124  | 5195.103  | 3981.306  |
| NM_003564 | 886.747   | 1098.176  | NM_005923 | 4335.206  | 5115.527  | AF060170  | 848.716   | 644.657   |
| AF317516  | 4381.106  | 3967.729  | NM_003465 | 2370.473  | 3224.767  | NM_016602 | 412.325   | 300.425   |
| NM_002581 | 627.232   | 431.943   | NM_005127 | 10500.875 | 6919.189  | NM_004409 | 7240.586  | 3725.559  |
| J03571    | 10812.715 | 9165.913  | NM_005567 | 2622.241  | 1158.322  | AK023397  | 1558.653  | 1139.958  |
| X56134    | 954.221   | 1267.891  | AF071569  | 817.008   | 389.489   | NM_001725 | 1944.634  | 1749.405  |
| NM_001456 | 1151.176  | 1124.366  | NM_002269 | 2201.002  | 641.1     | NM_004079 | 3705.811  | 3076.582  |
| AI421041  | 38273.598 | 33101.855 | J04948    | 511.721   | 383.16    | NM_002996 | 497.07    | 645.281   |
| BI759091  | 1743.466  | 1935.069  | NM_018043 | 361.869   | 228.902   | NM_000383 | 972.877   | 794.617   |
| BG685843  | 9384.163  | 10347.141 | AK022564  | 56807.84  | 57013.422 | NM_006875 | 1288.441  | 1283.191  |
| BI490011  | 1700.301  | 1530.563  | NM_001492 | 456.497   | 802.774   | D87119    | 2801.478  | 2099.302  |
| AF035771  | 737.404   | 780.249   | AB012643  | 7990.013  | 8139.89   | AL050040  | 675.213   | 498.458   |
| N20475    | 3657.036  | 3921.203  | AB023170  | 1558.731  | 4073.883  | NM_006556 | 9920.598  | 7752.494  |
| BI199286  | 3936.075  | 4752.346  | NM_014153 | 6252.017  | 8254.072  | AL133066  | 424.581   | 392.925   |
| AA026626  | 777.123   | 907.053   | NM_002296 | 16976.973 | 13239.43  | AF264717  | 2178.094  | 1535.385  |
| NM_004997 | 2292.02   | 2773.553  | NM_000414 | 5130.503  | 4520.167  | NM_012260 | 6089.756  | 5717.658  |
| NM_003465 | 985.128   | 1396.943  | NM_018845 | 4994.749  | 2405.131  | NM_001141 | 4968.156  | 3841.109  |
| NM_005127 | 6944.303  | 8372.917  | NM_005505 | 1398.475  | 472.278   | NM_000018 | 8688.614  | 9017.473  |
| NM_005567 | 3066.682  | 2857.24   | NM_001134 | 1135.119  | 317.067   | NM_018479 | 7490.824  | 7461.955  |
| NM_005216 | 3753.113  | 3510.49   | NM_016016 | 10432.002 | 18178.422 | NM_014362 | 3199.024  | 2665.13   |
| NM_003965 | 919.141   | 500.942   | NM_020407 | 888.161   | 1311.073  | NM_018308 | 1359.454  | 933.392   |
| AK023618  | 1907.687  | 2119.054  | AF118274  | 5042.981  | 4489.799  | NM_001832 | 8983.495  | 6669.784  |
| AF212842  | 463.259   | 1211.861  | NM_018344 | 1517.926  | 1871.24   | NM_017774 | 15956.976 | 13451.309 |
| NM_018404 | 635.349   | 342.413   | NM_000079 | 5005.724  | 3560.783  | AB037716  | 1930.921  | 1674.963  |
| M27544    | 3505.269  | 3034.179  | NM_004774 | 2967.625  | 955.187   | NM_016297 | 2275.512  | 1194.139  |
| AL133097  | 3976.813  | 3020.085  | NM_005234 | 2476.768  | 1020.506  | NM_001752 | 2209.822  | 1652.489  |
| NM_001165 | 2860.446  | 2849.813  | X74609    | 32765.91  | 49511.238 | BC003406  | 1823.174  | 1549.531  |
| NM_006458 | 3357.098  | 3040.945  | AB002316  | 479.795   | 961.658   | AL137672  | 347.029   | 186.039   |
| NM_004093 | 735.838   | 869.279   | NM_018990 | 8773.342  | 8970.682  | X64177    | 902.556   | 1606.311  |
| NM_001449 | 5591.273  | 6016.423  | NM_013363 | 774.572   | 792.572   | NM_015994 | 6351.361  | 3661.433  |
| NM_016016 | 5686.14   | 8326.963  | NM_000947 | 4764.743  | 3712.388  | NM_018476 | 19258.346 | 11917.891 |
| NM_020407 | 607.036   | 765.409   | AL096750  | 32468.908 | 20653.229 | AF220492  | 7924.795  | 5218.254  |
| AF118274  | 6713.393  | 5565.478  | NM_016061 | 3629.575  | 2379.895  | X89671    | 2323.299  | 1900.303  |
| NM_018344 | 1416.681  | 1438.844  | NM_016062 | 36872.406 | 10751.284 | NM_014941 | 3825.321  | 2669.864  |
| NM_000079 | 2378.573  | 2564      | NM_004153 | 2484.7    | 605.344   | NM_018372 | 6045.968  | 4853.204  |
| AL110245  | 1825.173  | 1587.174  | AK024740  | 7274.661  | 3249.919  | NM_013253 | 1304.595  | 1226.997  |
| NM_005628 | 9373.541  | 7512.418  | NM_019049 | 2238.396  | 1842.78   | NM_005895 | 4499.486  | 3985.045  |
| NM_016605 | 17894.119 | 13852.771 | NM_012413 | 632.945   | 833.422   | D82345    | 14643.749 | 15453.361 |
| S78203    | 1986.733  | 1947.097  | AF130101  | 886.713   | 837.983   | NM_003814 | 2391.03   | 2630.945  |
| NM_016208 | 9335.428  | 8058.951  | NM_004656 | 3819.564  | 3745.42   | NM_002968 | 745.727   | 635.328   |
| NM_005638 | 6194.556  | 5808.902  | NM_005576 | 1213.748  | 700.822   | NM_000262 | 714.528   | 758.164   |
| NM_007235 | 9225.53   | 8682.851  | AF086122  | 3443.082  | 947.858   | NM_017831 | 1395.466  | 887.661   |
| NM_007269 | 2974.837  | 2721.355  | AK024397  | 3507.464  | 1761.436  | AK022537  | 9705.483  | 5300.621  |
| NM_014845 | 2500.617  | 2069.444  | NM_018047 | 1596.388  | 668.258   | AF064597  | 767.718   | 840.839   |
| NM_004298 | 2176.47   | 2559.957  | NM_005022 | 515.928   | 561.113   | NM_006345 | 2492.181  | 1692.699  |
| NM_007181 | 2098.914  | 2118.942  | NM_001288 | 379.784   | 327.704   | NM_003255 | 16716.178 | 18809.814 |
| NM_001778 | 19340.035 | 19840.918 | NM_003564 | 1378.196  | 1500.474  | AL080128  | 3178.265  | 2323.309  |

|           |           |           |           |           |           |           |           |           |
|-----------|-----------|-----------|-----------|-----------|-----------|-----------|-----------|-----------|
| NM_019049 | 1819.117  | 2186.357  | AF317516  | 7541.454  | 13498.553 | AB037787  | 6158.152  | 6453.698  |
| AF130101  | 577.917   | 617.152   | NM_002581 | 1245.721  | 2874.409  | AB033072  | 674.962   | 844.378   |
| NM_005576 | 999.066   | 734.476   | AI417964  | 1053.29   | 1507.403  | AB040892  | 1434.431  | 1478.616  |
| AF071569  | 923.064   | 1084.779  | X56134    | 1258.062  | 689.346   | NM_001822 | 1811.469  | 2831.197  |
| NM_002269 | 2093.241  | 1879.207  | NM_001456 | 999.52    | 607.66    | NM_018266 | 16619.514 | 19532.811 |
| J04948    | 760.454   | 646.457   | AI421041  | 45072.258 | 13067.13  | AF230904  | 9909.849  | 12799.431 |
| AK022564  | 57109.453 | 60477.402 | BI759091  | 2057.698  | 993.056   | AL157480  | 840.332   | 775.181   |
| AB012643  | 16308.459 | 11710.934 | BG685843  | 12230.114 | 3240.158  | NM_014386 | 970.353   | 1706.28   |
| AB023170  | 2073.891  | 2008.635  | BI490011  | 896.673   | 492.301   | NM_018110 | 2291.63   | 2315.657  |
| NM_014153 | 8464.436  | 8136.847  | AF035771  | 897.891   | 461.794   | AF312678  | 567.246   | 703.3     |
| NM_002296 | 12235.962 | 12726.468 | N20475    | 4341.41   | 2506.588  | NM_006253 | 9194.317  | 8693.208  |
| NM_000414 | 7056.712  | 5096.174  | BI199286  | 5237.621  | 5480.778  | NM_003866 | 500.484   | 704.503   |
| NM_018845 | 4864.273  | 4333.674  | AA026626  | 799.256   | 1002.905  | NM_018262 | 1162.643  | 1155.208  |
| NM_005505 | 1379.887  | 1648.858  | H61726    | 467.092   | 240.917   | NM_006207 | 1692.555  | 1635.34   |
| NM_006695 | 1083.48   | 1088.893  | NM_004997 | 3264.21   | 1840.535  | NM_003220 | 1449.775  | 1045.253  |
| NM_004815 | 2295.565  | 2468.94   | NM_005923 | 2700.234  | 1746.078  | AF009674  | 5432.375  | 3257.224  |
| NM_004147 | 828.132   | 935.808   | NM_003465 | 1365.275  | 787.834   | NM_000360 | 1242.206  | 1049.517  |
| AK000959  | 2407.178  | 2311.963  | NM_005127 | 10553.08  | 12182.26  | NM_000844 | 715.253   | 534.033   |
| AB037743  | 1532.951  | 1468.191  | NM_005567 | 2608.432  | 3291.897  | NM_005510 | 5356.785  | 3520.282  |
| AB046820  | 3038.971  | 2785.328  | NM_005216 | 5654.204  | 6848.458  | Z36817    | 909.393   | 729.726   |
| NM_014646 | 871.409   | 865.521   | NM_006626 | 532.786   | 1505.443  | NM_014505 | 24450.939 | 15451.331 |
| AF123659  | 1624.893  | 1098.489  | AF212842  | 399.706   | 2321.571  | NM_004209 | 5598.446  | 3528.947  |
| X74609    | 54590.559 | 47262.867 | NM_018404 | 799.765   | 915.275   | NM_016162 | 3041.004  | 4672.063  |
| AB002316  | 712.657   | 272.946   | M27544    | 3249.015  | 3037.589  | AF130056  | 2116.859  | 4103.261  |
| NM_018990 | 8579.139  | 7670.198  | NM_001118 | 524.464   | 349.153   | NM_002201 | 52704.715 | 64009.496 |
| NM_013363 | 829.693   | 671.181   | AL133097  | 3649.016  | 1718.334  | AK025047  | 2521.143  | 3218.152  |
| NM_000947 | 4962.343  | 4949.285  | NM_001165 | 3210.931  | 1335.364  | NM_006806 | 3490.174  | 5967.288  |
| AL096750  | 53852.852 | 59295.664 | NM_006458 | 1917.852  | 730.673   | NM_006763 | 3504.514  | 4346.807  |
| NM_016061 | 3641.574  | 3324.042  | NM_004093 | 851.157   | 719.752   | NM_006119 | 1686.981  | 2891.097  |
| NM_016062 | 42384.32  | 38781.777 | NM_001449 | 10378.411 | 6773.346  | NM_004465 | 784.294   | 1158.662  |
| NM_004153 | 2214.173  | 2048.385  | NM_016016 | 6834.257  | 6017.063  | AK026927  | 2408.03   | 3878.94   |
| AK024740  | 2286.159  | 2136.298  | NM_020407 | 898.578   | 1094.689  | NM_001761 | 5236.019  | 7800.855  |
| AF078164  | 5789.648  | 4874.354  | AF118274  | 4363.493  | 5969.166  | BE884341  | 3322.839  | 5581.842  |
| NM_003628 | 1631.587  | 1178.897  | NM_018344 | 1398.93   | 1843.932  | AF231997  | 2217.387  | 3382.441  |
| AF029325  | 1024.65   | 1288.313  | NM_000079 | 4114.002  | 4954.924  | NM_007125 | 2355.456  | 3444.454  |
| NM_005704 | 1724.432  | 1271.147  | NM_000083 | 858.776   | 1130.251  | NM_002598 | 5526.063  | 7609.88   |
| NM_001365 | 771.014   | 631.868   | NM_003951 | 943.622   | 2752.842  | NM_020184 | 827.914   | 1171.925  |
| NM_000677 | 3997.785  | 3514.491  | S78203    | 4358.679  | 7828.781  | NM_005815 | 2315.253  | 3103.577  |
| BF308728  | 1014.002  | 973.039   | NM_016208 | 9254.063  | 6922      | NM_001229 | 1365.753  | 2108.421  |
| NM_018315 | 18436.5   | 14792.451 | NM_005638 | 8455.458  | 3741.744  | NM_000250 | 582.137   | 461.058   |
| AF142421  | 869.031   | 777.535   | NM_007235 | 13743.078 | 6136.735  | NM_018147 | 6303.827  | 4963.677  |
| AB037836  | 2126.98   | 1800.712  | NM_007269 | 3147.374  | 1073.955  | NM_018967 | 2307.157  | 1724.237  |
| NM_014247 | 1220.547  | 974.979   | NM_014845 | 2227.345  | 605.619   | NM_001850 | 774.393   | 587.277   |
| NM_018695 | 50933.281 | 52884.125 | NM_004298 | 3148.903  | 1369.4    | NM_002160 | 1474.926  | 730.719   |
| AL122065  | 2231.425  | 6095.656  | NM_007181 | 2487.79   | 4007.745  | NM_005675 | 2350.966  | 1578.044  |
| NM_006343 | 2598.773  | 4270.54   | AB007857  | 962.332   | 558.16    | NM_002770 | 1607.663  | 2595.018  |
| NM_014786 | 1413.222  | 1808.802  | NM_001778 | 29032.229 | 17437.99  | BC030636  | 2030.704  | 3794.63   |
| NM_015716 | 7083.431  | 6172.785  | NM_019049 | 2002.632  | 2868.85   | NM_002812 | 3389.223  | 5180.771  |
| NM_003955 | 641.22    | 784       | NM_005447 | 367.718   | 537.941   | NM_020365 | 2551.226  | 3874.187  |
| NM_005739 | 3200.938  | 3234.853  | AF130101  | 797.525   | 1036.41   | NM_003982 | 480.248   | 889.529   |
| AB023166  | 1040.08   | 982.283   | NM_004656 | 2714.541  | 3224.005  | NM_002079 | 5171.336  | 9437.3    |
| AB028966  | 7927.644  | 6296.794  | NM_005576 | 1153.876  | 1639.344  | AY007092  | 2779.886  | 5301.262  |
| NM_005758 | 2815.436  | 2461.389  | AF071569  | 3186.217  | 3305.303  | NM_016261 | 1568.07   | 2492.48   |

|           |           |           |           |           |           |           |           |           |
|-----------|-----------|-----------|-----------|-----------|-----------|-----------|-----------|-----------|
| AF044774  | 1851.266  | 1243.07   | NM_002269 | 2940.846  | 5873.16   | NM_006519 | 2293.043  | 2974.557  |
| NM_005402 | 4034.382  | 3899.529  | J04948    | 1366.13   | 3531.759  | NM_004607 | 59623.316 | 63486.813 |
| AF055027  | 3355.896  | 2844.417  | NM_018043 | 1176.815  | 2321.066  | NM_012076 | 1147.17   | 1773.177  |
| U63541    | 2311.217  | 1872.856  | AK022564  | 61219.777 | 68286.367 | D14678    | 6038.099  | 6147      |
| AF055006  | 3389.844  | 2675.559  | NM_001492 | 755.208   | 1706.37   | NM_016221 | 2285.625  | 1949.184  |
| NM_004935 | 2802.095  | 2821.811  | AB012643  | 10099.273 | 12705.532 | NM_018113 | 1298.816  | 812.024   |
| NM_001896 | 3635.776  | 2864.758  | AB023170  | 1842.303  | 2171.763  | NM_005187 | 1556.738  | 1171.78   |
| NM_002745 | 1650.226  | 1863.582  | NM_014153 | 5939.444  | 4715.387  | U73377    | 2499.028  | 2005.372  |
| NM_001432 | 939.836   | 796.05    | NM_002296 | 17356.779 | 6100.936  | NM_002195 | 3581.25   | 3873.742  |
| AK002193  | 754.66    | 513.311   | NM_000414 | 5128.401  | 1973.589  | BC005219  | 4800.435  | 5368.783  |
| AB014554  | 1752.732  | 1281.837  | NM_018845 | 4670.272  | 1549.964  | NM_006662 | 6814.16   | 5587.596  |
| AF097431  | 3638.651  | 5158.954  | NM_005505 | 1055.755  | 401.517   | NM_004031 | 1129.403  | 1346.965  |
| NM_001978 | 1212.064  | 1777.463  | AK026964  | 613.227   | 1048.309  | NM_004514 | 4341.352  | 4175.333  |
| NM_005897 | 1040.766  | 977.464   | NM_001134 | 1511.202  | 801.914   | NM_006163 | 1454.663  | 2808.544  |
| NM_004221 | 5241.205  | 5194.761  | NM_006695 | 1094.677  | 2102.256  | NM_001272 | 13366.982 | 13885.967 |
| NM_003019 | 1615.643  | 1506.369  | NM_004815 | 2365.028  | 3441.077  | NM_016303 | 8243.503  | 14494.075 |
| NM_006923 | 3432.867  | 2630.092  | NM_004147 | 1017.093  | 829.762   | AV733560  | 1103.814  | 1823.831  |
| NM_004615 | 27972.98  | 22766.178 | AK000959  | 2949.461  | 3347.042  | D17129    | 53266.793 | 60828.586 |
| AF119889  | 9800.919  | 7983.948  | AB037743  | 2138.532  | 3164.17   | NM_003091 | 22925.746 | 40945.793 |
| M90657    | 550.384   | 333.739   | AB046820  | 5544.008  | 8668.077  | NM_004247 | 3992.759  | 7810.792  |
| NM_006695 | 1891.665  | 1776.236  | AK025922  | 555.717   | 1242.936  | NM_017722 | 3629.449  | 5907.357  |
| AK025645  | 14617.501 | 14158.829 | NM_014646 | 1705.736  | 4062.619  | AL137730  | 4542.99   | 5672.396  |
| AK023266  | 631.066   | 633.079   | NM_006375 | 937.461   | 1693.697  | NM_004500 | 41530.652 | 55031.398 |
| NM_006814 | 9797.667  | 7562.627  | AF123659  | 3599.695  | 10070.106 | NM_003276 | 8032.951  | 9647.03   |
| NM_005067 | 5451.036  | 4416.516  | AL050355  | 561.625   | 1475.312  | AL137681  | 3114.299  | 3142.002  |
| NM_002817 | 2894.14   | 2300.973  | X74609    | 32766.012 | 29834.494 | NM_014365 | 522.962   | 703.402   |
| NM_002801 | 1644.121  | 1383.899  | NM_018990 | 5581.194  | 3160.538  | NM_005147 | 3804.588  | 5001.454  |
| BE905810  | 895.237   | 445.096   | NM_013363 | 688.033   | 377.671   | NM_014665 | 3918.707  | 4842.128  |
| NM_014780 | 848.885   | 912.799   | NM_000947 | 4320.277  | 1574.043  | AK023609  | 1713.411  | 1605.513  |
| U82987    | 4084.849  | 3805.116  | AL096750  | 33419.395 | 12368.784 | NM_018019 | 2721.431  | 2949.189  |
| NM_005732 | 980.081   | 1175.657  | NM_016061 | 3453.831  | 1235.454  | AF132733  | 1584.735  | 2258.874  |
| AK056481  | 4040.615  | 4400.896  | NM_016062 | 35182.469 | 9631.555  | NM_001071 | 34886.703 | 36725.672 |
| NM_005433 | 949.64    | 751.305   | NM_004153 | 2004.228  | 1482.994  | NM_006187 | 1427.152  | 1672.945  |
| L35035    | 4411.352  | 3553.461  | AK024740  | 1787.901  | 1700.368  | NM_020354 | 8383.72   | 8925.97   |
| NM_007152 | 1695.996  | 1229.49   | AF078164  | 7850.428  | 6753.545  | NM_000026 | 38974.184 | 44535.762 |
| NM_018293 | 1098.789  | 1101.681  | NM_003628 | 1593.61   | 2400.611  | AB033016  | 7860.411  | 7720.491  |
| NM_001938 | 4160.245  | 2946.883  | NM_004648 | 512.44    | 1292.397  | D87452    | 2325.783  | 2960.678  |
| AF230808  | 3346.954  | 2493.94   | AF029325  | 1603.389  | 1824.027  | AB037864  | 1965.387  | 3333.444  |
| U18910    | 854.357   | 590.749   | AF097021  | 616.406   | 1202.796  | L26494    | 1051.418  | 1692.751  |
| NM_005238 | 2272.765  | 1617.825  | NM_001365 | 1311.985  | 2948.168  | NM_000346 | 564.473   | 1045.934  |
| AK075306  | 1636.423  | 1085.277  | NM_000677 | 5739.152  | 11066.075 | BF382513  | 3767.694  | 4979.611  |
| NM_002948 | 46542.402 | 40334.723 | BF308728  | 1732.873  | 3964.203  | AB020713  | 10953.403 | 16877.725 |
| AF113008  | 2470.762  | 2882.902  | NM_013280 | 656.588   | 1709.875  | AK025426  | 1091.212  | 1626.288  |
| NM_020217 | 1468.117  | 1367.895  | NM_018315 | 12752.989 | 29460.377 | NM_016558 | 5552.706  | 6940.368  |
| NM_018135 | 49167.316 | 47237.391 | AF051151  | 890.093   | 2060.248  | NM_007145 | 7000.294  | 9983.998  |
| AF205435  | 10883.879 | 9678.663  | AF142421  | 3586.36   | 8177.469  | AL133112  | 633.914   | 1662.995  |
| AF052105  | 3047.066  | 1399.043  | AB037836  | 1997.802  | 3042.761  | AF085877  | 530.577   | 460.553   |
| AK001204  | 5757.671  | 3616.787  | NM_014247 | 1501.793  | 1589.792  | AK002078  | 1954.812  | 1798.279  |
| M15465    | 3065.413  | 2087.33   | NM_018695 | 60280.82  | 53187.176 | AF085837  | 1914.764  | 1480.56   |
| J03866    | 5645.02   | 3878.058  | NM_006343 | 723.132   | 327.957   | AK023165  | 712.697   | 704.676   |
| AK022836  | 2784.76   | 2144.322  | NM_014786 | 764.669   | 432.77    | NM_016115 | 2862.256  | 2508.384  |
| NM_012343 | 10444.555 | 6187.076  | NM_015716 | 3098.176  | 1036.239  | NM_014950 | 2819.615  | 2093.935  |
| NM_003078 | 2351.881  | 2196.404  | NM_005739 | 3318.534  | 3145.763  | AL080180  | 720.513   | 673.27    |

|           |           |           |           |           |           |           |           |           |
|-----------|-----------|-----------|-----------|-----------|-----------|-----------|-----------|-----------|
| NM_012107 | 3685.213  | 5940.566  | AB023166  | 1024.724  | 847.757   | X89067    | 916.921   | 1136.693  |
| AB037760  | 1190.296  | 1324.958  | AB028966  | 6701.387  | 3747.599  | AK027250  | 576.431   | 1319.591  |
| NM_01568C | 2132.815  | 2151.469  | NM_005758 | 4439.052  | 5157.529  | AF147376  | 1021.273  | 1026.605  |
| M22637    | 1770.863  | 1740.498  | NM_005402 | 4738.296  | 5982.858  | AL360136  | 784.748   | 878.655   |
| NM_018364 | 5693.711  | 4152.283  | U63541    | 3418.684  | 5022.912  | AF086259  | 1257.877  | 884.799   |
| NM_007022 | 2597.895  | 2484.566  | AB033045  | 1547.898  | 3968.286  | AF086328  | 1819.366  | 1792.917  |
| AL049943  | 17583.613 | 15819.73  | NM_004935 | 3864.467  | 8573.803  | AF086427  | 516.652   | 387.405   |
| AL137303  | 1655.057  | 1135.977  | NM_006951 | 1419.771  | 3381.151  | AK024196  | 843.315   | 593.895   |
| AL355708  | 594.467   | 508.247   | NM_001896 | 7962.271  | 17211.076 | AK023753  | 1039.24   | 909.379   |
| NM_015681 | 3727.513  | 2633.725  | NM_014023 | 1239.152  | 4356.989  | AF086441  | 4602.455  | 3483.87   |
| AF070582  | 761.568   | 760.071   | NM_002745 | 4207.771  | 9914.536  | AK027255  | 487.514   | 843.029   |
| NM_006383 | 5221.144  | 4593.437  | D26488    | 4282.736  | 9572.588  | NM_014117 | 2094.665  | 1941.519  |
| NM_01540C | 5714.542  | 5924.908  | NM_001432 | 1191.344  | 1867.169  | AF086087  | 6040.884  | 5290.639  |
| AK023491  | 1466.917  | 2976.965  | AK002193  | 1017.884  | 1528.477  | AK000671  | 40668.055 | 27043.855 |
| AK022400  | 1405.161  | 1455.499  | AB014554  | 1478.097  | 1515.687  | AL137425  | 895.625   | 636.94    |
| AF052100  | 2308.348  | 2632.778  | AF097431  | 2640.316  | 1281.533  | AL137637  | 989.243   | 746.01    |
| AL110235  | 873.522   | 735.69    | NM_001978 | 894.084   | 236.695   | AL359584  | 798.066   | 806.019   |
| U79245    | 697.61    | 736.308   | NM_005897 | 582.028   | 241.713   | AL137285  | 894.835   | 931.354   |
| AF086124  | 1526.726  | 1090.679  | NM_004221 | 3623.97   | 1319.01   | AL137456  | 1414.308  | 1596.431  |
| AK024820  | 990.583   | 927.598   | NM_004061 | 881.256   | 391.823   | AL157489  | 808.35    | 533.735   |
| AB033105  | 1298.075  | 1108.463  | NM_003019 | 1011.404  | 792.42    | AL390157  | 659.926   | 496.181   |
| D61704    | 14922.587 | 10467.779 | M90657    | 928.476   | 2792.183  | AK021649  | 329.238   | 192.893   |
| AJ227889  | 1172.679  | 752.953   | AK023266  | 1099.58   | 1903.34   | AK023086  | 2516.584  | 1419.523  |
| Y10512    | 1180.569  | 2384.131  | NM_006814 | 11902.706 | 25052.424 | NM_017621 | 6455.322  | 3780.336  |
| L34409    | 21054.148 | 26916.834 | NM_005067 | 8592.141  | 18309.314 | AK023574  | 1066.682  | 814.635   |
| M73799    | 2702.301  | 2417.259  | AB007899  | 1154.616  | 4066.173  | AF131767  | 1871.745  | 1251.37   |
| AF086119  | 1708.682  | 1353.813  | NM_002817 | 18596.533 | 39710.469 | AK021907  | 1506.44   | 1011.666  |
| NM_003782 | 3237.911  | 2814.246  | NM_002801 | 8900.688  | 21482.207 | AK022029  | 842.598   | 723.586   |
| AL442096  | 1393.821  | 1090.112  | BE905810  | 924.207   | 1757.523  | AK022320  | 2551.097  | 3047.031  |
| NM_01822E | 976.001   | 609.566   | NM_01478C | 1122.354  | 1106.081  | AK022058  | 855.818   | 477.845   |
| AJ270693  | 614.422   | 388.811   | NM_01473C | 8008.395  | 4225.769  | AK026503  | 796.46    | 448.902   |
| AK000023  | 1363.476  | 1133.182  | NM_014167 | 805.372   | 399.933   | AK025522  | 11927.858 | 10174.958 |
| AK000901  | 509.997   | 2427.237  | NM_016063 | 1947.05   | 743.138   | AK025464  | 46016.738 | 37953.816 |
| AK024952  | 1835.147  | 1714.602  | U82987    | 2466.823  | 583.169   | AL049962  | 3878.95   | 2112.449  |
| AK024886  | 723.38    | 434.265   | NM_005732 | 1041.466  | 365.268   | NM_016941 | 2190.444  | 1666.03   |
| AK025002  | 3391.092  | 2376.889  | AK056481  | 2525.424  | 713.001   | NM_02040E | 1381.585  | 982.795   |
| AK024011  | 1367.173  | 1021.375  | NM_005433 | 733.197   | 895.169   | NM_00498E | 11942.015 | 7334.47   |
| AF119913  | 949.199   | 652.119   | NM_018293 | 1620.192  | 1656.524  | AL080151  | 1023.447  | 507.086   |
| NM_01834C | 1276.008  | 1284.777  | NM_002955 | 793.697   | 1706.74   | AL050085  | 306.725   | 188.371   |
| AF049883  | 1682.978  | 1531.863  | AF230808  | 2842.63   | 5577.337  | AK024127  | 417.052   | 249.341   |
| L10148    | 1022.318  | 680.153   | U18910    | 1180.634  | 2897.056  | AK021574  | 1344.192  | 560.966   |
| AL110175  | 1700.845  | 2039.596  | NM_00523E | 3539.043  | 9950.738  | AF119911  | 8330.86   | 5856.287  |
| AF288406  | 1423.709  | 2181.033  | AK075306  | 5170.047  | 13161.71  | AF116656  | 4294.625  | 2379.765  |
| AK027156  | 12978.65  | 15984.032 | AB037820  | 447.205   | 1253.279  | NM_00105C | 2589.916  | 1633.804  |
| AL157504  | 8188.726  | 9187.414  | NM_00128C | 16654.27  | 12560.648 | AF132206  | 1316.47   | 1133.665  |
| AK023328  | 6145.302  | 6387.84   | AB019572  | 58356.508 | 38344.508 | AJ001869  | 6324.437  | 3324.062  |
| AJ012499  | 57737.684 | 56476.68  | NM_00294E | 39547.102 | 8565.236  | NM_00529E | 1569.122  | 920.371   |
| AK024900  | 3143.547  | 3119.199  | AF113008  | 1548.448  | 422.847   | NM_020213 | 5898.662  | 3045.07   |
| AF119879  | 36769.816 | 27621.23  | NM_020217 | 1205.014  | 320.515   | D17267    | 8967.725  | 6748.169  |
| AY007095  | 1051.865  | 707.322   | NM_018135 | 41735.742 | 9928.866  | AB040944  | 1330.741  | 608.613   |
| AF086244  | 3162.204  | 2292.762  | AF205435  | 12321.827 | 7281.771  | NM_01814E | 2044.255  | 1312.131  |
| AL161992  | 7579.28   | 5981.321  | AK001204  | 4622.725  | 5816.557  | AK024326  | 1333.117  | 1177.1    |
| AK023910  | 2536.436  | 1431.933  | M15465    | 2626.454  | 3890.266  | U61088    | 599.359   | 339.091   |



|           |           |           |           |           |           |           |           |           |
|-----------|-----------|-----------|-----------|-----------|-----------|-----------|-----------|-----------|
| D16991    | 1960.469  | 1145.167  | J03866    | 6165.373  | 14439.746 | AF086467  | 852.077   | 358.052   |
| AK023538  | 1015.628  | 681.061   | AK022836  | 2713.255  | 6583.289  | AL137345  | 1958.844  | 1058.093  |
| X77485    | 20327.654 | 18625.092 | NM_012343 | 6182.542  | 13449.388 | AK000967  | 2277.481  | 1033.23   |
| NM_014495 | 1862.03   | 2001.332  | NM_000397 | 927.552   | 2425.604  | AK021583  | 2489.815  | 1446.598  |
| AK021555  | 1926.56   | 2494.451  | NM_003078 | 3348.476  | 6437.375  | AL137442  | 3995.953  | 1947.118  |
| AF133333  | 7218.693  | 6869.452  | AL137703  | 540.901   | 589.919   | NM_001208 | 15774.153 | 5836.207  |
| NM_018368 | 1212.168  | 1174.112  | NM_001809 | 6794.907  | 3105.074  | AL050206  | 506.787   | 341.002   |
| NM_004881 | 29283.375 | 21442.354 | AL117477  | 3400.719  | 883.631   | AK026898  | 2569.78   | 1568.525  |
| U94903    | 1149.208  | 683.137   | NM_012107 | 3910.249  | 1207.024  | AK022419  | 756.385   | 505.235   |
| NM_005155 | 13096.184 | 8882.266  | AB037760  | 1154.826  | 351.853   | AJ251832  | 471.025   | 550.155   |
| U80764    | 11721.183 | 10462.822 | NM_015680 | 2081.456  | 454.404   | NM_013936 | 828.314   | 848.711   |
| AB020684  | 7284.024  | 6698.048  | M22637    | 1194.416  | 464.34    | AF086145  | 765.994   | 648.948   |
| AF077036  | 33387.609 | 26587.277 | AB037770  | 600.905   | 483.349   | BC002538  | 1200.237  | 865.204   |
| NM_020421 | 3863.158  | 2083.004  | NM_018364 | 6536.39   | 6016.362  | NM_017836 | 2369.954  | 1443.473  |
| L37690    | 20311.949 | 16951.201 | NM_006778 | 668.486   | 1382.348  | AK096584  | 13965.729 | 7236.585  |
| D61707    | 818.102   | 581.476   | NM_007022 | 3237.333  | 3668.505  | Z29070    | 559.828   | 577.777   |
| AK021610  | 1121.299  | 996.073   | AL049943  | 13703.242 | 19866.623 | AL078636  | 718.43    | 392.112   |
| AK023767  | 3574.36   | 3328.617  | AL137303  | 1406.012  | 3780.415  | AF076617  | 57244.117 | 33037.008 |
| AF084516  | 942.233   | 1159.548  | AL355708  | 879.261   | 1513.359  | M91159    | 534.982   | 415.122   |
| AJ001907  | 1303.607  | 1472.683  | AL161980  | 331.18    | 1085.176  | NM_014392 | 5002.214  | 1861.806  |
| M32220    | 2857.405  | 3516.373  | AB002449  | 780.048   | 1977.831  | AK023291  | 6634.096  | 2515.716  |
| D17188    | 5608.709  | 5888.246  | U79248    | 505.171   | 1576.792  | CY3Cy5    | 3189.752  | 149.981   |
| AJ001432  | 31971.596 | 26645.387 | AK001489  | 2652.745  | 6404.092  | X07696    | 1481.017  | 1818.001  |
| NM_020435 | 6646.895  | 7131.138  | NM_015681 | 3880.629  | 9362.176  | AA481015  | 888.645   | 921.841   |
| AF052169  | 1490.504  | 1435.294  | AF070582  | 2450.716  | 4421.633  | AI925826  | 2063.857  | 2278.677  |
| CY3Cy5    | 3663.376  | 172.132   | NM_006383 | 4681.942  | 8885.933  | U04209    | 3010.396  | 2630.894  |
| BF942101  | 2639.286  | 2664.522  | NM_015400 | 4958.033  | 8141.32   | M55284    | 1181.055  | 1232.366  |
| BI825012  | 14665.205 | 14459.906 | AL359561  | 929.502   | 613.452   | AA679391  | 866.715   | 751.627   |
| BM051302  | 1079.595  | 1027.927  | AK026464  | 1206.502  | 596.63    | BG682146  | 1592.864  | 1659.734  |
| BE314182  | 5696.224  | 5305.376  | AK001362  | 602.337   | 358.261   | NM_005060 | 1045.036  | 653.155   |
| AI808029  | 942.728   | 971.964   | AK023491  | 529.14    | 240.882   | NM_005437 | 4276.973  | 3121.501  |
| X03225    | 3116.31   | 3526.716  | AK022400  | 852.33    | 359.07    | SR5       | 4472.892  | 3069.773  |
| AK097395  | 7484.941  | 7269.843  | AF052100  | 2004.886  | 506.785   | SR7       | 4514.235  | 24927.936 |
| M12783    | 1543.266  | 1733.4    | U79245    | 787.681   | 740.574   | SR9       | 15888.095 | 1890.654  |
| AK091535  | 441.298   | 1454.395  | AF086124  | 1775.229  | 2782.325  | CY3Cy5    | 2250.182  | 90.692    |
| AF085357  | 8598.48   | 15018.776 | AK024820  | 926.274   | 2042.687  | NM_003974 | 4360.458  | 3957.428  |
| NM_003841 | 21851.047 | 18362.408 | AB033105  | 1583.296  | 1530.61   | NM_014336 | 11061.884 | 11127.635 |
| AF296673  | 529.63    | 876.251   | AF085932  | 122.066   | 1635.287  | NM_001495 | 647.746   | 2030.68   |
| NM_080824 | 584.942   | 597.841   | AF038192  | 413.23    | 1874.174  | NM_002288 | 824.002   | 969.358   |
| SR4       | 15214.072 | 21065.088 | NM_017938 | 513.361   | 2584.356  | NM_004416 | 3433.401  | 4665.611  |
| SR6       | 2938.328  | 3338.044  | AJ001865  | 1282.142  | 2363.082  | NM_000628 | 5410.272  | 6476.371  |
| SR8       | 6550.321  | 29277.594 | AJ227875  | 247.661   | 1078.333  | AB005216  | 614.165   | 778.388   |
| SR10      | 31597.26  | 16084.174 | D61704    | 12278.256 | 26513.189 | NM_000325 | 6213.883  | 6361.223  |
| CY3Cy5    | 5061.755  | 300.253   | AJ227889  | 918.814   | 2156.669  | AF015041  | 578.414   | 622.41    |
| NM_014322 | 1367.817  | 1338.203  | Y12017    | 1055.938  | 1762.238  | AF055020  | 2784.622  | 2535.514  |
| NM_004122 | 2977.175  | 2458.67   | X64989    | 210.047   | 813.097   | NM_006986 | 2111.249  | 2236.521  |
| NM_002928 | 4685.606  | 4647.602  | Y10512    | 596.905   | 791.062   | AF272043  | 5357.941  | 4004.32   |
| NM_000160 | 1308.667  | 1441.526  | L34409    | 8350.379  | 7737.238  | NM_002587 | 4551.979  | 3408.001  |
| NM_003301 | 543.096   | 822.845   | U12210    | 3663.032  | 2887.021  | NM_002238 | 1225.92   | 1045.619  |
| NM_000955 | 1243.837  | 1141.303  | Z83936    | 529.082   | 346.757   | NM_004868 | 580.67    | 265.926   |
| U27768    | 950.586   | 844.573   | L08440    | 3623.113  | 1373.896  | NM_007028 | 7101.641  | 4540.615  |
| AF305550  | 3688.261  | 3681.6    | M73799    | 954.566   | 335.218   | AF130728  | 1357.444  | 989.558   |
| U66582    | 5475.591  | 6248.678  | NM_003782 | 2809.335  | 1649.795  | NM_001288 | 17780.209 | 11559.396 |

|           |           |           |            |           |           |           |           |           |
|-----------|-----------|-----------|------------|-----------|-----------|-----------|-----------|-----------|
| S73288    | 569.82    | 581.976   | AL442096   | 1220.069  | 1830.744  | NM_001131 | 14253.276 | 9247.594  |
| NM_00619E | 2893.013  | 4168.25   | AK023299   | 509.023   | 934.71    | NM_002414 | 44380.031 | 36062.496 |
| NM_003812 | 977.605   | 1513.24   | NM_01822E  | 826.827   | 2339.904  | NM_00035E | 441.431   | 637.8     |
| NM_00084C | 868.705   | 1120.929  | AJ270693   | 730.639   | 1314.06   | AL133580  | 11837.289 | 15695.63  |
| NM_00467E | 1592.227  | 2180.904  | NM_01779C  | 1271.759  | 2812.436  | NM_01466E | 7641.454  | 13872.36  |
| NM_00095C | 22518.619 | 22284.689 | AK000861   | 472.459   | 987.663   | NM_005451 | 1181.702  | 1677.291  |
| NM_00513E | 7171.273  | 7775.784  | AK000023   | 1585.702  | 2978.318  | NM_00717E | 3342.195  | 4197.439  |
| L10139    | 1274.675  | 1623.428  | AK000901   | 683.674   | 1096.387  | NM_00615E | 1980.568  | 2594.483  |
| NM_02047C | 4285.243  | 5737.919  | AK024351   | 848.369   | 871.579   | NM_01333E | 13901.837 | 15966.202 |
| AA478950  | 1598.501  | 2421.885  | AK025002   | 1200.577  | 429.767   | NM_00233E | 1109.561  | 1150.59   |
| AB029033  | 8308.409  | 8289.648  | AK024011   | 1714.406  | 639.188   | NM_00340C | 5308.612  | 6277.988  |
| AF091034  | 3631.657  | 3112.123  | AF119913   | 1593.596  | 1206.317  | NM_00670E | 1202.764  | 1255.766  |
| NM_005301 | 16852.91  | 14429.707 | U10512     | 344.639   | 1009.418  | NM_01443E | 418.275   | 579.033   |
| NM_004167 | 1269.893  | 999.559   | L10148     | 1081.882  | 2350.255  | NM_01226E | 3507.95   | 2893.913  |
| NM_01665E | 3851.818  | 4154.884  | AK026247   | 1089.867  | 2445.395  | NM_00455E | 1523.715  | 1585.254  |
| AB035124  | 3854.313  | 3226.901  | AK024893   | 639.087   | 1629.954  | X56692    | 3194.018  | 2781.254  |
| AF060170  | 757.039   | 706.957   | unknown (E | 26.896    | 1517.72   | NM_01427E | 1546.829  | 841.679   |
| NM_01660E | 702.758   | 808.407   | AL110175   | 663.077   | 494.396   | NM_000734 | 6926.934  | 4540.558  |
| NM_00440E | 9251.043  | 7352.335  | AF288406   | 614.387   | 219.608   | NM_012331 | 1518.048  | 899.976   |
| AK023397  | 1986.554  | 2016.178  | AK027156   | 16800.168 | 4287.458  | NM_006644 | 4539.611  | 2674.257  |
| NM_00172E | 2262.852  | 2087.097  | AL157504   | 10151.02  | 2620.941  | NM_00658E | 46083.734 | 764.311   |
| NM_00407E | 3777.567  | 3281.775  | AK023328   | 4922.25   | 1638.218  | X82693    | 6146.666  | 4924.047  |
| NM_00299E | 829.511   | 859.495   | AJ012499   | 66548.563 | 50689.84  | NM_00717E | 18758.152 | 21664.592 |
| NM_00038E | 812.189   | 1296.331  | AK024900   | 3346.761  | 1928.097  | NM_00272E | 1494.373  | 1988.78   |
| NM_00463E | 354.255   | 719.655   | AF119879   | 28260.014 | 28742.127 | AF317058  | 437.464   | 847.984   |
| X01394    | 47465.84  | 53876.672 | AY007095   | 862.639   | 2284.796  | NM_014904 | 852.178   | 266.988   |
| NM_000041 | 33496.73  | 37457.16  | AK023551   | 1468.532  | 3380.558  | AL137576  | 5091.943  | 3629.056  |
| NM_002984 | 2095.732  | 1764.36   | AK023910   | 2293.241  | 5527.723  | NM_01835E | 2428.116  | 2162.356  |
| AB037752  | 6797.849  | 7094.385  | AK023538   | 768.853   | 2116.105  | AF131781  | 3660.776  | 2344.496  |
| AK024821  | 10787.942 | 15786.097 | NM_01449E  | 1857.075  | 3629.886  | NM_00651E | 10640.634 | 8475.463  |
| NM_000224 | 2860.919  | 5295.128  | AK021555   | 1291.678  | 1426.622  | NM_00305E | 5052.662  | 2613.311  |
| NM_01432E | 7211.522  | 12374.79  | AB046765   | 1909.612  | 1122.747  | NM_014824 | 1202.29   | 1050.213  |
| NM_006414 | 5541.684  | 7649.291  | AF133333   | 9850.331  | 3505.422  | NM_014504 | 1428.32   | 1605.095  |
| NM_01847E | 8158.021  | 7621.805  | NM_01836E  | 1037.9    | 300.954   | NM_01440E | 10804.104 | 10981.386 |
| NM_01436E | 3220.565  | 2482.092  | NM_004881  | 19231.016 | 6070.32   | NM_014741 | 2375.333  | 3115.077  |
| NM_01830E | 1740.774  | 2217.004  | U94903     | 921.307   | 588.105   | AF212247  | 2821.675  | 3525.356  |
| AB037716  | 1609.533  | 1453.38   | U80764     | 14399.212 | 20904.021 | AF161407  | 6165.142  | 6078.154  |
| NM_004827 | 813.62    | 797.488   | NM_020421  | 4411.344  | 9846.484  | NM_01473E | 2150.861  | 2195.942  |
| NM_016297 | 2411.554  | 1936.128  | AK021610   | 2839.658  | 6106.831  | NM_01808C | 4740.943  | 4515.504  |
| NM_00175E | 2502.935  | 2221.06   | AK023767   | 3072.289  | 7988.385  | AF174605  | 2987.972  | 3003.048  |
| BC003406  | 1644.298  | 1633.591  | AF084516   | 1024.294  | 2177.994  | NM_01445E | 10249.7   | 6109.96   |
| AL137672  | 755.511   | 431.78    | AJ001907   | 1467.134  | 1371.019  | NM_00571E | 1124.973  | 817.773   |
| X64177    | 888.239   | 2471.525  | M32220     | 3167.488  | 1326.554  | AK023553  | 1165.454  | 787.628   |
| NM_015994 | 7356.699  | 7329.503  | D17188     | 5364.572  | 2479.764  | NM_01673E | 1571.966  | 1280.4    |
| NM_00169E | 4562.415  | 5370.312  | AJ001432   | 27774.416 | 5665.816  | AF181994  | 1682.725  | 1021.599  |
| NM_00224E | 3265.246  | 2393.517  | NM_02043E  | 7664.17   | 2284.003  | NM_01896E | 779.534   | 482.991   |
| NM_012281 | 2276.389  | 2613.465  | AF052169   | 1130.668  | 434.557   | AF125100  | 1683.587  | 1107.435  |
| AK025772  | 2702.396  | 3346.758  | CY3Cy5     | 3388.514  | 318.182   | NM_006114 | 7435.375  | 4738.061  |
| NM_00550E | 857.42    | 1561.844  | BF942101   | 2322.349  | 5039.438  | AF130728  | 540.376   | 728.659   |
| NM_001667 | 25046.725 | 39099.637 | BI825012   | 11411.298 | 13978.739 | NM_00128E | 19600.873 | 20539.59  |
| AB046834  | 820.773   | 1101.235  | M21574     | 385.656   | 234.429   | NM_001131 | 12705.317 | 12776.193 |
| NM_017831 | 1428.903  | 2022.122  | BM051302   | 888.406   | 641.651   | X07696    | 1734.545  | 1573.052  |
| AK022537  | 8298.342  | 8262.773  | BE314182   | 6355.738  | 6989.908  | AA481015  | 597.902   | 925.191   |

|           |           |           |           |           |           |           |           |           |
|-----------|-----------|-----------|-----------|-----------|-----------|-----------|-----------|-----------|
| AF116632  | 933.972   | 706.127   | AI808029  | 655.488   | 967.459   | AI925826  | 1847.561  | 1827.16   |
| AF064597  | 816.201   | 895.742   | X03225    | 3503.269  | 2417.2    | U04209    | 2762.759  | 2284.214  |
| NM_006345 | 4234.961  | 3812.062  | AK097395  | 6714.196  | 9585.284  | Z15108    | 373.272   | 518.419   |
| NM_006875 | 1622.783  | 1917.118  | M12783    | 1391.909  | 938.965   | M55284    | 1893.239  | 1441.343  |
| D87119    | 3538.59   | 3977.003  | AK091535  | 476.197   | 620.056   | BG682146  | 1405.883  | 944.949   |
| AB037769  | 1361.334  | 2497.201  | AF085357  | 7111.932  | 4567.68   | NM_005060 | 1021.486  | 650.987   |
| AL050040  | 908.138   | 1303.815  | NM_003841 | 16237.966 | 26800.764 | NM_005437 | 5031.432  | 3258.694  |
| NM_006550 | 12117.676 | 14577.86  | AF296673  | 750.255   | 1134.294  | AK022417  | 820.687   | 433.238   |
| AL133066  | 866.14    | 763.66    | NM_080824 | 513.381   | 1090.391  | NM_014270 | 1275.507  | 1245.39   |
| AF264717  | 2168.243  | 2625.203  | SR4       | 13813.485 | 19464.43  | NM_000734 | 5274.111  | 5439.396  |
| NM_012260 | 6393.144  | 10301.471 | SR10      | 26968.758 | 12099.392 | NM_012331 | 1733.67   | 2388.526  |
| NM_001141 | 5387.455  | 7232.771  | CY3Cy5    | 2848.799  | 193.769   | NM_006644 | 4800.471  | 5343.291  |
| NM_000010 | 8239.645  | 14405.022 | NM_014322 | 1085.559  | 2417.265  | NM_006583 | 33189.98  | 1008.725  |
| AB028992  | 1410.504  | 2236.724  | NM_004122 | 2270.901  | 5225.101  | NM_003974 | 5548.521  | 5366.7    |
| L10139    | 1006.187  | 965.171   | NM_002920 | 4403.085  | 4693.484  | NM_014330 | 11664.648 | 8818.209  |
| AA478950  | 1799.851  | 1742.824  | NM_000160 | 931.048   | 563.595   | NM_001490 | 515.393   | 661.866   |
| BM051302  | 903.075   | 934.753   | NM_003301 | 605.948   | 415.446   | NM_002280 | 723.64    | 699.489   |
| BE314182  | 3783.097  | 3811.484  | NM_000950 | 1136.337  | 1684.831  | NM_004410 | 2898.879  | 3074.538  |
| AI808029  | 718.46    | 565.391   | U27768    | 1167.38   | 2697.849  | NM_000620 | 5378.81   | 5034.628  |
| X03225    | 2760.476  | 2595.585  | AF305550  | 4083.788  | 3697.9    | AB005216  | 784.114   | 666.376   |
| AK097395  | 6645.363  | 5311.794  | U66582    | 6025.17   | 3345.183  | NM_000320 | 7287.343  | 5745.323  |
| M12783    | 1527.083  | 1476.173  | S73288    | 662.56    | 540.422   | AF015041  | 923.627   | 433.574   |
| AK091535  | 458.808   | 625.187   | NM_006190 | 2876.082  | 2273.394  | AF055020  | 2430.434  | 1665.455  |
| AF085357  | 7374.908  | 8189.9    | NM_003812 | 709.012   | 975.454   | NM_006980 | 2491.654  | 1845.601  |
| AK092768  | 360.33    | 2050.509  | NM_000840 | 732.096   | 952.807   | AF272043  | 5151.849  | 2984.038  |
| NM_003841 | 23392.975 | 19511.514 | NM_004670 | 1548.858  | 1739.327  | NM_002587 | 7921.436  | 5001.411  |
| AF296673  | 864.279   | 993.826   | NM_000950 | 27136.418 | 32217.32  | NM_002230 | 1360.461  | 1076.369  |
| NM_080824 | 712.307   | 894.075   | L10139    | 1559.453  | 2517.515  | NM_004860 | 747.82    | 485.536   |
| NM_018002 | 1057.475  | 893.364   | NM_020470 | 4486.658  | 5686.943  | NM_004660 | 891.704   | 407.58    |
| NM_014320 | 6479.44   | 6552.708  | NM_006574 | 362.067   | 1222.928  | NM_007020 | 7070.948  | 4234.684  |
| NM_004122 | 2034.952  | 2057.355  | AA478950  | 2511.255  | 3301.387  | AF131781  | 3040.42   | 2521.858  |
| NM_002920 | 3001.766  | 3272.057  | AB029033  | 6044.324  | 5569.488  | NM_006510 | 9904.58   | 10563.818 |
| NM_000160 | 1298.662  | 1318.507  | AF091034  | 2880.054  | 5332.932  | NM_015860 | 516.11    | 582.266   |
| NM_003301 | 572.409   | 509.092   | NM_005301 | 21921.65  | 41119.156 | NM_003050 | 5150.427  | 5136.586  |
| NM_000950 | 978.238   | 866.99    | NM_016650 | 4045.411  | 1757.177  | NM_005070 | 468.829   | 409.463   |
| U27768    | 1009.954  | 770.94    | AB035124  | 4710.545  | 3487.994  | NM_002414 | 48565.551 | 46623.188 |
| AF305550  | 4061.825  | 3569.662  | AF060170  | 857.707   | 2460.323  | NM_000350 | 559.137   | 549.491   |
| U66582    | 6523.839  | 7120.046  | NM_016602 | 549.889   | 1480.933  | AL133580  | 12941.188 | 13206.989 |
| S73288    | 693.149   | 1356.223  | NM_004400 | 6452.736  | 6673.439  | NM_014660 | 9751.253  | 8989.289  |
| NM_006190 | 2789.671  | 3894.014  | AK023397  | 1523.241  | 1537.632  | NM_005451 | 1019.705  | 1027.164  |
| NM_003812 | 1001.356  | 1408.6    | NM_001720 | 1721.663  | 2296.739  | NM_007170 | 3302.23   | 3066.509  |
| NM_000840 | 903.03    | 1129.774  | NM_004070 | 3309.823  | 1581.797  | NM_006150 | 2433.591  | 2373.019  |
| NM_004670 | 1958.573  | 3067.048  | NM_002990 | 799.359   | 748.836   | NM_013330 | 13683.566 | 13211.809 |
| NM_000950 | 24239.631 | 27557.254 | NM_000380 | 937.718   | 536.831   | NM_002330 | 1424.685  | 898.476   |
| AK025772  | 1585.508  | 1290.86   | X01394    | 50496.52  | 50462.355 | NM_003400 | 5899.277  | 5496.604  |
| NM_005500 | 807.234   | 713.967   | NM_000041 | 43812.18  | 47387.133 | NM_006700 | 1499.12   | 868.98    |
| NM_152747 | 1212.223  | 996.283   | NM_002984 | 1629.127  | 1934.531  | NM_014430 | 482.098   | 295.649   |
| AB029033  | 6254.69   | 4801.728  | AB037752  | 8152.48   | 11936.413 | NM_012260 | 3174.528  | 2872.34   |
| AF091034  | 2504.093  | 2656.139  | AK024821  | 12146.466 | 14159.319 | NM_004550 | 1771.505  | 1191.387  |
| NM_005301 | 21459.984 | 19440.811 | NM_000224 | 2715.791  | 4055.062  | X56692    | 2812.12   | 2282.853  |
| NM_016650 | 3365.996  | 2808.31   | NM_014320 | 7340.889  | 9768.305  | NM_014600 | 640.099   | 535.658   |
| AB035124  | 4409.594  | 3529.618  | NM_006414 | 5744.014  | 8050.466  | NM_016730 | 1145.006  | 1293.62   |
| AF060170  | 833.242   | 773.412   | NM_018470 | 7344.641  | 3527.032  | AF181994  | 1949.031  | 1568.768  |

|           |           |           |           |           |           |           |           |           |
|-----------|-----------|-----------|-----------|-----------|-----------|-----------|-----------|-----------|
| NM_016602 | 673.928   | 812.779   | NM_014362 | 3493.596  | 2862.785  | NM_018962 | 1103.091  | 753.598   |
| NM_004409 | 8443.174  | 5894.354  | NM_018308 | 1721.625  | 1554.391  | AF125100  | 1653.837  | 1365.692  |
| AK023397  | 1901.455  | 1755.467  | NM_001832 | 15318.316 | 9226.487  | NM_006114 | 7988.575  | 5802.255  |
| NM_001725 | 2434.8    | 2366.907  | NM_017774 | 8648.624  | 3224.603  | X82693    | 5945.236  | 4909.358  |
| NM_004079 | 4220.578  | 4518.682  | AB037716  | 1397.07   | 1425.076  | NM_007176 | 17270.631 | 17820.27  |
| NM_002996 | 943.156   | 2409.757  | NM_004827 | 382.974   | 1042.715  | NM_002722 | 1385.869  | 1541.661  |
| NM_000383 | 897.134   | 1663.372  | NM_016297 | 2577.661  | 1938.873  | AF317058  | 697.575   | 759.53    |
| X01394    | 45440.199 | 53263.859 | NM_001752 | 3049.848  | 2951.077  | M22538    | 28360.658 | 17386.922 |
| NM_000041 | 28607.301 | 33942.855 | BC003406  | 2016.116  | 2229.856  | NM_014904 | 683.96    | 323.56    |
| NM_002984 | 1949.396  | 2011.945  | AL137672  | 615.118   | 634.042   | AL137576  | 4914.737  | 3156.955  |
| AF317425  | 2326.167  | 3088.253  | X64177    | 2282.844  | 435.145   | NM_018358 | 2395.352  | 1293.037  |
| AF264717  | 2055.627  | 1398.211  | NM_015994 | 7311.233  | 6368.344  | NM_005060 | 1014.905  | 1558.895  |
| NM_012260 | 6404.267  | 5970.952  | NM_002235 | 490.386   | 513.794   | NM_005437 | 5415.55   | 7828.276  |
| NM_001141 | 3864.133  | 3124.824  | NM_014065 | 1481.036  | 1951.89   | AK022417  | 998.057   | 823.852   |
| NM_000018 | 1003.084  | 1152.869  | NM_001695 | 4516.282  | 4657.791  | NM_014824 | 1859.211  | 1421.896  |
| NM_018479 | 4459.046  | 3533.578  | NM_002248 | 2010.797  | 3434.224  | NM_014504 | 1483.881  | 1070.557  |
| NM_014362 | 2595.745  | 2481.346  | NM_012281 | 1798.345  | 2559.824  | NM_014408 | 13359.712 | 18226.357 |
| NM_018308 | 2157.043  | 1571.359  | AK025772  | 4431.761  | 4100.117  | NM_014741 | 3389.26   | 4239.112  |
| NM_001832 | 20008.727 | 17853.598 | NM_005509 | 872.186   | 1826.607  | AF212247  | 4020.481  | 5252.863  |
| NM_017774 | 12586.392 | 10899.631 | NM_152747 | 1599.678  | 2366.571  | AF161407  | 7853.447  | 6353.903  |
| AB037716  | 1714.735  | 1194.185  | NM_017415 | 1250.102  | 1880.725  | NM_014738 | 2454.176  | 1541.641  |
| NM_004827 | 281.689   | 381.242   | NM_001667 | 33890.418 | 42676.473 | NM_016406 | 1162.337  | 940.78    |
| NM_016297 | 2350.772  | 2045.756  | AB046834  | 911.2     | 1432.985  | NM_018080 | 4511.601  | 3228.055  |
| NM_001752 | 2625.27   | 2312.585  | NM_000262 | 795.289   | 382.457   | AF174605  | 2871.698  | 2711.234  |
| BC003406  | 1727.993  | 1901.461  | NM_017831 | 1006.892  | 1113.049  | NM_014453 | 8815.732  | 6029.486  |
| AL137672  | 813.493   | 648.546   | AK024393  | 207.08    | 183.648   | NM_005713 | 968.397   | 893.674   |
| X64177    | 1220.181  | 2935.136  | AK022537  | 10943.276 | 10717.996 | AK023553  | 1762.896  | 897.427   |
| NM_015994 | 8128.732  | 12582.572 | AF116632  | 691.85    | 867.147   | AF272043  | 7105.998  | 12328.754 |
| NM_002235 | 393       | 848.7     | AF064597  | 1018.409  | 702.777   | NM_002587 | 7176.634  | 11371.73  |
| NM_002241 | 413.079   | 795.99    | NM_006345 | 5315.739  | 4356.272  | NM_002238 | 1693.096  | 4033.995  |
| NM_014065 | 2185.705  | 2679.944  | NM_006875 | 1154.755  | 1102.007  | NM_004868 | 710.254   | 1756.167  |
| NM_001695 | 4882.386  | 7149.296  | D87119    | 4794.896  | 3962.177  | NM_004669 | 1001.541  | 1725.74   |
| NM_002248 | 4045.056  | 5512.25   | AL050040  | 752.657   | 1182.859  | NM_007028 | 7975.947  | 12258.068 |
| NM_012281 | 2059.175  | 2160.261  | NM_006556 | 11329.301 | 14163.896 | AF130728  | 768.417   | 1207.91   |
| NM_080824 | 843.795   | 531.867   | AL133066  | 508.478   | 521.504   | NM_001289 | 18481.76  | 21141.494 |
| NM_000262 | 1247.01   | 972.374   | AF264717  | 1866.967  | 3180.943  | NM_001131 | 13524.423 | 18599.814 |
| NM_017831 | 1415.232  | 1024.039  | NM_012260 | 6474.204  | 9943.255  | M54894    | 806.542   | 545.76    |
| AK022537  | 8863.584  | 9289.979  | NM_001141 | 4625.297  | 7288.291  | X07696    | 2999.278  | 4552.652  |
| AF116632  | 1042.841  | 918.881   | NM_000018 | 6665.409  | 12762.393 | AA481015  | 941.484   | 1538.849  |
| AF064597  | 810.828   | 821.589   | AB028992  | 1695.819  | 1935.968  | AI925826  | 3228.043  | 4269.108  |
| NM_006345 | 5846.408  | 10413.394 | L10139    | 760.379   | 527.931   | U04209    | 3138.422  | 3542.587  |
| NM_006875 | 2047.348  | 2698.824  | NM_020470 | 3294.907  | 3643.692  | M55284    | 1823.36   | 2002.651  |
| D87119    | 3420.5    | 4418.951  | NM_006574 | 401.29    | 637.585   | AA679391  | 930.318   | 816.317   |
| AL050040  | 741.974   | 1361.107  | AA478950  | 1549.434  | 836.778   | BG682146  | 1741.36   | 1220.924  |
| NM_006556 | 11183.001 | 15676.69  | BF942101  | 1879.708  | 874.483   | NM_012266 | 4496.173  | 7498.833  |
| AL133066  | 395.085   | 737.081   | BI825012  | 15711.091 | 10080.977 | NM_004559 | 2107.692  | 4055.931  |
| NM_000849 | 837.006   | 569.371   | M21574    | 461.598   | 314.97    | X56692    | 4285.319  | 7213.028  |
| NM_004678 | 1141.176  | 1407.631  | BM051302  | 901.966   | 576.259   | AK024467  | 919.005   | 1316.518  |
| NM_000950 | 22088.541 | 18676.217 | BE314182  | 6250.657  | 3589.969  | NM_014278 | 1831.995  | 4537.803  |
| NM_005139 | 4410.474  | 4473.404  | AI808029  | 731.364   | 1318.046  | NM_000734 | 9176.886  | 17613.436 |
| L10139    | 978.09    | 832.562   | X03225    | 3625.842  | 1522.802  | NM_012331 | 1853.16   | 3692.743  |
| NM_020470 | 3118.156  | 2527.319  | AK097395  | 9296.993  | 8412.686  | NM_006644 | 5307.942  | 9738.539  |
| NM_006574 | 869.587   | 837.521   | M12783    | 1405.836  | 955.421   | NM_006583 | 45168.359 | 2027.354  |

|           |           |           |           |           |           |           |           |           |
|-----------|-----------|-----------|-----------|-----------|-----------|-----------|-----------|-----------|
| AA478950  | 2293.317  | 1631.026  | AF085357  | 6463.157  | 6513.745  | NM_003974 | 7358.734  | 12164.77  |
| BF942101  | 2721.939  | 1899.193  | NM_003841 | 15640.235 | 31713.168 | NM_014336 | 19324.963 | 26556.049 |
| BI825012  | 13151.092 | 10613.953 | AF296673  | 499.175   | 1225.484  | NM_001495 | 674.242   | 1289.189  |
| M21574    | 376.913   | 527.022   | NM_080824 | 417.915   | 1096.32   | NM_002288 | 1175.662  | 1847.662  |
| BM051302  | 1029.573  | 1160.232  | NM_018002 | 1815.744  | 947.731   | NM_004416 | 3823.131  | 7117.274  |
| BE314182  | 4665.628  | 4957.559  | AB002340  | 2088.282  | 4245.831  | NM_000628 | 7045.774  | 12163.091 |
| AI808029  | 886.037   | 917.97    | NM_000224 | 1972.465  | 1874.809  | AF015041  | 812.65    | 1541.141  |
| X03225    | 1891.487  | 2370.392  | NM_014328 | 6597.185  | 2407.605  | NM_002363 | 556.942   | 738.488   |
| AK097395  | 6144.979  | 7794.933  | NM_006414 | 4691.916  | 2177.699  | AK000184  | 680.45    | 1278.834  |
| M12783    | 2085.111  | 3417.668  | NM_014322 | 695.676   | 679.452   | AF055020  | 3130.599  | 4217.116  |
| AK091535  | 640.818   | 1043.743  | NM_004122 | 2532.984  | 2386.528  | NM_006986 | 3125.799  | 5583.5    |
| AF085357  | 7095.735  | 9117.034  | NM_002928 | 6049.572  | 4610.26   | NM_014904 | 459.427   | 216.03    |
| NM_003841 | 17929.02  | 17518.354 | NM_000160 | 1288.495  | 1743.108  | AL137576  | 5432.46   | 5385.715  |
| AF296673  | 521.864   | 697.676   | NM_003301 | 506.624   | 613.082   | NM_018358 | 3037.906  | 2933.357  |
| NM_004633 | 679.929   | 621.724   | NM_000955 | 1304.603  | 1234.822  | AF131781  | 3735.308  | 3827.244  |
| X01394    | 49230.207 | 41868.199 | U27768    | 997.083   | 491.343   | NM_006516 | 11201.824 | 16475.76  |
| NM_000041 | 25201.275 | 24574.801 | AF305550  | 4976.521  | 4304.975  | NM_015865 | 666.628   | 1136.552  |
| NM_002984 | 1466.694  | 1117.459  | U66582    | 6205.965  | 8349.576  | NM_003055 | 5578.979  | 7300.861  |
| AF317425  | 1504.981  | 1245.508  | S73288    | 538.75    | 764.775   | NM_006841 | 505.718   | 771.545   |
| NM_018002 | 1326.741  | 1366.063  | NM_006198 | 2742.829  | 2967.943  | NM_002414 | 46867.789 | 59140.652 |
| AB002340  | 1671.854  | 1286.022  | NM_003812 | 793.287   | 1026.604  | NM_000355 | 1105.313  | 2050.576  |
| NM_000224 | 1961.036  | 1327.538  | NM_000849 | 562.962   | 1268.921  | AL133580  | 16485.762 | 31855.568 |
| NM_014328 | 6680.359  | 5969.472  | NM_004678 | 1348.221  | 1868.252  | NM_014666 | 12271.813 | 21960.293 |
| NM_006414 | 4650.247  | 3997.048  | NM_000950 | 19765.867 | 26036.406 | NM_005451 | 1531.904  | 2533.093  |
| NM_014322 | 908.955   | 755.626   | NM_005139 | 4621.9    | 6330.104  | NM_007172 | 4436.027  | 6643.509  |
| NM_004122 | 2191.891  | 2219.307  | AK025772  | 2088.673  | 933.801   | NM_006152 | 2706.977  | 4968.356  |
| NM_002928 | 3879.346  | 3965.887  | NM_005509 | 585.03    | 420.774   | NM_013333 | 14868.529 | 25643.154 |
| NM_000160 | 1355.172  | 1541.751  | NM_152747 | 1085.086  | 1614.452  | NM_002333 | 1432.719  | 2299.526  |
| NM_003301 | 484.66    | 919.597   | NM_017415 | 842.672   | 1012.208  | NM_003400 | 9107.593  | 16335.521 |
| NM_000955 | 1127.061  | 1177.998  | NM_001667 | 25916.184 | 11543.734 | NM_006705 | 2033.618  | 2463.802  |
| U27768    | 730.308   | 867.265   | AB046834  | 763.563   | 373.789   | NM_014436 | 744.846   | 1098.825  |
| AF305550  | 2744.06   | 3431.047  | AB029033  | 8065.052  | 9955.694  | NM_005582 | 347.473   | 942.406   |
| U66582    | 5936.222  | 8321.279  | AF091034  | 3959.904  | 7798.178  | AF174605  | 2006.373  | 1482.633  |
| S73288    | 634.038   | 1049.298  | NM_005301 | 20035.375 | 26358.469 | NM_014453 | 10555.907 | 8397.568  |
| NM_006198 | 2563.646  | 3951.601  | NM_016653 | 4286.826  | 4209.586  | NM_005713 | 1298.964  | 1070.929  |
| NM_003812 | 652.463   | 1173.684  | AB035124  | 5353.889  | 4661.778  | AK023553  | 1288.324  | 966.598   |
| NM_014065 | 1821.453  | 1570.041  | AF060170  | 802.607   | 584.35    | NM_014600 | 582.304   | 471.855   |
| NM_001695 | 1774.344  | 1810.629  | NM_016602 | 648.047   | 824.282   | NM_016733 | 1317.811  | 1144.046  |
| NM_002248 | 2140.986  | 1879.125  | NM_004409 | 8181.598  | 5739.959  | AF181994  | 1399.057  | 1657.319  |
| NM_012281 | 1390.859  | 1158.464  | AK023397  | 2305.501  | 2183.8    | NM_018962 | 927.248   | 722.317   |
| AK025772  | 1607.63   | 1261.5    | NM_001725 | 1838.944  | 2601.044  | AF125100  | 1810.595  | 1537.199  |
| NM_005509 | 491.327   | 722.73    | NM_004079 | 3676.459  | 4287.556  | NM_006114 | 8298.665  | 6193.494  |
| NM_152747 | 857.467   | 887.192   | NM_002996 | 957.38    | 1649.908  | X82693    | 6653.155  | 5262.264  |
| NM_017415 | 1014.922  | 936.863   | NM_000383 | 760.002   | 1398.802  | NM_007176 | 24761.896 | 45406.445 |
| NM_001667 | 26898.738 | 21739.016 | X01394    | 47541.84  | 57658.531 | NM_002722 | 2271.076  | 5102.695  |
| AB046834  | 598.57    | 521.391   | NM_000041 | 37438.215 | 45876.633 | AF317058  | 932.343   | 1557.873  |
| AB029033  | 6136.833  | 5011.492  | NM_002984 | 1454.171  | 2933.383  | NM_006028 | 576.141   | 779.854   |
| AF091034  | 3165.199  | 2826.325  | AB037752  | 7124.569  | 11117.426 | NM_012297 | 9350.035  | 5822.791  |
| NM_005301 | 17761.365 | 16992.063 | AF317425  | 2668.841  | 3337.285  | AB007925  | 29229.945 | 18961.279 |
| NM_016653 | 3752.032  | 5517.339  | AF264717  | 1336.139  | 957.304   | NM_000361 | 6561.821  | 5533.563  |
| AB035124  | 4617.77   | 5530.429  | NM_012260 | 4564.702  | 3119.543  | NM_002475 | 33441.375 | 29932.205 |
| AF060170  | 746.823   | 908.635   | NM_001141 | 3740.253  | 5563.213  | NM_003836 | 3996.993  | 3504.058  |
| NM_016602 | 650.975   | 636.428   | NM_000018 | 6168.572  | 4596.138  | AK022417  | 1095.563  | 848.952   |

|           |           |           |           |           |           |           |           |           |
|-----------|-----------|-----------|-----------|-----------|-----------|-----------|-----------|-----------|
| NM_004409 | 8647.664  | 7864.572  | AB028992  | 1086.308  | 768.869   | U50534    | 555.96    | 436.702   |
| AK023397  | 1988.463  | 2310.212  | NM_018479 | 9113.383  | 12066.501 | NM_014824 | 1729.438  | 1491.583  |
| NM_001725 | 1986.131  | 2362.941  | NM_014362 | 3854.825  | 7279.426  | NM_014504 | 1711.908  | 1611.901  |
| NM_004079 | 4162.453  | 4777.674  | NM_018308 | 2397.611  | 2258.608  | NM_014408 | 12060.993 | 14293.252 |
| NM_002996 | 913.903   | 1309.305  | NM_001832 | 18937.5   | 32058.346 | NM_014741 | 3015.5    | 3281.148  |
| NM_000383 | 975.122   | 1510.28   | NM_017774 | 10110.743 | 13319.648 | AF212247  | 4412.291  | 7611.603  |
| NM_006875 | 3787.589  | 5167.09   | AB037716  | 1746.271  | 1496.119  | AF161407  | 9757.566  | 12523.771 |
| D87119    | 3498.246  | 3575.218  | NM_004827 | 305.13    | 355.149   | NM_014738 | 3365.386  | 5826.004  |
| AL050040  | 690.65    | 828.141   | NM_016297 | 2718.177  | 1895.402  | NM_018080 | 7363.313  | 9340.097  |
| NM_006556 | 8769.949  | 9570.75   | NM_001752 | 2812.335  | 2573.523  | NM_007115 | 1110.977  | 978.215   |
| AF264717  | 1866.139  | 1447.331  | BC003406  | 2145.685  | 2617.551  | NM_004616 | 660.8     | 412.757   |
| NM_012260 | 5429.868  | 4524.021  | AL137672  | 622.531   | 1091.515  | NM_017692 | 2833.765  | 2569.829  |
| NM_001141 | 4374.121  | 3197.943  | X64177    | 2176.523  | 1141.622  | NM_003975 | 2713.091  | 2287.765  |
| NM_000018 | 8207.419  | 7427.679  | NM_015994 | 8201.865  | 9079.711  | NM_004834 | 8478.279  | 7321.636  |
| AB028992  | 1382.324  | 866.208   | NM_002235 | 385.137   | 1013.944  | NM_000812 | 1169.375  | 1119.568  |
| NM_018479 | 8430.939  | 7257.066  | NM_014065 | 1778.171  | 2896.597  | AK024747  | 19045.832 | 14810.679 |
| NM_014362 | 3493.342  | 2813.254  | NM_001695 | 3695.283  | 5558.093  | NM_006390 | 2103.513  | 1970.168  |
| NM_018308 | 2045.511  | 2037.783  | NM_002248 | 2357.978  | 3941.534  | NM_003580 | 2509.918  | 2156.277  |
| NM_001832 | 16445.477 | 16166.974 | NM_012281 | 1766.346  | 2943.152  | NM_006506 | 1477.685  | 1194.481  |
| NM_017774 | 13059.207 | 16369.337 | NM_000262 | 1197.011  | 1177.202  | NM_003235 | 2991.569  | 1897.52   |
| AB037716  | 1538.868  | 1801.024  | NM_017831 | 1214.615  | 923.237   | AB042562  | 1376.669  | 703.138   |
| NM_004827 | 548.155   | 392.519   | AK022537  | 10246.175 | 9650.789  | NM_016009 | 5355.535  | 4052.353  |
| NM_016297 | 2041.546  | 1982.994  | AF116632  | 852.855   | 933.465   | NM_002378 | 1423.553  | 950.524   |
| NM_001752 | 2207.154  | 2704.82   | AF064597  | 902.693   | 1556.299  | NM_003726 | 2989.666  | 2548.501  |
| BC003406  | 1523.04   | 2710.725  | NM_006345 | 5270.435  | 6825.01   | NM_006097 | 4882.781  | 4411.358  |
| AL137672  | 845.4     | 1091.963  | NM_006875 | 1941.672  | 2183.709  | NM_006113 | 2059.694  | 2094.258  |
| X64177    | 681.375   | 2762.861  | D87119    | 4536.52   | 5891.771  | NM_015313 | 12962.609 | 11849.498 |
| NM_015994 | 8694.073  | 12213.509 | AL050040  | 596.635   | 1100.239  | AK022287  | 7957.824  | 9502.994  |
| X89671    | 1952.579  | 2342.889  | NM_006556 | 10048.225 | 14989.578 | NM_015897 | 2202.638  | 3310.493  |
| NM_014941 | 4465.342  | 3947.282  | AL133066  | 519.027   | 1003.205  | NM_005436 | 3245.829  | 3019.381  |
| NM_018372 | 4323.453  | 3973.382  | NM_000849 | 437.501   | 242.028   | AF177473  | 9914.936  | 7284.481  |
| NM_013253 | 891.087   | 694.841   | NM_004678 | 991.912   | 529.35    | NM_000546 | 2815.771  | 2421.265  |
| NM_005895 | 2453.817  | 2322.628  | NM_000950 | 17752.061 | 18201.365 | AB023223  | 1164.313  | 1537.643  |
| D82345    | 9753.951  | 9816.353  | L10139    | 1068.334  | 1481.418  | AB018257  | 2183.15   | 1591.112  |
| NM_003814 | 1630.953  | 1708.7    | NM_000039 | 51743.016 | 26980.092 | NM_002708 | 16076.325 | 15979.675 |
| NM_002968 | 912.12    | 576.929   | NM_020470 | 3684.329  | 2159.219  | NM_007282 | 3291.909  | 2880.86   |
| NM_000262 | 845.373   | 802.264   | NM_006574 | 359.025   | 634.62    | AK025133  | 7823.297  | 5488.146  |
| NM_017831 | 1403.546  | 1232.939  | AA478950  | 2482.793  | 3191.288  | AB020704  | 1707.757  | 855.64    |
| AK022537  | 10006.189 | 11373.055 | BF942101  | 2035.01   | 1433.105  | NM_004087 | 2803.073  | 1975.749  |
| AF116632  | 1162.074  | 1861.937  | BI825012  | 13857.723 | 8266.486  | NM_018700 | 994.026   | 563.523   |
| AF064597  | 1049.459  | 1912.239  | M21574    | 312.768   | 242.463   | NM_000119 | 2666.748  | 2360.987  |
| NM_006345 | 4701      | 5883.169  | BM051302  | 899.434   | 948.238   | NM_001065 | 5193.487  | 3188.945  |
| NM_003259 | 19726.553 | 23473.105 | BE314182  | 6100.753  | 5459.434  | NM_003622 | 1191.627  | 571.79    |
| AL080128  | 3377.976  | 4323.699  | AI808029  | 700.348   | 1233.86   | NM_001774 | 1061.223  | 592.176   |
| AB033072  | 837.824   | 1218.375  | X03225    | 3740.378  | 3785.011  | AK021645  | 869.346   | 551.801   |
| AB040892  | 1468.857  | 1399.206  | AK097395  | 6621.913  | 8010.025  | NM_013339 | 1783.266  | 1698.15   |
| NM_001822 | 1170.91   | 1359.58   | M12783    | 1358.65   | 2052.994  | NM_001491 | 962.018   | 556.529   |
| NM_018268 | 15641.545 | 12841.631 | AK091535  | 446.254   | 520.964   | AK026541  | 1669.637  | 1418.179  |
| AF230904  | 6931.329  | 6412.138  | AF085357  | 5498.252  | 7316.702  | NM_005899 | 11187.164 | 6691.284  |
| NM_017596 | 6566.766  | 5481.924  | NM_003841 | 17650.752 | 42535     | D42055    | 5980.392  | 5966.492  |
| AL157480  | 2623.701  | 2100.813  | AF296673  | 456.346   | 1180.832  | AL137349  | 1780.808  | 1599.742  |
| AF312678  | 1372.609  | 1289.201  | X01394    | 40961.918 | 20305.811 | NM_003339 | 512.983   | 360.357   |
| NM_006253 | 10134.94  | 8973.947  | NM_000041 | 31045.275 | 33623.648 | NM_016476 | 27449.875 | 19260.033 |

|           |           |           |           |           |           |           |           |           |
|-----------|-----------|-----------|-----------|-----------|-----------|-----------|-----------|-----------|
| NM_018262 | 836.37    | 919.992   | NM_002984 | 1724.792  | 3910.752  | NM_015902 | 744.792   | 384.166   |
| NM_006207 | 1863.404  | 1594.785  | AF317425  | 3192.818  | 6376.424  | NM_020155 | 2249.363  | 1442.913  |
| NM_003220 | 1933.43   | 1610.825  | NM_018002 | 2164.361  | 2495.182  | BE874471  | 4899.532  | 3016.156  |
| AF009674  | 8096.956  | 8308.544  | AK024821  | 10284.375 | 4417.573  | NM_006121 | 2752.301  | 1739.679  |
| NM_000360 | 999.935   | 1022.461  | AB002340  | 2105.385  | 893.102   | AK023520  | 4643.393  | 2768.342  |
| NM_000844 | 899.624   | 1087.661  | NM_000224 | 1989.688  | 1529.504  | NM_007211 | 4881.233  | 2498.02   |
| NM_005510 | 5501.994  | 6664.273  | NM_014328 | 7377.277  | 10433.509 | AB011152  | 1149.342  | 752.156   |
| Z36817    | 1532.375  | 2720.204  | NM_006414 | 4819.843  | 3206.698  | NM_014956 | 5897.481  | 3763.167  |
| NM_014505 | 25084.859 | 30312.912 | NM_014322 | 722.403   | 549.533   | AB014592  | 443.814   | 300.217   |
| NM_004209 | 4947.711  | 6634.088  | NM_004122 | 2198.663  | 1433.149  | NM_016952 | 1354.56   | 607.923   |
| NM_016162 | 1693.36   | 1784.971  | NM_002928 | 5347.919  | 3585.515  | NM_001654 | 2568.126  | 1644.877  |
| AF130056  | 1592.838  | 1687.262  | NM_000160 | 1072.583  | 1571.466  | NM_014519 | 2167.335  | 2499.625  |
| AK025047  | 1869.457  | 1426.545  | NM_003301 | 706.853   | 930.703   | NM_007147 | 6409.695  | 8145.59   |
| NM_006806 | 2570.901  | 2652.524  | NM_000955 | 1391.723  | 1799.574  | X65463    | 2811.304  | 2581.667  |
| NM_006119 | 1297.369  | 1309.332  | U27768    | 908.005   | 1167.54   | AK024418  | 1221.396  | 1158.04   |
| NM_004465 | 626.658   | 756.143   | AF305550  | 4469.668  | 6722.877  | NM_003367 | 2832.147  | 2442.126  |
| AK026927  | 1904.136  | 1919.926  | U66582    | 5107.038  | 6976.901  | NM_005194 | 9570.023  | 6690.133  |
| NM_014059 | 9384.595  | 7647.519  | S73288    | 590.846   | 913.867   | AB002296  | 1296.933  | 1063.552  |
| NM_001761 | 5275.37   | 4086.663  | NM_006198 | 3265.441  | 4007.394  | NM_014315 | 4059.54   | 3945.084  |
| NM_007125 | 1771.067  | 1732.086  | NM_003812 | 767.952   | 1599.02   | NM_012087 | 1492.304  | 1511.792  |
| NM_002598 | 4276.778  | 3586.081  | NM_014065 | 1313.898  | 1202.854  | AF165520  | 844.345   | 482.057   |
| NM_020184 | 998.663   | 1048.183  | NM_001695 | 3950.538  | 5810.787  | NM_015679 | 3706.387  | 2335.209  |
| NM_005815 | 1620.614  | 1679.398  | NM_002248 | 2251.928  | 6268.427  | AF299118  | 51632.266 | 37954.777 |
| NM_001229 | 1274.725  | 1142.23   | NM_012281 | 2225.792  | 4462.202  | AK025353  | 11727.967 | 5812.172  |
| NM_000250 | 1162.095  | 860.36    | AK025772  | 2728.003  | 2668.603  | AK056896  | 19200.24  | 9360.272  |
| NM_018147 | 7204.281  | 8974.438  | NM_005509 | 912.749   | 800.407   | AK022763  | 17299.91  | 10232.913 |
| NM_018967 | 2935.958  | 3593.548  | NM_152747 | 1028.98   | 689.047   | AF288207  | 31115.75  | 22873.148 |
| NM_001850 | 831.35    | 947.725   | NM_017415 | 825.949   | 597.632   | NM_001001 | 45083.07  | 28083.832 |
| NM_005675 | 1625.133  | 2226.189  | NM_001667 | 27142.646 | 23748.123 | NM_005715 | 3798.785  | 6231.932  |
| NM_002770 | 1359.869  | 1734.989  | AB046834  | 742.222   | 651.133   | AK026992  | 2956.203  | 6286.909  |
| BC030636  | 1396.718  | 1582.406  | AB029033  | 6835.538  | 4131.123  | X81895    | 455.448   | 1096.087  |
| NM_002812 | 2957.103  | 2796.859  | AF091034  | 3185.767  | 1465.074  | AL137343  | 484.986   | 1079.811  |
| NM_020365 | 2301.313  | 2163.433  | NM_005301 | 20013.205 | 16888.35  | AK026414  | 9369.216  | 12877.925 |
| NM_003982 | 1106.151  | 1081.885  | NM_016653 | 4542.482  | 4941.55   | D17297    | 845.032   | 1506.573  |
| NM_002079 | 5728.741  | 4726.732  | AB035124  | 5427.191  | 6718.389  | NM_004074 | 40346.641 | 56678.57  |
| NM_002112 | 3224.576  | 1871.676  | AF060170  | 749.915   | 1307.103  | NM_002626 | 37413.434 | 49926.129 |
| NM_004121 | 2180.878  | 1806.436  | NM_016602 | 571.957   | 1068.118  | NM_018436 | 13437.122 | 21248.92  |
| AY007092  | 2515.193  | 2059.316  | NM_004409 | 7862.115  | 10487.075 | AF157115  | 4328.351  | 5716.983  |
| NM_001902 | 1855.601  | 1741.456  | AK023397  | 2262.566  | 3238.131  | AJ223353  | 4032.18   | 4007.551  |
| AL137605  | 33814.383 | 26965.506 | NM_001725 | 2085.547  | 2699.561  | NM_012241 | 2960.688  | 3385.679  |
| NM_016261 | 1151.903  | 1277.057  | NM_004079 | 3944.44   | 6379.776  | NM_018486 | 1430.633  | 1319.978  |
| NM_006519 | 707.604   | 911.112   | NM_002996 | 1281.533  | 1824.054  | NM_005324 | 20869.328 | 18815.189 |
| NM_004607 | 58430.168 | 59616.047 | NM_000383 | 857.162   | 1526.58   | AL080201  | 16616.697 | 14812.663 |
| NM_012076 | 1637.933  | 1426.975  | NM_006875 | 1385.81   | 434.53    | NM_001806 | 6775.747  | 7940.115  |
| D14678    | 6635.559  | 6062.09   | D87119    | 3537.243  | 1369.682  | AB040941  | 3386.509  | 4345.567  |
| NM_016221 | 1993.994  | 2613.406  | AL050040  | 646.053   | 649.587   | AL137241  | 763.241   | 1009.994  |
| NM_018113 | 1508.868  | 1880.886  | NM_006556 | 10174.999 | 11474.683 | AB037742  | 1318.464  | 1920.401  |
| NM_005187 | 1401.801  | 2252.154  | AL133066  | 454.938   | 821.346   | AF272375  | 1010.335  | 1475.027  |
| U73377    | 2771.964  | 3336.387  | AF264717  | 2155.465  | 3674.617  | AK025078  | 964.309   | 1804.17   |
| NM_002199 | 2733.674  | 3757.435  | NM_012260 | 5355.468  | 4144.114  | AK023754  | 611.669   | 1429.546  |
| BC005219  | 3690.481  | 1951.619  | NM_001141 | 4186.205  | 3158.047  | AK021689  | 421.621   | 1032.229  |
| NM_004268 | 1171.741  | 985.415   | NM_000018 | 6038.427  | 5135.136  | AK024737  | 1983.17   | 3989.857  |
| NM_006662 | 6380.434  | 5176.576  | AB028992  | 1238.473  | 1051.822  | AB007890  | 6403.754  | 9633.861  |

|           |           |           |           |           |           |           |           |           |
|-----------|-----------|-----------|-----------|-----------|-----------|-----------|-----------|-----------|
| NM_004031 | 795.5     | 491.057   | NM_018479 | 8345.584  | 5811.765  | AF070591  | 482.156   | 1098.851  |
| NM_004514 | 3423.544  | 2614.189  | NM_014362 | 3568.68   | 1437.823  | AF286160  | 8159.679  | 14517.064 |
| NM_006163 | 1125.621  | 827.868   | NM_018308 | 1844.335  | 1460.188  | AF275800  | 3020.971  | 4680.707  |
| NM_001272 | 10519.283 | 6360.217  | NM_001832 | 23596.119 | 24707.877 | AL359605  | 1828.761  | 3081.603  |
| NM_016303 | 5854.906  | 4592.796  | NM_017774 | 9892.101  | 11238.305 | AB020633  | 3705.074  | 6483.593  |
| NM_006196 | 25281.463 | 23643.594 | AB037716  | 1856.192  | 2295.639  | AK025445  | 8321.549  | 12836.193 |
| D17129    | 39097.93  | 29012.73  | NM_016297 | 2801.31   | 3645.387  | AL357200  | 1701.229  | 2936.655  |
| NM_003091 | 17476.734 | 13976.579 | NM_001752 | 2953.665  | 3476.328  | NM_017727 | 11476.515 | 20440.35  |
| NM_004247 | 3028.642  | 2387.387  | BC003406  | 2054.62   | 2691.109  | NM_018319 | 3941.409  | 6073.298  |
| NM_017722 | 2945.867  | 2392.05   | AL137672  | 792.838   | 1742.868  | AL359559  | 607.684   | 1157.322  |
| AL137730  | 4325.745  | 3432.577  | X64177    | 2692.148  | 1604.882  | AK021714  | 1556.3    | 2429.781  |
| NM_002157 | 54473.484 | 60278.59  | NM_015994 | 8653.144  | 10116.392 | NM_020314 | 6953.983  | 12630.668 |
| NM_004095 | 8405.713  | 9308.014  | NM_018476 | 24300.615 | 10090.598 | AK022972  | 3787.065  | 7044.548  |
| NM_014365 | 374.276   | 565.34    | AF220492  | 6081.773  | 1837.082  | AK025996  | 1377.15   | 2022.074  |
| NM_005147 | 3010.497  | 3263.773  | X89671    | 923.783   | 367.406   | NM_017596 | 1641.434  | 2553.032  |
| NM_014665 | 2958.633  | 3119.529  | NM_014941 | 2922.973  | 1727.942  | AF088015  | 944.322   | 1389.657  |
| AK023609  | 1496.874  | 1610.527  | NM_018372 | 5234.591  | 2013.288  | AF086168  | 446.324   | 475.521   |
| NM_018019 | 2028.984  | 2273.206  | NM_013253 | 894.031   | 571.737   | AK026711  | 1343.021  | 1975.857  |
| AK027220  | 1913.355  | 1785.654  | NM_005895 | 3779.322  | 1766.02   | NM_017864 | 3831.594  | 6457.801  |
| NM_018011 | 6167.697  | 5146.512  | D82345    | 13305.348 | 8319.838  | NM_004869 | 3882.684  | 5845.257  |
| AF132733  | 1239.434  | 910.609   | NM_003814 | 952.928   | 2164.31   | AF136408  | 1036.618  | 1754.939  |
| NM_001071 | 31850.693 | 24539.344 | NM_002968 | 684.449   | 416.758   | AL110203  | 571.419   | 909.18    |
| NM_006187 | 1860.656  | 1568.237  | NM_000262 | 1933.929  | 1653.796  | AJ011595  | 566.718   | 1052.482  |
| NM_020354 | 4556.944  | 3856.358  | NM_017831 | 1332.709  | 1980.827  | AJ011602  | 578.55    | 1056.038  |
| AF202637  | 4192.604  | 2913.44   | AK024393  | 653.523   | 1134.157  | AJ002787  | 2848.509  | 4873.011  |
| NM_000026 | 30691.93  | 21690.799 | AK022537  | 10428.321 | 12657.4   | Z70764    | 1124.398  | 1869.215  |
| AB033016  | 8589.488  | 6605.028  | AF116632  | 800.922   | 1378.658  | Z83948    | 812.576   | 1132.38   |
| D87452    | 1668.991  | 1425.307  | NM_006345 | 5258.23   | 6314.185  | M25785    | 1167.016  | 1975.951  |
| AB037864  | 1655.779  | 1085.235  | NM_003259 | 15706.269 | 6071.186  | M32443    | 2725.098  | 4411.135  |
| AB020713  | 10203.816 | 12688.736 | AL080128  | 2362.113  | 939.071   | D16908    | 712.932   | 739.082   |
| AK025426  | 1803.695  | 2667.13   | AB037787  | 6190.148  | 2104.984  | D16477    | 977.247   | 1982.452  |
| NM_016558 | 4716.585  | 6520.021  | AB033072  | 338.501   | 422.383   | AK024759  | 913.479   | 1134.224  |
| NM_007145 | 4109.742  | 4361.839  | AB040892  | 1257.433  | 636.732   | AK022309  | 843.22    | 726.181   |
| AL133112  | 849.411   | 890.656   | NM_001822 | 1679.457  | 730.169   | AK000063  | 612.093   | 506.043   |
| AF085855  | 451.616   | 710.369   | NM_018268 | 20366.842 | 10240.232 | AK000949  | 1204.379  | 1825.953  |
| AK002078  | 1875.639  | 1560.68   | AF230904  | 7724.531  | 3295.178  | AK027068  | 659.164   | 1101.829  |
| AF085837  | 1824.571  | 1412.481  | NM_017596 | 6434.717  | 4279.706  | AK000974  | 1726.936  | 4047.26   |
| AK023165  | 684.669   | 637.253   | AL157480  | 3210.347  | 2892.562  | AK024527  | 310.571   | 795.337   |
| NM_016115 | 1049.334  | 729.197   | NM_018110 | 1280.796  | 812.147   | AK025051  | 996.779   | 1330.985  |
| NM_014950 | 2618.836  | 2008.37   | AF312678  | 452.054   | 313.427   | AK024553  | 23687.6   | 21488.285 |
| AL080180  | 967.82    | 641.98    | NM_006253 | 10461.169 | 6675.766  | AK024930  | 630.997   | 908.537   |
| X89067    | 949.589   | 701.537   | NM_003866 | 774.299   | 806.468   | AF143879  | 4006.656  | 2345.592  |
| AF147376  | 1026.091  | 697.478   | NM_018262 | 1080.926  | 1806.679  | AK024621  | 16063.319 | 9936.86   |
| AK027190  | 1184.822  | 850.958   | NM_006207 | 2276.208  | 3007.782  | AL157449  | 10990.437 | 6370.228  |
| AL360136  | 961.221   | 836.767   | NM_003220 | 2484.352  | 3409.972  | AK025525  | 739.118   | 436.165   |
| AF086259  | 1342.699  | 910.861   | AF009674  | 11394.128 | 16012.855 | NM_018233 | 6119.149  | 4654.897  |
| AF086369  | 740.332   | 664.039   | NM_000360 | 1114.301  | 2216.167  | AV740891  | 1259.622  | 775.416   |
| AF086328  | 3287.513  | 2933.8    | NM_000844 | 1273.431  | 2169.982  | AK026860  | 4400.52   | 2994.782  |
| AF086441  | 12295.286 | 10655.992 | NM_004209 | 6546.325  | 7611.612  | NM_014896 | 1349.168  | 1308.386  |
| AK027255  | 715.059   | 472.496   | NM_016162 | 1824.54   | 501.715   | AK023435  | 1367.383  | 1207.856  |
| NM_014117 | 1428.604  | 1627.947  | AF130056  | 1772.474  | 563.637   | AF086035  | 4348.86   | 2831.9    |
| AF086087  | 4401.679  | 3988.387  | NM_002201 | 52727.625 | 24012.309 | AK022159  | 2811.595  | 1712.229  |
| AK000671  | 44168.52  | 34735.914 | AK025047  | 1188.349  | 1716.604  | AF007136  | 2308.297  | 4851.073  |



|           |           |           |           |           |           |           |           |           |
|-----------|-----------|-----------|-----------|-----------|-----------|-----------|-----------|-----------|
| AL137425  | 899.31    | 699.631   | NM_006806 | 2435.96   | 823.119   | U25750    | 3082.105  | 1699.169  |
| AL359584  | 724.863   | 706.66    | NM_006763 | 2226.445  | 823.635   | AK023691  | 3285.891  | 1618.077  |
| AL137285  | 862.386   | 489.677   | NM_006119 | 2212.446  | 721.521   | NM_005234 | 3173.338  | 2070.899  |
| AL137456  | 1341.24   | 1395.643  | NM_004465 | 591.925   | 297.345   | NM_001803 | 3981.622  | 3082.772  |
| AL157489  | 851.25    | 757.768   | AK026927  | 2075.433  | 706.421   | NM_006233 | 14724.015 | 7573.927  |
| AL390157  | 647.379   | 760.356   | NM_014059 | 10285.562 | 4735.959  | AK000992  | 921.056   | 830.712   |
| AK023086  | 3785.482  | 4141.804  | NM_001761 | 5940.461  | 2467.117  | L23544    | 14097.81  | 6273.567  |
| NM_017621 | 7828.128  | 6206.861  | BE884341  | 2404.259  | 2744.733  | NM_019020 | 3221.938  | 1739.618  |
| AK023574  | 854.367   | 975.209   | AF231997  | 1806.339  | 988.969   | NM_016474 | 1187.192  | 450.358   |
| AF083117  | 641.734   | 237.479   | NM_007125 | 1644.337  | 797.914   | NM_000910 | 1249.365  | 965.79    |
| AF131767  | 2563.271  | 2444.673  | NM_002598 | 5223.592  | 2640.004  | AF086001  | 29546.578 | 14433.194 |
| AK021907  | 1130.653  | 879.405   | NM_020184 | 941.034   | 982.848   | AL117560  | 19040.82  | 11412.259 |
| AK022029  | 1010.034  | 857.516   | NM_005815 | 2569.389  | 2558.02   | M24749    | 2937.746  | 2379.583  |
| AK022320  | 1021.26   | 622.982   | NM_001229 | 1202.26   | 2272.374  | NM_005831 | 38497.199 | 21086.197 |
| AK022058  | 1390.657  | 923.663   | NM_014916 | 563.055   | 1200.029  | NM_005850 | 50260.211 | 30599.799 |
| NM_018280 | 823.721   | 804.071   | NM_000250 | 1240.522  | 3171.036  | NM_000554 | 19513.047 | 10530.55  |
| AK024381  | 725.926   | 1051.694  | NM_018147 | 8842.963  | 13501.974 | AF009317  | 2955.956  | 2237.591  |
| AK026503  | 1081.386  | 1313.979  | NM_018967 | 3361.548  | 5144.437  | AK026583  | 3268.871  | 2541.067  |
| AK026671  | 1155.395  | 1350.072  | NM_001850 | 688.533   | 1269.847  | AF218031  | 4067.466  | 3045.513  |
| AK025522  | 10935.505 | 10905.453 | NM_002770 | 1462.252  | 378.425   | AF210650  | 1276.254  | 717.776   |
| AK025464  | 53437.383 | 51231.113 | BC030636  | 1497.917  | 494.394   | NM_018356 | 2380.858  | 2010.667  |
| AL049962  | 2620.241  | 2305.85   | NM_006587 | 265.303   | 162.417   | X74613    | 18261.25  | 10404.045 |
| NM_016941 | 2019.648  | 2085.813  | D21064    | 314.647   | 153.681   | AF075080  | 9077.861  | 4891.112  |
| NM_020408 | 1003.348  | 742.203   | NM_002812 | 3407.035  | 809.873   | Y13897    | 668.672   | 361.393   |
| NM_004988 | 15003.807 | 9605.766  | NM_020365 | 2602.67   | 936.513   | AK001857  | 948.665   | 464.636   |
| AL080151  | 1891.366  | 1769.501  | NM_003982 | 1155.259  | 1102.214  | AL133577  | 2029.308  | 709.852   |
| AL050085  | 590.349   | 661.521   | NM_002079 | 5604.336  | 3130.194  | AK025378  | 839.119   | 276.414   |
| AK024127  | 566.021   | 878.189   | NM_002112 | 2977.808  | 4955.554  | NM_000479 | 1030.71   | 356.346   |
| AK021574  | 2181.665  | 2119.04   | NM_004121 | 2387.352  | 1184.53   | AF038199  | 1400.29   | 616.368   |
| AF119911  | 6342.215  | 6222.645  | AY007092  | 2531.962  | 1031.913  | CY3Cy5    | 1571.132  | 148.864   |
| AF116656  | 3942.844  | 2788.863  | NM_001902 | 2370.512  | 1388.333  | BE908993  | 948.38    | 1063.822  |
| NM_001050 | 2886.312  | 2161.22   | AL137605  | 43909.578 | 38414.004 | AB012701  | 648.432   | 430.977   |
| AF132206  | 1139.872  | 909.079   | NM_016261 | 1189.077  | 1906.389  | M61156    | 1074.169  | 804       |
| AJ001869  | 6742.17   | 4935.433  | NM_006519 | 905.042   | 1576.904  | R44005    | 815.529   | 957.321   |
| NM_005295 | 825.014   | 671.409   | NM_012076 | 1232.668  | 3013.782  | M55040    | 238.753   | 298.577   |
| NM_020213 | 3885.953  | 3114.064  | NM_005187 | 1312.891  | 1808.938  | AW009739  | 355.294   | 319.366   |
| D17267    | 5667.203  | 4971.243  | U73377    | 3117.591  | 3893.476  | BC036805  | 3889.633  | 2831.661  |
| AB040944  | 1740.166  | 1070.927  | NM_002199 | 3104.76   | 1005.318  | Z74615    | 15667.433 | 9762.409  |
| NM_018145 | 2750.63   | 2044.028  | BC005219  | 4700.991  | 1070.534  | X03884    | 28740.711 | 13448.173 |
| AK024326  | 1410.279  | 1049.711  | NM_004268 | 1218.661  | 591.462   | X91625    | 3020.296  | 1642.658  |
| U61088    | 711.547   | 447.715   | NM_006662 | 8090.571  | 2678.337  | AF090901  | 310.718   | 314.626   |
| AF086467  | 1206.287  | 1089.072  | NM_004031 | 905.137   | 374.789   | AF004231  | 410.572   | 322.707   |
| AL137345  | 1924.024  | 1689.872  | NM_004514 | 4059.588  | 1070.562  | AF001862  | 6514.03   | 5574.116  |
| AK000967  | 1187.904  | 1436.146  | NM_006163 | 903.368   | 399.247   | SR2       | 62396.547 | 51844.109 |
| AK021583  | 2272.308  | 2045.9    | NM_001272 | 9691.043  | 2143.058  | SR4       | 9997.797  | 5700.167  |
| AL137442  | 3114.536  | 2801.37   | NM_016303 | 6774.104  | 5501.228  | SR6       | 1556.334  | 587.816   |
| AL049281  | 585.832   | 763.728   | NM_006196 | 28062.342 | 9293.054  | SR8       | 6080.521  | 5240.792  |
| NM_001208 | 20235.553 | 19618.125 | AV733560  | 683.536   | 904.193   | SR10      | 20894.424 | 1556.922  |
| AL050061  | 1435.688  | 1810.213  | D17129    | 42568.777 | 18624.545 | CY3Cy5    | 1685.211  | 195.184   |
| AL050206  | 1225.639  | 1688.188  | NM_003091 | 17640.838 | 5066.42   | U87460    | 4202.925  | 3082.245  |
| AK026898  | 1403.098  | 1189.609  | NM_004247 | 3858.607  | 1539.76   | NM_003617 | 325.389   | 343.963   |
| AK022419  | 818.827   | 577.635   | NM_017722 | 3214.739  | 2101.962  | NM_001841 | 675.447   | 511.375   |
| NM_013936 | 1269.286  | 1305.673  | AL137730  | 7110.643  | 9240.401  | NM_002054 | 1775.916  | 1511.342  |

|           |           |           |           |           |           |           |           |           |
|-----------|-----------|-----------|-----------|-----------|-----------|-----------|-----------|-----------|
| BC002538  | 1281.288  | 1274.791  | NM_004500 | 38423.199 | 55118.926 | AF300649  | 1451.942  | 1378.457  |
| NM_017836 | 2072.835  | 1462.032  | AK023609  | 1219.037  | 435.7     | NM_004125 | 462.179   | 481.818   |
| AK096584  | 23448.107 | 15148.229 | NM_018019 | 2195.52   | 835.863   | NM_000823 | 2081.641  | 1315.005  |
| Z29070    | 666.818   | 247.235   | AK027220  | 1800.839  | 779.907   | NM_004414 | 1901.517  | 1363.091  |
| AL078636  | 1249.623  | 967.828   | NM_018011 | 6232.679  | 5309.529  | NM_003317 | 3809.468  | 2313.32   |
| S72917    | 789.425   | 448.365   | AF132733  | 1408.412  | 539.167   | NM_001139 | 1400.443  | 916.165   |
| AF076617  | 55056.27  | 45997.688 | NM_001071 | 30393.912 | 7271.122  | NM_004609 | 23116.031 | 9237.046  |
| AK025129  | 942.554   | 812.254   | NM_006187 | 1685.594  | 404.225   | NM_003772 | 1258.786  | 684.985   |
| NM_014392 | 6454.082  | 5736.303  | NM_020354 | 7139.412  | 3063.803  | NM_001541 | 3019.961  | 1359.275  |
| AK023291  | 5462.553  | 5259.219  | AF202637  | 3995.463  | 1528.245  | NM_005416 | 1098.486  | 362.666   |
| BF541820  | 482.179   | 1202.461  | NM_000026 | 24331.982 | 12386.93  | L09081    | 4496.557  | 5089.221  |
| CY3Cy5    | 6530.792  | 408.41    | AB033016  | 14212.73  | 7762.574  | NM_016113 | 2818.904  | 3693.662  |
| X07696    | 5295.997  | 5257.86   | D87452    | 2334.041  | 2160.659  | NM_014222 | 1520.271  | 3306.523  |
| AA481015  | 1279.512  | 1499.527  | AB037864  | 1617.294  | 2536.073  | NM_000509 | 1717.908  | 720.054   |
| AI925826  | 6526.218  | 6241.933  | L26494    | 2697.34   | 4090.245  | NM_004542 | 622.967   | 278.474   |
| U04209    | 4411.99   | 4016.067  | AK002078  | 1944.36   | 756.032   | AI742810  | 317.826   | 165.042   |
| Z15108    | 1046.26   | 1117.968  | AF085837  | 1451.375  | 952.201   | BF217496  | 3205.644  | 2417.079  |
| M55284    | 3676.598  | 3551.759  | AK023165  | 562.579   | 645.857   | NM_004762 | 7102.116  | 4333.955  |
| AA001218  | 671.404   | 634.536   | NM_016115 | 1751.495  | 842.64    | NM_006641 | 33950.832 | 21311.811 |
| AA679391  | 1721.571  | 1581.749  | NM_014950 | 2466.176  | 985.398   | NM_000634 | 4994.763  | 3674.567  |
| BG682146  | 2744.639  | 2698.146  | AL080180  | 841.73    | 560.807   | NM_014679 | 22982.063 | 13812.704 |
| NM_005060 | 2223.581  | 2718.355  | X89067    | 1163.546  | 641.192   | AB040969  | 1999.248  | 1450.79   |
| NM_005437 | 8380.918  | 10348.162 | AF147376  | 1078.273  | 729.635   | NM_003467 | 11781.125 | 9564.146  |
| SR7       | 7053.707  | 60494.09  | AK027190  | 772.542   | 436.35    | NM_014936 | 1425.636  | 1141.658  |
| SR9       | 28422.594 | 8826.757  | AL360136  | 756.312   | 451.832   | NM_003943 | 1046.688  | 1070.85   |
| CY3Cy5    | 7840.848  | 446.185   | AF086259  | 1050.124  | 834.047   | NM_019052 | 7418.94   | 6481.753  |
| NM_003974 | 6999.813  | 7589.311  | AF086369  | 677.961   | 729.97    | NM_003202 | 10758.76  | 6183.073  |
| NM_006065 | 633.928   | 633.116   | AF086328  | 5264.82   | 6174.956  | AF119902  | 443.098   | 494.602   |
| NM_014339 | 23947.271 | 25293.967 | AF086427  | 599.893   | 950.573   | NM_020525 | 5387.336  | 2487.523  |
| NM_001495 | 975.428   | 1056.092  | AF086087  | 3556.373  | 1333.447  | NM_003890 | 2596.249  | 978.444   |
| NM_002288 | 1377.072  | 1194.192  | AK000671  | 46378.578 | 38708.355 | BF127978  | 2177.339  | 815.747   |
| NM_004416 | 5321.064  | 5280.154  | AK094020  | 460.782   | 384.734   | AF110801  | 436.663   | 301.806   |
| NM_000628 | 7747.148  | 8708.827  | AL137425  | 698.785   | 339.622   | NM_016579 | 13635.548 | 15816.337 |
| AB005216  | 1457.229  | 1403.804  | AL137637  | 361.804   | 143.211   | AK022565  | 4043.675  | 6742.017  |
| NM_000325 | 10170.762 | 11076.901 | AL359584  | 712.444   | 267.025   | AK023151  | 1756.529  | 3169.84   |
| AF015041  | 1492.844  | 1452.736  | AL137285  | 765.442   | 366.183   | AB033076  | 827.797   | 649.511   |
| NM_002363 | 690.715   | 833.879   | AL137456  | 1257.07   | 544.652   | AK022876  | 1052.023  | 612.891   |
| AK000184  | 751.336   | 672.514   | AL157489  | 753.655   | 859.385   | NM_003938 | 3122.285  | 965.374   |
| AF055020  | 7475.013  | 6456.688  | AL390157  | 784.953   | 742.415   | NM_001441 | 624.522   | 481.682   |
| NM_006986 | 4126.006  | 4033.721  | AK021649  | 498.626   | 826.597   | NM_018324 | 472.847   | 429.429   |
| AF272043  | 9607.541  | 10242.785 | AF086071  | 733.318   | 1885.098  | AF064255  | 12935.585 | 7933.079  |
| NM_002587 | 15573.684 | 14116.052 | AK027235  | 426.111   | 395.169   | NM_016368 | 36675.242 | 19398.227 |
| NM_002238 | 2287.405  | 2641.275  | AK023086  | 2413.471  | 3222.956  | U08853    | 2022.006  | 1740.544  |
| NM_004868 | 1392.288  | 1324.209  | NM_017621 | 5831.879  | 2127.752  | NM_004261 | 28782.037 | 18006.84  |
| AF130728  | 1485.626  | 1752.991  | AK023574  | 1231.024  | 736.297   | NM_016006 | 1028.634  | 1205.051  |
| NM_004987 | 885.159   | 1184.192  | AF131767  | 2418.178  | 911.052   | NM_016245 | 4064.559  | 3577.525  |
| NM_001289 | 28192.621 | 45050.355 | NM_013343 | 300.612   | 827.498   | AF005632  | 2181.399  | 1377.124  |
| NM_001131 | 48023.973 | 58210.891 | AF147424  | 329.799   | 852.469   | NM_000903 | 2112.588  | 2085.519  |
| NM_002414 | 54009.613 | 55068.977 | AK021907  | 1196.903  | 432.96    | NM_004493 | 9424.553  | 6859.222  |
| NM_000355 | 1456.02   | 1487.267  | AK022029  | 619.047   | 663.686   | NM_004047 | 14192.987 | 5896.578  |
| AL133580  | 15667.279 | 19227.441 | AK022320  | 904.372   | 409.8     | NM_004823 | 1498.168  | 401.709   |
| NM_014666 | 12853.206 | 12876.602 | AK022058  | 1788.202  | 1535.706  | Y17179    | 58051.055 | 29097.949 |
| NM_005451 | 1739.15   | 1837.803  | AK022196  | 349.396   | 469.503   | NM_000891 | 598.437   | 830.571   |

|           |           |           |            |           |           |           |           |           |
|-----------|-----------|-----------|------------|-----------|-----------|-----------|-----------|-----------|
| NM_007172 | 5555.503  | 5692.188  | AK022429   | 994.594   | 1776.862  | AF239613  | 710.751   | 1321.031  |
| NM_006152 | 3511.361  | 3481.944  | AK025763   | 836.146   | 1663.586  | AK026840  | 1698.391  | 1560.745  |
| NM_013333 | 16304.118 | 19493.955 | AK024381   | 617.19    | 890.076   | NM_00028E | 1310.458  | 1610.986  |
| NM_002333 | 2633.811  | 2307.799  | AK026503   | 1231.196  | 1839.438  | AK026317  | 5059.041  | 1918.759  |
| NM_00340C | 11355.015 | 12431.343 | AK025522   | 11504.791 | 3252.118  | X82207    | 16436.137 | 4890.038  |
| NM_00670E | 4197.418  | 3619.546  | AK025464   | 50896.898 | 34270.504 | NM_015044 | 577.288   | 325.575   |
| NM_01443E | 1065.662  | 1076.544  | AL049962   | 2321.085  | 851.911   | NM_00052C | 1977.438  | 1260.495  |
| NM_005582 | 1114.738  | 888.012   | NM_016941  | 1785.224  | 521.907   | NM_00028E | 459.195   | 286.736   |
| NM_01226E | 6620.804  | 7719.343  | NM_02040E  | 825.448   | 492.12    | NM_00150C | 2527.824  | 1881.367  |
| NM_00455E | 3038.395  | 3117.52   | NM_00498E  | 14588.22  | 4994.879  | NM_00438E | 1950.03   | 1890.689  |
| X56692    | 7128.504  | 7537.841  | unknown (S | 839.009   | 867.342   | AL110127  | 1256.802  | 1105.806  |
| NM_01447E | 1030.434  | 665.249   | AL080151   | 6168.17   | 7756.913  | NM_00252E | 1915.007  | 1401.261  |
| NM_01427E | 3336.27   | 3556.434  | AK001308   | 689.841   | 1318.49   | D38438    | 4152.284  | 7247.487  |
| NM_00583E | 626.257   | 858.173   | AK024127   | 737.714   | 1049.297  | AV714945  | 753.25    | 1785.575  |
| NM_000734 | 13871.493 | 18832.068 | AF119911   | 7787.372  | 3850.661  | AF007872  | 8625.508  | 5018.22   |
| NM_012331 | 2967.477  | 3920.925  | AF116656   | 4451.388  | 1554.686  | M30938    | 4896.735  | 2051.682  |
| NM_006644 | 9974.367  | 12269.084 | NM_00105C  | 2404.193  | 953.591   | NM_01514E | 930.326   | 411.77    |
| NM_00658E | 54606.008 | 5744.344  | AF132206   | 1101.204  | 408.615   | NM_004714 | 961.471   | 387.079   |
| X82693    | 9997.52   | 10758.181 | AJ001869   | 8305.121  | 5203.184  | NM_002497 | 13085.495 | 10741.385 |
| NM_00717E | 21745.828 | 24723.121 | AJ002969   | 419.558   | 632.525   | AB025194  | 6337.754  | 4924.979  |
| NM_002722 | 2478.809  | 2725.534  | AF070579   | 294.224   | 978.609   | NM_00623E | 1215.347  | 1117.189  |
| AF317058  | 1414.292  | 1324.208  | NM_00529E  | 1742.381  | 2798.445  | NM_017897 | 2188.735  | 724.57    |
| NM_00602E | 988.273   | 635.062   | NM_020213  | 5264.237  | 4127.72   | NM_00426E | 17460.086 | 6850.454  |
| NM_014904 | 1314.742  | 932.63    | D17267     | 7485.126  | 2674.278  | NM_00257E | 2808.427  | 1101.731  |
| AL137576  | 9556.919  | 10342.856 | AJ238214   | 368.118   | 242.967   | NM_00050E | 1999.703  | 1237.55   |
| NM_01835E | 6287.363  | 5419.085  | AB040944   | 1189.061  | 858.2     | NM_00454E | 388.01    | 374.7     |
| AF131781  | 7000.917  | 7233.333  | NM_01814E  | 2672.525  | 1101.423  | X06182    | 773.429   | 718.03    |
| NM_00651E | 18183.373 | 23489.15  | AK024326   | 1263.75   | 818.195   | BE908993  | 1109.28   | 1125.807  |
| NM_01586E | 1235.766  | 1361.078  | U61088     | 574.769   | 554.749   | AB012701  | 561.797   | 598.179   |
| NM_00305E | 9888.604  | 9618.095  | AF086467   | 1562.08   | 3394.518  | M61156    | 1449.844  | 1047.404  |
| NM_00507E | 556.05    | 1115.949  | AK026898   | 1892.771  | 884.009   | R44005    | 1080.895  | 682.855   |
| NM_006841 | 743.443   | 1074.768  | AK022419   | 599.436   | 257.979   | AI942392  | 1692.919  | 1094.703  |
| NM_014824 | 2309.969  | 2462.862  | AJ251832   | 293.222   | 214.331   | AW009739  | 282.174   | 235.1     |
| NM_014504 | 2714.853  | 1933.079  | NM_014624  | 493.09    | 340.416   | BC036805  | 4657.557  | 2300.121  |
| NM_01440E | 13956.493 | 12968.72  | NM_01393E  | 1179.776  | 1754.141  | Z74615    | 17905.035 | 6747.456  |
| NM_014741 | 3921.631  | 4570.629  | AF086145   | 911.758   | 1664.34   | X03884    | 31365.914 | 9078.729  |
| AF212247  | 4936.222  | 5162.859  | Z70709     | 404.268   | 486.349   | U36759    | 268.029   | 170.665   |
| AF161407  | 14859.968 | 14109.395 | BC002538   | 1434.406  | 653.793   | X91625    | 1913.866  | 1065.269  |
| NM_01473E | 3610.548  | 3484.905  | NM_01783E  | 1865.64   | 1187.157  | AF004231  | 424.192   | 443.74    |
| NM_01808C | 8761.934  | 7100.274  | AK096584   | 29664.678 | 18699.549 | AF001862  | 7692.337  | 3806.005  |
| AF174605  | 5810.558  | 5103.959  | Z29070     | 490.337   | 312.194   | NM_016044 | 1191.502  | 776.306   |
| NM_01445E | 18473.129 | 18375.387 | AL078636   | 1237.391  | 910.125   | AK023151  | 1126.421  | 775.658   |
| NM_00571E | 2148.73   | 2579.975  | AK022382   | 480.428   | 347.967   | AB033076  | 601.966   | 389.963   |
| AK023553  | 2798.461  | 2176.526  | AF147362   | 425.817   | 519.902   | AK022876  | 1140.987  | 831.106   |
| NM_01460C | 1616.459  | 1463.995  | S72917     | 698.676   | 877.599   | AF134894  | 577.736   | 362.41    |
| NM_01673E | 2768.051  | 3233.741  | AF076617   | 55682.047 | 51928.668 | NM_00393E | 3280.342  | 1841.079  |
| AF181994  | 3073.832  | 3467.742  | CY3Cy5     | 6215.52   | 238.101   | NM_014827 | 11079.766 | 6977.202  |
| NM_01896E | 2130.693  | 2353.061  | H69204     | 1263.703  | 548.192   | U87460    | 4263.168  | 2909.121  |
| AF125100  | 2894.215  | 3445.435  | X07696     | 5753.056  | 5987.355  | NM_001841 | 538.367   | 440.59    |
| NM_006114 | 14590.939 | 15398.678 | AA481015   | 1271.889  | 1679.081  | NM_002054 | 2387.363  | 1446.506  |
| AF130728  | 1121.746  | 1234.52   | AI925826   | 7642.14   | 10983.902 | AF300649  | 2185.463  | 1561.239  |
| NM_00128E | 21949.605 | 25929.934 | U04209     | 5665.372  | 5255.729  | NM_00412E | 969.626   | 472.083   |
| NM_001131 | 35547.836 | 36136.801 | M55284     | 3323.84   | 3971.337  | NM_00082E | 4511.353  | 1563.591  |

|           |           |           |           |           |           |           |           |           |
|-----------|-----------|-----------|-----------|-----------|-----------|-----------|-----------|-----------|
| X07696    | 3266.825  | 2893.226  | AA001218  | 709.651   | 857.852   | NM_004414 | 2698.133  | 852.351   |
| AA481015  | 984.967   | 1258.605  | AA679391  | 1749.089  | 2649.476  | NM_003317 | 7092.177  | 1988.414  |
| AI925826  | 5582.08   | 4625.81   | BG682146  | 2742.572  | 3366.309  | NM_001139 | 1073.178  | 661.543   |
| U04209    | 4857.464  | 4099.714  | AA884709  | 734.172   | 845.324   | NM_004609 | 20708.836 | 7870.91   |
| Z15108    | 933.865   | 1235.751  | NM_005060 | 2876.497  | 4320.596  | NM_003772 | 1277.016  | 763.374   |
| M55284    | 4109.711  | 4135.658  | NM_005437 | 7852.653  | 8827.429  | NM_001541 | 2095.503  | 1187.08   |
| AA001218  | 671.61    | 706.131   | SR7       | 6436.646  | 58683.848 | NM_005416 | 838.843   | 343.429   |
| AA679391  | 1596.381  | 1779.266  | SR9       | 25227.822 | 5667.728  | L09081    | 2624.9    | 1027.525  |
| BG682146  | 2726.217  | 2850.737  | CY3Cy5    | 6121.042  | 214.801   | NM_000218 | 67373.898 | 40990.02  |
| AA884709  | 716.32    | 623.623   | NM_003974 | 6748.032  | 6524.592  | NM_016113 | 2382.102  | 811.264   |
| NM_005060 | 2670.017  | 2916.003  | NM_006065 | 605.184   | 554.056   | NM_014222 | 1245.559  | 701.554   |
| NM_005437 | 9571.484  | 11269.374 | NM_014339 | 28797.76  | 34689.332 | AK026840  | 1583.732  | 872.331   |
| AK022417  | 1992.96   | 2076.956  | NM_001495 | 1779.857  | 1736.703  | NM_000288 | 1277.871  | 1014.108  |
| U50534    | 804.19    | 833.763   | NM_002288 | 974.573   | 1523.619  | AK026317  | 5899.867  | 4264.25   |
| NM_014278 | 1680.849  | 2017.424  | NM_004416 | 5658.884  | 10402.735 | X82207    | 16486.35  | 9445.419  |
| NM_000734 | 10623.008 | 11682.416 | NM_000628 | 7828.872  | 12123.719 | NM_015044 | 639.106   | 507.293   |
| NM_012331 | 2387.786  | 2887.443  | AB005216  | 1390.208  | 1495.451  | NM_002867 | 226.771   | 308.319   |
| NM_006644 | 7809.529  | 7101.172  | NM_000325 | 10371.549 | 11467.315 | BF217496  | 3545.194  | 2709.297  |
| NM_006583 | 55006.598 | 2936.99   | NM_002363 | 553.94    | 792.803   | NM_004762 | 6996.081  | 4575.831  |
| NM_003974 | 7638.729  | 7008.59   | AK000184  | 763.079   | 847.577   | NM_006641 | 36625.063 | 19227.492 |
| NM_014339 | 22743.449 | 19672.303 | AF055020  | 12349.74  | 14724.864 | NM_000634 | 5298.5    | 3244.849  |
| NM_001495 | 1373.696  | 1079.988  | NM_006986 | 4702.292  | 4635.832  | NM_014679 | 25343.301 | 12906.822 |
| NM_002288 | 1081.22   | 873.811   | AF272043  | 9034.546  | 9614.138  | AB040969  | 2118.785  | 1261.953  |
| NM_004416 | 5553.754  | 5094.898  | NM_002587 | 23176.518 | 28691.973 | NM_003467 | 12855.944 | 6115.923  |
| NM_000628 | 8222.934  | 8391.563  | NM_002238 | 2610.382  | 2734.921  | NM_014936 | 1268.216  | 501.552   |
| AB005216  | 1619.641  | 1745.674  | NM_004868 | 1379.51   | 1881.561  | NM_003943 | 1767.769  | 715.315   |
| NM_000325 | 10657.175 | 11372.983 | AF130728  | 1663.654  | 2181.274  | NM_019052 | 8816.332  | 3313.108  |
| AF015041  | 2861.882  | 3448.282  | NM_004987 | 408.651   | 625.693   | NM_003202 | 12695.641 | 6191.68   |
| NM_002363 | 656.644   | 769.995   | NM_001289 | 22780.883 | 27206.092 | AF119902  | 249.605   | 216.852   |
| AK000184  | 745.418   | 892.506   | NM_002414 | 56320.262 | 52575.844 | NM_020525 | 6206.612  | 2177.79   |
| AF055020  | 6969.727  | 7245.197  | NM_000355 | 2809.751  | 2566.25   | NM_003890 | 1576.816  | 682.519   |
| NM_006986 | 4131.792  | 5034.829  | AL133580  | 18546.875 | 17019.434 | BF127978  | 1634.425  | 707.2     |
| AF272043  | 9768.146  | 10244.38  | NM_014666 | 15023.798 | 14610.666 | AF110801  | 872.277   | 261.598   |
| NM_002587 | 15918.37  | 16073.227 | NM_005451 | 2363.374  | 2390.385  | NM_016579 | 9954.885  | 2323.744  |
| NM_002238 | 2682.816  | 3100.787  | NM_007172 | 6074.233  | 6791.425  | AB018297  | 802.079   | 235.811   |
| NM_004868 | 1410.666  | 1588.674  | NM_006152 | 5740.879  | 6866.471  | AK022565  | 3802.142  | 1324.782  |
| NM_004669 | 1752.24   | 2081.39   | NM_013333 | 18005.666 | 22057.811 | AB025194  | 5023.663  | 2407.892  |
| NM_007028 | 12314.782 | 18072.105 | NM_002333 | 3563.135  | 4429.312  | NM_006239 | 736.868   | 497.687   |
| AF131781  | 4465.932  | 5293.924  | NM_003400 | 13758.92  | 20729.773 | NM_017897 | 2809.221  | 2095.548  |
| NM_006516 | 13278.951 | 14662.888 | NM_006705 | 4302.734  | 5911.4    | NM_004265 | 20265.24  | 13142.439 |
| NM_015865 | 637.913   | 585.808   | NM_014439 | 1423.452  | 1478.21   | NM_002572 | 3051.926  | 2018.421  |
| NM_003055 | 5099.567  | 5113.112  | NM_005582 | 1739.13   | 2136.594  | NM_001441 | 636.768   | 639.943   |
| NM_005075 | 669.938   | 646.071   | NM_012266 | 6774.276  | 6375.484  | NM_018324 | 401.892   | 377.991   |
| NM_006841 | 757.339   | 701.98    | NM_004559 | 3508.73   | 3813.364  | AF064255  | 14512.417 | 7526.688  |
| NM_002414 | 53875.047 | 47606.738 | X56692    | 11532.359 | 13136.564 | NM_016368 | 35870.902 | 16403.637 |
| NM_000355 | 1913.093  | 1930.945  | NM_014476 | 488.63    | 648.694   | U08853    | 1982.807  | 1307.73   |
| AL133580  | 16176.663 | 17016.145 | NM_014278 | 3206.289  | 3776.226  | NM_004261 | 29204.158 | 19141.521 |
| NM_014666 | 12975.857 | 11942.034 | NM_005838 | 1011.567  | 939.696   | NM_016006 | 1410.531  | 818.162   |
| NM_005451 | 1852.195  | 1590.016  | NM_000734 | 11800.684 | 14689.533 | NM_016245 | 5110.017  | 2203.021  |
| NM_007172 | 5691.974  | 5239.236  | NM_012331 | 2760.449  | 3495.845  | AF005632  | 3335.74   | 1010.929  |
| NM_006152 | 4600.465  | 4476.936  | NM_006583 | 59251.809 | 7138.164  | NM_000903 | 2024.092  | 595.619   |
| NM_013333 | 19034.65  | 20131.232 | X82693    | 19085.639 | 15992.397 | NM_004493 | 12428.941 | 3849.052  |
| NM_002333 | 3217.504  | 3284.335  | NM_007176 | 24399.99  | 21468.057 | AF309489  | 288.732   | 239.321   |

|           |           |           |           |           |           |           |           |           |
|-----------|-----------|-----------|-----------|-----------|-----------|-----------|-----------|-----------|
| NM_00340C | 12472.032 | 13759.796 | NM_002722 | 3490.406  | 3552.807  | NM_004047 | 13461.823 | 6346.372  |
| NM_00670E | 4094.139  | 4230.951  | AF317058  | 1351.329  | 1095.601  | NM_004823 | 1090.229  | 1034.703  |
| NM_01443E | 1013.27   | 1199.341  | M22538    | 41207.813 | 44950.324 | Y17179    | 56445.805 | 45480.887 |
| NM_005582 | 1098.87   | 1299.058  | NM_00602E | 1195.423  | 1329.672  | NM_000891 | 319.616   | 160.674   |
| NM_01226E | 6514.605  | 7227.838  | NM_014904 | 1107.185  | 1400.964  | AF239613  | 489.426   | 251.026   |
| NM_00455E | 3161.31   | 3818.598  | AL137576  | 10311.739 | 10033.549 | NM_016044 | 1502.811  | 1205.696  |
| X56692    | 8021.131  | 9386.613  | NM_01835E | 5466.579  | 7074.755  | NM_00052C | 1793.906  | 1338.141  |
| NM_01447E | 568.984   | 746.511   | NM_016321 | 525.385   | 1024.166  | NM_00028E | 673.524   | 392.327   |
| NM_01460C | 770.969   | 720.332   | AF131781  | 5055.702  | 6078.637  | NM_00150C | 2195.579  | 1368.22   |
| NM_016733 | 1706.2    | 1706.136  | NM_00651E | 18284.553 | 17930.705 | NM_00438E | 1845.129  | 1515.311  |
| AF181994  | 2059.186  | 2180.565  | NM_01586E | 1071.643  | 1315.265  | NM_02037E | 319.517   | 290.149   |
| NM_018962 | 1285.062  | 1359.736  | NM_00305E | 7947.039  | 9396.914  | NM_00252E | 2574.724  | 992.193   |
| AF125100  | 2286.077  | 2416.015  | NM_00507E | 502.948   | 803.108   | D38438    | 3763.697  | 1395.496  |
| NM_006114 | 12421.464 | 10397.133 | NM_006841 | 1011.676  | 959.137   | AV714945  | 409.59    | 174.156   |
| X82693    | 15988.437 | 13599.538 | NM_014824 | 3237.798  | 2535.175  | AF007872  | 2346.663  | 2925.814  |
| NM_00717E | 24456.748 | 24289.625 | NM_014504 | 2472.021  | 2182.004  | NM_002497 | 12936.378 | 3003.36   |
| NM_002722 | 3108.299  | 2869.079  | NM_01440E | 15763.999 | 15406.827 | NM_00541E | 953.453   | 751.716   |
| AF317058  | 1054.88   | 1297.236  | NM_014741 | 4342.511  | 4313.208  | L09081    | 1872.913  | 1732.95   |
| M22538    | 39966.727 | 42731.492 | AF212247  | 6698.218  | 7150.651  | NM_016113 | 1814.274  | 1889.533  |
| NM_00602E | 795.727   | 818.544   | NM_01640E | 2237.307  | 2951.312  | NM_014222 | 1059.503  | 1473.414  |
| NM_014904 | 1336.905  | 1296.102  | NM_01808C | 8683.176  | 11360.135 | NM_00050E | 1856.041  | 1370.927  |
| AL137576  | 9504.574  | 10487.407 | AF174605  | 5733.556  | 5726.084  | NM_004542 | 419.654   | 295.398   |
| NM_01835E | 5798.712  | 6402.299  | NM_014453 | 19933.141 | 25545.908 | X06182    | 784.136   | 718.15    |
| NM_016321 | 583.606   | 653.997   | NM_005713 | 2720.342  | 3386.032  | BE908993  | 1831.907  | 1492.055  |
| NM_01335E | 489.583   | 739.849   | AK023553  | 2003.26   | 2590.143  | AB012701  | 906.516   | 828.981   |
| NM_00506C | 1282.612  | 1261.289  | NM_01460C | 1386.672  | 1809.329  | M61156    | 1125.627  | 483.557   |
| NM_005437 | 6719.238  | 7295.707  | NM_016733 | 2418.115  | 2187.766  | R44005    | 1513.369  | 436.043   |
| AK022417  | 1554.331  | 1140.949  | AF181994  | 2201.077  | 2129.414  | AI942392  | 1856.053  | 775.579   |
| U50534    | 605.411   | 629.358   | NM_018962 | 1854.224  | 2060.196  | M55040    | 434.985   | 322.478   |
| NM_014824 | 2921.549  | 2521.678  | AF125100  | 2956.972  | 2667.245  | Z74615    | 25762.697 | 44048.59  |
| NM_014504 | 3474.708  | 2442.404  | NM_006114 | 11726.147 | 11158.774 | X03884    | 44146.969 | 58229.094 |
| NM_01440E | 14754.437 | 13601.272 | AF130728  | 1572.396  | 1319.006  | U36759    | 491.24    | 1342.533  |
| NM_014741 | 4370.783  | 3952.035  | NM_00128E | 21680.791 | 21139.1   | X91625    | 3372.845  | 8031.563  |
| AF212247  | 5908.568  | 6171.944  | NM_001131 | 46460.961 | 56463.07  | AF001862  | 6620.457  | 1071.153  |
| AF161407  | 16781.521 | 27803.418 | BG752013  | 672.461   | 610.276   | NM_00389C | 2398.443  | 4180.026  |
| NM_01473E | 4235.669  | 4803.335  | X07696    | 6271.137  | 5956.911  | BF127978  | 2473.63   | 2910.015  |
| NM_01640E | 2330.2    | 2543.552  | AA481015  | 1310.991  | 1519.248  | AF110801  | 1283.336  | 1693.948  |
| NM_01808C | 8143.617  | 7813.184  | AI925826  | 10174.962 | 14248.57  | AB018297  | 999.098   | 1387.794  |
| AF174605  | 5879.357  | 5964.504  | U04209    | 6160.265  | 6782.906  | AK022565  | 3764.07   | 3047.945  |
| AL050107  | 421.98    | 924.507   | Z15108    | 2445.206  | 2376.569  | AK023151  | 1084.393  | 964.34    |
| NM_014453 | 17804.684 | 18111.064 | M55284    | 3712.92   | 3911.427  | AB033076  | 655.605   | 482.262   |
| NM_005713 | 2756.829  | 3185.531  | AA001218  | 873.066   | 1099.043  | AK022876  | 1056.093  | 1033.478  |
| AK023553  | 2981.194  | 5054.56   | AA679391  | 1801.682  | 3168.816  | AF134894  | 656.699   | 629.08    |
| AF272043  | 6726.603  | 7805.243  | BG682146  | 3106.468  | 3736.849  | NM_00393E | 3111.149  | 2472.237  |
| NM_002587 | 8706.959  | 8093.911  | AA884709  | 650.133   | 817.328   | NM_014827 | 12157.485 | 7849.82   |
| NM_00223E | 1781.056  | 2311.657  | NM_00506C | 2990.04   | 3621.96   | U87460    | 5054.158  | 2562.967  |
| NM_00486E | 1147.474  | 1336.72   | NM_005437 | 7357.407  | 7935.458  | NM_003617 | 363.567   | 257.174   |
| NM_00466E | 1173.566  | 1132.302  | AK022417  | 1965.049  | 2065.781  | NM_001841 | 546.53    | 441.692   |
| NM_00702E | 10157.517 | 11233.229 | NM_01427E | 2782.088  | 2341.841  | NM_002054 | 2858.671  | 3662.527  |
| AF130728  | 1057.193  | 1190.495  | NM_00583E | 698.804   | 702.885   | NM_00412E | 1160.593  | 2866.859  |
| NM_00128E | 25403.266 | 25025.354 | NM_000734 | 12489.632 | 11103.753 | NM_000823 | 3483.055  | 6993.867  |
| NM_001131 | 47749.242 | 43833.527 | NM_012331 | 2974.915  | 2917.364  | NM_004414 | 2881.669  | 5652.921  |
| X07696    | 4148.232  | 3428.431  | NM_006644 | 7553.946  | 6650.225  | NM_003317 | 5194.019  | 12290.156 |

|           |           |           |           |           |           |           |           |           |
|-----------|-----------|-----------|-----------|-----------|-----------|-----------|-----------|-----------|
| AA481015  | 755.962   | 1392.666  | NM_006583 | 65364.598 | 5280.1    | NM_001139 | 1470.276  | 4726.471  |
| AI925826  | 6697.505  | 6580.248  | NM_003974 | 8654.07   | 6863.618  | NM_004609 | 19613.801 | 35392.43  |
| U04209    | 5294.661  | 4793.391  | NM_006065 | 731.29    | 846.383   | NM_001541 | 1704.769  | 490.048   |
| AI393201  | 7158.836  | 7722.871  | NM_014339 | 35261.918 | 38280.234 | NM_004823 | 1580.475  | 2894.256  |
| M34664    | 64833.895 | 72077.438 | NM_001495 | 2300.793  | 2523.576  | Y17179    | 58005.766 | 58425.57  |
| Z15108    | 1108.023  | 1129.698  | NM_002288 | 1069.429  | 1712.043  | NM_000891 | 627.896   | 894.435   |
| M55284    | 3785.202  | 4599.124  | NM_004416 | 5510.091  | 6848.781  | AF239613  | 935.197   | 1804.153  |
| AA001218  | 836.955   | 664.895   | NM_000628 | 9101.528  | 11509.474 | AK026840  | 1915.728  | 3377.553  |
| AA679391  | 1804.01   | 1906.351  | NM_000325 | 11189.633 | 11515.09  | NM_000288 | 1176.952  | 2112.326  |
| BG682146  | 2801.903  | 3644.444  | AF015041  | 2720.564  | 2751.826  | AK026317  | 6046.007  | 8025.911  |
| AA884709  | 533.765   | 945.765   | NM_002363 | 726.52    | 891.535   | X82207    | 21374.648 | 22137.279 |
| NM_012266 | 4843.739  | 5645.386  | AK000184  | 828.929   | 903.766   | NM_015044 | 1138.114  | 1681.854  |
| NM_004559 | 2187.967  | 2966.614  | AF055020  | 12452.174 | 16003.158 | NM_002867 | 524.14    | 553.73    |
| X56692    | 4826.355  | 5847.505  | NM_006986 | 4599.685  | 5719.317  | BF217496  | 4877.353  | 4524.991  |
| NM_014278 | 2655.231  | 2591.153  | AF272043  | 9415.391  | 10164.676 | NM_004762 | 8963.05   | 6309.417  |
| NM_005838 | 586.191   | 729.142   | NM_002587 | 17718.23  | 20788.662 | NM_006641 | 43038.781 | 22480.742 |
| NM_000734 | 13575.387 | 13019.332 | NM_002238 | 2013.249  | 1694.268  | NM_000634 | 6102.476  | 3886.021  |
| NM_012331 | 2999.003  | 2841.375  | NM_004868 | 1189.669  | 1394.586  | AB040969  | 1736.868  | 2930.439  |
| NM_006644 | 8622.357  | 7572.879  | NM_004669 | 1179.378  | 1293.326  | NM_003467 | 13167.616 | 23256.527 |
| NM_006583 | 62089.723 | 3967.377  | NM_007028 | 10929.183 | 9340.143  | NM_014936 | 1575.326  | 4784.333  |
| NM_003974 | 8069.752  | 7428.927  | AF131781  | 4131.302  | 3808.708  | NM_003943 | 1238.925  | 3366.089  |
| NM_006065 | 615.076   | 649.344   | NM_006516 | 18554.469 | 14039.735 | NM_019052 | 9104.675  | 22163.424 |
| NM_014339 | 24311.941 | 19884.857 | NM_015865 | 1195.554  | 1161.589  | NM_003202 | 14958.976 | 29697.471 |
| NM_001495 | 1123.038  | 1089.58   | NM_003055 | 9816.186  | 11431.055 | AF119902  | 684.753   | 1551.373  |
| NM_002288 | 1216.581  | 1115.96   | NM_006841 | 988.333   | 909.687   | NM_015148 | 1196.696  | 2615.493  |
| AB005216  | 1487.05   | 1704.683  | NM_002414 | 54634.809 | 47640.262 | NM_004714 | 1594.44   | 2421.084  |
| NM_000325 | 10855.53  | 12738.467 | NM_000355 | 3860.162  | 3204.668  | AB025194  | 6854.483  | 11938.748 |
| AF015041  | 1696.795  | 1713.846  | AL133580  | 19359.307 | 17808.619 | NM_006239 | 1110.662  | 1993.133  |
| NM_002363 | 799.533   | 1058      | NM_014666 | 15349.144 | 16111.843 | BC020863  | 299.216   | 507.108   |
| AK000184  | 707.711   | 1002.484  | NM_005451 | 2385.859  | 2764.684  | NM_017897 | 3115.767  | 5061.379  |
| AF055020  | 7743.808  | 9135.787  | NM_007172 | 6673.96   | 9023.826  | NM_004265 | 23921.709 | 36630.063 |
| NM_006986 | 4374.203  | 6225.614  | NM_006152 | 7073.472  | 10398.289 | NM_002572 | 3913.672  | 6250.108  |
| NM_014904 | 563.953   | 823.555   | NM_013333 | 19704.943 | 21062.729 | NM_001441 | 1296.866  | 2623.469  |
| AL137576  | 7261.716  | 7189.213  | NM_002333 | 4064.346  | 4680.461  | NM_018324 | 887.596   | 1610.676  |
| NM_018358 | 4071.454  | 3931.982  | NM_003400 | 13289.436 | 13615.685 | AF064255  | 25089     | 24681.16  |
| AF131781  | 5696.875  | 5381.186  | NM_006705 | 5755.583  | 7859.412  | NM_004261 | 23864.996 | 39409.762 |
| NM_006516 | 15395.951 | 15401.363 | NM_014439 | 1754.15   | 2130.364  | NM_016006 | 1653.096  | 4341.069  |
| NM_015865 | 880.502   | 886.814   | NM_005582 | 2278.942  | 2811.542  | NM_016245 | 7343.86   | 17313.393 |
| NM_003055 | 7352.309  | 5984.45   | NM_012266 | 5886.189  | 6663.291  | AF005632  | 3469.702  | 8058.213  |
| NM_005075 | 625.902   | 937.63    | NM_004559 | 3007.242  | 2922.4    | NM_000903 | 2749.026  | 7393.927  |
| NM_002414 | 53725.27  | 48122.5   | X56692    | 8494.484  | 9834.401  | NM_004493 | 15807.325 | 35545.574 |
| NM_000355 | 1488.097  | 1268.104  | NM_014600 | 1199.619  | 1233.253  | AF309489  | 471.396   | 1079.887  |
| AL133580  | 17548.217 | 18743.277 | NM_016733 | 2212.111  | 2118.481  | NM_004047 | 17084.979 | 29600.691 |
| NM_014666 | 13691.686 | 14740.387 | AF181994  | 2797.616  | 2217.511  | NM_006773 | 1831.286  | 2955.765  |
| NM_005451 | 1939.973  | 1823.598  | NM_018962 | 2632.272  | 2185.645  | AK024439  | 9617.613  | 15186.858 |
| NM_007172 | 6594.949  | 5971.036  | AF125100  | 2754.631  | 2520.824  | X89676    | 853.015   | 1837.463  |
| NM_006152 | 4155.445  | 4301.769  | NM_006114 | 13242.048 | 11252.964 | NM_012444 | 576.635   | 1252.352  |
| NM_013333 | 18060.141 | 19033.076 | X82693    | 22371.395 | 20406.494 | NM_016512 | 1104.896  | 2157.484  |
| NM_002333 | 2743.132  | 3017.937  | NM_007176 | 25641.18  | 21993.143 | NM_017488 | 5318.68   | 8789.401  |
| NM_003400 | 10131.708 | 11221.28  | NM_002722 | 4044.116  | 3552.592  | AY009400  | 488.197   | 648.12    |
| NM_006705 | 4138.387  | 4897.891  | AF317058  | 1094.845  | 1432.05   | NM_005069 | 369.963   | 537.38    |
| NM_014439 | 1301.055  | 1603.161  | M22538    | 40680.371 | 41642.012 | NM_016044 | 1772.339  | 2548.908  |
| NM_005582 | 1170.537  | 1616.812  | NM_006028 | 847.633   | 1336.648  | NM_000520 | 2560.434  | 3931.449  |

|           |           |           |           |           |           |           |           |           |
|-----------|-----------|-----------|-----------|-----------|-----------|-----------|-----------|-----------|
| AF174605  | 4298.353  | 5730.415  | NM_014904 | 1179.982  | 1400.346  | NM_000285 | 1279.758  | 2065.282  |
| NM_014453 | 15054.236 | 13423.638 | AL137576  | 8887.321  | 9564.954  | NM_00150C | 3219.045  | 4613.457  |
| NM_005713 | 1528.868  | 1788.922  | NM_018358 | 4623.149  | 5969.427  | NM_020375 | 726.051   | 755.094   |
| AK023553  | 1965.095  | 1548.116  | NM_016321 | 628.383   | 732.717   | AL110127  | 1805.026  | 4514.218  |
| NM_01460C | 1261.691  | 984.032   | NM_00506C | 4844.264  | 4406.856  | AK001997  | 497.789   | 1135.9    |
| NM_016733 | 2100.036  | 2162.011  | AK022417  | 2785.642  | 2327.535  | NM_002525 | 2755.706  | 5997.837  |
| AF181994  | 2179.293  | 2306.98   | NM_014824 | 3276.946  | 2777.052  | D38438    | 3539.732  | 7895.962  |
| NM_018962 | 1748.766  | 1421.26   | NM_014504 | 3431.918  | 2848.643  | AV714945  | 523.628   | 1820.136  |
| AF125100  | 2719.324  | 2800.035  | NM_014405 | 16274.662 | 17509.346 | AF007872  | 2603.086  | 5640.75   |
| NM_006114 | 11626.906 | 10432.836 | NM_014741 | 4620.004  | 5034.244  | M30938    | 4182.243  | 1019.1    |
| X82693    | 11847.251 | 9744.636  | AF212247  | 6549.876  | 5990.197  | NM_017585 | 6283.227  | 7790.942  |
| NM_007175 | 24445.094 | 24267.186 | AF161407  | 20898.383 | 22044.514 | NM_004145 | 3148.911  | 3753.81   |
| NM_002722 | 3115.775  | 3571.238  | NM_014735 | 3494.474  | 3984.113  | X03168    | 1141.187  | 2247.176  |
| AF317058  | 1275.93   | 1158.478  | NM_016405 | 2258.164  | 2438.767  | NM_005165 | 2839.079  | 5496.143  |
| NM_006025 | 1217.96   | 2289.861  | NM_01808C | 8870.619  | 11194.294 | NM_017801 | 7772.769  | 12838.155 |
| NM_012297 | 13459.192 | 12870.762 | AF174605  | 5315.521  | 5451.771  | NM_007345 | 3543.253  | 7182.771  |
| AB007925  | 36161.871 | 32075.201 | NM_014453 | 17258.268 | 19963.529 | NM_016953 | 481.35    | 1144.748  |
| NM_01818C | 566.81    | 702.709   | NM_005713 | 2300.194  | 2407.844  | U65473    | 6601.098  | 10928.202 |
| NM_000361 | 8581.449  | 8381.469  | AK023553  | 1873.273  | 1949.79   | D63481    | 15698.123 | 18404.123 |
| NM_002475 | 35391.727 | 29385.207 | AF272043  | 7603.618  | 5377.707  | AY009951  | 12239.469 | 18535.311 |
| NM_003835 | 6768.233  | 5279.063  | NM_002587 | 15811.8   | 13286.092 | AL157424  | 612.187   | 739.613   |
| NM_017987 | 684.269   | 689.253   | NM_002235 | 2112.92   | 2114.806  | NM_002673 | 1110.574  | 1051.38   |
| NM_018203 | 788.84    | 874.964   | NM_004865 | 2390.53   | 2221.958  | NM_003875 | 3754.913  | 4893.533  |
| AK022417  | 2184.464  | 1629.308  | NM_004665 | 1773.661  | 1246.346  | AJ276310  | 698.018   | 784.96    |
| U50534    | 579.043   | 867.024   | NM_007025 | 12177.923 | 8344.156  | NM_012295 | 5798.674  | 6040.444  |
| NM_014824 | 3040.533  | 2460.094  | AF130728  | 1783.298  | 1610.943  | NM_01591C | 1082.096  | 1216.487  |
| NM_014504 | 2297.922  | 2223.088  | NM_004987 | 624.375   | 373.098   | AL133666  | 1890.683  | 4277.226  |
| NM_014405 | 15347.949 | 16046.124 | NM_001285 | 24928.354 | 22863.854 | NM_000663 | 1986.954  | 4462.729  |
| NM_014741 | 4774.487  | 5199.348  | NM_001131 | 58110.211 | 61176.355 | NM_00471C | 3161.53   | 5796.33   |
| AF212247  | 5528.741  | 6610.556  | BG752013  | 544.966   | 523.218   | NM_004395 | 16860.619 | 31105.59  |
| AF161407  | 15619.303 | 18090.51  | X07696    | 5738.502  | 5283.514  | NM_017995 | 3182.806  | 7028.859  |
| NM_014735 | 4421.341  | 5209.992  | AA481015  | 1176.755  | 1140.226  | NM_015985 | 40661.953 | 44399.961 |
| NM_01808C | 10489.248 | 10925.142 | AI925826  | 7901.928  | 8797.78   | NM_001043 | 1036.237  | 267.359   |
| NM_007115 | 977.35    | 1412.961  | U04209    | 5088.438  | 4473.998  | NM_004775 | 6734.542  | 4905.729  |
| NM_004615 | 975.296   | 901.971   | AI393201  | 8041.647  | 8028.992  | NM_019071 | 2665.151  | 1890.88   |
| NM_00436C | 1060.505  | 1245.271  | M34664    | 64101.297 | 65813.211 | NM_014395 | 3701.551  | 3036.391  |
| NM_017692 | 3768.065  | 3497.86   | Z15108    | 1877.752  | 2050.165  | AF113685  | 422.378   | 498.844   |
| NM_003975 | 3919.399  | 3326.9    | M55284    | 3119.428  | 3743.019  | NM_00547C | 3186.632  | 2973.102  |
| NM_004834 | 13278.382 | 11667.771 | AA001218  | 581.599   | 752.492   | NM_004225 | 7941.7    | 7442.444  |
| NM_000812 | 1325.003  | 1409.648  | AA679391  | 1591.959  | 2266.131  | NM_003862 | 1121.703  | 1810.332  |
| AK024747  | 22063.932 | 19308.521 | BG682146  | 2434.933  | 2585.954  | NM_002873 | 3379.48   | 4283.485  |
| NM_00639C | 3460.646  | 3394.748  | NM_012265 | 5702.498  | 4529.675  | NM_015571 | 3404.42   | 4630.804  |
| NM_00358C | 4103.768  | 3872.012  | NM_004555 | 1959.298  | 1705.838  | NM_004701 | 5166.167  | 7466.77   |
| NM_006505 | 2466.114  | 2210.712  | X56692    | 7992.983  | 6384.216  | AK025554  | 1189.986  | 1830.116  |
| NM_003235 | 4735.559  | 3689.495  | AK024467  | 1291.11   | 1034.801  | BI824151  | 6417.994  | 9199.786  |
| AB042562  | 2180.426  | 2217.875  | NM_014275 | 3198.681  | 2762.51   | AK021791  | 5933.517  | 7461.427  |
| NM_016005 | 7972.391  | 7846.808  | NM_005835 | 983.468   | 748.141   | NM_004052 | 16924.07  | 17505.982 |
| NM_002375 | 2658.33   | 2772.014  | NM_000734 | 14195.98  | 12479.962 | NM_004394 | 6634.252  | 7794.608  |
| NM_001364 | 538.897   | 688.615   | NM_012331 | 4004.515  | 3638.179  | NM_005727 | 32009.527 | 50019.563 |
| NM_003725 | 3122.091  | 4418.617  | NM_006644 | 9898.958  | 8358.783  | AK027242  | 1870.28   | 3531.549  |
| NM_017431 | 1032.662  | 837.274   | NM_006583 | 63514.063 | 6349.977  | NM_001275 | 16938.174 | 24321.336 |
| NM_006097 | 6094.575  | 6941.852  | NM_003974 | 8495.396  | 7890.564  | NM_00501C | 1178.73   | 2925.457  |
| NM_006113 | 3400.431  | 4179.367  | NM_006055 | 666.907   | 989.694   | NM_019055 | 2815.875  | 7176.203  |

|           |           |           |           |           |           |           |           |           |
|-----------|-----------|-----------|-----------|-----------|-----------|-----------|-----------|-----------|
| NM_015313 | 15303.781 | 16434.135 | NM_014339 | 33774.402 | 37972.582 | NM_020195 | 1432.628  | 2758.86   |
| AK022287  | 11906.117 | 12886.395 | NM_001495 | 1925.259  | 1527.497  | AF201380  | 1846.569  | 1644.52   |
| NM_015897 | 3663.435  | 4195.404  | NM_002288 | 1021.347  | 1400.035  | NM_012392 | 6106.864  | 4656.167  |
| NM_005436 | 5669.076  | 4867.304  | NM_004416 | 4811.03   | 5281.843  | NM_014833 | 11196.332 | 7626.923  |
| AF177473  | 18515.049 | 17825.377 | NM_000628 | 7769.54   | 8544.509  | NM_000045 | 311.025   | 306.131   |
| NM_000546 | 4294.547  | 3579.042  | AB005216  | 1370.317  | 1269.738  | NM_003878 | 1397.04   | 1678.391  |
| AB023223  | 1015.899  | 847.925   | NM_000325 | 10932.981 | 11152.726 | NM_004832 | 842.074   | 989.204   |
| AB018257  | 3291.031  | 2746.118  | AF015041  | 2592.733  | 2754.776  | NM_005957 | 842.668   | 1361.942  |
| NM_002708 | 21770.084 | 23820.191 | NM_002363 | 598.213   | 726.575   | AK024374  | 1312.005  | 1744.874  |
| AK001059  | 1388.583  | 1401.19   | AK000184  | 715.097   | 720.247   | NM_007101 | 781.666   | 838.433   |
| NM_007282 | 4994.552  | 3837.651  | AF055020  | 9717.895  | 11444.816 | NM_018234 | 554.131   | 371.887   |
| NM_017610 | 1170.733  | 937.363   | NM_006986 | 3867.516  | 3910.9    | AB033062  | 1595.863  | 1961.329  |
| AL122070  | 618.873   | 462.851   | NM_014904 | 977.461   | 1024.335  | NM_002720 | 7799.729  | 17907.986 |
| AK025133  | 10132.609 | 11286.991 | AL137576  | 8829.451  | 7584.6    | AK024716  | 8707.836  | 17245.068 |
| AB020704  | 2519.763  | 2156.039  | NM_018358 | 3896.935  | 3851.216  | X67155    | 1419.11   | 2772.335  |
| NM_004087 | 4688.766  | 5384.412  | NM_016321 | 966.287   | 933.426   | NM_020380 | 5318.606  | 11878.482 |
| NM_018700 | 2379.007  | 4200.482  | AF131781  | 4902.197  | 5086.834  | AL137519  | 344.968   | 1404.317  |
| NM_000119 | 4522.415  | 5039.622  | NM_006516 | 18636.398 | 14333.692 | NM_005122 | 325.736   | 296.811   |
| NM_001065 | 8333.664  | 8819.12   | NM_015865 | 1203.24   | 1076.893  | NM_014552 | 1926.091  | 1039.322  |
| AK027100  | 1744.94   | 1713.582  | NM_003055 | 11002.975 | 10403.196 | NM_003072 | 6520.504  | 3476.833  |
| NM_003622 | 2008.943  | 1779.41   | NM_005075 | 726.776   | 562.665   | NM_001913 | 1664.586  | 1143.61   |
| NM_001774 | 2103.134  | 1420.771  | NM_006841 | 697.103   | 1244.584  | AK025594  | 520.59    | 364.46    |
| AK021645  | 1244.118  | 903.505   | NM_002414 | 56078.902 | 56107.773 | AB040931  | 2414.808  | 1484.767  |
| NM_013339 | 3205.757  | 2583.145  | NM_000355 | 3515.579  | 3991.487  | NM_003595 | 780.732   | 332.102   |
| NM_001491 | 1577.239  | 1353.422  | AL133580  | 19364.16  | 18990.287 | NM_015911 | 712.181   | 335.981   |
| NM_002642 | 540.702   | 409.478   | NM_014666 | 14615.219 | 13048.468 | BC011826  | 4493.798  | 2347.785  |
| AK026541  | 2212.104  | 2162.543  | NM_005451 | 2099.406  | 2314.161  | NM_017647 | 3010.842  | 2021.797  |
| NM_005895 | 17226.688 | 12456.043 | NM_007172 | 5385.766  | 6715.388  | NM_012091 | 1036.599  | 457.958   |
| D42055    | 8505.976  | 8600.333  | NM_006152 | 4549.148  | 4445.257  | NM_012321 | 2796.71   | 1617.214  |
| AL137349  | 2647.137  | 2097.669  | NM_013333 | 18107.52  | 17388.918 | D13642    | 2215.228  | 1466.764  |
| NM_016476 | 25550.986 | 23053.037 | NM_002333 | 3524.142  | 3335.051  | NM_004741 | 5772.465  | 1984.586  |
| NM_015902 | 1850.009  | 1287.505  | NM_003400 | 13103.558 | 13357.446 | NM_018032 | 4915.317  | 2132.637  |
| NM_020155 | 3841.815  | 3511.672  | NM_006705 | 4504.05   | 5458.802  | NM_017518 | 713.613   | 2021.161  |
| BE874471  | 6846.062  | 6304.112  | NM_014439 | 1763.328  | 1863.697  | NM_004117 | 2065.409  | 5048.672  |
| NM_006121 | 4945.308  | 5290.508  | NM_005582 | 2257.254  | 2269.07   | NM_016594 | 4307.31   | 11734.958 |
| AK023520  | 6484.029  | 7217.376  | AF174605  | 4842.92   | 3388.669  | NM_030752 | 4718.328  | 10983.145 |
| NM_004693 | 648.65    | 722.087   | NM_014453 | 16505.885 | 14842.891 | D26068    | 18420.801 | 24881.979 |
| AB011152  | 1861.472  | 1549.931  | NM_005713 | 2754.154  | 2405.634  | NM_018555 | 11813.427 | 18655.723 |
| AB014592  | 2043.255  | 1750.474  | AK023553  | 1748.597  | 2006.919  | NM_017593 | 2115.235  | 2211.626  |
| NM_016952 | 1808.827  | 1758.292  | NM_014600 | 1598.816  | 1681.23   | NM_004282 | 6685.873  | 860.74    |
| NM_001654 | 4331.022  | 4431.372  | NM_016733 | 2330.969  | 1631.324  | AK025695  | 1690.413  | 1391.761  |
| NM_014519 | 2519.847  | 2527.832  | AF181994  | 2387.312  | 1960.035  | AK025442  | 5199.445  | 4811.942  |
| NM_007147 | 11692.642 | 9746.143  | NM_018962 | 2892.519  | 2554.139  | AL050041  | 506.911   | 486.137   |
| X65463    | 3575.016  | 3161.198  | AF125100  | 3172.475  | 2235.878  | NM_002451 | 1197.531  | 982.81    |
| AK024418  | 1846.41   | 1688.32   | NM_006114 | 13024.34  | 11798.243 | NM_013411 | 842.554   | 617.007   |
| NM_003367 | 4959.234  | 4633.121  | X82693    | 25621.322 | 28913.615 | NM_020200 | 258.05    | 259.178   |
| NM_005194 | 13068.67  | 12483.89  | NM_007176 | 26673.916 | 25811.033 | NM_000180 | 6035.162  | 3065.411  |
| AB002296  | 2018.576  | 1676.763  | NM_002722 | 3261.606  | 2987.46   | NM_000858 | 5512.384  | 2168.55   |
| NM_014315 | 5863.215  | 5031.12   | AF317058  | 1181.031  | 1114.42   | AF254087  | 967.549   | 381.284   |
| NM_012087 | 2075.108  | 2215.907  | M22538    | 38374.762 | 36987.586 | NM_017715 | 700.648   | 352.164   |
| AF165520  | 1183.603  | 1011.217  | NM_006028 | 701.342   | 920.23    | AL117607  | 1433.01   | 346.777   |
| AK026072  | 637.379   | 465.842   | NM_012297 | 19789.842 | 20002.818 | AB037774  | 1845.411  | 1147.395  |
| NM_015675 | 5293.976  | 4928.908  | AB007925  | 57374.102 | 54215.863 | NM_005438 | 629.805   | 1381.624  |



|           |           |           |           |           |           |           |           |           |
|-----------|-----------|-----------|-----------|-----------|-----------|-----------|-----------|-----------|
| AF299118  | 57395.121 | 59733.801 | NM_018180 | 1316.93   | 1180.55   | AK024361  | 1035.971  | 2859.646  |
| AK025353  | 16413.721 | 15466.6   | NM_000361 | 9011.423  | 6564.337  | NM_004350 | 1151.329  | 3205.263  |
| AK056896  | 12476.455 | 11556.227 | NM_002475 | 48370.5   | 43777.344 | NM_018044 | 2688.873  | 4549.306  |
| NM_001001 | 53162.738 | 61263.91  | NM_003836 | 13400.649 | 11640.17  | NM_001717 | 263.181   | 721.332   |
| NM_005715 | 5078.977  | 4905.13   | NM_017987 | 662.218   | 778.17    | AF274347  | 3904.177  | 7236.329  |
| AK026992  | 2160.756  | 2337.439  | NM_018203 | 829.28    | 563.226   | NM_018555 | 1816.77   | 336.252   |
| AL137343  | 618.619   | 432.563   | NM_014244 | 563.493   | 362.152   | AK023525  | 3049.493  | 3143.663  |
| NM_004541 | 38810.973 | 36002.531 | AK022417  | 3248.861  | 3095.245  | AF085829  | 1093.333  | 1617.616  |
| NM_006830 | 51618.211 | 44122.473 | U50534    | 1449.256  | 928.088   | AF075029  | 476.856   | 338.01    |
| AK026414  | 11818.484 | 9935.376  | NM_014824 | 3785.612  | 5750.08   | AK021903  | 2431.15   | 2651.125  |
| D17297    | 1012.209  | 862.087   | NM_014504 | 2406.041  | 2864.385  | AL390143  | 3659.547  | 3068.608  |
| NM_004074 | 32350.203 | 27484.801 | NM_014408 | 14046.923 | 16018.131 | AL162075  | 991.408   | 807.505   |
| NM_002626 | 37026.746 | 28705.934 | NM_014741 | 3916.67   | 4567.171  | AF147384  | 321.358   | 303.901   |
| NM_018436 | 15509.463 | 13607.986 | AF212247  | 5912.418  | 5568.198  | AK021595  | 937.529   | 770.832   |
| AF157115  | 6324.079  | 6146.416  | AF161407  | 24459.084 | 27529.805 | AK021648  | 619.512   | 310.243   |
| AJ223353  | 6101.511  | 5260.084  | NM_014738 | 3600.385  | 4746.404  | AF147358  | 9104.968  | 4042.08   |
| NM_012241 | 4413.087  | 4137.862  | NM_016406 | 2040.795  | 2527.363  | NM_018410 | 3083.156  | 1550.356  |
| AF250288  | 1162.977  | 799.683   | NM_018080 | 8160.21   | 8200.767  | AF086355  | 516.602   | 246.641   |
| NM_018486 | 2518.523  | 2186.345  | NM_007115 | 1209.569  | 666.727   | AF086314  | 752.886   | 1098.203  |
| NM_005324 | 28193.936 | 23902.357 | NM_004616 | 1022.802  | 1059.52   | NM_016364 | 593.397   | 950.043   |
| AL080201  | 18118.818 | 18459.104 | NM_004360 | 1269.591  | 1268.412  | AF086419  | 2065.372  | 3262.551  |
| NM_015363 | 889.496   | 840.417   | NM_003821 | 833.619   | 385.556   | AF086461  | 671.119   | 1581.465  |
| AB040941  | 6294.495  | 6173.696  | NM_017692 | 5072.64   | 3867.692  | AF131795  | 503.112   | 1181.972  |
| AL137241  | 1257.541  | 1134.899  | NM_003975 | 4548.312  | 4290.115  | AL833296  | 1399.893  | 2420.597  |
| AB037742  | 2450.243  | 2441.987  | NM_004834 | 15389.299 | 15250.982 | AL110240  | 2990.536  | 1374.75   |
| AF272375  | 1563.583  | 2177.754  | NM_000812 | 1308.579  | 541.338   | AF085919  | 363.687   | 575.399   |
| AK025078  | 1113.257  | 1154.751  | AK024747  | 26001.928 | 19726.734 | AF085933  | 855.526   | 1510.18   |
| AK023754  | 626.152   | 644.852   | NM_006390 | 3569.309  | 2950.897  | AF147431  | 624.17    | 1096.691  |
| AK024737  | 1482.695  | 1905.388  | NM_003580 | 4841.236  | 5782.495  | AK026422  | 9908.435  | 10071.008 |
| AB007890  | 5849.171  | 4688.888  | NM_006506 | 2777.855  | 4157.785  | AF085938  | 1344.038  | 1786.186  |
| AF070591  | 721.794   | 611.69    | NM_003235 | 10235.324 | 18147.625 | AK022264  | 1018.206  | 1454.902  |
| AF286160  | 7305.108  | 6598.553  | AB042562  | 1912.127  | 1892.598  | AL137331  | 1023.123  | 1161.264  |
| NM_020411 | 869.55    | 729.278   | NM_016009 | 7566.094  | 9134.937  | AL162040  | 3543.089  | 4159.284  |
| AF275800  | 3291.458  | 2266.205  | NM_002378 | 4674.921  | 4992.986  | AL442084  | 466.653   | 611.83    |
| AL359605  | 2598.37   | 2441.707  | NM_001364 | 495.355   | 786.346   | AL137371  | 6207.906  | 3968.297  |
| AB020633  | 3806.585  | 3803.305  | NM_003726 | 4658.384  | 5007.448  | AL137596  | 1756.186  | 954.624   |
| AK025445  | 9994.071  | 7461.47   | NM_017431 | 797.079   | 1051.355  | AL353942  | 10206.082 | 4228.895  |
| AL357200  | 3027.701  | 2000.261  | NM_006097 | 11822.607 | 10953.157 | Z38010    | 7562.975  | 2450.671  |
| NM_017727 | 13224.975 | 12127.742 | NM_006113 | 4225.148  | 3611.044  | AK024713  | 277.058   | 899.505   |
| NM_018319 | 5852.927  | 4939.327  | NM_015313 | 12945.907 | 12723.247 | AK024204  | 438.529   | 888.603   |
| AL359559  | 956.233   | 960.458   | AK022287  | 10865.22  | 10451.846 | AK023737  | 1169.557  | 1984.515  |
| AK021714  | 2102.526  | 1998.386  | NM_015897 | 2989.416  | 2615.289  | NM_006609 | 2440.839  | 1993.565  |
| NM_020314 | 7943.456  | 8770.853  | U48728    | 1387.564  | 1148.956  | AK023643  | 368.979   | 550.701   |
| AK022972  | 3933.628  | 4382.086  | NM_005436 | 8809.006  | 7835.527  | NM_014157 | 904.448   | 1978.365  |
| AK025996  | 1869.199  | 1793.688  | AF177473  | 35043.609 | 32706.697 | AF090933  | 611.894   | 314.739   |
| AF088015  | 1047.578  | 1731.324  | NM_000546 | 5384.279  | 5582.827  | AF111851  | 5071.245  | 5445.581  |
| AF007132  | 661.303   | 757.056   | AB023223  | 1029.853  | 923.758   | AF152529  | 312.087   | 659.271   |
| AK026711  | 1348.08   | 1779.042  | AB018257  | 3472.707  | 2587.19   | AL360200  | 538.556   | 978.419   |
| NM_017864 | 3259.501  | 3061.796  | NM_002708 | 22837.588 | 18459.467 | AK021992  | 452.566   | 672.02    |
| NM_004869 | 3652.42   | 3043.52   | AK001059  | 1706.949  | 1456.515  | AK022102  | 543.213   | 829.626   |
| AF136408  | 962.672   | 859.858   | NM_007282 | 5120.229  | 3942.477  | AK022235  | 617.422   | 1003.558  |
| AL110203  | 535.259   | 757.167   | NM_017770 | 477.789   | 558.286   | AK022378  | 1743.701  | 1853.063  |
| AJ011602  | 804.781   | 579.17    | NM_017610 | 1055.755  | 1194.141  | AK022274  | 388.99    | 365.03    |

|           |           |           |           |           |           |           |           |           |
|-----------|-----------|-----------|-----------|-----------|-----------|-----------|-----------|-----------|
| AJ002787  | 5017.089  | 4038.331  | AL122070  | 608.792   | 729.013   | AL110173  | 836.48    | 2050.369  |
| Z70764    | 1791.254  | 1351.509  | AK025133  | 14223.952 | 18247.232 | AK024106  | 452.155   | 779.662   |
| Z83948    | 1406.126  | 1045.752  | AB020704  | 2502.915  | 3116.216  | AK027254  | 1492.795  | 2530.438  |
| M25785    | 1751.347  | 1613.993  | NM_020197 | 587.028   | 607.283   | AK021772  | 758.812   | 565.069   |
| M32443    | 4758.718  | 3754.173  | NM_004087 | 3856.963  | 4205.641  | AK026297  | 860.048   | 567.118   |
| M73048    | 899.268   | 784.345   | NM_018700 | 1854.117  | 2265.454  | AK054831  | 22721.807 | 22987.254 |
| D16908    | 954.402   | 776.494   | NM_000119 | 4985.269  | 5880.388  | AK021770  | 1063.256  | 1956.56   |
| D16477    | 1013.871  | 1472.202  | NM_001065 | 8588.73   | 8795.867  | AK027248  | 1212.095  | 2195.944  |
| AK024759  | 858.039   | 720.97    | AK027100  | 1491.651  | 1673.379  | AK022804  | 8530.761  | 14151.612 |
| AK022309  | 959.276   | 797.232   | AY010111  | 546.485   | 653.557   | AF009263  | 1692.594  | 2065.367  |
| AK000063  | 861.103   | 887.575   | NM_003622 | 1782.724  | 1261.357  | AF009283  | 290.057   | 577.29    |
| AK000949  | 1212.962  | 1339.298  | AK021645  | 941.464   | 1095.233  | AF086329  | 2807.754  | 3725.246  |
| AK027068  | 776.667   | 478.882   | NM_013339 | 3066.735  | 2768.256  | AK025799  | 640.163   | 1666.541  |
| AK000974  | 1887.36   | 1783.456  | NM_001491 | 3726.903  | 3016.268  | AL110206  | 998.112   | 1917.303  |
| AK024612  | 2146.789  | 3431.015  | AK026541  | 2098.83   | 1869.359  | NM_004821 | 1807.125  | 2777.281  |
| AK025051  | 1425.287  | 1513.808  | NM_005899 | 31340.564 | 30686.867 | AK024292  | 948.194   | 838.015   |
| AK024553  | 45081.555 | 41864.953 | D42055    | 10313.118 | 7058.792  | AK026263  | 1495.576  | 1171.203  |
| AK024930  | 773.519   | 864.814   | AL137349  | 3163.221  | 3116.479  | U50526    | 275.986   | 262.074   |
| AF143879  | 5007.58   | 5508.366  | NM_003339 | 1183.492  | 792.115   | S75105    | 3214.097  | 2223.103  |
| AK024621  | 19571.449 | 20461.031 | NM_016476 | 43108.793 | 46181.938 | AF056455  | 4323.106  | 2939.017  |
| AL157449  | 15871.001 | 24659.166 | NM_015902 | 2346.313  | 2179.443  | NM_018510 | 1048.496  | 788.885   |
| AL117582  | 685.916   | 806.071   | NM_020155 | 3260.615  | 3465.274  | AK024988  | 754.076   | 825.819   |
| AK025525  | 1105.574  | 892.312   | BE874471  | 7508.229  | 6967.295  | AF026943  | 1226.961  | 1975.953  |
| NM_018233 | 7361.597  | 5864.268  | NM_006121 | 4096.182  | 4043.942  | L77582    | 718.973   | 1299.312  |
| AV740891  | 1760.023  | 1737.999  | AK023520  | 7094.628  | 6894.74   | NM_020448 | 1088.67   | 1950.988  |
| AF090916  | 867.095   | 932.544   | NM_004693 | 731.506   | 740.493   | NM_005419 | 1242.031  | 1885.886  |
| AF086214  | 819.725   | 737.624   | NM_007211 | 7787.022  | 8029.293  | L31956    | 532.873   | 540.977   |
| AK026860  | 8014.761  | 7031.532  | AB011152  | 2042.647  | 1866.615  | NM_003479 | 28125.375 | 31340.271 |
| AK024211  | 1237.74   | 982.858   | NM_014956 | 8189.753  | 7283.679  | AF130108  | 366.379   | 1060.686  |
| NM_014898 | 2696.694  | 2888.634  | AB014592  | 571.47    | 779.314   | NM_020224 | 4400.059  | 8804.953  |
| AK023435  | 2983.322  | 3192.058  | NM_016952 | 1800.216  | 2008.167  | U17617    | 1866.006  | 3290.703  |
| AF086035  | 4605.289  | 5529.371  | NM_001654 | 3567.992  | 3417.215  | AK022952  | 5068.645  | 10110.742 |
| AK022159  | 3524.951  | 3662.679  | NM_007147 | 29647.877 | 26421.285 | BF218888  | 763.573   | 1595.84   |
| U25750    | 5682.63   | 4367.811  | X65463    | 3714.03   | 3572.494  | AF086401  | 2017.663  | 1086.249  |
| AK023691  | 6595.527  | 5705.559  | AK024418  | 3666.437  | 3251.098  | L23869    | 625.752   | 179.487   |
| NM_005234 | 5818.556  | 5556.093  | NM_003367 | 4429.575  | 3152.009  | Z21853    | 1222.699  | 473.767   |
| BC023536  | 802.154   | 1001.186  | NM_005194 | 13877.826 | 8296.855  | NM_018342 | 482.413   | 263.369   |
| NM_001803 | 5420.467  | 4391.465  | AB002296  | 2202.194  | 1784.85   | BC020260  | 1029.333  | 657.698   |
| NM_006233 | 19348.025 | 15917.676 | NM_014315 | 6940.081  | 4541.725  | D17156    | 3957.289  | 2752.042  |
| AK021889  | 1075.569  | 1065.503  | NM_012087 | 2278.865  | 1675.201  | L04461    | 405.83    | 417.11    |
| AK000992  | 1372.891  | 1409.501  | AF165520  | 1252.258  | 1156.115  | AK026938  | 8642.009  | 6775.898  |
| L23544    | 19726.605 | 16362.601 | AK026072  | 663.465   | 1060.321  | AK024373  | 9861.004  | 8224.553  |
| NM_019020 | 5947.261  | 5117.846  | NM_004289 | 677.363   | 704.853   | AK022343  | 5515.554  | 6247.889  |
| NM_016474 | 1641.978  | 1796.955  | NM_015679 | 6098.552  | 5380.071  | AF119870  | 656.162   | 702.762   |
| NM_000910 | 1701.133  | 2003.587  | AF299118  | 59517.57  | 61586.027 | AK026400  | 1066.489  | 1464.234  |
| AF086001  | 38760.672 | 28543.49  | AK025353  | 15273.586 | 13707.482 | U92989    | 7222.834  | 9002.526  |
| AL117560  | 22023.324 | 21253.594 | AK056896  | 22246.055 | 22418.365 | AF075102  | 1183.965  | 1496.901  |
| M24749    | 6160.981  | 6792.905  | AK022763  | 21567.863 | 22246.25  | NM_018463 | 5874.001  | 9428.933  |
| NM_005831 | 50652.371 | 42477.348 | AF288207  | 35244.727 | 37469.645 | X74956    | 20109.672 | 27017.59  |
| NM_005850 | 53178.734 | 50617.742 | NM_001001 | 51337.988 | 56038.926 | AF132197  | 3853.66   | 7497.379  |
| NM_000554 | 36030.551 | 30431.5   | NM_005715 | 5582.604  | 5915.326  | AK025546  | 515.498   | 1325.432  |
| AF009317  | 5259.065  | 5118.807  | X81895    | 556.552   | 541.078   | AF278761  | 300.246   | 1163.172  |
| AK026583  | 4675.629  | 3883.644  | AL137343  | 1042.311  | 906.415   | AL137487  | 1068.495  | 2697.232  |

|           |           |           |           |           |           |           |           |           |
|-----------|-----------|-----------|-----------|-----------|-----------|-----------|-----------|-----------|
| AF218031  | 5483.762  | 4913.718  | NM_004541 | 44714.023 | 35429.074 | AK023800  | 653.384   | 1823.862  |
| AF210650  | 1670.449  | 1187.729  | NM_006830 | 53843.98  | 39460.949 | AF086120  | 697.846   | 1746.149  |
| NM_018356 | 4867.383  | 4637.595  | AK026414  | 13436.072 | 8178.942  | AK024120  | 1644.633  | 1378.245  |
| AF085896  | 972.206   | 804.551   | D17297    | 878.196   | 621.545   | CY3Cy5    | 3032.959  | 272.185   |
| X74613    | 35460.684 | 28142.787 | NM_004074 | 29014.063 | 23164.127 | W96179    | 1140.823  | 1356.294  |
| AF075080  | 19970.143 | 15689.905 | NM_002626 | 39334.332 | 25883.83  | AW247841  | 2420.911  | 2783.773  |
| AL390183  | 914.13    | 499.659   | NM_018436 | 16365.35  | 10417.266 | M76559    | 1458.277  | 1901.274  |
| Y13897    | 1059.509  | 807.504   | AF157115  | 9092.689  | 7480.694  | AI222585  | 454.009   | 502.418   |
| AK001857  | 1201.686  | 1009.387  | AJ223353  | 6598.504  | 5744.905  | AA411678  | 5997.457  | 7755.891  |
| AK021525  | 1024.712  | 715.414   | NM_012241 | 4465.002  | 3633.528  | AA398427  | 1439.76   | 1955.011  |
| AL133577  | 3444.095  | 2726.806  | AF250288  | 1278.962  | 1122.987  | T55728    | 3463.709  | 3752.152  |
| AF279773  | 646.297   | 656.773   | NM_018486 | 2315.156  | 2288.825  | H20856    | 1073.991  | 1077.865  |
| AK025378  | 2299.042  | 1843.219  | NM_005324 | 28622.428 | 24012.582 | N62586    | 2174.268  | 3108.694  |
| NM_000479 | 2038.459  | 1739.616  | AL080201  | 14011.511 | 13227.944 | AA242743  | 2674.866  | 3610.023  |
| AF038199  | 2032.547  | 3090.759  | NM_015363 | 695.049   | 831.235   | NM_005163 | 3241.588  | 5008.329  |
| CY3Cy5    | 6081.983  | 299.676   | NM_001806 | 8288.891  | 7857.497  | SR5       | 4402.716  | 4279.516  |
| BE908993  | 2267.536  | 3789.366  | AB040941  | 6706.915  | 6768.607  | SR7       | 3580.333  | 32890.734 |
| AB012701  | 2193.375  | 2767.521  | AL137241  | 1286.425  | 1075.267  | SR9       | 12651.325 | 2401.237  |
| M61156    | 4226.058  | 3771.063  | AB037742  | 1863.92   | 1752.998  | CY3Cy5    | 3613.36   | 298.553   |
| R44005    | 2508.494  | 3505.517  | AF272375  | 1573.018  | 1122.433  | NM_016382 | 536.871   | 578.234   |
| AI942392  | 3496.515  | 4815.224  | AK025078  | 1115.305  | 862.281   | AK023117  | 1761.905  | 1791.227  |
| M55040    | 831.304   | 1152.492  | AK024737  | 2606.916  | 2429.946  | AL122046  | 510.028   | 712.648   |
| AW009739  | 915.779   | 1024.354  | AB007890  | 11314.42  | 9686.464  | NM_000855 | 1350.583  | 1301.464  |
| BC036805  | 8947.144  | 10193.385 | AF070591  | 817.824   | 816.203   | NM_005536 | 4119.352  | 5413.428  |
| Z74615    | 43938.906 | 41900.711 | AF286160  | 10196.986 | 6407.335  | NM_005077 | 1350.636  | 1568.507  |
| X03884    | 53518.387 | 49570.004 | NM_020411 | 1032.403  | 586.081   | NM_004423 | 4851.411  | 4185.808  |
| U36759    | 961.223   | 829.37    | AF275800  | 2589.551  | 2506.905  | NM_001990 | 758.262   | 1081.08   |
| X91625    | 6462.664  | 5814.117  | AL359605  | 3904.856  | 3676.971  | NM_002141 | 739.184   | 721.997   |
| AF090901  | 703.802   | 497.098   | AB020633  | 4722.949  | 3758.217  | NM_003311 | 1455.398  | 1402.096  |
| AF004231  | 980.717   | 433.92    | AK025445  | 11174.938 | 9250.378  | NM_003776 | 2257.763  | 3117.246  |
| AF001862  | 16047.725 | 10483.1   | AL357200  | 3227.377  | 3218.207  | NM_015719 | 377.991   | 676.724   |
| SR2       | 59847.871 | 44459.461 | NM_017727 | 13080.641 | 16038.221 | NM_006129 | 693.672   | 866.904   |
| SR4       | 16947.82  | 9750.839  | NM_018319 | 5834.478  | 5910.159  | NM_005593 | 747.727   | 625.001   |
| SR6       | 3081.901  | 2292.696  | AL359559  | 947.868   | 924.419   | AF100756  | 2575.598  | 2964.37   |
| SR8       | 11076.296 | 25701.314 | AK021714  | 1621.794  | 1441.092  | NM_006825 | 1527.1    | 1664.908  |
| SR10      | 39762.684 | 12330.131 | NM_020314 | 8091.903  | 7064.07   | NM_001661 | 398.326   | 380.196   |
| CY3Cy5    | 5716.26   | 261.605   | AK022972  | 3598.619  | 3375.034  | NM_014563 | 587.621   | 627.299   |
| U87460    | 9877.804  | 12826.979 | AK025996  | 2129.409  | 1793.809  | NM_020150 | 2603.958  | 4031.717  |
| NM_003617 | 777.833   | 976.115   | AF088015  | 960.831   | 1022.792  | NM_007150 | 2784.23   | 3125.27   |
| NM_001841 | 1490.066  | 1937.96   | AF007132  | 819.015   | 1167.476  | NM_006831 | 1810.488  | 2034.939  |
| NM_002054 | 4504.751  | 5748.803  | AK026711  | 1379.305  | 1317.636  | AL162044  | 3335.347  | 3679.338  |
| AF300649  | 4815.639  | 5987.045  | NM_017864 | 4719.145  | 4201.274  | AK024004  | 785.97    | 984.018   |
| NM_004125 | 1153.053  | 1540.872  | NM_004869 | 4789.336  | 4560.038  | AK022365  | 446.037   | 751.727   |
| NM_000823 | 4565.676  | 4433.092  | AF136408  | 1094.383  | 906.909   | BE892273  | 16917.201 | 17655.664 |
| NM_004414 | 4871.506  | 5047.94   | AL110203  | 623.753   | 473.607   | NM_016734 | 321.35    | 394.571   |
| NM_003317 | 10061.626 | 9301.158  | AJ011595  | 945.709   | 763.126   | Y08147    | 1034.281  | 846.657   |
| NM_001139 | 2989.342  | 3093.533  | X51527    | 713.887   | 568.302   | D00174    | 3215.791  | 3837.257  |
| NM_003772 | 2160.57   | 2725.493  | AJ011602  | 1215.247  | 744.003   | AB000520  | 553.373   | 382.502   |
| NM_001541 | 5391.969  | 4214.047  | AJ002787  | 6816.334  | 5795.402  | NM_006907 | 290.359   | 315.203   |
| NM_005416 | 2206.196  | 1246.836  | Z70764    | 1851.886  | 1713.152  | NM_002686 | 312.639   | 355.257   |
| NM_004670 | 600.285   | 367.504   | Z83948    | 1369.701  | 1453.586  | NM_006267 | 421.089   | 637.346   |
| L09081    | 4485.511  | 2953.553  | M25785    | 1121.702  | 1113.618  | NM_002661 | 2822.286  | 2565.385  |
| NM_016113 | 3699.369  | 2503.014  | M32443    | 4852.225  | 4983.504  | AK023982  | 388.263   | 986.249   |

|           |           |           |           |           |           |           |           |           |
|-----------|-----------|-----------|-----------|-----------|-----------|-----------|-----------|-----------|
| NM_014222 | 2372.745  | 2181.774  | M73048    | 864.619   | 1096.752  | NM_018466 | 745.065   | 820.059   |
| L14819    | 458.275   | 584.435   | D16908    | 840.41    | 607.168   | Y11312    | 906.555   | 827.058   |
| NM_000509 | 4324.515  | 3665.069  | D16477    | 1002.592  | 1075.473  | NM_000744 | 319.244   | 353.223   |
| NM_004542 | 1415.708  | 1183.454  | AK024759  | 813.329   | 1000.565  | NM_003039 | 351.251   | 503.677   |
| X06182    | 1801.661  | 2326.965  | AK022309  | 1168.876  | 740.62    | NM_020372 | 963.78    | 833.468   |
| BF217496  | 7325.842  | 10117.633 | AK000063  | 1107.464  | 723.366   | NM_002635 | 31727.389 | 32368.334 |
| NM_004762 | 14297.332 | 16366.854 | AK000949  | 1092.957  | 576.454   | NM_016077 | 1721.035  | 1857.792  |
| NM_014679 | 48785.352 | 48994.738 | AK027068  | 672.158   | 542.986   | NM_015537 | 2118.945  | 2214.969  |
| AB040969  | 3374.815  | 4042.368  | AK000974  | 1247.76   | 1453.371  | NM_016520 | 9793.113  | 7438.684  |
| NM_003467 | 22716.85  | 28045.861 | AK024527  | 541.05    | 757.424   | AB018353  | 1487.204  | 1289.348  |
| NM_014936 | 2950.245  | 3582.407  | AK025051  | 973.867   | 643.889   | NM_007036 | 1632.234  | 1337.027  |
| NM_003943 | 2756.692  | 3131.493  | AK024553  | 44280.441 | 44483.293 | NM_002617 | 1286.53   | 1272.622  |
| NM_019052 | 12164.596 | 16681.965 | AK024930  | 763.201   | 909.718   | NM_003313 | 4940.465  | 5079.233  |
| NM_003202 | 21850.594 | 21529.023 | AF143879  | 6704.5    | 7051.57   | AF090907  | 1285.745  | 1523.98   |
| AF119902  | 749.947   | 842.188   | AL157449  | 15640.841 | 21210.217 | AK024476  | 2695.395  | 2291.375  |
| NM_003890 | 6556.239  | 3922.646  | AL117582  | 813.523   | 887.427   | X74794    | 3395.924  | 3945.707  |
| BF127978  | 5776.23   | 2904.504  | AK025525  | 1641.919  | 1672.47   | AL050298  | 1443.085  | 1543.708  |
| AF110801  | 1822.65   | 915.028   | NM_018233 | 20297.338 | 15680.907 | NM_007079 | 19003.602 | 20668.104 |
| NM_016579 | 17687.311 | 11740.438 | AV740891  | 2256.846  | 2435.782  | NM_002915 | 417.051   | 520.979   |
| AK022565  | 6526.029  | 3788.46   | AF143329  | 631.983   | 497.006   | NM_006736 | 1249.77   | 1428.713  |
| AK023151  | 1902.365  | 1254.211  | AF090916  | 924.456   | 710.009   | NM_003640 | 856.6     | 1030.706  |
| AB033076  | 1377.589  | 1084.283  | AK026860  | 6426.167  | 6423.265  | NM_014444 | 2208.327  | 2750.186  |
| AK022876  | 2127.415  | 1916.489  | AK024211  | 1120.587  | 895.703   | NM_012248 | 2791.075  | 3415.048  |
| AF134894  | 1686.078  | 1445.636  | NM_014898 | 2131.336  | 2329.163  | NM_014970 | 1599.539  | 1916.597  |
| NM_014827 | 22476.018 | 33815.41  | AK023435  | 2491.131  | 2861.479  | NM_014393 | 2113.83   | 2485.512  |
| NM_001441 | 1776.49   | 2457.232  | AF086035  | 6357.905  | 7726.504  | NM_004223 | 6741.045  | 6549.057  |
| NM_018324 | 1369.825  | 1514.059  | D16905    | 572.145   | 3045.677  | NM_001355 | 5321.716  | 5172.86   |
| AF064255  | 36248.457 | 40128.266 | U25750    | 8220.575  | 7720.817  | U63336    | 444.779   | 372.273   |
| U08853    | 4433.92   | 6075.566  | AK023691  | 6853.294  | 6825.358  | W96179    | 1015.503  | 1206.795  |
| NM_004261 | 40425.48  | 52068.199 | AK023502  | 637.739   | 659.498   | AW247841  | 2666.288  | 2835.606  |
| NM_016006 | 2857.053  | 3806.274  | AK026744  | 741.357   | 717.885   | M76559    | 1869.155  | 2086.955  |
| NM_016245 | 9615.282  | 11604.84  | AK002105  | 621.164   | 531.635   | AI222585  | 646.33    | 407.837   |
| AF005632  | 5983.718  | 5712.846  | NM_005234 | 11284.273 | 7518.461  | AA411678  | 5691.538  | 7161.833  |
| NM_000903 | 3805.07   | 4167.979  | BC023536  | 1398.488  | 811.071   | AA862813  | 13994.671 | 14956.301 |
| NM_004493 | 20205.639 | 21043.295 | NM_001803 | 5768.271  | 4151.911  | AA398427  | 1367.738  | 1735.781  |
| NM_004047 | 23866.178 | 24222.266 | NM_006233 | 19166.439 | 16361.995 | T55728    | 3384.121  | 3639.564  |
| AF287303  | 574.447   | 426.358   | AK021889  | 1034.96   | 1090.765  | H20856    | 867.293   | 584.275   |
| NM_004823 | 3464.38   | 2224.288  | AK023736  | 400.404   | 944.37    | N62586    | 2454.986  | 2410.534  |
| Y17179    | 55922.219 | 58281.938 | AK000992  | 1134.203  | 1299.443  | AA242743  | 2947.021  | 2658.88   |
| NM_000891 | 993.337   | 517.524   | L23544    | 19247.475 | 17977.652 | NM_004758 | 1224.48   | 743.966   |
| AF239613  | 1303.159  | 1012.901  | NM_019020 | 4520.352  | 4128.704  | NM_005163 | 3152.112  | 3068.338  |
| AK026840  | 2428.568  | 1754.704  | NM_016474 | 1712.54   | 1597.165  | NM_015361 | 6848.905  | 6094.22   |
| NM_000288 | 2451.353  | 2398.659  | NM_000910 | 1783.215  | 1454.562  | NM_004310 | 7923.298  | 8358.818  |
| AK026317  | 10417.489 | 7107.319  | AF086001  | 49347.289 | 54954.594 | Y08147    | 950.497   | 835.896   |
| NM_000520 | 4390.961  | 5803.16   | AL117560  | 21676.334 | 20602.189 | D00174    | 2474.26   | 2065.596  |
| NM_000289 | 1978.917  | 2004.086  | M24749    | 5937.402  | 5110.8    | AB000520  | 421.829   | 389.42    |
| NM_001500 | 4274.297  | 6489.489  | NM_000554 | 30559.559 | 22983.303 | NM_016382 | 420.338   | 451.316   |
| NM_020379 | 886.445   | 1182.458  | AF009317  | 5328.094  | 4358.029  | AK023117  | 1559.812  | 1673.567  |
| AL110127  | 2202.879  | 3652.137  | AK026583  | 6122.72   | 4131.887  | AL122046  | 760.432   | 652.347   |
| AK001997  | 604.339   | 871.68    | AF218031  | 6754.035  | 5423.13   | NM_000855 | 1835.889  | 1802.138  |
| NM_002528 | 4638.251  | 4731.083  | AF210650  | 1757.056  | 1022.501  | NM_005536 | 3134.718  | 1932.309  |
| D38438    | 4606.594  | 5617.748  | NM_018356 | 5027.144  | 3408.905  | NM_005077 | 1215.304  | 1355.907  |
| AV714945  | 1169.931  | 889.558   | AF085896  | 1170.759  | 822.815   | NM_004423 | 3431.575  | 2490.559  |

|           |           |           |           |           |           |           |           |           |
|-----------|-----------|-----------|-----------|-----------|-----------|-----------|-----------|-----------|
| AF089897  | 558.185   | 533.752   | X74613    | 49775.629 | 42351.266 | NM_00199C | 670.613   | 1064.58   |
| AF007872  | 4969.331  | 4082.16   | AF075080  | 34849.559 | 34141.074 | NM_002141 | 578.612   | 475.392   |
| M30938    | 10387.645 | 9334.54   | AL390183  | 712.696   | 716.897   | NM_003311 | 1326.005  | 1140.439  |
| NM_01514E | 2031.527  | 1836.436  | Y13897    | 765.686   | 908.479   | NM_00377E | 3056.104  | 3245.827  |
| NM_004714 | 2392.919  | 1275.748  | AK001857  | 759.918   | 1284.68   | NM_01571E | 354.734   | 968.654   |
| NM_002497 | 18937.357 | 13606.08  | AK021525  | 444.981   | 862.789   | NM_00612E | 649.151   | 999.489   |
| AB025194  | 8181.061  | 5574.536  | AF067801  | 735.552   | 853.99    | NM_00058E | 643.814   | 614.513   |
| NM_00623E | 1662.428  | 1464.094  | AL133577  | 2866.81   | 3308.516  | NM_00559E | 746.622   | 855.278   |
| BC020863  | 506.127   | 475.302   | AK025378  | 2944.918  | 3183.588  | NM_016077 | 1219.029  | 1101.725  |
| NM_00426E | 45941.625 | 60554.73  | NM_00047E | 1590.244  | 2093.371  | AF100756  | 3943.96   | 4367.234  |
| NM_00257E | 9416.61   | 17570.396 | AF038199  | 1716.238  | 2278.518  | NM_00682E | 2323.191  | 2529.161  |
| L14819    | 619.264   | 641.506   | CY3Cy5    | 5118.922  | 146.013   | NM_001661 | 354.487   | 298.236   |
| NM_00050E | 4426.52   | 5140.114  | BE908993  | 1720.503  | 1939.8    | NM_01456E | 597.74    | 622.517   |
| NM_00454E | 927.03    | 1483.577  | AB012701  | 1517.727  | 1913.528  | NM_02015C | 2321.428  | 2628.99   |
| X06182    | 2100.991  | 2962.877  | M61156    | 2710.983  | 2723.688  | NM_00715C | 1977.961  | 2015.43   |
| BE908993  | 2528.452  | 4216.619  | R44005    | 1996.691  | 1883.504  | NM_006831 | 1550.821  | 1511.067  |
| AB012701  | 2316.821  | 3174.195  | AI942392  | 2377.55   | 2821.269  | AL162044  | 2655.384  | 2709.026  |
| M61156    | 3510.522  | 3706.922  | M55040    | 661.637   | 899.661   | AK024004  | 779.357   | 852.022   |
| R44005    | 2203.427  | 2989.531  | AW009739  | 650.087   | 580.059   | BE892273  | 20072.023 | 15374.1   |
| AI942392  | 3626.62   | 4456.539  | BC036805  | 6971.523  | 7622.274  | NM_016734 | 475.676   | 625.933   |
| M55040    | 971.848   | 1045.623  | Z74615    | 30117.266 | 32814.973 | NM_01439E | 1740.159  | 2133.648  |
| AW009739  | 975.361   | 943.633   | X03884    | 38004.004 | 35507.07  | NM_00422E | 3760.077  | 3497.361  |
| BC036805  | 9326.725  | 9343.812  | X91625    | 4933.656  | 4607.07   | NM_00135E | 5092.081  | 5499.155  |
| Z74615    | 48015.129 | 39514.434 | AF090901  | 447.022   | 492.366   | NM_00121E | 192.603   | 241.223   |
| X03884    | 50506.363 | 30239.947 | AF004231  | 796.123   | 1066.571  | U63336    | 393.125   | 290.18    |
| U36759    | 915.94    | 302.986   | AF001862  | 11682.835 | 13396.159 | NM_006907 | 395.335   | 468.546   |
| X91625    | 5920.71   | 3909.355  | SR2       | 58556.348 | 59972.719 | NM_00268E | 352.794   | 358.587   |
| AF001862  | 14603.484 | 9185.44   | SR4       | 17617.045 | 20879.053 | NM_006267 | 694.361   | 846.96    |
| NM_016044 | 3628.774  | 6711.818  | SR6       | 2983.382  | 3324.35   | NM_002661 | 3755.443  | 4111.707  |
| AK023151  | 2341.707  | 2863.738  | SR8       | 9027.058  | 36142.531 | AK023982  | 490.188   | 676.214   |
| AB033076  | 1675.481  | 1848.539  | SR10      | 30809.531 | 14061.478 | NM_01846E | 893.721   | 791.179   |
| AK022876  | 2591.336  | 3940.958  | CY3Cy5    | 5250.968  | 178.452   | Y11312    | 764.035   | 957.513   |
| AF134894  | 1167.234  | 2453.04   | NM_00412E | 232.533   | 492.835   | AB014533  | 1970.215  | 1763.136  |
| NM_00393E | 7465.466  | 12665.895 | U87460    | 7375.827  | 8016.776  | NM_00303E | 696.06    | 531.576   |
| NM_014827 | 20979.504 | 32684.965 | NM_003617 | 574.249   | 578.72    | NM_01450E | 372.103   | 180.403   |
| NM_00412E | 636.505   | 1468.732  | NM_001841 | 1137.351  | 954.368   | NM_02037E | 813.214   | 956.957   |
| U87460    | 10514.409 | 12374.848 | NM_002054 | 3255.321  | 3611.011  | NM_00263E | 31477     | 35577.18  |
| NM_003617 | 536.118   | 1034.742  | AF300649  | 3394.726  | 4370.888  | NM_00475E | 834.861   | 520.672   |
| NM_001841 | 1333.628  | 1953.678  | NM_00412E | 1366.502  | 1523.244  | NM_00516E | 1788.544  | 2097.755  |
| NM_002054 | 4151.514  | 3732.24   | NM_00082E | 3325.02   | 4160.921  | NM_015361 | 5942.335  | 4480.138  |
| AF300649  | 4348.289  | 4050.096  | NM_004414 | 3544.891  | 3470.138  | NM_00431C | 5987.903  | 5417.124  |
| NM_00412E | 1540.023  | 1218.999  | NM_003317 | 8274.732  | 9410.599  | NM_015537 | 2484.318  | 2566.733  |
| NM_00082E | 5443.178  | 4551.033  | NM_001139 | 2268.819  | 2424.797  | NM_01652C | 9824.898  | 7869.542  |
| NM_004414 | 4874.172  | 3399.333  | NM_00460E | 41286.941 | 40729.82  | AB018353  | 1726.937  | 1750.63   |
| NM_003317 | 10540.271 | 6013.218  | NM_00377E | 1543.546  | 2211.722  | NM_00703E | 1988.168  | 1578.152  |
| NM_001139 | 3067.619  | 2156.584  | NM_001541 | 3752.751  | 5360.393  | NM_002617 | 1441.359  | 1419.081  |
| NM_00460E | 37587.047 | 22665.234 | NM_00541E | 1421.454  | 1929.834  | NM_00331E | 5583.644  | 5628.473  |
| NM_00377E | 1868.782  | 1534.721  | NM_00467C | 574.563   | 584.549   | AF090907  | 1245.698  | 1544.293  |
| NM_001541 | 3342.311  | 2265.744  | L09081    | 7538.247  | 10166.657 | AK024476  | 1932.317  | 1741.709  |
| NM_00541E | 1891.209  | 1324.184  | NM_016113 | 8379.534  | 10442.812 | X74794    | 2945.45   | 3449.041  |
| L09081    | 3946.832  | 2899.136  | NM_01422E | 3126.822  | 4015.884  | AL050298  | 1285.321  | 1104.593  |
| NM_016113 | 5743.774  | 10927.33  | L14819    | 537.14    | 931.321   | NM_00707E | 15887.845 | 15464.836 |
| NM_01422E | 3768.393  | 7526.626  | NM_00050E | 4124.036  | 3943.46   | M20696    | 1752.146  | 1628.863  |

|           |           |           |           |           |           |           |           |           |
|-----------|-----------|-----------|-----------|-----------|-----------|-----------|-----------|-----------|
| AK026840  | 3135.667  | 4638.742  | NM_004542 | 1072.87   | 1321.478  | NM_002915 | 378.808   | 514.193   |
| NM_000288 | 2797.127  | 7384.517  | X06182    | 1972.057  | 2333.126  | NM_006736 | 1389.4    | 1437.751  |
| AK026317  | 15439.108 | 22832.57  | BF217496  | 7363.657  | 8262.495  | NM_003640 | 1023.858  | 872.604   |
| X82207    | 36789.844 | 46395.473 | NM_004762 | 10003.441 | 11621.528 | NM_014444 | 2421.386  | 2787.237  |
| NM_015044 | 1275.925  | 2158.685  | NM_006641 | 49996.113 | 55154.945 | NM_012248 | 2973.433  | 2607.831  |
| NM_002867 | 799.964   | 1154.466  | NM_000634 | 7875.876  | 8071.089  | NM_014970 | 2750.015  | 3499.086  |
| BF217496  | 6246.119  | 8691.239  | NM_014679 | 33013.559 | 30682.564 | NM_015719 | 200.258   | 311.432   |
| NM_004762 | 12954.754 | 15963.675 | AB040969  | 2224.32   | 2449.776  | NM_006129 | 472.943   | 436.854   |
| NM_006641 | 48877.383 | 55952.711 | NM_003467 | 15698.604 | 16847.387 | NM_000582 | 630.933   | 621.648   |
| NM_000634 | 9947.158  | 11021.58  | NM_014936 | 2135.571  | 1686.935  | NM_005593 | 495.093   | 486.47    |
| NM_014679 | 40982.098 | 35766.98  | NM_003943 | 2111.472  | 2531.656  | AJ224741  | 566.076   | 179.94    |
| AB040969  | 3743.883  | 3182.179  | NM_019052 | 9548.088  | 11574.823 | NM_004684 | 276.462   | 301.509   |
| NM_003467 | 20937.063 | 19785.809 | NM_003202 | 15310.225 | 16616.098 | W96179    | 910.953   | 1426.191  |
| NM_014936 | 2721.277  | 2911.985  | AF119902  | 953.361   | 546.225   | AW247841  | 2460.677  | 3049.917  |
| NM_003943 | 2747.784  | 2423.228  | NM_020525 | 8617.002  | 8328.201  | M76559    | 1306.576  | 1621.754  |
| NM_019052 | 12485.741 | 9903.901  | X62468    | 671.929   | 736.627   | AI222585  | 410.987   | 281.83    |
| NM_003202 | 22527.504 | 13909.404 | NM_003890 | 5288.74   | 7750.979  | AA411678  | 5418.653  | 6296.083  |
| AF119902  | 608.042   | 670.129   | BF127978  | 3467.517  | 5361.844  | AA862813  | 14467.142 | 14597.831 |
| NM_020525 | 6723.781  | 4541.956  | AF110801  | 1475.291  | 1741.814  | AA398427  | 1256.537  | 1510.472  |
| NM_003890 | 3330.748  | 2776.167  | NM_016579 | 24751.836 | 28938.156 | T55728    | 3345.696  | 2823.462  |
| BF127978  | 3191.337  | 3066.28   | AK022565  | 7790.71   | 9094.55   | H20856    | 1026.815  | 664.012   |
| AF110801  | 1857.235  | 1292.493  | AK023151  | 2587.863  | 3367.871  | N62586    | 2789.906  | 2146.546  |
| AB018297  | 1764.792  | 3155.7    | AB033076  | 1596.555  | 1812.251  | AA242743  | 3161.952  | 2881.335  |
| AK022565  | 8711.317  | 17104.604 | AK022876  | 2664.22   | 3559.849  | BE892273  | 15754.259 | 13442.068 |
| AB025194  | 12260.535 | 16280.395 | AF134894  | 1227.953  | 1596.417  | NM_016734 | 513.166   | 486.058   |
| NM_006239 | 1788.575  | 2847.526  | NM_003938 | 5060.296  | 5950.806  | Y08147    | 1243.64   | 1228.513  |
| BC020863  | 748.92    | 748.538   | NM_014827 | 18442.754 | 21568.08  | D00174    | 2718.726  | 2766.749  |
| NM_017897 | 5792.324  | 6896.389  | NM_001441 | 1421.73   | 1624.709  | AB000520  | 400.64    | 412.875   |
| NM_004265 | 37263.113 | 48133.203 | NM_018324 | 1123.316  | 1290.133  | AK023117  | 1644.434  | 2119.878  |
| NM_002572 | 6397.756  | 7323.03   | AF064255  | 30898.309 | 33418.313 | AL122046  | 673.961   | 1245.84   |
| NM_001441 | 1695.528  | 2253.332  | NM_016368 | 49000.449 | 54268.277 | NM_000855 | 1255.499  | 1098.501  |
| NM_018324 | 1190.571  | 1932.181  | U08853    | 2913.245  | 2844.571  | NM_005536 | 4164.914  | 3740.221  |
| AF064255  | 32832.223 | 33396.488 | NM_004261 | 34119.215 | 31675.65  | NM_005077 | 1065.53   | 782.354   |
| NM_016368 | 51266.254 | 51411.277 | NM_016006 | 2156.431  | 2263.655  | NM_004423 | 3535.35   | 2560.128  |
| U08853    | 4554.185  | 4153.855  | NM_016245 | 7024.747  | 7735.134  | NM_001990 | 726.016   | 523.169   |
| NM_004261 | 41233.613 | 40284.629 | AF005632  | 4125.439  | 4279.997  | NM_002141 | 494.345   | 423.492   |
| NM_016006 | 2417.022  | 2636.752  | NM_000903 | 2870.558  | 2787.551  | NM_003311 | 1396.587  | 901.599   |
| NM_016245 | 8905.979  | 8326.512  | NM_004493 | 17982.582 | 16578.529 | NM_003776 | 3150.369  | 3090.87   |
| AF005632  | 5671.404  | 4552.672  | AF309489  | 572.654   | 546.339   | NM_003039 | 409.208   | 269.919   |
| NM_000903 | 3337.367  | 2058.987  | NM_004047 | 19234.854 | 18162.434 | NM_020372 | 727.632   | 459.5     |
| NM_004493 | 20280.383 | 13456.237 | AF287303  | 218.596   | 436.829   | NM_002635 | 27474.291 | 26583.219 |
| AF309489  | 1232.006  | 601.335   | NM_004823 | 3089.787  | 2977.546  | NM_016077 | 1820.879  | 1546.925  |
| NM_004047 | 25706.01  | 18371.199 | Y17179    | 54945.75  | 58205.297 | AF100756  | 3395.366  | 3675.708  |
| NM_004823 | 2769.006  | 2069.438  | NM_000891 | 1076.882  | 1468.063  | NM_006825 | 1782.408  | 1809.25   |
| Y17179    | 59134.785 | 57438.965 | AF239613  | 1427.441  | 1755.853  | NM_004862 | 191.541   | 434.06    |
| AF239613  | 1437.665  | 4396.331  | AK026840  | 3140.048  | 4112.634  | NM_001661 | 414.638   | 479.937   |
| NM_016044 | 2994.874  | 4709.149  | NM_000288 | 2429.598  | 2519.375  | NM_014563 | 573.383   | 581.205   |
| NM_000520 | 3981.761  | 5024.742  | AK026317  | 13090.342 | 16550.1   | NM_020150 | 2279.677  | 1771.179  |
| NM_000288 | 1677.024  | 2424.864  | NM_015044 | 1434.003  | 1795.446  | NM_007150 | 2392.921  | 1981.358  |
| NM_001500 | 5414.622  | 6438.944  | NM_002867 | 709.227   | 940.808   | NM_006831 | 1592.708  | 1316.484  |
| NM_004388 | 4207.49   | 5019.203  | NM_000520 | 3168.633  | 3074.178  | AL162044  | 2628.41   | 2371.102  |
| NM_020379 | 655.815   | 863.183   | NM_000289 | 1226.276  | 1374.83   | AK024004  | 1024.1    | 1076.544  |
| AL110127  | 2698.112  | 2759.559  | NM_001500 | 3447.21   | 3676.715  | NM_006736 | 899.272   | 731.514   |

|           |           |           |           |           |           |           |           |           |
|-----------|-----------|-----------|-----------|-----------|-----------|-----------|-----------|-----------|
| NM_00252E | 4210.32   | 3138.107  | NM_00438E | 3281.479  | 3032.593  | NM_00364C | 628.319   | 661.155   |
| D38438    | 3557.037  | 2188.605  | NM_020379 | 576.338   | 836.918   | NM_01444A | 1416.771  | 1520.963  |
| AV714945  | 1345.215  | 489.617   | AL110127  | 1828.444  | 1943.153  | NM_01224E | 2369.238  | 2136.276  |
| AF007872  | 4120.832  | 2367.515  | AK001997  | 540.554   | 552.837   | NM_01497C | 1779.897  | 1716.107  |
| M30938    | 11298.624 | 6688.413  | NM_00252E | 3331.295  | 3187.361  | NM_01439E | 2059.187  | 2704.864  |
| NM_01514E | 2080.171  | 1557.326  | D38438    | 5096.713  | 4880.308  | NM_00422E | 6488.718  | 7515.584  |
| NM_004714 | 2358.271  | 1842.45   | AV714945  | 1112.625  | 901.117   | NM_00135E | 5508.07   | 5211.4    |
| NM_002497 | 22920.969 | 26729.781 | AF007872  | 2910.82   | 2818.589  | NM_00121E | 274.671   | 369.073   |
| NM_00541E | 1829.511  | 2299.168  | M30938    | 8591.188  | 7435.202  | U63336    | 339.594   | 433.681   |
| NM_00467C | 600.055   | 800.91    | NM_01514E | 1712.443  | 1950.262  | NM_006907 | 439.809   | 299.721   |
| L09081    | 5978.921  | 7157.855  | NM_004714 | 1361.777  | 2128.308  | NM_00268E | 408.281   | 504.517   |
| NM_00021E | 60111.934 | 62553.805 | NM_005401 | 281.828   | 462.462   | NM_006267 | 717.277   | 504.788   |
| NM_016113 | 4703.202  | 6365.91   | NM_002497 | 21221.725 | 16513.289 | NM_002661 | 4120.505  | 3126.767  |
| NM_01422E | 3794.313  | 7307.076  | AB025194  | 12929.505 | 16446.988 | AK023982  | 617.754   | 490.577   |
| L14819    | 1000.961  | 1659.675  | NM_006239 | 2742.95   | 3276.242  | NM_01846E | 969.564   | 786.23    |
| NM_00050E | 4353.274  | 5235.192  | BC020863  | 532.988   | 699.62    | Y11312    | 841.723   | 625.903   |
| NM_00454E | 1110.005  | 1473.395  | NM_00426E | 30315.604 | 35591.805 | AB014533  | 1928.173  | 1678.646  |
| X06182    | 1837.587  | 1821.521  | NM_00257E | 5944.809  | 7262.465  | AK022097  | 1092.824  | 950.747   |
| BE908993  | 2262.002  | 2622.456  | NM_00050E | 3728.661  | 2927.56   | NM_00216E | 7009.609  | 6173.078  |
| AB012701  | 1955.991  | 1936.595  | NM_00454E | 749.721   | 821.523   | NM_00466C | 5199.456  | 4268.374  |
| M61156    | 4087.132  | 3323.385  | X06182    | 1483.622  | 1466.637  | NM_00616E | 1341.172  | 1343.258  |
| R44005    | 2092.644  | 1421.421  | BE908993  | 1849.299  | 1440.986  | NM_016011 | 3453.148  | 3566.566  |
| AI942392  | 3466.168  | 2094.909  | AB012701  | 1358.085  | 1736.137  | AL035307  | 1775.053  | 2206.293  |
| M55040    | 1103.474  | 358.756   | M61156    | 2110.768  | 2149.757  | NM_01223A | 2444.746  | 3356.266  |
| AW009739  | 1131.604  | 512.086   | R44005    | 1697.908  | 1938.486  | NM_015361 | 6795.576  | 6696.13   |
| BC036805  | 8381.361  | 4839.482  | AI942392  | 2364.284  | 2587.351  | NM_00431C | 6986.025  | 7872.129  |
| Z74615    | 31891.787 | 18487.941 | M55040    | 600.28    | 621.814   | NM_015537 | 2970.078  | 2916.94   |
| X03884    | 50194.051 | 38561.027 | AW009739  | 631.319   | 637.919   | NM_01652C | 10768.456 | 7531.987  |
| X91625    | 7213.514  | 8555.12   | BC036805  | 7004.915  | 6089.887  | AB018353  | 2065.06   | 1604.986  |
| AF090901  | 705.049   | 1052.146  | Z74615    | 35272.664 | 35367.891 | NM_00703E | 2641.525  | 1835.527  |
| AF004231  | 668.339   | 784.008   | X03884    | 39722.016 | 40283.934 | NM_002617 | 1793.441  | 1657.513  |
| AF001862  | 21054.035 | 37449.227 | U36759    | 384.857   | 412.459   | NM_00331E | 5868.308  | 5116.137  |
| NM_00389C | 3964.625  | 4621.178  | X91625    | 4147.697  | 5074.09   | AF090907  | 705.696   | 779.388   |
| BF127978  | 5157.394  | 4469.034  | AF004231  | 1111.262  | 1290.551  | AK024476  | 2264.016  | 1954.777  |
| AF110801  | 1656.683  | 2004.429  | AF001862  | 15489.875 | 18098.229 | X74794    | 3239.503  | 3294.017  |
| NM_01657E | 18298.801 | 22353.889 | NM_058197 | 324.376   | 501.711   | AL050298  | 1329.161  | 1125.349  |
| AB018297  | 1786.339  | 2469.827  | NM_016044 | 2383.819  | 3109.713  | NM_00707E | 16482.777 | 13020.969 |
| AK022565  | 8024.536  | 9473.082  | AK023151  | 2036.261  | 2210.661  | M20696    | 2656.135  | 2270.079  |
| AK023151  | 2572.191  | 3160.73   | AB033076  | 1311.378  | 1185.973  | NM_00291E | 418.007   | 363.461   |
| AB033076  | 1389.815  | 1381.924  | AK022876  | 2378.769  | 2339.427  | NM_00656E | 487.266   | 324.351   |
| AK022876  | 2652.868  | 3602.654  | AF134894  | 971.787   | 904.07    | AK026154  | 4023.248  | 3336.056  |
| AF134894  | 1209.431  | 1931.014  | NM_00393E | 4406.433  | 4148.519  | AL117546  | 10029.439 | 8711.455  |
| NM_00393E | 6716.122  | 5244.315  | NM_014827 | 16059.077 | 15465.544 | AL157482  | 1781.327  | 1899.897  |
| NM_014827 | 18457.658 | 17642.873 | NM_00412E | 526.943   | 438.304   | NM_00542E | 4123.263  | 4370.492  |
| U87460    | 11102.224 | 9955.333  | U87460    | 6832.304  | 8114.969  | NM_01797A | 647.603   | 634.418   |
| NM_003617 | 664.112   | 708.309   | NM_003617 | 539.049   | 763.846   | NM_00397E | 442.818   | 366.674   |
| NM_001841 | 1313.893  | 562.771   | NM_001841 | 859.93    | 1035.53   | X14677    | 1576.654  | 1236.884  |
| NM_002054 | 3706.064  | 1823.736  | NM_002054 | 3550.728  | 3439.866  | NM_00586E | 1844.993  | 1445.536  |
| AF300649  | 3763.803  | 1843.397  | AF300649  | 3806.644  | 4146.834  | U17077    | 1081.39   | 988.967   |
| NM_00412E | 1304.606  | 554.673   | NM_00412E | 1248.705  | 1417.046  | NM_00091E | 1786.87   | 1288.407  |
| NM_00082E | 3794.461  | 2069.313  | NM_00082E | 3601.711  | 3529.411  | AK024475  | 933.869   | 1053.787  |
| NM_004414 | 4358.556  | 2913.987  | NM_004414 | 3451.11   | 3952.825  | AB026542  | 8213.607  | 7864.452  |
| NM_003317 | 7936.665  | 6187.105  | NM_003317 | 6884.06   | 7996.366  | NM_01984E | 2085.442  | 1509.65   |

|           |           |           |           |           |           |           |           |           |
|-----------|-----------|-----------|-----------|-----------|-----------|-----------|-----------|-----------|
| NM_001139 | 2969.401  | 3769.117  | NM_001139 | 2471.256  | 2949.569  | NM_014433 | 526.341   | 275.591   |
| NM_004609 | 36492.785 | 52848.074 | NM_004609 | 40990.543 | 42609.328 | NM_002062 | 3982.459  | 3685.238  |
| NM_003772 | 2348.232  | 3781.69   | NM_003772 | 1670.546  | 2491.812  | NM_014394 | 35903.285 | 26624.127 |
| NM_001541 | 3662.029  | 5722.232  | NM_001541 | 5415.091  | 7061.292  | NM_005243 | 4790.215  | 5171.392  |
| NM_004823 | 2928.935  | 3309.464  | NM_005416 | 1945.53   | 1985.694  | NM_006218 | 604.385   | 556.686   |
| Y17179    | 51599.676 | 56044.496 | NM_004670 | 494.647   | 719.008   | NM_018140 | 1581.828  | 1715.672  |
| AF239613  | 1539.735  | 2405.454  | L09081    | 7751.928  | 10443.443 | NM_016948 | 1096.972  | 1028.519  |
| AK026840  | 2427.102  | 3082.133  | NM_000218 | 61826.453 | 64128.262 | NM_000142 | 785.605   | 833.093   |
| NM_000288 | 2846.542  | 3301.262  | NM_016113 | 8200.451  | 11060.624 | AF272372  | 11067.914 | 11629.204 |
| AK026317  | 13690.388 | 15274.326 | NM_014222 | 3319.043  | 4712.327  | AK097045  | 1215.143  | 1210.505  |
| X82207    | 35847.551 | 38244.418 | AK026840  | 2812.718  | 2493.251  | NM_018256 | 1989.689  | 2041.096  |
| NM_015044 | 1292.597  | 1422.345  | NM_000288 | 1966.54   | 2499.325  | AK025150  | 396.477   | 270.464   |
| NM_002867 | 409.108   | 822.367   | AK026317  | 11276.218 | 12085.807 | AK024611  | 7118.557  | 7951.139  |
| BF217496  | 6036.287  | 6225.881  | X82207    | 21927.551 | 22692.766 | BC010420  | 2881.361  | 2903.406  |
| NM_004762 | 14606.101 | 11839.504 | NM_015044 | 1270.294  | 1103.379  | NM_012280 | 8780.633  | 8248.726  |
| NM_006641 | 52443.574 | 49138.566 | NM_002867 | 637.108   | 618.716   | NM_018172 | 3285.306  | 2254.068  |
| NM_000634 | 10115.54  | 5375.921  | BF217496  | 7790.719  | 8385.039  | U03886    | 368.247   | 380.721   |
| NM_014679 | 39974.422 | 17876.777 | NM_004762 | 11155.054 | 12002.543 | AK022040  | 829.841   | 774.247   |
| AB040969  | 3282.589  | 1740.786  | NM_006641 | 49512.84  | 53267.152 | AK022722  | 540.597   | 542.109   |
| NM_003467 | 21727.162 | 11047.866 | NM_000634 | 8173.082  | 8716.666  | NM_003591 | 7396.43   | 7951.543  |
| NM_014936 | 2623.235  | 1943.239  | NM_014679 | 35116.035 | 33435.543 | AL080111  | 9370.552  | 10167.782 |
| NM_003943 | 1739.906  | 1639.527  | AB040969  | 2380.07   | 2369.269  | NM_003550 | 4210.694  | 3005.042  |
| NM_019052 | 12163.589 | 11556.293 | NM_003467 | 16776.209 | 15449.041 | NM_014642 | 2170.784  | 1852.969  |
| NM_003202 | 24029.178 | 24725.053 | NM_014936 | 2167.94   | 2214.45   | NM_003828 | 1221.119  | 746.962   |
| AF119902  | 888.433   | 1537.662  | NM_003943 | 2028.738  | 2507.054  | AL110168  | 2396.25   | 2359.516  |
| NM_020525 | 7305.266  | 11989.882 | NM_019052 | 9013.013  | 12918.05  | NM_002831 | 2246.012  | 2555.038  |
| X62468    | 390.081   | 857.94    | NM_003202 | 14855.607 | 18227.91  | AL833409  | 1303.11   | 1269.435  |
| NM_015148 | 2156.739  | 3134.036  | AF119902  | 703.441   | 888.044   | NM_016147 | 2208.469  | 2833.444  |
| NM_004714 | 2530.871  | 4251.192  | NM_020525 | 8520.751  | 9454.055  | NM_002833 | 1029.424  | 1339.947  |
| NM_005401 | 352.323   | 1049.854  | X62468    | 720.868   | 566.882   | NM_016592 | 558.449   | 812.902   |
| NM_002497 | 21363.814 | 27927.732 | NM_003890 | 6013.485  | 8237.853  | NM_018326 | 3517.701  | 3536.25   |
| AB025194  | 9666.543  | 11557.297 | BF127978  | 4022.032  | 5459.24   | NM_005606 | 4709.025  | 4284.029  |
| NM_006239 | 1612.529  | 1567.695  | AF110801  | 1279.109  | 2023.039  | AF134707  | 606.797   | 468.163   |
| NM_017897 | 6072.755  | 7201.663  | NM_016579 | 22179.137 | 29010.096 | BE730629  | 433.664   | 342.114   |
| NM_004265 | 36130.715 | 36815.723 | AB018297  | 1439.362  | 1788.401  | AK027167  | 884.426   | 1031.571  |
| NM_002572 | 6649.837  | 5730.793  | AK022565  | 7397.407  | 9220.523  | AK025265  | 2417.361  | 1808.981  |
| NM_001441 | 1899.222  | 1942.948  | AB025194  | 8733.615  | 8071.896  | NM_013279 | 493.393   | 281.584   |
| NM_018324 | 1524.844  | 1293.457  | NM_006239 | 1997.086  | 2050.115  | NM_018652 | 7817.882  | 6550.8    |
| AF064255  | 38061.055 | 23380.203 | BC020863  | 486.46    | 540.922   | AB011166  | 1392.272  | 1213.172  |
| NM_016368 | 52556.871 | 31570.889 | NM_017897 | 3839.072  | 3863.671  | AK024460  | 3167.792  | 2535.526  |
| U08853    | 3861.333  | 1946.342  | NM_004265 | 25128.092 | 21731.846 | NM_006606 | 2774.34   | 2107.053  |
| NM_004261 | 38454.582 | 23489.875 | NM_002572 | 5312.94   | 5098.981  | S78570    | 380.285   | 284.683   |
| NM_016006 | 2228.313  | 1803.668  | NM_001441 | 1761.154  | 1783.899  | NM_006442 | 13908.244 | 12889.239 |
| NM_016245 | 8052.56   | 5323.833  | NM_018324 | 1433.071  | 1206.974  | NM_003902 | 5264.577  | 6222.412  |
| AF005632  | 3951.698  | 2530.905  | AF064255  | 29460.023 | 31208.85  | NM_016427 | 4920.954  | 3983.645  |
| NM_000903 | 2681.064  | 2644.904  | NM_016368 | 49841.332 | 52713.727 | U80741    | 1806.776  | 1548.903  |
| NM_004493 | 21067.934 | 22458.994 | U08853    | 3198.911  | 2852.132  | NM_014497 | 593.643   | 372.255   |
| AF309489  | 417.789   | 1159.705  | NM_004261 | 33540.246 | 30545.486 | AL133598  | 3471.636  | 2970.601  |
| NM_004047 | 30078.191 | 37173.938 | NM_016006 | 2123.685  | 2021.609  | NM_015511 | 2013.335  | 1752.882  |
| AF287303  | 608.119   | 749.328   | NM_016245 | 7570.4    | 7026.917  | NM_006625 | 1683.051  | 1320.636  |
| NM_006773 | 2434.656  | 2917.66   | AF005632  | 4146.907  | 4448.762  | NM_004891 | 10382.397 | 9085.972  |
| AK024439  | 11114.776 | 18199.047 | NM_000903 | 2877.795  | 3043.228  | NM_002879 | 652.72    | 358.552   |
| X89676    | 1444.038  | 1791.585  | NM_004493 | 17109.773 | 17407.066 | AF075068  | 12182.509 | 14412.815 |



|           |           |           |           |           |           |           |           |           |
|-----------|-----------|-----------|-----------|-----------|-----------|-----------|-----------|-----------|
| NM_012444 | 686.432   | 895.542   | AF309489  | 849.494   | 550.996   | X78938    | 499.555   | 277.259   |
| Z32684    | 2149.028  | 3050.781  | NM_004047 | 19985.525 | 22277.34  | AF085881  | 1326.067  | 1322.888  |
| NM_016512 | 1194.613  | 1447.65   | NM_004823 | 2688.954  | 3003.399  | AK022737  | 1487.657  | 1544.566  |
| NM_017488 | 5511.306  | 5969.321  | Y17179    | 53289.754 | 57772.523 | NM_003472 | 21244.912 | 17768.537 |
| AY009400  | 980.443   | 1119.119  | NM_000891 | 975.324   | 1072.191  | U92980    | 1688.314  | 1632.541  |
| NM_005068 | 3898.952  | 11968.955 | AF239613  | 1147.402  | 1313.675  | AF133658  | 509.966   | 533.477   |
| NM_016044 | 3143.802  | 3309.832  | NM_016044 | 2503.777  | 2110.524  | AB048287  | 3339.497  | 2582.376  |
| NM_000520 | 4174.302  | 4157.469  | NM_000520 | 2872.468  | 2944.308  | Y11159    | 414.607   | 280.988   |
| NM_000288 | 1939.133  | 1563.965  | NM_000288 | 1248.739  | 1401.854  | AB020648  | 1361.294  | 2012.409  |
| NM_001500 | 5393.853  | 3867.338  | NM_001500 | 3499.617  | 3230.522  | AK025798  | 8395.354  | 8576.743  |
| NM_004388 | 4108.754  | 2984.45   | NM_004388 | 3139.85   | 3305.102  | AF086173  | 294.385   | 268.717   |
| NM_020378 | 1114.502  | 334.026   | NM_020378 | 840.923   | 921.224   | AK025164  | 530.858   | 466.245   |
| AL110127  | 2426.405  | 1488.283  | AL110127  | 2278.989  | 1717.627  | NM_018368 | 3394.422  | 3407.623  |
| NM_002528 | 4262.607  | 2693.654  | AK001997  | 542.792   | 376.893   | AB040290  | 750.189   | 825.94    |
| D38438    | 2556.007  | 2469.529  | NM_002528 | 3433.791  | 3489.701  | NM_019848 | 5476.768  | 6048.78   |
| AV714945  | 852.686   | 807.268   | D38438    | 5454.369  | 5398.933  | AK025168  | 315.642   | 285.354   |
| AF007872  | 5597.987  | 5936.999  | AV714945  | 941.082   | 1076.966  | AK026947  | 11164.618 | 8526.876  |
| M30938    | 11041.888 | 10381.23  | AF007872  | 2924.215  | 3174.736  | U84526    | 793.23    | 678.434   |
| NM_017588 | 16681.354 | 17270.703 | M30938    | 8356.797  | 8403.708  | L23401    | 1244.366  | 673.278   |
| NM_004148 | 4988.337  | 5296.776  | NM_015148 | 1736.999  | 1726.848  | NM_018090 | 34439.418 | 28998.141 |
| X03168    | 1652.285  | 2297.382  | NM_004714 | 1842.513  | 2298.016  | AK022728  | 20587.338 | 12524.284 |
| NM_005168 | 2187.368  | 3965.254  | NM_002497 | 25346.375 | 20169.406 | AL109678  | 720.077   | 512.921   |
| NM_017801 | 11165.418 | 14878.047 | NM_005416 | 1384.457  | 1296.985  | AL137524  | 402.657   | 370.037   |
| NM_007348 | 4941.665  | 8110.057  | NM_004670 | 539.182   | 498.129   | AF218008  | 1957.893  | 1767.234  |
| NM_016953 | 684.144   | 974.136   | L09081    | 7088.334  | 7220.346  | M22404    | 12686.565 | 6422.605  |
| U65473    | 6684.492  | 8839.823  | NM_000218 | 59955.59  | 59570.883 | AF052115  | 675.467   | 510.63    |
| D63481    | 16795.91  | 20703.383 | NM_016113 | 5955.854  | 5531.686  | NM_014018 | 10792.792 | 10686.601 |
| AY009951  | 16176.661 | 17974.334 | NM_014222 | 2247.096  | 2274.44   | Z70711    | 584.011   | 645.195   |
| AL157424  | 1610.294  | 1566.956  | NM_000509 | 3791.349  | 2334.113  | NM_012368 | 718.388   | 842.747   |
| AK024422  | 703.054   | 411.3     | NM_004542 | 848.088   | 766.379   | NM_013328 | 3009.469  | 3106.89   |
| NM_002673 | 1729.375  | 1156.943  | X06182    | 1834.047  | 1936.058  | Y12022    | 1016.23   | 1681.567  |
| NM_003878 | 5627.046  | 5406.847  | BE908993  | 2229.274  | 1590.401  | AK001375  | 949.718   | 1036.548  |
| NM_012295 | 7935.809  | 4485.547  | AB012701  | 2120.378  | 2251.815  | AL137559  | 1460.78   | 1199.055  |
| NM_015910 | 1044.757  | 584.176   | M61156    | 3500.767  | 3279.667  | AF026944  | 2311.288  | 1774.073  |
| AL133666  | 2160.656  | 1421.053  | R44005    | 2412.346  | 2755.699  | AK021493  | 1896.765  | 1679.41   |
| NM_000663 | 3576.488  | 2584.417  | AI942392  | 2515.419  | 2920.513  | NM_006161 | 3579.282  | 2785.938  |
| NM_004710 | 5642.145  | 3602.684  | M55040    | 531.108   | 454.149   | NM_006192 | 300.216   | 383.715   |
| NM_004398 | 20273.748 | 17407.875 | AW009739  | 651.053   | 664.526   | NM_012155 | 895.536   | 625.605   |
| NM_017998 | 5502.025  | 12042.079 | BC036805  | 6623.458  | 6430.326  | AF144700  | 1041.607  | 635.288   |
| NM_015988 | 41044.688 | 43088.672 | Z74615    | 39763.93  | 44924.867 | NM_004105 | 5433.913  | 3779.799  |
| NM_001043 | 3383.163  | 4648.329  | X03884    | 42718.563 | 42273.461 | AB046825  | 1225.906  | 856.079   |
| NM_004778 | 11003.375 | 13170.554 | U36759    | 494.015   | 665.577   | X64975    | 846.954   | 815.38    |
| NM_019071 | 5022.275  | 5024.666  | X91625    | 4870.337  | 4966.599  | AF071509  | 33.617    | 855.216   |
| NM_014398 | 5963.761  | 6844.799  | AF090901  | 495.067   | 560.017   | AL050297  | 4022.065  | 3720.72   |
| AF113685  | 769.611   | 1071.32   | AF004231  | 1169.087  | 1479.058  | AF147398  | 299.081   | 272.653   |
| NM_005470 | 4933.14   | 5992.635  | AF001862  | 13608.047 | 14574.712 | AF185573  | 328.785   | 243.962   |
| NM_004225 | 11749.361 | 22608.643 | NM_003890 | 5727.756  | 6662.319  | AJ009817  | 3002.83   | 10832.152 |
| NM_003862 | 1206.151  | 1883.873  | BF127978  | 3558.469  | 3568.837  | NM_015508 | 2614.223  | 3060.454  |
| NM_002873 | 3867.02   | 3810.027  | AF110801  | 1249.454  | 1262.137  | AL110157  | 2213.344  | 1995.087  |
| NM_015571 | 4724.977  | 4682.981  | NM_016579 | 20659.568 | 20065.594 | NM_002318 | 4221.923  | 5114.209  |
| NM_004701 | 11976.29  | 12057.819 | AB018297  | 1339.808  | 1036.814  | L38712    | 3920.756  | 2239.873  |
| AK025554  | 2325.798  | 1812.859  | AK022565  | 6428.781  | 5772.951  | U84508    | 716.102   | 334.657   |
| BI824151  | 9901.549  | 8645.348  | AK023151  | 2211.506  | 2021.393  | NM_017793 | 3841.782  | 2484.169  |

|           |           |           |           |           |           |           |           |           |
|-----------|-----------|-----------|-----------|-----------|-----------|-----------|-----------|-----------|
| AK021791  | 8449.422  | 7211.22   | AB033076  | 1237.331  | 1189.689  | NM_012131 | 1899.557  | 1215.641  |
| NM_004052 | 23673.893 | 16750.711 | AK022876  | 2270.408  | 1915.46   | S41540    | 571.102   | 635.857   |
| NM_004394 | 10095.239 | 6663.439  | AF134894  | 1122.909  | 898.506   | CY3Cy5    | 925.919   | 162.022   |
| NM_005727 | 40555.82  | 19608.229 | NM_003938 | 5391.16   | 5283.461  | BI906766  | 301.536   | 447.69    |
| AK027242  | 2485.65   | 1617.646  | NM_014827 | 18134.613 | 17078.434 | U60519    | 600.176   | 807.973   |
| NM_001279 | 20459.254 | 12609.89  | U87460    | 8653.355  | 8537.283  | AA282906  | 545.237   | 701.942   |
| NM_005010 | 1640.316  | 1404.153  | NM_003617 | 659.318   | 668.951   | L02870    | 910.334   | 1380.673  |
| NM_019055 | 3543.828  | 8256.243  | NM_001841 | 1051.192  | 1041.475  | BG755482  | 1602.647  | 2568.856  |
| NM_020199 | 2622.464  | 2984.872  | NM_002054 | 3570.369  | 3681.01   | AI480307  | 603.794   | 889.406   |
| U96136    | 957.06    | 824.271   | AF300649  | 3119.36   | 3273.988  | X51757    | 1887.398  | 2913.164  |
| NM_005941 | 411.872   | 699.708   | NM_004125 | 1324.627  | 1349.185  | L24038    | 630.109   | 888.374   |
| NM_015884 | 512.95    | 608.899   | NM_000823 | 3567.882  | 4059.983  | NM_006186 | 294.543   | 489.87    |
| AF201380  | 3020.652  | 5082.603  | NM_004414 | 3755.59   | 3694      | NM_002751 | 954.264   | 950.532   |
| NM_012392 | 9955.257  | 11630.105 | NM_003317 | 8848.825  | 10107.181 | M55593    | 739.149   | 827.243   |
| NM_014833 | 15762.798 | 16242.239 | NM_001139 | 2748.686  | 3127.605  | NM_078467 | 2302.425  | 1727.103  |
| NM_000045 | 858.311   | 1699.531  | NM_004609 | 52412.758 | 50373.262 | SR2       | 42260.285 | 31536.432 |
| NM_003878 | 11357.201 | 10651.865 | NM_003772 | 1849.281  | 2499.906  | SR4       | 8139.194  | 5885.239  |
| NM_004832 | 793.447   | 715.392   | NM_001541 | 5014.58   | 6646.323  | SR6       | 1311      | 1050.843  |
| NM_005957 | 1179.099  | 1124.221  | NM_004823 | 2916.74   | 3132.652  | SR8       | 4461.887  | 11647.042 |
| AK024374  | 1765.075  | 1626.54   | Y17179    | 53414.133 | 55919.078 | SR10      | 15719.569 | 3746.09   |
| NM_007101 | 1387.716  | 942.764   | NM_000891 | 944.364   | 694.609   | CY3Cy5    | 795.878   | 174.002   |
| NM_018234 | 882.858   | 379.844   | AF239613  | 1179.497  | 1107.667  | NM_016848 | 2256.853  | 2728.027  |
| AB033062  | 1960.859  | 1208.906  | AK026840  | 2915.933  | 2666.023  | NM_000514 | 836.303   | 970.879   |
| NM_016437 | 39412.301 | 20510.883 | NM_000288 | 1980.207  | 1757.243  | AL137432  | 1354.331  | 1955.935  |
| NM_002720 | 12989.052 | 7470.97   | AK026317  | 11220.879 | 11593.999 | NM_000957 | 1029.849  | 854.754   |
| AK024716  | 12679.883 | 6702.576  | X82207    | 40962.07  | 41861.027 | NM_019043 | 2694.627  | 3344.026  |
| X67155    | 2441.818  | 1323.487  | NM_015044 | 1499.223  | 1438.14   | NM_003240 | 1019.635  | 1297.845  |
| NM_020380 | 8265.026  | 5510.686  | NM_002867 | 677.712   | 806.876   | NM_016564 | 3261.296  | 3844.399  |
| AL137519  | 602.973   | 565.421   | BF217496  | 11060.951 | 9602.944  | AK021660  | 106.438   | 65.572    |
| NM_001330 | 38626.168 | 48920.23  | NM_004762 | 12727.362 | 11980.778 | AB007933  | 5434.125  | 5765.946  |
| NM_015927 | 1102.656  | 781.425   | NM_006641 | 55007.188 | 54471.305 | NM_006702 | 791.158   | 902.425   |
| NM_005122 | 1026.921  | 1065.862  | NM_000634 | 9048.508  | 8738.137  | NM_001396 | 504.731   | 391.992   |
| NM_001913 | 3333.6    | 5096.377  | NM_014679 | 34526.031 | 34123.082 | NM_014474 | 291.353   | 420.222   |
| AK025594  | 1022.49   | 1765.413  | AB040969  | 2181.567  | 2479.128  | NM_016249 | 683.576   | 680.614   |
| AB040931  | 5369.919  | 7225.552  | NM_003467 | 15531.116 | 16081.641 | NM_006181 | 492.711   | 689.979   |
| NM_003599 | 1168.887  | 1825.03   | NM_014936 | 2387.543  | 2127.824  | NM_003796 | 7958.916  | 9076.559  |
| NM_015911 | 1324.324  | 1295.708  | NM_003943 | 2218.285  | 2461.177  | NM_002973 | 1523.371  | 2333.971  |
| BC011826  | 8077.719  | 8503.254  | NM_019052 | 10407.293 | 11583.185 | NM_004436 | 11455.034 | 13930.197 |
| NM_017647 | 7430.404  | 6881.495  | NM_003202 | 17137.625 | 18968.158 | NM_006580 | 1509.863  | 1425.629  |
| NM_012091 | 2258.87   | 2288.514  | AF119902  | 767.538   | 1196.855  | NM_001305 | 483.214   | 506.836   |
| NM_012321 | 4511.666  | 3271.497  | NM_020525 | 11004.355 | 11656.855 | NM_005082 | 260.992   | 209.891   |
| D13642    | 2576.897  | 2878.915  | X62468    | 575.918   | 519.385   | D17028    | 11083.576 | 9421.661  |
| NM_004741 | 10625.846 | 6349.874  | NM_015148 | 1765.438  | 1685.794  | NM_013442 | 13279.258 | 12556.858 |
| NM_018032 | 7265.358  | 3782.989  | NM_004714 | 2164.587  | 2334.393  | BG611243  | 1050.62   | 1222.989  |
| NM_003675 | 11008.557 | 4321.371  | NM_005401 | 570.022   | 464.352   | AK023221  | 2471.621  | 3168.393  |
| NM_017518 | 2563.296  | 1394.493  | NM_002497 | 22270.543 | 11449.523 | NM_003664 | 1379.719  | 1593.652  |
| NM_004117 | 3262.02   | 1811.281  | AB025194  | 10755.669 | 9589.4    | NM_002426 | 759.313   | 694.121   |
| NM_016594 | 6179.323  | 3198.702  | NM_006239 | 1946.451  | 1840.882  | AK027182  | 394.538   | 637.311   |
| NM_030752 | 6418.09   | 3509.931  | BC020863  | 514.096   | 540.106   | J03651    | 1304.017  | 2077.783  |
| D26068    | 26177.291 | 18634.627 | NM_017897 | 3845.444  | 4216.758  | U61738    | 1011.468  | 1350.237  |
| NM_017593 | 4190.938  | 5218.379  | NM_004265 | 29044.482 | 27193.289 | NM_000442 | 575.801   | 971.983   |
| NM_004282 | 16087.011 | 20241.934 | NM_002572 | 6587.53   | 5710.71   | AK023011  | 2658.542  | 2945.46   |
| AK025695  | 3375.464  | 4269.123  | NM_001441 | 2412.392  | 2099.332  | NM_016816 | 370.764   | 708.987   |

|           |           |           |           |           |           |           |           |           |
|-----------|-----------|-----------|-----------|-----------|-----------|-----------|-----------|-----------|
| AK025442  | 8236.896  | 16765.641 | NM_018324 | 1900.684  | 1695.851  | NM_017716 | 491.181   | 656.246   |
| AL050041  | 991.292   | 2232.628  | AF064255  | 43445.855 | 40374.926 | M58603    | 6145.964  | 7927.881  |
| NM_002451 | 2467.376  | 4646.987  | NM_016368 | 55966.559 | 51409.813 | NM_003636 | 1378.113  | 1710.735  |
| NM_013411 | 2030.956  | 4858.431  | U08853    | 3209.966  | 2873.123  | NM_001546 | 278.28    | 165.161   |
| NM_020200 | 595.265   | 740.663   | NM_004261 | 35042.023 | 27836.404 | NM_000115 | 1856.651  | 2777.807  |
| NM_001248 | 272.093   | 794.111   | NM_016006 | 1969.661  | 1961.307  | AF308801  | 1325.063  | 2669.374  |
| NM_000180 | 9231.014  | 8138.552  | NM_016245 | 7246.677  | 7422.643  | NM_007318 | 38076.723 | 38971.652 |
| NM_000858 | 9360.802  | 8258.78   | AF005632  | 4477.209  | 5543.317  | NM_014874 | 253.264   | 272.742   |
| AF254087  | 2167.992  | 1941.496  | NM_000903 | 2876.294  | 2931.855  | NM_005765 | 6466.789  | 6789.799  |
| NM_017715 | 1600.316  | 1086.129  | NM_004493 | 19209.43  | 18259.273 | NM_002762 | 290.33    | 383.312   |
| AL117607  | 2918.668  | 1561.07   | NM_004047 | 22635.893 | 22658.986 | NM_006324 | 6155.498  | 5783.027  |
| AB037774  | 2840.416  | 1769.277  | NM_006773 | 1716.656  | 1542.362  | NM_005466 | 4912.259  | 5497.418  |
| NM_005438 | 1207.023  | 111.989   | AK024439  | 8365.509  | 7885.3    | NM_016361 | 1508.164  | 1795.283  |
| AK024361  | 1887.065  | 953.711   | X89676    | 1288.638  | 1591.566  | NM_003708 | 21999.611 | 19831.248 |
| NM_004350 | 1698.181  | 972.387   | NM_012444 | 671.519   | 414.537   | NM_014346 | 2334.917  | 3283.317  |
| NM_018044 | 4868.316  | 2265.594  | Z32684    | 2091.685  | 2059.602  | AB040895  | 403.839   | 1655.014  |
| NM_004503 | 773.048   | 227.728   | NM_016512 | 1829.566  | 1682.452  | NM_004820 | 3006.294  | 9363.275  |
| AF274347  | 4976.101  | 8491.627  | NM_017488 | 5506.659  | 4693.667  | NM_018210 | 1327.747  | 4328.505  |
| NM_018558 | 3496.947  | 2597.691  | AY009400  | 754.83    | 821.216   | NM_001096 | 394.818   | 1068.09   |
| AK023525  | 4588.831  | 4491.803  | NM_005069 | 1029.991  | 936.833   | NM_016014 | 1256.674  | 1616.241  |
| AF085829  | 2214.903  | 2326.425  | NM_016044 | 2431.27   | 2486.81   | NM_000198 | 2801.807  | 8157.132  |
| AF075029  | 851.676   | 953.386   | NM_000520 | 3141.24   | 2729.662  | NM_018327 | 223.618   | 197.56    |
| AK021903  | 5131.959  | 5645.725  | NM_000289 | 1753.004  | 1409.13   | NM_017581 | 940.558   | 1016.661  |
| AL390143  | 5627.001  | 6856.333  | NM_001500 | 4371.299  | 3979.156  | AA488804  | 4739.295  | 6385.969  |
| AL162075  | 1480.774  | 1759.269  | NM_004388 | 3892.606  | 3990.867  | NM_006536 | 351.611   | 485.761   |
| AF147384  | 880.417   | 791.651   | NM_020379 | 828.234   | 1259.684  | NM_001684 | 1240.839  | 1345.221  |
| AK021595  | 1204.396  | 1570.091  | AL110127  | 2321.133  | 2115.338  | NM_000808 | 249.23    | 303.913   |
| AK021648  | 1070.198  | 1361.238  | AK001997  | 520.258   | 392.484   | NM_016318 | 2904.498  | 2468.555  |
| AF147358  | 14653.25  | 13300.37  | NM_002528 | 3361.944  | 4070.181  | NM_019891 | 374.01    | 336.432   |
| NM_018410 | 5208.337  | 5261.79   | D38438    | 5568.336  | 5375.311  | AF038186  | 1361.02   | 1485.309  |
| AF086355  | 819.547   | 382.857   | AV714945  | 1113.62   | 1097.38   | NM_016277 | 1976.356  | 1682.499  |
| AF086314  | 1271.487  | 443.555   | AF007872  | 3470.507  | 4069.904  | NM_007247 | 1968.804  | 1729.849  |
| NM_016364 | 1380.901  | 436.181   | M30938    | 10061.864 | 8443.359  | NM_006554 | 2719.993  | 2429.29   |
| AF086419  | 3089.828  | 1483.324  | NM_017586 | 12595.869 | 9058.757  | X99962    | 5125.711  | 5152.383  |
| AF086461  | 1487.428  | 574.254   | NM_004148 | 5037.042  | 4944.204  | AL050114  | 285.553   | 512.686   |
| AK000789  | 722.665   | 343.952   | X03168    | 1833.692  | 1626.578  | AK021492  | 1308.996  | 1486.576  |
| AF131795  | 1128.856  | 1837.227  | NM_005168 | 2483.563  | 1982.258  | AK023794  | 4811.43   | 6836.429  |
| AL833296  | 2693.587  | 3790.613  | NM_017801 | 10808.048 | 9453.094  | NM_019885 | 1349.371  | 2097.704  |
| AL110240  | 5675.147  | 9447.48   | NM_007348 | 4610.129  | 3822.856  | AB033103  | 661.12    | 1559.849  |
| NM_015372 | 1107.144  | 1293.986  | NM_016953 | 780.264   | 734.584   | AK022371  | 730.581   | 972.567   |
| AF085919  | 462.987   | 582.448   | U65473    | 11535.285 | 10478.914 | D42045    | 652.953   | 764.984   |
| AF085933  | 936.799   | 951.322   | D63481    | 26502.197 | 23201.805 | AB007953  | 365.312   | 681.894   |
| AF147431  | 838.42    | 1045.616  | AY009951  | 17086.555 | 13759.121 | NM_014002 | 2334.556  | 3239.41   |
| AK026422  | 11506.452 | 11580.401 | AL157424  | 1406.41   | 1164.184  | NM_004197 | 2539.934  | 2134.242  |
| AF085938  | 1196.701  | 1837.48   | AK024422  | 596.559   | 710.351   | NM_004073 | 916.313   | 1060.829  |
| AK022264  | 1152.716  | 1132.547  | NM_002673 | 1020.643  | 1066.371  | NM_001278 | 2626.769  | 2942.423  |
| AL137331  | 1154.333  | 1151.233  | NM_003876 | 4343.539  | 3572.434  | NM_019105 | 914.853   | 1390.233  |
| AL162040  | 3828.175  | 2953.311  | AJ276310  | 733.59    | 631.646   | NM_000294 | 2532.86   | 3536.551  |
| AL442084  | 265.981   | 821.883   | NM_012295 | 7551.472  | 7687.692  | AJ272212  | 443.191   | 460.549   |
| AL137371  | 8425.441  | 7337.394  | NM_015910 | 1222.754  | 891.19    | NM_001626 | 7278.91   | 7687.135  |
| AL137596  | 3201.605  | 2871.083  | AL133666  | 2623.5    | 2711.856  | NM_005677 | 704.839   | 805.833   |
| AL353942  | 14567.188 | 11825.864 | NM_000663 | 2727.344  | 2340.666  | AF229803  | 193.841   | 184.93    |
| Z38010    | 12115.16  | 7393.462  | NM_004710 | 4643.063  | 4398.493  | AF151810  | 963.559   | 724.887   |

|           |           |           |           |           |           |           |           |           |
|-----------|-----------|-----------|-----------|-----------|-----------|-----------|-----------|-----------|
| AF086114  | 910.084   | 190.669   | NM_004396 | 15626.175 | 16294.241 | NM_002130 | 21026.402 | 19845.811 |
| AK024204  | 1331.274  | 478.046   | NM_017999 | 3564.815  | 3412.084  | NM_001305 | 585.606   | 531.232   |
| AK023737  | 2134.532  | 1393.587  | NM_015989 | 52466.559 | 47642.059 | NM_005082 | 505.649   | 554.086   |
| NM_006609 | 3899.587  | 5281.448  | NM_001043 | 2537.302  | 2243.182  | D17028    | 15452.925 | 16909.994 |
| NM_014118 | 559.472   | 1053.956  | NM_004779 | 9823.731  | 10006.304 | NM_013442 | 15504.487 | 19943.631 |
| AL390159  | 629.98    | 544.532   | NM_019071 | 4267.61   | 3994.083  | BG611243  | 1007.245  | 1440.757  |
| NM_014157 | 1337.2    | 1723.884  | NM_014399 | 4710.828  | 4353.746  | L02870    | 1088.197  | 1784.352  |
| AF090933  | 821.449   | 763.789   | AF113685  | 1188.122  | 868.16    | BG755482  | 961.022   | 1322.82   |
| AF111851  | 6373.683  | 6123.703  | NM_005470 | 4582.911  | 3545.811  | AI480307  | 1121.673  | 1274.419  |
| AL360200  | 832.978   | 1178.038  | AF142570  | 619.025   | 612.934   | X51757    | 1657.174  | 2091.049  |
| AK021992  | 695.683   | 797.9     | NM_004225 | 9592.224  | 9132.765  | L24038    | 848.994   | 1153.957  |
| AK022378  | 2584.757  | 2393.021  | NM_003862 | 1375.246  | 1190.207  | NM_053056 | 309.438   | 353.384   |
| AL110173  | 1383.269  | 631.374   | NM_002873 | 3842.315  | 4302.65   | NM_006186 | 317.537   | 245.363   |
| AK025833  | 1830.08   | 678.472   | NM_015571 | 5267.901  | 5135.732  | NM_002751 | 157.74    | 169.232   |
| AK027254  | 1276.29   | 703.775   | NM_004701 | 9675.295  | 8182.309  | M55593    | 211.564   | 317.912   |
| NM_017597 | 1229.768  | 1757.367  | AK025554  | 1548.129  | 1296.74   | AK001883  | 8594.391  | 5994.51   |
| AK021772  | 791.935   | 1502.079  | BI824151  | 7887.229  | 5777.886  | NM_014629 | 2437.964  | 2143.745  |
| AK026297  | 458.994   | 989.767   | AK021791  | 6655.082  | 5365.551  | NM_007318 | 36754.723 | 35554.309 |
| AK054831  | 38075.461 | 32406.432 | NM_004052 | 19325.861 | 17549.754 | NM_014874 | 732.261   | 940.626   |
| AK021770  | 1155.359  | 1201.194  | NM_004394 | 8184.077  | 7524.888  | NM_005765 | 12231.462 | 15406.011 |
| AK027248  | 1844.121  | 1774.168  | NM_005727 | 43756.914 | 43378.078 | NM_002762 | 338.502   | 316.132   |
| AK022804  | 13205.207 | 14852.493 | AK027242  | 2358.009  | 2258.625  | NM_006324 | 3883.769  | 5612.701  |
| AF009263  | 2991.188  | 3020.201  | NM_001279 | 15477.86  | 21603.707 | NM_016848 | 1444.375  | 2623.615  |
| AF009283  | 824.099   | 894.727   | NM_005010 | 1886      | 1942.509  | NM_000514 | 6835.595  | 20772.182 |
| AF086329  | 4815.719  | 3870.371  | NM_019055 | 2545.162  | 2838.579  | AL137432  | 110.731   | 6817.913  |
| AK025799  | 1153.451  | 340.442   | NM_020199 | 1607.079  | 1811.442  | NM_019043 | 841.193   | 1221.908  |
| AL110206  | 1692.068  | 592.787   | U96136    | 897.189   | 607.866   | NM_003240 | 525.001   | 377.651   |
| NM_004821 | 2313.776  | 2910.723  | NM_005941 | 516.635   | 490.79    | NM_016564 | 7668.894  | 6116.462  |
| AK024292  | 1267.571  | 1663.836  | AF201380  | 2983.395  | 2743.084  | AF279656  | 230.925   | 366.897   |
| AK026263  | 1352.876  | 1531.291  | NM_012392 | 9747.555  | 7993.407  | AB007933  | 7074.014  | 6322.802  |
| U50526    | 780.514   | 939.663   | NM_014833 | 16605.607 | 17806.994 | NM_006702 | 1831.877  | 1616.314  |
| S75105    | 5066.681  | 4787.173  | NM_000045 | 1564.634  | 1435.301  | NM_001396 | 801.348   | 1064.338  |
| AF056455  | 13097.063 | 11471.599 | NM_003878 | 9799.188  | 8150.716  | NM_003796 | 7731.159  | 8798.183  |
| NM_018510 | 1574.175  | 1493.968  | NM_004832 | 839.837   | 778.251   | NM_002973 | 1100.312  | 1379.054  |
| AK024988  | 1065.659  | 870.62    | NM_005957 | 1094.713  | 790.643   | NM_004436 | 10312.631 | 9534.685  |
| AK025719  | 484.893   | 811.448   | AK024374  | 1580.922  | 1291.361  | NM_006580 | 1476.712  | 996.281   |
| AF026943  | 1712.151  | 2129.43   | NM_007101 | 994.22    | 1044.179  | NM_019891 | 650.913   | 530.64    |
| L77582    | 987.371   | 849.51    | AB033062  | 1747.974  | 1438.009  | AF038186  | 1989.379  | 2651.31   |
| NM_020448 | 1758.797  | 1473.678  | NM_016437 | 46719.324 | 35408.289 | NM_016277 | 2834.81   | 3821.096  |
| NM_005419 | 1735.702  | 1506.512  | NM_002720 | 6332.028  | 6044.654  | NM_007247 | 2354.192  | 3006.901  |
| NM_003479 | 31746.613 | 23130.541 | AK024716  | 9805.542  | 10016.273 | NM_006554 | 2110.133  | 2379.076  |
| NM_020224 | 5287.104  | 2269.979  | X67155    | 1653.303  | 1397.361  | X99962    | 3974.081  | 6340.855  |
| U17617    | 2202.646  | 983.005   | NM_020380 | 6340.678  | 5500.473  | AK023221  | 1331.349  | 1852.439  |
| AK022952  | 7701.462  | 4320.985  | NM_002890 | 23401.648 | 25962.934 | NM_003664 | 1154.121  | 1741.385  |
| BF218888  | 1617.269  | 2341.016  | NM_001330 | 51419.73  | 55823.652 | NM_002426 | 4169.299  | 15033.206 |
| AF086401  | 3610.606  | 3328.477  | NM_015927 | 1357.277  | 1303.974  | AK027182  | 9547.155  | 12936.026 |
| L23869    | 1408.043  | 1276.767  | NM_005122 | 801.454   | 896.547   | J03651    | 503.862   | 718.593   |
| Z21853    | 2589.865  | 2375.011  | NM_014552 | 4901.394  | 4778.76   | U61738    | 623.047   | 562.604   |
| AB075846  | 660.883   | 639.795   | NM_003072 | 9317.388  | 7756.979  | AJ132087  | 155.94    | 173.637   |
| BC020260  | 1684.438  | 2823.878  | NM_001913 | 2711.14   | 2101.018  | NM_000442 | 1127.251  | 982.582   |
| D17156    | 6227.148  | 7736.199  | AK025594  | 909.696   | 763.09    | NM_002934 | 775.271   | 538.238   |
| L04461    | 712.885   | 784.211   | AB040931  | 4981.904  | 4340.214  | AK023011  | 4795.363  | 3586.833  |
| AK026938  | 15268.617 | 13542.925 | NM_003599 | 1236.774  | 926.887   | NM_016816 | 764.168   | 811.933   |

|           |           |           |           |           |           |           |           |           |
|-----------|-----------|-----------|-----------|-----------|-----------|-----------|-----------|-----------|
| AK024373  | 7974.607  | 6164.307  | NM_015911 | 1307.289  | 1309.769  | L17325    | 557.267   | 836.029   |
| AK022343  | 5446.887  | 4762.824  | BC011826  | 6609.292  | 5639.724  | NM_017716 | 588.519   | 1175.575  |
| AK026400  | 1467.773  | 784.823   | NM_017647 | 8667.161  | 6865.815  | M58603    | 5155.06   | 7412.807  |
| U92989    | 11023.802 | 7702.507  | NM_012091 | 2049.309  | 1793.505  | NM_003636 | 1186.587  | 1435.885  |
| AF075102  | 1722.969  | 1315.709  | NM_012321 | 4354.334  | 2920.489  | NM_000115 | 1592.281  | 1499.268  |
| NM_018463 | 8765.178  | 4714.081  | D13642    | 3159.339  | 2044.221  | AF308801  | 2309.666  | 1898.402  |
| X74956    | 25455.09  | 11864.163 | NM_004741 | 7621.19   | 5104.707  | AJ272212  | 644.388   | 1126.597  |
| AF132197  | 5996.041  | 2522.072  | NM_018032 | 4190.375  | 3566.934  | NM_001626 | 9667.416  | 12033.289 |
| AK025546  | 1144.019  | 450.099   | NM_003675 | 8387.257  | 6330.398  | NM_005677 | 1018.599  | 1272.468  |
| AL137487  | 2039.024  | 1144.58   | NM_017518 | 1828.897  | 1232.298  | AF151810  | 834.258   | 1114.235  |
| AK023800  | 1104.795  | 1659.706  | NM_004117 | 2473.384  | 2094.291  | NM_002130 | 16690.621 | 19810.053 |
| AK024120  | 1216.642  | 2319.191  | NM_016594 | 5053.267  | 3690.85   | NM_005466 | 4232.478  | 5630.423  |
| CY3Cy5    | 5190.924  | 415.352   | NM_030752 | 5062.464  | 3686.476  | NM_016361 | 1076.291  | 1700.106  |
| W96179    | 1906.526  | 1985.486  | D26068    | 23060.332 | 19126.633 | NM_003708 | 10963.08  | 9673.759  |
| AW247841  | 4539.114  | 4321.84   | NM_018559 | 20142.121 | 17713.609 | NM_014346 | 374.632   | 786.236   |
| BG568198  | 549.882   | 186.705   | NM_017593 | 3789.628  | 2758.887  | AB040895  | 534.289   | 1263.658  |
| M76559    | 3245.577  | 3336.209  | NM_004282 | 12308.264 | 10332.289 | NM_018210 | 807.025   | 669.163   |
| AI222585  | 547.802   | 461.917   | AK025695  | 3330.76   | 2978.532  | NM_001096 | 1806.386  | 2709.211  |
| AA411678  | 7784.31   | 8790.532  | AK025442  | 5981.965  | 6838.146  | NM_016014 | 3431.203  | 3584.112  |
| AA862813  | 14603.059 | 13874.884 | AL050041  | 1012.102  | 964.956   | NM_000198 | 133.353   | 184.954   |
| AA398427  | 1340.006  | 1326.936  | NM_002451 | 2250.94   | 1563.03   | NM_018327 | 215.606   | 200.668   |
| T55728    | 2908.886  | 3019.677  | NM_013411 | 1010.984  | 934.14    | AA488804  | 4394.129  | 3720.892  |
| H20856    | 741.166   | 1021.729  | NM_020200 | 613.432   | 524.896   | NM_001684 | 817.842   | 567.109   |
| N62586    | 2224.061  | 2717.797  | NM_000156 | 539.552   | 432.219   | AB028977  | 123.498   | 147.057   |
| SR9       | 11961.214 | 1897.988  | NM_000180 | 13283.316 | 13172.327 | NM_016318 | 3290.608  | 2869.545  |
| CY3Cy5    | 5306.791  | 365.531   | NM_000858 | 8155.196  | 6572.892  | NM_013306 | 398.196   | 335.149   |
| NM_016382 | 746.469   | 692.417   | AF254087  | 1632.776  | 1386.247  | NM_078467 | 1897.135  | 1850.372  |
| AK023117  | 2340.461  | 2528.106  | NM_017715 | 1349.063  | 1195.066  | AK001883  | 8966.573  | 9364.032  |
| AL122046  | 472.897   | 376.874   | AL117607  | 1949.878  | 1632.939  | NM_014626 | 2645.78   | 2955.455  |
| NM_000855 | 3108.184  | 2688.22   | AB037774  | 2056.263  | 1514.31   | AK023794  | 1691.413  | 2136.514  |
| NM_005536 | 6349.728  | 5573.436  | NM_005438 | 714.883   | 531.011   | NM_019885 | 233.128   | 159.664   |
| NM_005077 | 1795.776  | 1690.15   | AK024361  | 1636.255  | 1593.751  | AB033103  | 567.907   | 834.756   |
| NM_004423 | 6598.586  | 5088.837  | NM_004350 | 1650.712  | 1497.95   | NM_002907 | 360.488   | 505.825   |
| NM_001990 | 549.006   | 760.299   | NM_018044 | 2855.244  | 2802.439  | AK024098  | 245.94    | 247.792   |
| NM_002141 | 770.348   | 914.316   | NM_001717 | 385.252   | 488.876   | AK022371  | 2042.269  | 1698.971  |
| NM_003311 | 1409.055  | 1410.942  | AF274347  | 5322.331  | 5451.424  | D42045    | 1223.077  | 905.835   |
| NM_003776 | 2443.71   | 3103.451  | NM_018555 | 5452.678  | 4817.391  | AB007953  | 1013.865  | 951.772   |
| NM_015719 | 357.908   | 1021.537  | AK023525  | 4002.615  | 3645.448  | NM_014002 | 2383.805  | 1568.209  |
| NM_006129 | 875.569   | 1855.329  | AF085829  | 2255.768  | 2351.304  | NM_004197 | 2249.105  | 1238.402  |
| AF204171  | 751.13    | 929.992   | AF075029  | 571.159   | 733.877   | NM_004073 | 624.357   | 415.356   |
| AF100756  | 4676.881  | 4203.062  | AK021903  | 6087.477  | 5231.87   | NM_001278 | 1765.692  | 1240.843  |
| NM_006825 | 4235.705  | 3957.073  | AL390143  | 3733.017  | 4456.103  | NM_019105 | 970.172   | 975.582   |
| NM_004862 | 519.648   | 466.239   | AL162075  | 964.443   | 1244.586  | NM_000294 | 2505.969  | 2076.384  |
| NM_001661 | 711.692   | 713.572   | AF147384  | 1267.604  | 1202.748  | NM_016246 | 1193.619  | 3003.448  |
| NM_014563 | 915.042   | 810.262   | AK021595  | 1081.762  | 1110.492  | NM_006181 | 721.308   | 1606.522  |
| NM_020150 | 3364.125  | 3384.972  | AK021648  | 949.343   | 1025.16   | NM_003796 | 9199.861  | 9686.152  |
| NM_007150 | 2293.445  | 2082.49   | AF147358  | 12084.089 | 13157.983 | NM_002973 | 1474.839  | 1994.201  |
| NM_006831 | 1444.852  | 1176.126  | NM_018410 | 4755.976  | 3496.862  | NM_004436 | 10948.353 | 11478.045 |
| AL162044  | 2689.246  | 2555.426  | AF147404  | 387.978   | 411.668   | NM_006580 | 1604.95   | 1540.716  |
| AK024004  | 882.192   | 1107.051  | AF086355  | 487.27    | 433.984   | NM_001305 | 593.102   | 702.323   |
| AK022365  | 336.597   | 190.206   | AF086403  | 767.358   | 257.233   | NM_005082 | 200.263   | 316.265   |
| AF026929  | 231.442   | 526.311   | AF086314  | 784.167   | 952.852   | D17028    | 8514.26   | 8127.632  |
| AF035803  | 471.615   | 403.975   | NM_016364 | 716.575   | 1026.554  | NM_013442 | 2391.871  | 2910.199  |

|           |           |           |           |           |           |           |           |           |
|-----------|-----------|-----------|-----------|-----------|-----------|-----------|-----------|-----------|
| Y08147    | 2284.836  | 2421.319  | AF086419  | 4389.149  | 4067.921  | BG611243  | 414.731   | 485.052   |
| D00174    | 5070.203  | 4968.995  | AF086461  | 902.76    | 872.239   | U60519    | 182.726   | 233.998   |
| AB000520  | 786.321   | 935.691   | AF131795  | 576.957   | 559.633   | L02870    | 366.132   | 281.697   |
| NM_006907 | 519.077   | 413.849   | AL833296  | 3409.871  | 2820.398  | BG755482  | 886.532   | 825.88    |
| NM_002686 | 407.874   | 430.109   | AL110240  | 4978.345  | 3785.657  | AI480307  | 1173.099  | 811.286   |
| NM_006267 | 1047.033  | 969.239   | AF075081  | 475.467   | 579.903   | X51420    | 204.17    | 210.622   |
| NM_002661 | 6152.639  | 5631.913  | NM_015372 | 925.617   | 918.038   | X51757    | 1843.498  | 1900.071  |
| AK023982  | 697.561   | 634.887   | AF085933  | 752.798   | 843.325   | L24038    | 526.962   | 486.643   |
| NM_018466 | 1054.412  | 820.719   | AF147431  | 988.299   | 440.113   | NM_053056 | 216.255   | 115.175   |
| Y11312    | 1073.788  | 869.347   | AK026422  | 8816.149  | 8939.374  | NM_002751 | 562.934   | 464.955   |
| AB014533  | 6880.247  | 5696.099  | AF085938  | 1043.45   | 957.775   | M55593    | 554.573   | 392.507   |
| M11427    | 486.14    | 492.336   | AK022264  | 997.711   | 1023.108  | NM_017716 | 649.796   | 938.448   |
| NM_000744 | 691.755   | 685.252   | AL137331  | 1010.534  | 1152.299  | M58603    | 6199.018  | 7679.326  |
| NM_020372 | 3647.46   | 3676.769  | AL162040  | 3533.2    | 3244.092  | NM_003636 | 3088.397  | 2262.448  |
| NM_002635 | 37875.914 | 23442.35  | AL442084  | 888.374   | 756.065   | NM_000115 | 1958.097  | 2486.016  |
| NM_016077 | 1786.163  | 1303.08   | AL137371  | 7814.273  | 6242.124  | AF308801  | 2049.969  | 2308.425  |
| NM_015537 | 2611.143  | 2754.122  | AL137596  | 3226.292  | 2393.726  | NM_007318 | 34596.195 | 33226.363 |
| NM_016520 | 18635.91  | 14422.271 | AL353942  | 12860.514 | 9935.246  | NM_014874 | 536.988   | 687.589   |
| AB018353  | 2838.123  | 2627.131  | Z38010    | 14740.705 | 12898.102 | NM_005765 | 10451.662 | 11594.742 |
| NM_007036 | 3322.076  | 2473.342  | AF086114  | 539.615   | 635.005   | NM_002762 | 119.867   | 103.621   |
| NM_002617 | 2426.513  | 2213.333  | AK024204  | 737.139   | 664.996   | NM_006324 | 1282.978  | 1525.275  |
| AF090907  | 2729.07   | 2538.538  | AK023737  | 1608.785  | 1885.185  | NM_016846 | 921.14    | 899.629   |
| AK024476  | 4684.509  | 3671.997  | NM_006609 | 4001.452  | 3272.825  | NM_000514 | 497.208   | 200.943   |
| X74794    | 5808.189  | 5158.154  | AK023643  | 674.497   | 583.52    | AL137432  | 510.341   | 511.875   |
| AL050298  | 2366.018  | 2327.257  | AL390159  | 356.286   | 482.374   | NM_000957 | 518.864   | 474.121   |
| NM_007079 | 41950.297 | 35587.613 | NM_014157 | 982.873   | 1076.667  | NM_019043 | 1389.386  | 903.622   |
| M20696    | 3019.935  | 2761.802  | AF111851  | 5494.307  | 6236.551  | NM_003240 | 794.633   | 542.71    |
| NM_006736 | 2214.799  | 2514.717  | AL360200  | 687.527   | 803.793   | NM_016564 | 13009.654 | 7812.571  |
| NM_003640 | 1238.621  | 2060.655  | AK021992  | 605.995   | 576.9     | AF279656  | 520.863   | 522.625   |
| BF338709  | 365.372   | 476.871   | AK022102  | 568.663   | 384.501   | AB007933  | 5679.306  | 4198.99   |
| AF204171  | 378.347   | 395.14    | AK022235  | 750.614   | 425.687   | NM_006702 | 2510.742  | 1829.253  |
| W96179    | 1584.399  | 1570.766  | AK022378  | 2600.584  | 2260.991  | NM_001396 | 1303.128  | 849.949   |
| BG568198  | 655.862   | 361.818   | AK027174  | 499.19    | 547.952   | NM_014474 | 612.796   | 464.819   |
| M76559    | 3263.271  | 2998.846  | AL110173  | 1133.384  | 1102.849  | NM_006536 | 301.409   | 494.658   |
| AI222585  | 803.742   | 657.077   | AK024106  | 388.583   | 560.211   | NM_001684 | 1682.4    | 1499.921  |
| AA411678  | 8929.718  | 8553.508  | AK021772  | 1935.181  | 1888.333  | AB028977  | 399.073   | 621.06    |
| AA862813  | 20546.273 | 21004.045 | AK026297  | 755.942   | 532.396   | NM_016318 | 4362.253  | 3937.989  |
| AA398427  | 2230.346  | 2778.682  | AK054831  | 43774.598 | 39294.512 | NM_013306 | 451.424   | 562.477   |
| AF035803  | 192.023   | 358.513   | AK021770  | 1051.612  | 891.139   | NM_019891 | 337.827   | 347.91    |
| Y08147    | 2398.247  | 2288.12   | AK027248  | 1598.532  | 1459.454  | AF038186  | 1946.769  | 2149.66   |
| D00174    | 5036.7    | 4460.3    | AK022804  | 9482.739  | 8779.923  | NM_016277 | 1984.117  | 1824.588  |
| AB000520  | 552.94    | 495.831   | AF009263  | 3073.13   | 3540.211  | NM_007247 | 1539.875  | 1583.703  |
| NM_016382 | 876.542   | 639.165   | AF009283  | 572.181   | 574.385   | NM_006554 | 1619.408  | 1828.131  |
| AK023117  | 3196.678  | 2910.093  | AF086329  | 3662.678  | 4430.579  | X99962    | 656.647   | 898.599   |
| AL122046  | 1252.58   | 1204.35   | AK025799  | 797.137   | 897.949   | AK023221  | 475.177   | 621.181   |
| NM_000855 | 3778.42   | 2763.646  | AL110206  | 2369.836  | 2992.746  | NM_003664 | 294.814   | 235.15    |
| NM_005536 | 6799.61   | 5759.248  | NM_004821 | 1984.95   | 2127.454  | NM_002426 | 291.845   | 326.557   |
| NM_005077 | 2061.676  | 1799.742  | AK024292  | 1034.065  | 768.273   | J03651    | 827.326   | 837.312   |
| NM_004423 | 7902.669  | 5602.13   | AK026263  | 2032.755  | 1481.558  | U61738    | 909.993   | 707.624   |
| NM_001990 | 1118.363  | 1005.276  | U50526    | 625.332   | 587.356   | U92818    | 440.458   | 596.792   |
| NM_002141 | 1301.489  | 1218.692  | S75105    | 5833.785  | 5899.681  | NM_000442 | 1917.655  | 1146.524  |
| NM_003776 | 3987.316  | 12723.383 | AF056455  | 12486.575 | 13662.938 | NM_002934 | 853.995   | 548.998   |
| NM_007096 | 218.635   | 789.74    | NM_018510 | 1557.836  | 1422.824  | AK023011  | 3400.927  | 2150.281  |

|           |           |           |           |           |           |           |           |           |
|-----------|-----------|-----------|-----------|-----------|-----------|-----------|-----------|-----------|
| NM_000582 | 2092.759  | 1796.524  | AK024988  | 576.462   | 619.882   | NM_016816 | 678.945   | 712.928   |
| NM_005593 | 904.641   | 504.715   | AK025719  | 769.74    | 705.369   | L17325    | 535.067   | 371.398   |
| NM_004979 | 358.595   | 368.932   | AF026943  | 1204.005  | 1164.898  | NM_014002 | 2091.675  | 1973.54   |
| NM_016077 | 2439.644  | 2508.138  | L77582    | 601.088   | 697.006   | NM_004197 | 2456.457  | 2638.643  |
| AF100756  | 5448.428  | 4760.652  | NM_020448 | 1331.616  | 896.871   | NM_004073 | 702.305   | 714.708   |
| NM_006825 | 4139.923  | 3574.118  | NM_005419 | 1291.438  | 1353.458  | NM_001278 | 2126.915  | 2609.695  |
| NM_004862 | 431.892   | 387.183   | NM_003479 | 26126.939 | 18997.898 | NM_019105 | 1138.167  | 1520.107  |
| NM_001661 | 564.183   | 502.548   | AF075101  | 530.356   | 357.109   | NM_000294 | 2852.206  | 3611.647  |
| NM_014563 | 1051.575  | 816.353   | NM_020224 | 6253.886  | 6791.165  | AJ272212  | 912.732   | 1344.666  |
| NM_020150 | 3556.243  | 3128.516  | U17617    | 3172.683  | 3985.505  | NM_001626 | 9939.676  | 10191.816 |
| NM_007150 | 2390.485  | 1432.536  | AK022952  | 6245.775  | 5320.584  | NM_005677 | 955.506   | 933.916   |
| AK024004  | 1326.027  | 4437.859  | BF218888  | 889.975   | 696.949   | AF229803  | 164.926   | 181.108   |
| AK022365  | 392.244   | 1333.399  | AF086401  | 3109.862  | 2672.247  | AF151810  | 717.066   | 747.897   |
| NM_016734 | 3168.779  | 4506.424  | L23869    | 1265.718  | 1312.382  | NM_002130 | 10761.31  | 10785.172 |
| NM_014393 | 3030.928  | 3891.364  | Z21853    | 2451.327  | 2352.114  | NM_005465 | 411.425   | 589.399   |
| NM_004223 | 9827.447  | 10914.1   | U80770    | 1032.158  | 587.551   | NM_016361 | 264.835   | 293.573   |
| NM_001355 | 7726.375  | 6625.853  | AB075846  | 560.692   | 401.222   | NM_003708 | 16207.608 | 10651.242 |
| NM_001216 | 457.421   | 324.5     | NM_018342 | 946.102   | 516.576   | NM_014345 | 1100.815  | 893.637   |
| U63336    | 525.799   | 247.749   | BC020260  | 2339.827  | 1572.163  | NM_018210 | 1470.371  | 1157.964  |
| NM_006907 | 594.173   | 430.427   | D17156    | 5700.045  | 4636.433  | NM_001096 | 1439.755  | 1216.387  |
| NM_002686 | 444.986   | 473.634   | L04461    | 559.771   | 478.769   | NM_016014 | 2398.245  | 1556.618  |
| NM_006267 | 1189.02   | 978.225   | AK026938  | 14280.47  | 13257.145 | NM_018327 | 170.41    | 221.57    |
| NM_002661 | 7059.136  | 5914.431  | AK024373  | 8463.975  | 8295.361  | NM_017581 | 1204.261  | 821.264   |
| AK023982  | 701.863   | 834.747   | AK022343  | 8034.22   | 6046.157  | AA488804  | 4836.218  | 3945.307  |
| NM_018466 | 1032.971  | 852.443   | AK026400  | 1286.421  | 1170.874  | L29496    | 897.918   | 604.886   |
| Y11312    | 1136.498  | 878.561   | U92989    | 8513.599  | 6636.372  | NM_000928 | 317.616   | 244.312   |
| NM_020372 | 2955.142  | 2190.676  | AF075102  | 1146.394  | 1226.062  | NM_007002 | 6226.225  | 6492.129  |
| NM_002635 | 24981.168 | 18526.229 | NM_018463 | 9189.487  | 7722.193  | NM_012121 | 675.173   | 510.315   |
| NM_004758 | 1738.482  | 1566.344  | X74956    | 24344.33  | 22773.658 | NM_003255 | 2701.237  | 2529.485  |
| NM_005163 | 4139.786  | 4542.075  | AF132197  | 4729.511  | 4659.318  | NM_014155 | 1735.606  | 1751.441  |
| NM_015361 | 13545.331 | 9854.166  | AK025546  | 784.241   | 828.058   | AK026331  | 8350.69   | 7900.301  |
| NM_004310 | 10299.63  | 8304.204  | AL137487  | 1644.165  | 1516.341  | M30773    | 1325.964  | 1431.446  |
| NM_015537 | 4234.416  | 3939.821  | AK023800  | 680.447   | 405.509   | NM_016338 | 5488.056  | 6033.808  |
| NM_016520 | 19254.146 | 11642.905 | AK024120  | 1725.322  | 1628.12   | AF113699  | 4385.895  | 2562.826  |
| AB018353  | 2924.338  | 2833.411  | CY3Cy5    | 3536.896  | 87.517    | AK001883  | 6681.236  | 5368.551  |
| NM_007036 | 3819.04   | 2327.973  | W96179    | 2204.127  | 432.742   | NM_014625 | 1805.8    | 1513.535  |
| NM_002617 | 2057.74   | 1584.445  | AW247841  | 3895.295  | 1092.563  | AK021492  | 547.456   | 354.622   |
| NM_003313 | 15700.367 | 10640.831 | M76559    | 2852.924  | 3994.333  | AK023794  | 2835.251  | 2855.162  |
| AF090907  | 2430.586  | 2352.733  | U03884    | 344.578   | 519.341   | NM_019885 | 558.431   | 467.171   |
| AK024476  | 4772.983  | 3847.754  | U11058    | 466.765   | 684.179   | AB033103  | 791.242   | 995.448   |
| X74794    | 5565.138  | 4260.267  | AI222585  | 847.171   | 2379.86   | NM_002907 | 876.261   | 683.325   |
| AL050298  | 1722.448  | 1100.926  | AA411678  | 10597.832 | 15892.458 | AK024098  | 490.041   | 406.454   |
| M20696    | 2247.576  | 1616.044  | AA862813  | 25801.896 | 40986.93  | AK022371  | 2321.406  | 1910.183  |
| NM_003640 | 861.299   | 756.58    | AA398427  | 2667.324  | 5019.142  | D42045    | 1324.352  | 948.603   |
| NM_012248 | 2844.711  | 1889.148  | T55728    | 7343.82   | 10831.256 | AB007953  | 1047.719  | 882.059   |
| NM_014970 | 1719.607  | 1426.261  | H20856    | 1621.344  | 3200.902  | NM_017820 | 337.657   | 294.93    |
| NM_015719 | 616.677   | 1124.331  | N62586    | 4494.71   | 7174.272  | NM_001845 | 568.925   | 515.607   |
| NM_012464 | 218.094   | 400.597   | AA242743  | 5441.272  | 7929.175  | NM_003734 | 3052.052  | 3023.968  |
| NM_006129 | 1051.949  | 1050.055  | NM_004758 | 1539.904  | 2054.24   | NM_014935 | 3261.604  | 3105.968  |
| NM_000582 | 3692.613  | 3441.281  | SR5       | 4566.394  | 2171.313  | X99660    | 4280.851  | 3595.448  |
| NM_005593 | 1073.119  | 879.04    | SR7       | 5582.709  | 12734.789 | X03635    | 1026.646  | 788.09    |
| BF338709  | 366.051   | 388.581   | SR9       | 17626.979 | 733.512   | X97671    | 191.879   | 124.724   |
| AF204171  | 317.346   | 284.5     | CY3Cy5    | 3384.374  | 132.12    | NM_004351 | 1646.167  | 1522.478  |

|           |           |           |           |           |           |           |           |           |
|-----------|-----------|-----------|-----------|-----------|-----------|-----------|-----------|-----------|
| W96179    | 1971.434  | 1703.062  | NM_016382 | 635.801   | 137.902   | NM_004236 | 1348.754  | 1214.084  |
| AW247841  | 4493.353  | 3833.02   | AK023117  | 2312.289  | 417.04    | AB011093  | 1757.972  | 1371.431  |
| BG568198  | 595.647   | 224.243   | AL122046  | 1137.092  | 187.237   | NM_020533 | 1252.954  | 938.855   |
| M76559    | 2498.143  | 2269.494  | NM_000855 | 2206.199  | 4056.544  | NM_001894 | 1460.675  | 892.477   |
| AI222585  | 583.716   | 528.622   | NM_014817 | 287.232   | 731.916   | NM_000614 | 181.866   | 209.936   |
| AA411678  | 7469.458  | 6165.735  | NM_005536 | 7729.378  | 10571.135 | AK022884  | 517.634   | 309.998   |
| AA862813  | 14600.017 | 9547.188  | NM_005077 | 1290.717  | 3403.396  | NM_006620 | 1620.369  | 1010.037  |
| AA398427  | 1404.362  | 1446.227  | NM_002141 | 1227.176  | 2763.394  | NM_001397 | 297.814   | 249.797   |
| H20856    | 668.818   | 489.992   | NM_003311 | 2009.741  | 4600.121  | NM_004772 | 1423.952  | 883.747   |
| N62586    | 1980.117  | 1854.678  | NM_003776 | 5297.252  | 7698.883  | NM_003714 | 1854.488  | 1288.103  |
| AA242743  | 4920.514  | 3738.862  | NM_015719 | 934.046   | 1599.539  | NM_004004 | 204.277   | 213.735   |
| AK022365  | 444.191   | 291.614   | NM_006129 | 1294.16   | 1131.779  | AF024540  | 1288.225  | 1315.323  |
| BE892273  | 50512.172 | 42784.254 | AF204171  | 439.021   | 114.31    | NM_002185 | 731.059   | 755.735   |
| AF026929  | 363.033   | 380.815   | AF100756  | 4547.585  | 1107.184  | U42977    | 2141.638  | 2745.051  |
| Y08147    | 2758.352  | 2270.371  | NM_006825 | 2613.259  | 1240.738  | NM_003666 | 985.295   | 1243.387  |
| D00174    | 6348.31   | 5264.128  | NM_004862 | 636.568   | 675.575   | NM_003288 | 1978.729  | 2456.935  |
| AB000520  | 580.389   | 568.137   | NM_001661 | 662.651   | 1558.162  | NM_018242 | 222.962   | 367.803   |
| NM_016382 | 760.883   | 482.006   | NM_014563 | 1060.546  | 2358.938  | M83822    | 1286.77   | 1352.539  |
| AK023117  | 2970.203  | 2468.576  | NM_007150 | 3626.813  | 5057.417  | NM_018434 | 4962.688  | 4821.153  |
| AL122046  | 1096.32   | 894.246   | NM_006831 | 2259.391  | 4434.37   | NM_003914 | 314.924   | 304.622   |
| NM_000855 | 2522.734  | 1624.027  | AL162044  | 5506.307  | 8846.609  | NM_020423 | 494.217   | 561.593   |
| NM_005536 | 5851.36   | 4519.686  | AK024004  | 1344.549  | 2575.515  | AK021437  | 337.686   | 246.184   |
| NM_005077 | 1514.705  | 1132.821  | AK022365  | 295.995   | 710.725   | NM_003831 | 1221.707  | 905.537   |
| NM_004423 | 5808.02   | 4215.781  | BE892273  | 35074.961 | 43084.633 | AB007965  | 1360.615  | 710.909   |
| NM_001990 | 700.047   | 783.248   | AF026929  | 550.249   | 194.522   | NM_001196 | 4843.366  | 3746.333  |
| NM_003311 | 1788.672  | 1313.191  | Y08147    | 1799.806  | 687.552   | NM_016008 | 370.21    | 255.391   |
| NM_003776 | 2792.005  | 2458.498  | D00174    | 3333.149  | 773.879   | NM_017744 | 189.063   | 151.044   |
| NM_000744 | 751.318   | 766.831   | AB000520  | 603.105   | 155.331   | NM_001924 | 1410.227  | 987.235   |
| NM_003039 | 1114.637  | 992.63    | NM_002686 | 372.72    | 118.829   | NM_017705 | 955.033   | 696.192   |
| NM_014509 | 605.455   | 621.394   | NM_006267 | 1016.736  | 134       | NM_001796 | 425.381   | 238.631   |
| NM_020372 | 5974.68   | 5379.472  | NM_002661 | 4582.224  | 1928.422  | AB040880  | 353.066   | 334.401   |
| NM_002635 | 41494.418 | 34401.426 | NM_001263 | 646.411   | 559.171   | NM_009587 | 2560.649  | 1750.201  |
| NM_016077 | 2469.696  | 1878.45   | AK023982  | 771.435   | 1307.891  | AL133566  | 376.506   | 355.44    |
| AF100756  | 3763.79   | 3948.974  | NM_018466 | 1135.35   | 2424.13   | M36118    | 1554.644  | 1815.589  |
| NM_006825 | 2678.26   | 2075.583  | Y11312    | 1409.254  | 3220.807  | NM_003395 | 4029.677  | 4732.359  |
| NM_004862 | 469.135   | 328.776   | M11427    | 593.958   | 723.515   | AJ295149  | 18704.832 | 21905.131 |
| NM_001661 | 720.873   | 451.688   | NM_000744 | 532.984   | 1102.17   | NM_013438 | 2354.576  | 2750.774  |
| NM_014563 | 729.35    | 836.244   | NM_003039 | 1003.163  | 1909.351  | NM_014688 | 2307.585  | 1486.295  |
| NM_020150 | 1994.183  | 1774.413  | NM_014509 | 618.699   | 872.713   | AL359623  | 692.376   | 643.842   |
| NM_006831 | 871.844   | 663.759   | NM_020372 | 2611.46   | 3160.71   | AK026920  | 196.604   | 250.911   |
| AL162044  | 2639.715  | 2276.043  | NM_016077 | 2717.84   | 546.604   | AL137255  | 213.218   | 143.854   |
| AK024004  | 674.668   | 670.749   | NM_015537 | 3091.983  | 721.054   | NM_003370 | 2418.792  | 2121.772  |
| NM_006736 | 2060.597  | 2373.79   | NM_016520 | 17396.291 | 2722.579  | AB037715  | 496.555   | 246.513   |
| NM_003640 | 1347.366  | 1398.862  | AB018353  | 2801.875  | 714.005   | AF250924  | 2267.656  | 1333.822  |
| NM_014444 | 3453.876  | 3808.954  | NM_007036 | 2900.712  | 1242.657  | D86979    | 924.066   | 764.904   |
| NM_012248 | 3632.873  | 3122.349  | NM_002617 | 2647.521  | 4479.497  | AB023230  | 92.913    | 86.001    |
| NM_014970 | 2251.956  | 2446.818  | AK024476  | 3223.969  | 5187.271  | AF018081  | 5604.569  | 3565.604  |
| NM_014393 | 2594.247  | 3024.301  | X74794    | 5751.224  | 8133.201  | NM_020202 | 6303.955  | 4627.423  |
| NM_004223 | 8871.652  | 8085.295  | AL050298  | 2436.215  | 3824.843  | AK022889  | 3673.307  | 4090.001  |
| NM_006813 | 550.574   | 319.687   | NM_007079 | 30677.961 | 54446.859 | X52357    | 20166.508 | 15118.201 |
| NM_001355 | 6504.113  | 5668.079  | NM_002915 | 812.637   | 1264.819  | AF211891  | 754.132   | 918.216   |
| NM_006907 | 404.012   | 467.966   | NM_006736 | 2218.837  | 4280.968  | NM_005641 | 1295.357  | 1909.258  |
| NM_002686 | 485.629   | 433.64    | NM_003640 | 1531.942  | 3564.752  | AK021776  | 1329.138  | 1794.786  |



|           |           |           |           |           |           |           |           |           |
|-----------|-----------|-----------|-----------|-----------|-----------|-----------|-----------|-----------|
| NM_006267 | 986.954   | 715.147   | NM_014444 | 4745.659  | 4812.353  | AK026042  | 725.693   | 582.057   |
| NM_002661 | 5802.014  | 4915.951  | NM_012248 | 6288.384  | 4275.764  | NM_014233 | 8239.142  | 6960.473  |
| AK023982  | 532.704   | 742.641   | NM_004223 | 11966.591 | 8690.384  | NM_002137 | 44439.848 | 38462.844 |
| Y11312    | 869.455   | 598.275   | NM_006813 | 343.893   | 119.079   | NM_002911 | 378.012   | 223.252   |
| AB014533  | 4832.719  | 3503.771  | NM_001355 | 8705.504  | 2249.381  | U94386    | 368.304   | 468.618   |
| M11427    | 391.491   | 383.583   | U63336    | 401.432   | 156.11    | NM_01600C | 908.396   | 504.247   |
| AK022097  | 2511.067  | 2258.449  | W96179    | 2394.524  | 3744.01   | NM_006372 | 796.358   | 556.947   |
| NM_002166 | 13128.805 | 11325.697 | M76559    | 2914.614  | 4527.173  | NM_01415C | 194.714   | 57.817    |
| NM_00466C | 6215.139  | 5399.267  | U03884    | 109.367   | 592.331   | NM_00680E | 1501.822  | 700.633   |
| NM_00616E | 2206.123  | 1962.993  | U11058    | 376.625   | 608.168   | AF132027  | 2991.268  | 1698.427  |
| NM_016011 | 7705.102  | 6230.948  | AI222585  | 610.594   | 1269.953  | NM_004681 | 4430.158  | 2482.381  |
| AL035307  | 2602.77   | 2448.476  | AA411678  | 11258.591 | 15551.216 | AB033096  | 3165      | 1738.588  |
| AK023772  | 386.123   | 190.093   | AA862813  | 25452.986 | 35137.086 | NM_01488E | 328.802   | 205.167   |
| NM_012234 | 3307.425  | 3212.022  | AA398427  | 2102.29   | 3994.144  | L31408    | 3377.904  | 1934.616  |
| NM_015361 | 10075.001 | 7427.942  | T55728    | 7206.724  | 5797.992  | NM_00154E | 4369.841  | 2763.739  |
| NM_00431C | 8541.414  | 7141.675  | H20856    | 1697.207  | 1415.452  | NM_00444E | 4426.772  | 2818.422  |
| NM_015537 | 2770.898  | 2655.557  | N62586    | 4678.694  | 3497.873  | AF070625  | 1250.878  | 1175.003  |
| NM_01652C | 17925.451 | 12261.294 | AA242743  | 5880.488  | 5059.227  | AL365512  | 1688.085  | 1230.877  |
| AB018353  | 2446.346  | 2654.117  | NM_005163 | 6264.376  | 4923.435  | AK001740  | 2932.934  | 3776.794  |
| NM_00703E | 2748.08   | 2211.172  | NM_015361 | 9484.279  | 2019.435  | NM_00454E | 16527.076 | 15844.32  |
| NM_002617 | 1995.192  | 2677.085  | NM_00431C | 9541.185  | 1767.541  | NM_005333 | 11967.318 | 10293.399 |
| X74794    | 2449.08   | 2473.49   | Y08147    | 1670.471  | 375.306   | NM_000767 | 174.798   | 119.335   |
| NM_00707E | 37192.492 | 29216.865 | D00174    | 2256.832  | 1182.725  | AK026161  | 1485.377  | 1150.293  |
| M20696    | 2141.74   | 2109.912  | AB000520  | 787.355   | 1224.512  | NM_004553 | 17460.588 | 13608.564 |
| AK026015  | 308.145   | 339.522   | NM_016382 | 811.506   | 1542.148  | D63484    | 616.167   | 347.845   |
| NM_005203 | 393.218   | 557.634   | AK023117  | 3016.89   | 5011.126  | AK026745  | 1293.677  | 924.851   |
| NM_00656E | 1675.496  | 1180.608  | AL122046  | 951.871   | 1811.932  | AL157440  | 486.832   | 355.798   |
| AK026154  | 6557.063  | 5488.832  | AF119914  | 352.37    | 577.037   | NM_016423 | 599.604   | 362.894   |
| AL117546  | 19707.361 | 14202.223 | NM_00085E | 2686.938  | 5635.288  | NM_005119 | 1871.843  | 942.528   |
| AK027073  | 553.045   | 424.307   | NM_00553E | 8248.256  | 11526.737 | NM_00316E | 9008.555  | 5971.436  |
| NM_000384 | 447.688   | 291.115   | NM_005077 | 1334.867  | 3023.387  | AK055844  | 353.135   | 252.375   |
| AB018325  | 2151.792  | 2011.523  | NM_004423 | 5575.613  | 9948.67   | NM_01828E | 4441.847  | 3406.918  |
| AL157482  | 3219.094  | 2541.257  | NM_00199C | 1008.105  | 2311.564  | NM_00314E | 2526.509  | 1582.835  |
| NM_00542E | 4712.883  | 4661.245  | NM_002141 | 848.611   | 896.553   | X52342    | 218.66    | 329.283   |
| NM_017974 | 912.552   | 621.145   | NM_003311 | 1884.585  | 1691.793  | NM_003131 | 7302.009  | 4206.975  |
| NM_00397E | 439.664   | 387.761   | NM_00377E | 5083.182  | 3800.121  | NM_00523E | 1663.201  | 1157.265  |
| X14677    | 2811.11   | 2156.336  | NM_00612E | 1272.369  | 381.167   | AB014526  | 533.709   | 466.553   |
| NM_005863 | 3231.519  | 2789.842  | NM_000582 | 1831.605  | 659.393   | NM_01853E | 544.761   | 672.169   |
| U17077    | 2180.112  | 1863.885  | NM_005593 | 813.887   | 158.028   | NM_01334E | 872.533   | 987.858   |
| NM_00091E | 2151.213  | 2420.465  | NM_016077 | 2181.373  | 715.193   | AF131784  | 463.426   | 531.574   |
| NM_002344 | 309.776   | 487.814   | NM_003052 | 622.217   | 166.626   | NM_017851 | 1741.162  | 2309.897  |
| NM_01984E | 2376.732  | 2236.73   | AF100756  | 5985.049  | 8090.688  | AK026182  | 52696.41  | 69554.453 |
| NM_002062 | 7817.411  | 5773.738  | NM_00682E | 3687.409  | 5673.34   | NM_01608E | 10410.872 | 8546.096  |
| NM_014394 | 42972.027 | 36517.059 | NM_004862 | 626.247   | 904.072   | AK025768  | 1306.631  | 1201.691  |
| NM_005243 | 9286.595  | 10614.823 | NM_001661 | 687.59    | 1627.23   | AL117502  | 1053.13   | 1195.543  |
| NM_00621E | 1029.406  | 1442.159  | NM_014563 | 1239.309  | 2818.413  | AK001846  | 496.585   | 538.708   |
| NM_01814C | 3328.904  | 3914.663  | NM_02015C | 4339.645  | 6493.69   | AF147300  | 249.167   | 262.704   |
| NM_01694E | 1708.491  | 1776.08   | NM_00715C | 3285.275  | 3354.707  | AK024637  | 218.199   | 176.556   |
| NM_000142 | 1148.393  | 932.547   | NM_006831 | 2226.858  | 1695.499  | AL117454  | 2537.355  | 1273.899  |
| AF272372  | 16976.707 | 13725.039 | AL162044  | 4796.958  | 2984.608  | AF272890  | 556.048   | 400.807   |
| AK097045  | 2088.333  | 1575.363  | AK024004  | 1389.851  | 853.966   | U00684    | 342.919   | 174.914   |
| AF161356  | 50440.324 | 58767.492 | NM_016734 | 480.94    | 122.621   | NM_01645E | 10212.408 | 5036.083  |
| AB014548  | 3805.158  | 3664.396  | NM_014393 | 3035.442  | 763.81    | AF086227  | 456.998   | 355.614   |

|           |           |           |           |           |           |           |           |           |
|-----------|-----------|-----------|-----------|-----------|-----------|-----------|-----------|-----------|
| NM_018256 | 2905.872  | 1949.324  | NM_004223 | 10454.31  | 2191.794  | AK026246  | 1198.977  | 506.945   |
| AK025150  | 751.858   | 316.636   | NM_001355 | 8006.852  | 1723.829  | AF035281  | 1309.194  | 1581.415  |
| AK024611  | 7919.261  | 5063.217  | U63336    | 920.381   | 452.532   | AK026304  | 243.054   | 215.378   |
| BC010420  | 3430.514  | 3728.326  | NM_002686 | 364.157   | 1088.405  | AK023501  | 237.172   | 366.659   |
| NM_012280 | 16064.951 | 9996.889  | NM_006267 | 953.76    | 1382.812  | AL133446  | 1405.095  | 1391.604  |
| NM_018172 | 3658.664  | 3201.426  | NM_002661 | 6217.801  | 8373.368  | U56251    | 794.308   | 1134.043  |
| U03886    | 593.77    | 583.459   | NM_001263 | 415.821   | 622.227   | AK024689  | 360.399   | 305.805   |
| AK022040  | 887.32    | 801.208   | AK023982  | 903.002   | 1448.877  | BC035667  | 353.543   | 291.315   |
| AK022722  | 862.536   | 990.021   | NM_018466 | 1364.618  | 2115.842  | AL049277  | 654.773   | 829.142   |
| NM_014642 | 1522.981  | 2120.826  | Y11312    | 1905.174  | 2759.431  | AL050043  | 189.976   | 120.085   |
| NM_003829 | 840.585   | 1047.734  | AB014533  | 2641.707  | 1910.252  | AK091573  | 150.673   | 157.218   |
| AL110168  | 2461.121  | 3286.243  | M11427    | 371.64    | 209.272   | AF131814  | 843.612   | 702.856   |
| NM_002831 | 5273.758  | 5589.281  | NM_000744 | 614.226   | 896.94    | AL359600  | 1030.38   | 366.466   |
| AL833409  | 3228.285  | 3109.258  | NM_014509 | 616.397   | 463.605   | AL360144  | 327.069   | 298.099   |
| NM_015966 | 483.984   | 567.083   | NM_020372 | 1866.625  | 607.961   | BC028617  | 433.333   | 296.728   |
| NM_016147 | 3629.956  | 3343.434  | NM_002635 | 47244.953 | 6483.55   | AL117653  | 278.885   | 255.4     |
| NM_002833 | 1517.195  | 1504.664  | NM_004758 | 1236.996  | 232.408   | AF087999  | 508.219   | 242.616   |
| NM_016592 | 843.228   | 636.644   | NM_005163 | 4463.129  | 960.25    | NM_003740 | 1277.028  | 1005.287  |
| NM_018326 | 4678.272  | 3391.561  | NM_015361 | 11471.354 | 4523.323  | AL050078  | 526.598   | 303.119   |
| NM_005606 | 6058.761  | 5363.603  | NM_004310 | 11886.896 | 18917.021 | AK022933  | 274.242   | 290.445   |
| AF134707  | 915.986   | 906.112   | NM_015537 | 3258.499  | 5916.686  | NM_014276 | 1965.934  | 1438.317  |
| BE730629  | 1307.652  | 2096.317  | NM_016520 | 16399.215 | 19231.27  | AF035303  | 313.137   | 344.322   |
| NM_018652 | 21603.246 | 29555.109 | AB018353  | 2980.25   | 4835.475  | AF056438  | 806.332   | 789.357   |
| AB011166  | 1323.006  | 1568.107  | NM_007036 | 3458.123  | 4594.939  | AF003737  | 18935.023 | 12144.444 |
| AK024460  | 2225.287  | 4005.358  | NM_002617 | 2982.809  | 4838.339  | AK001011  | 2197.731  | 2037.366  |
| S78570    | 635.884   | 821.768   | X74794    | 6680.708  | 9149.227  | AK021457  | 201.157   | 255.501   |
| NM_006442 | 26034.852 | 28713.053 | AL050298  | 2425.355  | 2669.313  | AK021690  | 547.124   | 398.482   |
| NM_003902 | 5532.211  | 5814.294  | NM_007079 | 27554.209 | 21018.154 | AK026238  | 398.482   | 192.641   |
| NM_016427 | 10330.554 | 15284.102 | M20696    | 3051.964  | 2188.335  | AK026694  | 263.7     | 150.113   |
| U80741    | 2190.714  | 3975.573  | NM_002915 | 1089.509  | 518.538   | AK025564  | 312.867   | 248.71    |
| NM_014497 | 1617.145  | 2000.487  | NM_006736 | 2187.398  | 2168.43   | AK026286  | 483.961   | 179.867   |
| AL133598  | 6378.919  | 7881.969  | NM_014444 | 4486.244  | 2917.118  | AK026731  | 489.619   | 296.755   |
| NM_015511 | 1296.86   | 896.942   | NM_012248 | 5769.408  | 2137.655  | NM_004192 | 1610.093  | 1694.981  |
| NM_006625 | 1150.308  | 1100.729  | NM_014970 | 2592.878  | 478.133   | AK024160  | 773.823   | 737.023   |
| NM_002879 | 583.001   | 481.314   | NM_015719 | 732.25    | 269.125   | AK025077  | 591.309   | 615.421   |
| AF075068  | 14640.458 | 13486.029 | NM_006129 | 1067.253  | 250.363   | NM_006417 | 2491.501  | 3017.403  |
| AK024366  | 1142.962  | 1142.264  | NM_000582 | 1430.838  | 916.892   | L43350    | 644.401   | 393.165   |
| X78938    | 534.012   | 245.659   | NM_005593 | 1009.468  | 2198.854  | NM_020317 | 3722.311  | 2447.321  |
| AK001439  | 459.962   | 273.121   | NM_004684 | 432.494   | 982.504   | AL080234  | 1569.7    | 1268.374  |
| AK023462  | 766.888   | 428.721   | BF338709  | 308.551   | 449.219   | AK027025  | 531.466   | 550.37    |
| AK001115  | 774.879   | 573.606   | AF204171  | 363.239   | 503.506   | AK025105  | 396.432   | 365.188   |
| AF085881  | 3099.754  | 3239.75   | W96179    | 2279.476  | 3386.843  | AF212220  | 2705.323  | 2110.626  |
| AK022737  | 7603.5    | 7824.54   | BG568198  | 525.259   | 639.942   | AL137709  | 962.79    | 678.719   |
| NM_003472 | 36602.926 | 31400.061 | AF043473  | 319.548   | 982.465   | AK023277  | 1229.122  | 864.931   |
| U92980    | 2413.195  | 2374.557  | AI222585  | 709.066   | 494.577   | AK000425  | 1316.423  | 985.086   |
| AF133658  | 1043.828  | 1050.934  | AA411678  | 11648.876 | 6012.552  | Z27200    | 631.276   | 790.793   |
| AB048287  | 9078.101  | 7339.209  | AA862813  | 28255.4   | 23606.43  | AF070571  | 2422.384  | 2031.418  |
| Y11159    | 1410.633  | 1412.157  | T55728    | 6560.674  | 6699.239  | AK023554  | 471.637   | 421.265   |
| AB020648  | 2661.135  | 3707.745  | H20856    | 1621.588  | 599.128   | NM_003513 | 4660.688  | 4190.962  |
| AK025798  | 12095.067 | 10795.988 | N62586    | 3424.439  | 1194.929  | AL079294  | 788.193   | 695.072   |
| AF086173  | 420.9     | 492.234   | AA242743  | 2468.174  | 560.404   | AK024844  | 960.946   | 438.967   |
| AK025164  | 509.565   | 373.131   | BE892273  | 38651.32  | 6291.69   | AL049437  | 337.967   | 260.899   |
| NM_018366 | 3712.459  | 4137.18   | NM_016734 | 790.22    | 992.144   | AF161427  | 46555.727 | 42631.629 |

|           |           |           |           |           |           |           |           |           |
|-----------|-----------|-----------|-----------|-----------|-----------|-----------|-----------|-----------|
| NM_01984E | 8356.404  | 5921.325  | Y08147    | 1476.147  | 2758.95   | AK021715  | 5169.431  | 4372.773  |
| AL359056  | 378.342   | 390.102   | D00174    | 3590.796  | 5254.054  | AK000315  | 5206.823  | 4063.772  |
| AK026947  | 34552.742 | 31618.648 | AB000520  | 639.91    | 1074.494  | AK023248  | 838.792   | 597.09    |
| U84526    | 8047.686  | 8464.588  | NM_016382 | 958.578   | 1585.83   | NM_012404 | 11255.344 | 9323.664  |
| L23401    | 2152.459  | 2013.242  | AK023117  | 3514.084  | 5243.863  | AF251190  | 349.006   | 302.909   |
| NM_01809C | 54623.434 | 62059.008 | AL122046  | 1291.539  | 2335.668  | AF130075  | 2887.694  | 1895.253  |
| AL109678  | 1081.313  | 671.888   | AF119914  | 422.697   | 1346.825  | NM_005444 | 3239.619  | 2699.206  |
| AL137524  | 1323.68   | 1327.737  | NM_000855 | 1483.627  | 2087.539  | V00589    | 15263.558 | 8358.744  |
| AF218008  | 3192.136  | 3234.32   | NM_005536 | 8055.147  | 3825.313  | AL390163  | 663.022   | 482.196   |
| M22404    | 25883.125 | 18768.193 | NM_005077 | 1318.661  | 987.559   | NM_018572 | 634.362   | 457.24    |
| AF052115  | 685.946   | 926.208   | NM_004423 | 5612.343  | 4864.761  | AK024838  | 349.717   | 314.936   |
| NM_014019 | 14304.368 | 10200.998 | NM_003311 | 1526.76   | 387.817   | AK000175  | 1219.041  | 845.558   |
| Z70711    | 496.163   | 311.075   | NM_003776 | 3635.4    | 862.913   | AL137736  | 1104.108  | 880.609   |
| NM_01236E | 1384.738  | 1093.976  | NM_003039 | 529.347   | 109.944   | AK021897  | 3989.64   | 3862.033  |
| AK025323  | 443.503   | 391.348   | NM_014509 | 500.603   | 129.643   | AK001051  | 786.204   | 620.262   |
| NM_01332E | 3654.63   | 3369.874  | NM_016077 | 2346.175  | 3425.438  | NM_018317 | 945.294   | 1083.266  |
| BC037322  | 668.586   | 730.455   | AF100756  | 7341.743  | 9262.942  | AF086051  | 439.849   | 462.675   |
| Y12022    | 1168.64   | 1064.139  | NM_006825 | 3293.823  | 3534.773  | AK024356  | 728.914   | 667.649   |
| AK001375  | 1128.428  | 946.343   | NM_004862 | 634.849   | 355.54    | AL049370  | 265.029   | 237.497   |
| AL137559  | 752.465   | 1269.198  | NM_001661 | 846.319   | 382.563   | AL365410  | 3683.37   | 2887.334  |
| AF026944  | 2694.137  | 3041.856  | NM_014563 | 1390.172  | 1278.15   | D17082    | 10500.326 | 8386.935  |
| AK021493  | 1559.654  | 2215.229  | NM_020150 | 4505.677  | 5291.443  | D17252    | 32089.137 | 21943.334 |
| NM_006204 | 494.887   | 380.584   | NM_006831 | 2305.03   | 1262.622  | NM_003673 | 978.026   | 736.433   |
| NM_01215E | 4838.15   | 4821.651  | AL162044  | 3696.682  | 1258.699  | Z36823    | 2425.874  | 1635.544  |
| AF144700  | 1801.417  | 1934.172  | AK024004  | 1481.8    | 212.444   | AF147387  | 1067.083  | 1018.695  |
| AB046825  | 2628.56   | 2670.462  | NM_006736 | 1801.208  | 214.109   | NM_012081 | 751.204   | 643.82    |
| X64975    | 1424.771  | 1595.865  | NM_003640 | 1548.925  | 226.35    | AL137463  | 246.002   | 296.851   |
| AL050297  | 4070.936  | 3720.344  | NM_014444 | 3628.576  | 617.028   | AF085909  | 6355.158  | 5300.312  |
| AK026966  | 1525.544  | 1211.838  | NM_01224E | 4843.249  | 1384.811  | AF090888  | 308.238   | 236.168   |
| AJ009817  | 352.041   | 365.87    | NM_004223 | 10879.813 | 16462.137 | AK027193  | 440.977   | 314.256   |
| AK025268  | 1055.597  | 710.357   | NM_006813 | 245.122   | 933.508   | AF086471  | 3992.283  | 3160.656  |
| AL833005  | 2381.404  | 1711.885  | NM_001355 | 7971.689  | 10309.173 | NM_01845E | 5646.447  | 3861.872  |
| L43366    | 1455.836  | 1278.855  | NM_001216 | 422.747   | 567.381   | AF113018  | 554.045   | 536.731   |
| AK026124  | 4821.192  | 3916.613  | U63336    | 530.392   | 849.294   | AK021996  | 779.234   | 431.336   |
| NM_01550E | 3413.133  | 3557.57   | NM_006907 | 652.498   | 1263.743  | AL049337  | 1075.381  | 766.637   |
| AL110157  | 3048.346  | 2408.75   | NM_002686 | 544.81    | 1028.62   | CY3Cy5    | 2012.436  | 252.211   |
| NM_017793 | 3023.685  | 2990.216  | NM_006267 | 1469.16   | 2807.988  | U13697    | 299.484   | 463.45    |
| NM_012131 | 1176.959  | 1097.925  | NM_002661 | 5904.262  | 5716.053  | U04270    | 606.409   | 749.782   |
| S41540    | 961.443   | 1146.916  | AK023982  | 1036.224  | 521.678   | AA629719  | 49910.93  | 74266.289 |
| CY3Cy5    | 1482.4    | 170.166   | NM_018466 | 1389.038  | 743.816   | BG676364  | 1027.969  | 1350.659  |
| AI417481  | 810.838   | 993.12    | Y11312    | 1975.782  | 2484.407  | BG181154  | 699.511   | 497.5     |
| BI906766  | 1006.083  | 1003.862  | AF020774  | 184.211   | 920.479   | AA843679  | 2197.256  | 2996.452  |
| U60519    | 1289.934  | 1411.449  | AB014533  | 2494.553  | 1103.258  | H68922    | 390.128   | 1026.186  |
| AA282906  | 1589.16   | 1611.735  | M11427    | 509.23    | 136.514   | NM_004957 | 1142.213  | 1112.037  |
| L02870    | 1606.38   | 1656.253  | AK022097  | 2435.766  | 352.26    | NM_005252 | 484.536   | 316.735   |
| BG755482  | 2681.302  | 2636.007  | NM_002166 | 15842.727 | 3199.19   | SR5       | 3682.181  | 2585.226  |
| AI480307  | 3748.688  | 3594.922  | NM_004660 | 6845.873  | 3321.117  | SR7       | 3153.872  | 19019.943 |
| X51420    | 1080.842  | 987.974   | NM_006165 | 2494.409  | 2997.567  | SR9       | 11627.485 | 1766.74   |
| X51757    | 3543.7    | 4437.887  | AL035307  | 2961.552  | 4770.248  | CY3Cy5    | 1514.253  | 257.983   |
| L24038    | 974.859   | 893.049   | AK023772  | 434.996   | 728.031   | AY007378  | 1303.29   | 1517.809  |
| NM_05305E | 292.591   | 335.047   | NM_012234 | 4813.514  | 5723.235  | D26070    | 622.001   | 831.516   |
| NM_002751 | 1560.399  | 1431.207  | NM_015361 | 13114.518 | 17319.596 | NM_001642 | 3638.051  | 5742.811  |
| M55593    | 1324.767  | 1276.336  | NM_004310 | 12519.344 | 16928.174 | NM_000114 | 1007.601  | 937.244   |

|           |           |           |           |           |           |           |           |           |
|-----------|-----------|-----------|-----------|-----------|-----------|-----------|-----------|-----------|
| NM_078467 | 4627.011  | 3653.347  | NM_015537 | 5360.881  | 8133.761  | NM_005156 | 1734.665  | 1702.897  |
| SR2       | 47121.949 | 45971.824 | NM_016109 | 49.201    | 478.16    | X98834    | 1899.472  | 2299.407  |
| SR4       | 11987.752 | 10521.825 | NM_016520 | 21609.582 | 31073.197 | NM_007035 | 2947.779  | 3239.427  |
| SR6       | 1896.919  | 1581.264  | AB018353  | 4348.392  | 6627.353  | AB019562  | 394.947   | 285.131   |
| SR8       | 6006.676  | 19798.986 | NM_007036 | 3926.629  | 3649.084  | AF036364  | 862.434   | 843.973   |
| SR10      | 21570.848 | 7916.518  | NM_002617 | 2491.265  | 2167.285  | AK022847  | 1400.579  | 1233.253  |
| CY3Cy5    | 1332.22   | 105.845   | NM_003313 | 10675.31  | 5313.766  | NM_020203 | 364.122   | 189.141   |
| NM_016848 | 3455      | 3141.604  | AF090907  | 1163.087  | 550.518   | U20582    | 1977.146  | 1710.372  |
| NM_000514 | 3045.319  | 2647.735  | AK024476  | 3708.136  | 2677.492  | NM_006634 | 1181.401  | 2120.906  |
| AL137432  | 1730.494  | 1420.613  | X74794    | 6619.182  | 4292.667  | NM_016465 | 718.324   | 1003.224  |
| NM_000957 | 2006.774  | 1695.353  | AL050298  | 2993.662  | 3616.731  | NM_000328 | 444.264   | 738.361   |
| NM_019043 | 4364.404  | 4868.854  | NM_007079 | 30980.137 | 19563.289 | NM_013395 | 2171.539  | 2840.248  |
| NM_003240 | 1653.029  | 1361.623  | M20696    | 3027.105  | 1240.018  | NM_002410 | 294.971   | 398.767   |
| NM_016564 | 23763.273 | 21877.779 | NM_002915 | 764.625   | 180.025   | AL122120  | 836.464   | 1370.039  |
| NM_000796 | 359.794   | 339.158   | NM_006566 | 1438.556  | 166.156   | NM_014684 | 394.812   | 615.105   |
| AF279656  | 803.344   | 860.196   | AK026154  | 4471.983  | 1398.938  | AK027247  | 335.043   | 387.085   |
| AK021660  | 619.664   | 612.97    | AL117546  | 9198.536  | 4528.19   | NM_002480 | 2800.065  | 3306.638  |
| AB007933  | 24630.082 | 24186.873 | AK027073  | 390.462   | 866.472   | NM_017571 | 2933.747  | 1702.432  |
| NM_006702 | 4048.422  | 3822.131  | NM_000384 | 914.832   | 551.128   | AB007946  | 214.363   | 260.119   |
| NM_001396 | 3157.726  | 2824.673  | AL157482  | 2996.076  | 4991.692  | L03169    | 501.046   | 405.5     |
| NM_014474 | 1321.873  | 1328.702  | NM_005428 | 7144.798  | 10391.444 | NM_001928 | 3615.018  | 2783.297  |
| NM_016249 | 1411.425  | 995.832   | NM_017974 | 1144.095  | 2404.052  | NM_006395 | 430.496   | 250.79    |
| NM_006181 | 616.914   | 847.778   | NM_003979 | 644.132   | 613.218   | NM_018965 | 457.305   | 309.391   |
| NM_003796 | 13142.524 | 11109.039 | X14677    | 2137.97   | 3956.394  | NM_000185 | 1400.024  | 1002.607  |
| NM_002973 | 1823.721  | 2352.348  | NM_005863 | 5047.935  | 7993.292  | Y00816    | 468.61    | 303.365   |
| NM_004436 | 15988.816 | 16426.604 | U17077    | 2012.778  | 3599.128  | NM_001055 | 6343.47   | 5776.07   |
| NM_006580 | 3404.076  | 3314.237  | NM_000915 | 1710.487  | 2030.51   | NM_018361 | 1194.701  | 1364.633  |
| NM_001305 | 1511.352  | 1349.111  | AK024475  | 1670.669  | 1153.061  | NM_019893 | 361.089   | 438.259   |
| NM_005082 | 484.314   | 575.2     | AB026542  | 16660.576 | 8434.926  | AB040966  | 1885.271  | 2798.219  |
| D17028    | 21340.977 | 22527.367 | NM_019846 | 3163.248  | 2722.719  | NM_020132 | 790.255   | 889.372   |
| NM_013442 | 21830.559 | 23971.264 | NM_014433 | 1004.119  | 637.699   | NM_016467 | 5873.39   | 6549.531  |
| BG611243  | 1443.124  | 1594.565  | NM_002062 | 5163.882  | 1898.733  | NM_007253 | 959.264   | 826.725   |
| AK023221  | 2264.288  | 2979.254  | NM_014394 | 47982.445 | 10881.859 | NM_019106 | 527.325   | 746.425   |
| NM_003664 | 1685.393  | 1497.016  | NM_005243 | 10521.787 | 2055.915  | L08436    | 380.922   | 367.576   |
| NM_002426 | 1184.565  | 1378.814  | NM_006218 | 1753.437  | 298.512   | NM_000558 | 1850.131  | 1812.239  |
| AK027182  | 1031.066  | 1768.082  | NM_018140 | 3827.856  | 594.748   | NM_014170 | 1953.816  | 1791.102  |
| J03651    | 1570.245  | 1558.446  | NM_016948 | 1695.012  | 361.474   | AF116652  | 16878.535 | 12086.734 |
| U61738    | 1118.419  | 1221.836  | NM_000142 | 1312.588  | 604.249   | NM_000835 | 544.601   | 510.76    |
| U92818    | 329.81    | 566.762   | AF272372  | 12125.458 | 9527.729  | NM_018835 | 1687.733  | 1962.774  |
| NM_000442 | 2789.266  | 2772.399  | AK097045  | 2879.479  | 1472.085  | NM_003401 | 913.68    | 1245.929  |
| NM_002934 | 1607.547  | 1511.377  | NM_018256 | 3397.963  | 5829.472  | NM_004758 | 1546.512  | 1115.838  |
| AK023011  | 10972.972 | 10481.212 | AK025150  | 832.676   | 1229.693  | NM_002913 | 1319.993  | 1450.701  |
| NM_016816 | 1187.247  | 934.146   | AK024611  | 13252.085 | 19213.389 | AK022797  | 569.371   | 661.996   |
| L17325    | 876.641   | 894.275   | BC010420  | 5392.779  | 6582.156  | NM_007370 | 2237.54   | 2529.095  |
| NM_017716 | 835.832   | 637.164   | NM_012280 | 15566.15  | 22562.924 | NM_006231 | 553.968   | 723.627   |
| M58603    | 7399.052  | 7264.917  | U03886    | 692.278   | 848.82    | AK023471  | 494.41    | 522.666   |
| NM_003639 | 1781.896  | 1709.297  | AK022040  | 1007.984  | 1216.856  | NM_001948 | 1136.122  | 1351.376  |
| NM_001549 | 362.67    | 323.705   | AK022722  | 1026.771  | 373.049   | NM_001067 | 6794.02   | 8565.73   |
| NM_000115 | 2477.434  | 2341.446  | NM_003591 | 16010.523 | 10844.638 | NM_014034 | 3394.087  | 3765.262  |
| AF308801  | 4379.978  | 4946.632  | AL080111  | 18739.898 | 9595.903  | NM_005335 | 10911.555 | 10618.428 |
| NM_007318 | 50023.387 | 54774.316 | NM_003550 | 6766.213  | 4020.146  | J04474    | 3013.327  | 2950.492  |
| NM_014874 | 880.071   | 982.266   | NM_014642 | 3659.356  | 2691.494  | NM_003761 | 745.48    | 576.944   |
| NM_005765 | 13989.779 | 17739.084 | NM_003829 | 2338.538  | 1670.246  | NM_004726 | 404.783   | 202.42    |

|           |           |           |           |           |           |           |           |           |
|-----------|-----------|-----------|-----------|-----------|-----------|-----------|-----------|-----------|
| NM_002762 | 564.718   | 615.251   | AL110168  | 1847.792  | 840.734   | NM_014011 | 832.634   | 888.784   |
| NM_006324 | 7428.006  | 9114.703  | NM_002831 | 5492.328  | 1084.784  | AK025994  | 842.496   | 539.374   |
| NM_005469 | 5485.447  | 5386.046  | AL833409  | 3033.525  | 673.496   | L29306    | 433.158   | 219.036   |
| NM_016361 | 1750.178  | 1246.017  | NM_015966 | 550.073   | 136.185   | NM_013989 | 963.129   | 814.167   |
| NM_003709 | 42737.961 | 47043.801 | NM_016147 | 3650.67   | 921.322   | NM_001739 | 553.79    | 567.893   |
| NM_014349 | 3902.645  | 3935.25   | NM_002833 | 2049.923  | 950.136   | NM_020203 | 412.643   | 396.702   |
| AB040895  | 574.051   | 517.468   | NM_018326 | 8169.203  | 9646.41   | L40992    | 238.888   | 184.668   |
| NM_018210 | 1027.43   | 937.018   | NM_001868 | 550.017   | 1067.791  | U20582    | 2181.083  | 3152.124  |
| NM_001096 | 3293.115  | 3525.054  | NM_000930 | 474.025   | 1495.323  | NM_000337 | 320.417   | 333.901   |
| NM_016014 | 2710.184  | 2250.561  | NM_014773 | 389.541   | 821.896   | NM_002079 | 3034.364  | 3448.867  |
| NM_000199 | 285.353   | 293.696   | NM_005606 | 8138.041  | 12246.76  | U13697    | 344.387   | 421.111   |
| NM_018327 | 553.787   | 339.289   | NM_001223 | 242.589   | 1106.884  | U04270    | 1787.418  | 1844.31   |
| NM_017581 | 1699.235  | 1451.326  | BE730629  | 834.524   | 643.508   | X02152    | 56138.293 | 74041.617 |
| AA488804  | 6467.591  | 6285.414  | AK027167  | 1533.098  | 1263.039  | BG676364  | 1276.213  | 1365.82   |
| NM_006539 | 378.581   | 514.578   | AK025265  | 2655.985  | 2644.769  | BG181154  | 706.401   | 563.951   |
| NM_001684 | 1613.129  | 1379.739  | NM_013279 | 872.207   | 998.683   | AA843679  | 1992.309  | 1789.647  |
| NM_000809 | 320.763   | 308.031   | NM_018652 | 12597.573 | 10560.311 | NM_004957 | 1021.483  | 958.103   |
| NM_016319 | 8355.713  | 6360.986  | AK024460  | 4658.118  | 3973.047  | NM_005252 | 422.96    | 340.23    |
| NM_013309 | 885.073   | 989.099   | NM_006606 | 2772.987  | 2405.003  | AF090906  | 448.696   | 214.093   |
| NM_019891 | 1662.261  | 2575.26   | S78570    | 484.065   | 107.854   | AB023219  | 1043.833  | 775.493   |
| AF038186  | 2411.408  | 2883.851  | NM_005515 | 8.327     | 364.504   | NM_001929 | 3702.927  | 3874.685  |
| NM_016277 | 2797.962  | 3147.405  | NM_006442 | 25013.271 | 37588.055 | NM_006399 | 271.544   | 311.14    |
| NM_007247 | 3196.39   | 3498.881  | NM_003902 | 9046.35   | 10728.09  | NM_000189 | 1101.647  | 1137.781  |
| NM_006554 | 3119.217  | 3588.358  | NM_005099 | 69.674    | 1020.525  | Y00816    | 392.866   | 356.218   |
| X99962    | 6116.655  | 7309.111  | NM_016427 | 7376.271  | 10564.111 | NM_004512 | 1259.186  | 1331.193  |
| AK021492  | 1184.292  | 1418.918  | NM_006706 | 671.922   | 613.789   | NM_004380 | 4401.73   | 5244.008  |
| AK023794  | 10659.493 | 10291.773 | U80741    | 2765.862  | 1719.633  | AY007378  | 1793.38   | 2174.763  |
| NM_019889 | 628.252   | 671.874   | NM_014497 | 1297.625  | 701.598   | NM_000501 | 10960.108 | 10121.131 |
| AB033103  | 1351.231  | 1414.084  | AL133598  | 6945.665  | 3975.649  | NM_000114 | 704.136   | 448.022   |
| NM_002907 | 1231.397  | 1410.736  | NM_006625 | 3835.39   | 3798.756  | NM_005159 | 1674.548  | 1207.647  |
| AK024098  | 1175.075  | 1163.221  | NM_004891 | 21405.631 | 21933.027 | NM_015193 | 366.616   | 310.415   |
| AK001116  | 1035.997  | 867.531   | NM_002879 | 854.14    | 2077.093  | X98834    | 1856.98   | 1532.935  |
| AK022371  | 2769.822  | 3179.938  | U81599    | 481.164   | 1643.855  | NM_007039 | 3497.232  | 2587.374  |
| D42045    | 2208.692  | 2027.343  | AF075068  | 21806.395 | 25456.271 | AB019562  | 497.703   | 462.644   |
| AB007953  | 1320.599  | 1170.587  | NM_007202 | 113.836   | 1609.11   | AF036364  | 1067.815  | 819.897   |
| NM_014002 | 2835.176  | 2259.901  | NM_003663 | 86.823    | 1276.843  | AK022847  | 1334.48   | 1144.653  |
| NM_004197 | 5997.147  | 4469.961  | AK021777  | 17.986    | 1868.499  | NM_006809 | 13250.546 | 14114.711 |
| NM_004073 | 1412.417  | 1371.022  | AF086529  | 146.896   | 1536.471  | NM_006634 | 4856.368  | 5970.857  |
| NM_001279 | 3193.169  | 3072.284  | AK021930  | 543.09    | 306.95    | NM_016469 | 561.843   | 761.218   |
| NM_019109 | 2290.337  | 2690.093  | NM_018004 | 74.417    | 1138.531  | NM_013399 | 2040.404  | 2189.202  |
| NM_000294 | 4900.376  | 4472.06   | X78938    | 824.217   | 914.448   | AL122120  | 1326.979  | 1114.304  |
| AJ272212  | 1305.318  | 1141.011  | U96191    | 115.266   | 857.662   | NM_014684 | 579.837   | 575.701   |
| NM_001629 | 20012.531 | 17846.844 | AK022379  | 983.203   | 347.828   | AK027247  | 428.907   | 301.895   |
| NM_005677 | 2010.085  | 1855.885  | AK001439  | 486.802   | 1011.868  | NM_002480 | 2652.414  | 2300.032  |
| AF229803  | 488.286   | 693.805   | AK023462  | 375.837   | 572.033   | NM_017571 | 3199.313  | 1619.445  |
| AF151810  | 1008.572  | 1413.268  | NM_014099 | 1269.682  | 2063.856  | L03169    | 470.013   | 287.816   |
| NM_002130 | 20585.844 | 25392.334 | AK027233  | 30.016    | 962.185   | NM_014011 | 820.392   | 1020.746  |
| NM_001309 | 1215.727  | 951.767   | AK024131  | 58.334    | 1901.45   | AK025994  | 734.357   | 743.118   |
| D17028    | 20117.244 | 19916.549 | AK023343  | 99.949    | 1166.216  | L29306    | 316.832   | 167.685   |
| NM_013442 | 11857.499 | 11685.481 | AK022452  | 620.459   | 491.528   | NM_013989 | 1078.636  | 1166.393  |
| BG611243  | 1455.835  | 1769.953  | AK023375  | 54.069    | 859.142   | NM_001739 | 656.044   | 664.686   |
| AI417481  | 556.598   | 572.397   | AF085881  | 4054.765  | 1821.725  | NM_001059 | 7222.243  | 5908.603  |
| BI906766  | 426.842   | 577.129   | AK022737  | 10027.423 | 6738.306  | NM_015879 | 280.785   | 508.745   |

|           |           |           |           |           |           |           |           |           |
|-----------|-----------|-----------|-----------|-----------|-----------|-----------|-----------|-----------|
| U60519    | 1207.442  | 1547.569  | NM_003472 | 41778.895 | 24224.27  | NM_002271 | 19315.99  | 19013.82  |
| AA282906  | 1218.698  | 1339.081  | U92980    | 2008.904  | 1744.986  | NM_018361 | 1405.637  | 1863.002  |
| L02870    | 3078.393  | 2605.053  | AF133658  | 809.07    | 464.943   | NM_019893 | 311.051   | 351.583   |
| BG755482  | 5113.608  | 4630.034  | AB048287  | 4318.999  | 5763.745  | AB040966  | 1830.544  | 2246.688  |
| AI480307  | 5246.346  | 5326.578  | Y11159    | 815.947   | 2535.436  | NM_020132 | 736.846   | 642.931   |
| X51420    | 927.131   | 895.918   | AB020648  | 3065.234  | 5450.947  | NM_016467 | 5536.636  | 5144.853  |
| X51757    | 3615.22   | 4233.802  | AK025798  | 19181.15  | 23451.311 | NM_007253 | 1541.048  | 1415.972  |
| L24038    | 1074.851  | 1078.151  | AF086173  | 533.54    | 778.211   | NM_019106 | 917.668   | 844.788   |
| NM_053056 | 503.326   | 510.156   | AK025164  | 616.223   | 890.153   | L08436    | 549.342   | 513.706   |
| NM_006186 | 543.221   | 476.945   | NM_018366 | 5739.792  | 7745.608  | NM_000556 | 1486.133  | 993.975   |
| NM_002751 | 1873.435  | 1733.511  | AB040290  | 997.186   | 2398.623  | NM_004196 | 872.514   | 2501.465  |
| M55593    | 1211.076  | 1418.069  | NM_019848 | 7286.84   | 9505.913  | NM_014170 | 2012.268  | 1525.162  |
| NM_078467 | 3807.428  | 3191.658  | AK021497  | 767.099   | 401.955   | AF116652  | 19559.971 | 10572.239 |
| AK001883  | 13403.536 | 11536.529 | AF124367  | 601.536   | 495.496   | NM_000835 | 439.564   | 396.934   |
| NM_014629 | 4076.115  | 4360.101  | AK000798  | 286.334   | 458.241   | NM_004957 | 1003.413  | 1190.955  |
| NM_007318 | 48594.559 | 50043.914 | L23401    | 1538.492  | 1663.169  | NM_005252 | 487.364   | 444.13    |
| NM_014874 | 603.276   | 682.743   | NM_018090 | 50960.793 | 42609.016 | AF090906  | 493.862   | 546.218   |
| NM_005765 | 15569.714 | 19085.699 | AK022728  | 21045.439 | 10470.04  | AB023219  | 1396.486  | 1576.131  |
| NM_002762 | 545.149   | 476.502   | AL109678  | 886.019   | 1364.378  | NM_014148 | 375.755   | 530.896   |
| NM_006324 | 9329.081  | 10440.87  | AL137524  | 818.06    | 2066.642  | NM_018835 | 1905.691  | 2772.861  |
| NM_016848 | 4732.729  | 4553.206  | AF218008  | 3529.322  | 4787.195  | NM_003401 | 830.175   | 1239.281  |
| NM_000514 | 2862.099  | 2787.969  | M22404    | 13017.021 | 14696.236 | AL137724  | 2108.579  | 2261.943  |
| AL137432  | 1648.329  | 1544.576  | AF052115  | 931.832   | 708.436   | NM_004756 | 1691.119  | 975.263   |
| NM_000957 | 2950.599  | 1973.529  | NM_014019 | 17554.277 | 24622.553 | NM_002913 | 1389.609  | 2046.821  |
| NM_019043 | 4048.73   | 3560.435  | Z70711    | 704.48    | 1061.241  | AK022797  | 504.55    | 495.68    |
| NM_003240 | 2630.944  | 2130.906  | AF116653  | 561.233   | 855.045   | NM_007370 | 2406.636  | 2634.171  |
| NM_016564 | 27051.98  | 18727.221 | NM_012368 | 1115.673  | 1324.058  | NM_006231 | 566.466   | 622.635   |
| NM_000796 | 344.075   | 253.284   | AK025323  | 740.218   | 719.67    | AK023471  | 787.002   | 890.389   |
| AF279656  | 766.156   | 652.505   | NM_013326 | 4556.365  | 4940.851  | AF044578  | 839.983   | 688.051   |
| AK021660  | 345.497   | 275.38    | BC037322  | 1350.193  | 1076.12   | NM_001948 | 1487.613  | 1526.411  |
| AB007933  | 33786.344 | 30051.998 | Y12022    | 1800.304  | 717.466   | NM_001067 | 6163.462  | 5823.214  |
| NM_006702 | 4645.963  | 4749.993  | AK001375  | 1505.316  | 648.603   | NM_014034 | 3545.796  | 2618.647  |
| NM_001396 | 4123.398  | 3498.247  | NM_019597 | 6579.218  | 2666.761  | NM_005335 | 9774.797  | 6874.026  |
| NM_014474 | 1550.762  | 1681.306  | AL137559  | 1210.026  | 441.025   | J04474    | 2637.594  | 2130.629  |
| NM_016249 | 1223.399  | 864.262   | AF026944  | 3243.251  | 2550.008  | NM_003761 | 525.512   | 436.537   |
| NM_006181 | 636.589   | 673.564   | AK021493  | 2769.704  | 2486.811  | X98834    | 1594.436  | 1686.345  |
| NM_003796 | 10658.798 | 11158.858 | NM_006161 | 5559.179  | 2957.61   | NM_007035 | 2691.137  | 3724.512  |
| NM_002973 | 1643.307  | 2543.951  | NM_012155 | 4195.385  | 4100.235  | AB019562  | 404.774   | 504.221   |
| NM_004436 | 14374.207 | 16526.979 | AF144700  | 1335.564  | 1346.273  | AF036364  | 901.895   | 1054.867  |
| NM_006580 | 2853.284  | 3118.133  | NM_004105 | 8188.571  | 4622.881  | AK022847  | 1479.629  | 1847.01   |
| NM_019891 | 595.703   | 407.535   | AB046825  | 1953.66   | 3678.424  | NM_020203 | 403.136   | 507.65    |
| AF038186  | 929.486   | 1168.714  | X64975    | 1014.663  | 2330.309  | U20582    | 2225.02   | 2676.664  |
| NM_016277 | 3749.453  | 3940.566  | AF064876  | 342.636   | 580.825   | NM_002075 | 2890.594  | 3836.689  |
| NM_007247 | 3500.929  | 3965.038  | AL050297  | 4818.835  | 3042.373  | U13697    | 288.681   | 526.197   |
| NM_006554 | 2831.323  | 3569.001  | AK026966  | 1999.283  | 2299.593  | U04270    | 1653.217  | 1619.481  |
| X99962    | 6579.034  | 8364.203  | AF147398  | 458.005   | 444.351   | BG181154  | 623.893   | 237.779   |
| AK023221  | 2134.832  | 2334.634  | AF185573  | 546.907   | 521.592   | AA843679  | 1510.141  | 1426.86   |
| NM_003664 | 3117.418  | 2747.531  | AJ009817  | 432.075   | 809.865   | NM_017571 | 2871.076  | 1631.892  |
| NM_002426 | 2393.283  | 2740.844  | AK025268  | 1122.563  | 2053.235  | L03169    | 390.45    | 550.689   |
| AK027182  | 616.754   | 791.237   | AL833005  | 2132.302  | 2815.619  | NM_001926 | 3878.038  | 3966.832  |
| J03651    | 1829.939  | 1590.998  | L43366    | 916.811   | 1075.293  | NM_006396 | 244.168   | 268.611   |
| U61738    | 2736.39   | 2261.878  | AK026124  | 5183.12   | 3689.733  | NM_000185 | 1072.254  | 1117.417  |
| AJ132087  | 403.862   | 416.168   | NM_015509 | 4606.728  | 2928.062  | Y00816    | 2133.203  | 3101.04   |

|           |           |           |           |           |           |           |           |           |
|-----------|-----------|-----------|-----------|-----------|-----------|-----------|-----------|-----------|
| U92818    | 523.403   | 406.69    | AL110157  | 3449.213  | 2103.675  | NM_004512 | 1391.649  | 1554.541  |
| NM_000442 | 3183.354  | 3028.331  | NM_002319 | 6556.015  | 3752.942  | NM_00438C | 5581.089  | 5758.095  |
| NM_002934 | 1696.808  | 1721.313  | L38712    | 8624.039  | 3899.67   | AY007378  | 1721.415  | 2006.172  |
| AK023011  | 12908.17  | 11954.882 | U84508    | 1169.944  | 798.012   | D26070    | 649.778   | 659.439   |
| NM_01681E | 1386.481  | 1494.357  | NM_017793 | 4892.881  | 2442.177  | NM_001642 | 3487.057  | 4429.841  |
| L17325    | 979.759   | 1161.893  | NM_012131 | 1866.544  | 938.101   | NM_000501 | 9727.772  | 6924.925  |
| NM_01771E | 1046.261  | 1122.993  | S41540    | 1505.847  | 282.989   | NM_00515E | 1610.195  | 1203.657  |
| M58603    | 5835.672  | 6994.242  | CY3Cy5    | 483.878   | 100.249   | NM_00055E | 1494.986  | 1381.51   |
| NM_00363E | 1579.648  | 1840.826  | AI417481  | 273.829   | 247.473   | NM_01417C | 1789.024  | 2263.962  |
| NM_000115 | 2116.856  | 2431.994  | BI906766  | 387.279   | 187.785   | AF116652  | 16905.963 | 16509.691 |
| AF308801  | 3712.048  | 3741.492  | U60519    | 717.865   | 319.616   | NM_00083E | 346.015   | 519.469   |
| AJ272212  | 802.438   | 624.898   | AA282906  | 978.048   | 548.137   | NM_00680E | 14314.45  | 14893.904 |
| NM_00162E | 24370.025 | 22187.93  | L02870    | 2542.393  | 1616.034  | NM_006634 | 5041.917  | 5046.686  |
| NM_005677 | 1936.99   | 1897.236  | BG755482  | 4232.159  | 2143.964  | NM_01646E | 818.71    | 821.403   |
| AF229803  | 315.019   | 528.245   | AI480307  | 4236.079  | 1753.806  | NM_00032E | 486.246   | 347.374   |
| AF151810  | 1138.255  | 1392.926  | X51420    | 689.28    | 410.447   | NM_01339E | 1722.325  | 1770.736  |
| NM_00213C | 25317.736 | 30064.084 | D28235    | 587.433   | 796.305   | AL122120  | 1065.5    | 716.114   |
| NM_00546E | 3078.034  | 2577.828  | X51757    | 3878.602  | 1346.799  | NM_014684 | 603.145   | 521.339   |
| NM_016361 | 1252.048  | 1343.604  | L24038    | 908.113   | 595.496   | AK027247  | 286.131   | 302.109   |
| NM_00370E | 49359.645 | 49831.977 | NM_00618E | 342.637   | 394.52    | NM_00248C | 2657.591  | 2227.56   |
| NM_01434E | 4270.163  | 4638.261  | NM_002751 | 1628.599  | 2369.579  | NM_014034 | 3462.084  | 4019.484  |
| NM_00482C | 759.831   | 562.954   | M55593    | 1040.288  | 1938.503  | NM_00533E | 11022.22  | 10362.351 |
| NM_01821C | 2677.977  | 2348.676  | NM_078467 | 3123.262  | 6065.447  | J04474    | 2974.948  | 3567.491  |
| NM_00109E | 4447.879  | 4568.242  | SR4       | 8928.729  | 14996.246 | NM_003761 | 568.08    | 791.922   |
| NM_016014 | 4962.089  | 4233.383  | SR6       | 1148.427  | 2804.947  | NM_00472E | 288.874   | 334.586   |
| NM_018327 | 822.963   | 927.502   | SR8       | 5655.042  | 27562.004 | NM_014011 | 784.15    | 941.849   |
| NM_017581 | 2181.253  | 1848.272  | SR10      | 20486.289 | 12131.715 | AK025994  | 1169.994  | 3683.82   |
| AA488804  | 7254.814  | 8326.71   | CY3Cy5    | 1199.11   | 222.598   | L29306    | 266.97    | 295.824   |
| NM_00653E | 688.415   | 926.664   | NM_01684E | 2344.3    | 1247.947  | NM_01398E | 1024.88   | 1172.493  |
| NM_001684 | 1506.477  | 1080.659  | NM_000514 | 1928.157  | 825.704   | NM_00173E | 615.739   | 1117.443  |
| NM_00080E | 468.173   | 514.112   | AL137432  | 1390.019  | 490.912   | NM_00105E | 6908.316  | 6627.601  |
| NM_01631E | 6290.646  | 5204.664  | NM_000957 | 1586.615  | 557.125   | NM_01587E | 271.535   | 328.084   |
| NM_01330E | 711.612   | 571.035   | NM_019043 | 3030.695  | 1187.353  | NM_002271 | 21848.744 | 17543.904 |
| NM_078467 | 3261.447  | 2797.797  | NM_00324C | 2589.542  | 1643.379  | NM_018361 | 1531.688  | 1712.588  |
| AK001883  | 17001.602 | 18844.6   | NM_016564 | 20559.795 | 13565.774 | NM_019893 | 447.41    | 230.043   |
| NM_01462E | 1040.834  | 969.69    | AF279656  | 618.736   | 402.4     | AB040966  | 2211.594  | 1794.813  |
| AL050114  | 288.815   | 261.836   | AK021660  | 237.483   | 207.101   | NM_020132 | 844.908   | 677.217   |
| AK021492  | 1543.874  | 1277.005  | AB007933  | 31240.299 | 16130.233 | NM_016467 | 6122.985  | 4441.808  |
| AK023794  | 11946.961 | 10627.014 | NM_006702 | 4173.908  | 2371.827  | NM_007253 | 1241.977  | 558.819   |
| NM_01988E | 1547.017  | 1656.491  | NM_00139E | 5140.73   | 2922.753  | NM_01910E | 666.073   | 566.706   |
| AB033103  | 1266.214  | 990.433   | NM_014474 | 1343.958  | 1677.108  | L08436    | 814.348   | 734.828   |
| NM_002907 | 1709.656  | 1347.77   | NM_01624E | 1189.575  | 2046.864  | NM_005607 | 1202.956  | 1095.454  |
| AK024098  | 1129.252  | 874.178   | NM_006181 | 537.353   | 1622.083  | NM_006761 | 39070.836 | 34205.621 |
| AK001116  | 429.43    | 300.096   | NM_00379E | 9643.797  | 14566.762 | NM_014897 | 808.168   | 1024.867  |
| AK022371  | 2732.083  | 3219.391  | NM_002973 | 1716.859  | 4871.693  | NM_003453 | 3790.131  | 3192.216  |
| D42045    | 2617.806  | 2749.377  | NM_00130E | 1204.509  | 2498.255  | NM_018371 | 13079.303 | 12674.452 |
| AB007953  | 1592.152  | 1922.748  | NM_005082 | 353.709   | 1219.73   | NM_01439C | 4902.106  | 6676.29   |
| NM_014002 | 3509.648  | 3701.198  | D17028    | 25407.84  | 37676.18  | NM_018143 | 349.993   | 486.779   |
| NM_004197 | 4174.08   | 3789.229  | NM_013442 | 23486.691 | 31816.295 | X78924    | 4695.659  | 4826.402  |
| NM_004073 | 953.207   | 1005.982  | BG611243  | 2075.894  | 4455.519  | NM_01325C | 520.796   | 692.471   |
| NM_00127E | 2807.59   | 2734.659  | AK023221  | 2369.477  | 911.732   | AF090906  | 443.08    | 496.804   |
| NM_01910E | 1690.063  | 1572.422  | NM_003664 | 1473.905  | 877.107   | AB023219  | 1158.851  | 1278.482  |
| NM_000294 | 3195.71   | 2854.254  | NM_00242E | 1156.83   | 649.783   | NM_01414E | 361.504   | 219.728   |

|           |           |           |           |           |           |           |          |          |
|-----------|-----------|-----------|-----------|-----------|-----------|-----------|----------|----------|
| NM_016249 | 1166.021  | 1122.633  | AK027182  | 501.775   | 285.301   | NM_01883E | 1824.557 | 2347.778 |
| NM_006181 | 371.556   | 520.942   | J03651    | 2148.693  | 1037.02   | NM_003401 | 984.503  | 1057.953 |
| NM_00379E | 10252.056 | 9873.924  | U61738    | 3674.867  | 3230.76   | AL137724  | 1865.593 | 2100.315 |
| NM_002973 | 1465.364  | 2250.225  | AJ132087  | 636.04    | 601.735   | NM_00475E | 1650.898 | 861.75   |
| NM_00443E | 15262.522 | 16163.859 | U92818    | 432.029   | 468.036   | NM_002913 | 1361.825 | 1376.495 |
| NM_00658C | 3520.041  | 3675.691  | NM_000442 | 3351.791  | 1838.599  | AK022797  | 658.279  | 433.379  |
| NM_00130E | 1671.582  | 1517.755  | NM_002934 | 1193.108  | 445.208   | NM_00737C | 2349.84  | 1817.77  |
| NM_005082 | 507.014   | 691.086   | AK023011  | 12341.046 | 6772.691  | NM_006231 | 558.645  | 545.808  |
| D17028    | 23055.004 | 20407.643 | NM_01681E | 1086.088  | 656.892   | AK023471  | 799.808  | 644.245  |
| NM_013442 | 18621.883 | 17504.564 | L17325    | 925.975   | 1045.97   | AF044578  | 923.568  | 515.844  |
| BG611243  | 1382.439  | 1495.001  | NM_01771E | 694.709   | 1238.036  | NM_00194E | 1461.98  | 1242.528 |
| BI906766  | 425.514   | 389.571   | M58603    | 8411.006  | 10679.637 | NM_001067 | 7837.923 | 6186.216 |
| U60519    | 1230.44   | 1171.986  | NM_003639 | 1511.979  | 3010.107  | AB028984  | 244.502  | 296.073  |
| AA282906  | 1387.961  | 1319.398  | NM_000115 | 1678.647  | 3034.959  | NM_005602 | 517.209  | 464.121  |
| L02870    | 3653.426  | 2758.428  | AF308801  | 3354.301  | 11371.201 | NM_003573 | 1568.095 | 1662.525 |
| BG755482  | 5759.736  | 5218.019  | NM_00731E | 49934.996 | 60710.426 | NM_00029E | 1945.785 | 1860.513 |
| AI480307  | 5278.264  | 5080.178  | NM_014874 | 797.086   | 1888.322  | NM_017422 | 2766.216 | 3485.367 |
| X51420    | 887.856   | 1189.635  | NM_012397 | 239.594   | 1011.775  | NM_00587E | 610.043  | 828.407  |
| D28235    | 208.039   | 388.511   | NM_00576E | 19267.604 | 30891.807 | AF147790  | 443.552  | 488.778  |
| X51757    | 4084.948  | 4852.174  | NM_002762 | 705.743   | 2159.103  | NM_004112 | 915.201  | 983.143  |
| L24038    | 904.056   | 1140.169  | NM_006324 | 11176.25  | 26626.693 | AK025592  | 2672.552 | 2326.502 |
| NM_05305E | 437.933   | 307.216   | NM_00546E | 4887.099  | 1656.359  | NM_00463E | 3484.704 | 4023.229 |
| NM_00618E | 542.253   | 347.226   | NM_016361 | 1325.004  | 714.482   | AK023023  | 3385.313 | 3145.338 |
| NM_002751 | 947.466   | 737.178   | NM_00370E | 38496.352 | 19762.408 | NM_015993 | 1745.621 | 1467.13  |
| M55593    | 896.676   | 787.046   | NM_01434E | 4853.345  | 2015.587  | NM_00265E | 422.237  | 299.048  |
| NM_01771E | 737.77    | 1026.058  | AB040895  | 324.779   | 287.168   | Z36776    | 838.802  | 402.685  |
| M58603    | 7097.034  | 8129.497  | NM_01821C | 2214.898  | 4055.542  | AB029015  | 1028.049 | 771.668  |
| NM_00363E | 968.803   | 1053.869  | NM_00109E | 5335.086  | 11188.86  | NM_002067 | 5278.508 | 3320.628 |
| NM_000115 | 2083.831  | 2432.432  | NM_016014 | 4369.679  | 7284.143  | NM_00615C | 651.402  | 511.671  |
| AF308801  | 3214.011  | 4173.773  | NM_00019E | 237.41    | 296.239   | NM_02034E | 640.889  | 701.785  |
| NM_00731E | 52661.848 | 57618.047 | NM_018327 | 367.763   | 388.092   | NM_003287 | 377.58   | 547.63   |
| NM_014874 | 872.147   | 896.457   | NM_017581 | 2044.026  | 861.198   | NM_01232E | 7796.907 | 9741.823 |
| NM_00576E | 12067.452 | 11789.214 | AA488804  | 6529.527  | 5312.891  | NM_014434 | 636.106  | 761.871  |
| NM_002762 | 571.713   | 523.126   | NM_00653E | 593.47    | 1978.948  | NM_019607 | 1841.739 | 1912.658 |
| NM_006324 | 8673.977  | 7501.02   | NM_001684 | 1421.699  | 2274.289  | U79260    | 5294.017 | 9233.897 |
| NM_01684E | 3874.883  | 3440.884  | AB028977  | 183.327   | 501.062   | NM_00189E | 4301.328 | 6415.671 |
| NM_000514 | 2844.672  | 2889.112  | NM_00080E | 295.439   | 660.259   | NM_006447 | 1230.495 | 1195.162 |
| AL137432  | 1730.214  | 1602.674  | NM_01631E | 7752.632  | 14415.319 | AF119851  | 404.658  | 306.713  |
| NM_000957 | 2429.223  | 2153.393  | NM_01330E | 921.977   | 1654.824  | NM_01412E | 1882.642 | 2917.406 |
| NM_019043 | 4218.497  | 4013.743  | NM_019891 | 902.677   | 1701.315  | D87455    | 1367.348 | 1524.117 |
| NM_00324C | 2350.385  | 2342.972  | AF038186  | 2900.198  | 4882.776  | AF080577  | 722.372  | 722.788  |
| NM_016564 | 27190.166 | 23496.281 | NM_016277 | 3358.406  | 9228.125  | L22005    | 3531.234 | 2830.584 |
| NM_00079E | 360.813   | 515.504   | NM_007247 | 3583.579  | 6984.955  | NM_012291 | 6232.017 | 6877.555 |
| AF279656  | 768.416   | 765.186   | NM_006554 | 3379.396  | 5904.323  | NM_01336E | 915.947  | 924.521  |
| AB007933  | 21620.217 | 19031.422 | X99962    | 7910.611  | 13860.026 | NM_003807 | 2223.292 | 1698.949 |
| NM_006702 | 3355.831  | 3844.453  | AL050114  | 234.62    | 128.894   | NM_00435E | 1775.193 | 1427.271 |
| NM_00139E | 2219.864  | 2012.099  | AK021492  | 1114.745  | 513.087   | NM_00179C | 1198.277 | 1167.76  |
| NM_014474 | 1118.827  | 1065.068  | AK023794  | 11560.195 | 4346.338  | NM_018243 | 2486.187 | 3007.985 |
| NM_00653E | 368.539   | 328.124   | NM_01988E | 1575.723  | 682.16    | NM_01493E | 1088.421 | 1199.803 |
| NM_001684 | 1688.957  | 1530.787  | AB033103  | 1012.223  | 2873.851  | Y17866    | 754.946  | 852.146  |
| AB028977  | 313.038   | 364.633   | NM_002907 | 2299.439  | 6185.222  | NM_00300E | 1872.935 | 1214.893 |
| NM_01631E | 9987.529  | 9175.918  | AK024098  | 1148.509  | 2354.555  | NM_002842 | 565.074  | 369.545  |
| NM_01330E | 1273.922  | 1166.795  | AK001116  | 336.844   | 292.268   | AF290204  | 26.661   | 1581.69  |



|           |           |           |           |           |           |           |           |           |
|-----------|-----------|-----------|-----------|-----------|-----------|-----------|-----------|-----------|
| NM_019891 | 2326.587  | 1923.927  | AK022371  | 1662.842  | 1011.668  | NM_00441E | 1129.582  | 1683.868  |
| AF038186  | 3101.777  | 3327.232  | D42045    | 2719.979  | 1426.605  | NM_000917 | 5958.45   | 7674.263  |
| NM_016277 | 3217.935  | 2676.965  | AB007953  | 1319.874  | 1163.607  | NM_00538E | 8258.947  | 9393.85   |
| NM_007247 | 2788.007  | 2796.672  | NM_014002 | 3184.912  | 3471.723  | NM_01444E | 12522.824 | 14265.958 |
| NM_006554 | 2621.272  | 2699.192  | NM_004197 | 6819.828  | 8282.126  | AL832826  | 689.916   | 1000.77   |
| X99962    | 6332.975  | 5936.094  | NM_004073 | 1248.952  | 1882.337  | NM_01612E | 780.383   | 763.964   |
| AK023221  | 3164.979  | 3661.617  | NM_00127E | 2725.858  | 3975.415  | NM_000391 | 1728.288  | 1777.358  |
| NM_003664 | 1836.141  | 2022.042  | NM_01910E | 1615.494  | 2257.043  | AF229179  | 330.124   | 446.998   |
| NM_00242E | 1343.805  | 1394.639  | NM_000294 | 2883.964  | 4203.454  | NM_014771 | 4059.517  | 4693.73   |
| AK027182  | 629.333   | 740.769   | AJ272212  | 1150.397  | 1912.835  | NM_00227E | 1223.22   | 1664.271  |
| J03651    | 1475.187  | 1989.898  | NM_00162E | 21296.848 | 26787.385 | AK025215  | 4958.845  | 3927.832  |
| U61738    | 2791.12   | 2770.287  | NM_005677 | 1642.686  | 3293.161  | BF569160  | 412.137   | 342.155   |
| AJ132087  | 477.513   | 553.355   | AF229803  | 622.174   | 1145.731  | AK024625  | 594.296   | 298.708   |
| U92818    | 551.343   | 486.107   | AF151810  | 1674.698  | 2575.521  | NM_018131 | 3080.24   | 2248.667  |
| NM_00044E | 3228.043  | 2962.749  | NM_00213C | 40512.332 | 39376.313 | NM_01763E | 2908.515  | 2010.495  |
| NM_002934 | 1495.345  | 1583.127  | NM_00130E | 466.298   | 250.147   | NM_01246E | 169.29    | 447.032   |
| AK023011  | 5711.254  | 5679.864  | NM_00508E | 300.189   | 245.697   | M27877    | 8805.983  | 6320.992  |
| NM_01681E | 1105.266  | 860.154   | D17028    | 15976.618 | 7091.277  | D70836    | 23350.639 | 23754.361 |
| L17325    | 924.531   | 1034.673  | NM_01344E | 15076.002 | 4720.411  | D16878    | 376.483   | 637.985   |
| NM_01400E | 2866.327  | 2757.475  | BG611243  | 1292.411  | 650.607   | NM_01494E | 1035.63   | 1148.518  |
| NM_004197 | 7497.054  | 6586.877  | AI417481  | 327.551   | 374.212   | AK024392  | 1641.391  | 1572.785  |
| NM_00407E | 1685.189  | 1329.011  | BI906766  | 599.278   | 1594.317  | NM_01326C | 615.169   | 648.179   |
| NM_00127E | 3213.191  | 3108.477  | U60519    | 1590.511  | 3877.822  | NM_01830C | 551.785   | 395.786   |
| NM_01910E | 2193.351  | 2430.392  | AA282906  | 1906.828  | 4609.002  | NM_00487E | 1054.344  | 1111.304  |
| NM_000294 | 3426.737  | 3740.93   | L02870    | 2648.984  | 2682.366  | NM_018254 | 2433.076  | 1919.233  |
| AJ272212  | 1456.386  | 1274.139  | BG755482  | 5441.714  | 2528.455  | NM_01774E | 762.362   | 695.139   |
| NM_00162E | 27852.805 | 25474.576 | AI480307  | 4370.963  | 2289.899  | NM_01843E | 1235.206  | 1635.171  |
| NM_005677 | 1862.317  | 1922.154  | X51420    | 786.65    | 514.346   | NM_000937 | 466.969   | 311.134   |
| AF151810  | 1245.003  | 1584.541  | D28235    | 578.649   | 832.616   | AK024810  | 7237.421  | 6173.82   |
| NM_00213C | 26430.969 | 25006.369 | X51757    | 4528.264  | 2834.793  | AK022615  | 13457.506 | 10669.633 |
| NM_00546E | 6237.438  | 5757.349  | L24038    | 1042.531  | 1042.921  | NM_00404E | 2976.955  | 2234.82   |
| NM_016361 | 1886.986  | 1606.486  | NM_05305E | 458.706   | 865.156   | BM458096  | 6320.353  | 5271.264  |
| NM_00370E | 42670.535 | 45753.57  | NM_00618E | 352.455   | 656.483   | NM_00562E | 4753.088  | 3402.993  |
| NM_01434E | 5186.749  | 5676.481  | NM_002751 | 1330.772  | 2680.646  | D29958    | 7384.662  | 5356.342  |
| AB040895  | 706.036   | 880.405   | M55593    | 843.239   | 1964.831  | NM_015971 | 3574.617  | 2641.361  |
| NM_01821C | 2875.74   | 5751.79   | NM_078467 | 2861.877  | 5509.862  | D17257    | 35231.09  | 18296.711 |
| NM_00109E | 4122.936  | 4427.083  | NM_01462E | 4064.384  | 6964.418  | AK000724  | 1804.844  | 1622.834  |
| NM_016014 | 4502.861  | 3931.294  | NM_00731E | 40728.547 | 14825.404 | NM_00372C | 6201.496  | 6984.329  |
| NM_017581 | 2200.943  | 2759.222  | NM_014874 | 682.897   | 403.697   | AF097159  | 639.427   | 573.527   |
| AA488804  | 7017.132  | 10127.643 | NM_00576E | 12953.252 | 3833.552  | NM_004807 | 878.417   | 766.708   |
| L29496    | 435.349   | 543.044   | NM_00276E | 408.27    | 209.103   | J03569    | 22502.426 | 29648.668 |
| NM_00092E | 334.135   | 389.133   | NM_006324 | 7428.993  | 8224.515  | NM_00311E | 2578.023  | 2331.182  |
| NM_00700E | 10338.354 | 11174.403 | NM_01684E | 5334.469  | 15154.181 | NM_000687 | 5829.469  | 6028.818  |
| NM_012121 | 1589.712  | 1291.856  | NM_000514 | 3519.924  | 9686.384  | NM_01820C | 805.603   | 636.701   |
| NM_00325E | 4909.995  | 4706.942  | AL137432  | 1674.518  | 3011.49   | NM_01483E | 1697.839  | 1501.458  |
| NM_01415E | 2912.98   | 3028.466  | NM_000957 | 2108.504  | 1689.889  | NM_00721E | 1970.284  | 1847.207  |
| AK026331  | 14840.204 | 12950.231 | NM_01904E | 3494.24   | 1464.75   | AF005067  | 1081.605  | 1016.894  |
| M30773    | 2460.872  | 2767.732  | NM_00324C | 3189.257  | 1434.674  | NM_00571C | 3414.82   | 2736.21   |
| NM_01633E | 8230.729  | 8024.428  | NM_016564 | 15699.141 | 7504.815  | AF252284  | 762.234   | 418.132   |
| AF113699  | 13066.938 | 10134.25  | AF279656  | 953.316   | 910.446   | NM_01493C | 890.41    | 262.489   |
| AK001883  | 15745.484 | 12150.604 | AK021660  | 475.017   | 1037.424  | NM_00153C | 1587.923  | 1435.941  |
| NM_01462E | 3456.733  | 3077.803  | AB007933  | 43577.258 | 46514.363 | U80232    | 4663.64   | 3107.161  |
| AL050114  | 301.051   | 185.701   | NM_014474 | 1237.554  | 2193.955  | AF086526  | 452.742   | 339.438   |

|           |           |           |           |           |           |           |           |           |
|-----------|-----------|-----------|-----------|-----------|-----------|-----------|-----------|-----------|
| AK021492  | 2471.357  | 3074.718  | NM_016249 | 1186.494  | 1982.583  | AK025788  | 1519.898  | 1343.022  |
| AK023794  | 14961.475 | 19744.283 | NM_006181 | 383.709   | 627.964   | AF086164  | 742.28    | 752.684   |
| NM_019885 | 2675.424  | 2845.025  | NM_003796 | 8728.193  | 11248.597 | AK025577  | 613.171   | 654.551   |
| AB033103  | 1591.612  | 3155.33   | NM_002973 | 1965.235  | 5401.034  | AK000216  | 773.898   | 710.128   |
| NM_002907 | 2399.089  | 3081.548  | NM_006580 | 3633.193  | 5474.224  | AK023440  | 493.245   | 605.728   |
| AK024098  | 1378.406  | 2283.839  | NM_019891 | 657.956   | 341.599   | AB033041  | 12312.826 | 13526.957 |
| AK001116  | 798.952   | 1164.687  | AF038186  | 2120.754  | 1095.8    | NM_014894 | 36499.289 | 26461.662 |
| AB007953  | 2332.427  | 4223.528  | NM_016277 | 2433.758  | 1332.841  | AY007155  | 2705.632  | 2894.366  |
| NM_017820 | 847.702   | 887.203   | NM_007247 | 2993.5    | 1299.919  | AK027160  | 1304.436  | 1072.552  |
| NM_001849 | 1457.928  | 1171.604  | NM_006554 | 2540.192  | 874.754   | AL359211  | 598.657   | 376.777   |
| NM_003734 | 9063.787  | 8736.145  | X99962    | 5627.043  | 3377.573  | U79264    | 732.946   | 817.767   |
| NM_014935 | 13526.377 | 15144.259 | AK023221  | 2634.434  | 3300.874  | NM_015695 | 3379.734  | 2936.82   |
| X99660    | 20411.74  | 24170.684 | NM_003664 | 2218.485  | 3788.82   | AF070530  | 8542.52   | 6828.006  |
| X03635    | 3097.443  | 4530.963  | NM_002426 | 1462.239  | 1577.52   | NM_006420 | 598.196   | 450.986   |
| X97671    | 751.693   | 1131.451  | AK027182  | 453.742   | 257.176   | AF131855  | 363.439   | 368.665   |
| NM_004351 | 6903.448  | 10156.711 | J03651    | 2078.181  | 1249.829  | AF086046  | 902.714   | 633.38    |
| NM_004236 | 7788.441  | 12323.948 | U61738    | 3857.123  | 1662.941  | AK024962  | 580.357   | 850.756   |
| AB011093  | 4471.181  | 7532.857  | AJ132087  | 310.477   | 265.515   | AK025135  | 2230.012  | 2691.779  |
| NM_005618 | 524.976   | 699.29    | U92818    | 727.273   | 598.598   | NM_017926 | 1236.738  | 1429.205  |
| NM_020533 | 10436.46  | 17642.506 | NM_000442 | 3810.15   | 3931.113  | AY007145  | 1209.724  | 1591.28   |
| NM_001894 | 10168.207 | 17776.5   | NM_002934 | 1576.665  | 3190.245  | D38549    | 1129.994  | 1276.686  |
| NM_000614 | 770.111   | 1322.943  | NM_017716 | 685.758   | 1033.044  | AK024780  | 702.205   | 676.633   |
| AK022884  | 1468.559  | 2723.115  | M58603    | 7536.869  | 8441.773  | AF085947  | 524.805   | 621.778   |
| AF305072  | 504.656   | 906.857   | NM_003639 | 1285.807  | 2321.264  | U10510    | 2732.761  | 2265.163  |
| NM_006620 | 7794.328  | 12607.193 | NM_000115 | 1973.515  | 3301.096  | Z36842    | 710.523   | 249.797   |
| NM_001397 | 1359.09   | 1640.056  | AF308801  | 3839.123  | 6450      | AF086155  | 475.316   | 335.555   |
| Y08770    | 588.086   | 538.945   | AJ272212  | 575.926   | 311.056   | NM_014155 | 2229.919  | 1865.232  |
| NM_004772 | 3816.365  | 3782.721  | NM_001626 | 12460.859 | 6420.917  | AK021795  | 348.694   | 346.724   |
| NM_004004 | 617.935   | 589.32    | NM_005677 | 1271.311  | 535.284   | AL162042  | 868.462   | 1153.284  |
| AF024540  | 1453.798  | 1767.417  | AF229803  | 466.13    | 230.679   | AK026131  | 548.267   | 459.997   |
| NM_002189 | 1833.999  | 2497.097  | AF151810  | 981.624   | 430.991   | AK023312  | 749.097   | 460.076   |
| U42977    | 4010.182  | 8112.593  | NM_002130 | 23562.215 | 7062.926  | AL133570  | 345.914   | 486.271   |
| NM_002881 | 7190.846  | 13288.481 | NM_005469 | 4862.731  | 3619.703  | AK021462  | 442.671   | 311.647   |
| NM_003666 | 4756.833  | 6388.294  | NM_016361 | 1700.148  | 2724.595  | AK022678  | 658.515   | 811.786   |
| NM_003288 | 5116.197  | 9529.373  | NM_003708 | 40722.684 | 19530.582 | AK023835  | 1172.957  | 1090.781  |
| NM_018242 | 485.956   | 804.759   | NM_014349 | 4628.894  | 2514.435  | AK023906  | 1384.208  | 955.025   |
| M83822    | 2834.848  | 4778.711  | AB040895  | 297.511   | 468.524   | NM_012405 | 1580.056  | 1674.928  |
| NM_018434 | 11171.703 | 17022.959 | NM_018210 | 2144.532  | 1780.069  | AK021708  | 194.405   | 350.639   |
| NM_003914 | 821.548   | 1365.531  | NM_001096 | 3482.887  | 1384.955  | AK023947  | 195.277   | 237.691   |
| NM_020423 | 787.997   | 903.953   | NM_016014 | 4211.9    | 2461.825  | NM_005691 | 627.205   | 630.938   |
| AK021437  | 1058.835  | 1042.414  | NM_018327 | 789.328   | 1726.891  | AK023814  | 297.001   | 293.977   |
| NM_003831 | 2817.709  | 2517.014  | NM_017581 | 1876.325  | 2999.73   | AF130063  | 325.85    | 313.273   |
| NM_001759 | 311.238   | 216.001   | AA488804  | 5923.599  | 8146.329  | AL162043  | 297.43    | 511.484   |
| AB007965  | 6503.262  | 6671.57   | NM_006539 | 393.739   | 659.658   | NM_006543 | 495.159   | 622.207   |
| NM_017649 | 1002.456  | 986.042   | NM_001684 | 1189.337  | 1585.624  | AK023018  | 727.911   | 710.478   |
| NM_000066 | 951.749   | 669.618   | AB028977  | 147.19    | 286.06    | AK022672  | 1134.987  | 851.258   |
| NM_001196 | 13419.099 | 15569.505 | NM_016318 | 9607.834  | 16267.688 | AK023870  | 900.584   | 984.775   |
| NM_016008 | 1514.198  | 1471.026  | NM_013309 | 1099.773  | 1312.276  | AK021599  | 915.237   | 570.998   |
| NM_017744 | 880.04    | 877.255   | NM_078467 | 1910.653  | 972.923   | AK024263  | 625.979   | 676.89    |
| NM_001924 | 2456.12   | 2898.324  | AK001883  | 14674.306 | 3735.163  | NM_016613 | 1237.445  | 1451.04   |
| NM_017705 | 2132.548  | 2193.454  | NM_014629 | 3093.65   | 1120.52   | U84516    | 7076.989  | 7353.29   |
| NM_001796 | 2796.394  | 2180.427  | AL050114  | 244.31    | 222.248   | AL049270  | 515.093   | 760.289   |
| NM_009587 | 4680.327  | 3154.05   | AK021492  | 1324.657  | 567.535   | U88834    | 1852.891  | 2137.936  |

|           |           |           |           |           |           |           |           |           |
|-----------|-----------|-----------|-----------|-----------|-----------|-----------|-----------|-----------|
| AL133566  | 810.532   | 1618.052  | AK023794  | 8931.773  | 4303.068  | BC025324  | 359.464   | 182.58    |
| M36118    | 9585.107  | 10488.291 | NM_019885 | 1756.969  | 708.637   | NM_006087 | 49394.762 | 62681.676 |
| NM_00339E | 9167.122  | 9686.053  | AB033103  | 991.227   | 589.196   | NM_00353E | 1008.668  | 996.395   |
| NM_00263C | 667.848   | 783.537   | NM_002907 | 1343.094  | 563.992   | AK023726  | 1670.544  | 2064.059  |
| AJ295149  | 45155.539 | 40293.191 | AK024098  | 844.738   | 721.614   | AF131836  | 1076.633  | 793.396   |
| NM_01343E | 5531.51   | 5515.874  | AK001116  | 211.942   | 471.54    | AF275804  | 12108.033 | 9686.604  |
| NM_01468E | 3161.44   | 2523.722  | AK022371  | 1570.743  | 1957.55   | AL137488  | 519.951   | 396.837   |
| AB037784  | 415.209   | 552.374   | D42045    | 2318.594  | 2695.867  | AL049447  | 38554.055 | 28918.441 |
| AL359623  | 1045.766  | 986.696   | AB007953  | 1115.389  | 1263.131  | NM_020527 | 1059.078  | 983.635   |
| AK026920  | 2218.43   | 2590.594  | NM_014002 | 2461.425  | 3105.689  | AB020637  | 4290.772  | 4029.316  |
| AL137255  | 1693.655  | 1638.368  | NM_004197 | 5607.901  | 7740.806  | NM_00528E | 1075.054  | 863.02    |
| NM_00337C | 8062.765  | 8802.14   | NM_004073 | 1274.939  | 1951.789  | AK024365  | 1099.883  | 837.06    |
| AB037715  | 2600.08   | 2286.151  | NM_00127E | 2758.209  | 3535.351  | AJ251759  | 570.539   | 461.556   |
| AF250924  | 7416.784  | 6454.451  | NM_01910E | 2183.469  | 2337.088  | AK024371  | 408.179   | 354.104   |
| D86979    | 2045.758  | 2206.321  | NM_000294 | 3323.058  | 4238.14   | AB019569  | 51846.43  | 33087.703 |
| AB023230  | 340.105   | 424.019   | NM_01624E | 398.878   | 288.679   | NM_00188E | 7569.216  | 4713.751  |
| AF018081  | 16393.318 | 12816.519 | NM_006181 | 262.385   | 222.509   | NM_00499E | 392.043   | 583.073   |
| NM_020202 | 10612.803 | 9290.538  | NM_00379E | 7280.213  | 2195.224  | X89668    | 15845.335 | 8885.227  |
| X52357    | 39447.902 | 30767.555 | NM_002973 | 1285.807  | 583.307   | NM_00445E | 2426.284  | 2582.481  |
| AF211891  | 1127.04   | 1408.284  | NM_00443E | 11352.846 | 3058.552  | NM_006901 | 607.762   | 646.949   |
| NM_005641 | 1447.737  | 1604.64   | NM_00658C | 2301.759  | 812.751   | NM_01853C | 3166.258  | 2563.362  |
| NM_00166E | 898.11    | 909.168   | NM_00130E | 789.429   | 648.822   | AK022855  | 5206.825  | 4361.318  |
| AK025362  | 755.727   | 522.653   | NM_005082 | 367.354   | 442.853   | AK023816  | 764.852   | 939.427   |
| AK021776  | 2535.683  | 2512.27   | D17028    | 16332.751 | 6801.739  | AL050102  | 529.439   | 422.988   |
| AK026042  | 1008.726  | 866.898   | NM_013442 | 16129.134 | 5998.297  | AF305686  | 2040.928  | 1758.521  |
| NM_01423E | 15126.354 | 13164.767 | BG611243  | 1232.104  | 465.943   | AF085832  | 413.17    | 453.53    |
| NM_002137 | 48403.492 | 49933.688 | BI906766  | 274.403   | 265.824   | AK025981  | 888.06    | 709.78    |
| NM_002911 | 923.813   | 664.962   | U60519    | 746.52    | 445.74    | AF086266  | 473.664   | 321.916   |
| U94386    | 588.72    | 373.889   | AA282906  | 1422.939  | 1022.518  | AF086252  | 575.331   | 597.997   |
| NM_01600C | 8437.447  | 7650.4    | L02870    | 3388.656  | 2919.952  | AK026703  | 296.168   | 197.388   |
| NM_006372 | 4160.794  | 3533.041  | BG755482  | 5516.957  | 5313.59   | NM_01759E | 353.051   | 438.658   |
| NM_01415C | 1404.658  | 1189.318  | AI480307  | 4460.329  | 4182.192  | NM_01786E | 3878.049  | 3797.847  |
| NM_00680E | 21942.748 | 21610.514 | X51420    | 631.397   | 862.725   | NM_00353E | 835.633   | 887.088   |
| AF132027  | 18705.385 | 15098.442 | D28235    | 103.824   | 458.847   | AF116707  | 1473.843  | 1535.683  |
| NM_004681 | 11029.636 | 8582.937  | X51757    | 3803.473  | 3164.999  | U90910    | 2067.201  | 2089.882  |
| AB033096  | 6306.678  | 5270.126  | L24038    | 819.132   | 827.736   | AL049979  | 491.321   | 301.428   |
| NM_01488E | 719.301   | 505.44    | NM_05305E | 247.156   | 545.562   | AK025765  | 707.039   | 646.12    |
| L31408    | 6562.105  | 5630.907  | NM_00618E | 340.564   | 396.672   | CY3Cy5    | 679.038   | 200.218   |
| NM_00154E | 8001.044  | 6597.663  | NM_002751 | 1695.068  | 2437.724  | AA143087  | 2504.237  | 2308.847  |
| NM_00444E | 8079.85   | 6496.699  | M55593    | 1421.922  | 1551.233  | U25804    | 942.508   | 1296.405  |
| AL365512  | 2854.024  | 2206.645  | NM_01771E | 556.452   | 282.317   | BI870965  | 1538.823  | 1645.84   |
| AK001740  | 5420.513  | 5044.711  | M58603    | 6670.484  | 2021.606  | NM_00190E | 3808.445  | 5170.855  |
| AF131793  | 849.16    | 924.603   | NM_00363E | 1275.294  | 695.254   | BI835536  | 5063.73   | 6042.174  |
| NM_00591E | 14179.15  | 15136.61  | NM_000115 | 1438.531  | 583.359   | BF205051  | 1807.692  | 1465.169  |
| J02625    | 7334.287  | 8367.197  | AF308801  | 2852.106  | 1396.656  | X02761    | 911.056   | 1065.457  |
| NM_00454E | 23530.063 | 22441.117 | NM_00731E | 53291.488 | 47998.559 | M91463    | 465.17    | 599.917   |
| NM_00533E | 16121.977 | 14766.318 | NM_014874 | 826.573   | 720.591   | J03060    | 1495.291  | 1374.723  |
| AK026161  | 1416.556  | 1280.956  | NM_00576E | 13092.584 | 5127.085  | X54156    | 336.591   | 328.145   |
| NM_00455E | 21247.287 | 18081.906 | NM_002762 | 469.938   | 268.699   | NM_00374E | 600.875   | 442.451   |
| D63484    | 1254.233  | 1377.693  | NM_006324 | 7031.371  | 2803.076  | AA829383  | 2018.339  | 2416.208  |
| AK026745  | 3562.833  | 3809.718  | NM_01684E | 3553.913  | 2018.297  | AF012434  | 4238.55   | 8171.197  |
| AL157440  | 1923.355  | 1849.678  | NM_000514 | 2587.71   | 1161.745  | SR6       | 1178.668  | 6371.869  |
| NM_01642E | 5691.272  | 4443.816  | AL137432  | 1668.409  | 988.069   | SR8       | 5494.667  | 67057.359 |

|           |           |           |           |           |           |           |           |           |
|-----------|-----------|-----------|-----------|-----------|-----------|-----------|-----------|-----------|
| AB040975  | 1234.948  | 1247.298  | NM_000957 | 2274.917  | 1729.175  | SR10      | 19762.004 | 30389.004 |
| NM_005119 | 6467.041  | 4626.266  | NM_019043 | 3651.928  | 3281.091  | NM_005902 | 536.303   | 647.495   |
| NM_00316E | 18759.289 | 18566.113 | NM_00324C | 2998.971  | 2780.737  | NM_00285C | 44201.152 | 35808.609 |
| AK055844  | 735.526   | 723.467   | NM_016564 | 25141.094 | 19032.502 | NM_004302 | 238.943   | 180.921   |
| NM_01828E | 6950.103  | 7337.302  | AF279656  | 815.242   | 1226.181  | NM_005903 | 660.093   | 664.35    |
| NM_00314E | 5405.1    | 4794.391  | AK021660  | 318.968   | 709.678   | AB037734  | 453.964   | 1138.526  |
| X52342    | 895.6     | 704.721   | AB007933  | 27389.283 | 20057.176 | U77493    | 287.431   | 262.478   |
| NM_003131 | 12423.557 | 9609.794  | NM_006702 | 3765.788  | 4829.051  | NM_019062 | 270.374   | 240.67    |
| NM_00523E | 3570.816  | 2797.784  | NM_00139E | 3535.747  | 2642.364  | NM_003873 | 177.135   | 155.591   |
| AB014526  | 707.1     | 635.462   | NM_014474 | 1101.018  | 850.393   | NM_000263 | 482.944   | 377.887   |
| NM_01853E | 622.624   | 713.473   | NM_00653E | 353.283   | 140.638   | AF073519  | 3459.199  | 2541.632  |
| NM_01334E | 1143.027  | 961.587   | NM_001684 | 1043.328  | 560.699   | Y16132    | 6223.036  | 26841.459 |
| AF131784  | 609.264   | 564.591   | NM_00080E | 237.055   | 160.319   | NM_002521 | 378.325   | 2118.881  |
| NM_017851 | 2822.744  | 2996.811  | NM_01631E | 6516.006  | 2981.273  | NM_00115C | 424.408   | 1908.043  |
| AK026182  | 58932.188 | 64762.793 | NM_01330E | 710.733   | 849.828   | NM_00285E | 627.025   | 2844.199  |
| NM_01608E | 20051.895 | 19021.633 | NM_019891 | 665.087   | 1431.205  | NM_00322E | 405.31    | 1264.901  |
| AK025768  | 3137.423  | 2627.693  | AF038186  | 2456.542  | 4613.845  | NM_00009E | 615.001   | 3293.513  |
| AL117502  | 2530.04   | 2323.619  | NM_016277 | 2785.009  | 2710.382  | NM_01904E | 266.961   | 337.953   |
| AK001846  | 920.023   | 884.229   | NM_007247 | 3360.827  | 2073.038  | NM_00638C | 1493.169  | 1398.869  |
| AK024637  | 440.661   | 627.856   | NM_006554 | 3150.215  | 1297.733  | AB020710  | 768.245   | 1076.993  |
| AK024108  | 541.021   | 282.655   | X99962    | 6403.403  | 3311.293  | NM_016174 | 1594.153  | 1590.975  |
| AL117454  | 13698.319 | 11976.463 | AK023221  | 2401.815  | 793.574   | NM_020377 | 225.834   | 245.285   |
| AF272890  | 1627.121  | 1617.075  | NM_003664 | 1722.722  | 1038.118  | U88896    | 703.23    | 691.677   |
| U00684    | 839.352   | 813.027   | NM_00242E | 1204.679  | 621.772   | NM_00173E | 1300.134  | 1230.09   |
| NM_01645E | 17224.092 | 13067.413 | AK027182  | 632.066   | 698.524   | NM_00234E | 442.631   | 336.906   |
| AF086227  | 1097.202  | 896.73    | J03651    | 2243.531  | 2019.941  | NM_00508C | 6470.646  | 6481.723  |
| AK026246  | 2927.99   | 2227.765  | U61738    | 2653.332  | 2365.676  | NM_004887 | 5542.08   | 4302.548  |
| AF070524  | 322.821   | 211.125   | AJ132087  | 326.55    | 496.608   | NM_006404 | 277.792   | 287.185   |
| AF035281  | 1978.928  | 1439.628  | U92818    | 748.914   | 884.023   | NM_01479E | 391.439   | 360.466   |
| AL133446  | 2336.908  | 2890.592  | NM_000442 | 3787.929  | 3977.725  | NM_00298E | 420.383   | 520.699   |
| U56251    | 1701.236  | 2075.203  | NM_002934 | 1453.276  | 1775.206  | AK027201  | 1033.94   | 5388.853  |
| AK024689  | 659.624   | 654.455   | AK023011  | 10432.77  | 9595.269  | NM_00048E | 3470.919  | 11864.818 |
| BC035667  | 714.742   | 798.541   | NM_01681E | 1047.582  | 975.866   | X98507    | 1070.605  | 4995.691  |
| AL049277  | 2564.052  | 1898.201  | L17325    | 754.157   | 523.18    | NM_01466E | 3956.332  | 14063.951 |
| AL049988  | 302.117   | 150.711   | NM_014002 | 2175.233  | 714.064   | AL133064  | 1674.999  | 1573.745  |
| AL117506  | 453.564   | 443.964   | NM_004197 | 3978.736  | 2128.556  | NM_006227 | 1866.017  | 2154.172  |
| AL050043  | 691.584   | 612.089   | NM_004073 | 715.658   | 622.373   | NM_00290E | 2398.194  | 2378.848  |
| AL117571  | 1495.024  | 1562.482  | NM_00127E | 2560.421  | 958.693   | NM_01902E | 3583.296  | 3773.639  |
| L22263    | 729.372   | 838.529   | NM_01910E | 1391.722  | 822.161   | NM_000431 | 1320.27   | 1707.36   |
| AK091573  | 621.124   | 715.549   | NM_000294 | 2836.727  | 3796.225  | NM_013421 | 428.4     | 428.789   |
| AF131814  | 1655.454  | 1941.122  | AJ272212  | 1475.285  | 4045.819  | AB033118  | 2799.049  | 4238.527  |
| AL359600  | 2104.818  | 1795.336  | NM_00162E | 33526.184 | 50036.332 | NM_01960E | 1103.614  | 1474.162  |
| AL360144  | 1061.01   | 810.363   | NM_005677 | 2095.426  | 4510.743  | NM_00169C | 3025.542  | 3090.391  |
| BC028617  | 613.613   | 560.77    | AF229803  | 418.095   | 503.805   | AF034374  | 2962.704  | 3279.629  |
| AL117653  | 1021.323  | 1037.601  | AF151810  | 1262.095  | 523.725   | NM_01611E | 2788.177  | 2214.513  |
| NM_00374C | 2336.434  | 1966.79   | NM_00213C | 28761.15  | 12387.026 | NM_018674 | 9562.161  | 9105.441  |
| AL050078  | 1182.025  | 901.182   | NM_00546E | 5267.823  | 2778.352  | NM_001683 | 13949.269 | 7667.028  |
| NM_01427E | 4861.511  | 4398.437  | NM_016361 | 1575.157  | 1079.991  | NM_001682 | 857.094   | 457.157   |
| AF009288  | 413.221   | 279.684   | NM_00370E | 48414.637 | 30858.275 | NM_01440E | 1224.231  | 1113.133  |
| AF035303  | 1276.787  | 2053.949  | NM_01434E | 6191.552  | 4657.186  | NM_00081E | 539.647   | 960.619   |
| AF056438  | 2039.852  | 5060.383  | NM_01821C | 2133.911  | 2499.947  | AK025130  | 1812.457  | 10406.81  |
| AF003737  | 45089.121 | 45709.605 | NM_00109E | 3861.955  | 3800.526  | NM_01787E | 1048.657  | 4243.161  |
| AF009296  | 961.455   | 1455.113  | NM_016014 | 3998.857  | 3982.718  | AK023232  | 1133.735  | 6374.606  |

|           |           |           |           |           |           |           |           |           |
|-----------|-----------|-----------|-----------|-----------|-----------|-----------|-----------|-----------|
| AK001011  | 6556.64   | 6252.089  | NM_000198 | 424.945   | 395.055   | NM_018205 | 2081.613  | 8374.165  |
| AK021457  | 619.789   | 541.453   | NM_018327 | 1470.512  | 1569.344  | AB018268  | 1567.161  | 1053.535  |
| AK021690  | 1404.679  | 1272.555  | NM_017581 | 2465.856  | 1308.814  | Z70701    | 3271.906  | 3145.35   |
| AK001078  | 374.029   | 278.753   | AA488804  | 5672.606  | 2760.888  | AB040972  | 1656.063  | 1210.791  |
| AK001840  | 930.149   | 821.803   | L29496    | 258.453   | 199.317   | BE260997  | 284.503   | 217.907   |
| AK021486  | 663.088   | 719.994   | NM_007002 | 7763.843  | 2747.093  | NM_018686 | 4703.241  | 5174.593  |
| AK021740  | 595.513   | 373.729   | NM_012121 | 886.115   | 421.017   | NM_017676 | 689.143   | 871.386   |
| AK025148  | 457.973   | 335.326   | NM_003255 | 3533.559  | 1809.426  | AK021764  | 274.149   | 322.653   |
| AK026238  | 478.42    | 375.482   | NM_014155 | 1894.085  | 2922.245  | NM_005431 | 1045.656  | 1385.099  |
| AK026694  | 496.93    | 367.544   | AK026331  | 14133.616 | 33494.117 | AB036063  | 913.801   | 937.281   |
| AK025564  | 908.446   | 593.994   | M30773    | 2423.052  | 7141.946  | NM_002894 | 2663.215  | 2593.76   |
| AK026286  | 1135.239  | 881.416   | NM_016338 | 10081.321 | 17150.043 | NM_004625 | 3850.396  | 3133.086  |
| AK026731  | 1139.984  | 779.3     | AF113699  | 11729.854 | 9892.776  | NM_004260 | 3312.757  | 2991.587  |
| NM_004192 | 2228.887  | 2214.524  | AK001883  | 13929.231 | 5677.937  | AL050067  | 695.757   | 366.035   |
| AK024160  | 2427.607  | 2988.287  | NM_014629 | 3902.564  | 1292.747  | NM_004972 | 2570.387  | 1705.024  |
| AK025077  | 759.352   | 756.267   | AL050114  | 217.133   | 329.135   | NM_006251 | 2095.224  | 1571.358  |
| NM_006417 | 6264.111  | 5845.274  | AK021492  | 2275.062  | 1034.184  | NM_004103 | 3198.191  | 2754.515  |
| L43350    | 1041.239  | 2025.233  | AK023794  | 18199.977 | 13829.534 | NM_002314 | 2548.863  | 4253.998  |
| NM_020317 | 7030.689  | 9118.99   | NM_019885 | 2472.895  | 1793.058  | NM_006296 | 1001.464  | 5606.972  |
| AL080234  | 3538.674  | 3645.29   | AB033103  | 1168.297  | 1632.59   | Z25433    | 1473.476  | 9691.811  |
| AK027025  | 1328.57   | 1263.7    | NM_002907 | 2027.471  | 1876.412  | NM_005922 | 1573.911  | 9385.264  |
| AK025105  | 541.698   | 600.452   | AK024098  | 1388.496  | 1621.256  | NM_018638 | 3108.214  | 16235.907 |
| AK021675  | 391.923   | 367.644   | AK022371  | 1840.155  | 1253.857  | AL137593  | 6062.348  | 21646.332 |
| AF212220  | 4826.355  | 4576.454  | D42045    | 1801.442  | 778.192   | NM_000382 | 1113.827  | 693.91    |
| AK022082  | 301.945   | 218.16    | AB007953  | 2459.411  | 2052.481  | NM_001150 | 225.965   | 189.853   |
| AL137709  | 1755.366  | 1422.145  | NM_017820 | 383.729   | 229.887   | NM_002856 | 385.876   | 450.926   |
| AK023277  | 1687.041  | 1382.781  | NM_001849 | 1003.862  | 521.887   | NM_003225 | 380.356   | 352.67    |
| AK000425  | 2317.186  | 1959.954  | NM_003734 | 7099.295  | 2612.801  | NM_000096 | 562.484   | 574.517   |
| Z27200    | 937.568   | 918.315   | NM_014935 | 9957.991  | 5168.767  | AA418251  | 465.396   | 374.657   |
| AF070571  | 2861.577  | 2759.134  | X99660    | 13881.263 | 20033.369 | AA143087  | 2751.726  | 2068.592  |
| AK023554  | 755.061   | 750.772   | X03635    | 2803.437  | 7434.899  | U25804    | 1009.704  | 1242.327  |
| NM_003513 | 9303.597  | 7975.386  | X97671    | 363.997   | 1248.581  | BI870965  | 1376.618  | 1487.888  |
| AK024844  | 1121.254  | 1696.17   | NM_004351 | 5306.054  | 7148.632  | NM_001903 | 3555.982  | 5347.293  |
| AL049437  | 965.046   | 1042.395  | NM_004236 | 6569.036  | 4452.226  | BI835536  | 4494.038  | 5244.592  |
| AF161427  | 54791.563 | 59148.828 | AB011093  | 5001.708  | 3054.131  | BF205051  | 1312.504  | 965.555   |
| AK021715  | 9692.161  | 11954.248 | NM_002462 | 200.834   | 139.013   | X02761    | 703.027   | 532.289   |
| AK000315  | 12110.526 | 12463.97  | NM_004560 | 520.649   | 723.619   | M91463    | 383.752   | 296.873   |
| AK023248  | 978.844   | 1359.521  | NM_005618 | 255.737   | 137.397   | J03060    | 1534.743  | 823.71    |
| NM_012404 | 18632.537 | 22089.787 | NM_020533 | 5317.6    | 2661.891  | X54156    | 287.088   | 209.082   |
| AF251190  | 418.579   | 570.762   | NM_001894 | 6459.275  | 6539.163  | NM_003743 | 593.039   | 370.338   |
| AF130075  | 9855.56   | 9477.015  | NM_000614 | 489.347   | 686.06    | AA829383  | 2021.261  | 3116.048  |
| NM_005444 | 5223.331  | 5634.223  | AK022884  | 1168.419  | 1452.719  | AF012434  | 5218.813  | 24845.748 |
| V00589    | 39399.785 | 29069.275 | AF305072  | 293.895   | 568.524   | NM_033334 | 233.195   | 1369.301  |
| AL390163  | 1015.833  | 1111.08   | NM_006620 | 6931.583  | 10928.223 | NM_018124 | 1763.486  | 1005.501  |
| NM_018572 | 1041.724  | 815.302   | NM_001397 | 1034.599  | 2074.957  | NM_000485 | 2038.939  | 1867.178  |
| AK024838  | 634.789   | 546.893   | NM_005543 | 2043.608  | 2558.085  | X98507    | 728.425   | 586.534   |
| AK000175  | 3086.961  | 3317.887  | NM_004772 | 3671.66   | 2461.546  | NM_016030 | 13146.853 | 11719.268 |
| AL137736  | 3108.119  | 2857.818  | NM_003714 | 3474.136  | 3541.037  | NM_014665 | 3021.993  | 3512.956  |
| AK021427  | 757.671   | 372.883   | NM_004004 | 1278.02   | 2700.873  | NM_005652 | 1591.809  | 1630.917  |
| AK021897  | 4517.207  | 4597.953  | AF024540  | 930.445   | 237.796   | AK026686  | 261.51    | 257.731   |
| AK001051  | 1026.869  | 881.633   | NM_002189 | 881.004   | 435.095   | NM_005902 | 517.307   | 508.983   |
| NM_018317 | 1274.945  | 1351.064  | U42977    | 2839.95   | 1004.22   | NM_002850 | 41182.656 | 37821.48  |
| AF086051  | 518.114   | 584.487   | NM_002881 | 4877.22   | 1487.198  | NM_004302 | 285.515   | 147.094   |

|           |           |           |           |           |           |           |          |           |
|-----------|-----------|-----------|-----------|-----------|-----------|-----------|----------|-----------|
| AL049370  | 1023.237  | 1445.787  | NM_003666 | 3009.169  | 1178.353  | NM_005903 | 638.271  | 566.509   |
| AL365410  | 6080.747  | 8858.514  | NM_003288 | 3470.379  | 3269.749  | NM_000861 | 330.968  | 271.85    |
| D17082    | 15017.013 | 16503.854 | NM_018242 | 335.249   | 1297.495  | NM_000024 | 224.379  | 193.33    |
| D17252    | 45659.488 | 50302.773 | M83822    | 2971.61   | 4316.386  | AB037734  | 357.384  | 523.412   |
| D16476    | 415.8     | 881.442   | NM_018434 | 8620.88   | 7629.683  | U77493    | 334.112  | 376.77    |
| NM_003673 | 2218.227  | 2489.827  | NM_003914 | 939.167   | 653.438   | NM_019062 | 294.998  | 267.255   |
| Z36823    | 4998.489  | 6467.196  | NM_020423 | 1131.613  | 616.885   | NM_003873 | 302.713  | 179.598   |
| AF147387  | 2505.321  | 2640.027  | AK021437  | 1493.411  | 624.952   | NM_000263 | 679.834  | 4034.054  |
| NM_012081 | 1374.996  | 1947.954  | NM_003831 | 2389.752  | 1138.181  | AF073519  | 4802.018 | 22082.578 |
| AF085909  | 10529.461 | 9160.68   | NM_001759 | 228.71    | 229.928   | AB001451  | 359.923  | 1798.266  |
| AF090888  | 577.235   | 421.53    | AB007965  | 5873.202  | 4800.303  | NM_017583 | 1608.768 | 7676.787  |
| AK027193  | 1210.628  | 1247.456  | NM_017649 | 612.937   | 1750.021  | NM_002521 | 498.189  | 229.662   |
| AF086471  | 5599.093  | 4854.977  | NM_000066 | 707.555   | 2035.676  | NM_017875 | 974.495  | 921.722   |
| NM_018455 | 9630.244  | 8716.354  | NM_001196 | 10800.822 | 15637.239 | AK023232  | 802.172  | 740.226   |
| AF113018  | 777.039   | 740.861   | NM_016008 | 1367.995  | 3023.192  | NM_000271 | 2514.916 | 2504.863  |
| AK021996  | 1206.652  | 1050.928  | NM_017744 | 1050.189  | 3329.762  | NM_018209 | 1727.041 | 1875.612  |
| AL049337  | 2043.471  | 1668.477  | NM_001924 | 3153.965  | 5417.109  | NM_006184 | 9746.105 | 8255.05   |
| CY3Cy5    | 4219.07   | 339.47    | NM_017705 | 2585.12   | 2664.564  | AB018268  | 1622.779 | 2252.081  |
| U13697    | 786.269   | 1076.247  | NM_001796 | 1207.15   | 897.998   | NM_019045 | 447.322  | 905.456   |
| U04270    | 5607.568  | 5347.35   | AB040880  | 508.676   | 486.552   | NM_006380 | 1429.327 | 1584.042  |
| AA629719  | 58305.938 | 63424.008 | AL133566  | 336.482   | 172.752   | AB020710  | 739.173  | 987.871   |
| AA927528  | 2541.309  | 3117.499  | M36118    | 4346.072  | 2286.39   | NM_016174 | 1609.187 | 1672.258  |
| BG676364  | 2002.058  | 2166.197  | NM_003399 | 7719.883  | 3272.972  | NM_020377 | 350.99   | 793.772   |
| BG181154  | 1553.082  | 1288.589  | NM_002630 | 558.044   | 302.234   | U88896    | 1254.906 | 1605.778  |
| AA843679  | 7542.824  | 10703.804 | AJ295149  | 51179.695 | 43194.172 | NM_005724 | 3420.684 | 3522.097  |
| H68922    | 522.941   | 601.41    | NM_013438 | 3901.401  | 2378.526  | X58794    | 517.342  | 494.968   |
| NM_004957 | 2674.804  | 2623.932  | NM_014688 | 4901.63   | 1835.914  | NM_001735 | 925.778  | 816.215   |
| NM_005252 | 1224.847  | 1166.236  | AB037784  | 282.221   | 194.371   | NM_002345 | 299.378  | 200.748   |
| SR5       | 7138.675  | 8083.939  | AL359623  | 1091.876  | 651.681   | NM_005080 | 7064.716 | 11429.52  |
| SR7       | 6541.873  | 58455.277 | AK026920  | 2297.156  | 6795.457  | NM_014396 | 1240.014 | 1250.233  |
| SR9       | 24285.238 | 5675.278  | AL137255  | 1492.099  | 4079.323  | AK027201  | 832.729  | 591.013   |
| CY3Cy5    | 5433.514  | 323.65    | NM_003370 | 8260.104  | 13127.721 | Z25433    | 1175.284 | 1330.654  |
| NM_004380 | 10859.236 | 11368.3   | AB037715  | 3076.095  | 8745.826  | NM_005922 | 1098.708 | 1301.713  |
| AY007378  | 3894.051  | 4023.083  | AF250924  | 13000.547 | 13565.45  | NM_018638 | 2383.091 | 2140.523  |
| D26070    | 1063.069  | 1256.265  | D86979    | 2118.244  | 1471.159  | AL137593  | 4943.616 | 4488.202  |
| NM_001642 | 4711.146  | 5701.364  | NM_018212 | 269.534   | 269.502   | NM_003915 | 1276.962 | 1180.09   |
| NM_001542 | 535.378   | 580.516   | AK022889  | 4865.156  | 1528.348  | NM_000382 | 1154.56  | 1449.629  |
| NM_000114 | 1481.39   | 1697.025  | X52357    | 26404.244 | 9539.271  | AL133064  | 1513.452 | 1849.045  |
| NM_005156 | 3854.723  | 3621.191  | AF211891  | 1026.171  | 416.309   | NM_006227 | 2000.08  | 2254.625  |
| NM_015193 | 543.127   | 602.62    | NM_005641 | 1371.592  | 588.275   | NM_002905 | 2093.797 | 2525.401  |
| X98834    | 3379.479  | 3372.843  | NM_001668 | 892.776   | 347.307   | NM_000700 | 23030.77 | 29786.201 |
| NM_007035 | 6922.387  | 7204.656  | AK025362  | 477.169   | 898.736   | NM_019028 | 4005.684 | 4620.407  |
| AB019562  | 1195.227  | 1347.779  | AK021776  | 2154.202  | 733.496   | NM_000431 | 1253.962 | 1391.399  |
| AF036364  | 2294.9    | 2678.195  | AK026042  | 819.555   | 387.214   | NM_013421 | 457.694  | 812.777   |
| AK022847  | 2897.417  | 3308.905  | NM_014233 | 15234.229 | 11104.538 | AB033118  | 3110.494 | 3090.284  |
| NM_020203 | 1006.135  | 1095.304  | NM_002137 | 53015.383 | 24007.154 | NM_019606 | 1136.312 | 1031.04   |
| L40992    | 693.297   | 1026.009  | NM_002911 | 552.028   | 276.124   | NM_001690 | 2807.957 | 2257.116  |
| U20582    | 4226.63   | 6864.239  | U94386    | 475.096   | 302.476   | AF034374  | 2614.302 | 2310.006  |
| NM_000337 | 752.545   | 1144.538  | NM_016000 | 10403.715 | 6428.038  | NM_016118 | 2319.097 | 1455.031  |
| NM_002079 | 7015.086  | 11827.469 | NM_006372 | 3801.005  | 2570.151  | NM_018674 | 8832.154 | 11345.195 |
| NM_016465 | 1544.205  | 1975.717  | NM_014150 | 1321.331  | 1968.68   | NM_000816 | 445.649  | 330.409   |
| NM_000328 | 915.937   | 1408.465  | NM_006805 | 21887.387 | 33773.773 | NM_014928 | 587.05   | 284.212   |
| NM_013395 | 3837.967  | 5018.213  | AF132027  | 16831.121 | 19288.229 | AK025130  | 1883.365 | 1497.026  |

|           |           |           |           |           |           |           |           |           |
|-----------|-----------|-----------|-----------|-----------|-----------|-----------|-----------|-----------|
| NM_00241C | 462.747   | 692.017   | NM_004681 | 9185.37   | 8658.875  | AB037791  | 512.612   | 382.271   |
| AL122120  | 1681.548  | 2119.058  | AB033096  | 5765.105  | 2605.104  | NM_018124 | 2043.207  | 2398.924  |
| NM_014684 | 819.448   | 1157.178  | NM_014886 | 566.391   | 439.948   | Z70701    | 2993.358  | 2531.702  |
| AK027247  | 721.253   | 992.728   | L31408    | 7122.312  | 15011.93  | AB040972  | 1625.367  | 1595.303  |
| NM_00248C | 5353.397  | 4921.563  | NM_001545 | 9339.758  | 7212.166  | AF148505  | 1099.522  | 1310.315  |
| NM_017571 | 6392.83   | 4280.699  | NM_004446 | 8285.485  | 5044.814  | NM_018686 | 4908.166  | 5236.747  |
| L03169    | 802.939   | 833.469   | AF070625  | 732.678   | 419.875   | NM_017676 | 697.151   | 645.951   |
| NM_001928 | 8132.532  | 8240.25   | AL365512  | 1786.069  | 985.401   | AK021764  | 262.856   | 206.433   |
| NM_006396 | 656.75    | 787.26    | AK001740  | 5346.151  | 2491.403  | NM_005431 | 1005.201  | 786.975   |
| NM_018965 | 661.467   | 1043.727  | AF131793  | 679.155   | 495.793   | AB036063  | 892.866   | 651.949   |
| NM_000185 | 4174.213  | 5038.526  | NM_005918 | 11777.908 | 4899.928  | NM_002894 | 2644.74   | 2340.932  |
| Y00816    | 765.255   | 1179.522  | J02625    | 5728.811  | 5364.465  | NM_004625 | 3671.112  | 2743.02   |
| NM_004512 | 4657.585  | 6316.025  | Y17175    | 59174.977 | 50519.355 | NM_00426C | 2710.566  | 1625.257  |
| NM_001055 | 12597.384 | 10763.919 | NM_004549 | 19318.363 | 6368.174  | AL050067  | 514.361   | 223.537   |
| NM_018361 | 2642.482  | 2836.535  | NM_005333 | 14654.107 | 6273.791  | NM_004972 | 2122.297  | 1256.876  |
| NM_019893 | 841.436   | 929.986   | NM_000767 | 204.43    | 585.278   | NM_006251 | 1554.786  | 873.625   |
| NM_000954 | 903.831   | 942.202   | AK026161  | 1610.847  | 836.778   | NM_004103 | 2579.728  | 2036.476  |
| NM_016467 | 10780.826 | 17481.986 | NM_004553 | 17224.404 | 5552.838  | NM_002314 | 2016.54   | 1386.616  |
| NM_007253 | 2323.539  | 3017.264  | D63484    | 1141.421  | 756.712   | NM_001744 | 2433.93   | 2013.218  |
| NM_019106 | 1150.4    | 1569.956  | AK026745  | 2798.784  | 1192.154  | NM_006296 | 830.755   | 950.859   |
| L08436    | 511.118   | 815.796   | AL157440  | 1611.751  | 950.718   | AF073519  | 2971.297  | 2293.188  |
| NM_000558 | 3425.51   | 3289.452  | NM_016423 | 5026.186  | 3816.072  | AB001451  | 242.154   | 324.495   |
| NM_004198 | 886.913   | 844.001   | AB040975  | 1029.945  | 1479.921  | NM_017583 | 1175.498  | 1230.101  |
| NM_01417C | 3935.568  | 3429.869  | NM_005119 | 6222.375  | 5035.598  | Y16132    | 3609.163  | 3073.559  |
| AF116652  | 34317.688 | 30189.691 | NM_003168 | 17419.656 | 14270.438 | NM_016593 | 451.927   | 494.603   |
| NM_000835 | 631.786   | 944.949   | AK055844  | 881.573   | 2296.881  | NM_002521 | 283.175   | 167.083   |
| NM_014148 | 901.93    | 653.864   | NM_018288 | 7248.477  | 4956.458  | NM_00115C | 255.299   | 402.83    |
| NM_018835 | 2603.79   | 2768.732  | NM_003146 | 4871.978  | 2683.402  | NM_002856 | 446.503   | 763.214   |
| NM_003401 | 1921.214  | 2453.769  | X52342    | 769.529   | 347.408   | NM_003225 | 408.802   | 333.166   |
| NM_004758 | 2524.055  | 1902.309  | NM_003131 | 11015.726 | 5625.723  | NM_000096 | 554.119   | 633.383   |
| NM_002913 | 2269.597  | 3103.255  | NM_005239 | 2684.084  | 1305.606  | AA418251  | 477.832   | 779.419   |
| NM_00737C | 3841.451  | 7006.469  | AB014526  | 494.693   | 448.739   | AA143087  | 2783.554  | 2284.534  |
| AF044578  | 1550.865  | 1974.449  | NM_018538 | 525.511   | 274.179   | U25804    | 951.733   | 970.812   |
| NM_001948 | 2917.076  | 3344.401  | NM_013346 | 751.251   | 358.146   | BI870965  | 1402.491  | 1389.694  |
| NM_001067 | 12804.531 | 14749.899 | AF131784  | 554.764   | 280.356   | NM_001903 | 4152.389  | 4224.231  |
| NM_014034 | 6787.221  | 7248.43   | NM_017851 | 2230.631  | 1368.54   | BI835536  | 3995.054  | 3871.783  |
| NM_005335 | 18990.332 | 16310.678 | AK025603  | 2021.73   | 1392.667  | BF205051  | 1327.261  | 1013.401  |
| J04474    | 6980.415  | 6368.949  | NM_016085 | 14451.941 | 5367.676  | X02761    | 651.087   | 440.797   |
| NM_003761 | 1900.249  | 1962.309  | AK025768  | 2214.17   | 1604.775  | M91463    | 258.88    | 215.739   |
| NM_014011 | 1502.966  | 1949.251  | AL117502  | 1779.996  | 1082.645  | J03060    | 1203.508  | 547.604   |
| AK025994  | 1967.925  | 2175.032  | AK001846  | 735.021   | 484.208   | NM_003743 | 438.641   | 292.782   |
| L29306    | 427.221   | 862.626   | AK024637  | 383.295   | 485.899   | AA829383  | 1650.961  | 1168.695  |
| NM_013986 | 3302.703  | 3825.498  | AL117454  | 13166.394 | 15874.871 | AF012434  | 3330.277  | 2927.673  |
| NM_001738 | 1294.302  | 1981.601  | AF272890  | 1609.759  | 4211.436  | NM_014795 | 271.973   | 301.341   |
| NM_020203 | 670.434   | 663.906   | U00684    | 1441.576  | 2394.613  | NM_002986 | 475.366   | 447.198   |
| U20582    | 2767.973  | 3237.877  | NM_016459 | 28900.176 | 37735.492 | M15330    | 430.78    | 447.08    |
| NM_000337 | 628.302   | 557.874   | AF086227  | 1374.86   | 1419.893  | NM_014396 | 1219.149  | 830.131   |
| NM_002079 | 5428.746  | 4639.407  | AK026246  | 4400.281  | 3092.771  | AK027201  | 896.022   | 815.478   |
| U13697    | 776.047   | 1087.286  | AF070524  | 511.621   | 526.011   | NM_000486 | 2213      | 2009.789  |
| U04270    | 3803.02   | 5249.239  | AF035281  | 1305.169  | 1811.799  | X98507    | 789.315   | 758.009   |
| AA629719  | 62023.781 | 62130.898 | AK026304  | 494.147   | 450.12    | NM_01603C | 17220.771 | 15183.529 |
| AA927528  | 2356.293  | 3067.624  | AK023501  | 270.118   | 186.266   | NM_014666 | 3385.675  | 3852.174  |
| BG676364  | 2686.969  | 2639.616  | AL133446  | 2890.803  | 1297.784  | NM_005652 | 1876.663  | 2240.975  |

|           |           |           |           |           |           |           |           |           |
|-----------|-----------|-----------|-----------|-----------|-----------|-----------|-----------|-----------|
| BG181154  | 1421.758  | 1254.714  | AF147406  | 478.085   | 572.367   | AK026686  | 253.646   | 356.38    |
| AA843679  | 6333.75   | 8994.61   | NM_006553 | 284.402   | 518.926   | NM_005902 | 401.607   | 468.207   |
| H68922    | 650.709   | 710.684   | AK024689  | 403.296   | 970.965   | NM_002850 | 39781.32  | 33831.477 |
| NM_004957 | 1946.31   | 2801.814  | BC035667  | 423.483   | 377.635   | NM_004302 | 261.84    | 191.17    |
| NM_005252 | 898.79    | 1265.064  | AL049277  | 1635.836  | 1062.702  | NM_005903 | 569.091   | 522.485   |
| AF090906  | 3180.146  | 3791.943  | AL117506  | 317.66    | 228.445   | NM_000861 | 269.195   | 224.861   |
| AB023219  | 2836.803  | 4527.925  | AL050043  | 435.819   | 501.284   | AB037734  | 661.593   | 562.196   |
| NM_001928 | 5118.593  | 4286.861  | AL117571  | 1003.312  | 377.061   | U77493    | 246.32    | 193.237   |
| NM_006398 | 412.278   | 368.5     | L22263    | 350.471   | 256.841   | NM_019062 | 248.854   | 185.894   |
| NM_018965 | 433.979   | 677.978   | AK091573  | 722.399   | 1476.022  | NM_003873 | 241.701   | 246.756   |
| NM_000185 | 1934.742  | 1541.803  | AF131814  | 1902.715  | 3942.15   | NM_000263 | 580.218   | 731.755   |
| Y00816    | 530.659   | 548.448   | AL359600  | 1423.153  | 1915.088  | NM_001683 | 8308.566  | 6491.246  |
| NM_004512 | 1596.34   | 2028.329  | AL360144  | 1814.24   | 2575.528  | NM_001682 | 744.779   | 723.982   |
| NM_004380 | 8291.351  | 8113.16   | BC028617  | 702.879   | 1556.925  | NM_014405 | 940.561   | 803.484   |
| U86813    | 403.904   | 515.721   | AL117653  | 389.436   | 1156.466  | NM_000816 | 344.659   | 345.363   |
| AY007378  | 3187.339  | 4661.999  | AF087999  | 793.55    | 3300.352  | NM_014928 | 477.863   | 451.147   |
| D26070    | 972.208   | 1488.196  | NM_003740 | 2779.25   | 8119.579  | AK025130  | 1996.995  | 2097.908  |
| NM_001642 | 5002.695  | 6824.43   | AL050078  | 2787.986  | 8885.243  | NM_017875 | 918.75    | 633.461   |
| NM_001542 | 706.287   | 1028.055  | AK022933  | 208.818   | 231.217   | AK023232  | 1071.633  | 1203.262  |
| NM_000501 | 28156.705 | 26101.85  | NM_014276 | 3464.824  | 2084.898  | NM_000271 | 3429.089  | 3629.95   |
| NM_000114 | 1938.133  | 1903.346  | AF009288  | 207.99    | 465.94    | NM_018209 | 1870.406  | 2177.602  |
| NM_005156 | 4379.245  | 4432.315  | AF035303  | 553.562   | 2242.237  | NM_006184 | 10050.475 | 8417.734  |
| NM_015193 | 672.83    | 1137.294  | AF056438  | 1812.744  | 5236.869  | AB018268  | 1836.661  | 2156.229  |
| X98834    | 3745.817  | 6350.721  | AF003737  | 51246.668 | 53245.398 | NM_019045 | 377.764   | 460.871   |
| NM_007035 | 6094.362  | 11579.569 | AF009296  | 862.188   | 833.633   | AB020710  | 715.914   | 827.411   |
| AB019562  | 1153.882  | 1684.21   | AK001011  | 5104.222  | 1345.09   | NM_016174 | 1709.262  | 1543.751  |
| AF036364  | 2375.488  | 6541.415  | AK021457  | 251.138   | 210.409   | NM_020377 | 291.305   | 352.608   |
| AK022847  | 2713.918  | 5158.105  | AK021690  | 604.852   | 448.588   | U88896    | 673.151   | 478.468   |
| NM_016465 | 1832.775  | 2806.473  | AK001078  | 277.489   | 138.158   | AF116702  | 24011.844 | 16792.143 |
| NM_000328 | 1463.92   | 1257.871  | AK001840  | 500.249   | 248.772   | NM_005724 | 2966.797  | 2595.708  |
| NM_013398 | 4484.346  | 5244.131  | AK021486  | 580.987   | 366.008   | X58794    | 404.138   | 280.789   |
| NM_002410 | 516.031   | 791.205   | AK021740  | 346.765   | 454.843   | NM_001735 | 813.735   | 801.529   |
| AL122120  | 2584.911  | 2049.65   | AK025148  | 324.91    | 327.543   | NM_002348 | 290.686   | 209.543   |
| NM_014684 | 1276.146  | 1330.963  | AK026238  | 563.422   | 1876.523  | NM_005080 | 5618.028  | 7162.284  |
| AK027247  | 1146.48   | 987.635   | AK026694  | 537.12    | 2195.167  | NM_004887 | 2713.704  | 2635.035  |
| NM_002480 | 5772.958  | 7288.56   | AK025180  | 198.037   | 1407.881  | NM_004972 | 1822.308  | 1573.645  |
| NM_017571 | 6576.515  | 7201.915  | AK025564  | 1062.398  | 3700.099  | NM_006251 | 1822.773  | 2326.773  |
| AB007946  | 385.636   | 1289.819  | AK026286  | 1735.973  | 6370.335  | NM_004103 | 2289.501  | 2441.37   |
| L03169    | 1085.751  | 2209.849  | AK026731  | 1455.306  | 5766.599  | NM_002314 | 2260.24   | 2568.599  |
| NM_014011 | 1124.001  | 1029.017  | NM_004192 | 2071.975  | 733.986   | NM_001744 | 2595.498  | 2771.607  |
| AK025994  | 1195.094  | 828.792   | AK024160  | 637.787   | 757.901   | NM_006296 | 875.969   | 904.564   |
| L29306    | 352.83    | 324.886   | AK025077  | 608.533   | 465.305   | Z25433    | 1555.244  | 1747.128  |
| NM_013988 | 1392.594  | 1244.93   | NM_006417 | 4606.107  | 7497.64   | NM_005922 | 1209.572  | 1437.612  |
| NM_001738 | 857.63    | 646.92    | L43350    | 750.912   | 2029.999  | NM_018638 | 2608.716  | 2816.723  |
| NM_001055 | 9428.773  | 7134.454  | NM_020317 | 4157.761  | 16457.943 | AL137593  | 5768.85   | 5367.668  |
| NM_002271 | 38966.938 | 36868.098 | AL080234  | 3681.454  | 7482.129  | NM_003915 | 1288.49   | 1280.5    |
| NM_018361 | 3272.089  | 3742.947  | AK027025  | 645.474   | 918.303   | NM_000382 | 1206.364  | 1418.785  |
| NM_019893 | 731.769   | 633.192   | AK025105  | 357.863   | 372.833   | AL133064  | 1515.059  | 1917.983  |
| AB040966  | 4494.837  | 7385.813  | AF212220  | 3607.947  | 1426.786  | NM_006227 | 1952.927  | 2388.176  |
| NM_020132 | 1384.728  | 2235.795  | AK025010  | 403.128   | 1716.908  | NM_002905 | 2435.277  | 2433.461  |
| NM_016467 | 12339.349 | 12387.068 | AK022082  | 354.851   | 2214.303  | NM_000700 | 21874.871 | 23646.607 |
| NM_007253 | 2918.943  | 2451.199  | AL137470  | 410.835   | 1402.934  | NM_019028 | 4441.75   | 4067.45   |
| NM_019106 | 1883.012  | 1873.63   | AL137709  | 1681.338  | 5359.499  | NM_000431 | 1238.322  | 1108.781  |



|           |           |           |           |           |           |           |          |          |
|-----------|-----------|-----------|-----------|-----------|-----------|-----------|----------|----------|
| L08436    | 1113.012  | 1664.689  | AK023277  | 2365.563  | 6622.966  | NM_013421 | 450.563  | 450.861  |
| AB033002  | 1300.942  | 2026.19   | AK000425  | 2701.606  | 10127.72  | NM_012474 | 3589.625 | 3742.033 |
| NM_000558 | 5014.45   | 11589.461 | Z27200    | 736.557   | 492.51    | AB033118  | 2850.474 | 2716.945 |
| NM_004198 | 482.422   | 850.688   | AF070571  | 3570.866  | 1514.684  | NM_019608 | 1071.946 | 819.212  |
| NM_014170 | 4215.534  | 5077.195  | AK023554  | 717.494   | 498.465   | NM_001690 | 2538.042 | 2245.403 |
| AF116652  | 53407.094 | 54843.566 | NM_003513 | 8054.471  | 9435.186  | AF034374  | 2367.668 | 2012.569 |
| NM_000835 | 1162.358  | 1643.505  | AL079294  | 423.655   | 1068.898  | NM_016118 | 2331.947 | 1869.027 |
| NM_004957 | 1094.3    | 1273.352  | AK024844  | 746.607   | 2412.741  | NM_018674 | 4945.645 | 4711.6   |
| NM_005252 | 448.334   | 334.071   | AL049437  | 674.262   | 1180.829  | NM_000068 | 460.748  | 437.646  |
| AF090906  | 565.882   | 439.787   | AF161427  | 59223.086 | 55667.652 | AB033046  | 5234.676 | 6749.016 |
| AB023219  | 2015.506  | 1683.042  | AK021715  | 7390.84   | 4074.135  | NM_015918 | 4541.828 | 4716.202 |
| NM_014148 | 636.234   | 437.174   | AK000315  | 8518.875  | 3382.26   | AK023228  | 224.941  | 252.936  |
| NM_018835 | 3279.236  | 2944.402  | AK023248  | 755.565   | 503.468   | AB029041  | 5742.756 | 4646.703 |
| NM_003401 | 1879.17   | 1913.329  | NM_012404 | 13588.817 | 6431.475  | AK026642  | 5226.82  | 4983.259 |
| AL137724  | 3850.181  | 3704.81   | AF251190  | 380.004   | 402.838   | AL359063  | 656.345  | 667.204  |
| NM_004758 | 2540.428  | 2262.207  | AF130075  | 8119.66   | 4540.917  | AL079292  | 1761.836 | 1921.008 |
| NM_002913 | 2959.613  | 5046.201  | NM_005444 | 4748.537  | 3372.484  | X89667    | 1155.124 | 743.111  |
| AK022797  | 1381.31   | 2929.873  | V00589    | 21073.732 | 13380.85  | AB037791  | 481.482  | 375.007  |
| NM_006231 | 1257.606  | 2304.632  | AL390163  | 954.198   | 2460.089  | NM_018124 | 2068.325 | 2432.777 |
| AF044578  | 1854.608  | 2114.605  | NM_018572 | 1049.08   | 3269.6    | Z70701    | 3302.962 | 3511.194 |
| NM_001948 | 3009.749  | 3414.61   | NM_005315 | 284.161   | 1142.769  | AB040972  | 1882.444 | 1676.427 |
| NM_001067 | 12936.756 | 15511.813 | AL109959  | 245.272   | 703.706   | AF148505  | 1210.78  | 1031.98  |
| NM_014034 | 7977.745  | 13776.9   | AK024838  | 627.572   | 2205.662  | BE260997  | 274.858  | 244.092  |
| NM_005335 | 22083.09  | 32403.361 | AK000175  | 3033.657  | 8451.295  | NM_018688 | 2946.554 | 2685.301 |
| J04474    | 7003.199  | 9874.754  | AL137736  | 3571.758  | 10497.702 | NM_017678 | 653.764  | 512.699  |
| NM_003761 | 2940.445  | 2963.451  | AF143870  | 621.055   | 2153.823  | AK021764  | 210.767  | 218.596  |
| NM_004728 | 805.433   | 1252.648  | AK021427  | 289.841   | 971.782   | NM_005431 | 1129.059 | 1169.002 |
| X98834    | 1865.203  | 1711.131  | AK021897  | 5584.061  | 2431.905  | AB036063  | 868.865  | 757.664  |
| NM_007035 | 4854.442  | 4185.811  | AK001051  | 822.833   | 757.153   | NM_002894 | 2290.947 | 1505.521 |
| AB019562  | 655.725   | 608.049   | NM_018317 | 1320.264  | 919.032   | NM_004625 | 3563.736 | 2867.807 |
| AF036364  | 1555.992  | 1179.671  | AF086051  | 477.604   | 600.298   | NM_004260 | 2770.406 | 2351.834 |
| AK022847  | 1935.152  | 1501.289  | AK026434  | 311.321   | 960.647   | AL050067  | 476.119  | 504.174  |
| NM_020203 | 638.022   | 766.492   | AK024356  | 801.593   | 1368.614  | NM_015564 | 651.316  | 474.607  |
| U20582    | 3316.131  | 3004.878  | AL049370  | 766.287   | 840.919   | AF160476  | 253.741  | 449.017  |
| NM_000337 | 630.994   | 483.139   | AL365410  | 3841.199  | 2819.777  | L22650    | 501.358  | 477.619  |
| NM_002078 | 6066.233  | 5655.851  | D17082    | 12146.944 | 7237.445  | AB014520  | 2020.473 | 1821.179 |
| U13697    | 666.585   | 1032.803  | D17252    | 37072.461 | 15076.412 | AF161420  | 553.837  | 503.789  |
| X75308    | 554.236   | 751.484   | D16476    | 248.87    | 226.576   | NM_004907 | 557.928  | 526.193  |
| J03810    | 736.442   | 3023.801  | NM_003673 | 2297.894  | 1262.358  | NM_002891 | 288.092  | 241.946  |
| AA927528  | 2800.938  | 3774.311  | Z36823    | 3936.89   | 2130.918  | NM_001775 | 297.208  | 265.218  |
| BG181154  | 2427.259  | 3539.402  | AF147387  | 2634.27   | 5298.5    | X04526    | 6969.348 | 7355.377 |
| AA843679  | 11138.365 | 25163.727 | NM_012081 | 1405.608  | 3595.6    | D26067    | 2066.052 | 1736.746 |
| H68922    | 1162.877  | 1653.669  | AL137463  | 440.274   | 1607.437  | AF227924  | 1104.176 | 965.831  |
| NM_017571 | 3529.253  | 1443.877  | AF085909  | 15134.771 | 29735.73  | NM_005718 | 6740.094 | 6518.936 |
| L03169    | 743.688   | 600.044   | AF090888  | 424.364   | 1301.362  | NM_006183 | 675.597  | 766.548  |
| NM_001928 | 6072.045  | 4288.367  | AK027193  | 1640.12   | 5021.827  | S59184    | 785.283  | 650.436  |
| NM_006398 | 498.266   | 368.776   | AF113018  | 607.443   | 1988.129  | NM_005130 | 169.02   | 258.259  |
| NM_018965 | 418.179   | 432.469   | AK021996  | 1085.414  | 3840.069  | NM_006661 | 1538.954 | 1349.112 |
| NM_000185 | 1522.88   | 1562.066  | AL049337  | 4760.586  | 13679.653 | NM_005748 | 5714.113 | 4419.165 |
| Y00816    | 723.7     | 628.06    | CY3Cy5    | 4982.861  | 455.774   | NM_004588 | 480.553  | 429.517  |
| NM_004512 | 1768.557  | 2052.183  | AI660957  | 426.613   | 631.407   | U16126    | 331.219  | 217.276  |
| D26070    | 1375.922  | 3258.479  | U13697    | 846.942   | 1249.139  | NM_002614 | 253.163  | 291.449  |
| NM_001642 | 8727.685  | 17520.445 | U04270    | 5522.742  | 6415.816  | NM_005655 | 805.948  | 1067.494 |

|           |           |           |           |           |           |           |           |           |
|-----------|-----------|-----------|-----------|-----------|-----------|-----------|-----------|-----------|
| NM_01745E | 708.519   | 1055.818  | Z34820    | 304.368   | 894.065   | NM_007314 | 1347.277  | 1560.984  |
| NM_000501 | 45325.715 | 53830.906 | L02840    | 1123.727  | 1331.185  | NM_01607E | 1244.562  | 1264.432  |
| NM_000114 | 3796.193  | 5000.426  | AA629719  | 61301.785 | 59190.746 | NM_00660C | 6758.639  | 6032.715  |
| NM_00515E | 5591.416  | 7817.017  | AA927528  | 2847.75   | 2320.545  | AF297709  | 565.653   | 681.032   |
| NM_00055E | 1201.5    | 1036.712  | BG181154  | 1646.706  | 1265.841  | L77564    | 313.197   | 353.825   |
| NM_01417C | 2854.162  | 2956.184  | AA843679  | 16508.277 | 16493.822 | NM_015384 | 907.81    | 1157.373  |
| AF116652  | 9970.946  | 11954.03  | H68922    | 727.238   | 1401.23   | AK023327  | 590.02    | 609.223   |
| NM_00083E | 903.113   | 1395.636  | NM_004957 | 2711.067  | 3821.889  | AB046858  | 715.659   | 596.615   |
| NM_003274 | 361.348   | 710.902   | NM_005252 | 1291.29   | 1530.792  | D50914    | 1311.422  | 1543.335  |
| NM_01646E | 2223.351  | 3227.254  | SR5       | 6721.767  | 7933.413  | BE878692  | 324.219   | 381.928   |
| NM_00032E | 877.583   | 902.06    | SR7       | 6377.208  | 54351.672 | NM_002007 | 208.21    | 252.041   |
| NM_01339E | 4312.628  | 3988.642  | SR9       | 21379.619 | 5076.398  | NM_01589E | 497.498   | 524.47    |
| NM_00241C | 625.737   | 646.316   | CY3Cy5    | 5379.623  | 236.449   | NM_00230E | 12409.289 | 14729.902 |
| AL122120  | 2170.638  | 1915.061  | NM_00438C | 17754.094 | 21184.967 | AK025439  | 1182.975  | 1371.56   |
| NM_014684 | 1093.737  | 1071.369  | U86813    | 540.668   | 1006.427  | NM_001737 | 797.811   | 860.018   |
| AK027247  | 654.331   | 646.881   | NM_004119 | 966.74    | 1143.323  | Z36784    | 247.3     | 306.162   |
| NM_00248C | 6220.092  | 5949.017  | AY007378  | 4312.95   | 4239.579  | NM_01662E | 4209.134  | 4403.238  |
| J04474    | 4657.07   | 8861.393  | D26070    | 1548.287  | 2192.924  | NM_00721E | 1008.459  | 1150.447  |
| NM_003761 | 1161.057  | 1758.718  | NM_00164E | 9867.441  | 18436.189 | NM_019064 | 458.94    | 444.936   |
| NM_00472E | 745.358   | 1586.702  | NM_00154E | 797.291   | 1540.924  | AJ295148  | 319.273   | 339.623   |
| NM_014011 | 1701.421  | 2970.727  | NM_01745E | 386.202   | 555.844   | AF176701  | 163.512   | 220.769   |
| AK025994  | 2063.5    | 3333.132  | NM_000114 | 3188.589  | 2717.75   | NM_01630E | 1519.668  | 1778.974  |
| NM_01398E | 1683.615  | 2840.691  | NM_00515E | 3485.213  | 3508.449  | NM_00415E | 6654.365  | 6520.356  |
| NM_00173E | 1474.832  | 2083.506  | NM_01519E | 803.724   | 1322.708  | AK021866  | 237.934   | 180.268   |
| NM_00105E | 10914.207 | 11829.321 | X98834    | 3529.859  | 4691.479  | NM_00324E | 2284.119  | 2502.323  |
| NM_01587E | 361.447   | 426.303   | NM_00703E | 5818.191  | 7914.632  | M21897    | 297.934   | 589.986   |
| NM_002271 | 43032.48  | 45701.195 | AB019562  | 1218.291  | 1786.042  | AF301463  | 410.224   | 542.784   |
| NM_018361 | 3117.3    | 2864.742  | AF036364  | 1901.881  | 2615.883  | NM_015984 | 2298.823  | 2740.849  |
| NM_01989E | 526.281   | 430.478   | AK022847  | 2496.803  | 2917.973  | AK022471  | 251.761   | 103.928   |
| AB040966  | 4932.217  | 4479.758  | NM_02020E | 993.534   | 1171.171  | AK025969  | 379.339   | 437.652   |
| NM_02013E | 1437.368  | 1569.495  | L40992    | 494.584   | 624.475   | NM_006894 | 339.728   | 347.24    |
| NM_016467 | 11871.161 | 10122.927 | U20582    | 3151.559  | 3865.509  | AK023031  | 796.634   | 900.355   |
| NM_00725E | 3576.2    | 2526.754  | NM_000337 | 612.514   | 764.56    | NM_005717 | 20675.693 | 16360.239 |
| NM_01910E | 1684.162  | 1326.824  | NM_00207E | 6577.416  | 7050.67   | NM_01209C | 1370.087  | 1205.621  |
| L08436    | 574.67    | 591.067   | NM_00680E | 24824.508 | 23019.094 | BE793385  | 457.55    | 831.629   |
| NM_00345E | 1661.303  | 2063.435  | NM_006634 | 9840.153  | 8703.573  | NM_00308E | 2779.873  | 2265.479  |
| NM_018371 | 20280.01  | 24162.627 | NM_01646E | 2037.901  | 2016.007  | AF043290  | 201.31    | 321.391   |
| NM_01439C | 8204.13   | 9496.335  | NM_00032E | 989.416   | 1409.377  | NM_00408E | 1373.636  | 1232.048  |
| NM_01814E | 563.332   | 527.397   | NM_01339E | 4157.963  | 5578.854  | NM_01439E | 1733.312  | 1339.209  |
| X78924    | 5672.808  | 4906.131  | NM_00241C | 641.696   | 570.22    | NM_005934 | 3146.771  | 2867.857  |
| NM_01325C | 1143.445  | 1088.261  | AL122120  | 1786.852  | 1253.902  | NM_00712E | 1869.608  | 1518.644  |
| AF090906  | 752.865   | 578.894   | NM_014684 | 986.393   | 741.552   | AY004253  | 1645.4    | 1491.661  |
| AB023219  | 2346.34   | 2064.169  | NM_00248C | 5018.517  | 3350.259  | Z46967    | 212.767   | 154.828   |
| NM_01414E | 619.692   | 540.89    | NM_017571 | 5231.863  | 3423.575  | NM_00214E | 264.6     | 260.872   |
| NM_01883E | 3398.995  | 3141.545  | AB007946  | 536.497   | 536.968   | AL137449  | 744.422   | 663.483   |
| NM_003401 | 2312.489  | 2365.774  | L03169    | 834.207   | 1781.488  | U88153    | 472.777   | 815.258   |
| AL137724  | 4309.365  | 3932.568  | NM_00192E | 8633.388  | 9501.674  | X03910    | 5033.305  | 6046.472  |
| NM_00475E | 3482.565  | 2149.182  | NM_00639E | 700.504   | 921.012   | NM_01842E | 1784.486  | 1839.415  |
| NM_00291E | 2531.261  | 2179.641  | NM_00018E | 6513.721  | 8168.809  | NM_006924 | 7107.741  | 7773.663  |
| AK022797  | 874.574   | 680.79    | Y00816    | 829.369   | 1078.805  | NM_016024 | 2849.07   | 3063.876  |
| NM_00737C | 5001.237  | 4497.29   | NM_00451E | 5280.204  | 7065.092  | NM_018107 | 1487.722  | 1332.783  |
| NM_006231 | 1199.813  | 1222.465  | NM_00105E | 30515.299 | 30481.539 | NM_01227E | 416.84    | 439.792   |
| AK023471  | 1499.133  | 1257.374  | NM_01587E | 396.875   | 421.058   | NM_018387 | 3350.734  | 3002.63   |

|           |           |           |           |           |           |           |           |           |
|-----------|-----------|-----------|-----------|-----------|-----------|-----------|-----------|-----------|
| AF044578  | 2295.313  | 1614.86   | NM_002271 | 35465.355 | 25261.18  | BF310673  | 503.383   | 486.326   |
| NM_00194E | 2916.68   | 2707.147  | NM_018361 | 3572.983  | 2928.14   | R97012    | 7631.699  | 8145.671  |
| NM_001067 | 14379.593 | 13455.956 | NM_019893 | 475.554   | 666.724   | U77700    | 3023.433  | 2902.352  |
| AF063936  | 387.655   | 285.001   | AB040966  | 4592.95   | 3352.331  | NM_006567 | 2048.075  | 2103.02   |
| NM_003573 | 1712.824  | 1619.643  | NM_020132 | 1967.726  | 1838.046  | AF038554  | 7749.067  | 6693.453  |
| NM_00029E | 2089.256  | 1284.473  | NM_016467 | 11515.842 | 9710.802  | AF264621  | 1018.971  | 956.319   |
| NM_017422 | 1019.771  | 762.694   | NM_007253 | 3406.596  | 3223.586  | NM_00587E | 5661.888  | 4163.127  |
| NM_00587E | 1516.328  | 1247.569  | NM_01910E | 1493.546  | 1302.361  | NM_004184 | 1278.789  | 1140.042  |
| AF147790  | 1075.458  | 965.155   | L08436    | 691.899   | 488.809   | AK075087  | 206.279   | 184.53    |
| NM_004112 | 1628.34   | 970.207   | NM_00055E | 6999.297  | 6525.461  | AK026571  | 1304.037  | 1346.8    |
| AK025592  | 5646.341  | 4454.272  | NM_00419E | 584.15    | 890.051   | AK024673  | 1801.332  | 1944.432  |
| NM_00463E | 7052.897  | 5102.24   | NM_01417C | 3876.947  | 4511.843  | AF070618  | 346.645   | 237.974   |
| AK023023  | 7084.612  | 4952.788  | AF116652  | 49107.188 | 49724.684 | AF131748  | 1401.478  | 1428.714  |
| NM_015993 | 2652.274  | 2275.037  | NM_00083E | 784.68    | 1143.136  | NM_00045E | 688.118   | 827.432   |
| NM_00265E | 974.08    | 697.636   | NM_01414E | 984.267   | 1217.554  | NM_00249E | 2610.129  | 3020.096  |
| Z36776    | 2756.291  | 1870.026  | NM_01883E | 3960.388  | 3743.675  | NM_016243 | 1092.615  | 1374.469  |
| AB029015  | 2085.195  | 1559.772  | NM_003401 | 1734.622  | 1491.991  | NM_014402 | 30315.994 | 27417.74  |
| NM_002067 | 24804.93  | 15930.025 | AL137724  | 4624.742  | 2833.902  | NM_00464E | 1627.318  | 1950.932  |
| NM_00243C | 315.308   | 260.342   | NM_00475E | 3035.178  | 3269.415  | NM_00654C | 847.754   | 841.944   |
| NM_00615C | 1029.426  | 779.485   | NM_002913 | 2790.214  | 1963.767  | NM_01776E | 480.748   | 758.704   |
| NM_02034E | 566.991   | 527.913   | AK022797  | 1098.284  | 899.831   | NM_002811 | 4347.277  | 4830.011  |
| NM_003287 | 720.733   | 722.785   | NM_00737C | 5297.666  | 3570.299  | NM_02031C | 780.728   | 659.176   |
| NM_01232E | 8136.692  | 5964.923  | NM_006231 | 1245.824  | 956.964   | AK024444  | 205.477   | 185.138   |
| NM_014434 | 548.074   | 615.003   | AK023471  | 1794.885  | 1255.777  | NM_005802 | 1324.741  | 1246.746  |
| NM_019607 | 2404.453  | 1590.931  | AF044578  | 2124.696  | 1647.989  | AB002331  | 1530.625  | 1462.472  |
| U79260    | 6350.267  | 4487.657  | NM_00194E | 3720.3    | 2212.194  | NM_002504 | 838.392   | 703.051   |
| NM_00189E | 7411.685  | 7536.669  | NM_001067 | 14347.326 | 9255.439  | AB046775  | 343.15    | 295.547   |
| NM_006447 | 2187.895  | 1684.82   | NM_014034 | 7815.557  | 7113.687  | X74862    | 228.753   | 298.376   |
| AF119851  | 541.151   | 495.997   | NM_00533E | 21593.17  | 21959.43  | X65663    | 1323.438  | 1271.065  |
| NM_01412E | 4871.522  | 5083.637  | J04474    | 5719.526  | 6882.009  | NM_00318E | 859.793   | 589.057   |
| D87455    | 2557.488  | 2149.479  | NM_003761 | 3514.268  | 3843.01   | NM_00445E | 2712.47   | 2845.201  |
| AF080577  | 1350.912  | 971.782   | NM_00472E | 735.986   | 1058.911  | NM_004284 | 2237.618  | 2316.007  |
| L22005    | 6661.003  | 4471.354  | NM_014011 | 1441.044  | 1918.574  | NM_012243 | 655.687   | 517.022   |
| NM_012291 | 9924.158  | 7978.233  | AK025994  | 1677.108  | 2358.827  | AK025743  | 259.568   | 223.551   |
| NM_01336E | 1817.845  | 1347.356  | L29306    | 686.951   | 887.268   | AK023974  | 832.297   | 785.62    |
| NM_003807 | 6197.24   | 3795.853  | NM_01398E | 3302.733  | 4687.278  | AK023768  | 510.57    | 532.942   |
| NM_00435E | 3211.063  | 2026.088  | NM_00173E | 1355.388  | 2422.635  | NM_01472E | 462.895   | 447.213   |
| NM_00179C | 2198.441  | 1809.1    | NM_020203 | 950.74    | 1180.02   | AK022216  | 1374.231  | 1505.565  |
| NM_018243 | 4039.063  | 2394.652  | L40992    | 1279.73   | 1215.197  | AK025812  | 1045.606  | 1096.145  |
| NM_01493E | 1923.124  | 1425.334  | U20582    | 2368.421  | 1418.281  | U00960    | 513.91    | 713.212   |
| Y17866    | 814.324   | 551.698   | NM_000337 | 514.895   | 620.926   | AK022262  | 426.884   | 524.676   |
| AK024247  | 732.906   | 544.513   | NM_00207E | 5930.705  | 3894.845  | AF088039  | 35724.066 | 39032.402 |
| NM_00300E | 5178.473  | 3711.777  | U13697    | 636.919   | 504.387   | AF086220  | 391.752   | 383.8     |
| NM_002842 | 1756.933  | 1179.15   | U04270    | 8328.698  | 6377.499  | AK023941  | 641.041   | 600.354   |
| NM_01212E | 431.342   | 355.469   | L02840    | 561.372   | 422.436   | AL390083  | 2535.413  | 2112.11   |
| AB033025  | 549.558   | 278.462   | AA629719  | 68484.031 | 61737.867 | AB020702  | 363.76    | 391.099   |
| NM_00441E | 1490.677  | 961.67    | AA927528  | 2985.806  | 2441.578  | AL050227  | 381.159   | 387.523   |
| NM_000917 | 7215.101  | 5160.205  | X02152    | 67502.266 | 62530.91  | AF085905  | 354.33    | 393.248   |
| NM_00538E | 10743.068 | 5744.919  | BG676364  | 2540.166  | 3103.982  | NM_01335E | 188.403   | 336.546   |
| NM_01444E | 18414.717 | 8569.173  | BG181154  | 1257.346  | 1507.8    | NM_003847 | 2946.258  | 3022.569  |
| AL832826  | 580.069   | 466.969   | AA843679  | 14789.202 | 15353.214 | AK021973  | 532.595   | 443.915   |
| NM_016123 | 1139.222  | 1170.858  | H68922    | 1090.087  | 1566.333  | AF075054  | 171.307   | 157.304   |
| NM_000391 | 3429.287  | 2402.811  | NM_004957 | 1974.077  | 2089.457  | AL049918  | 152.262   | 150.128   |

|           |           |           |           |           |           |           |           |           |
|-----------|-----------|-----------|-----------|-----------|-----------|-----------|-----------|-----------|
| NM_014771 | 7320.702  | 5226.514  | NM_005252 | 1197.133  | 1446.029  | AL050165  | 31738.242 | 33688.758 |
| NM_002275 | 3085.765  | 2010.395  | AF090906  | 1236.888  | 1727.697  | AL117445  | 501.289   | 489.391   |
| AK025215  | 8947.467  | 6340.202  | AB023219  | 2469.153  | 2927.129  | AL122113  | 2856.018  | 3643.396  |
| BF569160  | 632.917   | 474.119   | NM_001928 | 8453.744  | 7705.958  | AK024415  | 947.626   | 1113.232  |
| NM_018131 | 6850.224  | 4445.215  | NM_006399 | 425.964   | 306.861   | AL049365  | 1803.105  | 2673.86   |
| NM_017636 | 7323.922  | 6071.302  | NM_018965 | 270.407   | 317.271   | AB007877  | 240.976   | 285.483   |
| NM_012468 | 460.986   | 450.073   | NM_000185 | 5918.351  | 2821.826  | AK025132  | 259.464   | 401.454   |
| M27877    | 16575.324 | 8734.321  | Y00816    | 684.079   | 545.95    | AK025157  | 471.31    | 511.257   |
| D70836    | 32384.285 | 17095.482 | NM_004512 | 3819.158  | 2818.425  | NM_020215 | 474.821   | 411.791   |
| D16878    | 677.353   | 416.558   | NM_004380 | 13078.336 | 6464.956  | AK022001  | 1149.258  | 1394.925  |
| NM_014943 | 1409.287  | 949.112   | NM_004119 | 817.317   | 705.824   | AK022633  | 367.695   | 336.92    |
| AK024392  | 1725.778  | 670.019   | AY007378  | 4051.667  | 2806.739  | AK027199  | 341.67    | 258.204   |
| NM_013260 | 630.393   | 299.165   | D26070    | 1783.644  | 1169.683  | AK000079  | 1004.252  | 838.748   |
| NM_018300 | 932.03    | 548.459   | NM_001642 | 8512.53   | 5848.089  | AJ227874  | 553.596   | 878.676   |
| NM_004875 | 1993.508  | 1484.565  | NM_017459 | 21011.008 | 34852.891 | AF009312  | 234.105   | 286.887   |
| NM_018254 | 3755.214  | 2493.377  | NM_000501 | 44434.508 | 51067.012 | AF009276  | 302.545   | 240.176   |
| NM_017745 | 1470.648  | 924.205   | NM_000114 | 3039.577  | 5758.307  | AF056428  | 1235.897  | 1353.41   |
| NM_018433 | 2655.249  | 1862.406  | NM_005156 | 3569.047  | 4789.535  | AF069136  | 275.394   | 301.381   |
| NM_000937 | 806.145   | 574.499   | NM_015193 | 661.274   | 1015.314  | AK001995  | 260.386   | 221.626   |
| AB028451  | 617.659   | 511.593   | X98834    | 3531.135  | 3982.212  | AK021594  | 212.174   | 237.69    |
| AK024810  | 14722.72  | 8771.586  | NM_007035 | 6050.9    | 7356.624  | AK001151  | 877.818   | 1769.851  |
| AK022615  | 28653.316 | 18419.125 | AB019562  | 1164.958  | 1403.278  | AK021635  | 643.529   | 736.113   |
| NM_004043 | 5714.239  | 3508.844  | AF036364  | 1843.669  | 2638.175  | AK021856  | 339.081   | 448.244   |
| BM458096  | 12209.473 | 8589.399  | AK022847  | 2384.766  | 5445.235  | AK025276  | 1149.535  | 892.264   |
| NM_005626 | 8504.542  | 6990.884  | NM_006808 | 23077.383 | 11307.006 | AK026457  | 325.408   | 231.657   |
| D29958    | 16474.986 | 11139.693 | NM_006634 | 10550.101 | 4861.083  | AJ008131  | 4537.064  | 4183.726  |
| NM_015971 | 7849.953  | 6406.089  | NM_016465 | 1810.208  | 1485.177  | NM_006272 | 200.721   | 115.454   |
| D17257    | 51991.703 | 39888.5   | NM_000328 | 1127.248  | 783.881   | AK024303  | 294.568   | 247.903   |
| AK000724  | 3149.713  | 2035.194  | NM_013399 | 4582.217  | 3764.232  | AL160131  | 4184.696  | 4006.111  |
| NM_003720 | 10020.556 | 6573.55   | NM_002410 | 544.144   | 764.756   | AF086045  | 1568.045  | 1774.319  |
| AF097159  | 859.647   | 574.852   | AL122120  | 1873.078  | 1867.022  | AK027028  | 634.855   | 548.243   |
| NM_004807 | 634.112   | 417.514   | NM_014684 | 895.003   | 1478.221  | AK026916  | 1480.97   | 1800.994  |
| J03569    | 24436.125 | 10522.254 | AK027247  | 591.773   | 962.286   | AK026914  | 869.731   | 681.497   |
| NM_003115 | 3619.773  | 2755.109  | NM_002480 | 5373.638  | 6699.573  | Y13808    | 226.032   | 266.53    |
| NM_000687 | 8034.269  | 5716.501  | NM_017571 | 5715.082  | 5332      | Y11166    | 592.828   | 708.465   |
| NM_018200 | 1687.536  | 1278.172  | AB007946  | 315.96    | 298.592   | AK023515  | 546.758   | 511.893   |
| NM_014838 | 3231.145  | 2680.159  | L03169    | 1382.658  | 1686.058  | AL137623  | 4649.376  | 3714.796  |
| NM_007212 | 3117.93   | 2610.555  | M81349    | 433.551   | 946.968   | NM_003546 | 880.149   | 1143.111  |
| AF005067  | 2286.043  | 1512.643  | NM_014011 | 1410.027  | 779.06    | AF118077  | 949.584   | 1014.899  |
| NM_005710 | 6848.519  | 5676.416  | AK025994  | 1552.353  | 1004.439  | AL137625  | 220.409   | 218.244   |
| AF252284  | 1440.344  | 1422.124  | NM_013989 | 2461.812  | 1992.618  | AK025750  | 657.199   | 597.28    |
| NM_014930 | 1913.324  | 1338.028  | NM_001738 | 868.51    | 732.473   | BF031253  | 202.743   | 199.996   |
| NM_001530 | 4145.204  | 3479.283  | NM_001055 | 23268.104 | 15600.01  | AK025783  | 519.987   | 514.568   |
| U80232    | 12108.59  | 8595.482  | NM_002271 | 33385.543 | 13862.386 | AF113675  | 366.352   | 305.754   |
| AF086526  | 848.706   | 565.068   | NM_018361 | 3221.75   | 1608.427  | AK024514  | 276.306   | 213.9     |
| AK025788  | 2964.915  | 2095.425  | NM_019893 | 339.369   | 295.75    | NM_020119 | 1547.211  | 1608.553  |
| AF086164  | 866.343   | 720.66    | AB040966  | 4074.344  | 2801.533  | AL049417  | 2375.065  | 2994.62   |
| AK025577  | 1972.492  | 1357.02   | NM_020132 | 1712.413  | 1542.507  | AK023507  | 299.559   | 268.263   |
| AB033041  | 10097.172 | 7069.179  | NM_016467 | 11355.254 | 11776.368 | NM_005169 | 1140.725  | 1557.548  |
| AL137507  | 607.239   | 662.751   | NM_007253 | 3389.847  | 4310.683  | NM_017929 | 310.298   | 347.415   |
| NM_014894 | 46656.051 | 32702.68  | NM_019106 | 1504.064  | 2195.929  | NM_018472 | 571.804   | 1168.807  |
| AY007155  | 5274.256  | 5174.176  | L08436    | 663.017   | 1067.337  | AJ008128  | 7584.524  | 6660.401  |
| AK027160  | 2459.968  | 1863.639  | NM_000558 | 6256.681  | 7743.572  | AL449243  | 2917.538  | 3186.55   |

|           |           |           |           |           |           |           |           |           |
|-----------|-----------|-----------|-----------|-----------|-----------|-----------|-----------|-----------|
| AL359211  | 882.508   | 850.649   | NM_004198 | 480.988   | 842.46    | M12211    | 319.929   | 338.695   |
| AF070526  | 463.649   | 478.114   | NM_014170 | 4150.414  | 4634.756  | AK026449  | 3770.288  | 2785.106  |
| U79264    | 1773.13   | 1447.057  | AF116652  | 59565.207 | 56993.09  | NM_014027 | 1632.638  | 1863.613  |
| NM_015698 | 8053.447  | 6007.928  | NM_000835 | 892.226   | 838.145   | NM_020467 | 1715.734  | 1792.49   |
| AF070530  | 14535.202 | 14945.334 | NM_004957 | 1808.049  | 1073.849  | AF116621  | 1208.383  | 1341.309  |
| AF086487  | 798.969   | 1034.171  | NM_005252 | 901.793   | 679.767   | AF086554  | 878.111   | 765.65    |
| NM_006420 | 1316.162  | 1218.271  | AF090906  | 762.309   | 562.495   | AL390136  | 3798.523  | 3155.505  |
| AF131855  | 1063.636  | 781.656   | AB023219  | 2136.848  | 1183.958  | AF086398  | 28265.742 | 16904.428 |
| AF086046  | 2111.959  | 1373.471  | NM_014148 | 664.859   | 433.251   | AK024545  | 305.333   | 209.275   |
| AK024962  | 874.648   | 636.177   | NM_018835 | 3491.989  | 1905.226  | AK023444  | 245.646   | 270.756   |
| AK025135  | 3781.43   | 2723.429  | NM_003401 | 1897.315  | 1444.079  | AK025953  | 387.138   | 420.261   |
| NM_017928 | 1967.148  | 1431.586  | AL137724  | 4482.974  | 2758.927  | NM_003180 | 707.871   | 778.271   |
| AY007145  | 2474.175  | 1552.78   | NM_004758 | 2454.961  | 1589.562  | AF086406  | 5409.371  | 6125.256  |
| D38549    | 1753.12   | 1189.483  | NM_002913 | 2215.828  | 1630.4    | D17216    | 1485.573  | 1562.887  |
| AK024780  | 1210.587  | 610.798   | AK022797  | 1068.966  | 694.388   | AL137581  | 535.369   | 898.097   |
| AF085947  | 1351.464  | 739.042   | NM_007370 | 5205.571  | 3780.601  | AK024942  | 491.698   | 501.879   |
| AK022389  | 1474.831  | 2327.725  | NM_006231 | 992.604   | 793.255   | AJ227873  | 5834.122  | 5432.843  |
| U10510    | 5725.364  | 4772.341  | AK023471  | 1471.687  | 1414.116  | AK022886  | 1481.989  | 1931.702  |
| Z36818    | 946.765   | 1400.641  | AF044578  | 1914.328  | 2930.876  | AK024665  | 4030.637  | 3726.717  |
| Z36842    | 1103.11   | 1218.899  | NM_001948 | 3979.712  | 6328.203  | AF147363  | 337.639   | 424.208   |
| AF086137  | 967.087   | 835.736   | NM_001067 | 15484.286 | 17511.334 | AJ227880  | 369.581   | 399.505   |
| AF086155  | 1050.688  | 1020.461  | NM_014034 | 7248.464  | 7372.073  | AK000691  | 718.09    | 719.085   |
| NM_014158 | 2752.393  | 1318.506  | NM_005335 | 20105.32  | 20590.545 | AK001448  | 509.355   | 727.163   |
| AK021795  | 766.532   | 701.477   | J04474    | 6178.293  | 5923.259  | AK026890  | 234.867   | 229.753   |
| AL162042  | 2212.804  | 1726.844  | NM_003761 | 3907.98   | 4425.174  | AL049321  | 1103.7    | 1138.126  |
| AK026131  | 906.756   | 677.909   | NM_004726 | 891.033   | 832.03    | CY3Cy5    | 1130.881  | 199.823   |
| AK023312  | 1506.009  | 1116.442  | NM_015193 | 580.35    | 342.264   | W74254    | 9942.367  | 8120.789  |
| AL133570  | 570.099   | 763.602   | X98834    | 2414.64   | 2136.286  | M58603    | 2571.551  | 2923.871  |
| AK021462  | 3408.482  | 4830.073  | NM_007035 | 4802.738  | 4632.396  | AB003334  | 3181.587  | 3271.019  |
| AK022678  | 1165.678  | 1401.428  | AB019562  | 972.217   | 1436.859  | AW276315  | 311.029   | 294.176   |
| AK023473  | 658.104   | 1332.022  | AF036364  | 1478.466  | 1744.627  | AI878886  | 11212.726 | 8966.679  |
| AK023835  | 1709.664  | 1726.156  | AK022847  | 1688.446  | 1683.05   | BM012504  | 2164.097  | 4152.554  |
| AK023012  | 1230.455  | 965.649   | NM_020203 | 879.141   | 1033.404  | AA664145  | 822.054   | 1328.002  |
| AK024234  | 1414.797  | 2536.549  | L40992    | 449.499   | 676.994   | NM_004452 | 415.673   | 550.405   |
| NM_012408 | 2292.099  | 1588.3    | U20582    | 2754.336  | 1935.392  | SR5       | 3460.32   | 3406.63   |
| AL050205  | 3318.961  | 2118.485  | NM_000337 | 552.078   | 525.392   | SR7       | 2881.341  | 19107.879 |
| NM_005691 | 923.084   | 669.312   | NM_002079 | 6063.478  | 4018.816  | SR9       | 10068.447 | 1543.157  |
| AF130063  | 418.021   | 521.8     | U13697    | 636.373   | 382.197   | CY3Cy5    | 1137.176  | 186.704   |
| AF086528  | 743.46    | 447.79    | U04270    | 5781.376  | 4612.214  | NM_000591 | 760.379   | 1486.724  |
| AL162043  | 395.617   | 465.764   | L02840    | 499.608   | 630.111   | NM_000568 | 699.014   | 874.561   |
| AF251187  | 639.62    | 555.6     | AA629719  | 64877.793 | 64507.719 | NM_002018 | 861.025   | 908.94    |
| NM_006543 | 1452.461  | 1914.623  | BG181154  | 1234.127  | 1409.645  | NM_017767 | 4863.335  | 5770.219  |
| AK024171  | 519.143   | 666.261   | AA843679  | 15666.773 | 13980.777 | AK024848  | 4394.835  | 6814.095  |
| AK023018  | 1556.724  | 1125.894  | H68922    | 620.66    | 763.286   | NM_004852 | 838.57    | 1014.919  |
| AK022672  | 1579.493  | 1179.467  | NM_017571 | 5037.909  | 2859.739  | NM_003633 | 234.081   | 441.431   |
| AK023870  | 1135.391  | 991.259   | L03169    | 644.777   | 767.515   | AJ290954  | 6992.578  | 9546.6    |
| AK024263  | 1196.703  | 1125.581  | NM_001928 | 7883.007  | 11500.968 | AK025451  | 914.87    | 758.715   |
| NM_016613 | 2809.635  | 1628.537  | NM_006399 | 342.31    | 523.766   | NM_002783 | 533.103   | 391.564   |
| AF086414  | 1691.378  | 1225.929  | NM_018965 | 534.97    | 913.992   | X52005    | 5319.114  | 2247.809  |
| AJ012490  | 5100.217  | 3615.301  | NM_000185 | 6926.051  | 4491.987  | AK024396  | 612.255   | 703.441   |
| U84516    | 10861.933 | 5740.382  | Y00816    | 468.213   | 447.525   | U58514    | 836.983   | 1260.076  |
| AL049270  | 938.448   | 763.62    | NM_004512 | 4039.41   | 2721.534  | NM_000544 | 635.475   | 943.306   |
| U88834    | 7259.542  | 4734.505  | NM_004380 | 14248.671 | 9300.323  | AV681967  | 833.746   | 961.196   |

|           |           |           |           |           |           |           |           |           |
|-----------|-----------|-----------|-----------|-----------|-----------|-----------|-----------|-----------|
| BC025324  | 592.814   | 314.624   | NM_004119 | 789.448   | 707.439   | NM_01825C | 770.02    | 968.912   |
| NM_006087 | 67182.492 | 66176.063 | AY007378  | 4219.929  | 4526.192  | NM_016553 | 2503.635  | 3533.327  |
| NM_003533 | 1790.76   | 1659.652  | D26070    | 1823.829  | 2219.686  | NM_003795 | 14846.516 | 13617.216 |
| AK023726  | 4897.7    | 4944.005  | NM_001642 | 8510.584  | 9287.83   | NM_014232 | 2381.767  | 2179.392  |
| AK024906  | 969.273   | 805.947   | NM_000501 | 49529.176 | 47686.109 | NM_005701 | 623.81    | 1054.746  |
| AF131836  | 2395.181  | 2421.766  | NM_000114 | 2631.907  | 3608.565  | NM_006819 | 24708.258 | 26031.563 |
| AF275804  | 21746.854 | 26535.365 | NM_005156 | 3818.987  | 4785.308  | NM_014744 | 1451.128  | 1950.875  |
| AL049447  | 52571.461 | 44265.953 | NM_000558 | 8236.427  | 11334.643 | AF146759  | 474.519   | 448.379   |
| NM_020527 | 2674.583  | 2251.347  | NM_004198 | 590.508   | 1009.326  | AB032993  | 3003.266  | 2950.801  |
| AB020637  | 7717.018  | 6180.236  | NM_014170 | 3513.221  | 2965.495  | NM_000854 | 2188.978  | 2860.649  |
| NM_005286 | 3416.032  | 2187.615  | AF116652  | 55737.137 | 53151.32  | NM_002084 | 954.248   | 925.714   |
| AK024365  | 3871.539  | 2053.983  | NM_000835 | 501.508   | 625.608   | D16892    | 8244.208  | 5947.828  |
| AJ251759  | 1322.918  | 1265.013  | NM_006808 | 23264.393 | 18776.795 | NM_00475C | 820.529   | 702.066   |
| AK024371  | 1439.835  | 1115.127  | NM_006634 | 9987.389  | 11120.3   | NM_007295 | 1413.336  | 1511.515  |
| NM_001889 | 10587.386 | 7055.61   | NM_016465 | 2133.509  | 3945.044  | NM_003651 | 6349.463  | 6878.583  |
| NM_004999 | 446.516   | 303.662   | NM_000328 | 1103.22   | 1607.293  | NM_003262 | 878.315   | 945.918   |
| X89668    | 24845.449 | 12777.574 | NM_013399 | 4531.014  | 7102.61   | NM_020125 | 331.2     | 355.061   |
| NM_004458 | 3609.486  | 2677.128  | NM_002410 | 705.227   | 1009.835  | AK022832  | 1489.5    | 1636.554  |
| NM_006901 | 1176.347  | 820.824   | AL122120  | 1875.883  | 1844.023  | NM_014641 | 1288.393  | 1381.043  |
| NM_01853C | 8987.215  | 5191.331  | NM_014684 | 1014.796  | 1311.912  | NM_004462 | 6316.033  | 6219.932  |
| AJ003145  | 416.873   | 275.514   | AK027247  | 701.329   | 869.717   | NM_00664C | 9620.001  | 11455.735 |
| AK022855  | 12707.73  | 7929.947  | NM_002480 | 6183.106  | 7399.187  | NM_000343 | 403.113   | 520.542   |
| AL050102  | 557.825   | 526.785   | NM_014034 | 7325.931  | 4238.399  | NM_019112 | 1454.811  | 1529.137  |
| AF305686  | 3389.385  | 2118.388  | NM_005335 | 20840.117 | 18630.006 | NM_012336 | 6400.573  | 6847.06   |
| AF085832  | 859.966   | 910.078   | J04474    | 6617.99   | 10391.916 | NM_020246 | 793.292   | 773.856   |
| AK025981  | 2982.657  | 2578.146  | NM_003761 | 3116.744  | 2899.078  | NM_000084 | 1149.967  | 1348.965  |
| AF086266  | 771.764   | 550.876   | NM_004726 | 523.46    | 565.419   | NM_016354 | 580.724   | 625.856   |
| AF086252  | 1614.435  | 2806.098  | NM_014011 | 1141.164  | 516.371   | NM_003038 | 525.821   | 500.614   |
| AK026703  | 2086.071  | 2277.326  | AK025994  | 1860.13   | 1423.787  | NM_018155 | 2041.304  | 2285.128  |
| NM_017866 | 8071.133  | 7265.607  | L29306    | 342.991   | 307.218   | AL050358  | 841.517   | 871.483   |
| NM_003536 | 1450.745  | 990.925   | NM_013989 | 2899.402  | 1905.195  | NM_004731 | 510.383   | 452.431   |
| AF116707  | 3508.139  | 2702.147  | NM_001738 | 1245.477  | 1090.515  | AB023139  | 1611.589  | 1298.144  |
| U90910    | 4298.358  | 2631.651  | NM_001055 | 24313.982 | 12367.479 | NM_017885 | 1837.154  | 1830.116  |
| AA143087  | 9624.019  | 9124.908  | NM_015878 | 400.521   | 348.023   | D80004    | 555.458   | 619.022   |
| U25804    | 3066.099  | 3941.366  | NM_002271 | 39509.602 | 39540.973 | NM_000946 | 2874.278  | 2629.37   |
| BI870965  | 4050.192  | 5317.326  | NM_018361 | 3239.709  | 3569.892  | NM_01607C | 999.222   | 1308.883  |
| X02761    | 1997.939  | 2376.99   | NM_019893 | 319.725   | 788.709   | NM_01639C | 785.142   | 825.966   |
| M91463    | 794.43    | 1214.656  | AB040966  | 5138.53   | 9978.829  | NM_016101 | 3186.29   | 4091.97   |
| J03060    | 3265.808  | 2963.05   | NM_020132 | 1873.592  | 2760.993  | AK025630  | 962.13    | 1450.658  |
| NM_003743 | 1566.676  | 1370.623  | NM_016467 | 11751.448 | 15305.893 | AL365404  | 9907.35   | 11865.202 |
| AA829383  | 4418.163  | 4803.471  | NM_007253 | 3502.02   | 4374.298  | AK022907  | 2562.54   | 2077.783  |
| AF012434  | 10046.065 | 8764.399  | NM_019106 | 1525.94   | 2546.776  | NM_014793 | 1799.231  | 1376.9    |
| SR2       | 62506.156 | 30393.256 | L08436    | 822.272   | 986.219   | NM_004245 | 541.13    | 603.569   |
| SR4       | 18032.184 | 8999.802  | NM_005607 | 2354.912  | 706.179   | NM_003241 | 287.454   | 209.611   |
| SR6       | 2583.814  | 1254.49   | NM_006761 | 58863.637 | 55393.887 | NM_002685 | 1538.417  | 1294.849  |
| SR8       | 10451.477 | 15172.576 | NM_014897 | 1766.118  | 1218.603  | AK024504  | 714.588   | 798.133   |
| SR10      | 43670.074 | 20361.586 | NM_003453 | 6923.457  | 5799.283  | AF039023  | 1163.974  | 1286.118  |
| CY3Cy5    | 7086.974  | 872.616   | NM_018371 | 22878.84  | 16146.474 | NM_005511 | 1896.116  | 1792.026  |
| NM_018842 | 1825.466  | 3217.823  | NM_014390 | 10986.395 | 3404.24   | NM_014696 | 5629.463  | 4851.443  |
| NM_004302 | 544.147   | 1105.876  | NM_018143 | 531.129   | 225.549   | NM_018475 | 2908.962  | 2296.618  |
| NM_005903 | 1857.897  | 2985.674  | X78924    | 20197.486 | 22933.672 | X52005    | 4525.624  | 2752.054  |
| AB037734  | 898.489   | 1379.543  | NM_013250 | 658.589   | 857.241   | NM_001047 | 219.126   | 445.01    |
| U77493    | 836.467   | 981.942   | AF090906  | 1296.399  | 1112.344  | AK024396  | 590.597   | 504.828   |

|           |           |           |           |           |           |           |           |           |
|-----------|-----------|-----------|-----------|-----------|-----------|-----------|-----------|-----------|
| NM_019062 | 521.316   | 817.246   | AB023219  | 2290.055  | 1034.471  | U58514    | 852.592   | 829.824   |
| NM_000263 | 1179.243  | 1164.863  | NM_014148 | 684.798   | 539.486   | W74254    | 11861.035 | 9433.517  |
| AF073519  | 8658.053  | 7150.645  | NM_018835 | 3895.288  | 2511.428  | M58603    | 3015.915  | 3539.49   |
| NM_017583 | 2880.517  | 2870.039  | NM_003401 | 2101.859  | 2226.81   | AB003334  | 3803.563  | 3493.324  |
| Y16132    | 10215.149 | 5773.924  | AL137724  | 5517.288  | 9108.53   | AW276315  | 326.717   | 395.098   |
| NM_016593 | 771.126   | 547.076   | NM_004758 | 2573.706  | 5161.438  | AA490737  | 470.633   | 567.074   |
| NM_002521 | 951.587   | 576.663   | NM_002913 | 2682.83   | 3524.619  | AI878886  | 11229.684 | 13988.379 |
| NM_002856 | 1491.16   | 987.078   | AK022797  | 1441.186  | 1996.326  | BG697179  | 4179.817  | 5142.547  |
| NM_000096 | 2069.066  | 5357.859  | NM_007370 | 5269.625  | 6932.53   | BM012504  | 2175.488  | 2666.627  |
| NM_019045 | 1059.211  | 1999.158  | NM_006231 | 1143.463  | 1543.141  | AA664145  | 695.521   | 596.602   |
| NM_006380 | 3475.207  | 5098.497  | AK023471  | 1488.481  | 1842.537  | X72308    | 3604.938  | 3024.4    |
| AB020710  | 2191.887  | 2604.825  | AF044578  | 2280.979  | 2700.049  | T70999    | 507.194   | 550.374   |
| NM_016174 | 5882.227  | 7106.04   | NM_001948 | 3757.442  | 4028.521  | R48168    | 7935.793  | 7492.809  |
| NM_020377 | 716.894   | 1119.064  | AK025337  | 361.828   | 254.198   | NM_003942 | 1092.87   | 1022.544  |
| U88896    | 1376.554  | 2075.252  | AB028984  | 321.742   | 332.302   | NM_004452 | 405.944   | 410.505   |
| NM_005724 | 9193.493  | 10920.896 | NM_005602 | 2016.708  | 1007.282  | AB040954  | 1534.75   | 1508.902  |
| X58794    | 1356.315  | 1960.452  | NM_003573 | 5622.266  | 2326.158  | NM_002081 | 539.829   | 457.344   |
| NM_001735 | 2036.273  | 2586.687  | NM_000296 | 4392.688  | 2544.361  | NM_002084 | 896.387   | 823.616   |
| NM_002349 | 296.194   | 802.148   | NM_017422 | 18950.234 | 9080.739  | D16892    | 7817.253  | 5124.716  |
| NM_005080 | 17658.463 | 16207.82  | NM_005879 | 1013.783  | 643.345   | NM_004750 | 838.863   | 711.277   |
| NM_004887 | 5052.016  | 6297.942  | AF147790  | 817.127   | 550.447   | NM_007295 | 1087.538  | 829.918   |
| NM_006404 | 413.149   | 639.575   | NM_004112 | 4569.985  | 3515.496  | NM_003651 | 4869.123  | 4894.581  |
| NM_014795 | 531.559   | 795.304   | AK025592  | 6268.795  | 6503.374  | NM_000591 | 792.791   | 1209.562  |
| NM_002986 | 807.222   | 942.236   | NM_004635 | 9536.696  | 8355.126  | NM_000565 | 614.192   | 669.012   |
| M15330    | 736.808   | 1424.664  | AK023023  | 10056.545 | 10690.157 | NM_017767 | 3926.68   | 3329.952  |
| NM_014396 | 3084.151  | 1804.794  | NM_015993 | 5235.395  | 6236.302  | AK024848  | 3840.015  | 3963.103  |
| AK027201  | 1791.351  | 1462.135  | NM_002659 | 1463.171  | 2469.976  | NM_004852 | 1099.249  | 1181.499  |
| NM_000489 | 8177.651  | 3834.516  | Z36776    | 2927.68   | 4234.842  | NM_000543 | 721.417   | 558.526   |
| X98507    | 2561.97   | 1389.125  | AB029015  | 2306.915  | 2195.98   | U06699    | 2027.991  | 1661.287  |
| NM_016030 | 48664.496 | 27632.516 | NM_002067 | 33703.621 | 33158.863 | AJ290954  | 6850.947  | 6536.855  |
| NM_005652 | 5467.129  | 14055.082 | NM_006150 | 2711.2    | 791.086   | AK025451  | 1123.32   | 1091.181  |
| AL133064  | 3321.871  | 4689.737  | NM_020345 | 1044.6    | 473.412   | NM_002783 | 468.039   | 425.125   |
| NM_006227 | 4502.164  | 6764.203  | NM_003287 | 582.25    | 251.233   | NM_000084 | 1029.41   | 799.14    |
| NM_002905 | 3846.962  | 5571.683  | NM_012325 | 15846.287 | 4235.646  | NM_016354 | 580.574   | 386.723   |
| NM_019028 | 13919.442 | 13265.534 | NM_014434 | 1119.226  | 610.663   | NM_003038 | 542.925   | 498.922   |
| NM_000431 | 3599.171  | 4459.638  | NM_019607 | 2800.815  | 3303.655  | NM_018155 | 1831.533  | 1648.554  |
| NM_013421 | 1044.066  | 1603.079  | U79260    | 10641.381 | 9263.633  | AL050358  | 956.578   | 686.228   |
| AB033118  | 8069.524  | 10051.766 | NM_001895 | 8725.826  | 7518.437  | NM_000544 | 797.211   | 966.932   |
| NM_019606 | 2920.56   | 3572.446  | NM_006447 | 2432.401  | 1529.626  | NM_004644 | 330.451   | 262.916   |
| NM_001690 | 8237.706  | 7771.96   | AF119851  | 834.907   | 732.438   | AV681967  | 1046.719  | 1145.629  |
| AF034374  | 7444.936  | 7543.041  | NM_014129 | 3753.11   | 2828.376  | NM_018250 | 1006.932  | 1302.823  |
| NM_018674 | 12502.485 | 12633.135 | D87455    | 2493.163  | 1184.14   | NM_016553 | 3392.972  | 4718.742  |
| NM_001683 | 28137.395 | 18763.174 | AF080577  | 895.236   | 671.929   | AB023136  | 415.374   | 708.261   |
| NM_001682 | 2403.133  | 1791.9    | L22005    | 8415.728  | 6706.889  | NM_003795 | 16999.51  | 16643.961 |
| NM_014405 | 2071.627  | 1729.755  | NM_012291 | 10514.493 | 7501.685  | NM_014232 | 2577.209  | 2840.363  |
| NM_000816 | 882.553   | 1044.409  | NM_013368 | 2081.088  | 2033.442  | NM_005701 | 563.361   | 593.008   |
| NM_014928 | 1512.215  | 1124.32   | NM_003807 | 18093.48  | 24887.379 | NM_006819 | 22797.445 | 16539.045 |
| AK025130  | 3762.403  | 2642.452  | NM_004358 | 4624.205  | 7210.969  | NM_014744 | 3369.227  | 3672.83   |
| NM_017875 | 2450.994  | 1266.712  | NM_001790 | 2911.197  | 4641.011  | AF146759  | 1066.63   | 799.58    |
| AK023232  | 2996.103  | 1886      | NM_018243 | 4488.25   | 4089.59   | AB032993  | 2792.197  | 1895.89   |
| NM_000271 | 7869.712  | 4800.214  | NM_014939 | 1980.986  | 2132.311  | NM_000854 | 2310.193  | 1773.888  |
| Z70701    | 10528.198 | 10223.548 | Y17866    | 679.535   | 1020.75   | AL117423  | 2095.487  | 1951.752  |
| AB040972  | 4278.413  | 5812.829  | AK024247  | 803.685   | 1410.171  | NM_002685 | 1427.451  | 1183.585  |

|           |           |           |           |           |           |           |           |           |
|-----------|-----------|-----------|-----------|-----------|-----------|-----------|-----------|-----------|
| NM_018686 | 12825.189 | 14022.584 | NM_003005 | 4730.662  | 5598.11   | AK024504  | 595.612   | 529.238   |
| NM_017676 | 1434.778  | 2108.323  | NM_002842 | 2518.8    | 1291.18   | AF039023  | 1184.038  | 1001.527  |
| AK021764  | 534.526   | 859.747   | NM_012126 | 363.756   | 247.945   | NM_005511 | 1792.735  | 1673.682  |
| NM_005431 | 2501.71   | 3127.475  | NM_004418 | 2727.009  | 898.045   | NM_014698 | 6394.689  | 4613.344  |
| AB036063  | 2126.4    | 2557.899  | NM_000917 | 13585.993 | 7604.049  | NM_018475 | 2079.982  | 1595.021  |
| NM_002894 | 7813.969  | 7112.109  | NM_005389 | 21597.016 | 31184.404 | NM_003262 | 1032.291  | 1209.956  |
| NM_004629 | 10504.275 | 10182.79  | NM_014445 | 27636.643 | 45834.539 | AK022832  | 1894.017  | 2897.519  |
| AL050067  | 1544.527  | 1103.276  | AL832826  | 1605.163  | 3097.208  | NM_014641 | 1419.68   | 1820.536  |
| NM_004972 | 5217.802  | 4143.375  | NM_016123 | 1493.233  | 993.098   | NM_004462 | 6967.116  | 8889.376  |
| NM_006251 | 5368.413  | 4687.431  | AB048365  | 809.659   | 564.449   | AB020664  | 1589.342  | 1753.085  |
| NM_004103 | 8034.953  | 5703.248  | NM_000391 | 2800.565  | 1567.831  | NM_006640 | 9477.347  | 7358.664  |
| NM_002314 | 5646.723  | 4853.607  | AF229179  | 406.701   | 359.32    | NM_000343 | 364.919   | 393.347   |
| NM_001744 | 6244.547  | 5014.995  | NM_014771 | 9236.362  | 9520.771  | NM_019112 | 1460.556  | 1302.308  |
| NM_006296 | 2302.024  | 1408.469  | NM_002275 | 6557.827  | 9318.236  | NM_012336 | 6407.697  | 6195.635  |
| Z25433    | 3765.321  | 2497.266  | AB032945  | 695.475   | 1646.105  | NM_020246 | 791.633   | 742.102   |
| NM_005922 | 3573.72   | 2118.899  | AK025215  | 9465.796  | 19131.543 | NM_003942 | 978.098   | 894.493   |
| NM_018638 | 6528.607  | 3960.008  | BF569160  | 1350.999  | 2332.689  | AB040954  | 1030.909  | 1219.638  |
| AL137593  | 21227.863 | 20016.951 | AK024625  | 817.554   | 985.541   | NM_002081 | 430.809   | 477.881   |
| NM_001150 | 494.597   | 1068.502  | NM_018131 | 6445.527  | 6071.452  | AB023139  | 1641.74   | 1370.161  |
| NM_002856 | 1273.409  | 2045.878  | NM_014834 | 328.203   | 540.385   | NM_017885 | 1698.05   | 1840.149  |
| NM_003225 | 865.237   | 2270.039  | NM_017636 | 7247.49   | 10983.307 | D80004    | 1053.428  | 1181.007  |
| NM_000096 | 1567.692  | 2385.89   | NM_012468 | 605.905   | 1015.964  | NM_016070 | 1158.512  | 2449.075  |
| AA418251  | 1196.749  | 1678.901  | M27877    | 28322.063 | 12469.77  | NM_016390 | 801.302   | 956.438   |
| AA143087  | 8585.339  | 8324.371  | D70836    | 39482.723 | 17267.283 | NM_016101 | 2585.838  | 2166.401  |
| U25804    | 2664.755  | 3263.024  | D16878    | 605.929   | 401.726   | NM_005855 | 10267.553 | 8336.777  |
| BI870965  | 4109.104  | 4590.332  | NM_014943 | 1970.426  | 540.082   | NM_020313 | 558.328   | 533.986   |
| NM_001903 | 10457.88  | 12703.114 | AK024392  | 3349.421  | 3413.016  | NM_014628 | 3287.047  | 3194.897  |
| BI835536  | 13191.404 | 13608.407 | NM_013260 | 1359.978  | 2708.788  | AL365404  | 8388.763  | 6676.346  |
| BF205051  | 3644.399  | 3675.182  | NM_018300 | 1229.286  | 824.923   | AK022907  | 2215.081  | 1652.621  |
| X02761    | 1839.468  | 1745.08   | NM_004875 | 1506.631  | 634.234   | NM_014793 | 1584.312  | 957.531   |
| M91463    | 906.476   | 573.877   | NM_018254 | 8003.109  | 4697.513  | NM_004245 | 498.206   | 426.588   |
| J03060    | 3917.158  | 3065.678  | NM_017745 | 1437.617  | 593.535   | NM_003241 | 796.872   | 734.09    |
| X54156    | 384.859   | 638.56    | NM_018433 | 2937.185  | 836.891   | NM_000543 | 626.691   | 670.667   |
| NM_003743 | 1706.084  | 1246.371  | NM_000937 | 1002.056  | 664.28    | U06699    | 1828.568  | 1897.698  |
| AA829383  | 5012.704  | 4254.134  | AB028451  | 724.844   | 800.161   | AJ290954  | 5514.933  | 5433.493  |
| AF012434  | 10151.743 | 5033.227  | AK024810  | 17622.996 | 26460.541 | AK025451  | 690.693   | 870.578   |
| NM_018124 | 6643.743  | 13441.188 | AK022615  | 27039.855 | 42579.086 | NM_002783 | 475.321   | 538.112   |
| NM_000489 | 7094.779  | 8395.293  | NM_004043 | 5420.587  | 5963.684  | X52005    | 7106.7    | 3731.123  |
| X98507    | 2409.54   | 3568.681  | BM458096  | 10642.298 | 10889.721 | AK024396  | 502.604   | 585.674   |
| NM_016030 | 53933.168 | 61015.371 | NM_005626 | 9574.139  | 9853.891  | U58514    | 543.467   | 547.733   |
| NM_014669 | 8068.755  | 11238.602 | D29958    | 14261.994 | 15565.555 | W74254    | 13752.126 | 13992.079 |
| NM_005652 | 4851.997  | 5974.511  | NM_015971 | 6922.774  | 9428.626  | AA490737  | 12127.234 | 9335.966  |
| AK026686  | 412.611   | 752.758   | D17257    | 55227.621 | 59707.492 | AI878886  | 10233.891 | 8500.454  |
| NM_004302 | 527.84    | 787.075   | AK000724  | 3998.004  | 1465.746  | BG697179  | 4021.399  | 2969.876  |
| NM_005903 | 1765.286  | 2194.597  | NM_003720 | 13929.382 | 5609.514  | NM_002136 | 28381.291 | 19023.439 |
| NM_000861 | 772.366   | 976.436   | AF097159  | 1133.621  | 443.791   | BM012504  | 1913.89   | 1708.6    |
| NM_000024 | 391.118   | 438.114   | NM_004807 | 1067.439  | 595.749   | AA664145  | 744.794   | 738.527   |
| AB037734  | 883.024   | 1087.817  | J03569    | 57712.23  | 50757.871 | X72308    | 2710.517  | 2040.672  |
| U77493    | 748.753   | 741.86    | NM_003115 | 5981.113  | 1574.336  | T70999    | 256.824   | 208.593   |
| NM_019062 | 599.066   | 619.91    | NM_000687 | 10405.411 | 4147.754  | R48168    | 7718.214  | 6694.666  |
| NM_000263 | 1780.457  | 1112.357  | NM_000446 | 719.047   | 376.031   | AB032993  | 2219.235  | 1320.297  |
| AF073519  | 8974.24   | 6827.539  | NM_018200 | 2087.089  | 1729.364  | NM_000854 | 1599.197  | 1486.622  |
| AB001451  | 498.957   | 1402.609  | NM_014838 | 3580.756  | 4752.788  | AL117423  | 1408.169  | 1272.515  |



|           |           |           |           |           |           |           |           |           |
|-----------|-----------|-----------|-----------|-----------|-----------|-----------|-----------|-----------|
| NM_017583 | 3889.64   | 5657.579  | NM_007212 | 5295.813  | 8893.771  | NM_002084 | 906.76    | 707.253   |
| Y16132    | 17865.395 | 19357.814 | AF005067  | 2236.902  | 2440.814  | D16892    | 7825.089  | 6096.755  |
| NM_016593 | 1041.421  | 3129.34   | NM_005710 | 7559.133  | 7258.952  | NM_004750 | 814.383   | 666.033   |
| NM_017875 | 1918.045  | 2814.242  | AF252284  | 1968.105  | 2114.222  | NM_007295 | 1036.229  | 1052.995  |
| AK023232  | 3033.669  | 4926.71   | NM_014930 | 2132.674  | 2110.55   | NM_003651 | 5936.969  | 6994.462  |
| NM_000271 | 10914.53  | 21774.82  | NM_001530 | 4085.164  | 5302.82   | NM_000591 | 757.425   | 614.318   |
| NM_018209 | 4930.438  | 6983.618  | U80232    | 18388.814 | 36932.195 | NM_000565 | 454.179   | 459.952   |
| NM_006184 | 23200.441 | 25909.445 | AF086526  | 1091.057  | 361.739   | NM_002019 | 1063.709  | 1030.159  |
| AB018268  | 8808.899  | 10571.055 | AK025788  | 5239.103  | 1169.998  | AF253318  | 685.828   | 552.927   |
| NM_019045 | 1105.694  | 1299.748  | AF086164  | 1319.526  | 423.326   | NM_017767 | 3779.354  | 2700.236  |
| NM_006380 | 3564.638  | 3980.925  | AK025577  | 1673.805  | 646.902   | AK024848  | 3544.697  | 4116.451  |
| AB020710  | 1570.467  | 1871.151  | AK000216  | 1354.708  | 524.292   | NM_004852 | 808.813   | 635.634   |
| NM_016174 | 4932.326  | 4666.361  | AK023440  | 824.3     | 496.044   | NM_019112 | 1057.497  | 835.115   |
| NM_020377 | 583.238   | 961.55    | AB033041  | 10619.573 | 5761.876  | NM_012336 | 3653.714  | 3300.388  |
| U88896    | 1261.858  | 1728.143  | NM_014894 | 65922.914 | 48312.242 | NM_020246 | 662.129   | 471.428   |
| NM_005724 | 8981.726  | 8891.087  | AY007155  | 6816.179  | 5393.938  | NM_000084 | 593.808   | 683.063   |
| X58794    | 1394.969  | 1537.909  | AK027160  | 3379.156  | 4672.968  | NM_016354 | 503.133   | 556.963   |
| NM_001735 | 2301.386  | 2879.293  | AL359211  | 1086.444  | 1361.055  | NM_018155 | 1559.257  | 2066.905  |
| NM_002349 | 713.805   | 1376.062  | AF070526  | 1394.239  | 1570.587  | AL050358  | 565.478   | 561.482   |
| NM_006404 | 725.468   | 1642.607  | U79264    | 3886.973  | 4210.022  | NM_004731 | 369.085   | 487.968   |
| NM_014795 | 920.447   | 1576.897  | NM_015699 | 13745.937 | 17142.42  | NM_000544 | 1014.976  | 1049.225  |
| NM_002986 | 1396.854  | 2039.35   | AK023619  | 808.297   | 1019.575  | NM_004644 | 370.894   | 541.347   |
| M15330    | 1121.619  | 2854.155  | AF070530  | 12823.299 | 12209.784 | AV681967  | 870.021   | 830.756   |
| NM_014396 | 4290.687  | 8786.423  | AF086487  | 663.18    | 840.808   | NM_018250 | 919.242   | 830.739   |
| Z25433    | 3592.434  | 4966.243  | NM_006420 | 1192.132  | 1396.952  | NM_016553 | 3067.752  | 3101.477  |
| NM_005922 | 3100.397  | 4846.846  | AF131855  | 999.125   | 1200.108  | AB023136  | 333.973   | 236.265   |
| NM_018638 | 6227.358  | 9391.199  | AF086046  | 1981.347  | 3042.638  | NM_003795 | 15717.317 | 10774.424 |
| AL137593  | 17258.752 | 16972.885 | AK024962  | 2323.807  | 1713.347  | NM_014232 | 2695.42   | 2463.133  |
| NM_003915 | 2818.113  | 3297.414  | AK022164  | 519.484   | 757.693   | NM_006819 | 23541.648 | 17150.16  |
| NM_000382 | 3006.609  | 3390.87   | AK025135  | 6340.512  | 3391.425  | NM_014744 | 1630.287  | 1535.29   |
| AL133064  | 3069.234  | 4014.155  | NM_017926 | 2426.532  | 753.69    | AF146759  | 656.094   | 425.529   |
| NM_006227 | 5033.626  | 6549.03   | AY007145  | 7576.708  | 2271.108  | AL365404  | 7998.992  | 6106.35   |
| NM_002905 | 3942.96   | 5251.848  | AK021573  | 381.765   | 360.363   | AK022907  | 2492.136  | 1662.539  |
| NM_000700 | 54633.926 | 60742.621 | D38549    | 4875.083  | 1462.394  | NM_014793 | 1689.144  | 1184.299  |
| NM_019028 | 12464.233 | 12789.123 | AK024780  | 1256.142  | 673.754   | NM_004245 | 537.558   | 456.672   |
| NM_000431 | 3619.614  | 6652.247  | AF085947  | 1611.975  | 933.175   | NM_003241 | 299.574   | 271.045   |
| NM_013421 | 1011.9    | 1493.982  | AF086000  | 456.445   | 532.319   | NM_002685 | 1386.818  | 1119.383  |
| AB033118  | 10171.523 | 18340.129 | AL359591  | 604.038   | 407.12    | AK024504  | 671.367   | 806.46    |
| NM_019606 | 4535.757  | 8017.985  | U10510    | 8333.031  | 8470.165  | AF039023  | 1268.657  | 1121.755  |
| NM_001690 | 12686.133 | 19688.838 | Z36818    | 487.981   | 814.842   | NM_005511 | 1523.204  | 1674.377  |
| AF034374  | 14484.058 | 20496.662 | Z36842    | 1389.019  | 1799.79   | NM_014698 | 4483.02   | 4166.829  |
| NM_001682 | 3126.029  | 4167.945  | AF086137  | 741.506   | 1240.534  | NM_018475 | 2295.92   | 2394.134  |
| NM_014405 | 3466.831  | 4549.107  | AF086155  | 946.926   | 1465.202  | NM_003262 | 1445.156  | 1738.367  |
| NM_000816 | 1375.878  | 2383.143  | AK025619  | 699.879   | 1197.635  | AK022832  | 1602.235  | 1549.571  |
| NM_014928 | 1658.665  | 4058.929  | AF116677  | 1100.389  | 513.751   | NM_014641 | 1345.342  | 1012.999  |
| AB037791  | 1692.4    | 2334.54   | AK022010  | 479.866   | 377.58    | NM_004462 | 6893.271  | 8484.468  |
| NM_018124 | 6755.239  | 12831.079 | NM_014159 | 5896.751  | 1450.325  | AB020664  | 1570.162  | 1224.71   |
| Z70701    | 15505.81  | 20128.41  | AK021795  | 1845.209  | 587.711   | NM_006640 | 10671.135 | 9235.365  |
| AB040972  | 5517.945  | 10110.237 | AL162042  | 5574.653  | 1992.457  | NM_000857 | 592.556   | 519.41    |
| AF148505  | 3808.955  | 8455.498  | AK026131  | 1320.238  | 477.924   | L20688    | 41862.059 | 26388.115 |
| BE260997  | 711.521   | 1678.03   | AK023312  | 1890.768  | 1147.783  | X69111    | 7934.399  | 5160.005  |
| NM_018686 | 17036.859 | 33139.918 | AK022483  | 487.529   | 590.141   | AB037799  | 1278.179  | 1157.389  |
| NM_017676 | 2165.169  | 4451.964  | AL133570  | 617.144   | 309.292   | AB007950  | 3631.884  | 2609.238  |

|           |           |           |           |           |           |           |           |           |
|-----------|-----------|-----------|-----------|-----------|-----------|-----------|-----------|-----------|
| AK021764  | 1007.081  | 1892.084  | AK021462  | 970.224   | 1122.836  | AK025593  | 1044.13   | 983.161   |
| NM_005431 | 3386.246  | 5141.898  | AK022678  | 1311.692  | 1594.525  | AB018304  | 1288.452  | 1269.881  |
| AB036063  | 3055.324  | 4542.047  | AK023473  | 628.724   | 844.227   | NM_007061 | 4539.579  | 4039.453  |
| NM_002894 | 10027.453 | 12598.465 | AK023835  | 1702.87   | 2386.824  | AB040954  | 1402.579  | 1322.825  |
| NM_004629 | 14032.377 | 18038.99  | AK023012  | 1701.697  | 2089.633  | NM_002081 | 617.335   | 518.281   |
| NM_004260 | 13095.248 | 15430.677 | AK023906  | 2871.218  | 3715.937  | AB023139  | 2192.565  | 2227.663  |
| AL050067  | 2128.192  | 3077.756  | AK024234  | 788.542   | 1143.435  | NM_017885 | 2085.759  | 2424.344  |
| NM_006251 | 6702.256  | 9689.309  | NM_012409 | 5312.95   | 9104.3    | D80004    | 535.829   | 604.963   |
| NM_004103 | 12065.124 | 15838.405 | AK021708  | 544.664   | 769.212   | NM_000946 | 3346.909  | 2869.775  |
| NM_002314 | 8432.864  | 11545.52  | AL050205  | 5353.313  | 3289.627  | NM_016070 | 970.183   | 687.631   |
| NM_001744 | 9890.425  | 18228.83  | AK023947  | 498.367   | 212.759   | NM_016390 | 1011.539  | 2122.457  |
| AF073519  | 11106.29  | 15849.893 | NM_005691 | 1226.809  | 439.477   | NM_016101 | 4235.414  | 10920.325 |
| AB001451  | 614.309   | 1326.277  | AF130063  | 514.596   | 402.944   | NM_005859 | 11644.578 | 11800.181 |
| NM_017583 | 3607.488  | 7083.846  | AF086528  | 555.732   | 589.996   | NM_020313 | 589.664   | 604.222   |
| Y16132    | 14870.036 | 21829.947 | AL162043  | 519.588   | 464.169   | NM_014628 | 3434.471  | 3415.188  |
| NM_016593 | 1303.245  | 2597.657  | AF251187  | 812.414   | 534.257   | AK025630  | 864.334   | 854.153   |
| NM_002521 | 1298.104  | 2392.988  | NM_006543 | 1064.451  | 771.058   | NM_005761 | 412.166   | 362.36    |
| NM_001150 | 964.483   | 1746.908  | AK023018  | 2028.896  | 3637.591  | NM_014718 | 1046.641  | 1153.037  |
| NM_002856 | 1544.902  | 2870.483  | AK022672  | 1749.792  | 2543.894  | NM_000632 | 394.564   | 304.812   |
| NM_003225 | 1015.132  | 1540.089  | AK023870  | 1924.323  | 2050.64   | AB002298  | 346.019   | 328.905   |
| NM_000096 | 1392.57   | 2615.344  | AK021599  | 1832.627  | 2485.877  | AK024488  | 4107.067  | 2579.785  |
| AA418251  | 1230.47   | 1705.965  | BC030975  | 556.218   | 875.478   | AK023249  | 19803.5   | 13267.057 |
| AA143087  | 6902.312  | 6949.689  | AK024263  | 1309.764  | 2684.688  | NM_017442 | 2704.705  | 2048.085  |
| U25804    | 2469.641  | 2713.81   | NM_016613 | 4528.114  | 9308.297  | NM_000743 | 963.02    | 814.785   |
| BI870965  | 3375.642  | 3786.127  | AJ012490  | 10097.257 | 12107.439 | NM_007218 | 1351.215  | 1314.504  |
| NM_001903 | 9213.655  | 10763.801 | U84516    | 18348.275 | 13653.246 | Z25436    | 1434.579  | 1058.151  |
| BI835536  | 13692.34  | 11854.399 | AL049270  | 1495.31   | 537.24    | NM_005275 | 3323.618  | 3209.149  |
| BF205051  | 4082.002  | 3540.535  | U88834    | 14258.761 | 5477.595  | NM_003844 | 4638.629  | 3267.589  |
| X02761    | 1881.45   | 1648.658  | BC025324  | 1159.424  | 342.98    | NM_002005 | 6470.54   | 4437.409  |
| M91463    | 842.43    | 756.488   | NM_003533 | 2011.068  | 2953.545  | NM_012324 | 1774.448  | 1203.866  |
| J03060    | 3883.343  | 2903.245  | AL157478  | 736.894   | 681.282   | AK000039  | 591.91    | 380.101   |
| X54156    | 566.936   | 355.612   | AK023726  | 8884.807  | 4147.606  | AL137352  | 749.766   | 394.198   |
| NM_003743 | 1750.662  | 1323.068  | AK024906  | 1402.79   | 1084.129  | NM_014749 | 619.38    | 399.352   |
| AA829383  | 5016.754  | 5200.45   | AF131836  | 2566.734  | 4617.254  | NM_004489 | 2319.029  | 2103.405  |
| NM_006404 | 522.992   | 1153.43   | AF275804  | 23568.357 | 22249.104 | BI461699  | 600.645   | 737.982   |
| NM_014795 | 606.561   | 837.992   | AL137488  | 1911.663  | 3014.091  | AK090409  | 336.456   | 247.956   |
| NM_002986 | 1159.18   | 1707.067  | AL049447  | 62312.582 | 65104.734 | AF172264  | 1270.353  | 1504.973  |
| M15330    | 1052.167  | 1931.117  | NM_020527 | 3236.486  | 4468.517  | Y08267    | 329.622   | 405.462   |
| NM_014396 | 3337.492  | 3688.383  | AB020637  | 9639.298  | 12538.474 | U80756    | 10811.434 | 7274.728  |
| AK027201  | 1761.872  | 2197.191  | NM_005286 | 4065.474  | 6620.072  | NM_018161 | 628.296   | 545.812   |
| NM_000489 | 8097.713  | 7439.433  | AK024365  | 4418.103  | 6133.834  | NM_005248 | 958.654   | 522.382   |
| X98507    | 2472.29   | 2601.374  | AJ251759  | 1655.389  | 1593.184  | NM_004810 | 4319.524  | 3432.673  |
| NM_016030 | 56814.871 | 48273.281 | AK024371  | 3629.564  | 4046.527  | AL117629  | 1707.964  | 1268.151  |
| NM_014669 | 8075.152  | 9975.549  | NM_005454 | 1356.392  | 2075.833  | NM_002595 | 1305.479  | 1556.028  |
| NM_005652 | 5226.916  | 5559.557  | NM_001889 | 11630.411 | 23832.93  | NM_015726 | 658.415   | 646.727   |
| NM_005902 | 1269.558  | 1528.928  | NM_004999 | 1286.299  | 1825.61   | AF174604  | 546.67    | 591.114   |
| NM_002850 | 67112.953 | 64779.711 | NM_004458 | 6123.346  | 13538.536 | AB002379  | 2157.425  | 2340.805  |
| NM_004302 | 627.627   | 896.25    | NM_006901 | 1888.091  | 1657.652  | AF113223  | 803.051   | 1020.879  |
| NM_005903 | 1768.976  | 1514.389  | NM_018530 | 11884.275 | 7640.83   | AB046851  | 1637.643  | 1799.401  |
| NM_000861 | 951.574   | 748.417   | AJ003145  | 599.571   | 506.228   | NM_018174 | 750.272   | 460.354   |
| AB037734  | 762.171   | 557.382   | AK022855  | 16263.188 | 9398.26   | NM_014548 | 952.13    | 963.463   |
| U77493    | 591.461   | 370.141   | AL050102  | 772.756   | 614.664   | NM_004437 | 747.466   | 635.858   |
| NM_019062 | 548.909   | 424.073   | AF305686  | 4266.717  | 5559.474  | AK025875  | 471.66    | 326.925   |

|           |           |           |           |           |           |           |           |           |
|-----------|-----------|-----------|-----------|-----------|-----------|-----------|-----------|-----------|
| NM_000263 | 1232.693  | 2513.244  | AK025981  | 2086.224  | 1031.955  | BC014152  | 33561.887 | 19192.451 |
| NM_001683 | 27272.176 | 25052.939 | AF113212  | 575.128   | 354.094   | AB037779  | 16562.994 | 10800.415 |
| NM_001682 | 2118.544  | 2024.843  | AF086266  | 568.849   | 653.85    | NM_000655 | 8400.885  | 6939.824  |
| NM_014405 | 2623.192  | 2392.833  | AF086252  | 1291.673  | 981.302   | NM_000393 | 587.051   | 558.977   |
| NM_000816 | 738.214   | 1045.544  | AK026703  | 1032.998  | 1256.713  | NM_000885 | 1058.525  | 832.635   |
| NM_014925 | 1289.715  | 969.341   | NM_017866 | 8648.202  | 9189.749  | NM_003855 | 3120.183  | 2452.044  |
| AK025130  | 3322.98   | 4176.123  | AJ131244  | 731.429   | 1122.903  | NM_002903 | 13236.414 | 8134.591  |
| NM_017875 | 2290.475  | 2469.411  | NM_003536 | 1501.343  | 1688.336  | NM_012335 | 1736.859  | 1102.135  |
| AK023232  | 3215.694  | 3367.71   | AF116707  | 4310.642  | 4681.372  | NM_005787 | 11567.956 | 9542.197  |
| NM_000271 | 10498.312 | 10458.579 | U90910    | 7836.574  | 9761.664  | NM_002143 | 1722.846  | 1177.651  |
| NM_018205 | 5720.375  | 6615.805  | AL049979  | 478.522   | 1297.991  | AF284421  | 3897.143  | 3246.347  |
| NM_006184 | 24781.57  | 21020.668 | CY3Cy5    | 2744.854  | 127.533   | NM_006045 | 2318.755  | 1779.838  |
| AB018268  | 5608.024  | 6326.804  | AA143087  | 7053.806  | 8401.719  | NM_006360 | 15121.592 | 13843.788 |
| NM_019045 | 1154.164  | 1324.333  | U25804    | 2096.953  | 2483.67   | NM_003965 | 2882.146  | 2896.688  |
| NM_006380 | 3457.206  | 3781.552  | BI870965  | 4263.858  | 4467.013  | NM_002785 | 3472.912  | 3980.424  |
| AB020710  | 1579.345  | 1558.541  | NM_001903 | 10023.719 | 8816.491  | NM_003470 | 855.485   | 667.531   |
| NM_016174 | 4671.91   | 4523.837  | BI835536  | 10719.042 | 10729.391 | AK026127  | 281.698   | 296.292   |
| NM_020377 | 601.004   | 470.513   | BF205051  | 2616.139  | 3045.968  | BC016062  | 8949.487  | 7358.833  |
| U88896    | 1579.382  | 1183.312  | X02761    | 1770.666  | 2067.847  | NM_002814 | 2194.454  | 1955.248  |
| AF116702  | 57073.297 | 35837.34  | M91463    | 1123.572  | 1070.179  | NM_012250 | 1658.602  | 1482.488  |
| NM_005724 | 8638.773  | 6005.707  | J03060    | 2989.74   | 3298.807  | NM_006283 | 5112.053  | 4908.779  |
| X58794    | 1216.755  | 745.446   | X54156    | 506.612   | 580.082   | X97303    | 6188.92   | 3838.972  |
| NM_001735 | 2366.193  | 1481.798  | NM_003743 | 1398.738  | 1288.323  | NM_017530 | 919.306   | 748.47    |
| NM_002345 | 444.88    | 319.717   | AA829383  | 4149.46   | 3681.867  | AL360183  | 626.132   | 467.387   |
| NM_005080 | 22012.742 | 27984.73  | AF012434  | 8079.704  | 8004.29   | AK027046  | 500.37    | 796.999   |
| NM_004887 | 11565.821 | 23640.928 | SR6       | 2448.785  | 2295.68   | NM_003113 | 1588.522  | 1258.168  |
| NM_004972 | 5204.209  | 4936.165  | SR8       | 7852.524  | 25125.131 | NM_016575 | 1714.037  | 1805.096  |
| NM_006251 | 4726.753  | 4653.583  | SR10      | 26677.396 | 9514.074  | AB019566  | 50536.703 | 40918.23  |
| NM_001744 | 5967.235  | 6083.414  | CY3Cy5    | 2608.526  | 136.252   | NM_000981 | 51415.523 | 36775.793 |
| NM_006295 | 2024.126  | 2210.63   | NM_005902 | 1249.712  | 1246.719  | NM_002047 | 8333.124  | 5223.685  |
| Z25433    | 3452.282  | 3684.666  | NM_004302 | 550.476   | 493.229   | NM_001031 | 63433.211 | 72095.391 |
| NM_005922 | 3175.804  | 3255.96   | NM_005903 | 1317.9    | 1429.36   | NM_007205 | 3407.792  | 2722.856  |
| NM_018635 | 6866.494  | 7388.763  | NM_000861 | 824.173   | 971.634   | NM_000995 | 59013.184 | 63011.891 |
| AL137593  | 22377.396 | 20075.918 | AB037734  | 714.114   | 783.149   | NM_000985 | 6336.702  | 4258.943  |
| NM_003915 | 2698.965  | 2900.574  | U77493    | 633.837   | 762.643   | BF130622  | 5458.91   | 4548.049  |
| NM_000382 | 2982.909  | 3099.429  | NM_019062 | 885.81    | 1301.46   | BU165106  | 334.929   | 235.179   |
| AL133064  | 3225.017  | 3645.478  | NM_003873 | 480.661   | 543.688   | AF038202  | 836.171   | 476.869   |
| NM_006227 | 4905.01   | 5328.047  | NM_000263 | 1071.619  | 1095.489  | AB040925  | 395.722   | 308.596   |
| NM_002905 | 3350.914  | 3273.488  | AF073519  | 6191.171  | 5535.333  | AK025558  | 2536.281  | 2002.004  |
| NM_019025 | 13383.771 | 10948.954 | AB001451  | 399.454   | 390.699   | AK024355  | 449.025   | 604.899   |
| NM_000431 | 3469.817  | 3149.161  | NM_017583 | 2658.432  | 2492.442  | NM_001864 | 16233.214 | 12032.661 |
| NM_013421 | 1042.647  | 736.505   | Y16132    | 13716.422 | 14281.067 | NM_003477 | 4583.465  | 3959.035  |
| NM_012474 | 11775.021 | 8506.584  | NM_002521 | 969.081   | 929.411   | NM_002654 | 27384.053 | 21887.637 |
| AB033118  | 7722.479  | 5487.736  | NM_001150 | 1421.857  | 1583.211  | NM_007192 | 3147.175  | 1733.926  |
| NM_019605 | 3080.635  | 1537.574  | NM_002855 | 1896.372  | 1907.416  | AB002337  | 1789.963  | 2696.058  |
| NM_001690 | 8263.803  | 3715.229  | NM_003225 | 788.606   | 793.26    | NM_014933 | 951.82    | 780.307   |
| AF034374  | 8512.894  | 3822.078  | NM_000095 | 1375.533  | 1391.795  | NM_003075 | 8515.818  | 4796.909  |
| NM_016118 | 8478.104  | 7322.423  | AA418251  | 1055.804  | 1129.796  | NM_006385 | 596.037   | 538.31    |
| NM_018674 | 22123.146 | 44107.73  | NM_019045 | 985.738   | 963.22    | NM_003455 | 1308.351  | 817.2     |
| NM_000065 | 2036.566  | 1928.419  | NM_006380 | 3550.537  | 3169.395  | AB029016  | 403.47    | 346.64    |
| AB033046  | 9535.863  | 8520.687  | AB020710  | 1463.316  | 1511.357  | AK000584  | 3645.308  | 2611.726  |
| NM_015915 | 11009.567 | 9684.451  | NM_016174 | 5374.119  | 6228.305  | AK026379  | 1348.522  | 1093.229  |
| AK023228  | 656.053   | 690.16    | NM_020377 | 754.514   | 837.098   | AK022965  | 1147.51   | 1045.957  |

|           |           |           |           |           |           |           |          |           |
|-----------|-----------|-----------|-----------|-----------|-----------|-----------|----------|-----------|
| AB029041  | 20275.105 | 15399.309 | U88896    | 1683.062  | 1666.655  | AK024278  | 2304.475 | 2013.857  |
| AK026642  | 13385.892 | 11493.019 | NM_005724 | 7239.926  | 7278.777  | AB056722  | 3428.082 | 3372.3    |
| AL359063  | 1562.317  | 1622.52   | X58794    | 1229.229  | 1574.646  | NM_013242 | 3832.594 | 4738.762  |
| AL079292  | 4035.988  | 4393.631  | NM_001735 | 2115.903  | 2534.84   | NM_012066 | 2889.353 | 1370.461  |
| X89667    | 3180.086  | 3252.225  | NM_002349 | 954.859   | 861.368   | AF052168  | 2385.184 | 2022.395  |
| AB037791  | 1560.098  | 1006.504  | NM_005080 | 13169.409 | 13966.432 | AK022632  | 728.53   | 489.174   |
| NM_018124 | 6545.04   | 5965.9    | NM_004887 | 6049.364  | 5795.327  | NM_020235 | 1324.778 | 806.188   |
| Z70701    | 11093.311 | 8998.846  | NM_006404 | 565.374   | 652.558   | AL162039  | 2414.139 | 1368.819  |
| AB040972  | 3575.383  | 2584.543  | NM_014795 | 590.133   | 534.419   | AK024896  | 823.913  | 405.738   |
| BE260997  | 331.54    | 727.685   | NM_002986 | 793.018   | 978.021   | AK095125  | 251.083  | 336.769   |
| NM_018686 | 12377.366 | 9092.197  | M15330    | 1022.035  | 1182.905  | AK024059  | 1002.473 | 718.007   |
| NM_017676 | 1798.248  | 1441.816  | NM_014396 | 2969.573  | 2937.225  | AB007928  | 809.975  | 484.98    |
| AK021764  | 560.812   | 456.894   | AK027201  | 2509.568  | 2705.55   | NM_016930 | 1923.836 | 1853.046  |
| NM_005431 | 2840.72   | 1875.75   | NM_000489 | 12755.365 | 13789.839 | AJ001861  | 1099.389 | 1019.373  |
| AB036063  | 2657.334  | 1374.331  | X98507    | 2927.149  | 3084.16   | X75692    | 613.973  | 531.097   |
| NM_002894 | 7167.546  | 2714.968  | NM_014669 | 8340.406  | 7946.547  | Y10511    | 4236.275 | 3178.606  |
| NM_004629 | 10136.538 | 4610.131  | NM_005652 | 7860.034  | 8535.272  | M26147    | 2442.97  | 1429.777  |
| NM_004260 | 10748.596 | 8195.886  | AK026686  | 699.366   | 597.604   | AF018254  | 214.496  | 165.899   |
| AL050067  | 2642.993  | 5406.991  | AL133064  | 2774.274  | 3351.373  | NM_016240 | 601.428  | 513.832   |
| NM_015564 | 1459.104  | 1480.109  | NM_006227 | 5183.596  | 5847.336  | AK026416  | 2237.805 | 1570.765  |
| AF160476  | 480.676   | 719.305   | NM_002905 | 4545.234  | 4432.423  | AK024947  | 563.716  | 287.874   |
| L22650    | 1370.728  | 1169.845  | NM_019028 | 13956.175 | 14540.713 | NM_017503 | 506.041  | 480.029   |
| AB014520  | 7790.217  | 6210.471  | NM_000431 | 2851.844  | 2433.617  | AK024606  | 1735.746 | 1423.097  |
| AF161420  | 1542.39   | 1400.602  | NM_013421 | 1308.746  | 1468.636  | NM_016417 | 9193.249 | 9608.526  |
| NM_004907 | 1910.648  | 1631.359  | AB033118  | 6165.898  | 6911.872  | NM_019108 | 534.389  | 559.838   |
| NM_001775 | 601.539   | 805.215   | NM_019606 | 2350.524  | 2621.408  | AL080118  | 3388.7   | 4703.097  |
| X04526    | 20287.721 | 15292.741 | NM_001690 | 6641.503  | 6243.096  | AL049378  | 705.063  | 599.34    |
| D26067    | 5298.704  | 4774.566  | AF034374  | 8428.659  | 9740.385  | AK021505  | 349.735  | 147.079   |
| AF227924  | 2598.664  | 2533.976  | NM_001683 | 21023.611 | 21157.918 | AK021598  | 2289.156 | 638.589   |
| NM_005716 | 16834.525 | 10996.715 | NM_001682 | 1760.464  | 1808.296  | NM_005973 | 7674.849 | 11695.615 |
| NM_006183 | 1801.326  | 1873.547  | NM_014405 | 2207.534  | 2448.245  | X04547    | 1591.835 | 2606.689  |
| S59184    | 2569.31   | 2452.597  | NM_000816 | 972.24    | 937.173   | AK025823  | 1469.396 | 2165.268  |
| NM_006661 | 3294.492  | 2302.082  | NM_014928 | 1989.553  | 2410.082  | AK026691  | 625.932  | 1603.572  |
| NM_005746 | 14303.669 | 6398.32   | AK025130  | 4599.03   | 4754.3    | AL359941  | 1618.815 | 3202.306  |
| NM_004588 | 1246.523  | 514.39    | NM_017875 | 2064.816  | 2421.268  | U52076    | 1207.222 | 2805.874  |
| U16126    | 1128.097  | 418.589   | AK023232  | 4352.142  | 5389.274  | AF035278  | 1104.121 | 1487.142  |
| NM_002172 | 34869.086 | 50182.809 | NM_018209 | 4065.274  | 4729.792  | AL050202  | 352.06   | 277.675   |
| NM_002614 | 846.048   | 703.21    | NM_006184 | 20187.861 | 22584.947 | U32999    | 3411.64  | 3413.427  |
| NM_005655 | 2155.703  | 1760.039  | AB018268  | 10009.207 | 9637.756  | U66052    | 2245.185 | 1913.295  |
| NM_007314 | 3553.174  | 3339.134  | Z70701    | 9944.528  | 11090.824 | AK024156  | 641.889  | 600.679   |
| NM_016073 | 2967.031  | 2675.418  | AB040972  | 4202.254  | 5230.713  | AF086288  | 454.095  | 299.617   |
| NM_006600 | 20627.309 | 15425.4   | BE260997  | 717.446   | 636.774   | AK023109  | 695.225  | 520.036   |
| AF297709  | 1862.545  | 1879.994  | NM_018686 | 10962.16  | 10480.287 | NM_005293 | 6907.948 | 3756.626  |
| L77564    | 1296.516  | 1234.97   | NM_017676 | 1511.411  | 1421.564  | AF133332  | 2667.542 | 1870.338  |
| NM_015384 | 2449.972  | 2725.038  | AK021764  | 582.379   | 289.509   | NM_001088 | 3980.228 | 5772.98   |
| AK023327  | 1825.627  | 1629.615  | NM_005431 | 2383.299  | 2382.595  | BC015991  | 8623.199 | 14466.535 |
| AB046858  | 2046.043  | 1726.187  | AB036063  | 2439.213  | 2696.658  | U94902    | 414.366  | 799.117   |
| D50914    | 3984.304  | 3713.735  | NM_002894 | 5694.086  | 5998.989  | U46214    | 914.152  | 1636.964  |
| BE878692  | 691.961   | 1029.503  | NM_004629 | 8172.967  | 7883.978  | NM_000310 | 6930.895 | 12500.333 |
| NM_002007 | 902.601   | 1004.975  | NM_004972 | 4200.716  | 5020.804  | AF161343  | 1719.626 | 4116.875  |
| NM_015896 | 1270.053  | 1249.092  | NM_006251 | 4122.604  | 3614.04   | NM_004765 | 6992.998 | 15318.798 |
| NM_002305 | 33409.535 | 27707.031 | NM_004103 | 7947.488  | 7884.527  | AK022246  | 1071.029 | 2548.362  |
| AK025439  | 3441.163  | 3052.49   | NM_002314 | 4290.197  | 4271.758  | X75684    | 889.363  | 1905.127  |

|           |           |           |           |           |           |           |           |           |
|-----------|-----------|-----------|-----------|-----------|-----------|-----------|-----------|-----------|
| NM_001737 | 2469.859  | 1922.876  | NM_001744 | 5585.189  | 4845.166  | AF113701  | 3365.983  | 6437.713  |
| Z36784    | 809.553   | 587.098   | NM_006296 | 2050.421  | 2408.614  | Y11158    | 1422.781  | 2337.265  |
| NM_016626 | 12072.521 | 8164.662  | Z25433    | 3717.497  | 4351.75   | NM_006771 | 9275.396  | 10420.196 |
| NM_007213 | 2534.16   | 1254.121  | NM_005922 | 3073.782  | 3377.551  | L37702    | 7123.3    | 8874.554  |
| NM_019064 | 1384.021  | 830.455   | NM_018638 | 6761.066  | 7522.727  | AK022812  | 1939.09   | 3372.684  |
| NM_000094 | 4626.576  | 8463.265  | AL137593  | 19830.641 | 23558.984 | U79301    | 2070.25   | 2593.051  |
| AJ295148  | 823.266   | 830.832   | NM_003915 | 2426.795  | 2977.487  | AK022260  | 2186.628  | 2474.578  |
| AF176701  | 433.231   | 400.107   | NM_000382 | 2842.809  | 2972.428  | M32219    | 6669.014  | 9799.024  |
| NM_016302 | 4031.277  | 3270.148  | NM_001150 | 988.96    | 1626.439  | BC018868  | 493.334   | 623.458   |
| NM_004156 | 17752.213 | 12881.323 | NM_002856 | 1463.697  | 1674.78   | AF007128  | 4829.438  | 5332.09   |
| AK021866  | 642.184   | 569.935   | NM_003225 | 1005.996  | 970.216   | CY3Cy5    | 867.951   | 245.904   |
| NM_003249 | 6025.8    | 6361.887  | NM_000096 | 1374.432  | 1232.22   | AI351740  | 2114.449  | 4221.387  |
| M21897    | 761.286   | 939.514   | AA418251  | 1024.365  | 1116.255  | AA444051  | 275.416   | 363.976   |
| AF301463  | 1551.888  | 1448.569  | AA143087  | 6681.772  | 7338.123  | NM_007164 | 492.622   | 591.496   |
| NM_015984 | 7642.677  | 6958.807  | U25804    | 2270.547  | 2094.749  | BE783826  | 6319.022  | 8285.812  |
| AK025969  | 1301.163  | 934.187   | BI870965  | 4095.464  | 4084.909  | X04827    | 2013.804  | 1930.566  |
| NM_006894 | 1219.046  | 589.642   | NM_001903 | 9735.435  | 7889.491  | BC020596  | 759.077   | 877.435   |
| AK023031  | 1813.788  | 1855.055  | BI835536  | 10143.732 | 9254.442  | AF116606  | 32798.875 | 35701.148 |
| NM_012090 | 4819.199  | 3317.896  | BF205051  | 2397.763  | 3144.438  | X98922    | 1564.75   | 2179.703  |
| BE793385  | 1143.037  | 1175.74   | X02761    | 1670.667  | 1931.013  | AK098435  | 2759.015  | 3609.067  |
| NM_003088 | 7410.547  | 3415.037  | M91463    | 879.217   | 664.78    | AK092872  | 1289.41   | 1734.713  |
| NM_004082 | 5033.636  | 1840.709  | J03060    | 2417.922  | 3029.552  | AF230496  | 291.751   | 197.292   |
| NM_014398 | 6867.744  | 4593.892  | X54156    | 580.083   | 531.404   | M16801    | 279.162   | 309.782   |
| NM_005934 | 18729.588 | 26655.52  | NM_003743 | 1286.318  | 1204.408  | NM_145904 | 10211.844 | 13990.883 |
| NM_007129 | 4349.184  | 3254.068  | AA829383  | 4075.465  | 3662.461  | NM_021969 | 197.088   | 144.524   |
| AY004253  | 6115.374  | 4423.812  | AF012434  | 7752.76   | 8354.785  | SR6       | 1019.909  | 807.936   |
| NM_002148 | 852.96    | 772.007   | AB037791  | 1250.092  | 1057.337  | SR8       | 3166.552  | 7945.73   |
| AL137449  | 2245.389  | 1879.15   | NM_018124 | 5197.048  | 4645.781  | SR10      | 11036.816 | 3207.377  |
| U88153    | 1634.578  | 1714.624  | NM_000489 | 9380.744  | 11033.927 | CY3Cy5    | 989.097   | 248.496   |
| X03910    | 16566.422 | 12027.189 | X98507    | 2425.301  | 2751.878  | NM_004488 | 822.289   | 935.951   |
| NM_018428 | 5349.212  | 4848.037  | NM_014669 | 8401.716  | 7901.363  | NM_012419 | 330.354   | 383.448   |
| NM_006924 | 19347.25  | 15669.058 | NM_005652 | 6021.101  | 6671.284  | NM_013296 | 2769.824  | 4209.179  |
| NM_016024 | 8039.114  | 6852.028  | AK026686  | 583.784   | 469.26    | AL117478  | 266.904   | 377.115   |
| NM_018107 | 4317.041  | 3679.7    | NM_004302 | 754.77    | 987.725   | NM_005307 | 357.81    | 420.467   |
| NM_012279 | 1495.914  | 1208.726  | NM_005903 | 1395.689  | 1318.243  | NM_005958 | 737.961   | 1042.211  |
| BF310673  | 1445.747  | 980.236   | NM_000861 | 840.562   | 818.465   | NM_013436 | 745.415   | 1096.917  |
| R97012    | 23454.475 | 14296.141 | AB037734  | 709.901   | 680.377   | AF225426  | 283.718   | 426.971   |
| U77700    | 8129.694  | 5300.069  | U77493    | 707.672   | 665.413   | NM_005208 | 1694.215  | 1991.828  |
| NM_006567 | 5992.615  | 2997.944  | NM_019062 | 1076.95   | 991.762   | NM_000421 | 411.179   | 422.062   |
| AF038554  | 20270.637 | 7126.796  | NM_003873 | 546.607   | 525.513   | AK025687  | 2906.473  | 3918.598  |
| AF264621  | 3740.885  | 1234.663  | NM_000263 | 933.93    | 1429.144  | AF218941  | 1137.654  | 1098.896  |
| NM_005875 | 23076.238 | 10894.845 | AF073519  | 6437.009  | 7042.544  | AL137264  | 2575.744  | 3196.016  |
| NM_004184 | 6774.115  | 9647.971  | AB001451  | 504.991   | 503.752   | NM_002226 | 295.125   | 274.154   |
| AK075087  | 634.381   | 688.567   | NM_017583 | 2679.127  | 2599.355  | X84370    | 3443.174  | 3631.911  |
| AK026571  | 3613.602  | 2945.272  | Y16132    | 12457.29  | 13279.343 | NM_004039 | 564.034   | 1361.632  |
| AK024673  | 4161.089  | 3637.749  | NM_016593 | 763.209   | 854.857   | AB014558  | 320.586   | 327.906   |
| AF070618  | 829.708   | 1118.301  | NM_002521 | 1125.732  | 925.069   | NM_000118 | 986.094   | 911.286   |
| AF131748  | 4050.235  | 3477.282  | NM_017875 | 1932.374  | 2697.195  | NM_000913 | 311.985   | 214.242   |
| NM_000456 | 2216.364  | 1914.79   | AK023232  | 3550.931  | 5749.702  | NM_001298 | 38974.867 | 41829.691 |
| NM_002496 | 8703.702  | 8346.291  | NM_018209 | 3949.448  | 4654.83   | BG325046  | 1204.617  | 1681.85   |
| NM_016243 | 3245.092  | 3198.182  | NM_006184 | 18949.576 | 18537.379 | AK026248  | 947.1     | 4699.477  |
| NM_014402 | 49999.246 | 36783.727 | AB018268  | 7606.116  | 7352.604  | NM_004578 | 457.733   | 1059.177  |
| NM_004649 | 4910.157  | 4537.41   | NM_019045 | 920.052   | 905.368   | NM_000647 | 213.045   | 235.636   |

|           |           |           |           |           |           |           |           |           |
|-----------|-----------|-----------|-----------|-----------|-----------|-----------|-----------|-----------|
| NM_00654C | 2898.441  | 2625.32   | NM_00638C | 3007.059  | 2645.252  | AB046793  | 286.968   | 358.094   |
| NM_01776E | 1667.584  | 1735.783  | AB020710  | 1476.054  | 1443.653  | NM_017604 | 687.119   | 975.842   |
| NM_002811 | 14652.485 | 10898.131 | NM_016174 | 4885.773  | 6241.982  | NM_01773E | 1879.229  | 1846.825  |
| NM_02031C | 1955.833  | 1849.846  | NM_020377 | 909.749   | 743.553   | NM_016557 | 479.392   | 580.806   |
| AK024444  | 611.634   | 454.829   | U88896    | 1618.84   | 1744.575  | NM_00062E | 1067.138  | 1208.779  |
| NM_00580Z | 4282.621  | 2733.178  | NM_005724 | 6705.711  | 6536.887  | NM_018301 | 236.371   | 21.734    |
| AB002331  | 3962.892  | 3185.597  | X58794    | 1343.024  | 1444.024  | AF161348  | 703.861   | 551.319   |
| NM_002504 | 2499.329  | 1467.279  | NM_00173E | 2282.825  | 2149.822  | NM_018467 | 2804.875  | 3159.305  |
| AB046775  | 1474.686  | 761.471   | NM_00234E | 834.33    | 862.086   | NM_00606E | 300.624   | 365.736   |
| X74862    | 1190.976  | 576.568   | NM_00508C | 12866.04  | 14712.947 | NM_00203E | 3450.064  | 3403.94   |
| X65663    | 3223.401  | 1767.001  | NM_004887 | 6438.153  | 5776.6    | NM_00572E | 2578.976  | 2626.779  |
| NM_00318E | 2486.057  | 772.59    | NM_006404 | 648.186   | 902.067   | NM_01549E | 643.306   | 862.239   |
| NM_00445E | 9460.714  | 5557.269  | NM_01479E | 602.581   | 791.961   | NM_003747 | 359.989   | 371.196   |
| NM_004284 | 10458.398 | 10640.998 | NM_00298E | 996.161   | 1118.333  | AF141901  | 295.45    | 151.203   |
| NM_01224E | 1613.604  | 1366.688  | M15330    | 1086.125  | 1230.797  | NM_00700E | 500.063   | 666.482   |
| AK025743  | 1058.904  | 606.487   | NM_01439E | 2845.348  | 3077.716  | AL109708  | 552.638   | 920.083   |
| AK023974  | 2303.701  | 1690.482  | AK027201  | 2275.349  | 2105.44   | AF234532  | 469.96    | 466.82    |
| AK023768  | 1283.407  | 1406.262  | Z25433    | 3954.783  | 4766.215  | AF099740  | 1711.724  | 7350.049  |
| NM_01472E | 1064.369  | 1271.681  | NM_00592Z | 2905.46   | 2813.448  | NM_006117 | 9660.549  | 28100.297 |
| AF147335  | 688.887   | 623.897   | NM_01863E | 6307.531  | 7592.774  | NM_00222E | 1059.521  | 2170.256  |
| BI768072  | 689.788   | 493.793   | AL137593  | 16933.412 | 20623.34  | NM_00622E | 308.285   | 406.306   |
| AK022216  | 5463.485  | 4736.193  | NM_00391E | 2543.942  | 2770.093  | NM_01541E | 10935.074 | 12424.896 |
| AK025812  | 4387.451  | 4033.132  | NM_00038Z | 2394.438  | 2529.598  | NM_004897 | 938.9     | 1182.778  |
| U00960    | 1853.846  | 1984.618  | AL133064  | 3028.449  | 3303.943  | NM_00255E | 492.483   | 539.021   |
| AK022262  | 1826.459  | 1912.548  | NM_006227 | 4680.576  | 4502.89   | AF225418  | 587.025   | 843.288   |
| AF086220  | 1500.465  | 1105.732  | NM_00290E | 4641.688  | 4232.218  | NM_00030E | 420.434   | 570.171   |
| AK023941  | 2204.961  | 1604.682  | NM_00070C | 47700.566 | 40928.738 | NM_00452E | 9366.841  | 11003.077 |
| AF086265  | 491.566   | 195.737   | NM_01902E | 14523.752 | 16426.244 | AK026381  | 4915.665  | 5292.063  |
| AL390083  | 8550.079  | 3683.468  | NM_000431 | 2569.265  | 2754.84   | NM_00245C | 5795.599  | 12952.654 |
| AB020702  | 957.876   | 455.713   | NM_013421 | 1230.047  | 1192.388  | NM_00168E | 369.396   | 655.242   |
| AL050227  | 1395.104  | 717.502   | AB033118  | 5435.847  | 6628.548  | NM_00070E | 302.685   | 472.537   |
| AF085905  | 1219.842  | 1448.705  | NM_01960E | 2732.446  | 2692.529  | NM_004231 | 26375.699 | 21170.676 |
| NM_01335E | 654.807   | 549.91    | NM_00169C | 6715.864  | 5952.276  | NM_016577 | 247.033   | 448.431   |
| NM_003847 | 12030.579 | 7322.593  | AF034374  | 8817.604  | 9939.429  | AK023107  | 2453.514  | 2402.967  |
| AK021973  | 1868.093  | 1329.365  | NM_016118 | 5431.251  | 4547.386  | NM_006854 | 3988.976  | 3789.068  |
| AL117638  | 426.208   | 121.376   | NM_018674 | 23957.131 | 28337.035 | NM_00458C | 2088.351  | 1977.649  |
| AL050165  | 54423.93  | 55930.93  | NM_00168E | 26367.551 | 31342.887 | NM_020387 | 14210.954 | 13475.271 |
| AL117445  | 1649.209  | 1574.427  | NM_00168Z | 1946.355  | 2077.418  | NM_00724E | 1032.766  | 1581.417  |
| AL122113  | 9274.211  | 8425.489  | NM_01440E | 2696.576  | 3842.434  | AB049629  | 284.234   | 7104.966  |
| AK024415  | 2903.345  | 2665.832  | NM_00081E | 1125.329  | 1256.104  | AF150735  | 2497.418  | 3827.699  |
| AB007877  | 963.464   | 599.593   | NM_01492E | 2205.85   | 2408.542  | NM_01818E | 651.767   | 925.834   |
| AK025132  | 759.198   | 745.461   | AK025130  | 4648.87   | 4463.458  | NM_01238Z | 1253.21   | 1811.654  |
| AK025157  | 1409.032  | 1131.942  | AB037791  | 1071.84   | 1037.475  | BF038366  | 302.809   | 300.309   |
| AK022001  | 3013.837  | 1571.029  | NM_018124 | 5336.605  | 4279.049  | NM_00245Z | 8820.766  | 9994.534  |
| AK022633  | 1165.632  | 475.172   | Z70701    | 9302.292  | 9807.357  | NM_01644C | 6913.316  | 8218.924  |
| AK027199  | 892.893   | 422.413   | AB040972  | 3834.094  | 4323.402  | NM_007194 | 1128.259  | 1716.937  |
| AK000079  | 3169.855  | 2208.597  | AF148505  | 2365.881  | 2345.106  | NM_000314 | 2685.176  | 2603.355  |
| AJ227874  | 1086.335  | 1249.962  | BE260997  | 838.403   | 570.371   | AB002369  | 434.773   | 420.913   |
| AF009312  | 686.651   | 528.81    | NM_01868E | 10776.615 | 10179.258 | S74620    | 446.247   | 330.351   |
| AF056428  | 7219.421  | 5685.298  | NM_01767E | 1403.617  | 1280.912  | AF305239  | 405.364   | 450.928   |
| AF069136  | 581.49    | 588.887   | AK021764  | 613.926   | 520.254   | NM_002827 | 1350.66   | 1050.511  |
| AK021594  | 428.165   | 373.381   | NM_005431 | 1890.455  | 2095.779  | BF035425  | 3876.373  | 3677.916  |
| AK002150  | 1198.607  | 1306.452  | AB036063  | 2569.094  | 2242.242  | NM_00015E | 24195.266 | 21201.561 |

|           |           |           |           |           |           |           |           |           |
|-----------|-----------|-----------|-----------|-----------|-----------|-----------|-----------|-----------|
| AK021635  | 2352.568  | 1936.82   | NM_002894 | 6196.582  | 5436.854  | NM_01463E | 623.144   | 644.231   |
| AK021856  | 1238.256  | 1092.417  | NM_004629 | 7906.87   | 6851.276  | NM_00011E | 893.745   | 1179.841  |
| AK025276  | 4476.659  | 2487.65   | NM_004260 | 8753.658  | 9622.038  | NM_00129E | 35306.613 | 41574.969 |
| AK026457  | 1661.732  | 674.756   | AL050067  | 1767.033  | 2000.068  | BG325046  | 1137.552  | 1152.955  |
| AJ008131  | 22746.445 | 15393.45  | NM_004972 | 5169.25   | 6008.862  | AI351740  | 2168.082  | 3218.268  |
| AF086338  | 770.7     | 679.295   | NM_006251 | 4147.66   | 5061.258  | AA444051  | 386.199   | 218.782   |
| NM_006272 | 520.673   | 178.439   | NM_004103 | 9847.889  | 11852.332 | NM_007164 | 573.929   | 486.192   |
| AL160131  | 10114.742 | 7995.551  | NM_002314 | 5029.506  | 5300.665  | BE783826  | 5737.26   | 5471.276  |
| AF086045  | 3855.84   | 3128.133  | NM_001744 | 6154.294  | 5673.875  | X04827    | 447.636   | 402.53    |
| AK027028  | 1571.318  | 1353.047  | NM_006296 | 2291.749  | 2211.734  | H07088    | 335.324   | 440.698   |
| AK026916  | 4755.891  | 3741.862  | AF073519  | 6429.518  | 7160.467  | BC020596  | 746.276   | 748.778   |
| AK026914  | 2386.906  | 2131.456  | NM_017583 | 2483.143  | 2557.161  | AF116606  | 32914.402 | 29080.08  |
| Y13808    | 346.091   | 303.212   | Y16132    | 9127.679  | 10731.204 | X98922    | 1557.359  | 2139.458  |
| Y11166    | 1708.456  | 1459.337  | NM_016593 | 657.949   | 616.505   | AK098435  | 2477.352  | 2867.103  |
| AK023515  | 1781.737  | 1140.069  | NM_002521 | 844.96    | 735.514   | AK092872  | 1002.086  | 1198.419  |
| AL137623  | 19277.012 | 8335.257  | NM_001150 | 1042.086  | 1187.186  | M16801    | 264.947   | 158.166   |
| AK026485  | 796.45    | 413.525   | NM_002856 | 1643.419  | 1449.529  | NM_145904 | 8656.37   | 6806.095  |
| NM_00354E | 2966.664  | 2909.904  | NM_003225 | 992.093   | 854.153   | NM_013334 | 1377.13   | 1358.139  |
| AF118077  | 2965.319  | 2108.485  | NM_000096 | 1288.494  | 1069.071  | AB037744  | 709.166   | 798.332   |
| AK025750  | 1543.802  | 1868.76   | AA418251  | 964.693   | 993.03    | AF141901  | 538.836   | 446.485   |
| AK025783  | 1747.521  | 1061.534  | AA143087  | 6760.373  | 6725.835  | NM_00700E | 427.21    | 617.893   |
| AF113675  | 879.214   | 939.458   | U25804    | 2286.737  | 1833.676  | AL109708  | 327.885   | 395.623   |
| AK024514  | 637.859   | 693.995   | BI870965  | 4270.058  | 4152.506  | AF234532  | 269.438   | 274.041   |
| NM_020119 | 4791.861  | 4508.168  | NM_001903 | 9480.739  | 7207.378  | NM_00241E | 173.029   | 179.249   |
| AL049417  | 7346.757  | 6286.076  | BI835536  | 10629.83  | 8427.571  | NM_00448E | 897.906   | 1265.433  |
| AK023507  | 696.005   | 620.6     | BF205051  | 2519.154  | 2407.515  | NM_01241E | 256.095   | 262.587   |
| NM_00516E | 4193.608  | 3613.786  | X02761    | 1789.573  | 1670.63   | NM_01329E | 2418.655  | 3100.008  |
| AL109818  | 577.054   | 592.203   | M91463    | 966.309   | 671.905   | AL117478  | 247.429   | 429.59    |
| S97393    | 439.549   | 541.385   | J03060    | 3111.67   | 3787.833  | NM_005307 | 300.113   | 350.1     |
| NM_01792E | 943.909   | 1065.908  | X54156    | 583.441   | 561.105   | NM_00595E | 604.682   | 835.671   |
| NM_018472 | 1156.898  | 864.122   | NM_003743 | 1512.237  | 1551.083  | NM_01343E | 448.699   | 541.667   |
| AJ008128  | 31181.871 | 12967.719 | AA829383  | 4630.341  | 4425.137  | AF225426  | 255.193   | 355.452   |
| AL449243  | 9657.419  | 5299.932  | AF012434  | 8577.618  | 8436.054  | NM_00520E | 1218.152  | 1113.901  |
| M12211    | 1511.82   | 598.346   | NM_006404 | 665.886   | 785.261   | NM_000421 | 251.297   | 383.426   |
| AK026449  | 9816.77   | 6717.142  | NM_01479E | 616.675   | 790.406   | AK025687  | 1898.245  | 2228.604  |
| NM_014027 | 3923.341  | 3671.558  | NM_00298E | 855.177   | 1529.43   | AF218941  | 759.3     | 580.841   |
| NM_020467 | 4120.68   | 3087.426  | M15330    | 978.349   | 901.78    | AL137264  | 1499.806  | 1496.699  |
| AF116621  | 3012.289  | 2418.328  | NM_01439E | 2727.959  | 2465.392  | NM_00222E | 191.752   | 124.4     |
| AF086554  | 2077.22   | 1791.903  | AK027201  | 1910.106  | 1578.472  | X84370    | 2999.283  | 2662.54   |
| AL390136  | 14491.798 | 7824.837  | NM_00048E | 9019.021  | 7871.118  | NM_00403E | 507.136   | 574.719   |
| AK023156  | 560.053   | 311.223   | X98507    | 2469.193  | 2067.516  | NM_016577 | 341.097   | 416.254   |
| AF086398  | 57631.281 | 46223.973 | NM_016030 | 55819.328 | 49965.285 | AK023107  | 3547.049  | 3614.509  |
| AK024545  | 891.917   | 586.281   | NM_01466E | 7349.807  | 6783.338  | NM_006854 | 4323.461  | 4879.958  |
| AK023444  | 573.815   | 570.839   | NM_005652 | 5492.671  | 5208.229  | NM_00458C | 2011.533  | 2693.94   |
| AK025953  | 765.371   | 869.688   | NM_005902 | 1094.99   | 1147.521  | NM_020387 | 11105.208 | 10523.85  |
| NM_00318C | 1611.344  | 1471.531  | NM_00285C | 58597.25  | 63805.563 | NM_00724E | 597.486   | 819.146   |
| AF086406  | 15696.204 | 10950.879 | NM_004302 | 542.132   | 442.413   | AK026248  | 540.563   | 591.465   |
| D17216    | 5300.079  | 4683.501  | NM_005903 | 1315.469  | 1085.308  | NM_00457E | 548.054   | 737.625   |
| AL137581  | 1611.769  | 1599.38   | NM_000861 | 947.122   | 803.635   | AB046793  | 335.042   | 268.506   |
| AK024942  | 2084.19   | 1499.678  | NM_000024 | 443.665   | 532.33    | NM_017604 | 719.968   | 1023.99   |
| AJ227873  | 20117.75  | 13044.622 | AB037734  | 1293.025  | 1405.035  | NM_01773E | 2382.742  | 1891.8    |
| AK022886  | 4617.825  | 3316.906  | U77493    | 702.166   | 929.258   | NM_016557 | 569.574   | 688.902   |
| AK024665  | 10802.921 | 7876.904  | NM_019062 | 1057.223  | 1171.433  | NM_000623 | 828.268   | 1157.49   |

|           |           |           |           |           |           |           |           |           |
|-----------|-----------|-----------|-----------|-----------|-----------|-----------|-----------|-----------|
| AF147363  | 920.365   | 744.101   | NM_003873 | 543.815   | 675.944   | AF161348  | 504.218   | 672.602   |
| AJ227880  | 626.76    | 653.432   | NM_000263 | 1026.544  | 1070.091  | NM_018467 | 2547.503  | 2324.923  |
| AK000691  | 1799.448  | 1282.204  | NM_001683 | 24934.875 | 33332.074 | NM_006068 | 252.577   | 346.469   |
| AK001448  | 2154.563  | 1117.652  | NM_001682 | 1803.935  | 2380.127  | NM_002038 | 3126.348  | 3103.466  |
| AK026890  | 717.174   | 399.247   | NM_014405 | 2434.625  | 3571.184  | NM_005728 | 2493.572  | 2140.387  |
| AL049321  | 4108.22   | 2083.603  | NM_000816 | 770.591   | 840.416   | NM_015493 | 465.194   | 627.763   |
| CY3Cy5    | 3133.571  | 225.547   | NM_014928 | 1482.922  | 1603.551  | NM_003747 | 820.142   | 1076.103  |
| W74254    | 15457.385 | 16358.083 | AK025130  | 3780.111  | 3950.015  | NM_002827 | 1834.921  | 1790.916  |
| M58603    | 4574.878  | 5633.405  | NM_017875 | 1875.209  | 2008.393  | NM_001946 | 440.905   | 876.678   |
| AA443286  | 936.479   | 626.784   | AK023232  | 3506.295  | 3913.845  | BF035425  | 5805.49   | 7403.457  |
| AB003334  | 6493.205  | 6746.643  | NM_000271 | 13246.06  | 12081.331 | NM_000158 | 22008.361 | 22198.051 |
| AW276315  | 720.319   | 617.363   | NM_018209 | 3768.044  | 4632.646  | NM_014638 | 546.494   | 757.844   |
| AA490737  | 536.678   | 694.6     | NM_006184 | 18641.68  | 19115.455 | AF099740  | 580.93    | 602.349   |
| AI878886  | 16401.555 | 14759.297 | AB018268  | 8338.58   | 7284.129  | NM_006117 | 8320.519  | 10036.637 |
| BG697179  | 6854.956  | 8678.196  | NM_019045 | 931.983   | 806.858   | NM_002225 | 991.642   | 1432.859  |
| NM_002138 | 37164.887 | 29656.223 | NM_006380 | 3435.418  | 2841.619  | NM_006228 | 388.662   | 470.859   |
| BM012504  | 4392.674  | 5162.178  | AB020710  | 1383.271  | 1438.378  | NM_015415 | 10127.804 | 10769.04  |
| AA664145  | 1221.714  | 1331.344  | NM_016174 | 6164.632  | 6792.235  | NM_004897 | 985.618   | 1272.073  |
| X72308    | 13741.867 | 12416.651 | NM_020377 | 820.55    | 915.254   | NM_002555 | 516.898   | 518.484   |
| T50790    | 432.806   | 482.964   | U88896    | 1447.303  | 1335.95   | AF225418  | 353.341   | 527.487   |
| R48168    | 8320.92   | 9264.948  | AF116702  | 48542.285 | 42281.973 | NM_000308 | 406.017   | 427.135   |
| NM_003942 | 1479.946  | 1645.114  | NM_005724 | 6925.423  | 7840.263  | NM_004528 | 8649.975  | 9734.808  |
| NM_004452 | 1059.704  | 993.649   | X58794    | 1480.126  | 1626.908  | AK026381  | 3330.753  | 3648.719  |
| SR5       | 6306.754  | 5770.418  | NM_001735 | 2286.925  | 2710.078  | NM_002450 | 5576.942  | 9792.97   |
| SR7       | 4498.408  | 34296.559 | NM_002349 | 965.075   | 1204.779  | NM_001688 | 387.583   | 547.853   |
| SR9       | 13105.077 | 2579.794  | NM_005080 | 14112.954 | 16599.217 | NM_000705 | 237.947   | 188.695   |
| CY3Cy5    | 2835.929  | 257.426   | NM_004887 | 7458.424  | 6581.86   | NM_004231 | 25900.043 | 17645.764 |
| NM_000591 | 1179.663  | 1257.012  | NM_004972 | 5250.21   | 10356.956 | NM_145904 | 10390.781 | 12534.458 |
| NM_000565 | 1205.048  | 1185.353  | NM_006251 | 4574.257  | 5552.841  | NM_013334 | 1528.226  | 1900.393  |
| NM_002018 | 1753.527  | 1562.86   | NM_004103 | 8857.243  | 11921.148 | AF150735  | 2783.966  | 3268.081  |
| AF253318  | 1466.565  | 1272.563  | NM_002314 | 4434.378  | 5435.588  | NM_018183 | 702.268   | 841.507   |
| NM_017767 | 10290.969 | 10026.943 | NM_001744 | 5990.17   | 4720.649  | NM_012382 | 1264.125  | 1620.064  |
| AK024848  | 5465.453  | 5695.858  | NM_006296 | 2225.511  | 2320.677  | NM_002452 | 9343.613  | 10221.107 |
| NM_004852 | 1215.162  | 979.481   | Z25433    | 3822.217  | 3526.778  | NM_016440 | 5962.334  | 4490.66   |
| NM_000543 | 936.44    | 869.474   | NM_005922 | 3213.951  | 2199.24   | NM_007194 | 1275.362  | 1274.622  |
| U06699    | 5375.005  | 5044.49   | NM_018638 | 6005.5    | 5236.559  | NM_000314 | 2646.062  | 2156.318  |
| AJ290954  | 10968.76  | 11636.33  | AL137593  | 17528.225 | 17602.1   | AB002369  | 533.85    | 452.359   |
| AK025451  | 1746.366  | 2185.44   | NM_003915 | 2513.204  | 2426.546  | S74620    | 593.747   | 500.319   |
| NM_002783 | 1746.694  | 1632.224  | NM_000382 | 2573.839  | 2132.131  | AF305239  | 472.459   | 686.04    |
| X52005    | 11903.556 | 8516.054  | AL133064  | 3067.176  | 2732.969  | AL137264  | 2779.079  | 3421.904  |
| NM_001047 | 659.321   | 431.677   | NM_006227 | 4894.547  | 5206.366  | NM_002226 | 274.558   | 181.223   |
| AK024396  | 1357.736  | 1371.625  | NM_002905 | 4950.756  | 4489.6    | X84370    | 3129.27   | 3831.196  |
| NM_000544 | 2287.091  | 2226.382  | NM_000700 | 50675.215 | 36092.543 | NM_004038 | 457.314   | 633.629   |
| NM_001044 | 577.996   | 429.989   | NM_019028 | 17176.918 | 15488.375 | AB014558  | 384.155   | 489.762   |
| NM_004644 | 408.101   | 589.575   | NM_000431 | 2811.257  | 2500.207  | NM_000118 | 1022.297  | 997.631   |
| AV681967  | 1167.647  | 1135.559  | NM_013421 | 1505.054  | 1292.89   | NM_000913 | 252.334   | 285.535   |
| NM_018250 | 1314.282  | 1738.568  | NM_012474 | 9099.216  | 7919.266  | NM_001298 | 25859.65  | 28318.006 |
| NM_016553 | 4224.008  | 4794.229  | AB033118  | 5816.713  | 6899.492  | BG325046  | 1057.607  | 1174.373  |
| AB023136  | 783.404   | 699.531   | NM_019606 | 2552.599  | 2400.731  | AI351740  | 2274.118  | 2847.856  |
| NM_003795 | 22686.758 | 23722.5   | NM_001690 | 7012.781  | 6660.591  | AA444051  | 185.213   | 266.184   |
| NM_014232 | 4548.755  | 4622.955  | AF034374  | 9667.152  | 10719.91  | NM_007164 | 423.96    | 472.831   |
| NM_005701 | 944.022   | 886.885   | NM_016118 | 6281.057  | 5387.067  | BE783826  | 4467.963  | 4591.908  |
| NM_006818 | 42208.715 | 40420.266 | NM_018674 | 28947.705 | 30882.031 | X04827    | 450.947   | 400.61    |



|           |           |           |           |           |           |           |           |           |
|-----------|-----------|-----------|-----------|-----------|-----------|-----------|-----------|-----------|
| NM_014744 | 2520.682  | 2324.166  | NM_000068 | 1759.076  | 2103.04   | H07088    | 284.035   | 203.495   |
| AF146759  | 1537.148  | 1347.127  | AB033046  | 8216.063  | 8733.483  | BC020596  | 444.344   | 571.207   |
| AB032993  | 3905.276  | 2528.18   | NM_015918 | 10229.915 | 11699.953 | AF116606  | 32654.955 | 22949.162 |
| NM_000854 | 2479.6    | 2480.904  | AK023228  | 598.362   | 871.828   | X98922    | 1442.367  | 1516.78   |
| AL117423  | 3083.781  | 3312.526  | NM_013249 | 528.328   | 486.142   | AK098435  | 2123.903  | 1648.134  |
| NM_002084 | 2082.037  | 1716.613  | AB029041  | 25223.357 | 24788.352 | AK092872  | 1086.019  | 1004.107  |
| D16892    | 16343.2   | 14710.791 | AK026642  | 10247.718 | 11967.846 | NM_002038 | 2949.951  | 3406.076  |
| NM_004750 | 2250.202  | 2073.287  | AL359063  | 1520.098  | 1202.26   | NM_005728 | 2101.213  | 2370.336  |
| NM_007295 | 2369.377  | 2432.202  | AL079292  | 4082.207  | 2968.279  | NM_015493 | 450.244   | 429.793   |
| NM_003651 | 7931.898  | 8928.343  | X89667    | 3198.512  | 3085.32   | NM_003747 | 798.037   | 897.09    |
| NM_003262 | 2722.152  | 2778.687  | AB037791  | 1287.507  | 1076.83   | AB037744  | 645.642   | 673.515   |
| NM_020125 | 526.461   | 687.916   | NM_018124 | 5282.913  | 4250.049  | AF141901  | 419.269   | 418.979   |
| AK022832  | 2289.903  | 2333.721  | Z70701    | 10298.215 | 11451.55  | NM_007008 | 635.251   | 753.336   |
| NM_014641 | 2352.637  | 2153.914  | AB040972  | 4526.516  | 4788.159  | AF234532  | 390.992   | 307.649   |
| NM_004462 | 10308.528 | 10552.188 | AF148505  | 3046.943  | 2495.856  | NM_002418 | 337.923   | 264.063   |
| AB020664  | 2616.988  | 2028.145  | BE260997  | 918.163   | 671.433   | NM_004485 | 809.844   | 771.273   |
| NM_006640 | 12921.763 | 11601.124 | NM_018686 | 11268.454 | 9018.25   | NM_012419 | 222.246   | 278.424   |
| NM_000343 | 578.394   | 597.774   | NM_017676 | 1554.239  | 1217.124  | NM_013296 | 2450.067  | 3075.443  |
| NM_019112 | 1279.513  | 1325.958  | AK021764  | 610.716   | 510.868   | AL117478  | 257.474   | 423.153   |
| NM_012336 | 7974.736  | 7888.184  | NM_005431 | 2642.478  | 2283.448  | NM_005307 | 258.285   | 229.484   |
| NM_020246 | 1510.951  | 1722.078  | AB036063  | 2501.241  | 2268.775  | NM_005958 | 378.546   | 295.084   |
| NM_000084 | 1429.221  | 1254.04   | NM_002894 | 6618.421  | 6528.569  | NM_013436 | 686.547   | 603.609   |
| NM_016354 | 1357.741  | 1256.433  | NM_004629 | 8567.588  | 7415.849  | AF225426  | 665.236   | 599.953   |
| NM_003038 | 1204.311  | 1408.317  | NM_004260 | 10034.895 | 11116.672 | NM_005208 | 1884.719  | 1125.377  |
| NM_018155 | 2487.068  | 2735.488  | AL050067  | 2412.111  | 2365.992  | NM_000421 | 285.922   | 261.74    |
| AL050358  | 2413.912  | 2406.729  | J05158    | 382.983   | 737.594   | AK025687  | 2180.536  | 1919.017  |
| NM_004731 | 818.277   | 1056.422  | NM_015564 | 1196.66   | 1613.311  | AF218941  | 905.982   | 764.43    |
| AB023139  | 2799.893  | 3113.133  | AF160476  | 599.71    | 528.817   | NM_004231 | 22769.9   | 20295.51  |
| NM_017885 | 2227.53   | 2141.581  | L22650    | 1265.706  | 1259.087  | NM_002243 | 135.658   | 420.488   |
| D80004    | 814.3     | 656.604   | AB014520  | 11096.276 | 9616.421  | NM_016577 | 250.318   | 352.803   |
| NM_000946 | 4957.128  | 5073.368  | AF161420  | 1368.204  | 1560.672  | AK023107  | 3715.367  | 3716.278  |
| NM_016070 | 2314.683  | 2466.07   | NM_004907 | 2404.506  | 2277.548  | NM_006854 | 4689.861  | 4995.616  |
| NM_016390 | 1787.007  | 1623.906  | NM_002891 | 718.299   | 642.549   | NM_004580 | 1769.158  | 1778.088  |
| NM_016101 | 3920.594  | 3561.838  | NM_001775 | 796.158   | 656.464   | NM_020387 | 12263.39  | 10853.677 |
| NM_005855 | 46979.316 | 48179.559 | X04526    | 17021.986 | 12542.378 | NM_007246 | 669.795   | 822.377   |
| NM_020313 | 1296.576  | 1266.803  | D26067    | 4234.077  | 3444.073  | AK026248  | 470.663   | 595.282   |
| NM_014628 | 5530.586  | 4842.771  | AF227924  | 2399.624  | 1791.454  | NM_004578 | 503.678   | 668.183   |
| AK025630  | 1254.349  | 1100.516  | NM_005716 | 26247.832 | 25239.992 | NM_017604 | 635.213   | 644.387   |
| AL365404  | 16658.502 | 14101.467 | NM_006183 | 1546.976  | 1320.14   | NM_017738 | 1496.195  | 1375.916  |
| AK022907  | 4930.953  | 5436.139  | NM_016087 | 503.178   | 559.477   | NM_016557 | 488.357   | 446.074   |
| NM_014793 | 3174.625  | 3016.895  | S59184    | 2084.034  | 1568.947  | NM_000623 | 1030.866  | 805.908   |
| NM_004245 | 1769.95   | 1788.262  | NM_006661 | 5414.748  | 4770.796  | AF161348  | 746.414   | 495.815   |
| NM_003241 | 992.078   | 1116.45   | M54886    | 420.985   | 489.84    | NM_018467 | 3126.229  | 2232.042  |
| NM_002685 | 2514.549  | 2415.22   | NM_005746 | 13568.066 | 10850.025 | NM_006068 | 402.714   | 318.008   |
| AK024504  | 975.25    | 1236.817  | NM_004588 | 989.685   | 1411.228  | NM_016440 | 7528.726  | 7594.364  |
| AF039023  | 1786.156  | 2091.067  | U16126    | 1063.706  | 1131.875  | NM_007194 | 1192.632  | 1772.875  |
| NM_005511 | 2021.788  | 2877.906  | NM_002172 | 30336.277 | 29579.016 | NM_000314 | 2960.146  | 2565.772  |
| NM_014698 | 22789.547 | 21187.939 | NM_002614 | 1143.977  | 1360.36   | AB002369  | 557.779   | 520.111   |
| NM_018475 | 3733.134  | 4146.048  | NM_005655 | 2379.91   | 3194.8    | S74620    | 452.901   | 522.532   |
| X52005    | 12929.711 | 11601.411 | AJ008144  | 939.289   | 1021.016  | AF305239  | 515.054   | 509.285   |
| AK024396  | 1283.709  | 1755.483  | NM_007314 | 3916.582  | 4592.965  | NM_002827 | 1518.708  | 1549.676  |
| U58514    | 1003.278  | 1205.344  | NM_016073 | 3369.131  | 2936.496  | NM_001946 | 395.492   | 493.135   |
| W74254    | 16992.719 | 17074.813 | NM_006600 | 17350.992 | 15217.725 | BF035425  | 3629.484  | 3869.539  |

|           |           |           |           |           |           |           |           |           |
|-----------|-----------|-----------|-----------|-----------|-----------|-----------|-----------|-----------|
| M58603    | 5434.188  | 5677.882  | AF297709  | 2058.456  | 2017.303  | NM_000155 | 25667.088 | 22400.98  |
| AA443286  | 1558.092  | 950.215   | L77564    | 1082.632  | 901.304   | NM_014635 | 611.444   | 600.273   |
| AB003334  | 7403.664  | 6587.76   | NM_015384 | 2309.323  | 1993.055  | AF099740  | 574.38    | 508.839   |
| AW276315  | 910.664   | 679.17    | AK023327  | 1321.174  | 1100.366  | NM_006117 | 8312.713  | 8843.42   |
| AA490737  | 792.348   | 527.929   | AB046858  | 1688.513  | 1600.767  | NM_002225 | 1036.687  | 926.185   |
| AI878886  | 17819.916 | 16179.438 | D50914    | 3499.883  | 3304.759  | NM_006225 | 240.091   | 193.698   |
| BG697179  | 5934.134  | 5733.273  | BE878692  | 779.867   | 584.522   | NM_015415 | 8925.285  | 7595.924  |
| NM_002135 | 31470.189 | 26337.418 | NM_002007 | 763.818   | 476.538   | NM_004897 | 712.131   | 896.037   |
| BM012504  | 3530.727  | 3066.733  | NM_015895 | 1264.108  | 973.405   | NM_002555 | 322.586   | 206.748   |
| AA664145  | 945.504   | 939.124   | NM_002305 | 32929.867 | 23157.357 | AF225418  | 531.034   | 370.29    |
| T70999    | 547.384   | 393.588   | AK025439  | 3019.934  | 2386.055  | NM_000305 | 389.773   | 292.947   |
| T50790    | 873.404   | 849.432   | NM_001737 | 2417.716  | 2123.609  | NM_004525 | 9212.478  | 7156.519  |
| R48168    | 12765.104 | 14650.316 | Z36784    | 609.276   | 549.197   | AK026381  | 4763.519  | 3536.837  |
| NM_003942 | 1797.797  | 1864.587  | NM_016625 | 8986.193  | 7693.503  | NM_002450 | 6358.12   | 9074.944  |
| NM_004452 | 1322.007  | 1037.342  | NM_007213 | 2164.646  | 1931.31   | NM_001685 | 416.076   | 482.203   |
| AB040954  | 3946.535  | 4357.113  | NM_019064 | 1783.427  | 1084.789  | NM_014723 | 1361.09   | 1623.532  |
| NM_002081 | 930.472   | 983.836   | NM_000094 | 3412.092  | 3215.97   | AB011106  | 995.408   | 1009.813  |
| NM_002084 | 2057.345  | 2418.129  | NM_000435 | 602.031   | 493.31    | D26362    | 1380.886  | 1354.733  |
| D16892    | 15522.943 | 17608.08  | AJ295148  | 704.154   | 1236.421  | NM_013452 | 455.244   | 352.286   |
| NM_004750 | 1804.241  | 1665.342  | AF176701  | 547.625   | 726.521   | AY009402  | 747.229   | 605.06    |
| NM_007295 | 1951.448  | 2077.656  | NM_016302 | 3815.402  | 4590.378  | NM_018451 | 677.097   | 497.47    |
| NM_003651 | 6543.721  | 7042.964  | NM_004155 | 16770.455 | 17396.84  | NM_012443 | 363.78    | 404.342   |
| NM_000415 | 539.047   | 379.459   | AK021866  | 738.718   | 517.349   | NM_007005 | 239.471   | 196.489   |
| NM_000591 | 1371.194  | 1437.341  | NM_003245 | 5934.413  | 5286.169  | NM_002584 | 1615.618  | 1917.502  |
| NM_000565 | 1278.849  | 1084.308  | M21897    | 716.155   | 861.866   | NM_013334 | 1387.437  | 1215.63   |
| NM_002015 | 1509.959  | 1399.367  | AF301463  | 1260.008  | 1097.356  | AF150735  | 1194.682  | 980.084   |
| AF253318  | 1095.775  | 957.563   | NM_015984 | 5565.668  | 4401.707  | NM_018183 | 687.611   | 739.189   |
| AK024848  | 4142.811  | 4691.313  | AK025969  | 860.308   | 916.784   | NM_012382 | 1576.08   | 1236.811  |
| NM_004852 | 1365.596  | 1145.802  | NM_006894 | 1386.968  | 1316.218  | BF038366  | 364.222   | 396.166   |
| NM_003633 | 584.281   | 432.318   | AK023031  | 1567.042  | 1396.29   | NM_002452 | 10317.041 | 8642.453  |
| NM_000543 | 1364.387  | 1132.929  | NM_012090 | 3793.027  | 3573.937  | NM_012304 | 252.066   | 314.086   |
| U06699    | 9213.337  | 8806.044  | BE793385  | 1192.638  | 1033.691  | AF245505  | 543.877   | 747.029   |
| AJ290954  | 8673.229  | 9297.897  | AF177292  | 442.036   | 624.159   | AB037776  | 483.969   | 693.075   |
| AK025451  | 2128.653  | 2263.556  | NM_003085 | 5258.151  | 6378.735  | AF196976  | 1422.288  | 1587.735  |
| NM_002783 | 1653.927  | 1735.07   | AF043290  | 609.147   | 523.416   | AL050379  | 561.682   | 496.51    |
| NM_000084 | 1245.303  | 1603.82   | NM_004082 | 3457.225  | 3011.133  | NM_003161 | 1026.151  | 1290.812  |
| NM_016354 | 1166.638  | 1256.121  | NM_014395 | 5583.318  | 4663.162  | NM_016215 | 4905.416  | 5006.219  |
| NM_003035 | 899.595   | 1326.099  | NM_005934 | 23689.938 | 20658.053 | AK026919  | 433.748   | 311.544   |
| NM_018155 | 3313.288  | 4019.691  | NM_007125 | 3745.678  | 4603.918  | NM_001501 | 1675.249  | 1561.648  |
| AL050358  | 2240.056  | 2091.087  | AY004253  | 6424.032  | 13334.26  | NM_006175 | 14523.308 | 13905.421 |
| NM_004731 | 824.988   | 751.969   | Z46967    | 557.646   | 476.872   | AL137459  | 722.715   | 529.169   |
| NM_000544 | 2019.927  | 2058.392  | NM_002145 | 704.393   | 668.537   | AB037812  | 148.076   | 258.748   |
| NM_001044 | 527.568   | 430.899   | AL137449  | 1854.394  | 1474.413  | AB007932  | 387.481   | 555.717   |
| NM_004644 | 715.822   | 740.158   | U88153    | 1536.79   | 1114.072  | AF219257  | 4783.358  | 4622.376  |
| AV681967  | 1415.925  | 1748.75   | NM_018425 | 4175.899  | 4204.657  | NM_003975 | 386.282   | 315.318   |
| NM_018250 | 1499.036  | 1599.432  | NM_006924 | 14623.579 | 14262.55  | NM_002561 | 1920.747  | 1300.575  |
| NM_016553 | 4250.198  | 3791.934  | NM_016024 | 6312.051  | 5725.132  | NM_006103 | 7589.792  | 5163.015  |
| AB023136  | 710.602   | 545.862   | NM_018107 | 3203.913  | 3001.787  | NM_006205 | 230.642   | 96.963    |
| NM_003795 | 20883.588 | 18500.258 | NM_012275 | 1212.603  | 879.806   | NM_000805 | 194.536   | 176.01    |
| NM_014232 | 3718.922  | 3564.051  | BF310673  | 1325.811  | 1026.277  | AL359933  | 4806.867  | 3503.206  |
| NM_005701 | 686.196   | 815.927   | R97012    | 19683.904 | 14505.869 | NM_001302 | 414.771   | 310.187   |
| NM_006815 | 35270.195 | 31459.396 | U77700    | 6223.178  | 6294.21   | M17783    | 2377.751  | 1719.364  |
| NM_014744 | 2187.788  | 2589.503  | NM_006567 | 5113.831  | 3918.885  | NM_018590 | 4198.733  | 3745.544  |

|           |           |           |           |           |           |           |           |           |
|-----------|-----------|-----------|-----------|-----------|-----------|-----------|-----------|-----------|
| AF146759  | 1740.713  | 1776.58   | AF038554  | 17203.572 | 14131.727 | NM_00317E | 553.254   | 446.779   |
| AB032993  | 4846.777  | 3735.871  | AF264621  | 3868.139  | 3410.693  | NM_012437 | 3759.481  | 3408.929  |
| NM_000854 | 3576.626  | 3281.58   | NM_005875 | 14727.63  | 10851.881 | AF090944  | 274.062   | 241.925   |
| AL117423  | 3367.796  | 4804.811  | NM_004184 | 2835.193  | 2228.978  | NM_002607 | 592.13    | 436.66    |
| NM_007003 | 431.862   | 1469.675  | AK075087  | 704.644   | 1102.31   | NM_002527 | 376.359   | 532.135   |
| NM_00268E | 2451.606  | 2640.305  | AK026571  | 4577.577  | 5417.047  | NM_00589C | 1302.46   | 1328.64   |
| AK024504  | 878.912   | 1172.583  | AK024673  | 4109.441  | 4693.888  | NM_00706E | 16146.738 | 13700.337 |
| AF039023  | 1781.996  | 2288.517  | AF070618  | 991.333   | 1287.237  | AF149785  | 1242.549  | 1087.989  |
| NM_005511 | 2511.098  | 2808.902  | AF131748  | 3864.064  | 3562.309  | NM_01206E | 2608.864  | 2664.198  |
| NM_01469E | 15245.863 | 16458.314 | NM_00045E | 2229.524  | 1912.426  | NM_004064 | 2169.554  | 2766.231  |
| NM_01847E | 3513.03   | 3606.401  | NM_00249E | 7278.984  | 6857.799  | NM_00125E | 2783.623  | 8878.305  |
| NM_00326E | 2102.051  | 2163.897  | NM_016243 | 2968.496  | 2577.953  | NM_014704 | 1266.148  | 1369.381  |
| NM_02012E | 526.182   | 470.353   | X53943    | 306.717   | 374.909   | NM_02020E | 181.375   | 285.515   |
| AK022832  | 1405.349  | 1661.287  | NM_00464E | 3543.19   | 3214.249  | NM_001227 | 456.085   | 361.691   |
| NM_014641 | 1768.737  | 1649.695  | NM_00654C | 2033.524  | 1445.39   | NM_001191 | 1576.974  | 1341.353  |
| NM_00446E | 7711.192  | 8918.392  | NM_01776E | 1250.472  | 1151.438  | NM_01334E | 1224.433  | 990.363   |
| NM_00664C | 13252.487 | 15718.057 | NM_002811 | 11496.721 | 8217.233  | NM_014344 | 552.082   | 387.683   |
| NM_00034E | 893.589   | 875.28    | NM_02031C | 1561.435  | 1509.697  | AB040917  | 336.387   | 400.395   |
| NM_019112 | 2399.627  | 2929.95   | NM_00580E | 3041.686  | 2476.401  | AL110261  | 1840.497  | 1373.443  |
| NM_01233E | 8957.674  | 11632.546 | AB002331  | 3627.277  | 2650.891  | AK021786  | 347.886   | 192.04    |
| NM_02024E | 1188.279  | 1461.687  | NM_002504 | 1742.453  | 1722.463  | NM_00593E | 435.903   | 654.058   |
| NM_00394E | 1102.784  | 1389.087  | AB046775  | 1537.778  | 1186.768  | NM_00427E | 3874.258  | 5117.556  |
| NM_00445E | 764.426   | 1176.759  | X74862    | 1021.681  | 921.117   | NM_004851 | 172.787   | 227.989   |
| AB040954  | 2739.11   | 2604.255  | X65663    | 4350.531  | 2978.179  | NM_00190E | 783.636   | 1002.5    |
| NM_002081 | 685.224   | 531.773   | NM_00318E | 2058.965  | 1435.846  | NM_00028E | 4307.077  | 5711.191  |
| AB023139  | 2848.766  | 3054.163  | NM_00445E | 6772.199  | 5905.959  | NM_005911 | 6433.609  | 4631.883  |
| NM_01788E | 2225.648  | 2400.325  | NM_004284 | 6670.305  | 4811.325  | AV702690  | 607.737   | 882.02    |
| D80004    | 919.567   | 762.191   | NM_01224E | 1724.383  | 1855.654  | AL117452  | 1577.448  | 1875.785  |
| NM_00094E | 4723.804  | 4206.502  | AK025743  | 1422.241  | 1571.188  | NM_01223C | 870.185   | 1206.295  |
| NM_01607C | 1706.784  | 1455.343  | AL137466  | 468.914   | 541.153   | NM_01403E | 2813.51   | 3367.447  |
| NM_01639C | 1740.876  | 1346.492  | AK023974  | 2414.313  | 2891.448  | NM_002061 | 1478.654  | 1721.539  |
| NM_016101 | 4902.495  | 4667.493  | AK023768  | 1231.414  | 1436.82   | AF169974  | 1080.352  | 1072.129  |
| NM_00585E | 43186.754 | 46909.59  | NM_01472E | 1130.897  | 1005.844  | NM_00452E | 276.947   | 330.839   |
| NM_01479E | 2563.65   | 3787.551  | AF147335  | 889.971   | 791.886   | NM_00573E | 740.774   | 803.511   |
| NM_00424E | 1755.535  | 1856.411  | AK000711  | 1554.601  | 887.081   | NM_01813E | 1455.607  | 1181.819  |
| NM_003241 | 822.123   | 954.115   | BI768072  | 768.843   | 542.984   | NM_01961E | 2165.53   | 1870.602  |
| NM_00054E | 917.893   | 1259.662  | AK022216  | 5341.161  | 4228.737  | AF183411  | 620.542   | 584.584   |
| U06699    | 5330.889  | 6854.765  | AK025812  | 4885.219  | 4601.694  | BF244591  | 486.844   | 336.661   |
| AJ290954  | 11340.979 | 12889.387 | U00960    | 1143.096  | 1296.173  | NM_00588E | 4928.153  | 3519.521  |
| AK025451  | 1581.706  | 1720.008  | AK022262  | 1243.471  | 1269.646  | U63785    | 430.89    | 280.691   |
| NM_00278E | 1553.542  | 1530.918  | AF088039  | 54026.887 | 57640.809 | NM_00596E | 554.306   | 435.874   |
| X52005    | 9572.617  | 7769.735  | AF086220  | 1369.649  | 1399.279  | NM_00315E | 1182.06   | 910.343   |
| AK024396  | 970.683   | 1277.412  | AK023941  | 1810.413  | 1885.407  | NM_00310E | 398.664   | 391.811   |
| U58514    | 1028.966  | 1378.802  | AL390083  | 7660.325  | 7185.255  | NM_01331C | 2502.023  | 2677.022  |
| W74254    | 15980.226 | 14105.051 | AB020702  | 1108.99   | 879.79    | BC004958  | 1351.644  | 1698.657  |
| M58603    | 4556.555  | 4656.826  | AL050227  | 1135.974  | 1136.333  | NM_00576E | 4398.642  | 5791.024  |
| AA443286  | 854.599   | 358.205   | AF085905  | 1074.027  | 727.646   | NM_00647E | 687.998   | 666.439   |
| AB003334  | 6960.362  | 5846.215  | NM_01335E | 851.279   | 961.759   | NM_01464E | 380.88    | 308.206   |
| AW276315  | 743.948   | 580.432   | NM_003847 | 24507.172 | 27355.953 | NM_00565E | 607.093   | 503.661   |
| R48168    | 12567.462 | 15541.08  | AK021973  | 2113.592  | 2761.807  | NM_01455E | 1746.061  | 3376.04   |
| AB032993  | 3866.531  | 3508.724  | AL110155  | 1105.906  | 224.472   | NM_00344C | 442.271   | 553.225   |
| NM_000854 | 2174.222  | 2298.511  | AL050165  | 52839.039 | 57288.324 | NM_00469E | 2140.483  | 1784.163  |
| AL117423  | 3698.398  | 4090.041  | AL117445  | 1452.15   | 1755.768  | U41387    | 3563.09   | 2974.699  |

|           |           |           |           |           |           |           |           |          |
|-----------|-----------|-----------|-----------|-----------|-----------|-----------|-----------|----------|
| NM_002084 | 1642.812  | 1745.949  | AL122113  | 8873.642  | 10347.635 | NM_004516 | 2658.29   | 2322.466 |
| D16892    | 12026.039 | 12385.562 | AK024415  | 2690.079  | 2879.89   | NM_006513 | 543.007   | 342.143  |
| NM_004750 | 1594.736  | 1695.125  | AL049365  | 4305.736  | 3708.625  | NM_003685 | 6735.746  | 5346.184 |
| NM_007295 | 2240.973  | 2447.989  | AB007877  | 568.365   | 547.196   | NM_002486 | 226.991   | 113.001  |
| NM_003651 | 5698.943  | 5915.329  | AK025132  | 674.196   | 628.379   | NM_006295 | 2020.294  | 1882.26  |
| NM_000591 | 875.6     | 898.463   | AK025157  | 1015.713  | 1221.929  | NM_001540 | 1371.686  | 1138.838 |
| NM_003633 | 532.635   | 589.611   | NM_020215 | 984.286   | 1010.961  | NM_012111 | 4865.739  | 3988.279 |
| NM_000343 | 536.038   | 894.52    | AK022001  | 2468.568  | 2214.848  | NM_004470 | 4253.348  | 3202.655 |
| NM_019112 | 2383.58   | 2652.496  | AK022633  | 1354.016  | 1104.18   | NM_001418 | 2953.586  | 1771.549 |
| NM_012336 | 9952.309  | 12463.779 | AK027199  | 1000.147  | 901.312   | NM_003756 | 10715.327 | 7178.166 |
| NM_020161 | 378.22    | 873.652   | AK000079  | 2363.162  | 1786.079  | AL049680  | 969.967   | 720.936  |
| NM_020246 | 1365.476  | 1499.64   | AJ227874  | 1128.535  | 1954.622  | NM_018015 | 1172.774  | 1991.943 |
| NM_000084 | 1187.525  | 1357.892  | AF009268  | 551.117   | 867.124   | NM_003715 | 2505.18   | 3417.517 |
| NM_016354 | 915.058   | 1158.592  | AF009312  | 607.337   | 823.002   | M94065    | 854.712   | 789.85   |
| NM_003038 | 737.881   | 582.256   | AF009276  | 951.506   | 1118.116  | BF036874  | 768.09    | 902.534  |
| NM_018155 | 3212.121  | 3492.061  | AF056428  | 8845.464  | 8989.554  | AF182419  | 1334.839  | 2104.405 |
| AL050358  | 1980.525  | 1182.25   | AF069136  | 604.466   | 838.228   | NM_007016 | 1055.265  | 901.751  |
| NM_004731 | 782.997   | 651.542   | AK001995  | 456.452   | 524.852   | NM_002703 | 1843.951  | 1814.485 |
| NM_000544 | 1528.607  | 1598.298  | AK001151  | 574.285   | 602.06    | NM_005375 | 3222.11   | 2386.725 |
| NM_004644 | 628.789   | 479.207   | AK002150  | 809.813   | 684.151   | NM_005985 | 1074.294  | 902.362  |
| AV681967  | 1097.115  | 1277.363  | AK021635  | 1351.302  | 1369.244  | NM_015906 | 1735.176  | 1416.039 |
| NM_003795 | 22276.053 | 23846.229 | AK021856  | 2004.618  | 1468.969  | AK023759  | 1307.503  | 801.296  |
| NM_014232 | 3877.441  | 3511.912  | AK026419  | 301.243   | 292.124   | AB033111  | 608.701   | 423.956  |
| AF146759  | 1625.209  | 1542.474  | AK025276  | 3523.876  | 4174.538  | AJ276316  | 571.83    | 305.342  |
| AL365404  | 15834.729 | 18316.604 | AK026457  | 1261.376  | 1515.471  | AF229246  | 1842.345  | 989.692  |
| AK022907  | 5525.388  | 6429.233  | AJ008131  | 26364.244 | 43641.184 | S64709    | 1345.432  | 1147.872 |
| NM_014793 | 3280.772  | 3357.842  | AF086338  | 958.535   | 1134.219  | X56465    | 308.589   | 278.649  |
| NM_004245 | 1695.487  | 1863.382  | NM_006272 | 425.964   | 713.986   | NM_003071 | 3103.383  | 2460.801 |
| NM_003241 | 964.092   | 866.622   | AK024303  | 745.645   | 1107.445  | AK022117  | 222.516   | 289.747  |
| NM_002685 | 2279.799  | 2209.234  | AL160131  | 9751.197  | 11136.763 | AF075023  | 501.359   | 502.043  |
| AK024504  | 915.565   | 1078.043  | AF086045  | 4024.425  | 3967.382  | AL360160  | 4406.992  | 4117.737 |
| AF039023  | 1548.498  | 2043.948  | AK027028  | 1369.509  | 1579.833  | AB040926  | 266.833   | 179.933  |
| NM_005511 | 2700.566  | 2972.384  | AK026916  | 4721.148  | 4382.111  | AK001092  | 7169.343  | 4852.023 |
| NM_014695 | 17060.877 | 13463.633 | AK026914  | 2642.604  | 2607.384  | AK023427  | 182.844   | 215.205  |
| NM_018475 | 3026.387  | 3124.545  | Y13808    | 490.857   | 311.414   | NM_014144 | 395.063   | 458.085  |
| NM_003262 | 2212.902  | 1851.137  | Y11166    | 1481.813  | 1219.677  | AF147345  | 291.575   | 244.3    |
| NM_020125 | 498.727   | 475.342   | AK023515  | 1651.287  | 1433.979  | AF147373  | 1138.804  | 835.722  |
| AK022832  | 2034.607  | 2508.557  | AL137623  | 19226.68  | 19224.68  | AF086253  | 481.063   | 485.497  |
| NM_014641 | 1796.416  | 1419.536  | NM_003546 | 2243.6    | 3137.633  | AF086337  | 179.817   | 145.543  |
| NM_006640 | 11173.355 | 12596.298 | AF118077  | 2669.236  | 4183.561  | AF086464  | 341.957   | 169.491  |
| NM_000857 | 1047.858  | 1426.349  | AL137625  | 1373.049  | 2499.377  | AL049278  | 1025.051  | 757.311  |
| L20688    | 49900.09  | 55406.945 | AK025750  | 1403.788  | 2106.926  | NM_013318 | 303.633   | 135.172  |
| X69111    | 13955.988 | 14819.271 | BF031253  | 813.956   | 1092.782  | AK025063  | 334.313   | 460.312  |
| AB037799  | 3475.463  | 4291.596  | AK025783  | 1849.699  | 1971.139  | NM_005060 | 539.388   | 418.752  |
| AB007950  | 18409.418 | 13929.809 | AF113675  | 1017.373  | 1307.74   | AF085935  | 388.272   | 239.984  |
| AL133111  | 432.338   | 436.285   | NM_020119 | 4394.454  | 4013.509  | AL035369  | 1177.959  | 730.094  |
| AK025593  | 2184.362  | 2196.331  | AL049417  | 7106.044  | 6907.006  | AF075094  | 187.7     | 175.783  |
| AB018304  | 1575.67   | 1766.198  | AK023507  | 829.52    | 951.402   | AF075097  | 344.526   | 323.042  |
| NM_007061 | 13859.638 | 14592.837 | NM_005169 | 7972.336  | 7142.964  | AK022801  | 738.94    | 581.203  |
| AB040954  | 2485.739  | 2108.824  | AL109818  | 602.489   | 641.152   | AL133075  | 2761.274  | 2053.326 |
| NM_002081 | 592.639   | 713.835   | S97393    | 505.921   | 401.199   | AL137692  | 298.408   | 395.374  |
| AB023139  | 2938.985  | 2494.336  | NM_017929 | 705.065   | 612.033   | AL137630  | 926.332   | 767.568  |
| NM_017885 | 1967.94   | 2055.525  | NM_018472 | 1234.249  | 1252.299  | AL137277  | 2259.354  | 1805.341 |

|           |           |           |           |           |           |           |           |           |
|-----------|-----------|-----------|-----------|-----------|-----------|-----------|-----------|-----------|
| D80004    | 832.017   | 576.658   | AJ008128  | 34787.309 | 34304.664 | AL137447  | 316.344   | 470.416   |
| AK025630  | 1304.017  | 1749.598  | AL449243  | 7825.779  | 7715.771  | AL157467  | 208.325   | 146.004   |
| NM_005761 | 1263.566  | 1195.765  | M12211    | 3208.53   | 2614.861  | BC023609  | 606.965   | 464.658   |
| NM_014718 | 3056.265  | 3368.922  | AK026449  | 12455.98  | 22426.055 | AF086395  | 3952.47   | 3089.74   |
| AB028953  | 824.1     | 591.422   | NM_014027 | 4366.645  | 5732.542  | AF086049  | 750.048   | 493.396   |
| NM_000632 | 766.384   | 804.968   | NM_020467 | 4181.595  | 7806.214  | AF114263  | 745.458   | 501.893   |
| AB002298  | 582.988   | 863.645   | AF116621  | 2910.295  | 4598.792  | AF086073  | 659.52    | 351.776   |
| AK024488  | 7440.733  | 5819.527  | AF086554  | 1926.664  | 2472.798  | AK026142  | 987.719   | 585.383   |
| AK023249  | 34754.188 | 29764.627 | AL390136  | 18075.303 | 19778.729 | AF161369  | 694.464   | 564.58    |
| NM_017442 | 6394.078  | 7987.941  | AK023156  | 819.518   | 805.783   | AK027176  | 1036.32   | 855.219   |
| NM_000743 | 1572.261  | 1255.121  | AF086398  | 56608.723 | 57039.188 | AF073328  | 332.553   | 288.773   |
| NM_007218 | 1728.762  | 1340.041  | AK025953  | 1004.052  | 875.272   | AF129266  | 240.097   | 58.753    |
| Z25436    | 3512.224  | 2360.954  | NM_003180 | 1734.003  | 1694.468  | Y12019    | 413.782   | 336.392   |
| NM_005275 | 4576.248  | 4118.705  | AF086406  | 12055.745 | 9892.343  | AF232217  | 240.062   | 275.074   |
| NM_003844 | 26701.33  | 26045.744 | D17216    | 4116.351  | 3849.656  | AL137326  | 278.012   | 254.742   |
| NM_002005 | 14659.871 | 13122.726 | AL137581  | 1658.591  | 1460.773  | AK021898  | 634.563   | 478.959   |
| AK000039  | 1226.351  | 949.423   | AK024942  | 2071.203  | 2180.03   | AK022024  | 1013.848  | 866.69    |
| BI461699  | 1178.817  | 1135.459  | AJ227873  | 17396.537 | 16661.525 | AK022301  | 610.755   | 437.881   |
| AF172264  | 951.153   | 1331.631  | AK022886  | 4234.503  | 3615.306  | AK021948  | 736.12    | 658.487   |
| Y08267    | 1461.674  | 1777.02   | AK024665  | 7809.963  | 8100.648  | AK022054  | 384.839   | 313.231   |
| U80756    | 15559.927 | 16448.217 | AF147363  | 975.224   | 712.045   | AK022341  | 317.191   | 204.66    |
| NM_018161 | 1881.406  | 1986.017  | AJ227880  | 710.619   | 692.851   | AK021642  | 1035.013  | 786.633   |
| NM_005248 | 1690.864  | 1601.044  | AK000691  | 1240.37   | 1596.192  | AK022455  | 328.93    | 166.693   |
| NM_004810 | 8154.341  | 7966.21   | AK001448  | 1737.588  | 1800.394  | AK021987  | 380.466   | 277.293   |
| AL117629  | 3382.62   | 3249.682  | AK026890  | 763.27    | 743.513   | AK026905  | 1896.349  | 1223.323  |
| NM_002595 | 2456.666  | 3006.092  | AL049321  | 3441.458  | 2764.784  | AK023449  | 705.789   | 434.975   |
| NM_015728 | 1131.481  | 954.646   | CY3Cy5    | 3816.053  | 161.263   | NM_006638 | 1692.668  | 1357.901  |
| AF174604  | 1978.298  | 2044.26   | W74254    | 19518.25  | 17743.109 | X14675    | 420.651   | 193.059   |
| AB002379  | 7868.095  | 4585.308  | M58603    | 7624.969  | 5586.748  | AF071170  | 295.552   | 228.061   |
| AF113223  | 898.12    | 808.469   | AA443286  | 749.903   | 556.757   | AF161364  | 471.905   | 491.099   |
| AB046851  | 1732.276  | 1469.73   | AB003334  | 8054.322  | 9367.252  | AF075075  | 446.528   | 451.972   |
| NM_018174 | 739.018   | 681.812   | AW276315  | 625.939   | 805.27    | NM_005453 | 241.037   | 174.96    |
| AK025875  | 1087.893  | 872.051   | AA490737  | 670.462   | 528.025   | NM_018304 | 3022.657  | 1987.261  |
| BC014152  | 54018.074 | 54474.578 | AI878886  | 17802.953 | 14975.613 | AK024457  | 1607.826  | 961.628   |
| NM_000889 | 1280.343  | 1485.615  | BG697179  | 6593.82   | 5750.002  | AL389977  | 618.293   | 314.656   |
| NM_003859 | 12668.227 | 16155.892 | NM_002136 | 42174.215 | 51547.84  | AK026894  | 490.905   | 265.787   |
| NM_000236 | 1718.381  | 1745.072  | BM012504  | 3657.285  | 6649.878  | AK026372  | 298.088   | 173.026   |
| NM_002903 | 35117.941 | 32558.314 | AA664145  | 1396.656  | 2589.135  | NM_014186 | 2851.299  | 2642.506  |
| NM_012339 | 3289.293  | 2946.178  | X72308    | 11180.021 | 21389.486 | AF056442  | 923.457   | 576.209   |
| NM_005787 | 19819.33  | 22936.479 | T70999    | 509.698   | 1500.836  | AK023632  | 4578.532  | 2905.716  |
| NM_002143 | 3467.31   | 3392.89   | T50790    | 1012.829  | 1493.863  | AF086118  | 1780.799  | 1467.265  |
| AF284421  | 19768.506 | 19813.301 | R48168    | 16522.598 | 24365.072 | NM_014138 | 679.734   | 409.198   |
| NM_006048 | 7887.479  | 7015.856  | NM_003942 | 2395.241  | 3042.101  | AK025044  | 560.286   | 274.354   |
| NM_006360 | 26380.291 | 22665.783 | NM_004452 | 1059.694  | 1159.673  | AK023690  | 216.951   | 278.555   |
| NM_003968 | 4367.558  | 3984.637  | SR5       | 7081.524  | 7928.475  | U48697    | 298.284   | 104.919   |
| NM_002786 | 4574.428  | 3882.001  | CY3Cy5    | 5322.279  | 200.312   | AK023806  | 564.2     | 383.922   |
| NM_003343 | 12973.339 | 8989.738  | NM_000418 | 464.437   | 1025.166  | AF088068  | 453.948   | 245.53    |
| NM_002789 | 42091.215 | 28844.086 | NM_000591 | 1120.412  | 1422.201  | Y16696    | 7458.788  | 4175.348  |
| NM_003470 | 12581.605 | 13074.286 | NM_000565 | 903.361   | 1231.205  | AK026094  | 1361.031  | 1263.807  |
| NM_006283 | 7699.04   | 8745.325  | NM_002019 | 2123.827  | 2633.161  | AF161344  | 2732.035  | 1422.757  |
| NM_002701 | 780.169   | 892.049   | NM_017767 | 5057.744  | 5961.477  | AF086027  | 846.411   | 437.451   |
| NM_005693 | 626.567   | 727.049   | AK024848  | 4191.192  | 5087.47   | NM_001207 | 34707.426 | 27128.406 |
| X97303    | 10192.332 | 9701.17   | NM_004852 | 1497.12   | 2401.414  | AK022199  | 687.76    | 571.916   |

|           |           |           |           |           |           |           |           |           |
|-----------|-----------|-----------|-----------|-----------|-----------|-----------|-----------|-----------|
| NM_01753C | 3090.515  | 2726.626  | NM_003633 | 663.883   | 1209.221  | NM_006211 | 379.234   | 377.47    |
| AB029030  | 1053.484  | 603.82    | NM_000543 | 1294.852  | 2117.31   | AK021438  | 1549.203  | 1449.607  |
| AL360183  | 1024.234  | 1434.48   | U06699    | 4434.383  | 7167.942  | S39891    | 1167.292  | 1442.025  |
| AK027046  | 1605.205  | 1446.801  | AJ290954  | 15062.823 | 13777.833 | R17536    | 6617.431  | 6950.389  |
| NM_003113 | 2619.084  | 2193.625  | AK025451  | 2334.154  | 1865.288  | AK021624  | 648.143   | 453.004   |
| NM_01657E | 3607.982  | 3076.454  | NM_002783 | 1196.692  | 1227.669  | AF278605  | 6092.694  | 4581.618  |
| NM_015832 | 9948.419  | 8771.598  | NM_001047 | 667.217   | 705.631   | NM_006497 | 4272.05   | 3367.223  |
| NM_01431E | 2557.563  | 1959.531  | AK024396  | 1146.872  | 1385.383  | AK022329  | 171.709   | 90.529    |
| NM_00486E | 4728.581  | 5323.176  | U58514    | 1582.921  | 1287.169  | AL133599  | 572.463   | 507.954   |
| NM_00720E | 10178.464 | 10814.558 | NM_000544 | 1484.307  | 1608.376  | AK022380  | 227.739   | 198.92    |
| BF130622  | 6365.331  | 7281.312  | NM_004644 | 420.331   | 526.087   | NM_016472 | 1503.694  | 1253.28   |
| BU165106  | 1301.584  | 1196.596  | AV681967  | 1605.825  | 904.623   | AF086064  | 250.128   | 252.846   |
| AF038202  | 1040.421  | 990.48    | NM_01825C | 1928.719  | 1034.84   | AK023042  | 1306.252  | 1308.021  |
| AB040925  | 643.76    | 669.419   | NM_016553 | 6287.263  | 8355.047  | AK026429  | 203.76    | 251.172   |
| BC008837  | 920.672   | 1157.13   | AB023136  | 930.844   | 1369.794  | NM_01655C | 2712.38   | 1886.403  |
| NM_001861 | 625.61    | 676.503   | NM_00379E | 28721.619 | 24567.482 | AK024813  | 3243.197  | 2708.69   |
| AK025558  | 5808.435  | 5998.243  | NM_014232 | 5409.944  | 9295.15   | AJ227909  | 5589.9    | 3785.6    |
| AK024355  | 1164.611  | 1240.573  | NM_005701 | 1233.933  | 2168.028  | AK021880  | 385.03    | 708.862   |
| NM_001864 | 27003.57  | 22694.148 | NM_00681E | 34825.258 | 40193.668 | CY3Cy5    | 1652.958  | 312.592   |
| NM_003477 | 3185.503  | 2637.262  | NM_014744 | 4556.115  | 6261.443  | BG698522  | 1658.361  | 2057.829  |
| NM_002654 | 35146.258 | 27603.928 | AF146759  | 728.567   | 1436.152  | AA152346  | 331.263   | 417.369   |
| NM_01547E | 764.25    | 558.666   | AB032993  | 4694.533  | 4917.35   | L15189    | 634.941   | 788.979   |
| NM_020382 | 2916.784  | 1917.994  | NM_000854 | 3879.668  | 3842.588  | AB023420  | 4394.929  | 5789.049  |
| NM_007192 | 6494.298  | 7570.371  | AL117423  | 4468.698  | 4947.858  | BI822179  | 479.688   | 482.57    |
| AB002337  | 7735.167  | 6188.956  | NM_002084 | 2079.31   | 1930.271  | AF022912  | 2394.177  | 2463.067  |
| NM_014933 | 3596.57   | 4037.409  | NM_00475C | 1907.512  | 1998.328  | AA477428  | 10379.368 | 13531.057 |
| NM_00345E | 3719.768  | 3670.797  | NM_00729E | 3082.425  | 2851.18   | AA156342  | 483.091   | 465.62    |
| AB029016  | 1864.173  | 2424.517  | NM_003651 | 11335.92  | 6489.644  | R45594    | 8006.869  | 9419.906  |
| AL049390  | 1406.559  | 1295.025  | NM_003262 | 2313.13   | 2372.785  | H46425    | 335.936   | 292.575   |
| AK000584  | 5740.119  | 6026.229  | AK022832  | 2392.305  | 558.072   | AI355949  | 232.743   | 274.693   |
| AJ297363  | 1226.471  | 857.168   | NM_014641 | 2685.305  | 2071.92   | AA278152  | 5317.703  | 6989.678  |
| AK026379  | 2464.274  | 2854.314  | NM_004462 | 14868.071 | 10795.744 | H75530    | 733.944   | 1105.649  |
| AK022965  | 2181.567  | 2492.802  | AB020664  | 2646.656  | 1653.017  | NM_00417E | 1377.565  | 1597.437  |
| AK024278  | 5857.484  | 6289.853  | NM_00664C | 14935.814 | 11543.099 | NM_00454E | 13091.104 | 13122.156 |
| NM_018022 | 1191.126  | 1248.455  | NM_000343 | 750.281   | 618.361   | SR5       | 2479.092  | 2186.198  |
| AB056722  | 13854.387 | 11609.295 | NM_019112 | 2878.375  | 1641.533  | SR7       | 2304.617  | 15685.814 |
| NM_013242 | 6099.782  | 5510.945  | NM_01233E | 12180.068 | 8102.398  | SR9       | 8919.866  | 1234.451  |
| NM_01206E | 13252.831 | 8493.011  | NM_020161 | 439.602   | 437.273   | CY3Cy5    | 930.645   | 224.417   |
| AF052168  | 11118.414 | 7875.86   | NM_02024E | 1405.436  | 1115.682  | NM_00131E | 3041.374  | 5093.94   |
| NM_01465C | 1334.079  | 1089.215  | NM_000084 | 1623.326  | 1361.707  | AF286095  | 1092.063  | 1301.898  |
| AK022632  | 1654.766  | 1425.369  | NM_016354 | 1806.191  | 1722.774  | NM_00087E | 340.017   | 389.467   |
| AK021554  | 2074.281  | 1906.711  | NM_00303E | 1517.223  | 1681.562  | S66407    | 444.09    | 621.905   |
| NM_02023E | 2881.513  | 2730.715  | NM_01815E | 3711.247  | 4710.413  | NM_00425E | 9562.292  | 8718.382  |
| AL109681  | 708.875   | 415.655   | AL050358  | 1121.395  | 888.018   | NM_001981 | 1267.499  | 1634.369  |
| AL162039  | 5036.671  | 4954.08   | NM_004731 | 736.935   | 394.778   | NM_014654 | 350.681   | 101.676   |
| AK024896  | 2428.78   | 2292.366  | AB023139  | 3599.145  | 3363.82   | NM_00158E | 9708.078  | 9017.946  |
| AK021912  | 169.992   | 1727.56   | NM_01788E | 3109.082  | 2564.322  | AK026108  | 1661.37   | 1537.889  |
| AK095125  | 657.062   | 873.714   | NM_00094E | 5072.739  | 3149.469  | NM_00637E | 876.34    | 875.133   |
| AK024059  | 2658.86   | 3027.533  | NM_01607C | 1742.547  | 2513.03   | BF571428  | 1066.91   | 1255.416  |
| AB007928  | 1778.42   | 1550.603  | NM_01639C | 1765.226  | 2866.124  | AB037723  | 811.252   | 726.213   |
| AK023645  | 881.488   | 1140.161  | NM_016101 | 5866.396  | 6459.08   | NM_00624E | 2435.463  | 2509.021  |
| D83543    | 1190.426  | 902.232   | NM_00585E | 30961.158 | 42155.02  | U58096    | 10514.138 | 10501.173 |
| NM_01693C | 3280.585  | 3519.617  | NM_020313 | 956.085   | 950.792   | NM_01692E | 1987.421  | 1761.014  |

|           |           |           |           |           |           |           |           |           |
|-----------|-----------|-----------|-----------|-----------|-----------|-----------|-----------|-----------|
| AJ001861  | 1606.171  | 1558.292  | NM_014628 | 5374.297  | 3979.971  | NM_018195 | 21.825    | 1169.143  |
| X64981    | 2207.735  | 1874.693  | AK025630  | 1498.484  | 1090.5    | NM_001635 | 3936.183  | 4092.03   |
| X75692    | 4181.223  | 4322      | AL365404  | 14508.864 | 10950.174 | NM_006555 | 2273.389  | 3190.389  |
| X64988    | 1010.246  | 1102.697  | AK022907  | 4416.133  | 3438.625  | NM_002445 | 655.393   | 685.389   |
| Y10511    | 5774.851  | 5845.531  | NM_014793 | 2750.381  | 1780.436  | NM_017805 | 276.135   | 185.457   |
| M26147    | 4698.581  | 3949.924  | NM_004245 | 778.289   | 537.65    | AK023202  | 1372.704  | 1611.916  |
| AF018254  | 606.277   | 868.08    | NM_002685 | 3088.596  | 1722.048  | D63877    | 1277.286  | 1439.439  |
| NM_016240 | 2117.686  | 2506.841  | AK024504  | 1523.535  | 833.38    | AF131760  | 465.434   | 505.021   |
| AK026459  | 949.408   | 822.912   | AF039023  | 2647.876  | 2387.186  | NM_018695 | 804.191   | 758.474   |
| AK000027  | 575.643   | 711.474   | NM_005511 | 4412.654  | 3648.028  | NM_006461 | 1703.514  | 2187.793  |
| AK026416  | 33643.133 | 23899.266 | NM_014695 | 12834.009 | 8418.101  | NM_018201 | 1133.128  | 1105.468  |
| AK025797  | 822.331   | 546.024   | NM_018475 | 2939.477  | 1271.98   | NM_014435 | 379.243   | 179.646   |
| AK000019  | 1869.216  | 2219.874  | X52005    | 6374.947  | 3269.422  | NM_003764 | 1716.161  | 1636.283  |
| AK000645  | 623.633   | 561.053   | AK024396  | 1092.192  | 1379.41   | NM_006793 | 7643.314  | 9226.796  |
| AK024947  | 1157.885  | 874.021   | U58514    | 1215.3    | 1037.141  | NM_001535 | 965.815   | 635.58    |
| NM_017503 | 893.595   | 654.514   | M58603    | 7174.774  | 7734.278  | X97261    | 4910.675  | 22588.398 |
| AK024606  | 3842.488  | 3712.026  | AA443286  | 573.438   | 600.117   | NM_001465 | 1309.604  | 1851.451  |
| NM_016417 | 18903.488 | 22807.385 | AB003334  | 8355.022  | 10122.444 | D87666    | 35164.977 | 28788.418 |
| NM_019105 | 1064.941  | 1146.732  | AW276315  | 756.452   | 906.086   | X73079    | 8479.348  | 9440.667  |
| AL080118  | 6493.204  | 5161.453  | AA490737  | 888.189   | 1121.417  | NM_019091 | 717.296   | 667.822   |
| AL049378  | 4441.5    | 3932.014  | AI878886  | 20726.174 | 17847.334 | AF264781  | 535.233   | 520.565   |
| L09086    | 1434.948  | 915.662   | BG697179  | 7593.402  | 5754.736  | AK024215  | 1508.716  | 1648.553  |
| AK021832  | 1098.135  | 1068.299  | BM012504  | 3923.485  | 3884.659  | AB044661  | 1968.307  | 1939.543  |
| AK021505  | 1719.461  | 1632.953  | AA664145  | 1232.432  | 773.655   | NM_000605 | 2109.54   | 2129.029  |
| AK021598  | 5678.352  | 4533.216  | X72308    | 6624.302  | 3098.66   | NM_016124 | 2417.811  | 2359.347  |
| AJ012498  | 468.688   | 232.309   | R48168    | 12843.005 | 5770.896  | U53530    | 809.473   | 691.192   |
| NM_005973 | 11705.706 | 10406.353 | NM_003942 | 2153.99   | 1178.599  | NM_006595 | 1314.192  | 1308.647  |
| X04547    | 2338.764  | 2625.985  | NM_004452 | 773.563   | 377.712   | NM_015945 | 953.055   | 1242.188  |
| AK025823  | 2716.274  | 2506.271  | AB040954  | 2755.502  | 750.418   | NM_003054 | 1532.579  | 1328.642  |
| AK026691  | 905.984   | 913.425   | NM_002081 | 849.436   | 307.556   | NM_003042 | 333.391   | 176.96    |
| AL359941  | 3849.366  | 3437.106  | NM_002084 | 1372.321  | 264.57    | NM_002215 | 4001.735  | 4245.798  |
| U52076    | 650.747   | 1002.926  | D16892    | 14266.485 | 3376.392  | AF159141  | 1510.314  | 1403.129  |
| AF035278  | 1869.245  | 1424.357  | NM_004750 | 1308.616  | 500.235   | NM_016455 | 5645.379  | 4498.705  |
| AL050202  | 1255.194  | 993.47    | NM_007295 | 2948.371  | 1972.428  | AK022233  | 921.311   | 1484.265  |
| U32999    | 11703.256 | 9216.184  | NM_000591 | 1190.755  | 1239.142  | AK026410  | 3922.026  | 3829.042  |
| U66052    | 8814.676  | 6256.307  | NM_000565 | 1128.305  | 853.332   | NM_014637 | 1614.058  | 1637.717  |
| AK024156  | 1248.142  | 803.72    | NM_017767 | 5418.201  | 4023.51   | NM_013375 | 5589.658  | 5933.533  |
| AF086288  | 1183.888  | 1270.961  | AK024848  | 4791.796  | 2945.809  | AF113208  | 3786.31   | 3923.127  |
| AK023109  | 2020.394  | 1736.665  | NM_004852 | 1495.516  | 809.405   | NM_006153 | 2262.691  | 2535.277  |
| NM_005293 | 25031.689 | 18487.652 | NM_000543 | 1214.298  | 858.206   | NM_012164 | 1693.755  | 1577.098  |
| AF133332  | 6192.696  | 4798.924  | U06699    | 4486.086  | 2125.996  | AB011156  | 254.888   | 416.078   |
| AK022805  | 312.624   | 593.396   | AJ290954  | 13550.123 | 4810.364  | NM_018075 | 486.809   | 694.251   |
| NM_001085 | 10362.814 | 9487.079  | AK025451  | 2046.073  | 448.084   | NM_004760 | 8265.896  | 7829.978  |
| BC015991  | 11199.023 | 11414.296 | NM_002783 | 839.024   | 318.986   | NM_006752 | 1780.914  | 1607.071  |
| U94902    | 437.582   | 554.34    | NM_000084 | 769.426   | 212.167   | NM_004425 | 341.315   | 184.553   |
| U46214    | 2669.574  | 2960.059  | NM_016354 | 630.387   | 244.639   | NM_006805 | 1870.792  | 1839.345  |
| NM_000310 | 9223.875  | 11354.218 | NM_003035 | 691.042   | 310.391   | NM_013943 | 199.49    | 707.91    |
| AF161343  | 3852.03   | 3665.075  | NM_018155 | 3273.942  | 1587.863  | NM_001635 | 4144.588  | 5570.092  |
| NM_004765 | 7944.548  | 8962.904  | AL050358  | 1939.629  | 2370      | H39560    | 201.679   | 427.787   |
| AK022246  | 1757.157  | 1035.535  | NM_004731 | 1352.638  | 812.527   | BG698522  | 1051.46   | 953.272   |
| X75684    | 623.903   | 632.328   | NM_000544 | 1066.88   | 662.172   | L15189    | 476.048   | 446.463   |
| AF113701  | 5309.855  | 4109.943  | NM_004644 | 614.583   | 840.989   | AB023420  | 4155.37   | 4269.642  |
| Y11158    | 1997.694  | 1359.758  | AV681967  | 2096.638  | 2123.436  | BI822179  | 403.299   | 323.341   |

|           |           |           |           |           |           |           |           |           |
|-----------|-----------|-----------|-----------|-----------|-----------|-----------|-----------|-----------|
| NM_006771 | 18299.756 | 11547.715 | NM_018250 | 2282.651  | 2796.474  | AF022912  | 2474.109  | 2815.68   |
| L37702    | 17526.965 | 16164.024 | NM_016553 | 6834.132  | 6375.482  | AA477428  | 10842.589 | 13500.111 |
| AK022812  | 3121.3    | 2214.293  | AB023136  | 805.519   | 1050.193  | AA156342  | 449.145   | 443.018   |
| U79301    | 7314.438  | 6642.802  | NM_003795 | 28701.318 | 25462.018 | R45594    | 7919.238  | 7167.437  |
| AK022260  | 5240.072  | 5080.815  | NM_014232 | 4627.158  | 5283.975  | H46425    | 227.783   | 148.042   |
| M32219    | 10538.394 | 15317.819 | NM_005701 | 978.053   | 783.473   | AA278152  | 6249.649  | 7377.128  |
| BC018868  | 1404.739  | 2009.469  | NM_006819 | 35717.594 | 21112.365 | H75530    | 777.347   | 541.87    |
| AF007128  | 11479.41  | 23065.428 | NM_014744 | 2675.393  | 1598.409  | NM_004176 | 1464.673  | 1413.065  |
| CY3Cy5    | 2564.767  | 229.041   | AB032993  | 4771.25   | 4337.107  | NM_004548 | 14026.518 | 13260.572 |
| AI351740  | 3051.737  | 2932.506  | NM_000854 | 4025.326  | 2510.271  | AK000554  | 1346.938  | 1292.762  |
| AA444051  | 469.874   | 672.007   | AL117423  | 4145.752  | 4347.007  | NM_006472 | 798.395   | 957.729   |
| NM_007164 | 1940.489  | 2530.009  | NM_002685 | 2263.431  | 411.723   | NM_001538 | 1085.217  | 770.505   |
| BE783826  | 23979.521 | 27814.283 | AK024504  | 696.081   | 251.264   | X97261    | 5354.972  | 19102.98  |
| X04827    | 1005.298  | 1222.171  | AF039023  | 1406.644  | 358.353   | NM_001468 | 1117.815  | 1263.848  |
| H07088    | 595.153   | 676.639   | NM_005511 | 2866.399  | 1001.691  | D87666    | 37673.012 | 35873.992 |
| AI004656  | 395.712   | 557.76    | NM_014698 | 6154.701  | 8281.58   | NM_001315 | 2229.495  | 2504.555  |
| BC020596  | 3887.784  | 5901.375  | NM_018475 | 3372.555  | 4105.631  | AF286095  | 726.87    | 724.029   |
| M16801    | 481.796   | 750.895   | NM_003262 | 2301.285  | 2475.596  | NM_000878 | 254.453   | 290.496   |
| NM_145904 | 13027.79  | 16253.639 | NM_020125 | 485.281   | 1200.148  | S66407    | 432.608   | 458.584   |
| NM_021968 | 432.63    | 702.071   | AK022832  | 3324.777  | 3482.211  | NM_004258 | 8090.29   | 7596.958  |
| SR2       | 47048.035 | 42695.855 | NM_014641 | 2847.063  | 2592.084  | NM_001981 | 1185.705  | 1632.35   |
| SR4       | 11531.894 | 9046.76   | NM_004462 | 15080.937 | 9527.946  | NM_001588 | 4474.284  | 3801.495  |
| SR6       | 1597.04   | 1460.089  | AB020664  | 2916.838  | 1337.118  | AK026108  | 1108.194  | 1210.76   |
| SR8       | 6170.188  | 16155.749 | NM_006640 | 15793.595 | 11355.171 | NM_006379 | 816.697   | 769.461   |
| SR10      | 21853.799 | 5857.117  | NM_000343 | 855.185   | 535.362   | BF571428  | 892.836   | 915.282   |
| CY3Cy5    | 2461.978  | 498.734   | NM_019112 | 3160.043  | 2020.047  | AB037723  | 774.253   | 857.42    |
| NM_002418 | 321.403   | 458.232   | NM_012336 | 11873.713 | 6824.468  | NM_006246 | 2498.887  | 2621.645  |
| NM_004485 | 1456.322  | 1333.241  | NM_020246 | 860.929   | 389.391   | U58096    | 11301.315 | 11020.126 |
| NM_012419 | 483.271   | 608.276   | NM_003942 | 1618.294  | 384.917   | NM_016929 | 1864.885  | 1617.403  |
| NM_013296 | 5092.591  | 6566.583  | NM_004452 | 472.976   | 232.842   | NM_012323 | 355.682   | 221.899   |
| AL117478  | 518.95    | 546.404   | AB040954  | 2514.949  | 2430.758  | NM_015948 | 878.345   | 747.369   |
| NM_005307 | 989.817   | 1572.796  | NM_002081 | 834.31    | 1599.394  | NM_003054 | 1378.087  | 1269.231  |
| NM_005958 | 998.329   | 1665.089  | AB023139  | 3217.031  | 6238.889  | NM_003042 | 390.831   | 313.711   |
| NM_013436 | 1324.817  | 2182.619  | NM_017885 | 2762.566  | 5262.145  | NM_002219 | 3904.701  | 4275.394  |
| AF225426  | 577.148   | 889.5     | D80004    | 945.521   | 1604.779  | AF182404  | 648.754   | 759.093   |
| NM_005208 | 5249.151  | 5886.321  | NM_016070 | 2024.001  | 3002.712  | NM_006555 | 2068.905  | 2244.046  |
| NM_000421 | 777.93    | 1267.066  | NM_016390 | 1865.546  | 2214.353  | NM_014521 | 244.902   | 427.387   |
| AK025687  | 9517.039  | 14852.624 | NM_016101 | 4721.514  | 5295.134  | NM_002445 | 380.011   | 534.405   |
| NM_002226 | 956.916   | 925.986   | NM_005859 | 21959.529 | 17165.08  | NM_017809 | 238.426   | 327.739   |
| X84370    | 6414.471  | 8401.854  | NM_020313 | 918.435   | 643.493   | AK023202  | 1333.572  | 1730.517  |
| NM_004039 | 903.936   | 1174.776  | NM_014628 | 5191.408  | 4433.534  | D63877    | 1451.898  | 1668.146  |
| AB014558  | 656.893   | 631.728   | AK025630  | 1465.52   | 1159.107  | AF131760  | 380.266   | 443.301   |
| NM_006287 | 681.903   | 823.164   | AL365404  | 13161.443 | 13654.059 | NM_018698 | 632.201   | 746.405   |
| NM_000118 | 1950.079  | 1732.06   | AK022907  | 4330.414  | 3032.456  | NM_006461 | 1581.48   | 1805.86   |
| NM_000913 | 386.516   | 542.749   | NM_014793 | 2835.797  | 2372.01   | NM_018201 | 904.144   | 846.729   |
| NM_001298 | 51342.605 | 52996.891 | NM_000543 | 836.321   | 224       | NM_003764 | 2432.937  | 2779.439  |
| BG325046  | 2262.096  | 1794.727  | U06699    | 3801.222  | 818.983   | NM_006793 | 7645.596  | 8891.148  |
| AK026248  | 826.447   | 762.553   | AJ290954  | 11022.741 | 3526.406  | NM_018079 | 506.473   | 568.862   |
| NM_004578 | 1191.543  | 1101.964  | AK025451  | 1738.61   | 1786.566  | NM_004760 | 7753.736  | 7892.575  |
| NM_000647 | 267.067   | 288.016   | NM_002783 | 841.541   | 1454.741  | NM_006752 | 1753.625  | 1815.81   |
| AB046793  | 516.343   | 376.528   | X52005    | 7209.974  | 17061.113 | NM_006809 | 1710.831  | 2106.326  |
| NM_017604 | 1592.943  | 1470.791  | AK024396  | 839.919   | 1861.189  | AF149304  | 244.699   | 425.792   |
| NM_017738 | 5810.65   | 4739.621  | U58514    | 1059.951  | 1556.101  | NM_012095 | 2402.225  | 3280.157  |



|           |           |           |           |           |           |           |           |           |
|-----------|-----------|-----------|-----------|-----------|-----------|-----------|-----------|-----------|
| NM_016557 | 821.968   | 1050.23   | W74254    | 18916.748 | 23963.711 | X73079    | 8000.359  | 9263.1    |
| NM_000623 | 2206.781  | 3078.052  | AA443286  | 658.665   | 512.638   | NM_019091 | 583.526   | 523.426   |
| AF161348  | 1376.926  | 1805.74   | AB003334  | 8110.941  | 8061.721  | AF264781  | 425.153   | 567.745   |
| NM_018467 | 7537.162  | 8775.381  | AW276315  | 703.792   | 744.626   | NM_002456 | 348.573   | 69.977    |
| NM_006066 | 750.999   | 936.155   | AA490737  | 748.269   | 403.496   | AK024215  | 1553.823  | 1426.49   |
| U16752    | 392.691   | 493.058   | AI878886  | 19450.775 | 10953.786 | AB044661  | 1710.848  | 1779.519  |
| NM_002036 | 8718.347  | 12258.302 | BG697179  | 7822.125  | 5119.753  | NM_000606 | 3293.847  | 4755.446  |
| NM_005729 | 6553.102  | 7958.26   | NM_002136 | 45135.273 | 30432.967 | NM_016124 | 5341.787  | 14345.694 |
| NM_015493 | 1591.741  | 2143.772  | BM012504  | 3874.304  | 3575.207  | NM_019079 | 244.734   | 207.653   |
| NM_003747 | 1392.239  | 1511.145  | AA664145  | 1310.228  | 762.431   | U53530    | 922.642   | 821.928   |
| AB037744  | 978.652   | 913.79    | X72308    | 7804.686  | 6134.596  | NM_006596 | 1482.804  | 1246.862  |
| AF141901  | 1092.705  | 1074.549  | R48168    | 10571.759 | 2657.236  | NM_004176 | 1378.39   | 1235.491  |
| NM_007006 | 991.433   | 1197.662  | AB032993  | 3566.222  | 495.695   | NM_004546 | 13339.254 | 12036.677 |
| AL109708  | 657.002   | 496.343   | NM_000854 | 2578.187  | 519.284   | AK000554  | 1140.142  | 1238.547  |
| L29143    | 447.912   | 418.543   | AL117423  | 2869.402  | 1158.183  | NM_006472 | 358.286   | 652.787   |
| AF234532  | 1290.523  | 1102.712  | NM_002084 | 2072.188  | 3094.092  | NM_002826 | 1191.623  | 1256.293  |
| AF099740  | 1065.766  | 1267.653  | D16892    | 18196.734 | 25837.695 | AF159141  | 1366.306  | 1468.516  |
| NM_006117 | 15056.173 | 15874.079 | NM_004750 | 1587.865  | 2772.075  | NM_016456 | 4746.319  | 4042.13   |
| NM_002225 | 1874.945  | 1647.483  | NM_007295 | 2730.547  | 3886.642  | AK022233  | 1039.997  | 1362.537  |
| NM_006229 | 393.375   | 477.225   | AK023317  | 262.434   | 1187.533  | AK026410  | 3822.47   | 3391.44   |
| NM_015415 | 17211.611 | 15822.017 | NM_003651 | 9287.447  | 10322.532 | NM_014637 | 1417.223  | 1565.654  |
| NM_004897 | 2498.427  | 2113.304  | NM_000591 | 1060.445  | 879.766   | NM_013379 | 5426.285  | 6163.997  |
| NM_002555 | 1335.883  | 1545.902  | NM_000565 | 626.292   | 497.395   | AF113208  | 3705.402  | 4718.363  |
| AF225418  | 841.987   | 1225.417  | NM_002019 | 2216.258  | 2667.341  | NM_012164 | 1668.44   | 1862.876  |
| NM_000309 | 2221.446  | 3052.635  | AF253318  | 440.297   | 876.742   | AB011156  | 252.652   | 346.631   |
| NM_004526 | 20432.18  | 29266.002 | NM_017767 | 5529.133  | 4600.256  | NM_006246 | 2343.252  | 1916.378  |
| NM_002450 | 14390.993 | 31848.92  | AK024848  | 4297.764  | 3629.894  | U58096    | 11477.45  | 9332.38   |
| NM_001686 | 585.052   | 1000.546  | NM_004852 | 1077.709  | 642.126   | NM_016929 | 2070.181  | 1782.039  |
| NM_004976 | 690.297   | 920.338   | NM_000343 | 272.113   | 178.003   | NM_013943 | 297.053   | 282.034   |
| NM_000705 | 784.566   | 645.474   | NM_019112 | 1570.71   | 368.309   | NM_001639 | 3783.188  | 4265.352  |
| NM_016577 | 711.524   | 946.331   | NM_012336 | 8747.367  | 3468.761  | BG698522  | 880.809   | 891.969   |
| AK023107  | 6725.715  | 5546.488  | NM_020161 | 850.364   | 760.123   | AA152346  | 241.58    | 261.099   |
| NM_004580 | 3950.426  | 3721.301  | NM_020246 | 1436.267  | 2594.449  | L15189    | 452.041   | 441.558   |
| NM_020387 | 27052.715 | 21207.051 | NM_000084 | 1739.134  | 2095.513  | AB023420  | 3964.931  | 3603.416  |
| NM_007246 | 2174.493  | 2630.237  | NM_016354 | 1499.416  | 2494.144  | BI822179  | 459.959   | 226.575   |
| AF150735  | 3486.542  | 3959.763  | NM_003036 | 1405.786  | 2182.381  | AF022912  | 2386.824  | 2265.209  |
| NM_018183 | 1506.705  | 2047.789  | NM_018155 | 3620.377  | 6724.563  | AA477428  | 9629.139  | 11761.628 |
| NM_012382 | 3883.015  | 4270.803  | AL050358  | 1231.665  | 2623.703  | AA156342  | 787.407   | 764.566   |
| BF038366  | 939.15    | 893.199   | NM_004731 | 855.72    | 1600.451  | AI355949  | 279.674   | 363.434   |
| NM_012304 | 771.027   | 580.692   | NM_000544 | 1452.642  | 2316.275  | AA278152  | 5748.773  | 7837.539  |
| NM_016440 | 12629.571 | 16304.781 | NM_004644 | 598.272   | 1024.574  | H75530    | 763.517   | 754.704   |
| NM_007194 | 3151.304  | 3806.973  | AV681967  | 1940.879  | 1945.36   | NM_003764 | 1926.705  | 1275.154  |
| NM_000314 | 6409.971  | 7305.727  | NM_018250 | 1994.642  | 1416.845  | NM_004829 | 257.711   | 231.245   |
| S74620    | 2120.613  | 1749.137  | NM_016553 | 6154.986  | 4730.945  | NM_006793 | 8194.982  | 8671.171  |
| AF305239  | 852.957   | 891.74    | AB023136  | 675.092   | 530.754   | NM_001536 | 1238.197  | 493.222   |
| NM_002827 | 3197.438  | 2377.699  | NM_003795 | 26673.252 | 23715.553 | X97261    | 5099.028  | 21862.912 |
| NM_001946 | 905.223   | 657.349   | NM_014232 | 4589.6    | 5655.17   | NM_001466 | 888.573   | 930.204   |
| NM_000159 | 51037.02  | 49268.766 | NM_005701 | 1197.962  | 1297.767  | D87666    | 37198.516 | 33767.105 |
| NM_014636 | 1144.482  | 1012.43   | NM_006819 | 33079.27  | 25662.381 | NM_001315 | 2156.486  | 2568.455  |
| NM_006287 | 337.319   | 427.013   | NM_014744 | 2198.768  | 1279.738  | AF286095  | 611.723   | 693.608   |
| NM_000118 | 1524.435  | 1230.177  | AF146759  | 515.902   | 295.159   | S66407    | 288.759   | 276.265   |
| NM_000913 | 413.437   | 610.686   | AL365404  | 11196.907 | 2159.319  | NM_004256 | 7476.416  | 6870.439  |
| NM_001296 | 52189.227 | 57314.289 | AK022907  | 3333.154  | 621.698   | NM_001981 | 1356.022  | 1548.531  |

|           |           |           |           |           |           |           |          |          |
|-----------|-----------|-----------|-----------|-----------|-----------|-----------|----------|----------|
| BG325046  | 2007.565  | 1662.525  | NM_014793 | 1737.972  | 331.869   | NM_001585 | 3828.042 | 3618.417 |
| AI351740  | 3361.938  | 3041.34   | NM_004245 | 1551.133  | 1937.028  | AK026108  | 1380.235 | 1221.126 |
| AA444051  | 551.593   | 416.26    | NM_003241 | 893.632   | 1626.55   | NM_006375 | 883.875  | 695.54   |
| NM_007164 | 2560.798  | 2265.765  | NM_002685 | 3530.96   | 6203.961  | BF571428  | 777.055  | 636.575  |
| BE783826  | 33192.691 | 29513.641 | AK024504  | 1708.986  | 2431.095  | AB037723  | 665.152  | 453.604  |
| X04827    | 1246.465  | 1227.708  | AF039023  | 3016.136  | 5628.586  | NM_000606 | 1582.321 | 911.041  |
| H07088    | 750.662   | 786.791   | NM_005511 | 3859.626  | 6058.575  | NM_016124 | 2099.884 | 1986.787 |
| AI004656  | 813.714   | 508.331   | NM_014698 | 13584     | 23816.047 | U53530    | 778.739  | 670.119  |
| BC020596  | 1361.359  | 1599.8    | NM_018475 | 4118.984  | 6769.682  | NM_006598 | 1238.94  | 1327.531 |
| AF116606  | 48417.473 | 57621.422 | NM_003262 | 2362.632  | 3373.489  | NM_015948 | 825.603  | 993.151  |
| X98922    | 4140.463  | 4685.45   | NM_020125 | 524.358   | 592.723   | NM_003054 | 1377.979 | 1469.048 |
| AK098435  | 4568.744  | 5100.999  | AK022832  | 2978.217  | 2453.181  | NM_003042 | 255.942  | 228.403  |
| AK092872  | 3215.643  | 3118.635  | NM_014641 | 2682.198  | 2282.99   | NM_002219 | 3647.953 | 3887.76  |
| M16801    | 473.928   | 765.609   | NM_004462 | 16237.005 | 13650.803 | AF182404  | 839.049  | 1082.149 |
| NM_145904 | 14603.607 | 13985.258 | AB020664  | 2134.113  | 946.528   | NM_006555 | 1717.007 | 1725.719 |
| NM_013334 | 3398.691  | 2485.227  | NM_006640 | 13530.074 | 3978.023  | NM_002445 | 429.741  | 298.65   |
| AB037744  | 1297.926  | 1168.978  | NM_000857 | 830.747   | 236.49    | NM_017805 | 287.956  | 152.775  |
| AF141901  | 1071.919  | 674.1     | L20688    | 43622.488 | 7564.444  | AK023202  | 1182.301 | 1412.417 |
| NM_007008 | 795.661   | 787.658   | X69111    | 12337.855 | 1917.084  | D63877    | 1936.371 | 1995.986 |
| AL109708  | 818.65    | 545.975   | AB037799  | 3218.745  | 5465.09   | AF131760  | 374.322  | 331.553  |
| AF234532  | 1165.715  | 1126.4    | AB007950  | 11389.39  | 20831.004 | NM_018698 | 607.085  | 799.608  |
| NM_002418 | 650.745   | 445.293   | AL133111  | 631.497   | 2033.287  | NM_006461 | 1385.205 | 1667.708 |
| NM_004485 | 1979.401  | 1512.154  | AK025593  | 2759.643  | 4925.49   | NM_018201 | 890.405  | 863.023  |
| NM_012419 | 535.684   | 596.701   | AB018304  | 1861.152  | 2646.67   | NM_014438 | 531.251  | 770.055  |
| NM_013296 | 6757.428  | 6976.097  | NM_007061 | 10065.545 | 16512.73  | NM_006153 | 2144     | 1906.458 |
| AL117478  | 1064.039  | 1067.853  | AB040954  | 3197.354  | 4908.694  | NM_012164 | 1478.052 | 1677.201 |
| NM_005307 | 1204.752  | 1422.993  | NM_002081 | 708.295   | 986.631   | AB011156  | 282.092  | 310.099  |
| NM_005958 | 1338.284  | 1555.145  | AB023139  | 3289.333  | 4632.835  | NM_018079 | 452.338  | 386.691  |
| NM_013436 | 1371.669  | 1593.086  | NM_017885 | 3550.174  | 3201.847  | NM_004760 | 8173.1   | 8072.287 |
| AF225426  | 657.655   | 925.836   | D80004    | 924.292   | 1398.359  | NM_006752 | 1803.949 | 1881.767 |
| NM_005208 | 6397.909  | 6292.704  | NM_000946 | 5270.803  | 3775.907  | NM_004428 | 210.816  | 231.991  |
| NM_000421 | 862.419   | 659.641   | NM_016070 | 1739.255  | 2065.708  | NM_006805 | 1846.068 | 2161.792 |
| AF218941  | 2312.017  | 2662.626  | NM_016390 | 1643.311  | 1978.039  | AF149304  | 269.468  | 203.922  |
| AL137264  | 3841.918  | 4145.653  | NM_016101 | 4934.868  | 5093.503  | NM_012095 | 2391.445 | 2218.82  |
| NM_002226 | 1513.477  | 1821.571  | NM_005859 | 35988.445 | 32003.414 | NM_016438 | 226.964  | 294.544  |
| X84370    | 5946.317  | 5883.73   | NM_020313 | 896.349   | 1140.213  | X73079    | 8596.613 | 7816.61  |
| NM_004039 | 1116.317  | 1234.723  | NM_014628 | 5270.116  | 3872.182  | NM_019091 | 559.395  | 587.503  |
| AB014558  | 877.939   | 787.139   | AK025630  | 724.881   | 286.448   | AF264781  | 494.018  | 410.769  |
| NM_016577 | 1042.407  | 853.788   | NM_005761 | 479.081   | 215.912   | AK024215  | 1461.052 | 1198.091 |
| AK023107  | 6704.409  | 5481.796  | NM_014718 | 1724.079  | 331.003   | AB044661  | 1810.956 | 1508.644 |
| NM_006854 | 8408.411  | 7263.1    | AB002298  | 486.616   | 398.323   | NM_015376 | 619.377  | 721.32   |
| NM_004580 | 4004.467  | 3132.299  | AK024488  | 7218.479  | 14316.568 | NM_001176 | 306.307  | 361.399  |
| NM_020387 | 35766.008 | 29520.592 | AK023249  | 43381.711 | 50859.102 | NM_016536 | 406.929  | 628.84   |
| NM_007246 | 1288.757  | 1323.509  | NM_017442 | 5840.751  | 9897.788  | NM_004066 | 251.114  | 222.239  |
| AK026248  | 728.8     | 595.65    | NM_000743 | 1065.223  | 1938.312  | NM_004941 | 2544.002 | 1977.309 |
| NM_004578 | 1399.865  | 1038.178  | NM_007218 | 2249.628  | 3028.102  | AF151831  | 1054.173 | 962.372  |
| NM_000647 | 395.098   | 268.65    | Z25436    | 1292.64   | 1878.539  | AF083255  | 2272.122 | 2611.874 |
| AB046793  | 1135.353  | 981.752   | NM_005275 | 4614.648  | 5936.851  | AK022605  | 444.24   | 427.49   |
| NM_017604 | 1891.416  | 1711.026  | NM_002005 | 13035.613 | 12886.347 | AK000554  | 1359.975 | 1484.907 |
| NM_017738 | 7941.873  | 6713.752  | NM_012324 | 3321.612  | 2246.258  | NM_006472 | 336.072  | 400.537  |
| NM_016557 | 1666.037  | 1425.818  | AL137352  | 982.773   | 639.222   | NM_002826 | 1241.845 | 1148.205 |
| NM_000623 | 2634.406  | 2469.368  | NM_014749 | 1120.536  | 891.592   | AF159141  | 1317.576 | 1108.305 |
| AF161348  | 1468.43   | 1747.305  | NM_004489 | 2955.155  | 2535.602  | NM_016458 | 5581.988 | 4453.319 |

|           |           |           |           |           |           |           |           |           |
|-----------|-----------|-----------|-----------|-----------|-----------|-----------|-----------|-----------|
| NM_018467 | 8997.955  | 8701.125  | BI461699  | 873.445   | 1072.458  | AK022233  | 1408.25   | 1404.349  |
| NM_000880 | 774.031   | 956.75    | AK090409  | 444.626   | 507.38    | AK026410  | 3817.687  | 3337.931  |
| NM_002038 | 6162.218  | 5497.32   | AF172264  | 2912.011  | 606.986   | NM_014637 | 1601.276  | 1448.819  |
| NM_005729 | 5449.788  | 4289.167  | U80756    | 12270.646 | 1980.008  | NM_013379 | 5375.44   | 5434.239  |
| NM_015493 | 879.729   | 954.088   | NM_018161 | 1057.78   | 667.663   | AF113208  | 4180.907  | 4537.758  |
| NM_003747 | 1552.038  | 1175.031  | NM_005248 | 1868.176  | 3604.469  | BC012757  | 407.514   | 396.325   |
| NM_002827 | 4489.524  | 3693.474  | NM_004810 | 7551.185  | 9021.98   | M96686    | 270.431   | 191.006   |
| NM_001946 | 553.582   | 571.047   | AL117629  | 4073.408  | 2908.465  | NM_004062 | 1101.781  | 1205.161  |
| BF035425  | 18922.965 | 15540.78  | NM_002595 | 2466.575  | 2616.509  | NM_004449 | 376.194   | 581.72    |
| NM_000159 | 54898.867 | 63120.066 | NM_015726 | 1280.033  | 2463.641  | NM_014591 | 1139.704  | 1144.433  |
| NM_014638 | 1274.944  | 1478.802  | AB002379  | 4377.5    | 7427.684  | NM_014592 | 234.09    | 169.463   |
| AF099740  | 1525.634  | 1498.024  | AF113223  | 1669.101  | 2213.105  | NM_001945 | 801.616   | 1036.455  |
| NM_006117 | 16775.051 | 16608.434 | AB046851  | 1991.762  | 2202.014  | NM_020039 | 874.857   | 831.617   |
| NM_002225 | 3040.117  | 2035.079  | NM_018174 | 944.915   | 920.065   | NM_006653 | 775.063   | 927.578   |
| NM_006229 | 1083.221  | 1020.299  | NM_014548 | 2334.878  | 1511.229  | NM_014442 | 587.858   | 525.293   |
| NM_015415 | 22531.818 | 21469.885 | NM_004437 | 2384.745  | 1532.405  | AB011167  | 606.051   | 534.37    |
| NM_004897 | 3259.327  | 3305.856  | AK025875  | 1274.132  | 889.845   | NM_005409 | 367.747   | 335.925   |
| NM_002555 | 1753.152  | 1473.858  | AB037779  | 24390.934 | 22319.203 | NM_000208 | 683.348   | 502.744   |
| AF225418  | 1097.73   | 1247.689  | NM_000655 | 11188.132 | 8141.839  | NM_002188 | 6270.014  | 5058.986  |
| NM_000309 | 847.649   | 1061.779  | NM_000393 | 1220.152  | 759.03    | AK027119  | 3313.91   | 2860.302  |
| NM_004528 | 21170.348 | 25388.773 | NM_000889 | 1248.827  | 492.543   | AB037727  | 4712.063  | 4072.864  |
| NM_004978 | 468.898   | 692.138   | NM_003859 | 10777.654 | 1896.622  | NM_005426 | 900.514   | 894.067   |
| NM_000705 | 640.113   | 552.925   | NM_000236 | 924.335   | 224.333   | NM_004763 | 731.589   | 576.948   |
| NM_145904 | 14440.919 | 13880.894 | NM_002903 | 20235.803 | 3746.917  | NM_014063 | 2828.879  | 2577.482  |
| NM_013334 | 4388.39   | 3118.609  | NM_012339 | 4117.608  | 6636.991  | D86964    | 2909.578  | 3437.438  |
| AF150735  | 4194.44   | 4193.993  | NM_005787 | 19598.84  | 21450.316 | AL049801  | 1958.922  | 1882.432  |
| NM_018183 | 1905.568  | 2302.541  | NM_002143 | 2419.859  | 2467.73   | NM_016395 | 5432.385  | 5390.476  |
| NM_012382 | 3648.189  | 4987.522  | AF284421  | 8050.636  | 6719.295  | NM_003152 | 516.396   | 513.985   |
| BF038366  | 844.801   | 1205.083  | NM_006048 | 4858.399  | 7550.016  | NM_014727 | 544.317   | 482.704   |
| NM_007194 | 2304.455  | 2122.551  | NM_003968 | 6479.94   | 9696.481  | NM_006342 | 2693.211  | 3055.818  |
| NM_000314 | 6272.023  | 5025.448  | NM_002786 | 5258.427  | 7931.1    | NM_016396 | 874.561   | 1153.717  |
| AF305239  | 909.459   | 628.155   | NM_003343 | 8617.077  | 10712.211 | NM_005689 | 761.048   | 751.564   |
| AL137264  | 9833.512  | 9020.81   | AL080137  | 485.704   | 702.21    | NM_005552 | 4663.736  | 4273.267  |
| NM_002226 | 492.831   | 464.467   | NM_017679 | 1200.442  | 787.184   | NM_006717 | 1165.015  | 911.004   |
| X84370    | 7863.222  | 8826.123  | BC006359  | 1720.685  | 1692.123  | AL109786  | 704.933   | 1025.803  |
| NM_004039 | 863.086   | 768.995   | AK026127  | 2590.036  | 1792.525  | AK026479  | 1034.92   | 930.927   |
| AB014558  | 723.42    | 830.886   | BC016062  | 20259.588 | 17301.064 | AK022860  | 1510.339  | 1892.872  |
| NM_006287 | 513.475   | 457.026   | NM_002814 | 3199.281  | 3167.99   | X60188    | 7726.594  | 7021.168  |
| NM_000118 | 2149.451  | 1334.543  | NM_012250 | 3381.978  | 2624.868  | NM_005977 | 1131.009  | 895.065   |
| NM_000913 | 1327.216  | 890.283   | NM_006283 | 8252.561  | 2442.768  | NM_006265 | 13148.556 | 11985.986 |
| AI351740  | 3636.537  | 4222.984  | X97303    | 9865.52   | 1501.246  | NM_003126 | 248.5     | 244.331   |
| X04827    | 1007.019  | 1270.407  | NM_017530 | 2437.463  | 3187.777  | NM_006059 | 607.332   | 456.194   |
| H07088    | 455.373   | 691.128   | AL360183  | 1868.745  | 2136.785  | NM_000347 | 658.655   | 708.205   |
| BC020596  | 2107.364  | 2202.381  | AK027046  | 1974.379  | 2494.195  | M13452    | 352.881   | 454.206   |
| X98922    | 3436.225  | 3352.814  | NM_003113 | 3442.33   | 4328.327  | NM_016114 | 976.187   | 924.154   |
| AK098435  | 2353.932  | 1639.698  | NM_015832 | 11128.945 | 14161.198 | AY007114  | 725.17    | 491.312   |
| AK092872  | 2141.783  | 1460.02   | NM_014319 | 2339.457  | 2945.967  | AB000895  | 298.068   | 385.116   |
| M16801    | 494.21    | 461.133   | NM_004865 | 6306.413  | 6756.213  | X80031    | 630.682   | 703.445   |
| NM_002038 | 6437.951  | 6295.2    | BF130622  | 10361.276 | 2643.425  | AK022178  | 482.712   | 284.578   |
| NM_005729 | 5991.603  | 5747.543  | BU165106  | 754.791   | 237.302   | L00635    | 728.655   | 1567.976  |
| NM_015493 | 794.847   | 991.588   | AF038202  | 1256.885  | 275.592   | NM_015601 | 353.637   | 421.476   |
| NM_003747 | 1545.625  | 1401.76   | AB040925  | 966.314   | 769.916   | NM_001780 | 3926.753  | 3584.377  |
| AB037744  | 1179.078  | 1071.762  | BC008837  | 968.188   | 1501.697  | AJ277442  | 353.378   | 485.939   |

|           |           |           |           |           |           |           |           |           |
|-----------|-----------|-----------|-----------|-----------|-----------|-----------|-----------|-----------|
| AF141901  | 1113.547  | 900.001   | NM_001861 | 896.339   | 1257.585  | NM_00456€ | 2638.123  | 2517.345  |
| NM_00700€ | 2255.278  | 2078.86   | AK025558  | 6877.389  | 7953.922  | AF089088  | 541.506   | 496.267   |
| AL109708  | 3036.792  | 3693.712  | AK024355  | 1360.593  | 2101.899  | L07557    | 1941.589  | 2141.994  |
| AF234532  | 1012.12   | 1211.717  | NM_001864 | 30904.195 | 33532.91  | NM_00279€ | 24146.508 | 21246.254 |
| NM_01241€ | 472.022   | 529.574   | NM_003477 | 8191.662  | 9227.405  | D78514    | 3007.192  | 2702.94   |
| NM_01329€ | 5337.36   | 6851.088  | NM_002654 | 43723.574 | 42151.289 | NM_01336€ | 328.875   | 268.26    |
| AL117478  | 606.529   | 558.063   | NM_020382 | 3330.79   | 2935.701  | NM_002787 | 15603.594 | 14413.716 |
| NM_00595€ | 832.918   | 722.978   | NM_007192 | 8466.49   | 5689.4    | U95006    | 6863.464  | 6542.679  |
| NM_01343€ | 1280.385  | 1190.589  | AB002337  | 7364.894  | 5518.161  | NM_003347 | 1772.267  | 1534.361  |
| AF225426  | 738.343   | 638.611   | NM_014933 | 5662.792  | 3024.658  | AF273051  | 440.903   | 322.88    |
| NM_00520€ | 2915.648  | 2001.449  | NM_006385 | 2039.07   | 2988.364  | NM_01451€ | 2188.289  | 1695.648  |
| NM_000421 | 1462.195  | 1247.121  | NM_00345€ | 1977.33   | 2194.957  | AK021868  | 731.701   | 648.426   |
| AF218941  | 3629.4    | 2880.691  | AK000584  | 5257.199  | 628.634   | AK000643  | 33294.777 | 37361.715 |
| NM_00497€ | 770.522   | 974.819   | AJ297363  | 880.672   | 588.102   | NM_018421 | 2472.102  | 2065.011  |
| NM_004231 | 53728.859 | 51409.031 | AK026379  | 2220.68   | 2517.941  | AB014574  | 13080.502 | 11649.852 |
| NM_016577 | 896       | 686.466   | AK022965  | 3210.771  | 2084.811  | NM_020127 | 655.966   | 792.663   |
| AK023107  | 8382.101  | 6767.803  | AK024278  | 6304.938  | 4037.346  | NM_015623 | 3216.713  | 3273.262  |
| NM_006854 | 9536.781  | 6508.164  | AB056722  | 8919.145  | 11696.646 | AB045116  | 367.762   | 231.556   |
| NM_00458€ | 4355.668  | 3592.792  | NM_013242 | 7797.463  | 8405.449  | NM_001675 | 508.346   | 412.731   |
| NM_020387 | 35554.668 | 26877.85  | NM_01206€ | 7050.359  | 7939.938  | NM_003422 | 583.23    | 519.843   |
| NM_00724€ | 1427.279  | 1457.305  | AF052168  | 5329.939  | 6767.636  | NM_01477€ | 597.453   | 874.378   |
| AK026248  | 794.311   | 1139.537  | AK022632  | 1983.479  | 1920.727  | NM_002943 | 1242.501  | 1203.205  |
| NM_00457€ | 1293.302  | 1634.013  | AK021554  | 1207.293  | 919.497   | AL133649  | 554.937   | 472.86    |
| NM_000647 | 384.242   | 394.05    | NM_020235 | 3635.49   | 3094.822  | NM_006454 | 2590.885  | 2591.779  |
| AB046793  | 558.772   | 759.786   | AL109681  | 625.578   | 406.677   | NM_01584€ | 2041.827  | 1941.551  |
| NM_017604 | 1556.506  | 1894.019  | AL162039  | 6589.818  | 7333.998  | NM_015972 | 4575.475  | 3488.971  |
| NM_01773€ | 6356.004  | 5060.818  | AK024896  | 1623.578  | 1519.553  | NM_016132 | 1116.458  | 1283.805  |
| NM_000623 | 2517.479  | 2195.672  | AK024059  | 1802.717  | 336.21    | NM_01800€ | 928.743   | 905.735   |
| AF161348  | 1446.98   | 1100.468  | AB007928  | 1908.744  | 1358.85   | NM_01609€ | 813.362   | 670.692   |
| NM_018467 | 5128.571  | 4142.273  | AK023645  | 1118.887  | 1609.48   | NM_001013 | 23385.975 | 19817.445 |
| NM_00606€ | 1109.672  | 753.092   | NM_01693€ | 4691.132  | 2794.036  | AK024040  | 1386.096  | 1164.349  |
| NM_01644€ | 14842.578 | 13083.575 | AJ001861  | 2141.813  | 1933.765  | NM_005061 | 1299.351  | 1501.621  |
| NM_007194 | 2784.967  | 2367.143  | X75692    | 2153.377  | 2042.364  | NM_000997 | 35559.422 | 72694.055 |
| NM_000314 | 5404.607  | 5085.639  | Y10511    | 6895.373  | 5121.948  | AF182417  | 18325.895 | 14782.07  |
| AB002369  | 860.677   | 1130.667  | M26147    | 4613.27   | 4445.841  | AL137354  | 7080.17   | 5615.288  |
| S74620    | 1979.535  | 1741.07   | AF018254  | 910.349   | 1138.619  | NM_001023 | 37859.848 | 54437.832 |
| AF305239  | 895.989   | 934.79    | NM_01624€ | 1012.154  | 801.055   | AK021571  | 2676.188  | 2307.927  |
| NM_002827 | 5091.817  | 4086.373  | AK026416  | 11695.182 | 15152.086 | AF052149  | 2511.457  | 2725.501  |
| NM_00194€ | 950.079   | 942.201   | AK025797  | 585.93    | 1099.599  | AK025586  | 485.42    | 624.233   |
| BF035425  | 22195.168 | 16347.189 | AK000019  | 669.999   | 928.299   | NM_002541 | 547.986   | 627.722   |
| NM_00015€ | 55403.727 | 57279.816 | AK024947  | 1301.706  | 1766.428  | NM_00005€ | 1565.474  | 1837.34   |
| NM_01463€ | 1475.151  | 1483.353  | NM_017503 | 361.172   | 149.576   | NM_016311 | 11586.39  | 11731.026 |
| AF099740  | 1302.712  | 1529.552  | AK024606  | 1715.788  | 317.706   | NM_00029€ | 1120.923  | 796.665   |
| NM_006117 | 16087.493 | 19659.305 | NM_016417 | 17707.926 | 28062.105 | NM_01653€ | 1571.814  | 962.181   |
| NM_002225 | 2271.069  | 1904.891  | NM_01910€ | 1315.125  | 1192.035  | AK023275  | 2764.083  | 1496.255  |
| NM_00622€ | 665.53    | 960.851   | AL080118  | 5921.549  | 8572.876  | AJ223352  | 1885.236  | 1303.834  |
| NM_01541€ | 21362.229 | 21183.063 | AL049378  | 1961.266  | 3565.096  | NM_01223€ | 617.225   | 617.286   |
| NM_004897 | 2640.74   | 2259.809  | L09086    | 565.579   | 1880.211  | NM_01653€ | 3486.238  | 2824.679  |
| AF225418  | 1221.927  | 933.341   | AK021505  | 817.68    | 1053.049  | NM_006807 | 11526.318 | 10167.878 |
| NM_00452€ | 13140.984 | 11569.232 | AK021598  | 2567.272  | 819.119   | L16464    | 283.243   | 163.181   |
| NM_00245€ | 11573.316 | 15240.777 | NM_005973 | 9831.286  | 1656.154  | NM_006532 | 751.069   | 838.552   |
| NM_00168€ | 689.878   | 742.622   | X04547    | 3081.265  | 2082.008  | U07132    | 1470.699  | 1058.731  |
| NM_014723 | 3245.623  | 3079.155  | AK025823  | 2714.141  | 2731.374  | NM_00343€ | 320.959   | 319.67    |

|           |           |           |           |           |           |           |           |           |
|-----------|-----------|-----------|-----------|-----------|-----------|-----------|-----------|-----------|
| AB011106  | 1420.951  | 1106.815  | AL359941  | 1294.394  | 892.72    | AL035301  | 782.648   | 680.961   |
| D26362    | 2323.161  | 2664.951  | AF035278  | 1408.447  | 1752.775  | NM_017687 | 826.483   | 468.317   |
| NM_013452 | 2707.216  | 2777.585  | U32999    | 7795.576  | 7990.296  | NM_017975 | 1047.135  | 870.496   |
| AY009402  | 2627.773  | 2038.29   | U66052    | 4573.396  | 4009.063  | AK025036  | 619.769   | 738.832   |
| NM_018451 | 1316.598  | 911.801   | AK024156  | 890.958   | 1054.216  | AK024843  | 5126.394  | 4844.92   |
| NM_012443 | 773.118   | 606.775   | AF086288  | 1436.968  | 1316.9    | AF074994  | 371.083   | 226.097   |
| NM_007009 | 340.684   | 224.636   | AK023109  | 1931.338  | 1141.956  | NM_01767C | 2445.597  | 2433.187  |
| NM_002584 | 2312.301  | 1916.638  | NM_005293 | 23384.264 | 18709.219 | AF286598  | 402.757   | 307.803   |
| NM_013334 | 3819.215  | 3182.895  | AF133332  | 6785.664  | 8570.748  | AK021468  | 275.869   | 630.634   |
| NM_018183 | 1424.615  | 1079.41   | NM_001088 | 9327.944  | 1667.647  | NM_004366 | 2018.371  | 1494.893  |
| NM_01208C | 531.752   | 526.481   | BC015991  | 12446.651 | 2207.653  | AJ296152  | 3218.406  | 2759.91   |
| NM_012382 | 3259.296  | 2820.968  | U46214    | 2306.24   | 1830.468  | AK001067  | 554.574   | 436.11    |
| BF038366  | 972.222   | 557.274   | NM_00031C | 9667.086  | 15721.167 | AK027088  | 3556.414  | 2873.646  |
| NM_012304 | 462.017   | 271.908   | AF161343  | 3205.566  | 4666.358  | AB037721  | 772.26    | 413.829   |
| AF245505  | 873.317   | 807.08    | NM_004765 | 7616.046  | 8293.255  | AK027120  | 430.736   | 292.802   |
| AB037776  | 704.822   | 540.609   | AK022246  | 953.314   | 877.837   | AB029001  | 456.62    | 497.831   |
| AF196976  | 3783.561  | 3077.89   | X75684    | 738.093   | 1021.689  | AB006624  | 1217.853  | 1307.841  |
| AL050379  | 1130.695  | 931.033   | AF113701  | 5880.662  | 8310.641  | AL109717  | 307.682   | 304.088   |
| NM_003161 | 1799.487  | 1808.037  | Y11158    | 1561.526  | 1981.546  | AK025473  | 605.929   | 473.466   |
| NM_014496 | 872.419   | 791.57    | NM_006771 | 11280.808 | 12732.326 | AF146693  | 367.153   | 751.399   |
| NM_016215 | 25963.906 | 19320.984 | L37702    | 9970.754  | 10067.982 | AF271070  | 4454.285  | 3623.944  |
| AK026919  | 1028.013  | 774.478   | AK022812  | 4046.516  | 6564.601  | AK055959  | 495.205   | 452.79    |
| NM_001501 | 8546.897  | 5797.769  | U79301    | 3141.131  | 3423.121  | AK021705  | 1510.474  | 1359.831  |
| NM_006176 | 49168.801 | 43910.184 | AK022260  | 4290.233  | 8073.064  | NM_016141 | 3765.178  | 3584.997  |
| AL137459  | 1883.415  | 1505.397  | M32219    | 9496.748  | 12954.844 | AL109702  | 642.711   | 666.355   |
| AB037812  | 315.096   | 338.155   | BC018868  | 1047.681  | 1038.333  | AK025624  | 3561.07   | 3481.067  |
| AB007932  | 1706.712  | 1328.166  | AF086174  | 735.685   | 1160.387  | AK026684  | 920.713   | 690.687   |
| AF219257  | 27797.355 | 23776.629 | AF007128  | 9538.589  | 4152.074  | AL110125  | 990.696   | 764.61    |
| NM_003978 | 1110.045  | 1173.204  | CY3Cy5    | 3296.3    | 260.929   | AK022764  | 851.451   | 1079.967  |
| NM_002561 | 5348.97   | 4317.393  | AI351740  | 5577.6    | 5115.72   | AJ011600  | 272.94    | 284.209   |
| NM_006103 | 22272.965 | 20169.385 | AA444051  | 696.997   | 1115.188  | L05148    | 2900.812  | 2406.444  |
| NM_000805 | 667.671   | 471.745   | NM_007164 | 2709.519  | 5418.395  | D16474    | 1467.531  | 954.09    |
| AL359933  | 8509.605  | 6494.376  | BE783826  | 28415.584 | 32275.936 | AL080072  | 257.671   | 237       |
| NM_001302 | 922.586   | 580.719   | X04827    | 1303.785  | 1386.567  | AL049280  | 930.957   | 264.59    |
| NM_01859C | 7938.6    | 6338.133  | H07088    | 933.146   | 1082.591  | AK025212  | 2066.42   | 1895.892  |
| NM_003178 | 1547.577  | 986.13    | AI004656  | 738.648   | 725.53    | AL157503  | 1884.619  | 1871.907  |
| NM_012437 | 7733.236  | 5554.086  | BC020596  | 1875.889  | 1592.914  | AK000053  | 330.873   | 327.379   |
| AF090944  | 1196.436  | 1250.895  | AK098435  | 6769.352  | 10170.485 | AK000786  | 338.977   | 209.721   |
| NM_002607 | 726.297   | 693.034   | AK092872  | 2723.856  | 6746.376  | AK000935  | 431.974   | 410.727   |
| AF116712  | 837.865   | 1505.297  | AF230496  | 252.996   | 1077.014  | AK021458  | 527.326   | 466.212   |
| AF116626  | 2261.699  | 2649.52   | M16801    | 613.656   | 997.03    | NM_017674 | 594.903   | 498       |
| NM_00176C | 17680.361 | 15020.402 | NM_145904 | 16214.087 | 22620.174 | AK000966  | 426.883   | 496.128   |
| NM_002527 | 1132.37   | 929.542   | NM_021969 | 363.355   | 498.998   | AK024525  | 634.111   | 578.615   |
| NM_00589C | 3157.792  | 2446.674  | SR2       | 52656.211 | 46319.188 | AK024909  | 366.052   | 96.861    |
| NM_007065 | 30810.77  | 23172.154 | SR4       | 11324.911 | 16057.945 | AK024544  | 374.451   | 352.353   |
| AF149785  | 5104.449  | 3813.747  | SR6       | 1629.802  | 1952.313  | AK001880  | 3842.448  | 3243.288  |
| NM_012068 | 7597.877  | 5872.377  | SR8       | 7894.731  | 42729.816 | AF156166  | 1391.541  | 1548.422  |
| NM_004064 | 6895.317  | 6496.629  | SR10      | 27050.668 | 17520.008 | NM_014373 | 1557.479  | 1292.925  |
| NM_001256 | 6539.914  | 6521.292  | CY3Cy5    | 3771.532  | 312.327   | NM_014206 | 15864.972 | 12661.704 |
| NM_014704 | 4390.725  | 4245.59   | NM_002418 | 480.935   | 570.849   | NM_001651 | 1099.385  | 1082.508  |
| NM_020205 | 655.283   | 835.241   | NM_004485 | 1539.935  | 1864.837  | L32786    | 807.42    | 500.975   |
| NM_001227 | 2781.54   | 3020.974  | NM_012419 | 585.979   | 1157.985  | AK002023  | 773.414   | 662.957   |
| NM_001191 | 2770.644  | 2485.407  | NM_013296 | 6816.91   | 6281.21   | NM_016464 | 332.337   | 193.317   |

|           |           |           |           |           |           |           |           |           |
|-----------|-----------|-----------|-----------|-----------|-----------|-----------|-----------|-----------|
| U15174    | 464.365   | 364.241   | AL117478  | 745.628   | 819.593   | L40402    | 748.005   | 309.392   |
| NM_013342 | 2631.23   | 2120.256  | NM_005307 | 1506.235  | 1262.175  | AK022474  | 7894.278  | 8772.979  |
| NM_014344 | 820.869   | 501.672   | NM_005958 | 1847.586  | 1563.997  | AK022392  | 2150.382  | 2791.951  |
| AB040917  | 859.772   | 621.849   | NM_013436 | 1708.222  | 1909.41   | AL117451  | 323.865   | 316.746   |
| AL110261  | 7930.713  | 4906.676  | AF225426  | 648.62    | 611.472   | AK025949  | 560.049   | 530.505   |
| AK021786  | 898.459   | 485.637   | NM_005208 | 6808.394  | 7147.351  | Y10259    | 1323.613  | 1349.503  |
| NM_005932 | 529.475   | 618.195   | NM_000421 | 712.871   | 787.233   | AK021725  | 1141.309  | 761.879   |
| NM_004279 | 6451.566  | 5542.952  | AK025687  | 13358.712 | 22447.594 | NM_002408 | 1622.864  | 1436.593  |
| NM_001908 | 3424.601  | 2756.953  | AF218941  | 3531.957  | 7617.284  | AK024282  | 656.414   | 318.934   |
| NM_000285 | 7437.703  | 6996.498  | AL137264  | 11813.442 | 20224.545 | AF085838  | 1999.389  | 1403.863  |
| NM_005911 | 34075.492 | 24212.861 | NM_002226 | 398.774   | 981.48    | NM_018277 | 362.9     | 338.976   |
| AV702690  | 1319.463  | 1272.345  | X84370    | 7459.825  | 13060.972 | AF014455  | 421.242   | 239.317   |
| AL117452  | 3828.178  | 3554.279  | NM_004039 | 1062.456  | 1293.193  | AL355741  | 608.943   | 1223.822  |
| NM_012230 | 1267.676  | 1237.391  | AB014558  | 973.869   | 1697.343  | AB011118  | 3460.377  | 3353.319  |
| NM_014038 | 8491.173  | 8148.619  | NM_006287 | 625.396   | 1028.564  | S66666    | 298.288   | 220.671   |
| NM_002061 | 2793.681  | 2582.463  | NM_000118 | 2010.517  | 2768.066  | AK021476  | 400.649   | 391.489   |
| AF169974  | 3510.568  | 3293.811  | NM_000913 | 949.741   | 2439.923  | NM_018630 | 2300.121  | 2071.281  |
| NM_004522 | 831.819   | 1159.027  | BG325046  | 2821.318  | 7462.724  | AF086175  | 637.286   | 663.075   |
| NM_005733 | 1988.247  | 2212.929  | AK026248  | 958.053   | 1070.147  | AK002196  | 396.745   | 250.885   |
| NM_018138 | 2839.961  | 2701.24   | NM_004578 | 1296.13   | 1165.354  | NM_004576 | 447.264   | 441.193   |
| NM_019619 | 3131.659  | 3351.608  | NM_000647 | 455.937   | 409.451   | AF040097  | 455.359   | 142.865   |
| AF183411  | 1415.906  | 858.168   | AB046793  | 716.435   | 630.337   | NM_020436 | 331.256   | 242.605   |
| BF244591  | 936.595   | 687.386   | NM_017604 | 1664.786  | 1632.969  | AK024182  | 389.468   | 346.646   |
| NM_005886 | 10277.246 | 6996.128  | NM_017738 | 6736.556  | 6570.035  | NM_006913 | 4282.664  | 5003.476  |
| U63785    | 990.411   | 749.142   | NM_016557 | 1365.791  | 1300.932  | NM_000496 | 3288.59   | 2420.418  |
| NM_005966 | 1148      | 807.097   | NM_000623 | 2235.605  | 2438.555  | AL049955  | 10342.179 | 7306.049  |
| NM_003156 | 2155.429  | 1354.269  | AF161348  | 1485.597  | 1379.881  | AF155654  | 5465.893  | 5234.667  |
| NM_003108 | 573.945   | 410.039   | NM_018467 | 7194.247  | 6719.642  | AF088044  | 274.181   | 183.76    |
| NM_013310 | 5169.333  | 5150.247  | NM_006068 | 875.292   | 880.47    | AK000028  | 2031.497  | 1765.129  |
| BC004958  | 1905.148  | 1691.743  | U16752    | 451.511   | 1049.561  | NM_013320 | 24652.408 | 18761.789 |
| NM_005762 | 4562.233  | 4683.429  | NM_000880 | 251.911   | 523.509   | AJ245902  | 349.707   | 256.531   |
| NM_006473 | 659.328   | 686.517   | NM_002038 | 7806.152  | 14394.342 | AL050039  | 282.585   | 376.168   |
| NM_014643 | 864.729   | 761.609   | NM_005729 | 7289.342  | 13924.087 | AF087987  | 628.527   | 2289.44   |
| NM_005653 | 1251.27   | 976.311   | NM_015493 | 1089.105  | 2475.226  | AK021723  | 189.975   | 245.467   |
| NM_014553 | 1470.781  | 1487.358  | NM_003747 | 1961.667  | 4595.635  | H09474    | 560.167   | 229.531   |
| NM_003440 | 1167.59   | 1092.06   | AB037744  | 1591.192  | 2172.582  | AB002368  | 4571.605  | 3550.456  |
| NM_004698 | 6782.243  | 6085.813  | AF141901  | 1045.973  | 2047.056  | AL360263  | 37566.691 | 27232.795 |
| U41387    | 10193.55  | 7574.832  | NM_007008 | 1652.918  | 2580.495  | Z36780    | 970.74    | 725.212   |
| NM_004516 | 6963.154  | 6119.479  | AF234532  | 1622.411  | 4509.804  | AK022403  | 870.261   | 841.959   |
| NM_006513 | 1092.448  | 1161.599  | AF099740  | 1279.733  | 1461.258  | AK022955  | 4008.101  | 3412.339  |
| NM_003685 | 15591.866 | 16846.859 | NM_006117 | 16915.729 | 13360.75  | AL137408  | 1710.412  | 1507.325  |
| NM_006295 | 3673.288  | 3957.449  | NM_002225 | 2219.939  | 2322.019  | AF054995  | 519.182   | 843.962   |
| NM_001540 | 2289.113  | 2029.749  | NM_006229 | 588.9     | 733.543   | AL080176  | 1016.053  | 843.077   |
| NM_012111 | 11041.897 | 8583.968  | NM_015415 | 22631.643 | 16487.824 | AK023627  | 1013.472  | 1224.392  |
| NM_004470 | 11294.453 | 7648.194  | NM_004897 | 2988.463  | 2971.022  | CY3Cy5    | 698.533   | 192.531   |
| NM_001418 | 7272.876  | 5347.123  | NM_002555 | 1596.078  | 1593.121  | BI759406  | 601.799   | 643.909   |
| NM_003756 | 26222.648 | 17595.775 | AF225418  | 1288.027  | 1023.927  | R76099    | 247.377   | 205.952   |
| AL049680  | 1837.891  | 1047.9    | NM_000309 | 938.782   | 1135.137  | S74445    | 220.848   | 276.203   |
| AK001595  | 2141.984  | 1991.434  | NM_004528 | 20872     | 15987.556 | BI763360  | 414.442   | 376.995   |
| NM_018015 | 2720.067  | 3334.806  | AK026381  | 14505.233 | 10073.143 | D25538    | 498.944   | 432.242   |
| NM_003715 | 5029.363  | 3995.485  | NM_002450 | 30157.756 | 14042.922 | NM_000360 | 2202.976  | 2596.192  |
| M94065    | 1132.197  | 1062.864  | NM_001686 | 588.05    | 1476.89   | NM_001846 | 222.477   | 223.575   |
| BF036874  | 1891.263  | 1424.2    | NM_004978 | 325.634   | 724.7     | X03635    | 623.849   | 563.586   |

|           |           |           |           |           |           |           |           |           |
|-----------|-----------|-----------|-----------|-----------|-----------|-----------|-----------|-----------|
| BE888487  | 502.379   | 406.474   | NM_000705 | 397.331   | 1204.755  | BC011847  | 42419.09  | 53626.785 |
| AF182419  | 4021.379  | 3589.74   | NM_016577 | 855.342   | 1793.265  | X03348    | 731.955   | 772.638   |
| NM_00701E | 3287.444  | 3517.128  | AK023107  | 8668.476  | 15896.312 | AF353674  | 3279.73   | 3561.339  |
| NM_002703 | 5696.958  | 5405.615  | NM_006854 | 11454.319 | 24129.102 | BC002645  | 1663.369  | 1755.071  |
| NM_005375 | 10106.581 | 8548.854  | NM_004580 | 5817.048  | 12787.442 | BC002792  | 483.841   | 469.54    |
| NM_005985 | 4357.711  | 4109.675  | NM_007246 | 1604.616  | 3788.251  | NM_021005 | 653.042   | 495.203   |
| NM_01590E | 4661.647  | 5393.305  | AF150735  | 4044.925  | 3623.991  | SB        | 252.635   | 289.827   |
| AK023759  | 1353.585  | 1293.987  | NM_018183 | 1578.035  | 1987.32   | SR2       | 31445.396 | 22894.916 |
| L25270    | 18163.727 | 15724.11  | NM_012382 | 3532.042  | 3741.105  | SR4       | 5998.538  | 4815.827  |
| AB033111  | 1818.87   | 1432.191  | BF038366  | 760.112   | 392.042   | SR6       | 1075.249  | 786.97    |
| AJ276316  | 1439.859  | 920.367   | NM_002452 | 20950.883 | 13492.124 | SR8       | 3634.172  | 9464.197  |
| AF229246  | 9292.001  | 6134.435  | NM_012304 | 464.77    | 1115.731  | SR10      | 12181.364 | 3922.612  |
| S64709    | 3618.703  | 2649.376  | NM_016440 | 11960.278 | 16131.513 | CY3Cy5    | 920.449   | 162.847   |
| NM_01848E | 800.858   | 557.071   | NM_007194 | 2862.21   | 6679.169  | NM_003834 | 1267.252  | 1290.973  |
| X56465    | 782.543   | 363.536   | NM_000314 | 5917.256  | 13137.366 | NM_005955 | 1473.963  | 1363.975  |
| NM_003071 | 8611.722  | 5294.5    | S74620    | 2879.348  | 6893.83   | NM_003381 | 431.751   | 472.521   |
| AK021494  | 3347.163  | 2647.105  | AF305239  | 1076.711  | 2392.458  | NM_005755 | 351.892   | 386.191   |
| AK022117  | 389.491   | 380.394   | NM_002827 | 5469.58   | 11394.615 | NM_003702 | 5163.487  | 5353.271  |
| AF075023  | 1209.279  | 1125.359  | NM_001946 | 787.005   | 1440.058  | NM_000365 | 321.27    | 238.091   |
| AL360160  | 33584.227 | 33515.797 | BF035425  | 25524.438 | 32675.721 | NM_016351 | 649.428   | 779.898   |
| AK001092  | 50871.016 | 52646.191 | NM_014638 | 1098.751  | 2995.687  | NM_004405 | 932.038   | 852.395   |
| AK023427  | 625.796   | 693.111   | NM_006287 | 290.354   | 263.682   | NM_001988 | 3108.419  | 2583.686  |
| NM_014144 | 1380.195  | 1345.769  | NM_000118 | 1349.784  | 888.047   | NM_006060 | 1111.437  | 1114.205  |
| AF147345  | 1558.316  | 1726.993  | AI351740  | 5913.252  | 5338.165  | NM_005667 | 1545.288  | 1610.855  |
| AF147373  | 6201.873  | 6772.312  | AA444051  | 829.965   | 714.085   | NM_006308 | 275.452   | 319.549   |
| AK026209  | 783.263   | 650.117   | NM_007164 | 2755.293  | 4078.171  | L09080    | 731.467   | 782.904   |
| AF086253  | 1150.563  | 1377.229  | BE783826  | 27629.416 | 26827.326 | NM_007326 | 1560.774  | 1166.014  |
| AF086337  | 367.633   | 321.588   | X04827    | 1317.768  | 1373.566  | NM_001886 | 1795.894  | 1841.722  |
| AF086303  | 579.997   | 599.866   | H07088    | 633.202   | 736.466   | NM_004467 | 222.799   | 158.839   |
| AF086434  | 981.299   | 848.488   | AI004656  | 524.417   | 704.976   | NM_005622 | 400.521   | 385.164   |
| AK022063  | 4699.01   | 3721.758  | BC020596  | 1788.862  | 3572.688  | NM_018058 | 3344.207  | 2948.407  |
| AF086345  | 4504.284  | 3804.198  | AF116606  | 50654.227 | 60823.785 | NM_004548 | 8509.511  | 10445.264 |
| AF086464  | 752.34    | 821.903   | X98922    | 3334.043  | 5661.563  | X69079    | 8855.717  | 14019.693 |
| AL049278  | 2549.787  | 3096.04   | AK098435  | 5141.321  | 9472.487  | AF091033  | 253.15    | 436.152   |
| AL117519  | 783.665   | 998.391   | AK092872  | 3093.667  | 7224.354  | NM_001122 | 3173.476  | 3388.978  |
| AK055338  | 620.732   | 614.134   | AF230496  | 519.387   | 1037.896  | NM_004591 | 334.056   | 296.234   |
| NM_00506C | 1218.054  | 1036.783  | M16801    | 524.199   | 1004.427  | AL133027  | 563.273   | 683.66    |
| AF085935  | 803.636   | 801.196   | NM_145904 | 22000.086 | 38300.648 | AB037732  | 685.585   | 602.443   |
| AL035369  | 3223.83   | 4032.906  | NM_021969 | 380.419   | 910.491   | NM_005767 | 223.251   | 166.12    |
| AF075097  | 3747.2    | 4176.955  | NM_013334 | 6097.761  | 12387.388 | NM_001837 | 255.877   | 324.749   |
| AK022801  | 1839.024  | 2679.917  | AB037744  | 1192.187  | 549.277   | NM_001835 | 48940.352 | 45727.254 |
| AL133075  | 13198.896 | 11370.304 | AF141901  | 511.562   | 170.865   | BC016029  | 280.409   | 325.599   |
| AL137692  | 477.322   | 575.45    | NM_007008 | 704.069   | 312.474   | M27487    | 288.463   | 294.751   |
| AL137630  | 2352.341  | 2637.735  | L29143    | 477.809   | 434.222   | NM_002286 | 25255.279 | 17713.508 |
| AK055236  | 396.468   | 535.02    | AF234532  | 1268.091  | 942.397   | NM_002164 | 382.323   | 375.579   |
| AL137277  | 13386.507 | 13047.284 | NM_002418 | 789.401   | 704.742   | NM_003811 | 1699.825  | 1959.073  |
| AL137447  | 1136.273  | 1941.82   | NM_002090 | 383.45    | 551.17    | NM_002981 | 2512.321  | 3039.122  |
| AL157467  | 1253.164  | 1536.197  | NM_004485 | 1916.358  | 3074.833  | NM_001244 | 487.253   | 509.46    |
| BC023609  | 1355.767  | 1769.771  | NM_012419 | 1665.593  | 2187.509  | NM_012275 | 207.611   | 253.541   |
| AK025100  | 856.213   | 971.752   | NM_013296 | 7581.52   | 8550.668  | NM_006137 | 2270.698  | 2042.403  |
| AF086395  | 9314.414  | 13918.174 | AL117478  | 629.448   | 639.248   | NM_016135 | 23325.674 | 18833.369 |
| AF086049  | 2235.353  | 3052.833  | NM_005307 | 1165.343  | 1039.179  | AL117468  | 3419.661  | 2798.877  |
| AF114263  | 1636.395  | 2614.907  | NM_005958 | 1435.411  | 2591.104  | NM_019613 | 3502.645  | 3370.289  |

|           |           |           |           |           |           |           |           |           |
|-----------|-----------|-----------|-----------|-----------|-----------|-----------|-----------|-----------|
| AK026142  | 2885.446  | 3093.155  | NM_013436 | 1679.846  | 3173.452  | NM_005382 | 450.048   | 722.86    |
| AF161369  | 5746.076  | 4862.603  | AF225426  | 520.426   | 1249.093  | AK027086  | 2093.265  | 2248.536  |
| AK027176  | 12301.398 | 11367.494 | NM_005208 | 6077.438  | 9036.333  | AB032997  | 403.172   | 395.504   |
| AF073328  | 459.939   | 377.097   | NM_000421 | 921.831   | 1944.624  | AL096857  | 1365.628  | 1485.908  |
| AF211968  | 254.376   | 355.908   | AK025687  | 17336.408 | 29410.586 | AB002351  | 258.916   | 348.345   |
| Y12019    | 4030.239  | 3926.877  | AF218941  | 3542.552  | 7800.189  | AF073770  | 1407.109  | 1323.121  |
| AF147418  | 370.183   | 332.65    | AL137264  | 12008.839 | 25628.129 | AL359401  | 3317.1    | 4144.589  |
| AK021898  | 3582.365  | 3192.13   | NM_002226 | 423.966   | 1572.772  | NM_012213 | 988.556   | 945.927   |
| AK022163  | 611.751   | 1243.185  | X84370    | 7862.554  | 15568.119 | NM_016573 | 1227.36   | 1138.738  |
| AK022301  | 1308.349  | 2041.964  | NM_004039 | 1028.798  | 1749.887  | NM_001303 | 3310.28   | 3518.739  |
| AK021948  | 1660.551  | 2604.903  | NM_000508 | 143.022   | 899.5     | M21304    | 223.285   | 273.445   |
| AK022054  | 961.482   | 1362.613  | AB014558  | 830.459   | 1510.297  | NM_001979 | 2563.349  | 2338.132  |
| AK022191  | 776.137   | 1400.749  | NM_016577 | 446.904   | 249.587   | AB040896  | 626.858   | 766.399   |
| AK022341  | 724.109   | 932.632   | AK023107  | 5231.826  | 1391.055  | NM_001107 | 3306.786  | 3329.28   |
| AK026861  | 873.45    | 1001.309  | NM_006854 | 6918.375  | 2149.668  | AF151851  | 1645.368  | 1461.094  |
| AK021642  | 5831.804  | 8133.041  | NM_004580 | 3728.267  | 1500.295  | NM_003636 | 5319.498  | 5524.607  |
| AK022455  | 1608.17   | 2266.073  | NM_020387 | 36499.523 | 21673.887 | NM_002234 | 492.507   | 575.598   |
| AK021987  | 1854.875  | 2682.214  | NM_007246 | 1355.885  | 678.585   | NM_000701 | 864.878   | 1395.711  |
| AK026905  | 5391.312  | 8486.083  | AK026248  | 842.086   | 438.044   | AB022696  | 994.205   | 1026.367  |
| AK023449  | 734.607   | 991.407   | NM_004578 | 953.222   | 677.026   | AF137372  | 2916.617  | 3078.563  |
| NM_000134 | 732.652   | 961.023   | NM_000647 | 325.556   | 191.085   | AF220417  | 876.935   | 1021.43   |
| NM_006638 | 3216.79   | 2982.869  | AB046793  | 1585.505  | 1361.458  | D83782    | 2686.916  | 2226.23   |
| X14675    | 1807.822  | 1244.533  | NM_017604 | 1870.478  | 2029.557  | NM_002078 | 1294.585  | 1208.286  |
| AF071170  | 953.817   | 716.061   | NM_017738 | 6409.622  | 6388.509  | NM_000287 | 1185.601  | 1077.527  |
| AF075075  | 712.916   | 668.264   | NM_016557 | 1403.034  | 796.408   | NM_001656 | 946.046   | 1273.454  |
| AK023264  | 1305.77   | 1186.106  | NM_000623 | 2181.748  | 6136.098  | NM_002611 | 580.202   | 645.264   |
| AK024457  | 7603.627  | 10282.56  | AF161348  | 1365.566  | 2358.4    | NM_017417 | 213.828   | 364.081   |
| AL389977  | 1092.573  | 1663.113  | NM_018467 | 7999.011  | 14841.855 | AL133602  | 445.097   | 459.768   |
| AK022022  | 1519.546  | 1875.437  | NM_006068 | 1142.962  | 2152.456  | AF037219  | 1729.425  | 1743.187  |
| AK026894  | 1887.797  | 3053.93   | NM_002704 | 351.24    | 629.229   | AK026075  | 821.389   | 615.979   |
| AK026372  | 1221.471  | 1735.992  | U16752    | 460.859   | 657.41    | NM_000251 | 1025.164  | 891.111   |
| AL109684  | 533.006   | 402.582   | NM_002038 | 7425.664  | 13332.373 | NM_006038 | 1392.081  | 1117.488  |
| NM_014186 | 6964.769  | 8402.739  | NM_005729 | 9121.788  | 18463.428 | AB011133  | 1253.998  | 1317.071  |
| AF056442  | 2114.59   | 1513.568  | NM_015493 | 817.117   | 1842.95   | NM_017572 | 15552.657 | 15218.614 |
| AK024752  | 37011.984 | 28010.432 | NM_003747 | 2011.086  | 4911.908  | NM_018444 | 1058.513  | 970.571   |
| BG117194  | 1482.868  | 1103.477  | NM_002827 | 2761.873  | 676.687   | NM_000252 | 678.129   | 560.164   |
| AK024181  | 555.492   | 203.914   | NM_001946 | 648.483   | 206.564   | NM_006947 | 5452.312  | 5327.906  |
| AF131859  | 4086.806  | 3704.215  | BF035425  | 16145.306 | 4702.52   | NM_017917 | 1082.969  | 1043.961  |
| AK001864  | 472.767   | 366.986   | NM_000159 | 61305.398 | 45602.652 | NM_004090 | 2777.514  | 3096.584  |
| AK023632  | 934.916   | 716.232   | NM_014638 | 1189.551  | 525.501   | NM_014634 | 3203.687  | 3054.393  |
| AK023690  | 811.42    | 1127.172  | AF099740  | 1080.12   | 624.697   | NM_001919 | 1770.235  | 1670.806  |
| AF230317  | 693.294   | 920.328   | NM_006117 | 15899.669 | 5665.32   | BC031485  | 983.026   | 887.509   |
| AK023806  | 2761.605  | 3739.829  | NM_002225 | 1927.233  | 998.447   | NM_004092 | 3047.019  | 3415.599  |
| AF088068  | 804.2     | 1098.308  | NM_006229 | 551.608   | 439.41    | X15624    | 949.628   | 1282.715  |
| Y16696    | 18948.096 | 29777.811 | NM_015415 | 18941.605 | 11007.577 | NM_004467 | 220.502   | 148.049   |
| AK026094  | 4065.962  | 7767.735  | NM_004897 | 2531.378  | 1908.172  | NM_005622 | 410.607   | 366.148   |
| AF161344  | 10606.251 | 13063.646 | NM_002555 | 1317.449  | 709.881   | NM_018058 | 3074.416  | 3048.302  |
| AF086027  | 1615.719  | 2400.315  | AF225418  | 1103.78   | 1956.664  | NM_004548 | 7869.753  | 8533.693  |
| AK023655  | 474.129   | 518.357   | NM_000309 | 930.013   | 2214.868  | X69079    | 6981.29   | 5671.998  |
| AF075045  | 614.703   | 610.587   | NM_004528 | 20159.715 | 28805.404 | BI759406  | 828.658   | 752.039   |
| AK022199  | 2199.436  | 2671.256  | NM_002450 | 32798.996 | 20757.516 | R76099    | 323.565   | 304.392   |
| NM_006211 | 621.072   | 723.645   | NM_001686 | 733.191   | 1391.692  | S74445    | 259.796   | 212.413   |
| NM_003524 | 6202.651  | 7286.963  | NM_004978 | 331.832   | 1318.974  | BI763360  | 407.071   | 275.287   |



|           |           |           |           |           |           |           |          |          |
|-----------|-----------|-----------|-----------|-----------|-----------|-----------|----------|----------|
| AK021438  | 930.442   | 1043.599  | NM_000705 | 527.663   | 1440.022  | D25538    | 414.069  | 278.512  |
| NM_005913 | 1175.804  | 1236.352  | NM_145904 | 13292.148 | 3035.104  | NM_000360 | 2224.791 | 2469.094 |
| AK022315  | 646.343   | 759.662   | NM_013334 | 5885.671  | 3062.742  | NM_001840 | 251.522  | 170.729  |
| S39891    | 1680.419  | 1719.464  | AF150735  | 2860.877  | 881.266   | X03635    | 636.592  | 560.584  |
| AK021624  | 1081.189  | 881.242   | NM_018183 | 1418.25   | 677.315   | X03348    | 737.588  | 977.68   |
| AF278605  | 12848.045 | 16910.641 | NM_012382 | 3845.582  | 9046.964  | AF353674  | 3399.188 | 3950.178 |
| NM_006497 | 16398.645 | 20115.559 | BF038366  | 402.238   | 973.573   | BC002645  | 1869.563 | 2082.864 |
| AK022329  | 562.018   | 393.348   | NM_012304 | 591.189   | 1207.967  | NM_021138 | 604.791  | 618.88   |
| AL133599  | 1324.488  | 1223.362  | NM_016440 | 14516.463 | 20609.047 | SB        | 312.621  | 276.853  |
| AK022380  | 547.214   | 659.582   | NM_007194 | 3145.523  | 7750.884  |           | 212.785  | 52.03    |
| NM_016472 | 3926.311  | 4677.264  | NM_000314 | 7452.322  | 16618.977 | NM_001523 | 377.319  | 268.74   |
| AF086064  | 1024.149  | 990.788   | S74620    | 4000.559  | 8986.136  | NM_017423 | 1062.142 | 882.133  |
| AK023042  | 3560.555  | 3522.837  | AF305239  | 1118.434  | 2511.223  | NM_019613 | 3355.953 | 2836.014 |
| AK026429  | 650.431   | 450.857   | AL137264  | 4831.286  | 1398.343  | NM_005382 | 366.354  | 390.76   |
| NM_016550 | 5806.271  | 6349.924  | X84370    | 4421.103  | 1652.666  | AK027086  | 2309.387 | 1929.802 |
| AK024813  | 6398.428  | 7264.707  | NM_004039 | 901.817   | 947.838   | AB032997  | 453.94   | 424.563  |
| AJ227909  | 21103.061 | 18765.227 | NM_000508 | 256.694   | 739.367   | AL096857  | 1350.513 | 1146.878 |
| CY3Cy5    | 2146.263  | 229.066   | AB014558  | 810.066   | 629.949   | X07203    | 211.919  | 230.902  |
| BG698522  | 4531.957  | 3537.808  | NM_000118 | 1649.594  | 749.803   | NM_003834 | 1351.762 | 1185.46  |
| AA152346  | 462.763   | 395.612   | NM_000913 | 463.931   | 195.538   | NM_005950 | 1458.882 | 1140.16  |
| L15189    | 966.64    | 996.581   | NM_001298 | 64243.781 | 28246.859 | NM_003381 | 372.817  | 468.406  |
| AB023420  | 7907.911  | 6072.535  | BG325046  | 2422.808  | 1021.587  | NM_005750 | 369.375  | 366.526  |
| BI822179  | 697.468   | 742.679   | AI351740  | 3930.638  | 1648.956  | NM_003702 | 5418.045 | 5328.959 |
| AF022912  | 3932.575  | 3294.044  | AA444051  | 421.725   | 238.067   | NM_000360 | 316.771  | 327.888  |
| AA477428  | 15739.543 | 15680.825 | NM_007164 | 1608.123  | 406.535   | NM_004405 | 1029.737 | 1139.814 |
| AA156342  | 1002.606  | 860.786   | BE783826  | 18088.027 | 18043.838 | NM_001980 | 2897.02  | 2548.996 |
| R45594    | 12273.489 | 10902.639 | X04827    | 1094.61   | 2035.057  | NM_006060 | 1260.73  | 1382.559 |
| H46425    | 682.472   | 783.724   | H07088    | 523.33    | 1637.137  | NM_005667 | 1554.604 | 1637.738 |
| H75530    | 1522.236  | 1786.564  | AI004656  | 504.825   | 1075.191  | NM_000060 | 395.351  | 363.994  |
| NM_004170 | 2611.268  | 3073.669  | BC020596  | 1407.724  | 2147.895  | NM_009580 | 277.112  | 259.675  |
| SR5       | 4738.541  | 2623.47   | AF116606  | 48802.754 | 58570.852 | L09080    | 705.458  | 912.03   |
| SR7       | 4223.488  | 19658.402 | X98922    | 4457.477  | 9186.421  | NM_007320 | 1426.577 | 1166.636 |
| SR9       | 16673.578 | 2231.676  | AK098435  | 6480.044  | 14272.932 | AK023080  | 343.528  | 244.169  |
| CY3Cy5    | 2355.498  | 192.658   | AK092872  | 2747.816  | 6951.33   | NM_001880 | 2139.634 | 2282.499 |
| NM_001315 | 3646.492  | 3422.242  | AF230496  | 515.431   | 1163.49   | AF137372  | 2995.987 | 2730.742 |
| AF286095  | 1260.231  | 1582.525  | M16801    | 571.593   | 1735.022  | AF220417  | 844.088  | 983.337  |
| NM_000870 | 733.934   | 724.772   | NM_002030 | 4337.04   | 1332.557  | D83782    | 2551.352 | 1672.547 |
| S66407    | 802.097   | 755.499   | NM_005720 | 4210.799  | 4973.722  | NM_002070 | 1289.562 | 996.064  |
| NM_004250 | 43265.367 | 25521.67  | NM_015493 | 977.685   | 2284.299  | NM_000287 | 1060.456 | 855.113  |
| NM_001981 | 2097.173  | 2164.64   | NM_003747 | 1839.707  | 1217.576  | NM_001650 | 865.934  | 830.888  |
| NM_014654 | 474.499   | 421.587   | AB037744  | 1303.292  | 472.856   | AF091033  | 343.824  | 278.874  |
| NM_001580 | 30313.492 | 19954.303 | AF141901  | 751.51    | 374.064   | NM_001122 | 3843.822 | 3659.171 |
| AK026108  | 3190.782  | 2560.077  | NM_007000 | 637.76    | 307.214   | NM_004591 | 438.924  | 350.975  |
| NM_006370 | 1221.974  | 1187.059  | AL109708  | 724.104   | 326.715   | AL133027  | 536.086  | 566.623  |
| BF571428  | 1753.238  | 1552.696  | AF234532  | 1065.872  | 553.188   | AB037732  | 634.468  | 520.75   |
| NM_006240 | 4048.681  | 5853.387  | NM_002410 | 510.341   | 302.573   | NM_001837 | 233.896  | 334.972  |
| NM_004310 | 386.885   | 652.043   | NM_004480 | 1116.749  | 395.864   | BC016029  | 334.893  | 336.534  |
| NM_016920 | 3535.511  | 2503.178  | NM_012410 | 408.853   | 501.245   | M27487    | 337.283  | 271.931  |
| NM_012320 | 598.53    | 519.427   | NM_013290 | 5100.963  | 6541.532  | NM_002164 | 424.761  | 435.782  |
| NM_013940 | 573.514   | 685.928   | AL117478  | 539.412   | 1327.061  | NM_003811 | 1795.095 | 2614.18  |
| NM_001630 | 6666.404  | 4739.441  | NM_005307 | 1367.312  | 2555.365  | NM_002981 | 2706.534 | 3162.724 |
| AF182404  | 1325.122  | 1690.583  | NM_005950 | 1359.048  | 2864.447  | NM_001244 | 608.513  | 652.748  |
| NM_006550 | 3305.76   | 3342.56   | NM_013430 | 1833.968  | 4249.47   | NM_012270 | 379.207  | 431.673  |

|           |           |           |           |           |           |           |          |          |
|-----------|-----------|-----------|-----------|-----------|-----------|-----------|----------|----------|
| NM_00244E | 764.465   | 677.643   | AF225426  | 835.381   | 1832.348  | AL117468  | 3657.815 | 3476.47  |
| NM_01780E | 418.729   | 753.169   | NM_00520E | 9953.706  | 22390.066 | NM_00409C | 2670.536 | 2627.372 |
| AK023202  | 2391.632  | 2155.923  | NM_000421 | 812.199   | 2051.807  | NM_014634 | 3176.957 | 2882.352 |
| D63877    | 2474.635  | 2495.489  | AK025687  | 18331.219 | 32286.957 | NM_00191E | 1911.184 | 1864.089 |
| AF131760  | 800.173   | 719.146   | AF218941  | 3888.193  | 8868.549  | BC031485  | 939.436  | 792.506  |
| NM_01869E | 1404.335  | 1372.657  | NM_004231 | 48079.098 | 27240.201 | NM_00409Z | 3216.453 | 3508.196 |
| NM_006461 | 3224.542  | 3561.58   | NM_016577 | 560.621   | 489.845   | X15624    | 832.743  | 887.248  |
| NM_018201 | 1368.327  | 1158.515  | AK023107  | 6587.143  | 3260.48   | AF073770  | 1402.542 | 1279.141 |
| NM_01443E | 317.348   | 375.643   | NM_006854 | 8366.448  | 4094.365  | AL359401  | 3491.394 | 3858.752 |
| NM_01488C | 460.837   | 451.765   | NM_00458C | 2952.137  | 1332.513  | NM_01221E | 1086.438 | 1028.31  |
| NM_003764 | 3083.752  | 3273.335  | NM_020387 | 32774.672 | 13557.557 | NM_01657E | 1459.562 | 1222.952 |
| NM_00482E | 449.655   | 370.83    | NM_00724E | 1095.404  | 663.291   | NM_00130E | 3802.692 | 3329.844 |
| NM_00679E | 14437.82  | 8260.145  | AK026248  | 590.637   | 337.658   | M21304    | 248.816  | 148.395  |
| NM_00153E | 1994.744  | 1087.539  | NM_00457E | 1087.359  | 828.799   | NM_00197E | 2764.391 | 2146.269 |
| X97261    | 7799.791  | 15183.067 | NM_000647 | 257.988   | 169.834   | AB040896  | 743.864  | 755.716  |
| NM_00146E | 1391.83   | 1089.318  | AB046793  | 617.569   | 273.041   | AF084645  | 199.477  | 201.31   |
| D87666    | 55528.59  | 30188.068 | NM_017604 | 1072.144  | 778.153   | NM_00517E | 290.657  | 483.882  |
| NM_002921 | 858.058   | 366.14    | NM_01773E | 7040.575  | 13327.392 | NM_00363E | 5504.673 | 6697.527 |
| AF149304  | 617.171   | 846.849   | NM_016557 | 1142.908  | 2527.455  | NM_002234 | 613.547  | 646.273  |
| NM_01209E | 4135.287  | 3937.602  | NM_00062E | 2006.504  | 2515.501  | NM_003471 | 286.268  | 222.288  |
| X73079    | 14407.93  | 12824.788 | AF161348  | 1468.152  | 1792.669  | NM_000701 | 969.849  | 1514.65  |
| NM_019091 | 883.369   | 930.805   | NM_018467 | 8768.325  | 17027.377 | AB022696  | 921.974  | 977.662  |
| AF264781  | 951.053   | 687.519   | NM_00606E | 1259.574  | 2719.347  | NM_01437E | 242.041  | 405.105  |
| NM_00245E | 341.777   | 310.37    | NM_002704 | 335.667   | 1052.834  | NM_02100E | 636.922  | 676.307  |
| AK024215  | 2310.005  | 1978.679  | U16752    | 352.28    | 802.336   | SB        | 315.303  | 420.511  |
| AB044661  | 3172.426  | 2025.497  | NM_01644C | 8731.963  | 2252.862  | NM_00152E | 311.332  | 181.31   |
| NM_00060E | 8524.606  | 6875.76   | NM_007194 | 2052.593  | 635.926   | NM_01742E | 850.491  | 759.135  |
| NM_016124 | 3100.184  | 2955.695  | NM_000314 | 4262.652  | 1477.783  | Z70705    | 239.757  | 239.421  |
| NM_01907E | 286.815   | 216.634   | AB002369  | 899.208   | 572.334   | NM_002611 | 660.894  | 765.356  |
| U53530    | 1313.541  | 775.155   | S74620    | 2212.633  | 2848.423  | NM_017417 | 283.06   | 270.95   |
| NM_00659E | 2634.454  | 1819.429  | AF305239  | 828.099   | 386.132   | AL133602  | 456.995  | 424.724  |
| NM_01594E | 1271.094  | 641.579   | NM_002827 | 3756.315  | 1634.584  | AF037219  | 1683.739 | 1710.172 |
| NM_003054 | 2273.017  | 1094.938  | NM_00194E | 760.02    | 357.942   | AK026075  | 1040.327 | 907.852  |
| NM_00304Z | 735.626   | 528.647   | BF035425  | 24536.635 | 9508.39   | NM_000251 | 1164.513 | 1275.762 |
| NM_00221E | 7537.515  | 4772.869  | NM_00015E | 51009.969 | 31957.748 | AF118071  | 181.331  | 243.058  |
| NM_00282E | 1693.121  | 1382.565  | NM_01463E | 1071.694  | 835.771   | NM_00603E | 1529.894 | 1587.306 |
| AF159141  | 2285.123  | 2131.853  | AF099740  | 1240.659  | 979.981   | NM_00248E | 269.583  | 190.709  |
| NM_00242C | 291.021   | 377.683   | NM_006117 | 16457.568 | 9254.41   | NM_018444 | 1224.29  | 1228.221 |
| NM_01645E | 18047.74  | 11929.686 | NM_00222E | 2060.515  | 1830.777  | NM_00025Z | 968.686  | 996.871  |
| AK022233  | 1656.635  | 1941.885  | NM_01541E | 17881.566 | 5233.588  | NM_006947 | 5614.292 | 7304.925 |
| AL137713  | 216.464   | 327.717   | NM_004897 | 2431.498  | 4076.558  | NM_017917 | 1021.777 | 1338.364 |
| AK026410  | 9917.149  | 6188.162  | NM_00255E | 1257.987  | 1650.169  | NM_00006C | 238.313  | 255.904  |
| NM_014637 | 2436.044  | 2166.739  | AF225418  | 850.763   | 1483.212  | L09080    | 536.948  | 390.522  |
| NM_01337E | 12757.801 | 9108.281  | NM_00030E | 956.889   | 1686.702  | NM_00732E | 1223.886 | 963.776  |
| AF113208  | 8351.412  | 4669.821  | NM_00452E | 21060.004 | 29566.568 | NM_00188E | 1418.451 | 2002.473 |
| NM_00615E | 4366.93   | 3401.068  | NM_00245C | 32320.693 | 16604.645 | NM_00562Z | 336.697  | 460.385  |
| NM_012164 | 3215.039  | 2764.501  | NM_00168E | 714.945   | 1373.571  | NM_01805E | 3018.376 | 3215.888 |
| AB011156  | 865.054   | 443.013   | NM_01472E | 2077.031  | 540.79    | NM_00454E | 8229.619 | 8057.711 |
| NM_01807E | 651.06    | 578.817   | AB011106  | 1513.149  | 326.085   | X69079    | 7257.63  | 5785.896 |
| NM_00476C | 13786.374 | 7743.547  | D26362    | 2405.504  | 845.002   | BI759406  | 745.912  | 707.281  |
| NM_00675Z | 2641.337  | 1186.078  | NM_01345Z | 1502.103  | 1072.863  | R76099    | 293.934  | 244.584  |
| NM_00442E | 406.626   | 391.9     | AL133073  | 312.548   | 720.54    | S74445    | 270.624  | 425.036  |
| NM_00680E | 2928.592  | 2119.015  | AY009402  | 1771.966  | 1523.947  | BI763360  | 485.239  | 350.672  |

|           |           |           |           |           |           |           |           |           |
|-----------|-----------|-----------|-----------|-----------|-----------|-----------|-----------|-----------|
| NM_013943 | 552.657   | 504.518   | NM_018451 | 1019.395  | 368.596   | D25538    | 449.389   | 518.633   |
| NM_001639 | 5605.247  | 5065.396  | NM_012443 | 434.744   | 317.644   | NM_00036C | 2578.627  | 2567.46   |
| BG698522  | 5048.245  | 3438.093  | NM_002584 | 1658.299  | 1747.372  | D49950    | 307.035   | 170.766   |
| AA152346  | 494.038   | 365.347   | NM_013334 | 4907.525  | 4843.148  | NM_001849 | 404.342   | 431.785   |
| L15189    | 1087.093  | 862.796   | AF150735  | 3623.347  | 1477.589  | AF353674  | 3941.75   | 4374.216  |
| AB023420  | 8378.937  | 5490.789  | NM_018183 | 1517.381  | 1805.656  | BC002645  | 1799.627  | 2100.119  |
| BI822179  | 835.556   | 881.045   | NM_012382 | 4298.417  | 6448.208  | NM_021138 | 594.691   | 860.094   |
| AF022912  | 4262.614  | 2519.466  | BF038366  | 710.681   | 550.477   | BC002792  | 869.088   | 1279.744  |
| AA477428  | 16794.629 | 9380.854  | NM_012304 | 612.003   | 815.044   | NM_002981 | 2368.297  | 2401.146  |
| AA156342  | 874.803   | 443.655   | AF245505  | 581.584   | 142.727   | NM_001244 | 490.162   | 347.587   |
| R45594    | 13629.308 | 11287.901 | AB037776  | 374.691   | 145.503   | NM_012275 | 178.715   | 171.943   |
| H46425    | 651.957   | 427.918   | AF196976  | 2473.243  | 1235.128  | NM_006137 | 1968.157  | 2021.42   |
| AI355949  | 323.668   | 358.821   | AL050379  | 586.636   | 1131.021  | NM_016139 | 20822.215 | 18266.363 |
| AA278152  | 10544.507 | 5363.888  | NM_003161 | 1883.364  | 4713.1    | AL117468  | 3473.468  | 2930.96   |
| H75530    | 1601.878  | 1164.029  | NM_014496 | 582.973   | 461.069   | NM_019613 | 2943.736  | 3168.432  |
| NM_004176 | 2829.026  | 1916.789  | NM_016215 | 16152.457 | 7650.623  | NM_005382 | 333.928   | 563.123   |
| NM_004548 | 24152.799 | 15216.547 | NM_001501 | 5050.892  | 6927.446  | AK027086  | 1934.888  | 2102.608  |
| AK000554  | 2079.127  | 1172.037  | NM_006176 | 48228.777 | 60820.996 | AB032997  | 358.885   | 335.492   |
| NM_006472 | 686.106   | 521.149   | AL137459  | 1859.376  | 2087.943  | AL096857  | 1178.506  | 1090.51   |
| NM_001538 | 1871.753  | 1543.583  | AB037812  | 308.508   | 242.191   | AB040104  | 374.961   | 274.112   |
| X97261    | 7469.396  | 23316.785 | AB007932  | 2054.324  | 2730.877  | NM_003834 | 1326.109  | 1307.209  |
| NM_001468 | 1347.246  | 1438.096  | NM_002561 | 5366.672  | 5384.331  | NM_005959 | 1426.539  | 1553.711  |
| D87666    | 55336.086 | 38479.16  | NM_006103 | 25058.137 | 13060.936 | NM_003381 | 417.297   | 505.145   |
| NM_001315 | 4014.775  | 3825.864  | AL359933  | 12517.421 | 3807.179  | NM_003702 | 5818.47   | 6881.075  |
| AF286095  | 1541.504  | 1281.422  | NM_001302 | 691.767   | 145.066   | NM_000369 | 510.354   | 485.447   |
| NM_000878 | 784.958   | 611.126   | M17783    | 5583.827  | 1640.318  | NM_004405 | 1361.976  | 1326.754  |
| S66407    | 956.081   | 738.573   | NM_01859C | 8713.565  | 2331.27   | NM_001988 | 3277.056  | 3001.754  |
| NM_004258 | 39461.426 | 16740.6   | NM_003178 | 1199.418  | 413.836   | NM_00606C | 1426.283  | 1733.868  |
| NM_001981 | 2767.285  | 1997.508  | NM_012437 | 7721.606  | 3328.613  | NM_005667 | 1726.244  | 1737.708  |
| NM_014654 | 326.019   | 181.705   | NM_002607 | 718.353   | 601.661   | NM_006308 | 330.225   | 432.825   |
| NM_001585 | 27425.857 | 9496.591  | AF116712  | 514.027   | 1174.078  | NM_002234 | 477.794   | 458.196   |
| AK026108  | 3020.924  | 1853.846  | AF116626  | 2326.48   | 1957.296  | NM_000701 | 852.528   | 837.161   |
| NM_006379 | 1162.876  | 741.877   | NM_00176C | 18308.383 | 7144.312  | AB022696  | 1172.011  | 1034.958  |
| BF571428  | 2011.487  | 1109.484  | NM_002527 | 485.93    | 454.587   | AF137372  | 2564.761  | 2977.286  |
| AB037723  | 2848.255  | 1748.901  | NM_00589C | 1882.605  | 2601.155  | AF220417  | 937.639   | 1111.052  |
| NM_006246 | 4378.167  | 2533.203  | NM_007065 | 32164.164 | 28885.555 | D83782    | 2240.202  | 1628.009  |
| U58096    | 19290.697 | 10589.757 | AF149785  | 2822.955  | 4043.722  | NM_002078 | 1101.017  | 942.455   |
| NM_016929 | 3782.306  | 1302.822  | NM_012068 | 6522.773  | 6576.708  | NM_000287 | 1080.857  | 1128.375  |
| NM_012323 | 933.301   | 642.071   | NM_004064 | 6671.689  | 4823.044  | NM_001656 | 719.095   | 956.343   |
| NM_015948 | 1397.112  | 1289.267  | NM_001256 | 6245.218  | 6486.051  | AF091033  | 322.229   | 343.121   |
| NM_003054 | 2541.665  | 2173.71   | NM_020205 | 1388.364  | 4599.094  | NM_001122 | 3639.617  | 3850.576  |
| NM_003042 | 948.746   | 668.791   | NM_001227 | 2235.659  | 1425.302  | NM_004591 | 419.4     | 546.883   |
| NM_002219 | 6536.644  | 5721.096  | NM_001191 | 3013.468  | 2247.95   | AL133027  | 649.629   | 467.354   |
| AF182404  | 1317.193  | 1520.418  | NM_013342 | 2332.429  | 1339.234  | NM_005767 | 375.77    | 356.337   |
| NM_006555 | 3178.788  | 2775.489  | NM_014344 | 1296.213  | 701.615   | BC016029  | 473.709   | 562.169   |
| NM_014521 | 339.231   | 391.709   | AB040917  | 808.276   | 490.088   | M27487    | 494.526   | 464.99    |
| NM_002445 | 683.367   | 538.455   | AL110261  | 9918.794  | 5836.168  | NM_002286 | 11556.99  | 11177.615 |
| NM_017809 | 363.238   | 388.54    | AA203539  | 746.273   | 513.224   | NM_002164 | 303.419   | 444.872   |
| AK023202  | 2035.546  | 1447.21   | AK021786  | 637.396   | 463.917   | NM_003811 | 1850.57   | 2311.509  |
| D63877    | 2198.178  | 1164.012  | NM_005932 | 614.954   | 172.638   | AB011133  | 1437.41   | 1196.425  |
| AF131760  | 861.368   | 630.703   | NM_004279 | 6385.468  | 3080.432  | NM_017572 | 15374.521 | 15307.094 |
| NM_018698 | 1149.222  | 540.506   | NM_001908 | 2362.155  | 2497.351  | NM_018444 | 929.209   | 940.045   |
| NM_006461 | 2821.039  | 1762.647  | NM_000285 | 6812.377  | 8044.693  | NM_000252 | 778.209   | 679.312   |

|           |           |           |           |           |           |           |          |          |
|-----------|-----------|-----------|-----------|-----------|-----------|-----------|----------|----------|
| NM_018201 | 1764.144  | 946.092   | NM_005911 | 20398.588 | 19667.469 | NM_006947 | 5725.916 | 5505.675 |
| NM_01443E | 424.585   | 294.126   | AV702690  | 1242.93   | 901.662   | NM_017917 | 934.814  | 850.302  |
| NM_01488C | 334.495   | 274.551   | AL117452  | 3441.269  | 2553.754  | NM_00409C | 2288.321 | 2911.015 |
| NM_003764 | 3778.869  | 3714.568  | NM_01223C | 1626.449  | 934.298   | NM_014634 | 2859.077 | 2882.599 |
| NM_00482E | 375.966   | 428.435   | NM_01403E | 8428.456  | 6138.45   | NM_00191E | 1730.864 | 1794.124 |
| NM_00679E | 16767.035 | 8556.461  | NM_002061 | 3501.126  | 3106.223  | BC031485  | 834.642  | 752.038  |
| NM_01807E | 532.284   | 516.89    | AF169974  | 3569.382  | 6022.1    | NM_00409E | 2743.24  | 3010.029 |
| NM_00476C | 12780.887 | 9612.2    | NM_00452E | 577.288   | 744.186   | X15624    | 938.914  | 798.298  |
| NM_00675E | 2672.709  | 2268.506  | NM_00573E | 2352.75   | 1303.186  | AF073770  | 1776.735 | 1383.689 |
| NM_00442E | 427.992   | 424.748   | NM_01813E | 2939.105  | 2086.751  | AL359401  | 3580.963 | 3960.619 |
| NM_00680E | 2830.711  | 2610.504  | NM_01961E | 4407.61   | 2567.7    | NM_01221E | 1039.294 | 1045.665 |
| AF149304  | 396.043   | 500.589   | AF183411  | 1250.22   | 718.649   | NM_01657E | 1248.565 | 1203.958 |
| NM_01209E | 5039.779  | 4322.795  | BF244591  | 1011.239  | 453.438   | NM_00130E | 3300.193 | 4274.119 |
| X73079    | 16159.321 | 11188.126 | NM_00588E | 10515.23  | 8263.163  | NM_00197E | 3242.682 | 3388.066 |
| NM_019091 | 805.552   | 579.984   | U63785    | 626.551   | 403.711   | AB040896  | 735.211  | 1249.193 |
| AF264781  | 507.709   | 272.612   | NM_00596E | 1198.375  | 845.434   | NM_001107 | 3530.902 | 4791.027 |
| AK024215  | 2761.799  | 1889.122  | NM_00315E | 2335.281  | 1815.465  | AF084645  | 334.606  | 435.421  |
| AB044661  | 3667.773  | 2461.529  | NM_00310E | 402.093   | 259.682   | AF151851  | 1606.788 | 2043.074 |
| NM_00060E | 9571.341  | 6685.88   | NM_01331C | 3552.175  | 813.742   | NM_00517E | 249.927  | 403.908  |
| NM_016124 | 3692.201  | 3040.085  | BC004958  | 2189.407  | 798.872   | NM_00363E | 5626.77  | 5855.897 |
| NM_01907E | 441.418   | 482.456   | NM_00576E | 5867.957  | 3099.171  | AF040723  | 2354.76  | 2047.114 |
| U53530    | 1496.534  | 749       | NM_00647E | 1014.143  | 610.09    | NM_01552E | 2932.269 | 3624.292 |
| NM_00659E | 2372.231  | 1407.045  | NM_01464E | 444.998   | 233.842   | X89675    | 599.982  | 692.712  |
| NM_00417E | 2587.177  | 2851.467  | NM_00565E | 682.352   | 555.584   | NM_01218E | 301.784  | 370.148  |
| NM_00454E | 20824.908 | 13480.187 | NM_01455E | 1136.164  | 2056.464  | NM_00579E | 4854.438 | 5184.347 |
| AK000554  | 1890.968  | 1366.021  | NM_00344C | 868.43    | 1343.959  | NM_00421E | 1245.655 | 1343.733 |
| NM_00647E | 799.121   | 986.969   | NM_00469E | 3617.987  | 2979.909  | NM_01628E | 8734.435 | 9628.601 |
| NM_00282E | 2024.379  | 2048.733  | U41387    | 7057.63   | 4677.428  | NM_001464 | 454.089  | 383.964  |
| AF159141  | 2610.792  | 1777.251  | NM_00451E | 7393.246  | 4615.8    | NM_002051 | 2039.282 | 2773.039 |
| NM_00242C | 363.104   | 254.142   | NM_00651E | 1042.855  | 806.102   | NM_00152E | 290.482  | 287.935  |
| NM_01645E | 17069.377 | 4708.201  | NM_00368E | 15766.884 | 10206.902 | NM_01742E | 837.556  | 772.633  |
| AK022233  | 1589.935  | 1051.766  | NM_00629E | 4069.594  | 2722.547  | Z70705    | 263.456  | 223.459  |
| AK026410  | 9834.375  | 7391.279  | NM_00154C | 2143.696  | 1254.803  | NM_002611 | 709.457  | 593.687  |
| NM_01463E | 2113.857  | 1106.857  | NM_012111 | 15273.321 | 8117.65   | NM_017417 | 304.883  | 374.749  |
| NM_01337E | 11894.776 | 7031.379  | NM_00447C | 11007.586 | 6253.915  | AF037219  | 2062.72  | 2009.688 |
| AF113208  | 9483.21   | 20836.775 | NM_00141E | 6795.439  | 4816.447  | AK026075  | 843.13   | 1273.069 |
| NM_00615E | 4495.603  | 2683.158  | NM_00375E | 21838.426 | 9834.221  | NM_000251 | 1193.181 | 1758.453 |
| NM_012164 | 2864.165  | 1463.66   | AL049680  | 2175.759  | 1607.23   | AF118071  | 126.067  | 252.793  |
| NM_004721 | 299.336   | 166.876   | AK001595  | 1447.875  | 371.32    | NM_00603E | 987.627  | 1112.456 |
| AB011156  | 720.144   | 668.483   | NM_01801E | 1721.969  | 458.68    | NM_00009E | 378.104  | 627.375  |
| NM_00624E | 4030.182  | 3548.866  | NM_00371E | 3767.438  | 2361.438  | NM_00177E | 1814.93  | 1606.244 |
| U58096    | 17833.773 | 13134.337 | M94065    | 859.305   | 284.525   | AB033059  | 413.941  | 369.495  |
| NM_01692E | 3291.045  | 2261.242  | BF036874  | 1297.805  | 536.962   | NM_016484 | 1758.292 | 1809.369 |
| NM_01232E | 748.18    | 741.491   | AF182419  | 2368.54   | 2249.053  | NM_01445E | 668.019  | 710.263  |
| NM_01819E | 294.266   | 651.901   | NM_00701E | 2540.68   | 1606.134  | AK021536  | 3964.95  | 3348.577 |
| NM_01394E | 540.215   | 774.733   | NM_00270E | 3933.223  | 2872.116  | NM_00260C | 260.934  | 214.312  |
| NM_00163E | 5790.749  | 3265.507  | NM_00537E | 7109.731  | 4264.596  | NM_00364E | 7219.547 | 4588.643 |
| BG698522  | 3872.647  | 1507.847  | NM_00598E | 4722.353  | 3090.749  | NM_00666E | 542.971  | 442.058  |
| AA152346  | 415.267   | 199.119   | NM_01590E | 3306.688  | 3558.338  | NM_00609E | 528.574  | 478.737  |
| L15189    | 1398.838  | 3604.876  | L25270    | 35054.188 | 18121.977 | NM_00393E | 339.877  | 471.788  |
| AB023420  | 7823.659  | 4666.587  | AB033111  | 1935.524  | 1093.666  | NM_012424 | 351.139  | 265.944  |
| BI822179  | 802.085   | 1358.248  | AJ276316  | 1375.719  | 973.277   | NM_00086E | 616.618  | 724.055  |
| AF022912  | 4730.413  | 3490.63   | AF229246  | 10292.767 | 6064.134  | NM_006651 | 1242.676 | 1265.752 |

|           |           |           |           |           |           |           |           |           |
|-----------|-----------|-----------|-----------|-----------|-----------|-----------|-----------|-----------|
| AA477428  | 24862.912 | 49890.387 | S64709    | 2901.617  | 1887.34   | NM_005336 | 3076.562  | 3432.386  |
| AA156342  | 1257.375  | 2652.173  | NM_018488 | 840.689   | 765.618   | NM_001419 | 5664.934  | 6613.384  |
| R45594    | 15546.94  | 26912.631 | X56465    | 597.546   | 597.824   | AF119817  | 4825.412  | 4326.441  |
| H46425    | 832.069   | 1755.282  | NM_003071 | 8941.432  | 6199.713  | AL035306  | 1041.798  | 1062.362  |
| AI355949  | 336.918   | 540.254   | AK021494  | 1318.512  | 298.115   | NM_005746 | 1485.011  | 1570.005  |
| AA278152  | 10446.786 | 3292.177  | AF075023  | 635.082   | 604.76    | NM_004230 | 1156.613  | 713.773   |
| H75530    | 1576.083  | 786.676   | AL360160  | 21815.18  | 10931.033 | NM_014503 | 402.757   | 409.634   |
| NM_003764 | 2992.577  | 2446.931  | AK001092  | 39935.059 | 23334.664 | NM_014656 | 579.203   | 598.458   |
| NM_006793 | 14919.295 | 12340.323 | NM_014144 | 1098.771  | 982.176   | NM_004396 | 1787.119  | 1538.987  |
| NM_001536 | 2136.14   | 1672.521  | AF147345  | 646.335   | 486.731   | NM_006337 | 2583.218  | 2959.808  |
| X97261    | 8114.336  | 19459.432 | AF147373  | 3221.259  | 2406.369  | NM_004507 | 1320.255  | 1054.59   |
| NM_001466 | 1423.83   | 1198.016  | AK026209  | 352.858   | 319.781   | NM_002710 | 5139.251  | 4766.479  |
| D87666    | 50037.777 | 18116.725 | AF086253  | 667.957   | 373.948   | NM_014060 | 1793.498  | 1855.546  |
| NM_001315 | 4437.108  | 3917.051  | AF086434  | 751.032   | 482.557   | NM_004746 | 3742.602  | 3702.215  |
| AF286095  | 1429.491  | 2379.031  | AK022063  | 4632.816  | 3659.996  | BQ446064  | 710.351   | 665.257   |
| NM_000876 | 960.084   | 2853.693  | AF086345  | 3903.853  | 2714.694  | AF302502  | 3525.516  | 3448.091  |
| S66407    | 787.584   | 489.893   | AF086464  | 709.266   | 542.826   | AF274571  | 674.691   | 765.79    |
| NM_004256 | 32824.895 | 12728.123 | AL049278  | 1913.515  | 1386.293  | NM_005446 | 787.627   | 891.097   |
| NM_001981 | 2682.053  | 1828.514  | AL117519  | 375.189   | 500.52    | NM_003876 | 1007.172  | 1257.509  |
| NM_014654 | 328.762   | 200.299   | NM_005060 | 669.228   | 843.667   | NM_006716 | 694.5     | 684.552   |
| NM_001586 | 26075.604 | 10892.997 | AF085935  | 436.917   | 1411.754  | NM_005427 | 389.604   | 311.122   |
| AK026108  | 3254.325  | 2226.64   | AL035369  | 1863.479  | 2620.722  | NM_016312 | 341.777   | 499.143   |
| NM_006376 | 1524.084  | 2403.95   | AF075097  | 2961.97   | 1278.52   | AF234887  | 343.898   | 366.07    |
| BF571428  | 1802.322  | 540.743   | AK022801  | 1196.697  | 724.187   | NM_001776 | 496.261   | 714.059   |
| AB037723  | 2771.598  | 924.434   | AL133075  | 6875.488  | 6891.668  | NM_001792 | 238.084   | 162.358   |
| NM_000606 | 6677.625  | 4037.226  | AL137692  | 388.561   | 826.608   | NM_001903 | 3913      | 4959.396  |
| NM_016124 | 2853.827  | 2970.248  | AL137630  | 1808.545  | 1803.928  | NM_005857 | 1891.488  | 1708.164  |
| NM_019076 | 282.625   | 298.392   | AK055236  | 343.62    | 214.94    | NM_000426 | 365.901   | 307.837   |
| U53530    | 1307.875  | 1127.115  | AL137277  | 8148.907  | 4706.584  | AK027037  | 387.138   | 443.552   |
| NM_006596 | 2064.214  | 1689.486  | AL137447  | 459.845   | 363.914   | NM_003875 | 4037.949  | 3972.323  |
| NM_015946 | 1660.406  | 1035.618  | AL157467  | 298.469   | 312.421   | AF191687  | 1367.314  | 1145.367  |
| NM_003054 | 2747.53   | 1564.016  | BC023609  | 1602.96   | 1015.794  | NM_000274 | 4744.344  | 4572.519  |
| NM_003042 | 798.855   | 496.367   | AK025100  | 574.32    | 379.813   | NM_000170 | 673.29    | 611.658   |
| NM_002216 | 6773.335  | 4786.207  | AF086395  | 7649.827  | 4515.32   | NM_000281 | 5958.86   | 5241.79   |
| AF182404  | 1832.814  | 4261.445  | AF086049  | 2466.922  | 1983.682  | NM_006031 | 1279.448  | 1302.749  |
| NM_006556 | 3429.18   | 2250.191  | AF114263  | 1364.559  | 1016.297  | NM_002715 | 3258.898  | 2517.327  |
| NM_014521 | 346.623   | 238.782   | AK026142  | 1683.127  | 1355.417  | NM_001020 | 43702.02  | 73319.891 |
| NM_002446 | 722.317   | 275.832   | AF161369  | 1245.949  | 486.246   | AB020660  | 1289.389  | 1452.883  |
| NM_017806 | 401.205   | 152.031   | AK027176  | 6041.168  | 2346.944  | NM_006656 | 4680.646  | 7214.313  |
| AK023202  | 2099.781  | 768.993   | AF073328  | 417.508   | 323.767   | NM_018051 | 573.355   | 766.225   |
| D63877    | 2528.43   | 1097.565  | AF129266  | 445.187   | 602.218   | NM_015371 | 675.47    | 544.988   |
| AF131760  | 664.59    | 347.783   | Y12019    | 3173.718  | 1698.791  | AB040915  | 682.574   | 531.864   |
| NM_018696 | 1427.922  | 1124.144  | AF232217  | 647.017   | 1147.576  | NM_006481 | 1521.912  | 1891.287  |
| NM_006461 | 3267.806  | 1891.204  | AL137326  | 577.574   | 1415.241  | AB011115  | 455.693   | 454.061   |
| NM_018201 | 2112.574  | 2648.701  | AK021898  | 1516.591  | 2365.395  | NM_003910 | 11083.154 | 8474.373  |
| NM_014436 | 387.478   | 248.936   | AK022024  | 2115.355  | 1490.392  | AB007913  | 300.342   | 270.218   |
| NM_006153 | 3964.782  | 2878.647  | AK022301  | 1102      | 526.225   | NM_006696 | 2044.95   | 1563.654  |
| NM_012164 | 2750.737  | 2314.007  | AK021948  | 1144.476  | 767.24    | NM_004596 | 2890.907  | 3880.383  |
| AB011156  | 438.345   | 521.609   | AK022054  | 973.121   | 1074.24   | NM_006037 | 3624.064  | 3283.167  |
| NM_018076 | 567.588   | 715.123   | AK022341  | 660.01    | 673.35    | NM_015871 | 2317.743  | 2296.261  |
| NM_004760 | 13432.694 | 7953.694  | AK021642  | 4236.393  | 3135.78   | NM_019037 | 1716.597  | 1499.037  |
| NM_006752 | 3159.159  | 1793.355  | AK021987  | 1453.069  | 1185.642  | NM_015891 | 1847.08   | 1460.676  |
| NM_006806 | 3600.538  | 4066.534  | AK026905  | 3167.517  | 2963.648  | NM_006802 | 300.555   | 257.591   |

|           |           |           |           |           |           |           |           |           |
|-----------|-----------|-----------|-----------|-----------|-----------|-----------|-----------|-----------|
| AF149304  | 380.485   | 329.632   | AK023449  | 360.801   | 528.058   | AB037778  | 243.396   | 237.842   |
| NM_01209E | 5607.646  | 3234.761  | NM_000134 | 493.819   | 526.25    | NM_00506E | 12632.952 | 10861.882 |
| NM_01643E | 559.623   | 275.576   | NM_00663E | 2661.028  | 695.64    | NM_00308E | 2613.257  | 2887.506  |
| X73079    | 20174.75  | 13849.555 | X14675    | 899.237   | 429.251   | NM_00375E | 5191.753  | 4930.117  |
| NM_019091 | 1213.544  | 583.37    | AF071170  | 565.655   | 494.17    | NM_00622E | 938.513   | 855.051   |
| AF264781  | 805.382   | 467.405   | AF161364  | 361.187   | 756.519   | NM_01759C | 906.02    | 1002.011  |
| NM_00245E | 601.667   | 1011.152  | AF075075  | 729.132   | 496.786   | AB011145  | 1820.916  | 2203.633  |
| AK024215  | 2353.903  | 542.595   | NM_018304 | 6134.608  | 4492.123  | NM_00375C | 4094.438  | 4039.455  |
| AB044661  | 3480.294  | 1160.95   | AK024457  | 5542.608  | 4220.033  | M92422    | 948.959   | 755.606   |
| NM_01537E | 811.96    | 599.498   | AK026894  | 1084.292  | 1202.851  | NM_01786E | 511.016   | 662.668   |
| NM_00117E | 572.907   | 494.68    | AK026372  | 739.261   | 979.258   | AK021888  | 454.044   | 339.563   |
| NM_01653E | 763.483   | 776.948   | NM_01418E | 5158.028  | 2848.73   | AK022848  | 584.458   | 435.872   |
| NM_00406E | 330.134   | 258.13    | AF056442  | 899.568   | 1303.041  | AL049957  | 442.113   | 437.133   |
| NM_004941 | 3632.23   | 2241.854  | AK024752  | 31073.717 | 41943.457 | NM_01815E | 5523.219  | 5623.392  |
| AF151831  | 2407.146  | 1809.487  | BG117194  | 967.557   | 1135.157  | NM_00081E | 2346.857  | 3047.318  |
| AF083255  | 3955.599  | 2151.986  | AF131859  | 3294.979  | 1755.059  | NM_00251E | 1710.939  | 2070.8    |
| AK022605  | 689.195   | 406.142   | AK023632  | 407.471   | 259.799   | NM_017424 | 2804.612  | 2257.494  |
| AK000554  | 1985.418  | 1204.322  | AF086118  | 3139.281  | 2898.48   | NM_00152E | 2595.183  | 2808.469  |
| NM_00647E | 855.738   | 1999.774  | NM_01413E | 985.641   | 802.494   | NM_00088E | 2807.502  | 2315.532  |
| NM_00282E | 3065.488  | 5890.772  | AK025044  | 2323.914  | 1445.837  | AF254086  | 709.31    | 647.34    |
| AF159141  | 3347.329  | 3619.178  | AK023690  | 666.174   | 507.431   | AL390142  | 456.221   | 302.821   |
| NM_01645E | 20152.609 | 12707.722 | AF230317  | 551.919   | 365.022   | NM_00656E | 1152.168  | 1343.249  |
| AK022233  | 2077.904  | 1818.296  | AK023806  | 2506.342  | 1821.078  | AB007930  | 2355.869  | 1995.528  |
| AK026410  | 10022.831 | 3636.889  | AF088068  | 934.086   | 1937.269  | AJ005273  | 1747.788  | 1622.115  |
| NM_014637 | 3051.685  | 1861.449  | Y16696    | 15621.483 | 8576.889  | AK021892  | 1401.27   | 1222.063  |
| NM_01337E | 14251.352 | 10954.723 | AK026094  | 2478.023  | 1513.755  | NM_003121 | 603.274   | 310.513   |
| AF113208  | 7867.488  | 2438.721  | AF161344  | 7162.813  | 5518.061  | NM_003437 | 524.909   | 626.034   |
| AF019382  | 693.361   | 474.754   | AF086027  | 1235.003  | 1060.595  | NM_018337 | 2380.687  | 2380      |
| BC012757  | 569.529   | 492.318   | NM_001207 | 56094.922 | 36740.051 | AA193295  | 3896.224  | 3446.293  |
| M96686    | 322.456   | 333.4     | AK022199  | 956.933   | 651.765   | NM_01804E | 2098.713  | 1674.902  |
| NM_00406E | 1478.202  | 1352.207  | NM_006211 | 330.606   | 293.495   | NM_01480E | 847.477   | 699.538   |
| NM_00588E | 369.714   | 261.316   | NM_003524 | 3898.052  | 3730.226  | AK024956  | 208.368   | 183.559   |
| NM_00444E | 602.16    | 626.807   | AK021438  | 357.657   | 379.268   | AF147386  | 765.065   | 641.983   |
| NM_014591 | 1868.449  | 1369.457  | NM_00591E | 573.368   | 400.708   | AF273052  | 4388.349  | 2588.939  |
| NM_01459E | 435.224   | 392.599   | S39891    | 1083.014  | 549.479   | NM_01794E | 4090.605  | 3433.111  |
| NM_00194E | 1734.999  | 910.75    | AK021624  | 569.747   | 378.542   | AF147383  | 258.37    | 169.669   |
| NM_02003E | 2264.54   | 984.511   | AF278605  | 10087.67  | 4139.252  | AK025682  | 692.918   | 663.645   |
| NM_00665E | 1120.02   | 877.254   | NM_006497 | 15789.678 | 9541.288  | NM_01335E | 335.317   | 285.097   |
| NM_01444E | 2971.025  | 2437.758  | AL133599  | 1346.942  | 798.233   | NM_01647E | 4237.857  | 3134.509  |
| AB002313  | 717.901   | 1117.535  | NM_01647E | 2912.558  | 1453.431  | AL389986  | 4245.085  | 3367.625  |
| AB011167  | 1865.889  | 4851.463  | AF086064  | 671.543   | 696.444   | AF088052  | 481.366   | 299.938   |
| NM_00540E | 1125.843  | 3583.373  | AK023042  | 4204.338  | 5023.274  | AF086387  | 304.972   | 259.029   |
| NM_00020E | 3971.78   | 9103.691  | AK026429  | 1399.5    | 1300.189  | AL389941  | 310.119   | 229.172   |
| AK027119  | 13694.436 | 15461.353 | NM_01655C | 4312.333  | 3440.567  | AB037756  | 888.757   | 742.164   |
| AB037727  | 25868.832 | 20197.566 | AK024813  | 6106.602  | 2702.471  | AK001853  | 1656.528  | 1244.276  |
| NM_00542E | 2279.694  | 2097.188  | AJ227909  | 19025.742 | 13230.548 | AK025071  | 579.456   | 570.735   |
| NM_00476E | 1110.368  | 594.852   | AK021880  | 540.884   | 652.04    | NM_01537C | 775.702   | 943.997   |
| NM_01406E | 7052.577  | 3234.524  | AK024107  | 437.766   | 557.959   | AF085917  | 530.239   | 815.325   |
| D86964    | 4990.149  | 2841.4    | CY3Cy5    | 6801.039  | 309.724   | AF085989  | 330.98    | 512.996   |
| AL049801  | 3384.698  | 3270.579  | BG698522  | 16669.568 | 29064.889 | AL360139  | 28178.537 | 20775.844 |
| NM_01639E | 9025.796  | 2065.231  | AA152346  | 1132.142  | 1227.906  | AF075110  | 6653.876  | 4982.872  |
| NM_00315E | 610.125   | 287.363   | L15189    | 2068.007  | 1211.268  | AL137323  | 303.405   | 319.385   |
| NM_014727 | 1807.579  | 1130.726  | AB023420  | 12451.141 | 4528.708  | AL137494  | 2137.4    | 1953.25   |

|           |           |           |           |           |           |           |           |           |
|-----------|-----------|-----------|-----------|-----------|-----------|-----------|-----------|-----------|
| BE885010  | 654.977   | 477.421   | BI822179  | 1010.056  | 396.13    | AL162037  | 2378.391  | 1856.689  |
| NM_006342 | 4556.097  | 3539.313  | AF022912  | 6157.439  | 2252.057  | AL390150  | 628.55    | 328.996   |
| NM_016396 | 2700.79   | 2496.541  | AA477428  | 25107.908 | 11403.517 | NM_002761 | 247.067   | 178.485   |
| NM_005689 | 1170.445  | 764.25    | AA156342  | 1523.293  | 1274.197  | AF086063  | 287.863   | 277.573   |
| NM_005552 | 14953.786 | 8228.754  | R45594    | 16602.309 | 6914.112  | AF086098  | 704.5     | 551.842   |
| NM_006717 | 2246.252  | 1253.883  | H46425    | 1203.659  | 692.195   | AF086076  | 457.887   | 342.995   |
| AL109786  | 1372.495  | 917.138   | AI355949  | 853.148   | 687.214   | AL833393  | 1149.6    | 969.065   |
| AK026479  | 2177.971  | 1429.919  | AA278152  | 15939.793 | 9284.211  | AF088005  | 755.533   | 418.157   |
| AK022860  | 3114.304  | 4448.78   | H75530    | 1581.019  | 1668.59   | AF086096  | 2282.427  | 2595.408  |
| X60188    | 31935.861 | 55945.219 | NM_004176 | 2918.425  | 3629.052  | AL390132  | 223.398   | 221.619   |
| NM_005977 | 3479.079  | 9925.115  | SR5       | 6957.339  | 8456.496  | NM_017933 | 660.914   | 434.354   |
| NM_002747 | 396.444   | 1221.376  | SR7       | 6568.59   | 53912.434 | NM_017819 | 4511.179  | 2517.968  |
| NM_006265 | 37898.918 | 63024.383 | SR9       | 21300.502 | 4274.181  | AK024653  | 4735.031  | 6285.931  |
| NM_003126 | 617.992   | 2090.632  | CY3Cy5    | 7110.106  | 371.151   | AF103907  | 292.803   | 654.784   |
| NM_000347 | 4630.26   | 8890.406  | NM_001315 | 8391.723  | 13117.721 | AF161351  | 416.368   | 458.982   |
| M13452    | 1514.868  | 1795.992  | AF286095  | 2844.097  | 5471.377  | AF257098  | 225.941   | 517.948   |
| AF082075  | 482.97    | 537.132   | NM_000878 | 1496.834  | 3199.158  | AF111782  | 357.666   | 392.361   |
| NM_016114 | 2030.851  | 1492.313  | S66407    | 2650.335  | 4165.187  | AF151530  | 320.536   | 419.833   |
| AY007114  | 1195.157  | 953.901   | NM_004258 | 57040.547 | 28810.623 | AK021991  | 229.065   | 488.339   |
| AF086604  | 636.375   | 469.527   | NM_001981 | 4221.216  | 1783.144  | AK022093  | 1385.318  | 1277.055  |
| AB000895  | 521.856   | 274.177   | NM_014654 | 664.747   | 490.72    | AK022005  | 237.237   | 269.091   |
| X80031    | 444.569   | 240.113   | NM_001585 | 48156.633 | 19217.473 | AK022137  | 261.732   | 73.239    |
| AK022178  | 741.006   | 516.66    | AK026108  | 6827.902  | 3332.658  | AK022272  | 233.065   | 215.651   |
| NM_006011 | 309.789   | 264.22    | NM_006379 | 2138.355  | 1313.056  | AK027155  | 1753.074  | 1416.159  |
| L00635    | 614.16    | 506.856   | BF571428  | 3333.555  | 2077.981  | AF264626  | 242.412   | 158.902   |
| NM_015601 | 665.136   | 648.102   | AB037723  | 5888.752  | 3884.932  | AK027219  | 771.838   | 728.04    |
| NM_001780 | 8337.538  | 4889.607  | NM_006246 | 6143.707  | 4253.865  | AK024528  | 1636.54   | 1332.617  |
| AJ277442  | 688.776   | 571.021   | NM_004316 | 605.92    | 508.747   | AL049311  | 214.902   | 239.686   |
| NM_004569 | 4510.207  | 2597.199  | NM_012323 | 1184.304  | 1939.036  | AK000016  | 493.102   | 597.875   |
| AF089088  | 967.697   | 563.28    | NM_013943 | 887.733   | 1084.409  | AK023367  | 704.553   | 730.138   |
| L07557    | 3659.851  | 1676.12   | NM_001639 | 8689.154  | 10761.428 | AL080209  | 1269.249  | 1365.086  |
| NM_002796 | 45614.5   | 51279.395 | H39560    | 381.169   | 1173.149  | AL137431  | 191.596   | 219.505   |
| D78514    | 6682.333  | 6737.176  | AF182404  | 3039.889  | 5473.442  | NM_016255 | 918.361   | 1019.421  |
| AK021665  | 834.115   | 2094.895  | NM_000804 | 329.997   | 924.133   | NM_014318 | 706.409   | 1108.932  |
| NM_013366 | 731.715   | 1163.566  | NM_006555 | 6341.06   | 10072.9   | AK056674  | 568.288   | 520.046   |
| NM_002787 | 37153.887 | 56715.434 | NM_014521 | 1731.8    | 2937.487  | AK022042  | 371.032   | 336.707   |
| NM_003347 | 5999.752  | 12880.972 | NM_002445 | 1766.783  | 2969.555  | AL117588  | 274.806   | 214.122   |
| AF273051  | 906.021   | 2573.129  | NM_017809 | 1424.181  | 858.458   | NM_017708 | 238.518   | 231.915   |
| NM_014516 | 8919.689  | 20903.863 | AK023202  | 3892.977  | 2687.058  | BE895529  | 1248.579  | 1823.992  |
| AK021868  | 1685.031  | 4002.015  | D63877    | 4605.76   | 2117.988  | AK000964  | 346.128   | 309.842   |
| NM_018421 | 4448.237  | 5309.5    | AF131760  | 1248.213  | 675.579   | AL117536  | 1294.387  | 1138.734  |
| AB014574  | 46563.609 | 36865.559 | NM_018698 | 1767.444  | 704.957   | NM_017751 | 3542.086  | 3111.318  |
| NM_020127 | 1427.327  | 1079.526  | NM_006461 | 3444.965  | 1336.198  | NM_003771 | 536.993   | 387.356   |
| NM_015623 | 6495.39   | 3861.621  | NM_018201 | 2477.971  | 1111.224  | NM_017860 | 329.749   | 599.476   |
| AB045116  | 764.495   | 258.828   | NM_014438 | 1055.058  | 482.169   | X91195    | 24637.879 | 24774.793 |
| L49054    | 355.917   | 373.309   | NM_014880 | 1652.389  | 1139.118  | AF086190  | 303.897   | 239.87    |
| NM_001675 | 596.816   | 443.695   | NM_003764 | 4305.131  | 2926.799  | NM_006143 | 239.99    | 191.353   |
| NM_003422 | 1300.801  | 850.884   | NM_004829 | 792.708   | 977.674   | AL050035  | 1223.685  | 1105.954  |
| NM_001451 | 1331.866  | 937.642   | NM_001538 | 3003.267  | 5118.514  | AK024449  | 234.511   | 225.974   |
| NM_014779 | 664.665   | 580.777   | X97261    | 36394.734 | 11202.967 | AF279780  | 21881.838 | 16499.404 |
| NM_002943 | 2779.317  | 2209.16   | NM_001468 | 2413.079  | 2368.05   | AK022510  | 902.927   | 645.733   |
| AL133649  | 891.715   | 460.123   | D87666    | 58988.684 | 61547.898 | AK023878  | 269.587   | 210.198   |
| AB018303  | 400.634   | 309.434   | AF149304  | 915.158   | 1418.263  | AK021851  | 323.893   | 307.284   |

|           |           |           |           |           |           |           |           |           |
|-----------|-----------|-----------|-----------|-----------|-----------|-----------|-----------|-----------|
| NM_006454 | 4578.867  | 4960.66   | NM_012095 | 8779.576  | 15058.526 | L37717    | 225.256   | 263.269   |
| NM_015846 | 5291.296  | 11103.096 | NM_016438 | 470.908   | 1252.415  | AJ131609  | 906.1     | 900.188   |
| NM_015972 | 8744.213  | 13858.935 | X73079    | 22680.563 | 33783.352 | BC019280  | 1497.63   | 1245.953  |
| NM_018006 | 1947.851  | 4557.104  | NM_019091 | 2143.538  | 1359.328  | AF086498  | 283.282   | 318.552   |
| NM_016090 | 2128.949  | 6052.369  | AF264781  | 1270.835  | 473.864   | AK000687  | 812.76    | 525.091   |
| NM_001013 | 52448.004 | 66041.859 | NM_002456 | 690.208   | 735.795   | L77565    | 273.042   | 230.384   |
| NM_005061 | 3456.342  | 6784.156  | AK024215  | 3752.83   | 2706.494  | AF079567  | 910.627   | 879.039   |
| NM_000997 | 51742.121 | 64959.516 | AB044661  | 5358.201  | 3102.736  | AK022177  | 710.66    | 800.828   |
| AF182417  | 30644.568 | 16792.643 | NM_000606 | 12415.342 | 9603.526  | AK023852  | 502.894   | 556.429   |
| AL137354  | 13561.75  | 7076.403  | NM_016124 | 5235.715  | 4408.807  | AF086466  | 626.141   | 797.112   |
| NM_001023 | 50330.105 | 16550.773 | NM_019079 | 440.027   | 585.826   | AB007962  | 1038.986  | 1086.871  |
| AK021571  | 3569.948  | 1140.354  | U53530    | 2123.53   | 1977.378  | AF005081  | 541.664   | 676.39    |
| AF052149  | 4874.28   | 4779.559  | NM_006598 | 3156.107  | 3508.199  | AK026438  | 360.185   | 372.398   |
| AK025586  | 702.172   | 990.762   | NM_000111 | 734.082   | 1020.325  | AK021546  | 292.116   | 157.63    |
| AL137512  | 756.597   | 951.055   | NM_015948 | 3235.968  | 4469.308  | AL050186  | 9042.328  | 12030.56  |
| NM_005036 | 432.741   | 318.002   | NM_003054 | 3996.087  | 4668.771  | AK021918  | 1828.776  | 2419.219  |
| NM_002541 | 1022.542  | 912.708   | NM_003042 | 1591.357  | 1824.027  | AK021669  | 1312.736  | 1593.548  |
| NM_000056 | 3313.293  | 2605.146  | NM_002219 | 9963.236  | 13493.545 | AL080113  | 15188.868 | 12064.142 |
| NM_016311 | 22474.412 | 24365.371 | NM_002826 | 4034.838  | 6722.781  | AL050083  | 453.405   | 365.11    |
| NM_000290 | 2679.145  | 4996.062  | AF159141  | 6140.579  | 10128.712 | AL049422  | 2626.617  | 2014.276  |
| NM_016538 | 4105.315  | 5925.304  | NM_002420 | 824.653   | 338.718   | AL133089  | 298.099   | 183.837   |
| AK023275  | 5937.859  | 9246.004  | NM_016458 | 26776.326 | 14533.943 | AK023526  | 1103.017  | 1484.744  |
| AJ223352  | 4667.532  | 8626.742  | AK022233  | 2824.509  | 1052.958  | BE266129  | 351.032   | 283.834   |
| NM_012238 | 1287.83   | 2531.584  | AK026410  | 14748.338 | 7088.313  | AK025602  | 4533.76   | 3706.854  |
| NM_016539 | 6535.948  | 6319.865  | NM_014637 | 3645.18   | 1762.974  | AK026309  | 2087.242  | 2038.901  |
| NM_006807 | 29167.486 | 55351.621 | NM_013379 | 15026.642 | 25701.846 | AL137486  | 1332.779  | 1028.126  |
| NM_000326 | 367.097   | 990.551   | AF113208  | 12303.185 | 8478.221  | AL110162  | 519.541   | 374.822   |
| L16464    | 730.206   | 1475.424  | NM_006153 | 7286.245  | 4896.31   | AF119880  | 299.419   | 185.098   |
| NM_006532 | 2122.697  | 1736.384  | NM_012164 | 4758.217  | 4472.873  | AK022681  | 4994.817  | 4627.477  |
| U07132    | 2434.449  | 1553.384  | AK026010  | 681.023   | 1056.035  | CY3Cy5    | 1091.813  | 231.136   |
| NM_003436 | 635.474   | 363.599   | AB011156  | 978.805   | 1420.112  | AA609759  | 449.125   | 723.183   |
| AL035301  | 2027.501  | 3631.807  | NM_018079 | 1439.106  | 1930.32   | AA029418  | 1924.743  | 2047.791  |
| NM_017687 | 1495.855  | 3253.109  | NM_004760 | 20419.09  | 23984.254 | L20815    | 1537.571  | 1843.865  |
| NM_017975 | 2400.552  | 4552.439  | NM_006752 | 3837.493  | 4286.676  | AI364483  | 2129.976  | 2898.104  |
| AK025036  | 1531.456  | 3278.865  | NM_004428 | 673.038   | 631.062   | AA456001  | 1846.713  | 2668.54   |
| AK024843  | 13127.259 | 23492.295 | NM_006809 | 5428.754  | 9435.419  | AA451686  | 1219.633  | 1984.005  |
| AF074994  | 763.952   | 2143.425  | NM_018199 | 393.697   | 500.071   | NM_003822 | 507.393   | 1081.57   |
| NM_017670 | 6347.024  | 10049.452 | NM_013943 | 1081.653  | 1667.736  | NM_004412 | 1786.62   | 3476.788  |
| AF286598  | 789.222   | 1257.414  | NM_001639 | 8246.801  | 9226.899  | SR5       | 2819.405  | 3942.538  |
| AK021468  | 802.548   | 1130.855  | H39560    | 533.585   | 672.962   | SR7       | 2222.741  | 30289.359 |
| NM_004366 | 9452.873  | 17718.232 | BG698522  | 9510.085  | 4065.738  | SR9       | 8956.168  | 2920.612  |
| AK026168  | 1418.632  | 3619.389  | AA152346  | 848.669   | 286.514   | NM_019555 | 656.391   | 783.305   |
| AJ296152  | 7341.547  | 13607.914 | L15189    | 1552.189  | 524.844   | NM_012096 | 3284.57   | 3793.271  |
| AK001067  | 1637.22   | 4057.626  | AB023420  | 12448.339 | 3501.143  | L12052    | 1805.458  | 1999.297  |
| AK027088  | 10328.898 | 23097.193 | BI822179  | 1008.333  | 656.037   | AB028976  | 982.292   | 1207.97   |
| AB037721  | 6077.342  | 13388.428 | AF022912  | 6579.864  | 6020.26   | NM_004305 | 8881.288  | 10343.88  |
| AK027120  | 1385.628  | 3198.327  | AA477428  | 25706.736 | 20314.297 | NM_006088 | 1989.208  | 2660.156  |
| AB029001  | 1294.738  | 3883.398  | AA156342  | 1265.28   | 929.129   | NM_003144 | 9951.905  | 11509.262 |
| AB006624  | 3737.748  | 7520.759  | R45594    | 19020.578 | 13027.587 | AB011102  | 1262.856  | 1533.881  |
| AL109717  | 849.474   | 2397.565  | H46425    | 1351.849  | 1497.75   | NM_002968 | 561.914   | 696.071   |
| AK025473  | 1002.991  | 2557.626  | AI355949  | 497.708   | 888.913   | NM_004620 | 321.391   | 256.984   |
| AF146693  | 1175.92   | 965.25    | AA278152  | 18468.293 | 20079.309 | AF087940  | 576.203   | 553.377   |
| AF271070  | 8153.332  | 4645.296  | H75530    | 1667.783  | 2555.678  | AJ277587  | 471.574   | 467.641   |



|           |           |           |           |           |           |           |           |           |
|-----------|-----------|-----------|-----------|-----------|-----------|-----------|-----------|-----------|
| NM_014903 | 857.026   | 638.665   | NM_004176 | 3672.995  | 5214.005  | D87432    | 1250.236  | 1420.709  |
| AK055959  | 504.682   | 215.769   | NM_004548 | 33530     | 33893.871 | NM_002337 | 1597.418  | 1967.476  |
| AF052141  | 267.099   | 253.748   | AK000554  | 3611.792  | 4744.285  | NM_013245 | 896.46    | 908.854   |
| AK021705  | 3368.431  | 6212.364  | NM_006472 | 1188.878  | 1965.781  | NM_006423 | 12720.611 | 11463.963 |
| NM_016141 | 13921.812 | 21400.564 | NM_001538 | 3603.53   | 7444.504  | NM_004766 | 1045.42   | 792.393   |
| AL109702  | 1438.895  | 3500.923  | X97261    | 41412.465 | 17586.439 | NM_005819 | 1731.769  | 1647.108  |
| AK025624  | 8658.553  | 17462.447 | NM_001468 | 2567.815  | 3218.773  | AK024722  | 307.596   | 451.855   |
| AK026684  | 1766.899  | 3644.159  | D87666    | 62180.371 | 61154.57  | AK025520  | 951.998   | 631.352   |
| AL110125  | 10084.711 | 14230.849 | NM_001315 | 5647.136  | 2581.311  | NM_004892 | 3392.917  | 4599.536  |
| AK022764  | 1682.019  | 3191.05   | AF286095  | 1838.188  | 932.166   | NM_014597 | 4419.758  | 4686.046  |
| X89744    | 370.596   | 1107.651  | NM_000878 | 1151.585  | 387.282   | NM_017896 | 3188.105  | 3437.403  |
| AJ011600  | 1219.191  | 2631.128  | S66407    | 1870.803  | 543.126   | AB002374  | 996.053   | 1436.839  |
| AJ002785  | 926.599   | 1110.768  | NM_004258 | 57726.047 | 47076.895 | U17327    | 388.518   | 467.901   |
| Z70716    | 614.531   | 1223.704  | NM_001981 | 4695.518  | 2957.898  | M87790    | 2149.718  | 1564.995  |
| AL049251  | 474.384   | 1077.664  | NM_014654 | 633.03    | 570.9     | NM_001768 | 1150.135  | 789.58    |
| Z83945    | 1238.586  | 1116.341  | NM_001585 | 47404.246 | 40966.008 | NM_000029 | 1685.136  | 1119.875  |
| L05148    | 6501.415  | 14278.297 | AK026108  | 7892.729  | 7301.702  | AF035802  | 517.063   | 382.275   |
| AK091125  | 663.967   | 1856      | NM_006379 | 2228.983  | 2540.722  | NM_001838 | 414.545   | 209.669   |
| D16474    | 4783.908  | 2402.96   | BF571428  | 4409.364  | 5021.491  | NM_013328 | 6480.871  | 7166.179  |
| AL080072  | 548.126   | 209.593   | AB037723  | 5895.188  | 8179.33   | NM_002660 | 1934.25   | 1512.369  |
| AK024898  | 491.104   | 429.425   | NM_006246 | 6993.67   | 12174.257 | AL122071  | 311.709   | 422.009   |
| AL049280  | 2519.245  | 3249.29   | NM_004316 | 570.636   | 792.923   | AB033054  | 1529.717  | 1708.601  |
| AK025212  | 7478.58   | 10713.335 | U58096    | 31306.811 | 43649.129 | AF153330  | 1167.073  | 1041.075  |
| AB021925  | 476.432   | 894.759   | NM_016929 | 6455.717  | 8275.519  | D87446    | 1304.223  | 1639.813  |
| AL157503  | 3431.699  | 7166.53   | NM_015948 | 3754.161  | 5859.251  | NM_007081 | 1210.236  | 1174.045  |
| AK000053  | 483.133   | 1070.99   | NM_003054 | 4228.499  | 6187.5    | AB032964  | 1491.103  | 1722.463  |
| AK000786  | 1447.248  | 2335.359  | NM_003042 | 1684.695  | 2055.428  | BE733605  | 2186.157  | 3272.633  |
| AK000935  | 614.687   | 1259.746  | NM_004790 | 635.301   | 559.475   | NM_003334 | 6087.136  | 6910.953  |
| AK021458  | 2135.499  | 3124.006  | NM_002219 | 9154.316  | 4557.607  | NM_002693 | 746.826   | 861.833   |
| NM_017674 | 3458.115  | 6533.386  | AF182404  | 2142.231  | 1060.667  | AK026000  | 778.42    | 858.251   |
| AK000811  | 429.49    | 590.998   | NM_006555 | 4219.221  | 1168.729  | NM_006675 | 735.151   | 825.788   |
| AK000966  | 682.025   | 2288.048  | NM_014521 | 1159.573  | 469.456   | NM_003022 | 1120.573  | 1067.089  |
| AK024525  | 3207.743  | 7182.924  | NM_002445 | 1280.228  | 863.811   | NM_004873 | 1524.407  | 1329.241  |
| AK024909  | 938.232   | 1978.241  | NM_017809 | 1058.073  | 574.108   | NM_019842 | 248.29    | 313.257   |
| AK024544  | 1242.354  | 969.085   | AK023202  | 3977.903  | 3040.685  | NM_002951 | 6755.859  | 8133.681  |
| AK024629  | 512.054   | 427.546   | D63877    | 4658.402  | 3299.702  | NM_002317 | 326.194   | 356.604   |
| AK001880  | 6851.545  | 12195.57  | AF131760  | 1218.422  | 985.06    | NM_000320 | 1724.633  | 1336.134  |
| AF156166  | 3998.246  | 7346.778  | NM_018698 | 1818.826  | 1406.755  | NM_003136 | 3666.681  | 3527.278  |
| NM_014373 | 3533.445  | 6437.767  | NM_006461 | 3838.312  | 3648.531  | NM_004620 | 360.703   | 369.395   |
| NM_014206 | 40071.734 | 59100.531 | NM_018201 | 2704.935  | 3829.3    | AF087940  | 470.883   | 536.075   |
| NM_001651 | 6005.336  | 10108.9   | NM_014438 | 1200.71   | 1886.502  | AJ277587  | 399.59    | 606.84    |
| L32786    | 2024.672  | 3602.886  | NM_014880 | 1336.081  | 2298.573  | D87432    | 963.49    | 1148.757  |
| U03239    | 643.967   | 895.796   | NM_003764 | 4223.489  | 5181.069  | AB011098  | 289.862   | 317.11    |
| AL355720  | 711.671   | 1129.163  | NM_004829 | 656.511   | 1154.705  | AA609759  | 306.229   | 317.688   |
| AK002023  | 3552.87   | 4758.195  | NM_018079 | 975.395   | 1317.962  | AA029418  | 1516.814  | 1189.632  |
| AF150156  | 615.913   | 933.107   | NM_004760 | 22081.518 | 26634.338 | L20815    | 1409.705  | 1159.38   |
| NM_016464 | 615.932   | 1209.431  | NM_006752 | 4133.713  | 6926.411  | AI364483  | 1205.947  | 1208.378  |
| L40402    | 1710.152  | 3807.256  | NM_004428 | 614.118   | 407.828   | AA456001  | 734.392   | 514.431   |
| AF086216  | 666.786   | 1405.764  | NM_006809 | 4247.138  | 2215.75   | AA451686  | 1490.908  | 1728.778  |
| AK022422  | 831.279   | 586.157   | AF149304  | 722.432   | 364.725   | NM_004412 | 2452.934  | 2184.645  |
| AK023485  | 423.621   | 302.889   | NM_012095 | 7867.242  | 2483.077  | NM_002050 | 301.057   | 280.686   |
| AK022474  | 11672.427 | 5348.238  | X73079    | 19996.729 | 8978.495  | NM_007097 | 2680.224  | 1993.119  |
| AK022392  | 4258.447  | 1737.403  | NM_019091 | 2033.32   | 863.514   | NM_000029 | 1506.29   | 1373.145  |

|           |           |           |           |           |           |           |           |           |
|-----------|-----------|-----------|-----------|-----------|-----------|-----------|-----------|-----------|
| AL117451  | 1179.475  | 475.107   | AF264781  | 1092.506  | 1222.586  | AF035802  | 552.815   | 544.127   |
| AK025949  | 1633.505  | 2953.469  | NM_002456 | 656.216   | 779.481   | Y08145    | 273.907   | 248.285   |
| Y10259    | 3360.074  | 6654.854  | AK024215  | 5139.145  | 8591.395  | NM_001838 | 485.722   | 490.527   |
| AK021725  | 3241.662  | 5593.609  | AB044661  | 5872.409  | 8498.669  | NM_012096 | 2953.053  | 3214.832  |
| NM_002408 | 4724.943  | 6043.288  | NM_000606 | 11103.658 | 21662.189 | NM_003905 | 7394.753  | 8219.972  |
| AK024282  | 1606.727  | 2903.201  | NM_016124 | 5437.335  | 7130.209  | L12052    | 1326.901  | 1644.372  |
| AF085838  | 3839.785  | 5769.253  | NM_019079 | 429.959   | 844.048   | AB028976  | 789.05    | 957.379   |
| NM_018277 | 1357.255  | 2899.305  | U53530    | 1966.522  | 2874.163  | NM_004305 | 9332.442  | 8163.527  |
| AF014455  | 823.44    | 1572.658  | NM_006598 | 2958.599  | 3787.574  | NM_006088 | 1822.563  | 1805.516  |
| AF086335  | 3126.91   | 4604.788  | NM_004176 | 3128.336  | 2944.793  | NM_003144 | 13679.233 | 9488.847  |
| AL355741  | 490.989   | 1368.262  | NM_004548 | 31318.072 | 29352.383 | AB011102  | 1798.105  | 1516.665  |
| AB011118  | 16584.557 | 30527.211 | AK000554  | 3447.164  | 1890.711  | D63480    | 299.505   | 315.519   |
| S66666    | 520.357   | 1182.426  | NM_006472 | 1270.282  | 628.218   | NM_002968 | 488.734   | 541.809   |
| AK021476  | 1771.329  | 4259.94   | NM_002826 | 3298.547  | 1164.981  | NM_002337 | 1482.515  | 1544.184  |
| NM_018630 | 4696.738  | 11860.452 | AF159141  | 6197.854  | 2958.25   | NM_013245 | 956.88    | 1084.294  |
| AF086175  | 798.809   | 2571.332  | NM_002420 | 506.236   | 446.983   | NM_006423 | 11312.739 | 11680.222 |
| AK002196  | 836.408   | 1706.365  | NM_016458 | 31770.488 | 45295.887 | NM_004766 | 705.182   | 1072.006  |
| NM_004576 | 1176.853  | 3850.654  | AK022233  | 2556.298  | 4723.33   | NM_005819 | 2334.828  | 4073.344  |
| AF040097  | 859.755   | 2843.865  | AK026410  | 13344.896 | 10596.521 | AK025520  | 1007.224  | 672.618   |
| NM_020436 | 699.18    | 2007.447  | NM_014637 | 3878.133  | 3667.62   | NM_004892 | 3401.934  | 3436.564  |
| AK024182  | 762.009   | 1647.997  | NM_013379 | 7900.553  | 9750.897  | NM_014597 | 1457.759  | 1325.104  |
| NM_006913 | 7762.179  | 6533.854  | AF113208  | 13539.14  | 18264.625 | NM_017896 | 3072.093  | 2495.961  |
| NM_000498 | 7915.447  | 2023.938  | NM_006153 | 6964.928  | 9443.774  | AB002374  | 945.504   | 733.694   |
| AL049955  | 17014.01  | 13432.396 | NM_012164 | 4712.154  | 7064.187  | U17327    | 459.726   | 421.772   |
| AF155654  | 9605.302  | 8159.256  | AK026010  | 714.563   | 1002.368  | M87790    | 2811.836  | 1610.677  |
| AF088044  | 344.305   | 484.555   | NM_004721 | 444.002   | 681.488   | NM_001768 | 1396.082  | 1129.729  |
| AK000028  | 3223.913  | 2745.938  | AB011156  | 1160.65   | 1354.578  | NM_002951 | 6663.966  | 8753.043  |
| NM_013320 | 43310.184 | 25036.188 | NM_006246 | 6844.83   | 7924.779  | NM_000320 | 1602.642  | 2036.84   |
| AJ245902  | 597.502   | 575.048   | NM_004316 | 387.554   | 763.969   | NM_003136 | 4153.165  | 5117.79   |
| AL050039  | 823.635   | 667.674   | U58096    | 26136.445 | 11487.514 | NM_013328 | 9198.597  | 10862.742 |
| AF009316  | 269.179   | 316.577   | NM_016929 | 5557.042  | 2847.722  | NM_002660 | 1236.065  | 1738.504  |
| AF087987  | 395.735   | 243.651   | NM_013943 | 984.887   | 651.448   | NM_003706 | 340.589   | 288       |
| Z36840    | 712.276   | 1564.38   | NM_001639 | 7732.135  | 3890.446  | AB033054  | 3959.374  | 4125.149  |
| AK021723  | 417.95    | 1320.393  | BG698522  | 9782.222  | 8326.207  | NM_016122 | 377.414   | 293.246   |
| H09474    | 1550.925  | 3461.681  | AA152346  | 797.816   | 830.771   | AF153330  | 445.342   | 314.619   |
| AB002368  | 8670.966  | 21197.859 | L15189    | 1448.254  | 1318.685  | NM_004412 | 2359.993  | 3568.209  |
| AL360263  | 53446.277 | 66997.07  | AB023420  | 11418.64  | 7547.955  | NM_002050 | 386.555   | 498.085   |
| Z36780    | 1642.11   | 4991.869  | BI822179  | 935.787   | 980.379   | NM_007097 | 3104.754  | 3220.345  |
| AK022403  | 1802.628  | 5527.02   | AF022912  | 7259.969  | 6380.097  | D87446    | 1857.744  | 1858.678  |
| AK022955  | 7409.304  | 18491.146 | AA477428  | 28097.84  | 36317.641 | NM_007081 | 1137.532  | 1002.539  |
| AF131741  | 509.47    | 1166.418  | AA156342  | 1571.081  | 1704.313  | AB032964  | 1728.529  | 2186.827  |
| AK021760  | 560.144   | 1075.086  | R45594    | 18878.455 | 24010.258 | BE733605  | 2218.456  | 2536.683  |
| BC035855  | 946.306   | 637.915   | H46425    | 1108.735  | 1750.146  | NM_003334 | 8060.493  | 7160.155  |
| AL137408  | 8677.185  | 3865.796  | AI355949  | 602.546   | 893.1     | NM_002693 | 2202.874  | 2118.523  |
| AF054995  | 988.954   | 534.808   | AA278152  | 17706.762 | 18359.432 | NM_003671 | 299.777   | 302.425   |
| AL080176  | 2134.895  | 847.673   | H75530    | 2178.488  | 2476.799  | M20695    | 344.011   | 228.757   |
| AK023627  | 1913.919  | 662.771   | NM_003764 | 4854.261  | 6561.185  | AK026000  | 1749.6    | 1276.873  |
| CY3Cy5    | 2111.991  | 256.22    | NM_006793 | 20598.998 | 6253.458  | NM_017833 | 336.457   | 251.897   |
| BI759406  | 2554.347  | 3175.988  | NM_001538 | 2956.516  | 1727.031  | NM_006675 | 2270.354  | 1860.705  |
| R76099    | 548.023   | 707.434   | X97261    | 32526.447 | 4493.673  | NM_003022 | 2564.156  | 1964.721  |
| S74445    | 395.841   | 430.683   | NM_001468 | 2157.797  | 1116.675  | NM_004873 | 1393.584  | 1482.225  |
| BI763360  | 1132.985  | 1100.994  | D87666    | 66377.289 | 51405.656 | NM_019842 | 314.661   | 332.724   |
| D25538    | 786.992   | 801.836   | NM_001315 | 6919.759  | 4922.78   | NM_003144 | 14371.564 | 13805.572 |

|           |           |           |           |           |           |           |           |           |
|-----------|-----------|-----------|-----------|-----------|-----------|-----------|-----------|-----------|
| NM_00036C | 4662.417  | 4913.837  | AF286095  | 2080.182  | 2124.036  | AB011102  | 1697.846  | 2502.662  |
| NM_00184C | 283.518   | 383.277   | NM_00087E | 1226.665  | 1237.749  | D63480    | 539.984   | 1099.326  |
| X03635    | 1848.836  | 2002.964  | S66407    | 1630.117  | 1388.659  | NM_00296C | 602.156   | 754.818   |
| X03348    | 1633.302  | 2412.757  | NM_00425E | 59601.059 | 61425.262 | AF087940  | 504.293   | 494.722   |
| AF353674  | 7246.091  | 10552.371 | NM_001981 | 4902.158  | 7253.117  | AJ277587  | 546.311   | 1010.958  |
| BC002645  | 3556.867  | 5247.451  | NM_014654 | 863.203   | 1581.202  | D87432    | 873.066   | 1526.284  |
| NM_021138 | 1887.123  | 2610.914  | NM_00158E | 38218.777 | 54149.707 | AI565117  | 29897.799 | 47296.117 |
| BC002792  | 941.751   | 1863.299  | AK026108  | 6991.754  | 8171.083  | AB011098  | 307.788   | 288.478   |
| NM_02100E | 1323.76   | 2073.515  | NM_00637E | 2212.368  | 2538.783  | AA609759  | 511.018   | 247.86    |
| SB        | 627.865   | 551.549   | BF571428  | 4226.76   | 5030.44   | AI364483  | 2579.313  | 1826.531  |
| SR6       | 2187.296  | 1789.318  | AB037723  | 8051.207  | 15603.002 | AA456001  | 2065.764  | 1395.235  |
| SR8       | 6947.024  | 16848.512 | NM_00060E | 12034.612 | 9704.131  | AA451686  | 1973.617  | 1743.423  |
| SR10      | 24406.314 | 6967.694  | NM_016124 | 4950.227  | 4476.847  | M87790    | 2879.578  | 2804.319  |
| CY3Cy5    | 1676.211  | 218.517   | NM_01907E | 770.716   | 213.884   | NM_00176E | 1379.039  | 1229.821  |
| NM_003834 | 2237.681  | 3749.11   | U53530    | 1766.146  | 617.466   | NM_00002E | 1496.471  | 1515.019  |
| NM_00595E | 3035.544  | 2700.52   | NM_00659E | 2738.783  | 1453.719  | AF035802  | 417.401   | 342.837   |
| NM_003381 | 1039.28   | 1185.705  | NM_01594E | 2372.768  | 2135.51   | Y08145    | 210.56    | 355.991   |
| NM_00575E | 576.331   | 687.82    | NM_003054 | 3623.946  | 2395.55   | NM_00183E | 479.708   | 428.477   |
| NM_00370Z | 9368.035  | 10309.409 | NM_00304Z | 1315.906  | 752.327   | NM_00390E | 9452.603  | 11057.308 |
| NM_00036E | 637.915   | 799.482   | NM_00221E | 9245.418  | 6064.309  | L12052    | 1609.729  | 1595.151  |
| NM_016351 | 1153.249  | 1414.402  | AF182404  | 2073.589  | 1653.368  | AB028976  | 729.102   | 629.158   |
| NM_00440E | 2494.405  | 2437.208  | NM_00655E | 4563.237  | 3459.745  | NM_00430E | 8771.019  | 6976.387  |
| NM_00606C | 2961.818  | 3708.602  | NM_014521 | 984.598   | 797.981   | NM_00608E | 1945.435  | 1911.396  |
| NM_005667 | 2887.24   | 4352.046  | NM_00244E | 1082.337  | 1390.201  | NM_01612Z | 249.522   | 283.539   |
| NM_00630E | 449.601   | 1010.592  | NM_01780E | 1132.237  | 1229.918  | AF153330  | 478.865   | 690.604   |
| NM_00006C | 500.275   | 772.588   | AK023202  | 4255.702  | 5077.725  | NM_002337 | 1883.452  | 2436.603  |
| L09080    | 2090.366  | 2419.164  | D63877    | 5005.152  | 6317.583  | NM_01324E | 871.872   | 890.102   |
| NM_00732E | 4116.306  | 4195.641  | AF131760  | 1131.29   | 2790.668  | NM_00642Z | 10793.353 | 9047.708  |
| NM_00188E | 3803.065  | 5033.53   | NM_01869E | 2290.732  | 3128.995  | NM_00581E | 1660.491  | 1395.685  |
| NM_00562Z | 813.076   | 835.445   | NM_006461 | 4238.549  | 5002.59   | AK024722  | 853.14    | 504.903   |
| X69079    | 25430.73  | 12918.413 | NM_018201 | 2571.901  | 3024.135  | NM_014597 | 5448.827  | 4248.643  |
| AF091033  | 818.264   | 1124.248  | NM_01443E | 926       | 831.674   | NM_01789E | 3404.833  | 2472.791  |
| AL133027  | 1116.858  | 1075.832  | NM_01488C | 1797.579  | 1932.934  | AB002374  | 1240.366  | 1003.481  |
| AB037732  | 1485.054  | 1619.598  | NM_00615Z | 7822.448  | 6758.867  | U17327    | 423.726   | 396.71    |
| NM_005767 | 339.814   | 379.217   | NM_012164 | 4436.212  | 1275.536  | NM_01783Z | 277.022   | 490.928   |
| NM_001837 | 403.902   | 637.911   | AB011156  | 1033.756  | 661.892   | NM_00667E | 1956.544  | 2402.298  |
| NM_00183E | 54469.563 | 71405.07  | NM_01807E | 936.659   | 579.007   | NM_00302Z | 2142.784  | 2334.458  |
| BC016029  | 698.544   | 826.19    | NM_00476C | 18351.793 | 9699.608  | NM_00487Z | 1504.583  | 1492.138  |
| M27487    | 752.726   | 983.872   | NM_00675Z | 3189.427  | 2534.671  | NM_01984Z | 576.663   | 864.835   |
| NM_002164 | 871.992   | 1048.784  | NM_00442E | 624.01    | 224.791   | NM_002951 | 7666.044  | 9551.671  |
| NM_003811 | 3475.533  | 5591.394  | NM_00680E | 4692.409  | 3348.263  | NM_002317 | 339.617   | 370.869   |
| NM_002981 | 4044.165  | 5739.088  | AF149304  | 570.952   | 553.924   | NM_00032C | 1367.348  | 1456.644  |
| NM_001244 | 1201.952  | 1611.186  | NM_01209E | 7454.563  | 5406.938  | NM_00313E | 4936.404  | 7969.021  |
| NM_01227E | 396.05    | 758.956   | NM_01643E | 505.06    | 340.682   | NM_01332E | 10726.647 | 16243.434 |
| NM_006137 | 4067.417  | 4919.125  | X73079    | 21204.836 | 15018.305 | NM_00266C | 1676.875  | 1379.081  |
| NM_01613E | 44651.203 | 39524.629 | NM_019091 | 1993.885  | 1304.199  | AL122071  | 340.396   | 203.875   |
| AL117468  | 6591.095  | 6779.759  | L07518    | 327.634   | 294.871   | NM_01491Z | 11035.991 | 11105.104 |
| NM_01961Z | 6793.507  | 7256.901  | AF264781  | 1368.426  | 1900.092  | NM_012341 | 1609.519  | 1749.994  |
| NM_00538Z | 784.18    | 1126.47   | NM_00245E | 602.981   | 657.86    | NM_00325E | 7426.248  | 8882.08   |
| AK027086  | 4227.428  | 4225.933  | AK024215  | 4124.799  | 4237.436  | D87450    | 1013.334  | 1251.493  |
| AB032997  | 911.883   | 677.619   | AB044661  | 5218.49   | 4947.105  | NM_017797 | 6315.843  | 6331.15   |
| AL096857  | 3122.356  | 2195.988  | NM_01537E | 1198.794  | 359.641   | AF000562  | 1820.398  | 2354.981  |
| AF073770  | 2506.696  | 4872.54   | NM_00117E | 857.606   | 241.983   | AK025713  | 1321.73   | 1453.518  |

|           |           |           |           |           |           |           |           |           |
|-----------|-----------|-----------|-----------|-----------|-----------|-----------|-----------|-----------|
| NM_012213 | 2013.029  | 2829.099  | NM_016536 | 929.031   | 570.753   | NM_01810C | 412.772   | 1464.916  |
| NM_016573 | 3145.049  | 3814.346  | NM_004941 | 5533.256  | 2974.537  | NM_00205C | 521.23    | 840.191   |
| NM_001303 | 7295.619  | 7870.819  | AF151831  | 3118.126  | 2433.814  | NM_007097 | 3395.92   | 6597.081  |
| M21304    | 510.32    | 541.526   | AB011121  | 587.135   | 387.049   | D87446    | 1997.967  | 3058.594  |
| NM_001979 | 5462.789  | 5393.104  | AF083255  | 6131.016  | 4577.357  | NM_007081 | 968.047   | 856.519   |
| AB040896  | 1220.9    | 1707.951  | AK022605  | 833.525   | 837.878   | AB032964  | 1463.478  | 1626.549  |
| NM_001107 | 5823.613  | 8637.229  | AK000554  | 3753.289  | 2566.609  | BE733605  | 2085.739  | 2278.876  |
| NM_003636 | 12335.266 | 16535.4   | NM_006472 | 1451.324  | 1199.67   | NM_003334 | 6714.471  | 5464.712  |
| NM_002234 | 1959.49   | 2168.343  | NM_002826 | 3092.615  | 2438.573  | NM_002693 | 1794.48   | 1629.104  |
| NM_000701 | 1950.012  | 2979.453  | AF159141  | 4691.526  | 4097.887  | M20695    | 523.436   | 413.907   |
| AB022696  | 3764.625  | 3965.959  | NM_00242C | 750.046   | 1302.829  | AK026000  | 1490.076  | 1278.94   |
| NM_002233 | 332.637   | 600.278   | AK022233  | 2781.808  | 4602.582  | NM_000211 | 3203.755  | 3368.68   |
| NM_014379 | 385.368   | 481.11    | AL137713  | 323.77    | 191.876   | AB037830  | 395.379   | 709.911   |
| AF137372  | 5259.355  | 6251.425  | NM_013379 | 17801.59  | 22627.234 | NM_015685 | 1130.967  | 1215.375  |
| D83782    | 5676.539  | 4735.867  | AF113208  | 12895.159 | 13359.773 | X03324    | 1701.38   | 1804.201  |
| NM_002078 | 2708.007  | 1810.687  | AF019382  | 1052.713  | 503.415   | NM_015385 | 1000.613  | 3146.374  |
| NM_000287 | 2550.612  | 2145.385  | BC012757  | 826.614   | 530.029   | NM_00369C | 2164.04   | 4055.308  |
| NM_001656 | 1495.329  | 1400.465  | NM_004062 | 1695.83   | 1004.054  | NM_000876 | 1386.324  | 2136.495  |
| NM_017417 | 712.992   | 719.017   | NM_005883 | 739.066   | 705.725   | NM_005232 | 268.295   | 205.61    |
| AL133602  | 1317.996  | 1020.165  | NM_014591 | 1891.463  | 1733.224  | NM_002752 | 1142.47   | 1439.711  |
| AF037219  | 3645.073  | 4150.116  | NM_014592 | 632.457   | 701.738   | NM_013281 | 314.836   | 248.027   |
| AK026075  | 1586.345  | 1974.292  | NM_001945 | 2235.849  | 1911.469  | Y11306    | 379.333   | 442.849   |
| NM_000251 | 2130.302  | 2718.096  | NM_020039 | 2473.052  | 1909.454  | X85106    | 499.342   | 408.902   |
| NM_006038 | 2988.465  | 3385.684  | NM_006653 | 2156.815  | 1238.858  | NM_003931 | 669.917   | 456.018   |
| AB011133  | 2411.745  | 3021.891  | NM_014442 | 5538.916  | 4759.214  | NM_012479 | 10605.978 | 7271.386  |
| NM_017572 | 31633.656 | 34958.684 | AB002313  | 1104.74   | 999.551   | AF250226  | 4423.457  | 3263.868  |
| NM_018444 | 2081.825  | 2631.376  | AB011167  | 1168.031  | 1076.846  | NM_003217 | 11975.653 | 8894.745  |
| NM_000252 | 1424.024  | 1716.876  | NM_005409 | 1757.017  | 1418.473  | NM_006069 | 6506.085  | 5543.679  |
| NM_006947 | 10210.851 | 12966.396 | NM_000208 | 4760.168  | 3873.481  | NM_006534 | 1271.066  | 1354.778  |
| NM_017917 | 2234.714  | 2060.282  | NM_002188 | 40156.82  | 41010.238 | NM_017601 | 731.698   | 817.614   |
| NM_00409C | 4391.348  | 5305.735  | AK027119  | 19278.045 | 23540.266 | AF110265  | 3536.695  | 2808.338  |
| NM_001919 | 5142.297  | 4124.994  | NM_005426 | 4159.386  | 7083.84   | AK021848  | 627.773   | 694.219   |
| BC031485  | 2135.083  | 1432.809  | NM_004763 | 1744.137  | 2559.188  | NM_003704 | 520.572   | 571.547   |
| NM_004092 | 6965.135  | 5928.539  | NM_014063 | 9589.228  | 12266.6   | AK023140  | 344.703   | 230.176   |
| X15624    | 1733.387  | 1394.795  | D86964    | 7381.561  | 8277.536  | AF084362  | 223.057   | 389.44    |
| X69079    | 23818.463 | 26869.098 | AL049801  | 3335.958  | 3735.116  | NM_001553 | 390.029   | 854.38    |
| BI759406  | 2531.132  | 2266.237  | NM_016395 | 14264.51  | 14895.838 | NM_014173 | 9913.291  | 15205.541 |
| R76099    | 482.717   | 509.203   | NM_003152 | 1236.983  | 1265.025  | AL137506  | 441.767   | 587.626   |
| S74445    | 467.794   | 503.117   | NM_014727 | 2458.496  | 1550.663  | AK022961  | 1348.027  | 1519.049  |
| BI763360  | 973.586   | 1026.138  | BE885010  | 517.965   | 273.064   | NM_007375 | 2306.297  | 2181.481  |
| D25538    | 1069.468  | 1100.175  | NM_006342 | 6449.42   | 4264.266  | NM_014371 | 1773.869  | 1894.755  |
| NM_00036C | 5233.175  | 5106.839  | NM_016396 | 6427.945  | 3911.677  | AF290512  | 566.999   | 470.316   |
| D49950    | 329.49    | 366.055   | NM_005689 | 1534.579  | 1260.002  | NM_006716 | 3755.418  | 3493.406  |
| NM_001849 | 346.948   | 470.192   | NM_005552 | 17943.887 | 15554.419 | AB002323  | 1104.848  | 939.295   |
| X03635    | 2330.488  | 2806.979  | NM_006717 | 2636.987  | 2461.095  | AK022241  | 3235.809  | 3046.754  |
| X03348    | 1733.341  | 2618.01   | AL109786  | 2009.733  | 1512.701  | AK022587  | 1597.09   | 1672.51   |
| AF353674  | 7870.951  | 9458.04   | AK026479  | 2951.286  | 2305.967  | NM_005506 | 780.446   | 574.514   |
| BC002645  | 3622.142  | 4071.122  | AK022860  | 3707.97   | 3120.618  | NM_005723 | 703.57    | 598.456   |
| NM_021138 | 1910.066  | 1909.788  | X60188    | 34899.52  | 29717.668 | AL137404  | 22983.004 | 13825.091 |
| BC002792  | 1302.452  | 1735.077  | NM_005977 | 2933.548  | 2573.335  | NM_020185 | 1378.193  | 1753.408  |
| NM_021005 | 1431.533  | 1596.77   | NM_002747 | 877.715   | 658.079   | NM_002832 | 18148.734 | 13582.122 |
| SB        | 577.538   | 485.345   | NM_006265 | 36204.941 | 26303.805 | NM_017732 | 1776.721  | 2082.527  |
| NM_001523 | 660.17    | 349.186   | NM_003126 | 602.904   | 590.762   | NM_002851 | 855.712   | 927.734   |

|           |           |           |           |           |           |           |           |          |
|-----------|-----------|-----------|-----------|-----------|-----------|-----------|-----------|----------|
| NM_017423 | 1859.506  | 1128.587  | NM_006059 | 1666.209  | 2014.671  | NM_005339 | 6742.786  | 6293.567 |
| NM_005382 | 1031.285  | 2011.793  | NM_000347 | 9331.026  | 11854.453 | NM_001906 | 2104.503  | 2361.749 |
| AK027086  | 4294.188  | 10624.275 | M13452    | 2993.593  | 4341.011  | AF108138  | 1741.195  | 1861.636 |
| AL096857  | 2617.244  | 3743.435  | AF082075  | 1392.409  | 1666.683  | BF340302  | 1118.115  | 934.731  |
| X07203    | 484.196   | 496.324   | NM_016114 | 3061.724  | 4343.545  | AK024210  | 402.958   | 403.952  |
| AB040104  | 386.766   | 394.742   | AY007114  | 1463.522  | 2929.673  | NM_002276 | 437.175   | 496.532  |
| NM_003834 | 2616.099  | 2696.994  | AF086604  | 685.951   | 1069.076  | AL133087  | 829.507   | 705.485  |
| NM_005959 | 3010.349  | 2885.249  | AB000895  | 983.871   | 1150.725  | NM_018010 | 776.868   | 827.672  |
| NM_003381 | 1070.43   | 1258.004  | X80031    | 737.199   | 965.844   | NM_002274 | 2245.237  | 1906.831 |
| NM_005756 | 732.384   | 1098.369  | AK022178  | 1592.681  | 943.22    | BF337874  | 787.573   | 529.069  |
| NM_003702 | 10026.988 | 12566.067 | NM_006011 | 614.889   | 407.944   | NM_003475 | 3106.046  | 1903.673 |
| NM_000369 | 694.035   | 1054.493  | L00635    | 1192.095  | 768.15    | NM_000243 | 1254.233  | 1336.887 |
| NM_004405 | 2622.469  | 3150.864  | NM_015601 | 980.277   | 561.193   | NM_004383 | 5226      | 3886.194 |
| NM_001988 | 8938.334  | 9674.114  | NM_001780 | 11736.226 | 9011.558  | NM_012256 | 3247.066  | 3105.03  |
| NM_006060 | 3148.434  | 3458.772  | AJ277442  | 975.152   | 810.951   | NM_016325 | 817.393   | 761.148  |
| NM_005667 | 2888.527  | 3824.097  | NM_004569 | 6270.972  | 5275.319  | NM_001604 | 591.202   | 799.385  |
| NM_006308 | 401.564   | 525.404   | AF089088  | 787.006   | 805.514   | NM_017656 | 583.208   | 504.724  |
| NM_000060 | 589.863   | 617.728   | L07557    | 5852.569  | 5171.584  | X16282    | 2504.735  | 2727.929 |
| NM_009589 | 312.097   | 303.485   | D78514    | 7802.227  | 5504.507  | NM_014415 | 1039.677  | 1325.94  |
| L09080    | 2006.18   | 1580.87   | AK021665  | 762.288   | 931.867   | S75264    | 2735.813  | 2777.65  |
| NM_007326 | 4727.108  | 3227.509  | NM_013366 | 693.264   | 598.271   | AF027513  | 550.884   | 684.983  |
| NM_001886 | 3970.292  | 3161.681  | NM_002787 | 39689.828 | 26943.646 | NM_001379 | 1079.409  | 1317.649 |
| AF137372  | 4523.293  | 4551.035  | U95006    | 17820.758 | 15346.303 | NM_018664 | 2939.017  | 3357.92  |
| AF220417  | 1330.641  | 1485.1    | NM_003347 | 7208.9    | 8707.842  | NM_005034 | 408.336   | 328.234  |
| D83782    | 5198.338  | 6321.662  | AF273051  | 1063.559  | 1950.493  | NM_003926 | 2512.639  | 2362.677 |
| NM_002078 | 2307.447  | 2871.674  | NM_014516 | 18393.779 | 25491.277 | AF085356  | 276.021   | 205.843  |
| NM_000287 | 2143.5    | 2123.191  | AK021868  | 2427.514  | 2467.642  | NM_016047 | 12513.873 | 8537.196 |
| NM_001656 | 1508.8    | 1867.331  | NM_020127 | 2054.321  | 2276.053  | NM_001499 | 2920.681  | 2755.705 |
| AF091033  | 780.454   | 780.729   | NM_015623 | 7334.732  | 8915.387  | BF030165  | 3864.937  | 3113.413 |
| NM_001122 | 10425.07  | 10661.326 | AB045116  | 1483.636  | 1999.823  | NM_016732 | 7616.961  | 4765.795 |
| NM_004591 | 2098.937  | 2064.796  | L49054    | 525.885   | 1007.553  | NM_014763 | 4794.248  | 3326.158 |
| AL133027  | 1143.227  | 1022.523  | NM_001675 | 848.574   | 717.874   | NM_014918 | 1880.869  | 2161.164 |
| AB037732  | 1533.338  | 1876.612  | NM_003422 | 1770.273  | 1453.691  | NM_000152 | 2099.951  | 2161.751 |
| NM_005767 | 371.121   | 443.952   | NM_001451 | 1650.9    | 1270.629  | D17222    | 4863.682  | 6136.926 |
| NM_001837 | 567.7     | 606.626   | NM_014779 | 1048.237  | 1091.538  | NM_000154 | 598.78    | 857.837  |
| BC016029  | 725.258   | 802.964   | NM_002943 | 4494.286  | 4185.939  | NM_003549 | 321.803   | 267.762  |
| M27487    | 792.297   | 1146.28   | AL133649  | 1279.751  | 1170.073  | NM_000671 | 1568.819  | 1626.235 |
| NM_002286 | 51704.77  | 52127.363 | AB018303  | 2576.689  | 1917.044  | NM_006297 | 3411.988  | 3159.367 |
| NM_002164 | 899.324   | 971.893   | NM_015846 | 5372.579  | 4399.916  | AF318366  | 2322.435  | 2294.922 |
| NM_001244 | 1247.24   | 1246.34   | NM_015972 | 9828.821  | 9559.314  | AF182423  | 345.119   | 476.827  |
| NM_012275 | 610.528   | 454.134   | NM_016132 | 3398.601  | 2999.775  | D26018    | 1490.631  | 1655.536 |
| NM_006137 | 4596.595  | 3105.444  | NM_018006 | 2171.122  | 3526.735  | BC000363  | 412.364   | 468.013  |
| NM_016139 | 46009.617 | 29751.258 | NM_016090 | 1875.692  | 2452.896  | NM_007237 | 685.578   | 467.898  |
| AL117468  | 7875.058  | 5499.371  | NM_001013 | 46940.844 | 45818.012 | NM_004608 | 344.434   | 178.617  |
| NM_004090 | 4236.971  | 4953.617  | AK024040  | 3133.258  | 3985.06   | NM_018257 | 1205.282  | 853.565  |
| NM_014634 | 5889.925  | 4460.975  | NM_005061 | 4090.027  | 4510.816  | NM_005919 | 879.317   | 694.573  |
| NM_001919 | 5081.599  | 4214.361  | AL137354  | 14284.457 | 16980.918 | AF085931  | 955.289   | 702.262  |
| BC031485  | 1625.425  | 1810.482  | NM_001023 | 59003.285 | 63927.348 | AL137254  | 340.648   | 315.807  |
| NM_004092 | 5369.167  | 5653.972  | AK021571  | 4950.009  | 6114.007  | AK026359  | 430.089   | 242.042  |
| X15624    | 1457.16   | 1772.852  | AF052149  | 7124.387  | 4881.613  | AF085884  | 445.904   | 405.014  |
| AF073770  | 2917.386  | 2749.479  | AK025586  | 1222.322  | 961.555   | S81522    | 1567.22   | 1443.257 |
| AL359401  | 6334.588  | 7005.602  | AL137512  | 964.862   | 1074.368  | S94541    | 463.56    | 441.816  |
| NM_012213 | 2187.359  | 2334.136  | NM_005036 | 550.754   | 434.688   | AK024228  | 645.264   | 626.866  |

|           |           |           |           |           |           |           |           |           |
|-----------|-----------|-----------|-----------|-----------|-----------|-----------|-----------|-----------|
| NM_016573 | 3132.105  | 3057.092  | NM_002541 | 1344.205  | 1303.874  | NM_016647 | 888.536   | 1009.933  |
| NM_001303 | 7927.592  | 8186.86   | NM_000056 | 3445.132  | 3501.524  | AK024695  | 468.292   | 660.201   |
| M21304    | 602.822   | 766.238   | NM_016311 | 24785.637 | 19267.105 | AF038174  | 994.655   | 862.78    |
| NM_001979 | 5807.493  | 7103.078  | NM_000290 | 5160.012  | 4624.097  | AF161359  | 745.636   | 605.138   |
| AB040896  | 1690.809  | 2468.109  | NM_016538 | 3578.286  | 4339.698  | AL365520  | 295.027   | 203.483   |
| AF084645  | 329.364   | 453.139   | AK023275  | 6116.4    | 6550.171  | AK023623  | 431.715   | 390.997   |
| NM_005176 | 784.666   | 767.399   | AJ223352  | 4111.082  | 4396.467  | AK021539  | 1635.275  | 1375.35   |
| NM_003636 | 11431.396 | 9525.313  | NM_012238 | 1978.535  | 2338.799  | AK026738  | 673.694   | 518.57    |
| NM_002234 | 1527.867  | 1299.611  | NM_016539 | 7124.579  | 5912.079  | AK025011  | 408.326   | 456.604   |
| NM_003471 | 324.938   | 606.255   | NM_006807 | 31816.658 | 28137.047 | AL157491  | 465.494   | 547.494   |
| NM_000701 | 1992.47   | 1878.435  | L16464    | 785.269   | 1101.492  | NM_005266 | 662.339   | 508.629   |
| AB022696  | 4935.462  | 3308.129  | NM_006532 | 4536.8    | 8559.116  | AF085998  | 594.094   | 434.039   |
| NM_014379 | 231.312   | 218.979   | U07132    | 4608.861  | 5604.093  | AK024681  | 282.941   | 459.983   |
| NM_021005 | 1251.527  | 1142.053  | NM_003436 | 927.298   | 1125.786  | NM_014907 | 9883.916  | 9060.991  |
| SB        | 494.859   | 357.14    | AB034691  | 401.046   | 841.371   | AB007977  | 1500.563  | 1764.205  |
| NM_001523 | 734.68    | 403.672   | AL035301  | 1766.067  | 1422.787  | NM_014221 | 2470.174  | 2287.818  |
| NM_017423 | 1514.603  | 1340.408  | NM_017687 | 1719.229  | 1373.072  | U84515    | 399.361   | 368.544   |
| Z70705    | 576.525   | 503.466   | NM_017975 | 2540.011  | 1723.102  | AF086143  | 1963.232  | 1240.955  |
| NM_002611 | 1453.916  | 1576.211  | AK025036  | 1193.185  | 1283.556  | AK024244  | 1340.127  | 1341.015  |
| NM_017417 | 658.265   | 511.447   | AK024843  | 12218.969 | 9531.387  | AL390084  | 631.595   | 618.969   |
| AL133602  | 1193.639  | 1625.07   | AF074994  | 560.527   | 514.337   | AK021479  | 297.931   | 259.731   |
| AF037219  | 3982.684  | 4960.084  | NM_017670 | 4437.808  | 3935.262  | NM_003835 | 517.617   | 587.629   |
| AK026075  | 1994.228  | 2301.107  | AF286598  | 901.046   | 848.693   | AK000245  | 490.392   | 323.333   |
| NM_000251 | 2404.856  | 2989.275  | AK021468  | 691.539   | 720.313   | AF118072  | 315.912   | 394.841   |
| AB050195  | 391.528   | 464.596   | NM_004366 | 8384.885  | 6848.613  | AF085900  | 5008.5    | 3773.289  |
| AB011133  | 2398.901  | 2423.768  | AK026168  | 1799.591  | 1937.716  | AK022420  | 433.645   | 364.343   |
| NM_017572 | 29447.984 | 23240.934 | AJ296152  | 9292.598  | 12735.733 | AK023945  | 8835.871  | 7617.822  |
| NM_018444 | 2048.766  | 1645.193  | AK001067  | 2039.723  | 3365.727  | AK022446  | 272.288   | 290.144   |
| NM_000252 | 1299.085  | 1271.179  | AK027088  | 11207.157 | 14749.913 | AF116709  | 334.395   | 337.707   |
| NM_006947 | 11357.758 | 9516.675  | AB037721  | 9283.074  | 9354.444  | AK021911  | 3705.152  | 3872.819  |
| NM_017917 | 2168.616  | 1310.786  | AK027120  | 846.123   | 1161.645  | D17225    | 1095.373  | 1367.968  |
| NM_000060 | 323.889   | 336.794   | AB029001  | 1285.811  | 1360.615  | AK025766  | 1945.913  | 1579.392  |
| L09080    | 1407.994  | 1014.247  | AB006624  | 6155.534  | 5847.605  | U35875    | 8637.82   | 7016.075  |
| NM_007326 | 4395.645  | 2704.184  | AL109717  | 1353.913  | 2033.733  | AK021857  | 6877.25   | 4994.112  |
| NM_001886 | 3107.211  | 3565.412  | AK025473  | 1262.62   | 1533.883  | AK022257  | 790.121   | 537.338   |
| NM_004467 | 355.633   | 370.357   | AF146693  | 1141.642  | 1929.392  | BE887356  | 23616.641 | 15625.544 |
| NM_005622 | 727.009   | 739.631   | AF271070  | 10893.278 | 11845.887 | AK023329  | 3616.581  | 3705.704  |
| NM_018058 | 5823.836  | 5888.073  | NM_014903 | 589.365   | 858.917   | AK021773  | 710.433   | 470.44    |
| NM_004548 | 11407.723 | 14486.364 | AK055959  | 1430.173  | 2811.281  | AK027074  | 673.484   | 502.618   |
| X69079    | 21087.209 | 17351.627 | AF052141  | 1044.289  | 1793.756  | AL365456  | 435.02    | 565.217   |
| BI759406  | 2270.892  | 2622.91   | AK021705  | 3962.846  | 2631.221  | AK021694  | 487.532   | 368.209   |
| R76099    | 634.931   | 693.473   | NM_016141 | 17975.033 | 13953.831 | U84505    | 796.007   | 738.478   |
| S74445    | 476.928   | 902.059   | AL109702  | 1715.29   | 1268.015  | X81005    | 767.7     | 631.329   |
| BI763360  | 1114.655  | 1212.665  | AK025624  | 10797.807 | 7821.553  | AL049265  | 871.166   | 872.538   |
| D25538    | 1306.69   | 1755.423  | AK026684  | 1886.871  | 1740.117  | AL049430  | 697.906   | 579.38    |
| NM_000360 | 6188.224  | 7634.266  | AL110125  | 9021.592  | 7776.376  | AL079274  | 2542.991  | 1894.065  |
| X03635    | 2070.488  | 1990.053  | AK022764  | 1740.43   | 1703.137  | AL137398  | 425.246   | 305.959   |
| BC011847  | 50718.734 | 69765.844 | X89744    | 460.893   | 486.754   | Y12021    | 465.659   | 462.036   |
| X03348    | 1815.401  | 1634.981  | AJ011600  | 2419.324  | 3678.512  | NM_013300 | 8841.788  | 6658.592  |
| AF353674  | 6741.055  | 5647.904  | AJ002785  | 1507.355  | 2959.804  | AK026039  | 3668.071  | 2022.175  |
| BC002645  | 3662.469  | 2710.116  | Z70716    | 1048.273  | 1283.733  | AF108756  | 5516.667  | 3210.47   |
| NM_021138 | 2305.22   | 1436.132  | AL049251  | 533.2     | 704.17    | NM_004075 | 2397.375  | 2622.449  |
| BC002792  | 1094.458  | 799.901   | Z83945    | 1908.133  | 1973.17   | NM_001887 | 1459.594  | 578.012   |

|           |           |           |           |           |           |            |           |           |
|-----------|-----------|-----------|-----------|-----------|-----------|------------|-----------|-----------|
| NM_002981 | 3280.304  | 2237.749  | L32606    | 833.526   | 995.017   | NM_006533  | 682.177   | 756.417   |
| NM_001244 | 988.762   | 775.997   | L05148    | 5785.996  | 7670.608  | AK026747   | 2747.345  | 1331.11   |
| NM_012275 | 338.245   | 330.556   | AK091125  | 1209.669  | 1634.613  | AL110150   | 1865.093  | 1323.799  |
| NM_006137 | 3506.752  | 2218.515  | D16904    | 954.083   | 1451.869  | NM_001995  | 2650.238  | 2382.373  |
| NM_016135 | 38868.852 | 26259.75  | M93056    | 632.057   | 956.783   | X87825     | 1009.739  | 877.312   |
| AL117468  | 6788.336  | 6033.361  | D16474    | 9317.471  | 12654.727 | AK001285   | 9830.007  | 5990.828  |
| NM_019613 | 5990.23   | 5609.958  | AL080072  | 1548.142  | 2798.335  | D17215     | 1334.825  | 1098.083  |
| NM_005382 | 819.751   | 1149.098  | AK024898  | 1666.841  | 2498.704  | NM_015714  | 6125.369  | 6320.702  |
| AK027086  | 3986.876  | 4665.387  | AL049280  | 2393.222  | 2223.855  | AK026219   | 701.066   | 537.711   |
| AB032997  | 817.272   | 849.865   | AK025212  | 9046.916  | 7725.548  | AK024756   | 1261.6    | 1044.467  |
| AL096857  | 2542.952  | 2651.855  | AB021925  | 316.949   | 734.312   | NM_017911  | 948.143   | 954.178   |
| X07203    | 411.015   | 562.01    | AL157503  | 3204.469  | 3340.079  | AJ224168   | 1091.229  | 1124.227  |
| AB040104  | 397.492   | 670.856   | AK000053  | 636.484   | 969.169   | S69873     | 374.896   | 383.943   |
| NM_003834 | 2470.059  | 3301.961  | AK000786  | 1711.304  | 2289.332  | AF147325   | 38482.984 | 25801.063 |
| NM_005955 | 3861.318  | 4278.277  | AK000935  | 959.625   | 825.172   | NM_014425  | 730.579   | 626.261   |
| NM_003381 | 1172.214  | 1674.588  | AK021458  | 2790.568  | 3543.82   | D87466     | 3264.596  | 2152.391  |
| NM_005755 | 857.505   | 1363.2    | NM_017674 | 6389.787  | 5748.477  | CY3Cy5     | 1396.207  | 288.765   |
| NM_003702 | 10805.179 | 12374.992 | AK000966  | 706.364   | 1022.281  | AA608568   | 5472.065  | 13779.287 |
| NM_000365 | 705.986   | 1101.604  | AK024525  | 6014.421  | 7949.725  | BG831301   | 4704.046  | 9097.809  |
| NM_016351 | 1091.607  | 1621.689  | AK024909  | 1759.92   | 2108.149  | M14764     | 839.977   | 2259.267  |
| NM_004405 | 2433.952  | 2169.14   | AK024544  | 2574.501  | 4780.125  | AA478647   | 5018.67   | 8746.737  |
| NM_001985 | 7760.445  | 5548.01   | AK024629  | 382.501   | 534.548   | M35999     | 438.054   | 903.446   |
| NM_006060 | 3095.504  | 2075.865  | AK001880  | 8867.759  | 6119.335  | M81379     | 6958.613  | 13949.896 |
| NM_005667 | 3124.388  | 2696.479  | AF156166  | 4710.126  | 3693.021  | ID 2623896 | 814.536   | 2049.304  |
| NM_006305 | 481.392   | 320.665   | NM_014373 | 3451.541  | 2624.988  | L10709     | 5991.413  | 13821.526 |
| NM_002234 | 1198.572  | 638.314   | NM_014205 | 28799.775 | 25277.555 | N35489     | 383.161   | 1044.341  |
| NM_000701 | 1582.616  | 1564.789  | NM_001651 | 7479.867  | 8255.833  | AI928195   | 570.773   | 1376.823  |
| AB022696  | 4799.913  | 4048.926  | L32786    | 2405.95   | 2717.781  | AA458922   | 1576.523  | 4393.567  |
| NM_002233 | 273.589   | 429.801   | U03239    | 442.161   | 488.701   | NM_145655  | 873.494   | 1794.244  |
| AF137372  | 4816.502  | 5647.396  | AL355720  | 718.494   | 973.109   | SR2        | 35707.699 | 25489.82  |
| AF220417  | 1247.457  | 1532.634  | AK002023  | 5538.775  | 5600.894  | SR4        | 8041.98   | 5528.913  |
| D83782    | 5000.333  | 4512.293  | NM_016464 | 858.916   | 869.611   | SR6        | 1279.352  | 1164.855  |
| NM_002075 | 2120.235  | 1805.199  | L40402    | 2684.866  | 3069.668  | SR8        | 4744.768  | 9746.43   |
| NM_000287 | 1990.476  | 2086.155  | AF086216  | 554.796   | 652.218   | CY3Cy5     | 721.824   | 177.905   |
| NM_001655 | 1455.872  | 2184.615  | AK022422  | 719.922   | 858.116   | NM_017725  | 506.542   | 513.88    |
| AF091033  | 740.099   | 1051.009  | AK022474  | 18682.379 | 19524.918 | NM_006174  | 450.248   | 468.035   |
| NM_001122 | 10094.146 | 12514.202 | AK022392  | 7398.462  | 11555.377 | NM_015850  | 1592.584  | 2788.467  |
| NM_004591 | 1420.327  | 1790.821  | AL117451  | 556.261   | 1168.814  | NM_004864  | 440.168   | 794.796   |
| NM_006274 | 254.281   | 521.09    | AK025949  | 1670.382  | 1645.849  | NM_002835  | 2619.152  | 4271.75   |
| AL133027  | 1193.935  | 1672.609  | Y10259    | 2352.942  | 1702.318  | AK027377   | 4856.648  | 8197.155  |
| AB037732  | 1395.085  | 2120.896  | AK021725  | 3701.312  | 3702.543  | NM_014685  | 35664.793 | 48009.754 |
| NM_005767 | 507.815   | 511.898   | NM_002405 | 3861.048  | 4045.028  | NM_002487  | 4413.116  | 9619.165  |
| NM_001837 | 483.126   | 591.927   | AK024282  | 1054.686  | 1322.296  | NM_013340  | 302.181   | 765.395   |
| BC016029  | 628.584   | 611.048   | AF085838  | 2759.989  | 2795.494  | NM_005462  | 378.607   | 1209.366  |
| M27487    | 753.458   | 577.283   | NM_018277 | 1373.876  | 1393.923  | NM_012315  | 1180.817  | 3413.811  |
| NM_002164 | 869.926   | 651.405   | AF014455  | 570.002   | 514.487   | AK026235   | 180.996   | 912.474   |
| NM_003811 | 3608.41   | 2935.047  | AF086335  | 3270.293  | 3342.127  | NM_006510  | 4976.316  | 10674.461 |
| AB011133  | 2226.375  | 1531.687  | AB011118  | 22321.244 | 21163.566 | NM_003141  | 1164.574  | 3495.239  |
| NM_017572 | 23910.195 | 13584.602 | S66666    | 899.876   | 947.121   | NM_020245  | 1091.172  | 2566.62   |
| NM_018444 | 1717.243  | 1283.182  | AK021476  | 5194.942  | 4293.439  | NM_007175  | 700.093   | 1360.052  |
| NM_000252 | 1038.221  | 970.346   | NM_018630 | 5538.12   | 7639.792  | AB046381   | 496.26    | 1306.343  |
| NM_006947 | 9385.778  | 8085.201  | AF086175  | 809.656   | 1035.851  | AJ011497   | 655.103   | 1418.281  |
| NM_017917 | 1796.574  | 1575.271  | AK002196  | 826.737   | 1107.053  | NM_003015  | 429.219   | 818.046   |

|           |           |           |           |           |           |           |           |           |
|-----------|-----------|-----------|-----------|-----------|-----------|-----------|-----------|-----------|
| NM_00409C | 4589.626  | 4728.34   | NM_004576 | 2980.288  | 5821.32   | AF215923  | 2647.589  | 2537.041  |
| NM_014634 | 6200.549  | 4774.022  | AF040097  | 1259.592  | 1602.143  | U66621    | 2394.959  | 2477.179  |
| NM_001919 | 5432.397  | 6093.794  | NM_020436 | 647.956   | 810.496   | U61736    | 223.098   | 460.836   |
| BC031485  | 1674.331  | 1641.022  | AK024182  | 830.411   | 1347.433  | AJ132086  | 1939.849  | 1895.572  |
| NM_004092 | 5931.882  | 6979.008  | NM_006913 | 11145.75  | 14439.405 | U92816    | 2456.251  | 2664.846  |
| X15624    | 1579.334  | 2259.516  | NM_000499 | 11794.325 | 24981.852 | BC011987  | 1792.18   | 2318.084  |
| AF073770  | 2926.118  | 3404.139  | AL049955  | 21316.408 | 14415.2   | NM_003485 | 743.147   | 738.147   |
| AL359401  | 6625.398  | 8448.728  | AF155654  | 12723.977 | 11136.969 | NM_005038 | 4200.559  | 4425.793  |
| NM_012213 | 2333.98   | 2605.603  | AF088044  | 960.116   | 1016.099  | M95923    | 270.043   | 312.176   |
| NM_016573 | 3174.996  | 3619.975  | AK000028  | 3696.602  | 3376.404  | NM_002415 | 43195.609 | 75293.594 |
| NM_001303 | 8336.785  | 10086.235 | NM_013320 | 46147.977 | 41310.352 | NM_006332 | 6650.96   | 13133.9   |
| M21304    | 689.114   | 629.221   | AJ245902  | 711.265   | 1068.686  | NM_002000 | 211.322   | 716.81    |
| NM_001979 | 5900.813  | 7212.622  | AL050039  | 649.033   | 861.191   | NM_000916 | 715.002   | 1675.97   |
| AB040896  | 1567.866  | 1919.76   | AF009316  | 438.165   | 297.697   | NM_018663 | 2190.58   | 5559.952  |
| AF084645  | 395.912   | 211.862   | AF087987  | 598.177   | 892.21    | NM_145904 | 6179.233  | 14980.447 |
| NM_003636 | 12227.862 | 9078.78   | AK021723  | 505.647   | 472.344   | NM_006796 | 6844.913  | 14424.691 |
| AF040723  | 10658.889 | 5126.935  | H09474    | 2173.821  | 2645.242  | NM_000706 | 518.083   | 1196.363  |
| NM_015527 | 4771.558  | 3023.352  | AB002368  | 10347.728 | 8848.571  | NM_015941 | 1270.156  | 3920.245  |
| X89675    | 1194.671  | 790.852   | AL360263  | 58746.762 | 50896.57  | NM_003655 | 1145.077  | 2080.484  |
| NM_012189 | 454.454   | 380.508   | Z36780    | 1968.611  | 2443.651  | AK025111  | 699.769   | 443.821   |
| NM_005798 | 7424.544  | 7709.165  | AK022403  | 1778.351  | 1887.827  | NM_018690 | 1256.727  | 924.422   |
| NM_004216 | 2268.365  | 1993.498  | AK022955  | 8060.379  | 7919.924  | NM_000780 | 554.574   | 426.112   |
| NM_016289 | 22050.689 | 19173.637 | AF131741  | 457.133   | 672.385   | AF272663  | 2636.701  | 2199.182  |
| NM_001464 | 744.018   | 1074.653  | AK021760  | 764.904   | 721.845   | NM_012190 | 762.13    | 904.015   |
| NM_002051 | 3168.6    | 3564.211  | BC035855  | 3280.843  | 4585.717  | AB033015  | 432.95    | 227.319   |
| NM_001523 | 663.868   | 538.076   | AL137408  | 15463.334 | 29744.518 | NM_003681 | 635.657   | 699.232   |
| NM_017423 | 2174.995  | 1731.646  | AF054995  | 1309.323  | 1845.821  | NM_004800 | 3575.812  | 3118.208  |
| Z70705    | 475.011   | 527.99    | AL080176  | 2635.485  | 4271.15   | NM_014954 | 4391.837  | 4158.896  |
| NM_002611 | 1913.775  | 2221.251  | AK023627  | 2708.264  | 5066.923  | NM_000807 | 330.418   | 352.674   |
| NM_017417 | 837.639   | 810.554   | CY3Cy5    | 5574.604  | 252.154   | NM_014909 | 739.514   | 862.271   |
| AL133602  | 1451.087  | 1706.82   | BI759406  | 3263.742  | 3624.711  | X91148    | 478.903   | 805.973   |
| AF037219  | 4233.513  | 4728.182  | R76099    | 589.678   | 911.616   | NM_015700 | 4817.468  | 8741.399  |
| AK026075  | 1783.727  | 2371.835  | S74445    | 570.23    | 616.724   | NM_019087 | 867.092   | 2278.865  |
| NM_000251 | 2594.2    | 2450.056  | BI763360  | 2515.016  | 1993.617  | NM_005072 | 546.314   | 789.928   |
| NM_006038 | 3033.454  | 2575.246  | D25538    | 1104.579  | 1099.771  | AF308802  | 548.101   | 381.223   |
| U87223    | 2540.705  | 958.846   | NM_000360 | 6238.82   | 5438.222  | NM_007195 | 831.543   | 616.308   |
| NM_000093 | 474.103   | 258.218   | X03635    | 2675.05   | 2409.418  | NM_013275 | 4834.956  | 3426.422  |
| NM_001779 | 3143.987  | 2064.091  | AF353674  | 7503.05   | 6397.477  | U92074    | 259.728   | 310.535   |
| AB033059  | 483.213   | 439.676   | BC002645  | 3973.281  | 3329.173  | NM_019011 | 1173.043  | 1229.595  |
| NM_016484 | 3062.75   | 2370.366  | NM_021138 | 2098.877  | 2022.834  | AF459094  | 2266.679  | 2017.256  |
| AK026114  | 357.074   | 421.655   | BC002792  | 1220.451  | 971.868   | NM_003157 | 774.508   | 701.832   |
| NM_014452 | 1328.074  | 1276.563  | NM_021005 | 1454.491  | 1114.992  | NM_004938 | 501.206   | 327.483   |
| NM_014683 | 320.332   | 184.296   | SB        | 612.776   | 509.452   | NM_014326 | 175.886   | 292.223   |
| AK021536  | 7064.487  | 5901.469  | SR6       | 2463.379  | 1725.229  | NM_004448 | 132.145   | 166.321   |
| NM_002600 | 498.885   | 594.033   | SR8       | 6923.003  | 18150.83  | NM_015981 | 314.19    | 283.9     |
| NM_003646 | 13140.221 | 13704.274 | SR10      | 28020.377 | 8472.647  | NM_000455 | 1305.971  | 1139.48   |
| NM_006663 | 1247.325  | 1567.548  | CY3Cy5    | 3619.94   | 160.141   | NM_014791 | 4708.952  | 4610.405  |
| NM_006092 | 970.94    | 1138.404  | X07203    | 779.729   | 901.131   | NM_003318 | 2002.233  | 1874.287  |
| NM_003939 | 730.687   | 1231.121  | NM_003834 | 3540.891  | 6348.804  | NM_004362 | 1135.35   | 1693.762  |
| NM_012424 | 737.475   | 1073.559  | NM_005959 | 3664.718  | 5575.007  | NM_000182 | 1549.713  | 2831.576  |
| NM_002446 | 2216.057  | 2679.218  | NM_003381 | 1713.474  | 1501.705  | AK023384  | 765.009   | 1667.207  |
| NM_000863 | 1241.626  | 1372.048  | NM_005756 | 900.563   | 763.684   | NM_016026 | 8357.284  | 10455.055 |
| NM_006651 | 3081.784  | 2846.13   | NM_003702 | 11377.687 | 9875.72   | AB046381  | 206.875   | 245.916   |



|           |           |           |           |           |           |            |           |           |
|-----------|-----------|-----------|-----------|-----------|-----------|------------|-----------|-----------|
| NM_005336 | 7317.794  | 6323.831  | NM_000369 | 790.384   | 883.335   | AA478647   | 2871.599  | 2646.161  |
| NM_001419 | 11492.262 | 7976.322  | NM_016351 | 1477.856  | 1183.337  | ID 2623896 | 454.165   | 394.153   |
| AF119817  | 16549.969 | 11651.651 | NM_004405 | 3230.482  | 3089.208  | ID 2602214 | 954.154   | 570.491   |
| AL035306  | 1553.27   | 1246.926  | NM_006060 | 2630.066  | 2191.846  | ID 2071279 | 3408.086  | 2627.795  |
| NM_001328 | 16458.088 | 7060.396  | NM_005667 | 2768.964  | 2707.693  | L10709     | 2908.326  | 3731.581  |
| NM_005749 | 2752.185  | 1280.422  | NM_006308 | 561.578   | 501.136   | N35489     | 301.37    | 193.285   |
| NM_004230 | 2710.062  | 1348.842  | NM_000060 | 610.998   | 581.721   | AI928195   | 250.33    | 330.857   |
| NM_014503 | 545.788   | 429.328   | L09080    | 3403.423  | 2853.469  | AA458922   | 1116.765  | 711.074   |
| NM_014659 | 1212.994  | 1235.386  | NM_007326 | 7326.751  | 5865.794  | NM_145659  | 480.411   | 254.341   |
| NM_004399 | 3400.253  | 2842.094  | NM_001886 | 4527.346  | 3895.702  | NM_001719  | 3200.982  | 3064.899  |
| NM_006337 | 5135.421  | 4557.854  | NM_004467 | 667.111   | 717.708   | AL080062   | 673.881   | 615.658   |
| NM_004507 | 2748.904  | 2193.616  | NM_005622 | 935.37    | 761.491   | NM_145904  | 2168.348  | 1629.576  |
| NM_002710 | 10659.212 | 8904.899  | NM_018058 | 7786.86   | 6743.831  | NM_015941  | 1057.419  | 953.496   |
| NM_014060 | 3392.819  | 3756.535  | NM_004548 | 19370.982 | 15041.267 | NM_003655  | 1917.625  | 1665.251  |
| NM_004749 | 7183.525  | 7926.088  | X69079    | 36093.59  | 24480.572 | NM_014837  | 1091.527  | 1027.001  |
| BQ446064  | 1627.478  | 1969.709  | AF091033  | 1091.996  | 1775.603  | NM_017729  | 390       | 267.55    |
| AF302502  | 7596.247  | 8428.843  | NM_001122 | 20718.414 | 27056.713 | NM_005259  | 719.51    | 452.749   |
| AF274571  | 1534.7    | 1927.148  | NM_004591 | 3115.035  | 3480.51   | NM_002840  | 213.535   | 208.303   |
| NM_005449 | 1502.576  | 2051.622  | AL133027  | 1355.124  | 1705.31   | NM_006174  | 320.833   | 373.178   |
| NM_003879 | 1926.509  | 2902.143  | AB037732  | 1707.303  | 1617.443  | NM_015850  | 1099.097  | 953.369   |
| NM_016052 | 5092.087  | 5483.211  | NM_005767 | 457.502   | 423.075   | NM_004864  | 190.962   | 171.505   |
| NM_006718 | 1217.646  | 1246.458  | NM_001839 | 66993.781 | 65395.262 | NM_002838  | 4103.416  | 3051.719  |
| NM_005427 | 701.964   | 845.973   | BC016029  | 709.703   | 684.154   | NM_014686  | 29394.066 | 14099.185 |
| NM_016312 | 587.073   | 665.122   | M27487    | 1614.418  | 1458.536  | BF528358   | 328.862   | 261.691   |
| AF234887  | 802.932   | 871.451   | NM_003811 | 3999.436  | 3615.051  | NM_016339  | 249.49    | 245.481   |
| NM_001776 | 1036.125  | 815.951   | NM_002981 | 4964.13   | 4312.925  | NM_002487  | 2182.439  | 2165.697  |
| NM_001792 | 372.958   | 205.295   | NM_001244 | 1696.231  | 1694.866  | NM_005462  | 212.883   | 107.061   |
| NM_001903 | 8006.288  | 6206.995  | NM_006137 | 4572.403  | 2968.529  | NM_012319  | 303.677   | 198.144   |
| NM_005857 | 3313.442  | 2135.362  | NM_016139 | 49554.227 | 37389.828 | AK026235   | 192.522   | 112.763   |
| NM_000429 | 843.762   | 827.824   | AL117468  | 7718.421  | 7264.331  | NM_006510  | 2470.742  | 1665.375  |
| AK027037  | 575.023   | 640.252   | NM_019613 | 7454.613  | 5948.313  | NM_003141  | 315.727   | 197.957   |
| NM_003875 | 7305.031  | 7044.469  | NM_005382 | 1262.732  | 867.846   | NM_020245  | 1003.755  | 543.316   |
| AF191687  | 2565.17   | 2684.777  | AK027086  | 4471.928  | 4299.308  | NM_007175  | 527.414   | 348.45    |
| NM_003046 | 385.68    | 473.403   | AB032997  | 1093.185  | 982.499   | X91148     | 199.093   | 248.776   |
| NM_000274 | 9288.028  | 11615.67  | AL096857  | 3524.441  | 2807.624  | NM_015700  | 3044.812  | 3127.565  |
| NM_000170 | 1423.212  | 2080      | AF073770  | 3541.531  | 6079.359  | NM_019087  | 761.799   | 919.586   |
| NM_000281 | 10691.376 | 12872.965 | AL359401  | 8473.523  | 10595.363 | NM_016322  | 216.323   | 314.414   |
| NM_006031 | 2575.246  | 2810.004  | NM_012213 | 2959.632  | 3920.817  | NM_004277  | 185.164   | 77.872    |
| NM_002715 | 5527.546  | 6865.866  | NM_016573 | 3809.281  | 3981.434  | NM_005072  | 309.988   | 428.952   |
| NM_001020 | 48845.426 | 68511.414 | NM_001303 | 8412.188  | 9066.324  | AF215923   | 2326.752  | 2434.355  |
| AB020660  | 2942.96   | 3137.503  | M21304    | 779.041   | 753.877   | U66621     | 2855.3    | 2826.139  |
| NM_006659 | 22731.76  | 18887.283 | NM_001979 | 6299.068  | 6484.578  | NM_005720  | 7050.267  | 4312.375  |
| NM_018051 | 1169.008  | 1161.882  | AB040896  | 1801.073  | 1750.954  | AB040936   | 154.921   | 195.15    |
| NM_015371 | 3103.187  | 2044.195  | NM_001107 | 8089.817  | 6996.474  | AB023161   | 156.623   | 123.662   |
| AB040915  | 1751.454  | 1213.302  | NM_005176 | 412.132   | 346.923   | U61736     | 219.878   | 269.58    |
| AF147791  | 449.363   | 299.089   | NM_003636 | 11358.779 | 10762.055 | AJ132086   | 272.976   | 400.763   |
| NM_006481 | 1862.302  | 836.886   | NM_002234 | 3299.016  | 3350.556  | U92816     | 2274.872  | 1746.788  |
| AB011115  | 784.555   | 442.653   | NM_000701 | 2115.067  | 1844.605  | BC011987   | 789.735   | 1428.266  |
| NM_003910 | 15675.152 | 8815.122  | AB022696  | 7132.743  | 5703.43   | NM_004106  | 385.03    | 433.933   |
| AB007913  | 605.141   | 328.249   | AF137372  | 6238.088  | 5928.254  | NM_003485  | 744.109   | 560.968   |
| NM_006696 | 4925.958  | 12695.643 | AF220417  | 1629.415  | 1646.017  | NM_005038  | 1379.099  | 1096.026  |
| NM_004599 | 5337.743  | 5897.252  | D83782    | 6927.208  | 7107.181  | M95923     | 256.663   | 127.788   |
| NM_006037 | 7320.317  | 5179.115  | NM_002078 | 2417.528  | 2172.608  | NM_002415  | 45346.922 | 34261.832 |

|           |           |           |           |           |           |           |           |           |
|-----------|-----------|-----------|-----------|-----------|-----------|-----------|-----------|-----------|
| NM_015871 | 4553.841  | 4186.53   | NM_000287 | 2347.008  | 2161.113  | NM_006332 | 3570.406  | 2757.343  |
| NM_019037 | 3919.781  | 3186.854  | NM_001656 | 2904.379  | 2378.017  | NM_000916 | 547.428   | 285.34    |
| NM_015891 | 3922.617  | 3170.141  | Z70705    | 665.925   | 795.989   | NM_018663 | 1593.765  | 1174.44   |
| NM_006802 | 822.134   | 842.129   | NM_002611 | 1888.339  | 2351.102  | NM_014791 | 3758.724  | 3820.17   |
| AB037778  | 670.644   | 687.694   | NM_017417 | 789.035   | 1295.084  | NM_003318 | 2385.01   | 2079.553  |
| NM_005066 | 28073.961 | 22081.57  | AL133602  | 1757.108  | 1801.693  | NM_004362 | 1379.102  | 1201.062  |
| NM_003089 | 6318.451  | 6652.169  | AF037219  | 4773.938  | 3806.564  | NM_000182 | 4093.549  | 4797.897  |
| NM_003753 | 11875.853 | 11595.977 | AK026075  | 2297.251  | 2204.507  | AK023384  | 919.309   | 845.054   |
| NM_006223 | 328.131   | 356.285   | NM_000251 | 2671.991  | 2667.709  | NM_016026 | 6663.922  | 5606.786  |
| NM_017590 | 1995.656  | 1693.514  | NM_006038 | 3964.292  | 3781.049  | AK025111  | 386.883   | 479.939   |
| AB011145  | 3515.07   | 3273.584  | AB011133  | 2826.233  | 2530.284  | NM_001732 | 369.417   | 411.32    |
| NM_003750 | 11087.648 | 6910.15   | NM_017572 | 37133.32  | 29270.926 | NM_018690 | 1811.557  | 1271.357  |
| M92422    | 1800.159  | 1150.769  | NM_018444 | 2336.159  | 2142.67   | NM_000860 | 2218.017  | 2177.909  |
| NM_017868 | 1054.925  | 970.591   | NM_000252 | 1754.515  | 1566.395  | AB037798  | 878.489   | 1045.949  |
| AK021888  | 539.548   | 220.359   | NM_006947 | 12977.598 | 9818.252  | NM_000780 | 205.589   | 255.111   |
| AK022848  | 1561.75   | 756.299   | NM_017917 | 2192.74   | 2153.057  | AF272663  | 2773.393  | 1984.005  |
| AL049957  | 694.685   | 767.151   | NM_004090 | 5398.043  | 4573.606  | NM_012190 | 620.687   | 600.36    |
| NM_018159 | 13465.1   | 15106.301 | NM_014634 | 7773.598  | 7568.563  | AF277719  | 304.955   | 513.285   |
| NM_000819 | 4112.38   | 3041.742  | NM_001919 | 10222.687 | 9591.98   | NM_000791 | 1106.722  | 1334.162  |
| NM_002513 | 2598.165  | 2627.156  | BC031485  | 2330.782  | 1927.455  | NM_003681 | 597.084   | 639.508   |
| NM_017424 | 4948.093  | 3944.874  | NM_004092 | 7618.91   | 7687.741  | NM_004800 | 1862.876  | 1595.011  |
| NM_001522 | 4990.493  | 4977.569  | X15624    | 1945.561  | 1562.207  | AB037738  | 136.317   | 441.773   |
| NM_000883 | 5779.301  | 5425.4    | NM_004467 | 474.408   | 544.718   | NM_014954 | 3264.365  | 2029.647  |
| AF254086  | 1713.131  | 1269.356  | NM_005622 | 1029.383  | 1703.267  | NM_000807 | 757.717   | 1047.498  |
| AL390142  | 1037.507  | 903.111   | NM_018058 | 9252.994  | 17477.537 | NM_014909 | 561.638   | 498.209   |
| NM_006565 | 2567.446  | 3248.921  | NM_004548 | 16672.936 | 21597.533 | NM_145659 | 400.846   | 388.022   |
| AB007930  | 5031.651  | 5252.91   | BI759406  | 3176.207  | 2732.643  | NM_001719 | 3340.917  | 3467.619  |
| X76978    | 272.544   | 297.978   | R76099    | 779.279   | 689.821   | AL080062  | 801.505   | 780.193   |
| AJ005273  | 3517.552  | 3562.266  | S74445    | 601.298   | 580.662   | AF308802  | 638.366   | 537.827   |
| AK021892  | 2448.808  | 2532.42   | BI763360  | 2507.963  | 2257.204  | S76984    | 4185.223  | 4222.466  |
| NM_003121 | 268.539   | 201.231   | D25538    | 1303.013  | 1137.289  | NM_014495 | 40039.539 | 60930.934 |
| NM_003437 | 1521.274  | 1381.378  | NM_000360 | 6800.147  | 5927.055  | NM_014081 | 426.368   | 705.231   |
| NM_018337 | 6294.035  | 5004.32   | X03635    | 2937.884  | 3019.86   | NM_005651 | 318.032   | 375.696   |
| AA193295  | 8078.586  | 5382.883  | BC011847  | 59146.52  | 63453.605 | NM_007195 | 789.082   | 866.361   |
| NM_018045 | 5272.163  | 3964.444  | X03348    | 1874.487  | 1585.906  | AK023337  | 653.653   | 798.919   |
| NM_014803 | 1241.601  | 440.205   | AF353674  | 8081.771  | 6820.65   | NM_013275 | 4384.667  | 4453.128  |
| AK024956  | 264.889   | 312.228   | BC002645  | 4154.618  | 3253.663  | AB037842  | 372.447   | 426.425   |
| AF147386  | 1512.602  | 888.837   | NM_021138 | 2625.238  | 2336.79   | U92074    | 278.304   | 472.557   |
| AF273052  | 6635.872  | 4220.785  | BC002792  | 1053.696  | 1161.153  | NM_019011 | 751.401   | 731.295   |
| AF075066  | 345.589   | 119.728   | NM_021005 | 1608.28   | 1391.474  | AF459094  | 1267.631  | 1068.759  |
| NM_017943 | 6315.629  | 4843.176  | SB        | 765.411   | 529.185   | NM_003157 | 875.132   | 750.414   |
| AF147383  | 427.34    | 313.05    | NM_001523 | 817.384   | 909.034   | NM_004938 | 448.795   | 379.913   |
| AK025682  | 1346.833  | 1079.749  | NM_017423 | 2008.453  | 1514.761  | NM_015981 | 423.801   | 331.92    |
| NM_013352 | 533.015   | 530.637   | NM_019613 | 8799.322  | 13914.142 | NM_000455 | 1550.346  | 1185.743  |
| NM_016478 | 7836.866  | 7445.61   | NM_005382 | 1149.817  | 1518.901  | NM_012319 | 681.896   | 457.187   |
| AL389986  | 8006.123  | 6853.157  | AK027086  | 3856.608  | 6231.304  | NM_006510 | 2502.996  | 2115.77   |
| AF086279  | 379.616   | 343.913   | AB032997  | 1048.383  | 1832.152  | NM_003141 | 950.162   | 630.421   |
| AF088052  | 1019.872  | 1237.501  | X07203    | 668.993   | 624.2     | NM_020245 | 841.771   | 732.741   |
| AF086342  | 494.565   | 297.224   | NM_003834 | 3346.527  | 3165.242  | NM_007175 | 361.032   | 367.83    |
| AF086387  | 568.759   | 745.821   | NM_005959 | 3599.352  | 3556.575  | AB046381  | 236.536   | 259.882   |
| AF086443  | 380.902   | 300.081   | NM_003381 | 1743.654  | 1514.583  | AJ011497  | 364.596   | 216.121   |
| AL389941  | 713.147   | 650.838   | NM_005756 | 999.739   | 968.646   | NM_000336 | 399.298   | 431.301   |
| AB037756  | 2002.345  | 2427.66   | NM_003702 | 12325.436 | 9952.594  | W61100    | 10472.457 | 8838.498  |

|           |           |          |           |           |           |            |           |           |
|-----------|-----------|----------|-----------|-----------|-----------|------------|-----------|-----------|
| AK001853  | 3547.526  | 1962.048 | NM_000369 | 866.81    | 888.822   | AA608568   | 3414.858  | 4434.134  |
| AK025071  | 1140.131  | 580.37   | NM_016351 | 1327.367  | 1272.225  | BG831301   | 6949.254  | 5390.431  |
| NM_01537C | 1858.078  | 1255.083 | NM_004405 | 3700.09   | 3475.985  | AA478647   | 3945.222  | 7346.504  |
| AF085917  | 872.557   | 581.767  | NM_001988 | 11216.434 | 8769.028  | ID 2623896 | 410.007   | 267.41    |
| AF085989  | 370.727   | 374.256  | NM_00606C | 3087.343  | 2285.742  | ID 2602214 | 704.965   | 298.02    |
| AF147434  | 1372.899  | 1275.519 | NM_005667 | 3376.805  | 3046.924  | ID 2071279 | 2800.722  | 1641.645  |
| AL360139  | 49809.328 | 41933    | NM_006308 | 597.118   | 383.135   | L10709     | 3179.768  | 2274.107  |
| AF075110  | 10403.159 | 7227.198 | NM_00006C | 571.502   | 475.152   | N35489     | 271.017   | 424.656   |
| AL137323  | 382.434   | 572.02   | L09080    | 3938.533  | 3954.121  | AI928195   | 228.062   | 195.55    |
| AL137494  | 1996.36   | 1974.423 | NM_007326 | 7772.257  | 6276.998  | AA458922   | 1306.876  | 843.78    |
| AL162037  | 2746.284  | 2556.985 | NM_001886 | 5259.115  | 3808.363  | M95923     | 234.009   | 160.224   |
| AL390150  | 647.827   | 573.495  | AF137372  | 6803.57   | 8260.033  | NM_002415  | 42103.645 | 38832.352 |
| NM_002761 | 504.613   | 694.67   | AF220417  | 1598.84   | 2830.362  | NM_006332  | 3776.967  | 3056.61   |
| AF086063  | 516.332   | 826.126  | D83782    | 8707.9    | 18830.232 | NM_000916  | 388.761   | 282.724   |
| AF086098  | 1307.608  | 1284.418 | NM_002078 | 3147.839  | 4535.589  | NM_018663  | 1594.438  | 1595.68   |
| AF086076  | 623.23    | 583.465  | NM_000287 | 2463.078  | 3014.243  | NM_145904  | 3604.559  | 3624.743  |
| AL833393  | 2178.012  | 1704.748 | NM_001656 | 2021.819  | 1975.816  | NM_006796  | 3352.926  | 3342.621  |
| AF088005  | 1089.312  | 841.054  | AF091033  | 1129.083  | 1204.386  | NM_000706  | 307.093   | 275.108   |
| AF086096  | 4602.114  | 3896.55  | NM_001122 | 19909.057 | 19116.729 | NM_015941  | 1130.105  | 1062.572  |
| AL390132  | 528.58    | 474.907  | NM_004591 | 2513.566  | 2683.804  | NM_003655  | 2421.051  | 2296.412  |
| NM_017933 | 2172.965  | 1064.873 | AL133027  | 1364.349  | 1661.591  | NM_014837  | 1314.75   | 1205.627  |
| NM_017819 | 7971.835  | 3434.074 | AB037732  | 1775.275  | 1821.657  | NM_017729  | 424.78    | 446.071   |
| AK024653  | 10530.118 | 4782.419 | NM_005767 | 583.518   | 409.355   | NM_005259  | 661.222   | 690.951   |
| AF103907  | 656.795   | 406.209  | NM_001837 | 622.849   | 551.539   | NM_00284C  | 264.184   | 108.938   |
| AF094508  | 405.314   | 424.777  | M27487    | 1567.953  | 1410.695  | NM_006174  | 240.451   | 403.204   |
| AF161351  | 686.397   | 495.528  | NM_002164 | 1100.731  | 1272.592  | NM_01585C  | 523.158   | 587.77    |
| AF257098  | 859.856   | 419.035  | NM_003811 | 4445.82   | 4191.262  | NM_002838  | 3915.067  | 2571.981  |
| NM_01413C | 488.918   | 539.984  | NM_002981 | 5386.825  | 4399.948  | NM_014686  | 35315.152 | 15200.525 |
| AF111782  | 1175.627  | 835.919  | NM_001244 | 1827.887  | 1651.333  | BF528358   | 384.494   | 308.83    |
| AF151530  | 701       | 733.373  | NM_012275 | 643.087   | 676.918   | NM_016339  | 254.231   | 139.792   |
| AK021991  | 248.016   | 297.086  | NM_006137 | 4534.854  | 3619.809  | NM_002487  | 2622.548  | 2361.674  |
| AK022093  | 2963.779  | 2519.34  | NM_016139 | 51851.332 | 42228.672 | NM_01334C  | 228.359   | 157.144   |
| AK022376  | 400.147   | 553.006  | AL117468  | 8305.786  | 7042.986  | NM_014954  | 4849.172  | 3346.747  |
| AK022005  | 447.123   | 591.982  | NM_00409C | 5075.364  | 5121.026  | NM_000807  | 265.36    | 544.399   |
| AK022137  | 313.078   | 172.211  | NM_014634 | 8314.419  | 11991.59  | NM_014909  | 698.582   | 569.199   |
| AK022272  | 825.245   | 926.004  | NM_001919 | 12301.58  | 18039.906 | X91148     | 357.503   | 610.685   |
| AK027155  | 2953.423  | 2653.631 | BC031485  | 2624.983  | 3563.789  | NM_01570C  | 3082.217  | 3328.266  |
| AL049983  | 348.394   | 269.759  | NM_004092 | 7204.785  | 9701.4    | NM_019087  | 701.018   | 790.891   |
| AF221846  | 553.262   | 480.247  | X15624    | 1913.955  | 2110.593  | NM_016322  | 267.549   | 651.575   |
| AF264626  | 553.626   | 597.436  | AF073770  | 3860.744  | 3767.728  | NM_005072  | 254.66    | 253.083   |
| AK027219  | 418.467   | 285.872  | AL359401  | 8743.334  | 8467.287  | AF215923   | 2248.679  | 2500.579  |
| AK024528  | 4873.664  | 2472.677 | NM_012213 | 3214.009  | 3327.179  | U66621     | 2859.248  | 3249.255  |
| AL049311  | 366.687   | 365.723  | NM_016573 | 3981.558  | 4498.845  | NM_00572C  | 5995.785  | 5284.936  |
| AK000016  | 653.676   | 346.738  | NM_001303 | 8703.582  | 10157.106 | U61736     | 144.477   | 254.286   |
| AK023367  | 804.396   | 564.741  | M21304    | 877.519   | 694.906   | AJ132086   | 212.073   | 196.91    |
| AL080209  | 1490.939  | 946.158  | NM_001979 | 6110.486  | 5905.567  | U92816     | 1953.72   | 1858.497  |
| AL137431  | 423.087   | 287.731  | AB040896  | 1822.152  | 1705.86   | BC011987   | 1484.218  | 915.77    |
| L27642    | 341.05    | 348.985  | NM_003636 | 12186.414 | 11721.178 | NM_004106  | 472.566   | 304.436   |
| NM_016255 | 1253.885  | 975.108  | NM_002234 | 3667.47   | 3627.604  | NM_003485  | 1221.578  | 926.813   |
| NM_014318 | 1187.425  | 904.416  | NM_003471 | 688.727   | 772.856   | NM_005038  | 2713.66   | 2152.721  |
| AK021962  | 368.763   | 283.339  | NM_000701 | 2544.382  | 2360.963  | NM_003157  | 709.846   | 810.693   |
| AK056674  | 1326.267  | 1263.63  | AB022696  | 8639.937  | 8804.485  | NM_004938  | 509.763   | 418.495   |
| AK022856  | 414.188   | 253.192  | NM_021005 | 1427.947  | 1799.193  | NM_014326  | 253.051   | 188.054   |

|           |           |           |           |           |           |           |           |           |
|-----------|-----------|-----------|-----------|-----------|-----------|-----------|-----------|-----------|
| AK022042  | 533.65    | 347.849   | SB        | 523.955   | 692.475   | NM_00444E | 181.065   | 157.592   |
| AL117588  | 585.372   | 344.623   | NM_001523 | 831.485   | 1012.967  | NM_015981 | 748.551   | 423.468   |
| NM_01770E | 929.468   | 643.115   | NM_017423 | 1940.306  | 2143.697  | NM_00045E | 1269.541  | 1575.271  |
| BE895529  | 2256.265  | 1038.614  | Z70705    | 622.632   | 883.634   | NM_014791 | 4099.649  | 4851.09   |
| AK000964  | 290.658   | 273.312   | NM_002611 | 1820.068  | 1947.134  | NM_00331E | 2673.116  | 3065.662  |
| AL117536  | 1482.467  | 1304.345  | NM_017417 | 1031.902  | 1099.729  | NM_00436E | 1433.654  | 2139.577  |
| NM_017751 | 6123.232  | 4590.225  | AL133602  | 1810.48   | 2256.972  | NM_00018E | 4517.946  | 5049.021  |
| NM_003771 | 1198.583  | 1189.427  | AF037219  | 4801.81   | 4274.707  | AK023384  | 873.34    | 971.935   |
| NM_01786C | 515.795   | 469.537   | AK026075  | 2076.761  | 2009.734  | NM_01602E | 6557.202  | 6593.712  |
| X91195    | 37289.492 | 28909.252 | NM_000251 | 3058.032  | 2581.41   | AK025111  | 225.881   | 230.372   |
| AF086190  | 579.729   | 579.81    | NM_00603E | 3810.71   | 3809.521  | NM_00173E | 467.218   | 593.684   |
| NM_00614E | 360.936   | 274.3     | AB011133  | 2875.592  | 2472.023  | NM_01869C | 1428.827  | 1064.452  |
| AL050035  | 2784.084  | 2200.172  | NM_01757E | 36045.605 | 31731.83  | NM_00086C | 789.877   | 785.715   |
| AK024449  | 506.609   | 632.877   | NM_018444 | 2640.32   | 2441.228  | AB037798  | 430.776   | 391.189   |
| AL357201  | 362.732   | 501.823   | NM_00025E | 1901.613  | 1415.074  | AF272663  | 1646.915  | 1193.105  |
| AF279780  | 29433.621 | 24209.303 | NM_006947 | 13361.98  | 11334.718 | NM_01219C | 545.556   | 370.911   |
| AK022510  | 1883.311  | 1545.695  | NM_017917 | 2051.55   | 2002.103  | AF277719  | 287.62    | 207.804   |
| AK023878  | 494.386   | 507.2     | NM_00006C | 714.907   | 1315.024  | NM_000791 | 1176.22   | 969.454   |
| AK021851  | 857.289   | 906.643   | NM_00958E | 445.411   | 483.477   | NM_003681 | 760.855   | 869.365   |
| L37717    | 476.523   | 548.881   | L09080    | 2468.582  | 2664.545  | NM_00480C | 3291.832  | 2335.941  |
| AJ131609  | 1706.091  | 1716.185  | NM_00732E | 6826.061  | 8006.591  | NM_00495E | 1558.116  | 1610.148  |
| BC019280  | 3483.165  | 2381.268  | AK023080  | 748.949   | 721.016   | AY007239  | 143.306   | 127.455   |
| AF086498  | 592.674   | 467.497   | NM_00188E | 4573.049  | 4245.66   | NM_020414 | 1864.638  | 1812.739  |
| AK000687  | 603.608   | 320.982   | NM_004467 | 484.386   | 470.489   | AB037730  | 1315.245  | 1359.146  |
| L77565    | 569.555   | 374.688   | NM_00562E | 922.325   | 1096.097  | AF147429  | 181.547   | 423.929   |
| AF079567  | 2047.579  | 847.71    | NM_01805E | 7502.549  | 8170.583  | NM_00135E | 2530.606  | 3837.897  |
| AK022177  | 697.091   | 360.56    | NM_00454E | 15444.625 | 17867.85  | NM_00389E | 1369.212  | 1643.927  |
| AK023852  | 480.396   | 290.007   | X69079    | 29529.791 | 39070.023 | AB037816  | 432.389   | 475.74    |
| AF086466  | 1317.854  | 981.358   | BI759406  | 3436.201  | 3786.112  | NM_00171E | 3751.462  | 4648.729  |
| AB007962  | 2157.697  | 1165.352  | R76099    | 696.515   | 831.068   | AL080062  | 838.803   | 1102.852  |
| AF005081  | 754.947   | 579.946   | S74445    | 716.74    | 829.567   | AF308802  | 762.039   | 727.651   |
| AK026438  | 495.341   | 385.057   | BI763360  | 2211.452  | 2050.884  | S76984    | 3650.865  | 3692.316  |
| AK021546  | 629.674   | 489.151   | D25538    | 1241.942  | 1328.205  | NM_01449E | 40123.125 | 49545.324 |
| AL050186  | 15081.893 | 14600.897 | NM_00036C | 7318.42   | 5923.637  | NM_014081 | 179.066   | 242.567   |
| AK021918  | 2926.029  | 3433.167  | NM_00184E | 460.519   | 399.077   | NM_005651 | 238.807   | 175.983   |
| AK021669  | 2246.09   | 2046.064  | X03635    | 3300.623  | 2766.855  | NM_00719E | 339.662   | 245.447   |
| AL080113  | 22514.15  | 16245.627 | BC011847  | 58587.121 | 64684.445 | AK023337  | 483.803   | 481.684   |
| AL050083  | 942.003   | 933.185   | X03348    | 2102.033  | 1713.909  | NM_01327E | 4089.303  | 2467.504  |
| AK022766  | 344.035   | 280.777   | AF353674  | 8577.455  | 7744.226  | U92074    | 345.344   | 572.263   |
| AL049422  | 4993.679  | 4480.209  | BC002645  | 4226.056  | 3718.659  | NM_019011 | 995.342   | 900.991   |
| AL133089  | 508.559   | 455.742   | NM_02113E | 3394.623  | 2775.021  | AF459094  | 1831.636  | 1765.203  |
| AK023526  | 1691.047  | 1758.881  | BC002792  | 1158.817  | 879.296   | AB011542  | 494.86    | 583.691   |
| BE266129  | 1040.771  | 665.087   | NM_002981 | 4605.605  | 5764.94   | NM_00185E | 556.512   | 418.717   |
| X66227    | 271.726   | 250.711   | NM_001244 | 1681.462  | 2087.759  | U41737    | 253.658   | 198.65    |
| AK025602  | 9487.964  | 8818.763  | NM_01227E | 559.958   | 834.824   | NM_00579E | 281.778   | 278.101   |
| AK026309  | 3893.197  | 3181.736  | NM_006137 | 4379.435  | 6359.058  | X99661    | 467.693   | 502.242   |
| AL137486  | 2083.463  | 1183.793  | NM_01613E | 53290.906 | 55480.484 | NM_005927 | 960.433   | 1265.107  |
| AL110162  | 705.313   | 644.695   | AL117468  | 9295.533  | 10698.169 | AB028983  | 681.134   | 607.954   |
| AF119880  | 407.727   | 257.273   | NM_01961E | 8210.032  | 8468.282  | NM_01866C | 1696.121  | 2037.011  |
| AK022681  | 10327.973 | 5222.979  | NM_00538E | 1128.058  | 809.854   | NM_003394 | 965.133   | 862.57    |
| CY3Cy5    | 2356.532  | 189.634   | AK027086  | 3880.64   | 4369.125  | NM_01463E | 538.971   | 343.293   |
| AI565117  | 46540.664 | 40452.262 | AB032997  | 994.347   | 1150.008  | NM_006747 | 721.453   | 675.744   |
| AI299075  | 429.455   | 236.24    | AL096857  | 3635.564  | 6452.848  | NM_00708E | 745.537   | 1067.335  |

|           |           |           |           |           |           |           |           |          |
|-----------|-----------|-----------|-----------|-----------|-----------|-----------|-----------|----------|
| M59979    | 557.778   | 419.878   | X07203    | 656.035   | 540.49    | NM_00387C | 1549.51   | 1511.077 |
| AB011098  | 1111.641  | 1118.707  | AB040104  | 815.341   | 703.906   | NM_001243 | 951.321   | 880.326  |
| AA609759  | 1771.436  | 3067.111  | NM_003834 | 3222.117  | 3312.148  | NM_005546 | 498.322   | 270.699  |
| AA029418  | 11099.229 | 13508.041 | NM_005959 | 3253.718  | 3629.52   | NM_000299 | 149.074   | 87.048   |
| L20815    | 11301.602 | 14869.316 | NM_003381 | 1411.05   | 1257.283  | NM_014887 | 1545.289  | 1078.813 |
| AI364483  | 30525.533 | 41583.016 | NM_005756 | 1175.019  | 845.168   | NM_018556 | 3313.138  | 2725.319 |
| AA456001  | 11628.487 | 17950.133 | NM_003702 | 12337.243 | 10838.555 | NM_005824 | 345.685   | 239.024  |
| AA176581  | 197.588   | 775.147   | NM_000369 | 970.198   | 941.411   | AF052211  | 1772.384  | 1068.189 |
| AA451686  | 5135.737  | 10050.782 | NM_016351 | 1323.953  | 1112.999  | NM_00560C | 1548.481  | 1526.49  |
| NM_003822 | 1082.746  | 1762.168  | NM_004405 | 3347.792  | 3023.149  | NM_005967 | 492.347   | 544.66   |
| NM_004412 | 5003.234  | 7605.67   | NM_001988 | 10825.303 | 9227.864  | AK025950  | 167.223   | 683.252  |
| SR1       | 54480.781 | 63859.855 | NM_00606C | 2903.17   | 2790.478  | NM_014223 | 566.3     | 546.529  |
| SR3       | 45328.633 | 36893.988 | NM_005667 | 3200.88   | 3093.431  | NM_016194 | 753.083   | 571.003  |
| SR5       | 6134.684  | 5023.531  | NM_006308 | 749.837   | 375.284   | AL050385  | 484.618   | 346.772  |
| SR7       | 4576.489  | 27130.213 | NM_002234 | 3780.865  | 4257.444  | NM_007027 | 952.822   | 684.799  |
| SR9       | 13983.381 | 2111.461  | NM_000701 | 2142.842  | 3511.557  | NM_000633 | 5269.205  | 3785.954 |
| CY3Cy5    | 3344.375  | 246.235   | AB022696  | 10674.219 | 23054.67  | AB037855  | 294.174   | 291.044  |
| NM_019555 | 1660.609  | 1086.565  | AF137372  | 7221.837  | 7946.104  | AK024524  | 1601.034  | 1615.935 |
| NM_012096 | 6087.017  | 4685.061  | AF220417  | 1495.145  | 1760.27   | NM_000562 | 267.292   | 198.908  |
| NM_003905 | 16649.904 | 14740.483 | D83782    | 6684.041  | 8315.707  | NM_019011 | 2439.173  | 1739.64  |
| L12052    | 5637.77   | 7424.944  | NM_002078 | 2610.136  | 3298.136  | NM_004879 | 639.428   | 555.729  |
| AB028976  | 3300.028  | 3641.817  | NM_000287 | 2424.756  | 3529.203  | AB020694  | 824.478   | 429.462  |
| AK026337  | 1159.486  | 1902.989  | NM_001656 | 2169.809  | 2468.466  | NM_016071 | 7834.141  | 3749.917 |
| NM_015869 | 1006.875  | 1263.369  | AF091033  | 1472.932  | 1276.617  | NM_004475 | 1385.742  | 1533.664 |
| AB031038  | 645.184   | 749.637   | NM_001122 | 21435.561 | 21883.803 | NM_001627 | 976.163   | 1911.151 |
| NM_004626 | 799.384   | 922.48    | NM_004591 | 3425.529  | 3740.286  | NM_001226 | 1252.524  | 889.408  |
| NM_001899 | 740.915   | 1212.845  | AL133027  | 1474.547  | 1269.388  | AB050716  | 803.874   | 2443.037 |
| NM_004305 | 50030.297 | 60499.93  | AB037732  | 1895.387  | 1423.489  | X77690    | 382.768   | 377.583  |
| NM_006089 | 7844.556  | 8863.489  | NM_005767 | 484.546   | 515.429   | NM_006536 | 262.51    | 225.549  |
| NM_003144 | 31876.061 | 24735.414 | NM_001837 | 612.408   | 601.906   | NM_005658 | 436.475   | 363.908  |
| NM_000908 | 515.996   | 452.194   | M27487    | 1612.483  | 1500.433  | NM_002422 | 402.834   | 842.092  |
| AB011102  | 4307.609  | 3291.509  | NM_002164 | 1090.328  | 1019.165  | AF218022  | 588.261   | 461.096  |
| D63480    | 1213.141  | 727.004   | NM_003811 | 4157.553  | 3554.972  | NM_003348 | 1270.364  | 1073.241 |
| NM_00462C | 972.479   | 613.57    | AB011133  | 2754.079  | 3257.659  | AB006198  | 3489.144  | 3152.833 |
| AF087940  | 1673.115  | 1045.393  | NM_018444 | 2649.07   | 3028.489  | U72518    | 1030.818  | 751.036  |
| AJ277587  | 1075.624  | 918.372   | NM_000252 | 1798.51   | 2346.376  | NM_015322 | 1149.756  | 1010.333 |
| D87432    | 3465.137  | 3267.737  | NM_006947 | 15646.786 | 18558.434 | NM_016607 | 1348.107  | 668.732  |
| AK023749  | 581.287   | 1051.358  | NM_017917 | 2583.306  | 2954.382  | NM_003275 | 286.194   | 180.849  |
| NM_002337 | 3348.359  | 4110.94   | NM_00409C | 5681.403  | 5682.844  | NM_000268 | 2720.26   | 2405.557 |
| NM_004766 | 1782.626  | 1284.137  | NM_014634 | 8801.724  | 9442.646  | M30493    | 3148.089  | 1998.053 |
| NM_005819 | 9583.338  | 10800.514 | NM_001919 | 10677.873 | 13596.697 | NM_004343 | 14091.102 | 7554.978 |
| AK024722  | 1057.607  | 1511.969  | BC031485  | 2303.561  | 4204.915  | X52355    | 1482.405  | 1065.019 |
| AK025520  | 2491.416  | 1631.827  | NM_004092 | 7219.789  | 11082.902 | NM_000306 | 659.303   | 787.102  |
| NM_004892 | 8865.906  | 9075.026  | X15624    | 1723.934  | 1930.538  | NM_00220C | 1674.066  | 1856.921 |
| NM_014597 | 15274.735 | 20560.428 | AF073770  | 3662.559  | 3391.862  | NM_016307 | 578.185   | 556.64   |
| NM_017896 | 7373.667  | 6585.877  | AL359401  | 8858.614  | 9275.91   | AB028449  | 1279.806  | 799.083  |
| AB002374  | 2684.261  | 2162.69   | NM_012213 | 3738.548  | 3892.001  | NM_004697 | 1559.307  | 1474.928 |
| U17327    | 1450.428  | 1271.64   | NM_016573 | 3928.015  | 3737.449  | AF131776  | 1456.334  | 1005.703 |
| M87790    | 9663.691  | 6445.558  | NM_001303 | 5795.908  | 5457.278  | NM_020528 | 542.108   | 377.213  |
| NM_001768 | 3466.131  | 2628.693  | M21304    | 879.719   | 794.434   | NM_00704C | 2241.441  | 4149.87  |
| NM_000715 | 393.867   | 413.223   | NM_001979 | 6258.832  | 6709.133  | NM_014483 | 894.728   | 1512.499 |
| AF035802  | 1672.47   | 1274.407  | AB040896  | 1881.527  | 1884.986  | AK024249  | 360.401   | 574.246  |
| Y08145    | 1039.99   | 972.298   | NM_001107 | 7756.92   | 6842.713  | AF239156  | 2982.597  | 2379.516 |

|           |           |           |           |           |           |           |           |           |
|-----------|-----------|-----------|-----------|-----------|-----------|-----------|-----------|-----------|
| M26123    | 379.854   | 381.238   | AF084645  | 560.948   | 436.523   | NM_02039C | 489.012   | 369.848   |
| NM_00183E | 964.612   | 885.183   | NM_003636 | 12151.313 | 11137.715 | NM_003321 | 9059.366  | 6657.267  |
| NM_01332E | 17505.232 | 18102.141 | AF040723  | 15555.155 | 17446.059 | U18937    | 3235.598  | 2281.151  |
| NM_00079C | 377.266   | 272.223   | X89675    | 1917.368  | 2670.113  | U01925    | 240.668   | 282.385   |
| NM_00266C | 3996.077  | 2470.045  | NM_012189 | 882.248   | 1097.635  | AJ420488  | 42649.094 | 45923.441 |
| NM_01590C | 671.93    | 437.601   | NM_00579E | 9530.634  | 10693.752 | AF268872  | 616.936   | 449.658   |
| NM_00370E | 694.54    | 1035.535  | NM_00421E | 3339.456  | 3026.063  | AK022180  | 5658.32   | 2978.148  |
| AL122071  | 1335.604  | 923.682   | NM_016289 | 47265.359 | 45600.98  | AK001384  | 270.794   | 235.491   |
| AB033054  | 12230.122 | 11430.227 | NM_001464 | 857.543   | 1001.513  | AK025437  | 1209.994  | 1101.577  |
| NM_01612Z | 887.592   | 754.923   | NM_002051 | 4638.818  | 4609.411  | AK074164  | 631.795   | 514.619   |
| D87446    | 4209.701  | 3111.578  | NM_00152Z | 961.146   | 1416.844  | NM_00416E | 3940.449  | 4776.267  |
| BF540935  | 4243.404  | 3624.32   | NM_01742Z | 2053.476  | 2469.414  | AF161353  | 5140.732  | 4025.083  |
| NM_00446E | 483.514   | 314.057   | Z70705    | 746.502   | 834.992   | NM_000764 | 218.474   | 307.308   |
| NM_007081 | 3164.492  | 2734.16   | NM_002611 | 2194.349  | 2704.943  | NM_00414E | 8124.416  | 5490.584  |
| AB032964  | 3643.773  | 3328.474  | NM_017417 | 1201.409  | 888.517   | NM_00300Z | 7372.33   | 5564.195  |
| BE733605  | 2727.375  | 2247.959  | AL133602  | 1849.402  | 2173.829  | D42047    | 487.47    | 281.265   |
| NM_003334 | 26701.338 | 17770.232 | AF037219  | 4573.904  | 4813.847  | AB009282  | 8869.031  | 5176.772  |
| NM_00269Z | 5872.831  | 5272.41   | AK026075  | 2072.012  | 2032.175  | NM_005004 | 14679.373 | 10418.476 |
| NM_003671 | 837.434   | 1028.636  | NM_000251 | 2860.957  | 2586.602  | NM_00367C | 1245.412  | 1178.674  |
| M20695    | 1188.389  | 1972.239  | NM_00603E | 3736.855  | 3949.327  | NM_01463E | 2036.278  | 2403.051  |
| AK026000  | 4090.967  | 3618.836  | U87223    | 5712.563  | 6071.394  | NM_014717 | 129.277   | 204.81    |
| NM_01783Z | 1091.297  | 1053.004  | NM_00009Z | 779.641   | 969.91    | NM_01792Z | 728.922   | 1707.972  |
| NM_00667E | 3239.602  | 3879.505  | NM_00177Z | 5295.836  | 6143.783  | NM_00282Z | 42275.387 | 58485.602 |
| NM_00302Z | 3759.786  | 3970.891  | AB033059  | 1038      | 823.88    | NM_01791E | 6415.366  | 7080.095  |
| NM_00487Z | 4582.606  | 4310.177  | NM_016484 | 4388.872  | 4242.499  | NM_00180E | 2541.776  | 1427.531  |
| NM_01984Z | 2253.731  | 5546.134  | AK026114  | 537.284   | 844.09    | AK022360  | 860.604   | 557.166   |
| NM_00032C | 3546.048  | 3809.909  | NM_01445Z | 1677.179  | 1879.944  | AK095694  | 498.07    | 609.563   |
| NM_00313E | 8287.988  | 9039.286  | NM_01468Z | 383.887   | 521.789   | X52341    | 26286.18  | 17468.334 |
| NM_00462C | 828.488   | 1289.586  | AK021536  | 8395.403  | 8934.522  | NM_00308Z | 3148.723  | 2069.139  |
| AF087940  | 1591.03   | 1548.723  | NM_00260C | 822.328   | 841.052   | AL133632  | 1021.024  | 994.098   |
| AJ277587  | 777.144   | 910.436   | NM_00364E | 14998.229 | 15349.604 | AK024551  | 196.749   | 102.259   |
| D87432    | 2442.395  | 2038.603  | NM_00666Z | 1449.748  | 1671.767  | AL833249  | 556.438   | 409.347   |
| AI565117  | 42071     | 58441.563 | NM_00609Z | 1118.38   | 1334.567  | NM_018374 | 1359.231  | 1129.4    |
| AI299075  | 359.169   | 259.612   | NM_00393E | 820.544   | 929.923   | AF131852  | 240.977   | 176.313   |
| AB011098  | 505.695   | 531.847   | NM_012424 | 743.015   | 1002.426  | AK021894  | 1000.373  | 812.667   |
| AA609759  | 1125.208  | 1119.567  | NM_00244E | 2852.887  | 2706.025  | NM_020424 | 1973.088  | 1649.08   |
| AA029418  | 5756.212  | 4649.429  | NM_00086Z | 1693.433  | 1756.919  | AF438313  | 233.189   | 332.33    |
| L20815    | 6532.918  | 5130.016  | NM_006651 | 5360.064  | 5022.027  | AB033009  | 8397.598  | 4798.619  |
| AI364483  | 13679.795 | 13085.474 | NM_00533E | 7592.617  | 7908.969  | AL137761  | 1395.646  | 1283.277  |
| AA456001  | 5528.159  | 5448.967  | NM_00141E | 12598.681 | 10887.144 | AK022086  | 396.561   | 411.886   |
| AA451686  | 3629.702  | 4360.788  | AF119817  | 34316.777 | 34313.754 | AF147320  | 406.689   | 174.459   |
| NM_00382Z | 785.067   | 1071.316  | AL035306  | 2089.05   | 1432.412  | AK022339  | 233.702   | 218.596   |
| NM_00441Z | 3692.393  | 5426.112  | NM_00132E | 20865.701 | 26159.785 | AK022138  | 301.448   | 462.945   |
| NM_00205C | 956.626   | 1507.131  | NM_00574E | 4027.831  | 4598.933  | AF086191  | 655.751   | 920.201   |
| NM_007097 | 4156.869  | 5548.237  | NM_00423C | 4837.191  | 7089.063  | NM_01763E | 3920.031  | 2682.542  |
| NM_00002E | 3889.519  | 3435.57   | NM_01450Z | 870.724   | 1191.933  | AL133052  | 792.299   | 759.937   |
| NM_00071E | 377.643   | 561.224   | NM_01465E | 2089.814  | 2860.462  | AB037824  | 1200.896  | 817.48    |
| AF035802  | 1495.491  | 1599.931  | NM_00439E | 4289.237  | 4805.138  | AF361494  | 296.179   | 209.687   |
| Y08145    | 1081.269  | 936.71    | NM_006337 | 6895.541  | 7389.675  | AK022810  | 976.64    | 1108.676  |
| M26123    | 339.266   | 375.298   | NM_004507 | 3597.245  | 3100.799  | NM_00511C | 404.359   | 337.161   |
| NM_00183E | 780.178   | 818.92    | NM_00271C | 13461.427 | 12836.829 | X92110    | 179.83    | 146.008   |
| NM_01955E | 1689.725  | 1281.724  | NM_01406C | 4375.718  | 4542.395  | AF147408  | 652.698   | 574.404   |
| NM_01209E | 6468.041  | 5174.185  | NM_00474E | 11079.278 | 10037.707 | AK027222  | 1239.837  | 1236.49   |

|           |           |           |           |           |           |           |          |           |
|-----------|-----------|-----------|-----------|-----------|-----------|-----------|----------|-----------|
| NM_00390E | 16390.877 | 13856.092 | BQ446064  | 2011.522  | 1672.489  | AK054767  | 193.82   | 340.897   |
| L12052    | 4022.535  | 3265.698  | AF302502  | 10657.028 | 10731.502 | AL049301  | 276.432  | 249.462   |
| AB028976  | 2069.826  | 2112.733  | AF274571  | 1906.542  | 1804.486  | AL050042  | 634.905  | 376.742   |
| AK026337  | 572.202   | 558.758   | NM_005449 | 2591.305  | 2251.21   | NM_01846E | 626.727  | 603.183   |
| NM_01586E | 658.402   | 560.152   | NM_003879 | 2240.479  | 2239.296  | NM_014867 | 1096.309 | 635.004   |
| AB031038  | 579.489   | 683.47    | NM_016052 | 5559.243  | 5133.658  | AL359932  | 370.894  | 445.765   |
| NM_00462E | 342.329   | 362.16    | NM_00671E | 1147.255  | 1053.165  | AB037850  | 1332.133 | 913.637   |
| NM_00189E | 395.567   | 699.468   | NM_005427 | 1128.912  | 927.354   | AK002197  | 1102.11  | 432.544   |
| NM_00430E | 40500.664 | 42354.969 | NM_016312 | 808.923   | 749.265   | AF087996  | 694.439  | 275.904   |
| NM_00608E | 6354.704  | 7783.472  | AF234887  | 956.673   | 996.902   | AK021710  | 717.906  | 661.715   |
| NM_003144 | 33028.801 | 32311.646 | NM_00177E | 1386.848  | 1354.844  | NM_007017 | 331.896  | 465.362   |
| NM_00090E | 483.978   | 744.646   | NM_001792 | 578.929   | 657.963   | AL137446  | 651.332  | 670.409   |
| AB011102  | 4383.402  | 7309.932  | NM_001903 | 11237.443 | 6622.672  | AB025286  | 601.676  | 573.654   |
| D63480    | 1147.813  | 1869.281  | NM_001874 | 1174.959  | 2494.131  | AF009286  | 295.845  | 443.06    |
| NM_00296E | 1758.219  | 2106.498  | NM_005857 | 5517.169  | 8950.145  | NM_01588C | 132.137  | 128.781   |
| AK023749  | 366.137   | 430.427   | NM_000429 | 1082.588  | 956.681   | AF056437  | 185.77   | 188.115   |
| NM_002337 | 3087.694  | 2771.692  | AK027037  | 923.207   | 949.885   | AB032364  | 270.291  | 48.99     |
| NM_01324E | 1511.706  | 1112.46   | NM_00387E | 11234.197 | 10705.533 | NM_00502E | 600.662  | 519.699   |
| NM_00642E | 21754.973 | 21497.229 | AF191687  | 3418.3    | 3418.748  | AF056447  | 558.659  | 435.015   |
| NM_00476E | 1516.178  | 1747.339  | NM_000274 | 14596.219 | 12885.344 | AK001010  | 470.413  | 524.263   |
| NM_00581E | 5279.129  | 5005.665  | NM_00017C | 3877.108  | 4171.367  | NM_01807E | 322.941  | 380.441   |
| AK024722  | 821.84    | 1347.318  | NM_000281 | 15494.813 | 13166.899 | AK021442  | 615.189  | 312.276   |
| AK025520  | 2147.654  | 1829.567  | AK001295  | 448.313   | 495.886   | AK001820  | 179.052  | 318.487   |
| NM_004892 | 8207.63   | 10209.979 | NM_006031 | 2495.148  | 2714.105  | AK021482  | 359.159  | 1466.123  |
| NM_014597 | 8044.858  | 10338.157 | NM_00271E | 6313.819  | 7703.135  | AK025317  | 1558.674 | 815.355   |
| NM_01789E | 4901.758  | 5559.142  | NM_00102C | 59940.035 | 65183.16  | AJ008118  | 38639.57 | 22624.229 |
| AB002374  | 1831.808  | 3257.692  | AB020660  | 3521.026  | 3144.059  | AK000939  | 263.269  | 244.332   |
| U17327    | 783.597   | 2065.764  | NM_00665E | 37128.926 | 37021.457 | NM_00552E | 320.708  | 748.609   |
| M87790    | 10164.656 | 10519.496 | NM_018051 | 1376.86   | 1519.839  | AL109674  | 230.211  | 174.125   |
| NM_00176E | 3140.294  | 3322.86   | NM_015371 | 7291.295  | 6394.365  | AK024512  | 3960.406 | 3158.16   |
| NM_002951 | 16592.945 | 24605.328 | AB040915  | 2289.461  | 2173.637  | AK023454  | 545.477  | 312.792   |
| NM_002317 | 1162.392  | 1498.559  | AF147791  | 576.771   | 542.4     | L23207    | 164.658  | 182.636   |
| NM_00032C | 4072.677  | 4417.076  | NM_006481 | 2065.195  | 2377.572  | NM_01806E | 491.091  | 380.689   |
| NM_00313E | 9213.424  | 7651.636  | AB011115  | 1260.509  | 1710.572  | NM_00712E | 4892.831 | 3334.336  |
| NM_01332E | 18589.271 | 16129.306 | NM_00391C | 23972.844 | 29238.973 | NM_00716C | 223.601  | 224.514   |
| NM_00079C | 296.988   | 303.608   | AB007913  | 2192.534  | 3077.646  | NM_018627 | 303.076  | 242.954   |
| NM_00266C | 5076.578  | 3767.344  | NM_00669E | 5482.559  | 6400.206  | AL157458  | 186.262  | 165.068   |
| NM_01590C | 726.047   | 676.317   | NM_00459E | 6831.159  | 7639.939  | NM_015377 | 477.232  | 357.339   |
| AL122071  | 2435.591  | 6567.2    | NM_006037 | 7832.957  | 9427.361  | AL137531  | 507.004  | 262.915   |
| AB033054  | 14092.798 | 17143.789 | NM_015871 | 5438.837  | 5626.917  | AL080085  | 2290.183 | 1847.106  |
| NM_01612E | 720.92    | 1085.179  | NM_019037 | 5194.555  | 5395.437  | AF055012  | 903.321  | 667.872   |
| AF153330  | 1199.34   | 1531.442  | NM_015891 | 4639.462  | 3705.936  | AK022307  | 1012.511 | 502       |
| NM_00382E | 1155.497  | 1387.789  | NM_00680E | 965.328   | 884.448   | AF085997  | 166.23   | 156.431   |
| NM_00441E | 4750.987  | 6254.098  | AB037778  | 1449.146  | 1283.857  | NM_00517E | 477.06   | 364.494   |
| NM_00205C | 1561.323  | 1670.871  | NM_00506E | 29871.598 | 27309.199 | AK025192  | 1950.988 | 1469.008  |
| NM_007097 | 5583.396  | 4068.785  | NM_00308E | 7922.681  | 6669.496  | NM_01240E | 872.846  | 491.071   |
| D87446    | 4390.317  | 3515.25   | NM_00375E | 13518.332 | 13723.772 | AK022611  | 3158.529 | 2783.004  |
| BF540935  | 4857.691  | 3420.941  | NM_00622E | 564.198   | 547.192   | NM_00615E | 2248.968 | 1687.179  |
| NM_00446E | 337.63    | 492.839   | NM_01759C | 2038.51   | 1785.782  | NM_00634E | 700.693  | 688.485   |
| NM_007081 | 2688.945  | 2672.781  | AB011145  | 5116.737  | 4942.836  | AK025240  | 922.685  | 982.077   |
| AB032964  | 3302.827  | 3354.223  | NM_00375C | 17690.096 | 14745.828 | NM_005377 | 113.588  | 154.604   |
| NM_00269E | 6077.24   | 11430.657 | M92422    | 2495.447  | 2467.185  | NM_01763E | 4589.874 | 3314.631  |
| NM_003671 | 1375.658  | 2341.766  | NM_01786E | 1653.747  | 1021.354  | AF086186  | 2099.51  | 1378.177  |

|           |           |           |           |           |           |           |           |           |
|-----------|-----------|-----------|-----------|-----------|-----------|-----------|-----------|-----------|
| M20695    | 1440.464  | 3009.023  | AK021888  | 1002.502  | 1088.982  | NM_017802 | 1700.627  | 845.432   |
| AK026000  | 5176.484  | 8649.698  | AK022848  | 4054.149  | 5044.307  | AK023667  | 406.383   | 179.337   |
| NM_017833 | 883.042   | 856.81    | AL049957  | 1147.281  | 1269.876  | AJ008137  | 2562.549  | 1577.498  |
| NM_006675 | 3739.86   | 3925.583  | NM_018159 | 31012.025 | 33339.039 | AF085841  | 277.775   | 243.754   |
| NM_003022 | 4244.772  | 4374.351  | NM_000819 | 7468.564  | 7571.329  | AL049232  | 310.169   | 517.431   |
| NM_004873 | 2448.605  | 2497.473  | NM_002513 | 3192.78   | 2651.083  | U92026    | 414.269   | 190.67    |
| NM_019842 | 940.609   | 1140.929  | NM_017424 | 5640.942  | 5453.535  | AF086234  | 15190.095 | 7631.505  |
| NM_003144 | 34856.848 | 36632.246 | NM_001522 | 7973.546  | 8798.662  | AK023680  | 1835.28   | 995.977   |
| NM_000908 | 690.875   | 890.28    | NM_000883 | 7562.101  | 6758.578  | AF009324  | 1650.349  | 1483.7    |
| AB011102  | 5265.606  | 7477.954  | AF254086  | 2305.452  | 1771.401  | AF019226  | 462.003   | 364.543   |
| D63480    | 1641.697  | 2425.234  | AL390142  | 1923.433  | 2216.802  | AL137480  | 3318.874  | 1948.215  |
| NM_002968 | 2337.608  | 1551.022  | NM_006565 | 3095.732  | 2513.154  | AK022182  | 275.597   | 228.685   |
| NM_004620 | 975.249   | 992.104   | AB007930  | 6399.917  | 5085.08   | D16473    | 986.52    | 1335.573  |
| AF087940  | 1939.721  | 1682.511  | AJ005273  | 4381.928  | 3933.535  | AB028968  | 784.353   | 816.259   |
| AJ277587  | 820.762   | 743.18    | AK021892  | 3292.05   | 2668.738  | AK001202  | 284.94    | 259.036   |
| D87432    | 1784.333  | 1746.79   | NM_003437 | 1894.088  | 1966.875  | AF195764  | 30622.709 | 16721.738 |
| AI565117  | 46485.383 | 56627.621 | NM_018337 | 8609.747  | 9303.185  | AF055029  | 420.996   | 292.724   |
| AB011098  | 436.922   | 976.657   | AA193295  | 9363.433  | 8457.016  | S82164    | 289.828   | 220.028   |
| AA609759  | 1162.939  | 1425.174  | NM_018045 | 6983.848  | 6209.913  | AK024394  | 749.364   | 725.157   |
| AA029418  | 6299.207  | 6078.959  | NM_014803 | 1726.256  | 2415.15   | AF147374  | 769.532   | 859.777   |
| L20815    | 7433.895  | 7917.484  | AK024956  | 575.865   | 1151.108  | AF130091  | 282.56    | 210.627   |
| AI364483  | 20286.289 | 17375.779 | AF147386  | 2430.349  | 4074.173  | L43338    | 2261.97   | 1437.231  |
| AA456001  | 8175.584  | 6514.715  | AF273052  | 8119.014  | 9824.432  | AJ227866  | 6076.099  | 2868.777  |
| AA451686  | 1946.847  | 2994.072  | NM_017943 | 9306.098  | 9755.521  | AF458223  | 2280.925  | 1507.998  |
| M87790    | 14202.57  | 26344.762 | AF147383  | 1837.435  | 1880.07   | AK026822  | 608.979   | 442.142   |
| NM_001768 | 4101.114  | 2516.069  | AK025682  | 2673.924  | 2748.556  | AK022838  | 4256.775  | 3085.427  |
| NM_000029 | 6981.987  | 4846.799  | NM_013352 | 664.974   | 773.514   | NM_003505 | 208.029   | 235.048   |
| NM_000715 | 457.953   | 436.21    | NM_016478 | 16378.645 | 17697.264 | CY3Cy5    | 1845.931  | 434.151   |
| AF035802  | 1582.517  | 1231.703  | AL389986  | 9737.266  | 8631.921  | AA700390  | 1878.59   | 1901.199  |
| Y08145    | 761.46    | 475.802   | AF086279  | 394.122   | 350.801   | AA436163  | 364.799   | 339.787   |
| NM_019555 | 666.84    | 565.292   | AF088052  | 1536.744  | 1533.297  | BI603841  | 377.54    | 328.258   |
| NM_012096 | 2721.039  | 2346.156  | AF086342  | 730.643   | 705.298   | AA156863  | 2241.38   | 1938.597  |
| NM_003905 | 7581.938  | 7136.211  | AF086310  | 357.536   | 393.708   | BI915199  | 1391.977  | 1263.076  |
| L12052    | 1777.76   | 1833.759  | AF086387  | 953.512   | 711.804   | R82957    | 36744.281 | 24933.781 |
| AB028976  | 1729.675  | 1656.904  | AL389941  | 995.078   | 1013.527  | BI830442  | 173.789   | 194.131   |
| AK026337  | 667.834   | 579.535   | AB037756  | 2050.151  | 2023.936  | AI218732  | 1020.671  | 1048.999  |
| NM_004305 | 44892.02  | 46707.629 | AK001853  | 4302.474  | 4431.539  | NM_004102 | 979.897   | 891.79    |
| NM_006088 | 6496.583  | 8832.144  | AK025071  | 1303.999  | 1147.306  | NM_004544 | 2640.417  | 2696.664  |
| AB033054  | 14941.011 | 15867.853 | AF075082  | 385.872   | 402.681   | SR5       | 2780.605  | 2754.425  |
| NM_016122 | 894.453   | 1337.497  | NM_015370 | 3463.222  | 4766.802  | SR7       | 2678.698  | 21505.748 |
| AF153330  | 1611.164  | 2089.632  | AF085917  | 1702.198  | 3491.69   | SR9       | 9197.004  | 1389.85   |
| NM_001652 | 422.958   | 784.904   | AF085989  | 1163.376  | 1199.374  | CY3Cy5    | 1821.46   | 501.68    |
| NM_002337 | 1078.161  | 904.516   | AL360139  | 58441.656 | 61079.008 | NM_018045 | 3288.726  | 3688.664  |
| NM_013245 | 1114.777  | 784.222   | AF075110  | 14294.273 | 12798.876 | NM_005160 | 3656.267  | 2744.118  |
| NM_006423 | 10871.957 | 10988.182 | AK022157  | 337.473   | 341.089   | X78817    | 3126.86   | 2662.608  |
| NM_004766 | 855.667   | 908.84    | AL137323  | 755.739   | 712.675   | AB023135  | 326.778   | 637.781   |
| NM_005819 | 6493.415  | 5839.944  | AL137494  | 4870.052  | 4224.084  | AY009401  | 207.51    | 233.791   |
| AK024722  | 543.164   | 653.125   | AL162037  | 5616.526  | 5264.493  | AF294628  | 474.449   | 443.027   |
| AK025520  | 1610.07   | 1312.917  | AL390150  | 1271.92   | 1277.612  | AK026960  | 311.263   | 215.039   |
| NM_004892 | 5678.781  | 5324.283  | AL137359  | 409.002   | 385.622   | NM_001991 | 480.542   | 295.418   |
| NM_014597 | 7660.632  | 6985.139  | AL137575  | 364.892   | 320.096   | NM_000193 | 499.058   | 570.831   |
| NM_017896 | 5038.567  | 5407.461  | NM_002761 | 566.293   | 606.881   | BC014586  | 257.091   | 247.065   |
| AB002374  | 1999.613  | 2838.332  | AF086063  | 903.377   | 1003.113  | NM_002448 | 1488.268  | 1546.944  |



|           |           |           |           |           |           |           |           |           |
|-----------|-----------|-----------|-----------|-----------|-----------|-----------|-----------|-----------|
| U17327    | 762.424   | 1066.487  | AF086098  | 1885.39   | 1947.892  | AF053952  | 2580.512  | 2583.701  |
| NM_017833 | 922.263   | 1193.553  | AF086076  | 756.393   | 922.536   | NM_003213 | 2664.187  | 2565.916  |
| NM_006675 | 4786.542  | 5741.52   | AL833393  | 2691.775  | 2588.609  | NM_014044 | 1413.18   | 1590.515  |
| NM_003022 | 5508.147  | 6233.693  | AF088005  | 1917.126  | 1939.612  | NM_000900 | 365.837   | 528.349   |
| NM_004873 | 4282.943  | 4747.48   | AF086096  | 6735.899  | 7540.361  | AK023684  | 3552.467  | 5786.725  |
| NM_019842 | 1158.596  | 1028.001  | AL390132  | 579.201   | 475.876   | NM_000232 | 1300.65   | 3122.012  |
| NM_002951 | 17961.957 | 18711.225 | NM_017933 | 6522.335  | 6678.415  | NM_015057 | 283.322   | 690.194   |
| NM_002317 | 1207.72   | 1022.272  | NM_017819 | 9512.931  | 7349.956  | AF303398  | 1236.487  | 1503.269  |
| NM_000320 | 3810.905  | 2980.478  | AK024653  | 29920.4   | 34772.875 | NM_014810 | 652.121   | 708.554   |
| NM_003136 | 2098.78   | 1949.842  | AF103907  | 1404.538  | 1640.589  | NM_004738 | 1300.161  | 1586.46   |
| NM_013328 | 5293.527  | 5278.76   | AF094508  | 883.744   | 1397.9    | NM_007357 | 2409.802  | 3058.376  |
| NM_002660 | 2719.776  | 2619.008  | AF161351  | 1336.77   | 1757.103  | NM_003763 | 2663.023  | 2524.768  |
| NM_015900 | 645.475   | 453.082   | AF257098  | 784.995   | 699.819   | AK023448  | 829.936   | 967.128   |
| NM_003706 | 320.127   | 620.811   | AF111782  | 3605.31   | 3367.967  | Y18213    | 1501.982  | 1679.456  |
| AL122071  | 1039.143  | 1132.78   | AF151530  | 1267.89   | 1470.355  | NM_003283 | 1503.112  | 1661.122  |
| NM_014913 | 20647.957 | 21609.498 | AK021991  | 486.558   | 586.647   | AF249898  | 3202.217  | 3362.146  |
| NM_005864 | 517.167   | 761.282   | AK022093  | 8897.651  | 9879.902  | M69181    | 2793.287  | 2750.616  |
| NM_012341 | 4180.425  | 5341.501  | AK022232  | 385.608   | 368.402   | AK027224  | 249.915   | 187.046   |
| NM_003256 | 18102.557 | 17018.494 | AK022376  | 516.673   | 765.403   | NM_001311 | 2033.865  | 2652.544  |
| D87450    | 4028.349  | 4383.561  | AK022005  | 847.066   | 898.237   | NM_017798 | 5015.599  | 8889.571  |
| NM_017797 | 15681.722 | 16019.854 | AK022137  | 308.647   | 722.524   | NM_012410 | 513.273   | 869.468   |
| AF000562  | 2710.33   | 2980.285  | AK022272  | 1661.495  | 1686.217  | NM_001111 | 3011.406  | 3139.472  |
| AK025713  | 3217.964  | 2676.326  | AK027155  | 5683.302  | 6334.002  | NM_001611 | 595.758   | 1287.388  |
| NM_002050 | 745.968   | 678.334   | AL049983  | 921.079   | 931.146   | AB018310  | 1872.731  | 4828.206  |
| NM_007097 | 1442.782  | 1311.615  | AF221846  | 530.385   | 836.297   | NM_020133 | 485.357   | 1757.911  |
| D87446    | 1209.938  | 907.096   | AF264626  | 592.556   | 786.509   | NM_015379 | 13421.381 | 26393.654 |
| BF540935  | 2905.386  | 2415.998  | AK024528  | 16760.244 | 15653.729 | NM_004878 | 347.327   | 822.579   |
| NM_007081 | 1429.895  | 1152.964  | AL049311  | 638.659   | 1006.46   | BF028822  | 359.855   | 447.563   |
| AB032964  | 2449.061  | 2241.536  | AK000016  | 1992.863  | 1965.842  | NM_005502 | 262.731   | 546.941   |
| BE733605  | 1733.297  | 1761.907  | AK023367  | 1687.136  | 1552.499  | NM_000742 | 483.288   | 1137.748  |
| NM_003334 | 26217.777 | 21297.314 | AL080209  | 2652.112  | 3491.579  | NM_002355 | 4586.025  | 5651.056  |
| NM_002693 | 4772.318  | 4346.27   | AL137431  | 813.04    | 766.719   | AK026608  | 1432.534  | 1997.021  |
| NM_003671 | 835.325   | 860.2     | NM_016255 | 1631.748  | 2246.946  | AB046836  | 551.874   | 1775.373  |
| M20695    | 1499.242  | 1466.154  | NM_014318 | 1647.775  | 1934.726  | AJ224166  | 631.322   | 1498.582  |
| AK026000  | 3759.59   | 4558.407  | AK056674  | 1542.597  | 1680.744  | AK026098  | 2464.741  | 7190.288  |
| NM_005814 | 1395.321  | 1474.462  | AK022856  | 657.478   | 669.145   | NM_012381 | 1258.049  | 4451.606  |
| NM_016279 | 653.353   | 587.217   | AK022042  | 934.661   | 820.099   | M20702    | 1039.87   | 3118.529  |
| NM_000211 | 6903.631  | 7176.037  | AL117588  | 968.393   | 1013.95   | NM_006397 | 10071.448 | 22926.006 |
| AB037830  | 1374.457  | 1343.433  | NM_017708 | 590.552   | 477.165   | D83776    | 813.82    | 2533.141  |
| NM_015685 | 4552.56   | 4335.865  | BE895529  | 4585.766  | 5328.399  | NM_004088 | 1506.047  | 3669.032  |
| NM_004357 | 26890.363 | 21818.633 | AK000964  | 608.493   | 639.815   | NM_000138 | 2245.579  | 5313.526  |
| X03324    | 2928.718  | 2969.29   | AL117536  | 2535.432  | 2323.712  | NM_018163 | 622.392   | 2200.293  |
| AF130988  | 677.83    | 555.155   | NM_017751 | 8375.306  | 9339.68   | AK026362  | 2198.656  | 4973.31   |
| NM_015385 | 924       | 1363.344  | NM_003771 | 1959.869  | 1862.004  | NM_004968 | 1924.151  | 4909.066  |
| NM_003690 | 1547.938  | 1995.441  | NM_017860 | 811.443   | 932.357   | NM_005908 | 1132.718  | 3691.372  |
| NM_000876 | 2966.946  | 2545.456  | X91195    | 46228.59  | 45700.648 | NM_004785 | 2276.715  | 6601.979  |
| NM_014214 | 878.238   | 991.92    | AF086190  | 1366.438  | 1507.081  | AK024079  | 482.016   | 1587.843  |
| NM_002752 | 3233.719  | 2819.236  | NM_006143 | 928.382   | 1175.984  | NM_002428 | 1132.498  | 3538.905  |
| NM_013281 | 456.498   | 376.191   | AL050035  | 4230.879  | 4538.488  | NM_014674 | 2611.779  | 6267.047  |
| X85106    | 847.113   | 739.759   | AK024449  | 558.896   | 947.916   | NM_018271 | 682.752   | 3681.569  |
| NM_003931 | 1284.703  | 875.637   | AF279780  | 39784.836 | 35526.164 | NM_000547 | 465.916   | 1305.265  |
| NM_012479 | 21422.916 | 20461.256 | AK022510  | 1995.479  | 1759.681  | NM_014652 | 509.373   | 2072.31   |
| AF250226  | 14489.733 | 14196.526 | AK023878  | 1473.17   | 1799.971  | AL133020  | 3266.658  | 8770.466  |

|           |           |           |           |           |           |           |           |           |
|-----------|-----------|-----------|-----------|-----------|-----------|-----------|-----------|-----------|
| AL157475  | 2965.778  | 3257.324  | AK021851  | 1993.444  | 1917.046  | NM_014044 | 1362.268  | 1545.044  |
| NM_006069 | 34905.203 | 29313.994 | L37717    | 656.881   | 689.701   | NM_000900 | 457.431   | 689.34    |
| NM_006534 | 4566.998  | 4143.607  | AJ131609  | 1734.329  | 2127.944  | AK023684  | 3003.875  | 3079.472  |
| NM_017601 | 1587.548  | 1856.332  | BC019280  | 3728.379  | 4667.191  | NM_000232 | 883.691   | 1004.51   |
| AF110265  | 9123.396  | 10871.832 | AF086498  | 847.838   | 900.573   | AA700390  | 1667.583  | 3688.492  |
| AF272371  | 51096.594 | 59853.035 | AK000687  | 605.708   | 603.398   | AA436163  | 532.279   | 1761.697  |
| AK021848  | 1483.339  | 1357.322  | AF079567  | 2112.243  | 1361.956  | BI907981  | 360.357   | 902.198   |
| NM_003704 | 1455.052  | 1648.861  | AK022177  | 1272.856  | 1026.839  | BI603841  | 759.49    | 2118.362  |
| AK023140  | 946.081   | 718.251   | AK023852  | 669.538   | 873.349   | Y08136    | 416.328   | 1042.372  |
| AF084362  | 358.88    | 249.264   | AF086466  | 2288.494  | 2550.165  | AA156863  | 3112.623  | 7781.289  |
| NM_001553 | 1615.511  | 3592.118  | AB007962  | 3411.18   | 4245.866  | BI915199  | 1847.45   | 4725.027  |
| NM_014173 | 5640.353  | 7640.181  | AF005081  | 1358.237  | 1494.841  | AI218732  | 1476.709  | 4121.127  |
| NM_001731 | 4383.651  | 7990.646  | AK026438  | 685.957   | 842.724   | NM_001311 | 1952.472  | 2016.096  |
| AL137506  | 692.597   | 944.013   | AK021546  | 1514.975  | 1456.927  | NM_017798 | 4191.591  | 2914.404  |
| AK022961  | 2838.421  | 2977.257  | AL050186  | 19832.396 | 18782.797 | NM_012410 | 399.347   | 265.858   |
| NM_007375 | 1517.363  | 1838.543  | AK021918  | 3289.265  | 3740.35   | NM_001111 | 1755.593  | 1684.223  |
| NM_014371 | 1130.309  | 1202.777  | AK021669  | 3420.536  | 3757.185  | NM_018048 | 2668.333  | 2803.509  |
| AF290512  | 1524.46   | 1284.119  | AL080113  | 30017.58  | 29612.754 | NM_005160 | 4431.178  | 3951.699  |
| NM_006716 | 3269.122  | 3034.355  | AL050083  | 1840.946  | 1604.799  | X78817    | 4572.857  | 4643.119  |
| AB002323  | 1680.748  | 1009.322  | AL049422  | 4907.447  | 4980.909  | AB023135  | 332.165   | 618.419   |
| AK022241  | 4778.071  | 3869.402  | AL133089  | 1954.883  | 2326.658  | AK026960  | 562.349   | 1470.07   |
| AK022587  | 2989.501  | 3039.27   | AK023526  | 2251.245  | 2520.367  | NM_001991 | 642.153   | 2067.464  |
| NM_005506 | 3034.51   | 2716.693  | BE266129  | 893.097   | 1122.481  | NM_017852 | 191.212   | 250.703   |
| NM_005723 | 1342.622  | 1796.632  | AK025602  | 10805.69  | 10552.409 | BC014586  | 369.568   | 1683.577  |
| NM_020185 | 3878.893  | 4109.291  | AK026309  | 5466.838  | 6244.367  | NM_002448 | 2237.512  | 5567.184  |
| NM_002832 | 29606.381 | 22937.197 | AL137486  | 4483.544  | 4802.376  | AF053952  | 2950.035  | 9563.211  |
| NM_017732 | 4870.865  | 4608.762  | AL110162  | 1580.587  | 1691.687  | NM_015057 | 270.875   | 292.364   |
| NM_002851 | 2762.151  | 5214.544  | AK022681  | 10122.226 | 11865.966 | AF303398  | 1916.843  | 1530.59   |
| NM_002071 | 538.655   | 536.351   | CY3Cy5    | 1085.213  | 77.453    | NM_014810 | 790.632   | 542.289   |
| NM_005338 | 19255.006 | 15557.627 | Y18483    | 333.322   | 100.072   | NM_004738 | 1264.321  | 1225.901  |
| NM_001906 | 1566.364  | 1574.041  | AI299075  | 509.282   | 754.474   | NM_007357 | 1982.004  | 2075.479  |
| NM_004142 | 422.288   | 399.078   | M59979    | 447.382   | 636.074   | NM_003763 | 3150.596  | 2655.095  |
| BF340302  | 4304.464  | 5683.457  | AB011098  | 923.91    | 1420.267  | AK023448  | 839.851   | 969.095   |
| AK024210  | 869.034   | 758.072   | AA609759  | 673.842   | 1621.013  | Y18213    | 1327.774  | 1463.671  |
| NM_002276 | 1330.999  | 1441.237  | AA029418  | 4584.457  | 5879.605  | NM_003283 | 1433.672  | 1652.061  |
| AL133087  | 1563.552  | 1045.585  | L20815    | 4211.105  | 5502.799  | AF249898  | 3066.776  | 3261.664  |
| NM_018010 | 673.306   | 608.009   | AI364483  | 10268.222 | 9732.223  | M69181    | 2683.71   | 3112.77   |
| NM_002274 | 7763.514  | 6157.302  | AA456001  | 5664.071  | 5984.48   | NM_002428 | 696.414   | 684.484   |
| BF337874  | 2723.087  | 2474.944  | AA451686  | 4562.875  | 3914.093  | NM_014674 | 1557.411  | 1575.779  |
| NM_003475 | 14498.257 | 14099.148 | NM_003822 | 904.499   | 772.95    | NM_018271 | 277.958   | 318.741   |
| NM_000243 | 2713.761  | 2924.695  | NM_004412 | 7249.375  | 4560.834  | NM_000547 | 255.645   | 203.018   |
| NM_004383 | 9342.958  | 9549.561  | SR9       | 20871.207 | 4399.797  | NM_014652 | 396.555   | 337.193   |
| NM_012256 | 26590.367 | 21152.65  | CY3Cy5    | 5106.267  | 188.285   | AL133020  | 2849.467  | 5313.952  |
| NM_006006 | 548.007   | 410.857   | NM_019555 | 1459.762  | 287.136   | NM_001611 | 489.31    | 296.064   |
| NM_016325 | 3074.775  | 2820.494  | NM_012096 | 6749.954  | 1307.479  | AB018310  | 1511.322  | 1379.398  |
| NM_001604 | 1953.721  | 1874.402  | AB028976  | 2735.836  | 2828.987  | NM_020133 | 323.868   | 367.423   |
| NM_017656 | 1727.213  | 2506.31   | AK026337  | 355.129   | 929.797   | NM_015379 | 10041.104 | 11142.173 |
| X16282    | 7057.162  | 6144.953  | NM_015869 | 387.356   | 564.293   | NM_004878 | 280.973   | 307.293   |
| NM_014415 | 2048.89   | 1785.856  | NM_004626 | 359.506   | 458.144   | AF144638  | 30557.932 | 19581.273 |
| S75264    | 5288.924  | 4892.097  | NM_001899 | 483.646   | 567.003   | NM_005502 | 232.928   | 463.553   |
| AF027513  | 900.058   | 857.548   | NM_004305 | 28420.775 | 30351.938 | NM_000742 | 411.039   | 409.515   |
| NM_001379 | 1304.466  | 2062.372  | NM_006089 | 8091.843  | 8342.136  | NM_002355 | 4273.688  | 3215.324  |
| NM_003926 | 2603.95   | 2778.935  | NM_003144 | 29966.725 | 17598.418 | AK026608  | 1573.641  | 1668.858  |

|           |           |           |           |           |           |           |           |           |
|-----------|-----------|-----------|-----------|-----------|-----------|-----------|-----------|-----------|
| NM_016047 | 16632.643 | 14809.435 | NM_000908 | 623.569   | 438.253   | NM_004102 | 792.085   | 773.203   |
| NM_001498 | 3504.017  | 2972.878  | AB011102  | 5127.678  | 4009.938  | NM_004544 | 2480.34   | 2647.907  |
| BF030165  | 5308.076  | 5289.46   | D63480    | 1521.215  | 2426.389  | NM_018890 | 10141.065 | 7360.972  |
| NM_016732 | 14699.709 | 13611.177 | NM_004620 | 1126.019  | 1662.266  | AB046836  | 314.163   | 387.697   |
| NM_014763 | 5783.943  | 6445.127  | AF087940  | 1070.753  | 1404.049  | NM_017816 | 3831.296  | 2764.123  |
| AK026261  | 391.596   | 265.235   | AJ277587  | 915.783   | 825.828   | AJ224166  | 524.476   | 437.768   |
| AF086534  | 634.03    | 648.732   | D87432    | 1760.31   | 1245.333  | AK026098  | 1995.988  | 1535.303  |
| AF070617  | 1118.291  | 961.857   | NM_002337 | 3672.572  | 869.111   | NM_012381 | 1210.952  | 1152.3    |
| NM_014918 | 6876.682  | 6450.13   | NM_013245 | 1764.558  | 1229.338  | M20702    | 1851.825  | 2952.49   |
| NM_003654 | 428.649   | 376.474   | NM_004766 | 2959.618  | 4805.798  | NM_006397 | 12998.307 | 35903.734 |
| NM_000152 | 3966.898  | 3854.36   | NM_005819 | 6692.253  | 9180.977  | D83776    | 1084.088  | 1909.871  |
| D17222    | 6337.559  | 7204.734  | AK024722  | 918.917   | 1334.049  | NM_004088 | 1347.324  | 1470.255  |
| NM_000154 | 1942.772  | 1842.248  | AK025520  | 2680.779  | 2867.434  | NM_002180 | 653.799   | 951.563   |
| AF318366  | 1349.764  | 1650.876  | NM_004892 | 9359.953  | 11624.883 | NM_000138 | 1694.625  | 1975.957  |
| D26018    | 4774.067  | 5695.036  | NM_014597 | 10568.534 | 11623.181 | NM_018163 | 548.802   | 657.499   |
| AB037863  | 514.782   | 332.858   | NM_017896 | 7444.031  | 5883.136  | AK026362  | 1373.739  | 1553.089  |
| BC000363  | 535.866   | 425.535   | AB002374  | 2977.579  | 2745.814  | NM_004968 | 1433.277  | 1513.677  |
| NM_007237 | 1387.019  | 1245      | U17327    | 1035.181  | 789.034   | NM_005908 | 935.083   | 1538.715  |
| NM_004608 | 568.429   | 674.104   | M87790    | 9410.125  | 7158.262  | NM_004785 | 1590.37   | 2038.039  |
| NM_018257 | 2900.937  | 3470.444  | NM_001768 | 4015.203  | 5425.292  | AK024079  | 357.915   | 378.771   |
| NM_005918 | 1392.978  | 1697.12   | NM_000029 | 3294.661  | 5440.985  | NM_000193 | 440.74    | 284.504   |
| AF085931  | 1908.084  | 1569.915  | NM_000715 | 731.122   | 620.822   | BC014586  | 278.837   | 298.799   |
| AF086112  | 486.37    | 516.009   | AF035802  | 1268.896  | 1913.744  | NM_002448 | 1103.429  | 1077.779  |
| AL137254  | 1807.632  | 1523.027  | Y08145    | 1107.55   | 1068.593  | AF053952  | 2220.149  | 2174.261  |
| AK026359  | 778.286   | 696.799   | M26123    | 506.023   | 397.353   | NM_003213 | 2091.574  | 1846.104  |
| AF085884  | 1445.901  | 1135.197  | NM_001838 | 676.112   | 312.451   | NM_014044 | 1232.326  | 789.565   |
| S81522    | 1659.437  | 1478.129  | NM_013328 | 18748.051 | 2118.77   | NM_000900 | 295.684   | 253.814   |
| S94541    | 688.779   | 599.66    | NM_000790 | 287.493   | 161.309   | AK023684  | 2995.481  | 3486.236  |
| AK024228  | 554.865   | 844.471   | NM_002660 | 4066.899  | 7533.475  | NM_000232 | 699.686   | 762.092   |
| NM_016647 | 750.015   | 834.765   | NM_015900 | 691.317   | 1065.804  | AA700390  | 1934.898  | 1416.567  |
| AF038174  | 2245.521  | 1963.202  | NM_003706 | 693.216   | 1254.287  | AA436163  | 529.589   | 640.492   |
| NM_013243 | 466.638   | 377.992   | AL122071  | 785.55    | 1091.295  | BI907981  | 297.897   | 389.635   |
| AF161359  | 1248.415  | 1045.108  | AB033054  | 12568.313 | 13427.99  | BI603841  | 631.087   | 647.338   |
| AL365520  | 1628.561  | 1288.48   | NM_016122 | 912.581   | 961.571   | Y08136    | 229.538   | 192.527   |
| AK023623  | 1373.115  | 1561.951  | AF153330  | 1403.156  | 1125.18   | AA156863  | 2249.982  | 1615.226  |
| AK026202  | 380.035   | 263.906   | NM_001652 | 494.751   | 320.206   | BI915199  | 1367.894  | 1334.323  |
| AK021539  | 5953.642  | 4588.547  | NM_004770 | 36.768    | 1687.651  | R82957    | 37328.68  | 28329.352 |
| AK021819  | 429.918   | 574.881   | D87446    | 3612.854  | 616.283   | AI218732  | 1107.648  | 1117.758  |
| AK026738  | 2428.05   | 1821.646  | BF540935  | 1597.142  | 207.458   | AF249898  | 1809.188  | 1696.977  |
| AK025011  | 730.255   | 732.306   | NM_004466 | 514.238   | 962.219   | M69181    | 2505.316  | 2038.485  |
| AL157491  | 723.779   | 857.291   | NM_007081 | 2865.292  | 4768.418  | NM_001311 | 1527.947  | 1478.577  |
| NM_005268 | 1790.873  | 1849.034  | AB032964  | 3615.871  | 4196.247  | NM_017798 | 3810.228  | 3034.269  |
| AF087965  | 1053.175  | 644.806   | BE733605  | 3248.971  | 4352.956  | NM_012410 | 276.122   | 238.447   |
| AF085998  | 1127.904  | 926.477   | NM_003334 | 17709.805 | 23627.055 | NM_001111 | 2175.406  | 1860.755  |
| AK024681  | 820.3     | 909.365   | NM_002693 | 6707.903  | 7017.094  | NM_018048 | 2782.531  | 1966.602  |
| NM_014907 | 6635.847  | 6601.819  | NM_003671 | 1290.486  | 1473.236  | NM_005160 | 4472.802  | 2967.963  |
| AB007977  | 4436.659  | 4257.022  | M20695    | 1153.162  | 1718.645  | X78817    | 4448.853  | 3067.511  |
| NM_014221 | 2167.139  | 2301.241  | AK026000  | 3357.682  | 3713.767  | AB023135  | 363.636   | 197.655   |
| U84515    | 630.49    | 812.645   | NM_017833 | 1011.178  | 1114.356  | AY009401  | 162.958   | 231.298   |
| AF086143  | 5382.986  | 5223.635  | NM_006675 | 3446.797  | 3218.979  | AF294628  | 570.604   | 541.098   |
| AK022364  | 437.209   | 628.461   | NM_003022 | 4820.884  | 3054.449  | AK026960  | 326.752   | 311.393   |
| AK024674  | 676.484   | 703.73    | NM_004873 | 3409.623  | 2361.782  | NM_001991 | 545.035   | 284.971   |
| AK024244  | 2727.164  | 2291.132  | NM_019842 | 1072.269  | 753.087   | NM_000742 | 378.204   | 406.047   |

|           |           |           |           |           |           |           |           |           |
|-----------|-----------|-----------|-----------|-----------|-----------|-----------|-----------|-----------|
| AK023812  | 829.58    | 737.522   | NM_003136 | 8265.002  | 2245.641  | NM_00235E | 2944.43   | 2195.578  |
| AL390084  | 1595.599  | 1675.525  | NM_004620 | 369.639   | 176.431   | AK026608  | 1080.282  | 945.492   |
| AK023565  | 501.239   | 559.344   | AF087940  | 654.177   | 279.577   | NM_015057 | 271.033   | 246.091   |
| AK021479  | 895.979   | 1207.681  | AJ277587  | 1227.606  | 628.542   | AF303398  | 1593.822  | 1326.052  |
| NM_00383E | 1532.564  | 1356.521  | D87432    | 2678.621  | 4641.745  | NM_014810 | 642.136   | 511.812   |
| AK000245  | 2618.925  | 1577.554  | Y18483    | 392.324   | 591.341   | NM_00473E | 1097.465  | 972.375   |
| AF118072  | 1481.114  | 1631.407  | AI299075  | 244.654   | 587.549   | NM_007357 | 1944.862  | 1890.546  |
| AF085900  | 19812.613 | 17867.789 | M59979    | 286.532   | 894.081   | NM_00376E | 2648.11   | 2074.959  |
| AK022420  | 762.763   | 1224.913  | AB011098  | 1045.288  | 1107.697  | AK023448  | 604.999   | 530.395   |
| AK023945  | 10056.337 | 8975.189  | AA609759  | 733.881   | 1267.188  | Y18213    | 1113.208  | 1058.929  |
| AK022446  | 860.608   | 587.473   | AA029418  | 3673.983  | 4055.461  | NM_00328E | 1291.226  | 1408.356  |
| AK023352  | 292.86    | 238.798   | L20815    | 3306.481  | 3689.876  | NM_01816E | 409.213   | 383.433   |
| AK023773  | 710.127   | 813.898   | AI364483  | 6516.012  | 6337.932  | AK026362  | 1238.506  | 1163.956  |
| AF116709  | 1045.906  | 1060.193  | AA456001  | 3069.308  | 2790.121  | NM_00496E | 1250.752  | 1087.513  |
| AK025533  | 1183.29   | 1696.463  | AA451686  | 4725.692  | 2667.459  | NM_00590E | 767.054   | 825.958   |
| AK021911  | 8001.4    | 7446.274  | AA934644  | 1925.081  | 1200.142  | NM_00478E | 1749.019  | 1885.213  |
| D17225    | 2479.08   | 2447.692  | NM_002050 | 1039.645  | 496.458   | AK024079  | 282.533   | 337.613   |
| AF147430  | 430.213   | 365.984   | NM_007097 | 5486.196  | 1723.071  | NM_00242E | 744.737   | 840.06    |
| AK025766  | 5580.719  | 5115.986  | NM_000029 | 1498.211  | 232.927   | NM_014674 | 1049.879  | 865.001   |
| U35875    | 26201.695 | 20801.566 | AF035802  | 726.006   | 267.69    | NM_018271 | 287.187   | 308.396   |
| AK021857  | 29960.656 | 19937.643 | Y08145    | 1068.846  | 578.809   | NM_000547 | 259.083   | 367.676   |
| AK022257  | 1932.167  | 1737.648  | M26123    | 492.284   | 782.735   | NM_01465E | 336.429   | 365.099   |
| BE887356  | 44909.945 | 47781.09  | NM_00183E | 936.389   | 1590.313  | AL133020  | 1920.915  | 1739.154  |
| AK023329  | 4704.789  | 10367.776 | L12052    | 6189.11   | 9223.856  | NM_001611 | 400.708   | 298.479   |
| AK025181  | 2223.446  | 1590.522  | AB028976  | 2746.725  | 4272.93   | AB018310  | 1232.476  | 1245.508  |
| AK021773  | 1928.742  | 1157.712  | NM_01586E | 342.331   | 568.497   | NM_02013E | 300.255   | 384.957   |
| AK027074  | 1618.896  | 1156.803  | AB031038  | 302.569   | 206.34    | NM_01537E | 8552.637  | 7077.284  |
| NM_01803E | 611.713   | 463.702   | NM_00430E | 22272.908 | 11877.242 | NM_00487E | 231.679   | 233.651   |
| U84522    | 3636.527  | 4180.71   | NM_00608E | 7115.303  | 4077.45   | NM_001777 | 20254.117 | 12749.757 |
| AK021694  | 1385.998  | 1158.01   | NM_00090E | 624.26    | 977.541   | U79457    | 4419.563  | 4078.017  |
| AF086013  | 702.256   | 671.945   | AB011102  | 4518.902  | 5714.667  | AB037832  | 235.53    | 235.03    |
| U84505    | 2783.031  | 2413.111  | D63480    | 1281.649  | 613.831   | NM_014347 | 2174.137  | 1887.729  |
| X81005    | 1761.793  | 1445.015  | NM_00296E | 1262.211  | 468.662   | NM_00129E | 3919.308  | 2644.84   |
| AL049265  | 2166.908  | 2441.152  | AK023749  | 377.868   | 658.512   | NM_004344 | 6473.143  | 4985.842  |
| AK022225  | 784.245   | 395.416   | NM_002337 | 4691.243  | 5381.975  | NM_000757 | 345.945   | 455.622   |
| AL137635  | 958.959   | 767.771   | NM_01324E | 2341.571  | 2519.129  | NM_016620 | 11230.761 | 8337.889  |
| AL049430  | 3083.665  | 1780.552  | NM_00476E | 2420.145  | 3461.277  | NM_018890 | 9278.202  | 6874.732  |
| AK021461  | 965.859   | 694.37    | NM_00581E | 5139.523  | 5947.762  | AB046836  | 500.068   | 853.907   |
| AB015349  | 359.889   | 169.362   | AK024722  | 746.118   | 997.616   | AJ224166  | 531.892   | 378.386   |
| AL079274  | 14366.526 | 8213.7    | AK025520  | 2152.132  | 1687.247  | AK026098  | 1667.896  | 1645.014  |
| NM_013300 | 14782.24  | 9845.515  | NM_00489E | 7997.257  | 6116.896  | NM_012381 | 935.332   | 989.665   |
| AK026039  | 4821.384  | 3472.749  | NM_014597 | 9317.75   | 5405.419  | M20702    | 789.905   | 1018.842  |
| AF108756  | 8479.992  | 5761.556  | NM_01789E | 7017.628  | 3517.391  | NM_006397 | 7178.614  | 5297.771  |
| AF086394  | 7052.271  | 30056.623 | AB002374  | 3099.447  | 1765.635  | D83776    | 600.618   | 342.403   |
| NM_00407E | 6233.316  | 5415.548  | U17327    | 1456.318  | 810.9     | NM_00408E | 944.509   | 1245.916  |
| NM_001887 | 4992.378  | 3543.956  | AY009151  | 114.889   | 1390.271  | NM_00013E | 1263.169  | 1587.903  |
| NM_00653E | 3081.635  | 2974.893  | M87790    | 7081.42   | 3807.109  | BC032460  | 1354.174  | 1193.987  |
| AK026747  | 6930.383  | 4737.486  | NM_00176E | 3359.993  | 1035.315  | NM_014071 | 525.985   | 441.248   |
| AL110150  | 12087.607 | 9252.063  | NM_002951 | 17639.146 | 3052.808  | AK024404  | 474.198   | 482.987   |
| NM_00199E | 6911.356  | 4575.552  | NM_002317 | 477.834   | 217.114   | NM_00632E | 380.223   | 446.002   |
| X87825    | 4687.668  | 3745.219  | NM_000320 | 2696.85   | 856.609   | NM_00516E | 509.892   | 352.408   |
| AK001285  | 23811.92  | 11809.544 | NM_00313E | 9809.367  | 12681.496 | NM_00021E | 4619.366  | 2078.261  |
| D17215    | 7327.945  | 3834.025  | NM_01332E | 19970.473 | 21015.121 | BE906107  | 2076.978  | 1479.855  |

|            |           |           |           |           |           |           |           |           |
|------------|-----------|-----------|-----------|-----------|-----------|-----------|-----------|-----------|
| BE781513   | 823.574   | 447.456   | NM_015900 | 602.917   | 837.888   | NM_015516 | 1804.39   | 1323.72   |
| NM_015714  | 32740.928 | 16680.758 | NM_003706 | 706.865   | 931.747   | AB033065  | 338.5     | 326.811   |
| AK075564   | 1606.254  | 1382.257  | AL122071  | 986.314   | 970.957   | NM_004857 | 1219.923  | 1082.96   |
| AK026219   | 1578.595  | 715.055   | AB033054  | 13470.242 | 14734.667 | NM_012108 | 284.497   | 264.5     |
| D28446     | 1209.583  | 696.56    | NM_016122 | 1145.377  | 1342.102  | NM_003253 | 319.757   | 293.834   |
| AK024756   | 1320.685  | 763.961   | AF153330  | 1515.743  | 2860.639  | NM_013285 | 2208.807  | 1868.942  |
| AF147325   | 50862.195 | 34334.09  | NM_001652 | 354.459   | 274.957   | NM_002872 | 5906.45   | 4915.947  |
| NM_014428  | 1255.973  | 443.585   | NM_003822 | 567.389   | 189.762   | NM_004839 | 1309.792  | 1252.332  |
| AK023584   | 706.327   | 288.339   | NM_004412 | 6020.385  | 1054.406  | NM_012193 | 399.491   | 397.257   |
| D87466     | 4877.372  | 4132.239  | NM_002050 | 929.838   | 2179.908  | NM_003405 | 3414.853  | 2406.966  |
| CY3Cy5     | 1671.277  | 161.495   | NM_007097 | 7568.697  | 11033.75  | NM_004720 | 2656.716  | 2316.745  |
| AA608568   | 8793.76   | 9930.215  | D87446    | 5232.052  | 7809.96   | NM_001057 | 622.826   | 539.444   |
| BG831301   | 18993.229 | 8847.649  | BF540935  | 1836.546  | 2194.51   | NM_005561 | 2770.342  | 2140.218  |
| M14764     | 456.167   | 300.98    | NM_004466 | 764.388   | 673.639   | AF272381  | 758.761   | 831.152   |
| AA478647   | 5891.52   | 3620.419  | NM_007081 | 2720.521  | 5838.16   | NM_004524 | 353.728   | 194.157   |
| AW058501   | 675.596   | 529.624   | AB032964  | 3796.587  | 4349.465  | NM_006315 | 1083.113  | 879.996   |
| ID 2623896 | 1286.246  | 976.976   | BE733605  | 2962.195  | 3093.21   | NM_018401 | 353.478   | 244.594   |
| ID 2602214 | 2789.271  | 2274.196  | NM_003334 | 17818.654 | 15708.867 | NM_005163 | 1872.481  | 1845.75   |
| ID 2071279 | 9123.741  | 7269.538  | NM_002693 | 5701.256  | 3896.519  | NM_007273 | 12097.598 | 8996.878  |
| L10709     | 8107.655  | 8833.468  | NM_003671 | 1289.874  | 861.858   | NM_016422 | 1447.276  | 1359.403  |
| N35489     | 453.908   | 534.402   | M20695    | 1281.667  | 959.434   | NM_017878 | 594.305   | 529.69    |
| AI928195   | 906.808   | 874.248   | AK026000  | 3877.508  | 2862.96   | NM_004494 | 34356.738 | 22173.422 |
| NM_145659  | 1866.172  | 1488.904  | NM_017833 | 1097.04   | 1577.275  | AL049687  | 455.452   | 444.701   |
| NM_021957  | 418.619   | 587.87    | NM_004873 | 4106.148  | 3072.871  | NM_005643 | 3760.167  | 2730.591  |
| SR2        | 50464     | 50357.758 | NM_019842 | 900.458   | 340.767   | NM_003592 | 1055.244  | 965.865   |
| SR4        | 11214.636 | 8328.139  | NM_003144 | 29713.982 | 4870.056  | NM_014953 | 936.577   | 472.553   |
| SR6        | 1623.865  | 1328.606  | NM_000908 | 454.826   | 264.386   | AF179995  | 746.997   | 760.887   |
| SR8        | 6586.191  | 15275.628 | AB011102  | 5687.845  | 6747.434  | NM_016195 | 1532.16   | 664.24    |
| SR10       | 23261.43  | 5247.843  | D63480    | 1480.551  | 2893.398  | NM_004523 | 1259.556  | 933.693   |
| CY3Cy5     | 1425.905  | 91.204    | NM_002969 | 1543.031  | 3119.366  | NM_004404 | 4802.586  | 2607.913  |
| NM_017729  | 874.726   | 832.4     | NM_004620 | 917.078   | 1410.921  | NM_002960 | 1198.343  | 1110.605  |
| NM_005259  | 3474.607  | 2807.81   | AF087940  | 1077.77   | 1802.228  | AB046788  | 177.369   | 111.957   |
| NM_015850  | 3995.234  | 3170.133  | AJ277587  | 813.118   | 639.354   | NM_006790 | 673.853   | 546.303   |
| NM_002838  | 12873.196 | 9095.233  | D87432    | 2025.535  | 3274.645  | AL117522  | 1634.476  | 1425.587  |
| NM_014686  | 52587.672 | 51330.531 | Y18483    | 331.199   | 662.54    | NM_006572 | 2309.614  | 2366.572  |
| BF528358   | 767.623   | 798.004   | AI565117  | 59072.965 | 55444.902 | NM_004784 | 175.764   | 411.862   |
| NM_016339  | 850.871   | 515.023   | AB011098  | 757.38    | 896.112   | NM_019061 | 885.451   | 772.832   |
| NM_002487  | 5722.18   | 5923.224  | AA609759  | 1003.31   | 706.447   | AB033007  | 1190.401  | 789.62    |
| NM_013340  | 560.251   | 742.955   | AA029418  | 4226.074  | 2716.465  | NM_003130 | 404.891   | 327.399   |
| NM_005462  | 682.912   | 789.501   | L20815    | 3627.076  | 2880.175  | NM_004716 | 3264.009  | 2059.558  |
| NM_012319  | 1901.318  | 1751.323  | AI364483  | 8413.823  | 10660.027 | D29810    | 1026.445  | 759.986   |
| NM_006510  | 7806.328  | 6204.233  | AA456001  | 4336.851  | 6408.095  | NM_000128 | 304.23    | 207.642   |
| NM_003141  | 1834.445  | 1779.019  | AA451686  | 5043.651  | 2881.807  | AB002384  | 582.077   | 479.093   |
| NM_020245  | 2099.25   | 1997.551  | NM_006757 | 445.454   | 199.412   | NM_018437 | 361.781   | 273.202   |
| NM_007175  | 919.901   | 755.11    | M87790    | 6489.735  | 9620.668  | NM_000422 | 192.666   | 131.263   |
| AB046381   | 390.478   | 504.213   | NM_001768 | 3391.12   | 5774.918  | AK023164  | 749.648   | 495.127   |
| AJ011497   | 1794.961  | 1163.366  | NM_000029 | 1858.175  | 3601.548  | NM_005379 | 306.827   | 236.229   |
| NM_000336  | 752.73    | 374.162   | AF035802  | 1249.009  | 2141.16   | AK027121  | 4574.124  | 3220.427  |
| AF215923   | 4950.452  | 4456.89   | Y08145    | 666.241   | 534.865   | NM_017433 | 434.988   | 688.038   |
| U66621     | 7379.486  | 7514.028  | M26123    | 386.348   | 395.24    | AL117661  | 1938.582  | 1465.839  |
| NM_005720  | 10659.527 | 8590.474  | NM_001838 | 920.138   | 1893.702  | X64643    | 706.196   | 595.339   |
| AB040936   | 516.607   | 366.55    | NM_019555 | 1804.535  | 2871.69   | NM_005380 | 3050.537  | 2676.128  |
| U61736     | 591.008   | 449.954   | NM_012096 | 7465.413  | 7175.681  | NM_005269 | 181.842   | 186.488   |

|           |           |           |           |           |           |           |           |           |
|-----------|-----------|-----------|-----------|-----------|-----------|-----------|-----------|-----------|
| AJ132086  | 778.833   | 525       | NM_003905 | 19165.162 | 17675.064 | D70835    | 23337.826 | 12063.658 |
| U92816    | 10937.691 | 8642.897  | L12052    | 4517.122  | 4424.271  | NM_002697 | 683.952   | 645.586   |
| BC011987  | 3454.781  | 4773.721  | AB028976  | 2364.142  | 1673.333  | NM_001518 | 3650.224  | 2325.992  |
| NM_004106 | 756.694   | 663.803   | AB031038  | 381.435   | 1019.752  | NM_003412 | 3247.05   | 1664.549  |
| NM_003485 | 2285.107  | 2069.776  | NM_001899 | 453.121   | 861.034   | NM_018336 | 421.056   | 300.332   |
| NM_005038 | 6643.385  | 6147.551  | NM_004305 | 20858.506 | 26035.086 | AK022668  | 720.668   | 717.581   |
| M95923    | 538.346   | 672.629   | NM_006089 | 6053.051  | 3998.218  | AW975132  | 441.76    | 416.606   |
| NM_002415 | 56243.52  | 59333.859 | AB033054  | 11105.849 | 1613.466  | NM_006051 | 1493.069  | 846.931   |
| NM_006332 | 8245.904  | 7437.801  | NM_016122 | 786.872   | 219.342   | NM_018427 | 1301.009  | 1080.763  |
| NM_000916 | 1587.626  | 1326.559  | AF153330  | 1540.037  | 2287.738  | NM_014663 | 391.471   | 206.841   |
| NM_018663 | 4096.057  | 3772.69   | NM_001652 | 437.366   | 481.1     | AF007217  | 351.059   | 348.251   |
| NM_145904 | 4672.168  | 4150.828  | AK023749  | 522.547   | 710.954   | AB037753  | 1225.39   | 911.665   |
| NM_006796 | 9570.038  | 6653.513  | NM_002337 | 3080.975  | 3292.218  | NM_004674 | 830.925   | 694.88    |
| NM_000706 | 715.856   | 695.075   | NM_013245 | 1780.157  | 1380.125  | AB037801  | 1331.633  | 858.136   |
| NM_015941 | 1681.24   | 1409.413  | NM_006423 | 22240.529 | 12666.777 | AL080159  | 3701.156  | 2173.328  |
| NM_003655 | 4168.358  | 2870.248  | NM_004766 | 1904.674  | 1270.575  | NM_017823 | 12298.532 | 7376.517  |
| AK025111  | 760.336   | 611.343   | NM_005819 | 4666.17   | 2914.495  | U55185    | 457.523   | 530.149   |
| NM_001732 | 1243.648  | 1222.334  | AK024722  | 879.733   | 731.869   | U30828    | 4618.086  | 3515.219  |
| NM_018690 | 4519.258  | 3849.771  | AK025520  | 2374.776  | 3171.591  | AF085886  | 27603.344 | 12988.784 |
| NM_000860 | 5540.84   | 4939.428  | NM_004892 | 7758.018  | 9829.333  | AK023828  | 793.012   | 780.761   |
| AB037798  | 1581.609  | 1620.93   | NM_014597 | 10186.144 | 13795.416 | AL080223  | 875.183   | 910.785   |
| NM_000780 | 193.177   | 614.148   | NM_017896 | 7706.702  | 7877.371  | AK001630  | 2825.985  | 2200.768  |
| AF272663  | 12273.266 | 11222.8   | AB002374  | 2787.623  | 1363.992  | NM_014612 | 3362.176  | 2873.944  |
| NM_012190 | 1153.467  | 1166.781  | U17327    | 1068.396  | 262.992   | AF079098  | 320.707   | 307.106   |
| AF277719  | 608.612   | 764.537   | NM_017833 | 611.003   | 191.814   | NM_001543 | 334.409   | 297.558   |
| NM_000791 | 1960.104  | 2467.301  | NM_006675 | 3647.839  | 847.349   | NM_016641 | 3188.861  | 2929.509  |
| NM_003681 | 1633.655  | 2357.498  | NM_003022 | 5393.225  | 1883.431  | AB018010  | 263.525   | 167.775   |
| NM_004800 | 8159.628  | 7515.853  | NM_013306 | 449.762   | 310.032   | NM_014610 | 4339.276  | 2782.6    |
| NM_014954 | 28609.322 | 25060.906 | NM_004873 | 4446.016  | 6720.16   | NM_006621 | 1566.993  | 1325.08   |
| NM_000807 | 468.774   | 605.28    | NM_019842 | 1271.124  | 1774.909  | BF347398  | 525.242   | 333.106   |
| NM_014909 | 3737.842  | 2773.216  | NM_002951 | 19366.473 | 25672.654 | AK026762  | 847.693   | 593.015   |
| X91148    | 758.102   | 517.726   | NM_002317 | 707.414   | 1183.701  | NM_004412 | 414.25    | 316.593   |
| NM_015700 | 6902.576  | 6025.908  | NM_000320 | 3044.095  | 4635.666  | L48516    | 792.097   | 639.25    |
| NM_019087 | 1264.434  | 1288.555  | NM_003136 | 9604.353  | 10965.836 | NM_016648 | 3837.332  | 2060.942  |
| NM_016322 | 537.503   | 404.035   | NM_013328 | 21265.107 | 22866.039 | AF083930  | 860.741   | 857.72    |
| NM_005072 | 712.437   | 451.37    | NM_002660 | 3273.182  | 3338.023  | AB040907  | 265.88    | 254.659   |
| AF308802  | 1023.468  | 923.119   | NM_015900 | 388.353   | 264.675   | NM_003426 | 433.294   | 321.211   |
| S76984    | 6271.83   | 5967.528  | NM_003706 | 745.581   | 1023.842  | NM_014862 | 442.801   | 405.393   |
| NM_014495 | 50421.133 | 51842.336 | AL122071  | 642.902   | 283.725   | AK027159  | 615.076   | 459.968   |
| NM_014081 | 1141.853  | 897.156   | NM_014913 | 29518.057 | 3505.11   | AF086152  | 1046.55   | 1042.1    |
| NM_005651 | 848.267   | 1040.729  | NM_005864 | 314.04    | 154.479   | U78519    | 626.421   | 505.534   |
| NM_007195 | 1575.797  | 1927.417  | NM_012341 | 4036.207  | 1794.269  | AK026872  | 409.707   | 406.584   |
| AK023337  | 1949.129  | 2373.554  | NM_003256 | 19951.172 | 29099.244 | AL157505  | 162.2     | 195.018   |
| NM_013275 | 11000.166 | 9610.89   | AK021919  | 391.066   | 749.938   | NM_007190 | 697.521   | 483.255   |
| AB037842  | 641.419   | 634.419   | AF000562  | 3050.598  | 4989.572  | AF043897  | 538.901   | 528.256   |
| U92074    | 628.648   | 519.19    | AK025713  | 3583.843  | 6382.239  | U79246    | 581.238   | 496.917   |
| NM_019011 | 3040.801  | 3441.927  | NM_018100 | 777.214   | 1047.51   | AF052140  | 251.482   | 201.989   |
| AF459094  | 4584.579  | 4708.399  | NM_002050 | 980.63    | 1380.458  | AF007147  | 372.517   | 260.796   |
| NM_003157 | 2072.127  | 2148.24   | NM_007097 | 6687.066  | 6760.941  | AF052127  | 879.259   | 572.624   |
| NM_004938 | 1254.772  | 1306.833  | D87446    | 4469.004  | 5950.852  | AF052150  | 215.681   | 127.937   |
| NM_014326 | 685.621   | 562.251   | BF540935  | 1520.063  | 1982.13   | AF086481  | 232.092   | 258.435   |
| NM_004448 | 452.486   | 417.285   | NM_004466 | 371.651   | 371.128   | AK024885  | 1079.094  | 861.767   |
| NM_015981 | 1364.1    | 1310.613  | NM_007081 | 2552.087  | 2197.882  | AK022441  | 269.589   | 312.139   |

|            |           |           |           |           |           |           |           |           |
|------------|-----------|-----------|-----------|-----------|-----------|-----------|-----------|-----------|
| NM_00045E  | 3376.63   | 3103.393  | AB032964  | 3490.897  | 2571.861  | AK026208  | 1336.594  | 873.735   |
| NM_014791  | 9631.453  | 7798.815  | BE733605  | 3564.146  | 3236.337  | NM_016947 | 15764.459 | 8706.098  |
| NM_00331E  | 4757.009  | 3457.839  | NM_003334 | 21843.514 | 26557.582 | AY007136  | 288.22    | 372.488   |
| NM_00436E  | 3812.406  | 3369.111  | NM_00269E | 6264.737  | 8959.898  | AL359940  | 499.578   | 357.352   |
| NM_00018E  | 8451.472  | 6393.605  | NM_003671 | 1104.132  | 1568.098  | AK024925  | 2419.846  | 1701.645  |
| AK023384   | 1918.6    | 1408.806  | M20695    | 1297.131  | 915.588   | AL049460  | 1008.732  | 482.784   |
| NM_01602E  | 12943.693 | 9171.302  | AK026000  | 3802.058  | 1007.588  | AK022396  | 382.168   | 162.824   |
| AB046381   | 494.233   | 545.846   | NM_005814 | 404.544   | 129.101   | AF075113  | 299.646   | 207.914   |
| AJ011497   | 1517.835  | 1209.169  | NM_000211 | 6172.412  | 2317.006  | AK022892  | 985.159   | 577.121   |
| NM_00301E  | 346.621   | 546.868   | AB037830  | 1280.059  | 2183.173  | Z36807    | 4366.203  | 2258.604  |
| NM_00033E  | 747.668   | 834.757   | X03324    | 3455.802  | 5569.094  | U20896    | 205.58    | 195.297   |
| W61100     | 50923.332 | 54097.52  | AF130988  | 681.919   | 1063.086  | NM_01793E | 484.973   | 639.728   |
| AA608568   | 7461.154  | 9789.081  | NM_014934 | 607.352   | 1272.651  | AK021837  | 268.864   | 193.864   |
| BG831301   | 23585.834 | 23998.688 | NM_01538E | 427.993   | 624.656   | AK022193  | 241.524   | 328.551   |
| M14764     | 291.646   | 553.758   | NM_00369C | 4267.473  | 6109.269  | AK000106  | 1004.129  | 766.939   |
| AW058501   | 328.633   | 287.976   | NM_00087E | 2836.42   | 4320.927  | AK022370  | 513.022   | 345.376   |
| ID 2623896 | 1004.763  | 1122.262  | NM_014214 | 3969.188  | 5075.209  | AK026765  | 220.707   | 135.315   |
| ID 2602214 | 2396.861  | 2376.372  | NM_00085E | 576.775   | 881.875   | AL080191  | 658.375   | 746.441   |
| ID 2071279 | 8055.046  | 6228.016  | NM_00523E | 685.958   | 1125.769  | AK021639  | 295.488   | 369.661   |
| L10709     | 9589.204  | 10061.804 | NM_00275E | 2361.346  | 2209.382  | AK023189  | 1708.705  | 3216.189  |
| N35489     | 665.629   | 709.659   | NM_013281 | 570.644   | 617.79    | AF306347  | 221.45    | 143.969   |
| AI928195   | 1022.281  | 1171.998  | Y11306    | 1180.831  | 554.67    | AK001164  | 585.724   | 473.89    |
| AA458922   | 2889.935  | 2920.86   | X85106    | 1048.206  | 954.074   | AK023464  | 306.975   | 304.149   |
| NM_14565E  | 1472.55   | 1284.517  | NM_003931 | 1397.169  | 1596.306  | AK022963  | 252.326   | 215.647   |
| NM_021957  | 410.069   | 209.036   | NM_004367 | 601.871   | 684.231   | AK023905  | 528.255   | 468.176   |
| NM_00171E  | 6049.501  | 4294.214  | NM_01247E | 22729.523 | 18235.426 | AK024231  | 831.672   | 809.222   |
| AL080062   | 1372.896  | 1228.43   | AF250226  | 11827.41  | 7184.97   | AK025757  | 1719.741  | 1705.614  |
| NM_145904  | 3696.775  | 4379.395  | NM_003217 | 35925.414 | 6311.184  | Y16713    | 216.491   | 157.873   |
| NM_00679E  | 10269.688 | 9588.454  | AL157475  | 3099.906  | 532.818   | L07394    | 2197.437  | 1668.071  |
| NM_00070E  | 884.305   | 1241.654  | NM_00606E | 7237.58   | 1428.231  | AK056133  | 839.793   | 1296.95   |
| NM_015941  | 1543.421  | 2088.457  | NM_006534 | 2082.444  | 896.941   | NM_01784E | 5059.598  | 4149.281  |
| NM_00365E  | 5628.818  | 5224.718  | NM_017601 | 1661.724  | 2652.613  | AF130080  | 245.718   | 207.518   |
| NM_014837  | 4130.075  | 4633.724  | AF110265  | 9407.32   | 14565.745 | AK026006  | 331.174   | 328.516   |
| NM_01772E  | 864.947   | 1418.63   | AK021848  | 1590.829  | 2761.659  | NM_01908E | 1272.211  | 835.829   |
| NM_01585C  | 3827.261  | 5105.004  | NM_003704 | 1470.82   | 2581.356  | AL122072  | 1372.681  | 715.587   |
| NM_004864  | 274.964   | 630.997   | AK023140  | 818.272   | 1520.775  | AK026221  | 214.317   | 190.045   |
| NM_00283E  | 12198.08  | 12915.457 | AF084362  | 585.931   | 753.486   | Y13870    | 347.758   | 254.816   |
| NM_01468E  | 50949.793 | 51596.172 | NM_00155E | 911.932   | 1450.887  | AK026403  | 554.301   | 570.061   |
| BF528358   | 903.82    | 1149.456  | NM_01417E | 18726.33  | 19327.391 | AK022980  | 259.604   | 163.175   |
| NM_01633E  | 787.22    | 828.122   | NM_001731 | 19450.973 | 20611.717 | AL359058  | 939.466   | 914.206   |
| NM_002487  | 7439.375  | 13885.083 | AL137506  | 1256.38   | 2034.728  | AK022439  | 772.941   | 409.838   |
| NM_01334C  | 537.177   | 635.674   | AK022961  | 3174.045  | 3494.329  | AK026237  | 691.409   | 603.912   |
| NM_00546E  | 724.446   | 665.204   | NM_00737E | 5698.76   | 4974.865  | AK023687  | 880.935   | 881.644   |
| NM_01231E  | 1425.997  | 1595.876  | NM_014371 | 3733.669  | 3061.757  | NM_01763E | 670.205   | 471.207   |
| NM_00651C  | 7046.57   | 5801.524  | AF290512  | 1388.616  | 1217.302  | AK026655  | 471.635   | 525.961   |
| NM_003141  | 2097.563  | 1716.625  | NM_00671E | 7933.582  | 3414.738  | AF129926  | 763.354   | 481.453   |
| NM_02024E  | 1665.285  | 1385.824  | AB002323  | 2450.669  | 1645.069  | AK025822  | 889.181   | 789.944   |
| NM_00717E  | 1048.96   | 817.213   | AK022241  | 7625.918  | 5525.498  | AF201937  | 15253.253 | 12395.039 |
| X91148     | 711.654   | 933.143   | AK022587  | 4457.126  | 4441.902  | AL390128  | 800.782   | 437.473   |
| NM_01570C  | 5987.423  | 6476.642  | NM_00550E | 2206.667  | 2529.961  | AL157429  | 1561.079  | 1007.703  |
| NM_019087  | 1195.56   | 1823.092  | NM_00572E | 1537.322  | 929.58    | NM_012071 | 14428.542 | 6752.314  |
| NM_004277  | 246.21    | 573.484   | AL137404  | 54628.598 | 13222.19  | AF055018  | 1856.611  | 953.656   |
| NM_00507E  | 621.472   | 1673.754  | NM_02018E | 3049.851  | 620.626   | AF070599  | 370.08    | 350.636   |

|           |           |           |           |           |           |            |           |           |
|-----------|-----------|-----------|-----------|-----------|-----------|------------|-----------|-----------|
| AF215923  | 5258.423  | 8559.569  | NM_002832 | 30228.979 | 4823.907  | NM_00545C  | 703.018   | 667.783   |
| AB023161  | 372.049   | 594.332   | NM_017732 | 3705.293  | 1421.674  | AK023600   | 333.423   | 260.769   |
| U61736    | 564.325   | 1207.811  | NM_012405 | 330.994   | 277.213   | NM_00552E  | 234.195   | 209.965   |
| AJ132086  | 510.877   | 904.326   | NM_002851 | 1827.291  | 3382.486  | NM_00528E  | 395.524   | 239.616   |
| U92816    | 7398.16   | 7780.112  | NM_005339 | 17192.621 | 24380.953 | AK001918   | 307.351   | 240.595   |
| BC011987  | 2880.727  | 5104.592  | NM_001906 | 4703.046  | 5720.068  | NM_01863E  | 8043.043  | 4778.225  |
| NM_00410E | 791.772   | 992.038   | NM_004142 | 414.099   | 643.298   | AF086048   | 1605.248  | 1723.352  |
| NM_00348E | 2552.231  | 3713.377  | AF108138  | 3175.166  | 4813.221  | L15616     | 1665.043  | 1464.423  |
| NM_00503E | 7135.76   | 7269.392  | NM_004347 | 465.544   | 536.047   | AB019565   | 3878.267  | 2599.019  |
| M95923    | 461.053   | 264.174   | BF340302  | 1978.568  | 2342.292  | D16914     | 38199.996 | 18387.607 |
| NM_00241E | 54256.555 | 59435.234 | AK024210  | 986.664   | 934.049   | AA084879   | 504.987   | 434.397   |
| NM_006332 | 8655.175  | 8087.131  | NM_002276 | 1362.183  | 982.247   | NM_000833  | 654.457   | 374.759   |
| NM_00091E | 1550.602  | 1272.786  | AL133087  | 1795.076  | 1178.689  | NM_000283  | 1501.23   | 721.57    |
| NM_018663 | 3784.223  | 2639.016  | NM_018010 | 1412.58   | 1075.153  | NM_01246C  | 930.466   | 461.483   |
| NM_014791 | 9719.114  | 10152.7   | NM_002274 | 6770.601  | 6683.684  | NM_01211E  | 1424.086  | 1089.713  |
| NM_00331E | 5608.072  | 5695.311  | BF337874  | 2142.009  | 3515.525  | AK024092   | 1033.85   | 817.89    |
| NM_004362 | 3991.192  | 3715.279  | NM_003475 | 8964.54   | 9857.004  | AK002044   | 1058.173  | 489.044   |
| NM_000182 | 7526.987  | 7382.333  | NM_000243 | 3737.05   | 2543.484  | U90904     | 2525.939  | 1781.067  |
| AK023384  | 2235.984  | 2440.066  | NM_004383 | 10505.268 | 2062.652  | AF088053   | 1566.182  | 1785.304  |
| NM_01602E | 15095.68  | 18766.771 | NM_012256 | 5464.396  | 943.023   | AL133662   | 363.4     | 226.886   |
| AK025111  | 474.502   | 846.313   | NM_016325 | 1028.665  | 360.87    | NM_00256E  | 245.054   | 229.972   |
| NM_00086C | 5019.218  | 6933.166  | NM_001604 | 1816.581  | 2607.284  | U90903     | 541.916   | 1065.655  |
| AB037798  | 2885.608  | 3474.608  | NM_017656 | 1368.359  | 1837.346  | AF278760   | 306.199   | 179.061   |
| NM_00078C | 495.634   | 518.17    | X16282    | 7193.756  | 12386.157 | X58061     | 229.898   | 148.93    |
| AF272663  | 11783.879 | 16998.307 | AK022519  | 321.614   | 810.755   | AB032954   | 1078.486  | 840.22    |
| NM_01219C | 1179.92   | 1959.517  | NM_014415 | 3425.438  | 5291.848  | NM_006003  | 12292.696 | 10154.465 |
| AB033015  | 451.718   | 822.514   | S75264    | 6299.867  | 8663.385  | AL110197   | 1880.088  | 1303.34   |
| AF277719  | 729.211   | 859.502   | AF027513  | 1240.274  | 1947.289  | AF085995   | 402.457   | 355.959   |
| NM_000791 | 2465.103  | 3313.802  | NM_001379 | 2148.309  | 3047.987  | CY3Cy5     | 862.75    | 285.145   |
| NM_003681 | 1627.257  | 1776.998  | NM_018664 | 6972.931  | 7466.932  | AA029300   | 1582.509  | 2634.366  |
| NM_00480C | 8728.145  | 10979.262 | NM_005034 | 780.313   | 661.529   | BG708842   | 9616.366  | 14429.949 |
| NM_014954 | 28989.771 | 23297.221 | NM_003926 | 4924.609  | 3603.882  | M19723     | 33459.449 | 56720.246 |
| NM_000807 | 624.688   | 558.929   | S73205    | 216.964   | 81.414    | X06256     | 1397.243  | 2841.535  |
| NM_01490E | 2860.984  | 2176.339  | AF085356  | 603.804   | 404.87    | H-430185 N | 671.185   | 841.739   |
| NM_14565E | 1394.619  | 1192.003  | NM_016047 | 25529.857 | 15920.893 | D16583     | 619.999   | 430.984   |
| NM_00171E | 6928.673  | 8417.792  | NM_016732 | 15649.073 | 15911.049 | AA481547   | 7186.091  | 7783.257  |
| AL080062  | 1409.091  | 1741.505  | NM_014763 | 9373.069  | 2036.263  | T64880     | 826.064   | 676.487   |
| AF308802  | 1284.086  | 2267.565  | AF070617  | 729.887   | 291.115   | NM_020967  | 462.86    | 654.247   |
| S76984    | 6629.959  | 10256.29  | NM_01491E | 10510.436 | 11409.997 | SR2        | 30275.973 | 15904.539 |
| NM_01449E | 47313.996 | 50911.371 | NM_003654 | 558.001   | 898.163   | SR4        | 6351.228  | 4413.407  |
| NM_014081 | 774.967   | 916.909   | NM_000152 | 5634.446  | 8522.135  | SR6        | 947.063   | 795.697   |
| NM_005651 | 1706.568  | 2897.396  | D17222    | 13720.711 | 17411.779 | SR8        | 3921.563  | 8306.945  |
| NM_00719E | 1851.497  | 2524.641  | NM_000154 | 2110.594  | 3261.397  | SR10       | 13199.462 | 3250.687  |
| AB037842  | 1001.803  | 1049.526  | NM_006213 | 171.124   | 1029.748  | CY3Cy5     | 374.88    | 359.662   |
| U92074    | 734.026   | 607.63    | NM_003549 | 392.155   | 875.576   | NM_005027  | 465.523   | 1111.925  |
| NM_019011 | 4272.685  | 9273.452  | NM_000671 | 3331.956  | 4171.983  | NM_004612  | 605.574   | 1963.743  |
| AF459094  | 5884.493  | 6521.456  | NM_006297 | 11583.251 | 13865.846 | NM_001106  | 1030.337  | 1908.446  |
| NM_003157 | 1900.429  | 1794.983  | AF318366  | 4717.494  | 4868.351  | NM_015583  | 1095.265  | 2109.915  |
| NM_00493E | 1147.613  | 1229.672  | AF182423  | 1389.207  | 890.646   | NM_01849C  | 566.026   | 709.893   |
| NM_01432E | 640.894   | 569.092   | D26018    | 3745.558  | 1931.458  | NM_00477E  | 432.553   | 399.914   |
| NM_00444E | 635.668   | 565.965   | AB037863  | 704.357   | 1055.076  | NM_004822  | 377.936   | 832.319   |
| NM_015981 | 1262.624  | 1449.017  | BC000363  | 729.071   | 966.233   | AK022349   | 2553.075  | 3561.307  |
| NM_00045E | 2866.739  | 2866.906  | NM_007237 | 1417.061  | 2367.92   | NM_004973  | 2440.941  | 3067.537  |



|            |           |           |           |           |           |            |           |           |
|------------|-----------|-----------|-----------|-----------|-----------|------------|-----------|-----------|
| NM_01231E  | 1371.078  | 1852.449  | NM_00460E | 586.85    | 501.392   | NM_00128E  | 1304.448  | 910.857   |
| NM_00651C  | 7359.332  | 7214.238  | NM_018257 | 3167.388  | 2131.853  | NM_000951  | 1282.345  | 1480.86   |
| NM_003141  | 1828.817  | 1792.664  | NM_00591E | 1888.98   | 483.82    | NM_00096E  | 985.879   | 1754.025  |
| NM_02024E  | 2033.273  | 2027.188  | AF085931  | 1517.099  | 196.713   | AF027302   | 1432.821  | 1690.894  |
| NM_00717E  | 1126.481  | 1723.038  | AF085884  | 1492.073  | 2205.739  | NM_00285E  | 1093.88   | 957.082   |
| AB046381   | 458.003   | 791.651   | AL109711  | 378.105   | 325.564   | NM_001817  | 1249.815  | 1140.474  |
| AJ011497   | 2611.894  | 3642.854  | S81522    | 2860.469  | 5041.265  | AF063611   | 514.665   | 1140.385  |
| NM_00301E  | 289.898   | 677.033   | NM_01496E | 94.348    | 47.484    | NM_00603E  | 452.962   | 519.626   |
| NM_00033E  | 1038.071  | 1866.82   | AF075070  | 637.723   | 1050.902  | NM_00207E  | 1884.152  | 1347.397  |
| W61100     | 48498.52  | 47302.293 | S94541    | 879.771   | 1133.316  | X05299     | 2344.333  | 1665.074  |
| AA608568   | 8823.154  | 11255.721 | AK024228  | 1478.578  | 1775.638  | BM468475   | 470.438   | 332.774   |
| BG831301   | 27507.441 | 30742.664 | NM_016647 | 1924.116  | 1522.165  | NM_00031E  | 2637.198  | 2076.111  |
| M14764     | 547.603   | 719.705   | AK024695  | 1705.791  | 1141.957  | NM_00206C  | 2159.189  | 1896.14   |
| AW058501   | 320.632   | 672.11    | AF038174  | 2885.113  | 2030.661  | AK001230   | 624.733   | 816.748   |
| ID 2623896 | 886.209   | 1365.759  | NM_01324E | 875.191   | 542.41    | NM_01468C  | 2348.151  | 1761.3    |
| ID 2602214 | 2230.378  | 2451.891  | AF070632  | 407.693   | 721.583   | NM_00022E  | 1876.411  | 5479.675  |
| ID 2071279 | 8903.634  | 6782.411  | AF161359  | 1567.405  | 2548.7    | AL133581   | 1221.337  | 1502.501  |
| L10709     | 8711.784  | 8354.667  | AL365520  | 1180.581  | 1047.952  | NM_00255E  | 387.236   | 700.214   |
| N35489     | 474.751   | 534.769   | AL359338  | 421.932   | 377.162   | NM_005031  | 2493.766  | 2422.475  |
| AI928195   | 946.259   | 906.96    | AK021539  | 2986.82   | 1062.769  | NM_01572C  | 1524.488  | 1929.189  |
| AA458922   | 2314.069  | 2928.867  | AK021819  | 715.421   | 1130.005  | AB007915   | 439.231   | 462.287   |
| M95923     | 661.117   | 437.193   | AK025011  | 741.511   | 1247.299  | NM_01822E  | 1009.819  | 978.513   |
| NM_00241E  | 57036.348 | 55915.457 | AL157491  | 1251.924  | 1450.734  | AY009127   | 6378.895  | 6002.579  |
| NM_00633E  | 8755.68   | 8127.057  | AK024681  | 655.545   | 1129.052  | NM_01486E  | 577.702   | 686.316   |
| NM_00091E  | 1779.388  | 1753.134  | X68742    | 459.186   | 858.414   | AB037835   | 1074.568  | 4836.837  |
| NM_01866E  | 4045.06   | 4402.913  | NM_014907 | 15291.767 | 15637.983 | NM_00071E  | 13925.039 | 54381.039 |
| NM_145904  | 4238.401  | 5898.542  | AB007977  | 7969.784  | 8006.948  | M24750     | 831.097   | 1378.49   |
| NM_00679E  | 12162.644 | 15758.416 | NM_014221 | 5513.825  | 3423.258  | NM_00596E  | 1121.742  | 1793.096  |
| NM_00070E  | 574.936   | 921.495   | U37688    | 566.501   | 266.911   | NM_00274E  | 30087.127 | 24389.805 |
| NM_015941  | 1800.833  | 2211.83   | U58663    | 367.483   | 778.93    | Z25431     | 1342.254  | 1175.409  |
| NM_00365E  | 6376.043  | 7366.431  | U84515    | 1330.191  | 1219.609  | NM_005627  | 1453.053  | 1479.248  |
| NM_00525E  | 5695.729  | 7739.656  | AF086106  | 325.288   | 262.311   | M64497     | 765.828   | 951.154   |
| NM_00284C  | 361.292   | 723.683   | AF086143  | 3451.05   | 660.53    | NM_00335E  | 2156.495  | 1688.646  |
| NM_006174  | 570.658   | 1042.536  | AK024244  | 3126.581  | 4623.837  | NM_019604  | 212.281   | 1570.82   |
| NM_01585C  | 4348.669  | 5064.722  | AK023812  | 353.076   | 1147.353  | NM_000951  | 1662.833  | 5585.291  |
| NM_00283E  | 15089.333 | 15845.828 | AL390084  | 1298.938  | 2054.011  | AA029300   | 1988.528  | 6573.668  |
| AK027377   | 266.915   | 436.084   | AK023565  | 517.857   | 904.922   | M34057     | 307.774   | 330.548   |
| NM_01468E  | 51776.395 | 45430.293 | AK023724  | 340.381   | 647.604   | ID 1984668 | 688.233   | 1221.781  |
| BF528358   | 854.175   | 896.849   | AF085900  | 13101.797 | 16874.955 | ID 1832579 | 748.714   | 1088.103  |
| NM_01633E  | 777.649   | 567.123   | AK026195  | 344.517   | 370.601   | H-430185 N | 692.86    | 1106.727  |
| NM_002487  | 6119.417  | 5801.792  | AK023254  | 435.039   | 681.324   | D16583     | 585.873   | 382.106   |
| NM_01334C  | 643.545   | 1312.571  | AK022446  | 711.168   | 902.063   | T64880     | 644.468   | 538.156   |
| NM_00546E  | 733.898   | 872.022   | AK023773  | 414.864   | 269.72    | NM_020967  | 419.308   | 293.016   |
| NM_014954  | 29794.639 | 29083.545 | AF116709  | 530.952   | 194.005   | AB028990   | 305.022   | 280.854   |
| NM_000807  | 785.691   | 601.82    | AK025533  | 947.147   | 301.675   | X05299     | 3807.797  | 9327.36   |
| NM_01490E  | 3488.97   | 3159.742  | AK021911  | 7036.695  | 8736.048  | BM468475   | 632.989   | 3141.617  |
| X91148     | 738.472   | 979.023   | D17225    | 2151.013  | 2887.97   | NM_00031E  | 3849.841  | 12985.04  |
| NM_01570C  | 6798.659  | 7784.816  | AF147430  | 424.79    | 556.322   | NM_00206C  | 2014.866  | 7291.501  |
| NM_019087  | 1319.115  | 1491.462  | AK025766  | 4697.058  | 3089.402  | AK001230   | 891.393   | 3783.72   |
| NM_00572C  | 13904.415 | 15569.017 | AK022257  | 1779.527  | 1228.75   | NM_00560E  | 7915.135  | 6970.233  |
| U61736     | 523.122   | 613.667   | X84369    | 762.799   | 885.811   | NM_01558E  | 779.054   | 900.668   |
| AJ132086   | 741.148   | 816.945   | AK021773  | 1641.148  | 2038.703  | NM_01849C  | 332.542   | 410.661   |
| U92816     | 9423.22   | 7168.733  | AK027074  | 1598.71   | 1630.052  | NM_00477E  | 250.098   | 188.343   |

|           |           |           |            |           |           |           |           |           |
|-----------|-----------|-----------|------------|-----------|-----------|-----------|-----------|-----------|
| BC011987  | 3461.265  | 4632.335  | AL365456   | 563.813   | 247.703   | NM_00624E | 1994.137  | 1851.958  |
| NM_00410E | 909.367   | 621.917   | NM_01803E  | 347.907   | 230.127   | AK022349  | 2080.732  | 1691.556  |
| NM_00348E | 2032.896  | 2322.319  | U84522     | 1920.134  | 392.774   | NM_00724E | 4045.688  | 2638.237  |
| NM_00503E | 8159.533  | 12268.953 | AF086013   | 591.264   | 790.845   | NM_00128E | 1026.421  | 946.378   |
| NM_003157 | 1839.636  | 1779.125  | U84505     | 1140.557  | 2210.571  | AB033070  | 435.239   | 1710.461  |
| NM_00493E | 1055.024  | 1202.02   | X81005     | 1375.878  | 1574.426  | NM_01822E | 1754.711  | 5978.539  |
| NM_01432E | 565.113   | 441.852   | AL049265   | 1849.735  | 1074.223  | NM_00632E | 4658.273  | 14827.926 |
| NM_00444E | 490.472   | 357.138   | AL137635   | 583.339   | 476.131   | AY009127  | 9035.06   | 28680.73  |
| NM_015981 | 1159.804  | 1111.78   | AK021461   | 706.719   | 846.916   | AK000158  | 2166.623  | 2106.143  |
| NM_00045E | 2979.01   | 2705.52   | AB015349   | 614.794   | 845.786   | AK024500  | 4560.247  | 4403.829  |
| NM_014791 | 12938.104 | 14524.446 | AL079274   | 8844.255  | 11067.378 | NM_002564 | 1519.907  | 1492.772  |
| NM_00331E | 7485.566  | 6464.229  | S46403     | 688.296   | 697.271   | NM_00096E | 1016.667  | 1797.722  |
| NM_00436E | 4464.247  | 4060.207  | NM_01330C  | 14578.014 | 9943.308  | NM_01330E | 844.824   | 923.352   |
| NM_00018E | 9565.276  | 9194.843  | AK026039   | 4058.22   | 3756.062  | AF027302  | 1325.794  | 1418.743  |
| NM_01869C | 4860.569  | 4427.804  | AF108756   | 10196.906 | 2323.151  | NM_00285E | 1206.836  | 977.514   |
| NM_00086C | 4764.723  | 4799.063  | NM_00407E  | 3901.14   | 536.855   | AF063611  | 410.426   | 369.436   |
| AB037798  | 1953.071  | 2349.658  | NM_001887  | 2098.47   | 797.725   | NM_00603E | 229.751   | 319.827   |
| NM_00078C | 532.716   | 562.736   | NM_00653E  | 1587.895  | 986.508   | NM_01465E | 1555.734  | 1514.073  |
| AF272663  | 11530.843 | 8873.972  | AK026747   | 3627.533  | 9770.039  | NM_00207E | 1491.916  | 1231.387  |
| NM_01219C | 1263.267  | 1429.625  | AL110150   | 3739.782  | 6218.996  | M64497    | 1359.607  | 5319.265  |
| AF277719  | 811.613   | 706.796   | NM_00199E  | 5328.436  | 4592.965  | NM_00022E | 1296.604  | 1196.098  |
| NM_000791 | 2224.868  | 2288.277  | X87825     | 2070.921  | 1631.163  | NM_00699E | 11026.965 | 8724.406  |
| NM_003681 | 1287.625  | 1750.389  | AK001285   | 19529.264 | 6508.418  | NM_00312E | 9493.913  | 10619.008 |
| NM_00480C | 8232.762  | 10060.727 | D17215     | 3062.321  | 2306.807  | NM_00195E | 851.731   | 1161.625  |
| AB037738  | 439.142   | 477.927   | AK026219   | 1556.976  | 2340.332  | AB033064  | 1243.938  | 1654.335  |
| NM_00495E | 2764.165  | 3035.625  | D28446     | 1029.864  | 1363.659  | AK022317  | 2149.964  | 2876.394  |
| AY007239  | 248.504   | 437.535   | AK024756   | 2785.36   | 2906.2    | NM_01839E | 5536.716  | 4892.39   |
| NM_020414 | 4066.185  | 3875.93   | NM_017911  | 2138.075  | 1831.062  | NM_003124 | 1959.367  | 1460.084  |
| AB037730  | 2538.521  | 2642.424  | NM_01442E  | 1262.662  | 733.447   | NM_004531 | 4186.334  | 3223.388  |
| NM_001357 | 9076.177  | 7827.061  | AK023584   | 435.365   | 598.752   | NM_00255E | 365.588   | 270.294   |
| NM_00389E | 2783.878  | 2701.153  | NM_003774  | 224.855   | 166.261   | NM_005031 | 2118.68   | 1823.832  |
| AB037816  | 1129.306  | 1090.847  | D87466     | 4489.245  | 1012.125  | AB040920  | 373.023   | 346.629   |
| NM_01438C | 50511.902 | 46713.852 | CY3Cy5     | 1756.104  | 118.079   | NM_00072C | 412.208   | 456.207   |
| NM_00171E | 7876.566  | 6832.169  | AA608568   | 7896.168  | 11127.259 | NM_00484E | 761.768   | 672.776   |
| AL080062  | 1742.426  | 1812.766  | BG831301   | 13976.266 | 17331.584 | AK024639  | 1068.867  | 1363.462  |
| AF308802  | 1935.437  | 2909.288  | M14764     | 352.975   | 553.463   | NM_01572C | 2096.876  | 2049.265  |
| S76984    | 9747.526  | 10891.344 | AA478647   | 6703.538  | 10397.516 | NM_020967 | 579.964   | 734.751   |
| NM_01449E | 45083.688 | 54303.563 | M35999     | 456.911   | 876.741   | AB037835  | 792.259   | 957.394   |
| NM_014081 | 795.037   | 1029.439  | AW058501   | 562.061   | 592.112   | NM_01622E | 563.085   | 993.716   |
| NM_005651 | 848.283   | 951.474   | ID 2623896 | 974.134   | 1594.075  | NM_000157 | 2285.338  | 1692.499  |
| NM_00719E | 1917.252  | 2274.679  | ID 2602214 | 1889.085  | 3119.313  | NM_00071E | 8874.9    | 7500.833  |
| AK023337  | 2573.718  | 2340.142  | ID 2071279 | 6391.306  | 8701.131  | NM_01808E | 315.556   | 436.581   |
| NM_01327E | 13304.583 | 11349.71  | L10709     | 7203.126  | 9038.154  | NM_01484E | 2104.421  | 1749.643  |
| AB037842  | 927.145   | 954.412   | N35489     | 408.372   | 733.644   | AB011164  | 1335.972  | 1026.011  |
| NM_019011 | 3101.886  | 5070.352  | AI928195   | 689.784   | 884.288   | M24750    | 892.879   | 847.932   |
| NM_002544 | 427.246   | 388.519   | AA482489   | 281.957   | 642.323   | NM_00596E | 520.384   | 549.059   |
| AB011542  | 1388.156  | 1501.661  | NM_14565E  | 1700.313  | 4481.794  | NM_00274C | 1054.391  | 881.86    |
| NM_00185E | 1440.197  | 1544.569  | NM_021957  | 434.579   | 888.736   | AL117482  | 1449.937  | 1041.668  |
| U41737    | 767.411   | 606.014   | SR8        | 4976.53   | 10452.838 | NM_00654E | 10630.73  | 7043.777  |
| NM_00579E | 497.396   | 454.67    | SR10       | 18284.441 | 4189.426  | AB018324  | 5099.06   | 4705.047  |
| X99661    | 745.996   | 578.908   | CY3Cy5     | 1526.511  | 156.458   | NM_00274E | 26359.027 | 20636.361 |
| NM_005927 | 3001.009  | 2590.746  | NM_01772E  | 697.183   | 657.868   | NM_00724E | 4965.929  | 2249.865  |
| AB028983  | 2800.181  | 1889.035  | NM_00525E  | 2332.309  | 3630.691  | NM_00128E | 1331.922  | 753.036   |

|           |           |           |           |           |           |            |           |           |
|-----------|-----------|-----------|-----------|-----------|-----------|------------|-----------|-----------|
| AB037800  | 1332.797  | 1070.723  | NM_002840 | 524.933   | 829.211   | NM_01464E  | 319.477   | 257.221   |
| AK026377  | 1874.702  | 1970.791  | NM_006174 | 695.593   | 763.681   | NM_000951  | 1129.903  | 1301.717  |
| NM_018660 | 3893.712  | 4098.096  | NM_015850 | 4028.476  | 6583.125  | AA029300   | 1205.997  | 1568.626  |
| NM_003394 | 4667.006  | 4044.652  | NM_004864 | 449.424   | 943.512   | BG708842   | 9514.052  | 5733.514  |
| NM_01463E | 1438.693  | 836.422   | NM_00283E | 13656.354 | 20167.58  | M19723     | 29363.309 | 18787.773 |
| NM_006747 | 1406.473  | 1672.271  | AK027377  | 776.135   | 779.527   | ID 1984668 | 640.492   | 758.607   |
| NM_00708E | 2073.589  | 2473.848  | NM_01468E | 45622.254 | 51025.227 | ID 1832579 | 628.287   | 464.348   |
| NM_003870 | 6589.194  | 6938.3    | BF528358  | 813.738   | 1245.986  | H-430185 N | 654.328   | 537.052   |
| AK024507  | 899.079   | 965.971   | NM_01633E | 536.861   | 913.506   | D16583     | 528.963   | 355.563   |
| NM_00124E | 3433.297  | 3376.18   | NM_002487 | 5137.39   | 7740.757  | AA481547   | 6653.136  | 5229.362  |
| AK025997  | 342.322   | 304.838   | NM_013340 | 461.189   | 847.426   | T64880     | 512.937   | 460.191   |
| NM_00554E | 2523.645  | 2702.565  | NM_005462 | 668.912   | 874.967   | NM_01465E  | 1296.794  | 1053.355  |
| S51112    | 241.535   | 478.649   | NM_01231E | 1732.081  | 2593.784  | NM_00207E  | 1721.417  | 1680.127  |
| NM_014887 | 3946.712  | 3860.3    | AK026235  | 239.422   | 867.473   | X05299     | 2496.37   | 1686.972  |
| NM_002590 | 427.969   | 699.561   | NM_006510 | 7260.039  | 17174.273 | BM468475   | 480.557   | 640.981   |
| NM_005824 | 671.208   | 718.357   | NM_003141 | 1716.276  | 4587.463  | NM_00031E  | 2502.313  | 1817.405  |
| AF052211  | 3934.974  | 3987.337  | AJ011497  | 2457.404  | 2783.229  | NM_002060  | 1532.758  | 1165.612  |
| NM_005600 | 3319.107  | 2505.75   | NM_00033E | 935.006   | 672.605   | AK001230   | 598.002   | 575.434   |
| NM_005967 | 1892.307  | 1960.766  | AF215923  | 3622.813  | 1447.26   | NM_014680  | 2135.111  | 1625.407  |
| AB014566  | 1862.886  | 1686.967  | U66621    | 5613.834  | 4504.734  | NM_005027  | 391.042   | 283.431   |
| NM_01567E | 351.9     | 436.48    | NM_005720 | 9069.6    | 9819.576  | NM_00461E  | 502.351   | 582.056   |
| NM_01422E | 1314.361  | 1207.884  | AB040936  | 377.371   | 265.678   | NM_00560E  | 7113.606  | 4695.36   |
| NM_016194 | 1158.402  | 1337.759  | U61736    | 479.342   | 1082.934  | NM_00110E  | 788.27    | 744.872   |
| AL050385  | 1150.575  | 1081.754  | AJ132086  | 805.977   | 1720.629  | NM_01558E  | 864.19    | 693.169   |
| NM_007027 | 2302.312  | 2514.926  | U92816    | 6746.074  | 9052.892  | NM_018490  | 405.581   | 508.641   |
| NM_00063E | 25116.865 | 22609.063 | BC011987  | 3664.067  | 5078.349  | NM_00624E  | 2040.23   | 1506.372  |
| AB037855  | 791.774   | 840.829   | NM_00410E | 815.174   | 981.047   | AK022349   | 2103.092  | 1897.539  |
| AK024524  | 5944.645  | 6082.537  | NM_00348E | 2026.107  | 2608.382  | NM_005031  | 2008.106  | 1515.523  |
| NM_00056E | 1262.193  | 1440.4    | NM_00503E | 6426.494  | 9365.084  | AB040920   | 379.187   | 473.321   |
| NM_02035E | 366.225   | 561.246   | M95923    | 858.226   | 896.086   | NM_000720  | 432.022   | 325.92    |
| NM_019011 | 13815.424 | 10404.434 | NM_00633E | 9976.045  | 18126.33  | NM_00484E  | 1000.29   | 807.602   |
| NM_00487E | 3541.192  | 3548.587  | NM_00091E | 1734.103  | 4722.539  | AK024639   | 1391.286  | 1127.917  |
| AB020694  | 3792.064  | 3087.005  | NM_00070E | 1284.498  | 1370.363  | NM_015720  | 878.594   | 859.975   |
| NM_016071 | 20537.775 | 20563.592 | NM_015941 | 1907.184  | 1496.486  | AB007915   | 838.96    | 1302.578  |
| AL050131  | 595.644   | 541.978   | NM_00365E | 4947.084  | 3775.271  | NM_01822E  | 1040.359  | 983.568   |
| NM_00447E | 4460.355  | 3980.459  | AK025111  | 579.722   | 330.016   | NM_00632E  | 2916.113  | 2321.598  |
| NM_001627 | 2622.618  | 3372.85   | NM_00173E | 1039.906  | 1222.492  | AY009127   | 6722.066  | 4846.943  |
| NM_00122E | 2314.943  | 2830.328  | NM_018690 | 2990.131  | 7074.174  | NM_01486E  | 443.353   | 530.921   |
| NM_00133E | 357.417   | 291.21    | NM_000860 | 3827.636  | 3460.636  | NM_00392E  | 206.372   | 3512.578  |
| AB050716  | 734.191   | 743.828   | AB037798  | 1470.017  | 714.584   | AK000158   | 1711.558  | 1565.313  |
| X77690    | 1663.98   | 1238.556  | AF272663  | 6277.737  | 8156.654  | NM_00576E  | 333.548   | 306.804   |
| NM_00653E | 764.924   | 689.327   | NM_012190 | 1045.96   | 1313.106  | AK024500   | 3754.941  | 2691.873  |
| NM_00565E | 1178.774  | 1065.315  | AF277719  | 537.06    | 302.677   | NM_002564  | 1638.05   | 1229.931  |
| NM_00242E | 1214.793  | 959.011   | NM_000791 | 1854.377  | 1321.808  | NM_00096E  | 719.298   | 827.121   |
| NM_006690 | 2222.195  | 1996.114  | NM_003681 | 1383.578  | 1251.301  | NM_01330E  | 841.391   | 1141.419  |
| AF218022  | 1978.014  | 2596.986  | NM_004800 | 6048.017  | 4933.497  | AF027302   | 1330.756  | 1574.188  |
| NM_00334E | 2429.157  | 2612.875  | NM_000807 | 619.062   | 2029.827  | NM_00285E  | 1138.144  | 1303.445  |
| AL137663  | 859.8     | 909.06    | NM_01632E | 1007.368  | 2586.904  | NM_001817  | 1375.259  | 1779.586  |
| AB006198  | 11868.073 | 11226.276 | NM_004277 | 262.3     | 352.106   | AF063611   | 446.589   | 676.599   |
| U72518    | 3548.771  | 3318.929  | NM_00507E | 655.25    | 622.3     | NM_00596E  | 594.737   | 559.073   |
| AF264765  | 603.865   | 801.257   | AF308802  | 1263.182  | 926.994   | NM_002740  | 1186.135  | 1290.087  |
| NM_01532E | 3160.986  | 3217.932  | S76984    | 5107.757  | 6030.803  | AL117482   | 1662.226  | 1612.502  |
| NM_016607 | 4538.909  | 4517.071  | NM_01449E | 48355.543 | 55798.469 | NM_00654E  | 7919.143  | 5007.303  |

|           |           |           |            |           |           |           |           |           |
|-----------|-----------|-----------|------------|-----------|-----------|-----------|-----------|-----------|
| NM_003275 | 774.139   | 934.937   | NM_014081  | 552.161   | 449.015   | AB018324  | 5886.453  | 4375.669  |
| NM_000268 | 20539.768 | 17633.689 | NM_005651  | 460.238   | 285.515   | NM_002742 | 22783.711 | 14170.266 |
| M30493    | 21567.9   | 19623.723 | NM_007195  | 1316.703  | 1268.706  | Z25431    | 1170.791  | 1163.87   |
| AJ008160  | 678.234   | 950.855   | AK023337   | 1873.392  | 1672.093  | NM_005627 | 1767.194  | 3060.702  |
| NM_004343 | 20392.033 | 17231.857 | NM_013275  | 9290.61   | 6948.48   | M64497    | 909.995   | 863.789   |
| X52355    | 3989.557  | 4448.33   | AB037842   | 462.384   | 391.218   | NM_007274 | 4927.131  | 4415.453  |
| NM_006963 | 14881.478 | 16361.319 | U92074     | 453.494   | 236.46    | NM_003356 | 1330.274  | 1023.125  |
| U66561    | 5661.387  | 4439.154  | NM_019011  | 2879.999  | 2085.587  | AF238315  | 245.754   | 386.997   |
| NM_000306 | 1844.522  | 1635.938  | AF459094   | 4126.4    | 3285.169  | NM_006224 | 23024.684 | 13659.459 |
| NM_002200 | 1242.43   | 1451.034  | NM_000182  | 9810.189  | 8978.695  | NM_000225 | 1054.651  | 1178.385  |
| AF017433  | 1564.285  | 1687.499  | AK023384   | 1825.844  | 1621.276  | NM_006995 | 11342.025 | 7932.689  |
| AF130111  | 2958.857  | 2760.214  | NM_016026  | 11950.341 | 9380.102  | NM_003125 | 9061.823  | 8413.066  |
| NM_016307 | 1532.428  | 1253.194  | AB046381   | 486.727   | 508.87    | NM_001956 | 788.853   | 649.185   |
| AB028449  | 2955.644  | 2358.635  | AJ011497   | 832.786   | 689.895   | AB033064  | 1015.29   | 938.282   |
| NM_004697 | 2698.783  | 2723.812  | NM_003018  | 295.061   | 526.164   | AK022317  | 1929.073  | 1783.036  |
| U94384    | 2444.89   | 1533.119  | NM_000336  | 842.344   | 443.792   | NM_018396 | 5189.181  | 4007.227  |
| AF131776  | 3098.217  | 2666.193  | W61100     | 32975.656 | 20968.883 | NM_003124 | 1703.387  | 1579.1    |
| NM_020528 | 2422.687  | 1971.619  | AA608568   | 6542.994  | 4231.441  | NM_004531 | 4389.398  | 3847.685  |
| NM_007040 | 18597.193 | 16812.783 | BG831301   | 18316.471 | 12813.393 | AL133581  | 1228.422  | 1271.061  |
| NM_014483 | 4064.18   | 4466.339  | AA478647   | 5128.648  | 3986.739  | NM_002558 | 271.14    | 236.21    |
| AK024249  | 1716.047  | 1524.568  | ID 2623896 | 903.778   | 571.094   | NM_003586 | 382.928   | 693.429   |
| AF239156  | 8247.613  | 8315.646  | ID 2602214 | 1934.066  | 1829.063  | NM_000922 | 1600.382  | 1425.288  |
| NM_020390 | 1948.126  | 2551.522  | ID 2071279 | 5750.392  | 4938.46   | NM_013232 | 1322.985  | 1111.964  |
| NM_003321 | 20704.381 | 23562.631 | L10709     | 8756.977  | 10180.373 | NM_014425 | 958.457   | 723.584   |
| U18937    | 6012.567  | 8613.412  | N35489     | 354.95    | 286.099   | AK000770  | 485.018   | 347.906   |
| U01925    | 729.466   | 698.025   | NM_001719  | 7380.253  | 6203.313  | NM_002370 | 12039.05  | 15217.73  |
| AJ420488  | 48391.305 | 58559.582 | AL080062   | 1036.283  | 1092.679  | NM_015670 | 1410.963  | 1314.231  |
| AF268872  | 1508.32   | 1596.731  | NM_145904  | 4831.536  | 3104.72   | NM_014705 | 482.658   | 483.635   |
| AK022180  | 30538.047 | 22203.412 | NM_006796  | 6711.208  | 11917.385 | AB028990  | 386.016   | 471.485   |
| AK001384  | 774.945   | 835.148   | NM_000706  | 703.064   | 1016.001  | AB037835  | 664.079   | 534.347   |
| AK025437  | 3146.641  | 3306.297  | NM_015941  | 1633.399  | 1039.84   | NM_016228 | 431.883   | 387.251   |
| AK074164  | 660.282   | 371.774   | NM_003655  | 4573.801  | 2741.146  | NM_000157 | 1837.327  | 1433.513  |
| NM_004168 | 7629.503  | 5705.612  | NM_014837  | 2717.379  | 2791.625  | NM_000712 | 8397.641  | 6080.965  |
| AF161353  | 7548.191  | 6068.816  | NM_017729  | 610.031   | 705.774   | NM_018088 | 253.583   | 300.031   |
| NM_000764 | 741.111   | 600.224   | NM_005259  | 3049.72   | 2807.721  | BC013695  | 6295.077  | 4953.581  |
| NM_004146 | 14951.371 | 12461.029 | NM_006174  | 418.978   | 724.227   | NM_014846 | 1774.127  | 1753.706  |
| NM_003002 | 13416.152 | 10847.986 | NM_015850  | 2857.039  | 3761.785  | AB011164  | 1266.947  | 1266.527  |
| D42047    | 1150.491  | 1135.912  | NM_002838  | 9384.601  | 6838.364  | M24750    | 739.456   | 815.935   |
| AB009282  | 17485.203 | 13153.486 | NM_014686  | 50699.699 | 44759.32  | NM_002687 | 6507.04   | 2968.583  |
| NM_005004 | 25106.334 | 20184.48  | BF528358   | 525.623   | 502.244   | NM_000627 | 652.737   | 404.948   |
| NM_003670 | 2362.091  | 2947.238  | NM_016339  | 1927.508  | 2618.15   | NM_000038 | 507.51    | 364.92    |
| NM_014639 | 2825.815  | 2887.525  | NM_002487  | 4901.566  | 3061.618  | NM_000825 | 434.604   | 378.585   |
| NM_006392 | 1644.846  | 1615.269  | NM_013340  | 524.123   | 601.224   | NM_003886 | 1137.057  | 1225.931  |
| NM_014717 | 1031.983  | 1257.98   | NM_005462  | 800.075   | 595.483   | NM_005843 | 749.225   | 881.35    |
| NM_017922 | 2829.364  | 2619.714  | NM_012319  | 1799.286  | 1890.173  | NM_017980 | 1455.666  | 1564.148  |
| NM_002823 | 56134.766 | 56093.113 | NM_006510  | 7459.661  | 8374.524  | NM_001252 | 639.717   | 605.515   |
| NM_017916 | 20813.586 | 27957.809 | NM_003141  | 2250.948  | 1979.814  | AF053712  | 413.1     | 343.909   |
| NM_001805 | 6305.97   | 7156.791  | NM_020245  | 2259.652  | 1885.825  | NM_003947 | 251.9     | 174.451   |
| AK022360  | 2504.271  | 4969.78   | NM_007175  | 886.823   | 998.548   | NM_002821 | 7013.31   | 4773.403  |
| AK095694  | 1854.212  | 3083.822  | X91148     | 502.728   | 572.489   | M96652    | 3825.416  | 2149.378  |
| X52341    | 55941.152 | 56730.176 | NM_015700  | 5431.375  | 11675.841 | L41690    | 898.363   | 730.634   |
| NM_003082 | 6596.4    | 4931.825  | NM_019087  | 1325.356  | 1652.898  | NM_018055 | 469.549   | 467.285   |
| AL133632  | 1882.03   | 1475.172  | NM_016322  | 525.355   | 212.529   | NM_000935 | 29529.229 | 19532.592 |

|           |           |           |           |           |           |           |           |           |
|-----------|-----------|-----------|-----------|-----------|-----------|-----------|-----------|-----------|
| AK024551  | 626.623   | 387.421   | NM_005072 | 798.219   | 1163.618  | NM_006514 | 511.835   | 668.36    |
| AL833249  | 2081.895  | 1923.712  | AF215923  | 4067.057  | 4759.459  | AF065164  | 689.506   | 807.028   |
| NM_018374 | 3180.856  | 2992.123  | U66621    | 7308.309  | 6595.438  | AB028991  | 1324.508  | 1268.323  |
| AF131852  | 513.375   | 420.42    | NM_005720 | 11670.79  | 13820.184 | AF263547  | 3978.851  | 3030.394  |
| AK021894  | 1746.332  | 1613.255  | AB040936  | 551.018   | 1840.588  | AJ008143  | 1428.349  | 978.817   |
| NM_020424 | 4362.097  | 3154.779  | U61736    | 387.084   | 370.704   | NM_007144 | 1576.413  | 1469.634  |
| AF438313  | 409.978   | 293.461   | AJ132086  | 606.585   | 584.209   | NM_004424 | 1529.666  | 1042.039  |
| AF147341  | 641.107   | 405.703   | U92816    | 8780.648  | 5440.011  | AL133117  | 1386.067  | 1011.062  |
| AB033009  | 23634.594 | 15752.651 | BC011987  | 3882.646  | 4067.761  | AB033040  | 679.032   | 1190.006  |
| AL137761  | 2743.869  | 2313.295  | NM_003485 | 2787.974  | 3014.999  | AF070586  | 990.051   | 663.635   |
| AK022086  | 629.19    | 523.721   | NM_005038 | 8165.683  | 6506.652  | NM_014412 | 588.85    | 521.347   |
| AF147320  | 1577.666  | 1113.199  | L03418    | 2088.832  | 3107.431  | NM_013303 | 1186.45   | 594.68    |
| AK027024  | 582.523   | 563.998   | M95923    | 2205.37   | 2570.875  | NM_012227 | 1704.327  | 1533.152  |
| AK022339  | 1513.973  | 1233.182  | NM_002415 | 61551.602 | 48941.031 | NM_006101 | 2537.778  | 2168.381  |
| AK022138  | 935.967   | 912.227   | NM_006332 | 7615.897  | 6540.738  | NM_001237 | 3812.804  | 2489.511  |
| AF086191  | 7157.424  | 4236.134  | NM_000916 | 2643.713  | 2444.941  | NM_002507 | 524.501   | 521.345   |
| AF143880  | 739.416   | 603.674   | NM_018663 | 2808.707  | 2559.566  | NM_015962 | 751.154   | 693.36    |
| NM_017638 | 9851.483  | 5724.438  | NM_014791 | 7227.102  | 2921.814  | NM_016078 | 1482.727  | 1093.374  |
| AL133052  | 1926.489  | 1688.93   | NM_003318 | 4928.219  | 4628.866  | NM_004401 | 988.889   | 1000.877  |
| AB037824  | 2494.012  | 1954.817  | NM_004362 | 3186.481  | 2075.228  | NM_001848 | 1943.144  | 1137.177  |
| AF361494  | 941.832   | 410.98    | NM_000182 | 7850.503  | 4229.3    | NM_016148 | 2312.098  | 1973.879  |
| AK022810  | 1569.14   | 740.089   | AK023384  | 1784.557  | 1234.073  | AK024343  | 1447.581  | 1057.33   |
| NM_005110 | 1078.863  | 1043.091  | NM_016026 | 11527.748 | 7793.353  | NM_002568 | 313.52    | 250.807   |
| X92110    | 484.34    | 568.715   | AK025111  | 425.473   | 449.539   | D42084    | 2078.202  | 1444.443  |
| AF147408  | 1783.954  | 1695.849  | NM_001732 | 1186.643  | 984.526   | NM_014693 | 369.031   | 316.025   |
| AK027222  | 3875.434  | 2357.196  | NM_018690 | 3424.136  | 4916.216  | AB007896  | 862.413   | 1381.638  |
| AK054767  | 514.364   | 302.02    | NM_000860 | 3936.928  | 5671.416  | AB007916  | 6626.292  | 7437.862  |
| AL049301  | 1178.807  | 509.618   | AB037798  | 1565.487  | 1679.003  | NM_002874 | 343.928   | 261.853   |
| AL050042  | 2500.704  | 1821.794  | NM_000780 | 289.686   | 254.059   | AF049140  | 966.42    | 775.484   |
| NM_018468 | 1919.386  | 1272.387  | AF272663  | 6434.564  | 6566.018  | AL136794  | 617.818   | 468.85    |
| NM_014867 | 3225.579  | 2142.36   | NM_012190 | 1209.01   | 777.03    | BC035601  | 14863.149 | 8923.837  |
| AL359932  | 850.608   | 413.026   | AF277719  | 628.417   | 489.833   | NM_001458 | 432.464   | 363.667   |
| AB037850  | 5793.116  | 3108.313  | NM_000791 | 1664.417  | 1598.363  | NM_020388 | 1840.469  | 1654.072  |
| AK002197  | 3238.063  | 1506.595  | NM_003681 | 2274.902  | 1940.381  | AB046829  | 797.141   | 783.172   |
| AF087996  | 3894.47   | 2081.181  | NM_004800 | 6498.049  | 4630.218  | NM_003379 | 6597.929  | 4424.398  |
| AK021710  | 1963.373  | 1271.197  | NM_014954 | 23417.438 | 21082.285 | NM_004521 | 3551.577  | 2274.298  |
| NM_007017 | 1475.139  | 1006.427  | NM_014909 | 2569.457  | 2747.7    | AF229162  | 431.469   | 591.292   |
| AL137446  | 2145.189  | 1636.58   | NM_145659 | 843.527   | 362.316   | U02309    | 18003.113 | 14117.417 |
| AB025286  | 1923.88   | 1248.101  | NM_001719 | 4857.718  | 3029.799  | NM_005257 | 6011.321  | 3516.857  |
| AF009286  | 761.912   | 495.734   | AL080062  | 1324.415  | 641.803   | AF011573  | 2646.052  | 2257.504  |
| AF056437  | 531.297   | 350.464   | AF308802  | 989.227   | 741.712   | NM_002148 | 1234.706  | 676.633   |
| AB032364  | 557.099   | 326.056   | S76984    | 5650.796  | 5020.23   | NM_004831 | 543.719   | 755.787   |
| AF009295  | 404.806   | 346.323   | NM_014495 | 48528.402 | 54502.984 | AF294629  | 944.518   | 927.289   |
| NM_005028 | 1654.052  | 1219.078  | NM_014081 | 534.234   | 642.886   | NM_000548 | 1318.989  | 1147.609  |
| AF056447  | 1448.535  | 936.31    | NM_005651 | 336.34    | 531.083   | NM_002138 | 25245.467 | 14176.97  |
| AK001010  | 1452.174  | 809.706   | NM_007195 | 1456.738  | 1133.248  | NM_014463 | 17452.879 | 11801.508 |
| NM_018078 | 1290.919  | 683.17    | AK023337  | 2876.395  | 1914.305  | NM_005520 | 8710.383  | 4353.769  |
| AK021442  | 2345.74   | 1410.578  | NM_013275 | 11438.582 | 7090.314  | AK023265  | 814.514   | 772.608   |
| AK001076  | 452.476   | 304.826   | AB037842  | 645.559   | 463.397   | AB029009  | 651.161   | 681.457   |
| AK001820  | 317.388   | 171.555   | U92074    | 490.358   | 268.403   | AF112207  | 796.76    | 684.618   |
| AK021482  | 5011.818  | 3245.408  | NM_019011 | 3324.823  | 2568.294  | NM_005594 | 10798.661 | 6314.504  |
| AK021730  | 747.799   | 514.823   | AF459094  | 4378.268  | 2859.172  | NM_004461 | 27448.398 | 19701.693 |
| AK025317  | 9677.8    | 5021.869  | NM_003157 | 1655.808  | 1247.653  | NM_018473 | 4995.217  | 3259.881  |

|            |           |           |            |           |           |           |           |          |
|------------|-----------|-----------|------------|-----------|-----------|-----------|-----------|----------|
| AK026119   | 911.931   | 418.95    | NM_004938  | 755.801   | 597.417   | BF106121  | 338.623   | 407.142  |
| AK026725   | 3996.797  | 4267.863  | NM_014326  | 443.585   | 431.629   | AK022590  | 474.799   | 574.342  |
| AJ008118   | 60037.488 | 56292.156 | NM_015981  | 1247.903  | 1275.071  | AK023719  | 1374.418  | 1160.974 |
| AK000939   | 571.245   | 257.904   | NM_000455  | 2510.331  | 2544.723  | AK025590  | 353.011   | 180.271  |
| NM_005523  | 566.546   | 656.94    | NM_012319  | 1338.044  | 1146.795  | AY007149  | 1352.276  | 1159.02  |
| AK024512   | 7618.608  | 4014.316  | AK026235   | 262.107   | 877.77    | NM_004110 | 1830.13   | 1168.129 |
| AK023454   | 1189.26   | 641.304   | NM_006510  | 5803.877  | 3306.201  | NM_013387 | 21154.414 | 13690.2  |
| L23207     | 1090.242  | 543.744   | NM_003141  | 1664.355  | 952.837   | NM_005262 | 2739.318  | 1893.575 |
| NM_018062  | 1044.043  | 511.585   | NM_020245  | 1988.667  | 1132.617  | NM_005757 | 591.796   | 482.489  |
| NM_007128  | 9178.856  | 5698.809  | NM_007175  | 951.435   | 595.343   | NM_020128 | 377.43    | 346.306  |
| NM_007160  | 502.921   | 210.877   | AB046381   | 379.49    | 365.985   | NM_005068 | 1223.964  | 932.164  |
| unknown (S | 769.212   | 821.315   | AJ011497   | 1002.513  | 805.874   | NM_018223 | 1236.264  | 1166.269 |
| AL157458   | 527.906   | 722.606   | NM_000336  | 598.12    | 499.134   | NM_006693 | 6867.64   | 4580.053 |
| NM_015377  | 985.716   | 980.616   | W61100     | 36555.598 | 28093.789 | NM_001722 | 759.283   | 762.035  |
| AL137531   | 2010.87   | 2335.431  | AA608568   | 7254.133  | 4878.89   | NM_003297 | 397.189   | 335.914  |
| AK022210   | 515.539   | 706.035   | BG831301   | 20211.848 | 13530.356 | NM_018268 | 2900.998  | 2262.063 |
| AL080085   | 6658.249  | 9992.733  | M14764     | 455.9     | 368.382   | AK024633  | 1625.05   | 1410.047 |
| AK022106   | 503.495   | 645.334   | AA478647   | 5484.334  | 3266.097  | NM_001453 | 1671.576  | 1824.082 |
| AF055012   | 2069.042  | 1118.726  | AW058501   | 373.298   | 324.705   | NM_012075 | 314.01    | 365.146  |
| AK022307   | 2686.575  | 1655.001  | ID 2623896 | 738.532   | 505.663   | AK023911  | 751.103   | 431.522  |
| NM_005172  | 1613.431  | 1076.489  | ID 2602214 | 2375.827  | 1960.893  | NM_001283 | 1309.286  | 952.178  |
| AK025192   | 10129.627 | 6167.629  | ID 2071279 | 5832.985  | 4123.432  | AL110237  | 869.635   | 1387.017 |
| NM_012403  | 1607.487  | 1799.082  | L10709     | 6910.716  | 5333.136  | AF147307  | 3834.083  | 3065.774 |
| AK022611   | 7692.744  | 8179.533  | N35489     | 443.112   | 291.567   | AK001829  | 1226.208  | 672.341  |
| NM_006158  | 11257.014 | 10284.924 | AA458922   | 1964.129  | 1854.624  | NM_016525 | 1392.365  | 898.243  |
| NM_006346  | 3247.483  | 4416.58   | M95923     | 543.9     | 754.547   | AK024931  | 4669.646  | 1743.064 |
| AK025240   | 4083.186  | 5999.159  | NM_002415  | 51933.383 | 53209.32  | AL109715  | 277.412   | 242.621  |
| NM_005377  | 471.977   | 597.029   | NM_006332  | 7097.218  | 3284.109  | AK022258  | 463.34    | 511.915  |
| NM_017633  | 14431.926 | 20427.863 | NM_000916  | 1486.231  | 697.493   | AK000455  | 509.605   | 539.753  |
| AF086186   | 16972.881 | 20422.443 | NM_018663  | 2711.607  | 1841.499  | NM_005230 | 290.785   | 435.826  |
| NM_017802  | 5232.816  | 4968.164  | NM_145904  | 5435.384  | 3073.908  | AK000840  | 1249.804  | 740.349  |
| AF155194   | 626.147   | 706.766   | NM_006796  | 7516.758  | 4339.245  | AL162073  | 405.881   | 335.148  |
| AK023667   | 998.672   | 739.824   | NM_000706  | 623.034   | 444.593   | AJ006835  | 2461.567  | 3368.439 |
| AJ008137   | 10441.438 | 6524.347  | NM_015941  | 1889.917  | 1099.705  | AF070577  | 2637.886  | 1419.901 |
| AF085841   | 1183.112  | 1532.875  | NM_003655  | 4668.41   | 2908.066  | AL157484  | 1994.872  | 1344.48  |
| AL049232   | 355.572   | 329.511   | NM_014837  | 2764.381  | 1978.779  | AK024850  | 379.003   | 301.637  |
| U92026     | 1046.489  | 820.143   | NM_017729  | 753.486   | 419.649   | Y09836    | 392.377   | 444.12   |
| AF086234   | 32865.832 | 30734.047 | NM_005259  | 4046.33   | 2923.203  | AL137597  | 1516.344  | 1203.183 |
| AK023680   | 5845.789  | 6402.176  | NM_002840  | 481.446   | 157.218   | AK022144  | 829.728   | 484.983  |
| AF009324   | 4005.666  | 5918.952  | NM_006174  | 604.476   | 474.949   | AF009266  | 361.995   | 250.646  |
| AF019226   | 1609.793  | 2246.941  | NM_015850  | 4488.805  | 3359.784  | AF060168  | 862.23    | 631.305  |
| AL137480   | 16759.158 | 20463.293 | NM_004864  | 303.692   | 408.806   | AF009275  | 646.027   | 508.159  |
| AK022182   | 630.219   | 1230.095  | NM_002838  | 10649.509 | 6773.122  | AF015251  | 270.799   | 430.793  |
| D16473     | 1405.966  | 2313.545  | NM_014686  | 55561.055 | 52141.629 | AF056426  | 336.163   | 231.326  |
| AB028968   | 1494.606  | 2646.22   | BF528358   | 616.577   | 579.006   | NM_018325 | 309.744   | 269.374  |
| AK001202   | 650.516   | 1125.587  | NM_016339  | 769.022   | 1075.349  | AK001150  | 836.52    | 378.949  |
| S82164     | 2841.616  | 3391.026  | NM_002487  | 5340.272  | 5849.318  | AK002123  | 225.419   | 233.714  |
| AK024394   | 2399.608  | 2393.753  | NM_013340  | 381.071   | 357.699   | AK021633  | 472.168   | 414.385  |
| AF147374   | 1919.423  | 2186.648  | NM_005462  | 812.555   | 864.26    | AK025659  | 802.514   | 566.433  |
| AF130091   | 1283.27   | 1451.28   | NM_004677  | 126.231   | 685.738   | AK026788  | 560.992   | 525.671  |
| L43338     | 17319.76  | 15382.526 | NM_014954  | 12540.578 | 10317.04  | AK025272  | 411.063   | 297.132  |
| AJ227866   | 23949.836 | 13332.807 | NM_000807  | 365.133   | 248.168   | AJ008130  | 7207.476  | 4188.725 |
| AF458223   | 4686.869  | 2956.666  | NM_014909  | 2090.296  | 1821.322  | AF086502  | 602.017   | 428.562  |

|           |           |          |           |           |           |           |           |           |
|-----------|-----------|----------|-----------|-----------|-----------|-----------|-----------|-----------|
| AK026822  | 1278.909  | 792.522  | X91148    | 556.951   | 417.663   | L39924    | 709.835   | 575.687   |
| AK022838  | 12235.194 | 7677.119 | NM_015700 | 5096.571  | 3158.282  | U52054    | 3903.268  | 2512.649  |
| NM_003509 | 589.752   | 472.736  | NM_019087 | 1379.105  | 703.97    | AK023325  | 797.732   | 1194.975  |
| CY3Cy5    | 4517.132  | 278.271  | NM_016322 | 473.372   | 303.348   | NM_017985 | 804.164   | 746.208   |
| AA700390  | 4290.867  | 3116.663 | NM_005072 | 506.283   | 343.071   | AK025866  | 1150.339  | 683.988   |
| AA436163  | 1504.099  | 1025.798 | AF215923  | 3670.257  | 2734.011  | AF088058  | 5265.789  | 2789.637  |
| BI907981  | 680.256   | 416.827  | U66621    | 9303.59   | 7141.601  | NM_000513 | 623.62    | 478.605   |
| BI603841  | 2351.837  | 1400.052 | NM_005720 | 13770.552 | 7158.794  | Y11165    | 873.62    | 746.801   |
| M19888    | 365.56    | 371.052  | AB040936  | 509.772   | 197.823   | AL137445  | 231       | 307.861   |
| Y08136    | 384.814   | 283.729  | AJ132086  | 829.72    | 746.773   | BC028422  | 316.503   | 326.103   |
| AA156863  | 4050.064  | 1381.842 | U92816    | 9835.257  | 10262.202 | AK024413  | 420.413   | 416.974   |
| BI830442  | 695.042   | 1777.558 | BC011987  | 4216.706  | 3911.195  | AK022247  | 521.081   | 700.299   |
| AI218732  | 2725.03   | 7725.284 | NM_004106 | 671.941   | 742.316   | AK001453  | 2696.583  | 1700.249  |
| NM_004102 | 2357.197  | 5312.77  | NM_003485 | 2311.617  | 1784.848  | AB007972  | 596.409   | 426.319   |
| NM_004544 | 5725.282  | 4935.402 | NM_005038 | 5912.022  | 5238.783  | AL390144  | 10008.293 | 4892.697  |
| SR5       | 4652.086  | 1261.229 | NM_003157 | 1344.027  | 4011.872  | AK024017  | 486.79    | 541.098   |
| SR7       | 4251.746  | 9447.788 | NM_004938 | 827.232   | 2671.998  | D17220    | 3431.532  | 2557.973  |
| SR9       | 13989.927 | 1076.493 | NM_014326 | 324.725   | 316.258   | D28363    | 36255.75  | 22605.822 |
| CY3Cy5    | 2190.396  | 139.996  | NM_004448 | 289.019   | 255.645   | AB011171  | 487.748   | 270.534   |
| NM_018049 | 4745.231  | 3392.629 | NM_015981 | 753.964   | 674.302   | NM_005322 | 1375.502  | 1262.341  |
| NM_005160 | 8526.307  | 4499.272 | NM_000455 | 2786.214  | 2025.667  | AK024465  | 479.992   | 319.553   |
| X78817    | 15119.454 | 7386.582 | NM_014791 | 9848.509  | 5774.235  | AK021478  | 2115.445  | 1717.676  |
| AB023135  | 702.509   | 382.834  | NM_003318 | 5442.917  | 3896.224  | AF131782  | 506.294   | 354.558   |
| AY009401  | 454.676   | 224.528  | NM_004362 | 3376.778  | 2286.502  | NM_014210 | 1304.299  | 1474.212  |
| AF294628  | 1266.257  | 410.13   | NM_000182 | 7226.104  | 5243.512  | AK021603  | 655.985   | 592.81    |
| AK026960  | 662.231   | 337.081  | AK023384  | 1686.465  | 1162.824  | AL110136  | 1084.353  | 771.937   |
| NM_000193 | 2315.926  | 4369.042 | NM_016026 | 11160.397 | 8041.539  | AK002203  | 209.126   | 215.323   |
| BC014586  | 960.377   | 1091.127 | AK025111  | 883.745   | 1959.237  | AK026469  | 702.41    | 607.004   |
| NM_002448 | 2950.531  | 2455.682 | NM_001732 | 1412.022  | 1968.923  | D16935    | 3089.515  | 4853.502  |
| AF053952  | 5434.674  | 3665.873 | NM_018690 | 2567.666  | 2410.175  | U52835    | 571.023   | 292.024   |
| NM_014044 | 2370.201  | 955.713  | NM_000860 | 4386.301  | 2724.54   | NM_000756 | 373.29    | 337.328   |
| NM_000900 | 947.125   | 381.21   | AB037798  | 1572.903  | 985.384   | Z36811    | 36798.125 | 23753.828 |
| AK023684  | 6108.067  | 3382.383 | NM_000780 | 299.352   | 299.189   | NM_018950 | 5064.495  | 1990.953  |
| NM_000232 | 2342.842  | 1054.736 | AF272663  | 8002.244  | 7850.776  | K03200    | 2862.837  | 1799.47   |
| AF303398  | 5443.975  | 3318.424 | NM_012190 | 1286.162  | 1027.625  | U17629    | 1428.094  | 967.075   |
| NM_014810 | 1684.986  | 844.935  | AB033015  | 255.489   | 310.052   | NM_020428 | 1293.943  | 936.4     |
| NM_004738 | 2268.017  | 1611.165 | AF277719  | 620.961   | 591.15    | U79265    | 457.664   | 379.159   |
| NM_007357 | 4213.244  | 2858.561 | NM_000791 | 1722.692  | 1680.064  | AK022868  | 2308.023  | 1727.995  |
| NM_003763 | 5200.49   | 3034.259 | NM_003681 | 2292.955  | 2011.302  | NM_003530 | 263.364   | 411.643   |
| AK023448  | 1098.032  | 510.073  | NM_004800 | 6563.855  | 5795.994  | AJ227871  | 765.874   | 542.787   |
| Y18213    | 1992.83   | 917.714  | AB037738  | 321.887   | 361.643   | AK025344  | 1082.041  | 786.165   |
| NM_003283 | 2216.438  | 693.923  | NM_004952 | 2682.719  | 3702.27   | D28589    | 11496.308 | 5544.133  |
| AF249898  | 4479.408  | 2266.526 | AY007239  | 329.582   | 224.645   | NM_017867 | 17007.332 | 8266.65   |
| M69181    | 6784.85   | 3040.249 | NM_020414 | 2868.021  | 1661.888  | U92820    | 1587.409  | 1206.833  |
| NM_001311 | 2850.388  | 1204.249 | AB037730  | 2201.788  | 1401.616  | NM_017937 | 729.253   | 591.053   |
| NM_017798 | 7026.282  | 2728.676 | NM_001357 | 6929.233  | 5858.262  | AL360266  | 944.411   | 676.109   |
| NM_012410 | 1290.904  | 399.4    | NM_003893 | 2210.297  | 1857.206  | AL160132  | 12419.267 | 8481.352  |
| NM_001111 | 6023.789  | 2559.147 | AB037816  | 835.339   | 627.074   | NM_019557 | 1642.383  | 1217.511  |
| NM_001611 | 1150.266  | 854.595  | NM_014380 | 43873.012 | 20081.908 | CY3Cy5    | 977.851   | 182.119   |
| AB018310  | 2837.425  | 1969.695 | NM_001719 | 6195.819  | 4605.916  | AA150828  | 353.286   | 315.414   |
| NM_020133 | 547.98    | 529.554  | AL080062  | 1285.777  | 1037.501  | H64379    | 1680.527  | 1255.933  |
| NM_015379 | 15473.714 | 8761.313 | AF308802  | 1464.05   | 2638.65   | BE208258  | 41185.973 | 43720.707 |
| NM_004878 | 523.674   | 360.894  | S76984    | 6887.762  | 6143.893  | T72202    | 525.295   | 732.994   |

|           |           |           |           |           |           |           |           |           |
|-----------|-----------|-----------|-----------|-----------|-----------|-----------|-----------|-----------|
| NM_000742 | 704.777   | 335.053   | NM_014495 | 48353.5   | 51995.555 | BI831922  | 918.183   | 1014.622  |
| NM_002355 | 6789.745  | 2724.151  | NM_014081 | 814.234   | 482.643   | M69238    | 434.974   | 570.407   |
| AK026608  | 2413.359  | 1265.996  | NM_005651 | 603.453   | 537.994   | AA599158  | 2702.45   | 3391.696  |
| AB046836  | 546.553   | 481.716   | NM_007195 | 1394.666  | 1576.443  | NM_002711 | 627.674   | 689.084   |
| AJ224166  | 1081.853  | 602.761   | AK023337  | 3330.449  | 3193.183  | SR5       | 3145.959  | 2411.724  |
| AK026098  | 3049.818  | 2260.128  | NM_013275 | 12043.54  | 10059.241 | SR7       | 2706.814  | 16247.584 |
| NM_012381 | 2071.312  | 1424.11   | AB037842  | 767.328   | 568.615   | SR9       | 8206.404  | 958.487   |
| M20702    | 1793.263  | 1483.509  | U92074    | 449.897   | 328.007   | CY3Cy5    | 692.77    | 204.452   |
| NM_006397 | 16818.328 | 8921.568  | NM_019011 | 3326.89   | 2896.495  | NM_001783 | 5777.748  | 4898.954  |
| D83776    | 1463.726  | 946.317   | AF459094  | 4308.016  | 4835.815  | J03171    | 1698.375  | 1873.034  |
| NM_004085 | 1947.953  | 1333.169  | NM_002544 | 537.03    | 517.656   | NM_004323 | 4568.383  | 4843.701  |
| NM_000135 | 2551.853  | 1643.792  | AB011542  | 985.17    | 510.67    | NM_005312 | 767.708   | 561.838   |
| NM_018163 | 1090.108  | 691.141   | NM_001853 | 1030.451  | 364.91    | NM_001711 | 377.897   | 364.764   |
| AK026362  | 2536.052  | 1531.317  | U41737    | 424.473   | 136.683   | NM_004210 | 4835.446  | 3678.369  |
| NM_004965 | 2183.168  | 1235.271  | NM_005799 | 415.624   | 265.125   | NM_020140 | 768.134   | 861.611   |
| NM_005905 | 1883.38   | 1450.539  | X99661    | 418.599   | 330.99    | AK026232  | 2469.911  | 3121.543  |
| NM_004785 | 2572.023  | 1527.543  | NM_005927 | 1990.754  | 1589.464  | NM_014892 | 6165.862  | 7354.496  |
| AK024079  | 692.95    | 397.265   | AB028983  | 1485.615  | 1321.229  | NM_000231 | 286.634   | 259.805   |
| NM_002425 | 1866.007  | 972.808   | AB037800  | 870.856   | 705.59    | L07517    | 1181.592  | 893.822   |
| NM_014674 | 3269.223  | 1502.835  | AK026377  | 1558.589  | 1402.003  | AK022451  | 778.812   | 669.731   |
| NM_018271 | 589.556   | 406.46    | NM_018660 | 3208.114  | 2452.847  | NM_014355 | 45152.016 | 48012.816 |
| NM_000547 | 497.546   | 474.628   | NM_003394 | 3623.316  | 4427.028  | BM918441  | 362.374   | 288.233   |
| NM_014652 | 811.11    | 379.438   | NM_014636 | 1459.578  | 3289.322  | NM_001045 | 1541.696  | 1565.416  |
| AL133020  | 3769.433  | 1873.45   | NM_006747 | 1219.855  | 1232.712  | NM_005697 | 2577.916  | 2238.191  |
| NM_014044 | 2425.891  | 1707.151  | NM_007086 | 2398.092  | 1372.627  | NM_003095 | 2997.361  | 3820.027  |
| NM_000900 | 782.838   | 531.147   | NM_003870 | 7258.758  | 5165.052  | NM_004781 | 700.631   | 589.191   |
| AK023684  | 4610.523  | 4562.732  | AK024507  | 954.075   | 856.323   | NM_018303 | 750.466   | 785.81    |
| NM_000232 | 1927.075  | 1543.678  | NM_001243 | 2652.252  | 1963.348  | NM_014755 | 1280.54   | 988.61    |
| AA700390  | 4084.463  | 3203.458  | NM_005546 | 1697.192  | 1597.678  | NM_005124 | 926.336   | 1022.263  |
| AA436163  | 1198.39   | 1095.107  | NM_014887 | 2431.236  | 2551.124  | AK000947  | 1161.363  | 1170.114  |
| BI907981  | 533.993   | 475.251   | NM_002590 | 338.805   | 471.696   | L08240    | 610.1     | 492.268   |
| BI603841  | 2173.231  | 1496.937  | NM_018556 | 10865.786 | 10550.404 | NM_017952 | 351.734   | 256.583   |
| Y08136    | 544.5     | 417.916   | AF052211  | 3070.467  | 1315.849  | NM_002940 | 808.517   | 775.613   |
| AA156863  | 4125.188  | 3031.957  | NM_005600 | 2283.002  | 1285.679  | NM_016081 | 3621.37   | 3168.083  |
| BI915199  | 2288.305  | 1340.343  | NM_005967 | 1511.905  | 1042.191  | NM_006385 | 1793.471  | 1787.769  |
| R82957    | 51489.527 | 24722.605 | NM_013315 | 221.944   | 676.808   | M30818    | 223.596   | 400.789   |
| BI830442  | 425.022   | 253.513   | AB014566  | 1674.372  | 1147.766  | NM_000163 | 239.535   | 196.831   |
| AI218732  | 3078.369  | 1882.325  | NM_015675 | 356.604   | 244.022   | NM_003325 | 39882.07  | 30328.186 |
| NM_004102 | 2746.142  | 1294.222  | NM_014223 | 1083.933  | 885.121   | NM_003295 | 17053.754 | 11654.482 |
| NM_004544 | 4820.229  | 2467.5    | NM_016194 | 1226.628  | 1258.833  | NM_014330 | 7906.52   | 5660.814  |
| NM_018890 | 17534.859 | 7341.236  | NM_000633 | 29882.705 | 24169.006 | NM_007214 | 2844.173  | 3206.176  |
| NM_016204 | 514.342   | 363.266   | AB037855  | 775.112   | 753.808   | NM_000311 | 2597.204  | 2539.469  |
| NM_001311 | 2419.287  | 1961.408  | AK024524  | 5133.486  | 4174.06   | NM_017905 | 955.833   | 962.018   |
| NM_017795 | 8165.271  | 5267.738  | NM_000562 | 1561.31   | 1893.947  | NM_006335 | 4869.722  | 5233.411  |
| NM_012410 | 1500.087  | 874.99    | NM_020353 | 222.96    | 210.301   | NM_017731 | 284.626   | 262.203   |
| NM_001111 | 4803.518  | 4253.738  | NM_019011 | 8910.318  | 7736.034  | AB040891  | 1124.1    | 1290.788  |
| NM_018045 | 4362.37   | 3660.954  | NM_004879 | 2197.528  | 2091.835  | AB037780  | 462.619   | 291.536   |
| NM_005160 | 7339.958  | 4116.227  | AB020694  | 2819.131  | 2509.831  | NM_005845 | 8283.881  | 7489.052  |
| NM_000595 | 386.489   | 238.769   | NM_016071 | 15018.877 | 11133.491 | NM_016205 | 5834.729  | 5347.305  |
| X78817    | 16805.863 | 8554.283  | AL050131  | 711.677   | 569.765   | NM_018964 | 1948.779  | 1745.461  |
| AB023135  | 728.121   | 446.127   | NM_004475 | 5189.626  | 5465.808  | NM_000080 | 622.898   | 634.471   |
| AY009401  | 489.887   | 295.871   | NM_001627 | 2429.296  | 2753.326  | NM_001825 | 891.822   | 1210.694  |
| AF294628  | 1189.762  | 580.25    | NM_001226 | 1954.326  | 1112.167  | AF283645  | 1617.882  | 948.171   |



|           |           |           |           |           |           |           |           |           |
|-----------|-----------|-----------|-----------|-----------|-----------|-----------|-----------|-----------|
| AK026960  | 615.457   | 536.562   | AB050716  | 595.183   | 226.812   | NM_016575 | 620.696   | 355.577   |
| NM_001991 | 1103.298  | 612.247   | X77690    | 816.496   | 612.449   | NM_003897 | 1331.896  | 1520.872  |
| NM_000193 | 2174.453  | 1504.068  | NM_006536 | 506.177   | 345.259   | NM_014165 | 6051.474  | 6470.583  |
| BC014586  | 560.204   | 386.683   | NM_005658 | 751.481   | 804.272   | AL442085  | 1422.714  | 1444.462  |
| NM_002448 | 2558.083  | 1189.327  | NM_002422 | 701.747   | 564.81    | NM_013313 | 2102.224  | 2258.936  |
| AF053952  | 7420.605  | 4093.833  | NM_006690 | 2232.26   | 1985.806  | NM_014736 | 6325.037  | 5191.958  |
| NM_003213 | 4852.323  | 2765.849  | NM_003348 | 3041.519  | 3924.113  | AK023886  | 494.653   | 351.979   |
| BF184738  | 418.797   | 220.157   | AL137663  | 703.602   | 653.137   | NM_002553 | 893.77    | 646.91    |
| NM_015057 | 378.614   | 357.744   | AB006198  | 9616.229  | 8753.505  | AJ404615  | 1423.26   | 1148.869  |
| AF303398  | 5977.247  | 3741.527  | U72518    | 2561.561  | 2268.39   | NM_016053 | 10784.881 | 9841.665  |
| NM_014810 | 1691.799  | 696.797   | AF264765  | 557.701   | 446.972   | AB007869  | 965.1     | 736.821   |
| NM_004738 | 2111.083  | 1464.956  | NM_015322 | 2375.48   | 2123.643  | AB046844  | 604.006   | 578.632   |
| NM_007357 | 4111.149  | 3544.086  | NM_016607 | 3886.298  | 3350.34   | NM_000302 | 564.204   | 647.959   |
| NM_003763 | 5223.612  | 3094.492  | NM_003275 | 605.509   | 769.801   | NM_013235 | 13900.09  | 13443.388 |
| AK023448  | 1235.669  | 689.356   | NM_000268 | 26077.654 | 21672.684 | NM_016015 | 6040.477  | 5807.549  |
| Y18213    | 1704.873  | 1899.112  | M30493    | 20124.043 | 18110.922 | NM_020120 | 607.768   | 616.136   |
| NM_003283 | 2121.957  | 1662.176  | AJ008160  | 748.516   | 709.987   | AK022900  | 586.953   | 653.83    |
| AF249898  | 6406.366  | 4168.891  | NM_004343 | 20741.91  | 22666.893 | AB023216  | 308.124   | 357.771   |
| M69181    | 8098.284  | 3738.291  | X52355    | 3637.771  | 2476.684  | NM_002266 | 22312.547 | 16474.236 |
| AK027224  | 381.307   | 277.497   | NM_006963 | 9914.581  | 5652.63   | NM_014400 | 3193.795  | 2725.624  |
| NM_002428 | 1373.146  | 999.72    | U66561    | 5217.312  | 3328.262  | AL157492  | 688.004   | 553.695   |
| NM_014674 | 3224.52   | 2494.276  | NM_000306 | 2036.291  | 1566.77   | AL353957  | 1401.135  | 1008.814  |
| NM_018271 | 634.388   | 568.226   | NM_002200 | 1420.835  | 1271.171  | NM_000231 | 261.187   | 227.651   |
| NM_000547 | 529.091   | 680.278   | AF017433  | 1408.113  | 1528.197  | L07517    | 716.822   | 1010.955  |
| NM_014652 | 734.335   | 756.665   | AF130111  | 2931.708  | 4795.592  | AK022451  | 451.478   | 443.564   |
| AL133020  | 4083.413  | 3981.592  | AF131776  | 3697.403  | 4554.048  | AA150828  | 270.03    | 168.768   |
| NM_001611 | 1093.078  | 643.639   | NM_020528 | 2431.555  | 2489.163  | H64379    | 1558.595  | 989.704   |
| AB018310  | 3002.152  | 1997.874  | NM_007040 | 29126.281 | 20910.664 | T72202    | 275.318   | 200.273   |
| NM_020133 | 547.942   | 493.826   | NM_014483 | 3771.26   | 3730.755  | BI831922  | 970.965   | 1043.172  |
| NM_015379 | 15160.938 | 9394.538  | AK024249  | 1303.755  | 1273.581  | M69238    | 568.78    | 707.546   |
| NM_004878 | 634.83    | 415.333   | AF239156  | 5890.129  | 4954.025  | NM_002711 | 702.736   | 804.973   |
| NM_005502 | 385.103   | 1085.052  | NM_020390 | 1744.677  | 1430.18   | AK026092  | 1838.054  | 1657.504  |
| NM_000742 | 958.704   | 523.865   | NM_003321 | 19631.277 | 16569.652 | AK001175  | 471.232   | 241.754   |
| NM_002355 | 7053.871  | 3362.532  | U18937    | 7048.972  | 5266.32   | NM_003329 | 38127.426 | 34408.676 |
| AK026608  | 2512.981  | 1599.963  | U01925    | 603.442   | 424.352   | NM_003295 | 15249.277 | 13484.12  |
| NM_004102 | 1631.504  | 1648.016  | AJ420488  | 58541.004 | 59515.816 | NM_007034 | 378.822   | 477.533   |
| NM_004544 | 4189.096  | 4610.279  | AF268872  | 1473.341  | 1317.978  | NM_001783 | 5228.604  | 3808.597  |
| NM_018890 | 18338.541 | 16489.123 | AK022180  | 41656.871 | 33909.762 | J03171    | 1570.167  | 1186.564  |
| NM_016204 | 661.015   | 774.837   | AK001384  | 745.326   | 1882.787  | NM_005312 | 795.276   | 876.718   |
| AB046836  | 695.887   | 745.608   | AK025437  | 2689.026  | 2372.183  | NM_001711 | 396.193   | 409.994   |
| AJ224166  | 1203.905  | 651.558   | NM_004168 | 6576.097  | 5836.324  | NM_004210 | 4529.47   | 4302.259  |
| AK026098  | 2868.607  | 2482.211  | AF161353  | 7141.658  | 5397.11   | NM_020140 | 703.515   | 777.784   |
| NM_012381 | 1804.587  | 1370.438  | NM_000764 | 1083.095  | 1067.405  | AK026232  | 2547.098  | 2409.987  |
| M20702    | 1587.885  | 1516.908  | NM_004146 | 17733.936 | 17126.146 | NM_014892 | 6819.188  | 6969.666  |
| NM_006397 | 16385.379 | 11174.336 | NM_014639 | 2994.302  | 3126.07   | AK023827  | 1429.175  | 1373.673  |
| D83776    | 1520.129  | 1254.622  | NM_006392 | 1536.582  | 1705.353  | NM_001829 | 811.888   | 807.429   |
| NM_004088 | 1858.545  | 1688.728  | NM_014717 | 1320.093  | 1146.325  | NM_016575 | 741.664   | 748.406   |
| NM_000138 | 2375.367  | 2104.739  | NM_017922 | 2485.093  | 2289.143  | NM_001045 | 2305.432  | 1720.634  |
| NM_018163 | 939.237   | 1066.844  | NM_002823 | 58383.898 | 53247.203 | NM_005697 | 2078.964  | 1460.452  |
| AK026362  | 2534.206  | 1894.543  | NM_017916 | 14734.41  | 12094.695 | NM_003095 | 3369.863  | 3542.44   |
| NM_004968 | 2392.216  | 1942.202  | NM_001805 | 10149.08  | 9261.061  | NM_004781 | 652.543   | 662.922   |
| NM_005908 | 1780.369  | 1161.551  | AK022360  | 2320.957  | 2018.429  | NM_018303 | 898.971   | 975.708   |
| NM_004785 | 3480.479  | 2120.534  | AK095694  | 1161.357  | 1293.195  | NM_014758 | 1620.915  | 1824.814  |

|           |          |           |           |           |           |           |           |           |
|-----------|----------|-----------|-----------|-----------|-----------|-----------|-----------|-----------|
| AK024079  | 776.86   | 408.158   | X52341    | 55911.859 | 55495.453 | NM_005124 | 963.068   | 787.575   |
| NM_000193 | 1505.283 | 1651.019  | NM_003082 | 5311.199  | 5758.054  | AK000947  | 1117.803  | 1210.976  |
| BC014586  | 499.973  | 689.513   | AL133632  | 1943.823  | 2156.523  | L08240    | 699.978   | 576.153   |
| NM_002448 | 2701.968 | 3609.918  | AK024551  | 261.796   | 431.129   | NM_017952 | 385.201   | 244.053   |
| AF053952  | 9929.776 | 13252.512 | AL833249  | 1409.996  | 934.697   | M30818    | 336.533   | 1250.108  |
| NM_003213 | 5226.475 | 5591.638  | NM_018374 | 1926.436  | 1286.666  | NM_000163 | 378.23    | 2251.603  |
| BF184738  | 442.11   | 647.99    | AF131852  | 354.688   | 238.68    | NM_002266 | 19203.012 | 16553.646 |
| NM_014044 | 2290.486 | 2246.689  | AK021894  | 1550.759  | 1044.877  | NM_014400 | 2727.981  | 2049.992  |
| NM_000900 | 760.822  | 789.048   | NM_020424 | 3656.496  | 2888.836  | AL157492  | 662.342   | 640.445   |
| AK023684  | 4417.886 | 4851.046  | AK022086  | 462.918   | 920.305   | AL353957  | 1511.138  | 1546.952  |
| NM_000232 | 1798.182 | 1445.043  | AF147320  | 1170.704  | 2050.006  | NM_007214 | 3220.585  | 2446.989  |
| AA700390  | 3808.695 | 3118.718  | AK027024  | 556.749   | 607.076   | NM_000311 | 3805.521  | 3515.722  |
| AA436163  | 1403.9   | 1455.518  | AK022339  | 927.045   | 979.952   | NM_017909 | 1011.398  | 1009.337  |
| BI907981  | 602.162  | 701.717   | AK022138  | 1169.071  | 1240.707  | NM_006335 | 4797.813  | 4154.456  |
| BI603841  | 2227.101 | 1647.865  | AF086191  | 4744.204  | 5267.965  | NM_017731 | 417.438   | 375.322   |
| Y08136    | 522.016  | 283.616   | AF143880  | 290.611   | 518.989   | AB040891  | 1318.451  | 1522.921  |
| AA156863  | 3900.788 | 3375.962  | NM_017638 | 6722.977  | 7108.782  | AB037780  | 399.325   | 302.653   |
| BI915199  | 2323.431 | 1730.875  | AL133052  | 1723.918  | 1674.941  | NM_005845 | 7127.007  | 7633.629  |
| R82957    | 52608.93 | 25976.098 | AB037824  | 2502.68   | 2637.89   | NM_016209 | 5678.587  | 6140.956  |
| BI830442  | 508.371  | 187.434   | AF361494  | 741.612   | 740.228   | NM_002711 | 443.07    | 571.801   |
| AI218732  | 2204.448 | 1233.35   | AK022810  | 1703.427  | 1935.866  | AK026092  | 1645.884  | 1472.277  |
| AF249898  | 3882.356 | 5357.535  | NM_005110 | 831.089   | 424.995   | AK001175  | 416.831   | 531.462   |
| M69181    | 7750.456 | 10401.485 | AF147408  | 1384.542  | 1248.706  | NM_003897 | 1457.018  | 1000.179  |
| AK027224  | 312.344  | 886.515   | AK027222  | 3201.556  | 2133.226  | NM_014165 | 6416.444  | 5197.271  |
| NM_002652 | 320.197  | 679.537   | AL049275  | 530.155   | 831.936   | AL442085  | 1380.525  | 1287.261  |
| NM_001311 | 2820.001 | 2645.835  | AL049301  | 1275.98   | 2042.905  | NM_013313 | 2541.5    | 2873.724  |
| NM_017798 | 7765.655 | 6601.517  | AL050042  | 1998.576  | 2685.982  | NM_014736 | 6474.798  | 6208.044  |
| NM_012410 | 1421.457 | 989.961   | AK026818  | 29.324    | 1753.431  | AK023886  | 520.045   | 687.813   |
| NM_001111 | 5157.365 | 3846.562  | NM_018469 | 1675.963  | 1514.656  | NM_002553 | 1034.517  | 947.999   |
| NM_018049 | 4647.814 | 3761.305  | NM_014867 | 2354.849  | 2389.777  | AJ404615  | 1757.906  | 1836.941  |
| X78817    | 14844.75 | 9576.2    | AL359932  | 756.299   | 884.051   | NM_016053 | 12195.763 | 13357.993 |
| AB023135  | 847.325  | 713.653   | AB037850  | 4471.763  | 5391.629  | AB007869  | 1136.661  | 940.335   |
| AY009401  | 689.823  | 417.147   | AK002197  | 2730.548  | 3287.57   | AB046844  | 657.721   | 1739.237  |
| AF294628  | 1516.122 | 481.586   | AF087996  | 2979.641  | 4609.602  | AK022900  | 714.496   | 1086.025  |
| AK026960  | 745.153  | 441.992   | AK021710  | 1890.742  | 2266.152  | AK026232  | 2268.393  | 2601.847  |
| NM_001991 | 1239.329 | 567.657   | NM_007017 | 670.026   | 369.183   | NM_014892 | 6556.562  | 7273.946  |
| NM_000742 | 766.016  | 1602.687  | AL137446  | 1398.378  | 1096.094  | AK023827  | 1457.57   | 1443.591  |
| NM_006359 | 1147.009 | 2213.049  | AB025286  | 1907.461  | 1153.313  | NM_000231 | 259.413   | 256.359   |
| AF303398  | 7859.84  | 6164.445  | AF009286  | 626.492   | 435.901   | L07517    | 1002.049  | 859.62    |
| NM_014810 | 1736.89  | 923.991   | AF056437  | 924.178   | 991.385   | AK022451  | 338.121   | 273.806   |
| NM_004738 | 2633.373 | 2148.91   | AB032364  | 375.635   | 348.222   | BM918441  | 204.41    | 179.709   |
| NM_007357 | 4605.131 | 3032.552  | AF009295  | 584.081   | 471.724   | AA150828  | 319.87    | 399.925   |
| NM_003763 | 5337.555 | 3239.966  | NM_005029 | 2167.79   | 2467.647  | H64379    | 1882.181  | 2574.874  |
| AK023448  | 1518.818 | 669.666   | AF056447  | 2027.182  | 3077.397  | BE208258  | 42547.313 | 82338.281 |
| Y18213    | 2059.159 | 983.672   | AK001010  | 1268.659  | 2117.023  | T72202    | 218.058   | 267.746   |
| NM_003283 | 2352.104 | 1092.784  | NM_018076 | 1655.307  | 2200.365  | BI831922  | 928.428   | 1097.02   |
| NM_018163 | 866.588  | 1781.047  | AK021442  | 2272.417  | 3214.485  | NM_016081 | 3994.956  | 3941.879  |
| AK024079  | 714.927  | 1600.232  | AK001076  | 712.514   | 747.639   | NM_006389 | 1514.654  | 1801.646  |
| NM_002428 | 1587.226 | 2170.518  | AK001820  | 628.568   | 517.638   | M30818    | 359.085   | 479.696   |
| NM_014674 | 4006.363 | 3450.973  | AK021482  | 5876.31   | 8433.303  | NM_003329 | 39563.676 | 33773.32  |
| NM_018271 | 822.306  | 761.318   | AK021730  | 472.297   | 836.986   | NM_003299 | 15851.396 | 12445.699 |
| NM_001611 | 1223.575 | 989.941   | AK025317  | 7292.879  | 9128.607  | NM_005261 | 209.121   | 390.205   |
| AB018310  | 3189.708 | 2520.618  | AK026119  | 724.251   | 1158.505  | NM_001783 | 4857.787  | 3626.577  |

|           |           |           |           |           |           |           |           |           |
|-----------|-----------|-----------|-----------|-----------|-----------|-----------|-----------|-----------|
| NM_020133 | 669.749   | 479.243   | AK025177  | 242.044   | 633.543   | J03171    | 1504.521  | 2195.929  |
| NM_015379 | 16129.932 | 8409.333  | AK025552  | 288.337   | 403.886   | NM_005312 | 786.105   | 877.166   |
| NM_004878 | 541.904   | 538.678   | AK026725  | 2548.296  | 4628.672  | NM_001711 | 649.437   | 1386.953  |
| AF144638  | 65023.391 | 38950.141 | AJ008118  | 63271.895 | 45920.059 | NM_018964 | 1564.436  | 1427.635  |
| NM_001777 | 43909.621 | 65401.332 | AK000939  | 669.979   | 374.578   | NM_000080 | 664.546   | 693.896   |
| U79457    | 6389.805  | 13243.341 | AK024512  | 5841.615  | 4468.931  | NM_001829 | 764.394   | 748.73    |
| AB037832  | 661.569   | 1390.63   | AK023454  | 1549.389  | 1583.012  | AF283645  | 1411.3    | 1224.131  |
| NM_014347 | 7668.774  | 12918.286 | L23207    | 1051.223  | 684.487   | NM_016575 | 779.383   | 577.467   |
| NM_001296 | 10966.181 | 18605.891 | NM_018062 | 1060.695  | 918.727   | NM_001045 | 2137.729  | 2116.13   |
| NM_004344 | 14058.109 | 20650.047 | NM_007128 | 12573.509 | 9313.205  | NM_005697 | 1972.105  | 1452.322  |
| AF085972  | 429.498   | 538.114   | NM_007160 | 463.384   | 567.468   | NM_003099 | 1888.98   | 2372.972  |
| NM_000757 | 1198.066  | 948.638   | NM_018627 | 684.349   | 1399.762  | NM_018303 | 1196.542  | 1666.226  |
| AJ224166  | 1159.585  | 2089.466  | NM_015377 | 650.183   | 810.932   | NM_014758 | 1684.802  | 2203.853  |
| AK026098  | 3399.794  | 2926.563  | AL137531  | 960.251   | 1518.496  | NM_005124 | 1204.581  | 2565.899  |
| NM_012381 | 1922.315  | 1464.44   | AK022210  | 266.18    | 406.281   | AK000947  | 1595.248  | 3982.071  |
| M20702    | 1647.077  | 1011.715  | AL080085  | 4741.014  | 5983.127  | L08240    | 816.003   | 2572.417  |
| NM_006397 | 17580.689 | 9087.219  | AF055012  | 1579.723  | 1277.347  | NM_002940 | 787.428   | 858.976   |
| D83776    | 1666.082  | 1110.903  | AK022307  | 2540.328  | 2078.35   | AB046844  | 584.812   | 905.809   |
| NM_004088 | 2049.435  | 1162.958  | NM_005172 | 3385.7    | 3530.273  | NM_000302 | 600.641   | 735.917   |
| NM_002180 | 878.348   | 592.496   | AK025192  | 14367.077 | 13704.331 | NM_013235 | 10656.524 | 12449.551 |
| NM_000138 | 2664.242  | 1764.415  | NM_012403 | 3287.391  | 4144.296  | NM_016015 | 6078.01   | 6392.782  |
| AB011541  | 900.149   | 3753.599  | AK022611  | 5685.209  | 6202.02   | NM_020120 | 497.023   | 635.657   |
| BC032460  | 3394.839  | 6376.016  | NM_006158 | 14552.209 | 14084.317 | AK022900  | 594.123   | 565.786   |
| NM_014071 | 1470.972  | 2721.509  | NM_006346 | 1905.168  | 3070.997  | AB023216  | 250.332   | 374.019   |
| AK024404  | 1197.21   | 1464.193  | AK025240  | 2711.694  | 4576.212  | NM_002266 | 18052.344 | 12637.116 |
| NM_006329 | 920.683   | 1463.782  | NM_017633 | 9562.382  | 15209.822 | NM_014400 | 2642.611  | 2148.358  |
| NM_005166 | 1285.492  | 920.805   | AF086186  | 17824.596 | 23663.121 | AL157492  | 763.688   | 766.334   |
| AB033065  | 517.215   | 2164.918  | NM_017802 | 3836.474  | 7677.669  | AL353957  | 1369.087  | 1184.218  |
| NM_003253 | 979.729   | 1107.035  | AF155194  | 319.906   | 899.381   | NM_007214 | 3068.362  | 2790.439  |
| NM_013285 | 4287.938  | 3080.196  | AK023667  | 982.102   | 1130.993  | NM_000311 | 3503.862  | 3143.988  |
| NM_002872 | 10385.42  | 6563.297  | AJ008137  | 13490.706 | 16000.884 | NM_017909 | 1348.78   | 1373.313  |
| NM_000490 | 909.859   | 552.872   | AF085841  | 796.552   | 1154.372  | NM_006335 | 4947.572  | 5800.082  |
| NM_004839 | 2528.663  | 1583.236  | AL049232  | 172.465   | 516.524   | NM_017731 | 412.226   | 397.598   |
| NM_012193 | 1894.736  | 1101.628  | U92026    | 1050.173  | 531.376   | AB040891  | 1530.16   | 2291.481  |
| NM_003405 | 9751.313  | 4094.397  | AF086234  | 22917.203 | 11989.906 | AB037780  | 457.644   | 522.121   |
| NM_004720 | 5329.065  | 2627.175  | AK023680  | 3656.093  | 2546.182  | NM_005845 | 7482.081  | 8916.784  |
| NM_001057 | 1693.704  | 599.598   | AF009324  | 2839.187  | 2091.455  | NM_016209 | 6187.632  | 5434.837  |
| NM_005561 | 8085.441  | 14067.008 | AF019226  | 1006.074  | 820.252   | AK002114  | 2486.885  | 3167.135  |
| AF272381  | 4173.721  | 6006.569  | AK022112  | 472.021   | 244.327   | AL390184  | 279.267   | 421.361   |
| NM_004524 | 1205.461  | 1772.061  | AL137480  | 13122.791 | 10509.857 | NM_018699 | 301.816   | 308.734   |
| NM_006315 | 2447.805  | 2992.547  | AK022182  | 469.037   | 241.35    | AK026318  | 574.341   | 555.483   |
| NM_018401 | 707.725   | 779.483   | D16473    | 1493.361  | 1349.204  | AF291673  | 891.648   | 1132.572  |
| NM_005163 | 3300.337  | 4162.833  | AB028968  | 1360.973  | 1423.707  | NM_004365 | 5991.434  | 5804.494  |
| NM_007273 | 25505.322 | 21572.752 | AK001202  | 632.775   | 483.295   | NM_016355 | 2451.481  | 1937.838  |
| BE894943  | 1294.62   | 813.459   | AF195764  | 47054.867 | 39302.219 | AJ296290  | 1460.458  | 1693.664  |
| NM_016422 | 2693.97   | 3239.804  | AF055029  | 917.866   | 1285.073  | AK026092  | 1532.615  | 1481.784  |
| NM_003592 | 3767.375  | 3457.888  | S82164    | 2283.669  | 2789.831  | AK001175  | 281.614   | 240.018   |
| NM_014953 | 2953.824  | 1762.473  | AK024394  | 1797.471  | 2954.988  | NM_003897 | 1424.314  | 1329.296  |
| AF179995  | 1996.527  | 2064.052  | AF147374  | 1233.501  | 1819.527  | NM_014165 | 6756.705  | 7387.966  |
| NM_016195 | 2708.682  | 776.806   | AF130091  | 619.035   | 1096.017  | AL442085  | 1900.862  | 2032.182  |
| NM_004523 | 2602.181  | 1661.832  | L43338    | 33025.371 | 41097.922 | NM_013313 | 2366.289  | 3424.368  |
| NM_004404 | 8066.426  | 4117.125  | AJ227866  | 34118.91  | 56141.383 | NM_014736 | 6675.694  | 8783.593  |
| NM_002960 | 5412.151  | 3324.761  | AF458223  | 3643.597  | 5402.401  | AK023886  | 590.731   | 600.536   |

|           |           |           |           |           |           |           |           |           |
|-----------|-----------|-----------|-----------|-----------|-----------|-----------|-----------|-----------|
| AB046788  | 470.457   | 398.167   | AK026822  | 1072.077  | 1231.688  | NM_002553 | 1017.37   | 1063.901  |
| NM_00679C | 2515.945  | 1682.602  | AK022838  | 14176.991 | 13555.928 | AJ404615  | 1750.107  | 1602.993  |
| AL117522  | 8941.06   | 4678.469  | NM_003509 | 582.414   | 741.651   | NM_016053 | 11974.884 | 10538.265 |
| NM_006572 | 8498.683  | 9070.672  | CY3Cy5    | 7956.832  | 325.616   | AB007869  | 1141.212  | 837.489   |
| NM_004784 | 257.09    | 459.415   | AA700390  | 6828.633  | 6250.419  | M64108    | 878.145   | 813.856   |
| NM_019061 | 2877.564  | 2853.237  | Y18474    | 415.722   | 457.726   | Y17867    | 688.958   | 634.535   |
| AB033007  | 3369.064  | 3614.234  | AA436163  | 1709.666  | 1707.389  | M92642    | 348.46    | 449.383   |
| NM_001304 | 660.418   | 598.57    | BI907981  | 1152.081  | 1195.45   | NM_018071 | 1271.844  | 1796.688  |
| D29810    | 2683.152  | 2658.467  | BI603841  | 2822.507  | 2928.963  | NM_004333 | 1300.052  | 1672.92   |
| NM_00012E | 1738.568  | 1144.019  | M19888    | 561.539   | 314.73    | M31520    | 43683.559 | 80682.813 |
| AB002384  | 1855.451  | 1299.193  | Y08136    | 772.081   | 624.142   | NM_00202C | 3888.174  | 2697.788  |
| NM_018437 | 832.496   | 523.427   | AA156863  | 5576.677  | 5673.074  | AL050137  | 268.815   | 132.422   |
| NM_000422 | 557.716   | 567.398   | BI915199  | 2577.167  | 2655.461  | AK024423  | 652.827   | 413.162   |
| AK023164  | 1709.197  | 1620.447  | R82957    | 60225.203 | 52730.078 | NM_005043 | 7888.911  | 5777.789  |
| NM_005379 | 1034.423  | 1258.3    | BI830442  | 935.563   | 569.595   | NM_005979 | 3331.454  | 2331.501  |
| AK027121  | 9175.427  | 10863.295 | AI218732  | 2378.304  | 2377.296  | NM_006282 | 2194.781  | 2046.322  |
| NM_017433 | 2243.008  | 3560.147  | NM_004102 | 2915.912  | 2781.349  | NM_020321 | 386.091   | 373.074   |
| AL117661  | 4789.162  | 6767.321  | NM_004544 | 6264.491  | 6541.996  | NM_01592C | 9338.309  | 9585.252  |
| X64643    | 2363.617  | 3242.711  | SR5       | 6536.521  | 7460.957  | AB011113  | 914.123   | 943.111   |
| NM_00538C | 9381.739  | 14644.591 | SR7       | 5711.159  | 49550.875 | NM_004115 | 550.412   | 429.461   |
| NM_005269 | 458.851   | 613.324   | SR9       | 21195.605 | 4342.488  | NM_018287 | 434.297   | 494.302   |
| D70835    | 49730.121 | 36707.375 | CY3Cy5    | 10715.646 | 491.687   | NM_00195E | 609.097   | 816.819   |
| NM_002697 | 1457.784  | 1400.871  | NM_018049 | 6483.884  | 4738.301  | AF016004  | 1012.074  | 2123.731  |
| NM_00151E | 9821.534  | 6160.893  | AJ133439  | 611.279   | 607.197   | NM_003567 | 1069.619  | 1129.09   |
| NM_003412 | 22416.908 | 14528.191 | NM_00516C | 11134.551 | 9670.175  | NM_00731E | 1015.352  | 791.178   |
| AK022668  | 2262.837  | 1479.084  | NM_000596 | 431.839   | 468.06    | L20686    | 859.583   | 639.939   |
| AW975132  | 1814.407  | 912.797   | X78817    | 18774.504 | 18380.381 | NM_000304 | 686.436   | 609.805   |
| NM_006051 | 5385.345  | 2796.226  | AB023135  | 980.664   | 1222.823  | S72604    | 8846.471  | 6811.725  |
| NM_018427 | 3378.121  | 2008.905  | AY009401  | 491.21    | 766.401   | NM_00267E | 829.734   | 648.221   |
| NM_014663 | 1215.72   | 836.156   | AF294628  | 2525.669  | 3510.218  | NM_012432 | 6853.689  | 6558.612  |
| AF007217  | 1554.274  | 927.157   | AK026960  | 1385.526  | 963.069   | NM_005007 | 1798.338  | 1845.647  |
| AB037753  | 3132.047  | 3582.007  | NM_001991 | 1331.283  | 1219.463  | AK024996  | 1972.021  | 1960.819  |
| NM_004674 | 2193.156  | 2183.541  | NM_000193 | 3142.907  | 2718.293  | NM_004417 | 321.402   | 263.926   |
| AB037801  | 3595.802  | 5213.59   | BC014586  | 528.999   | 593.381   | NM_01229C | 2481.295  | 2159.176  |
| AL080159  | 14213.403 | 19643.125 | NM_00244E | 4016.367  | 3246.407  | NM_002431 | 3120.31   | 2103.097  |
| NM_017823 | 31167.082 | 48001.93  | AF053952  | 24212.518 | 27900.934 | NM_001827 | 36120.246 | 24131.881 |
| U55185    | 1085.121  | 2295.414  | NM_003213 | 5648.077  | 6101.561  | NM_02046E | 1197.693  | 929.006   |
| U30828    | 10723.273 | 14014.981 | BF184738  | 567.616   | 820.491   | NM_002853 | 1699.428  | 1340.148  |
| AF085886  | 50988.273 | 65396.363 | NM_014044 | 2910.751  | 3497.132  | NM_003174 | 1005.859  | 805.877   |
| AK023828  | 3911.007  | 5681.762  | NM_00090C | 1694.97   | 1886.815  | NM_012307 | 4752.759  | 3490.006  |
| AL080223  | 1838.222  | 1373.949  | AK023684  | 7999.163  | 9246.859  | NM_00254C | 909.515   | 749.707   |
| AK001630  | 8603.574  | 5281.066  | NM_000232 | 3422.332  | 5178.123  | NM_006371 | 918.888   | 1181.464  |
| NM_014612 | 15090.773 | 8142.979  | NM_015057 | 881.63    | 539.251   | NM_018834 | 507.966   | 453.903   |
| AF079098  | 830.945   | 640.523   | AF303398  | 8774.436  | 9764.258  | AK026882  | 481.546   | 596.819   |
| NM_001543 | 707.166   | 453.741   | NM_01481C | 2206.76   | 1730.612  | NM_004574 | 412.081   | 456.86    |
| NM_016641 | 5966.404  | 3027.389  | NM_00473E | 3112.779  | 2827.35   | NM_00484E | 567.992   | 616.549   |
| AB018010  | 612.734   | 274.892   | NM_007357 | 6064.794  | 6012.602  | NM_001944 | 304.607   | 118.895   |
| NM_01461C | 10342.304 | 7605.239  | NM_003763 | 5814.86   | 6960.87   | NM_014813 | 427.849   | 284.495   |
| NM_00068E | 631.593   | 661.819   | AK023448  | 1460.193  | 1376.837  | AF014459  | 1127.921  | 725.496   |
| NM_006621 | 4834.729  | 7990.578  | Y18213    | 2475.189  | 2494.612  | AK024601  | 2585.071  | 2455.095  |
| BF347398  | 3542.381  | 6610.773  | NM_003283 | 2953.377  | 2499.054  | S68069    | 3059.473  | 3229.155  |
| AK026762  | 3075.08   | 5973.321  | AF249898  | 7548.465  | 6214.809  | AB011095  | 560.116   | 458.024   |
| AF078844  | 99.027    | 1030.426  | M69181    | 10946.174 | 8816.304  | NM_001503 | 373.328   | 434.476   |

|           |           |           |           |           |           |           |           |           |
|-----------|-----------|-----------|-----------|-----------|-----------|-----------|-----------|-----------|
| NM_004412 | 1482.767  | 3036.255  | AK027224  | 839.292   | 725.396   | NM_006302 | 1201.032  | 1049.204  |
| L48516    | 2462.121  | 3878.815  | L09078    | 470.463   | 544.451   | AJ224875  | 2789.711  | 2995.843  |
| NM_01664E | 9894.894  | 13267.769 | NM_002652 | 452.956   | 1142.211  | NM_00214C | 1606.141  | 1429.971  |
| AF083930  | 2505.642  | 4186.742  | NM_001311 | 4911.51   | 5136.002  | AF043324  | 3000.599  | 2743.411  |
| AB040907  | 742.383   | 1489.838  | NM_01779E | 10041.739 | 11185.228 | AK024172  | 787.733   | 545.492   |
| NM_00342E | 1092.562  | 2090.537  | NM_000354 | 1764.279  | 2550.188  | NM_014814 | 3480.714  | 2744.576  |
| NM_014862 | 1065.385  | 2077.193  | NM_01241C | 3304.479  | 6064.355  | NM_002797 | 8066.785  | 7325.56   |
| AK027159  | 1768.558  | 2697.365  | NM_001111 | 11092.86  | 17887.127 | AK024318  | 839.534   | 960.421   |
| AK001796  | 507.955   | 412.808   | NM_00502E | 9364.877  | 9790.238  | NM_01612E | 3810.339  | 3500.091  |
| AF086152  | 9056.783  | 5426.771  | NM_001611 | 1212.759  | 1428.303  | NM_00280E | 5713.494  | 5608.141  |
| U78519    | 1582.677  | 862.222   | AB018310  | 5362.765  | 5562.335  | NM_017912 | 1878.253  | 1442.153  |
| AK026872  | 1595.19   | 1158.19   | NM_020133 | 785.194   | 617.798   | NM_000423 | 2272.27   | 2435.368  |
| AL157505  | 800.613   | 1497.372  | NM_01537E | 20109.824 | 18482.408 | AB046838  | 1426.129  | 1408.434  |
| S77361    | 576.393   | 1349.981  | NM_00487E | 662.106   | 1051.26   | AK026339  | 316.64    | 233.922   |
| NM_00719C | 3302.147  | 6784.551  | NM_000742 | 1900.127  | 1617.079  | X98411    | 1405.205  | 1852.769  |
| AF043897  | 1358.713  | 2709.695  | NM_00235E | 11262.273 | 9129.872  | AF116658  | 2230.135  | 2567.983  |
| U79246    | 1772.083  | 3514.152  | AK026608  | 3317.556  | 3269.76   | NM_01486E | 2684.002  | 2562.588  |
| AF052140  | 755.877   | 1338.725  | AB046836  | 1161.37   | 729.847   | AB032977  | 2805.49   | 1977.98   |
| NM_01883E | 804.221   | 1252.796  | AJ224166  | 1668.658  | 1205.854  | AK001725  | 488.602   | 701.615   |
| AF007147  | 1097.89   | 2332.156  | AK026098  | 3899.078  | 4881.941  | NM_00303E | 945.648   | 784.872   |
| AF052127  | 3724.103  | 6504.76   | NM_012381 | 2960.105  | 2950.513  | NM_02052E | 1838.217  | 1748.966  |
| AK024261  | 702.065   | 1510.681  | M20702    | 1932.786  | 2408.198  | NM_02039E | 1303.277  | 1465.528  |
| AF052150  | 1205.808  | 2423.043  | NM_006397 | 21302.449 | 22489.479 | NM_00342E | 526.973   | 545.664   |
| AF086481  | 894.7     | 1966.619  | D83776    | 1714.229  | 2341.472  | NM_01338E | 2572.864  | 2322.458  |
| AK021982  | 268.352   | 816.466   | NM_00408E | 2997.572  | 4617.407  | AF038951  | 4418.008  | 3862.92   |
| AL355689  | 410.732   | 1026.924  | NM_00013E | 3382.023  | 3643.568  | AK021811  | 993.398   | 933.87    |
| AK024885  | 3055.893  | 5710.552  | NM_018163 | 1048.631  | 1166.767  | NM_00342E | 1360.912  | 1224.938  |
| AK022441  | 1129.684  | 783.066   | AK026362  | 3923.973  | 3350.925  | AF055030  | 808.651   | 567.195   |
| AK026208  | 3096.439  | 4289.026  | NM_00496E | 3007.236  | 2503.713  | AK000589  | 648.379   | 645.71    |
| NM_016947 | 40935.371 | 52712.676 | NM_00590E | 2354.179  | 2418.803  | X53281    | 2136.224  | 1640.23   |
| AY007136  | 747.713   | 1464.75   | NM_00478E | 4518.534  | 3764.267  | BC012782  | 795.25    | 559.381   |
| AK026759  | 455.68    | 739.2     | AK024079  | 1005.534  | 1026.917  | AF132026  | 24210.221 | 16564.561 |
| AL359940  | 1899.364  | 3994.792  | NM_00242E | 2176.756  | 2618.411  | AL050353  | 855.551   | 859.735   |
| NM_01828E | 587.851   | 1291.339  | NM_014674 | 4995.794  | 6498.958  | AB037788  | 3089.059  | 3150.196  |
| AF085961  | 562.82    | 1021.883  | NM_018271 | 1293.097  | 1607.24   | NM_004587 | 2349.478  | 1835.834  |
| AK024925  | 16396.24  | 20399.16  | NM_000547 | 869.697   | 1029.887  | NM_00097E | 48823.715 | 83530.047 |
| AL049460  | 7543.339  | 11558.323 | NM_014652 | 1036.918  | 1595.072  | AF147412  | 5874.02   | 6208.613  |
| AK022396  | 1330.985  | 2587.78   | AL133020  | 6392.03   | 6749.736  | AK024570  | 7012.166  | 7704.854  |
| AF075113  | 806.381   | 1526.223  | NM_014044 | 2255.621  | 1328.612  | AF161401  | 5608.938  | 5303.495  |
| AF086037  | 377.833   | 937.871   | NM_00090C | 1264.202  | 786.517   | NM_00099C | 5073.252  | 4318.615  |
| AK022892  | 7026.4    | 7294.666  | AK023684  | 6659.144  | 4791.1    | NM_01474C | 2074.091  | 2061.879  |
| U50536    | 569.182   | 771.112   | NM_000232 | 2459.986  | 2287.011  | NM_01595E | 4216.752  | 3372.817  |
| Z36807    | 21243.457 | 29252.076 | AA700390  | 7327.623  | 9823.989  | AF075008  | 593.963   | 501.095   |
| U20896    | 718.621   | 1252.82   | Y18474    | 397.854   | 621.914   | NM_006504 | 1330.108  | 1155.575  |
| U52836    | 520.055   | 910.497   | AA436163  | 1667.01   | 3042.316  | AF070538  | 424.648   | 383.137   |
| NM_01793E | 1575.416  | 2787.32   | BI907981  | 1147.02   | 1668.164  | NM_00069E | 3091.448  | 4061.99   |
| AK021837  | 1361.315  | 2322.75   | BI603841  | 2596.823  | 3130.496  | NM_00248E | 11079.453 | 11981.091 |
| AK002088  | 16677.459 | 23452.051 | M19888    | 546.195   | 596.689   | NM_004003 | 2240.548  | 1666.782  |
| X98206    | 624.135   | 1344.422  | Y08136    | 864.625   | 657.668   | NM_00018E | 723.603   | 946.088   |
| AK022193  | 581.412   | 896.351   | AA156863  | 5280.522  | 4464.881  | BF244401  | 592.168   | 461.76    |
| AK000106  | 1810.899  | 3756.541  | BI915199  | 2579.246  | 2136.586  | NM_00471E | 8559.387  | 8200.006  |
| AK022370  | 1220.382  | 3414.202  | BI830442  | 708.537   | 752.559   | AL359585  | 1190.835  | 1275.701  |
| AK026765  | 1323.044  | 2704.093  | AI218732  | 2855.263  | 3670.914  | AB046850  | 991.262   | 857.966   |

|           |           |           |           |           |           |           |           |           |
|-----------|-----------|-----------|-----------|-----------|-----------|-----------|-----------|-----------|
| AL117530  | 926.371   | 1405.037  | NM_016204 | 1109.329  | 1522.284  | NM_014801 | 727.626   | 556.521   |
| AK025016  | 363.168   | 761.024   | NM_001311 | 4190.268  | 1917.247  | NM_003642 | 3655.027  | 3619.735  |
| AL080191  | 5500.159  | 8134.501  | NM_017798 | 10256.866 | 6955.69   | AB027013  | 1082.248  | 1053.246  |
| AK021639  | 858.58    | 1708.428  | NM_000354 | 245.493   | 365.75    | BC032686  | 196.426   | 117.924   |
| AK023189  | 1285.633  | 2771.516  | NM_012410 | 1817.856  | 1885.602  | BF185480  | 1432.746  | 1726.454  |
| AK023872  | 411.313   | 1248.769  | NM_001111 | 7117.168  | 5366.417  | NM_002128 | 10592.564 | 10276.005 |
| AK022127  | 435.029   | 1063.626  | NM_018049 | 6254.494  | 5435.415  | NM_003074 | 1301.716  | 1094.637  |
| AF306347  | 834.854   | 1853.913  | AJ133439  | 588.28    | 640.054   | AL360195  | 549.263   | 810.208   |
| AK001164  | 2040.177  | 4500.878  | NM_005160 | 10543.912 | 8574.146  | NM_017810 | 1057.665  | 1060.459  |
| AK022619  | 383.546   | 1188.354  | NM_000596 | 428.973   | 520.352   | NM_003181 | 41683.84  | 43514.063 |
| AK023464  | 2008.654  | 3949.982  | X78817    | 18313.602 | 19717.139 | NM_004451 | 762.1     | 712.383   |
| AK024157  | 566.555   | 1127.162  | AB023135  | 1188.595  | 1143.168  | NM_004364 | 410.909   | 391.124   |
| AK023563  | 770.1     | 2064.546  | AY009401  | 662.789   | 618.907   | AK023505  | 1302.965  | 984.59    |
| AK023905  | 2814.953  | 4136.504  | AK026960  | 851.198   | 820.174   | AB037851  | 2743.727  | 2814.521  |
| AK024231  | 3286.213  | 5896.184  | NM_001991 | 1265.49   | 1377.987  | AL050389  | 2545.503  | 2610.541  |
| NM_016940 | 3080.251  | 6493.634  | NM_000193 | 3513.119  | 5211.564  | AK025855  | 449.778   | 453.738   |
| AK025757  | 4987.416  | 9995.722  | BC014586  | 878.6     | 1136.722  | AK024684  | 541.251   | 537.276   |
| Y16713    | 803.848   | 1188.133  | NM_002448 | 4070.241  | 4541.517  | NM_014945 | 5565.307  | 6553.54   |
| L07394    | 9736.87   | 14696.233 | AF053952  | 27695.424 | 24055.736 | AK001546  | 562.501   | 516.446   |
| AK056133  | 1124.097  | 2793.683  | BF184738  | 834.339   | 1087.191  | NM_006537 | 2805.607  | 3111.585  |
| NM_017845 | 11880.032 | 20367.523 | NM_015057 | 785.319   | 706.06    | AF007155  | 4574.915  | 4541.299  |
| AF130080  | 638.857   | 1458.375  | AF303398  | 7147.229  | 8803.704  | AK023055  | 297.672   | 200.654   |
| AK026006  | 1164.559  | 2062.294  | NM_014810 | 2019.891  | 1677.863  | AL049282  | 2210.788  | 2271.419  |
| NM_019085 | 9961.588  | 15127.691 | NM_004738 | 2890.216  | 3163.289  | AK021443  | 1421.09   | 1198.144  |
| AF147440  | 488.017   | 1181.753  | NM_007357 | 6268.011  | 7628.013  | AF070569  | 288.325   | 188.087   |
| AL122072  | 3851.159  | 6365.669  | NM_003763 | 6322.987  | 6983.035  | NM_020233 | 1595.772  | 1410.292  |
| AK026221  | 710.228   | 1398.252  | AK023448  | 1391.081  | 1065.088  | AL355732  | 1108.591  | 1144.832  |
| Y13870    | 908.765   | 1915.263  | Y18213    | 2476.089  | 1855.685  | NM_017966 | 1227.609  | 1565.289  |
| AK026403  | 2112.192  | 4038.24   | NM_003283 | 2345.35   | 2001.164  | AF143327  | 551.976   | 558.581   |
| AF086361  | 825.761   | 987.242   | AF249898  | 8107.646  | 6865.345  | AL137535  | 346.57    | 298.141   |
| AK002162  | 595.299   | 961.209   | M69181    | 12282.488 | 11163.413 | AL049991  | 761.849   | 602.881   |
| AK022980  | 1013.458  | 1748.416  | AK027224  | 497.132   | 704.271   | AL049990  | 709.821   | 1004.951  |
| AL359058  | 1357.044  | 2828.3    | L09078    | 588.442   | 532.961   | AF131843  | 748.294   | 780.635   |
| AK022439  | 850.799   | 1814.753  | NM_002428 | 2106.622  | 942.416   | AK026653  | 670.192   | 581.974   |
| AK026237  | 2362.685  | 4587.189  | NM_014674 | 5336.607  | 3039.735  | NM_020231 | 626.266   | 565.766   |
| AK023687  | 1032.603  | 1729.462  | NM_018271 | 1413.004  | 833.702   | AL133118  | 1728.413  | 1993.888  |
| NM_017632 | 2695.14   | 5319.492  | NM_000547 | 830.448   | 611.062   | AK023571  | 1183.367  | 1376.05   |
| AK026655  | 1273.05   | 3379.78   | NM_014652 | 924.484   | 841.886   | NM_001702 | 1997.232  | 2029.922  |
| NM_005279 | 542.943   | 1026.077  | AL133020  | 5828.957  | 4346.594  | AK026657  | 963.428   | 1024.022  |
| AF129926  | 2064.415  | 3609.408  | NM_001611 | 1044.086  | 1747.698  | AF087991  | 8316.615  | 7404.009  |
| AK025822  | 2131.831  | 4550.958  | AB018310  | 4647.812  | 5040.567  | Y12839    | 291.868   | 259.899   |
| AL360140  | 689.321   | 1380.472  | NM_020133 | 1032.762  | 789.059   | AJ001876  | 301.783   | 312.33    |
| AF201937  | 47663.125 | 55780.855 | NM_015379 | 20740.211 | 20235.961 | AJ227884  | 330.729   | 317.747   |
| AL390128  | 3837.373  | 5633.308  | NM_004878 | 866.832   | 955.907   | X64986    | 4851.71   | 4817.296  |
| AL157429  | 11263.804 | 14321.528 | NM_000742 | 1049.567  | 1252.553  | L38282    | 1001.384  | 905.552   |
| NM_012071 | 36876.914 | 43430.43  | NM_002355 | 12320.173 | 19044.34  | NM_018056 | 1780.485  | 2015.105  |
| AF055018  | 9275.489  | 9839.216  | AK026608  | 3593.985  | 4616.738  | Y16185    | 427.46    | 247.01    |
| AF070599  | 1248.005  | 2132.455  | NM_004102 | 2545.533  | 1363.067  | NM_019008 | 1122.479  | 1109.384  |
| NM_005450 | 2501.432  | 3550.751  | NM_004544 | 5414.45   | 2784.347  | M20838    | 444.834   | 366.597   |
| AK023600  | 853.068   | 1292.411  | NM_018890 | 24112.701 | 18781.605 | AK022738  | 292.809   | 176.403   |
| Z83952    | 563.786   | 909.269   | NM_016204 | 805.241   | 924.395   | AK002095  | 513.949   | 449.417   |
| NM_005210 | 455.548   | 1051.796  | AB046836  | 1319.486  | 1224.6    | AK000821  | 2755.664  | 2329.802  |
| NM_005525 | 581.057   | 988.8     | AJ224166  | 1488.959  | 1526.231  | AK024526  | 3742.058  | 3112.081  |

|            |           |           |           |           |           |           |           |           |
|------------|-----------|-----------|-----------|-----------|-----------|-----------|-----------|-----------|
| NM_005285  | 2331.041  | 3673.542  | AK026098  | 4579.036  | 6780.617  | NM_017618 | 983.986   | 668.497   |
| AK001918   | 852.363   | 1318.422  | NM_012381 | 3024.178  | 3621.55   | NM_017848 | 275.431   | 158.227   |
| NM_018635  | 26637.135 | 22029.494 | M20702    | 2249.666  | 3046.876  | AK024315  | 5479.117  | 6841.854  |
| AF086048   | 3097.758  | 3076.798  | NM_006397 | 24572.627 | 25350.443 | AK024945  | 834.412   | 742.49    |
| L15616     | 3675.873  | 3605.71   | D83776    | 1873.14   | 2014.107  | AK024579  | 1580.428  | 1260.165  |
| AB019565   | 7151.125  | 5723.602  | NM_004088 | 2835.64   | 3227.056  | S75708    | 4406.583  | 3459.808  |
| D16914     | 53908.66  | 66099.555 | NM_000138 | 3257.093  | 2942.295  | U79291    | 4067.573  | 5030.739  |
| AA084879   | 1355.458  | 1772.771  | NM_018163 | 1401.158  | 1047.334  | D17172    | 9574.447  | 11229.066 |
| NM_000833  | 2409.348  | 2669.45   | AK026362  | 4001.413  | 3627.193  | AJ227859  | 817.023   | 1120.906  |
| NM_000283  | 5092.141  | 6116.105  | NM_004968 | 2889.71   | 2980.009  | NM_018544 | 410.92    | 509.478   |
| NM_012460  | 3015.61   | 3948.699  | NM_005908 | 2850.851  | 3264.307  | AK022670  | 412.031   | 999.785   |
| NM_012118  | 3979.765  | 4312.325  | NM_004785 | 4947.404  | 4694.443  | AB020699  | 2650.965  | 1777.837  |
| AK001133   | 538.453   | 1023.581  | AK024079  | 763.048   | 898.744   | AF086269  | 746.243   | 691.057   |
| AK024092   | 2409.293  | 1964.031  | NM_000193 | 2921.055  | 1784.753  | U90437    | 5039.788  | 4130.562  |
| AK002044   | 2194.624  | 1655.894  | BC014586  | 1026.631  | 547       | AK000842  | 5589.648  | 7308.898  |
| AK022206   | 728.652   | 658.438   | NM_002448 | 3635.184  | 2319.941  | AK023386  | 5655.957  | 6719.782  |
| U90904     | 4973.321  | 4291.237  | AF053952  | 24540.887 | 15296.219 | NM_007053 | 12450.625 | 13124.581 |
| AF088053   | 3265.619  | 2497.867  | NM_003213 | 5447.805  | 4574.237  | AK022153  | 571.62    | 522.159   |
| AL133662   | 725.063   | 595.915   | BF184738  | 561.779   | 578.264   | AK022789  | 363.086   | 353.851   |
| NM_002565  | 672.662   | 375.692   | NM_014044 | 2510.066  | 2633.814  | AK023756  | 323.7     | 377.38    |
| U90903     | 626.031   | 618.323   | NM_000900 | 1089.976  | 1089.477  | NM_001126 | 2681.667  | 2721.409  |
| AF278760   | 1717.294  | 1107.226  | AK023684  | 6869.639  | 8694.703  | AK023673  | 2200.728  | 2442.194  |
| X58061     | 488.857   | 252.688   | NM_000232 | 2316.911  | 2581.147  | NM_018252 | 1717.118  | 1964.407  |
| AB032954   | 2905.739  | 1964.824  | AA700390  | 7278.316  | 7780.177  | NM_018000 | 22131.607 | 13643.742 |
| NM_006003  | 22908.152 | 11939.355 | Y18474    | 424.5     | 557.947   | AF164963  | 484.938   | 575.619   |
| AL110197   | 3790.299  | 1667.091  | AA436163  | 1898.12   | 3866.429  | AF124366  | 17183.324 | 15575.635 |
| AF085995   | 829.454   | 299.887   | BI907981  | 1136.076  | 1437.316  | AF130112  | 591.098   | 542.062   |
| CY3Cy5     | 716.066   | 154.128   | BI603841  | 2417.805  | 3374.569  | NM_000551 | 2114.374  | 1870.677  |
| AA029300   | 2203.005  | 1362.43   | M19888    | 430.954   | 608.402   | AL365518  | 542.148   | 604.991   |
| BG708842   | 28490.174 | 15255.393 | Y08136    | 570.69    | 657.844   | AF086257  | 1267.906  | 1047.398  |
| M19723     | 48699.922 | 34096.914 | AA156863  | 5033.405  | 4335.25   | AF075056  | 374.217   | 291.323   |
| X06256     | 2280.404  | 1804.585  | BI830442  | 759.554   | 668.657   | AC119751  | 217.088   | 190.206   |
| M34057     | 1140.323  | 1835.497  | AI218732  | 2656.061  | 2829.514  | NM_019056 | 2726.455  | 2927.937  |
| ID 1984668 | 2126.874  | 6499.833  | AF249898  | 7550.055  | 4037.247  | AF279783  | 1535.907  | 1369.656  |
| ID 1832579 | 1971.112  | 4186.032  | M69181    | 11137.151 | 5590.713  | AF182422  | 5891.258  | 5144.646  |
| H-430185 N | 1514.024  | 1108.203  | L09078    | 422.804   | 369.706   | NM_016943 | 322.024   | 247.066   |
| D16583     | 2197.619  | 1281.819  | NM_002652 | 457.013   | 406.747   | AF070602  | 541.364   | 577.102   |
| H44051     | 429.853   | 459.88    | NM_001311 | 4324.72   | 3157.336  | BE393290  | 756.152   | 1121.466  |
| AA481547   | 15357.965 | 10141.792 | NM_017798 | 9232.502  | 8637.941  | NM_017622 | 1082.94   | 1165.177  |
| AA831880   | 926.158   | 825.051   | NM_012410 | 1621.507  | 1896.421  | AF133331  | 4138.896  | 5647.579  |
| T64880     | 1735.935  | 1433.46   | NM_001111 | 6873.444  | 5923.787  | AK022289  | 380.384   | 721.358   |
| NM_020967  | 1192.258  | 673.714   | NM_018049 | 6092.964  | 5753.053  | L34408    | 241.396   | 158.646   |
| NM_001071  | 41151.734 | 24519.732 | AJ133439  | 549.708   | 484.406   | AF161403  | 3922.769  | 3478.737  |
| SR2        | 50262.762 | 32114.516 | NM_005160 | 10162.061 | 9065.646  | NM_020183 | 2669.744  | 4225.215  |
| SR4        | 13477.253 | 7251.402  | NM_000596 | 1024.995  | 1834.042  | NM_018029 | 522.754   | 565.911   |
| SR6        | 2417.296  | 1299.299  | X78817    | 18417.229 | 34134.332 | AL389954  | 477.092   | 502.493   |
| SR8        | 8294.441  | 8345.271  | AB023135  | 1340.828  | 1235.812  | NM_019852 | 1076.084  | 1042.042  |
| SR10       | 26027.865 | 4040.643  | AY009401  | 645.051   | 801.755   | NM_006118 | 1674.225  | 1414.541  |
| CY3Cy5     | 1725.394  | 160.898   | AK026960  | 854.586   | 813.931   | AK026225  | 16253.767 | 18229.615 |
| NM_005027  | 914.641   | 384.683   | NM_001991 | 1345.687  | 1422.164  | AL050032  | 2078.892  | 2891.856  |
| NM_004612  | 1228.159  | 629.664   | NM_000742 | 874.639   | 642.802   | AF009304  | 290.046   | 318.485   |
| NM_005608  | 13734.226 | 6217.197  | NM_002355 | 11329.274 | 6873.285  | AF086177  | 3276.133  | 3415.171  |
| NM_001106  | 1746.883  | 1156.746  | AK026608  | 3594.882  | 3072.37   | NM_018948 | 684.457   | 618.317   |

|           |           |           |           |           |           |           |           |           |
|-----------|-----------|-----------|-----------|-----------|-----------|-----------|-----------|-----------|
| NM_015583 | 1804.842  | 1295.002  | NM_015057 | 852.797   | 822.046   | D17187    | 879.62    | 861.921   |
| NM_018490 | 1363.217  | 1207.966  | NM_004738 | 2682.747  | 3046.38   | AJ243672  | 578.252   | 704.279   |
| NM_004778 | 776.887   | 997.627   | NM_007357 | 5963.074  | 5307.94   | AL122087  | 515.541   | 616.818   |
| NM_006245 | 5688.896  | 7862.621  | NM_003763 | 6790.514  | 7096.724  | D17169    | 27745.816 | 19350.787 |
| NM_004822 | 681.887   | 674.165   | AK023448  | 1482.095  | 1177.826  | NM_017924 | 5964.171  | 6214.716  |
| AK022349  | 4201.498  | 2932.014  | Y18213    | 2622.704  | 2054.308  | NM_017546 | 3072.604  | 4416.742  |
| NM_005750 | 853.38    | 552.716   | NM_003283 | 2949.092  | 2704.589  | AL137400  | 880.077   | 1183.872  |
| NM_004973 | 4578.604  | 3164.748  | NM_018163 | 1548.582  | 844.104   | NM_006511 | 809.517   | 961.374   |
| NM_007245 | 10266.516 | 5243.701  | AK026362  | 3943.741  | 2363.123  | AF007142  | 1102.824  | 1526.221  |
| NM_001890 | 807.693   | 532.624   | NM_004968 | 2984.354  | 2000.792  | AF119853  | 1457.023  | 1718.977  |
| NM_001286 | 3169.581  | 2282.295  | NM_005908 | 2597.797  | 2044.105  | CY3Cy5    | 397.917   | 178.522   |
| NM_014648 | 1050.301  | 790.561   | NM_004785 | 5118.144  | 3857.307  | AI248827  | 1531.262  | 1917.494  |
| NM_019604 | 236.73    | 160.001   | AK024079  | 984.283   | 736.347   | R45026    | 717.12    | 973.834   |
| NM_005073 | 421.992   | 260.857   | NM_002428 | 2310.048  | 2051.15   | AI970239  | 547.959   | 488.91    |
| NM_000951 | 2416.994  | 1495.844  | NM_014674 | 4537.464  | 4888.513  | AA496452  | 1261.544  | 1401.005  |
| X52599    | 486.079   | 266.197   | NM_018271 | 1395.866  | 1436.395  | X67594    | 406.272   | 355.577   |
| AK000158  | 3420.798  | 1550.015  | NM_000547 | 900.984   | 840.468   | AF363393  | 173.555   | 79.49     |
| NM_005769 | 708.019   | 584.69    | NM_014652 | 1029.032  | 1199.753  | BC008837  | 276.568   | 544.901   |
| AK024500  | 8111.174  | 3577.461  | AL133020  | 5473.455  | 6308.496  | NM_015869 | 186.027   | 74.89     |
| NM_002564 | 3785.626  | 2452.935  | NM_001611 | 1120.559  | 1344.585  | NM_001631 | 193.612   | 182.937   |
| NM_000963 | 1783.811  | 1930.229  | AB018310  | 5183.978  | 5897.961  | AB000734  | 337.927   | 206.997   |
| NM_013308 | 2819.91   | 3882.148  | NM_020133 | 879.386   | 666.27    | NM_005987 | 23455.805 | 53252.82  |
| AF027302  | 3023.469  | 3244.649  | NM_015379 | 20038.998 | 15955.741 | X87838    | 511.451   | 1355.777  |
| NM_002852 | 1884.284  | 1709.628  | NM_004878 | 835.777   | 624.364   | NM_033199 | 635.13    | 749.06    |
| NM_001817 | 2615.584  | 2242.277  | NM_001777 | 47845.891 | 25271.912 | NM_015001 | 527.562   | 658.166   |
| AF063611  | 779.215   | 905.44    | U79457    | 8802.637  | 4755.688  | SR2       | 20464.123 | 15638.982 |
| NM_006039 | 745.931   | 469.494   | AB037832  | 1200.263  | 871.887   | SR4       | 4123.541  | 3085.416  |
| NM_002089 | 420.34    | 405.967   | NM_014347 | 12153.243 | 8191.009  | SR6       | 530.638   | 429.111   |
| NM_014656 | 3332.284  | 2695.506  | NM_001296 | 11943.011 | 9119.281  | SR8       | 2339.291  | 5135.787  |
| NM_002076 | 4238.441  | 2854.673  | NM_004344 | 17630.822 | 11559.842 | SR10      | 8235.189  | 2221.523  |
| X05299    | 5947.029  | 3237.772  | AF085972  | 638.079   | 469.987   | CY3Cy5    | 333.828   | 184.54    |
| BM468475  | 1089.601  | 569.349   | NM_000757 | 1485.542  | 1759.801  | X00094    | 298.495   | 471.525   |
| NM_000318 | 6534.357  | 3134.229  | AB046786  | 1576.704  | 2455.618  | NM_002082 | 1005.859  | 1004.128  |
| NM_002060 | 3300.386  | 1772.984  | NM_016620 | 20779.295 | 26403.621 | NM_002922 | 122.335   | 103.865   |
| AK001230  | 1761.58   | 637.101   | NM_018890 | 24951.451 | 24293.547 | AF155657  | 4758.143  | 4964.288  |
| NM_014680 | 5609.202  | 2151.678  | NM_016204 | 823.933   | 1126.176  | NM_006056 | 556.263   | 487.929   |
| NM_006224 | 42340.59  | 20183.617 | AB046836  | 1342.158  | 1832.964  | AF045229  | 3774.941  | 3641.211  |
| NM_000229 | 2214.802  | 1374.157  | AJ224166  | 1776.16   | 2261.396  | NM_001840 | 1959.822  | 2175.644  |
| NM_003129 | 16729.748 | 11436.724 | AK026098  | 4362.315  | 3910.732  | AK025099  | 434.997   | 385.575   |
| NM_001956 | 2549.027  | 1710.798  | NM_012381 | 2799.851  | 2084.256  | NM_016099 | 3219.797  | 2540.753  |
| AB033064  | 1951.715  | 1703.558  | M20702    | 1913.52   | 2024.227  | NM_000394 | 136.073   | 148.32    |
| AK022317  | 5091.23   | 3711.545  | NM_006397 | 27505.297 | 22428.088 | NM_000228 | 147.096   | 105.358   |
| NM_018396 | 9571.857  | 6764.259  | D83776    | 2055.528  | 2206.444  | NM_000830 | 311.551   | 512.545   |
| NM_003124 | 5555.327  | 4032.333  | NM_004088 | 3272.819  | 3086.573  | NM_001155 | 2002.964  | 3446.678  |
| NM_004531 | 8790.23   | 5555.481  | NM_000138 | 3280.183  | 3046.167  | M62896    | 1736.185  | 1542.603  |
| AL133581  | 2654.287  | 2069.115  | AB011541  | 676.329   | 431.842   | NM_017736 | 504.862   | 371.961   |
| NM_002558 | 669.298   | 800.413   | BC032460  | 4611.135  | 3052.815  | NM_000390 | 441.004   | 426.183   |
| NM_005031 | 6122.279  | 3928.983  | NM_014071 | 2076.287  | 1533.297  | NM_000313 | 118.71    | 165.941   |
| AB040920  | 823.361   | 747.98    | AK024404  | 1228.948  | 955.109   | NM_001498 | 7012.435  | 4010.278  |
| NM_000720 | 885.199   | 914.02    | NM_006329 | 1184.318  | 884.451   | AF263523  | 436.375   | 314.72    |
| NM_004842 | 2091.178  | 1834.115  | NM_005166 | 1404.874  | 1462.489  | L08441    | 2992.913  | 1139.838  |
| AK024639  | 2805.437  | 2142.308  | NM_000213 | 35618.453 | 57829.559 | AA641953  | 696.965   | 580.826   |
| NM_015720 | 4414.273  | 2765.269  | BE906107  | 25915.77  | 31891.77  | AL137764  | 3280.207  | 4004.981  |



|            |           |           |           |           |           |           |           |          |
|------------|-----------|-----------|-----------|-----------|-----------|-----------|-----------|----------|
| AB007915   | 1128.304  | 780.66    | NM_015516 | 6658.682  | 7300.964  | NM_00166C | 4901.814  | 5046.76  |
| AB033070   | 532.034   | 633.93    | AB033065  | 815.87    | 1067.842  | NM_00071C | 258.685   | 224.809  |
| NM_01822E  | 2465.963  | 1542.324  | NM_005211 | 646.712   | 1173.49   | NM_00075Z | 405.379   | 390.66   |
| NM_00632E  | 6860.063  | 3029.705  | NM_004857 | 12326.604 | 14406.697 | AB040945  | 160.837   | 127.333  |
| AY009127   | 14311.432 | 6333.184  | NM_01210E | 860.904   | 1034.163  | NM_00201E | 1768.676  | 1718.692 |
| NM_01486E  | 1295.125  | 708.465   | NM_00325Z | 1426.378  | 1570.177  | NM_00601E | 164.915   | 115.172  |
| AB037835   | 1056.496  | 786.984   | NM_01328E | 6164.633  | 5458.68   | AF161383  | 1071.634  | 637.885  |
| NM_000157  | 3991.825  | 2083.296  | NM_00287Z | 10772.335 | 7485.669  | NM_00041C | 3288.484  | 3186.822 |
| NM_00071Z  | 14359.734 | 9608.312  | NM_00049C | 1532.008  | 2039.409  | AF224266  | 221.608   | 177.114  |
| NM_01808E  | 681.607   | 543.775   | AJ225028  | 604.976   | 1128.353  | U72882    | 1581.51   | 1493.057 |
| BC013695   | 12243.647 | 10114.759 | NM_00340E | 18361.434 | 14559.664 | NM_014337 | 2693.348  | 2737.443 |
| NM_01484E  | 3699.024  | 3112.2    | NM_00472C | 7485.083  | 6745.586  | NM_007161 | 2884.95   | 2973.167 |
| AB011164   | 3486.802  | 2612.075  | NM_001057 | 1719.408  | 1790.322  | NM_014387 | 5002.963  | 8590.535 |
| M24750     | 1731.439  | 1544.86   | NM_005561 | 8042.286  | 4318.578  | NM_003641 | 421.367   | 1047.598 |
| NM_00596E  | 1653.403  | 1601.472  | AF272381  | 4882.921  | 3148.225  | NM_01246Z | 561.852   | 590.916  |
| NM_00274C  | 2250.586  | 2143.577  | NM_004524 | 1575.033  | 1046.217  | L29140    | 2615.11   | 2313.524 |
| AL117482   | 2700.062  | 2020.302  | NM_00631E | 2766.353  | 2035.262  | AK026448  | 1564.438  | 1082.212 |
| NM_00654E  | 24583.26  | 15536.592 | NM_018401 | 952.442   | 582.638   | AK057418  | 1097.982  | 908.184  |
| AB018324   | 8366.184  | 5839.096  | NM_00516Z | 3397.809  | 2866.938  | NM_00726C | 603.547   | 483.961  |
| NM_00274Z  | 42657.238 | 25678.268 | NM_00727Z | 29883.295 | 22208.559 | AF148646  | 1203.067  | 786.743  |
| Z25431     | 3006.254  | 2371.166  | BE894943  | 2004.244  | 2025.894  | AL110218  | 239.828   | 162.013  |
| NM_005627  | 3092.716  | 3004.574  | AF085994  | 552.964   | 621.016   | AB023201  | 822.083   | 544.232  |
| M64497     | 1478.009  | 1186.757  | NM_01642Z | 4423.739  | 5385.036  | NM_00007Z | 293.84    | 207.342  |
| NM_007274  | 11703.096 | 6361.775  | NM_01787E | 5956.767  | 6353.385  | NM_000697 | 525.521   | 510.087  |
| NM_00335E  | 3272.148  | 1533.131  | NM_004494 | 57628.598 | 59741.48  | NM_000017 | 1986.271  | 1815.971 |
| AF238315   | 383.502   | 246.717   | AL049687  | 1502.02   | 1471.666  | NM_000237 | 259.614   | 193.642  |
| NM_01464E  | 612.699   | 406.744   | NM_00564Z | 10617.222 | 13445.433 | NM_01834E | 2543.886  | 2352.133 |
| NM_00507Z  | 393.403   | 385.425   | NM_00359Z | 5611.52   | 6748.941  | AL122054  | 752.519   | 1006.561 |
| NM_000951  | 2300.566  | 1775.543  | NM_01495Z | 3901.184  | 3938.826  | AB011182  | 420.435   | 730.117  |
| X52599     | 392.176   | 325.66    | AF179995  | 2888.406  | 3283.19   | NM_00014C | 1311.409  | 867.837  |
| AA029300   | 2419.161  | 1886.824  | NM_01619E | 3482.027  | 1175.739  | NM_00512E | 887.678   | 797.594  |
| BG708842   | 28059.33  | 16600.945 | NM_00679C | 5081.407  | 4728.59   | NM_02003E | 181.939   | 261.546  |
| M19723     | 48461.273 | 42300.406 | AL117522  | 14158.924 | 14157.46  | NM_01624E | 375.051   | 366.964  |
| X06256     | 2333.662  | 1809.302  | NM_00657Z | 11217.447 | 7281.422  | NM_01592E | 1458.246  | 925.44   |
| M34057     | 735.9     | 590.162   | NM_004784 | 530.954   | 307.701   | X03757    | 850.109   | 1110.409 |
| ID 1984668 | 1464.398  | 1016.45   | NM_019061 | 3512.229  | 3082.51   | NM_00513E | 157.941   | 430.153  |
| ID 1832579 | 1839.91   | 1336.98   | AB033007  | 3349.336  | 2790.687  | AK094513  | 227.571   | 268.339  |
| H-430185 N | 1640.887  | 915.693   | NM_001304 | 655.745   | 871.416   | NM_00118Z | 2110.686  | 4217.976 |
| D16583     | 2191.385  | 1369.298  | NM_00313C | 1224.956  | 1294.623  | NM_00089C | 224.608   | 338.129  |
| H44051     | 349.214   | 314.08    | NM_00471E | 24628.424 | 29077.99  | NM_00497E | 5290.407  | 5107.732 |
| AA481547   | 14811.083 | 9005.206  | D29810    | 3620.49   | 4213.12   | AK021597  | 298.194   | 287.743  |
| AA831880   | 881.54    | 671.766   | NM_00012E | 3425.878  | 5460.451  | NM_005737 | 10353.356 | 9128.024 |
| T64880     | 2013.297  | 1238.268  | AB002384  | 4218.909  | 4412.644  | NM_000014 | 122.013   | 179.227  |
| NM_020967  | 1150.428  | 678.219   | NM_018437 | 971.75    | 1007.022  | NM_00680Z | 477.981   | 489.206  |
| AB028990   | 941.383   | 344.023   | NM_00042Z | 1013.195  | 613.004   | NM_00253Z | 455.029   | 476.08   |
| X05299     | 3842.872  | 2077.512  | AL117661  | 5699.952  | 7257.233  | AF235022  | 179.146   | 151.914  |
| BM468475   | 753.434   | 396.526   | X64643    | 2086.356  | 1835.841  | BE799167  | 120.215   | 77.288   |
| NM_00031E  | 4463.451  | 2905.033  | NM_00538C | 8504.106  | 8373.25   | AF182814  | 1231.067  | 1007.063 |
| NM_00206C  | 6417.231  | 3486.026  | NM_00526E | 719.263   | 823.771   | AK026147  | 142.717   | 285.288  |
| AK001230   | 1628.809  | 1068.603  | NM_002697 | 1948.235  | 2247.624  | NM_00532E | 371.879   | 791.868  |
| NM_01468C  | 4767.315  | 3003.974  | NM_00151E | 10557.738 | 9857.648  | NM_000107 | 1213.205  | 1635.263 |
| NM_005027  | 1132.921  | 781.477   | NM_00341Z | 22669.09  | 20837.148 | AL157445  | 427.944   | 224.306  |
| NM_00461Z  | 1325.392  | 973.917   | NM_01833E | 1056.492  | 906.647   | NM_001517 | 1143.301  | 1158.645 |

|           |           |           |           |           |           |           |           |           |
|-----------|-----------|-----------|-----------|-----------|-----------|-----------|-----------|-----------|
| NM_00560E | 14180.313 | 8760.269  | AK022668  | 2810.795  | 2899.688  | NM_00505E | 206.695   | 171.924   |
| NM_001106 | 1650.613  | 816.104   | AW975132  | 2613.411  | 2914.416  | D86974    | 402.396   | 542.557   |
| NM_01558E | 1827.208  | 1095.035  | NM_006051 | 6773.948  | 13510.039 | NM_01828E | 1046.269  | 1021.794  |
| NM_01849C | 1378.981  | 821.244   | NM_018427 | 4626.341  | 5663.7    | NM_00198E | 992.714   | 956.293   |
| NM_00477E | 587.104   | 435.111   | NM_01466E | 1911.513  | 1988.435  | NM_00499E | 204.034   | 177.733   |
| NM_00624E | 4582.537  | 3033.636  | AF007217  | 1591.251  | 1087.483  | M29551    | 1026.192  | 3841.026  |
| NM_00482E | 671.051   | 450.653   | AB037753  | 4307.451  | 4473.827  | AB023148  | 168.372   | 233.518   |
| AK022349  | 5292.117  | 3084.941  | NM_004674 | 2880.892  | 3034.574  | NM_00292E | 484.671   | 574.81    |
| NM_00575C | 819.727   | 578.638   | AB037801  | 3617.446  | 2741.777  | BC028375  | 629.672   | 525.635   |
| NM_00724E | 10219.497 | 4335.295  | AL080159  | 16437.717 | 14759.063 | AB026436  | 964.626   | 715.661   |
| NM_00189C | 817.338   | 668.373   | AF085886  | 57038.066 | 58228.848 | NM_01602E | 3219.504  | 2691.522  |
| NM_00128E | 3486.641  | 1771.539  | AK023828  | 6752.639  | 6712.874  | AK024562  | 339.83    | 308.647   |
| AB007915  | 809.979   | 544.164   | AK022664  | 270.123   | 511.981   | NM_01406E | 516.888   | 368.262   |
| AB033070  | 548.006   | 525.048   | AL080223  | 2889.499  | 3021.192  | NM_00457E | 441.296   | 294.43    |
| NM_01822E | 2009.014  | 1693.729  | AF079098  | 968.748   | 1230.354  | NM_00149E | 8066.289  | 5441.633  |
| AY009127  | 11482.494 | 7839.401  | NM_00154E | 1090.015  | 818.077   | AF263523  | 395.27    | 260.163   |
| NM_01486E | 1233.874  | 953.69    | NM_016641 | 7784.388  | 5813.833  | L08441    | 3314.681  | 1901.841  |
| AK000158  | 4081.328  | 2719.219  | AB018010  | 751.977   | 944.077   | AA641953  | 836.818   | 946.876   |
| NM_00576E | 675.697   | 585.21    | NM_01461C | 12836.113 | 12750.244 | AI248827  | 1647.074  | 1850.563  |
| AK024500  | 8721.845  | 4611.67   | NM_00068E | 815.723   | 576.941   | R45026    | 813.742   | 1159.463  |
| NM_002564 | 3762.518  | 2503.52   | NM_006621 | 5264.66   | 5216.809  | BI768063  | 200.955   | 193.694   |
| NM_00096E | 1688.702  | 1562.107  | BF347398  | 6745.793  | 7779.681  | BG386057  | 164.27    | 169.665   |
| NM_01330E | 2364.492  | 2328.606  | AK026762  | 3561.202  | 3816.636  | AI970239  | 512.21    | 524.216   |
| AF027302  | 2979.565  | 2624.089  | NM_00441E | 1336.352  | 1552.563  | AA496452  | 801.837   | 648.904   |
| NM_00285E | 2229.385  | 1784.564  | L48516    | 2446.971  | 2296.889  | X67594    | 345.105   | 475.577   |
| NM_001817 | 2683.181  | 2156.034  | NM_01664E | 9797.5    | 8601.397  | AF363393  | 134.87    | 104.924   |
| AF063611  | 1129.375  | 955.281   | AF083930  | 2063.232  | 2611.796  | BC008837  | 140.693   | 124.03    |
| NM_00603E | 775.694   | 547.595   | AB040907  | 1092.025  | 1322.934  | AB000734  | 223.084   | 694.453   |
| NM_00208E | 521.652   | 328.976   | NM_00342E | 1229.997  | 1392.178  | NM_00598E | 30544.275 | 33338.906 |
| NM_01465E | 2775.462  | 2355.972  | NM_01486E | 1299.753  | 1247.044  | X87838    | 647.671   | 481.085   |
| NM_00207E | 5661.375  | 3132.338  | AK027159  | 1668.388  | 1314.866  | NM_03319E | 623.796   | 401.719   |
| Z25431    | 2063.036  | 1433.257  | AF075112  | 568.209   | 631.831   | NM_015001 | 561.708   | 403.913   |
| NM_005627 | 2389.3    | 2224.688  | AK001796  | 606.267   | 867.348   | NM_00016E | 916.514   | 861.148   |
| M64497    | 1559.581  | 1705.91   | U78519    | 1723.569  | 1977.348  | AK057418  | 798.335   | 632.358   |
| NM_00335E | 4223.591  | 3332.425  | AK026872  | 2574.919  | 2024.269  | L37199    | 152.311   | 135.087   |
| AF238315  | 489.749   | 502.925   | AL157505  | 1039.986  | 1046.206  | NM_00726C | 856.922   | 447.035   |
| NM_006224 | 50877.605 | 37588.188 | NM_00719C | 4436.577  | 5362.29   | AF148646  | 1541.927  | 1472.695  |
| AL137300  | 3338.18   | 2790.589  | AF043897  | 1555.207  | 1451.346  | AL110218  | 529.819   | 770.569   |
| NM_00022E | 2386.818  | 2097.36   | U79246    | 1742.102  | 1695.035  | AB023201  | 869.453   | 964.261   |
| NM_00699E | 20597.563 | 16311.212 | NM_01883E | 1650.587  | 1572.123  | X00094    | 355.741   | 391.644   |
| NM_00312E | 17394.787 | 13492.941 | AF007147  | 1512.638  | 1180.025  | NM_00377E | 226.851   | 168.326   |
| NM_00195E | 2879.563  | 1723.799  | AF052127  | 5412.162  | 5053.594  | NM_00208E | 1140.941  | 1147.829  |
| AB033064  | 2019.629  | 1710.365  | AK024261  | 791.111   | 730.934   | AF155657  | 5144.547  | 5278.558  |
| AK022317  | 5653.206  | 3889      | AF052150  | 1027.804  | 1022.662  | NM_00605E | 422.6     | 428.976   |
| NM_01839E | 10154.229 | 6561.431  | AF086481  | 840.821   | 547.887   | AF045229  | 3326.136  | 3177.71   |
| NM_003124 | 5148.688  | 3434.599  | AL355689  | 502.208   | 428.364   | NM_00184C | 1905.1    | 2182.49   |
| NM_00688E | 55047.641 | 52885.297 | AK024885  | 3099.652  | 2881.287  | AK025099  | 1030.946  | 783.858   |
| NM_004531 | 9903.324  | 6906.476  | AK022441  | 1435.98   | 1302.832  | NM_01609E | 2395.976  | 3124.588  |
| AL133581  | 3012.608  | 2587.3    | AK026208  | 4875.808  | 4082.891  | NM_00022E | 152.384   | 90.147    |
| NM_00255E | 773.728   | 602.526   | NM_016947 | 38471.453 | 42823.984 | NM_00083C | 286.494   | 274.66    |
| NM_005031 | 5385.504  | 3581.375  | AY007136  | 848.577   | 786.596   | NM_00520E | 136.23    | 254.149   |
| AB040920  | 825.414   | 600.18    | AL359940  | 2110.595  | 1802.603  | NM_00115E | 1939.213  | 1622.357  |
| NM_00072C | 986.201   | 654.293   | AK024925  | 15593.974 | 13441.401 | M62896    | 1804.829  | 1669.787  |

|            |           |           |           |           |           |           |           |          |
|------------|-----------|-----------|-----------|-----------|-----------|-----------|-----------|----------|
| NM_004842  | 2475.521  | 2456.364  | AL049460  | 8268.485  | 9355.751  | NM_017736 | 512.849   | 326.509  |
| AK024639   | 4549.377  | 3319.323  | AK022396  | 1509.594  | 2009.422  | NM_00039C | 480.785   | 590.182  |
| NM_01572C  | 3951.452  | 3575.839  | AF075113  | 727.487   | 851.717   | AK021597  | 467.103   | 260.984  |
| NM_020967  | 778.936   | 449.437   | AF086037  | 456.824   | 427.449   | NM_005737 | 11500.581 | 9020.767 |
| NM_001071  | 34729.184 | 19534.758 | AK022892  | 9650.534  | 6413.973  | NM_006803 | 491.385   | 644.472  |
| AB028990   | 1010.655  | 788.859   | U50536    | 421.325   | 479.575   | NM_002533 | 627.368   | 414.839  |
| NM_00670E  | 19167.766 | 15622.209 | Z36807    | 35792.602 | 26624.414 | AF235022  | 304.3     | 333.169  |
| AB037835   | 1483.028  | 1155.022  | U20896    | 784.264   | 689.308   | AL137764  | 3432.753  | 3143.068 |
| NM_01622E  | 1168.009  | 894.076   | U52836    | 829.573   | 654.569   | NM_00166C | 4711.039  | 4599.86  |
| NM_000157  | 3916.359  | 2899.759  | NM_017939 | 1689.526  | 1666.303  | NM_00071C | 233.784   | 220.735  |
| NM_000712  | 14452.203 | 10589.267 | AK021837  | 2093.894  | 2114.188  | NM_000752 | 341.696   | 284.126  |
| NM_01808E  | 537.093   | 406.166   | AK002088  | 16525.338 | 23746.303 | AB040945  | 176.674   | 163.454  |
| BC013695   | 12756.429 | 9664.27   | X98206    | 774.495   | 1367.501  | NM_00201E | 1817.833  | 1296.672 |
| AK023035   | 3687.966  | 2650.476  | AK000106  | 1989.788  | 2829.157  | NM_002377 | 160.698   | 155.163  |
| NM_01484E  | 4379.393  | 3318.447  | AK022370  | 1664.677  | 1438.707  | NM_00601E | 181.32    | 145.334  |
| AB011164   | 3669.549  | 2485.303  | AK026765  | 1389.611  | 1001.617  | AF161383  | 2487.267  | 2931.672 |
| M24750     | 1716.588  | 973.698   | AL117530  | 1040.79   | 829.65    | NM_00041C | 2906.643  | 5164.363 |
| NM_00596E  | 896.064   | 605.083   | AK025016  | 510.664   | 437.666   | AF224266  | 143.07    | 126.678  |
| NM_00274C  | 2447.835  | 1237.242  | AL080191  | 4358.32   | 3849.379  | U72882    | 1259.841  | 943.156  |
| AL117482   | 3353.149  | 1598.573  | AK021639  | 986.015   | 1052.809  | NM_014337 | 2353.236  | 1914.321 |
| NM_00575C  | 829.597   | 407.191   | AK023189  | 1319.534  | 1486.456  | NM_007161 | 2616.17   | 1982.7   |
| NM_004973  | 3827.959  | 2286.944  | AK023872  | 509.534   | 536.578   | NM_014387 | 8124.167  | 5795.307 |
| NM_00724E  | 8536.267  | 4785.844  | AK022127  | 480.769   | 683.93    | NM_003641 | 638.685   | 279.643  |
| NM_00189C  | 636.848   | 422.17    | AF306347  | 891.807   | 1434.675  | NM_012463 | 648.633   | 391.752  |
| NM_00128E  | 2274.125  | 1774.847  | AK001164  | 2553.543  | 3941.043  | L29140    | 3133.697  | 2001.115 |
| NM_01464E  | 663.945   | 568.996   | AK022619  | 483.951   | 747.739   | AK026448  | 1630.41   | 825.181  |
| NM_005073  | 397.108   | 287.876   | AK023464  | 2978.888  | 3194.904  | AB026436  | 1203.555  | 1191.3   |
| NM_000951  | 2298.578  | 2039.33   | AK024157  | 543.972   | 664.627   | NM_01602E | 3655.144  | 3896.776 |
| X52599     | 459.869   | 473.033   | AK022963  | 516.262   | 410.54    | AK024562  | 417.093   | 451.328  |
| AA029300   | 1915.406  | 1888.001  | AK023563  | 348.55    | 459.462   | NM_01406E | 566.968   | 449.75   |
| BG708842   | 30797.902 | 17488.262 | AK023905  | 5546.592  | 7381.812  | NM_004573 | 464.698   | 459.969  |
| M19723     | 48646.488 | 42784.438 | AK024231  | 4806.747  | 4886.361  | NM_000072 | 248.136   | 168.471  |
| X06256     | 2209.158  | 2064.821  | NM_01694C | 3604.427  | 4731.862  | NM_000697 | 535.352   | 638.22   |
| AA709271   | 339.845   | 363.378   | AK025757  | 5363.832  | 5838.319  | NM_000017 | 1474.207  | 1471.694 |
| M34057     | 809.324   | 554.501   | Y16713    | 677.261   | 684.972   | NM_000237 | 154.351   | 198.268  |
| ID 1984668 | 1795.583  | 1399.362  | L07394    | 11786.002 | 13393.151 | NM_01834E | 2040.939  | 2043.238 |
| ID 1832579 | 1964.898  | 1245.426  | AK056133  | 1514.193  | 1496.918  | AL122054  | 807.125   | 720.922  |
| H-430185 N | 1399.903  | 660.572   | NM_017845 | 11588.199 | 9328.766  | AB011182  | 521.454   | 620.073  |
| D16583     | 1335.53   | 709.859   | AF130080  | 851.434   | 596.47    | AB023151  | 210.036   | 278.052  |
| H44051     | 310.822   | 235.293   | AK026006  | 1220.229  | 684.598   | NM_00014C | 1664.443  | 1769.601 |
| AA831880   | 848.982   | 1342.386  | NM_019089 | 10037.593 | 6134.167  | NM_00512E | 537.03    | 1251.022 |
| T64880     | 2839.449  | 5031.365  | AF147440  | 679.525   | 420.272   | NM_01624E | 260.964   | 289.282  |
| NM_00603E  | 594.669   | 427.765   | AL122072  | 3783.168  | 3673.557  | NM_01592E | 982.133   | 753.516  |
| NM_01465E  | 3798.62   | 3026.721  | AK026221  | 712.108   | 682.869   | X03757    | 781.228   | 609.407  |
| NM_00207E  | 3633.994  | 3124.417  | Y13870    | 824.522   | 772.659   | NM_01865E | 1222.985  | 787.815  |
| X05299     | 4765.389  | 3544.052  | AK026403  | 2019.111  | 2007.799  | NM_00513E | 224.517   | 129.082  |
| BM468475   | 842.046   | 922.354   | AK002162  | 449.708   | 473.07    | AK094513  | 202.033   | 173.145  |
| NM_00031E  | 5262.069  | 3582.966  | AK022980  | 687.863   | 750.716   | NM_001183 | 3141.969  | 2594.663 |
| NM_00206C  | 7013.398  | 4915.481  | AL359058  | 1394.653  | 1240.808  | NM_00089C | 253.518   | 287.781  |
| AK001230   | 1725.566  | 1242.923  | AK022439  | 744.879   | 981.374   | NM_00497E | 6247.777  | 4040.77  |
| NM_01468C  | 4868.281  | 3097.832  | AK026237  | 3482.111  | 3114.884  | NM_03319E | 1009.776  | 1414.041 |
| NM_005027  | 1110.015  | 786.059   | AK023687  | 1452.21   | 1010.034  | NM_015001 | 576.746   | 395.102  |
| NM_004612  | 1250.612  | 934.988   | NM_017632 | 2774.876  | 3388.267  | NM_00016E | 1309.398  | 1403.107 |

|           |           |           |            |           |           |           |           |           |
|-----------|-----------|-----------|------------|-----------|-----------|-----------|-----------|-----------|
| NM_00560E | 15538.433 | 8748.737  | AK026655   | 1826.527  | 1561.518  | AF182814  | 676.9     | 573.278   |
| NM_001106 | 1909.078  | 1492.697  | AF129926   | 2611.142  | 2175.719  | AK026147  | 152.58    | 132.757   |
| NM_015583 | 2014.607  | 1334.199  | AK025822   | 2372.944  | 1689.263  | NM_00532E | 311.822   | 217.796   |
| NM_01849C | 1574.196  | 1034.277  | AL360140   | 934.811   | 534.213   | NM_000107 | 919.971   | 975.272   |
| NM_00477E | 762.408   | 383.671   | AF201937   | 49589.391 | 31944.727 | AL157445  | 480.031   | 435.843   |
| NM_00624E | 4171.271  | 2813.785  | AL390128   | 3399.563  | 3239.159  | NM_001517 | 1919.346  | 1941.407  |
| NM_005103 | 1619.016  | 4028.837  | AL157429   | 19943.809 | 20246.693 | NM_005053 | 200.509   | 1067.682  |
| NM_004822 | 717.065   | 1858.137  | NM_012071  | 34050.258 | 31743.908 | D86974    | 323.136   | 1606.542  |
| AK022349  | 6355.351  | 11584.104 | AF055018   | 10102.739 | 11268.637 | NM_018283 | 552.315   | 1062.021  |
| NM_005031 | 4874.972  | 3184.091  | AF070599   | 1610.816  | 2078.866  | NM_001983 | 824.732   | 867.91    |
| AB040920  | 590.446   | 393.287   | NM_00545C  | 3518.788  | 5363.243  | Y12337    | 248.806   | 157.066   |
| NM_00072C | 805.949   | 527.755   | AK023600   | 1181.638  | 1452.615  | M29551    | 2396.502  | 1825.249  |
| NM_004842 | 1724.769  | 1234.012  | Z83952     | 957.15    | 1046.946  | AB023148  | 302.245   | 177.698   |
| AK024639  | 2153.733  | 1431.167  | NM_00521C  | 541.422   | 466.462   | NM_00292E | 587.983   | 616.219   |
| NM_01572C | 6034.016  | 3856.548  | NM_00552E  | 575.159   | 685.11    | BC028375  | 570.424   | 322.084   |
| AB007915  | 1078.477  | 1200.584  | NM_00528E  | 4544.886  | 5109.98   | NM_00520E | 307.924   | 1032.294  |
| AB033070  | 929.815   | 1046.949  | AK001918   | 1268.273  | 1026.477  | AF148950  | 169.236   | 142.766   |
| NM_01822E | 2026.362  | 2303.751  | AF086048   | 3982.247  | 3385.01   | NM_00115E | 2627.748  | 3652.47   |
| NM_00632E | 7334.077  | 6984.451  | L15616     | 4672.883  | 3748.036  | NM_00039C | 590.451   | 640.123   |
| AY009127  | 12607.836 | 10500.516 | AB019565   | 9483.231  | 6822.312  | NM_00149E | 7717.776  | 7408.472  |
| NM_01486E | 1205.435  | 920.24    | D16914     | 59263.734 | 57607.559 | AF263523  | 494.437   | 742.61    |
| NM_00392E | 425.487   | 483.185   | AA084879   | 620.747   | 807.63    | L08441    | 3421.41   | 1936.107  |
| AK000158  | 3829.796  | 2561.793  | NM_000833  | 2370.924  | 2481.395  | AA641953  | 866.908   | 1008.594  |
| NM_00576E | 726.711   | 528.756   | NM_000283  | 5225.355  | 4193.656  | AI248827  | 1597.221  | 2021.272  |
| AK024500  | 9815.365  | 5617.803  | NM_01246C  | 3439.582  | 2739.475  | R45026    | 740.483   | 1027.578  |
| NM_002564 | 4512.135  | 2995.417  | NM_012118  | 3389.594  | 2407.627  | BI768063  | 125.925   | 173.018   |
| NM_000963 | 1802.344  | 3219.442  | AK001133   | 587.331   | 577.086   | BG386057  | 197.382   | 199.858   |
| NM_01330E | 2626.788  | 5596.014  | AK024092   | 2998.926  | 2440.941  | AI970239  | 346.865   | 573.881   |
| AF027302  | 4885.54   | 7230.025  | AK026285   | 369.87    | 251.294   | AA496452  | 647.117   | 2531.595  |
| NM_002852 | 3360.137  | 6766.805  | AK002044   | 3174.457  | 3267.235  | X67594    | 308.462   | 220.792   |
| NM_001817 | 4257.037  | 6894.431  | AK022206   | 759.187   | 975.704   | AF363393  | 182.959   | 199.401   |
| AF063611  | 1107.234  | 2740.734  | U90904     | 6899.076  | 8214.64   | BC008837  | 198.141   | 135.322   |
| NM_00596E | 912.479   | 740.342   | AF088053   | 4331.408  | 5307.292  | NM_001631 | 205.709   | 171.795   |
| NM_00274C | 2252.406  | 1776.236  | AL133662   | 861.66    | 1247.504  | AB000734  | 258.141   | 210.488   |
| AL117482  | 2916.815  | 2116.692  | NM_00256E  | 1310.727  | 1914.318  | NM_005987 | 29888.705 | 26926.059 |
| NM_00654E | 24333.279 | 13726.634 | U90903     | 1002.191  | 1124.978  | X87838    | 795.295   | 553.965   |
| AB018324  | 8275.941  | 5091.271  | AF278760   | 2616.451  | 2781.553  | NM_007161 | 3968.981  | 3353.363  |
| NM_002742 | 50473.137 | 42540.816 | X58061     | 787.883   | 1076.372  | NM_014387 | 10690.341 | 11791.098 |
| Z25431    | 2465.014  | 2096.687  | NM_006003  | 31543.428 | 24927.596 | NM_003641 | 953.78    | 694.587   |
| NM_005627 | 3188.321  | 3028.849  | AL110197   | 5785.087  | 4915.04   | NM_012463 | 770.269   | 972.413   |
| M64497    | 1399.452  | 1246.137  | AF085995   | 1155.906  | 875.427   | L29140    | 4786.147  | 5856.131  |
| NM_007274 | 13384.159 | 11859.014 | CY3Cy5     | 3825.98   | 150.15    | AK026448  | 1926.985  | 2081.951  |
| NM_00335E | 4221.785  | 3014.745  | AA029300   | 2983.868  | 3275.961  | AK057418  | 1242.479  | 1686.484  |
| AF238315  | 431.51    | 309.232   | BG708842   | 51631.984 | 57535.141 | NM_00726C | 581.287   | 638.552   |
| NM_006224 | 53896.27  | 35490.246 | M19723     | 58209.762 | 60592.086 | AF148646  | 1231.307  | 1465.635  |
| AL137300  | 3872.073  | 3212.651  | X06256     | 4385.286  | 4161.969  | AL110218  | 338.911   | 337.232   |
| NM_00022E | 2956.795  | 2663.319  | AA709271   | 658.767   | 857.925   | AB023201  | 995.487   | 1008.461  |
| NM_00312E | 20529.406 | 22279.076 | M34057     | 1453.885  | 1416.079  | X00094    | 281.09    | 713.266   |
| NM_00195E | 4325.466  | 4849.661  | ID 1984668 | 1774.01   | 1699.473  | NM_00377E | 239.95    | 407.014   |
| AB033064  | 2573.794  | 5338.236  | ID 1832579 | 2099.11   | 1822.228  | NM_002082 | 1040.563  | 903.446   |
| AK022317  | 8862.323  | 14685.625 | H-430185 N | 2044.676  | 1797.233  | NM_002922 | 107.935   | 157.364   |
| NM_01839E | 12846.92  | 23134.166 | D16583     | 2463.537  | 2924.511  | AF155657  | 3059.744  | 8027.539  |
| NM_003124 | 6233.078  | 8969.404  | H44051     | 885.746   | 702.331   | NM_00605E | 470.47    | 523.39    |

|           |           |           |           |           |           |           |           |           |
|-----------|-----------|-----------|-----------|-----------|-----------|-----------|-----------|-----------|
| AL133581  | 4631.892  | 7719.472  | AA481547  | 15030.269 | 13131.318 | AF045229  | 3077.153  | 2546.255  |
| NM_00255E | 977.221   | 1628.057  | AA831880  | 1004.402  | 799.766   | NM_00184C | 1739.409  | 1787.46   |
| NM_00358E | 761.979   | 385.941   | T64880    | 2040.001  | 1930.408  | AK025099  | 841.083   | 465.204   |
| NM_000922 | 2876.956  | 2153.839  | NM_020967 | 1183.668  | 972.531   | NM_01609E | 3845.253  | 2987.354  |
| NM_013232 | 3141.496  | 2447.78   | NM_001071 | 52406.758 | 44901.758 | NM_00022E | 116.807   | 146.561   |
| NM_000362 | 390.44    | 283.022   | SR2       | 54506.039 | 57063.715 | NM_00083C | 331.624   | 213.431   |
| NM_01442E | 2267.803  | 836.561   | SR4       | 14745.125 | 14179.411 | NM_014587 | 128.152   | 55.231    |
| AK000770  | 1244.528  | 728.279   | SR6       | 2534.224  | 2202.07   | NM_01865E | 1930.189  | 1557.875  |
| NM_00237C | 21006.162 | 14278.703 | SR8       | 8731.898  | 24253.969 | NM_00513E | 257.428   | 220.347   |
| NM_01567C | 2570.782  | 2340.178  | SR10      | 29021.334 | 9367.387  | AK094513  | 215.183   | 304.064   |
| NM_01470E | 1237.906  | 689.369   | CY3Cy5    | 2852.713  | 88.803    | NM_001183 | 3770.293  | 3718.391  |
| AB028990  | 790.688   | 538.02    | NM_005027 | 1702.206  | 3578.431  | NM_00089C | 252.611   | 172.508   |
| NM_00670E | 24555.404 | 30955.66  | NM_004612 | 1755.822  | 1870.01   | NM_00497E | 6902.721  | 7336.892  |
| AB037835  | 1606.951  | 3508.58   | NM_00560E | 18447.271 | 19065.779 | AK021597  | 494.33    | 425.678   |
| NM_000157 | 6028.295  | 9602.369  | NM_001106 | 2611.348  | 2397.191  | NM_005737 | 10892.726 | 11467.605 |
| NM_000712 | 22483.506 | 41541.582 | NM_015583 | 2641.521  | 2720.759  | NM_000014 | 156.322   | 143.487   |
| NM_01808E | 892.576   | 1952.245  | NM_01849C | 2991.387  | 3202.841  | NM_00680E | 554.629   | 544.27    |
| BC013695  | 17338.32  | 33779.109 | NM_00477E | 1607.314  | 1861.477  | NM_00253E | 593.064   | 657.33    |
| NM_00720E | 415.341   | 707.407   | NM_00624E | 5488.294  | 6107.325  | AF235022  | 206.849   | 434.199   |
| AB011164  | 5212.185  | 7649.283  | NM_00510E | 431.13    | 440.203   | AL137764  | 3035.456  | 2925.523  |
| M24750    | 2456.895  | 5034.222  | NM_004822 | 1311.798  | 1165.463  | NM_00166C | 4254.187  | 4693.178  |
| AB046776  | 555.845   | 273.286   | AK022349  | 5510.317  | 4501.971  | NM_00071C | 191.898   | 251.016   |
| NM_002687 | 10347.471 | 5223.917  | NM_00575C | 905.065   | 1052.036  | NM_000752 | 249.909   | 407.559   |
| NM_000627 | 1131.945  | 756.449   | NM_00497E | 5205.141  | 4256.833  | AB040945  | 178.606   | 360.978   |
| NM_00003E | 1029.762  | 511.385   | NM_00724E | 9692.461  | 8684.669  | NM_00201E | 1317.387  | 1455.312  |
| NM_00082E | 776.419   | 621.291   | NM_00189C | 1160.699  | 852.19    | NM_00601E | 816.451   | 1064.689  |
| NM_00196E | 452.034   | 503.207   | NM_00128E | 3789.004  | 3588.364  | AF161383  | 2054.073  | 1589.2    |
| NM_004334 | 1171.195  | 1806.024  | NM_01464E | 996.733   | 971.997   | NM_00041C | 3641.509  | 3445.964  |
| NM_00388E | 3889.181  | 6549.254  | NM_019604 | 825.843   | 517.054   | AF224266  | 223.072   | 133.706   |
| NM_00584E | 4788.442  | 6653.288  | NM_00507E | 714.8     | 435.703   | U72882    | 1495.556  | 1066.318  |
| NM_003854 | 1714.383  | 3167.633  | NM_000951 | 5377.486  | 4478.192  | NM_014337 | 2348.439  | 1495.175  |
| NM_01798C | 4858.861  | 7515.937  | X52599    | 1226.615  | 1029.522  | M29551    | 2984.864  | 3205.066  |
| NM_001252 | 1950.955  | 3848.041  | NM_00392E | 164.25    | 400.725   | AB023148  | 209.45    | 184.383   |
| AF053712  | 1433.393  | 2562.628  | AK000158  | 6326.614  | 8204.702  | NM_00292E | 553.388   | 536.183   |
| NM_003947 | 1097.162  | 1844.364  | NM_00576E | 1149.951  | 1269.317  | BC028375  | 733.132   | 858.408   |
| NM_002821 | 20634.074 | 31126.164 | AK024500  | 12541.655 | 12625.448 | AB026436  | 1126.932  | 1291.882  |
| M96652    | 14317.351 | 21848.594 | NM_002564 | 8846.841  | 9165.771  | NM_01602E | 3782.529  | 4760.634  |
| L41690    | 2214.97   | 4288.075  | NM_00096E | 2291.635  | 2598.704  | AK024562  | 424.507   | 457.761   |
| NM_01805E | 2052.087  | 4219.722  | NM_01330E | 5574.315  | 5154.589  | NM_01406E | 537.115   | 669.139   |
| NM_00093E | 50975.781 | 67854.75  | AF027302  | 4159.071  | 4690.29   | NM_00457E | 560.819   | 882.953   |
| NM_00518E | 502.841   | 902.004   | NM_00285E | 4069.693  | 4962.847  | NM_00007E | 313.211   | 326.746   |
| NM_006514 | 3089.594  | 5092.637  | NM_001817 | 4665.015  | 4507.943  | NM_000697 | 526.036   | 668.251   |
| AF065164  | 2948.016  | 4569.357  | AF063611  | 1071.326  | 947.236   | NM_000017 | 1992.714  | 2311.942  |
| AB028991  | 2946.869  | 3581.549  | NM_00603E | 1051.32   | 973.964   | NM_000237 | 174.72    | 347.569   |
| AF263547  | 7283.907  | 8488.066  | NM_00208E | 650.166   | 541.438   | NM_01834E | 1773.011  | 3142.756  |
| AJ008143  | 6333.264  | 6759.021  | NM_01465E | 11020.436 | 9642.306  | AL122054  | 653.955   | 890.488   |
| NM_007144 | 4185.427  | 7362.679  | NM_00207E | 5149.312  | 4985.409  | AB011182  | 455.262   | 431.667   |
| NM_004424 | 6456.332  | 10226.355 | X05299    | 6197.188  | 4794.367  | AB023151  | 385.082   | 475.275   |
| AL133117  | 3832.934  | 6476.766  | BM468475  | 1340.77   | 1206.122  | NM_00014C | 1637.688  | 1325.89   |
| AB033040  | 1634.846  | 3734.285  | NM_00031E | 7359.964  | 5644.194  | NM_00512E | 724.915   | 525.63    |
| AF070586  | 5379.72   | 7311.373  | NM_00206C | 15424.354 | 13071.457 | NM_02003E | 146.171   | 133.746   |
| NM_01441E | 1487.992  | 2934.315  | AK001230  | 3154.999  | 2716.8    | NM_01624E | 364.613   | 281.441   |
| NM_01330E | 4262.592  | 5385.093  | NM_01468C | 8369.479  | 6094.375  | NM_01592E | 1019.695  | 521.948   |

|           |           |           |            |           |           |           |          |          |
|-----------|-----------|-----------|------------|-----------|-----------|-----------|----------|----------|
| NM_012227 | 4752.4    | 7262.881  | NM_006224  | 64730.629 | 62298.375 | X03757    | 810.709  | 459.772  |
| NM_006101 | 7749.194  | 14551.145 | NM_000229  | 4419.916  | 5287.877  | NM_02024E | 4621.022 | 3528.281 |
| NM_001237 | 11105.611 | 20354.883 | NM_006995  | 23645.324 | 21363.729 | X89670    | 334.907  | 240.295  |
| NM_002507 | 2028.71   | 4344.154  | NM_003129  | 24381.502 | 21602.195 | NM_00172E | 251.159  | 175.844  |
| NM_015962 | 2536.27   | 5088.495  | NM_001956  | 4658.002  | 4849.492  | NM_004053 | 1181.617 | 1342.44  |
| NM_01614E | 878.408   | 1409.099  | AB033064   | 4148.554  | 3689.381  | NM_01442C | 109.037  | 125.91   |
| NM_01607E | 7236.583  | 10082.033 | AK022317   | 7925.751  | 7952.021  | NM_00148E | 404.614  | 402.942  |
| NM_00379E | 755.189   | 2125.724  | NM_01839E  | 11393.235 | 10740.446 | M20259    | 191.026  | 350.397  |
| NM_004401 | 4104.307  | 5793.326  | NM_003124  | 7412.031  | 8084.972  | NM_020374 | 1046.559 | 1349.767 |
| NM_00184E | 5503.816  | 6852.521  | NM_004531  | 10365.833 | 10799.903 | NM_014922 | 317.432  | 522.461  |
| AF255910  | 1346.292  | 2212.26   | AL133581   | 3321.772  | 3372.948  | NM_00016E | 1270.462 | 1966.562 |
| NM_01614E | 8299.244  | 11689.715 | NM_005031  | 6438.824  | 7422.352  | AF182814  | 1029.982 | 904.918  |
| AK024343  | 3297.467  | 5197.002  | AB040920   | 1185.579  | 1145.57   | NM_00532E | 244.856  | 511.543  |
| NM_00193E | 627.122   | 930.372   | NM_00072C  | 1326.827  | 1661.334  | NM_000107 | 1295.083 | 1781.392 |
| NM_00256E | 834.378   | 1576.729  | NM_004842  | 2394.224  | 2253.517  | AL157445  | 442.621  | 399.441  |
| D42084    | 5296.093  | 8988.782  | AK024639   | 3493.613  | 3028.972  | NM_001517 | 698.791  | 499.8    |
| NM_001734 | 486.106   | 1088.566  | AB007915   | 1099.841  | 1161.785  | NM_005053 | 383.954  | 344.389  |
| NM_014693 | 896.417   | 1586.355  | AB033070   | 1323.971  | 1274.387  | D86974    | 701.063  | 529.22   |
| AB007896  | 1256.8    | 2233.707  | NM_018229  | 2640.454  | 2225.817  | NM_018283 | 1063.301 | 626.629  |
| AB007916  | 12291.56  | 21398.553 | NM_00632E  | 9175.809  | 9217.778  | NM_001983 | 898.898  | 752.814  |
| NM_002874 | 1254.283  | 1840.816  | AY009127   | 14551.631 | 12477.937 | NM_001793 | 2815.617 | 2101.884 |
| AF049140  | 3523.307  | 6094.172  | NM_014869  | 2017.606  | 1492.978  | NM_001943 | 893.493  | 763.977  |
| AL136794  | 3308.889  | 5913.888  | AB037835   | 1595.513  | 1712.433  | NM_004927 | 2442.987 | 2205.397 |
| AJ224172  | 283.872   | 686.044   | NM_01622E  | 1696.769  | 1571.715  | AB040928  | 242.886  | 228.513  |
| BC035601  | 45456.305 | 62246.18  | NM_000157  | 4957.087  | 5617.838  | NM_00145E | 953.852  | 951.889  |
| NM_00145E | 2394.555  | 4632.472  | NM_000712  | 15609.102 | 13840.924 | NM_015513 | 2230.639 | 2119.846 |
| NM_02038E | 7064.225  | 10931.507 | NM_01808E  | 1103.145  | 1086.607  | NM_00621E | 1927.585 | 2341.625 |
| AB046829  | 2535.958  | 4816.338  | BC013695   | 16508.705 | 13885.745 | NM_004443 | 707.308  | 446.09   |
| NM_01644E | 710.492   | 1099.257  | NM_01484E  | 5253.412  | 4550.422  | NM_001932 | 163.97   | 113.722  |
| NM_00337E | 30049.088 | 38489.219 | AB011164   | 4272.727  | 4564.103  | NM_017412 | 635.218  | 960.53   |
| NM_004521 | 11198.053 | 16540.494 | NM_00274C  | 3860.859  | 2890.51   | NM_005544 | 196.004  | 242.569  |
| AF229162  | 1823.654  | 3372.739  | AL117482   | 3657.968  | 3137.013  | NM_002964 | 2160.272 | 2221.125 |
| U02309    | 40286.07  | 49372.113 | NM_006549  | 47155.105 | 45651.191 | NM_00321E | 144.541  | 126.465  |
| NM_005257 | 15168.101 | 21716.684 | AB018324   | 10132.44  | 8648.573  | NM_016447 | 332.327  | 506.415  |
| AF011573  | 7875.712  | 12908.288 | Z25431     | 3529.534  | 2628.05   | NM_01562E | 1167.263 | 1283.02  |
| NM_00214E | 3754.89   | 5811.947  | NM_005627  | 4434.247  | 3402.854  | NM_00489E | 765.361  | 1134.693 |
| NM_003923 | 638.838   | 3428.308  | M64497     | 1874.281  | 1501.777  | AB006628  | 1386.396 | 1729.621 |
| NM_004831 | 1102.292  | 2679.333  | NM_007274  | 24902.037 | 22935.457 | AF272036  | 2198.281 | 2126.816 |
| NM_014213 | 6260.102  | 8901.099  | NM_00335E  | 9744.782  | 8813.753  | AF231023  | 1142.963 | 917.746  |
| NM_00016E | 2921.562  | 5872.418  | AF238315   | 854.821   | 713.356   | NM_00514E | 854.284  | 725.407  |
| AF294629  | 2908.643  | 5682.695  | NM_01464E  | 601.03    | 833.715   | NM_00474E | 251.911  | 203.603  |
| NM_00054E | 6645.373  | 10860.386 | NM_019604  | 647.71    | 566.992   | AF146019  | 2220.732 | 1655.665 |
| NM_00213E | 50392.441 | 67263.313 | NM_005073  | 558.875   | 855.364   | Z36782    | 1387.725 | 1055.081 |
| AK025571  | 1233.913  | 2236.839  | NM_000951  | 5384.738  | 5658.613  | M70435    | 160.339  | 128.437  |
| NM_00494C | 341.851   | 559.691   | X52599     | 1229.255  | 1078.686  | NM_00349C | 1801.59  | 910.873  |
| NM_014463 | 43194.918 | 61306.172 | AA029300   | 2924.115  | 2700.593  | AF210651  | 288.164  | 254.338  |
| NM_00552C | 24483.893 | 29638.396 | BG708842   | 54972.484 | 54356.402 | AF090942  | 352.041  | 245.255  |
| AK023265  | 2678.612  | 4548.411  | M19723     | 55831.324 | 59718.621 | AF508940  | 691.101  | 327.488  |
| NM_018723 | 591.957   | 966.969   | X06256     | 3663.878  | 3472.138  | NM_00542E | 126.855  | 51.656   |
| AB029009  | 1886.788  | 3618.361  | AA709271   | 636.936   | 669.032   | NM_020237 | 400.279  | 521.593  |
| AF112207  | 2654.692  | 4830.263  | M34057     | 1494.761  | 1041.984  | AF130051  | 312.009  | 196.408  |
| NM_005594 | 36353.98  | 49235.121 | ID 1984668 | 1694.525  | 1476.985  | M25753    | 7158.123 | 8371.379 |
| NM_004461 | 49762.008 | 66416.813 | ID 1832579 | 2198.036  | 1765.736  | NM_003883 | 1108.781 | 1372.017 |

|           |           |           |            |           |           |           |           |           |
|-----------|-----------|-----------|------------|-----------|-----------|-----------|-----------|-----------|
| NM_018473 | 14723.801 | 24713.705 | H-430185 M | 1624.633  | 1656.026  | NM_014925 | 809.24    | 688.022   |
| BF106121  | 1294.361  | 1943.018  | D16583     | 2404.225  | 2667.909  | NM_004203 | 2544.277  | 2784.414  |
| AK022590  | 1878.206  | 3268.415  | H44051     | 929.575   | 688.964   | NM_001951 | 519.167   | 780.548   |
| AK023719  | 5119.961  | 7314.766  | AA481547   | 15422.379 | 14973.029 | NM_002391 | 444.857   | 313.644   |
| AK025590  | 1029.192  | 1994.877  | AA831880   | 1012.955  | 1172.729  | NM_003674 | 5282.539  | 5540.892  |
| AY007149  | 3711.997  | 6196.974  | T64880     | 2196.868  | 1821.153  | NM_001197 | 854.058   | 694.589   |
| BE879612  | 165.903   | 2527.964  | NM_020967  | 1041.719  | 1170.132  | NM_006682 | 265.502   | 161.569   |
| M12078    | 1116.067  | 2766.203  | NM_001071  | 50128.035 | 43393.781 | NM_006410 | 106.585   | 328.458   |
| NM_004550 | 10643.178 | 17312.096 | AB028990   | 2046.594  | 1328.62   | NM_014977 | 5592.317  | 6518.57   |
| NM_000785 | 1339.566  | 2453.982  | X05299     | 5918.38   | 5536.9    | AK026325  | 694.758   | 543.47    |
| NM_004110 | 6843.068  | 10280.733 | BM468475   | 1272.637  | 1257.463  | U83857    | 291.244   | 219.45    |
| NM_013387 | 49037.703 | 61001.301 | NM_000318  | 6662.113  | 6505.351  | NM_001230 | 257.376   | 301.639   |
| NM_005262 | 7631.272  | 12997.623 | NM_002060  | 15003.928 | 15410.551 | AK025662  | 637.839   | 696.4     |
| NM_005757 | 1824.668  | 4252.296  | AK001230   | 2663.351  | 2461.615  | NM_000201 | 491.284   | 442.142   |
| NM_016483 | 809.172   | 1075.322  | NM_014680  | 7308.57   | 6912.707  | AB011539  | 296.529   | 450.808   |
| NM_020125 | 1189.316  | 2342.371  | NM_005027  | 1683.024  | 2104.85   | U37028    | 223.653   | 201.695   |
| NM_005065 | 4576.185  | 5275.358  | NM_004612  | 1768.05   | 1809.507  | AB014597  | 693.913   | 705.652   |
| NM_018223 | 3828.506  | 7236.62   | NM_005608  | 16796.34  | 16916.867 | AJ001495  | 80.665    | 174.2     |
| NM_006693 | 17154.793 | 29959.51  | NM_001106  | 2797.209  | 2296.411  | S81361    | 188.802   | 91.262    |
| NM_001722 | 2864.641  | 4773.844  | NM_015583  | 2439.312  | 2419.91   | AK024313  | 1315.029  | 1245.162  |
| AB046802  | 2241.422  | 4537.123  | NM_018490  | 3393.997  | 2793.223  | NM_003891 | 764.416   | 875.203   |
| NM_003297 | 1425.147  | 2498.484  | NM_004778  | 869.082   | 995.431   | AL359575  | 174.691   | 239.59    |
| X74861    | 579.679   | 1189.815  | NM_006245  | 5349.9    | 5409.82   | NM_002022 | 169.256   | 88.983    |
| NM_018265 | 8824.478  | 12856.21  | NM_005103  | 450.168   | 419.897   | NM_015524 | 1194.77   | 1209.47   |
| AK024633  | 4378.316  | 6976.435  | NM_004822  | 1290.794  | 1332.907  | NM_001673 | 1413.043  | 1482.688  |
| NM_001453 | 5366.342  | 6927.46   | AK022349   | 5907.307  | 4674.389  | AK023167  | 125.446   | 165.074   |
| NM_012075 | 1098.193  | 1860.742  | NM_005750  | 1103.865  | 1389.053  | NM_016510 | 880.554   | 767.337   |
| AB004851  | 525.515   | 1190.488  | NM_004973  | 5494.413  | 5085.767  | NM_014270 | 491.179   | 581.716   |
| NM_013381 | 374.514   | 908.521   | NM_007245  | 9907.037  | 9184.147  | NM_000071 | 791.353   | 827.577   |
| AK023911  | 2544.903  | 4323.699  | NM_001890  | 1029.771  | 790.405   | NM_006843 | 228.089   | 167.114   |
| NM_001283 | 4306.504  | 8031.453  | NM_001286  | 3266.578  | 2839.449  | NM_004321 | 479.305   | 577.394   |
| AL110237  | 686.893   | 1433.947  | AB007915   | 825.21    | 1278.437  | AF311212  | 1768.571  | 2533.01   |
| D87470    | 1751.06   | 4346.761  | AB033070   | 1167.12   | 1590.321  | NM_006915 | 671.326   | 663.054   |
| AF147307  | 9374.028  | 16980.141 | NM_018229  | 2701.399  | 3490.181  | NM_006035 | 538.932   | 837.919   |
| AK001829  | 3569.551  | 6137.413  | NM_006325  | 8710.912  | 9572.925  | NM_006086 | 1480.818  | 1299.701  |
| NM_016525 | 4471.473  | 7231.717  | AY009127   | 14564.226 | 15284.859 | NM_004520 | 2522.528  | 2426.89   |
| AK024931  | 13459.384 | 18582.689 | NM_014869  | 2377.186  | 2182.622  | AK027118  | 3539.183  | 2987.88   |
| AL109715  | 900.56    | 1627.068  | AK000158   | 5743.482  | 6062.408  | AK022882  | 4519.124  | 1965.704  |
| AF086181  | 500.975   | 1359.778  | NM_005769  | 1322.108  | 1479.655  | NM_006105 | 994.924   | 833.7     |
| AK021540  | 514.026   | 765.364   | AK024500   | 14282.551 | 15364.218 | NM_005981 | 135.725   | 171.813   |
| D86985    | 619.705   | 1196.305  | NM_002564  | 8549.725  | 9311.022  | NM_000474 | 195.367   | 132.606   |
| AK022258  | 1114.757  | 2345.227  | NM_000963  | 2372.123  | 2086.1    | NM_016264 | 237.604   | 262.111   |
| AF088043  | 432.618   | 778.247   | NM_013308  | 5756.572  | 5201.347  | NM_006079 | 5983.174  | 6263.514  |
| AF131799  | 488.277   | 1304.173  | AF027302   | 3722.195  | 3486.177  | AB037837  | 700.003   | 901.252   |
| AK000455  | 1986.138  | 3982.61   | NM_002852  | 4294.327  | 4159.98   | NM_014595 | 1399.215  | 1479.864  |
| NM_005230 | 1590.917  | 2875.594  | NM_001817  | 5155.864  | 4532.539  | NM_014785 | 402.92    | 291.482   |
| AL365407  | 868.326   | 1312.007  | AF063611   | 1100.785  | 1095.772  | AB046784  | 277.916   | 355.97    |
| AK000840  | 4791.61   | 6391.43   | NM_006039  | 1209.027  | 1269.919  | X52402    | 527.233   | 520.502   |
| AL162073  | 1072.075  | 2250.607  | NM_002089  | 645.021   | 680.42    | AL133663  | 360.097   | 314.212   |
| AL390160  | 494.146   | 1023.67   | NM_014656  | 9596.254  | 7205.635  | NM_004992 | 402.397   | 408.268   |
| AJ006835  | 4498.378  | 6767.367  | NM_002076  | 5522.699  | 4610.053  | NM_014462 | 767.213   | 651.914   |
| AF085890  | 791.633   | 1350.938  | Z25431     | 3361.198  | 3332.352  | NM_014156 | 17499.436 | 18394.141 |
| AL110138  | 913.112   | 1319.813  | NM_005627  | 3995.828  | 4613.955  | NM_003137 | 1557.176  | 1574.829  |

|           |           |           |            |           |           |           |           |           |
|-----------|-----------|-----------|------------|-----------|-----------|-----------|-----------|-----------|
| AL117625  | 326.81    | 654.55    | M64497     | 1911.591  | 2051.478  | NM_00693E | 13876.909 | 12498.185 |
| AL050153  | 272.881   | 934.323   | NM_007274  | 24768.16  | 25002.504 | NM_00451E | 217.879   | 304.621   |
| AL122039  | 1008.459  | 1711.738  | NM_00335E  | 9738.375  | 10056.535 | NM_02015E | 698.198   | 873.732   |
| AF070577  | 8410.893  | 10161.78  | AF238315   | 710.379   | 677.766   | AF176085  | 630.163   | 798.845   |
| AL157484  | 8449.805  | 12283.964 | NM_00022E  | 4162.718  | 4181.1    | NM_00698E | 2988.598  | 3262.076  |
| AK024850  | 1301.331  | 2644.364  | NM_00699E  | 23944.248 | 23734.285 | AF265228  | 697.284   | 582.731   |
| Y09836    | 1120.699  | 2235.55   | NM_00195E  | 4924.687  | 6328.646  | NM_003757 | 7999.55   | 6831.055  |
| AL137597  | 3822.467  | 4846.379  | AB033064   | 3784.382  | 3906.35   | AK025561  | 1119.609  | 1004.872  |
| AK022144  | 2857.122  | 5164.166  | AK022317   | 7063.233  | 7395.292  | NM_01860E | 5190.216  | 4548.171  |
| AF086044  | 651.56    | 1200.41   | NM_01839E  | 11357.55  | 10556.058 | NM_00409E | 1266.86   | 1036.992  |
| NM_01492E | 529.556   | 1347.683  | NM_003124  | 8764.655  | 8836.265  | NM_01762E | 1564.237  | 1248.909  |
| AF131790  | 924.716   | 1573.772  | NM_00688E  | 60652.906 | 58779.227 | AL049681  | 421.457   | 274.539   |
| AJ011378  | 640.842   | 1467.647  | NM_004531  | 8166.406  | 7827.436  | NM_006584 | 190.415   | 221.888   |
| AF009266  | 786.28    | 1766.168  | AL133581   | 3255.578  | 3692.278  | AF052181  | 628.902   | 621.012   |
| AF009310  | 734.583   | 1708.149  | NM_00255E  | 1219.894  | 1165.594  | AL050074  | 1524.498  | 921.036   |
| AF054991  | 481.445   | 865.763   | NM_005031  | 7291.138  | 8373.935  | AK026436  | 303.135   | 299.783   |
| AF060168  | 1656.419  | 4145.467  | AB040920   | 1076.668  | 1047.559  | NM_018061 | 743.047   | 482.799   |
| AF009275  | 1103.422  | 1840.243  | NM_00072E  | 1818.705  | 1893.186  | AK023059  | 330.536   | 429.631   |
| AF015251  | 676.986   | 1631.612  | NM_00484E  | 2413.11   | 2297.196  | NM_003551 | 1322.362  | 1105.521  |
| AF056426  | 1371.242  | 3177.573  | AK024639   | 3233.082  | 2621.298  | AF305210  | 183.189   | 200.904   |
| AF064850  | 397.811   | 995.24    | NM_01572E  | 12921.413 | 12050.738 | AK021900  | 756.556   | 806.731   |
| AK001096  | 744.751   | 1184.906  | NM_020967  | 1057.51   | 1203.723  | NM_002764 | 3308.359  | 3810.048  |
| NM_01832E | 1134.198  | 1724.814  | AB028990   | 939.627   | 920.236   | NM_01545E | 16061.233 | 16753.072 |
| AK021565  | 366.024   | 721.246   | NM_00670E  | 24774.512 | 24637.236 | AF024702  | 1698.644  | 1755.032  |
| AK021778  | 673.85    | 1006.171  | AB037835   | 2002.991  | 1908.173  | NM_001964 | 572.907   | 542.023   |
| AK001150  | 2928.275  | 2749.809  | NM_01622E  | 1502.293  | 1589.357  | NM_00596E | 1312.156  | 1395.024  |
| AK002123  | 684.092   | 487.75    | NM_00071E  | 21455.652 | 21889.129 | X74864    | 397.198   | 448.357   |
| AK021633  | 1255.723  | 1182.681  | NM_01808E  | 1116.344  | 1166.26   | AK026804  | 724.47    | 778.074   |
| AK025659  | 1821.055  | 2005.858  | BC013695   | 16617.066 | 14021.001 | NM_01617E | 1295.995  | 1104.454  |
| AK026407  | 306.726   | 472.217   | NM_00720E  | 477.984   | 479.133   | NM_002114 | 162.964   | 204.333   |
| AK026788  | 1489.297  | 1230.86   | AK023035   | 4223.868  | 4789.891  | NM_00616E | 1037.33   | 782.535   |
| AK025272  | 1217.499  | 2059.811  | M24750     | 2050.225  | 2249.821  | S72620    | 8470.189  | 7499.556  |
| AK026824  | 860.951   | 1029.53   | NM_00596E  | 1864.144  | 1772.54   | S73501    | 102.739   | 123.33    |
| AJ008130  | 21715.537 | 29511.439 | NM_00274E  | 2886.836  | 2607.967  | NM_00526E | 2111.959  | 2100.01   |
| NM_00366E | 478.446   | 824.628   | AL117482   | 3239.917  | 3511.057  | AB033022  | 900.723   | 714.093   |
| AF086502  | 1768.966  | 3089.819  | NM_00654E  | 48400.941 | 52419.184 | AF147397  | 211.4     | 172.172   |
| L39924    | 1363.003  | 2988.582  | AB018324   | 10049.847 | 8496.862  | AK027158  | 156.025   | 162.233   |
| U52054    | 6694.518  | 9605.578  | NM_00274E  | 61199.203 | 63316.227 | AK002187  | 146.859   | 101.572   |
| D17226    | 575.03    | 758.09    | NM_00575E  | 1303.31   | 1771.157  | AF085836  | 336.428   | 413.19    |
| AK023325  | 1453.464  | 1768.009  | NM_00724E  | 9417.883  | 9854.117  | AL049449  | 314.785   | 275.823   |
| NM_01798E | 1583.326  | 2211.574  | NM_00189E  | 1044.517  | 890.008   | AF147347  | 159.552   | 150.732   |
| AK025866  | 2515.11   | 2081.216  | NM_00128E  | 2811.891  | 2936.381  | AL359654  | 323.365   | 246.466   |
| AF088058  | 9761.85   | 7736.724  | NM_01464E  | 806.18    | 994.231   | AK024224  | 780.847   | 1059.166  |
| NM_00051E | 1741.131  | 1778.316  | NM_019604  | 471.126   | 711.113   | NM_01536E | 4373.941  | 5203.282  |
| Y11165    | 1705.633  | 1011.339  | NM_00507E  | 463.595   | 568.556   | AF147344  | 289.095   | 414.97    |
| AL137445  | 353.539   | 406.112   | NM_000951  | 4879.114  | 5352.363  | AF147371  | 219.489   | 154.302   |
| BC028422  | 576.84    | 425.634   | X52599     | 1114.973  | 1213.017  | AK023745  | 168.039   | 122.151   |
| NM_00354E | 516.834   | 560.521   | AA029300   | 2802.852  | 2957.887  | NM_01898E | 1354.198  | 1831.581  |
| AK024413  | 706.063   | 328.584   | X06256     | 3767.396  | 3643.792  | AF086254  | 1539.206  | 1672.005  |
| AK022247  | 780.303   | 450.696   | AA709271   | 634.023   | 582.759   | AF086294  | 198.652   | 269.853   |
| AK001453  | 4075.005  | 2601.624  | ID 1984668 | 1623.617  | 1785.184  | AF086324  | 99.187    | 119.095   |
| AB007972  | 2353.281  | 1256.341  | ID 1832579 | 2237.514  | 1757.759  | AK022150  | 134.811   | 90.772    |
| AL390144  | 16669.066 | 8899.154  | H-430185 N | 1645.272  | 1791.028  | AF086261  | 265.233   | 239.127   |



|           |           |           |           |           |           |           |          |          |
|-----------|-----------|-----------|-----------|-----------|-----------|-----------|----------|----------|
| AK024017  | 1084.867  | 554.323   | D16583    | 2522.706  | 2956.909  | AF086367  | 438.064  | 434.801  |
| X56196    | 606.206   | 482.251   | H44051    | 860.59    | 782.888   | AF086437  | 348.803  | 444.461  |
| D17220    | 6190.451  | 3247.344  | AA481547  | 15151.714 | 15250.828 | AK025088  | 1309.776 | 1328.032 |
| D28363    | 49192.898 | 33934.008 | AA831880  | 956.175   | 918.63    | U79295    | 223.022  | 145.572  |
| AB011171  | 1116.43   | 787.31    | T64880    | 2423.177  | 2066.111  | AK002107  | 250.591  | 144.823  |
| AK023606  | 439.163   | 546.683   | NM_006039 | 1161.497  | 1082.857  | NM_003596 | 546.243  | 478.84   |
| AF189251  | 464.751   | 324.134   | NM_002089 | 839.403   | 690.847   | NM_018838 | 2013.256 | 2468.626 |
| NM_005322 | 3134.437  | 2714.804  | NM_014656 | 11676.106 | 9106.484  | AF075083  | 149.853  | 115.912  |
| AK024465  | 1007.447  | 576.916   | NM_002076 | 4700.072  | 4968.908  | AK021454  | 674.996  | 497.239  |
| AK021478  | 2827.613  | 1757.311  | X05299    | 5420.255  | 5083.104  | AK022069  | 370.04   | 335.185  |
| AF131782  | 859.826   | 715.013   | BM468475  | 1049.13   | 1505.984  | AL137457  | 207.331  | 183.682  |
| NM_014210 | 3281.633  | 2811.672  | NM_000318 | 6851.7    | 8217.015  | AF075092  | 160.724  | 77.991   |
| AK021603  | 2126.172  | 1253.545  | NM_002060 | 16108.437 | 18812.521 | AF085913  | 143.471  | 100.57   |
| AL110136  | 2889.718  | 2060.273  | AK001230  | 2632.029  | 2906.644  | AF085944  | 288.61   | 263.066  |
| AK002203  | 446.999   | 214.553   | NM_014680 | 7426.983  | 7156.699  | AL133038  | 481.633  | 643.33   |
| AK026469  | 1951.696  | 547.562   | NM_005027 | 1923.085  | 1842.993  | AL137414  | 448.557  | 529.461  |
| D16935    | 2946.65   | 2114.494  | NM_004612 | 1529.131  | 1343.121  | AL359574  | 533.87   | 389.971  |
| U92019    | 431.717   | 289.132   | NM_005608 | 16207.692 | 16942.416 | AL133569  | 1453.725 | 1628.95  |
| U52835    | 1403.148  | 712.311   | NM_001106 | 2842.746  | 2516.261  | AL137435  | 162.117  | 239.853  |
| NM_000756 | 1250.766  | 1470.992  | NM_015583 | 2492.649  | 2529.301  | AL157463  | 132.073  | 223.134  |
| AK022148  | 423.749   | 248.007   | NM_018490 | 4337.777  | 3638.665  | AK027189  | 359.428  | 371.623  |
| Z36811    | 50343.82  | 52084.465 | NM_004778 | 694.362   | 1091.79   | AF088014  | 212.643  | 131.966  |
| NM_018950 | 8495.161  | 4053.751  | NM_006245 | 5310.5    | 5010.622  | AL109719  | 227.468  | 240.076  |
| K03200    | 4070.585  | 2528.891  | NM_005103 | 470.483   | 419.651   | AF086093  | 278.316  | 526.708  |
| U17629    | 2265.922  | 1541.238  | NM_004822 | 1499.096  | 1304.598  | U92022    | 277.721  | 389.567  |
| NM_020428 | 3017.589  | 1813.23   | AK022349  | 5663.063  | 4764.468  | NM_003650 | 3992.729 | 3911.393 |
| U79265    | 1228.296  | 717.109   | NM_005031 | 8181.467  | 10304.208 | AK022119  | 512.399  | 871.621  |
| AK022868  | 4844.205  | 3185.047  | AB040920  | 976.813   | 1220.126  | NM_016644 | 491.097  | 453.35   |
| NM_003530 | 540.07    | 445.935   | NM_000720 | 1505.853  | 1517.906  | AF085842  | 160.976  | 135.962  |
| AJ227871  | 1370.937  | 978.547   | NM_004842 | 2189.712  | 2306.667  | AK023882  | 221.704  | 305.954  |
| AK025344  | 2146.92   | 1493.086  | AK024639  | 3029.867  | 2852.393  | AK026750  | 436.616  | 293.485  |
| D28589    | 20248.721 | 9202.817  | NM_015720 | 10852.718 | 9693.457  | AF072164  | 595.832  | 436.584  |
| AF301223  | 546.813   | 564.131   | AB007915  | 1190.449  | 1188.197  | NM_018610 | 290.67   | 134.712  |
| NM_017867 | 32236.313 | 18343.213 | AB033070  | 1641.393  | 2003.027  | AK025234  | 207.544  | 280.444  |
| U92820    | 4023.971  | 2497.868  | NM_018229 | 3049.841  | 4321.296  | AF083122  | 198.762  | 213.383  |
| NM_017937 | 2050.241  | 1177.555  | NM_006325 | 8674.639  | 12158.102 | AF232216  | 233.963  | 284.479  |
| AL360266  | 2625.774  | 1690.616  | AY009127  | 14520.774 | 16285.018 | NM_017773 | 829.312  | 866.762  |
| AL160132  | 24284.43  | 15208.647 | NM_014869 | 2216.792  | 2390.554  | AK021885  | 239.601  | 242.601  |
| NM_019557 | 3953.024  | 2547.783  | AK000158  | 6515.238  | 6896      | AK022018  | 142.239  | 125.987  |
| CY3Cy5    | 3507.072  | 123.775   | NM_005769 | 1657.344  | 1644.405  | AK022161  | 188.274  | 236.604  |
| AA150828  | 1455.702  | 1037.92   | AK024500  | 15690.856 | 17249.412 | AK022296  | 174.429  | 107.941  |
| H90764    | 524.436   | 641.81    | NM_002564 | 8824.324  | 10114.132 | AK021940  | 205.105  | 300.104  |
| AI859208  | 616.141   | 572.05    | NM_000963 | 2315.502  | 2594.499  | AK022189  | 260.932  | 220.981  |
| H64379    | 10260.693 | 11119.718 | NM_013308 | 5583.313  | 6295.254  | AK022338  | 164.943  | 232.935  |
| BE208258  | 61692.023 | 61945.297 | AF027302  | 3901.06   | 4206.088  | AK026856  | 339.845  | 408.386  |
| T72202    | 685.88    | 898.038   | NM_002852 | 4684.54   | 4667.96   | AL162033  | 393.731  | 517.047  |
| BI831922  | 3275.791  | 3931.645  | NM_001817 | 4839.499  | 4323.465  | AL162010  | 141.358  | 104.289  |
| AA599158  | 7973.489  | 14370.512 | AF063611  | 1177.905  | 1142.077  | AK026761  | 143.656  | 66.469   |
| SR7       | 4562.255  | 34687.875 | NM_005965 | 1681.168  | 1507.429  | NM_005001 | 9683.224 | 8275.702 |
| SR9       | 13524.547 | 1811.991  | NM_002740 | 2844.402  | 2668.076  | AK024175  | 1612.905 | 1407.363 |
| CY3Cy5    | 3399.987  | 119.751   | AL117482  | 3168.473  | 3639.288  | NM_000510 | 507.933  | 398.652  |
| NM_005261 | 859.055   | 1568.203  | NM_006549 | 51483.785 | 50013.824 | NM_017787 | 1133.535 | 1182.14  |
| NM_001560 | 914.214   | 1423.684  | AB018324  | 9132.454  | 7676.876  | NM_020315 | 2724.584 | 4068.294 |

|           |           |           |           |           |           |           |           |           |
|-----------|-----------|-----------|-----------|-----------|-----------|-----------|-----------|-----------|
| J03171    | 6095.617  | 9455.779  | NM_002742 | 59406.398 | 59056.543 | AK001910  | 184.502   | 126.543   |
| NM_005856 | 730.098   | 1134.09   | Z25431    | 3419.094  | 3194.15   | AK023892  | 182.868   | 361.752   |
| NM_004323 | 15847.295 | 23318.182 | NM_005627 | 4103.226  | 3491.445  | AF124368  | 226.992   | 205.432   |
| NM_002310 | 553.63    | 998.977   | M64497    | 1919.264  | 1960.226  | AF265210  | 608.638   | 656.088   |
| NM_005312 | 2653.911  | 3980.604  | NM_007274 | 22563.139 | 23163.496 | AK024241  | 295.375   | 278.011   |
| NM_001711 | 1570.627  | 2679.521  | NM_003356 | 10939.615 | 11454.783 | AK025061  | 404.124   | 249.978   |
| NM_004210 | 17006.842 | 25559.594 | AF238315  | 631.893   | 907.548   | AF088067  | 1864.358  | 2371.841  |
| NM_020140 | 1888.035  | 3921.896  | NM_006224 | 62550.211 | 59244.266 | AK022213  | 200.071   | 239.274   |
| NM_001962 | 1056.195  | 1479.879  | AL137300  | 6390.658  | 5893.05   | AF056441  | 513.064   | 275.746   |
| AK026232  | 3365.718  | 2473.053  | NM_000229 | 4693.492  | 5009.278  | AK024142  | 168.225   | 110.2     |
| NM_014892 | 10162.233 | 7572.367  | NM_006995 | 22597.186 | 22067.393 | Y10509    | 589.725   | 402.491   |
| AK023827  | 2171.453  | 1566.228  | NM_003129 | 23859.951 | 23464.57  | AK024389  | 2063.055  | 2905.641  |
| L07517    | 1525.185  | 904.499   | NM_001956 | 4967.708  | 6132.264  | AK026793  | 558.622   | 712.172   |
| AK022451  | 1209.122  | 763.148   | AB033064  | 3951.67   | 4181.303  | NM_001672 | 170.719   | 277.992   |
| NM_014359 | 64931.57  | 62417.074 | AK022317  | 8160.104  | 9404.378  | AJ276253  | 4769.197  | 4490.752  |
| BM918441  | 663.794   | 646.086   | NM_018396 | 12148.797 | 11948.326 | AF147314  | 235.21    | 295.484   |
| NM_018557 | 308.723   | 796.975   | NM_003124 | 9534.349  | 9982.88   | NM_018980 | 795.193   | 1405.09   |
| NM_001045 | 19395.355 | 26143.949 | NM_006886 | 62252.832 | 61289.102 | AF086201  | 571.745   | 660.157   |
| NM_005697 | 9151.105  | 13669.445 | NM_004531 | 10374.077 | 11177.847 | AK024712  | 114.996   | 164.335   |
| NM_004781 | 2127.667  | 3184.593  | AL133581  | 3341.621  | 4049.103  | U48696    | 435.805   | 624.759   |
| NM_016315 | 216.968   | 1031.602  | NM_002558 | 1283.852  | 975.314   | AF230316  | 2356.596  | 2654.451  |
| NM_018303 | 3898.476  | 5528.455  | NM_003586 | 1274.596  | 1409.621  | K00629    | 179.03    | 262.321   |
| NM_014758 | 8226.433  | 11275.432 | NM_000922 | 3599.874  | 3607.892  | NM_004488 | 118.494   | 194.724   |
| AL133047  | 660.158   | 1255.928  | NM_013232 | 9549.362  | 10393.457 | AK024515  | 1112.286  | 1561.967  |
| NM_005124 | 4401.903  | 5089.766  | NM_000362 | 652.547   | 606.192   | AF085862  | 1247.404  | 1483.009  |
| AK000947  | 3811.751  | 5338.312  | NM_014429 | 2924.185  | 2544.823  | NM_017998 | 715.762   | 1049.521  |
| L08240    | 1680.743  | 2002.838  | AK000770  | 2640.43   | 2525.706  | AL049271  | 17969.102 | 17700.398 |
| NM_017952 | 837.267   | 454.391   | NM_002370 | 28095.174 | 26367.383 | AK023079  | 10604.681 | 11640.352 |
| NM_016081 | 9532.547  | 6553.713  | NM_015670 | 3162.684  | 3188.442  | NM_019609 | 744.444   | 970.147   |
| NM_006389 | 2675.924  | 2166.82   | NM_014709 | 1428.581  | 1469.611  | AK026198  | 586.865   | 540.235   |
| M30818    | 584.092   | 337.092   | AB028990  | 849.889   | 1049.732  | AF183570  | 262.751   | 201.607   |
| NM_003329 | 59119.496 | 44427.531 | NM_006708 | 25821.111 | 24532.486 | NM_005497 | 2592.315  | 2120.597  |
| NM_003299 | 44819.352 | 21538.535 | AB037835  | 1518.446  | 1723.277  | AK024048  | 1862.433  | 1921.478  |
| NM_014330 | 23064.148 | 12858.5   | NM_016228 | 1589.267  | 1518.057  | AB033093  | 2419.221  | 2132.652  |
| NM_007214 | 10828.72  | 13254.499 | NM_000157 | 4827.839  | 5944.926  | NM_005912 | 512.429   | 942.554   |
| NM_000311 | 12347.056 | 15853.409 | NM_000712 | 19251.609 | 18019.279 | NM_005909 | 7655.328  | 8964.422  |
| NM_017909 | 3241.597  | 2892.724  | NM_018088 | 1162.158  | 1339.046  | AK001948  | 103.473   | 117.879   |
| NM_006335 | 15101.25  | 13807.928 | BC013695  | 15511.135 | 16213.489 | AK021879  | 133.719   | 114.985   |
| NM_017731 | 948.287   | 514.365   | AK023035  | 4147.689  | 3987.741  | AL355717  | 132.893   | 134.702   |
| AB040891  | 3507.208  | 2958.963  | NM_014846 | 5637.071  | 5526.749  | AK055991  | 444.9     | 425.613   |
| AB037780  | 5449.15   | 3637.041  | AB011164  | 4392.772  | 5894.721  | AF113697  | 218.435   | 237.737   |
| NM_005845 | 11810.396 | 7530.279  | M24750    | 2469.337  | 1987.572  | AK022326  | 419.161   | 434.379   |
| NM_016209 | 11715.58  | 5723.079  | AB046776  | 1371.618  | 1582.497  | AF085991  | 329.656   | 215.721   |
| NM_018964 | 4987.253  | 3243.718  | NM_002687 | 17327.291 | 21974.771 | NM_005683 | 362.862   | 488.277   |
| NM_000080 | 1073.342  | 822.638   | NM_000627 | 2188.277  | 2265.441  | NM_020427 | 4049.9    | 5682.173  |
| NM_001829 | 1312.572  | 720.766   | NM_000038 | 1390.311  | 1065.75   | AF085920  | 404.566   | 480.479   |
| NM_007256 | 583.161   | 214.407   | NM_000825 | 1311.358  | 1574.389  | AK023173  | 2481.221  | 2296.696  |
| AF283645  | 2636.377  | 1729.565  | NM_001963 | 757.406   | 784.113   | AK025225  | 200.703   | 142.376   |
| NM_016575 | 2418.209  | 1296.195  | NM_004334 | 2590.667  | 2513.339  | U79275    | 1050.58   | 1212.455  |
| NM_003897 | 3412.242  | 2235.977  | NM_003886 | 5305.17   | 5425.384  | AJ227908  | 278.906   | 245.415   |
| NM_014165 | 17190.695 | 9419.18   | NM_005843 | 1742.524  | 1781.041  | AF007193  | 319.757   | 163.813   |
| AL442085  | 6100.92   | 3100.861  | NM_003854 | 723.501   | 700.751   | AK022367  | 380.377   | 520.69    |
| NM_013313 | 6709.616  | 4218.169  | NM_017980 | 4186.996  | 3616.279  | BC028589  | 856.463   | 941.517   |

|           |           |           |           |           |           |           |           |           |
|-----------|-----------|-----------|-----------|-----------|-----------|-----------|-----------|-----------|
| NM_014736 | 16747.072 | 9940.807  | NM_001252 | 2130.179  | 2384.569  | CY3Cy5    | 469.683   | 284.378   |
| AK023886  | 1298.12   | 986.678   | AF053712  | 2507.13   | 2427.422  | K02765    | 230.908   | 100.876   |
| NM_002553 | 4738.601  | 3298.885  | NM_003947 | 1293.403  | 1651.517  | M65134    | 139.373   | 277.82    |
| AJ404615  | 2117.159  | 1611.714  | NM_002821 | 21157.58  | 21948.662 | BG539651  | 270.935   | 274.941   |
| NM_016053 | 23378.988 | 12018.941 | M96652    | 30364.83  | 33758.313 | N52646    | 2932.781  | 3227.691  |
| AB007869  | 2315.61   | 1389.387  | L41690    | 1740.069  | 2107.778  | AW160671  | 25367.277 | 20224.723 |
| AB046844  | 1047.921  | 780.369   | NM_018059 | 1583.932  | 1946.394  | BI870529  | 6405.446  | 7996.226  |
| NM_000302 | 3421.372  | 2071.177  | NM_002170 | 376.315   | 496.495   | AA702698  | 432.661   | 265.665   |
| NM_013235 | 24385.637 | 16723.139 | NM_005183 | 671.141   | 730.974   | AI681514  | 215.62    | 262.18    |
| NM_016015 | 10332.511 | 7360.717  | NM_006514 | 4394.239  | 4634.781  | NM_001300 | 1261.97   | 2082.291  |
| NM_020120 | 789.984   | 713.275   | AF065164  | 6181.233  | 6410.771  | BG748827  | 1569.817  | 2301.132  |
| NM_002266 | 29585.672 | 19892.658 | AB028991  | 6346.407  | 5753.524  | AA952897  | 575.177   | 673.29    |
| NM_014400 | 5022.042  | 4025.714  | AF263547  | 8875.834  | 7482.61   | BG760342  | 1618.047  | 1275.266  |
| AL157492  | 899.529   | 998.411   | AJ008143  | 12414.154 | 19344.691 | AA703141  | 685.805   | 881.904   |
| AL353957  | 2225.391  | 1947.886  | NM_007144 | 3796.461  | 4098.768  | AI122630  | 2841.76   | 3334.435  |
| NM_000231 | 722.942   | 404.37    | NM_004424 | 9659.947  | 9078.579  | NM_002103 | 3471.048  | 3202.556  |
| L07517    | 2435.768  | 1504.339  | AL133117  | 3565.664  | 3572.037  | NM_003375 | 2150.354  | 2747.493  |
| AK022451  | 2206.344  | 1082.673  | AB033040  | 1963.531  | 2227.085  | SR1       | 35614.699 | 44909.57  |
| AA150828  | 1171.993  | 969.86    | AF070586  | 7285.895  | 7850.198  | SR3       | 15125.644 | 10059.065 |
| AI859208  | 523.063   | 784.43    | NM_014412 | 1420.535  | 1391.644  | SR5       | 1567.313  | 1341.542  |
| H64379    | 8270.314  | 5574.032  | NM_013303 | 3369.365  | 2732.138  | SR7       | 1869.5    | 15954.198 |
| BI831922  | 1462.312  | 1636.691  | NM_012227 | 4072.916  | 3901.508  | SR9       | 5314.539  | 1042.909  |
| M69238    | 705.986   | 818.148   | NM_006101 | 7242.332  | 6750.263  | CY3Cy5    | 404.251   | 238.917   |
| AA664180  | 709.18    | 555.505   | NM_001237 | 11561.781 | 9626.117  | NM_012428 | 1754.333  | 1745.665  |
| NM_002711 | 516.54    | 526.452   | NM_002507 | 2458.756  | 2448.087  | NM_013265 | 711.645   | 842.8     |
| AK026092  | 3387.318  | 3273.531  | NM_015962 | 2726.93   | 3477.453  | NM_001728 | 1504.443  | 1325.976  |
| AK001175  | 676.982   | 650.24    | NM_016145 | 606.178   | 1045.182  | NM_005565 | 1834.293  | 1788.334  |
| NM_003329 | 62158.207 | 54898.652 | NM_016078 | 9361.16   | 10704.6   | NM_003824 | 1693.125  | 2036.838  |
| NM_003295 | 51755.047 | 37763.363 | NM_003798 | 1219.723  | 673.451   | NM_000686 | 153.951   | 173.773   |
| NM_007034 | 651.052   | 735.478   | NM_001849 | 14146.424 | 15986.401 | NM_012452 | 384.509   | 467.022   |
| NM_005261 | 516.515   | 724.731   | AF255910  | 1824.783  | 1934.686  | AF229166  | 248.104   | 221.115   |
| NM_001560 | 644.405   | 488.767   | NM_016146 | 6742.983  | 5450.289  | NM_005137 | 717.65    | 512.826   |
| NM_001783 | 16101.945 | 11992.482 | AK024343  | 3258.87   | 3160.242  | NM_006764 | 873.984   | 2191.307  |
| J03171    | 4377.163  | 2702.676  | NM_001936 | 885.37    | 717.394   | NM_001386 | 438.217   | 819.26    |
| NM_005312 | 1307.716  | 1151.019  | NM_002569 | 1185.214  | 1167.18   | NM_001163 | 342.724   | 347.317   |
| NM_001711 | 1060.732  | 1421.639  | D42084    | 4732.536  | 4509.421  | NM_005878 | 333.626   | 302.883   |
| NM_004210 | 7456.773  | 7818.219  | NM_001734 | 580.673   | 579.101   | AF308602  | 1202.549  | 1358.647  |
| NM_020140 | 636.406   | 932.813   | NM_014693 | 1321.698  | 1645.306  | AB011089  | 336.023   | 377.333   |
| AK026232  | 2549.608  | 2378.651  | AB007896  | 1168.024  | 1290.823  | AF007192  | 208.712   | 203.217   |
| NM_014892 | 10204.726 | 10394.815 | AB007916  | 10882.98  | 12326.808 | NM_001276 | 1973.853  | 1607.515  |
| AK023827  | 2703.909  | 2445.169  | NM_002874 | 547.905   | 508.973   | NM_016157 | 227.577   | 393.433   |
| NM_001829 | 2383.573  | 2599.631  | AF049140  | 2878.637  | 2696.156  | NM_014915 | 5596.895  | 3019.345  |
| NM_007256 | 1146.795  | 1098.312  | AL136794  | 2427.36   | 2682.301  | NM_012286 | 543.168   | 405.481   |
| AF283645  | 3583.734  | 3032.442  | BC035601  | 52048.969 | 52141.254 | NM_002195 | 1713.733  | 1687.949  |
| NM_016575 | 3285.818  | 2702.306  | NM_001458 | 2644.841  | 3240.203  | D84294    | 689.098   | 682.095   |
| NM_001045 | 16713.293 | 15188.533 | NM_020388 | 9278.691  | 10765.249 | M31659    | 280.761   | 183.848   |
| NM_005697 | 7220.164  | 5027.173  | AB046829  | 2244.424  | 2677.797  | NM_003056 | 1308.392  | 1358.367  |
| NM_003099 | 8246.805  | 6705.05   | NM_016445 | 923.155   | 832.889   | NM_016226 | 4002.889  | 3432.595  |
| NM_004781 | 1522.801  | 1860.193  | NM_003379 | 41228.672 | 38642.348 | AK024311  | 325.066   | 280.595   |
| NM_018303 | 1506.881  | 1494.706  | NM_004521 | 9041.433  | 8248.348  | AF052155  | 2328.401  | 1473.323  |
| NM_014758 | 4476.884  | 3495.635  | AF229162  | 1670.211  | 1804.552  | NM_005085 | 421.111   | 206.4     |
| AL133047  | 978.018   | 2366.63   | U02309    | 52756.926 | 52812.504 | AF060902  | 477.661   | 454.948   |
| NM_005124 | 1909.115  | 1787.845  | NM_005257 | 13557.552 | 13063.563 | AF121858  | 795.258   | 1441.527  |

|           |           |           |           |           |           |           |           |           |
|-----------|-----------|-----------|-----------|-----------|-----------|-----------|-----------|-----------|
| AK000947  | 1376.145  | 1682.259  | AF011573  | 9798.599  | 10305.43  | NM_013437 | 1528.703  | 1516.21   |
| L08240    | 1176.96   | 972.977   | NM_002145 | 3552.257  | 4235.793  | NM_017681 | 309.685   | 424.626   |
| NM_002940 | 976.575   | 926.363   | NM_003923 | 676.677   | 478.076   | X57655    | 3740.767  | 4818.888  |
| NM_016081 | 5418.738  | 3706.434  | NM_004831 | 1545.309  | 1223.21   | AK025966  | 824.316   | 613.583   |
| NM_006389 | 1759.515  | 1860.211  | NM_014213 | 6663.158  | 8370.847  | NM_018725 | 231.214   | 194.212   |
| AB023216  | 764.496   | 498.06    | NM_000168 | 4172.585  | 4891.541  | NM_003081 | 2688.886  | 2772.249  |
| NM_002266 | 42613.906 | 36603.055 | AF294629  | 5011.243  | 5923.117  | NM_016495 | 2222.844  | 2612.47   |
| NM_014400 | 7838.887  | 6836.49   | AK025571  | 2063.212  | 2329.543  | D50402    | 1963.786  | 1676.598  |
| AL157492  | 1595.934  | 1623.531  | NM_004940 | 798.57    | 743.507   | M73547    | 2726.409  | 2717.313  |
| AL353957  | 3585.168  | 2785.026  | NM_014463 | 44394.965 | 40204.371 | NM_004134 | 1344.642  | 1322.691  |
| NM_007214 | 9122.201  | 7661.695  | NM_005520 | 16537.895 | 20563.824 | NM_005955 | 710.863   | 530.383   |
| NM_000311 | 9718.095  | 8498.406  | AK023265  | 3013.889  | 3303.555  | NM_004048 | 269.329   | 124.767   |
| NM_017909 | 2723.913  | 1991.421  | NM_018723 | 1235.801  | 1145.223  | NM_017765 | 2028.418  | 1384.017  |
| NM_006335 | 12162.829 | 9934.62   | AB029009  | 2120.894  | 2141.23   | NM_000428 | 207.105   | 180.03    |
| NM_017731 | 2404.229  | 2322.101  | AF112207  | 2360.707  | 2820.31   | AB040967  | 404.713   | 363.281   |
| AB040891  | 2361.053  | 2783.07   | NM_005594 | 48149.258 | 50055.125 | NM_003578 | 734.987   | 681.939   |
| AB037780  | 1177.557  | 883.684   | NM_004461 | 54563.918 | 56254.168 | NM_014721 | 606.098   | 1927.423  |
| NM_005845 | 7237.39   | 5888.72   | NM_018473 | 12962.28  | 11368.2   | AK026352  | 255.325   | 662.005   |
| NM_016209 | 7978.305  | 5500.375  | BF106121  | 1469.638  | 1388.487  | AL137705  | 886.781   | 1126.32   |
| NM_018964 | 5164.642  | 4126.988  | AK022590  | 1696.942  | 1194.008  | U41898    | 212.275   | 346.385   |
| NM_000080 | 884.453   | 1344.156  | AK023719  | 5748.665  | 4567.579  | NM_020346 | 772.459   | 1358.714  |
| NM_002711 | 999.955   | 1106.848  | AK025590  | 1359.215  | 1408.003  | AF169257  | 241.352   | 100.566   |
| AK026092  | 5638.393  | 4936.035  | AY007149  | 3616      | 3631.53   | NM_014848 | 253.619   | 154.42    |
| AK001175  | 1409.871  | 1149.575  | M12078    | 1495.42   | 1437.885  | BF217766  | 258.661   | 154.629   |
| NM_003897 | 2633.82   | 2386.553  | NM_004550 | 10341.491 | 10384.264 | NM_000184 | 445.716   | 383.889   |
| NM_014165 | 15893.391 | 15795.419 | NM_000785 | 1385.703  | 1510.415  | NM_000112 | 533.46    | 579.369   |
| AL442085  | 5807.482  | 4856.237  | NM_004110 | 9890.651  | 12879.233 | NM_005827 | 2545.819  | 2796.397  |
| NM_013313 | 4753.966  | 4837.884  | NM_013387 | 52827.352 | 55679.793 | NM_003053 | 796.144   | 1128.509  |
| NM_014736 | 13444.352 | 14314.961 | NM_005262 | 15898.42  | 16274.183 | NM_003044 | 253.016   | 214.565   |
| AK023886  | 3888.864  | 4386.034  | NM_005757 | 1847.043  | 1712.025  | NM_006672 | 825.292   | 773.303   |
| NM_002553 | 2826.104  | 2725.032  | NM_016483 | 477.124   | 540.986   | AB007875  | 260.02    | 37.659    |
| AJ404615  | 1624.8    | 1384.623  | NM_020128 | 1377.357  | 1221.217  | NM_014796 | 1667.913  | 1825.917  |
| NM_016053 | 18666.76  | 13342.063 | NM_005068 | 4431.466  | 6495.003  | NM_001147 | 123.52    | 214.703   |
| AB007869  | 1469.464  | 1053.557  | NM_018223 | 3131.257  | 3006.496  | AL050288  | 10553.419 | 23260.914 |
| AB046844  | 982.712   | 679.664   | NM_006693 | 14535.962 | 14725.706 | NM_005040 | 1514.376  | 2749.674  |
| NM_000302 | 698.469   | 955.618   | NM_001722 | 2111.687  | 2591.904  | NM_016391 | 3141.103  | 6209.37   |
| NM_013235 | 21317.229 | 16454.133 | AB046802  | 5281.491  | 5218.197  | AF075033  | 1568.311  | 1744.756  |
| NM_016015 | 10783.728 | 8742.71   | NM_003297 | 1214.315  | 1365.699  | D50911    | 4039.037  | 4028.044  |
| NM_020120 | 798.476   | 734.199   | X74861    | 592.478   | 880.381   | AB011104  | 505.882   | 593.736   |
| AK022900  | 990.195   | 1033.511  | NM_006940 | 526.662   | 324.825   | AK024069  | 1569.549  | 812.11    |
| NM_001962 | 466.217   | 823.207   | NM_018269 | 7033.49   | 6503.166  | NM_004582 | 6561.187  | 5606.298  |
| NM_002500 | 660.821   | 631.201   | AK024633  | 4439.2    | 3961.385  | NM_015640 | 3625.588  | 3568.467  |
| AK026232  | 5006.671  | 4663.804  | NM_001453 | 4688.788  | 4038.066  | AF233450  | 343.6     | 348.085   |
| NM_014892 | 16922.15  | 15766.273 | NM_012075 | 1522.786  | 1169.765  | NM_016233 | 206.667   | 203.782   |
| AK023827  | 4286.962  | 3291.249  | AB004851  | 993.372   | 1218.883  | NM_000821 | 2984.569  | 6478.25   |
| NM_001117 | 660.941   | 762.09    | NM_013381 | 348.536   | 359.27    | NM_003145 | 9069.932  | 7588.465  |
| NM_000231 | 821.62    | 1120.982  | AK023911  | 8995.119  | 8229.662  | NM_001632 | 532.668   | 262.251   |
| L07517    | 2227.408  | 2093.487  | NM_001283 | 2541.586  | 2548.448  | NM_012264 | 442.011   | 665.867   |
| AK022451  | 1596.266  | 1685.126  | AL110237  | 996.783   | 948.37    | AF311312  | 771.412   | 773.294   |
| NM_014355 | 62142.148 | 63567.582 | D87470    | 1681.817  | 1741.569  | NM_014915 | 5115.235  | 1068.978  |
| BM918441  | 1332.883  | 1652.11   | AF147307  | 9406.979  | 8825.525  | NM_012286 | 418.717   | 303.679   |
| AA150828  | 895.173   | 646.898   | AK001829  | 4330.319  | 4470.919  | NM_002195 | 1655.297  | 1615.358  |
| H64379    | 6611.896  | 5151      | NM_016525 | 4112.647  | 3651.541  | D84294    | 573.881   | 246.083   |

|           |           |           |           |           |           |           |           |          |
|-----------|-----------|-----------|-----------|-----------|-----------|-----------|-----------|----------|
| BE208258  | 55826.301 | 61685.605 | AK024931  | 15568.596 | 17080.537 | K02765    | 188.197   | 298.991  |
| BI831922  | 1223.533  | 962.364   | AL109715  | 1071.415  | 1035.229  | BG539651  | 268.658   | 443.055  |
| M69238    | 456.002   | 466.522   | AF086181  | 1059.599  | 1198.863  | N52646    | 2962.331  | 2969.471 |
| AA664180  | 644.147   | 303.483   | AK021540  | 762.284   | 835.995   | AW160671  | 25331.213 | 19081.75 |
| NM_016081 | 13034.262 | 22129.35  | D86985    | 577.66    | 992.124   | BI870529  | 5380.544  | 6864.287 |
| NM_006389 | 3278.442  | 4388.532  | AK022258  | 1083.892  | 1043.992  | AA702698  | 361.909   | 493.284  |
| M30818    | 523.43    | 772.396   | AF088043  | 500.976   | 698.776   | AI681514  | 233.835   | 151.749  |
| NM_000163 | 728.72    | 632.111   | AF131799  | 503.661   | 872.718   | NM_001300 | 1275.703  | 1987.598 |
| NM_003329 | 63718.609 | 65198.297 | AK000455  | 1901.722  | 2146.003  | BG748827  | 1645.406  | 2322.927 |
| NM_003299 | 43455.43  | 27236.717 | NM_005230 | 1592.439  | 1257.513  | AA952897  | 452.59    | 304.198  |
| NM_014330 | 32020.973 | 23430.309 | AL365407  | 1534.755  | 1528.126  | BG760342  | 1618.159  | 1371.684 |
| NM_007034 | 1925.36   | 3300.785  | AK000840  | 12438.92  | 11081.659 | AA703141  | 612.419   | 573.277  |
| NM_005261 | 2545.077  | 3135.984  | AL162073  | 1953.845  | 1886.18   | AI122630  | 2963.174  | 3856.15  |
| NM_001560 | 1858.846  | 2147.333  | AL390160  | 1552.825  | 916.763   | NM_002103 | 3894.971  | 3417.921 |
| NM_001783 | 12303.078 | 11334.868 | AJ006835  | 3337.247  | 3677.72   | NM_003379 | 2053.229  | 2286.835 |
| J03171    | 3358.162  | 2863.195  | AF085890  | 753.549   | 706.967   | NM_006589 | 1454.424  | 1428.475 |
| NM_004323 | 13784.338 | 12449.264 | AF075057  | 374.208   | 437.443   | NM_004134 | 1196.551  | 683.686  |
| NM_005312 | 961.007   | 512.002   | AL110138  | 1314.519  | 1501.496  | NM_005955 | 581.734   | 405.966  |
| NM_001711 | 568.152   | 403.032   | AL050153  | 494.263   | 510.342   | NM_004048 | 235.104   | 390.254  |
| NM_004210 | 6895.282  | 5611.103  | AL122039  | 840.974   | 841.205   | NM_012428 | 1848.082  | 1581.412 |
| NM_020140 | 768.889   | 573.247   | AF070577  | 12204.615 | 14671.304 | NM_001728 | 1887.99   | 2542.608 |
| AK075415  | 629.51    | 602.143   | AL157484  | 17708.637 | 18371.393 | NM_005565 | 2021.063  | 2165.688 |
| NM_018964 | 6958.069  | 5870.615  | AK024850  | 1256.445  | 1267.587  | NM_003824 | 1834.729  | 1769.509 |
| NM_000080 | 1383.99   | 1729.108  | Y09836    | 1196.543  | 1287.759  | NM_000686 | 266.547   | 208.66   |
| NM_001829 | 2216.019  | 2152.864  | AL137597  | 3753.804  | 3767.645  | NM_012452 | 386.945   | 251.646  |
| NM_007256 | 825.066   | 619.455   | AK022144  | 2932.999  | 2841.727  | AF229166  | 318.99    | 522.048  |
| AF283645  | 2726.589  | 2524.405  | AF086044  | 776.972   | 710.657   | NM_005137 | 820.423   | 930.844  |
| NM_016575 | 3139.662  | 2528.289  | NM_014926 | 631.214   | 647.626   | NM_006764 | 400.06    | 469.413  |
| NM_001045 | 8708.369  | 7512.949  | AF131790  | 1039.435  | 1028.364  | NM_001386 | 211.62    | 97.98    |
| NM_005697 | 4340.771  | 4102.494  | AJ011378  | 1604.281  | 1316.526  | NM_001163 | 470.382   | 503.114  |
| NM_003099 | 6647.024  | 6925.657  | AF009266  | 964.744   | 660.964   | NM_005878 | 914.021   | 684.606  |
| NM_004781 | 902.468   | 1128.054  | AF009310  | 1013.917  | 1058.084  | AF308602  | 1274.942  | 937.517  |
| NM_018303 | 1556.357  | 1352.839  | AF054991  | 835.303   | 629.372   | AB011089  | 472.926   | 849.8    |
| NM_014758 | 2769.912  | 1878.455  | AF060168  | 1892.745  | 1477.271  | AF007192  | 254.439   | 244.015  |
| NM_005124 | 1857.503  | 1110.704  | AF009275  | 1397.641  | 1590.458  | NM_001276 | 1652.171  | 1653.39  |
| AK000947  | 1595.041  | 1101.485  | AF015251  | 753.788   | 655.084   | NM_016157 | 224.315   | 359.64   |
| L08240    | 1191.799  | 730.096   | AF056426  | 2254.524  | 2249.787  | NM_000112 | 226.283   | 117.598  |
| NM_017952 | 547.137   | 266.338   | AF064850  | 426.27    | 473.741   | NM_005827 | 2364.196  | 1778.486 |
| NM_002940 | 1332.216  | 1431.448  | AK001096  | 633.06    | 730.085   | NM_003053 | 580.093   | 430.104  |
| AB046844  | 1621.373  | 1826.864  | NM_018329 | 1521.986  | 1534.124  | NM_003044 | 193.658   | 147.254  |
| NM_000302 | 1755.593  | 1897.402  | AK021778  | 713.519   | 824.269   | NM_006672 | 841.849   | 463.38   |
| NM_013235 | 34428.922 | 29540.721 | AK001150  | 3731.24   | 4631.187  | M31659    | 330.247   | 199.887  |
| NM_016015 | 14456.673 | 12300.987 | AK002123  | 754.002   | 818.923   | NM_016226 | 5596.61   | 12686.13 |
| NM_020120 | 1491.96   | 1416.987  | AK021633  | 1985.067  | 2002.888  | AK024311  | 760.257   | 1003.402 |
| AK022900  | 1613.343  | 1470.355  | AK025194  | 362.322   | 386.066   | AF052155  | 2630.738  | 2547.37  |
| NM_002266 | 32016.396 | 24956.225 | AK025659  | 2841.336  | 2878.323  | NM_005085 | 358.759   | 401.36   |
| NM_014400 | 5368.462  | 5255.708  | AK026407  | 937.04    | 1092.314  | AF060902  | 472.938   | 512.329  |
| AL157492  | 1191.361  | 1296.314  | AK026788  | 2317.788  | 2665.065  | AF121858  | 1235.963  | 1330.212 |
| AL353957  | 2135.105  | 1704.519  | AK025272  | 1108.821  | 1043.556  | NM_013437 | 1745.702  | 2433.293 |
| NM_007214 | 3831.177  | 3276.053  | AK026020  | 336.054   | 413.141   | NM_017681 | 313.71    | 356.931  |
| NM_000311 | 6104.685  | 4859.249  | AK026824  | 1082.107  | 965.449   | X57655    | 3918.713  | 3488.969 |
| NM_017909 | 2799.862  | 1794.164  | AJ008130  | 33167.313 | 26519.986 | AK025966  | 841.734   | 738.151  |
| NM_006335 | 10298.563 | 10396.101 | AF086502  | 3113.3    | 2720.594  | NM_018725 | 210.951   | 198.594  |

|           |           |           |           |           |           |           |          |          |
|-----------|-----------|-----------|-----------|-----------|-----------|-----------|----------|----------|
| AB040891  | 2662.008  | 3657.1    | L39924    | 1643.816  | 1355.314  | NM_003081 | 3673.146 | 5378.821 |
| AB037780  | 1594.252  | 1849.865  | U52054    | 7997.094  | 6951.831  | NM_01649E | 2319.47  | 2618.514 |
| NM_00584E | 4931.944  | 5606.363  | D17226    | 655.67    | 645.462   | D50402    | 2798.748 | 2222.951 |
| NM_01620E | 12806.42  | 16230.046 | AK023325  | 2464.638  | 2236.285  | M73547    | 2882.269 | 2129.906 |
| AK002114  | 7647.201  | 6354.72   | NM_01798E | 2566.577  | 2402.608  | NM_003687 | 228.497  | 219.758  |
| AL390184  | 938.057   | 916.754   | AK025866  | 3150.105  | 3839.555  | NM_00314E | 8695.687 | 5124.017 |
| NM_01869E | 824.096   | 632.634   | AF088058  | 12605.889 | 14685.361 | NM_00163E | 542.794  | 353.79   |
| NM_01804E | 700.586   | 292.172   | NM_00051E | 1931.299  | 2225.51   | NM_012264 | 539.661  | 342.43   |
| AK026318  | 1331.386  | 1027.604  | Y11165    | 2326.793  | 2543.93   | AF311312  | 697.657  | 487.001  |
| AF291673  | 1218.187  | 982.453   | AL137445  | 1196.263  | 1123.662  | NM_00117E | 238.271  | 63.506   |
| NM_00436E | 15563.607 | 11761.093 | BC028422  | 994.088   | 825.546   | NM_01776E | 1969.495 | 1653.475 |
| NM_01635E | 5463.783  | 3708.626  | AK022219  | 734.027   | 817.278   | NM_00042E | 351.075  | 847.534  |
| AJ296290  | 3190.24   | 2388.95   | AK024192  | 536.327   | 336.783   | AB040967  | 568.47   | 422.207  |
| AK026092  | 3839.298  | 3070.345  | NM_013244 | 516.066   | 337.409   | NM_014721 | 458.209  | 387.766  |
| AK001175  | 766.076   | 1384.384  | NM_00354E | 974.937   | 1086.166  | AK026352  | 348.882  | 381.677  |
| NM_003897 | 2826.439  | 6213.648  | AK024413  | 1389.923  | 1091.092  | AB020649  | 24.539   | 286.119  |
| NM_01448E | 561.199   | 1534.633  | AL137752  | 621.972   | 474.358   | NM_00666E | 92.004   | 132.839  |
| NM_01416E | 15543.766 | 33202.832 | AK022247  | 1460.403  | 1592.156  | AL137705  | 774.533  | 551.196  |
| AL442085  | 4193.74   | 7511.26   | AK001453  | 6926.68   | 6291.979  | U41898    | 298.168  | 484.144  |
| AK023886  | 1028.991  | 1006.477  | AB007972  | 4287.897  | 4578.005  | AF169257  | 154.846  | 176.85   |
| NM_00255E | 1781.845  | 1726.323  | AL390144  | 22789.084 | 19320.088 | NM_01484E | 211.34   | 360.851  |
| AJ404615  | 2145.011  | 1948.403  | AK024017  | 2060.331  | 1983.053  | BF217766  | 402.266  | 273.414  |
| NM_01605E | 23298.699 | 15355.683 | X56196    | 1254.802  | 1207.562  | NM_000184 | 555.85   | 480.125  |
| AB007869  | 2440.675  | 1662.094  | D17220    | 9051.499  | 8906.482  | NM_01618C | 162.17   | 185.944  |
| M64108    | 3134.677  | 5918.309  | D28363    | 59583.379 | 58876.766 | NM_00210E | 3705.375 | 2453.455 |
| NM_014767 | 632.708   | 921.563   | AB011171  | 1573.078  | 2211.809  | NM_00337E | 1827.435 | 2085.96  |
| Y17867    | 4612.956  | 9638.151  | AF090099  | 602.274   | 488.765   | NM_00658E | 1621.194 | 1320.047 |
| M92642    | 1603.682  | 3073.74   | AF189251  | 786.012   | 1259.732  | AB007875  | 285.096  | 209.942  |
| NM_018071 | 3158.192  | 7051.178  | NM_00532E | 4533.839  | 5606.472  | NM_01479E | 1751.26  | 1569.313 |
| NM_00202C | 14256.321 | 24310.764 | AK024465  | 1955.697  | 2380.216  | AL050288  | 8603.466 | 8181.661 |
| AL050137  | 883.774   | 2180.137  | AF075119  | 644.724   | 852.543   | NM_00504C | 1640.682 | 1593.382 |
| AK024423  | 1944.83   | 3354.653  | AK021478  | 7592.907  | 8661.804  | NM_016391 | 3090.715 | 3028.734 |
| NM_00504E | 31471.076 | 50635.602 | AF131782  | 2154.596  | 1990.842  | M80783    | 177.458  | 344.069  |
| NM_00597E | 11475.457 | 18838.107 | NM_01421C | 3734.4    | 3858.573  | AF075033  | 1890.979 | 2106.85  |
| NM_00628E | 3839.302  | 6823.647  | AK021603  | 6687.436  | 6476.013  | D50911    | 4444.091 | 3957.534 |
| NM_020321 | 3258.728  | 7015.436  | AL110136  | 4548.327  | 4888.848  | AB011104  | 535.594  | 396.525  |
| NM_01592C | 17382.34  | 13888.689 | AK002203  | 877.836   | 728.468   | AK024069  | 1518.969 | 1478.933 |
| AB011113  | 2604.907  | 1759.648  | AK026469  | 8480.931  | 7898.23   | NM_00458E | 6354.275 | 5223.934 |
| NM_004115 | 1481.914  | 785.036   | D16935    | 4257.359  | 3628.355  | NM_01564C | 3485.914 | 3340.231 |
| NM_018287 | 995.727   | 574.123   | U92019    | 791.103   | 654.265   | AF233450  | 321.992  | 240.371  |
| NM_00195E | 1479.894  | 1122.507  | U52835    | 2278.446  | 2275.672  | NM_01623E | 237.705  | 204.427  |
| AF016004  | 1509.361  | 3094.565  | NM_00075E | 2705.008  | 2282.428  | NM_000821 | 2854.339 | 2770.132 |
| NM_003567 | 2897.284  | 2584.015  | AK022148  | 1098.147  | 1141.359  | AF308602  | 1306.045 | 724.382  |
| NM_00731E | 1553.786  | 1050.868  | Z36811    | 55823.73  | 55195.145 | AB011089  | 385.597  | 314.374  |
| L20686    | 3884.653  | 2904.347  | NM_01895C | 10652.861 | 11123.77  | NM_00127E | 1768.55  | 1277.136 |
| NM_000304 | 1015.71   | 476.758   | K03200    | 6397.223  | 5876.472  | NM_016157 | 182.409  | 122.465  |
| AK023362  | 798.646   | 562.189   | U17629    | 3306.197  | 3054.091  | NM_01491E | 5614.858 | 2632.646 |
| S72604    | 37060.594 | 53735.004 | NM_02042E | 4606.841  | 4719.958  | NM_01228E | 453.54   | 402.691  |
| NM_017984 | 519.313   | 923.489   | U79265    | 1404.61   | 1850.148  | NM_00219E | 1648.362 | 1767.207 |
| NM_00246C | 587.854   | 1099.927  | AK022868  | 5598.21   | 5682.162  | D84294    | 794.023  | 760.942  |
| NM_00267E | 3065.104  | 6625.345  | NM_00353C | 637.944   | 828.924   | K02765    | 293.852  | 484.446  |
| NM_01243E | 41957.91  | 54131.238 | AJ227871  | 1586.537  | 1475.017  | M65134    | 183.577  | 208.953  |
| NM_005007 | 9958.682  | 16207.137 | AK025344  | 2150.336  | 2602.671  | BG539651  | 336.597  | 307.951  |

|           |           |           |           |           |           |           |           |           |
|-----------|-----------|-----------|-----------|-----------|-----------|-----------|-----------|-----------|
| AK024996  | 6007.229  | 5007.979  | D28589    | 25707.268 | 30531.998 | N52646    | 3371.666  | 2662.152  |
| NM_004417 | 414.057   | 570.582   | AF301223  | 830.403   | 992.373   | AW160671  | 27491.227 | 20357.143 |
| NM_012290 | 4190.124  | 3182.22   | NM_017867 | 38779.508 | 32992.738 | BI870529  | 6842.949  | 8103.312  |
| NM_002431 | 7009.692  | 4621.322  | U92820    | 5793.682  | 5686.925  | AA702698  | 303.535   | 324.629   |
| NM_001827 | 55913.563 | 54772.488 | NM_017937 | 2652.448  | 3236.217  | AI681514  | 279.644   | 154.836   |
| NM_020466 | 2442.249  | 1402.959  | AL360266  | 2997.095  | 3125.628  | NM_001300 | 974.162   | 1095.157  |
| NM_002853 | 3108.47   | 3475.173  | AL160132  | 38097.617 | 43746.48  | BG748827  | 1475.118  | 1350.014  |
| NM_003174 | 1459.373  | 1520.073  | NM_019557 | 4360.409  | 4124.407  | AA952897  | 468.539   | 333.804   |
| NM_012307 | 15193.086 | 10864.329 | CY3Cy5    | 1353.134  | 112.041   | BG760342  | 1522.668  | 1387.087  |
| NM_002540 | 1078.738  | 812.857   | AA150828  | 716.441   | 1912.387  | AA703141  | 603.755   | 413.31    |
| NM_006371 | 1193.286  | 896.747   | H90764    | 424.389   | 657.215   | AI122630  | 2922.801  | 3473.286  |
| AK026882  | 1419.7    | 2387.508  | AI859208  | 680.705   | 663.062   | NM_003081 | 4293.973  | 3286.476  |
| NM_004574 | 1370.592  | 3452.97   | H64379    | 3449.917  | 2975.029  | NM_016495 | 2403.918  | 1867.203  |
| NM_004848 | 1235.034  | 3833.144  | BE208258  | 65529.277 | 62183.297 | D50402    | 2204.201  | 1208.706  |
| NM_014813 | 1682.855  | 1417.596  | T72202    | 699.306   | 1467.67   | M73547    | 2574.996  | 1801.845  |
| AF014459  | 2785.738  | 1838.692  | BI831922  | 2901.688  | 4593.877  | NM_003687 | 194.535   | 177.377   |
| AK024601  | 9263.615  | 8274.868  | M69238    | 1163.265  | 1404.462  | NM_004134 | 1206.513  | 1325.394  |
| S68069    | 8875.912  | 8421.915  | AA599158  | 5941.747  | 5131.397  | NM_005955 | 725.486   | 595.729   |
| AB011095  | 3024.485  | 3050.876  | SR5       | 4928.651  | 2768.554  | NM_004048 | 225.238   | 241.516   |
| NM_001503 | 1507.501  | 1405.777  | SR7       | 4593.501  | 15717.455 | NM_012428 | 1953.854  | 2247.132  |
| NM_006302 | 3205.353  | 3512.14   | SR9       | 14977.313 | 1599.773  | NM_001728 | 2058.213  | 1665.665  |
| AJ224875  | 7925.866  | 6936.833  | CY3Cy5    | 1199.612  | 142.518   | NM_005565 | 2252.926  | 2056.686  |
| NM_002149 | 3645.613  | 3484.61   | NM_005261 | 449.776   | 239.128   | NM_003824 | 2051.464  | 2040.022  |
| AF043324  | 6785.033  | 7124.366  | NM_001560 | 593.618   | 472.015   | NM_000686 | 253.201   | 167.128   |
| AK024172  | 1860.862  | 1540.965  | NM_001783 | 12681.214 | 20639.797 | NM_012452 | 441.899   | 277.229   |
| NM_014814 | 7858.326  | 6765.247  | J03171    | 4345.516  | 7750.833  | AF229166  | 285.71    | 211.641   |
| NM_002797 | 18016.457 | 15406.125 | NM_004323 | 14260.971 | 19200.748 | NM_005137 | 877.11    | 1072.722  |
| AK024318  | 1903.218  | 1932.955  | NM_005312 | 1987.923  | 3347.854  | NM_006764 | 497.351   | 394.314   |
| NM_016129 | 5078.833  | 3794.526  | NM_001711 | 980.301   | 1974.821  | NM_001386 | 197.028   | 157.997   |
| NM_002809 | 9176.255  | 8635.673  | NM_020140 | 2162.308  | 3872.668  | NM_001163 | 449.398   | 444.568   |
| NM_017912 | 8752.017  | 13663.766 | NM_001962 | 447.399   | 634.516   | NM_005878 | 384.198   | 210.237   |
| NM_000423 | 3324.334  | 3335.751  | AK023827  | 2193.376  | 2679.413  | NM_014848 | 226.478   | 75.924    |
| AB046838  | 2518.479  | 1432.523  | L07517    | 1847.061  | 962.359   | BF217766  | 225.38    | 234.591   |
| X98411    | 4036.105  | 6951.392  | AK022451  | 1035.384  | 830.793   | NM_000184 | 471.087   | 345.861   |
| AK001725  | 1258.609  | 4008.305  | NM_014359 | 63693.871 | 63548.945 | NM_000112 | 285.908   | 180.684   |
| NM_003036 | 1453.632  | 1834.034  | BM918441  | 962.165   | 514.851   | NM_005827 | 2440.75   | 2512.057  |
| NM_020529 | 2901.904  | 2196.354  | NM_018557 | 227.044   | 165.092   | NM_003053 | 821.371   | 1272.526  |
| NM_020395 | 2591.012  | 2723.053  | NM_001045 | 7326.615  | 2390.471  | NM_003044 | 291.958   | 292.366   |
| NM_003425 | 1982.631  | 2020.125  | NM_005697 | 6753.512  | 4134.359  | NM_006672 | 1678.195  | 3065.019  |
| NM_013388 | 9394.714  | 9838.804  | NM_003099 | 8234.782  | 9970.739  | M31659    | 345.946   | 128.201   |
| NM_006492 | 640.38    | 678.31    | NM_004781 | 1700.28   | 2911.084  | NM_016226 | 4768.04   | 4736.231  |
| AK021811  | 3005.833  | 2991.6    | NM_016315 | 104.807   | 1000.268  | AK024311  | 425.076   | 380.927   |
| NM_003428 | 4741.834  | 4521.936  | NM_018303 | 3056.292  | 5405.708  | AF052155  | 2970.538  | 3505.771  |
| AF055030  | 1901.661  | 1797.172  | NM_014758 | 5234.536  | 8446.19   | NM_005085 | 356.867   | 330.221   |
| AK000589  | 1985.097  | 1281.189  | AL133047  | 634.117   | 1263.448  | AF060902  | 473.31    | 522.933   |
| X53281    | 8474.328  | 6849.849  | NM_005124 | 3025.231  | 5025.606  | AF121858  | 1167.591  | 1330.203  |
| BC012782  | 1917.194  | 1493.284  | L08240    | 1790.749  | 2830.234  | NM_013437 | 1150.637  | 1010.63   |
| AF132026  | 43134.887 | 31713.848 | NM_017952 | 769.364   | 2477.059  | NM_017681 | 374.469   | 525.715   |
| AL050353  | 1852.068  | 1612.993  | NM_016081 | 11306.488 | 15006.815 | X57655    | 3583.824  | 3364.374  |
| AB037788  | 5770.573  | 4393.261  | NM_006389 | 4566.32   | 4969.143  | AK025966  | 693.805   | 530.722   |
| NM_004587 | 6147.047  | 7062.836  | NM_003299 | 45351.977 | 24897.404 | NM_018725 | 320.743   | 272.249   |
| NM_000990 | 7412.443  | 12052.009 | NM_014330 | 15165.054 | 9540.416  | AK024069  | 1317.153  | 899.723   |
| NM_014740 | 1930.096  | 4000.919  | NM_007214 | 7147.229  | 1217.943  | NM_004582 | 5222.401  | 4164.642  |

|           |           |           |           |           |           |           |           |           |
|-----------|-----------|-----------|-----------|-----------|-----------|-----------|-----------|-----------|
| NM_015956 | 5925.219  | 3619.127  | NM_000311 | 9314.82   | 2343.004  | NM_015640 | 3377.391  | 2403.54   |
| AF075008  | 2033.01   | 1777.236  | NM_017909 | 2840.68   | 2537.554  | AF233450  | 263.768   | 260.275   |
| NM_006504 | 4435.76   | 3511.37   | NM_006335 | 12504.092 | 18923.811 | NM_016233 | 299.68    | 227.735   |
| AF070538  | 1716.822  | 1514.626  | NM_000786 | 455.058   | 1139.591  | NM_000821 | 3057.707  | 3225.358  |
| AL137430  | 1011.577  | 677.698   | NM_017731 | 685.838   | 1773.719  | NM_003145 | 10134.997 | 9691.355  |
| NM_002488 | 28609.396 | 26390.211 | AB040891  | 3395.584  | 5929.307  | NM_001632 | 769.088   | 1637.457  |
| NM_004003 | 16642.271 | 15605.086 | AB037780  | 901.22    | 1692.244  | AF311312  | 804.05    | 720.783   |
| NM_000188 | 1926.157  | 2500.213  | NM_016209 | 13555.583 | 18200.381 | NM_017765 | 2462.229  | 2256.557  |
| BF244401  | 3012.031  | 2132.276  | AK075415  | 560.209   | 1347.24   | NM_000428 | 287.72    | 180.969   |
| NM_004718 | 30558.939 | 20785.326 | AK025616  | 471.042   | 488.673   | AB040967  | 487.491   | 327.666   |
| AL359585  | 3605.307  | 2841.747  | NM_018964 | 5287.851  | 6065.443  | NM_014721 | 506.771   | 348.236   |
| AB046850  | 2215.669  | 1783.143  | NM_004733 | 490.976   | 629.531   | AK026352  | 265.933   | 170.076   |
| NM_014801 | 2314.359  | 2127.832  | NM_007256 | 534.358   | 763.93    | AL137705  | 787.793   | 1068.721  |
| NM_003642 | 6574.222  | 6225.335  | AF283645  | 2268.322  | 2168.864  | U41898    | 310.316   | 391.991   |
| AB027013  | 4206.51   | 3680.296  | NM_016575 | 1508.216  | 2037.044  | NM_007262 | 6755.191  | 4846.685  |
| BF185480  | 2207.666  | 1912.031  | NM_003897 | 3245.965  | 2392.894  | NM_014783 | 1467.759  | 857.145   |
| NM_002128 | 17136.123 | 8566.729  | NM_014165 | 14911.38  | 23410.271 | NM_014053 | 1398.164  | 1252.208  |
| NM_007105 | 1147.562  | 2222.789  | AL442085  | 3851.905  | 7109.228  | NM_002571 | 234.642   | 222.975   |
| NM_003074 | 4397.48   | 5741.424  | NM_013313 | 7421.583  | 12130.09  | NM_004939 | 1404.997  | 853.168   |
| AL360195  | 1883.699  | 4321.938  | NM_014736 | 19827.414 | 28405.867 | NM_001425 | 3608.161  | 3249.239  |
| U14383    | 760.838   | 1020.063  | AK023886  | 1445.141  | 2709.406  | NM_015710 | 264.95    | 171.79    |
| NM_017810 | 1780.861  | 2202.723  | NM_002553 | 2537.981  | 4719.31   | NM_014158 | 1209.129  | 1205.749  |
| NM_004364 | 815.219   | 424.759   | AJ404615  | 4148.423  | 6052.83   | AK021591  | 956.243   | 1292.452  |
| NM_014951 | 266.068   | 964.66    | AB007869  | 2695.296  | 4380.642  | AB007875  | 340.307   | 510.337   |
| AK023505  | 4133.585  | 3203.84   | AB046844  | 1529.747  | 2339.974  | NM_014796 | 1456.999  | 1237.839  |
| AB037851  | 9440.809  | 7694.976  | NM_000302 | 1784.788  | 2295.333  | AL050288  | 7621.249  | 7451.719  |
| AL050389  | 10028.058 | 8916.517  | NM_013235 | 32385.453 | 31336.549 | NM_005040 | 1275.397  | 1243.343  |
| AK025855  | 1305.056  | 1454.229  | AK022900  | 1470.252  | 1350.979  | NM_016391 | 3076.526  | 2975.916  |
| AK024684  | 2310.179  | 1828.915  | AB023216  | 529.662   | 416.924   | M80783    | 203.899   | 226.228   |
| NM_014945 | 15360.4   | 14875.373 | NM_002266 | 32628.631 | 11444.113 | AF075033  | 1602.927  | 1665.894  |
| AK001546  | 1376.325  | 908.458   | NM_014400 | 5357.407  | 2507.638  | D50911    | 4169.514  | 3323.68   |
| NM_006537 | 7549.576  | 7122.511  | AL157492  | 1026.543  | 853.016   | AB011104  | 547.598   | 781.983   |
| AF007155  | 7406.146  | 6463.42   | AL353957  | 1955.022  | 762.076   | NM_001078 | 170.582   | 115.028   |
| AL049282  | 3664.578  | 2965.81   | NM_000231 | 429.392   | 206.319   | NM_000552 | 1897.868  | 1115.125  |
| AK021443  | 2957.986  | 2198.367  | L07517    | 1955.813  | 612.024   | NM_003809 | 190.219   | 139.421   |
| AF070569  | 730.396   | 695.431   | AA150828  | 854.949   | 1786.307  | AK000860  | 556.656   | 374.918   |
| NM_020233 | 3131.627  | 3146.666  | H90764    | 328.933   | 624.534   | NM_014961 | 221.665   | 201.983   |
| AF143873  | 962.324   | 706.007   | AI859208  | 637.596   | 824.357   | NM_020145 | 599.196   | 677.079   |
| AL355732  | 3189.357  | 2637.394  | H64379    | 3820.625  | 5835.343  | AK021529  | 614.366   | 777.25    |
| NM_017966 | 3363.563  | 6017.51   | T72202    | 830.524   | 1242      | NM_016190 | 9845.537  | 20197.141 |
| AF143327  | 2709.376  | 4189.677  | BI831922  | 2791.458  | 3596.453  | AL137579  | 1317.302  | 1710.149  |
| AL137535  | 756.988   | 1701.256  | M69238    | 1015.006  | 1678.787  | NM_012383 | 3949.111  | 4169.474  |
| AL049990  | 1024.673  | 1656.235  | AA664180  | 736.217   | 887.753   | AJ271684  | 235.918   | 199.312   |
| NM_020231 | 1376.896  | 1021.851  | BE294756  | 341.881   | 1181.808  | AF255342  | 1033.466  | 921.513   |
| AL133118  | 5028.329  | 4352.287  | NM_002711 | 1645.698  | 1076.405  | NM_003300 | 1347.578  | 1330.826  |
| AK023571  | 4365.38   | 3462.676  | AK026092  | 3020.121  | 1448.308  | AK026682  | 563.24    | 435.028   |
| AF131783  | 631.894   | 375.73    | AK001175  | 564.114   | 286.043   | NM_017720 | 23063.414 | 15090.564 |
| NM_001702 | 5002.863  | 4445.256  | NM_003329 | 50396.75  | 6598.448  | NM_004655 | 548.356   | 647.475   |
| AK026657  | 2669.66   | 2339.058  | NM_003299 | 30537.273 | 5526.826  | NM_003942 | 717.727   | 685.796   |
| NM_018050 | 717.975   | 352.132   | NM_007034 | 823.381   | 675.762   | NM_006471 | 19361.029 | 12872.774 |
| AF087991  | 13721.884 | 8349.439  | NM_005261 | 526.937   | 769.117   | NM_004165 | 900.341   | 800.873   |
| X64979    | 645.953   | 676.491   | NM_001560 | 368.19    | 968.178   | NM_000368 | 915.227   | 1093.513  |
| AJ001876  | 925.093   | 1010.799  | NM_001783 | 11751.502 | 9904.992  | NM_016586 | 906.888   | 1008.976  |



|           |           |           |           |           |           |           |          |          |
|-----------|-----------|-----------|-----------|-----------|-----------|-----------|----------|----------|
| AJ227884  | 1334.934  | 1491.906  | J03171    | 3668.4    | 3618.16   | NM_00414C | 521.923  | 273.348  |
| X64986    | 22904.936 | 23721.818 | NM_00231C | 371.512   | 556.342   | NM_00286E | 849.165  | 405.102  |
| Y10510    | 423.871   | 606.738   | NM_005312 | 1970.786  | 3149.776  | NM_00386C | 308.224  | 265.988  |
| L38282    | 6836.657  | 5974.979  | NM_001711 | 967.425   | 1919.293  | NM_005414 | 201.093  | 317.271  |
| NM_01805E | 5144.214  | 7806.982  | NM_00421C | 13807.869 | 17653.174 | NM_00446E | 1342.48  | 746.234  |
| L25446    | 588.65    | 696.741   | NM_02014C | 1811.999  | 3590.664  | NM_016031 | 2248.631 | 1539.208 |
| NM_01900E | 2384.902  | 5147.886  | AK026232  | 5040.404  | 1701.626  | NM_004804 | 877.882  | 710.235  |
| M20838    | 1263.002  | 1376.817  | NM_014892 | 13664.124 | 3548.643  | M92439    | 1379.076 | 2265.638 |
| AK024252  | 924.522   | 601.852   | AK023827  | 2597.176  | 1110.227  | NM_001262 | 2679.058 | 4438.738 |
| AK002095  | 2525.103  | 2178.093  | NM_001117 | 475.37    | 251.642   | BE873030  | 311.263  | 236.1    |
| NM_012431 | 381.439   | 1735.855  | NM_001829 | 1585.673  | 311.475   | NM_00362E | 290.587  | 357.461  |
| AK000821  | 4721.605  | 6763.511  | NM_00725E | 366.762   | 189.29    | BC006990  | 3666.941 | 3635.78  |
| AK024526  | 16599.402 | 17250.947 | AF283645  | 3656.263  | 6783.399  | NM_002277 | 383.511  | 168.324  |
| AK000848  | 1198.469  | 1332.486  | NM_01657E | 2166.582  | 3763.821  | NM_019114 | 832.707  | 787.989  |
| AK023307  | 825.295   | 994.612   | NM_018557 | 363.94    | 832.467   | M33552    | 1998.641 | 1948.991 |
| NM_01761E | 4039.793  | 3778.166  | NM_00104E | 6912.199  | 9252.556  | AJ252060  | 737.833  | 917.772  |
| AK024560  | 725.738   | 1124.611  | NM_005697 | 6443.102  | 6063.19   | NM_006403 | 747.795  | 578.715  |
| AK024945  | 4187.653  | 6441.973  | NM_003099 | 7925.285  | 6821.452  | NM_018977 | 292.866  | 185.515  |
| AK024411  | 563.062   | 1350.218  | NM_004781 | 1930.84   | 2469.641  | AJ001402  | 222.148  | 216.528  |
| S75708    | 15827.412 | 10447.514 | NM_018303 | 2706.533  | 4346.029  | NM_00454C | 145.096  | 235.259  |
| U79291    | 13530.998 | 12265.467 | NM_01475E | 4867.188  | 7368.769  | NM_00023E | 1461.902 | 1021.113 |
| D17172    | 25177.064 | 31478.084 | AL133047  | 663.989   | 967.198   | NM_01587E | 241.247  | 113.749  |
| AF161370  | 624.861   | 922.531   | NM_005124 | 3212.718  | 4866.286  | AF068236  | 6107.386 | 4187.538 |
| AJ227859  | 1341.721  | 2439.069  | AK000947  | 3469.141  | 4008.468  | L25628    | 249.159  | 133.144  |
| NM_018544 | 1370.295  | 1808.234  | NM_00294C | 1576.818  | 1606.539  | M37033    | 4317.376 | 2467.49  |
| AK022670  | 330.169   | 1170.294  | NM_016081 | 10398.704 | 5763.284  | NM_007171 | 1901.579 | 1163.963 |
| L10141    | 1291.21   | 1146.128  | NM_006389 | 3242.346  | 1814.13   | NM_00427E | 731.476  | 450.335  |
| AB020699  | 8312.13   | 9868.851  | AB023216  | 346.67    | 170.471   | NM_005632 | 667.182  | 786.971  |
| AF086269  | 3413.678  | 3939.89   | NM_00226E | 34988.332 | 15762.367 | AK021499  | 274.335  | 514.129  |
| U90437    | 6808.411  | 6563.013  | NM_01440C | 6350.509  | 9523.402  | AB007948  | 777.38   | 1031.645 |
| AK000842  | 17043.738 | 32385.229 | AL157492  | 1497.478  | 3250.52   | AB033066  | 571.004  | 651.241  |
| NM_00112E | 7500.339  | 12729.466 | AL353957  | 2983.047  | 5505.996  | AF126028  | 1109.549 | 965.318  |
| AK023673  | 6032.983  | 10899.345 | NM_007214 | 8229.919  | 11909.051 | NM_00701E | 6987.673 | 8148.546 |
| NM_018252 | 3914.661  | 5876.494  | NM_000311 | 11252.273 | 16849.814 | NM_00707E | 293.052  | 275.443  |
| NM_01800C | 54491.492 | 51266.059 | NM_017909 | 2719.067  | 4783.911  | NM_016042 | 681.758  | 591.891  |
| AF164963  | 1421.478  | 1694.222  | NM_00633E | 13232.607 | 19981.432 | NM_01764C | 605.757  | 387.931  |
| AF124366  | 31127.186 | 34649.379 | NM_00078E | 604.154   | 987.458   | NM_017721 | 846.52   | 628.64   |
| AF130112  | 1279.814  | 1592.847  | NM_002519 | 317.656   | 678.26    | NM_01908E | 1968.866 | 1803.422 |
| NM_000551 | 5266.573  | 4953.698  | NM_017731 | 656.656   | 1408.886  | AB002373  | 754.207  | 774.411  |
| AL365518  | 1339.801  | 1310.788  | AB040891  | 2945.119  | 3941.746  | NM_01635C | 3679.878 | 3103.057 |
| AF086257  | 1634.065  | 1370.373  | NM_016209 | 11997.065 | 9091.431  | AK024167  | 2738.162 | 2183.314 |
| AF075056  | 671.812   | 603.745   | NM_018964 | 3397.661  | 1785.349  | AK025308  | 278.948  | 491.894  |
| U00928    | 873.601   | 878.544   | NM_00008C | 1456.836  | 330.365   | NM_00502E | 526.54   | 515.979  |
| NM_01905E | 3717.96   | 3593.184  | NM_002711 | 1187.342  | 220.572   | AF213356  | 212.121  | 81.2     |
| AF279783  | 4105.924  | 3686.521  | AK026092  | 4446.904  | 7268.254  | BC035716  | 304.889  | 225.297  |
| AF182422  | 12076.059 | 10207.747 | AK001175  | 1008.493  | 2128.296  | NM_018014 | 1421.172 | 1024.202 |
| NM_016943 | 880.966   | 704.635   | NM_003897 | 3598.65   | 6065.517  | NM_00235E | 2780.109 | 1652.965 |
| NM_017622 | 2359.844  | 4456.286  | NM_01416E | 14108.87  | 20434.799 | AF230809  | 491.283  | 389.446  |
| AF133331  | 7529.263  | 11123.419 | AL442085  | 3726.965  | 6813.339  | NM_017894 | 3772.287 | 2338.031 |
| NM_020183 | 5969.658  | 7008.92   | NM_013313 | 6780.521  | 9723.431  | NM_00650E | 580.051  | 714.719  |
| NM_01802E | 1307.188  | 1198.225  | NM_01473E | 18680.168 | 22147.25  | AK025447  | 699.591  | 340.407  |
| AL389954  | 1183.345  | 1363.544  | AK023886  | 1360.613  | 2453.512  | NM_002624 | 8448.32  | 7168.891 |
| NM_019852 | 2438.95   | 2312.079  | NM_002553 | 1800.873  | 2129.225  | AF006199  | 346.626  | 315.227  |

|           |           |           |           |           |           |           |           |           |
|-----------|-----------|-----------|-----------|-----------|-----------|-----------|-----------|-----------|
| NM_006118 | 5281.803  | 4937.127  | AB007869  | 1906.056  | 1918.531  | NM_004554 | 704.493   | 842.983   |
| AK026225  | 30181.006 | 30524.545 | AB046844  | 1161.392  | 865.116   | NM_018119 | 852.097   | 754.916   |
| AL050032  | 5329.697  | 5769.626  | NM_000302 | 1214.969  | 730.047   | NM_014576 | 216.422   | 259.885   |
| AF009304  | 800.707   | 459.813   | NM_013235 | 25862.816 | 8464.802  | AL162035  | 261.98    | 350.408   |
| AF086177  | 6319.501  | 5838.955  | NM_016015 | 10789.721 | 2715.832  | NM_006692 | 370.32    | 455.596   |
| NM_018949 | 1540.828  | 1281.954  | AK022900  | 1131.506  | 269.096   | NM_003084 | 1205.028  | 1370.869  |
| D17187    | 1154.853  | 945.637   | AK026232  | 4513.582  | 1772.219  | NM_002582 | 1708.696  | 1573.549  |
| AJ243672  | 1285.601  | 1016.227  | NM_014892 | 15073.092 | 20969.893 | NM_001009 | 34760.879 | 32555.602 |
| D17169    | 52212.113 | 41658.023 | AK023827  | 3287.734  | 5762.077  | AB061315  | 128.102   | 305.007   |
| NM_017924 | 12089.589 | 10551.937 | NM_001117 | 595.885   | 1323.849  | D17289    | 2064.487  | 1661.503  |
| S81578    | 554.492   | 292.446   | NM_000231 | 861.823   | 1415.298  | NM_002949 | 6399.771  | 5936.827  |
| AF007142  | 2422.949  | 2823.963  | L07517    | 3200.629  | 4629.5    | NM_014230 | 2067.431  | 1878.148  |
| CY3Cy5    | 2736.44   | 826.952   | BM918441  | 805.017   | 1180.919  | NM_017748 | 1805.112  | 1581.911  |
| AI248827  | 2660.201  | 1734.859  | H90764    | 393.065   | 696.451   | AK025374  | 577.924   | 529.573   |
| R45026    | 2256.605  | 1498.435  | AI859208  | 607.269   | 736.941   | NM_014901 | 4065.14   | 2519.945  |
| BG386057  | 375.016   | 271.724   | H64379    | 3392.132  | 3392.476  | AK000005  | 1069.089  | 811.235   |
| AI970239  | 2532.212  | 1287.895  | T72202    | 396.605   | 1090.73   | AF086790  | 316.153   | 627.614   |
| AA496452  | 3236.774  | 1997.166  | BI831922  | 2170.85   | 1502.465  | U28480    | 246.977   | 280.965   |
| X67594    | 843.295   | 578.821   | M69238    | 850.486   | 595.338   | NM_000108 | 4507.413  | 3605.498  |
| NM_001631 | 430.243   | 328.952   | NM_016081 | 7087.96   | 1244.032  | NM_018128 | 1222.37   | 868.35    |
| AB000734  | 1055.148  | 535.035   | NM_006389 | 2819.6    | 604.906   | NM_016931 | 1327.323  | 899.543   |
| NM_005987 | 59052.848 | 62192.988 | M30818    | 696.951   | 730.496   | NM_004373 | 22345.697 | 14448.394 |
| X87838    | 4409.384  | 3976.132  | NM_000163 | 491.113   | 1071.167  | NM_005566 | 30396.078 | 37072.578 |
| NM_033199 | 3986.603  | 1523.813  | NM_003329 | 67043.203 | 73732.211 | NM_000162 | 708.337   | 1324.747  |
| NM_015001 | 2407.67   | 1635.537  | NM_003299 | 48849.984 | 55285.953 | AK027067  | 212.626   | 594.292   |
| SR6       | 2532.578  | 1771.523  | NM_007034 | 719.22    | 1400.527  | NM_016287 | 3516.853  | 3649.332  |
| SR8       | 7449.807  | 13569.863 | NM_005261 | 702.933   | 860.973   | AK021661  | 216.018   | 161.397   |
| SR10      | 27493.305 | 5792.126  | NM_001783 | 12193.439 | 15396.187 | NM_003864 | 2478.399  | 3233.342  |
| CY3Cy5    | 3387.216  | 191.892   | J03171    | 3358.367  | 4323.018  | NM_006824 | 8243.69   | 7812.07   |
| NM_003775 | 730.843   | 761.056   | NM_001711 | 1137.661  | 1087.825  | NM_002107 | 344.646   | 338.179   |
| NM_002082 | 5951.175  | 2624.799  | NM_004210 | 10376.004 | 5568.575  | NM_002694 | 4482.937  | 4189.329  |
| AF155657  | 15057.235 | 7688.64   | NM_020140 | 1474.574  | 790.969   | NM_004454 | 812.036   | 1062.659  |
| NM_006056 | 1975.545  | 1049.156  | NM_018964 | 4213.687  | 2507.73   | NM_000966 | 303.505   | 238.244   |
| AF045229  | 9217.064  | 5019.021  | NM_000080 | 1299.861  | 2000.336  | NM_012482 | 1194.447  | 1748.681  |
| NM_001840 | 4747.287  | 3087.819  | NM_001829 | 2372.883  | 3987.12   | AF217227  | 590.098   | 781.89    |
| AK025099  | 2326.627  | 1284.707  | NM_007256 | 458.596   | 1053.311  | AK024141  | 438.379   | 543.632   |
| NM_016099 | 21470.004 | 11256.21  | AF283645  | 2972.971  | 5537.77   | U13706    | 187.354   | 278.153   |
| NM_000228 | 1158.297  | 315.805   | NM_016575 | 1688.035  | 3455.311  | NM_002813 | 3835.949  | 3361.958  |
| NM_000830 | 333.059   | 360.496   | NM_018557 | 519.084   | 846.94    | NM_001198 | 174.417   | 264.666   |
| AF148950  | 688.899   | 282.554   | NM_001045 | 7154.43   | 10012.414 | AK022745  | 1652.826  | 1434.489  |
| NM_001155 | 6671      | 3463.879  | NM_004781 | 1482.741  | 1342.258  | AL049450  | 2032.265  | 1269.994  |
| M62896    | 16999.049 | 10323.939 | NM_014758 | 2554.856  | 2976.07   | NM_005086 | 8335.496  | 4160.431  |
| NM_017736 | 2725.118  | 1321.075  | NM_005124 | 1987.042  | 1231.924  | NM_007238 | 1452.683  | 1361.156  |
| NM_001498 | 48434.273 | 38985.457 | AK000947  | 2226.983  | 848.056   | AL049340  | 283.764   | 309.692   |
| AF263523  | 1933.147  | 1403.656  | L08240    | 1124.712  | 290.395   | NM_017606 | 1027.058  | 1154.798  |
| L08441    | 11202.977 | 6348.517  | NM_002940 | 1661.534  | 313.843   | AK024644  | 2620.472  | 2417.649  |
| AL137764  | 9417.393  | 5111.601  | AB046844  | 974.464   | 256.939   | AB019573  | 281.412   | 328.585   |
| NM_001660 | 11234.087 | 5987.41   | NM_000302 | 891.609   | 259.681   | U68494    | 398.027   | 1095.611  |
| NM_000710 | 605.743   | 710.91    | NM_013235 | 27176.221 | 12557.052 | AF064254  | 425.972   | 369.2     |
| NM_000752 | 928.383   | 353.971   | NM_016015 | 12757.363 | 18901.861 | AK021524  | 186.242   | 122.931   |
| NM_002018 | 8631.731  | 3220.407  | NM_020120 | 1408.554  | 2316.757  | AL137360  | 1345.105  | 1557.825  |
| AF161383  | 5865.97   | 3773.771  | AK022900  | 1139.606  | 1813.664  | AF143331  | 265.536   | 390.945   |
| NM_000410 | 9962.274  | 7360.651  | AB023216  | 645.368   | 965.58    | AK000819  | 144.918   | 202.238   |

|           |           |           |           |           |           |           |          |          |
|-----------|-----------|-----------|-----------|-----------|-----------|-----------|----------|----------|
| AF224266  | 1378.304  | 1140.76   | NM_002266 | 37543.629 | 46286.867 | AF201941  | 1331.998 | 1788.97  |
| U72882    | 8506.948  | 5331.014  | NM_014400 | 7109.199  | 11078.836 | AF143325  | 161.253  | 160.671  |
| NM_014387 | 28757.168 | 21162.875 | AL157492  | 1445.647  | 2844.788  | AF026941  | 373.067  | 468.856  |
| NM_003641 | 3795.801  | 2557.806  | AL353957  | 2533.214  | 4576.598  | NM_007070 | 1083.884 | 1264.189 |
| NM_012463 | 2905.361  | 2806.494  | NM_007214 | 8128.545  | 10690.809 | AL133019  | 1419.021 | 1545.572 |
| L29140    | 28277.611 | 30244.002 | NM_000311 | 9982.472  | 12028.108 | AK026192  | 220.992  | 105.355  |
| AL110218  | 907.446   | 1087.522  | NM_017909 | 2949.166  | 4023.423  | NM_014895 | 320.904  | 381.206  |
| NM_000697 | 1884.11   | 1264.625  | NM_006335 | 11404.614 | 11971.376 | AK024883  | 2180.086 | 2441.004 |
| NM_000017 | 7486.511  | 4673.241  | NM_017731 | 551.449   | 1940.092  | AF217989  | 962.33   | 835.922  |
| NM_000237 | 814.539   | 601.605   | AB040891  | 2009.542  | 1129.06   | NM_017654 | 788.251  | 491.151  |
| NM_018346 | 6827.684  | 3835.359  | AB037780  | 733.568   | 237.72    | L77561    | 214.548  | 102.34   |
| AL122054  | 2226.572  | 1820.356  | NM_005845 | 9352.946  | 1889.874  | AL109696  | 311.332  | 331.432  |
| AB011182  | 1767.979  | 1393.325  | NM_016209 | 10068.854 | 2130.142  | AK022190  | 244.827  | 154.24   |
| AB023151  | 933.135   | 968.907   | AK002114  | 4502.77   | 1009.726  | AJ011593  | 1082.67  | 1344.112 |
| NM_000140 | 7940.2    | 6990.735  | AL390184  | 529.866   | 301.049   | AJ227907  | 237.497  | 84.014   |
| NM_005125 | 3881.907  | 3529.556  | NM_018699 | 530.379   | 833.433   | X89743    | 244.81   | 217.447  |
| NM_020038 | 496.874   | 642.295   | NM_018048 | 964.457   | 690.525   | AJ002784  | 199.759  | 123.081  |
| NM_016246 | 1392.726  | 1678.001  | AK026318  | 1059.881  | 2374.358  | U17621    | 396.711  | 684.818  |
| NM_015926 | 9178.865  | 7417.407  | AF291673  | 1010.886  | 2283.069  | AL049239  | 781.939  | 772.19   |
| X03757    | 4244.707  | 4320.92   | NM_004365 | 14106.343 | 18020.846 | NM_013288 | 605.994  | 766.666  |
| NM_005136 | 534.845   | 838.424   | NM_016355 | 6310.282  | 8616.02   | M60721    | 775.532  | 676.198  |
| AK094513  | 1003.072  | 938.818   | AJ296290  | 3595.855  | 4716.954  | L39061    | 1138.66  | 1028.897 |
| NM_001183 | 9855.023  | 12859.457 | AK026092  | 4270.745  | 6446.662  | AF071508  | 488.239  | 482.651  |
| NM_000890 | 1948.224  | 2651.158  | AK001175  | 1005.041  | 1526.199  | L07265    | 3032.134 | 3370.462 |
| AK021597  | 1531.405  | 2212.435  | NM_003897 | 3404.955  | 4434.536  | D16472    | 513.867  | 535.698  |
| NM_000014 | 1753.723  | 310.104   | NM_014165 | 11845.016 | 10798.726 | AK022467  | 199.615  | 103.363  |
| NM_006803 | 2076.441  | 2111.981  | J03250    | 769.271   | 592.323   | AL157459  | 1108.648 | 824.733  |
| NM_002533 | 1905.364  | 2215.003  | NM_013313 | 5258.548  | 5065.689  | AB020654  | 194.337  | 45.265   |
| AF235022  | 510.242   | 775.787   | NM_014736 | 15122.722 | 8415.733  | AL353954  | 415.876  | 309.743  |
| AF182814  | 1915.727  | 1933.372  | AK023886  | 1093.834  | 654.385   | NM_017630 | 315.276  | 593.389  |
| NM_005329 | 1057.372  | 712.732   | NM_002553 | 1706.962  | 858.698   | AK000778  | 494.423  | 631.139  |
| NM_000107 | 4831.415  | 5150.296  | AJ404615  | 2558.223  | 691.818   | AK000932  | 2297.786 | 4194.696 |
| AL157445  | 2386.932  | 2238.812  | NM_016053 | 19555.203 | 3998.079  | AL133573  | 1032.146 | 1117.521 |
| NM_001517 | 9594.502  | 9451.582  | AB007869  | 2173.862  | 444.11    | AK000115  | 196.482  | 173.474  |
| NM_005053 | 2380.733  | 2350.859  | M64108    | 790.524   | 165.24    | AK000958  | 312.928  | 316.604  |
| D86974    | 4298.214  | 4222.113  | Y17867    | 1491.012  | 1452.313  | AK024523  | 387.89   | 459.937  |
| NM_018283 | 3524.803  | 4052.256  | M92642    | 791.336   | 1180.026  | AK024600  | 218.346  | 177.212  |
| NM_001983 | 2687.634  | 3204.59   | NM_018071 | 1902.084  | 2880.725  | AK024543  | 625.037  | 474.583  |
| NM_004993 | 844.299   | 662.907   | NM_004333 | 3695.96   | 4861.842  | AK024624  | 1821.779 | 1652.475 |
| M29551    | 12032.433 | 13362.319 | NM_002020 | 7915.938  | 11867.273 | AK025090  | 295.838  | 538.824  |
| NM_016029 | 10552.004 | 12348.984 | AL050137  | 779.78    | 1557.98   | NM_014152 | 236.822  | 88.567   |
| AK024562  | 1640.313  | 1729.357  | AK024423  | 1805.823  | 2993.975  | AF086473  | 285.788  | 215.607  |
| NM_001498 | 49860.859 | 39324.594 | NM_005043 | 17708.699 | 30223.568 | D87682    | 306.987  | 229.536  |
| AF263523  | 1365.233  | 1262.667  | NM_005979 | 7078.714  | 11710.125 | AF321617  | 1319.026 | 710.308  |
| L08441    | 9041.805  | 9446.618  | NM_006282 | 4683.589  | 6188.142  | AV710479  | 198.006  | 112.905  |
| AA641953  | 2377.472  | 2218.797  | NM_020321 | 755.647   | 1300.824  | NM_006950 | 335.356  | 397.65   |
| AI248827  | 4015.104  | 3508.819  | NM_000826 | 361.031   | 333.856   | AK023335  | 665.504  | 853.399  |
| R45026    | 3256.278  | 3242.907  | NM_015920 | 16850.213 | 18001.484 | AK023187  | 308.563  | 225.304  |
| BI768063  | 175.288   | 918.112   | AB011113  | 1691.78   | 2130.445  | AK022231  | 481.926  | 1856.469 |
| BG386057  | 501.592   | 934.961   | NM_018287 | 1329.668  | 1747.604  | NM_019033 | 339.171  | 334.707  |
| AI970239  | 2577.246  | 2728.279  | NM_001955 | 1450.561  | 1776.181  | AL133101  | 684.783  | 791.589  |
| AF363393  | 575.67    | 711.787   | AF016004  | 2400.088  | 2699.649  | AK024602  | 5529.962 | 7376.073 |
| BC008837  | 537.375   | 819.102   | NM_003567 | 1865.987  | 994.321   | NM_018507 | 176.602  | 240.214  |

|           |           |           |           |           |           |           |           |           |
|-----------|-----------|-----------|-----------|-----------|-----------|-----------|-----------|-----------|
| NM_001631 | 660.481   | 698.039   | NM_007315 | 1953.049  | 438.554   | NM_000485 | 3588.56   | 3490.042  |
| AK057418  | 2017.061  | 1887.393  | L20686    | 1809.769  | 679.308   | AK025503  | 502.024   | 171.548   |
| NM_007260 | 1202.284  | 973.149   | NM_000304 | 1540.24   | 301.939   | AF130073  | 548.315   | 387.525   |
| AF148646  | 5716.055  | 4507.867  | S72604    | 12268.602 | 1547.638  | AK024225  | 6040.145  | 3263.253  |
| AL110218  | 962.744   | 784.688   | NM_002675 | 1513.727  | 2209.634  | AF086334  | 634.747   | 293.744   |
| AB023201  | 2995.53   | 2677.241  | NM_004417 | 795.177   | 1104.253  | AL137602  | 355.874   | 214.785   |
| X00094    | 1089.598  | 1036.343  | NM_012290 | 6894.185  | 9295.449  | AF075035  | 4244.902  | 4511.933  |
| NM_003775 | 881.665   | 1021.754  | NM_002431 | 7414.183  | 7336.877  | AL110180  | 1527.821  | 2244.82   |
| NM_002082 | 4747.839  | 4835.202  | NM_001827 | 48359.914 | 52334.297 | U00949    | 207.365   | 178.422   |
| NM_002922 | 770.849   | 510.938   | NM_020466 | 2114.407  | 3003.517  | BC024924  | 2017.373  | 3642.56   |
| NM_006056 | 2662.224  | 2968.652  | AL079280  | 509.706   | 607.13    | NM_017906 | 2880.296  | 4294.502  |
| AF045229  | 9946.182  | 13109.737 | NM_002853 | 3198.703  | 3947.261  | AL110286  | 1683.734  | 3462.367  |
| NM_001840 | 4761.911  | 6106.163  | NM_003174 | 1324.233  | 1646.498  | AF086374  | 196.218   | 463.641   |
| AK025099  | 2133.365  | 2381.823  | NM_012307 | 8183.478  | 7882.684  | AL162066  | 3535.556  | 6982.819  |
| NM_016095 | 22143.703 | 21705.334 | NM_018834 | 687.648   | 1134.682  | X98114    | 178.454   | 353.446   |
| NM_001155 | 5379.272  | 6344.761  | AK026882  | 1425.637  | 897.476   | NM_014040 | 2467.209  | 4283.455  |
| M62896    | 12709.143 | 12848.5   | NM_004574 | 866.877   | 473.102   | AK000799  | 3009.932  | 3305.733  |
| AK021597  | 1263.164  | 1183.559  | NM_004848 | 1245.986  | 569.554   | NM_015582 | 3010.664  | 3187.659  |
| NM_005737 | 27170.076 | 22059.357 | NM_014813 | 1038.362  | 255.896   | AK027091  | 551.443   | 434.649   |
| NM_006803 | 1983.43   | 1723.387  | AF014459  | 2704.861  | 817.703   | NM_001526 | 313.777   | 304.049   |
| NM_002533 | 2200.383  | 1895.697  | AK024601  | 3573.585  | 579.816   | U31738    | 466.998   | 183.512   |
| AF235022  | 750.213   | 719.27    | S68069    | 6348.115  | 1525.404  | AF179890  | 1934.519  | 943.269   |
| AL137764  | 11809.028 | 11059.303 | AB011095  | 1296.28   | 1022.479  | AK023536  | 3307.737  | 2196.174  |
| NM_001660 | 14738.032 | 14828.387 | NM_001503 | 1069.956  | 1028.654  | AK026561  | 265.058   | 112.461   |
| NM_000710 | 851.874   | 1228.835  | NM_006302 | 2032.667  | 2434.629  | AK021568  | 3087.658  | 1914.223  |
| NM_000752 | 1052.576  | 929.524   | AJ224875  | 6355.874  | 3711.277  | Z36838    | 232.553   | 134.881   |
| NM_002018 | 7691.396  | 7307.942  | NM_002149 | 1878.18   | 1291.544  | AK023881  | 1100.734  | 1686.852  |
| NM_002377 | 1053.102  | 998.588   | AF043324  | 5973.185  | 7890.686  | AK027114  | 28436.051 | 35087.711 |
| NM_006018 | 910.575   | 1557.238  | AK024172  | 1059.84   | 2011.17   | NM_016298 | 770.51    | 1094.267  |
| AF161383  | 5358.279  | 6590.376  | NM_014814 | 8589.37   | 9881.818  | AK002146  | 244.701   | 279.081   |
| NM_000410 | 9436.499  | 12353.693 | NM_002797 | 16501.443 | 19471.082 | NM_003159 | 262.909   | 675.438   |
| L29140    | 23928.82  | 29721.742 | AK024318  | 1705.203  | 2628.296  | AK023494  | 180.877   | 422.219   |
| AK026448  | 6426.173  | 6385.944  | NM_016129 | 7874.182  | 8723.128  | NM_015492 | 989.76    | 936.098   |
| AB026436  | 2954.073  | 2403.838  | NM_002809 | 12756.504 | 12449.15  | NM_006933 | 169.553   | 247.741   |
| NM_016029 | 8909.243  | 7893.554  | NM_017912 | 3706.565  | 4518.644  | AF132204  | 482.451   | 1205.315  |
| AK024562  | 2288.142  | 1704.804  | NM_000423 | 4073.716  | 3575.265  | AK022874  | 2473.607  | 2790.876  |
| NM_014066 | 1465.022  | 1334.686  | AF116658  | 4717.099  | 2866.59   | CY3Cy5    | 559.329   | 224.119   |
| NM_004573 | 2034.694  | 1769.472  | NM_014865 | 6354.645  | 3111.095  | BI912037  | 472.209   | 548.822   |
| NM_000072 | 1009.735  | 770.179   | AB032977  | 5641.052  | 2219.547  | AA454646  | 642.628   | 754.114   |
| NM_000697 | 1775.846  | 1598.341  | AK001725  | 1204.386  | 302.628   | U18087    | 5826.844  | 4487.572  |
| NM_000017 | 6250.051  | 4910.019  | NM_003036 | 1152.019  | 339.328   | U66349    | 561.855   | 879       |
| NM_000237 | 942.525   | 1060.399  | NM_020529 | 3285.656  | 777.843   | AA057156  | 621.563   | 961.862   |
| NM_018346 | 7927.226  | 7669.174  | NM_020395 | 2518.635  | 339.911   | AF166327  | 9322.423  | 9417.743  |
| AL122054  | 2907.293  | 2989.678  | NM_003425 | 868.3     | 351.319   | AF260739  | 346.278   | 514.621   |
| AB011182  | 1946.568  | 2698.784  | NM_013388 | 7175.18   | 9293.254  | AF531423  | 1744.241  | 1635.622  |
| AB023151  | 743.869   | 843.117   | AF038951  | 9016.546  | 7539.627  | NM_005432 | 601.621   | 409.713   |
| NM_000140 | 5466.749  | 5771.419  | NM_006492 | 529.289   | 212.693   | L10386    | 1219.871  | 1152.295  |
| NM_005125 | 3483.184  | 3106.175  | AK021811  | 1482.339  | 1756.327  | AF061812  | 754.533   | 657.858   |
| NM_020038 | 922.185   | 973.256   | NM_003428 | 2523.321  | 3209.622  | AL136756  | 403.45    | 438.254   |
| NM_016246 | 1822.755  | 1856.405  | AF055030  | 1543.456  | 2164.625  | NM_012469 | 1994.331  | 2068.389  |
| NM_015926 | 12097.93  | 12780.616 | AK000589  | 1630.031  | 1938.316  | NM_134260 | 3835.249  | 3150.987  |
| X03757    | 6097.045  | 7319.995  | X53281    | 5357.831  | 6002.824  | SR2       | 19672.197 | 17802.41  |
| NM_000890 | 1827.535  | 1823.998  | BC012782  | 1191.974  | 2053.772  | SR4       | 4245.168  | 3800.629  |

|           |           |           |           |           |           |           |           |           |
|-----------|-----------|-----------|-----------|-----------|-----------|-----------|-----------|-----------|
| NM_004976 | 14080.253 | 13676.896 | AF132026  | 45179.027 | 48737.484 | SR6       | 780.274   | 639.641   |
| NM_033196 | 2098.223  | 1471.872  | AL050353  | 1430.845  | 1945.709  | SR8       | 2604.987  | 6252.87   |
| NM_015001 | 1336.438  | 1177.4    | AB037788  | 7037.35   | 5164.318  | SR10      | 9075.844  | 3062.88   |
| NM_000166 | 6408.621  | 4456.808  | AF147412  | 22707.404 | 14182.581 | CY3Cy5    | 443.083   | 132.787   |
| NM_000696 | 702.181   | 662.963   | AK024570  | 14519.738 | 5897.599  | AL080157  | 655.617   | 539.33    |
| BE799167  | 462.766   | 415.711   | AF161401  | 11009.636 | 3637.301  | NM_005306 | 761.414   | 573.727   |
| AF182814  | 2732.686  | 2362.898  | NM_000990 | 8441.479  | 1543.627  | NM_007227 | 365.613   | 330.181   |
| NM_005326 | 1183.623  | 1444.445  | NM_014740 | 2858.207  | 781.442   | NM_014461 | 5314.974  | 7415.279  |
| NM_000107 | 5145.788  | 6898.833  | NM_015956 | 7745.063  | 1879.616  | NM_003865 | 408.585   | 366.286   |
| AL157445  | 2685.721  | 3549.149  | AF075008  | 1363.672  | 221.372   | AB015330  | 865.888   | 580.281   |
| NM_001517 | 4866.891  | 5016.347  | NM_006504 | 1833.608  | 802.536   | NM_001455 | 1173.293  | 1140.44   |
| NM_005053 | 1939.172  | 2346.186  | AF070538  | 930.814   | 874.952   | L09071    | 164.123   | 243.583   |
| NM_001983 | 3320.051  | 4554.187  | AL137430  | 910.12    | 1202.715  | NM_003322 | 433.418   | 392.957   |
| NM_004993 | 1103.431  | 876.323   | NM_000696 | 10460.686 | 8934.162  | BC036375  | 4710.575  | 5218.214  |
| AB023148  | 1121.674  | 1039.587  | NM_002488 | 15522.563 | 18026.943 | NM_006363 | 1839.528  | 1655.882  |
| NM_002926 | 1924.605  | 2184.057  | NM_004003 | 6006.877  | 6824.648  | NM_020415 | 859.384   | 880.821   |
| BC028375  | 3510.184  | 3881.697  | NM_000188 | 1345.982  | 1035.756  | AL049667  | 1591.614  | 1271.892  |
| NM_005206 | 1078.737  | 1656.625  | BF244401  | 1208.926  | 1026.288  | NM_000334 | 725.976   | 885.545   |
| AF148950  | 1116.701  | 914.364   | NM_004718 | 20642.461 | 14938.852 | NM_020400 | 540.897   | 356.429   |
| NM_001155 | 6898.553  | 5418.167  | AL359585  | 3381.203  | 5113.037  | NM_001504 | 353.698   | 600.808   |
| M62896    | 20445.635 | 14959.105 | AB046850  | 2528.836  | 3809.612  | D50926    | 878.508   | 1199.793  |
| NM_017736 | 2088.623  | 1472.182  | NM_014801 | 1726.609  | 3190.743  | BF205683  | 488.81    | 529.304   |
| NM_000390 | 2074.354  | 1910.883  | NM_003642 | 9471.879  | 9123.457  | NM_001546 | 410.479   | 171.443   |
| AF263523  | 1658.037  | 1311.753  | AB027013  | 1982.955  | 2469.719  | NM_000756 | 1757.475  | 1845.113  |
| L08441    | 9276.438  | 6625.346  | BF185480  | 2625.498  | 2716.85   | NM_002990 | 1938.689  | 1838.523  |
| AA641953  | 2544.24   | 2144.54   | NM_003074 | 3312.389  | 2514.937  | NM_002432 | 378.272   | 580.841   |
| AI248827  | 3561.934  | 3230.768  | AL360195  | 1674.644  | 1508.032  | AB033037  | 484.037   | 585.153   |
| R45026    | 6228.226  | 7291.784  | U14383    | 735.471   | 501.031   | L40400    | 1469.117  | 1309.122  |
| AI970239  | 2189.751  | 1802.986  | NM_017810 | 1904.527  | 974.576   | AK025688  | 944.22    | 868.845   |
| BC008837  | 658.95    | 897.741   | NM_003181 | 62504.184 | 17508.227 | NM_014446 | 412.19    | 441.125   |
| NM_001631 | 1004.888  | 1188.577  | NM_004451 | 1259.246  | 498.806   | NM_004315 | 2541.012  | 2369.043  |
| AB000734  | 1845.868  | 2223.393  | NM_004364 | 579.595   | 203.758   | NM_020166 | 1071.704  | 1165.441  |
| NM_000862 | 293.065   | 842.819   | AK023505  | 2078.445  | 731.313   | S56138    | 228.007   | 497.141   |
| NM_005987 | 53641.184 | 63484.559 | AB037851  | 5259.528  | 4659.766  | AK023860  | 552.889   | 336.904   |
| X87838    | 3214.134  | 4179.882  | AL050389  | 6289.328  | 7171.943  | NM_016286 | 3285.216  | 3737.719  |
| NM_007161 | 12902.16  | 9997.466  | AK025855  | 1062.403  | 2424.812  | NM_001567 | 424.124   | 392.431   |
| NM_014387 | 27327.088 | 23496.064 | AK024684  | 885.255   | 1961.886  | NM_004905 | 3478.937  | 3622.984  |
| NM_003641 | 5190.496  | 3469.833  | NM_014945 | 10154.342 | 10827.464 | AF217971  | 804.125   | 1046.467  |
| NM_012463 | 3439.067  | 2858.686  | AK001546  | 1135.831  | 713.649   | AF245517  | 446.337   | 305.108   |
| L29140    | 35116.242 | 29803.859 | NM_006537 | 6113.707  | 4701.606  | NM_004982 | 605.081   | 1702.858  |
| AK057418  | 3128.108  | 2645.623  | AF007155  | 2711.41   | 4578.523  | NM_001694 | 22519.393 | 21654.486 |
| NM_007260 | 1717.86   | 2267.719  | AK023055  | 743.004   | 1084.103  | AK026180  | 358.682   | 382.834   |
| AF148646  | 4068.955  | 4365.307  | AL049282  | 4441.404  | 6283.654  | NM_005817 | 1547.293  | 1698.476  |
| AL110218  | 1336.325  | 1473.189  | AK021443  | 2954.497  | 3344.29   | NM_003916 | 1413.732  | 2011.786  |
| AB023201  | 3692      | 4625.038  | AF070569  | 556.245   | 1167.701  | NM_002870 | 5063.922  | 5665.761  |
| X00094    | 1000.519  | 1092.47   | NM_020233 | 2567.639  | 3059.417  | NM_001476 | 6684.073  | 4458.312  |
| NM_003775 | 1171.119  | 944.819   | AF143327  | 743.595   | 1236.666  | AF135422  | 793.541   | 644.601   |
| NM_002082 | 4167.656  | 4232.347  | AL137535  | 686.402   | 356.877   | NM_004479 | 2070.551  | 1280.568  |
| AF155657  | 14856.537 | 14256.878 | AL049991  | 463.98    | 793.992   | NM_002610 | 545.635   | 339.221   |
| AF045229  | 12297.69  | 16564.189 | AL049990  | 702.191   | 298.295   | AF070587  | 2000.05   | 1185.095  |
| NM_001840 | 7037.911  | 10454.432 | AF131843  | 613.577   | 175.937   | BE250526  | 254.289   | 207.692   |
| AK025099  | 4109.853  | 5161.844  | AK026653  | 1295.858  | 269.429   | NM_016819 | 492.031   | 421.603   |
| NM_016096 | 29056.072 | 29738.625 | NM_020231 | 922.388   | 400.911   | NM_012222 | 1799.15   | 2201.608  |

|           |           |           |           |           |           |           |          |           |
|-----------|-----------|-----------|-----------|-----------|-----------|-----------|----------|-----------|
| NM_00022E | 386.675   | 436.039   | AL133118  | 1579.544  | 225.554   | AK023214  | 2407.865 | 1997.101  |
| NM_00083C | 654.658   | 670.097   | AK023571  | 1216.489  | 386.607   | NM_00146E | 3324.717 | 3470.103  |
| NM_01865E | 18598.314 | 20953.578 | NM_001702 | 3667.014  | 5192.58   | NM_00360C | 1037.121 | 923.948   |
| NM_00513E | 1144.685  | 1013.063  | AK026657  | 1727.729  | 3287.246  | NM_01749C | 1264.727 | 1389.924  |
| AK094513  | 1429.842  | 1849.965  | AF087991  | 11861.403 | 10708.426 | NM_00271E | 453.663  | 459.035   |
| NM_001183 | 12785.595 | 16589.773 | AJ001876  | 451.44    | 875.366   | AK026727  | 691.634  | 532.162   |
| NM_00089C | 2725.332  | 3022.495  | AJ227884  | 748.466   | 817.946   | NM_00283C | 251.577  | 491.407   |
| NM_005737 | 32556.189 | 47415.484 | X64986    | 10449.33  | 7879.47   | NM_006247 | 2029.251 | 2163.732  |
| NM_000014 | 636.588   | 1017.815  | Y10510    | 408.675   | 847.645   | AB032983  | 549.562  | 742.854   |
| NM_006803 | 2278.395  | 2534.691  | NM_01900E | 1402.197  | 1466.051  | NM_018281 | 1447.77  | 1810.566  |
| NM_002533 | 2070.444  | 2791.547  | AK022738  | 490.555   | 209.874   | NM_004457 | 1851.008 | 1859.269  |
| AF235022  | 588.685   | 774.901   | AK002095  | 493.353   | 298.484   | NM_01404E | 811.755  | 1334.324  |
| AL137764  | 12034.056 | 13952.907 | AK000821  | 4149.844  | 4220.122  | BC036375  | 4830.699 | 4278.067  |
| NM_00166C | 17835.926 | 19971.484 | AK024526  | 6180.178  | 6825.672  | BI912037  | 337.702  | 415.526   |
| NM_00071C | 701.168   | 492.333   | AK023307  | 672.827   | 986.146   | AA454646  | 380.136  | 257.5     |
| NM_000752 | 1415.075  | 974.584   | NM_01761E | 1406.184  | 1669.859  | U18087    | 5820.048 | 5483.728  |
| AB040945  | 972.042   | 1175.535  | AK024862  | 391.953   | 92.119    | U66349    | 372.625  | 550.049   |
| NM_002377 | 815.485   | 736.675   | AK024945  | 1553.289  | 1074.784  | AA057156  | 1208.686 | 3187.845  |
| AF161383  | 6320.973  | 7525.459  | AK024579  | 2371.766  | 1064.288  | U19487    | 4667.906 | 5946.755  |
| NM_00041C | 10244.08  | 10954.196 | S75708    | 5777.978  | 1104.38   | AF166327  | 8267.132 | 11289.258 |
| AF224266  | 1459.247  | 1493.411  | U79291    | 8569.269  | 2504.791  | AF260739  | 326.262  | 272.649   |
| U72882    | 9561.623  | 9101.526  | D17172    | 20497.402 | 21374.193 | AF531423  | 1730.192 | 1730.29   |
| NM_014337 | 8726.131  | 7726.443  | AJ227859  | 1105.412  | 1581.335  | X76555    | 293.804  | 348.802   |
| Y12337    | 3006.553  | 3399.386  | NM_018544 | 643.816   | 650.242   | NM_005432 | 616.813  | 612.827   |
| M29551    | 20949.73  | 23892.844 | AB020699  | 4008.34   | 6350.282  | L10386    | 1128.834 | 983.946   |
| AB023148  | 1043.18   | 1238.56   | AF086269  | 1322.723  | 2275.324  | AF061812  | 1031.211 | 1156.633  |
| NM_00292E | 1729.641  | 1853.987  | U90437    | 10126.81  | 11610.424 | AL136756  | 447.73   | 473.515   |
| NM_01602E | 9766.924  | 9232.836  | unknown ( | 371.233   | 944.877   | NM_01246E | 2030.939 | 2072.895  |
| AK024562  | 1376.433  | 1311.148  | AK000842  | 15995.903 | 14844.824 | NM_13426C | 3591.832 | 2980.285  |
| NM_01406E | 1377.919  | 828.631   | AK023386  | 10392.178 | 9362.441  | AK025688  | 832.264  | 783.103   |
| NM_004573 | 1556.333  | 1191.707  | NM_007053 | 29511.113 | 18524.529 | Z36819    | 19464.18 | 14537.145 |
| NM_000072 | 544.342   | 426.859   | AK022153  | 1962.163  | 1798.665  | NM_01444E | 571.814  | 529.546   |
| NM_000697 | 2025.308  | 2095.38   | AK022789  | 1255.17   | 924.121   | AL080157  | 570.789  | 521.163   |
| NM_000017 | 4456.45   | 3100.634  | AK023756  | 600.343   | 794.612   | NM_00530E | 800.516  | 877.993   |
| AB011182  | 1765.336  | 2283.23   | NM_001126 | 4980.228  | 1811.29   | NM_007227 | 313.677  | 407.331   |
| AB023151  | 507.113   | 754.505   | AK023673  | 4279.912  | 5413.275  | NM_007023 | 522.662  | 744.457   |
| NM_00014C | 8323.751  | 8242.4    | NM_018252 | 3046.632  | 3338.114  | NM_014461 | 342.203  | 225.245   |
| NM_00512E | 4286.372  | 5233.455  | NM_01800C | 37412.379 | 23092.021 | NM_00386E | 424.645  | 334.711   |
| NM_02003E | 627.984   | 800.706   | AF164963  | 689.248   | 457.859   | AB015330  | 950.739  | 846.992   |
| NM_01624E | 1470.783  | 1697.521  | AF124366  | 21605.098 | 27518.629 | NM_00145E | 1165.215 | 1427.741  |
| NM_01592E | 11157.384 | 10556.508 | AF130112  | 786.673   | 854.553   | L09071    | 211.653  | 232.008   |
| X03757    | 4799.898  | 3890.468  | NM_000551 | 4185.788  | 4062.806  | NM_003322 | 465.027  | 484.18    |
| NM_02024E | 34609.891 | 31347.248 | AL365518  | 1418.305  | 2732.652  | AK026180  | 652.741  | 359.008   |
| X89670    | 1567.102  | 1437.49   | AF086257  | 2572.468  | 4877.029  | NM_01336E | 982.869  | 796.355   |
| NM_004053 | 4007.258  | 2984.792  | AF075056  | 856.049   | 1180.443  | NM_005817 | 1756.854 | 1180.76   |
| NM_00016E | 3203.74   | 2553.75   | AC119751  | 523.009   | 680.736   | NM_00391E | 1408.735 | 1011.1    |
| AF182814  | 2892.044  | 2686.226  | U00928    | 885.543   | 1813.299  | NM_00287C | 3724.573 | 2621.902  |
| NM_000107 | 3908.369  | 5393.74   | NM_01905E | 4137.431  | 5192.223  | NM_006363 | 1900.925 | 2467.09   |
| AL157445  | 3718.082  | 3424.686  | NM_017622 | 2475.123  | 1980.03   | NM_02041E | 1079.148 | 1405.584  |
| NM_001517 | 9144.07   | 9085.075  | AF133331  | 8994.475  | 7346.255  | NM_01487E | 337.819  | 1052.411  |
| NM_005053 | 3247.47   | 3413.479  | AK022289  | 1289.732  | 1273.67   | NM_000334 | 711.692  | 1256.557  |
| D86974    | 4125.04   | 3954.844  | AF161403  | 16560.951 | 15755.166 | D50926    | 962.706  | 1379.96   |
| NM_018283 | 3403.523  | 2856.676  | NM_020183 | 3770.338  | 699.678   | BF205683  | 784.412  | 704.529   |

|           |           |           |           |           |           |           |          |           |
|-----------|-----------|-----------|-----------|-----------|-----------|-----------|----------|-----------|
| NM_001983 | 2950.117  | 3242.203  | NM_018029 | 729.53    | 337.258   | NM_00075E | 2058.431 | 1846.83   |
| NM_004993 | 681.639   | 784.991   | AL389954  | 708.282   | 1105.777  | M17017    | 251.93   | 214.462   |
| NM_001793 | 19002.508 | 14204.806 | NM_019852 | 1234.282  | 1631.886  | NM_00299C | 2267.834 | 1914.531  |
| NM_001943 | 2376.426  | 2181.348  | NM_006118 | 2443.759  | 2033.608  | NM_002432 | 538.008  | 420.775   |
| NM_004927 | 4505.22   | 3421.964  | AK026225  | 23988.869 | 15878.952 | AB033037  | 454.252  | 506.061   |
| AB040928  | 370.832   | 466.418   | AL050032  | 1532.239  | 2252.551  | L40400    | 1270.975 | 1306.356  |
| NM_00145E | 3077.871  | 2487.375  | AF009304  | 551.992   | 519.88    | NM_006247 | 2009.406 | 1808.237  |
| NM_015513 | 11079.444 | 8499.351  | AF086177  | 6568.433  | 4672.17   | AB032983  | 959.595  | 742.88    |
| NM_004443 | 3222.614  | 2363.875  | NM_018949 | 904.253   | 1800.129  | NM_018281 | 1500.69  | 1124.109  |
| NM_005544 | 611.681   | 555.337   | AK021593  | 361.11    | 789.626   | NM_004457 | 2063.154 | 1320.299  |
| NM_002964 | 2328.574  | 2036.512  | Z36847    | 302.651   | 573.202   | NM_01404C | 1017.342 | 849.788   |
| AF311862  | 22141.51  | 16632.555 | D17187    | 1287.086  | 1574.558  | NM_00431E | 2345.144 | 2994.095  |
| AF272036  | 9867.187  | 11761.505 | AJ243672  | 541.151   | 1010.007  | NM_02016E | 1144.616 | 1698.992  |
| AF231023  | 3767.486  | 3745.734  | AL122087  | 957.922   | 1035.125  | S56138    | 318.724  | 218.268   |
| NM_00514E | 2642.26   | 3226.675  | D17169    | 45496.902 | 45086.082 | AK023860  | 1212.445 | 2387.083  |
| NM_00474E | 850.917   | 1095.536  | NM_017924 | 10961.17  | 11490.979 | NM_00208E | 8897.706 | 14741.154 |
| AF146019  | 7879.034  | 7622.475  | AJ001889  | 558.936   | 1059.593  | NM_01628E | 3428.35  | 5381.504  |
| Z36782    | 5973.602  | 5247.979  | AL137400  | 2161.139  | 1893.18   | NM_001567 | 505.979  | 428.278   |
| M70435    | 612.774   | 736.1     | NM_006511 | 1229.356  | 956.049   | NM_00490E | 3434.444 | 3689.771  |
| NM_00349C | 27982.158 | 27847.193 | AF007142  | 2863.146  | 2662.591  | AF217971  | 1011.133 | 750.257   |
| AF210651  | 622.456   | 560.85    | AF119853  | 2774.23   | 2758.24   | NM_00192E | 203.186  | 257.323   |
| AF090942  | 649.4     | 748.146   | CY3Cy5    | 888.428   | 120.671   | AF245517  | 487.035  | 562.747   |
| AF508940  | 1749.8    | 1996.648  | AI248827  | 4651.827  | 2208.295  | NM_004982 | 395.792  | 331.795   |
| NM_020237 | 935.324   | 655.693   | R45026    | 2557.538  | 1870.985  | AF286370  | 209.666  | 154.175   |
| NM_01492E | 2216.341  | 2177.042  | BI768063  | 291.822   | 321.852   | NM_000217 | 127.179  | 198.648   |
| NM_001951 | 1053.661  | 883.767   | BG386057  | 532.848   | 336.918   | NM_01246E | 1977.826 | 1390.152  |
| NM_002391 | 648.736   | 833.064   | AI970239  | 2665.321  | 2023.43   | NM_13426C | 3071.564 | 2217.585  |
| NM_00706E | 1160.832  | 864.242   | AA496452  | 3368.123  | 2401.87   | NM_00147E | 4027.579 | 2738.771  |
| AK026325  | 2612.718  | 3011.416  | X67594    | 1542.248  | 1644.346  | AF135422  | 845.72   | 827.221   |
| U83857    | 916.427   | 1265.841  | BC008837  | 411.428   | 684.51    | NM_00447E | 1733.626 | 1803.608  |
| NM_00123C | 2903.076  | 4729.804  | NM_01586E | 302.361   | 602.544   | NM_00261C | 538.581  | 499.855   |
| AK025662  | 1698.975  | 2520.011  | NM_001631 | 405.289   | 555.888   | AF070587  | 1971.879 | 1637.493  |
| NM_000201 | 1581.171  | 2030.315  | AB000734  | 1328.872  | 2742.38   | BE250526  | 215.69   | 131.178   |
| AB011539  | 1596.088  | 1587.171  | NM_03319E | 2788.515  | 4975.709  | NM_01681E | 524.735  | 550.555   |
| U37028    | 2847.851  | 2603.74   | SR8       | 6233.404  | 21711.666 | NM_012222 | 1780.678 | 1916.881  |
| AB014597  | 2410.394  | 2183.855  | SR10      | 22122.564 | 7928.631  | NM_005002 | 1045.423 | 1088.1    |
| AK024313  | 4805.343  | 3495.292  | CY3Cy5    | 2173.925  | 95.222    | NM_00659E | 1250.95  | 1187.023  |
| NM_003891 | 2338.237  | 2005.735  | X00094    | 643.205   | 352.563   | AK023214  | 2566.998 | 1969.455  |
| NM_002022 | 2994.106  | 1677.401  | NM_00377E | 928.26    | 884.439   | NM_00146E | 3609.434 | 3320.754  |
| NM_015524 | 3311.572  | 2802.119  | NM_002082 | 6129.814  | 5440.563  | NM_00360C | 1287.542 | 911.804   |
| NM_001673 | 4654.116  | 4687.588  | AF155657  | 14060.364 | 10930.707 | NM_01749C | 1154.765 | 894.931   |
| AK023167  | 698.248   | 483.597   | NM_00605E | 2590.015  | 2197.458  | AK026727  | 507.615  | 512.344   |
| NM_000071 | 1796.923  | 1399.586  | AF045229  | 8043.552  | 7714.049  | NM_00283C | 251.097  | 184.4     |
| NM_00691E | 2271.942  | 2404.481  | NM_00184C | 5269.199  | 4267.647  | NM_003322 | 468.439  | 417.622   |
| NM_00603E | 1791.811  | 3279.694  | AK025099  | 2301.144  | 3138.402  | BC036375  | 4046.318 | 6144.819  |
| NM_00608E | 8486.128  | 9714.57   | NM_01609E | 18377.215 | 16621.424 | BI912037  | 346.337  | 527.168   |
| NM_00452C | 10109.44  | 11557.013 | NM_00022E | 236.289   | 398.86    | AA454646  | 334.316  | 362.173   |
| AK027118  | 12685.831 | 13139.055 | NM_00083C | 704.676   | 1105.786  | U18087    | 7141.764 | 6681.02   |
| AK022882  | 15980.185 | 11058.838 | AF148950  | 590.111   | 1122.322  | U66349    | 657.613  | 923.261   |
| NM_00610E | 3314.791  | 2947.82   | NM_00115E | 6002.229  | 8869.932  | AA057156  | 503.657  | 756.466   |
| NM_005981 | 437.141   | 502.888   | NM_01773E | 1458.68   | 3669.758  | AF166327  | 7968.224 | 6766.521  |
| NM_016264 | 879.942   | 947.896   | AF263523  | 1232.954  | 1841.118  | AF260739  | 254.003  | 327.038   |
| NM_00607E | 10220.336 | 10201.861 | L08441    | 4229.935  | 7976.441  | AF531423  | 1595.562 | 1566.71   |

|           |           |           |           |           |           |           |          |          |
|-----------|-----------|-----------|-----------|-----------|-----------|-----------|----------|----------|
| AB037837  | 1318.37   | 1081.684  | AA641953  | 2079.7    | 1853.615  | X76555    | 294.514  | 280.375  |
| NM_014595 | 4768.236  | 4246.8    | AL137764  | 8067.819  | 3916.227  | NM_005432 | 575.957  | 455.764  |
| NM_014789 | 1181.47   | 1180.492  | NM_001660 | 10112.895 | 6295.17   | L10386    | 1052.484 | 1061.129 |
| AB046784  | 1117.514  | 1046.777  | NM_000710 | 425.522   | 243.262   | AF061812  | 996.219  | 1025.861 |
| NM_004992 | 1289.768  | 1099.031  | NM_000752 | 1028.309  | 1032.819  | AL136756  | 390.031  | 343.515  |
| NM_014462 | 2022.351  | 2087.799  | AB040945  | 497.191   | 307.77    | NM_002990 | 2145.926 | 1355.041 |
| NM_014156 | 41854.285 | 34499.68  | NM_002018 | 6682.461  | 5728.231  | NM_002432 | 491.02   | 251.022  |
| NM_003137 | 4112.226  | 3680.669  | NM_000410 | 8274.411  | 10240.887 | AB033037  | 726.399  | 477.32   |
| NM_006938 | 38008.02  | 30648.402 | AF224266  | 1580.795  | 1813.554  | L40400    | 932.615  | 1250.968 |
| AF265228  | 2410.652  | 2089.054  | U72882    | 8369.014  | 9739.45   | AK025688  | 806.26   | 809.732  |
| NM_003757 | 40363.203 | 41433.211 | NM_014337 | 7562.811  | 9164.822  | NM_001195 | 162.091  | 330.366  |
| AK025561  | 4854.954  | 5702.805  | NM_007161 | 11031.472 | 12072.032 | NM_014448 | 303.391  | 351.762  |
| NM_018602 | 36134.637 | 36225.441 | NM_014387 | 20734.344 | 24378.484 | AL080157  | 464.986  | 542.344  |
| NM_004096 | 3137.397  | 3583.808  | NM_003641 | 3341.626  | 4098.403  | NM_005308 | 845.571  | 835.761  |
| NM_017629 | 5256.334  | 5297.48   | NM_012463 | 1732.659  | 2482.477  | NM_007227 | 253.175  | 420.962  |
| AL049681  | 1272.369  | 1426.872  | L29140    | 28278.996 | 34064.734 | NM_007023 | 203.393  | 287.177  |
| NM_006584 | 732.787   | 1022.864  | AK026448  | 4647.125  | 6789.354  | NM_005873 | 1750.61  | 1348.294 |
| AF052181  | 2510.428  | 2419.403  | AK057418  | 2636.789  | 2955.606  | NM_004624 | 540.711  | 699.509  |
| AL050074  | 6911.308  | 6092.936  | AF148646  | 4541.552  | 4487.246  | NM_003865 | 409.955  | 413.232  |
| AK026436  | 505.386   | 764.681   | AL110218  | 847.916   | 964.79    | AB015330  | 967.259  | 993.018  |
| NM_018061 | 2015.592  | 2221.025  | AB023201  | 2362.192  | 2241.421  | NM_001455 | 1086.511 | 1066.021 |
| AK023059  | 760.972   | 727.498   | NM_000697 | 1530.727  | 948.608   | NM_004982 | 405.24   | 263.158  |
| NM_003551 | 2117.129  | 2060.262  | NM_000017 | 6115.998  | 4139.375  | AK026180  | 640.553  | 765.317  |
| AK021900  | 1415.537  | 1258.856  | NM_000237 | 605.343   | 421.21    | NM_005817 | 1767.305 | 1788.874 |
| NM_019857 | 520.383   | 824.565   | NM_018346 | 5869.633  | 4968.152  | NM_003916 | 1557.494 | 1696.33  |
| NM_015455 | 24588.199 | 23353.9   | AL122054  | 2015.473  | 1814.394  | NM_002870 | 4696.169 | 5330.837 |
| X74864    | 3548.836  | 3679.737  | AB011182  | 1246.244  | 1512.011  | NM_006363 | 1956.629 | 2230.838 |
| AK026804  | 4648.023  | 3866.499  | NM_020038 | 490.458   | 871.279   | NM_020415 | 1116.16  | 1484.275 |
| NM_016170 | 16142.189 | 12479.121 | NM_016246 | 1406.471  | 2000.707  | AL049667  | 1676.852 | 1467.573 |
| NM_006166 | 3233.911  | 4126.898  | NM_015926 | 6190.333  | 6579.903  | NM_000334 | 761.487  | 706.286  |
| S72620    | 35016.734 | 38709.355 | X03757    | 5196.573  | 5449.866  | NM_020400 | 489.587  | 417.034  |
| NM_016831 | 504.193   | 574.966   | NM_005136 | 405.771   | 720.53    | NM_001504 | 344.85   | 255.36   |
| NM_005263 | 11571.884 | 11988.126 | AK094513  | 558.062   | 611.545   | D50926    | 806.207  | 721.889  |
| AB033022  | 4320.766  | 4379.358  | NM_001183 | 6706.495  | 7082.522  | BF205683  | 751.509  | 432.313  |
| AF147397  | 722.488   | 532.003   | NM_000890 | 1911.924  | 2334.178  | NM_001565 | 203.701  | 83.79    |
| AF085836  | 1539.751  | 2063.131  | NM_004976 | 12704.453 | 11440.536 | NM_000758 | 1843.435 | 1674.67  |
| AL049449  | 1535.584  | 2145.301  | AK021597  | 1417.882  | 1517.351  | NM_003600 | 1224.143 | 664.378  |
| AF147347  | 897.911   | 1142.622  | NM_005737 | 35751.031 | 27468.439 | NM_017490 | 1177.464 | 661.285  |
| AL359654  | 1182.875  | 1414.071  | NM_006803 | 1685.319  | 2290.632  | AK026727  | 527.23   | 563.27   |
| AF086261  | 1232.316  | 1484.819  | NM_002533 | 1412.762  | 1782.28   | NM_002830 | 379.398  | 383.779  |
| AF086367  | 1577.574  | 2072.42   | AF235022  | 436.504   | 441.224   | NM_006247 | 2092.937 | 1604.954 |
| AF086437  | 2038.833  | 3264.413  | AF182814  | 2511.728  | 1688.307  | AB032983  | 568.75   | 480.847  |
| AK025088  | 5611.167  | 7839.527  | NM_005329 | 860.25    | 556.669   | NM_018281 | 1601.089 | 1748.43  |
| U79295    | 985.724   | 1343.754  | NM_000107 | 3890.276  | 4138.051  | NM_004457 | 2135.268 | 2468.947 |
| AK002107  | 733.802   | 746.989   | NM_018283 | 2042.154  | 2162.025  | NM_014049 | 1008.604 | 1868.898 |
| NM_003596 | 3599.604  | 3111.214  | NM_001983 | 2441.823  | 2836.335  | NM_004315 | 2837.05  | 3465.224 |
| NM_018838 | 3512.303  | 3424.961  | NM_004993 | 333.817   | 464.706   | NM_020166 | 1561.974 | 1501.905 |
| AK022069  | 1264.973  | 1386.135  | M29551    | 10784.265 | 10079.722 | AK023860  | 690.347  | 935.706  |
| AL137457  | 1068.819  | 1002.423  | AB023148  | 530.662   | 575.594   | NM_000031 | 1776.275 | 2007.858 |
| AF085913  | 766.208   | 754.158   | NM_002929 | 1032.957  | 909.781   | NM_002085 | 8616.352 | 8580.992 |
| AL359604  | 609.107   | 495.574   | BC028375  | 1711.45   | 2233.727  | AK026061  | 516.822  | 726.943  |
| AK027189  | 1055.575  | 1149.235  | AB026436  | 3184.295  | 3178.783  | NM_016286 | 3181.419 | 2426.023 |
| AF088014  | 374.78    | 504.184   | NM_016029 | 9221.083  | 8525.531  | NM_001567 | 463.925  | 492.565  |



|           |           |           |           |           |           |           |           |           |
|-----------|-----------|-----------|-----------|-----------|-----------|-----------|-----------|-----------|
| AL109719  | 1404.813  | 1638.973  | AK024562  | 1351.946  | 1898.645  | NM_00490E | 3715.267  | 3204.925  |
| AF086093  | 2049.271  | 3089.69   | NM_014066 | 1128.024  | 1402.102  | AF217971  | 955.464   | 880.2     |
| U92022    | 1305.756  | 2109.966  | NM_004573 | 1373.108  | 2453.042  | AF245517  | 366.89    | 455.601   |
| NM_00365C | 17139.98  | 21531.531 | NM_00149E | 16227.76  | 9733.053  | X78926    | 1157.37   | 796.981   |
| AK022119  | 5915.704  | 5876.992  | AF263523  | 1039.875  | 908.274   | AJ278110  | 435.546   | 295.05    |
| AL157488  | 664.983   | 519.573   | L08441    | 4531.57   | 5774.822  | NM_014237 | 503.34    | 283.478   |
| NM_016644 | 1511.493  | 1421.591  | AA641953  | 2210.953  | 1432.044  | AF029900  | 809.533   | 589.053   |
| AF085842  | 541.437   | 916.785   | AI248827  | 3910.455  | 2967.584  | NM_00332E | 3977.598  | 4235.131  |
| AK023882  | 865.791   | 683.346   | R45026    | 2472.59   | 2637.726  | NM_01617E | 824.685   | 757.771   |
| AK026750  | 1642.341  | 1476.716  | BI768063  | 215.062   | 369.738   | AK022639  | 406.404   | 430.108   |
| AF072164  | 1641.676  | 1592.336  | AA496452  | 2973.455  | 2995.058  | D31766    | 3276.866  | 3313.05   |
| AF083122  | 616.036   | 801.307   | X67594    | 1166.114  | 1313.893  | NM_006547 | 660.554   | 656.395   |
| AK021885  | 753.801   | 1299.534  | NM_001631 | 315.605   | 528.49    | NM_00147E | 9455.246  | 8373.787  |
| AK021940  | 511.671   | 554.744   | AB000734  | 1243.922  | 1273.353  | AF135422  | 976.17    | 1239.951  |
| AK022189  | 913.464   | 759.208   | X87838    | 2294.023  | 2211.499  | NM_00447E | 3769.378  | 2981.307  |
| AK022338  | 1234.61   | 1127.117  | NM_03319E | 2537.179  | 3196.171  | NM_00261C | 508.533   | 629.404   |
| AK026856  | 1023.119  | 1096.758  | NM_015001 | 1358.346  | 1895.124  | AF070587  | 2014.189  | 1240.576  |
| AL162033  | 5889.042  | 6004.564  | NM_00016E | 3630.359  | 5772.104  | BE250526  | 310.691   | 248.355   |
| AL162010  | 498.521   | 745.802   | AK057418  | 2352.32   | 1209.526  | NM_01681E | 599.385   | 463.47    |
| AK026761  | 1119.349  | 1385.524  | NM_00726C | 1357.286  | 1065.273  | NM_01222E | 2107.431  | 1573.954  |
| NM_005001 | 23628.18  | 22568.299 | AF148646  | 3727.941  | 2428.004  | NM_00500E | 1046.978  | 915.872   |
| AK024175  | 5288.35   | 4593.458  | AL110218  | 579.699   | 708.913   | NM_00659E | 1402.312  | 1347.095  |
| NM_00051C | 1683.29   | 1489.547  | AB023201  | 2357.783  | 1727.599  | AK023214  | 2715.28   | 2505.528  |
| AK001910  | 2605.839  | 2697.193  | X00094    | 765.635   | 735.75    | NM_00146E | 2842.854  | 2927.208  |
| AK023892  | 840.176   | 724.217   | NM_00377E | 1058.504  | 1135.767  | NM_001851 | 964.951   | 491.861   |
| AF124368  | 1903.369  | 1944.62   | NM_00208E | 7200.569  | 8977.274  | S67789    | 579.463   | 435.418   |
| AF265210  | 2651.019  | 2514.306  | AF155657  | 12875.747 | 11356.983 | AK022689  | 1954.663  | 1965.95   |
| AK024241  | 1292.121  | 1162.681  | NM_00605E | 2091.511  | 2084.261  | NM_016227 | 490.305   | 394.455   |
| AK025061  | 2969.749  | 2995.115  | AF045229  | 7498.116  | 6004.224  | NM_02019C | 1947.112  | 2302.188  |
| AF088067  | 8455.167  | 6032.804  | NM_00184C | 4213.421  | 3287.11   | NM_014357 | 892.096   | 874.294   |
| AK022213  | 1010.998  | 695.886   | AK025099  | 2194.655  | 1609.163  | NM_004067 | 510.401   | 606.898   |
| AF056441  | 2317.512  | 1330.261  | NM_01609E | 18894.523 | 13681.957 | NM_000121 | 2583.701  | 2892.184  |
| Y10509    | 1090.603  | 1120.578  | NM_00022E | 279.319   | 402.413   | NM_002091 | 1823.049  | 2225.781  |
| AK024389  | 8219.396  | 6780.146  | AF148950  | 475.556   | 738.309   | AB033092  | 1385.986  | 1708.378  |
| AK026793  | 2010.319  | 1934.931  | NM_001155 | 5555.146  | 7093.722  | NM_00302E | 553.975   | 347.758   |
| NM_00167E | 665.816   | 565.587   | M62896    | 15227.328 | 23795.58  | BC035030  | 1546.821  | 1021.012  |
| AJ276253  | 16386.242 | 11415.379 | AK021597  | 992.947   | 498.899   | NM_00534C | 19385.324 | 14612.095 |
| AF147314  | 896.523   | 1102.448  | NM_005737 | 24107.74  | 11912.093 | NM_016201 | 504.115   | 620.218   |
| NM_01898C | 4722.316  | 3470.985  | NM_00680E | 1317.791  | 1204.385  | NM_000864 | 1187.201  | 902.652   |
| AF086201  | 1315.819  | 1625.16   | NM_00253E | 1236.994  | 1042.444  | NM_017977 | 834.884   | 793.973   |
| AK024712  | 617.831   | 489.849   | AF235022  | 491.351   | 566.614   | AF147727  | 715.558   | 384.964   |
| U48696    | 980.532   | 992.825   | AL137764  | 10694.49  | 7470.655  | NM_006751 | 1488.553  | 1154.158  |
| AF230316  | 5007.701  | 5837.896  | NM_00166C | 10771.775 | 7757.589  | AB037834  | 1266.268  | 903.261   |
| AK024515  | 6743.857  | 6006.985  | NM_00071C | 418.617   | 418.059   | NM_00356E | 698.844   | 779.833   |
| AF085862  | 4558.881  | 3912.621  | NM_00075E | 1104.644  | 1281.905  | NM_01405E | 6011.378  | 5014.773  |
| NM_01799E | 2528.61   | 2467.181  | AB040945  | 335.65    | 238.825   | NM_002777 | 233.338   | 235.525   |
| AL049271  | 39070.461 | 41657.777 | NM_00201E | 6261.685  | 5313.863  | AF202635  | 371.099   | 323.084   |
| AK023079  | 28383.287 | 28001.637 | NM_00601E | 243.001   | 645.036   | NM_01412E | 227.901   | 274.3     |
| NM_01960E | 2512.497  | 2693.62   | AF161383  | 5144.394  | 3281.408  | NM_017904 | 20.174    | 984.039   |
| AK026198  | 4307.53   | 4440.463  | NM_00041C | 7998.072  | 7084.446  | NM_013367 | 2084.05   | 6044.888  |
| AF183570  | 1472.286  | 1198.672  | AF224266  | 2105.881  | 1926.918  | NM_000321 | 2672.498  | 3759.256  |
| NM_005497 | 35162.41  | 24535.592 | U72882    | 11414.421 | 11314.246 | NM_006341 | 6360.748  | 18992.01  |
| AK024048  | 5584.054  | 4840.365  | NM_014337 | 8738.697  | 9726.158  | NM_00170E | 1610.341  | 2531.038  |

|           |           |           |           |           |           |           |          |          |
|-----------|-----------|-----------|-----------|-----------|-----------|-----------|----------|----------|
| AB033093  | 7028.673  | 5386.182  | NM_007161 | 11712.925 | 16051.551 | NM_006191 | 1816.237 | 2196.712 |
| NM_005912 | 819.251   | 785.012   | NM_014387 | 22087.213 | 23830.633 | NM_00180C | 2557.128 | 2455.767 |
| NM_005909 | 34225.012 | 30523.189 | NM_003641 | 3848.161  | 5547.167  | NM_00433E | 3384.804 | 3576.75  |
| AK055991  | 1103.509  | 918.966   | NM_012463 | 2173.396  | 3104.816  | NM_01594E | 962.865  | 958.502  |
| AF113697  | 683.44    | 435.088   | L29140    | 31609.352 | 40613.727 | NM_01397E | 1723.649 | 1779.375 |
| AK022326  | 2122.69   | 1892.981  | AB026436  | 2306.428  | 1403.837  | NM_00379C | 622.134  | 666.404  |
| AF085991  | 947.907   | 980.975   | NM_016029 | 8120.56   | 4648.555  | NM_00049A | 1213.338 | 1513.978 |
| NM_005683 | 1308.917  | 1204.509  | AK024562  | 1057.297  | 872.058   | NM_016023 | 437.485  | 619.938  |
| NM_020427 | 12224.592 | 10566.769 | NM_014066 | 1072.353  | 1015.701  | NM_003722 | 1500.686 | 1141.344 |
| AF085920  | 1842.148  | 1665.521  | NM_004573 | 1238.25   | 1214.397  | NM_01443C | 291.627  | 204.253  |
| AK023173  | 23403.607 | 20299.672 | NM_000072 | 475.876   | 410.225   | NM_00049E | 292.289  | 261.086  |
| AK025225  | 722.141   | 769.632   | NM_000697 | 2059.646  | 1531.484  | AF085883  | 1031.654 | 936.888  |
| U79275    | 10225.949 | 9145.34   | NM_000017 | 6816.184  | 4743.022  | NM_016571 | 468.247  | 587.622  |
| AJ227908  | 896.381   | 937.333   | NM_000237 | 503.275   | 616.62    | NM_01644E | 999.467  | 885.63   |
| AF007193  | 1410.561  | 1306.531  | NM_018346 | 5914.705  | 4566.541  | NM_00251E | 237.241  | 237.013  |
| AK022367  | 1184.382  | 1381.431  | AL122054  | 1969.742  | 1687.259  | AK023237  | 187.261  | 202.033  |
| BC028589  | 2147.639  | 2195.801  | AB011182  | 1303.345  | 844.282   | AJ271216  | 642.069  | 1052.264 |
| K02765    | 2192.466  | 1542.642  | AB023151  | 264.786   | 343.496   | U23028    | 1221.012 | 2202.804 |
| AW160671  | 53032.043 | 36219.949 | NM_00014C | 7061.429  | 5287.031  | NM_000817 | 1529.063 | 2815.026 |
| BI870529  | 25323.346 | 14573.414 | NM_00512E | 2791.144  | 2658.776  | NM_006571 | 4039.872 | 5587.478 |
| AA702698  | 1158.013  | 883.398   | NM_02003E | 769.187   | 1026.624  | NM_00187E | 254.678  | 489.158  |
| AI681514  | 843.735   | 596.384   | NM_01624E | 1938.548  | 1617.192  | AK022680  | 728.815  | 645.738  |
| NM_00130C | 4195.13   | 2780.949  | NM_01592E | 8152.332  | 8842.827  | NM_01635E | 3425.983 | 2557.186 |
| BG748827  | 4076.163  | 2318.653  | X03757    | 5847.755  | 7265.051  | NM_00415E | 2673.528 | 2135.586 |
| AA952897  | 1754.154  | 1023.78   | NM_00513E | 573.397   | 862.863   | AK000561  | 356.137  | 383.928  |
| BG760342  | 5289.139  | 2990.829  | AK094513  | 811.596   | 1049.651  | AB051449  | 4585.37  | 2969.362 |
| AA703141  | 2128.939  | 1353.237  | NM_001183 | 7536.427  | 8878.762  | BC009187  | 2643.242 | 1967.141 |
| AI122630  | 10403.613 | 8049.404  | NM_00089C | 2382.304  | 3325.15   | AL133617  | 327.409  | 133.547  |
| NM_002103 | 30266.428 | 18323.4   | NM_00497E | 13088.408 | 15918.533 | NM_01648E | 2898.729 | 2057.677 |
| NM_00337E | 7437.237  | 4529.873  | NM_03319E | 1713.808  | 845.59    | AF090894  | 279.405  | 330.469  |
| SR1       | 71221.539 | 62733.113 | NM_015001 | 1371.8    | 942.421   | NM_006167 | 1394.334 | 959.557  |
| SR3       | 42622.984 | 19263.199 | NM_00016E | 3173.094  | 3421.935  | NM_016357 | 1808.331 | 1420.567 |
| SR5       | 5765.043  | 3188.26   | AF182814  | 2500.144  | 1938.987  | NM_01450C | 3483.725 | 2493.812 |
| SR7       | 5214.305  | 18131.559 | NM_00532E | 696.497   | 688.067   | NM_02014E | 592.907  | 558.55   |
| SR9       | 15668.88  | 1547.605  | NM_000107 | 3680.143  | 3183.765  | NM_006237 | 937.735  | 877.436  |
| CY3Cy5    | 2600.157  | 155.482   | AL157445  | 1934.824  | 2016.39   | NM_001271 | 1547.342 | 1219.213 |
| NM_01326E | 592.216   | 968.243   | NM_001517 | 9715.919  | 6823.704  | NM_003683 | 971.139  | 1213.47  |
| NM_00068E | 911.931   | 727.904   | NM_005053 | 3635.264  | 2722.321  | AF039019  | 1307.536 | 1912.198 |
| NM_012452 | 2468.172  | 1500.069  | D86974    | 3575.677  | 3790.433  | NM_01225E | 2275.641 | 3329.204 |
| AF229166  | 1012.215  | 627.46    | NM_018283 | 2568.711  | 2425.029  | NM_00481E | 2247.32  | 2873.461 |
| NM_005137 | 3220.705  | 1887.521  | NM_001983 | 2601.931  | 2230.201  | J04205    | 4284.525 | 4399.581 |
| NM_006764 | 2093.429  | 1495.831  | M29551    | 13135.443 | 15389.167 | D38491    | 2151.894 | 1386.187 |
| NM_00138E | 1491.581  | 950.821   | AB023148  | 524.959   | 825.143   | NM_00281E | 5835.804 | 5170.59  |
| NM_001163 | 1405.104  | 1061.807  | NM_00292E | 1201.268  | 1664.298  | NM_013264 | 1382.803 | 1648.511 |
| NM_00587E | 2403.17   | 1306.333  | BC028375  | 2227.332  | 2899.749  | NM_00331E | 3910.428 | 2473.902 |
| AF308602  | 3034.935  | 2420.575  | AF148950  | 242.084   | 183.485   | NM_00557C | 3322.186 | 2302.808 |
| AB011089  | 1807.411  | 1145.864  | NM_001155 | 4684.191  | 2678.73   | NM_00008E | 1904.317 | 1338.168 |
| NM_00127E | 6551.97   | 4279.917  | M62896    | 7843.653  | 6190.897  | NM_003752 | 1303.383 | 883.944  |
| NM_016157 | 1003.55   | 519.949   | NM_01773E | 1026.831  | 872.323   | NM_003932 | 5023.427 | 3869.705 |
| NM_01491E | 21091.217 | 8393.179  | NM_00039C | 1279.308  | 950.761   | NM_016491 | 4005.642 | 3439.777 |
| NM_01228E | 1642.673  | 1249.082  | NM_000313 | 444.578   | 2285.641  | NM_00642E | 9377.282 | 7649.357 |
| NM_00219E | 6054.021  | 2838.291  | NM_00149E | 32855.109 | 21051.143 | NM_003307 | 1391.688 | 899.866  |
| D84294    | 2032.788  | 636.699   | AF263523  | 1220.891  | 1173.442  | AK021644  | 628.845  | 482.491  |

|           |           |           |           |           |           |           |          |           |
|-----------|-----------|-----------|-----------|-----------|-----------|-----------|----------|-----------|
| M31659    | 1283.454  | 2979.554  | L08441    | 4721.482  | 7952.978  | NM_015944 | 372.974  | 264.378   |
| NM_016226 | 15874.809 | 27932.648 | AA641953  | 1867.294  | 2497.217  | NM_002064 | 628.543  | 521.529   |
| NM_005085 | 1945.593  | 2043.122  | AI248827  | 3462.131  | 3212.624  | NM_015523 | 4810.705 | 4536.456  |
| AF060902  | 1985.302  | 2000.379  | R45026    | 2062.63   | 1909.552  | NM_015960 | 2002.613 | 3180.29   |
| AF121858  | 7542.386  | 5451.743  | BG386057  | 459.638   | 303.108   | NM_006085 | 2371.869 | 2942.888  |
| NM_013437 | 5372.728  | 5084.413  | AI970239  | 3022.379  | 2052.028  | NM_000907 | 2782.064 | 3409.433  |
| NM_017681 | 1199.105  | 1069.358  | AA496452  | 2812.771  | 2167.378  | AF254085  | 2034.913 | 2897.681  |
| X57655    | 12293.089 | 8324.153  | X67594    | 1551.769  | 1752.819  | AK023541  | 147.381  | 138.066   |
| AK025966  | 2855.722  | 1843.219  | BC008837  | 350.624   | 536.061   | NM_001987 | 424.668  | 447.404   |
| NM_018725 | 476.041   | 390.26    | NM_001631 | 512.332   | 930.968   | AF244088  | 618.44   | 493.621   |
| NM_003081 | 15601.303 | 10925.619 | AB000734  | 1515.276  | 2508.885  | NM_007136 | 354.26   | 352.457   |
| NM_016495 | 7558.501  | 6914.01   | NM_005987 | 56572.523 | 60989.098 | AK025434  | 342.031  | 542.053   |
| D50402    | 19691.221 | 11282.539 | X87838    | 2464.722  | 3732.842  | AJ251845  | 246.884  | 346.996   |
| M73547    | 9534.128  | 6383.291  | NM_007161 | 6849.909  | 3508.797  | AK000435  | 514.674  | 298.204   |
| NM_003687 | 1202.792  | 841.111   | NM_014387 | 17158.73  | 9252.381  | AK000569  | 1176.191 | 979.805   |
| NM_004134 | 2877.791  | 1795.566  | NM_003641 | 2365.205  | 1980.34   | NM_006045 | 835.545  | 827.034   |
| NM_005955 | 2971.727  | 1578.651  | NM_012463 | 1787.632  | 1225.682  | NM_017661 | 1195.817 | 804.634   |
| NM_004048 | 795.809   | 539.922   | L29140    | 16150.512 | 10704.221 | BC016698  | 3767.168 | 3226.795  |
| NM_017765 | 19854.711 | 20615.25  | AK026448  | 4086.702  | 2983.915  | NM_007374 | 3221.599 | 2779.306  |
| NM_000428 | 632.191   | 927.54    | AK057418  | 2891.129  | 2378.582  | AK027185  | 701.644  | 675.399   |
| AB040967  | 1042.738  | 1294.401  | L37199    | 434.857   | 412.926   | AK025576  | 597.137  | 390.418   |
| NM_014721 | 1024.194  | 836.255   | NM_007260 | 1316.938  | 1305.728  | AF147385  | 546.723  | 1339.074  |
| AK026352  | 1105.772  | 1252.505  | AF148646  | 4173.945  | 3531.975  | AL442086  | 1312.429 | 1068.587  |
| AL137705  | 2013.33   | 1984.693  | AL110218  | 842.528   | 875.628   | BC034819  | 1325.001 | 1021.474  |
| U41898    | 677.319   | 575.454   | AB023201  | 2049.441  | 1931.217  | AF147313  | 2568.886 | 2436.749  |
| NM_014848 | 497.32    | 333.632   | X00094    | 512.083   | 540.991   | AF147382  | 9692.406 | 10792.446 |
| BF217766  | 827.049   | 764.014   | NM_003775 | 974.575   | 853.507   | AK001957  | 2317.019 | 1841.533  |
| NM_000184 | 1511.533  | 1177.635  | NM_002082 | 8518.772  | 6893.067  | AK000850  | 284.059  | 169.509   |
| NM_016180 | 674.558   | 268.362   | NM_002922 | 219.726   | 351.726   | AK021833  | 798.297  | 934.956   |
| NM_000112 | 793.782   | 366.862   | AF155657  | 12584.49  | 10434.179 | AF143867  | 638.103  | 720.451   |
| NM_005827 | 7897.166  | 5140.622  | NM_006056 | 2696.444  | 2533.399  | AK025889  | 2093.193 | 2492.84   |
| NM_003053 | 3155.964  | 1919.606  | AF045229  | 7902.984  | 7070.123  | NM_014715 | 917.925  | 1333.7    |
| NM_003044 | 1135.475  | 474.127   | NM_001840 | 5086.493  | 4269.924  | AF086448  | 848.75   | 674.429   |
| NM_006672 | 6765.565  | 2066.362  | AK025099  | 2518.46   | 3057.973  | AF086386  | 408.947  | 297.186   |
| AB007875  | 1181.688  | 1118.246  | NM_016099 | 23006.51  | 23797.971 | AF086413  | 182.929  | 197.212   |
| NM_014796 | 4995.271  | 4384.707  | NM_000394 | 147.793   | 1049.893  | AF086457  | 569.027  | 449.082   |
| AL050288  | 25007.164 | 22174.658 | NM_000228 | 209.914   | 880.616   | AK025469  | 475.097  | 583.777   |
| NM_005040 | 4284.014  | 3799.894  | NM_000830 | 930.667   | 1628.206  | NM_020235 | 2273.24  | 1754.058  |
| NM_016391 | 10765.114 | 7424.608  | NM_014587 | 435.505   | 753.541   | AF070581  | 241.634  | 82.316    |
| AF075033  | 5807.626  | 4926.27   | NM_018658 | 2146.947  | 1364.322  | AK024187  | 304.004  | 236.826   |
| D50911    | 13155.966 | 9130.477  | NM_005136 | 328.294   | 255.578   | AF075079  | 167.353  | 254.419   |
| AB011104  | 1319.092  | 1024.465  | AK094513  | 466.597   | 334.431   | AK022479  | 260.653  | 220.946   |
| AK024069  | 4518.308  | 3457.605  | NM_001183 | 7966.019  | 6110.753  | AF086004  | 3031.991 | 1891.134  |
| NM_004582 | 21003.809 | 16514.561 | NM_000890 | 1099.025  | 914.269   | AF147433  | 291.757  | 211.005   |
| NM_015640 | 11929.111 | 9393.071  | NM_004976 | 11847.924 | 7744.473  | AF085930  | 243.099  | 257.452   |
| AF233450  | 928.228   | 990.778   | AK021597  | 1389.919  | 2079.475  | AF086006  | 241.825  | 204.889   |
| NM_016233 | 1011.147  | 771.136   | NM_005737 | 29860.258 | 18085.943 | AL137318  | 623.358  | 772.103   |
| NM_000821 | 16779.859 | 8745.668  | NM_006803 | 1663.073  | 1593.655  | AL137482  | 540.394  | 619.438   |
| NM_003145 | 25160.766 | 13369.586 | NM_002533 | 1430.111  | 1303.589  | AL162011  | 5142.021 | 5209.458  |
| NM_001632 | 1347.816  | 744.53    | AF235022  | 413.172   | 406.531   | AL390177  | 331.771  | 284.78    |
| NM_012264 | 1236.731  | 429.38    | AL137764  | 9415.003  | 7099.056  | AL137678  | 242.559  | 233.568   |
| AF311312  | 2238.852  | 2001.696  | NM_001660 | 10852.176 | 8168.196  | AK056111  | 363.537  | 571.26    |
| NM_014915 | 18980.705 | 14566.111 | NM_000710 | 358.124   | 282.868   | Y13807    | 520.026  | 453.852   |

|           |           |           |           |           |           |           |           |           |
|-----------|-----------|-----------|-----------|-----------|-----------|-----------|-----------|-----------|
| NM_012286 | 1175.032  | 1191.907  | NM_000752 | 1418.955  | 1472.845  | AK022053  | 190.802   | 92.723    |
| NM_002195 | 5032.198  | 5759.634  | AB040945  | 365.754   | 450.691   | AK023038  | 303.28    | 122.095   |
| D84294    | 1933.907  | 1565.485  | NM_002018 | 7609.345  | 6612.648  | AK026206  | 348.653   | 183.941   |
| K02765    | 1209.801  | 1232.182  | NM_002377 | 349.873   | 347.248   | AF086074  | 428.605   | 168.005   |
| M65134    | 579.152   | 990.284   | NM_006018 | 495.322   | 508.088   | AK023964  | 1026.971  | 803.285   |
| BG539651  | 1669.25   | 1673.057  | AF161383  | 5201.977  | 5137.521  | AF086084  | 425.04    | 379.705   |
| N52646    | 17264.463 | 9893.19   | NM_000410 | 8424.818  | 11545.108 | AL050184  | 387.229   | 562.82    |
| AW160671  | 54557.711 | 45771.086 | AF224266  | 2263.25   | 3449.576  | AK027112  | 1442.078  | 970.837   |
| BI870529  | 18920.777 | 17008.691 | U72882    | 13928.831 | 17989.412 | AL049314  | 1684.53   | 1450.452  |
| AA702698  | 1053.829  | 828.057   | NM_014337 | 9105.392  | 10537.488 | AF093016  | 4751.521  | 3772.035  |
| AI681514  | 888.667   | 827.467   | NM_003384 | 10173.775 | 4891.658  | -         | 271.048   | 308.144   |
| NM_001300 | 3611.719  | 3362.35   | Y12337    | 1123.507  | 578.569   | AF090925  | 191.665   | 235.973   |
| BG748827  | 3439.15   | 3537.833  | M29551    | 7777.6    | 5743.261  | NM_014163 | 2036.046  | 2165.298  |
| AA952897  | 1243.86   | 1370.539  | AB023148  | 500.219   | 368.912   | AK021659  | 173.962   | 339.674   |
| BG760342  | 5163.332  | 4371.049  | NM_002929 | 1270.215  | 697.55    | NM_014137 | 404.119   | 1662.365  |
| AA703141  | 1840.02   | 1724.452  | BC028375  | 1970.759  | 1540.702  | AK021974  | 575.869   | 657.199   |
| AI122630  | 9474.015  | 7010.625  | AB026436  | 3232.194  | 2556.402  | AK022068  | 577.421   | 1252.986  |
| NM_002103 | 23072.818 | 16674.488 | NM_016029 | 8769.91   | 6853.015  | AK022229  | 1054.813  | 2348.544  |
| NM_003379 | 7269.291  | 8435.032  | AK024562  | 1394.744  | 1611.478  | AK022362  | 1738.078  | 2121.259  |
| NM_006589 | 4687.53   | 3215.97   | NM_014066 | 1029.125  | 802.051   | AK022004  | 2100.683  | 2073.689  |
| NM_004134 | 2380.071  | 3205.93   | NM_004573 | 1317.814  | 1136.94   | AK022390  | 473.948   | 273.721   |
| NM_005955 | 3134.165  | 2990.159  | NM_000072 | 468.598   | 410.997   | AK024168  | 283.573   | 147.927   |
| NM_004048 | 1899.409  | 1903.899  | NM_000697 | 1871.906  | 1733.192  | AK021793  | 995.264   | 612.717   |
| NM_012428 | 5578.586  | 4876.862  | NM_000017 | 7546.9    | 5439.703  | AK022255  | 661.502   | 298.254   |
| NM_013269 | 446.571   | 324.869   | NM_000237 | 685.847   | 562.127   | AK023730  | 305.929   | 136.526   |
| NM_001728 | 3009.166  | 2979.659  | NM_018346 | 6058.879  | 5464.345  | AF161360  | 497.807   | 476.474   |
| NM_005565 | 6359.833  | 4986.344  | AL122054  | 1782.44   | 1537.116  | AK021720  | 376.992   | 212.013   |
| NM_003824 | 5954.463  | 4943.218  | AB011182  | 1421.645  | 1198.588  | NM_016497 | 13453.331 | 9361.87   |
| NM_000686 | 686.916   | 747.878   | AB023151  | 223.955   | 489.083   | AB037792  | 753.287   | 504.772   |
| NM_012452 | 2483.25   | 2093.249  | NM_000140 | 6578.735  | 8109.187  | AK022480  | 142.015   | 360.522   |
| AF229166  | 801.338   | 840.149   | NM_005125 | 2757.083  | 4696.465  | AK024158  | 366.462   | 439.802   |
| NM_005137 | 2585.07   | 2478.159  | NM_015926 | 8772.726  | 13160.979 | AL080082  | 429.935   | 334.968   |
| NM_006764 | 1675.861  | 1455.949  | X03757    | 4648.212  | 6197.721  | AK021623  | 542.865   | 539.068   |
| NM_001386 | 1594.935  | 1085.352  | NM_002902 | 7037.188  | 3712.825  | AF119901  | 1510.572  | 1160.432  |
| NM_001163 | 1160.256  | 1637.718  | NM_020248 | 10946.02  | 7828.369  | AK001936  | 661.368   | 444.127   |
| NM_005878 | 2521.305  | 2361.644  | X89670    | 593.446   | 615.184   | NM_003770 | 16360.502 | 16570.703 |
| AF308602  | 2774.029  | 3411.505  | NM_004053 | 2394.814  | 1832.734  | AK001395  | 2423.782  | 2533.303  |
| AF007192  | 512.042   | 312.652   | M20259    | 301.394   | 365.391   | AK023131  | 1035.079  | 1909.798  |
| NM_000112 | 886.307   | 927.159   | NM_020374 | 1994.454  | 2193.884  | AJ276248  | 379.822   | 937.684   |
| NM_005827 | 8799.741  | 8671.387  | NM_014922 | 1359.583  | 1260.232  | AF090100  | 419.982   | 563.415   |
| NM_003053 | 4383.388  | 4430.425  | NM_000169 | 4137.622  | 3069.767  | AF085865  | 2520.446  | 2700.003  |
| NM_003044 | 1253.573  | 1166.068  | AF182814  | 2277.929  | 1515.899  | AK025521  | 1681.491  | 1523.194  |
| NM_006672 | 8282.527  | 5122.105  | NM_005329 | 750.069   | 802.672   | NM_001053 | 18460.936 | 15702.273 |
| M31659    | 1195.07   | 528.487   | NM_000107 | 3994.04   | 3261.994  | Z70694    | 957.748   | 404.128   |
| NM_016226 | 13634.315 | 11849.173 | AL157445  | 2693.483  | 2893.934  | L77602    | 240.974   | 220.027   |
| AK024311  | 872.587   | 862.546   | NM_001517 | 8003.675  | 10567.551 | NM_015421 | 4523.053  | 4079.437  |
| AF052155  | 6320.269  | 6402.347  | NM_005053 | 3265.247  | 5949.081  | AF086081  | 1477.369  | 1491.987  |
| NM_005085 | 1849.361  | 1575.769  | NM_001983 | 2748.155  | 4450.738  | NM_018111 | 356.44    | 404.954   |
| AF060902  | 1749.922  | 1580.394  | NM_004993 | 528.734   | 738.039   | L23867    | 339.691   | 351.12    |
| AF121858  | 5791.62   | 6038.845  | NM_001793 | 11544.894 | 5379.076  | AB020968  | 312.545   | 521.446   |
| NM_013437 | 5414.767  | 6780.88   | NM_001943 | 1925.045  | 1006.744  | AL138690  | 1112.862  | 908.001   |
| NM_017681 | 1110.77   | 1880.335  | NM_004927 | 4413.889  | 2705.013  | AK000394  | 348.212   | 420.341   |
| X57655    | 13439.516 | 17873.258 | NM_001459 | 1792.543  | 1283.054  | NM_013941 | 484.069   | 652.637   |

|           |           |           |           |           |           |           |           |           |
|-----------|-----------|-----------|-----------|-----------|-----------|-----------|-----------|-----------|
| AK025966  | 3325.382  | 5245.331  | NM_015513 | 8472.963  | 5489.144  | AF074989  | 588.163   | 1357.791  |
| NM_018725 | 1086.11   | 1715.443  | NM_006219 | 3931.615  | 3484.314  | AK001107  | 528.36    | 555.25    |
| NM_003081 | 22358.994 | 33305.527 | NM_004443 | 4146.14   | 3117.152  | AF147393  | 732.735   | 318.521   |
| M73547    | 10736.775 | 18629.787 | NM_017412 | 1676.101  | 1270.74   | AL080112  | 1334.266  | 1490.16   |
| NM_003687 | 1688.925  | 2703.491  | NM_005544 | 334.733   | 291.468   | AL137325  | 302.923   | 406.34    |
| NM_020121 | 428.713   | 460.989   | NM_002964 | 25404.369 | 19679.344 | AF147361  | 575.287   | 546.025   |
| NM_003145 | 30405.277 | 25765.555 | AF311862  | 57120.242 | 48110.652 | AL133086  | 566.727   | 796.349   |
| NM_001632 | 1290.419  | 1754.275  | NM_016447 | 826.061   | 460.314   | NM_012151 | 13811.224 | 18161.166 |
| NM_012264 | 1317.698  | 997.492   | NM_015626 | 3209.589  | 2769.141  | AF087994  | 760.06    | 742.811   |
| AF311312  | 2060.169  | 2033.808  | NM_004899 | 2662.411  | 2375.931  | AJ227912  | 664.526   | 609.254   |
| NM_001179 | 619.731   | 612.856   | AB006628  | 11971.874 | 10539.42  | NM_018195 | 1176.827  | 848.434   |
| NM_017765 | 26068.578 | 25267.521 | AF272036  | 7777.871  | 6130.59   | AK025532  | 1679.819  | 1021.491  |
| NM_000425 | 1059.854  | 1725.183  | AF231023  | 2066.38   | 2519.959  | AK021789  | 192.926   | 172.086   |
| AB040967  | 1648.698  | 2061.276  | NM_005145 | 2125.412  | 2684.36   | NM_003522 | 516.286   | 495.626   |
| NM_014721 | 1675.104  | 2947.165  | NM_004746 | 705.824   | 1320.322  | BF217847  | 412.239   | 757.047   |
| AK026352  | 1407.918  | 3161.683  | Z36782    | 5050.806  | 10564.041 | NM_005320 | 1208.988  | 736.937   |
| AL137705  | 2910.859  | 4897.916  | NM_003490 | 11871.921 | 22478.939 | CY3Cy5    | 3634.729  | 305.531   |
| U41898    | 840.04    | 1177.113  | AF210651  | 572.513   | 257.723   | BI830936  | 537.775   | 716.151   |
| AF169257  | 453.257   | 994.885   | AF090942  | 455.975   | 365.855   | U79292    | 1738.684  | 2908.759  |
| NM_014845 | 1398.628  | 1611.866  | AF508940  | 1446.1    | 1037.487  | BI830753  | 304.205   | 707.261   |
| BF217766  | 1133.737  | 1683.724  | NM_020237 | 371.018   | 373.781   | X68314    | 1017.958  | 1121.467  |
| NM_016180 | 790.617   | 1607.092  | AF130051  | 543.482   | 416.764   | X71973    | 16076.601 | 21536.824 |
| NM_002103 | 30698.834 | 35811.707 | M25753    | 10645.34  | 3305.209  | T49651    | 10993.103 | 15379.171 |
| NM_003379 | 7599.734  | 9499.017  | NM_003883 | 2845.508  | 1714.957  | N51014    | 829.923   | 1082.33   |
| NM_006585 | 6471.078  | 9784.545  | NM_014929 | 2326.337  | 1487.326  | BE392471  | 9053.021  | 11199.173 |
| AB007875  | 1641.741  | 1879.902  | NM_004203 | 9479.604  | 6437.554  | AI802950  | 710.368   | 984.385   |
| NM_018261 | 2847.765  | 3541.285  | NM_001951 | 1476.09   | 1003.21   | AL043686  | 3420.346  | 3620.247  |
| NM_014795 | 7629.978  | 10218.272 | NM_002391 | 1380.169  | 888.433   | AA490172  | 326.608   | 250.861   |
| NM_016391 | 13849.964 | 18990.018 | NM_007066 | 2203.18   | 1135.335  | AA775212  | 2959.902  | 3321.665  |
| M80783    | 560.395   | 788.17    | NM_003674 | 31398.764 | 19306.285 | NM_000945 | 1170.486  | 1479.781  |
| AF075033  | 8674.385  | 14047.998 | NM_001197 | 2121.98   | 1168.191  | SR7       | 3664.639  | 27907.344 |
| D50911    | 17354.178 | 25133.184 | NM_006682 | 775.762   | 701.07    | SR9       | 11297.487 | 2157.644  |
| AB011104  | 2181.78   | 3685.029  | NM_006410 | 648.108   | 479.018   | CY3Cy5    | 2026.381  | 188.235   |
| AK024069  | 7181.409  | 11152.666 | NM_014977 | 53919.297 | 53900.758 | NM_003371 | 5357.281  | 7483.069  |
| AF233450  | 1485.676  | 2689.258  | AK026325  | 1503.893  | 1959.932  | AK023114  | 2944.413  | 4070.404  |
| AF308602  | 3002.086  | 4628.613  | U83857    | 490.993   | 645.839   | NM_003675 | 2580.301  | 3949.788  |
| AB011089  | 2009.39   | 2772.601  | NM_001230 | 1209.946  | 1626.634  | NM_012301 | 371.72    | 650.707   |
| AF007192  | 412.251   | 1146.045  | AK025662  | 1924.062  | 2328.572  | NM_005631 | 967.918   | 2161.656  |
| NM_001275 | 6574.437  | 8912.207  | AB014597  | 1564.12   | 2226.964  | NM_014415 | 1291.599  | 2250.569  |
| NM_016157 | 1730.78   | 1920.439  | AK024313  | 3203.414  | 1995.604  | NM_014935 | 1892.454  | 3312.036  |
| NM_014915 | 21767.977 | 17660.088 | NM_003891 | 2133.577  | 1557.782  | AK026066  | 852.165   | 1609.815  |
| NM_012285 | 1710.079  | 2521.052  | AL359575  | 332.812   | 410.188   | NM_005244 | 1320.855  | 2371.238  |
| NM_002195 | 8495.756  | 10254.906 | NM_002022 | 680.14    | 458.946   | NM_005270 | 516.163   | 1241.051  |
| D84294    | 1918.33   | 2610.788  | NM_015524 | 2618.803  | 1890.735  | NM_014815 | 1263.312  | 2581.398  |
| K02765    | 1415.807  | 2192.828  | NM_001673 | 5483.954  | 3330.112  | NM_007221 | 5153.369  | 8346.843  |
| M65134    | 875.426   | 1004.393  | NM_016510 | 2044.326  | 1531.202  | X54163    | 15711.924 | 24793.227 |
| BG539651  | 1807.652  | 2133.34   | NM_014270 | 1849.294  | 1083.363  | AK025395  | 317.637   | 807.384   |
| N52646    | 16744.564 | 17819.201 | NM_000071 | 1204.762  | 1161.021  | NM_000385 | 526.449   | 665.014   |
| AW160671  | 54578.898 | 62181.918 | NM_006843 | 2489.326  | 1645.077  | X58377    | 267.386   | 769.443   |
| BI870529  | 20398.611 | 26192.07  | NM_004321 | 2106.261  | 1567.283  | NM_002465 | 457.869   | 1085.556  |
| AA702698  | 836.2     | 1191.607  | AF311212  | 5286.533  | 4004.724  | NM_014665 | 544.253   | 535.848   |
| AI681514  | 1689.076  | 2445.087  | NM_006915 | 1200.612  | 1470.999  | NM_004722 | 1700.292  | 1421.422  |
| NM_001300 | 4733.578  | 11128.76  | NM_006035 | 1051.938  | 1434.085  | NM_014425 | 618.125   | 494.33    |

|           |           |           |           |           |           |           |           |           |
|-----------|-----------|-----------|-----------|-----------|-----------|-----------|-----------|-----------|
| BG748827  | 3770.567  | 6460.172  | NM_006086 | 7277.485  | 7269.014  | NM_012133 | 1491.675  | 1775.794  |
| AA952897  | 1841.956  | 1985.904  | NM_004520 | 7330.507  | 6674.522  | NM_017954 | 865.547   | 1226.957  |
| BG760342  | 5791.886  | 6959.759  | AK027118  | 8060.259  | 9860.526  | NM_006612 | 591.856   | 791.516   |
| AA703141  | 2462.761  | 2130.245  | AK022882  | 6385.731  | 12804.247 | NM_016451 | 1225.442  | 1486.95   |
| NM_003081 | 20758.439 | 25740.188 | NM_006105 | 2064.544  | 2866.127  | NM_007351 | 10085.499 | 11179.352 |
| NM_016495 | 10225.31  | 13815.96  | NM_005981 | 194.749   | 633.724   | AK026266  | 4347.886  | 4423.255  |
| D50402    | 28220.107 | 25611.195 | NM_000474 | 279.899   | 189.844   | NM_007124 | 1937.119  | 2075.464  |
| M73547    | 9297.586  | 10651.809 | NM_016264 | 525.366   | 431.56    | NM_003176 | 1726.71   | 2727.527  |
| NM_003687 | 1327.754  | 1270.072  | NM_006079 | 9641.407  | 5026.994  | NM_000723 | 862.527   | 1275.304  |
| NM_004134 | 2497.799  | 2571.678  | AB037837  | 1191.784  | 804.868   | AL096751  | 3153.011  | 4116.849  |
| NM_005955 | 3367.299  | 3180.759  | NM_014595 | 5414.579  | 2602.533  | NM_000364 | 520.088   | 903.595   |
| NM_004048 | 1079.301  | 838.917   | NM_014789 | 770.585   | 354.185   | AF026920  | 1768.352  | 3216.345  |
| BE548044  | 1402.967  | 1853.759  | AB046784  | 1288.765  | 712.557   | NM_004931 | 2578.202  | 3711.117  |
| NM_012428 | 6514.396  | 8306.766  | X52402    | 2801.261  | 2259.397  | NM_000607 | 10101.223 | 14857.006 |
| NM_013269 | 1178.548  | 1230.633  | AL133663  | 709.707   | 574.037   | AF090409  | 330.191   | 742.43    |
| NM_001728 | 4555.948  | 4939.702  | NM_004992 | 895.789   | 646.152   | AK001500  | 560.73    | 264.413   |
| NM_005565 | 7203.502  | 6736.512  | NM_014462 | 1708.607  | 955.24    | NM_020129 | 545.549   | 504.632   |
| NM_003824 | 6006.908  | 5902.581  | NM_014156 | 53760.895 | 34884.316 | Y16521    | 1759.194  | 1688.35   |
| NM_000686 | 1125.949  | 1464.012  | NM_003137 | 3357.694  | 2041.445  | AL050371  | 2328.882  | 1601.746  |
| NM_012452 | 2371.642  | 2328.11   | NM_006938 | 32349.238 | 14977.679 | NM_002651 | 1382.002  | 1133.332  |
| AF229166  | 809.729   | 831.991   | NM_020158 | 2163.254  | 1452.061  | NM_002413 | 1060.667  | 952.529   |
| NM_005137 | 3992.927  | 3371.296  | AF176085  | 1686.695  | 1414.94   | NM_017577 | 261.187   | 377.402   |
| NM_006764 | 1970.952  | 1779.642  | NM_006985 | 7576.507  | 5321.495  | NM_001647 | 800.141   | 728.034   |
| NM_001386 | 1954.234  | 1856.624  | AF265228  | 1106.48   | 1135.092  | NM_018158 | 1612.846  | 1777.606  |
| NM_001163 | 1700.464  | 1002.312  | NM_003757 | 22567.479 | 16472.596 | NM_016301 | 4203.773  | 3742.915  |
| NM_005878 | 2066.888  | 1138.543  | AK025561  | 3812.928  | 2951.85   | AK021975  | 591.834   | 828.951   |
| NM_014848 | 720.221   | 643.311   | NM_018602 | 27308.195 | 22628.217 | AB032952  | 8275.421  | 7479.113  |
| BF217766  | 1108.575  | 1168.802  | NM_004096 | 2875.518  | 2901.062  | NM_002522 | 4851.877  | 4867.822  |
| NM_000184 | 1972.398  | 1621.361  | NM_017629 | 4694.949  | 4355.056  | AB040879  | 645.068   | 350.479   |
| NM_016180 | 715.806   | 482.324   | AL049681  | 1026.95   | 1232.059  | AL049935  | 8600.923  | 4952.658  |
| NM_000112 | 700.245   | 540.638   | NM_006584 | 480.97    | 809.281   | AB033043  | 4169.842  | 3166.353  |
| NM_005827 | 8959.161  | 8351.594  | AF052181  | 1422.464  | 1017.72   | NM_014999 | 3355.945  | 2181.657  |
| NM_003053 | 5183.332  | 6263.296  | AL050074  | 4254.578  | 2618.399  | AK025220  | 1654.077  | 1441.083  |
| NM_003044 | 1685.616  | 2432.522  | AK026436  | 553.169   | 359.192   | NM_016308 | 7735.393  | 5221.201  |
| NM_006672 | 11750.159 | 15587.977 | NM_018061 | 1541.143  | 864.176   | D42046    | 2210.78   | 1464.165  |
| NM_000338 | 238.762   | 707.455   | AK023059  | 440.271   | 287.069   | NM_001033 | 6287.466  | 4252.024  |
| M31659    | 1156.797  | 1339.227  | NM_003551 | 2276.606  | 1420.657  | NM_004526 | 10189.638 | 8107.422  |
| NM_016226 | 15146.264 | 13728.334 | AF305210  | 518.722   | 716.304   | NM_002526 | 1896.336  | 958.591   |
| AK024311  | 1045.256  | 1251.797  | AK021900  | 2277.831  | 2345.659  | NM_020135 | 3360.056  | 2004.293  |
| AF052155  | 5520.651  | 5555.614  | NM_002764 | 8635.716  | 3764.959  | NM_018518 | 3054.746  | 1992.425  |
| NM_005085 | 1783.317  | 1905.241  | NM_019857 | 273.023   | 200.454   | AK023149  | 1461.237  | 1178.178  |
| AF060902  | 2099.931  | 1775.097  | NM_015455 | 25384.379 | 12347.436 | AK023168  | 1814.006  | 1902.261  |
| AF121858  | 5312.389  | 4230.088  | AF024702  | 11362.768 | 7440.801  | NM_006646 | 804.408   | 586.733   |
| NM_013437 | 6047.128  | 5099.01   | NM_001964 | 1207.795  | 569.547   | NM_004742 | 635.854   | 431.826   |
| NM_017681 | 1251.136  | 797.267   | NM_005962 | 3661.441  | 2069.904  | NM_014753 | 1464.764  | 1202.701  |
| X57655    | 12504.447 | 8006.888  | X74864    | 2511.365  | 1680.631  | NM_006585 | 18648.396 | 14240.76  |
| AK025966  | 2949.703  | 1622.821  | AK026804  | 2658.181  | 1896.327  | NM_014331 | 2407.984  | 2082.494  |
| NM_018725 | 959.013   | 294.608   | NM_016170 | 6523.107  | 6068.97   | NM_006795 | 5691.646  | 4694.698  |
| AK024069  | 5259.644  | 5400.663  | NM_006166 | 1832.324  | 1872.464  | AF070568  | 1539.564  | 1508.821  |
| NM_004582 | 24185.586 | 21079.529 | S72620    | 26034.945 | 21372.07  | NM_000240 | 1441.462  | 1963.809  |
| NM_015640 | 15052.524 | 13509.22  | NM_016831 | 376.851   | 498.841   | AK055733  | 6899.152  | 9295.841  |
| AF233450  | 1194.671  | 1075.802  | NM_005263 | 7875.765  | 7921.771  | AF298880  | 2613.501  | 3689.469  |
| NM_016233 | 1472.144  | 1107.413  | AB033022  | 2880.205  | 2823.831  | NM_000388 | 309.863   | 248.021   |

|           |           |           |           |          |           |           |           |           |
|-----------|-----------|-----------|-----------|----------|-----------|-----------|-----------|-----------|
| NM_000821 | 23672.383 | 17002.184 | AF147397  | 410.25   | 232.008   | BI830936  | 331.256   | 275.322   |
| NM_003145 | 32133.615 | 27024.527 | AK027158  | 371.674  | 346.57    | U79292    | 1220.206  | 894.426   |
| NM_001632 | 1512.85   | 1814.981  | AK002187  | 463.476  | 356.892   | BI830753  | 265.01    | 266.807   |
| NM_012264 | 1629.537  | 1768.233  | AF085836  | 1151.09  | 498.284   | X68314    | 499.883   | 272.212   |
| AF311312  | 2424.643  | 2675.985  | AL049449  | 1076.406 | 1240.094  | X71973    | 11058.978 | 6220.344  |
| NM_001179 | 624.028   | 698.707   | AF147347  | 376.278  | 967.144   | T49651    | 7589.924  | 4969.168  |
| NM_017765 | 20979.34  | 14655.977 | AL359654  | 1339.527 | 2682.815  | N51014    | 693.784   | 282.955   |
| NM_000425 | 822.594   | 637.917   | AK024224  | 2551.644 | 2560.751  | BE392471  | 8160.522  | 4414.067  |
| AB040967  | 1338.62   | 897.881   | NM_015362 | 9060.739 | 5415.654  | AI802950  | 593.51    | 431.215   |
| NM_003575 | 977.738   | 776.471   | AF147344  | 499.433  | 373.153   | AA682423  | 189.453   | 79.339    |
| NM_014721 | 2009.052  | 1874.274  | AF147371  | 501.218  | 319.999   | AL043686  | 2628.619  | 1825.174  |
| AK026352  | 1112.451  | 1222.478  | AK023745  | 636.579  | 370.904   | AA490172  | 292.134   | 211.437   |
| AL137705  | 2367.363  | 2156.368  | NM_018982 | 3617.04  | 2324.613  | AA775212  | 2106.98   | 1766.757  |
| U41898    | 1477.38   | 1355.516  | AF086254  | 3241.833 | 1685.805  | NM_000945 | 1120.292  | 1111.243  |
| NM_007262 | 24902.311 | 23421.537 | AF086261  | 729.719  | 712.956   | NM_002574 | 55351.203 | 42232.574 |
| NM_014783 | 7605.366  | 7228.274  | AF086367  | 1038.587 | 1100.683  | AB011174  | 1260.618  | 1228.303  |
| NM_014053 | 4001.647  | 4182.913  | AF086437  | 1541.44  | 1565.788  | AB043635  | 346.991   | 368.668   |
| NM_002571 | 2427.299  | 2127.884  | AK025088  | 3347.604 | 3481.36   | NM_000607 | 10386.875 | 5026.48   |
| NM_004935 | 5313.971  | 4918.359  | U79295    | 704.002  | 874.442   | NM_002575 | 1149.438  | 1092.692  |
| NM_001425 | 10282.292 | 9184.944  | AK002107  | 384.303  | 431.336   | NM_004244 | 1491.777  | 1114.805  |
| NM_015710 | 822.892   | 1011.497  | NM_003595 | 1878.153 | 2151.004  | NM_003371 | 2847.479  | 2123.935  |
| NM_014155 | 3912.09   | 3284.911  | NM_018835 | 3359.803 | 1247.966  | AK023114  | 2106.318  | 1175.27   |
| AK021591  | 3093.673  | 2667.749  | AK021454  | 1075.552 | 778.19    | NM_003675 | 2142.87   | 1706.328  |
| NM_014675 | 2093.548  | 1979.931  | AK022069  | 872.687  | 393.967   | NM_005631 | 792.843   | 465.783   |
| NM_006585 | 5773.394  | 6160.348  | AL137457  | 851.815  | 273.088   | NM_014415 | 1017.075  | 718.607   |
| AB007875  | 1376.363  | 1169.624  | AF085944  | 1018.04  | 1339.335  | NM_014935 | 1467.102  | 882.686   |
| NM_018261 | 2276.851  | 1831.791  | AL133038  | 791.405  | 543.7     | AF049460  | 226.676   | 211.31    |
| NM_014795 | 4998.067  | 4089.969  | AL137414  | 1056.725 | 515.734   | AK026066  | 587.999   | 458.085   |
| AL050288  | 26592.063 | 22117.176 | AL359574  | 1496.746 | 1025.134  | NM_005244 | 974.745   | 801.184   |
| NM_005040 | 4707.908  | 3656.452  | AL133569  | 4683.148 | 3078.281  | AF054589  | 123.299   | 150.785   |
| NM_016391 | 11725.393 | 7278.795  | AL137435  | 349.281  | 200.22    | NM_005270 | 337.88    | 534.57    |
| AF075033  | 7521.864  | 4691.113  | AL359604  | 320.995  | 193.912   | NM_014815 | 937.528   | 1021.316  |
| D50911    | 15861.052 | 8714.32   | AK027189  | 750.599  | 552.219   | NM_005443 | 1472.023  | 1474.321  |
| AB011104  | 1294.52   | 1328.41   | AL109719  | 744.552  | 947.856   | NM_007221 | 4089.959  | 3701.844  |
| NM_001075 | 1214.345  | 1531.49   | AF086093  | 832.357  | 975.584   | X54163    | 13091.783 | 13108.021 |
| NM_000552 | 6294.267  | 6703.872  | U92022    | 586.135  | 783.714   | NM_002975 | 637.369   | 494.105   |
| NM_003805 | 597.154   | 664.054   | NM_003650 | 12618.41 | 12490.591 | NM_014665 | 481.065   | 336.855   |
| AK000860  | 3905.434  | 2943.167  | AK022119  | 4726.602 | 4904.549  | NM_004722 | 1327.747  | 1069.062  |
| NM_014961 | 887.579   | 957.243   | NM_016644 | 790.171  | 926.119   | NM_014425 | 453.879   | 494.243   |
| NM_020145 | 1574.397  | 1263.731  | AF085842  | 459.718  | 453.172   | NM_012133 | 1344.421  | 844.235   |
| AK021529  | 2668.605  | 2299.925  | AK026750  | 1061.507 | 1106.187  | NM_017954 | 765.654   | 591.197   |
| AB037845  | 3883.604  | 3200.153  | AF072164  | 1074.333 | 748.687   | NM_006612 | 413.639   | 392.829   |
| NM_005980 | 1329.131  | 1126.525  | NM_018610 | 398.757  | 328.527   | NM_016451 | 986.51    | 619.411   |
| NM_016190 | 52021.828 | 44393.004 | AF232216  | 728.579  | 1655.648  | NM_007351 | 10235.552 | 7493.65   |
| AL137579  | 8163.49   | 7464.124  | NM_017773 | 3597.606 | 4814.909  | AK026266  | 4764.856  | 3502.123  |
| NM_012383 | 15030.64  | 12349.608 | AK021885  | 1787.504 | 860.016   | NM_007124 | 2074.933  | 1797.503  |
| AJ271684  | 1754.326  | 1190.531  | AK022296  | 410.62   | 388.234   | NM_003175 | 1299.8    | 1377.067  |
| AF255342  | 9679.127  | 7462.799  | AK021940  | 807.677  | 515.259   | NM_000723 | 626.199   | 387.446   |
| NM_003300 | 7222.018  | 5898.144  | AK022189  | 435.874  | 447.049   | AL096751  | 1660.8    | 1577.887  |
| AK026682  | 1833.81   | 1595.957  | AK022338  | 579.447  | 537.426   | NM_000364 | 279.644   | 352.34    |
| NM_017720 | 53677.242 | 61916.367 | AK026856  | 565.767  | 542.628   | AF026920  | 1964.074  | 1524.932  |
| NM_004655 | 2635.499  | 1948.727  | AL162033  | 3103.741 | 2662.626  | NM_004931 | 1902.567  | 1841.427  |
| NM_003942 | 2292.29   | 2029.6    | AL162010  | 292.668  | 338.441   | NM_006795 | 9329.938  | 6625.723  |

|           |           |           |           |           |           |           |           |           |
|-----------|-----------|-----------|-----------|-----------|-----------|-----------|-----------|-----------|
| NM_006471 | 50593.387 | 31426.154 | AK026893  | 244.815   | 707.532   | AF070568  | 2053.697  | 1598.797  |
| NM_004165 | 2729.641  | 1099.167  | AK026761  | 351.838   | 557.577   | NM_00024C | 2086.295  | 1541.511  |
| NM_000365 | 2320.606  | 1469.648  | NM_005001 | 25965.637 | 24563.502 | AK055733  | 7325.591  | 4904.054  |
| NM_016585 | 3324.621  | 4232.223  | AK024175  | 3939.633  | 5735.03   | AF298880  | 2413.115  | 1739.879  |
| BE535363  | 685.525   | 1131.658  | NM_00051C | 1202.988  | 1212.153  | AK001500  | 728.481   | 386.158   |
| NM_00414C | 701.066   | 559.797   | NM_017787 | 2412.89   | 4010.258  | NM_006774 | 274.974   | 260.857   |
| NM_002865 | 11884.891 | 11627.28  | NM_020315 | 7712.404  | 6166.581  | NM_020125 | 544.057   | 405.081   |
| NM_00386C | 2445.372  | 1979.638  | AK001910  | 2091.315  | 2415.612  | Y16521    | 1532.699  | 816.502   |
| NM_005414 | 946.818   | 541.055   | AK023892  | 436.779   | 918.921   | AL050371  | 1777.271  | 1268.239  |
| NM_004465 | 9831.744  | 7483.067  | AF124368  | 1777.678  | 4136.387  | NM_002651 | 1515.361  | 1102.144  |
| NM_016031 | 8049.086  | 6669.391  | AF265210  | 1702.065  | 2533.871  | NM_002413 | 1133.573  | 730.574   |
| NM_004804 | 1400.462  | 1600.498  | AK024241  | 641.949   | 1148.747  | NM_017577 | 284.1     | 363.804   |
| M92439    | 5570.852  | 5464.427  | AK025061  | 1180.999  | 2245.444  | NM_001647 | 804.981   | 561.111   |
| AL117665  | 2905.805  | 2729.854  | AF088067  | 5404.963  | 7242.502  | NM_018155 | 1293.564  | 1548.139  |
| AF263541  | 2868.562  | 2940.319  | AK022213  | 535.909   | 845.973   | NM_016301 | 3219.448  | 3012.948  |
| NM_001262 | 8058.833  | 7792.991  | AF056441  | 1358.92   | 1707.698  | AK021975  | 294.055   | 312.283   |
| BE873030  | 2034.86   | 1322.818  | AK024142  | 903.113   | 897.933   | AB032952  | 7588.358  | 6196.286  |
| NM_00244C | 737.227   | 613.855   | Y10509    | 776.221   | 2121.843  | NM_002522 | 5759.874  | 4888.365  |
| NM_003625 | 958.728   | 992.678   | AK024389  | 5275.909  | 10595.896 | NM_000945 | 1217.696  | 963.512   |
| BC006990  | 11378.078 | 8786.586  | AK026793  | 2060.309  | 3349.63   | NM_002574 | 55358.023 | 37396.191 |
| NM_002277 | 2901.306  | 2039.991  | NM_001672 | 645.27    | 1270.471  | AB011174  | 1327.494  | 916.68    |
| NM_019114 | 2339.693  | 1872.197  | AJ276253  | 14134.52  | 25542.094 | AB043635  | 298.694   | 240.264   |
| M33552    | 9707.357  | 5844.989  | AF147314  | 663.322   | 1549.577  | AB040879  | 663.942   | 501.24    |
| AJ252060  | 2180.333  | 1419.54   | NM_01898C | 4206.113  | 8709.498  | AL049935  | 8557.269  | 5032.681  |
| NM_006403 | 5521.199  | 4041.838  | AF086201  | 1340.854  | 556.761   | AB033043  | 3920.303  | 2752.968  |
| NM_018977 | 768.445   | 478.561   | AK024712  | 289.377   | 270.452   | NM_014995 | 2785.355  | 1584.776  |
| AJ001402  | 1156.744  | 1579.668  | U48696    | 742.899   | 441.66    | AK025220  | 1706.877  | 964.619   |
| NM_00454C | 804.736   | 3225.265  | AF230316  | 4974.616  | 2197.151  | NM_016305 | 6639.464  | 4880.859  |
| NM_000235 | 4700.431  | 5381.445  | K00629    | 250.203   | 395.239   | D42046    | 1867.637  | 1190.613  |
| NM_015875 | 702.257   | 770.651   | AK024515  | 7132.106  | 8643.36   | NM_001033 | 6358.112  | 3876.355  |
| AF068236  | 50611.703 | 54077.328 | AF085862  | 4705.56   | 6199.428  | NM_004525 | 10489.136 | 8140.814  |
| L25628    | 718.842   | 806.063   | NM_017995 | 1815.472  | 3045.36   | NM_002525 | 1731.733  | 1245.855  |
| M37033    | 15273.589 | 14102.937 | AL049271  | 35494.406 | 45539.625 | NM_020135 | 3656.651  | 3278.106  |
| NM_007171 | 6044.672  | 5228.838  | AK023079  | 24956.006 | 39853.711 | NM_018515 | 2695.888  | 2885.372  |
| NM_004275 | 1883.343  | 1916.38   | NM_019605 | 1608.603  | 2659.197  | AK023149  | 1541.713  | 1622.464  |
| NM_005632 | 1088.149  | 1051.127  | AK026198  | 3455.974  | 4189.416  | AK023168  | 1286.417  | 1268.739  |
| AK021499  | 853.832   | 667.386   | AF183570  | 975.676   | 1297.713  | NM_006645 | 504.012   | 758.301   |
| AK000336  | 2857.784  | 2719.753  | NM_005497 | 23941.508 | 21981.309 | NM_004742 | 633.567   | 672.647   |
| NM_002795 | 52806.652 | 36807.852 | AK024048  | 4581.971  | 3131.065  | NM_014753 | 1590.753  | 1287.624  |
| NM_006292 | 5977.254  | 4537.292  | AB033093  | 4412.501  | 8470.4    | NM_006585 | 22357.576 | 15706.535 |
| AB007948  | 2038.645  | 1796.901  | NM_005912 | 713.755   | 1686.838  | NM_014331 | 2390.115  | 2269.051  |
| AB033066  | 1819.027  | 1264.326  | NM_005905 | 36067.426 | 44048.082 | NM_00527C | 382.698   | 488.488   |
| AF126028  | 2995.505  | 2604.986  | AL355717  | 173.372   | 538.948   | NM_014815 | 1124.495  | 760.512   |
| NM_007015 | 18434.949 | 16116.438 | AK055991  | 940.565   | 1779.62   | NM_005443 | 1572.463  | 1280.679  |
| NM_007075 | 691.373   | 473.931   | AF113697  | 717.452   | 1218.828  | NM_007221 | 4249.247  | 3065.292  |
| NM_016042 | 1893.219  | 1958.974  | AK022326  | 2337.053  | 2788.759  | X54163    | 9806.347  | 7665.539  |
| NM_01764C | 1313.515  | 992.442   | AF085991  | 655.397   | 465.564   | AK025395  | 296.917   | 181.054   |
| NM_017721 | 2899.462  | 1908.102  | NM_005683 | 1175.081  | 537.476   | NM_000385 | 319.027   | 292.549   |
| NM_019085 | 6870.777  | 4959.861  | NM_020427 | 10939.992 | 6667.535  | NM_002465 | 260.674   | 248.084   |
| AB002373  | 2212.14   | 1504.903  | AF085920  | 1022.592  | 1022.718  | BI830936  | 342.742   | 443.515   |
| NM_01635C | 20638.432 | 7826.231  | AK023173  | 14261.903 | 15674.876 | U79292    | 827.756   | 550.195   |
| AK024167  | 7576.649  | 5200.281  | AK025225  | 540.024   | 784.816   | X68314    | 562.98    | 401.612   |
| NM_005025 | 1704.292  | 2029.401  | U79275    | 6840.154  | 11403.576 | X71973    | 11461.152 | 9231.23   |



|           |           |           |           |           |           |           |           |           |
|-----------|-----------|-----------|-----------|-----------|-----------|-----------|-----------|-----------|
| AF213356  | 561.624   | 782.951   | AJ227908  | 599.836   | 1512.436  | T49651    | 8119.069  | 8193.932  |
| BC035716  | 1426.353  | 1328.535  | AF007193  | 728.584   | 1369.306  | N51014    | 553.711   | 450.847   |
| NM_018014 | 4100.865  | 5189.307  | AK022367  | 1106.865  | 1433.778  | BE392471  | 8034.766  | 7192.866  |
| NM_002359 | 13677.507 | 12382.381 | BC028589  | 1502.109  | 2139.363  | AI802950  | 664.503   | 550.554   |
| AF230809  | 1703.133  | 1606.802  | CY3Cy5    | 4697.811  | 133.022   | AL043686  | 3080.334  | 2172.367  |
| NM_017894 | 33828.145 | 26064.305 | K02765    | 1849.368  | 1399.65   | AA490172  | 320.299   | 202.073   |
| NM_006509 | 1051.027  | 866.18    | M65134    | 557.214   | 775.843   | AA775212  | 2417.695  | 2024.523  |
| AK025447  | 1481.27   | 1651.689  | BG539651  | 2027.338  | 1830.828  | NM_000723 | 671.92    | 798.683   |
| NM_002624 | 43887.215 | 34906.688 | N52646    | 20004.652 | 15243.254 | AL096751  | 2952.515  | 2007.827  |
| AF006199  | 1482.627  | 1278.548  | AW160671  | 57381.18  | 49797.277 | NM_000364 | 418.591   | 285.75    |
| NM_004554 | 5256.847  | 4397.998  | BI870529  | 21575.045 | 14913.896 | AF026920  | 1785.22   | 1412.868  |
| NM_018119 | 2604.339  | 2229.119  | AA702698  | 897.433   | 1057.383  | NM_004931 | 1731.182  | 1374.991  |
| AL162035  | 688.334   | 612.791   | AI681514  | 1434.798  | 1048.558  | NM_000607 | 5466.396  | 4550.343  |
| NM_006692 | 1458.207  | 1115.36   | NM_001300 | 4801.021  | 4519.099  | NM_002575 | 1412.408  | 1515.442  |
| NM_003084 | 3441.465  | 3194.192  | BG748827  | 3871.093  | 3691.185  | NM_004244 | 1622.011  | 1273.077  |
| NM_002582 | 6142.374  | 5029.987  | AA952897  | 1778.485  | 1526.714  | NM_003371 | 2186.184  | 1777.284  |
| NM_001009 | 53615.578 | 56859.309 | BG760342  | 5499.986  | 5345.25   | AK023114  | 1877.126  | 1157.083  |
| NM_001026 | 60825.941 | 62233.832 | AA703141  | 1601.881  | 2302.731  | NM_003678 | 1755.06   | 1757.929  |
| NM_001011 | 54661     | 56377.418 | AI122630  | 10643.209 | 10871.289 | NM_005631 | 766.858   | 956.213   |
| NM_017748 | 7235.189  | 6829.988  | NM_002103 | 27797.6   | 31752.615 | NM_014419 | 1181.011  | 982.919   |
| AK025374  | 1386.156  | 1890.533  | NM_003379 | 7961.428  | 8908.412  | NM_014938 | 1702.688  | 1519.525  |
| NM_014901 | 9952.472  | 12213.551 | SR5       | 6797.478  | 8437.294  | AF049460  | 213.089   | 470.357   |
| AK000005  | 3047.126  | 3576.166  | SR7       | 5400.452  | 43342.848 | AK026066  | 698.205   | 464.414   |
| AF086790  | 1944.404  | 2029.291  | SR9       | 17692.699 | 3472.887  | NM_005244 | 1255.821  | 1175.241  |
| U28480    | 866.337   | 925.113   | CY3Cy5    | 6111.041  | 181.158   | NM_018158 | 1242.979  | 1863.032  |
| NM_000108 | 13188.54  | 12224.113 | NM_012428 | 6535.105  | 5060.901  | NM_016301 | 3862.305  | 7683.684  |
| NM_018128 | 2806.734  | 2484.719  | NM_013269 | 731.599   | 496.673   | AK021975  | 384.292   | 355.02    |
| NM_016931 | 6774.609  | 6313.029  | NM_001728 | 4118.141  | 3206.511  | AB032952  | 11139.243 | 7050.138  |
| NM_004373 | 50315.313 | 41885.289 | NM_005565 | 8283.365  | 7216.459  | NM_002522 | 9208.836  | 5646.265  |
| NM_005566 | 54932.629 | 59502.055 | NM_003824 | 7276.548  | 6874.229  | NM_002978 | 553.16    | 358.362   |
| NM_000162 | 3668.882  | 3386.91   | NM_000686 | 1234.945  | 1526.236  | NM_014668 | 410.301   | 234.144   |
| AK027067  | 955.789   | 680.365   | NM_012452 | 3626.51   | 2381.717  | NM_004722 | 1334.812  | 747.706   |
| NM_016287 | 11074.697 | 9338.394  | AF229166  | 953.275   | 901.369   | NM_014425 | 416.929   | 245.131   |
| NM_003864 | 5902.375  | 5065.306  | NM_005137 | 3410.544  | 3448.813  | NM_012133 | 1487.188  | 1331.23   |
| NM_006824 | 22259.418 | 17862.805 | NM_006764 | 1985.865  | 1707.017  | NM_017954 | 800.004   | 677.096   |
| NM_002107 | 1393.856  | 1485.385  | NM_001386 | 1528.217  | 2358.902  | NM_006612 | 536.51    | 728.424   |
| NM_002694 | 18894.359 | 16097.336 | NM_001163 | 1629.095  | 1516.736  | NM_016451 | 1074.542  | 860.026   |
| NM_004454 | 1854.614  | 1666.792  | NM_005878 | 2492.378  | 2729.15   | NM_007351 | 10743.898 | 9507.695  |
| AF217227  | 1092.326  | 2507.559  | AF308602  | 3488.251  | 4156.957  | AK026266  | 5241.297  | 4445.16   |
| AK024141  | 3359.062  | 5945.807  | AB011089  | 1825.831  | 2030.703  | NM_007124 | 2171.246  | 2030.181  |
| NM_002813 | 17764.148 | 20005.822 | AF007192  | 554.168   | 783.273   | NM_003176 | 1695.073  | 1701.83   |
| AK022745  | 3594.446  | 4140.178  | NM_001276 | 6637.689  | 7432.59   | AK023168  | 1380.694  | 1355.576  |
| AL049450  | 6500.726  | 7411.88   | NM_016157 | 1787.268  | 1911.145  | NM_006646 | 728.044   | 1189.938  |
| AK023481  | 664.696   | 1040.023  | NM_014915 | 10643.676 | 21970.42  | NM_004742 | 1031.772  | 650.862   |
| NM_005086 | 58354.68  | 53810.492 | NM_012286 | 1978.674  | 1895.625  | NM_014753 | 1447.697  | 1012.116  |
| NM_007238 | 3685.903  | 4527.327  | NM_002195 | 6121.019  | 6963.468  | NM_006585 | 21805.902 | 12861.313 |
| AL049340  | 1081.292  | 859.786   | D84294    | 1801.76   | 2545.005  | NM_014331 | 2327.57   | 2088.559  |
| NM_017606 | 2653.785  | 4086.068  | M31659    | 1037.631  | 613.36    | NM_006795 | 7994.456  | 6519.068  |
| AK024644  | 9570.263  | 8968.926  | NM_003056 | 5873.433  | 4397.956  | AF070568  | 1558.257  | 1905.057  |
| AB019573  | 605.133   | 627.103   | NM_016226 | 14705.601 | 10966.397 | NM_000277 | 243.789   | 284.373   |
| U68494    | 1061.883  | 2479.615  | AK024311  | 971.45    | 740.332   | NM_000240 | 1609.66   | 964.143   |
| AF064254  | 1022.306  | 1085.753  | AF052155  | 7022.062  | 5582.195  | AK055733  | 5549.412  | 4619.359  |
| AL137360  | 3859.422  | 4911.816  | NM_005085 | 2733.141  | 3246.566  | AF298880  | 2771.056  | 2957.876  |

|           |           |           |           |           |           |           |           |           |
|-----------|-----------|-----------|-----------|-----------|-----------|-----------|-----------|-----------|
| AF143331  | 1244.915  | 1106.032  | AF060902  | 3450.815  | 5310.589  | AK001500  | 437.215   | 321.492   |
| AK000819  | 916.223   | 730.093   | AF121858  | 9778.284  | 11316.809 | NM_020125 | 760.249   | 765.189   |
| AF201941  | 3014.205  | 2996.68   | NM_013437 | 6438.47   | 6575.974  | Y16521    | 1686.03   | 1694.047  |
| AL133019  | 5885.821  | 13124.158 | NM_017681 | 1532.547  | 1344.926  | AL050371  | 2009.677  | 1943.246  |
| AK024883  | 6277.682  | 9328.205  | X57655    | 13178.092 | 12497.845 | NM_002651 | 1761.739  | 1723.49   |
| AF217989  | 3132.529  | 3980.8    | AK025966  | 3857.467  | 3734.487  | NM_002413 | 1231.497  | 1003.464  |
| NM_017654 | 2246.145  | 2503.033  | NM_014440 | 347.704   | 374.902   | NM_017577 | 260.749   | 345.491   |
| L77561    | 491.035   | 373.168   | NM_018725 | 742.279   | 631.227   | NM_001647 | 773.616   | 888.972   |
| AL109696  | 777.804   | 1120.733  | NM_003081 | 23391.332 | 23695.424 | NM_006228 | 268.617   | 138.559   |
| AK022190  | 1016.62   | 966.546   | NM_016495 | 9128.282  | 8308.054  | NM_003768 | 2877.566  | 1878.614  |
| AJ011593  | 1569.276  | 1964.247  | D50402    | 23502.266 | 25085.574 | NM_018393 | 845.677   | 634.19    |
| X89743    | 647.671   | 581.627   | M73547    | 10599.786 | 11521.408 | BF032535  | 1538.765  | 1002.482  |
| U17621    | 560.416   | 869.815   | NM_003687 | 2492.55   | 2573.727  | NM_018332 | 1940.553  | 1343.414  |
| AL049239  | 2763.098  | 2831.999  | NM_004134 | 3697.793  | 3578.695  | NM_005096 | 3747.941  | 2773.489  |
| Z83942    | 989.413   | 862.115   | NM_005955 | 3846.653  | 4210.951  | NM_006760 | 705.503   | 449.477   |
| NM_013288 | 1471.202  | 1553.239  | NM_004048 | 826.454   | 827.056   | NM_012288 | 2977.443  | 2628.306  |
| M60721    | 2416.714  | 1861.27   | NM_017765 | 20263.367 | 17697.713 | AB037775  | 1301.636  | 1015.667  |
| L39061    | 3639.688  | 2742.964  | NM_000428 | 710.975   | 478.48    | L27560    | 434.293   | 272.47    |
| AK022467  | 1080.29   | 172.319   | AB040967  | 1214.633  | 1328.651  | AB011174  | 1223.704  | 1133.686  |
| AL157459  | 2935.24   | 5898.515  | NM_003578 | 695.392   | 1204.299  | AB043635  | 254.661   | 248.599   |
| AB020654  | 220.912   | 827.613   | NM_014721 | 1719.37   | 1842.627  | AB040879  | 572.605   | 382.072   |
| AL353954  | 1075.099  | 1179.806  | AK026352  | 1585.908  | 2531.265  | AL049935  | 8138.421  | 4339.559  |
| NM_017630 | 885.175   | 917.926   | AL137705  | 2678.794  | 2285.161  | AB033043  | 4125.424  | 3433.895  |
| AK000778  | 1738.784  | 2216.667  | U41898    | 701.549   | 654.479   | NM_014998 | 3484.24   | 3307.245  |
| AK000932  | 908.235   | 1162.137  | NM_020346 | 482.022   | 498.744   | AK025220  | 1856.878  | 2183.959  |
| AL133573  | 7630.617  | 7940.633  | NM_014848 | 778.678   | 877.898   | NM_016308 | 5440.657  | 7436.252  |
| AK000115  | 1407.046  | 1455.139  | BF217766  | 1132.038  | 1249.188  | D42046    | 2267.849  | 2041.436  |
| NM_017958 | 1543.343  | 1509.663  | NM_000184 | 1789.015  | 1957.711  | NM_001033 | 6772.009  | 7185.438  |
| AK000958  | 929.649   | 816.306   | NM_016180 | 880.513   | 939.968   | NM_004526 | 11332.618 | 11606.969 |
| AK024523  | 1120.079  | 705.851   | NM_000112 | 864.471   | 818.959   | NM_002526 | 2120.333  | 1718.032  |
| AK024600  | 1122.771  | 1341.478  | NM_005827 | 11942.523 | 11556.205 | NM_020135 | 3468.987  | 3208.53   |
| AK024907  | 1570.757  | 1804.756  | NM_003053 | 3704.481  | 3401.408  | NM_018518 | 2787.67   | 2948.385  |
| AK024543  | 3189.013  | 5163.092  | NM_003044 | 1618.407  | 1375.502  | AK023149  | 1221.61   | 1421.708  |
| AK024624  | 17211.678 | 26159.377 | NM_006672 | 9675.026  | 9482.788  | NM_006438 | 514.47    | 361.918   |
| AK024918  | 556.085   | 1757.212  | NM_000338 | 426.847   | 438.836   | AK024697  | 1869.744  | 1179.881  |
| NM_014152 | 479.242   | 1020.301  | AB007875  | 1467.203  | 1088.369  | NM_006460 | 1631.673  | 1085.61   |
| AF321617  | 5183.704  | 5215.15   | NM_014796 | 5846.029  | 5743.39   | NM_003748 | 954.615   | 849.261   |
| AF223389  | 643.226   | 759.905   | AL050288  | 31794.191 | 43449.719 | NM_003557 | 4544.49   | 2801.829  |
| NM_006950 | 571.562   | 727.273   | NM_005040 | 5929.344  | 9363.532  | NM_001257 | 6766.824  | 4006.251  |
| NM_000682 | 736.434   | 1025.877  | NM_016391 | 12124.767 | 15321.06  | D85245    | 2587.477  | 1587.014  |
| AF086208  | 2512.479  | 2945.997  | AF075033  | 5011.346  | 4630.11   | NM_000943 | 346.534   | 256.542   |
| AK023335  | 2364.934  | 2536.04   | D50911    | 13407.134 | 11615.836 | NM_004658 | 1615.892  | 1028.502  |
| AK023187  | 705.347   | 984.986   | AB011104  | 1225.831  | 1245.526  | NM_001250 | 1328.811  | 932.999   |
| NM_019033 | 690.552   | 1095.531  | AK024069  | 6048.819  | 5341.604  | AF298812  | 378.569   | 219.742   |
| AL133101  | 1516.179  | 1641.459  | NM_004582 | 23290.623 | 22615     | NM_004968 | 1033.845  | 1150.723  |
| AK024602  | 41315.336 | 48328.43  | NM_015640 | 15882.155 | 15259.351 | AK022581  | 3862.334  | 11932.163 |
| NM_018507 | 530.458   | 876.355   | AF233450  | 1295.28   | 1188.099  | NM_018054 | 1031.514  | 2282.804  |
| NM_000485 | 6955.723  | 10164.911 | NM_016233 | 1440.495  | 1650.926  | NM_006186 | 530.528   | 630.609   |
| NM_018542 | 1028.825  | 1153.681  | NM_000821 | 22523.545 | 24222.83  | NM_000958 | 4650.926  | 4666.854  |
| AK025503  | 2790.389  | 2847.235  | NM_020121 | 565.362   | 903.081   | NM_001401 | 616.413   | 761.167   |
| AF130073  | 2151.186  | 2673.704  | NM_003145 | 29789.482 | 28502.467 | NM_013271 | 3578.844  | 2650.551  |
| AK024225  | 14711.806 | 15439.25  | NM_001632 | 1562.937  | 1241.518  | NM_004157 | 1009.673  | 857.391   |
| AF086334  | 1713.488  | 1678.306  | NM_012264 | 1613.73   | 1438.086  | NM_000684 | 761.662   | 677.633   |

|           |           |           |           |           |           |           |           |           |
|-----------|-----------|-----------|-----------|-----------|-----------|-----------|-----------|-----------|
| AF075035  | 39698.504 | 43789.16  | AF311312  | 2085.206  | 1960.67   | NM_015913 | 5905.917  | 4634.317  |
| NM_01790E | 8787.396  | 15259.869 | NM_014915 | 10654.315 | 18196.455 | NM_005157 | 3255.013  | 1982.13   |
| AL110286  | 6217.771  | 12608.327 | NM_01228E | 1835.204  | 1407.789  | NM_007354 | 335.076   | 213.531   |
| AF086374  | 429.339   | 1047.49   | NM_002195 | 7594.563  | 6108.827  | U67037    | 669.199   | 497.466   |
| AL162066  | 26255.023 | 25782.119 | D84294    | 1947.618  | 1972.44   | NM_00496C | 8262.706  | 4691.077  |
| NM_01609E | 27554.004 | 22049.561 | K02765    | 2464.627  | 1882.127  | AF272370  | 5395.75   | 3872.353  |
| U79290    | 2315.212  | 2490.011  | M65134    | 683.891   | 749.95    | AF130050  | 2233.583  | 1987.879  |
| X98114    | 622.868   | 680.752   | BG539651  | 2279.306  | 2314.786  | AF119898  | 235.646   | 169.951   |
| NM_01404C | 4878.121  | 7792.815  | N52646    | 18547.35  | 19181.35  | AK023045  | 259.32    | 136.679   |
| AK000799  | 8560.563  | 10403.931 | AW160671  | 57262.063 | 52528.922 | NM_012197 | 4768.372  | 2830.377  |
| NM_015582 | 8975.625  | 10447.022 | BI870529  | 21335.438 | 18626.537 | AK024016  | 3074.48   | 2076.311  |
| AK027091  | 1307.88   | 2082.469  | AA702698  | 1186.649  | 1053.71   | NM_003581 | 2333.813  | 1635.722  |
| NM_00152E | 1837.316  | 1812.71   | AI681514  | 1314.948  | 1157.364  | NM_012407 | 848.806   | 507.366   |
| U31738    | 1268.199  | 1200.316  | NM_00130C | 4954.266  | 3769.448  | AF302505  | 903.007   | 640.316   |
| AF179890  | 4190.444  | 5641.426  | BG748827  | 4348.432  | 3697.122  | NM_00718E | 1476.693  | 1236.354  |
| AK023536  | 7653.534  | 9428.68   | AA952897  | 1917.527  | 1652.026  | NM_007044 | 2239.843  | 2681.768  |
| AK026561  | 2368.83   | 2886.708  | BG760342  | 5636.206  | 6439.887  | AF294326  | 2241.277  | 2866.69   |
| AK021568  | 10235.57  | 11186.165 | AA703141  | 2120.131  | 2127.443  | NM_01467E | 1396.984  | 2016.114  |
| Z36838    | 711.685   | 764.912   | AI122630  | 12322.306 | 10578.814 | NM_012317 | 53504.117 | 57036.844 |
| AK023881  | 3113.919  | 8496.541  | NM_002103 | 25528.684 | 26286.826 | NM_017853 | 3082.095  | 2621.773  |
| NM_01629E | 1910.554  | 3431.436  | NM_003379 | 8352.127  | 7634.395  | NM_016097 | 8101.371  | 8317.973  |
| AK002146  | 843.782   | 1212.262  | NM_006589 | 6005.417  | 5670.608  | AB035301  | 510.04    | 402.152   |
| NM_00315E | 986.466   | 865.384   | NM_004134 | 3240.891  | 2807.524  | AB046800  | 1913.242  | 1675.654  |
| NM_015492 | 4416.556  | 4161.362  | NM_005955 | 4579.311  | 5151.641  | NM_002162 | 7902.413  | 6504.939  |
| NM_006933 | 383.31    | 624.036   | NM_00404E | 668.832   | 644.549   | NM_01545E | 920.533   | 444.295   |
| AF132204  | 2579.476  | 2263.576  | NM_01242E | 5677.136  | 5008.375  | D13540    | 3495.794  | 2886.677  |
| AK022874  | 4710.125  | 4004.84   | NM_013269 | 473.625   | 337.723   | NM_01657C | 5564.035  | 3768.181  |
| CY3Cy5    | 1588.126  | 159.259   | NM_00172E | 4150.938  | 3407.51   | AF209198  | 1648.066  | 1384.472  |
| BI912037  | 781.973   | 480.554   | NM_005565 | 7216.37   | 6082.018  | M69012    | 26619.063 | 16757.809 |
| AA454646  | 555.543   | 450.87    | NM_003824 | 6936.316  | 7191.388  | NM_00693E | 13429.552 | 9499.317  |
| U18087    | 31749.83  | 65933.406 | NM_00068E | 1363.291  | 1207.672  | NM_001327 | 9951.19   | 7203.435  |
| U66349    | 600.803   | 1858.693  | NM_012452 | 3052.377  | 2458.94   | NM_000063 | 359.328   | 296.438   |
| AA057156  | 1961.183  | 5663.168  | AF229166  | 834.29    | 792.366   | NM_01838E | 1020.235  | 884.201   |
| U19487    | 670.148   | 1619.848  | NM_005137 | 3414.95   | 3762.953  | AB033026  | 367.38    | 429.008   |
| AF166327  | 12648.967 | 12871.57  | NM_006764 | 1899.58   | 1535.113  | AF104914  | 15212.869 | 13340.786 |
| AF260739  | 839.113   | 635.468   | NM_00138E | 1793.905  | 2936.171  | NM_01471E | 6853.665  | 6379.59   |
| AF531423  | 2234.296  | 1840.738  | NM_001163 | 1902.629  | 1543.668  | AB002354  | 543.663   | 429.744   |
| X76555    | 655.688   | 557.88    | NM_00587E | 2700.594  | 2597.74   | AK023845  | 887.271   | 1009.038  |
| NM_005432 | 1513.763  | 1370.292  | AF308602  | 3266.534  | 3290.192  | NM_00263E | 2849.207  | 2302.617  |
| L10386    | 2500.109  | 2328.09   | AB011089  | 2121.24   | 1918.93   | NM_016487 | 966.178   | 935.846   |
| AF061812  | 3135.279  | 2962.061  | AF007192  | 638.765   | 614.768   | NM_00580E | 9449.074  | 9054.687  |
| AL136756  | 1015.129  | 829.314   | NM_00127E | 6074.816  | 5176.486  | NM_006401 | 24507.729 | 24276.709 |
| NM_01246E | 5612.436  | 5678.585  | NM_016157 | 1494.901  | 1198.765  | AF269249  | 473.741   | 502.736   |
| NM_13426C | 6560.147  | 6677.436  | NM_000112 | 869.646   | 608.194   | X51417    | 233.345   | 159.52    |
| SR2       | 39614.539 | 32395.057 | NM_005827 | 10967.114 | 13227.026 | D31763    | 1454.788  | 665.436   |
| SR4       | 11283.053 | 10763.411 | NM_003053 | 5505.264  | 5734.242  | NM_01816E | 3938.572  | 2404.922  |
| SR6       | 1867.576  | 1729.267  | NM_003044 | 2035.718  | 1861.52   | AK021452  | 1607.372  | 1173.21   |
| SR8       | 5741.56   | 14041.504 | NM_006672 | 11262.433 | 9142.663  | NM_00450E | 1743.848  | 1670.878  |
| SR10      | 22212.568 | 6224.976  | M31659    | 883.576   | 709.763   | S74529    | 26462.494 | 14312.869 |
| CY3Cy5    | 1656.743  | 189.705   | NM_01622E | 14498.305 | 11337.709 | NM_005933 | 270.582   | 256.861   |
| AL080157  | 1790.062  | 1149.587  | AK024311  | 1028.93   | 1018.077  | M73837    | 1818.465  | 1377.587  |
| NM_00510C | 359.711   | 41.163    | AF052155  | 7343.951  | 5111.399  | U69127    | 12957.534 | 12305.039 |
| NM_00530E | 1595.151  | 940.127   | NM_00508E | 2446.272  | 1842.801  | NM_00583E | 7736.128  | 6229.548  |

|           |           |           |           |           |           |           |           |           |
|-----------|-----------|-----------|-----------|-----------|-----------|-----------|-----------|-----------|
| NM_000911 | 452.915   | 240.667   | AF060902  | 2284.473  | 1806.147  | AK023379  | 2980.367  | 3023.524  |
| NM_007227 | 629.162   | 1428.158  | AF121858  | 8572.301  | 7106.883  | NM_006076 | 873.438   | 1166.661  |
| NM_007023 | 592.239   | 1507.147  | NM_013437 | 6667.526  | 6508.757  | AK021904  | 3922.383  | 3514.054  |
| NM_014461 | 553.315   | 709.666   | NM_017681 | 1770.437  | 1103.588  | -         | 626.824   | 697.207   |
| NM_003865 | 651.336   | 455.476   | X57655    | 12654.032 | 12750.266 | NM_018292 | 447.104   | 334.348   |
| AB015330  | 3240.594  | 1996.339  | AK025966  | 3803.598  | 3426.616  | AL049705  | 5844.065  | 7142.025  |
| NM_001455 | 2608.163  | 2439.874  | NM_014440 | 454.146   | 327.325   | AK022294  | 1394.782  | 1359.816  |
| L09071    | 470.398   | 472.758   | NM_018725 | 793.006   | 766.058   | AF086507  | 602.609   | 398.674   |
| NM_003322 | 1162.643  | 1076.979  | NM_003081 | 23850.188 | 23589.334 | U79289    | 1000.364  | 455.625   |
| BC036375  | 10538.442 | 10139.836 | NM_016495 | 9439.897  | 9275.115  | NM_014028 | 3060.611  | 2121.194  |
| NM_006363 | 2775.035  | 1810.609  | D50402    | 18081.775 | 17026.211 | NM_000402 | 1052.807  | 1029.225  |
| NM_020415 | 1478.827  | 1374.67   | M73547    | 11053.096 | 9344.187  | NM_004273 | 237       | 180.891   |
| AL049667  | 3331.227  | 2184.481  | NM_003687 | 1564.013  | 1956.839  | NM_000690 | 976.815   | 788.528   |
| NM_000334 | 1824.896  | 2313.066  | NM_020121 | 314.204   | 694.587   | NM_000155 | 5226.625  | 3250.994  |
| NM_020400 | 918.407   | 1331.363  | NM_003145 | 28883.324 | 33009.563 | AK024489  | 636.702   | 401.682   |
| NM_001504 | 737.261   | 823.058   | NM_001632 | 1500.249  | 1184.747  | NM_000181 | 1621.358  | 986.368   |
| D50926    | 1677.482  | 1752.677  | NM_012264 | 1692.421  | 1315.707  | NM_014121 | 508.55    | 461.95    |
| BF205683  | 1721.843  | 1314.513  | AF311312  | 1947.805  | 1557.844  | NM_006730 | 418.961   | 379.482   |
| NM_001565 | 404.979   | 278.63    | NM_001179 | 504.541   | 338.905   | NM_005644 | 3174.856  | 2381.968  |
| NM_001548 | 460.691   | 318.946   | NM_017765 | 13197.413 | 10343.214 | NM_018442 | 1193.482  | 637.064   |
| NM_000758 | 2883.131  | 2575.682  | NM_000428 | 790.01    | 660.851   | AF182416  | 3249.347  | 2852.885  |
| M17017    | 408.454   | 539.783   | AB040967  | 1166.906  | 1139.224  | NM_005995 | 10839.81  | 10127.158 |
| NM_002990 | 4461.018  | 4220.08   | NM_003578 | 791.221   | 704.86    | NM_006015 | 1072.156  | 929.979   |
| NM_002432 | 1226.778  | 902.926   | NM_014721 | 1294.788  | 801.879   | NM_004634 | 1799.14   | 2496.298  |
| AB033037  | 959.831   | 1068.905  | AK026352  | 1600.003  | 2510.18   | NM_002017 | 4920.148  | 6825.157  |
| L40400    | 3485.891  | 3574.727  | AL137705  | 2582.539  | 2486.965  | NM_017523 | 6072.232  | 7104.055  |
| AK025688  | 1650.71   | 1387.191  | U41898    | 729.26    | 706.845   | NM_002382 | 17234.846 | 12669.743 |
| NM_001195 | 390.316   | 334.185   | NM_014848 | 630.925   | 762.817   | NM_002158 | 419.084   | 490.481   |
| NM_014448 | 1408.964  | 1858.645  | BF217766  | 936.522   | 852.995   | U13223    | 7410.388  | 6942.653  |
| NM_004315 | 4477.335  | 10933.207 | NM_000184 | 1700.401  | 1760.109  | NM_016270 | 1296.813  | 1521.806  |
| NM_020166 | 2613.348  | 4480.17   | NM_016180 | 891.585   | 1135.383  | AK001357  | 260.507   | 205.176   |
| S56138    | 337.855   | 230.202   | NM_002103 | 37895.492 | 42419.859 | NM_015721 | 2110.39   | 1619.22   |
| AK023860  | 1123.416  | 612.261   | NM_003379 | 8104.03   | 10737.856 | AF086298  | 950.153   | 770.256   |
| NM_000031 | 2310.438  | 1360.135  | NM_006589 | 5095.324  | 3980.256  | AK027238  | 730.084   | 598.322   |
| NM_002085 | 17071.895 | 12178.771 | AB007875  | 1466.097  | 1080.363  | AK000032  | 430.708   | 352.212   |
| AK026061  | 469.657   | 301.323   | NM_018261 | 2008.2    | 1295.937  | S94540    | 7471.925  | 4577.054  |
| NM_016286 | 5931.241  | 4915.354  | NM_014796 | 5147.33   | 4780.261  | U79297    | 713.38    | 408.517   |
| NM_001567 | 967.103   | 775.305   | AL050288  | 27994.986 | 21785.771 | AK002164  | 494.349   | 518.782   |
| NM_004905 | 7150.552  | 6341.747  | NM_005040 | 4771.716  | 3803.409  | AF052122  | 3510.62   | 3088.984  |
| AF217971  | 2406.807  | 2319.703  | NM_016391 | 11628.947 | 10818.596 | NM_001310 | 1452.505  | 1565.095  |
| NM_001925 | 460.266   | 350.292   | AF075033  | 5609.204  | 5075.013  | AK026924  | 1862.11   | 1744.51   |
| AF245517  | 564.176   | 933.945   | D50911    | 13002.262 | 10850.212 | AL122047  | 4220.998  | 6482.67   |
| NM_004982 | 632.321   | 622.859   | AB011104  | 554.033   | 677.569   | AF052091  | 857.325   | 1506.75   |
| AF286370  | 454.104   | 379.036   | AK024069  | 5535.729  | 5281.971  | AK024447  | 50212.949 | 53649.777 |
| NM_000217 | 289.405   | 350.715   | NM_004582 | 22635.439 | 23820.844 | AF052145  | 475.371   | 492.044   |
| AK026180  | 515.686   | 455.482   | NM_015640 | 15348.091 | 14023.022 | AF086458  | 3582.402  | 3384.636  |
| NM_005817 | 3354.057  | 2779.703  | AF233450  | 1487.78   | 1267.945  | AF086548  | 1493.141  | 1120.595  |
| NM_003916 | 3435.237  | 2814.72   | NM_016233 | 1663.494  | 1707.598  | AK024350  | 519.509   | 578.549   |
| NM_002870 | 15956.646 | 13912.392 | NM_000821 | 23601.805 | 26155.604 | AK023717  | 1149.207  | 1224.497  |
| AF135422  | 1833.457  | 4985.689  | AF308602  | 3708.673  | 4354.406  | AK023727  | 936.252   | 1123.236  |
| NM_004479 | 7474.408  | 3906.085  | AB011089  | 2188.485  | 2767.043  | AK025271  | 438.163   | 574.491   |
| NM_002610 | 733.579   | 338.719   | AF007192  | 454.418   | 667.782   | AF086204  | 4145.465  | 4371.432  |
| AF070587  | 3797.644  | 2067.68   | NM_001276 | 5495.17   | 5658.745  | NM_007021 | 645.645   | 878.051   |

|           |           |           |           |           |           |           |           |           |
|-----------|-----------|-----------|-----------|-----------|-----------|-----------|-----------|-----------|
| BE250526  | 389.224   | 319.854   | NM_016157 | 1543.785  | 1304.412  | AK026283  | 303.139   | 460.834   |
| NM_016819 | 890.675   | 765.198   | NM_014915 | 10371.854 | 14757.143 | AK022076  | 240.965   | 200.096   |
| NM_012222 | 3621.313  | 3760.068  | NM_012286 | 1866.82   | 1349.331  | AK023065  | 297.237   | 247.578   |
| NM_005002 | 2251.752  | 1754.94   | NM_002195 | 6658.578  | 6002.918  | NM_017678 | 241.705   | 164.734   |
| NM_006596 | 2372.441  | 2262.591  | D84294    | 1645.424  | 1873.076  | AK021570  | 821.195   | 701.794   |
| AK023214  | 4289.816  | 3281.934  | X59770    | 519.539   | 1487.706  | AL360204  | 453.316   | 447.427   |
| NM_001469 | 6960.38   | 8041.253  | K02765    | 1473.055  | 1987.5    | AK000103  | 874.636   | 609.464   |
| NM_003600 | 3434.819  | 2546.532  | M65134    | 839.613   | 593.247   | AF085959  | 544.216   | 636.698   |
| NM_017490 | 2897.13   | 2761.681  | BG539651  | 2167.055  | 1930.101  | AF075107  | 496.151   | 607.322   |
| AK026727  | 1108.19   | 1210.967  | N52646    | 19699.051 | 19883.064 | AK023104  | 359.175   | 399.937   |
| NM_002830 | 379.297   | 478.694   | AW160671  | 53772.578 | 51505.418 | AK022181  | 221.256   | 149.174   |
| NM_006247 | 3595.182  | 3290      | BI870529  | 19719.098 | 17801.191 | AK026923  | 707.364   | 542.879   |
| AB032983  | 1458.432  | 1444.028  | AA702698  | 756.603   | 1124.674  | Y11177    | 374.709   | 1277.245  |
| NM_018281 | 3008.562  | 3300.852  | AI681514  | 1334.877  | 1275.04   | U61091    | 206.252   | 241.233   |
| NM_004457 | 4122.874  | 3285.917  | NM_001300 | 5048.947  | 4843.781  | AK021691  | 18871.406 | 20316.998 |
| NM_014049 | 2054.739  | 1908.851  | BG748827  | 3947.468  | 3812.266  | AK023595  | 348.913   | 403.631   |
| NM_005396 | 252.92    | 310.5     | AA952897  | 1809.793  | 1645.063  | AK022037  | 349.433   | 826.299   |
| BC036375  | 9597.866  | 16490.738 | BG760342  | 5467.793  | 6165.747  | AK000141  | 6238.11   | 11363.448 |
| BI912037  | 715.136   | 381.476   | AA703141  | 2332.6    | 2124.333  | AL137758  | 2351.965  | 5016.787  |
| AA454646  | 566.499   | 413.683   | AI122630  | 11950.396 | 11291.926 | AK023865  | 386.4     | 813.968   |
| U18087    | 24038.014 | 16000.698 | NM_003081 | 29533.781 | 29907.617 | AK025786  | 584.762   | 1634.271  |
| U66349    | 787.954   | 730.937   | NM_016495 | 9409.042  | 13940.998 | AK024188  | 1494.043  | 2899.01   |
| AA057156  | 911.233   | 938.891   | D50402    | 25489.369 | 39273.141 | AK024379  | 474.83    | 743.071   |
| AF166327  | 11070.124 | 10320.564 | M73547    | 10499.262 | 10832.412 | AK026820  | 543.747   | 508.244   |
| AF260739  | 730.081   | 568.403   | AF181722  | 358.963   | 595.561   | AK001716  | 1890.382  | 2015.198  |
| AF531423  | 2179.301  | 2281.414  | NM_003687 | 1749.151  | 1816.129  | AF113683  | 311.921   | 328.041   |
| X76555    | 569.191   | 597.455   | NM_004134 | 3365.643  | 2743.906  | AK026821  | 993.05    | 1589.5    |
| NM_005432 | 1251.566  | 1225.449  | NM_005955 | 4115.887  | 3447.885  | AK026280  | 831.142   | 1089.16   |
| L10386    | 2340.232  | 2481.723  | NM_004048 | 783.959   | 951.234   | AF113017  | 2205.154  | 2167.712  |
| AF061812  | 3284.694  | 3294.421  | NM_012428 | 5822.28   | 5823.555  | AL080232  | 1468.565  | 1451.997  |
| AL136756  | 1092.792  | 954.29    | NM_013269 | 510.078   | 546.765   | AK001120  | 3558.58   | 3942.912  |
| NM_012469 | 5359.009  | 5247.016  | NM_001728 | 4141.583  | 3451.545  | AF264629  | 193.288   | 334.563   |
| NM_134260 | 6234.341  | 5936.427  | NM_005565 | 7284.831  | 5923.697  | AK023731  | 1718.799  | 3743.012  |
| AK025688  | 1910.777  | 6212.866  | NM_003824 | 7151.056  | 7567.128  | AK022442  | 835.957   | 1292.028  |
| Z36819    | 36516.922 | 60591.152 | NM_000686 | 909.052   | 1164.233  | AK023336  | 406.938   | 496.285   |
| NM_001195 | 338.854   | 432.041   | NM_012452 | 3300.474  | 2530.427  | AK023771  | 664.432   | 973.438   |
| NM_014448 | 790.931   | 621.934   | AF229166  | 886.374   | 1103.003  | AK026873  | 2646.531  | 5627.3    |
| AL080157  | 1981.086  | 1153.093  | NM_005137 | 3412.268  | 3900.245  | AK026394  | 4504.519  | 8238.705  |
| NM_005308 | 1511.778  | 1315.6    | NM_006764 | 1720.61   | 1911.004  | NM_005448 | 919.626   | 2521.367  |
| NM_000911 | 232.535   | 266.309   | NM_001386 | 1287.063  | 1905.9    | AK025943  | 34018.078 | 53259.008 |
| NM_007227 | 405.118   | 290.568   | NM_001163 | 2131.055  | 1526.06   | BG106479  | 913.526   | 2043.736  |
| NM_007023 | 402.21    | 248.391   | NM_005878 | 2685.695  | 3713.205  | AF130069  | 10570.795 | 16899.492 |
| NM_005873 | 4064.686  | 3601.223  | AF169257  | 491.534   | 722.992   | AL109669  | 1961.898  | 4043.516  |
| NM_004624 | 1096.964  | 1276.739  | NM_014848 | 881.592   | 1044.351  | AB037766  | 1051.013  | 2225.398  |
| NM_003865 | 894.116   | 800.714   | BF217766  | 1025.088  | 1076.452  | AK026995  | 614.146   | 667.942   |
| AB015330  | 3437.473  | 3077.694  | NM_000184 | 2357.365  | 3522.643  | AL133091  | 656.883   | 1140.865  |
| NM_001455 | 2504.478  | 2449.233  | NM_000112 | 690.667   | 529.241   | BF842915  | 487.513   | 1306.899  |
| L09071    | 449.723   | 687.131   | NM_005827 | 10823.611 | 9351.376  | X82545    | 4033.035  | 7542.102  |
| NM_003322 | 1181.962  | 1137.35   | NM_003053 | 5161.652  | 4927.318  | AK024632  | 3931.325  | 6005.713  |
| AK026180  | 1098.37   | 3709.683  | NM_003044 | 1510.335  | 1845.983  | NM_018474 | 4341.694  | 7589.926  |
| NM_013365 | 2444.935  | 4533.853  | NM_006672 | 10799.152 | 16746.803 | AK024937  | 1829.845  | 5771.558  |
| NM_003916 | 3013.684  | 6688.859  | M31659    | 1134.294  | 993.42    | D17178    | 998.127   | 2933.861  |
| NM_002870 | 18467.029 | 12933.266 | NM_016226 | 14190.479 | 13114.356 | AK022094  | 3726.661  | 7331.007  |

|           |           |           |           |           |           |             |           |           |
|-----------|-----------|-----------|-----------|-----------|-----------|-------------|-----------|-----------|
| NM_006363 | 3486.287  | 5304.298  | AK024311  | 1286.455  | 972.771   | AK026695    | 938.398   | 2347.494  |
| NM_020415 | 2079.025  | 2459.237  | AF052155  | 7374.085  | 6526.011  | AK022220    | 366.005   | 472.516   |
| AL049667  | 3536.029  | 2602.795  | NM_005085 | 2308.913  | 2236.643  | AL137539    | 373.826   | 830.727   |
| NM_000334 | 1813.503  | 1885.605  | AF060902  | 2654.494  | 2396.239  | U84520      | 1986.526  | 2896.159  |
| NM_020400 | 1006.951  | 1019.575  | AF121858  | 9340.043  | 10301.659 | Z11853      | 425.669   | 792.096   |
| NM_001504 | 716.029   | 629.611   | NM_013437 | 7033.277  | 6750.155  | AL133616    | 7535.113  | 13254.373 |
| D50926    | 1510.467  | 1849.456  | NM_017681 | 1573.993  | 1321.094  | AK023391    | 306.298   | 870.521   |
| BF205683  | 1692.415  | 1616.461  | X57655    | 7352.882  | 7423.512  | AK026382    | 2561.844  | 4283.562  |
| NM_001565 | 297.51    | 306.494   | AK025966  | 3640.047  | 3572.015  | AK091169    | 2744.633  | 5498.875  |
| NM_001545 | 448.881   | 298.641   | NM_014440 | 802.62    | 1367.879  | NM_014745   | 40843.023 | 53200.223 |
| NM_000755 | 2932.21   | 2658.432  | NM_018725 | 816.793   | 2043.983  | AF086026    | 6426.112  | 10011.813 |
| M17017    | 399.232   | 417.623   | AK024069  | 5383.632  | 4226.081  | AL133011    | 689.418   | 1265.007  |
| NM_002990 | 4180.957  | 4016.913  | NM_004582 | 20318.016 | 23487.367 | NM_016300   | 1388.548  | 3005.291  |
| NM_002432 | 1241.637  | 1156.705  | NM_015640 | 13847.226 | 20997.516 | AK021980    | 607.451   | 1648.589  |
| AB033037  | 794.671   | 786.983   | AF233450  | 1165.213  | 1796.726  | S46402      | 845.393   | 1803.496  |
| L40400    | 3012.104  | 3142.538  | NM_016233 | 1747.088  | 2819.036  | AF075048    | 400.677   | 926.657   |
| NM_018281 | 3607.954  | 7695.086  | NM_000821 | 24889.16  | 26811.324 | Z83940      | 830.672   | 1885.681  |
| NM_014045 | 1813.201  | 3369.627  | NM_020121 | 514.803   | 581.024   | NM_005800   | 1967.371  | 3816.077  |
| NM_005395 | 1744.499  | 1426.113  | NM_003145 | 29215.947 | 25895.848 | AF019617    | 6061.82   | 10823.7   |
| NM_004315 | 4112.194  | 3461.049  | NM_001632 | 1477.776  | 1693.682  | AL137305    | 3727.364  | 9446.603  |
| NM_020165 | 3572.934  | 11081.416 | NM_012264 | 3028.447  | 4594.115  | NM_005290   | 603.719   | 1202.74   |
| S56138    | 344.074   | 327.125   | AF311312  | 3534.85   | 5483.068  | AK025802    | 753.566   | 2400.435  |
| AK023860  | 1160.107  | 1148.187  | NM_017765 | 20950.984 | 20710.17  | AF085973    | 527.011   | 996.652   |
| NM_000031 | 2428.138  | 2747.405  | NM_000425 | 956.166   | 758.841   | NM_018013   | 3080.378  | 4917.509  |
| NM_002085 | 18119.26  | 16075.712 | AB040967  | 1128.501  | 1546.834  | AK022517    | 1027.887  | 584.43    |
| AK026061  | 593.388   | 626.309   | NM_003575 | 597.765   | 588.832   | NM_000325   | 12901.616 | 9617.758  |
| NM_016285 | 5939.124  | 6833.438  | NM_014721 | 1488.19   | 1041.019  | NM_001182   | 6199.835  | 6265.444  |
| NM_001567 | 984.845   | 813.998   | AK026352  | 1509.159  | 2730.748  | AF143328    | 185.846   | 114.807   |
| NM_004905 | 6515.484  | 6906.614  | AL137705  | 2334.297  | 3015.458  | NM_000333   | 2401.887  | 3532.759  |
| AF217971  | 2882.469  | 2877.684  | U41898    | 1474      | 2042.878  | NM_000172   | 4896.166  | 5632.199  |
| NM_001925 | 463.497   | 386.184   | NM_007262 | 23533.861 | 17344.613 | NM_002297   | 4033.594  | 5895.403  |
| AF245517  | 685.71    | 759.937   | NM_014783 | 9202.146  | 8159.868  | AB040968    | 8921.962  | 12686.203 |
| NM_004982 | 808.25    | 895.763   | NM_014053 | 4185.213  | 4405.467  | X85323      | 778.886   | 1477.08   |
| NM_001694 | 43536.531 | 49947.41  | NM_002571 | 3135.143  | 4241.761  | U17615      | 992.552   | 1558.069  |
| AF286370  | 335.753   | 244.997   | NM_004939 | 6623.453  | 7888.727  | NM_003605   | 2472.552  | 2814.278  |
| NM_001475 | 23673.076 | 15385.142 | NM_001425 | 11331.306 | 12246.044 | AF302079    | 7227.045  | 13653.209 |
| NM_002612 | 245.01    | 183.69    | NM_015710 | 1235.539  | 1331.922  | AJ224167    | 610.914   | 1361.896  |
| AF135422  | 1700.685  | 1729.235  | NM_014155 | 4022.853  | 4380.954  | NM_002550   | 394.545   | 477.689   |
| NM_004475 | 7944.712  | 7199.115  | AK021591  | 3110.372  | 2938.736  | NM_000692   | 506.543   | 1041.077  |
| NM_002610 | 737.215   | 624.31    | NM_014675 | 1919.203  | 2140.45   | AF086062    | 654.943   | 1296.896  |
| AF070587  | 3745.975  | 2764.428  | NM_006585 | 6274.254  | 5748.466  | L47668      | 13781.319 | 15327.887 |
| BE250526  | 466.029   | 499.321   | AB007875  | 1700.096  | 1859.822  | NM_017920   | 2062.736  | 3451.46   |
| NM_016815 | 902.266   | 851.634   | NM_018261 | 2317.177  | 2371.319  | AK025345    | 490.833   | 836.847   |
| NM_012222 | 3517.029  | 4140.67   | NM_014795 | 5495.184  | 6028.591  | D25274      | 4663.009  | 4666.814  |
| NM_005002 | 2080.097  | 2471.976  | NM_005040 | 4804.635  | 5500.962  | CY3Cy5      | 671.823   | 153.272   |
| NM_006595 | 2724.669  | 3162.146  | NM_016391 | 12032.492 | 12049.894 | D50373      | 260.523   | 162.726   |
| AK023214  | 5120.366  | 4750.782  | M80783    | 694.885   | 490.287   | AA488757    | 1117.99   | 658.122   |
| NM_001465 | 6774.269  | 11187.311 | AF075033  | 6086.345  | 6224.197  | H07071      | 200.482   | 103.862   |
| NM_003600 | 3375.37   | 3291.003  | D50911    | 14272.098 | 19524.176 | M25322      | 1058.386  | 507.838   |
| NM_017490 | 2861.799  | 2912.678  | AB011104  | 1503.489  | 1493.933  | H-L 27586 I | 1760.719  | 1287.384  |
| NM_002715 | 1317.082  | 1253.662  | NM_001075 | 1474.507  | 1318.745  | ID 214180   | 334.48    | 319.666   |
| AK026727  | 1129.89   | 1171.606  | NM_000552 | 6789.551  | 8387.972  | ID 1867426  | 1381.172  | 855.776   |
| NM_002830 | 510.763   | 359.236   | NM_003805 | 602.024   | 819.111   | W99328      | 380.651   | 254.077   |

|           |           |           |           |           |           |           |           |           |
|-----------|-----------|-----------|-----------|-----------|-----------|-----------|-----------|-----------|
| NM_003322 | 879.793   | 822.893   | AK000860  | 4718.03   | 6774.328  | AI434176  | 380.228   | 315.01    |
| BC036375  | 9234      | 9325.652  | NM_014961 | 1154.693  | 1819.5    | H08563    | 227.531   | 160.649   |
| BI912037  | 804.436   | 642.423   | NM_020145 | 2133.364  | 3041.006  | BE735403  | 272.932   | 218.772   |
| AA454646  | 614.098   | 706.184   | AK021529  | 3201.204  | 3192.501  | NM_022552 | 2438.686  | 1015.046  |
| U18087    | 22865.498 | 17518.475 | AB037845  | 4513.554  | 4261.503  | NM_014385 | 2287.776  | 1328.33   |
| U66349    | 828.195   | 714.718   | NM_005980 | 1652.818  | 1549.712  | SR2       | 38433.813 | 15533.816 |
| AA057156  | 1101.882  | 1025.212  | NM_016190 | 60791.43  | 57139.484 | SR4       | 7801.425  | 2618.045  |
| AF166327  | 12973.282 | 13618.327 | AL137579  | 11044.713 | 12554.286 | SR6       | 1251.236  | 472.84    |
| AF260739  | 674.341   | 560.527   | NM_012383 | 15552.731 | 14966.938 | SR8       | 4721.53   | 5552.523  |
| AF531423  | 2454.543  | 2806.677  | AJ271684  | 1929.663  | 1743.21   | SR10      | 16412.939 | 2260.433  |
| X76555    | 576.562   | 630.563   | AF255342  | 12107.58  | 12199.106 | CY3Cy5    | 532.454   | 114.584   |
| NM_005432 | 1442.816  | 1060.671  | NM_003300 | 9472.898  | 10513.298 | AK025175  | 256.484   | 534.854   |
| L10386    | 2271.513  | 2027.72   | AK026682  | 2489.019  | 2274.089  | NM_005811 | 2584.048  | 4023.742  |
| AF061812  | 3373.262  | 2951.215  | NM_004655 | 2542.006  | 2728.992  | NM_005764 | 554.595   | 490.2     |
| AL136756  | 1017.578  | 1078.536  | NM_003942 | 2290.682  | 2157.543  | NM_016362 | 363.29    | 583.119   |
| AB033037  | 749.242   | 578.87    | NM_006471 | 55632.492 | 51279.574 | NM_004214 | 7669.305  | 8694.684  |
| L40400    | 2285.047  | 2197.12   | NM_004165 | 3164.453  | 2251.239  | NM_004325 | 4652.789  | 4250.446  |
| AK025688  | 1517.927  | 1313.152  | NM_000365 | 2130.744  | 2419.128  | NM_002835 | 1932.186  | 2089.731  |
| Z36819    | 41374.832 | 37258.289 | NM_016585 | 3362.039  | 3502.176  | NM_020167 | 365.355   | 230.739   |
| NM_001195 | 280.435   | 245.713   | NM_004140 | 473.512   | 386.975   | AL049963  | 13039.127 | 12653.527 |
| NM_014445 | 898.892   | 875.821   | NM_002865 | 12794.102 | 12524.954 | NM_016055 | 17647.021 | 13702.093 |
| AL080157  | 2349.548  | 2435.641  | NM_003860 | 2651.367  | 3278.425  | NM_014005 | 411.449   | 220.269   |
| NM_005305 | 1571.946  | 1745.647  | NM_005414 | 788.83    | 656.459   | NM_004635 | 354.86    | 332.239   |
| NM_000911 | 245.378   | 363.12    | NM_004465 | 12341.723 | 13468.677 | NM_004895 | 1595.844  | 1218.22   |
| NM_007227 | 452.359   | 663.612   | NM_016031 | 7544.903  | 9784.699  | NM_003975 | 207.72    | 117.681   |
| NM_007023 | 356.653   | 358.488   | NM_004804 | 2053.622  | 2018.191  | NM_017685 | 832.835   | 681.086   |
| NM_005873 | 4173.355  | 4142.364  | M92439    | 9323.572  | 9072.914  | AK025612  | 1331.174  | 1037.922  |
| NM_004624 | 1125.655  | 1452.35   | AL117665  | 3807.535  | 3246.468  | NM_012265 | 460.93    | 275.94    |
| NM_003865 | 839.97    | 909.019   | AK027169  | 670.506   | 1139.398  | NM_012203 | 508.17    | 416.215   |
| AB015330  | 3151.895  | 2629.614  | NM_001262 | 9932.233  | 10041.778 | NM_003295 | 423.41    | 291.642   |
| NM_001455 | 2376.591  | 1447.915  | BE873030  | 2576.735  | 3077.783  | NM_004735 | 3679.853  | 2393.521  |
| NM_004982 | 961.905   | 752.75    | NM_002440 | 991.408   | 966.043   | NM_006455 | 2476.296  | 1431.195  |
| AF286370  | 703.12    | 879.747   | NM_003625 | 1350.637  | 1378.243  | NM_003827 | 9392.472  | 17480.23  |
| NM_000217 | 307.182   | 271.925   | BC006990  | 11557.292 | 12257.264 | NM_004583 | 506.544   | 1101.219  |
| AK026180  | 787.656   | 740.375   | NM_002277 | 3652.488  | 3860.303  | NM_001103 | 708.221   | 1170.069  |
| NM_013365 | 2257.632  | 1961.169  | NM_019114 | 2393.025  | 2016.509  | AF228710  | 3717.082  | 5562.035  |
| NM_005817 | 3833.562  | 4480.594  | M33552    | 11527.415 | 11624.904 | NM_018395 | 373.412   | 567.572   |
| NM_003915 | 2764.124  | 2875.604  | AJ252060  | 2864.22   | 2201.93   | AY007131  | 11191.604 | 18995.633 |
| NM_002870 | 17221.084 | 13376.015 | NM_006403 | 3941.771  | 3581.15   | U61735    | 2407.03   | 4551.092  |
| NM_006363 | 2788.512  | 3190.624  | NM_018977 | 974.992   | 1003.925  | NM_001144 | 3790.426  | 7090.9    |
| NM_020415 | 2169.536  | 2400.495  | AJ001402  | 1364.229  | 1701.019  | AK023766  | 3610.725  | 5823.876  |
| AL049667  | 3382.231  | 3504.028  | NM_000235 | 4534.32   | 3669.708  | NM_001897 | 588.143   | 1260.161  |
| NM_000334 | 1827.169  | 1953.553  | NM_015879 | 766.805   | 678.528   | NM_003853 | 675.684   | 1100.203  |
| NM_020400 | 1134.426  | 1304.776  | AF068236  | 23788.371 | 23031.695 | AB033109  | 932.085   | 2068.574  |
| NM_001504 | 683.151   | 549.581   | L25628    | 957.514   | 1015.011  | NM_002053 | 4406.227  | 7504.037  |
| D50926    | 1576.766  | 2359.568  | M37033    | 15768.252 | 14048.771 | NM_006885 | 796.66    | 1166.236  |
| BF205683  | 1599.213  | 1489.14   | NM_007171 | 3643.586  | 3231.851  | NM_002435 | 409.556   | 595.287   |
| NM_001565 | 321.451   | 289.927   | NM_004275 | 1997.222  | 1976.474  | NM_014585 | 317.307   | 786.477   |
| NM_001545 | 350.072   | 319.5     | NM_005632 | 991.445   | 1143.971  | NM_000755 | 381.805   | 488.867   |
| NM_000755 | 2897.636  | 2800.745  | AK021499  | 759.069   | 782.14    | AK023334  | 468.3     | 737.985   |
| M17017    | 329.447   | 253.839   | AK000336  | 3527.664  | 3014.767  | NM_002563 | 9672.848  | 12216.264 |
| NM_003600 | 3942.508  | 3351.812  | NM_006292 | 6557.241  | 6466.63   | NM_002437 | 719.584   | 547.517   |
| NM_017490 | 2799.972  | 2289.667  | AB007948  | 2227.43   | 1885.667  | D79991    | 1603.824  | 1395.768  |

|           |           |           |           |           |           |           |           |           |
|-----------|-----------|-----------|-----------|-----------|-----------|-----------|-----------|-----------|
| AK026727  | 1690.871  | 1813.115  | AB033066  | 2233.91   | 1542.635  | NM_000054 | 1411.787  | 1265.612  |
| NM_00283C | 418.955   | 389.378   | AF126028  | 2919.269  | 2837.548  | NM_014713 | 6650.435  | 5070.75   |
| NM_006247 | 3686.09   | 3605.219  | NM_007019 | 21176.26  | 16715.623 | NM_001812 | 982.29    | 588.808   |
| AB032983  | 1265.743  | 1224.704  | NM_007075 | 768.051   | 716.238   | NM_014785 | 472.283   | 260.97    |
| NM_018281 | 3579.79   | 3830.891  | NM_016042 | 3026.914  | 3057.008  | NM_006033 | 1382.908  | 1878.254  |
| NM_004457 | 3801.898  | 3742.442  | NM_01764C | 1654.764  | 1957.473  | NM_004837 | 4976.63   | 4778.352  |
| NM_014049 | 1889.561  | 1874.201  | NM_017721 | 2826.719  | 2812.095  | NM_00037C | 1314.663  | 1425.538  |
| NM_004315 | 4254.639  | 5250.642  | NM_01908E | 7011.857  | 6568.381  | BE865893  | 1836.418  | 1694.356  |
| NM_020166 | 2392.792  | 2706.415  | AB002373  | 2712.016  | 2187.311  | NM_003123 | 22507.371 | 19996.438 |
| S56138    | 271.237   | 218.871   | NM_01635C | 40478.262 | 36286.988 | AY005822  | 658.032   | 972.995   |
| AK023860  | 570.523   | 617.577   | AK024167  | 8517.896  | 7945.776  | NM_018125 | 6478.43   | 6764.382  |
| NM_000031 | 2651.184  | 2901.154  | AK025308  | 867.059   | 331.1     | AF289022  | 1923.698  | 3084.832  |
| NM_002085 | 19633.25  | 19347.084 | NM_005026 | 3712.55   | 6480.727  | AB002326  | 204.789   | 657.407   |
| AK026061  | 561.373   | 540.63    | AF213356  | 832.628   | 669.684   | M17252    | 277.922   | 415.593   |
| NM_016286 | 6313.122  | 7089.649  | BC035716  | 1889.526  | 1894.41   | NM_016025 | 8423.108  | 11967.574 |
| NM_001567 | 940.316   | 997.981   | NM_018014 | 4790.371  | 4254.578  | NM_013315 | 1847.17   | 2991.741  |
| NM_004905 | 7233.854  | 8299.753  | NM_002359 | 19689.877 | 20479.748 | NM_000746 | 1659.583  | 2478.612  |
| AF217971  | 2608.105  | 2574.913  | AF230809  | 2302.479  | 1709.465  | NM_000722 | 447.559   | 738.223   |
| NM_001925 | 412.688   | 531.667   | NM_017894 | 45536.441 | 42237.363 | NM_00603C | 491.448   | 951.313   |
| AF245517  | 694.949   | 862.206   | NM_006509 | 1369.317  | 1292.446  | NM_02041C | 3006.144  | 5745.802  |
| X78926    | 2322.598  | 2345.186  | AK025447  | 1867.75   | 1570.442  | AF000143  | 3032.75   | 5580.281  |
| AJ278110  | 782.097   | 811.915   | NM_002624 | 47291.438 | 46800.117 | NM_014211 | 309.979   | 333.21    |
| NM_020396 | 621.661   | 685.319   | AF006199  | 1861.286  | 1628.47   | NM_000814 | 1316.976  | 3247.831  |
| AF029900  | 3317.402  | 3656.798  | NM_004554 | 7203.393  | 6050.383  | J03077    | 14425.142 | 25795.383 |
| NM_003325 | 6616.002  | 7689.108  | NM_018119 | 2801.582  | 2886.011  | AL157469  | 741.132   | 1555.195  |
| NM_016178 | 1213.368  | 1029.314  | NM_014576 | 1143.927  | 1508.259  | AK024100  | 3972.161  | 6810.579  |
| AK022639  | 1042.824  | 1048.651  | AL162035  | 916.677   | 834.459   | NM_005135 | 527.879   | 845.217   |
| D31766    | 5201.584  | 4950.417  | NM_006692 | 1637.917  | 1663.081  | NM_000317 | 10552.111 | 6798.653  |
| NM_006547 | 1114.45   | 1049.267  | NM_003084 | 4073.62   | 3961.755  | NM_018376 | 3318.343  | 2337.108  |
| NM_001478 | 27187.588 | 22874.881 | NM_002582 | 7983.018  | 8706.426  | NM_017615 | 385.418   | 271.232   |
| AF135422  | 1685.457  | 1887.124  | NM_001009 | 56470.563 | 57332.824 | NM_017438 | 2090.502  | 1164.993  |
| NM_004479 | 7889.806  | 7906.516  | D17289    | 5054.648  | 4276.434  | U59209    | 1737.824  | 1054.245  |
| NM_00261C | 1084.54   | 1032.29   | NM_002949 | 18284.857 | 20766.43  | NM_020195 | 4437.639  | 2397.123  |
| AF070587  | 3927.314  | 3068.961  | NM_01423C | 7994.987  | 9088.892  | AK023824  | 2024.331  | 1442.275  |
| BE250526  | 393.589   | 565.249   | NM_017748 | 6396.395  | 6045.996  | AL133069  | 2165.896  | 2007.543  |
| NM_016819 | 989.505   | 1142.17   | AK025374  | 1440.361  | 1280.297  | AL117574  | 292.13    | 496.856   |
| NM_012222 | 3977.17   | 4374.754  | NM_014901 | 12383.262 | 10832.72  | AK026055  | 4484.117  | 4676.227  |
| NM_005002 | 2180.531  | 2062.327  | AK000005  | 3181.552  | 3088.182  | AK024126  | 670.876   | 891.466   |
| NM_006596 | 2824.251  | 2612.937  | AF086790  | 2493.499  | 2191.262  | NM_001516 | 2762.936  | 2867.818  |
| AK023214  | 5769.671  | 4465.457  | U28480    | 1096.173  | 1052.673  | NM_002744 | 1770.645  | 2534.922  |
| NM_001469 | 7152.311  | 7375.859  | NM_000108 | 13561.427 | 13773.941 | NM_015917 | 7602.847  | 9609.797  |
| BC036368  | 426.898   | 524.492   | NM_018128 | 3136.66   | 3006.274  | NM_020397 | 630.224   | 1233.11   |
| NM_001851 | 2089.289  | 1980.45   | NM_016931 | 9182.224  | 9277.208  | NM_000061 | 515.23    | 980.444   |
| S67789    | 869.194   | 729.924   | NM_004373 | 48733.473 | 46932.66  | AB046859  | 3852.548  | 5769.203  |
| AK022689  | 2575.247  | 2778.119  | NM_005566 | 58385.148 | 58529.914 | AK023573  | 1506.6    | 2932.638  |
| NM_016227 | 892.667   | 877.221   | NM_000162 | 4080.843  | 3666.917  | NM_004828 | 1150.394  | 2057.059  |
| NM_004195 | 9620.105  | 9722.442  | AK027067  | 1116.191  | 1074.272  | NM_00004C | 3158.28   | 5226.253  |
| NM_004705 | 2833.602  | 2642.509  | NM_016287 | 12131.06  | 13276.622 | NM_004631 | 2318.902  | 4127.473  |
| NM_02019C | 5855.064  | 5545.045  | NM_003864 | 6754.727  | 6562.066  | NM_004736 | 3364.178  | 2457.932  |
| AK024003  | 385.338   | 402.026   | NM_006824 | 22143.463 | 21507.453 | NM_006455 | 2071.564  | 984.828   |
| NM_014357 | 1984.975  | 2112.125  | NM_002107 | 1202.786  | 929.498   | D50373    | 290.351   | 151.286   |
| NM_004067 | 902.701   | 894.045   | NM_002694 | 15688.868 | 16713.729 | AA488757  | 910.238   | 447.52    |
| NM_000121 | 5040.422  | 5259.569  | NM_004454 | 2341.934  | 2402.078  | M25322    | 991.38    | 497.981   |



|           |           |           |           |           |           |             |           |          |
|-----------|-----------|-----------|-----------|-----------|-----------|-------------|-----------|----------|
| NM_002091 | 4071.962  | 3973.71   | NM_000966 | 730.911   | 742.493   | H-L 27586 I | 1616.598  | 1274.914 |
| AB033092  | 2319.121  | 2615.964  | NM_012482 | 3148.01   | 3073.3    | ID 214180   | 331.147   | 212.972  |
| M89957    | 245.041   | 279.081   | AF217227  | 1602.036  | 1780.415  | ID 1867426  | 1377.955  | 975.8    |
| NM_003023 | 882.16    | 832.131   | AK024141  | 4229.629  | 6526.956  | W99328      | 281.723   | 292.422  |
| BC035030  | 3128.164  | 2994.219  | U13706    | 1421.971  | 1695.767  | AI434176    | 304.005   | 529.899  |
| NM_005340 | 42216.738 | 40503.777 | NM_002813 | 21651.744 | 17943.211 | H08563      | 245.503   | 237.317  |
| NM_016201 | 1370.571  | 1388.313  | AK022745  | 4771.801  | 4249.078  | BE735403    | 843.93    | 1390.793 |
| NM_000864 | 1900.327  | 2437.337  | AL049450  | 6707.043  | 7338.032  | NM_022552   | 2553.682  | 2184.257 |
| NM_017977 | 1895.088  | 1941.315  | AK023481  | 611.431   | 704.515   | NM_014388   | 2877.689  | 3093.096 |
| AF147727  | 1254.597  | 977.492   | NM_005086 | 47711.008 | 58658.379 | NM_001718   | 340.475   | 478.151  |
| NM_006751 | 2615.247  | 2107.294  | NM_007238 | 4242.437  | 4916.432  | AF116659    | 838.791   | 761.561  |
| AB037834  | 2314.303  | 1985.665  | AL049340  | 853.571   | 1062.694  | D79991      | 1530.512  | 1113.263 |
| NM_003568 | 984.714   | 1113.113  | NM_017606 | 3299.339  | 3994.616  | NM_000054   | 1474.752  | 596.567  |
| NM_014052 | 9460.402  | 8905.631  | AK024644  | 8964.771  | 9867.222  | NM_014713   | 6292.541  | 2700.146 |
| NM_002777 | 394.681   | 399.587   | AB019573  | 883.561   | 709.323   | NM_001812   | 619.706   | 293.357  |
| AF202635  | 569.676   | 441.611   | U68494    | 2031.453  | 1438.012  | NM_014785   | 276.458   | 221.243  |
| NM_014125 | 618.088   | 730.774   | AF064254  | 1392.233  | 1113.472  | NM_005811   | 1645.179  | 846.454  |
| NM_017904 | 632.396   | 913.313   | AK021524  | 501.299   | 507.615   | NM_005764   | 312.074   | 251.213  |
| NM_013367 | 2324.189  | 2327.951  | AL137360  | 5272.288  | 6165.048  | NM_016362   | 226.35    | 229.962  |
| NM_000321 | 4103.988  | 4008.916  | AF143331  | 899.832   | 383.429   | NM_004214   | 6122.191  | 3632.874 |
| NM_006341 | 9478.664  | 9276.324  | AK000819  | 1432.855  | 2042.949  | NM_004328   | 3584.091  | 2162.618 |
| NM_001708 | 2269.261  | 1659.227  | AF201941  | 3035.565  | 2871.495  | NM_002838   | 1796.287  | 1606.332 |
| NM_006191 | 2635.434  | 2482.828  | AF143325  | 445.169   | 754.533   | NM_020167   | 341.777   | 179.323  |
| NM_001800 | 4252.145  | 4324.27   | AF143878  | 439.693   | 838.798   | AL049963    | 10846.063 | 7442.89  |
| NM_004338 | 5621.019  | 5982.97   | AF026941  | 1299.865  | 1673.149  | NM_016058   | 13121.951 | 9459.161 |
| NM_015948 | 1718.972  | 1935.701  | NM_007070 | 3344.4    | 4023.178  | NM_004898   | 1452.898  | 2074.874 |
| NM_013978 | 2875.274  | 3159.405  | AL133019  | 5204.54   | 5128.352  | NM_003978   | 276.431   | 307.512  |
| NM_003790 | 1341.666  | 1173.583  | AK026192  | 491.814   | 415.542   | NM_017688   | 1153.532  | 1112.485 |
| NM_000494 | 1870.838  | 2111.838  | NM_014895 | 2971.987  | 6668.317  | AK025612    | 2083.653  | 1494.656 |
| NM_016023 | 1047.179  | 847.231   | AK024883  | 6163.79   | 5162.879  | NM_012268   | 662.268   | 620.914  |
| NM_003722 | 4234.869  | 4483.245  | AF217989  | 3905.555  | 3640.789  | NM_012203   | 499.722   | 400.316  |
| NM_014430 | 376.815   | 442.054   | NM_017654 | 2435.619  | 2385.89   | J03077      | 10975.717 | 7621.565 |
| NM_000495 | 404.048   | 459.842   | L77561    | 510.323   | 426.295   | J03048      | 2679.222  | 4831.861 |
| AF085883  | 1836.981  | 1863.796  | AL109696  | 836.337   | 1364.953  | AL157469    | 562.006   | 310.794  |
| NM_016571 | 688.214   | 583.835   | AK022190  | 1258.043  | 1841.144  | NM_002868   | 1500.196  | 1100.945 |
| NM_003688 | 377.51    | 284.205   | AJ011593  | 2093.823  | 2083.862  | AK024100    | 2606.909  | 1133.55  |
| NM_016448 | 2542.512  | 2285.412  | AJ227907  | 560.369   | 619.261   | NM_005135   | 221.806   | 121.952  |
| AK023237  | 226.702   | 221.949   | X89743    | 557.904   | 925.412   | NM_003827   | 6061.673  | 2762.701 |
| NM_001870 | 721.535   | 663.465   | AJ002784  | 873.907   | 787.273   | NM_004583   | 391.686   | 227.694  |
| AJ271216  | 901.965   | 946.091   | U17621    | 1081.693  | 1018.86   | NM_001103   | 260.901   | 175.657  |
| U23028    | 2242.424  | 2269.625  | AL049239  | 4705.052  | 6059.225  | AF228710    | 2997.459  | 1723.069 |
| NM_000817 | 3068.145  | 3522.542  | NM_013288 | 1422.728  | 1244.018  | NM_018398   | 307.201   | 399.162  |
| NM_006571 | 6350.328  | 6361.69   | M60721    | 2304.596  | 2350.232  | AY007131    | 9550.96   | 7440.378 |
| NM_001875 | 325.248   | 548.423   | L39061    | 3720.729  | 3519.466  | U61735      | 1729.633  | 1591.581 |
| AK022680  | 1377.448  | 1622.522  | AF071508  | 2532.213  | 3389.538  | NM_001144   | 2872.854  | 2658.03  |
| NM_018948 | 5632.169  | 5805.358  | L07265    | 34701.504 | 37291.652 | AK023766    | 2376.726  | 2017.317 |
| NM_016358 | 7081.633  | 7536.793  | D16472    | 7942.693  | 7114.659  | NM_001897   | 325.383   | 310.909  |
| NM_004158 | 5454.452  | 5689.49   | AF085823  | 435.437   | 927.594   | NM_003853   | 364.567   | 359.254  |
| AK000561  | 576.713   | 603.893   | AK022467  | 1128.529  | 3501.675  | AB033109    | 865.208   | 1076.364 |
| AB051449  | 11802.236 | 12607.797 | AL157459  | 2648.83   | 2796.491  | NM_002053   | 3527.066  | 4642.278 |
| BC009187  | 5777.102  | 6038.595  | AL353954  | 1525.406  | 1347.221  | NM_014588   | 701.824   | 747.703  |
| AL133617  | 550.515   | 457.099   | NM_017630 | 914.292   | 1018.224  | NM_000758   | 466.45    | 357.402  |
| NM_016485 | 5339.069  | 3674.86   | AK000778  | 2172.626  | 1876.604  | AK023334    | 675.169   | 539.18   |

|           |           |           |           |           |           |           |           |           |
|-----------|-----------|-----------|-----------|-----------|-----------|-----------|-----------|-----------|
| NM_002615 | 427.151   | 338.253   | AL133573  | 11428.626 | 13919.654 | NM_002563 | 10845.593 | 7475.484  |
| AF090894  | 421.936   | 340.061   | AK000115  | 996.851   | 1123.686  | NM_002437 | 1000.31   | 524.263   |
| NM_006167 | 2472.229  | 2507.579  | NM_017959 | 715.024   | 729.79    | AK023573  | 1267.817  | 1034.679  |
| NM_016357 | 2688.699  | 2782.948  | AK000958  | 1080.123  | 1190.036  | NM_002730 | 3988.229  | 2631.239  |
| NM_014500 | 5741.627  | 6167.29   | AK024523  | 1043.114  | 1171.799  | NM_004828 | 720.711   | 453.055   |
| NM_020149 | 998.876   | 1052.554  | AK024600  | 1788.65   | 1483.63   | AB011540  | 5341.534  | 2365.457  |
| NM_006237 | 1426.358  | 1175.87   | AK025038  | 856.448   | 1095.604  | NM_000040 | 1511.905  | 694.91    |
| NM_001271 | 2732.864  | 2165.595  | AK024543  | 3244.077  | 3721.527  | NM_004631 | 1504.185  | 1050.716  |
| NM_003683 | 1733.074  | 1670.786  | AK024624  | 19675.078 | 21594.234 | NM_006033 | 1149.104  | 752.393   |
| AF039019  | 2698.199  | 2859.823  | AK024918  | 1475.701  | 2488.969  | NM_004837 | 4025.407  | 2416.667  |
| NM_012255 | 3272.748  | 3427.42   | AK025090  | 1447.626  | 1831.916  | NM_000370 | 1073.342  | 473.158   |
| NM_004818 | 3890.682  | 3737.259  | NM_014152 | 619.156   | 770.307   | BE865893  | 1573.98   | 776.236   |
| J04205    | 7955.917  | 7995.061  | AF086473  | 618.687   | 674.487   | NM_003123 | 22005.766 | 11791.948 |
| D38491    | 3572.815  | 2402.329  | D87682    | 1219.16   | 1295.84   | AY005822  | 600.749   | 512.086   |
| AK026835  | 1772.266  | 2008.816  | AF321617  | 7163.665  | 8104.845  | NM_018129 | 5848.252  | 4696.292  |
| NM_002819 | 10082.328 | 9924.53   | AF223389  | 783.719   | 675.536   | AF289022  | 1403.526  | 1490.892  |
| NM_013264 | 2457.004  | 2370.256  | NM_006950 | 657.854   | 625.553   | NM_016025 | 3830.238  | 3603.922  |
| NM_003315 | 7747.75   | 7806.981  | NM_000682 | 737.017   | 600.021   | NM_013319 | 1084.738  | 1229.88   |
| NM_005570 | 6451.268  | 6081.55   | AF086208  | 3473.109  | 2866.477  | NM_000746 | 1109.708  | 1628.42   |
| NM_000086 | 4110.146  | 4392.62   | NM_019033 | 1022.166  | 1618.292  | NM_020410 | 3354.685  | 3290.866  |
| NM_003752 | 2111.253  | 2007.205  | AL133101  | 2764.407  | 2849.713  | AF000143  | 7004.224  | 5401.477  |
| NM_003932 | 8532.341  | 5681.335  | AK024602  | 40774.27  | 51232.344 | NM_000814 | 1127.648  | 977.59    |
| NM_016491 | 9697.318  | 7566.682  | NM_018507 | 592.755   | 734.632   | NM_000453 | 1165.835  | 846.351   |
| NM_006429 | 24744.42  | 20010.377 | NM_000485 | 8925.159  | 8693.688  | NM_022552 | 2672.485  | 1358.516  |
| NM_003307 | 2641.917  | 2932.172  | NM_018542 | 2273.467  | 2066.103  | NM_014389 | 2345.999  | 1493.878  |
| AF070565  | 665.037   | 842.899   | AK025503  | 2331.052  | 2530.153  | AF116659  | 423.191   | 348.324   |
| AK021644  | 1059.036  | 1387.22   | AF130073  | 2849.361  | 2720.48   | NM_000317 | 10093.854 | 6895.872  |
| NM_016599 | 262.902   | 370.382   | AK024225  | 15221.907 | 17139.93  | NM_018376 | 2717.697  | 1801.073  |
| NM_015944 | 681.072   | 789.57    | AF086334  | 1032.178  | 1493.671  | NM_017615 | 399.208   | 184.486   |
| NM_002064 | 1012.432  | 1111.547  | AL137602  | 613.359   | 632.414   | NM_017438 | 1990.478  | 1113.523  |
| NM_015523 | 7514.617  | 6898.385  | AF075035  | 43185.973 | 38422.473 | U59209    | 1734.385  | 1256.9    |
| NM_015960 | 5105.383  | 4739.294  | AL110180  | 5813.281  | 5608.618  | NM_020195 | 4764.88   | 3251.787  |
| NM_006085 | 2936.052  | 3128.124  | U00949    | 553.085   | 1229.104  | AK023824  | 2099.854  | 1879.48   |
| NM_000907 | 4370.791  | 4831.137  | BC024924  | 4727.471  | 4515.222  | AL133069  | 2416.256  | 2157.518  |
| AF254085  | 2169.441  | 2292.24   | NM_017906 | 9058.843  | 8354.006  | AL117574  | 280.947   | 276.98    |
| AK023541  | 272.251   | 159.247   | AL110286  | 6454.971  | 7973.909  | AK026055  | 3369.245  | 3526.272  |
| NM_001987 | 874.159   | 1020.803  | AF086374  | 705.496   | 727.281   | AK024126  | 607.761   | 1071.514  |
| AF244088  | 1618.092  | 1555.908  | AL162066  | 30104.328 | 33812.566 | NM_001516 | 2778.951  | 2660.251  |
| NM_007136 | 751.368   | 695.426   | NM_016096 | 32348.859 | 30261.645 | NM_002744 | 2112.511  | 2444.356  |
| AK025434  | 458.727   | 455.061   | U79290    | 2540.733  | 2429.171  | NM_015917 | 8428.531  | 7348.445  |
| AJ251845  | 477.011   | 355.027   | NM_014040 | 6413.611  | 5444.153  | NM_020397 | 667.264   | 987.342   |
| AK000435  | 1020.683  | 1105.456  | AK000799  | 10747.697 | 9687.517  | NM_000061 | 543.023   | 696.118   |
| AK000569  | 2783.713  | 2643.24   | NM_015582 | 8694.676  | 8579.604  | AB046859  | 4630.308  | 3064.698  |
| NM_006049 | 1843.977  | 1749.098  | AK027091  | 1964.567  | 1691.066  | NM_005109 | 5900.497  | 4670.376  |
| NM_017661 | 2373.931  | 1839.062  | NM_001526 | 3125.572  | 3419.038  | NM_003976 | 177.387   | 154.216   |
| BC016698  | 8286.46   | 6579.702  | U31738    | 925.271   | 1234.08   | NM_017688 | 932.301   | 558.821   |
| NM_007374 | 7533.449  | 6156.383  | AF179890  | 4601.863  | 4674.335  | AK025612  | 1572.41   | 877.784   |
| AK027185  | 1412.736  | 2594.439  | AK023536  | 7914.929  | 7757.922  | NM_012268 | 375.282   | 128.341   |
| AK025576  | 705.572   | 687.581   | AK026561  | 3638.792  | 4285.097  | NM_012203 | 404.72    | 322.752   |
| AF147385  | 420.913   | 448.33    | AK021568  | 10344.691 | 10280.557 | NM_004736 | 2780.528  | 1977.504  |
| AL442086  | 2925.661  | 3269.199  | Z36838    | 882.252   | 753.008   | NM_006459 | 2037.61   | 1319.221  |
| BC034819  | 2800.391  | 2918.755  | AF088054  | 609.754   | 628.854   | D50373    | 353.577   | 271.813   |
| AF147313  | 7649.179  | 7364.945  | AK023881  | 3772.482  | 3371.159  | AA488757  | 1055.2    | 1052.826  |

|           |           |           |           |           |           |             |           |           |
|-----------|-----------|-----------|-----------|-----------|-----------|-------------|-----------|-----------|
| AF147382  | 31063.543 | 32825.598 | AK027114  | 60351.488 | 61165.445 | M25322      | 451.059   | 300.707   |
| AK001957  | 3581.351  | 4303.47   | NM_016298 | 1953.83   | 1727.218  | AA436187    | 258.188   | 231.215   |
| AK000850  | 514.699   | 374.507   | AK002146  | 1253.821  | 1276.536  | H-L 27586 I | 1488.097  | 1623.16   |
| AK021833  | 1321.031  | 1201.594  | AB007970  | 815.065   | 630.861   | ID 214180   | 352.217   | 592.975   |
| AF143867  | 1297.805  | 1595.809  | NM_003159 | 1371.378  | 1689.745  | ID 1867426  | 1540.529  | 1317.034  |
| AK025889  | 3730.791  | 3358.373  | NM_015492 | 8306.539  | 10675.9   | ID 396450   | 228.17    | 214.324   |
| NM_014715 | 1583.242  | 1895.435  | NM_006933 | 749.669   | 983.085   | W99328      | 428.921   | 350.444   |
| AK021584  | 213.114   | 76.884    | AK022874  | 5715.924  | 5097.98   | AI434176    | 639.481   | 615.904   |
| AF086448  | 1338.643  | 1220.335  | CY3Cy5    | 5123.334  | 204.062   | H08563      | 247.721   | 234.352   |
| AB019391  | 284.146   | 203.083   | BI912037  | 1448.837  | 1458.719  | BE735403    | 408.75    | 331.785   |
| AF086386  | 1263.718  | 1098.83   | AA454646  | 1031.774  | 845.185   | NM_002438   | 524.807   | 465.97    |
| AF086413  | 243.682   | 278.337   | U18087    | 55839.645 | 50055.711 | NM_014588   | 621.575   | 517.864   |
| AF086457  | 823.553   | 918.045   | U66349    | 1023.002  | 1146.95   | NM_000758   | 332.172   | 318.104   |
| AK025469  | 996.675   | 870.56    | AA057156  | 1675.163  | 1512.107  | AK023334    | 494.786   | 286.804   |
| NM_020238 | 4800.01   | 3944.47   | AF166327  | 17493.83  | 15265.444 | NM_002563   | 8644.109  | 4692.615  |
| AF070581  | 445.282   | 331.043   | AF260739  | 1650.977  | 1613.868  | NM_002437   | 708.482   | 417.222   |
| AK024187  | 692.159   | 590.231   | AF531423  | 3043.612  | 2925.757  | D79991      | 1400.878  | 889.862   |
| AF075079  | 404.017   | 1044.407  | X76555    | 1034.313  | 1101.92   | AK022425    | 226.973   | 247.687   |
| AK022479  | 384.986   | 397.602   | NM_005432 | 2059.77   | 2492.814  | NM_000054   | 1282.749  | 1331.152  |
| AK023572  | 487.821   | 769.82    | L10386    | 3238.797  | 4016.321  | NM_014713   | 6947.394  | 4441.363  |
| AF086004  | 6482.49   | 6741.326  | AF061812  | 8847.558  | 11174.445 | NM_001812   | 786.694   | 473.775   |
| AF147433  | 305.602   | 564.114   | AL136756  | 1517.187  | 2064.623  | NM_014788   | 506.455   | 434.627   |
| AF085978  | 315.268   | 90.313    | NM_012469 | 12779.842 | 13440.099 | NM_005811   | 1655.669  | 1832.405  |
| AF085930  | 295.302   | 638.32    | NM_134260 | 11222.182 | 9983.589  | NM_005764   | 322.68    | 165.136   |
| AF086006  | 279.599   | 402.307   | SR6       | 2519.083  | 2491.694  | NM_016362   | 219       | 346.89    |
| AL137318  | 935.383   | 809.284   | SR8       | 8068.655  | 28383.219 | NM_004214   | 3613.32   | 3010.201  |
| AL137482  | 487.973   | 569.866   | SR10      | 29468.732 | 11521.955 | NM_004328   | 2806.29   | 2344.478  |
| AL162011  | 7849.403  | 6975.278  | CY3Cy5    | 4082.786  | 143.609   | NM_002838   | 1969.995  | 1563.026  |
| AL390177  | 371.895   | 428.303   | AL080157  | 4526.948  | 7381.357  | NM_020167   | 316.508   | 268.025   |
| AL137678  | 333.395   | 354.213   | NM_005308 | 2636.672  | 2427.104  | AL049963    | 13222.568 | 9485.161  |
| AK056111  | 569.99    | 732.952   | NM_007227 | 612.991   | 649.61    | NM_016058   | 19552.506 | 14802.628 |
| AL162055  | 284.261   | 266.001   | NM_007023 | 664.732   | 574.881   | NM_014008   | 338.869   | 328.095   |
| Y13807    | 810.309   | 1078.67   | NM_005873 | 6719.43   | 5431.748  | NM_004638   | 421.385   | 479.372   |
| AK022053  | 260.051   | 317.396   | NM_004624 | 1979.164  | 1693.737  | NM_004898   | 1505.337  | 1496.843  |
| AK023038  | 726.712   | 622.37    | NM_014461 | 652.54    | 591.032   | NM_006030   | 509.044   | 306.074   |
| AK026206  | 744.4     | 784.255   | NM_003865 | 974.031   | 1225.563  | NM_020410   | 3383.764  | 2555.559  |
| AF086074  | 1035.853  | 969.144   | AB015330  | 5625.938  | 5632.466  | AF000143    | 5495.623  | 3292.27   |
| AK023964  | 1955.219  | 1904.502  | NM_001455 | 3519.84   | 3670.527  | NM_014211   | 302.428   | 156.566   |
| AF086084  | 594.595   | 623.457   | L09071    | 535.268   | 854.612   | NM_000814   | 1411.578  | 914.618   |
| AK000156  | 245.729   | 152.091   | NM_006363 | 5847.316  | 5954.131  | NM_000453   | 960.976   | 548.416   |
| AL050184  | 618.788   | 635.09    | NM_020415 | 4746.512  | 5579.213  | J03077      | 11872.466 | 6870.214  |
| AK027112  | 2353.821  | 2861.209  | AL049667  | 4879.459  | 5142.189  | J03048      | 3024.778  | 4607.415  |
| AL049314  | 1496.169  | 2042.121  | NM_000334 | 3695.68   | 3802.133  | AL157469    | 546.005   | 438.06    |
| AF093016  | 5860.686  | 7311.652  | NM_020400 | 1723.087  | 1608.689  | NM_002868   | 1765.354  | 2413.992  |
| -         | 451.085   | 612.366   | NM_001504 | 1627.035  | 1410.395  | AK024100    | 3141.719  | 2552.635  |
| AF090925  | 457.918   | 772.398   | D50926    | 2561.164  | 2285.427  | NM_005138   | 368.971   | 396.019   |
| NM_014163 | 5126.696  | 5292.119  | BF205683  | 2877.907  | 2998.922  | NM_003827   | 6539.157  | 5365.351  |
| AK021659  | 368.172   | 341.484   | NM_001548 | 681.588   | 653.783   | NM_004583   | 321.449   | 396.915   |
| AK021974  | 914.521   | 1106.663  | NM_000758 | 4946.553  | 4794.536  | NM_001103   | 339.402   | 329.203   |
| AK022068  | 536.921   | 768.84    | M17017    | 609.716   | 936.399   | AF228710    | 2699.375  | 2184.557  |
| AK022229  | 849.725   | 816.255   | NM_002990 | 5303.193  | 6877.599  | AY007131    | 10883.721 | 8749.667  |
| AK022362  | 2132.679  | 2499.676  | NM_002432 | 1811.992  | 2023.188  | U61735      | 1743.682  | 1722.142  |
| AK022004  | 2498.943  | 2610.363  | AB033037  | 1617.012  | 1762.325  | NM_001144   | 3137.296  | 2988.904  |

|           |           |           |           |           |           |           |           |           |
|-----------|-----------|-----------|-----------|-----------|-----------|-----------|-----------|-----------|
| AK022136  | 229.279   | 177.865   | L40400    | 5071.392  | 5782.892  | AK023766  | 2232.225  | 2033.389  |
| AK022265  | 224.139   | 287.448   | NM_014448 | 3508.718  | 3465.956  | NM_001897 | 557.864   | 485.175   |
| AK022390  | 655.407   | 1050.785  | NM_004315 | 6771.175  | 7096.263  | NM_003853 | 440.117   | 586.209   |
| AK027134  | 543.721   | 889.953   | NM_020166 | 4253.315  | 4031.994  | AB033109  | 999.103   | 1113.071  |
| AK024168  | 461.232   | 278.183   | S56138    | 774.764   | 1050.505  | NM_006889 | 609.449   | 873.407   |
| AF222857  | 218.026   | 169.553   | AK023860  | 3240.128  | 3087.673  | NM_002744 | 2026.458  | 1849.158  |
| AF264622  | 361.745   | 446.63    | NM_000031 | 3606.229  | 3245.961  | NM_015917 | 8588.216  | 6384.937  |
| AK027203  | 286.4     | 229.343   | NM_002085 | 24681.916 | 21448.611 | NM_020397 | 824.664   | 637.182   |
| AK021793  | 2265.921  | 1708.774  | AK026061  | 1262.936  | 1218.542  | NM_000061 | 696.62    | 444.412   |
| AK022255  | 2081.238  | 1748.912  | NM_016286 | 8452.897  | 7286.641  | AB046859  | 3891.034  | 2076.107  |
| AK023730  | 402.668   | 641.888   | NM_001567 | 1269.447  | 1542.082  | NM_005109 | 5432.911  | 3164.508  |
| AF161360  | 916.95    | 1096.905  | NM_004905 | 12229.343 | 10625.142 | AK023573  | 1507.148  | 913.464   |
| AK021720  | 574.641   | 575.782   | AF217971  | 5452.558  | 5855.794  | NM_002730 | 3750.467  | 1964.079  |
| NM_016497 | 21357.875 | 22710.309 | NM_001925 | 954.57    | 1050.051  | NM_004828 | 694.798   | 504.061   |
| AF009261  | 486.267   | 688.138   | AF245517  | 1043.894  | 1075.622  | AB011540  | 6644.938  | 5001.108  |
| AB037792  | 1189.802  | 1586.642  | NM_004982 | 2220.807  | 2860.504  | NM_000040 | 1763.755  | 2824.252  |
| AK022480  | 265.155   | 314.097   | NM_000217 | 702.421   | 815.022   | NM_004631 | 1317.808  | 1451.629  |
| AK024158  | 511.019   | 600.652   | AK026180  | 1661.929  | 1628.162  | NM_006033 | 1439.156  | 1438.17   |
| AL080082  | 428.897   | 442.853   | NM_005817 | 5945.822  | 6930.139  | NM_004837 | 4069.755  | 3431.323  |
| AK021623  | 771.883   | 744.811   | NM_003916 | 5019.82   | 5128.44   | NM_000370 | 1019.879  | 957.475   |
| AK023733  | 370.587   | 305.332   | NM_002870 | 43376.355 | 46685.691 | BE865893  | 1718.05   | 1417.673  |
| AF056452  | 644.725   | 884.003   | NM_001478 | 48856.359 | 45874.664 | NM_003123 | 18672.563 | 13711.143 |
| AF119901  | 2325.525  | 3077.76   | NM_002612 | 1343.138  | 1447.912  | AY005822  | 613.938   | 592.226   |
| AK001936  | 1080.845  | 1427.992  | AF135422  | 3008.813  | 2440.768  | NM_018129 | 7939.5    | 6397.405  |
| NM_003770 | 35759.121 | 42892.043 | NM_004479 | 15981.126 | 14922.591 | AF289022  | 1575.759  | 1828.62   |
| AK001395  | 2368.858  | 3164.757  | NM_002610 | 1389.639  | 1072.007  | NM_016025 | 6351.557  | 6224.239  |
| S57803    | 4186.159  | 5117.061  | AF070587  | 5499.256  | 3649.768  | NM_013319 | 1348.008  | 1517.473  |
| AF131822  | 736.947   | 592.545   | BE250526  | 1675.314  | 2081.506  | NM_000722 | 506.703   | 447.326   |
| AK023131  | 1158.439  | 1302.575  | NM_016819 | 2090.421  | 1291.467  | NM_000929 | 205.235   | 292.548   |
| AJ276248  | 313.885   | 296.292   | NM_012222 | 7114.664  | 7485.299  | NM_018655 | 1509.725  | 1361.324  |
| AF085865  | 3277.756  | 4337.126  | NM_005002 | 3483.379  | 2894.269  | NM_005663 | 1228.846  | 846.161   |
| X78261    | 264.636   | 257.067   | NM_006596 | 4423.315  | 4013.12   | X89960    | 434.49    | 269.971   |
| AK025521  | 3063.241  | 3766.527  | AK023214  | 9390.324  | 9328.81   | NM_006550 | 858.987   | 630.554   |
| NM_001053 | 34098.82  | 36055.77  | NM_001469 | 11209.101 | 11524.87  | NM_005773 | 1918.97   | 1255.791  |
| Z70694    | 2142.133  | 2338.23   | NM_003600 | 7480.868  | 8421.172  | NM_017644 | 2181.648  | 2137.533  |
| L77602    | 485.747   | 456.344   | NM_017490 | 4751.919  | 5524.606  | NM_002482 | 787.686   | 1312.38   |
| NM_015421 | 6827.622  | 7023.104  | AK026727  | 2716.218  | 2699.551  | NM_001718 | 519.747   | 2254.169  |
| AF086081  | 2640.469  | 2568.163  | NM_002830 | 697.952   | 858.665   | AF116659  | 514.215   | 846.328   |
| NM_018634 | 251.463   | 332.834   | NM_006247 | 6611.325  | 6554.125  | NM_000317 | 12925.754 | 8433.928  |
| NM_018111 | 605.673   | 394.897   | AB032983  | 2300.866  | 2322.088  | NM_018376 | 3171.692  | 2698.062  |
| L23867    | 493.118   | 510.29    | NM_018281 | 5952.152  | 6681.969  | NM_017615 | 407.814   | 298.198   |
| AB020968  | 319.852   | 472.907   | NM_004457 | 6589.21   | 6160.412  | NM_017438 | 1713.429  | 1599.287  |
| AL138690  | 1117.794  | 1235.055  | NM_014049 | 3241.003  | 3465.181  | U59209    | 1134.012  | 1355.7    |
| AK000394  | 464.46    | 531.573   | NM_005396 | 800.188   | 750.344   | NM_020195 | 3871.793  | 3891.235  |
| NM_013941 | 831.926   | 982.977   | BI912037  | 1877.674  | 1857.177  | AK023824  | 2295.916  | 2298.122  |
| AF074989  | 930.718   | 912.963   | AA454646  | 910.906   | 848.898   | AL133069  | 1919.056  | 1830.466  |
| AK001107  | 580.238   | 386.602   | U18087    | 53697.035 | 48914.52  | AL117574  | 361.319   | 507.557   |
| AF147393  | 585.785   | 450.732   | U66349    | 1030.563  | 1032.759  | AK026055  | 4696.593  | 4655.437  |
| AL080112  | 1611.058  | 2035.71   | AA057156  | 1528.79   | 1585.419  | AK024126  | 788.365   | 821.606   |
| AK022299  | 223.779   | 392.34    | AF166327  | 18240.5   | 18264.469 | NM_001516 | 2875.413  | 2548.35   |
| AL137325  | 354.674   | 386.672   | AF260739  | 1542.716  | 1626.902  | NM_019086 | 614.835   | 549.459   |
| AF147361  | 822.837   | 864.024   | AF531423  | 3358.211  | 3074.965  | NM_006670 | 2055      | 2076.048  |
| AL133086  | 881.575   | 913.559   | X76555    | 1031.658  | 1054.389  | NM_012425 | 3704.888  | 2465.604  |

|           |           |           |           |           |           |           |           |          |
|-----------|-----------|-----------|-----------|-----------|-----------|-----------|-----------|----------|
| NM_012151 | 25118.195 | 29871.328 | NM_005432 | 2331.792  | 2287.725  | NM_005816 | 916.632   | 787.648  |
| AF087994  | 1486.236  | 1654.778  | L10386    | 3446.479  | 3829.667  | NM_002750 | 4585.461  | 2800.823 |
| AJ227912  | 1209.582  | 1297.376  | AF061812  | 9977.058  | 12543.114 | AK024134  | 2074.942  | 1312.295 |
| NM_018195 | 1949.868  | 2374.904  | AL136756  | 1739.864  | 2315.454  | NM_003014 | 774.607   | 452.705  |
| AK025532  | 2712.125  | 2783.41   | NM_012469 | 12034.906 | 13309.421 | NM_018558 | 477.474   | 329.068  |
| AK021789  | 317.806   | 271.865   | NM_134260 | 10708.137 | 9403.228  | NM_001974 | 1869.748  | 1818.904 |
| AF086383  | 237.003   | 299.914   | NM_014448 | 2004.663  | 1888.424  | NM_013957 | 585.435   | 518.705  |
| NM_003522 | 923.926   | 888.832   | AL080157  | 3482.55   | 3183.86   | NM_002468 | 3946.497  | 2771.589 |
| BF217847  | 614.454   | 539.481   | NM_005308 | 2405.396  | 2082.339  | NM_003028 | 1050.911  | 704.625  |
| NM_005320 | 2816.191  | 1851.669  | NM_007227 | 501.111   | 525.513   | NM_001566 | 669.076   | 510.493  |
| CY3Cy5    | 5073.053  | 193.018   | NM_007023 | 570.208   | 677.423   | NM_016541 | 321.093   | 204.28   |
| BI830936  | 813.911   | 616.486   | NM_005873 | 6852.555  | 7110.398  | NM_018548 | 2736.105  | 2734.493 |
| U79292    | 4480.397  | 3459.853  | NM_004624 | 2149.912  | 2382.24   | NM_013401 | 682.639   | 696.259  |
| AA947915  | 459.825   | 552.724   | NM_014461 | 771.158   | 1021.872  | NM_018238 | 1803.512  | 1620.21  |
| BI830753  | 440.69    | 454.975   | AB015330  | 6817.7    | 7029.885  | NM_006858 | 4549.498  | 3683.125 |
| X68314    | 1306.646  | 1025.84   | NM_001455 | 3669.945  | 3742.37   | NM_001405 | 3613.781  | 2400.299 |
| X71973    | 16653.842 | 17171.857 | L09071    | 578.104   | 661.047   | NM_003880 | 604.714   | 716.332  |
| T49651    | 13253.406 | 12578.471 | NM_003322 | 1772.505  | 2011.835  | AF131778  | 730.35    | 620.296  |
| N51014    | 1027.357  | 725.898   | NM_005817 | 5448.881  | 5226.247  | NM_001562 | 1147.978  | 1235.664 |
| BE392471  | 12128.054 | 17875.648 | NM_003916 | 4885.266  | 3771.886  | NM_013278 | 697.19    | 632.597  |
| AI802950  | 3077.949  | 4337.546  | NM_002870 | 36721.43  | 34921.73  | NM_003487 | 4378.806  | 2487.577 |
| AI741278  | 338.077   | 295.743   | NM_006363 | 5423.963  | 4589.41   | NM_006887 | 6095.446  | 5068.176 |
| AL043686  | 6017.752  | 4872.564  | NM_020415 | 3767.722  | 3427.621  | NM_006477 | 738.607   | 567.34   |
| AA490172  | 1480.413  | 1037.698  | NM_014879 | 263.618   | 259.115   | NM_002880 | 2625.524  | 2017.515 |
| AA775212  | 4507.481  | 4014.772  | AL049667  | 4397.422  | 5114.704  | NM_000678 | 2788.153  | 1698.677 |
| NM_000945 | 2180.547  | 2066.934  | NM_000334 | 3578.165  | 4132.152  | NM_001066 | 732.369   | 434.19   |
| CY3Cy5    | 4960.065  | 208.091   | NM_020400 | 1642.2    | 1913.053  | NM_004657 | 584.854   | 261.658  |
| NM_003371 | 15063.896 | 9706.45   | NM_001504 | 1797.567  | 1929.73   | NM_018170 | 1197.951  | 892.909  |
| AK023114  | 3560.813  | 2666.013  | D50926    | 2489.014  | 2914.196  | NM_003867 | 251.514   | 507.853  |
| NM_003678 | 3256.45   | 2850.125  | BF205683  | 3553.906  | 4238.935  | AK022588  | 293.043   | 378.079  |
| NM_012301 | 540.677   | 534.95    | NM_001565 | 474.116   | 543.365   | AL162062  | 382.972   | 289.565  |
| NM_005631 | 1507.306  | 1420.433  | NM_001548 | 510.987   | 614.661   | NM_003173 | 3991.16   | 1992.487 |
| NM_014419 | 2216.503  | 1941.228  | NM_000758 | 5284.714  | 5171.313  | NM_005030 | 6036.721  | 3197.861 |
| NM_014938 | 2579.673  | 2701.638  | M17017    | 577.96    | 867.483   | NM_017584 | 1939.578  | 1284.557 |
| NM_000441 | 1035.554  | 2306.798  | NM_002990 | 5768.842  | 6638.262  | NM_020358 | 1498.111  | 1519.264 |
| AK026066  | 1247.286  | 982.703   | NM_002432 | 2321.553  | 2153.766  | AB014541  | 4923.166  | 3277.475 |
| NM_005244 | 2826.678  | 2259.851  | AB033037  | 1798.077  | 1450.277  | NM_002583 | 1565.716  | 1569.633 |
| NM_005270 | 791.455   | 538.442   | L40400    | 5195.696  | 4825.82   | NM_006570 | 8331.437  | 6339.837 |
| NM_014815 | 1499.033  | 1261.644  | NM_006247 | 6436.678  | 6874.624  | NM_020348 | 698.131   | 594.903  |
| X58377    | 952.715   | 918.299   | AB032983  | 2191.107  | 2187.165  | NM_006034 | 3836.655  | 3352.29  |
| NM_014668 | 2017.988  | 1372.061  | NM_018281 | 5377.028  | 5324.26   | AB040943  | 337.569   | 329.481  |
| NM_004722 | 3119.902  | 2703.732  | NM_004457 | 6218.042  | 5547.325  | NM_005201 | 2622.204  | 2152.998 |
| NM_014425 | 1108.767  | 748.401   | NM_014049 | 3085.878  | 2195.355  | NM_000092 | 323.241   | 210.291  |
| NM_012133 | 3088.71   | 2598.917  | NM_005396 | 503.601   | 550.09    | AF174600  | 4742.976  | 4039.319 |
| NM_017954 | 1654.601  | 1272.12   | NM_004315 | 6655.557  | 6645.704  | AK001003  | 1172.52   | 989.191  |
| NM_006612 | 772.186   | 1140.52   | NM_020166 | 4304.936  | 3363.567  | NM_002800 | 11545.098 | 9056.896 |
| NM_016451 | 1646.763  | 1715.694  | S56138    | 452.388   | 379.695   | NM_018384 | 8539.751  | 5029.338 |
| NM_007351 | 9610.058  | 10164.567 | AK023860  | 2879.09   | 2728.692  | AF282617  | 4846.723  | 3838.507 |
| AK026266  | 5049.357  | 4579.642  | NM_000031 | 3526.791  | 3739.762  | AF157323  | 1569.592  | 1174.315 |
| NM_007124 | 2456.949  | 2415.323  | NM_002085 | 23188.209 | 23545.896 | NM_006025 | 260.134   | 247.965  |
| NM_003176 | 1956.97   | 1795.016  | AK026061  | 1302.174  | 2156.016  | NM_005877 | 5871.976  | 2980.812 |
| NM_000723 | 929.499   | 596.219   | NM_016286 | 9096.515  | 10353.712 | NM_003338 | 4333.312  | 1860.617 |
| AL096751  | 5558.13   | 4162.915  | NM_001567 | 1409.669  | 1611.074  | NM_013396 | 584.739   | 305.845  |

|           |           |           |           |           |           |           |           |           |
|-----------|-----------|-----------|-----------|-----------|-----------|-----------|-----------|-----------|
| NM_000364 | 735.669   | 500.544   | NM_004905 | 11925.079 | 12036.732 | NM_017752 | 791.844   | 712.839   |
| AF026920  | 3836.811  | 2941.603  | AF217971  | 5506.708  | 6390.638  | D26069    | 4414.16   | 3885.719  |
| NM_004931 | 2742.05   | 2094.099  | NM_001925 | 703.55    | 1063.127  | BF107577  | 7197.591  | 5565.583  |
| AB011099  | 477.504   | 1107.629  | AF245517  | 1273.834  | 1301.509  | NM_005837 | 6636.044  | 5652.835  |
| AF090409  | 901.302   | 950.58    | NM_004982 | 2583.972  | 2829.811  | NM_016625 | 3700.903  | 3142.419  |
| NM_004244 | 2612.302  | 2308.218  | NM_001694 | 59685.781 | 62189.477 | NM_017493 | 965.487   | 1202.585  |
| AK001500  | 1164.315  | 885.247   | AF286370  | 1177.225  | 1261.976  | NM_006136 | 4456.674  | 4733.201  |
| NM_006774 | 517.342   | 514.788   | NM_000217 | 646.824   | 939.975   | AF237772  | 1025.273  | 916.8     |
| NM_020129 | 1247.163  | 1043.822  | NM_012469 | 12820.095 | 11627.087 | AK025934  | 855.326   | 861.422   |
| Y16521    | 3762.478  | 3200.937  | NM_134260 | 9171.095  | 7410.634  | AJ008154  | 539.178   | 580.279   |
| AL050371  | 3307.85   | 3840.554  | NM_001478 | 53404.418 | 50575.445 | NM_006856 | 2953.56   | 2362.973  |
| NM_002651 | 2357.597  | 2452.099  | AF135422  | 3067.698  | 2446.097  | X52350    | 48303.031 | 49426.328 |
| NM_002413 | 2268.622  | 1740.247  | NM_004479 | 15233.753 | 17273.055 | AF071554  | 692.895   | 476.958   |
| NM_017577 | 989.046   | 613.84    | NM_002610 | 1349.716  | 1311.038  | NM_002147 | 277.097   | 741.456   |
| NM_001647 | 1888.536  | 1497.672  | AF070587  | 5709.725  | 4790.334  | U90919    | 1584.397  | 1691.807  |
| NM_018158 | 2487.789  | 2320.161  | BE250526  | 903.739   | 1025.291  | NM_006177 | 370.76    | 217.974   |
| NM_016301 | 6170.634  | 5947.215  | NM_016819 | 1953.408  | 2108.393  | AL137286  | 1850.46   | 883.075   |
| AK021975  | 895.099   | 778.648   | NM_012222 | 8135.153  | 9560.708  | NM_016358 | 2093.778  | 507.235   |
| AB032952  | 16325.026 | 11107.523 | NM_005002 | 3506.263  | 3506.75   | NM_016275 | 7292.323  | 5896.828  |
| NM_002522 | 21406.387 | 17328.678 | NM_006596 | 4706.261  | 4450.792  | NM_020418 | 1939.853  | 2601.441  |
| NM_018607 | 485.16    | 1071.292  | AK023214  | 9978.071  | 10530.335 | NM_013293 | 2656.848  | 3445.14   |
| AB040879  | 1760.649  | 937.666   | NM_001469 | 11638.02  | 12311.928 | AF315592  | 2293.492  | 1199.954  |
| AL049935  | 18149.336 | 10725.727 | NM_017490 | 5203.678  | 5142.687  | AF095844  | 662.737   | 353.815   |
| AB033043  | 9363.874  | 8213.663  | NM_002718 | 1990.633  | 2376.144  | NM_015833 | 1116.014  | 625.275   |
| NM_014999 | 6209.675  | 4883.665  | NM_002830 | 765.618   | 827.636   | NM_000986 | 49485.957 | 74919.758 |
| AK025220  | 2815.054  | 2779.675  | L09071    | 600.624   | 521.089   | AK026760  | 5685.874  | 4072.263  |
| NM_016308 | 10489.638 | 11100.821 | NM_003322 | 1340.666  | 2262.197  | NM_014772 | 1261.293  | 1393.422  |
| D42046    | 4277.958  | 4117.86   | BC036375  | 19748.258 | 16636.955 | AK025248  | 973.138   | 912.175   |
| NM_001033 | 10292.751 | 10584.049 | BI912037  | 1548.917  | 1628.633  | NM_004539 | 7461.343  | 7364.13   |
| NM_004526 | 12859.261 | 13452.824 | AA454646  | 945.007   | 960.745   | NM_006428 | 7845.868  | 7770.032  |
| NM_002526 | 5547.913  | 3853.347  | U18087    | 53245.223 | 56461.98  | NM_004280 | 11049.104 | 8913.296  |
| NM_020135 | 5357.734  | 4890.531  | U66349    | 1435.176  | 1146.776  | AF110399  | 982.445   | 904.718   |
| NM_018518 | 3826.719  | 3656.196  | AA057156  | 1758.099  | 2042.684  | AK027094  | 1767.742  | 1918.689  |
| AK023149  | 2084.438  | 2177.632  | U19487    | 11201.848 | 12006.353 | AL359596  | 922.113   | 733.341   |
| AK023168  | 3596.424  | 3051.702  | AF166327  | 16931.928 | 19396.061 | U79249    | 422.329   | 370.34    |
| NM_006646 | 1733.065  | 1588.754  | AF260739  | 1678.87   | 1889.436  | AK022114  | 498.398   | 365.576   |
| NM_004742 | 1915.483  | 1533.6    | X76555    | 1057.125  | 1343.758  | AL133585  | 839.153   | 943.779   |
| NM_014753 | 2984.903  | 1905.869  | NM_005432 | 2258.69   | 2528.71   | NM_002631 | 9217.647  | 11882.747 |
| NM_006585 | 34528.137 | 26445.775 | L10386    | 3223.462  | 4023.677  | NM_000775 | 345.65    | 396.302   |
| NM_000240 | 4315.091  | 4594.807  | AL136756  | 1946.917  | 1821.318  | AB032981  | 215.695   | 115.153   |
| AK025395  | 683.057   | 644.654   | NM_002990 | 5728.232  | 5113.139  | BF217864  | 3181.66   | 1030.769  |
| NM_000388 | 830.308   | 789.223   | NM_002432 | 1847.349  | 1884.359  | NM_005917 | 15352.158 | 10269.906 |
| NM_002469 | 581.879   | 513.454   | AB033037  | 1940.656  | 2744.028  | NM_007052 | 306.868   | 796.968   |
| BI830936  | 977.809   | 947.801   | L40400    | 5403.89   | 7396.8    | BC017044  | 554.111   | 844.899   |
| U79292    | 3133.829  | 3227.658  | AK025688  | 2468.086  | 2724.003  | AV758498  | 1210.119  | 2599.109  |
| AA947915  | 673.095   | 750.257   | NM_014448 | 2653.007  | 2584.526  | NM_020196 | 2068.785  | 4437.245  |
| BI830753  | 606.721   | 997.932   | AL080157  | 4691.491  | 4432.654  | AK024113  | 371.777   | 408.115   |
| X68314    | 1346.488  | 912.725   | NM_005308 | 2490.178  | 2925.589  | NM_018657 | 595.107   | 365.126   |
| X71973    | 14975.143 | 13038.695 | NM_000911 | 455.79    | 506.592   | L40410    | 8353.511  | 4146.4    |
| T49651    | 13303.074 | 12508.282 | NM_007227 | 697.898   | 806.496   | NM_007055 | 950.805   | 770.925   |
| N51014    | 1363.958  | 1086.187  | NM_007023 | 590.855   | 599.757   | NM_016652 | 1052.163  | 1261.325  |
| BE392471  | 13047.742 | 11643.632 | NM_005873 | 7069.598  | 6178.103  | NM_016310 | 6171.296  | 6106.232  |
| AI802950  | 1374.749  | 1198.618  | NM_004624 | 1834.492  | 1762.763  | AK021562  | 481.951   | 543.497   |

|           |           |           |           |           |           |           |           |           |
|-----------|-----------|-----------|-----------|-----------|-----------|-----------|-----------|-----------|
| AI741278  | 506.336   | 581.719   | NM_014461 | 603.653   | 652.221   | BC006560  | 749.807   | 901.492   |
| AA682423  | 526.83    | 445.227   | NM_003865 | 1173.422  | 1366.632  | NM_006296 | 485.609   | 325.992   |
| AL043686  | 6076.698  | 3957.462  | AB015330  | 6977.171  | 8192.528  | AF060938  | 13490.324 | 9547.747  |
| AA490172  | 911.096   | 683.811   | NM_001455 | 3415.49   | 3165.407  | NM_001973 | 2064.112  | 1845.209  |
| AA775212  | 4731.278  | 3590.766  | NM_004982 | 2397.89   | 2486.271  | NM_014466 | 2712.22   | 2999.607  |
| NM_000945 | 2997.608  | 3281.352  | NM_001694 | 58504.031 | 59778.836 | AL050015  | 1027.57   | 958.173   |
| AB011174  | 2215.003  | 2003.936  | AF286370  | 852.777   | 1095.63   | AY007117  | 3214.757  | 3798.517  |
| NM_000607 | 20175.797 | 14026.624 | AK026180  | 1172.991  | 1278.648  | AF039698  | 1976.374  | 3831.842  |
| AB011099  | 345.838   | 151.135   | NM_005817 | 5466.65   | 5529.563  | AF144487  | 985.484   | 1785.224  |
| AF090409  | 544.02    | 340.139   | NM_003916 | 4934.432  | 5351.002  | AL137532  | 1099.418  | 893.527   |
| NM_002575 | 2527.187  | 2828.454  | NM_002870 | 39390.57  | 44231.32  | AK025419  | 1416.344  | 783.41    |
| NM_004244 | 2952.893  | 2823.12   | NM_006363 | 6508.941  | 5663.408  | AK074298  | 140.06    | 213.527   |
| NM_003371 | 7597.243  | 6233.294  | NM_020415 | 3395.173  | 3964.759  | NM_017413 | 865.746   | 1156.626  |
| NM_001164 | 504.875   | 466.726   | AL049667  | 4880.339  | 6317.446  | NM_013255 | 2976.41   | 8499.796  |
| AK023114  | 3785.587  | 3385.998  | NM_000334 | 4495.305  | 5260.687  | NM_018375 | 2970.721  | 6015.878  |
| NM_003678 | 2978.854  | 3115.987  | NM_020400 | 1887.793  | 2036.549  | AK026838  | 795.795   | 1009.758  |
| NM_014271 | 549.763   | 528.488   | NM_001504 | 2044.356  | 1657.779  | AK022443  | 1229.228  | 2215.841  |
| NM_012301 | 668.381   | 570.568   | D50926    | 2507.558  | 3035.605  | AK023371  | 866.159   | 1845.597  |
| NM_005631 | 1242.567  | 1365.017  | BF205683  | 3791.516  | 4180.766  | AF086187  | 1581.773  | 1006.741  |
| NM_014419 | 3228.377  | 2799.147  | NM_001548 | 568.368   | 648.411   | AF305836  | 27922.139 | 23016.449 |
| NM_014938 | 3036.257  | 3059.558  | NM_000758 | 4997.519  | 4146.226  | AL137383  | 129.268   | 408.356   |
| AF049460  | 543.291   | 531.579   | M17017    | 530.645   | 889.523   | AL035295  | 1386.335  | 1609.252  |
| AK026066  | 1400.341  | 999.135   | NM_003600 | 7136.99   | 6472.018  | NM_018302 | 3781.793  | 4532.998  |
| NM_005244 | 2470.049  | 1626.787  | NM_017490 | 5151.936  | 5494.678  | AK027252  | 1304.8    | 1089.301  |
| AF054589  | 1071.631  | 961.717   | NM_002718 | 2041.808  | 2543.445  | AF165527  | 1280.246  | 928.523   |
| NM_014815 | 2175.117  | 2352.979  | NM_002830 | 780.201   | 928.629   | NM_014092 | 622.613   | 724.393   |
| NM_005443 | 2675.336  | 2897.157  | NM_006247 | 6819.097  | 6815.805  | AL110133  | 3985.126  | 3670.911  |
| NM_007221 | 6908.169  | 7402.645  | AB032983  | 2619.719  | 2623.404  | AK000529  | 4273.95   | 9618.535  |
| X54163    | 15052.982 | 14115.151 | NM_018281 | 5479.816  | 5924.054  | AF147415  | 1051.381  | 2003.828  |
| NM_002978 | 1606.514  | 1695.036  | NM_004457 | 6017.662  | 6466.328  | AL049273  | 478.869   | 1162.955  |
| S83549    | 866.321   | 555.305   | NM_014049 | 3377.756  | 3494.184  | AK098474  | 401.255   | 1023.522  |
| NM_014668 | 1614.315  | 1686.86   | NM_005396 | 683.949   | 1075.457  | AL117475  | 729.851   | 1494.018  |
| NM_004722 | 2242.233  | 1946.382  | NM_004315 | 6753.35   | 7939.946  | AL049300  | 197.458   | 200.605   |
| NM_014425 | 907.833   | 818.766   | NM_020166 | 4578.291  | 4881.304  | NM_017535 | 2094.995  | 2703.709  |
| NM_012133 | 2434.128  | 2572.295  | S56138    | 342.276   | 545.266   | AL117539  | 474.074   | 358.723   |
| NM_017954 | 927.699   | 1156.174  | AK023860  | 3606.243  | 4145.301  | NM_003887 | 773.732   | 401.715   |
| NM_006612 | 1448.611  | 2984.112  | NM_000031 | 4000.602  | 4057.122  | NM_004267 | 4329.164  | 2706.334  |
| NM_016451 | 3784.003  | 4452.764  | AK026061  | 1473.811  | 1788.55   | AL357212  | 199.558   | 193.45    |
| NM_007351 | 13544.038 | 13937.934 | NM_016286 | 10336.563 | 10701.205 | AK026687  | 1111.53   | 1181.487  |
| AK026266  | 6666.656  | 6360.064  | NM_001567 | 1704.547  | 1980.464  | AL117444  | 713.042   | 560.688   |
| NM_007124 | 2797.644  | 2519.364  | NM_004905 | 11678.95  | 11162.194 | NM_017994 | 6238.872  | 6005.993  |
| NM_003176 | 2215.115  | 1642.55   | AF217971  | 5553.992  | 6901.862  | AK021693  | 1284.546  | 1332.581  |
| NM_000723 | 1138.574  | 1463.894  | NM_001925 | 750.339   | 1043.153  | AB023177  | 299.376   | 299.026   |
| AL096751  | 5689.964  | 4809.821  | AF245517  | 1165.789  | 969.52    | NM_012125 | 3520.576  | 7584.379  |
| NM_000364 | 1593.575  | 1844.5    | X78926    | 3400.892  | 2960.942  | AB032363  | 437.982   | 747.649   |
| AF026920  | 4571.165  | 4350.014  | AJ278110  | 1762.516  | 1695.145  | AF009294  | 2373.964  | 3738.5    |
| NM_004931 | 2635.123  | 2980.632  | NM_014237 | 2501.734  | 3192.938  | NM_001524 | 481.205   | 923.106   |
| NM_006795 | 16507.936 | 12289.764 | NM_016178 | 2734.231  | 3365.469  | AF056445  | 215.8     | 461.129   |
| AF070568  | 3583.944  | 2622.798  | AK022639  | 2557.045  | 2915.631  | AK000998  | 636.559   | 1329.57   |
| NM_000240 | 3619.822  | 3075.579  | D31766    | 8675.321  | 9593.956  | AK001225  | 430.755   | 868.582   |
| AK055733  | 10894.781 | 8101.705  | NM_006547 | 1715.574  | 1884.788  | AK021684  | 1129.774  | 2785.786  |
| AF298880  | 5723.257  | 5422.193  | NM_001478 | 46347.719 | 46113.254 | AK001060  | 341.754   | 695.101   |
| AK001500  | 1207.105  | 988.078   | AF135422  | 3690.47   | 3604.067  | AK025112  | 438.829   | 348.479   |

|           |           |           |           |           |           |           |           |           |
|-----------|-----------|-----------|-----------|-----------|-----------|-----------|-----------|-----------|
| NM_006774 | 455.722   | 432.925   | NM_004479 | 21954.6   | 27784.537 | AK026079  | 147.712   | 134.153   |
| NM_020129 | 1052.284  | 1011.008  | AF070587  | 5812.453  | 5353.398  | AK025173  | 3174.071  | 3910.987  |
| Y16521    | 3434.044  | 3909.336  | BE250526  | 993.839   | 1288.497  | AK025430  | 453.993   | 334.129   |
| AL050371  | 4376.899  | 7183.937  | NM_016819 | 1438.865  | 1362.572  | AK026722  | 238.732   | 356.331   |
| NM_002651 | 2728.185  | 3494.707  | NM_012222 | 9878.068  | 11165.28  | BE905682  | 373.509   | 523.564   |
| NM_002413 | 3566.851  | 4197.869  | NM_005002 | 3468.52   | 3378.547  | AF086421  | 986.302   | 1730.99   |
| NM_017577 | 771.584   | 778.297   | NM_006596 | 4605.492  | 4720.591  | AK001612  | 553.239   | 1383.576  |
| NM_001647 | 2604.583  | 1721.789  | AK023214  | 9939.223  | 9978.595  | AF161522  | 4079.431  | 10490.839 |
| NM_018158 | 2592.836  | 2109.648  | NM_001469 | 11859.854 | 10900.715 | AF086028  | 8994.174  | 10335.494 |
| NM_016301 | 5711.73   | 6133.604  | BC036368  | 1325.782  | 1259.433  | AK025365  | 751.219   | 678.114   |
| AK021975  | 790.886   | 837.262   | NM_001851 | 3673.244  | 3115.792  | AK023489  | 457.719   | 441.812   |
| AB032952  | 23481.254 | 20926.6   | S67789    | 2832.572  | 2588.685  | AK021561  | 1249.059  | 1231.23   |
| NM_000945 | 2869.677  | 2507.563  | NM_004195 | 32337.453 | 45521.871 | AK025222  | 218.596   | 187.83    |
| NM_002574 | 62883.988 | 60481.125 | NM_004705 | 5574.272  | 5874.382  | NM_003531 | 1673.628  | 2190.083  |
| AB011174  | 2611.276  | 1815.525  | NM_020190 | 15223.785 | 18367.461 | NM_003510 | 596.778   | 675.041   |
| AB043635  | 591.023   | 432.211   | AK024003  | 707.528   | 1064.912  | AL137403  | 1492.634  | 3586.279  |
| AB040879  | 1132.733  | 1102.802  | NM_014357 | 4875.909  | 6115.291  | AL049348  | 554.853   | 622.888   |
| AL049935  | 14513.791 | 11322.659 | NM_004067 | 2035.521  | 2243.711  | NM_018534 | 748.513   | 1505.923  |
| AB033043  | 7241.19   | 8066.043  | NM_000121 | 10967.619 | 11096.832 | AB037847  | 1776.288  | 3553.721  |
| NM_014999 | 5518.775  | 5290.681  | NM_002091 | 14957.498 | 13687.781 | NM_005170 | 1674.462  | 4667.258  |
| AK025220  | 2870.731  | 3040.85   | AB033092  | 5032.474  | 5289.665  | S96437    | 1049.973  | 2211.764  |
| NM_016308 | 12466.058 | 17399.635 | NM_003023 | 1203.817  | 1312.121  | NM_015176 | 1090.872  | 2481.412  |
| D42046    | 4944.34   | 5895.073  | BC035030  | 7759.821  | 8785.569  | AL353939  | 557.912   | 1364.809  |
| NM_002526 | 10098.104 | 10904.545 | NM_005340 | 56313.887 | 57151.215 | AL117573  | 2343.109  | 5303.402  |
| NM_020135 | 7009.997  | 7062.63   | NM_016201 | 6151.944  | 5085.704  | AL080186  | 635.715   | 1665.327  |
| NM_018518 | 5128.007  | 5693.92   | NM_000864 | 3103.319  | 3124.554  | NM_005306 | 14535.438 | 28813.006 |
| AK023149  | 2874.07   | 2871.764  | NM_017977 | 4018.281  | 4029.445  | AL137327  | 2084.452  | 3823.194  |
| AK023168  | 3699.783  | 3938.029  | AF147727  | 2498.788  | 2485.117  | AF358454  | 2592.9    | 1597.174  |
| NM_006646 | 1966.028  | 2574.207  | NM_006751 | 4375.734  | 4029.721  | AK026090  | 840.987   | 788.694   |
| NM_004742 | 2207.747  | 2028.535  | AB037834  | 3256.137  | 3280.726  | AF070637  | 177.863   | 109.647   |
| NM_014753 | 3076.15   | 2206.608  | NM_003569 | 1617.087  | 1488.025  | AL137634  | 517.66    | 773.901   |
| NM_006585 | 36628.289 | 33133.668 | NM_014052 | 18826.35  | 12547.776 | AK024863  | 3792.933  | 3492.948  |
| NM_005270 | 644.763   | 718.372   | NM_002777 | 1631.216  | 1866.652  | AJ008135  | 29702.596 | 21304.84  |
| NM_014815 | 1924.303  | 1345.293  | AF202635  | 1488.995  | 1140.454  | AK026908  | 3208.086  | 3023.445  |
| NM_005443 | 2951.411  | 2236.951  | NM_014125 | 1246.439  | 1060.741  | U92025    | 263.13    | 271.043   |
| NM_007221 | 7829.725  | 6250.533  | NM_017904 | 1272.324  | 1636.664  | AF009323  | 609.885   | 816.95    |
| X54163    | 17061.787 | 15410.917 | NM_013367 | 4006.742  | 5194.812  | AK001526  | 2519.031  | 5399.433  |
| AK025395  | 699.115   | 780.266   | AL137550  | 257.317   | 484.575   | NM_000519 | 310.166   | 857.605   |
| NM_000388 | 585.698   | 663.178   | NM_000321 | 7852.371  | 8101.83   | AF086183  | 473.776   | 884.257   |
| X58377    | 380.484   | 719.585   | NM_006341 | 17895.977 | 18388.352 | AK000525  | 917.301   | 2077.467  |
| BI830936  | 568.704   | 1031.86   | NM_001709 | 3696.49   | 3457.112  | AL137434  | 471.371   | 1016.028  |
| U79292    | 4704.04   | 7177.798  | NM_006191 | 4075.792  | 4150.985  | Z36795    | 992.511   | 1969.887  |
| AA947915  | 1446.726  | 2317.125  | NM_001800 | 7786.603  | 5891.4    | AL080216  | 1293.016  | 3373.408  |
| BI830753  | 723.675   | 1077.098  | NM_004336 | 11875.083 | 9165.03   | NM_019897 | 374.146   | 698.874   |
| X71973    | 20166.553 | 22189.512 | NM_015949 | 2601.384  | 2917.343  | AJ227888  | 407.454   | 392.217   |
| T49651    | 16567.146 | 17456.598 | NM_013979 | 4301.202  | 4384.985  | D17046    | 380.435   | 289.906   |
| N51014    | 1287.026  | 1333.888  | NM_003790 | 4171.411  | 3990.206  | NM_017645 | 4752.966  | 3743.247  |
| BE392471  | 15024.413 | 17143.926 | NM_000494 | 4271.554  | 4376.651  | AJ227864  | 353.594   | 379.037   |
| AI802950  | 1622.668  | 2767.4    | NM_016023 | 1753.061  | 1511.313  | AF157562  | 2336.283  | 2123.105  |
| AL043686  | 6217.98   | 5431.883  | NM_003722 | 15764.429 | 15949.684 | AK021958  | 5745.949  | 3431.262  |
| AA490172  | 633.629   | 614.31    | NM_014430 | 604.763   | 673.119   | M31164    | 916.316   | 757.416   |
| NM_000723 | 1367.327  | 894.391   | AF085883  | 3042.883  | 2761.187  | AF113674  | 10001.707 | 9918.077  |
| AL096751  | 4813.715  | 3318.225  | NM_016571 | 1624.313  | 1954.386  | NM_003511 | 435.433   | 1568.345  |



|           |           |           |           |           |           |           |           |           |
|-----------|-----------|-----------|-----------|-----------|-----------|-----------|-----------|-----------|
| NM_000364 | 3203.563  | 2158.015  | NM_003688 | 559.418   | 448.684   | CY3Cy5    | 1697.441  | 160.854   |
| AF026920  | 3892.615  | 3255.791  | NM_016446 | 3604.29   | 3399.51   | H97792    | 792.37    | 257.739   |
| NM_004931 | 4533.438  | 3691.933  | NM_002516 | 1315.057  | 942.045   | M13509    | 297.327   | 224.625   |
| NM_000607 | 14357.636 | 11247.491 | AK023237  | 260.159   | 201.801   | X04076    | 1653.55   | 393.557   |
| NM_002575 | 1894.343  | 2643.846  | NM_001870 | 1404.213  | 1052.198  | W95082    | 948.299   | 258.421   |
| NM_004244 | 2987.996  | 4189.222  | AJ271216  | 1701.251  | 1316.407  | AA485362  | 514.427   | 229.082   |
| NM_012301 | 1389.873  | 1484.446  | NM_002771 | 678.381   | 939.2     | AJ222801  | 1450.82   | 348.112   |
| NM_005631 | 1583.945  | 1932.319  | U23028    | 3769.21   | 4386.514  | W72207    | 1910.852  | 401.13    |
| AK026066  | 1282.954  | 1197.512  | NM_000817 | 5682.121  | 5732.963  | BI772354  | 3107.702  | 841.53    |
| NM_018158 | 2814.46   | 1947.995  | AF113132  | 40001.688 | 39351.199 | AA733033  | 2914.609  | 911.365   |
| NM_016301 | 6432.983  | 5639.719  | NM_006571 | 11379.956 | 8808.163  | AA583574  | 1202.412  | 698.702   |
| AK021975  | 814.443   | 469.379   | NM_001875 | 553.163   | 569.241   | SR5       | 5570.885  | 2625.75   |
| AB032952  | 18182.736 | 13431.709 | AK022680  | 2151.489  | 1743.626  | SR7       | 3749.98   | 11176.778 |
| NM_002522 | 25905.266 | 15210.109 | NM_018946 | 9311.162  | 8659.888  | SR9       | 16214.767 | 800.347   |
| NM_002978 | 1813.231  | 1765.479  | NM_016359 | 11317.49  | 8740.043  | CY3Cy5    | 1248.563  | 120.704   |
| S83549    | 606.523   | 669.194   | NM_004156 | 9091.745  | 7811.234  | NM_017818 | 2458.017  | 820.885   |
| NM_014668 | 1657.62   | 1632.48   | AK000561  | 889.686   | 885.824   | NM_001767 | 3941.538  | 775.048   |
| NM_004722 | 3465.683  | 3169.539  | AB051449  | 26781.063 | 27147.275 | AF028823  | 3572.521  | 921.894   |
| NM_014425 | 1203.679  | 1104.682  | BC009187  | 9002.648  | 7591.666  | NM_004295 | 7894.808  | 1855.93   |
| NM_017954 | 1216.586  | 1143.592  | AL133617  | 565.107   | 633.225   | AF200815  | 990.788   | 688.151   |
| NM_006612 | 1311.004  | 1280.256  | NM_016485 | 8281.923  | 7703.252  | NM_013441 | 1955.62   | 1713.453  |
| AK026266  | 6495.832  | 8213.363  | NM_002615 | 832.61    | 956.744   | NM_003833 | 5583.957  | 2674.513  |
| NM_007124 | 2735.07   | 3418.781  | AF090894  | 796.939   | 737.414   | AK000868  | 2507.582  | 614.993   |
| NM_003176 | 2404.729  | 2736.419  | NM_006167 | 3045.501  | 2342.024  | NM_001233 | 2169.872  | 711.624   |
| AK023168  | 4072.756  | 3186.568  | NM_016357 | 5037.129  | 3630.197  | NM_001234 | 538.57    | 246.662   |
| NM_006646 | 1583.87   | 1445.269  | NM_014500 | 13548.179 | 10993.313 | BF679789  | 704.082   | 281.087   |
| NM_004742 | 2294.842  | 1417.458  | NM_020149 | 2084.692  | 1325.463  | AB007859  | 644.1     | 333.751   |
| NM_014753 | 4530.739  | 3656.589  | NM_006237 | 2786.125  | 2276.131  | NM_001127 | 1987.578  | 745.571   |
| NM_006585 | 37189.902 | 24851.063 | NM_001271 | 4007.566  | 2223.31   | NM_012430 | 1978.304  | 738.531   |
| NM_014331 | 4648.624  | 3125.767  | NM_003683 | 3208.164  | 1949.669  | AK023521  | 3726.718  | 1472.06   |
| NM_006795 | 12546.621 | 10767.345 | AF039019  | 4114.526  | 3899.867  | NM_014267 | 15890.097 | 11632.424 |
| AF070568  | 3326.548  | 3735.365  | NM_012255 | 4920.766  | 3494.744  | NM_001481 | 412.602   | 862.878   |
| NM_000277 | 455.237   | 370.791   | NM_018196 | 2299.26   | 1749.529  | NM_000256 | 1429.13   | 1059.315  |
| NM_000240 | 4011.073  | 3507.546  | NM_004818 | 6093.261  | 5403.225  | NM_020466 | 2656.126  | 3013.663  |
| AK055733  | 8800.538  | 9738.699  | J04205    | 12805.807 | 11003.848 | NM_014734 | 1399.856  | 1025.727  |
| AF298880  | 5610.178  | 5919.525  | D38491    | 5278.819  | 3597.137  | NM_002286 | 328.194   | 275.213   |
| AK001500  | 1235.006  | 1302.285  | AK026835  | 2623.314  | 2497.679  | AK026408  | 1077.281  | 444.28    |
| NM_006774 | 806.141   | 767.721   | NM_002819 | 16309.985 | 14490.252 | NM_005025 | 926.328   | 328.438   |
| NM_020129 | 1463.538  | 1790.041  | NM_013264 | 3632.029  | 3043.341  | NM_001056 | 488.057   | 379.824   |
| NM_002413 | 2719.554  | 3922.02   | NM_003315 | 11468.728 | 10907.876 | AY026461  | 2489.35   | 1577.912  |
| NM_017577 | 673.659   | 979.662   | NM_005570 | 14147.82  | 14438.066 | AK025708  | 3089.607  | 1605.943  |
| NM_001757 | 741.588   | 865.399   | NM_000086 | 10007.129 | 11021.119 | NM_000405 | 502.955   | 827.408   |
| NM_001647 | 2469.587  | 2728.344  | NM_003752 | 3495.51   | 3348.863  | NM_006405 | 4030.985  | 1609.574  |
| NM_006228 | 748.337   | 584.182   | NM_003932 | 15290.723 | 11947.341 | NM_006746 | 1623.938  | 2094.666  |
| NM_003768 | 6195.653  | 4684.019  | NM_016491 | 12755.845 | 10933.095 | AL137619  | 690.627   | 385.209   |
| NM_018393 | 1939.019  | 1571.919  | NM_006429 | 34547.992 | 26614.986 | NM_004300 | 7039.438  | 2102.565  |
| BF032535  | 5018.926  | 4117.575  | NM_003307 | 3369.256  | 2947.557  | AK001913  | 5672.4    | 8076.64   |
| NM_018332 | 3208.683  | 3185.89   | AF070565  | 1132.777  | 916.175   | NM_017737 | 1149.358  | 1371.149  |
| NM_005096 | 7904.377  | 5306.019  | AK021644  | 2449.438  | 1431.869  | NM_015484 | 5644.926  | 6465.953  |
| NM_006760 | 1133.198  | 1112.498  | NM_015944 | 1272.397  | 843.932   | NM_018046 | 1889.721  | 3757.851  |
| NM_012286 | 4552.583  | 4907.435  | NM_002064 | 1767.246  | 1498.728  | NM_013316 | 1657.295  | 2564.192  |
| AB037775  | 2431.843  | 2092.691  | NM_015523 | 8507.131  | 4097.931  | M20701    | 8309.799  | 11145.133 |
| L27560    | 1461.341  | 1410.857  | NM_015960 | 10114.532 | 9542.828  | NM_013274 | 3371.031  | 2008.961  |

|           |           |           |           |           |           |           |           |           |
|-----------|-----------|-----------|-----------|-----------|-----------|-----------|-----------|-----------|
| AB011174  | 2126.836  | 2693.966  | NM_006085 | 4303.777  | 2728.103  | AL050187  | 865.807   | 662.657   |
| AB043635  | 657.627   | 855.161   | NM_000907 | 7002.466  | 3923.445  | NM_004252 | 14014.336 | 8510.573  |
| AB040879  | 1313.887  | 1472.799  | AF254085  | 3679.676  | 2627.843  | AF172929  | 9418.874  | 5028.779  |
| AL049935  | 18447.359 | 18050.281 | NM_001987 | 1277.762  | 1177.68   | NM_006398 | 7555.453  | 4475.099  |
| AB033043  | 8793.665  | 12846.863 | AF244088  | 2260.68   | 1772.708  | AK025655  | 3100.004  | 1752.648  |
| NM_014998 | 6912.229  | 7222.362  | AK025434  | 769.853   | 533.63    | NM_004056 | 1720.205  | 670.842   |
| AK025220  | 3712.163  | 3583.055  | AJ251845  | 664.703   | 592.148   | NM_003833 | 7840.644  | 10793.112 |
| D42046    | 4736.566  | 3975.647  | AK000435  | 2052.753  | 1794.315  | AK000868  | 4322.548  | 4248.729  |
| NM_002526 | 6931.382  | 5365.019  | AK000569  | 6171.048  | 5829.938  | NM_001233 | 2597.041  | 3214.792  |
| NM_020135 | 6998.727  | 6320.393  | NM_006049 | 2933.148  | 2726.293  | NM_001234 | 902.063   | 1374.822  |
| NM_018518 | 4437.036  | 4965.93   | NM_017661 | 3481.916  | 3141.858  | H97792    | 1271.889  | 1387.12   |
| AK023149  | 3508.094  | 3703.09   | BC016698  | 13083.658 | 11584.382 | L33404    | 531.609   | 941.1     |
| NM_006438 | 1546.167  | 1060.105  | NM_007374 | 11767.774 | 9538.657  | M13509    | 757.974   | 1271.396  |
| NM_004598 | 576.752   | 699.74    | AK027185  | 1917.237  | 1519.071  | X04076    | 3551.213  | 6863.46   |
| AK024697  | 3537.889  | 2894.708  | AK025576  | 1228.986  | 986.243   | W72207    | 2197.668  | 632.793   |
| NM_006460 | 2854.483  | 2717.712  | AF147385  | 603.451   | 528.099   | BI772354  | 2768.22   | 1182.036  |
| L34156    | 746.898   | 683.768   | AL442086  | 4699.194  | 3674.655  | AA733033  | 2386.886  | 1377.032  |
| NM_003749 | 1627.541  | 1871.988  | BC034819  | 5531.402  | 5517.073  | AA583574  | 1170.283  | 702.979   |
| NM_003557 | 5591.437  | 6182.841  | AF147313  | 21897.264 | 26154.494 | AI690184  | 10235.107 | 5851.834  |
| NM_001257 | 16534.863 | 15484.212 | AF147382  | 59132.488 | 57960.762 | AA927490  | 929.424   | 592.865   |
| D85245    | 6299.077  | 6532.82   | AK001957  | 5456.327  | 6044.408  | NM_001824 | 31803.045 | 14828.604 |
| NM_000943 | 875.059   | 1722.808  | AK000850  | 777.909   | 765.827   | NM_005052 | 9387.628  | 3119.979  |
| NM_004658 | 3543.255  | 5427.613  | AK021833  | 2023.115  | 2487.15   | NM_014734 | 1423.3    | 1002.971  |
| NM_001250 | 4418.637  | 5365.321  | AF143867  | 2867.698  | 2167.133  | NM_002288 | 353.453   | 294.321   |
| AF298812  | 851.158   | 1067.106  | AK025889  | 5843.623  | 3974.868  | AK026408  | 871.51    | 457.913   |
| NM_004969 | 2026.953  | 3247.99   | NM_014715 | 3385.14   | 3161.306  | NM_005025 | 1052.067  | 714.171   |
| AK022581  | 7046.759  | 7573.053  | AF086448  | 2195.75   | 1718.655  | NM_020433 | 450.757   | 1113.785  |
| NM_018054 | 2347.648  | 2474.933  | AB019391  | 472.82    | 618.528   | NM_004295 | 11448.25  | 5683.429  |
| NM_006186 | 1079.326  | 771.301   | AF086386  | 1918.655  | 1787.945  | NM_002087 | 3833.332  | 1830.062  |
| NM_013271 | 8372.141  | 6720.71   | AF086413  | 454.783   | 622.232   | AB023154  | 240.336   | 126.807   |
| NM_004157 | 1497.217  | 1566.076  | AF086457  | 1784.86   | 1657.054  | NM_014585 | 1758.649  | 996.147   |
| NM_000684 | 1442.868  | 1162.334  | AK025469  | 1691.911  | 1593.6    | AF200815  | 599.568   | 523.68    |
| NM_000832 | 1011.622  | 707.859   | NM_020239 | 7053.216  | 7076.948  | NM_013441 | 1784.939  | 1203.954  |
| NM_015913 | 12444.158 | 9864.346  | AF070581  | 1212.786  | 1344.946  | NM_014421 | 661.016   | 774.987   |
| NM_005157 | 8194.284  | 6069.859  | AK024187  | 1224.882  | 1295.227  | AB033028  | 390.285   | 481.176   |
| NM_007354 | 1289.843  | 732.641   | AK022479  | 684.338   | 384.223   | M60499    | 1185.336  | 819.859   |
| U67037    | 1220.65   | 1098.469  | AK023572  | 1071.313  | 589.553   | NM_001614 | 72644.547 | 64201.867 |
| NM_004960 | 12096.334 | 9554.975  | AF086004  | 10826.396 | 8740.712  | NM_000052 | 269.503   | 279.613   |
| AF272370  | 5909.152  | 6036.12   | AF147433  | 678.516   | 728.213   | NM_012430 | 2309.971  | 1000.216  |
| AF130050  | 3619.563  | 3795.861  | AF085930  | 470.172   | 452.841   | NM_003917 | 7977.363  | 3500.776  |
| NM_012197 | 10656.18  | 13428.533 | AF086006  | 533.384   | 1324.857  | NM_007077 | 571.346   | 383.982   |
| AK024016  | 5668.576  | 6051.148  | AL137318  | 2355.03   | 2010.266  | NM_002956 | 1278.551  | 759.477   |
| NM_003581 | 6182.959  | 8326.429  | AL137482  | 836.876   | 701.225   | AB018739  | 569.761   | 549.311   |
| NM_002888 | 400.001   | 844.508   | AL162011  | 14604.441 | 11345.275 | NM_006750 | 19274.029 | 15425.585 |
| NM_012407 | 1608.902  | 2484.39   | AL390177  | 617.073   | 530.256   | NM_020164 | 3488.418  | 2166.828  |
| AF302505  | 1405.763  | 2528.587  | AL137678  | 491.035   | 256.876   | AK023521  | 3638.28   | 2784.341  |
| NM_007186 | 2134.554  | 3036.225  | AK056111  | 1310.151  | 993.52    | NM_014267 | 17865.684 | 15880.844 |
| NM_007044 | 2833.85   | 4867.176  | AL162055  | 323.98    | 487.105   | NM_001481 | 551.396   | 666.661   |
| AF294326  | 6245.896  | 8117.792  | Y13807    | 1431.861  | 1240.537  | U30872    | 659.347   | 579.114   |
| NM_014678 | 2683.877  | 3027.49   | AK023038  | 1651.062  | 1665.527  | NM_020468 | 2772.604  | 2122.794  |
| AB035301  | 448.795   | 462.778   | AK026206  | 2159.621  | 2262.524  | NM_002638 | 1173.31   | 842.816   |
| AB046800  | 5146.686  | 4693.138  | AF086074  | 4619.654  | 4175.337  | NM_006398 | 10585.977 | 5377.678  |
| NM_002162 | 10876.131 | 12010.556 | AK023964  | 3386.609  | 3868.005  | AK025655  | 1346.32   | 533.998   |

|           |           |           |           |           |           |           |           |           |
|-----------|-----------|-----------|-----------|-----------|-----------|-----------|-----------|-----------|
| NM_01545E | 1458.288  | 1042.716  | AF086066  | 327.084   | 180.055   | NM_00105E | 1058.77   | 914.566   |
| D13540    | 6803.854  | 6350.254  | AF086084  | 1414.963  | 1507.33   | NM_00040E | 356.088   | 328.793   |
| NM_01657C | 11337.008 | 8098.758  | AK000156  | 483.918   | 473.162   | NM_005564 | 28302.939 | 19660.168 |
| AF209198  | 1977.914  | 1590.89   | AL050184  | 1461.648  | 1366.038  | NM_00450E | 3263.306  | 5946.127  |
| L09247    | 1170.516  | 806.902   | AF085853  | 588.768   | 602.552   | NM_00640E | 4792.753  | 3736.329  |
| M69012    | 46638.762 | 42715.977 | AK027112  | 4598.622  | 5421.395  | NM_00674E | 865.884   | 1304.787  |
| AB037722  | 351.626   | 825.982   | AL049314  | 2739.226  | 1627.907  | AL137619  | 1128.31   | 713.771   |
| NM_00006E | 530.396   | 1057.189  | AF093016  | 13430.968 | 10804.416 | NM_001824 | 36936.168 | 13657.835 |
| NM_01838E | 1316.534  | 1935.979  | AF161345  | 1022.696  | 659.18    | AF319476  | 1828.903  | 2774.416  |
| AB033026  | 637.544   | 873.84    | -         | 954.17    | 745.983   | AK001913  | 5115.023  | 6429.136  |
| NM_01471E | 10549.603 | 10883.349 | AF090925  | 934.428   | 613.269   | NM_015484 | 4616.474  | 2432.062  |
| NM_00263E | 4041.438  | 3445.255  | NM_01416E | 15301.224 | 12215.326 | NM_01804E | 1149.433  | 800.853   |
| NM_016487 | 1956.454  | 1586.219  | AK021659  | 619.557   | 585.547   | NM_01331E | 1329.576  | 964.982   |
| NM_00580E | 11217.146 | 17018.516 | NM_014137 | 753.63    | 611.035   | M20701    | 7729.981  | 9883.431  |
| NM_006401 | 33277.281 | 49074.668 | AK021974  | 1941.14   | 1749.709  | NM_00291E | 988.696   | 1008.135  |
| AF269249  | 1290.69   | 1077.62   | AK022068  | 1182.782  | 698.106   | NM_013284 | 2573.106  | 1978.568  |
| X51417    | 562.972   | 410.878   | AK022229  | 1756.922  | 1098.331  | NM_00673E | 2474.999  | 3204.429  |
| D31763    | 4879.798  | 2972.25   | AK022362  | 4174.454  | 2194.812  | NM_013274 | 3577.339  | 2957.161  |
| NM_01816E | 7804.08   | 6830.263  | AK022004  | 5343.313  | 3898.576  | AL050187  | 1043.968  | 920.834   |
| AK021452  | 4004.156  | 3751.35   | AK022136  | 416.678   | 422.079   | NM_012387 | 11923.673 | 6647.385  |
| NM_00450E | 3019.51   | 3974.655  | AK022390  | 2208.172  | 2026.845  | NM_00425E | 13260.301 | 7756.449  |
| S74529    | 29655.797 | 32271.006 | AK027134  | 1288.235  | 1186.809  | AF172929  | 11498.7   | 5903.675  |
| NM_00593E | 595.351   | 809.181   | AK024168  | 1240.556  | 1159.925  | M60499    | 1179.082  | 1129.526  |
| NM_001421 | 472.345   | 876.7     | AF264622  | 1399.636  | 1012.556  | NM_00383E | 5356.613  | 5265.23   |
| M73837    | 3231.421  | 4268.15   | AK027203  | 552.913   | 555.378   | AK000868  | 2387.879  | 1955.038  |
| NM_00583E | 14532.151 | 12716.796 | AK021793  | 4334.211  | 5114.315  | NM_00123E | 1961.929  | 2214.906  |
| AK023379  | 5443.036  | 4904.864  | AK022255  | 9054.69   | 9441.29   | NM_001234 | 983.532   | 1283.282  |
| -         | 868.636   | 715.765   | AF161360  | 2901.175  | 1861.786  | BF679789  | 802.1     | 603.017   |
| NM_01829E | 1218.907  | 1280.093  | AK021720  | 1400.263  | 1410.949  | H97792    | 885.528   | 402.766   |
| AL049705  | 8663.682  | 10435.747 | NM_016497 | 38586.125 | 34547.238 | L33404    | 261.75    | 158.063   |
| AK022294  | 3601.917  | 2468.28   | AF009261  | 1195.914  | 1489.712  | M13509    | 402.102   | 357.803   |
| AF086507  | 1902.496  | 1433.37   | AF086264  | 467.359   | 399.518   | X04076    | 2166.068  | 1958.466  |
| U79289    | 2105.154  | 1480.489  | AB037792  | 2167.471  | 2057.822  | W95082    | 1218.459  | 1319.729  |
| NM_01402E | 5589.526  | 4716.195  | AK022480  | 776.63    | 985.828   | AA485362  | 692.059   | 668.919   |
| NM_00040E | 2331.921  | 2375.267  | AK024158  | 974.245   | 1251.926  | AJ222801  | 2120.173  | 1771.016  |
| NM_00427E | 663.128   | 598.981   | AL080082  | 776.913   | 1029.291  | W72207    | 2000.765  | 810.124   |
| NM_00069C | 2072.268  | 2041.836  | AK021623  | 1816.727  | 1679.344  | BI772354  | 2795.688  | 2664.064  |
| NM_00015E | 6173.018  | 7846.183  | AK023733  | 483.788   | 589.214   | AA733033  | 2118.476  | 1598.674  |
| AK024489  | 611.561   | 747.647   | U79242    | 738.568   | 785.186   | AA583574  | 965.934   | 688.451   |
| NM_000181 | 3125.411  | 4497.988  | AF119901  | 5379.202  | 5354.038  | AI690184  | 10779.754 | 5768.24   |
| NM_014121 | 1235.886  | 1557.163  | AK001936  | 1625.881  | 2002.841  | AA927490  | 1325.969  | 864.614   |
| NM_00673C | 1016.563  | 1607.995  | NM_00377C | 57494.012 | 62554.992 | NM_001481 | 390.891   | 281.176   |
| NM_005644 | 6640.431  | 9659.175  | AK001395  | 5519.765  | 7626.458  | U30872    | 508.417   | 350.364   |
| NM_01844E | 3797.986  | 4699.237  | S57803    | 12478.521 | 19372.996 | NM_00025E | 406.417   | 546.073   |
| AF182416  | 7507.17   | 9903.616  | AF131822  | 1467.838  | 2474.254  | NM_00263E | 883.927   | 941.293   |
| NM_00599E | 18646.791 | 22171.674 | AK023131  | 3379.423  | 3741.721  | NM_014734 | 1619.837  | 2081.518  |
| NM_00601E | 1910.639  | 2073.021  | U61096    | 440.44    | 372.81    | NM_00228E | 391.92    | 694.893   |
| NM_00238E | 33707.543 | 30576.287 | AF085865  | 5567.818  | 5825.428  | AK026408  | 959.944   | 764.981   |
| NM_00215E | 1298.687  | 1408.183  | X78261    | 671.944   | 567.753   | NM_00502E | 935.548   | 589.404   |
| U13223    | 8591.672  | 8928.126  | AK025521  | 5262.479  | 5435.651  | M74782    | 165.994   | 204.937   |
| NM_01627C | 1523.335  | 1843.6    | NM_00105E | 52810.238 | 52628.867 | NM_01781E | 2705.149  | 1797.493  |
| AK001357  | 997.181   | 509.458   | Z70694    | 5133.036  | 6235.402  | NM_02043E | 262.877   | 270.105   |
| NM_015721 | 5440.758  | 3702.455  | L77602    | 1720.625  | 1718.847  | NM_001767 | 4319.648  | 2225.326  |

|           |           |           |           |           |           |           |           |           |
|-----------|-----------|-----------|-----------|-----------|-----------|-----------|-----------|-----------|
| AF086298  | 1541.065  | 1358.566  | NM_015421 | 10403.878 | 10409.623 | AF028823  | 4641.731  | 3502.188  |
| AK027238  | 1602.702  | 1303.871  | AF086081  | 3929.99   | 3908.776  | NM_004295 | 12530.649 | 4731.001  |
| AK000032  | 1473.617  | 1103.591  | NM_018634 | 622.204   | 775.031   | NM_002087 | 3399.236  | 2299.582  |
| AK025758  | 1190.65   | 1928.994  | NM_018111 | 1311.37   | 1240.016  | AB023154  | 382.894   | 291.552   |
| AL360201  | 500.741   | 632.61    | L23867    | 952.668   | 668.577   | NM_014585 | 1752.041  | 1136.52   |
| S94540    | 28915.959 | 34983.402 | AL138690  | 2074.604  | 2257.106  | AF200815  | 409.125   | 426.943   |
| U79297    | 1503.144  | 2421.061  | AK000394  | 1257.005  | 1466.507  | NM_013441 | 1698.842  | 1540.836  |
| AK002164  | 1142.3    | 1621.74   | NM_013941 | 1365.667  | 995.495   | NM_014421 | 396.938   | 235.729   |
| AF052122  | 6937.329  | 9490.879  | AF074989  | 1533.151  | 1725.329  | NM_006745 | 477.655   | 516.499   |
| NM_00131C | 3254.725  | 5273.119  | AK001107  | 1287.148  | 1870.854  | NM_004694 | 381.576   | 255.65    |
| AK026924  | 4058.189  | 4185.947  | AF147393  | 1023.912  | 1695.481  | NM_000324 | 347.312   | 320.76    |
| AL122047  | 8289.229  | 8745.024  | AL080112  | 2489.062  | 1886.103  | NM_012206 | 422.47    | 264.664   |
| AF086458  | 7066.497  | 5513.473  | AL137325  | 495.22    | 657.661   | AL137619  | 1062.064  | 806.85    |
| AF086548  | 2925.446  | 2648.123  | AF147361  | 1724.768  | 1736.217  | NM_00430C | 7161.429  | 4003.574  |
| AK024350  | 485.839   | 898.673   | AL133086  | 1361.624  | 1125.216  | AB007859  | 737.648   | 717.872   |
| AK023717  | 2604.86   | 2206.077  | NM_012151 | 35952.867 | 32804.504 | NM_006754 | 270.656   | 254.646   |
| AK023727  | 1348.31   | 1033.729  | AF087994  | 2094.245  | 2454.232  | NM_001127 | 2349.884  | 1981.319  |
| AK025271  | 972.168   | 774.185   | AJ227912  | 2385.007  | 2066.644  | NM_01243C | 1880.38   | 1450.307  |
| AF086204  | 9419.901  | 6461.769  | NM_018195 | 3166.948  | 3242.302  | NM_003917 | 7950.052  | 5156.445  |
| NM_007021 | 1717.228  | 1177.135  | AK025532  | 10363.195 | 12400.075 | NM_007077 | 732.277   | 502.858   |
| AK022076  | 760.524   | 971.892   | AK021789  | 570.061   | 592.453   | NM_002956 | 1212.249  | 1237.698  |
| AK023065  | 1283.905  | 1317.597  | NM_003522 | 1444.152  | 1579.192  | AB018739  | 662.905   | 639.828   |
| NM_01767E | 559.197   | 458.071   | BF217847  | 1487.959  | 1886.72   | NM_00675C | 15525.231 | 12527.687 |
| AK021570  | 1609.053  | 1780.116  | NM_00532C | 7886.896  | 7225.438  | NM_014267 | 16560.346 | 12676.642 |
| AL360204  | 802.575   | 916.929   | CY3Cy5    | 2116.991  | 81.647    | AL050187  | 596.104   | 502.737   |
| AK000103  | 909.114   | 1141.858  | BI830936  | 664.696   | 817.547   | NM_012387 | 10694.022 | 7458.463  |
| AF085959  | 848.114   | 1395.226  | U79292    | 2087.544  | 3343.026  | NM_014735 | 1224.106  | 1916.527  |
| AK023104  | 933.919   | 1594.907  | AA947915  | 366.786   | 601.037   | AF172929  | 11161.988 | 15986.512 |
| AK026923  | 2337.895  | 2651.062  | BI830753  | 459.247   | 801.016   | NM_00639E | 12408.082 | 17351.734 |
| AK021691  | 16844.283 | 17932.879 | X68314    | 805.012   | 1182.809  | AK025655  | 1836.423  | 1579.389  |
| AK023595  | 1188.142  | 1113.615  | X71973    | 17640.047 | 22370.092 | NM_004056 | 1365.16   | 1167.845  |
| AK022037  | 443.35    | 378.662   | T49651    | 12591.125 | 16674.285 | NM_001056 | 930.37    | 1105.382  |
| AK000141  | 8461.901  | 6973.168  | BE392471  | 14306.807 | 17464.096 | AY026461  | 2560.107  | 2270.136  |
| AL137758  | 3507.659  | 3234.797  | AI802950  | 1120.243  | 1828.618  | NM_000405 | 487.458   | 491.478   |
| AK023865  | 1076.518  | 1387.504  | AL043686  | 3997.573  | 5038.792  | NM_005564 | 31642.324 | 21362.816 |
| AK025786  | 1500.743  | 1382.234  | AA490172  | 514.412   | 682.827   | NM_00450E | 2798.789  | 2547.978  |
| AK024188  | 2531.73   | 2163.276  | SR5       | 4818.191  | 2293.171  | NM_006405 | 4174.072  | 3000.445  |
| AK024379  | 1795.272  | 1576.332  | SR7       | 4269.076  | 9270.513  | NM_00239C | 4212.336  | 3119.545  |
| AK026820  | 1006.584  | 1175.095  | SR9       | 13707.604 | 825.93    | NM_006142 | 559.75    | 375.932   |
| AK001716  | 3273.907  | 4326.032  | CY3Cy5    | 2522.341  | 91.362    | NM_01491C | 4609.181  | 5234.401  |
| AK026821  | 1055.059  | 1717.115  | NM_003371 | 4859.17   | 1973.39   | AB029031  | 5283.62   | 6555.579  |
| AK026280  | 967.673   | 1300.564  | NM_001164 | 601.587   | 521.097   | NM_001294 | 5470.706  | 6328.682  |
| AF113017  | 5143.867  | 6427.555  | AK023114  | 2728.221  | 5886.637  | NM_014241 | 6622.728  | 8313.165  |
| AL080232  | 11378.923 | 11880.422 | NM_00367E | 3500.73   | 6495.79   | AF302786  | 1863.063  | 2058.982  |
| AK001120  | 8734.043  | 8961.051  | NM_012301 | 376.538   | 419.061   | AL122083  | 1683.317  | 1501.078  |
| AF264629  | 676.793   | 634.972   | NM_005631 | 1335.302  | 2350.215  | NM_005052 | 10223.867 | 7534.378  |
| AK022416  | 1083.446  | 1198.114  | NM_014419 | 1199.131  | 1654.522  | AF319476  | 1768.237  | 1645.357  |
| AK022442  | 1397.921  | 2073.502  | NM_01493E | 2036.89   | 3420.23   | AK001913  | 5165.316  | 7326.559  |
| AK023336  | 1268.425  | 1240.991  | AF049460  | 290.808   | 663.495   | NM_017737 | 907.852   | 1540.979  |
| AK023771  | 772.65    | 555.114   | AK026066  | 924.978   | 1103.059  | NM_015484 | 4665.245  | 4935.695  |
| AK026873  | 4882.843  | 3689.06   | NM_005244 | 1786.361  | 2678.45   | NM_018046 | 1765.54   | 2028.008  |
| AK026394  | 6744.821  | 5337.38   | NM_007221 | 5179.354  | 3778.232  | NM_013316 | 1400.808  | 1489.957  |
| NM_00544E | 1449.966  | 1120.248  | AK025395  | 653.567   | 102.629   | M20701    | 8797.854  | 6554.278  |

|           |           |           |           |           |           |           |           |           |
|-----------|-----------|-----------|-----------|-----------|-----------|-----------|-----------|-----------|
| AK025943  | 36731.961 | 29401.064 | NM_014668 | 719.656   | 249.788   | NM_002912 | 1256.357  | 2031.889  |
| BG106479  | 1588.557  | 1485.167  | NM_004722 | 2166.409  | 3107.415  | NM_006739 | 2256.156  | 2736.733  |
| AF130069  | 25159.199 | 20003.316 | NM_014425 | 725.213   | 990.193   | NM_013274 | 3503.706  | 2716.104  |
| AL109669  | 3491.487  | 2939.569  | NM_012133 | 2844.677  | 4902.884  | AK024955  | 11172.281 | 7462.029  |
| AB037766  | 4878.87   | 3714.438  | NM_017954 | 815.609   | 1749.222  | NM_016580 | 757.301   | 752.826   |
| AK026995  | 1793.387  | 1943.322  | NM_006612 | 835.101   | 1332.638  | AF169693  | 925.024   | 1478.09   |
| AL133091  | 1046.265  | 1368.121  | NM_016451 | 1734.817  | 2255.399  | L23206    | 2690.904  | 4431.179  |
| BF842915  | 794.616   | 986.448   | NM_007351 | 11648.853 | 11301.307 | NM_012192 | 5656.375  | 9214.3    |
| X82545    | 6907.652  | 8827.551  | AK026266  | 5344.504  | 4367.991  | NM_006293 | 3016.978  | 5402.142  |
| AK024632  | 11297.096 | 9470.738  | NM_007124 | 2372.038  | 2081.245  | NM_007229 | 3802.317  | 7928.774  |
| NM_018474 | 9737.034  | 6873.017  | NM_003176 | 1762.713  | 1712.406  | AB011105  | 1353.423  | 2219.788  |
| D17178    | 1612.028  | 2416.761  | NM_000723 | 958.139   | 764.2     | NM_004814 | 9271.52   | 10723.874 |
| AK022094  | 6849.401  | 8020.733  | NM_004931 | 2797.758  | 1707.734  | D86976    | 15858.084 | 14062.013 |
| AK026695  | 1249.172  | 1132.516  | NM_000607 | 10732.317 | 5894.913  | NM_004057 | 912.476   | 960.287   |
| AK022220  | 734.369   | 879.641   | NM_002575 | 2272.259  | 592.745   | NM_018971 | 446.336   | 743.357   |
| AL137539  | 297.454   | 225.964   | NM_004244 | 2690.932  | 810.803   | NM_003265 | 524.816   | 668.084   |
| U84520    | 7593.229  | 5996.651  | AK001500  | 699.654   | 188.894   | NM_003015 | 462.447   | 555.73    |
| Z11853    | 927.549   | 658.707   | NM_006774 | 489.737   | 156.892   | NM_003711 | 1398.203  | 1572.972  |
| AL133616  | 10842.473 | 8763.847  | NM_020129 | 916.663   | 2108.195  | NM_006496 | 9096.389  | 10108.591 |
| AK023391  | 506.674   | 460.377   | Y16521    | 2530.963  | 4477.475  | NM_002072 | 1804.019  | 1552.722  |
| AK026382  | 4779.364  | 3883.825  | AL050371  | 2654.063  | 4687.928  | NM_003182 | 380.933   | 299.224   |
| AK091169  | 3698.876  | 3376.676  | NM_002651 | 2060.307  | 2953.407  | BE904126  | 14296.018 | 9049.186  |
| NM_014745 | 53861.457 | 51032.051 | NM_002413 | 1262.947  | 2030.172  | AF272380  | 11250.41  | 8840.298  |
| AF086026  | 16559.795 | 12591.452 | NM_017577 | 612.558   | 816.293   | NM_004431 | 2547.012  | 2897.687  |
| AL133011  | 1622.09   | 1611.182  | NM_001647 | 1211.781  | 1454.023  | NM_002012 | 1329.894  | 2450.934  |
| NM_016300 | 2069.654  | 2137.261  | NM_018158 | 1756.471  | 2248.51   | NM_002070 | 38942.148 | 54550.848 |
| NM_015607 | 30820.402 | 30597.541 | NM_016301 | 4847.938  | 5250.853  | AF227969  | 2635.851  | 4251.302  |
| AK026955  | 2315.5    | 2745.782  | NM_002978 | 1292.065  | 505.003   | AF116657  | 1075.927  | 1819.86   |
| S46402    | 3296.543  | 2611.005  | AB040879  | 750.438   | 85.74     | NM_004102 | 1427.631  | 1888.458  |
| AF075048  | 1363.079  | 1287.24   | AL049935  | 12385.605 | 18563.123 | NM_003944 | 14537.887 | 19807.139 |
| Z83940    | 1086.111  | 1182.105  | AB033043  | 4589.364  | 11694.106 | NM_016120 | 50633.875 | 52395.43  |
| NM_005800 | 3388.157  | 2944.956  | NM_014999 | 4650.246  | 8310.857  | NM_002893 | 1251.34   | 1095.84   |
| AF019617  | 18574.002 | 13159.891 | AK025220  | 2097.153  | 3725.411  | NM_002393 | 6043.671  | 4397.826  |
| AL137305  | 7751.368  | 8946.564  | NM_016308 | 10777.058 | 13016.267 | NM_002669 | 7971.966  | 6837.797  |
| NM_005290 | 1132.837  | 1672.584  | D42046    | 2569.187  | 4952.045  | AB014600  | 2220.679  | 1520.027  |
| AK025802  | 1529.807  | 2958.008  | NM_001033 | 9471.975  | 12202.961 | NM_018312 | 2251.67   | 1865.99   |
| AF085973  | 957.667   | 1544.788  | NM_004526 | 15956.069 | 17996.346 | X98259    | 742.373   | 913.12    |
| NM_018013 | 6068.203  | 4602.084  | NM_002526 | 2262.833  | 3099.397  | U05255    | 269.667   | 224.634   |
| AK022517  | 2270.669  | 1481.697  | NM_020135 | 4682.295  | 6435.684  | X98260    | 5007.7    | 5544.578  |
| NM_000329 | 25360.563 | 23079.67  | NM_018518 | 3496.976  | 3754.329  | NM_007217 | 10867.094 | 10132.689 |
| NM_001182 | 21889.25  | 15557.473 | AK023149  | 1741.917  | 2254.027  | NM_014777 | 4371.268  | 3632.245  |
| AF143328  | 232.455   | 326.779   | AK023168  | 2783.291  | 3093.129  | NM_002818 | 51941.281 | 47101.945 |
| NM_000333 | 4216.681  | 4127.732  | NM_006646 | 1165.296  | 1569.759  | NM_001937 | 2126.941  | 1414.825  |
| NM_000172 | 8114.76   | 5982.308  | NM_006795 | 9084.289  | 4690.827  | AK024778  | 861.901   | 682.905   |
| NM_002297 | 10700.062 | 8532.681  | AF070568  | 2453.506  | 793.409   | AK021608  | 1779.971  | 1228.492  |
| AB040968  | 23867.205 | 19522.637 | NM_000240 | 2983.979  | 634.855   | NM_006044 | 5654.343  | 7715.711  |
| X85323    | 1589.849  | 1513.942  | AK055733  | 8303.743  | 3244.792  | AK025498  | 2767.021  | 5707.881  |
| AK000802  | 286.713   | 565.476   | AF298880  | 3375.297  | 1609.599  | NM_001395 | 3472.923  | 4536.308  |
| U17615    | 3630.623  | 3496.101  | AK025395  | 544.115   | 83.09     | NM_002068 | 14197.663 | 20443.756 |
| NM_005303 | 3786.197  | 4251.644  | NM_000388 | 584.802   | 107.527   | NM_013338 | 2244.481  | 3376.295  |
| NM_003608 | 4238.381  | 4143.054  | X58377    | 403.724   | 822.487   | NM_014671 | 2527.411  | 3200.984  |
| AF302079  | 16769.953 | 13448.03  | NM_002469 | 456.78    | 274.305   | NM_001814 | 7064.237  | 8944.469  |
| AJ224167  | 460.515   | 336.783   | U79292    | 2111.267  | 2758.103  | NM_005656 | 1233.364  | 1109.279  |

|             |           |           |           |           |           |           |           |           |
|-------------|-----------|-----------|-----------|-----------|-----------|-----------|-----------|-----------|
| NM_00255C   | 938.768   | 689.362   | AA947915  | 240.739   | 504.602   | NM_006012 | 7041.185  | 5875.877  |
| NM_000692   | 1326.172  | 923.153   | BI830753  | 433.813   | 727.233   | NM_002151 | 1589.085  | 1209.432  |
| AF086062    | 1665.832  | 1454.587  | X68314    | 706.276   | 1211.761  | NM_01488E | 1846.725  | 1765.919  |
| L47668      | 44929.5   | 42396.031 | X71973    | 17908.711 | 21179.902 | AF173935  | 1560.421  | 1238.179  |
| NM_01792C   | 7051.491  | 6494.997  | T49651    | 12015.958 | 11257.429 | AK025322  | 5917.566  | 5753.366  |
| AK025345    | 1012.108  | 1017.934  | N51014    | 908.965   | 1031.152  | NM_017887 | 6182.789  | 5115.425  |
| D25274      | 9535.254  | 7259.208  | BE392471  | 10441.802 | 10080.387 | NM_00052E | 460.158   | 610.166   |
| CY3Cy5      | 2390.887  | 182.993   | AI802950  | 884.795   | 1164.992  | AF007152  | 1350.617  | 1438.033  |
| D50373      | 2690.562  | 2398.322  | AA775212  | 3374.874  | 2644.656  | NM_01757E | 682.344   | 823.312   |
| AA488757    | 9180.354  | 6958.168  | NM_00094E | 1515.025  | 1763.909  | NM_00531C | 443.48    | 340.945   |
| AA205399    | 630.324   | 520.224   | NM_002574 | 59436.418 | 17139.521 | NM_01442E | 5408.94   | 4343.581  |
| H07071      | 755.408   | 821.031   | AB011174  | 1037.562  | 311.022   | NM_01808E | 769.15    | 673.643   |
| M25322      | 3283.895  | 2410.745  | NM_000607 | 8839.633  | 1981.728  | AL110188  | 3590.804  | 2548.509  |
| H-L 27586 I | 2664.103  | 2263.778  | NM_00257E | 1930.938  | 1740.675  | D70834    | 17241.143 | 20470.971 |
| ID 1867426  | 4672.82   | 3325.104  | NM_004244 | 2884.192  | 4646.399  | NM_00097C | 59970.004 | 63120.969 |
| W99328      | 940.897   | 1361.762  | NM_003371 | 3584.73   | 5864.622  | NM_03328E | 501.984   | 1164.763  |
| AI434176    | 654.709   | 1087.14   | AK023114  | 2814.689  | 4573.345  | AK000102  | 1191.181  | 1525.754  |
| BE735403    | 800.449   | 903.492   | NM_00367E | 3311.289  | 3779.392  | AB040916  | 1657.54   | 2046.392  |
| NM_022552   | 5049.09   | 4580.357  | NM_012301 | 399.754   | 374.839   | NM_005587 | 705.811   | 1053.276  |
| NM_01438E   | 6699.929  | 5764.735  | NM_005631 | 1111.484  | 943.362   | AF038362  | 1127.161  | 978.982   |
| SR2         | 51138.582 | 53335.828 | NM_01441E | 1140.133  | 1428.644  | NM_00519E | 7081.859  | 7351.271  |
| SR4         | 12336.326 | 12895.544 | NM_01493E | 1455.922  | 1876.075  | NM_005481 | 1963.361  | 3130.248  |
| CY3Cy5      | 2123.864  | 163.906   | NM_005244 | 1936.371  | 1858.294  | NM_00471E | 2679.729  | 2770.86   |
| NM_005811   | 5213.931  | 6491.997  | NM_00527C | 575.826   | 245.696   | L40392    | 1625.709  | 1207.02   |
| NM_016362   | 927.602   | 768.996   | NM_01481E | 1273.85   | 261.799   | NM_001007 | 60185.742 | 61136.438 |
| NM_004214   | 11174.36  | 8551.599  | NM_005443 | 1976.584  | 319.151   | NM_003017 | 4838.537  | 4907.084  |
| NM_00432E   | 13497.359 | 9148.304  | NM_007221 | 5103.36   | 1573.051  | NM_02036E | 2512.655  | 3571.381  |
| NM_00283E   | 3630.919  | 3217.343  | X54163    | 7999.927  | 2494.526  | AF086497  | 922.681   | 666.463   |
| NM_020167   | 1488.83   | 1145.068  | NM_018607 | 209.513   | 373.51    | NM_020141 | 5529.565  | 3313.899  |
| AL049963    | 19662.654 | 15494.414 | NM_00297E | 616.722   | 1073.808  | NM_00648E | 1326.064  | 2527.557  |
| NM_01605E   | 28734.066 | 24030.074 | NM_01466E | 643.456   | 895.963   | NM_00377E | 690.017   | 1207.877  |
| NM_01400E   | 849.153   | 523.637   | NM_004722 | 1374.464  | 2488.604  | NM_00363E | 1513.803  | 1955.969  |
| NM_00463E   | 769.35    | 1332.364  | NM_01442E | 823.141   | 994.462   | NM_00066E | 2354.039  | 3323.54   |
| AK022603    | 1737.093  | 2742.868  | NM_01213E | 2240.327  | 2684.106  | NM_00029E | 1343.077  | 1855.531  |
| NM_00489E   | 3157.228  | 4573.961  | NM_017954 | 800.097   | 1447.424  | NM_00368E | 32257.955 | 31810.783 |
| NM_00397E   | 474.566   | 686.777   | NM_006612 | 892.812   | 545.475   | NM_01617E | 1187.924  | 1869.271  |
| NM_01768E   | 1207.208  | 1405.466  | NM_016451 | 1214.704  | 1494.306  | NM_00287E | 3726.86   | 4510.044  |
| AK025612    | 4293.626  | 4085.334  | NM_007351 | 10812.013 | 9367.709  | NM_004427 | 8773.484  | 8056.563  |
| NM_01226E   | 1828.205  | 1922.397  | NM_00317E | 2621.968  | 1820.409  | U90549    | 5254.775  | 6928.039  |
| NM_01220E   | 732.117   | 861.013   | NM_00072E | 1231.932  | 406.664   | NM_01324C | 6848.409  | 8498.438  |
| NM_003827   | 11299.405 | 11694.098 | AL096751  | 3130.446  | 914.984   | NM_015874 | 20144.148 | 12949.827 |
| NM_00458E   | 1474.563  | 2548.879  | AF026920  | 2588.664  | 1247.541  | NM_00496E | 54214.949 | 37433.332 |
| NM_001103   | 1181.566  | 2236.924  | NM_004931 | 2411.436  | 981.341   | AF312393  | 16469.734 | 11816.207 |
| AY007131    | 26409.584 | 21558.51  | NM_00679E | 7347.48   | 3303.052  | AF272898  | 5154.283  | 3342.579  |
| U61735      | 2325.92   | 2427.749  | AF070568  | 1902.206  | 1575.893  | AB037817  | 337.247   | 574.061   |
| NM_001144   | 4299.626  | 4183.264  | NM_000277 | 630.917   | 895.909   | AB032951  | 5550.077  | 4068.689  |
| AK023766    | 3133.02   | 2524.367  | NM_00024C | 1862.319  | 3035.489  | NM_003417 | 975.936   | 1163.957  |
| NM_001897   | 675.527   | 658.623   | AK055733  | 7851.135  | 10479.165 | NM_00514E | 7087.565  | 7233.954  |
| NM_00385E   | 1066.503  | 732.871   | AF298880  | 3773.709  | 5883.736  | AK024073  | 724.041   | 1155.653  |
| AB033109    | 1248.648  | 989.13    | AK001500  | 602.388   | 1077.045  | AK022223  | 427.409   | 235.156   |
| NM_00205E   | 9728.14   | 12761.528 | NM_006774 | 394.817   | 539.605   | NM_005887 | 2960.108  | 1954.561  |
| NM_00688E   | 915.072   | 1333.645  | NM_02012E | 1162.005  | 1354.975  | AK024921  | 554.573   | 455.536   |
| NM_00243E   | 900.942   | 1229.688  | Y16521    | 2526.518  | 2754.452  | AL110232  | 484.792   | 1068.603  |

|             |           |           |           |           |           |           |           |           |
|-------------|-----------|-----------|-----------|-----------|-----------|-----------|-----------|-----------|
| NM_014589   | 1524.47   | 1476.911  | AL050371  | 1870.285  | 2936.156  | AK026103  | 1946.265  | 2470.197  |
| NM_000759   | 1514.107  | 1287.716  | NM_002651 | 1830.412  | 1867.936  | NM_016353 | 11453.984 | 12133.058 |
| AK023334    | 945.816   | 840.962   | NM_002413 | 1581.356  | 1764.547  | AF075077  | 462.362   | 1505.238  |
| NM_002563   | 8366.754  | 8913.782  | NM_001647 | 2247.845  | 1421.295  | AK022567  | 1079.718  | 1939.47   |
| NM_002437   | 1251.252  | 1188.995  | NM_018158 | 1974.193  | 937.372   | AK023450  | 669.023   | 1342.302  |
| D79991      | 2771.327  | 2504.941  | NM_016301 | 5102.908  | 1341.339  | AL080280  | 2587.709  | 3929.523  |
| AY005822    | 1195.27   | 1022.805  | AB032952  | 15274.094 | 2916.851  | AB028947  | 1361.018  | 2293.872  |
| NM_018129   | 15406.01  | 13269.625 | NM_002522 | 14738.951 | 5956.62   | AF035314  | 1242.327  | 1909.774  |
| AF289022    | 2124.132  | 1848.91   | NM_000945 | 1428.932  | 1411.872  | NM_018036 | 1201.359  | 996.853   |
| NM_016025   | 8715.735  | 7202.529  | NM_002574 | 62588.184 | 50208.039 | AF052087  | 1467.511  | 1288.36   |
| NM_013319   | 2230.666  | 1620.787  | AB011174  | 1371.968  | 1397.371  | AF007143  | 901.764   | 1025.885  |
| NM_000746   | 2261.362  | 2001.604  | AB043635  | 434.287   | 594.903   | AF147417  | 435.221   | 343.347   |
| NM_000722   | 1228.153  | 947.526   | AB040879  | 914.776   | 1276.359  | AK023656  | 3159.85   | 1654.593  |
| NM_006030   | 1242.114  | 1161.06   | AL049935  | 10647     | 10231.979 | AF086511  | 1167.712  | 1900.227  |
| NM_020410   | 5942.702  | 5292.239  | AB033043  | 3900.633  | 5564.124  | AK022989  | 2390.573  | 2587.711  |
| AF000143    | 27085.711 | 23108.742 | NM_014999 | 4978.338  | 6366.062  | AK001604  | 4364.893  | 4158.076  |
| NM_014211   | 754.76    | 705.923   | AK025220  | 3586.854  | 2816.893  | AK021619  | 579.66    | 607.639   |
| NM_000814   | 3005.354  | 2552.282  | NM_016308 | 11599.419 | 9620.002  | AF131762  | 14716.298 | 12342.708 |
| NM_000453   | 2184.336  | 1937.971  | D42046    | 1634.641  | 2007.036  | AY007089  | 1292.172  | 1494.107  |
| J03077      | 18188.266 | 18516.467 | NM_001033 | 8003.42   | 7955.881  | AK021816  | 2790.923  | 2778.821  |
| J03048      | 8675.619  | 15735.66  | NM_004526 | 13084.699 | 9210.254  | D43770    | 9982.574  | 19829.08  |
| AL157469    | 993.583   | 1129.193  | NM_002526 | 2621.752  | 2335.5    | AF085960  | 838.269   | 1372.949  |
| NM_002868   | 2677.979  | 4461.042  | AK023149  | 2501.55   | 1862.653  | AK021519  | 1115.196  | 1799.839  |
| NM_017438   | 3425.165  | 7153.704  | AK023168  | 2330.513  | 1160.386  | NM_014254 | 4560.289  | 6410.445  |
| NM_020195   | 5746.696  | 5458.219  | NM_006646 | 1220.389  | 333.518   | AF086036  | 668.478   | 938.883   |
| AK023824    | 4002.535  | 3260.996  | NM_004742 | 1303.766  | 232.453   | AF086010  | 588.952   | 850.084   |
| AL133069    | 3572.334  | 3011.276  | NM_014753 | 1688.667  | 337.885   | U09197    | 2348.737  | 4133.175  |
| AL117574    | 600.251   | 356.797   | NM_006585 | 23788.865 | 8318.97   | U15553    | 2777.264  | 2118.017  |
| AK026055    | 5266.667  | 4920.759  | NM_014331 | 3583.203  | 1286.614  | Z36829    | 458.107   | 493.232   |
| AK024126    | 767.303   | 732.398   | AF054589  | 560.301   | 36.927    | AK024734  | 5861.559  | 11197.317 |
| NM_001516   | 4539.642  | 3964.375  | NM_014815 | 1236.48   | 1623.386  | NM_017741 | 1649.792  | 1420.059  |
| NM_002744   | 3923.294  | 3660.23   | NM_005443 | 2171.29   | 2482.914  | AK000144  | 1055.468  | 843.685   |
| NM_015917   | 14489.109 | 12745.248 | NM_007221 | 6202.37   | 5579.808  | AK022275  | 295.035   | 398.426   |
| NM_020397   | 1489.756  | 1064.516  | X54163    | 13460.364 | 14038.537 | AK000942  | 636.81    | 528.2     |
| NM_000061   | 1151.592  | 939.721   | AK025395  | 729.552   | 1080.678  | AL117533  | 1925.353  | 1242.531  |
| AB046859    | 17200.844 | 13095.209 | NM_000388 | 818.996   | 975.418   | AK026036  | 738.901   | 1426.878  |
| NM_005109   | 12233.291 | 12835.796 | X58377    | 386.049   | 348.818   | AK023422  | 682.615   | 1016.323  |
| AK023573    | 2925.594  | 2747.922  | NM_002469 | 298.937   | 610.164   | AK022796  | 1545.092  | 1754.791  |
| NM_002730   | 6858.747  | 7579.569  | BI830936  | 430.8     | 765.571   | AK095193  | 1252.072  | 1820.091  |
| NM_004828   | 1494.319  | 1742.927  | U79292    | 1767.347  | 2559.658  | AK025081  | 1001.584  | 2071.64   |
| AB011540    | 35567.102 | 35288.832 | AA947915  | 3353.338  | 5796.415  | AL122088  | 1460.664  | 2050.914  |
| NM_000040   | 6582.642  | 6777.507  | X68314    | 743.588   | 828.009   | AF116633  | 347.507   | 645.984   |
| NM_004631   | 3009.2    | 2662.459  | X71973    | 14429.196 | 9884.433  | AF119912  | 550.375   | 810.058   |
| NM_004736   | 4419.27   | 8419.801  | BE392471  | 9979.11   | 5044.391  | AL137518  | 913.294   | 2050.541  |
| NM_006895   | 231.23    | 1519.773  | AI802950  | 979.956   | 248.591   | AK023437  | 2197.497  | 1827.042  |
| NM_006459   | 4519.527  | 8899.484  | AL043686  | 3431.73   | 760.492   | AK023822  | 1481.291  | 1199.469  |
| D50373      | 971.65    | 787.116   | AA490172  | 526.46    | 192.893   | AK024147  | 1648.766  | 1492.464  |
| AA488757    | 5615.569  | 5269.938  | AA775212  | 3026.942  | 1232.151  | AK022897  | 3311.089  | 2776.824  |
| AA205399    | 478.912   | 237.219   | NM_000723 | 1001.951  | 591.982   | AK023556  | 1927.444  | 1656.49   |
| H07071      | 420.826   | 409.285   | AL096751  | 3442.174  | 4781.455  | AK023898  | 3479.358  | 3560.614  |
| M25322      | 2384.262  | 1538.11   | NM_000364 | 825.226   | 1078.902  | NM_019040 | 6077.96   | 3732.744  |
| H-L 27586 I | 2907.394  | 2580.918  | AF026920  | 2635.142  | 4567.287  | NM_005978 | 1114.783  | 719.444   |
| ID 214180   | 420.687   | 515.513   | NM_004931 | 3663.409  | 4635.056  | Y16711    | 752.461   | 597.284   |

|            |           |           |           |           |           |           |           |           |
|------------|-----------|-----------|-----------|-----------|-----------|-----------|-----------|-----------|
| ID 1867426 | 4456.573  | 3456.903  | NM_000607 | 9104.461  | 14762.332 | AJ272179  | 1823.686  | 1782.137  |
| W99328     | 942.633   | 864.593   | AB011099  | 228.64    | 245.819   | AJ007015  | 2555.916  | 3307.215  |
| AI434176   | 800.862   | 990.604   | NM_002575 | 1789.605  | 1964.993  | AL049317  | 1599.404  | 1477.527  |
| H08563     | 989.476   | 906.1     | NM_004244 | 2633.004  | 2196.219  | AL050090  | 1112.886  | 1308.016  |
| BE735403   | 1150      | 1099.114  | NM_003371 | 5108.053  | 4710.273  | AF086309  | 832.889   | 1292.282  |
| NM_022552  | 6100.869  | 4673.375  | AK023114  | 2290.364  | 2729.603  | AF238870  | 632.896   | 943.557   |
| NM_014389  | 8138.957  | 7891.212  | NM_003678 | 2459.146  | 2120.551  | AK026279  | 5261.361  | 9067.531  |
| AF116659   | 1157.311  | 1280.443  | NM_005631 | 1040.75   | 656.329   | AF130094  | 9152.268  | 17604.525 |
| D79991     | 2911.996  | 2563.614  | NM_014419 | 1452.341  | 588.213   | AK026673  | 2242.894  | 3475.757  |
| NM_000054  | 5231.955  | 7445.225  | NM_014938 | 1665.347  | 603.632   | NM_005452 | 3898.638  | 4330.188  |
| NM_014713  | 12452.213 | 15773.582 | AK026066  | 818.498   | 290.526   | AF170935  | 14726.675 | 27520.656 |
| NM_001812  | 1711.867  | 1548.1    | NM_005244 | 1886.163  | 717.212   | AK025218  | 893.051   | 1305.887  |
| NM_014785  | 862.535   | 869.384   | NM_018158 | 2035.845  | 1605.108  | AJ227899  | 1953.59   | 2143.532  |
| NM_005811  | 4625.378  | 3360.494  | AB032952  | 15068.142 | 24794.135 | AL359607  | 1070.553  | 862.962   |
| NM_005764  | 1104.023  | 612.863   | NM_002522 | 12407.562 | 18852.193 | AF161371  | 8683.813  | 8627.004  |
| NM_016362  | 446.802   | 530.718   | NM_002978 | 838.808   | 949.13    | AK022464  | 852.308   | 513.935   |
| NM_004214  | 10001.194 | 7545.71   | NM_014668 | 873.623   | 406.382   | AF086230  | 953.466   | 963.885   |
| NM_004329  | 13788.464 | 8750.364  | NM_004722 | 1835.548  | 2325.217  | AK023408  | 4731.976  | 4073.026  |
| NM_002836  | 5331.29   | 4254.397  | NM_014425 | 686.99    | 665.433   | U84509    | 1115.15   | 744.097   |
| NM_020167  | 1800.409  | 1249.191  | NM_012133 | 1790.105  | 1224.347  | AK002036  | 2710.54   | 2272.012  |
| AL049963   | 21605.662 | 16518.873 | NM_017954 | 929.671   | 933.142   | AK025775  | 3729.708  | 3727.641  |
| NM_016058  | 34481.539 | 27680.336 | NM_006612 | 1018.288  | 487.046   | AB046791  | 1317.758  | 1432.795  |
| NM_014005  | 1341.74   | 1004.592  | NM_016451 | 1686.407  | 787.567   | AF043469  | 2192.434  | 4125.726  |
| NM_004636  | 1292.669  | 1223.396  | NM_007351 | 11497.313 | 2337.41   | AL109671  | 867.069   | 1243.623  |
| AK022603   | 449.98    | 494.916   | AK026266  | 5311.411  | 1110.547  | NM_012375 | 407.837   | 1032.168  |
| NM_004896  | 3107.373  | 3214.542  | NM_007124 | 2600.307  | 956.707   | AK022008  | 1405.107  | 2004.688  |
| NM_003976  | 539.667   | 658.055   | NM_003176 | 2238.56   | 777.374   | NM_018186 | 3356.838  | 4807.07   |
| NM_017688  | 1431.469  | 1540.422  | NM_004742 | 1080.372  | 1545.152  | AL080188  | 4385.467  | 5167.633  |
| AK025612   | 4607.677  | 5040.165  | NM_014753 | 2226.136  | 3845.325  | T99941    | 2131.341  | 3173.633  |
| NM_012268  | 2034.463  | 1777.701  | NM_014331 | 5032.316  | 5031.56   | AF113678  | 1278.71   | 1414.24   |
| NM_012203  | 812.997   | 819.162   | NM_006795 | 8685.109  | 10476.88  | AL137313  | 56730.84  | 57411.902 |
| J03077     | 18034.266 | 16615.547 | AF070568  | 4144.45   | 4924.317  | Z83951    | 903.037   | 1671.806  |
| J03048     | 8076.631  | 14306.13  | NM_000277 | 561.935   | 362.689   | AL833529  | 391.879   | 1046.436  |
| AL157469   | 975.945   | 883.454   | NM_000240 | 1776.051  | 2082.825  | AB002363  | 7334.241  | 6151.482  |
| NM_002868  | 3056.048  | 3309.663  | AK055733  | 8389.036  | 7930.888  | NM_005284 | 2243.9    | 2383.446  |
| AK024100   | 6020.889  | 5858.907  | AF298880  | 3624.795  | 3639.413  | AF086351  | 2854.36   | 4025.656  |
| NM_005135  | 701.647   | 599.258   | AK001500  | 939.528   | 590.77    | D83199    | 21695.609 | 18523.096 |
| NM_003827  | 10762.329 | 8757.191  | NM_006774 | 616.816   | 261.983   | Y16708    | 735.433   | 732.246   |
| NM_004583  | 607.949   | 441.862   | NM_020129 | 834.833   | 684.689   | AL157453  | 3404.839  | 2699.474  |
| NM_001103  | 890.646   | 510.391   | Y16521    | 1823.274  | 1604.061  | NM_019098 | 6360.607  | 2365.592  |
| AF228710   | 14838.042 | 10237.285 | AL050371  | 2025.221  | 1222.362  | AK022212  | 21553.391 | 12480.985 |
| AY007131   | 32152.078 | 25614.363 | NM_002651 | 2123.73   | 924.176   | X64974    | 3641.327  | 1413.047  |
| U61735     | 2867.622  | 2429.927  | NM_002413 | 3035.169  | 1280.189  | NM_000834 | 8270.358  | 3464.967  |
| NM_001144  | 6155.682  | 4870.458  | NM_017577 | 863.306   | 372.173   | NM_006485 | 16428.465 | 14897.146 |
| AK023766   | 3762.624  | 3041.913  | NM_001647 | 1858.471  | 624.791   | NM_012459 | 2794.325  | 2896.005  |
| NM_001897  | 1071.186  | 822.047   | BF032535  | 2696.314  | 3123.601  | AL137268  | 3864.816  | 5801.233  |
| NM_003853  | 1499.57   | 1237.306  | NM_005096 | 6720.952  | 4749.878  | AK024109  | 2725.807  | 3876.98   |
| AB033109   | 1798.212  | 1392.08   | NM_006760 | 983.428   | 744.471   | AF088048  | 1438.337  | 2906.499  |
| NM_002053  | 16561.408 | 14707.336 | NM_012289 | 4627.677  | 3599.053  | AK001143  | 3096.901  | 2986.192  |
| NM_006889  | 1207.724  | 1136.585  | AB037775  | 1012.737  | 1423.901  | AK001701  | 3793.14   | 3351.693  |
| NM_002438  | 1062.922  | 971.822   | L27560    | 540.679   | 872.373   | AK022205  | 375.324   | 292.069   |
| NM_014589  | 1640.382  | 1667.557  | AB011174  | 1222.338  | 1952.319  | AB007978  | 421.816   | 617.534   |
| NM_000759  | 1228.137  | 1246.718  | AB043635  | 483.51    | 595.626   | AF217970  | 788.517   | 1232.243  |



|           |           |           |           |           |           |            |           |           |
|-----------|-----------|-----------|-----------|-----------|-----------|------------|-----------|-----------|
| AK023334  | 918.263   | 1070.861  | AB040879  | 818.634   | 908.985   | AF086297   | 1220.137  | 2368.755  |
| NM_002563 | 9394.285  | 10002.762 | AL049935  | 11638.624 | 9201.344  | AK025455   | 4026.919  | 8805.483  |
| NM_002437 | 1457.949  | 1152.186  | AB033043  | 4711.239  | 5754.959  | AK026799   | 1833.652  | 2365.767  |
| AK023573  | 1846.159  | 2156.052  | NM_014999 | 3433.617  | 3165.943  | NM_014860  | 677.486   | 822.916   |
| NM_002730 | 5390.907  | 5507.453  | AK025220  | 1748.42   | 2105.022  | AK022549   | 1742.129  | 1456.725  |
| NM_004828 | 1128.715  | 1350.245  | NM_016308 | 9332.397  | 4319.599  | NM_018157  | 1013.323  | 897.828   |
| AB011540  | 25860.783 | 25995.535 | D42046    | 2141.041  | 1890.682  | Z70714     | 4822.502  | 3600.902  |
| NM_000040 | 6182.791  | 5468.856  | NM_001033 | 8621.212  | 4204.175  | AK021640   | 7132.343  | 5204.544  |
| NM_004631 | 2565.277  | 1914.712  | NM_004526 | 15710.487 | 6555.619  | NM_016565  | 51836.23  | 46264.758 |
| NM_006033 | 5663.995  | 4613.84   | NM_002526 | 6457.55   | 3792.492  | CY3Cy5     | 661.323   | 122.47    |
| NM_004837 | 7896.931  | 6690.853  | NM_020135 | 5876.046  | 2805.433  | BF310427   | 787.846   | 669.416   |
| NM_000370 | 1480.996  | 1275.681  | NM_018518 | 4814.655  | 1723.416  | AA045192   | 319.855   | 157.257   |
| BE865893  | 5579.861  | 3478.666  | AK023149  | 2268.99   | 727.569   | H45617     | 235.804   | 78.512    |
| NM_003123 | 55659.648 | 52549.398 | AK024697  | 2128.234  | 3167.44   | M92642     | 332.292   | 362.706   |
| AY005822  | 2082.739  | 1372.083  | NM_006460 | 1829.673  | 1883.423  | H-U 44385  | 7683.448  | 3672.395  |
| NM_018129 | 25032.43  | 19786.555 | L34156    | 654.981   | 247.768   | ID 1654970 | 2943.337  | 1760.472  |
| AF289022  | 2781.309  | 2393.461  | NM_003749 | 1448.117  | 2411.259  | ID 2531132 | 3720.634  | 2377.655  |
| AB002326  | 196.608   | 319.036   | NM_003557 | 2866.914  | 2484.556  | AA485665   | 281.507   | 124.081   |
| NM_016025 | 9978.924  | 9167.63   | NM_001257 | 3527.964  | 3734.559  | BF125928   | 7681.342  | 2994.892  |
| NM_013319 | 2672.805  | 2163.95   | NM_001795 | 485.372   | 466.479   | BG571026   | 630.241   | 351.546   |
| NM_000746 | 2719.758  | 2357.333  | D85245    | 2341.771  | 4001.069  | AA489017   | 2523.704  | 1224.492  |
| NM_000722 | 1506.597  | 1368.05   | NM_000943 | 693.034   | 727.612   | NM_012245  | 6229.644  | 2653.777  |
| NM_006030 | 1207.464  | 1252.489  | NM_004658 | 2494.507  | 3789.2    | NM_133263  | 854.58    | 312.616   |
| NM_020410 | 6103.756  | 6398.162  | NM_001250 | 2825.903  | 4590.13   | SR2        | 33135.453 | 9698.49   |
| AF000143  | 24261.691 | 24839.484 | AF298812  | 735.839   | 1341.193  | SR4        | 6982.938  | 1949.713  |
| NM_014211 | 468.855   | 611.668   | NM_004969 | 1493.585  | 1723.776  | SR6        | 962.947   | 351.444   |
| NM_000814 | 2456.388  | 2890.879  | AJ249900  | 282.363   | 792.453   | SR8        | 4276.774  | 3787.305  |
| NM_000453 | 1974.098  | 2445.825  | AK022581  | 4497.653  | 5774.559  | SR10       | 13815.928 | 1483.781  |
| NM_022552 | 4180.171  | 3991.749  | NM_018054 | 1535.533  | 1509.215  | CY3Cy5     | 312.408   | 279.72    |
| NM_014389 | 4843.59   | 4907.562  | NM_006186 | 530.732   | 509.801   | NM_017450  | 1263.828  | 676.323   |
| NM_001718 | 349.93    | 539.405   | NM_000958 | 6215.946  | 4296.131  | NM_002023  | 636.286   | 445.568   |
| AF116659  | 1298.199  | 953.983   | NM_001401 | 1137.096  | 1034.923  | NM_002839  | 331.09    | 267.184   |
| NM_000317 | 16476.342 | 14808.208 | NM_013271 | 9950.345  | 7716.289  | AF190500   | 292.931   | 305.964   |
| NM_018376 | 4329.586  | 4146.663  | NM_004157 | 1528.931  | 1607.051  | NM_001616  | 224.769   | 213.409   |
| NM_017615 | 613.607   | 487.006   | NM_000684 | 1272.914  | 684.884   | NM_005904  | 219.96    | 187.446   |
| NM_017438 | 3146.559  | 2029.933  | U67037    | 934.094   | 1125.741  | NM_005273  | 8303.537  | 5065.915  |
| U59209    | 2156.712  | 1829.818  | NM_004960 | 7985.413  | 9301.803  | NM_000524  | 419.103   | 338.368   |
| NM_020195 | 6548.667  | 4005.188  | AF272370  | 5670.186  | 5449.416  | NM_006576  | 620.423   | 382.96    |
| AK023824  | 5644.8    | 4522.55   | AF130050  | 3077.147  | 2219.047  | NM_018645  | 465.277   | 202.343   |
| AL133069  | 4636.858  | 3582.763  | AF119898  | 462.341   | 313.675   | AB035266   | 1360.485  | 795.165   |
| AL117574  | 634.036   | 542.459   | AK023045  | 398.423   | 547.182   | NM_003744  | 1281.194  | 765.581   |
| AK026055  | 6965.414  | 6591.295  | NM_012197 | 5764.628  | 7805.125  | NM_006378  | 8397.173  | 4140.414  |
| AK024126  | 1078.335  | 1073.554  | AK024016  | 4029.554  | 4635.676  | NM_018132  | 1184.947  | 903.039   |
| NM_001516 | 5331.144  | 5420.35   | NM_003581 | 2771.67   | 3611.577  | NM_003061  | 915.425   | 597.797   |
| NM_002744 | 6560.856  | 6324.223  | NM_012407 | 1037.574  | 1855.78   | NM_018207  | 1180.233  | 507.253   |
| NM_015917 | 14223.928 | 13144.248 | AF302505  | 1496.468  | 1657.111  | NM_000345  | 3992.401  | 1355.211  |
| NM_020397 | 1442.545  | 1589.642  | NM_007186 | 1596.739  | 1452.531  | NM_001862  | 28979.129 | 9386.136  |
| NM_000061 | 969.939   | 1075.987  | NM_007044 | 3072.081  | 5239.662  | NM_006531  | 674.279   | 341.229   |
| AB046859  | 13100.2   | 18175.725 | AF294326  | 6083.817  | 7424.601  | AB029021   | 3157.562  | 1405.669  |
| NM_005109 | 11145.731 | 14494.77  | NM_014678 | 1861.727  | 2085.387  | NM_002101  | 21128.223 | 8011.852  |
| NM_003976 | 723.018   | 600.202   | NM_012317 | 54893.02  | 59583.512 | Z36789     | 1379.166  | 973.022   |
| NM_017688 | 1335.51   | 1315.772  | NM_017853 | 4171.295  | 3349.155  | J02874     | 481.629   | 332.778   |
| AK025612  | 3416.995  | 3131.234  | NM_016097 | 9330.448  | 7421.732  | AF070525   | 5060.417  | 2509.029  |

|             |           |           |           |           |           |           |           |           |
|-------------|-----------|-----------|-----------|-----------|-----------|-----------|-----------|-----------|
| NM_01226E   | 1754.239  | 1580.231  | AB035301  | 698.249   | 466.297   | NM_001177 | 3698.441  | 1930.142  |
| NM_012203   | 689.663   | 848.147   | AB046800  | 4807.068  | 4156.397  | NM_014447 | 627.392   | 358.324   |
| NM_00473E   | 3876.876  | 3629.01   | NM_002162 | 8653.812  | 3092.109  | NM_006691 | 512.333   | 251.854   |
| NM_00645E   | 4627.825  | 3475.188  | AF209198  | 2676.211  | 3533.321  | NM_00150E | 304.733   | 195.9     |
| D50373      | 951.457   | 647.727   | NM_00693E | 17012.41  | 20034.387 | NM_00371C | 1385.872  | 774.83    |
| AA488757    | 5317.742  | 4464.407  | NM_001327 | 9041.661  | 10570.83  | Z83805    | 982.507   | 605.732   |
| AA205399    | 415.443   | 459.304   | AB037722  | 314.567   | 368.568   | NM_003614 | 325.613   | 255.245   |
| H07071      | 478.938   | 756.857   | NM_003652 | 413.056   | 542.147   | NM_014257 | 1102.243  | 503.483   |
| M25322      | 2817.415  | 1925.131  | NM_01838E | 1213.734  | 2117.327  | NM_001140 | 435.247   | 479.214   |
| H-L 27586 I | 3072.358  | 2926.898  | NM_01471E | 7816.747  | 8184.657  | NM_004843 | 1225.907  | 846.634   |
| ID 1867426  | 6144.49   | 5872.623  | AB002354  | 539.885   | 1146.938  | AK022845  | 846.088   | 1070.644  |
| ID 396450   | 384.426   | 636.359   | AK023845  | 1583.911  | 1840.951  | S77835    | 442.764   | 314.857   |
| W99328      | 1002.802  | 1103.407  | NM_00263E | 6147.344  | 6541.274  | NM_00298E | 444.526   | 475.164   |
| AI434176    | 789.261   | 973.658   | NM_016487 | 1301.335  | 1660.158  | AB018347  | 2480.214  | 1284.755  |
| H08563      | 980.577   | 967.818   | NM_00580E | 13093.589 | 9440.18   | AB033073  | 862.321   | 410.352   |
| BE735403    | 880.16    | 1185.407  | NM_006401 | 29699.166 | 10076.579 | NM_003284 | 560.029   | 308.615   |
| NM_00075E   | 1234.808  | 992.041   | AF269249  | 1058.58   | 768.454   | NM_018152 | 273.597   | 134.697   |
| AK023334    | 585.06    | 563.668   | AB040889  | 78.217    | 215.53    | NM_00031E | 1819.957  | 902.031   |
| NM_00256E   | 9348.148  | 9336.228  | NM_01816E | 4782.532  | 11656.127 | NM_012461 | 2511.25   | 1182.526  |
| NM_002437   | 852.578   | 679.034   | NM_00450E | 2688.956  | 4270.182  | AK001379  | 663.989   | 274.49    |
| D79991      | 2461.555  | 2246.94   | S74529    | 20132.961 | 30952.125 | NM_007072 | 936.553   | 511.049   |
| NM_000054   | 7462.164  | 6270.383  | NM_00593E | 482.908   | 821.085   | NM_01232C | 1351.062  | 505.282   |
| NM_01471E   | 13010.29  | 9516.376  | NM_001421 | 380.745   | 908.066   | NM_01820E | 2119.684  | 1044.205  |
| NM_00181E   | 1515.397  | 961.264   | M73837    | 3511.906  | 4287.672  | NM_01592E | 2794.453  | 1564.853  |
| NM_01478E   | 537.817   | 331.062   | NM_00583E | 9843.305  | 9485.348  | U90653    | 3181.938  | 2076.51   |
| NM_005811   | 3451.717  | 3407.161  | AK023379  | 4404.798  | 4254.483  | NM_00019E | 258.314   | 164.515   |
| NM_005764   | 680.254   | 673.099   | NM_00607E | 1238.028  | 1355.619  | NM_01833E | 3550.816  | 1970.493  |
| NM_01636E   | 688.429   | 676.85    | AK021904  | 5513.776  | 5196.162  | NM_00674E | 25156.154 | 14139.078 |
| NM_004214   | 9905.437  | 9279.668  | -         | 1103.526  | 1262.162  | NM_00027E | 570.123   | 753.494   |
| NM_00432E   | 13027.836 | 10615.572 | NM_01829E | 788.374   | 565.818   | AK000037  | 505.251   | 587.909   |
| NM_00283E   | 5666.67   | 4816.457  | AL049705  | 8744.21   | 3739.668  | NM_01476C | 1691.923  | 1810.314  |
| NM_020167   | 2004.141  | 1844.367  | AK022294  | 1211.298  | 1042.626  | NM_014404 | 800.322   | 675.581   |
| AL049963    | 22493.676 | 21445.006 | NM_00040E | 1241.383  | 1760.197  | NM_01871E | 338.1     | 190.917   |
| NM_01605E   | 35109.113 | 36528.203 | NM_00069C | 1118.711  | 1136.355  | NM_015947 | 2664.168  | 1701.386  |
| NM_01400E   | 1257.72   | 1258.3    | NM_00015E | 3436.264  | 3320.664  | NM_00204E | 7864.824  | 3581.094  |
| NM_00463E   | 1253.329  | 1351.705  | AK024489  | 579.383   | 470.378   | AB028944  | 372.556   | 218.872   |
| AK022603    | 563.534   | 469.933   | NM_000181 | 1894.732  | 1836.949  | AJ006268  | 449.707   | 334.477   |
| NM_00489E   | 2884.697  | 3323.918  | NM_014121 | 712.316   | 1013.665  | M74089    | 2920.065  | 1360.478  |
| AF000143    | 12356.128 | 10724.238 | NM_00673C | 754.565   | 834.866   | AF190864  | 3156.424  | 1291.092  |
| NM_014211   | 444.227   | 602.494   | NM_005644 | 6633.59   | 6548.44   | NM_00277E | 1552.089  | 764.723   |
| NM_000814   | 2185.503  | 1872.382  | NM_01844E | 2641.047  | 2241.577  | NM_02019E | 4562.398  | 1861.469  |
| NM_00045E   | 1582.261  | 1633.877  | AF182416  | 5404.823  | 4843.014  | AA098879  | 286.27    | 351.067   |
| J03077      | 18792.344 | 19855.631 | NM_00599E | 17477.686 | 22749.289 | NM_00040E | 2134.108  | 1104.508  |
| J03048      | 9442.439  | 15174.285 | NM_00601E | 1178.823  | 1274.689  | NM_018127 | 8223.515  | 4902.685  |
| AL157469    | 1050.255  | 980.627   | NM_004634 | 2491.13   | 3626.392  | AB020677  | 1841.16   | 1616.175  |
| NM_00286E   | 3289.372  | 3356.416  | NM_002017 | 6433.402  | 6135.038  | AB033097  | 1109.852  | 772.082   |
| AK024100    | 6606.651  | 5666.101  | NM_01752E | 9023.91   | 8170.167  | NM_00013E | 676.617   | 319.553   |
| NM_00513E   | 430.939   | 702.061   | NM_00238E | 22010.037 | 19586.379 | AJ223948  | 2599.92   | 2380.505  |
| NM_003827   | 10895.938 | 9768.821  | NM_00215E | 742.85    | 556.216   | NM_01621E | 486.18    | 291.043   |
| NM_00458E   | 407.061   | 683.874   | U13223    | 12959.571 | 10568.271 | AK022947  | 1223.44   | 1231.258  |
| NM_00110E   | 710.69    | 561.47    | NM_01627C | 1965.411  | 1306.173  | AL049966  | 292.089   | 293.398   |
| AF228710    | 15922.295 | 12099.393 | AK001357  | 534.637   | 585.799   | NM_005204 | 2235.626  | 1616.97   |
| AY007131    | 28089.592 | 26586.037 | NM_015721 | 1883.255  | 1486.837  | NM_01620E | 1083.405  | 737.174   |

|           |           |           |           |           |           |            |           |           |
|-----------|-----------|-----------|-----------|-----------|-----------|------------|-----------|-----------|
| U61735    | 2818.216  | 2780.952  | AK000032  | 216.659   | 479.724   | NM_002755  | 1524.527  | 970.052   |
| NM_001144 | 5911.395  | 6313.176  | S94540    | 11530.876 | 13476.894 | NM_007271  | 1248.402  | 1151.16   |
| AK023766  | 3834.132  | 4260.322  | U79297    | 1745.157  | 1720.96   | NM_006255  | 3047.745  | 1481.081  |
| NM_001897 | 1170.606  | 1238.231  | AK002164  | 870.626   | 1532.747  | BE392143   | 1843.632  | 1008.455  |
| NM_003853 | 1555.829  | 1642.754  | AF052122  | 5437.496  | 5458.331  | NM_005813  | 557.99    | 255.683   |
| AB033109  | 1638.325  | 1686.637  | NM_001310 | 2402.135  | 2409.547  | AB037718   | 2083.417  | 793.02    |
| NM_002053 | 13262.567 | 14429.403 | AK026924  | 2299.115  | 3921.731  | AL389994   | 531.744   | 349.904   |
| NM_006889 | 1065.311  | 1012.711  | AL122047  | 5926.711  | 4977.462  | NM_001277  | 1871.232  | 1089.554  |
| NM_020397 | 1260.294  | 2124.105  | AF052091  | 1475.309  | 1861.026  | NM_003655  | 2907.565  | 1528.053  |
| NM_000061 | 1002.017  | 701.753   | AK024447  | 57282.164 | 48341.723 | Z36789     | 1732.14   | 1066.909  |
| AB046859  | 10332.15  | 9732.296  | AF052145  | 970.35    | 661.792   | J02874     | 472.695   | 545.348   |
| NM_005109 | 10838.311 | 11493.402 | AF086458  | 5226.794  | 3474.527  | BF310427   | 663.488   | 382.245   |
| AK023573  | 3575.205  | 5656.558  | AF086548  | 2183.422  | 2070.447  | N94424     | 277.83    | 329.369   |
| NM_002730 | 7899.591  | 8919.582  | AK024350  | 938.622   | 793.833   | AA045192   | 318.158   | 292.551   |
| NM_004828 | 1330.755  | 1518.353  | AK023717  | 1654.698  | 1667.823  | H45617     | 352.735   | 475.421   |
| AB011540  | 43205.273 | 31792.518 | AK023727  | 1228.565  | 1533.706  | M92642     | 354.329   | 306.443   |
| NM_000040 | 8900.363  | 6971.275  | AK025271  | 645.862   | 611.512   | AA464532   | 240.313   | 172.55    |
| NM_004631 | 3050.394  | 1952.108  | AF086204  | 2087.234  | 2833.323  | H-U 44385  | 8211.89   | 6974.751  |
| NM_006033 | 6645.145  | 5075.483  | NM_007021 | 514.311   | 800.818   | ID 1654970 | 2961.98   | 2626.99   |
| NM_004837 | 8049.459  | 6782.785  | AK021570  | 644.879   | 1163.763  | ID 2531132 | 3465.585  | 2903.23   |
| NM_000370 | 1314.213  | 1178.224  | AL360204  | 604.731   | 349.072   | BF125928   | 8300.452  | 3705.49   |
| BE865893  | 6514.995  | 4694.973  | AK000103  | 607.109   | 721.481   | BG571026   | 729.138   | 362.057   |
| NM_003123 | 54269.082 | 55398.949 | AK026294  | 271.554   | 671.314   | AA489017   | 2171.656  | 760.495   |
| AY005822  | 1816.714  | 1231.302  | AF085959  | 833.412   | 1318.978  | NM_012245  | 6161.69   | 2304.385  |
| NM_018129 | 24234.148 | 21321.23  | AK023104  | 950.962   | 731.858   | NM_133263  | 773.909   | 295.873   |
| AF289022  | 2148.903  | 2831.64   | AK022181  | 592.826   | 206.589   | NM_003284  | 558.832   | 488.052   |
| NM_016025 | 9774.276  | 12118.063 | AK026923  | 1572.222  | 3221.489  | NM_000319  | 1924.183  | 1421.089  |
| NM_013319 | 2485.303  | 2606.263  | AK021691  | 19972.84  | 14036.494 | NM_003257  | 290.92    | 170.916   |
| NM_000746 | 2288.598  | 2348.661  | AK023595  | 1170.398  | 808.353   | NM_012461  | 2707.817  | 1657.266  |
| NM_000722 | 1310.784  | 1242.926  | U52832    | 557.833   | 329.394   | AK001379   | 1059.556  | 912.621   |
| NM_018655 | 2364.05   | 4100.468  | AK022037  | 337.697   | 456.482   | NM_002023  | 612.125   | 473.642   |
| NM_005663 | 2213.282  | 2034.088  | AK000141  | 5218.722  | 7624.998  | NM_002839  | 387.295   | 307.945   |
| X89960    | 771.398   | 619.025   | AL137758  | 2431.074  | 2995.007  | AF190500   | 242.653   | 283.809   |
| NM_006550 | 1125.72   | 1472.513  | AK025786  | 937.086   | 1541.46   | NM_001616  | 291.338   | 266.375   |
| NM_005773 | 3181.939  | 3418.123  | AK024188  | 900.636   | 2417.06   | NM_005904  | 390.501   | 525.644   |
| NM_017644 | 4043.468  | 5311.286  | AK024379  | 411.608   | 1040.446  | NM_005273  | 7956.434  | 6898.377  |
| NM_002482 | 883.07    | 616.986   | AK026820  | 888.073   | 1059.724  | NM_000524  | 372.265   | 524.763   |
| NM_001718 | 1062.201  | 880.279   | AK001716  | 1598.028  | 2575.663  | NM_006576  | 1915.22   | 1689.888  |
| AF116659  | 1236.442  | 1027.769  | AF113683  | 262.604   | 656.393   | NM_018645  | 452.756   | 449.463   |
| NM_000317 | 15918.648 | 14368.948 | NM_014095 | 215.987   | 465.12    | NM_014682  | 554.887   | 1094.509  |
| NM_018376 | 4790.4    | 4557.212  | AK026821  | 555.659   | 1110.019  | AB035266   | 1432.434  | 1141.271  |
| NM_017615 | 949.726   | 781.962   | AK026280  | 1267.806  | 1108.626  | NM_003744  | 1335.159  | 517.666   |
| NM_017438 | 3485.263  | 2861.179  | AF113017  | 3968.346  | 4410.494  | NM_006378  | 7849.901  | 3108.54   |
| U59209    | 2153.498  | 2267.181  | AL080232  | 4184.485  | 3270.504  | NM_018132  | 1033.114  | 650.957   |
| NM_020195 | 6385.717  | 4998.457  | AK001120  | 5905.702  | 5882.812  | NM_003061  | 718.894   | 365.785   |
| AK023824  | 4798.122  | 5564.274  | AF264629  | 174.021   | 1284.628  | NM_018207  | 933.983   | 365.187   |
| AL133069  | 4804.798  | 8438.77   | AK022416  | 701.445   | 381.652   | NM_000345  | 4807.731  | 1962.796  |
| AL117574  | 602.742   | 935.624   | AK023224  | 2001.996  | 1482.238  | NM_001862  | 27377.729 | 11741.146 |
| AK026055  | 6118.464  | 7425.557  | AK023731  | 1334.867  | 661.152   | NM_006531  | 749.199   | 521.622   |
| AK024126  | 1128.398  | 993.353   | AK023336  | 898.123   | 454.553   | M74089     | 3784.793  | 2948.751  |
| NM_001516 | 5219.563  | 4924.016  | AK023771  | 714.318   | 533.723   | AF190864   | 3585.724  | 2494.015  |
| NM_006670 | 2001.603  | 2412.021  | AK026873  | 4179.507  | 4820.307  | NM_002779  | 1729.969  | 1532.805  |
| NM_012425 | 4673.357  | 4837.914  | AK026394  | 4551.683  | 5205.986  | L40397     | 11296.054 | 8237.211  |

|           |           |           |           |           |           |           |          |           |
|-----------|-----------|-----------|-----------|-----------|-----------|-----------|----------|-----------|
| NM_00581E | 1549.372  | 1422.324  | NM_00544E | 1556.758  | 2658.278  | NM_02019E | 4718.251 | 2734.973  |
| NM_00275C | 8658.842  | 8415.254  | AK025943  | 27618.547 | 36678.922 | AA098879  | 372.639  | 215.591   |
| AK024134  | 3777.039  | 4688.706  | BG106479  | 754.034   | 1460.256  | NM_001177 | 4167.576 | 4500.049  |
| NM_003014 | 2402.648  | 3838.916  | AF130069  | 4981.97   | 8730.81   | NM_014447 | 768.56   | 1026.003  |
| NM_01855E | 727.126   | 1059.371  | AL109669  | 944.962   | 2425.876  | NM_006691 | 900.834  | 760.698   |
| NM_001974 | 2870.442  | 2462.268  | AB037766  | 1160.931  | 1802.595  | NM_00150E | 373.963  | 394.979   |
| NM_013957 | 931.897   | 896.035   | AK026995  | 590.328   | 1271.791  | NM_00371C | 1456.454 | 1923.502  |
| NM_00246E | 6253.277  | 5009.441  | AL133091  | 573.426   | 1279.83   | Z83805    | 476.293  | 367.472   |
| NM_00302E | 1393.491  | 1147.101  | BF842915  | 560.268   | 777.431   | NM_00466E | 662.365  | 1089.267  |
| NM_00156E | 1019.43   | 1054.452  | X82545    | 3657.317  | 4935.818  | NM_003614 | 306.189  | 431.176   |
| NM_016541 | 1057.958  | 697.698   | AK024632  | 4357.229  | 4210.59   | NM_014257 | 1349.175 | 1169.82   |
| NM_01854E | 5392.828  | 5182.716  | NM_018474 | 4034.606  | 4231.708  | NM_00484E | 1135.251 | 622.975   |
| NM_013401 | 1364.137  | 1289.783  | AK024937  | 1388.935  | 629.227   | AK022845  | 679.321  | 558.425   |
| NM_01823E | 5173.577  | 4354.604  | D17178    | 951.407   | 393.248   | NM_003004 | 194.619  | 141.109   |
| NM_00685E | 10529.041 | 11814.539 | AK022094  | 2668.76   | 1294.414  | S77835    | 273.146  | 147.439   |
| NM_00140E | 10864.355 | 13912.623 | AK026695  | 1203.192  | 433.511   | NM_00298E | 295.193  | 247.686   |
| NM_00388C | 1432.43   | 1743.764  | AK022220  | 688.085   | 298.373   | AB018347  | 2603.87  | 1266.567  |
| AF131778  | 1626.26   | 1854.704  | U84520    | 2155.358  | 2907.894  | AB033073  | 806.414  | 406.234   |
| NM_00156E | 2677.907  | 2875.967  | Z11853    | 327.106   | 782.846   | NM_00581E | 753.716  | 1043.431  |
| NM_01327E | 2033.653  | 1926.162  | AL133616  | 7909.999  | 16773.291 | AB037718  | 2489.498 | 2100.261  |
| NM_003487 | 9555.843  | 7184.194  | AK023391  | 264.193   | 660.086   | AL389994  | 635.232  | 656.83    |
| NM_006887 | 8419.395  | 8440.229  | AK026382  | 2129.978  | 4693.488  | NM_00390E | 3110.666 | 2556.141  |
| NM_006477 | 1549.608  | 1199.655  | AK091169  | 2387.546  | 3635.879  | NM_001277 | 2144.403 | 1691.41   |
| NM_00288C | 3761.978  | 3305.747  | NM_01474E | 23396.254 | 32691.295 | NM_00365E | 3702.94  | 2523.115  |
| NM_00067E | 6181.859  | 5465.017  | AF086026  | 3935.487  | 6656.955  | NM_00707E | 1233.177 | 1120.923  |
| NM_00106E | 1071.318  | 1104.068  | AL133011  | 214.28    | 785.105   | NM_01232C | 1533.562 | 1934.414  |
| NM_004657 | 2713.106  | 2943.828  | NM_01630C | 1301.927  | 2947.326  | NM_01820E | 2303.839 | 3369.7    |
| NM_01817C | 2013.045  | 2148.387  | NM_015607 | 16159.695 | 23636.922 | NM_01592E | 4173.513 | 4071.832  |
| NM_003867 | 998.041   | 670.742   | AK026955  | 1516.072  | 2462.087  | U90653    | 4021.458 | 4089.757  |
| AK022588  | 354.064   | 318.697   | AL110202  | 24510.516 | 33405.016 | NM_00019E | 369.016  | 578.681   |
| AL162062  | 695.564   | 510.698   | AK021980  | 999.166   | 1240.035  | NM_01833E | 4373.924 | 5827.604  |
| NM_00317E | 6604.804  | 6416.876  | S46402    | 1316.137  | 1042.588  | NM_00027E | 702.643  | 745.045   |
| NM_00503C | 8567.249  | 7433.335  | AF075048  | 492.574   | 307.739   | AK000037  | 494.697  | 295.656   |
| NM_017584 | 2657.688  | 1944.527  | Z83940    | 1203.637  | 1075.083  | NM_01476C | 1562.352 | 1167.732  |
| NM_02035E | 2495.274  | 2385.194  | AF019617  | 7434.027  | 8392.224  | NM_01839E | 934.137  | 874.052   |
| AB014541  | 16622.631 | 10965.634 | AL137305  | 4161.42   | 3277.974  | NM_00256C | 5112.332 | 2572.598  |
| NM_00258E | 3896.715  | 3346.512  | AK025802  | 735.32    | 230.596   | NM_014404 | 714.985  | 377.199   |
| NM_00657C | 14605.311 | 12781.867 | AF085973  | 584.395   | 255.377   | NM_01871E | 350.163  | 218.449   |
| NM_02034E | 893.173   | 857.952   | NM_01801E | 4200.063  | 1670.005  | NM_015947 | 2570.588 | 1642.041  |
| NM_006034 | 8317.111  | 9592.599  | AK022517  | 1436.308  | 908.6     | NM_00204E | 9676.143 | 4245.402  |
| NM_005201 | 11958.608 | 11762.05  | NM_00032E | 20538.447 | 18903.031 | AB028944  | 268.166  | 183.283   |
| NM_00009E | 809.488   | 922.037   | NM_001182 | 4504.045  | 11817.152 | AJ006268  | 396.879  | 236.692   |
| AF174600  | 5531.145  | 6059.063  | AF143328  | 91.295    | 385.918   | NM_01224E | 6409.744 | 4698.934  |
| AK001003  | 1832.039  | 1750.486  | NM_00033E | 1281.536  | 3784.184  | NM_13326E | 638.497  | 648.881   |
| NM_00280C | 16268.46  | 15063.523 | NM_00017E | 2165.559  | 5490.032  | NM_00002E | 8430.517 | 5924.277  |
| NM_018384 | 15037.673 | 11525.504 | NM_002297 | 1935.099  | 3294.056  | D38521    | 1330.519 | 2200.838  |
| AF282617  | 7890.961  | 7829.747  | AB040968  | 5109.198  | 10067.313 | NM_00040E | 2462.625 | 2626.852  |
| AF157323  | 2564.826  | 2301.976  | X85323    | 621.853   | 1013.381  | NM_018127 | 8149.667 | 10145.285 |
| NM_00602E | 509.278   | 533.268   | U17615    | 1006.837  | 1513.448  | AB020677  | 1813.013 | 2376.737  |
| NM_005877 | 9560.334  | 7338.892  | NM_00530E | 777.089   | 1119.84   | AB033097  | 818.094  | 1329.637  |
| NM_00333E | 7727.13   | 5878.688  | NM_01612E | 12228.328 | 15594.902 | AJ223948  | 2716.972 | 2993.892  |
| NM_01339E | 884.137   | 678.529   | U84119    | 1078.034  | 1780.117  | NM_01621E | 438.657  | 342.515   |
| NM_01775E | 1292.491  | 981.873   | NM_00360E | 3888.497  | 5016.088  | AK022947  | 1101.728 | 747.113   |

|           |           |           |             |           |           |            |           |           |
|-----------|-----------|-----------|-------------|-----------|-----------|------------|-----------|-----------|
| D26069    | 4380.313  | 4333.831  | AF302079    | 10669.567 | 10916.75  | AL050029   | 1304.258  | 868.967   |
| BF107577  | 11661.24  | 9855.121  | AJ224167    | 517.146   | 343.221   | AL049966   | 259.914   | 201.816   |
| NM_005837 | 8651.697  | 8413.243  | NM_000692   | 793.071   | 1236.378  | NM_005204  | 2154.374  | 1167.641  |
| NM_016625 | 7241.2    | 8909.254  | AF086062    | 1162.327  | 910.577   | NM_016203  | 1140.965  | 530.738   |
| NM_017493 | 2246.096  | 2043.724  | L47668      | 22023.455 | 10648.823 | NM_002755  | 1552.998  | 829.301   |
| NM_006136 | 9038.852  | 9725.282  | NM_017920   | 4290.33   | 1842.909  | NM_007271  | 976.867   | 553.08    |
| AF237772  | 4066.979  | 4250.958  | AK025345    | 962.766   | 287.732   | NM_006255  | 2986.91   | 1756.381  |
| AK025934  | 1686.684  | 1655.641  | D25274      | 6954.518  | 1823.329  | BE392143   | 2012.567  | 1348.348  |
| AJ008154  | 1553.821  | 2539.301  | CY3Cy5      | 895.466   | 79.959    | NM_018132  | 1153.642  | 1302.055  |
| NM_006856 | 4958.577  | 5280.55   | D50373      | 510.256   | 368.874   | NM_003061  | 663.101   | 735.826   |
| X52350    | 59733.738 | 61227.508 | AA488757    | 3577.018  | 1792.212  | NM_018207  | 1179.75   | 973.943   |
| AF071554  | 1368.341  | 1358.156  | H07071      | 579.074   | 1284.173  | NM_000345  | 3978.895  | 3077.534  |
| U90919    | 2799.861  | 2443.84   | M25322      | 1967.413  | 4799.68   | NM_001862  | 32199.912 | 25566.953 |
| NM_006177 | 735.46    | 980.704   | H-L 27586 I | 2474.683  | 5619.655  | NM_002101  | 23625.172 | 16291.316 |
| AL137286  | 6036.003  | 5160.862  | ID 214180   | 581.136   | 606.257   | NM_005423  | 270.602   | 271.728   |
| NM_016355 | 5557.131  | 4160.17   | ID 1867426  | 3165.061  | 4679.357  | Z36789     | 1841.58   | 2353.546  |
| NM_016275 | 14120.036 | 16344.313 | ID 396450   | 502.22    | 561.755   | J02874     | 579.271   | 722.62    |
| NM_020415 | 4944.978  | 5266.218  | AI434176    | 1081.393  | 286.496   | BF310427   | 597.556   | 592.321   |
| NM_013293 | 5864.38   | 5391.534  | H08563      | 867.831   | 480.998   | N94424     | 242.617   | 226.278   |
| AF315592  | 4673.343  | 4621.199  | BE735403    | 770.037   | 679.984   | AA045192   | 547.94    | 1067.607  |
| AF095844  | 1318.588  | 1536.117  | NM_022552   | 4115.106  | 2957.385  | AI521645   | 339.658   | 101.002   |
| NM_015833 | 1621.302  | 1754.897  | NM_014389   | 6740.834  | 6170.627  | H45617     | 328.286   | 287.292   |
| NM_000986 | 57295.672 | 63884.969 | SR2         | 47860.641 | 40637.906 | M92642     | 315.839   | 346.065   |
| AK026760  | 8432.052  | 6651.758  | SR4         | 10341.75  | 10942.098 | ID 1654970 | 2923.097  | 1707.044  |
| NM_014772 | 1345.785  | 1345.142  | SR6         | 1759.262  | 1605.627  | ID 2531132 | 3288.911  | 1842.19   |
| AK025248  | 1406.878  | 1424.27   | SR8         | 6439.08   | 22172.717 | BF125928   | 7533.656  | 3343.253  |
| NM_004536 | 14934.077 | 19212.406 | SR10        | 22785.932 | 8505.502  | BG571026   | 616.849   | 354.758   |
| NM_006425 | 13733.742 | 14519.2   | CY3Cy5      | 1391.336  | 144.345   | AA489017   | 2062.845  | 1043.732  |
| NM_004280 | 18815.688 | 20391.672 | NM_005811   | 3044.998  | 1578.911  | AK022845   | 808.509   | 800.96    |
| AF110399  | 1195.486  | 1365.509  | NM_005764   | 564.552   | 462.322   | NM_003004  | 257.402   | 194.509   |
| AK027094  | 3322.304  | 5202.194  | NM_016362   | 441.583   | 140.845   | S77835     | 329.264   | 268.285   |
| AL359596  | 2271.528  | 2528.811  | NM_004214   | 7605.318  | 10728.852 | NM_002985  | 325.642   | 499.061   |
| U79249    | 1432.747  | 1959.259  | NM_004329   | 8735.838  | 18453.059 | AB018347   | 3182.821  | 3674.498  |
| AK022114  | 1311.38   | 1013.395  | NM_002836   | 4002.065  | 8440.116  | AB033073   | 1066.856  | 1200.538  |
| AL133585  | 1372.888  | 1092.142  | NM_020167   | 1126.528  | 2300.017  | NM_018152  | 251.285   | 331.748   |
| NM_002631 | 13448.456 | 10919.685 | NM_014005   | 1149.904  | 1660.736  | NM_000319  | 2418.009  | 2483.09   |
| BF217864  | 5865.691  | 3876.818  | NM_004636   | 1044.311  | 1246.447  | NM_012461  | 2889.851  | 2931.197  |
| NM_005917 | 20695.484 | 18891.863 | NM_004896   | 2406.469  | 809.167   | AK001379   | 1026.425  | 671.769   |
| NM_007052 | 900.633   | 1247.092  | NM_003976   | 461.783   | 601.614   | NM_017450  | 929.028   | 937.833   |
| BC017044  | 1228.202  | 1994.109  | NM_017685   | 1342.568  | 1020.711  | NM_002023  | 596.737   | 524.328   |
| AV758498  | 792.972   | 1537.805  | AK025612    | 3409.89   | 3653.655  | NM_002839  | 304.848   | 278.867   |
| NM_020196 | 2249.977  | 3415.138  | NM_012265   | 1899.088  | 3364.526  | AF190500   | 330.265   | 342.802   |
| AK024113  | 757.657   | 1086.436  | NM_012203   | 656.79    | 984.143   | NM_001616  | 300.006   | 257.954   |
| NM_018657 | 902.481   | 1289.105  | NM_004736   | 3599.089  | 3943.455  | NM_005904  | 246.135   | 271.111   |
| L40410    | 13604.901 | 22117.273 | NM_006459   | 3805.678  | 5382.711  | NM_006576  | 668.133   | 479.819   |
| NM_007055 | 619.598   | 961.631   | NM_003827   | 8252.366  | 4978.318  | NM_018645  | 364.432   | 184.301   |
| NM_016652 | 827.038   | 920.883   | NM_004583   | 528.871   | 482.656   | AB035266   | 1649.011  | 825.19    |
| NM_016310 | 8050.758  | 7066.946  | NM_001103   | 484.822   | 237.598   | NM_003744  | 1323.158  | 663.896   |
| AK021562  | 574.036   | 696.102   | AF228710    | 9604.344  | 4627.959  | NM_006375  | 7879.074  | 3734.108  |
| BC006560  | 1673.839  | 1296.996  | U61735      | 3582.29   | 7086.86   | NM_014404  | 850.68    | 833.36    |
| NM_006295 | 990.335   | 899.704   | NM_001144   | 5456.584  | 10607.097 | NM_018713  | 353.152   | 452.702   |
| AF060938  | 31964.174 | 28931.203 | AK023766    | 4076.481  | 8802.443  | NM_015947  | 3145.132  | 3160.098  |
| NM_001973 | 6002.295  | 6338.992  | AB033109    | 1493.405  | 2773.848  | NM_002042  | 10627.345 | 11892.013 |

|           |           |           |           |           |           |           |           |           |
|-----------|-----------|-----------|-----------|-----------|-----------|-----------|-----------|-----------|
| NM_01446E | 3165.463  | 4308.436  | NM_002053 | 16554.059 | 28234.57  | AB028944  | 330.32    | 502.511   |
| AL050015  | 1365.09   | 1773.172  | NM_00243E | 911.439   | 475.416   | AJ006268  | 738.7     | 1712.379  |
| AY007117  | 5543.644  | 7532.696  | NM_01458E | 1803.041  | 797.354   | AF190864  | 4316.1    | 5057.153  |
| AF039698  | 3004.977  | 4007.333  | NM_00075E | 780.696   | 789.31    | NM_00277E | 1741.907  | 2424.676  |
| AL109679  | 720.672   | 736.201   | AK023334  | 793.237   | 591.791   | L40397    | 12803.048 | 14825.611 |
| AB046828  | 5561.302  | 5268.478  | NM_00256E | 8671.41   | 6871.607  | NM_02019E | 6047.793  | 5449.385  |
| AF144487  | 1614.655  | 1240.307  | NM_002437 | 1429.766  | 1472.677  | AA098879  | 411.607   | 342.91    |
| AL137532  | 2155.759  | 1096.643  | D79991    | 2412.586  | 2275.731  | AF070525  | 5730.564  | 5022.479  |
| AK025419  | 2247.506  | 1902.143  | NM_000054 | 8158.266  | 8893.989  | NM_001177 | 4185.658  | 4064.127  |
| NM_01325E | 11229.996 | 10217.301 | NM_01471E | 9886.804  | 9286.271  | NM_014447 | 914.209   | 1155.452  |
| NM_01837E | 7266.361  | 6702.493  | NM_00181E | 1276.779  | 1382.142  | NM_006691 | 768.79    | 883.168   |
| NM_00491E | 678.071   | 583.029   | NM_01478E | 613.42    | 830.559   | NM_00150E | 380.71    | 330.712   |
| AK026838  | 2242.132  | 3028.587  | NM_00603E | 3717.354  | 2350.437  | NM_00371E | 1538.269  | 1065.028  |
| AK022443  | 1740.337  | 2407.188  | NM_004837 | 6023.894  | 3357.116  | Z83805    | 396.712   | 228.958   |
| AK023371  | 3271.624  | 4817.171  | NM_00037E | 1343.38   | 844.228   | NM_00466E | 534.758   | 269.572   |
| AF086187  | 2011.088  | 3475.615  | BE865893  | 3460.563  | 2147.758  | NM_003614 | 276.368   | 149.233   |
| AF305836  | 46554.438 | 44547.043 | NM_00312E | 49701.484 | 24383.902 | NM_014257 | 1285.786  | 666.353   |
| AL109784  | 505.184   | 409.33    | AY005822  | 1278.265  | 580.883   | NM_00484E | 1248.356  | 1018.646  |
| AL035295  | 4562.432  | 4243.545  | NM_01812E | 22603.002 | 21450.328 | NM_005204 | 2929.631  | 2779.672  |
| NM_01830E | 4637.639  | 5014.022  | AF289022  | 2635.223  | 5727.268  | NM_01620E | 1184.924  | 1236.276  |
| AK027252  | 3779.636  | 3326.592  | AB002326  | 320.325   | 457.613   | NM_00275E | 1633.273  | 2092.998  |
| AF165527  | 3107.205  | 2452.799  | M17252    | 262.514   | 654.635   | NM_007271 | 1085.15   | 1556.46   |
| NM_01409E | 1149.532  | 1235.224  | NM_01602E | 10153.959 | 10539.758 | NM_00625E | 3525.631  | 5449.634  |
| AL110133  | 10250.425 | 8968.542  | NM_01331E | 1997.264  | 2934.657  | AL389994  | 805.369   | 881.874   |
| AK000529  | 6944.525  | 6967.976  | NM_00074E | 1586.331  | 2809.762  | NM_00390E | 3497.664  | 4011.143  |
| AK027243  | 2333.187  | 2152.87   | NM_00603E | 1376.774  | 828.55    | NM_001277 | 2672.215  | 3196.886  |
| AF147415  | 1171.325  | 1679.944  | NM_02041E | 3773.377  | 2608.744  | NM_00365E | 4567.458  | 3951.545  |
| AL049273  | 446.979   | 917.226   | AF000143  | 19740.449 | 11563.371 | NM_00707E | 1494.803  | 1574.125  |
| AK098474  | 851.091   | 649.735   | NM_014211 | 421.582   | 434.267   | NM_01232E | 1496.42   | 1383.472  |
| AL117475  | 2454.063  | 2303.645  | NM_000814 | 2044.76   | 1698.917  | NM_01820E | 2616.734  | 2872.672  |
| AL049300  | 745.687   | 989.242   | NM_00045E | 1581.134  | 1930.668  | NM_01592E | 3240.223  | 3361.708  |
| NM_01753E | 7714.668  | 11614.858 | J03077    | 16906.41  | 17099.139 | U90653    | 3971.53   | 4622.976  |
| L23852    | 904.953   | 1094.384  | J03048    | 10624.745 | 6460.597  | NM_00019E | 325.216   | 257.009   |
| NM_003887 | 1765.844  | 1831.237  | AL157469  | 687.992   | 855.441   | NM_01833E | 3774.95   | 2590.276  |
| NM_004267 | 10507.163 | 12736.74  | NM_00286E | 2460.321  | 3584.295  | NM_00674E | 26642.311 | 14483.48  |
| AL357212  | 585.174   | 348.655   | AK024100  | 4358.664  | 5349.544  | NM_00027E | 492.378   | 301.613   |
| AK026687  | 2282.904  | 1942.38   | NM_00513E | 439.667   | 752.958   | AK000037  | 384.52    | 234.499   |
| AL117444  | 1370.097  | 1029.114  | NM_000317 | 14713.151 | 6615.345  | NM_01476E | 1494.552  | 1033.8    |
| NM_017994 | 9659.397  | 11789.203 | NM_01837E | 4109.677  | 2224.933  | NM_01839E | 458.978   | 284.073   |
| AK021693  | 2349.967  | 2470.649  | NM_01761E | 579.107   | 344.785   | NM_00256E | 6007.121  | 3574.051  |
| AB023177  | 721.297   | 764.532   | NM_01743E | 3264.218  | 1371.919  | NM_000787 | 611.276   | 716.626   |
| Y11609    | 2954.173  | 2847.33   | U59209    | 2053.757  | 892.605   | U57962    | 1688.534  | 2426.917  |
| AJ278482  | 1107.219  | 1739.243  | NM_02019E | 4274.372  | 2901.468  | NM_01617E | 5324.183  | 6381.42   |
| NM_01212E | 10493.881 | 10381.696 | AK023824  | 5290.468  | 8316.452  | NM_005574 | 256.124   | 333.934   |
| AF009285  | 12605.039 | 9826.693  | AL133069  | 4380.717  | 8880.067  | NM_01789E | 3222.121  | 4893.849  |
| NM_01212E | 5113.186  | 4420.77   | AL117574  | 782.086   | 1102.64   | NM_00461E | 1235.745  | 2339.654  |
| AB032363  | 1125.514  | 1198.036  | NM_002744 | 4092.029  | 1592.752  | AK027002  | 1678.687  | 2500.982  |
| AF009294  | 4889.516  | 6726.233  | NM_015917 | 9262.297  | 4353.678  | AB025254  | 1302.338  | 2102.2    |
| NM_001524 | 1717.978  | 1541.15   | NM_020397 | 997.565   | 608.718   | NM_004081 | 914.921   | 1779.715  |
| AK000998  | 1225.261  | 1344.822  | NM_000061 | 792.029   | 652.101   | NM_00002E | 10125.169 | 8506.869  |
| AK001225  | 757.25    | 1189.703  | AB046859  | 12004.463 | 10326.605 | D38521    | 1448.233  | 2518.586  |
| AK021435  | 872.612   | 1190.655  | NM_00510E | 9604.19   | 8069.831  | NM_00040E | 3262.725  | 4302.824  |
| AK021684  | 3795.712  | 6457.024  | AK023573  | 2671.098  | 2894.407  | NM_018127 | 9764.707  | 9989.83   |

|           |           |           |             |           |           |           |           |           |
|-----------|-----------|-----------|-------------|-----------|-----------|-----------|-----------|-----------|
| AK001060  | 524.258   | 1269.136  | NM_002730   | 5646.124  | 4966.857  | AB020677  | 1785.421  | 1427.15   |
| AK001819  | 963.369   | 1186.143  | NM_004828   | 1142.556  | 1237.931  | AB033097  | 876.494   | 604.438   |
| AK021480  | 1558.072  | 1485.795  | AB011540    | 29277.541 | 29833.014 | NM_000135 | 731.953   | 677.67    |
| AK025112  | 1263.806  | 1247.171  | NM_000040   | 5965.289  | 7192.371  | AJ223948  | 2672.422  | 1911.378  |
| AK026079  | 414.365   | 382.017   | NM_004631   | 2158.021  | 2844.983  | NM_016218 | 464.601   | 251.851   |
| AK026675  | 704.44    | 761.411   | NM_004736   | 3377.024  | 2007.007  | AK022947  | 1106.874  | 695.645   |
| AK025173  | 6144.613  | 5266.318  | NM_006459   | 3335.379  | 2260.38   | AL050029  | 1156.427  | 443.495   |
| AK025430  | 910.587   | 847.866   | D50373      | 393.116   | 332.143   | NM_004063 | 240.099   | 705.346   |
| AK026722  | 795.949   | 1096.252  | AA488757    | 3605.597  | 2806.981  | AB040976  | 4502.458  | 6341.744  |
| AF117338  | 7236.39   | 6357.104  | H-L 27586 I | 1904.627  | 1388.208  | NM_018641 | 4003.76   | 6129.614  |
| AK025567  | 3473.684  | 3177.425  | ID 214180   | 674.176   | 411.312   | U49089    | 719.695   | 1092.748  |
| NM_019102 | 452.79    | 347.024   | ID 1867426  | 2872.887  | 1501.166  | NM_002221 | 1594.386  | 2311.587  |
| U56857    | 8198.896  | 7068.593  | W99328      | 630.072   | 275.327   | NM_002371 | 2238.985  | 4482.41   |
| L43349    | 1058.33   | 866.539   | AI434176    | 725.392   | 420.508   | NM_002562 | 528.206   | 830.178   |
| BE905682  | 578.524   | 485.096   | H08563      | 656.439   | 619.157   | NM_004586 | 2729.591  | 4824.108  |
| Z70695    | 508.144   | 320.641   | BE735403    | 776.444   | 803.674   | NM_004844 | 3886.702  | 6332.99   |
| AF086421  | 1136.35   | 1546.303  | NM_022552   | 4427.498  | 3980.802  | NM_013447 | 666.038   | 682.811   |
| AK001612  | 648.388   | 696.063   | NM_014389   | 7823.274  | 8116.964  | NM_000051 | 2560.968  | 3223.693  |
| AF161522  | 7063.146  | 6047.435  | NM_001718   | 435.371   | 699.113   | NM_005709 | 437.046   | 353.408   |
| AF086028  | 30360.654 | 34555.313 | AF116659    | 1055.899  | 1440.657  | NM_004180 | 2871.486  | 3757.604  |
| U46119    | 280.581   | 873.742   | D79991      | 2274.516  | 1010.053  | NM_004786 | 25504.969 | 31419.227 |
| AK025365  | 1177.751  | 681.998   | AK022425    | 225.682   | 164.646   | AF302109  | 691.542   | 837.118   |
| AK023489  | 884.076   | 805.785   | NM_000054   | 4100.622  | 2580.29   | AL117485  | 4796.389  | 3206.871  |
| AK021561  | 4107.407  | 4336.887  | NM_014713   | 8353.946  | 4060.201  | NM_003505 | 501.16    | 509.539   |
| AK025222  | 327.387   | 660.396   | NM_001812   | 1285.903  | 655.839   | NM_007191 | 1193.877  | 782.736   |
| NM_003531 | 2939.999  | 2960.243  | NM_014785   | 573.951   | 260.891   | AL109667  | 426.699   | 341.663   |
| L08434    | 478.948   | 437.858   | NM_005811   | 3539.6    | 1931.545  | NM_000840 | 278.297   | 222.644   |
| NM_017799 | 1367.36   | 1183.3    | NM_005764   | 613.141   | 372.116   | AF034102  | 17287.105 | 26348.342 |
| NM_003510 | 986.132   | 540.082   | NM_016362   | 535.397   | 429.896   | AJ008142  | 6333.846  | 14422.835 |
| NM_003538 | 529.932   | 331.178   | NM_004214   | 7102.69   | 5030.669  | AL035289  | 251.012   | 674.035   |
| AL137403  | 5202.538  | 3865.747  | NM_004329   | 7127.932  | 7928.073  | NM_001343 | 2162.316  | 3025.52   |
| AL049348  | 1153.06   | 912.016   | NM_002836   | 3072.8    | 2836.531  | NM_007275 | 6422.09   | 6560.789  |
| NM_018534 | 1401.78   | 1292.525  | NM_020167   | 785.938   | 750.504   | NM_019025 | 16192.832 | 18381.271 |
| AB037847  | 3387.32   | 3496.616  | AL049963    | 14833.365 | 7453.498  | NM_018461 | 3327.44   | 3583.54   |
| NM_005170 | 2200.952  | 2591.113  | NM_016058   | 21073.766 | 10538.104 | AF235023  | 4870.91   | 7122.483  |
| S96437    | 2559.213  | 3789.323  | NM_014005   | 936.973   | 666.44    | NM_006910 | 3529.56   | 5424.114  |
| NM_015176 | 2340.557  | 3413.259  | NM_004636   | 798.386   | 634.403   | AF162667  | 2243.494  | 4116.097  |
| AL353939  | 1103.782  | 1752.202  | NM_004896   | 2505.541  | 3042.269  | AB046847  | 3003.184  | 3469.319  |
| AL117573  | 4344.233  | 5982.719  | NM_003976   | 483.092   | 944.472   | NM_000447 | 586.004   | 658.656   |
| AL080186  | 1522.689  | 1695.335  | NM_017688   | 1636.745  | 1898.956  | NM_006354 | 3060.174  | 4196.349  |
| NM_005306 | 51704.426 | 55790.973 | AK025612    | 4421.323  | 5532.801  | AF303378  | 3911.247  | 6429.498  |
| NM_001646 | 29237.598 | 40339.914 | NM_012268   | 1867.954  | 3489.346  | NM_016037 | 8281.908  | 14146.192 |
| AL137327  | 4453.798  | 6980.256  | NM_012203   | 659.812   | 995.876   | NM_000043 | 5490.012  | 7656.829  |
| AF358454  | 4782.619  | 6516.701  | J03077      | 13820.436 | 7738.737  | NM_016140 | 194.254   | 366.536   |
| AK026090  | 1060.762  | 941.163   | J03048      | 9564.312  | 2967.358  | NM_015965 | 236.539   | 302.301   |
| AF070637  | 586.719   | 530.705   | AL157469    | 770.533   | 580.778   | NM_000417 | 1760.612  | 1640.033  |
| AL137634  | 800.323   | 621.497   | NM_002868   | 2532.243  | 2078.709  | NM_020356 | 404.711   | 246.18    |
| AK024863  | 3953.831  | 4312.216  | AK024100    | 4549.65   | 2685.416  | AF152527  | 197.542   | 197.206   |
| AJ008135  | 43788.895 | 51041.02  | NM_005135   | 449.236   | 395.189   | NM_018235 | 12861.513 | 15130.652 |
| AK026908  | 8519.456  | 12208.921 | NM_003827   | 8065.883  | 5671.673  | NM_002424 | 254.445   | 384.938   |
| D17110    | 439.558   | 1018.884  | NM_004583   | 463.707   | 402.328   | NM_012104 | 5766.533  | 8644.352  |
| AL050068  | 546.985   | 346.013   | NM_001103   | 455.524   | 295.046   | NM_006144 | 17144.002 | 24285.412 |
| AB046766  | 654.301   | 517.746   | AF228710    | 10865.281 | 5469.704  | AL136549  | 7168.678  | 8710.859  |

|           |           |           |           |           |           |           |           |           |
|-----------|-----------|-----------|-----------|-----------|-----------|-----------|-----------|-----------|
| AF009323  | 701.038   | 801.587   | AY007131  | 23024.25  | 18258.191 | NM_01216E | 892.318   | 1201.549  |
| U52829    | 591.037   | 622.837   | U61735    | 2247.276  | 1542.271  | NM_00703E | 742.323   | 1322.587  |
| AK001526  | 4863.467  | 3695.481  | NM_001144 | 3945.628  | 3170.087  | AF311324  | 4137.773  | 5476.274  |
| AF086183  | 1557.546  | 1745.455  | AK023766  | 3126.415  | 1789.98   | AF124433  | 647.441   | 1422.152  |
| AK000525  | 1195.951  | 1835.001  | NM_001897 | 668.498   | 289.937   | AK001647  | 332.275   | 473.495   |
| AL137434  | 1610.583  | 2726.13   | NM_003853 | 935.586   | 650.98    | AF061556  | 1132.153  | 1421.456  |
| Z36795    | 1763.734  | 2731.184  | AB033109  | 1295.372  | 810.662   | AL162049  | 772.712   | 1337.53   |
| AL080216  | 2986.847  | 4461.536  | NM_002053 | 15540.262 | 12734.876 | AF036144  | 167.804   | 107.451   |
| NM_019897 | 562.256   | 825.741   | NM_006889 | 835.285   | 1410.653  | NM_005032 | 728.07    | 1488.1    |
| AF038188  | 19076.861 | 28455.066 | NM_00243E | 1613.93   | 3533.063  | NM_00416C | 3344.061  | 4617.586  |
| AJ227888  | 781.176   | 1311.503  | NM_014589 | 1815.537  | 2519.878  | AL109677  | 832.053   | 880.764   |
| D17046    | 762.695   | 1231.75   | NM_000759 | 1108.564  | 2163.978  | NM_003941 | 27161.92  | 22020.316 |
| AF157562  | 3553.44   | 2300.173  | NM_002437 | 1224.31   | 1490.32   | AF177909  | 620.475   | 648.658   |
| AK021958  | 4989.937  | 5324.327  | AK023573  | 2145.294  | 1012.521  | NM_002664 | 718.602   | 798.391   |
| M31164    | 1722.916  | 1853.668  | NM_00273C | 5061.5    | 2872.398  | AB018271  | 718.843   | 678.371   |
| AF113674  | 9999.748  | 15297.597 | NM_00482E | 1178.632  | 715.83    | AL137665  | 1612.476  | 1008.573  |
| NM_003511 | 679.172   | 3129.693  | AB011540  | 23107.283 | 14473.13  | NM_016434 | 589.872   | 352.726   |
| CY3Cy5    | 7198.715  | 292.159   | NM_00004C | 5971.008  | 3283.141  | U36561    | 47044.965 | 73206.367 |
| H97792    | 1285.962  | 1374.235  | NM_004631 | 1886.085  | 1250.23   | NM_005634 | 1276.71   | 2063.562  |
| L33404    | 340.947   | 922.336   | NM_006033 | 3787.948  | 3482.85   | NM_017757 | 1975.908  | 2961.785  |
| M13509    | 1126.492  | 833.29    | NM_004837 | 5703.241  | 4933.473  | NM_00214E | 9901.123  | 12944.25  |
| X04076    | 3186.026  | 3114.938  | NM_00037C | 1283.11   | 811.155   | AB007892  | 1050.776  | 1493.813  |
| W95082    | 2113.825  | 2355.707  | BE865893  | 3927.468  | 2878.547  | AB037748  | 618.429   | 775.408   |
| AA485362  | 2225.063  | 3024.712  | NM_003123 | 50586.637 | 31210.293 | AB002306  | 1919.648  | 3730.736  |
| AJ222801  | 4093.191  | 6152.261  | AY005822  | 1437.595  | 1222.762  | NM_00130C | 3590.735  | 5650.499  |
| W72207    | 3939.211  | 3797.323  | NM_018129 | 17144.316 | 10663.227 | NM_018187 | 5437.858  | 8902.53   |
| BI772354  | 3761.931  | 3516.047  | AF289022  | 2690.563  | 2067.462  | NM_00301E | 18839.719 | 17447.193 |
| AA733033  | 2511.288  | 2264.527  | NM_01602E | 7917.369  | 4816.041  | NM_005463 | 8182.593  | 8030.616  |
| AA583574  | 1961.675  | 2246.581  | NM_013319 | 2077.325  | 1291.169  | NM_00132E | 1521.114  | 2193.17   |
| AI690184  | 24693.85  | 24833.145 | NM_00074E | 1573.245  | 1222.488  | NM_018282 | 8740.432  | 9285.591  |
| AA927490  | 1975.74   | 2745.13   | NM_000722 | 1134.958  | 1583.586  | BC019932  | 1298.363  | 2026.822  |
| NM_001824 | 61031.582 | 65375.355 | NM_00603C | 1081.051  | 1645.021  | AF114818  | 1981.752  | 3690.079  |
| SR9       | 20650.82  | 3695.367  | NM_02041C | 4248.367  | 6402.795  | AK025106  | 1292.637  | 2106.995  |
| CY3Cy5    | 8747.782  | 530.94    | AF000143  | 21171.943 | 29834.42  | NM_020144 | 1423.14   | 2018.351  |
| NM_01781E | 3855.607  | 4431.914  | NM_014211 | 827.396   | 1733.332  | NM_00390E | 39391.543 | 45778.32  |
| NM_020433 | 697.88    | 762.981   | NM_000453 | 1659.566  | 3191.545  | BE893142  | 1263.714  | 1558.68   |
| NM_001767 | 6512.937  | 6078.701  | NM_022552 | 3170.476  | 1517.02   | NM_003103 | 2802.532  | 2306.289  |
| AF028823  | 8129.024  | 8870.434  | NM_014389 | 3836.688  | 2517.023  | NM_01534C | 2062.075  | 1889.728  |
| NM_00429E | 19472.543 | 18466.908 | NM_00171E | 326.322   | 391.93    | NM_006451 | 2298.689  | 2192.858  |
| NM_002087 | 5257.496  | 5979.662  | AF116659  | 856.813   | 751.568   | NM_002094 | 1192.255  | 880.818   |
| AB023154  | 393.026   | 591.669   | NM_000317 | 18076.158 | 11757.422 | NM_002937 | 611.531   | 432.804   |
| NM_01458E | 2881.865  | 2109.575  | NM_01837E | 3476.281  | 2924.094  | NM_003191 | 2029.997  | 1356.231  |
| AF200815  | 873.177   | 899.96    | NM_01761E | 370.27    | 313.755   | AL137476  | 2866.341  | 3596.354  |
| NM_013441 | 3418.901  | 3004.539  | NM_01743E | 3130.113  | 1813.606  | AF052174  | 1703.857  | 2708.069  |
| NM_014421 | 1202.275  | 1094.493  | U59209    | 2358.095  | 1414.509  | AF070590  | 553.832   | 951.342   |
| M60499    | 1337.141  | 1442.869  | NM_02019E | 4772.199  | 3252.72   | NM_00470E | 238.161   | 331.996   |
| NM_003833 | 10499.654 | 9128.829  | AK023824  | 3985.71   | 2780.538  | NM_000761 | 22797.049 | 41854.941 |
| AK000868  | 4496.145  | 2997.371  | AL133069  | 3292.8    | 1975.997  | NM_017781 | 18519.656 | 17656.053 |
| NM_001233 | 2744.155  | 2762.442  | AL117574  | 437.831   | 357.088   | NM_006004 | 46879.211 | 44153.188 |
| NM_001234 | 1064.258  | 949.793   | AK026055  | 5052.611  | 3878.729  | NM_004894 | 21364.123 | 17457.316 |
| BF679789  | 2722.74   | 3517.902  | AK024126  | 817.602   | 739.063   | AB028960  | 420.988   | 448.664   |
| AB007859  | 940.629   | 1088.033  | NM_00151E | 3557.231  | 3323.229  | NM_00564E | 35189.387 | 34165.93  |
| NM_006754 | 1275.604  | 1458.577  | NM_002744 | 4422.789  | 4454.847  | NM_006943 | 4477.869  | 5131.482  |



|           |           |           |             |           |           |           |           |          |
|-----------|-----------|-----------|-------------|-----------|-----------|-----------|-----------|----------|
| NM_001127 | 2527.987  | 2231.047  | NM_015917   | 10437.984 | 10315.229 | NM_006741 | 3603.93   | 4187.832 |
| NM_012430 | 2973.707  | 3383.139  | NM_020397   | 998.715   | 1343.107  | NM_014166 | 5816.158  | 6147.937 |
| NM_003917 | 14469.461 | 13430.205 | NM_000061   | 1052.415  | 1532.257  | AL117606  | 3472.835  | 3378.804 |
| NM_007077 | 1085.789  | 1400.478  | AB046859    | 14759.345 | 19601.258 | NM_012330 | 1012.56   | 1039.629 |
| NM_002956 | 1835.607  | 1932.103  | NM_005109   | 10053.494 | 10792.545 | AF294278  | 1452.949  | 1202.825 |
| AB018739  | 738.374   | 704.677   | NM_017688   | 1306.3    | 888.705   | NM_018211 | 2080.871  | 1943.605 |
| NM_006750 | 16973.215 | 16859.535 | AK025612    | 3074.632  | 2320.82   | NM_014520 | 1961.997  | 1759.965 |
| NM_020164 | 3178.376  | 3461.789  | NM_012268   | 1155.669  | 1116.576  | AL117508  | 180.675   | 144.549  |
| AK023521  | 3506.158  | 3243.531  | NM_012203   | 619.989   | 1167.37   | NM_002616 | 1967.92   | 1465.094 |
| NM_014267 | 22917.057 | 21494.436 | NM_004736   | 3184.924  | 2382.287  | AK025712  | 4779.545  | 2788.585 |
| NM_001481 | 638.324   | 563.782   | NM_006459   | 3733.191  | 4601.009  | AK026375  | 2543.891  | 3727.943 |
| U30872    | 866.819   | 1247.976  | D50373      | 573.913   | 758.036   | NM_014710 | 537.934   | 889.004  |
| NM_020469 | 4785.329  | 4057.383  | AA488757    | 3757.049  | 2918.758  | U85992    | 785.289   | 2011.243 |
| NM_014734 | 1896.514  | 1538.411  | AA205399    | 122.699   | 1385.709  | AL110152  | 430.198   | 799.915  |
| NM_002289 | 560.634   | 559.534   | H07071      | 611.093   | 360.927   | AF131745  | 2532.862  | 6910.425 |
| AK026408  | 2030.76   | 1329.968  | M25322      | 2022.985  | 1591.706  | AL117565  | 1770.696  | 3529.586 |
| NM_005025 | 1734.299  | 1736.609  | H-L 27586 I | 2063.896  | 1751.891  | AF147305  | 330.726   | 447.585  |
| NM_006307 | 392.673   | 458.915   | ID 214180   | 519.509   | 517.626   | AK022109  | 1239.305  | 2306.331 |
| NM_001056 | 955.843   | 799.654   | ID 1867426  | 3019.714  | 3677.767  | AK022103  | 513.954   | 732.769  |
| AY026461  | 4374.013  | 3734.467  | W99328      | 774.235   | 835.544   | NM_007030 | 366.377   | 564.782  |
| AK025708  | 4342.143  | 3685.817  | AI434176    | 901.752   | 814.294   | AF143882  | 581.819   | 837.458  |
| NM_000405 | 960.551   | 1106.654  | H08563      | 853.467   | 1137.178  | U00953    | 280.854   | 423.018  |
| NM_005564 | 52933.008 | 45531.586 | BE735403    | 830.081   | 1428.021  | AF086176  | 614.084   | 604.063  |
| NM_004508 | 3455.522  | 3050.985  | NM_002438   | 697.396   | 590.043   | AF086232  | 231.671   | 375.813  |
| NM_006405 | 12756.152 | 11456.24  | NM_014589   | 1032.106  | 673.16    | NM_017742 | 712.571   | 934.487  |
| AJ245946  | 457.221   | 424.302   | NM_000759   | 550.968   | 384.151   | NM_005108 | 1268.521  | 1378.228 |
| NM_006749 | 1191.215  | 1153.002  | AK023334    | 855.254   | 605.269   | AK022292  | 3175.358  | 2797.179 |
| AL137619  | 2614.377  | 1975.895  | NM_002563   | 9347.282  | 5890.501  | AB051436  | 1990.007  | 1942.444 |
| NM_004300 | 7930.851  | 6334.649  | NM_002437   | 1161.323  | 936.185   | AK026482  | 9724.007  | 7126.922 |
| AF319476  | 2287.51   | 2152.605  | D79991      | 2010.264  | 1841.223  | AL137473  | 1806.432  | 1447.485 |
| AK001913  | 6227.383  | 5920.727  | AK022425    | 254.644   | 413.77    | AJ001873  | 2083.323  | 1791.051 |
| NM_017737 | 1719.909  | 1342.044  | NM_000054   | 4695.231  | 4705.628  | AB026054  | 248.493   | 771.93   |
| NM_004292 | 3918.065  | 4054.512  | NM_014713   | 9295.909  | 10558.5   | AK022604  | 1270.405  | 2491.22  |
| NM_015484 | 6551.792  | 6630.269  | NM_001812   | 1625.221  | 3039.687  | U66048    | 754.033   | 1090.78  |
| NM_018046 | 2277.529  | 2445.511  | NM_014785   | 707.575   | 913.235   | AK023401  | 2500.099  | 4117.086 |
| NM_013316 | 2027.576  | 2296.301  | NM_005811   | 3144.438  | 2610.125  | AK001865  | 613.709   | 585.386  |
| M20701    | 14732.081 | 14528.763 | NM_005764   | 787.447   | 721.546   | AK024035  | 7813.623  | 9802.867 |
| NM_002912 | 1588.202  | 1708.087  | NM_016362   | 597.998   | 521.063   | AL050079  | 906.001   | 749.58   |
| NM_013284 | 4126.663  | 3337.471  | NM_004214   | 7086.148  | 5859.352  | AL080233  | 1556.996  | 2095.024 |
| NM_006739 | 2234.201  | 2869.553  | NM_004329   | 8386.717  | 8015.313  | AL117591  | 418.403   | 626.014  |
| NM_013274 | 4043.728  | 5257.485  | NM_002836   | 4252.826  | 3922.198  | AL117663  | 1119.245  | 1264.342 |
| AL050187  | 1228.552  | 1249.914  | NM_020167   | 1010.089  | 974.295   | NM_014293 | 1191.006  | 1848.789 |
| NM_012387 | 13816.998 | 11473.355 | AL049963    | 18189.27  | 14244.111 | AK024432  | 1756.539  | 1871.244 |
| NM_014735 | 1389.02   | 1433.089  | NM_016058   | 24915.92  | 20388.617 | AL137513  | 528.144   | 911.006  |
| NM_004252 | 20179.238 | 18688.037 | NM_014005   | 1284.544  | 1357.338  | AF088001  | 332.303   | 780.852  |
| AF172929  | 12759.705 | 9281.112  | NM_004636   | 1082.525  | 1354.354  | NM_018067 | 4036.201  | 3783.227 |
| NM_006398 | 12813.876 | 11424.852 | AK022603    | 225.881   | 551.193   | NM_018956 | 10970.311 | 8702.284 |
| AK025655  | 2755.067  | 2195.577  | NM_004896   | 2629.202  | 6093.006  | NM_014787 | 1429.959  | 1463.649 |
| NM_001362 | 469.128   | 313.135   | NM_006030   | 595.254   | 460.717   | AL122109  | 502.025   | 436.81   |
| NM_004056 | 1467.427  | 1187.711  | NM_020410   | 3959.338  | 3050.587  | AF074988  | 1073.048  | 777.556  |
| NM_003833 | 10752.54  | 12631.66  | AF000143    | 15484.907 | 9914.56   | AK024946  | 370.793   | 356.187  |
| AK000868  | 4231.572  | 3248.356  | NM_014211   | 463.805   | 396.529   | AK001432  | 734.231   | 1527.086 |
| NM_001233 | 2223.598  | 2410.934  | NM_000814   | 2051.865  | 1424.099  | AL133568  | 2498.719  | 6952.265 |

|           |           |           |           |           |           |           |           |           |
|-----------|-----------|-----------|-----------|-----------|-----------|-----------|-----------|-----------|
| NM_001234 | 613.404   | 801.009   | NM_000453 | 1626.899  | 1218.901  | AF009265  | 1564.882  | 3877.255  |
| BF679789  | 1264.005  | 1468.228  | J03077    | 14821.207 | 12886.658 | AF009309  | 1413.093  | 2429.166  |
| H97792    | 1204.291  | 1251.217  | J03048    | 9679.169  | 4282.946  | NM_00236C | 751.462   | 1357.092  |
| L33404    | 663.856   | 1246.669  | AL157469  | 689.41    | 652.072   | AF056425  | 809.597   | 1263.793  |
| M13509    | 1025.998  | 1041.451  | NM_00286E | 2566.159  | 2869.074  | AF090893  | 350.676   | 438.592   |
| X04076    | 2505.981  | 3340.534  | AK024100  | 4735.413  | 5152.853  | NM_01803E | 2034.234  | 2135.583  |
| W95082    | 1352.847  | 1424.002  | NM_00513E | 478.977   | 683.163   | AK001945  | 429.098   | 517.252   |
| AA485362  | 1882.175  | 1381.598  | NM_003827 | 7275.133  | 6297.658  | AK021541  | 407.536   | 597.432   |
| AJ222801  | 3721.34   | 3153.906  | NM_00458E | 350.539   | 374.495   | AK001147  | 212.186   | 497.676   |
| BI772354  | 3779.701  | 5524.465  | NM_001103 | 387.123   | 271.619   | AK021630  | 335.277   | 693.65    |
| AA733033  | 2169.797  | 1778.137  | AF228710  | 9289.412  | 6079.455  | AK021831  | 803.067   | 899.962   |
| AA583574  | 1902.841  | 1812.908  | AY007131  | 30623.063 | 23946.145 | AK025650  | 1271.301  | 1541.185  |
| AI690184  | 32018.17  | 25565.584 | U61735    | 2713.017  | 2172.385  | AK026401  | 831.857   | 630.086   |
| AA927490  | 1365.176  | 902.798   | NM_001144 | 5096.793  | 3690.267  | AK026773  | 610.048   | 462.972   |
| NM_001824 | 62564.484 | 60483.855 | AK023766  | 3504.139  | 3138.226  | AF086158  | 4932.825  | 12259.463 |
| NM_00505E | 12774.739 | 9782.811  | NM_001897 | 920.715   | 904.675   | AF086050  | 3369.384  | 6339.154  |
| BF038439  | 496.22    | 80.631    | NM_00385E | 1265.833  | 1444.551  | AF147375  | 1132.244  | 1905.31   |
| NM_014734 | 1839.337  | 1704.696  | AB033109  | 1492.432  | 1653.93   | X51524    | 4424.523  | 5105.119  |
| NM_00228E | 485.172   | 592.465   | NM_00205E | 19313.4   | 22708.613 | AK025759  | 1761.342  | 2555.292  |
| AK026408  | 1598.538  | 1520.173  | NM_00688E | 1048.639  | 1322.742  | AK024105  | 437.526   | 846.124   |
| NM_00502E | 1684.036  | 1837.057  | NM_002744 | 2980.276  | 1288.273  | AK021516  | 1754.897  | 2630.631  |
| NM_006307 | 1367.733  | 1960.906  | NM_015917 | 9266.334  | 6007.584  | Z70699    | 405.576   | 622.09    |
| NM_01781E | 3566.685  | 3887.171  | NM_020397 | 1122.46   | 666.884   | NM_00689E | 637.209   | 1095.021  |
| NM_02043E | 911.027   | 713.345   | NM_000061 | 980.613   | 526.905   | AK023429  | 368.183   | 328.502   |
| NM_001767 | 6479.559  | 6877.977  | AB046859  | 11752.125 | 6636.701  | AK022276  | 457.606   | 568.294   |
| AF028823  | 8407.744  | 8036.83   | NM_00510E | 8731.814  | 5348.168  | AK026881  | 219.768   | 263.59    |
| NM_00429E | 30385.574 | 31781.465 | AK023573  | 2391.842  | 2043.681  | AL133653  | 201.556   | 251.205   |
| NM_01458E | 2842.457  | 2102.49   | NM_00273C | 4993.944  | 3860.498  | AK023774  | 610.072   | 458.903   |
| AF200815  | 718.824   | 803.946   | NM_00482E | 1068.392  | 774.372   | AL049377  | 406.786   | 298.037   |
| NM_013441 | 3470.937  | 2352.341  | AB011540  | 23518.402 | 20039.762 | NM_003544 | 41527.629 | 62128.598 |
| NM_014421 | 1522.765  | 1100.595  | NM_00004C | 5655.96   | 5571.986  | U17640    | 275.614   | 527.391   |
| AB033028  | 477.092   | 286.9     | NM_004631 | 1956.823  | 1826.044  | AK001187  | 1098.32   | 1517.218  |
| M60499    | 1187.722  | 1369.558  | NM_00603E | 3404.326  | 3802.241  | NM_00352E | 8360.4    | 14421.155 |
| NM_00430C | 8116.888  | 9700.934  | NM_004837 | 5096.894  | 3960.18   | AF056436  | 2059.797  | 2722.475  |
| AB007859  | 998.362   | 1109.936  | NM_00037C | 1133.358  | 693.015   | AB023191  | 968.943   | 1549.7    |
| NM_006754 | 633.688   | 488.616   | BE865893  | 4394.445  | 2936.952  | AK027212  | 4030.056  | 6839.068  |
| NM_001127 | 3539.735  | 3717.888  | NM_00312E | 51252.727 | 40664.195 | X56197    | 989.856   | 2201.94   |
| NM_01243C | 3465.137  | 3444.663  | AY005822  | 2085.835  | 1372.31   | NM_00519E | 3916.525  | 6310.852  |
| NM_003917 | 26060.115 | 25211.416 | NM_01812E | 22052.389 | 14988.608 | U90905    | 671.945   | 1339.517  |
| NM_007077 | 1242.504  | 1379.571  | AF289022  | 2483.816  | 2201.775  | AF161422  | 1867.586  | 2857.621  |
| NM_00295E | 1960.368  | 1977.763  | NM_01602E | 10931.847 | 10023.378 | AL137384  | 1540.415  | 1997.851  |
| AB018739  | 917.493   | 817.384   | NM_01331E | 2347.797  | 2516.957  | AF070619  | 727.367   | 1516.326  |
| NM_00675C | 18072.576 | 18931.441 | NM_00074E | 1631.02   | 2009.625  | NM_02015E | 1425.767  | 3140.264  |
| NM_020164 | 3574.427  | 3076.3    | NM_00072E | 1192.518  | 1840.108  | NM_005321 | 2880.277  | 5092.224  |
| AK023521  | 3618.744  | 3584.494  | NM_01865E | 1710.185  | 784.25    | AF073520  | 1176.915  | 2295.448  |
| NM_014267 | 22539.545 | 19335.311 | NM_00566E | 1889.53   | 860.639   | AF143885  | 184.07    | 578.527   |
| NM_001481 | 721.411   | 471.246   | X89960    | 377.646   | 404.257   | NM_01401E | 5068.824  | 6548.647  |
| U30872    | 1047.875  | 891.618   | NM_00655C | 1125.093  | 537.905   | AK026839  | 631.297   | 860.919   |
| AF111783  | 1011.851  | 717.741   | NM_00577E | 2557.961  | 1343.408  | AJ008123  | 1630.364  | 1662.023  |
| NM_00263E | 1139.397  | 811.925   | NM_017644 | 3442.878  | 2053.975  | AJ008156  | 680.865   | 837.336   |
| NM_00639E | 13725.399 | 13627.148 | NM_00248E | 573.61    | 483.071   | AF147321  | 287.581   | 152.894   |
| AK025655  | 2758.624  | 2976.777  | NM_00171E | 244.5     | 162.147   | AF161437  | 2289.654  | 1604.374  |
| NM_00405E | 1277.02   | 1535.534  | AF116659  | 1011.294  | 745.247   | AK001039  | 2100.946  | 3014.469  |

|           |           |           |           |           |           |           |           |           |
|-----------|-----------|-----------|-----------|-----------|-----------|-----------|-----------|-----------|
| NM_001056 | 1026.009  | 1155.903  | NM_000317 | 17018.172 | 9982.938  | AK026465  | 590.654   | 1042.346  |
| AY026461  | 4911.819  | 5118.261  | NM_018376 | 3654.576  | 2502.389  | AK024321  | 338.205   | 656.689   |
| AK025708  | 5518.535  | 5716.172  | NM_017615 | 474.773   | 389.633   | U52834    | 605.976   | 866.046   |
| NM_000405 | 1224.332  | 1085.405  | NM_017438 | 2995.388  | 1642.789  | AJ227898  | 198.259   | 596.082   |
| NM_005564 | 51239.504 | 47561.266 | U59209    | 2787.82   | 1761.974  | M34428    | 282.178   | 877.379   |
| NM_004508 | 3643.38   | 3463.566  | NM_020195 | 6077.012  | 4212.836  | NM_003532 | 342.347   | 971.845   |
| NM_006405 | 12760.313 | 9955.298  | AK023824  | 5025.621  | 4513.81   | NM_017865 | 4874.158  | 9979.416  |
| AJ245946  | 538.013   | 364.811   | AL133069  | 4442.248  | 4613.279  | AF075100  | 645.185   | 985.253   |
| NM_006749 | 948.148   | 864.965   | AL117574  | 772.855   | 1227.598  | AF203447  | 5179.013  | 15435.261 |
| NM_004694 | 621.665   | 653.509   | AK026055  | 6356.949  | 7419.862  | NM_018502 | 1222.154  | 2944.707  |
| NM_000324 | 1054.482  | 745.476   | AK024126  | 1031.784  | 1232.397  | AL080066  | 6593.083  | 12139.503 |
| AL137619  | 2447.91   | 1634.963  | NM_001516 | 4072.458  | 4741.118  | AJ227870  | 777.435   | 1708.101  |
| NM_001824 | 59734.789 | 60041.098 | NM_019086 | 1835.306  | 1458.349  | AL137620  | 718.899   | 1505.77   |
| NM_002964 | 431.321   | 527.766   | NM_006670 | 2014.748  | 1205.817  | NM_005294 | 1181.856  | 1671.253  |
| NM_005052 | 13281.004 | 13687.607 | NM_012425 | 4230.144  | 2841.883  | AK026879  | 177.675   | 392.864   |
| AF319476  | 2463.353  | 3390.303  | NM_005816 | 1306.547  | 862.642   | AF085826  | 590.591   | 760.231   |
| AK001913  | 6896.027  | 8466.007  | NM_002750 | 5441.016  | 3020.094  | AK024362  | 347.527   | 387.534   |
| NM_017737 | 1660.094  | 1455.15   | AK024134  | 4443.103  | 3135.473  | AF118068  | 1403.239  | 932.108   |
| NM_004292 | 2271.408  | 2029.505  | NM_003014 | 1093.253  | 1119.147  | NM_004164 | 262.212   | 418.416   |
| NM_015484 | 7510.421  | 6679.231  | NM_018558 | 751.952   | 760.492   | NM_019018 | 1790.111  | 1856.432  |
| NM_018046 | 2682.739  | 2404.964  | NM_001974 | 2594.949  | 1999.06   | M87931    | 449.699   | 522.178   |
| NM_013316 | 2598.554  | 2722.024  | NM_013957 | 608.042   | 397.7     | CY3Cy5    | 1396.206  | 172.357   |
| M20701    | 13925.357 | 14879.444 | NM_002468 | 4482.411  | 2659.183  | BE790116  | 619.655   | 574.083   |
| NM_002912 | 1952.342  | 3521.73   | NM_003028 | 1451.359  | 742.463   | AI922341  | 426.934   | 511.524   |
| NM_013284 | 4283.665  | 3825.281  | NM_001566 | 829.157   | 364.569   | M12824    | 1829.275  | 1624.927  |
| NM_006739 | 1150.21   | 1553.144  | NM_016541 | 1484.13   | 672.4     | W60100    | 1589.356  | 1628.074  |
| NM_013274 | 4043.849  | 3185.698  | NM_018548 | 5575.307  | 3011.533  | AA457153  | 1575.591  | 1511.586  |
| AL050187  | 1284.105  | 1301.662  | NM_013401 | 1233.848  | 890.913   | AA283122  | 419.605   | 373.507   |
| NM_012387 | 14438.063 | 11397.158 | NM_018238 | 4032.067  | 3852.785  | AA868504  | 649.557   | 480.317   |
| NM_014735 | 1714.97   | 1153.739  | NM_006858 | 16752.867 | 13659.034 | AA877845  | 2800.985  | 2034.674  |
| NM_004252 | 21045.859 | 16951.701 | NM_001405 | 8464.721  | 8750.797  | AA664241  | 9551.683  | 7352.147  |
| AF172929  | 11844.841 | 7654.63   | NM_003880 | 1287.557  | 1430.061  | NM_000588 | 9643.175  | 11688.553 |
| NM_012465 | 306.129   | 615.004   | AF131778  | 1837.333  | 3626.691  | SR9       | 10672.127 | 2476.302  |
| M60499    | 1449.958  | 1671.759  | NM_001562 | 2579.703  | 3843.259  | CY3Cy5    | 1882.294  | 200.866   |
| NM_000366 | 728.222   | 935.666   | NM_013278 | 1724.771  | 3145.773  | NM_005810 | 2299      | 1921.344  |
| NM_003833 | 12308     | 13023.471 | NM_003487 | 4533.752  | 4442.759  | M28170    | 2423.402  | 1783.983  |
| AK000868  | 5229.889  | 5303.868  | NM_006887 | 8197.874  | 7628.479  | NM_001555 | 273.861   | 262.021   |
| NM_001233 | 3344.794  | 5663.559  | NM_006477 | 972.324   | 1279.465  | AK026223  | 358.376   | 323.408   |
| NM_001234 | 1121.844  | 1187.634  | NM_002880 | 3342.786  | 3127.623  | NM_000874 | 3346.531  | 2515.669  |
| BF679789  | 1818.632  | 1741.147  | NM_000678 | 6532.6    | 7098.921  | NM_005854 | 347.931   | 449.694   |
| H97792    | 1053.108  | 980.507   | NM_001066 | 1219.714  | 1833.839  | AB007863  | 6561.625  | 5282.292  |
| L33404    | 633.292   | 608.443   | NM_004657 | 2930.116  | 4843.114  | AK024456  | 3216.863  | 4028.011  |
| M13509    | 1206.811  | 926.758   | NM_018170 | 2369.407  | 3223.041  | D31887    | 1663.69   | 1523.991  |
| X04076    | 2990.746  | 3691.326  | NM_003867 | 1199.122  | 2107.915  | NM_002313 | 1822.303  | 1477.382  |
| W95082    | 1428.251  | 1976.647  | AL162062  | 818.873   | 528.266   | NM_004459 | 1061.94   | 825.764   |
| W72207    | 2916.544  | 2125.401  | NM_003173 | 6637.341  | 5184.188  | NM_005503 | 682.843   | 446.697   |
| BI772354  | 3777.085  | 2854.517  | NM_005030 | 10065.115 | 5124.434  | NM_001502 | 490.595   | 420.429   |
| AA733033  | 2042.795  | 1516.757  | NM_017584 | 2785.159  | 2974.099  | NM_005721 | 872.671   | 809.833   |
| AA583574  | 1765.717  | 1265.946  | NM_020359 | 3046.466  | 2620.598  | AF284223  | 750.287   | 799.516   |
| AI690184  | 25490.557 | 16484.537 | AB014541  | 15109.443 | 14061.565 | BE743838  | 3886.637  | 7939.946  |
| AA927490  | 1370.784  | 1039.187  | NM_002583 | 5818.408  | 4543.528  | AF273046  | 1515.245  | 1951.231  |
| NM_001481 | 573.594   | 675.295   | NM_006570 | 15596.223 | 19734.99  | NM_001081 | 1308.653  | 1653.063  |
| U30872    | 1031.825  | 1021.52   | NM_020348 | 1243.444  | 1669.147  | NM_002483 | 1254.526  | 1976.946  |

|           |           |           |           |           |           |           |           |           |
|-----------|-----------|-----------|-----------|-----------|-----------|-----------|-----------|-----------|
| NM_00263E | 1235.389  | 1393.553  | NM_006034 | 11904.458 | 16313.874 | BF002026  | 902.687   | 1571.298  |
| NM_014734 | 1868.956  | 2138.053  | AB040943  | 1782.515  | 4395.337  | NM_004171 | 421.416   | 478.094   |
| NM_00228E | 457.932   | 785.37    | NM_005201 | 11790.146 | 20358.434 | NM_014037 | 3184.957  | 2290.102  |
| AK026408  | 1972.055  | 2141.959  | NM_000092 | 504.146   | 773.291   | NM_00486E | 10612.795 | 9343.352  |
| NM_00502E | 1504.646  | 1689.098  | AF174600  | 5236.696  | 5810.464  | NM_01868E | 1748.724  | 1316.758  |
| NM_006307 | 758.138   | 1001.653  | AK001003  | 1583.122  | 1652.391  | AK056652  | 3429.687  | 3111.364  |
| NM_01781E | 3168.905  | 3001.87   | NM_00280C | 15742.021 | 19281.627 | AL137438  | 301.967   | 272.613   |
| NM_02043E | 809.18    | 661.427   | NM_018384 | 12880.899 | 17556.176 | NM_017957 | 1246.577  | 1362.608  |
| NM_001767 | 6519.797  | 6451.167  | NM_001872 | 565.108   | 757.433   | NM_003024 | 853.431   | 902.297   |
| AF028823  | 9409.027  | 9394.464  | AF282617  | 8521.276  | 10519.948 | NM_01324E | 2445.913  | 2383.602  |
| NM_002087 | 5231.073  | 4317.761  | AF157323  | 3030.724  | 5850.429  | NM_000034 | 63729.91  | 70105     |
| AB023154  | 435.689   | 188.52    | NM_00602E | 583.286   | 1016.817  | AK022230  | 1930.566  | 1532.074  |
| NM_01458E | 2848.667  | 1960.628  | NM_005877 | 11592.638 | 14310.558 | AK022147  | 4830.274  | 4400.214  |
| AF200815  | 873.174   | 522.037   | NM_00333E | 7104.379  | 9755.849  | L25664    | 961.365   | 687.937   |
| NM_013441 | 3440.183  | 2305.224  | NM_01339E | 1123.573  | 1165.161  | NM_01494C | 979.935   | 631.283   |
| NM_014421 | 1039.581  | 833.509   | NM_017752 | 1616.528  | 1444.307  | NM_00690C | 1395.497  | 1199.089  |
| NM_00674E | 948.716   | 978.987   | D26069    | 8528.541  | 11311.538 | AJ289111  | 5443.614  | 5068.875  |
| NM_000324 | 755.959   | 766.974   | BF107577  | 27465.68  | 32088.217 | NM_01635E | 3015.816  | 2450.678  |
| AL137619  | 2694.466  | 3010.77   | NM_005837 | 10826.685 | 14554.733 | NM_00640E | 3549.334  | 3949.462  |
| NM_00430C | 7970.327  | 8821.749  | NM_00613E | 7535.487  | 10692.886 | AF216292  | 13667.925 | 14355.508 |
| AB007859  | 1094.589  | 1360.829  | AF237772  | 3651.016  | 6433.477  | NM_005894 | 272.741   | 425.494   |
| NM_006754 | 437       | 743.525   | AK025934  | 1584.424  | 2279.943  | NM_014584 | 3122.953  | 3325.8    |
| NM_001127 | 2991.505  | 3418.234  | AJ008154  | 1238.532  | 1659.26   | NM_01664E | 1784.288  | 1884.978  |
| NM_01243C | 3018.197  | 3515.152  | NM_00685E | 3802.156  | 4443.641  | AK090536  | 8450.246  | 7101.574  |
| NM_003917 | 21406.73  | 18098.707 | X52350    | 51618.664 | 60825.914 | D63477    | 386.191   | 468.347   |
| NM_007077 | 1267.928  | 1159.941  | AF071554  | 1430.775  | 2368.137  | NM_02024E | 21469.645 | 16150.674 |
| NM_00295E | 2199.193  | 1731.378  | NM_002147 | 661.51    | 1710.741  | NM_014051 | 6984.553  | 6387.727  |
| AB018739  | 887.784   | 608.864   | U90919    | 3339.014  | 5321.799  | AK025398  | 1262.574  | 1743.167  |
| NM_00675C | 17247.621 | 13966.336 | NM_006177 | 900.624   | 1602.209  | NM_01788E | 974.737   | 829.774   |
| NM_020164 | 3489.816  | 2531.265  | AL137286  | 5502.148  | 9525.479  | NM_00491E | 2638.988  | 1719.297  |
| AK023521  | 3728.492  | 2617.94   | NM_01635E | 6955.3    | 10423.258 | AK022207  | 497.092   | 372.934   |
| NM_014267 | 22092.672 | 13485.294 | NM_01627E | 13096.614 | 17961.963 | AV708752  | 2600.678  | 1741.691  |
| AL050187  | 1289.002  | 1509.704  | NM_02041E | 4383.588  | 7084.187  | AF119885  | 1813.58   | 1753.002  |
| NM_012387 | 17153.953 | 20485.852 | NM_01329E | 5325.99   | 7563.178  | NM_00499E | 2687.463  | 2563.059  |
| NM_01473E | 2181.923  | 2275.763  | AF315592  | 3796.375  | 4463.056  | NM_005971 | 3257.847  | 2255.154  |
| NM_00425E | 25354.889 | 40655.922 | AF095844  | 1146.397  | 1388.332  | NM_01743E | 1390.018  | 5034.423  |
| AF172929  | 15951.918 | 16906.359 | NM_01583E | 2009.551  | 2538.24   | NM_01338E | 1715.255  | 1957.613  |
| NM_00639E | 16846.955 | 21424.586 | NM_00098E | 50620.504 | 59114.852 | AK026680  | 3291.151  | 2966.179  |
| AK025655  | 2847.601  | 3372.063  | AK026760  | 14029.693 | 13705.059 | NM_01243E | 52440.539 | 46434.617 |
| NM_00136E | 373.96    | 516.179   | NM_01477E | 2376.742  | 4147.981  | AK001299  | 15012.571 | 12211.399 |
| NM_00405E | 1407.673  | 1603.189  | NM_00428C | 14187.979 | 18582.395 | AB014559  | 6803.705  | 5665.593  |
| NM_00105E | 1497.696  | 2112.99   | AF110399  | 984.137   | 1101.695  | NM_01648E | 5533.505  | 4844.951  |
| AY026461  | 4997.173  | 5517.972  | AK027094  | 3420.955  | 3797.986  | NM_00503E | 5236.444  | 5568.145  |
| NM_005564 | 55250.066 | 43459.094 | AL359596  | 1295.151  | 1569.606  | NM_01593E | 49506.926 | 66552.453 |
| NM_00450E | 4896.747  | 2913.911  | U79249    | 915.77    | 1150.94   | NM_01794E | 1031.851  | 3114.447  |
| NM_00640E | 12021.652 | 6510.625  | AK022114  | 1674.347  | 2482.474  | AK022169  | 579.554   | 544.139   |
| NM_00239C | 6522.764  | 7539.357  | AL133585  | 1378.626  | 2644.287  | AF015592  | 2148.21   | 1870.566  |
| NM_00614E | 1588.58   | 1633.666  | NM_002631 | 14440.286 | 18961.266 | AK026795  | 1780.939  | 1477.344  |
| NM_01491C | 6055.471  | 6982.518  | NM_00077E | 632.384   | 1354.753  | NM_016617 | 7394.767  | 5347.015  |
| AK001064  | 4131.575  | 4458.516  | AB032981  | 504.73    | 1096.908  | NM_002027 | 5886.217  | 3728.636  |
| AB029031  | 3967.809  | 4574.403  | BF217864  | 9801.958  | 16051.407 | AL162078  | 943.035   | 442.976   |
| NM_001294 | 8698.437  | 10502.346 | NM_005917 | 29591.861 | 36240.938 | NM_00091E | 383.792   | 286.78    |
| AL122083  | 5811.024  | 5870.45   | NM_00705E | 557.698   | 1110.558  | NM_01338E | 5939.718  | 5566.644  |

|           |           |           |           |           |           |           |           |           |
|-----------|-----------|-----------|-----------|-----------|-----------|-----------|-----------|-----------|
| NM_005052 | 13260.218 | 17970.992 | BC017044  | 898.695   | 1556.221  | AB002314  | 629.59    | 476.655   |
| BF038439  | 1098.628  | 2648.433  | AV758498  | 1712.179  | 2458.175  | NM_014622 | 700.61    | 653.638   |
| AF319476  | 3519.332  | 5672.494  | NM_020196 | 2756.368  | 3930.137  | AB011114  | 44826.504 | 29941.711 |
| AK001913  | 8203.737  | 9375.104  | AK024113  | 549.187   | 918.08    | D11466    | 11182.063 | 11749.321 |
| NM_017737 | 2815.984  | 3714.811  | NM_018657 | 1226.291  | 1634.945  | NM_014056 | 20253.76  | 21995.467 |
| NM_015484 | 8083.793  | 10103.426 | L40410    | 14367.433 | 16902.238 | D31885    | 12926.563 | 19614.795 |
| NM_018046 | 3082.874  | 2630.858  | NM_007055 | 1331.144  | 1993.116  | BE743838  | 3280.201  | 3133.323  |
| NM_013316 | 3473.393  | 2474.333  | NM_016652 | 1427.866  | 1712.425  | AF273046  | 1030.661  | 696.539   |
| M20701    | 20990.838 | 14878.014 | NM_016310 | 11192.207 | 12478.292 | NM_001081 | 852.173   | 806.097   |
| NM_002912 | 3416.142  | 2653.389  | NM_006298 | 582.222   | 806.666   | NM_002483 | 953.767   | 734.059   |
| NM_013284 | 4770.978  | 3235.107  | AF060938  | 24092.748 | 30305.635 | BF002026  | 938.748   | 1083.637  |
| NM_006739 | 3000.568  | 2683.442  | NM_001973 | 3895.942  | 4908.932  | BE790116  | 577.059   | 611.386   |
| NM_013274 | 5234.855  | 3339.807  | NM_014468 | 2793.264  | 2293.404  | AI922341  | 455.511   | 727.923   |
| AK024955  | 44954.262 | 54056.059 | AL050015  | 1338.459  | 1284.097  | M12824    | 1708.623  | 1516.597  |
| NM_016580 | 2549.179  | 2986.766  | AY007117  | 3917.903  | 4142.624  | W60100    | 1783.89   | 1096.868  |
| AF169693  | 1114.33   | 1203.793  | AF039698  | 3527.139  | 5124.871  | U72508    | 342.205   | 195.102   |
| L23206    | 3818.515  | 3839.979  | AL109679  | 322.655   | 716.765   | AA457153  | 1408.645  | 980.874   |
| NM_012192 | 8443.682  | 9943.852  | AB046828  | 3871.715  | 4443.945  | AA283122  | 318.54    | 187.866   |
| NM_006293 | 3707.387  | 3656.257  | AF144487  | 1332.025  | 1722.176  | AA868504  | 637.963   | 422.624   |
| NM_007229 | 6126.923  | 6141.764  | AL137532  | 1622.035  | 3215.558  | AA877845  | 2883.208  | 2731.854  |
| AB011105  | 2435.926  | 2607.601  | AK025419  | 2489.696  | 4071.439  | AA664241  | 11556.679 | 9001.367  |
| NM_002213 | 700.02    | 837.742   | NM_017413 | 389.51    | 477.151   | AK026281  | 640.537   | 643.806   |
| NM_004814 | 13559.371 | 20702.24  | NM_013259 | 8811.289  | 9762.831  | NM_006406 | 2474.54   | 2425.759  |
| D86976    | 19638.506 | 23617.869 | NM_018375 | 5654.463  | 7462.046  | AF216292  | 9851.015  | 9152.727  |
| AF307080  | 883.825   | 854.069   | NM_004913 | 374.529   | 577.746   | NM_014584 | 4618.077  | 4199.687  |
| NM_004057 | 4575.471  | 5241.384  | AK026838  | 1653.353  | 2223.206  | NM_005810 | 2352.658  | 2212.924  |
| NM_018971 | 1342.756  | 1487.819  | AK022443  | 1620.983  | 2132.247  | M28170    | 2141.448  | 1690.42   |
| K03175    | 1107.873  | 1286.657  | AK023371  | 3198.209  | 4527.963  | AK026223  | 566.321   | 458.742   |
| NM_003265 | 978.676   | 703.131   | AF086187  | 2069.606  | 1402.663  | NM_000874 | 3277.818  | 2098.871  |
| NM_003015 | 1322.305  | 1048.203  | AL109784  | 415.564   | 628.154   | NM_005854 | 325.572   | 230.772   |
| NM_003711 | 2426.932  | 1594.302  | AL137383  | 354.108   | 548.45    | AB007863  | 5067.313  | 2788.497  |
| NM_006496 | 13336.77  | 11191.209 | AL035295  | 4655.062  | 8292.001  | AK024456  | 2540.997  | 1746.849  |
| NM_000828 | 705.543   | 417.988   | NM_018302 | 4099.213  | 5728.345  | D31887    | 1853.113  | 1985.968  |
| NM_004826 | 2069.576  | 1360.341  | AK027252  | 2534.536  | 4101.888  | NM_002313 | 1465.844  | 1052.266  |
| NM_013314 | 1877.423  | 1228.47   | AF165527  | 2117.641  | 2021.303  | NM_004459 | 540.352   | 559.689   |
| NM_002072 | 5415.903  | 3083.25   | NM_014092 | 840.891   | 681.183   | NM_005503 | 886.285   | 872.334   |
| BE904126  | 40234.914 | 42510.449 | AL110133  | 4848.858  | 4853.332  | NM_001502 | 941.073   | 716.168   |
| AF272380  | 18177.25  | 23563.744 | AL050053  | 433.016   | 314.513   | AF284223  | 565.809   | 574.544   |
| NM_004431 | 7513.277  | 8914.793  | AK000529  | 5495.994  | 6251.859  | AF176012  | 294.292   | 261.18    |
| NM_002012 | 1075.166  | 1086.182  | AK027243  | 1921.153  | 2222.05   | NM_005971 | 1763.271  | 1477.309  |
| NM_002070 | 35578.133 | 37513.539 | AF147415  | 1170.05   | 1254.652  | NM_017435 | 727.489   | 4214.711  |
| AF227969  | 3045.064  | 3604.441  | AK098474  | 444.473   | 491.019   | NM_013386 | 1448.268  | 1502.431  |
| AF116657  | 887.675   | 1069.205  | AL117475  | 1328.017  | 1461.857  | NM_004171 | 696.231   | 725.056   |
| NM_004102 | 726.266   | 667.11    | AL049300  | 410.395   | 380.606   | NM_014037 | 3728.842  | 3403.073  |
| NM_003944 | 38674.188 | 40320.848 | NM_017535 | 4053.191  | 4189.719  | NM_004866 | 10932.911 | 11526.919 |
| NM_002393 | 13559.615 | 17222.572 | NM_003887 | 1822.347  | 2163.766  | NM_018688 | 1673.718  | 1464.909  |
| NM_002669 | 11189.736 | 13316.72  | AL357212  | 495.907   | 411.315   | AK056652  | 3676.062  | 3555.998  |
| AB014600  | 5704.084  | 5190.267  | AK026687  | 1787.44   | 2802.722  | NM_017957 | 1055.572  | 647.932   |
| NM_018312 | 4084.652  | 4027.854  | AL117444  | 1060.774  | 1379.301  | NM_003024 | 692.516   | 368.926   |
| X98259    | 1582.643  | 1649.642  | NM_017994 | 8865.916  | 12069.849 | NM_013248 | 2205.467  | 1448.805  |
| U05255    | 670.73    | 677.797   | AK021693  | 2295.245  | 2542.71   | NM_000034 | 67394.469 | 68938.906 |
| X98260    | 7099.635  | 4308.749  | AB023177  | 337.13    | 883.065   | AK022230  | 1773.697  | 1826.508  |
| NM_007217 | 14380.788 | 10931.361 | Y11609    | 2215.818  | 1301.68   | AK022147  | 4839.265  | 4281.692  |

|           |           |           |           |           |           |           |           |           |
|-----------|-----------|-----------|-----------|-----------|-----------|-----------|-----------|-----------|
| NM_014777 | 11422.504 | 8705.822  | NM_012122 | 9046.312  | 8183.229  | L25664    | 1223.332  | 1171.084  |
| NM_001102 | 6512.161  | 5067.204  | AF009285  | 9135.049  | 9589.648  | NM_01494C | 1019.747  | 735.651   |
| NM_003803 | 1327.49   | 1134.281  | NM_012125 | 3505.217  | 3427.332  | NM_00690C | 1654.075  | 835.03    |
| NM_00281E | 40780.555 | 32284.262 | AF056435  | 213.466   | 255.242   | AJ289111  | 4938.27   | 4069.117  |
| NM_001937 | 4055.441  | 2901.817  | AF009294  | 3324.951  | 2930.049  | NM_01635E | 2850.462  | 4579.718  |
| AK024778  | 1230.586  | 930.569   | NM_001524 | 835.639   | 855.464   | NM_014043 | 4734.223  | 4468.977  |
| AK021608  | 2297.663  | 2196.106  | AK000998  | 623.643   | 606.996   | NM_014622 | 560.817   | 706.853   |
| NM_004297 | 988.561   | 916.128   | AK001225  | 487.86    | 627.834   | AB011114  | 32919.234 | 27589.402 |
| NM_006044 | 7059.005  | 8206.055  | AK021435  | 393.794   | 511.373   | D11466    | 9658.315  | 8521.588  |
| AK025498  | 4085.113  | 4422.929  | AK021684  | 2654.358  | 3332.644  | NM_01405E | 20954.426 | 18004.242 |
| NM_00139E | 11872.669 | 9974.573  | AK001060  | 511.224   | 765.208   | D31885    | 14649.75  | 17303.199 |
| NM_00206E | 19781.324 | 21863.807 | AK001819  | 264.507   | 204.789   | NM_01664E | 2362.359  | 2026.755  |
| NM_019854 | 460.647   | 641.761   | AK021480  | 633.354   | 567.493   | AK090536  | 9217.624  | 9511.373  |
| NM_01333E | 2932.328  | 2989.724  | AK025112  | 1380.179  | 1554.464  | D63477    | 574.821   | 654.811   |
| NM_014671 | 5849.967  | 5150.426  | AK026079  | 520.607   | 833.499   | NM_020243 | 20644.809 | 17351.352 |
| NM_00565E | 1848.193  | 1719.215  | AK026675  | 552.186   | 966.922   | NM_014051 | 7425.26   | 6841.116  |
| NM_006012 | 7779.495  | 7444.604  | AK025173  | 5577.828  | 5868.503  | AK025398  | 1156.469  | 1209.565  |
| NM_002151 | 3173.307  | 3429.231  | AK025430  | 961.669   | 816.64    | AK023056  | 585.888   | 374.467   |
| NM_01488E | 2793.228  | 2587.184  | AK026722  | 644.788   | 614.65    | NM_01788E | 1187.885  | 862.813   |
| AF173935  | 2148.781  | 1890.289  | AF117338  | 4866.776  | 2172.443  | NM_00491E | 2922.331  | 2269.665  |
| AK025322  | 10976.407 | 8093.314  | AK025567  | 2667.569  | 2723.188  | AK022207  | 397.33    | 434.542   |
| NM_017887 | 7921.116  | 5917.262  | NM_019102 | 316.859   | 623.127   | AV708752  | 2481.667  | 2333.39   |
| NM_00052E | 1454.952  | 1407.791  | U56857    | 6295.517  | 5476.366  | AF119885  | 1516.789  | 981.886   |
| AF007152  | 1751.199  | 1463.277  | L43349    | 786.165   | 639.265   | NM_00075C | 722.081   | 409.687   |
| NM_01757E | 1152.868  | 1014.331  | BE905682  | 293.502   | 458.921   | NM_00499E | 2656.158  | 2584.52   |
| AL122100  | 870.734   | 708.821   | AF086421  | 962.431   | 837.789   | NM_00058E | 8672.479  | 6858.38   |
| NM_00531C | 1107.774  | 1051.116  | AK001612  | 569.031   | 738.515   | AK026281  | 965.531   | 795.576   |
| NM_014423 | 6218.314  | 5082.375  | AF161522  | 4764.411  | 5655.896  | U23862    | 208.508   | 206.366   |
| NM_018083 | 1367.682  | 1253.494  | AF086028  | 12537.006 | 17993.67  | AK026680  | 4370.096  | 4938.946  |
| AL110188  | 7475.171  | 6948.826  | U46119    | 361.785   | 445.647   | NM_01243E | 54928.082 | 57996.113 |
| D70834    | 24439.484 | 23782.012 | AK025365  | 1442.733  | 1473.321  | AK001299  | 20397.1   | 16289.587 |
| NM_00097C | 59144.652 | 59378.879 | AK023445  | 330.489   | 479.271   | AB014559  | 9257.749  | 7774.336  |
| AK000102  | 1751.603  | 1812.945  | AK023489  | 612.008   | 948.79    | NM_01648E | 5534.553  | 5023.78   |
| AB040916  | 2682.583  | 2741.908  | AK021561  | 3919.092  | 2665.77   | NM_005033 | 5426.674  | 4253.509  |
| NM_005587 | 2379.77   | 2059.795  | NM_003531 | 2096.988  | 984.965   | NM_015932 | 52379.465 | 42378.367 |
| AF038362  | 2727.461  | 3135.215  | NM_00351C | 508.536   | 783.02    | NM_01794E | 581.14    | 566.641   |
| NM_00519E | 8531.261  | 8924.257  | NM_00353E | 375.67    | 432.298   | AK022169  | 659.329   | 343.899   |
| NM_005481 | 1927.479  | 1936.224  | AL137403  | 3945.642  | 3890.667  | AF015592  | 1666.449  | 1478.047  |
| NM_00471E | 3682.526  | 3585      | AL049348  | 636.77    | 526.919   | AK026795  | 1666.553  | 1339.166  |
| L40392    | 1858.417  | 1507.08   | NM_018534 | 568.892   | 967.333   | NM_016617 | 7443.229  | 6606.323  |
| NM_001007 | 66404.133 | 70930.047 | AB037847  | 1917.062  | 2061.995  | NM_002027 | 5572.798  | 5218.017  |
| NM_003017 | 5819.937  | 6875.292  | NM_00517C | 2456.131  | 2769.601  | AL162078  | 1145.643  | 1006.505  |
| NM_02036E | 3279.221  | 3986.107  | S96437    | 1817.526  | 1708.926  | NM_00091E | 469.644   | 373.633   |
| AF086497  | 1280.323  | 1205.527  | NM_01517E | 1364.287  | 1477.084  | NM_013382 | 6505.215  | 5184.076  |
| NM_020141 | 6718.896  | 6661.105  | AL353939  | 1238.621  | 1127.508  | AB002314  | 518.856   | 323.345   |
| NM_006482 | 1456.849  | 1414.967  | AL117573  | 4010.46   | 4869.387  | NM_005503 | 822.359   | 838.868   |
| NM_00377E | 598.232   | 655.975   | AL080186  | 2172.035  | 2574.26   | NM_001502 | 784.842   | 664.544   |
| NM_00363E | 2143.353  | 2485.65   | NM_00530E | 46478.441 | 31735.969 | NM_005721 | 420.646   | 386.754   |
| NM_00368E | 47135.078 | 44476.438 | NM_00164E | 24812.199 | 18996.418 | AF284223  | 595.602   | 654.263   |
| NM_016173 | 1167.06   | 1293.052  | AL137327  | 2888.893  | 3892.178  | AF176012  | 268.217   | 336.755   |
| NM_00287E | 8267.765  | 8364.498  | AF358454  | 4054.621  | 4469.181  | BE743838  | 3533.084  | 3649.198  |
| NM_004427 | 14217.217 | 13395.937 | AK026090  | 1865.487  | 2565.182  | AF273046  | 1585.459  | 1407.753  |
| U90549    | 6227.51   | 7483.489  | AF070637  | 437.422   | 773.111   | NM_001081 | 1127.604  | 1188.607  |

|           |           |           |           |           |           |           |           |           |
|-----------|-----------|-----------|-----------|-----------|-----------|-----------|-----------|-----------|
| NM_013240 | 6470.965  | 6884.815  | AL137634  | 970.455   | 1756.505  | NM_002483 | 1200.421  | 1516.068  |
| NM_015874 | 22465.545 | 16847.439 | AK024863  | 3945.595  | 4616.238  | BF002026  | 1171.711  | 1214.514  |
| NM_004965 | 56814.941 | 55266.637 | AJ008135  | 47481.168 | 39296.664 | BE790116  | 404.315   | 367.02    |
| AF312393  | 33672.246 | 25918.047 | AK026908  | 9099.5    | 7374.815  | AI922341  | 354.104   | 362.971   |
| AF272898  | 6517.503  | 6183.475  | U92025    | 288.288   | 254.183   | M12824    | 1684.823  | 1017.943  |
| NM_005149 | 10832.744 | 12013.322 | AB046766  | 757.592   | 828.043   | W60100    | 1330.91   | 1133.976  |
| AK024073  | 941.448   | 982.061   | AF009323  | 614.696   | 474.428   | AA457153  | 1476.332  | 1443.251  |
| NM_005887 | 3817.549  | 4213.75   | U52829    | 387.825   | 303.314   | AA283122  | 391.145   | 315.787   |
| AK024921  | 1179.428  | 1044.708  | AK001526  | 3835.522  | 2229.223  | AA868504  | 669.048   | 559.533   |
| AK026103  | 2281.452  | 2062.54   | AF086183  | 943.557   | 1009.902  | AA877845  | 2351.348  | 2511.935  |
| NM_016353 | 19605.568 | 20134.85  | AK000525  | 1543.632  | 1302.384  | AA664241  | 11805.137 | 9695.018  |
| AK022567  | 1863.379  | 2074.459  | AL137434  | 1278.326  | 1284.678  | AI016456  | 1588.13   | 1170.148  |
| AK023450  | 805.982   | 1096.784  | Z36795    | 1555.273  | 1423.766  | NM_014940 | 1351.922  | 874.559   |
| AL080280  | 7750.074  | 8030.342  | AL080216  | 1402.495  | 1394.316  | NM_005783 | 246.559   | 201.204   |
| AB028947  | 3003.921  | 4642.347  | AF038188  | 9991.798  | 9294.48   | NM_006900 | 891.973   | 645.484   |
| AF035314  | 1169.502  | 1510.325  | AJ227888  | 434.025   | 572.037   | AJ289111  | 3793.011  | 4024.785  |
| NM_018036 | 1102.668  | 1213.302  | D17046    | 1047.215  | 1298.073  | NM_016356 | 2650.356  | 2766.044  |
| AF052087  | 1370.304  | 1104.57   | NM_017645 | 8977.481  | 15261.314 | NM_006406 | 2916.27   | 2643.576  |
| AF007143  | 1870.277  | 1325.86   | AJ227864  | 470.517   | 648.919   | AF216292  | 11630.646 | 12648.009 |
| AF147417  | 1239.692  | 1416.443  | AF157562  | 3170.091  | 4580.547  | NM_014584 | 3084.409  | 2737.458  |
| AK001604  | 6275.599  | 4723.86   | AK021958  | 4014.37   | 7371.603  | NM_005810 | 1802.102  | 1420.747  |
| AK021619  | 733.838   | 720.519   | M31164    | 802.236   | 1106.825  | M28170    | 1203.468  | 457.715   |
| AK025872  | 530.697   | 957.441   | AF113674  | 10464.191 | 10272.45  | AK026223  | 479.673   | 764.349   |
| AF131762  | 20863.916 | 22492.238 | NM_003511 | 364.459   | 1409.47   | NM_000874 | 3370.391  | 3587.771  |
| AY007089  | 1791.12   | 1500.634  | CY3Cy5    | 5362.771  | 194.405   | AB007863  | 7062.302  | 5227.022  |
| AK021816  | 9437.405  | 10606.681 | H97792    | 1777.028  | 2068.012  | AK024456  | 2614.555  | 4821.708  |
| D43770    | 9906.768  | 16383.925 | L33404    | 919.314   | 945.15    | D31887    | 1983.333  | 2331.178  |
| AF085960  | 510.977   | 1239.37   | M13509    | 1394.725  | 1312.311  | NM_002313 | 1619.77   | 2078.779  |
| AK021519  | 2090.086  | 2290.884  | X04076    | 3427.403  | 2985.533  | NM_004456 | 1601.685  | 1080.626  |
| NM_014254 | 5037.466  | 4844.884  | W95082    | 1892.265  | 1786.301  | NM_004915 | 2794.348  | 2521.121  |
| AF086036  | 728.633   | 1038.078  | AA485362  | 1406.774  | 1461.218  | AK022207  | 395.485   | 392.231   |
| AF086010  | 1003.714  | 1617.147  | AJ222801  | 2601.252  | 3340.902  | AV708752  | 1943.98   | 1557.801  |
| U09197    | 4021.213  | 6020.654  | W72207    | 2510.18   | 2824.306  | AF119885  | 1348.257  | 1410.284  |
| U50529    | 259.11    | 870.036   | BI772354  | 3078.146  | 3986.801  | NM_004996 | 1884.656  | 1937.807  |
| Z36800    | 570.385   | 545.602   | AA733033  | 2069.388  | 2760.194  | NM_005971 | 1781.808  | 1708.125  |
| U15553    | 4996.075  | 4598.167  | AA583574  | 1890.63   | 1956.773  | NM_017435 | 697.727   | 4546.494  |
| AK024734  | 5441.516  | 5282.923  | U67733    | 753.838   | 1828.894  | NM_013386 | 1461.558  | 2211.265  |
| NM_017741 | 2268.493  | 1747.603  | AI690184  | 30922.254 | 34679.551 | NM_004171 | 438.589   | 447.122   |
| AK000144  | 2572.451  | 5002.952  | AA927490  | 1279.444  | 1332.77   | NM_014037 | 2891.932  | 2002.592  |
| AK022275  | 659.727   | 620.055   | SR7       | 5386.001  | 43026.031 | NM_004866 | 8137.677  | 4970.431  |
| AK000942  | 848.273   | 1211.75   | SR9       | 18337.691 | 3325.279  | NM_018688 | 1466.381  | 1229.813  |
| NM_016349 | 496.017   | 792.98    | CY3Cy5    | 5533.358  | 208.267   | AK056652  | 3164.25   | 4486.458  |
| AL117533  | 7328.318  | 7381.055  | NM_017818 | 3288.09   | 3902.668  | AL137438  | 226.837   | 353.305   |
| AK026036  | 1327.161  | 1698.313  | NM_020433 | 606.547   | 772.199   | NM_017957 | 1352.356  | 1498.656  |
| AK023422  | 2642.143  | 2815.28   | NM_001767 | 5059.674  | 5149.241  | NM_003024 | 1078.956  | 4007.409  |
| AK022796  | 3038.896  | 3825.14   | AF028823  | 6591.567  | 6523.303  | NM_013248 | 3065.217  | 13063.229 |
| AK095193  | 2336.032  | 2130.17   | NM_004295 | 33218.145 | 37230.477 | NM_000034 | 59887.465 | 73802.938 |
| AK025081  | 1920.582  | 1891.887  | NM_002087 | 4614.317  | 4910.252  | AK022230  | 2076.426  | 4079.22   |
| AL122088  | 1456.672  | 1548.343  | AB023154  | 566.414   | 379.188   | AK022147  | 4865.731  | 6069.222  |
| AF116633  | 695.648   | 627.902   | NM_014585 | 1903.469  | 2760.52   | L25664    | 3576.132  | 3778.029  |
| AF119912  | 1114.09   | 945.832   | AF200815  | 617.003   | 865.303   | NM_002027 | 5236.072  | 4632.391  |
| AL137518  | 2267.597  | 2792.691  | NM_013441 | 3072.391  | 3071.94   | AL162078  | 1034.721  | 1055.697  |
| AK022556  | 287.528   | 580.953   | NM_014421 | 845.178   | 765.268   | NM_013382 | 6261.147  | 4920.937  |

|           |           |           |           |           |           |           |           |           |
|-----------|-----------|-----------|-----------|-----------|-----------|-----------|-----------|-----------|
| AK023437  | 3185.555  | 3047.765  | NM_003833 | 12650.421 | 11950.022 | AB002314  | 577.063   | 621.176   |
| AK024147  | 566.067   | 777.615   | AK000868  | 3628.979  | 3172.13   | NM_014043 | 4614.332  | 5046.24   |
| AK022897  | 1268.403  | 1621.38   | NM_001233 | 2361.238  | 1985.544  | NM_014622 | 593.936   | 822.126   |
| AK023898  | 8019.315  | 6669.106  | NM_001234 | 899.902   | 1112.112  | D11466    | 10345.673 | 11033.354 |
| NM_005978 | 2117.655  | 3205.229  | BF679789  | 1699.378  | 1895.487  | NM_014056 | 19688.359 | 18192.324 |
| Y16711    | 1912.88   | 2290.843  | AB007859  | 1013.224  | 1456.841  | D31885    | 12237.068 | 13157.963 |
| AJ272179  | 2138.378  | 2950.283  | NM_006754 | 377.473   | 457.612   | NM_016646 | 1815.887  | 1479.904  |
| AJ007015  | 4080.738  | 3081.464  | NM_001127 | 2732.155  | 2704.941  | AK090536  | 8451.276  | 6323.997  |
| AL049317  | 1897.433  | 2259.688  | NM_012430 | 2962.692  | 3182.915  | NM_020243 | 21356.012 | 18905.49  |
| AL050090  | 1531.148  | 1933.823  | NM_003917 | 19679.916 | 24582.662 | NM_014051 | 6881.107  | 7315.48   |
| AF086309  | 1525.775  | 1447.124  | NM_007077 | 1286.449  | 1655.756  | AK025398  | 1368.992  | 3623.958  |
| AF238870  | 2117.648  | 2036.134  | NM_002956 | 1851.349  | 2238.124  | AK023056  | 685.353   | 715.938   |
| AK026279  | 6296.833  | 8091.512  | AB018739  | 820.434   | 995.977   | NM_017888 | 2004.138  | 2632.752  |
| AF130094  | 12464.437 | 13009.663 | NM_006750 | 16806.98  | 18143.643 | NM_003150 | 1751.408  | 1189.566  |
| AK026673  | 4286.144  | 5172.625  | NM_020164 | 3775.057  | 3453.822  | NM_014784 | 1417.72   | 1398.456  |
| NM_005452 | 6241.974  | 6844.557  | AK023521  | 3891.996  | 3947.263  | AK026383  | 1835.797  | 1990.791  |
| AF170935  | 18268.5   | 19282.164 | NM_014267 | 20503.961 | 21969.582 | AK023821  | 338.49    | 381.011   |
| AK025218  | 1151.37   | 1142.902  | NM_001481 | 668.26    | 605.157   | AB014594  | 2544.663  | 2697.198  |
| AJ227899  | 2546.516  | 2808.95   | U30872    | 913.833   | 977.222   | M94547    | 581.651   | 550.793   |
| AL359607  | 2388.892  | 2537.026  | AF111783  | 544.88    | 397.31    | NM_005087 | 3852.989  | 4316.982  |
| AF161371  | 11428.621 | 11278.557 | NM_020469 | 4064.574  | 4331.909  | NM_012098 | 935.919   | 1157.071  |
| AK022464  | 1716.227  | 1213.308  | NM_014734 | 2509.125  | 2675.396  | AB023164  | 1727.193  | 1975.182  |
| AF086230  | 1710.329  | 1207.191  | NM_002289 | 641.346   | 304.647   | AK026281  | 764.754   | 825.873   |
| AK023408  | 6800.53   | 5454.382  | NM_006307 | 810.757   | 510.875   | AK026680  | 3055.387  | 2583.09   |
| AJ223366  | 178.841   | 1000.39   | M74782    | 452.964   | 250.07    | NM_012436 | 52866.164 | 54848.805 |
| AK002036  | 3564.175  | 5047.632  | NM_001056 | 844.763   | 788.364   | AK001299  | 19541.563 | 23693.234 |
| AK025775  | 5347.047  | 6327.106  | AY026461  | 3109.128  | 3157.831  | AB014559  | 7334.71   | 7446.078  |
| AB046791  | 1936.465  | 2009.219  | AK025708  | 3796.916  | 3404.131  | NM_016488 | 4844.877  | 6841.498  |
| AF043469  | 2436.418  | 3016.915  | NM_000405 | 956.332   | 1213.067  | NM_005033 | 4638.243  | 7830.858  |
| AL109671  | 1335.143  | 1723.108  | NM_004508 | 3263.717  | 3982.523  | NM_015932 | 55630.414 | 67073.469 |
| AK022008  | 2195.541  | 2088.556  | NM_006405 | 11164.8   | 12991.862 | AK022169  | 521.22    | 440.294   |
| NM_018186 | 3656.992  | 3826.011  | AJ245946  | 383.718   | 486.057   | AF015592  | 1979.924  | 2290.875  |
| AL080188  | 4770.829  | 4901.045  | NM_006749 | 912.903   | 1061.078  | AK026795  | 2025.07   | 2966.904  |
| T99941    | 5658.401  | 5097.313  | NM_004694 | 475.308   | 369.074   | NM_016617 | 8300.482  | 11342.492 |
| AF113678  | 3689.679  | 2949.312  | NM_000324 | 311.993   | 618.392   | NM_002338 | 3800.982  | 2923.16   |
| AL137313  | 57169.891 | 58807.719 | NM_012206 | 355.355   | 572.971   | AL117666  | 371.318   | 536.726   |
| Z83951    | 399.205   | 491.72    | NM_004300 | 7352.307  | 6602.521  | NM_005825 | 7665.921  | 8532.846  |
| AB002363  | 8423.319  | 6616.39   | AF319476  | 1940.458  | 1412.681  | NM_002756 | 1295.037  | 1704.155  |
| NM_005284 | 5455.501  | 4808.974  | AK001913  | 5011.493  | 4062.703  | AJ000414  | 320.051   | 382.701   |
| AF086351  | 3693.799  | 3781.281  | NM_017737 | 1192.816  | 1255.605  | AK025674  | 4467.772  | 4087.229  |
| D83199    | 23665.98  | 24735.227 | NM_004292 | 3486.321  | 3591.213  | AF007194  | 3129.131  | 3185.437  |
| AK025957  | 768.036   | 526.559   | NM_015484 | 5915.471  | 6288.081  | NM_019068 | 860.349   | 885.853   |
| Y16708    | 1302.664  | 1000.303  | NM_018046 | 1792.849  | 1980.665  | NM_004761 | 1628.445  | 1447.469  |
| NM_019098 | 7062.453  | 5146.019  | NM_013316 | 2546.856  | 2547.44   | Z25424    | 1522.254  | 1234.654  |
| AK022212  | 24086.928 | 23957.018 | M20701    | 11753.741 | 13452.656 | U79458    | 3720.628  | 2528.086  |
| X64974    | 3168.953  | 3467.372  | NM_002912 | 1489.282  | 1542.139  | NM_014920 | 370.267   | 275.931   |
| NM_000834 | 7663.532  | 7879.856  | NM_006739 | 3180.919  | 2699.357  | NM_002961 | 2144.592  | 5452.541  |
| NM_006485 | 34552.77  | 51189.137 | NM_013274 | 4627.046  | 4970.243  | NM_018298 | 518.709   | 1066.19   |
| NM_012458 | 3485.583  | 5817.825  | AL050187  | 1049.881  | 1411.912  | NM_000676 | 791.488   | 2833.509  |
| NM_012360 | 258.603   | 861.907   | NM_007127 | 397.15    | 682.949   | AF064770  | 493.562   | 1540.032  |
| AL137268  | 3907.53   | 3943.357  | NM_012387 | 12189.822 | 14605.579 | NM_005766 | 418.941   | 693.607   |
| AK022398  | 911.508   | 928.565   | NM_014735 | 1375.404  | 1658.929  | NM_004127 | 35398.691 | 22966.893 |
| AK024109  | 2449.706  | 2905.548  | NM_004252 | 19627.443 | 25181.012 | NM_013324 | 2324.894  | 1984.576  |



|            |           |           |           |           |           |           |           |           |
|------------|-----------|-----------|-----------|-----------|-----------|-----------|-----------|-----------|
| AF088048   | 1311.612  | 1222.286  | NM_003833 | 10660.273 | 10036.259 | AL133022  | 580.935   | 1009.125  |
| AK001143   | 3685.611  | 2782.336  | AK000868  | 3490.036  | 2775.307  | NM_003953 | 2317.256  | 3697.932  |
| AK001701   | 4899.047  | 3080.676  | NM_001233 | 2121.941  | 1918.371  | NM_006301 | 726.772   | 1332.411  |
| AK022205   | 742.559   | 685.685   | NM_001234 | 779.694   | 811.159   | AL049925  | 838.781   | 826.994   |
| AB007978   | 721.264   | 859.712   | BF679789  | 2275.163  | 2708.523  | X72887    | 886.662   | 640.309   |
| AF217970   | 1264.448  | 1342.287  | H97792    | 1681.35   | 1882.114  | NM_004525 | 779.915   | 874.102   |
| AF086297   | 1956.296  | 1908.665  | L33404    | 789.71    | 838.134   | NM_000127 | 1667.38   | 1669.668  |
| AK025455   | 4311.724  | 4073.877  | M13509    | 996.872   | 1183.816  | Y10483    | 6481.002  | 7025.278  |
| AK026799   | 3969.689  | 2903.931  | X04076    | 3014.727  | 2460.329  | NM_006784 | 903.245   | 880.521   |
| NM_01486C  | 1407.336  | 1301.778  | W95082    | 1727.907  | 1537.815  | NM_017876 | 1404.15   | 1183.547  |
| AK022549   | 2452.054  | 2134.149  | AA485362  | 1277.244  | 1275.608  | NM_001087 | 21508.848 | 19771.195 |
| NM_018157  | 1130.883  | 1268.408  | AJ222801  | 2867.828  | 3590.338  | AK025352  | 326.418   | 384.437   |
| Z70714     | 4520.413  | 4902.053  | W72207    | 2478.795  | 2800.328  | NM_003721 | 3483.152  | 1505.071  |
| AK021640   | 8043.278  | 5231.958  | BI772354  | 3268.063  | 3516.887  | NM_004724 | 736.905   | 1247.173  |
| CY3Cy5     | 2187.419  | 217.061   | AA733033  | 2280.136  | 2730.316  | NM_001431 | 5446.074  | 19428.615 |
| BF310427   | 1245.723  | 1087.747  | AA583574  | 1604.826  | 1202.029  | NM_000381 | 298.333   | 492.03    |
| N94424     | 476.15    | 503.219   | AI690184  | 24099.068 | 28532.092 | NM_000427 | 1002.944  | 1088.469  |
| AA045192   | 652.166   | 553.158   | AA927490  | 1074.936  | 1223.823  | NM_014924 | 436.69    | 370.013   |
| M92642     | 731.634   | 624.452   | NM_001824 | 59728.383 | 66599.813 | NM_006946 | 400.996   | 408.216   |
| AA464532   | 419.243   | 310.212   | NM_002964 | 995.664   | 687.636   | NM_000174 | 16334.78  | 10453.212 |
| H-U 44385  | 10762.438 | 9194.215  | BF038439  | 759.93    | 598.916   | NM_002508 | 1194.724  | 901.375   |
| ID 1654970 | 4747.226  | 3979.232  | NM_014734 | 1435.469  | 1249.328  | NM_014343 | 2481.121  | 2398.938  |
| ID 2531132 | 5406.848  | 4731.139  | NM_002289 | 504.759   | 357.905   | D25303    | 727.307   | 1501.033  |
| AA485665   | 392.91    | 285.385   | AK026408  | 1471.759  | 1334.663  | AB043007  | 15608.699 | 14302.699 |
| BF125928   | 11961.604 | 9308.567  | NM_005025 | 1453.026  | 1320.841  | NM_004861 | 849.579   | 680.082   |
| BG571026   | 1263.761  | 1274.754  | NM_006307 | 766.962   | 5306.632  | AF022913  | 2112.557  | 1904.436  |
| AA489017   | 4283.906  | 3232.764  | M74782    | 423.296   | 458.98    | NM_000028 | 1099.651  | 932.105   |
| NM_012245  | 11559.693 | 8445.437  | NM_017818 | 3068.758  | 3872.332  | NM_001382 | 4068.383  | 3309.782  |
| NM_133263  | 1143.524  | 858.081   | NM_020433 | 560.507   | 584.038   | M93718    | 6313.174  | 7495.808  |
| SR2        | 45595.313 | 33196.109 | NM_001767 | 4602.175  | 5549.053  | NM_005386 | 421.367   | 426.071   |
| SR4        | 11411.345 | 8428.99   | AF028823  | 6440.279  | 6624.605  | AK023807  | 5044.64   | 4999.164  |
| SR6        | 1795.29   | 1379.945  | NM_004295 | 33191.555 | 37200.457 | NM_018188 | 4441.417  | 4244.604  |
| SR8        | 6588.712  | 14312.615 | NM_002087 | 4783.353  | 5106.939  | AK024273  | 1390.409  | 1535.947  |
| SR10       | 22576.209 | 5462.189  | AB023154  | 511.81    | 479.933   | X59417    | 23103.102 | 18980.721 |
| CY3Cy5     | 1255.821  | 163.337   | NM_014585 | 1661.181  | 1919.007  | NM_005655 | 25024.971 | 15185.367 |
| NM_01745C  | 1077.097  | 1523.704  | AF200815  | 424.829   | 674.414   | D28476    | 4241.113  | 2288.628  |
| NM_002023  | 1074.444  | 1014.314  | NM_013441 | 3147.679  | 3004.717  | NM_016263 | 2499.968  | 2132.979  |
| NM_002839  | 580.45    | 602.144   | NM_014421 | 1063.597  | 957.971   | NM_003335 | 9637.899  | 14356.554 |
| AF190500   | 382.759   | 311.585   | NM_00430C | 7638.984  | 5088.563  | AB002376  | 2216.514  | 3233.594  |
| NM_001616  | 490.338   | 505.228   | AB007859  | 910.328   | 1042.839  | NM_005558 | 1050.515  | 940.132   |
| NM_005904  | 378.193   | 415.854   | NM_006754 | 290.137   | 408.882   | NM_016631 | 576.767   | 748.913   |
| NM_005273  | 9529.06   | 8990.219  | NM_001127 | 2626.627  | 3007.701  | AB015617  | 9066.351  | 9081.33   |
| NM_000524  | 484.385   | 329.591   | NM_01243C | 2658.314  | 3112.393  | AK022730  | 843.696   | 966.98    |
| NM_006576  | 1069.357  | 1049.96   | NM_003917 | 20099.559 | 23341.764 | NM_002256 | 8750.029  | 9193.377  |
| NM_018645  | 551.864   | 506.723   | NM_007077 | 1244.04   | 1648.377  | AF064839  | 29403.684 | 19473.887 |
| AB035266   | 2923.696  | 2147.781  | NM_002956 | 1928.965  | 2012.932  | NM_005435 | 6411.367  | 5886.428  |
| NM_003744  | 2262.27   | 1718.996  | AB018739  | 562.184   | 452.861   | AB037810  | 3022.886  | 2069.268  |
| NM_006378  | 11074.188 | 9030.415  | NM_00675C | 14523.254 | 14716.337 | NM_000376 | 1359.865  | 1125.11   |
| NM_018132  | 1816.579  | 1688.749  | NM_020164 | 3292.295  | 2671.554  | NM_000475 | 3703.055  | 3490.572  |
| NM_003061  | 1237.538  | 1025.46   | AK023521  | 3378.184  | 3219.6    | M61872    | 7242.49   | 4568.621  |
| NM_018207  | 1603.991  | 1264.417  | NM_014267 | 19447.814 | 20497.398 | AK027089  | 409.63    | 356.656   |
| NM_000345  | 9526.36   | 6462.286  | NM_001481 | 801.609   | 477.055   | NM_006284 | 8126.614  | 8764.335  |
| NM_001862  | 44012.57  | 33754.207 | U30872    | 1006.118  | 682.072   | U18909    | 652.201   | 508.125   |

|           |           |           |           |           |           |           |           |           |
|-----------|-----------|-----------|-----------|-----------|-----------|-----------|-----------|-----------|
| NM_006531 | 1430.069  | 1328.349  | NM_002639 | 1264.601  | 1633.406  | NM_003489 | 1541.585  | 1936.831  |
| AB029021  | 7201.538  | 5382.39   | AK025655  | 2318.216  | 2286.96   | NM_016589 | 5916.223  | 6671.799  |
| NM_005423 | 363.006   | 406.799   | NM_001362 | 433.333   | 542.465   | NM_002569 | 15688.514 | 13540.889 |
| Z36789    | 2336.154  | 1665.115  | NM_004056 | 1577.773  | 1047.474  | NM_006561 | 2584.243  | 1803.66   |
| J02874    | 699.313   | 673.132   | NM_001056 | 840.291   | 835.003   | NM_017521 | 446.601   | 475.418   |
| AF070525  | 7025.11   | 8585.228  | AY026461  | 3067.791  | 3366.705  | AK025200  | 3857.598  | 3737.269  |
| NM_001177 | 4447.837  | 5567.67   | AK025708  | 3768.889  | 4920.224  | NM_001383 | 4268.185  | 4715.263  |
| NM_014447 | 866.889   | 1232.478  | NM_000405 | 734.129   | 1327.078  | NM_001029 | 58323.973 | 69293.773 |
| NM_006691 | 847.968   | 987.674   | NM_005564 | 45617.535 | 46444.117 | NM_005009 | 5721.99   | 7736.072  |
| NM_001505 | 529.32    | 639.864   | NM_004509 | 3248.947  | 3603.472  | NM_016304 | 11697.343 | 14748.387 |
| NM_003710 | 2139.262  | 2372.125  | NM_006405 | 11702.859 | 11681.176 | NM_006013 | 13082.498 | 16436.904 |
| Z83805    | 615.351   | 767.253   | AJ245946  | 619.383   | 1002.321  | NM_014049 | 5416.28   | 5345.698  |
| NM_004666 | 774.089   | 887.464   | NM_006749 | 828.22    | 989.312   | L34071    | 2358.16   | 1873.297  |
| NM_003614 | 882.663   | 631.621   | NM_004694 | 575.338   | 237.673   | AK025201  | 4107.543  | 3433.19   |
| NM_014257 | 3271.783  | 2341.657  | AL137619  | 3393.587  | 3063.905  | AK021927  | 841.916   | 1105.159  |
| NM_001140 | 723.156   | 616.793   | NM_005052 | 13505.972 | 12132.875 | AK022995  | 1706.352  | 1429.796  |
| NM_004843 | 1603.964  | 1572.448  | BF038439  | 387.709   | 567.431   | NM_006066 | 7404.756  | 6461.36   |
| AK022845  | 1246.333  | 1311.917  | AF319476  | 2073.605  | 1920.912  | NM_005165 | 3259.89   | 3760.518  |
| NM_003004 | 220.416   | 260.117   | AK001913  | 4734.339  | 4904.427  | NM_005139 | 14652.248 | 15240.695 |
| S77835    | 500.447   | 560.425   | NM_017737 | 1237.634  | 1416.039  | NM_002115 | 10970.885 | 23783.125 |
| NM_002985 | 538.543   | 567.77    | NM_004292 | 1765.463  | 2497.22   | AK023162  | 702.444   | 574.384   |
| AB018347  | 4266.47   | 3363.046  | NM_015484 | 5756.7    | 6539.763  | NM_006399 | 4833.169  | 3770.41   |
| AB033073  | 1700.608  | 1245.761  | NM_018046 | 2131.868  | 3093.947  | NM_018649 | 1679.766  | 2721.457  |
| NM_003284 | 1047.007  | 1058.604  | NM_013316 | 2544.104  | 2689.125  | NM_013449 | 1219.545  | 1426.785  |
| NM_018152 | 513.967   | 477.821   | M20701    | 13234.667 | 14929.662 | AL390134  | 7139.154  | 13928.744 |
| NM_012461 | 3538.493  | 2631.478  | NM_002912 | 715.024   | 520.88    | NM_020229 | 3147.396  | 9175.613  |
| AK001379  | 1506.941  | 1057.557  | NM_013284 | 2687.115  | 2826.319  | NM_017865 | 2710.348  | 4013.874  |
| NM_007072 | 1528.708  | 1830.753  | NM_006739 | 899.483   | 588.252   | NM_003427 | 1855.575  | 3518.025  |
| NM_012320 | 2034.032  | 2157.096  | NM_013274 | 4708.491  | 5599.074  | NM_005920 | 1402.029  | 2367.29   |
| NM_018209 | 2497.877  | 3061.915  | AL050187  | 1172.597  | 1070.955  | AK001499  | 1812.002  | 1275.307  |
| NM_015929 | 3441.208  | 4166.689  | NM_007127 | 1090.783  | 1589.944  | AK026852  | 838.837   | 440.827   |
| U90653    | 2953.765  | 3526.124  | NM_012387 | 13240.159 | 9350.47   | AK021629  | 583.058   | 513.605   |
| NM_000196 | 475.319   | 361.166   | NM_014735 | 1213.016  | 930.476   | AL110257  | 39636.211 | 24795.295 |
| NM_018339 | 4637.201  | 4655.744  | NM_004252 | 22667.262 | 20075.631 | AB013384  | 927.777   | 1069.866  |
| NM_006745 | 31066.896 | 31526.404 | AF172929  | 12221.403 | 10630.679 | AK024824  | 862.735   | 704.667   |
| NM_000275 | 614.075   | 855.44    | M60499    | 1225.816  | 980.993   | AK024270  | 1406.864  | 1215.673  |
| AK000037  | 732.933   | 501.546   | NM_003833 | 10007.04  | 10903.584 | AK025569  | 3390.993  | 3583.637  |
| NM_014760 | 2206.863  | 1906.104  | AK000868  | 3150.295  | 2897.076  | AK023060  | 1004.382  | 1513.004  |
| NM_018399 | 921.477   | 949.75    | NM_001233 | 2104.49   | 2251.685  | NM_014870 | 532.329   | 662.682   |
| NM_002560 | 8310.583  | 7572.811  | NM_001234 | 890.042   | 725.381   | AK021917  | 316.167   | 286.304   |
| NM_014404 | 1112.618  | 1139.938  | BF679789  | 1789.799  | 2108.393  | AF052146  | 28626.396 | 22157.914 |
| NM_018713 | 591.426   | 571       | H97792    | 1196.968  | 1856.531  | NM_004870 | 5536.518  | 4009.353  |
| NM_015947 | 4082.844  | 3733.602  | L33404    | 675.747   | 851.496   | AF143872  | 10048.585 | 12211.937 |
| NM_002042 | 10266.141 | 9652.932  | M13509    | 1125.763  | 1362.718  | AK025686  | 1610.407  | 2755.957  |
| AB028944  | 595.701   | 588.325   | X04076    | 3348.682  | 3472.277  | AF143326  | 2269.457  | 5784.744  |
| AJ006268  | 954.584   | 817.373   | W95082    | 1291.177  | 1077.07   | AL049229  | 2757.49   | 5904.381  |
| M74089    | 5049.063  | 3742.436  | AA485362  | 1232.005  | 1274.339  | AK023152  | 1916.182  | 3665.062  |
| AF190864  | 5688.885  | 4263.26   | AJ222801  | 3235.881  | 3472.321  | AK000155  | 1601.847  | 3457.432  |
| NM_002779 | 2614.971  | 2047.869  | W72207    | 2605.469  | 2959.608  | AL389937  | 3779.298  | 7223.247  |
| L40397    | 16688.627 | 12127.272 | BI772354  | 3269.705  | 4215.816  | AK022628  | 52308.387 | 39811.566 |
| NM_020199 | 7226.448  | 3923.341  | AA733033  | 2129.086  | 1634.664  | AK021737  | 5382.864  | 5155.445  |
| AA098879  | 489.25    | 362.729   | AA583574  | 1797.534  | 1524.117  | AK026295  | 6457.697  | 3847.434  |
| NM_000025 | 12967.213 | 11491.465 | AI690184  | 33635.547 | 19959.672 | AK022346  | 798.03    | 492.472   |

|            |           |           |           |           |           |           |           |           |
|------------|-----------|-----------|-----------|-----------|-----------|-----------|-----------|-----------|
| D38521     | 1728.816  | 2165.227  | AA927490  | 1290.747  | 1310.824  | AK025007  | 1679.528  | 1448.42   |
| NM_000403  | 3662.981  | 4026.383  | NM_001481 | 521.249   | 604.645   | NM_016486 | 3863.051  | 2872.971  |
| NM_018127  | 10228.472 | 10315.875 | U30872    | 948.817   | 804.16    | AL117601  | 422.855   | 293.785   |
| AB020677   | 2659.358  | 2279.158  | AF111783  | 341.871   | 334.824   | AK026490  | 35402.32  | 22643.602 |
| AB033097   | 1577.408  | 1420.819  | NM_002639 | 905.274   | 1000.486  | AJ227861  | 1456.531  | 1011.874  |
| NM_000135  | 1118.908  | 1013.103  | NM_014734 | 1415.142  | 1801.518  | AJ001020  | 371.86    | 368.041   |
| AJ223948   | 3044.099  | 3185.234  | NM_002289 | 368.36    | 554.565   | AJ001875  | 1793.046  | 1235.423  |
| NM_016218  | 667.141   | 484.961   | AK026408  | 1653.601  | 1375.407  | X64985    | 537.574   | 476.526   |
| AK022947   | 1694.13   | 1477.624  | NM_005025 | 1558.49   | 1222.358  | NM_017777 | 1967.599  | 5090.388  |
| AL050029   | 1794.952  | 1579.186  | NM_006307 | 248.912   | 506.009   | AK021989  | 730.117   | 1460.349  |
| AL049966   | 424.663   | 307.291   | NM_017818 | 2979.606  | 2696.413  | AK022298  | 2370.093  | 2039.312  |
| NM_005204  | 2027.493  | 1803.021  | NM_020433 | 633.363   | 625.616   | AJ277441  | 16542.783 | 11228.01  |
| NM_016203  | 1605.658  | 1509.061  | NM_001767 | 4528.557  | 6963.031  | NM_006057 | 918.261   | 1896.425  |
| NM_002759  | 2255.11   | 2033.221  | AF028823  | 1746.52   | 1686.254  | AK024242  | 14098.476 | 41580.234 |
| NM_007271  | 1598.431  | 1409.489  | NM_004295 | 31896.031 | 34386.258 | AK024559  | 1246.896  | 4621.135  |
| NM_006255  | 4701.385  | 3720.729  | NM_002087 | 4916.435  | 5370.303  | AK024851  | 960.691   | 2758.242  |
| BE392143   | 3193.116  | 2655.308  | AB023154  | 927.281   | 1766.536  | AK024943  | 734.896   | 1753.125  |
| NM_005813  | 1248.088  | 933.948   | NM_001714 | 480.823   | 1539.927  | AK024577  | 670.559   | 1493.035  |
| AB037718   | 3290.662  | 2262.625  | NM_014585 | 1875.054  | 1844.998  | AK024995  | 311.23    | 715.965   |
| AL389994   | 936.439   | 673.687   | AF200815  | 478.028   | 512.643   | AL359943  | 56059.219 | 63658.246 |
| NM_003909  | 3289.496  | 1982.818  | NM_013441 | 3258.766  | 2885.471  | NM_000534 | 2033.128  | 3361.583  |
| NM_001277  | 3416.782  | 2737.482  | NM_014421 | 995.329   | 990.062   | NM_005365 | 1367.327  | 2993.955  |
| NM_003659  | 4881.895  | 3716.966  | NM_006749 | 838.69    | 942.569   | L10140    | 522.846   | 1012.701  |
| AB029021   | 9696.304  | 11284.267 | NM_004694 | 370.387   | 381.076   | AL133447  | 1591.352  | 2694.39   |
| NM_002101  | 27863.82  | 29221.619 | AL137619  | 3178.851  | 3923.172  | AB037853  | 18718.225 | 21042.074 |
| NM_005423  | 400.136   | 428.193   | NM_004300 | 8041.02   | 8723.121  | D28450    | 67705.313 | 69658.719 |
| Z36789     | 1717.201  | 2372.663  | AB007859  | 1044.998  | 1279.628  | AK056222  | 1945.734  | 3484.593  |
| J02874     | 1188.271  | 1285.334  | NM_001127 | 2684.308  | 3077.971  | AK002028  | 43469.184 | 66983.859 |
| BF310427   | 1138.985  | 1034.45   | NM_012430 | 3021.551  | 2948.41   | AL050127  | 1876.17   | 5038.307  |
| N94424     | 485.385   | 431.012   | NM_003917 | 22155.939 | 24599.961 | AK024805  | 6985.379  | 18985.717 |
| AA045192   | 643.258   | 600.718   | NM_007077 | 1481.135  | 953.586   | AK001423  | 1036.897  | 1810.054  |
| H45617     | 455.139   | 359.23    | NM_002956 | 1961.838  | 1117.376  | AK024090  | 10309.878 | 7073.742  |
| M92642     | 687.005   | 719.104   | AB018739  | 643.528   | 604.666   | AL133574  | 1136.783  | 1077.47   |
| AA464532   | 464.447   | 226.275   | NM_006750 | 15683.002 | 10756.402 | AK021936  | 1065.971  | 1039.879  |
| H-U 44385  | 11349.134 | 9561.811  | NM_020164 | 3927.234  | 1716.034  | AF147339  | 15139.372 | 11435.602 |
| ID 1654970 | 4788.341  | 5277.091  | AK023521  | 3768.3    | 1905.639  | AL390181  | 24506.15  | 18028.359 |
| ID 2531132 | 5413.584  | 4439.442  | NM_014267 | 19314.639 | 13301.198 | NM_017914 | 14984.261 | 11297.882 |
| BF125928   | 12597.633 | 10015.551 | AL050187  | 1177.683  | 1171.013  | AK024953  | 4934.868  | 4251.697  |
| BG571026   | 1326.562  | 1087.233  | NM_007127 | 510.725   | 228.61    | AK024276  | 1622.738  | 1315.642  |
| AA489017   | 4016.964  | 3407.712  | NM_012387 | 12827.596 | 13161.804 | S83374    | 1467.851  | 1391.894  |
| NM_012245  | 11347.48  | 9530.929  | NM_014735 | 1505.078  | 1527      | AL161979  | 616.728   | 1008.268  |
| NM_133263  | 1177.221  | 709.763   | NM_004252 | 22646.82  | 37025.676 | AK025784  | 28811.646 | 40494.953 |
| NM_003284  | 1496.546  | 1663.391  | AF172929  | 11848.638 | 13152.187 | U07199    | 2860.788  | 4946.254  |
| NM_018152  | 651.874   | 581.182   | NM_006398 | 17026.043 | 17657.861 | AK023713  | 723.92    | 1950.853  |
| NM_000319  | 2546.971  | 2832.379  | AK025655  | 2685.642  | 2517.473  | X81445    | 523.929   | 1089.929  |
| NM_003257  | 256.981   | 342.449   | NM_001362 | 419.284   | 534.208   | U95091    | 523.393   | 1054.693  |
| NM_012461  | 3626.006  | 4197.964  | NM_004056 | 1497.97   | 1449.006  | NM_017900 | 26600.412 | 55442.348 |
| AK001379   | 1461.787  | 1338.689  | NM_001056 | 802.148   | 1075.13   | S50182    | 781.039   | 2004.434  |
| NM_002023  | 970.02    | 765.988   | AY026461  | 2729.852  | 4122.743  | AL360145  | 1184.229  | 3071.297  |
| NM_002839  | 653.451   | 611.645   | AK025708  | 3597.116  | 4108.06   | Y12016    | 1093.072  | 2719.097  |
| AF190500   | 449.376   | 289.996   | NM_000405 | 1162.203  | 1173.96   | NM_001178 | 1348.959  | 1008.992  |
| NM_001616  | 578.6     | 369.088   | NM_005564 | 45222.504 | 35291.086 | AK023696  | 1806.432  | 1433.942  |
| NM_005904  | 385.585   | 464.06    | NM_004508 | 3465.242  | 2876.488  | NM_000704 | 815.755   | 618.616   |

|           |           |           |           |           |           |           |           |           |
|-----------|-----------|-----------|-----------|-----------|-----------|-----------|-----------|-----------|
| NM_005273 | 10185.14  | 8766.339  | NM_006405 | 10397.54  | 7475.792  | NM_015987 | 431.909   | 454.345   |
| NM_000524 | 472.581   | 578.819   | AJ245946  | 510.713   | 265.065   | NM_019605 | 907.882   | 591.727   |
| NM_006576 | 1178.042  | 1032.675  | NM_002390 | 6295.028  | 8963.271  | NM_015365 | 285.521   | 204.081   |
| NM_018645 | 633.756   | 709.007   | NM_006142 | 1337.312  | 1649.661  | Z49090    | 3058.021  | 1793.21   |
| AB035266  | 2568.662  | 1935.96   | NM_014910 | 9095.695  | 10664.467 | AK021592  | 1562.093  | 917.13    |
| NM_003744 | 2220.624  | 1422.406  | AK001064  | 2970.823  | 3597.229  | AK025467  | 1937.552  | 1661.774  |
| NM_006378 | 11394.511 | 9106.196  | AB029031  | 5736.712  | 6009.562  | AK026593  | 7577.427  | 8049.397  |
| NM_018132 | 1845.104  | 1981.612  | NM_001294 | 5679.512  | 6326.322  | L37700    | 967.616   | 844.469   |
| NM_003061 | 1147.623  | 753.24    | NM_014241 | 8261.836  | 9100.326  | NM_017665 | 2857.559  | 8538.095  |
| NM_018207 | 1380.828  | 580.55    | AF302786  | 2666.271  | 3404.434  | AK024819  | 479.911   | 685.784   |
| NM_000345 | 7783.009  | 4257.102  | AL122083  | 5332.918  | 7549.55   | AF052106  | 1869.357  | 3155.81   |
| NM_001862 | 41056.547 | 30751.641 | NM_005052 | 12794.811 | 20725.475 | AK000441  | 823.746   | 1643.824  |
| NM_006531 | 1311.791  | 989.059   | BF038439  | 1377.648  | 1597.992  | AK022391  | 1217.807  | 3402.075  |
| M74089    | 4372.495  | 4842.112  | AF319476  | 1604.377  | 1532.575  | NM_016125 | 618.05    | 1197.295  |
| AF190864  | 4352.78   | 4531.621  | AK001913  | 5319.12   | 6119.501  | CY3Cy5    | 1880.016  | 130.504   |
| NM_002779 | 2348.357  | 2550.335  | NM_017737 | 1071.133  | 1356.347  | R72122    | 1492.313  | 1312.585  |
| L40397    | 15755.746 | 18940.693 | NM_004292 | 2005.194  | 2553.063  | Z35309    | 551.158   | 394.317   |
| NM_020198 | 7890.181  | 8166.511  | NM_015484 | 6164.953  | 6879.655  | AA292025  | 704.202   | 333.007   |
| AA098879  | 543.695   | 586.833   | NM_018046 | 2038.67   | 2160.518  | AA437226  | 1416.483  | 1478.504  |
| NM_001177 | 4486.205  | 3918.856  | NM_002912 | 1303.399  | 993.887   | D10353/NM | 1724.619  | 1558.807  |
| NM_014447 | 1069.598  | 1164.134  | NM_013284 | 2824.183  | 1757.285  | M15042    | 2748.373  | 2209.681  |
| NM_006691 | 906.728   | 960.174   | NM_006739 | 3394.701  | 1673.493  | AK056843  | 651.64    | 901.442   |
| NM_001505 | 536.256   | 438.512   | NM_013274 | 4774.785  | 3845.448  | AK092859  | 457.822   | 476.363   |
| NM_003710 | 1861.832  | 1767.448  | AK024955  | 37312.699 | 29066.592 | NM_019884 | 3039.495  | 1987.857  |
| Z83805    | 518.808   | 218.846   | NM_016580 | 2199.689  | 1899.324  | SR2       | 44914.051 | 24842.236 |
| NM_004666 | 811.512   | 738.735   | AF169693  | 964.036   | 1153.307  | SR4       | 8810.629  | 6434.412  |
| NM_003614 | 713.875   | 722.815   | L23206    | 7497.48   | 8345.005  | SR6       | 1374.62   | 918.624   |
| NM_014257 | 2692.836  | 2371.226  | NM_012192 | 7206.422  | 6307.214  | SR8       | 5241.684  | 14150.001 |
| NM_001140 | 390.684   | 312.382   | NM_006293 | 2773.151  | 3121.899  | SR10      | 18816.174 | 5088.087  |
| NM_004843 | 1847.393  | 1672.921  | NM_007229 | 4975.557  | 4864.378  | CY3Cy5    | 2276.805  | 131.182   |
| AK022845  | 1025.296  | 933.808   | AB011105  | 1979.131  | 2368.688  | NM_005291 | 6842.664  | 4827.328  |
| NM_002985 | 387.156   | 523.18    | NM_002213 | 495.882   | 716.59    | AF253316  | 1923.465  | 2778.905  |
| AB018347  | 4011.645  | 3328.155  | NM_018970 | 496.263   | 575.127   | NM_002923 | 1382.705  | 1391.94   |
| AB033073  | 1567.532  | 1125.848  | NM_004814 | 11338.995 | 11453.671 | NM_006794 | 314.106   | 200.842   |
| NM_005813 | 951.366   | 1409.327  | D86976    | 14416.158 | 16154.197 | NM_018653 | 492.873   | 379.813   |
| AB037718  | 3721.244  | 3622.769  | AF307080  | 754.821   | 1725.716  | NM_005388 | 3169.695  | 1543.192  |
| AL389994  | 694.814   | 1027.839  | NM_004057 | 2815.859  | 3416.564  | NM_007232 | 14342.63  | 18826.193 |
| NM_003909 | 3660.419  | 5243.571  | K03175    | 488.48    | 547.812   | NM_003027 | 889.202   | 2197.62   |
| NM_001277 | 4057.958  | 5324.146  | NM_003265 | 578.428   | 672.184   | NM_002717 | 3878.943  | 6610.191  |
| NM_003659 | 4371.527  | 5013.133  | NM_003015 | 1042.722  | 2607.961  | NM_003025 | 5830.273  | 7496.2    |
| NM_007072 | 1340.129  | 1274.706  | NM_003711 | 1980.016  | 1813.966  | NM_020179 | 4583.839  | 3232.186  |
| NM_012320 | 2591.125  | 2297.335  | NM_000828 | 519.976   | 414.757   | NM_004306 | 18203.846 | 14172.409 |
| NM_018208 | 3771.486  | 3961.096  | NM_004826 | 1887.76   | 1286.574  | NM_006786 | 1148.398  | 1090.678  |
| NM_015929 | 3528.495  | 3713.027  | NM_002072 | 3877.469  | 2707.662  | NM_006205 | 1400.022  | 1351.404  |
| U90653    | 3367.976  | 3602.075  | BE904126  | 40827.832 | 39507.668 | NM_004034 | 1766.558  | 1690.801  |
| NM_018339 | 4359.184  | 4391.979  | AF272380  | 28970.592 | 15623.312 | NM_000130 | 2103.082  | 1827.316  |
| NM_006745 | 30409.768 | 27057.469 | NM_004431 | 9824.181  | 5331.089  | AI492087  | 898.263   | 1019.369  |
| NM_000275 | 654.523   | 800.22    | NM_002012 | 1422.932  | 893.496   | NM_004193 | 1256.953  | 1095.255  |
| AK000037  | 762.49    | 563.786   | NM_002070 | 38528.949 | 21446.168 | NM_002803 | 8493.418  | 8276.917  |
| NM_014760 | 2382.897  | 2113.061  | AF227969  | 2738.618  | 1826.655  | NM_005508 | 3908.315  | 3229.197  |
| NM_018398 | 839.011   | 764.204   | AF116657  | 629.068   | 527.823   | NM_006788 | 508.207   | 613.885   |
| NM_002560 | 7848.188  | 7569.058  | NM_004102 | 644.077   | 303.725   | NM_016568 | 1336.754  | 1427.64   |
| NM_014404 | 1096.35   | 981.324   | NM_003944 | 36830.5   | 30819.711 | AB033102  | 5649.552  | 3693.993  |

|            |           |           |           |           |           |           |           |           |
|------------|-----------|-----------|-----------|-----------|-----------|-----------|-----------|-----------|
| NM_018713  | 456.288   | 519.604   | NM_002893 | 1534.667  | 1526.217  | NM_014774 | 3310.489  | 4856.096  |
| NM_015947  | 3698.921  | 2711.174  | NM_002393 | 10546.173 | 13620.561 | NM_006112 | 16489.018 | 24866.682 |
| NM_002042  | 8103.457  | 6632.19   | NM_002669 | 9206.413  | 10057.659 | NM_001765 | 3419.094  | 1763.009  |
| AB028944   | 619.908   | 524.517   | AB014600  | 3915.218  | 4338.178  | NM_003361 | 773.85    | 626.267   |
| AJ006268   | 777.622   | 749.277   | NM_018312 | 3738.712  | 4018.391  | NM_012095 | 1476.478  | 1031.521  |
| NM_012245  | 9508.825  | 11233.583 | X98259    | 1240.937  | 1091.775  | NM_018684 | 11332.75  | 9359.787  |
| NM_133263  | 888.653   | 1170.382  | U05255    | 677.345   | 1212.019  | NM_017983 | 715.67    | 509.556   |
| NM_000025  | 10907.827 | 8733.258  | X98260    | 4732.528  | 3554.672  | AF116909  | 670.124   | 417.645   |
| D38521     | 1798.555  | 2113.062  | NM_007217 | 10900.753 | 10689.016 | BE906724  | 627.144   | 541.874   |
| NM_000403  | 3687.376  | 3388.949  | NM_014777 | 8779.591  | 14213.164 | NM_002283 | 2261.191  | 2080.236  |
| NM_018127  | 11583.305 | 11936.295 | NM_001102 | 5311.548  | 5984.016  | AJ276095  | 7073.317  | 7259.38   |
| AB020677   | 2590.592  | 2041.141  | NM_003803 | 1603.425  | 1410.435  | NM_004815 | 2212.811  | 2469.143  |
| AB033097   | 1186.351  | 1392.045  | NM_002815 | 50164.496 | 33795.383 | NM_007184 | 1619.319  | 1887.845  |
| NM_000135  | 1027.005  | 875.846   | NM_001937 | 6431.443  | 5443.412  | AF231916  | 1223.08   | 994.768   |
| AJ223948   | 3167.661  | 3354.767  | AK024778  | 1168.356  | 612.772   | NM_003501 | 4074.806  | 3396.84   |
| NM_016215  | 789.296   | 762.649   | AK021608  | 2247.702  | 1659.023  | AK022654  | 15595.416 | 12228.229 |
| AK022947   | 1451.864  | 1319.839  | NM_004297 | 1341.796  | 645.812   | BC002905  | 4248.807  | 4029.104  |
| AL050029   | 1733.206  | 1590.25   | NM_006044 | 7885.051  | 6460.456  | NM_018091 | 7714.688  | 6405.231  |
| AL049966   | 417.053   | 369.246   | AK025498  | 3333.083  | 2026.536  | NM_001108 | 5189.922  | 3791.996  |
| NM_005204  | 2028.943  | 1692.538  | NM_001395 | 9351.288  | 10053.432 | NM_016630 | 10249.345 | 6281.884  |
| NM_016203  | 1591.139  | 1250.484  | NM_002065 | 17772.34  | 11307.906 | NM_014291 | 4373.847  | 5505.474  |
| NM_002755  | 1857.091  | 1389.566  | NM_019854 | 467.341   | 213.763   | NM_014631 | 516.762   | 592.814   |
| NM_007271  | 1482.467  | 1175.237  | NM_013335 | 2614.327  | 1703.129  | NM_001085 | 1609.64   | 1063.947  |
| NM_006255  | 4578.314  | 3816.583  | NM_014671 | 5357.488  | 3499.677  | NM_000120 | 1643.488  | 2648.212  |
| BE392143   | 3033.667  | 2483.511  | NM_005655 | 1706.04   | 1028.539  | AF172327  | 26821.883 | 27126.367 |
| NM_018132  | 1593.711  | 2473.668  | NM_006012 | 6196.907  | 3564.661  | NM_001675 | 2081.575  | 1681.707  |
| NM_003061  | 1194.834  | 1560.487  | NM_002151 | 2489.6    | 3549.514  | NM_001675 | 10449.065 | 5478.53   |
| NM_018207  | 1528.365  | 2300.213  | NM_014889 | 2039.931  | 1869.152  | U09384    | 395.419   | 244.51    |
| NM_000345  | 10590.127 | 12982.881 | AF173935  | 1343.586  | 1024.108  | NM_006860 | 4745.248  | 3136.839  |
| NM_001862  | 43903.094 | 51391.875 | AK025322  | 10170.69  | 7071.326  | NM_004794 | 9383.593  | 9964.799  |
| NM_006531  | 1500.13   | 1810.683  | NM_017887 | 5992.774  | 4414.546  | NM_004283 | 998.012   | 1216.941  |
| AB029021   | 7557.207  | 7795.745  | NM_000525 | 1873.121  | 1459.355  | AK026308  | 1193.57   | 1718.799  |
| NM_002101  | 25654.807 | 24751.063 | AF007152  | 1574.017  | 1224.753  | NM_013337 | 1476.633  | 1645.308  |
| NM_005423  | 365.72    | 419.562   | NM_005310 | 1672.217  | 705.956   | NM_006895 | 6055.28   | 6596.447  |
| Z36789     | 1828.519  | 1985.772  | NM_014423 | 5896.376  | 4686.603  | NM_012200 | 1913.962  | 2569.912  |
| J02874     | 850.153   | 863.626   | NM_018083 | 1302.96   | 1598.816  | NM_001724 | 1893.545  | 1940.471  |
| BF310427   | 1166.493  | 995.213   | AL110188  | 9071.959  | 8480.082  | NM_000150 | 1713.938  | 1572.276  |
| N94424     | 339.171   | 288.125   | D70834    | 28387.492 | 24792.607 | AB023152  | 723.243   | 504.276   |
| AA045192   | 752.211   | 651.113   | NM_000970 | 58724.93  | 61377.375 | NM_006212 | 2254.548  | 1773.629  |
| AI521645   | 223.55    | 136.557   | NM_033285 | 498.674   | 714.188   | AK022872  | 1957.86   | 1504.113  |
| H45617     | 401.109   | 399.335   | AK000102  | 1533.452  | 1830.189  | AK024272  | 5018.477  | 4076.676  |
| M92642     | 608.059   | 660.135   | AB040916  | 2654.808  | 3422.811  | NM_016381 | 1409.867  | 1336.768  |
| AA464532   | 305.788   | 268.21    | NM_005587 | 2315.685  | 2128.755  | AL591715  | 308.419   | 558.721   |
| H-U 44385  | 10835.128 | 8828.089  | AF038362  | 2434.292  | 2144.551  | NM_018042 | 1530.922  | 1421.776  |
| ID 1654970 | 5140.69   | 5067.051  | NM_005195 | 13573.862 | 10111.927 | BE741525  | 767.101   | 880.149   |
| ID 2531132 | 5379.97   | 4718.319  | NM_005481 | 1344.106  | 634.192   | BF030555  | 8678.108  | 3719.422  |
| AA485665   | 313.238   | 156.265   | NM_004715 | 4075.876  | 1856.073  | NM_012433 | 8491.111  | 4066.733  |
| BF125928   | 13171.144 | 10311.811 | L40392    | 1503.33   | 723.08    | NM_002575 | 1704.543  | 1380.571  |
| BG571026   | 1142.186  | 974.558   | NM_003800 | 878.781   | 860.322   | NM_003582 | 2544.46   | 1842.568  |
| AA489017   | 4450.09   | 3071.602  | NM_020365 | 3405.763  | 2437.518  | AF057354  | 467.675   | 292.908   |
| AK022845   | 1076.201  | 1582.35   | AF086497  | 1309.274  | 1393.722  | AF169351  | 4645.675  | 3866.1    |
| NM_003004  | 648.187   | 1435.196  | NM_020141 | 8395.609  | 9433.026  | M14200    | 53117.535 | 50030.828 |
| S77835     | 626.901   | 1988.55   | NM_006482 | 1357.966  | 1260.302  | NM_000532 | 18507.189 | 34963.086 |

|           |           |           |           |           |           |           |           |           |
|-----------|-----------|-----------|-----------|-----------|-----------|-----------|-----------|-----------|
| NM_002985 | 598.675   | 1081.825  | NM_003779 | 567.132   | 488.035   | NM_016341 | 842.857   | 1194.327  |
| AB018347  | 4719.629  | 6442.149  | NM_003635 | 1889.5    | 1789.013  | NM_004034 | 2300.112  | 3611.209  |
| AB033073  | 2184.25   | 2809.14   | NM_000662 | 2935.825  | 2891.83   | NM_00013C | 2303.839  | 4216.178  |
| NM_003284 | 1295.067  | 1226.748  | NM_000292 | 2139.851  | 2220.417  | AF193756  | 1328.314  | 1470.515  |
| NM_018152 | 488.835   | 561.48    | NM_003689 | 52293.668 | 46845.098 | AI492087  | 1626.538  | 1393.252  |
| NM_000319 | 2884.57   | 3099.836  | NM_016173 | 1295.483  | 915.09    | R72122    | 1546.604  | 1531.381  |
| NM_003257 | 362.588   | 435.346   | NM_002875 | 7696.484  | 6444.103  | Z35309    | 634.339   | 475.748   |
| NM_012461 | 3612.326  | 3531.646  | NM_004427 | 6875.728  | 4634.391  | AA700005  | 399.43    | 452.723   |
| AK001379  | 1227.073  | 1156.154  | U90549    | 6176.879  | 3624.935  | AA292025  | 583.599   | 572.401   |
| NM_01745C | 1233.892  | 1327.957  | NM_01324C | 6943.779  | 3212.864  | AA437226  | 1095.601  | 1052.262  |
| NM_002023 | 875.552   | 870.882   | NM_015874 | 22008.957 | 14182.508 | D10353/NM | 1767.595  | 1306.007  |
| NM_002839 | 816.014   | 698.862   | AF312393  | 31734.627 | 39849.734 | M15042    | 2130.698  | 1552.441  |
| AF190500  | 347.671   | 460.489   | AF272898  | 3941.885  | 2727.846  | AK056843  | 547.272   | 417.948   |
| NM_001616 | 443.838   | 472.448   | AB037817  | 1096.476  | 516.857   | U49928    | 4529.921  | 2808.412  |
| NM_005904 | 324.234   | 368.991   | AB032951  | 9535.627  | 8146.564  | AK096645  | 14170.301 | 10440.426 |
| NM_005273 | 10811.505 | 9962.082  | NM_005149 | 11349.492 | 7118.185  | AK092859  | 521.618   | 433.676   |
| NM_000524 | 444.681   | 548.707   | AK024073  | 654.035   | 767.291   | NM_019884 | 2975.027  | 2586.695  |
| NM_006576 | 1013.707  | 1135.63   | AK022223  | 510.3     | 408.428   | NM_018291 | 3792.382  | 4360.472  |
| NM_018645 | 702.432   | 674.594   | NM_005887 | 3771.42   | 4128.143  | NM_00553C | 4049.023  | 4837.268  |
| AB035266  | 2535.27   | 1816.326  | AK024921  | 949.456   | 1400.515  | AF116909  | 1236.5    | 1820.726  |
| NM_003744 | 2377.618  | 1713.219  | AK026103  | 2366.115  | 2044.706  | BE906724  | 1513.031  | 3206.602  |
| NM_006378 | 12435.442 | 8648.528  | NM_016353 | 22208.924 | 21504.084 | NM_002283 | 2102.384  | 2910.305  |
| NM_014404 | 1739.267  | 2147.967  | AK022567  | 1611.337  | 1168.577  | AJ276095  | 7992.279  | 7583.597  |
| NM_018713 | 664.474   | 1045.71   | AK023450  | 1075.097  | 608.293   | NM_004819 | 2404.704  | 1820.779  |
| NM_015947 | 4088.137  | 6579.471  | AL080280  | 3354.78   | 2770.594  | NM_007184 | 1711.605  | 1275.835  |
| NM_002042 | 16663.578 | 21615.813 | AB028947  | 1853.012  | 2076.998  | NM_005291 | 8364.067  | 6922.346  |
| AB028944  | 646.393   | 899.18    | AF035314  | 1408.129  | 1399.559  | NM_002923 | 1455.984  | 1873.184  |
| AJ006268  | 698.473   | 820.447   | NM_018036 | 2196.005  | 2053.291  | NM_005388 | 3082.672  | 3720.563  |
| M74089    | 3693.945  | 4543.274  | AF052087  | 1385.861  | 1186.967  | NM_007232 | 10050.203 | 8676.114  |
| AF190864  | 5364.219  | 5257.382  | AF007143  | 1978.056  | 1834.978  | NM_003027 | 540.919   | 582.745   |
| NM_002779 | 2560.052  | 2927.117  | AF147417  | 888.928   | 880.158   | NM_002717 | 3629.692  | 2570.676  |
| L40397    | 16390.053 | 17742.414 | AK023656  | 957.573   | 875.549   | NM_014486 | 278.913   | 479.013   |
| NM_020198 | 7443.307  | 6577.813  | AF086511  | 4239.406  | 2748.988  | NM_003025 | 5411.231  | 4377.102  |
| AA098879  | 586.804   | 496.99    | AK022989  | 3903.505  | 3040.947  | NM_020179 | 5922.931  | 5957.524  |
| AF070525  | 7252.112  | 7324.768  | AK001604  | 4908.02   | 3758.878  | NM_004306 | 21931.107 | 21913.637 |
| NM_001177 | 5223.71   | 5100.226  | AK021619  | 669.801   | 538.595   | NM_006786 | 919.434   | 1022.092  |
| NM_014447 | 1343.202  | 1330.843  | AK025872  | 506.71    | 736.72    | NM_006205 | 1670.383  | 2276.274  |
| NM_002356 | 241.998   | 295.717   | AF131762  | 19260.523 | 21864.898 | NM_00686C | 4641.674  | 5089.543  |
| NM_006691 | 945.397   | 845.073   | AY007089  | 1575.774  | 1767.062  | NM_004794 | 9764.634  | 13452.405 |
| NM_001505 | 625.584   | 605.507   | AK021816  | 9689.38   | 10136.992 | NM_004283 | 987.481   | 1015.875  |
| NM_00371C | 2395.193  | 2119.382  | D43770    | 7894.116  | 6341.382  | NM_004163 | 4651.319  | 4922.77   |
| Z83805    | 594.349   | 399.613   | AK021519  | 1701.076  | 2119.446  | AK026308  | 1425.351  | 1215.411  |
| NM_004666 | 889.106   | 853.429   | NM_014254 | 3978.528  | 3125.526  | NM_013337 | 1440.672  | 1379.028  |
| NM_003614 | 685.299   | 578.273   | AF086036  | 706.425   | 636.954   | NM_004193 | 1234.212  | 1206.526  |
| NM_014257 | 2607.516  | 1788.913  | AF086010  | 1134.116  | 966.656   | NM_002803 | 8902.022  | 10711.383 |
| NM_001140 | 250.59    | 414.928   | U09197    | 2910.898  | 3241.807  | NM_005508 | 3413.685  | 3350.033  |
| NM_004843 | 1902.603  | 1403.728  | Z36800    | 527.159   | 354.242   | NM_006788 | 738.896   | 994.658   |
| NM_005204 | 2400.063  | 3525.25   | U15553    | 5716.969  | 4443.497  | NM_016568 | 593.767   | 373.794   |
| NM_016203 | 1771.427  | 2096.713  | Z36829    | 1100.865  | 548.89    | AB033102  | 5478.16   | 4677.351  |
| NM_002759 | 2403.2    | 3047.478  | AK024734  | 4763.953  | 3420.627  | NM_014774 | 3021.639  | 2249.331  |
| NM_007271 | 1873.649  | 3036.319  | NM_017741 | 1919.436  | 1760.742  | NM_014143 | 7015.833  | 6577.346  |
| NM_006255 | 4707.878  | 7200.923  | AK000144  | 1299.186  | 1376.663  | M55646    | 8370.424  | 7339.223  |
| BE392143  | 3665.988  | 4883.903  | AK022275  | 442.329   | 517.218   | NM_006112 | 14936.487 | 13593.841 |

|           |           |           |           |           |           |           |           |           |
|-----------|-----------|-----------|-----------|-----------|-----------|-----------|-----------|-----------|
| NM_005813 | 1256.078  | 1666.169  | AK000942  | 766.274   | 790.798   | M12807    | 514.737   | 507.384   |
| AB037718  | 4420.82   | 4352.506  | AL117533  | 3187.836  | 4682.372  | NM_001765 | 3900.078  | 2972.509  |
| AL389994  | 1032.441  | 1233.892  | AK026036  | 1298.516  | 908.676   | NM_003361 | 938.161   | 835.937   |
| NM_003909 | 3717.756  | 4575.933  | AK023422  | 1973.511  | 2125.214  | NM_012095 | 2401.902  | 2510.38   |
| NM_001277 | 4657.351  | 4869.418  | AK022796  | 2397.208  | 2796.523  | NM_018684 | 12023.709 | 12884.298 |
| NM_003659 | 4774.261  | 4523.433  | AK095193  | 1757.504  | 2342.276  | NM_017983 | 606.844   | 711.477   |
| NM_007072 | 1691.815  | 1833.825  | AK025081  | 1879.286  | 2154.561  | AF057354  | 459.425   | 518.043   |
| NM_012320 | 2003.411  | 2032.594  | AL122088  | 1662.957  | 1396.511  | AF169351  | 4187.723  | 3795.522  |
| NM_018208 | 3032.02   | 2971.009  | AF116633  | 289.149   | 558.281   | M14200    | 48779.484 | 44790.82  |
| NM_015929 | 3591.729  | 3841.876  | AF119912  | 923.993   | 828.248   | NM_000282 | 3328.201  | 3207.284  |
| U90653    | 3909.064  | 3697.118  | AL137518  | 1270.146  | 1045.39   | NM_000532 | 15291.664 | 15778.564 |
| NM_000196 | 446.049   | 491.15    | AK022556  | 514.485   | 571.489   | NM_016341 | 785.279   | 630.385   |
| NM_018339 | 5393.825  | 5557.149  | AK023437  | 2874.628  | 2864.069  | AF231916  | 1308.119  | 1186.413  |
| NM_006745 | 39291.734 | 36931.277 | AK024147  | 610.134   | 750.974   | NM_003501 | 3165.677  | 3665.758  |
| NM_000275 | 648.445   | 629.879   | AK023898  | 6221.228  | 5948.834  | AK022654  | 12176.717 | 12363.857 |
| AK000037  | 640.507   | 427.161   | NM_019040 | 8708.111  | 6102.891  | BC002905  | 3976.814  | 3616.079  |
| NM_014760 | 2463.011  | 2056.236  | NM_005978 | 2362.205  | 1219.128  | NM_018091 | 7270.034  | 7212.642  |
| NM_018398 | 531.883   | 343.632   | Y16711    | 982.766   | 914.849   | NM_001108 | 4593.43   | 4522.64   |
| NM_002560 | 7845.945  | 6136.305  | AJ272179  | 2271.222  | 2266.623  | NM_016630 | 9028.926  | 8378.182  |
| NM_000787 | 630.634   | 975.24    | AJ007015  | 2750.712  | 2866.815  | NM_014291 | 3971.785  | 4376.644  |
| U57962    | 3121.241  | 4304.169  | AL049317  | 1722.007  | 1607.726  | NM_001089 | 1339.057  | 879.324   |
| NM_016176 | 6659.647  | 10718.782 | AL050090  | 1842.897  | 1507.772  | NM_000120 | 1567.609  | 1467.58   |
| NM_005574 | 545.566   | 1220.1    | AF086309  | 1459.954  | 1476.446  | AF172327  | 25379.805 | 22558.229 |
| NM_017895 | 4627.702  | 5753.573  | AF238870  | 1397.519  | 1805.076  | NM_001676 | 2360.044  | 1578.833  |
| NM_004610 | 1821.372  | 2787.685  | AK026279  | 5705.143  | 6135.387  | NM_001679 | 11683.437 | 11039.791 |
| NM_001612 | 1687.817  | 1883.149  | AF130094  | 13218.396 | 14892.314 | NM_004046 | 60982.359 | 63940.988 |
| AK027002  | 2224.315  | 2197.652  | AK026673  | 3398      | 3781.933  | NM_004983 | 549.592   | 488.37    |
| AB025254  | 2120.212  | 2421.444  | NM_005452 | 4345.141  | 5436.849  | U09384    | 406.587   | 370.355   |
| NM_004081 | 1152.2    | 1501.006  | AF170935  | 15558.28  | 17341.066 | NM_019884 | 2574.828  | 2545.435  |
| NM_000025 | 13350.769 | 11861.477 | AK025218  | 1217.931  | 1472.387  | NM_018291 | 3139.745  | 2771.3    |
| D38521    | 1987.38   | 2128.586  | AJ227899  | 2371.981  | 2365.909  | NM_005530 | 3934.281  | 3621.523  |
| NM_000403 | 4126.659  | 4034.551  | AL359607  | 1830.086  | 1659.047  | NM_006899 | 6085.687  | 5562.945  |
| NM_018127 | 10552.564 | 11477.813 | AK023408  | 6511.823  | 7260.35   | NM_012200 | 1699.016  | 1875.328  |
| AB020677  | 2469.475  | 2229.312  | U84509    | 4042.356  | 2523.97   | NM_001724 | 1972.491  | 1716.217  |
| AB033097  | 1520.073  | 1482.791  | AK002036  | 3872.266  | 2884.431  | NM_000150 | 1852.66   | 1354.197  |
| NM_000135 | 1247.02   | 1158.645  | U84512    | 669.391   | 807.137   | AB023152  | 565.643   | 753.462   |
| AJ223948  | 3194.834  | 3100.992  | AK025775  | 4581.479  | 3102.813  | NM_006212 | 2203.776  | 2376.227  |
| NM_016218 | 702.581   | 514.135   | AB046791  | 1727.802  | 1980.698  | AK022872  | 2283.627  | 2042.342  |
| AK022947  | 1603.997  | 1393.486  | AF043469  | 2280.859  | 2796.454  | AK024272  | 4466.738  | 4205.178  |
| AL050029  | 1993.244  | 1790.164  | AL109671  | 1234.4    | 1631.561  | NM_016381 | 1211.286  | 1227.493  |
| AL049966  | 372.449   | 490.979   | NM_012375 | 580.88    | 717.967   | NM_018042 | 1479.059  | 1340.533  |
| NM_004063 | 479.437   | 767.831   | AK022008  | 1559.521  | 1953.56   | BE741525  | 740.924   | 915.861   |
| AB040976  | 6166.671  | 7541.538  | NM_018186 | 3022.192  | 3624.435  | BF030555  | 14395.313 | 11185.484 |
| NM_018641 | 5194.04   | 12594.931 | AJ132194  | 553.536   | 336.058   | NM_012433 | 9929.401  | 7669.637  |
| U49089    | 840.891   | 1405.603  | AL080188  | 4014.607  | 4735.942  | NM_005605 | 2898.228  | 3074.075  |
| NM_002221 | 1892.881  | 2001.489  | T99941    | 3404.466  | 4009.031  | NM_002576 | 1531.57   | 1704.843  |
| NM_002371 | 2020.04   | 2781.987  | AF113678  | 1954.133  | 2094.566  | NM_003582 | 2245.157  | 2300.415  |
| NM_002562 | 442.962   | 606.255   | AL137313  | 52838.668 | 56226.535 | NM_020179 | 5193.124  | 6244.543  |
| AK024502  | 2783.555  | 3544.028  | Z83951    | 809.072   | 528.067   | NM_004306 | 19293.416 | 16529.158 |
| NM_001124 | 1618.154  | 1965.098  | AB002363  | 6230.374  | 8129.939  | NM_006786 | 957.53    | 882.595   |
| NM_004586 | 2380.219  | 2276.722  | NM_005284 | 4499.947  | 5361.597  | NM_006205 | 1194.873  | 1547.205  |
| NM_004844 | 3739.282  | 3979.754  | AF086351  | 3711.211  | 3785.796  | NM_004034 | 1651.638  | 1795.215  |
| NM_013447 | 522.311   | 641.369   | Y16708    | 1507.79   | 1349.838  | NM_000130 | 2356.485  | 1987.123  |

|           |           |           |            |           |           |           |           |           |
|-----------|-----------|-----------|------------|-----------|-----------|-----------|-----------|-----------|
| NM_000051 | 3961.924  | 4014.694  | AL157453   | 4181.838  | 3521.852  | AI492087  | 1127.461  | 1435.576  |
| NM_005709 | 478.197   | 332.721   | NM_019098  | 4879.555  | 4598.657  | R72122    | 1563.37   | 1820.933  |
| NM_004180 | 3201.558  | 3001.648  | AK022212   | 45429.418 | 32481.23  | Z35309    | 541.027   | 554.159   |
| NM_004786 | 27730.756 | 26694.572 | X64974     | 2440.23   | 2858.396  | AA700005  | 344.016   | 303.458   |
| AF302109  | 916.05    | 861.062   | NM_000834  | 4248.748  | 7893.308  | AA292025  | 477.845   | 736.066   |
| AL117485  | 6240.184  | 5396.546  | NM_006485  | 49350.223 | 48491.727 | AA437226  | 1012.27   | 1526.258  |
| NM_003505 | 638.434   | 733.019   | NM_012459  | 2978.672  | 2189.58   | XM_056359 | 373.529   | 445.902   |
| NM_007191 | 1115.605  | 1196.286  | NM_012360  | 541.01    | 422.853   | D10353/NM | 2145.159  | 1753.255  |
| AL109667  | 725.663   | 494.673   | AL137268   | 4315.989  | 4675.811  | M15042    | 2696.593  | 2264.559  |
| NM_000840 | 530.406   | 367.874   | AK001130   | 479.862   | 500.748   | AK056843  | 892.331   | 931.893   |
| AF205437  | 352.06    | 903.664   | AK022398   | 787.534   | 785.072   | U49928    | 4074.108  | 3278.362  |
| AF034102  | 19146.227 | 28568.852 | AK024109   | 2914.078  | 1702.429  | AK096645  | 13721.75  | 12651.481 |
| AJ008142  | 11428.014 | 18823.293 | AF088048   | 1409.594  | 1126.571  | AK092859  | 366.986   | 530.022   |
| AL035289  | 528.537   | 1309.647  | AK001143   | 2477.631  | 1561.398  | M12807    | 439.322   | 400.606   |
| NM_001343 | 2504.557  | 3938.66   | AK001701   | 3276.74   | 2673.174  | NM_001765 | 4214.856  | 3463.251  |
| NM_007275 | 7332.034  | 9670.004  | AB007978   | 630.369   | 578.852   | NM_003361 | 965.155   | 708.326   |
| NM_019025 | 23831.719 | 22781.715 | AF217970   | 1087.033  | 1262.93   | NM_012095 | 1771.616  | 1634.148  |
| NM_018461 | 3364.861  | 3778.873  | AF086297   | 2214.698  | 2045.079  | NM_018684 | 10386.828 | 10276.349 |
| AF235023  | 4946.418  | 6311.398  | AK025455   | 4380.687  | 4455.881  | NM_017983 | 541.243   | 731.508   |
| AF162667  | 1887.017  | 1997.558  | AK026799   | 3586.836  | 2804.343  | AF116909  | 492.866   | 563.775   |
| AB046847  | 3247.802  | 2761.354  | NM_014860  | 944.588   | 1384.324  | BE906724  | 1210.579  | 1193.675  |
| NM_000447 | 1202.18   | 1146.698  | AK022549   | 2058.173  | 1929.647  | NM_002283 | 2272.76   | 2166.719  |
| NM_006354 | 3354.782  | 3702.002  | NM_018157  | 1170.576  | 1000.983  | AJ276095  | 7574.24   | 7820.434  |
| AF303378  | 4495.847  | 3905.674  | Z70714     | 4830.403  | 4589.83   | NM_004815 | 2119.099  | 2251.073  |
| NM_016037 | 8437.759  | 7766.217  | AK021640   | 11488.454 | 13870.912 | NM_007184 | 1552.825  | 1348.027  |
| NM_000043 | 5937.188  | 5944.271  | NM_016565  | 55747.375 | 56637.828 | NM_005291 | 9458      | 8374.711  |
| NM_016140 | 350.874   | 299.818   | CY3Cy5     | 2532.919  | 99.521    | NM_002923 | 1425.866  | 2376.271  |
| NM_000417 | 2247.213  | 2550.562  | BF310427   | 976.032   | 1505.702  | NM_018653 | 577.089   | 795.906   |
| NM_020356 | 440.155   | 181.234   | N94424     | 688.299   | 1313.616  | NM_005388 | 3541.348  | 3434.414  |
| NM_018235 | 23866.432 | 29915.215 | AA045192   | 902.598   | 990.421   | NM_007232 | 12531.923 | 10409.809 |
| NM_002424 | 236.168   | 262.338   | H45617     | 262.079   | 301.59    | NM_003027 | 580.287   | 714.342   |
| NM_012104 | 10735.131 | 15498.661 | M92642     | 1016.407  | 615.23    | NM_002717 | 3404.971  | 4152.346  |
| NM_006144 | 20079.467 | 34462.672 | AA464532   | 317.541   | 272.483   | NM_003025 | 5328.253  | 4832.563  |
| AL136549  | 9355.833  | 12435.52  | H-U 44385  | 11275.648 | 7012.263  | NM_001675 | 10682.493 | 8753.311  |
| NM_012168 | 1251.329  | 1508.679  | ID 1654970 | 4657.131  | 2579.444  | NM_004046 | 59490.129 | 66019.977 |
| NM_001461 | 297.773   | 281.038   | ID 2531132 | 5941.92   | 4146.905  | NM_004983 | 445.779   | 476.622   |
| AF061556  | 959.113   | 1385.026  | ID 4365538 | 447.861   | 1066.096  | U09384    | 899.998   | 432.537   |
| AL162049  | 937.437   | 1019.899  | AA485665   | 345.407   | 514.07    | NM_006860 | 4845.105  | 3492.262  |
| AF036144  | 227.915   | 253.625   | BF125928   | 11408.267 | 8903.505  | NM_004794 | 8197.694  | 9368.03   |
| NM_005032 | 813.53    | 1043.017  | BG571026   | 1390.472  | 881.263   | NM_004283 | 792.446   | 780.643   |
| NM_004160 | 4463.99   | 4640.278  | AA489017   | 3247.952  | 1933.867  | NM_004163 | 4880.708  | 5488.391  |
| AL109677  | 1030.852  | 889.015   | NM_012245  | 15234.659 | 12119.854 | AK026308  | 1127.049  | 1156.376  |
| NM_003941 | 35155.012 | 27522.963 | NM_133263  | 1432.868  | 1471.977  | NM_013337 | 1288.914  | 1641.625  |
| AF177909  | 974.982   | 994.092   | SR2        | 51065.438 | 47604.492 | NM_004193 | 1247.852  | 1350.734  |
| NM_002664 | 1247.998  | 1123.044  | SR4        | 11629.466 | 13292.401 | NM_002803 | 8761.476  | 10852.68  |
| AB018271  | 913.018   | 699.432   | SR6        | 2050.916  | 2375.037  | NM_005508 | 3655.92   | 4987.27   |
| AL137665  | 2507.798  | 1871.964  | SR8        | 6989.639  | 25382.219 | NM_018485 | 567.298   | 933.904   |
| NM_016434 | 928.324   | 814.977   | SR10       | 25507.227 | 10399.986 | NM_006788 | 1100.888  | 1344.674  |
| U36561    | 47593.926 | 70680.672 | CY3Cy5     | 3972.385  | 141.913   | AK025039  | 683.452   | 973.547   |
| NM_005634 | 1432.006  | 2324.908  | NM_017450  | 1650.155  | 2497.868  | NM_016568 | 625.136   | 784.142   |
| NM_017757 | 2270.564  | 3071.13   | NM_002023  | 902.29    | 851.094   | AB033102  | 6258.174  | 5748.036  |
| NM_002146 | 16931.979 | 23270.221 | NM_002839  | 916.949   | 919.437   | NM_014774 | 3568.268  | 3239.147  |
| AB007892  | 1279.108  | 3023.688  | AF190500   | 729.387   | 663.261   | NM_014143 | 8028.189  | 9935.692  |



|           |           |           |           |           |           |           |           |           |
|-----------|-----------|-----------|-----------|-----------|-----------|-----------|-----------|-----------|
| AB037748  | 488.931   | 918.754   | NM_001616 | 537.798   | 474.054   | M55646    | 9387.346  | 12378.045 |
| AB002306  | 1549.019  | 2899.803  | NM_005904 | 321.913   | 296.505   | NM_006112 | 14068.889 | 16763.303 |
| NM_00130C | 3013.198  | 4685.531  | NM_005273 | 14466.279 | 13051.726 | BE741525  | 1447.711  | 920.728   |
| NM_012472 | 854.042   | 775.403   | NM_000524 | 499.261   | 741.113   | BF030555  | 11609.004 | 8256.699  |
| NM_018187 | 6060.597  | 10247.802 | NM_006576 | 1858.492  | 1620.655  | NM_012433 | 9479.445  | 6591.516  |
| NM_003016 | 20859.527 | 20442.729 | NM_018645 | 434.863   | 428.737   | NM_005605 | 3011.347  | 3062.057  |
| NM_005463 | 12913.698 | 11229.045 | AB035266  | 5148.299  | 4011.392  | NM_002576 | 1461.456  | 1900.525  |
| NM_001325 | 1873.745  | 1942.903  | NM_003744 | 2086.316  | 1718.674  | NM_003582 | 2467.471  | 2401.5    |
| NM_018282 | 11136.34  | 9459.578  | NM_006378 | 14086.854 | 10931.541 | AF057354  | 733.015   | 423.272   |
| BC019932  | 1667.112  | 1784.679  | NM_018132 | 2236.015  | 1782.453  | AF169351  | 4378.111  | 4413.899  |
| AF114818  | 2072.178  | 2121.236  | NM_003061 | 1332.075  | 1238.737  | NM_000282 | 3239.877  | 3334.679  |
| AK025106  | 1719.666  | 1710.4    | NM_018207 | 2075.313  | 1460.661  | NM_000532 | 15303.48  | 17447.389 |
| NM_020144 | 1901.801  | 1833.771  | NM_000345 | 21228.555 | 20642.449 | NM_016341 | 780.559   | 1087.173  |
| NM_003908 | 46521.574 | 41932.035 | NM_006531 | 3511.915  | 4260.126  | AF231916  | 1445.957  | 1620.623  |
| BE893142  | 1309.709  | 1448.229  | AB029021  | 14881.785 | 18143.885 | NM_003501 | 3776.586  | 4633.659  |
| NM_003103 | 4783.252  | 3663.052  | NM_005423 | 700.978   | 668.339   | AK022654  | 18499.02  | 19800.248 |
| NM_01534C | 4010.101  | 3057.504  | Z36789    | 3056.78   | 3113.466  | BC002905  | 4080.703  | 4770.615  |
| NM_006451 | 3055.432  | 2084.554  | J02874    | 2175.969  | 3718.331  | NM_018091 | 7332.868  | 10874.209 |
| NM_002094 | 1621.773  | 1344.422  | AF070525  | 8338.076  | 10058.268 | NM_001108 | 4989.299  | 5184.079  |
| NM_002937 | 1164.076  | 1112.554  | NM_001177 | 6183.059  | 11100.304 | NM_01663C | 9516.73   | 8542.377  |
| NM_003191 | 4086.579  | 2882.965  | NM_014447 | 699.225   | 296.201   | NM_014291 | 4603.162  | 4491.444  |
| AL137476  | 6237.971  | 8302.208  | NM_006691 | 1043.693  | 1485.729  | NM_014631 | 384.709   | 307.829   |
| AF052174  | 2199.67   | 2946.03   | NM_001505 | 652.111   | 961.028   | NM_001085 | 1647.313  | 1592.24   |
| AF070590  | 756.274   | 1219.203  | NM_00371C | 2919.754  | 2768.194  | NM_00012C | 1565.621  | 1860.715  |
| NM_000761 | 30924.709 | 32603.1   | Z83805    | 844.226   | 1013.818  | AF172327  | 20325.646 | 23227.34  |
| NM_020142 | 1760.181  | 2272.458  | NM_004666 | 1005.452  | 1063.305  | NM_001676 | 2578.977  | 2207.004  |
| NM_000774 | 3985.989  | 4706.48   | NM_003614 | 1406.338  | 1100.843  | AB018338  | 9916.793  | 3883.588  |
| NM_017781 | 22074.387 | 19042.391 | NM_014257 | 3864.653  | 3630.698  | D80010    | 1936.857  | 1458.506  |
| NM_006004 | 49181.668 | 52195.668 | NM_001140 | 421.547   | 453.493   | NM_004923 | 828.783   | 704.979   |
| NM_004894 | 23195.006 | 19139.07  | NM_004843 | 1705.263  | 1535.466  | NM_003971 | 977.271   | 784.693   |
| AB028960  | 697.03    | 959.263   | AK022845  | 1340.68   | 2017.458  | AK026973  | 653.946   | 398.521   |
| NM_005648 | 38800.879 | 35360.434 | NM_003004 | 338.915   | 612.125   | NM_005822 | 519.277   | 450.694   |
| NM_006943 | 5846.425  | 4679.482  | S77835    | 465.176   | 476.368   | U81002    | 4091.967  | 4316.609  |
| NM_006741 | 5287.749  | 4208.319  | NM_002985 | 689.79    | 552.081   | NM_016295 | 7936.171  | 9911.298  |
| NM_014166 | 7228.898  | 6680.788  | AB018347  | 10097.611 | 10459.843 | L38517    | 2073.014  | 2107.645  |
| AL117606  | 4394.856  | 3833.871  | NM_003284 | 2256.735  | 2901.785  | NM_018291 | 3743.932  | 4055.515  |
| NM_01233C | 1557.802  | 1516.39   | NM_018152 | 650.709   | 897.834   | NM_00553C | 3804.512  | 3945.92   |
| AF294278  | 2154.253  | 1376.089  | NM_003257 | 307.645   | 796.312   | NM_006895 | 5868.814  | 6653.321  |
| NM_018211 | 2863.48   | 2267.765  | NM_012461 | 4932.142  | 5460.032  | NM_01220C | 1979.235  | 2296.928  |
| NM_01452C | 2416.896  | 1639.033  | AK001379  | 1378.683  | 2376.999  | NM_001724 | 1756.133  | 2080.895  |
| NM_002616 | 2947.43   | 2301.701  | NM_007072 | 1733.576  | 3116.69   | NM_00015C | 2869.391  | 2721.358  |
| AK025712  | 7750.935  | 6021.604  | NM_01232C | 2275.527  | 3292.801  | AB023152  | 812.355   | 981.452   |
| AF052497  | 351.511   | 633.884   | NM_018208 | 2739.169  | 2333.701  | NM_006212 | 2797.862  | 2891.372  |
| AK026375  | 3346.252  | 4039.407  | NM_015929 | 4113.978  | 4359.671  | AK022872  | 2320.565  | 2222.846  |
| NM_01471C | 686.247   | 1072.605  | U90653    | 3642.141  | 3630.112  | AK024272  | 4630.701  | 4429.574  |
| AF131745  | 2392.187  | 3012.399  | NM_000196 | 505.429   | 609.779   | NM_016381 | 1291.257  | 1136.58   |
| AK022109  | 2213.688  | 2637.465  | NM_018339 | 6164.389  | 6334.188  | NM_018042 | 2059.717  | 2191.702  |
| AK022103  | 774.164   | 826.678   | NM_006745 | 40820.492 | 41025.68  | NM_014944 | 4126.99   | 2165.377  |
| NM_00703C | 458.137   | 557.454   | NM_000275 | 747.497   | 814.714   | AF200348  | 2843.625  | 2576.32   |
| AK021527  | 416.892   | 336.703   | AK000037  | 962.173   | 579.182   | NM_00265C | 1210.642  | 1503.312  |
| AF143882  | 637.009   | 766.719   | NM_01476C | 2295.109  | 2508.044  | NM_00326C | 8094.263  | 5496.207  |
| AF086176  | 474.481   | 536.692   | NM_018398 | 1477.068  | 1480.248  | AK024071  | 989.904   | 1513.577  |
| AF086232  | 424.36    | 440.693   | NM_00256C | 21373.529 | 19760.242 | AF056490  | 1335.123  | 1823.809  |

|           |           |           |            |           |           |           |           |           |
|-----------|-----------|-----------|------------|-----------|-----------|-----------|-----------|-----------|
| NM_017742 | 972.245   | 855.949   | NM_014404  | 2519.397  | 4423.923  | NM_00553C | 890.719   | 917.962   |
| NM_00510E | 1780.091  | 1891.08   | NM_018713  | 842.505   | 2100.146  | NM_005541 | 1390.481  | 2529.845  |
| AK022292  | 4296.986  | 3817.466  | NM_015947  | 5252.513  | 7209.613  | AB046863  | 6207.579  | 7215.432  |
| AB051436  | 2424.941  | 2063.787  | NM_002042  | 36808.609 | 35531.492 | M62403    | 5263.452  | 4415.945  |
| AK026482  | 11202.363 | 8372.497  | AB028944   | 719.877   | 549.533   | NM_017883 | 1860.899  | 1869.725  |
| AL137473  | 2740.368  | 2299.371  | AJ006268   | 941.636   | 1056.894  | AK025131  | 2280.743  | 1729.5    |
| AJ001873  | 3149.945  | 2458.104  | M74089     | 4208.916  | 5766.984  | NM_000754 | 10713.163 | 10211.237 |
| AK022604  | 1651.81   | 2253.688  | AF190864   | 5360.686  | 7233.883  | NM_01461C | 518.502   | 595.399   |
| U66048    | 1154.163  | 1213.925  | NM_002779  | 3573.904  | 4756.005  | NM_00562C | 4389.624  | 4817.327  |
| AK024035  | 12148.501 | 12958.878 | NM_02019E  | 14117.571 | 19580.584 | J04621    | 638.124   | 933.066   |
| AL080233  | 2042.134  | 2154.804  | AA098879   | 674.833   | 864.574   | NM_002634 | 14587.122 | 6499.371  |
| AL117591  | 820.479   | 463.38    | NM_000025  | 14730.222 | 10500.446 | NM_01774C | 2271.625  | 1703.602  |
| AL050132  | 385.579   | 408.146   | D38521     | 2124.188  | 2046.899  | NM_001972 | 485.324   | 439.764   |
| AL117663  | 1055.109  | 1055.512  | NM_000403  | 5227.088  | 3596.372  | NM_00144E | 823.036   | 637.941   |
| NM_014293 | 1910.782  | 1634.928  | NM_018127  | 12487.42  | 12044.455 | NM_00200C | 14854.763 | 18383.268 |
| AK024432  | 1918.352  | 2224.518  | AB020677   | 4702.519  | 4337.659  | NM_007111 | 5945.15   | 7649.646  |
| AL137513  | 709.173   | 572.254   | AB033097   | 2573.624  | 2958.197  | NM_00204E | 450.059   | 704.852   |
| AF088001  | 517.562   | 605.038   | NM_000135  | 1213.676  | 1139.342  | NM_004702 | 1031.607  | 832.859   |
| NM_018067 | 5149.022  | 4974.357  | AJ223948   | 4486.764  | 3801.95   | NM_00710C | 1550.011  | 1999.736  |
| NM_01895C | 13812.455 | 11247.967 | NM_01621E  | 787.191   | 357.379   | AK023404  | 1482.579  | 1006.679  |
| NM_014787 | 1617.747  | 1791.773  | AK022947   | 1338.513  | 1137.665  | NM_00178C | 1755.875  | 1920.349  |
| AL122109  | 800.041   | 425.177   | AL050029   | 2028.969  | 1600.141  | NM_00265E | 961.961   | 1088.19   |
| AF074988  | 1353.068  | 1062.176  | AL049966   | 586.603   | 673.897   | AB028955  | 5206.532  | 5347.125  |
| AK024946  | 912.249   | 579.79    | NM_005204  | 2851.668  | 2640.712  | U66879    | 6604.678  | 6722.885  |
| AK001432  | 1355.259  | 2106.353  | NM_016203  | 1672.645  | 3669.433  | NM_016022 | 4311.686  | 3781.23   |
| AL133568  | 3800.549  | 5114.366  | NM_002759  | 3322.352  | 5130.07   | NM_004874 | 1829.165  | 1735.384  |
| AF009265  | 1542.743  | 2325.655  | NM_007271  | 1527.093  | 2476.502  | NM_014204 | 881.97    | 674.579   |
| AF009309  | 2838.978  | 3411.534  | NM_006255  | 4852.654  | 5287.39   | S70385    | 5552.816  | 5180.593  |
| AF054830  | 2976.875  | 3558.598  | BE392143   | 4126.399  | 3373.596  | M34671    | 6102.976  | 7407.139  |
| NM_00236C | 2971.994  | 2931.04   | NM_005813  | 1382.121  | 1705.815  | AL050199  | 520.548   | 262.698   |
| AF009274  | 461       | 499.878   | AB037718   | 4868.525  | 5750.79   | AF176706  | 1285.947  | 1397.511  |
| AF009322  | 1377.248  | 1559.873  | AL389994   | 1003.855  | 1210.052  | NM_014484 | 340.876   | 585.345   |
| AF056425  | 2349.801  | 2119.221  | NM_001277  | 7760.209  | 11530.5   | NM_00108C | 1525.729  | 2236.89   |
| AF090893  | 909.093   | 993.001   | NM_003659  | 6781.183  | 8761.705  | NM_01467C | 1513.311  | 1845.314  |
| NM_018033 | 3528.989  | 3857.028  | AB029021   | 12153.135 | 11626.501 | NM_01904E | 4374.155  | 4281      |
| AK001945  | 652.778   | 760.8     | NM_002101  | 27868.6   | 11865.148 | NM_00104C | 1564.126  | 1680.9    |
| AK001147  | 304.192   | 414.607   | NM_005423  | 368.666   | 339.655   | NM_01984C | 1528.771  | 1343.148  |
| AK021630  | 599.208   | 495.686   | Z36789     | 2286.576  | 1391.878  | AB032996  | 20353.477 | 19717.145 |
| AK021831  | 804.521   | 1188.239  | J02874     | 2047.093  | 1396.953  | AB040881  | 3091.934  | 3613.986  |
| AK025650  | 1947.37   | 1893.625  | BF310427   | 1453.668  | 1472.799  | AY007121  | 1146.814  | 1321.194  |
| AK026401  | 1060.916  | 789.744   | N94424     | 768.639   | 594.57    | NM_003372 | 10107.636 | 10026.427 |
| AK026773  | 953.677   | 849.47    | AA045192   | 1084.312  | 1351.934  | NM_007317 | 4034.058  | 4219.041  |
| AK026452  | 319.449   | 183.429   | H45617     | 396.884   | 316.632   | AK021466  | 1307.669  | 1044.881  |
| U73530    | 377.451   | 638.351   | M92642     | 1389.501  | 928.963   | NM_00495C | 583.62    | 390.04    |
| AF086158  | 4481.521  | 6003.235  | AA464532   | 283.006   | 268.872   | AK026022  | 18004.912 | 13337.313 |
| AF086050  | 4265.125  | 5707.417  | H-U 44385  | 13143.414 | 8979.188  | NM_00319C | 1162.253  | 952.21    |
| AF147375  | 1670.669  | 2019.706  | ID 1654970 | 6618.084  | 6103.708  | NM_00293E | 4593.279  | 4016.542  |
| X51524    | 6415.919  | 8267.666  | ID 2531132 | 6389.542  | 6262.938  | AK023652  | 3590.024  | 3256.93   |
| AK025759  | 2106.8    | 2952.702  | ID 4365538 | 546.944   | 628.082   | AF099032  | 867.029   | 819.782   |
| AK024105  | 550.377   | 672.746   | AA485665   | 443.215   | 665.238   | NM_00307C | 2432.408  | 3352.229  |
| AJ238556  | 499.012   | 641.477   | BF125928   | 13682.227 | 18794.189 | AL122101  | 1811.934  | 1797.884  |
| AK021516  | 2639.412  | 3163.131  | BG571026   | 1764.924  | 1116.282  | NM_00478C | 608.68    | 599.305   |
| Z70699    | 512.994   | 459.571   | AA489017   | 3978.982  | 2540.449  | NM_01621C | 3105.45   | 2754.529  |

|           |           |           |           |           |           |           |           |           |
|-----------|-----------|-----------|-----------|-----------|-----------|-----------|-----------|-----------|
| NM_00689E | 595.563   | 557.192   | NM_01224E | 19078.123 | 15629.195 | AK001649  | 574.139   | 623.279   |
| AK023429  | 518.377   | 489.965   | NM_13326E | 1495.337  | 1169.405  | NM_005871 | 5065.998  | 4864.017  |
| AK022276  | 677.192   | 765.73    | NM_003284 | 2383.693  | 1805.521  | NM_00704E | 1353.742  | 1210.434  |
| AK026881  | 432.467   | 267.434   | NM_01815E | 583.939   | 452.192   | NM_01633E | 6080.175  | 4917.501  |
| AL133653  | 284.576   | 208.087   | NM_00031E | 2801.782  | 2742.395  | BE875028  | 1721.448  | 1581.758  |
| AK023774  | 966.355   | 660.895   | NM_003257 | 301.727   | 226.173   | AK000511  | 2290.79   | 2145.439  |
| AL049377  | 607.884   | 513.082   | NM_012461 | 4593.551  | 3620.231  | AF121255  | 1708.685  | 1857.157  |
| NM_003544 | 43758.59  | 64896.496 | AK001379  | 1324.599  | 1055.277  | NM_005494 | 2905.056  | 2975.626  |
| U17640    | 321.673   | 719.107   | NM_00202E | 1290.72   | 1394.953  | NM_01794E | 674.056   | 406.68    |
| AK001187  | 1482.096  | 1962.599  | NM_00283E | 1054.281  | 862.24    | NM_00495E | 2044.786  | 2125.698  |
| NM_00352E | 10160.693 | 14357.071 | AF190500  | 721.508   | 544.183   | AL049682  | 801.721   | 754.453   |
| AF056436  | 2511.87   | 2921.928  | NM_00161E | 504.464   | 613.598   | NM_00552E | 3362.038  | 3236.384  |
| AB023191  | 950.043   | 932.537   | NM_005904 | 434.376   | 298.48    | AK022842  | 584.556   | 478.375   |
| AK027212  | 4128.142  | 5062.833  | NM_00527E | 16317.71  | 11842.032 | NM_00700E | 13801.673 | 6345.087  |
| X56197    | 749.216   | 1022.005  | NM_000524 | 468.435   | 674.487   | NM_01775E | 14848.957 | 11145.392 |
| NM_00519E | 3248.38   | 3691.443  | NM_00657E | 1987.721  | 2113.836  | NM_00579E | 4113.132  | 3252.538  |
| U90905    | 638.677   | 1038.732  | NM_01864E | 486.504   | 511.793   | NM_004901 | 1285.346  | 1003.17   |
| AF161422  | 2312.613  | 2747.608  | AB035266  | 5401.714  | 5095.391  | U77088    | 698.959   | 608.125   |
| AL137384  | 1031.05   | 804.503   | NM_003744 | 2802.134  | 1798.234  | NM_006721 | 8281.137  | 9164.396  |
| AF070619  | 1078.642  | 1625.45   | NM_00637E | 15437.824 | 14850.585 | NM_01628E | 2982.279  | 3089.702  |
| NM_02015E | 1587.762  | 1671.887  | NM_01813E | 2331.38   | 1562.974  | NM_00276E | 4713.143  | 4876.529  |
| NM_005321 | 3104.745  | 4059.657  | NM_003061 | 1533.297  | 1387.853  | NM_00190E | 673.457   | 830.901   |
| AF073520  | 1844.442  | 1700.599  | NM_018207 | 2128.473  | 2052.904  | AF292100  | 2861.93   | 2767.116  |
| NM_01401E | 6047.144  | 5349.643  | NM_00034E | 27829.199 | 30624.482 | NM_003434 | 47611.781 | 45073.215 |
| AK026839  | 942.043   | 807.516   | NM_00186E | 54928.051 | 59428.164 | AF024698  | 58153.68  | 54260.273 |
| AK024973  | 338.139   | 120.13    | NM_006531 | 3482.945  | 4652.22   | BE904617  | 15475.311 | 11119.229 |
| AJ008123  | 3026.762  | 2188.533  | M74089    | 4200.14   | 3361.452  | AK024495  | 507.451   | 421.518   |
| AJ008156  | 1154.887  | 739.303   | AF190864  | 5788.75   | 5491.134  | AF024694  | 1837.54   | 1565.509  |
| AF147321  | 340.706   | 355.789   | NM_00277E | 3477.085  | 4131.53   | AF091081  | 6103.565  | 5701.218  |
| AF161437  | 3555.079  | 2670.46   | NM_02019E | 16540.219 | 19435.832 | AK001758  | 3124.111  | 2497.397  |
| AK001039  | 3206.734  | 3879.978  | AA098879  | 658.315   | 968.334   | U90842    | 355.216   | 333.177   |
| AK026465  | 672.124   | 838.326   | NM_001177 | 6719.677  | 7961.907  | AF086325  | 1132.195  | 833.564   |
| AK024321  | 925.95    | 1510.379  | NM_014447 | 1174.238  | 820.426   | NM_00492E | 519.544   | 430.691   |
| U52834    | 706.296   | 843.892   | NM_006691 | 996.17    | 945.815   | AF147401  | 393.794   | 262.757   |
| NM_00353E | 420.074   | 650.049   | NM_00150E | 666.744   | 598.063   | AJ001904  | 503.39    | 252.076   |
| NM_01786E | 5428.251  | 4622.696  | NM_00371E | 3017.249  | 1992.821  | AF075022  | 721.269   | 373.77    |
| U17627    | 247.43    | 198.187   | Z83805    | 773.654   | 728.307   | AF075060  | 1747.894  | 1206.165  |
| AF075100  | 781.048   | 696.299   | NM_00466E | 992.614   | 916.184   | AF147436  | 682.901   | 723.168   |
| AF203447  | 5579.526  | 6336.928  | NM_003614 | 1315.505  | 1134.125  | AK021441  | 1254.199  | 1520.545  |
| NM_01850E | 1120.089  | 1150.679  | NM_014257 | 3973.049  | 3790.696  | AK026018  | 364.685   | 537.278   |
| AL080066  | 6589.663  | 6863.076  | NM_001140 | 281.204   | 401.604   | AF085846  | 2417.928  | 2925.779  |
| AJ227870  | 1039.344  | 1405.216  | NM_00484E | 1918.572  | 2860.771  | AK023901  | 4646.993  | 3880.452  |
| AL137620  | 621.905   | 677.764   | AK022845  | 1366.739  | 1019.888  | AL109705  | 729.824   | 1065.385  |
| NM_005294 | 1927.264  | 1471.866  | S77835    | 524.557   | 561.313   | AF147392  | 396.376   | 437.723   |
| AK026879  | 394.572   | 254.859   | NM_00298E | 634.299   | 610.675   | AF088057  | 4278.983  | 3975.828  |
| AF085826  | 923.293   | 711.117   | AB018347  | 11523.968 | 14897.025 | AF086255  | 7635.186  | 7140.354  |
| AK024362  | 703.752   | 530.681   | AB033073  | 6144.376  | 7259.969  | AF088051  | 1138.109  | 958.861   |
| AF118068  | 2321.536  | 1700.926  | NM_00581E | 1327.339  | 1181.093  | AF086360  | 2298.839  | 1701.176  |
| NM_004164 | 502.79    | 299.812   | AB037718  | 4996.34   | 4873.651  | AF086436  | 468.683   | 451.49    |
| NM_01901E | 3282.591  | 2978.948  | AL389994  | 994.191   | 973.535   | AF087993  | 2826.221  | 2892.542  |
| M87931    | 972.145   | 923.044   | NM_001277 | 9459.964  | 11980.523 | AF035282  | 1041.973  | 915.344   |
| CY3Cy5    | 4702.437  | 211.667   | NM_00365E | 7038.272  | 8317.15   | AK021966  | 3084.271  | 3206.948  |
| BE790116  | 2085.988  | 2692.252  | NM_00707E | 2426.173  | 2942.883  | AB018292  | 5753.306  | 6064.595  |

|           |           |           |           |           |           |           |           |           |
|-----------|-----------|-----------|-----------|-----------|-----------|-----------|-----------|-----------|
| AI922341  | 1820.188  | 1386.198  | NM_012320 | 2764.05   | 3536.601  | AF085971  | 530.143   | 276.538   |
| M12824    | 4752.679  | 3432.528  | NM_018208 | 3759.653  | 2979.552  | AF147302  | 917.119   | 313.179   |
| W60100    | 3522.037  | 2408.314  | NM_015929 | 4440.571  | 4870.598  | AF085929  | 1027.68   | 816.688   |
| M24898    | 1037.162  | 740.531   | U90653    | 4128.817  | 3360.549  | AK001126  | 1430.061  | 1438.64   |
| AA457153  | 2771.221  | 1991.38   | NM_000196 | 560.781   | 498.714   | AF085976  | 3802.285  | 3843.348  |
| AA283122  | 1408.3    | 780.028   | NM_018339 | 5941.443  | 5175.327  | AF075104  | 4330.625  | 4434.526  |
| AA868504  | 1278.58   | 762.7     | NM_006745 | 42314.457 | 44566.613 | AK021724  | 592.054   | 774.164   |
| AA877845  | 4216.693  | 2950.17   | NM_000275 | 827.153   | 759.577   | AL133025  | 753.951   | 944.586   |
| AA664241  | 49358.402 | 27774.064 | AK000037  | 705.458   | 462.84    | AL137402  | 8951.377  | 9753.759  |
| AI016456  | 952.131   | 499.312   | NM_014760 | 1872.781  | 1863.113  | AL137617  | 1082.021  | 1329.676  |
| NM_000588 | 15872.567 | 11150.536 | NM_018398 | 1449.429  | 2398.253  | AL359568  | 18392.467 | 16718.141 |
| SR5       | 7102.781  | 5638.05   | NM_002560 | 19151.473 | 28733.467 | AL133564  | 3348.494  | 3010.017  |
| SR7       | 5422.135  | 39107.801 | NM_014404 | 2295.624  | 2565.484  | AL137428  | 899.856   | 835.664   |
| SR9       | 18510.936 | 2651.177  | NM_018713 | 818.301   | 697.651   | AL157462  | 734.061   | 879.816   |
| CY3Cy5    | 5386.724  | 209.494   | NM_015947 | 4454.037  | 3676.133  | AL359602  | 2956.027  | 2901.006  |
| NM_005810 | 8041.144  | 6018.229  | NM_002042 | 33172.98  | 30077.289 | NM_018190 | 34030.918 | 31043.895 |
| M28170    | 6722.93   | 3762.499  | AB028944  | 719.606   | 751.805   | AF086054  | 712.182   | 675.186   |
| NM_001555 | 957.184   | 810.946   | AJ006268  | 849.838   | 1162.735  | AK022259  | 56187.133 | 51924.172 |
| AK026223  | 1632.923  | 678.901   | NM_012245 | 18277.545 | 15098.779 | NM_016010 | 3106.804  | 3889.777  |
| NM_000874 | 6610.388  | 3389.08   | NM_133263 | 1166.723  | 935.013   | AF070647  | 19466.564 | 7424.369  |
| NM_005854 | 1611.293  | 1491.56   | NM_000025 | 18612.418 | 22067.377 | AF116649  | 593.138   | 383.147   |
| AB007863  | 24161.465 | 17513.063 | D38521    | 2228.748  | 1645.057  | AF174394  | 1493.202  | 1545.119  |
| AK024456  | 5487.845  | 5844.683  | NM_000403 | 7372.012  | 5026.553  | AF144054  | 630.392   | 1060.472  |
| NM_017789 | 737.368   | 662.519   | NM_018127 | 13348.27  | 12258.065 | AK025924  | 395.259   | 448.419   |
| D31887    | 3332.599  | 2757.797  | AB020677  | 5149.954  | 4450.356  | AK021876  | 7022.063  | 7385.559  |
| NM_002313 | 3308.115  | 3098.218  | AB033097  | 3246.665  | 3015.256  | AK022017  | 657.174   | 785.718   |
| NM_004459 | 1458.8    | 1104.265  | NM_000135 | 1327.569  | 1330.197  | AK022160  | 1475.4    | 1370.752  |
| NM_005503 | 2344.177  | 2385.332  | AJ223948  | 4720.832  | 3844.181  | AK022295  | 654.989   | 585.107   |
| NM_001502 | 3575.19   | 3620.676  | NM_016218 | 776.657   | 337.771   | AK021935  | 1607.319  | 1627.785  |
| NM_005721 | 1124.709  | 699.206   | AK022947  | 1120.657  | 976.418   | AK022187  | 6505.489  | 8131      |
| AF284223  | 1465.028  | 1882.722  | AL050029  | 1706.307  | 1654.307  | AK022337  | 805.096   | 904.385   |
| AF176012  | 1096.745  | 1834.902  | NM_005204 | 2011.987  | 1197.946  | AK026847  | 716.218   | 829.107   |
| BE743838  | 7638.11   | 8765.902  | NM_016203 | 1489.733  | 1434.409  | AK023048  | 528.004   | 620.184   |
| AF273046  | 2830.857  | 3117.725  | NM_002759 | 2451.336  | 1623.456  | AK026891  | 1339.539  | 1414.868  |
| NM_001081 | 1841.361  | 2450.183  | NM_007271 | 1490.941  | 1412.168  | AK025573  | 428.846   | 373.35    |
| NM_002483 | 2022.786  | 2596.271  | NM_006255 | 4590.408  | 5053.528  | AK024595  | 556.26    | 590.4     |
| BF002026  | 2343.227  | 2885.344  | BE392143  | 4633.717  | 4246.958  | AL137562  | 2360.738  | 4148.659  |
| NM_004171 | 1991.077  | 2059.987  | NM_018132 | 2209.45   | 1719.256  | AK022495  | 3361.458  | 1434.214  |
| NM_014037 | 12052.664 | 12846.905 | NM_003061 | 1359.271  | 1384.907  | AK021632  | 622.042   | 327.266   |
| NM_004866 | 20412.01  | 20795.289 | NM_018207 | 1748.772  | 1655.828  | AK023143  | 269.234   | 212.534   |
| NM_018688 | 5369.342  | 5356.252  | NM_000345 | 20013.932 | 18452.182 | AK026373  | 14965.062 | 11605.333 |
| AK056652  | 10301.767 | 12532.654 | NM_001862 | 51685.289 | 40141.711 | AK021581  | 2721.72   | 2970.105  |
| AL137438  | 1033.69   | 1026.43   | NM_006531 | 3512.224  | 3014.798  | AK021744  | 1093.133  | 816.72    |
| NM_017957 | 5793.605  | 5410.592  | AB029021  | 13115.563 | 13990.181 | NM_018430 | 14333.771 | 10507.503 |
| NM_003024 | 2225.49   | 2449.404  | NM_002101 | 33422.645 | 25831.211 | AL110200  | 816.8     | 556.376   |
| NM_013248 | 5230.106  | 5426.233  | NM_005423 | 449.635   | 543.127   | AL133640  | 1887.766  | 2473.09   |
| NM_000034 | 65645.07  | 75267.414 | Z36789    | 2198.583  | 1564.551  | AJ012502  | 7357.929  | 15000.953 |
| AK022230  | 5505.301  | 4871.925  | J02874    | 2111.048  | 2072.914  | AK021722  | 734.926   | 758.11    |
| AK022147  | 15262.229 | 18589.051 | BF310427  | 1623.556  | 1239.613  | AF147445  | 1589.733  | 1054.756  |
| L25664    | 5939.473  | 7541.596  | N94424    | 719.122   | 484.309   | Y10508    | 6508.271  | 6276.644  |
| NM_014940 | 2957.599  | 2425.123  | AA045192  | 955.657   | 1017.692  | NM_005182 | 55154.805 | 54272.785 |
| NM_005783 | 598.366   | 550.284   | H45617    | 409.566   | 313.022   | D17074    | 884.541   | 1669.61   |
| NM_006900 | 4855.979  | 4455.933  | M92642    | 1229.508  | 996.626   | AF039944  | 5039.177  | 9568.992  |

|           |           |           |            |           |           |           |           |           |
|-----------|-----------|-----------|------------|-----------|-----------|-----------|-----------|-----------|
| AJ289111  | 9748.054  | 10991.76  | H-U 44385  | 10550.563 | 6470.808  | AJ276252  | 743.787   | 1038.029  |
| NM_016356 | 19083.336 | 18100.623 | ID 1654970 | 3555.413  | 2156.557  | AK021716  | 3677.927  | 4390.695  |
| NM_006406 | 4903.47   | 4373.192  | ID 2531132 | 5321.257  | 3950.826  | AK025035  | 7720.168  | 11523.529 |
| AF216292  | 21051.158 | 17090.086 | ID 4365538 | 351.129   | 353.941   | AK002085  | 5957.2    | 7562.285  |
| NM_000952 | 600.562   | 565.135   | AA485665   | 272.944   | 350.46    | AL133618  | 2868.412  | 3268.937  |
| NM_005894 | 648.442   | 449.164   | BF125928   | 12680.623 | 10250.081 | AF230314  | 841.142   | 1033.847  |
| NM_014584 | 6956.955  | 4753.912  | BG571026   | 1622.156  | 1294.095  | AK001086  | 656.935   | 831.741   |
| NM_016649 | 5282.875  | 6247.096  | AA489017   | 3768.725  | 3661.682  | AJ131610  | 3402.332  | 3401.067  |
| AK090536  | 20486.762 | 27024.084 | AK022845   | 1365.322  | 1117.688  | AF119872  | 6656.152  | 5821.074  |
| D63477    | 835.412   | 1059.275  | NM_003004  | 210.032   | 450.217   | AK023255  | 50270.285 | 48164.398 |
| NM_020243 | 41971.758 | 44424.965 | S77835     | 414.863   | 338.577   | AK024185  | 1662.68   | 3227.085  |
| NM_014051 | 16503.824 | 20517.865 | NM_002985  | 489.06    | 547.517   | NM_015417 | 730.383   | 1565.54   |
| AK025398  | 2690.367  | 1716.484  | AB033073   | 5124.063  | 5807.485  | AK026101  | 3677.246  | 5203.739  |
| AK023056  | 1107.472  | 1031.693  | NM_003284  | 2630.185  | 3012.072  | AF085963  | 1201.56   | 922.336   |
| NM_001120 | 38286.59  | 24038.92  | NM_018152  | 682.508   | 812.837   | AF131851  | 416.02    | 173.511   |
| NM_017886 | 2960.068  | 2294.248  | NM_000319  | 3320.76   | 3744.988  | AK021436  | 892.47    | 687.019   |
| NM_004915 | 9331.769  | 7778.894  | NM_003257  | 204.061   | 442.036   | U58664    | 854.612   | 720.469   |
| AK022207  | 975.516   | 891.111   | NM_012461  | 4801.571  | 3886.552  | AL137569  | 2406.925  | 3416.392  |
| AV708752  | 4249.796  | 4835.287  | AK001379   | 1425.207  | 1091.733  | AK021920  | 3144.859  | 5031.508  |
| AF119885  | 3609.059  | 4240.242  | NM_017450  | 1966.06   | 1405.611  | AL049415  | 1730.707  | 1795.439  |
| NM_004996 | 3770.36   | 3220.385  | NM_002023  | 1164.924  | 1123.465  | AK022375  | 697.511   | 1088.641  |
| NM_005971 | 3403.015  | 2821.406  | NM_002839  | 917.688   | 828.4     | AI065056  | 2429.936  | 4874.523  |
| NM_017435 | 1361.646  | 5785.977  | AF190500   | 793.475   | 735.652   | NM_003376 | 36292.02  | 47527.477 |
| NM_013386 | 3352.533  | 3345.979  | NM_001616  | 470.602   | 480.754   | AL110194  | 8467.19   | 9257.087  |
| AK026680  | 9861.674  | 10356.192 | NM_005273  | 14026.529 | 10253.274 | AF138860  | 1674.799  | 1690.968  |
| NM_012436 | 59706.668 | 62982.059 | NM_000524  | 537.641   | 612.289   | NM_014106 | 885.821   | 767.535   |
| AK001299  | 45616.305 | 34562.133 | NM_006576  | 2313.68   | 3797.723  | NM_006687 | 1619.839  | 2023.529  |
| AB014559  | 23971.463 | 23501.705 | NM_018645  | 567.619   | 559.593   | NM_013301 | 437.713   | 487.473   |
| NM_016489 | 12776.932 | 10340.731 | AB035266   | 5624.397  | 5286.868  | NM_017673 | 806.803   | 779.03    |
| NM_005033 | 10321.385 | 6269.135  | NM_003744  | 2449.519  | 2311.39   | AB046857  | 661.833   | 553.629   |
| NM_015932 | 57406.531 | 61581.109 | NM_006378  | 13702.643 | 12271.165 | AK024408  | 6220.241  | 5606.552  |
| AK022169  | 1445.373  | 745.613   | NM_014404  | 2569.545  | 2342.063  | L19364    | 2352.546  | 4407.498  |
| AF015592  | 3833.663  | 2679.444  | NM_018713  | 1100.895  | 1269.281  | NM_005390 | 1943.567  | 1884.063  |
| AK026795  | 3246.727  | 2472.866  | NM_015947  | 4934.213  | 5038.102  | CY3Cy5    | 3813.697  | 163.276   |
| NM_016399 | 5147.55   | 3974.568  | NM_002042  | 36353.551 | 31551.318 | Z48054    | 938.17    | 1036.201  |
| NM_016617 | 14768.12  | 13734.217 | AJ006268   | 1026.873  | 1052.451  | H90415    | 1472.437  | 1065.684  |
| NM_002027 | 11056.209 | 9254.008  | M74089     | 5365.54   | 7681.449  | AA676470  | 7831.391  | 5712.686  |
| AL162078  | 4361.379  | 3756.735  | AF190864   | 6488.891  | 9137.436  | M38258    | 428.884   | 1009.432  |
| NM_000919 | 1273.766  | 1270.88   | NM_002779  | 4568.855  | 5102.136  | AA457155  | 7647.843  | 6677.312  |
| NM_013382 | 26628.371 | 25912.852 | L40397     | 24935.59  | 27860.385 | BM014365  | 739.509   | 889.574   |
| AB002314  | 1828.858  | 1757.646  | NM_020198  | 18182.379 | 22135.887 | H91842    | 396.703   | 456.387   |
| NM_014622 | 1110.235  | 1520.127  | AA098879   | 531.297   | 993.55    | U78045    | 491.6     | 513.691   |
| AB011114  | 54480.105 | 54497.508 | AF070525   | 10162.765 | 11386.207 | AA878561  | 55675.156 | 58939.09  |
| D11466    | 12767.772 | 14897.645 | NM_001177  | 6628.941  | 6607.615  | AI538525  | 708.347   | 826.665   |
| NM_014056 | 35319.125 | 46318.867 | NM_014447  | 1263.627  | 1037.362  | NM_000941 | 1289.769  | 1406.621  |
| D31885    | 29913.086 | 35892.465 | NM_002356  | 262.846   | 247.547   | SR5       | 5654.127  | 3119.549  |
| BE743838  | 8086.628  | 5817.932  | NM_006691  | 1159.524  | 1137.601  | SR7       | 4900.238  | 25515.572 |
| AF273046  | 3281.515  | 1892.059  | NM_001505  | 697.237   | 558.207   | SR9       | 10459.646 | 1100.242  |
| NM_001081 | 2315.857  | 1423.016  | NM_003710  | 2901.755  | 2680.84   | CY3Cy5    | 2874.951  | 158.75    |
| NM_002483 | 2574.101  | 1535.912  | Z83805     | 667.551   | 767.761   | U62858    | 1509.854  | 993.552   |
| BF002026  | 3264.156  | 2084.905  | NM_004666  | 987.068   | 1012.453  | NM_014432 | 1266.384  | 1162.86   |
| BE790116  | 1547.326  | 1068.917  | NM_003614  | 1458.142  | 2425.526  | NM_001556 | 1572.192  | 1203.728  |
| AI922341  | 1534.176  | 1025.76   | NM_014257  | 4926.561  | 4608.197  | U96173    | 1664.198  | 2509.791  |

|           |           |           |           |           |           |           |           |           |
|-----------|-----------|-----------|-----------|-----------|-----------|-----------|-----------|-----------|
| M12824    | 3721.27   | 3076.602  | NM_001140 | 867.592   | 671.584   | NM_018941 | 1328.736  | 1786.42   |
| W60100    | 2979.285  | 2619.03   | NM_004843 | 2139.023  | 2681.782  | NM_020241 | 1023.034  | 755.222   |
| M24898    | 716.392   | 1072.169  | NM_005204 | 2484.783  | 1665.535  | NM_001980 | 1500.203  | 1498.458  |
| U72508    | 682.639   | 730.555   | NM_016203 | 1370.463  | 1377.815  | NM_005954 | 431.899   | 682.735   |
| AA457153  | 2910.013  | 2877.778  | NM_002759 | 2754.981  | 2573.398  | NM_012471 | 409.395   | 1034.928  |
| AA283122  | 1900.892  | 1719.163  | NM_007271 | 1663.871  | 1836.327  | NM_001321 | 2759.713  | 2566.487  |
| AA868504  | 1648.153  | 1986.428  | NM_006255 | 4553.833  | 3501.976  | AB018264  | 2825.554  | 3460.647  |
| AA877845  | 5332.383  | 7609.292  | BE392143  | 4514.36   | 4351.043  | NM_006911 | 952.169   | 782.276   |
| AA664241  | 61502.441 | 59387.008 | NM_005813 | 1578.789  | 2030.239  | U92544    | 1390.414  | 787.99    |
| AI016456  | 992.94    | 1325.428  | AB037718  | 6542.043  | 9238.316  | NM_019644 | 340.779   | 77.297    |
| AK026281  | 2530.384  | 4303.251  | AL389994  | 1003.963  | 1505.866  | NM_006791 | 2668.83   | 2277.377  |
| NM_006400 | 5989.045  | 4599.876  | NM_003909 | 5226.373  | 4680.297  | AJ278348  | 14750.664 | 12058.95  |
| AF216292  | 24646.818 | 20396.615 | NM_001277 | 11009.78  | 13938.091 | NM_015872 | 735.205   | 411.901   |
| NM_000952 | 694.407   | 748.99    | NM_003659 | 7521.453  | 7222.216  | NM_016730 | 6039.926  | 3827.693  |
| NM_005894 | 669.405   | 597.667   | NM_007072 | 2585.217  | 2092.187  | NM_002532 | 2886.763  | 2401.604  |
| NM_014584 | 9942.335  | 8294.527  | NM_012320 | 2599.876  | 2846.205  | NM_012380 | 2326.528  | 2188.761  |
| M30627    | 759.483   | 516.899   | NM_018200 | 3582.799  | 3334.919  | NM_001671 | 1127.475  | 1053.592  |
| NM_005810 | 5958.09   | 5000.6    | NM_015929 | 4861.477  | 5324.987  | NM_019843 | 2343.645  | 2717.866  |
| M28170    | 5564.78   | 4151.852  | U90653    | 4332.117  | 3232.443  | NM_016192 | 4280.226  | 5684.817  |
| NM_001555 | 740.927   | 629.139   | NM_000196 | 686.358   | 553.882   | BE878426  | 56131.594 | 55097.969 |
| AK026223  | 1152.865  | 1182.499  | NM_018339 | 7282.514  | 5760.335  | NM_001745 | 14175.719 | 13006.836 |
| NM_000874 | 6199.057  | 5907.937  | NM_006745 | 38117.063 | 40480.473 | NM_003825 | 4294.363  | 6311.16   |
| NM_005854 | 1305.659  | 1179.291  | NM_000275 | 1033.395  | 1894.152  | AK025006  | 11147.039 | 13632.548 |
| AB007863  | 31788.686 | 27528.832 | AK000037  | 1469.782  | 2677.259  | AF218014  | 6981.274  | 10878.472 |
| AK024456  | 5308.146  | 5625.222  | NM_014760 | 2873.416  | 2243.306  | NM_006670 | 2403.971  | 2362.838  |
| NM_017780 | 858.617   | 788.865   | NM_018390 | 1893.537  | 1982.346  | AY007729  | 19627.094 | 12796.119 |
| D31887    | 4283.23   | 4785.617  | NM_002560 | 26421.578 | 26965.27  | NM_014424 | 664.609   | 613.093   |
| NM_006180 | 1399.15   | 2397.135  | NM_000787 | 561.212   | 529.208   | AF159092  | 2114.809  | 1573.297  |
| NM_002313 | 3604.733  | 4020.485  | U57962    | 3697.37   | 3613.191  | BC007318  | 5845.049  | 3886.376  |
| NM_004450 | 1464.972  | 1312.038  | NM_016176 | 6592.375  | 6555.08   | M36693    | 1595.459  | 1159.955  |
| NM_005503 | 2042.196  | 2618.883  | NM_005574 | 1109.208  | 893.127   | NM_016292 | 5167.87   | 4234.12   |
| NM_001502 | 3142.251  | 3638.717  | NM_017895 | 6357.556  | 6062.889  | NM_002601 | 5102.369  | 3527.477  |
| NM_005721 | 990.062   | 1329.605  | NM_004610 | 4023.622  | 3523.669  | NM_005890 | 7986.049  | 6512.336  |
| AF284223  | 1673.711  | 2468.177  | NM_001612 | 2146.249  | 2346.272  | NM_002880 | 6416.22   | 5706.488  |
| AF176012  | 968.298   | 1030.884  | AK027002  | 2705.803  | 3870.091  | AF078866  | 2749.637  | 2662.818  |
| NM_005971 | 5080.549  | 4401.235  | AB025254  | 3320.097  | 5971.241  | BF311880  | 5699.169  | 2446.83   |
| NM_017435 | 1839.037  | 9543.791  | NM_004081 | 3195.619  | 3413.099  | NM_016075 | 457.258   | 487.933   |
| NM_013380 | 3710.686  | 3714.276  | NM_000025 | 18294.23  | 19040.988 | NM_001360 | 21610.289 | 21462.133 |
| NM_004171 | 2092.589  | 2740.555  | D38521    | 2917.919  | 2049.134  | AK026656  | 2773.482  | 3007.543  |
| NM_014037 | 8803.172  | 7583.391  | NM_000403 | 9314.511  | 6585.236  | AJ276207  | 3934.11   | 4169.303  |
| NM_004860 | 15551.839 | 16462.158 | NM_018127 | 14746.063 | 12414.666 | AB011131  | 7224.243  | 6240.366  |
| NM_018680 | 2445.047  | 2711.527  | AB020677  | 7158.542  | 6538.745  | NM_000751 | 4369.471  | 4546.752  |
| AK056652  | 7023.319  | 7814.512  | AB033097  | 3065.665  | 2541.984  | NM_014840 | 3742.566  | 4384.57   |
| AL137438  | 1053.085  | 808.243   | NM_000135 | 1300.661  | 1700.934  | NM_001042 | 5409.993  | 5284.408  |
| NM_017957 | 6522.839  | 5436.879  | AJ223948  | 5867.975  | 8975.362  | NM_012220 | 2821.129  | 2399.918  |
| NM_003024 | 2420.404  | 2120.143  | NM_016210 | 1136.518  | 1753.655  | NM_005071 | 570.082   | 470.857   |
| NM_013240 | 4509.257  | 5414.998  | AK022947  | 1843.458  | 1907.694  | AB023147  | 2191.582  | 2296.744  |
| NM_000034 | 65276.379 | 63027.93  | AL050029  | 2589.892  | 2085.19   | NM_016615 | 2756.616  | 1616.219  |
| AK022230  | 5908.62   | 6169.341  | AL049966  | 584.766   | 590.528   | NM_005630 | 1100.633  | 818.475   |
| AK022147  | 14705.039 | 15247.681 | NM_004063 | 537.969   | 532.699   | NM_012201 | 2302.588  | 1869.716  |
| L25664    | 3825.809  | 4331.314  | AB040976  | 10514.69  | 9047.775  | AB046774  | 842.286   | 866.212   |
| NM_014940 | 2587.651  | 2490.43   | NM_018641 | 5083.917  | 4532.873  | NM_002775 | 589.819   | 260.518   |
| NM_005783 | 465.804   | 704.409   | U49089    | 1126.961  | 742.216   | AK024584  | 3917.083  | 2232.856  |

|           |           |           |           |           |           |           |           |           |
|-----------|-----------|-----------|-----------|-----------|-----------|-----------|-----------|-----------|
| NM_00690C | 4504.667  | 5046.017  | NM_002221 | 3058.084  | 3001.665  | NM_003504 | 8025.379  | 7406.945  |
| AJ289111  | 10604.881 | 12232.724 | NM_002371 | 2630.033  | 3170.025  | NM_01329E | 2764.05   | 2212.347  |
| NM_01635E | 19894.895 | 21837.877 | NM_002562 | 670.352   | 696.829   | NM_007267 | 2051.642  | 1878.469  |
| NM_014043 | 10995.388 | 9703.18   | AK024502  | 3714.347  | 5212.759  | AK022830  | 666.91    | 736.35    |
| NM_014622 | 1623.595  | 1599.935  | NM_001124 | 1694.589  | 1851.14   | Z36816    | 1757.046  | 2016.728  |
| AB011114  | 60803.797 | 50048.09  | NM_00458E | 2978.348  | 2754.538  | NM_00586E | 3249.955  | 2749.706  |
| D11466    | 23658.344 | 21013.951 | NM_004844 | 5721.935  | 4653.11   | NM_006413 | 9848.608  | 8783.355  |
| NM_01405E | 36892.262 | 29794.211 | NM_013447 | 611.549   | 427.232   | NM_017684 | 546.624   | 402.166   |
| D31885    | 31868.43  | 30315.521 | NM_000051 | 5332.142  | 4649      | AK025542  | 1321.367  | 1319.254  |
| NM_01664E | 4548.336  | 4018.911  | NM_005709 | 616.341   | 618.824   | AF207547  | 424.905   | 760.386   |
| AK090536  | 18709.656 | 17421.77  | NM_00418C | 3855.848  | 3719.313  | NM_00276E | 5535.971  | 7786.299  |
| D63477    | 776.34    | 834.314   | NM_00478E | 25189.055 | 20908.57  | NM_003691 | 3601.249  | 4528.22   |
| NM_020243 | 32911.148 | 30232.617 | AF302109  | 1184.826  | 1176.875  | NM_00295C | 16738.682 | 18317.799 |
| NM_014051 | 13412.859 | 14542.026 | AL117485  | 11726.51  | 12538.027 | NM_00231E | 2490.265  | 2439.23   |
| AK025398  | 3404.826  | 3519.495  | NM_00350E | 776.319   | 706.765   | NM_001433 | 541.078   | 559.944   |
| AK023056  | 1252.178  | 1326.893  | NM_007191 | 1324.452  | 1188.479  | NM_003134 | 58328.969 | 53622.191 |
| NM_00112C | 39387.738 | 39324.457 | AL109667  | 951.857   | 1103.325  | NM_004314 | 3247.081  | 2906.001  |
| NM_01788E | 2217.629  | 2239.975  | NM_00447E | 483.686   | 859.551   | NM_018247 | 6353.972  | 4966.329  |
| NM_00491E | 8478.302  | 9720.347  | NM_00315E | 395.477   | 1054.32   | NM_01797E | 4101.917  | 3690.114  |
| AK022207  | 878.109   | 1094.359  | AF034102  | 25414.766 | 17355.1   | NM_006791 | 1958.444  | 1678.647  |
| AV708752  | 3273.058  | 5130.337  | AJ008142  | 21803.59  | 19485.486 | AI285199  | 492.805   | 419.195   |
| AF119885  | 2814.719  | 4937.38   | NM_001343 | 3161.787  | 2924.575  | L07738    | 550.171   | 432.139   |
| NM_00075C | 646.016   | 597.516   | NM_00727E | 11682.727 | 11341.569 | Z48054    | 1306.949  | 1136.692  |
| NM_00499E | 4213.702  | 4479.94   | NM_01902E | 41205.422 | 42125.957 | H90415    | 1491.299  | 1516.313  |
| NM_00058E | 20973.285 | 21278.932 | NM_018461 | 5501.484  | 6269.397  | AA676470  | 8418.182  | 5527.648  |
| AK026281  | 2812.844  | 2267.719  | AF235023  | 7291.796  | 7321.556  | M38258    | 450.019   | 545.585   |
| U23862    | 598.174   | 333.864   | NM_00691C | 4697.894  | 4284.055  | AA457155  | 9260.557  | 5891.223  |
| AK026680  | 11586.648 | 11026.145 | AF162667  | 2140.12   | 2224.042  | BM014365  | 518.68    | 534.029   |
| NM_01243E | 61083.535 | 62693.152 | AB046847  | 4234.141  | 3426.609  | H91842    | 475.063   | 176.125   |
| AK001299  | 32632.756 | 28830.391 | NM_000447 | 1724.691  | 1643.988  | U78045    | 668.422   | 914.403   |
| AB014559  | 17676.291 | 16184.867 | NM_006354 | 4818.39   | 4218.684  | AA878561  | 61388.805 | 63896.766 |
| NM_01648E | 11383.492 | 10900.801 | AF303378  | 8602.162  | 7470.845  | BF688309  | 370.729   | 501.204   |
| NM_005033 | 9974.452  | 7901.32   | NM_016037 | 11056.618 | 9175.647  | AI538525  | 1646.674  | 2418.154  |
| NM_015932 | 52076.738 | 57874.219 | NM_000043 | 6453.03   | 6012.922  | NM_000623 | 549.142   | 699.231   |
| NM_01794E | 1432.935  | 1286.526  | NM_01614C | 354.694   | 405.501   | NM_000941 | 1480.658  | 1247.241  |
| AK022169  | 1400.416  | 1559.378  | NM_01596E | 463.767   | 260.673   | AF222980  | 656.034   | 764.869   |
| AF015592  | 4291.837  | 3927.863  | NM_000417 | 2813.37   | 2432.66   | AK026758  | 3000.257  | 4424.579  |
| AK026795  | 3302.637  | 3269.472  | NM_01823E | 37072.168 | 39506.648 | NM_014424 | 396.406   | 296.362   |
| NM_01639E | 5693.142  | 5649.542  | NM_012104 | 22751.742 | 21159.9   | AF159092  | 1294.469  | 1412.071  |
| NM_016617 | 15650.151 | 18567.836 | NM_006144 | 25823.756 | 17715.598 | NM_016292 | 4516.528  | 5303.415  |
| NM_002027 | 12109.751 | 19097.373 | AL136549  | 10342.283 | 10739.215 | NM_002601 | 4463.728  | 4183.729  |
| AL162078  | 3019.139  | 3751.773  | NM_01216E | 1626.773  | 1457.738  | U62858    | 1972.969  | 2181.854  |
| NM_00091E | 1013.527  | 1077.276  | NM_00703E | 2626.795  | 2691.923  | NM_001781 | 2198.786  | 2376.77   |
| NM_013382 | 24261.133 | 27883.068 | AF311324  | 7067.628  | 4832.977  | NM_014432 | 1358.63   | 1100.763  |
| AB002314  | 2110.614  | 2358.005  | AF124433  | 717.593   | 471.455   | NM_00155E | 1221.105  | 1278.155  |
| NM_005503 | 2126.599  | 1934.466  | AK001647  | 625.178   | 331.957   | NM_00253C | 342.207   | 389.152   |
| NM_001502 | 2997.267  | 2325.308  | AF061556  | 1344.892  | 916.118   | U96173    | 1495.332  | 1059.807  |
| NM_005721 | 1106.79   | 1214.274  | AL162049  | 1361.262  | 968.29    | NM_018941 | 1416.546  | 976.928   |
| AF284223  | 1715.095  | 1704.609  | AF036144  | 298.419   | 361.814   | NM_020241 | 757.198   | 472.146   |
| AF176012  | 1017.447  | 905.753   | NM_005032 | 1102.166  | 797.737   | NM_00198C | 1771.114  | 2126.576  |
| BE743838  | 8418.552  | 8097.021  | NM_00416C | 6712.94   | 4892.972  | NM_012471 | 489.58    | 509.156   |
| AF273046  | 4048.504  | 3444.512  | AL109677  | 1276.864  | 1219.03   | NM_001321 | 2277.502  | 2196.622  |
| NM_001081 | 1909.48   | 1779.114  | NM_003941 | 48633.398 | 44185.41  | AB018264  | 2854.433  | 3689.467  |

|           |           |           |           |           |           |           |           |           |
|-----------|-----------|-----------|-----------|-----------|-----------|-----------|-----------|-----------|
| NM_002483 | 1837.131  | 1751.589  | AF177909  | 1723.43   | 1734.548  | NM_006911 | 980.455   | 1081.321  |
| BF002026  | 2092.913  | 2399.545  | NM_002664 | 1387.77   | 956.342   | U92544    | 1808.441  | 1908.636  |
| BE790116  | 1221.401  | 1383.366  | AB018271  | 1227.537  | 1203.654  | NM_012225 | 3048.839  | 2584.944  |
| AI922341  | 1428.405  | 1210.796  | NM_016434 | 1755.167  | 3247.337  | NM_005630 | 799.932   | 806.187   |
| M12824    | 3440.687  | 2860.704  | NM_005634 | 1942.73   | 1528.166  | AK023106  | 850.182   | 778.599   |
| W60100    | 2740.795  | 2807.867  | NM_017757 | 3882.145  | 3261.92   | NM_016730 | 7760.036  | 7550.477  |
| M24898    | 806.615   | 750.443   | NM_002146 | 36030.059 | 26021.193 | AL035297  | 1496.24   | 945.451   |
| U72508    | 428.934   | 366.204   | AB007892  | 1228.182  | 948.529   | NM_004408 | 1566.858  | 1364.715  |
| AA457153  | 2786.602  | 3841.61   | AB037748  | 607.202   | 711.34    | AJ131244  | 1176.422  | 1353.168  |
| AA283122  | 1947.663  | 1842.289  | AB002306  | 2150.727  | 1696.633  | NM_002532 | 3419.729  | 3681.299  |
| AA868504  | 1337.249  | 1579.078  | NM_001300 | 4659.676  | 3391.747  | NM_012388 | 2313.567  | 2253.394  |
| AA877845  | 5599.719  | 9052.111  | NM_012472 | 866.385   | 680.54    | NM_001671 | 995.048   | 767.957   |
| AA664241  | 58339.32  | 61591.695 | NM_018187 | 7716.805  | 6155.957  | NM_019843 | 1863.655  | 1738.167  |
| AI016456  | 1229.97   | 1101.518  | NM_003016 | 26868.932 | 28468.459 | NM_016192 | 3035.628  | 3080.245  |
| NM_014940 | 3254.559  | 2258.964  | NM_005463 | 27532.629 | 33462.148 | BE878426  | 57585.367 | 58989.215 |
| NM_005783 | 536.907   | 476.448   | NM_001325 | 2492.656  | 2711.228  | NM_001745 | 13873.593 | 16257.695 |
| NM_006900 | 3896.136  | 3158.101  | NM_018282 | 16486.449 | 9690.06   | NM_003825 | 5705.143  | 8409.409  |
| AJ289111  | 11227.945 | 10310.217 | BC019932  | 1791.124  | 1313.998  | AK025006  | 12283.076 | 13685.5   |
| NM_016356 | 19799.645 | 18309.859 | AF114818  | 2911.163  | 2249.613  | AF218014  | 7626.727  | 10261.012 |
| NM_006406 | 5621.112  | 5507.004  | AK025106  | 1963.054  | 1642.423  | NM_006678 | 2192.111  | 2471.174  |
| AF216292  | 22023.447 | 18819.611 | NM_020144 | 2072.264  | 1479.574  | AY007729  | 23127.096 | 19269.314 |
| NM_000952 | 601.345   | 770.709   | NM_003908 | 50722.777 | 46726.594 | NM_003134 | 47326.953 | 50461.496 |
| NM_005894 | 564.342   | 589.31    | BE893142  | 1640.329  | 1224.562  | NM_018247 | 5070.526  | 4624.344  |
| NM_014584 | 7166.754  | 7334.745  | NM_003103 | 5022.283  | 3324.673  | NM_017975 | 2985.187  | 3168.689  |
| M30627    | 567.117   | 526.425   | NM_015340 | 4496.906  | 2954.644  | NM_005898 | 8689.82   | 6719.747  |
| NM_005810 | 8102.553  | 6211.631  | NM_006451 | 3300.747  | 2164.643  | NM_002888 | 20976.32  | 19297.914 |
| M28170    | 6233.37   | 4586.272  | NM_002094 | 2026.616  | 1696.489  | AF078866  | 2977.241  | 2840.429  |
| NM_001555 | 613.149   | 539.609   | NM_002937 | 1798.16   | 2556.374  | BF311880  | 6271.393  | 3528.018  |
| AK026223  | 1218.033  | 826.812   | AL137476  | 13693.61  | 14230.273 | NM_016075 | 438.408   | 436.184   |
| NM_000874 | 6067.496  | 5382.901  | AF052174  | 2767.762  | 2835.743  | NM_001360 | 17225.381 | 16265.001 |
| NM_005854 | 1145.497  | 1010.51   | AF070590  | 917.237   | 884.006   | AK026656  | 3456.61   | 3264.036  |
| AB007863  | 29811.328 | 25432.838 | NM_000761 | 52939.367 | 47013.063 | AJ276207  | 8710.572  | 13253.819 |
| AK024456  | 4819.922  | 6087.383  | NM_020142 | 3099.14   | 2932.733  | AB011131  | 9170.114  | 7496.341  |
| NM_017788 | 796.438   | 972.226   | NM_000774 | 4480.238  | 3859.954  | NM_000751 | 4886.282  | 6118.004  |
| D31887    | 4284.939  | 5330.709  | NM_017781 | 49894.34  | 54247.25  | NM_014848 | 3824.319  | 4890.892  |
| NM_002313 | 3916.991  | 4807.23   | NM_006004 | 59764.691 | 61917.102 | NM_001042 | 5795.067  | 5406.258  |
| NM_004458 | 1800.579  | 1733.795  | NM_004894 | 30166.834 | 40923.02  | NM_000941 | 867.754   | 866.206   |
| NM_004915 | 7465.435  | 6330.843  | AB028960  | 802.958   | 978.636   | AF222980  | 696.11    | 645.827   |
| AK022207  | 1025.794  | 1200.865  | NM_005648 | 46251.012 | 54941.336 | AK026758  | 2309.52   | 2376.944  |
| AV708752  | 3945.04   | 3991.948  | NM_006943 | 5954.328  | 4507.054  | NM_012201 | 2963.219  | 2186.588  |
| AF119885  | 3341.971  | 3239.002  | NM_006741 | 9393.521  | 5927.11   | AK022385  | 14416.463 | 11256.338 |
| NM_000750 | 559.611   | 598.458   | NM_014166 | 7716.664  | 4581.529  | NM_002775 | 701.407   | 522.64    |
| NM_004996 | 4591.307  | 4546.478  | AL117606  | 6150.732  | 5150.223  | AK024584  | 4578.606  | 2604.5    |
| NM_005971 | 4594.432  | 3443.366  | NM_012330 | 1606.042  | 1165.537  | NM_003504 | 8774.167  | 7642.466  |
| NM_017435 | 1223.533  | 5849.467  | AF294278  | 5785.545  | 5271.358  | NM_013298 | 3576.86   | 2571.354  |
| NM_013386 | 2991.351  | 3949.204  | NM_018211 | 3468.366  | 2692.51   | NM_007267 | 2048.375  | 1676.989  |
| NM_006517 | 795.588   | 679.952   | NM_014520 | 3627.428  | 3039.935  | AK022830  | 519.881   | 527.59    |
| NM_004171 | 2584.287  | 2519.537  | NM_002616 | 3380.135  | 3148.368  | Z36816    | 1640.708  | 1672.699  |
| NM_014037 | 14232.556 | 11935.521 | AK025712  | 9710.217  | 5318.721  | NM_005865 | 3165.339  | 2894.184  |
| NM_004866 | 17953.893 | 14757.518 | AF052497  | 431.651   | 355.279   | NM_006413 | 10598.981 | 10007.422 |
| NM_018688 | 2972.211  | 2637.923  | AK026375  | 3324.604  | 2593.271  | NM_017684 | 701.985   | 460.978   |
| AK056652  | 6883.028  | 6109.688  | NM_014710 | 854.988   | 874.96    | AK025542  | 1559.451  | 2105.097  |
| NM_017957 | 5232.485  | 4975.251  | U85992    | 1116.768  | 1334.103  | AF207547  | 455.18    | 468.844   |



|           |           |           |           |           |           |           |           |           |
|-----------|-----------|-----------|-----------|-----------|-----------|-----------|-----------|-----------|
| NM_003024 | 2178.247  | 2174.003  | AL110152  | 871.269   | 779.171   | NM_00276E | 5558.513  | 7050.866  |
| NM_01324E | 4975.161  | 6069.897  | AF131745  | 2956.415  | 1589.08   | NM_003691 | 3135.744  | 3639.562  |
| NM_000034 | 64698.594 | 71835.961 | AL117565  | 2982.301  | 2032.349  | NM_00295C | 15577.609 | 17157.543 |
| AK022230  | 7565.43   | 9689.273  | AF147305  | 547.494   | 223.182   | NM_00231E | 2310.998  | 3072.614  |
| AK022147  | 15191.173 | 18957.057 | AK022109  | 3770      | 6684.181  | NM_012471 | 367.9     | 349.58    |
| L25664    | 5052.092  | 5492.752  | AK022103  | 994.552   | 1601.788  | NM_001321 | 2176.664  | 1937.415  |
| NM_002027 | 10897.174 | 10278.523 | NM_00703C | 646.643   | 1189.98   | AB018264  | 2809.295  | 2438.466  |
| AL162078  | 3187.698  | 2868.057  | AK022111  | 382.774   | 578.403   | NM_006911 | 695.084   | 739.485   |
| NM_00091E | 1410.035  | 1167.17   | AK021527  | 492.589   | 938.52    | U92544    | 1945.693  | 1291.894  |
| NM_01338E | 17800.607 | 13964.035 | AF143882  | 1010.556  | 1643.434  | NM_006791 | 2287.954  | 2088.109  |
| AB002314  | 1706.685  | 1244.326  | U00953    | 595.886   | 729.666   | AI285199  | 600.868   | 914.06    |
| NM_01404E | 10568.724 | 10196.579 | AF086176  | 1193.3    | 853.941   | L07738    | 837.964   | 690.698   |
| NM_01462E | 1424.251  | 1378.871  | NM_01774E | 1104.985  | 567.877   | Z48054    | 1175.823  | 1200.932  |
| AB011114  | 56176.711 | 52514.484 | NM_00510E | 2038.956  | 1839.021  | H90415    | 1662.732  | 1519.016  |
| D11466    | 18852.59  | 19411.135 | AK022292  | 7164.062  | 5471.549  | AA676470  | 13586.133 | 11924.57  |
| NM_01405E | 33143.113 | 30273.117 | AB051436  | 2385.474  | 1516.561  | M38258    | 501.738   | 523.685   |
| D31885    | 33326.898 | 32162.105 | AK026482  | 24147.234 | 13404.057 | AA457155  | 6982.314  | 5349.078  |
| NM_01664E | 4495.703  | 3734.382  | AL137473  | 2718.566  | 1915.787  | BM014365  | 779.395   | 777.965   |
| AK090536  | 18125.828 | 15918.117 | AJ001873  | 10984.568 | 8481.99   | U78045    | 1322.055  | 1511.139  |
| D63477    | 865.474   | 932.99    | AB026054  | 419.515   | 642.933   | AA878561  | 55241.805 | 57651.016 |
| NM_02024E | 38775.594 | 30468.178 | AK022604  | 2082.127  | 1969.481  | AI538525  | 441.765   | 1039.077  |
| NM_014051 | 13146.951 | 11618.125 | U66048    | 1363.844  | 1657.004  | NM_00382E | 4248.086  | 4866.745  |
| AK025398  | 2630.25   | 2612.57   | AK023401  | 10090.405 | 7069.887  | AK025006  | 10255.975 | 7919.192  |
| AK023056  | 1993.931  | 2259.093  | AK001865  | 729.616   | 872.186   | AF218014  | 6984.425  | 5847.468  |
| NM_01788E | 2295.152  | 2574.299  | AK024035  | 22064.039 | 20167.85  | NM_00667E | 2505.594  | 2501.67   |
| NM_00315C | 5035.363  | 4014.95   | AL049331  | 355.114   | 715.071   | AY007729  | 25135.783 | 16165.294 |
| NM_014784 | 4332.882  | 3121.692  | AL050079  | 2278.685  | 4759.835  | NM_014424 | 440.41    | 431.961   |
| AK026383  | 3468.999  | 3574.378  | AL080233  | 2693.041  | 4945.639  | AF159092  | 1538.345  | 1563.67   |
| AK023821  | 1114.343  | 1054.407  | AL117591  | 756.977   | 1402.504  | BC007318  | 6675.822  | 6429.206  |
| AB014594  | 6556.43   | 6154.635  | AL050132  | 466.886   | 827.618   | M36693    | 1922.587  | 1922.629  |
| M94547    | 1606.412  | 1729.355  | AL110230  | 231.747   | 471.04    | NM_01629E | 5574.456  | 10542.127 |
| NM_005087 | 9326.052  | 10473.844 | AL117663  | 2464.218  | 5122.204  | NM_002601 | 4825.264  | 4836.916  |
| NM_01209E | 2357.726  | 2175.686  | NM_01429E | 4903.461  | 5102.133  | U62858    | 1261.27   | 1220.961  |
| NM_01809E | 3280.406  | 3279.885  | AK024432  | 2208.128  | 1383.2    | NM_001781 | 2533.75   | 3300.37   |
| AB023164  | 3941.679  | 3556.156  | AL137513  | 1003.598  | 489.77    | AF035121  | 383.132   | 578.082   |
| AK026281  | 2352.935  | 2142.373  | AF088001  | 604.809   | 433.455   | NM_01443E | 1547.014  | 2563.962  |
| AK026680  | 11475.206 | 9880.697  | NM_018067 | 6210.708  | 4382.454  | NM_00155E | 1775.475  | 1804.057  |
| NM_01243E | 61507.02  | 59833.512 | NM_01895E | 25144.205 | 15091.757 | U96173    | 1453.448  | 1688.108  |
| AK001299  | 46985.586 | 41626.305 | NM_014787 | 1760.61   | 967.352   | NM_018941 | 1198.567  | 1135.368  |
| AB014559  | 21121.99  | 18157.988 | AL122109  | 889.39    | 533.91    | NM_020241 | 811.749   | 744.709   |
| NM_01648E | 11274.627 | 10022.037 | AF074988  | 2001.221  | 749.44    | BE730585  | 372.181   | 555.956   |
| NM_00503E | 10354.343 | 7434.08   | AK024946  | 821.033   | 635.516   | NM_00198C | 1018.673  | 1264.601  |
| NM_01593E | 58990.367 | 60272.555 | AK001432  | 2148.712  | 2660.09   | NM_00104E | 5010.577  | 4103.42   |
| NM_01794E | 1384.439  | 1866.376  | AL133568  | 4159.463  | 4456.701  | NM_01222E | 2777.33   | 2285.985  |
| AK022169  | 2057.122  | 1873.758  | AF009265  | 2188.195  | 2595.132  | NM_005071 | 582.126   | 468.25    |
| AF015592  | 5223.076  | 6440.484  | AF009309  | 5083.307  | 6614.844  | AB023147  | 2082.415  | 2791.007  |
| AK026795  | 3994.243  | 4990.585  | NM_00236C | 3221.58   | 3120.326  | NM_01661E | 2983.238  | 3200.803  |
| NM_016617 | 15584.895 | 18989.17  | AF009322  | 782.953   | 748.539   | NM_00563C | 865.386   | 1188.602  |
| NM_00233E | 10797.935 | 9120.036  | AF056425  | 2145.377  | 4153.101  | NM_00104E | 382.699   | 463.052   |
| AL117666  | 1586.838  | 1103.718  | AF090893  | 623.527   | 714.749   | AK023106  | 1154.922  | 1262.513  |
| Y17865    | 3966.567  | 3448.442  | NM_01803E | 7708.976  | 14281.847 | NM_01673C | 19615.59  | 15770.516 |
| AK022630  | 609.467   | 573.191   | AK001945  | 1106.902  | 2523.711  | AL035297  | 2064.956  | 1451.234  |
| NM_00582E | 19613.418 | 19002.721 | AK021541  | 564.589   | 1003.111  | NM_00440E | 3247.949  | 2065.282  |

|           |           |           |           |           |           |           |           |           |
|-----------|-----------|-----------|-----------|-----------|-----------|-----------|-----------|-----------|
| NM_002756 | 4745.642  | 4561.396  | AK021766  | 358.841   | 510.351   | AJ131244  | 1313.49   | 1257.165  |
| AJ000414  | 820.347   | 516.417   | AK001147  | 386.729   | 992.386   | NM_002532 | 3283.449  | 3681.11   |
| AK025674  | 11657.604 | 10006.182 | AK021630  | 584.456   | 1031.396  | NM_012388 | 2803.792  | 2808.485  |
| AF007194  | 8330.405  | 7123.76   | AK021831  | 1061.844  | 1507.072  | NM_016651 | 508.036   | 467.253   |
| NM_019069 | 1931.201  | 1884.227  | AK025650  | 2711.945  | 1834.698  | NM_001671 | 767.127   | 814.309   |
| NM_004761 | 3365.5    | 3015.409  | AK026401  | 1634.71   | 1186.294  | NM_019843 | 2757.411  | 6232.643  |
| Z25424    | 3065.002  | 2718.659  | AK026773  | 1810.567  | 882.361   | NM_016192 | 4255.863  | 4194.937  |
| U79458    | 6896.848  | 7116.314  | AK025893  | 424.329   | 272.368   | BE878426  | 49885.934 | 51454.832 |
| NM_014920 | 1722.554  | 1463.671  | U73530    | 451.849   | 820.039   | NM_001745 | 12826.817 | 13839.854 |
| NM_002961 | 3651.196  | 3619.996  | AF086158  | 7164.921  | 6656.945  | NM_003691 | 3324.266  | 3253.894  |
| NM_018298 | 1048.146  | 803.962   | AF086050  | 6220.006  | 6989.017  | NM_002950 | 15376.317 | 15104.987 |
| NM_000676 | 3794.051  | 3594.728  | AF147375  | 1790.032  | 2391.765  | NM_002318 | 1807.468  | 2095.364  |
| AF064770  | 1343.389  | 943.019   | X51524    | 14103.752 | 14989.429 | NM_001433 | 236.735   | 374.678   |
| NM_005766 | 1584.778  | 1512.521  | AK025759  | 3350.171  | 3105.522  | NM_003134 | 53815.246 | 50976.355 |
| AL133022  | 1460.137  | 2567.958  | AK024105  | 625.244   | 488.896   | NM_004314 | 3454.186  | 3690.263  |
| NM_003953 | 6320.937  | 11162.139 | AJ238556  | 330.267   | 734.192   | NM_018247 | 4596.323  | 5243.176  |
| NM_006301 | 1466.007  | 1214.86   | AK021516  | 7182.806  | 11224.817 | NM_017979 | 5673.277  | 4974.484  |
| AL049925  | 3678.984  | 3383.538  | Z70699    | 934.302   | 1452.468  | NM_005898 | 9062.151  | 9864.9    |
| NM_012219 | 981.654   | 1125.845  | AL049919  | 332.049   | 358.755   | NM_002888 | 27884.721 | 26614.84  |
| X72887    | 2455.183  | 2371.496  | NM_006898 | 2417.086  | 4146.656  | AF078866  | 3211.815  | 3246.54   |
| NM_004529 | 1897.674  | 2006.42   | AK023429  | 1061.369  | 1513.507  | BF311880  | 8497.49   | 4269.224  |
| NM_000127 | 3848.555  | 3468.162  | AK022276  | 984.255   | 1206.28   | NM_016075 | 512.105   | 709.376   |
| Y10483    | 15421.878 | 15634.807 | AK026881  | 589.595   | 253.249   | NM_001360 | 14517.563 | 10908.995 |
| NM_006784 | 1990.868  | 1588.037  | AL133653  | 466.163   | 269.487   | AK026656  | 3669.496  | 4231.629  |
| NM_017876 | 3346.896  | 3381.709  | AK023774  | 903.549   | 478.409   | AJ276207  | 5608.316  | 6738.806  |
| NM_001087 | 59614.875 | 59549.289 | AL049377  | 1452.866  | 697.475   | AB011131  | 8168.769  | 6872.895  |
| NM_001826 | 593.334   | 524.885   | NM_003544 | 57063.531 | 57572.188 | AK023648  | 3090.479  | 3385.611  |
| AK025352  | 867.308   | 902.948   | U17640    | 762.165   | 784.944   | NM_000412 | 885.149   | 949.18    |
| NM_003721 | 6404.541  | 5464.875  | AK001187  | 2385.452  | 2954.228  | AF077033  | 1974.607  | 2331.831  |
| NM_004724 | 2082.007  | 2479.825  | NM_003529 | 32721.891 | 29235.908 | NM_017786 | 320.111   | 618.678   |
| NM_001431 | 7653.484  | 9390.273  | AF056436  | 3470.558  | 3482.15   | NM_004991 | 543.115   | 308.524   |
| NM_000381 | 657.955   | 666.803   | AB023191  | 1366.328  | 1346.64   | AF222980  | 679.246   | 691.03    |
| NM_000427 | 2768.834  | 2238.385  | AK027212  | 6305.027  | 10320.305 | AK026758  | 3566.301  | 3645.659  |
| NM_014924 | 2028.922  | 1718.684  | X56197    | 1247.752  | 2232.337  | NM_012201 | 3755.96   | 5843.935  |
| NM_006946 | 878.788   | 1121.66   | NM_005199 | 14301.709 | 22572.463 | AK022385  | 23637.822 | 19518.762 |
| NM_000174 | 59948.168 | 65243.066 | U90905    | 1174.139  | 2243.016  | NM_002775 | 937.704   | 490.213   |
| NM_002508 | 3024.828  | 3938.733  | AF161422  | 3044.58   | 5472.537  | AK024584  | 4748.897  | 2845.871  |
| NM_014343 | 3481.904  | 5079.969  | AL137384  | 1824.413  | 1993.585  | NM_003504 | 9243.092  | 8800.957  |
| D25303    | 1133.569  | 1206.578  | AF070619  | 2046.646  | 3844.546  | NM_013298 | 3115.476  | 2828.846  |
| AB043007  | 38902.203 | 36420.535 | NM_020153 | 2362.031  | 4189.164  | NM_007267 | 2356.569  | 2377.848  |
| NM_004861 | 3419.186  | 3799.89   | NM_005321 | 5046.506  | 9952.441  | AK022830  | 809.505   | 559.961   |
| NM_016161 | 905.209   | 1038.54   | AF073520  | 2745.208  | 5430.522  | Z36816    | 1525.571  | 1593.991  |
| AF022913  | 4710.789  | 5182.132  | AF143885  | 499.489   | 648.834   | NM_005865 | 4465.16   | 7503.027  |
| NM_000028 | 2983.953  | 2269.406  | NM_014015 | 14074.385 | 20874.105 | NM_006413 | 10182.645 | 10619.843 |
| NM_001382 | 10590.16  | 9415.7    | AK026839  | 1105.154  | 2264.188  | NM_017684 | 541.676   | 309.096   |
| M93718    | 13463.519 | 16128.645 | Z34278    | 283.291   | 613.102   | NM_000216 | 455.061   | 511.785   |
| NM_005386 | 1595.033  | 1490.433  | AK024973  | 320.085   | 923.394   | NM_003010 | 888.261   | 1167.093  |
| AK023807  | 11760.985 | 11686.459 | AJ008123  | 6663.134  | 11090.276 | NM_006871 | 602.254   | 537.339   |
| NM_018188 | 13442.277 | 11404.157 | AJ008156  | 1409.159  | 2355.991  | NM_019074 | 2419.092  | 2070.509  |
| AK024273  | 3455.647  | 3567.85   | AF147321  | 578.396   | 909.375   | NM_018494 | 13454.659 | 20863.328 |
| X59417    | 43911.137 | 41578.891 | AF161437  | 3786.079  | 2712.854  | AK000006  | 540.04    | 869.978   |
| D28476    | 11024.375 | 10469.642 | AK001039  | 4353.762  | 3987.264  | NM_001115 | 723.641   | 1054.446  |
| NM_016263 | 5013.395  | 4437.975  | AK026465  | 1168.019  | 1608.928  | NM_014921 | 966.428   | 956.917   |

|           |           |           |           |           |           |           |           |           |
|-----------|-----------|-----------|-----------|-----------|-----------|-----------|-----------|-----------|
| NM_00333E | 38078.195 | 34856.586 | AK024321  | 1037.526  | 978.511   | NM_016581 | 56204.043 | 47445.777 |
| AB002376  | 4361.303  | 4239.968  | U52834    | 1222.99   | 1086.331  | NM_01325E | 1209.362  | 1571.018  |
| NM_01824E | 673.132   | 716.241   | M34428    | 685.023   | 1040.217  | NM_00718E | 689.707   | 566.392   |
| NM_00555E | 2472.049  | 1965.216  | NM_00353E | 948.145   | 1520.258  | AJ238243  | 17710.195 | 19230.959 |
| NM_016631 | 1556.671  | 1673.578  | NM_01786E | 9621.017  | 16646.146 | J05046    | 22710.26  | 18826.453 |
| AB015617  | 29153.908 | 25741.824 | AF075100  | 928.446   | 1465.166  | NM_01231E | 2260.075  | 1890.839  |
| AK022730  | 2296.749  | 2364.578  | AF203447  | 10891.854 | 18220.898 | NM_002751 | 2973.76   | 2531.654  |
| NM_00225E | 18176.373 | 20155.432 | NM_01850E | 2334.492  | 4814.314  | NM_004291 | 1489.818  | 1356.712  |
| AF064839  | 52507.246 | 59150.176 | AL080066  | 9884.058  | 16290.212 | NM_00381E | 4089.846  | 3786.341  |
| NM_00543E | 10874.197 | 15225.667 | AJ227870  | 1225.517  | 2519.249  | AK022635  | 362.067   | 283.125   |
| AB037810  | 4505.81   | 4796.911  | AL137620  | 905.129   | 1176.408  | NM_00491E | 2212.045  | 2352.363  |
| NM_00659E | 1289.157  | 1263.089  | NM_005294 | 3422.908  | 7195.246  | U79304    | 12164.145 | 10888.891 |
| NM_00037E | 11185.678 | 9386.968  | AK026879  | 496.445   | 937.026   | NM_016267 | 2485.802  | 2518.93   |
| NM_00047E | 8193.381  | 8634.535  | AF085826  | 823.348   | 2121.275  | NM_004671 | 4647.057  | 5489.364  |
| M61872    | 16540.09  | 13875.415 | AK024362  | 847.256   | 1445.969  | NM_00518E | 8879.223  | 9350.627  |
| NM_01615E | 853.337   | 942.854   | AF118068  | 1432.941  | 3441.139  | NM_00652E | 3248.913  | 4554.814  |
| AK027089  | 959.56    | 1072.17   | NM_004164 | 172.308   | 813.31    | NM_003627 | 3200.93   | 3599.225  |
| X59845    | 1520.11   | 1419.693  | NM_01901E | 2715.89   | 3462.587  | NM_01214E | 20068.934 | 18461.66  |
| NM_006284 | 19332.777 | 19692.064 | M87931    | 853.794   | 915.37    | AF305779  | 861.335   | 1027.525  |
| U18909    | 2521.21   | 2368.759  | CY3Cy5    | 4264.555  | 77.054    | AF225416  | 6849.737  | 9406.685  |
| NM_00348E | 2991.031  | 2758.422  | BE790116  | 820.046   | 636.427   | NM_016231 | 1352.225  | 1548.501  |
| NM_01658E | 11949.323 | 11417.858 | M12824    | 3138.655  | 4876.74   | NM_00209E | 3467.219  | 3453.629  |
| NM_003597 | 940.176   | 810.104   | W60100    | 2826.992  | 3727.553  | AB042555  | 7886.898  | 8399.447  |
| NM_006561 | 6501.088  | 5853.247  | U72508    | 544.136   | 588.718   | NM_00172E | 1017.569  | 1188.143  |
| NM_017521 | 1145.091  | 994.681   | AA457153  | 3235.567  | 3764      | NM_01776E | 644.96    | 860.446   |
| AK025200  | 7617.452  | 6581.029  | AA283122  | 633.364   | 795.515   | NM_01397E | 3257.063  | 3323.534  |
| NM_00138E | 8677.732  | 7191.578  | AA868504  | 1655.501  | 1753.459  | NM_00384E | 2763.36   | 3751.112  |
| NM_00102E | 60620.914 | 63528.301 | AA877845  | 5994.987  | 5120.951  | NM_01221E | 1387.006  | 1434.679  |
| NM_00500E | 11457.784 | 11425.643 | AA664241  | 20995.779 | 16547.607 | X73502    | 1336.686  | 1251.645  |
| NM_016304 | 18706.525 | 23034.826 | NM_00058E | 16405.947 | 13527.854 | NM_02044E | 40481.391 | 39551.68  |
| NM_00601E | 24223.977 | 31769.012 | NM_00071E | 1011.114  | 146.793   | NM_01637E | 9688.169  | 9904.199  |
| NM_01404E | 9006.068  | 11179.546 | SR5       | 5967.462  | 2327      | AB046848  | 5079.884  | 4232.241  |
| L34071    | 3904.972  | 5818.495  | SR7       | 5296.926  | 15919.284 | AL133057  | 5771.716  | 5705.016  |
| AK025201  | 9607.784  | 9511.945  | SR9       | 19176.443 | 900.482   | U04845    | 6711.438  | 7133.48   |
| AK022995  | 4748.271  | 4644.048  | CY3Cy5    | 2288.031  | 85.694    | NM_01810E | 3905.663  | 3531.826  |
| NM_00606E | 21427.555 | 21866.816 | NM_00581E | 2734.586  | 3199.964  | AK026302  | 7659.787  | 8316.759  |
| AV718258  | 750.872   | 863.178   | M28170    | 856.553   | 1272.666  | NM_012214 | 6743.223  | 6573.81   |
| NM_00516E | 7114.536  | 8145.834  | AK026223  | 642.693   | 991.3     | AF049656  | 15765.035 | 19139.912 |
| NM_00513E | 43580.27  | 38083.508 | NM_000874 | 6199.521  | 7696.996  | NM_01659E | 3816.531  | 3740.574  |
| NM_00211E | 33725.328 | 31575.834 | NM_005854 | 526.459   | 757.301   | BE874867  | 32296.99  | 23123.357 |
| AK023162  | 2763.972  | 2600.568  | AB007863  | 2821.707  | 3653.994  | AL136719  | 3223.699  | 3047.542  |
| NM_00639E | 9534.695  | 10301.2   | AK024456  | 3808.932  | 4393.18   | NM_01410E | 7376.887  | 13379.904 |
| NM_01864E | 2720.785  | 3059.978  | D31887    | 3059.529  | 3834.219  | NM_01216E | 1422.219  | 1280.738  |
| NM_01826E | 567.652   | 589.564   | NM_00618E | 396.051   | 601.505   | NM_006357 | 45809.664 | 49944.367 |
| NM_01344E | 2264.929  | 2091.8    | NM_00231E | 3558.322  | 4120.327  | NM_01424E | 52320.93  | 59335.59  |
| NM_004537 | 963.966   | 969.929   | NM_00445E | 1687.638  | 1598.589  | AK027070  | 1058.814  | 1178.745  |
| AL390134  | 10428.214 | 8990.483  | NM_00550E | 1529.81   | 1688.742  | NM_003341 | 8141.57   | 8111.168  |
| NM_02022E | 3507.933  | 3525.394  | NM_00150E | 1277.351  | 1546.565  | NM_01778E | 1053.495  | 1409.751  |
| NM_01786E | 2860.034  | 2667.376  | NM_005721 | 950.074   | 904.254   | NM_00624E | 2895.677  | 2603.701  |
| NM_003427 | 2335.368  | 2024.379  | AF284223  | 1361.317  | 675.575   | NM_01831E | 1409.461  | 1490.943  |
| NM_00592E | 2058.594  | 2312.028  | BE743838  | 6283.339  | 2171.886  | AB020640  | 1627.164  | 1513.768  |
| Y09321    | 1138.058  | 2246.997  | AF273046  | 1906.248  | 761.665   | D29954    | 10325.012 | 8206.167  |
| AK001499  | 4650.902  | 3559.352  | NM_001081 | 2201.157  | 696.936   | AF007131  | 4727.498  | 5708.05   |

|           |           |           |           |           |           |           |           |           |
|-----------|-----------|-----------|-----------|-----------|-----------|-----------|-----------|-----------|
| AK023568  | 790.076   | 1021.861  | NM_002483 | 2139.558  | 445.884   | NM_00683E | 2072.175  | 4102.428  |
| AK026852  | 3057.117  | 2590.611  | BF002026  | 2545.235  | 605.639   | NM_00022E | 628.346   | 777.551   |
| AK021629  | 2309.597  | 2438.275  | NM_004171 | 406.391   | 427.097   | NM_005851 | 1241.747  | 1562.396  |
| AL110257  | 59708.352 | 58808.738 | NM_014037 | 7723.269  | 8943.054  | AF119256  | 1133.594  | 1258.025  |
| AB013384  | 2969.708  | 3521.409  | NM_00486E | 18168.658 | 22784.23  | X74497    | 629.961   | 663.223   |
| AK024824  | 3186.593  | 2819.298  | NM_01868E | 3571.292  | 4718.903  | NM_01221C | 872.91    | 1054.302  |
| AK024270  | 4583.17   | 3815.063  | AK056652  | 7595.079  | 9262.944  | U10072    | 1497.323  | 1882.503  |
| AK025569  | 8182.07   | 7752.221  | AL137438  | 830.547   | 810.588   | AF222749  | 13971.824 | 17371.205 |
| AK023060  | 2249.12   | 2343.068  | NM_017957 | 1808.923  | 2371.152  | NM_00222E | 684.492   | 731.862   |
| NM_01487C | 1375.822  | 1636.018  | NM_003024 | 1540.096  | 1789.669  | S69027    | 2765.884  | 2536.349  |
| AK021917  | 810.299   | 1088.231  | NM_01324E | 4235.187  | 4878.914  | NM_01211E | 1251.943  | 964.172   |
| AF052146  | 55523.906 | 55308.895 | NM_000034 | 68296.438 | 66669.461 | X99631    | 13253.288 | 14647.637 |
| NM_00487C | 11372.266 | 12321.001 | AK022230  | 3080.84   | 3774.524  | NM_00173C | 1457.414  | 1691.16   |
| AF143872  | 21905.475 | 20121.078 | AK022147  | 7331.83   | 8034.874  | AB014589  | 2338.563  | 2368.775  |
| AK025686  | 2902.789  | 3077.304  | L25664    | 1618.085  | 2094.588  | AF248649  | 509.526   | 687.105   |
| AF143326  | 3913.75   | 2887.98   | NM_01494C | 2594.083  | 2713.612  | U37146    | 10226.414 | 9881.122  |
| AL049229  | 5256.855  | 4718.742  | NM_00578E | 509.754   | 674.574   | NM_01208E | 1823.37   | 2176.175  |
| AK026146  | 5915.828  | 6210.099  | NM_00690C | 1990.139  | 1622.586  | NM_000991 | 47342.391 | 52253.008 |
| AK023152  | 5183.424  | 5260.799  | AJ289111  | 6926.174  | 4595.684  | NM_016034 | 17129.945 | 16561.014 |
| AK000155  | 4541.68   | 5160.558  | NM_01635E | 5429.783  | 5051.129  | X69150    | 28905.42  | 31467.373 |
| AL389937  | 9729.052  | 13340.978 | NM_00640E | 4700.77   | 2971.757  | NM_00102E | 46785.531 | 54285.102 |
| AK022628  | 61756.848 | 62469.34  | AF216292  | 17943.313 | 8790.679  | NM_016067 | 24792.816 | 19746.535 |
| AK021737  | 10941.64  | 11079.513 | NM_00095E | 626.161   | 328.05    | NM_01828E | 4635.949  | 4493.134  |
| AL357454  | 1265.794  | 1340.896  | NM_005894 | 547.501   | 214.576   | AK022393  | 3149.254  | 3119.476  |
| AK026295  | 18010.717 | 16940.561 | NM_014584 | 8216.184  | 1817.922  | AK026654  | 1078.897  | 1166.4    |
| AK025007  | 5345.179  | 6197.071  | NM_01664E | 4466.142  | 3131.772  | AK025496  | 4618.093  | 5007.411  |
| NM_01648E | 8727.303  | 8541.215  | D63477    | 949.557   | 1268.312  | NM_01613E | 1794.401  | 1638.026  |
| AL117601  | 1549.925  | 1170.912  | NM_014051 | 14846.563 | 18070.406 | Z36833    | 52856.863 | 55791.352 |
| AK026490  | 56911.82  | 52489.184 | AK025398  | 1951.136  | 3052.93   | NM_01435E | 892.195   | 1255.037  |
| AJ227861  | 3914.4    | 3234.592  | AK023056  | 1540.733  | 1696.965  | M21191    | 22765.105 | 21573.676 |
| AJ001020  | 1547.266  | 1402.373  | NM_01788E | 2513.112  | 2917.603  | AF072810  | 861.613   | 777.772   |
| AJ001875  | 3789.565  | 4996.917  | NM_00491E | 5100.144  | 6125.494  | L19778    | 869.628   | 1031.964  |
| X64985    | 1445.429  | 1702.37   | AK022207  | 1026.854  | 1213.612  | AF174482  | 4399.919  | 3635.625  |
| Y10507    | 450.647   | 928.19    | AV708752  | 4152.455  | 4273.512  | NM_01776E | 638.762   | 850.883   |
| NM_00722C | 1362.019  | 1531.007  | AF119885  | 2548.347  | 2415.813  | D85131    | 9465.559  | 8464.146  |
| NM_017777 | 2355.042  | 2758.442  | NM_00075C | 718.217   | 305.758   | NM_00495E | 542.052   | 673.965   |
| AL109722  | 867.278   | 1228.161  | NM_00499E | 3691.501  | 3320.453  | D30612    | 2031.447  | 2442.047  |
| AK021989  | 1668.089  | 1432.166  | NM_005971 | 2927.506  | 2847.786  | NM_00216E | 384.958   | 299.364   |
| AK023844  | 561.659   | 489.343   | NM_01743E | 6020.975  | 1213.697  | U52097    | 12020.619 | 10878.536 |
| AK022298  | 3920.121  | 6635.724  | NM_01338E | 3192.744  | 1025.614  | NM_00341E | 2228.89   | 2453.533  |
| AJ277441  | 37535.867 | 44270.895 | AK026680  | 6969.031  | 3918.849  | NM_017594 | 1183.873  | 1396.822  |
| AK022760  | 468.561   | 875.67    | AB014559  | 5750.14   | 8137.915  | AK027237  | 678.408   | 699.504   |
| NM_006057 | 1629.918  | 2243.121  | NM_01648E | 8814.441  | 10707.529 | AF085867  | 5345.76   | 5065.946  |
| AK024242  | 13441.58  | 15590.295 | NM_00503E | 8528.378  | 10538.454 | AF086510  | 2798.137  | 2570.561  |
| AK024559  | 905.367   | 1144.096  | NM_01593E | 60183.32  | 59973.734 | Z36779    | 1619.663  | 1671.704  |
| AK024851  | 826.43    | 838.655   | NM_01794E | 1357.151  | 1354.247  | NM_00281E | 955.419   | 1037.857  |
| AK024943  | 1044.566  | 887.203   | AK022169  | 457.406   | 778.182   | NM_01751E | 542.377   | 563.207   |
| AK024577  | 1004.141  | 1176.02   | AF015592  | 3188.33   | 3759.577  | NM_01782E | 6376.427  | 5594.081  |
| AK024995  | 767.519   | 1065.992  | AK026795  | 2872.414  | 3594.642  | AK026844  | 2823.333  | 2362.723  |
| AL359943  | 61004.676 | 60040.922 | NM_016617 | 13301.495 | 14618.812 | AK026735  | 900.857   | 1077.116  |
| NM_000534 | 3633.798  | 4186.797  | NM_002027 | 9769.952  | 11381.301 | AF240633  | 1070.023  | 1297.525  |
| NM_00536E | 2393.658  | 3915.362  | AL162078  | 2002.849  | 2146.351  | AK027056  | 1893.156  | 1765.455  |
| L10140    | 1043.757  | 1594.004  | NM_00091E | 1021.307  | 1162.347  | AK024294  | 1377.651  | 1495.168  |

|           |           |           |           |           |           |           |           |           |
|-----------|-----------|-----------|-----------|-----------|-----------|-----------|-----------|-----------|
| AL133447  | 3089.376  | 4370.689  | NM_013382 | 9279.744  | 8710.343  | AL110126  | 1549.689  | 1868.568  |
| AB037853  | 37188.449 | 38556.109 | AB002314  | 1364.77   | 629.248   | AF052172  | 8990.979  | 7640.938  |
| D28450    | 65822.07  | 72773.023 | NM_012247 | 219.797   | 60.318    | AB014573  | 4937.716  | 4953.013  |
| AK056222  | 3621.452  | 4193.556  | NM_014622 | 1148.302  | 1428.465  | AK025418  | 679.897   | 1241.616  |
| AK002028  | 38693.16  | 42349.176 | AB011114  | 47365.66  | 20589.262 | AK091109  | 24431.26  | 25171.908 |
| AL050127  | 1680.647  | 1729.265  | D11466    | 17586.229 | 5994.508  | NM_014967 | 2292.02   | 1953.641  |
| AK024805  | 8603.584  | 10786.527 | NM_014056 | 29290.664 | 7778.822  | AK022915  | 5945.197  | 5254.272  |
| AK001423  | 3110.06   | 4529.274  | D31885    | 26775.207 | 8096.259  | AK021736  | 1283.069  | 937.146   |
| AK024090  | 24024.859 | 19925.236 | BE743838  | 7680.642  | 3599.876  | AJ011409  | 12385.815 | 11019.311 |
| AL133574  | 5166.218  | 5295.693  | AF273046  | 1579.809  | 1257.311  | AJ227906  | 1259.399  | 1167.614  |
| AK021936  | 3183.126  | 4651.864  | NM_001081 | 2552.418  | 2741.538  | AJ011598  | 394.534   | 481.912   |
| AF147339  | 48458.977 | 51316.184 | NM_002483 | 1935.647  | 2364.98   | AJ001906  | 525.667   | 699.229   |
| AL390181  | 50072.25  | 59454.609 | BF002026  | 1664.569  | 1722.915  | L10404    | 875.416   | 695.975   |
| NM_017914 | 44197.563 | 46604.941 | BE790116  | 845.92    | 952.93    | L10123    | 27828.721 | 31434.217 |
| AK024953  | 7737.532  | 12101.959 | AI922341  | 456.309   | 432.124   | D16877    | 1858.866  | 2213.421  |
| AK024276  | 3988.129  | 4593.896  | M12824    | 2436.486  | 3241.636  | L19363    | 361.623   | 597.788   |
| S83374    | 4214.637  | 4858.67   | W60100    | 2832.47   | 3234.725  | AL109781  | 1557.33   | 1453.627  |
| AK025784  | 28098.104 | 44696.809 | U72508    | 392.628   | 628.491   | AK021895  | 836.323   | 958.306   |
| U07199    | 3964.577  | 6132.444  | AA457153  | 2843.489  | 2853.667  | AK000036  | 2546.313  | 3294.069  |
| AK023713  | 1539.788  | 2390.477  | AA283122  | 812.338   | 791.234   | AK000924  | 667.2     | 1113.51   |
| X81445    | 1119.091  | 1932.584  | AA868504  | 1564.004  | 1721.319  | AK022252  | 673.281   | 574.9     |
| U95091    | 1840.116  | 2578.347  | AA877845  | 4900.704  | 3788.638  | AK000114  | 2163.718  | 2298.095  |
| NM_017900 | 32252.709 | 34896.137 | AK026281  | 1678.733  | 485.369   | AK000952  | 3030.448  | 3064.558  |
| S50182    | 1181.663  | 1671.313  | NM_006406 | 3955.881  | 2176.194  | AK024520  | 3666.239  | 4606.634  |
| AL360145  | 1638.161  | 1643.573  | AF216292  | 18572.139 | 19032.545 | AK024592  | 1024.462  | 1127.469  |
| Y12016    | 1041.543  | 1555.063  | NM_005894 | 501.185   | 689.03    | AK024904  | 1741.049  | 1788.585  |
| NM_001178 | 3116.156  | 2953.75   | NM_014584 | 8402.984  | 10418.443 | AK025030  | 1358.845  | 1702.134  |
| AK023696  | 6273.582  | 7108.394  | NM_005810 | 2037.793  | 2464.011  | AK024542  | 4437.62   | 3687.064  |
| NM_000704 | 1776.955  | 2284.644  | M28170    | 937.713   | 1316.635  | AK024623  | 477.314   | 1476.429  |
| NM_015987 | 958.932   | 1749.425  | NM_001555 | 340.159   | 573.547   | AK024915  | 438.862   | 463.826   |
| AK025205  | 579.723   | 934.362   | AK026223  | 438.581   | 1064.472  | AB050477  | 3024.735  | 3200.139  |
| NM_019605 | 2674.581  | 3355.467  | NM_000874 | 4740.036  | 4968.049  | AK000152  | 550.307   | 611.22    |
| NM_015369 | 612.71    | 1226.71   | NM_005854 | 278.529   | 694.366   | AK024300  | 915.352   | 1072.137  |
| Z49090    | 6032.465  | 7535.838  | AB007863  | 4418.448  | 4580.406  | L09092    | 594.191   | 462.097   |
| AK021592  | 6923.391  | 7918.638  | AK024456  | 4646.891  | 4922.499  | NM_012132 | 1080.637  | 1022.239  |
| AK025467  | 3366.925  | 5324.24   | NM_017789 | 533.597   | 694.398   | NM_012129 | 910.731   | 903.182   |
| AK026593  | 11642.902 | 20050.902 | D31887    | 3269.88   | 3553.584  | AK024881  | 455.481   | 318.442   |
| L37700    | 1913.502  | 2653.557  | NM_004459 | 1036.899  | 1123.698  | AK025716  | 650.625   | 550.842   |
| NM_017665 | 4469.159  | 8932.174  | NM_005503 | 1742.499  | 1938.444  | AF086202  | 12001.31  | 15066.635 |
| AB007966  | 764.235   | 1096.974  | NM_001502 | 1452.528  | 1795.043  | AK022352  | 418.059   | 528.944   |
| AK024819  | 1198.152  | 1045.231  | NM_005721 | 1060.984  | 531.638   | AK023270  | 2173.45   | 3272.543  |
| AF052106  | 2967.298  | 3509.502  | AF284223  | 1289.964  | 682.611   | AF085979  | 18004.908 | 19569.381 |
| AK000441  | 1453.276  | 1620.964  | AF176012  | 628.173   | 223.459   | AK023112  | 1962.241  | 2207.053  |
| AK022391  | 1800.683  | 2716.741  | NM_005971 | 2161.534  | 1466.34   | NM_017806 | 25865.115 | 31250.533 |
| NM_016125 | 1371.473  | 1437.846  | NM_017435 | 5724.708  | 1312.967  | AK001937  | 36500.98  | 30313.787 |
| CY3Cy5    | 4950.619  | 151.55    | NM_013386 | 3936.31   | 4775.8    | AL365517  | 1019.725  | 1186.868  |
| R72122    | 2686.4    | 2372.924  | NM_006517 | 383.544   | 746.754   | AK021988  | 5232.876  | 4055.676  |
| Z35309    | 1443.053  | 1200.337  | NM_004171 | 409.242   | 818.835   | AF086494  | 19618.559 | 17801.146 |
| AA700005  | 757.325   | 1078.682  | NM_014037 | 2738.27   | 4244.059  | BI769977  | 809.289   | 666.775   |
| AA292025  | 1712.159  | 1696.465  | NM_004866 | 16652.15  | 19688.533 | AL137567  | 866.612   | 715.676   |
| AA437226  | 2875.703  | 3119.413  | NM_018688 | 3085.235  | 3518.311  | AK024913  | 1308.836  | 1337.176  |
| R36143    | 1065.234  | 968.756   | AK056652  | 5729.307  | 7134.437  | AB007961  | 1753.516  | 1616.853  |
| XM_056359 | 460.111   | 736.005   | AL137438  | 611.787   | 813.233   | NM_005547 | 1363.195  | 1072.237  |

|           |           |           |           |           |           |           |           |           |
|-----------|-----------|-----------|-----------|-----------|-----------|-----------|-----------|-----------|
| D10353/NM | 4918.917  | 4081.859  | NM_017957 | 1111.643  | 1455.019  | AF119862  | 8819.716  | 9075.264  |
| M15042    | 3703.652  | 3168.229  | NM_003024 | 1788.646  | 1895.936  | U17628    | 1116.079  | 1370.348  |
| AK056843  | 1860.697  | 1482.559  | NM_013248 | 4417.105  | 4598.147  | AF119867  | 2623.635  | 3093.891  |
| U49928    | 11258.434 | 8895.905  | NM_000034 | 68074.32  | 64204.766 | AL357205  | 7058.759  | 13150.333 |
| AK096645  | 23137.684 | 23022.082 | AK022230  | 3145.228  | 3563.517  | AF124819  | 1102.424  | 1306.732  |
| AK092859  | 725.385   | 863.297   | AK022147  | 8641.843  | 9436.391  | D17091    | 1392.696  | 1254.921  |
| NM_019884 | 4343.439  | 4342.853  | L25664    | 1507.74   | 2045.594  | AL133074  | 1631.39   | 1817.253  |
| SR2       | 47232.18  | 42391.023 | NM_014940 | 2048.151  | 2408.882  | AF086318  | 4905.389  | 4386.953  |
| SR4       | 9606.153  | 5967.76   | NM_005783 | 882.515   | 579.938   | AF088012  | 518.705   | 897.129   |
| SR6       | 1277.388  | 1080.27   | NM_006900 | 1743.957  | 1456.263  | NM_018121 | 810.376   | 486.207   |
| SR8       | 5195.797  | 14352.831 | AJ289111  | 7419.393  | 3143.208  | AK021765  | 1100.643  | 1163.784  |
| SR10      | 19481.865 | 7045.891  | NM_016356 | 7690.626  | 3220.759  | AK026708  | 2796.601  | 1905.048  |
| CY3Cy5    | 7895.91   | 318.203   | NM_014043 | 8829.354  | 4993.59   | NM_017903 | 3664.656  | 2080.518  |
| NM_005291 | 37785.098 | 36890.027 | NM_014622 | 1319.73   | 926.135   | NM_018074 | 1897.209  | 1903.728  |
| NM_002923 | 2973.985  | 3158.49   | AB011114  | 52162.965 | 54561.883 | NM_000909 | 2980.841  | 2565.444  |
| NM_006794 | 1248.092  | 997.5     | D11466    | 19943.566 | 28420.959 | U31737    | 368.983   | 492.05    |
| NM_018653 | 1373.656  | 863.233   | NM_014056 | 32205.381 | 46996.609 | AK024828  | 1068.646  | 867.219   |
| NM_005388 | 7579.222  | 5493.263  | D31885    | 15769.482 | 19595.879 | AF009315  | 1149.697  | 1299.201  |
| NM_007232 | 42381.039 | 28059.051 | NM_016649 | 3690.627  | 5740.291  | NM_019013 | 822.843   | 551.954   |
| NM_003027 | 2994.018  | 2762.707  | AK090536  | 16194.413 | 20603.354 | S70313    | 6659.867  | 6122.28   |
| NM_016257 | 527.583   | 782.231   | D63477    | 1068.157  | 1603.095  | AK021607  | 1213.667  | 1191.934  |
| NM_002717 | 5596.692  | 5856.079  | NM_014051 | 12123.074 | 14755.918 | AK025860  | 1053.375  | 1234.969  |
| NM_014486 | 622.259   | 659.323   | AK025398  | 2092.698  | 2848.279  | L09268    | 329.709   | 357.349   |
| NM_003025 | 8834.179  | 8672.622  | AK023056  | 1185.266  | 1006.714  | NM_020186 | 6836.734  | 7502.731  |
| NM_020179 | 8233.714  | 9670.398  | NM_017888 | 2194.969  | 2497.609  | AF090947  | 1506.64   | 1490.13   |
| NM_004306 | 50671.887 | 55920.859 | NM_004915 | 5205.312  | 6442.537  | NM_005047 | 1442.519  | 1210.208  |
| NM_006786 | 1060.402  | 1081.393  | AK022207  | 834.851   | 898.457   | AJ272196  | 10726.252 | 10397.425 |
| NM_006205 | 2057.984  | 1668.228  | AV708752  | 3190.468  | 2341.561  | X58162    | 8679.951  | 4381.03   |
| NM_004034 | 3220.938  | 1943.796  | AF119885  | 2397.091  | 1450.774  | AK022825  | 915.858   | 856.384   |
| NM_000130 | 3095.634  | 2595.481  | NM_004996 | 4307.916  | 1802.863  | CY3Cy5    | 2979.442  | 82.378    |
| AI492087  | 1328.464  | 1605.099  | NM_000588 | 11419.506 | 5749.485  | L35251    | 2368.956  | 2029.716  |
| NM_004193 | 2332.722  | 1529.387  | AK026281  | 866.128   | 1196.012  | BE910395  | 1034.143  | 753.505   |
| NM_002803 | 15327.254 | 11653.7   | AK026680  | 6597.669  | 7769.657  | N46828    | 991.69    | 1042.969  |
| NM_005508 | 5794.833  | 5809.837  | NM_012436 | 55084.109 | 57196.719 | BI908302  | 7407.404  | 7543.567  |
| NM_006788 | 1372.433  | 1359.167  | AB014559  | 3257.904  | 5250.83   | AA460969  | 2916.027  | 3599.822  |
| AK025039  | 594.587   | 678.821   | NM_016489 | 8914.015  | 11047.225 | BG695859  | 1881.069  | 2256.743  |
| NM_016568 | 1885.355  | 1413.542  | NM_005033 | 9182.937  | 10527.118 | M85079    | 2080.01   | 2265.224  |
| NM_002987 | 997.774   | 958.848   | NM_015932 | 64000.391 | 60351.832 | AA457671  | 9816.639  | 9547.396  |
| AB033102  | 17520.564 | 10878.729 | NM_017949 | 1548.366  | 1804.112  | X07437    | 2519.524  | 2273.669  |
| M55646    | 38723.254 | 51931.645 | AK022169  | 892.771   | 1175.398  | NM_000641 | 1378.25   | 1502.858  |
| NM_006112 | 24332.988 | 29949.051 | AF015592  | 3087.949  | 3050.73   | AE006466  | 2578.975  | 2087.317  |
| M12807    | 849.515   | 1197.463  | AK026795  | 2787.234  | 2685.797  | BC008737  | 38263.18  | 41468.457 |
| NM_001765 | 8357.566  | 10831.545 | NM_016617 | 12306.685 | 14276.084 | BC011655  | 5179.142  | 5824.586  |
| NM_003361 | 2165.987  | 2742.354  | NM_002027 | 9438.914  | 11147.82  | BC002396  | 3315.936  | 3048.684  |
| NM_012099 | 3922.326  | 4760.206  | AL162078  | 1957.461  | 2148.168  | SR4       | 11992.821 | 8680.816  |
| NM_018684 | 25483.912 | 33994.258 | NM_000919 | 911.836   | 797.535   | SR6       | 1947.753  | 927.454   |
| NM_017983 | 1078.49   | 990.375   | NM_013382 | 9689.562  | 7370.964  | SR8       | 6767.688  | 11390.497 |
| AF116909  | 870.011   | 589.705   | AB002314  | 1152.887  | 803.305   | SR10      | 25372.947 | 4288.82   |
| BE906724  | 958.355   | 659.355   | NM_005503 | 1299.757  | 900.47    | CY3Cy5    | 1984.094  | 95.05     |
| NM_002283 | 3479.286  | 3364.447  | NM_001502 | 1410.249  | 1170.92   | NM_020370 | 766.646   | 729.058   |
| AJ276095  | 7268.935  | 8644.451  | NM_005721 | 769.77    | 1243.655  | NM_004767 | 654.267   | 925.07    |
| NM_004819 | 2578.254  | 2537.145  | AF284223  | 1435.124  | 1763.739  | BF310159  | 8231.613  | 8935.667  |
| NM_007184 | 1729.19   | 1836.162  | AF176012  | 554.265   | 792.002   | NM_018986 | 1790.373  | 1804.495  |

|           |           |           |           |           |           |           |           |           |
|-----------|-----------|-----------|-----------|-----------|-----------|-----------|-----------|-----------|
| AF231916  | 4887.374  | 4126.751  | BE743838  | 8362.26   | 9209.273  | AB044934  | 499.996   | 475.448   |
| NM_003501 | 6058.862  | 5381.346  | AF273046  | 1751.156  | 2222.186  | U27655    | 1615.002  | 1553.897  |
| AK022654  | 48820.277 | 45327.988 | NM_001081 | 3079.515  | 3768.691  | NM_00336C | 1689.39   | 2216.009  |
| BC002905  | 9128.288  | 7497.422  | NM_002483 | 1988.997  | 2382.382  | Z21965    | 12572.089 | 12201.784 |
| NM_018091 | 12817.787 | 10906.285 | BF002026  | 1509.548  | 1580.652  | NM_012427 | 4018.859  | 4373.933  |
| NM_001108 | 8698.018  | 7566.846  | BE790116  | 945.658   | 1011.281  | AF131857  | 5707.837  | 5803.574  |
| NM_001637 | 623.016   | 624.522   | M12824    | 2842.824  | 2826.007  | NM_000852 | 20591.912 | 23202.01  |
| NM_01663C | 18234.506 | 22846.992 | W60100    | 2734      | 2948.701  | NM_00039C | 456.634   | 662.528   |
| NM_014291 | 8797.438  | 10161.183 | M24898    | 674.558   | 416.76    | AW797282  | 608.123   | 697.894   |
| NM_014631 | 1330.72   | 1559.256  | U72508    | 624.858   | 496.905   | L09070    | 2029.088  | 2221.709  |
| NM_00108E | 4240.867  | 3239.362  | AA457153  | 2750.523  | 2494.097  | NM_000062 | 13600.909 | 11680.01  |
| NM_00012C | 4738.385  | 7159.356  | AA283122  | 1023.129  | 644.838   | NM_00959C | 5969.528  | 4472.9    |
| AF172327  | 31968.764 | 44722.223 | AA868504  | 1306.717  | 1099.484  | AL133037  | 1397.724  | 755.576   |
| NM_00167E | 8522.443  | 10665.913 | AA877845  | 3802.153  | 2799.287  | NM_02035C | 3434.75   | 1971.096  |
| NM_00022C | 327.591   | 524.497   | AA664241  | 28442.721 | 16504.037 | NM_00035C | 1902.13   | 889.101   |
| NM_00451E | 629.244   | 827.146   | NM_01494C | 2199.743  | 1400.735  | X91103    | 3744.179  | 1643.005  |
| NM_00167E | 22607.145 | 24486.898 | NM_005783 | 910.931   | 406.131   | AA419164  | 955.674   | 534.14    |
| NM_004983 | 1718.861  | 1742.535  | NM_00690C | 940.301   | 1362.736  | AL117235  | 1003.45   | 1079.278  |
| U09384    | 882.985   | 876.878   | AJ289111  | 6701.918  | 8030.571  | NM_014822 | 2698.907  | 4639.9    |
| NM_00686C | 7553.782  | 6929.601  | NM_01635E | 1620.535  | 2438.749  | NM_00529E | 1589.359  | 1719.751  |
| NM_004794 | 9062.907  | 8010.205  | NM_00640E | 5522.519  | 6985.212  | NM_001337 | 651.902   | 829.333   |
| NM_004163 | 13126.742 | 18748.576 | AF216292  | 24949.643 | 32436.561 | NM_003611 | 1707.243  | 2070.913  |
| AK026308  | 1811.4    | 3153.9    | NM_000952 | 446.14    | 673.625   | AB014538  | 1256.967  | 1255.052  |
| NM_013337 | 1419.94   | 1630.572  | NM_005894 | 789.867   | 651.005   | NM_00620E | 415.5     | 646.918   |
| NM_00689E | 8662.032  | 8127.753  | NM_014584 | 7950.412  | 9975.269  | AK025118  | 5116.406  | 5870.247  |
| NM_01220C | 2995.814  | 3092.138  | M30627    | 499.335   | 845.885   | NM_000727 | 1265.756  | 1307.714  |
| NM_001724 | 3108.591  | 3783.333  | NM_00581C | 1775.801  | 2245.558  | NM_00538E | 6114.887  | 6619.041  |
| NM_00015C | 5120.785  | 4780.533  | M28170    | 1075.813  | 1323.316  | NM_01898E | 2057.184  | 2167.101  |
| AB023152  | 713.408   | 956.174   | AK026223  | 774.14    | 1069.331  | NM_006074 | 18241.326 | 18696.529 |
| NM_006212 | 3852.064  | 3408.893  | NM_000874 | 5031.487  | 4646.67   | AF208232  | 12161.56  | 14172.059 |
| AK022872  | 3248.052  | 3514.292  | NM_005854 | 979.074   | 699.955   | NM_00298E | 5858.354  | 4968.784  |
| AK024272  | 10022.16  | 9720.623  | AB007863  | 10226.197 | 11853.819 | NM_00418E | 1102.865  | 929.431   |
| NM_016381 | 2117.326  | 2669.147  | AK024456  | 4610.244  | 4333.682  | NM_01625E | 7021.6    | 5068.776  |
| AL591715  | 952.931   | 802.901   | NM_01778E | 757.773   | 467.308   | AF203032  | 3661.249  | 3329.182  |
| NM_018042 | 5042.061  | 6603.241  | D31887    | 3364.923  | 2710.9    | AB014542  | 7330.715  | 4604.481  |
| BE741525  | 756.058   | 1132.039  | NM_002313 | 3100.15   | 1984.056  | NM_01464C | 1271.06   | 1033.829  |
| BF030555  | 38985.824 | 46996.605 | NM_00445E | 1367.076  | 981.993   | Y10518    | 27654.137 | 16516.828 |
| NM_012433 | 20709.492 | 21203.078 | NM_00491E | 5332.275  | 3229.162  | AF155135  | 10252.09  | 5982.046  |
| NM_00257E | 2847.709  | 4030.246  | AV708752  | 3963.776  | 5348.023  | NM_01479C | 1101.359  | 613.516   |
| NM_003582 | 4116.017  | 4123.215  | AF119885  | 2876.289  | 3263.642  | NM_003571 | 4262.471  | 2085.643  |
| AF057354  | 613.202   | 909.268   | NM_00499E | 3842.048  | 4961.976  | AB032965  | 24524.549 | 10476.707 |
| AF169351  | 7892.236  | 6319.459  | NM_005971 | 3527.105  | 4713.223  | AF133424  | 2351.663  | 1796.587  |
| NM_000282 | 4939.788  | 5774.79   | NM_01743E | 8540.251  | 2794.621  | NM_005003 | 19072.064 | 21369.168 |
| NM_000532 | 19914.375 | 21059.02  | NM_01338E | 3786.483  | 4218.044  | AF084560  | 4660.566  | 5083.866  |
| NM_016341 | 1306.816  | 1664.416  | NM_006517 | 416.489   | 497.206   | NM_01571E | 1242.414  | 1735.342  |
| NM_004034 | 5241.747  | 4596.865  | NM_004171 | 388.027   | 636.182   | NM_000032 | 3709.944  | 4277.759  |
| NM_00013C | 7762.6    | 7069.863  | NM_014037 | 2400.249  | 3180.308  | NM_002083 | 2005.934  | 2038.638  |
| AF193756  | 931.315   | 827.937   | NM_00486E | 15663.429 | 16159.725 | NM_00203E | 6031.513  | 5959.686  |
| NM_004183 | 1226.157  | 1932.129  | NM_01868E | 5915.511  | 6737.022  | NM_01490C | 836.84    | 700.993   |
| AI492087  | 2351.954  | 2318.439  | AK056652  | 5754.722  | 5658.038  | BF342908  | 1485.506  | 1692.197  |
| R72122    | 2237.345  | 2307.27   | AL137438  | 833.574   | 481.615   | AF118073  | 1129.825  | 1072.524  |
| Z35309    | 1318.507  | 1469.793  | NM_017957 | 2453.572  | 2908.585  | AK023510  | 4607.261  | 5475.021  |
| AA700005  | 702.607   | 668.117   | NM_003024 | 1851.124  | 1665.211  | NM_00434E | 1761.395  | 2510.684  |

|           |           |           |           |           |           |           |           |           |
|-----------|-----------|-----------|-----------|-----------|-----------|-----------|-----------|-----------|
| AA292025  | 1318.552  | 1113.224  | NM_013248 | 5066.874  | 3799.373  | X71490    | 9646.661  | 11329.389 |
| AA437226  | 2522.243  | 4036.329  | NM_000034 | 66967.719 | 62240.438 | AF257081  | 1472.352  | 1436.782  |
| R36143    | 907.871   | 444.908   | AK022230  | 3621.265  | 2802.392  | NM_001688 | 20849.15  | 20814.34  |
| XM_056359 | 474.587   | 782.948   | AK022147  | 10004.461 | 6212.831  | NM_003631 | 418.951   | 711.179   |
| D10353/NM | 4240.525  | 4844.422  | L25664    | 2531.048  | 1938.774  | NM_002232 | 1003.032  | 866.601   |
| M15042    | 3804.378  | 3997.175  | NM_002027 | 8291.838  | 5287.639  | NM_016106 | 3904.495  | 3082.077  |
| AK056843  | 1284.114  | 1440.512  | AL162078  | 1829.33   | 1440.085  | NM_014570 | 4744.583  | 3606.234  |
| U49928    | 10438.778 | 10267.232 | NM_000919 | 996.809   | 1433.708  | NM_014747 | 4715.808  | 3238.167  |
| AK096645  | 26509.422 | 26102.678 | NM_013382 | 4889.466  | 7619.996  | Y19240    | 4493.276  | 2666.427  |
| AK092859  | 999.632   | 831.691   | AB002314  | 755.56    | 913.487   | AF091029  | 4700.097  | 2665.084  |
| NM_019884 | 4739.227  | 6387.138  | NM_014043 | 9680.342  | 11527.103 | X97074    | 12182.979 | 5590.446  |
| NM_018291 | 3870.067  | 3624.501  | NM_014622 | 1394.712  | 1693.936  | NM_004135 | 2790.501  | 3121.441  |
| NM_005530 | 3680.042  | 4196.542  | AB011114  | 49404.523 | 53051.418 | NM_000203 | 669.571   | 352.991   |
| AF116909  | 1343.722  | 1078.587  | D11466    | 16673.908 | 21796.029 | NM_013443 | 2316.586  | 2203.058  |
| BE906724  | 1570.455  | 1479.416  | NM_014056 | 28032.148 | 35482.066 | NM_000925 | 10232.065 | 10208.945 |
| NM_002283 | 7852.994  | 7843.396  | D31885    | 22174.914 | 26410.424 | NM_000465 | 1707.845  | 1793.494  |
| AJ276095  | 16105.783 | 17980.855 | NM_016649 | 2028.366  | 2746.04   | NM_000123 | 5903.671  | 6401.422  |
| NM_004819 | 4087.517  | 3875.55   | D63477    | 786.143   | 827.67    | AL137501  | 766.287   | 764.346   |
| NM_007184 | 2756.275  | 2371.054  | NM_014051 | 10010.237 | 9050.517  | BE858979  | 841.808   | 985.596   |
| NM_005291 | 28610.658 | 25365.508 | AK025398  | 2199.815  | 1869.153  | NM_006712 | 40233.957 | 43177.484 |
| AF253316  | 810.251   | 651.747   | AK023056  | 1130.039  | 878.76    | NM_006240 | 1394.365  | 1118.119  |
| NM_002923 | 2930.705  | 3172.459  | NM_017888 | 2342.284  | 1236.541  | NM_007026 | 3766.125  | 3391.091  |
| NM_006794 | 1164.273  | 1042.177  | NM_003150 | 5663.671  | 3665.032  | M37712    | 13827.105 | 7931.8    |
| NM_018653 | 880.018   | 486.119   | NM_014784 | 2561.949  | 2379.601  | NM_002648 | 542.446   | 945.033   |
| NM_005388 | 6576.631  | 6188.11   | AK026383  | 2092.77   | 2411.847  | AF070670  | 3114.611  | 2315.277  |
| NM_007232 | 42435.57  | 47195.367 | AK023821  | 743.413   | 1674.844  | NM_016156 | 4405.563  | 3544.212  |
| NM_003027 | 1267.761  | 1904.682  | AB014594  | 4595.603  | 7315.498  | NM_016528 | 1801.413  | 1423.23   |
| NM_002717 | 4765.104  | 6249.264  | M94547    | 1177.885  | 1892.604  | NM_015974 | 3228.246  | 2016.711  |
| NM_012114 | 672.434   | 181.757   | NM_005087 | 7610.774  | 8785.747  | NM_014384 | 4001.177  | 2753.868  |
| NM_014486 | 662.703   | 424.956   | NM_012098 | 1085.806  | 1367.535  | NM_002573 | 5649.359  | 3127.551  |
| NM_003025 | 11341.771 | 17269.027 | NM_018095 | 3000.436  | 3883.069  | AL133037  | 2022.646  | 1786.924  |
| NM_020179 | 8217.533  | 7043.734  | AB023164  | 2802.573  | 3511.035  | NM_020350 | 2718.51   | 2747.974  |
| NM_004306 | 45502.078 | 42719.496 | AK026281  | 496.834   | 744.893   | NM_000350 | 1915.619  | 1780.158  |
| NM_006786 | 1175.098  | 1296.187  | AK026680  | 4876.691  | 5410.435  | X91103    | 4534.499  | 5182.55   |
| NM_006205 | 1193.384  | 1502.411  | AB014559  | 6980.467  | 6243.257  | AA419164  | 1046.933  | 1354.72   |
| NM_006860 | 11425.628 | 9924.724  | NM_016489 | 7254.514  | 5786.761  | L35251    | 2838.387  | 2483.756  |
| NM_004794 | 18913.582 | 20848.205 | NM_005033 | 7380.802  | 5748.111  | BE910395  | 972.185   | 853.333   |
| NM_004283 | 1733.595  | 1475.671  | NM_015932 | 59003.707 | 57293.273 | N46828    | 1012.934  | 997.099   |
| NM_004163 | 18717.859 | 16472.986 | NM_017949 | 1334.288  | 1003.048  | BI908302  | 8919.111  | 8796.483  |
| AK026308  | 2277.558  | 2661.362  | AK022169  | 830.986   | 618.438   | AA460969  | 3103.305  | 3675.747  |
| NM_013337 | 2188.239  | 2132.928  | AF015592  | 3225.541  | 2146.895  | BG695859  | 778.357   | 964.197   |
| NM_004193 | 2082.621  | 2022.006  | AK026795  | 2694.597  | 1555.49   | M85079    | 2585.714  | 3871.497  |
| NM_002803 | 14844.955 | 14663.965 | NM_016617 | 13157.084 | 7101.377  | AA457671  | 9788.427  | 11658.742 |
| NM_005508 | 6268.773  | 5395.229  | NM_002338 | 3170.153  | 2218.019  | X07437    | 2703.395  | 2729.253  |
| NM_006788 | 1414.597  | 1222.917  | AL117666  | 979.091   | 877.814   | NM_000641 | 1430.831  | 1326.44   |
| AK025039  | 719.651   | 1266.219  | Y17865    | 697.7     | 1203.744  | AE006466  | 2524.04   | 1767.604  |
| NM_016568 | 1729.943  | 1099.97   | NM_005825 | 15255.952 | 19096.793 | BC011655  | 5641.827  | 4765.146  |
| AB033102  | 16179.594 | 18307.916 | NM_002756 | 4156.513  | 5181.472  | BC002396  | 3674.961  | 3317.615  |
| NM_014774 | 6282.735  | 8823.148  | U79299    | 692.24    | 810.77    | NM_022095 | 1120.356  | 820.601   |
| NM_014143 | 8776.682  | 12422.38  | AJ000414  | 530.192   | 537.97    | AF112219  | 20049.123 | 12216.855 |
| M55646    | 32528.51  | 42118.395 | AK025674  | 4536.991  | 7021.911  | NM_014640 | 1284.085  | 1275.585  |
| M12807    | 778.272   | 899.199   | AF007194  | 2423.133  | 3480.55   | Y10518    | 23973.725 | 22652.029 |
| NM_001765 | 7151.982  | 5433.037  | NM_004761 | 2349.018  | 3176.322  | AF155135  | 9381.855  | 8690.272  |



|           |           |           |           |           |           |           |           |           |
|-----------|-----------|-----------|-----------|-----------|-----------|-----------|-----------|-----------|
| NM_003361 | 2215.894  | 2396.619  | Z25424    | 1956.977  | 2338.21   | NM_01479C | 1179.719  | 1211.957  |
| NM_01209C | 3500.505  | 3083.269  | U79458    | 5693.581  | 6272.419  | NM_003571 | 4847.901  | 4540.563  |
| NM_018684 | 17919.656 | 17471.1   | NM_01492C | 659.428   | 732.141   | AB032965  | 28175.803 | 24184.332 |
| NM_017983 | 1118.091  | 1160.113  | NM_002961 | 3019.232  | 3017.289  | NM_02037C | 978.068   | 1024.965  |
| AF057354  | 962.096   | 717.878   | NM_01829E | 1105.875  | 1024.854  | NM_004767 | 877.752   | 1287.117  |
| AF169351  | 12273.529 | 9619.866  | NM_00067E | 1987.57   | 1749.082  | BF310159  | 10048.46  | 12336.271 |
| M14200    | 57855.996 | 54592.352 | AF064770  | 1082.994  | 645.887   | NM_00031E | 1906.797  | 1934.161  |
| NM_000282 | 5894.901  | 5870.879  | NM_00576E | 1060.618  | 624.665   | NM_01898E | 2203.256  | 2642.978  |
| NM_000532 | 27291.861 | 38967.477 | NM_004127 | 60872.504 | 54884.379 | AB044934  | 299.416   | 606.538   |
| NM_016341 | 1114.556  | 1644.783  | NM_013324 | 2602.716  | 1668.359  | U27655    | 1571.305  | 1705.702  |
| AF231916  | 4334.578  | 4059.258  | AL133022  | 1959.576  | 1235.356  | NM_00336C | 1591.021  | 1753.904  |
| NM_003501 | 5751.048  | 5372.355  | NM_003953 | 4695.659  | 2367.828  | Z21965    | 14168.566 | 12318.01  |
| AK022654  | 42839.723 | 35713.727 | NM_006301 | 966.478   | 725.09    | NM_012427 | 888.147   | 741.065   |
| BC002905  | 8663.872  | 7292.286  | AF222694  | 447.475   | 570.362   | NM_000852 | 22496.061 | 23459.918 |
| NM_018091 | 12123.773 | 11329.293 | AL049925  | 2765.865  | 2271.944  | NM_00039E | 553.348   | 579.052   |
| NM_001108 | 9079.164  | 11493.386 | NM_01221E | 696.015   | 737.085   | AW797282  | 784.32    | 953.011   |
| NM_001637 | 2997.303  | 2716.166  | X72887    | 1020.688  | 1506.266  | NM_002402 | 655.881   | 466.291   |
| NM_01663C | 16739.492 | 14499.611 | NM_00452E | 1860.049  | 2217.862  | L09070    | 1986.917  | 1419.421  |
| NM_014291 | 9364.892  | 13273.909 | NM_000127 | 2977.813  | 3388.88   | NM_000062 | 11996.748 | 8197.759  |
| NM_014631 | 922.481   | 1245.861  | Y10483    | 5546.474  | 5558.509  | NM_00959C | 5168.642  | 3227.617  |
| NM_00108E | 4334.795  | 5629.418  | NM_006784 | 1440.946  | 1792.065  | NM_01610E | 4360.252  | 3889.473  |
| NM_00012C | 3394.708  | 5575.49   | NM_01787E | 3746.983  | 4636.546  | NM_01457C | 4576.114  | 4188.042  |
| NM_00167E | 8254.264  | 8006.113  | NM_001087 | 14607.304 | 19678.402 | NM_014747 | 4386.024  | 4283.577  |
| NM_00022C | 897.423   | 871.958   | NM_00182E | 829.867   | 1141.425  | Y19240    | 4009.455  | 3674.405  |
| NM_00451E | 837.995   | 942.138   | AK025352  | 828.844   | 928.747   | AF091029  | 5545.724  | 5397.083  |
| NM_00167E | 21102.283 | 26552.525 | NM_003721 | 4238.327  | 5574.902  | X97074    | 15401.075 | 13410.253 |
| NM_004983 | 1330.513  | 1151.215  | NM_004724 | 2651.544  | 2783.17   | AL117235  | 591.204   | 543.335   |
| U09384    | 1081.175  | 1328.348  | NM_001431 | 9336.024  | 9296.908  | NM_014822 | 3467.514  | 6499.672  |
| NM_019884 | 5180.704  | 5073.298  | NM_000381 | 779.671   | 290.011   | NM_00620E | 565.653   | 382.004   |
| NM_018291 | 6686.375  | 7186.599  | NM_000427 | 2744.79   | 2426.655  | AK025118  | 4322.355  | 4676.349  |
| NM_00553C | 6993.609  | 10156.581 | NM_014924 | 1211.675  | 1366.338  | NM_000727 | 1052.446  | 1010.484  |
| NM_00689E | 7760.681  | 9337.493  | NM_00694E | 906.349   | 715.201   | NM_00538E | 5927.707  | 4858.509  |
| NM_01220C | 2511.323  | 3051.374  | NM_000174 | 43530.938 | 33314.863 | NM_01898E | 2142.886  | 1876.684  |
| NM_001724 | 3322.716  | 3867.659  | NM_00250E | 1733.759  | 1010.864  | NM_006074 | 22042.834 | 17836.646 |
| NM_00015C | 4769.222  | 3859.697  | NM_014343 | 3604.774  | 2039.913  | AF208232  | 12310.226 | 11051.435 |
| AB023152  | 1177.891  | 993.854   | D25303    | 1146.453  | 629.568   | NM_00298E | 6199.88   | 4934.914  |
| NM_006212 | 3744.388  | 3529.401  | AB043007  | 32913.164 | 19791.006 | NM_00418E | 1209.659  | 946.888   |
| AK022872  | 2754.739  | 2947.845  | NM_004861 | 1061.477  | 724.666   | NM_01625E | 6036.341  | 3580.047  |
| AK024272  | 8666.905  | 4713.736  | NM_016161 | 840.601   | 1072.707  | AF203032  | 2697.51   | 1767.952  |
| NM_016381 | 2587.634  | 2033.269  | AF022913  | 4224.847  | 5167.741  | AB014542  | 6129.396  | 3266.767  |
| AL591715  | 931.554   | 1155.783  | NM_00002E | 2131.011  | 3427.097  | AF070670  | 3590.998  | 3023.135  |
| NM_018042 | 5701.168  | 7663.142  | NM_001382 | 5279.417  | 6952.982  | NM_01615E | 4491.617  | 4192.832  |
| BE741525  | 835.862   | 938.428   | M93718    | 12618.631 | 14849.425 | NM_01652E | 1783.547  | 1370.929  |
| BF030555  | 34633.125 | 40660.563 | NM_00538E | 1350.396  | 1669.068  | NM_015974 | 2711.516  | 2673.388  |
| NM_003582 | 1869.872  | 2471.957  | AK023807  | 12075.114 | 14390.817 | NM_014384 | 4135.883  | 5184.416  |
| NM_02017E | 8549.225  | 9646.678  | NM_01818E | 5201.741  | 7188.545  | NM_002573 | 6758.571  | 6754.622  |
| NM_00430E | 45178.344 | 38394.504 | AK024273  | 2565.793  | 3152.49   | AF133424  | 2288.911  | 1782.146  |
| NM_00678E | 1516.526  | 1373.55   | X59417    | 39043.168 | 49089.348 | NM_005003 | 20805.072 | 23400.352 |
| NM_00620E | 2780.847  | 2897.97   | NM_00565E | 22458.791 | 29286.1   | NM_01571E | 1976.109  | 1919.628  |
| NM_004034 | 3339.466  | 4045.078  | D28476    | 9288.229  | 10533.79  | NM_000032 | 4456.667  | 4818.894  |
| NM_00013C | 5347.627  | 5841.181  | NM_016263 | 4172.297  | 5054.294  | NM_00203E | 5687.79   | 6932.739  |
| AF193756  | 468.994   | 601.07    | NM_00333E | 15012.115 | 18471.807 | NM_01490C | 914.249   | 830.295   |
| AI492087  | 2257.411  | 1970.896  | AB002376  | 3686.596  | 3159.88   | BF342908  | 1875.104  | 1555.917  |

|           |           |           |           |           |           |           |           |           |
|-----------|-----------|-----------|-----------|-----------|-----------|-----------|-----------|-----------|
| R72122    | 2574.067  | 2158.135  | NM_018249 | 849.013   | 498.734   | AF118073  | 738.572   | 562.691   |
| Z35309    | 1428.347  | 1268.606  | NM_005558 | 1723.587  | 1472.302  | AK023510  | 4190.932  | 4684.013  |
| AA700005  | 2409.936  | 1870.373  | NM_016631 | 1045.677  | 938.689   | NM_00434E | 1758.708  | 1763.165  |
| AA292025  | 966.523   | 1053.581  | AB015617  | 11211.491 | 9158.1    | X71490    | 9769.679  | 7635.49   |
| AA437226  | 1984.197  | 1695.324  | AK022730  | 1565.996  | 921.34    | AF257081  | 1893.63   | 1158.9    |
| XM_056359 | 718.264   | 452.309   | AF064839  | 36012.406 | 24362.959 | NM_00168E | 20153.355 | 14611.257 |
| D10353/NM | 3936.467  | 4002.008  | NM_005439 | 10157.239 | 5633.651  | NM_00223Z | 808.728   | 620.848   |
| M15042    | 2968.955  | 3106.556  | AB037810  | 4513.115  | 2903.497  | NM_02209E | 885.729   | 820.151   |
| AK092859  | 536.329   | 586.768   | NM_000376 | 1760.74   | 1523.393  | AF112219  | 22362.453 | 22855.996 |
| M12807    | 907.046   | 833.373   | NM_00047E | 5718.616  | 5950.442  | NM_00262E | 1342.674  | 1240.23   |
| NM_00176E | 7223.861  | 6384.932  | M61872    | 11359.513 | 10859.046 | NM_00012Z | 4174.13   | 4555.309  |
| NM_003361 | 1903.248  | 1877.624  | X59845    | 797.935   | 1420.147  | AL137501  | 604.405   | 625.242   |
| NM_01209E | 3303.297  | 3329.226  | NM_006284 | 20674.025 | 26120.662 | BE858979  | 827.402   | 779.933   |
| NM_018684 | 19704.977 | 18355.691 | U18909    | 1690.193  | 2320.228  | NM_00671Z | 57754.609 | 60832.473 |
| NM_01798Z | 1236.957  | 1203.96   | NM_00348E | 2531.866  | 3354.252  | NM_00624C | 1704.854  | 1077.299  |
| AF116909  | 950.322   | 1174.275  | NM_01658E | 10942.928 | 14065.815 | NM_00702E | 3875.807  | 2557.306  |
| BE906724  | 1383.254  | 1863.865  | NM_003597 | 423.789   | 853.668   | M37712    | 13883.215 | 5471.932  |
| NM_00228Z | 6554.255  | 7397.606  | NM_00256E | 30070.742 | 38508.75  | NM_00264E | 525.955   | 391.682   |
| AJ276095  | 15361.198 | 17620.98  | NM_006561 | 5380.578  | 5832.918  | AW797282  | 497.651   | 493.676   |
| NM_00481E | 4752.499  | 4881.338  | NM_017521 | 723.454   | 974.438   | L09070    | 1599.898  | 1746.459  |
| NM_007184 | 2867.981  | 2406.735  | NM_00674Z | 336.781   | 226.219   | NM_00006Z | 10836.821 | 12151.217 |
| NM_005291 | 29902.398 | 25248.813 | AK025200  | 5480.306  | 5148.595  | NM_00959C | 5581.336  | 5764.781  |
| AF253316  | 725.92    | 689.206   | NM_00138Z | 6514.023  | 6002.267  | AL133037  | 1508.249  | 2240.188  |
| NM_00292Z | 2426.051  | 1734.41   | NM_00102E | 62677.535 | 57048.266 | AA419164  | 1087.901  | 1262.478  |
| NM_006794 | 854.405   | 760.878   | NM_00500E | 9138.51   | 6526.909  | N46828    | 1167.804  | 1233.728  |
| NM_01865Z | 877.423   | 472.763   | NM_00601Z | 21622.723 | 13004.894 | BI908302  | 8148.432  | 7103.958  |
| NM_00538E | 7190.899  | 10717.125 | NM_01404E | 10560.009 | 5890.932  | AA460969  | 2548.161  | 2384.271  |
| NM_00723Z | 34224.398 | 46267.926 | L34071    | 4324.008  | 2401.703  | BG695859  | 733.352   | 559.423   |
| NM_003027 | 695.268   | 820.213   | AK025201  | 8855.526  | 4727.149  | M85079    | 3313.644  | 3310.56   |
| NM_016257 | 607.269   | 445.423   | AK021927  | 878.705   | 509.779   | AA457671  | 9812.876  | 9584.819  |
| NM_002717 | 5590.529  | 5482.74   | AK022995  | 3490.918  | 3676.72   | X07437    | 3063.185  | 2370.231  |
| NM_00302E | 4434.279  | 6384.342  | NM_00606E | 13357.201 | 9153.195  | NM_000641 | 1646.542  | 1106.464  |
| NM_00451E | 910.029   | 1065.111  | AV718258  | 713.554   | 1074.902  | AE006466  | 2629.001  | 1476.728  |
| NM_00167E | 21847.094 | 18963.061 | NM_00516E | 3813.95   | 4183.513  | BC008737  | 36951.93  | 23463.896 |
| NM_00498Z | 1049.368  | 983.987   | NM_00513E | 21324.463 | 23071.504 | BC011655  | 4534.196  | 3058.372  |
| U09384    | 1089.453  | 959.533   | NM_00211E | 10121.451 | 12577.614 | BC002396  | 3161.393  | 2004.73   |
| NM_00686C | 7280.743  | 8222.563  | AK023162  | 1749.107  | 2144.8    | NM_00418E | 1126.86   | 1059.275  |
| NM_004794 | 17471.779 | 23517.346 | NM_00639E | 8466.295  | 8986.474  | NM_01625E | 6162.306  | 5881.735  |
| NM_00428Z | 1943.832  | 2756.881  | NM_01864E | 2569.717  | 2117.918  | AF203032  | 2680.584  | 2902.034  |
| NM_00416Z | 20189.158 | 25120.9   | NM_01344E | 1487.021  | 1205.229  | AB014542  | 7587.881  | 6510.322  |
| AK026308  | 2432.479  | 2922.939  | NM_004537 | 1095.94   | 687.199   | NM_01464C | 1114.337  | 1431.154  |
| NM_013337 | 2524.763  | 2390.871  | AL390134  | 8580.831  | 7555.814  | AB032965  | 37659.227 | 35562.898 |
| NM_00419Z | 2247.815  | 1945.973  | NM_02022E | 2600.454  | 1357.373  | NM_004767 | 1295.35   | 1002.537  |
| NM_00280Z | 14191.838 | 13635.653 | NM_01786E | 1861.341  | 1484.404  | BF310159  | 8323.406  | 8074.64   |
| NM_00550E | 4583.316  | 3538.183  | NM_003427 | 1269.885  | 1068.775  | NM_01898E | 1291.062  | 1276.639  |
| NM_00678E | 1215.927  | 1350.384  | NM_00592C | 1172.12   | 982.993   | AB044934  | 400.279   | 377.989   |
| NM_01656E | 1284.093  | 1362.474  | Y09321    | 751.801   | 401.411   | U27655    | 1755.339  | 1446.946  |
| AB033102  | 16749.289 | 15940.491 | AK001499  | 3715.707  | 1908.23   | NM_00336C | 1355.014  | 1276.319  |
| NM_014774 | 5862.43   | 4790.437  | AK026852  | 1925.251  | 1883.781  | Z21965    | 13304.252 | 9569.95   |
| NM_01414Z | 8454.983  | 7911.397  | AK021629  | 2071.515  | 2539.232  | NM_012427 | 698.657   | 568.241   |
| M55646    | 26504.268 | 25173.521 | AB013384  | 2310.129  | 2570.004  | AF131857  | 5464.46   | 3435.242  |
| NM_00611Z | 22052.771 | 26511.551 | AK024270  | 2095.52   | 2471.935  | NM_00085Z | 18407.91  | 12956.598 |
| BE741525  | 1133.076  | 879.21    | AK025569  | 4316.324  | 5035.262  | NM_00039E | 613.201   | 418.913   |

|           |           |           |           |           |           |           |           |           |
|-----------|-----------|-----------|-----------|-----------|-----------|-----------|-----------|-----------|
| BF030555  | 29424.928 | 24463.102 | AK023060  | 1329.933  | 2137.527  | NM_003631 | 323.752   | 651.853   |
| NM_012433 | 16893.846 | 10817.495 | AK021917  | 740.187   | 796.993   | NM_000219 | 665.69    | 665.288   |
| NM_002576 | 2314.442  | 2776.913  | AF052146  | 28736.688 | 36498.715 | NM_002232 | 1135.648  | 1194.224  |
| NM_003582 | 3539.659  | 3626.223  | NM_004870 | 9119.136  | 8709.652  | NM_016106 | 3908.165  | 4933.166  |
| AF057354  | 602.959   | 616.67    | AF143872  | 9184.06   | 7480.646  | Y19240    | 4828.166  | 4934.358  |
| AF169351  | 10451.978 | 10259.77  | AK025686  | 2351.876  | 2069.213  | X97074    | 19333.965 | 18523.74  |
| M14200    | 64591.277 | 55890.57  | AF143326  | 1671.764  | 1621.04   | NM_014822 | 2785.055  | 3761.637  |
| NM_000282 | 6662.816  | 8170.024  | AL049229  | 3641.583  | 2949.469  | NM_005296 | 1722.49   | 1684.943  |
| NM_000532 | 29685.648 | 33655.297 | NM_018306 | 48785.773 | 36499.918 | NM_001337 | 617.173   | 363.9     |
| NM_016341 | 1292.182  | 1323.062  | AK026146  | 2011.733  | 1318.816  | NM_003611 | 2662.556  | 2338.886  |
| AF231916  | 6578.593  | 5823.998  | AK023152  | 2949.181  | 2046.847  | AB014538  | 1282.614  | 1172.133  |
| NM_003501 | 6050.773  | 5235.95   | AK000155  | 3740.519  | 1768.289  | NM_006209 | 559.319   | 371.549   |
| AK022654  | 38897.465 | 32268.238 | AL389937  | 3798.753  | 1863.51   | AK025118  | 4571.75   | 3669.834  |
| BC002905  | 7654.578  | 6031.159  | AK022628  | 56389.855 | 37481.484 | NM_000727 | 1071.493  | 745.898   |
| NM_018091 | 13299.594 | 13330.514 | AK021737  | 7539.345  | 4746.2    | NM_005385 | 6420.92   | 3361.84   |
| NM_001108 | 10352.529 | 13919.829 | AL357454  | 787.803   | 1020.267  | NM_018985 | 1843.596  | 1194.166  |
| NM_001637 | 856.839   | 635.241   | AK026295  | 13066.615 | 13017.296 | NM_006074 | 20238.695 | 12877.688 |
| NM_016630 | 18137.521 | 20527.67  | AK022346  | 644.848   | 462.757   | NM_006712 | 53475.539 | 61068.527 |
| NM_014291 | 8802.276  | 9254.89   | AK025007  | 3659.828  | 4584.996  | NM_006240 | 2207.528  | 2323.231  |
| NM_014631 | 1017.904  | 593.455   | AK026490  | 40979.164 | 48735.426 | NM_007026 | 4566.832  | 4473.29   |
| NM_001089 | 4268.591  | 3647.426  | AJ227861  | 905.564   | 1283.471  | M37712    | 15968.305 | 12656.892 |
| NM_000120 | 2626.801  | 2187.339  | AJ001020  | 426.09    | 1120.685  | NM_002648 | 665.282   | 936.615   |
| AF172327  | 23923.957 | 27247.059 | NM_005553 | 436.817   | 696.177   | AF070670  | 4055.261  | 4919.957  |
| NM_001676 | 4508.481  | 4080.933  | AJ001875  | 1931.776  | 2663.183  | NM_002573 | 7284.709  | 7606.887  |
| AB018338  | 27037.955 | 19897.26  | X64985    | 750.012   | 749.569   | AF133424  | 4031.936  | 3445.71   |
| D80010    | 3395.988  | 2555.478  | L77562    | 700.495   | 376.902   | NM_005003 | 19245.357 | 19806.586 |
| NM_004923 | 1130.169  | 918.059   | L13433    | 861.315   | 810.296   | AF084560  | 8041.421  | 7834.313  |
| NM_003971 | 2111.119  | 1402.523  | NM_007220 | 1145.313  | 938.189   | NM_015715 | 718.779   | 780.587   |
| AK026973  | 790.692   | 776.592   | NM_017777 | 1849.884  | 996.61    | NM_000032 | 7351.908  | 6957.391  |
| NM_005822 | 848.513   | 870.495   | AK023844  | 634.257   | 237.379   | NM_002083 | 2087.799  | 1969.682  |
| U81002    | 6523.468  | 6767.849  | AK022073  | 202.798   | 499.932   | NM_002035 | 5202.69   | 5892.784  |
| NM_016299 | 19331.34  | 16951.014 | AK022298  | 4858.653  | 5442.918  | NM_014900 | 1068.178  | 868.225   |
| NM_014185 | 20800.006 | 19183.68  | AJ277441  | 15231.703 | 20067.561 | BF342908  | 2210.733  | 1809.013  |
| L38517    | 8466.476  | 7872.47   | NM_006057 | 795.706   | 719.513   | AF118073  | 624.885   | 560.975   |
| NM_018291 | 10238.607 | 12339.434 | AK024242  | 13125.648 | 10741.126 | AK023510  | 4600.608  | 3366.971  |
| NM_005530 | 8106.766  | 9222.261  | AK024559  | 1025.352  | 878.2     | NM_004345 | 1949.47   | 1119.938  |
| NM_006899 | 9856.78   | 10739.751 | AK024943  | 726.929   | 450.393   | X71490    | 7380.442  | 5263.773  |
| NM_012200 | 3404.001  | 3181.174  | AL359943  | 52896.676 | 55419.504 | NM_014273 | 14922.865 | 17468.447 |
| NM_001724 | 2912.924  | 2456.354  | NM_000534 | 2484.576  | 3612.905  | AF039442  | 1328.738  | 1912.847  |
| NM_000150 | 5518.416  | 4314.728  | NM_005365 | 1960.375  | 2005.088  | NM_004680 | 1942.804  | 1898.265  |
| AB023152  | 1848.178  | 2001.544  | L10140    | 522.482   | 807.816   | NM_005671 | 1884.357  | 3031.351  |
| NM_006212 | 4847.93   | 3602.941  | AL133447  | 2215.594  | 3452.83   | NM_006729 | 3560.668  | 4794.9    |
| AK022872  | 3178.513  | 3630.154  | AB037853  | 6205.433  | 9564.596  | NM_006071 | 1355.197  | 1648.926  |
| AK024272  | 9266.142  | 8923.71   | D28450    | 68178.805 | 63887.188 | NM_012236 | 11027.893 | 9218.127  |
| NM_016381 | 2135.052  | 1718.056  | AK056222  | 2661.727  | 3439.976  | AF112219  | 23621.705 | 26181.104 |
| AL591715  | 688.367   | 877.092   | AK002028  | 26477.549 | 16503.57  | NM_000521 | 401.863   | 821.135   |
| NM_018042 | 1432.601  | 1926.584  | AL050127  | 1262.004  | 954.652   | NM_002625 | 591.824   | 217.345   |
| NM_014944 | 6756.383  | 6900.732  | AK024805  | 6892.085  | 4530.48   | NM_004135 | 2801.479  | 3560.661  |
| AF200348  | 4623.089  | 4793.312  | AK001423  | 1983.579  | 1697.198  | NM_000203 | 719.727   | 750.389   |
| Y11710    | 677.671   | 604.497   | AK024090  | 17908.049 | 12299.524 | NM_013443 | 2516.611  | 2462.897  |
| J03756    | 571.845   | 418.599   | AL133574  | 1283.502  | 1643.179  | NM_000925 | 9475.901  | 10990.806 |
| NM_002650 | 2197.438  | 1959.055  | AK021936  | 1377.49   | 1745.234  | NM_000465 | 1941.361  | 2177.635  |
| NM_003260 | 29607.574 | 23306.311 | AF147339  | 9653.84   | 11734.583 | NM_000123 | 5188.592  | 4916.615  |

|           |           |           |           |           |           |           |           |           |
|-----------|-----------|-----------|-----------|-----------|-----------|-----------|-----------|-----------|
| AK024071  | 2480.912  | 2194.509  | AL390181  | 33216.395 | 36282.879 | AL137501  | 576.396   | 527.091   |
| AF056490  | 2302.464  | 2566.606  | NM_017914 | 18811.707 | 23880.529 | BE858979  | 886.497   | 632.039   |
| NM_005539 | 1549.215  | 2108.884  | NM_006350 | 528.837   | 951.691   | U87223    | 601.616   | 942.175   |
| BF341504  | 1276.691  | 1903.769  | AK024953  | 8723.608  | 12902.433 | Z36505    | 2834.578  | 3467.098  |
| NM_005541 | 3795.446  | 4296.217  | AK024276  | 957.45    | 1382.625  | NM_001854 | 1867.578  | 2595.26   |
| AB002319  | 2263.343  | 2617.936  | S83374    | 1667.868  | 2318.476  | NM_017913 | 2307.795  | 3515.681  |
| AF039942  | 7056.925  | 5537.745  | AL161979  | 386.153   | 323.795   | NM_002755 | 11758.069 | 17479.486 |
| NM_004421 | 2750.549  | 2260.633  | AK025784  | 28508.279 | 29626.908 | AK024799  | 35717.773 | 42197.359 |
| AB046863  | 13757.696 | 11602.181 | U07199    | 4042.18   | 3264.592  | NM_003330 | 10588.535 | 12363.767 |
| M62403    | 10418.705 | 6498.113  | AK023713  | 1352.005  | 1180.208  | NM_003647 | 1627.854  | 1969.888  |
| NM_017883 | 3200.091  | 2468.028  | X81445    | 814.016   | 496.359   | NM_001699 | 61745.836 | 63091.035 |
| AK025131  | 3572.374  | 3668.948  | U95091    | 1449.736  | 1202.026  | AB006589  | 473.374   | 916.504   |
| NM_000754 | 15015.113 | 12666.073 | NM_017900 | 25769.852 | 20219.309 | NM_018351 | 2704.535  | 2896.361  |
| NM_014619 | 879.317   | 845.279   | S50182    | 1365.327  | 837.69    | AK023019  | 882.028   | 956.645   |
| NM_005629 | 9869.906  | 10473.421 | AL360145  | 1097.956  | 982.941   | NM_147171 | 4932.157  | 3598.276  |
| J04621    | 815.469   | 974.936   | Y12016    | 1067.417  | 943.354   | AF238083  | 13506.65  | 11953.485 |
| NM_000718 | 2167.224  | 2288.512  | NM_001178 | 2253.137  | 1234.998  | NM_002962 | 657.959   | 517.899   |
| NM_000161 | 3887.986  | 4717.601  | AK023696  | 4453.219  | 2709.419  | NM_016388 | 2538.294  | 1948.282  |
| NM_002634 | 21358.129 | 19460.582 | NM_000704 | 1834.587  | 2607.369  | AB046783  | 2475.89   | 2314.434  |
| NM_017749 | 3476.758  | 3618.792  | NM_015987 | 1112.636  | 1363.947  | NM_000845 | 1160.77   | 887.769   |
| NM_001445 | 928.554   | 923.444   | NM_019605 | 1362.285  | 2345.229  | NM_014965 | 3209.202  | 2845.466  |
| NM_002006 | 21055.896 | 21542.146 | NM_015369 | 617.142   | 764.504   | NM_004882 | 20835.682 | 14507.977 |
| NM_007111 | 11533.175 | 11941.069 | Z49090    | 2652.333  | 3842.71   | AL390148  | 13490.459 | 8219.887  |
| NM_002048 | 919.725   | 946.011   | AK021592  | 1237.907  | 1846.602  | AK024055  | 872.294   | 802.525   |
| NM_004702 | 2002.17   | 2095.961  | AK025467  | 4047.521  | 4749.58   | U10485    | 759.573   | 651.367   |
| NM_007109 | 3515.348  | 4205.448  | AK026593  | 12851.475 | 12235.312 | NM_013376 | 1017.318  | 1060.39   |
| AK023404  | 5098.788  | 4804.608  | L37700    | 796.205   | 980.85    | NM_017964 | 1116.787  | 1231.937  |
| NM_013239 | 1914.594  | 2379.904  | NM_017665 | 3369.197  | 2364.417  | NM_016428 | 2464.05   | 2638.845  |
| NM_001789 | 3896.836  | 3990.196  | AB007966  | 400.839   | 225.101   | NM_004083 | 5646.427  | 7248.219  |
| NM_016004 | 5526.864  | 5657.616  | AB007976  | 657.684   | 377.225   | NM_001184 | 2715.207  | 3329.222  |
| NM_002655 | 1669.526  | 1654.087  | AK024819  | 644.866   | 380.681   | NM_015530 | 9596.075  | 11410.335 |
| AB028955  | 19263.002 | 16665.453 | AF052106  | 2936.257  | 2265.658  | NM_001758 | 972.747   | 820.89    |
| U66879    | 12750.377 | 13015.963 | AK000441  | 1227.175  | 984.145   | BE546276  | 791.187   | 784.047   |
| NM_016022 | 6238.875  | 6085.63   | AK022391  | 1883.905  | 1300.89   | NM_004725 | 15419.022 | 15434.709 |
| NM_004874 | 2467.857  | 2702.146  | NM_016125 | 870.24    | 765.277   | NM_015997 | 8264.666  | 8763.39   |
| NM_014204 | 1088.766  | 887.434   | CY3Cy5    | 1273.725  | 84.118    | NM_001167 | 13326.083 | 11069.729 |
| S70385    | 8366.339  | 7465.387  | R72122    | 2242.199  | 1849.352  | NM_012115 | 6662.667  | 6008.487  |
| M34671    | 7909.532  | 9524.483  | Z35309    | 1046.132  | 985.672   | NM_004933 | 16347.84  | 17533.865 |
| NM_018509 | 6929.151  | 8692.7    | X04571    | 375.759   | 611.506   | M96577    | 11692.893 | 12934.268 |
| NM_004086 | 5671.226  | 6103.392  | AA292025  | 604.773   | 507.037   | NM_013258 | 9017.375  | 8111.79   |
| AL050199  | 1002.793  | 1226.35   | AA437226  | 1802.204  | 1041.525  | NM_003842 | 2869.458  | 2387.824  |
| NM_007352 | 530.736   | 576.55    | R36143    | 507.707   | 356.254   | L11238    | 9908.822  | 10685.517 |
| AF176706  | 2305.832  | 2056.634  | XM_056359 | 504.936   | 461.257   | AK025684  | 944.579   | 723.886   |
| NM_014484 | 745.284   | 755.535   | D10353/NM | 4212.444  | 2892.749  | NM_012205 | 5197.81   | 3872.98   |
| NM_001086 | 2690.979  | 2660.958  | M15042    | 3772.95   | 3162.673  | K02046    | 2971.481  | 2279.535  |
| NM_014670 | 2627.255  | 2753.957  | AK056843  | 1520.757  | 2677.232  | AL110151  | 7524.386  | 7220.681  |
| NM_019048 | 8756.967  | 8969.303  | U49928    | 6733.007  | 7497.49   | NM_004995 | 4011.718  | 4271.033  |
| NM_001040 | 3302.29   | 3893.963  | AK096645  | 15234.712 | 13151.119 | NM_000386 | 9268.502  | 10160.032 |
| AF279698  | 5693.252  | 6780.896  | AK092859  | 653.359   | 580.121   | NM_007231 | 597.352   | 689.079   |
| NM_019849 | 2194.791  | 2387.211  | NM_019884 | 4080.274  | 3038.587  | NM_001190 | 4323.115  | 5050.02   |
| AB032996  | 52293.863 | 48691.977 | SR2       | 47382.52  | 44120.59  | NM_015654 | 7780.16   | 7338.444  |
| AB040881  | 3397.867  | 3630.003  | SR4       | 9666.298  | 11862.786 | NM_012244 | 2758.82   | 3102.245  |
| AY007121  | 1916.547  | 1246.251  | SR6       | 1626.449  | 1592.453  | NM_004341 | 1308.906  | 1531.373  |

|           |           |           |           |           |           |           |           |           |
|-----------|-----------|-----------|-----------|-----------|-----------|-----------|-----------|-----------|
| NM_003372 | 19002.396 | 24130.09  | SR8       | 5611.081  | 17578.385 | AB082521  | 9386.009  | 9579.662  |
| NM_007317 | 6143.682  | 5400.222  | SR10      | 20516.324 | 6429.315  | AL050182  | 1770.49   | 1804.318  |
| AB037826  | 527.819   | 520.858   | CY3Cy5    | 2779.777  | 130.448   | NM_020040 | 1562.517  | 1546.978  |
| AK021466  | 1778.306  | 2868.444  | NM_005291 | 16556.619 | 9924.738  | NM_002374 | 2759.324  | 2965.524  |
| Z36796    | 67108.992 | 70560     | AF253316  | 473.433   | 480.413   | AK026940  | 3120.08   | 3128.322  |
| NM_006443 | 14115.514 | 19092.279 | NM_005855 | 309.287   | 207.959   | AF155117  | 4129.666  | 3782.104  |
| NM_004959 | 647.435   | 530.249   | NM_002923 | 2004.708  | 1209.273  | AB014527  | 600.517   | 512.733   |
| AK026022  | 20400.982 | 19601.061 | NM_006794 | 557.018   | 852.344   | NM_004411 | 1794.556  | 1507.057  |
| NM_003199 | 1169.454  | 1248.771  | NM_018653 | 562.405   | 272.437   | NM_015938 | 5691.334  | 3961.104  |
| NM_002938 | 7430.907  | 7544.202  | NM_005388 | 4469.687  | 3262.697  | NM_000740 | 521.706   | 622.992   |
| AK023652  | 10139.465 | 7928.724  | NM_007232 | 26082.518 | 19174.943 | NM_017843 | 2409.883  | 1966.851  |
| AF099032  | 1494.555  | 1493.054  | NM_003027 | 734.313   | 593.289   | AK025985  | 2407.798  | 7115.826  |
| NM_003070 | 4219.771  | 4968.75   | NM_002717 | 4932.6    | 3969.243  | NM_013256 | 1284.447  | 1227.092  |
| AL122101  | 7027.643  | 6106.009  | NM_014486 | 242.318   | 433.329   | NM_004143 | 1078.729  | 1425.315  |
| NM_004780 | 1048.13   | 924.046   | NM_003025 | 7860.576  | 6849.42   | X66087    | 1116.315  | 1460.127  |
| NM_016216 | 6774.029  | 6469.35   | NM_020179 | 7502.336  | 5373.611  | NM_016328 | 3959.189  | 5186.668  |
| AK001649  | 1205.264  | 1496.262  | NM_004306 | 30765.637 | 25656.436 | NM_017544 | 16041.26  | 17684.27  |
| NM_016638 | 12092.163 | 15898.421 | NM_006786 | 1088.877  | 1224.701  | NM_003153 | 1054.813  | 1019.086  |
| AB018274  | 6567.589  | 7115.727  | NM_006205 | 1896.182  | 3111.379  | NM_016285 | 1689.659  | 1834.844  |
| NM_005871 | 7534.859  | 6557.546  | NM_004034 | 3203.755  | 3405.778  | NM_014707 | 976.419   | 1510.139  |
| NM_007042 | 2329.01   | 2379.758  | NM_000130 | 3870.76   | 4322.332  | AF025771  | 1217.008  | 1276.64   |
| NM_016333 | 10197.607 | 9540.425  | AF193756  | 415.951   | 498.174   | NM_018215 | 1198.274  | 1412.548  |
| BE875028  | 2894.915  | 2816.596  | AI492087  | 1292.589  | 1366.333  | AB033110  | 693.415   | 920.95    |
| AK000511  | 3206.113  | 3232.412  | NM_004193 | 1712.073  | 982.31    | NM_005083 | 17543.283 | 19282.291 |
| AF121255  | 2258.092  | 2671.927  | NM_002803 | 10726.562 | 6233.165  | NM_007187 | 14902.765 | 17234.617 |
| NM_005494 | 4220.363  | 2970.394  | NM_005508 | 4004.909  | 2954.841  | NM_018983 | 13325.703 | 19051.955 |
| NM_017946 | 765.478   | 1046.715  | NM_006788 | 723.881   | 707.942   | NM_003096 | 7974.543  | 9820.853  |
| NM_004953 | 2211.422  | 3881.401  | NM_016568 | 907.58    | 857.561   | NM_007279 | 3209.468  | 3593.16   |
| NM_012199 | 1253.643  | 1990.144  | AB033102  | 13223.487 | 9480.164  | BE390833  | 15049.951 | 14967.21  |
| AL049682  | 914.119   | 1199.1    | NM_014774 | 3906.719  | 3261.782  | NM_004730 | 7799.063  | 7584.638  |
| NM_005528 | 2899.458  | 4126.991  | NM_014143 | 7686.792  | 4970.231  | NM_000801 | 3466.242  | 3159.986  |
| AK022842  | 1555.192  | 1426.912  | M55646    | 19717.072 | 16767.908 | NM_006115 | 17178.102 | 14202.875 |
| NM_007006 | 25775.941 | 25500.693 | NM_006112 | 17190.545 | 13838.336 | NM_005801 | 2334.782  | 1678.711  |
| NM_017756 | 33885.59  | 29610.695 | M12807    | 504.315   | 321.849   | NM_018198 | 2450.227  | 1711.561  |
| NM_005793 | 5360.442  | 5702.607  | NM_001765 | 3705.589  | 3520.157  | NM_001538 | 21089.676 | 18468.898 |
| NM_004901 | 2583.029  | 2386.79   | NM_003361 | 1478.9    | 1532.425  | AK027232  | 9504.937  | 11624.256 |
| U77088    | 1148.078  | 1323.245  | NM_012099 | 2940.5    | 3268.011  | NM_004342 | 2527.058  | 4149.423  |
| NM_006721 | 14802.358 | 13914.306 | NM_018684 | 13350.647 | 11601.708 | NM_003613 | 2311.342  | 2518.492  |
| NM_016282 | 7231.157  | 6888.123  | NM_017983 | 730.325   | 851.711   | NM_000022 | 41047.414 | 46042.016 |
| NM_002765 | 9109.314  | 8196.995  | AF116909  | 899.662   | 882.685   | NM_016576 | 5038.926  | 5879.332  |
| NM_001905 | 1895.827  | 2281.588  | BE906724  | 1020.047  | 986.622   | NM_004213 | 1208.56   | 1476.478  |
| AF292100  | 5228.686  | 4693.769  | NM_002283 | 5733.284  | 5429.084  | NM_001929 | 60707.082 | 58828.301 |
| NM_003434 | 53738.547 | 52422.516 | AJ276095  | 9457.299  | 10172.672 | NM_000906 | 1256.499  | 1216.201  |
| X68880    | 324.989   | 1009.465  | NM_004819 | 2440.972  | 2817.51   | NM_000480 | 4552.59   | 5822.652  |
| AF024698  | 63392.457 | 60255.414 | NM_007184 | 1543.672  | 2136.87   | AF254084  | 35325.77  | 39321.691 |
| BE904617  | 27761.996 | 21286.467 | AF231916  | 2549.186  | 1740.544  | AK022648  | 528.244   | 533.395   |
| AK024495  | 911.253   | 563.803   | NM_003501 | 3706.37   | 2282.767  | AK022976  | 1646.575  | 1307.955  |
| AF024694  | 3461.498  | 2743.063  | AK022654  | 24147.242 | 17902.414 | AB048791  | 7189.604  | 7074.625  |
| AF091081  | 4994.295  | 4107.495  | BC002905  | 4795.247  | 4237.569  | NM_003107 | 14957.301 | 15740.968 |
| AK001758  | 3662.629  | 3073.513  | NM_018091 | 7200.899  | 5196.498  | NM_006874 | 3728.547  | 3735.985  |
| AF086325  | 1703.522  | 2500.058  | NM_001108 | 4605.309  | 3315.304  | AB046777  | 3150.634  | 3838.638  |
| NM_004928 | 554.89    | 684.672   | NM_001637 | 618.412   | 483.09    | AJ251844  | 3412.936  | 3448.487  |
| AF147401  | 1067.598  | 1196.563  | NM_016630 | 9121.392  | 7446.228  | D16815    | 1233.682  | 890.53    |

|           |           |           |           |           |           |           |           |           |
|-----------|-----------|-----------|-----------|-----------|-----------|-----------|-----------|-----------|
| AJ001904  | 1269.56   | 1238.149  | NM_014291 | 5987.961  | 4455.882  | NM_00188C | 2705.16   | 2777.435  |
| AF075022  | 2790.432  | 2333.387  | NM_014631 | 409.237   | 381.314   | AB028943  | 2100.489  | 1731.571  |
| AF075060  | 4313.849  | 4057.826  | NM_001089 | 2439.239  | 2362.351  | NM_006194 | 1750.139  | 1357.815  |
| AF147436  | 1330.607  | 1324.566  | NM_000120 | 2017.105  | 1997.686  | AK001603  | 6349.387  | 4509.82   |
| AK021441  | 1288.706  | 1655.692  | AF172327  | 22794.854 | 17870.215 | U71601    | 1616.467  | 1129.288  |
| AK026018  | 1479.134  | 1836.608  | NM_001676 | 4615.278  | 5334.305  | AF042838  | 1252.765  | 1556.038  |
| AF085846  | 4437.89   | 4730.131  | NM_000220 | 293.335   | 257.974   | AL137511  | 1504.367  | 2108.316  |
| AK023901  | 18001.867 | 13851.529 | NM_004519 | 1195.577  | 1020.536  | X91221    | 691.988   | 1067.497  |
| AL109705  | 1310.259  | 1227.408  | NM_001679 | 16325.541 | 16502.898 | AF075031  | 1299.441  | 1743.591  |
| AF147392  | 623.52    | 551.921   | NM_004983 | 819.716   | 850.936   | AK022085  | 1302.441  | 1743.708  |
| AF088057  | 7229.669  | 6650.07   | U09384    | 623.638   | 840.435   | AF075062  | 5093.291  | 6302.058  |
| AF086255  | 22727.732 | 28174.871 | NM_006860 | 7301.15   | 8441.917  | NM_00418E | 1097.767  | 1673.551  |
| AK022660  | 851.235   | 1083.357  | NM_004794 | 12817.16  | 14038.668 | AF147381  | 7472.388  | 10840.554 |
| AF088051  | 2052.5    | 2441.181  | NM_004283 | 1092.517  | 1088.003  | AB002452  | 650.689   | 1072.866  |
| AK023883  | 811.772   | 760.458   | NM_004163 | 13867.727 | 15148.792 | AK027101  | 19733.195 | 23297.066 |
| AF086366  | 772.947   | 624.988   | AK026308  | 1483.314  | 1731.072  | AF010236  | 612.527   | 911.953   |
| AF086360  | 4573.754  | 3093.038  | NM_013337 | 1488.129  | 2031.681  | AF088075  | 1339.681  | 1812.829  |
| AF086436  | 527.355   | 601.608   | NM_006899 | 6567.686  | 2546.708  | AK026376  | 3846.824  | 4723.617  |
| AF087993  | 2747.395  | 2470.61   | NM_012200 | 2701.434  | 1254.828  | AF088061  | 2691.603  | 2893.39   |
| AF035282  | 959.732   | 1182.63   | NM_001724 | 2171.999  | 1595.633  | AF086286  | 2299.588  | 2087.717  |
| AK021966  | 5410.532  | 6687.375  | NM_000150 | 2420.826  | 2106.024  | AF086376  | 2061.044  | 1902.276  |
| AB018292  | 9165.311  | 10012.386 | AB023152  | 668.505   | 631.095   | AF086410  | 921.796   | 853.834   |
| AF085971  | 1277.393  | 969.042   | NM_006212 | 2623.261  | 1939.02   | AF086455  | 693.763   | 629.674   |
| AF147302  | 2384.186  | 2342.134  | AK022872  | 2661.068  | 2080.361  | AK022997  | 7663.187  | 8236      |
| AF085929  | 4262.164  | 3854.189  | AK024272  | 7752.215  | 7191.585  | NM_017617 | 3415.754  | 2797.219  |
| AK001126  | 3547.394  | 3745.42   | NM_016381 | 1850.304  | 1645.039  | AF131830  | 1208.704  | 953.507   |
| AF085976  | 6717.496  | 6461.945  | AL591715  | 511.48    | 295.831   | NM_014811 | 803.502   | 537.05    |
| AF075104  | 9537.479  | 8545.651  | NM_018042 | 3606.594  | 4537.046  | AF147426  | 2212.661  | 2636.39   |
| AK021724  | 595.125   | 581.73    | BE741525  | 1101.022  | 1164.186  | BC019667  | 5392.512  | 6598.277  |
| AL133025  | 784.711   | 952.932   | BF030555  | 23377.691 | 25659.791 | AK026026  | 1946.525  | 2920.126  |
| AL137402  | 11965.357 | 12780.137 | NM_012433 | 10761.001 | 9669.313  | AF085941  | 13653.446 | 22403.059 |
| AL137617  | 3473.368  | 2665.638  | NM_002576 | 2653.566  | 2412.919  | Z69892    | 7552.12   | 11105.712 |
| AL359568  | 23234.191 | 21901.924 | NM_003582 | 2858.517  | 3071.135  | AK023590  | 3392.827  | 4274.107  |
| AL133564  | 9461.288  | 8808.493  | AF057354  | 853.972   | 601.913   | AF087961  | 863.266   | 1015.011  |
| AL137428  | 1221.281  | 1324.814  | AF169351  | 6348.714  | 9199.427  | AL137309  | 2217.942  | 3902.778  |
| AL157462  | 1546.232  | 1815.568  | M14200    | 54589.434 | 53515.172 | AL137475  | 1100.679  | 1432.496  |
| AL359602  | 13073.894 | 13839.979 | NM_000282 | 3751.217  | 4114.287  | AL161956  | 4045.688  | 5238.155  |
| NM_01819C | 41386.746 | 43022.875 | NM_000532 | 18829.438 | 20739.35  | AL390176  | 2639.638  | 3288.101  |
| AF086054  | 1107.787  | 965.57    | NM_016341 | 908.899   | 913.775   | AL137356  | 1130.3    | 1476.043  |
| AK022259  | 56941.754 | 46576.367 | NM_004034 | 3245.056  | 1345.736  | AL137547  | 1399.161  | 1625.661  |
| AK022461  | 772.748   | 1076.203  | NM_000130 | 3984.493  | 2098.184  | AK021994  | 1387.825  | 1708.815  |
| NM_01601C | 2695.287  | 3469.913  | AF193756  | 451.64    | 334.88    | Z70763    | 932.815   | 883.268   |
| AK023783  | 586.429   | 539.759   | AI492087  | 1471.9    | 1152.335  | AK023802  | 9762.465  | 10191.156 |
| AF070647  | 25785.293 | 24271.906 | R72122    | 2485.641  | 2253.908  | AF086103  | 767.741   | 503.041   |
| AF116649  | 1530.609  | 1462.948  | Z35309    | 1231.92   | 817.335   | AL080135  | 508.725   | 521.908   |
| AF174394  | 2924      | 2501.489  | X04571    | 518.327   | 417.707   | AK023158  | 1250.235  | 1038.899  |
| AF144054  | 637.351   | 656.158   | AA700005  | 785.393   | 880.303   | AF085852  | 4962.486  | 2907.644  |
| AK025924  | 799.51    | 926.542   | AA292025  | 927.117   | 841.534   | AK023952  | 2552.199  | 3938.948  |
| AK021876  | 15803.224 | 12987.271 | AA437226  | 1281.045  | 1073.044  | AK000787  | 1122.009  | 1312.47   |
| AK022017  | 983.722   | 1032.996  | R36143    | 461.203   | 375.753   | AF090885  | 14954.354 | 20163.514 |
| AK022160  | 2552.768  | 2480.584  | XM_056359 | 619.017   | 1028.853  | AF161342  | 1144.939  | 1176.722  |
| AK022295  | 890.485   | 1094.411  | AK056843  | 1653.567  | 1699.197  | NM_01664E | 680.664   | 1308.022  |
| AK021935  | 2553.353  | 2259.281  | U49928    | 9611.828  | 9372.673  | NM_01408Z | 1997.413  | 2322.175  |

|           |           |           |           |           |           |           |           |           |
|-----------|-----------|-----------|-----------|-----------|-----------|-----------|-----------|-----------|
| AK022187  | 15707.519 | 19413.648 | AK096645  | 16635.873 | 17779.646 | AF100636  | 2280.028  | 2548.314  |
| AK022337  | 2288.99   | 1982.19   | AK092859  | 853.161   | 916.3     | AK022197  | 1789.433  | 2306.253  |
| AK026847  | 802.872   | 800.922   | NM_019884 | 5187.084  | 5949.396  | AK021970  | 1112.35   | 1718.037  |
| AK023048  | 1070.848  | 1054.025  | NM_018291 | 4311.208  | 4931.588  | AK022066  | 59592.008 | 62656.484 |
| AL359560  | 617.005   | 489.147   | NM_005530 | 4862.885  | 4433.607  | AK022224  | 1788.039  | 2571.725  |
| AK026891  | 1805.526  | 1460.458  | AF116909  | 1007.78   | 406.182   | AK022359  | 1010.969  | 1370.71   |
| AK025573  | 864.889   | 780.404   | BE906724  | 832.975   | 571.697   | AK022000  | 1380.304  | 1532.193  |
| AK024595  | 771.443   | 647.041   | NM_002283 | 6225.769  | 4316.466  | AK022129  | 2268.014  | 2302.276  |
| AK025313  | 624.27    | 614.809   | AJ276095  | 9705.693  | 7613.124  | AK022263  | 2849.226  | 2815.563  |
| AL137562  | 3986.053  | 4563.85   | NM_004819 | 2814.093  | 2251.935  | AK022384  | 976.196   | 972.936   |
| M90355    | 57002.625 | 54409.004 | NM_007184 | 1787.094  | 1666.427  | AK027097  | 703.204   | 595.508   |
| AK022495  | 5389.293  | 5047.212  | NM_005291 | 22227.047 | 19382.35  | AK027198  | 1311.7    | 1016.248  |
| AK021632  | 856.293   | 703.902   | AF253316  | 661.358   | 469.46    | AK023324  | 813.391   | 611.566   |
| AK026373  | 23657.754 | 18074.004 | NM_005855 | 324.065   | 293.46    | AK000257  | 2927.271  | 4226.282  |
| AK021581  | 3160.827  | 3680.934  | NM_002923 | 2087.209  | 1706.664  | NM_006160 | 3187.029  | 3350.444  |
| AK021744  | 1590.458  | 1003.673  | NM_006794 | 541.145   | 657.929   | NM_000525 | 911.365   | 1248.09   |
| NM_018430 | 17050.91  | 12727.438 | NM_018653 | 542.748   | 541.677   | AF009259  | 882.783   | 954.865   |
| AL110200  | 1084.414  | 890.794   | NM_005388 | 4567.836  | 5938.395  | AF009260  | 1789.686  | 1619.877  |
| AL133640  | 1919.423  | 2177.838  | NM_003027 | 1058.087  | 1907.421  | NM_003075 | 1673.799  | 2482.124  |
| AJ012502  | 13622.322 | 13539.896 | NM_002717 | 5601.104  | 6378.456  | NM_017902 | 3405.042  | 4699.747  |
| AK021722  | 731.156   | 848.81    | NM_012114 | 835.103   | 900.237   | AL359567  | 1167.271  | 1065.839  |
| NM_000681 | 516.037   | 218.178   | NM_014486 | 697.989   | 639.115   | NM_017725 | 3464.128  | 3456.448  |
| AF147445  | 2394.062  | 2470.276  | NM_003025 | 11461.238 | 10939.669 | AK026716  | 550.141   | 516.682   |
| Y10508    | 10963.47  | 9820.671  | NM_020179 | 9268.758  | 15997.826 | AL049325  | 8453.772  | 6701.425  |
| NM_005182 | 61428.445 | 55356.266 | NM_004306 | 41060.984 | 64471.801 | AK024154  | 5050.391  | 5758.49   |
| D17074    | 1207.561  | 1231.75   | NM_006786 | 1111.452  | 1203.6    | AF086341  | 914.26    | 1211.927  |
| AF039944  | 7523.059  | 7179.533  | NM_006205 | 1966.748  | 2220.411  | AK026672  | 1481.001  | 1840.093  |
| AJ276252  | 756.117   | 939.725   | NM_006860 | 6706.091  | 2710.581  | S83282    | 56989.848 | 60270.629 |
| AK021716  | 6079.164  | 4847.279  | NM_004794 | 11877.515 | 5610.885  | AK024164  | 19692.096 | 19969.691 |
| AK025035  | 12481.823 | 11595.681 | NM_004283 | 947.853   | 808.114   | AF052130  | 9390.646  | 10255.079 |
| AK002085  | 10104.229 | 9824.418  | NM_004163 | 8674.122  | 6893.091  | AF130090  | 15393.613 | 16640.008 |
| AF086200  | 359.423   | 449.045   | AK026308  | 1408.353  | 1228.781  | AL096727  | 1315.902  | 1216.385  |
| AL133618  | 7138.501  | 6993.035  | NM_006788 | 772.908   | 715.133   | AL080110  | 8801.857  | 10559.476 |
| AF230314  | 936.388   | 1054.304  | AK025039  | 312.82    | 417.548   | NM_020425 | 1445.588  | 1552.605  |
| AF119872  | 8976.035  | 9186.029  | NM_016568 | 1021.663  | 952.563   | AK024076  | 2089.369  | 2635.786  |
| AK023255  | 47545.164 | 43298.578 | AB033102  | 16805.844 | 26758.158 | M87940    | 1650.91   | 1775.796  |
| NM_002622 | 46124     | 41798.426 | NM_014774 | 4392.56   | 6184.193  | L77588    | 1930.766  | 2406.097  |
| AK024185  | 1941.688  | 1613.782  | NM_014143 | 7617.294  | 7409.627  | AF086304  | 17485.512 | 20813.348 |
| NM_015417 | 716.691   | 678.682   | M55646    | 10989.942 | 12127.01  | AB032976  | 1657.57   | 1832.125  |
| AK026101  | 8756.096  | 11919.243 | NM_006112 | 15283.365 | 14613.287 | AF301222  | 19111.35  | 23914.393 |
| AK022194  | 30117.816 | 28029.195 | M12807    | 535.371   | 576.971   | AF215981  | 7964.17   | 7612.457  |
| AF085963  | 2489.783  | 2214.552  | NM_001765 | 4242.343  | 6617.947  | NM_000732 | 52528.523 | 49077.93  |
| AF131851  | 722.636   | 480.729   | NM_003361 | 1508.274  | 2705.256  | AF130044  | 1721.31   | 999.119   |
| AK021436  | 1487.88   | 1544.367  | NM_012099 | 2779.729  | 4810.637  | AF087980  | 2164.69   | 1416.624  |
| U58664    | 1142.722  | 990.678   | NM_018684 | 14323.681 | 18064.289 | AF075111  | 590.945   | 955.698   |
| AL137569  | 4573.603  | 3772.865  | NM_017983 | 899.722   | 918.392   | NM_013935 | 2671.156  | 3001.294  |
| AK021920  | 3803.267  | 3409.545  | AF057354  | 872.31    | 418.901   | AB038651  | 4011.342  | 4702.78   |
| AL049415  | 2749.236  | 2139.253  | AF169351  | 6010.167  | 2864.85   | AL359603  | 589.727   | 1387.906  |
| AK022375  | 1491.054  | 1069.752  | M14200    | 50552.777 | 28726.873 | X84838    | 632.656   | 755.967   |
| NM_003378 | 58049.262 | 52950.875 | NM_000282 | 3265.199  | 2551.084  | AL117643  | 2105.187  | 2513.664  |
| AL110194  | 13650.711 | 13301.12  | NM_018091 | 6715.939  | 5566.895  | AF069135  | 6572.467  | 5820.473  |
| AF138860  | 2403.872  | 2884.781  | NM_001108 | 5055.822  | 4856.645  | AK026524  | 1047.129  | 952.001   |
| NM_006687 | 2407.655  | 2717.767  | NM_016630 | 10322.628 | 9934.545  | AB011157  | 6207.203  | 7296.802  |

|           |           |           |           |           |           |           |           |           |
|-----------|-----------|-----------|-----------|-----------|-----------|-----------|-----------|-----------|
| NM_013301 | 867.112   | 1187.823  | NM_014291 | 6763.789  | 6192.46   | U17632    | 898.909   | 1097.952  |
| NM_017673 | 1373.564  | 1286.21   | NM_014631 | 374.596   | 424.401   | AK026764  | 1444.065  | 2097.042  |
| AB046857  | 1079.194  | 839.012   | NM_001089 | 2355.517  | 3159.264  | AF113700  | 2284.59   | 3192.799  |
| AK024408  | 16804.85  | 13021.309 | NM_000120 | 1925.357  | 2299.613  | NM_017835 | 16563.088 | 18276.756 |
| AJ227905  | 749.49    | 947.827   | AF172327  | 21998.693 | 18786.59  | NM_018347 | 2973.073  | 2962.484  |
| AF086307  | 23488.074 | 19007.727 | NM_001676 | 4487.257  | 5406.776  | AK024986  | 560.082   | 612.582   |
| L19364    | 2196.551  | 2098.809  | NM_004519 | 487.675   | 537.161   | AK026730  | 740.168   | 952.492   |
| NM_005390 | 3919.768  | 2480.977  | U09384    | 685.349   | 1059.929  | AK024739  | 2062.148  | 2089.202  |
| CY3Cy5    | 11199.338 | 775.879   | NM_019884 | 4114.241  | 1831.329  | AK098681  | 1208.174  | 1239.005  |
| L07738    | 394.486   | 443.329   | AB023152  | 706.786   | 620.449   | AK026772  | 501.637   | 652.803   |
| Z48054    | 733.064   | 1130.421  | NM_006212 | 3051.588  | 2620.715  | NM_014260 | 11386.959 | 10695.834 |
| H90415    | 1331.047  | 1412.555  | AK022872  | 2965.174  | 2198.675  | AK026458  | 680.491   | 718.691   |
| AA676470  | 7723.267  | 7312.084  | AK024272  | 7659.987  | 7086.927  | CY3Cy5    | 2712.101  | 166.508   |
| M38258    | 538.315   | 709.411   | NM_016381 | 1653.968  | 1241.079  | R28062    | 1227.629  | 982.565   |
| AA457155  | 17696.301 | 17201.732 | AL591715  | 605.823   | 477.921   | BI756258  | 1387.337  | 1172.985  |
| BM014365  | 921.597   | 791.166   | NM_018042 | 3640.257  | 3333.275  | AF110020  | 448.038   | 345.799   |
| H91842    | 671.529   | 351.429   | BE741525  | 992.335   | 746.042   | AA608557  | 3731.704  | 2291.876  |
| U78045    | 1828.454  | 1579.949  | BF030555  | 24412.832 | 28093.26  | AL050095  | 2010.651  | 770.118   |
| AA878561  | 54322.344 | 54123.004 | NM_012433 | 11327.323 | 13804.756 | NM_000495 | 534.604   | 1204.149  |
| BF688309  | 857.371   | 718.481   | NM_002576 | 2622.952  | 3493.561  | NM_000664 | 623.688   | 1562.623  |
| AI538525  | 1180.345  | 2464.043  | NM_003582 | 2643.592  | 3154.883  | SR9       | 12813.608 | 2513.719  |
| NM_000623 | 580.567   | 587.274   | NM_020179 | 7275.611  | 3329.182  | CY3Cy5    | 3380.97   | 158.512   |
| NM_000941 | 1409.781  | 1496.958  | NM_004306 | 24994.068 | 16773.387 | NM_000416 | 2874.427  | 2064.385  |
| SR1       | 57639.32  | 57472.176 | NM_006205 | 3102.29   | 2583.225  | NM_002965 | 596.08    | 1113.248  |
| SR3       | 52771.805 | 50891.043 | R72122    | 2834.772  | 2172.714  | AB007883  | 1380.064  | 1101.866  |
| SR5       | 8955.655  | 9048.569  | Z35309    | 1605.329  | 1042.878  | AK093780  | 5054.959  | 5883.93   |
| SR7       | 7503.144  | 52717.891 | X04571    | 315.705   | 379.609   | NM_007037 | 8793.81   | 8944.283  |
| SR9       | 19101.977 | 4134.02   | AA700005  | 602.802   | 462.597   | NM_005492 | 400.098   | 1028.202  |
| CY3Cy5    | 5519.345  | 168.197   | AA292025  | 764.811   | 843.974   | AF038196  | 2229.361  | 1952.735  |
| U62858    | 395.674   | 445.996   | AA437226  | 1252.497  | 1324.569  | NM_004855 | 4810.411  | 2681.371  |
| NM_001781 | 1804.063  | 1937.564  | R36143    | 407.305   | 530.699   | NM_005014 | 758.839   | 1935.515  |
| NM_014432 | 728.918   | 1033.796  | XM_056359 | 564.573   | 424.503   | NM_006944 | 557.148   | 1602.504  |
| NM_001555 | 918.875   | 764.46    | D10353/NM | 4079.528  | 3903.347  | NM_001202 | 698.299   | 676.198   |
| NM_002530 | 756.49    | 492.909   | M15042    | 3682.361  | 3632.236  | NM_003285 | 29525.361 | 33183.168 |
| U96173    | 1743.333  | 1317.602  | AK056843  | 1774.766  | 1761.328  | NM_006323 | 5964.982  | 4926.383  |
| NM_018941 | 1341.374  | 1312.926  | U49928    | 9171.667  | 11050.575 | NM_016466 | 1458.3    | 1452.019  |
| NM_020241 | 1626.923  | 1047.514  | AK096645  | 17551.746 | 20061.309 | NM_001493 | 5491.205  | 4056.356  |
| BE730585  | 1285.349  | 851.055   | AK092859  | 979.532   | 872.814   | NM_014426 | 8084.66   | 7529.861  |
| NM_001980 | 2169.212  | 1956.986  | M12807    | 452.426   | 244.337   | NM_006816 | 16635.221 | 18191.045 |
| NM_012471 | 1020.716  | 1118.475  | NM_001765 | 3053.16   | 1871.91   | NM_000255 | 9469.123  | 9333.325  |
| NM_001321 | 4860.846  | 5246.48   | NM_003361 | 1227.551  | 1158.744  | AB033055  | 4968.079  | 4878.811  |
| AB018264  | 5235.855  | 4139.604  | NM_012099 | 2377.712  | 1425.833  | AF311287  | 2078.85   | 2361.29   |
| NM_006911 | 1068.572  | 943.781   | NM_004819 | 3119.904  | 2640.736  | NM_003095 | 864.692   | 507.06    |
| U92544    | 3378.817  | 2138.25   | NM_007184 | 1818.461  | 1773.508  | NM_014781 | 1460.591  | 977.912   |
| NM_019644 | 792.633   | 432.992   | NM_005291 | 26858.055 | 19635.131 | BU629989  | 1186.575  | 679.26    |
| NM_006791 | 3714.952  | 3250.685  | NM_002923 | 2008.792  | 1502.174  | X87896    | 576.474   | 1045.244  |
| AJ278348  | 13653.191 | 13335.248 | NM_006794 | 797.84    | 717.828   | M88310    | 1130.414  | 1766.464  |
| AI285199  | 1422.51   | 1075.604  | NM_018653 | 569.718   | 526.161   | NM_000042 | 951.556   | 829.317   |
| AL035297  | 900.84    | 874.481   | NM_005385 | 4211.119  | 4065.015  | NM_016335 | 943.59    | 815.942   |
| NM_004405 | 803.15    | 646.266   | NM_007232 | 26986.273 | 25224.912 | NM_003165 | 3784.092  | 3677.53   |
| AJ131244  | 815.185   | 1226.068  | NM_003027 | 821.313   | 891.82    | NM_003906 | 5950.55   | 4128.711  |
| NM_002532 | 2044.543  | 3312.573  | NM_016257 | 339.255   | 414.076   | AL359590  | 27318.498 | 23197.01  |
| NM_012385 | 1095.078  | 1129.522  | NM_002717 | 5079.929  | 5313.602  | NM_002861 | 6309.503  | 6298.086  |



|           |           |           |           |           |           |           |           |           |
|-----------|-----------|-----------|-----------|-----------|-----------|-----------|-----------|-----------|
| NM_016651 | 546.817   | 478.337   | NM_014486 | 327.022   | 444.869   | NM_00308C | 2596.967  | 2109.251  |
| NM_001671 | 748.37    | 735.336   | NM_003025 | 11956.698 | 12188.455 | NM_01326E | 432.495   | 386.47    |
| NM_019843 | 2235.16   | 2790.337  | NM_001679 | 15269.006 | 9000.031  | NM_00264E | 1675.097  | 1808.583  |
| NM_016192 | 2054.328  | 2553.492  | NM_004046 | 61069.262 | 52328.457 | AB033027  | 890.693   | 989.446   |
| BE878426  | 55900.285 | 53190.93  | U09384    | 1072.621  | 950.62    | AB014550  | 1980.793  | 1978.44   |
| NM_00174E | 18840.729 | 14991.065 | NM_00686C | 6914.027  | 7299.048  | AF320294  | 2198.028  | 2288.856  |
| NM_00382E | 8596.329  | 10286.685 | NM_004163 | 8469.827  | 6867.533  | AF161436  | 3595.193  | 2346.24   |
| AK025006  | 18865.643 | 30594.609 | AK026308  | 1926.221  | 1348.574  | NM_020402 | 1514.375  | 1148.532  |
| AF218014  | 11284.187 | 10701.833 | NM_013337 | 1744.263  | 1556.43   | NM_00429C | 1374.646  | 3453.667  |
| NM_00667E | 3514.582  | 3359.862  | NM_004193 | 1862.887  | 1488.68   | NM_001171 | 678.556   | 872.249   |
| AY007729  | 40509.594 | 30557.955 | NM_002803 | 11194.139 | 9251.34   | NM_00225C | 3102.357  | 3330.822  |
| NM_014424 | 686.621   | 607.17    | NM_00550E | 3998.56   | 3504.145  | NM_00647E | 1543.173  | 1346.763  |
| AF159092  | 2023.009  | 2029.588  | NM_00678E | 782.841   | 727.73    | AF132734  | 10514.306 | 10460.5   |
| BC007318  | 10018.112 | 7289.48   | AK025039  | 240.867   | 343.593   | NM_01837C | 1314.544  | 1037.576  |
| M36693    | 1999.807  | 1615.981  | NM_01656E | 972.598   | 905.891   | NM_016403 | 21814.346 | 15725.105 |
| NM_016292 | 8038.132  | 6190.056  | AB033102  | 16275.499 | 16564.465 | NM_015603 | 1192.475  | 942.866   |
| NM_002601 | 6790.309  | 4495.884  | NM_014774 | 4519.324  | 4905.863  | NM_001921 | 5512.244  | 5080.498  |
| NM_00589E | 2937.472  | 5252.506  | NM_014143 | 8186.953  | 8601.122  | NM_00623C | 7577.228  | 6556.83   |
| BF311880  | 608.607   | 573.991   | M55646    | 21837.787 | 25101.076 | NM_01469C | 3234.389  | 2834.014  |
| NM_00136C | 12617.655 | 17630.977 | NM_006112 | 17843.307 | 17368.299 | NM_01340C | 7670.698  | 10380.653 |
| AK026656  | 3906.996  | 3868.198  | BE741525  | 900.661   | 1339.468  | AK026257  | 1302.353  | 1520.414  |
| AJ276207  | 7004.525  | 6674.953  | BF030555  | 18184.982 | 27669.816 | AK023836  | 3325.888  | 3775.013  |
| AB011131  | 13960.466 | 9198.632  | NM_012433 | 9196.313  | 5396.268  | AJ299442  | 3102.466  | 3938.444  |
| NM_00074C | 610.873   | 349.986   | NM_00560E | 4473.268  | 2637.032  | NM_00012C | 1906.219  | 1362.995  |
| NM_000751 | 9067.577  | 9218.266  | NM_00257C | 2681.454  | 1846.761  | NM_003762 | 4479.077  | 9205.369  |
| NM_01484C | 5494.314  | 6115.272  | NM_003582 | 2723.244  | 2683.095  | NM_01844E | 3527.927  | 7412.633  |
| NM_001042 | 5811.096  | 5677.182  | AF057354  | 700.138   | 621.779   | NM_000187 | 695.884   | 959.585   |
| NM_01222C | 4423.705  | 3225.452  | AF169351  | 6645.34   | 6600.104  | NM_01446E | 912.177   | 1145.083  |
| NM_005071 | 3184.573  | 2386.688  | NM_000282 | 3345.882  | 3273.483  | D87292    | 776.133   | 857.385   |
| AB023147  | 3494.559  | 2987.131  | NM_000532 | 17436.48  | 13293.273 | NM_00549E | 1197.635  | 1637.272  |
| NM_01661E | 6893.493  | 4023.138  | NM_016341 | 1022.935  | 872.784   | NM_001202 | 586.257   | 552.707   |
| NM_00563C | 1189.486  | 885.457   | AF231916  | 3092.336  | 3165.184  | NM_00328C | 20411.242 | 16430.031 |
| NM_012201 | 1063.858  | 2108.128  | NM_003501 | 4542.162  | 4321.477  | M23254    | 346.815   | 439.642   |
| AB046774  | 564.138   | 846.823   | AK022654  | 36350.605 | 29804.633 | BE618539  | 319.626   | 286.252   |
| AK022385  | 5039.408  | 5951.422  | BC002905  | 6419.769  | 6218.208  | R28062    | 1053.025  | 1167.305  |
| AK024584  | 1368.712  | 1390.26   | NM_018091 | 7805.363  | 7871.061  | BI756258  | 1711.709  | 1773.318  |
| NM_003504 | 3167.017  | 3914.191  | NM_001108 | 4960.169  | 5021.189  | AI342225  | 50080.586 | 49396.313 |
| NM_01329E | 969.089   | 1043.525  | NM_001637 | 500.806   | 435.876   | AA634103  | 60735.273 | 71534.922 |
| NM_007267 | 1312.96   | 1386.115  | NM_01663C | 11561.232 | 10886.05  | AF110020  | 557.424   | 299.075   |
| AK022830  | 404.066   | 554.702   | NM_014291 | 7903.384  | 7746.454  | AA608557  | 2586.786  | 1867.341  |
| Z36816    | 1308.547  | 1444.152  | NM_014631 | 402.933   | 510.259   | AL050095  | 1780.824  | 1532.781  |
| NM_00586E | 5707.447  | 4795.58   | NM_00108C | 2849.605  | 4670.715  | U03272    | 587.57    | 1118.698  |
| NM_006413 | 13712.18  | 12079.299 | NM_00012C | 2428.076  | 4765.958  | NM_000664 | 591.067   | 956.626   |
| AK025542  | 3774.625  | 3149.99   | AF172327  | 24706.1   | 24184.08  | AF075085  | 54185.266 | 67806.484 |
| AF207547  | 1027.975  | 1270.227  | NM_00167C | 4646.883  | 6445.174  | NM_005892 | 1192.673  | 2052.096  |
| NM_00276E | 7500.355  | 6983.891  | AB018338  | 10953.914 | 24917.104 | NM_000042 | 986.063   | 874.898   |
| NM_003691 | 4809.278  | 4298.164  | D80010    | 2058.319  | 5578.969  | NM_01480E | 776.502   | 1117.741  |
| NM_00295C | 22496.432 | 20935.541 | NM_004923 | 922.559   | 615.509   | NM_00041E | 3130.077  | 3576.645  |
| NM_00231E | 3072.252  | 2273.522  | NM_003971 | 1348.878  | 751.237   | NM_00296E | 707.735   | 1295.503  |
| NM_001433 | 835.317   | 438.443   | AK026973  | 711.876   | 519.195   | AB007883  | 1361.985  | 1435.221  |
| NM_003134 | 51400.723 | 48022.113 | NM_005822 | 928.004   | 813.894   | AK093780  | 4032.494  | 4433.647  |
| NM_004314 | 3947.742  | 2710.195  | U81002    | 6206.71   | 4927.437  | AY009397  | 45842.438 | 33599.855 |
| NM_018247 | 7097.228  | 5669.261  | NM_01629C | 10289.265 | 10487.357 | NM_007037 | 6920.434  | 4954.839  |

|           |           |           |           |           |           |           |           |           |
|-----------|-----------|-----------|-----------|-----------|-----------|-----------|-----------|-----------|
| NM_017979 | 6332.731  | 4020.365  | L38517    | 3754.588  | 4050.468  | NM_005014 | 570.61    | 1049.504  |
| NM_006791 | 866.505   | 921.651   | NM_018291 | 4543.474  | 3912.872  | NM_006944 | 702.787   | 1386.436  |
| AJ278348  | 3323.299  | 4278.217  | NM_005530 | 4716.995  | 3849.028  | NM_000070 | 1339.199  | 2656.918  |
| Z48054    | 614.268   | 774.018   | NM_006899 | 7297.631  | 6250.761  | NM_002250 | 3020.145  | 2747.281  |
| H90415    | 1704.849  | 2098.826  | NM_012200 | 2704.05   | 2632.08   | NM_006323 | 5615.213  | 6323.886  |
| AA676470  | 10606.453 | 9073.923  | NM_001724 | 2216.773  | 1882.214  | NM_016466 | 1694.582  | 2374.249  |
| M38258    | 738.638   | 586.714   | NM_000150 | 4156.67   | 4665.039  | NM_001493 | 5305.828  | 5407.155  |
| AA457155  | 26177.16  | 19311.408 | AB023152  | 828.502   | 934.445   | NM_014426 | 6932.285  | 7340.533  |
| BM014365  | 1073.636  | 879.937   | NM_006212 | 3641.452  | 2873.602  | NM_006816 | 15071.421 | 12917.276 |
| H91842    | 641.004   | 479.42    | AK022872  | 3464.245  | 2667.296  | AK026518  | 29070.277 | 22271.723 |
| U78045    | 1520.057  | 844.444   | AK024272  | 8436.13   | 8928.73   | NM_000258 | 8118.647  | 5254.255  |
| AA878561  | 56216.879 | 54892.828 | NM_016381 | 1920.737  | 1778.746  | AB033055  | 3022.79   | 1933.63   |
| BF688309  | 725.604   | 677.989   | NM_018042 | 4214.598  | 4576.536  | AF311287  | 2112.223  | 1077.896  |
| AI538525  | 841.572   | 1177.211  | NM_014944 | 4767.526  | 8114.228  | NM_003098 | 1110.777  | 2696.338  |
| NM_000941 | 1263.727  | 1093.157  | NM_001942 | 433.33    | 617.406   | NM_014781 | 2384.299  | 4920.504  |
| AF222980  | 1059.003  | 865.881   | AF200348  | 4033.075  | 3172.607  | BU629989  | 450.464   | 935.963   |
| AK026758  | 3260.926  | 2249.589  | Y11710    | 428.804   | 290.565   | X87896    | 595.239   | 994.924   |
| AF159092  | 301.324   | 680.043   | J03756    | 393.536   | 361.268   | M88310    | 1319.614  | 2967.42   |
| BC007318  | 2307.58   | 3217.249  | NM_002650 | 1832.83   | 1712.848  | NM_018446 | 2838.701  | 2788.566  |
| M36693    | 707.282   | 897.588   | NM_003260 | 10770.093 | 16049.342 | NM_000187 | 492.093   | 670.357   |
| NM_016292 | 2230.677  | 3157.276  | AK024071  | 1553.137  | 1546.595  | NM_014465 | 990.369   | 616.309   |
| NM_002601 | 2621.902  | 3737.764  | AF056490  | 1449.066  | 1609.702  | D87292    | 855.31    | 606.909   |
| U62858    | 406.045   | 615.24    | NM_005539 | 975.512   | 1147.129  | NM_016335 | 1274.725  | 1185.195  |
| NM_001781 | 2235.414  | 3123.68   | NM_005541 | 1333.517  | 1169.62   | NM_003165 | 3800.595  | 3936.688  |
| AF035121  | 497.92    | 788.368   | AB002319  | 1558.366  | 1704.517  | NM_003906 | 6351.573  | 6229.592  |
| NM_014432 | 1592.243  | 1936.685  | AF039942  | 4093.824  | 4412.728  | AL359590  | 12333.215 | 13706.423 |
| NM_001558 | 2019.331  | 1679.053  | NM_004421 | 2593.977  | 2925.24   | NM_002861 | 5657.257  | 6806.166  |
| NM_002530 | 646.284   | 424.774   | AB046863  | 14982.404 | 16018.156 | NM_003080 | 2367.853  | 2679.556  |
| U96173    | 2078.729  | 1755.662  | M62403    | 9023.747  | 8382.188  | NM_002645 | 1210.57   | 1409.828  |
| NM_018941 | 1828.873  | 1297.173  | NM_017883 | 3373.922  | 3438.483  | AB033027  | 931.213   | 649.005   |
| NM_020241 | 3420.115  | 2421.56   | AK025131  | 3618.305  | 3966.373  | AK021805  | 4834.113  | 3546.666  |
| BE730585  | 832.563   | 841.018   | NM_000754 | 17849.949 | 18875.131 | AB014550  | 1879.668  | 1253.775  |
| NM_005954 | 490.888   | 316.295   | NM_014619 | 1211.08   | 1334.272  | AF161436  | 4865.941  | 7717.878  |
| NM_012471 | 1451.814  | 1078.347  | NM_005629 | 14179.708 | 19237.238 | NM_020402 | 2414.119  | 5054.589  |
| NM_001321 | 5063.122  | 3739.265  | J04621    | 1081.435  | 1654.387  | NM_004295 | 1331.87   | 3271.896  |
| AB018264  | 5764.901  | 4090.845  | NM_000718 | 2324.46   | 3190.966  | NM_001171 | 669.603   | 1551.459  |
| NM_006911 | 1206.857  | 862.73    | NM_000161 | 4922.484  | 5850.581  | NM_000664 | 462.756   | 527.471   |
| U92544    | 2537.171  | 1493.266  | NM_002634 | 17742.51  | 15404.561 | NM_006478 | 1430.753  | 1256.884  |
| NM_012229 | 1068.993  | 1289.271  | NM_017749 | 2631.529  | 2212.05   | AF132734  | 10668.97  | 13325.095 |
| AB023147  | 1234.102  | 1976.849  | NM_001972 | 501.869   | 322.544   | NM_018379 | 1293.644  | 979.857   |
| NM_016615 | 1320.723  | 1473.217  | NM_001445 | 531.896   | 401.488   | NM_016403 | 21546.748 | 18732.434 |
| NM_005630 | 431.814   | 417.709   | NM_002006 | 17342.805 | 14670.858 | NM_015603 | 1025.63   | 940.215   |
| NM_016730 | 11949.05  | 14765.126 | NM_007111 | 8302.92   | 6859.248  | NM_001921 | 5077.791  | 4981.576  |
| AL035297  | 1134.846  | 1557.276  | NM_002048 | 778.288   | 567.367   | NM_006230 | 6378.269  | 7037.562  |
| NM_004408 | 1486.691  | 1409.744  | NM_004702 | 1291.138  | 1652.104  | NM_014699 | 2121.916  | 2351.84   |
| AJ131244  | 1869.817  | 1683.185  | NM_007109 | 2216.758  | 1846.964  | NM_013400 | 6484.65   | 7901.188  |
| NM_002532 | 4803.658  | 4710.312  | AK023404  | 2053.693  | 2618.064  | AK026257  | 1279.633  | 1554.574  |
| NM_012388 | 4789.325  | 4106.309  | NM_013239 | 2045.633  | 2183.174  | AK023836  | 2736.174  | 2848.441  |
| NM_016651 | 1186.953  | 968.476   | NM_001789 | 2768.08   | 3299.825  | NM_018109 | 2155.537  | 1715.435  |
| NM_001671 | 1607.96   | 1049.548  | NM_016004 | 5522.339  | 5414.122  | AJ299442  | 4103.916  | 2907.667  |
| NM_019843 | 4332.648  | 3061.052  | NM_002655 | 1543.442  | 1723.668  | NM_000129 | 3318.987  | 7471.764  |
| NM_016192 | 4516.247  | 4050.683  | AB028955  | 15398.78  | 15985.278 | NM_003762 | 4922.479  | 10313.21  |
| BE878426  | 53972.422 | 53332.762 | U66879    | 12988.057 | 11675.407 | NM_004859 | 3611.368  | 3049.245  |

|           |           |           |           |           |           |           |           |           |
|-----------|-----------|-----------|-----------|-----------|-----------|-----------|-----------|-----------|
| NM_00174E | 18197.318 | 19601.375 | NM_016022 | 5340.625  | 5676.403  | NM_005014 | 416.217   | 445.738   |
| NM_00382E | 8226.229  | 9702.847  | NM_004874 | 2572.402  | 2383.653  | NM_006944 | 437.19    | 630.543   |
| AK025006  | 17681.252 | 15596.798 | NM_014204 | 1461.676  | 1463.346  | NM_00007C | 866.976   | 1132.949  |
| AF218014  | 13607.014 | 10605.279 | S70385    | 8479.937  | 9638.782  | NM_00120Z | 616.714   | 459.931   |
| NM_00667E | 5414.018  | 3560.885  | M34671    | 8744.84   | 9396.088  | NM_00328E | 21288.143 | 19415.043 |
| AY007729  | 39131.496 | 27285.602 | NM_018509 | 9046.134  | 10291.695 | R28062    | 905.411   | 941.521   |
| NM_003134 | 42240.684 | 49701.359 | NM_00408E | 6654.128  | 7163.527  | BI756258  | 1562.089  | 1011.785  |
| NM_004314 | 995.516   | 1846.32   | AL050199  | 1009.65   | 766.5     | AI342225  | 49552.75  | 33524.348 |
| NM_018247 | 1985.529  | 2520.28   | AF176706  | 1699.281  | 1540.594  | AA634103  | 59325.691 | 76053.797 |
| NM_01797E | 2491.12   | 3414.88   | NM_014484 | 676.921   | 570.126   | AA608557  | 3896.027  | 8466.39   |
| NM_00589E | 3762.119  | 4665.368  | NM_00108E | 1668.819  | 1432.501  | AL050095  | 2625.819  | 6710.213  |
| NM_00288E | 7921.343  | 12122.464 | NM_01467C | 2933.256  | 3114.594  | NM_00309E | 802.548   | 573.471   |
| AF078866  | 813.108   | 1317.532  | NM_01904E | 5479.279  | 5942.497  | NM_014781 | 1716.745  | 1452.854  |
| BF311880  | 7367.878  | 7706.504  | NM_00104C | 2409.797  | 3026.029  | M88310    | 1093.665  | 976.327   |
| NM_01607E | 900.965   | 1016.014  | AF279698  | 5688.915  | 8949.501  | NM_00004Z | 950.818   | 948.286   |
| NM_00136C | 23437.574 | 20278.305 | NM_01984E | 2257.507  | 4808.326  | NM_01480E | 740.333   | 1023.292  |
| AK026656  | 6863.417  | 5649.999  | NM_00004E | 768.734   | 1326.789  | NM_00041E | 3025.872  | 3345.949  |
| AJ276207  | 6977.392  | 8610.813  | AB032996  | 49471.859 | 53760.875 | NM_00296E | 679.329   | 944.18    |
| AB011131  | 13077.566 | 9573.572  | AB040881  | 3864.115  | 3268.448  | AB007883  | 1265.388  | 992.586   |
| NM_00074E | 743.622   | 656.556   | AY007121  | 1188.58   | 1560.35   | AK093780  | 3507.237  | 1879.669  |
| NM_000751 | 10478.811 | 9828.383  | NM_00337Z | 12584.432 | 12304.44  | NM_00164E | 419.071   | 1119.903  |
| NM_01484E | 7677.48   | 7387.791  | NM_007317 | 6645.475  | 5983.887  | NM_00549Z | 471.633   | 1513.003  |
| NM_00104Z | 7023.916  | 6246.938  | AB037826  | 438.457   | 330.192   | AF038196  | 1950.267  | 4891.92   |
| NM_000941 | 410.472   | 601.037   | AK021466  | 1919.663  | 2339.74   | AF320294  | 2279.878  | 1954.717  |
| AK026758  | 1217.601  | 1482.483  | NM_00644Z | 14717.873 | 15299.871 | AF161436  | 4077.262  | 2940.512  |
| NM_012201 | 964.016   | 1394.768  | NM_00155E | 372.653   | 269.434   | NM_02040Z | 1760.218  | 1325.304  |
| AB046774  | 565.833   | 610.931   | NM_00495E | 648.225   | 364.02    | NM_00429E | 1222.062  | 962.656   |
| AK022385  | 23670.885 | 23458.383 | AK026022  | 22431.619 | 13946.219 | NM_001171 | 485.079   | 468.34    |
| NM_00277E | 1129.453  | 973.336   | NM_00319E | 1174.545  | 650.767   | NM_00225C | 2510.684  | 3074.174  |
| AK024584  | 6880.47   | 4258.102  | NM_00293E | 6363.542  | 3631.335  | NM_00632Z | 4408.683  | 4457.807  |
| NM_003504 | 13047.784 | 12431.581 | AK023652  | 6577.195  | 5406.548  | NM_01646E | 1169.952  | 1576.371  |
| NM_01329E | 6172.16   | 5134.391  | AF099032  | 1308.222  | 1242.636  | NM_00149Z | 4530.927  | 4849.379  |
| NM_007267 | 3438.221  | 2855.279  | NM_00307C | 3161.491  | 2563.227  | NM_01442E | 5934.545  | 3852.959  |
| AK022830  | 808.599   | 625.475   | AL122101  | 3258.506  | 3556.719  | NM_00025E | 9109.262  | 23270.953 |
| Z36816    | 2249.8    | 2332.707  | NM_00478C | 735.12    | 686.467   | AB033055  | 4613.95   | 10939.498 |
| NM_00586E | 6935.622  | 4523.368  | NM_01621E | 4436.379  | 4384.363  | AF311287  | 2467.334  | 6545.71   |
| NM_00641Z | 12899.782 | 10493.626 | AK001649  | 1138.163  | 864.013   | AJ299442  | 3318.81   | 3512.143  |
| NM_017684 | 418.289   | 397.829   | NM_01663E | 10298.761 | 13254.522 | NM_00012E | 1775.305  | 1746.8    |
| AK025542  | 4900.425  | 4333.599  | AB018274  | 7396.301  | 9874.287  | NM_00376Z | 3320.982  | 3641.807  |
| AF207547  | 1156.912  | 1936.894  | NM_005871 | 7521.06   | 6272.073  | NM_01844E | 2647.03   | 3116.237  |
| NM_00276E | 10703.499 | 14609.192 | NM_00704Z | 2324.461  | 2038.77   | NM_000187 | 376.599   | 599.562   |
| NM_003691 | 5396.876  | 5151.927  | NM_01633Z | 7742.14   | 6656.728  | NM_01446E | 905.867   | 904.12    |
| NM_00295C | 25095.953 | 19986.205 | BE875028  | 2813.818  | 2917.599  | D87292    | 788.191   | 660.543   |
| NM_00231E | 3170.646  | 2672.708  | AK000511  | 3348.761  | 3296.972  | NM_00549E | 1042.351  | 948.285   |
| NM_001321 | 2099.503  | 2502.626  | AF121255  | 2582.669  | 2531.724  | NM_01633E | 1030.576  | 1463.384  |
| AB018264  | 2481.91   | 2909.475  | NM_005494 | 3988.317  | 4226.549  | NM_00316E | 3014.173  | 3695.222  |
| NM_006911 | 461.697   | 769.937   | NM_01794E | 898.907   | 943.944   | NM_00390E | 6513.134  | 5876.653  |
| U92544    | 1628.783  | 1620.798  | NM_00495Z | 3364.169  | 3707.387  | AL359590  | 20223.662 | 24638.748 |
| NM_006791 | 2181.009  | 2455.464  | AL049682  | 1347.059  | 1200.84   | NM_002861 | 4359.007  | 5127.585  |
| AJ278348  | 9867.404  | 11538.595 | NM_00552E | 4804.082  | 5013.023  | NM_00308C | 2235.508  | 1929.116  |
| AI285199  | 1744.637  | 1431.292  | AK022842  | 936.405   | 945.685   | NM_00264E | 2156.272  | 1494.385  |
| L07738    | 1102.664  | 1089.141  | NM_00700E | 17721.045 | 13356.632 | AB033027  | 1234.978  | 1974.682  |
| Z48054    | 1598.974  | 1163.401  | AL137346  | 502.349   | 374.179   | AK021805  | 6100.323  | 13636.771 |

|           |           |           |           |           |           |           |           |           |
|-----------|-----------|-----------|-----------|-----------|-----------|-----------|-----------|-----------|
| H90415    | 2157.112  | 2249.885  | NM_017756 | 23775.773 | 14962.19  | AB014550  | 1881.353  | 4771.193  |
| AA676470  | 17972.023 | 13238.784 | NM_005793 | 5728.01   | 3647.305  | NM_006826 | 7877.822  | 6239.765  |
| M38258    | 686.178   | 785.078   | NM_004901 | 1908.145  | 1485.871  | AB007973  | 4866.339  | 4318.703  |
| AA457155  | 25018.797 | 17404.164 | U77088    | 780.564   | 886.184   | M96843    | 3487.648  | 3568.186  |
| BM014365  | 709.113   | 601.225   | NM_006721 | 10991.822 | 9610.645  | NM_017791 | 1344.517  | 1096.824  |
| H91842    | 637.554   | 548.118   | NM_016282 | 6003.556  | 5609.922  | NM_005882 | 4237.888  | 4441.489  |
| U78045    | 1585.82   | 1276.842  | NM_002765 | 6259.934  | 5465.501  | BC012304  | 2742.183  | 3309.865  |
| AA878561  | 57237.215 | 54617.539 | NM_001905 | 2013.065  | 1809.839  | AB046815  | 1647.026  | 1349.882  |
| BF688309  | 732.427   | 537.494   | AF292100  | 4009.391  | 4894.839  | AF075085  | 45250.902 | 45780.5   |
| AI538525  | 720.483   | 715.795   | NM_003434 | 51356.441 | 45211.387 | NM_005892 | 1158.798  | 1602.418  |
| NM_003825 | 3016.596  | 5511.868  | NM_018181 | 713.731   | 778.026   | NM_006478 | 1051.486  | 1134.835  |
| AK025006  | 6309.893  | 9193.262  | X68880    | 452.009   | 467.304   | AF132734  | 9049.775  | 9478.313  |
| AF218014  | 5187.339  | 7342.002  | NM_005654 | 433.551   | 292.615   | NM_018379 | 937.967   | 734.382   |
| NM_006678 | 1245.835  | 1990.45   | AF024698  | 56342.773 | 61648.004 | NM_016403 | 19010.727 | 16947.375 |
| AY007729  | 22037.885 | 26061.695 | BE904617  | 22954.744 | 22663.066 | NM_015603 | 919.808   | 921.641   |
| NM_014424 | 575.656   | 774.669   | AK024495  | 676.413   | 833.155   | NM_001921 | 5146.926  | 4557.545  |
| AF159092  | 1387.509  | 1925.637  | AF024694  | 3242.26   | 3543.269  | NM_006230 | 6203.438  | 5673.232  |
| BC007318  | 8270.327  | 9476.451  | AF091081  | 7633.7    | 6522.397  | NM_014699 | 3165.859  | 2397.938  |
| M36693    | 2405.1    | 2609.767  | AK001758  | 4138.752  | 4266.723  | NM_013400 | 5973.637  | 4085.651  |
| NM_016292 | 8840.722  | 8661.764  | U90842    | 629.383   | 717.348   | AK026257  | 1339.007  | 896.29    |
| NM_002601 | 6943.072  | 6811.994  | AF086325  | 1713.373  | 2743.546  | AK023836  | 3531.04   | 4170.404  |
| U62858    | 2029.417  | 2264.287  | NM_004928 | 519.91    | 662.148   | NM_018109 | 2241.435  | 4715.413  |
| NM_001781 | 3674.385  | 4020.252  | AF147401  | 613.41    | 568.5     | NM_005076 | 9375.692  | 5367.938  |
| NM_014432 | 1627.067  | 1160.165  | AJ001904  | 463.67    | 438.608   | AF253321  | 555.581   | 691.663   |
| NM_001558 | 2745.317  | 1687.181  | AF075022  | 1180.268  | 1825.37   | U80735    | 2219.22   | 2330.091  |
| U96173    | 2081.031  | 1604.806  | AF075060  | 2179.226  | 3024.068  | NM_017850 | 1455.976  | 1155.832  |
| NM_018941 | 1820.656  | 1500.195  | AB002438  | 403.569   | 428.309   | NM_016522 | 786.318   | 670.844   |
| NM_020241 | 2631.724  | 1879.787  | AF147436  | 728.194   | 762.504   | NM_002224 | 1581.79   | 1450.246  |
| BE730585  | 639.04    | 513.165   | AK021441  | 1151.397  | 1139.927  | X07979    | 18585.117 | 15633.533 |
| NM_001980 | 1790.295  | 1698.43   | AK026018  | 487.891   | 517.17    | NM_003874 | 1246.953  | 1260.996  |
| NM_000749 | 578.857   | 812.055   | AF085846  | 3154.274  | 3369.826  | NM_000082 | 918.774   | 1031.182  |
| NM_000751 | 4022.496  | 6092.331  | AK023901  | 10689.268 | 11961.676 | NM_018098 | 3540.452  | 4559.518  |
| NM_014849 | 2979.429  | 4657.115  | AL109705  | 1206.663  | 1316.64   | AF286164  | 982.817   | 1272.784  |
| NM_001042 | 4241.771  | 6612.47   | AF147392  | 630.208   | 899.836   | AF146277  | 4376.461  | 4241.166  |
| NM_012229 | 3059.747  | 3364.609  | AF088057  | 7704.128  | 9374.888  | AF055033  | 18829.143 | 18706.492 |
| NM_005071 | 924.488   | 1357.595  | AB024518  | 1290.403  | 1700.759  | NM_017700 | 564.061   | 642.523   |
| AB023147  | 3396.232  | 4518.881  | AF086255  | 12739.139 | 13989.989 | M37191    | 5581.417  | 4866.909  |
| NM_016615 | 11332.776 | 8141.161  | AK022660  | 1061.976  | 1160.93   | J04422    | 2920.866  | 2393.686  |
| NM_005630 | 1266.537  | 1545.066  | AF088051  | 1918.768  | 1679.615  | NM_005242 | 1588.845  | 1085.035  |
| NM_001046 | 450.786   | 595.72    | AF086260  | 336.521   | 256.101   | NM_003020 | 2425.926  | 1346.469  |
| AK023106  | 1200.967  | 1508.846  | AF086366  | 798.412   | 832.22    | NM_001114 | 1167.79   | 2305.562  |
| NM_016730 | 40722.328 | 43170.426 | AF086360  | 4062.454  | 4644.752  | X82240    | 1295.486  | 1168.997  |
| AL035297  | 3255.055  | 2393.692  | AF086436  | 525.151   | 623.691   | NM_013995 | 3293.842  | 3127.986  |
| NM_004408 | 2853.824  | 2156.704  | AF087993  | 3400.928  | 3581.333  | NM_006010 | 13084.419 | 11363.917 |
| AJ131244  | 1912.763  | 1795.88   | AF035282  | 1330.391  | 1714.971  | K03191    | 1082.934  | 669.915   |
| NM_002532 | 4493.471  | 5120.593  | AK021966  | 3918.943  | 5868.338  | NM_005079 | 3386.884  | 3966.365  |
| NM_012388 | 3306.019  | 3012.783  | AB018292  | 11033.788 | 13921.946 | NM_005192 | 25680.877 | 24254.678 |
| NM_016651 | 957.492   | 657.177   | AF085971  | 545.078   | 800.14    | NM_004585 | 1376.249  | 1569.893  |
| NM_001671 | 1270.863  | 1139.472  | AF147302  | 1030.908  | 2240.456  | NM_015032 | 2342.275  | 2279.156  |
| NM_019843 | 3817.397  | 3199.954  | AF085929  | 2065.505  | 3043.23   | AK022956  | 1678.225  | 2384.617  |
| NM_016192 | 4027.122  | 4089.459  | AK001126  | 2245.551  | 2282.177  | AK023121  | 508.74    | 331.844   |
| BE878426  | 50605.535 | 50134.063 | AF085976  | 4407.181  | 3979.883  | NM_014104 | 18773.375 | 18060.848 |
| AK025542  | 1695.993  | 2803.703  | AF075104  | 5519.427  | 5967.652  | NM_002392 | 989.842   | 801.562   |

|           |           |           |           |           |           |           |           |           |
|-----------|-----------|-----------|-----------|-----------|-----------|-----------|-----------|-----------|
| NM_00276E | 4147.172  | 6317.489  | AK021724  | 470.786   | 561.138   | NM_00274E | 42806.996 | 44027.449 |
| NM_003691 | 2611.729  | 4969.821  | AL133025  | 947.196   | 864.796   | NM_01821E | 3376.507  | 4034.573  |
| NM_00295C | 15128.463 | 20368.904 | AL137402  | 12297.574 | 14833.378 | NM_00339C | 1323.635  | 1391.773  |
| NM_00231E | 2356.869  | 2933.917  | AL137617  | 4385.385  | 4884.125  | AL137747  | 2052.693  | 2596.748  |
| NM_003134 | 48158.188 | 51332.266 | AL359568  | 25923.918 | 27659.605 | NM_01475E | 3372.379  | 3278.843  |
| NM_004314 | 3718.226  | 4189.785  | AL133564  | 8044.989  | 10473.909 | AF077188  | 4427.234  | 4517.792  |
| NM_018247 | 8624.413  | 9152.116  | AL137428  | 1595.798  | 2177.832  | NM_01833E | 2698.368  | 2174.254  |
| NM_01797E | 9305.43   | 9089.225  | AL157462  | 2246.557  | 3565.148  | NM_01868E | 29459.063 | 27480.779 |
| NM_00589E | 13346.718 | 13597.918 | AL359602  | 9047.208  | 11606.617 | NM_006984 | 2624.134  | 2033.661  |
| NM_00288E | 45295.492 | 49437.508 | NM_01819C | 38137.754 | 34918.027 | AL133644  | 4919.41   | 3655.8    |
| AF078866  | 3361.363  | 3305.271  | AF086054  | 1048.913  | 1015.121  | NM_00270E | 1511.994  | 1427.325  |
| BF311880  | 10448.842 | 7537.749  | AK022259  | 56632.707 | 61307.137 | NM_01902E | 55155.199 | 58127.898 |
| NM_01607E | 756.847   | 539.027   | AK022461  | 1174.763  | 1376.251  | NM_00442C | 776.459   | 792.181   |
| NM_00136C | 23514.865 | 23374.979 | NM_01601C | 3874.052  | 6378.049  | NM_00549E | 8281.73   | 8300.585  |
| AK026656  | 6532.224  | 6471.241  | AF161442  | 589.757   | 656.999   | NM_015387 | 5334.379  | 6188.145  |
| AF164794  | 6077.546  | 8184.992  | AF070647  | 19600.527 | 16625.926 | NM_00173E | 1366.509  | 1364.252  |
| NM_001173 | 1548.91   | 2170.323  | AF116649  | 624.577   | 443.935   | NM_00506E | 383.355   | 342.256   |
| AB020656  | 1076.001  | 1400.589  | AF174394  | 1717.21   | 1285.616  | NM_01782E | 8930.873  | 11867.736 |
| AK023648  | 3311.834  | 3217.261  | AF083121  | 477.302   | 494.126   | NM_01403E | 2884.022  | 3120.655  |
| NM_00041E | 1294.63   | 1249.716  | AK025924  | 571.542   | 749.306   | NM_02012E | 13147.518 | 12439.445 |
| AF077033  | 2248.696  | 3276.642  | AK021876  | 13306.086 | 14384.132 | NM_00573C | 22629.834 | 23949.92  |
| NM_01778E | 325.5     | 558.142   | AK022017  | 1230.527  | 1238.261  | NM_00539E | 1217.774  | 839.839   |
| NM_004991 | 985.881   | 953.069   | AK022160  | 2499.285  | 3092.59   | AL133572  | 3114.315  | 2568.252  |
| AF222980  | 1178.614  | 1324.014  | AK022295  | 928.052   | 1286.452  | AK022500  | 1362.066  | 1281.835  |
| AK026758  | 5236.449  | 5289.578  | AK021935  | 1760.248  | 2082.138  | U52096    | 3356.76   | 3154.684  |
| NM_012201 | 5642.93   | 5634.127  | AK022187  | 7732.487  | 10110.872 | AB013897  | 819.935   | 596.397   |
| AB046774  | 1884.827  | 2651.833  | AK022337  | 1828.212  | 1922.256  | NM_00552E | 20988.217 | 20190.867 |
| AK022385  | 36366.402 | 29984.885 | AK026847  | 1013.129  | 1047.428  | NM_00619C | 6834.854  | 7412.043  |
| NM_00277E | 1931.828  | 1230.44   | AK023048  | 647.62    | 699.145   | NM_00636E | 2934.923  | 2810.106  |
| AK024584  | 7531.314  | 3161.693  | AL359560  | 753.854   | 700.205   | NM_00161E | 1692.526  | 1134.301  |
| NM_003504 | 13081.783 | 10428.967 | AK026891  | 1949.191  | 2762.557  | BC000401  | 8518.3    | 6367.611  |
| NM_01329E | 4693.033  | 3820.246  | AK025573  | 719.385   | 1093.965  | NM_00642E | 2405.179  | 1807.634  |
| NM_007267 | 3121.492  | 2909.52   | AK024595  | 799.121   | 1433.432  | AF432218  | 5734.509  | 4771.907  |
| AK022830  | 1181.234  | 1172.214  | AK025313  | 374.848   | 945.403   | NM_00428E | 1872.061  | 1457.522  |
| Z36816    | 2975.12   | 3160.632  | AL137562  | 2901.534  | 2712.408  | AK025082  | 1685.368  | 1486.69   |
| NM_00586E | 8658.94   | 7441.913  | M90355    | 51910.883 | 52736.141 | AF086535  | 585.19    | 530.664   |
| NM_00641E | 12566.43  | 14489.044 | AK022495  | 3262.669  | 2843.334  | AL137406  | 2105.616  | 1960.268  |
| NM_017684 | 747.005   | 674.829   | AK021632  | 624.37    | 289.024   | NM_01225E | 3787.922  | 3422.991  |
| AL049689  | 2027.229  | 2847.35   | AK023143  | 419.126   | 102.1     | NM_00687E | 1204.433  | 1202.99   |
| NM_00021E | 812.962   | 836.783   | AK026373  | 12675.673 | 11988.649 | NM_00029E | 524.608   | 680.28    |
| AF135960  | 829.447   | 870.384   | AK021581  | 4318.476  | 4563.915  | NM_00374E | 471.427   | 505.086   |
| NM_01421E | 18741.26  | 19901.443 | AK021744  | 1096.482  | 1262.346  | AF153821  | 622.035   | 420.964   |
| NM_00301C | 1916.724  | 2554.875  | NM_01843C | 16225.239 | 19604.193 | NM_01337C | 1350.075  | 1648.182  |
| NM_006871 | 941.496   | 1085.538  | AL133640  | 1986.268  | 2288.751  | NM_00331C | 3909.455  | 2614.144  |
| NM_019074 | 3082.537  | 3085.317  | AJ012502  | 8153.216  | 10011.767 | AK024461  | 1557.237  | 938.29    |
| NM_018494 | 31846.947 | 34560.277 | AK024170  | 466.617   | 351.414   | NM_01763E | 1754.215  | 1129.754  |
| AK000006  | 602.041   | 623.434   | AK021722  | 651.566   | 749.223   | X62534    | 3018.178  | 3003.685  |
| NM_001115 | 1724.131  | 1838.077  | NM_000681 | 324.291   | 278.225   | AF027147  | 20529.105 | 14322.128 |
| NM_014921 | 1442.459  | 1451.41   | AF147445  | 1636.857  | 1490.11   | M62399    | 7469.027  | 5590.598  |
| NM_016581 | 55947.082 | 53044.121 | Y10508    | 7682.164  | 6548.027  | NM_00447E | 1021.447  | 746.317   |
| NM_01325E | 2285.415  | 2559.041  | NM_00518E | 52118.965 | 51566.426 | AB037862  | 1140.178  | 804.776   |
| NM_00718E | 852.725   | 557.352   | D17074    | 1291.106  | 1681.048  | AF088022  | 5711.201  | 4393.82   |
| AJ238243  | 14906.263 | 12403.622 | AF039944  | 6698.094  | 7814.192  | AK026537  | 1080.335  | 802.434   |

|           |           |           |           |           |           |           |           |           |
|-----------|-----------|-----------|-----------|-----------|-----------|-----------|-----------|-----------|
| J05046    | 33382.445 | 22583.162 | AJ276252  | 1117.805  | 1050.307  | NM_015485 | 2577.132  | 2787.936  |
| NM_012318 | 3066.001  | 2264.006  | AK021716  | 4711.566  | 6841.353  | NM_002666 | 4957.006  | 4144.821  |
| NM_002751 | 5710.574  | 4247.445  | AK025035  | 12828.115 | 12948.158 | AF202145  | 2235.561  | 2071.499  |
| NM_004291 | 2404.704  | 1727.018  | AK002085  | 7936.344  | 8022.584  | AK026155  | 1071.732  | 561.732   |
| NM_003816 | 7861.487  | 5730.823  | AF086200  | 248.535   | 478.917   | NM_018052 | 25759.182 | 21056.029 |
| AK022635  | 433.359   | 425.352   | AL133618  | 4430.854  | 4713.252  | NM_013393 | 4485.423  | 3760.394  |
| NM_004912 | 4072.706  | 4781.768  | AF230314  | 749.88    | 723.533   | AK025072  | 1402.346  | 1315.483  |
| U79304    | 18966.291 | 19372.383 | AK001086  | 913.052   | 1189.898  | L10378    | 9451.014  | 6374.801  |
| NM_016267 | 6927.359  | 8692.886  | AJ131610  | 4781.811  | 5168.36   | AJ227860  | 1701.182  | 1617.205  |
| NM_004671 | 9049.314  | 8888.424  | S50207    | 470.393   | 932.882   | AL157448  | 665.847   | 512.21    |
| NM_007015 | 356.96    | 751.549   | AF119872  | 8734.866  | 9156.817  | AF026942  | 1693.256  | 1620.545  |
| NM_005180 | 7918.004  | 10502.454 | NM_015417 | 478.688   | 936.58    | AJ276429  | 1244.89   | 892.722   |
| NM_006526 | 3542.133  | 4795.032  | AK026101  | 3916.685  | 5873.719  | AL117657  | 643.168   | 719.112   |
| NM_007045 | 1869.914  | 1865.331  | AK022194  | 15655.371 | 22156.811 | AK023589  | 626.398   | 417.956   |
| NM_003627 | 3846.404  | 4593.308  | AF085963  | 984.185   | 1309.263  | AK021590  | 2376.523  | 2698.777  |
| NM_012145 | 23951.473 | 30231.852 | AF131851  | 406.274   | 786.716   | AB002441  | 611.444   | 1349.879  |
| AF305779  | 771.394   | 1093.936  | AK021436  | 1205.864  | 1638.337  | AK023998  | 2445.023  | 2818.154  |
| AF225416  | 7998.292  | 9968.101  | U58664    | 960.817   | 1222.074  | AK000872  | 1179.911  | 811.569   |
| NM_016231 | 2250.48   | 2183.492  | AF085937  | 529.437   | 707.817   | AK027147  | 9474.57   | 12845.614 |
| NM_002093 | 4660.416  | 4340.813  | AL137569  | 2618.736  | 3799.173  | AK026084  | 620.725   | 412.263   |
| AB042555  | 15643.05  | 13913.326 | AK021920  | 2597.395  | 2869.582  | AK022415  | 27017.078 | 11363.868 |
| NM_001729 | 769.581   | 903.801   | AL049415  | 2200.668  | 2586.923  | AL137368  | 794.542   | 699.812   |
| NM_017763 | 1199.511  | 706.689   | AK022375  | 1308.452  | 1676.599  | AK021932  | 910.932   | 537.693   |
| NM_013975 | 4506.687  | 3169.528  | AI065056  | 349.071   | 595.346   | AK026787  | 1904.294  | 1638.136  |
| NM_003843 | 6242.031  | 4878.35   | NM_003378 | 52623.52  | 55387     | AK023542  | 830.997   | 854.605   |
| NM_012216 | 1633.91   | 1236.302  | AL110194  | 10223.738 | 11939.49  | AK000203  | 712.939   | 370.487   |
| X73502    | 2320.896  | 1776.695  | AF138860  | 3089.709  | 2931.743  | AK021845  | 4108.533  | 3924.748  |
| NM_020445 | 59841.02  | 55257.539 | NM_006687 | 2003.879  | 1922.103  | NM_018592 | 1464.378  | 1663.154  |
| NM_016376 | 13732.083 | 12660.852 | NM_013301 | 369.905   | 494.539   | NM_018503 | 23347.639 | 17503.244 |
| AB046848  | 8432.641  | 9030.232  | NM_017673 | 866.73    | 1129.935  | NM_016445 | 12064.428 | 12269.39  |
| AL133057  | 6903.416  | 8233.924  | AB046857  | 717.106   | 959.167   | AL049670  | 5111.851  | 7869.932  |
| U04845    | 7858.708  | 10254.565 | AK024408  | 12783.173 | 14033.468 | NM_018512 | 8812.306  | 7532.385  |
| NM_018103 | 5870.351  | 4757.308  | L19364    | 2158.552  | 2562.796  | AK022412  | 3307.179  | 3796.34   |
| AK026302  | 6731.538  | 5958.425  | NM_005390 | 2051.884  | 4884.08   | AK023073  | 6517.834  | 4852.065  |
| NM_012214 | 10880.927 | 10205.666 | CY3Cy5    | 3786.074  | 132.685   | AK023697  | 631.772   | 416.265   |
| AF049656  | 19490.74  | 21131.496 | L07738    | 493.504   | 365.698   | AK023764  | 1001.265  | 1453.499  |
| NM_000312 | 1383.61   | 1622.354  | Z48054    | 1248.259  | 883.432   | AK025062  | 1612.3    | 1420.095  |
| NM_003963 | 1534.987  | 1088.572  | H90415    | 2374.427  | 1277.021  | Z27405    | 15509.564 | 14369.742 |
| AC009729  | 431.813   | 623.443   | AA676470  | 14395.912 | 7789.155  | AK023412  | 614.45    | 416.646   |
| NM_016598 | 4215.59   | 5605.959  | M38258    | 638.577   | 446.069   | NM_014617 | 29274.631 | 24692.168 |
| BE874867  | 45510.891 | 52152.102 | AA457155  | 16852.473 | 10104.229 | AK074682  | 3239.186  | 3702.676  |
| AL136719  | 4590.293  | 5069.074  | BM014365  | 636.854   | 639.525   | X74605    | 598.815   | 681.763   |
| NM_014109 | 7349.863  | 8584.757  | H91842    | 379.592   | 259.397   | AK024513  | 565.914   | 628.284   |
| NM_012160 | 1443.951  | 1558.876  | U78045    | 1015.796  | 816.599   | BC036692  | 655.459   | 675.32    |
| NM_006357 | 50848.953 | 54655.676 | AA878561  | 52785.625 | 47601.02  | AJ009640  | 1288.741  | 1163.55   |
| NM_014248 | 60891.402 | 57485.93  | AI538525  | 748.051   | 324.602   | AK022026  | 415.87    | 504.375   |
| AK027070  | 885.87    | 887.208   | NM_000941 | 1249.203  | 499.727   | AF147340  | 532.953   | 688.351   |
| NM_003341 | 9418.195  | 10152.815 | SR1       | 58206.176 | 56843.695 | AF035308  | 5283.117  | 5404.863  |
| NM_017785 | 1942.892  | 1739.153  | SR3       | 43372.336 | 28487.17  | NM_014054 | 2678.682  | 4122.12   |
| NM_006249 | 4232.862  | 3183.073  | SR5       | 6991.628  | 6697.788  | AK021840  | 36622.133 | 36994.848 |
| NM_018318 | 1608.748  | 1419.287  | SR7       | 4551.214  | 40939.547 | AK022228  | 1236.168  | 1889.452  |
| AB020640  | 3677.742  | 2748.299  | SR9       | 16552.668 | 2588.914  | AK022031  | 785.344   | 674.73    |
| D29954    | 14639.308 | 12114.016 | CY3Cy5    | 4325.777  | 141.101   | AF086480  | 2015.454  | 2547.785  |

|           |           |           |           |           |           |           |           |           |
|-----------|-----------|-----------|-----------|-----------|-----------|-----------|-----------|-----------|
| AF007131  | 7048.659  | 6891.433  | NM_001781 | 3268.812  | 2736.76   | AK022122  | 789.151   | 857.388   |
| NM_006839 | 2825.19   | 2819.143  | AF035121  | 337.508   | 489.625   | AK000806  | 36981.254 | 27331.93  |
| NM_000223 | 1103.978  | 1028.578  | NM_014432 | 1564.992  | 1660.865  | NM_016471 | 4624.118  | 4429.566  |
| NM_005851 | 1699.933  | 1447.264  | NM_001558 | 1912.472  | 1204.713  | NM_001145 | 778.305   | 836.724   |
| AF119256  | 2157.975  | 1765.297  | U96173    | 1639.831  | 1149.339  | NM_005364 | 6365.377  | 7072.362  |
| X74497    | 632.752   | 546.677   | NM_018941 | 1277.261  | 818.244   | AK023482  | 2968.602  | 4027.74   |
| NM_012210 | 1294.211  | 844.186   | NM_020241 | 851.759   | 710.089   | AK022798  | 795.822   | 798.756   |
| U10072    | 2026.866  | 2153.737  | NM_001980 | 1513.136  | 744.837   | AK023176  | 820.837   | 892.706   |
| AF222749  | 19537.795 | 23318.771 | NM_012471 | 503.098   | 247.585   | AL161991  | 14115.886 | 14858.688 |
| NM_003410 | 6932.018  | 7368.245  | NM_001321 | 3428.884  | 1768.777  | D17032    | 19385.41  | 27077.871 |
| NM_007146 | 2772.202  | 3660.164  | AB018264  | 4123.184  | 2090.858  | NM_017941 | 2545.738  | 2742.54   |
| NM_002229 | 838.045   | 1384.8    | NM_006911 | 877.047   | 384.464   | AF301016  | 942.799   | 588.586   |
| S69027    | 2990.576  | 3352.095  | U92544    | 2079.608  | 1466.57   | AF118079  | 29541.412 | 25396.217 |
| NM_012119 | 2532.149  | 2101.244  | NM_006791 | 3021.561  | 2060.286  | AL365413  | 2047.461  | 1799.977  |
| X99631    | 14906.246 | 15531.387 | AJ278348  | 14595.483 | 12760.081 | NM_005258 | 4703.943  | 4115.855  |
| NM_001730 | 1750.333  | 1467.662  | AK023106  | 1549.903  | 1767.257  | NM_000440 | 2682.633  | 2649.601  |
| AB014589  | 3490.874  | 3608.927  | AL035297  | 2241.872  | 2668.723  | NM_001297 | 3365.135  | 2489.393  |
| U37146    | 15426.667 | 13446.915 | NM_004408 | 1823.887  | 2209.659  | NM_004403 | 6027.829  | 2588.766  |
| NM_012086 | 4166.792  | 4119.583  | AJ131244  | 1662.242  | 1714.007  | X64993    | 774.016   | 359.355   |
| NM_000991 | 53016.73  | 51483.094 | NM_002532 | 3886.573  | 4158.997  | NM_004434 | 11427.182 | 5263.974  |
| NM_016034 | 19789.916 | 18873.693 | NM_012388 | 5016.739  | 5269.559  | NM_006269 | 649.245   | 704.14    |
| X69150    | 47890.102 | 49395.414 | NM_016651 | 545.583   | 810.646   | NM_016230 | 2557.938  | 3065.85   |
| NM_001025 | 51941.75  | 55527.266 | NM_001671 | 1068.729  | 1212.539  | NM_001083 | 1357.409  | 1620.648  |
| NM_016067 | 31214.355 | 27074.307 | NM_019843 | 3389.373  | 3194.1    | AK023966  | 5907.75   | 4917.042  |
| NM_018285 | 6488.193  | 6077.693  | NM_016192 | 4648.671  | 3336.151  | AK025702  | 2130.433  | 1516.945  |
| AK022393  | 3918.409  | 4085.881  | BE878426  | 55150.449 | 52047.172 | NM_018958 | 753.83    | 1330.974  |
| AK026654  | 1518.942  | 1131.734  | NM_001745 | 13912.404 | 7614.87   | AK022038  | 1544.6    | 1604.09   |
| AB020643  | 626.594   | 659.652   | NM_003825 | 4532.939  | 3250.121  | AK025119  | 577.262   | 391.073   |
| AK025245  | 605.697   | 1080.643  | AK025006  | 11160.604 | 5776.84   | AF085866  | 2478.702  | 2345.649  |
| AK025496  | 7128.363  | 10466.082 | AF218014  | 9298.167  | 5314.222  | CY3Cy5    | 2146.7    | 257.274   |
| NM_005205 | 56412.203 | 54627.82  | NM_006678 | 3718.474  | 2021.127  | AA397813  | 52736.598 | 58131.492 |
| NM_001966 | 504.679   | 941.382   | AY007729  | 27236.293 | 19199.438 | W47350    | 1142.291  | 1799.152  |
| NM_016138 | 2077.714  | 2289.298  | NM_014424 | 821.22    | 565.366   | W68291    | 3358.286  | 3317.216  |
| Z36833    | 52036.992 | 54108.918 | AF159092  | 1894.36   | 1161.738  | N64384    | 991.9     | 877.351   |
| NM_014355 | 1627.969  | 1413.577  | BC007318  | 8590.497  | 4292.921  | H-X 53655 | 341.629   | 737.094   |
| M21191    | 21734.357 | 24715.498 | M36693    | 1660.304  | 1056.687  | H-U 05770 | 4663.587  | 4599.41   |
| AF072810  | 1609.159  | 975.228   | NM_005898 | 13140.431 | 13076.924 | H-M 65199 | 2949.995  | 2908.329  |
| L19778    | 960.053   | 1060.669  | NM_002889 | 49465.75  | 50839.488 | H-M 32315 | 698.473   | 514.465   |
| AF174482  | 6283.332  | 6264.55   | AF078866  | 3297.169  | 3936.217  | H-V00536M | 692.129   | 1017.363  |
| NM_003528 | 850.702   | 919.192   | BF311880  | 6850.083  | 15437.955 | H-D85429M | 19907.885 | 20533.559 |
| NM_017769 | 884.669   | 835.62    | NM_016075 | 723.622   | 906.124   | BF439832  | 1009.278  | 831.604   |
| D85131    | 9304.341  | 10132.399 | NM_001360 | 22785.559 | 23010.139 | BG819162  | 633.817   | 625.861   |
| NM_004956 | 698.989   | 592.855   | AK026656  | 5828.659  | 5977.852  | NM_017532 | 3469.337  | 3273.402  |
| D30612    | 3690.805  | 3178.815  | AJ276207  | 7057.411  | 5821.039  | SR6       | 1734.212  | 1070.522  |
| U52097    | 21269.641 | 23071.758 | AB011131  | 7015.989  | 6905.926  | SR8       | 5393.914  | 13632.169 |
| NM_003416 | 2974.089  | 3406.022  | NM_000751 | 4090.601  | 3756.847  | SR10      | 20107.533 | 5112.244  |
| NM_018484 | 793.133   | 640.626   | NM_014849 | 4165.463  | 3853.889  | CY3Cy5    | 1733.76   | 111.755   |
| NM_017594 | 1435.998  | 1881.571  | NM_001042 | 4567.656  | 2665.01   | NM_004447 | 3840.996  | 1632.869  |
| AK027237  | 926.495   | 1103.746  | NM_012229 | 3374.47   | 2100.713  | NM_001204 | 809.933   | 654.549   |
| AF075017  | 503.19    | 539.237   | NM_005071 | 1667.504  | 1057.039  | NM_000020 | 1446.432  | 1144.346  |
| AK027104  | 2294.414  | 2987.296  | AB023147  | 3248.806  | 2135.936  | NM_002442 | 2816.31   | 5006.12   |
| AL133090  | 21402.168 | 27378.822 | NM_016615 | 6257.56   | 4038.626  | AB033091  | 3334.919  | 2194.045  |
| AF085867  | 7119.505  | 8827.225  | NM_005630 | 3385.671  | 2162.889  | NM_004557 | 2445.312  | 2076.122  |

|           |           |           |           |           |           |           |           |           |
|-----------|-----------|-----------|-----------|-----------|-----------|-----------|-----------|-----------|
| AK026158  | 411.07    | 422.629   | NM_012201 | 4121.548  | 4384.471  | NM_014757 | 12588.913 | 8641.371  |
| AF086510  | 3535.724  | 3488.833  | AK022385  | 11889.706 | 15985.396 | NM_017893 | 690.416   | 449.168   |
| Z36779    | 2450.663  | 2586.425  | NM_013298 | 4010.227  | 4688.332  | NM_001584 | 2200.677  | 2240.296  |
| NM_018422 | 354.551   | 383.823   | NM_007267 | 2741.149  | 2964.151  | NM_012258 | 22183.992 | 17421.416 |
| NM_002816 | 1756.129  | 1728.042  | Z36816    | 1948.003  | 2372.552  | AF272357  | 1043.979  | 681.163   |
| NM_017513 | 423.347   | 787.692   | NM_005865 | 5298.943  | 6319.31   | NM_016372 | 13966.947 | 12092.749 |
| NM_017822 | 8912.936  | 12991.203 | NM_006413 | 11390.024 | 10224.552 | AB020705  | 1533.154  | 1439.071  |
| AK026844  | 3771.977  | 2814.485  | AK025542  | 2593.2    | 1778.017  | NM_002980 | 742.236   | 571.283   |
| AK026735  | 4367.261  | 3358.01   | AF207547  | 809.719   | 601.904   | NM_007102 | 46858.422 | 35346.301 |
| AL110104  | 33143.727 | 22301.416 | NM_002768 | 5751.172  | 4858.074  | BG491613  | 11327.861 | 10538.668 |
| AF240633  | 1168.425  | 1058.203  | NM_003691 | 3415.484  | 2684.557  | NM_002728 | 407.62    | 469.662   |
| AK027056  | 3101.59   | 2202.168  | NM_002950 | 20234.104 | 14724.285 | NM_000450 | 453.944   | 378.525   |
| AK024294  | 1961.862  | 1617.591  | NM_002318 | 2995.602  | 2489.094  | NM_004513 | 4680.883  | 3507.619  |
| AL110126  | 2191.234  | 2345.075  | NM_001433 | 675.136   | 594.277   | NM_001708 | 19911.943 | 18148.232 |
| AF052172  | 23244.984 | 22470.436 | NM_003134 | 47177.371 | 48227.43  | NM_017735 | 1716.607  | 1353.946  |
| AB014573  | 9226.844  | 9513.339  | NM_004314 | 3256.132  | 2280.007  | AB033044  | 2125.789  | 1640.342  |
| AK025418  | 767.024   | 539.995   | NM_018247 | 6959.09   | 4288.712  | AB014564  | 682.921   | 641.741   |
| AK091109  | 19004.129 | 18341.166 | NM_017979 | 7188.978  | 4100.196  | NM_020230 | 3363.334  | 2994.398  |
| NM_014967 | 3037.904  | 2653.021  | NM_019644 | 319.104   | 623.432   | NM_006762 | 35544.551 | 29634.41  |
| AK022915  | 7171.536  | 7020.293  | AI285199  | 1443.408  | 1861.996  | NM_016430 | 876.018   | 807.534   |
| AF131834  | 878.324   | 1110.595  | L07738    | 761.385   | 664.479   | AK022558  | 2556.592  | 2249.93   |
| AL355711  | 2627.228  | 3296.951  | Z48054    | 1656.943  | 1605.793  | NM_000808 | 478.445   | 502.593   |
| AK025851  | 3151.542  | 4024.355  | H90415    | 2746.169  | 2610.906  | NM_004258 | 1783.355  | 1079.694  |
| AJ011409  | 13028.009 | 14258.999 | AA676470  | 14021.441 | 15931.037 | NM_016271 | 4679.156  | 3676.768  |
| AJ227906  | 3512.473  | 2734.914  | M38258    | 551.125   | 711.267   | NM_016618 | 1483.888  | 1461.303  |
| AJ011598  | 799.4     | 739.278   | AA457155  | 14867.208 | 14955.921 | NM_014481 | 1277.369  | 1268.751  |
| AJ001906  | 499.008   | 691.612   | BM014365  | 655.787   | 534.89    | U22172    | 1545.657  | 1447.798  |
| U17633    | 678.502   | 769.472   | H91842    | 385.705   | 485.411   | AB032960  | 1486.739  | 1648.422  |
| L10404    | 1231.618  | 1036.279  | U78045    | 718.936   | 977.064   | NM_014264 | 5871.165  | 5886.16   |
| AF283776  | 4347.037  | 4856.029  | AA878561  | 52548.984 | 54840.043 | AF020089  | 1100.461  | 1087.793  |
| AF071507  | 541.014   | 421.501   | BF688309  | 551.824   | 444.493   | NM_006257 | 3716.249  | 3367.891  |
| D16877    | 2831.531  | 2554.06   | AI538525  | 862.12    | 728.316   | NM_016281 | 5763.925  | 4865.75   |
| L19363    | 395.212   | 681.305   | NM_000941 | 1204.235  | 1215.952  | NM_004734 | 12008.238 | 9906.709  |
| AL049992  | 604.843   | 469.818   | AF222980  | 1192.416  | 846.266   | AK024793  | 1090.453  | 904.637   |
| AL109781  | 3120.168  | 3377.532  | AK026758  | 3118.038  | 2380.309  | AF208291  | 805.71    | 590.363   |
| AK021895  | 1363.625  | 1659.076  | NM_014424 | 740.191   | 633.869   | NM_004877 | 44100.219 | 41156.586 |
| AL080107  | 1190.123  | 915.833   | BC007318  | 8600.539  | 11860.395 | BG491613  | 10090.07  | 5138.329  |
| AK000036  | 3793.65   | 4143.94   | M36693    | 2265.695  | 2622.751  | W47350    | 1416.95   | 863.426   |
| AK000769  | 723.606   | 864.771   | NM_016292 | 9296.202  | 9528.706  | W68291    | 3321.73   | 3177.994  |
| AK000924  | 825.817   | 517.696   | NM_002601 | 5577.757  | 5348.815  | N64384    | 1023.695  | 917.362   |
| AK022252  | 514.514   | 617.257   | U62858    | 1733.943  | 1691.621  | H-X 53655 | 461.989   | 214.497   |
| AK000114  | 2322.372  | 2358.488  | NM_001781 | 3419.219  | 2824.901  | H-U 05770 | 3809.142  | 3962.335  |
| AK000952  | 7773.124  | 6201.304  | NM_014432 | 1461.488  | 1548.302  | H-M 65199 | 2529.311  | 2314.906  |
| AK024520  | 3873.662  | 3764.135  | NM_001558 | 1826.586  | 1959.148  | BG819162  | 543.145   | 361.717   |
| AK025030  | 1765.207  | 2032.571  | NM_002530 | 420.118   | 450.231   | NM_017532 | 3455.131  | 3000.978  |
| AK024915  | 487.114   | 717.351   | U96173    | 1464.809  | 1160.279  | AB033044  | 2220.947  | 3214.767  |
| AB050477  | 2632.843  | 3268.226  | NM_018941 | 1299.88   | 1416.923  | AB014564  | 936.786   | 618.604   |
| AK000152  | 942.944   | 971.208   | NM_020241 | 687.783   | 1243.497  | NM_020230 | 3302.055  | 2050.308  |
| AK024300  | 1546.46   | 1435.231  | NM_001980 | 1334.951  | 1414.314  | NM_006352 | 892.618   | 322.593   |
| L09092    | 711.993   | 861.302   | NM_012471 | 553.021   | 594.311   | NM_016430 | 641.98    | 453.606   |
| NM_012132 | 1419.62   | 1451.684  | NM_001321 | 3986.987  | 4403.438  | NM_001204 | 808.813   | 260.738   |
| NM_012128 | 1347.581  | 1476.763  | AB018264  | 3864.28   | 3618.058  | BF131321  | 639.773   | 273.511   |
| AK025716  | 1171.433  | 720.101   | NM_006911 | 783.4     | 694.231   | NM_012116 | 1032.273  | 731.006   |



|           |           |           |           |           |           |           |           |           |
|-----------|-----------|-----------|-----------|-----------|-----------|-----------|-----------|-----------|
| AF086202  | 10691.067 | 11038.734 | U92544    | 1740.802  | 2090.901  | NM_00002C | 1811.98   | 1347.938  |
| AK023112  | 2946.212  | 3584.321  | NM_012229 | 3246.215  | 3186.234  | NM_002442 | 2160.711  | 2840.819  |
| NM_017806 | 38761.203 | 48392.617 | NM_005071 | 885.972   | 827.847   | AB033091  | 2552.104  | 1542.144  |
| AK001937  | 46028.93  | 47732.555 | AB023147  | 3473.161  | 3426.488  | NM_004557 | 2282.965  | 1935.05   |
| AL365517  | 1232.373  | 1152.154  | NM_016615 | 6138.726  | 6417.516  | NM_001584 | 1969.824  | 2520.63   |
| AK021988  | 6933.348  | 8929.592  | NM_005630 | 1159.403  | 1217.226  | NM_012259 | 21867.424 | 18158.199 |
| AF086494  | 19255.785 | 21872.457 | AK023106  | 1577.593  | 1887.169  | AF272357  | 917.056   | 554.662   |
| BI769977  | 1435.833  | 1172.95   | NM_016730 | 36028.645 | 35787.695 | NM_016372 | 11888.328 | 10748.178 |
| AL137567  | 1546.508  | 1365.354  | AL035297  | 1802.891  | 1677.171  | AB020705  | 1684.908  | 1608.194  |
| AK024913  | 3117.667  | 2750.444  | NM_004408 | 2324.548  | 2955.232  | NM_014333 | 833.097   | 1057.599  |
| AB007961  | 3448.416  | 3469.953  | AJ131244  | 1783.372  | 1706.129  | NM_002980 | 539.211   | 817.512   |
| NM_005547 | 2859.076  | 3038.972  | NM_002532 | 3918.817  | 4145.854  | NM_002728 | 545.299   | 740.885   |
| AF119862  | 9170.943  | 8422.427  | NM_012388 | 4954.182  | 5744.406  | NM_000450 | 495.658   | 384.307   |
| U17628    | 1501.818  | 1787.198  | NM_016651 | 737.549   | 826.339   | NM_017735 | 1332.91   | 1620.668  |
| AF119867  | 7049.244  | 6145.758  | NM_001671 | 1035.103  | 979.531   | AF208291  | 807.396   | 1274.045  |
| AL357205  | 10636.238 | 22267.107 | NM_019843 | 2057.589  | 1226.622  | NM_004877 | 45597.363 | 62344.086 |
| AF124819  | 1643.217  | 1689.745  | NM_016192 | 3519.424  | 3391.784  | AK022558  | 2649.526  | 2835.271  |
| D17091    | 2377.921  | 2242.392  | BE878426  | 52032.215 | 49594.363 | NM_004259 | 1467.224  | 1304.557  |
| AL133074  | 2557.822  | 3157.078  | NM_001745 | 13036.543 | 12594.168 | NM_016271 | 3680.896  | 2967.092  |
| AF086318  | 9614.224  | 8527.702  | NM_003825 | 5752.496  | 7795.75   | NM_016619 | 1422.226  | 1554.189  |
| NM_018121 | 977.499   | 1100.982  | AK025006  | 14285.172 | 20819.932 | NM_014481 | 1081.251  | 1206.413  |
| NM_014191 | 37.785    | 249.686   | AF218014  | 10686.303 | 8119.997  | U22172    | 1383.19   | 1264.41   |
| AK026708  | 4142.996  | 4804.149  | NM_006678 | 3792.468  | 3260.023  | AB032960  | 1618.517  | 1415.66   |
| NM_017903 | 4693.4    | 5197.05   | AY007729  | 28133.506 | 23514.807 | NM_014264 | 6393.845  | 6494.766  |
| NM_018074 | 1044.738  | 1635.325  | NM_003134 | 52567.859 | 51839.031 | AF020089  | 1160.658  | 1012.095  |
| NM_000909 | 3174.552  | 3403.398  | NM_004314 | 3295.26   | 3815.447  | NM_006257 | 3138.183  | 3305.103  |
| U31737    | 498.675   | 670.949   | NM_018247 | 6399.671  | 6949.454  | NM_016281 | 5711.471  | 5696.237  |
| AK024828  | 982.632   | 1147.67   | NM_017979 | 6823.159  | 6961.368  | NM_004734 | 12966.011 | 13748.711 |
| AF009315  | 2098.522  | 1341.345  | NM_005898 | 11971.228 | 11505.73  | AK024793  | 1283.977  | 960.274   |
| NM_019013 | 891.767   | 887.23    | NM_002889 | 47924.289 | 43414.395 | NM_016372 | 12082.335 | 14331.32  |
| NM_006783 | 708.883   | 471.582   | AF078866  | 3434.249  | 4125.693  | AB020705  | 1492.036  | 2312.075  |
| L37711    | 538.161   | 588.87    | BF311880  | 6805.521  | 14275.165 | NM_014333 | 825.626   | 645.637   |
| S70313    | 9325.878  | 8789.42   | NM_016075 | 478.872   | 655.247   | NM_002980 | 644.233   | 412.865   |
| AK021607  | 2695.793  | 2678.349  | NM_001360 | 19316.586 | 9666.64   | BG491613  | 10325.829 | 10081.813 |
| AK025860  | 1836.555  | 1518.743  | AK026656  | 5052.161  | 5968.813  | AA397813  | 53886.133 | 53847.734 |
| L09268    | 585.818   | 368.709   | AJ276207  | 7494.902  | 6292.795  | W47350    | 1423.954  | 1228.197  |
| NM_020186 | 10489.799 | 8937.452  | AB011131  | 9020.842  | 9502.627  | H-U 05770 | 3675.139  | 4281.523  |
| AK022424  | 522.938   | 514.026   | NM_000751 | 7110.319  | 8120.393  | H-M 65199 | 2635.153  | 2488.632  |
| AF090947  | 3261.182  | 2432.333  | NM_014849 | 5851.543  | 5398.07   | H-M 32315 | 699.238   | 800.483   |
| NM_005047 | 1910.15   | 1688.359  | NM_001042 | 5062.496  | 3717.361  | H-V00536M | 701.447   | 854.265   |
| AJ272196  | 12692.388 | 12430.443 | NM_000623 | 282.699   | 385.794   | H-D85429M | 17383.854 | 21206.814 |
| AF116662  | 271.526   | 374.328   | NM_000941 | 1490.966  | 1200.488  | BF439832  | 914.682   | 735.448   |
| X58162    | 10729.669 | 7086.433  | AF222980  | 1040.787  | 844.867   | BG819162  | 605.034   | 606.423   |
| AK022825  | 1140.18   | 985.76    | AK026758  | 3515.985  | 3228.208  | NM_004513 | 4549.741  | 5691.812  |
| CY3Cy5    | 4388.046  | 342.032   | NM_012201 | 3679.907  | 4044.494  | NM_001708 | 16730.873 | 13794.55  |
| L35251    | 2671.804  | 2612.949  | AB046774  | 1096.885  | 1246.614  | NM_017735 | 1275.26   | 909.293   |
| BE910395  | 1195.539  | 1010.469  | AK022385  | 28512.451 | 40917.59  | AB033044  | 1983.06   | 1218.481  |
| N46828    | 1340.321  | 1358.3    | NM_002775 | 491.227   | 1078.237  | AB014564  | 470.571   | 548.279   |
| BI908302  | 12135.474 | 12035.212 | AK024584  | 6037.449  | 4609.758  | NM_020230 | 3233.171  | 3156.011  |
| AA460969  | 2989.604  | 2879.271  | NM_003504 | 10910.188 | 10117.359 | NM_006352 | 953.098   | 678.157   |
| BG695859  | 1134.588  | 821.194   | NM_013298 | 3917.138  | 5830.613  | NM_016430 | 903.458   | 1167.018  |
| M85079    | 2976.424  | 2521.734  | NM_007267 | 2710.934  | 3087.467  | NM_004447 | 4403.365  | 6082.787  |
| AA457671  | 10316.06  | 10192.818 | AK022830  | 479.781   | 891.366   | NM_001204 | 823.175   | 629.61    |

|           |           |           |           |           |           |           |           |           |
|-----------|-----------|-----------|-----------|-----------|-----------|-----------|-----------|-----------|
| X07437    | 3936.764  | 3869.982  | Z36816    | 2279.178  | 3826.591  | BF131321  | 454.926   | 409.95    |
| NM_000641 | 1618.259  | 1609.282  | NM_005865 | 5609.833  | 7754.737  | NM_002442 | 2183.829  | 2616.727  |
| SB        | 1086.715  | 1667.276  | NM_006413 | 10773.829 | 10160.627 | AB033091  | 2693.728  | 1816.8    |
| AE006466  | 3535.395  | 2371.474  | AK025542  | 3573.3    | 3105.272  | NM_004557 | 2282.78   | 2499.284  |
| BC008737  | 38052.766 | 30823.113 | AF207547  | 876.306   | 842.613   | NM_014757 | 12665.567 | 11187.442 |
| BC011655  | 6659.866  | 5203.631  | NM_002768 | 6526.239  | 5852.78   | NM_001584 | 2033.364  | 2333.417  |
| BC002396  | 4154.262  | 3471.054  | NM_003691 | 3660.964  | 3014.587  | NM_014264 | 5637.808  | 9562.433  |
| NM_022095 | 1142.406  | 725.416   | NM_002950 | 19263.4   | 15169.649 | AF020089  | 846.644   | 1494.54   |
| SR6       | 1902.217  | 1263.964  | NM_002318 | 2735.505  | 2222.353  | NM_006257 | 2746.925  | 4760.411  |
| SR8       | 7843.347  | 12688.838 | NM_012471 | 453.577   | 595.5     | NM_016281 | 5647.95   | 5834.794  |
| SR10      | 24020.445 | 4359.886  | NM_001321 | 4026.665  | 4447.278  | NM_004734 | 13490.398 | 17702.635 |
| CY3Cy5    | 2372.678  | 108.661   | AB018264  | 4784.637  | 4964.29   | AK024793  | 1410.385  | 1636.57   |
| NM_020370 | 1163.332  | 843.569   | NM_006911 | 792.953   | 893.217   | AF208291  | 1148.606  | 1700.24   |
| NM_004767 | 798.805   | 818.827   | U92544    | 1912.531  | 2540.807  | NM_004877 | 40343.742 | 45757.199 |
| BF310159  | 5821.762  | 6098.877  | NM_006791 | 2425.696  | 3032.849  | NM_004255 | 1666.882  | 1881.055  |
| NM_018986 | 1323.44   | 1415.04   | AJ278348  | 11948.08  | 12283.044 | NM_016271 | 3103.575  | 3289.802  |
| AB044934  | 441.4     | 382.882   | NM_015872 | 367.765   | 445.399   | NM_016615 | 1806.729  | 1688.546  |
| U27655    | 2241.011  | 2198.153  | L07738    | 755.117   | 664.824   | NM_014481 | 1105.658  | 1179.901  |
| NM_005795 | 790.226   | 887.126   | Z48054    | 1694.548  | 2103.868  | U22172    | 1447.698  | 1577.982  |
| NM_003360 | 1684.019  | 1738.204  | H90415    | 2624.806  | 2695.104  | AB032960  | 1456.336  | 1804.777  |
| Z21965    | 16178.761 | 15176.688 | AA676470  | 11478.143 | 15924.758 | NM_017675 | 453.611   | 639.798   |
| NM_000852 | 23041.031 | 21007.863 | M38258    | 661.561   | 357.516   | NM_015991 | 958.604   | 1233.605  |
| NM_000395 | 589.39    | 442.631   | AA457155  | 15898.167 | 14715.423 | BF246606  | 236.157   | 584.624   |
| AW797282  | 750.276   | 567.164   | BM014365  | 792.81    | 968.787   | NM_014883 | 1961.195  | 2263.327  |
| NM_002402 | 461.242   | 247.261   | H91842    | 387.498   | 210.376   | U56387    | 904.806   | 898.492   |
| L09070    | 1823.972  | 1455.585  | U78045    | 1248.327  | 1050.129  | NM_003657 | 1039.733  | 1055.504  |
| NM_000062 | 11860.954 | 8066.17   | AA878561  | 52752.199 | 54949.313 | AL049296  | 3671.004  | 5320.721  |
| NM_009590 | 5821.482  | 4436.179  | BF688309  | 448.304   | 504.445   | NM_003185 | 5024.395  | 3961.524  |
| AL133037  | 1474.369  | 960.13    | AI538525  | 782.535   | 676.007   | NM_020235 | 2137.495  | 1615.848  |
| NM_020350 | 3388.151  | 1756.972  | NM_003825 | 5970.176  | 6975.437  | D49356    | 557.168   | 535.75    |
| NM_000350 | 1792.871  | 713.726   | AK025006  | 14690.297 | 11772.723 | AJ250475  | 7364.036  | 5617.944  |
| X91103    | 4905.832  | 2552.911  | AF218014  | 11812.787 | 13439.926 | NM_018575 | 1380.671  | 1113.832  |
| AA419164  | 1372.542  | 888.932   | NM_006678 | 4588.417  | 4596.932  | NM_006201 | 2664.91   | 2252.233  |
| AL117235  | 536.007   | 640.503   | AY007729  | 29284.221 | 30655.164 | NM_007110 | 1558.698  | 1309.078  |
| NM_014822 | 2852.45   | 3011.201  | NM_014424 | 595.051   | 580.247   | NM_001255 | 10641.72  | 13338.205 |
| NM_005295 | 1578.663  | 1243.274  | AF159092  | 1697.215  | 1816.186  | U50383    | 8065.988  | 11375.672 |
| NM_001337 | 589.432   | 416.681   | BC007318  | 7823.608  | 8653.448  | AK025085  | 5157.859  | 5971.944  |
| NM_003611 | 2085.926  | 1861.103  | M36693    | 2261.707  | 2306.901  | NM_003680 | 45478.457 | 47219.121 |
| AB014538  | 1221.052  | 1532.345  | NM_016292 | 9712.846  | 9719.562  | AF118124  | 5833.729  | 5947.387  |
| NM_006205 | 627.157   | 568.085   | NM_002601 | 6528.44   | 5658.625  | NM_004845 | 6990.353  | 7959.472  |
| AK025118  | 4569.75   | 5034.763  | U62858    | 1677.366  | 1886.642  | AL137527  | 6198.853  | 7075.127  |
| NM_000727 | 1063.154  | 955.054   | NM_001781 | 4000.091  | 4689.917  | J04974    | 8034.746  | 7578.285  |
| NM_002621 | 308.076   | 357.965   | NM_014432 | 1075.856  | 1000.476  | NM_007055 | 5967.769  | 8272.321  |
| NM_005385 | 6396.602  | 6743.813  | NM_001558 | 1433.458  | 2188.884  | NM_001525 | 2511.855  | 2995.156  |
| NM_006074 | 19423.568 | 16795.537 | NM_006953 | 583.049   | 664.663   | NM_007014 | 1053.492  | 804.29    |
| AF208232  | 12708.584 | 10829.704 | NM_002530 | 706.67    | 528.87    | AL096740  | 781.918   | 574.039   |
| NM_002985 | 5513.45   | 4280.219  | U96173    | 2322.583  | 1985.454  | AF191545  | 2274.033  | 2917.446  |
| NM_004185 | 1031.734  | 658.352   | NM_018941 | 1397.295  | 1348.574  | NM_014554 | 1658.134  | 1645.356  |
| NM_016255 | 6859.46   | 4912.255  | NM_020241 | 983.659   | 1040.313  | AK023968  | 2492.358  | 1522.632  |
| AF203032  | 2739.752  | 1675.846  | BE730585  | 630.576   | 547.417   | NM_004652 | 666.384   | 639.492   |
| AB014542  | 6327.173  | 3916.934  | NM_001980 | 1464.577  | 1194.416  | AK025974  | 14690.239 | 15240.627 |
| NM_014640 | 1639.193  | 1077.994  | NM_006155 | 723.19    | 733.389   | BC036740  | 5056.027  | 5370.683  |
| Y10518    | 28406.934 | 18183.699 | NM_000751 | 7653.362  | 8321.701  | NM_001747 | 9148.634  | 10392.651 |

|           |           |           |           |           |           |           |           |           |
|-----------|-----------|-----------|-----------|-----------|-----------|-----------|-----------|-----------|
| AF155135  | 10774.766 | 6919.42   | NM_014849 | 5762.267  | 6470.011  | NM_004024 | 4153.217  | 5267.897  |
| NM_014790 | 1386.568  | 706.117   | NM_001042 | 5230.862  | 5666.438  | X52345    | 11482.288 | 10929.204 |
| NM_003571 | 4664.375  | 2748.573  | NM_012229 | 3253.274  | 3191.145  | NM_006965 | 3537.105  | 3335.465  |
| AB032965  | 24530.465 | 14047.782 | NM_005071 | 1046.883  | 1407.383  | AF027142  | 45378.785 | 50307.211 |
| AF133424  | 2517.518  | 2912.064  | AB023147  | 3024.809  | 3455.752  | S67970    | 611.495   | 911.053   |
| NM_005003 | 16183.278 | 19462.074 | NM_016615 | 7880.202  | 7721.473  | AF221520  | 1543.66   | 1482.003  |
| AF084560  | 5859.189  | 5062.079  | NM_005630 | 1293.805  | 1480.001  | NM_006941 | 18055.607 | 18762.889 |
| NM_015715 | 744.247   | 823.382   | NM_016730 | 34563.703 | 37493.336 | NM_005360 | 1054.124  | 604.801   |
| NM_000032 | 4147.578  | 4616.191  | AL035297  | 1973.205  | 1792.216  | NM_004345 | 4007.91   | 2775.536  |
| NM_002083 | 1991.339  | 1945.309  | NM_004408 | 1502.637  | 1691.702  | NM_002092 | 4898.887  | 4052.805  |
| NM_002035 | 5161.069  | 7134.146  | AJ131244  | 1272.08   | 1453.184  | NM_018077 | 1819.191  | 1972.128  |
| NM_014900 | 923.981   | 1022.7    | NM_002532 | 3904.222  | 5591.463  | NM_016835 | 9581.892  | 8434.245  |
| BF342908  | 1958.397  | 2089.811  | NM_012388 | 3792.97   | 5188.643  | NM_006560 | 2833.015  | 3204.047  |
| AF118073  | 614.593   | 1057.337  | NM_016651 | 690.267   | 746.763   | NM_004757 | 2697.616  | 2704.365  |
| AK023510  | 4068.883  | 5781.601  | NM_001671 | 3460.704  | 2696.562  | NM_018122 | 2879.523  | 2850.841  |
| NM_004345 | 1580.323  | 1606.282  | NM_019843 | 2816.096  | 2574.484  | AF035318  | 1090.169  | 1258.405  |
| X71490    | 9231.249  | 9080.675  | NM_016192 | 4651.822  | 3348.798  | NM_015455 | 4464.645  | 5066.3    |
| AF257081  | 1182.028  | 987.153   | BE878426  | 45675.297 | 44718.645 | AK025056  | 815.323   | 1020.71   |
| NM_001685 | 21572.973 | 17828.635 | NM_001745 | 13642.967 | 12509.456 | AF140710  | 3416.985  | 2842.575  |
| NM_003631 | 429.341   | 376.063   | AK025542  | 3747.791  | 3074.722  | NM_012085 | 8055.108  | 9097.669  |
| NM_000219 | 553.042   | 220.952   | AF207547  | 1064.607  | 846.53    | NM_017947 | 741.735   | 1077.047  |
| NM_002232 | 1156.5    | 873.466   | NM_002318 | 3095.372  | 3931.711  | NM_002494 | 4983.262  | 3828.923  |
| NM_016105 | 3907.519  | 3319.369  | NM_001433 | 546.804   | 761.768   | M58510    | 7230.882  | 5819.716  |
| NM_014570 | 5151.772  | 3847.142  | NM_003134 | 51890.5   | 47926.316 | NM_000782 | 528.612   | 472.254   |
| NM_014747 | 5095.345  | 3692.375  | NM_004314 | 3352.888  | 3955.278  | BE396003  | 1287.309  | 1265.59   |
| Y19240    | 5007.464  | 3180.244  | NM_018247 | 6893.486  | 9132.031  | AK023300  | 1564.652  | 1535.181  |
| AF091029  | 4508.846  | 2705.536  | NM_002889 | 48251.141 | 51893.305 | NM_003904 | 3856.97   | 3365.111  |
| X97074    | 12401.186 | 6464.492  | AF078866  | 4224.09   | 3907.235  | NM_006234 | 20025.178 | 21227.004 |
| NM_002625 | 461.134   | 159.49    | BF311880  | 6532.922  | 11760.199 | AF164438  | 5200.267  | 5237.006  |
| NM_004135 | 2492.469  | 2796.753  | NM_016075 | 525.73    | 624.523   | AK022284  | 2377.729  | 3189.595  |
| NM_000203 | 598.224   | 1082.048  | NM_001360 | 19377.986 | 13817.453 | AB040893  | 1561.092  | 1529.369  |
| NM_013443 | 2206.623  | 3667.101  | AK026656  | 6080.067  | 5073.169  | AK025844  | 529.826   | 397.062   |
| NM_000925 | 10027.309 | 13052.407 | AJ276207  | 6450.206  | 5414.959  | AL137727  | 2037.911  | 2437.686  |
| NM_000465 | 1748.801  | 2621.998  | AB011131  | 7394.063  | 7713.787  | L17327    | 763.645   | 519.67    |
| NM_000123 | 5322.49   | 7749.648  | AF164794  | 11109.727 | 8406.897  | AF074986  | 876.606   | 1311.898  |
| AL137501  | 1945.228  | 4249.866  | NM_001173 | 1726.481  | 1511.735  | AL049240  | 2040.527  | 2450.149  |
| BE858979  | 1503.4    | 2920.119  | AF077033  | 3177.979  | 3642.175  | U80773    | 1722.85   | 2035.119  |
| NM_006712 | 54424.813 | 49515.813 | D50406    | 590.099   | 579.823   | AK021745  | 1392.183  | 1434.178  |
| NM_006240 | 1402.674  | 1170.936  | NM_017785 | 711.078   | 1156.717  | L38937    | 4840.923  | 3381.773  |
| NM_007025 | 4197.729  | 3561.032  | NM_004991 | 778.935   | 1197.747  | U90907    | 4030.08   | 3331.644  |
| M37712    | 14735.506 | 6538.964  | AK026758  | 4549.578  | 6640.044  | AK024327  | 1287.553  | 942.951   |
| NM_002645 | 708.203   | 366.166   | AB046774  | 1053.931  | 1809.413  | AK024395  | 738.363   | 1038.889  |
| AF070670  | 3629.832  | 2670.038  | AK022385  | 25904.686 | 28364.686 | AF147327  | 412.727   | 681.59    |
| NM_016155 | 5092.281  | 3999.836  | NM_002775 | 477.711   | 1027.95   | AK000801  | 3308.089  | 3653.799  |
| NM_016525 | 1811.078  | 1173.642  | AK024584  | 5825      | 3516.752  | D85433    | 4689.325  | 5721.382  |
| NM_015974 | 3682.737  | 2071.465  | NM_003504 | 11126.413 | 8177.199  | AF086184  | 10871.343 | 11550.467 |
| NM_014384 | 5182.497  | 3585.079  | NM_013295 | 3796.042  | 3130.07   | NM_018275 | 4634.808  | 3670.11   |
| NM_002573 | 7263.762  | 4490.808  | NM_007267 | 2674.327  | 2126.154  | AL049266  | 5304.507  | 4502.506  |
| AL133037  | 1709.479  | 1994.585  | AK022830  | 661.002   | 788.206   | AF088045  | 589.932   | 913.319   |
| NM_000350 | 2034.76   | 1938.315  | Z36816    | 2953.717  | 2591.374  | AF007149  | 777.62    | 1069.9    |
| X91103    | 5884.093  | 6365.485  | NM_005865 | 6091.495  | 5325.74   | AK001469  | 1565.117  | 1473.392  |
| AA419164  | 1156.627  | 1660.044  | NM_006413 | 12068.856 | 11627.629 | AK021627  | 973.399   | 1015.973  |
| L35251    | 2742.989  | 3249.646  | NM_000215 | 805.614   | 1033.082  | NM_019595 | 1315.371  | 1980.044  |

|           |           |           |           |           |           |           |           |           |
|-----------|-----------|-----------|-----------|-----------|-----------|-----------|-----------|-----------|
| BE910395  | 1171.632  | 1305.038  | NM_003010 | 2252.408  | 2309.767  | AF085859  | 1946.418  | 1851.64   |
| N46828    | 1601.803  | 1956.519  | NM_006871 | 836.963   | 845.151   | AK026307  | 1657.73   | 2043.033  |
| BI908302  | 10961.147 | 13103.328 | NM_019074 | 2771.584  | 3203.614  | AL049260  | 1011.627  | 841.784   |
| AA460969  | 3298.672  | 4510.818  | NM_018494 | 42274.75  | 42465.664 | AL080067  | 626.463   | 445.377   |
| BG695859  | 819.113   | 1206.966  | AK000006  | 718.753   | 876.594   | AL117464  | 3026.761  | 2696.244  |
| M85079    | 2622.774  | 2970.512  | NM_014921 | 1091.154  | 1365.909  | AL049291  | 801.233   | 926.261   |
| AA457671  | 10415.138 | 11142.291 | NM_013255 | 1562.695  | 1556.419  | AL080160  | 779.338   | 1100.632  |
| X07437    | 3565.921  | 2987.91   | NM_007183 | 494.26    | 636.715   | L23849    | 761.43    | 1168.652  |
| NM_000641 | 1500.031  | 1441.432  | AJ238243  | 11986.786 | 11795.777 | AL157477  | 2917.535  | 2616.923  |
| AE006466  | 3879.397  | 2844.21   | J05046    | 21197.594 | 20474.887 | AB002318  | 1429.356  | 917.409   |
| BC008737  | 41081.926 | 29607.299 | NM_012318 | 2841.34   | 2129.693  | AL357535  | 1683.461  | 1483.36   |
| BC011655  | 7379.169  | 5613.47   | NM_002751 | 3060.293  | 2691.271  | AL049951  | 1655.254  | 1371.456  |
| BC002396  | 3810.713  | 3248.889  | NM_004291 | 1296.431  | 1248.522  | AK024963  | 543.751   | 366.377   |
| NM_022095 | 1118.913  | 798.899   | NM_003816 | 4674.266  | 4303.301  | AK023725  | 2222.547  | 2477.864  |
| AF112219  | 23792.6   | 15579.243 | AK022635  | 384.133   | 579.181   | AK022936  | 3298.886  | 5942.561  |
| NM_014640 | 1402.406  | 1379.968  | NM_004912 | 3116.652  | 3390.224  | AK024385  | 1981.703  | 2184.843  |
| AF155135  | 11567.127 | 10547.708 | U79304    | 15882.377 | 15779.791 | NM_017705 | 1205.113  | 691       |
| NM_014790 | 1104.734  | 1409.829  | NM_016267 | 4049.91   | 3591.389  | NM_014355 | 17098.305 | 21803.178 |
| NM_003571 | 6839.58   | 8119.608  | NM_004671 | 7460.232  | 9484.925  | AF009282  | 4234.678  | 6456.485  |
| AB032965  | 42046.559 | 50101.301 | NM_005180 | 10714.432 | 8843.565  | AF024704  | 4843.815  | 5508.367  |
| NM_020370 | 1086.594  | 1606.664  | NM_006526 | 3144.19   | 2949.083  | AF056431  | 761.422   | 1278.973  |
| NM_004767 | 931.759   | 1644.486  | U35622    | 616.562   | 421.007   | NM_016412 | 442.762   | 605.909   |
| BF310159  | 6976.705  | 10765.374 | NM_007045 | 2444.455  | 2379.657  | AF009293  | 1160.354  | 985.452   |
| NM_000316 | 520.708   | 779.662   | NM_003627 | 3339.338  | 3822.407  | NM_004155 | 57344.754 | 57064.258 |
| NM_018986 | 1747.071  | 2205.424  | NM_012145 | 25458.047 | 23947.514 | AF056444  | 5591.021  | 4983.061  |
| U27655    | 1899.175  | 1713.052  | AF305779  | 1000.96   | 1218.311  | AK000989  | 2193.48   | 2017.801  |
| NM_003360 | 1610.299  | 1310.35   | AF225416  | 9233.576  | 8337.232  | AK002210  | 4575.965  | 4599.524  |
| Z21965    | 17538.58  | 12163.886 | NM_016231 | 1443.241  | 1311.497  | AK021677  | 1108.581  | 1604.548  |
| NM_012427 | 748.684   | 538.226   | NM_002093 | 5433.948  | 5308.816  | AK001057  | 1187.546  | 1059.116  |
| AF131857  | 6776.552  | 5657.258  | AB042555  | 13960.134 | 13620.875 | AK021471  | 986.733   | 839.319   |
| NM_000852 | 24024.127 | 18365.223 | NM_017763 | 866.096   | 909.595   | AK021709  | 743.265   | 755.447   |
| NM_000395 | 2543.007  | 2475.903  | NM_013975 | 3322.497  | 3120.18   | AK025109  | 1731.845  | 1590.674  |
| AW797282  | 719.84    | 586.246   | NM_003843 | 5137.517  | 5514.286  | AK026057  | 1583.047  | 1687.474  |
| L09070    | 2143.157  | 1669.144  | NM_012216 | 1580.931  | 1440.443  | AJ008117  | 7733.226  | 4596.16   |
| NM_000062 | 13657.466 | 8317.405  | X73502    | 1352.792  | 1188.548  | AJ008147  | 16929.072 | 11554.334 |
| NM_009590 | 6329.375  | 4427.819  | NM_020445 | 52381.406 | 50892.668 | AK024369  | 896.683   | 601.679   |
| NM_016106 | 4514.424  | 4788.955  | NM_016376 | 12056.345 | 10251.623 | L43345    | 833.09    | 1303.104  |
| NM_014570 | 5375.347  | 5616.28   | AB046848  | 6188.268  | 5984.692  | AF180297  | 2808.658  | 3421.684  |
| NM_014747 | 5407.897  | 6475.393  | AL133057  | 3128.172  | 3292.536  | AK023245  | 1582.719  | 1343.101  |
| Y19240    | 5134.012  | 5966.238  | AK026302  | 7700.278  | 5647.13   | AF147303  | 621.277   | 646.271   |
| AF091029  | 6865.64   | 7537.767  | NM_012214 | 8887.936  | 8393.077  | S56365    | 59533.504 | 58760.41  |
| X97074    | 22505.049 | 24703.979 | AF049656  | 18772.389 | 19530.572 | AK023607  | 862.375   | 491.101   |
| AL117235  | 751.345   | 1032.44   | NM_000312 | 2132.66   | 2242.619  | AL049997  | 6747.271  | 7210.161  |
| NM_014822 | 3257.263  | 9726.085  | NM_003963 | 694.098   | 870.407   | AK024118  | 528.276   | 685.516   |
| NM_005296 | 2427.073  | 5535.326  | AC009729  | 510.081   | 701.278   | X89657    | 472.344   | 825.309   |
| NM_001337 | 698.494   | 1101.821  | NM_016595 | 5038.167  | 4524.336  | AK024509  | 1491.041  | 1830.94   |
| NM_003611 | 2345.414  | 3009.741  | BE874867  | 42759.238 | 44016.098 | NM_017847 | 3040.197  | 3215.566  |
| AB014538  | 1451.345  | 1698.105  | AL136719  | 3989.676  | 3887.378  | AL049675  | 1974.827  | 1092.013  |
| NM_006205 | 399.398   | 892.491   | NM_014105 | 8739.271  | 7280.709  | AF074983  | 1036.699  | 1025.136  |
| AK025118  | 4585.392  | 4589.471  | NM_012160 | 1379.384  | 1293.106  | AK021862  | 447.403   | 598.669   |
| NM_000727 | 1070.932  | 761.825   | NM_006357 | 59350.805 | 53902.965 | AK024177  | 1203.908  | 869.941   |
| NM_005385 | 7024.762  | 4780.171  | NM_014245 | 55309.422 | 49709.168 | AK024827  | 5349.587  | 4386.284  |
| NM_018985 | 2135.77   | 1393.843  | AK027070  | 783.207   | 954.757   | AF090102  | 720.967   | 632.455   |

|           |           |           |           |           |           |           |           |           |
|-----------|-----------|-----------|-----------|-----------|-----------|-----------|-----------|-----------|
| NM_006074 | 20282.896 | 15836.705 | AF129533  | 261.659   | 567.419   | K01564    | 878.568   | 824.745   |
| AF208232  | 12114.003 | 9751.087  | NM_003341 | 6843.803  | 6841.599  | AB023175  | 10151.044 | 8556.879  |
| NM_002988 | 5584.325  | 3642.7    | NM_017785 | 1063.663  | 1223.841  | AL359563  | 1226.238  | 1138.456  |
| NM_004186 | 942.167   | 524.598   | NM_006249 | 2878.049  | 2390.905  | NM_005304 | 596.597   | 314.102   |
| NM_016258 | 7005.926  | 4113.177  | NM_018318 | 1057.65   | 1062.401  | NM_014477 | 1188.626  | 942.761   |
| AF203032  | 2655.357  | 1744.627  | AB020640  | 2078.039  | 2131.553  | AF086478  | 3748.744  | 3636.935  |
| AB014542  | 5794.355  | 3398.946  | D29954    | 11393.039 | 9667.524  | AK021514  | 54007.777 | 49371.195 |
| AF070670  | 3859.613  | 4705.828  | AF007131  | 6235.441  | 4794.976  | AJ008134  | 2890.774  | 3137.188  |
| NM_016156 | 5144.858  | 5920.694  | NM_006839 | 2392.516  | 2798.435  | S71486    | 1867.429  | 2451.447  |
| NM_016528 | 1609.731  | 1803.015  | X74497    | 887.962   | 779.801   | L33808    | 14440.494 | 12254.837 |
| NM_015974 | 3298.42   | 3993.73   | NM_012210 | 1178.664  | 997.795   | D31886    | 2765.367  | 2580.461  |
| NM_014384 | 4216.571  | 5427.194  | U10072    | 1237.701  | 1272.275  | AK023330  | 4078.011  | 2129.686  |
| NM_002573 | 6980.701  | 7879.705  | AF222749  | 18783.467 | 24901.031 | AF075071  | 1268.924  | 769.54    |
| AF133424  | 3323.388  | 4077.635  | NM_007146 | 3303.927  | 4659.363  | AF001892  | 411.618   | 329.846   |
| NM_005003 | 20205.215 | 32155.764 | NM_002229 | 681.78    | 849.192   | X93500    | 1603.986  | 1469.029  |
| AF084560  | 5743.609  | 7925.831  | S69027    | 3043.14   | 3274.201  | U79271    | 1290.587  | 1001.267  |
| NM_015715 | 522.169   | 666.752   | NM_012119 | 1984.797  | 2041.14   | AK024609  | 4784.333  | 3609.122  |
| NM_000032 | 3931.027  | 5069.979  | X99631    | 18049.68  | 15880.437 | AK023660  | 463.987   | 191.683   |
| NM_002083 | 2188.775  | 2008.151  | NM_001730 | 1727.401  | 1429.586  | NM_018120 | 8377.127  | 7178.141  |
| NM_002035 | 5258.114  | 5832.022  | AB014589  | 2234.587  | 3022.707  | AK026874  | 1215.048  | 1052.904  |
| NM_014900 | 1251.817  | 1203.532  | AF248649  | 666.815   | 673.468   | D17217    | 1524.245  | 1653.464  |
| BF342908  | 1735.349  | 1748.358  | U37146    | 10203.596 | 8661.16   | AF088033  | 1843.476  | 1382.025  |
| AF118073  | 644.089   | 607.644   | NM_012086 | 3631.276  | 3203.467  | NM_020422 | 2021.434  | 1878.234  |
| AK023510  | 4293.854  | 3944.475  | NM_016034 | 20073.916 | 16527.43  | AJ227897  | 631.513   | 282.332   |
| NM_004345 | 1859.562  | 1336.373  | X69150    | 45963.965 | 48837.5   | AY007156  | 1396.029  | 1130.912  |
| NM_000702 | 22900.107 | 18717.441 | AK026654  | 895.551   | 1107.051  | AF086408  | 42223.598 | 48746.871 |
| X71490    | 9133.213  | 7633.124  | AB020643  | 458.397   | 497.534   | AK023979  | 2709.503  | 3551.887  |
| AF257081  | 1536.331  | 908.631   | AK025496  | 6232.482  | 7211.965  | CY3Cy5    | 7710.415  | 335.226   |
| NM_001688 | 22212.764 | 16757.984 | NM_001966 | 2682.045  | 3563.67   | U13738    | 1239.188  | 1042.622  |
| NM_002232 | 1288.156  | 822.522   | NM_016138 | 2823.021  | 3292.156  | H63077    | 31603.957 | 33245.023 |
| NM_022095 | 881.464   | 1132.806  | Z36833    | 57746.25  | 56316.621 | AA679352  | 17086.566 | 16228.342 |
| AF112219  | 21112.662 | 25849.434 | AW963246  | 247.994   | 196.262   | AA437291  | 951.004   | 1005.637  |
| NM_000521 | 311.483   | 662.607   | NM_014355 | 1482.795  | 1327.229  | X04503    | 3108.871  | 4055.804  |
| NM_004135 | 2643.782  | 4267.192  | M21191    | 26610.643 | 19983.896 | D45917    | 1244.01   | 2057.493  |
| NM_000203 | 513.746   | 431.252   | AF072810  | 876.452   | 1624.618  | X52001    | 2262.282  | 2245.596  |
| NM_013443 | 2449.267  | 2312.591  | L19778    | 676.598   | 723.727   | AA430552  | 3315.992  | 3654.434  |
| NM_000925 | 10382.135 | 10528.195 | AF174482  | 4278.593  | 3585.168  | X66142    | 3623.768  | 2985.485  |
| NM_000465 | 1629.148  | 2108.741  | NM_017769 | 717.936   | 660.54    | R45054    | 1155.197  | 1247.764  |
| AF116685  | 210.938   | 684.189   | D85131    | 11940.597 | 11171.4   | NM_000620 | 1034.909  | 1164.73   |
| NM_000123 | 6096.044  | 5524.103  | D30612    | 2096.182  | 1965.325  | NM_000905 | 7703.832  | 7413.918  |
| AL137501  | 842.066   | 676.938   | NM_018484 | 457.571   | 280.412   | SR7       | 4657.212  | 33019.328 |
| BE858979  | 740.228   | 685.37    | NM_017594 | 1167.673  | 1098.601  | SR9       | 17695.168 | 2659.269  |
| NM_000122 | 2617.728  | 1906.892  | AK027237  | 753.499   | 811.309   | CY3Cy5    | 5171.438  | 192.669   |
| NM_006712 | 50793.613 | 59019.266 | AK027104  | 2390.541  | 3404.427  | AF312769  | 1186.675  | 936.439   |
| NM_006240 | 1463.823  | 891.423   | AL133090  | 22730.936 | 20648.732 | AB020668  | 533.855   | 388.336   |
| NM_007026 | 4478.455  | 2667.507  | AF085867  | 7522.929  | 6071.153  | AF309553  | 3871.254  | 3097.049  |
| M37712    | 15568.029 | 6719.072  | AK026158  | 288.354   | 593.132   | NM_003605 | 1212.303  | 1102.074  |
| NM_002648 | 832.181   | 484.484   | AF086510  | 4062.478  | 3957.446  | NM_006135 | 8119.755  | 8138.268  |
| AW797282  | 721.683   | 897.418   | Z36779    | 3042.215  | 2894.727  | NM_005586 | 1832.42   | 1743.987  |
| L09070    | 1832.673  | 2586.868  | NM_002816 | 1359.245  | 1520.801  | NM_006896 | 1974.232  | 1740.042  |
| NM_000062 | 10614.125 | 14244.966 | NM_017822 | 6736.584  | 5594.005  | NM_001130 | 66661.75  | 61393.789 |
| NM_009590 | 6055.494  | 7462.869  | AK026844  | 2857.142  | 3597.537  | NM_002975 | 2707.008  | 2688.895  |
| AL133037  | 1462.689  | 1647.628  | AK026735  | 3529.719  | 3253.35   | AK023511  | 6757.223  | 8336.583  |

|           |           |           |           |           |           |           |           |           |
|-----------|-----------|-----------|-----------|-----------|-----------|-----------|-----------|-----------|
| NM_02035C | 3298.797  | 3251.445  | AL110104  | 17644.285 | 22136.074 | NM_01437E | 9751.47   | 7208.316  |
| NM_00035C | 2062.453  | 2289.805  | AK027056  | 2720.038  | 2921.049  | NM_01781Z | 15644.328 | 14568.56  |
| X91103    | 6245.638  | 5666.773  | AK024294  | 1386.854  | 1375.967  | AF204173  | 492.654   | 848.831   |
| AA419164  | 1039.237  | 1420.711  | AL110126  | 1797.064  | 1604.953  | J03260    | 1166.702  | 1280.392  |
| L35251    | 2591.11   | 2293.13   | AK091109  | 24541.516 | 18175.113 | AB014514  | 1943.868  | 1712.375  |
| BE910395  | 978.336   | 995.634   | NM_014967 | 2643.886  | 2469.503  | NM_00286E | 3790.498  | 2815.323  |
| N46828    | 1180.524  | 1212.352  | AK022915  | 6613.954  | 6293.37   | NM_00356E | 833.19    | 840.402   |
| BI908302  | 11459.793 | 10440.809 | AF131834  | 836.494   | 883.507   | NM_01329Z | 2435.226  | 2609.221  |
| AA460969  | 3353.144  | 3133.056  | AL355711  | 1812.154  | 2151.417  | NM_002387 | 1696.86   | 1488.958  |
| BG695859  | 774.735   | 452.055   | AK025851  | 2171.341  | 1803.542  | NM_00006E | 576.504   | 458.822   |
| M85079    | 2829.332  | 3135.872  | AJ011409  | 13402.136 | 10555.01  | AB023217  | 676.755   | 896.36    |
| AA457671  | 11517.769 | 8823.85   | AJ227906  | 2726.401  | 2509.449  | L08902    | 477.705   | 456.293   |
| X07437    | 4745.868  | 3685.564  | AJ011598  | 591.94    | 368.807   | J02639    | 2427.265  | 2096.72   |
| NM_000641 | 1904.494  | 1320.464  | AJ001906  | 478.234   | 374.396   | NM_00726Z | 7701.585  | 8885.902  |
| AE006466  | 4015.957  | 2101.532  | U17633    | 413.12    | 532.441   | AF206020  | 1304.803  | 1312.284  |
| BC008737  | 42468.43  | 24999.26  | L10404    | 1199.266  | 1084.061  | NM_00215C | 2982.926  | 2245.936  |
| BC011655  | 8614.076  | 5589.691  | AF283776  | 7385.556  | 8804.445  | NM_00459E | 9266.083  | 7327.342  |
| BC002396  | 4531.236  | 3217.984  | L10123    | 26088.445 | 40919.262 | NM_02017E | 432.597   | 484.095   |
| AF208232  | 12461.079 | 21723.074 | D16877    | 3609.764  | 3894.521  | NM_002264 | 1075.219  | 1225.46   |
| NM_00298E | 8463.617  | 16497.225 | L19363    | 420.247   | 239.547   | NM_014754 | 16315.36  | 12227.723 |
| NM_00418E | 1631.341  | 2830.517  | AK021895  | 2821.491  | 2496.449  | D49387    | 725.244   | 647.533   |
| NM_01625E | 6769.337  | 8372.83   | AL080107  | 497.073   | 1639.442  | AF050146  | 3380.063  | 2546.739  |
| AF203032  | 3808.226  | 4834.962  | AK000036  | 4104.439  | 3262.221  | NM_00011E | 3939.612  | 3014.764  |
| AB014542  | 8398.138  | 8273.206  | AK000769  | 352.943   | 700.352   | NM_00669E | 8332.047  | 7066.535  |
| NM_01464C | 1454.197  | 1408.491  | AK000924  | 691.789   | 519.537   | NM_006804 | 9755.346  | 12660.298 |
| Y10518    | 41812.043 | 44515.098 | AK022252  | 503.836   | 487.985   | NM_01596E | 8883.71   | 12466.041 |
| AF155135  | 12039.391 | 12933.323 | AK000114  | 2504.524  | 2076.814  | NM_003051 | 3955.295  | 4028.677  |
| NM_01479C | 1119.438  | 1375.62   | AK000952  | 8985.038  | 11539.054 | NM_14534Z | 4972.023  | 4089.925  |
| NM_003571 | 5004.013  | 5122.705  | AK024520  | 4588.418  | 6110.564  | AJ278917  | 7550.95   | 5733.267  |
| AB032965  | 36788.691 | 34594.477 | AK024592  | 1990.09   | 3546.928  | AK025641  | 26178.539 | 24723.793 |
| NM_02037C | 1447.381  | 1166.588  | AK024904  | 1620.725  | 2269.688  | AK025886  | 1125.517  | 851.221   |
| NM_004767 | 864.693   | 821.395   | AK025030  | 1939.808  | 2192.906  | NM_00172C | 791.832   | 626.568   |
| BF310159  | 7241.724  | 7942.407  | AK024542  | 4001.797  | 3715.663  | NM_01839C | 3085.176  | 2395.679  |
| NM_01898E | 1895.524  | 1773.974  | AK024915  | 460.02    | 692.15    | AB037724  | 4585.836  | 2997.562  |
| AB044934  | 409.57    | 436.373   | AB050477  | 2436.471  | 2241.86   | AK025086  | 986.578   | 876.963   |
| U27655    | 2153.012  | 1473.729  | AK000152  | 2166.828  | 3049.903  | AK026151  | 3811.149  | 2414.982  |
| NM_00336C | 2068.491  | 1682.401  | AK024300  | 2137.269  | 2498.068  | NM_01414C | 2658.232  | 2565.683  |
| Z21965    | 22595.35  | 17502.178 | L09092    | 1101.599  | 1625.83   | NM_00291E | 4632.026  | 4490.216  |
| NM_012427 | 779.291   | 733.92    | NM_01213Z | 1180.531  | 1124.958  | M20700    | 6599.475  | 5720.753  |
| AF131857  | 8172.792  | 4538.66   | NM_01212Z | 1429.716  | 1333.569  | NM_001034 | 13993.996 | 14144.009 |
| NM_00085Z | 29083.383 | 17977.936 | AK025716  | 709.77    | 692.109   | NM_00268E | 1247.804  | 1429.369  |
| NM_00039E | 884.986   | 509.371   | AF086202  | 12798.674 | 13244.725 | NM_01768E | 2106.845  | 2514.214  |
| AF257081  | 2694.517  | 3740.404  | AF085979  | 23711.402 | 18185.719 | AL096734  | 7389.963  | 10170.134 |
| NM_00168E | 17448.953 | 33895.977 | AK023112  | 2119.954  | 1633.742  | AK000800  | 1984.619  | 2647.044  |
| NM_003631 | 386.477   | 556.559   | NM_01780E | 31217.996 | 23414.715 | NM_018154 | 2798.412  | 2881.577  |
| NM_00021E | 499.111   | 514.391   | AK001937  | 46505.973 | 45625.047 | BC006287  | 3773.324  | 3794.692  |
| NM_00223Z | 1104.413  | 1480.241  | AL365517  | 1225.511  | 1049.578  | AB023198  | 3070.203  | 3043.284  |
| NM_01610E | 4543.775  | 4524.154  | AK021988  | 6468.993  | 6461.18   | AF304163  | 12780.175 | 12150.009 |
| NM_01457C | 5187.084  | 6314.551  | AF086494  | 19616.172 | 18525.875 | NM_005231 | 3834.446  | 4260.058  |
| NM_014747 | 5589.566  | 6607.947  | BI769977  | 1113.785  | 1109.063  | AF064729  | 2155.594  | 1693.202  |
| Y19240    | 4850.33   | 5722.073  | AL137567  | 786.389   | 1354.454  | NM_00541Z | 11376.746 | 10175.136 |
| AF091029  | 6166.716  | 6367.189  | AK024913  | 2227.852  | 1895.911  | NM_012113 | 1540.922  | 1351.947  |
| X97074    | 22254.387 | 21545.834 | AB007961  | 2552.188  | 2220.037  | NM_00272E | 972.938   | 1032.276  |

|           |           |           |           |           |           |           |           |           |
|-----------|-----------|-----------|-----------|-----------|-----------|-----------|-----------|-----------|
| AL117235  | 827.484   | 890.158   | NM_005547 | 1924.603  | 1819.587  | NM_014375 | 8419.207  | 4909.534  |
| NM_014822 | 3137.021  | 3903.601  | AF119862  | 10133.942 | 8313.642  | NM_017812 | 13349.563 | 11567.021 |
| NM_005296 | 1393.355  | 930.334   | U17628    | 1472.512  | 1222.334  | J03260    | 1502.939  | 1007.237  |
| NM_001337 | 687.648   | 769.591   | AF119867  | 5614.482  | 5476.383  | U13738    | 1164.719  | 880.448   |
| NM_003611 | 1949.676  | 1643.932  | AL357205  | 8316.143  | 12907.387 | AF068236  | 46810.098 | 38008.574 |
| AB014538  | 1643.713  | 1621.226  | AF124819  | 691.731   | 919.565   | H94487    | 1435.582  | 1160.937  |
| NM_006209 | 737.86    | 514.777   | D17091    | 1985.971  | 1854.869  | BG681747  | 30525.873 | 28014.66  |
| AK025118  | 5779.465  | 4817.94   | AL133074  | 2486.526  | 2018.309  | H63077    | 32089.865 | 33725.684 |
| NM_000727 | 1266.643  | 808.739   | NM_018121 | 919.794   | 718.13    | AA679352  | 17795.752 | 15715.617 |
| NM_002621 | 582.561   | 231.234   | AK026708  | 4110.611  | 3080.124  | AA437291  | 612.412   | 626.633   |
| NM_005385 | 8472.29   | 4498.981  | NM_017903 | 3736.498  | 3560.383  | X04503    | 2868.572  | 2623.037  |
| NM_018985 | 2555.324  | 1429.604  | NM_018074 | 1580.43   | 1271.848  | D45917    | 1172.301  | 1563.559  |
| NM_006074 | 23795.732 | 15478.689 | NM_000909 | 3083.709  | 2787.877  | X52001    | 2955.875  | 3078.876  |
| NM_006712 | 49507.992 | 65633.961 | U31737    | 349.603   | 442.869   | AA430552  | 3892.898  | 3904.754  |
| NM_006240 | 2197.196  | 3425.262  | AK024828  | 974.935   | 1363.318  | X66142    | 3015.022  | 2443.299  |
| NM_007026 | 5089.804  | 7234.497  | AF009315  | 1663.354  | 1598.024  | R45054    | 1485.85   | 1377.099  |
| M37712    | 15660.109 | 14942.703 | NM_019013 | 1097.596  | 824.448   | NM_000905 | 7411.169  | 5496.733  |
| NM_002648 | 530.891   | 638.875   | NM_006783 | 489.489   | 547.307   | AL117398  | 3584.911  | 2981.743  |
| AF070670  | 4140.259  | 5191.068  | S70313    | 10042.606 | 9461.725  | AY007158  | 51871.934 | 44935.551 |
| NM_016156 | 4879.963  | 6695.745  | AK021607  | 2541.293  | 2213.1    | M58050    | 3832.29   | 2935.381  |
| NM_016528 | 1977.037  | 2140.721  | AK025860  | 1542.435  | 1365.46   | NM_007263 | 6172.049  | 4726.722  |
| NM_015974 | 3514.447  | 3858.152  | L09268    | 307.021   | 500.356   | AF206020  | 1016.414  | 564.854   |
| NM_014384 | 4865.714  | 6132.609  | NM_020186 | 9255.22   | 7607.585  | AF312769  | 1526.847  | 973.324   |
| NM_002573 | 7438.196  | 7637.656  | AK022424  | 340.76    | 432.022   | AB020668  | 740.038   | 695.547   |
| AF133424  | 3204.689  | 3179.007  | AF090947  | 2322.16   | 2869.822  | NM_006203 | 17056.662 | 13753.339 |
| NM_005003 | 21528.633 | 15504.019 | NM_005047 | 2387.35   | 1961.21   | AF309553  | 3824.69   | 4059.027  |
| AF084560  | 6621.333  | 6087.197  | AJ272196  | 9226.81   | 5270.605  | NM_003605 | 1108.691  | 1152.015  |
| NM_015715 | 716.586   | 520.924   | X58162    | 6762.345  | 7554.763  | NM_006139 | 8391.496  | 7985.812  |
| NM_000032 | 4361.441  | 4446.684  | AK022825  | 1233.169  | 1149.879  | NM_018961 | 4067.549  | 3642.65   |
| NM_002083 | 2287.766  | 1816.459  | CY3Cy5    | 3861.607  | 114.011   | NM_005586 | 1883.366  | 1924.396  |
| NM_002035 | 5987.531  | 5139.522  | L35251    | 3391.767  | 2762.373  | NM_006896 | 2143.513  | 1727.396  |
| NM_014900 | 1325.179  | 909.454   | BE910395  | 1414.569  | 1462.581  | NM_001130 | 64637.391 | 61377.266 |
| BF342908  | 1900.271  | 1709.692  | N46828    | 2709.857  | 2081.107  | NM_002975 | 2620.577  | 2276.388  |
| AF118073  | 824.472   | 642.343   | BI908302  | 22615.398 | 14567.843 | AK023511  | 5781.115  | 8341.71   |
| AK023510  | 5143.141  | 3983.727  | AA460969  | 4298.993  | 2055.6    | NM_014556 | 2651.462  | 1926.823  |
| NM_004345 | 2023.709  | 1103.854  | BG695859  | 1014.912  | 1494.464  | NM_001615 | 61945.477 | 62260.754 |
| NM_000702 | 29919.766 | 20505.715 | M85079    | 5960.613  | 6613.689  | AK025886  | 1009.518  | 894.748   |
| X71490    | 11082.834 | 7025.645  | AA457671  | 15994.99  | 21122.012 | AB014514  | 2091.312  | 1901.281  |
| NM_014273 | 17924.809 | 24489.949 | X07437    | 6408.837  | 9814.64   | NM_002865 | 3413.852  | 3976.555  |
| AF039442  | 1253.961  | 2070.864  | NM_000641 | 2106.62   | 2634.755  | NM_003566 | 1021.699  | 937.828   |
| NM_004680 | 839.901   | 1389.231  | AE006466  | 4066.032  | 6096.648  | NM_007159 | 18033.834 | 18682.957 |
| AF104260  | 554.839   | 1015.966  | BC008737  | 49487.035 | 59764.316 | NM_003731 | 9991.485  | 10226.588 |
| NM_005671 | 2137.613  | 3246.554  | BC011655  | 7552.628  | 8949.095  | NM_005446 | 3147.23   | 3610.073  |
| NM_017409 | 4030.246  | 5782.192  | BC002396  | 4916.543  | 7267.272  | NM_013292 | 2604.486  | 2779.05   |
| NM_019625 | 4567.555  | 5050.912  | NM_022095 | 1109.199  | 2139.559  | NM_002387 | 1832.61   | 1563.509  |
| NM_006729 | 3216.586  | 3860.267  | SR2       | 59364.945 | 59364.344 | NM_000069 | 845.965   | 605.41    |
| NM_006071 | 1280.226  | 1142.705  | SR4       | 14909.979 | 16224.458 | AB023217  | 473.54    | 306.208   |
| NM_012236 | 8537.827  | 8255.235  | SR6       | 2228.654  | 1986.654  | L08902    | 421.786   | 472.092   |
| AF112219  | 23548.061 | 25597.484 | SR8       | 8145.732  | 24858.488 | J02639    | 2689.052  | 2243.903  |
| NM_000521 | 409.96    | 847.713   | SR10      | 29958.078 | 9696.786  | NM_005231 | 3156.733  | 3075.697  |
| NM_002625 | 315.213   | 419.679   | CY3Cy5    | 3452.997  | 141.641   | AF064729  | 1666.433  | 1448.727  |
| NM_004135 | 3516.575  | 3671.242  | NM_020370 | 1239.262  | 1247.9    | NM_005412 | 10796.715 | 8474.179  |
| NM_000203 | 640.333   | 440.378   | NM_004767 | 1451.692  | 1459.518  | NM_012113 | 1841.395  | 1598.814  |

|           |           |           |           |           |           |           |           |           |
|-----------|-----------|-----------|-----------|-----------|-----------|-----------|-----------|-----------|
| NM_013443 | 2460.037  | 2606.506  | BF310159  | 9692.507  | 5671.95   | NM_00215C | 4402.955  | 3788.464  |
| NM_000925 | 11262.785 | 10848.076 | NM_018986 | 1521.666  | 1366.569  | NM_004595 | 9252.395  | 9002.818  |
| NM_000465 | 2216.81   | 2644.388  | U27655    | 2644.412  | 2992.89   | NM_002264 | 945.583   | 1147.717  |
| NM_000123 | 7066.458  | 6691.487  | NM_00336C | 1972.084  | 2595.232  | NM_014754 | 16338.279 | 17022.98  |
| AL137501  | 1045.848  | 895.085   | Z21965    | 45414.215 | 56992.059 | D49387    | 497.999   | 532.596   |
| NM_000122 | 3161.868  | 1926.963  | NM_012427 | 5907.671  | 7785.443  | AF050146  | 3180.497  | 2770.237  |
| U87223    | 970.573   | 1060.062  | AF131857  | 7206.815  | 11052.857 | NM_000116 | 3641.867  | 4071.246  |
| Z36505    | 3167.814  | 5121.226  | NM_000852 | 28732.432 | 37772.316 | NM_00669E | 6880.23   | 7202.005  |
| NM_001854 | 2451.708  | 3426.351  | NM_000399 | 765.974   | 1114.62   | NM_006804 | 7722.909  | 7607.086  |
| NM_017913 | 2716.47   | 6095.118  | AW797282  | 958.469   | 1303.211  | NM_015965 | 10001.858 | 11193.178 |
| NM_002755 | 11763.729 | 17901.811 | L09070    | 2946.197  | 3014.301  | NM_003051 | 3207.892  | 2835.379  |
| AK024799  | 30127.734 | 32507.434 | NM_000062 | 13015.523 | 16072.766 | NM_145342 | 4938.995  | 4507.493  |
| NM_000924 | 5516.387  | 6464.137  | NM_00959C | 7177.276  | 8130.91   | AJ278917  | 7218.587  | 7101.588  |
| NM_00333C | 11169.851 | 13258.13  | AL133037  | 1576.533  | 2107.878  | AK025641  | 23742.572 | 20079.791 |
| NM_003647 | 1587.455  | 1499.2    | NM_02035C | 3722.012  | 2830.651  | NM_000905 | 6022.5    | 4271.954  |
| NM_001699 | 34205.703 | 30269.145 | NM_00035C | 2474.144  | 2274.625  | AL117398  | 2981.765  | 2448.667  |
| AB006589  | 592.79    | 776.585   | X91103    | 8086.708  | 10581.787 | AY007158  | 52498.297 | 48018.695 |
| NM_018351 | 1304.748  | 1129.814  | AA419164  | 1336.349  | 1595.425  | NM_00172C | 1099.794  | 986.09    |
| AK023019  | 895.926   | 966.057   | AL117235  | 917.345   | 825.913   | NM_01839C | 3029.365  | 2899.67   |
| NM_147171 | 3683.303  | 3051.34   | NM_014822 | 4757.37   | 2821.422  | AB037724  | 4316.088  | 4633.466  |
| AF238083  | 6996.241  | 6604.562  | NM_005296 | 1858.801  | 1690.283  | AK025086  | 1256.213  | 1685.911  |
| NM_002962 | 547.471   | 543.748   | NM_001337 | 548.032   | 505.519   | AK026151  | 3946.782  | 4851.234  |
| NM_01638E | 2766.512  | 2048.166  | NM_003611 | 3592.031  | 2730.672  | NM_01414C | 2647.959  | 2916.517  |
| AB046783  | 3132.845  | 2755.774  | AB014538  | 2155.688  | 1561.663  | NM_00291E | 4338.054  | 5001.092  |
| NM_000845 | 1542.268  | 1076.337  | NM_006209 | 638.394   | 1266.057  | M20700    | 6314.481  | 6044.917  |
| NM_014965 | 3744.347  | 2915.476  | AK025118  | 6015.803  | 7584.493  | NM_01768E | 1939.973  | 2365.571  |
| NM_004882 | 15963.418 | 9768.105  | NM_000727 | 2213.268  | 2609.548  | AL096734  | 566.682   | 502.432   |
| AL390148  | 12908.56  | 7749.685  | NM_002621 | 418.377   | 789.88    | AK000800  | 2018.184  | 2151.199  |
| AK024055  | 1366.634  | 1083.789  | NM_005385 | 10983.805 | 15531.385 | NM_018154 | 3002.442  | 3616.03   |
| U10485    | 592.724   | 1158.903  | NM_018985 | 3888.666  | 4155.708  | NM_00535E | 1616.773  | 1505.426  |
| NM_01337E | 963.626   | 1387.54   | NM_006074 | 36686.301 | 39605.621 | BC006287  | 3767.166  | 3743.852  |
| NM_017964 | 1157.306  | 1714.277  | AF208232  | 15549.711 | 20834.945 | AB023198  | 2567.348  | 3167.449  |
| NM_016272 | 587.89    | 757.883   | NM_00298E | 7998.892  | 10082.134 | AF304163  | 11565.061 | 10750.825 |
| NM_01642E | 2144.824  | 3138.788  | NM_00418E | 1230.084  | 1477.856  | NM_00689E | 1839.191  | 1665.917  |
| NM_004083 | 4654.363  | 5971.238  | NM_01625E | 7968.673  | 9833.808  | NM_00113C | 61795.277 | 58524.934 |
| NM_01603E | 9801.011  | 9646.457  | AF203032  | 5192.861  | 6483.726  | NM_002975 | 2348.09   | 1875.455  |
| NM_001184 | 3202.06   | 3933.874  | AB014542  | 10083.563 | 10907.427 | AK023511  | 4972.478  | 4441.457  |
| NM_01553C | 8886.574  | 9133.846  | NM_01464C | 2527.512  | 3664.812  | NM_01455E | 2599.099  | 1774.109  |
| NM_01623E | 3914.231  | 4205.242  | Y10518    | 54727.688 | 61504.086 | NM_001615 | 63125.047 | 63232     |
| NM_00175E | 643.202   | 1262.824  | AF155135  | 13619.027 | 19505.621 | NM_002725 | 1182.41   | 1218.01   |
| BE546276  | 721.542   | 630.149   | NM_01479C | 1504.465  | 1903.079  | NM_014375 | 8195.942  | 6795.658  |
| NM_004725 | 14448.74  | 15356.131 | NM_003571 | 11302.17  | 15066.564 | NM_017812 | 12731.166 | 18423.58  |
| NM_015997 | 4973.056  | 5069.835  | AB032965  | 60852.336 | 64376.844 | AF068236  | 40420.332 | 46793.254 |
| NM_001167 | 4243.323  | 4559.712  | AF133424  | 4139.374  | 3187.252  | H94487    | 968.082   | 867.535   |
| NM_012115 | 3790.574  | 4258.753  | NM_005003 | 30976.35  | 21483.002 | BG681747  | 27423.121 | 31986.174 |
| NM_004933 | 14952.392 | 15501.395 | AF084560  | 10983.515 | 7857.55   | X04503    | 3229.825  | 3581.124  |
| M96577    | 10769.915 | 10392.378 | NM_015715 | 1106.827  | 932.01    | D45917    | 1238.447  | 1060.73   |
| NM_01325E | 11406.304 | 9415.039  | NM_000032 | 7458.462  | 5326.45   | X52001    | 2120.178  | 1885.881  |
| NM_003842 | 3414.351  | 2969.16   | NM_002083 | 4773.036  | 2851.515  | BI823872  | 13115.728 | 11795.573 |
| L11238    | 9743.383  | 8183.107  | NM_002035 | 7683.994  | 9901.04   | AA430552  | 3097.694  | 3140.318  |
| AK025684  | 985.36    | 880.628   | NM_01490C | 1367.375  | 2794.48   | X66142    | 3231.294  | 2548.494  |
| NM_012205 | 3672.845  | 2668.473  | BF342908  | 3220.141  | 4813.208  | R45054    | 1196.043  | 943.484   |
| K02046    | 3266.039  | 2619.746  | AF118073  | 1348.145  | 1657.878  | NM_002387 | 1212.441  | 1287.232  |



|           |           |           |           |           |           |           |           |           |
|-----------|-----------|-----------|-----------|-----------|-----------|-----------|-----------|-----------|
| AL110151  | 7222.233  | 10272.929 | AK023510  | 5866.597  | 7990.088  | NM_000065 | 469.533   | 746.717   |
| NM_004995 | 3305.058  | 4793.391  | NM_004345 | 2908.324  | 3678.118  | L08902    | 604.72    | 582.775   |
| NM_000386 | 9008.145  | 10555.608 | X71490    | 14430.043 | 17787.33  | J02639    | 1589.328  | 1842.069  |
| NM_007231 | 363.426   | 503.874   | AF257081  | 2432.977  | 3444.579  | M58050    | 4665.939  | 3715.532  |
| NM_001190 | 4122.65   | 4109.056  | NM_001688 | 25525.875 | 24038.168 | NM_007263 | 5495.358  | 7276.163  |
| NM_005271 | 8873.52   | 10850.806 | NM_003631 | 597.714   | 474.048   | AF312769  | 1482.674  | 1975.218  |
| NM_015654 | 6776.968  | 7398.769  | NM_002232 | 1216.011  | 1271.292  | AB020668  | 397.234   | 799.107   |
| NM_012244 | 2400.968  | 2948.603  | NM_016106 | 5707.631  | 7269.724  | NM_006203 | 13763.413 | 13988.081 |
| NM_004341 | 1151.182  | 1139.01   | NM_014570 | 6287.086  | 8147.317  | AF309553  | 3614.246  | 4128.555  |
| AB082521  | 5804.842  | 6174.072  | NM_014747 | 8124.582  | 9585.659  | NM_003605 | 1037.112  | 1435.085  |
| AL050182  | 1576.96   | 1615.65   | Y19240    | 7580.396  | 9841.678  | NM_006135 | 9245.983  | 9612.626  |
| NM_020040 | 1402.44   | 1397.785  | AF091029  | 11974.76  | 16022.624 | NM_000100 | 34994.5   | 29411.6   |
| NM_002374 | 2019.361  | 1547.735  | X97074    | 40019.355 | 52366.395 | NM_001900 | 68175.25  | 63787.793 |
| AK026940  | 3460.098  | 3328.665  | M34423    | 103769.19 | 29401.451 | NM_003993 | 2516.606  | 2048.105  |
| AF155117  | 4801.806  | 4166.692  | NM_004135 | 3267.246  | 1943.331  | NM_018961 | 3510.967  | 3135.962  |
| AB014527  | 883.335   | 496.799   | NM_013443 | 2346.041  | 1607.659  | NM_005586 | 1979.62   | 2243.621  |
| NM_004411 | 2121.939  | 1490.984  | NM_000925 | 14190.422 | 7682.706  | NM_145342 | 3980.534  | 5258.972  |
| NM_015938 | 7390.444  | 4485.358  | NM_000465 | 2286.411  | 2505.157  | AJ278917  | 7165.719  | 6058.566  |
| NM_000740 | 575.887   | 541.864   | AF116685  | 597.849   | 971.77    | AK025641  | 25989.721 | 28985.238 |
| NM_017843 | 2972.088  | 2322.599  | NM_000123 | 7107.226  | 9814.638  | AB014514  | 2152.242  | 2207.295  |
| AK025985  | 4615.294  | 13255.603 | AL137501  | 740.347   | 1386.605  | NM_003566 | 1136.223  | 873.109   |
| NM_013256 | 1596.555  | 1897.427  | BE858979  | 1071.054  | 1814.409  | NM_007155 | 17576.406 | 16654.57  |
| NM_004143 | 837.865   | 1201.723  | M37712    | 14510.246 | 12181.385 | NM_003731 | 9703.743  | 9062.478  |
| X66087    | 810.138   | 897.834   | NM_002648 | 889.847   | 571.869   | NM_005446 | 3894.183  | 4744.409  |
| NM_016328 | 6092.876  | 7726.991  | AF070670  | 6860.166  | 7029.662  | NM_013292 | 2998.096  | 2708.343  |
| NM_017544 | 14438.684 | 18699.146 | NM_016156 | 6988.944  | 8244.237  | BC006287  | 3336.979  | 4338.379  |
| NM_003153 | 841.303   | 775.069   | NM_016528 | 2067.109  | 2736.74   | NM_005231 | 4394.644  | 4566.034  |
| NM_016285 | 1585.994  | 1811.18   | NM_015974 | 5403.841  | 6305.782  | AF064729  | 1976.574  | 2211.309  |
| NM_014707 | 1183.806  | 1301.573  | NM_014384 | 5973.501  | 7540.366  | NM_005412 | 10741.177 | 14028.597 |
| AF025771  | 1169.464  | 1038.715  | NM_002573 | 9591.665  | 13866.008 | NM_012113 | 1796.779  | 2106.697  |
| NM_018215 | 1119.319  | 1586.976  | AL133037  | 4349.666  | 2544.272  | NM_002150 | 3783.374  | 3548.589  |
| AB033110  | 587.034   | 684.475   | NM_020350 | 4253.732  | 1729.919  | NM_004595 | 9334.747  | 10314.427 |
| NM_005083 | 12451.032 | 12941.311 | NM_000350 | 2826.858  | 1293.258  | NM_002264 | 1291.489  | 1655.838  |
| NM_007187 | 12037.062 | 12954.46  | BE910395  | 1883.995  | 2826.946  | NM_014754 | 17517.246 | 19018.99  |
| NM_018983 | 12753.089 | 17708.51  | N46828    | 2001.901  | 2618.845  | NM_000116 | 3797.899  | 3397.651  |
| NM_007279 | 3300.461  | 3214.776  | BI908302  | 18495.979 | 26591.02  | NM_006698 | 7946.756  | 7749.095  |
| BE390833  | 14323.39  | 12860.979 | AA460969  | 4088.534  | 4819.948  | NM_006804 | 9742.676  | 9185.524  |
| NM_004730 | 8119.738  | 7159.035  | BG695859  | 998.987   | 1514.811  | NM_015965 | 9066.728  | 8606.023  |
| NM_000801 | 3871.043  | 3527.161  | M85079    | 7477.708  | 8127.099  | NM_020162 | 3042.197  | 3417.043  |
| NM_006115 | 15741.96  | 13144.76  | AA457671  | 13952.71  | 13541.335 | AK027124  | 30197.219 | 31077.748 |
| NM_005801 | 4171.437  | 2937.284  | X07437    | 6403.301  | 9248.242  | M31212    | 33190.809 | 53056.578 |
| NM_018198 | 2676.549  | 1685.282  | BC011655  | 7732.396  | 8703.233  | AL117398  | 3435.087  | 3108.911  |
| NM_001539 | 22283.785 | 15601.867 | BC002396  | 5554.166  | 6537.18   | AY007158  | 51559.539 | 53374.367 |
| NM_012267 | 626.795   | 209.431   | NM_022095 | 1374.289  | 1961.263  | NM_001720 | 1054.912  | 1227.906  |
| AK027232  | 13312.562 | 16134.739 | AF112219  | 16869.287 | 16998.197 | NM_018390 | 3387      | 3091.666  |
| NM_012204 | 377.881   | 738.144   | NM_000521 | 820.411   | 681.805   | AB037724  | 7993.117  | 9052.244  |
| AK091117  | 255.568   | 593.248   | NM_014640 | 1622.131  | 863.843   | AK025086  | 1709.426  | 1521.685  |
| NM_003613 | 872.269   | 1178.836  | Y10518    | 54423.594 | 34976.105 | AK026151  | 7998.263  | 6844.086  |
| NM_000022 | 35808.477 | 44500.844 | AF155135  | 12298.229 | 5795.92   | NM_014140 | 3131.812  | 3344.78   |
| NM_016576 | 4414.086  | 5800.432  | NM_004767 | 1521.995  | 2489.715  | M20700    | 5776.723  | 6056.724  |
| NM_004213 | 1389.267  | 1746.461  | BF310159  | 11172.465 | 10365.747 | NM_001034 | 13275.062 | 19945.564 |
| NM_000906 | 1116.418  | 1305.17   | NM_018986 | 1729.458  | 2723.677  | NM_002685 | 1207.813  | 1371.084  |
| NM_000480 | 5476.595  | 6228.836  | AB044934  | 548.734   | 638.212   | NM_017686 | 2238.867  | 2538.16   |

|           |           |           |           |           |           |           |           |           |
|-----------|-----------|-----------|-----------|-----------|-----------|-----------|-----------|-----------|
| AF254084  | 28990.188 | 33682.793 | U27655    | 2998.021  | 4509.729  | AL096734  | 613.425   | 644.048   |
| AK022976  | 1414.895  | 1476.174  | NM_005795 | 446.88    | 876.016   | NM_016645 | 4722.716  | 6083.107  |
| AB048791  | 7420.838  | 14349.438 | NM_003360 | 907.713   | 1671.844  | NM_002206 | 1273.897  | 1293.208  |
| NM_006874 | 3614.849  | 3499.807  | NM_000852 | 30113.764 | 35112.859 | NM_007074 | 655.224   | 902.608   |
| AB046777  | 3530.268  | 3319.565  | NM_000399 | 827.198   | 1386.169  | NM_003815 | 2178.454  | 1799.819  |
| AJ251844  | 2749.952  | 2277.292  | AW797282  | 1271.235  | 1531.807  | NM_001430 | 976.003   | 1337.382  |
| D16815    | 1573.54   | 1189.958  | L09070    | 2968.293  | 3028.294  | U17989    | 1382.885  | 1302.163  |
| NM_001880 | 3512.027  | 2920.595  | NM_000062 | 14419.925 | 15670.718 | NM_018028 | 1287.935  | 1639.985  |
| AB028943  | 1679.781  | 1052.535  | NM_009590 | 8611.406  | 11793.163 | AF249267  | 53627.918 | 57017.82  |
| NM_006194 | 1881.774  | 1077.123  | NM_016106 | 5302.57   | 4042      | NM_004113 | 554.854   | 913.784   |
| AK001603  | 5843.444  | 3145.289  | NM_014570 | 5285.146  | 3813.104  | X84939    | 3294.098  | 2987.161  |
| U71601    | 2120.614  | 1181.927  | NM_014747 | 6094.642  | 5019.734  | NM_018320 | 26804.035 | 24370.309 |
| AF042838  | 1187.069  | 1894.314  | NM_005296 | 2329.288  | 3186.911  | NM_002065 | 2128.058  | 2225.933  |
| AL137511  | 648.1     | 855.943   | NM_001337 | 696.702   | 948.036   | NM_016056 | 14593.883 | 12077.83  |
| AF075031  | 613.697   | 1173.386  | NM_003611 | 4288.479  | 5174.224  | M65066    | 8069.172  | 8443.833  |
| AF075062  | 7128.472  | 6881.477  | AB014538  | 3249.009  | 3810.795  | NM_016951 | 1545.981  | 1548.165  |
| NM_004185 | 649.824   | 566.396   | NM_006209 | 999.916   | 1285.47   | NM_013251 | 975.554   | 1006.241  |
| AF147381  | 5371.802  | 6918.813  | AK025118  | 6567.626  | 6923.912  | NM_006095 | 2873.691  | 3811.666  |
| AB002452  | 499.857   | 883.624   | NM_000727 | 1863.84   | 2423.709  | NM_016084 | 10898.291 | 13850.203 |
| AF010236  | 392.566   | 759.296   | NM_005385 | 9843.328  | 13330.431 | AF095289  | 23748.938 | 28778.572 |
| AK024358  | 441.431   | 576.024   | NM_018985 | 2965.591  | 3143.179  | NM_005537 | 3781.089  | 3741.339  |
| AF088075  | 1137.061  | 1260.729  | NM_006074 | 39395.984 | 42384.234 | NM_019003 | 2068.177  | 1654.438  |
| AK026376  | 4280.761  | 6219.04   | AF208232  | 14889.548 | 17894.645 | NM_015935 | 2666.938  | 2676.529  |
| AF088061  | 2913.195  | 3380.736  | NM_002988 | 10533.165 | 12723.89  | AF182412  | 787.269   | 975.902   |
| AF086286  | 2159.733  | 2601.703  | NM_004186 | 1720.445  | 2383.769  | AK027200  | 1416.079  | 1368.174  |
| AF086376  | 2161.147  | 2032.094  | NM_016258 | 7688.856  | 9409.646  | U03106    | 4568.401  | 6018.251  |
| AF086410  | 953.525   | 986.178   | AF203032  | 6493.636  | 7482.777  | NM_006845 | 16973.221 | 19776.656 |
| AF086455  | 890.746   | 631.279   | AF070670  | 5234.453  | 3390.282  | NM_014885 | 846.924   | 903.893   |
| AK022997  | 8164.364  | 7301.603  | NM_016156 | 5923.95   | 4392.068  | NM_004945 | 4107.266  | 4011.059  |
| NM_017617 | 3463.369  | 2359.138  | NM_016528 | 1671.492  | 1297.034  | NM_020242 | 2416.947  | 2751.77   |
| AF131830  | 1454.151  | 944.888   | NM_015974 | 4535.569  | 3452.555  | NM_001788 | 20468.051 | 23570.4   |
| NM_014811 | 542.818   | 376.26    | NM_005003 | 30625.197 | 37578.383 | NM_007178 | 52538.785 | 56438.195 |
| AF147426  | 1216.745  | 1642.68   | AF084560  | 11127.243 | 14924.039 | NM_002205 | 11356.972 | 9795.062  |
| BC019667  | 14242.775 | 19678.492 | NM_015715 | 874.206   | 813.963   | NM_002291 | 509.021   | 671.702   |
| AK026026  | 4115.864  | 6186.824  | NM_000032 | 9128.396  | 11341.833 | AL137477  | 6045.761  | 4585.632  |
| AF085941  | 10047.618 | 17276.244 | NM_002083 | 4308.836  | 6295.895  | AF284580  | 707.515   | 932.541   |
| Z69892    | 6538.299  | 8551.451  | NM_002035 | 9310.308  | 9875.684  | NM_015967 | 2006.177  | 2548.825  |
| AK023590  | 698.968   | 819.542   | NM_014900 | 1335.632  | 2588.487  | NM_012237 | 458.127   | 512.331   |
| AF087961  | 992.56    | 929.967   | BF342908  | 3179.447  | 3826.732  | NM_002405 | 3921.203  | 3403.472  |
| AL137309  | 2183.336  | 2789.154  | AF118073  | 764.732   | 1216.825  | NM_004994 | 17593.504 | 14672.703 |
| AL137475  | 860.292   | 1495.225  | AK023510  | 5732.642  | 6638.452  | NM_006610 | 7272.348  | 6856.408  |
| AL161956  | 3360.653  | 4908.014  | NM_004345 | 2642.679  | 3620.502  | NM_001333 | 1665.89   | 2428.161  |
| AL390176  | 2409.7    | 3498.031  | NM_000702 | 32014.412 | 35925.246 | NM_003791 | 6051.144  | 6660.351  |
| AL137356  | 951.102   | 1281.461  | X71490    | 15736.375 | 20707.359 | NM_018017 | 11465.616 | 12910.913 |
| AL137547  | 1313.453  | 1636.423  | AF257081  | 3104.771  | 3724.014  | AK001296  | 9971.549  | 7719.908  |
| AK021994  | 1435.72   | 1769.152  | NM_001688 | 25519.494 | 19318.955 | AK000173  | 853.392   | 949.186   |
| Z70763    | 1098.849  | 1124.882  | NM_003631 | 476.669   | 198.152   | NM_018365 | 1552.126  | 1728.913  |
| AK023802  | 9775.885  | 10693.627 | NM_000219 | 765.971   | 769.668   | NM_006586 | 14185.143 | 12663.627 |
| AF086103  | 805.089   | 707.101   | NM_022095 | 968.427   | 931.038   | AJ272180  | 1905.683  | 2188.207  |
| AL080135  | 700.515   | 689.609   | AF112219  | 24450.699 | 16703.473 | AK025709  | 1043.554  | 1490.302  |
| AK023158  | 1575.273  | 1353.975  | NM_000521 | 2495.215  | 767.577   | NM_019016 | 7916.333  | 6999.895  |
| AF085852  | 3332.495  | 2127.27   | NM_004135 | 3917.687  | 4079.464  | NM_012261 | 5914.312  | 5578.348  |
| AK023952  | 1340.657  | 2088.521  | NM_000203 | 736.457   | 961.19    | NM_015556 | 3083.622  | 3408.951  |

|           |           |           |           |           |           |           |           |           |
|-----------|-----------|-----------|-----------|-----------|-----------|-----------|-----------|-----------|
| AK000787  | 1098.315  | 1705.667  | NM_013443 | 3099.248  | 3927.725  | NM_018416 | 1487.196  | 1441.303  |
| AF090885  | 12727.729 | 29721.316 | NM_000925 | 17027.088 | 19410.791 | NM_004606 | 2769.491  | 2780.966  |
| AF161342  | 955.706   | 1764.425  | NM_000465 | 2999.767  | 3286.519  | NM_016621 | 1283.749  | 2273.406  |
| AF100636  | 588.71    | 683.857   | NM_000123 | 7097.857  | 9981.259  | AB046808  | 1964.416  | 1562.73   |
| AK022197  | 1946.635  | 1994.543  | AL137501  | 844.496   | 1153.615  | AK026265  | 1005.016  | 1088.377  |
| AK021970  | 815.406   | 960.117   | BE858979  | 844.06    | 1042.787  | AF015313  | 470.482   | 736.399   |
| AK022066  | 53056.012 | 57453.746 | NM_000122 | 3023.534  | 2762.829  | NM_006466 | 1109.7    | 840.194   |
| AK022224  | 1754.723  | 1731.875  | NM_006712 | 61122.082 | 61520.219 | NM_005681 | 1799.191  | 1788.566  |
| AK022359  | 1015.978  | 1177.76   | NM_006240 | 1961.54   | 2117.099  | NM_015156 | 4148.012  | 4333.029  |
| AK022000  | 1463.682  | 1541.196  | NM_007026 | 4291.649  | 4082.402  | NM_012384 | 2639.612  | 3057.225  |
| AK022129  | 1992.168  | 1930.337  | M37712    | 16561.506 | 15444.989 | NM_004653 | 2553.044  | 3516.404  |
| AK022263  | 2666.636  | 2778.338  | AW797282  | 776.984   | 388.847   | AF233453  | 2221.551  | 2219.854  |
| AK022384  | 1048.774  | 1303.537  | L09070    | 2379.384  | 1408.692  | D87454    | 6463.637  | 7664.028  |
| AK027097  | 819.277   | 785.732   | NM_000062 | 12053.401 | 8016.67   | NM_007020 | 1531.702  | 1407.514  |
| AL117437  | 557.157   | 586.004   | NM_009590 | 6519.88   | 4191.841  | NM_016055 | 1528.539  | 1675.592  |
| AK027198  | 1387.688  | 799.597   | AL133037  | 1237.514  | 689.075   | NM_013291 | 5674.078  | 7138.617  |
| AK000257  | 877.001   | 1307.774  | X91103    | 10045.188 | 14681.054 | NM_002936 | 10448.141 | 10238.455 |
| NM_006160 | 7204.629  | 10054.146 | AA419164  | 1866.887  | 2164.598  | NM_014161 | 1782.225  | 1887.057  |
| NM_000529 | 953.152   | 1561.771  | L35251    | 4168.629  | 5348.774  | BF312817  | 2671.316  | 2946.294  |
| AL110159  | 576.354   | 734.671   | BE910395  | 1773.954  | 2218.143  | AF086491  | 3879.222  | 3242.119  |
| AF009260  | 1242.426  | 882.571   | N46828    | 3130.804  | 3867.337  | NM_003780 | 20321.352 | 15789.547 |
| NM_003079 | 1782.115  | 2765.093  | BI908302  | 21254.428 | 28096.871 | NM_000199 | 10381.754 | 7959.998  |
| NM_017902 | 3391.061  | 4485.009  | AA460969  | 4192.484  | 4949.913  | NM_003778 | 63602.914 | 64012.82  |
| AK021981  | 557.524   | 610.81    | BG695859  | 955.017   | 1591.796  | NM_001041 | 1216.849  | 2313.704  |
| AL359567  | 1249.848  | 1132.78   | M85079    | 7788.806  | 6741.578  | AK023263  | 4213.36   | 4515.445  |
| NM_017726 | 3219.292  | 3005.228  | AA457671  | 12919.379 | 10991.044 | NM_004622 | 2374.872  | 2608.116  |
| AK026716  | 906.418   | 534.254   | X07437    | 5292.56   | 6023.381  | AK021445  | 1486.753  | 1166.108  |
| AL049325  | 9172.805  | 5259.851  | NM_000641 | 2025.073  | 2535.675  | NM_017934 | 5115.425  | 4809.976  |
| AK024154  | 10023.105 | 14462.915 | AE006466  | 4018.991  | 4398.629  | NM_014166 | 42643.66  | 44801.855 |
| AF086341  | 1139.954  | 1711.222  | BC008737  | 53928.164 | 54432.301 | AF211971  | 2715.375  | 2609.545  |
| AK026672  | 1676.921  | 1952.183  | BC011655  | 7490.386  | 8163.204  | NM_002931 | 1682.291  | 1740.515  |
| S83282    | 52704.352 | 64845.082 | AF208232  | 14634.046 | 10384.477 | U17630    | 692.757   | 620.173   |
| AK024164  | 42944.688 | 48375.676 | NM_002988 | 8724.207  | 6444.191  | M33782    | 841.647   | 714.795   |
| AF052130  | 9465.442  | 11363.09  | NM_004186 | 1358.43   | 1395.35   | NM_002196 | 437.018   | 706.399   |
| AF130090  | 12487.647 | 14255.198 | NM_016258 | 6326.338  | 4783.525  | NM_017755 | 7375.945  | 7703.96   |
| AL096727  | 1426.498  | 1629.316  | AF203032  | 5251.95   | 3759.708  | AK022551  | 1152.092  | 1002.96   |
| AL080110  | 9190.894  | 9627.328  | AB014542  | 11106.767 | 5523.515  | AB011136  | 1393.191  | 1083.355  |
| NM_020425 | 1316.981  | 1838.988  | NM_014640 | 1499.043  | 1151.605  | AF085898  | 3751.153  | 3063.785  |
| AK024076  | 2009.265  | 2524.523  | Y10518    | 57486.543 | 44698.887 | AL161960  | 1498.185  | 1323.33   |
| M87940    | 1755.393  | 1661.463  | AF155135  | 14836.45  | 9541.412  | AL049964  | 1288.633  | 1209.513  |
| L77588    | 2043.699  | 2495.555  | NM_014790 | 1809.619  | 2026.934  | AK023269  | 2123.031  | 2161.208  |
| AF086304  | 16262.873 | 21177.51  | NM_003571 | 14051.5   | 17664.611 | AF070564  | 3219.984  | 3204.082  |
| AB032976  | 1658.732  | 2154.251  | AB032965  | 58551.852 | 61324.727 | AK021439  | 22867.961 | 11551.425 |
| AF301222  | 20096.861 | 25915.264 | NM_020370 | 1298.584  | 1668.823  | AF052099  | 1734.51   | 1701.684  |
| AF215981  | 5831.891  | 4793.504  | NM_004767 | 1640.173  | 2091.316  | AL110111  | 1245.102  | 1060.825  |
| NM_000732 | 50811.504 | 48706.605 | BF310159  | 11044.34  | 11470.846 | AF070543  | 680.729   | 510.137   |
| AF130044  | 852.841   | 566.889   | NM_018986 | 1777.459  | 2118.487  | AF086525  | 480.911   | 525.653   |
| AF116709  | 543.419   | 324.261   | AB044934  | 289.419   | 948.525   | NM_014778 | 3291.504  | 2908.266  |
| AF087980  | 2517.531  | 1540.984  | U27655    | 2569.86   | 3270.438  | AK001171  | 13063.032 | 11114.176 |
| AF075111  | 875.787   | 3467.376  | NM_003360 | 2001.223  | 1906.971  | AK026273  | 6056.994  | 3720.661  |
| NM_013936 | 950.307   | 1514.425  | Z21965    | 43719.535 | 49660.449 | NM_020250 | 12987.872 | 10076.835 |
| AB038651  | 4669.47   | 6604.578  | NM_012427 | 1094.809  | 1290.173  | AF055007  | 429.729   | 383.566   |
| AL359603  | 1162.381  | 1637.722  | NM_000852 | 31280.861 | 33993.918 | AL389879  | 6375.497  | 6234.83   |

|           |           |           |           |           |           |           |           |           |
|-----------|-----------|-----------|-----------|-----------|-----------|-----------|-----------|-----------|
| X84838    | 651.018   | 874.294   | AF257081  | 3314.735  | 2609.016  | AF086021  | 2822.443  | 2585.246  |
| AL117643  | 1418.588  | 1221.816  | NM_001688 | 25422.018 | 17183.135 | AK024472  | 2373.09   | 1995.331  |
| AF069135  | 5912.771  | 5309.14   | NM_000219 | 599.038   | 321.404   | NM_017976 | 4342.176  | 4475.563  |
| AK026524  | 1102.138  | 869.455   | NM_002232 | 1256.973  | 957.8     | U06700    | 1141.024  | 1183.849  |
| AB011157  | 5249.924  | 6471.165  | NM_016106 | 5078.828  | 3869.048  | U63828    | 1652.219  | 1354.587  |
| U17632    | 974.111   | 1145.492  | NM_014570 | 6107.745  | 4378.077  | Z36828    | 5830.093  | 4523.846  |
| AK026764  | 1580.386  | 1815.229  | NM_014747 | 7055.365  | 3951.629  | AF086121  | 14923.974 | 14309.217 |
| AF113700  | 2361.127  | 3197.892  | Y19240    | 7753.988  | 4906.626  | AF086140  | 883.071   | 1150.062  |
| NM_017835 | 14518.843 | 16540.602 | AF091029  | 11513.572 | 15430.541 | AK026915  | 1422.124  | 1079.027  |
| NM_018347 | 2292.865  | 2397.875  | X97074    | 46861.121 | 53892.48  | AL110259  | 1154.057  | 934.343   |
| AK024986  | 511.208   | 676.475   | AL117235  | 1066.77   | 1300.101  | AB033100  | 14091.872 | 11008.304 |
| AK026730  | 1300.381  | 1100.694  | NM_014822 | 5546.974  | 6052.648  | AL390138  | 1653.912  | 1653.177  |
| AK024739  | 2088.271  | 2077.31   | NM_005296 | 2573.794  | 3632.311  | NM_014124 | 30859.801 | 21070.234 |
| AK098681  | 1166.095  | 827.234   | NM_001337 | 605.114   | 754.851   | AF119888  | 690.663   | 892.425   |
| AK026772  | 549.363   | 581.212   | NM_003611 | 3707.706  | 5048.56   | AK001551  | 1739.011  | 1884.984  |
| NM_014260 | 11135.009 | 8263.554  | AB014538  | 2487.248  | 2465.07   | AK001825  | 904.472   | 950.429   |
| AK026458  | 772.508   | 512.285   | NM_006209 | 786.774   | 1453.179  | AK024714  | 645.324   | 972.144   |
| CY3Cy5    | 9412.054  | 264.816   | AK025118  | 6852.47   | 8174.042  | AK022363  | 762.541   | 999.364   |
| M23254    | 957.536   | 986.766   | NM_000727 | 1890.225  | 2369.742  | AK023395  | 3943.75   | 2198.861  |
| BE618539  | 1081.434  | 1171.661  | NM_018985 | 3679.884  | 3865.707  | AK023818  | 3515.912  | 3157.38   |
| R28062    | 3039.154  | 3161.738  | NM_006074 | 42172.902 | 46300.699 | AK023522  | 122.922   | 1451.825  |
| AI627464  | 751.819   | 786.959   | NM_006712 | 58844.75  | 55231.926 | AK023895  | 1789.147  | 1359.774  |
| BI756258  | 5119.779  | 3942.633  | NM_006240 | 3446.136  | 2707.503  | AK024206  | 6563.533  | 6038.104  |
| J04599    | 794.528   | 915.977   | NM_007026 | 4894.785  | 4243.248  | NM_006262 | 2226.591  | 1835.145  |
| AF110020  | 837.345   | 949.775   | M37712    | 17408.359 | 10498.822 | AK026598  | 1960.083  | 1485.177  |
| AA608557  | 8215.504  | 8794.729  | NM_002648 | 1035.87   | 640.087   | AK023602  | 826.729   | 803.175   |
| AL050095  | 3653.237  | 4550.649  | AF070670  | 8936.232  | 6566.912  | NM_018097 | 28005.508 | 24775.527 |
| NM_000498 | 1062.767  | 1082.269  | NM_016156 | 6385.803  | 4589.153  | AF116622  | 461.692   | 594.528   |
| NM_000664 | 1620.279  | 1440.475  | NM_016528 | 2392.706  | 1356.584  | NM_005325 | 566.248   | 624.801   |
| SR5       | 8279.251  | 6062.609  | NM_015974 | 4960.934  | 2284.925  | AF217967  | 881.681   | 955.827   |
| SR7       | 6599.652  | 44015.301 | NM_014384 | 5526.135  | 4763.865  | NM_018150 | 6430.906  | 7498.081  |
| SR9       | 21976.139 | 3949.422  | NM_002573 | 9626.548  | 11744.89  | NM_017918 | 10822.396 | 11839.003 |
| CY3Cy5    | 14607.51  | 965.874   | AF133424  | 5264.89   | 6964.808  | NM_017855 | 42705.094 | 42838.176 |
| NM_014808 | 2894.025  | 3468.884  | NM_005003 | 33845.137 | 36008.594 | AB007954  | 1600.801  | 1475.698  |
| AB006627  | 1061.828  | 1419.497  | AF084560  | 13001.412 | 16009.533 | AK026494  | 2654.385  | 2314.56   |
| NM_000416 | 8907.822  | 9129.236  | NM_015715 | 694.869   | 1150.014  | AK023508  | 1488.238  | 1410.035  |
| NM_002965 | 1589.107  | 2429.588  | NM_000032 | 8253.628  | 11212.698 | AK025840  | 1318.056  | 2027.743  |
| AB007883  | 2917.342  | 2531.02   | NM_002083 | 4079.809  | 5137.742  | BC024009  | 2703.336  | 1962.655  |
| AK093780  | 9427.22   | 10477.155 | NM_002035 | 9373.826  | 9127.878  | AF128543  | 4738.692  | 3119.727  |
| AY009397  | 69384.609 | 64786.125 | NM_014900 | 1251.192  | 2255.281  | AK022071  | 369.603   | 257.559   |
| NM_007037 | 21210.799 | 19762.797 | BF342908  | 3652.537  | 4020.809  | NM_004185 | 915.705   | 796.869   |
| NM_001649 | 731.738   | 790.647   | AF118073  | 494.546   | 799.805   | U84510    | 3514.424  | 2499.334  |
| NM_005492 | 1229.675  | 1472.459  | AK023510  | 5937.283  | 6246.399  | S83198    | 7836.913  | 5882.388  |
| AF038196  | 4310.31   | 5115.236  | NM_004345 | 2824.619  | 4718.766  | AL137642  | 1275.956  | 986.641   |
| NM_004859 | 13545.832 | 12386.648 | X71490    | 17254.49  | 23022.207 | AL133619  | 5373.094  | 5038.954  |
| NM_016352 | 812.965   | 964.38    | NM_014273 | 19600.115 | 15529.156 | AK025902  | 3053.682  | 2921.302  |
| NM_005014 | 918.229   | 727.652   | AF039442  | 1379.639  | 1218.944  | NM_005181 | 1079.559  | 1344.182  |
| NM_000070 | 3250.219  | 2541.944  | NM_004680 | 1187.023  | 1059.868  | AF143676  | 3386.915  | 3234.326  |
| NM_001202 | 1721.62   | 1463.594  | AF104260  | 455.683   | 260.376   | U66044    | 4626.378  | 4590.877  |
| AB037804  | 700.176   | 596.84    | NM_005671 | 2071.626  | 1913.167  | NM_005247 | 21484.381 | 17595.244 |
| U34249    | 1240.595  | 835.397   | NM_017409 | 4533.332  | 4205.51   | NM_005283 | 1262.973  | 1149.765  |
| NM_003289 | 43878.676 | 39428.531 | NM_019625 | 8284.442  | 6740.362  | AL122089  | 2486.788  | 2394.398  |
| AI200114  | 1519.364  | 964.594   | NM_006729 | 4293.26   | 2961.196  | AA203665  | 3556.365  | 3278.901  |

|           |           |           |           |           |           |             |           |           |
|-----------|-----------|-----------|-----------|-----------|-----------|-------------|-----------|-----------|
| NM_006323 | 15670.066 | 18439.363 | NM_006071 | 1716.387  | 1111.437  | U95646      | 833.859   | 1043.354  |
| NM_016466 | 3008.806  | 3145.889  | NM_012236 | 11867.481 | 8243.113  | Y16705      | 1427.485  | 1393.622  |
| NM_001493 | 11238.788 | 10502.598 | AF112219  | 28915.68  | 13151.411 | AF279775    | 5194.32   | 4875.506  |
| NM_014841 | 930.382   | 1197.744  | NM_000521 | 1163.48   | 586.247   | NM_001821   | 4629.212  | 2454.188  |
| NM_014426 | 17139.588 | 17437.217 | NM_004135 | 3868.494  | 4643.871  | NM_005647   | 680.692   | 546.183   |
| NM_006816 | 25316.758 | 23148.418 | NM_000203 | 294.858   | 917.971   | X64978      | 6357.594  | 3503.417  |
| AK026518  | 46482.445 | 51285.535 | NM_013443 | 2605.496  | 2802.434  | NM_000912   | 25415.576 | 19349.475 |
| NM_000258 | 10797.668 | 11820.681 | NM_000925 | 15787.666 | 18637.359 | NM_002345   | 691.126   | 471.734   |
| AB033055  | 5083.419  | 5947.171  | NM_000465 | 2756.79   | 2713.084  | U57971      | 1361.672  | 1505.014  |
| AF311287  | 2878.076  | 3056.8    | NM_000123 | 7386.115  | 10694.673 | AK024593    | 1266.868  | 1080.647  |
| NM_003098 | 1474.783  | 1534.957  | AL137501  | 1021.71   | 1459.953  | NM_018355   | 4629.884  | 3886.565  |
| NM_014781 | 3527.152  | 4275.577  | BE858979  | 1299.023  | 1645.868  | AK022020    | 1408.493  | 971.666   |
| BU629989  | 429.118   | 759.018   | U87223    | 1242.913  | 665.736   | AK000263    | 7620.119  | 6080.963  |
| X87896    | 816.983   | 832.436   | X91348    | 32251.777 | 25182.33  | NM_017447   | 1325.764  | 1395.368  |
| M88310    | 1739.816  | 1574.464  | Z36505    | 4628.601  | 3527.279  | AL049452    | 632.276   | 460.998   |
| NM_000042 | 1729.6    | 1305.649  | NM_001854 | 2982.51   | 2033.008  | NM_016622   | 1520.209  | 1572.639  |
| AF035787  | 886.016   | 784.833   | NM_017913 | 2938.1    | 2137.348  | AK026976    | 1330.259  | 1429.041  |
| NM_016335 | 2521.165  | 1847.45   | NM_002755 | 17849.848 | 16235.532 | AF070559    | 3153.875  | 3275.636  |
| NM_003165 | 6035.97   | 5401.687  | NM_000924 | 9333.944  | 7434.938  | D42043      | 5751.036  | 6177.397  |
| NM_003906 | 12333.52  | 11193.885 | NM_003330 | 16257.126 | 10401.108 | CY3Cy5      | 1352.076  | 114.037   |
| AL359590  | 48683.168 | 54297.68  | NM_003647 | 2035.064  | 1510.256  | BG744154    | 11811.094 | 12347.224 |
| NM_002861 | 11324.575 | 12482.138 | AF238083  | 15518.67  | 19211.832 | Z11694      | 2977.884  | 2855.186  |
| NM_003080 | 6946.232  | 6319.75   | NM_002962 | 969.862   | 970.836   | Z26317      | 1332.967  | 1215.395  |
| NM_013268 | 641.309   | 859.046   | NM_016388 | 3715.723  | 5263.007  | X16983      | 14798.337 | 17208.254 |
| NM_002645 | 2705.031  | 2462.024  | AB046783  | 2748.793  | 2546.265  | X56160      | 2007.276  | 2097.574  |
| AB033027  | 1584.55   | 1429.889  | NM_000845 | 2225.238  | 2759.009  | BG679991    | 576.919   | 620.579   |
| AK021805  | 9844.927  | 10625.496 | NM_014965 | 7282.906  | 9855.224  | H-Y 00097 I | 4853.619  | 4763.789  |
| AB014550  | 4277.853  | 4404.184  | NM_004882 | 41205.828 | 43301.258 | H-Y 00711 I | 65366.855 | 69095.359 |
| AF320294  | 4155.553  | 5020.346  | AK024055  | 1643.682  | 1563.966  | H-X 16707 I | 1697.581  | 1475.776  |
| AF320293  | 482.177   | 752.427   | U10485    | 1102.61   | 977.314   | AL038354    | 31690.475 | 36397.293 |
| AF161436  | 8521.062  | 8627.8    | AK025326  | 20834.393 | 15726.341 | R14607      | 967.674   | 1094.944  |
| NM_020402 | 5493.339  | 4893.227  | NM_013376 | 1176.568  | 1326.681  | NM_021976   | 2319.043  | 2129.416  |
| NM_004299 | 2789.293  | 3061.045  | NM_017964 | 1590.409  | 1489.385  | SR2         | 53623.793 | 49909.938 |
| NM_001171 | 1449.901  | 852.159   | NM_016428 | 3244.001  | 3208.416  | SR4         | 11589.04  | 11155.638 |
| NM_002250 | 4477.026  | 3993.615  | NM_016039 | 20168.59  | 15934.838 | SR6         | 1660.986  | 1450.474  |
| NM_006478 | 3660.599  | 2954.613  | NM_001184 | 4759.825  | 3247.037  | SR8         | 6550.357  | 17507.129 |
| AF132734  | 20186.004 | 19904.857 | NM_015530 | 10320.461 | 6705.989  | SR10        | 24370.348 | 7303.459  |
| NM_018379 | 2546.412  | 1959.164  | NM_016238 | 5409.625  | 3627.281  | CY3Cy5      | 998.022   | 162.671   |
| NM_016403 | 37771.633 | 37675.594 | NM_015997 | 9474.541  | 13427.57  | NM_001284   | 31198.473 | 27563.422 |
| NM_015603 | 1973.685  | 1912.373  | NM_004933 | 33225.348 | 40435.078 | NM_003242   | 9898.085  | 9741.156  |
| AK021788  | 1140.424  | 503.864   | M96577    | 19283.932 | 22231.117 | NM_001105   | 1961.277  | 1581.583  |
| NM_001921 | 14000.587 | 13766.07  | NM_013258 | 28852.088 | 34155.426 | NM_005585   | 658.435   | 589.077   |
| NM_006230 | 15706.132 | 16610.998 | NM_003842 | 4003.501  | 5683.463  | NM_002075   | 1594.439  | 1243.599  |
| NM_014699 | 8046.52   | 6582.494  | L11238    | 11949.34  | 11776.787 | Y08756      | 4336.991  | 3791.024  |
| NM_013400 | 10145.37  | 10773.876 | AK025684  | 1341.408  | 1675.145  | NM_005563   | 15019.021 | 13387.165 |
| AK026257  | 3129.175  | 3144.883  | K02046    | 4236.417  | 5774.305  | NM_005102   | 941.422   | 895.879   |
| AK023836  | 3615.646  | 4236.111  | AL110151  | 8785.592  | 6890.093  | NM_004518   | 1032.326  | 797.376   |
| NM_018109 | 4163.048  | 4944.79   | NM_004995 | 5300.697  | 7676.741  | NM_006501   | 776.912   | 972.004   |
| AJ299442  | 6168.64   | 7734.365  | NM_000386 | 13445.899 | 10770.898 | NM_002719   | 6382.75   | 6605.381  |
| NM_000129 | 4182.016  | 4611.577  | NM_007231 | 604.949   | 526.616   | AB035356    | 506.153   | 505.826   |
| NM_003762 | 8196.263  | 8356.963  | NM_001190 | 5706.405  | 4211.364  | AV752086    | 1032.078  | 1000.533  |
| NM_018446 | 5278.031  | 5176.153  | NM_005271 | 13775.609 | 13200.514 | NM_016102   | 4638.936  | 5464.052  |
| NM_000187 | 882.844   | 747.708   | NM_015654 | 7955.476  | 7066.75   | NM_004376   | 2602.179  | 3221.024  |

|           |           |           |           |           |           |           |           |           |
|-----------|-----------|-----------|-----------|-----------|-----------|-----------|-----------|-----------|
| NM_014465 | 920.784   | 1099.224  | AB082521  | 9938.185  | 10981.767 | NM_000272 | 1126.04   | 1195.605  |
| D87292    | 1270.755  | 1103.486  | AL050182  | 3054.954  | 3779.032  | NM_005603 | 25866.867 | 21260.875 |
| NM_005498 | 2594.272  | 1824.129  | NM_020040 | 2006.227  | 2903.186  | NM_001061 | 568.614   | 501.538   |
| NM_001202 | 1786.542  | 1389.345  | NM_002374 | 4990.603  | 6390.289  | AB011100  | 1764.383  | 1455.888  |
| AB037804  | 657.221   | 653.807   | AK026940  | 4624.599  | 6258.943  | U61741    | 1051.903  | 1080.801  |
| NM_003288 | 34825.934 | 37624.293 | AF155117  | 5404.161  | 5965.557  | NM_012402 | 4478.144  | 4285.144  |
| AI200114  | 975.428   | 871.132   | NM_004411 | 1842.27   | 2567.042  | M76676    | 2520.539  | 2244.224  |
| M23254    | 685.147   | 1062.578  | NM_015938 | 6481.848  | 10126.823 | NM_003857 | 445.587   | 522.102   |
| BE618539  | 1052.364  | 850.438   | NM_000740 | 906.699   | 1260.509  | AL137690  | 499.882   | 440.615   |
| R28062    | 2509.942  | 2877.501  | NM_017843 | 3525.114  | 3738.511  | Z83804    | 1291.099  | 1094.45   |
| BI756258  | 3246.157  | 3240.164  | AK025985  | 20919.797 | 26620.939 | NM_004388 | 1077.209  | 1056.867  |
| AA608557  | 6540.951  | 8764.048  | NM_013256 | 2292.246  | 2102.416  | U67784    | 845.559   | 707.918   |
| AL050095  | 2775.563  | 2923.262  | NM_004143 | 1813.469  | 1758.726  | NM_007368 | 1025.331  | 1017.411  |
| NM_000498 | 1067.942  | 990.326   | X66087    | 996.869   | 945.131   | NM_000592 | 585.765   | 660.063   |
| NM_000664 | 1073.326  | 1182.032  | NM_016328 | 11892.702 | 12959.685 | NM_016584 | 6951.43   | 6465.48   |
| AF075085  | 58215.02  | 55495.965 | NM_017544 | 27034.275 | 34473.547 | NM_001815 | 1216.088  | 1151.336  |
| NM_005892 | 3173.716  | 2251.385  | NM_003153 | 1250.832  | 1654.084  | NM_000064 | 5182.105  | 6388.556  |
| NM_000042 | 1885.371  | 2012.999  | NM_016285 | 2101.217  | 1858.267  | NM_006725 | 4991.019  | 5433.927  |
| AF035787  | 1006.966  | 1184.943  | NM_014707 | 1830.155  | 1017.582  | NM_003328 | 1343.191  | 1517.186  |
| NM_014808 | 2263.19   | 2784.237  | AF025771  | 1513.232  | 1113.044  | NM_004568 | 42295.707 | 48912.137 |
| AB006627  | 965.365   | 1099.202  | NM_018215 | 1446.056  | 888.006   | NM_000202 | 1851.74   | 2475.531  |
| NM_000418 | 7749.703  | 7650.703  | AB033110  | 1314.364  | 505.618   | NM_005498 | 11300.271 | 9484.974  |
| NM_002965 | 1337.592  | 1909.33   | NM_018983 | 18478.541 | 27702.814 | NM_016608 | 914.065   | 1077.122  |
| AB007883  | 2456.183  | 2327.061  | NM_003096 | 12521.488 | 11263.221 | NM_004817 | 1485.504  | 1424.221  |
| AK093780  | 7570.427  | 9546.835  | NM_007279 | 4421.767  | 5513.508  | NM_018975 | 18366.014 | 17571.213 |
| AY009397  | 63398.219 | 58074.246 | BE390833  | 19593.988 | 20587.449 | AB023215  | 9099.523  | 6804.636  |
| NM_001648 | 1014.107  | 731.281   | NM_004730 | 9555.592  | 10217.021 | NM_018073 | 1895.011  | 1997.469  |
| NM_005492 | 1180.407  | 1281.475  | NM_000801 | 4468.492  | 4283.559  | AL137529  | 3738.791  | 4169.85   |
| AF038196  | 4090.797  | 3770.143  | NM_006115 | 33919.316 | 40502.203 | NM_012332 | 912.2     | 1526.784  |
| NM_004858 | 9756.625  | 7853.667  | NM_005801 | 5137.897  | 6039.23   | AK026648  | 899.276   | 1145.931  |
| NM_016352 | 1008.777  | 774.076   | NM_018198 | 3499.329  | 5008.345  | NM_000497 | 934.13    | 1621.933  |
| NM_005014 | 772.494   | 1025.668  | NM_001539 | 35965.566 | 44528.609 | NM_017421 | 1191.152  | 1374.547  |
| NM_000070 | 4805.698  | 3452.583  | NM_012267 | 703.029   | 786.103   | AK025977  | 13872.336 | 12341.705 |
| NM_002250 | 5878.75   | 6676.033  | AK027232  | 18095.564 | 15315.772 | AK023130  | 4034.076  | 4147.32   |
| S81591    | 648.392   | 788.853   | NM_012204 | 931.564   | 692.019   | NM_000273 | 803.067   | 843.024   |
| NM_006323 | 12473.962 | 13710.397 | NM_003613 | 1337.571  | 1679.273  | NM_002898 | 7662.14   | 7169.808  |
| NM_016468 | 2633.216  | 3201.161  | NM_000022 | 38378.309 | 32727.705 | BE876237  | 1031.868  | 1076.463  |
| NM_001493 | 9999.41   | 8974.828  | NM_016576 | 7209.013  | 5737.077  | NM_005397 | 1279.974  | 1753.582  |
| NM_014428 | 16676.469 | 19230.578 | NM_004213 | 1371.596  | 954.257   | NM_000808 | 5622.267  | 6600.545  |
| NM_006818 | 23451.422 | 28601.563 | NM_001929 | 67392.695 | 54768.988 | NM_006320 | 1678.139  | 2354.698  |
| NM_000258 | 14107.263 | 16157.399 | NM_000906 | 1728.818  | 1361.459  | AB014511  | 3239.243  | 3592.72   |
| AB033055  | 5710.034  | 6449.108  | NM_000480 | 7659.222  | 5258.828  | NM_014252 | 6645.865  | 7006.168  |
| AF311287  | 2599.315  | 2486.555  | AF254084  | 34856.215 | 26297.857 | NM_001662 | 12288.498 | 13602.929 |
| NM_003098 | 1066.18   | 1328.081  | AK022648  | 1770.59   | 1218.265  | NM_016131 | 9267.497  | 11414.591 |
| NM_014781 | 3309.749  | 3546.861  | AK022976  | 2797.453  | 1331.524  | NM_006822 | 2451.039  | 2306.51   |
| BU629989  | 598.964   | 717.021   | AB048791  | 8760.768  | 9998.824  | NM_012142 | 8435.266  | 7120.049  |
| X87896    | 1018.574  | 804.133   | NM_003107 | 17426.697 | 17861.572 | NM_016428 | 1557.274  | 1279.168  |
| M88310    | 1968.882  | 1594.518  | NM_006874 | 5556.854  | 6011.446  | NM_018264 | 933.263   | 930.684   |
| NM_018448 | 7189.514  | 7694.054  | AB046777  | 5463.884  | 7587.022  | NM_014580 | 717.578   | 521.888   |
| NM_000187 | 1198.02   | 1059.678  | AJ251844  | 10476.455 | 13607.41  | AB028998  | 325.24    | 327.049   |
| NM_014465 | 1386.114  | 1768.275  | D16815    | 1321.016  | 1552.713  | NM_000153 | 480.944   | 744.315   |
| D87292    | 1568.444  | 1708.519  | NM_001880 | 3988.913  | 4733.921  | NM_002033 | 722.044   | 853.993   |
| NM_005498 | 2026.807  | 2512.164  | AB028943  | 4061.056  | 4825.672  | NM_004111 | 1596.038  | 1462.117  |

|           |           |           |           |           |           |             |           |           |
|-----------|-----------|-----------|-----------|-----------|-----------|-------------|-----------|-----------|
| NM_003165 | 7191.858  | 7010.74   | NM_006194 | 2641.885  | 2718.084  | AF085966    | 3136.881  | 3081.236  |
| NM_003906 | 13479.995 | 10840.444 | AK001603  | 10441.047 | 12506.339 | NM_005316   | 2511.015  | 2191.603  |
| AL359590  | 44176.02  | 51125.371 | U71601    | 1992.297  | 2212.53   | NM_016316   | 2226.643  | 2303.616  |
| NM_002861 | 9961.769  | 10600.965 | AF042838  | 1949.068  | 1205.017  | NM_003366   | 5858.884  | 6518.176  |
| NM_003080 | 4720.831  | 4663.288  | AL137511  | 829.794   | 576.941   | NM_000057   | 1866.148  | 2458.235  |
| NM_002645 | 2281.646  | 2817.101  | AF075031  | 647.144   | 1079.256  | NM_018343   | 4305.236  | 4788.453  |
| AB033027  | 2982.96   | 3080.754  | AF075062  | 11673.405 | 9366.973  | AK095793    | 835.052   | 740.291   |
| AK021805  | 16104.181 | 16952.678 | NM_004188 | 943.539   | 881.31    | NM_003177   | 3007.32   | 3798.523  |
| AB014550  | 4333.376  | 4234.277  | AF147381  | 7589.308  | 5803.467  | NM_017719   | 1582.515  | 2022.206  |
| AF320294  | 4893.749  | 3681.289  | AB002452  | 1060.734  | 1030.211  | AF064078    | 746.325   | 915.775   |
| AF320293  | 448.299   | 378.109   | AK027101  | 30324.016 | 22898.469 | AL049688    | 1498.784  | 1969.43   |
| AF161436  | 8295.556  | 8051.552  | AF088075  | 1426.227  | 1249.875  | NM_002737   | 4783.203  | 4731.859  |
| NM_020402 | 4895.971  | 4349.346  | AK026376  | 5260.114  | 2463.622  | Z25427      | 3014.382  | 3134.21   |
| NM_004296 | 2624.462  | 2501.993  | AF086286  | 2817.861  | 3400.797  | NM_004672   | 8183.058  | 8192.174  |
| NM_001171 | 2009.027  | 1296.262  | AF086376  | 3377.413  | 4020.179  | NM_001353   | 2692.072  | 2922.706  |
| NM_000498 | 1229.918  | 1049.972  | AF086410  | 872.135   | 1018.926  | NM_006214   | 1984.223  | 2174.917  |
| NM_000664 | 1412.738  | 1693.591  | AF086455  | 756.353   | 914.936   | AJ010228    | 3217.966  | 2765.47   |
| AF075085  | 63819.66  | 59356.434 | AK022997  | 6501.736  | 5819.868  | NM_005198   | 2576.023  | 1600.559  |
| NM_005892 | 3102.961  | 3347.049  | NM_017617 | 5469.288  | 6355.05   | NM_006848   | 61700.887 | 61207.188 |
| NM_006478 | 3697.976  | 3775.507  | AF131830  | 1481.847  | 1808.372  | NM_005603   | 22339.283 | 20373.879 |
| AF132734  | 26850.582 | 29355.875 | NM_014811 | 749.723   | 996.507   | NM_001061   | 562.028   | 644.801   |
| NM_018379 | 3305.804  | 2504.832  | AF147426  | 1946.324  | 1368.974  | BG744154    | 12037.751 | 14802.463 |
| NM_016403 | 38897.859 | 35647.648 | BC019667  | 16771.953 | 14199.358 | Z11694      | 3797.167  | 4357.667  |
| NM_015603 | 1709.267  | 1688.752  | AK026026  | 6965.955  | 6724.917  | BF983177    | 354.027   | 295.799   |
| AK021788  | 578.716   | 695.095   | AF085941  | 14988.094 | 16521.955 | Z26317      | 1192.172  | 1090.362  |
| NM_001921 | 9259.692  | 10352.312 | Z69892    | 7929.976  | 6631.542  | X16983      | 14438.412 | 15972.522 |
| NM_006230 | 13772.664 | 14271.913 | AK023590  | 1090.468  | 813.883   | X56160      | 2411.064  | 2871.755  |
| NM_014698 | 8062.034  | 6585.377  | AF087961  | 1157.318  | 1181.498  | BG679991    | 861.115   | 934.312   |
| NM_013400 | 7934.161  | 9400.745  | AL137309  | 2223.948  | 1693.394  | H-Y 00097 I | 5050.551  | 6455.284  |
| AK026257  | 3133.493  | 3565.29   | AL137475  | 1436.458  | 1121.183  | AL038354    | 33615.887 | 41646.84  |
| AK023836  | 5858.85   | 6808.99   | AL161956  | 5895.58   | 4672.644  | R14607      | 1009.856  | 1115.767  |
| NM_018108 | 5279.557  | 5047.27   | AL390176  | 4547.182  | 3903.306  | NM_021976   | 1862.851  | 1731.556  |
| AJ299442  | 5804.542  | 6175.646  | Z70763    | 2933.99   | 655.282   | NM_005718   | 3979.647  | 3171.417  |
| NM_000129 | 4490.163  | 4933.577  | AF088013  | 14487.001 | 5439.706  | NM_005496   | 9941.325  | 7098.363  |
| NM_003762 | 9739.158  | 9670.278  | AF088064  | 431.55    | 678.692   | NM_002858   | 4070.608  | 4246.261  |
| NM_004859 | 9230.363  | 8641.342  | AF086103  | 909.288   | 1031.014  | NM_004817   | 1334.263  | 2089.462  |
| NM_016352 | 861.184   | 688.341   | AL080135  | 828.565   | 933.882   | NM_001284   | 34882.906 | 40699.629 |
| NM_005014 | 1041.108  | 1238.553  | AK023158  | 1411.772  | 1373.643  | NM_003242   | 16864.658 | 19036.434 |
| NM_006944 | 480.904   | 715.552   | AF085852  | 3837.146  | 5298.114  | NM_002846   | 424.471   | 612.24    |
| NM_004407 | 812.694   | 563.859   | AK023952  | 1576.036  | 1126.203  | U31099      | 631.415   | 714.18    |
| NM_000070 | 3136.842  | 3443.372  | AK000787  | 2082.827  | 1702.878  | NM_001105   | 2780.75   | 2957.759  |
| NM_001202 | 2684.431  | 2391.824  | AF090885  | 14889.501 | 10214.05  | NM_005588   | 966.138   | 931.814   |
| AB037804  | 843.002   | 888.337   | AF161342  | 636.623   | 674.763   | NM_002075   | 2563.211  | 3081.207  |
| U34249    | 842.668   | 849.23    | NM_014082 | 2645.762  | 2351.956  | Y08756      | 7045.251  | 7251.375  |
| NM_003288 | 37413.945 | 37664.594 | AF100636  | 638.503   | 588.417   | NM_006436   | 470.957   | 519.008   |
| AI200114  | 803.864   | 609.611   | AK022197  | 3468.592  | 2235.844  | NM_005102   | 945.597   | 989.809   |
| BE618539  | 728.291   | 679.153   | AK021970  | 1231.7    | 892.56    | NM_004518   | 1044.737  | 811.881   |
| R28062    | 1918.507  | 2259.263  | AK022129  | 4454.191  | 3145.044  | NM_006501   | 683.505   | 653.843   |
| AI627464  | 386.852   | 761.298   | AK022263  | 5112.867  | 3088.32   | NM_002719   | 6204.761  | 6034.051  |
| BI756258  | 4980.541  | 4743.67   | AK022384  | 1589.92   | 1516.384  | AV752086    | 833.306   | 833.854   |
| AF110020  | 910.447   | 764.5     | AK027097  | 911.085   | 996.146   | NM_016102   | 4356.998  | 4138.056  |
| AA608557  | 7281.515  | 7734.23   | AK024613  | 541.618   | 599.672   | NM_004376   | 2120.863  | 2005.874  |
| NM_003098 | 1593.556  | 1630.361  | AL117437  | 787.05    | 940.639   | NM_000272   | 701.958   | 597.814   |

|           |           |           |           |           |           |           |           |           |
|-----------|-----------|-----------|-----------|-----------|-----------|-----------|-----------|-----------|
| NM_014781 | 4684.522  | 5449.729  | AK027198  | 1870.605  | 2222.901  | NM_014252 | 5699.319  | 5265.708  |
| BU629989  | 1168.558  | 1179.263  | AK000257  | 974.142   | 674.515   | NM_001662 | 10216.822 | 10076.666 |
| X87896    | 1477.882  | 1317.258  | NM_006160 | 11206.99  | 8927.254  | NM_016131 | 8321.519  | 8417.552  |
| M88310    | 2557      | 2454.129  | NM_000529 | 1411.564  | 786.094   | NM_006822 | 2554.106  | 2342.702  |
| NM_000042 | 1980.351  | 2128.109  | AF009259  | 785.142   | 664.671   | NM_012142 | 8139.196  | 9323.7    |
| AF035787  | 1083.542  | 1090.65   | AF009260  | 1483.613  | 1329.629  | NM_016422 | 1821.214  | 2190.007  |
| NM_014802 | 1310.216  | 1965.01   | NM_003079 | 2735.834  | 2014.785  | AB011100  | 2121.052  | 2280.152  |
| AB006627  | 1087.809  | 674.199   | AK021981  | 707.401   | 771.32    | U61741    | 829.142   | 1191.865  |
| NM_000412 | 6658.172  | 6452.364  | AL359567  | 1417.705  | 1451.101  | NM_012402 | 4858.805  | 5472.764  |
| NM_002962 | 1432.776  | 1718.222  | NM_017722 | 6582.528  | 6546.622  | M76676    | 2774.952  | 2842.438  |
| AB007883  | 3130.039  | 3330.543  | AK026716  | 273.918   | 2242.094  | AL137690  | 693.919   | 979.913   |
| AK093780  | 6073.548  | 6647.7    | AL049325  | 13848.688 | 12317.147 | Z83804    | 1785.025  | 1983.003  |
| NM_001642 | 982.765   | 1062.505  | AK024154  | 11845.391 | 10835.24  | NM_004382 | 1232.926  | 1460.621  |
| AF038196  | 6406.764  | 7207.677  | AF086341  | 1238.1    | 1074.731  | U67784    | 921.904   | 1106.676  |
| AF320294  | 3698.992  | 2776.32   | AK026672  | 1682.461  | 1533.182  | NM_007362 | 1377.845  | 1099.576  |
| AF161436  | 7776.359  | 7446.628  | S83282    | 67734.867 | 56400.84  | NM_000592 | 773.393   | 656.018   |
| NM_020402 | 4538.953  | 3986.915  | AK024164  | 50170.75  | 45242.727 | NM_016584 | 8366.788  | 7926.038  |
| NM_004292 | 3952.862  | 4213.767  | AF052130  | 10299.492 | 11646.872 | NM_001812 | 1237.852  | 1081.62   |
| NM_001171 | 1737.007  | 1759.58   | AF130090  | 18242.803 | 17506.211 | NM_000064 | 5595.75   | 5110.244  |
| NM_002250 | 8627.319  | 9207.396  | AL096727  | 2517.852  | 2590.836  | NM_006722 | 3556.022  | 3638.619  |
| S81591    | 600.258   | 869.237   | AL080110  | 12584.569 | 8477.646  | NM_003322 | 1076.775  | 877.695   |
| NM_006322 | 9849.889  | 10740     | NM_020422 | 1534.275  | 1300.465  | NM_004562 | 28915.064 | 24916.549 |
| NM_016462 | 2282.461  | 2743.491  | AK024076  | 2833.047  | 2563.745  | NM_000202 | 920.41    | 889.966   |
| NM_001492 | 9807.163  | 10145.784 | M87940    | 2468.917  | 2171.658  | Z25427    | 2115.192  | 1907.608  |
| NM_014841 | 956.716   | 1080.948  | L77588    | 3925.429  | 4110.682  | NM_004672 | 6400.161  | 5953.36   |
| NM_014422 | 15310.032 | 15725.716 | AF086304  | 21037.928 | 17547.871 | NM_001352 | 2375.245  | 1955.187  |
| NM_000252 | 15749.73  | 16793.861 | AB032976  | 2045.525  | 1301.045  | NM_006214 | 2347.064  | 2201.466  |
| AB033055  | 8111.116  | 9347.541  | AF301222  | 26778.975 | 19519.189 | AJ010228  | 3807.011  | 3544.622  |
| AF311287  | 5810.301  | 5967.125  | AJ131606  | 319.895   | 5317.346  | NM_005192 | 4387.92   | 4526.286  |
| AJ299442  | 7262.158  | 7162.892  | AF215981  | 13453.088 | 10599.409 | NM_018072 | 2302.26   | 2972.815  |
| NM_000122 | 3944.472  | 4645.306  | NM_000732 | 61233.207 | 52055.332 | AL137529  | 3515.283  | 4462.148  |
| NM_003762 | 12077.546 | 13442.655 | AF130044  | 1384.41   | 1487.737  | NM_012332 | 1091.119  | 1015.437  |
| NM_018442 | 8767.689  | 9803.635  | AF087980  | 1934.523  | 1902.327  | AK026648  | 1279.173  | 1266.533  |
| NM_000187 | 892.934   | 1011.938  | NM_013932 | 611.846   | 529.692   | NM_000497 | 1085.124  | 1304.687  |
| NM_014462 | 1326.988  | 1662.106  | AB038651  | 5203.291  | 3797.637  | NM_017421 | 1506.479  | 1848.347  |
| D87292    | 1171.345  | 1340.766  | AL359603  | 2019.484  | 1689.409  | AK025977  | 20611.432 | 21980.756 |
| NM_005492 | 2037.339  | 2023.549  | NM_013940 | 1968.8    | 3024.507  | AK023130  | 4917.195  | 5302.188  |
| NM_016332 | 2152.036  | 1983.898  | AL117643  | 4164.439  | 5618.227  | NM_000272 | 952.371   | 1002.412  |
| NM_003162 | 6236.896  | 6835.585  | AF069135  | 15112.954 | 10247.585 | NM_002892 | 8863.594  | 7155.657  |
| NM_003902 | 2690.166  | 2683.931  | AK026524  | 1235.165  | 961.188   | NM_000482 | 709.776   | 727.573   |
| AL359590  | 46535.109 | 53516.602 | AB011157  | 8249.99   | 4875.816  | BE876237  | 747.362   | 937.288   |
| NM_002862 | 12271.437 | 15206.04  | U17632    | 1734.491  | 1080.395  | NM_005397 | 1042.009  | 1450.021  |
| NM_003080 | 6952.704  | 6755.605  | AK026764  | 2491.77   | 1782.453  | NM_000802 | 4703.795  | 4397.521  |
| NM_013262 | 1561.146  | 1350.031  | AF113700  | 3686.53   | 2493.273  | NM_006320 | 1213.667  | 950.302   |
| NM_002642 | 3907.531  | 3977.179  | NM_017832 | 20471.26  | 13047.075 | AB014511  | 1509.85   | 1323.6    |
| AB033027  | 3459.297  | 3243.203  | NM_018347 | 4730.979  | 2108.994  | NM_021972 | 1612.832  | 1476.804  |
| AK021805  | 19244.863 | 17473.102 | AK026730  | 1178.088  | 841.531   | NM_005712 | 4909.126  | 3766.998  |
| AB014550  | 5730.224  | 4273.711  | AK024739  | 2226.124  | 1917.448  | NM_018264 | 1107.889  | 1101.552  |
| NM_006822 | 16828.891 | 19023.873 | AK098681  | 1258.224  | 930.152   | NM_014580 | 844.422   | 1154.751  |
| AB007973  | 14278.153 | 15391.748 | AK026772  | 726.884   | 753.676   | AB028998  | 419.324   | 724.15    |
| NM_002992 | 1154.397  | 1113.188  | NM_014260 | 12774.271 | 8954.74   | NM_000152 | 648.162   | 464.185   |
| M96843    | 11125.018 | 10680.517 | AK026458  | 1372.226  | 1120.061  | NM_002032 | 1335.297  | 1365.669  |
| NM_017791 | 2039.906  | 2001.404  | CY3Cy5    | 4612.951  | 82.922    | AK091794  | 760.792   | 777.307   |



|           |           |           |           |           |           |             |           |           |
|-----------|-----------|-----------|-----------|-----------|-----------|-------------|-----------|-----------|
| NM_005882 | 15024.207 | 15303.327 | M23254    | 324.61    | 609.161   | NM_004111   | 2337.719  | 2556.685  |
| BC012304  | 8049.536  | 8340.303  | BE618539  | 426.172   | 750.137   | AF085966    | 3730.829  | 4087.726  |
| AB046815  | 4679.737  | 4785.147  | R28062    | 2111.943  | 2534.772  | NM_005316   | 2596.021  | 2387.229  |
| AF075085  | 58228.168 | 56620.168 | AI627464  | 837.121   | 802.345   | NM_016316   | 2234.43   | 2109.726  |
| NM_005892 | 2675.965  | 2446.703  | BI756258  | 2944.007  | 4410.884  | NM_003366   | 6797.393  | 6023.894  |
| NM_006478 | 3397.338  | 3747.401  | AA608557  | 5825.39   | 5520.832  | NM_000057   | 1940.274  | 1587.639  |
| AF132734  | 20642.578 | 20129.936 | AL050095  | 2329.722  | 2512.665  | NM_018343   | 4319.663  | 3965.26   |
| NM_018379 | 2074.213  | 1680.298  | NM_000498 | 617.652   | 486.232   | AK095793    | 1002.839  | 673.178   |
| NM_016403 | 38940.199 | 44266.594 | NM_000664 | 1314.349  | 972.894   | NM_003177   | 2744.565  | 2438.684  |
| NM_015603 | 1545.713  | 1576.981  | SR9       | 13415.241 | 1632.724  | NM_017719   | 1349.116  | 1135.419  |
| AK021788  | 903.337   | 1092.64   | CY3Cy5    | 4398.959  | 77.269    | AF064078    | 445.607   | 575.47    |
| NM_001921 | 10338.862 | 11270.828 | NM_014808 | 2222.1    | 1231.332  | AL049688    | 927.218   | 842.643   |
| NM_013400 | 10308.734 | 13381.366 | AB006627  | 532.351   | 642.671   | NM_002737   | 2901.275  | 2177.301  |
| AK026257  | 2445.888  | 2464.749  | NM_000416 | 6242.239  | 8047.481  | NM_002719   | 5820.467  | 5701.807  |
| AK023836  | 7781.331  | 8483.729  | NM_002965 | 1229.588  | 1274.907  | AV752086    | 875.195   | 1038.554  |
| NM_018109 | 5093.436  | 4589.346  | AB007883  | 549.535   | 1042.257  | NM_016102   | 4543.984  | 4862.938  |
| NM_005076 | 18992.205 | 16632.871 | NM_007037 | 2484.76   | 3128.679  | NM_004376   | 1768.852  | 2284.983  |
| AF253321  | 1860.904  | 1716.248  | AF038196  | 2886.786  | 3907.681  | NM_000272   | 947.612   | 913.429   |
| U80735    | 6793.232  | 7460.687  | NM_004859 | 5170.221  | 5468.236  | NM_006848   | 62127.203 | 63749.805 |
| NM_017850 | 4712.478  | 4371.494  | NM_005014 | 1043.497  | 822.75    | NM_005603   | 25670.377 | 27656.439 |
| NM_016522 | 1681.958  | 1841.007  | NM_000070 | 1066.374  | 751.205   | NM_001061   | 565.055   | 487.751   |
| NM_002224 | 5172.648  | 4802.439  | NM_001202 | 1064.076  | 711.375   | BG744154    | 13061.153 | 13499.376 |
| X07979    | 55765.105 | 49368.891 | NM_003289 | 23169.078 | 17532.365 | Z11694      | 4200.146  | 5595.974  |
| NM_003874 | 4033.101  | 3679.303  | NM_006323 | 9768.042  | 11910.881 | Z26317      | 1264.573  | 1479.822  |
| NM_000082 | 3358.692  | 3636.139  | NM_016466 | 2613.186  | 2826.587  | X16983      | 16856.023 | 16756.586 |
| L13857    | 2406.244  | 1838.266  | NM_001493 | 5807.891  | 8647.712  | X56160      | 3013.184  | 2229.687  |
| NM_018098 | 13058.476 | 12573.479 | NM_014841 | 672.228   | 910.438   | BG679991    | 684.213   | 468.018   |
| AF286164  | 1900.546  | 2075.256  | NM_014426 | 14730.971 | 15786.649 | H-Y 00097 I | 5493.141  | 4590.705  |
| AF146277  | 14618.979 | 13869.408 | NM_006816 | 14812.912 | 17975.443 | H-Y 00711 I | 57821.215 | 62856.953 |
| NM_002559 | 936.408   | 702.481   | AK026518  | 34514.094 | 36891.887 | H-X 16707 I | 1378.292  | 1245.494  |
| AF055033  | 27513.961 | 27282.02  | NM_000258 | 8057.932  | 7962.812  | AL038354    | 26287.658 | 22789.145 |
| NM_017700 | 1217.587  | 1141.035  | AB033055  | 4522.123  | 4180.065  | R14607      | 1019.14   | 733.767   |
| M37191    | 15113.006 | 12501.104 | AF311287  | 2864.253  | 2819.961  | NM_000064   | 4761.32   | 4162.723  |
| NM_005242 | 582.123   | 655.844   | NM_003098 | 1645.391  | 1537.384  | NM_006725   | 4842.304  | 3988.636  |
| NM_003020 | 1071.935  | 1213.311  | NM_014781 | 3500.918  | 2514.324  | NM_003326   | 1113.507  | 1094.213  |
| NM_003404 | 56445.832 | 56456.598 | X87896    | 804.308   | 896.004   | NM_004568   | 33718.73  | 31478.211 |
| NM_001114 | 2710.588  | 2410.726  | M88310    | 1664.065  | 1495.901  | NM_000202   | 1276.923  | 1453.85   |
| X82240    | 3059.82   | 3361.494  | NM_000042 | 1368.903  | 902.724   | NM_005496   | 10412.049 | 9582.338  |
| NM_013995 | 12056.512 | 11921.287 | AF035787  | 726.712   | 681.518   | NM_002858   | 3754.959  | 4818.053  |
| NM_004455 | 971.484   | 1075.248  | NM_003165 | 3785.574  | 5699.627  | NM_004817   | 1087.542  | 1371.517  |
| NM_006010 | 31683.535 | 37074.227 | NM_003906 | 3343.662  | 5212.219  | NM_018975   | 17151.361 | 19055.619 |
| K03191    | 3584.818  | 3654      | AL359590  | 39291.828 | 46940.906 | AB023215    | 9411.564  | 8690.181  |
| NM_005079 | 24699.891 | 33030.34  | NM_002861 | 7303.358  | 9468.538  | NM_001284   | 35278.867 | 40818.027 |
| NM_005192 | 40165.008 | 43558.918 | NM_003080 | 2425.828  | 3432.871  | NM_003242   | 19066.244 | 20288.863 |
| NM_004585 | 3912.787  | 4111.288  | NM_013268 | 723.227   | 886.186   | NM_002846   | 668.17    | 706.027   |
| NM_015032 | 6414.511  | 5228.808  | NM_002645 | 2072.664  | 2796.921  | U31099      | 613.926   | 670.001   |
| AK022956  | 7473.057  | 7610.569  | AK021805  | 4432.515  | 4221.975  | NM_001105   | 3522.872  | 2371.586  |
| AK023121  | 2549.423  | 2211.731  | AB014550  | 2851.445  | 3397.484  | NM_005585   | 774.827   | 852.614   |
| NM_014104 | 50504.059 | 48276.141 | AF320294  | 1563.929  | 2059.853  | NM_002075   | 2752.668  | 2080.03   |
| NM_002392 | 3834.043  | 3226.124  | AF161436  | 4389.85   | 3921.057  | Y08756      | 9173.706  | 7728.524  |
| NM_002749 | 68992.43  | 65872.391 | NM_020402 | 2294.126  | 2645.919  | NM_005563   | 15799.528 | 14394.495 |
| NM_018216 | 8237.228  | 10233.158 | NM_004299 | 2491.939  | 2637.208  | AY007090    | 516.023   | 377.032   |
| NM_003390 | 3666.522  | 4532.898  | NM_001171 | 1012.909  | 869.638   | NM_005102   | 793.697   | 696.359   |

|           |           |           |           |           |           |           |           |           |
|-----------|-----------|-----------|-----------|-----------|-----------|-----------|-----------|-----------|
| AL137747  | 5866.934  | 6816.464  | NM_002250 | 5273.798  | 4910.072  | NM_004518 | 1061.473  | 682.703   |
| NM_014755 | 7738.514  | 8077.222  | NM_006478 | 2071.75   | 1575.621  | NM_006501 | 852.498   | 883.34    |
| AF077188  | 14694.273 | 14584.761 | AF132734  | 18260.451 | 11656.46  | NM_005397 | 1134.813  | 1343.494  |
| NM_012446 | 11669.439 | 11892.3   | NM_016403 | 26013.203 | 33277.672 | NM_000806 | 4996.409  | 4627.592  |
| NM_018338 | 640.012   | 821.135   | NM_015603 | 988.031   | 1363.666  | NM_006320 | 1216.614  | 967.405   |
| NM_018685 | 41602.625 | 49444.945 | NM_001921 | 9744.781  | 11950.062 | AB014511  | 2089.893  | 2132.023  |
| NM_006984 | 1420.406  | 1411.782  | NM_006230 | 15125.761 | 16381.976 | NM_014252 | 5561.178  | 5745.606  |
| AF231919  | 1253.644  | 1165.071  | NM_014699 | 2909.844  | 4439.855  | NM_001662 | 10540.841 | 12462.907 |
| NM_018214 | 3000.39   | 3089.701  | NM_013400 | 10154.611 | 10938.26  | NM_016131 | 7645.221  | 11595.624 |
| AL133644  | 14076.781 | 11377.884 | AK026257  | 1870.327  | 2112.139  | NM_006822 | 2093.742  | 2513.715  |
| NM_002706 | 4288.799  | 4394.578  | AK023836  | 1140.313  | 1233.014  | NM_012142 | 7406.744  | 8635.884  |
| NM_019023 | 69621.781 | 63410.246 | NM_018109 | 3526.08   | 3513      | NM_016425 | 1986.008  | 2020.918  |
| NM_004420 | 2652.251  | 2392.172  | AJ299442  | 5443.69   | 4956.212  | AB011100  | 2006.033  | 2433.836  |
| NM_002970 | 1232.51   | 1257.453  | NM_000129 | 2377.23   | 2141.841  | U61741    | 1029.019  | 1262.268  |
| NM_005499 | 22974.121 | 24938.367 | NM_003762 | 10256.613 | 9667.625  | NM_012402 | 5273.011  | 6156.453  |
| NM_013270 | 738.722   | 942.379   | NM_018446 | 5818.882  | 5615.971  | M76676    | 2803.329  | 2714.395  |
| NM_015387 | 14071.861 | 16398.732 | NM_000187 | 955.431   | 1082.363  | NM_003857 | 532.929   | 585.274   |
| NM_001733 | 6821.544  | 6348.048  | NM_014465 | 1333.997  | 940.368   | AL137690  | 595.28    | 556.659   |
| NM_005065 | 1634.026  | 1691.398  | D87292    | 746.912   | 1037.276  | Z83804    | 1736.839  | 1678.926  |
| NM_017825 | 21773.205 | 27621.693 | NM_005498 | 1250.552  | 941.211   | NM_004386 | 1573.139  | 1628.691  |
| NM_014035 | 6367.456  | 7047.133  | NM_001202 | 1168.482  | 585.509   | U67784    | 1075.679  | 1136.675  |
| NM_020122 | 24864.707 | 27721.104 | NM_003289 | 11818.203 | 14989.6   | NM_007366 | 1234.488  | 1329.023  |
| NM_013432 | 9437.355  | 8403.254  | M23254    | 644.938   | 633.454   | NM_016584 | 8802.829  | 8065.977  |
| NM_002298 | 69107.32  | 63595.664 | R28062    | 2160.031  | 2177.427  | NM_001815 | 1166.161  | 930.382   |
| AK027130  | 1202.49   | 1193.716  | BI756258  | 1762.219  | 2165.502  | AK095793  | 919.804   | 1134.818  |
| NM_005479 | 16965.221 | 20011.055 | AA608557  | 6980.161  | 6336.192  | NM_003177 | 2527.219  | 2557.867  |
| NM_005730 | 40582.766 | 34643.055 | AL050095  | 2717.685  | 2353.695  | NM_017719 | 1190.42   | 1136.056  |
| NM_005392 | 3085.882  | 2384.482  | NM_000498 | 841.503   | 603.38    | AF064078  | 387.585   | 506.611   |
| AL133572  | 7437.585  | 7043.12   | NM_000664 | 1161.866  | 1449.371  | AL049688  | 1101.005  | 990.377   |
| AK022500  | 3741.2    | 4261.477  | AF075085  | 56398.129 | 52887.656 | NM_002737 | 3986.677  | 2988.204  |
| BC021298  | 1222.678  | 1348.989  | NM_005892 | 1546.045  | 1478.485  | Z25427    | 2452.541  | 1900.182  |
| U52096    | 8858.525  | 8351.521  | NM_000042 | 1230.866  | 782.462   | NM_004672 | 6776.074  | 7158.831  |
| AB013897  | 2352.721  | 2258.531  | AF035787  | 833.109   | 948.26    | NM_001353 | 2579.942  | 3789.588  |
| NM_005526 | 40813.945 | 44069.508 | NM_014808 | 1524.871  | 1874.72   | NM_006214 | 2302.669  | 2512.295  |
| AK001669  | 2704.85   | 2586.6    | NM_000416 | 5803.926  | 6449.846  | AJ010228  | 3385.764  | 3971.843  |
| NM_006195 | 1201.535  | 1124.244  | NM_002965 | 1480.938  | 1050.426  | NM_005198 | 4124.696  | 5037.567  |
| NM_006190 | 14817.091 | 14285.066 | AK093780  | 6406.198  | 5402.836  | NM_018073 | 2192.126  | 2655.757  |
| NM_006368 | 7610.061  | 7807.3    | AY009397  | 52017.754 | 53994.176 | AL137529  | 4312.13   | 5318.238  |
| NM_001618 | 5955.168  | 5242.14   | NM_007037 | 7763.009  | 7096.447  | NM_012332 | 1121.154  | 1642.025  |
| BC000401  | 24253.893 | 31789.439 | NM_005492 | 548.738   | 499.696   | AK026648  | 1356.11   | 1250.532  |
| NM_006425 | 7597.951  | 8230.35   | AF038196  | 3273.251  | 3975.146  | NM_000497 | 1195.09   | 1440.561  |
| BF344046  | 967.872   | 1146.3    | NM_004859 | 6796.842  | 7893.702  | NM_017421 | 1538.875  | 1812.702  |
| AF432218  | 12194.253 | 12215.896 | NM_016352 | 668.07    | 641.367   | AK025977  | 22685.273 | 23102.826 |
| NM_004286 | 1953.169  | 1961.024  | NM_005014 | 719.26    | 949.189   | AK023130  | 5038.954  | 5710.769  |
| AK025082  | 4099.508  | 3835.729  | NM_000070 | 2149.77   | 1726.06   | NM_000273 | 1024.908  | 1009.043  |
| AF086535  | 984.66    | 809.633   | NM_002250 | 3537.902  | 1466.339  | NM_002899 | 9075.217  | 11272.175 |
| AB040901  | 1594.421  | 1533.382  | NM_006323 | 10999.601 | 9113.068  | NM_000486 | 472.119   | 554.687   |
| AL137406  | 7827.7    | 6863.708  | NM_016466 | 2306.719  | 1682.922  | BE876237  | 858.134   | 794.261   |
| NM_012253 | 10451.815 | 10494.954 | NM_001493 | 5338.554  | 6366.624  | NM_014750 | 5659.557  | 6442.378  |
| NM_006876 | 2778.385  | 2914.667  | NM_014841 | 910.576   | 802.984   | NM_015912 | 639.995   | 507.331   |
| NM_000293 | 1752.107  | 2205.608  | NM_014426 | 11881.101 | 11100.835 | NM_000460 | 939.064   | 677.749   |
| NM_003748 | 1571.898  | 1901.605  | NM_006816 | 12492.936 | 11035.941 | AB002339  | 712.901   | 621.342   |
| AF153821  | 1327.342  | 1052.641  | AK026518  | 45087.055 | 35100.652 | NM_005104 | 5814.044  | 4947.61   |

|           |           |           |           |           |           |           |           |           |
|-----------|-----------|-----------|-----------|-----------|-----------|-----------|-----------|-----------|
| NM_01337C | 2121.978  | 2553.947  | NM_00025E | 15730.915 | 13167.908 | NM_00688E | 16445.73  | 15218.042 |
| NM_00331C | 8522.376  | 9082.025  | AB033055  | 6826.858  | 6844.575  | AL137423  | 2837.58   | 3118.041  |
| AK024461  | 3565.876  | 3256.636  | AF311287  | 3766.521  | 3973.438  | AB018322  | 1619.447  | 1982.021  |
| NM_01763E | 5399.989  | 4874.7    | NM_00309E | 1643.362  | 1794.234  | NM_00706E | 24319.063 | 34451.555 |
| X62534    | 3857.445  | 3862.09   | NM_014781 | 2418.641  | 2041.847  | NM_00571E | 5175.04   | 5755.653  |
| AF027147  | 33420.941 | 31519.516 | X87896    | 523.236   | 592.802   | NM_018264 | 1299.704  | 1740.006  |
| M62399    | 7471.538  | 7427.007  | M88310    | 1404.607  | 1093.607  | NM_01458C | 1051.834  | 1640.573  |
| NM_002357 | 996.896   | 1032.416  | NM_01844E | 5385.531  | 3620.468  | NM_00015E | 646.903   | 867.527   |
| U71600    | 1420.866  | 1655.467  | NM_000187 | 824.674   | 848.436   | NM_00203E | 2111.141  | 2796.103  |
| NM_00447Z | 2336.358  | 1737.005  | NM_01446E | 1208.743  | 1750.002  | AK091794  | 797.733   | 877.73    |
| AB037862  | 1831.979  | 1934.245  | D87292    | 639.567   | 1224.148  | NM_004111 | 2612.207  | 2878.97   |
| AF086285  | 856.931   | 695.487   | NM_00549E | 849.951   | 1064.025  | AF085966  | 3629.486  | 3518.008  |
| AK023887  | 1118.975  | 866.266   | NM_01633E | 703.444   | 853.291   | NM_00531E | 2940.645  | 2913.246  |
| AF088022  | 12346.95  | 9814.732  | NM_00316E | 4607.647  | 4550.974  | NM_01631E | 1859.715  | 1991.37   |
| AK026537  | 2243.606  | 2556.009  | NM_00390E | 6177.482  | 6251.425  | NM_00336E | 5686.748  | 6200.244  |
| NM_01548E | 7040.945  | 6340.991  | AL359590  | 43960.828 | 45219.113 | NM_000057 | 1669.95   | 1448.022  |
| AF147411  | 745.198   | 892.023   | NM_002861 | 8635.776  | 9669.508  | NM_01834E | 3806.498  | 3144.379  |
| NM_00266E | 10366.703 | 11510.642 | NM_00308C | 3195.439  | 3787.507  | X15880    | 56454.66  | 57251.078 |
| AF202145  | 5415.823  | 5271.16   | NM_00264E | 1832.057  | 2023.98   | AF114264  | 1719.968  | 1697.542  |
| AK026155  | 2042.459  | 1880.764  | AB033027  | 1446.416  | 1642.324  | NM_01897Z | 1635.532  | 1532.858  |
| NM_01805Z | 57539.332 | 52370.145 | AK021805  | 8288.006  | 8270.699  | AB037828  | 717.806   | 664.671   |
| AK022386  | 7638.694  | 6150.657  | AB014550  | 3429.495  | 3671.02   | AB023210  | 560.398   | 936.7     |
| NM_002767 | 6367.379  | 6802.15   | AF320294  | 2168.137  | 2780.232  | AB037786  | 1987.38   | 1675.17   |
| AF131846  | 21109.037 | 19964.754 | AF320293  | 588.759   | 562.674   | NM_00364E | 7420.551  | 8267.773  |
| AF088069  | 2035.406  | 2791.417  | AF161436  | 3835.132  | 3871.533  | AB037735  | 1038.681  | 826.607   |
| AF086551  | 995.552   | 883.005   | NM_02040Z | 1628.49   | 1683.855  | AK002177  | 2436.692  | 2414.355  |
| NM_01339E | 7440.423  | 5714.523  | NM_00429E | 1669.974  | 1406.384  | AK024429  | 2533.911  | 2981.879  |
| AK025072  | 2715.65   | 2843.157  | NM_000664 | 1351.692  | 811.488   | AB000509  | 3623.761  | 3867.852  |
| L10378    | 18910.244 | 19682.592 | AF075085  | 61867.863 | 60431.285 | AB018314  | 1113.266  | 1007.361  |
| AK022179  | 774.666   | 966.393   | NM_00589Z | 1141.694  | 1711.624  | NM_00437E | 901.183   | 1255.16   |
| AJ227860  | 3892.64   | 3622.133  | NM_00647E | 2841.746  | 3931.005  | AJ238899  | 901.291   | 1051.995  |
| AL157448  | 1050.156  | 1255.414  | AF132734  | 21008.832 | 23855.465 | NM_018037 | 1054.114  | 944.093   |
| AF026942  | 3644.665  | 3976.218  | NM_01837E | 2114.868  | 2700.724  | NM_001110 | 3495.687  | 2879.702  |
| AJ276429  | 3101.115  | 2609.793  | NM_01640E | 28513.377 | 29601.029 | NM_00322Z | 929.668   | 1012.891  |
| AL117657  | 1542.72   | 1583.216  | NM_01560E | 1612.113  | 1816.572  | NM_000841 | 4975.088  | 3670.016  |
| AK023589  | 1739.325  | 1521.669  | NM_001921 | 11126.198 | 11017.366 | NM_00124E | 1172.321  | 975       |
| AK021590  | 2445.847  | 1947.01   | NM_00623C | 14077.745 | 13833.278 | NM_00367Z | 8693.318  | 9846.054  |
| AB002441  | 767.84    | 647.421   | NM_01469E | 4905.314  | 6069.351  | NM_002574 | 58857.602 | 60893.637 |
| AK023998  | 4434.451  | 4089.435  | NM_01340C | 11185.17  | 11078.085 | AJ008139  | 2534.653  | 1932.299  |
| AK021643  | 1177.274  | 1256.338  | AK026257  | 2428.025  | 2258.654  | NM_00432E | 1996.622  | 1527.806  |
| Z11802    | 682.348   | 797.286   | AK023836  | 4025.74   | 4436.505  | NM_004577 | 2913.654  | 2461.524  |
| AK000872  | 1830.193  | 1886.646  | NM_01810E | 4988.384  | 5024.9    | AF007157  | 13594.552 | 9367.034  |
| AK027147  | 15644.347 | 13866.077 | AJ299442  | 4927.378  | 5845.498  | D38553    | 5143.929  | 5917.677  |
| AL109713  | 694.071   | 571.775   | NM_00012E | 2050.68   | 1605.611  | NM_00617C | 4382.123  | 3331.701  |
| AK022415  | 45597.402 | 40381.902 | NM_00376Z | 7394.523  | 5300.103  | NM_01429E | 4744.35   | 3721.966  |
| AL137368  | 2063.346  | 1970.307  | NM_00485E | 4815.244  | 2760.51   | AK001581  | 3310.654  | 3171.659  |
| AK021932  | 1403.745  | 1290.795  | NM_005014 | 779.447   | 858.109   | NM_00586Z | 2689.241  | 2109.224  |
| AK026787  | 4168.939  | 4031.052  | NM_00007C | 913.955   | 1079.707  | NM_00054E | 3814.172  | 3231.717  |
| AK023542  | 1374.685  | 1047.46   | NM_00120Z | 1344.645  | 1724.307  | AB002297  | 3298.331  | 3138.36   |
| AK000203  | 1504.455  | 1579.22   | NM_00328E | 22431.826 | 24525.18  | NM_00502C | 16491.715 | 17629.715 |
| AK021845  | 10595.86  | 8740.454  | M23254    | 676.176   | 604.997   | NM_014077 | 3743.483  | 3924.427  |
| NM_01859Z | 2770.951  | 3080.422  | R28062    | 2643.16   | 2922.812  | NM_01841Z | 846.702   | 752.833   |
| NM_01850E | 41571.105 | 37073.672 | AI627464  | 559.461   | 532.626   | NM_01232E | 3383.509  | 2805.581  |

|           |           |           |           |           |           |           |           |           |
|-----------|-----------|-----------|-----------|-----------|-----------|-----------|-----------|-----------|
| NM_01644  | 17692.42  | 16658.865 | BI756258  | 2936.76   | 3799.878  | M14087    | 11808.645 | 16131.374 |
| AL049670  | 8399.231  | 7460.665  | AI342225  | 55299.008 | 55756.055 | NM_00088  | 7973.498  | 5837.255  |
| NM_01851  | 32486.576 | 33226.41  | AA608557  | 5317.687  | 3611.472  | M59040    | 1031.528  | 1025.159  |
| NM_01856  | 1285.734  | 1253.408  | AL050095  | 2180.861  | 1714.902  | NM_01758  | 13255.196 | 14077.277 |
| AK022412  | 4514.576  | 5201.508  | NM_00309  | 1718.92   | 1203.37   | NM_01523  | 2647.563  | 2545.289  |
| AK023073  | 14899.365 | 13156.684 | NM_014781 | 3086.665  | 3418.144  | AK026962  | 1749.63   | 1562.888  |
| AK022438  | 1096.669  | 1580.003  | BU629989  | 639.23    | 705.382   | X04366    | 1667.456  | 1514.516  |
| AK023316  | 840.936   | 746.22    | X87896    | 603.125   | 655.472   | NM_00050  | 35881.859 | 29704.047 |
| AK023764  | 973.358   | 1341.207  | M88310    | 1436.576  | 1503.941  | NM_00066  | 1423.827  | 1082.342  |
| AK024082  | 820.329   | 580.262   | NM_00004  | 1314.119  | 1294.469  | NM_003481 | 3075.66   | 2828.111  |
| AK025062  | 3403.535  | 3272.118  | AF035787  | 674.95    | 863.937   | AB046814  | 552.126   | 490.592   |
| Z27405    | 35843.434 | 34038.238 | NM_01480  | 2307.35   | 1883.399  | NM_01766  | 2947.805  | 3710.316  |
| AK023412  | 2072.851  | 1717.104  | AB006627  | 679.323   | 817.109   | AK025523  | 472.768   | 827.208   |
| NM_014617 | 54278.828 | 51508.102 | NM_00041  | 6835.066  | 7247.781  | NM_00705  | 6738.013  | 5794.877  |
| AK074682  | 4582.868  | 5172.442  | NM_00295  | 1489.904  | 1171.864  | NM_00687  | 19157.883 | 18317.303 |
| X74605    | 1250.904  | 1339.032  | AB007883  | 1146.198  | 1267.796  | NM_00735  | 5113.86   | 4522.687  |
| AK024513  | 1293.146  | 1277.003  | AK093780  | 6845.57   | 6719.194  | AF303888  | 8113.308  | 8030.122  |
| BC036692  | 923.304   | 805.467   | AF038196  | 2372.46   | 1896.768  | NM_000077 | 752.872   | 507.018   |
| AJ009640  | 2285.77   | 2663.845  | AF320294  | 1380.619  | 1134.31   | AF176646  | 654.659   | 691.643   |
| Y11163    | 1057.896  | 1192.217  | AF320293  | 656.834   | 458.823   | NM_00708  | 1067.193  | 847.365   |
| AK022026  | 950.988   | 947.9     | AF161436  | 4050.607  | 5639.83   | M97191    | 17503.928 | 16778.641 |
| AF147340  | 791.191   | 1141.158  | NM_02040  | 1274.196  | 1847.29   | AK023015  | 10625.861 | 12782.78  |
| AF035308  | 18259.734 | 17235.182 | NM_00429  | 2545.804  | 2952.603  | NM_003457 | 12814.048 | 11625.546 |
| NM_01405  | 4670.387  | 5613.254  | NM_001171 | 517.975   | 849.504   | NM_012391 | 997.61    | 1109.633  |
| AK022228  | 2261.306  | 2531.625  | NM_00225  | 5152.307  | 5012.253  | NM_00525  | 2234.081  | 3126.864  |
| AK022031  | 856.357   | 857.552   | NM_00632  | 11161.883 | 12022.352 | NM_005611 | 520.453   | 497.119   |
| AF086480  | 3263.438  | 2502.824  | NM_01646  | 2722.267  | 2432.733  | AF141655  | 1270.174  | 1054.488  |
| AK022122  | 1474.339  | 1205.547  | NM_00149  | 5059.837  | 5542.856  | NM_00734  | 731.645   | 971.657   |
| AK000806  | 53750.824 | 43349.234 | NM_01442  | 11402.981 | 11208.372 | NM_00483  | 1061.658  | 928.697   |
| NM_016471 | 9718.508  | 8379.454  | AK026518  | 31871.559 | 28067.039 | NM_007007 | 7683.752  | 7076.177  |
| NM_001145 | 1717.16   | 2243.573  | NM_00025  | 7053.735  | 5446.546  | NM_00638  | 837.032   | 779.041   |
| NM_00536  | 10695.573 | 9772.966  | AB033055  | 3469.306  | 2778.782  | NM_00655  | 16681.48  | 14752.754 |
| AK023482  | 4467.84   | 4658.352  | AF311287  | 1791.534  | 1636.416  | NM_004501 | 34323.285 | 26708.824 |
| AK022798  | 1224.668  | 1353.43   | AJ299442  | 6352.325  | 3852.622  | NM_00496  | 10237.077 | 9277.906  |
| AL157423  | 758.111   | 912.896   | NM_00012  | 2005.488  | 2372.843  | NM_00670  | 1158.064  | 1284.062  |
| AK023115  | 899.866   | 935.109   | NM_00376  | 10749.342 | 10214.996 | NM_00644  | 7359.81   | 7977.687  |
| AK023176  | 1913.925  | 2284.934  | NM_01844  | 6504.937  | 7208.92   | NM_01210  | 5235.7    | 4190.462  |
| AL161991  | 23792.381 | 29476.459 | NM_000187 | 968.911   | 960.648   | AF019633  | 2228.853  | 1719.826  |
| D17032    | 36458.543 | 43179.391 | NM_01446  | 1176.664  | 1458.515  | AB002361  | 3212.01   | 2652.697  |
| AL137292  | 743.356   | 1006.508  | D87292    | 786.247   | 1054.192  | NM_01806  | 3508.058  | 3099.899  |
| NM_017941 | 4173.791  | 4446.116  | NM_00549  | 773.465   | 1111.914  | NM_01423  | 2268.857  | 2298.277  |
| AF301016  | 2293.983  | 1868.142  | NM_01633  | 705.899   | 800.861   | NM_01766  | 2431.529  | 2140.084  |
| AF118079  | 47623.039 | 51479.711 | NM_00316  | 4309.533  | 4453.922  | U88837    | 964.747   | 850.82    |
| AF277572  | 1218.383  | 1207.655  | NM_00390  | 3515.915  | 3929.153  | NM_01744  | 25131.678 | 21003.729 |
| AL365413  | 4740.343  | 3965.445  | AL359590  | 34828.039 | 29554.43  | AK001478  | 2394.54   | 2619.89   |
| NM_00525  | 8873.368  | 6913.922  | NM_002861 | 6164.641  | 5871.767  | AK025697  | 6348.275  | 4835.131  |
| NM_00044  | 4670.516  | 5663.169  | NM_00308  | 2764.556  | 3454.823  | AK021734  | 1090.035  | 889.22    |
| NM_001297 | 4648.446  | 3677.208  | NM_00264  | 1801.866  | 1564.841  | D00265    | 24434.898 | 22014.383 |
| NM_00440  | 15059.928 | 10085.012 | AB033027  | 784.03    | 940.47    | NM_00077  | 272.5     | 269.768   |
| X64993    | 2535.474  | 1945.185  | AK021805  | 4640.585  | 3515.685  | NM_00455  | 39509.371 | 32430.646 |
| NM_00443  | 28314.977 | 23816.232 | AB014550  | 2481.824  | 2134.845  | NM_00014  | 2598.235  | 3288.101  |
| NM_00626  | 1177.097  | 929.737   | NM_00682  | 26026.172 | 30705.947 | AL137294  | 2769.443  | 2698.14   |
| NM_01623  | 5555.403  | 5345.534  | AB007973  | 9879.745  | 9927.85   | NM_00374  | 976.796   | 875.212   |

|             |           |           |           |           |           |           |           |           |
|-------------|-----------|-----------|-----------|-----------|-----------|-----------|-----------|-----------|
| NM_001083   | 1667.22   | 1570.836  | NM_002999 | 704.874   | 684.897   | AB037797  | 654.657   | 514.61    |
| AK023966    | 10870.979 | 9531.006  | M96843    | 4559.532  | 5551.948  | NM_00152C | 1099.096  | 1333.833  |
| AK025702    | 4957.782  | 4007.068  | NM_017791 | 845.17    | 1072.002  | AL133633  | 1232.172  | 1063.115  |
| NM_01895E   | 1507.787  | 1179.969  | NM_005882 | 10312.164 | 11706.452 | AK026817  | 658.375   | 611.326   |
| AK022038    | 3860.031  | 3014.025  | BC012304  | 6351.208  | 6259.12   | AL157442  | 13548.095 | 11520.987 |
| AK025119    | 965.453   | 1056.509  | AB046815  | 3005.513  | 3668.257  | AB011148  | 1424.182  | 964.799   |
| AF085866    | 6503.692  | 5915.333  | AF075085  | 61655.93  | 58054.883 | AL389938  | 36078.457 | 25893.344 |
| CY3Cy5      | 5093.295  | 248.021   | NM_005892 | 995.569   | 1457.773  | NM_00194C | 20511.621 | 16663.492 |
| AA397813    | 63571.004 | 60774.789 | NM_00647E | 2657.774  | 2922.862  | NM_003507 | 822.144   | 859.724   |
| W47350      | 1978.812  | 2356.741  | AF132734  | 18409.021 | 18432.16  | AK026591  | 977.621   | 1076.133  |
| W68291      | 4124.531  | 4255.23   | NM_018379 | 1438.972  | 2067.706  | AK001889  | 2011.07   | 1974.216  |
| N64384      | 11063.005 | 10187.941 | NM_016403 | 23489.018 | 20409.229 | AK025726  | 1621.161  | 1490.693  |
| H-X 53655 I | 1179.875  | 733.768   | NM_015603 | 996.777   | 1029.091  | AJ227869  | 3192.725  | 3113.831  |
| H-U 05770 I | 8257.146  | 8355.951  | NM_001921 | 7717.694  | 8389.767  | AK026189  | 478.129   | 419.606   |
| H-M 65199   | 6712.59   | 6578.761  | NM_00623C | 11040.44  | 11240.884 | AL117613  | 6823.393  | 6632.745  |
| H-M 32315   | 673.238   | 1089.378  | NM_014699 | 4575.149  | 5227.63   | AL137753  | 3603.128  | 3727.851  |
| H-V00536M   | 1338.705  | 1412.939  | NM_01340C | 8360.747  | 8231.823  | AK021785  | 319.81    | 344.992   |
| H-D85429M   | 24755.67  | 33354.809 | AK026257  | 2516.221  | 2196.146  | AL110262  | 9591.57   | 8138.25   |
| BF439832    | 1406.544  | 1586.423  | AK023836  | 2202.573  | 2014.097  | AK025627  | 13095.948 | 13727.848 |
| BG819162    | 943.456   | 994.099   | NM_018109 | 3178.996  | 2479.383  | AF216077  | 3913.729  | 3549.815  |
| NM_017532   | 6469.121  | 5733.15   | NM_005076 | 6242.715  | 4681.433  | AF086238  | 648.523   | 650.714   |
| SR2         | 55283.777 | 53361.797 | NM_00009C | 10910.749 | 2841.565  | AK021612  | 11637.849 | 7869.992  |
| SR4         | 13180.079 | 11313.874 | AF253321  | 837.36    | 942.07    | AF088031  | 607.288   | 410.715   |
| SR6         | 2152.397  | 2065.946  | U80735    | 4120.957  | 4167.321  | AK002025  | 36798.484 | 38915.551 |
| SR8         | 7794.673  | 25793.926 | NM_01785C | 2436.629  | 2906.179  | AK026299  | 1489.268  | 1212.741  |
| SR10        | 29980.705 | 9581.159  | NM_016522 | 888.139   | 1000.939  | NM_017794 | 925.794   | 726.257   |
| CY3Cy5      | 3445.13   | 135.129   | NM_002224 | 2657.527  | 3252.843  | AK025170  | 2191.482  | 1999.065  |
| NM_004447   | 4530.872  | 5064.825  | X07979    | 22723.85  | 27660.826 | AB033031  | 917.398   | 1346.808  |
| NM_001204   | 1505.98   | 1373.181  | NM_003874 | 2918.639  | 2736.206  | AF085872  | 7966.578  | 6768.713  |
| NM_012116   | 1526.945  | 1577.848  | NM_000082 | 2185.122  | 2533.658  | AK022538  | 9779.122  | 12137.255 |
| NM_00002C   | 2455.375  | 2389.903  | L13857    | 1182.801  | 999.722   | AL360257  | 989.368   | 932.058   |
| NM_002442   | 3155.247  | 3143.264  | NM_01809E | 7076.338  | 7276.081  | AK022342  | 675.964   | 807.211   |
| AB033091    | 6662.33   | 3767.067  | AF286164  | 659.762   | 720.734   | AF147420  | 933.813   | 1217.471  |
| NM_004557   | 5403.113  | 4859.094  | AF146277  | 4854.229  | 4577.41   | AL049312  | 1969.304  | 2100.559  |
| NM_014757   | 19923.471 | 20230.48  | NM_002559 | 757.957   | 473.71    | AL050072  | 2456.588  | 2420.313  |
| NM_017893   | 703.152   | 950.519   | AF055033  | 7836.702  | 8561.288  | AL117590  | 517.634   | 489.433   |
| NM_001584   | 2805.402  | 2843.569  | NM_01770C | 1098.468  | 1470.185  | AL049357  | 3224.093  | 2142.309  |
| NM_012259   | 50664.891 | 47085.371 | M37191    | 7024.315  | 8167.695  | AK027180  | 2062.283  | 2334.064  |
| AF272357    | 1658.535  | 1225.531  | NM_005242 | 443.923   | 694.664   | NM_004544 | 9956.924  | 11338.575 |
| NM_016372   | 43117.145 | 37568.738 | NM_00302C | 653.094   | 739.766   | AF086041  | 1001.614  | 991.877   |
| AB020705    | 2711.667  | 2398.044  | NM_003404 | 32729.588 | 22678.082 | Y15167    | 823.426   | 648.776   |
| NM_014333   | 1365.065  | 1501.651  | NM_001114 | 1451.775  | 1051.112  | AL133080  | 1674.478  | 1314.983  |
| NM_00298C   | 963.496   | 936.545   | X82240    | 3681.475  | 2926.058  | NM_017792 | 4024.199  | 4124.533  |
| NM_007102   | 68795.609 | 62540.859 | NM_01399E | 10651.112 | 12639.696 | AK025213  | 5131.617  | 5171.533  |
| BG491613    | 21263.377 | 18595.352 | NM_00445E | 484.817   | 648.98    | NM_01494C | 1408.002  | 1269.18   |
| NM_00272E   | 819.25    | 737.085   | NM_00601C | 20245.555 | 21906.078 | AL080221  | 531.682   | 521.14    |
| NM_00045C   | 806.913   | 708.309   | K03191    | 1679.44   | 1903.736  | AF009262  | 8289.521  | 12543.797 |
| NM_00044E   | 1060.851  | 537.951   | NM_00458E | 2876.465  | 2608.394  | AF009306  | 462.962   | 722.242   |
| NM_004513   | 9612.938  | 7984.214  | NM_015032 | 3985.682  | 3389.935  | AF050198  | 932.019   | 981.47    |
| NM_00170E   | 25362.723 | 23812.652 | AK022956  | 4864.464  | 6003.561  | AK024346  | 1625.995  | 1805.957  |
| NM_01773E   | 2730.998  | 2655.444  | AK023121  | 1416.839  | 1344.348  | AF056422  | 770.598   | 1007.476  |
| AB033044    | 4336.077  | 3788.698  | NM_014104 | 19282.551 | 20747.178 | AF090892  | 547.925   | 492.235   |
| AB014564    | 676.691   | 655.496   | NM_018216 | 5166.998  | 4825.038  | AK001919  | 929.068   | 799.655   |

|           |           |           |           |           |           |           |           |           |
|-----------|-----------|-----------|-----------|-----------|-----------|-----------|-----------|-----------|
| NM_020230 | 5339.551  | 5628.75   | NM_003390 | 2492.396  | 2560.202  | AK021535  | 648.07    | 761.762   |
| NM_006762 | 62623.133 | 57298.289 | AL137747  | 1618.744  | 1744.433  | AK021753  | 1943.497  | 1486.518  |
| NM_006352 | 1576.397  | 1424.804  | NM_014755 | 3971.606  | 4071.949  | AK001139  | 3217.486  | 3082.328  |
| NM_016430 | 835.98    | 1066.913  | AF077188  | 8513.275  | 9423.38   | AK002090  | 804.755   | 1171.956  |
| NM_003742 | 4681.118  | 5063.401  | NM_012446 | 9057.355  | 9320.989  | AK021822  | 652.631   | 703.604   |
| BE382905  | 646.629   | 1230.637  | NM_018338 | 403.813   | 669.889   | AK025246  | 5415.404  | 4808.7    |
| NM_002152 | 7943.799  | 7082.314  | NM_018685 | 38169.031 | 36854.336 | AK025847  | 3162.596  | 2451.73   |
| AK022558  | 4265.703  | 4362.753  | NM_006984 | 938.991   | 589.222   | AF147337  | 1755.015  | 1614.639  |
| NM_006476 | 69401.242 | 68222.203 | AF231919  | 1125.843  | 1024.684  | AK025203  | 47652.742 | 49919.172 |
| AK023787  | 2273.164  | 2078.122  | NM_018214 | 1659.888  | 1485.713  | AK026981  | 1939.398  | 2647.933  |
| NM_002133 | 8113.582  | 7663.037  | AL133644  | 8231.837  | 5183.474  | NM_006394 | 534.83    | 379.887   |
| NM_007177 | 15211.11  | 16326.371 | NM_002706 | 4099.015  | 4041.851  | AK023819  | 343.094   | 644.733   |
| NM_000809 | 2708.604  | 2775.693  | NM_005499 | 16525.568 | 14465.558 | AL359558  | 829.144   | 1143.605  |
| AB018258  | 663.105   | 731.953   | NM_015387 | 10331.633 | 10844.319 | AL133656  | 1835.783  | 1501.692  |
| AL359592  | 1137.307  | 941.584   | NM_001733 | 1828.731  | 1645.046  | AL050037  | 8991.715  | 8395.497  |
| NM_006078 | 9407.903  | 8820.203  | NM_005065 | 802.247   | 751.751   | NM_001417 | 22574.826 | 23923.053 |
| NM_000824 | 2878.299  | 2439.295  | NM_017825 | 14924.295 | 11753.091 | AK022236  | 3102.884  | 3417.435  |
| NM_016274 | 17141.063 | 21248.752 | NM_014035 | 2208.58   | 2216.502  | AK000073  | 603.413   | 646.862   |
| NM_014251 | 2004.384  | 1838.228  | NM_020122 | 18163.195 | 17682.738 | AK000618  | 612.44    | 592.547   |
| AK023915  | 8812.279  | 8310.835  | NM_013432 | 6962.243  | 7330.813  | X60484    | 649.64    | 786.049   |
| AK026842  | 2092.679  | 2101.047  | NM_002298 | 67183.797 | 56253.684 | AF055019  | 1196.021  | 1363.501  |
| NM_002395 | 997.683   | 899.188   | AK027130  | 558.399   | 763.857   | NM_003525 | 5247.106  | 4562.358  |
| NM_004259 | 2173.592  | 2006.498  | NM_005479 | 17803.123 | 12247.438 | AK000229  | 592.347   | 492.936   |
| NM_016271 | 8089.496  | 6076.07   | NM_005730 | 21038.172 | 15580.543 | AF056432  | 2811.539  | 2776.776  |
| NM_016619 | 3336.587  | 3136.092  | NM_005392 | 2923.186  | 1697.023  | AK001987  | 21985.838 | 25380.342 |
| NM_014481 | 2524.851  | 2791.225  | AL133572  | 6121.147  | 6200.733  | NM_013332 | 1544.485  | 2258.667  |
| U22172    | 5063.991  | 5026.147  | AK022500  | 2027.986  | 1898.724  | X56199    | 1699.785  | 1858.974  |
| AB032960  | 3234.207  | 3401.532  | BC021298  | 545.565   | 942.96    | NM_005193 | 2452.562  | 2641.315  |
| NM_014264 | 8789.598  | 9193.797  | U52096    | 4953.204  | 5470.722  | NM_017971 | 34676.816 | 27266.393 |
| AF020089  | 1917.035  | 1833.146  | AB013897  | 1550.841  | 1544.399  | AF090097  | 543.787   | 507.446   |
| NM_006257 | 5445.916  | 5497.859  | NM_005526 | 27103     | 34959.594 | AF054998  | 328.938   | 437.803   |
| NM_016281 | 11198.268 | 8744.342  | AK001669  | 1622.61   | 1656.131  | AF116620  | 7567.735  | 8730.666  |
| NM_004734 | 24519.697 | 20710.494 | NM_006195 | 501.405   | 862.067   | AF293335  | 37620.309 | 41461.777 |
| AK024793  | 2582.506  | 2159.01   | NM_006190 | 14808.425 | 14081.592 | AK024431  | 9352.201  | 10235.762 |
| AF208291  | 1677.228  | 1350.044  | NM_006368 | 6540.554  | 6350.066  | X96644    | 5697.165  | 4866.514  |
| NM_000276 | 1603.596  | 1465.296  | NM_001618 | 3506.176  | 3563.053  | Z34281    | 22596.287 | 19277.373 |
| NM_000019 | 62638.059 | 63750.762 | BC000401  | 17482.291 | 19088.318 | NM_018678 | 54291.625 | 48660.258 |
| AK023701  | 1877.137  | 1519.518  | NM_006425 | 6652.77   | 5587.271  | AJ008122  | 23671.113 | 20553.436 |
| BG491613  | 15951.498 | 18883.863 | BF344046  | 772.601   | 699.823   | NM_006220 | 893.798   | 988.532   |
| AA397813  | 57462.477 | 56992.277 | AF432218  | 12759.22  | 10167.62  | AF113211  | 790.056   | 912.914   |
| W47350    | 2312.059  | 2494.509  | NM_004286 | 2795.525  | 1963.006  | AL117568  | 1298.648  | 1431.788  |
| AI160964  | 602.152   | 617.856   | AK025082  | 2029.845  | 1080.129  | S71805    | 1160.842  | 814.321   |
| W68291    | 6955.557  | 6501.674  | AF086535  | 893.79    | 744.204   | NM_018391 | 1015.106  | 933.195   |
| N64384    | 3441.762  | 2567.823  | AB040901  | 806.249   | 1312.096  | U90917    | 616.073   | 660.407   |
| H-X 53655 | 1405.733  | 1020.601  | AL137406  | 5638.561  | 5785.666  | AK022140  | 2988.23   | 3789.944  |
| H-U 05770 | 7761.509  | 9827.638  | NM_012253 | 7050.505  | 6268.267  | AK023372  | 16419.914 | 18239.523 |
| H-M 65199 | 9017.303  | 8699.025  | NM_006876 | 2458.245  | 2351.575  | U21072    | 1410.746  | 1558.563  |
| H-M 32315 | 1055.275  | 1090.138  | NM_000293 | 1792.259  | 1680.773  | AK024377  | 461.376   | 303.349   |
| H-V00536M | 1275.856  | 1418.306  | NM_003748 | 1772.027  | 2097.409  | AK023557  | 1730.732  | 1535.949  |
| H-D85429M | 25295.025 | 30988.258 | NM_012269 | 296.042   | 654.818   | AB040887  | 2112.599  | 2616.224  |
| BF439832  | 1292.46   | 1479.342  | AF153821  | 902.376   | 1355.995  | AK025196  | 3210.607  | 3962.952  |
| BG819162  | 684.404   | 736.465   | NM_013370 | 2192.763  | 2779.435  | AK000401  | 1426.598  | 1085.005  |
| NM_017532 | 4151.903  | 5748.974  | NM_003310 | 5507.317  | 4743.021  | AF305068  | 680.012   | 691.879   |

|           |           |           |           |           |           |           |           |           |
|-----------|-----------|-----------|-----------|-----------|-----------|-----------|-----------|-----------|
| M38449    | 6470.417  | 6090.876  | AK024461  | 2313.806  | 2615.801  | AF531295  | 1647.532  | 1113.747  |
| AB033044  | 4094.179  | 3388.205  | NM_017635 | 3437.005  | 4238.016  | CY3Cy5    | 2831.529  | 194.614   |
| AB014564  | 725.19    | 784.981   | X62534    | 3113.461  | 2875.657  | BF974315  | 2762.022  | 2890.572  |
| NM_02023C | 4553.171  | 4740.859  | AF027147  | 21273.26  | 24222.148 | AI652705  | 2694.835  | 2253.338  |
| NM_006352 | 1179.354  | 1195.77   | M62399    | 5794.711  | 6341.304  | M80583    | 489.851   | 1140.812  |
| NM_01643C | 748.03    | 1162.397  | U71600    | 2068.344  | 1326.297  | AW009565  | 2737.467  | 2250.834  |
| NM_004447 | 3973.048  | 4898.458  | NM_004472 | 1630.224  | 1159.806  | X07767    | 3431.177  | 3068.695  |
| NM_001204 | 1416.422  | 1335.489  | AB037862  | 1165.258  | 923.494   | AF252284  | 1283.538  | 1169.164  |
| BF131321  | 809.019   | 863.043   | AF085924  | 748.567   | 574.472   | SR1       | 61985.801 | 45753.789 |
| NM_012116 | 2666.183  | 2563.072  | AK023887  | 703.974   | 873.843   | SR3       | 35256.723 | 18863.785 |
| NM_00002C | 5471.17   | 5072.12   | AF088022  | 8114.58   | 8420.621  | SR9       | 7532.604  | 903.252   |
| NM_000956 | 488.306   | 855.092   | AK026537  | 2553.943  | 2572.9    | CY3Cy5    | 2765.693  | 174.873   |
| NM_002442 | 3921.988  | 3745.852  | NM_015485 | 5050.447  | 5448.49   | NM_016511 | 5341.862  | 3916.405  |
| AB033091  | 7129.262  | 4733.629  | NM_002666 | 10159.42  | 9713.776  | NM_003555 | 1395.176  | 1277.557  |
| NM_004557 | 7426.066  | 6075.271  | AF202145  | 4718.056  | 5953.967  | NM_013225 | 590.955   | 1208.49   |
| NM_014757 | 21729.926 | 17825.395 | AK026155  | 1736.668  | 1461.691  | NM_016533 | 31255.783 | 21005.83  |
| NM_017893 | 942.731   | 967.04    | NM_018052 | 30166.688 | 35609.945 | NM_014751 | 4668.566  | 3655.283  |
| NM_001584 | 3011.495  | 3835.413  | AF143322  | 566.602   | 610.863   | NM_002347 | 11819.008 | 7464.998  |
| NM_012255 | 56447.816 | 59344.234 | AK022386  | 5054.849  | 5220.085  | AB046807  | 1229.912  | 965.54    |
| AF272357  | 2184.603  | 2434.895  | NM_002767 | 7527.961  | 7294.319  | M33197    | 67678.883 | 68111.852 |
| NM_016372 | 51816.082 | 55539.316 | AF131846  | 10866.345 | 11153.028 | NM_014623 | 3980.689  | 4297.907  |
| AB020705  | 2930.139  | 2870.466  | AF088069  | 3254.074  | 2375.957  | M30629    | 2870.752  | 2817.102  |
| NM_014333 | 1397.627  | 1516.155  | NM_013393 | 4324.94   | 2996.772  | NM_002625 | 854.901   | 487.757   |
| NM_00298C | 1815.812  | 1514.933  | AK025072  | 1724.723  | 1078.852  | AA190729  | 1228.152  | 837.507   |
| NM_016274 | 15786.636 | 15660.085 | AK022410  | 869.477   | 480.492   | NM_00417C | 646.702   | 481.215   |
| NM_014251 | 1918.421  | 2589.227  | L10378    | 15977.715 | 16661.012 | M33197    | 61971.809 | 68525.508 |
| NM_00045C | 518.295   | 1176.882  | AK022179  | 1037.363  | 644.396   | NM_015717 | 1093.993  | 912.448   |
| NM_000445 | 943.635   | 965.403   | AK022173  | 748.729   | 541.432   | NM_003665 | 452.09    | 362.528   |
| NM_004513 | 10377.846 | 9993.81   | AJ227860  | 3025.23   | 2923.789  | AF220217  | 340.551   | 525.66    |
| NM_001705 | 29868.197 | 29694.611 | AL157448  | 1115.608  | 1534.747  | NM_013323 | 7387.846  | 6854.477  |
| NM_017735 | 4030.055  | 3644.771  | AF026942  | 3716.177  | 3630.533  | M33197    | 1515.987  | 1464.628  |
| AF208291  | 1996.48   | 1598.848  | AJ276429  | 1405.948  | 1652.703  | NM_000853 | 1531.001  | 1055.331  |
| L10284    | 57517.953 | 51596.113 | AL117657  | 1665.246  | 1603.225  | AF016903  | 18805.184 | 13160.722 |
| NM_000276 | 1147.585  | 1434.629  | AK023589  | 1302.218  | 1634.28   | NM_015675 | 3143.572  | 3048.524  |
| NM_000019 | 58657.098 | 60325.535 | AK021590  | 1772.389  | 1631.183  | NM_01604C | 1493.117  | 1669.873  |
| AK023701  | 760.803   | 767.313   | AB002441  | 665.336   | 558.941   | NM_006597 | 29819.945 | 37395.398 |
| BE382905  | 1200.898  | 1130.274  | AK023998  | 3324.909  | 2234.479  | NM_003495 | 3267.13   | 2406.372  |
| NM_001701 | 649.414   | 592.333   | AK021643  | 944.574   | 867.542   | AB023420  | 6971.485  | 5889.798  |
| AK022558  | 5513.053  | 5541.46   | AK000872  | 1376.268  | 831.074   | NM_007342 | 3362.056  | 3236.817  |
| AK023787  | 3545.408  | 3395.356  | AK027147  | 8222.925  | 5161.444  | D25217    | 1392.461  | 1277.535  |
| NM_002133 | 6307.074  | 7350.688  | AK026084  | 1256.399  | 753.042   | NM_006351 | 5299.445  | 3866.521  |
| NM_007177 | 16663.102 | 17158.512 | AK022415  | 14181.123 | 22064.52  | M33197    | 66624.172 | 59189.113 |
| NM_000805 | 802.708   | 494.658   | AL137368  | 2085.735  | 2333.171  | NM_004683 | 3053.944  | 2698.094  |
| AB018258  | 494.771   | 644.165   | AK021932  | 999.656   | 1162.752  | AK023226  | 1152.77   | 994.768   |
| NM_000824 | 3295.254  | 3071.999  | AK026787  | 2292.87   | 3037.051  | NM_018066 | 19944.783 | 15653.381 |
| NM_017532 | 4327.81   | 4342.315  | AK023542  | 1464.799  | 1491.697  | NM_006931 | 5689.378  | 5258.442  |
| M38449    | 4220.763  | 6156.431  | AK000203  | 1014.987  | 1076.271  | NM_020344 | 4665.837  | 5249.734  |
| NM_002395 | 2181.11   | 2328.589  | AK021845  | 4359.472  | 5592.664  | AF119868  | 385.148   | 716.216   |
| NM_004255 | 3545.193  | 2749.377  | NM_018592 | 4257.191  | 3548.902  | NM_018976 | 6392.155  | 9460.269  |
| NM_016271 | 9248.613  | 8219.925  | NM_018503 | 23707.293 | 25834.059 | NM_005074 | 876.778   | 834.059   |
| NM_016619 | 3544.731  | 3541.42   | NM_016449 | 11954.88  | 11488.972 | NM_004555 | 4332.64   | 3409.079  |
| NM_014481 | 2341.659  | 1981.3    | AL049670  | 6326.478  | 5026.528  | AL079296  | 791.242   | 840.792   |
| U22172    | 4690.644  | 4016.827  | NM_018512 | 7828.76   | 7515.881  | NM_01477C | 2572.386  | 1562.719  |

|           |           |           |           |           |           |           |           |           |
|-----------|-----------|-----------|-----------|-----------|-----------|-----------|-----------|-----------|
| AB032960  | 2624.103  | 2678.927  | AK022412  | 6738.621  | 3730.34   | M33197    | 65435.988 | 68484.656 |
| NM_014264 | 7858.335  | 8470.948  | AK023073  | 4714.216  | 4250.829  | AK023103  | 2358.514  | 2573.245  |
| AF020089  | 1233.107  | 2074.359  | AK023922  | 760.284   | 408.807   | NM_01785E | 2549.91   | 2457.564  |
| NM_006257 | 5200.017  | 5998.496  | AK022438  | 1829.068  | 1151.66   | NM_01905E | 36241.645 | 35569.941 |
| NM_016281 | 13077.908 | 11139.138 | AK023764  | 1100.369  | 526.821   | D80008    | 866.846   | 933.931   |
| NM_004734 | 26824.615 | 25043.771 | AK025062  | 2802.203  | 2888.343  | AK001069  | 44701.813 | 33562.84  |
| AK024793  | 2892.277  | 2567.386  | Z27405    | 12228.751 | 14385.48  | M33197    | 62301.141 | 71984.523 |
| NM_01225E | 44624.867 | 39616.645 | AK023412  | 1416.338  | 1789.098  | NM_00035E | 8602.757  | 8340.68   |
| AF272357  | 888.089   | 616.891   | NM_014617 | 50984.199 | 50086.996 | NM_00639E | 1122.341  | 1653.362  |
| NM_01637E | 24694.221 | 25562.311 | AK074682  | 5403.62   | 5438.177  | NM_01430E | 5257.609  | 8003.816  |
| AB020705  | 1991.696  | 2627.919  | X74605    | 1187.454  | 1241.089  | NM_001084 | 1871.322  | 2184.628  |
| NM_01433E | 2884.803  | 3977.464  | AK024513  | 1023.041  | 1159.428  | NM_01862E | 5119.736  | 7313.848  |
| NM_00298C | 997.035   | 1134.154  | BC036692  | 676.482   | 1079.982  | M33197    | 65926.422 | 68417.43  |
| NM_00710E | 64859.887 | 63376.168 | AJ009640  | 2392.932  | 2089.986  | NM_005867 | 5098.155  | 7212.336  |
| BG491613  | 23599.797 | 25316.516 | AF035308  | 4282.115  | 4217.681  | AK026031  | 9564.199  | 7736.453  |
| AA397813  | 57540.895 | 57541.531 | NM_014054 | 4605.472  | 3577.159  | NM_01646E | 24751.33  | 20190.4   |
| W47350    | 2975.888  | 3249.199  | AK022228  | 2535.4    | 1985.201  | AF193873  | 4039.773  | 2280.694  |
| W68291    | 4880.528  | 4741.272  | AF086480  | 1667.443  | 1116.55   | NM_00262E | 1048.416  | 918.499   |
| N64384    | 2016.42   | 1833.042  | AK022122  | 1120.921  | 531.044   | AA190729  | 1433.684  | 1127.314  |
| H-X 53655 | 1072.134  | 849.075   | AK000806  | 30129.367 | 23094.381 | BF974315  | 2743.115  | 3357.794  |
| H-U 05770 | 5916.711  | 7092.599  | NM_016471 | 8490.265  | 9143.938  | AI652705  | 2839.364  | 2658.371  |
| H-M 65199 | 4433.125  | 5032.638  | NM_001145 | 1600.215  | 1381.995  | AW009565  | 2957.189  | 2156.103  |
| H-V00536M | 1102.67   | 1237.561  | NM_005364 | 5694.796  | 6221.931  | X07767    | 3523.201  | 4877.585  |
| H-D85429M | 24655.496 | 32619.809 | AK023482  | 5935.759  | 5692.604  | AF252284  | 1720.214  | 1944.009  |
| BF439832  | 1196.765  | 1163.171  | AK022798  | 1375.506  | 1466.109  | AL050139  | 5368.097  | 5542.794  |
| BG819162  | 763.779   | 743.716   | AK023115  | 708.549   | 709.667   | U90878    | 250.081   | 294.871   |
| NM_00272E | 797.211   | 802.617   | AK023176  | 1223.765  | 1413.393  | NM_006597 | 31507.291 | 24741.973 |
| NM_00045C | 605.128   | 766.903   | AL161991  | 18604.932 | 17387.953 | NM_01248E | 6036.924  | 4419.525  |
| NM_00044E | 657.942   | 597.736   | D17032    | 28654.305 | 24966.771 | NM_00349E | 3677.518  | 3043.885  |
| NM_00451E | 8012.345  | 7970.938  | NM_017941 | 1770.931  | 1697.73   | AB023420  | 6818.16   | 6956.852  |
| NM_00170E | 23293.676 | 35013.906 | AF301016  | 521.311   | 870.759   | NM_016511 | 6697.26   | 5034.167  |
| NM_01773E | 2642.216  | 3241.959  | AF118079  | 40976.176 | 38983.734 | NM_00355E | 1675.472  | 1087.054  |
| AB033044  | 3757.211  | 4010.007  | AL365413  | 1482.283  | 1535.672  | M33197    | 69905.227 | 68111.109 |
| AB014564  | 803.474   | 609.982   | NM_00525E | 3570.798  | 2351.741  | NM_01653E | 37259.457 | 32998.25  |
| NM_02023C | 6161.484  | 5892.872  | NM_00044C | 4016.648  | 2877.226  | NM_014751 | 6682.07   | 6852.938  |
| NM_00676E | 61886.988 | 55961.016 | NM_001297 | 2790.131  | 5722.005  | NM_002347 | 14139.733 | 15435.703 |
| NM_00635E | 2368.495  | 2005.345  | NM_00440E | 8439.749  | 17587.066 | AB046807  | 1234.458  | 1825.569  |
| NM_01643C | 1357.615  | 1666.605  | X64993    | 1058.975  | 2383.104  | M33197    | 59120.668 | 68641.109 |
| NM_004447 | 5962.181  | 6153.865  | NM_004434 | 12246.129 | 23943.475 | NM_01462E | 4892.486  | 6918.33   |
| NM_001204 | 2306.3    | 2408.947  | NM_00626E | 541.764   | 765.432   | M30629    | 3992.841  | 3748.37   |
| BF131321  | 1130.145  | 1236.827  | NM_01623C | 4605.585  | 4839.185  | M33197    | 64140.129 | 65783.844 |
| NM_012116 | 2007.804  | 2021.571  | NM_00108E | 1223.481  | 1420.097  | NM_01897E | 6935.751  | 5986.442  |
| NM_00002C | 3306.076  | 2595.483  | AK023966  | 8869.727  | 9164.729  | NM_00335E | 4706.43   | 4979.497  |
| NM_00244E | 2709.04   | 3413.329  | AK025702  | 2425.016  | 3292.061  | NM_005074 | 1085.426  | 1199.768  |
| AB033091  | 5827.154  | 6434.846  | NM_01895E | 817.907   | 914.327   | NM_018057 | 1709.968  | 1558.103  |
| NM_004557 | 4551.928  | 5480.019  | AL050200  | 708.94    | 772.199   | M33197    | 72118.383 | 67800.461 |
| NM_014757 | 19737.908 | 16857.842 | NM_002367 | 773.724   | 637.402   | NM_015717 | 901.751   | 827.999   |
| NM_01789E | 980.096   | 936.672   | AK022038  | 1398.328  | 1653.92   | NM_01332E | 6044.81   | 4842.817  |
| NM_001584 | 2743.364  | 3019.066  | AK025119  | 647.773   | 733.434   | NM_01742E | 1931.215  | 1987.302  |
| NM_00080E | 751.452   | 673.515   | AJ224170  | 854.25    | 702.904   | M33197    | 1692.9    | 1692.585  |
| AL359592  | 812.126   | 789.731   | AF085866  | 3874.854  | 2711.655  | NM_00085E | 2336.831  | 1973.953  |
| NM_000824 | 2823.628  | 3531.608  | CY3Cy5    | 2025.403  | 53.431    | AF016903  | 17828.816 | 30259.994 |
| NM_014264 | 9774.506  | 8906.278  | AA397813  | 52624.73  | 58880.094 | NM_01567E | 2836.073  | 5430.797  |



|           |           |           |             |           |           |           |           |           |
|-----------|-----------|-----------|-------------|-----------|-----------|-----------|-----------|-----------|
| AF020089  | 1471.678  | 1473.949  | W47350      | 2252.976  | 1258.654  | NM_01604C | 1641.342  | 1940.229  |
| NM_006257 | 4678.685  | 4498.535  | W68291      | 5878.165  | 6665.459  | NM_015983 | 3580.1    | 3364.295  |
| NM_016281 | 9736.065  | 9284.798  | N64384      | 1737.981  | 2035.174  | NM_018622 | 5654.397  | 3789.309  |
| NM_004734 | 23384.422 | 21800.057 | H-X 53655 I | 680.79    | 892.707   | M33197    | 69800.391 | 67938.047 |
| AK024793  | 2452.552  | 2637.229  | H-U 05770 I | 5974.346  | 5839.929  | NM_005867 | 6414.543  | 5902.235  |
| AF208291  | 1841.789  | 2192.606  | H-M 65199   | 6689.374  | 7076.759  | AK026031  | 12385.267 | 10729.759 |
| NM_000276 | 1262.275  | 1314.185  | H-M 32315   | 914.269   | 926.627   | NM_01646E | 26806.063 | 22533.568 |
| AK023701  | 1046.056  | 1102.963  | H-V00536M   | 1521.052  | 1232.546  | NM_007342 | 3683.222  | 4334.776  |
| BE382905  | 680.318   | 1084.271  | H-D85429M   | 28373.768 | 19644.752 | D25217    | 1440.375  | 1143.092  |
| NM_001701 | 3640.893  | 2766.979  | BF439832    | 1067.159  | 854.268   | NM_006351 | 4863.191  | 3854.523  |
| AK022558  | 5031.805  | 6064.335  | BG819162    | 986.033   | 651.699   | M33197    | 63058.563 | 42349.746 |
| NM_001743 | 44034.289 | 49092.133 | NM_017532   | 4219.176  | 3983.942  | NM_004683 | 3116.386  | 2188.618  |
| M38449    | 4362.521  | 4630.163  | SR2         | 49552.188 | 43382.414 | AK023226  | 1098.922  | 960.685   |
| NM_004259 | 2452.756  | 2167.89   | SR4         | 12407.533 | 11275.982 | M33197    | 69804.273 | 59903.039 |
| NM_016271 | 7654.106  | 7647.255  | SR6         | 1890.702  | 1675.145  | NM_018066 | 21825.859 | 29084.936 |
| NM_016619 | 2982.454  | 3428.822  | SR8         | 7033.475  | 20385.732 | NM_006931 | 6126.846  | 10568.446 |
| NM_014481 | 1723.281  | 2241.87   | SR10        | 24580.158 | 7474.222  | NM_020344 | 4645.05   | 7385.138  |
| U22172    | 4177.022  | 3673.702  | CY3Cy5      | 2226.884  | 115.934   | AF252284  | 1762.425  | 1474.456  |
| AB032960  | 2536.585  | 2565.763  | NM_004447   | 4560.111  | 3988.692  | M33197    | 9826.024  | 10764.377 |
| NM_017675 | 809.06    | 550.04    | NM_001204   | 723.741   | 994.974   | AL050139  | 6660.919  | 6985.703  |
| NM_015991 | 1166.695  | 894.007   | NM_012116   | 1805.169  | 1533.489  | NM_00455E | 4766.004  | 5313.085  |
| NM_002342 | 1089.874  | 1142.649  | NM_000020   | 3063.261  | 3407.636  | AL079296  | 788.632   | 750.159   |
| NM_002184 | 2525.653  | 2429.445  | NM_002442   | 4093.661  | 3092.461  | NM_01477C | 2818.518  | 1705.964  |
| NM_014883 | 2793.984  | 2827.596  | AB033091    | 3041.363  | 3358.646  | M33197    | 71980.836 | 68047.008 |
| NM_000230 | 1088.981  | 969.721   | NM_004557   | 4618.268  | 5090.465  | AK023103  | 2207.757  | 2000.406  |
| M86841    | 1312.307  | 1150.753  | NM_014757   | 12423.651 | 14231.339 | NM_01785E | 2427.711  | 2200.29   |
| U56387    | 1545.483  | 1523.634  | NM_017893   | 443.055   | 577.28    | NM_01905C | 37713.285 | 28114.615 |
| NM_003657 | 1232.178  | 826.225   | NM_001584   | 2831.117  | 1747.689  | D80008    | 1491.162  | 1414.882  |
| AL049296  | 4418.639  | 4260.598  | NM_012259   | 38476.27  | 30340.438 | X56789    | 729.365   | 1234.359  |
| NM_014471 | 43482.488 | 40724.898 | AB020705    | 2273.24   | 2636.102  | NM_00035C | 8826.053  | 10759.087 |
| NM_004397 | 1862.659  | 1815.658  | NM_014333   | 1348.453  | 1392.466  | NM_01430E | 5323.081  | 5532.876  |
| NM_003189 | 7782.412  | 7685.723  | NM_002980   | 928.779   | 991.095   | NM_001084 | 1916.785  | 1523.261  |
| NM_02023E | 2832.476  | 2412.598  | BG491613    | 15703.209 | 13339.046 | M33197    | 62363.023 | 71981.547 |
| D49356    | 536.298   | 854.856   | U53532      | 1270.811  | 1154.595  | NM_014623 | 4655.87   | 4755.322  |
| NM_018579 | 1651.667  | 1581.313  | AB006423    | 712.552   | 570.844   | NM_007244 | 3664.463  | 3661.954  |
| NM_006201 | 3777.438  | 3428.516  | NM_005719   | 58752.309 | 60168.559 | M30629    | 3588.879  | 3618.484  |
| NM_007110 | 1788.975  | 1892.425  | NM_006093   | 4401.732  | 4442.08   | AF193873  | 2088.904  | 1480.812  |
| U50383    | 11139.398 | 11091.649 | NM_00272E   | 877.398   | 779.955   | NM_00262E | 834.423   | 817.799   |
| AK025085  | 7687.152  | 7955.14   | NM_000450   | 643.147   | 516.072   | AA190729  | 1228.363  | 964.671   |
| NM_016317 | 3612.13   | 2636.863  | NM_017735   | 2314.906  | 3003.316  | BF974315  | 2438.255  | 2011.564  |
| NM_006290 | 13350.836 | 11741.516 | AB033044    | 4773.122  | 4731.43   | AI652705  | 3049.72   | 2020.911  |
| AK022290  | 4266.339  | 4129.727  | AB014564    | 840.786   | 616.319   | AI570478  | 1247.708  | 2383.736  |
| NM_004849 | 13691.314 | 16144.165 | NM_020230   | 4953.866  | 4305.303  | X07767    | 3613.399  | 3425.876  |
| AL137527  | 7818.563  | 10002.317 | NM_006762   | 54016.484 | 52526.891 | AF016903  | 21292.449 | 20976.936 |
| J04974    | 23002.551 | 21327.088 | NM_016430   | 1074.014  | 1082.145  | NM_01567E | 3255.167  | 3075.596  |
| NM_00705E | 5974.284  | 4564.377  | NM_003742   | 2858.707  | 3718.433  | NM_01604C | 1712.358  | 1680.453  |
| NM_00152E | 3105.141  | 2488.499  | NM_005094   | 2510.976  | 2941.618  | AF031136  | 44598.164 | 35455.16  |
| NM_007014 | 1084.957  | 826.779   | BE382905    | 710.203   | 859.32    | U90878    | 607.949   | 531.868   |
| AL096740  | 986.863   | 1005.351  | NM_002152   | 5997.48   | 6269.797  | NM_006597 | 33618.434 | 31494.705 |
| AF191545  | 3628.153  | 3430.327  | NM_001701   | 537.608   | 648.824   | NM_012483 | 6666.219  | 4371.457  |
| NM_014554 | 2070.069  | 2327.566  | AK022558    | 3073.212  | 2714.556  | NM_00349E | 3477.067  | 2147.133  |
| AK023968  | 3638.277  | 4014.846  | AK023787    | 2658.216  | 2445.69   | AB023420  | 6638.629  | 5414.664  |
| NM_004652 | 965.307   | 933.813   | NM_002133   | 1934.515  | 2326.607  | NM_016511 | 7817.987  | 5657.742  |

|           |           |           |             |           |           |           |           |           |
|-----------|-----------|-----------|-------------|-----------|-----------|-----------|-----------|-----------|
| AK025425  | 30450.461 | 34367.91  | NM_015697   | 3026.257  | 2408.953  | NM_00355E | 1620.141  | 1619.22   |
| AK025974  | 19455.229 | 19470.264 | AF086489    | 634.633   | 553.509   | M55337    | 1368.663  | 1227.119  |
| NM_016532 | 5914.857  | 5524.231  | NM_007177   | 11955.98  | 12118.728 | NM_01322E | 831.421   | 1124.063  |
| NM_005781 | 5145.282  | 4878.835  | AL359592    | 697.282   | 974.801   | NM_01653E | 42580.043 | 49848.211 |
| BC036740  | 11965.834 | 11978.133 | NM_00607E   | 8605.702  | 12642.888 | NM_014751 | 6533.467  | 9210.417  |
| NM_001747 | 11540.82  | 14336.505 | NM_00048E   | 1287.378  | 1566.573  | NM_002347 | 13855.807 | 12766.653 |
| AF242522  | 5132.387  | 6828.579  | NM_016274   | 13614.145 | 13758.247 | AB046807  | 1156.725  | 1233.78   |
| AJ008152  | 4262.096  | 3698.142  | NM_014251   | 1779.292  | 1605.294  | NM_01806E | 27030.801 | 28205.229 |
| NM_004024 | 5873.874  | 5129.467  | AK022750    | 6759.817  | 6819.207  | NM_006931 | 6352.915  | 6052.878  |
| X52345    | 20987.367 | 14464.813 | AK023915    | 5808.264  | 7381.907  | NM_020344 | 5511.119  | 5302.942  |
| NM_00696E | 4334.445  | 3687.793  | AB051453    | 2322.384  | 2437.887  | AF119868  | 345.902   | 438.181   |
| AF027142  | 54615.176 | 50632.711 | AK026842    | 1753.491  | 1958.2    | M33197    | 65008.262 | 67428.406 |
| AF221520  | 1723.562  | 1941.247  | NM_00239E   | 1390.256  | 1144.023  | NM_01897E | 7998.455  | 7851.68   |
| NM_006941 | 26647.986 | 26075.605 | NM_00425E   | 1821.603  | 1975.911  | NM_00335E | 4744.013  | 4712.96   |
| NM_00536C | 1355.52   | 948.935   | NM_016271   | 6994.895  | 7453.974  | NM_005074 | 960.04    | 892.822   |
| NM_00434E | 4590.049  | 4634.147  | NM_01661E   | 2187.2    | 2431.282  | NM_018057 | 1686.977  | 1090.971  |
| NM_00209E | 13271.069 | 14932.668 | NM_014481   | 2280.059  | 2317.373  | M33197    | 66836.234 | 68044.891 |
| NM_018077 | 3049.988  | 2965.479  | U22172      | 3041.676  | 5374.96   | NM_015717 | 1213.34   | 1272.596  |
| NM_01683E | 18836.961 | 18140.23  | AB032960    | 2215.207  | 2286.823  | NM_00366E | 684.555   | 797.197   |
| NM_00596E | 56355.449 | 56547.035 | NM_014264   | 7996.147  | 5860.355  | NM_01332E | 7146.854  | 8735.158  |
| AK021416  | 2751.716  | 2489.925  | AF020089    | 1613.041  | 1407.809  | NM_01742E | 2103.014  | 4204.49   |
| NM_018471 | 13691.829 | 14748.248 | NM_006257   | 5282.611  | 4772.282  | M33197    | 1908.34   | 2436.338  |
| NM_00381E | 3763.029  | 3721.12   | NM_016281   | 9813.937  | 10905.299 | NM_00085E | 2416.658  | 2973.245  |
| NM_00656C | 5426.329  | 4827.593  | NM_004734   | 18907.584 | 23367.389 | NM_00035E | 8194.968  | 7574.248  |
| NM_01618E | 3000.605  | 3190.115  | AK024793    | 1804.746  | 2566.421  | NM_00639E | 941.911   | 1124.955  |
| NM_00487E | 4107.303  | 4485.386  | AF208291    | 945.308   | 1077.239  | NM_01430E | 5101.319  | 5845.166  |
| NM_00195E | 47571.418 | 50564.707 | L10284      | 50363.445 | 40419.773 | NM_001084 | 1707.378  | 1824.725  |
| NM_004757 | 4216.834  | 4830.732  | NM_00027E   | 1172.093  | 1070.321  | NM_01598E | 4522.932  | 4647.703  |
| NM_015904 | 7083.661  | 9531.163  | NM_00001E   | 58932.328 | 68035.453 | NM_01862E | 5876.969  | 6066.136  |
| NM_01812E | 4195.389  | 3951.642  | AK023701    | 1338.219  | 1380.273  | M33197    | 73025.023 | 67849.023 |
| AF035318  | 1409.18   | 789.299   | NM_01588E   | 534.509   | 485.03    | NM_005867 | 5910.141  | 6038.75   |
| NM_01545E | 6210.936  | 4810.819  | BG491613    | 17378.34  | 14136.223 | AK026031  | 11112.245 | 7487.952  |
| AK025056  | 1287.711  | 1355.012  | AA397813    | 51823.313 | 57534.836 | NM_01646E | 24659.711 | 17552.855 |
| AF140710  | 5884.003  | 4349.057  | W47350      | 1996.805  | 1924.682  | NM_00734E | 3239.823  | 3613.983  |
| NM_01208E | 8381.006  | 8729.366  | W68291      | 6032.25   | 7789.184  | D25217    | 1375.255  | 811.743   |
| NM_017947 | 755.488   | 801.386   | N64384      | 1613.522  | 3081.506  | NM_006351 | 5342.215  | 4106.351  |
| NM_002494 | 5980.383  | 5386.855  | H-X 53655 I | 745.765   | 1160.585  | M33197    | 70342.688 | 66578.273 |
| M58510    | 10139.769 | 10522.854 | H-U 05770 I | 5493.753  | 5124.617  | NM_00468E | 3317.398  | 3225.577  |
| BE396003  | 1125.396  | 1132.801  | H-M 65199   | 5890.452  | 4920.993  | AK02322E  | 1356.88   | 2037.495  |
| AK023300  | 1856.51   | 1926.151  | H-M 32315   | 870.991   | 729.812   | AK025263  | 624.336   | 656.576   |
| NM_01808E | 1599.696  | 1681.769  | H-V00536M   | 1240.71   | 1131.718  | M33197    | 71729.813 | 61684.313 |
| NM_003904 | 5170.985  | 5755.409  | BF439832    | 1214.386  | 1227.946  | M33197    | 56748.16  | 59857.02  |
| NM_006234 | 28088.416 | 28826.254 | BG819162    | 929.877   | 683.922   | NM_01771E | 1336.601  | 1174.041  |
| AK026387  | 714.388   | 413.734   | NM_01753E   | 3725.845  | 3438.656  | NM_00486C | 2661.452  | 2895.992  |
| AB028987  | 4680.255  | 4504.628  | M38449      | 5939.87   | 5365.47   | AF217190  | 6883.249  | 5579.787  |
| NM_003594 | 1051.713  | 1238.372  | AB033044    | 2177.702  | 2390.582  | AB028981  | 37267.609 | 34406.238 |
| NM_005521 | 4133.237  | 4348.938  | AB014564    | 667.848   | 1090.257  | NM_00680C | 7208.299  | 7081.481  |
| AF164438  | 10592.426 | 11265.112 | NM_02023C   | 4816.14   | 5165.87   | NM_00247E | 913.273   | 1165.877  |
| AK022284  | 3048.957  | 3934.5    | NM_00635E   | 1354.702  | 1299.36   | NM_00272E | 3495.699  | 3487.285  |
| AB040893  | 2849.233  | 2978.07   | NM_01643C   | 907.796   | 949.502   | M33197    | 9537.181  | 6186.711  |
| AK025844  | 2104.371  | 1825.917  | NM_004447   | 5374.159  | 5071.578  | AL050139  | 5069.009  | 4449.754  |
| AL137727  | 1496.469  | 1549.063  | NM_001204   | 1208.39   | 1421.986  | NM_00455E | 4266.592  | 3421.349  |
| L17327    | 965.402   | 735.243   | BF131321    | 607.81    | 726.136   | AL079296  | 615.626   | 625.885   |

|           |           |           |           |           |           |           |           |           |
|-----------|-----------|-----------|-----------|-----------|-----------|-----------|-----------|-----------|
| AF074986  | 958.636   | 758.671   | NM_012116 | 1730.341  | 2002.622  | NM_01477C | 3282.123  | 2001.616  |
| AL049240  | 2718.756  | 2782.166  | NM_000020 | 3075.677  | 3889.877  | AK023103  | 2297.404  | 3272.132  |
| U80773    | 1383.111  | 1505.731  | NM_002442 | 3099.79   | 2332.795  | NM_01785E | 2385.841  | 3371.936  |
| AK021745  | 1530.954  | 1588.538  | AB033091  | 2780.967  | 3612.561  | NM_01905E | 41003.219 | 40220.223 |
| L38937    | 7367.923  | 6350.776  | NM_004557 | 4403.798  | 4418.194  | D80008    | 1746.45   | 2510.411  |
| U90907    | 1768.371  | 1622.414  | NM_017893 | 809.254   | 595.39    | AK001069  | 49027.664 | 44244.656 |
| AK024327  | 2405.085  | 2069.036  | NM_001584 | 2771.227  | 2371.226  | NM_004132 | 3151.887  | 2715.153  |
| AK021700  | 502.121   | 524.327   | NM_012259 | 37264.535 | 30456.012 | NM_014844 | 3069.67   | 2121.546  |
| AK000801  | 4098.501  | 4011.864  | AF272357  | 1158.804  | 1242.262  | M33197    | 58284.836 | 66303.914 |
| D85433    | 7528.101  | 8457.507  | NM_016372 | 31099.439 | 26208.947 | NM_018492 | 4167.463  | 5075.523  |
| AF086184  | 14598.181 | 12874.989 | AB020705  | 2176.798  | 1872.877  | NM_00134E | 2994.643  | 2932.861  |
| NM_01827E | 6847.498  | 6208.586  | NM_014333 | 1180.049  | 1094.072  | NM_00314E | 2309.468  | 2714.603  |
| AL049266  | 8430.726  | 8982.97   | NM_002980 | 1100.984  | 994.505   | NM_003377 | 9366.768  | 7912.624  |
| AF088045  | 1159.877  | 1473.252  | NM_000482 | 702.38    | 742.943   | NM_00222C | 7513.291  | 5912.069  |
| AF007149  | 1412.718  | 2548.312  | NM_016274 | 10543.307 | 13917.075 | AB033034  | 3099.738  | 2447.783  |
| AK001469  | 2504.197  | 2393.145  | NM_01494E | 696.625   | 380.012   | D38169    | 2426.531  | 1990.726  |
| AK021627  | 1444.899  | 931.604   | NM_014251 | 2558.645  | 2898.933  | AJ293294  | 2116.782  | 1859.766  |
| AF085859  | 2197.654  | 1577.314  | AK022750  | 5858.951  | 5551.767  | NM_018171 | 1225.875  | 676.028   |
| AK026307  | 1644.423  | 1286.697  | NM_005719 | 59916.926 | 58954.883 | NM_002447 | 5581.518  | 5931.409  |
| AL049975  | 650.13    | 943.759   | NM_006093 | 4315.64   | 3472.134  | NM_01414E | 12555.447 | 17094.861 |
| AL080067  | 1162.986  | 989.393   | NM_00241E | 589.125   | 634.597   | NM_002223 | 2098.133  | 3707.422  |
| AL117464  | 4753.057  | 4782.956  | NM_00272E | 942.795   | 698.018   | NM_00549C | 3818.255  | 4648.122  |
| AL080160  | 2293.95   | 1965.014  | NM_000450 | 566.912   | 644.486   | NM_003151 | 3355.176  | 4487.682  |
| AL157477  | 4351.122  | 4031.08   | NM_00044E | 892.892   | 397.35    | NM_006811 | 6024.833  | 8382.153  |
| AB002318  | 2284.189  | 2021.476  | NM_004513 | 5705.002  | 5820.975  | NM_005601 | 1974.759  | 1913.58   |
| AL357535  | 3123.311  | 3154.964  | NM_00170E | 25930.596 | 20747.553 | NM_016151 | 3812.431  | 3833.972  |
| AL049951  | 2317.536  | 2512.656  | NM_01773E | 2369.587  | 2185.678  | NM_004324 | 1491.135  | 1266.325  |
| AK024963  | 587.051   | 859.89    | AF208291  | 669.944   | 754.354   | NM_005614 | 14925.811 | 14826.646 |
| AK023725  | 3264.525  | 3882.048  | L10284    | 46972.613 | 50361.871 | AK026270  | 951.159   | 615.859   |
| AK022936  | 3854.037  | 4161.625  | NM_00027E | 1400.132  | 1222.769  | NM_00455E | 1503.814  | 1450.211  |
| AK024385  | 4131.489  | 3925.513  | NM_000019 | 57423.488 | 66027.266 | D90075    | 561.967   | 504.861   |
| NM_01770E | 1387.941  | 1145.291  | AK023701  | 821.238   | 905.615   | M33197    | 59804.57  | 66670.891 |
| AF049615  | 845.152   | 545.988   | NM_003742 | 3665.547  | 4121.985  | AK023827  | 2054.994  | 1583.484  |
| NM_01435E | 16443.055 | 16176.901 | NM_005094 | 2982.61   | 3614.906  | AK021702  | 2266.039  | 1801.397  |
| AF009282  | 4229.12   | 3920.889  | BE382905  | 795.314   | 515.363   | NM_00388E | 1309.701  | 901.723   |
| AF024704  | 7291.717  | 7188.204  | NM_002152 | 5058.08   | 4967.243  | NM_00393E | 1088.986  | 859.279   |
| AF056431  | 1239.644  | 1212.648  | AK022558  | 3201.507  | 3950.376  | M33197    | 37660.449 | 41903.629 |
| NM_016412 | 930.799   | 1226.396  | NM_002133 | 2217.908  | 2321.809  | NM_00268E | 927.295   | 1578.772  |
| AF009293  | 1186.806  | 1163.754  | NM_015697 | 2642.359  | 2201.779  | NM_00441E | 3397.003  | 3926.894  |
| NM_00415E | 64752.441 | 54321.633 | AF086489  | 491.759   | 567.757   | NM_00727E | 17927.408 | 27237.996 |
| AF056444  | 8241.232  | 7425.885  | NM_007177 | 12465.538 | 11100.392 | NM_004723 | 2751.573  | 3820.245  |
| AK000989  | 2533.02   | 2724.636  | AB018258  | 548.618   | 444.323   | M33197    | 56669.145 | 67244.563 |
| NM_01806E | 708.332   | 771.17    | AL359592  | 768.653   | 633.899   | NM_018413 | 13694.902 | 16397.229 |
| AK021471  | 1382.832  | 1594.817  | NM_00607E | 7804.245  | 6988.336  | AB018299  | 15749.168 | 16557.938 |
| AK021709  | 1537.831  | 1474.975  | NM_000824 | 2028.419  | 2219.035  | NM_00524E | 4770.024  | 4388.211  |
| AK025109  | 3608.121  | 3542.009  | NM_017532 | 1179.587  | 1433.411  | M33197    | 61154.879 | 65252.188 |
| AK026057  | 2431.139  | 2580.044  | M38449    | 6792.937  | 6308.738  | NM_01621E | 8394.846  | 8154.154  |
| AJ008117  | 13454.534 | 8708.377  | AK023915  | 6311.97   | 6324.812  | NM_004751 | 925.17    | 681.368   |
| AJ008147  | 24380.623 | 19071.896 | AB051453  | 2015.484  | 2000.347  | AK025605  | 3429.512  | 3090.338  |
| AK024369  | 1527.487  | 1052.774  | AK026842  | 1525.885  | 1424.043  | NM_00700C | 3922.559  | 3661.719  |
| L43345    | 1133.622  | 1248.005  | NM_00239E | 1292.804  | 1120.755  | M23161    | 3924.26   | 3722.247  |
| AF180297  | 3874.721  | 4068.523  | NM_00425E | 1902.441  | 2686.513  | NM_003197 | 4814.86   | 3538.734  |
| AK023245  | 2089.884  | 2285.631  | NM_016271 | 6941.718  | 8480.337  | AF176705  | 3293.516  | 1693.459  |

|           |           |           |             |           |           |           |           |           |
|-----------|-----------|-----------|-------------|-----------|-----------|-----------|-----------|-----------|
| AF147303  | 1017.935  | 797.848   | NM_016619   | 2310.597  | 2074.355  | D29012    | 35766.777 | 32548.352 |
| S56365    | 65549.438 | 62049.188 | NM_014481   | 1829.729  | 1757.488  | NM_017414 | 1873.811  | 1876.135  |
| AF186017  | 307.971   | 1410.311  | U22172      | 3173.86   | 2522.387  | NM_012179 | 13220.233 | 10111.452 |
| AK023607  | 1469.671  | 1490.917  | AB032960    | 2370.873  | 2151.724  | NM_002793 | 5660.682  | 6355.74   |
| AL049997  | 7723.864  | 9566.03   | NM_014264   | 7987.59   | 6141.341  | NM_004788 | 1958.387  | 2510.298  |
| AK024118  | 872.449   | 1731.163  | AF020089    | 1808.111  | 1627.853  | M33197    | 61771.422 | 72212.961 |
| AL110258  | 4494.349  | 6476.37   | NM_006257   | 4685.187  | 3797.155  | AL442083  | 2730.567  | 3308.606  |
| X89657    | 587.328   | 555.518   | NM_016281   | 9467.451  | 7721.941  | D63487    | 2577.435  | 4203.208  |
| AK024509  | 2785.945  | 2824.205  | NM_004734   | 17148.279 | 16249.161 | AK097791  | 3957.488  | 5008.152  |
| NM_017847 | 4202.388  | 3150.637  | AK024793    | 1612.379  | 1787.539  | AK022705  | 1943.103  | 2968.639  |
| AL049675  | 2952.058  | 2230.8    | NM_012259   | 16274.586 | 18348.398 | NM_016404 | 4276.317  | 5544.621  |
| NM_003537 | 16566.967 | 17218.299 | AF272357    | 749.723   | 942.155   | L03426    | 3024.511  | 2534.55   |
| AF056419  | 39872.324 | 34169.816 | NM_016372   | 16302.066 | 17336.525 | M33197    | 56797.18  | 64660.625 |
| AF074983  | 1336.992  | 1401.613  | AB020705    | 2077.067  | 1964.534  | NM_020163 | 960.931   | 656.438   |
| AK024177  | 2197.985  | 1831.895  | NM_014333   | 869.774   | 991.777   | NM_000457 | 956.26    | 706.527   |
| AK024827  | 9631.886  | 10054.205 | NM_002980   | 1005.91   | 1030.696  | M34356    | 1769.05   | 1619.737  |
| AL359563  | 1977.929  | 2161.666  | NM_015886   | 1601.271  | 1708.592  | AJ133115  | 2907.424  | 2962.056  |
| NM_005304 | 1079.454  | 1153.756  | BG491613    | 13867.832 | 10847.242 | X51630    | 4639.969  | 4647.954  |
| AF085984  | 3437.334  | 4249.545  | AA397813    | 52836.832 | 58539.816 | NM_005056 | 2529.033  | 2336.984  |
| NM_014477 | 1449.192  | 1767.696  | AI160964    | 652.588   | 875.894   | AF208502  | 10470.719 | 6198.021  |
| AL109791  | 689.609   | 831.323   | W68291      | 4936.46   | 4194.019  | M33197    | 57281.031 | 58119.406 |
| AF086478  | 5540.349  | 6601.746  | N64384      | 1232.577  | 1177.843  | AF264750  | 16322.452 | 15162.065 |
| AF086022  | 1148.862  | 1256.969  | H-X 53655 I | 733.546   | 420.41    | NM_006980 | 1260.017  | 1013.625  |
| AK021514  | 59271.313 | 54061.395 | H-U 05770 I | 5308.475  | 4760.786  | AK023904  | 3189.636  | 2831.029  |
| AJ008134  | 7920.948  | 9833.363  | H-M 65199   | 6158.528  | 5084.336  | NM_017956 | 6373.781  | 7542.36   |
| S71486    | 2253.62   | 2729.041  | H-M 32315   | 966.38    | 556.139   | NM_016496 | 2121.036  | 2493.352  |
| L33808    | 31947.121 | 26860.73  | H-V00536M   | 1148.759  | 651.188   | NM_014306 | 2543.028  | 3899.082  |
| D31886    | 3775.128  | 3077.871  | H-D85429M   | 32127.764 | 20774.645 | M33197    | 47977.684 | 54637.055 |
| U92024    | 1259.314  | 694.234   | BF439832    | 1358.091  | 1172.167  | NM_004094 | 1508.153  | 1843.423  |
| AK023330  | 6797.265  | 4816.751  | BG819162    | 889.188   | 880.732   | NM_020236 | 1762.919  | 1845.856  |
| AF075071  | 1658.384  | 1408.999  | NM_000450   | 491.61    | 587.484   | AK027059  | 4645.071  | 5526.775  |
| AF001892  | 743.571   | 618.623   | NM_004513   | 4467.824  | 5101.206  | AF151109  | 6086.537  | 4756.148  |
| X93500    | 2572.252  | 2780.695  | NM_001708   | 24316.66  | 22802.596 | NM_015414 | 61467.734 | 60279.363 |
| U79271    | 2297.168  | 2255.304  | NM_017735   | 2047.047  | 1899.355  | L34070    | 4541.853  | 3940.419  |
| AK024609  | 8302.807  | 11346.043 | AB033044    | 3246.861  | 3012.124  | AF038182  | 993.442   | 1169.243  |
| AK023660  | 845.618   | 1415.932  | AB014564    | 790.024   | 779.887   | NM_016475 | 3834.175  | 3701.066  |
| NM_018120 | 12972.9   | 13279.194 | NM_020230   | 4262.573  | 4754.68   | AF086472  | 515.337   | 631.835   |
| AK026874  | 2594.943  | 2065.529  | NM_006352   | 1086.152  | 1006.286  | NM_001865 | 52370.105 | 46452.242 |
| D17217    | 2637.086  | 3394.291  | NM_016430   | 1041.268  | 984.119   | NM_006441 | 6493.538  | 5194.284  |
| AF088033  | 4288.632  | 4016.769  | NM_004447   | 4231.273  | 3679.783  | NM_001918 | 1488.411  | 958.489   |
| NM_020422 | 2706.371  | 3483.972  | NM_001204   | 1252.327  | 1325.575  | NM_018245 | 4272.052  | 3989.276  |
| AJ227897  | 586.355   | 1026.66   | BF131321    | 632.401   | 1061.763  | M33197    | 65757.805 | 66721.453 |
| AY007156  | 2283.899  | 1997.645  | NM_012116   | 1335.341  | 1491.193  | NM_012117 | 12730.36  | 16910.617 |
| AF086408  | 52852.984 | 51651.027 | NM_000020   | 2203.959  | 2043.511  | D17130    | 39294.445 | 44091.234 |
| AK023979  | 3925.097  | 3679.001  | NM_002442   | 2872.649  | 2219.837  | X76302    | 7333.879  | 11525.824 |
| CY3Cy5    | 12674.916 | 599.362   | AB033091    | 2823.36   | 3089.081  | AK026276  | 463.072   | 580.504   |
| U13738    | 1391.27   | 1781.24   | NM_004557   | 3229.134  | 3285.6    | NM_005413 | 1649.438  | 1362.137  |
| AF068236  | 51975.758 | 55367.086 | NM_014757   | 13371.42  | 13067.112 | NM_002315 | 829.097   | 696.257   |
| H94487    | 2274.741  | 2567.134  | NM_017893   | 762.681   | 826.164   | D83781    | 1167.237  | 1045.078  |
| BG681747  | 38007.547 | 49630.457 | NM_001584   | 2873.861  | 2404.595  | AL832699  | 1812.097  | 1536.563  |
| H63077    | 36569.73  | 41620.371 | AL359592    | 450.246   | 603.3     | NM_012191 | 693.839   | 429.281   |
| AA679352  | 23153.889 | 22838.783 | NM_006078   | 5846.398  | 8098.415  | AK000757  | 4526.228  | 4880.049  |
| AA437291  | 577.334   | 565.846   | NM_000824   | 2096.845  | 2594.436  | AL359577  | 1142.359  | 791.497   |

|           |           |           |           |           |           |            |           |           |
|-----------|-----------|-----------|-----------|-----------|-----------|------------|-----------|-----------|
| X04503    | 4391.576  | 3497.308  | NM_000482 | 916.01    | 1383.684  | NM_018135  | 1300.746  | 879.198   |
| D45917    | 1651.715  | 1779.141  | NM_016274 | 11217.323 | 14496.858 | NM_014805  | 3207.222  | 1795.589  |
| X52001    | 3781.802  | 3572.759  | NM_014251 | 1114.071  | 1098.943  | AF052120   | 1246.221  | 1084.25   |
| BI823872  | 16222.025 | 16579.307 | AK022750  | 6295.196  | 6262.635  | NM_014871  | 1488.537  | 1516.444  |
| AA430552  | 4571.972  | 4349.984  | AB006423  | 562.8     | 397.845   | M33197     | 59460.406 | 67245.438 |
| X66142    | 4793.883  | 3915.316  | AJ132084  | 418.721   | 243.562   | AL137552   | 1589.506  | 2582.096  |
| R45054    | 2089.378  | 1963.193  | NM_005719 | 58046.488 | 59398.098 | AK025794   | 2712.204  | 3603.836  |
| NM_000620 | 425.595   | 702.692   | NM_006093 | 3740.76   | 3583.764  | AK024522   | 879.524   | 1316.261  |
| NM_000905 | 8960.395  | 8369.853  | NM_014264 | 7629.543  | 7309.596  | M33197     | 60130.41  | 64369.992 |
| SR5       | 8663.972  | 7380.176  | AF020089  | 1189.226  | 1290.587  | AK023220   | 1075.881  | 920.624   |
| SR7       | 6338.705  | 43363.449 | NM_006257 | 4776.534  | 4207.107  | M33197     | 61934.23  | 67612.453 |
| SR9       | 21122.064 | 3533.119  | NM_016281 | 7991.021  | 8212.582  | AK024981   | 16447.654 | 15565.006 |
| CY3Cy5    | 12247.415 | 449.335   | NM_004734 | 15687.451 | 17791.949 | AK027246   | 810.461   | 953.444   |
| AF312769  | 2373.42   | 1838.776  | AF208291  | 986.044   | 1289.166  | U80766     | 4087.516  | 3392.276  |
| AB020668  | 666.712   | 1000.135  | L10284    | 46865.879 | 42434.863 | AK001638   | 1401.174  | 1346.898  |
| NM_006203 | 27477.055 | 29415.865 | NM_000276 | 1040.704  | 843.327   | AF161386   | 7146.975  | 6458.871  |
| AF309553  | 4722.019  | 4721.915  | NM_000019 | 56203.395 | 60238.066 | AK025454   | 3584.999  | 2802.917  |
| NM_003605 | 1568.79   | 1551.642  | AK023701  | 1047.984  | 993.681   | M33197     | 63586.301 | 62823.637 |
| NM_006135 | 12460.306 | 11198.87  | NM_003742 | 4317.288  | 3808.448  | X05826     | 5808.516  | 3881.219  |
| NM_003993 | 2349.084  | 2214.017  | NM_005094 | 3115.379  | 3360.838  | AJ001872   | 2469.093  | 2744.828  |
| NM_018961 | 5300.068  | 5103.311  | BE382905  | 898.004   | 584.538   | M33197     | 61687.641 | 69375.75  |
| NM_005586 | 2453.171  | 2216.045  | NM_002152 | 5314.924  | 5361.081  | NM_005595  | 1171.407  | 1393.133  |
| NM_006895 | 2913.383  | 2529.893  | AK022558  | 3155.006  | 2754.48   | AK023636   | 4660.065  | 3622.282  |
| NM_001130 | 69594.414 | 63895.359 | AK023787  | 2059.26   | 1858.206  | D25272     | 810.886   | 655.972   |
| NM_002975 | 4719.917  | 5380.871  | NM_002133 | 1992.716  | 1883.595  | M33197     | 61830.926 | 69163.375 |
| AK023511  | 6723.904  | 7734.579  | NM_015697 | 1920.022  | 1508.374  | NM_020165  | 2740.253  | 2610.357  |
| NM_014555 | 3937.874  | 2730.112  | NM_007177 | 13629.18  | 13676.749 | AK025931   | 49748.402 | 39572.914 |
| NM_014375 | 21777.404 | 17072.08  | M38449    | 5981.09   | 4824.773  | M33197     | 617.382   | 689.023   |
| NM_017812 | 19556.012 | 18238.17  | AK023915  | 8703.961  | 8429.092  | AK021972   | 697.139   | 565.096   |
| J03260    | 1799.059  | 1686.422  | AB051453  | 2835.817  | 3296.324  | M33197     | 64658.465 | 67802.125 |
| AB014514  | 2760.136  | 3052.832  | AK026842  | 1928.252  | 1705.586  | AK001083   | 1075.459  | 1561.573  |
| NM_002865 | 6402.618  | 5979.001  | NM_002395 | 1458.176  | 1232.857  | AK000185   | 2065.385  | 2982.089  |
| NM_003565 | 1510.034  | 1180.981  | NM_004259 | 1632.38   | 1663.732  | NM_017962  | 831.262   | 1451.31   |
| NM_003731 | 9487.35   | 10120.624 | NM_016271 | 5862.503  | 5295.907  | AK000865   | 745.579   | 855.314   |
| NM_005445 | 3133.332  | 3022.211  | NM_016619 | 2371.022  | 1925.821  | M33197     | 63389.996 | 68154.492 |
| NM_013292 | 2411.287  | 2315.088  | NM_014481 | 1930.694  | 1734.065  | AK024406   | 1047.557  | 993.237   |
| NM_002387 | 2301.367  | 2096.459  | U22172    | 3335.244  | 3266.041  | AK024568   | 4003.135  | 3939.173  |
| NM_000065 | 1060.75   | 871.718   | AB032960  | 2317.656  | 2463.778  | NM_018381  | 478.712   | 522.002   |
| AB023217  | 825.294   | 751.658   | NM_005233 | 2050.341  | 2452.092  | M33197     | 67169.305 | 67872.328 |
| L08902    | 698.466   | 879.866   | BF246606  | 512.224   | 681.261   | AK026277   | 13394.503 | 12756.346 |
| J02639    | 2823.095  | 2640.374  | NM_002342 | 862.342   | 841.665   | U10509     | 1632.203  | 1395.878  |
| NM_007263 | 8174.006  | 7833.004  | NM_003712 | 2362.566  | 3011.13   | NM_007165  | 35324.668 | 28668.527 |
| AF206020  | 2693.417  | 1802.511  | NM_002184 | 1857.006  | 1788.818  | NM_014015  | 5138.254  | 3729.118  |
| NM_014410 | 926.694   | 707.187   | NM_014883 | 2471.688  | 2046.638  | AF085956   | 2742.26   | 2288.699  |
| NM_002150 | 4918.892  | 3968.08   | U56387    | 933.958   | 1081.959  | NM_019116  | 1666.275  | 1839.498  |
| NM_004595 | 12203.402 | 12739.847 | NM_003657 | 938.464   | 836.782   | AF147318   | 1295.231  | 1997.421  |
| NM_020175 | 755.359   | 538.267   | AL049296  | 3641.926  | 4464.332  | unknown (S | 574.978   | 533.604   |
| NM_002264 | 1133.606  | 1333.731  | NM_014471 | 23478.318 | 26197.838 | M33197     | 59998.875 | 64687.98  |
| NM_014754 | 23405.725 | 23329.633 | NM_004397 | 1751.382  | 1800.937  | AL137556   | 1222.911  | 1300.381  |
| D49387    | 978.463   | 1043.054  | NM_003185 | 8281.152  | 9412.001  | NM_014695  | 5515.817  | 6432.968  |
| AF050146  | 5030.067  | 4015.087  | NM_020235 | 3151.416  | 3041.215  | AL359055   | 1229.125  | 1798.577  |
| NM_000116 | 5795.932  | 4990.493  | D49356    | 828.887   | 660.158   | NM_014905  | 2759.395  | 3605.135  |
| NM_006695 | 10597.793 | 9673.814  | AJ250475  | 10010.111 | 9052.519  | AF086125   | 977.184   | 770.749   |

|           |           |           |           |           |           |           |           |           |
|-----------|-----------|-----------|-----------|-----------|-----------|-----------|-----------|-----------|
| NM_006804 | 13247.304 | 12530.774 | NM_018579 | 1883.43   | 2161.62   | U67847    | 1857.334  | 1502.795  |
| NM_015969 | 11470.593 | 11666.704 | NM_006201 | 4223.365  | 6243.687  | AL137321  | 4396.756  | 3166.581  |
| NM_003051 | 4302.682  | 4724.416  | NM_007110 | 2181.512  | 2536.029  | M33197    | 60539.449 | 64024.133 |
| NM_145342 | 7711.269  | 7498.916  | NM_001255 | 22464.088 | 26947.076 | AK024207  | 3111.177  | 1908.405  |
| AJ278917  | 16969.281 | 17168.436 | U50383    | 12735.2   | 18201.391 | AK021843  | 885.449   | 630.035   |
| AK025641  | 40139.305 | 38885.496 | AK025085  | 7712.881  | 10466.514 | AF075025  | 1872.084  | 2034.985  |
| AK025886  | 1629.104  | 1486.806  | NM_006290 | 10821.352 | 10643.424 | AF088008  | 1479.153  | 2281.665  |
| NM_003058 | 746.851   | 457.757   | AK022290  | 750.131   | 670.973   | AK023528  | 646.244   | 1181.862  |
| NM_001720 | 1292.822  | 1159.948  | NM_003680 | 48479.914 | 46970.617 | AK023043  | 912.253   | 1770.406  |
| NM_018390 | 2599.702  | 2660.165  | AF118124  | 5834.625  | 5595.977  | M33197    | 59606.891 | 67956.469 |
| AB037724  | 5278.619  | 5657.114  | NM_004849 | 10238.181 | 9535.3    | AF147349  | 6014.418  | 8301.834  |
| AK025086  | 1225.65   | 1161.753  | AL137527  | 6767.152  | 5479.213  | AL050346  | 15363.854 | 21863.398 |
| AK026151  | 4704.979  | 4594.344  | J04974    | 19135.223 | 17957.527 | AK001520  | 2422.815  | 5246.794  |
| NM_014140 | 3652.058  | 3964.01   | NM_007058 | 3720.725  | 4630.809  | D90070    | 4792.007  | 4568.691  |
| NM_002916 | 6848.004  | 7041.038  | NM_001528 | 1373.185  | 1576.168  | M33197    | 49530.543 | 41172.691 |
| M20700    | 8059.878  | 8208.123  | NM_007014 | 1423.084  | 2046.862  | AF086179  | 790.756   | 1714.722  |
| NM_001034 | 16616.49  | 18434.557 | AL096740  | 919.022   | 1247.757  | AK025807  | 2400.909  | 4962.337  |
| NM_002689 | 1536.337  | 1931.268  | AF191545  | 3123.885  | 3300.602  | M33197    | 57526.988 | 60303.086 |
| NM_017686 | 2551.91   | 2846.724  | NM_014554 | 3082.654  | 3269.733  | AK025266  | 3106.889  | 2805.844  |
| AL096734  | 816.572   | 642.577   | AK023968  | 3127.377  | 2500.344  | AK001843  | 2423.104  | 2093.04   |
| AK000800  | 2924.346  | 2706.36   | NM_004652 | 839.722   | 660.699   | AK000548  | 36127.809 | 26013.408 |
| NM_018154 | 4282.288  | 4689.972  | NM_016532 | 4348.598  | 4639.59   | NM_003920 | 14249.628 | 11979.354 |
| BC006287  | 5441.636  | 7874.285  | NM_005781 | 4530.39   | 4298.695  | NM_004787 | 14510.477 | 11583.799 |
| AB023198  | 3213.605  | 4431.106  | BC036740  | 13252.07  | 12508.075 | AF087984  | 3639.355  | 2960.768  |
| AF304163  | 15482.273 | 16592.605 | NM_001747 | 14005.484 | 13293.718 | AF009302  | 755.241   | 519.253   |
| NM_005231 | 5547.72   | 6918.547  | NM_001148 | 9912.532  | 12402.257 | M33197    | 57014.457 | 63120.043 |
| AF064729  | 3875.807  | 3245.521  | AF242522  | 7012.956  | 5540.819  | AK022273  | 2855.644  | 3555.871  |
| NM_005412 | 18657.293 | 17183.957 | AJ008152  | 2916.912  | 2968.357  | NM_015882 | 1225.675  | 1187.204  |
| NM_012113 | 2333.418  | 2615.059  | NM_004024 | 3553.959  | 2711.119  | AK027161  | 405.39    | 975.769   |
| NM_002725 | 1414.228  | 1304.102  | X52345    | 7574.863  | 7053.993  | AK024271  | 1246.362  | 2116.198  |
| NM_014375 | 21615.707 | 18086.93  | NM_006965 | 3480.524  | 3443.672  | AK021650  | 5747.963  | 11837.566 |
| NM_017812 | 19756.605 | 21341.717 | AF027142  | 46889.453 | 54554     | AL050210  | 2181.364  | 2336.334  |
| AF204173  | 640.38    | 684.235   | AF221520  | 2457.546  | 2350.557  | L37699    | 1324.176  | 1894.549  |
| J03260    | 1640.129  | 1770.592  | NM_006941 | 36272.871 | 40322.41  | M33197    | 62059.781 | 69460.898 |
| U13738    | 1648.302  | 1663.652  | NM_005360 | 1200.856  | 1333.464  | AL050173  | 954.579   | 1750.883  |
| AF068236  | 57584.855 | 56746.043 | NM_004349 | 4654.717  | 4449.8    | D80002    | 905.899   | 606.875   |
| H94487    | 2514.311  | 2207.271  | NM_002092 | 10674.742 | 10215.837 | U17637    | 3735.105  | 3386.423  |
| BG681747  | 40352.184 | 46413.305 | NM_018077 | 2355.053  | 1839.325  | NM_003548 | 463.731   | 909.325   |
| H63077    | 39710.254 | 49049.254 | NM_016839 | 12841.414 | 11537.503 | M33197    | 58153.223 | 62834.074 |
| AA679352  | 21118.803 | 24873.803 | NM_005968 | 53201.43  | 60004.172 | NM_018272 | 7223.402  | 12269.614 |
| X04503    | 3903.503  | 4154.257  | AK021416  | 2096.477  | 2444.445  | CY3Cy5    | 2492.326  | 94.093    |
| D45917    | 1800.559  | 1717.58   | NM_018471 | 13229.506 | 12374.986 | R19938    | 6420.337  | 5838.017  |
| X52001    | 3462.879  | 3297.979  | NM_003819 | 4519.709  | 5280.234  | N94487    | 4203.294  | 3661.665  |
| BI823872  | 14934.513 | 16374.195 | NM_004872 | 4054.916  | 3368.984  | AI886795  | 3794.956  | 6513.14   |
| AA430552  | 4644.641  | 4547.445  | NM_001958 | 48968.727 | 52334.387 | D10495    | 1318.475  | 1236.047  |
| X66142    | 4577.519  | 5443.952  | NM_004757 | 3429.172  | 2745.33   | BF344679  | 1280.57   | 1182.17   |
| NM_005913 | 344.139   | 679.861   | NM_015904 | 6985.954  | 5168.44   | M36634    | 612.505   | 449.273   |
| R45054    | 2132.503  | 2311.408  | NM_001960 | 51773.531 | 53816.773 | M14156    | 4260.651  | 3259.692  |
| NM_000620 | 581.585   | 898.923   | NM_018122 | 3419.555  | 2988.815  | U87939    | 562.736   | 521.697   |
| NM_000905 | 11350.449 | 9119.363  | AF035318  | 828.84    | 733.565   | U86961    | 903.61    | 590.646   |
| AL117398  | 5073.945  | 4750.977  | NM_015456 | 3592.581  | 3237.153  | AK094237  | 1678.333  | 2183.067  |
| AY007158  | 68787.688 | 70687.563 | AK025056  | 921.828   | 885.04    | L07592    | 430.564   | 458.111   |
| M58050    | 8858.627  | 7657.864  | AF140710  | 3482.696  | 4765.125  | NM_006981 | 791.044   | 814.105   |

|           |           |           |           |           |           |           |           |           |
|-----------|-----------|-----------|-----------|-----------|-----------|-----------|-----------|-----------|
| NM_007263 | 10193.955 | 9773.741  | NM_012088 | 10892.996 | 11648.542 | SR2       | 49747.688 | 37848.066 |
| AF206020  | 2140.053  | 2322.254  | NM_017947 | 2153.915  | 2000.662  | SR4       | 9452.182  | 8351.026  |
| NM_014410 | 4541.498  | 4573.037  | NM_002494 | 6744.539  | 10081.028 | SR6       | 1554.044  | 1247.374  |
| AF305835  | 2297.255  | 2091.175  | NM_000782 | 742.619   | 628.652   | SR8       | 5205.591  | 19081.771 |
| AF312769  | 3103.15   | 3050.129  | BE396003  | 1462.599  | 1225.971  | SR10      | 20593.684 | 7648.445  |
| AB020668  | 869.08    | 843.205   | AK023300  | 2258.473  | 1724.871  | CY3Cy5    | 3554.38   | 136.324   |
| NM_006203 | 29480.025 | 27692.859 | NM_018082 | 1496.042  | 1380.963  | NM_007368 | 1182.474  | 596.309   |
| AF309553  | 4361.997  | 4714.917  | NM_003904 | 5080.868  | 4937.111  | NM_014776 | 2494.585  | 1989.333  |
| NM_003605 | 1402.128  | 1601.077  | NM_006234 | 25713.072 | 24589.096 | NM_006480 | 20634.492 | 18071.711 |
| NM_006138 | 12785.153 | 13337.063 | NM_003594 | 1170.021  | 1008.408  | NM_007223 | 33355.09  | 22809.027 |
| NM_003993 | 2437.991  | 2637.197  | NM_005521 | 4574.987  | 3620.091  | NM_000145 | 968.722   | 497.881   |
| NM_018961 | 5292.413  | 5409.791  | AF164438  | 9677.567  | 8592.512  | AF030107  | 809.128   | 715.161   |
| NM_005586 | 3014.567  | 3841.475  | AK022284  | 3601.796  | 2997.568  | NM_000871 | 552.6     | 465.728   |
| NM_012242 | 1486.12   | 1721.276  | AB040893  | 2433.521  | 2202.302  | M33197    | 60256.586 | 60298.148 |
| NM_006896 | 2711.21   | 2701.126  | AK025844  | 1801.493  | 1489.238  | NM_018968 | 675.431   | 529.887   |
| NM_001130 | 69602.516 | 65640.789 | AL137727  | 1502.835  | 1167.666  | AF086924  | 37942.684 | 31576     |
| NM_002975 | 5149.698  | 4765.341  | L17327    | 376.476   | 555.775   | NM_000264 | 678.258   | 559.184   |
| AK025886  | 1158.055  | 1384.898  | AF074986  | 762.843   | 530.723   | AB058740  | 5089.527  | 5094.655  |
| AB014514  | 3354.336  | 3418.835  | AL049240  | 2929.486  | 3678.223  | NM_003385 | 546.807   | 731.287   |
| NM_002865 | 5278.611  | 5777.891  | U90907    | 2945.572  | 4016.241  | NM_001888 | 651.674   | 1029.519  |
| NM_003566 | 1496.538  | 1477.997  | AK000801  | 4346.424  | 3583.827  | NM_004392 | 401.243   | 527.767   |
| NM_004249 | 628.473   | 606.224   | D85433    | 6740.356  | 5027.212  | M33197    | 56392.41  | 60257.641 |
| NM_007158 | 17909.568 | 19164.037 | AF086184  | 16768.455 | 15659.691 | NM_001154 | 7361.529  | 7502.793  |
| NM_003731 | 9726.218  | 10155.073 | NM_018275 | 5448.215  | 5513.463  | NM_001819 | 930.541   | 832.857   |
| NM_005446 | 3505.765  | 4023.382  | AL049266  | 6020.541  | 5286.115  | NM_000175 | 8738.251  | 11611.635 |
| NM_013292 | 2678.157  | 2763.34   | AF088045  | 1331.517  | 1030.881  | NM_015725 | 6559.656  | 8343.444  |
| NM_002387 | 2396.252  | 2038.831  | AF007149  | 1168.505  | 1015.137  | R61452    | 805.159   | 740.671   |
| NM_000069 | 943.634   | 809.249   | NM_014705 | 606.261   | 445.937   | NM_012455 | 3925.308  | 2377.154  |
| AB023217  | 520.178   | 1024.104  | AK001469  | 2266.57   | 2284.732  | M33197    | 59980.074 | 59932.016 |
| J02639    | 2231.396  | 2774.859  | AK021627  | 961.704   | 639.772   | NM_001716 | 900.79    | 972.939   |
| NM_005231 | 6799.833  | 6640.25   | AF085859  | 1199.405  | 1077.304  | NM_006564 | 3215.263  | 2277.225  |
| AF064729  | 2678.976  | 2756.301  | AF085888  | 477.234   | 946.985   | NM_004802 | 1016.98   | 856.885   |
| NM_005412 | 13696.487 | 14583.993 | AL080067  | 810.461   | 1185.288  | M33197    | 60528.707 | 62722.652 |
| NM_012113 | 2401.454  | 2425.212  | AL117464  | 5752.848  | 5504.804  | NM_000074 | 5227.45   | 5544.498  |
| NM_002150 | 6495.101  | 7513.548  | AL080160  | 1450.802  | 1223.123  | BF434335  | 20409.289 | 31318.088 |
| NM_004595 | 14705.513 | 14455.314 | AL157477  | 3406.584  | 2655.315  | M57627    | 600.131   | 1270.4    |
| NM_020178 | 659.481   | 679.688   | AB002318  | 1376.645  | 1096.676  | NM_002993 | 1164.593  | 2187.502  |
| NM_002264 | 1324.001  | 1554.471  | AL357535  | 3143.184  | 2558.351  | AK026946  | 994.173   | 1347.785  |
| NM_014754 | 24474.402 | 26349.986 | AL049951  | 1803.122  | 2164.333  | M33197    | 58147.516 | 59758.633 |
| D49387    | 1062.653  | 1260.019  | AK024963  | 502.512   | 619.179   | NM_003192 | 2932.268  | 2071.145  |
| AF050146  | 6181.93   | 8073.665  | AK023725  | 2477.846  | 2545.462  | NM_018449 | 2885.663  | 2793.635  |
| NM_000116 | 5337.256  | 4932.853  | AK022936  | 4352.474  | 3754.809  | AF086129  | 916.931   | 1128.951  |
| NM_006698 | 10013.284 | 11041.311 | AK024385  | 3958.596  | 3327.725  | NM_014458 | 4039.302  | 4695.016  |
| NM_006804 | 14606.753 | 12693.426 | NM_017709 | 1162.511  | 1016.337  | AF235049  | 2848.381  | 4278.325  |
| NM_015969 | 10666.074 | 11661.516 | NM_014358 | 23170.262 | 22168.633 | NM_001995 | 1270.28   | 673.41    |
| NM_003051 | 5020.906  | 4544.029  | AF009282  | 5057.087  | 4953.276  | NM_000183 | 6489.181  | 3705.293  |
| NM_145342 | 7575.811  | 8530.003  | AK000989  | 3336.063  | 3751.836  | AY004175  | 2143.968  | 1051.553  |
| AK025641  | 35212.949 | 41334.602 | AK002210  | 5525.085  | 4831.831  | M33197    | 58983.078 | 58210.34  |
| NM_000620 | 532.916   | 557.18    | AK021677  | 1314.91   | 1232.025  | NM_012327 | 2306.118  | 1855.311  |
| NM_000905 | 8351.826  | 8428.286  | AK001057  | 1126.492  | 878.316   | NM_000904 | 3538.586  | 3681.045  |
| AL117398  | 5138.709  | 5447.796  | AK021471  | 1046.78   | 1027.816  | NM_016048 | 4583.606  | 3311.072  |
| NM_001720 | 2159.1    | 1988.919  | AK021709  | 638.328   | 725.327   | NM_000375 | 6702.996  | 5098.157  |
| NM_018390 | 4955.802  | 4320.685  | AK025109  | 2105.161  | 1691.666  | NM_018849 | 2936.36   | 2411.751  |

|           |           |           |           |           |           |           |           |           |
|-----------|-----------|-----------|-----------|-----------|-----------|-----------|-----------|-----------|
| AB037724  | 8481.724  | 7370.024  | AK026057  | 2393.591  | 1965.949  | AJ000096  | 512.102   | 899.34    |
| AK025086  | 1794.805  | 1880.072  | AJ008117  | 6725.667  | 6702.389  | M16796    | 756.894   | 1361.725  |
| AK026151  | 6270.212  | 7411.714  | AJ008147  | 21537.061 | 20181.588 | AF279890  | 1238.316  | 2086.995  |
| NM_01414C | 4241.067  | 5148.774  | AK024369  | 1295.761  | 1740.059  | NM_016601 | 981.256   | 1007.927  |
| NM_00291E | 6136.367  | 8998.872  | AL049244  | 448.769   | 644.14    | NM_01790E | 7968.781  | 7436.033  |
| M20700    | 9056.181  | 9022.042  | AK023607  | 1134.654  | 1365.228  | NM_00681E | 18509.51  | 20655.748 |
| NM_00103A | 19210.703 | 21495.178 | AL049997  | 8823.679  | 5656.918  | NM_00166E | 3808.223  | 4738.442  |
| NM_00268E | 1913.237  | 1742.065  | AK024118  | 1111.661  | 793.647   | NM_00421E | 10120.523 | 10875.839 |
| NM_01768E | 2619.475  | 2698.006  | X89657    | 852.48    | 370.163   | NM_01653C | 6671.075  | 9752.932  |
| AL096734  | 637.962   | 612.379   | AK024509  | 2650.155  | 2117.992  | NM_01480A | 1143.22   | 1408.642  |
| AK000800  | 2966.375  | 2911.424  | NM_017847 | 3177.798  | 3216.285  | L40520    | 2053.757  | 1105.86   |
| NM_01815A | 4729.334  | 4852.471  | AL049675  | 1807.268  | 2075.821  | NM_00263E | 12157.783 | 8145.795  |
| NM_00535E | 785.082   | 607.561   | NM_003537 | 10072.8   | 8488.632  | M33197    | 58107.715 | 58603.145 |
| AF304163  | 15307.812 | 19064.682 | K01564    | 1838.013  | 1819.567  | NM_00287E | 4513.626  | 4295.568  |
| NM_00689E | 2332.069  | 2281.213  | AB023175  | 19082.957 | 19744.887 | NM_01772E | 1881.95   | 932.241   |
| NM_00113C | 63545.902 | 58833.891 | AL359563  | 1736.613  | 1650.048  | AK022922  | 1348.573  | 1068.232  |
| NM_00297E | 3691.626  | 4349.474  | NM_00530A | 803.202   | 1173.243  | NM_00646E | 3034.03   | 3562.461  |
| AK023511  | 6861.173  | 7005.308  | NM_014477 | 2122.141  | 1869.745  | M33197    | 60104.359 | 66628.18  |
| NM_01455E | 4236.93   | 3610.445  | AF086478  | 5203.845  | 5110.749  | NM_00261E | 4441.915  | 6212.505  |
| NM_00272E | 1439.837  | 1402.198  | AF086022  | 814.942   | 689.796   | NM_00441E | 4939.226  | 8996.724  |
| NM_01437E | 29262.969 | 21101.148 | AK021514  | 55952.949 | 52002.676 | NM_01865C | 1679.334  | 1445.241  |
| NM_01781E | 23023.15  | 24515.836 | AJ008134  | 7149.81   | 6715.212  | AK026945  | 8492.526  | 8019.534  |
| AF204173  | 761.385   | 615.821   | S71486    | 2335.791  | 1926.28   | NM_01436E | 738.87    | 705.106   |
| J03260    | 2390.333  | 2561.964  | L33808    | 17502.838 | 17630.547 | M33197    | 64393.246 | 63419.547 |
| U13738    | 2120.287  | 2090.671  | D31886    | 3295.828  | 2894.719  | NM_00139E | 17770.307 | 17617.225 |
| AF068236  | 64413.488 | 56494.227 | U92024    | 619.541   | 623.56    | AB050049  | 3055.369  | 4826.444  |
| H94487    | 3479.636  | 2769.474  | AK023330  | 4159.036  | 4521.032  | J05125    | 562.488   | 775.376   |
| BG681747  | 43482.863 | 51918.91  | AF075071  | 1739      | 2362.102  | NM_00017E | 7229.424  | 5209.311  |
| H63077    | 44057.332 | 48058     | AF001892  | 957.933   | 2342.571  | NM_01572E | 6777.629  | 4358.786  |
| AA679352  | 27556.721 | 27908.068 | X93500    | 2261.139  | 1789.498  | R61452    | 917.369   | 745.041   |
| AA437291  | 714.596   | 586.156   | U79271    | 1883.32   | 1829.846  | R19938    | 7117.94   | 6851.532  |
| X04503    | 4780.676  | 4013.521  | NM_01988E | 930.681   | 928.769   | N94487    | 4563.598  | 3928.504  |
| D45917    | 1883.667  | 1699.324  | AK024609  | 7172.934  | 6309.888  | AI886795  | 3005.6    | 2288.081  |
| X52001    | 4083.396  | 3892.795  | AK023660  | 884.133   | 704.452   | BF344679  | 719.888   | 518.758   |
| BI823872  | 15975.182 | 17355.945 | NM_01812C | 13387.186 | 11061.082 | M36634    | 637.177   | 840.143   |
| AA430552  | 5586.173  | 5656.854  | AK026874  | 1770.885  | 1247.428  | M14156    | 4503.537  | 7534.404  |
| X66142    | 4701.816  | 4547.949  | AK024178  | 696.308   | 86.179    | U86961    | 861.355   | 1649.168  |
| NM_00591E | 434.014   | 874.622   | D17217    | 1857.306  | 1489.863  | AK094237  | 2244.649  | 3031.558  |
| R45054    | 2238.554  | 2032.7    | AF088033  | 2869.552  | 1814.963  | L07592    | 473.013   | 442.793   |
| NM_002387 | 2360.871  | 2076.476  | NM_02042E | 3069.857  | 3118.817  | NM_006981 | 704.302   | 1112.315  |
| NM_00006E | 764.285   | 1025.795  | AJ227897  | 729.858   | 892.404   | NM_01844E | 3357.508  | 2119.573  |
| AB023217  | 574.699   | 725.201   | AK023628  | 659.543   | 1315.975  | AF086129  | 860.634   | 526.388   |
| L08902    | 905.419   | 771.415   | AY007156  | 1955.488  | 2472.887  | NM_01445E | 3671.042  | 2275.917  |
| J02639    | 2582.292  | 3078.106  | AF086408  | 51376.891 | 47295.668 | AF235049  | 3058.081  | 2929.427  |
| M58050    | 7985.989  | 7797.743  | AK023979  | 3758.704  | 3484.869  | M33197    | 59385.648 | 61523.125 |
| NM_00726E | 9190.085  | 8575.904  | CY3Cy5    | 7808.909  | 324.734   | NM_00736E | 1420.182  | 853.235   |
| AF206020  | 3035.074  | 2372.249  | U13738    | 1587.651  | 1631.453  | NM_01477E | 2279.968  | 1133.35   |
| NM_01441C | 967.019   | 1020.119  | AF068236  | 54647.48  | 62541.105 | NM_00648C | 21890.314 | 13421.81  |
| AF305835  | 343.27    | 773.262   | H94487    | 1554.671  | 2162.234  | NM_00722E | 35584.965 | 20302.492 |
| AF312769  | 3561.235  | 3277.837  | BG681747  | 36603.527 | 30635.621 | NM_00014E | 683.194   | 634.603   |
| AB020668  | 1066.111  | 1040.502  | H63077    | 41399.137 | 30113.977 | AF030107  | 1011.965  | 1297.733  |
| NM_00620E | 34680.469 | 35750.023 | AA679352  | 23795.893 | 18298.488 | NM_000871 | 1029.865  | 1636.329  |
| AF309553  | 5630.763  | 5649.626  | AA437291  | 691.138   | 568.135   | M33197    | 52348.309 | 60579.336 |



|           |           |           |           |           |           |           |           |           |
|-----------|-----------|-----------|-----------|-----------|-----------|-----------|-----------|-----------|
| NM_00360E | 1611.704  | 1696.997  | X04503    | 2942.915  | 2720.324  | NM_01896E | 912.716   | 1445.608  |
| NM_00613E | 13432.17  | 11976.67  | D45917    | 2003.725  | 2279.719  | NM_000264 | 628.9     | 774.18    |
| NM_00010C | 45022.027 | 45656.27  | X52001    | 3868.537  | 4095.009  | AB058740  | 5683.055  | 3983.459  |
| NM_00190C | 65834.43  | 61516.906 | BI823872  | 18048.33  | 21621.654 | M33197    | 55488.473 | 61474.441 |
| NM_00399E | 2225.09   | 2438.572  | AA430552  | 5800.476  | 9187.08   | NM_001154 | 7689.625  | 9225.904  |
| NM_018961 | 6403.143  | 5630.112  | X66142    | 3768.206  | 5480.353  | M33197    | 56274.93  | 58955.477 |
| NM_00558E | 2851.543  | 2975.589  | NM_005913 | 444.128   | 486.757   | NM_00681E | 17273.008 | 11952.959 |
| NM_01224E | 571.651   | 534.328   | R45054    | 2427.789  | 2855.548  | NM_00166E | 3462.152  | 2631.999  |
| NM_003051 | 4915.321  | 4811.584  | NM_00062C | 527.237   | 645.997   | NM_00421E | 10280.458 | 7321.766  |
| NM_14534E | 7385.638  | 7163.706  | SR9       | 16668.74  | 2516.43   | NM_01653C | 7607.319  | 11497.274 |
| AJ278917  | 14728.746 | 15327.416 | CY3Cy5    | 8528.758  | 417.12    | NM_014804 | 1718.475  | 1558.98   |
| AF016495  | 640.086   | 877.963   | AF312769  | 2395.156  | 2489      | NM_01245E | 4138.797  | 3994.09   |
| AK025641  | 43980.914 | 48207.137 | AB020668  | 1026.501  | 1098.792  | NM_00280E | 7428.624  | 8062.36   |
| AK025886  | 1439.824  | 1542.366  | NM_006203 | 28714.705 | 25649.969 | NM_00171E | 568.482   | 565.15    |
| AB014514  | 3213.619  | 3062.56   | AF309553  | 5339.786  | 3963.379  | NM_006564 | 3344.872  | 4021.211  |
| NM_00286E | 5984.793  | 5354.409  | NM_00360E | 1686.174  | 1694.718  | NM_00480E | 989.042   | 1277.334  |
| NM_00356E | 1654.112  | 1060.072  | NM_00613E | 10782.008 | 10359.37  | NM_000074 | 4819.953  | 4173.074  |
| NM_00715E | 19799.66  | 20072.746 | NM_00399E | 2257.226  | 2645.728  | BF434335  | 20001.213 | 13916.788 |
| NM_003731 | 11558.809 | 10707.395 | NM_018961 | 4183.124  | 5454.612  | NM_00299E | 622.674   | 739.834   |
| NM_00544E | 3807.914  | 3310.307  | NM_00558E | 3241.324  | 4441.119  | AK026946  | 875.365   | 709.774   |
| NM_01329E | 2934.569  | 2896.35   | NM_01224E | 675.512   | 750.482   | M33197    | 57692.613 | 58860.422 |
| AK000800  | 2586.135  | 2986.677  | NM_00689E | 2209.085  | 2692.24   | NM_00319E | 2852.042  | 2370.508  |
| NM_018154 | 3996.965  | 4247.197  | NM_00113C | 58794.148 | 66977.141 | NM_00282E | 4693.611  | 3040.263  |
| BC006287  | 5113.335  | 5582.982  | NM_00297E | 2993.062  | 3338.979  | NM_01436E | 851.978   | 430.457   |
| AB023198  | 4129.564  | 5299.013  | NM_00272E | 1152.894  | 993.609   | M33197    | 62133.18  | 59834.207 |
| AF304163  | 14813.995 | 20811.852 | NM_01437E | 13115.404 | 14517.694 | NM_00139E | 16504.9   | 10926.372 |
| NM_005231 | 5320.021  | 7007.774  | NM_01781E | 15970.823 | 14760.765 | AB050049  | 3420.988  | 2684.149  |
| AF064729  | 2588.302  | 2381.622  | AF204173  | 492.222   | 558.446   | J05125    | 1903.859  | 1286.368  |
| NM_00541E | 14489.845 | 14625.656 | J03260    | 2215.302  | 2894.246  | NM_00199E | 1474.061  | 852.787   |
| NM_012113 | 2208.176  | 2930.029  | AB014514  | 2850.089  | 3153.198  | AY004175  | 2271.268  | 1979.764  |
| NM_00215C | 7188.564  | 8208.109  | NM_00286E | 4682.645  | 5062.04   | M33197    | 55826.316 | 59351.406 |
| NM_00459E | 13991.905 | 20417.26  | NM_00356E | 1376.094  | 1089.134  | NM_01232E | 2432.965  | 1858.982  |
| NM_02017E | 688       | 850.849   | NM_00424E | 517.047   | 484.211   | NM_000904 | 4342.302  | 3838.071  |
| NM_002264 | 1272.556  | 1402.335  | NM_003731 | 11268.85  | 10380.928 | NM_01604E | 5254.892  | 4950.88   |
| NM_014754 | 23590.266 | 23201.498 | NM_00544E | 4474.426  | 4350.112  | NM_00037E | 6400.855  | 5564.593  |
| D49387    | 1338.366  | 1191.445  | NM_01329E | 4375.471  | 4356.217  | NM_01884E | 2635.879  | 2207.404  |
| AF050146  | 6640.152  | 5166.627  | NM_00238E | 2656.879  | 2374.66   | M33197    | 61702.25  | 57219.879 |
| NM_000116 | 6035.656  | 6486.944  | NM_00006E | 2087.848  | 2266.873  | AF279890  | 1252.427  | 798.954   |
| NM_00669E | 11423.773 | 15977.691 | AB023217  | 716.381   | 1091.042  | NM_00223E | 1712.013  | 1637.063  |
| NM_006804 | 15174.011 | 13960.391 | J02639    | 2257.85   | 1819.685  | NM_01206E | 1650.49   | 1467.675  |
| NM_01596E | 10698.553 | 10372.435 | NM_00726E | 8153.187  | 7564.921  | NM_00168E | 52424.348 | 45203.508 |
| NM_004517 | 3728.456  | 3994.511  | AF206020  | 1559.625  | 1643.87   | NM_016601 | 821.862   | 751.715   |
| AI017418  | 687.037   | 607.736   | NM_01441C | 1318.06   | 1096.25   | NM_01790E | 7102.528  | 5402.609  |
| NM_00067E | 2369.262  | 2813.122  | NM_00215C | 5965.47   | 5833.814  | NM_006981 | 703.965   | 463.593   |
| AF218006  | 51229.348 | 56660.551 | NM_00459E | 10427.626 | 8462.612  | M33197    | 61881.324 | 58984.488 |
| AK026935  | 17130.641 | 20170.467 | NM_02017E | 608.417   | 528.855   | AK027244  | 1304.032  | 1346.176  |
| NM_02016E | 5055.419  | 4841.529  | NM_002264 | 1461.928  | 1207.093  | L40520    | 2206.569  | 1680.531  |
| AK027124  | 49738.402 | 51902.203 | NM_014754 | 17741.275 | 15717.69  | NM_00263E | 11722.744 | 8479.702  |
| M31212    | 44309.664 | 49970.988 | D49387    | 916.038   | 1048.404  | M33197    | 49489.02  | 47533.992 |
| AL117398  | 4743.648  | 4863.387  | AF050146  | 5276.785  | 5350.49   | NM_00287E | 4833.361  | 6401.864  |
| AY007158  | 53629.332 | 58631.965 | NM_000116 | 4221.323  | 4391.282  | NM_01772E | 1820.371  | 1122.19   |
| NM_00172C | 2177.861  | 2314.973  | NM_00669E | 7145.647  | 7179.077  | AK022922  | 1432.649  | 1244.077  |
| NM_01839C | 5318.396  | 6103.756  | NM_006804 | 12466.623 | 16099.784 | NM_00646E | 3126.149  | 2705.36   |

|           |           |           |           |           |           |           |           |           |
|-----------|-----------|-----------|-----------|-----------|-----------|-----------|-----------|-----------|
| AB037724  | 10165.718 | 9066.478  | NM_015969 | 8930.86   | 9267.067  | AK024750  | 3264.625  | 3122.57   |
| AK025086  | 2131.551  | 1791.813  | NM_003051 | 6082.543  | 5943.156  | NM_000400 | 19812.063 | 16346.395 |
| AK026151  | 6552.031  | 5928.471  | NM_145342 | 5753.145  | 6383.969  | M33197    | 57420.215 | 58789.559 |
| NM_014140 | 3587.31   | 4540.526  | AJ278917  | 15745.56  | 19377.504 | NM_002613 | 3885.585  | 4001.299  |
| NM_002916 | 6946.817  | 7846.17   | AF016495  | 991.509   | 1826.725  | NM_004419 | 5093.38   | 5561.659  |
| NM_002689 | 1880.768  | 2361.119  | AK025886  | 1201.023  | 1137.655  | U47635    | 5648.354  | 5776.876  |
| NM_017686 | 2354.016  | 2578.179  | NM_001720 | 1815.595  | 2613.438  | NM_018650 | 1351.923  | 1155.535  |
| AL096734  | 1433.315  | 1366.542  | NM_018390 | 5079.677  | 4204.512  | AK026945  | 7819.555  | 7592.67   |
| NM_016645 | 6738.892  | 5791.964  | AB037724  | 5931.017  | 5188.874  | NM_001886 | 610.422   | 535.418   |
| L14723    | 17798.328 | 16956.42  | AK025086  | 2008.337  | 1772.964  | M33197    | 64115.293 | 61241.762 |
| AK024462  | 27056.342 | 26969.863 | AK026151  | 5359.704  | 4687.763  | NM_001154 | 7398.486  | 4823.781  |
| NM_005711 | 1337.906  | 1578.992  | NM_014140 | 3685.681  | 2833.089  | NM_001819 | 833.057   | 410.079   |
| NM_019601 | 707.938   | 795.23    | NM_002916 | 5880.563  | 4859.576  | NM_000175 | 7683.033  | 6942.023  |
| NM_002206 | 2134.245  | 2068.838  | M20700    | 6164.961  | 6550.456  | NM_015725 | 6610.942  | 4706.38   |
| NM_007074 | 829.076   | 747.971   | NM_001034 | 15932.491 | 14220.137 | R61452    | 949.2     | 652.535   |
| NM_002230 | 554.443   | 774.835   | NM_002689 | 1561.94   | 1542.562  | R19938    | 6268.695  | 5066.719  |
| NM_003815 | 6189.94   | 4634.964  | NM_017686 | 2104.874  | 2392.629  | N94487    | 4832.616  | 5148.812  |
| NM_001430 | 1844.067  | 1903.917  | AL096734  | 756.744   | 545.595   | AI886795  | 3197.307  | 4278.406  |
| AB010098  | 825.215   | 615.009   | AK000800  | 2374.837  | 2146.776  | D10495    | 701.531   | 819.301   |
| U17989    | 2036.433  | 2339.153  | NM_018154 | 4197.043  | 4938.235  | BF344679  | 825.684   | 640.088   |
| U62325    | 1118.466  | 1226.871  | BC006287  | 4205.335  | 4661.848  | M36634    | 824.916   | 547.079   |
| AL137595  | 897.964   | 667.035   | AB023198  | 3052.496  | 3975.899  | M14156    | 4205.019  | 5436.506  |
| NM_018026 | 1625.447  | 1739.418  | NM_005231 | 4703.736  | 4117.721  | U87939    | 551.297   | 569.967   |
| AF249267  | 58486.242 | 55449.672 | AF064729  | 1995.218  | 1815.947  | U86961    | 880.716   | 1008.352  |
| NM_004113 | 889.831   | 726.483   | NM_005412 | 12537.87  | 11940.084 | AK094237  | 1692.863  | 2162.79   |
| X84939    | 4216.313  | 3895.124  | NM_012113 | 1888.436  | 1769.454  | BF434335  | 19773.422 | 10234.035 |
| NM_018320 | 30593.199 | 29221.488 | NM_002725 | 2166.059  | 2097.446  | M57627    | 1101.293  | 879.762   |
| NM_002069 | 2560.196  | 2717.878  | NM_014375 | 14460.655 | 21059.383 | NM_002993 | 627.681   | 487.883   |
| M65066    | 9551.764  | 8957.713  | NM_017812 | 15123.279 | 13577.585 | AK026946  | 752.139   | 493.213   |
| NM_016951 | 2550.098  | 2513.145  | AF204173  | 472.766   | 699.522   | M33197    | 58562.016 | 60641.797 |
| NM_013251 | 1180.169  | 1024.44   | J03260    | 2006.234  | 1583.76   | NM_003192 | 2535.229  | 2417.127  |
| NM_006099 | 4243.33   | 3913.389  | U13738    | 1604.426  | 1492.366  | NM_018449 | 2969.13   | 3985.542  |
| AF272379  | 3258.085  | 3757.897  | AF068236  | 53537.063 | 59105.172 | AF086129  | 921.6     | 902.988   |
| NM_012326 | 1907.681  | 2323.073  | H94487    | 1436.483  | 1911.262  | NM_014456 | 4039.784  | 2913.278  |
| NM_003085 | 25645.66  | 25149.502 | BG681747  | 34049.766 | 27055.67  | AF235049  | 2995.282  | 2391.994  |
| NM_016084 | 12843.356 | 13279.476 | H63077    | 40234.391 | 30614.715 | M33197    | 60481.738 | 61630.758 |
| AF095289  | 29603.504 | 35035.176 | AA679352  | 22001.898 | 19079.924 | NM_007369 | 1192.085  | 844.275   |
| NM_005537 | 5852.394  | 6013.361  | AA437291  | 630.596   | 492.616   | NM_014776 | 2004.841  | 1831.483  |
| NM_019003 | 3514.168  | 3282.846  | X04503    | 4681.095  | 4928.129  | NM_006480 | 18345.373 | 15456.285 |
| NM_015935 | 6864.935  | 6789.721  | D45917    | 1861.693  | 2223.215  | NM_007223 | 41274.719 | 31455.082 |
| AF182412  | 1468.808  | 1408.963  | X52001    | 4247.222  | 4722.717  | NM_000145 | 659.446   | 992.663   |
| AK027200  | 2077.196  | 1903.165  | AA430552  | 4666.471  | 5471.072  | AF030107  | 1221.264  | 967.042   |
| S78372    | 850.509   | 757.361   | X66142    | 4082.59   | 4334.813  | NM_000871 | 373.578   | 715.036   |
| U03106    | 5411.964  | 8770.609  | NM_005913 | 379.599   | 360.333   | M33197    | 62115.93  | 57911.527 |
| NM_000075 | 21884.525 | 25748.031 | R45054    | 1545.167  | 1430.765  | NM_018966 | 807.054   | 1129.928  |
| NM_006845 | 27636.102 | 27038.217 | NM_000620 | 500.218   | 782.306   | NM_000264 | 651.805   | 813.918   |
| NM_014885 | 1203.327  | 1252.384  | AL117398  | 3586.197  | 3383.517  | AB058740  | 5345.099  | 4976.616  |
| M73239    | 554.876   | 650.836   | AY007158  | 54896.156 | 61896.148 | NM_003385 | 1128.433  | 1392.092  |
| NM_004945 | 5786.676  | 4888.395  | M58050    | 5104.716  | 7820.978  | AF279890  | 1044.69   | 624.902   |
| NM_020242 | 3791.518  | 4018.936  | NM_007263 | 8025.678  | 7677.57   | NM_002236 | 2122.02   | 1033.375  |
| NM_001786 | 29058.018 | 30577.689 | AF206020  | 2022.643  | 1752.155  | NM_012069 | 2023.584  | 1404.408  |
| NM_007176 | 59467.438 | 56750.645 | NM_014410 | 834.065   | 881.698   | NM_001689 | 54517.629 | 45905.801 |
| NM_017682 | 548.873   | 661.826   | AF312769  | 2333.53   | 2111.205  | NM_016601 | 1375.475  | 1601.26   |

|           |           |           |           |           |           |           |           |           |
|-----------|-----------|-----------|-----------|-----------|-----------|-----------|-----------|-----------|
| NM_002209 | 13557.424 | 11269.794 | AB020668  | 1005.211  | 917.336   | NM_01790E | 8697.615  | 10015.946 |
| NM_002291 | 877.454   | 839.411   | NM_006203 | 26194.748 | 24411.953 | M33197    | 59644.754 | 60911.738 |
| AL137477  | 8250.322  | 6462.668  | AF309553  | 5523.459  | 5054.789  | NM_00681E | 21209.297 | 30702.363 |
| AF284580  | 1028.795  | 945.876   | NM_003605 | 1809.054  | 2104.966  | NM_00166E | 4592.126  | 5260.144  |
| AK024961  | 1828.33   | 1590.239  | NM_006139 | 10310.619 | 10374.273 | NM_00421E | 11473.616 | 13480.839 |
| NM_01606E | 5503.736  | 6239.751  | NM_000100 | 37899.27  | 37381.664 | NM_01653C | 6913.948  | 6619.454  |
| NM_01425E | 1279.283  | 1453.235  | NM_018961 | 3634.851  | 4825.109  | NM_014804 | 1257.079  | 947.381   |
| NM_015967 | 3918.507  | 3927.037  | NM_00558E | 2743.159  | 3193.089  | NM_01245E | 4135.829  | 4215.468  |
| NM_00240E | 6781.619  | 5049.046  | NM_012242 | 536.267   | 737.317   | NM_00280E | 7210.443  | 7528.739  |
| NM_004994 | 17253.885 | 18175.414 | NM_00689E | 2455.117  | 2369.939  | M33197    | 65528.375 | 61741.352 |
| NM_00661C | 7741.657  | 8388.375  | NM_00297E | 3189.96   | 3761.824  | NM_00171E | 784.098   | 767.75    |
| NM_00133E | 3338.203  | 4928.783  | AK023511  | 5994.297  | 4998.823  | NM_006564 | 3636.435  | 3314.918  |
| NM_003791 | 8416.357  | 8900.473  | NM_01455E | 2991.891  | 3427.166  | NM_00480E | 1132.394  | 1220.61   |
| NM_018017 | 14237.342 | 14467.279 | NM_00161E | 57431.621 | 63117.75  | NM_000074 | 5380.935  | 5466.385  |
| AK001296  | 14001.427 | 12472.893 | AK025886  | 1426.518  | 1280.008  | M33197    | 59938.512 | 56625.402 |
| AK000173  | 1198.52   | 1116.41   | NM_00305E | 493.715   | 321.137   | NM_00261E | 4079.796  | 2479.9    |
| NM_01836E | 1902.842  | 1844.965  | AB014514  | 3104.313  | 2874.733  | NM_00441E | 5801.071  | 4005.072  |
| NM_00658E | 24261.732 | 21869.262 | NM_00286E | 4144.457  | 3889.994  | U47635    | 6189.245  | 5659.457  |
| AJ272180  | 2594.114  | 3104.859  | NM_00356E | 1464.696  | 1171.557  | NM_01865C | 1936.454  | 2038.216  |
| AK025709  | 1395.819  | 1725.481  | NM_003731 | 10600.753 | 12199.98  | AK026945  | 9458.051  | 10650.032 |
| NM_01901E | 17922.5   | 12893.021 | NM_00544E | 3945.073  | 3426.199  | NM_00282E | 5270.772  | 5668.85   |
| NM_012261 | 7908.8    | 7151.153  | NM_01329E | 3561.08   | 3083.355  | NM_01436E | 980.653   | 706.091   |
| NM_01555E | 3427.184  | 3374.828  | NM_002387 | 2784.945  | 2314.002  | M33197    | 59104.18  | 59472.012 |
| NM_01841E | 2299.122  | 2078.563  | NM_00006E | 1571.603  | 1420.599  | NM_00139E | 16989.434 | 18710.047 |
| NM_00460E | 3840.835  | 4039.353  | AB023217  | 766.172   | 759.647   | AB050049  | 3155.968  | 3526.742  |
| D70833    | 61744.996 | 58000.242 | L08902    | 564.676   | 580.897   | J05125    | 1915.511  | 1453.328  |
| NM_016621 | 1660.892  | 1815.915  | J02639    | 2388.858  | 1981.203  | NM_00199E | 1180.78   | 1442.836  |
| AB046808  | 3098.944  | 2916.385  | NM_005231 | 5000.294  | 5046.34   | NM_00018E | 6843.335  | 6173.687  |
| AK026265  | 1317.917  | 1243.968  | AF064729  | 2765.849  | 2364.595  | AY004175  | 1679.556  | 1422.594  |
| AK027179  | 977.653   | 742.738   | NM_00541E | 13906.039 | 12217.611 | M33197    | 56810.844 | 58481.699 |
| AF015313  | 504.656   | 476.904   | NM_012113 | 2046.576  | 1725.608  | NM_012327 | 2167.542  | 2394.628  |
| NM_00646E | 1164.64   | 1219.823  | NM_00215C | 4873.321  | 4735.877  | NM_000904 | 3852.761  | 4835.673  |
| NM_005681 | 2066.46   | 2238.83   | NM_00459E | 10917.946 | 8444.196  | NM_01604E | 5440.109  | 5408.798  |
| NM_01515E | 5077.039  | 5810.823  | NM_02017E | 620.626   | 661.932   | NM_00037E | 6630.141  | 7118.519  |
| NM_012384 | 3949.406  | 4489.659  | NM_002264 | 1646.747  | 1208.779  | NM_01884E | 3338.781  | 3250.126  |
| NM_00465E | 3378.836  | 4098.206  | NM_014754 | 17796.469 | 16588.969 | AJ000096  | 1383.903  | 2395.207  |
| AF233453  | 2769.989  | 2947.467  | D49387    | 854.284   | 1062.084  | M33197    | 63008.863 | 53293.855 |
| D87454    | 7830.202  | 7634.853  | AF050146  | 4842.342  | 5600.053  | M16796    | 976.663   | 1684.66   |
| NM_00702C | 1851.432  | 1945.033  | NM_000116 | 4539.65   | 6037.841  | AF015910  | 24407.064 | 15412.111 |
| NM_00071E | 5050.321  | 5605.468  | NM_00669E | 6995.772  | 11015.533 | BC009993  | 2627.035  | 1904.375  |
| NM_01605E | 3718.263  | 4158.215  | NM_006804 | 12926.095 | 15781.876 | M33197    | 60346.531 | 61017.66  |
| NM_013291 | 5403.156  | 5080.971  | NM_01596E | 8128.868  | 8495.278  | NM_016824 | 2620.929  | 2560.793  |
| NM_00293E | 11927.89  | 10585.984 | NM_003051 | 5201.522  | 5720.649  | NM_003031 | 3834.698  | 5025.32   |
| NM_014161 | 2288.716  | 2027.716  | NM_14534E | 5758.167  | 5645.932  | NM_00717C | 1241.915  | 1878.391  |
| BF312817  | 3316.72   | 2919.418  | AJ278917  | 15478.916 | 15830.444 | NM_00300E | 660.894   | 1094.593  |
| AF086491  | 7874.372  | 6738.511  | AK025641  | 39244.922 | 32911.496 | M33197    | 58104.992 | 60195.68  |
| NM_01485E | 860.483   | 822.075   | NM_00062C | 468.756   | 335.527   | AK027244  | 993.246   | 1279.027  |
| NM_00349E | 1695.501  | 1614.699  | NM_01839C | 4765.932  | 4183.425  | L40520    | 2527.635  | 3365.592  |
| NM_00378C | 39269.016 | 34472.105 | AB037724  | 5715.176  | 5987.057  | NM_00263E | 11922.762 | 17091.857 |
| NM_00019E | 14362.048 | 13349.46  | AK025086  | 2121.355  | 2008.459  | M33197    | 55381.695 | 57967.621 |
| NM_00377E | 62664.531 | 61248.957 | AK026151  | 5188.907  | 5541.241  | NM_00287E | 5606.279  | 5974.945  |
| AK023263  | 4283.18   | 4596.894  | NM_01414C | 3511.83   | 3088.165  | NM_01772E | 1761.174  | 1958.081  |
| NM_00462E | 2611.805  | 2942.394  | NM_00291E | 6051.391  | 5288.149  | AK022922  | 1630.151  | 1434.347  |

|           |           |           |           |           |           |           |           |           |
|-----------|-----------|-----------|-----------|-----------|-----------|-----------|-----------|-----------|
| AK021445  | 2669.848  | 3187.268  | M20700    | 5819.316  | 7256.321  | NM_006462 | 3310.341  | 2959.734  |
| NM_017934 | 7042.147  | 6606.834  | NM_001034 | 14865.07  | 22439.576 | AK024750  | 3519.789  | 3545.021  |
| NM_01416E | 48309.336 | 45480.938 | NM_002689 | 1443.746  | 1906.097  | NM_00040C | 21467.668 | 22149.525 |
| AF211971  | 3485.541  | 2656.494  | NM_01768E | 2111.262  | 2026.199  | NM_01588E | 2007.206  | 927.022   |
| NM_002931 | 2047.163  | 1699.196  | AL096734  | 454.496   | 591.461   | NM_01588E | 55858.227 | 42670.863 |
| NM_01344E | 47779.867 | 49332.91  | AK000800  | 2421.729  | 2428.922  | M33197    | 60575.031 | 60022.414 |
| X65232    | 43921.57  | 35242.367 | NM_018154 | 4176.24   | 3670.604  | NM_00427E | 2136.638  | 2683.943  |
| U12767    | 542.428   | 521.522   | BC006287  | 4313.801  | 5013.59   | NM_002332 | 8571.482  | 7105.303  |
| U17630    | 1055.816  | 754.039   | AB023198  | 3935.183  | 4493.441  | NM_00285E | 1875.636  | 1605.913  |
| M33782    | 955.183   | 749.057   | AF304163  | 15446.8   | 17383.486 | NM_00524E | 1386.774  | 1238.979  |
| NM_00219E | 938.805   | 665.275   | NM_00689E | 2244.862  | 1789.622  | AF161339  | 4653.958  | 4553.391  |
| NM_01775E | 8958.885  | 8024.45   | NM_00297E | 3110.695  | 2881.263  | M33197    | 61701.957 | 61577.809 |
| NM_01569E | 943.883   | 407.725   | AK023511  | 6453.543  | 4801.797  | AK000354  | 1914.936  | 1843.758  |
| AK022551  | 1956.443  | 2147.261  | NM_01455E | 2820.742  | 3340.764  | NM_014882 | 1030.222  | 1123.291  |
| AF085968  | 1209.726  | 986.812   | NM_01437E | 14332.958 | 15490.247 | NM_00083E | 831.85    | 653.609   |
| AK023665  | 671.794   | 683.596   | NM_017812 | 15339.084 | 13720.144 | M33197    | 58428.063 | 60968.906 |
| AB011136  | 2235.625  | 2243.295  | AF204173  | 611.209   | 485.882   | NM_00151C | 1083.992  | 1120.181  |
| AF085898  | 6954.137  | 6752.938  | J03260    | 2261.973  | 1998.874  | AK024474  | 5361.559  | 5680.917  |
| AL161960  | 1985.768  | 1908.042  | U13738    | 1602.427  | 1541.532  | NM_006862 | 385.042   | 543.085   |
| AL049964  | 1996.288  | 1959.577  | H63077    | 39838.043 | 31759.758 | NM_017901 | 1330.624  | 1542.929  |
| AF038184  | 593.601   | 388.34    | AA679352  | 16582.648 | 12445.235 | NM_004272 | 2596.36   | 2845.227  |
| AK023269  | 3305.703  | 2910.758  | AA437291  | 1310.909  | 1131.157  | NM_01758E | 825.931   | 540.959   |
| AF070564  | 6647.596  | 4888.776  | X04503    | 3702.876  | 3049.927  | NM_00035E | 1012.259  | 778.033   |
| AK021439  | 30103.916 | 23285.91  | D45917    | 1737.685  | 1676.204  | NM_00193C | 11398.846 | 11664.214 |
| AF052099  | 2271.641  | 2359.329  | X52001    | 3424.432  | 3180.031  | NM_001564 | 2499.269  | 1652.155  |
| AL110111  | 2272.833  | 1614.508  | BI823872  | 17164.17  | 13896.041 | M33197    | 60296.957 | 57582.449 |
| AF070543  | 1837.764  | 1449.924  | NM_002387 | 2607.745  | 3128.097  | AF263537  | 2365.146  | 2096.03   |
| NM_01477E | 4842.839  | 3918.114  | NM_00006E | 1081.224  | 1009.504  | NM_01589E | 6961.471  | 9053.979  |
| AK001171  | 18582.857 | 15283.241 | AB023217  | 729.873   | 663.232   | NM_00018E | 792.531   | 703.99    |
| AK026273  | 16601.52  | 14541.971 | L08902    | 664.758   | 455.87    | AL050050  | 1258.231  | 892.322   |
| NM_02025C | 20727.77  | 22992.627 | M58050    | 4786.499  | 4581.966  | NM_00469C | 1087.547  | 967.608   |
| AF055007  | 767.53    | 828.096   | NM_007263 | 8238.051  | 6040.779  | M33197    | 66886.414 | 65782.406 |
| NM_012337 | 1630.695  | 2228.592  | AF206020  | 1611.576  | 1267.986  | NM_013374 | 25197.404 | 24614.367 |
| AL389879  | 9742.623  | 11524.974 | NM_01441C | 882.35    | 955.44    | NM_003252 | 6867.885  | 6232.966  |
| AK022869  | 3584.642  | 4058.483  | AF312769  | 2572.403  | 2632.732  | NM_00122E | 3109.118  | 2422.115  |
| NM_016111 | 23278.572 | 20501.986 | AB020668  | 1079.287  | 912.239   | NM_016561 | 16886.184 | 17326.131 |
| AF085958  | 65090.355 | 55285.707 | AF309553  | 4695.097  | 4042.23   | NM_00122E | 1625.847  | 1828.367  |
| AF086021  | 3790.331  | 4057.724  | NM_00360E | 1326.837  | 1541.204  | NM_01424E | 22799.174 | 25445.004 |
| AL117655  | 504.078   | 738.257   | NM_00613E | 9567.469  | 9285.975  | M33197    | 58414.164 | 61703.602 |
| AK024472  | 2690.255  | 2612.618  | NM_003051 | 4171.915  | 6275.664  | AB046822  | 637.768   | 689.355   |
| NM_01797E | 5723.316  | 6082.537  | NM_001133 | 366.69    | 819.362   | M33197    | 1182.219  | 790.623   |
| U06700    | 1524.929  | 1309.352  | NM_145342 | 5743.06   | 5671.842  | NM_00030E | 1895.531  | 1416.514  |
| U63828    | 3189.733  | 2563.563  | AJ278917  | 15017.164 | 14852.79  | X69636    | 1784.242  | 1348.679  |
| Z36794    | 1492.728  | 1616.652  | AK025641  | 36538.695 | 30574.035 | M33197    | 60793.965 | 60705.809 |
| Z36828    | 10966.553 | 9130.934  | AK025886  | 1186.262  | 1225.081  | NM_004173 | 9988.575  | 9094.469  |
| AF086121  | 15069.351 | 12778.685 | NM_00305E | 473.842   | 521.388   | NM_013974 | 1430.521  | 1737.265  |
| AF086140  | 1205.239  | 1250.522  | AB014514  | 3044.593  | 3197.846  | NM_017547 | 978.551   | 1015.587  |
| AK026915  | 2200.583  | 1725.302  | NM_00286E | 4193.651  | 3684.747  | NM_003983 | 3081.99   | 3185.752  |
| AL110259  | 2232.917  | 2001.994  | NM_00356E | 1240.423  | 908.563   | AK023708  | 822.292   | 1092.927  |
| AB033100  | 16225.623 | 18662.525 | AK000800  | 2743.543  | 2625.81   | M33197    | 66643.938 | 65815.68  |
| AL390138  | 3142.885  | 3481.141  | NM_018154 | 4069.579  | 4105.66   | NM_018464 | 21985.422 | 22254.439 |
| AL137290  | 5193.386  | 6439.078  | BC006287  | 3877.197  | 4010.458  | D43948    | 2176.691  | 1945.314  |
| AK024180  | 722.673   | 694.014   | AB023198  | 3719.051  | 3013.484  | NM_01231C | 5308.689  | 5972.687  |

|           |           |           |           |           |           |           |           |           |
|-----------|-----------|-----------|-----------|-----------|-----------|-----------|-----------|-----------|
| AK023458  | 1466.937  | 1032.045  | AF304163  | 14473.853 | 12382.543 | BF382116  | 3891.806  | 2648.115  |
| AK021606  | 905.567   | 930.659   | NM_005231 | 5051.137  | 4429.043  | NM_003193 | 8110.572  | 9232.51   |
| NM_014124 | 50679.969 | 40482.977 | AF064729  | 2649.153  | 2256.247  | AF113216  | 770.684   | 581.012   |
| AF119888  | 985.474   | 1187.142  | NM_005412 | 13280.099 | 12736.554 | NM_005197 | 4017.246  | 2372.724  |
| AK001551  | 3052.556  | 2681.721  | NM_012113 | 1882.902  | 2090.18   | AL137421  | 29648.279 | 21610.822 |
| AK001825  | 1316.747  | 1074.571  | NM_002150 | 7453.726  | 7019.833  | M33197    | 59840.254 | 56158.773 |
| AK024714  | 1157.245  | 1060.055  | NM_004595 | 10826.355 | 11009.604 | NM_007241 | 1259.575  | 1472.668  |
| AK022363  | 1838.365  | 1428.507  | NM_020178 | 527.048   | 654.871   | NM_000124 | 1185.896  | 1966.363  |
| AK022485  | 839.251   | 775.075   | NM_002264 | 1350.069  | 1358.489  | NM_017996 | 2801.26   | 3665.036  |
| AK023395  | 6805.891  | 4902.517  | NM_014754 | 17495.553 | 16971.635 | NM_014517 | 1632.214  | 1371.545  |
| AK023818  | 6120.482  | 5719.03   | D49387    | 755.22    | 1200.497  | NM_005466 | 1719.742  | 1019.308  |
| AK024139  | 742.48    | 680.07    | AF050146  | 4855.75   | 4677.069  | NM_004266 | 3455.128  | 2748.807  |
| AK023895  | 1242.663  | 1243.309  | NM_000116 | 4190.285  | 4679.221  | D31765    | 1354.107  | 1444.082  |
| AK024206  | 11111.884 | 9651.391  | NM_006698 | 7965.625  | 7297.927  | NM_006107 | 6902.853  | 3962.743  |
| NM_006262 | 3355.048  | 2915.521  | AL353933  | 892.33    | 987.507   | NM_004175 | 1014.74   | 984.888   |
| AK026598  | 2875.651  | 2830.481  | NM_004517 | 4482.128  | 4089.192  | AF288288  | 12296.024 | 11231.832 |
| AK023602  | 1883.252  | 2379.71   | AI017418  | 583.691   | 654.313   | NM_017646 | 4537.811  | 4072.651  |
| NM_018097 | 36435.305 | 45755.406 | NM_000679 | 2689.26   | 2416.792  | AL050368  | 965.326   | 948.947   |
| AF130043  | 1057.307  | 1848.743  | AF218006  | 47143.391 | 48185.938 | NM_003092 | 15004.803 | 14107.554 |
| Y11167    | 2672.668  | 3552.942  | AK026935  | 16983.689 | 16867.281 | M33197    | 60415.18  | 61589.922 |
| AK026813  | 1434.204  | 1478.146  | NM_020162 | 4643      | 3510.221  | NM_005861 | 1580.635  | 1567.71   |
| AK027225  | 1183.07   | 1161.383  | AK027124  | 50316.039 | 47945.879 | NM_018848 | 1961.838  | 2140.553  |
| AK023083  | 3533.001  | 3409.139  | AB037813  | 299.86    | 506.192   | NM_003760 | 2833.17   | 3239.611  |
| AF130093  | 648.616   | 950.022   | M31212    | 42493.637 | 36831.961 | AB037759  | 918.19    | 1143.45   |
| AF116622  | 825.564   | 831.623   | AL117398  | 3335.247  | 3763.749  | AK025998  | 1537.658  | 1941.487  |
| NM_005325 | 665.368   | 987.077   | AY007158  | 49269.211 | 54979.539 | AL080080  | 7465.852  | 8204.491  |
| AF217967  | 1216.922  | 1284.432  | NM_001720 | 2280.796  | 2415.409  | NM_018482 | 1376.55   | 2678.102  |
| NM_018150 | 11069.901 | 9943.094  | NM_018390 | 5128.249  | 5568.276  | NM_017880 | 1354.75   | 1206.177  |
| NM_017918 | 14076.788 | 14599.791 | AB037724  | 6987.084  | 6986.769  | AF090945  | 2645.333  | 3411.011  |
| NM_017855 | 46483.504 | 54126.734 | AK025086  | 2248.078  | 2364.677  | M33197    | 63208.965 | 64429.449 |
| AB007954  | 2052.133  | 2025.693  | AK026151  | 5538.755  | 5633.377  | NM_001161 | 5812.097  | 6493.587  |
| AK026494  | 3583.639  | 3224.172  | NM_014140 | 4000.351  | 3797.295  | NM_004044 | 6073.738  | 5829.326  |
| AK022067  | 837.706   | 731.482   | NM_002916 | 5718.189  | 5163.214  | NM_000221 | 10991.693 | 7656.1    |
| AK023508  | 1739.45   | 1737.068  | M20700    | 6323.68   | 6341.84   | H75678    | 1011.859  | 692.998   |
| AK025840  | 2754.264  | 2367.168  | NM_001034 | 15254.43  | 14107.924 | NM_002535 | 605.887   | 331.614   |
| BC024009  | 4859.433  | 3735.884  | NM_002689 | 2060.413  | 4194.187  | AB002359  | 1285.425  | 1246.094  |
| AF128543  | 8427.903  | 8996.638  | NM_016645 | 5533.473  | 7175.56   | M33197    | 3771.367  | 4004.105  |
| AK022071  | 778.029   | 855.145   | L14723    | 9451.316  | 11400.801 | NM_002198 | 2490.041  | 3578.185  |
| NM_004188 | 1905.974  | 2431.567  | AK024462  | 18449.928 | 19310.088 | AF024693  | 1448.669  | 1733.265  |
| U84510    | 7822.948  | 9865.969  | NM_019601 | 498.355   | 444.957   | AK025905  | 746.07    | 1020.226  |
| S83198    | 25829.5   | 27473.104 | NM_002206 | 1226.552  | 1041.156  | AL121733  | 750.772   | 1154.393  |
| AF052119  | 21855.453 | 26861.832 | NM_007074 | 744.908   | 632.448   | M33197    | 52508.016 | 54378.859 |
| X94290    | 3389.859  | 3296.871  | NM_006614 | 481.149   | 278.29    | NM_014480 | 1516.091  | 1384.091  |
| AK026685  | 53522.172 | 47762.383 | NM_002230 | 581.196   | 679.661   | NM_014169 | 5069.979  | 5027.436  |
| AF090927  | 41138.141 | 39608.016 | NM_003815 | 4350.682  | 4124.634  | NM_004964 | 20458.402 | 22219.578 |
| AL137642  | 1411.69   | 1627.614  | NM_001430 | 1690.87   | 1491.83   | AL117497  | 1165.799  | 708.04    |
| AL133619  | 9038.972  | 8803.641  | AB010098  | 497.445   | 460.704   | AK023612  | 543.95    | 796.198   |
| AK025902  | 4649.872  | 4994.534  | U17989    | 1653.488  | 1474.442  | M33197    | 57464.219 | 58989.625 |
| NM_005181 | 1700.195  | 1851.776  | U62325    | 918.602   | 1086.397  | AF147360  | 581.806   | 439.101   |
| AF026945  | 670.589   | 608.367   | AL137595  | 504.683   | 593.722   | AL137269  | 5142.792  | 4639.902  |
| AF143676  | 5809.063  | 5527.459  | NM_018028 | 1041.539  | 917.556   | AK021983  | 1470.048  | 1545.396  |
| U66044    | 9969.221  | 10091.936 | AF249267  | 50053.512 | 49248.652 | Y11681    | 6582.682  | 7701.827  |
| NM_005247 | 42400.879 | 37237.742 | NM_004113 | 596.095   | 473.073   | AL110135  | 28214.783 | 24438.904 |

|             |           |           |           |           |           |           |           |           |
|-------------|-----------|-----------|-----------|-----------|-----------|-----------|-----------|-----------|
| NM_005283   | 2231.085  | 1991.973  | X84939    | 3947.607  | 3566.578  | NM_006993 | 14898.938 | 18094.926 |
| AL122089    | 3593.239  | 3499.073  | NM_018320 | 27073.119 | 22988.59  | M33197    | 62810.621 | 63940.281 |
| AA203665    | 4931.818  | 4554.011  | NM_002069 | 2272.361  | 1943.372  | AF086429  | 1762.308  | 2469.048  |
| U95646      | 1340.234  | 1298.957  | NM_016056 | 14148.058 | 11827.42  | AF086302  | 1985.535  | 2355.464  |
| Y16705      | 2713.813  | 2448.075  | AF188492  | 743.467   | 1106.613  | AF086439  | 2190.617  | 2269.91   |
| AF279775    | 7471.065  | 7100.92   | NM_013251 | 1329.574  | 2672.532  | M33197    | 55094.969 | 60017.629 |
| NM_001821   | 7309.187  | 6309.28   | NM_006099 | 2957.002  | 4900.588  | AF038171  | 668.572   | 863.862   |
| NM_005647   | 1467.771  | 1930.132  | AF272379  | 2872.38   | 3177.642  | AF052160  | 529.543   | 951.656   |
| X64978      | 16054.877 | 14775.837 | NM_012326 | 1674.846  | 1588.769  | AK026512  | 1261.652  | 1053.064  |
| NM_000912   | 49242.422 | 49024.5   | NM_003085 | 33903.691 | 33336.656 | M33197    | 60953.688 | 59803.254 |
| NM_002345   | 1733.389  | 1845.771  | NM_016084 | 12569.603 | 10100.579 | AF085969  | 463.157   | 957.158   |
| U57971      | 2754.139  | 2851.851  | AF095289  | 29612.605 | 25373.074 | AF144233  | 2504.61   | 3549.567  |
| X89673      | 1135.181  | 1403.353  | NM_005537 | 4733.516  | 3821.178  | AF085975  | 1312.949  | 1366.211  |
| AK024593    | 3250.142  | 3169.406  | NM_019003 | 3043.815  | 2905.602  | AF075103  | 689.832   | 669.23    |
| Z83934      | 1549.309  | 1522.546  | NM_015935 | 5605.247  | 5118.464  | M33197    | 60447.383 | 60138.609 |
| NM_018359   | 6453.991  | 6943.267  | AF182412  | 924.326   | 1030.341  | AL137611  | 4983.343  | 6870.86   |
| AK022020    | 2091.108  | 1798.755  | AK027200  | 1294.488  | 1383.507  | AL359566  | 23070.896 | 31046.197 |
| AK000263    | 11724.557 | 10579.382 | S78372    | 692.634   | 804.397   | AL137427  | 3002.947  | 3442.937  |
| NM_017447   | 1914.062  | 1860.06   | U03106    | 3487.894  | 4076.401  | AL157460  | 2230.929  | 2062.753  |
| AL049452    | 752.796   | 1031.781  | NM_000075 | 14533.261 | 12667.965 | M33197    | 60194.754 | 60265.863 |
| NM_016622   | 1990.415  | 2347.573  | NM_006845 | 15729.56  | 13636.614 | AF088010  | 906.732   | 682.014   |
| AK026976    | 2073.9    | 2799.414  | NM_014885 | 868.013   | 783.165   | AK026718  | 1575.764  | 2300.614  |
| AF070559    | 5976.106  | 5611.255  | NM_004945 | 5317.854  | 4528.79   | AK022035  | 4145.065  | 3891.633  |
| D42043      | 9090.872  | 8443.3    | NM_020242 | 3798.854  | 2959.493  | M33197    | 58325.762 | 59832.254 |
| CY3Cy5      | 3222.946  | 833.739   | NM_001788 | 24564.229 | 22319.758 | NM_004337 | 1571.182  | 1809.686  |
| BG744154    | 13657.061 | 16146.421 | NM_007178 | 54310.836 | 55848.836 | AK022141  | 763.548   | 416.316   |
| Z11694      | 4029.035  | 4897.548  | NM_017682 | 696.617   | 814.857   | AK023942  | 27659.844 | 27903.867 |
| Z26317      | 1543.556  | 1245.029  | NM_002291 | 961.542   | 1518.707  | M33197    | 60999.434 | 62356.957 |
| X16983      | 22062.217 | 18936.291 | AL137477  | 6352.703  | 12355.032 | AK027207  | 1139.039  | 745.722   |
| X56160      | 3024.163  | 2434.354  | AF284580  | 912.591   | 1213.452  | AK022013  | 1627.71   | 1971.715  |
| BG679991    | 911.19    | 748.523   | AK024961  | 2568.033  | 3018.204  | AK022155  | 3126.507  | 4027.158  |
| H-Y 00097 I | 6465.709  | 6022.1    | NM_016068 | 4835.522  | 4951.983  | AK022288  | 1388.024  | 1341.905  |
| H-Y 00711 I | 64304.195 | 79094.281 | NM_014256 | 1342.682  | 1467.733  | AK021916  | 472.707   | 517.935   |
| H-X 16707 I | 2008.64   | 1683.835  | NM_015967 | 2725.665  | 2671.902  | AK024201  | 642.097   | 596.819   |
| AL038354    | 36857.598 | 30656.992 | NM_012237 | 547.468   | 422.128   | AK022174  | 877.105   | 516.186   |
| R14607      | 1379.667  | 1090.633  | NM_003595 | 475.37    | 467.155   | M33197    | 61272.402 | 59572.539 |
| NM_021976   | 3068.153  | 2491.053  | NM_002409 | 6244.843  | 5504.882  | D17152    | 7885.075  | 7727.149  |
| SR2         | 57756.891 | 50620.391 | NM_004994 | 19072.459 | 16457.699 | AK024464  | 9546.432  | 10703.815 |
| SR4         | 16339.226 | 12240.383 | NM_006610 | 8651.414  | 8347.741  | M33197    | 644.545   | 475.434   |
| SR6         | 2634.007  | 1897.137  | NM_001333 | 2163.685  | 1702.011  | AK025423  | 1769.409  | 1361.264  |
| SR8         | 9344.28   | 18837.166 | NM_003791 | 5268.307  | 5268.071  | M33197    | 61523.664 | 63660.016 |
| SR10        | 33739.328 | 6417.082  | NM_018017 | 9020.679  | 9500.832  | AL049846  | 917.321   | 1162.288  |
| CY3Cy5      | 1191.971  | 106.469   | AK001296  | 8504.434  | 8700.954  | AK024161  | 891.53    | 801.127   |
| NM_003242   | 13535.796 | 16527.4   | AK000173  | 1469.392  | 1778.349  | AK021682  | 16739.807 | 19470.764 |
| U31099      | 830.507   | 529.332   | NM_018365 | 1700.097  | 1514.156  | AJ012500  | 1882.815  | 2598.416  |
| NM_001105   | 3507.507  | 2668.566  | NM_006586 | 22941.771 | 19581.623 | BC035058  | 2612.302  | 2728.768  |
| NM_005585   | 1137.378  | 921.008   | AJ272180  | 2095.983  | 1891.265  | X57566    | 3387.581  | 3363.879  |
| NM_002075   | 2601.525  | 2304.354  | AK025709  | 1205.963  | 1245.366  | M33197    | 56335.059 | 58218.023 |
| Y08756      | 10374.554 | 8705.681  | NM_019016 | 9167.281  | 11496.447 | NM_018616 | 6722.766  | 7969.373  |
| NM_005563   | 18616.67  | 14775.655 | NM_012261 | 7337.154  | 8690.223  | AK023809  | 1315.51   | 1262.991  |
| AY007090    | 973.169   | 758.557   | NM_015556 | 4365.76   | 4772.867  | M87943    | 59491.453 | 59905.859 |
| NM_005102   | 1339.24   | 1421.514  | NM_018416 | 2072.969  | 2559.476  | AL360137  | 1134.156  | 998.273   |
| NM_004518   | 1241.481  | 994.713   | NM_004606 | 4272.372  | 4289.687  | U28131    | 57179.059 | 58745.445 |

|           |           |           |           |           |           |           |           |           |
|-----------|-----------|-----------|-----------|-----------|-----------|-----------|-----------|-----------|
| NM_006501 | 1495.528  | 1080.239  | D70833    | 60624.75  | 62339.773 | AY007106  | 2889.66   | 3582.438  |
| NM_002719 | 10037.429 | 8602.579  | NM_016621 | 2459.873  | 2175.124  | M33197    | 61342.645 | 61906.246 |
| AB035356  | 567.946   | 621.805   | AB046808  | 2879.707  | 2330.108  | AL049299  | 672.33    | 1176.993  |
| AV752086  | 1390.328  | 1161.452  | AK026265  | 1195.906  | 1267.43   | NM_006088 | 44390.75  | 45913.66  |
| NM_016102 | 6605.676  | 5925.261  | AK027179  | 593.271   | 760.019   | AF130086  | 3392.694  | 3217.15   |
| NM_004376 | 4848.409  | 3798.157  | AF015313  | 358.571   | 365.322   | AK023858  | 12947.336 | 16706.031 |
| NM_000272 | 1697.403  | 1340.997  | NM_006466 | 1054.383  | 926.395   | M33197    | 54487.563 | 56787.734 |
| NM_005603 | 34448.156 | 19447.459 | NM_005681 | 2702.376  | 2275.009  | AF250920  | 1641.577  | 2320.254  |
| NM_001061 | 768.921   | 389.892   | NM_015156 | 4544.418  | 3744.35   | NM_017733 | 2710.194  | 3619.607  |
| U61741    | 1026.263  | 1724.095  | NM_012384 | 2848.694  | 2602.855  | NM_014042 | 12131.545 | 17647.648 |
| NM_012402 | 6808.852  | 7387.375  | NM_004653 | 2824.502  | 2897.681  | M33197    | 58044.699 | 57591.945 |
| M76676    | 3278.399  | 3041.68   | AF233453  | 2029.125  | 2247.658  | AK022165  | 726.854   | 355.155   |
| Z83804    | 1905.426  | 2202.432  | D87454    | 6734.045  | 6094.985  | M33197    | 57899.09  | 57369.949 |
| NM_004386 | 1730.497  | 1588.688  | NM_000713 | 6303.289  | 5500.13   | AK022372  | 2091.152  | 2735.972  |
| NM_007366 | 1465.233  | 1447.77   | NM_016055 | 3009.163  | 2909.469  | NM_00352C | 492.944   | 490.174   |
| NM_000592 | 934.75    | 881.27    | NM_013291 | 5660.646  | 4597.906  | M33197    | 58453.07  | 60567.344 |
| NM_016584 | 13426.554 | 13570.425 | NM_002936 | 11092.62  | 9917.949  | AL137658  | 18617.709 | 19499.434 |
| NM_001815 | 1536.857  | 1626.808  | NM_014161 | 2663.091  | 2487.747  | D16888    | 1029.838  | 1942.453  |
| NM_000064 | 8596.326  | 7870.194  | BF312817  | 2879.364  | 2958.703  | U79277    | 1976.841  | 1784.002  |
| NM_006725 | 6770.303  | 6145.379  | AF086491  | 3621.998  | 6065.186  | AF068298  | 3959.751  | 4691.231  |
| NM_003326 | 1615.502  | 1407.56   | NM_014856 | 919.648   | 1267.397  | Z70770    | 1557.627  | 1522.307  |
| NM_004566 | 49517.539 | 40330.57  | NM_003492 | 1870.331  | 1913.075  | AJ227900  | 3169.893  | 3603.719  |
| NM_000202 | 2476.398  | 2029.191  | NM_00378C | 37335.883 | 37559.949 | AK023242  | 844.826   | 850.645   |
| NM_005496 | 14052.308 | 9534.387  | NM_000199 | 18512.033 | 17576.838 | M33197    | 58339.164 | 62225.863 |
| NM_016608 | 809.306   | 705.349   | NM_003778 | 67307.922 | 66355.164 | CY3Cy5    | 3915.127  | 105.706   |
| NM_004817 | 1952.144  | 1192.16   | AK023263  | 3885.26   | 3709.729  | Y10802    | 622.628   | 763.905   |
| NM_018975 | 22428.854 | 14106.737 | NM_004622 | 2554.208  | 2425.242  | Y00787    | 835.409   | 619.937   |
| AB023215  | 10785.783 | 6349.348  | AK021445  | 1480.967  | 1773.16   | NM_007276 | 2586.395  | 1722.946  |
| AK021426  | 886.496   | 1485.171  | NM_017934 | 5895.71   | 5264.65   | N34462    | 1056.428  | 1274.916  |
| NM_018073 | 2963.077  | 4201.694  | NM_014168 | 34827.754 | 38093.863 | AI658778  | 916.28    | 1085.92   |
| AL137529  | 5056.938  | 6334.654  | NM_013448 | 44525.203 | 51258.621 | L19067    | 4329.693  | 3579.617  |
| NM_012332 | 1768.451  | 1744.927  | X65232    | 32375.16  | 33568.605 | Z48482    | 688.741   | 393.969   |
| AK026648  | 1941.503  | 1813.72   | U17630    | 699.492   | 556.524   | W60413    | 536.368   | 666.086   |
| NM_000497 | 1445.027  | 1367.162  | M33782    | 685.857   | 550.89    | BI823365  | 2461.356  | 2549.145  |
| NM_017421 | 1331.919  | 1690.248  | NM_017755 | 7744.541  | 8070.189  | X06318    | 4653.671  | 4918.757  |
| AK025977  | 28771.541 | 27174.68  | NM_015696 | 619.52    | 872.805   | AL834159  | 2275.424  | 2291.968  |
| AK023130  | 6248.31   | 6361.565  | AK022551  | 2483.826  | 2765.644  | NM_000164 | 16696.121 | 9031.462  |
| NM_000273 | 1283.524  | 2217.518  | AF085968  | 1034.694  | 1209.865  | SR9       | 17249.893 | 2414.6    |
| NM_002899 | 13317.005 | 12962.027 | AB011136  | 2214.118  | 1949.136  | CY3Cy5    | 4741.917  | 160.272   |
| NM_000486 | 894.062   | 1008.544  | AF085898  | 6109.317  | 6233.797  | NM_003682 | 904.638   | 652.758   |
| BE876237  | 957.396   | 1306.445  | AL442094  | 337.144   | 717.928   | NM_000207 | 787.618   | 816.578   |
| NM_005397 | 1660.546  | 1426.208  | AL161960  | 1133.117  | 969.589   | NM_016293 | 7859.095  | 7505.606  |
| NM_000806 | 7141.08   | 6049.167  | AL049964  | 1107.884  | 1429.422  | AF217525  | 257.974   | 506.227   |
| NM_00632C | 2280.606  | 1641.273  | AK023269  | 2214.299  | 2358.897  | AL080148  | 2772.103  | 2543.99   |
| AB014511  | 4488.057  | 4114.851  | AF070564  | 5191.316  | 6100.501  | NM_006731 | 686.54    | 462.82    |
| NM_014252 | 8419.758  | 6890.266  | AK021439  | 15356.424 | 23235.756 | NM_020134 | 414.455   | 355.895   |
| NM_001662 | 15104.801 | 12704.948 | AF052099  | 2870.705  | 2428.649  | NM_014061 | 711.881   | 712.06    |
| NM_016131 | 10492.864 | 8213.201  | AL110111  | 1884.279  | 1869.877  | NM_002479 | 583.758   | 679.803   |
| NM_006822 | 3087.158  | 2220.907  | AF070543  | 1084.407  | 996.062   | NM_000348 | 1376.38   | 1284.243  |
| NM_012142 | 10356.234 | 7234.809  | NM_014778 | 4075.643  | 3633.007  | NM_00495C | 1298.44   | 1921.308  |
| NM_016429 | 3054.451  | 1641.632  | AK001171  | 15360.187 | 16457.289 | NM_002557 | 6363.139  | 7038.767  |
| NM_018264 | 1599.563  | 3228.236  | AK026273  | 9447.834  | 10116.364 | NM_005662 | 32741.443 | 26070.439 |
| NM_01458C | 940.656   | 1529.14   | NM_02025C | 16566.797 | 15523.356 | NM_00306C | 597.092   | 441.055   |

|             |           |           |           |           |           |           |           |           |
|-------------|-----------|-----------|-----------|-----------|-----------|-----------|-----------|-----------|
| AB028998    | 492.552   | 783.884   | AF055007  | 464.973   | 511.532   | AK021489  | 18355.857 | 21672.859 |
| NM_000153   | 740.517   | 719.885   | NM_012337 | 1221.655  | 1362.375  | NM_003693 | 803.207   | 760.062   |
| NM_002033   | 2430.438  | 2877.163  | AL389879  | 11652.057 | 11777.036 | NM_000356 | 15896.003 | 13350.87  |
| AK091794    | 599.04    | 698.331   | AK022869  | 2781.545  | 2513.636  | NM_018134 | 24693.025 | 12424.452 |
| NM_004111   | 3073.656  | 2827.692  | NM_016111 | 20632.211 | 22522.531 | NM_013247 | 4580.159  | 4166.399  |
| AF085966    | 4828.893  | 4226.171  | AF085958  | 59277     | 62551.086 | NM_00677C | 1185.791  | 1097.158  |
| NM_005316   | 3689.318  | 4720.554  | AF086021  | 4594.592  | 4361.85   | BE394704  | 425.247   | 519.697   |
| NM_016316   | 3475.26   | 3624.669  | AL117655  | 450.959   | 582.45    | NM_004703 | 2591.415  | 2485.053  |
| NM_003369   | 8638.742  | 9148.615  | AK024472  | 2594.96   | 3172.894  | NM_001512 | 772.295   | 793.967   |
| NM_000057   | 2365.206  | 2637.868  | AF087981  | 419.217   | 563.585   | NM_014706 | 5977.794  | 7098.263  |
| NM_018343   | 5072.198  | 5459.718  | NM_017976 | 4463.981  | 6416.655  | AK023172  | 850.276   | 979.039   |
| AK095793    | 771.888   | 783.504   | U06700    | 1164.445  | 1600.383  | AF139768  | 249.26    | 606.42    |
| NM_003177   | 3404.092  | 2996.415  | U63828    | 2675.139  | 2613.252  | AJ001348  | 745.24    | 823.849   |
| NM_017719   | 1768.486  | 1254.198  | Z36794    | 1863.412  | 1763.631  | NM_014007 | 1058.6    | 1174.543  |
| AF064078    | 751.867   | 451.823   | Z36828    | 7329.484  | 6888.6    | NM_016332 | 5139.2    | 4542.086  |
| AL049688    | 1890.833  | 1222.949  | AF086121  | 13679.864 | 8741.645  | AK023936  | 339.533   | 307.384   |
| NM_002737   | 5564.586  | 4187.729  | AF086140  | 918.46    | 986.033   | NM_006457 | 1606.251  | 1924.975  |
| Z25427      | 4494.968  | 3343.256  | AK026915  | 1748.806  | 1665.154  | AF000381  | 4447.46   | 2931.298  |
| NM_004672   | 10466.464 | 8114.75   | AL110259  | 1228.296  | 1361.829  | S67798    | 453.893   | 175.526   |
| NM_001353   | 3945.387  | 2907.905  | AB033100  | 16014.606 | 13836.909 | NM_012105 | 4204.488  | 4385.511  |
| NM_006214   | 3125.174  | 1979.142  | AL390138  | 2137.85   | 2578.719  | AB028982  | 603.568   | 653.361   |
| AJ010228    | 6086.46   | 3116.191  | AL137290  | 5855.358  | 6295.852  | NM_002004 | 1504.108  | 1222.492  |
| NM_005198   | 5464.975  | 3525.013  | AK023458  | 827.716   | 1373.405  | NM_005121 | 1138.06   | 1244.976  |
| NM_006848   | 61797.887 | 65120.172 | AK021606  | 807.111   | 762.034   | NM_001643 | 17253.848 | 18286.594 |
| NM_005603   | 41477.52  | 44596.797 | NM_014124 | 48022.148 | 47424.641 | NM_020221 | 881.549   | 690.052   |
| NM_001061   | 675.583   | 853.96    | AF119888  | 1575.609  | 1631.598  | NM_000747 | 1685.796  | 1735.161  |
| BG744154    | 12688.84  | 13718.484 | AK001551  | 3380.359  | 3637.236  | NM_005415 | 2713.401  | 2917.287  |
| Z11694      | 3995.204  | 4863.945  | AK001825  | 1521.271  | 1351.92   | AJ275973  | 15962.937 | 15157.154 |
| BF983177    | 378.396   | 550.611   | AK022363  | 1438.707  | 1570.77   | NM_006493 | 3067.101  | 2768.598  |
| Z26317      | 1918.226  | 1502.682  | AK022485  | 3726.807  | 3827.129  | U76362    | 2899.181  | 2574.282  |
| X16983      | 21952.082 | 16164.779 | AK023395  | 2894.458  | 4683.24   | AF040248  | 523.578   | 542.689   |
| X56160      | 3090.514  | 2919.123  | AK023818  | 3959.31   | 3350.172  | NM_014228 | 1429.578  | 1823.579  |
| BG679991    | 989.216   | 1016.271  | AK023895  | 895.491   | 789.065   | AL832292  | 4284.235  | 3933.105  |
| H-Y 00097 I | 6713.244  | 7906.974  | AK024206  | 5061.331  | 5268.097  | NM_003045 | 6824.333  | 5279.333  |
| H-Y 00711 I | 60425.121 | 63880.176 | NM_006262 | 2935.216  | 2887.098  | NM_002618 | 2361.507  | 1573.707  |
| H-X 16707 I | 1847.053  | 1662.019  | AK026598  | 2331.591  | 2122.627  | L27479    | 1038.422  | 703.703   |
| AL038354    | 33490.516 | 29379.371 | AK023602  | 1188.938  | 1366.379  | NM_002193 | 1003.634  | 859.339   |
| R14607      | 1139.357  | 856.029   | NM_018097 | 30191.621 | 24808.068 | NM_001388 | 4482.577  | 3638.892  |
| NM_021976   | 3235.904  | 2195.209  | AF130043  | 646.641   | 573.725   | X76770    | 2184.025  | 1679.927  |
| NM_005718   | 7418.227  | 4023.357  | Y11167    | 1262.822  | 1263.997  | AB037808  | 1368.703  | 1440.79   |
| NM_005496   | 13130.338 | 14844.251 | AK026813  | 1132.331  | 1096.02   | NM_005915 | 604.405   | 720.67    |
| NM_016608   | 1147.587  | 2398.947  | AK027225  | 839.114   | 781.187   | NM_016038 | 2246.093  | 2685.612  |
| NM_002858   | 5282.754  | 6384.632  | AK023083  | 3248.01   | 2652.665  | Z36821    | 6757.206  | 6552.198  |
| NM_004817   | 1462.986  | 1428.069  | AF130093  | 647.427   | 760.614   | AF289485  | 2842.93   | 3599.793  |
| NM_018975   | 18440.752 | 21817.582 | AF116622  | 772.988   | 738.815   | AF130092  | 1460.672  | 1625.826  |
| AB023215    | 11735.188 | 12281.327 | NM_005325 | 716.302   | 875.02    | NM_016095 | 5594.79   | 5106.298  |
| NM_001284   | 35234.328 | 36817.109 | AF217967  | 1187.714  | 1565.452  | AK024794  | 1285.53   | 1094.589  |
| NM_003242   | 13457.177 | 14819.861 | NM_018150 | 6739.474  | 6874.778  | NM_019853 | 8427.171  | 10532.467 |
| U31099      | 889.374   | 727.988   | NM_017918 | 12400.03  | 12543.973 | NM_017992 | 3141.776  | 3691.534  |
| NM_001105   | 3749.946  | 3301.067  | NM_017855 | 42701.199 | 31822.266 | AK023061  | 623.85    | 624.132   |
| NM_005585   | 919.956   | 1123.82   | AB007954  | 2201.78   | 1598.902  | NM_007255 | 1749.039  | 1417.04   |
| NM_002075   | 2849.001  | 3139.217  | AK026494  | 2729.042  | 2604.825  | NM_003668 | 8183.357  | 8566.729  |
| Y08756      | 10547.646 | 9595.533  | AK022067  | 455.559   | 490.822   | NM_013384 | 56897.094 | 53835.324 |



|           |           |           |             |           |           |           |           |           |
|-----------|-----------|-----------|-------------|-----------|-----------|-----------|-----------|-----------|
| NM_005563 | 17452.227 | 18147.773 | AK023508    | 1212.653  | 1184.242  | NM_001187 | 1575.798  | 1472.307  |
| AY007090  | 767.223   | 689.747   | AK025840    | 2380.425  | 2610.196  | NM_018241 | 3487.573  | 2879.691  |
| NM_005102 | 1357.499  | 1200.368  | BC024009    | 3367.861  | 2978.885  | NM_005834 | 5623.911  | 6456.605  |
| NM_004518 | 1224.385  | 846.268   | AF128543    | 5961.2    | 4386.518  | NM_000724 | 2566.899  | 1877.15   |
| NM_006501 | 1156.429  | 988.408   | AK022071    | 510.842   | 509.58    | NM_000553 | 426.104   | 426.439   |
| NM_002719 | 9129.177  | 7935.616  | NM_004189   | 1116.441  | 1027.419  | NM_002557 | 5890.491  | 4047.14   |
| AB035356  | 596.585   | 410.327   | U84510      | 7730.881  | 6023.958  | Y10802    | 399.781   | 586.15    |
| AV752086  | 1274.757  | 885.639   | S83198      | 19714.066 | 18209.607 | AI417775  | 847.603   | 1076.174  |
| NM_016102 | 5555.323  | 3775.289  | AF052119    | 17864.779 | 16664.6   | BI762229  | 12072.36  | 15661.992 |
| NM_004376 | 4694.933  | 2738.917  | X94290      | 2455.861  | 1995.749  | AA131406  | 463.663   | 623.588   |
| NM_000272 | 1617.929  | 941.69    | AK026685    | 34064.016 | 31530.611 | BG618320  | 2691.785  | 2981.691  |
| NM_014252 | 7611.483  | 10213.614 | AF090927    | 38764.102 | 37813.75  | Y00787    | 1123.197  | 1000.786  |
| NM_001662 | 11237.238 | 16039.253 | AL137642    | 1357.81   | 1214.023  | NM_007276 | 3009.689  | 2695.669  |
| NM_016131 | 10535.594 | 11721.118 | AL133619    | 7420.096  | 8038.6    | N34462    | 1360.094  | 1320.162  |
| NM_006822 | 2620.786  | 3123.874  | AK025902    | 3874.894  | 4350.863  | AI658778  | 1371.446  | 1355.78   |
| NM_012142 | 9952.246  | 10198.937 | NM_005181   | 1189.918  | 1265.456  | L19067    | 5978.547  | 5310.801  |
| NM_016429 | 1909.613  | 2122.819  | AF143676    | 4969.892  | 4462.293  | Z48482    | 552.506   | 724.867   |
| AB011100  | 2446.426  | 2283.487  | U66044      | 7958.801  | 7323.689  | W60413    | 706.019   | 388.393   |
| U61741    | 940.345   | 1018.507  | NM_005247   | 32222.855 | 31593.922 | BI823365  | 2558.294  | 2873.865  |
| NM_012402 | 6187.265  | 5638.452  | NM_005283   | 1328.176  | 1258.736  | X06318    | 4706.764  | 4418.82   |
| M76676    | 3373.355  | 3514.154  | AL122089    | 2756.418  | 2792.52   | AL834159  | 2452.2    | 2719.422  |
| NM_003857 | 515.158   | 770.634   | AA203665    | 4435.023  | 3823.543  | NM_000164 | 19086.262 | 10406.133 |
| AL137690  | 602.999   | 644.512   | U95646      | 1066.42   | 1015.074  | NM_016217 | 11030.52  | 11972.334 |
| Z83804    | 1847.738  | 2109.394  | Y16705      | 1841.792  | 2067.65   | AK025971  | 2787.772  | 2523.839  |
| NM_004386 | 1723.374  | 1819.151  | AF279775    | 5449.501  | 5757.42   | NM_014007 | 975.485   | 661.708   |
| U67784    | 1117.857  | 1203.726  | NM_001821   | 3711.236  | 5459.968  | AB033006  | 2678.038  | 1337.129  |
| NM_007366 | 1630.8    | 1732.538  | NM_005647   | 1086.258  | 1168.371  | AF020314  | 1318.3    | 905.25    |
| NM_000592 | 897.882   | 884.885   | X64978      | 7806.464  | 11283.123 | NM_016332 | 4750.709  | 3111.583  |
| NM_016584 | 12385.178 | 10769.767 | NM_000912   | 43635.281 | 51152.379 | AK023936  | 456.141   | 477.164   |
| NM_001815 | 1550.148  | 1263.529  | NM_002345   | 1178.56   | 1303.722  | NM_006457 | 1892.202  | 2346.368  |
| NM_000064 | 7338.869  | 6084.269  | U57971      | 2576.083  | 2737.052  | NM_003682 | 816.313   | 1177.141  |
| NM_006725 | 6498.212  | 4821.235  | X89673      | 862.462   | 925.155   | NM_000207 | 849.02    | 926.423   |
| NM_003326 | 1658.492  | 1010.71   | AK024593    | 2518.137  | 2326.279  | NM_002531 | 679.489   | 858.32    |
| NM_004568 | 47846.84  | 29285.051 | Z83934      | 1201.756  | 1069.031  | NM_006314 | 6148.129  | 5929.047  |
| NM_000202 | 2460.2    | 1561.013  | NM_018359   | 5339.731  | 3549.726  | NM_001782 | 1098.518  | 1328.809  |
| Z25427    | 3643.125  | 4484.514  | AK022020    | 1293.013  | 1192.563  | NM_000797 | 6492.987  | 6564.996  |
| NM_004672 | 8160.258  | 10263.354 | AK000263    | 10230.973 | 9452.796  | NM_014927 | 757.681   | 755.755   |
| NM_001353 | 5014.454  | 5490.11   | Y13895      | 511.666   | 354.852   | NM_016293 | 9353.404  | 9373.753  |
| NM_006214 | 3211.707  | 3011.139  | NM_017447   | 1493.817  | 1260.149  | AF217525  | 171.681   | 723.041   |
| AJ010228  | 5864.78   | 5382.976  | AL049452    | 703.295   | 806.304   | NM_020134 | 675.468   | 550.883   |
| NM_005198 | 4767.512  | 5551.81   | NM_016622   | 2402.04   | 2312.712  | NM_014061 | 839.539   | 861.934   |
| AK021426  | 418.342   | 429.201   | AK026976    | 1434.431  | 2036.837  | BC034395  | 379.446   | 272.228   |
| NM_018073 | 3132.423  | 3083.106  | AF070559    | 4441.973  | 3956.143  | NM_000348 | 1790.876  | 1735.669  |
| AL137529  | 5058.776  | 4966.149  | D42043      | 7929.456  | 6867.944  | NM_005059 | 666.31    | 576.755   |
| NM_012332 | 1295.005  | 1468.719  | CY3Cy5      | 2164.475  | 118.761   | NM_004950 | 1157.56   | 826.507   |
| AK026648  | 1658.381  | 1770.119  | BF983177    | 1191.454  | 1000.876  | NM_006493 | 2614.408  | 1954.577  |
| NM_000497 | 1302.699  | 1725.135  | Z26317      | 2846.989  | 2373.1    | U76362    | 3015.93   | 1669.319  |
| NM_017421 | 1465.777  | 1967.94   | X16983      | 36503.57  | 40009.426 | AF040248  | 538.422   | 331.059   |
| AK025977  | 27578.256 | 28982.934 | X56160      | 3878.229  | 4990.323  | NM_014228 | 726.506   | 534.813   |
| AK023130  | 6487.531  | 7538.105  | BG679991    | 1336.256  | 1027.443  | AL832292  | 3648.358  | 2707.712  |
| NM_000273 | 1333.818  | 1194.757  | H-Y 00097 I | 8524.122  | 6219.521  | NM_003045 | 5458.275  | 6730.007  |
| NM_002899 | 12186.89  | 11804.765 | H-Y 00711 I | 62821.988 | 70745.633 | NM_003060 | 238.665   | 826.543   |
| NM_000486 | 1001.035  | 1109.986  | H-X 16707 I | 2178.382  | 2006.608  | AK021489  | 22777.932 | 29439.227 |

|             |           |           |           |           |           |           |           |           |
|-------------|-----------|-----------|-----------|-----------|-----------|-----------|-----------|-----------|
| BE876237    | 1195.391  | 1267.651  | AL038354  | 32749.592 | 29149.971 | NM_004525 | 429.559   | 623.015   |
| NM_005397   | 1826.725  | 1306.137  | R14607    | 1304.044  | 1200.19   | NM_003895 | 652.229   | 737.905   |
| NM_000806   | 5971.868  | 4453.733  | NM_021976 | 2477.188  | 2000.091  | NM_004317 | 5128.077  | 6732.046  |
| NM_006320   | 2185.553  | 1489.352  | SR2       | 52508.645 | 59732.867 | NM_014645 | 2921.281  | 3169.323  |
| AB014511    | 4456.966  | 2805.729  | SR4       | 13078.677 | 13483.072 | NM_014705 | 2932.531  | 3022.917  |
| NM_021976   | 2346.421  | 3510.284  | SR6       | 1865.203  | 851.997   | NM_003693 | 1031.098  | 1093.529  |
| NM_005715   | 5847.422  | 6311.313  | SR8       | 6825.699  | 14310.648 | NM_000356 | 19964.047 | 20840.316 |
| NM_018264   | 1378.975  | 1472.094  | SR10      | 26699.148 | 10840.315 | NM_013247 | 4796.377  | 4764.744  |
| NM_014580   | 902.388   | 1014.882  | CY3Cy5    | 955.293   | 91.764    | NM_006770 | 1159.727  | 1255.66   |
| NM_000153   | 831.098   | 1144.05   | NM_003242 | 12168.172 | 11515.825 | BE394704  | 1036.82   | 959.722   |
| NM_002033   | 2521.577  | 2919.524  | NM_002849 | 1226.875  | 1195.427  | NM_004703 | 2646.415  | 2703.182  |
| AK091794    | 786.625   | 912.859   | U31099    | 1712.028  | 1642.44   | NM_001512 | 1265.628  | 1362.941  |
| NM_004111   | 3082.13   | 3359.876  | NM_001105 | 6476.215  | 6147.644  | NM_014706 | 6152.518  | 7255.381  |
| AF085966    | 4447.535  | 4121.505  | NM_005585 | 1421.618  | 1086.358  | AK023172  | 418.87    | 687.345   |
| NM_005316   | 3865.234  | 3127.701  | NM_002075 | 5483.081  | 5038.271  | AJ001348  | 594.427   | 525.849   |
| NM_016316   | 3859.68   | 4634.352  | Y08756    | 22038.053 | 21224.928 | NM_007255 | 1531.664  | 840.415   |
| NM_003369   | 9697.199  | 9630.994  | NM_005563 | 20111.289 | 16463.162 | NM_003665 | 7902.1    | 4507.434  |
| NM_000057   | 2797.892  | 2530.484  | AY007090  | 1017.384  | 909.964   | NM_013384 | 47762.105 | 35296.777 |
| NM_018343   | 6197.775  | 5563.738  | NM_006439 | 712.135   | 897.199   | NM_001187 | 1210.429  | 817.068   |
| AK095793    | 1174.496  | 919.112   | NM_005102 | 1460.099  | 1017.585  | NM_018241 | 3285.33   | 2349.773  |
| NM_003177   | 3731.094  | 2918.47   | NM_004515 | 1445.816  | 2334.629  | NM_005834 | 5575.744  | 7032.986  |
| NM_017719   | 1941.325  | 1264.776  | NM_006501 | 664.019   | 791.537   | NM_012105 | 4830.344  | 4768.927  |
| AF064078    | 595.301   | 327.897   | NM_002719 | 8796.514  | 8929.382  | S82470    | 3593.465  | 4147.37   |
| AL049688    | 1545.528  | 946.11    | AB035356  | 498.83    | 845.577   | AB020695  | 1580.166  | 1575.786  |
| NM_002737   | 5686.542  | 3104.282  | AV752086  | 1316.851  | 1243.053  | AB028982  | 1027.223  | 919.62    |
| NM_002719   | 8533.128  | 9592.621  | NM_016102 | 7670.699  | 7193.804  | NM_002004 | 1576.709  | 1322.431  |
| AB035356    | 424.674   | 715.19    | NM_004376 | 3699.318  | 2883.124  | NM_005121 | 967.284   | 1223.063  |
| AV752086    | 1335.619  | 1390.378  | NM_000272 | 1496.704  | 1416.184  | NM_001643 | 18709.795 | 20227.82  |
| NM_016102   | 6904.167  | 7510.856  | NM_006061 | 713.815   | 1004.846  | NM_005415 | 2398.897  | 2237.167  |
| NM_004376   | 3344.64   | 3924.085  | U61741    | 1240.518  | 1154.783  | AL137708  | 328.025   | 580.298   |
| NM_000272   | 1143.569  | 1538.597  | NM_012402 | 6477.561  | 7272.045  | AJ275973  | 16018.09  | 15784.999 |
| NM_006845   | 67913.031 | 66506.945 | M76676    | 4133.542  | 3838.309  | AL834159  | 2507.668  | 1754.896  |
| NM_005603   | 44054.301 | 39476.398 | NM_003857 | 788.592   | 707.365   | NM_000164 | 13561.96  | 6090.911  |
| NM_001061   | 920.159   | 697.151   | AL137690  | 695.137   | 671.409   | NM_016217 | 12465.001 | 11431.961 |
| BG744154    | 14559.024 | 17800.381 | Z83804    | 2724.583  | 2418.811  | AK025971  | 2968.185  | 2888.055  |
| Z11694      | 4804.198  | 5779.928  | NM_004386 | 2443.244  | 2328.222  | NM_002615 | 2504.865  | 2986.878  |
| BF983177    | 491.93    | 501.353   | U67784    | 1515.361  | 1476.663  | L27479    | 764.666   | 788.766   |
| Z26317      | 2046.625  | 1815.115  | NM_007366 | 2053.464  | 1649.595  | NM_002193 | 1129.644  | 1012.007  |
| X16983      | 25130.803 | 23460.361 | NM_000592 | 911.974   | 933.024   | NM_001385 | 6168.775  | 6349.748  |
| X56160      | 3509.281  | 3533.963  | NM_016584 | 21010.877 | 22962.963 | X76770    | 2281.029  | 2506.972  |
| BG679991    | 1117.645  | 1134.048  | NM_001815 | 1787.267  | 2464.457  | AB037808  | 1587.431  | 1583.577  |
| H-Y 00097 I | 8127.144  | 8224.572  | NM_000064 | 8310.155  | 9733.055  | NM_016035 | 3177.441  | 3120.941  |
| H-M 59964   | 464.527   | 282.732   | NM_006725 | 7507.994  | 8187.322  | Z36821    | 6470.052  | 5595.832  |
| H-Y 00711 I | 60916.82  | 61338.684 | NM_003326 | 1726.537  | 1586.766  | AF289485  | 3213.723  | 2871.898  |
| H-X 16707 I | 2221.888  | 1757.25   | NM_004565 | 44718.141 | 36426.004 | AF130092  | 1868.48   | 1731.814  |
| AL038354    | 38429.34  | 25307.557 | NM_000202 | 2206.337  | 1844.873  | NM_016095 | 5182.781  | 5805.454  |
| R14607      | 1296.355  | 623.474   | NM_005496 | 11982     | 7595.261  | NM_019853 | 8131.875  | 7439.215  |
| NM_000064   | 8518.677  | 10033.26  | NM_016605 | 1429.399  | 1096.112  | NM_017992 | 2817.356  | 2661.939  |
| NM_006725   | 7609.735  | 7686.953  | NM_018975 | 18686.803 | 14956.742 | AK023061  | 443.853   | 587.2     |
| NM_003326   | 1680.308  | 1800.454  | AB023215  | 11126.916 | 7139.112  | NM_014061 | 655.808   | 678.532   |
| NM_004565   | 38672.18  | 38936.262 | AK021426  | 825.733   | 1318.833  | BC034395  | 648.477   | 573.29    |
| NM_000202   | 1674.954  | 1819.158  | NM_018073 | 3519.782  | 3160.237  | NM_002475 | 706.502   | 418.994   |
| NM_005496   | 13152.123 | 11480.426 | AL137529  | 4629.672  | 4887.082  | NM_000345 | 1606.38   | 1502.406  |

|           |           |           |             |           |           |           |           |           |
|-----------|-----------|-----------|-------------|-----------|-----------|-----------|-----------|-----------|
| NM_00285E | 5526.625  | 6451.396  | NM_01233Z   | 1705.745  | 2158.371  | NM_00505E | 710.092   | 655.485   |
| NM_004817 | 1748.608  | 1939.629  | AK026648    | 2184.713  | 2238.718  | NM_00495C | 1314.136  | 957.47    |
| AB023215  | 13679.606 | 13838.961 | NM_000497   | 2533.109  | 2632.989  | NM_000724 | 2930.918  | 2886.831  |
| NM_001284 | 37824.184 | 38956.273 | NM_017421   | 1898.031  | 1738.794  | NM_002557 | 7784.945  | 8009.798  |
| NM_00324Z | 12483.007 | 15979.7   | AK025977    | 41625.164 | 45001.543 | BI762229  | 11972.191 | 11659.774 |
| NM_00284E | 587.98    | 429.372   | AK023130    | 7942.885  | 7810.041  | BG618320  | 2469.195  | 2251.972  |
| U31099    | 841.386   | 752.541   | NM_00027Z   | 1362.964  | 1696.892  | Y00787    | 1067.484  | 781.237   |
| NM_001105 | 4556.767  | 3427.357  | NM_00289E   | 14262.273 | 18222.238 | NM_00727E | 3074.276  | 2268.677  |
| NM_00558E | 1077.473  | 1170.481  | NM_00048E   | 1442.03   | 1829.999  | N34462    | 1605.653  | 2010.703  |
| NM_00207E | 2811.547  | 2403.823  | BE876237    | 1655.274  | 2859.268  | AI658778  | 1410.836  | 1334.165  |
| Y08756    | 11614.856 | 9447.782  | NM_005397   | 1340.447  | 1672.815  | L19067    | 4684.974  | 4734.305  |
| NM_00556Z | 19579.756 | 18289.43  | NM_00080E   | 10018.296 | 10733.891 | Z48482    | 478.678   | 434.879   |
| AY007090  | 697.967   | 444.185   | NM_00632C   | 2108.276  | 2015.337  | W60413    | 479.458   | 565.44    |
| NM_00510Z | 1732.4    | 966.517   | AB014511    | 4230.298  | 3881.176  | BI823365  | 2782.012  | 2528.583  |
| NM_00451E | 1087.972  | 633.234   | NM_01425Z   | 7379.206  | 5608.921  | X06318    | 4846.51   | 4879.4    |
| NM_006501 | 1198.822  | 700.402   | NM_00166Z   | 14774.793 | 12128.351 | NM_00470Z | 2135.406  | 1747.415  |
| NM_005397 | 1850.019  | 2002.268  | NM_016131   | 8972.317  | 7200.155  | NM_00151Z | 893.072   | 586.983   |
| NM_00080E | 11255.905 | 10866.622 | NM_00682Z   | 2233.435  | 1980.117  | NM_01470E | 5838.225  | 6320.222  |
| NM_00632C | 1421.126  | 1699.986  | NM_01214Z   | 8153.125  | 6811.628  | AF139768  | 215.974   | 439.838   |
| AB014511  | 3205.681  | 3986.028  | NM_01642E   | 2427.85   | 3019.676  | AJ001348  | 805.135   | 725.527   |
| NM_01425Z | 7497.857  | 8461.363  | NM_018264   | 1562.007  | 1306.087  | NM_014007 | 928.36    | 932.897   |
| NM_00166Z | 12188.447 | 13736.951 | NM_01458C   | 1347.283  | 1522.377  | AB033006  | 3524.439  | 2919.861  |
| NM_016131 | 10954.503 | 11682.063 | AB028998    | 639.428   | 1003.607  | AF020314  | 1627.27   | 2500.122  |
| NM_00682Z | 2950.074  | 2657.777  | NM_00015Z   | 810.402   | 1135.583  | NM_01633Z | 5781.336  | 4956.009  |
| NM_01642E | 2237.944  | 2784.583  | NM_00203Z   | 2746.006  | 2851.769  | AK023936  | 483.629   | 329.229   |
| AB011100  | 2464.039  | 2896.442  | AK091794    | 1574.893  | 1600.968  | NM_006457 | 1964.596  | 2822.665  |
| U61741    | 1056.168  | 1283.633  | NM_004111   | 3726.247  | 4661.644  | NM_00368Z | 655.254   | 741.533   |
| NM_01240Z | 6808.16   | 7036.611  | AF085966    | 5697.391  | 5675.991  | NM_000207 | 609.46    | 629.881   |
| M76676    | 3559.262  | 3932.613  | NM_00531E   | 3108.792  | 3298.303  | NM_002531 | 678.622   | 550.947   |
| NM_003857 | 599.244   | 521.558   | NM_01631E   | 3120.135  | 3309.957  | NM_006314 | 4147.638  | 3816.127  |
| AL137690  | 779.952   | 776.243   | NM_00336E   | 12777.07  | 16792.287 | NM_00178Z | 888.047   | 841.838   |
| Z83804    | 2246.153  | 2312.219  | NM_003177   | 3465.785  | 3637.477  | NM_000797 | 6338.135  | 6994.355  |
| NM_00438E | 2061.02   | 1855.556  | NM_01771E   | 1683.731  | 1549.048  | NM_01629Z | 9034.886  | 11339.868 |
| U67784    | 1214.139  | 1208.682  | AF064078    | 694.016   | 866.95    | AL080148  | 3481.737  | 3717.202  |
| NM_00736E | 1637.324  | 1315.744  | AL049688    | 1913.957  | 1865.514  | NM_006731 | 732.51    | 635.083   |
| NM_00059Z | 849.33    | 637.053   | NM_002737   | 5361.297  | 6078.962  | NM_018487 | 412.742   | 563.874   |
| NM_016584 | 10681.858 | 7248.46   | Z25427      | 3831.018  | 3404.447  | NM_020134 | 548.387   | 420.17    |
| AK095793  | 1355.105  | 1187.495  | NM_00467Z   | 9433.064  | 7184.098  | NM_020221 | 1055.514  | 850.591   |
| NM_003177 | 4645.944  | 4461.28   | NM_00135Z   | 5016.487  | 4205.872  | NM_000747 | 1869.015  | 1411.252  |
| NM_01771E | 2275.008  | 2515.461  | NM_006214   | 2565.733  | 1661.303  | NM_00541E | 2195.299  | 1865.944  |
| AF064078  | 756.953   | 874.436   | AJ010228    | 5553.849  | 4927.883  | AJ275973  | 14851.556 | 13009.479 |
| AL049688  | 1871.808  | 1990.679  | NM_00519E   | 4120.839  | 3557.213  | NM_00649Z | 3065.755  | 2688.255  |
| NM_002737 | 5655.605  | 5663.754  | BG744154    | 16954.74  | 17560.26  | U76362    | 3283.907  | 2823.114  |
| Z25427    | 4634.083  | 4400.993  | Z11694      | 5861.35   | 7049.068  | NM_01422E | 958.243   | 842.509   |
| NM_00467Z | 8636.539  | 9678.17   | BF983177    | 905.706   | 962.381   | AL832292  | 4161.967  | 3562.1    |
| NM_00135Z | 4420.902  | 4879.614  | Z26317      | 2582.113  | 3199.128  | NM_00304E | 7327.925  | 5815.765  |
| NM_006214 | 2962.583  | 3410.199  | X16983      | 22473.609 | 31925.643 | NM_00566Z | 33518.637 | 33516.777 |
| AJ010228  | 5687.457  | 5279.644  | X56160      | 3053.841  | 3619.861  | NM_00306C | 548.221   | 485.731   |
| NM_00519E | 4841.633  | 5767.07   | BG679991    | 1481.967  | 2008.77   | AK021489  | 20943.121 | 22056.18  |
| NM_01807Z | 3018.6    | 3761.751  | H-Y 00097 I | 9349.645  | 13996.423 | NM_00452E | 1082.444  | 849.289   |
| AL137529  | 4639.054  | 4909.569  | AL038354    | 31716.443 | 28820.182 | NM_00389E | 692.918   | 743.368   |
| NM_01233Z | 1663.771  | 1474.596  | R14607      | 2022.467  | 2156.842  | NM_004317 | 5558.864  | 5604.27   |
| AK026648  | 1688.437  | 1989.536  | W84867      | 481.321   | 735.755   | NM_01464E | 3108.764  | 2734.458  |

|           |           |           |           |           |           |           |           |           |
|-----------|-----------|-----------|-----------|-----------|-----------|-----------|-----------|-----------|
| NM_000497 | 1310.706  | 1722.893  | NM_021976 | 2854.689  | 2548.009  | NM_014708 | 2631.299  | 3084.099  |
| NM_017421 | 1821.419  | 2206.384  | NM_005718 | 5367.727  | 4471.631  | NM_003693 | 1235.267  | 1223.609  |
| AK025977  | 27546.305 | 25092.594 | NM_005496 | 12215.789 | 12384.581 | NM_000356 | 21720.959 | 22701.256 |
| AK023130  | 6802.614  | 7088.078  | NM_004817 | 2045.774  | 2583.177  | NM_018134 | 29136.131 | 16148.061 |
| NM_000273 | 1058.707  | 1071.851  | AB023215  | 12736.66  | 15213.509 | NM_013247 | 5833.49   | 5706.664  |
| NM_002896 | 11026.739 | 7187.744  | NM_001284 | 40834.688 | 39031.078 | NM_006770 | 1469.634  | 1382.815  |
| NM_000486 | 745.68    | 653.626   | NM_003242 | 14104.26  | 17504.814 | BE394704  | 579.661   | 445.371   |
| BE876237  | 947.155   | 847.947   | NM_002849 | 1235.935  | 2135.58   | AK024794  | 1130.909  | 996.561   |
| NM_014750 | 8542.11   | 9329.693  | U31099    | 1079.651  | 1629.535  | NM_019853 | 9386.084  | 6344.464  |
| NM_015912 | 1378.286  | 1365.154  | NM_001105 | 5076.374  | 5679.286  | NM_017992 | 2769.383  | 2736.876  |
| NM_000460 | 1734.396  | 1564.844  | NM_005585 | 1189.916  | 2145.096  | NM_005400 | 479.8     | 545.958   |
| AB002339  | 1302.932  | 1483.405  | NM_002075 | 5629.367  | 9862.033  | AK023061  | 436.164   | 584.672   |
| AL137423  | 4327.103  | 5937.146  | Y08756    | 22206.621 | 34049.336 | NM_007255 | 1782.355  | 1515.784  |
| AB018322  | 1988.816  | 2284.28   | AY007090  | 860.198   | 932.592   | NM_003668 | 8596.95   | 7169.243  |
| NM_007068 | 29928.086 | 31678.701 | NM_006439 | 841.281   | 622.976   | NM_013384 | 54985.746 | 50491.473 |
| NM_005718 | 5719.842  | 6525.726  | NM_005102 | 1290.945  | 1241.992  | NM_001187 | 1560.944  | 1176.333  |
| NM_018264 | 1283.05   | 1775.833  | NM_004518 | 1459.383  | 1966.809  | NM_018241 | 3369.745  | 2967.085  |
| NM_014580 | 904.625   | 1022.115  | NM_006501 | 923.202   | 995.565   | NM_005834 | 5317.757  | 5335.098  |
| NM_000153 | 1092.746  | 844.395   | NM_002719 | 9347.15   | 11690.394 | NM_012105 | 3858.598  | 4128.903  |
| NM_002033 | 2509.45   | 2662.596  | AB035356  | 576.53    | 698.196   | S82470    | 2892.439  | 2799.541  |
| AK091794  | 683.724   | 718.739   | AV752086  | 1819.099  | 1646.959  | AB020695  | 1941.778  | 2511.152  |
| NM_004111 | 2745.268  | 2632.534  | NM_016102 | 9676.285  | 10152.633 | AB028982  | 904.27    | 986.137   |
| AF085966  | 4727.791  | 4176.599  | NM_004376 | 3749.349  | 2918.874  | NM_002004 | 1668.893  | 1921.026  |
| NM_005316 | 3623.216  | 3058.606  | NM_000272 | 1456.765  | 1085.038  | NM_005121 | 1075.087  | 1296.704  |
| NM_016316 | 3754.951  | 2964.478  | NM_014252 | 7120.357  | 6031.5    | NM_001643 | 18033.037 | 18267.309 |
| NM_003369 | 8347.615  | 5667.36   | NM_001662 | 14703.557 | 18062.049 | NM_019096 | 2511.813  | 1470.9    |
| NM_000057 | 2927.839  | 2164.794  | NM_012142 | 8434.854  | 11087.769 | NM_014725 | 1323.271  | 762.777   |
| NM_018343 | 5565.491  | 3762.251  | NM_016429 | 2684.88   | 2474.967  | NM_006892 | 2264.206  | 1662.663  |
| X15880    | 57868.445 | 58690.629 | AB011100  | 2677.512  | 3400.397  | NM_019117 | 1047.15   | 843.111   |
| AF114264  | 3048.602  | 3015.137  | U61741    | 1356.904  | 1394.949  | NM_018309 | 2313.039  | 2622.192  |
| NM_018972 | 2197.345  | 2620.266  | NM_012402 | 7151.966  | 8273.896  | NM_017658 | 2768.256  | 2237.847  |
| AB037828  | 1364.483  | 1636.945  | M76676    | 4022.371  | 5333.451  | NM_018679 | 5997.805  | 4732.235  |
| AB023210  | 765.806   | 909.248   | NM_003857 | 769.78    | 1302.417  | NM_016643 | 486.333   | 431.925   |
| AB037786  | 2748.56   | 2774.483  | AL137690  | 874.855   | 1597.193  | NM_006779 | 2796.044  | 2032.088  |
| NM_003648 | 8791.969  | 9485.572  | Z83804    | 2832.59   | 3304.37   | NM_016217 | 12067.886 | 10928.88  |
| AB037735  | 686.463   | 798.335   | NM_004386 | 2059.597  | 1934.758  | NM_001388 | 5683.858  | 4821.784  |
| AK002177  | 2022.252  | 2197.16   | U67784    | 1577.06   | 1462.742  | X76770    | 2595.28   | 2025.064  |
| AK024429  | 2843.978  | 3129.69   | NM_007366 | 2058.634  | 1406.224  | AB037808  | 528.569   | 513.949   |
| NM_003496 | 57492.156 | 59957.078 | NM_000592 | 864.577   | 1023.31   | NM_016038 | 3170.454  | 4005.656  |
| AB000509  | 4706.095  | 4731.128  | NM_016584 | 19856.439 | 19362.15  | Z36821    | 7370.363  | 8453.413  |
| AB018314  | 1877.205  | 2157.799  | NM_001815 | 1655.438  | 1853.074  | AF289485  | 3104.192  | 3122.155  |
| NM_004378 | 964.722   | 964.205   | NM_000064 | 9846.405  | 10423.58  | AF130092  | 1869.517  | 2352.705  |
| AJ238899  | 979.283   | 648.322   | NM_006725 | 8340.809  | 10746.959 | NM_016095 | 5967.586  | 6279.37   |
| NM_018037 | 1375.488  | 1011.172  | NM_003326 | 1960.326  | 1896.266  | AF300612  | 40697.848 | 27392.436 |
| NM_001110 | 5217.727  | 3787.555  | NM_004568 | 47271.605 | 35759.629 | AB014557  | 931.585   | 635.569   |
| NM_003222 | 1281.951  | 1068.171  | NM_000202 | 2429.115  | 2429.714  | NM_005578 | 4196.424  | 2378.798  |
| NM_000841 | 6625.189  | 4144.698  | Z25427    | 3385.81   | 3603.455  | NM_003653 | 11369.883 | 9479.223  |
| NM_001245 | 2251.952  | 1478.009  | NM_004672 | 8527.668  | 9149.091  | NM_018457 | 15379.001 | 10985.462 |
| NM_003672 | 11092.52  | 13649.219 | NM_001353 | 4537.421  | 5948.361  | NM_002953 | 4775.944  | 3556.013  |
| NM_002574 | 60575.785 | 66301.695 | NM_006214 | 2774.812  | 3305.601  | NM_002187 | 848.14    | 619.159   |
| AJ008139  | 3528.242  | 3880.059  | AJ010228  | 5747.359  | 6863.888  | NM_014246 | 6662.846  | 5338.792  |
| NM_004326 | 3155.27   | 3676.279  | NM_005198 | 4299.67   | 6404.644  | NM_014859 | 1280.511  | 1028.579  |
| NM_000882 | 578.962   | 794.701   | NM_018073 | 3222.035  | 3731.786  | NM_005049 | 2276.566  | 2778.384  |

|           |           |           |             |           |           |           |           |           |
|-----------|-----------|-----------|-------------|-----------|-----------|-----------|-----------|-----------|
| NM_004577 | 4235.702  | 3587.673  | AL137529    | 4388.723  | 4862.689  | NM_003882 | 518.311   | 617.241   |
| AF007157  | 16006.216 | 20584.326 | NM_012332   | 1864.111  | 1632.926  | NM_00463C | 8348.575  | 8621.894  |
| D38553    | 6244.107  | 9208.816  | AK026648    | 1771.531  | 2019.664  | AK023001  | 5488.098  | 5192.475  |
| NM_00617C | 4866.177  | 4966.184  | NM_000497   | 1974.853  | 3154.681  | NM_01482E | 8102.227  | 8942.703  |
| NM_01429E | 5173.186  | 6113.708  | NM_017421   | 1819.128  | 3132.587  | AF201947  | 899.048   | 969.301   |
| AK001581  | 3810.605  | 4513      | AK025977    | 39108.301 | 44371     | U01147    | 1466.561  | 1358.326  |
| NM_005862 | 2575.939  | 2840.616  | AK023130    | 6891.376  | 6302.41   | NM_00404C | 7334.241  | 7728.025  |
| NM_00054E | 3446.955  | 3842.491  | NM_000273   | 1507.458  | 1243.627  | NM_00611E | 2453.547  | 2674.901  |
| AK022541  | 7787.93   | 10741.499 | NM_002899   | 14404.318 | 14243.151 | NM_003587 | 10909.837 | 7282.377  |
| AB002297  | 3728.738  | 4656.75   | NM_00048E   | 724.689   | 894.53    | X90978    | 1129.703  | 853.008   |
| NM_00502C | 21316.035 | 20847.854 | BE876237    | 1133.651  | 1183.889  | BF219403  | 22720.98  | 18025.26  |
| NM_014077 | 5716.45   | 5881.708  | NM_005397   | 1354.077  | 1795.782  | NM_016119 | 2899.126  | 2223.193  |
| NM_018412 | 1021.74   | 1128.302  | NM_00080E   | 10332.688 | 17533.846 | AK075450  | 2480.146  | 2262.609  |
| NM_01232E | 5420.643  | 4832.072  | NM_00632C   | 2142.906  | 3105.796  | AF178983  | 2735.253  | 2358.67   |
| M14087    | 17007.98  | 17132.406 | AB014511    | 4412.247  | 4698.529  | NM_001324 | 4193.888  | 3205.361  |
| NM_00088E | 13594.548 | 7688.422  | NM_02197E   | 2607.376  | 2732.024  | AB037795  | 1287.046  | 1017.54   |
| M59040    | 1234.447  | 808.984   | NM_00571E   | 6581.31   | 6365.239  | D43949    | 1786.403  | 1051.724  |
| NM_017582 | 15366.073 | 18089.082 | NM_018264   | 1570.776  | 1707.952  | AK022975  | 924.39    | 1161.599  |
| NM_01523E | 3118.975  | 3921.406  | NM_01458C   | 1224.464  | 1609.731  | AK021750  | 3186.762  | 4776.731  |
| AK026962  | 2028.553  | 2068.371  | AB028998    | 690.99    | 627.979   | NM_00362E | 1525.941  | 1968.204  |
| NM_00679E | 719.704   | 663.587   | NM_000153   | 872.425   | 834.227   | NM_006932 | 500.476   | 469.842   |
| X04366    | 2034.875  | 2015.789  | NM_002033   | 2488.514  | 2959.938  | AK023594  | 4741.285  | 4584.459  |
| NM_00050E | 40839.457 | 43961.742 | AK091794    | 574.812   | 684.425   | AB010099  | 13516.168 | 12339.765 |
| NM_00066E | 1821.475  | 2100.147  | NM_004111   | 3883.931  | 3636.429  | AB039920  | 4332.583  | 3324.573  |
| NM_003481 | 3141.51   | 3396.605  | AF085966    | 3900.517  | 2976.895  | AB046782  | 1905.866  | 1807.657  |
| AB046814  | 761.994   | 1022.9    | NM_00531E   | 3270.008  | 2787.719  | NM_00419C | 15377.62  | 19288.801 |
| NM_017664 | 3131.903  | 3701.903  | NM_01631E   | 2817.477  | 2620.692  | NM_01427E | 4186.99   | 5220.791  |
| AK025523  | 426.703   | 573.068   | NM_00336E   | 12872.416 | 12268.742 | NM_00040E | 2993.841  | 2067.206  |
| NM_00705E | 7275.562  | 6701.313  | NM_000057   | 2352.159  | 2248.681  | AF208005  | 1305.286  | 965.748   |
| NM_00687C | 22864.117 | 22655.563 | NM_018343   | 5303.128  | 4611.326  | NM_002231 | 7410.578  | 5616.457  |
| NM_00735E | 7767.82   | 6320.78   | AK095793    | 1043.459  | 929.851   | NM_020474 | 7899.321  | 6943.608  |
| AF303888  | 13236.912 | 9938.42   | NM_003177   | 3420.308  | 3566.709  | NM_002643 | 2659.485  | 2442.219  |
| NM_000077 | 1032.167  | 759.742   | NM_01771E   | 1723.582  | 1953.567  | NM_017807 | 4088.293  | 3150.702  |
| NM_007084 | 1134.677  | 1121.027  | AF064078    | 766.927   | 1034.527  | NM_01474E | 1133.65   | 1441.444  |
| AK023015  | 13341.347 | 16521.986 | AL049688    | 1577.74   | 2568.106  | NM_000462 | 8958.289  | 10026.271 |
| NM_003457 | 16088.324 | 15950.132 | NM_002737   | 5206.69   | 7598.382  | NM_004181 | 591.756   | 903.675   |
| NM_012391 | 1350.412  | 1417.113  | NM_00271E   | 8405.237  | 8357.544  | NM_001723 | 1473.673  | 1910.682  |
| NM_005254 | 1974.642  | 4193.618  | AB035356    | 731.925   | 697.605   | M94362    | 9466.718  | 9247.968  |
| NM_005611 | 265.732   | 1071.519  | AV752086    | 1266.771  | 2091.34   | AK024707  | 981.559   | 906.704   |
| AF141655  | 1332.163  | 1754.225  | NM_016102   | 6799.124  | 8723.335  | NM_01425E | 1494.202  | 1585.324  |
| NM_00734E | 1007.8    | 1643.493  | NM_00437E   | 3267.425  | 3134.64   | AK022909  | 1375.559  | 1260.605  |
| NM_00483C | 793.56    | 921.763   | NM_000272   | 1349.876  | 1253.253  | NM_00653C | 11745.987 | 11044.149 |
| NM_007007 | 9101.233  | 9777.827  | NM_001061   | 790.539   | 874.955   | AB033024  | 874.258   | 910.602   |
| NM_00638E | 1089.371  | 1173.346  | AI075338    | 728.95    | 496.779   | NM_018942 | 2602.672  | 2130.305  |
| NM_00655E | 21288.729 | 23076.627 | BG744154    | 17693.076 | 11672.459 | NM_005531 | 12741.437 | 13279.4   |
| NM_004501 | 38217.527 | 36585.34  | Z11694      | 7171.125  | 5072.833  | NM_006977 | 1472.94   | 1183.231  |
| NM_00496E | 14623.497 | 15693.449 | BF983177    | 705.092   | 589.715   | NM_004387 | 1033.446  | 788.746   |
| NM_00670C | 1855.075  | 1854.387  | Z26317      | 2385.388  | 1633.89   | AF217226  | 3839.032  | 2765.586  |
| NM_00644E | 12231.776 | 13611.714 | X16983      | 29587.791 | 26839.842 | NM_005522 | 814.875   | 1110.482  |
| NM_01210E | 8339.17   | 8339.91   | X56160      | 3774.331  | 3324.358  | NM_00576C | 7099.979  | 6267.118  |
| AF019633  | 3254.378  | 3241.372  | BG679991    | 1237.792  | 1040.494  | NM_00726E | 3502.181  | 3347.711  |
| AB002361  | 5022.621  | 4342.185  | H-Y 00097 I | 8498.172  | 6621.125  | AK023639  | 6451.102  | 8482.376  |
| NM_01806C | 6778.553  | 6023.93   | H-M 59964   | 493.779   | 403.604   | AL122118  | 413.266   | 837.308   |

|           |           |           |             |           |           |           |           |           |
|-----------|-----------|-----------|-------------|-----------|-----------|-----------|-----------|-----------|
| NM_014239 | 3737.577  | 3461.23   | H-Y 00711 I | 58851.691 | 65171.352 | AL137700  | 1420.525  | 1745.235  |
| NM_017662 | 3892.551  | 3115.769  | H-X 16707 I | 2462.24   | 2038.444  | NM_004904 | 1258.798  | 1743.77   |
| U88837    | 1568.493  | 1275.769  | AL038354    | 31262.057 | 31251.324 | NM_003083 | 2849.76   | 4301.809  |
| NM_017446 | 30613.82  | 27178.074 | R14607      | 1606.209  | 2045.317  | NM_006789 | 1415.012  | 1952.9    |
| AK001478  | 3300.149  | 2973.523  | NM_000064   | 7440.721  | 6518.566  | NM_000982 | 2282.891  | 3134.774  |
| D00265    | 28693.951 | 35659.824 | NM_006725   | 7053.483  | 9185.477  | NM_012423 | 36277.922 | 37715.176 |
| NM_000779 | 402.192   | 880.563   | NM_003326   | 1405.443  | 1623.951  | AK026367  | 15436.321 | 16839.289 |
| AL137294  | 3628.849  | 4132.698  | NM_004568   | 38908.621 | 31187.988 | AL110170  | 18541.979 | 18309.271 |
| NM_003743 | 1448.042  | 1435.67   | NM_000202   | 1996.666  | 1754.463  | AK021747  | 1635.59   | 1459.859  |
| AB037797  | 806.228   | 1161.224  | NM_005496   | 12928.036 | 10797.524 | AK025640  | 5140.118  | 4650.427  |
| NM_001520 | 1588.51   | 1961.575  | NM_002858   | 6279.421  | 5044.014  | NM_019101 | 899.991   | 1097.65   |
| AL050367  | 750.034   | 933.93    | NM_004817   | 1838.472  | 1555.54   | NM_000920 | 1696.57   | 2409.568  |
| NM_017870 | 845.788   | 1047.551  | NM_018975   | 21238.979 | 16722.01  | NM_020375 | 5472.822  | 5710.303  |
| AL133633  | 2141.961  | 2261.019  | AB023215    | 12023.836 | 10699.097 | NM_016049 | 6945.548  | 9011.711  |
| AK026817  | 1351.775  | 904.721   | NM_001284   | 37891.793 | 23421.828 | NM_013311 | 6892.923  | 9057.369  |
| AL157442  | 17853.736 | 13736.477 | NM_003242   | 19425.953 | 12824.695 | NM_000291 | 69343.695 | 68562.602 |
| AB011148  | 2480.267  | 1805.812  | NM_002849   | 527.979   | 384.779   | NM_018081 | 4421.145  | 4417.076  |
| AL389938  | 29952.15  | 21047.252 | U31099      | 761.333   | 784.64    | NM_014649 | 3142.332  | 3907.264  |
| NM_001949 | 29021.139 | 25535.145 | NM_001105   | 7728.902  | 5657.708  | AL117488  | 1583.45   | 1518.5    |
| NM_003507 | 994.554   | 1129.036  | NM_005585   | 1044.486  | 1065.519  | NM_012240 | 1665.955  | 1775.974  |
| AK026591  | 1023.566  | 1175.605  | NM_002075   | 4241.676  | 4174.941  | NM_019005 | 9806.039  | 9480.228  |
| AK001889  | 2840.489  | 3386.997  | Y08756      | 18742.242 | 16878.412 | NM_004739 | 9332.676  | 11825.499 |
| AK025726  | 2221.606  | 2632.811  | NM_005563   | 18750.018 | 14670.018 | AV752216  | 1011.422  | 1438.155  |
| AJ227869  | 3612.483  | 4304.013  | AY007090    | 752.19    | 628.72    | NM_005341 | 1520.959  | 2105.998  |
| AF075011  | 1736.606  | 1550.424  | NM_006439   | 485.483   | 502.483   | AF181999  | 728.73    | 1146.76   |
| AK026189  | 511.81    | 871.198   | NM_005102   | 1186.49   | 988.49    | NM_001934 | 3765.737  | 4234.748  |
| AL137753  | 4835.428  | 7093.94   | NM_004518   | 845.628   | 1250.351  | AB011090  | 1276.409  | 1698.159  |
| AK021785  | 692.045   | 885.251   | NM_006501   | 890.998   | 1005.869  | NM_000209 | 1876.601  | 1644.195  |
| AL110262  | 14016.335 | 15686.227 | NM_005397   | 1292.505  | 1644.598  | NM_018682 | 5617.271  | 6560.783  |
| AK025627  | 22865.184 | 27038.184 | NM_000806   | 7724.862  | 9154.688  | NM_006545 | 14576.593 | 12550.802 |
| AF216077  | 4730.335  | 5133.25   | NM_006320   | 1967.867  | 1944.53   | NM_016534 | 1970.304  | 1737.375  |
| AF086238  | 738.405   | 680.41    | AB014511    | 3919.959  | 4144.156  | AB021923  | 1157.168  | 1319.561  |
| AK021612  | 13651.995 | 12183.65  | NM_014252   | 7914.008  | 9025.486  | AK024240  | 411.255   | 707.1     |
| AF147342  | 619.318   | 425.99    | NM_001662   | 16293.714 | 17588.16  | NM_016456 | 31721.021 | 40647.488 |
| AF088031  | 1173.901  | 849.073   | NM_016131   | 10569.326 | 9351.041  | AK022677  | 2042.448  | 2550.153  |
| AK002025  | 48443.398 | 46780.219 | NM_006822   | 2563.524  | 2851.469  | AL137645  | 17384.99  | 20228.648 |
| AK026299  | 2301.22   | 1669.785  | NM_012142   | 8810.993  | 8367.435  | AK026141  | 1050.169  | 1446.189  |
| NM_017794 | 1636.6    | 1710.37   | NM_016429   | 2465.644  | 2210.333  | AK022894  | 1484.78   | 1385.235  |
| AK025170  | 2176.325  | 2090.928  | AB011100    | 2663.888  | 2466.872  | AF217993  | 3554.671  | 3625.193  |
| AB033031  | 1521.601  | 1432.213  | U61741      | 1186.61   | 885.057   | AF131823  | 561.001   | 1010.748  |
| AF085872  | 9360.364  | 9590.586  | NM_012402   | 6545.324  | 6220.006  | AK026324  | 7332.743  | 6128.695  |
| AK022538  | 15704.102 | 20785.781 | M76676      | 3862.376  | 3487.299  | AK025253  | 1723.306  | 1798.009  |
| AL360257  | 892.494   | 1291.185  | NM_003857   | 681.059   | 538.02    | AL136818  | 1931.151  | 2818.242  |
| AK022342  | 1055.368  | 1582.175  | AL137690    | 530.872   | 718.121   | AF086517  | 3808.104  | 3303.206  |
| AF147420  | 2048.253  | 2461.886  | Z83804      | 2458.43   | 1987.377  | AK025740  | 8907.93   | 9187.015  |
| AL049312  | 3478.079  | 4830.989  | NM_004386   | 2219.505  | 1994.496  | AK000311  | 3333.872  | 3920.208  |
| AL050072  | 4244.095  | 5660.563  | U67784      | 1058.092  | 1306.578  | AK025346  | 59746.742 | 56135.313 |
| AL117590  | 768.339   | 1208.485  | NM_007366   | 1328.768  | 1464.897  | AK022583  | 4234.415  | 4429.084  |
| AL049357  | 6325.87   | 7100.548  | NM_000592   | 715.295   | 810.623   | AL137534  | 59302.566 | 55098.582 |
| AL110223  | 532.227   | 795.02    | NM_016584   | 15338.159 | 15668.307 | AF052121  | 2497.803  | 2347.962  |
| AK027180  | 3044.746  | 3467.294  | NM_001815   | 1441.161  | 1591.134  | AL359062  | 1826.157  | 1627.363  |
| AK026802  | 539.192   | 838.444   | AK095793    | 905.05    | 897.368   | AK026869  | 1642.752  | 1553.71   |
| NM_004544 | 13082.779 | 14626.715 | NM_003177   | 3378.895  | 3368.031  | AK022192  | 583.925   | 797.205   |

|           |           |           |           |           |           |           |           |           |
|-----------|-----------|-----------|-----------|-----------|-----------|-----------|-----------|-----------|
| AF086041  | 1014.56   | 1051.842  | NM_017719 | 1875.403  | 2014.678  | NM_01909  | 44378.141 | 49946.887 |
| Y15167    | 1441.926  | 1200.711  | AF064078  | 838.916   | 1827.503  | Y12020    | 19835.369 | 22427.766 |
| AL133080  | 2784.417  | 2089.437  | AL049688  | 2064.473  | 3021.395  | AJ001905  | 1243.838  | 1207.344  |
| NM_017792 | 6388.97   | 5343.459  | NM_002737 | 6298.549  | 7312.189  | U17635    | 1525.598  | 1225.112  |
| AK025213  | 7759.739  | 6288.052  | Z25427    | 4520.889  | 4937.886  | AL049930  | 604.9     | 481.012   |
| NM_01494  | 2839.846  | 2317.615  | NM_004672 | 10108.337 | 10683.304 | Z83946    | 344.191   | 586.996   |
| AK021965  | 667.786   | 884.182   | NM_001353 | 5594.147  | 5638.163  | D55638    | 420.367   | 912.3     |
| AL137370  | 1365.905  | 1364.262  | NM_006214 | 2892.016  | 2435.447  | L23870    | 534.22    | 751.867   |
| AF009262  | 8494.916  | 10303.806 | AJ010228  | 6479.372  | 7001.525  | L19362    | 734.819   | 673.266   |
| AF009306  | 453.39    | 554.888   | NM_005198 | 4232.657  | 5020.9    | L33807    | 1175.806  | 1370.711  |
| AF050198  | 1738.847  | 2712.83   | NM_018073 | 3267.555  | 2551.847  | AB007975  | 717.71    | 728.607   |
| AK024346  | 2349.916  | 4036.368  | AL137529  | 4564.122  | 4056.656  | AK021821  | 602.703   | 1009.237  |
| AF009320  | 416.821   | 1051.022  | NM_012332 | 1826.842  | 1544.374  | AK000772  | 425.192   | 732.85    |
| AF056422  | 1399.347  | 2046.699  | AK026648  | 1876.897  | 1659.07   | AL049328  | 855.794   | 1144.764  |
| AF090892  | 928.199   | 1062.94   | NM_000497 | 1711.315  | 1673.552  | AK000030  | 943.411   | 1095.574  |
| AK001089  | 1306.975  | 1715.895  | NM_017421 | 2062.625  | 1835.444  | NM_017932 | 436.47    | 905.99    |
| AK001919  | 924.506   | 1631.634  | AK025977  | 39286.578 | 45294.773 | AK000910  | 2073.404  | 2150.823  |
| AK021535  | 1010.015  | 1282.134  | AK023130  | 7222.442  | 7364.143  | AF252280  | 12129.267 | 11797.474 |
| AK021753  | 3219.899  | 3678.043  | NM_000273 | 1093.752  | 1480.147  | AK000107  | 476.847   | 1145.46   |
| AK001139  | 4525.473  | 4857.011  | NM_002899 | 10276.822 | 12333.387 | AK024518  | 13321.899 | 15535.979 |
| AK002090  | 1374.974  | 1822.2    | NM_000486 | 731.417   | 932.644   | AK024534  | 594.345   | 637.588   |
| AK021822  | 825.694   | 1170.37   | BE876237  | 1455.757  | 1256.947  | AK024914  | 2833.091  | 2006.374  |
| AK025246  | 7117.909  | 5352.418  | NM_014750 | 8338.495  | 7591.169  | BC030949  | 2324.992  | 2670.199  |
| AK025847  | 2935.225  | 2158.039  | NM_015912 | 1313.733  | 1870.51   | AF116615  | 1135.355  | 974.103   |
| NM_014174 | 25937.715 | 29722.225 | NM_000460 | 1799.211  | 2440.136  | U17636    | 58732.703 | 56202.766 |
| AF147337  | 3626.432  | 3469.542  | AB002339  | 1247.207  | 2068.67   | NM_01854  | 3504.003  | 4081.245  |
| AK025203  | 51117.902 | 55324.383 | AL137423  | 5300.301  | 5660.654  | U52699    | 18245.387 | 20391.016 |
| AK026981  | 3775.977  | 5615.098  | AB018322  | 2217.82   | 2358.477  | S71613    | 1013.662  | 1226.333  |
| AL133656  | 4764.401  | 4890.227  | NM_007068 | 42173.074 | 42954.535 | AJ011910  | 12862.123 | 11465.016 |
| AL050037  | 14284.72  | 16142.511 | NM_005718 | 7061.403  | 6897.351  | AK024378  | 1234.392  | 1082.44   |
| NM_001417 | 29128.977 | 30237.432 | NM_018264 | 1606.648  | 1294.379  | NM_01402  | 5266.369  | 6057.931  |
| AK022236  | 3819.874  | 3726.674  | NM_014580 | 1370.742  | 1261.865  | D61703    | 4749.896  | 5015.108  |
| AK000073  | 717.161   | 520.445   | NM_000153 | 766.313   | 792.095   | AF086198  | 13304.456 | 15285.128 |
| AK000618  | 589.435   | 517.912   | NM_002033 | 2568.138  | 2597.453  | AL137382  | 45618.617 | 47238.031 |
| AL390180  | 1233.189  | 827.735   | AK091794  | 632.676   | 551.632   | AK024599  | 3880.75   | 3968.308  |
| X60484    | 974.364   | 1213.447  | NM_004111 | 3354.294  | 4073.598  | AK024928  | 372.709   | 294.056   |
| AF055019  | 994.869   | 1349.722  | AF085966  | 4032.439  | 3994.277  | NM_01445  | 8435.964  | 9608.853  |
| NM_00352  | 6653.776  | 7542.426  | NM_005316 | 3445.284  | 4133.22   | NM_017991 | 1259.293  | 1046.636  |
| AK000229  | 883.641   | 1737.448  | NM_016316 | 2835.396  | 3886.971  | L37198    | 1261.366  | 901.934   |
| AF056432  | 4431.986  | 7060.486  | NM_003369 | 10096.28  | 11501.253 | U67822    | 673.091   | 748.362   |
| AK001987  | 30676.611 | 50534.352 | NM_000057 | 2707.242  | 3062.049  | AK025431  | 1284.846  | 1383.952  |
| X56199    | 2479.702  | 3131.281  | NM_018343 | 5375.227  | 5273.277  | AK023662  | 363.439   | 937.937   |
| NM_005193 | 3614.309  | 3972.439  | X15880    | 56071.684 | 60716.867 | AF086274  | 31072.117 | 35869.207 |
| AL162006  | 900.142   | 1060.862  | AL137461  | 444.491   | 696.679   | AK023682  | 974.258   | 988.31    |
| NM_017971 | 38098.008 | 38779.555 | AF114264  | 3150.186  | 3955.917  | AK024024  | 4195.759  | 3717.658  |
| AF090097  | 979.911   | 1248.133  | NM_005545 | 687.743   | 968.469   | AK000685  | 10753.732 | 6650.529  |
| AF116620  | 9223.122  | 12215.155 | NM_017514 | 603.182   | 961.034   | D28381    | 15728.032 | 17367.699 |
| AF293335  | 43656.863 | 45165.66  | NM_018972 | 2933.166  | 2984.013  | BE706519  | 563.985   | 879.968   |
| AL080065  | 830.386   | 818.586   | AB037828  | 1191.763  | 1043.386  | AF130064  | 32394.391 | 41425.184 |
| AK024431  | 12433.486 | 14181.603 | AB023210  | 974.736   | 1010.621  | U17624    | 783.804   | 984.187   |
| AF116635  | 524.357   | 498.793   | AB037786  | 2565.042  | 2873.809  | D16988    | 39877.363 | 35730.668 |
| X96644    | 6780.755  | 6503.078  | NM_003648 | 7679.921  | 7680.141  | AK001959  | 6205.121  | 6054.598  |
| Z34281    | 25672.258 | 21837.814 | AB037735  | 846.271   | 721.646   | U36217    | 1078.806  | 1244.111  |

|           |           |           |           |           |           |           |           |           |
|-----------|-----------|-----------|-----------|-----------|-----------|-----------|-----------|-----------|
| NM_01867E | 44482.438 | 36665.258 | AK002177  | 3171.344  | 2778.217  | AL389880  | 411.937   | 444.164   |
| AJ008122  | 14416.855 | 8884.373  | AK024429  | 3233.737  | 3299.777  | AL157452  | 954.191   | 1013.321  |
| NM_00622C | 768.423   | 862.419   | AB000509  | 4463.787  | 3058.262  | AK024155  | 15377.392 | 12682.229 |
| AK022667  | 34923.535 | 27662.334 | AB018314  | 1632.344  | 1285.415  | AL359334  | 9716.806  | 5124.767  |
| AK026667  | 6770.814  | 3896.886  | NM_00437E | 1252.829  | 1466.291  | AK027095  | 1943.926  | 1574.224  |
| AF113211  | 1519.49   | 1628.635  | AJ238899  | 943.053   | 913.938   | AF062097  | 670.067   | 599.061   |
| AL117568  | 2533.424  | 2762.599  | NM_018037 | 1033.725  | 1116.417  | NM_019847 | 1302.64   | 1812.679  |
| NM_000843 | 631.276   | 845.321   | NM_001110 | 4102.307  | 4168.679  | D17093    | 11772.994 | 12774.451 |
| S71805    | 1445.954  | 1337.667  | NM_003222 | 1285.255  | 1210.123  | AL117521  | 2047.286  | 2152.294  |
| NM_018391 | 1914.576  | 2845.673  | NM_000841 | 5242.953  | 6532.835  | AK021913  | 4176.913  | 3291.539  |
| U90917    | 783.289   | 1825.62   | NM_001245 | 2766.991  | 2987.149  | AL137489  | 19889.854 | 16944.48  |
| AK022140  | 3365.895  | 4977.318  | NM_003672 | 13610.65  | 8689.475  | AF009311  | 2704.241  | 2329.423  |
| AK023372  | 21434.303 | 23483.564 | NM_002574 | 57656.445 | 63546.938 | S73397    | 1057.934  | 1487.387  |
| U21072    | 1382.368  | 1921.56   | AJ008139  | 4860.267  | 5465.071  | AK023939  | 606.373   | 451.101   |
| AK024377  | 777.475   | 905.768   | NM_00432E | 3972.821  | 5477.271  | AL050219  | 388.84    | 573.212   |
| AK023557  | 2350.906  | 2745.438  | NM_000882 | 634.768   | 716.916   | AK024433  | 1866.064  | 2034.115  |
| AK027107  | 613.753   | 652.407   | NM_004577 | 4022.879  | 4771.395  | U82321    | 527.773   | 700.665   |
| AB040887  | 2801.982  | 2863.02   | AF007157  | 18756.047 | 21236.188 | AL050376  | 635.384   | 557.343   |
| AK025196  | 2716.107  | 2332.95   | D38553    | 6700.217  | 6972.963  | AL359652  | 1113.269  | 1028.839  |
| AJ227879  | 451.811   | 338.541   | NM_00617C | 4599.544  | 5057.048  | AK022423  | 697.485   | 603.428   |
| AK024800  | 1020.281  | 666.314   | NM_01429E | 4990.412  | 4302.061  | AF088021  | 5345.506  | 3730.489  |
| AK000401  | 1955.651  | 1420.93   | AK001581  | 4796.158  | 3725.346  | BF509267  | 1951.999  | 1630.381  |
| AF305068  | 1133.854  | 600.533   | NM_005862 | 4359.724  | 3415.153  | NM_00245E | 5898.015  | 4990.918  |
| D17231    | 37919.098 | 20266.572 | NM_00054E | 5836.762  | 5078.826  | NM_00295E | 6972.145  | 5526.437  |
| AF531295  | 2759.513  | 2202.515  | AB002297  | 4308.44   | 3503.746  | AK000899  | 12162.826 | 9184.509  |
| CY3Cy5    | 10234.635 | 464.068   | NM_00502C | 32583.252 | 29958.621 | CY3Cy5    | 3941.153  | 143.744   |
| BF974315  | 7363.797  | 8613.827  | NM_014077 | 5294.972  | 5650.495  | AW300857  | 10384.702 | 9468.4    |
| T74985    | 824.194   | 1334.708  | NM_018412 | 980.829   | 1169.153  | H85962    | 18209.084 | 17013.596 |
| AI652705  | 6470.987  | 6550.949  | NM_01232E | 5814.658  | 6187.763  | BG742446  | 1033.657  | 937.921   |
| AW009565  | 5530.931  | 6142.318  | M14087    | 23444.844 | 23852.625 | AA864554  | 807.942   | 1285.483  |
| AI570478  | 1633.506  | 1863.32   | NM_00088E | 12082.754 | 14169.604 | X66945    | 2168.212  | 2235.174  |
| X07767    | 8262.776  | 9732.059  | M59040    | 1922.508  | 2327.177  | X12830    | 1934.516  | 1767.236  |
| AF252284  | 5424.936  | 5913.653  | NM_017582 | 15381.494 | 11793.528 | U00482    | 953.102   | 814.406   |
| BU727558  | 1560.338  | 1509.195  | NM_01523E | 3893.303  | 2719.289  | K01904    | 5370.12   | 4821.507  |
| SR1       | 59885.332 | 59934.949 | AK026962  | 2139.242  | 1848.094  | BE538886  | 1116.208  | 1600.233  |
| SR3       | 53382.52  | 60824.621 | NM_00679E | 390.808   | 466.851   | NM_00222E | 4102.193  | 2590.773  |
| SR5       | 8255.525  | 8238.543  | X04366    | 2509.129  | 2260.745  | M57650    | 4007.861  | 4456.802  |
| SR7       | 4590.128  | 37640.215 | NM_00050E | 50044.082 | 53849.848 | BC023978  | 1312.392  | 1654.073  |
| SR9       | 12080.376 | 1912.364  | NM_01865E | 369.451   | 501.355   | M21302    | 1905.63   | 1806.217  |
| CY3Cy5    | 7553.18   | 305.3     | NM_00066E | 1880.25   | 1847.11   | NM_01634E | 2504.219  | 2383.259  |
| NM_007264 | 24976.607 | 22755.479 | NM_003481 | 4389.339  | 4494.861  | SR2       | 55703.805 | 45114.953 |
| NM_016511 | 16965.496 | 15669.308 | AB046814  | 1012.502  | 1151.766  | SR4       | 9516.299  | 7586.759  |
| NM_00355E | 2515.685  | 2880.972  | NM_017664 | 3787.74   | 2751.795  | SR6       | 1668.831  | 1239.702  |
| NM_00218E | 1188.6    | 1377.365  | AK025523  | 598.494   | 757.264   | SR8       | 6185.608  | 16344.235 |
| M55337    | 846.558   | 858.011   | NM_00705E | 8195.979  | 8310.333  | SR10      | 23882.531 | 6177.002  |
| NM_01653E | 56088.516 | 56411.426 | NM_00687C | 22936.85  | 20675.229 | CY3Cy5    | 2351.019  | 115.572   |
| NM_014751 | 18386.498 | 16334.146 | NM_00735E | 6502.544  | 7081.98   | NM_00152E | 22096.072 | 19700.049 |
| NM_002347 | 34365.605 | 38922.66  | L13283    | 644.903   | 698.098   | NM_00605E | 2881.157  | 2861.308  |
| AB046807  | 2911.327  | 3791.493  | NM_013327 | 290.37    | 657.001   | NM_00429E | 639.819   | 712.5     |
| NM_00350E | 815.847   | 587.106   | AF303888  | 11778.624 | 12601.004 | NM_00504E | 750.951   | 598.664   |
| NM_01462E | 12392.209 | 15649.131 | NM_000077 | 1231.69   | 1364.332  | NM_018841 | 1239.432  | 1070.803  |
| NM_007244 | 7587.359  | 6561.343  | AF176646  | 1092.803  | 956.449   | NM_00522E | 447.312   | 721.827   |
| M30629    | 6790.907  | 6104.447  | NM_007084 | 1400.674  | 1167.754  | AL133105  | 1901.197  | 2531.504  |



|           |           |           |           |           |           |           |           |           |
|-----------|-----------|-----------|-----------|-----------|-----------|-----------|-----------|-----------|
| AF193873  | 7196.1    | 5091.014  | M97191    | 25165.078 | 26166.016 | AK022859  | 1739.206  | 1772.905  |
| NM_00262E | 2580.418  | 2141.03   | AK023015  | 13961.517 | 13201.924 | NM_014864 | 4227.691  | 5431.507  |
| M23575    | 1515.949  | 1078.205  | NM_003457 | 16612.633 | 18431.717 | NM_00372E | 11422.29  | 9734.286  |
| AA190729  | 2661.994  | 1872.252  | NM_012391 | 1887.819  | 1743.912  | NM_01435E | 4587.466  | 4722.025  |
| NM_00417C | 1398.675  | 1960.88   | NM_005254 | 2959.285  | 3554.788  | NM_012481 | 738.582   | 925.733   |
| NM_01592E | 1386.212  | 1236.645  | NM_005611 | 973.407   | 1103.626  | U68488    | 297.622   | 746.897   |
| NM_00366E | 1328.767  | 1223.484  | AF141655  | 2143.575  | 2173.193  | NM_016247 | 2129.262  | 1788.359  |
| AF220217  | 1076.031  | 1323.439  | NM_00734E | 980.952   | 1005.146  | NM_01228E | 915.82    | 860.375   |
| NM_01332E | 14725.204 | 15238.973 | NM_00483C | 1065.19   | 1228.775  | NM_00332E | 15474.61  | 12193.014 |
| M33197    | 2664.733  | 2990.654  | NM_007007 | 9956.456  | 8891.289  | BG685310  | 1342.182  | 1171.85   |
| NM_00085E | 2569.46   | 2116.861  | NM_00638E | 1254.026  | 1271.46   | NM_01866E | 5441.613  | 6306.786  |
| AF016903  | 53701.785 | 52551.477 | NM_00655E | 20436.328 | 19609.033 | NM_004227 | 1274.424  | 1647.643  |
| NM_01567E | 7427.237  | 8709.52   | NM_004501 | 37615.203 | 28440.951 | NM_00528E | 1811.48   | 2220.656  |
| M33197    | 66681.773 | 68244.102 | NM_00496E | 14232.768 | 10416.547 | AB028949  | 1043.917  | 1237.622  |
| AF031136  | 66668.211 | 66952.531 | NM_00670C | 1826.413  | 1380.816  | AL137580  | 832.201   | 553.145   |
| NM_006597 | 61295.418 | 63750.242 | NM_00644E | 11571.44  | 8648.642  | NM_004101 | 884.763   | 1013.885  |
| NM_01248E | 17242.443 | 15323.64  | NM_01210E | 11494.256 | 10283.254 | NM_00299E | 27298.996 | 26104.281 |
| NM_00349E | 8385.939  | 6029.141  | AF019633  | 3720.154  | 2745.351  | AB033114  | 512.368   | 840.049   |
| AB023420  | 14091.263 | 9389.859  | AB002361  | 8610.928  | 8586.199  | NM_01597E | 1662.309  | 1690.751  |
| NM_00734E | 7665.788  | 8270.126  | NM_01806C | 6387.86   | 5717.226  | NM_00381C | 2974.475  | 3062.442  |
| NM_00567E | 584.032   | 1147.037  | NM_01423E | 4177.581  | 4096.839  | NM_01444E | 3882.627  | 2945.63   |
| NM_006351 | 11165.387 | 9917.181  | NM_01766E | 4665.24   | 4325.851  | NM_00521E | 3749.499  | 3001.68   |
| M33197    | 67341.32  | 63582.277 | U88837    | 993.319   | 1171.091  | M14584    | 305.019   | 1445.923  |
| NM_00468E | 3119.564  | 3758.232  | NM_01744E | 29497.77  | 27632.229 | NM_00641E | 1270.517  | 840.22    |
| AK023226  | 2629.872  | 3421.516  | AK001478  | 2771.301  | 2787.069  | AB020676  | 497.877   | 614.762   |
| AK025263  | 762.91    | 708.785   | AK025697  | 6257.233  | 4834.15   | U90942    | 46713.422 | 43704.496 |
| M33197    | 66824.883 | 61872.414 | AK021734  | 773.387   | 716.093   | NM_01836C | 1698.199  | 1488.405  |
| NM_01806E | 51441.859 | 58070.027 | AF075028  | 405.678   | 547.992   | AL365415  | 1397.612  | 936.322   |
| NM_006931 | 8644.851  | 10100.865 | D00265    | 30546.893 | 28365.678 | L29147    | 13236.513 | 10600.277 |
| NM_020344 | 10775.164 | 11583.051 | NM_00077E | 469.167   | 501.728   | NM_02022E | 5145.156  | 5567.524  |
| NM_00505C | 8120.794  | 8856.463  | NM_00455E | 46433.215 | 38336.543 | AK024685  | 2186.825  | 2768.563  |
| M33197    | 66754.336 | 66966.336 | NM_00014E | 3727.791  | 2955.049  | NM_00367E | 13259.773 | 12881.679 |
| NM_01897E | 18395.467 | 26193     | AF317889  | 770.947   | 441.073   | AF113007  | 1273.384  | 1121.365  |
| NM_00335E | 12248.721 | 15581.536 | AL137294  | 4024.205  | 3044.501  | NM_00068E | 2472.317  | 2920.485  |
| NM_005074 | 3683.634  | 3897.728  | NM_00374E | 1081.558  | 819.88    | U39573    | 680.258   | 793.634   |
| NM_00455E | 10609.318 | 9318.706  | AB037797  | 777.009   | 578.092   | D82061    | 3198.939  | 3336.805  |
| AL079296  | 1266.281  | 1451.546  | NM_00152C | 1588.105  | 1042.518  | AJ293009  | 3412.586  | 3184.346  |
| NM_01477C | 4289.583  | 3885.747  | AL050367  | 655.836   | 419.482   | NM_000374 | 2394.343  | 2685.107  |
| M33197    | 66980.625 | 64450.914 | NM_01787C | 1425.805  | 1186.876  | NM_00050E | 8737.135  | 7698.693  |
| AK023103  | 5207.525  | 6598.257  | AL133633  | 2061.659  | 1481.238  | NM_00169E | 20972.881 | 22809.139 |
| NM_01785E | 4383.114  | 6433.488  | AK026817  | 1185.401  | 1170.419  | NM_00497E | 3234.923  | 2449.735  |
| NM_01905E | 56936.406 | 59959.57  | AL157442  | 21193.842 | 19685.307 | NM_00224E | 2834.011  | 3264.893  |
| D80008    | 1885.369  | 2187.769  | AB011148  | 2278.257  | 2160.078  | D87445    | 5909.93   | 5391.503  |
| AK001069  | 60835.082 | 63572.055 | AL389938  | 39075.359 | 39402.645 | NM_00023E | 2863.224  | 2664.713  |
| NM_00035E | 7762.232  | 9052.918  | NM_00194E | 26438.273 | 24225.404 | NM_002247 | 676.068   | 798.399   |
| NM_00639E | 1485.237  | 1617.135  | NM_003507 | 866.247   | 687.69    | NM_00498C | 16401.652 | 14201.681 |
| NM_01430E | 10562.319 | 14028.646 | AK026591  | 1308.95   | 1052.57   | AB011094  | 12455.092 | 10833.096 |
| NM_001084 | 4023.766  | 5506.408  | AK001889  | 2619.872  | 3794.729  | NM_003224 | 1508.9    | 1083.228  |
| NM_01598E | 4537.083  | 6311.863  | AK025726  | 2456.526  | 3816.726  | NM_00165E | 61138.566 | 59501.727 |
| NM_01862E | 12421.192 | 13840.297 | AJ227869  | 3350.229  | 5679.245  | NM_006827 | 25857.492 | 20222.359 |
| M33197    | 66191.703 | 79416.641 | AK026189  | 496.913   | 329.509   | AK021761  | 4680.926  | 3837.115  |
| NM_005867 | 12161.504 | 14864.269 | AK026790  | 396.884   | 399.509   | AK024536  | 1045.041  | 947.061   |
| AK026031  | 46776.477 | 55350.918 | AL117613  | 7686.704  | 6721.276  | NM_00148E | 3227.518  | 3346.074  |

|           |           |           |           |           |           |           |           |           |
|-----------|-----------|-----------|-----------|-----------|-----------|-----------|-----------|-----------|
| NM_01646E | 45534     | 45290.336 | AL137753  | 3902.451  | 3782.287  | NM_01897E | 6499.829  | 6988.979  |
| BE539299  | 661.47    | 804.198   | AK021785  | 718.926   | 604.077   | NM_002591 | 10853.035 | 10832.169 |
| AF193873  | 4303.999  | 3769.016  | AL110262  | 14011.076 | 11924.732 | NM_02021E | 6447.029  | 7776.905  |
| NM_00262E | 1757.108  | 1854.233  | AK025627  | 22368.768 | 21230.723 | AK021860  | 929.385   | 1217.283  |
| AA190729  | 3587.305  | 3738.408  | AF216077  | 7105.527  | 5220.257  | AL137266  | 2924.607  | 3505.648  |
| BF974315  | 5090.697  | 6931.921  | AF086238  | 1225.603  | 1148.887  | NM_016457 | 1193.913  | 1510.861  |
| AI652705  | 5599.105  | 6055.151  | AK021612  | 12021.652 | 15041.504 | NM_005057 | 1417.18   | 1344.837  |
| AI570478  | 623.638   | 1144.513  | AF147342  | 433.32    | 468.993   | AF143321  | 817.55    | 737.132   |
| X07767    | 6672.64   | 9119.232  | AF088031  | 655.502   | 629.608   | AB046842  | 1859.812  | 1775.931  |
| AF252284  | 5840.23   | 7380.526  | AK002025  | 46101.512 | 37230.887 | NM_00485C | 1390.23   | 1546.675  |
| BU727558  | 2734.465  | 3643.278  | AK026299  | 2053.492  | 1740.876  | NM_00282E | 3927.677  | 3454.084  |
| M33197    | 14050.968 | 15562.515 | NM_017794 | 1567.383  | 1068.939  | BF306955  | 2152.609  | 2411.606  |
| AL050139  | 13933.037 | 16808.834 | AK025170  | 2929.393  | 1687.964  | NM_001394 | 5921.951  | 5234.338  |
| U90878    | 1182.704  | 1475.015  | AB033031  | 1338.63   | 1494.629  | NM_018441 | 10691.469 | 9187.413  |
| NM_006597 | 53263.625 | 61997.027 | AF085872  | 7265.854  | 11551.554 | NM_00077E | 7688.027  | 7926.477  |
| NM_01248E | 12523.938 | 11225.507 | AK026517  | 907.333   | 1411.29   | NM_00160E | 1366.744  | 1161.035  |
| NM_00349E | 7467.979  | 6970.549  | AK022538  | 14745.866 | 21151.279 | BE733234  | 807.366   | 971.959   |
| AB023420  | 14163.282 | 15882.09  | AL360257  | 1406.939  | 1951.339  | NM_001157 | 450.769   | 705.616   |
| NM_016511 | 11535.934 | 10543.594 | AK022342  | 932.772   | 1354.183  | NM_01228E | 1017.452  | 1279.736  |
| NM_00355E | 1207.596  | 1213.057  | AF147420  | 1465.234  | 1535.758  | NM_00332E | 17113.125 | 18726.898 |
| NM_00218E | 896.807   | 1087.66   | AL049312  | 3023.907  | 2478.96   | BG685310  | 1705.314  | 1691.697  |
| M33197    | 83174.086 | 64408.195 | AL050072  | 5302.387  | 4792.386  | AW300857  | 12774.664 | 12399.148 |
| NM_01322E | 663.508   | 1093.298  | AL117590  | 574.854   | 797.352   | H85962    | 22218.637 | 20997.066 |
| NM_01653E | 41111.918 | 49766.297 | AL049357  | 5227.205  | 3950.626  | BG742446  | 994.462   | 1238.096  |
| NM_014751 | 10882.888 | 11987.645 | AK027180  | 2866.351  | 2093.447  | AA864554  | 896.815   | 1383.302  |
| NM_002347 | 27873.008 | 40047.543 | NM_004544 | 12411.58  | 10892.158 | X66945    | 2582.05   | 2545.556  |
| AB046807  | 2988.99   | 4355.754  | AF086041  | 1087.525  | 1095.339  | X12830    | 2051.518  | 1640.144  |
| NM_00350E | 503.547   | 955.306   | Y15167    | 984.433   | 1100.58   | U00482    | 996.927   | 1082.178  |
| M33197    | 66312.727 | 75980.148 | AL133080  | 1754.987  | 1799.406  | K01904    | 4832.411  | 5168.258  |
| NM_01462E | 12453.001 | 18442.336 | NM_01779E | 4943.685  | 4515.087  | BE538886  | 894.494   | 805.719   |
| NM_007244 | 14534.652 | 15117.582 | AK025213  | 5907.821  | 5252.775  | NM_00222E | 3439.173  | 1545.405  |
| M30629    | 11215.042 | 11379.115 | NM_01494E | 2059.885  | 1774.845  | M57650    | 3512.591  | 3622.622  |
| M33197    | 66593.602 | 70682.148 | AL080221  | 669.227   | 773.231   | BC023978  | 917.974   | 758.13    |
| NM_01897E | 16005.309 | 15806.187 | AL137370  | 1044.834  | 1744.61   | M21302    | 1880.172  | 1507.233  |
| NM_00335E | 9581.665  | 10128.085 | AF009262  | 9500.096  | 14309.471 | NM_01634E | 2194.471  | 2025.292  |
| NM_005074 | 1790.817  | 2045.819  | AF050198  | 2030.794  | 2731.928  | AK024865  | 3143.917  | 3086.986  |
| NM_018057 | 4956.011  | 4519.992  | AK024346  | 2232.112  | 3671.066  | NM_00721C | 1208.08   | 1033.521  |
| M33197    | 66488.844 | 69699.578 | AF056422  | 1391.48   | 1408.783  | U90942    | 47823.027 | 50647.383 |
| NM_015717 | 1868.29   | 2011.005  | AF090892  | 668.298   | 823.698   | NM_01494E | 688.223   | 583.576   |
| NM_01592E | 904.241   | 848.755   | AK001089  | 1345.778  | 1226.103  | NM_01836C | 1857.939  | 1715.326  |
| NM_00366E | 1254.114  | 1196.736  | AK001919  | 1554.97   | 1293.565  | AL365415  | 1273.095  | 1355.173  |
| AF220217  | 814.016   | 1131.115  | AK021535  | 1315.252  | 1424.447  | L29147    | 20216.15  | 20326.646 |
| NM_01332E | 7751.738  | 9316.724  | AK021753  | 3395.18   | 2961.62   | NM_00152E | 24192.121 | 27107.648 |
| NM_01742E | 3174.131  | 4410.1    | AK001139  | 4768.21   | 4207.044  | NM_00605E | 3254.179  | 3965.904  |
| M33197    | 1863.874  | 3327.773  | AK002090  | 1046.034  | 812.757   | NM_00429E | 674.717   | 813.856   |
| NM_00085E | 2904.158  | 3517.455  | AK021822  | 1206.548  | 789.774   | NM_00504E | 1423.486  | 1854.794  |
| AF016903  | 60487.496 | 62723.441 | AK025246  | 6347.162  | 7057.787  | NM_018841 | 1196.377  | 930.8     |
| NM_01567E | 9922.178  | 11251.94  | AK025847  | 3331.239  | 3463.169  | NM_00522E | 815.776   | 574.993   |
| AK022267  | 693.452   | 1117.733  | AK026816  | 510.028   | 592.66    | AL133105  | 2042.948  | 2270.656  |
| NM_01604C | 3894.591  | 3834.964  | NM_014174 | 25498.568 | 42060.379 | AK022859  | 1641.157  | 1489.353  |
| AF031136  | 66673.789 | 69531.438 | AF147337  | 2680.389  | 4896.295  | NM_014864 | 3601.549  | 4064.642  |
| NM_01598E | 4361.222  | 5058.216  | AK023819  | 824.021   | 727.478   | NM_00372E | 10496.69  | 9203.697  |
| NM_01862E | 9395.284  | 11031.841 | AL359558  | 449.661   | 476.977   | NM_01435E | 4423.679  | 3659.037  |

|           |           |           |           |           |           |           |           |           |
|-----------|-----------|-----------|-----------|-----------|-----------|-----------|-----------|-----------|
| M33197    | 66647.648 | 66224.695 | AL133656  | 1954.742  | 2367.742  | NM_012481 | 883.646   | 911.658   |
| NM_005867 | 11493.535 | 12034.905 | AL050037  | 11327.254 | 9742.774  | L09102    | 9979.995  | 7378.245  |
| AK026031  | 31802.498 | 27939.623 | NM_001417 | 24867.186 | 19143.605 | NM_016247 | 2619.971  | 2136.289  |
| NM_01646E | 42380.395 | 44657.051 | AK022236  | 4106.637  | 2939.535  | AB011094  | 12663.813 | 12659.43  |
| NM_007342 | 7127.371  | 7568.705  | AK000073  | 1489.546  | 864.632   | NM_003224 | 1255.564  | 1142.642  |
| NM_005672 | 612.347   | 1073.286  | AK000618  | 1207.544  | 1005.857  | NM_006827 | 26349.246 | 25068.643 |
| D25217    | 2760.423  | 2936.683  | AK024773  | 951.004   | 845.4     | AK021761  | 5205.265  | 4594.349  |
| NM_006351 | 11943.299 | 11029.484 | X60484    | 929.224   | 1083.625  | AK024536  | 1478.131  | 1247.704  |
| M33197    | 66646.258 | 66597.211 | AF055019  | 1337.434  | 1167.486  | NM_01866E | 5904.215  | 6224.228  |
| NM_004683 | 3475.763  | 3909.232  | NM_003525 | 6416.755  | 5036.181  | NM_004227 | 1371.353  | 1076.026  |
| AK023226  | 2211.031  | 3027.846  | AF056432  | 3647.802  | 2876.411  | NM_005282 | 2043.394  | 2766.516  |
| AK025263  | 825.374   | 1357.815  | AK001987  | 21617.377 | 19895.961 | NM_00173E | 662.435   | 1075.776  |
| M33197    | 66602.75  | 68743.602 | NM_013332 | 2248.717  | 1405.82   | AB028949  | 1156.342  | 1098.313  |
| NM_001467 | 906.447   | 1007.627  | X56199    | 3220.19   | 2872.408  | AL137580  | 815.361   | 785.804   |
| NM_01806E | 60035.207 | 61172.859 | NM_005193 | 3965.84   | 3913.914  | NM_004101 | 1211.001  | 1352.918  |
| NM_006931 | 17014.938 | 21867.768 | AL162006  | 664.888   | 724.962   | NM_00299E | 27988.549 | 27981.008 |
| NM_020344 | 14145.307 | 16000.688 | NM_017971 | 26728.064 | 28602.193 | AB033114  | 324.873   | 803.704   |
| AF119868  | 621.611   | 1040.742  | AF090097  | 905.312   | 707.602   | NM_01597E | 1875.413  | 1489.555  |
| AF252284  | 4836.92   | 4745.7    | AF054998  | 779.723   | 499.671   | NM_00381C | 2819.015  | 2337.504  |
| BU727558  | 835.548   | 938.975   | AF116620  | 8736.27   | 8105.447  | NM_014443 | 3376.194  | 2099.666  |
| M33197    | 15772.197 | 18511.377 | AF293335  | 43689.078 | 44856.512 | NM_005212 | 3469.923  | 2887.795  |
| AL050139  | 13139.773 | 14058.844 | AL080065  | 717.883   | 422.245   | NM_00641E | 993.631   | 949.126   |
| NM_00455E | 12006.378 | 13145.132 | AK024431  | 11694.097 | 9028.028  | AK024715  | 779.307   | 802.669   |
| AL079296  | 1500.369  | 2007.935  | X96644    | 5288.8    | 5386.262  | BF306955  | 2290.767  | 2822.866  |
| NM_01477C | 5954.41   | 5145.991  | Z34281    | 22083.984 | 21958.264 | NM_001394 | 6005.729  | 5638.676  |
| M33197    | 66453.82  | 63701.406 | NM_01867E | 55870.551 | 55888.809 | NM_00077E | 8339.803  | 9286.662  |
| AK023103  | 5243.216  | 6491.925  | AJ008122  | 33117.715 | 28550.078 | NM_00160E | 1478.037  | 1374.483  |
| NM_01905E | 54005.035 | 58603.949 | NM_00622C | 1339.968  | 854.347   | BE733234  | 759.099   | 823.315   |
| D80008    | 2087.147  | 3442.703  | AK022667  | 31545.168 | 27356.354 | NM_02022E | 6336.008  | 6402.922  |
| X56789    | 1094.66   | 1752.202  | AK026667  | 994.557   | 734.863   | AK024685  | 2866.26   | 2717.868  |
| NM_00035E | 18434.383 | 18572.654 | AF113211  | 630.124   | 844.515   | NM_00367E | 14441.879 | 15652.27  |
| NM_00639E | 2373.961  | 2630.754  | AL117568  | 2665.187  | 2125.825  | AF113007  | 879.906   | 1643.917  |
| NM_01430E | 10440.5   | 10797.629 | NM_000843 | 559.61    | 579.082   | NM_00068E | 3102.251  | 3883.908  |
| NM_001084 | 5061.138  | 4697.21   | S71805    | 981.443   | 1280.795  | U39573    | 656.236   | 969.848   |
| M33197    | 58902.039 | 63840.957 | NM_018391 | 1350.174  | 1029.017  | D82061    | 3599.992  | 4646.728  |
| NM_014623 | 10764.874 | 11480.813 | U90917    | 610.659   | 699.98    | AJ293009  | 3512.671  | 3499.031  |
| NM_007244 | 8912.1    | 8117.548  | AK022140  | 3291.613  | 3114.153  | NM_000374 | 2292.343  | 1975.445  |
| M30629    | 7221.742  | 7083.536  | AK023372  | 23239.824 | 20652.584 | NM_000502 | 9244.21   | 7224.487  |
| AF193873  | 6071.93   | 5574.934  | U21072    | 1692.306  | 1342.708  | NM_00135E | 22107.283 | 20220.545 |
| NM_00262E | 3017.729  | 3496.561  | AK024377  | 737.604   | 402.522   | NM_00169E | 19921.572 | 18929.467 |
| M23575    | 1238.055  | 1346.878  | AK023557  | 1674.017  | 1342.972  | NM_00497E | 3439.861  | 1643.398  |
| AA190729  | 4219.178  | 4099.364  | AB040887  | 3609.895  | 2678.074  | NM_00224E | 2927.261  | 2351.463  |
| BF974315  | 5694.22   | 5428.321  | AK025196  | 4839.655  | 3985.192  | D87445    | 6410.687  | 4972.567  |
| T74985    | 1225.134  | 5138.579  | AJ227879  | 801.949   | 279.555   | NM_00023E | 3191.177  | 2670.87   |
| M80583    | 750.093   | 1251.16   | AK000401  | 2077.979  | 1243.085  | NM_002247 | 721.745   | 847.19    |
| AI570478  | 1071      | 1281.398  | AF305068  | 1731.816  | 1153.713  | NM_00498C | 19347.787 | 15874.264 |
| X07767    | 6782.412  | 6725.578  | D17231    | 43311.461 | 34916.258 | NM_01634E | 2134.286  | 2149.322  |
| AF016903  | 49508.004 | 49047.84  | AF531295  | 1666.318  | 1630.659  | AK024865  | 3256.776  | 3627.308  |
| NM_01567E | 4999.756  | 5042.97   | CY3Cy5    | 6523.785  | 171.79    | NM_00721C | 1164.658  | 1263.812  |
| NM_01604C | 3505.369  | 3877.235  | BF974315  | 7260.819  | 6562.326  | NM_001483 | 3377.553  | 4366.451  |
| U90878    | 982.225   | 1404.783  | T74985    | 833.076   | 668.875   | NM_018973 | 7298.059  | 9862.758  |
| NM_006597 | 59106.984 | 60668.27  | AI652705  | 3153.184  | 3206.058  | NM_002591 | 17142.377 | 20148.041 |
| NM_012483 | 17250.764 | 16224.809 | AA446028  | 605.525   | 734.981   | NM_02021E | 6161.012  | 6417.436  |

|           |           |           |           |           |           |           |           |           |
|-----------|-----------|-----------|-----------|-----------|-----------|-----------|-----------|-----------|
| NM_00349E | 8156.552  | 6556.551  | AW009565  | 4780.819  | 4609.029  | AK021860  | 986.857   | 1131.122  |
| NM_016511 | 13239.322 | 14736.402 | AI570478  | 1689.034  | 1904.5    | AB046816  | 1063.58   | 687.392   |
| NM_00355E | 1112.896  | 1509.633  | X07767    | 7579.824  | 6964.504  | AL137266  | 2844.374  | 3123.687  |
| NM_00218E | 787.026   | 965.16    | AF252284  | 2114.057  | 1912.792  | NM_016457 | 1287.315  | 1250.108  |
| M33197    | 74277.039 | 64018.465 | SR5       | 4981.623  | 5497.417  | NM_005057 | 1415.333  | 1510.536  |
| NM_01322E | 1615.652  | 1528.857  | SR7       | 4898.221  | 41344.477 | AF143321  | 978.171   | 867.733   |
| NM_01653E | 65890.398 | 62034.074 | SR9       | 16286.327 | 2443.983  | AB046842  | 1645.465  | 1918.057  |
| NM_014751 | 23787.127 | 24990.854 | CY3Cy5    | 6293.089  | 134.82    | NM_00485C | 1614.528  | 1919.768  |
| NM_002347 | 33984.863 | 34371.109 | NM_016511 | 5582.448  | 6384.35   | NM_00282E | 4882.74   | 5162.108  |
| AB046807  | 3147.377  | 3220.949  | NM_00355E | 1750.015  | 1658.233  | NM_01435E | 4383.598  | 4519.857  |
| NM_01806E | 44377.578 | 51021.051 | NM_00218E | 1004.655  | 757.698   | NM_012481 | 924.1     | 1009.882  |
| NM_006931 | 12228.26  | 13413.703 | NM_01653E | 40142.09  | 46499.609 | L09102    | 7776.479  | 8010.37   |
| NM_020344 | 11231.589 | 9572.557  | NM_014751 | 3825.388  | 4098.346  | NM_016247 | 2792.191  | 2658.051  |
| NM_00505C | 6128.615  | 5143.543  | NM_002347 | 18491.227 | 20117.633 | NM_001157 | 551.3     | 661.364   |
| M33197    | 66452.563 | 71952.703 | AB046807  | 2221.181  | 2232.896  | NM_01228E | 1187.076  | 1339.703  |
| NM_01897E | 18018.367 | 17385.529 | NM_007244 | 4051.252  | 4128.483  | NM_00332E | 17078.881 | 19463.121 |
| NM_00335E | 11514.196 | 8982.812  | M30629    | 3931.299  | 3947.437  | BG685310  | 1790.322  | 1974.223  |
| NM_005074 | 1983.748  | 1552.366  | AF193873  | 1455.22   | 1941.631  | AW300857  | 12375.369 | 13819.597 |
| NM_018057 | 16004.123 | 15734.545 | NM_00262E | 1012.481  | 1212.488  | H85962    | 22660.098 | 23860.855 |
| M33197    | 66504.648 | 70880.023 | AA190729  | 3371.133  | 2073.903  | BG742446  | 1070.789  | 1169.775  |
| NM_015717 | 2607.631  | 3177.681  | NM_00417C | 981.609   | 999.415   | AA864554  | 787.021   | 1200.208  |
| NM_01592E | 1413.026  | 1739.276  | NM_01592E | 930.348   | 918.237   | X66945    | 2635.683  | 2856.837  |
| NM_00366E | 1196.013  | 1532.955  | NM_00366E | 795.998   | 927.884   | X12830    | 2095.772  | 1909.042  |
| AF220217  | 706.33    | 1476.005  | AF220217  | 1828.406  | 1129.636  | U00482    | 955.158   | 901.21    |
| NM_01332E | 19682.709 | 23041.023 | NM_01332E | 9976.604  | 11030.133 | K01904    | 5962.953  | 4812.952  |
| NM_01742E | 5255.684  | 6486.463  | M33197    | 2996.769  | 2117.698  | BE538886  | 813.431   | 915.49    |
| M33197    | 3111.72   | 3541.954  | NM_00085E | 2308.396  | 2455.928  | NM_00222E | 4123.87   | 2217.619  |
| NM_00085E | 5961.005  | 7308.551  | AF016903  | 21564.543 | 26472.785 | M57650    | 4355.706  | 3885.9    |
| M33197    | 71950.07  | 63858.117 | NM_01567E | 3366.773  | 3061.277  | BC023978  | 931.091   | 1013.308  |
| NM_00035E | 10875.238 | 9730.985  | AF031136  | 45567.234 | 57662.09  | M21302    | 2162.99   | 1990.111  |
| NM_00639E | 1422.909  | 1480.615  | U90878    | 866.632   | 838.1     | NM_00521E | 3238.228  | 2953.423  |
| NM_01430E | 10287.221 | 10202.14  | NM_006597 | 40520.387 | 44644.578 | NM_00641E | 991.395   | 1024.302  |
| NM_001084 | 3115.173  | 2741.927  | NM_01248E | 8142.477  | 8659.732  | AB020676  | 504.435   | 510.692   |
| NM_01598E | 3349.263  | 3239.922  | NM_00349E | 4493.228  | 3618.434  | AK024715  | 760.646   | 650.242   |
| NM_01862E | 10177.315 | 7869.979  | AB023420  | 12407.419 | 8447.289  | U90942    | 58247.551 | 61151.289 |
| M33197    | 72644.008 | 63979.465 | NM_00734E | 6558.828  | 7257.53   | NM_01494E | 821.371   | 551.075   |
| NM_005867 | 10261.667 | 7592.756  | NM_00567E | 904.405   | 1029.231  | NM_01836C | 2072.843  | 1781.231  |
| AK026031  | 26445.199 | 16459.434 | NM_006351 | 8866.663  | 10111.322 | AL365415  | 1327.352  | 1433.633  |
| NM_00734E | 7138.152  | 9950.418  | M33197    | 66942.773 | 65966.641 | L29147    | 18626.361 | 20104.416 |
| D25217    | 3128.726  | 3365.235  | NM_00468E | 1612.746  | 1670.43   | NM_00152E | 27947.652 | 29880.479 |
| NM_006351 | 11258.979 | 13645.839 | AK023226  | 2751.869  | 2644.178  | NM_00605E | 3520.815  | 3891.241  |
| M33197    | 67679.797 | 63716.191 | AK025263  | 856.796   | 1208.189  | NM_00429E | 787.373   | 781.839   |
| NM_00468E | 4427.024  | 4528.021  | M33197    | 70855.938 | 62904.828 | NM_00504E | 888.627   | 969.325   |
| AK023226  | 2935.068  | 3699.174  | NM_001467 | 843.898   | 1084.957  | NM_00597E | 1158.414  | 1107.133  |
| AK025263  | 1131.675  | 1072.171  | NM_01806E | 26577.328 | 35528.934 | NM_00106C | 871.783   | 764.277   |
| M33197    | 66825.055 | 66506.852 | NM_006931 | 9295.185  | 8575.151  | NM_018841 | 1289.948  | 1360.717  |
| NM_00468E | 5363.73   | 4846.206  | NM_020344 | 5276.625  | 5919.681  | NM_00522E | 681.386   | 538.07    |
| AB037725  | 1073.999  | 743.499   | AF119868  | 668.946   | 658.557   | AL133105  | 2180.763  | 2585.767  |
| M33197    | 62409.898 | 60933.066 | NM_01897E | 11449.787 | 14710.3   | AK022859  | 1688.578  | 1565.907  |
| NM_01771E | 2425.156  | 2314.532  | NM_00335E | 9089.504  | 6766.703  | NM_014864 | 5064.919  | 8105.074  |
| NM_00486C | 3524.97   | 2835.318  | NM_005074 | 1328.004  | 1282.208  | NM_00372E | 12133.375 | 10911.243 |
| AF217190  | 10076.699 | 6364.598  | NM_00259E | 720.72    | 545.288   | NM_00497E | 2471.176  | 1483.698  |
| AB028981  | 39798.465 | 31090.225 | NM_00455E | 4091.365  | 5504.602  | NM_00224E | 2598.702  | 2598.867  |

|           |           |           |           |           |           |           |           |           |
|-----------|-----------|-----------|-----------|-----------|-----------|-----------|-----------|-----------|
| NM_00680C | 3654.569  | 2384.91   | AL079296  | 1005.266  | 915.687   | D87445    | 5066.516  | 4677.085  |
| NM_00272E | 6366.281  | 4496.545  | NM_01477C | 2525.801  | 3207.119  | NM_00023E | 2614.564  | 2873.677  |
| M33197    | 11178.008 | 8869.925  | M33197    | 67116.797 | 65792.148 | NM_002247 | 668.835   | 640.793   |
| NM_00455E | 7672.524  | 8175.684  | AK023103  | 4723.662  | 4942.027  | NM_00498C | 20980.563 | 22490.037 |
| AL079296  | 1388.551  | 1970.13   | NM_01785E | 5002.374  | 5523.448  | AB011094  | 12930.375 | 14116.957 |
| NM_01477C | 4877.344  | 5572.937  | NM_01905E | 51422.891 | 55949.094 | NM_003224 | 1384.911  | 1721.275  |
| AK023103  | 6584.625  | 8651.756  | D80008    | 3074.457  | 3417.999  | NM_00165E | 60502.449 | 59952.219 |
| NM_01785E | 5294.713  | 7388.4    | AK001069  | 38023.504 | 46726.645 | NM_006827 | 27389.414 | 31785.816 |
| D80008    | 2426.893  | 2771.035  | NM_00035E | 7021.951  | 9520.825  | AK021761  | 5539.472  | 5548.102  |
| X56789    | 1211.342  | 1627.654  | NM_00639E | 1000.999  | 1283.806  | AK024536  | 1494.03   | 1551.499  |
| AK001069  | 66276.234 | 69722.609 | NM_01430E | 7879.416  | 7866.797  | NM_01866E | 6311.308  | 6687.449  |
| NM_00413E | 5121.235  | 3416.567  | NM_001084 | 2674.731  | 2994.056  | NM_004227 | 1494.239  | 1440.843  |
| NM_014844 | 5635.836  | 3776.311  | NM_01862E | 8682.011  | 8843.896  | NM_00528E | 2409.735  | 2657.601  |
| M33197    | 63715.16  | 59057.078 | M33197    | 67152.398 | 63416.094 | AB028949  | 1845.993  | 1528.467  |
| NM_01849E | 7480.465  | 6063.842  | NM_005867 | 10078.194 | 12202.33  | AL137580  | 1094.512  | 904.05    |
| NM_00134E | 2758.321  | 2008.986  | AK026031  | 19855.131 | 18644.328 | NM_004101 | 1946.131  | 1803.983  |
| NM_00314E | 1415.973  | 949.348   | NM_01646E | 32577.822 | 23070.188 | NM_00299E | 31411.777 | 25675.082 |
| NM_003377 | 14283.84  | 10626.782 | BE539299  | 821.963   | 716.69    | AB033114  | 568.606   | 518.04    |
| NM_00222C | 13865.868 | 10143.183 | AF193873  | 1308.548  | 1828.123  | NM_01597E | 2135.45   | 1976.033  |
| AB033034  | 6429.103  | 4290.274  | NM_00262E | 1289.093  | 1431.966  | NM_00381C | 3040.177  | 2523.242  |
| D38169    | 2167.459  | 2464.137  | M23575    | 652.477   | 625.12    | NM_016457 | 1251.589  | 1419.966  |
| AJ293294  | 5566.344  | 7950.198  | AA190729  | 4221.583  | 4196.057  | NM_005057 | 1166.991  | 1365.471  |
| NM_018171 | 2523.83   | 3175.945  | BF974315  | 8186.265  | 7181.526  | AF143321  | 794.309   | 646.398   |
| NM_002447 | 11173.643 | 15988.298 | AI652705  | 3612.347  | 3582.135  | AB046842  | 1457.701  | 1718.917  |
| NM_01414E | 22255.156 | 31835.168 | AA446028  | 686.647   | 662.864   | NM_00485C | 1365.605  | 1442.353  |
| NM_00222E | 7124.097  | 8190.889  | M80583    | 699.981   | 889.716   | NM_00282E | 4879.7    | 5397.058  |
| NM_003151 | 7357.223  | 9221.121  | AI570478  | 1671.301  | 1608.345  | BF306955  | 2754.725  | 3037.294  |
| NM_006811 | 12261.121 | 12164.152 | X07767    | 7269.892  | 6323.652  | NM_001394 | 7234.307  | 7569.77   |
| NM_005601 | 4236.169  | 4708.298  | AF252284  | 2367.007  | 2400.723  | NM_018441 | 11633.415 | 11901.366 |
| NM_016151 | 18461.117 | 15417.451 | BU727558  | 628.694   | 621.603   | NM_00077E | 8739.615  | 8537.233  |
| NM_004324 | 2659.674  | 2247.406  | M33197    | 12554.516 | 9292.052  | NM_00160E | 1396.632  | 1572.032  |
| NM_005614 | 27338.918 | 20652.238 | AL050139  | 8612.785  | 6019.079  | BE733234  | 964.1     | 1059.739  |
| AK026270  | 2328.465  | 1303.792  | U90878    | 1343.934  | 1314.156  | NM_02022E | 6308.034  | 6541.857  |
| NM_00455E | 2656.473  | 2083.026  | NM_006597 | 49099.809 | 55916.141 | AK024685  | 2445.216  | 3240.969  |
| M33197    | 64529.301 | 63213.293 | NM_01248E | 6767.591  | 7872.251  | NM_00367E | 13800.519 | 15841.42  |
| AK023827  | 1971.628  | 1534.291  | NM_00349E | 4757.078  | 5129.8    | AF113007  | 1219.598  | 1312.043  |
| AK021702  | 4751.304  | 3153.551  | AB023420  | 15091.539 | 13483.83  | NM_00068E | 3309.694  | 3349.796  |
| NM_00388E | 1907.261  | 1542.128  | NM_016511 | 7226.629  | 7659.74   | U39573    | 2694.556  | 2627.942  |
| NM_00393E | 2380.79   | 3939.104  | NM_00355E | 1975.1    | 1665.258  | D82061    | 3270.504  | 3597.982  |
| M33197    | 61194.363 | 69794.32  | NM_00218E | 1050.947  | 1109.993  | AJ293009  | 3756.802  | 3120.725  |
| NM_00268E | 1659.409  | 2094.734  | M33197    | 69613.203 | 63174.133 | NM_000374 | 2801.232  | 2469.07   |
| NM_02036E | 731.398   | 565.273   | NM_01322E | 1626.584  | 1464.132  | NM_00050E | 11349.354 | 7919.511  |
| NM_00441E | 3353.124  | 4373.394  | NM_01653E | 40433.367 | 48413.949 | NM_00135E | 24657.047 | 22688.922 |
| NM_00727E | 30942.865 | 32329.039 | NM_014751 | 4622.385  | 4467.944  | NM_00169E | 21706.223 | 20843.717 |
| NM_00472E | 5046.795  | 4810.362  | NM_002347 | 18782.752 | 16792.217 | AF190900  | 8987.651  | 12737.308 |
| M33197    | 54788.844 | 56201.137 | AB046807  | 1978.217  | 1747.548  | NM_020404 | 12914.638 | 13954.813 |
| NM_01841E | 29418.264 | 40773.973 | M33197    | 66859.352 | 69452.07  | BE972401  | 7386.091  | 7335.26   |
| AB018299  | 34499.172 | 37283.914 | NM_01462E | 8506.476  | 9386.052  | NM_01742E | 2069.278  | 2613.316  |
| NM_00524E | 11479.559 | 8136.443  | NM_007244 | 5434.585  | 4465.563  | AB007922  | 766.743   | 818.84    |
| M33197    | 67267.906 | 62972.566 | M30629    | 4855.687  | 3720.149  | NM_01598E | 6141.971  | 5874.235  |
| NM_01621E | 16665.641 | 15124.221 | M33197    | 64581.227 | 64137.484 | NM_00374E | 34773.691 | 37729.715 |
| NM_004751 | 1909      | 1627.96   | NM_01897E | 14436.609 | 16816.682 | NM_00291C | 46042.289 | 47557.164 |
| AK025605  | 6885.284  | 6940.872  | NM_00335E | 11523.586 | 9818.218  | AC096970  | 21068.998 | 24529.4   |

|           |           |           |           |           |           |           |           |           |
|-----------|-----------|-----------|-----------|-----------|-----------|-----------|-----------|-----------|
| NM_003783 | 878.965   | 866.172   | NM_005074 | 868.423   | 1393.809  | AK024865  | 3135.012  | 3552.73   |
| NM_00700C | 7021.296  | 7061.515  | NM_018057 | 2636.714  | 2678.167  | NM_00721C | 893.446   | 996.112   |
| M23161    | 6468.545  | 4578.514  | M33197    | 63566.758 | 62006.703 | NM_001483 | 3461.179  | 5045.78   |
| NM_003197 | 8634.729  | 5514.235  | NM_015717 | 1253.936  | 1467.121  | NM_018973 | 6700.263  | 8237.849  |
| AF176705  | 5694.62   | 3801.978  | NM_015925 | 986.778   | 972.774   | NM_02021E | 6328.5    | 6952.658  |
| D29012    | 20929.381 | 22028.557 | NM_003665 | 933.145   | 968.949   | AK021860  | 1133.576  | 789.185   |
| NM_017414 | 4713.538  | 5302.026  | AF220217  | 1376.876  | 1165.831  | AL137266  | 3058.26   | 2975.776  |
| NM_002793 | 12842.46  | 18209.764 | NM_013323 | 9814.121  | 10525.398 | U95031    | 571.426   | 818.734   |
| NM_00478E | 3887.515  | 4851.276  | NM_01742E | 5989.179  | 5945.022  | NM_01428E | 14849.704 | 18680.057 |
| M33197    | 66536.078 | 69455.828 | M33197    | 2888.231  | 2596.102  | AF035300  | 942.033   | 1364.398  |
| AL442083  | 6442.306  | 7463.45   | NM_000853 | 2552.022  | 2608.716  | NM_017703 | 8512.117  | 9187.394  |
| D63487    | 5111.546  | 5926.892  | AF016903  | 24418.285 | 26261.432 | NM_01532C | 3929.118  | 4384.562  |
| AK097791  | 7118.283  | 6630.923  | NM_015675 | 3903.085  | 4096.634  | NM_00405E | 1878.605  | 1777.676  |
| NM_020367 | 810.235   | 1082.778  | AK022267  | 785.977   | 583.134   | AJ297349  | 1372.422  | 1589.509  |
| AK022705  | 3189.581  | 3392.941  | NM_01604C | 3772.168  | 3579.53   | NM_00582E | 5431.069  | 5996.286  |
| NM_016404 | 5424.116  | 6315.068  | NM_015983 | 2272.183  | 2296.954  | NM_00161E | 1723.094  | 2046.945  |
| L03426    | 8512.622  | 10046.479 | NM_018622 | 9511.769  | 10013.065 | NM_00659E | 3349.744  | 4145.165  |
| NM_020163 | 2139.118  | 2068.088  | M33197    | 67159.352 | 65112.246 | NM_004463 | 948.354   | 804.719   |
| NM_00660E | 1446.685  | 1242.13   | NM_005867 | 11915.67  | 11944.042 | NM_00593E | 1638.124  | 1000.699  |
| NM_000457 | 1752.592  | 1657.983  | AK026031  | 21227.754 | 22130.135 | U43586    | 878.058   | 893.092   |
| M34356    | 3665.029  | 2713.473  | NM_01646E | 39951.637 | 37471.02  | NM_018647 | 1166.442  | 1356.509  |
| AJ133115  | 4691.47   | 3745.067  | NM_007342 | 7517.858  | 7349.333  | NM_00302E | 717.886   | 444.848   |
| X51630    | 7985.138  | 5660.969  | NM_005672 | 1194.143  | 973.057   | NM_000721 | 50702.195 | 53233.051 |
| NM_00505E | 3426.402  | 2422.936  | D25217    | 2323.457  | 2687.509  | NM_003933 | 3321.529  | 3136.804  |
| AF208502  | 17319.01  | 8982.238  | NM_006351 | 8942.876  | 10242.473 | NM_00509E | 3279.562  | 3033.055  |
| M33197    | 61911.555 | 59964.5   | M33197    | 66968.031 | 66150.695 | NM_00005E | 6681.545  | 5940.015  |
| AF264750  | 24236.293 | 25905.002 | NM_004683 | 1696.707  | 1517.277  | NM_003163 | 10500.237 | 8871.283  |
| NM_00698C | 2528.65   | 2631.231  | AK023226  | 2178.428  | 2465.026  | NM_019057 | 2728.595  | 3278.273  |
| NM_01795E | 14270.227 | 14694.661 | NM_01806E | 30448.496 | 36018.883 | NM_002677 | 621.661   | 834.463   |
| NM_01649E | 3806.344  | 4995.771  | NM_006931 | 8589.652  | 8942.007  | NM_01620E | 2386.902  | 2634.869  |
| NM_01430E | 5067.071  | 6753.385  | NM_020344 | 6492.424  | 7119.001  | NM_00575E | 3126.484  | 3515.876  |
| M33197    | 59643.738 | 63301.105 | AF252284  | 2400.597  | 2942.688  | AF149724  | 1959.993  | 2915.59   |
| NM_004094 | 3101.443  | 2996.677  | M33197    | 14889.14  | 13272.344 | BC020745  | 1263.105  | 1230.472  |
| NM_02023E | 4476.159  | 3600.08   | AL050139  | 9860.598  | 9884.217  | NM_006367 | 12963.762 | 16197.283 |
| AK027059  | 8463.55   | 7225.309  | NM_00455E | 4640.602  | 7083.21   | NM_004354 | 4474.058  | 4921.892  |
| AF151109  | 14651.946 | 13331.151 | AL079296  | 848.772   | 1385.247  | NM_004661 | 2710.554  | 3525.477  |
| L34070    | 5970.216  | 4523.319  | NM_01477C | 2740.11   | 2879.118  | NM_00161C | 2707.202  | 2672.966  |
| AF038182  | 1834.969  | 1691.561  | M33197    | 67149.875 | 65488.809 | NM_001241 | 1227.748  | 1406.902  |
| NM_01647E | 8201.859  | 6124.034  | AK023103  | 4878.503  | 5505.687  | AF217504  | 1797.732  | 1608.906  |
| AF086472  | 1275.076  | 879.445   | NM_01785E | 4618.663  | 4708.558  | AK027102  | 4040.899  | 3208.701  |
| NM_00186E | 65348.59  | 60048.273 | NM_01905E | 48693.055 | 54879.918 | AL109714  | 722.704   | 877.08    |
| NM_006441 | 10733.746 | 6659.854  | D80008    | 3044.211  | 2722.165  | NM_004632 | 2185.552  | 2474.246  |
| NM_00191E | 2072.143  | 1395.277  | AK001069  | 42504.512 | 52729.316 | NM_01791E | 4020.104  | 4057.242  |
| NM_01824E | 6578.057  | 4459.649  | NM_00035E | 9229.546  | 12197.053 | NM_01445E | 3020.913  | 3323.961  |
| M33197    | 68810.359 | 63668.105 | NM_00639E | 1370.909  | 1330.982  | NM_00474C | 13365.084 | 12349.799 |
| AF252390  | 1506.933  | 1777.844  | NM_01430E | 8633.563  | 8145.656  | NM_00380E | 3570.069  | 3579.081  |
| NM_012117 | 24108.227 | 23324.273 | NM_001084 | 2898.566  | 2383.302  | NM_01988E | 4363.149  | 3816.402  |
| D17130    | 58868.863 | 59982.809 | NM_007244 | 3874.117  | 4438.757  | AK021957  | 56345.262 | 57339.156 |
| X76302    | 12580.017 | 18852.133 | M30629    | 4423.576  | 4650.824  | NM_016623 | 8645.831  | 10509.423 |
| AK026276  | 891.085   | 1200.739  | BE539299  | 631.519   | 750.498   | NM_001334 | 1567.1    | 1511.992  |
| X52354    | 1487.926  | 1505.855  | AF193873  | 1750.807  | 1869.718  | NM_004771 | 1800.251  | 1938.477  |
| NM_005413 | 1908.364  | 1948.099  | NM_00262E | 1656.985  | 1687.094  | AL365514  | 876.452   | 893.082   |
| NM_00231E | 2754.18   | 2956.385  | M23575    | 416.76    | 839.155   | NM_01829E | 1096.318  | 1286.514  |

|           |           |           |           |           |           |           |           |           |
|-----------|-----------|-----------|-----------|-----------|-----------|-----------|-----------|-----------|
| AK024191  | 1592.001  | 1107.659  | AA190729  | 4328.834  | 3736.382  | NM_002104 | 1065.454  | 1396.253  |
| D83781    | 3189.915  | 2406.994  | BF974315  | 6020.997  | 4716.255  | NM_005504 | 6281.595  | 7084.377  |
| AL832699  | 3481.183  | 2248.44   | AI652705  | 3180.674  | 3823.09   | AF234654  | 1896.886  | 1942.864  |
| NM_012191 | 745.648   | 732.77    | AA973397  | 6346.774  | 9268.944  | NM_000110 | 2279.789  | 2410.443  |
| M33197    | 73928.461 | 63653.262 | AI570478  | 1663.713  | 1684.55   | NM_016002 | 23701.254 | 28995.486 |
| AK000757  | 6834.025  | 4999.559  | X07767    | 6809.783  | 5588.976  | NM_014545 | 1501.243  | 1520.955  |
| AL359577  | 1798.885  | 1093.277  | AF016903  | 15188.279 | 21270.057 | NM_000531 | 742.79    | 1052.162  |
| NM_018135 | 2072.361  | 1342.161  | NM_015675 | 2882.191  | 2920.456  | NM_017832 | 1080.015  | 891.412   |
| NM_014805 | 4914.311  | 2657.116  | NM_016040 | 4570.995  | 4531.278  | NM_001713 | 3233.678  | 3123.936  |
| AF052120  | 1740.361  | 1055.009  | U90878    | 1240.517  | 1098.613  | NM_014495 | 3109.831  | 2902.234  |
| NM_014871 | 2129.405  | 3036.385  | NM_006597 | 49125.621 | 49728.527 | NM_001813 | 3255.471  | 2571.657  |
| M33197    | 62198.594 | 67577.953 | NM_012483 | 6330.374  | 6337.11   | AF055016  | 2984.72   | 2160.455  |
| AL137552  | 3234.033  | 4418.162  | NM_003495 | 4881.335  | 4964.208  | NM_014567 | 3577.884  | 2486.677  |
| AK025794  | 6980.693  | 9709.984  | NM_016511 | 7109.628  | 6811.682  | NM_017842 | 3214.102  | 2480.976  |
| NM_003541 | 688.382   | 1635.148  | NM_003555 | 1588.457  | 1878.184  | AB037809  | 1631.721  | 1619.298  |
| AK024522  | 2181.906  | 2515.743  | NM_002185 | 807.111   | 669.865   | AB011129  | 1482.474  | 1378.286  |
| M33197    | 62466.441 | 60243.832 | NM_013225 | 1217.102  | 1336.026  | NM_014391 | 5667.653  | 6217.579  |
| AK023220  | 2556.437  | 2386.025  | NM_016533 | 49181.527 | 53951.438 | NM_004270 | 2146.718  | 2318.689  |
| M33197    | 67688.664 | 62826.129 | NM_014751 | 6968.41   | 6932.164  | NM_012082 | 373.907   | 743.01    |
| AK024981  | 31081.779 | 24486.916 | NM_002347 | 19432.66  | 17784.967 | NM_001537 | 3715.406  | 4439.744  |
| AK027246  | 2206.735  | 1596.137  | AB046807  | 1745.203  | 1572.798  | U80743    | 1092.25   | 968.837   |
| U80766    | 6246.768  | 4373.002  | NM_018066 | 22970.682 | 25051.629 | NM_001352 | 3249.287  | 4150.438  |
| AK001638  | 2181.936  | 1552.343  | NM_006931 | 9135.702  | 9365.879  | D15050    | 1482.54   | 1283.357  |
| AF161386  | 11613.063 | 9013.614  | NM_020344 | 6434.637  | 6506.369  | NM_006527 | 8548.239  | 10176.067 |
| AL365369  | 4308.593  | 3371.316  | AF119868  | 853.081   | 1025.316  | NM_006627 | 2307.519  | 2595.342  |
| AK025454  | 4519.979  | 3120.357  | M33197    | 67428.477 | 63211.793 | NM_007363 | 9469.667  | 9598.419  |
| M33197    | 70525.063 | 63869.574 | NM_018976 | 15852.521 | 15143.457 | NM_003093 | 52516.719 | 57964.453 |
| X05826    | 7334.397  | 5915.61   | NM_003355 | 10985.052 | 7765.639  | U05589    | 1046.735  | 1184.977  |
| AJ001872  | 5904.649  | 5050.105  | NM_005074 | 1203.299  | 1150.048  | NM_014473 | 18055.385 | 18600.424 |
| M33197    | 66720.367 | 68484.164 | NM_018057 | 1942.879  | 1989.339  | NM_001762 | 7685.606  | 6844.126  |
| NM_005595 | 3110.848  | 2873.825  | M33197    | 66587.32  | 65309.367 | NM_016306 | 17621.619 | 13602.442 |
| Y10515    | 1452.257  | 1810.179  | NM_015717 | 1682.12   | 1349.158  | NM_003755 | 462.143   | 574.06    |
| AK023636  | 12871.479 | 9478.348  | NM_015925 | 634.989   | 880.464   | BE258640  | 7527.592  | 5205.368  |
| D25272    | 2917.013  | 2029.713  | NM_003665 | 772.111   | 836.191   | NM_003314 | 6839.276  | 5288.031  |
| M33197    | 66770.156 | 67781.25  | AF220217  | 1267.766  | 974.515   | AL355730  | 820.863   | 628.038   |
| NM_020165 | 2997.203  | 2299.398  | NM_013323 | 10968.48  | 10066.536 | U79273    | 1244.394  | 689.687   |
| AK025931  | 58431.301 | 47462.73  | NM_017426 | 5542      | 4687.537  | AK022050  | 4001.873  | 3805.694  |
| M33197    | 1004.525  | 1019.705  | M33197    | 3087.492  | 2564.042  | NM_002512 | 58714.137 | 55632.137 |
| M33197    | 65612.82  | 68291.492 | NM_000853 | 2772.927  | 2882.774  | AL365411  | 4000.821  | 4933.27   |
| AK001083  | 2586.25   | 2698.419  | NM_000359 | 6010.15   | 7693.794  | M24470    | 483.971   | 818.517   |
| AK000185  | 1879.597  | 1361.776  | NM_006395 | 1339.525  | 1301.786  | NM_016066 | 4062.519  | 5093.411  |
| NM_017962 | 2004.321  | 2138.738  | NM_014306 | 10925.813 | 11037.965 | NM_001245 | 2095.018  | 2641.882  |
| AK027227  | 491.761   | 1053.669  | NM_001084 | 2950.194  | 3261.745  | AK024677  | 676.377   | 1000.02   |
| NM_017834 | 743.268   | 1199.612  | NM_015983 | 2543.082  | 2605.114  | NM_000036 | 1560.563  | 1985.367  |
| AK000865  | 1143.568  | 1979.273  | NM_018622 | 10999.919 | 11279.195 | AF254082  | 27345.355 | 30226.484 |
| M33197    | 66724.07  | 65850.172 | M33197    | 69388.891 | 63258.621 | AF205718  | 10150.829 | 10470.363 |
| AK024779  | 1703.924  | 1396.55   | NM_005867 | 12005.386 | 12270.64  | AY004252  | 558.241   | 598.379   |
| AK024406  | 3364.681  | 2031.768  | AK026031  | 20791.021 | 21945.758 | AK027045  | 2276.898  | 2126.86   |
| AK024568  | 27177.611 | 14137.067 | NM_016465 | 38892.02  | 36846.992 | AK001814  | 3246.276  | 2756.388  |
| NM_018381 | 1153.54   | 1116.87   | NM_007342 | 7252.039  | 7419.074  | NM_007222 | 1001.675  | 635.946   |
| M33197    | 69374.477 | 63831.457 | NM_005672 | 880.707   | 744.863   | NM_003435 | 2537.918  | 1884.481  |
| AK026277  | 20277.371 | 22245.211 | D25217    | 2192.751  | 2618.482  | NM_016291 | 6161.406  | 3836.255  |
| U10509    | 2370.955  | 2877.863  | NM_006351 | 8930.65   | 9652.825  | NM_005937 | 55825.156 | 38653.539 |

|            |           |           |           |           |           |           |           |           |
|------------|-----------|-----------|-----------|-----------|-----------|-----------|-----------|-----------|
| NM_00716E  | 44379.445 | 43476.23  | M33197    | 66765.961 | 70410.625 | AK023259  | 580.973   | 800.656   |
| NM_01401E  | 10943.35  | 12318.02  | NM_004683 | 2156.133  | 1930.435  | AK001503  | 8004.337  | 14115.162 |
| AF085956   | 4764.245  | 5361.726  | AK023226  | 1852.369  | 2032.543  | AK022880  | 2193.354  | 2315.148  |
| NM_019116  | 3921.885  | 3400.039  | AK025263  | 653.194   | 972.841   | NM_003601 | 14997.69  | 18200.578 |
| AF147318   | 2939.164  | 2788.184  | M33197    | 68820.25  | 63295.957 | AK001228  | 2215.458  | 3060.719  |
| unknown (S | 1269.099  | 1038.27   | NM_001467 | 645.165   | 707.98    | AK026778  | 1586.956  | 2202.792  |
| M33197     | 66326.57  | 72774.484 | AB037725  | 1539.908  | 1591.851  | AF074987  | 2204.235  | 2424.887  |
| AL137556   | 4331.288  | 3613.115  | M33197    | 60567.551 | 65227.996 | AK001058  | 41846.031 | 41243.805 |
| NM_01469E  | 14414.148 | 9898.248  | NM_01771E | 1735.453  | 1542.303  | AK026239  | 3092.618  | 2862.386  |
| AL359055   | 4921.06   | 3493.25   | NM_00486C | 3809.978  | 4716.65   | AF086283  | 1504.996  | 1810.245  |
| NM_01490E  | 5630.569  | 4839.975  | AF217190  | 12822.792 | 12764.79  | AF088047  | 686.396   | 452.941   |
| AF086125   | 2344.838  | 2283.418  | AB028981  | 29020.008 | 37062.539 | AF086445  | 803.076   | 544.187   |
| AK023547   | 1024.95   | 1254.775  | NM_00680C | 3278.374  | 3402.063  | AF086281  | 2172.027  | 1979.603  |
| U67847     | 3040.619  | 3011.347  | NM_00247E | 1628.988  | 2355.415  | AF086372  | 764.653   | 811.543   |
| AL137321   | 6756.763  | 6043.69   | NM_00272E | 7491.239  | 7122.102  | AF086393  | 1270.933  | 1063.659  |
| M33197     | 64922.527 | 61065.273 | M33197    | 15107.827 | 13285.739 | AF070621  | 6424.288  | 5572.431  |
| AK024207   | 5593.467  | 6129.662  | AL050139  | 8421.392  | 9090.804  | NM_02024C | 3270.606  | 2743.979  |
| AK021843   | 2188.067  | 2444.991  | NM_00455E | 4547.706  | 5446.476  | AK023678  | 7728.062  | 3691.566  |
| AF075025   | 3693.037  | 3537.507  | AL079296  | 843.387   | 1316.658  | AF052090  | 3890.33   | 2284.636  |
| AF088008   | 3270.767  | 2702.424  | NM_01477C | 2527.244  | 3010.67   | AK023718  | 5227.321  | 8259.264  |
| AK023528   | 1207.154  | 1033.09   | M33197    | 66991.961 | 66616.93  | AF075089  | 5229.993  | 6418.905  |
| AK023043   | 3013.027  | 2453.271  | AK023103  | 3623.004  | 3834.034  | AF241255  | 986.888   | 1129.056  |
| M33197     | 64953.383 | 63397.719 | NM_01785E | 3832.168  | 4399.178  | AF086007  | 62683.652 | 63560.555 |
| AF147349   | 10793.617 | 11022.169 | NM_01905E | 41602.082 | 49347.992 | AK000803  | 2766.15   | 2732.135  |
| AL050346   | 33360.328 | 31013.902 | D80008    | 2963.747  | 2525.296  | AK022374  | 1409.4    | 1196.684  |
| AK001520   | 6014.196  | 6695.953  | AK001069  | 50927.973 | 45981.844 | AF085926  | 18564.402 | 20386.584 |
| D90070     | 14190.872 | 15311.433 | NM_00413E | 2194.394  | 2506.292  | AF085948  | 524.106   | 673.699   |
| M33197     | 63073.996 | 60221.801 | NM_014844 | 2094.083  | 2679.28   | AL137307  | 3859.354  | 5206.965  |
| AF086179   | 1555.182  | 1329.888  | M33197    | 63128.277 | 64164.957 | AL137468  | 6441.968  | 8091.194  |
| AK025807   | 3336.313  | 2887.2    | NM_01849E | 10100.384 | 9494.41   | AL162007  | 28005.67  | 31869.039 |
| M33197     | 65392.082 | 63534.684 | NM_00134E | 2723.365  | 2716.757  | AL390137  | 18861.67  | 21034.939 |
| AK025266   | 6933.088  | 6192.552  | NM_00314E | 1736.086  | 2283.386  | AL137340  | 906.513   | 982.42    |
| AK001843   | 5286.097  | 4331.935  | NM_003377 | 19486.643 | 19627.795 | AL137542  | 689.289   | 914.464   |
| AK000548   | 56370.617 | 48297.641 | NM_00222C | 7283.881  | 8044.022  | AL162045  | 1460.391  | 1162.125  |
| NM_00392C  | 24060.988 | 18021.959 | AB033034  | 6648.078  | 6813.06   | AK022437  | 15566.823 | 16523.535 |
| NM_004787  | 35373.281 | 24821.496 | D38169    | 2333.966  | 2674.801  | AB042410  | 705.495   | 749.711   |
| AF087984   | 9077.162  | 6886.666  | AJ293294  | 4843.51   | 4769.524  | AF086102  | 1610.658  | 1263.589  |
| AF009302   | 2234.977  | 1813.138  | NM_018171 | 1958.176  | 2457.234  | AF116682  | 43568.621 | 40594.379 |
| M33197     | 65432.852 | 63432.336 | NM_002447 | 7589.993  | 6769.702  | AL137259  | 3341.738  | 2511.977  |
| AK022273   | 5482.01   | 5469.833  | NM_01414E | 18010.834 | 20253.715 | AL122107  | 3347.079  | 2382.589  |
| NM_01588E  | 1646.364  | 1468.759  | NM_00222E | 2816.665  | 3026.681  | AF075021  | 654.384   | 415.589   |
| AK027161   | 911.14    | 662.266   | M33197    | 62722.809 | 62599.336 | AK025140  | 5922.3    | 3113.263  |
| AK024271   | 2349.068  | 2644.695  | NM_00549C | 7737.179  | 7333.262  | AK026628  | 1414.055  | 1457.497  |
| AK021650   | 12179.137 | 10229.3   | NM_003151 | 4544.692  | 4620.209  | AK023394  | 1233.264  | 1485.665  |
| AL050210   | 5136.003  | 4685.983  | NM_006811 | 9262.739  | 7852.403  | AF090093  | 15850.178 | 24951.102 |
| L37699     | 2964.068  | 2781.297  | NM_005601 | 3014.739  | 2282.486  | AF161340  | 6431.063  | 10074.596 |
| M33197     | 65448.207 | 61792.516 | NM_016151 | 14547.842 | 9931.1    | AF242771  | 1393.124  | 1583.154  |
| AL050173   | 1888.67   | 2186.929  | NM_004324 | 2288.102  | 2820.124  | NM_01856E | 11466.539 | 13660.486 |
| D80002     | 2481.962  | 2686.255  | NM_005614 | 25361.102 | 30679.701 | AF098666  | 954.901   | 994.948   |
| U17637     | 7717.488  | 7457.314  | AK026270  | 1518.08   | 2477.861  | AK021969  | 1650.62   | 2021.141  |
| AF207831   | 1093.704  | 874.247   | NM_00455E | 3494.465  | 3216.646  | AK022065  | 2209.589  | 2571.006  |
| NM_00354E  | 953.689   | 498.552   | AK023827  | 1609.835  | 1028.068  | AK022221  | 4266.048  | 5263.388  |
| M33197     | 62409.664 | 56469.609 | AK021702  | 4635.641  | 4166.471  | AK022356  | 1461.721  | 1889.488  |



|           |           |           |           |           |           |           |           |           |
|-----------|-----------|-----------|-----------|-----------|-----------|-----------|-----------|-----------|
| NM_018272 | 12516.546 | 7187.122  | NM_003885 | 3413.377  | 3079.39   | AK021998  | 2424.011  | 2051.406  |
| CY3Cy5    | 4325.927  | 216.251   | NM_003936 | 4042.609  | 3546.323  | AK022126  | 1982.011  | 1936.841  |
| R19938    | 8709.159  | 8430.769  | M33197    | 62991.703 | 61823.383 | AK022256  | 1002.597  | 765.043   |
| N94487    | 8046.797  | 7174.815  | NM_002688 | 2202.719  | 1880.614  | AK022383  | 2354.794  | 2338.836  |
| AI886795  | 4780.79   | 5157.219  | NM_020369 | 959.432   | 1062.674  | AK027041  | 2238.379  | 2198.667  |
| D10495    | 679.868   | 967.781   | NM_004415 | 2384.347  | 2435.911  | NM_005355 | 23945.666 | 16621.953 |
| BF344679  | 1406.982  | 1393.159  | NM_007278 | 24307.035 | 25481.016 | AK000937  | 871.523   | 615.673   |
| M36634    | 1245.949  | 1185.354  | NM_005219 | 24736.896 | 21547.773 | AF035306  | 1737.993  | 2081.286  |
| M14156    | 6904.745  | 7461.934  | NM_004723 | 4590.114  | 3997.095  | AK091662  | 1008.849  | 1142.918  |
| U87939    | 663.585   | 886.768   | M33197    | 42980.641 | 39409.629 | AB038318  | 860.41    | 894.582   |
| U86961    | 1407.93   | 1498.519  | NM_018413 | 22197.707 | 15337.579 | NM_016348 | 982.213   | 1344.544  |
| AK094237  | 2692.987  | 2825.513  | AB018299  | 16045.702 | 11383.918 | AK023877  | 739.457   | 824.852   |
| L07592    | 2452.83   | 1208.95   | NM_005245 | 8281.766  | 5204.225  | AK024213  | 24201.672 | 21009.646 |
| NM_006981 | 1928.918  | 1736.136  | M33197    | 66824.305 | 68722.805 | AK025093  | 464.002   | 375.113   |
| SR2       | 57680.121 | 58256.984 | NM_016219 | 13840.743 | 15084.879 | AK022184  | 1463.586  | 996.387   |
| SR4       | 13578.309 | 12033.384 | NM_004751 | 1598.102  | 1732.888  | AB007959  | 955.119   | 529.138   |
| SR6       | 2207.697  | 2014.056  | AK025605  | 6248.887  | 7243.544  | AK024153  | 1385.564  | 1714.967  |
| SR8       | 8337.257  | 25612.973 | NM_003783 | 820.549   | 1150.144  | Y10516    | 3933.575  | 4718.642  |
| SR10      | 29906.674 | 11026.296 | NM_007000 | 4797.82   | 5481.579  | U50528    | 1514.485  | 1675.012  |
| CY3Cy5    | 8317.244  | 484.513   | NM_006100 | 977.943   | 1235.567  | AB020632  | 2920.139  | 3463.85   |
| M33197    | 64635.785 | 62294.863 | NM_003197 | 10434.858 | 10990.238 | NM_018614 | 43081.156 | 49345.695 |
| NM_007369 | 1853.533  | 1827.827  | AF176705  | 2916.796  | 3247.766  | AL117549  | 1632.151  | 1861.948  |
| NM_014776 | 3697.085  | 3458.311  | D29012    | 33452.965 | 38541.977 | NM_005222 | 9820.188  | 11627.812 |
| NM_006480 | 54865.535 | 48397.059 | NM_017414 | 4729.12   | 4521.212  | BC024308  | 11913.338 | 13155.415 |
| NM_007223 | 57787.641 | 59096.031 | NM_012179 | 23841.395 | 20543.066 | NM_000538 | 2442.317  | 2418.46   |
| NM_000145 | 1108.409  | 913.234   | NM_002793 | 14411.105 | 13830.687 | AK001838  | 61810.023 | 61002.707 |
| AF030107  | 1685.126  | 1452.864  | NM_004788 | 4020.968  | 3628.363  | NM_018295 | 1481.167  | 2413.731  |
| NM_000871 | 946.081   | 896.507   | M33197    | 67004.992 | 65545.711 | AF070574  | 854.425   | 738.912   |
| M33197    | 61385.539 | 62453.641 | AL442083  | 4077.487  | 2861.959  | AF086262  | 2066.002  | 2288.189  |
| NM_018968 | 994.118   | 884.685   | D63487    | 4109.065  | 3006.918  | AF086292  | 7629.513  | 7349.469  |
| AF086924  | 58228.699 | 56344.941 | AK097791  | 4447.432  | 4271.745  | AK023769  | 464.71    | 551.824   |
| NM_000264 | 2042.224  | 2331.308  | AK022705  | 2060.052  | 1697.292  | AK024342  | 16781.359 | 14571.803 |
| AB058740  | 9165.921  | 8176.77   | NM_016404 | 6095.423  | 5581.554  | AL137712  | 6284.704  | 5431.714  |
| NM_003385 | 1639.005  | 1739.718  | L03426    | 4911.03   | 3676.583  | L77599    | 42930.445 | 32668.691 |
| NM_001888 | 1304.069  | 1371.595  | NM_020163 | 1236.647  | 1199.881  | AK021673  | 18281.943 | 17260.586 |
| M33197    | 64029.469 | 71606.07  | NM_000457 | 1343.123  | 1556.325  | AB014543  | 1953.376  | 1825.723  |
| NM_001154 | 11417.804 | 19258.031 | M34356    | 4147.652  | 4655.044  | NM_018445 | 6702.871  | 4425.714  |
| NM_001819 | 2324.779  | 2261.618  | AJ133115  | 6341.335  | 6456.646  | AK022743  | 6790.742  | 4386.72   |
| NM_016938 | 1408.824  | 965.93    | X51630    | 10096.257 | 10413.411 | NM_014627 | 1277.596  | 1534.478  |
| NM_001993 | 772.083   | 663.754   | NM_005056 | 4556.206  | 4293.265  | NM_013938 | 9279.517  | 7433.235  |
| NM_000175 | 13622.682 | 16245.964 | AF208502  | 15226.563 | 13363.52  | NM_013986 | 57706.563 | 55570     |
| NM_015725 | 9759.831  | 10855.662 | M33197    | 63646.199 | 61683.48  | U55055    | 872.056   | 916.163   |
| R61452    | 1298.271  | 1379.306  | AF264750  | 27948.65  | 24511.365 | AB018319  | 2266.791  | 2033.368  |
| NM_012455 | 7203.997  | 5465.722  | NM_006980 | 2470.017  | 2291.5    | AK001101  | 1953.241  | 1277.375  |
| NM_002806 | 10149.852 | 10899.896 | AK023904  | 2601.154  | 2647.531  | BM973473  | 1264.191  | 1299.517  |
| NM_002030 | 839.719   | 638.524   | NM_017956 | 4380.636  | 4405.541  | AK021637  | 1767.744  | 1681.672  |
| NM_006564 | 4876.927  | 4982.159  | NM_016496 | 4153.864  | 3339.305  | AK021658  | 827.2     | 683.879   |
| NM_004802 | 2429.907  | 2708.517  | NM_014309 | 6228.302  | 4021.816  | D61705    | 510.636   | 865.429   |
| M33197    | 63359.348 | 64490.461 | M33197    | 55977.598 | 50251.309 | U17631    | 958.529   | 712.201   |
| NM_000074 | 10883.476 | 10904.162 | NM_004094 | 2782.552  | 1954.74   | AL137723  | 1727.417  | 1295.127  |
| BF434335  | 32627.588 | 33036.363 | NM_020236 | 2918.15   | 2163.017  | AK024046  | 1913.089  | 1613.862  |
| M57627    | 1426.315  | 1200.003  | AK027059  | 8648.42   | 5733.907  | NM_017931 | 2669.094  | 2620.772  |
| NM_002993 | 1349.108  | 1715.944  | AF151109  | 11724.081 | 7030.434  | AK022793  | 1544.781  | 1255.612  |

|           |           |           |           |           |           |           |           |           |
|-----------|-----------|-----------|-----------|-----------|-----------|-----------|-----------|-----------|
| AK026946  | 1236.859  | 2314.735  | L34070    | 3772.578  | 2557.217  | AJ227910  | 1485.288  | 1402.623  |
| M33197    | 62268.051 | 66189.156 | AF038182  | 1954.439  | 2403.872  | X04236    | 9977.985  | 7440.557  |
| NM_003192 | 4258.01   | 4999.256  | NM_016475 | 10376.928 | 12766.283 | AK093746  | 13399.396 | 9652.789  |
| NM_018449 | 5914.531  | 5694.654  | AF086472  | 1841.815  | 2332.572  | AK027171  | 1426.019  | 1273.393  |
| AF086129  | 1563.958  | 1556.032  | NM_001865 | 64309.664 | 58730.434 | AK021945  | 5695.292  | 3950.48   |
| NM_014458 | 8396.337  | 8113.597  | NM_006441 | 13211.816 | 11387.66  | L23545    | 856.05    | 389.246   |
| AF235049  | 5638.481  | 6364.557  | NM_001918 | 2650.945  | 2592.678  | CY3Cy5    | 4847.628  | 183.105   |
| NM_001995 | 2047.386  | 2108.292  | NM_018245 | 5528.743  | 6037.131  | U13022    | 1142.227  | 625.964   |
| NM_012327 | 4800.981  | 4449.227  | NM_012117 | 19605.484 | 15819.661 | R23251    | 16346.149 | 9802.501  |
| NM_000904 | 5986.619  | 6966.517  | D17130    | 58289.539 | 53110.418 | AA702640  | 547.943   | 399.445   |
| NM_016048 | 8762.109  | 8507.67   | X76302    | 11605.03  | 8941.525  | T68583    | 2537.963  | 2034.101  |
| NM_000375 | 11872.731 | 11496.566 | X52354    | 1513.934  | 1304.923  | AA481944  | 26267.283 | 38867.957 |
| NM_018849 | 5673.883  | 6481.183  | NM_002315 | 1771.039  | 1057.317  | AF038440  | 1388.929  | 983.034   |
| AF279890  | 3995.193  | 3644.784  | AK024191  | 1866.707  | 979.91    | M31158    | 1775.031  | 2644.857  |
| NM_002236 | 4823.661  | 5822.696  | D83781    | 3436.184  | 3415.969  | H00742    | 2262.045  | 3312.907  |
| NM_016601 | 1885.584  | 2570.018  | AL832699  | 3311.06   | 4044.31   | D42108    | 1244.511  | 1861.015  |
| NM_017905 | 17259.08  | 20591.578 | NM_012191 | 961.257   | 1442.325  | BG700922  | 1594.24   | 2213.007  |
| M33197    | 62671.262 | 61850.566 | AK000757  | 9692.649  | 11305.705 | AI366068  | 1049.802  | 1695.173  |
| NM_006815 | 33196.328 | 35856.98  | AL359577  | 2634.987  | 2729.755  | N57553    | 802.38    | 901.954   |
| NM_001663 | 8143.714  | 8565.313  | NM_018139 | 2874.162  | 3294.306  | AF080158  | 2343.717  | 1700.277  |
| NM_004218 | 18706.174 | 19358.391 | NM_014805 | 4542.03   | 5348.615  | BM664556  | 887.02    | 980.557   |
| NM_016530 | 12526.29  | 12970.534 | AF052120  | 2564.391  | 2716.621  | SR5       | 5159.207  | 3509.183  |
| NM_014804 | 2082.068  | 2689.607  | M33197    | 62219.41  | 63620.711 | SR7       | 3562.764  | 18648.824 |
| L40520    | 2886.803  | 1807.826  | AL137552  | 1220.629  | 1155.539  | SR9       | 13482.143 | 1712.399  |
| NM_002633 | 20946.355 | 26919.863 | AK025794  | 4285.9    | 4815.861  | CY3Cy5    | 4569.411  | 170.428   |
| M33197    | 61996.109 | 58495.957 | NM_003541 | 780.967   | 785.163   | M33197    | 72039.047 | 63927.484 |
| NM_002878 | 7316.294  | 7693.367  | AK024522  | 999.45    | 930.128   | NM_007024 | 6684.571  | 3755.584  |
| NM_017723 | 3211.824  | 3561.653  | M33197    | 62249.66  | 60531.785 | NM_013231 | 2240.813  | 1192.663  |
| NM_000400 | 41975.773 | 41919.664 | AK023220  | 1294.246  | 840.715   | NM_012106 | 4228.507  | 2448.261  |
| M33197    | 62379.148 | 63777.254 | AK027246  | 2450.937  | 2561.355  | NM_006254 | 1142.894  | 706.978   |
| NM_002613 | 6272.272  | 6088.641  | U80766    | 5911.104  | 6969.774  | X95425    | 1579.787  | 2439.162  |
| NM_004419 | 7432.216  | 9242.915  | AK001638  | 2006.839  | 2612.361  | NM_004422 | 3404.487  | 4235.743  |
| NM_018650 | 2874.607  | 3664.209  | AF161386  | 12953.683 | 14663.254 | NM_016562 | 1382.811  | 1665.174  |
| AK026945  | 13319.978 | 16786.164 | AK025454  | 4447.282  | 5390.723  | M33197    | 66316.547 | 71967.477 |
| NM_002828 | 8032.696  | 7306.524  | M33197    | 65443.508 | 61976.391 | NM_004895 | 6996.99   | 11006.76  |
| NM_014369 | 1258.818  | 1371.285  | X05826    | 12631.574 | 11380.944 | U59748    | 1195.849  | 1887.364  |
| M33197    | 62495.051 | 61810.66  | AJ001872  | 1902.141  | 2068.828  | NM_014303 | 18256.146 | 13590.192 |
| NM_001398 | 24167.885 | 27278.012 | M33197    | 62609.301 | 61789.996 | L02922    | 9646.301  | 6703.124  |
| AB050049  | 5259.747  | 5589.645  | Y10515    | 589.864   | 856.823   | NM_001797 | 1086.64   | 798.44    |
| J05125    | 2311.647  | 2646.914  | AK023636  | 4590.306  | 4008.422  | NM_003154 | 1693.106  | 1024.021  |
| NM_001993 | 654.184   | 860.62    | D25272    | 1359.619  | 806.963   | AK023459  | 3130.461  | 3159.383  |
| NM_000175 | 12953.761 | 11257.207 | M33197    | 67062.281 | 67584.586 | NM_012139 | 4776.775  | 2731.6    |
| NM_015725 | 10439.867 | 11199.521 | NM_020168 | 1748.511  | 1058.427  | AF121856  | 4674.778  | 3490.592  |
| R61452    | 1345.576  | 1763.6    | AK025931  | 40456.953 | 51701.664 | NM_006421 | 3356.565  | 6075.418  |
| R19938    | 10912.66  | 12114.407 | M33197    | 1379.549  | 1749.254  | NM_017457 | 16490.455 | 25608.225 |
| N94487    | 8505.186  | 8665.371  | M33197    | 65997.039 | 69099.781 | NM_003765 | 8977.536  | 11483.279 |
| AI886795  | 4462.933  | 4686.265  | AK001083  | 2493.382  | 2087.101  | NM_005868 | 825.506   | 2035.519  |
| D10495    | 824.163   | 852.28    | AK000185  | 1096.624  | 913.527   | NM_018202 | 14893.453 | 19571.395 |
| BF344679  | 1887.984  | 2165.827  | NM_017962 | 923.541   | 1000.73   | AB023197  | 3983.532  | 6376.151  |
| M36634    | 1795.567  | 2627.172  | AK027227  | 458.526   | 1100.299  | NM_022173 | 4731.16   | 6644.747  |
| U87939    | 760.732   | 859.31    | AK000865  | 1217.893  | 1064.237  | AB040970  | 3175.253  | 2982.421  |
| U86961    | 1244.495  | 1602.783  | M33197    | 66970.211 | 67749.039 | NM_018330 | 3198.304  | 3195.382  |
| NM_005191 | 903.991   | 715.85    | AK024779  | 672.721   | 887.381   | AB023222  | 659.421   | 415.782   |

|           |           |           |           |           |           |           |           |           |
|-----------|-----------|-----------|-----------|-----------|-----------|-----------|-----------|-----------|
| AK094237  | 2615.927  | 3050.733  | AK024406  | 1012.405  | 783.805   | M33197    | 65331.164 | 65378.09  |
| L07592    | 1125.902  | 1323.391  | AK024568  | 8466.807  | 6117.709  | U50342    | 1751.05   | 1440.757  |
| NM_006981 | 1075.253  | 1101.853  | NM_018381 | 1170.254  | 1625.409  | NM_00029E | 699.596   | 684.049   |
| M33197    | 63783.082 | 61836.609 | M33197    | 66917.531 | 68301.828 | AF103795  | 470.76    | 443.462   |
| AK027244  | 1094.343  | 1115.731  | AK026277  | 25163.176 | 23503.959 | U80018    | 557.928   | 524.334   |
| NM_01844E | 5094.939  | 3872.637  | U10509    | 2752.051  | 2930.677  | NM_000717 | 1130.523  | 649.785   |
| AF086129  | 1015.371  | 1175.4    | NM_00716E | 29674.242 | 35608.859 | NM_007107 | 10918.449 | 20130.383 |
| NM_01445E | 8026.494  | 6218.021  | NM_01401E | 11068.563 | 11699.271 | NM_00631E | 3868.818  | 4804.195  |
| AF235049  | 5347.538  | 6267.027  | AF085956  | 6215.445  | 6520.834  | Z36813    | 3561.371  | 4752.786  |
| M33197    | 65957.008 | 71505.609 | NM_019116 | 2515.642  | 2337.211  | NM_00666C | 4666.513  | 3536.944  |
| NM_00736E | 1721.762  | 2116.914  | AF147318  | 1674.461  | 1507.757  | M33197    | 10898.738 | 7250.208  |
| NM_01477E | 4328.224  | 4692.464  | unknown ( | 951.433   | 903.415   | NM_00404E | 6323.784  | 4011.441  |
| AF030107  | 2059.62   | 1731.773  | M33197    | 63987.805 | 63269.621 | NM_001891 | 1382.491  | 789.858   |
| NM_000871 | 1026.096  | 1206.802  | AL137556  | 1382.055  | 1319.856  | NM_00144C | 31821.555 | 19879.26  |
| M33197    | 62330.781 | 63695.484 | NM_01469E | 3595.039  | 2727.794  | NM_001201 | 521.049   | 307.081   |
| NM_01896E | 960.15    | 1177.204  | AL359055  | 2112.429  | 1731.832  | NM_01661E | 1722.224  | 692.046   |
| NM_000264 | 1500.613  | 1453.935  | NM_01490E | 4139.992  | 2819.787  | AB014568  | 28360.979 | 25667.861 |
| AB058740  | 10509.072 | 8784.468  | AF086125  | 1202.091  | 1897.351  | NM_01224E | 5078.501  | 8392.149  |
| NM_00338E | 1666.789  | 2284.661  | AK023547  | 1380.7    | 1384.164  | NM_014067 | 11179.469 | 15114.669 |
| NM_00188E | 728.709   | 878.857   | U67847    | 2410.137  | 2624.325  | NM_002914 | 8305.254  | 11341.452 |
| M33197    | 62422.684 | 65370.059 | AK021933  | 1289.972  | 2147.828  | NM_02038E | 2314.393  | 2434.504  |
| NM_001154 | 11098.7   | 14284.143 | AL137321  | 6995.681  | 6984.698  | NM_014877 | 454.391   | 737.568   |
| NM_01693E | 994.613   | 965.026   | M33197    | 64213.891 | 69186.266 | NM_006541 | 1574.25   | 2540.444  |
| M33197    | 62635.551 | 62250.539 | AK024207  | 5169.901  | 4710.847  | NM_00432E | 1705.439  | 1342.834  |
| NM_00681E | 36197.027 | 47604.078 | AK021843  | 1722.427  | 1807.413  | NM_004581 | 3040.393  | 3116.334  |
| NM_00166E | 6969.323  | 4873.758  | AF075025  | 2911.132  | 3119.46   | NM_006817 | 8269.952  | 7245.948  |
| NM_00421E | 17356.98  | 12431.214 | AF088008  | 2856.566  | 2461.606  | NM_015921 | 25338.594 | 19666.576 |
| NM_01653C | 12408.02  | 11276.822 | AK023528  | 719.173   | 795.827   | AB040900  | 11199.598 | 9583.675  |
| NM_014804 | 1619.646  | 2097.677  | AK023043  | 1916.739  | 2033.694  | NM_001797 | 1503.293  | 799.714   |
| NM_01245E | 7080.282  | 7741.053  | M33197    | 63888.902 | 62248.449 | NM_003154 | 1368.529  | 557.599   |
| NM_00280E | 10407.025 | 11570.543 | AF147349  | 14512.593 | 13029.417 | AK023459  | 5453.27   | 8149.997  |
| NM_00171E | 1187.416  | 1653.559  | AL050346  | 9112.086  | 7957.273  | U13022    | 1162.344  | 1337.616  |
| NM_00203C | 790.877   | 731.92    | AK001520  | 6000.025  | 5302.512  | AA702640  | 883.932   | 1176.656  |
| NM_006564 | 5285.703  | 5347.956  | D90070    | 8352.623  | 7078.728  | T68583    | 2532.593  | 2690.913  |
| NM_00298E | 1736.069  | 1416.104  | M33197    | 53015.551 | 39821.113 | AA481944  | 24925.902 | 21185.838 |
| NM_000074 | 10517.869 | 8531.977  | AF086179  | 1101.224  | 617.561   | AF038440  | 619.21    | 916.096   |
| NM_02039E | 619.922   | 888.96    | AK025807  | 3862.953  | 2000.11   | M31158    | 1612.619  | 2158.763  |
| BF434335  | 28597.104 | 28125.639 | M33197    | 63620.875 | 58911.43  | H00742    | 1793.502  | 835.471   |
| M57627    | 1277.164  | 1514.266  | AK025266  | 5189.605  | 6787.779  | D42108    | 884.933   | 509.978   |
| NM_00299E | 1279.196  | 1551.963  | AK001843  | 5261.449  | 6673.049  | BG700922  | 1450.325  | 1266.585  |
| AK026946  | 1816.31   | 1918.376  | AK000548  | 54821.043 | 52917.094 | AI366068  | 920.966   | 766.519   |
| M33197    | 60681.695 | 64447.918 | NM_00392C | 17886.488 | 19013.844 | N57553    | 584.546   | 345.601   |
| NM_00319E | 4758.68   | 4392.061  | NM_004787 | 13954.278 | 18315.758 | AF080158  | 1928.664  | 1201.589  |
| NM_00282E | 9797.466  | 6849.712  | AF087984  | 7103.233  | 7090.055  | BM664556  | 1077.809  | 1049.493  |
| NM_01436E | 2522.23   | 1923.861  | AF009302  | 2581.255  | 2145.212  | M33197    | 66100.391 | 65769.656 |
| M33197    | 63509.508 | 59306.926 | M33197    | 62933.078 | 59319.805 | NM_01654E | 3383.86   | 3187.893  |
| NM_00139E | 26506.086 | 22075.514 | AK022273  | 1598.148  | 1714.176  | NM_00029E | 589.622   | 371.092   |
| AB050049  | 5507.383  | 4619.016  | AK024271  | 2485.834  | 1672.761  | AF026932  | 1115.302  | 935.01    |
| J05125    | 764.321   | 900.879   | AK021650  | 4356.753  | 4321.164  | AF103795  | 624.76    | 1175.111  |
| NM_005164 | 534.371   | 884.31    | AL050210  | 1687.828  | 3393.92   | NM_00621E | 490.672   | 718.595   |
| NM_00199E | 1871.931  | 2127.226  | L37699    | 1503.056  | 1280.182  | NM_007024 | 7562.931  | 8243.592  |
| AY004175  | 3247.797  | 3016.269  | M33197    | 66805.094 | 69073.438 | NM_013231 | 2498.45   | 2798.495  |
| M33197    | 62463.102 | 58478.379 | AL050173  | 1092.388  | 903.173   | NM_01210E | 4810.692  | 5106.552  |

|           |           |           |           |           |           |           |           |           |
|-----------|-----------|-----------|-----------|-----------|-----------|-----------|-----------|-----------|
| NM_012327 | 5228.914  | 5466.161  | D80002    | 1777.741  | 1422.137  | NM_006254 | 737.976   | 770.376   |
| NM_01604E | 9986.358  | 11974.085 | U17637    | 2256.826  | 2070.856  | X95425    | 1504.823  | 1396.726  |
| NM_00037E | 12253.963 | 13472.852 | M33197    | 57473.324 | 47729.066 | NM_00442E | 3207.404  | 4440.49   |
| AJ000096  | 997.096   | 1524.032  | NM_018272 | 3547.618  | 1925.894  | NM_01656E | 987.371   | 683.223   |
| M33197    | 62563.863 | 58438.844 | CY3Cy5    | 2879.363  | 132.38    | M33197    | 63776.336 | 65123.762 |
| AF279890  | 2986.403  | 2669.835  | R19938    | 7685.479  | 7859.897  | AY009399  | 14465.92  | 10793.413 |
| NM_00223E | 3865.762  | 3778.282  | N94487    | 4987.436  | 7258.772  | NM_00489E | 4318.786  | 3703.91   |
| NM_01206E | 3737.807  | 5245.72   | AI886795  | 4882.546  | 4923.878  | U59748    | 670.216   | 669.441   |
| NM_016601 | 2220.127  | 2454.797  | D10495    | 1173.528  | 858.436   | NM_01430E | 10980.967 | 5997.878  |
| NM_01790E | 16366.04  | 16464.428 | BF344679  | 1737.731  | 1209.146  | M33197    | 66217.188 | 72161.633 |
| NM_006981 | 1786.658  | 1886.602  | M36634    | 917.76    | 907.505   | M95610    | 7294.228  | 7131.164  |
| M33197    | 61928.391 | 60101.922 | M14156    | 8240.122  | 7841.955  | NM_00311E | 966.17    | 1118.533  |
| L40520    | 2782.841  | 2946.531  | U87939    | 807.6     | 1088.405  | L02922    | 9404.681  | 8413.725  |
| NM_00263E | 22515.172 | 28675.244 | U86961    | 1091.852  | 1104.263  | M33197    | 12619.157 | 6996.117  |
| NM_00646E | 6406.862  | 6329.034  | AK094237  | 2637.948  | 2312.102  | NM_00404E | 7127.175  | 11426.96  |
| AK024750  | 10204.689 | 9088.53   | NM_006981 | 993.03    | 858.794   | NM_001891 | 1629.62   | 1436.711  |
| NM_00040C | 37206.141 | 38764.762 | SR2       | 49887.984 | 42300.527 | NM_01213E | 5668.241  | 5229.548  |
| M33197    | 61893.008 | 60623.352 | SR4       | 12127.298 | 12755.905 | AF121856  | 3868.41   | 3308.851  |
| NM_00261E | 4953.713  | 4843.986  | SR6       | 2111.288  | 2167.669  | NM_006421 | 2735.973  | 3262.477  |
| AK026945  | 14849.464 | 20494.23  | CY3Cy5    | 3781.626  | 162.086   | NM_017457 | 16533.59  | 18293.74  |
| NM_00188E | 1247.164  | 1072.876  | NM_00736E | 1351.451  | 1468.098  | NM_00376E | 8283.06   | 9331.222  |
| M33197    | 61148.031 | 60432.629 | NM_01477E | 2112.81   | 2045.91   | NM_00586E | 703.883   | 251.367   |
| NM_001154 | 12226.028 | 12059.726 | NM_00648C | 25447.82  | 28837.75  | M33197    | 57380.09  | 38484.617 |
| NM_00181E | 2003.654  | 1613.511  | NM_00722E | 46679.207 | 38665.59  | NM_01820E | 10743.954 | 7523.298  |
| NM_00017E | 14291.302 | 16188.493 | NM_00014E | 1160.377  | 904.699   | AB023197  | 2300.289  | 2429.828  |
| NM_01572E | 12859.494 | 13284.546 | AF030107  | 1282.432  | 1222.207  | NM_02217E | 3088.711  | 2570.727  |
| R61452    | 1722.094  | 2045.273  | NM_000871 | 917.166   | 705.782   | AB040970  | 2333.86   | 1600.786  |
| R19938    | 10682.34  | 11832.645 | M33197    | 60297.102 | 60605.008 | NM_01833C | 2186.148  | 1815.451  |
| AI886795  | 6008.824  | 6867.148  | NM_01896E | 1273.468  | 847.633   | M33197    | 64793.57  | 61704.426 |
| BF344679  | 1578.395  | 2071.393  | AF086924  | 57761.527 | 56957.59  | U50342    | 1340.117  | 1579.761  |
| M36634    | 1482.879  | 1511.892  | NM_000264 | 929.349   | 832.432   | NM_015921 | 25806.811 | 20100.838 |
| M14156    | 8446.956  | 8999.92   | AB058740  | 9283.902  | 8632.527  | AB040900  | 9039.679  | 12947.351 |
| U87939    | 1065.206  | 2062.449  | NM_00188E | 615.13    | 474.564   | NM_00108C | 449.729   | 681.077   |
| U86961    | 800.192   | 1217.178  | M33197    | 61376.66  | 62282.191 | U80018    | 796.456   | 801.098   |
| L07592    | 1487.199  | 1593.01   | NM_001154 | 10133.217 | 9221.339  | NM_000717 | 1066.992  | 1034.686  |
| BF434335  | 38280.141 | 27383.191 | NM_00181E | 1261.134  | 982.498   | M33197    | 65599.336 | 66035.547 |
| M57627    | 1043.365  | 1016.489  | NM_00199E | 805.729   | 1452.01   | NM_00484E | 3061.26   | 3249.849  |
| NM_00299E | 1916.404  | 1639.04   | NM_00017E | 12324.069 | 14102.665 | NM_007107 | 9219.274  | 4774.135  |
| AK026946  | 1776.135  | 1730.248  | NM_01572E | 11033.971 | 13254.809 | NM_000047 | 11487.646 | 11700.039 |
| M33197    | 62071.707 | 59592.145 | R61452    | 1227.142  | 1135.306  | NM_00631E | 2465.091  | 1931.422  |
| NM_00319E | 5169.405  | 4223.416  | NM_01245E | 5735.095  | 6145.304  | NM_01822E | 3028.817  | 2072.903  |
| NM_01844E | 5424.711  | 5045.686  | M33197    | 61885.664 | 63798.906 | Z36813    | 2686.258  | 2547.217  |
| AF086129  | 1131.673  | 1445.809  | NM_00171E | 1012.367  | 1343.789  | NM_00666C | 4062.528  | 4223.16   |
| NM_01445E | 10275.092 | 9020.622  | NM_00203C | 962.808   | 902.228   | NM_00668E | 27045.789 | 26225.359 |
| AF235049  | 5790.551  | 6318.347  | NM_006564 | 5424.842  | 5337.814  | AF080158  | 2359.328  | 2061.177  |
| M33197    | 66151.203 | 64479.371 | NM_00480E | 2089.518  | 1990.029  | BM664556  | 1182.15   | 2105.73   |
| NM_00736E | 2101.504  | 2014.938  | M33197    | 58123.047 | 61083.156 | M33197    | 63370.531 | 64527.324 |
| NM_01477E | 3686.337  | 3054.751  | NM_000074 | 9741.54   | 9691.535  | NM_01654E | 4292.674  | 4758.633  |
| NM_00648C | 62409.66  | 57566.922 | BF434335  | 21805.77  | 15085.3   | NM_00144C | 32863.84  | 41726.375 |
| NM_00722E | 62448.34  | 60285.195 | NM_00299E | 1592.344  | 1539.81   | NM_001201 | 662.6     | 669.927   |
| NM_00014E | 1265.691  | 1512.884  | AK026946  | 1427.067  | 1374.887  | NM_01661E | 1854.819  | 1605.728  |
| AF030107  | 1725.844  | 1793.33   | M33197    | 58594.445 | 55364.309 | AB014568  | 27555.529 | 22431.898 |
| NM_000871 | 1767.49   | 1779.768  | NM_00319E | 3301.588  | 3677.396  | NM_01224E | 5435.251  | 5431.311  |

|           |           |           |           |           |           |           |           |           |
|-----------|-----------|-----------|-----------|-----------|-----------|-----------|-----------|-----------|
| M33197    | 62937.246 | 58583.16  | NM_018449 | 5488.925  | 5446.971  | AK022546  | 4178.836  | 2617.288  |
| NM_01896E | 1148      | 1203.722  | AF086129  | 1349.392  | 1434.768  | NM_014067 | 7889.137  | 5388.384  |
| AF086924  | 61492.027 | 57640.793 | D79994    | 411.859   | 575.458   | NM_002914 | 5449.861  | 3481.29   |
| AB058740  | 10724.864 | 11938.942 | NM_01445E | 6525.187  | 8682.07   | NM_02038E | 1608.302  | 1320.484  |
| NM_00338E | 840.807   | 991.459   | AF235049  | 4117.86   | 3928.125  | NM_006541 | 1005.908  | 774.503   |
| AF279890  | 6306.393  | 3794.954  | NM_00199E | 2012.2    | 2224.582  | NM_00432E | 1686.091  | 1686.37   |
| NM_00223E | 8403.684  | 6467.463  | NM_00018E | 8404.097  | 12858.378 | NM_004581 | 3007.704  | 3329.671  |
| NM_01206E | 8943.929  | 7053.063  | AY004175  | 1835.819  | 1904.043  | NM_006817 | 8397.618  | 10052.28  |
| NM_00168E | 62931.957 | 57882.75  | M33197    | 58524.832 | 61769.305 | NM_00710E | 10407.151 | 15762.817 |
| NM_016601 | 5516.397  | 7241.864  | NM_012327 | 3515.771  | 3053.654  | M33197    | 66279.18  | 72242.789 |
| NM_01790E | 25366.295 | 26541.264 | NM_000904 | 5701.528  | 6352.316  | M95610    | 13891.483 | 20371.119 |
| M33197    | 65269.918 | 71029.352 | NM_01604E | 5919.667  | 5774.292  | NM_00311E | 1920.996  | 2314.829  |
| NM_00681E | 35931.473 | 38986.676 | NM_00037E | 8435.043  | 7812.241  | L02922    | 13266.072 | 13605.063 |
| NM_00166E | 7753.426  | 7836.737  | NM_00026E | 783.154   | 441.08    | NM_001797 | 1923.096  | 2036.014  |
| NM_00421E | 19903.303 | 20956.617 | NM_01884E | 6820.751  | 6543.769  | NM_003154 | 1561.586  | 1607.978  |
| NM_01653C | 12495.575 | 14341.277 | AJ000096  | 759.089   | 850.475   | NM_00423E | 653.111   | 597.783   |
| NM_014804 | 2012.248  | 2539.012  | M16796    | 455.511   | 670.215   | AK023459  | 4834.777  | 5398.661  |
| NM_01245E | 9799.249  | 8630.352  | AF279890  | 3484.472  | 3109.669  | U13022    | 1371.631  | 1565.745  |
| NM_00280E | 10969.063 | 11650.664 | NM_00223E | 3747.892  | 3127.578  | AA702640  | 638.392   | 579.149   |
| M33197    | 66088.117 | 64954.988 | NM_01206E | 4323.165  | 3586.519  | T68583    | 2010.781  | 1262.704  |
| NM_00171E | 1164.893  | 1717.827  | NM_016601 | 1537.019  | 1455.259  | AA481944  | 22949.498 | 17487.951 |
| NM_00203C | 2143.597  | 3056.667  | NM_01790E | 13620.611 | 15567.481 | AF038440  | 715.953   | 622.197   |
| NM_00607E | 1238.517  | 1324.315  | M33197    | 59823.051 | 66459.516 | M31158    | 1389.126  | 1211.956  |
| NM_006564 | 5560.73   | 5588.877  | NM_00681E | 25226.238 | 36576.145 | D42108    | 744.177   | 826.439   |
| NM_00480E | 1611.642  | 1790.052  | NM_00166E | 4846.842  | 5885.759  | BG700922  | 1482.839  | 1932.126  |
| M33197    | 59638.828 | 62697.543 | NM_00421E | 12467.101 | 13981.872 | AI366068  | 1186.199  | 1652.923  |
| NM_000074 | 9118.97   | 8814.662  | NM_01653C | 9787.976  | 9175.253  | N57553    | 674.337   | 896.192   |
| M33197    | 63219.879 | 65347.09  | NM_014804 | 1609.13   | 1928.388  | AB040970  | 3028.121  | 4155.658  |
| NM_00261E | 9823.951  | 11665.034 | L40520    | 2720.867  | 3355.014  | NM_01833C | 2819.439  | 3629.172  |
| NM_00441E | 14587.372 | 10974.344 | NM_00263E | 14787.95  | 14640.501 | AB023222  | 553.988   | 1014.855  |
| U47635    | 10914.041 | 12780.878 | M33197    | 57861.859 | 57154.367 | AB033088  | 567.149   | 884.36    |
| NM_01865C | 5367.399  | 6562.662  | NM_00287E | 9141.79   | 9914.814  | M33197    | 66089.023 | 66523.008 |
| AK026945  | 14588.774 | 19379.494 | NM_01772E | 3055.953  | 2559.061  | U50342    | 2345.95   | 2575.463  |
| NM_00282E | 10109.297 | 10374.685 | AK022922  | 2616.196  | 2124.467  | NM_00029E | 775.871   | 751.455   |
| NM_01436E | 1014.277  | 1236.895  | NM_00646E | 6000.801  | 6948.032  | AF103795  | 712.977   | 799.705   |
| M33197    | 62787.078 | 61146.75  | NM_00040C | 25077.986 | 28495.359 | NM_00621E | 605.15    | 630.91    |
| NM_00139E | 26964.055 | 27648.811 | M33197    | 58070.809 | 58878.25  | NM_013231 | 3377.061  | 2461.491  |
| AB050049  | 4538.69   | 4514.614  | NM_00261E | 4469.169  | 3031.497  | NM_01210E | 3722.983  | 2392.717  |
| NM_00018E | 11832.003 | 11538.562 | NM_00441E | 8261.147  | 6443.818  | NM_006254 | 1066.404  | 1053.593  |
| AY004175  | 2451.681  | 2741.82   | NM_01865C | 2569.767  | 2290.623  | X95425    | 977.693   | 880.034   |
| M33197    | 63425.797 | 67466.398 | AK026945  | 13484.486 | 13556.453 | NM_00442E | 2108.134  | 1887.078  |
| NM_012327 | 4717.673  | 5939.583  | NM_00282E | 6499.097  | 7352.242  | NM_01656E | 631.39    | 463.474   |
| NM_000904 | 6697.814  | 7904.341  | NM_01436E | 1342.94   | 1621.07   | M33197    | 66115.086 | 64013.875 |
| NM_01604E | 8467.742  | 9133.022  | M33197    | 60725.031 | 59371.531 | AY009399  | 14877.385 | 14597.644 |
| NM_00037E | 11206.187 | 9140.809  | NM_00139E | 27702.551 | 25708.668 | NM_01430E | 6004.122  | 4584.846  |
| NM_01884E | 4768.025  | 5279.842  | AB050049  | 4832.638  | 4475.564  | NM_00666C | 5836.179  | 9703.719  |
| AJ000096  | 702.722   | 1108.369  | J05125    | 989.838   | 1108.844  | NM_00148E | 646.22    | 665.5     |
| AF015910  | 62818.203 | 61830.559 | NM_00017E | 9000.675  | 9395.429  | NM_004727 | 610.041   | 681.378   |
| BC009993  | 5310.93   | 7218.027  | NM_01572E | 5917.272  | 6079.346  | M33197    | 14540.509 | 15396.339 |
| M33197    | 62707.609 | 63621.797 | R61452    | 846.139   | 1157.985  | NM_00404E | 7233.407  | 5476.195  |
| NM_016824 | 5202.629  | 5152.291  | R19938    | 7493.775  | 5972.1    | NM_001891 | 1656.321  | 1110.859  |
| NM_003031 | 5858.765  | 5843.28   | N94487    | 7806.269  | 7740.966  | NM_01213E | 5066.729  | 4053.273  |
| NM_00717C | 1358.507  | 1758.702  | AI886795  | 5545.35   | 5324.173  | NM_006421 | 2346.718  | 2229.615  |

|           |           |           |           |           |           |           |           |           |
|-----------|-----------|-----------|-----------|-----------|-----------|-----------|-----------|-----------|
| NM_00300E | 713.078   | 1157.334  | D10495    | 857.913   | 713.21    | NM_017457 | 13462.914 | 12508.483 |
| M33197    | 62110.988 | 67252.969 | BF344679  | 1804.422  | 1685.089  | NM_00376E | 6038.958  | 5510.47   |
| L40520    | 3798.504  | 4640.401  | M36634    | 1224.135  | 1497.924  | NM_01820Z | 9162.181  | 8398.904  |
| NM_00263Z | 19949.443 | 27704.645 | M14156    | 9016.867  | 12592.573 | AB023197  | 1730.361  | 1594.901  |
| M33197    | 61461.621 | 61453.262 | U87939    | 748.329   | 1081.488  | NM_02217Z | 2478.846  | 2405.712  |
| NM_00287E | 9983.105  | 9132.116  | U86961    | 1042.656  | 881.935   | NM_00570E | 3929.553  | 5296.497  |
| NM_01772Z | 2980.978  | 2927.127  | AK094237  | 2375.687  | 2292.327  | NM_00432E | 1831.526  | 2548.33   |
| AK022922  | 2307.22   | 2565.977  | L07592    | 444.001   | 574.657   | NM_004581 | 4292.7    | 6858.12   |
| NM_00646Z | 6140.82   | 6443.362  | NM_006981 | 1163.646  | 962.75    | NM_006817 | 10036.262 | 11164.983 |
| NM_00040C | 41126.383 | 45908.305 | M33197    | 61820.621 | 64091.805 | NM_015921 | 30110.109 | 37095.676 |
| NM_01588E | 4309.854  | 4817.946  | AK027244  | 1101.016  | 942.712   | AB040900  | 13696.979 | 14343.104 |
| NM_01588E | 62167.496 | 56081.656 | NM_01844E | 3345.988  | 3584.822  | U80018    | 681.028   | 389.027   |
| NM_00021Z | 1275.134  | 1312.445  | AF086129  | 783.337   | 902.05    | NM_000717 | 1010.692  | 729.425   |
| M33197    | 63856.891 | 60303.93  | NM_01445E | 2736.854  | 3253.275  | NM_00484E | 1119.959  | 1117.249  |
| NM_00427E | 5148.887  | 5321.628  | AF235049  | 3414.781  | 3064.665  | NM_007107 | 8770.882  | 8269.611  |
| NM_00233Z | 9818.009  | 11601.651 | M33197    | 60357.313 | 57080.516 | NM_000047 | 4439.188  | 4455.504  |
| NM_00285E | 3643.662  | 3531.837  | NM_00736E | 1897.546  | 1953.644  | NM_00631E | 1933.648  | 1992.284  |
| NM_00524E | 3960.475  | 3996.174  | NM_01477E | 3193.607  | 2651.378  | NM_01822E | 2506.818  | 3085.95   |
| NM_017651 | 1865.43   | 2921.229  | NM_00648C | 58534.789 | 53413.125 | NM_00460E | 446.03    | 382.876   |
| AL137662  | 1583.86   | 1615.736  | NM_00722Z | 56673.961 | 56821.352 | Z36813    | 1961.513  | 2262.142  |
| AK000354  | 4475.595  | 5171.626  | AF030107  | 1853.247  | 2406.005  | AF303889  | 670.071   | 1284.687  |
| NM_01488Z | 1523.068  | 1851.748  | NM_000871 | 1351.043  | 1638.92   | M33197    | 66058.625 | 72620.203 |
| NM_00083E | 1090.078  | 1472.516  | M33197    | 59388.781 | 59077.625 | AK022649  | 4874.851  | 4946.53   |
| M33197    | 62043.289 | 63320.891 | NM_01896E | 1002.887  | 708.576   | NM_016507 | 5835.083  | 5734.914  |
| NM_00151C | 1609.26   | 1537.708  | AF086924  | 56170.508 | 56463.664 | NM_002024 | 4870.627  | 5007.168  |
| AK024474  | 9207.832  | 10167.873 | NM_000264 | 924.081   | 1137.51   | NM_00274Z | 5712.064  | 5542.531  |
| NM_00686Z | 923.387   | 1131.988  | AB058740  | 8986.3    | 10677.857 | AF173358  | 16313.278 | 15467.309 |
| NM_017901 | 3277.834  | 3743.291  | NM_00188E | 747.951   | 719.291   | NM_01636E | 3695.239  | 4510.835  |
| NM_00427Z | 5282.108  | 5808.008  | M33197    | 59548.902 | 63692.977 | NM_01654E | 4539.609  | 5930.05   |
| NM_01758E | 1514.208  | 1145.13   | NM_001154 | 11137.016 | 10265.262 | NM_00144C | 25393.965 | 14987.708 |
| AK023582  | 1108.597  | 702.248   | NM_01693E | 617.959   | 452.608   | NM_01661E | 1667.323  | 1157.032  |
| NM_00035E | 1682.125  | 1723.946  | M33197    | 57261.387 | 58945.77  | AB014568  | 20980.389 | 10261.403 |
| NM_00193C | 19799.971 | 20581.512 | NM_00681E | 25098.586 | 25686.66  | NM_01224E | 2592.037  | 2473.544  |
| AK025270  | 2107.457  | 1970.665  | NM_00166Z | 4118.943  | 5132.129  | AK022546  | 3107.708  | 3248.027  |
| NM_001564 | 4244.055  | 4294.542  | NM_00421E | 10499.675 | 12898.28  | NM_014067 | 2549.82   | 2777.687  |
| M33197    | 59877.141 | 60816.828 | NM_01653C | 8519.199  | 7716.699  | NM_002914 | 4806.45   | 4984.151  |
| AF263537  | 3371.255  | 3800.349  | NM_014804 | 1361.001  | 1344.186  | NM_02038E | 1102.406  | 896.363   |
| NM_01589E | 12053.489 | 13765.133 | NM_01245E | 6166.593  | 5483.251  | NM_01817E | 826.995   | 1697.913  |
| NM_00018E | 1209.322  | 1097.419  | NM_00280E | 9984.215  | 7809.493  | NM_006197 | 4383.46   | 3386.496  |
| AL050050  | 2034.201  | 1167.188  | NM_00171E | 2039.669  | 2287.474  | NM_014181 | 1903.344  | 2705.157  |
| NM_00469C | 1876.02   | 1920.477  | NM_00203C | 847.063   | 851.118   | NM_004854 | 2120.842  | 1872.896  |
| M33197    | 60371.637 | 61948.617 | NM_00607Z | 1284.337  | 1386.043  | AJ245418  | 14674.427 | 11385.754 |
| NM_013374 | 39746.902 | 44281.086 | NM_006564 | 5885.288  | 8625.666  | NM_006377 | 4089.892  | 4121.249  |
| NM_00325Z | 10857.282 | 10632.981 | NM_00480Z | 2030.64   | 1541.466  | AK026427  | 939.993   | 856.694   |
| NM_00122E | 4684.898  | 4144.071  | M33197    | 58097.672 | 60820.684 | AF244129  | 3926.269  | 4218.04   |
| NM_016561 | 21540.006 | 21669.236 | NM_000074 | 7979.826  | 6925.083  | NM_01836Z | 3710.962  | 1735.523  |
| NM_00122E | 1909.678  | 1837.986  | BF434335  | 22417.426 | 17209.047 | M33197    | 70272.703 | 62964.16  |
| NM_01424E | 31028.594 | 31492.195 | NM_00299Z | 1988.692  | 1845.919  | NM_00475E | 1224.166  | 1075.1    |
| M33197    | 62169.801 | 61968.059 | AK026946  | 1444.359  | 1096.035  | NM_00218E | 2161.879  | 1539.302  |
| AB046822  | 1066.302  | 1180.57   | M33197    | 59672.984 | 60469.609 | AL137543  | 4183.326  | 5270.544  |
| M33197    | 1413.461  | 1259.657  | NM_00319Z | 3464.282  | 3172.656  | NM_004444 | 3007.404  | 2749.877  |
| NM_00030E | 2753.313  | 3280.057  | NM_00282E | 5604.906  | 6061.284  | M33197    | 938.147   | 927.059   |
| X69636    | 2833.783  | 2705.878  | NM_01436E | 1106.614  | 1135.113  | NM_001957 | 1933.911  | 2227.75   |

|           |           |           |           |           |           |           |           |           |
|-----------|-----------|-----------|-----------|-----------|-----------|-----------|-----------|-----------|
| M33197    | 66071.633 | 65902.703 | M33197    | 60902.27  | 61874.004 | AK024533  | 5145.971  | 4201.563  |
| NM_004173 | 24156.141 | 23268.457 | NM_001398 | 19370.65  | 21532.762 | NM_002736 | 12021.672 | 11167.904 |
| NM_013974 | 2377.819  | 2269.658  | AB050049  | 4158.703  | 4728.776  | NM_004246 | 1176.31   | 1351.196  |
| NM_017547 | 3151.673  | 3289.032  | J05125    | 842.732   | 1000.346  | NM_002285 | 1509.332  | 2260.933  |
| NM_003983 | 3149.078  | 3022.554  | NM_001995 | 2224.768  | 2280.787  | NM_006694 | 11342.085 | 9981.138  |
| AK023708  | 1049.213  | 1119.986  | AY004175  | 3056.563  | 2542.325  | NM_005207 | 1783.394  | 1512.285  |
| M33197    | 62931.648 | 61522.336 | M33197    | 57689.914 | 61652.051 | NM_001630 | 1971.252  | 1785.849  |
| NM_018464 | 31576.719 | 30676.512 | NM_012327 | 3877.216  | 5106.628  | M33197    | 66227.313 | 70075.117 |
| D43948    | 4418.317  | 3100.225  | NM_000904 | 5562.98   | 5998.653  | NM_002031 | 1008.325  | 1282.392  |
| NM_012310 | 7850.133  | 5765.555  | NM_016048 | 6687.966  | 7028.402  | AF305081  | 3227.231  | 3524.46   |
| BF382116  | 4857.261  | 2556.283  | NM_000375 | 7925.287  | 7690.156  | NM_004712 | 8578.57   | 13212.376 |
| NM_003193 | 13046.568 | 7570.126  | NM_018849 | 5536.382  | 4717.504  | AF118078  | 1771.68   | 788.63    |
| AK055825  | 61912.262 | 61903.563 | AJ000096  | 501.443   | 349.364   | AL157428  | 848.527   | 467.754   |
| AF113216  | 991.086   | 780.173   | M33197    | 63358.461 | 58025.047 | M33197    | 61920.785 | 60863.555 |
| NM_005197 | 7584.793  | 4956.113  | AF279890  | 3164.851  | 3034.581  | NM_005858 | 1895.388  | 1550.794  |
| AL137421  | 58729.594 | 59346.199 | NM_002236 | 4369.292  | 3595.702  | AK025163  | 725.685   | 643.314   |
| M33197    | 62331.914 | 65482.273 | NM_012069 | 5650.55   | 5135.95   | NM_014931 | 5446.071  | 5646.627  |
| NM_007241 | 2436.148  | 2869.433  | NM_001689 | 58175.41  | 48954.129 | NM_014487 | 8460.071  | 9000.318  |
| NM_000124 | 1626.839  | 1790.739  | NM_016601 | 2007.18   | 1858.077  | NM_018070 | 5293.429  | 5592.562  |
| NM_017996 | 6954.947  | 8056.505  | NM_017905 | 19821.771 | 15967.483 | NM_002484 | 6913.979  | 6504.565  |
| NM_014517 | 2355.275  | 2279.345  | NM_006981 | 832.573   | 912.673   | M33197    | 61145.168 | 62850.367 |
| NM_005466 | 2404.463  | 2095.857  | M33197    | 46476.809 | 51364.527 | NM_018240 | 58407.648 | 57808.438 |
| NM_004269 | 5600.981  | 5337.101  | AK027244  | 1286.361  | 1064.996  | AL162052  | 841.446   | 899.517   |
| NM_003409 | 1272.289  | 1154.96   | L40520    | 3523.464  | 3628.87   | AK025941  | 982.409   | 909.322   |
| D31765    | 1775.615  | 1627.096  | NM_002633 | 10076.446 | 7208.5    | M33197    | 61273.363 | 65615.547 |
| NM_006107 | 8960.411  | 7285.461  | M33197    | 57202.922 | 57984.992 | NM_015914 | 1658.036  | 1796.693  |
| AF288288  | 19843.297 | 17067.227 | NM_002878 | 8960.471  | 9320.865  | AF059531  | 6152.343  | 4243.088  |
| NM_017646 | 7834.622  | 5607.723  | NM_017723 | 2574.982  | 2522.276  | NM_002707 | 7492.378  | 6769.134  |
| AL050368  | 1260.005  | 1025.081  | AK022922  | 1976.824  | 1657.191  | AF029777  | 1200.723  | 1575.219  |
| NM_003092 | 24533.678 | 16857.938 | NM_006462 | 4051.464  | 4001.177  | NM_003352 | 1335.92   | 1346.869  |
| M33197    | 60930.59  | 59740.266 | AK024750  | 5885.042  | 5560.227  | AK026884  | 16129.374 | 16498.225 |
| NM_005861 | 2453.054  | 1957.539  | NM_000400 | 24970.889 | 25283.127 | S82198    | 1097.291  | 1670.353  |
| NM_018848 | 2738.307  | 2465.118  | M33197    | 54838.012 | 57825.129 | NM_002594 | 3886.075  | 1935.066  |
| NM_003760 | 3768.306  | 3220.639  | NM_002613 | 5337.838  | 4255.666  | NM_001159 | 1352.833  | 1147.104  |
| AB037759  | 1293.282  | 1139.406  | NM_004419 | 9681.49   | 8893.015  | NM_031407 | 3093.604  | 2387.204  |
| AK025998  | 3047.484  | 2506.438  | U47635    | 7326.487  | 5731.586  | M33197    | 58802.414 | 59706.281 |
| AL080080  | 14833.502 | 12529.689 | NM_018650 | 2466.088  | 2111.381  | AK000410  | 22948.951 | 22338.971 |
| NM_018482 | 2409.203  | 2138.358  | AK026945  | 14658.506 | 12719.622 | NM_020193 | 1527.58   | 1648.272  |
| NM_017880 | 3586.317  | 3339.114  | NM_001888 | 745.664   | 1018.181  | NM_005619 | 898.454   | 625.43    |
| AF090945  | 6435.243  | 5568.2    | M33197    | 58874.418 | 62457.195 | D87440    | 4702.817  | 4408.098  |
| M33197    | 65750.445 | 71048.703 | NM_001154 | 9497.153  | 10726.239 | AK000332  | 12850.611 | 12127.292 |
| NM_001161 | 10866.218 | 10167.421 | NM_001819 | 868.503   | 1328.283  | AL080156  | 1026.404  | 702.032   |
| NM_004044 | 9973.502  | 9137.864  | NM_016938 | 651.987   | 830.237   | NM_006738 | 1249.43   | 1325.603  |
| NM_000221 | 25745.566 | 20097.896 | NM_001993 | 572.408   | 810.66    | NM_016260 | 1391.753  | 2145.682  |
| H75678    | 1974.975  | 1357.2    | NM_000175 | 10334.093 | 8686.756  | NM_002895 | 1250.79   | 2128.058  |
| NM_002535 | 1651.921  | 1378.181  | NM_015725 | 11602.185 | 10707.906 | NM_013351 | 15652.465 | 17665.211 |
| AB002359  | 2800.35   | 2173.074  | R61452    | 1140.047  | 1355.451  | NM_012340 | 4480.944  | 4038.956  |
| M33197    | 3821.903  | 3737.49   | R19938    | 9743.313  | 9715.144  | NM_006022 | 1565.736  | 2092.598  |
| AB007864  | 1027.099  | 752.254   | N94487    | 7906.458  | 8949.976  | AK025110  | 1423.51   | 1459.789  |
| NM_002198 | 4008.7    | 3112.88   | AI886795  | 4639.77   | 4569.118  | X52339    | 46689.199 | 33825.477 |
| AK025905  | 2050.284  | 1306.738  | D10495    | 1042.047  | 814.946   | M33197    | 59466.887 | 53125.695 |
| AL121733  | 3346.681  | 2985.912  | BF344679  | 1755.712  | 1726.604  | AB046830  | 3875.173  | 1737.683  |
| BE958072  | 1310.84   | 1232.348  | M36634    | 835.399   | 830.128   | NM_007122 | 3169.156  | 2456.905  |

|           |           |           |           |           |           |           |           |           |
|-----------|-----------|-----------|-----------|-----------|-----------|-----------|-----------|-----------|
| M33197    | 60080.676 | 56366.402 | M14156    | 7256.932  | 7574.798  | NM_00148E | 1258.26   | 792.227   |
| NM_01448C | 2160.258  | 1690.039  | U87939    | 792.738   | 693.886   | NM_01620Z | 10323.208 | 6110.286  |
| NM_00593E | 2077.697  | 1835.174  | U86961    | 950.447   | 1159.868  | NM_016604 | 759.949   | 1016.294  |
| NM_01416E | 11720.731 | 10493.875 | AK094237  | 2755.165  | 2341.614  | M33197    | 65054.078 | 66954.211 |
| NM_004964 | 32541.752 | 24665.475 | L07592    | 572.741   | 564.635   | NM_00627E | 970.198   | 1448.02   |
| AL117497  | 3192.072  | 2459.811  | BF434335  | 19399.5   | 17359.49  | NM_003407 | 1911.21   | 1712.959  |
| AF075016  | 745.839   | 856.779   | NM_002993 | 923.029   | 1320.185  | NM_00720E | 56179.801 | 58708.945 |
| AK023612  | 1390.69   | 1222.377  | AK026946  | 989.849   | 1665.717  | NM_00372E | 1773.018  | 1821.776  |
| AF147437  | 3003.988  | 1698.94   | M33197    | 60894.207 | 61998.418 | BC015899  | 5186.045  | 5257.929  |
| M33197    | 64562.828 | 58651.699 | NM_00319Z | 3414.624  | 3707.286  | NM_01798E | 12330.669 | 16855.961 |
| AL137269  | 9482.6    | 6855.379  | NM_01844E | 4146.665  | 3562.056  | AK023629  | 771.849   | 1217.955  |
| AK021983  | 2319.174  | 1920.01   | AF086129  | 1317.467  | 921.319   | AK024846  | 3470.784  | 5408.218  |
| Y11681    | 12675.634 | 9609.684  | NM_01445E | 6217.972  | 6383.769  | AK001451  | 6746.963  | 9125.856  |
| AL110135  | 29713.717 | 20396.771 | AF235049  | 4058.157  | 4203.268  | M33197    | 49439.992 | 46577.078 |
| NM_006993 | 23365.584 | 20423.924 | M33197    | 60382.863 | 58040.227 | NM_00718C | 1248.777  | 1620.522  |
| NM_00233E | 1359.601  | 1024.838  | NM_00736E | 1583.82   | 1558.734  | NM_00560E | 656.265   | 699.365   |
| M33197    | 64409.949 | 65137.887 | NM_01477E | 3453.056  | 2979.259  | NM_00547E | 4746.652  | 4640.588  |
| NM_01906C | 2274.639  | 1741.542  | NM_00648C | 55835.945 | 50100.879 | NM_00566C | 3455.305  | 3004.128  |
| AF086302  | 2750.743  | 2115.952  | NM_007223 | 57671.793 | 50570.34  | AK023902  | 1477.283  | 2191.851  |
| AF086439  | 3157.635  | 2035.378  | NM_00014E | 785.153   | 885.215   | AB011173  | 5818.38   | 4456.327  |
| M33197    | 63028.09  | 60491.27  | AF030107  | 1532.016  | 1547.791  | AB023195  | 1006.48   | 917.731   |
| AF052160  | 1235.018  | 711.237   | NM_000871 | 1535.501  | 1753.393  | U43431    | 671.113   | 845.645   |
| AK026512  | 2154.902  | 1357.619  | M33197    | 59963.621 | 59551.008 | AB006622  | 1253.235  | 1204.001  |
| M33197    | 62504.164 | 60332.184 | NM_01896E | 826.555   | 746.385   | M33197    | 65902.094 | 67261.961 |
| AF144233  | 5890.21   | 3648.874  | NM_000264 | 713.419   | 545.95    | AK097041  | 2180.344  | 1572.089  |
| AF085925  | 1056.445  | 747.912   | AB058740  | 11271.943 | 9433.063  | AF068744  | 16156.058 | 13369.675 |
| AK022986  | 678.107   | 728.644   | NM_00338E | 483.794   | 518.296   | AK000762  | 2373.925  | 2720.83   |
| AF085975  | 3640.005  | 3699.467  | AF279890  | 2397.106  | 2617.88   | NM_004571 | 671.117   | 492.35    |
| AF075103  | 1442.71   | 1645.239  | NM_00223E | 2488.913  | 2371.214  | AJ345030  | 2902.855  | 4310.999  |
| M33197    | 65884.398 | 66530.641 | NM_01206E | 1504.379  | 1787.877  | AK023631  | 1239.617  | 1311.2    |
| AL137390  | 2255.59   | 2114.477  | NM_00168E | 57993.527 | 53657.508 | AK023472  | 12390.724 | 17014.27  |
| AL137611  | 6719.507  | 6559.349  | NM_016601 | 937.429   | 1345.893  | AL109729  | 820.64    | 898.913   |
| AL359566  | 30426.053 | 31138.561 | NM_01790E | 13992.552 | 15139.624 | AF007146  | 463.991   | 638.264   |
| AL137427  | 3930.531  | 3511.034  | M33197    | 57996.063 | 59020.984 | M33197    | 59044.535 | 60648.715 |
| AL157460  | 3673.091  | 2723.349  | NM_00681E | 30017.977 | 24966.51  | S79912    | 28117.191 | 26603.6   |
| M33197    | 63054.563 | 62570.34  | NM_001663 | 5662.399  | 4817.771  | AL110283  | 1080.72   | 783.953   |
| AK023641  | 1315.641  | 1231.982  | NM_00421E | 12434.079 | 12020.792 | S83275    | 31054.916 | 18318.857 |
| AK026718  | 3097.065  | 2557.7    | NM_01653C | 9789.856  | 8715.431  | AL117427  | 7324.15   | 4955.625  |
| AF085899  | 1041.258  | 1218.805  | NM_014804 | 1388.571  | 1339.582  | M33197    | 59412.32  | 58428.27  |
| AK022035  | 7004.047  | 5871.467  | NM_01245E | 6008.056  | 6383.57   | AF052118  | 10238.519 | 11185.618 |
| M33197    | 66305.891 | 64345.223 | NM_00280E | 9172.622  | 8031.241  | AK025166  | 2854.156  | 2585.333  |
| NM_004337 | 3322.972  | 3021.901  | M33197    | 64218.906 | 62848.348 | AL359586  | 596.638   | 956.862   |
| AK022141  | 1456.977  | 1070.851  | NM_00171E | 2732.822  | 2529.334  | AF147421  | 610.716   | 796.645   |
| M33197    | 65880.289 | 66701.578 | NM_006564 | 5666.394  | 6004.411  | AF035290  | 1570.691  | 1693.586  |
| AK027207  | 2008.505  | 1969.939  | NM_00480Z | 1898.764  | 1612.226  | AK023216  | 621.923   | 665.893   |
| AJ227892  | 4006.481  | 2478.192  | NM_000074 | 8850.846  | 6702.756  | M33197    | 59710.82  | 60421.559 |
| M33197    | 60982.559 | 59850.359 | M33197    | 56792.109 | 57405.359 | AK023288  | 893.793   | 945.53    |
| AK022013  | 1897.309  | 1031.626  | NM_002613 | 3186.202  | 2992.975  | M33197    | 58600.691 | 59789.039 |
| AK022155  | 4411.419  | 3696.05   | NM_00441E | 2783.06   | 2891.064  | AK022428  | 895.129   | 1336.324  |
| AK022288  | 2309.792  | 1733.163  | U47635    | 6767.425  | 7293.769  | AK000788  | 566.615   | 739.891   |
| AK021916  | 540.909   | 692.666   | NM_01865C | 1843.145  | 2217.112  | AK023457  | 853.935   | 1125.157  |
| AK024201  | 1091.652  | 995.351   | AK026945  | 13293.922 | 16734.791 | AK025089  | 6251.21   | 7598.617  |
| AL359626  | 1859.298  | 1589.084  | NM_00282E | 7629.211  | 7281.289  | AK027206  | 460.242   | 528.876   |



|           |           |           |           |           |           |           |           |           |
|-----------|-----------|-----------|-----------|-----------|-----------|-----------|-----------|-----------|
| AK022084  | 1970.454  | 1768.066  | NM_014369 | 1368.084  | 1468.572  | M33197    | 56807.461 | 61430.227 |
| AK026878  | 2051.47   | 1800.749  | M33197    | 60970.434 | 60736.824 | AF085996  | 1810.159  | 1841.263  |
| AK021589  | 1134.221  | 822.167   | NM_001398 | 28525.668 | 29640.605 | AK001279  | 1922.913  | 749.216   |
| D17152    | 16016.657 | 12552.647 | AB050049  | 4828.627  | 5047.409  | AK001567  | 1312.747  | 1123.845  |
| AK023638  | 1189.443  | 1033.047  | J05125    | 956.83    | 1005.104  | M33197    | 51090.418 | 48796.797 |
| M33197    | 796.47    | 926.527   | NM_001995 | 2314.017  | 2467.164  | U52839    | 1195.423  | 1023.685  |
| AK025423  | 2872.77   | 2709.925  | NM_000183 | 11115.026 | 10924.816 | M33197    | 53670.031 | 51754.828 |
| M33197    | 62512.48  | 63778.996 | AY004175  | 2925.171  | 2846.481  | AK026984  | 11290.087 | 10045.903 |
| AL049846  | 1604.385  | 2174.499  | M33197    | 61023.871 | 61243.039 | NM_013391 | 508.374   | 1121.677  |
| AK024161  | 1197.354  | 1203.151  | NM_012327 | 4066.834  | 3633.787  | M33197    | 59628.086 | 58276.309 |
| AK021682  | 33537.898 | 30448.23  | NM_000904 | 5622.125  | 4685.273  | AL157466  | 2834.509  | 3768.821  |
| AJ012500  | 5405.68   | 3798.999  | NM_016048 | 6702.112  | 5991.501  | AL389981  | 675.493   | 1023.013  |
| L19368    | 896.624   | 572.573   | NM_000375 | 9047.001  | 9200.707  | AK024336  | 1895.571  | 2199.271  |
| U00944    | 1181.012  | 892.742   | NM_018849 | 2660.101  | 2487.829  | NM_018621 | 592.664   | 713.339   |
| BC035058  | 6854.441  | 4951.162  | AJ000096  | 528.755   | 403.391   | AK021628  | 716.33    | 343.154   |
| X57566    | 6339.161  | 5414.17   | AF015910  | 30727.635 | 29034.248 | M33197    | 60247.531 | 41293.418 |
| M33197    | 61124.398 | 61565.836 | BC009993  | 2445.143  | 2316.549  | AK022118  | 1522.422  | 1168.214  |
| NM_018616 | 8061.71   | 8718.813  | M33197    | 57546.277 | 62489.188 | AK026453  | 5451.206  | 4657.448  |
| M87943    | 62768.859 | 58775.254 | NM_016824 | 3504.828  | 4135.971  | AK025673  | 862.865   | 553.946   |
| AL360137  | 1694.782  | 1693.034  | NM_003031 | 4402.364  | 5541.534  | M33197    | 56036.238 | 58474.301 |
| U28131    | 61588.305 | 61938.078 | NM_007170 | 1832.172  | 2008.712  | AK023305  | 16579.088 | 12187.68  |
| AY007106  | 4960.573  | 7165.013  | NM_003008 | 896.178   | 1248.091  | AK022729  | 1631.463  | 2947.412  |
| M33197    | 61948.906 | 65567.969 | NM_004100 | 570.563   | 463.759   | NM_006166 | 8074.958  | 9779.739  |
| AL049299  | 628.203   | 817.149   | M33197    | 61054.348 | 63876.078 | AL050374  | 2716.761  | 3018.454  |
| NM_006086 | 56576.715 | 54274.891 | AK027244  | 1346.126  | 1368.436  | M33197    | 60588.164 | 61110.078 |
| AF130086  | 6566.996  | 7203.184  | L40520    | 3952.038  | 4335.628  | M28639    | 4222.151  | 4785.422  |
| AK023858  | 21603.92  | 27031.375 | NM_002633 | 18969.371 | 17057.326 | AL122073  | 20258.635 | 19268.242 |
| M33197    | 62716.137 | 63651.27  | M33197    | 54744.418 | 53306.852 | AF116655  | 4543.726  | 4245.053  |
| AF250920  | 1993.998  | 2641.948  | NM_002878 | 8914.049  | 9811.636  | AJ243222  | 1234.589  | 1119.055  |
| NM_017733 | 4446.397  | 4408.037  | NM_017723 | 2369.431  | 3346.678  | AK026132  | 2423.324  | 2792.52   |
| NM_014042 | 17900.703 | 17328.201 | AK022922  | 2069.475  | 1840.302  | Y11162    | 638.475   | 405.081   |
| M33197    | 62607.996 | 66083.453 | NM_006462 | 4578.908  | 4753.366  | M33197    | 59648.945 | 61258.625 |
| AF317550  | 696.886   | 692.612   | NM_000400 | 26537.254 | 25170.217 | AF070584  | 1358.777  | 898.768   |
| AK025416  | 950.371   | 649.067   | NM_015885 | 1559.052  | 1493.633  | M33197    | 58140.699 | 58099.75  |
| U58662    | 1600.057  | 3012.646  | NM_015889 | 57631.203 | 54269.676 | AK000903  | 23609.367 | 23835.832 |
| AF090883  | 624.405   | 949.827   | M33197    | 62021.707 | 63514.879 | AK023938  | 787.432   | 783.853   |
| AK022372  | 2994.56   | 3081.813  | NM_004276 | 3372.659  | 4260.167  | AL110169  | 989.748   | 1058.807  |
| AJ227863  | 646.655   | 521.833   | NM_002332 | 14488.136 | 13679.259 | L13743    | 1552.779  | 2155.825  |
| AL137380  | 887.098   | 784.552   | NM_002859 | 3576.538  | 4427.175  | U84519    | 1343.834  | 1680.338  |
| M33197    | 60284.703 | 65621.664 | NM_005246 | 3840.924  | 4733.574  | Z11849    | 6117      | 8058.514  |
| AL137658  | 34647.469 | 31091.004 | NM_017651 | 1247.261  | 1470.239  | AJ002788  | 1914.264  | 2216.849  |
| D16888    | 2100.223  | 2171.474  | AF161339  | 5070.575  | 6291.174  | M33197    | 60414.941 | 63762.953 |
| AF068298  | 6823.534  | 8349.413  | M33197    | 64133.117 | 64219.754 | AF052103  | 1670.351  | 1508.087  |
| Z70770    | 4422.154  | 4388.751  | AL137662  | 653.61    | 802.274   | AF075050  | 1108.085  | 1434.334  |
| AJ227900  | 5126.333  | 5525.957  | AK000354  | 4658.241  | 4990.708  | AK024842  | 1103.707  | 1085.227  |
| AK023242  | 1858.56   | 1673.438  | NM_014882 | 1709.911  | 1604.896  | NM_018382 | 986.627   | 773.311   |
| M33197    | 61082.023 | 64604.539 | NM_000836 | 1075.216  | 1291.447  | BC022303  | 1491.134  | 1077.662  |
| AK024101  | 1431.645  | 900.963   | M33197    | 60272.859 | 65875.648 | M33197    | 60797.145 | 59127.836 |
| CY3Cy5    | 7500.129  | 266.58    | NM_001510 | 1336.245  | 1694.662  | D17203    | 53824.012 | 55297.52  |
| AI417775  | 560.066   | 515.999   | AK024474  | 8201.141  | 8440.972  | NM_006495 | 2388.9    | 2692.092  |
| BI762229  | 17701.398 | 20822.293 | NM_017901 | 1921.362  | 1779.361  | AK022101  | 624.898   | 504.856   |
| AA131406  | 565.87    | 1035.215  | NM_004272 | 3447.046  | 2687.29   | NM_003251 | 562.791   | 429.331   |
| BG618320  | 7183.393  | 6703.443  | NM_017589 | 895.732   | 707.761   | M33197    | 60178.152 | 58498.547 |

|           |           |           |           |           |           |             |           |           |
|-----------|-----------|-----------|-----------|-----------|-----------|-------------|-----------|-----------|
| Y00787    | 1409.436  | 1644.983  | NM_000358 | 693.117   | 803.942   | AL442080    | 809.768   | 745.557   |
| NM_007276 | 3476.4    | 3044.633  | NM_001930 | 13462.838 | 14648.668 | AY007143    | 4493.357  | 4902.144  |
| N34462    | 1784.816  | 1687.687  | AK025270  | 1384.913  | 1427.652  | M33197      | 65628.922 | 67857.563 |
| AI658778  | 1866.889  | 1935.365  | NM_001564 | 3786.589  | 4123.392  | NM_001563   | 6256.272  | 7629.078  |
| L19067    | 6324.727  | 5967.677  | M33197    | 58420.559 | 61028.371 | NM_000266   | 1290.941  | 911.277   |
| Z48482    | 1031.792  | 1471.111  | AF263537  | 6174.719  | 5663.849  | X89666      | 2173.062  | 2522.297  |
| W60413    | 650.043   | 843.078   | NM_015895 | 13314.215 | 14480.502 | NM_017425   | 547.109   | 559.122   |
| BI823365  | 3060.064  | 3402.441  | NM_000189 | 1503.736  | 1599.945  | NM_003104   | 7273.521  | 7796.973  |
| X06318    | 5702.51   | 5869.867  | AL050050  | 1888.494  | 1136.077  | NM_014581   | 1992.001  | 2099.3    |
| AL834159  | 3714.334  | 3796.38   | NM_004690 | 1814.82   | 2000.352  | NM_000895   | 655.087   | 700.092   |
| NM_000164 | 40705.113 | 36795.172 | M33197    | 61268.93  | 65105.734 | M33197      | 59556.891 | 60764.039 |
| SR9       | 22283.826 | 4515.146  | NM_013374 | 38638.777 | 41467.855 | AK024448    | 4362.38   | 3527.997  |
| CY3Cy5    | 8596.209  | 328.831   | NM_003252 | 8912.522  | 8308.725  | NM_014406   | 1752.537  | 1576.722  |
| NM_003682 | 626.303   | 751.92    | NM_001228 | 3404.261  | 3427.129  | Z11801      | 853.205   | 584.402   |
| NM_000207 | 761.603   | 1003.848  | NM_016561 | 23511.365 | 23984.064 | S68954      | 4963.092  | 13817.75  |
| NM_002531 | 955.245   | 1101.867  | NM_001225 | 1988.537  | 2192.371  | S81335      | 1458.816  | 1152.394  |
| NM_006314 | 13028.029 | 13589.568 | NM_014245 | 34663.77  | 38680.418 | AF052109    | 1690.158  | 4466.499  |
| NM_001782 | 1488.396  | 1766.7    | M33197    | 55232.203 | 61668.344 | M33197      | 30139.539 | 34059.402 |
| NM_000797 | 6450.402  | 8768.836  | AB046822  | 910.274   | 781.391   | NM_003353   | 12132.772 | 11078.36  |
| NM_014927 | 836.907   | 704.342   | M33197    | 1112.783  | 1174.037  | X82127      | 7035.311  | 5188.74   |
| NM_016293 | 11123.45  | 10566.944 | NM_000308 | 2309.855  | 2636.226  | AL122044    | 1538.495  | 1767.93   |
| AF217525  | 663.931   | 629.435   | X69636    | 2692.042  | 3427.978  | M33197      | 57583.91  | 60628.746 |
| NM_006731 | 871.227   | 754.736   | M33197    | 61196.262 | 62911.328 | AF070578    | 996.459   | 896.549   |
| NM_018487 | 762.223   | 860.591   | NM_004173 | 24597.012 | 33397.391 | CY3Cy5      | 2420.417  | 87.242    |
| NM_020134 | 744.947   | 589.607   | NM_013974 | 2658.547  | 3001.387  | AA418907    | 586.521   | 403.441   |
| NM_014061 | 810.68    | 879.56    | NM_017547 | 3591.241  | 3894.113  | AA115473    | 4897.542  | 3928.766  |
| BC034395  | 590.044   | 504.986   | NM_003983 | 6100.306  | 8222.397  | AA872397    | 3149.47   | 2493.736  |
| NM_002479 | 1142.762  | 1103.833  | AK023708  | 1239.26   | 1277.133  | AA709414    | 1373.815  | 1148.549  |
| NM_000348 | 3393.825  | 4366.246  | NM_002108 | 868.221   | 693.965   | D12676      | 2712.234  | 2122.594  |
| NM_004950 | 2373.275  | 2257.598  | M33197    | 58107.625 | 61675.145 | NM_000935   | 23642.107 | 19603.363 |
| NM_000724 | 4553.068  | 4845.495  | D43948    | 3486.355  | 2670.25   | NM_004295   | 26952.26  | 23298.068 |
| NM_000553 | 709.838   | 1422.239  | NM_012310 | 8922.416  | 9055.536  | H-X 02812 I | 1438.168  | 1262.012  |
| NM_002557 | 8521.749  | 9058.617  | BF382116  | 3796.473  | 4914.544  | U75898      | 1977.582  | 1881.503  |
| NM_005662 | 43867.328 | 43423.453 | NM_003193 | 9810.767  | 8292.066  | M29039      | 684.339   | 654.911   |
| AK021489  | 26570.277 | 35922.965 | AF113216  | 985.951   | 872.916   | M59815      | 628.608   | 465.868   |
| NM_004525 | 698.601   | 956.363   | NM_005197 | 4082.991  | 3638.286  | NM_006917   | 669.714   | 837.863   |
| NM_004317 | 9035.062  | 10234.632 | AL137421  | 18287.707 | 17354.693 | SR2         | 53665.75  | 39548.523 |
| NM_014645 | 4226.164  | 4575.843  | M33197    | 60467.418 | 59080.223 | SR4         | 9998.986  | 7342.838  |
| NM_014708 | 4180.063  | 4651.349  | NM_007241 | 1104.214  | 1263.142  | SR6         | 1675.017  | 1485.951  |
| NM_003693 | 1301.948  | 1039.217  | NM_017996 | 4378.693  | 5843.631  | SR8         | 5861.237  | 25234.225 |
| BE394704  | 851.415   | 1044.574  | NM_014517 | 2326.695  | 3116.764  | SR10        | 24350.148 | 10214.536 |
| NM_004703 | 3465.595  | 3467.916  | NM_005466 | 3027.079  | 2804.085  | CY3Cy5      | 4223.796  | 177.254   |
| NM_001512 | 1430.407  | 1542.444  | NM_004269 | 6004.136  | 5646.193  | NM_004795   | 10097.475 | 8235.423  |
| NM_014706 | 8714.093  | 9396.89   | NM_003409 | 997.62    | 1063.391  | NM_006733   | 617.751   | 804.884   |
| AK023172  | 663.403   | 629.591   | D31765    | 2497.94   | 2998.087  | NM_014047   | 16797.574 | 16700.666 |
| AJ001348  | 1018.222  | 1181.49   | NM_006107 | 7513.094  | 11991.243 | AK022901    | 1265.862  | 1384.611  |
| NM_014007 | 1647.326  | 1882.899  | NM_004175 | 1802.864  | 1991.384  | M33197      | 63011.496 | 62497.906 |
| AB033006  | 5679.717  | 4902.885  | AF288288  | 24603.016 | 37643.941 | AF037332    | 4731.438  | 4143.155  |
| AF020314  | 1536.483  | 2208.841  | NM_017646 | 7740.868  | 10583.545 | NM_006052   | 919.399   | 1055.152  |
| NM_016332 | 7544.629  | 7159.601  | AL050368  | 2365.326  | 2524.33   | AB040912    | 2770.202  | 4003.582  |
| AK023936  | 343.276   | 690.35    | M33197    | 56654.598 | 59412.336 | NM_003871   | 681.015   | 935.173   |
| NM_006457 | 2797.697  | 2632.095  | NM_005861 | 2824.325  | 2788.565  | NM_006243   | 3961.238  | 5092.826  |
| AF000381  | 7828.028  | 6747.599  | NM_018848 | 2376.186  | 2348.208  | M33197      | 60424.633 | 66273.344 |

|           |           |           |           |           |           |           |           |           |
|-----------|-----------|-----------|-----------|-----------|-----------|-----------|-----------|-----------|
| NM_018075 | 328.446   | 586.582   | NM_003760 | 4273.708  | 3775.614  | AJ011129  | 4545.193  | 4320.747  |
| NM_012105 | 6390.046  | 8590.595  | AK025998  | 2377.59   | 1983.12   | AF282874  | 636.57    | 737.014   |
| S82470    | 3861.611  | 4711.473  | AL080080  | 9522.947  | 8410.022  | NM_006387 | 4754.25   | 6140.514  |
| AB020695  | 1985.078  | 1765.172  | NM_018482 | 1284.66   | 1127.434  | NM_005646 | 2276.234  | 2531.355  |
| NM_020221 | 1651.903  | 1576.241  | NM_017880 | 1247.781  | 1607.242  | NM_006635 | 804.58    | 1039.288  |
| NM_000747 | 2400.846  | 2069.897  | AF090945  | 1986.077  | 2411.283  | BI767871  | 1918.023  | 1967.326  |
| NM_005415 | 3219.095  | 3208.782  | M33197    | 62159.211 | 57982.824 | AK022817  | 1473.652  | 1182.606  |
| AJ275973  | 20561.307 | 22296.748 | NM_001161 | 6511.586  | 5524.469  | M33197    | 59515.555 | 63669.133 |
| NM_006493 | 5008.921  | 5408.713  | NM_004044 | 8314.917  | 8295.248  | AB037831  | 1526.604  | 1813.687  |
| U76362    | 9396.876  | 9059.421  | NM_000221 | 21752.34  | 23200.713 | NM_012103 | 12307.415 | 13967.33  |
| AF040248  | 955.452   | 1189.541  | H75678    | 2090.649  | 2060.434  | AL122077  | 9169.339  | 9947.502  |
| NM_014225 | 1497.059  | 2098.552  | NM_002535 | 969.228   | 623.589   | NM_014632 | 932.084   | 1368.537  |
| AL832292  | 6239.532  | 6214.966  | AB002359  | 2735.433  | 2443.808  | NM_006422 | 901.037   | 1493.748  |
| NM_003045 | 12030.9   | 11457.477 | M33197    | 4924.635  | 3567.381  | BE789195  | 343.466   | 975.809   |
| NM_002615 | 3469.941  | 3122.906  | AB007864  | 1800.905  | 1750.908  | NM_016946 | 1223.062  | 1390.253  |
| L27479    | 880.303   | 1244.097  | NM_002195 | 3559.416  | 2974.504  | M33197    | 67227.789 | 69075.602 |
| NM_002193 | 1368.877  | 1572.511  | AK025905  | 3600.875  | 3539.21   | NM_007255 | 1625.069  | 2049.473  |
| NM_001385 | 7736.085  | 8355.477  | AL121733  | 1781.99   | 1646.527  | NM_018402 | 884.568   | 993.745   |
| X76770    | 4207.782  | 5153.575  | BE958072  | 1096.178  | 1003.202  | NM_018005 | 807.376   | 679.3     |
| AB037808  | 2549.39   | 2993.015  | M33197    | 56733.98  | 48767.352 | AK075081  | 1801.784  | 2326.114  |
| NM_016035 | 3842.791  | 3859.099  | NM_014480 | 2182.926  | 2449.473  | NM_000895 | 8148.208  | 11405.017 |
| AF289485  | 4988.71   | 7780.788  | NM_014169 | 6821.859  | 5878.899  | NM_003820 | 26999.584 | 24690.842 |
| AF130092  | 3386.708  | 4846.502  | NM_004964 | 25583.867 | 21267.309 | NM_015915 | 3763.77   | 3734.841  |
| AK024794  | 2023.054  | 2267.748  | AL117497  | 1114.238  | 1471.226  | NM_016515 | 6825.115  | 9121.212  |
| NM_019853 | 11015.331 | 9671.596  | M33197    | 60835.219 | 60179.902 | NM_006185 | 12460.378 | 15451.626 |
| NM_017992 | 4020.136  | 4253.143  | AF147360  | 713.857   | 534.274   | NM_014800 | 3334.572  | 4832.143  |
| NM_005400 | 688.607   | 431.463   | AL137269  | 7983.865  | 6220.909  | NM_001557 | 746.66    | 789.562   |
| AK023061  | 579.778   | 920.98    | AK021983  | 2204.899  | 1652.192  | AF147311  | 2619.962  | 3382.084  |
| NM_007255 | 3967.848  | 3633.604  | Y11681    | 13142.416 | 13288.716 | NM_002131 | 24319.873 | 36588.109 |
| NM_003665 | 11421.263 | 13383.623 | AL110135  | 29777.684 | 24982.256 | NM_017927 | 2510.875  | 2820.536  |
| NM_013384 | 59546.027 | 55749.906 | NM_006993 | 16124.184 | 15762.437 | NM_020151 | 8160.367  | 7342.04   |
| NM_001187 | 2952.755  | 3208.697  | NM_002336 | 912.664   | 755.755   | NM_005891 | 37783.344 | 33368.332 |
| NM_018241 | 5902.799  | 5531.824  | AF086429  | 3088.209  | 2513.757  | NM_001645 | 1133.952  | 1338.186  |
| NM_000724 | 3615.578  | 3570.388  | AF086302  | 2194.719  | 2183.35   | NM_003956 | 1975.676  | 1902.529  |
| NM_002557 | 8628.009  | 9356.96   | AF086439  | 2960.387  | 2724.775  | M33197    | 60189.762 | 63385.785 |
| AI417775  | 595.058   | 762.232   | M33197    | 57963.738 | 58357.668 | NM_003500 | 4593.686  | 6001.267  |
| BI762229  | 20348.697 | 21731.748 | AF038171  | 899.554   | 723.209   | NM_014317 | 3247.469  | 4364.965  |
| AI658778  | 1692.997  | 1935.126  | AF052160  | 720.35    | 745.546   | L09234    | 10269.924 | 14058.603 |
| L19067    | 6344.458  | 6083.683  | AK026512  | 1506.7    | 934.598   | NM_000055 | 1456.929  | 2521.822  |
| Z48482    | 676.069   | 901.877   | M33197    | 59935.988 | 61180.352 | AK026740  | 609.403   | 956.135   |
| W60413    | 876.13    | 829.84    | AF144233  | 1661.869  | 2457.545  | NM_017881 | 8494.277  | 9015.134  |
| BI823365  | 3496.99   | 3954.942  | AF085975  | 1725.047  | 1948.939  | NM_017634 | 7732.415  | 8545.188  |
| X06318    | 6024.386  | 6884.209  | AL137611  | 5245.013  | 4573.726  | NM_000813 | 970.906   | 1281.327  |
| AL834159  | 4091.399  | 4091.297  | AL359566  | 21973.063 | 17796.975 | NM_018896 | 1220.752  | 1781.087  |
| NM_000164 | 38883.938 | 31318.209 | AL137427  | 3379.797  | 2999.888  | AJ300465  | 4001.621  | 3207.725  |
| NM_014007 | 1503.852  | 1472.504  | M33197    | 55506.902 | 48457.469 | X86400    | 1152.483  | 1363.223  |
| AB033006  | 4497.369  | 4183.031  | AK026718  | 2617.028  | 1892.83   | AF069307  | 3009.685  | 3605.657  |
| AF020314  | 1864.059  | 1936.024  | AK022035  | 6078.323  | 4754.437  | M33197    | 57271.063 | 58893.953 |
| NM_016332 | 5839.081  | 5653.986  | M33197    | 60826.164 | 60609.191 | U92978    | 3325.374  | 3976.274  |
| AK023936  | 618.067   | 765.322   | NM_004337 | 2432.974  | 2177.287  | NM_005735 | 843.809   | 951.016   |
| NM_006457 | 2812.632  | 3284.666  | AK023942  | 29751.617 | 33985.961 | NM_014485 | 629.054   | 1016.499  |
| NM_003682 | 1046.879  | 1661.261  | M33197    | 62435.707 | 62895.25  | NM_013385 | 2965.194  | 2848.493  |
| NM_000207 | 1460.777  | 1901.96   | AK027207  | 731.533   | 1034.689  | AB014567  | 601.139   | 892.403   |

|           |           |           |           |           |           |             |           |           |
|-----------|-----------|-----------|-----------|-----------|-----------|-------------|-----------|-----------|
| NM_002531 | 1333.542  | 1577.05   | AJ227892  | 3364.574  | 3246.271  | NM_005326   | 15226.466 | 12915.192 |
| NM_016293 | 12787.033 | 12688.298 | M33197    | 60367.938 | 56530.07  | NM_014066   | 1197.679  | 937.055   |
| AF217525  | 343.08    | 493.608   | AK022013  | 1400.059  | 1374.893  | AB035130    | 2651.168  | 2283.169  |
| AL080148  | 5185.308  | 5252.299  | AK022155  | 4192.309  | 4223.375  | NM_003356   | 1317.238  | 2028.602  |
| NM_006731 | 1066.256  | 961.248   | AK022288  | 2188.46   | 1833.819  | M33197      | 51598.164 | 55288.715 |
| NM_018487 | 691.194   | 649.499   | AK021916  | 433.719   | 426.085   | NM_017915   | 2369.083  | 2714.9    |
| NM_020134 | 971.412   | 882.577   | AK024201  | 783.693   | 618.749   | AL049283    | 1791.793  | 1640.299  |
| NM_014061 | 857.192   | 905.381   | AK022331  | 667.469   | 751.467   | M33197      | 56501.391 | 61903.137 |
| NM_002479 | 1220.484  | 710.261   | M33197    | 58046.852 | 59449.156 | NM_002401   | 36908.691 | 44408.523 |
| NM_000346 | 2582.615  | 2580.438  | D17152    | 8154.527  | 8068.213  | NM_001274   | 3976.866  | 4902.198  |
| NM_006493 | 5675.901  | 6286.297  | AK024464  | 9440.405  | 10335.314 | NM_003913   | 979.767   | 943.228   |
| U76362    | 7064.035  | 7000.281  | M33197    | 678.517   | 788.924   | NM_002227   | 3880.914  | 4457.095  |
| AF040248  | 1023.285  | 1167.164  | AK025423  | 1777.286  | 1915.231  | NM_007196   | 1348.758  | 1495.746  |
| NM_014226 | 1837.266  | 2603.718  | M33197    | 60037.938 | 62088.496 | AB002301    | 618.65    | 842.548   |
| AL832292  | 5499.657  | 6491.765  | AL049846  | 964.689   | 1095.465  | AB014530    | 6047.01   | 6931.01   |
| NM_003045 | 11246.429 | 11775.353 | AK024161  | 1229.294  | 1222.852  | M33197      | 60577.875 | 63906.902 |
| NM_005662 | 46769.699 | 49055.855 | AK021682  | 29732.684 | 27047.477 | NM_005986   | 2902.714  | 2677.578  |
| NM_003060 | 1199.339  | 1193.63   | AJ012500  | 1984.127  | 1689.08   | AB014607    | 3831.916  | 3300.277  |
| AK021489  | 31695.76  | 43987.293 | BC035058  | 4179.472  | 5518.451  | AF134401    | 870.993   | 1292.247  |
| NM_004525 | 892.67    | 522.059   | X57566    | 3750.597  | 4472.582  | NM_006387   | 3865.542  | 3002.296  |
| NM_003895 | 1310.675  | 1106.676  | NM_018616 | 6908.089  | 8084.06   | NM_005646   | 1483.441  | 1109.967  |
| NM_014645 | 4440.261  | 4489.181  | AK023809  | 1934.904  | 2175.971  | NM_006636   | 536.683   | 494.124   |
| NM_014706 | 3906.581  | 3572.886  | M87943    | 57819.746 | 58084.793 | BI767871    | 2507.215  | 1944.808  |
| NM_003693 | 1614.708  | 1443.239  | AL360137  | 1139.8    | 1135.627  | AA418907    | 653.955   | 661.28    |
| NM_000356 | 34565.172 | 33767.109 | U28131    | 58307.32  | 58601.016 | AA115473    | 4684.398  | 3888.438  |
| NM_018134 | 53331.727 | 51526.746 | AY007106  | 3446.429  | 4450.312  | AA872397    | 2563.639  | 2141.613  |
| NM_013247 | 7742.548  | 8439.069  | M33197    | 58915.789 | 60926.754 | AA709414    | 1460.238  | 943.359   |
| NM_006770 | 2576.493  | 2596.199  | NM_006086 | 48523.117 | 47889.141 | D12676      | 3140.842  | 2117.918  |
| BE394704  | 531.873   | 659.263   | NM_018265 | 1243.058  | 1673.227  | NM_000936   | 27051.031 | 27671.594 |
| NM_004703 | 3722.497  | 3283.572  | AF130086  | 3913.882  | 5165.54   | NM_004295   | 35710.766 | 39509.074 |
| NM_001512 | 1052.943  | 1311.803  | AK023858  | 9512.342  | 10204.471 | H-X 02812 I | 1483.274  | 1655.676  |
| NM_014706 | 7803.757  | 7982.026  | M33197    | 57575.328 | 54389.023 | U75898      | 1905.979  | 1732.243  |
| NM_007255 | 3305.165  | 2774.215  | AF250920  | 2296.697  | 2125.026  | M29039      | 838.192   | 886.236   |
| NM_003666 | 10304.626 | 12010.19  | NM_017733 | 2619.142  | 3532.106  | M59815      | 911.75    | 783.368   |
| NM_013384 | 60211.438 | 53783.688 | NM_014042 | 11629.157 | 11069.932 | NM_006917   | 1066.603  | 1434.688  |
| NM_001187 | 3355.223  | 3447.355  | M33197    | 58475.855 | 56666.875 | M33197      | 950.474   | 1183.396  |
| NM_018241 | 6100.652  | 5414.4    | AK025416  | 1962.878  | 1605.072  | AB011146    | 1726.127  | 2676.347  |
| NM_005834 | 8089.975  | 9204.106  | AK022165  | 1935.542  | 2168.98   | NM_006185   | 6289.422  | 4893.775  |
| AF000381  | 8393.772  | 8152.659  | U58662    | 2047.525  | 1394.218  | NM_014800   | 4760.751  | 4543.661  |
| NM_012105 | 6375.648  | 6456.148  | M33197    | 54364.805 | 57518.754 | AF147311    | 2645.572  | 2919.856  |
| S82470    | 3664.741  | 3974.886  | AK022372  | 2020.616  | 1632.838  | NM_002131   | 22952.221 | 28904.527 |
| AB020695  | 2298.424  | 2344.74   | M33197    | 57228.281 | 56770.797 | NM_017927   | 2852.194  | 2241.77   |
| AB028982  | 2476.412  | 3152.42   | AL137658  | 19147.967 | 20807.096 | NM_004796   | 9641.182  | 6070.404  |
| NM_002004 | 2181.773  | 2449.491  | D16888    | 1002.272  | 1243.11   | NM_006733   | 538.842   | 655.801   |
| NM_005121 | 1570.942  | 1577.262  | U79277    | 1100.046  | 1726.858  | NM_014047   | 18284.662 | 15086.858 |
| NM_001643 | 21478.031 | 23138.352 | AF068298  | 4929.946  | 4951.643  | AK022901    | 1693.475  | 1368.063  |
| NM_020221 | 1212.878  | 1300.144  | AK023242  | 1074.235  | 936.406   | M33197      | 61806.863 | 65447.664 |
| NM_000747 | 2316.495  | 1728.444  | M33197    | 57602.867 | 58115.84  | AF037332    | 5256.098  | 5260.457  |
| NM_005415 | 3328.2    | 3017.258  | BI762229  | 12977.317 | 12751.578 | NM_006052   | 1101.356  | 944.261   |
| AL137708  | 301.258   | 550.664   | BG618320  | 4711.99   | 3568.665  | AB040912    | 1911.304  | 2651.703  |
| AL834159  | 4084.858  | 3623.967  | Y00787    | 1078.272  | 946.725   | NM_003871   | 571.14    | 840.852   |
| NM_000164 | 35668.773 | 31559.82  | NM_007276 | 2855.23   | 2232.06   | NM_006243   | 4491.474  | 5812.648  |
| NM_016217 | 32109.271 | 36276.484 | N34462    | 2257.339  | 1424.058  | M33197      | 61187.375 | 64940.523 |

|           |           |           |           |           |           |           |           |           |
|-----------|-----------|-----------|-----------|-----------|-----------|-----------|-----------|-----------|
| AK025971  | 4905.438  | 5436.031  | AI658778  | 1530.779  | 1055.533  | AJ011129  | 3804.497  | 4245.366  |
| NM_00261E | 4931.631  | 5090.156  | L19067    | 4937.031  | 3672.447  | M33197    | 59760.918 | 59979.398 |
| L27479    | 1074.508  | 1145.045  | Z48482    | 466.193   | 498.498   | U92978    | 1860.825  | 1617.192  |
| NM_002193 | 2054.923  | 2323.245  | W60413    | 533.406   | 405.598   | NM_01338E | 2629.924  | 2065.205  |
| NM_00138E | 8716.018  | 7927.151  | BI823365  | 3364.228  | 2245.047  | AB014567  | 412.896   | 828.31    |
| X76770    | 3585.897  | 3642.948  | X06318    | 5169.31   | 4298.841  | AK022817  | 1225.461  | 1285.893  |
| AB037808  | 1938.072  | 1795.123  | AL834159  | 2648.321  | 2653.563  | NM_018034 | 5028.863  | 5321.174  |
| NM_01603E | 4310.753  | 5373.334  | SR5       | 7170.917  | 7544.847  | M33197    | 58857.043 | 60485.941 |
| AF090911  | 485.101   | 622.07    | SR7       | 5141.06   | 45261.617 | AB037831  | 1398.269  | 1399.275  |
| Z36821    | 12575.815 | 15824.452 | SR9       | 17379.568 | 3024.921  | NM_012103 | 12103.283 | 10243.654 |
| AF289485  | 4680.034  | 5533.046  | CY3Cy5    | 5506.807  | 226.245   | AL122077  | 7139.737  | 4837.314  |
| AF130092  | 3393.373  | 3396.328  | NM_006314 | 7777.999  | 7621.89   | NM_014632 | 1231.798  | 1006.913  |
| NM_01609E | 5487.43   | 7198.247  | NM_001782 | 1442.844  | 1110.066  | NM_006422 | 1078.895  | 1639.492  |
| AK024794  | 1418.09   | 1763.123  | NM_000797 | 4916.491  | 4556.78   | NM_01694E | 1346.172  | 1726.904  |
| NM_019853 | 10965.365 | 9521.984  | NM_016293 | 8866.924  | 9604.045  | NM_00725E | 1719.724  | 2279.932  |
| NM_017992 | 3424.666  | 3382.06   | AL080148  | 4879.877  | 4493.322  | NM_018402 | 1061.944  | 1166.926  |
| NM_00540C | 727.526   | 525.668   | NM_006731 | 793.533   | 712.444   | NM_01800E | 792.684   | 991.603   |
| NM_014061 | 713.216   | 1136.906  | NM_018487 | 327.3     | 477.055   | AK075081  | 2284.641  | 2273.381  |
| BC034395  | 713.141   | 775.93    | NM_020134 | 537.446   | 715.885   | NM_00089E | 8529.834  | 9967.093  |
| NM_00247E | 1084.627  | 1300.63   | NM_014061 | 608.108   | 478.699   | NM_00382C | 19532.588 | 22238.836 |
| NM_00034E | 3508.747  | 5849.085  | NM_00495C | 1798.072  | 1436.529  | AB002301  | 770.83    | 827.142   |
| NM_00505E | 1082.78   | 1268.72   | NM_000724 | 3083.497  | 2189.513  | AB014530  | 4105.159  | 3566.908  |
| NM_00495C | 2469.161  | 2183.478  | NM_002557 | 6602.908  | 5009.894  | M33197    | 52336.078 | 55579.902 |
| NM_000724 | 4235.391  | 4361.062  | BE728156  | 474.634   | 233.116   | NM_00598E | 2560.549  | 1638.992  |
| NM_002557 | 8950.792  | 8911.931  | NM_005662 | 36008.488 | 33948.957 | AB014607  | 2630.071  | 2185.243  |
| AI417775  | 546.645   | 287.062   | AK021489  | 21625.803 | 25696.928 | AF134401  | 776.905   | 906.929   |
| BI762229  | 20244.307 | 22299.59  | NM_00452E | 548.686   | 578.902   | NM_020151 | 8076.174  | 7100.302  |
| AA131406  | 630.138   | 610.287   | NM_00389E | 685.276   | 502.741   | NM_005891 | 36128.805 | 42375.004 |
| BG618320  | 9038.066  | 9543.663  | NM_004317 | 6769.288  | 5461.158  | NM_00164E | 1479.089  | 1101.656  |
| Y00787    | 1673.688  | 1423.846  | NM_01464E | 2840.295  | 2379.244  | NM_00395E | 2256.898  | 1886.218  |
| NM_00727E | 3582.636  | 3025.325  | NM_01470E | 2205.783  | 2312.333  | M33197    | 60559.555 | 60542.863 |
| N34462    | 1929.141  | 1859.218  | NM_003693 | 1021.749  | 1034.788  | NM_00350C | 4040.934  | 3963.712  |
| AI658778  | 1591.409  | 1572.203  | NM_00035E | 22045.014 | 19825.834 | NM_014317 | 2526.249  | 2771.229  |
| L19067    | 5512.051  | 5591.754  | NM_018134 | 23007.072 | 33658.703 | L09234    | 8747.914  | 12230.072 |
| Z48482    | 675.383   | 628.248   | NM_013247 | 5562.947  | 5334.548  | NM_00005E | 1695.243  | 2124.028  |
| W60413    | 512.511   | 970.408   | NM_00677C | 1435.226  | 1667.013  | AK026740  | 1010.325  | 1606.968  |
| BI823365  | 3329.922  | 3279.851  | NM_004703 | 2563.926  | 2788.269  | M33197    | 61593.105 | 66634.648 |
| X06318    | 5256.075  | 5447.197  | NM_001512 | 649.945   | 783.543   | NM_017634 | 7263.233  | 8325.954  |
| NM_004703 | 4651.353  | 4194.413  | NM_01470E | 6024.619  | 8118.14   | NM_000813 | 739.773   | 657.281   |
| NM_001512 | 1383.228  | 1489.239  | AK023172  | 526.097   | 698.097   | NM_01889E | 1144.912  | 1031.055  |
| NM_01470E | 9278.271  | 10053.522 | AF139768  | 405.514   | 302.746   | AJ300465  | 1895.227  | 1432.936  |
| AK023172  | 649.38    | 980.404   | AJ001348  | 705.382   | 772.426   | X86400    | 1168.051  | 1615.125  |
| AJ001348  | 1833.532  | 1224.403  | NM_014007 | 1051.066  | 974.125   | AF069307  | 2467.757  | 3042.611  |
| NM_014007 | 1814.95   | 1557.59   | AB033006  | 2467.375  | 2515.84   | M33197    | 1005.821  | 1136.331  |
| AB033006  | 5339.317  | 3814.206  | AF020314  | 1607.14   | 1502.244  | AB011146  | 1827.56   | 2176.295  |
| AF020314  | 1999.204  | 1863.922  | NM_016332 | 6317.732  | 5566.271  | NM_00532E | 17228.717 | 18251.707 |
| NM_016332 | 8495.524  | 6745.337  | NM_006457 | 2214.496  | 1991.721  | NM_01406E | 1364.85   | 1156.607  |
| NM_006457 | 2498.305  | 2319.524  | AF000381  | 5166.5    | 5358.299  | AB035130  | 2124.286  | 1800.628  |
| NM_003682 | 915.994   | 863.665   | NM_01210E | 4584.727  | 4172.064  | NM_00335E | 1203.678  | 1372.777  |
| NM_000207 | 1367.238  | 1004.895  | S82470    | 3223.175  | 2843.441  | M33197    | 47957.035 | 46068.168 |
| NM_002531 | 1354.048  | 1199.91   | AB020695  | 1678.556  | 1135.952  | AK021834  | 1348.562  | 1342.165  |
| NM_006314 | 12861.954 | 11998.418 | AB028982  | 690.983   | 586.623   | NM_01791E | 2296.617  | 2540.77   |
| NM_001782 | 1552.329  | 1528.311  | NM_002004 | 1923.935  | 1628.207  | NM_00357E | 1726.375  | 2360.052  |

|           |           |           |           |           |           |             |           |           |
|-----------|-----------|-----------|-----------|-----------|-----------|-------------|-----------|-----------|
| NM_000797 | 5032.595  | 5242.957  | NM_005121 | 1107.591  | 1003.126  | AL049283    | 1427.852  | 1469.305  |
| NM_016293 | 13487.409 | 12628.036 | NM_001643 | 16733.822 | 13783.621 | M33197      | 58845.711 | 60490.582 |
| AF217525  | 535.072   | 461.607   | NM_020221 | 963.22    | 1049.74   | NM_002401   | 32224.008 | 34314.16  |
| AL080148  | 5132.163  | 4793.761  | NM_000747 | 1713.929  | 1935.877  | NM_001274   | 3537.276  | 4156.482  |
| NM_006731 | 788.197   | 855.764   | NM_005415 | 2435.157  | 3186.052  | NM_003913   | 966.151   | 1046.357  |
| NM_018487 | 678.048   | 664.952   | AJ275973  | 13269.861 | 13997.312 | NM_002227   | 3447.866  | 3234.93   |
| NM_020134 | 1026.346  | 832.25    | NM_006493 | 3000.068  | 3413.447  | NM_007195   | 922.23    | 454.853   |
| NM_020221 | 2205.299  | 2497.572  | U76362    | 5040.305  | 5062.245  | NM_006243   | 3648.569  | 4060.366  |
| NM_000747 | 3466.752  | 3361.181  | AF040248  | 628.211   | 554.973   | M33197      | 59435.023 | 63899.039 |
| NM_005415 | 4073.174  | 4150.245  | NM_014228 | 868.675   | 949.128   | AJ011129    | 3536.357  | 3761.943  |
| AL137708  | 398.066   | 839.954   | AL832292  | 4357.319  | 3877.14   | AF282874    | 573.669   | 919.127   |
| AJ275973  | 16610.814 | 17878.234 | NM_003045 | 10131.122 | 10418.809 | NM_006387   | 4521.886  | 5441.57   |
| NM_006493 | 6145.04   | 5182.401  | NM_002618 | 3609.446  | 3552.804  | NM_005646   | 1718.879  | 1914.8    |
| U76362    | 11782.993 | 10565.783 | L27479    | 675.713   | 714.711   | NM_006635   | 749.335   | 643.555   |
| AF040248  | 1391.087  | 809.327   | NM_002193 | 1113.887  | 1176.768  | BI767871    | 1593.108  | 1342.716  |
| NM_014228 | 2354.865  | 2591.552  | NM_001388 | 5368.163  | 6806.475  | AA418907    | 512.856   | 564.378   |
| AL832292  | 5774.754  | 4710.113  | X76770    | 2086.755  | 2454.573  | M65291      | 428.41    | 802.329   |
| NM_003045 | 12042.123 | 9109.548  | AB037808  | 1677.979  | 1598.241  | AA115473    | 3494.954  | 4643.761  |
| NM_005662 | 41276.336 | 39103.016 | NM_016038 | 3266.709  | 2938.959  | AA872397    | 2821.499  | 2855.86   |
| NM_003060 | 849.897   | 593.192   | Z36821    | 7560.469  | 7463.961  | M24283      | 1103.725  | 737.972   |
| AK021489  | 27002.598 | 37025.141 | AF289485  | 3594.946  | 3132.251  | AA709414    | 1166.244  | 1229.747  |
| NM_004525 | 964.014   | 1026.842  | AF130092  | 2008.441  | 2298.558  | D12676      | 2326.005  | 2787.851  |
| NM_003895 | 1009.967  | 1088.365  | NM_016095 | 6266.557  | 5890.984  | NM_000935   | 21278.346 | 23806.5   |
| NM_004317 | 7625.727  | 7188.417  | AK024794  | 1451.449  | 1567.792  | NM_004295   | 25027.963 | 24898.807 |
| NM_014645 | 3353.248  | 3421.957  | NM_019853 | 9139.269  | 9109.359  | H-X 02812 I | 1335.309  | 1441.205  |
| NM_014708 | 3846.993  | 3818.833  | NM_017992 | 2623.807  | 3324.498  | U75898      | 1816.661  | 1645.262  |
| NM_003693 | 1391.746  | 1329.923  | NM_005400 | 661.755   | 947.808   | M29039      | 697.643   | 714.75    |
| NM_000356 | 30634.363 | 32905.809 | AK023061  | 756.344   | 542.068   | M59815      | 867.523   | 420.455   |
| NM_018134 | 49411.898 | 50072.926 | NM_007255 | 2254.883  | 2517.498  | AK075081    | 1626.488  | 1216.44   |
| NM_013247 | 7434.929  | 6968.406  | NM_003668 | 9312.637  | 7569.526  | NM_000895   | 7685.664  | 9030.02   |
| NM_006770 | 2375.966  | 2336.426  | NM_013384 | 57595.297 | 50442.152 | NM_003820   | 12464.459 | 12709.593 |
| BE394704  | 597.404   | 419.599   | NM_001187 | 1691.675  | 1458.705  | NM_015915   | 1425.962  | 1618.268  |
| AK024794  | 2397.582  | 2621.783  | NM_018241 | 3805.824  | 3632.465  | NM_006185   | 9352.488  | 12768.464 |
| NM_019853 | 14010.079 | 14786.403 | NM_005834 | 6919.916  | 6230.742  | NM_014800   | 5394.686  | 7770.68   |
| NM_017992 | 5951.267  | 5250.245  | NM_000724 | 3303.268  | 2824.342  | AF147311    | 2814.413  | 3505.7    |
| NM_005400 | 713.818   | 507.992   | NM_000553 | 315.335   | 473.693   | NM_002131   | 26306.838 | 38603.875 |
| AK023061  | 1192.942  | 1082.919  | NM_002557 | 6965.186  | 8521.269  | NM_017927   | 2654.914  | 2782.072  |
| NM_007255 | 4332.336  | 4910.227  | AI417775  | 363.232   | 480.227   | NM_004795   | 9839.715  | 9342.358  |
| NM_003668 | 13012.51  | 17748.936 | BI762229  | 13636.167 | 13389.248 | NM_014047   | 15864.059 | 17130.1   |
| NM_013384 | 61822.031 | 56214.289 | BG618320  | 5066.21   | 4703.083  | AK022901    | 1193.995  | 1232.406  |
| NM_001187 | 3517.879  | 3070.987  | Y00787    | 1070.067  | 1162.536  | M33197      | 63956.367 | 61878.504 |
| NM_018241 | 5465.37   | 4616.492  | NM_007276 | 2622.012  | 2914.878  | AF037332    | 3992.092  | 3791.968  |
| NM_005834 | 7034.934  | 5535.646  | N34462    | 2152.5    | 1968.359  | NM_006052   | 730.881   | 675.548   |
| AF000381  | 7361.913  | 4962.504  | AI658778  | 1754.179  | 1841.893  | AB040912    | 1879.813  | 2042.425  |
| NM_018075 | 422.595   | 666.485   | L19067    | 5153.423  | 5505.684  | NM_000813   | 359.8     | 928.373   |
| NM_012105 | 7105.629  | 8834.223  | Z48482    | 376.678   | 567.31    | AJ300465    | 1370.107  | 1399.648  |
| S82470    | 3853.022  | 3379.637  | W60413    | 707.995   | 971.818   | X86400      | 830.56    | 1383.34   |
| AB020695  | 1655.08   | 1614.099  | BI823365  | 2181.293  | 1860.708  | AF069307    | 2383.82   | 2870.239  |
| AB028982  | 1483.747  | 1936.085  | X06318    | 5798.871  | 5882.447  | M33197      | 59203.422 | 62702.504 |
| NM_002004 | 1872.705  | 2135.583  | AL834159  | 3196.453  | 3288.579  | U92978      | 2395.664  | 2626.176  |
| NM_005121 | 2317.992  | 2277.899  | NM_000164 | 17424.389 | 25177.754 | NM_005738   | 679.611   | 627.187   |
| NM_001643 | 12311.063 | 13691.138 | NM_016217 | 22018.848 | 19623.908 | NM_014488   | 613.945   | 979.152   |
| NM_019096 | 6821.917  | 6950.549  | AK025971  | 3395.705  | 3358.792  | NM_013385   | 3105.799  | 3458.054  |

|           |           |           |           |           |           |           |           |           |
|-----------|-----------|-----------|-----------|-----------|-----------|-----------|-----------|-----------|
| NM_01472E | 2583.918  | 2763.928  | NM_014007 | 1064.951  | 1172.109  | NM_018034 | 5450.213  | 6443.119  |
| NM_00689Z | 3379.267  | 3803.561  | AB033006  | 2608.425  | 2792.111  | M33197    | 64778.652 | 66540.336 |
| NM_019117 | 1524.146  | 1310.01   | AF020314  | 1610.201  | 1561.537  | AB037831  | 2179.896  | 2328.71   |
| NM_01830E | 3447.096  | 3491.253  | NM_01633Z | 6616.725  | 9653.882  | NM_01210Z | 12442.556 | 14316.257 |
| NM_01765E | 5171.498  | 3317.612  | AK023936  | 223.562   | 554.74    | AL122077  | 6887.801  | 5806.784  |
| NM_01867E | 15793.251 | 18546.99  | NM_006457 | 1831.541  | 2073.054  | NM_01463Z | 874.058   | 660.112   |
| NM_01664Z | 1134.795  | 1330.244  | NM_00368Z | 618.617   | 570.887   | NM_00642Z | 823.654   | 844.543   |
| NM_00258C | 686.854   | 587.837   | NM_002531 | 881.812   | 704.69    | NM_01694E | 767.386   | 757.514   |
| NM_00677E | 5200.824  | 5494.03   | NM_006314 | 9305.146  | 8966.574  | M33197    | 66756.914 | 74120.438 |
| NM_016217 | 32291.373 | 36481.766 | NM_00178Z | 1091.481  | 1274.466  | NM_00725E | 1617.831  | 1380.812  |
| AK025971  | 5347.321  | 6054.801  | NM_000797 | 3509.518  | 4147.118  | NM_01840Z | 919.084   | 842.891   |
| NM_00261E | 4011.525  | 2507.686  | NM_014927 | 772.01    | 896.317   | M33197    | 55693.145 | 57897.332 |
| L27479    | 1028.862  | 787.237   | NM_01629Z | 9069.169  | 12457.906 | NM_002401 | 17826.918 | 18595.439 |
| NM_00219Z | 2248.593  | 2342.245  | AL080148  | 4914.032  | 5620.272  | NM_001274 | 3331.132  | 3429.398  |
| NM_00138E | 9499.537  | 9971.676  | NM_006731 | 792.371   | 710.707   | NM_00391Z | 1351.746  | 1151.73   |
| X76770    | 3997.231  | 3483.686  | NM_020134 | 511.125   | 830.218   | NM_00719E | 1061.941  | 1047.79   |
| AB037808  | 1528.087  | 1162.594  | NM_014061 | 1018.38   | 846.515   | AB002301  | 545.712   | 1030.21   |
| NM_01603E | 3392.875  | 4242.979  | BC034395  | 506.657   | 475.193   | AB014530  | 4921.702  | 5465.395  |
| AF090911  | 2080.524  | 3841.935  | NM_00247E | 823.461   | 758.35    | M33197    | 61829.688 | 61083.309 |
| Z36821    | 8979.583  | 11545.769 | NM_00034E | 3553.983  | 2936.677  | NM_00598E | 2797.353  | 2679.154  |
| AF289485  | 4245.805  | 4930.333  | NM_00505E | 550.277   | 934.532   | AB014607  | 5178.684  | 4403.781  |
| AF130092  | 3509.668  | 3341.184  | NM_00495C | 1727.318  | 2115.146  | AF134401  | 992.86    | 1336.919  |
| NM_01609E | 6686.715  | 8158.422  | NM_00649Z | 3029.491  | 3138.921  | NM_020151 | 7934.491  | 8223.229  |
| AF300612  | 58748.285 | 56478.156 | U76362    | 5758.979  | 5796.832  | NM_005891 | 39403.98  | 47865.281 |
| AB014557  | 1634.13   | 1629.228  | AF040248  | 628.832   | 732.659   | NM_00164E | 1383.322  | 1198.353  |
| NM_00557E | 4474.474  | 2659.329  | NM_01422E | 756.368   | 922.357   | NM_00395E | 1440.882  | 1769.566  |
| NM_00365Z | 15164.266 | 9473.824  | AL832292  | 4242.009  | 4563.816  | M33197    | 59446.527 | 59015.039 |
| NM_018457 | 19496.52  | 11789.028 | NM_00304E | 9607.405  | 10781.052 | NM_00350C | 4175.148  | 4217.617  |
| NM_00295Z | 7948.905  | 9421.824  | NM_00306C | 533.437   | 603.836   | NM_014317 | 2922.149  | 2565.102  |
| NM_002187 | 1719.149  | 2024.827  | AK021489  | 22198.576 | 17141.934 | L09234    | 8032.938  | 8412.555  |
| NM_01424E | 9833.909  | 11098.343 | NM_00389E | 763.379   | 683.493   | NM_00005E | 1764.09   | 1503.282  |
| NM_01485E | 2405.338  | 2754.552  | NM_004317 | 5976.064  | 5218      | NM_017881 | 6373.596  | 6989.405  |
| AF311912  | 874.875   | 850.408   | NM_01464E | 2668.527  | 3204.503  | NM_017634 | 6161.649  | 6044.875  |
| NM_001116 | 1182.572  | 1299.079  | NM_01470E | 3616.551  | 4546.859  | NM_01774Z | 1606.829  | 1964.248  |
| BC035395  | 9943.239  | 12103.208 | NM_00369Z | 1338.329  | 1612.348  | NM_00030C | 3587.226  | 3540.765  |
| NM_00170Z | 16134.121 | 10478.682 | NM_00035E | 24651.084 | 24362.965 | M33197    | 60444.152 | 58682.391 |
| NM_02012E | 5881.066  | 6226.138  | NM_018134 | 26685.656 | 40624.719 | AV756917  | 2406.767  | 2377.973  |
| NM_01398Z | 4019.548  | 4185.023  | NM_013247 | 4929.188  | 5151.9    | NM_01838C | 7215.708  | 5736.106  |
| NM_00504E | 1521.833  | 1529.416  | NM_00677C | 1789.144  | 1908.669  | AK001442  | 1892.581  | 1862.458  |
| NM_00388Z | 1808.375  | 1716.467  | BE394704  | 518.075   | 458.854   | AF183423  | 4279.75   | 4210.259  |
| NM_00463C | 12130.776 | 12196.747 | NM_00470Z | 2770.508  | 2744.491  | M33197    | 638.942   | 1426.675  |
| AK023001  | 10296.127 | 9868.353  | NM_00151Z | 936.696   | 734.732   | AB011146  | 2354.538  | 3082.149  |
| NM_01482E | 9995.292  | 14045.422 | NM_01470E | 7392.291  | 6127.538  | NM_00532E | 17742.289 | 20198.58  |
| AF201947  | 1333.911  | 1644.671  | AK023172  | 445.642   | 341.506   | NM_01406E | 1358.715  | 797.995   |
| U01147    | 1436.677  | 1311.245  | AJ001348  | 863.535   | 887.939   | AB035130  | 2504.425  | 2183.15   |
| NM_00404C | 9610.625  | 7693.847  | NM_00725E | 2052.944  | 2359.736  | NM_00335E | 1974.816  | 1608.002  |
| NM_006116 | 3937.633  | 3384.811  | NM_00366E | 9079.929  | 7619.964  | M33197    | 51704.145 | 51188.516 |
| NM_00545E | 722.254   | 779.284   | NM_013384 | 56117.594 | 49873.465 | AF119917  | 666.808   | 400.777   |
| NM_003587 | 27238.072 | 15556.797 | NM_001187 | 1824.984  | 1680.147  | NM_01791E | 1715.367  | 1899.484  |
| X90978    | 1592.5    | 901.156   | NM_018241 | 3419.392  | 4983.933  | AL049283  | 1427.44   | 1245.479  |
| BF219403  | 38986.723 | 29485.186 | NM_005834 | 6498.476  | 7562.288  | AF005258  | 1064.486  | 622.326   |
| NM_016119 | 4636.883  | 3013.84   | NM_01807E | 329.254   | 329.258   | M33197    | 62536.293 | 59220.348 |
| AK075450  | 4523.835  | 2932.714  | NM_01210E | 4586.815  | 3940.03   | X99659    | 47862.527 | 39150.621 |

|           |           |           |           |           |           |           |           |           |
|-----------|-----------|-----------|-----------|-----------|-----------|-----------|-----------|-----------|
| AF178983  | 4669.367  | 4067.761  | S82470    | 3208.211  | 3211.812  | NM_002731 | 1617.478  | 1440.302  |
| NM_001324 | 7304.086  | 8382.561  | AB020695  | 1791.554  | 1606.998  | NM_003895 | 5114.379  | 4827.926  |
| AB037795  | 2383.264  | 3118.581  | AB028982  | 698.705   | 851.415   | X99662    | 3129.158  | 2996.582  |
| D43949    | 2716.787  | 3987.501  | NM_002004 | 2430.501  | 1774.59   | NM_003473 | 45612.07  | 43365.047 |
| AK022975  | 1390.437  | 1521.778  | NM_005121 | 1183.874  | 1188.094  | NM_014325 | 1998.786  | 1834.573  |
| NM_015344 | 4915.232  | 5215.425  | NM_020221 | 981.534   | 1002.22   | M33197    | 61964.117 | 61791.395 |
| NM_004285 | 2141.586  | 2228.33   | NM_000747 | 1847.221  | 1850.812  | NM_006015 | 46304.297 | 40478.492 |
| AL122055  | 4393.441  | 3162.528  | NM_005415 | 3161.119  | 2593.086  | NM_001242 | 4356.269  | 4139.392  |
| NM_005132 | 21851.518 | 26125.768 | AJ275973  | 16663.9   | 14301.807 | NM_001882 | 2279.55   | 2375.594  |
| X07695    | 731.558   | 1029.064  | AL834159  | 3162.451  | 2600.334  | NM_014891 | 11121.406 | 11058.396 |
| AK021750  | 5617.884  | 4395.024  | NM_000164 | 17570.934 | 24009.162 | NM_013392 | 12714.313 | 9700.139  |
| NM_003625 | 1780.579  | 1779.239  | NM_016217 | 19627.984 | 28946.365 | M33197    | 61517.836 | 60427.73  |
| NM_006932 | 519.359   | 696.249   | AK025971  | 3627.53   | 4216.406  | NM_003235 | 1689.761  | 1922.861  |
| AK023594  | 5901.186  | 6427.458  | NM_002615 | 3396.61   | 3467.72   | AF052692  | 1499.491  | 1213.319  |
| AB010099  | 17476.705 | 15567.584 | L27479    | 739.101   | 650.462   | NM_002354 | 977.152   | 921.774   |
| AB039920  | 7066.355  | 5898.691  | NM_002193 | 1271.104  | 1057.577  | NM_000175 | 1038.24   | 688.223   |
| AB046782  | 2885.415  | 2560.618  | NM_001385 | 5841.483  | 5953.378  | AF062739  | 1303.906  | 960.929   |
| NM_004190 | 16637.121 | 10855.351 | X76770    | 2548.728  | 2578.911  | NM_006602 | 1941.241  | 1626.055  |
| NM_014275 | 4550.557  | 3323.432  | AB037808  | 1801.28   | 1993.265  | M33197    | 52018.449 | 53205.176 |
| NM_000405 | 3473.219  | 2605.154  | NM_016035 | 3241.026  | 3190.415  | AL079314  | 1231.858  | 1583.996  |
| AF208005  | 1579.645  | 1695.791  | Z36821    | 9575.53   | 10503.011 | NM_001260 | 1676.086  | 1644.969  |
| NM_002231 | 15794.649 | 12276.162 | AF289485  | 4357.093  | 4001.942  | NM_001950 | 4622.664  | 5579.529  |
| NM_020474 | 14656.656 | 15377.28  | AF130092  | 2952.016  | 2968.276  | AK026364  | 1272.88   | 1550.093  |
| NM_002643 | 5311.79   | 5649.768  | AK024794  | 1372.398  | 1330.483  | NM_018117 | 723.084   | 887.488   |
| NM_017807 | 7302.3    | 7385.745  | NM_019853 | 9157.207  | 8829.186  | NM_006995 | 960.243   | 910.816   |
| NM_014745 | 2361.096  | 2952.25   | NM_017992 | 3068.002  | 2810.114  | NM_006285 | 1714.174  | 2129.57   |
| NM_000462 | 15418.164 | 16545.906 | AK023061  | 642.872   | 613.674   | M33197    | 56363.883 | 60899.074 |
| NM_003335 | 11140.639 | 12763.186 | NM_014061 | 733.371   | 546.546   | NM_004331 | 13231.507 | 14860.811 |
| NM_005805 | 35044.262 | 40691.426 | BC034395  | 566.517   | 728.522   | NM_015995 | 1126.194  | 1222.24   |
| NM_004181 | 1282.165  | 1069.901  | NM_002479 | 505.907   | 897.357   | NM_015703 | 12581.72  | 12467.225 |
| NM_003900 | 3860.663  | 3345.563  | NM_000345 | 3830.409  | 4757.956  | AB018337  | 1713.36   | 1350.787  |
| NM_003337 | 3558.919  | 3914.962  | NM_005059 | 696.461   | 1085.395  | NM_014485 | 1314.391  | 1409.589  |
| AF117233  | 7294.935  | 7562.691  | NM_004950 | 1599.447  | 2293.22   | AK025273  | 2716.219  | 2636.26   |
| NM_015845 | 2095.101  | 2009.81   | NM_000724 | 3291.243  | 3064.384  | M33197    | 57954.098 | 58210.289 |
| M94362    | 17291.521 | 18287.398 | NM_002557 | 5836.684  | 5284.511  | NM_001794 | 1580.159  | 1533.938  |
| AK024707  | 1370.685  | 1113.32   | BI762229  | 13508.955 | 14684.926 | NM_002205 | 2631.102  | 2305.198  |
| NM_014255 | 3055.093  | 2627.397  | BG618320  | 5397.909  | 6899.827  | M33197    | 60756.895 | 59382.75  |
| AK022909  | 2279.558  | 1985.352  | Y00787    | 1163.152  | 1339.864  | NM_000131 | 924.56    | 614.338   |
| NM_006530 | 13914.027 | 15107.658 | NM_007275 | 2883.186  | 3137.239  | NM_001911 | 13254.773 | 8975.573  |
| AB033024  | 2215.275  | 2002.014  | N34462    | 2112.276  | 1612.299  | NM_000537 | 844.717   | 865.557   |
| NM_018942 | 2964.967  | 2160.44   | AI658778  | 1962.846  | 2182.622  | NM_006503 | 1572.209  | 1483.802  |
| NM_005531 | 16696.223 | 12404.806 | L19067    | 4735.571  | 6402.498  | M33197    | 941.653   | 982.747   |
| NM_006977 | 2304.896  | 1569.175  | W60413    | 592.385   | 680.182   | AB020698  | 626.522   | 924.173   |
| AF217226  | 6430.39   | 5617.221  | BI823365  | 3631.293  | 3012.305  | U68382    | 641.78    | 896.503   |
| NM_005522 | 1735.984  | 1874.392  | X06318    | 5049.169  | 4328.015  | NM_003965 | 1819.176  | 2367.104  |
| NM_005760 | 13473.934 | 14409.947 | NM_004703 | 2544.016  | 2385.041  | NM_004651 | 3150.464  | 4309.847  |
| NM_014212 | 893.306   | 736.745   | NM_001512 | 921.896   | 838.71    | M33197    | 56246.953 | 56352.488 |
| NM_007265 | 4972.972  | 5370.309  | NM_014705 | 6993.915  | 7016.204  | NM_017565 | 10359.735 | 8156.346  |
| AK023639  | 8296.313  | 10051.993 | AK023172  | 378.229   | 481.855   | NM_001455 | 1139.71   | 985.477   |
| AL122118  | 470.31    | 690.224   | AJ001348  | 987.514   | 901.409   | NM_002905 | 1279.287  | 1439.884  |
| AL137700  | 2154.44   | 2152.801  | NM_014007 | 1061.514  | 1246.68   | AK024480  | 917.134   | 1074.457  |
| NM_004904 | 2042.468  | 1622.47   | AB033006  | 2590.441  | 2601.769  | Y13871    | 13231.11  | 12966.857 |
| NM_003083 | 4163.665  | 2836.629  | AF020314  | 1197.859  | 985.079   | AL137725  | 9214.038  | 3715.602  |



|           |           |           |           |           |           |           |           |           |
|-----------|-----------|-----------|-----------|-----------|-----------|-----------|-----------|-----------|
| NM_000982 | 1611.289  | 1572.388  | NM_016332 | 6187.926  | 5431.762  | M33197    | 61406.809 | 61095.477 |
| NM_012423 | 43672.789 | 47981.074 | AK023936  | 349.749   | 460.642   | AJ008151  | 11418.125 | 10459.565 |
| AK026367  | 21424.463 | 26395.18  | NM_006457 | 1979.538  | 1900.968  | AK024149  | 839.989   | 1058.859  |
| AK026491  | 7151.634  | 5912.67   | NM_003682 | 755.735   | 715.849   | AK023094  | 1235.569  | 1171.046  |
| NM_001015 | 64028.816 | 61184.863 | NM_000207 | 887.096   | 832.815   | M33197    | 58120.777 | 54777.531 |
| AL110170  | 23923.137 | 23101.811 | NM_006314 | 8915.251  | 11327.396 | NM_004091 | 1030.243  | 704.375   |
| AK021747  | 2326.453  | 1834.137  | NM_001782 | 1823.756  | 2565.053  | X74070    | 61541.297 | 56988.164 |
| AK025640  | 8770.83   | 6966.226  | NM_000797 | 3683.276  | 3677.112  | AF027219  | 1003.719  | 595.664   |
| AF131772  | 1052.022  | 1195.839  | NM_016293 | 7360.887  | 10302.599 | BC022846  | 820.35    | 696.816   |
| NM_019101 | 1463.219  | 738.597   | AF217525  | 627.926   | 489.196   | NM_006333 | 7278.008  | 10024.003 |
| AB044137  | 2217.93   | 2974.283  | AL080148  | 6047.271  | 7734.064  | M33197    | 60519.098 | 58928.5   |
| NM_000920 | 2408.152  | 2311.656  | NM_006731 | 523.039   | 597.541   | NM_002895 | 5110.489  | 5131.38   |
| NM_020375 | 7888.765  | 6799.401  | NM_018487 | 310.55    | 616.097   | AK022749  | 8614.024  | 10338.693 |
| NM_016045 | 9310.374  | 12555.592 | NM_020134 | 793.586   | 860.71    | BF031409  | 5224.03   | 5079.527  |
| NM_013311 | 11037.682 | 14120.012 | NM_020221 | 965.252   | 635.568   | NM_007043 | 1364.109  | 1338.663  |
| NM_000291 | 67027.938 | 62447.691 | NM_000747 | 2420.031  | 2251.761  | U94388    | 1317.5    | 1233.975  |
| NM_018081 | 7786.607  | 8792.264  | NM_005415 | 2899.196  | 3309.185  | NM_012322 | 6911.333  | 6522.416  |
| NM_014645 | 4964.32   | 6379.535  | AJ275973  | 16662.008 | 19297.273 | M33197    | 58144.602 | 58189.023 |
| AL117488  | 2728.969  | 2826.82   | NM_006493 | 3269.859  | 3419.784  | NM_004885 | 38950.492 | 39826.383 |
| NM_012240 | 1846.757  | 1397.284  | U76362    | 5298.42   | 5285.598  | AK025314  | 1906.056  | 1846.127  |
| NM_019005 | 11249.396 | 10081.105 | AF040248  | 443.786   | 603.836   | NM_002105 | 3494.525  | 3065.908  |
| NM_004735 | 12030.269 | 11304.224 | NM_014225 | 767.622   | 749.603   | NM_000984 | 40676.438 | 39181.039 |
| AV752216  | 1505.996  | 1845.207  | AL832292  | 3658.063  | 3206.612  | NM_002453 | 3163.901  | 1746.823  |
| NM_005341 | 1852.937  | 2429.092  | NM_003045 | 9162.491  | 9519.385  | AK000780  | 17772.775 | 14781.52  |
| AF181999  | 1366.93   | 1326.522  | NM_005662 | 35593.301 | 28252.492 | AK026721  | 1621.192  | 1788.37   |
| NM_001934 | 5019.246  | 4939.652  | NM_003060 | 423.552   | 405.608   | AK023027  | 1729.343  | 1805.865  |
| AB011090  | 1587.641  | 1297.077  | NM_003895 | 1332.71   | 2123.774  | AK025598  | 786.507   | 634.901   |
| NM_000205 | 394.081   | 631.866   | NM_004317 | 7094.975  | 6102.791  | AB002348  | 39180.465 | 27768.998 |
| NM_018682 | 8695.12   | 7884.436  | NM_014645 | 3138.716  | 2713.608  | M33197    | 40102.113 | 35754.59  |
| AL355722  | 1107.102  | 590.747   | NM_014705 | 3219.024  | 3738.465  | NM_005005 | 3749.583  | 3893.781  |
| AK022090  | 2416.506  | 1645.764  | NM_003693 | 1129.956  | 1534.553  | AK027033  | 1454.394  | 1700.549  |
| NM_006545 | 24763.547 | 22606.008 | NM_000355 | 19239.682 | 22828.932 | NM_000105 | 1633.444  | 1530.242  |
| NM_016534 | 2880.093  | 2622.711  | NM_018134 | 32101.785 | 57506.938 | NM_003000 | 18148.248 | 21298.836 |
| AB021923  | 1131.173  | 802.448   | NM_013247 | 5537.295  | 6060.728  | NM_002495 | 22288.873 | 25246.863 |
| AK024240  | 2061.999  | 2239.706  | NM_006770 | 1894.664  | 1869.127  | M33197    | 60161.176 | 59577.105 |
| NM_016455 | 26086.189 | 23125.234 | BE394704  | 838.077   | 814.4     | NM_016284 | 1411.174  | 1550.954  |
| AK022677  | 2212.388  | 1727.656  | AK024794  | 1635.101  | 1423.229  | NM_014593 | 2421.611  | 2020.083  |
| AL137645  | 28227.244 | 23155.529 | NM_019853 | 9330.32   | 8029.158  | NM_006833 | 9604.912  | 7671.284  |
| AK026141  | 1750.619  | 1945.625  | NM_017992 | 3279.744  | 3972.537  | NM_012257 | 1310.506  | 1374.432  |
| AK022894  | 2331.931  | 2698.176  | NM_005400 | 817.177   | 1117.608  | U37690    | 26367.324 | 28654.344 |
| AF217993  | 6001.471  | 7216.306  | AK023061  | 933.855   | 1651.706  | NM_005120 | 1404.597  | 1095.686  |
| AK024267  | 642.571   | 805.59    | NM_007255 | 2208.813  | 3087.187  | AB029012  | 11972.315 | 8326.818  |
| AF131823  | 1591.087  | 1445.863  | NM_003665 | 8857.037  | 7760.808  | M33197    | 65565.836 | 62767.473 |
| AK026324  | 14607.873 | 13241.131 | NM_013384 | 55747.105 | 49516.246 | NM_006295 | 859.493   | 425.508   |
| AK025253  | 1829.59   | 1272.11   | NM_001187 | 1904.511  | 1452.685  | AF060936  | 6784.266  | 4533.533  |
| AK025004  | 901.753   | 877.67    | NM_018241 | 4106.188  | 3857.704  | AL050088  | 4874.961  | 4471.674  |
| AL136818  | 2018.703  | 2234.739  | NM_005834 | 6341.67   | 6227.899  | AK024939  | 4844.345  | 5587.678  |
| AF146798  | 2112.373  | 1806.378  | AF000381  | 4485.756  | 4933.225  | AK001561  | 1914.087  | 1441.393  |
| AK022049  | 767.28    | 766.521   | NM_012105 | 5329.078  | 5067.223  | AB007880  | 2656.42   | 1825.233  |
| AF086517  | 9151.064  | 6785.686  | S82470    | 3771.235  | 3895.703  | M33197    | 60960.023 | 58076.75  |
| AK025740  | 17239.711 | 14036.104 | AB020695  | 1889.882  | 2242.562  | AF147356  | 4356.402  | 4362.178  |
| AK000311  | 4446.894  | 4437.297  | AB028982  | 1050.413  | 1271.439  | NM_018843 | 2895.017  | 3518.17   |
| AK025346  | 58568.773 | 53761.484 | NM_002004 | 2560.982  | 2566.296  | AL049461  | 2599.763  | 3408.623  |

|           |           |           |           |           |           |           |           |           |
|-----------|-----------|-----------|-----------|-----------|-----------|-----------|-----------|-----------|
| AK022583  | 6676.561  | 5098.485  | NM_005121 | 1290.876  | 1265.204  | M33197    | 59453.152 | 60488.199 |
| AL137534  | 61414.324 | 57993.461 | NM_001643 | 20441.879 | 17687.506 | AL109782  | 5400.778  | 5399.345  |
| AF052121  | 6928.142  | 5891.523  | NM_019096 | 4787.695  | 4041.642  | AF086225  | 1054.617  | 802.903   |
| AL359062  | 2792.274  | 2365.111  | NM_014725 | 2318.975  | 2121.363  | NM_005844 | 10862.726 | 8642.616  |
| AK026869  | 2118.394  | 1522.817  | NM_006892 | 2925.466  | 3155.853  | AK024941  | 2859.277  | 2423.588  |
| AK022192  | 747.681   | 482.212   | NM_019117 | 1432.703  | 2357.892  | AF056434  | 1624.426  | 1446.817  |
| NM_019096 | 49981.883 | 46048.348 | NM_018309 | 3143.68   | 5111.008  | M33197    | 46457.75  | 41881.414 |
| Y12020    | 37791.965 | 30084.197 | NM_017658 | 4426.239  | 7310.957  | AK025489  | 1421.357  | 1007.181  |
| AJ001905  | 2271.459  | 2391.273  | NM_018679 | 9876.231  | 11408.955 | AL390152  | 3627.396  | 3442.661  |
| U17635    | 2111.163  | 1886.46   | NM_016643 | 506.579   | 870.493   | M33197    | 58089.609 | 57800.266 |
| AL049930  | 795.399   | 850.53    | NM_006779 | 3343.697  | 3479.019  | NM_018126 | 1204.001  | 1243.493  |
| Z83946    | 576.476   | 332.865   | NM_016217 | 22861.496 | 22347.061 | AK024506  | 4825.642  | 3303.428  |
| D55638    | 678.622   | 740.08    | AK025971  | 3844.248  | 3762.166  | NM_014179 | 1730.511  | 1447.914  |
| D55644    | 570.838   | 346.107   | NM_002618 | 3305.579  | 3533.337  | AF086326  | 2834.026  | 2384.795  |
| D16951    | 768.185   | 683.526   | L27479    | 839.108   | 861.626   | M33197    | 60970.582 | 62745.863 |
| L19362    | 703.753   | 534.417   | NM_002193 | 1401.228  | 1571.318  | AL080057  | 745.501   | 931.491   |
| L33807    | 1573.264  | 1209.494  | NM_001388 | 7200.113  | 7516.992  | AL117528  | 1115.789  | 805.263   |
| AB007975  | 810.098   | 746.423   | X76770    | 2820.063  | 3317.731  | M33197    | 62685.77  | 59063.754 |
| AL049328  | 1238.748  | 971.785   | AB037808  | 1992.63   | 2018.929  | AK025948  | 808.87    | 1141.992  |
| AK000030  | 849.399   | 807.07    | NM_016038 | 2216.217  | 2894.976  | AK000674  | 750.181   | 706.534   |
| NM_017932 | 740.884   | 804.47    | Z36821    | 10207.063 | 10689.114 | AL353948  | 22454.861 | 16885.076 |
| AK000910  | 4204.798  | 2871.944  | AF289485  | 5348.256  | 6112.386  | M33197    | 60345.488 | 62356.617 |
| AF252280  | 14573.029 | 13580.204 | AF130092  | 2296.981  | 2460.242  | AK025869  | 8059.567  | 6786.029  |
| AK000951  | 521.96    | 385.754   | NM_016095 | 7230.021  | 6069.099  | M33197    | 58757.387 | 50454.48  |
| AK024518  | 13718.708 | 12693.511 | AB014557  | 1522.498  | 1675.456  | AF056430  | 926.463   | 804.094   |
| AK025017  | 4323.959  | 4879.036  | NM_005578 | 5747.735  | 3860.22   | AF009291  | 1136.451  | 1323.576  |
| AK024914  | 4889.957  | 3047.726  | NM_003653 | 14346.725 | 15195.154 | M33197    | 61955.184 | 60090.93  |
| BC030949  | 4047.228  | 3067.301  | NM_018457 | 20274.688 | 22401.969 | NM_018055 | 1845.964  | 1478.229  |
| AF116615  | 2885.351  | 2435.392  | NM_002953 | 4974.011  | 4963.855  | AK002199  | 1639.13   | 1632.841  |
| U17636    | 60374.445 | 56274.027 | NM_002187 | 876.112   | 945.067   | AK021662  | 1523.742  | 2146.044  |
| NM_018546 | 7354.452  | 6692.896  | NM_014246 | 5484.404  | 5812.446  | AK001038  | 431.18    | 894.57    |
| U52699    | 24905.227 | 24951.234 | NM_014859 | 1294.74   | 1296.847  | AK001802  | 1368.187  | 986.705   |
| S71613    | 908.62    | 1090.814  | AF311912  | 337.744   | 277.493   | AK021469  | 1056.327  | 632.787   |
| AJ011910  | 17731.229 | 13012.911 | NM_001116 | 894.539   | 687.478   | AK021706  | 3387.151  | 2621.527  |
| AK024378  | 1588.561  | 1633.994  | BC035395  | 7678.831  | 5851.788  | M33197    | 60972.086 | 61023.578 |
| NM_014026 | 6426.322  | 6027.058  | NM_020126 | 3965.366  | 4111.635  | AK025161  | 1014.409  | 773.903   |
| D61703    | 5218.345  | 4491.524  | NM_013982 | 3573.348  | 3196.295  | AK026259  | 40505.313 | 40164.492 |
| AF086198  | 14665.918 | 13636.909 | NM_005049 | 2496.179  | 2829.612  | AJ008115  | 21027.195 | 18952.189 |
| AL137382  | 55666.813 | 53897.738 | NM_003882 | 531.058   | 480.707   | M33197    | 61234.828 | 58177.273 |
| AK024599  | 3633.53   | 3912.988  | NM_004630 | 9590.318  | 11915.499 | AK022970  | 1001.296  | 708.8     |
| NM_014450 | 14207.437 | 11035.033 | AK023001  | 8770.828  | 13109.373 | AK026212  | 2223.023  | 2440.394  |
| L37198    | 1620.535  | 1406.214  | NM_014826 | 10006.926 | 9697.281  | AF086222  | 2568.609  | 3238.083  |
| U67822    | 1088.323  | 1109.15   | AF201947  | 967.619   | 1161.738  | AF086415  | 2888.854  | 2787.981  |
| AK021921  | 826.947   | 1011.951  | U01147    | 2005.455  | 1733.978  | M33197    | 60065.043 | 57475.574 |
| AK025431  | 2099.908  | 2419.586  | NM_004040 | 10034.68  | 10877.927 | AK024470  | 2081.231  | 1514.566  |
| AK023662  | 921.12    | 1013.174  | NM_006116 | 3745.125  | 4610.814  | NM_004226 | 5722.715  | 5652.876  |
| AF086274  | 36686.336 | 41571.398 | X90978    | 1710.611  | 1395.739  | AK023400  | 1294.22   | 1009.618  |
| AK023682  | 1437.419  | 1199.881  | BF219403  | 39516.508 | 39163.305 | NM_006432 | 13890.205 | 15498.536 |
| AK024024  | 5769.931  | 5089.954  | NM_016119 | 4040.512  | 4520.362  | AK023897  | 1397.584  | 1154.885  |
| AF000991  | 684.83    | 616.236   | AK075450  | 3458.292  | 4095.119  | AF025441  | 2372.27   | 2044.258  |
| AK000685  | 13085.063 | 9823.712  | AF178983  | 5816.012  | 6196.367  | U62823    | 2486.943  | 1857.253  |
| D28381    | 20076.088 | 18961.773 | NM_001324 | 5589.079  | 5720.818  | NM_003535 | 21804.82  | 15813.042 |
| AK023543  | 743.951   | 783.004   | AB037795  | 1646.779  | 1880.561  | AK026768  | 2206.194  | 1332.148  |

|           |           |           |           |           |           |           |           |           |
|-----------|-----------|-----------|-----------|-----------|-----------|-----------|-----------|-----------|
| BE706519  | 456.708   | 615.141   | D43949    | 2395.257  | 2534.651  | M33197    | 60483.313 | 55056.543 |
| AF130064  | 34491.902 | 36737.141 | NM_005132 | 15560.229 | 13806.651 | AK000852  | 14716.486 | 10890.765 |
| U17624    | 755.178   | 1019.764  | D87458    | 961.447   | 981.481   | AF251188  | 3429.576  | 3470.572  |
| AK025184  | 1905.027  | 1420.715  | AK021750  | 4317.458  | 4788.514  | AK026418  | 3762.366  | 3282.85   |
| AK001959  | 7967.779  | 9958.436  | NM_003626 | 1797.666  | 1949.307  | AF086194  | 19500.434 | 15986.065 |
| U36217    | 1597.179  | 2104.704  | AK023594  | 5745.306  | 4909.967  | AK026811  | 3654.827  | 3375.927  |
| AL389880  | 809.564   | 1079.584  | AB010099  | 21824.635 | 24776.221 | M33197    | 60778.531 | 62939.008 |
| AL157452  | 1407.813  | 1788.749  | AB039920  | 6467.584  | 9105.894  | AK023633  | 1230.465  | 1093.946  |
| AK024155  | 16046.819 | 12839.861 | AB046782  | 2478.765  | 2747.144  | NM_006175 | 832.992   | 947.513   |
| AL359334  | 10336.926 | 6436.345  | NM_004190 | 12543.323 | 8618.659  | AL360165  | 1632.564  | 1526.507  |
| AK027095  | 2597.752  | 2507.496  | NM_014275 | 4032.034  | 3816.606  | AJ008132  | 4880.964  | 4551.896  |
| AF062097  | 1561.791  | 718.442   | NM_000409 | 3938.428  | 4540.988  | NM_005281 | 4699.299  | 3441.762  |
| D17093    | 16256.921 | 18828.695 | AF208005  | 1500.314  | 1812.612  | NM_005545 | 5087.42   | 3707.021  |
| AK022784  | 579.833   | 788.019   | NM_002231 | 14201.901 | 18916.207 | M33197    | 57031.602 | 54592.031 |
| AL117521  | 3769.416  | 4140.826  | NM_020474 | 11459.62  | 10632.026 | U12129    | 3043.21   | 1961.196  |
| NM_000731 | 667.355   | 666.64    | NM_002643 | 3655.032  | 3490.439  | S81242    | 43517.762 | 35804.41  |
| AK021913  | 7624.54   | 5989.543  | NM_017807 | 5442.839  | 5465.202  | AF230801  | 1115.389  | 987.622   |
| AL137489  | 26783.217 | 30167.572 | NM_014746 | 1765.485  | 1920.395  | AF075072  | 1668.464  | 663.364   |
| AF009311  | 4801.738  | 3920.642  | NM_000462 | 9472.63   | 8779.424  | M33197    | 61833.293 | 59757.781 |
| S73397    | 1606.985  | 1628.174  | NM_004181 | 491.499   | 372.319   | NM_002505 | 2926.836  | 2713.37   |
| AL050219  | 630.904   | 472.812   | NM_003900 | 3226.022  | 2833.564  | U38442    | 5756.297  | 4548.64   |
| L37709    | 904.48    | 896.107   | NM_003337 | 3283.41   | 2788.913  | AK026706  | 1259.193  | 950.849   |
| AK024433  | 2745.722  | 2385.505  | AF298152  | 2726.723  | 2137.205  | AB007936  | 30675.699 | 29936.217 |
| U82321    | 858.161   | 671.976   | AF117233  | 8097.154  | 6621.621  | D28391    | 19305.217 | 18340.564 |
| AL050376  | 668.406   | 467.103   | NM_015848 | 760.271   | 783.286   | M33197    | 42873.25  | 33905.203 |
| AL359652  | 1449.179  | 1544.47   | NM_001723 | 1538.057  | 1434.41   | AJ227896  | 7881.318  | 7241.773  |
| BF509267  | 3389.594  | 4153.914  | NM_016018 | 1690.192  | 1278.311  | M33197    | 59338.664 | 63166.789 |
| NM_002455 | 8647.094  | 9746.435  | M94362    | 16155.365 | 15521.721 | AF131770  | 2337.237  | 2374.564  |
| NM_002955 | 9908.02   | 10716.518 | AK024707  | 955.28    | 1072.108  | CY3Cy5    | 4251.149  | 123.435   |
| AK000899  | 16715.813 | 12149.538 | NM_014255 | 2541.246  | 2924.997  | AI298534  | 492.488   | 420.468   |
| CY3Cy5    | 6291.385  | 353.864   | AK022909  | 2093.69   | 2074.89   | R71691    | 698.998   | 714.843   |
| AW300857  | 12196.382 | 13362.072 | NM_006530 | 13567.322 | 12862.498 | AW167715  | 443.225   | 544.714   |
| H85962    | 23917.75  | 26394.545 | AB033024  | 1163.027  | 1084.161  | AA424735  | 1538.97   | 1276.913  |
| BG742446  | 1145.366  | 1615.752  | NM_018942 | 2564.603  | 2852.224  | U78294    | 2375.309  | 1936.726  |
| AA864554  | 988.157   | 2091.68   | NM_005531 | 12955.576 | 12674.405 | BI760394  | 4944.673  | 5084.289  |
| X66945    | 3382.304  | 5733.559  | NM_006977 | 1610.874  | 1840.593  | AA555216  | 529.04    | 650.555   |
| X12830    | 2162.541  | 2479.555  | AF217226  | 6537.4    | 7053.94   | U09117    | 5065.453  | 5105.12   |
| U00482    | 912.19    | 1147.505  | AL359578  | 390.336   | 571.739   | M21054    | 522.304   | 435.709   |
| K01904    | 5855.604  | 6075.89   | NM_005522 | 1297.036  | 1298.98   | M18468    | 556.299   | 662.179   |
| BE538886  | 920.298   | 1314.62   | NM_005760 | 8400.368  | 8526.622  | H66070    | 2482.626  | 2676.938  |
| NM_002225 | 4713.626  | 3170.432  | NM_007265 | 3780.451  | 3112.341  | AA164741  | 8157.268  | 7270.417  |
| M57650    | 3498.182  | 4138.557  | AK023639  | 5858.109  | 4804.116  | AI189375  | 846.244   | 708.216   |
| BC023978  | 855.79    | 845.075   | AL137700  | 1436.424  | 1180.189  | AI978885  | 1785.051  | 1503.119  |
| M21302    | 2410.819  | 2590.078  | NM_004904 | 1117.315  | 1052.628  | AK054960  | 10710.636 | 8587.752  |
| NM_016345 | 3107.595  | 2752.68   | NM_003083 | 2546.957  | 2933.517  | L15344    | 2029.119  | 1764.01   |
| SR2       | 56583.289 | 38031.457 | NM_006789 | 1821.879  | 1558.982  | SR1       | 56068.797 | 53142.152 |
| SR4       | 14843.305 | 8851.051  | NM_000982 | 2289.312  | 2208.215  | SR3       | 39384.848 | 28159.156 |
| SR6       | 2319.428  | 1709.69   | NM_012423 | 44887.711 | 38456.391 | SR5       | 5428.053  | 3900.885  |
| SR8       | 8699.503  | 18608.633 | AK026367  | 18889.068 | 17506.35  | SR7       | 4173.14   | 30128.389 |
| SR10      | 30695.859 | 6930.936  | AK026491  | 6220.863  | 6223.286  | SR9       | 14152.735 | 3242.691  |
| CY3Cy5    | 1582.284  | 134.135   | NM_001015 | 61795.484 | 66374.82  | CY3Cy5    | 4109.25   | 93.33     |
| NM_006055 | 4612.051  | 5401.345  | AL110170  | 16417.307 | 16388.533 | NM_014585 | 2867.89   | 3560.525  |
| NM_004295 | 823.635   | 1018.822  | AK021747  | 2050.149  | 2017.703  | NM_014365 | 6878.11   | 7776.686  |

|           |           |           |           |           |           |           |           |           |
|-----------|-----------|-----------|-----------|-----------|-----------|-----------|-----------|-----------|
| NM_00504E | 1478.388  | 1832.096  | AK025640  | 6981.524  | 6033.246  | NM_00092E | 792.604   | 798.727   |
| NM_00597E | 517.702   | 658.238   | AF131772  | 501.656   | 789.174   | NM_00645E | 1224.32   | 1698.155  |
| NM_018841 | 1449.461  | 1807.993  | NM_019101 | 1011.406  | 1555.068  | NM_01809E | 1077.63   | 1167.077  |
| NM_00522E | 784.429   | 862.347   | NM_00092C | 2203.756  | 2284.088  | AL390078  | 747.468   | 810.012   |
| AL133105  | 3123.741  | 3576.777  | NM_02037E | 7079.105  | 6688.392  | NM_00403E | 1138.586  | 972.536   |
| AK022859  | 2145.272  | 2310.831  | NM_01604E | 12163.935 | 11868.174 | NM_01598E | 2957.534  | 2841.503  |
| NM_014864 | 5909.128  | 7105.568  | NM_000291 | 62585.824 | 64014.781 | NM_00654E | 756.112   | 618.561   |
| NM_00372E | 13497.447 | 13678.586 | NM_018081 | 3130.895  | 2999.771  | NM_01495E | 1078.141  | 1107.518  |
| NM_01435E | 4618.804  | 4792.168  | NM_01464E | 2872.993  | 3549.191  | NM_00399E | 2903.849  | 3324.51   |
| NM_012481 | 949.477   | 706.2     | AL117488  | 1325.629  | 1899.364  | AF279265  | 1985.604  | 2080.556  |
| L09102    | 18622.219 | 14318.454 | NM_01224C | 1851.042  | 1818.432  | NM_00521E | 1513.746  | 1389.041  |
| NM_016247 | 3739.888  | 3487.218  | NM_01900E | 10556.774 | 10260.811 | AB040914  | 693.337   | 410.849   |
| NM_001157 | 494.74    | 407.962   | NM_00473E | 13222.04  | 12761.083 | NM_002997 | 3709.574  | 2607.908  |
| NM_01228E | 1749.55   | 1666.715  | AV752216  | 1068.041  | 959.604   | NM_00237E | 9351.871  | 10776.887 |
| NM_00671C | 551.626   | 629.279   | NM_005341 | 2277.631  | 2044.871  | AB007929  | 3435.108  | 3371.57   |
| NM_00332E | 21812.094 | 16879.217 | AF181999  | 994.4     | 919.579   | NM_00457E | 3251.441  | 2480.95   |
| BG685310  | 2150.904  | 1803.599  | NM_001934 | 4106.548  | 3711.037  | AA203126  | 1657.098  | 1491.938  |
| NM_01866E | 8169.076  | 9926.962  | AB011090  | 1293.275  | 1261.526  | L12347    | 2140.479  | 2583.884  |
| NM_00528E | 1890.622  | 2641.235  | NM_00020E | 557.013   | 395.123   | NM_00162E | 1409.933  | 1463.805  |
| AB028949  | 2589.579  | 3115.7    | NM_01868E | 6612.267  | 5689.131  | NM_018477 | 4344.858  | 4851.037  |
| AL137580  | 1073.14   | 1284.362  | NM_00654E | 22036.191 | 18883.32  | U20536    | 1485.798  | 1842.699  |
| NM_004101 | 1415.136  | 2689.696  | NM_016534 | 2209.992  | 2149.265  | NM_00485E | 6177.225  | 7821.233  |
| NM_00299E | 40410.699 | 47068.156 | AB021923  | 993.719   | 900.586   | NM_001494 | 8754.034  | 11829.989 |
| AB033114  | 617.375   | 770.322   | AK024240  | 487.447   | 654.886   | NM_017707 | 580.646   | 505.784   |
| NM_01597E | 2611.508  | 3097.613  | NM_01645E | 41922.809 | 37573.387 | NM_00420E | 3602.97   | 4622.375  |
| NM_00381C | 4127.542  | 4299.067  | AK022677  | 2715.171  | 2850.765  | NM_01588E | 384.553   | 190.522   |
| NM_01444E | 4749.542  | 3662.761  | AK022894  | 1783.258  | 1910.891  | NM_00460E | 7701.769  | 6767.346  |
| NM_00521E | 5075.504  | 4796.561  | AF217993  | 2271.529  | 2674.166  | AK022849  | 1862.215  | 1617.591  |
| NM_00641E | 1342.128  | 1084.915  | AK024267  | 533.022   | 629.609   | AF040964  | 4425.234  | 3446.167  |
| AK024715  | 1361.866  | 2102.292  | AF131823  | 894.877   | 878.945   | NM_00193E | 2581.024  | 2401.585  |
| U90942    | 59710.59  | 47989.289 | AK026324  | 7838.578  | 9712.083  | NM_00327E | 10089.218 | 8870.258  |
| NM_01494E | 651.264   | 662.176   | AK025253  | 1729.071  | 2000.417  | AB014599  | 3296.033  | 2369.719  |
| NM_01836C | 3016.381  | 2038.693  | AK025004  | 1462.956  | 1288.398  | NM_00439E | 478.306   | 337.614   |
| AL365415  | 2005.108  | 1482.109  | AL136818  | 2059.782  | 2014.509  | AB018345  | 490.394   | 417.167   |
| L29147    | 16769.258 | 8672.238  | AF146798  | 3423.862  | 3084.226  | AW407841  | 685.964   | 848.619   |
| NM_02022E | 7709.608  | 8484.896  | AK022049  | 546.411   | 415.935   | NM_00187E | 1336.674  | 1239.396  |
| AK024685  | 4365.955  | 5219.056  | AF086517  | 6500.366  | 8156.815  | AF264014  | 4623.035  | 4689.033  |
| NM_00367E | 17403.855 | 20107.809 | AK025740  | 13623.19  | 15678.648 | L09098    | 746.502   | 732.762   |
| AF113007  | 1945.521  | 2153.205  | AK000311  | 4703.133  | 5518.548  | NM_000137 | 2479.663  | 3046.146  |
| NM_00068E | 5763.875  | 6631.837  | AK025346  | 51696.336 | 54367.215 | NM_01210E | 2566.103  | 2769.476  |
| U39573    | 878.028   | 1326.309  | AK022583  | 6292.598  | 4930.838  | NM_005017 | 12615.615 | 14780.85  |
| D82061    | 4881.816  | 6318.444  | AL137534  | 55905.926 | 59732.129 | AF163572  | 6064.646  | 7757.742  |
| AJ293009  | 5104.276  | 5376.027  | AF052121  | 3655.719  | 3628.386  | NM_000897 | 1591.178  | 1509.712  |
| NM_000374 | 3694.822  | 3882.558  | AL359062  | 2739.497  | 2254.304  | NM_000487 | 368.546   | 965.214   |
| NM_00050E | 10849.624 | 10960.54  | AK026869  | 1837.116  | 2081.623  | NM_006411 | 12828.489 | 12864.514 |
| NM_00135E | 25077.984 | 28130.314 | AK022192  | 727.246   | 583.103   | NM_01418E | 1387.322  | 1304.518  |
| NM_00169E | 25129.367 | 26905.395 | NM_01909E | 52417.926 | 49091.199 | AB040884  | 111.886   | 363.157   |
| NM_00497E | 5074.616  | 3261.012  | AJ001905  | 1352.317  | 768.37    | NM_00049E | 4171.197  | 4358.59   |
| NM_00224E | 3211.691  | 2483.62   | U17635    | 1222.575  | 1325.096  | NM_01208E | 892.481   | 898.947   |
| D87445    | 9457.138  | 11047.896 | AL049930  | 552.338   | 830.471   | NM_00117C | 2300.79   | 1815.668  |
| NM_00023E | 3760.157  | 2402.531  | L23870    | 634.593   | 409.213   | NM_00469E | 621.617   | 325.178   |
| NM_002247 | 910.16    | 618.605   | D55644    | 528.102   | 426.085   | NM_01434E | 1993.233  | 2272.176  |
| NM_00498C | 26935.84  | 23698.768 | D16951    | 692.044   | 519.969   | Z50169    | 651.446   | 642.747   |

|           |           |           |           |           |           |           |           |           |
|-----------|-----------|-----------|-----------|-----------|-----------|-----------|-----------|-----------|
| AB011094  | 20650.195 | 21509.887 | L33807    | 1392.885  | 1992.761  | AB043997  | 947.699   | 1232.074  |
| NM_003224 | 2257.998  | 1982.488  | U80774    | 881.625   | 775.9     | AF097645  | 328.606   | 566.743   |
| NM_001658 | 61510.363 | 59485.625 | AB007975  | 943.593   | 845.35    | NM_001773 | 612.254   | 543.268   |
| NM_006827 | 31646.334 | 23884.105 | AK024152  | 341.283   | 410.086   | Z70704    | 866.699   | 936.362   |
| AK021761  | 6246.031  | 3579.235  | AK021821  | 660.758   | 410.352   | NM_014363 | 1536.207  | 1505.259  |
| AK024536  | 738.907   | 525.972   | AL049328  | 1268.102  | 1039.822  | NM_000557 | 1952.725  | 1945.39   |
| NM_018973 | 8100.974  | 10733.34  | AK000030  | 585.252   | 367.697   | NM_003233 | 1001.887  | 1142.92   |
| NM_002591 | 12112.716 | 13587.266 | NM_017932 | 465.673   | 397.83    | NM_001375 | 3078.163  | 3447.811  |
| NM_020216 | 7279.021  | 9947.05   | AK000910  | 2279.608  | 2143.027  | NM_002312 | 2225.173  | 2583.357  |
| AK021860  | 1499.726  | 1455.331  | AF252280  | 9638.604  | 8642.748  | NM_004774 | 2733.968  | 2160.543  |
| AK000119  | 378.182   | 569.321   | AK000107  | 715.797   | 735.036   | NM_016937 | 1013.428  | 864.495   |
| AL137266  | 4115.129  | 4411.183  | AK000795  | 640.13    | 527.411   | NM_002690 | 6698.412  | 6735.92   |
| NM_016457 | 2064.136  | 2177.688  | AK000951  | 869.426   | 748.138   | NM_012328 | 3003.686  | 3671.89   |
| NM_005057 | 1666.901  | 1148.989  | AK024518  | 12806.576 | 8092.691  | NM_007341 | 727.195   | 755.923   |
| AF143321  | 890.038   | 599.113   | AK024586  | 642.405   | 284.891   | NM_016508 | 940.588   | 1514.117  |
| AB046842  | 2028.616  | 2329.888  | AK025017  | 4615.156  | 3149.009  | NM_006456 | 5102.173  | 4229.106  |
| NM_004850 | 1571.915  | 1730.818  | AK024914  | 2939.898  | 4722.574  | AK026062  | 3658.93   | 3664.779  |
| NM_002822 | 5595.042  | 5198.207  | BC030949  | 3546.565  | 2718.292  | AF047002  | 24880.736 | 26402.9   |
| BF306955  | 1687.328  | 1149.115  | AF116615  | 1307.068  | 1403.636  | AL050082  | 2424.387  | 2587.907  |
| NM_001394 | 9079.498  | 6087.783  | U17636    | 51542.895 | 50048.344 | NM_006623 | 37286.363 | 38080.758 |
| NM_018441 | 12939.217 | 11620.115 | NM_018546 | 4009.044  | 4819.613  | NM_016588 | 29119.926 | 35366.879 |
| NM_000778 | 12474.179 | 12247.551 | U52699    | 22041.354 | 19862.771 | NM_003135 | 5762.031  | 6308.264  |
| NM_001608 | 1993.366  | 1101.54   | S71613    | 858.057   | 652.854   | L12347    | 1879.705  | 2251.636  |
| BE733234  | 1027.012  | 777.384   | AJ011910  | 10151.371 | 11651.884 | NM_001622 | 1414.368  | 1512.929  |
| BG685310  | 2042.969  | 2617.734  | AK024378  | 1332.801  | 1604.238  | Z36788    | 843.271   | 823.468   |
| AW300857  | 11063.437 | 13082.126 | NM_014026 | 5985.133  | 5510.899  | NM_018477 | 4354.972  | 4466.65   |
| H85962    | 25102.752 | 27009.119 | D61703    | 4336.919  | 4255.202  | U20536    | 1247.629  | 1698.086  |
| BG742446  | 1035.089  | 1490.907  | AF086198  | 17631.256 | 15135.113 | AI298534  | 420.46    | 386.191   |
| AA864554  | 1028.721  | 1832.02   | AL137382  | 51449.684 | 47160.41  | AA424735  | 1471.027  | 1683.513  |
| X66945    | 2299.215  | 2923.137  | AK024599  | 4760.741  | 4073.086  | U78294    | 1974.35   | 1768.627  |
| X12830    | 2105.203  | 1860.991  | NM_014450 | 11835.245 | 11378.618 | BI760394  | 1873.486  | 1621.249  |
| U00482    | 644.639   | 681.919   | NM_017991 | 1344.06   | 1239.301  | AA555216  | 379.095   | 335.562   |
| K01904    | 6096.452  | 3791.572  | L37198    | 953.243   | 825.275   | U09117    | 5184.711  | 5182.02   |
| BE538886  | 758.636   | 734.307   | U67822    | 837.064   | 814.924   | M21054    | 507.245   | 424.868   |
| NM_002228 | 4255.279  | 1842.333  | AK021921  | 552.921   | 406.892   | M18468    | 513.504   | 635.33    |
| M57650    | 3122.124  | 2852.066  | AK025431  | 1690.792  | 1374.182  | H66070    | 2689.089  | 3486.9    |
| BC023978  | 675.074   | 768.573   | AK023662  | 660.066   | 758.138   | AA164741  | 4979.77   | 6020.616  |
| M21302    | 2206.36   | 1658.361  | AF086274  | 33846.813 | 33596.648 | AI189375  | 454.584   | 672.387   |
| NM_016346 | 2217.406  | 1625.093  | AK023682  | 1123.769  | 1029.405  | AI978885  | 1542.224  | 1284.199  |
| AK024865  | 4039.046  | 2435.389  | AK024024  | 4561.85   | 5210.778  | AK054960  | 9755.237  | 8412.222  |
| NM_007210 | 1386.711  | 897.764   | AF000991  | 372.014   | 392.617   | L15344    | 2018.3    | 2286.728  |
| AL365415  | 1571.911  | 1916.476  | AK000685  | 7076.585  | 9542.275  | NM_014470 | 466.255   | 659.71    |
| L29147    | 22770.869 | 24202.127 | D28381    | 16968.953 | 15859.537 | NM_001665 | 14955.928 | 21459.615 |
| NM_001525 | 27556.352 | 30102.32  | BE706519  | 483.498   | 459.764   | NM_003037 | 323.815   | 419.04    |
| NM_006055 | 3703.458  | 4890.467  | AF130064  | 29184.537 | 19554.016 | NM_006453 | 1107.008  | 1256.921  |
| NM_004296 | 799.946   | 1052.622  | U17624    | 848.945   | 479.885   | AL390078  | 447.384   | 361.89    |
| NM_005048 | 1123.714  | 1485.409  | D16988    | 37886.996 | 27694.941 | NM_004036 | 962.566   | 909.219   |
| NM_018841 | 1049.078  | 1001.81   | AK001959  | 7949.334  | 5285.836  | NM_015986 | 2361.028  | 2868.397  |
| NM_005226 | 671.873   | 504.795   | U36217    | 2373.235  | 1798.831  | NM_006546 | 573.537   | 507.297   |
| AL133105  | 2544.135  | 1951.443  | AL389880  | 728.856   | 558.316   | NM_014959 | 1275.014  | 1291.986  |
| AK022859  | 1948.194  | 1249.995  | AL359334  | 7025.61   | 7302.563  | NM_003992 | 2552.256  | 3114.812  |
| NM_014864 | 5510.308  | 3891.92   | AK027095  | 2173.429  | 1228.816  | AF279265  | 2010.144  | 1971.63   |
| NM_003728 | 12200.902 | 8337.423  | AF062097  | 844.669   | 489.564   | NM_005213 | 1920.895  | 1652.356  |

|           |           |           |           |           |           |           |           |           |
|-----------|-----------|-----------|-----------|-----------|-----------|-----------|-----------|-----------|
| NM_014352 | 3964      | 2974.459  | NM_019847 | 1492.993  | 1617.116  | AB040914  | 657.217   | 510.16    |
| NM_012481 | 975.959   | 725.192   | D17093    | 16780.217 | 11380.198 | NM_002997 | 3431.758  | 2828.712  |
| L09102    | 15173.449 | 7626.568  | AK022784  | 525.109   | 535.525   | NM_002379 | 9474.651  | 11729.597 |
| NM_016247 | 2741.33   | 2195.866  | AL117521  | 2907.401  | 2785.645  | AB007929  | 3214.59   | 3844.586  |
| AK021761  | 5116.445  | 5866.871  | AK021913  | 5691.112  | 5984.573  | NM_004579 | 3057.55   | 3408.008  |
| AK024536  | 1569.485  | 1905.576  | AL137489  | 22877.195 | 25218.617 | AA203126  | 1447.184  | 1969.546  |
| NM_018668 | 6846.126  | 8142.605  | AF009311  | 3542.088  | 4046.029  | AB043997  | 1074.876  | 1314.757  |
| NM_004227 | 1363.695  | 1523.528  | S73397    | 1246.677  | 1075.782  | NM_004853 | 1109.144  | 1359.663  |
| NM_005282 | 2088.002  | 2310.734  | AK023939  | 670.039   | 710.868   | NM_001494 | 2958.895  | 2346.007  |
| NM_001736 | 450.203   | 635.202   | AL050219  | 452.383   | 532.811   | NM_004206 | 2271.418  | 2128.287  |
| AB028949  | 1617.644  | 1632.465  | AK024433  | 1923.937  | 1685.276  | Y08991    | 388.245   | 427.941   |
| AL137580  | 824.224   | 685.632   | AL050376  | 298.983   | 390.35    | NM_004603 | 7174.401  | 7618.844  |
| NM_004101 | 1450.199  | 1647.279  | AL359652  | 2161.276  | 1497.483  | AK022849  | 1836.653  | 2120.211  |
| NM_002995 | 45486.543 | 51049.551 | AK022423  | 785.184   | 1129.112  | AF040964  | 4527.955  | 5019.449  |
| AB033114  | 796.748   | 881.733   | AF088021  | 6259.994  | 5743.308  | NM_001939 | 2788.989  | 3324.552  |
| NM_015978 | 2560.968  | 2184.606  | BF509267  | 1852.035  | 1914.434  | NM_003279 | 10063.052 | 10732.146 |
| NM_003810 | 3552.781  | 3121.092  | NM_002455 | 8060.045  | 10094.521 | AB014599  | 2887.938  | 2415.478  |
| NM_014443 | 3976.876  | 2609.128  | AK000899  | 11423.317 | 12212.697 | NM_004393 | 410.136   | 273.285   |
| NM_005212 | 4617.972  | 3786.572  | CY3Cy5    | 4881.816  | 187.129   | AB018345  | 558.189   | 364.14    |
| NM_006419 | 1354.027  | 1020.714  | AW300857  | 15554.672 | 11595.178 | NM_005832 | 527.521   | 724.636   |
| AB020676  | 560.063   | 424.726   | H85962    | 26786.502 | 25677.521 | AW407841  | 979.822   | 1037.993  |
| AK024715  | 794.364   | 993.681   | BG742446  | 1219.702  | 1005.099  | AL050082  | 2420.478  | 2623.048  |
| NM_001394 | 6855.741  | 10417.663 | AA864554  | 1639.927  | 872.41    | NM_006623 | 32386.068 | 33104.961 |
| NM_018441 | 14035.646 | 14915.136 | X66945    | 3106.283  | 3385.03   | NM_016588 | 26620.83  | 30991.41  |
| NM_020228 | 6062.365  | 6638.282  | X12830    | 1810.101  | 1940.456  | NM_003135 | 6175.695  | 7025.046  |
| AK024685  | 2674.494  | 3910.531  | U00482    | 906.521   | 1030.62   | NM_000137 | 2179.816  | 2531.813  |
| NM_003676 | 18587.637 | 23560.344 | K01904    | 6337.165  | 5267.713  | NM_012102 | 2780.911  | 2270.538  |
| AF113007  | 1473.313  | 1677.559  | BE538886  | 783.1     | 749.437   | NM_005017 | 13961.961 | 14671.821 |
| NM_000688 | 4269.763  | 4775.861  | NM_002228 | 4406.481  | 1591.313  | AF163572  | 6083.722  | 6514.774  |
| U39573    | 809.36    | 579.663   | M57650    | 2636.706  | 2360.616  | NM_000897 | 1596.748  | 1518.115  |
| D82061    | 3862.156  | 3812.201  | BC023978  | 862.488   | 721.842   | NM_000487 | 696.967   | 1015.716  |
| AJ293009  | 4374.479  | 3598.461  | M21302    | 2899.911  | 2150.691  | NM_006411 | 12341.234 | 14242.993 |
| NM_000374 | 3839.048  | 3660.159  | CY3Cy5    | 2571.939  | 171.755   | NM_014182 | 1701.803  | 2307.761  |
| NM_000502 | 10251.689 | 9022.957  | NM_006055 | 4922.119  | 5026.288  | AF090318  | 259.309   | 518.615   |
| NM_001359 | 26187.486 | 22331.008 | NM_004296 | 827.154   | 1278.41   | NM_000492 | 5305.929  | 5781.11   |
| NM_001696 | 23309.545 | 22805.715 | NM_018841 | 1314.344  | 1640.402  | NM_012089 | 870.578   | 1209.793  |
| NM_004975 | 3267.52   | 1786.458  | NM_005226 | 749.412   | 900.565   | NM_001170 | 4033.706  | 3570.444  |
| NM_002245 | 3373.609  | 2207.767  | AL133105  | 3015.758  | 2753.899  | NM_004696 | 625.229   | 420.785   |
| D87445    | 8109.686  | 5764.441  | AK022859  | 1981.218  | 2055.627  | NM_014342 | 2199.594  | 2490.369  |
| NM_000238 | 3397.661  | 2128.166  | NM_014864 | 5253.022  | 5157.17   | AK054960  | 10088     | 9369.922  |
| NM_002247 | 664.504   | 842.906   | NM_003728 | 4582.353  | 4140.139  | L15344    | 2600.692  | 2550.531  |
| NM_004980 | 21519.436 | 19442.631 | NM_014352 | 3094.301  | 3395.26   | NM_001665 | 16392.801 | 20384.244 |
| NM_016346 | 2533.25   | 3590.073  | NM_012481 | 1801.075  | 1344.055  | AF097645  | 870.686   | 871.809   |
| NM_007210 | 1879.82   | 2248.837  | L09102    | 27602.111 | 34594.352 | NM_001773 | 665.006   | 1004.709  |
| NM_001483 | 3461.183  | 5358.429  | BG685310  | 2134.529  | 2405.112  | Z70704    | 974.564   | 1190.371  |
| NM_018973 | 8112.837  | 8078.104  | NM_018668 | 7141.85   | 7734.407  | NM_014363 | 1334.392  | 1139.131  |
| NM_002591 | 11639.224 | 14260.482 | NM_005282 | 2313.462  | 2203.866  | NM_000557 | 2338.186  | 2425.213  |
| NM_020216 | 7889.212  | 9373.372  | NM_001736 | 770.211   | 620.455   | NM_003239 | 623.694   | 598.624   |
| AK021860  | 1207.681  | 719.161   | AB028949  | 1166.691  | 1700.79   | NM_001375 | 2912.132  | 3354.206  |
| AB046816  | 1181.255  | 767.458   | AL137580  | 671.518   | 871.256   | NM_002312 | 1538.753  | 1674.984  |
| AL137266  | 3803.009  | 3836.897  | NM_004101 | 866.893   | 1302.658  | M20699    | 731.976   | 816.343   |
| NM_016457 | 2188.949  | 1803.564  | NM_002995 | 34953.813 | 40169.203 | NM_004774 | 4420.148  | 4310.583  |
| NM_005057 | 2117.021  | 1500.598  | AB033114  | 628.265   | 940.331   | NM_016937 | 1821.818  | 1874.504  |

|           |           |           |           |           |           |           |          |           |
|-----------|-----------|-----------|-----------|-----------|-----------|-----------|----------|-----------|
| AB046842  | 1933.23   | 2086.339  | NM_015978 | 1872.649  | 2640.605  | NM_00269C | 6471.407 | 7490.494  |
| NM_00485C | 1757.251  | 1470.673  | NM_00381C | 3267.122  | 3080.606  | NM_01232E | 2601.39  | 2294.873  |
| NM_002822 | 5517.93   | 5070.63   | NM_005212 | 4413.646  | 5139.976  | NM_007341 | 672.968  | 653.842   |
| NM_014352 | 5667.954  | 7884.876  | M14584    | 1443.618  | 332.63    | NM_01650E | 1098.095 | 1111.601  |
| NM_012481 | 1121.966  | 1381.108  | NM_006419 | 1720.037  | 1339.225  | NM_00645E | 5673.855 | 3963.245  |
| L09102    | 30370.52  | 31952.602 | AB020676  | 587.244   | 1333.791  | AK026062  | 3890.708 | 3688.901  |
| U68488    | 663.638   | 750.355   | AK024715  | 1153.851  | 1554.622  | AF047002  | 26953.43 | 32885.801 |
| NM_016247 | 4961.153  | 5983.24   | L29147    | 32158.393 | 34316.164 | AB040914  | 643.971  | 776.308   |
| NM_001157 | 835.802   | 1412.162  | NM_02022E | 4897.453  | 7524.476  | NM_002997 | 3507.906 | 3770.116  |
| NM_012282 | 1782.623  | 3275.245  | AK024685  | 3600.615  | 5118.426  | AB007929  | 3412.425 | 4155.279  |
| NM_00671C | 886.546   | 1040.12   | NM_00367E | 14964.628 | 21438.877 | NM_00457E | 3323.591 | 4117.777  |
| NM_003323 | 19658.813 | 16954.76  | AF113007  | 1253.333  | 1530.137  | AA203126  | 1571.98  | 1579.032  |
| BG685310  | 1944.552  | 1652.905  | NM_00068E | 3963.674  | 3343.547  | L12347    | 2700.838 | 3187.339  |
| AW300857  | 11278.116 | 9476.982  | D82061    | 2784.764  | 3336.364  | NM_001622 | 780.109  | 1240.528  |
| H85962    | 27272.684 | 21703.537 | AJ293009  | 2983.622  | 3778.525  | Z36788    | 1081.684 | 1190.517  |
| BG742446  | 1019.423  | 1229.718  | NM_000374 | 2105.715  | 2786.036  | NM_018477 | 4431.942 | 4179.028  |
| AA864554  | 888.156   | 1474.686  | NM_000502 | 6453.721  | 8581.283  | U20536    | 1136.605 | 1228.406  |
| X66945    | 2866.322  | 2263.672  | NM_001359 | 25421.094 | 22746.537 | R71691    | 904.064  | 697.977   |
| X12830    | 2278.315  | 1496.67   | NM_00497E | 6825.737  | 4054.911  | AA424735  | 943.829  | 1151.127  |
| U00482    | 904.861   | 550.71    | NM_00224E | 4055.612  | 2679.408  | U78294    | 1932.639 | 2422.774  |
| K01904    | 7112.824  | 4407.085  | NM_00023E | 4418.033  | 7167.08   | AA171613  | 542.942  | 626.177   |
| BE538886  | 1139.772  | 770.597   | NM_002247 | 1051.353  | 1908.478  | BI760394  | 4409.17  | 5135.852  |
| NM_00222E | 5185.54   | 2183.576  | AK024536  | 1918.684  | 3601.078  | AA555216  | 352.336  | 529.169   |
| M57650    | 3673.813  | 2643.096  | NM_001483 | 4351.444  | 5724.721  | M18468    | 583.698  | 503.861   |
| BC023978  | 743.352   | 931.18    | NM_018973 | 8110.949  | 6859.759  | H66070    | 2486.887 | 2650.327  |
| M21302    | 2856.203  | 2710.934  | NM_002591 | 8127.147  | 8749.064  | AA164741  | 7409.752 | 8279.229  |
| NM_005212 | 5971.861  | 11281.071 | NM_02021E | 6730.054  | 6440.642  | AI978885  | 1889.958 | 1666.207  |
| M14584    | 623.851   | 719.51    | AK021860  | 1178.39   | 1192.035  | AB014599  | 2762.654 | 2858.537  |
| NM_00641E | 1450.854  | 1852.382  | AK000119  | 11890.604 | 13035.912 | NM_004393 | 527.352  | 984.416   |
| AB020676  | 658.403   | 1025.9    | NM_016457 | 1813.255  | 1745.562  | AW407841  | 667.453  | 928.962   |
| AK024715  | 1127.128  | 1429.208  | NM_005057 | 1705.082  | 1498.854  | NM_00187E | 1317.13  | 1541.676  |
| U90942    | 65254.648 | 67793.906 | AB046842  | 2022.375  | 2628.598  | AF264014  | 5055.244 | 6280.254  |
| NM_014942 | 1220.412  | 1858.497  | NM_00485C | 1520.2    | 2984.335  | L09098    | 116.116  | 388.725   |
| NM_01836C | 3019.355  | 3145.475  | NM_001609 | 2143.349  | 2092.316  | NM_00415E | 339.695  | 261.23    |
| AL365415  | 2110.418  | 1813.352  | BE733234  | 1413.253  | 2647.304  | NM_001831 | 378.682  | 827.865   |
| L29147    | 22500.316 | 18315.053 | NM_001157 | 590.88    | 464.887   | NM_01458E | 3425.898 | 4180.185  |
| NM_00152E | 31530.342 | 28487.75  | NM_012282 | 1156.18   | 1199.165  | NM_01436E | 4910.917 | 4944.849  |
| NM_00605E | 4603.026  | 4541.352  | NM_003323 | 18950.006 | 17164.152 | NM_01809E | 1013.49  | 1273.9    |
| NM_00429E | 806.821   | 569.427   | BG685310  | 2252.205  | 1830.73   | AL390078  | 434.614  | 703.602   |
| NM_00504E | 1234.127  | 1210.22   | AW300857  | 14278.995 | 14110.2   | NM_00403E | 756.933  | 909.979   |
| NM_018841 | 1113.703  | 760.678   | H85962    | 26193.443 | 30340.154 | NM_01598E | 2175.033 | 2217.873  |
| NM_00522E | 976.206   | 671.907   | BG742446  | 1080.487  | 1703.62   | NM_003992 | 2344.786 | 3289.372  |
| AL133105  | 3045.19   | 2982.897  | AA864554  | 1315.924  | 1162.554  | AF279265  | 2037.699 | 2410.703  |
| AK022859  | 2315.746  | 1816.3    | X66945    | 3345.254  | 3314.666  | NM_005213 | 1878.283 | 1968.397  |
| NM_000214 | 548.794   | 246.8     | X12830    | 1929.687  | 2310.76   | NM_00117C | 3758.947 | 3244.284  |
| NM_014864 | 6722.866  | 6028.457  | U00482    | 1386.056  | 1511.477  | NM_00469E | 522.323  | 827.532   |
| NM_00372E | 12316.206 | 11115.223 | K01904    | 6323.464  | 5437.617  | NM_017694 | 689.704  | 2339.638  |
| NM_00497E | 6792.273  | 6084.179  | BE538886  | 973.333   | 730.029   | NM_014342 | 2283.862 | 2757.861  |
| NM_00224E | 3521.948  | 4705.869  | BC023978  | 720.959   | 1801.542  | NM_000452 | 62.118   | 159.636   |
| D87445    | 8632.14   | 8902.586  | M21302    | 3278.173  | 6486.871  | AB043997  | 834.044  | 738.258   |
| NM_00023E | 3068.053  | 4258.511  | AK024865  | 4271.87   | 4612.876  | NM_000342 | 329.736  | 585.794   |
| NM_002247 | 948.129   | 1332.472  | NM_00721C | 2135.253  | 2889.636  | NM_00420E | 1932.857 | 2628.528  |
| NM_00498C | 35579.316 | 48849.238 | U90942    | 59373.359 | 57166.719 | AK022849  | 2163.401 | 2292.069  |

|           |           |           |           |           |           |           |           |           |
|-----------|-----------|-----------|-----------|-----------|-----------|-----------|-----------|-----------|
| AB011094  | 17377.209 | 28485.336 | NM_014942 | 997.211   | 1204.528  | AF040964  | 4751.605  | 5459.438  |
| NM_003224 | 2282.682  | 2800.063  | NM_018360 | 2129.932  | 1941.203  | NM_001935 | 2815.152  | 3751.216  |
| NM_001655 | 62796.242 | 62575.742 | AL365415  | 1622.152  | 1510.546  | NM_003275 | 9005.838  | 10399.719 |
| NM_006827 | 34859.738 | 33958.898 | L29147    | 23254.602 | 24813.133 | NM_012325 | 2273.698  | 1446.197  |
| AK021761  | 6028.987  | 5349.453  | NM_001525 | 27918.264 | 27822.84  | NM_007341 | 770.221   | 525.331   |
| AK024536  | 1480.463  | 1383.57   | NM_006055 | 4694.788  | 6295.363  | NM_016505 | 1349.744  | 977.606   |
| NM_018665 | 7406.856  | 8397.23   | NM_004296 | 748.409   | 1139.998  | NM_006455 | 6188.69   | 4195.17   |
| NM_004227 | 1545.284  | 1806.329  | NM_005045 | 823.216   | 1195.855  | AK026062  | 3872.783  | 2919.464  |
| NM_005282 | 2320.243  | 2063.333  | NM_001060 | 521.622   | 895.923   | AF047002  | 26137.15  | 27461.543 |
| NM_001735 | 734.956   | 637.717   | NM_018841 | 1339.87   | 1438.351  | AL050082  | 2357.972  | 1959.684  |
| AB028949  | 1714.464  | 1700.416  | NM_005225 | 756.253   | 801.431   | NM_006623 | 19704.125 | 16593.24  |
| AL137580  | 943.612   | 737.724   | AL133105  | 2670.608  | 2326.178  | NM_016585 | 25243.416 | 23065.387 |
| NM_004101 | 1138.305  | 1046.151  | AK022859  | 1517.406  | 1489.126  | NM_003135 | 5450.331  | 4865.933  |
| NM_002995 | 40254.074 | 31600.652 | NM_000675 | 1082.928  | 1995.623  | NM_000137 | 1809.395  | 1878.439  |
| AB033114  | 705.31    | 1022.41   | NM_016247 | 3984.241  | 4869.686  | NM_012102 | 1834.412  | 1480.037  |
| NM_015975 | 2661.268  | 2822.123  | AB011094  | 12888.933 | 10948.979 | NM_005017 | 7449.545  | 8399.77   |
| NM_003810 | 3825.158  | 2826.361  | NM_003224 | 1602.179  | 1645.982  | AF163572  | 4082.461  | 4320.74   |
| NM_014443 | 4614.692  | 3113.762  | NM_001655 | 57842.766 | 62072.691 | NM_000897 | 1160.547  | 995.203   |
| NM_016457 | 1786.779  | 2832.256  | AK021761  | 6215.828  | 6112.394  | NM_000487 | 655.216   | 1004.007  |
| NM_005057 | 1944.141  | 2682.459  | AK024536  | 1711.675  | 1895.932  | AB040884  | 588.93    | 565.301   |
| AF143321  | 1375.154  | 1759.349  | NM_018665 | 7319.433  | 9377.654  | NM_000492 | 5746.696  | 7173.938  |
| AB046842  | 2360.478  | 3641.899  | NM_004227 | 1660.64   | 2042.287  | NM_012085 | 906.735   | 953.852   |
| NM_004850 | 2017.267  | 3611.547  | NM_005282 | 3494.599  | 4843.744  | AJ272057  | 7397.183  | 5545.817  |
| NM_002822 | 6055.257  | 9612.456  | NM_001735 | 784.433   | 1131.051  | NM_004402 | 745.023   | 634.105   |
| BF306955  | 1950.754  | 2618.448  | AB028949  | 1184.077  | 2022.224  | AK024216  | 17634.475 | 18730.998 |
| NM_001394 | 6879.377  | 7392.311  | AL137580  | 1181.397  | 1129.944  | Y16752    | 4318.878  | 3021.351  |
| NM_018441 | 16784.613 | 19233.172 | NM_004101 | 1088.423  | 852.254   | NM_020155 | 1950.316  | 1913.969  |
| NM_000775 | 14788.289 | 23206.217 | NM_002995 | 33120.375 | 27883.795 | NM_014830 | 1542.645  | 1516.768  |
| NM_001605 | 2168.128  | 2195.131  | NM_015975 | 1917.572  | 1828.343  | AF355402  | 1681.086  | 1556.89   |
| BE733234  | 1328.559  | 1486.262  | NM_003810 | 3123.882  | 3121.32   | AK000407  | 1024.945  | 515.284   |
| NM_020225 | 4969.987  | 4588.03   | NM_004905 | 1339.795  | 994.229   | NM_014470 | 1220.009  | 826.852   |
| AK024685  | 3787.836  | 3452.881  | AB020676  | 1225.362  | 2185.319  | NM_001665 | 15171.584 | 12467.608 |
| NM_003675 | 19546.561 | 23951.76  | AK024715  | 2070.898  | 1533.965  | NM_001773 | 510.686   | 557.086   |
| AF113007  | 1435.814  | 1385.565  | BF306955  | 1306.922  | 1391.654  | Z70704    | 705.034   | 551.375   |
| NM_000685 | 4622.496  | 4049.381  | NM_001394 | 10057.145 | 6614.414  | NM_014363 | 922.003   | 925.211   |
| U39573    | 826.984   | 1041.894  | NM_018441 | 10185.748 | 8398.184  | NM_000557 | 1080.295  | 1089.359  |
| D82061    | 4286.484  | 3861.775  | NM_001605 | 1694.188  | 1425.875  | NM_003235 | 403.097   | 652.542   |
| AJ293009  | 4543.363  | 4465.195  | BE733234  | 1074.054  | 931.025   | NM_001375 | 2976.828  | 3127.048  |
| NM_000374 | 3540.716  | 3807.619  | NM_020225 | 6537.615  | 8320.376  | NM_002312 | 1943.36   | 2006.415  |
| NM_000502 | 9186.203  | 8072.625  | AF113007  | 1198.335  | 1574.377  | M20699    | 2027.02   | 2185.438  |
| NM_001355 | 26510.658 | 24421.932 | NM_000685 | 3950.624  | 3823.615  | NM_002690 | 6135.577  | 6411.685  |
| NM_001695 | 24437.857 | 22875.672 | U39573    | 912.174   | 1010.456  | NM_018235 | 3144.492  | 3316.46   |
| AF190900  | 11322.105 | 14530.098 | D82061    | 3118.238  | 3169.953  | U88892    | 727.721   | 1079.261  |
| NM_020404 | 18120.25  | 22608.646 | AJ293009  | 2219.054  | 2210.401  | AK023755  | 579.946   | 561.712   |
| BE972401  | 9415.927  | 13194.501 | NM_000374 | 2144.625  | 2365.027  | NM_005725 | 1713.992  | 1814.897  |
| NM_017425 | 2559.479  | 4520.469  | NM_000502 | 5688.902  | 6253.516  | NM_012211 | 634.981   | 333.742   |
| AB007922  | 1048.903  | 1362.253  | NM_001355 | 21446.299 | 21412.063 | AB040877  | 2021.294  | 1609.698  |
| NM_015982 | 7112.517  | 7878.195  | NM_001695 | 19128.229 | 18205.781 | AK026737  | 949.086   | 365.484   |
| NM_003745 | 36008.973 | 31093.088 | NM_004975 | 4766.239  | 3198.429  | NM_006285 | 2262.924  | 2005.79   |
| NM_002910 | 45859.746 | 46246.004 | NM_002245 | 3742.792  | 3376.007  | NM_019067 | 1997.83   | 1745.031  |
| AC096970  | 30724.189 | 41471.383 | D87445    | 7593.562  | 11726.49  | AF251025  | 1128.046  | 900.479   |
| AK024865  | 3852.412  | 4088.9    | NM_000235 | 5066.696  | 5762.541  | NM_015677 | 3649.183  | 3315.641  |
| NM_007210 | 1227.802  | 1059.667  | NM_002247 | 2025.697  | 1415.202  | NM_001772 | 4373.297  | 3417.222  |



|           |           |           |           |           |           |           |           |           |
|-----------|-----------|-----------|-----------|-----------|-----------|-----------|-----------|-----------|
| NM_001483 | 2862.459  | 3570.687  | NM_004980 | 30220.365 | 26462.867 | AB011087  | 768.102   | 502.68    |
| NM_018973 | 8308.824  | 7270.413  | NM_016346 | 2563.431  | 2412.773  | AF161341  | 1426.707  | 952.982   |
| NM_002591 | 9582.354  | 6933.814  | AK024865  | 3819.982  | 3360.084  | AJ249902  | 1375.308  | 1147.434  |
| NM_020216 | 7710.417  | 8114.875  | NM_007210 | 1439.435  | 1465.169  | NM_004384 | 1479.843  | 1483.375  |
| AK021860  | 1347.815  | 1065.039  | NM_001483 | 4836.419  | 5185.065  | L05500    | 6713.443  | 8358.966  |
| AL137266  | 4759.86   | 4319.755  | NM_018973 | 9381.878  | 10475.407 | NM_012306 | 11616.742 | 9767.827  |
| AF035300  | 747.029   | 2453.416  | NM_002591 | 9397.23   | 9132.176  | AB016902  | 1911.087  | 1988.819  |
| NM_017703 | 9060.994  | 11837.37  | NM_020216 | 7758.977  | 6080.517  | AF272378  | 28638.322 | 25158.811 |
| NM_015320 | 3869.406  | 4456.865  | AK021860  | 1242.742  | 895.805   | NM_000246 | 1952.439  | 2252.651  |
| NM_004055 | 1792.449  | 1537.613  | AK000119  | 8425.319  | 9838.899  | NM_014310 | 448.395   | 330.461   |
| NM_014726 | 14039.967 | 12427.907 | AB046816  | 802.118   | 1137.413  | NM_005860 | 4589.167  | 3074.341  |
| AJ297349  | 1387.996  | 1504.235  | AL137266  | 3688.05   | 4043.357  | AF095288  | 22149.838 | 22579.857 |
| NM_005828 | 6471.104  | 6418.463  | NM_016457 | 2302.91   | 2239.431  | AK025116  | 376.977   | 219.721   |
| NM_001619 | 2564.512  | 2489.459  | NM_005057 | 2040.667  | 2303.811  | AK026271  | 10678.854 | 11018.398 |
| NM_006599 | 3266.197  | 2385.752  | AF143321  | 1936.497  | 1962.499  | NM_001799 | 4790.003  | 4561.697  |
| NM_004463 | 695.457   | 567.332   | AB046842  | 2810.462  | 2477.605  | AF090895  | 414.38    | 453.177   |
| NM_005936 | 1344.025  | 705.161   | NM_004850 | 1222.055  | 1467.427  | NM_005610 | 2256.683  | 1761.024  |
| U43586    | 824.5     | 677.575   | NM_002822 | 4398.948  | 3785.547  | AL133651  | 1053.516  | 874.788   |
| NM_006271 | 5280.621  | 4636.028  | NM_014352 | 4381.725  | 4808.725  | AB014532  | 3163.518  | 2838.193  |
| NM_018647 | 1252.077  | 1549.308  | NM_012481 | 1226.72   | 1045.414  | NM_003478 | 1265.746  | 1229.164  |
| NM_003026 | 656.466   | 544.526   | L09102    | 16932.373 | 18239.07  | NM_016237 | 2914.819  | 2726.581  |
| NM_000721 | 54699.125 | 55000.336 | NM_016247 | 3318.185  | 3964.755  | NM_004924 | 2045.427  | 1850.581  |
| NM_003933 | 3748.478  | 2664.499  | NM_001157 | 515.941   | 746.639   | NM_001798 | 3314.004  | 4227.196  |
| NM_018640 | 541.082   | 520.445   | NM_012282 | 1280.571  | 1785.079  | NM_001211 | 3581.712  | 4025.479  |
| NM_005095 | 3914.897  | 3747.466  | NM_006710 | 435.189   | 986.173   | NM_006505 | 459.575   | 519.942   |
| NM_000055 | 8769.259  | 6987.941  | NM_003323 | 19768.703 | 28888.475 | AB033050  | 1033.647  | 1096.29   |
| NM_003163 | 6905.13   | 5578.778  | BG685310  | 2234.919  | 3933.304  | BC015022  | 1580.274  | 1778.874  |
| NM_019057 | 3076.522  | 4115.049  | AW300857  | 19229.648 | 23015.01  | NM_006697 | 2150.67   | 2340.918  |
| NM_002677 | 902.391   | 917.27    | H85962    | 29936.16  | 30535.584 | M19182    | 593.153   | 750.034   |
| NM_005759 | 3690.54   | 5489.704  | BG742446  | 995.172   | 1230.979  | AK025707  | 1126.009  | 1366.952  |
| AF149724  | 2260.461  | 3067.531  | AA864554  | 1637.266  | 1108.487  | NM_002406 | 41597.824 | 46349.852 |
| BC020745  | 1212.58   | 1058.826  | X66945    | 2734.431  | 2804.678  | U87169    | 1851.063  | 1902.991  |
| NM_006367 | 11739.996 | 11799.773 | X12830    | 1607.906  | 1371.701  | NM_002073 | 838.238   | 672.894   |
| NM_006732 | 26203.053 | 21953.035 | U00482    | 1187.696  | 1141.226  | AF117222  | 857.223   | 782.121   |
| NM_004354 | 4678.997  | 4974.315  | K01904    | 5463.658  | 6473.271  | NM_001935 | 24747.496 | 26382.293 |
| NM_004661 | 2995.166  | 2340.934  | BE538886  | 1038.416  | 865.335   | NM_001746 | 460.373   | 360.471   |
| NM_001610 | 4468.392  | 3828.288  | NM_002228 | 4368.396  | 2033.009  | NM_003291 | 2295.895  | 2147.932  |
| NM_001241 | 1634.87   | 1331.712  | M57650    | 5115.642  | 5279.733  | AK022950  | 1354.965  | 1110.61   |
| AF217504  | 1895.416  | 1525.118  | BC023978  | 1048.698  | 850.622   | S75755    | 1561.386  | 1053.004  |
| AK027102  | 3622.167  | 2209.606  | M21302    | 2841.467  | 2620.738  | AB014576  | 7439.196  | 5850.369  |
| AL109714  | 807.877   | 839.546   | NM_005212 | 4184.944  | 4254.701  | NM_019044 | 3972.62   | 2992.199  |
| NM_004632 | 2878.354  | 2270.056  | NM_006419 | 1184.169  | 966.426   | AK000145  | 394.878   | 339.06    |
| NM_017919 | 6320.075  | 5215.887  | AB020676  | 524.781   | 599.069   | AF174601  | 2118.511  | 2627.421  |
| NM_014456 | 3857.264  | 3432.769  | AK024715  | 812.731   | 600.534   | AF279865  | 434.809   | 582.072   |
| NM_004740 | 18235.633 | 18333.988 | U90942    | 58611.516 | 58622.5   | NM_014700 | 612.749   | 663.451   |
| NM_003805 | 4733.414  | 3960.559  | NM_018360 | 2509.981  | 2799.527  | NM_014714 | 232.859   | 484.953   |
| NM_019886 | 5987.551  | 4664.293  | AL365415  | 1773.928  | 2337.783  | NM_005983 | 2801.522  | 3407.477  |
| NM_003278 | 55715.586 | 57077.719 | L29147    | 24737.734 | 27176.967 | NM_017652 | 5833.175  | 6519.86   |
| AK021957  | 60242.031 | 63406.016 | NM_001525 | 32094.082 | 25283.031 | X59268    | 4415.4    | 4008.973  |
| NM_016623 | 14636.083 | 20427.096 | NM_006055 | 4759.689  | 4369.062  | D70832    | 48718.254 | 48530.594 |
| NM_001334 | 3050.074  | 5288.174  | NM_004296 | 807.886   | 565.567   | NM_001425 | 2235.144  | 2154.38   |
| NM_004771 | 2207.823  | 2601.855  | NM_005048 | 771.33    | 751.361   | M61870    | 629.602   | 642.12    |
| AL365514  | 1279.745  | 1328.806  | NM_018841 | 947.967   | 1079.74   | AK026980  | 1633.699  | 1506.682  |

|           |           |           |           |           |           |           |           |           |
|-----------|-----------|-----------|-----------|-----------|-----------|-----------|-----------|-----------|
| NM_018296 | 854.692   | 797.939   | NM_005226 | 776.354   | 491.349   | AJ277915  | 519.851   | 796.326   |
| NM_005504 | 7375.031  | 6654.852  | AL133105  | 2715.008  | 2382.884  | NM_020368 | 2052.791  | 1772.4    |
| AF234654  | 2806.772  | 3847.032  | AK022859  | 1944.212  | 1839.705  | AF024708  | 11509.849 | 9897.672  |
| NM_000110 | 2866.313  | 2967.171  | NM_014864 | 5568.122  | 3986.882  | NM_006467 | 1303.994  | 1795.417  |
| NM_016002 | 31811.92  | 32238.178 | NM_003728 | 13022.823 | 12599.522 | NM_017566 | 2129.127  | 1464.458  |
| NM_014549 | 2394.099  | 2249.154  | NM_004975 | 6822.204  | 3872.229  | NM_006582 | 538.827   | 477.12    |
| NM_017832 | 1444.663  | 1418.212  | NM_002245 | 3553.41   | 2594.828  | AB033019  | 2394.449  | 1577.658  |
| NM_001713 | 6085.579  | 5404.486  | D87445    | 6693.724  | 6109.399  | NM_001452 | 297.059   | 316.092   |
| NM_015367 | 10360.123 | 11285.101 | NM_000238 | 4438.003  | 4111.264  | NM_006162 | 580.523   | 395.385   |
| NM_014498 | 3656.268  | 3525.388  | NM_002247 | 994.059   | 699.316   | NM_014764 | 4545.117  | 4586.919  |
| NM_002375 | 13733.073 | 13481.991 | NM_004980 | 32063.811 | 29307.32  | NM_018078 | 1568.303  | 1222.781  |
| NM_001813 | 4276.537  | 3655.749  | AB011094  | 13965.8   | 12471.888 | NM_016013 | 325.186   | 288.328   |
| AF055016  | 4241.822  | 3145.033  | NM_003224 | 1665.685  | 1999.615  | NM_016050 | 457.095   | 571.074   |
| NM_007234 | 27564.137 | 24965.131 | NM_001658 | 59067.809 | 60359.098 | NM_007080 | 11922.782 | 12382.084 |
| NM_014567 | 4767.2    | 4324.676  | NM_006827 | 29235.152 | 25075.33  | AK026912  | 1250.758  | 1520.516  |
| NM_017842 | 5075.627  | 4356.401  | AK021761  | 6705.718  | 7980.566  | AK023531  | 2567.443  | 2193.19   |
| AB037809  | 2128.615  | 2816.597  | AK024536  | 1587.668  | 1480.656  | AB011128  | 5309.869  | 4217.95   |
| AB011129  | 1710.8    | 2380.875  | NM_018668 | 6834.247  | 5600.78   | AK026742  | 885.387   | 896.355   |
| NM_014391 | 13452.066 | 15148.883 | NM_004227 | 1183.464  | 1216.742  | AK025074  | 1873.325  | 2022.89   |
| NM_004270 | 3037.317  | 3534.126  | NM_005282 | 2155.643  | 2028.487  | NM_000303 | 5716.813  | 4619.685  |
| NM_012082 | 464.628   | 664.449   | NM_001736 | 861.706   | 708.838   | NM_006242 | 482.053   | 432.323   |
| NM_001537 | 4635.174  | 5202.242  | AB028949  | 1059.621  | 1067.843  | X78712    | 555.99    | 725.846   |
| U80743    | 1581.504  | 1756.757  | AL137580  | 733.311   | 611.059   | NM_001497 | 710.852   | 1096.923  |
| NM_001352 | 4239.392  | 3982.631  | NM_002995 | 32089.004 | 23054.639 | NM_004130 | 3100.903  | 4250.068  |
| D15050    | 1741.533  | 1297.88   | NM_015978 | 2871.291  | 2438.743  | AF067972  | 5513.877  | 4581.203  |
| NM_006527 | 10086.813 | 9760.771  | NM_003810 | 3202.296  | 2456.53   | NM_004958 | 674.647   | 784.261   |
| NM_006627 | 2477.278  | 2748.144  | NM_014443 | 4220.497  | 2737.954  | D87076    | 564.1     | 561.154   |
| NM_007363 | 14369.262 | 12634.933 | NM_016457 | 1689.888  | 1738.657  | NM_014149 | 694.627   | 623.199   |
| NM_003093 | 54928.43  | 49421.219 | NM_005057 | 1696.051  | 1497.252  | AB020635  | 850.325   | 874.723   |
| U05589    | 1436.481  | 1082.08   | AF143321  | 803.774   | 1073.994  | NM_006515 | 781.554   | 754.117   |
| NM_014473 | 21122.926 | 18908.854 | AB046842  | 2186.317  | 2106.941  | NM_005224 | 683.681   | 461.914   |
| NM_003095 | 65306.895 | 66715.602 | NM_004850 | 1327.887  | 1702.348  | NM_012144 | 1598.44   | 1607.715  |
| NM_016389 | 2159.782  | 1766.442  | NM_002822 | 5315.882  | 5237.142  | X65231    | 47790.445 | 47631.258 |
| NM_002295 | 65428.594 | 68499.5   | BF306955  | 1708.934  | 1898.199  | NM_002908 | 798.043   | 930.828   |
| NM_001762 | 10113.482 | 6753.66   | NM_001394 | 10368.994 | 9597.755  | AF205632  | 1036.794  | 1162.074  |
| NM_016306 | 19050.863 | 15544.141 | NM_018441 | 10887.856 | 10852.402 | NM_005378 | 7754.657  | 6951.979  |
| NM_003755 | 625.827   | 751.23    | NM_000778 | 12105.726 | 12463.739 | NM_002397 | 272.241   | 381.166   |
| BE258640  | 16618.42  | 14143.074 | NM_001609 | 1684.046  | 1805.641  | AF000672  | 1047.775  | 1030.952  |
| NM_003314 | 10246.656 | 9036.962  | BE733234  | 1021.527  | 1140.812  | AJ227854  | 88.209    | 361.906   |
| AL355730  | 569.341   | 834.509   | NM_020228 | 4841.01   | 5611.397  | AK002195  | 61.601    | 351.416   |
| U79273    | 1946.266  | 1824.475  | AK024685  | 3053.292  | 3499.875  | AF086128  | 381.201   | 552.373   |
| AK022050  | 6536.608  | 5875.309  | NM_003676 | 15123.691 | 14029.156 | AK022850  | 1729.97   | 1762.025  |
| NM_002512 | 58825.742 | 59081.734 | AF113007  | 1285.1    | 1152.135  | NM_016490 | 675.207   | 776.034   |
| AL365411  | 5313.325  | 7134.853  | NM_000688 | 3912.62   | 3098.222  | AK024341  | 248.088   | 660.873   |
| M24470    | 907.359   | 987.296   | U39573    | 817.488   | 568.317   | AF038193  | 354.059   | 670.55    |
| NM_016066 | 4735.097  | 4480.296  | D82061    | 3265.42   | 3946.596  | AL137498  | 2167.353  | 2344.394  |
| NM_001249 | 2784.167  | 3601.231  | AJ293009  | 3795.656  | 3737.958  | AK024289  | 961.676   | 1028.957  |
| AK024677  | 733.798   | 727.364   | NM_000374 | 2094.165  | 2218.03   | S66168    | 3647.853  | 2652.134  |
| NM_000036 | 2099.523  | 2950.512  | NM_000502 | 7386.127  | 8137.822  | AF131837  | 525.666   | 360.536   |
| AF254082  | 34337.004 | 37790.336 | NM_001359 | 23827.434 | 21701.596 | NM_003851 | 6908.881  | 9516.069  |
| AF205718  | 6451.291  | 5969.115  | NM_001696 | 18245.246 | 14010.037 | U79244    | 492.182   | 451.205   |
| AY004252  | 907.12    | 985.952   | AF190900  | 9557.471  | 9268.145  | AK024150  | 1046.934  | 1137.695  |
| NM_006261 | 3483.847  | 3185.813  | NM_020404 | 19217.656 | 19801.096 | AF070536  | 2437.088  | 1856.301  |

|           |           |           |           |           |           |           |           |           |
|-----------|-----------|-----------|-----------|-----------|-----------|-----------|-----------|-----------|
| AK027045  | 2526.669  | 2249.313  | BE972401  | 7564.992  | 7497.142  | U79300    | 1325.136  | 1225.986  |
| AF169796  | 3807.963  | 3988.378  | NM_017425 | 2073.654  | 2270.657  | AK025151  | 8501.285  | 7243.246  |
| AK001814  | 3711.733  | 2749.987  | AB007922  | 854.926   | 900.296   | AK025550  | 1111.622  | 1488.776  |
| NM_007222 | 1445.672  | 1041.206  | NM_015982 | 5769.932  | 6093.301  | AF088076  | 10706.545 | 16089.049 |
| NM_003435 | 3720.256  | 2892.6    | NM_003746 | 31041.533 | 34724.008 | AF086543  | 1172.81   | 792.898   |
| NM_016291 | 9211.774  | 6610.826  | NM_002910 | 48155.234 | 53492.559 | AB046797  | 487.247   | 422.179   |
| NM_005937 | 59722.57  | 54231.746 | AC096970  | 23206.811 | 27014.709 | AK002098  | 1074.417  | 865.313   |
| AK001503  | 7545.989  | 8156.909  | AK024865  | 3729.572  | 3589.344  | AK025156  | 15580.327 | 15861.204 |
| AK022880  | 3001.511  | 2305.887  | NM_007210 | 1291.12   | 1510.889  | AK022116  | 2683.297  | 2198.301  |
| NM_003601 | 17924.863 | 15884.128 | NM_001483 | 4831.463  | 4156.1    | AF026526  | 1150.068  | 1325.189  |
| AK001228  | 3587.541  | 4013.584  | NM_018973 | 9003.646  | 6756.913  | AK026207  | 4363.036  | 4192.88   |
| AK026778  | 2432.51   | 3050.827  | NM_002591 | 14318.979 | 15188.417 | AK024984  | 6614.649  | 5815.104  |
| AF074987  | 2719.266  | 2261.521  | NM_020216 | 6929.151  | 5700.133  | AK000276  | 401.215   | 617.526   |
| AK001058  | 41468.477 | 42545.113 | AK021860  | 1653.617  | 1577.976  | AL110236  | 550.278   | 596.926   |
| AK026239  | 3691.893  | 3563.238  | AK000119  | 11116.848 | 11938.746 | AF085955  | 384.887   | 454.768   |
| AF086283  | 1393.441  | 1296.532  | AL137266  | 4137.209  | 3429.634  | AF075106  | 3272.888  | 3000.106  |
| AF088047  | 557.815   | 711.056   | NM_014288 | 15313.093 | 17109.252 | AK023339  | 2370.428  | 2068.171  |
| AF086281  | 2617.2    | 2202.228  | AF035300  | 1403.718  | 1273.255  | AF085981  | 307.782   | 394.876   |
| AF086393  | 1278.105  | 1056.506  | NM_017703 | 7873.386  | 7839.431  | AF086008  | 1044.461  | 616.005   |
| AF086453  | 831.322   | 829.996   | NM_015320 | 4432.825  | 4248.988  | AF087970  | 702.404   | 668.503   |
| AF070621  | 8882.712  | 9111.688  | NM_004055 | 2506.698  | 2286.178  | AF086029  | 336.428   | 557.546   |
| NM_020240 | 6765.65   | 5879.328  | NM_014726 | 7496.222  | 6339.149  | AF075115  | 36.506    | 253.092   |
| AK023678  | 11181.747 | 7071.066  | AJ297349  | 1720.387  | 1753.194  | U05597    | 947.982   | 820.572   |
| AF052090  | 6426.388  | 5005.806  | NM_005828 | 6482.88   | 5476.849  | U50524    | 376.831   | 207.375   |
| AK023718  | 4598.135  | 5470.162  | NM_001619 | 1845.837  | 1823.432  | U73799    | 724.998   | 888.955   |
| AF075089  | 5862.093  | 5291.335  | NM_006599 | 3398.063  | 3572.947  | AK021668  | 21357.215 | 21116.303 |
| AF241255  | 1216.733  | 1242.092  | NM_004463 | 448.592   | 867.161   | AF086148  | 12837.984 | 11522.355 |
| AF086007  | 60123.969 | 59942.875 | NM_005936 | 987.694   | 1743.02   | AL360187  | 971.456   | 849.842   |
| AK000803  | 3801.559  | 3006.058  | U43586    | 954.266   | 1273.833  | AK021878  | 431.872   | 651.709   |
| AK022374  | 1381.108  | 1308.204  | NM_006271 | 7449.357  | 7134.929  | AK021817  | 1563.821  | 935.113   |
| AF085926  | 24327.41  | 24080.902 | NM_018647 | 1534.092  | 1404.146  | AL080103  | 713.369   | 587.24    |
| AF085948  | 547.26    | 622.433   | NM_000721 | 54752.551 | 46874.277 | AK023217  | 1958.206  | 1510.267  |
| AL137307  | 4826.725  | 5598.038  | NM_003933 | 2536.68   | 2753.332  | AF090902  | 2267.927  | 2357.737  |
| AL137468  | 8462.743  | 10164.485 | NM_018640 | 446.367   | 653.802   | AF119887  | 9684.389  | 7276.232  |
| AL162007  | 29134.049 | 34070.199 | NM_005095 | 2996.106  | 2961.104  | AK091038  | 457.777   | 271.056   |
| AL390137  | 18851.369 | 15517.011 | NM_000055 | 6331.733  | 6545.715  | AK024193  | 1105.831  | 1040.583  |
| AL137340  | 823.588   | 934.25    | NM_003163 | 14063.036 | 13856.411 | NM_018578 | 172.696   | 393.131   |
| AL137542  | 602.877   | 832.893   | NM_019057 | 3358.208  | 3398.336  | AK024438  | 10230.072 | 8283.249  |
| AL162045  | 1317.684  | 1090.246  | NM_002677 | 823.918   | 876.217   | AK022482  | 739.559   | 714.062   |
| AK022437  | 18580.131 | 15989.638 | NM_016205 | 2567.057  | 3484.297  | AK023811  | 350.479   | 260.552   |
| AF086102  | 1001.145  | 756.27    | NM_005759 | 4219.388  | 4001.411  | AK022803  | 992.842   | 1124.694  |
| AF116682  | 51340.711 | 46730.18  | AF149724  | 2997.378  | 2611.52   | AK023517  | 1100.881  | 1417.714  |
| AL137259  | 4668.545  | 4408.42   | BC020745  | 1363.421  | 1499.555  | AK023869  | 3486.429  | 3757.934  |
| AL122107  | 5838.785  | 4640.733  | NM_006367 | 16257.269 | 13538.942 | NM_017728 | 1066.455  | 745.342   |
| AF075021  | 1051.361  | 1204.273  | NM_006732 | 37732.246 | 35727.348 | U80772    | 470.497   | 621.378   |
| AK025140  | 9622.376  | 7610.02   | NM_004354 | 5533.157  | 4699.104  | NM_006185 | 936.71    | 767.966   |
| AK023394  | 1881.856  | 1883.739  | NM_004661 | 4042.028  | 3226.381  | AJ272177  | 874.744   | 927.638   |
| AF090093  | 16007.891 | 20003.104 | NM_001610 | 3362.345  | 3162.205  | AK026402  | 13631.202 | 15530.354 |
| AF161340  | 5878.968  | 6872.346  | NM_001241 | 1488.518  | 1349.372  | AF111846  | 1384.173  | 1504.255  |
| AF242771  | 1972.803  | 1840.048  | AF217504  | 2592.791  | 2441.847  | M11948    | 53596.215 | 53252.156 |
| NM_018562 | 10138.724 | 8656.156  | AK027102  | 4765.148  | 5264.262  | AK024618  | 1450.751  | 982.57    |
| AF098666  | 855.933   | 556.317   | AL109714  | 680.726   | 880.318   | AL049969  | 860.813   | 743.728   |
| AK021969  | 1626.552  | 2490.362  | NM_004632 | 3582.664  | 3935.579  | NM_005220 | 1116.72   | 724.236   |

|           |           |           |           |           |           |           |           |           |
|-----------|-----------|-----------|-----------|-----------|-----------|-----------|-----------|-----------|
| AK022065  | 2044.937  | 2373.195  | NM_017919 | 6841.422  | 7121.639  | AK000208  | 376.601   | 124.46    |
| AK022221  | 5404.402  | 4217.979  | NM_014456 | 3790.209  | 3916.517  | AK026366  | 30518.283 | 27423.195 |
| AK022356  | 1108.223  | 994.234   | NM_004740 | 14582.283 | 14038.855 | AK024229  | 14309.817 | 10660.68  |
| AK021998  | 1865.231  | 1169.565  | NM_003805 | 3627.159  | 3403.504  | AK021467  | 4354.937  | 4758.474  |
| AK022126  | 2411.45   | 2209.982  | NM_019886 | 4724.706  | 4460.991  | NM_020371 | 1107.565  | 1221.026  |
| AK022256  | 702.475   | 788.709   | NM_003278 | 54710.223 | 62808.129 | AK022498  | 1331.222  | 1452.145  |
| AK022383  | 3347.446  | 3056.246  | AK021957  | 59196.504 | 62958.039 | U84506    | 1869.078  | 1207.705  |
| AK027041  | 2897.173  | 2756.279  | NM_016623 | 13584.457 | 14241.277 | U21556    | 53696.961 | 50696.184 |
| NM_005355 | 24772.467 | 19578.383 | NM_001334 | 5168.036  | 5231.129  | AB002444  | 751.014   | 781.441   |
| AK027195  | 733.489   | 668.298   | NM_004771 | 2610.228  | 2218.854  | AB002344  | 1505.51   | 1928.508  |
| AK000937  | 1530.231  | 1007.894  | AL365514  | 1503.365  | 1182.232  | BF210352  | 764.539   | 769.9     |
| AF035306  | 2264.157  | 2999.359  | NM_018299 | 1172.231  | 1187.346  | AF147379  | 34164.309 | 30459.346 |
| AK091662  | 1449.092  | 1997.054  | NM_002104 | 1287.101  | 1326.721  | AK023760  | 4415.818  | 3954.696  |
| NM_003954 | 1179.768  | 1346.434  | NM_005504 | 6998.947  | 7253.105  | X98415    | 52626.363 | 45069.813 |
| NM_016348 | 1944.29   | 1706.173  | AF234654  | 2651.443  | 2489.744  | AK024205  | 2478.496  | 2125.69   |
| AK023877  | 878.351   | 650.613   | NM_000110 | 3599.541  | 3340.705  | AF086034  | 10982.927 | 8356.431  |
| AK024213  | 34768.301 | 27618.486 | NM_016002 | 26364.463 | 22025.99  | AF130071  | 848.83    | 797.723   |
| AK025093  | 592.667   | 602.196   | NM_014549 | 1480.692  | 1432.692  | AL390170  | 318.13    | 536.732   |
| AK022184  | 1288.815  | 1096.752  | NM_017832 | 1208.411  | 1272.851  | AK022887  | 692.878   | 732.962   |
| AB007959  | 1283.536  | 1395.76   | NM_001713 | 3941.565  | 3930.72   | AK000745  | 11060.447 | 9799.521  |
| AK026002  | 512.776   | 469.051   | NM_015367 | 9574.529  | 8411.607  | NM_005295 | 569.703   | 464.62    |
| AK024153  | 1781.199  | 2810.393  | NM_014498 | 3538.346  | 3303.393  | NM_015901 | 985.594   | 485.236   |
| Y10516    | 6430.478  | 9223.175  | NM_002375 | 13223.872 | 12537.54  | Z83935    | 515.732   | 326.542   |
| AF056451  | 4060.898  | 6241.525  | NM_001813 | 3250.894  | 3111.134  | NM_006365 | 416.89    | 195.019   |
| AF015039  | 8371.826  | 8601.527  | AF055016  | 2633.499  | 3167.427  | AF093744  | 906.062   | 1082.719  |
| U50528    | 2281.656  | 2435.174  | NM_007234 | 23207.729 | 19416.063 | NM_018687 | 10061.798 | 9032.146  |
| AB020632  | 4611.787  | 6065.151  | NM_014567 | 5774.4    | 8277.773  | Y16702    | 292.122   | 215.233   |
| NM_018614 | 51002.402 | 56539.828 | NM_017842 | 4444.847  | 6520.925  | M57417    | 37982.301 | 32443.227 |
| AL117549  | 2157.4    | 2505.938  | AB037809  | 2160.448  | 2053.605  | NM_020524 | 6603.317  | 4855.782  |
| NM_005222 | 14892.037 | 14575.849 | AB011129  | 1783.745  | 1957.509  | NM_001995 | 1730.988  | 877.852   |
| BC024308  | 13378.703 | 13171.363 | NM_014391 | 12428.723 | 13557.9   | X64977    | 1158.505  | 886.428   |
| NM_000538 | 3445.655  | 3847.553  | NM_004270 | 2461.13   | 2829.047  | AF064851  | 808.342   | 996.613   |
| AK001838  | 59001.273 | 59238.359 | NM_001537 | 3874.833  | 4109.316  | NM_002602 | 10881.376 | 7399.796  |
| NM_018295 | 2123.238  | 3063.242  | U80743    | 1291.693  | 1459.997  | X89672    | 248.665   | 422.539   |
| AF070574  | 575.305   | 668.154   | NM_001352 | 4194.849  | 4189.438  | NM_003383 | 1655.086  | 2219.22   |
| AF086262  | 2660.199  | 3092.246  | D15050    | 2363.86   | 1481.773  | D17271    | 6665.604  | 6999.915  |
| AF086292  | 7812.312  | 6148.965  | NM_006527 | 9927.932  | 8387.598  | X91648    | 1146.924  | 773.303   |
| AK024342  | 20128.48  | 16391.701 | NM_006627 | 2826.568  | 2296.635  | AK026658  | 599.465   | 471.093   |
| AL137712  | 9844.624  | 7798.996  | NM_007363 | 12962.556 | 9996.853  | AF282264  | 6623.17   | 6611.945  |
| L77599    | 49362.855 | 44199.238 | NM_003093 | 35547.988 | 31991.086 | AF086322  | 1903.506  | 1855.59   |
| AK021673  | 25939.645 | 24288.615 | U05589    | 1258.452  | 1234.162  | Z70717    | 847.855   | 719.738   |
| AB014543  | 3078.138  | 2494.028  | NM_014473 | 18687.521 | 17083.021 | AK024736  | 458.606   | 224.649   |
| NM_018445 | 9854.835  | 8178.009  | NM_003095 | 63640.406 | 69932.391 | X79308    | 823.946   | 530.804   |
| AK022743  | 13686.743 | 12581.731 | NM_016389 | 2393.652  | 2098.982  | AF086476  | 421.612   | 406.037   |
| NM_014627 | 2499.46   | 2776.757  | NM_002295 | 63487.375 | 68324.141 | NM_01766C | 4807.424  | 4286.286  |
| NM_013935 | 15723.281 | 19616.088 | NM_001762 | 10473.102 | 8324.822  | AB011151  | 3180.789  | 2903.366  |
| NM_013986 | 57013.75  | 62340.137 | NM_016306 | 15913.378 | 13885.4   | U92995    | 3012.615  | 2956.565  |
| U55055    | 964.079   | 1353.174  | NM_003755 | 599.058   | 712.557   | Z70769    | 286.544   | 568.216   |
| AB018319  | 2075.675  | 2049.192  | BE258640  | 15832.007 | 29351.984 | NM_007106 | 941.318   | 706.571   |
| AK001101  | 2183.866  | 1305.812  | NM_003314 | 9775.51   | 16345.181 | AL137555  | 1558.449  | 1145.967  |
| BM973473  | 2024.683  | 2277.672  | AL355730  | 362.139   | 887.713   | AL133017  | 1158.691  | 952.592   |
| AK021637  | 2356.429  | 2100.337  | U79273    | 1096.475  | 2066.985  | CY3Cy5    | 2084.015  | 115.72    |
| AK021658  | 1330.411  | 1151.977  | AK022050  | 3690.229  | 4736.407  | X00588    | 412.28    | 733.027   |

|           |           |           |           |           |           |           |           |           |
|-----------|-----------|-----------|-----------|-----------|-----------|-----------|-----------|-----------|
| U17631    | 1551.011  | 1297.859  | NM_002512 | 55930.695 | 58466.715 | AI359037  | 22805.738 | 32653.365 |
| AL137723  | 2091.533  | 2155.711  | AL365411  | 3644.067  | 4891.642  | X15998    | 1687.623  | 1479.252  |
| AK024046  | 2368.734  | 2535.385  | NM_016066 | 5137.132  | 5148.574  | X17519    | 7958.481  | 8271.398  |
| NM_017931 | 4166.172  | 3575.846  | NM_001249 | 1776.703  | 2178.481  | NM_001883 | 1040.697  | 1085.019  |
| AK022793  | 1749.049  | 1298.339  | AK024677  | 898.732   | 880.755   | NM_004628 | 1456.158  | 1535.337  |
| AJ227910  | 1744.056  | 1706.184  | NM_000036 | 2389.172  | 1790.659  | L31785    | 816.923   | 672.628   |
| AF001893  | 855.344   | 697.017   | AF254082  | 32412     | 24601.965 | H-M 69043 | 2416.874  | 2953.354  |
| X04236    | 13669.327 | 12081.862 | AF205718  | 6702.01   | 6387.733  | AF077374  | 960.671   | 876.852   |
| AK093746  | 18830.717 | 16915.6   | AY004252  | 993.485   | 811.297   | U43901    | 819.323   | 920.18    |
| D16875    | 1067.895  | 1014.629  | NM_006261 | 2302.713  | 2135.887  | X59065    | 496.931   | 536.642   |
| AK027171  | 2277.219  | 1937.524  | AK027045  | 1934.381  | 1581.489  | M59828    | 7196.437  | 7431.19   |
| AK021945  | 9190.498  | 8426.812  | AF169796  | 3488.452  | 3565.404  | NM_016134 | 451.986   | 353.437   |
| L23545    | 1468.571  | 1509.085  | AK001814  | 3474.283  | 2811.982  | SR2       | 47982.793 | 39485.563 |
| CY3Cy5    | 19347.338 | 1460.643  | NM_007222 | 1073.646  | 939.467   | SR4       | 9968.314  | 8002.709  |
| U13022    | 4399.125  | 5397.541  | NM_003435 | 2901.888  | 2761.127  | SR6       | 1536.107  | 1156.334  |
| R23251    | 31343.441 | 52601.316 | NM_016291 | 6017.218  | 6174.461  | SR8       | 5068.272  | 12458.184 |
| BG763477  | 862.427   | 1161.455  | NM_005937 | 59057.621 | 64248.227 | SR10      | 18571.549 | 4976.803  |
| AA702640  | 2341.161  | 3835.266  | AK001503  | 7694.989  | 9097.655  | CY3Cy5    | 1198.012  | 99.442    |
| T68583    | 6678.735  | 6174.652  | AK022880  | 2652.936  | 3850.928  | NM_000612 | 4460.758  | 5571.913  |
| AA481944  | 41764.336 | 32241.939 | NM_003601 | 17828.09  | 22666.15  | NM_004257 | 6278.297  | 5995.541  |
| AF038440  | 1575.522  | 785.404   | AK001228  | 2362.331  | 2447.947  | NM_002844 | 2455.079  | 3052.517  |
| M31158    | 2685.449  | 2121.451  | AK026778  | 1999.195  | 1809.265  | NM_000683 | 1736.513  | 2067.256  |
| H00742    | 3734.017  | 2788.926  | AF074987  | 2158.406  | 2285.765  | NM_003628 | 1233.33   | 1249.593  |
| D42108    | 2664.801  | 1779.286  | AK001058  | 28597.484 | 26385.979 | NM_005901 | 7327.626  | 8202.444  |
| BG700922  | 2963.801  | 2617.494  | AK026239  | 2499.742  | 2786.476  | NM_004248 | 1566.72   | 1436.617  |
| AI366068  | 1923.053  | 2099.506  | AF086283  | 935.93    | 952.431   | NM_019066 | 166.488   | 397.331   |
| N57553    | 1111.396  | 1560.529  | AF086281  | 1348.011  | 1568.171  | NM_002362 | 937.474   | 1033.05   |
| AF080158  | 4313.439  | 5276.646  | AF086393  | 805.014   | 993.665   | NM_004796 | 234.744   | 707.003   |
| BM664556  | 2487.256  | 2822.403  | AF086453  | 512.137   | 822.602   | NM_000435 | 2986.031  | 2565.293  |
| SR1       | 67829.883 | 67034.625 | AF070621  | 7854.023  | 6213.239  | NM_001842 | 7863.691  | 6561.628  |
| SR3       | 53743.598 | 48807.953 | NM_020240 | 5489.866  | 4482.179  | AB017169  | 379.485   | 364.587   |
| SR5       | 10864.872 | 11564.842 | AK023678  | 10487.167 | 11854.822 | AL080170  | 1163.469  | 1342.829  |
| CY3Cy5    | 12480.245 | 763.928   | AF052090  | 4184.485  | 6457.106  | AB039903  | 2359.449  | 2171.445  |
| M33197    | 67758.813 | 71937.125 | AK023718  | 4666.276  | 5603.698  | NM_000542 | 9703.647  | 9334.773  |
| NM_007024 | 12087.872 | 9644.418  | AF075089  | 7047.224  | 8011.765  | NM_006851 | 720.923   | 645.374   |
| NM_013231 | 6444.037  | 5187.928  | AF086007  | 61543.164 | 70313.898 | H99588    | 556.543   | 441.161   |
| NM_012106 | 10136.618 | 8354.023  | AK000803  | 2742.729  | 3352.004  | AK022600  | 7368.905  | 8178.391  |
| NM_006254 | 2296.421  | 1739.86   | AK022374  | 1160.709  | 1382.531  | AK023142  | 1850.378  | 1766.093  |
| X95425    | 4971.977  | 3872.175  | AF085926  | 21264.959 | 21477.244 | U61740    | 5264.607  | 7499.011  |
| NM_004422 | 7376.565  | 6098.912  | AF085948  | 772.794   | 1562.037  | NM_006409 | 49386.926 | 50517.965 |
| NM_016562 | 2459.322  | 2195.236  | AL137307  | 3837.251  | 3390.511  | AB049054  | 2753.875  | 2387.465  |
| M33197    | 67706.656 | 68433.539 | AL137468  | 5837.494  | 5491.577  | NM_015071 | 1349.076  | 2007.088  |
| AY009399  | 38325.09  | 39226.086 | AL162007  | 27374.441 | 22627.535 | NM_013227 | 1404.238  | 1633.95   |
| NM_004895 | 22303.955 | 19087.178 | AL390137  | 26627.063 | 23057.02  | Z83803    | 510.456   | 659.485   |
| U59748    | 3255.296  | 3623.947  | AL162045  | 1000.816  | 999.371   | AF027205  | 20819.559 | 21169.41  |
| L32537    | 1089.49   | 1039.173  | AK022437  | 17804.463 | 8887.502  | AF075012  | 1173.952  | 1410.426  |
| NM_014303 | 38316.973 | 39286.691 | AF086102  | 1122.323  | 1251.009  | NM_001570 | 886.859   | 1384.588  |
| NM_003118 | 4483.637  | 5234.421  | AF116682  | 39060.898 | 30501.852 | NM_015658 | 318.96    | 417.935   |
| L02922    | 20565.385 | 19809.984 | AL137259  | 2399.563  | 2756.38   | NM_000588 | 1371.881  | 1478.922  |
| NM_001797 | 3754.568  | 3849.408  | AL122107  | 5086.386  | 4371.836  | NM_016546 | 6327.892  | 6972.4    |
| AK023459  | 8528.033  | 9020.259  | AF075021  | 722.011   | 617.598   | AF309653  | 940.44    | 1029.425  |
| BI762154  | 1303.531  | 1194.093  | AK025140  | 5025.862  | 4852.935  | NM_002620 | 6204.726  | 5361.506  |
| NM_006421 | 6291.244  | 7321.114  | AK023394  | 928.214   | 734.788   | S79267    | 680.273   | 498.737   |

|           |           |           |           |           |           |           |           |           |
|-----------|-----------|-----------|-----------|-----------|-----------|-----------|-----------|-----------|
| NM_017457 | 26227.299 | 30034.277 | AF090093  | 16893.438 | 14846.759 | NM_001816 | 344.345   | 483.378   |
| NM_003765 | 19308.844 | 20077.482 | AF161340  | 6410.663  | 6764.496  | NM_003784 | 32880.227 | 34138.367 |
| NM_005865 | 980.954   | 1415.148  | AF242771  | 1275.256  | 1523.367  | NM_000195 | 15623.776 | 14420.847 |
| M33197    | 67295.32  | 64291.926 | NM_018562 | 12139.213 | 10920.95  | NM_005445 | 6670.346  | 4402.279  |
| NM_018202 | 26087.135 | 22784.721 | AF098666  | 1339.37   | 1881.781  | NM_014895 | 1100.571  | 1132.664  |
| AB023197  | 5708.567  | 5136.526  | AK021969  | 815.471   | 1501.715  | NM_003630 | 2940.664  | 2464.491  |
| NM_022173 | 12758.479 | 10782.392 | AK022065  | 1257.115  | 1165.018  | NM_000046 | 962.038   | 713.495   |
| AB040970  | 8070.576  | 8640.41   | AK022221  | 5730.406  | 4445.748  | NM_003215 | 500.754   | 384.802   |
| NM_018330 | 5736.406  | 7634.47   | AK022356  | 1154.03   | 935.485   | NM_006705 | 1423.936  | 1009.616  |
| AB023222  | 1399.04   | 1724.185  | AK027041  | 3207.433  | 2059.365  | NM_004910 | 1867.67   | 2128.321  |
| M33197    | 67700.469 | 68816.914 | NM_005355 | 24031.93  | 22757.111 | AB013452  | 1156.435  | 1592.15   |
| U50342    | 3970.979  | 5987.391  | AK000937  | 1226.238  | 1138.268  | M93107    | 4378.151  | 5274.785  |
| NM_000295 | 1273.212  | 1078.323  | AF035306  | 2574.964  | 2700.653  | BC001479  | 5103.643  | 6676.098  |
| AF103795  | 761.12    | 1051.028  | AK091662  | 650.857   | 1037.766  | NM_002461 | 20233.117 | 23795.488 |
| NM_006215 | 995.774   | 1220.981  | NM_003954 | 1195.761  | 1312.045  | NM_005771 | 610.491   | 863.255   |
| U80018    | 2113.791  | 1808.776  | NM_016345 | 2071.501  | 1494.206  | AB032986  | 33751.262 | 36350.902 |
| NM_000717 | 2394.58   | 2505.038  | AK022003  | 565.81    | 983.22    | NM_017525 | 26080.602 | 24586.576 |
| M33197    | 67463.328 | 66984.508 | AK023877  | 804.616   | 624.845   | NM_016032 | 7587.31   | 7371.152  |
| NM_004845 | 8840.478  | 8533.466  | AK024213  | 26639.238 | 20341.654 | NM_014324 | 48766.203 | 46400.199 |
| NM_007107 | 18701.266 | 18739.318 | AK025093  | 608.443   | 399.098   | NM_001687 | 15471.952 | 16464.631 |
| NM_000047 | 33398.129 | 34567.473 | AK022184  | 2001.611  | 1972.459  | AK026374  | 1042.775  | 1109.06   |
| NM_006315 | 7078.07   | 7200.214  | AB007959  | 1106.894  | 1056.392  | NM_001165 | 1069.263  | 1038.476  |
| NM_018225 | 5224.667  | 6042.448  | AK024360  | 393.235   | 537.599   | AK024648  | 4266.94   | 4986.064  |
| Z36813    | 9618.239  | 7314.459  | AK024153  | 1520.813  | 1080.926  | NM_000715 | 443.878   | 447.067   |
| NM_006660 | 6388.143  | 10671.994 | AF015039  | 5408.037  | 4067.534  | NM_003455 | 5356.357  | 5121.68   |
| NM_001485 | 1375.38   | 1757.414  | U50528    | 2162.259  | 2078.012  | NM_000171 | 683.126   | 655.442   |
| NM_004727 | 1136.876  | 1999.845  | AB020632  | 3724.005  | 3759.399  | AL354615  | 1256.914  | 1174.562  |
| NM_000555 | 1212.857  | 1780.126  | NM_018614 | 55819.469 | 49707.043 | NM_013345 | 25811.627 | 23423.754 |
| NM_004045 | 8888.22   | 9164.474  | AL117549  | 2801.982  | 3089.085  | NM_003705 | 1634.506  | 1480.073  |
| NM_001891 | 2233.272  | 2381.209  | NM_005222 | 9369.659  | 10370.58  | NM_006861 | 1047.278  | 1116.852  |
| NM_001440 | 57356.934 | 58464.754 | BC024308  | 12903.584 | 12658.522 | NM_005825 | 3536.392  | 2966.563  |
| NM_001201 | 1883.806  | 1493.391  | AK001838  | 57370.902 | 60184.246 | NM_000465 | 1330.496  | 943.336   |
| NM_016615 | 3519.109  | 3195.192  | NM_018295 | 1802.559  | 2204.232  | NM_015544 | 2838.561  | 2118.372  |
| AB014568  | 57186.863 | 56051.516 | AF070574  | 1574.937  | 1439.342  | NM_015905 | 16391.367 | 10825.541 |
| AK022238  | 898.82    | 1005.615  | AF086262  | 2800.843  | 4097.468  | NM_000895 | 886.13    | 868.16    |
| NM_012245 | 8483.339  | 8208.316  | AF086292  | 8143.795  | 12688.244 | AB040672  | 2785.206  | 3272.312  |
| AK022546  | 12821.025 | 10315.359 | AK023769  | 388.158   | 1255.577  | NM_002192 | 1159.92   | 1180.008  |
| NM_014067 | 16127.033 | 16195.634 | AK024342  | 23769.092 | 36438.5   | NM_005491 | 8327.389  | 7878.999  |
| NM_002914 | 14603.522 | 12322.563 | AL137712  | 9105.822  | 12476.03  | NM_003865 | 1474.265  | 1300.733  |
| NM_020385 | 3536.573  | 2711.934  | AL137606  | 1249.311  | 418.84    | AK025599  | 3214.034  | 4386.899  |
| NM_006541 | 2092.173  | 1386.793  | L77599    | 51118.934 | 44066.527 | X63417    | 1519.269  | 1676.296  |
| M33197    | 67620.977 | 79670.773 | AK021673  | 23011.902 | 16086.324 | S94539    | 27827.984 | 29944.234 |
| NM_005705 | 8242.664  | 8548.513  | AB014543  | 1839.971  | 1708.418  | NM_006402 | 604.547   | 825.96    |
| NM_004325 | 4180.279  | 5865.218  | NM_018445 | 6237.226  | 5933.117  | NM_005785 | 1084.778  | 1178.398  |
| NM_004581 | 9997.002  | 13639.244 | AK022743  | 11393.715 | 9804.06   | NM_018245 | 5281.136  | 4995.999  |
| NM_006817 | 14567.305 | 19010.623 | NM_014627 | 1481.035  | 1300.102  | AK001695  | 4173.873  | 3790.132  |
| NM_015921 | 39871.934 | 42834.785 | NM_013935 | 12778.206 | 12158.599 | NM_017885 | 1183.605  | 1050.1    |
| AB040900  | 16864.615 | 17443.967 | U55055    | 1107.335  | 1291.365  | NM_006252 | 821.395   | 814.984   |
| NM_001482 | 862.352   | 1020.491  | AB018319  | 2779.658  | 2378.592  | NM_001721 | 370.295   | 799.219   |
| NM_001797 | 5305.702  | 4526.391  | AK001101  | 3343.149  | 3580.554  | NM_014397 | 1232.322  | 1256.815  |
| NM_003154 | 3422.69   | 2664.686  | BM973473  | 1095.359  | 944.793   | AB023182  | 2581.703  | 1944.66   |
| NM_004235 | 1425.234  | 1154.636  | AK021637  | 1816.908  | 1758.424  | NM_003607 | 2051.113  | 1958.742  |
| AK023459  | 8725.729  | 7334.119  | AK021658  | 531.829   | 478.195   | NM_006575 | 2114.678  | 1636.845  |

|           |           |           |           |           |           |           |           |           |
|-----------|-----------|-----------|-----------|-----------|-----------|-----------|-----------|-----------|
| BI762154  | 1356.857  | 1059.474  | U17631    | 1345.071  | 1385.355  | NM_013254 | 1570.814  | 1373.136  |
| U13022    | 3732.026  | 2767.954  | AL137723  | 2027.886  | 1496.765  | NM_000437 | 7766.302  | 7664.813  |
| R23251    | 29497.693 | 31869.424 | AK024046  | 2631.432  | 3590.009  | AB046819  | 3027.845  | 2428.818  |
| AA702640  | 2006.188  | 2452.189  | NM_017931 | 4177.304  | 6217.105  | NM_00609C | 3268.943  | 2462.458  |
| T68583    | 6227.615  | 5822.22   | AK022793  | 1793.128  | 2946.423  | NM_00290C | 2856.556  | 2194.697  |
| AA481944  | 41437.688 | 41315.156 | AJ227910  | 1825.384  | 1626.074  | NM_006851 | 863.774   | 1458.636  |
| AF038440  | 1928.761  | 1505.985  | X04236    | 7702.294  | 7913.974  | AK001560  | 615.285   | 750.991   |
| M31158    | 3039.149  | 2706.24   | AK093746  | 10683.789 | 9513.005  | AB001328  | 782.742   | 724.464   |
| H00742    | 5331.451  | 5167.713  | AK027171  | 1522.985  | 1044.843  | NM_00094E | 284.272   | 634.573   |
| D42108    | 2641.899  | 3414.713  | AK021945  | 5853.633  | 5151.928  | H99588    | 896.675   | 997.865   |
| BG700922  | 3260.146  | 3797.614  | L23545    | 884.625   | 625.367   | X00588    | 625.625   | 909.978   |
| AI366068  | 1998.425  | 3597.476  | CY3Cy5    | 11171.837 | 281.514   | AI359037  | 23673.467 | 29301.736 |
| N57553    | 1136.632  | 1107.968  | U13022    | 2984.055  | 4379.775  | BI754285  | 405.197   | 376.594   |
| AF080158  | 3776.379  | 4032.665  | R23251    | 26075.627 | 35475.57  | X15998    | 1675.893  | 1400.418  |
| BM664556  | 1699.065  | 1861.22   | AA702640  | 1728.487  | 1388.53   | M76482    | 323.811   | 408.918   |
| M33197    | 67707.141 | 72200.383 | T68583    | 2185.011  | 3453.1    | X17519    | 8830.379  | 7778.329  |
| NM_01654E | 6876.414  | 8389.417  | AA481944  | 10298.15  | 12049.773 | NM_00188E | 1318.24   | 1131.226  |
| NM_00029E | 1490.267  | 1643.59   | M31158    | 1930.116  | 1599.917  | NM_00462E | 1528.67   | 1499.23   |
| AF026932  | 716.773   | 778.504   | H00742    | 1362.862  | 1636.44   | L31785    | 835.096   | 893.262   |
| AF103795  | 1463.324  | 1267.184  | D42108    | 1054.67   | 1026.983  | H-M 69043 | 2536.683  | 3502.822  |
| NM_00621E | 1053.936  | 1098.965  | BG700922  | 3192.351  | 3209.494  | AF077374  | 1111.325  | 1425.748  |
| M33197    | 68543.594 | 62576.73  | AI366068  | 1477.851  | 1743.104  | U43901    | 720.497   | 578.366   |
| NM_007024 | 10826.854 | 9894.129  | N57553    | 622.507   | 815.341   | X59065    | 661.127   | 636.098   |
| NM_013231 | 5793.771  | 5062.677  | AF080158  | 2045.093  | 2674.471  | M59828    | 8347.57   | 8093.167  |
| NM_01210E | 7847.296  | 7622.547  | BM664556  | 554.036   | 654.431   | AJ010482  | 968.165   | 903.092   |
| NM_006254 | 1403.271  | 1618.1    | SR5       | 5145.755  | 5084.384  | NM_00544E | 5742.422  | 6566.875  |
| X95425    | 3781.829  | 3588.759  | SR7       | 4908.509  | 27028.668 | NM_01489E | 1225.733  | 1673.486  |
| NM_00442E | 7335.002  | 6809.186  | SR9       | 15142.808 | 1602.852  | NM_00363C | 3743.533  | 4462.266  |
| NM_01656E | 2810.313  | 1928.794  | CY3Cy5    | 9164.286  | 170.633   | NM_00004E | 1178.746  | 1395.85   |
| M33197    | 67434.391 | 64437.813 | NM_013231 | 2228.945  | 2658.907  | NM_00321E | 836.736   | 944.673   |
| AY009399  | 39377.621 | 59361.023 | NM_01210E | 7953.907  | 10177.209 | NM_00670E | 2101.134  | 2148.765  |
| NM_00489E | 23174.492 | 27682.107 | NM_006254 | 1579.546  | 1965.73   | NM_00061E | 4184.359  | 5656.331  |
| U59748    | 2575.577  | 3045.524  | X95425    | 1020.41   | 1562.477  | NM_004257 | 6514.247  | 5919.116  |
| NM_01430E | 33372.621 | 37391.809 | NM_00442E | 4046.784  | 4751.524  | NM_002844 | 2641.239  | 2613.607  |
| M33197    | 67646.336 | 76401.008 | NM_01656E | 695.005   | 963.431   | NM_00068E | 1613.08   | 1169.802  |
| M95610    | 20604.438 | 25438.822 | M33197    | 68337.484 | 70324.688 | NM_00362E | 1207.329  | 1219.09   |
| NM_003118 | 3745.36   | 3867.109  | NM_00489E | 4343.475  | 4785.401  | NM_005901 | 7420.577  | 7970.432  |
| L02922    | 21891.637 | 22498.869 | U59748    | 1008.973  | 1041.401  | NM_00424E | 1123.43   | 1545.164  |
| M33197    | 29845.955 | 28580.736 | NM_01430E | 7276.242  | 10739.786 | NM_00095E | 283.421   | 783.172   |
| NM_00404E | 13710.93  | 12184.966 | NM_003118 | 2266.674  | 1905.322  | NM_00131E | 642.304   | 734.137   |
| NM_001891 | 3309.771  | 2637.911  | L02922    | 15400.273 | 14086.521 | NM_00236E | 646.338   | 789.903   |
| NM_01213E | 9308.813  | 8078.909  | NM_001797 | 786.769   | 1136.207  | NM_00043E | 2209.52   | 2331.028  |
| AF121856  | 6256.029  | 5835.128  | NM_003154 | 1256.389  | 529.436   | NM_00184E | 6375.225  | 5477.107  |
| NM_006421 | 5652.787  | 5619.797  | AK023459  | 4581.733  | 3601.291  | AL080170  | 874.925   | 943.384   |
| NM_017457 | 24059.822 | 21140.174 | NM_01213E | 9133.902  | 10407.277 | AB039903  | 1976.861  | 1798.989  |
| NM_00376E | 17451.986 | 15368.346 | AF121856  | 7396.155  | 8276.855  | NM_00054E | 8579.795  | 6449.902  |
| NM_00586E | 1001.273  | 977.322   | NM_006421 | 4726.42   | 5561.382  | NM_00370E | 1480.444  | 2169.919  |
| NM_01820E | 19345.219 | 18467.725 | NM_017457 | 22289.631 | 24251.703 | NM_006861 | 1182.585  | 1663.794  |
| AB023197  | 4193.575  | 4335.984  | NM_00376E | 11057.658 | 13450.124 | NM_00582E | 2747.791  | 3458.371  |
| NM_02217E | 7713.514  | 8656.54   | NM_01820E | 18159.275 | 15060.287 | NM_00046E | 1339.018  | 1617.828  |
| AB040970  | 4406.79   | 4887.158  | AB023197  | 3996.031  | 3375.59   | NM_015544 | 2858.658  | 4172.679  |
| NM_01833C | 3518.603  | 3185.722  | NM_02217E | 5793.054  | 5962.98   | NM_01590E | 17118.754 | 15611.935 |
| AB023222  | 861.894   | 1201.548  | AB040970  | 5123.939  | 4956.286  | AK022600  | 7805.457  | 7923.728  |

|           |           |           |           |           |           |           |           |           |
|-----------|-----------|-----------|-----------|-----------|-----------|-----------|-----------|-----------|
| AB033088  | 1024.34   | 1260.911  | NM_018330 | 5125.412  | 5034.373  | AK023142  | 1333.578  | 1687.835  |
| M33197    | 67830.539 | 68009.039 | AB023222  | 1174.406  | 923.409   | U61740    | 5919.297  | 5018.728  |
| U50342    | 3411.287  | 4591.097  | M33197    | 68943.477 | 61711.742 | NM_006400 | 53134.152 | 47823.492 |
| NM_015921 | 56118.063 | 54825.09  | U50342    | 2772.964  | 1978.705  | AB049054  | 1763.46   | 1902.18   |
| AB040900  | 22210.682 | 21752.174 | U80018    | 861.828   | 1218.455  | NM_015071 | 1233.459  | 1657.98   |
| NM_001080 | 1045.406  | 1026.064  | NM_000717 | 1830.957  | 2351.517  | NM_013227 | 815.657   | 824.758   |
| NM_001482 | 1696.99   | 1553.417  | M33197    | 67341.813 | 70089.766 | Z83803    | 515.049   | 655.981   |
| U80018    | 1784.611  | 1770.958  | NM_004845 | 2531.408  | 3044.033  | AF027205  | 20837.967 | 24118.201 |
| NM_000717 | 1843.467  | 1897.305  | NM_007107 | 16139.152 | 16021.961 | AF075012  | 942.325   | 1122.306  |
| M33197    | 67393.32  | 64888.676 | NM_000047 | 5381.466  | 6140.102  | NM_015650 | 401.71    | 333.64    |
| NM_004845 | 8634.735  | 6788.086  | NM_006319 | 6119.826  | 5910.075  | NM_000580 | 1198.238  | 1521.736  |
| NM_007107 | 16033.063 | 14148.177 | NM_018220 | 4455.605  | 4580.012  | NM_016540 | 5093.57   | 5617.379  |
| NM_000047 | 37964.152 | 33248.625 | Z36813    | 4195.376  | 4016.845  | AF309653  | 669.764   | 745.909   |
| M68874    | 730.691   | 895.626   | NM_006660 | 8006.374  | 6022.116  | NM_002620 | 4149.8    | 3357.301  |
| NM_006319 | 7698.938  | 8923.154  | M33197    | 10996.979 | 7705.15   | S79267    | 669.5     | 425.627   |
| Z36813    | 6675.703  | 8301.37   | NM_004045 | 7560.168  | 4193.929  | NM_001810 | 414.953   | 396.799   |
| NM_006660 | 7396.769  | 8630.315  | NM_001440 | 46322.43  | 57241.934 | NM_003784 | 30476.887 | 26129.254 |
| NM_001480 | 1066.794  | 1427.811  | NM_001201 | 982.963   | 1258.059  | NM_000190 | 13637.022 | 8927.964  |
| NM_004727 | 1035.129  | 1400.376  | NM_016610 | 3168.5    | 3839.657  | NM_006570 | 2056.096  | 2267.226  |
| NM_000550 | 1247.403  | 1622.199  | AB014568  | 20707.4   | 28257.51  | NM_013254 | 1537.665  | 2150.397  |
| AF080158  | 5274.456  | 4030.891  | NM_012240 | 2746.617  | 3017.892  | NM_000437 | 6490.348  | 9569.147  |
| BM664556  | 3127.644  | 2789.383  | AK022546  | 6277.411  | 6263.657  | AB046819  | 3074.764  | 3476.661  |
| M33197    | 67630.695 | 74783.539 | NM_014067 | 4233.963  | 3786.596  | NM_006090 | 2446.381  | 3052.658  |
| NM_016540 | 8878.887  | 7985.462  | NM_002914 | 9952.619  | 8498.685  | NM_002900 | 2565.345  | 2945.544  |
| NM_001440 | 57597.773 | 58842.523 | NM_020380 | 1538.532  | 1258.161  | NM_004910 | 1290.469  | 1129.181  |
| NM_001201 | 1472.565  | 1316.343  | NM_006541 | 1927.479  | 1947.969  | AB013452  | 835.086   | 925.721   |
| NM_016610 | 2621.272  | 2975.758  | NM_004320 | 2581.522  | 2275.946  | M93107    | 3893.06   | 3230.711  |
| AB014568  | 41359.461 | 32459.955 | NM_004581 | 6293.883  | 4269.42   | BC001479  | 4470.721  | 4585.103  |
| AK022238  | 671.17    | 728.757   | NM_006817 | 14940.929 | 10566.693 | NM_017520 | 21881.939 | 28336.797 |
| NM_012240 | 7465.333  | 7398.714  | NM_015921 | 38441.426 | 26445.908 | NM_016030 | 7603.986  | 9436.564  |
| AK022546  | 11675.172 | 8377.208  | AB040900  | 18623.721 | 12016.962 | NM_014324 | 46009.262 | 47685.109 |
| NM_014067 | 16506.756 | 18071.824 | NM_001797 | 923.354   | 1504.463  | NM_001687 | 13322.389 | 16681.633 |
| NM_002914 | 14812.367 | 18956.381 | NM_003154 | 1178.252  | 1481.985  | AK026374  | 1182.284  | 1415.086  |
| NM_020380 | 3194.077  | 2775.894  | NM_004230 | 537.322   | 645.113   | NM_001160 | 863.781   | 1068.402  |
| NM_006541 | 1762.328  | 3025.571  | AK023459  | 6845.296  | 8785.585  | AK024648  | 3862.629  | 4011.694  |
| NM_005700 | 5800.493  | 6463.531  | U13022    | 2436.631  | 2496.473  | NM_000710 | 400.159   | 519.43    |
| NM_004320 | 3717.396  | 3354.194  | AA702640  | 1300.623  | 1178.991  | NM_003450 | 3849.933  | 3934.861  |
| NM_004581 | 8097.013  | 8491.572  | T68583    | 2049.276  | 2114.703  | AL354615  | 1103.144  | 962.769   |
| NM_006817 | 15237.171 | 19232.365 | AA481944  | 9353.713  | 8946.409  | NM_013340 | 21262.195 | 15001.472 |
| M33197    | 67849.109 | 65825.109 | AF038440  | 590.825   | 840.838   | AJ010482  | 1048.052  | 1117.588  |
| M95610    | 41110.25  | 39537.84  | M31158    | 2239.372  | 2114.365  | NM_000890 | 610.744   | 429.455   |
| NM_003118 | 5552.35   | 5302.877  | H00742    | 1467.658  | 1559.04   | AB040672  | 1755.564  | 1534.823  |
| L02922    | 34045.902 | 33304.125 | D42108    | 1181.974  | 1180.822  | NM_002190 | 1057.33   | 966.947   |
| NM_001797 | 4578.746  | 4433.593  | BG700922  | 3321.585  | 2264.618  | NM_005491 | 6777.597  | 5971.304  |
| NM_003154 | 2826.753  | 2676.113  | AI366068  | 1549.464  | 784.61    | NM_003860 | 1421.104  | 1698.76   |
| NM_004230 | 969.262   | 783.496   | N57553    | 970.736   | 875.078   | AK025599  | 4016.892  | 5675.171  |
| AK023459  | 6945.341  | 5938.035  | AF080158  | 2370.022  | 1746.709  | S94539    | 22720.34  | 23097.275 |
| U13022    | 2823.545  | 2321.614  | M33197    | 68517.727 | 64749.082 | NM_006400 | 765.394   | 913.268   |
| R23251    | 27671.486 | 25322.557 | NM_016540 | 5241.774  | 2734.19   | NM_005780 | 1404.692  | 1411.98   |
| AA702640  | 2393.162  | 3451.128  | NM_000290 | 772.877   | 822.411   | NM_018240 | 4439.187  | 5189.294  |
| T68583    | 7076.704  | 9193.802  | AF103795  | 799.367   | 972.415   | AK001695  | 3183.636  | 3468.357  |
| AA481944  | 51398.711 | 49451.348 | NM_013231 | 1714.07   | 2100.502  | NM_017880 | 946.611   | 984.534   |
| AF038440  | 1733.517  | 1397.973  | NM_012100 | 6634.724  | 6826.31   | NM_006250 | 1184.885  | 788.168   |



|           |           |           |           |           |           |           |           |           |
|-----------|-----------|-----------|-----------|-----------|-----------|-----------|-----------|-----------|
| M31158    | 2766.469  | 2491.594  | NM_006254 | 1373.835  | 1429.173  | NM_014397 | 1687.239  | 1576.634  |
| D42108    | 3213.398  | 3671.03   | X95425    | 875.591   | 1168.626  | AB023182  | 2447.526  | 1624.868  |
| BG700922  | 2876.436  | 3709.938  | NM_004422 | 3727.644  | 3826.42   | NM_003607 | 2019.76   | 1223.084  |
| AI366068  | 2051.327  | 2765.916  | NM_016562 | 789.672   | 918.958   | AB017169  | 262.078   | 819.908   |
| BG565837  | 917.743   | 1722.569  | M33197    | 68098.688 | 67531.172 | AL080170  | 660.888   | 1364.546  |
| N57553    | 1245.651  | 1602.494  | AY009399  | 33653.586 | 30834.256 | AB039903  | 1823.291  | 2502.922  |
| AB040970  | 8426.964  | 7092.107  | NM_004895 | 6459.84   | 5071.305  | NM_000542 | 12549.195 | 12856.771 |
| NM_018330 | 7268.116  | 5643.737  | U59748    | 1350.597  | 932.395   | NM_006851 | 664.416   | 563.463   |
| AB023222  | 1933.997  | 1652.569  | NM_014303 | 8516.491  | 7722.317  | AK001560  | 1001.793  | 874.882   |
| AB033088  | 2275.074  | 1769.378  | M33197    | 68375.57  | 71398.344 | AB001328  | 926.558   | 1063.128  |
| M33197    | 73507.422 | 62710.434 | M95610    | 15759.444 | 8350.556  | NM_000948 | 293.246   | 538.651   |
| U50342    | 6422.813  | 6003.628  | NM_003118 | 2703.971  | 1103.892  | AI359037  | 24370.516 | 27093.729 |
| NM_000295 | 1376.892  | 1684.019  | L02922    | 17008.289 | 8299.679  | X15998    | 737.481   | 728.641   |
| AF103795  | 1164.616  | 1046.804  | M33197    | 14390.965 | 15347.945 | M76482    | 323.523   | 373.002   |
| NM_006215 | 969.276   | 989.734   | NM_004045 | 11653.181 | 14929.257 | X17519    | 8165.648  | 8818.678  |
| NM_013231 | 5704.889  | 6523.557  | NM_001891 | 1173.414  | 1429.892  | NM_001883 | 1158.516  | 978.616   |
| NM_006254 | 1809.846  | 2145.609  | NM_012139 | 6369.401  | 6412.719  | NM_004628 | 1268.225  | 1675.938  |
| X95425    | 4308.13   | 4235.752  | AF121856  | 5336.585  | 5151.209  | L31785    | 742.18    | 774.247   |
| NM_004422 | 6034.505  | 10542.947 | NM_006421 | 4210.735  | 3667.703  | H-M 69043 | 2201.668  | 2683.385  |
| NM_016562 | 2447.321  | 2845.257  | NM_003765 | 10562.653 | 11095.338 | AF077374  | 774.286   | 802.205   |
| M33197    | 68849.523 | 62065.992 | NM_005868 | 1040.581  | 908.286   | U43901    | 719.19    | 639.035   |
| AY009399  | 38020.777 | 49161.211 | NM_018202 | 19571.217 | 10844.018 | X59065    | 697.978   | 469.46    |
| NM_004895 | 23136.332 | 26727.285 | AB023197  | 4348.94   | 2522.727  | M59828    | 5777.623  | 4672.517  |
| U59748    | 2748.753  | 3114.282  | NM_022173 | 6592.644  | 4241.558  | AF309653  | 633.037   | 914.497   |
| L32537    | 849.955   | 4168.662  | AB040970  | 4533.849  | 2897.884  | NM_002620 | 4579.572  | 4658.987  |
| NM_014303 | 32196.42  | 29575.877 | NM_018330 | 4245.091  | 2626.526  | S79267    | 619.342   | 623.934   |
| NM_006660 | 10791.584 | 9379.021  | AB023222  | 1293.48   | 324.499   | NM_001816 | 729.385   | 852.586   |
| NM_001486 | 1042.733  | 916.046   | AB033088  | 1039.274  | 591.887   | NM_003784 | 32716.828 | 41740.09  |
| NM_004727 | 1353.968  | 1474.372  | M33197    | 64320.441 | 55772.773 | NM_000195 | 15334.31  | 21564.451 |
| NM_000558 | 1335.431  | 1608.303  | U50342    | 3072.375  | 1254.443  | NM_005445 | 5391.51   | 5053.153  |
| M33197    | 25963.141 | 27309.377 | NM_015921 | 37297.496 | 47041.594 | NM_014895 | 883.649   | 1195.306  |
| NM_004045 | 10845.754 | 10594.791 | AB040900  | 26519.559 | 35862.297 | NM_003630 | 3192.825  | 3435.953  |
| NM_001891 | 2463.958  | 1862.436  | NM_001080 | 1072.892  | 1067.031  | NM_000046 | 746.944   | 1397.314  |
| AF121856  | 7938.334  | 9912.733  | NM_001482 | 1162.446  | 961.021   | NM_003219 | 598.148   | 581.721   |
| NM_006421 | 5864.815  | 10026.817 | U80018    | 751.577   | 1106.309  | NM_006709 | 1579.682  | 1833.634  |
| NM_017457 | 28926.521 | 41446.699 | NM_000717 | 1358.432  | 1418.256  | NM_000612 | 4854.931  | 5748.063  |
| NM_003765 | 19537.846 | 29422.133 | M33197    | 67502.023 | 67272.969 | NM_004257 | 9320.605  | 8048.878  |
| NM_005868 | 1099.531  | 1214.422  | NM_004845 | 2406.54   | 2468.714  | NM_002844 | 2016.676  | 2715.418  |
| M33197    | 67698.313 | 65320.078 | NM_000047 | 5299.061  | 6064.819  | NM_000683 | 1283.481  | 1034.932  |
| NM_018202 | 20022.477 | 19998.557 | NM_006319 | 6670.596  | 6596.197  | NM_003625 | 1251.235  | 961.779   |
| AB023197  | 3810.33   | 4363.949  | Z36813    | 4501.379  | 2729.465  | NM_005901 | 7525.907  | 8174.22   |
| NM_022173 | 9389.647  | 10469.814 | NM_006660 | 7137.14   | 4467.126  | NM_004248 | 986.839   | 684.262   |
| M33197    | 66744.102 | 68747.578 | AF080158  | 2608.179  | 3896.642  | NM_001313 | 610.166   | 575.029   |
| NM_005705 | 8496.596  | 6571.722  | BM664556  | 1370.223  | 1461.244  | NM_019066 | 223.291   | 608.594   |
| NM_004328 | 4306.601  | 3802.711  | M33197    | 68027.406 | 70929.641 | NM_002362 | 803.368   | 964.623   |
| NM_004581 | 12053.672 | 10465.99  | NM_016545 | 7378.758  | 8585.689  | NM_004796 | 473.363   | 450.841   |
| NM_006817 | 21175.059 | 19308.578 | NM_001440 | 48219.5   | 55374.266 | NM_000435 | 1481.566  | 1775.932  |
| NM_015921 | 47272.563 | 47779.488 | NM_001201 | 711.232   | 890.031   | NM_001842 | 5063.828  | 3999.497  |
| AB040900  | 19193.625 | 18970.174 | NM_016618 | 2034.751  | 1944.448  | NM_000171 | 454.222   | 612.808   |
| NM_001080 | 740.522   | 710.053   | AB014568  | 17107.061 | 17545.104 | AL354615  | 1169.344  | 1587.603  |
| NM_001482 | 1149.571  | 1622.04   | NM_012249 | 2975.545  | 2752.266  | NM_013346 | 19797.74  | 25833.23  |
| U80018    | 1737.293  | 1784.919  | AK022546  | 5333.691  | 5976.983  | NM_003705 | 1341.047  | 1727.38   |
| NM_000717 | 2667.012  | 2069.276  | NM_014067 | 4880.892  | 5487.271  | NM_006861 | 1168.473  | 1241.457  |

|           |           |           |           |           |           |           |           |           |
|-----------|-----------|-----------|-----------|-----------|-----------|-----------|-----------|-----------|
| M33197    | 67234.547 | 62673.879 | NM_002914 | 10473.238 | 10610.184 | NM_005825 | 2530.713  | 2833.561  |
| NM_004845 | 10050.837 | 12238.217 | NM_020385 | 1424.752  | 895.588   | NM_000466 | 1076.703  | 1247.569  |
| NM_007107 | 19241.818 | 27794.797 | NM_006541 | 1107.59   | 711.184   | NM_015544 | 2926.381  | 3491.59   |
| NM_000047 | 42972.816 | 48876.711 | NM_004328 | 2249.396  | 1836.367  | NM_015908 | 12623.293 | 13300.22  |
| M68874    | 594.126   | 1071.31   | NM_004581 | 6328.618  | 3817.254  | AK022600  | 1786.26   | 2009.418  |
| NM_006319 | 6460.541  | 9122.08   | NM_006817 | 15276.26  | 9365.982  | AK023142  | 1779.556  | 1795.212  |
| NM_018226 | 5660.008  | 8293.194  | NM_003118 | 3118.229  | 3064.92   | U61740    | 3984.134  | 4401.481  |
| Z36813    | 7198.49   | 6723.207  | L02922    | 20883.313 | 24841.729 | NM_006405 | 44492.82  | 45319.52  |
| AB018327  | 4689.542  | 3594.809  | NM_001797 | 1424.335  | 1912.07   | AB049054  | 1222.436  | 1455.581  |
| AF303889  | 2017.349  | 1518.666  | NM_003154 | 936.514   | 1190.151  | NM_015071 | 1663.399  | 1756.1    |
| M33197    | 67150.953 | 64714.441 | NM_004235 | 372.687   | 688.469   | NM_013227 | 858.29    | 950.31    |
| AK022649  | 5543.6    | 4283.975  | AK023459  | 5919.768  | 6412.452  | AF027205  | 18193.367 | 16207.858 |
| NM_016507 | 8624.16   | 7818.281  | U13022    | 2458.822  | 2622.48   | AF075012  | 607.946   | 732.533   |
| NM_002024 | 10795.329 | 8211.095  | R23251    | 21645.869 | 23770.031 | NM_001570 | 769.83    | 724.666   |
| NM_002743 | 20922.582 | 18374.861 | AA702640  | 1339.92   | 1306.77   | NM_015658 | 431.486   | 349.391   |
| AF173358  | 25975.701 | 24403.277 | T68583    | 2080.614  | 2829.342  | NM_000585 | 1398.395  | 1507.721  |
| NM_016366 | 10757.955 | 9100.717  | AA481944  | 13644.152 | 12095.832 | NM_016546 | 4728.295  | 4502.547  |
| M33197    | 67873.383 | 68811.414 | AF038440  | 749.796   | 611.118   | NM_001721 | 507.555   | 618.958   |
| NM_016545 | 7691.981  | 7018.937  | M31158    | 1867.09   | 1241.615  | NM_014397 | 1994.927  | 2158.612  |
| NM_001440 | 53570.027 | 52274.602 | D42108    | 1385.894  | 962.687   | AB023182  | 2044.528  | 2762.776  |
| NM_001201 | 1601.547  | 1221.769  | BG700922  | 2963.169  | 1950.662  | NM_003607 | 1272.356  | 1570.724  |
| NM_016618 | 2980.29   | 2734.643  | AI366068  | 1725.551  | 995.541   | NM_006575 | 1733.645  | 1566.026  |
| AB014568  | 56947.355 | 58879.336 | N57553    | 599.489   | 529.583   | NM_013254 | 1787.539  | 1907.01   |
| AK022238  | 826.633   | 2011.213  | AB040970  | 5226.654  | 5779.632  | NM_000437 | 7480.115  | 7776.317  |
| NM_012249 | 7022.43   | 7784.483  | NM_018330 | 3941.728  | 5156.613  | AB046819  | 3473.898  | 3148.982  |
| AK022546  | 12618.129 | 14510.738 | AB033088  | 1322.343  | 1810.58   | NM_006090 | 4599.096  | 4856.231  |
| NM_014067 | 9885.69   | 13776.628 | U50342    | 4126.056  | 4310.996  | NM_002900 | 2290.255  | 2094.991  |
| NM_002914 | 14628.999 | 19233.639 | NM_000295 | 903.588   | 897.695   | NM_004910 | 1259.871  | 1051.971  |
| NM_020385 | 4297.983  | 5741.762  | AF103795  | 658.784   | 811.092   | AB013452  | 850.577   | 862.203   |
| NM_006541 | 1446.859  | 1454.132  | NM_007024 | 4431.441  | 5645.521  | M93107    | 4693.957  | 3873.055  |
| NM_018179 | 1774.198  | 1661.035  | NM_013231 | 1910.16   | 2349.427  | BC001479  | 4080.179  | 3500.938  |
| NM_006197 | 8553.335  | 5422.487  | NM_012106 | 7535.019  | 7661.886  | NM_002461 | 13262.966 | 14475.688 |
| NM_014181 | 4190.225  | 3764.802  | NM_006254 | 1598.019  | 1402.046  | NM_005771 | 475.997   | 552.454   |
| M29273    | 3081.53   | 2648.427  | X95425    | 1246.591  | 1229.671  | AB032986  | 25405.859 | 26207.563 |
| M33197    | 66336.578 | 63938.828 | NM_004422 | 3711.794  | 3241.463  | NM_017528 | 18041.158 | 20310.938 |
| NM_004854 | 3847.375  | 3966.316  | NM_016562 | 737.656   | 1048.417  | NM_016032 | 6515.257  | 5794.749  |
| AJ245418  | 26336.229 | 19891.305 | M33197    | 70791.938 | 61976.918 | NM_014324 | 49449.027 | 47806.578 |
| NM_006377 | 7539.268  | 6572.047  | AY009399  | 29979.389 | 27161.389 | NM_001687 | 12715.421 | 10211.097 |
| AK026427  | 1798.667  | 1781.574  | NM_004895 | 6303.408  | 5423.393  | AK026374  | 1026.337  | 966.56    |
| AF244129  | 5816.236  | 6000.351  | U59748    | 1529.115  | 904.731   | NM_001169 | 908.05    | 1018.083  |
| NM_002436 | 10362.882 | 9727.186  | NM_014303 | 8325.728  | 7603.783  | AK024648  | 3665.165  | 3197.999  |
| NM_018362 | 7137.802  | 6407.702  | NM_006660 | 7428.567  | 8380.421  | AB037761  | 13040.724 | 16069.97  |
| M33197    | 67244.664 | 64291.887 | NM_004727 | 666.893   | 824.174   | NM_014008 | 40387.988 | 38651.441 |
| NM_004755 | 3157.421  | 3217.903  | NM_006685 | 27330.1   | 37728.684 | NM_014731 | 684.587   | 893.403   |
| NM_002186 | 6523.365  | 6923.057  | M33197    | 20032.52  | 21935.148 | AF035191  | 10516.362 | 12924.632 |
| NM_006182 | 1998.907  | 2689.547  | NM_004045 | 11215.076 | 11591.506 | NM_004058 | 746.109   | 941.938   |
| AL137543  | 10174.837 | 14008.909 | NM_001891 | 802.141   | 1084.254  | NM_004527 | 588.691   | 492.022   |
| NM_004444 | 25834.512 | 25783.453 | NM_012139 | 8259.803  | 7712.328  | NM_012062 | 11326.125 | 12327.858 |
| M33197    | 1433.506  | 1985.063  | AF121856  | 5872.75   | 5540.459  | AJ010482  | 1029.282  | 934.243   |
| NM_001957 | 3712.291  | 6198.295  | NM_006421 | 4249.156  | 4150.192  | NM_000896 | 489.932   | 506.7     |
| AK024533  | 44383.18  | 45407.066 | NM_017457 | 16666.881 | 15242.078 | AB040672  | 440.785   | 691.586   |
| NM_002736 | 21468.514 | 19982.102 | NM_003765 | 9109.963  | 9625.658  | NM_002192 | 557.777   | 271.439   |
| NM_004246 | 6948.755  | 8180.054  | NM_005868 | 1030.57   | 804.52    | NM_005491 | 7352.465  | 4645.426  |

|           |           |           |           |           |           |           |           |           |
|-----------|-----------|-----------|-----------|-----------|-----------|-----------|-----------|-----------|
| NM_002285 | 2634.281  | 2891.283  | M33197    | 62216.676 | 59883.816 | NM_003865 | 637.818   | 714.929   |
| NM_006694 | 36991.211 | 33669.961 | NM_018202 | 17725.387 | 12534.702 | AK025599  | 3678.249  | 4419.476  |
| NM_005207 | 4436.353  | 3748.94   | AB023197  | 3364.035  | 2511.882  | X63417    | 1536.545  | 1586.558  |
| NM_014467 | 1185.997  | 942.18    | NM_022173 | 6023.832  | 4129.051  | S94539    | 13861.865 | 11957.625 |
| NM_003087 | 4545.767  | 4496.631  | NM_004328 | 2273.377  | 3391.316  | NM_006402 | 642.307   | 441.77    |
| NM_001630 | 1576.237  | 1852.108  | NM_004581 | 5703.802  | 6943.069  | NM_005785 | 1130.167  | 1036.173  |
| M33197    | 67535.648 | 66131.133 | NM_006817 | 15801.434 | 17636.572 | NM_018248 | 4169.272  | 3676.494  |
| NM_002031 | 1862.042  | 1997.223  | NM_007108 | 24616.682 | 31620.607 | AK001695  | 3559.562  | 2366.699  |
| AF305081  | 4829.334  | 4401.241  | NM_001080 | 984.104   | 814.018   | NM_003970 | 1519.806  | 1969.462  |
| NM_004712 | 17162.896 | 17936.926 | NM_001482 | 1007.307  | 766.274   | AK022496  | 767.784   | 1092.344  |
| AF118078  | 4208.331  | 5012.867  | U80018    | 1009.085  | 832.404   | AB042636  | 601.739   | 912.716   |
| NM_020169 | 1230.169  | 1246.384  | NM_000717 | 1239.815  | 1110.79   | AB033035  | 491.051   | 600.526   |
| AL157428  | 2181.728  | 2301.479  | M33197    | 71643.453 | 61880.074 | NM_002883 | 2048.665  | 2112.961  |
| M33197    | 64215.758 | 64309.848 | NM_004845 | 2958.826  | 2903.936  | NM_019012 | 1113.76   | 1116.502  |
| BE904175  | 1006.69   | 604.803   | NM_007107 | 12353.432 | 11097.223 | NM_016150 | 406.537   | 258.246   |
| NM_005858 | 4073.443  | 4565.803  | NM_006319 | 5646.737  | 4745.758  | AL137452  | 1425.002  | 1223.181  |
| AK025163  | 2058.175  | 2685.62   | NM_018226 | 3696.499  | 3628.111  | NM_004312 | 10739.041 | 8947.906  |
| NM_014931 | 12499.545 | 15879.666 | NM_004605 | 714.378   | 378.347   | NM_001347 | 2464.311  | 2291.727  |
| NM_014487 | 14371.638 | 18944.918 | Z36813    | 4617.897  | 3420.074  | AK024549  | 4335.632  | 3203.713  |
| NM_018070 | 7478.761  | 10200.092 | AF303889  | 900.37    | 721.947   | NM_006338 | 2110.915  | 1782.122  |
| NM_002484 | 13461.688 | 14780.079 | M33197    | 67797.422 | 72532.578 | NM_007164 | 1303.425  | 1527.787  |
| M33197    | 65766.469 | 67111.305 | AK022649  | 6595.45   | 6892.266  | NM_000261 | 575.481   | 947.408   |
| NM_018240 | 67344.172 | 74794.68  | NM_016507 | 4141.63   | 4802.263  | NM_002606 | 717.97    | 927.935   |
| AL162052  | 1739.21   | 2230.804  | AF173358  | 13500.046 | 16264.872 | NM_002570 | 809.545   | 978.399   |
| AK025941  | 1316.009  | 1791.226  | NM_016366 | 3022.65   | 3499.537  | NM_003183 | 1085.608  | 1150.451  |
| M33197    | 60700.438 | 60927.867 | M33197    | 68108.914 | 74611.188 | NM_001657 | 427.04    | 323.892   |
| NM_002848 | 1671.63   | 1160.6    | NM_016545 | 6857.904  | 8249.718  | NM_003585 | 178.971   | 594.478   |
| NM_015914 | 3080.559  | 2973.504  | NM_001440 | 43257.855 | 47889.727 | NM_019851 | 1252.029  | 1056.529  |
| AF059531  | 11218.352 | 8725.059  | NM_016618 | 2726.3    | 2513.489  | NM_003238 | 484.173   | 357.14    |
| NM_002707 | 15726.373 | 15049.363 | AB014568  | 21040.438 | 22677.369 | NM_014096 | 7995.583  | 11220.613 |
| AF029777  | 2590.066  | 2288.174  | AK022238  | 925.036   | 1006.861  | NM_005706 | 2602.483  | 3507.198  |
| NM_003352 | 2417.592  | 2624.589  | NM_012249 | 3887.781  | 3529.531  | NM_001261 | 3709.971  | 3933.352  |
| AK026884  | 28906.922 | 27846.445 | NM_014067 | 5325.241  | 5435.021  | NM_001977 | 919.738   | 1458.535  |
| S82198    | 1674.724  | 1992.357  | NM_002914 | 9448.276  | 9210.441  | NM_007219 | 2465.736  | 2606.657  |
| NM_002594 | 6572.552  | 6352.18   | NM_020385 | 1619.744  | 1330.672  | AK026854  | 1898.083  | 1691.421  |
| NM_001159 | 2645.719  | 2807.143  | NM_006541 | 1167.317  | 842.801   | NM_001269 | 1869.192  | 1545.529  |
| NM_031407 | 5381.936  | 5658.497  | NM_018179 | 956.428   | 826.555   | NM_004906 | 4804.427  | 2973.497  |
| M33197    | 62964.379 | 61368.047 | NM_006197 | 5927.404  | 5206.426  | NM_012447 | 1717.921  | 1676.868  |
| AK000410  | 64668.477 | 62636.84  | NM_014181 | 3056.831  | 3066.39   | AK027013  | 20653.693 | 23466.459 |
| NM_020193 | 4586.139  | 3884.276  | M29273    | 915.015   | 814.697   | NM_001344 | 38647.031 | 39780.281 |
| NM_005619 | 1675.075  | 1665.516  | M33197    | 66052.141 | 64271.059 | NM_018294 | 3292.356  | 2995.013  |
| D87440    | 11558.981 | 11796.729 | NM_004854 | 2216.859  | 2443.043  | AL389934  | 961.987   | 1059.652  |
| AK000332  | 48039.957 | 52226.457 | AJ245418  | 6763.329  | 8924.042  | NM_004330 | 3782.876  | 4194.144  |
| AL080156  | 1860.366  | 2340.435  | NM_006377 | 4680.427  | 5341.583  | AF151802  | 2053.478  | 2369.137  |
| NM_006738 | 2085.676  | 2084.409  | AK026427  | 638.684   | 884.56    | AB006746  | 839.346   | 1089.266  |
| NM_016260 | 3322.587  | 2058.139  | AF244129  | 5719.184  | 5562.824  | NM_006498 | 486.851   | 399.924   |
| NM_002895 | 2427.488  | 1847.156  | NM_002436 | 6125.544  | 6169.239  | AB023233  | 1397.83   | 1177.698  |
| AF276513  | 683.168   | 647.259   | NM_018362 | 5314.213  | 6424.82   | NM_004369 | 659.266   | 507.681   |
| NM_013351 | 28137.582 | 26397.504 | M33197    | 67664.719 | 71300.078 | NM_004370 | 255.628   | 362.925   |
| NM_012340 | 9950.923  | 8449.286  | NM_004755 | 3301.001  | 3159.867  | AB006630  | 1087.952  | 1077.407  |
| NM_006022 | 2784.081  | 2611.449  | NM_002186 | 3588.828  | 4491.905  | NM_016155 | 1736.713  | 1822.919  |
| AK025110  | 2389.675  | 2045.123  | AL137543  | 7432.301  | 6554.502  | NM_001224 | 9891.059  | 11526.519 |
| X52339    | 53817.5   | 52469.73  | NM_004444 | 7181.037  | 8055.345  | NM_017811 | 11725.603 | 15307.73  |

|           |           |           |           |           |           |           |           |           |
|-----------|-----------|-----------|-----------|-----------|-----------|-----------|-----------|-----------|
| M33197    | 63697.504 | 60833.535 | NM_001957 | 3161.146  | 2762.091  | NM_001566 | 1035.281  | 968.336   |
| AB046830  | 6906.96   | 6481.053  | AK024533  | 15216.496 | 15671.371 | AK023284  | 1229.101  | 1145.894  |
| NM_007122 | 6689.159  | 6802.095  | NM_004246 | 4778.372  | 4174.287  | AF106069  | 441.16    | 249.234   |
| NM_001488 | 2781.83   | 2469.913  | NM_002285 | 1189.269  | 1354.526  | NM_005101 | 14945.317 | 15704.095 |
| NM_016202 | 25549.988 | 20874.697 | NM_006694 | 23604.43  | 32185.67  | AF130060  | 5721.14   | 6141.582  |
| NM_012476 | 1997.369  | 1405.192  | NM_005207 | 2309.587  | 2904.42   | NM_007057 | 9942.972  | 12414.599 |
| NM_016604 | 1631.902  | 1315.257  | NM_003087 | 1498.753  | 1970.895  | NM_000177 | 434.375   | 649.693   |
| M33197    | 67786.148 | 67001.156 | NM_001630 | 1102.073  | 1440.848  | NM_003387 | 4309.818  | 4264.077  |
| NM_006276 | 2284.427  | 2455.393  | NM_002031 | 1472.987  | 1676.188  | U60665    | 600.866   | 746.047   |
| NM_003407 | 4503.98   | 4965.309  | AF305081  | 6075.823  | 5917.673  | NM_005507 | 41444.445 | 39887.211 |
| NM_007209 | 67225.25  | 66646.852 | NM_004712 | 10036.832 | 11991.371 | AL080133  | 1160.099  | 1021.26   |
| NM_003729 | 2107.055  | 2607.149  | AF118078  | 2250.138  | 2596.392  | AY014403  | 564.772   | 430.208   |
| BC015899  | 8566.604  | 10079.378 | NM_020169 | 951.812   | 1173.123  | NM_006912 | 2175.707  | 1445.876  |
| NM_017986 | 24263.127 | 16469.623 | AL157428  | 1318.9    | 1715.59   | X12534    | 1366.988  | 864.62    |
| AK023629  | 1523.697  | 1319.031  | M33197    | 66224.648 | 67535.07  | NM_003112 | 1355.428  | 1133.124  |
| AK024846  | 6440.651  | 5995.702  | NM_005858 | 2563.212  | 2630.901  | NM_014323 | 3126.797  | 3631.396  |
| AK001451  | 13260.602 | 11445.221 | AK025163  | 1183.864  | 939.773   | NM_003205 | 2135.23   | 2818.504  |
| M33197    | 60514.934 | 56664.969 | NM_014931 | 10068.199 | 9168.942  | AB002324  | 1188.07   | 666.233   |
| NM_007180 | 2629.054  | 2764.574  | NM_014487 | 10783.599 | 8358.784  | AK026231  | 791.069   | 506.086   |
| NM_005609 | 1009.353  | 1006.909  | NM_018070 | 6783.651  | 5717.365  | NM_002140 | 11268.986 | 6632.206  |
| NM_005476 | 6475.955  | 6255.309  | NM_002484 | 9020.638  | 8828.51   | NM_020143 | 2771.644  | 2269.441  |
| NM_005660 | 5167.194  | 4742.497  | AL162052  | 1807.529  | 1219.733  | NM_012466 | 2513.469  | 2561.549  |
| AK023902  | 3396.762  | 3688.894  | AK025941  | 1234.835  | 1159.04   | NM_005131 | 3177.275  | 2973.728  |
| NM_000401 | 1027.167  | 1440.387  | M33197    | 66878.891 | 66703.93  | NM_007056 | 2030.3    | 1633.385  |
| NM_005223 | 1245.572  | 1461.601  | NM_015914 | 1746.859  | 2237.682  | AF083383  | 2914.741  | 4808.367  |
| AB011173  | 10489.513 | 11427.712 | AF059531  | 4046.55   | 5665.356  | NM_006925 | 3675.267  | 2731.763  |
| AB023195  | 1973.651  | 2261.045  | NM_002707 | 13640.245 | 15428.864 | NM_004890 | 7916.007  | 8247.23   |
| U43431    | 1965.092  | 1622.126  | NM_003352 | 2213.192  | 2305.573  | AK023181  | 2793.96   | 2766.846  |
| AK021563  | 1392.576  | 1134.396  | AK026884  | 18072.84  | 18705.766 | NM_004294 | 974.909   | 707.037   |
| AB006622  | 2783.761  | 2727.103  | NM_002594 | 2824.885  | 3246.165  | NM_005051 | 9358.51   | 7145.757  |
| M33197    | 67567.602 | 68579.938 | NM_001159 | 618.604   | 830.639   | NM_001968 | 17011.027 | 12392.117 |
| AK097041  | 10321.904 | 10632.627 | NM_031407 | 4349.316  | 4859.294  | D17259    | 56953.664 | 51240.535 |
| AF068744  | 47460.434 | 46478.348 | M33197    | 61153.566 | 59712.492 | AF264627  | 12188.426 | 9810.638  |
| NM_004497 | 618.402   | 720.926   | AK000410  | 46370.5   | 44673.598 | AL133053  | 907.098   | 821.053   |
| AK000762  | 4009.743  | 4880.974  | NM_020193 | 2505.784  | 1768.509  | NM_018142 | 4301.8    | 4777.457  |
| NM_004571 | 911.683   | 1576.5    | D86982    | 959.73    | 498.223   | NM_017653 | 3346.432  | 4163.35   |
| AJ345030  | 6930.88   | 5764.094  | NM_005619 | 1041.381  | 1117.983  | AL109695  | 11578.836 | 11015.305 |
| AK023631  | 2490.011  | 1766.283  | D87440    | 6928.586  | 4867.766  | NM_002168 | 1707.18   | 2127.654  |
| AK023472  | 21665.465 | 17147.053 | AK000332  | 25688.82  | 19018.449 | AK027115  | 582.224   | 687.938   |
| AL109729  | 2149.672  | 1422.353  | AL080156  | 1314.067  | 858.99    | NM_004453 | 1545.46   | 1180.219  |
| AF007146  | 1169.377  | 818.844   | M33197    | 68045.063 | 65230.738 | NM_016229 | 1039.566  | 869.549   |
| M33197    | 62654.238 | 60983.91  | NM_006738 | 2475.408  | 1483.622  | NM_018244 | 1910.104  | 1602.513  |
| S79912    | 45584.121 | 42511.449 | NM_016260 | 1887.935  | 1909.128  | NM_002492 | 17442.342 | 10984.6   |
| AK026892  | 4971.844  | 4991.369  | NM_002895 | 1076.748  | 1301.337  | AB046855  | 756.317   | 690.329   |
| S83275    | 54000.559 | 54375.93  | NM_013351 | 13458.85  | 16034.384 | NM_005642 | 4631.529  | 3218.746  |
| AL117427  | 20566.389 | 18293.809 | NM_012340 | 3090.345  | 4014.777  | NM_018105 | 1844.383  | 1261.852  |
| M33197    | 63060.145 | 64324.488 | NM_006022 | 1846.356  | 1764.468  | AK023452  | 1881.182  | 1864.305  |
| AF052118  | 24325.021 | 24244.828 | AK025110  | 2173.429  | 2279.373  | NM_000332 | 478.634   | 533.814   |
| AK025166  | 7392.479  | 6146.924  | X52339    | 48418.723 | 56226.352 | AK022215  | 4446.959  | 4364.089  |
| AL359586  | 1491.683  | 1476.403  | M33197    | 63550.762 | 60931.684 | NM_001527 | 5764.762  | 4666.431  |
| AF147421  | 1597.338  | 1491.253  | AB046830  | 6081.172  | 5391.499  | AK025269  | 2633.744  | 1715.78   |
| AF035290  | 2398.692  | 2481.268  | NM_007122 | 5359.428  | 6554.302  | NM_001438 | 450.712   | 598.76    |
| AK023216  | 1899.191  | 2100.581  | NM_001488 | 3048.259  | 2496.425  | AB040971  | 885.184   | 633.357   |

|           |           |           |           |           |           |           |           |           |
|-----------|-----------|-----------|-----------|-----------|-----------|-----------|-----------|-----------|
| M33197    | 62716.824 | 61831.133 | NM_016202 | 11853.391 | 13683.12  | NM_006562 | 2122.793  | 1520.113  |
| AF086547  | 1309.726  | 1366.483  | NM_016604 | 1628.617  | 1160.156  | AK024254  | 873.717   | 901.568   |
| AK023288  | 2291.095  | 3189.976  | M33197    | 68314.789 | 66862.469 | NM_018456 | 2028.228  | 2750.019  |
| AK022198  | 2174.466  | 2555.324  | NM_006276 | 1881.039  | 1531.31   | AK026697  | 632.846   | 664.865   |
| M33197    | 65243.988 | 60133.797 | NM_007209 | 68083.336 | 66394.688 | NM_019021 | 1816.314  | 2406.249  |
| AK022428  | 2142.608  | 1405.679  | NM_003729 | 3461.875  | 2015.347  | NM_004717 | 374.159   | 484.587   |
| AK000788  | 992.461   | 880.388   | L05096    | 27793.719 | 18908.818 | AK002183  | 1226.101  | 1312.36   |
| AK023457  | 2230.352  | 1593.59   | BC015899  | 11424.642 | 7458.453  | NM_018996 | 1756.645  | 1196.504  |
| AK025089  | 12399.622 | 10845.831 | NM_017986 | 4563.851  | 5898.197  | AL137304  | 2151.4    | 1125.375  |
| AK021431  | 713.948   | 896.973   | AK023629  | 1108.498  | 1185.949  | AL049274  | 264.203   | 307.937   |
| M33197    | 63115.469 | 63733.152 | AK024846  | 5671.747  | 6926.274  | NM_018279 | 2669.469  | 1960.07   |
| AF085996  | 4617.162  | 3528.238  | AK001451  | 11003.98  | 13798.279 | NM_014350 | 9762.147  | 8380.883  |
| AK001279  | 4200.484  | 4131.96   | M33197    | 56543.059 | 60741.148 | U00925    | 4526.817  | 5545.886  |
| AF086407  | 1556.212  | 1307.621  | NM_007180 | 2317.438  | 2572.863  | AL390185  | 490.432   | 647.677   |
| AF085949  | 1100.429  | 939.37    | NM_005609 | 832.72    | 785.667   | AF086235  | 4449.36   | 4448.465  |
| AK001567  | 2552.299  | 2528.672  | NM_005476 | 7313.614  | 7675.381  | AK025583  | 29994.299 | 23048.6   |
| M33197    | 59496.383 | 59612.758 | NM_005660 | 3555.611  | 4667.555  | NM_014664 | 1437.837  | 950.744   |
| U52839    | 3547.211  | 2220.72   | AK023902  | 2350.121  | 2352.093  | NM_014952 | 41986.133 | 24380.234 |
| X78262    | 1355.046  | 1374.535  | NM_000401 | 995.667   | 593.242   | AB037765  | 670.718   | 740.525   |
| M33197    | 61439.16  | 61097.598 | NM_005223 | 934.552   | 875.795   | AK025068  | 2013.457  | 2414.859  |
| AK026984  | 38451.367 | 38730.48  | AB011173  | 11722.631 | 11095.437 | AK026720  | 1735.957  | 2036.929  |
| AK022088  | 1515.526  | 1259.105  | AB023195  | 2425.276  | 2360.189  | AL137566  | 2839.041  | 2931.803  |
| NM_013391 | 1190.184  | 842.12    | U43431    | 1380.914  | 1849.379  | AF087962  | 1922.851  | 2560.873  |
| M33197    | 64572.484 | 57759.719 | AK021563  | 1070.79   | 963.725   | AL050197  | 3723.258  | 3004.848  |
| AL157466  | 4968.95   | 4687.501  | AF068744  | 30432.465 | 30283.715 | AF085870  | 1640.995  | 1177.911  |
| AL389981  | 1445.217  | 1379.479  | AK000762  | 4068.091  | 2891.75   | AL117580  | 3147.139  | 1886.741  |
| AK024336  | 3710.561  | 3504.045  | NM_004571 | 797.36    | 701.581   | AJ001893  | 930.765   | 1443.972  |
| AK023862  | 894.9     | 1333.387  | AJ345030  | 3520.385  | 4018.476  | NM_014819 | 4134.395  | 4612.561  |
| NM_018621 | 1374.891  | 1523.434  | AK023631  | 1536.259  | 2141.906  | AB032988  | 1137.088  | 972.039   |
| AK022016  | 1652.807  | 1635.68   | AK023472  | 11868.472 | 14451.908 | AK023559  | 2341.802  | 1249.037  |
| AK021628  | 1155.732  | 802.554   | AK021796  | 825.844   | 697.4     | AB037859  | 27286.465 | 17828.539 |
| M33197    | 63329.523 | 61544.063 | AL109729  | 1057.093  | 1601.744  | AL049233  | 994.147   | 461.297   |
| AK022118  | 3242.375  | 3638.935  | AF007146  | 494.824   | 970.827   | NM_017696 | 1515.249  | 879.304   |
| AK026453  | 13310.145 | 14529.918 | M33197    | 60942.719 | 61520.645 | AL050166  | 3183.804  | 1587.793  |
| AK025673  | 1700.082  | 1957.427  | S79912    | 9372.901  | 12850.08  | AK026705  | 1302.659  | 1494.779  |
| M33197    | 62441.07  | 58586.945 | AL110283  | 1281.337  | 1160.944  | NM_003602 | 1313.196  | 1380.164  |
| AK022431  | 1293.807  | 1899.992  | AK026892  | 3104.112  | 2996.393  | AF009258  | 22801.227 | 29014.225 |
| AK023305  | 49791.047 | 49779.672 | S83275    | 21113.395 | 24370.561 | AF009305  | 1496.188  | 1946.042  |
| AK023763  | 7324.782  | 8707.008  | AL117427  | 6804.491  | 6954.249  | AF056454  | 604.704   | 653.104   |
| AK022729  | 3566.768  | 2832.722  | M33197    | 62958.117 | 65525.801 | AF009270  | 404.797   | 316.537   |
| NM_006166 | 12017.978 | 10202.178 | AF052118  | 17861.873 | 17261.793 | AF009318  | 619.262   | 503.317   |
| AL050374  | 2775.535  | 2442.484  | AK025166  | 3391.192  | 3548.38   | AF090889  | 691.396   | 493.335   |
| M33197    | 63481.945 | 59821.219 | AL359586  | 1306.114  | 1229.661  | AK001085  | 449.538   | 580.489   |
| M28639    | 8305.214  | 8996.212  | AF035290  | 3316.698  | 2478.791  | AK001906  | 555.067   | 669.853   |
| AL122073  | 36558.656 | 38037.324 | AK023216  | 1796.621  | 1458.343  | AK021528  | 942.716   | 666.488   |
| AF116655  | 8804.303  | 8417.994  | M33197    | 62050.762 | 61644.699 | AK021746  | 627.346   | 188.362   |
| AJ243222  | 2255.272  | 1996.696  | AF086547  | 1434.617  | 1078.649  | AK001136  | 887.96    | 724.433   |
| AK026132  | 5120.656  | 4564.646  | AK023288  | 1724.04   | 1455.276  | AK021617  | 401.175   | 474.406   |
| Y11162    | 1474.49   | 1364.11   | AK022198  | 1135.711  | 876.113   | AK021810  | 957.233   | 737.033   |
| M33197    | 62720.031 | 64188.98  | M33197    | 62815.93  | 58668.098 | AK025595  | 263.437   | 364.992   |
| AF070584  | 3439.689  | 4073.555  | AK023457  | 977.244   | 1532.366  | AK025846  | 1217.588  | 903.269   |
| AF165185  | 803.63    | 821.418   | AK025089  | 7130.772  | 7984.488  | AK026805  | 2809.831  | 1638.81   |
| AF075006  | 1462.908  | 1912.031  | M33197    | 63143.727 | 59163.945 | AL389983  | 5495.078  | 6014.598  |

|           |           |           |           |           |           |           |           |           |
|-----------|-----------|-----------|-----------|-----------|-----------|-----------|-----------|-----------|
| M33197    | 62139.707 | 59698.516 | AK001279  | 1913.077  | 2266.397  | AJ008159  | 622.044   | 584.941   |
| AK000903  | 49139.875 | 49674.16  | AK001567  | 1761.194  | 1634.975  | AK000995  | 892.147   | 694.387   |
| AK023938  | 2134.024  | 2729.21   | M33197    | 57034.957 | 55303.969 | U00959    | 1001.243  | 948.503   |
| AL110169  | 1460.938  | 1629.11   | U52839    | 1710.634  | 1880.295  | NM_014578 | 12023.596 | 16363.69  |
| L13743    | 3177.449  | 2441.365  | U42379    | 659.948   | 627.884   | AF147306  | 2665.359  | 3263.391  |
| U84519    | 1906.476  | 1020.291  | M33197    | 62582.777 | 58474.34  | AF086267  | 1365.252  | 1114.333  |
| Z11849    | 8988.623  | 7724.447  | AK026984  | 30625.104 | 30392.328 | X74606    | 351.415   | 409.039   |
| AJ002788  | 3078.419  | 2237.568  | NM_013391 | 967.039   | 855.04    | NM_012183 | 811.668   | 582.008   |
| M33197    | 62254.59  | 62934.465 | M33197    | 64793.543 | 58774.098 | AK026785  | 993.433   | 796.098   |
| AF052103  | 3811.099  | 3407.603  | AL157466  | 3470.573  | 3159.254  | NM_018225 | 11306.648 | 11156.271 |
| AF075050  | 2296.791  | 2192.882  | AL389981  | 587.987   | 687.727   | AK025534  | 720.995   | 504.416   |
| AK024842  | 2008.502  | 2247.55   | AK024336  | 1995.798  | 2062.833  | AK022577  | 910.701   | 548.765   |
| AK022962  | 678.638   | 1088.154  | NM_018621 | 1031.497  | 1093.843  | M60749    | 1757.714  | 2258.792  |
| NM_018382 | 2065.053  | 2099.187  | M33197    | 64216.961 | 59702.207 | X79986    | 805.179   | 995.854   |
| BC022303  | 3319.01   | 4579.947  | AK022118  | 1596.97   | 1710.142  | NM_003523 | 5960.664  | 7018.014  |
| M33197    | 60919.18  | 62726.063 | AK026453  | 8477.104  | 8156.092  | X01448    | 570.855   | 590.157   |
| D17203    | 61819.918 | 60120.16  | AK025673  | 680.134   | 850.397   | NM_016503 | 4113.14   | 4685.025  |
| NM_006495 | 4409.164  | 5038.357  | M33197    | 61871.082 | 57055.207 | AK056351  | 18411.137 | 16701.236 |
| NM_005288 | 2100.434  | 2562.004  | AK022431  | 525.899   | 739.352   | NM_014690 | 3169.079  | 4452.437  |
| AK022101  | 2211.139  | 2168.258  | AK023305  | 34047.02  | 43190.461 | NM_017698 | 1641.835  | 1678.349  |
| NM_003251 | 5272.071  | 4463.154  | AK023763  | 3123.845  | 2902.624  | AF086490  | 804.603   | 579.079   |
| AF086203  | 1591.374  | 1095.338  | AK022729  | 1277.487  | 1081.256  | AF131738  | 17836.141 | 8674.603  |
| AB046772  | 1596.808  | 1959.018  | NM_006168 | 3120.935  | 3385.412  | AK021666  | 1241.516  | 896.488   |
| M33197    | 62619.426 | 62571.066 | AL050374  | 673.651   | 811.786   | AK024081  | 302.315   | 676.963   |
| AL442080  | 1970.491  | 3254.866  | M33197    | 62971.563 | 56683.5   | AK024825  | 1973.927  | 1581.141  |
| AY007143  | 33632.668 | 37367.168 | M28639    | 5508.062  | 5222.405  | AF086317  | 4090.047  | 3327.524  |
| L15557    | 2111.817  | 1764.293  | AL122073  | 29231.135 | 30967.336 | U16850    | 3031.592  | 2014.393  |
| M33197    | 67889.688 | 64558.949 | AF116655  | 7749.284  | 7734.242  | AL390178  | 410.658   | 298.223   |
| NM_001563 | 10722.822 | 8778.958  | AJ243222  | 703.45    | 1431.984  | Z36806    | 1283.575  | 1144.342  |
| NM_000266 | 1582.289  | 1153.96   | AK026132  | 3045.181  | 4082.61   | NM_005368 | 831.253   | 768.951   |
| X89666    | 4091.368  | 3977.144  | Y11162    | 960.439   | 1090.498  | NM_018618 | 590.432   | 506.265   |
| NM_017429 | 784.453   | 625.469   | M33197    | 63192.727 | 61376.531 | AJ008121  | 13778.397 | 10023.046 |
| NM_003104 | 11093.555 | 9455.749  | AF070584  | 2317.176  | 2174.127  | AJ008153  | 785.194   | 782.301   |
| NM_014581 | 4349.511  | 4019.98   | AF075006  | 1005.476  | 925.989   | AK023739  | 1728.338  | 1262.622  |
| NM_000898 | 1244.239  | 1050.71   | M33197    | 63014.703 | 61508.801 | NM_005830 | 5726.258  | 3451.039  |
| M33197    | 62211.211 | 59566.984 | AK000903  | 35693.488 | 41993.207 | NM_001507 | 1250.112  | 1418.236  |
| AK024448  | 8936.775  | 7221.79   | AK023938  | 1392.882  | 1219.804  | AL389876  | 1165.762  | 1210.078  |
| NM_014406 | 4133.735  | 4544.35   | AL110169  | 1175.117  | 1060.822  | AK022120  | 1981.866  | 2344.345  |
| Z11801    | 1494.446  | 1507.136  | L13743    | 1285.96   | 963.922   | Z70762    | 552.749   | 663.009   |
| AK027253  | 997.505   | 1164.708  | Z11849    | 6051.89   | 6080.103  | AK021474  | 5686.102  | 4556.624  |
| S68954    | 9831.979  | 38307.027 | AJ002788  | 2878.765  | 2892.275  | AW511510  | 287.684   | 201.832   |
| S81335    | 4880.535  | 4308.827  | M33197    | 62630.488 | 59681.91  | AL049466  | 8869.433  | 5467.984  |
| AF052109  | 4940.072  | 10739.544 | AF052103  | 545.101   | 1061.852  | AB037802  | 1536.879  | 1323.038  |
| M33197    | 60844.402 | 58523.953 | AF075050  | 1654.306  | 2102.787  | AL137450  | 872.382   | 849.437   |
| NM_003353 | 50159.398 | 51492.293 | AK024842  | 1220.932  | 1541.543  | AK023058  | 491.861   | 594.024   |
| X82127    | 42181.844 | 36123.672 | NM_018382 | 1104.426  | 1408.934  | NM_012064 | 2292.03   | 1287.469  |
| AL122044  | 5896.736  | 5566.225  | BC022303  | 3321.747  | 2922.603  | AK001460  | 336.051   | 424.672   |
| NM_018296 | 3427.765  | 3100.932  | M33197    | 64151.305 | 62599.914 | AK092508  | 2115.444  | 1796.497  |
| NM_005752 | 2618.941  | 2826.9    | D17203    | 64137.023 | 57973.199 | AK027111  | 47624.418 | 32556.49  |
| M33197    | 58140.238 | 61098.449 | NM_006495 | 3519.918  | 3671.276  | NM_003518 | 449.832   | 352.526   |
| AF070578  | 1263.269  | 1442.591  | NM_005288 | 681.535   | 1026.816  |           |           |           |
| CY3Cy5    | 7303.231  | 526.939   | AK022101  | 1234.111  | 1716.205  |           |           |           |
| AA418907  | 1068.156  | 1158.322  | NM_003251 | 1820.827  | 2006.272  |           |           |           |

|             |           |           |             |           |           |
|-------------|-----------|-----------|-------------|-----------|-----------|
| AA115473    | 9640.535  | 9294.341  | AF086203    | 329.555   | 636.984   |
| AA872397    | 3982.198  | 4475.247  | AB046772    | 1301.392  | 1461.22   |
| AA709414    | 2051.471  | 1775.845  | M33197      | 62797.293 | 60955.09  |
| D12676      | 4489.683  | 3755.651  | AL442080    | 1837.456  | 1592.077  |
| NM_000939   | 27204.406 | 27039.367 | AY007143    | 16573.391 | 14941.867 |
| NM_004295   | 33597.664 | 35603.68  | L15557      | 1208.633  | 1012.709  |
| H-X 02812 I | 1637.208  | 1767.144  | M33197      | 65892.016 | 62438.813 |
| U75898      | 3110.6    | 2858.52   | NM_001563   | 5250.543  | 5662.698  |
| M29039      | 764.917   | 840.913   | NM_000266   | 783.51    | 1013.293  |
| M33210      | 749.004   | 808.914   | X89666      | 2082.919  | 2518.717  |
| NM_006917   | 1037.453  | 1485.78   | NM_017429   | 326.583   | 821.459   |
| SR2         | 54425.961 | 60021.426 | NM_003104   | 8588.729  | 8959.524  |
| SR4         | 12686.743 | 12941.547 | NM_014581   | 1466.96   | 1570.986  |
| SR6         | 2076.819  | 2181.585  | M33197      | 62294.559 | 62108.477 |
| SR8         | 7709.712  | 26610.959 | AK024448    | 3461.409  | 4898.613  |
| SR10        | 31906.834 | 10959.164 | NM_014406   | 3444.527  | 3632.488  |
| CY3Cy5      | 7353.532  | 435.651   | Z11801      | 820.417   | 918.465   |
|             | 963.046   | 1102.023  | AK027253    | 756.881   | 476.89    |
| NM_001203   | 4968.086  | 6401.716  | S68954      | 35181.891 | 9470.145  |
| NM_004799   | 24871.041 | 27189.395 | S81335      | 1911.771  | 2168.356  |
| NM_006733   | 1250.819  | 1474.957  | AF052109    | 5302.26   | 2218.801  |
| NM_014047   | 19874     | 18255.832 | M33197      | 54916.43  | 46783.609 |
| AK022901    | 2002.244  | 1695.188  | NM_003353   | 32864.004 | 37015.426 |
| M33197      | 66281.688 | 66348.641 | X82127      | 17075.273 | 20670.938 |
| AF037332    | 6462.344  | 6799.549  | AL122044    | 2794.65   | 3606.722  |
| NM_014571   | 499.788   | 603.662   | NM_018296   | 1482.446  | 1385.747  |
| NM_006052   | 1121.193  | 1074.503  | NM_005752   | 968.856   | 746.559   |
| AB040912    | 3286.701  | 4889.897  | M33197      | 62375.578 | 60713.258 |
| NM_003871   | 619.657   | 710.538   | AF070578    | 1416.266  | 936.193   |
| NM_006243   | 5846.711  | 6846.704  | CY3Cy5      | 2990.259  | 207.034   |
| M33197      | 62588.066 | 64169.855 | AA709414    | 1061.705  | 2070.479  |
| AJ011129    | 8271.604  | 9058.004  | D12676      | 2801.961  | 3333.753  |
| AF282874    | 965.933   | 1103.58   | NM_000939   | 28868.977 | 22832.129 |
| NM_006387   | 7130.959  | 8096.494  | NM_004295   | 22456.77  | 22298.012 |
| NM_005646   | 3305.542  | 2854.494  | H-X 02812 I | 1613.953  | 1658.361  |
| NM_006639   | 2304.61   | 1836.935  | U75898      | 1895.693  | 2238.37   |
| NM_001692   | 1494.489  | 1310.016  | M29039      | 1066.91   | 990.842   |
| BI767871    | 4748.113  | 4194.13   | M59815      | 531.234   | 761.182   |
| AK022817    | 3665.555  | 4079.099  | NM_006917   | 991.589   | 916.17    |
| M33197      | 62878.379 | 65473.141 | SR2         | 49913.254 | 45673.094 |
| AB037831    | 2838.615  | 4099.624  | SR4         | 10868.127 | 11485.888 |
| NM_012103   | 21305.945 | 24227.686 | SR6         | 1581.765  | 1642.434  |
| AL122077    | 16108.028 | 16152.672 | SR8         | 6619.941  | 23688.689 |
| NM_014632   | 1147.799  | 1290.329  | SR10        | 23378.6   | 9004.483  |
| NM_006422   | 1508.133  | 1436.874  | CY3Cy5      | 3552.703  | 195.639   |
| NM_016946   | 1663.06   | 2316.114  | NM_001203   | 2552.013  | 2964.199  |
| M33197      | 62629.609 | 62409.074 | NM_004799   | 7437.014  | 11317.666 |
| NM_007259   | 2185.166  | 2015.402  | NM_006733   | 949.256   | 1222.693  |
| NM_018402   | 1047.62   | 1090.935  | NM_014047   | 14410.192 | 22692.211 |
| NM_018009   | 743.834   | 1082.762  | AK022901    | 1467.419  | 1761.913  |
| AK075081    | 3557.631  | 3935.262  | M33197      | 64722.086 | 66444.219 |
| NM_000895   | 10478.176 | 11683.446 | AF037332    | 6049.399  | 4896.289  |
| NM_003820   | 29538.67  | 28569.982 | NM_014571   | 422.698   | 521.233   |

|           |           |           |           |           |           |
|-----------|-----------|-----------|-----------|-----------|-----------|
| NM_01591E | 2925.511  | 2534.889  | NM_006052 | 949.881   | 1054.187  |
| M33197    | 66392.984 | 64592.758 | AB040912  | 3560.069  | 3142.755  |
| NM_01651E | 8625.632  | 9184.82   | NM_003871 | 602.159   | 556.298   |
| NM_00618E | 18854.709 | 19952.021 | NM_006243 | 5898.916  | 5454.648  |
| NM_01480C | 8963.667  | 11509.056 | M33197    | 63308.191 | 70239.672 |
| NM_001557 | 1221.767  | 1385.789  | AJ011129  | 4617.416  | 5066.054  |
| AF147311  | 4545.128  | 4736.287  | AF282874  | 654.192   | 725.407   |
| NM_002131 | 37853.055 | 46650.996 | NM_006387 | 5022.76   | 5326.07   |
| NM_017927 | 5502.691  | 4380.781  | NM_00564E | 2233.353  | 2276.502  |
| NM_020151 | 17409.613 | 16159.584 | NM_00663E | 680.989   | 857.245   |
| NM_005891 | 54045.969 | 53880.867 | BI767871  | 1686.198  | 1924.924  |
| NM_00164E | 1979.078  | 2331.015  | AK022817  | 1567.585  | 1915.789  |
| NM_00395E | 2563.794  | 3261.701  | M33197    | 60546.223 | 65888.055 |
| M33197    | 63026.965 | 62632.352 | AB037831  | 1507.279  | 1512.864  |
| NM_00350C | 6140.446  | 7439.653  | NM_012103 | 13846.337 | 17222.133 |
| NM_014317 | 4729.659  | 5134.905  | AL122077  | 6466.541  | 9669.623  |
| L09234    | 14872.691 | 15613.207 | NM_014632 | 806.287   | 1039.683  |
| NM_00005E | 2948.117  | 2926.05   | NM_006422 | 1373.213  | 1404.968  |
| AK026740  | 964.748   | 1085.24   | NM_01694E | 1441.764  | 2253.094  |
| NM_017881 | 8515.129  | 10048.533 | M33197    | 61347.922 | 64764.645 |
| NM_017634 | 11139.903 | 13216.435 | NM_00725E | 2011.909  | 2028.547  |
| NM_01889E | 1463.888  | 1710.188  | NM_018402 | 858.131   | 945.488   |
| AJ300465  | 2889.015  | 2104.507  | NM_01800E | 652.507   | 732.735   |
| X86400    | 653.745   | 832.021   | AK075081  | 2456.229  | 2259.601  |
| NM_00081C | 2658.932  | 2753.3    | NM_00089E | 9849.372  | 9008.793  |
| AF069307  | 3080.425  | 4274.111  | NM_00382C | 28785.83  | 24481.4   |
| M33197    | 61089.16  | 59009.668 | NM_01591E | 2752.076  | 2167.004  |
| U92978    | 3762.873  | 4111.75   | M33197    | 68620.789 | 66060.172 |
| NM_00573E | 1341.069  | 1530.53   | NM_01651E | 7738.96   | 7969.052  |
| NM_01448E | 1115.331  | 1023.859  | NM_00618E | 16193.17  | 16710.357 |
| NM_01338E | 8976.489  | 7970.064  | NM_01480C | 7803.395  | 6910.612  |
| AB014567  | 1185.339  | 957.491   | NM_001557 | 498.277   | 471.085   |
| NM_00532E | 32976.789 | 44743.223 | AF147311  | 3322.824  | 3231.337  |
| NM_01406E | 1666.176  | 1550.238  | NM_002131 | 29921     | 29028.506 |
| AB035130  | 3492.235  | 3681.96   | NM_017927 | 2183.017  | 2505.065  |
| NM_00335E | 2109.36   | 2213.653  | NM_020151 | 7655.751  | 6746.129  |
| M33197    | 52812.016 | 54512.734 | NM_005891 | 41018.941 | 37572.07  |
| AF119917  | 1438      | 1960.352  | NM_00164E | 959.022   | 991.218   |
| AK021834  | 2198.99   | 1692.205  | NM_00395E | 2073.63   | 2260.226  |
| NM_01791E | 2634.783  | 2839.794  | M33197    | 57977.383 | 62670.324 |
| AL049283  | 2609.879  | 3327.313  | NM_00350C | 5135.199  | 5187.336  |
| NM_002401 | 49912.852 | 52965.711 | NM_014317 | 3175.629  | 3188.031  |
| NM_001274 | 5087.327  | 5645.684  | L09234    | 12373.083 | 12528.948 |
| NM_00391E | 1581.996  | 1401.499  | NM_00005E | 1747.564  | 1749.642  |
| NM_002227 | 4209.853  | 4156.583  | NM_017881 | 9208.139  | 8921.111  |
| NM_00719E | 1599.328  | 1741.471  | NM_017634 | 8084.458  | 9089.466  |
| AB002301  | 948.421   | 1837.066  | NM_00081E | 714.356   | 641.599   |
| AB014530  | 9659.778  | 10461.862 | NM_01889E | 1574.405  | 898.797   |
| M33197    | 63249.371 | 62771.008 | AJ300465  | 1513.084  | 1362.734  |
| NM_00598E | 5456.675  | 5616.014  | X86400    | 1221.165  | 759.479   |
| AB014607  | 8589.139  | 7260.879  | NM_00081C | 2169.652  | 1905.038  |
| AF134401  | 1304.358  | 1525.462  | AF069307  | 3488.971  | 3391.899  |
| NM_006387 | 8255.76   | 7729.579  | M33197    | 58636.555 | 61657.938 |



|             |           |           |           |           |           |
|-------------|-----------|-----------|-----------|-----------|-----------|
| NM_005646   | 4315.435  | 3641.539  | U92978    | 2037.931  | 1803.731  |
| NM_006639   | 1007.885  | 1108.015  | NM_005738 | 487.556   | 536.512   |
| BI767871    | 5434.913  | 4864.9    | NM_014488 | 647.232   | 718.455   |
| AA418907    | 1149.4    | 1042.097  | NM_013389 | 4067.165  | 5832.361  |
| AA115473    | 6268.699  | 6631.988  | NM_005326 | 15566.771 | 13059.269 |
| AA872397    | 5405.172  | 5952.963  | NM_014069 | 747.721   | 999.364   |
| AA709414    | 2570.632  | 2570.184  | AB035130  | 1458.693  | 1565.084  |
| D12676      | 4569.934  | 4329.134  | NM_003359 | 1501.593  | 1089.709  |
| NM_000939   | 29387.945 | 42309.688 | M33197    | 47511.137 | 38670.227 |
| NM_004295   | 37868.723 | 48229.102 | NM_017915 | 2111.825  | 1233.328  |
| H-X 02812 I | 1951.895  | 2244.709  | AL049283  | 1968.031  | 1265.721  |
| U75898      | 3834.962  | 3466.429  | M33197    | 56708.918 | 54196.492 |
| M29039      | 1112.739  | 2015.522  | NM_002401 | 42478.977 | 34385.578 |
| M59815      | 696.846   | 1177.443  | NM_001274 | 5818.062  | 4338.276  |
| M33210      | 566.22    | 645.846   | NM_003913 | 983.99    | 1298.826  |
| NM_006917   | 1401.11   | 1578.396  | NM_002227 | 4164.975  | 2764.089  |
| M33197      | 1240.266  | 1412.346  | NM_007199 | 537.701   | 807.299   |
| AB011146    | 3323.399  | 3874.901  | AB014530  | 5764.535  | 5268.569  |
| NM_006185   | 29000.996 | 29440.59  | M33197    | 59018.688 | 60327.695 |
| NM_014800   | 8294.186  | 8789.384  | NM_005989 | 2650.152  | 2591.146  |
| NM_001557   | 758.13    | 975.539   | AB014607  | 5069.185  | 3610.875  |
| NM_017927   | 4041.742  | 3841.469  | AF134401  | 593.7     | 356.89    |
| M33197      | 57828.484 | 55691.555 | NM_006387 | 4495.823  | 3802.589  |
| NM_001203   | 3246.658  | 3180.698  | NM_005646 | 2077.314  | 2110.268  |
| NM_004799   | 17621.889 | 14613.237 | BI767871  | 1253.317  | 1353.402  |
| NM_006733   | 1736.21   | 1932.783  | AA115473  | 4067.635  | 4306.379  |
| NM_014047   | 22800.717 | 23449.496 | AA872397  | 1838.564  | 1501.375  |
| AK022901    | 2841.914  | 2851.881  | AA709414  | 959.166   | 621.755   |
| M33197      | 63171.824 | 61284.105 | D12676    | 3449.371  | 2048.787  |
| AF037332    | 6616.502  | 7951.313  | NM_000939 | 28360.41  | 16466.281 |
| NM_014571   | 1361.256  | 1393.061  | U75898    | 2573.991  | 1845.74   |
| NM_006052   | 1038.739  | 1466.858  | M29039    | 1661.026  | 1648.465  |
| AB040912    | 15744.605 | 19873.191 | M59815    | 3250.671  | 2934.408  |
| NM_003871   | 1402.482  | 1742.354  | NM_006917 | 624.568   | 427.65    |
| NM_006243   | 7875.618  | 9914.92   | AB011146  | 2283.959  | 1060.351  |
| M33197      | 60277.352 | 68308.289 | NM_006185 | 13114.349 | 10084.127 |
| AJ011129    | 11931.729 | 13206.045 | NM_014800 | 6434.09   | 4399.713  |
| AF282874    | 1374.484  | 1699.364  | AF147311  | 3353.229  | 3656.435  |
| NM_001039   | 749.946   | 743.263   | NM_002131 | 36237.973 | 31850.438 |
| M33197      | 61367.738 | 60545.285 | NM_017927 | 2092.626  | 1996.464  |
| U92978      | 4564.12   | 4748.268  | M33197    | 72034.648 | 66584.18  |
| NM_005738   | 1033.771  | 1009.253  | NM_001203 | 2873.266  | 2205.378  |
| NM_014488   | 700.261   | 872.216   | NM_004799 | 8950.731  | 8204.397  |
| NM_013389   | 9427.348  | 7839.961  | NM_006733 | 824.215   | 645.715   |
| AK022817    | 1996.967  | 2371.684  | NM_014047 | 19155.816 | 13204.58  |
| NM_018034   | 6432.308  | 6062.517  | AK022901  | 1788.311  | 1752.582  |
| M33197      | 62714.816 | 62869.305 | NM_006052 | 1302.108  | 870.045   |
| AB037831    | 2879.27   | 3098.302  | AB040912  | 3933.999  | 2544.279  |
| NM_012103   | 20326.867 | 19492.043 | NM_006243 | 3875.286  | 2493.414  |
| AL122077    | 17376.012 | 15773.829 | M33197    | 56380.07  | 60189.848 |
| NM_014632   | 2167.547  | 2030.447  | U92978    | 2419.246  | 1813.376  |
| NM_006422   | 2112.837  | 2694.101  | NM_005738 | 585.965   | 481.828   |
| BE789195    | 710.066   | 1003.678  | NM_014488 | 742.257   | 801.664   |

|           |           |           |           |           |           |
|-----------|-----------|-----------|-----------|-----------|-----------|
| NM_016946 | 1562.564  | 2152.266  | NM_013389 | 3743.427  | 4542.144  |
| M33197    | 61204.551 | 62391.633 | AB014567  | 608.79    | 544.752   |
| NM_007259 | 3031.968  | 3054.774  | AK022817  | 1741.122  | 2195.647  |
| NM_018402 | 1384.399  | 1454.026  | NM_018034 | 5275.586  | 4065.555  |
| NM_018009 | 1190.905  | 1390.915  | M33197    | 60179.055 | 65395.18  |
| AK075081  | 4195.63   | 4144.83   | AB037831  | 1791.88   | 1116.295  |
| NM_000895 | 14009.904 | 18606.23  | NM_012103 | 16538.664 | 15691.153 |
| NM_003820 | 45103.035 | 54071.016 | AL122077  | 11149.054 | 12166.458 |
| NM_016518 | 8074.857  | 8255.935  | NM_014632 | 1210.443  | 1044.635  |
| AB002301  | 1206.916  | 1459.618  | NM_007259 | 1847.317  | 1256.989  |
| AB014530  | 13315.004 | 12948.613 | NM_018402 | 886.86    | 559.627   |
| M33197    | 63163.133 | 62424.008 | NM_018009 | 502.423   | 685.62    |
| NM_005989 | 5756.642  | 5830.264  | AK075081  | 2323.295  | 2326.264  |
| AB014607  | 9306.236  | 7525.349  | NM_000895 | 4685.125  | 4070.537  |
| AF134401  | 1151.304  | 1577.772  | NM_003820 | 22258.939 | 14800.313 |
| NM_020151 | 12855.281 | 12076.752 | NM_015915 | 3369.947  | 2048.691  |
| NM_005891 | 46860.367 | 43936.898 | M33197    | 68903.016 | 51402.883 |
| NM_001645 | 1323.581  | 1107.048  | NM_016518 | 5469.331  | 2782.986  |
| NM_003956 | 2066.903  | 2080.219  | AB014530  | 6365.034  | 5207.458  |
| M33197    | 64650.688 | 62211.98  | M33197    | 55692.355 | 59000.586 |
| NM_003500 | 6203.608  | 6043.061  | NM_005989 | 3090.874  | 3217.036  |
| NM_014317 | 3697.022  | 3287.116  | AB014607  | 5274.767  | 4146.387  |
| L09234    | 17004.051 | 18407.502 | AF134401  | 1750.043  | 1902.511  |
| NM_000059 | 3071.852  | 2972.505  | NM_020151 | 10119.771 | 10562.587 |
| AK026740  | 1084.293  | 1519.505  | NM_005891 | 48321.629 | 36975.922 |
| NM_017881 | 9801.925  | 11560.66  | NM_003956 | 2560.365  | 1801.457  |
| NM_017634 | 11838.381 | 13700.096 | M33197    | 57406.004 | 61018.031 |
| NM_000813 | 1119.819  | 1287.774  | NM_003500 | 5663.875  | 3708.147  |
| NM_018896 | 2513.722  | 2786.947  | NM_014317 | 3270.443  | 2486.029  |
| AJ300465  | 3365.888  | 2811.592  | M33197    | 60732.828 | 65201.133 |
| X86400    | 1623.755  | 1593.752  | NM_017634 | 6948.534  | 8412.945  |
| AF069307  | 4377.79   | 4743.151  | NM_000813 | 991.367   | 775.161   |
| NM_006917 | 1766.094  | 1494.028  | NM_018896 | 792.456   | 634.96    |
| M33197    | 855.756   | 1360.451  | AJ300465  | 2364.254  | 2509.575  |
| AB011146  | 2740.84   | 2662.073  | X86400    | 1515.659  | 1381.571  |
| NM_005326 | 22727.705 | 20187.201 | AF069307  | 2185.614  | 1003.802  |
| NM_014069 | 1840.338  | 1311.591  | M33197    | 424.477   | 505.05    |
| AB035130  | 3038.254  | 2672.375  | AB011146  | 2666.12   | 1976.853  |
| NM_003359 | 2360.356  | 2030.262  | NM_005326 | 20248.34  | 17606.771 |
| M33197    | 52708.371 | 55201.367 | NM_014069 | 1064.836  | 1053.842  |
| AK021834  | 1175.453  | 837.719   | AB035130  | 2024.178  | 1717.357  |
| NM_017915 | 3605.691  | 4472.543  | NM_003359 | 903.11    | 626.558   |
| AL050097  | 858.187   | 922.785   | M33197    | 49483.129 | 30919.662 |
| AK021513  | 842.572   | 991.313   | NM_017915 | 1329.867  | 727.437   |
| AL049283  | 2725.991  | 2616.595  | NM_003579 | 2545.581  | 2326.169  |
| NM_002401 | 47677.508 | 53491.34  | AL049283  | 939.039   | 735.812   |
| NM_001274 | 4603.942  | 5763.132  | NM_002401 | 48442.707 | 36718.996 |
| NM_003913 | 1995.925  | 1912.551  | NM_001274 | 4089.149  | 2384.57   |
| NM_002227 | 4843.919  | 4892.831  | NM_003913 | 897.221   | 1271.456  |
| NM_007199 | 1391.515  | 1502.868  | NM_002227 | 2033.863  | 1008.35   |
| NM_006243 | 8495.917  | 10559.339 | NM_007199 | 1521.743  | 1796.415  |
| M33197    | 59775.859 | 68842.992 | NM_006243 | 4682.78   | 4891.814  |
| AJ011129  | 6417.12   | 7429.121  | M33197    | 58085.031 | 65265.609 |

|             |           |           |             |           |           |
|-------------|-----------|-----------|-------------|-----------|-----------|
| AF282874    | 873.87    | 951.739   | AJ011129    | 4277.685  | 4176.605  |
| NM_006387   | 7130.417  | 6603.394  | AF282874    | 952.132   | 755.329   |
| NM_005646   | 2746.881  | 2493.058  | NM_006387   | 5347.114  | 5610.804  |
| NM_006639   | 772.447   | 852.268   | NM_005646   | 2390.168  | 2567.441  |
| BI767871    | 4677.684  | 3276.205  | NM_006639   | 673.426   | 542.73    |
| AA418907    | 1545.797  | 1694.717  | BI767871    | 2126.174  | 1948.986  |
| M65291      | 703.482   | 959.064   | AA418907    | 683.234   | 596.029   |
| AA115473    | 4190.61   | 4341.642  | AA115473    | 5341.583  | 4395.778  |
| AA872397    | 4552.937  | 4957.639  | AA872397    | 3876.784  | 2793.339  |
| M24283      | 1196.788  | 1403.153  | AA709414    | 1401.484  | 1310.317  |
| AA709414    | 2636.645  | 2984.165  | D12676      | 3460.686  | 2909.339  |
| D12676      | 6215.816  | 6303.894  | NM_000939   | 23624.621 | 21006.883 |
| NM_000939   | 25814.721 | 32839.863 | H-X 02812 I | 1285.447  | 623.762   |
| H-X 02812 I | 1633.417  | 1798.561  | U75898      | 2009.057  | 1317.717  |
| U75898      | 3443.034  | 3572.021  | AK075081    | 1199.109  | 1594.584  |
| M29039      | 1069.566  | 1249.242  | NM_000895   | 8561.156  | 8339.874  |
| M59815      | 1240.814  | 1261.917  | NM_003820   | 19433.752 | 22179.9   |
| AK075081    | 4326.683  | 4278.758  | NM_015915   | 2187.406  | 1859.986  |
| NM_000895   | 12059.613 | 12986.409 | M33197      | 63604.109 | 66366.578 |
| NM_003820   | 36994.699 | 40520.43  | NM_016518   | 8567.663  | 6773.077  |
| NM_015915   | 3391.454  | 2956.559  | NM_006185   | 15146.972 | 16768.494 |
| M33197      | 66542.5   | 66224.734 | NM_014800   | 7243.811  | 5841.217  |
| NM_016518   | 9849.158  | 8704.209  | AF147311    | 3686.614  | 3612.264  |
| NM_006185   | 23298.484 | 21949.412 | NM_002131   | 37305.797 | 31666.043 |
| NM_014800   | 8198.968  | 8644.025  | NM_017927   | 3037.453  | 3488.021  |
| NM_001557   | 1376.672  | 1159.835  | NM_004799   | 13589.993 | 12227.532 |
| AF147311    | 5507.812  | 5574.058  | NM_014047   | 11362.445 | 7418.08   |
| NM_002131   | 44818.078 | 46896.543 | AK022901    | 1019.127  | 699.289   |
| NM_017927   | 5634.299  | 5797.467  | NM_001508   | 1268.918  | 916.852   |
| NM_001203   | 3788.735  | 4974.616  | M33197      | 67364.063 | 66240.766 |
| NM_004799   | 29032.963 | 33074.191 | AF037332    | 3881.919  | 1867.951  |
| NM_006733   | 1497.434  | 1727.385  | NM_006052   | 608.022   | 563.221   |
| NM_014047   | 25666.438 | 28451.256 | AB040912    | 6070.512  | 3125.699  |
| AK022901    | 2261.915  | 2600.875  | NM_000813   | 522.985   | 686.406   |
| M33197      | 66198.148 | 70382.68  | NM_018896   | 506.235   | 533.626   |
| AF037332    | 6094.206  | 6924.416  | AJ300465    | 837.216   | 1686.609  |
| NM_014571   | 1111.444  | 1068.631  | X86400      | 1120.038  | 1256.645  |
| NM_006052   | 1386.24   | 1360.602  | NM_000810   | 1172.374  | 1496.228  |
| AB040912    | 3479.711  | 4465.02   | AF069307    | 3072.734  | 3181.371  |
| NM_003871   | 1013.125  | 1128.652  | M33197      | 55431.18  | 63188.152 |
| NM_000813   | 1968.637  | 2392.693  | U92978      | 2710.589  | 2273.964  |
| NM_018896   | 1359.08   | 1432.124  | NM_005738   | 572.05    | 470.722   |
| AJ300465    | 4635.035  | 3761.297  | NM_014488   | 444.24    | 513.007   |
| X86400      | 1407.82   | 1585.416  | NM_013389   | 3591.719  | 5629.766  |
| NM_000810   | 2855.67   | 2635.705  | NM_018034   | 7963.677  | 5155.708  |
| AF069307    | 4518.216  | 4440.465  | M33197      | 58532.156 | 59275.637 |
| M33197      | 61840.844 | 66530.266 | AB037831    | 895.73    | 424.076   |
| U92978      | 5993.938  | 7320.072  | NM_012103   | 6339.1    | 4734.747  |
| NM_005738   | 1479.967  | 1244.821  | AL122077    | 8550.002  | 7929.678  |
| NM_014488   | 853.648   | 1064.515  | NM_014632   | 611.471   | 534.764   |
| NM_013389   | 8891.403  | 8031.854  | NM_006422   | 763.835   | 676.219   |
| AB014567    | 1161.917  | 1230.012  | NM_016946   | 992.568   | 653.407   |
| NM_018034   | 9618.757  | 10352.29  | NM_007259   | 1037.862  | 650.458   |

|           |           |           |           |           |           |
|-----------|-----------|-----------|-----------|-----------|-----------|
| M33197    | 60988.945 | 63918.496 | NM_018402 | 414.171   | 276.288   |
| AB037831  | 2889.747  | 3518.657  | M33197    | 53470.285 | 56600.645 |
| NM_012103 | 20012.313 | 23346.969 | NM_002401 | 26782.205 | 33570.082 |
| AL122077  | 12073.456 | 12297.524 | NM_001274 | 4974.253  | 5033.255  |
| NM_014632 | 1434.821  | 1899.966  | NM_003913 | 768.29    | 1357.009  |
| NM_006422 | 1257.446  | 1845.863  | NM_002227 | 3386.479  | 4100.964  |
| BE789195  | 1326.629  | 2414.73   | NM_007199 | 522.761   | 1040.436  |
| NM_016946 | 1649.756  | 1638.178  | AB002301  | 978.582   | 959.992   |
| M33197    | 61453.473 | 65431.305 | AB014530  | 6565.977  | 7755.101  |
| NM_007259 | 2070.48   | 2314.786  | NM_005989 | 2337.121  | 2613.947  |
| NM_018402 | 1330.631  | 1746.723  | AB014607  | 4762.804  | 6006.585  |
| M33197    | 60039.191 | 57805.09  | AF134401  | 1255.184  | 1969.796  |
| NM_002401 | 54264.129 | 48979.332 | NM_020151 | 11060.644 | 13661.496 |
| NM_001274 | 7159.766  | 7673.527  | NM_005891 | 42155.715 | 30881.248 |
| NM_003913 | 2359.102  | 2700.698  | M33197    | 57283.508 | 60233.797 |
| NM_002227 | 5998.949  | 5685.584  | NM_003500 | 1428.332  | 1331.043  |
| NM_007199 | 1626.962  | 1715.471  | NM_014317 | 1461.881  | 1314.91   |
| AB002301  | 1237.896  | 1319.662  | L09234    | 7601.77   | 5925.786  |
| AB014530  | 13151.132 | 12156.264 | NM_000059 | 1824.408  | 1503.623  |
| NM_005989 | 8325.137  | 7017.848  | NM_017634 | 7294.949  | 5782.023  |
| AB014607  | 10156.986 | 8493.778  | NM_017743 | 1660.116  | 2697.913  |
| AF134401  | 2100.973  | 2332.549  | NM_000300 | 3101.583  | 4541.105  |
| NM_020151 | 15792.839 | 18148.998 | M33197    | 57682.242 | 62965.711 |
| NM_005891 | 33254.941 | 38235.336 | AV756917  | 3276.563  | 3717.984  |
| NM_001645 | 1564.712  | 2311.39   | NM_018380 | 9074.926  | 11650.835 |
| NM_003956 | 2864.079  | 3657.919  | AK001442  | 967.548   | 1533.58   |
| M33197    | 63301.699 | 59969.492 | NM_012070 | 1086.574  | 1223.621  |
| NM_003500 | 4229.866  | 5015.563  | NM_019038 | 788.671   | 805.602   |
| NM_014317 | 4000.004  | 4491.14   | M33197    | 747.679   | 868.935   |
| L09234    | 12229.199 | 15029.614 | AB011146  | 2544.18   | 4119.457  |
| NM_000059 | 2302.96   | 2441.579  | NM_005326 | 25713.459 | 23470.455 |
| AK026740  | 1116.219  | 1361.272  | AB035130  | 1114.775  | 1579.826  |
| NM_017881 | 5155.801  | 6107.806  | NM_003359 | 868.669   | 799.082   |
| NM_017634 | 12553.376 | 13446.552 | M33197    | 44695.742 | 28106.904 |
| NM_017743 | 2625.319  | 2365.962  | NM_017915 | 1567.58   | 1355.367  |
| NM_000300 | 6213.204  | 5019.331  | AL049283  | 1234.424  | 1125.659  |
| M33197    | 66316.625 | 69759.992 | AF005258  | 1094.1    | 1109.618  |
| AV756917  | 4544.914  | 5222.299  | M33197    | 60616.984 | 63127.531 |
| NM_018380 | 15423.097 | 14194.459 | X99659    | 45574.313 | 52831.508 |
| AK001442  | 2542.898  | 2848.235  | NM_015416 | 2846.579  | 4044.907  |
| NM_012070 | 1569.418  | 1888.416  | NM_002731 | 1975.995  | 1917.843  |
| NM_019038 | 1460.274  | 1843.951  | NM_003899 | 3809.692  | 3564.927  |
| M33197    | 972.688   | 1307.973  | X99662    | 2223.625  | 3392.271  |
| AB011146  | 3638.583  | 3599.152  | NM_003473 | 37828.199 | 49596.516 |
| NM_005326 | 22657.121 | 25186.836 | NM_014325 | 2288.656  | 4151.259  |
| NM_014069 | 1600.202  | 1384.869  | M33197    | 60285.664 | 64870.875 |
| AB035130  | 2559.521  | 2594.194  | NM_006016 | 15573.313 | 10385.211 |
| NM_003359 | 1348.429  | 1549.246  | NM_001242 | 2029.125  | 1555.46   |
| M33197    | 45052.105 | 51117.488 | NM_001882 | 991.941   | 613.208   |
| AF119917  | 1255.809  | 1052.121  | NM_014891 | 6083.271  | 4649.222  |
| NM_017915 | 3056.95   | 3417.717  | NM_013392 | 10296.904 | 8776.852  |
| AK021513  | 885.731   | 848.57    | M33197    | 60009.973 | 63261.488 |
| AL049283  | 2086.277  | 2069.714  | NM_003236 | 2138.256  | 2420.346  |

|           |           |           |           |           |           |
|-----------|-----------|-----------|-----------|-----------|-----------|
| NM_000887 | 1698.008  | 1367.145  | AF052692  | 1492.205  | 2003.157  |
| M33197    | 60747.352 | 58776.527 | NM_005228 | 597.061   | 1285.672  |
| X99659    | 57776.297 | 51384.121 | NM_002354 | 1212.256  | 1387.53   |
| NM_015416 | 5229.352  | 4603.382  | NM_000179 | 1184.805  | 1272.536  |
| NM_002731 | 3724.664  | 3627.846  | AF062739  | 982.948   | 1294.98   |
| NM_003899 | 9759.146  | 9417.005  | NM_006602 | 1816.261  | 3667.721  |
| X99662    | 4141.12   | 3614.1    | M33197    | 59704.973 | 60242.309 |
| NM_003473 | 55802.016 | 51430.715 | AL079314  | 1605.728  | 1995.373  |
| NM_014325 | 2492.425  | 2234.938  | NM_001260 | 1174.935  | 949.819   |
| M33197    | 63145.832 | 62607.238 | NM_001950 | 4686.208  | 6629.629  |
| NM_012453 | 571.63    | 425.154   | AK026364  | 900.183   | 1940.125  |
| NM_006016 | 57150.441 | 57683.848 | NM_018117 | 834.382   | 1276.888  |
| NM_001242 | 4502.755  | 4850.41   | NM_006999 | 1283.797  | 2559.811  |
| NM_001882 | 1340.415  | 1075.821  | NM_006286 | 1999.921  | 1402.048  |
| NM_014891 | 14663.179 | 18629.043 | M33197    | 54048.293 | 49212.574 |
| NM_013392 | 13956.98  | 14116.854 | NM_004331 | 3065.832  | 2172.614  |
| M33197    | 63014.52  | 57666.84  | NM_015996 | 729.878   | 625.342   |
| NM_003236 | 2938.446  | 3308.513  | NM_015703 | 9023.507  | 9917.174  |
| NM_003458 | 1751.196  | 1612.729  | AB018337  | 1426.272  | 984.292   |
| AF052692  | 2817.863  | 2547.01   | NM_014489 | 1267.573  | 1506.485  |
| NM_005228 | 1400.819  | 811.816   | M33197    | 56349.73  | 59708.75  |
| NM_002354 | 1914.13   | 1811.942  | NM_001794 | 1627.865  | 1714.412  |
| NM_000179 | 2698.216  | 1948.986  | NM_002205 | 2814.067  | 2864.679  |
| AF062739  | 1983.145  | 2123.332  | M33197    | 59743.133 | 61648.535 |
| NM_006602 | 4482.778  | 3803.192  | NM_000131 | 716.232   | 767.614   |
| M33197    | 62079.254 | 64136.875 | NM_001911 | 11736.549 | 14424.485 |
| AL079314  | 1581.274  | 2215.053  | NM_006503 | 1804.993  | 2545.247  |
| NM_001260 | 2099.914  | 2148.108  | NM_002515 | 695.27    | 944.187   |
| NM_001950 | 7451.328  | 6215.447  | U68382    | 742.064   | 1109.227  |
| NM_018117 | 813.197   | 869.359   | NM_003969 | 2182.447  | 3630.083  |
| NM_006999 | 906.686   | 760.205   | NM_004651 | 3294.488  | 3555.22   |
| NM_006286 | 1315.641  | 1495.645  | M33197    | 57218.844 | 60659.355 |
| M33197    | 59393.285 | 58693.805 | NM_017569 | 7892.885  | 8983.826  |
| NM_004331 | 17624.586 | 22885.58  | NM_001456 | 732.186   | 904.804   |
| NM_015996 | 1795.745  | 2048.437  | NM_002906 | 1466.305  | 1130.432  |
| NM_015703 | 14425.954 | 14931.441 | AK024480  | 1270.373  | 1270.621  |
| AB018337  | 2223.138  | 2237.9    | NM_012134 | 1077.597  | 1534.984  |
| NM_014489 | 1717.366  | 1866.48   | AL137725  | 8809.61   | 11342.521 |
| AK025273  | 3521.467  | 4159.513  | M33197    | 57451.918 | 63912.152 |
| M33197    | 61242.328 | 61592.391 | AJ008151  | 15043.12  | 15231.825 |
| NM_001794 | 2154.459  | 3085.875  | AK024149  | 949.318   | 888.061   |
| NM_002205 | 3090.373  | 3482.278  | AK023094  | 851.968   | 743.922   |
| M33197    | 62559.453 | 58034.082 | M33197    | 57349.602 | 58227.563 |
| NM_000131 | 1469.344  | 1016.523  | NM_004091 | 1341.394  | 1177.017  |
| NM_001836 | 764.422   | 917.858   | X74070    | 58799.156 | 61166.648 |
| NM_001911 | 22843.324 | 18783.355 | AF027219  | 817.211   | 1224.907  |
| NM_000537 | 2100.95   | 1458.352  | BC022846  | 652.417   | 682.397   |
| NM_006503 | 2624.898  | 3133.533  | NM_006333 | 5347.139  | 5098.588  |
| NM_002515 | 1093.6    | 889.251   | M33197    | 55905.863 | 62170.055 |
| M33197    | 847.295   | 1144.753  | NM_002898 | 5223.35   | 6794.458  |
| NM_003969 | 1344.114  | 1525.546  | AK022749  | 8207.044  | 12067.88  |
| NM_004651 | 3107.117  | 3246.465  | BF031409  | 5445.073  | 5849.805  |
| M33197    | 59676.754 | 60767.938 | NM_012322 | 5823.699  | 6592.405  |

|           |           |           |           |           |           |
|-----------|-----------|-----------|-----------|-----------|-----------|
| NM_01756  | 13534.742 | 12866.796 | M33197    | 54349.734 | 55998.371 |
| NM_00145  | 1652.058  | 1531.245  | NM_00488  | 39117.883 | 27870.359 |
| NM_00290  | 1903.427  | 2118.357  | AK025314  | 1816.705  | 1421.05   |
| AK024480  | 1286.126  | 1418.988  | NM_00210  | 3336.81   | 3021.526  |
| Y13871    | 16596.926 | 15991.791 | NM_000984 | 59828.402 | 67766.031 |
| AL137725  | 14563.268 | 12431.815 | NM_002453 | 2732.927  | 2557.726  |
| M33197    | 63408.211 | 65785.297 | AK000780  | 25928.279 | 25115.943 |
| AJ008151  | 11611.54  | 11998.503 | AK026721  | 2266.231  | 3459.614  |
| AK024149  | 2090.949  | 1811.528  | AK023027  | 1840.341  | 2757.089  |
| AK023094  | 1817.45   | 2064.323  | AK025598  | 1236.476  | 1674.105  |
| M33197    | 59820.125 | 59394.145 | AB002348  | 33556.867 | 35168.445 |
| NM_004091 | 3070.686  | 2060.398  | M33197    | 38733.844 | 30258.104 |
| X74070    | 62895.484 | 60832.773 | NM_00500  | 4815.164  | 4314.932  |
| AF027219  | 1353.47   | 1089.986  | AK027033  | 1153.263  | 870.824   |
| BC022846  | 945.626   | 825.322   | NM_00010  | 1882.682  | 1470.288  |
| NM_006333 | 4553.73   | 3950.474  | NM_00300  | 16738.959 | 17779.33  |
| M33197    | 59882.141 | 60857.406 | NM_00249  | 20493.971 | 26385.719 |
| NM_00289  | 2821.629  | 2624.208  | M33197    | 43322.277 | 50681.094 |
| AK022749  | 5105.084  | 5139.687  | NM_016284 | 1988.357  | 2471.797  |
| BF031409  | 5657.575  | 5781.957  | NM_006833 | 2937.246  | 2251.95   |
| NM_007043 | 3385.475  | 3688.853  | NM_012257 | 726.758   | 775.346   |
| BE378791  | 497.74    | 935.96    | U37690    | 23763.121 | 15429.823 |
| U94388    | 1515.057  | 1583.106  | NM_00512  | 1058.793  | 1030.321  |
| NM_012322 | 11542.433 | 12856.781 | AB029012  | 14696.014 | 12258.981 |
| M33197    | 62173.23  | 61663.699 | M33197    | 58231.402 | 56119.055 |
| NM_00488  | 50305.047 | 59411.316 | NM_00629  | 899.44    | 1338.771  |
| AK025314  | 2145.607  | 2279.784  | AF060936  | 7233.341  | 6722.574  |
| NM_00210  | 3715.931  | 3943.788  | AL050088  | 4812.807  | 7354.853  |
| NM_000984 | 63499.898 | 62679.422 | AK024939  | 6325.919  | 10684.202 |
| NM_002453 | 3634.219  | 3777.096  | AK001561  | 2574.295  | 2823.367  |
| AK000780  | 35109.801 | 44026.52  | AB007880  | 2499.495  | 3362.778  |
| AK026721  | 4331.807  | 3717.949  | AK024950  | 1008.957  | 914.195   |
| AK023027  | 4860.246  | 3781.165  | M33197    | 63855.375 | 66403.633 |
| AK025598  | 1650.048  | 1316.973  | AF147356  | 4716.471  | 4421.451  |
| AB002348  | 50618.871 | 47436.715 | NM_018843 | 3639.921  | 2494.219  |
| M33197    | 49398.176 | 50102.961 | AK024275  | 718.27    | 1042.063  |
| NM_00500  | 5814.281  | 4797.938  | AL049461  | 2112.527  | 3379.486  |
| AK027033  | 2530.697  | 1957.904  | M33197    | 58624.559 | 48837.68  |
| NM_00010  | 1953.604  | 1349.749  | AL109782  | 2222.223  | 1587.807  |
| NM_00300  | 17959.24  | 13990.805 | NM_005844 | 9056.83   | 9993.914  |
| NM_00249  | 24436.17  | 22168.176 | AK024941  | 2531.41   | 1679.127  |
| M33197    | 57508.34  | 54900.395 | AF056434  | 1710.315  | 1789.121  |
| NM_016284 | 1694.507  | 2161.531  | M33197    | 46329.875 | 33011.262 |
| NM_014593 | 2786.354  | 2874.646  | AK025489  | 1449.785  | 973.605   |
| NM_006833 | 12466.315 | 12587.893 | AL390152  | 5095.339  | 6155.334  |
| NM_012257 | 2338.54   | 2262.364  | M33197    | 57495.457 | 63382.184 |
| U37690    | 27865.34  | 24582.703 | NM_01812  | 2253.198  | 2113.493  |
| NM_00512  | 1786.562  | 1538.014  | AK024506  | 3378.001  | 4353.804  |
| AB029012  | 9788.799  | 8399.41   | NM_01417  | 2035.215  | 2392.461  |
| M33197    | 70510.422 | 63996.266 | AF086326  | 2556.497  | 2996.414  |
| NM_00629  | 1161.033  | 971.713   | M33197    | 63375.273 | 66259.438 |
| AF060936  | 9513.301  | 7729.709  | AL080057  | 593.057   | 812.23    |
| AL050088  | 7658.672  | 6324.225  | M33197    | 57988.492 | 52035.816 |

|           |           |           |           |           |           |
|-----------|-----------|-----------|-----------|-----------|-----------|
| AK024939  | 8488.482  | 7551.606  | AK025948  | 795.563   | 740.89    |
| AK001561  | 6912.283  | 4585.978  | AL353948  | 21889.875 | 23316.938 |
| AB007880  | 3578.009  | 3213.036  | AL122043  | 643.415   | 544.427   |
| AK024950  | 1882.051  | 1371.413  | M33197    | 57909.418 | 54498.984 |
| M33197    | 62383.863 | 59262.914 | AK025869  | 4626.436  | 5242.462  |
| AF147356  | 8059.985  | 5155.412  | M33197    | 61022.797 | 54035.727 |
| NM_018843 | 3999.408  | 3042.538  | AF056430  | 575.672   | 745.114   |
| AL049461  | 2079.162  | 2355.893  | AF009291  | 667.273   | 1097.566  |
| M33197    | 60778.656 | 64739.234 | M33197    | 62918.438 | 61188.316 |
| AL109782  | 7612.561  | 8279.74   | NM_018055 | 3022.733  | 2726.935  |
| AF086225  | 1313.459  | 1320.059  | AK002199  | 1170.327  | 1349.869  |
| NM_005844 | 10805.633 | 9219.335  | AK021662  | 1397.799  | 979.609   |
| AK024941  | 3287.169  | 3809.711  | AK021706  | 2805.343  | 3132.589  |
| M33197    | 43482.605 | 44500.852 | M33197    | 57430.324 | 52455.09  |
| AK025489  | 2150.55   | 1875.662  | AK025161  | 554.791   | 750.227   |
| AL390152  | 4978.808  | 4318.016  | AK025387  | 926.565   | 1126.469  |
| M33197    | 63317.301 | 65387.137 | AK026259  | 43710.762 | 46439.496 |
| NM_018126 | 3521.993  | 3237.713  | AJ008115  | 19022.711 | 25094.242 |
| AK024506  | 6159.277  | 4643.475  | AF083125  | 1386.484  | 908.206   |
| NM_014179 | 2983.751  | 2213.599  | M33197    | 65143.828 | 65483.449 |
| AF086326  | 4568.542  | 3265.402  | AK022970  | 782.787   | 1127.175  |
| M33197    | 71016     | 63745.754 | AK026212  | 2268.214  | 3373.292  |
| AL080057  | 710.82    | 642.122   | AF086222  | 2203.98   | 2822.095  |
| AL117528  | 1124.042  | 646.133   | AF086415  | 2855.975  | 2765      |
| M33197    | 62526.113 | 57546.578 | M33197    | 61768.043 | 60845.082 |
| AK025948  | 825.433   | 866.51    | AK024470  | 1509.422  | 1209.78   |
| AJ238555  | 698.564   | 673.515   | NM_004226 | 5536.98   | 5442.657  |
| AL353948  | 35256.391 | 31041.791 | NM_006432 | 16408.941 | 19506.635 |
| AL122043  | 762.689   | 577.915   | AK023897  | 1030.317  | 936.229   |
| M33197    | 61086.371 | 62009.57  | AF025441  | 2945.638  | 2431.801  |
| AK025869  | 10275.663 | 8923.365  | U62823    | 1879.588  | 1665.364  |
| M33197    | 62815.004 | 56975.648 | NM_003535 | 11365.943 | 9692.768  |
| AF056430  | 1470.367  | 1148.319  | AK026768  | 2048.256  | 2136.313  |
| AF009291  | 2080.792  | 1710.178  | M33197    | 58981.895 | 65970.148 |
| M33197    | 62069.336 | 57120.785 | AK000852  | 10226.827 | 21855.053 |
| NM_018055 | 3578.394  | 3052.532  | AF251188  | 3283.492  | 6001.643  |
| AK002199  | 2578.753  | 1810.759  | AK026418  | 2722.179  | 4873.494  |
| AK021662  | 1820.751  | 1282.761  | AF086194  | 18568.184 | 31436.482 |
| AK001038  | 845.938   | 528.539   | AK026811  | 2784.421  | 3969.447  |
| AK001802  | 1162.365  | 979.133   | M33197    | 58807.063 | 57958.438 |
| AK021469  | 1437.802  | 1231.581  | AK023633  | 956.652   | 1115.379  |
| AK021706  | 3180.531  | 1964.676  | NM_006179 | 1273.678  | 1316.928  |
| M33197    | 63189.047 | 62111.586 | AL360165  | 2266.831  | 2213.622  |
| AK026052  | 2374.564  | 1192.422  | M33197    | 59406.004 | 63280.27  |
| AK025161  | 672.143   | 854.544   | AJ008132  | 4887.659  | 5974.62   |
| AK026259  | 52248.648 | 51109.965 | NM_005281 | 5165.146  | 5872.347  |
| AJ008115  | 43598.887 | 35351.984 | NM_005549 | 3042.241  | 2932.301  |
| AF083125  | 1882.077  | 1532.561  | M33197    | 58072.203 | 61754.734 |
| M33197    | 66170.391 | 64464.457 | U12129    | 768.704   | 838.958   |
| AK022970  | 2061.435  | 1971.182  | S81242    | 56741.57  | 59797.676 |
| AK026212  | 3491.357  | 3588.498  | AF230801  | 718.745   | 1046.751  |
| AF086222  | 4563.58   | 4349.59   | AF075072  | 853.093   | 2387.073  |
| AF086415  | 2883.65   | 3047.316  | M33197    | 60465.992 | 64883.727 |

|           |           |           |           |           |           |
|-----------|-----------|-----------|-----------|-----------|-----------|
| M33197    | 62349.262 | 63239.523 | NM_002509 | 1789.97   | 3187.092  |
| NM_004226 | 9289.164  | 9057.304  | U38442    | 4744.152  | 7939.113  |
| AK023400  | 811.235   | 803.693   | AF110136  | 819.373   | 1382.49   |
| NM_006432 | 25092.797 | 24197.426 | AK026706  | 1726.621  | 3120.104  |
| AK023897  | 2115.357  | 2093.27   | AB007936  | 42030.969 | 47332.043 |
| AF025441  | 3369.81   | 2593.936  | D28391    | 12189.073 | 12135.973 |
| U62823    | 2605.017  | 2302.831  | M33197    | 45909.313 | 33934.5   |
| NM_003535 | 21356.959 | 20613.789 | D86961    | 1004.857  | 1170.468  |
| AK026768  | 3075.332  | 2813.112  | AJ227896  | 5295.769  | 7631.316  |
| M33197    | 62649.125 | 63102.754 | L32841    | 2317.142  | 2897.469  |
| AK000852  | 20884.135 | 17177.859 | M33197    | 51830.742 | 55487.324 |
| AF251188  | 4008.247  | 3345.023  | AF131770  | 3330.34   | 2600.513  |
| AK026418  | 4297.418  | 3353.21   | CY3Cy5    | 4382.864  | 237.015   |
| AF086194  | 22512.221 | 17399.104 | AI298534  | 646.719   | 986.482   |
| AK026811  | 5095.539  | 5705.796  | R71691    | 668.22    | 870.749   |
| M33197    | 62613.703 | 61364.152 | AW167715  | 553.521   | 607.802   |
| AK023633  | 3083.765  | 2882.343  | AA424735  | 1577.609  | 1466.637  |
| NM_006179 | 2180.48   | 1522.889  | U78294    | 3066.56   | 3112.256  |
| AL360165  | 2697.61   | 2870.616  | BI760394  | 5092.32   | 4568.468  |
| AJ008132  | 7240.336  | 8943.464  | AA555216  | 513.651   | 461.913   |
| NM_005281 | 8012.879  | 7568.077  | H66070    | 2811.134  | 3211.25   |
| NM_005549 | 4349.76   | 3761.916  | AA164741  | 9865.564  | 5924.48   |
| M33197    | 60947.82  | 55130.504 | AI189375  | 606.392   | 182.351   |
| U12129    | 2908.944  | 3036.865  | AI978885  | 2086.328  | 1133.453  |
| S81242    | 51316.355 | 42840.684 | AK054960  | 12595.366 | 8413.825  |
| AF230801  | 1624.49   | 1309.48   | L15344    | 2382.343  | 2006.993  |
| M33197    | 61435.258 | 55717.906 | SR1       | 57709.746 | 64923.656 |
| NM_002509 | 3167.225  | 2919.758  | SR3       | 24309.297 | 18494.33  |
| U38442    | 6294.983  | 6257.402  | SR5       | 5605.258  | 4986.097  |
| AF110136  | 1650.603  | 1167.75   | SR7       | 3266.867  | 22293.246 |
| AK026706  | 2360.008  | 1692.542  | SR9       | 12091.348 | 1866.473  |
| AB007936  | 49530.25  | 44734.145 | CY3Cy5    | 3280.048  | 152.087   |
| D28391    | 28326.85  | 23886.176 | NM_014586 | 4168.484  | 4428.251  |
| M33197    | 52411.641 | 49081.293 | NM_006453 | 1311.851  | 1420.612  |
| D86961    | 1628.499  | 1042.308  | NM_018096 | 963.62    | 1447.456  |
| AJ227896  | 14198.642 | 10294.591 | AL390078  | 463.569   | 553.92    |
| M33197    | 60454.777 | 56895.953 | NM_004036 | 1539.395  | 1302.811  |
| AF131770  | 3299.005  | 3099.276  | NM_015986 | 2874.942  | 3295.733  |
| CY3Cy5    | 7463.712  | 378.393   | NM_006546 | 769.077   | 430.431   |
| AI298534  | 1061.227  | 1515.122  | NM_003992 | 3802.588  | 4629.262  |
| R71691    | 1550.538  | 1453.949  | AF279265  | 2295.801  | 4168.857  |
| AW167715  | 831.564   | 1005.522  | NM_005213 | 1687.185  | 2970.835  |
| AA424735  | 3635.849  | 3741.072  | AB040914  | 1134.361  | 974.456   |
| U78294    | 5419.969  | 5987.838  | NM_002997 | 4426.75   | 5235.364  |
| AA171613  | 541.883   | 493.624   | NM_002379 | 10596.025 | 5036.085  |
| BI760394  | 6338.366  | 7064.708  | AB007929  | 3796.681  | 2224.155  |
| AA555216  | 595.111   | 760.979   | NM_004579 | 3594.924  | 2799.364  |
| U09117    | 9931.692  | 9233.459  | AA203126  | 1573.39   | 1088.88   |
| M21054    | 250.149   | 512.578   | L12347    | 2223.244  | 1396.049  |
| M18468    | 1053.169  | 767.732   | NM_001622 | 1546.226  | 1186.419  |
| H66070    | 3087.542  | 3025.756  | Z36788    | 1116.546  | 776.292   |
| AA164741  | 9169.822  | 9637.478  | NM_018477 | 3744.179  | 3073.138  |
| AI189375  | 827.23    | 517.448   | U20536    | 1419.185  | 1416.023  |



|           |           |           |           |           |           |
|-----------|-----------|-----------|-----------|-----------|-----------|
| AI978885  | 1946.634  | 1733.654  | NM_001494 | 10958.214 | 13316.117 |
| AK054960  | 13502.444 | 12471.271 | NM_017707 | 625.668   | 670.142   |
| L15344    | 3175.574  | 3203.496  | NM_004206 | 3299.874  | 3055.767  |
| SR1       | 56353.426 | 53010.379 | NM_004603 | 10220.127 | 6375.581  |
| SR7       | 5077.042  | 43895.887 | AK022849  | 2060.221  | 3669.566  |
| SR9       | 18943.475 | 4331.285  | NM_001939 | 3673.675  | 4443.458  |
| NM_014586 | 5566.689  | 6805.891  | NM_003279 | 9586.924  | 10106.705 |
| NM_014366 | 12343.358 | 13539.206 | AB014599  | 3580.651  | 3199.263  |
| NM_000923 | 1023.189  | 1030.184  | NM_004393 | 462.918   | 516.437   |
| NM_006453 | 1951.058  | 2324.594  | AB018345  | 829.175   | 672.909   |
| NM_018096 | 2125.06   | 2366.61   | NM_005832 | 572.09    | 386.971   |
| AL390078  | 999.639   | 945.248   | AW407841  | 913.058   | 545.576   |
| NM_004036 | 2051.538  | 2582.973  | AF264014  | 6859.256  | 5502.758  |
| NM_015986 | 2052.971  | 2558.184  | NM_001831 | 641.283   | 325.566   |
| NM_006546 | 1186.95   | 1217.18   | NM_000137 | 2099.093  | 2143.255  |
| NM_014959 | 1582.569  | 2380.526  | NM_012102 | 3309.052  | 4895.185  |
| NM_003992 | 3738.702  | 4291.065  | NM_005017 | 26852.689 | 28579.043 |
| AF279265  | 4249.466  | 3902.349  | AF163572  | 11879.172 | 10881.052 |
| NM_005213 | 3553.246  | 3214.333  | NM_000897 | 2627.511  | 2312.308  |
| AB040914  | 1146.152  | 1135.307  | NM_000487 | 945.331   | 448.562   |
| NM_002997 | 3589.722  | 3706.815  | NM_006411 | 19109.73  | 17083.771 |
| NM_002379 | 10683.307 | 10221.364 | NM_014182 | 2822.174  | 3477.022  |
| AB007929  | 4544.631  | 4860.836  | NM_000492 | 9475.624  | 12673.928 |
| NM_004579 | 5083.278  | 4857.338  | NM_012089 | 1051.549  | 1524.218  |
| AA203126  | 2147.073  | 2214.668  | NM_004696 | 700.698   | 739.588   |
| L12347    | 3682.388  | 3754.804  | AB043997  | 730.774   | 583.523   |
| NM_004853 | 8735.527  | 10236.302 | NM_001773 | 775.118   | 788.82    |
| NM_001494 | 12744.139 | 14391.092 | Z70704    | 1692.745  | 2115.063  |
| NM_017707 | 2989.293  | 2469.579  | NM_014363 | 1258.818  | 1469.507  |
| NM_004206 | 5122.777  | 6387.89   | NM_000557 | 3872.618  | 3859.326  |
| NM_004603 | 10631.308 | 11367.703 | NM_003239 | 751.203   | 618.375   |
| AK022849  | 2886.176  | 2605.105  | NM_001375 | 4464.588  | 2355.797  |
| AF040964  | 5770.914  | 6507.55   | NM_002312 | 2021.731  | 1607.32   |
| NM_001939 | 3618.365  | 3860.765  | M20699    | 2715.785  | 2407.803  |
| NM_003279 | 12888.554 | 12069.563 | NM_004774 | 7115.419  | 7332.11   |
| AB014599  | 4760.524  | 3797.195  | NM_016937 | 3316.43   | 3592.286  |
| NM_004393 | 771.548   | 454.538   | NM_002690 | 7258.824  | 10480.002 |
| AB018345  | 684.604   | 832.036   | NM_016508 | 1424.598  | 1257.125  |
| NM_005832 | 478.958   | 703.679   | NM_006456 | 4764.88   | 4065.203  |
| AW407841  | 931.486   | 1088.089  | AK026062  | 4101.445  | 3417.391  |
| U15197    | 126.142   | 643.693   | NM_003135 | 6212.246  | 6544.582  |
| NM_001879 | 1808.931  | 1757.923  | L12347    | 4847.482  | 3049.688  |
| AF264014  | 6718.696  | 5878.402  | NM_001622 | 1980.075  | 1375.753  |
| NM_000137 | 3605.793  | 3577.028  | Z36788    | 1095.558  | 858.033   |
| NM_012102 | 4529.668  | 4343.036  | NM_018477 | 4216.388  | 2694.498  |
| NM_005017 | 25396.098 | 30492.678 | U20536    | 1395.25   | 780.208   |
| AF163572  | 12600.222 | 13124.554 | AI298534  | 465.418   | 294.274   |
| NM_000897 | 3072.011  | 2748.914  | R71691    | 495.756   | 549.213   |
| NM_000487 | 1259.543  | 1442.062  | AW167715  | 484.65    | 387.71    |
| NM_006411 | 17790.273 | 17789.912 | AA424735  | 1732.033  | 1528.17   |
| NM_014182 | 2863.935  | 3150.355  | U78294    | 4232.401  | 4387.093  |
| AB040884  | 444.995   | 682.343   | BI760394  | 7526.568  | 6285.787  |
| NM_000492 | 10331.85  | 11549.51  | M18468    | 632.159   | 470.02    |

|           |           |           |           |           |           |
|-----------|-----------|-----------|-----------|-----------|-----------|
| NM_012089 | 1422.754  | 1361.236  | H66070    | 3934.483  | 2411.677  |
| NM_001170 | 2049.575  | 1856.943  | AA164741  | 9572.474  | 6238.011  |
| AL137716  | 969.203   | 759.086   | AI189375  | 2480.846  | 2266.766  |
| NM_004696 | 1111.208  | 1168.622  | L15344    | 2690.155  | 3637.435  |
| NM_014342 | 3674.961  | 3651.919  | NM_001665 | 12182.064 | 7657.048  |
| Z50169    | 706.802   | 833.12    | NM_001879 | 1907.87   | 1509.462  |
| AB043997  | 1233.896  | 1304.395  | AF264014  | 4789.579  | 4602.45   |
| NM_001773 | 1141.515  | 1189.906  | NM_001831 | 446.609   | 220.471   |
| Z70704    | 2435.226  | 2143.154  | NM_014586 | 3444.892  | 2530.625  |
| NM_014363 | 2369.904  | 2225.105  | NM_014366 | 5447.1    | 4984.422  |
| NM_000557 | 4275.769  | 4051.375  | NM_000923 | 465.212   | 542.577   |
| NM_003239 | 1616.004  | 1813.992  | NM_006453 | 1202.004  | 1426.673  |
| NM_001375 | 6106.948  | 6989.914  | NM_018096 | 1272.897  | 1480.547  |
| NM_002312 | 3931.59   | 4184.069  | AL390078  | 733.131   | 880.855   |
| M20699    | 3290.034  | 4050.494  | NM_004036 | 2275.431  | 2581.302  |
| NM_004774 | 8275.403  | 7640.735  | NM_015986 | 4075.651  | 4411.868  |
| NM_016937 | 4122.195  | 4805.099  | NM_006546 | 1014.381  | 935.461   |
| NM_002690 | 9430.9    | 10974.672 | NM_014959 | 2437.796  | 2800.22   |
| NM_012328 | 4130.599  | 3995.462  | NM_003992 | 3934.25   | 3497.777  |
| NM_007341 | 655.023   | 780.589   | AF279265  | 3863.069  | 4237.795  |
| NM_016508 | 1624.593  | 2059.206  | NM_005213 | 2390.049  | 2994.771  |
| NM_006456 | 10823.227 | 9775.471  | AB040914  | 1252.232  | 940.953   |
| AK026062  | 5777.579  | 7412.567  | NM_002997 | 5161.742  | 4355.455  |
| AF047002  | 41200.27  | 53757.258 | NM_002379 | 13351.908 | 13210.953 |
| AL050082  | 4289.643  | 4307.296  | AB007929  | 5505.343  | 6247.098  |
| NM_006623 | 64453.629 | 64959.109 | NM_004579 | 4886.154  | 5010.743  |
| NM_016588 | 40848.422 | 40801.809 | AA203126  | 1912.384  | 1517.735  |
| NM_003135 | 10243.539 | 9435.833  | Z50169    | 442.989   | 297.446   |
| L12347    | 7204.173  | 6590.446  | AB043997  | 897.204   | 713.364   |
| NM_001622 | 2634.57   | 2859.764  | NM_004853 | 6148.432  | 4485.205  |
| Z36788    | 1366.035  | 1497.208  | NM_001494 | 12719.005 | 12262.496 |
| NM_018477 | 7104.189  | 7304.451  | NM_017707 | 849.73    | 1092.822  |
| U20536    | 2464.854  | 2221.012  | NM_004206 | 3895.046  | 4073.048  |
| AI298534  | 747.865   | 483.901   | NM_004603 | 14686.453 | 15320.773 |
| R71691    | 1428.363  | 1218.688  | AK022849  | 2512.958  | 2006.658  |
| AW167715  | 851.787   | 783.8     | AF040964  | 6039.49   | 6048.813  |
| AA424735  | 2891.068  | 3253.44   | NM_001939 | 3234.715  | 2964.57   |
| U78294    | 6168.127  | 5467.772  | NM_003279 | 13562.586 | 12747.587 |
| AA171613  | 818.667   | 619.104   | AB014599  | 3852.834  | 3219.068  |
| BI760394  | 6620.408  | 7637.398  | NM_004393 | 492.416   | 525.456   |
| AA555216  | 575.227   | 804.802   | AB018345  | 550.792   | 588.812   |
| U09117    | 10329.53  | 9954.988  | NM_005832 | 609.123   | 558.423   |
| M21054    | 308.957   | 579.803   | AW407841  | 792.568   | 591.213   |
| M18468    | 553.678   | 653.512   | U15197    | 521.939   | 295.27    |
| H66070    | 2521.53   | 3305.569  | AL050082  | 2551.689  | 2162.289  |
| AA164741  | 10231.035 | 10235.865 | NM_006623 | 55765.871 | 38326.266 |
| AI189375  | 773.3     | 831.166   | NM_016588 | 27805.174 | 19929.135 |
| AI978885  | 2355.058  | 2651.814  | NM_003135 | 5729.694  | 5511.109  |
| AK054960  | 17435.322 | 19478.703 | NM_000137 | 2711.479  | 2208.805  |
| L15344    | 3541.323  | 3606.471  | NM_012102 | 4442.279  | 7015.857  |
| NM_014470 | 569.507   | 931.094   | NM_005017 | 43233.168 | 47786.266 |
| NM_001665 | 21429.439 | 24113.57  | AF163572  | 18478.41  | 20073.396 |
| NM_001879 | 1769.235  | 1777.131  | NM_000897 | 3800.868  | 3856.546  |

|           |           |           |           |           |           |
|-----------|-----------|-----------|-----------|-----------|-----------|
| AF264014  | 7277.783  | 8070.023  | NM_000487 | 1056.19   | 913.235   |
| L09098    | 389.6     | 549.304   | NM_006411 | 23105.1   | 27748.039 |
| NM_001831 | 730.537   | 884.634   | NM_014182 | 2391.244  | 2291.665  |
| NM_014586 | 5698.803  | 6104.784  | NM_000492 | 9056.004  | 9323.216  |
| NM_014366 | 11324.539 | 11300.911 | NM_012089 | 1091.351  | 744.807   |
| NM_000923 | 663.578   | 1023.372  | NM_001170 | 6830.492  | 8882.823  |
| NM_006453 | 2094.229  | 2241.683  | AL137716  | 384.45    | 685.972   |
| NM_018096 | 1769.688  | 1871.038  | NM_004696 | 954.052   | 1251.902  |
| AL390078  | 749.012   | 1066.653  | NM_014342 | 1902.044  | 1529.12   |
| NM_004036 | 1642.818  | 1671.407  | AK054960  | 9507.252  | 7419.642  |
| NM_015986 | 3349.041  | 4266.319  | L15344    | 2447.024  | 1422.206  |
| NM_006546 | 802.091   | 1039.897  | NM_014470 | 373.159   | 372.167   |
| NM_014959 | 1701.83   | 1709.597  | NM_001665 | 16455.672 | 15162.632 |
| NM_003992 | 3264.981  | 2992.327  | NM_001773 | 1723.149  | 1544.198  |
| AF279265  | 3072.297  | 3141.271  | Z70704    | 1899.719  | 1707.403  |
| NM_005213 | 2773.389  | 2706.25   | NM_014363 | 1164.464  | 1289.055  |
| AB040914  | 1556.291  | 1224.714  | NM_000557 | 4509.176  | 4518.788  |
| NM_002997 | 5168.573  | 4885.31   | NM_003239 | 1229.496  | 1553.889  |
| NM_002379 | 8885.515  | 7001.882  | NM_001375 | 7323.816  | 7543.219  |
| AB007929  | 4970.064  | 4984.688  | NM_002312 | 2765.761  | 2956.455  |
| NM_004579 | 4790.57   | 4625.407  | M20699    | 2853.219  | 3293.48   |
| AA203126  | 2538.681  | 2494.005  | NM_004774 | 8059.757  | 8648.475  |
| Z50169    | 804.505   | 847.993   | NM_016937 | 3486.082  | 3586.035  |
| AB043997  | 1166.174  | 1336.847  | NM_002690 | 6674.025  | 5641.258  |
| NM_004853 | 8313.389  | 7993.886  | NM_012328 | 2914.784  | 3281.794  |
| NM_001494 | 14950.839 | 16466.461 | NM_007341 | 802.689   | 925.377   |
| NM_017707 | 970.142   | 1102.954  | NM_016508 | 1422.568  | 1331.936  |
| NM_004206 | 4991.768  | 5886.08   | NM_006456 | 13189.959 | 13809.12  |
| NM_004603 | 8449.003  | 8855.708  | AB040914  | 838.858   | 633.18    |
| AK022849  | 2262.308  | 2386.489  | NM_002997 | 3544.099  | 1825.733  |
| AF040964  | 5942.819  | 5818.545  | NM_002379 | 10125.431 | 7466.469  |
| NM_001939 | 2768.835  | 2805.742  | AB007929  | 3793.302  | 3718.447  |
| NM_003279 | 8086.826  | 7867.984  | NM_004579 | 4183.63   | 4114.684  |
| AB014599  | 3926.941  | 3916.25   | AA203126  | 1587.057  | 1290.177  |
| NM_004393 | 617.114   | 585.354   | L12347    | 4256.503  | 3213.246  |
| NM_005832 | 892.176   | 845.896   | NM_001622 | 1779.001  | 1805.757  |
| AW407841  | 1339.022  | 1267.868  | Z36788    | 1037.455  | 1009.821  |
| AL050082  | 3981.2    | 4680.388  | NM_018477 | 4733.872  | 5349.356  |
| NM_006623 | 55714.41  | 53567.57  | U20536    | 1398.819  | 1404.827  |
| NM_016586 | 37984.461 | 37314.867 | AI298534  | 643.388   | 773.473   |
| NM_003135 | 8433.813  | 8308.613  | R71691    | 798.362   | 928.315   |
| NM_000137 | 4247.858  | 4269.36   | AW167715  | 601.689   | 850.844   |
| NM_012102 | 5435.521  | 4602.678  | AA424735  | 2363.113  | 1784.588  |
| NM_005017 | 25618.275 | 28094.92  | U78294    | 4113.321  | 5243.502  |
| AF163572  | 12310.323 | 12842.627 | BI760394  | 6356.576  | 5700.9    |
| NM_000897 | 3883.328  | 3393.292  | AA555216  | 548.958   | 566.431   |
| NM_000487 | 1067.477  | 1347.666  | U09117    | 23977.041 | 22326.443 |
| NM_006411 | 18217.602 | 20035.746 | AB014599  | 2603.106  | 1223.57   |
| NM_014182 | 2789.628  | 2906.536  | NM_004393 | 477.777   | 322.85    |
| AB040884  | 719.597   | 251.291   | AB018345  | 405.765   | 315.441   |
| NM_000492 | 8278.046  | 8802.909  | AW407841  | 474.503   | 432.258   |
| NM_012089 | 1139.177  | 1339.1    | NM_001879 | 1421.42   | 1113.265  |
| AK024382  | 603.174   | 579.328   | AF264014  | 4576.534  | 4637.742  |

|           |           |           |           |           |           |
|-----------|-----------|-----------|-----------|-----------|-----------|
| NM_001170 | 6440.852  | 5815.885  | NM_001831 | 604.197   | 378.892   |
| AL137716  | 961.075   | 871.662   | NM_014586 | 4218.686  | 3869.041  |
| NM_004696 | 1044.15   | 701.096   | NM_014366 | 7396.496  | 8871.792  |
| NM_014342 | 3653.153  | 3465.896  | NM_000923 | 643.051   | 756.547   |
| AK054960  | 17637.326 | 15508.578 | NM_006453 | 1011.07   | 1190.641  |
| L15344    | 4865.39   | 4393.006  | NM_018096 | 1200.854  | 1619.612  |
| NM_014470 | 532.916   | 792.629   | AL390078  | 652.566   | 611.953   |
| NM_001665 | 22042.555 | 26683.902 | NM_004036 | 2088.325  | 1903.052  |
| NM_001773 | 897.573   | 1032.663  | NM_015986 | 3265.006  | 2667.017  |
| Z70704    | 1962.441  | 2173.857  | NM_006546 | 816.388   | 366.326   |
| NM_014363 | 2262.48   | 1959.819  | NM_014959 | 2453.035  | 2190.726  |
| NM_000557 | 3830.211  | 3575.361  | NM_003992 | 5416.466  | 4287.394  |
| NM_003239 | 1447.267  | 1064.596  | AF279265  | 2747.364  | 2177.752  |
| NM_001375 | 5894.538  | 5220.975  | NM_007350 | 303.114   | 335.94    |
| NM_002312 | 3544.787  | 3299.631  | NM_005213 | 2043.948  | 2154.817  |
| M20699    | 3815.891  | 4480.486  | AL137716  | 649.77    | 881.996   |
| NM_004774 | 8303.624  | 8175.163  | NM_004696 | 876.81    | 1628.725  |
| NM_016937 | 3697.118  | 4875.726  | NM_014342 | 1901.438  | 2500.481  |
| NM_002690 | 9174.926  | 10715.211 | Z50169    | 316.757   | 224.628   |
| NM_012328 | 4411.466  | 4852.232  | AB043997  | 925.704   | 1001.236  |
| NM_007341 | 735.085   | 654.966   | NM_004853 | 5843.22   | 5233.666  |
| NM_016508 | 2055.502  | 2026.759  | NM_001494 | 11697.134 | 11723.706 |
| NM_006456 | 8917.201  | 7465.391  | NM_017707 | 685.363   | 517.252   |
| AK026062  | 6085.362  | 6227.057  | NM_004206 | 3483.596  | 1875.539  |
| AF047002  | 35153.027 | 41950.793 | NM_004603 | 10340.313 | 11148.968 |
| AB040914  | 1534.48   | 1678.599  | AK022849  | 2773.507  | 2239.492  |
| NM_002997 | 5565.765  | 6098.492  | AF040964  | 5786.895  | 6829.753  |
| NM_002379 | 12274.241 | 12568.365 | NM_001939 | 3323.95   | 3694.557  |
| AB007929  | 5018.527  | 5495.068  | NM_003279 | 11339.55  | 12040.079 |
| NM_004579 | 5596.666  | 5120.224  | NM_016508 | 1446.736  | 1435.298  |
| AA203126  | 2212.561  | 2160.807  | NM_006456 | 12307.798 | 15290.431 |
| L12347    | 4320.155  | 4187.381  | AK026062  | 4489.297  | 4815.038  |
| NM_001622 | 3152.405  | 2709.828  | AF047002  | 30959.732 | 34442.973 |
| Z36788    | 1061.856  | 1112.198  | AL050082  | 3206.139  | 3445.374  |
| NM_018477 | 6035.575  | 5851.351  | NM_012102 | 5262.209  | 6394.99   |
| U20536    | 1712.275  | 2077.149  | NM_005017 | 37150.805 | 36130.102 |
| AI298534  | 498.844   | 440.551   | AF163572  | 5851.417  | 4557.502  |
| R71691    | 1413.737  | 1268.172  | NM_000897 | 3227.108  | 3226.143  |
| AW167715  | 621.405   | 398.632   | NM_000487 | 1014.947  | 1301.379  |
| AA424735  | 2120.93   | 2099.922  | NM_006411 | 22196.057 | 21675.037 |
| U78294    | 4973.626  | 5233.224  | NM_014182 | 2493.625  | 2109.564  |
| AA171613  | 307.641   | 858.693   | AB040884  | 489.877   | 569.565   |
| BI760394  | 6295.663  | 6982.107  | NM_000492 | 7953.292  | 8687.368  |
| AA555216  | 594.153   | 880.875   | NM_012089 | 1155.609  | 1077.457  |
| U09117    | 8505.068  | 8526.149  | AK024216  | 20320.854 | 20105.752 |
| M21054    | 712.836   | 1036.524  | Y16752    | 10364.937 | 12448.737 |
| M18468    | 671.39    | 817.528   | NM_014694 | 1059.882  | 1092.703  |
| H66070    | 3011.802  | 3657.129  | NM_020156 | 2351.29   | 3085.162  |
| AA164741  | 9703.254  | 10858.804 | NM_014830 | 1920.544  | 2212.802  |
| AI978885  | 1868.687  | 1880.999  | AF097645  | 548.902   | 634.811   |
| AB014599  | 5694.338  | 5213.053  | NM_000557 | 4709.33   | 5104.191  |
| NM_004393 | 678.921   | 696.071   | NM_003239 | 1114.434  | 1216.023  |
| AB018345  | 951.788   | 1120.204  | NM_001375 | 6844.767  | 6013.391  |

|           |           |           |           |           |           |
|-----------|-----------|-----------|-----------|-----------|-----------|
| NM_005832 | 634.97    | 797.085   | NM_002312 | 1762.237  | 2099.375  |
| AW407841  | 1101.264  | 1083.918  | M20699    | 916.856   | 956.335   |
| NM_001879 | 1200.387  | 1220.136  | NM_004774 | 5727.427  | 5778.715  |
| AF264014  | 5608.712  | 6186.058  | NM_016937 | 3490.418  | 3698.032  |
| NM_001831 | 485.237   | 991.785   | NM_002690 | 6314.54   | 5767.441  |
| NM_014586 | 3815.827  | 3888.36   | U88892    | 1871.091  | 831.062   |
| NM_014366 | 9880.89   | 7544.031  | AK023755  | 1134.069  | 983.807   |
| NM_000923 | 507.779   | 509.383   | NM_005725 | 1858.064  | 1223.536  |
| NM_006453 | 1625.827  | 1474.139  | AB040877  | 3609.266  | 2869.795  |
| NM_018096 | 1543.237  | 1823.551  | AB040927  | 470.801   | 516.936   |
| AL390078  | 482.65    | 619.163   | AK026737  | 1746.269  | 1440.999  |
| NM_004036 | 1191.229  | 1306.67   | NM_006289 | 4347.461  | 3657.1    |
| NM_015986 | 3163.323  | 3653.811  | NM_019067 | 2142.174  | 2054.64   |
| NM_006546 | 1057.927  | 954.364   | AF251025  | 575.225   | 617.903   |
| NM_014959 | 2333.308  | 2625.254  | NM_015677 | 4429.155  | 4384.751  |
| NM_003992 | 3110.59   | 3511.285  | NM_001772 | 4645.751  | 4985.592  |
| AF279265  | 3221.061  | 4064.513  | AB011087  | 700.385   | 784.659   |
| NM_005213 | 2954.363  | 2691.133  | AF161341  | 4786.654  | 5799.843  |
| NM_001170 | 8029.821  | 7575.287  | AJ249902  | 2552.82   | 2924.334  |
| AL137716  | 1186.564  | 1215.149  | NM_004384 | 2042.262  | 1878.152  |
| NM_004696 | 1267.464  | 1338.521  | L05500    | 9114.97   | 8151.536  |
| NM_014342 | 2961.584  | 3415.494  | NM_012306 | 27127.721 | 36180.758 |
| Z50169    | 764.961   | 639.868   | AF222903  | 2490.132  | 2657.642  |
| NM_000452 | 392.485   | 143.409   | NM_006226 | 2542.84   | 2753.572  |
| AB043997  | 940.079   | 1093.797  | L10374    | 10408.195 | 9753.519  |
| NM_004853 | 7796.503  | 7186.549  | AB016902  | 1996.632  | 2122.416  |
| NM_001494 | 11661.026 | 10665.042 | NM_005860 | 6960.329  | 4546.773  |
| NM_017707 | 829.743   | 791.089   | AF095288  | 25251.367 | 16131.795 |
| NM_004206 | 4963.086  | 6132.967  | AF090895  | 862.032   | 827.114   |
| NM_004603 | 11149.659 | 12456.441 | NM_005610 | 4168.996  | 3456.981  |
| AK022849  | 2230.347  | 2728.279  | AL133651  | 1248.577  | 1505.494  |
| AF040964  | 6213.528  | 7645.284  | AB014532  | 4187.296  | 4350.976  |
| NM_001939 | 2856.47   | 3128.002  | NM_003478 | 2583.344  | 2705.438  |
| NM_003279 | 8606.424  | 8833.229  | NM_016237 | 3957.084  | 3652.693  |
| NM_012328 | 4917.769  | 5246.787  | NM_004924 | 3129.079  | 2801.56   |
| NM_007341 | 1134.447  | 1011.159  | NM_001211 | 6925.388  | 7717.897  |
| NM_016508 | 1632.518  | 1805      | NM_006505 | 653.472   | 934.841   |
| NM_006456 | 8345.106  | 7458.495  | AB033050  | 1768.898  | 1979.39   |
| AK026062  | 4212.955  | 4887.208  | NM_004356 | 11305.256 | 11149.719 |
| AF047002  | 34458.133 | 40235.105 | NM_001855 | 406.956   | 503.635   |
| AL050082  | 2872.129  | 2834.005  | BC015022  | 3256.572  | 3696.524  |
| NM_006623 | 54309.246 | 49696.984 | NM_006697 | 2363.816  | 2089.991  |
| NM_016588 | 37063.727 | 36110.07  | M19182    | 634.769   | 452.197   |
| NM_003135 | 7613.977  | 7329.74   | AK025707  | 1472.539  | 1330.25   |
| NM_000137 | 3833.586  | 3567.197  | NM_002406 | 40414.285 | 43866.844 |
| NM_012102 | 5016.667  | 4135.639  | U87169    | 1751.438  | 1588.262  |
| NM_005017 | 24660.682 | 22835.736 | NM_002073 | 1095.927  | 929.891   |
| AF163572  | 11021.798 | 10111.381 | AF090327  | 534.555   | 628.629   |
| NM_000897 | 2800.112  | 2155.139  | NM_003291 | 4346.122  | 4194.707  |
| NM_000487 | 1125.704  | 1076.874  | AK022950  | 1703.109  | 1509.944  |
| NM_006411 | 20390.291 | 20555.273 | S75755    | 3679.067  | 3799.482  |
| NM_014182 | 2927.613  | 3526.327  | AF176518  | 1067.399  | 1152.347  |
| AB040884  | 430.424   | 447.534   | AB014576  | 11887.818 | 13901.726 |

|           |           |           |           |           |           |
|-----------|-----------|-----------|-----------|-----------|-----------|
| NM_000492 | 8436.693  | 10292.688 | NM_019044 | 4238.151  | 4180.119  |
| NM_012089 | 854.786   | 1199.426  | AK000145  | 618.459   | 955.201   |
| AJ272057  | 10771.829 | 12470.656 | AF279865  | 892.061   | 883.586   |
| NM_004402 | 943.215   | 1153.88   | NM_014700 | 1244.553  | 1431.66   |
| AK024216  | 12790.323 | 14582.333 | NM_014714 | 779.98    | 896.088   |
| Y16752    | 5517.308  | 5101.63   | NM_005687 | 6800.731  | 8031.179  |
| NM_014694 | 806.886   | 859.736   | NM_005983 | 7794.553  | 7997.599  |
| NM_020156 | 3092.831  | 3060.904  | NM_017652 | 6718.516  | 5792.301  |
| NM_014830 | 2048.043  | 1941.546  | X59268    | 4504.646  | 4616.135  |
| AF355402  | 2430.067  | 2024.623  | D70832    | 51365.34  | 52730.266 |
| AK000407  | 3299.331  | 2544.623  | NM_001429 | 3456.25   | 4306.685  |
| NM_014470 | 1611.846  | 1530.905  | M61870    | 1536.602  | 1968.55   |
| NM_001665 | 24585.57  | 29309.355 | AK026980  | 1304.904  | 976.992   |
| NM_001773 | 1202.674  | 1085.7    | NM_006467 | 2540.528  | 2786.915  |
| Z70704    | 2065.231  | 1920.471  | NM_017566 | 3999.994  | 3965.617  |
| NM_014363 | 2036.924  | 1687.821  | NM_006582 | 1079.522  | 937.559   |
| NM_000557 | 4238.289  | 3385.159  | AB033019  | 4791.191  | 5123.994  |
| NM_003239 | 963.751   | 998.937   | NM_001452 | 482.165   | 310.163   |
| NM_001375 | 6268.346  | 5399.051  | NM_006162 | 719.887   | 928.624   |
| NM_002312 | 3674.215  | 3357.648  | NM_014764 | 5240.36   | 4823.15   |
| M20699    | 2983.742  | 3023.296  | NM_018078 | 1889.266  | 1540.503  |
| NM_004774 | 6692.905  | 5456.506  | NM_016050 | 366.425   | 332.686   |
| NM_016937 | 3917.087  | 3826.421  | NM_007080 | 19709.967 | 17853.779 |
| NM_002690 | 10493.231 | 12467.042 | AK026912  | 3006.525  | 3279.748  |
| AB033086  | 277.17    | 670.833   | AK023531  | 8601.779  | 8393.903  |
| NM_018239 | 4753.586  | 4325.373  | AB011128  | 5859.011  | 6693.205  |
| U88892    | 755.1     | 803.184   | AK026742  | 1224.483  | 1608.121  |
| AK023755  | 772.948   | 651.537   | AK025074  | 3480.529  | 4351.368  |
| NM_005725 | 1773.515  | 1589.056  | NM_000303 | 11272.063 | 12392.975 |
| NM_012211 | 1020.592  | 990.15    | NM_006242 | 542.19    | 515.744   |
| AB040877  | 3705.426  | 3383.979  | X78712    | 742.326   | 576.768   |
| AB040927  | 612.07    | 576.581   | NM_006348 | 731.164   | 483.812   |
| AK026737  | 1901.219  | 1660.822  | AF067972  | 12373.534 | 13164.574 |
| NM_000210 | 3398.345  | 3499.292  | NM_004958 | 656.164   | 655.978   |
| NM_015677 | 5228.326  | 4670.016  | D87076    | 592.136   | 958.009   |
| NM_001772 | 8742.578  | 5976.399  | NM_014149 | 799.017   | 1041.705  |
| AB011087  | 548.23    | 729.116   | AB020635  | 1688.552  | 1874.88   |
| AF161341  | 4813.862  | 2721.38   | NM_006515 | 1071.877  | 1324.714  |
| AJ249902  | 1945.601  | 2042.982  | NM_005224 | 793.302   | 875.369   |
| NM_004384 | 2355.178  | 2000.208  | NM_012144 | 4595.201  | 4608.869  |
| L05500    | 8583.35   | 10590.411 | X65231    | 51062.355 | 53090.43  |
| NM_012306 | 24019.727 | 21527.994 | NM_002908 | 1469.842  | 1474.787  |
| AF222903  | 2346.179  | 2842.647  | AF205632  | 1959.808  | 2680.155  |
| NM_006226 | 2549.42   | 3339.043  | NM_005378 | 17160.291 | 17106.375 |
| L10374    | 9932.658  | 10113.85  | NM_002397 | 380.787   | 567.601   |
| AB016902  | 2180.104  | 2086.166  | AF000672  | 1747.255  | 2005.856  |
| AF272378  | 46119.348 | 45865.52  | AF086128  | 494.267   | 321.904   |
| NM_000249 | 2367.929  | 2700.427  | AK023831  | 448.742   | 553.502   |
| NM_005860 | 5968.264  | 5547.53   | AK022850  | 2613.627  | 2915.584  |
| AF095288  | 19440.043 | 24950.307 | NM_016490 | 1699.333  | 1545.388  |
| AK026271  | 12553.279 | 14941.034 | S66168    | 5113.544  | 6259.269  |
| NM_001799 | 7233      | 8752.61   | NM_003851 | 6455.726  | 6959.566  |
| AF090895  | 3003.936  | 2996.383  | AK024150  | 1708.367  | 1662.621  |

|           |           |           |           |           |           |
|-----------|-----------|-----------|-----------|-----------|-----------|
| AB014532  | 5893.1    | 5122.597  | AF070536  | 2777.943  | 3522.61   |
| NM_003478 | 3398.044  | 3050.94   | AK022297  | 1166.598  | 963.406   |
| NM_016237 | 4235.755  | 4560.435  | U79300    | 1786.542  | 1816.97   |
| NM_004924 | 3408.029  | 3984.667  | AK025151  | 13594.446 | 15984.228 |
| NM_001798 | 5378.425  | 6608.61   | AK025550  | 3553.558  | 3012.628  |
| NM_001211 | 5529.634  | 5663.64   | AF088076  | 21363.891 | 19473.018 |
| NM_006505 | 229.413   | 638.859   | AF086543  | 3182.429  | 3740.364  |
| AB033050  | 1741.324  | 1909.503  | AB046797  | 809.108   | 931.138   |
| NM_004356 | 10698.919 | 11159.483 | AK002098  | 1509.894  | 2350.304  |
| NM_001855 | 516.769   | 646.317   | AK025156  | 22842.961 | 17141.307 |
| BC015022  | 2382.114  | 2935.171  | AK022116  | 3790.478  | 3750.779  |
| NM_006697 | 2888.325  | 2839.653  | AF026526  | 2285.553  | 2530.055  |
| M19182    | 978.334   | 916.38    | AK026207  | 6208.657  | 5400.294  |
| AK025707  | 1809.277  | 2074.032  | AK024984  | 9140.595  | 8701.33   |
| NM_002406 | 53945.754 | 46425.688 | AL110236  | 467.793   | 624.164   |
| U87169    | 2239.179  | 3321.918  | AF085955  | 713.097   | 699.733   |
| NM_002073 | 970.378   | 1209.413  | AF075106  | 3567.907  | 3552.883  |
| AF117222  | 765.824   | 410.328   | AK023339  | 2157.115  | 2102.134  |
| NM_001935 | 27100.842 | 26806.682 | AF086008  | 1421.989  | 1410.123  |
| NM_001749 | 483.813   | 833.213   | AF087970  | 581.476   | 734.606   |
| AF090327  | 709.499   | 632.065   | AF086029  | 704.704   | 818.458   |
| AB032957  | 684.806   | 689.49    | AF075115  | 437.723   | 544.499   |
| NM_003291 | 5063.693  | 3797.844  | U05597    | 765.106   | 494.056   |
| AK022950  | 2226.196  | 1836.07   | U50524    | 464.84    | 687.255   |
| S75755    | 2603.893  | 2418.832  | U52050    | 586.055   | 767.747   |
| AF176518  | 840.058   | 743.084   | U73799    | 1227.534  | 1358.021  |
| AB014576  | 9925.052  | 10247.697 | AK021668  | 33597.199 | 27134.828 |
| NM_019044 | 3718.333  | 3773.603  | AF086148  | 22071.199 | 21960.994 |
| AF174601  | 3171.599  | 3391.262  | NM_018363 | 748.249   | 498.306   |
| AF279865  | 717.086   | 952.083   | AJ245433  | 10493.686 | 12555.825 |
| NM_014700 | 912.253   | 1064.878  | AK021942  | 24940.605 | 21049.494 |
| NM_014714 | 1238.025  | 1049.596  | NM_014127 | 1277.578  | 988.228   |
| NM_005687 | 4895.988  | 5554.887  | AL360187  | 978.629   | 660.733   |
| NM_005983 | 4894.445  | 6330.757  | AK021878  | 378.353   | 306.438   |
| NM_017652 | 9489.413  | 7801.383  | AK021817  | 1256.321  | 1530.772  |
| X59268    | 6288.441  | 5946.67   | AL080103  | 797.746   | 799.587   |
| D70832    | 49122.715 | 45963.395 | AK023217  | 1429.865  | 1331.469  |
| NM_001429 | 3336.36   | 3180.809  | AF090902  | 4556.485  | 4044.96   |
| M61870    | 1102.704  | 1313.337  | AF119887  | 15917.543 | 15866.197 |
| AK026980  | 1585.414  | 1411.606  | AK091038  | 614.426   | 542.17    |
| AJ277915  | 495.254   | 195.033   | AK024193  | 1695.815  | 1944.502  |
| NM_020368 | 2824.148  | 2069.499  | NM_018578 | 827.016   | 910.85    |
| AF024708  | 14410.814 | 10644.12  | NM_018543 | 294.074   | 331.287   |
| NM_006467 | 2254.074  | 2508.826  | AK024438  | 16137.39  | 17817.377 |
| NM_017566 | 3663.877  | 3833.031  | AF161337  | 723.013   | 785.599   |
| NM_006582 | 1640.269  | 1476.408  | AK022482  | 1878.754  | 1964.754  |
| NM_014764 | 4921.517  | 5088.146  | AK023382  | 704.377   | 620.767   |
| NM_018078 | 1450.371  | 1572.469  | AK023811  | 522.637   | 996.232   |
| NM_016050 | 690.175   | 459.892   | AK024135  | 452.465   | 545.271   |
| NM_007080 | 20900.199 | 23266.957 | AK022803  | 4145.8    | 4962.33   |
| AK026912  | 2576.879  | 2430.269  | AK023517  | 2035.251  | 1794.052  |
| AK023531  | 3376.932  | 3808.867  | AK023869  | 4779.278  | 4780.034  |
| AK024298  | 435.055   | 205.231   | NM_017728 | 1245.132  | 1063.59   |

|           |           |           |            |           |           |
|-----------|-----------|-----------|------------|-----------|-----------|
| AB011128  | 7742.548  | 6438.019  | U80772     | 1159.296  | 1077.369  |
| AK026742  | 1121.023  | 1386.852  | NM_006189  | 1340.767  | 1317.048  |
| AK025074  | 3436.199  | 3560.896  | AJ272177   | 1010.141  | 925.731   |
| NM_000303 | 9278.022  | 8812.895  | AK026402   | 22767.445 | 19675.852 |
| X78712    | 1032.309  | 920.375   | AF111846   | 2256.375  | 2254.46   |
| NM_001497 | 784.021   | 797.493   | M11948     | 54287.129 | 60761.492 |
| NM_004130 | 4468.827  | 4368.428  | AK024618   | 1167.7    | 1259.472  |
| NM_006348 | 1202.354  | 1009.267  | AL049969   | 935.202   | 1162.187  |
| AF067972  | 10341.856 | 8356.709  | NM_005220  | 1887.22   | 2261.377  |
| NM_004958 | 1182.263  | 1027.24   | AK000208   | 413.126   | 365.628   |
| D87076    | 1103.141  | 1131.928  | NM_014566  | 575.701   | 600.085   |
| NM_006515 | 1506.069  | 1308.725  | unknown (S | 324.764   | 102.619   |
| NM_005224 | 756.825   | 669.233   | AK021467   | 9074.328  | 8275.345  |
| NM_012144 | 2537.205  | 2437.399  | NM_020371  | 1493.147  | 1843.277  |
| X65231    | 54060.898 | 48441.582 | AK022498   | 2246.857  | 1996.669  |
| NM_002908 | 1495.894  | 1610.861  | U84506     | 2289.391  | 2438.799  |
| AF205632  | 1749.278  | 1566.781  | U21556     | 52890.117 | 60322.613 |
| NM_005378 | 14467.024 | 12112.579 | AB002344   | 2867.394  | 3093.666  |
| AF000672  | 1334.224  | 1603.935  | BF210352   | 1404.066  | 1197.854  |
| AK002195  | 513.442   | 420.103   | NM_006829  | 3987.733  | 4747.935  |
| AK022850  | 3621.911  | 3704.299  | NM_017669  | 17501.223 | 21442.123 |
| NM_016490 | 1877.411  | 2253.707  | AF147379   | 43970.676 | 43685.125 |
| AL137498  | 3027.047  | 2701.679  | AK023760   | 5505.989  | 5585.204  |
| AK024289  | 1111.169  | 1059.6    | X98415     | 52216.055 | 56491.59  |
| S66168    | 7290.726  | 4795.91   | AK024205   | 2861.726  | 3360.237  |
| AF131837  | 887.917   | 772.368   | AF086034   | 14864.792 | 14198.532 |
| NM_003851 | 11178.452 | 10331.501 | AK000174   | 600.562   | 1063.786  |
| U79244    | 918.196   | 947.996   | AF130071   | 996.223   | 1170.681  |
| AK024150  | 1853.436  | 1848.239  | AL390170   | 697.007   | 551.043   |
| AF070536  | 3363.083  | 2456.892  | AK022887   | 913.395   | 788.383   |
| U79300    | 1770.71   | 1533.341  | AK000745   | 16536.76  | 14035.675 |
| AK025151  | 10578.467 | 8711.423  | NM_005299  | 1074.336  | 1108.503  |
| AK025550  | 3360.304  | 3426.978  | NM_015901  | 1701.465  | 1997.531  |
| AF088076  | 15650.216 | 18565.102 | AF130065   | 634.03    | 925.016   |
| AF086543  | 2220.675  | 1859.775  | Z83935     | 1733.662  | 2541.351  |
| AB046797  | 596.101   | 798.24    | NM_018687  | 28603.918 | 25754.244 |
| AK002098  | 1962.784  | 1641.393  | M57417     | 45029.82  | 49533.895 |
| AK025156  | 21724.459 | 20978.178 | NM_020524  | 9512.532  | 10483.024 |
| AK022116  | 3246.491  | 3080.209  | NM_001999  | 1906.431  | 4735.425  |
| AK024984  | 11910.517 | 11545.173 | X64977     | 1236.16   | 2836.644  |
| AL110236  | 862.672   | 730.071   | AF064851   | 1505.836  | 1567.008  |
| AF085955  | 880.709   | 639.809   | NM_002602  | 9535.037  | 19826.373 |
| AF075106  | 4814.164  | 6310.315  | NM_016239  | 1418.004  | 1886.852  |
| AK023339  | 4708.859  | 5204.693  | NM_003383  | 2369.082  | 3051.927  |
| AF085981  | 939.658   | 470.947   | D17271     | 9081.274  | 10132.608 |
| AF086008  | 1538.274  | 1667.478  | X91648     | 978.526   | 1405.56   |
| AF087970  | 814.094   | 820.983   | AF282264   | 8470.579  | 9124.646  |
| AF086029  | 957.164   | 683.003   | AF086322   | 2305.324  | 2478.098  |
| AF075115  | 443.153   | 581.605   | Z70717     | 885.679   | 1117.512  |
| U05597    | 687.274   | 543.84    | AK024736   | 1166.56   | 1286.289  |
| U63332    | 917.222   | 603.059   | X79308     | 1161.99   | 1459.544  |
| U52050    | 911.315   | 668.759   | AF086476   | 649.627   | 612.652   |
| U73799    | 940.226   | 619.243   | NM_017660  | 6978.579  | 7076.432  |



|           |           |           |           |           |           |
|-----------|-----------|-----------|-----------|-----------|-----------|
| AK021668  | 26603.213 | 30663.395 | AB011151  | 8701.65   | 11129.971 |
| AF086148  | 16853.34  | 17160.539 | U92995    | 4979.087  | 6153.449  |
| NM_018363 | 1227.588  | 836.11    | Z70769    | 791.86    | 646.254   |
| AJ245433  | 11937.831 | 10793.258 | AL137555  | 1420.754  | 1565.73   |
| AK021942  | 19046.504 | 20469.66  | AL133017  | 1272.06   | 1216.83   |
| AK023217  | 2491.151  | 2290.881  | CY3Cy5    | 2215.482  | 113.964   |
| AK021883  | 387.603   | 768.852   | X00588    | 1007.638  | 1350.746  |
| AF090902  | 5379.143  | 4566.104  | AI359037  | 28460.666 | 26506.924 |
| AF119887  | 21616.418 | 19216.895 | BI754285  | 542.808   | 750.344   |
| AK091038  | 1095.069  | 1049.492  | X15998    | 2737.702  | 2962.063  |
| AK024193  | 2769.759  | 2333.014  | X17519    | 8912.861  | 7687.141  |
| NM_018578 | 764.958   | 692.152   | NM_001883 | 1099.916  | 1300.942  |
| AK024438  | 12811.336 | 12257.919 | NM_004628 | 1291.705  | 1897.476  |
| AK022482  | 1291.146  | 1126.272  | L31785    | 868.365   | 1167.158  |
| AK023811  | 704.162   | 716.395   | H-M 69043 | 3158.769  | 2887.397  |
| AK024135  | 1058.765  | 886.744   | AF077374  | 1002.774  | 978.553   |
| AK022803  | 2661.265  | 2620.672  | U43901    | 914.347   | 800.643   |
| AK023517  | 2102.706  | 2580.776  | X59065    | 974.936   | 683.786   |
| AK023869  | 4176.917  | 5096.947  | M59828    | 9726.844  | 5798.786  |
| NM_017728 | 1758.464  | 1415.271  | NM_016134 | 426.588   | 431.707   |
| U80772    | 1106.873  | 805.06    | SR2       | 41574.188 | 27342.086 |
| NM_006188 | 1216.672  | 1105.62   | SR4       | 9105.829  | 6733.889  |
| AJ272177  | 1042.655  | 1042.807  | SR6       | 1717.033  | 1303.041  |
| AK026402  | 18455.682 | 20614.131 | SR8       | 5453.139  | 15145.103 |
| AF111846  | 1995.871  | 2496.425  | SR10      | 18595.072 | 4836.522  |
| M11948    | 60165.773 | 51200.148 | CY3Cy5    | 1184.008  | 77.046    |
| AL049969  | 2498.987  | 2762.021  | NM_000612 | 5274.174  | 4251.783  |
| NM_005220 | 4051.102  | 2861.444  | NM_004257 | 8321.895  | 7501.368  |
| NM_018618 | 460.73    | 564.598   | NM_002844 | 2974.023  | 2252.245  |
| AK000208  | 886.578   | 674.628   | NM_000683 | 1152.611  | 1276.863  |
| AK000470  | 886.508   | 642.771   | NM_003629 | 1593.245  | 1859.33   |
| AK024229  | 29271.406 | 29821.521 | NM_005901 | 4760.627  | 4699.789  |
| AK021824  | 87.645    | 615.052   | NM_004248 | 1465.955  | 1500.341  |
| AK021467  | 6102.182  | 6131.532  | NM_000959 | 278.032   | 244.553   |
| NM_020371 | 1489.206  | 1732.495  | NM_001313 | 376.062   | 648.578   |
| AK022498  | 2099.723  | 1948.622  | NM_002362 | 809.593   | 1537.67   |
| U84506    | 2565.429  | 1771.69   | NM_004796 | 274.38    | 634.606   |
| U21556    | 59667.422 | 52610.676 | NM_000435 | 4402.074  | 3566.986  |
| AB002444  | 1124.601  | 890.709   | NM_001842 | 15898.896 | 14553.057 |
| AB002344  | 4402.517  | 4840.447  | AB017169  | 524.774   | 340.049   |
| BF210352  | 1429.946  | 1728.258  | AL080170  | 1581.63   | 1078.474  |
| NM_006828 | 3361.736  | 3107.366  | AB039903  | 3119.91   | 2420.643  |
| NM_017668 | 12857.502 | 11737.372 | NM_000542 | 10294.119 | 11150.431 |
| AF147379  | 30231.953 | 24260.098 | NM_006851 | 809.653   | 676.495   |
| AK023760  | 6114.444  | 4931.963  | AK001560  | 503.884   | 519.17    |
| X98415    | 56928.836 | 45346.645 | AB001328  | 662.137   | 724.959   |
| AK024205  | 3336.566  | 2741.125  | H99588    | 1013.029  | 669.702   |
| AF086034  | 18572.863 | 15790.973 | AK022600  | 9768.174  | 6809.146  |
| AK000174  | 1620.148  | 1573.175  | AK023142  | 2031.397  | 1395.861  |
| AF130071  | 2045.527  | 1859.623  | U61740    | 10218.318 | 8432.014  |
| AL390170  | 954.264   | 990.494   | NM_006409 | 46827.523 | 50116.344 |
| AK022887  | 1166.836  | 1037.481  | AB049054  | 2808.769  | 1731.649  |
| AK000745  | 18224.148 | 15964.17  | NM_015071 | 1349.297  | 934.709   |

|           |           |           |           |           |           |
|-----------|-----------|-----------|-----------|-----------|-----------|
| NM_005296 | 487.284   | 675.517   | NM_013227 | 1010.359  | 958.188   |
| NM_015901 | 934.513   | 1162.24   | Z83803    | 448.091   | 395.555   |
| AF130065  | 328.33    | 794.554   | AF027205  | 25745.766 | 20812.521 |
| Z83935    | 1023.791  | 857.331   | AF075012  | 1007.817  | 947.065   |
| AF093744  | 2013.064  | 2346.494  | NM_001570 | 485.488   | 666.989   |
| NM_018687 | 16216.04  | 16793.43  | NM_000589 | 1716.356  | 1171.18   |
| M57417    | 41449.262 | 40911.785 | NM_016546 | 7901.578  | 6024.827  |
| NM_020524 | 8953.834  | 5912.698  | AF309653  | 1474.643  | 1359.887  |
| NM_001996 | 3012.439  | 1677.143  | NM_002620 | 11534.053 | 8910.934  |
| X64977    | 2003.85   | 1069.123  | S79267    | 713.927   | 502.612   |
| AF064851  | 1522.327  | 1603.456  | NM_001816 | 639.203   | 553.502   |
| NM_002602 | 21608.314 | 12522.106 | NM_003784 | 38030.496 | 28858.215 |
| NM_016236 | 1362.767  | 759.377   | NM_000195 | 25563.666 | 22878.146 |
| NM_003383 | 2217.338  | 2152.223  | NM_005445 | 6597.052  | 4178.16   |
| D17271    | 2222.404  | 1780.974  | NM_014899 | 1613.928  | 1291.467  |
| X91648    | 2044.52   | 1461.879  | NM_003630 | 4211.791  | 3062.395  |
| AK026658  | 847.402   | 435.549   | NM_000046 | 1919.081  | 1477.422  |
| AF282264  | 7537.046  | 5379.391  | NM_003219 | 1310.676  | 1036.86   |
| AF086322  | 4361.847  | 4270.568  | NM_006709 | 2370.177  | 1371.209  |
| Z70717    | 2297.664  | 2263.284  | NM_004910 | 1075.388  | 724.134   |
| AK024736  | 1037.51   | 1299.339  | AB013452  | 833.503   | 495.482   |
| X79308    | 1262.59   | 901.34    | M93107    | 3701.148  | 2769.091  |
| NM_017660 | 6759.43   | 6163.972  | BC001479  | 3625.74   | 2531.009  |
| AB011151  | 4814.186  | 5033.493  | NM_002461 | 18854.125 | 13770.337 |
| U92995    | 6762.354  | 6423.859  | NM_005771 | 694.54    | 562.508   |
| Z70769    | 767.128   | 1214.738  | NM_001687 | 16844.779 | 19260.588 |
| NM_007106 | 2554.183  | 2568.519  | AK026374  | 1574.414  | 1447.221  |
| AL137555  | 2753.179  | 2476.912  | NM_001169 | 1362.274  | 928.267   |
| AL133017  | 1487.687  | 1654.874  | AK024648  | 4959.313  | 4526.084  |
| CY3Cy5    | 2772.124  | 201.139   | NM_000719 | 533.254   | 286.373   |
| X00588    | 774.733   | 931.103   | NM_003459 | 5500.248  | 5399.925  |
| AI359037  | 33287.715 | 31885.701 | NM_000171 | 552.821   | 607.862   |
| BI754285  | 775.278   | 571.13    | AL354615  | 1575.711  | 1419.051  |
| X15998    | 2460.45   | 2115.536  | NM_013349 | 37607.664 | 28563.008 |
| X17519    | 12354.582 | 12928.171 | NM_003705 | 2324.843  | 2041.097  |
| NM_001883 | 2297.954  | 1630.694  | NM_006861 | 1811.452  | 1444.9    |
| NM_004628 | 2075.281  | 2620.096  | NM_005829 | 3756.382  | 2748.172  |
| L31785    | 1096.426  | 844.119   | NM_000466 | 2039.786  | 1526.337  |
| H-M 69043 | 3140.709  | 3274.343  | NM_015544 | 3932.442  | 2270.512  |
| AF077374  | 1316.299  | 1028.504  | NM_015908 | 15791.503 | 14977.093 |
| U43901    | 905.669   | 785.973   | NM_000896 | 572.162   | 513.214   |
| X59065    | 606.01    | 693.25    | AB040672  | 1508.062  | 1054.675  |
| M59828    | 8874.402  | 7103.35   | NM_002192 | 1160.09   | 872.366   |
| NM_016134 | 792.023   | 523.67    | NM_005491 | 5572.646  | 5260.698  |
| SR2       | 54513.52  | 44980.094 | NM_003869 | 2493.416  | 1407.803  |
| SR4       | 14614.162 | 12282.826 | AK025599  | 3490.19   | 2471.993  |
| SR6       | 2414.689  | 1836.648  | X63417    | 1267.571  | 1099.005  |
| SR8       | 8410.613  | 22520.484 | NM_006402 | 1193.748  | 1016.686  |
| SR10      | 32096.471 | 8062.671  | NM_005785 | 1489.072  | 1176.704  |
| CY3Cy5    | 2181.8    | 110.799   | NM_018248 | 4544.799  | 3643.839  |
| NM_000612 | 6796.863  | 6383.811  | AK001695  | 4517.675  | 6176.089  |
| NM_004257 | 11021.932 | 10140.139 | NM_017886 | 1349.671  | 2225.861  |
| NM_002844 | 4209.623  | 4792.164  | NM_006252 | 1010.162  | 1113.043  |

|           |           |           |           |           |           |
|-----------|-----------|-----------|-----------|-----------|-----------|
| NM_000683 | 2636.907  | 2312.091  | NM_001721 | 719.139   | 702.132   |
| NM_003629 | 1647.26   | 1984.962  | NM_014397 | 1750.419  | 2525.152  |
| NM_005901 | 11813.884 | 15497.392 | AB023182  | 2404.215  | 3814.522  |
| NM_004248 | 1687.658  | 1593.369  | NM_003607 | 2377.376  | 3696.847  |
| NM_001313 | 878.614   | 710.679   | NM_006575 | 2995.499  | 1951.037  |
| NM_002362 | 759.285   | 785.674   | NM_013254 | 2130.211  | 1539.923  |
| NM_004796 | 498.868   | 372.023   | NM_000437 | 10966.381 | 15965.232 |
| NM_000435 | 3679.344  | 2770.056  | AB046819  | 6031.772  | 9322.372  |
| NM_001842 | 11645.826 | 8586.92   | NM_006090 | 4486.458  | 4661.241  |
| AL080170  | 1332.03   | 1315.432  | NM_002900 | 5791.003  | 3799.095  |
| AB039903  | 3221.382  | 2698.858  | NM_006851 | 572.526   | 538.726   |
| NM_000542 | 14124.292 | 10630.674 | AK001560  | 687.24    | 400.971   |
| NM_006851 | 1483.687  | 1067.891  | AI359037  | 24755.34  | 18305.203 |
| AK001560  | 841.499   | 724.484   | X15998    | 1790.297  | 1303.745  |
| AB001328  | 775.651   | 644.301   | X17519    | 9669.341  | 7475.622  |
| NM_000948 | 323.379   | 614.374   | NM_001883 | 1161.307  | 1005.055  |
| H99588    | 1182.681  | 1181.501  | NM_004628 | 1773.804  | 1377.306  |
| AK022600  | 8661.299  | 9153.004  | L31785    | 912.394   | 625.814   |
| AK023142  | 2274.538  | 2298.28   | H-M 69043 | 2770.979  | 1913.497  |
| U61740    | 5988.82   | 5336.557  | AF077374  | 1252.815  | 718.006   |
| NM_006409 | 48137.371 | 40803.25  | U43901    | 843.254   | 700.069   |
| AB049054  | 2172.062  | 1982.891  | X59065    | 950.243   | 778.366   |
| NM_015071 | 1511.643  | 1698.321  | M59828    | 9934.173  | 7431.669  |
| NM_013227 | 864.433   | 798.508   | NM_016134 | 718.818   | 701.111   |
| Z83803    | 703.228   | 741.482   | NM_000046 | 1413.849  | 1056.183  |
| AF027205  | 26671.379 | 34248.332 | NM_003219 | 1056.636  | 824.721   |
| AF075012  | 1453.777  | 1253.658  | NM_006709 | 2122.283  | 1711.076  |
| NM_001570 | 1244.335  | 1495.636  | NM_000612 | 5634.327  | 4447.413  |
| NM_000589 | 1809.6    | 1353.57   | NM_004257 | 8856.711  | 8002.124  |
| NM_016546 | 7919.252  | 6705.989  | NM_002844 | 3160.49   | 2293.508  |
| AF309653  | 1407.75   | 929.419   | NM_005901 | 7224.061  | 7376.8    |
| NM_002620 | 6514.831  | 5276.096  | NM_004248 | 1483.647  | 1439.854  |
| S79267    | 1229.146  | 842.175   | NM_001313 | 809.071   | 919.497   |
| NM_001816 | 604.16    | 630.666   | NM_019066 | 621.891   | 475.597   |
| NM_003784 | 39016.469 | 32141.664 | NM_002362 | 799.597   | 494.884   |
| NM_000195 | 20611.77  | 15703.661 | NM_000435 | 4253.628  | 2943.178  |
| NM_005445 | 9150.029  | 5337.227  | NM_001842 | 17254.172 | 17636.055 |
| NM_014899 | 2330.016  | 1737.508  | AB017169  | 488.323   | 322.564   |
| NM_003630 | 6401.701  | 5320.969  | AL080170  | 1946.641  | 1592.793  |
| NM_000046 | 2368.902  | 2118.467  | NM_006861 | 1244.713  | 1120.827  |
| NM_003219 | 985.673   | 947.888   | NM_005829 | 2845.546  | 2107.011  |
| NM_006709 | 2874.439  | 2396.207  | NM_000466 | 1643.966  | 1402.046  |
| NM_004910 | 1786.713  | 1853.8    | NM_015544 | 3231.591  | 2727.607  |
| AB013452  | 1425.116  | 1220.181  | NM_015908 | 15610.741 | 13055.057 |
| M93107    | 5389.702  | 5405.74   | AK022600  | 10113.98  | 8066.917  |
| BC001479  | 8487.527  | 6930.157  | AK023142  | 1905.461  | 1730.027  |
| NM_002461 | 29572.701 | 35008.117 | U61740    | 11044.627 | 8380.602  |
| NM_005771 | 705.366   | 683.769   | AB049054  | 2256.261  | 1926.794  |
| AB032986  | 49315.07  | 46911.254 | NM_015071 | 953.591   | 699.59    |
| NM_017528 | 28924.578 | 32848.039 | NM_013227 | 958.119   | 772.276   |
| NM_016032 | 12296.73  | 14895.969 | Z83803    | 498.052   | 596.772   |
| NM_014324 | 48827.188 | 46570.199 | AF027205  | 21699.371 | 18831.887 |
| NM_001687 | 23778.094 | 29655.453 | AF075012  | 971.498   | 691.727   |

|           |           |           |           |           |           |
|-----------|-----------|-----------|-----------|-----------|-----------|
| AK026374  | 1119.771  | 1264.521  | NM_001570 | 616.956   | 538.32    |
| NM_001169 | 1389.594  | 1503.856  | NM_015658 | 317.355   | 330.86    |
| AK024648  | 6205.82   | 5548.054  | NM_000589 | 1756.193  | 1240.129  |
| NM_000719 | 396.312   | 505.263   | NM_016546 | 8285.907  | 6780.896  |
| NM_003459 | 7968.833  | 7401.603  | AF309653  | 1388.189  | 1350.123  |
| NM_000171 | 764.382   | 523.774   | NM_002620 | 11272.522 | 8997.661  |
| AL354615  | 1814.845  | 1825.13   | S79267    | 786.315   | 617.263   |
| NM_013349 | 37289.836 | 31042.311 | NM_001816 | 708.355   | 772.394   |
| NM_003705 | 2507.265  | 2670.854  | NM_003784 | 40940.629 | 25632.867 |
| NM_006861 | 1932.449  | 1674.333  | NM_000195 | 22258.32  | 14937.066 |
| NM_005829 | 5907.424  | 5769.777  | NM_006575 | 2802.674  | 1898.556  |
| NM_000466 | 2889.362  | 2551.901  | NM_013254 | 2051.283  | 1323.202  |
| NM_015544 | 6278.339  | 6234.215  | NM_000437 | 8714.534  | 7070.826  |
| NM_015908 | 27953.012 | 23747.512 | AB046819  | 5125.746  | 3770.596  |
| NM_000896 | 1143.035  | 1150.697  | NM_006090 | 3993.064  | 3272.203  |
| AB040672  | 1219.448  | 1352.376  | NM_002900 | 5646.254  | 4761.264  |
| NM_002192 | 1030.453  | 915.054   | NM_004910 | 1228.736  | 1095.583  |
| NM_005491 | 10804.58  | 7001.04   | AB013452  | 930.024   | 920.609   |
| NM_003869 | 3050.299  | 2618.481  | M93107    | 4609.441  | 3564.302  |
| AK025599  | 4921.958  | 5828.971  | BC001479  | 7237.676  | 5387.824  |
| X63417    | 2619.216  | 3265.295  | NM_002461 | 24117.617 | 19994.801 |
| S94539    | 35391.145 | 38999.367 | AB032986  | 40631.613 | 27828.248 |
| NM_006402 | 1363.182  | 1883.427  | NM_017528 | 22357.734 | 22808.111 |
| NM_005785 | 1884.229  | 1797.231  | NM_016032 | 6223.301  | 6192.808  |
| NM_018248 | 6650.585  | 6438.151  | NM_014324 | 47176.77  | 56575.848 |
| AK001695  | 5745.359  | 4986.255  | NM_001687 | 16485.445 | 12081.71  |
| NM_017886 | 2003.471  | 1726.569  | AK026374  | 1528.997  | 1270.851  |
| NM_006252 | 1441.902  | 1241.484  | NM_001169 | 1310.005  | 1233.081  |
| NM_001721 | 548.285   | 682.561   | AK024648  | 4406.063  | 3214.162  |
| NM_014397 | 2406.717  | 2911.255  | NM_000719 | 347.172   | 287.61    |
| AB023182  | 3079.255  | 2542.675  | NM_003459 | 4413.314  | 4497.386  |
| NM_003607 | 3856.597  | 3071.765  | NM_000171 | 432.29    | 634.247   |
| NM_006575 | 3609.769  | 2765.348  | AL354615  | 1821.273  | 1270.432  |
| NM_013254 | 2831.477  | 2660.716  | NM_013349 | 36440.688 | 34186.629 |
| NM_000437 | 15242.653 | 18466.998 | AJ010482  | 1479.345  | 1268.503  |
| AB046819  | 6375.348  | 5387.352  | NM_000896 | 1035.052  | 1124.06   |
| NM_006090 | 8332.294  | 9918.946  | AB040672  | 3053.687  | 2577.674  |
| NM_002900 | 6163.58   | 7250.301  | NM_002192 | 1734.216  | 1486.091  |
| NM_006851 | 1501.854  | 2021.89   | NM_005491 | 6180.043  | 6690.766  |
| AK001560  | 1100.486  | 1108.162  | NM_003869 | 2576.406  | 2013.865  |
| AB001328  | 939.412   | 1057.855  | AK025599  | 3914.922  | 3211.515  |
| NM_000948 | 524.093   | 450.474   | X63417    | 1437.391  | 1198.197  |
| H99588    | 878.923   | 1048.973  | S94539    | 28829.879 | 27994.131 |
| X00588    | 812.99    | 684.346   | NM_006402 | 1595.336  | 1038.935  |
| AI359037  | 34445.645 | 34400.121 | NM_005785 | 1622.79   | 1483.171  |
| X15998    | 2394.718  | 3456.692  | NM_018248 | 4135.64   | 3659.633  |
| M76482    | 325.461   | 574.754   | AK001695  | 3895.431  | 3213.387  |
| X17519    | 11772.023 | 14680.918 | NM_017886 | 1612.102  | 1621.81   |
| NM_001883 | 2008.33   | 2230.635  | NM_006252 | 996.888   | 724.426   |
| NM_004628 | 1903.326  | 2232.631  | NM_001721 | 438.064   | 409.092   |
| L31785    | 1275.512  | 1161.811  | NM_014397 | 1644.468  | 1124.139  |
| H-M 69043 | 3270.18   | 4638.258  | AB023182  | 1814.063  | 1557.094  |
| AF077374  | 1478.121  | 1106.554  | NM_003607 | 1483.599  | 1919.873  |

|           |           |           |           |           |           |
|-----------|-----------|-----------|-----------|-----------|-----------|
| U43901    | 880.583   | 1097.831  | AB017169  | 631.725   | 779.331   |
| X59065    | 686.278   | 693.483   | AL080170  | 1658.984  | 1426.5    |
| M59828    | 9550.841  | 8748.835  | AB039903  | 3203.173  | 2679.747  |
| NM_016134 | 700.009   | 549.458   | NM_000542 | 16806.545 | 17145.85  |
| AJ010482  | 2197.685  | 2643.119  | NM_006851 | 687.799   | 641.155   |
| NM_005445 | 7817.418  | 7949.688  | AK001560  | 1018.716  | 1334.262  |
| NM_014895 | 1749.991  | 2471.34   | AB001328  | 702.529   | 864.024   |
| NM_003630 | 5467.699  | 5481.03   | NM_000948 | 302.296   | 316.208   |
| NM_000046 | 1287.498  | 1617.116  | H99588    | 1204.014  | 767.385   |
| NM_003215 | 901.251   | 866.898   | X00588    | 1051.464  | 1022.938  |
| NM_006705 | 2066.059  | 1626.81   | AI359037  | 28895.898 | 22629.818 |
| NM_000612 | 6331.554  | 5355.562  | BI754285  | 358.986   | 581.197   |
| NM_004257 | 10058.14  | 10216.079 | X15998    | 2081.875  | 2157.759  |
| NM_002844 | 3993.829  | 5835.666  | M76482    | 517.136   | 507.415   |
| NM_000683 | 2271.802  | 2821.238  | X17519    | 10078.123 | 9937.144  |
| NM_003625 | 1806.503  | 1859.316  | NM_001883 | 1405.035  | 1339.212  |
| NM_005901 | 9924.066  | 12533.579 | NM_004628 | 1298.188  | 1375.912  |
| NM_004248 | 1041.245  | 1057.433  | L31785    | 865.397   | 776.093   |
| NM_001313 | 708.172   | 644.037   | H-M 69043 | 2809.081  | 2004.871  |
| NM_002362 | 999.815   | 736.675   | AF077374  | 1074.895  | 1081.633  |
| NM_004796 | 351.409   | 578.109   | U43901    | 737.965   | 548.741   |
| NM_000435 | 3201.885  | 2638.781  | X59065    | 775.676   | 567.184   |
| NM_001842 | 11732.286 | 8453.15   | M59828    | 6603.285  | 4647.603  |
| AB017169  | 708.419   | 494.533   | AF309653  | 1481.52   | 1687.666  |
| AL080170  | 1687.044  | 2096.581  | NM_002620 | 14295.63  | 14561.935 |
| AB039903  | 4602.377  | 4228.69   | S79267    | 1189.99   | 1472.071  |
| NM_000542 | 14885.511 | 13463.057 | NM_001816 | 504.238   | 775.041   |
| NM_003705 | 1873.808  | 2401.395  | NM_003784 | 35801.816 | 28552.059 |
| NM_006861 | 1477.245  | 2052.491  | NM_000195 | 29834.605 | 29976.824 |
| NM_005825 | 4561.036  | 4712.123  | NM_005445 | 6347.631  | 4909.37   |
| NM_000466 | 1906.264  | 2038.66   | NM_014895 | 2739.394  | 3461.212  |
| NM_015544 | 5365.211  | 5567.714  | NM_003630 | 4319.715  | 4872.583  |
| NM_015908 | 25514.635 | 33365.617 | NM_000046 | 1678.927  | 1765.315  |
| AK022600  | 6881.083  | 12492.825 | NM_003215 | 764.536   | 1051.28   |
| AK023142  | 2196.781  | 2116.025  | NM_006705 | 3069.996  | 3111.77   |
| U61740    | 5697.997  | 5912.141  | NM_000612 | 5674.023  | 5420.728  |
| NM_006405 | 48433.551 | 49161.594 | NM_004257 | 9237.624  | 10902.62  |
| AB049054  | 2621.563  | 4376.396  | NM_002844 | 2923.677  | 2926.541  |
| NM_015071 | 1803.078  | 2022.244  | NM_000683 | 1281.638  | 1731.447  |
| NM_013227 | 899.684   | 1272.834  | NM_003625 | 1804.678  | 2452.458  |
| Z83803    | 325.031   | 576.393   | NM_005901 | 7252.61   | 8261.257  |
| AF027205  | 35394.895 | 26904.395 | NM_004248 | 1574.558  | 1751.467  |
| AF075012  | 1228.691  | 1266.231  | NM_001313 | 1212.739  | 607.857   |
| NM_001570 | 1227.39   | 1273.713  | NM_002362 | 830.508   | 612.778   |
| NM_000585 | 1945.448  | 1561.41   | NM_000435 | 4183.255  | 3667.644  |
| NM_016546 | 8228.32   | 7388.464  | NM_001842 | 10757.025 | 9800.949  |
| AF309653  | 1314.163  | 860.09    | NM_000715 | 511.244   | 609.616   |
| NM_002620 | 6933.749  | 6781.855  | NM_003455 | 6470.132  | 8642.575  |
| S79267    | 1135.753  | 931.143   | NM_000171 | 1034.963  | 994.581   |
| NM_001816 | 717.265   | 452.717   | AL354615  | 1561.879  | 1659.814  |
| NM_003784 | 50462.848 | 49074.543 | NM_013345 | 39316.379 | 37960.043 |
| NM_000195 | 23744.355 | 26352.561 | NM_003705 | 3044.189  | 3600.343  |
| NM_006575 | 3488.45   | 3102.798  | NM_006861 | 1723.066  | 1860.173  |

|           |           |           |           |           |           |
|-----------|-----------|-----------|-----------|-----------|-----------|
| NM_013254 | 2559.255  | 2717.229  | NM_005829 | 3711.396  | 3659.729  |
| NM_000437 | 9024.956  | 9107.581  | NM_000466 | 2768.829  | 2760.019  |
| AB046819  | 4596.222  | 3839.585  | NM_015544 | 4461.607  | 4654.294  |
| NM_006090 | 5538.909  | 5608.359  | NM_015908 | 15824.854 | 19160.461 |
| NM_002900 | 3937.03   | 4609.63   | AK022600  | 11878.803 | 13720.029 |
| NM_004910 | 1825.323  | 3006.854  | AK023142  | 1629.26   | 2479.866  |
| M93107    | 5555.879  | 5596.095  | U61740    | 12436.53  | 14073.596 |
| BC001479  | 8363.993  | 7819.052  | NM_006409 | 42805.488 | 52377.785 |
| NM_002461 | 27071.684 | 26292.256 | AB049054  | 2936.017  | 3460.95   |
| AB032986  | 45894.191 | 44911.094 | NM_013227 | 1027.942  | 1126.132  |
| NM_017528 | 35889.191 | 38064.547 | Z83803    | 556.887   | 427.453   |
| NM_016032 | 12461.951 | 11402.355 | AF027205  | 28781.994 | 23810.91  |
| NM_014324 | 51895.469 | 46985.223 | AF075012  | 1009.976  | 706.678   |
| NM_001687 | 22194.621 | 19005.848 | NM_001570 | 828.15    | 933.409   |
| AK026374  | 1475.026  | 1227.781  | NM_000589 | 1745.633  | 1451.492  |
| NM_001169 | 1400.594  | 1195.447  | NM_016546 | 7382.79   | 5729.941  |
| AK024648  | 6505.977  | 5686.487  | NM_017886 | 1838.628  | 2312.355  |
| NM_000719 | 603.484   | 451.906   | NM_006252 | 1085.745  | 1148.867  |
| NM_003459 | 8046.503  | 8035.614  | NM_001721 | 471.736   | 631.352   |
| AB032526  | 432.105   | 396.49    | NM_014397 | 1264.916  | 1501.591  |
| NM_000171 | 634.217   | 448.082   | AB023182  | 1848.745  | 1880.005  |
| AL354615  | 2307.107  | 2312.879  | NM_003607 | 2348.259  | 2640.681  |
| NM_013349 | 45017.523 | 47401.469 | NM_006575 | 3456.654  | 3710.872  |
| NM_016134 | 583.096   | 633.843   | NM_013254 | 2668.987  | 3093.882  |
| AJ010482  | 1810.634  | 1614.52   | NM_000437 | 11099.89  | 14116.41  |
| NM_000896 | 715.583   | 1098.245  | AB046819  | 5722.596  | 7348.056  |
| AB040672  | 1370.033  | 1314.925  | NM_006090 | 4931.292  | 5557.962  |
| NM_002192 | 1118.965  | 629.086   | NM_002900 | 6837.703  | 8042.136  |
| NM_005491 | 8623.019  | 8005.842  | NM_004910 | 1784.854  | 1868.606  |
| NM_003869 | 2156.516  | 1856.739  | AB013452  | 808.523   | 1329.96   |
| AK025599  | 4998.515  | 6596.275  | M93107    | 4538.352  | 4965.477  |
| X63417    | 2081.463  | 2525.398  | BC001479  | 7310.916  | 7551.585  |
| S94539    | 35925.414 | 38290.953 | NM_002461 | 29866.426 | 27412.805 |
| NM_006402 | 1387.367  | 1345.686  | NM_016032 | 6765.231  | 6857.803  |
| NM_005785 | 1708.029  | 1401.919  | NM_014324 | 51786.309 | 58396.199 |
| NM_018248 | 7394.109  | 5369.034  | NM_001687 | 17736.418 | 14930.192 |
| AK001695  | 6303.715  | 3816.68   | AK026374  | 1996.015  | 1660.683  |
| NM_017886 | 2095.341  | 1635.558  | NM_001169 | 1839.91   | 1711.731  |
| NM_006252 | 1550.913  | 1247.198  | AK024648  | 5697.818  | 5581.948  |
| NM_001721 | 1015.569  | 1078.757  | NM_000795 | 294.762   | 458.94    |
| NM_014397 | 2680.177  | 2632.55   | AB037761  | 12470.049 | 11681.358 |
| AB023182  | 3978.412  | 4208.94   | NM_014008 | 47764.391 | 55781.973 |
| NM_003607 | 4623.408  | 6432.655  | NM_014731 | 1290.391  | 1659.455  |
| AB017169  | 698.971   | 813.612   | AF035191  | 15497.912 | 16666.93  |
| AL080170  | 1267.867  | 1598.665  | NM_004058 | 1467.494  | 2223.065  |
| AB039903  | 3529.662  | 3438.897  | NM_004527 | 1740.166  | 2112.226  |
| NM_000542 | 16612.314 | 13428.813 | NM_012062 | 11587.557 | 12196.44  |
| NM_006851 | 1290.198  | 1011.541  | AK026717  | 702.501   | 977.685   |
| AK001560  | 617.072   | 794.804   | AJ010482  | 1741.584  | 1829.624  |
| AB001328  | 776.051   | 691.957   | NM_000896 | 864.859   | 940.807   |
| NM_000948 | 459.994   | 616.65    | NM_002192 | 2412.335  | 2810.466  |
| H99588    | 1196.246  | 1447.179  | NM_005491 | 4865.52   | 8168.135  |
| X00588    | 701.595   | 1017.76   | NM_003869 | 2860.271  | 3283.845  |

|           |           |           |           |           |           |
|-----------|-----------|-----------|-----------|-----------|-----------|
| AI359037  | 36310.613 | 47381.742 | NM_006402 | 1713.843  | 1579.588  |
| X15998    | 1709.738  | 1508.391  | NM_005785 | 2279.209  | 2268.347  |
| X17519    | 14950.573 | 11166.07  | NM_018248 | 5794.175  | 6003.951  |
| NM_001883 | 2087.015  | 1581.411  | AK001695  | 4714.516  | 4614.079  |
| NM_004628 | 2520.777  | 2252.39   | AB040898  | 883.842   | 1061.113  |
| L31785    | 1554.426  | 1656.416  | AB031547  | 1206.305  | 1543.634  |
| H-M 69043 | 4421.898  | 5523.259  | NM_003970 | 1082.452  | 1255.149  |
| AF077374  | 1716.646  | 1766.836  | AK022496  | 423.156   | 418.803   |
| U43901    | 1455.51   | 1529.336  | AB042636  | 1323.987  | 1691.236  |
| X59065    | 1045.876  | 1095.115  | NM_002883 | 3211.388  | 3303.808  |
| M59828    | 13469.552 | 20496.791 | NM_019012 | 1635.686  | 1954.477  |
| AF309653  | 1433.328  | 1289.048  | NM_000141 | 616.717   | 583.75    |
| NM_002620 | 6888.063  | 8348.165  | NM_016150 | 3352.64   | 3673.191  |
| S79267    | 1447.239  | 1486.001  | U57058    | 557.706   | 798.178   |
| NM_001816 | 962.569   | 833.611   | AL137452  | 1901.621  | 1793.1    |
| NM_003784 | 38690.473 | 36289.766 | NM_001347 | 4060.386  | 5257.484  |
| NM_000195 | 28564.424 | 22408.781 | AK024549  | 15298.974 | 22429.229 |
| NM_005445 | 9237.311  | 4750.123  | NM_006338 | 10103.832 | 11745.136 |
| NM_014895 | 1701.412  | 1845.367  | NM_000261 | 1007.398  | 1111.242  |
| NM_003630 | 5725.191  | 5291.505  | NM_003183 | 2192.457  | 1991.923  |
| NM_000046 | 1661.837  | 2173.174  | NM_003585 | 778.278   | 994.166   |
| NM_003215 | 1116.081  | 1427.166  | NM_019851 | 2368.882  | 2846.386  |
| NM_006705 | 2517.062  | 2421.018  | NM_018367 | 847.821   | 845.693   |
| NM_000612 | 8619.7    | 10471.653 | NM_001363 | 6181.912  | 7146.25   |
| NM_004257 | 13702.866 | 14903.136 | NM_014096 | 10112.332 | 10628.739 |
| NM_002844 | 4733.784  | 5766.521  | NM_005706 | 4014.055  | 4016.747  |
| NM_000683 | 2276.489  | 1854.266  | NM_001261 | 5729.599  | 5593.041  |
| NM_003625 | 2641.668  | 2007.721  | NM_007215 | 2493.48   | 3455.424  |
| NM_005901 | 12639.801 | 11192.749 | AK026854  | 2296.115  | 2317.99   |
| NM_004248 | 1737.9    | 1130.848  | NM_001265 | 5932.153  | 7133.079  |
| NM_000955 | 506.603   | 570.002   | NM_002506 | 1131.144  | 1466.409  |
| NM_001313 | 805.697   | 828.12    | NM_004906 | 6651.823  | 6376.668  |
| NM_002362 | 1068.144  | 1643.562  | NM_012447 | 12386.824 | 12634.986 |
| NM_004796 | 615.579   | 581.58    | NM_006366 | 1771.914  | 1682.577  |
| NM_000435 | 5133.829  | 7259.163  | AK027013  | 28916.787 | 22777.947 |
| NM_001842 | 17261.658 | 19187.096 | NM_001344 | 39027.852 | 35544.449 |
| NM_000715 | 650.959   | 783.117   | NM_018294 | 4450.12   | 5286.672  |
| NM_003455 | 9712.758  | 9947.185  | AL389934  | 3583.268  | 3739.253  |
| NM_000171 | 1055.933  | 1175.501  | NM_004330 | 5841.963  | 6150.843  |
| AL354615  | 1979.461  | 2030.255  | AF151802  | 5814.215  | 7023.053  |
| NM_013345 | 45211.332 | 41029.379 | AB006746  | 2067.702  | 2265.511  |
| NM_003705 | 3195.727  | 2725.406  | NM_006498 | 1717.633  | 1781.761  |
| NM_006861 | 1772.286  | 1803.421  | AB023233  | 1912.023  | 2388.164  |
| NM_005825 | 7305.099  | 7557.354  | NM_004365 | 1148.601  | 1232.932  |
| NM_000466 | 2611.384  | 1928.464  | NM_004370 | 515.068   | 405.85    |
| NM_015544 | 5988.964  | 8669.61   | NM_018130 | 6242.647  | 6747.718  |
| NM_015908 | 23348.35  | 28350.311 | AF085878  | 1141.745  | 1385.929  |
| AK022600  | 6051.711  | 8799.151  | AB006630  | 926.979   | 907.396   |
| AK023142  | 3432.985  | 3649.678  | NM_016155 | 2812.13   | 2550.241  |
| U61740    | 9378.847  | 8223.72   | NM_001565 | 1982.69   | 2472.512  |
| NM_006405 | 50875.168 | 46174.438 | NM_004131 | 584.208   | 879.99    |
| AB049054  | 3473.471  | 2701.494  | AK023284  | 1737.524  | 1802.596  |
| NM_015071 | 1824.273  | 1746.006  | AF106069  | 497.355   | 522.893   |

|           |           |           |           |           |           |
|-----------|-----------|-----------|-----------|-----------|-----------|
| NM_013227 | 1803.798  | 1067.053  | NM_005101 | 16879.672 | 19045.736 |
| Z83803    | 707.248   | 1027.34   | NM_004205 | 426.382   | 372.698   |
| AF027205  | 38088.168 | 42986.105 | AF130060  | 24571.584 | 25354.102 |
| AF075012  | 1248.705  | 1937.944  | NM_007057 | 18434.117 | 22135.182 |
| NM_001570 | 1704.101  | 1858.73   | NM_000177 | 2147.713  | 2011.871  |
| NM_015658 | 780.672   | 1359.864  | NM_003387 | 7438.533  | 8901.016  |
| NM_000588 | 2762.212  | 4195.792  | U60665    | 999.131   | 1201.95   |
| NM_016548 | 12211.893 | 17052.049 | AY014403  | 640.747   | 831.648   |
| NM_017888 | 2731.032  | 3105.365  | NM_006912 | 5333.81   | 5683.659  |
| NM_006252 | 1685.773  | 1876.425  | X12534    | 2059.41   | 2068.539  |
| NM_001721 | 740.472   | 907.672   | X65665    | 446.486   | 321.54    |
| NM_014397 | 2033.411  | 2587.707  | NM_003112 | 1310.001  | 1293.467  |
| AB023182  | 2905.539  | 3365.35   | NM_014323 | 4072.33   | 3764.773  |
| NM_003607 | 4188.207  | 2995.817  | NM_003205 | 3968.017  | 4002.793  |
| NM_006575 | 4315.53   | 3682.611  | AB002324  | 2729.089  | 2789.843  |
| NM_013254 | 2657.586  | 1983.85   | AF205600  | 412.726   | 728.264   |
| NM_000437 | 12083.396 | 10557.722 | NM_002165 | 457.407   | 352.136   |
| AB046819  | 6217.497  | 5316.28   | AK026231  | 1320.302  | 1420.899  |
| NM_006090 | 7215.927  | 6555.947  | NM_002140 | 15917.146 | 14593.371 |
| NM_002900 | 4621.653  | 4639.906  | NM_020143 | 4489.777  | 4392.393  |
| NM_004910 | 1852.314  | 2816.204  | NM_012469 | 3762.475  | 3766.533  |
| AB013452  | 1692.689  | 1924.398  | NM_005131 | 3973.872  | 4737.763  |
| M93107    | 7377.534  | 6223.857  | NM_007056 | 2361.159  | 2934.199  |
| BC001479  | 9117.993  | 7867.56   | AF083383  | 4677.384  | 5095.171  |
| NM_002461 | 34752.332 | 28203.902 | NM_006925 | 3569.261  | 5143.816  |
| AB032986  | 53060.75  | 48625.652 | NM_004294 | 2114.722  | 2155.82   |
| NM_017528 | 45278.836 | 45765.625 | NM_001968 | 23292.244 | 21198.563 |
| NM_016032 | 13238.555 | 16008.331 | D17259    | 52727.977 | 62805.277 |
| NM_014324 | 50498.398 | 48461.133 | AF264627  | 19128.623 | 18955.459 |
| NM_001687 | 31547.359 | 40677.445 | AL133053  | 1589.932  | 1513.808  |
| AK026374  | 2456.583  | 2012.962  | NM_018142 | 7955.144  | 7704.702  |
| NM_001169 | 1859.858  | 1726.086  | NM_017653 | 4294.242  | 3572.784  |
| AK024648  | 7435.054  | 9240.091  | AL109695  | 19713.803 | 20508.662 |
| NM_000795 | 685.169   | 819.91    | NM_002168 | 4272.038  | 3643.433  |
| AB037761  | 16937.607 | 19187.42  | AK027115  | 352.36    | 456.77    |
| NM_014008 | 46923.289 | 40789.859 | NM_004453 | 1929.801  | 1934.231  |
| NM_014731 | 932.146   | 930.352   | NM_016229 | 5748.301  | 6118.938  |
| AF035191  | 24973.727 | 22135.773 | NM_018244 | 3090.022  | 3352.046  |
| NM_004058 | 1415.397  | 1013.904  | NM_002492 | 34554.219 | 34315.5   |
| NM_004527 | 831.75    | 756.936   | AB046855  | 1199.431  | 1240.529  |
| NM_012062 | 15445.975 | 12544.687 | NM_005642 | 5146.093  | 5963.327  |
| AK026717  | 889.726   | 487.914   | NM_018105 | 2684.522  | 1898.063  |
| AJ010482  | 2160.924  | 2579.187  | AK023452  | 2798.391  | 2834.074  |
| NM_000898 | 1364.946  | 1478.47   | NM_000332 | 625.882   | 848.033   |
| AB040672  | 2231.516  | 1385.303  | AK022215  | 6264.085  | 7144.857  |
| NM_002192 | 1754.696  | 1408.05   | U90305    | 390.281   | 283.268   |
| NM_005491 | 12589.025 | 8766.011  | NM_001527 | 8864.427  | 7988.315  |
| NM_003868 | 2960.088  | 1325.996  | AK025269  | 8964.192  | 9149.689  |
| AK025599  | 5183.95   | 4413.436  | NM_001438 | 480.497   | 724.071   |
| X63417    | 2792.437  | 3993.531  | AB040971  | 734.192   | 1267.848  |
| S94539    | 41181.965 | 49594.934 | NM_006562 | 3249.82   | 3502.964  |
| NM_006402 | 2433.752  | 2840.041  | AK024254  | 1844.024  | 1975.09   |
| NM_005785 | 2951.094  | 2598.58   | NM_018456 | 2345.744  | 2403.572  |



|           |           |           |           |           |           |
|-----------|-----------|-----------|-----------|-----------|-----------|
| NM_01824E | 9524.203  | 14234.502 | AK026697  | 1097.31   | 1303.374  |
| AK001695  | 9570.811  | 12743.866 | NM_019021 | 2630      | 2339.351  |
| AB040898  | 624.645   | 875.668   | NM_004717 | 570.079   | 795.434   |
| AB031547  | 1192.336  | 1235.342  | AK002183  | 1218.8    | 1485.17   |
| NM_00397C | 1763.112  | 2420.232  | NM_018996 | 2871.518  | 3674.386  |
| AK022496  | 885.435   | 866.717   | AL137304  | 2724.621  | 3610.223  |
| AB042636  | 922.148   | 1023.092  | AL049274  | 843.159   | 1014.33   |
| NM_002883 | 3070.511  | 2515.885  | NM_018279 | 3937.015  | 4111.859  |
| NM_019012 | 1608.96   | 1277.451  | AF147369  | 495.651   | 517.966   |
| NM_000141 | 499.811   | 277.481   | AK026883  | 2520.271  | 3224.473  |
| NM_01615C | 2621.917  | 1727.151  | NM_01435C | 13082.706 | 14658.42  |
| U57058    | 1156.45   | 1253.969  | U00925    | 7272.822  | 7592.004  |
| AL137452  | 2132.631  | 1756.775  | AL390185  | 3196.073  | 4620.953  |
| NM_004312 | 50679.996 | 45356.66  | AF086235  | 6404.78   | 6381.322  |
| NM_001347 | 4984.265  | 4852.366  | AF143886  | 1624.514  | 1572.487  |
| AK024549  | 12095.803 | 8586.702  | AK025975  | 1904.168  | 2783.137  |
| NM_00633E | 7596.358  | 4919.421  | AK025583  | 46968.594 | 47957.395 |
| NM_007164 | 4314.182  | 4062.235  | NM_014664 | 1444.419  | 1585.822  |
| NM_000261 | 1254.153  | 2005.215  | AL109788  | 359.378   | 860.434   |
| NM_00260E | 1077.564  | 1353.163  | NM_014952 | 40666.957 | 45410.926 |
| NM_00257C | 1982      | 3925.63   | AB037765  | 1169.184  | 1417.546  |
| NM_003183 | 3312.941  | 4686.104  | AK025068  | 2490.604  | 3002.718  |
| NM_001657 | 338.186   | 779.527   | AK026720  | 1590.902  | 2131.299  |
| NM_00358E | 960.923   | 1187.717  | AL137566  | 7182.147  | 8798.153  |
| NM_019851 | 4372.663  | 5201.75   | AF087962  | 5338.391  | 6391.482  |
| NM_00323E | 620.047   | 1093.303  | AL050197  | 4882.851  | 5430.95   |
| NM_018367 | 963.932   | 1438.621  | AF085870  | 19918.264 | 21712.307 |
| NM_001363 | 6624.478  | 7654.183  | AL050063  | 620.326   | 599.954   |
| NM_01409E | 9090.327  | 12300.85  | AL080217  | 419.989   | 220.755   |
| NM_00570E | 2339.805  | 3248.163  | AL117580  | 15353.086 | 21586.445 |
| NM_001261 | 4062.591  | 3832.524  | AL110190  | 1556.245  | 2605.065  |
| NM_001977 | 1064.739  | 1485.07   | AL117656  | 732.939   | 1192.154  |
| NM_00721E | 3213.865  | 3206.817  | AJ001893  | 1409.252  | 1783.557  |
| AK026854  | 2025.691  | 1741.103  | NM_01481E | 5924.832  | 5654.818  |
| NM_00126E | 3070.344  | 2550.356  | AF086040  | 1253.171  | 1095.104  |
| NM_00250E | 620.883   | 523.795   | AB032988  | 2381.507  | 2348.929  |
| NM_00490E | 5531.24   | 5451.807  | AK023559  | 5736.25   | 6207.021  |
| NM_012447 | 8217.804  | 8229.966  | AB037859  | 48424.871 | 56937.949 |
| NM_00636E | 1224.777  | 806.112   | AL049233  | 1417.538  | 2080.189  |
| AK027013  | 23795.748 | 20904.076 | NM_01769E | 2143.544  | 2708.639  |
| NM_001344 | 48670.359 | 42072.176 | AL050166  | 3228.9    | 3728.32   |
| NM_018294 | 4897.826  | 3375.121  | AK026705  | 3567.137  | 4374.315  |
| AL389934  | 1905.834  | 2132.408  | NM_003602 | 2047.944  | 2362.385  |
| NM_00433C | 5505.474  | 7882.169  | AF009258  | 31224.014 | 25797.857 |
| AF151802  | 5697.359  | 8574.542  | AF009305  | 5231.396  | 5081.16   |
| AB006746  | 2146.595  | 2909.209  | AF009270  | 808.548   | 1271.214  |
| AB023233  | 3205.501  | 4188.666  | AF009318  | 1777.216  | 2128.187  |
| NM_00436E | 1533.774  | 1632.001  | AF056421  | 2457.709  | 3130.525  |
| NM_00437C | 478.574   | 710.619   | AF090889  | 498.154   | 408.253   |
| NM_01813C | 6244.578  | 8767.574  | AK001085  | 2551.502  | 2639.505  |
| AF085878  | 1269.964  | 1393.039  | AK001906  | 4713.061  | 4838.627  |
| AB006630  | 1523.042  | 1499.675  | AK021528  | 2002.669  | 2210.408  |
| NM_01615E | 1766.917  | 2041.606  | AK021746  | 4058.326  | 5487.545  |

|           |           |           |           |           |           |
|-----------|-----------|-----------|-----------|-----------|-----------|
| NM_001224 | 11474.221 | 11604.742 | AK001136  | 1148.413  | 1624.199  |
| NM_017811 | 16245.363 | 17529.117 | AK021617  | 378.588   | 650.836   |
| NM_001569 | 1685.263  | 1586.575  | AK021810  | 782.534   | 992.941   |
| AK023284  | 1202.415  | 1038.126  | AK026743  | 255.595   | 877.009   |
| AF106069  | 851.587   | 549.131   | AK025846  | 777.71    | 1368.772  |
| NM_005101 | 19234.566 | 16985.928 | AK026805  | 1923.618  | 2444.135  |
| NM_004205 | 535.911   | 286.565   | AL389983  | 7208.911  | 7218.958  |
| AF130060  | 13825.15  | 9595.406  | AJ008159  | 1011.613  | 1280.61   |
| NM_007057 | 20231.904 | 24110.441 | AK000995  | 1747.418  | 2715.073  |
| NM_000177 | 2329.623  | 2987.314  | U00959    | 2002.903  | 1641.25   |
| NM_003387 | 12810.126 | 16496.357 | NM_014578 | 17620.084 | 18140.264 |
| U60665    | 1398.519  | 1755.654  | X74606    | 677.06    | 902.73    |
| NM_005507 | 50979.777 | 55265.715 | NM_012183 | 4419.061  | 4873.549  |
| AL080133  | 5428.091  | 7314.248  | AK026785  | 1727.262  | 1589.451  |
| AY014403  | 1613.823  | 2128.066  | AK022994  | 577.275   | 903.653   |
| NM_006912 | 7326.495  | 9077.784  | NM_018225 | 18169.436 | 20140.34  |
| X12534    | 3367.01   | 3113.815  | AK025534  | 1277.327  | 1721.99   |
| NM_003112 | 2031.461  | 2025.467  | AK022577  | 544.176   | 731.725   |
| NM_014323 | 4524.794  | 5218.8    | AF091526  | 1095.945  | 1675.09   |
| NM_003205 | 2138.745  | 3026.669  | AK022170  | 293.21    | 518.34    |
| AB002324  | 1992.85   | 1805.226  | M60749    | 3372.41   | 3618.272  |
| NM_002165 | 631.755   | 411.936   | X79986    | 1251.489  | 1096.991  |
| AK026231  | 1249.979  | 876.456   | NM_003523 | 10806.872 | 10006.665 |
| NM_002140 | 16772.316 | 11516.265 | X01448    | 842.923   | 948.108   |
| NM_020143 | 4190.32   | 3534.254  | NM_016503 | 8100.806  | 9283.659  |
| NM_012469 | 2857.246  | 2102.876  | NM_014690 | 6426.807  | 7875.305  |
| NM_005131 | 4435.749  | 3863.034  | NM_017698 | 3274.993  | 4239.823  |
| NM_007056 | 3414.246  | 2600.328  | AF086490  | 1365.479  | 1407.816  |
| AF083383  | 4261.167  | 2931.796  | AF131738  | 19769.373 | 29022.992 |
| NM_006925 | 6495.73   | 5220.465  | AK021666  | 8991.087  | 10214.275 |
| NM_004890 | 45231.059 | 44906.328 | AK024081  | 1059.756  | 1137.042  |
| AK023181  | 4607.037  | 7255.225  | AK024825  | 3312.775  | 3319.512  |
| NM_004294 | 2589.953  | 3205.103  | AF086317  | 5727.567  | 5836.781  |
| NM_005051 | 20484.816 | 25249.332 | U16850    | 5873.946  | 6293.891  |
| NM_001968 | 30354.703 | 37005.785 | AL390178  | 1241.792  | 1036.623  |
| D17259    | 55750.918 | 52800.301 | Z36806    | 1649.198  | 2284.869  |
| AF264627  | 28712.244 | 35083.496 | NM_018618 | 1004.203  | 1280.157  |
| AL133053  | 1066.229  | 1045.233  | AJ008121  | 22142.215 | 23789.188 |
| NM_018142 | 6286.275  | 7114.692  | AJ008153  | 1526.334  | 2082.355  |
| NM_017653 | 4143.447  | 5213.523  | AK023739  | 2216.931  | 2669.222  |
| AL109695  | 19377.637 | 16705.824 | NM_005830 | 7668.127  | 7889.1    |
| NM_002168 | 2918.033  | 3356.149  | NM_001507 | 2469.974  | 2465.037  |
| NM_004453 | 1824.234  | 2265.253  | X92108    | 459.655   | 561.831   |
| NM_016229 | 3603.759  | 2612.204  | AL389876  | 1963.209  | 1827.03   |
| NM_018244 | 3037.854  | 2370.256  | AK022120  | 3726.658  | 4537.462  |
| NM_002492 | 28136.07  | 22888.191 | NM_016206 | 434.286   | 676.7     |
| AB046855  | 940.364   | 863.703   | Z70762    | 1183.237  | 1443.2    |
| NM_005642 | 6898.317  | 4978.946  | BF037206  | 3737.537  | 4121.261  |
| NM_018105 | 2286.07   | 1134.567  | AK021474  | 23186.055 | 30924.426 |
| AK023452  | 2847.911  | 1956.042  | AK023642  | 482.294   | 657.938   |
| NM_000332 | 915.414   | 1042.061  | U52827    | 1473.82   | 1794.216  |
| AK022215  | 8822.621  | 12567.446 | AL049466  | 10441.353 | 9538.372  |
| U90305    | 515.677   | 694.658   | AB037802  | 1903.227  | 2175.497  |

|           |           |           |           |          |           |
|-----------|-----------|-----------|-----------|----------|-----------|
| NM_001527 | 13590.734 | 14444.56  | AL137450  | 1204.754 | 1541.2    |
| AK025269  | 9799.628  | 9567.452  | AK023058  | 1181.609 | 1895.576  |
| NM_001438 | 666.865   | 804.568   | NM_012064 | 4832.369 | 5445.306  |
| AB040971  | 1525.078  | 1081.254  | AK001460  | 553.858  | 1026.092  |
| NM_006562 | 5710.08   | 8326.336  | AK092508  | 3043.272 | 4304.875  |
| AK024254  | 954.427   | 1172.277  | AK027111  | 47206.48 | 52218.656 |
| NM_018456 | 2474.297  | 3285.876  | NM_003518 | 634.491  | 570.563   |
| AK026697  | 831.257   | 839.293   |           |          |           |
| NM_019021 | 2751.587  | 3539.849  |           |          |           |
| AK002183  | 1342.188  | 1490.868  |           |          |           |
| NM_018996 | 3632.034  | 3598.212  |           |          |           |
| AL137304  | 2364.219  | 1940.028  |           |          |           |
| AL049274  | 921.091   | 560.881   |           |          |           |
| NM_018279 | 3759.732  | 2655.474  |           |          |           |
| AK026883  | 3039.271  | 3574.891  |           |          |           |
| NM_014350 | 15645.754 | 11321.322 |           |          |           |
| U00925    | 7034.284  | 5473.014  |           |          |           |
| AL390185  | 2207.099  | 2097.699  |           |          |           |
| AF086235  | 8383.342  | 8027.274  |           |          |           |
| AF143886  | 2319.27   | 2577.002  |           |          |           |
| AK025975  | 3468.994  | 3991.003  |           |          |           |
| AK025583  | 52206.973 | 53423.969 |           |          |           |
| NM_014664 | 3353.275  | 3977.725  |           |          |           |
| AL109788  | 953.791   | 800.792   |           |          |           |
| NM_014952 | 41727.477 | 41471.051 |           |          |           |
| AB037765  | 899.901   | 1061.51   |           |          |           |
| AK025068  | 2398.278  | 2987.285  |           |          |           |
| AK026720  | 2211.854  | 2595.244  |           |          |           |
| AL137566  | 3534.658  | 3722.822  |           |          |           |
| AF087962  | 4276.391  | 4624.704  |           |          |           |
| AF075039  | 482.146   | 647.273   |           |          |           |
| AL050197  | 4874.947  | 5483.006  |           |          |           |
| AF085870  | 5602.94   | 5669.94   |           |          |           |
| AL117580  | 11638.69  | 11308.354 |           |          |           |
| AL110190  | 2615.514  | 1713.854  |           |          |           |
| AL117656  | 1361.238  | 771.244   |           |          |           |
| AJ001893  | 1951.9    | 1730.938  |           |          |           |
| NM_014819 | 7818.116  | 8623.488  |           |          |           |
| AF086040  | 1214.227  | 1322.7    |           |          |           |
| AB032988  | 3561.573  | 3519.595  |           |          |           |
| AK023559  | 8691.958  | 7739.943  |           |          |           |
| AB037859  | 55120.395 | 51817.07  |           |          |           |
| AL049233  | 2805.763  | 2325.801  |           |          |           |
| NM_017696 | 3746.149  | 3291.856  |           |          |           |
| AL050166  | 6725.094  | 8412.754  |           |          |           |
| NM_003602 | 1411.272  | 1614.487  |           |          |           |
| AF009258  | 29939.32  | 36067.504 |           |          |           |
| AF009305  | 1773.642  | 2207.112  |           |          |           |
| NM_006193 | 584.711   | 912.892   |           |          |           |
| AF056454  | 762.478   | 1013.465  |           |          |           |
| AF009270  | 1680.019  | 1778.393  |           |          |           |
| AF009318  | 1312.257  | 1561.672  |           |          |           |
| AF056421  | 999.117   | 954.579   |           |          |           |

|           |           |           |
|-----------|-----------|-----------|
| AF090889  | 510.399   | 549.951   |
| AK001085  | 1337.285  | 974.672   |
| AK001906  | 2228.863  | 1862.968  |
| AK021528  | 1241.955  | 1160.562  |
| AK021746  | 2255.707  | 1718.262  |
| AK001136  | 1325.256  | 1025.067  |
| AK021617  | 378.78    | 612.995   |
| AK021810  | 1547.144  | 1591.233  |
| AK025595  | 479.971   | 616.982   |
| AK026743  | 499.094   | 670.957   |
| AK025214  | 819.913   | 917.804   |
| AK025846  | 1418.511  | 1450.138  |
| AK026805  | 4740.678  | 4395.366  |
| AL389983  | 10671.675 | 12098.729 |
| AJ008159  | 1108.557  | 1212.833  |
| AK000995  | 1323.445  | 1396.267  |
| U00959    | 1536.243  | 1651.368  |
| NM_014578 | 19272.693 | 21388.365 |
| AF147306  | 5409.213  | 5058.55   |
| AF086267  | 1989.448  | 2422.214  |
| X74606    | 615.277   | 735.132   |
| NM_012183 | 3218.259  | 3142.705  |
| AK026785  | 1601.546  | 2186.584  |
| AK022994  | 760.925   | 712.86    |
| NM_018225 | 24070.887 | 28313.189 |
| AK025534  | 1301.899  | 1465.914  |
| AF091526  | 1839.756  | 1725.241  |
| AK022170  | 331.581   | 749.415   |
| M60749    | 2588.594  | 3978.569  |
| X79986    | 902.226   | 1276.078  |
| NM_003523 | 10353.398 | 11940.619 |
| X01448    | 830.458   | 1076.303  |
| NM_016503 | 6609.932  | 8395.75   |
| AK056351  | 31504.537 | 32084.746 |
| NM_014690 | 6206.083  | 7736.8    |
| NM_017698 | 3723.1    | 4161.276  |
| AF086490  | 1676.272  | 1438.064  |
| AF131738  | 24964.117 | 19560.98  |
| AK021666  | 5182.27   | 3730.794  |
| AK024081  | 699.022   | 549.383   |
| AK024825  | 3854.664  | 3173.549  |
| AF086317  | 5779.044  | 4209.557  |
| U16850    | 6779.943  | 5586.086  |
| AL390178  | 1175.189  | 991.471   |
| AF147326  | 566.827   | 873.689   |
| Z36806    | 3272.116  | 3697.174  |
| NM_018618 | 1804.421  | 2183.993  |
| AJ008121  | 29851.643 | 38664.141 |
| AJ008153  | 1953.387  | 2190.948  |
| AK023739  | 3158.754  | 3317.994  |
| NM_005830 | 13576.599 | 14422.776 |
| NM_001507 | 1004.694  | 1359.823  |
| X92108    | 569.133   | 534.078   |

|                  |           |           |
|------------------|-----------|-----------|
| <b>AL389876</b>  | 1688.583  | 1755.429  |
| <b>AK022120</b>  | 3249.766  | 3500.562  |
| <b>D17099</b>    | 791.551   | 661.927   |
| <b>BF037206</b>  | 3251.342  | 2593.414  |
| <b>AK021474</b>  | 13726.539 | 9681.683  |
| <b>AW511510</b>  | 670.447   | 570.515   |
| <b>U52827</b>    | 1134.082  | 578.134   |
| <b>AL049466</b>  | 15628.307 | 13355.705 |
| <b>AB037802</b>  | 2689.834  | 2477.008  |
| <b>AL137450</b>  | 2543.975  | 2277.454  |
| <b>AK023058</b>  | 882.628   | 1017.606  |
| <b>NM_012064</b> | 5016.192  | 4689.91   |
| <b>AK001460</b>  | 793.431   | 930.332   |
| <b>AK092508</b>  | 4101.515  | 3754.697  |
| <b>AK027111</b>  | 54906.266 | 51012     |
| <b>NM_00351E</b> | 862.585   | 1414.016  |
